# Supplementary material
Source: MDPI journal article supplement (https://www.mdpi.com/2073-4395/10/9/1437)
Supplement: s1 [file s1]

Table S1. List of genotypes analyzed with information on their name, respective genetic group, geographic origin/pedigree, and results of DAPC clustering.

| Genotypes    | Genetic Groups | Geographic Origin/Pedigree                                              | DAPC (K=2) | DAPC (K=3) | DAPC (K=4) | DAPC (K=5) | DAPC (K=12) |
|--------------|----------------|-------------------------------------------------------------------------|------------|------------|------------|------------|-------------|
| TDr_08_5_2   | Breeding line  | Direct selection from market variety, Ofegi, Irepo market, Oyo, Nigeria | 2          | 1          | 1          | 5          | 1           |
| TDr_08_5_1   | Breeding line  | Direct selection from market variety, Ofegi, Irepo market, Oyo, Nigeria | 2          | 1          | 1          | 5          | 7           |
| TDr_12_00417 | Breeding line  | Not available                                                           | 2          | 1          | 1          | 5          | 1           |
| TDr_00_00196 | Breeding line  | TDr9505576/TDr98:103* (Market variety Pouna from Kwara, Nigeria)        | 2          | 1          | 1          | 5          | 1           |
| TDr_08_00640 | Breeding line  | TDr9700917/TDr0000380*                                                  | 2          | 1          | 1          | 5          | 7           |
| TDr_05_00389 | Breeding line  | Not available                                                           | 1          | 2          | 3          | 4          | 5           |
| TDr_08_00045 | Breeding line  | Not available                                                           | 1          | 2          | 3          | 4          | 5           |
| TDr_08_00126 | Breeding line  | Not available                                                           | 1          | 2          | 3          | 4          | 4           |
| TDr_08_00140 | Breeding line  | TDr0200076/TDr9501932*                                                  | 1          | 2          | 3          | 4          | 5           |
| TDr_05_00807 | Breeding line  | TDr0300101                                                              | 1          | 2          | 3          | 4          | 4           |
| TDr_13_00294 | Breeding line  | TDr04:219/Pouna* (Market variety from Ghana)                            | 1          | 2          | 3          | 4          | 4           |
| TDr_13_00415 | Breeding line  | TDr04:219/TDr9501932*                                                   | 1          | 2          | 3          | 4          | 4           |
| TDr_96_01817 | Breeding line  | TDr8900839                                                              | 1          | 2          | 3          | 4          | 5           |
| TDr_97_00793 | Breeding line  | TDr93:23 (Market variety, Obiaoturugo, from Ebonyi, Nigeria)            | 1          | 2          | 3          | 4          | 4           |
| TDr_00_00539 | Breeding line  | TDr93:32 32 (Market variety, Amula, from Benue, Nigeria)/TDr9800158*    | 1          | 2          | 3          | 4          | 5           |
| TDr_00_00362 | Breeding line  | TDr9505576/TDr9800062*                                                  | 1          | 2          | 3          | 4          | 2           |
| TDr_13_00318 | Breeding line  | TDr9700793/TDr9501932*                                                  | 1          | 2          | 3          | 4          | 4           |
| TDr_08_00620 | Breeding line  | TDr9700917/TDr0000380*                                                  | 1          | 2          | 3          | 4          | 4           |
| TDr_08_00651 | Breeding line  | TDr9700917/TDr0000380*                                                  | 1          | 2          | 3          | 4          | 4           |
| TDr_08_00742 | Breeding line  | TDr9700917/TDr0000380*                                                  | 1          | 2          | 3          | 4          | 2           |
| TDr_08_00799 | Breeding line  | TDr9700917/TDr0000380*                                                  | 1          | 2          | 3          | 4          | 4           |
| TDr_08_00733 | Breeding line  | TDr9700917/TDr9601818*                                                  | 1          | 2          | 3          | 4          | 4           |
| TDr_08_00747 | Breeding line  | TDr9700917/TDr9601818*                                                  | 1          | 2          | 3          | 4          | 4           |
| TDr_08_00758 | Breeding line  | TDr9700917/TDr9601818*                                                  | 1          | 2          | 3          | 4          | 4           |
| TDr_08_00882 | Breeding line  | TDr9700917/TDr9601818*                                                  | 1          | 2          | 3          | 4          | 2           |
| TDr_08_00898 | Breeding line  | TDr9700917/TDr9601818*                                                  | 1          | 2          | 3          | 4          | 2           |
| TDr_12_00447 | Breeding line  | TDr9700917/TDr9700777*                                                  | 1          | 2          | 3          | 4          | 4           |
| TDr_12_00474 | Breeding line  | TDr9700917/TDr9700777*                                                  | 1          | 2          | 3          | 4          | 4           |
| TDr_12_00478 | Breeding line  | TDr9700917/TDr9700777*                                                  | 1          | 2          | 3          | 4          | 4           |
| TDr_08_01026 | Breeding line  | TDr9700917/TDr9902626*                                                  | 1          | 2          | 3          | 4          | 2           |
| TDr_08_01029 | Breeding line  | TDr9700917/TDr9902626*                                                  | 1          | 2          | 3          | 4          | 5           |

|              |               |                                                                                                  |   |   |   |   |    |
|--------------|---------------|--------------------------------------------------------------------------------------------------|---|---|---|---|----|
| TDr_02_00515 | Breeding line | TDr98:162 (Landrace from Nigeria)/TDr00:2:14* (Market variety, Litin-zeng, from Taraba, Nigeria) | 1 | 2 | 3 | 4 | 5  |
| TDr_89_02665 | Breeding line | Direct selection through open pollination of farmer variety from Nsukka, Nigeria                 | 1 | 3 | 3 | 4 | 2  |
| TDr_08_21_2  | Breeding line | Direct selection from market variety, Ekpeh, from Delta, Nigeria                                 | 1 | 3 | 3 | 4 | 4  |
| TDr_08_21_3  | Breeding line | Direct selection from market variety, Ekpeh, from Delta, Nigeria                                 | 1 | 3 | 3 | 4 | 4  |
| TDr_89_02475 | Breeding line | Direct selection through open pollination of farmer variety from Bagbo, Nigeria                  | 1 | 3 | 3 | 4 | 2  |
| TDr_89_02672 | Breeding line | Direct selection through open pollination of farmer variety from Nsukka, Nigeria                 | 1 | 3 | 4 | 1 | 8  |
| TDr_89_02677 | Breeding line | Direct selection through open pollination of farmer variety from Nsukka, Nigeria                 | 1 | 3 | 3 | 4 | 2  |
| TDr_93_2     | Breeding line | Direct selection through open pollination of market variety, Pepa, from Abuja, Nigeria           | 1 | 3 | 3 | 4 | 2  |
| TDr_05_00432 | Breeding line | Not available                                                                                    | 1 | 3 | 3 | 4 | 2  |
| TDr_07_00157 | Breeding line | Not available                                                                                    | 1 | 3 | 3 | 4 | 2  |
| TDr_08_00003 | Breeding line | Not available                                                                                    | 1 | 3 | 4 | 1 | 10 |
| TDr_08_00008 | Breeding line | Not available                                                                                    | 1 | 3 | 4 | 1 | 10 |
| TDr_08_00014 | Breeding line | Not available                                                                                    | 1 | 3 | 4 | 1 | 10 |
| TDr_08_00023 | Breeding line | Not available                                                                                    | 1 | 3 | 4 | 1 | 8  |
| TDr_08_00027 | Breeding line | Not available                                                                                    | 1 | 3 | 4 | 1 | 10 |
| TDr_08_00040 | Breeding line | Not available                                                                                    | 1 | 3 | 4 | 1 | 10 |
| TDr_08_00071 | Breeding line | Not available                                                                                    | 1 | 3 | 4 | 1 | 10 |
| TDr_08_00083 | Breeding line | Not available                                                                                    | 1 | 3 | 4 | 1 | 10 |
| TDr_08_00094 | Breeding line | Not available                                                                                    | 1 | 3 | 4 | 1 | 10 |
| TDr_08_00098 | Breeding line | Not available                                                                                    | 1 | 3 | 3 | 4 | 4  |
| TDr_08_00115 | Breeding line | Not available                                                                                    | 1 | 3 | 4 | 1 | 10 |
| TDr_08_00119 | Breeding line | Not available                                                                                    | 1 | 3 | 4 | 1 | 10 |
| TDr_08_00122 | Breeding line | Not available                                                                                    | 1 | 3 | 4 | 1 | 10 |
| TDr_08_00146 | Breeding line | Not available                                                                                    | 1 | 3 | 4 | 1 | 10 |
| TDr_08_00149 | Breeding line | Not available                                                                                    | 1 | 3 | 4 | 1 | 10 |
| TDr_08_00153 | Breeding line | Not available                                                                                    | 1 | 3 | 3 | 4 | 2  |
| TDr_08_00161 | Breeding line | Not available                                                                                    | 1 | 3 | 4 | 1 | 10 |
| TDr_08_00164 | Breeding line | Not available                                                                                    | 1 | 3 | 4 | 1 | 10 |

|              |               |                        |   |   |   |   |    |
|--------------|---------------|------------------------|---|---|---|---|----|
| TDr_08_00176 | Breeding line | Not available          | 1 | 3 | 4 | 1 | 10 |
| TDr_08_00185 | Breeding line | Not available          | 1 | 3 | 4 | 1 | 10 |
| TDr_08_00197 | Breeding line | Not available          | 1 | 3 | 4 | 1 | 8  |
| TDr_08_00268 | Breeding line | Not available          | 1 | 3 | 4 | 1 | 10 |
| TDr_08_01091 | Breeding line | Not available          | 1 | 3 | 3 | 4 | 4  |
| TDr_08_01123 | Breeding line | Not available          | 1 | 3 | 3 | 4 | 2  |
| TDr_08_01164 | Breeding line | Not available          | 1 | 3 | 3 | 4 | 4  |
| TDr_08_01464 | Breeding line | Not available          | 1 | 3 | 3 | 4 | 2  |
| TDr_08_01919 | Breeding line | Not available          | 1 | 3 | 4 | 1 | 2  |
| TDr_08_02381 | Breeding line | Not available          | 1 | 3 | 3 | 4 | 4  |
| TDr_12_00506 | Breeding line | Not available          | 1 | 3 | 4 | 1 | 10 |
| TDr_12_00507 | Breeding line | Not available          | 1 | 3 | 4 | 1 | 8  |
| TDr_12_00509 | Breeding line | Not available          | 1 | 3 | 4 | 1 | 10 |
| TDr_87_00211 | Breeding line | Not available          | 1 | 3 | 3 | 4 | 4  |
| TDr_89_00727 | Breeding line | Not available          | 1 | 3 | 4 | 4 | 4  |
| TDr_89_02617 | Breeding line | Not available          | 1 | 3 | 3 | 4 | 2  |
| TDr_94_01108 | Breeding line | Not available          | 1 | 3 | 3 | 4 | 2  |
| TDr_96_02433 | Breeding line | Not available          | 1 | 3 | 3 | 4 | 2  |
| TDr_08_00001 | Breeding line | TDr0200076/TDr9501932* | 1 | 3 | 4 | 1 | 10 |
| TDr_08_00013 | Breeding line | TDr0200076/TDr9501932* | 1 | 3 | 4 | 1 | 10 |
| TDr_08_00015 | Breeding line | TDr0200076/TDr9501932* | 1 | 3 | 3 | 4 | 2  |
| TDr_08_00041 | Breeding line | TDr0200076/TDr9501932* | 1 | 3 | 4 | 1 | 10 |
| TDr_08_00055 | Breeding line | TDr0200076/TDr9501932* | 1 | 3 | 4 | 1 | 10 |
| TDr_08_00082 | Breeding line | TDr0200076/TDr9501932* | 1 | 3 | 3 | 4 | 4  |
| TDr_08_00090 | Breeding line | TDr0200076/TDr9501932* | 1 | 3 | 4 | 1 | 10 |
| TDr_08_00091 | Breeding line | TDr0200076/TDr9501932* | 1 | 3 | 4 | 1 | 10 |
| TDr_08_00092 | Breeding line | TDr0200076/TDr9501932* | 1 | 3 | 4 | 1 | 10 |
| TDr_08_00104 | Breeding line | TDr0200076/TDr9501932* | 1 | 3 | 4 | 1 | 10 |
| TDr_08_00105 | Breeding line | TDr0200076/TDr9501932* | 1 | 3 | 4 | 1 | 10 |
| TDr_08_00108 | Breeding line | TDr0200076/TDr9501932* | 1 | 3 | 4 | 1 | 10 |
| TDr_08_00130 | Breeding line | TDr0200076/TDr9501932* | 1 | 3 | 4 | 1 | 10 |
| TDr_08_00132 | Breeding line | TDr0200076/TDr9501932* | 1 | 3 | 4 | 1 | 10 |
| TDr_08_00133 | Breeding line | TDr0200076/TDr9501932* | 1 | 3 | 3 | 4 | 4  |
| TDr_08_00134 | Breeding line | TDr0200076/TDr9501932* | 1 | 3 | 4 | 1 | 10 |
| TDr_08_00141 | Breeding line | TDr0200076/TDr9501932* | 1 | 3 | 4 | 1 | 10 |
| TDr_08_00155 | Breeding line | TDr0200076/TDr9501932* | 1 | 3 | 4 | 1 | 10 |
| TDr_08_00194 | Breeding line | TDr0200076/TDr9501932* | 1 | 3 | 4 | 1 | 10 |
| TDr_08_00207 | Breeding line | TDr0200076/TDr9501932* | 1 | 3 | 4 | 1 | 10 |
| TDr_08_00218 | Breeding line | TDr0200076/TDr9501932* | 1 | 3 | 4 | 1 | 10 |
| TDr_08_00229 | Breeding line | TDr0200076/TDr9501932* | 1 | 3 | 4 | 1 | 10 |
| TDr_08_00254 | Breeding line | TDr0200076/TDr9501932* | 1 | 3 | 4 | 1 | 10 |
| TDr_08_00292 | Breeding line | TDr0200076/TDr9501932* | 1 | 3 | 3 | 4 | 2  |
| TDr_08_00017 | Breeding line | TDr0200076/TDr9501933* | 1 | 3 | 3 | 4 | 4  |
| TDr_08_01932 | Breeding line | TDr0200076/TDr9700777* | 1 | 3 | 4 | 1 | 10 |

|              |               |                                              |   |   |   |   |    |
|--------------|---------------|----------------------------------------------|---|---|---|---|----|
| TDr_08_01228 | Breeding line | TDr0200076/TDr9902789*                       | 1 | 3 | 4 | 1 | 10 |
| TDr_08_01229 | Breeding line | TDr0200076/TDr9902789*                       | 1 | 3 | 4 | 1 | 10 |
| TDr_08_01278 | Breeding line | TDr0200076/TDr9902789*                       | 1 | 3 | 4 | 1 | 10 |
| TDr_08_01344 | Breeding line | TDr0200076/TDr9902789*                       | 1 | 3 | 3 | 4 | 2  |
| TDr_05_00046 | Breeding line | TDr0200410                                   | 1 | 3 | 4 | 1 | 8  |
| TDr_13_00391 | Breeding line | TDr04:219/TDr9501932*                        | 1 | 3 | 3 | 4 | 4  |
| TDr_13_00411 | Breeding line | TDr04:219/TDr9501932*                        | 1 | 3 | 4 | 1 | 4  |
| TDr_13_00421 | Breeding line | TDr04:219/TDr9501932*                        | 1 | 3 | 4 | 1 | 10 |
| TDr_13_00050 | Breeding line | TDr04:219/TDr9501932*                        | 1 | 3 | 3 | 4 | 4  |
| TDr_13_00061 | Breeding line | TDr04:219/TDr9501932*                        | 1 | 3 | 3 | 4 | 4  |
| TDr_13_00084 | Breeding line | TDr04:219/TDr9501932*                        | 1 | 3 | 3 | 4 | 4  |
| TDr_13_00125 | Breeding line | TDr04:219/TDr9600626*                        | 1 | 3 | 4 | 1 | 4  |
| TDr_13_00359 | Breeding line | TDr04:219/TDr9700777*                        | 1 | 3 | 3 | 4 | 4  |
| TDr_13_00366 | Breeding line | TDr04:219/TDr9700777*                        | 1 | 3 | 4 | 1 | 8  |
| TDr_13_00367 | Breeding line | TDr04:219/TDr9700777*                        | 1 | 3 | 3 | 4 | 4  |
| TDr_12_00150 | Breeding line | TDr04:219/TDr9902607*                        | 1 | 3 | 3 | 4 | 4  |
| TDr_12_00152 | Breeding line | TDr04:219/TDr9902607*                        | 1 | 3 | 3 | 4 | 4  |
| TDr_12_00156 | Breeding line | TDr04:219/TDr9902607*                        | 1 | 3 | 3 | 4 | 2  |
| TDr_12_00160 | Breeding line | TDr04:219/TDr9902607*                        | 1 | 3 | 3 | 4 | 4  |
| TDr_12_00168 | Breeding line | TDr04:219/TDr9902607*                        | 1 | 3 | 3 | 4 | 4  |
| TDr_12_00171 | Breeding line | TDr04:219/TDr9902607*                        | 1 | 3 | 3 | 4 | 4  |
| TDr_12_00178 | Breeding line | TDr04:219/TDr9902607*                        | 1 | 3 | 3 | 4 | 4  |
| TDr_12_00179 | Breeding line | TDr04:219/TDr9902607*                        | 1 | 3 | 3 | 4 | 2  |
| TDr_12_00195 | Breeding line | TDr04:219/TDr9902607*                        | 1 | 3 | 3 | 4 | 4  |
| TDr_12_00219 | Breeding line | TDr04:219/TDr9902607*                        | 1 | 3 | 3 | 4 | 4  |
| TDr_12_00249 | Breeding line | TDr04:219/TDr9902607*                        | 1 | 3 | 3 | 4 | 4  |
| TDr_12_00250 | Breeding line | TDr04:219/TDr9902607*                        | 1 | 3 | 3 | 4 | 2  |
| TDr_12_00254 | Breeding line | TDr04:219/TDr9902607*                        | 1 | 3 | 3 | 4 | 4  |
| TDr_13_00431 | Breeding line | TDr04:219/TDr9902607*                        | 1 | 3 | 3 | 4 | 4  |
| TDr_09_01932 | Breeding line | TDr0701551                                   | 1 | 3 | 4 | 1 | 8  |
| TDr_95_00965 | Breeding line | TDr8600309                                   | 1 | 3 | 3 | 4 | 2  |
| TDr_95_01932 | Breeding line | TDr8600309                                   | 1 | 3 | 4 | 1 | 10 |
| TDr_95_01958 | Breeding line | TDr8700334                                   | 1 | 3 | 3 | 4 | 4  |
| TDr_95_18544 | Breeding line | TDr8700571                                   | 1 | 3 | 3 | 4 | 2  |
| TDr_97_00205 | Breeding line | TDr8700839/TDr8700552*                       | 1 | 3 | 3 | 4 | 4  |
| TDr_96_01724 | Breeding line | TDr89/00839OP                                | 1 | 3 | 4 | 1 | 8  |
| TDr_96_01818 | Breeding line | TDr89/00839OP                                | 1 | 3 | 4 | 1 | 10 |
| TDr_96_01395 | Breeding line | TDr8901013                                   | 1 | 3 | 3 | 4 | 2  |
| TDr_97_00903 | Breeding line | TDr8901892/TDrIN94R:2*                       | 1 | 3 | 3 | 4 | 2  |
| TDr_97_00907 | Breeding line | TDr8901892/TDrIN94R:2*                       | 1 | 3 | 3 | 4 | 2  |
| TDr_97_00917 | Breeding line | TDr8901892/TDrIN94R:2*                       | 1 | 3 | 4 | 1 | 8  |
| TDr_97_00940 | Breeding line | TDr8901892/TDrIN94R:2*                       | 1 | 3 | 3 | 4 | 4  |
| TDr_03_00180 | Breeding line | TDr8902665                                   | 1 | 3 | 3 | 4 | 2  |
| TDr_96_00582 | Breeding line | TDr93:1 (Market variety, Akwoki, from Abuja, | 1 | 3 | 3 | 4 | 4  |

|              |               |                                                                        |   |   |   |   |   |
|--------------|---------------|------------------------------------------------------------------------|---|---|---|---|---|
|              |               | Nigeria)                                                               |   |   |   |   |   |
| TDr_96_00604 | Breeding line | TDr93:1 (Market variety, Akwoki, from Abuja, Nigeria)                  | 1 | 3 | 3 | 4 | 2 |
| TDr_96_00625 | Breeding line | TDr93:1 (Market variety, Akwoki, from Abuja, Nigeria)                  | 1 | 3 | 4 | 1 | 8 |
| TDr_96_00629 | Breeding line | TDr93:1 (Market variety, Akwoki, from Abuja, Nigeria)                  | 1 | 3 | 4 | 1 | 8 |
| TDr_99_02607 | Breeding line | TDr93:1 (Market variety, Akwoki, from Abuja, Nigeria)/TDr9500858*      | 1 | 3 | 3 | 4 | 2 |
| TDr_97_01715 | Breeding line | TDr93:23 (Market variety, Obiaoturugo, from Ebonyi, Nigeria)/TDr93:72* | 1 | 3 | 3 | 4 | 2 |
| TDr_97_00777 | Breeding line | TDr93:23 (Market variety, Obiaoturugo, from Ebonyi, Nigeria)OP         | 1 | 3 | 4 | 1 | 8 |
| TDr_99_02626 | Breeding line | TDr93:25 (Market variety, Igum, from Ebonyi, Nigeria)/TDr9500858*      | 1 | 3 | 3 | 4 | 4 |
| TDr_99_02674 | Breeding line | TDr93:25 (Market variety, Igum, from Ebonyi, Nigeria)/TDr9500858*      | 1 | 3 | 3 | 4 | 2 |
| TDr_01_00405 | Breeding line | TDr93:32 32 (Market variety, Amula, from Benue, Nigeria)/TDr9800137*   | 1 | 3 | 3 | 4 | 2 |
| TDr_00_0058  | Breeding line | TDr93:32 32 (Market variety, Amula, from Benue, Nigeria)/TDr9800158*   | 1 | 3 | 3 | 4 | 2 |
| TDr_99_02354 | Breeding line | TDr93:50 (Market variety from Ibadan)/TDr9500858*                      | 1 | 3 | 3 | 4 | 2 |
| TDr_99_02789 | Breeding line | TDr93:50 (Market variety from Ibadan)/TDr9502026*                      | 1 | 3 | 3 | 4 | 2 |
| TDr_99_02824 | Breeding line | TDr93:50 (Market variety from Ibadan)/TDr9502026*                      | 1 | 3 | 3 | 4 | 2 |
| TDr_97_00583 | Breeding line | TDr93:50 (Market variety from Ibadan)OP                                | 1 | 3 | 3 | 4 | 2 |
| TDr_97_00960 | Breeding line | TDr95:61(Market variety, Kamkpi, from Kogi, Nigeria)/IN94R:2*          | 1 | 3 | 3 | 4 | 4 |
| TDr_13_00452 | Breeding line | TDr9518544/TDr9700777*                                                 | 1 | 3 | 3 | 4 | 4 |
| TDr_13_00458 | Breeding line | TDr9518544/TDr9700777*                                                 | 1 | 3 | 3 | 4 | 4 |
| TDr_13_00444 | Breeding line | TDr9518544/TDr9902607*                                                 | 1 | 3 | 4 | 1 | 8 |
| TDr_05_00303 | Breeding line | TDr9519156                                                             | 1 | 3 | 3 | 4 | 4 |
| TDr_05_00356 | Breeding line | TDr9519156                                                             | 1 | 3 | 3 | 4 | 2 |
| TDr_05_00466 | Breeding line | TDr9519156                                                             | 1 | 3 | 3 | 4 | 2 |

|              |               |                                                     |   |   |   |   |    |
|--------------|---------------|-----------------------------------------------------|---|---|---|---|----|
| TDr_05_00530 | Breeding line | TDr9519156                                          | 1 | 3 | 3 | 4 | 2  |
| TDr_05_00632 | Breeding line | TDr9519177                                          | 1 | 3 | 3 | 4 | 4  |
| TDr_05_00694 | Breeding line | TDr9519177                                          | 1 | 3 | 3 | 4 | 4  |
| TDr_11_00799 | Breeding line | TDr9600604/TDr1892*                                 | 1 | 3 | 3 | 4 | 2  |
| TDr_11_00787 | Breeding line | TDr9600604/TDr1892*<br>(genebank landrace)          | 1 | 3 | 3 | 4 | 2  |
| TDr_11_00276 | Breeding line | TDr9600629/TDr9902626*                              | 1 | 3 | 3 | 4 | 2  |
| TDr_09_00715 | Breeding line | TDr9700205/TDr9501932*                              | 1 | 3 | 4 | 1 | 8  |
| TDr_11_00263 | Breeding line | TDr9700205/TDr9902626*                              | 1 | 3 | 3 | 4 | 4  |
| TDr_13_00330 | Breeding line | TDr9700793/TDr9501932*                              | 1 | 3 | 4 | 1 | 8  |
| TDr_13_00350 | Breeding line | TDr9700793/TDr9501932*                              | 1 | 3 | 4 | 1 | 8  |
| TDr_13_00354 | Breeding line | TDr9700793/TDr9501932*                              | 1 | 3 | 3 | 4 | 4  |
| TDr_13_00285 | Breeding line | TDr9700917/Pouna*<br>(Market variety from<br>Ghana) | 1 | 3 | 3 | 4 | 4  |
| TDr_08_00621 | Breeding line | TDr9700917/TDr0000380*                              | 1 | 3 | 3 | 4 | 4  |
| TDr_08_00632 | Breeding line | TDr9700917/TDr0000380*                              | 1 | 3 | 3 | 4 | 4  |
| TDr_08_00645 | Breeding line | TDr9700917/TDr0000380*                              | 1 | 3 | 3 | 4 | 4  |
| TDr_08_00662 | Breeding line | TDr9700917/TDr0000380*                              | 1 | 3 | 3 | 4 | 4  |
| TDr_08_00662 | Breeding line | TDr9700917/TDr0000380*                              | 1 | 3 | 3 | 4 | 4  |
| TDr_08_00669 | Breeding line | TDr9700917/TDr0000380*                              | 1 | 3 | 3 | 4 | 4  |
| TDr_08_00705 | Breeding line | TDr9700917/TDr0000380*                              | 1 | 3 | 3 | 4 | 4  |
| TDr_08_00707 | Breeding line | TDr9700917/TDr0000380*                              | 1 | 3 | 3 | 4 | 2  |
| TDr_08_00710 | Breeding line | TDr9700917/TDr0000380*                              | 1 | 3 | 3 | 4 | 4  |
| TDr_08_00727 | Breeding line | TDr9700917/TDr0000380*                              | 1 | 3 | 3 | 4 | 2  |
| TDr_08_00744 | Breeding line | TDr9700917/TDr0000380*                              | 1 | 3 | 4 | 1 | 10 |
| TDr_08_00756 | Breeding line | TDr9700917/TDr0000380                               | 1 | 3 | 3 | 4 | 2  |
| TDr_08_00794 | Breeding line | TDr9700917/TDr0000380*                              | 1 | 3 | 3 | 4 | 2  |
| TDr_08_00841 | Breeding line | TDr9700917/TDr0000380*                              | 1 | 3 | 3 | 4 | 4  |
| TDr_13_00288 | Breeding line | TDr9700917/TDr04:219*                               | 1 | 3 | 3 | 4 | 4  |
| TDr_08_01512 | Breeding line | TDr9700917/TDr9501932*                              | 1 | 3 | 4 | 1 | 2  |
| TDr_13_00256 | Breeding line | TDr9700917/TDr9501932*                              | 1 | 3 | 3 | 4 | 4  |
| TDr_13_00273 | Breeding line | TDr9700917/TDr9501932*                              | 1 | 3 | 4 | 1 | 8  |
| TDr_08_00589 | Breeding line | TDr9700917/TDr9601818*                              | 1 | 3 | 3 | 4 | 2  |
| TDr_08_00617 | Breeding line | TDr9700917/TDr9601818*                              | 1 | 3 | 3 | 4 | 4  |
| TDr_08_00639 | Breeding line | TDr9700917/TDr9601818*                              | 1 | 3 | 3 | 4 | 2  |
| TDr_08_00641 | Breeding line | TDr9700917/TDr9601818*                              | 1 | 3 | 3 | 4 | 2  |
| TDr_08_00648 | Breeding line | TDr9700917/TDr9601818*                              | 1 | 3 | 3 | 4 | 4  |
| TDr_08_00764 | Breeding line | TDr9700917/TDr9601818*                              | 1 | 3 | 3 | 4 | 2  |
| TDr_08_00789 | Breeding line | TDr9700917/TDr9601818*                              | 1 | 3 | 3 | 4 | 2  |
| TDr_08_00810 | Breeding line | TDr9700917/TDr9601818*                              | 1 | 3 | 4 | 1 | 8  |
| TDr_08_00861 | Breeding line | TDr9700917/TDr9601818*                              | 1 | 3 | 3 | 4 | 2  |
| TDr_08_00896 | Breeding line | TDr9700917/TDr9601818*                              | 1 | 3 | 3 | 4 | 4  |
| TDr_08_01692 | Breeding line | TDr9700917/TDr9700777*                              | 1 | 3 | 3 | 4 | 2  |
| TDr_12_00408 | Breeding line | TDr9700917/TDr9700777*                              | 1 | 3 | 4 | 1 | 8  |
| TDr_12_00415 | Breeding line | TDr9700917/TDr9700777*                              | 1 | 3 | 3 | 4 | 4  |

|              |               |                        |   |   |   |   |    |
|--------------|---------------|------------------------|---|---|---|---|----|
| TDr_12_00416 | Breeding line | TDr9700917/TDr9700777* | 1 | 3 | 3 | 4 | 2  |
| TDr_12_00418 | Breeding line | TDr9700917/TDr9700777* | 1 | 3 | 3 | 4 | 4  |
| TDr_12_00419 | Breeding line | TDr9700917/TDr9700777* | 1 | 3 | 3 | 4 | 2  |
| TDr_12_00420 | Breeding line | TDr9700917/TDr9700777* | 1 | 3 | 3 | 4 | 4  |
| TDr_12_00422 | Breeding line | TDr9700917/TDr9700777* | 1 | 3 | 3 | 4 | 2  |
| TDr_12_00423 | Breeding line | TDr9700917/TDr9700777* | 1 | 3 | 3 | 4 | 4  |
| TDr_12_00425 | Breeding line | TDr9700917/TDr9700777* | 1 | 3 | 3 | 4 | 4  |
| TDr_12_00426 | Breeding line | TDr9700917/TDr9700777* | 1 | 3 | 3 | 4 | 4  |
| TDr_12_00427 | Breeding line | TDr9700917/TDr9700777* | 1 | 3 | 3 | 4 | 4  |
| TDr_12_00429 | Breeding line | TDr9700917/TDr9700777* | 1 | 3 | 3 | 4 | 4  |
| TDr_12_00430 | Breeding line | TDr9700917/TDr9700777* | 1 | 3 | 3 | 4 | 4  |
| TDr_12_00432 | Breeding line | TDr9700917/TDr9700777* | 1 | 3 | 3 | 4 | 4  |
| TDr_12_00433 | Breeding line | TDr9700917/TDr9700777* | 1 | 3 | 3 | 4 | 4  |
| TDr_12_00435 | Breeding line | TDr9700917/TDr9700777* | 1 | 3 | 3 | 4 | 2  |
| TDr_12_00437 | Breeding line | TDr9700917/TDr9700777* | 1 | 3 | 3 | 4 | 4  |
| TDr_12_00438 | Breeding line | TDr9700917/TDr9700777* | 1 | 3 | 3 | 4 | 4  |
| TDr_12_00439 | Breeding line | TDr9700917/TDr9700777* | 1 | 3 | 3 | 4 | 4  |
| TDr_12_00446 | Breeding line | TDr9700917/TDr9700777* | 1 | 3 | 4 | 1 | 10 |
| TDr_12_00454 | Breeding line | TDr9700917/TDr9700777* | 1 | 3 | 3 | 4 | 4  |
| TDr_12_00456 | Breeding line | TDr9700917/TDr9700777* | 1 | 3 | 3 | 4 | 4  |
| TDr_12_00458 | Breeding line | TDr9700917/TDr9700777* | 1 | 3 | 3 | 4 | 4  |
| TDr_12_00465 | Breeding line | TDr9700917/TDr9700777* | 1 | 3 | 3 | 4 | 4  |
| TDr_12_00467 | Breeding line | TDr9700917/TDr9700777* | 1 | 3 | 3 | 4 | 2  |
| TDr_12_00475 | Breeding line | TDr9700917/TDr9700777* | 1 | 3 | 3 | 4 | 2  |
| TDr_12_00476 | Breeding line | TDr9700917/TDr9700777* | 1 | 3 | 4 | 1 | 10 |
| TDr_12_00479 | Breeding line | TDr9700917/TDr9700777* | 1 | 3 | 3 | 4 | 4  |
| TDr_13_00189 | Breeding line | TDr9700917/TDr9700777* | 1 | 3 | 3 | 4 | 4  |
| TDr_13_00196 | Breeding line | TDr9700917/TDr9700777* | 1 | 3 | 3 | 4 | 4  |
| TDr_13_00198 | Breeding line | TDr9700917/TDr9700777* | 1 | 3 | 3 | 4 | 4  |
| TDr_13_00200 | Breeding line | TDr9700917/TDr9700777* | 1 | 3 | 3 | 4 | 4  |
| TDr_13_00208 | Breeding line | TDr9700917/TDr9700777* | 1 | 3 | 3 | 4 | 4  |
| TDr_13_00227 | Breeding line | TDr9700917/TDr9700777* | 1 | 3 | 3 | 4 | 4  |
| TDr_13_00172 | Breeding line | TDr9700917/TDr9902607* | 1 | 3 | 3 | 4 | 4  |
| TDr_08_00905 | Breeding line | TDr9700917/TDr9902626* | 1 | 3 | 3 | 4 | 2  |
| TDr_08_00924 | Breeding line | TDr9700917/TDr9902626* | 1 | 3 | 3 | 4 | 2  |
| TDr_08_00926 | Breeding line | TDr9700917/TDr9902626* | 1 | 3 | 3 | 4 | 2  |
| TDr_08_00945 | Breeding line | TDr9700917/TDr9902626* | 1 | 3 | 3 | 4 | 2  |
| TDr_08_00963 | Breeding line | TDr9700917/TDr9902626* | 1 | 3 | 3 | 4 | 4  |
| TDr_08_00989 | Breeding line | TDr9700917/TDr9902626* | 1 | 3 | 3 | 4 | 2  |
| TDr_08_00998 | Breeding line | TDr9700917/TDr9902626* | 1 | 3 | 3 | 4 | 2  |
| TDr_08_01016 | Breeding line | TDr9700917/TDr9902626* | 1 | 3 | 3 | 4 | 4  |
| TDr_08_01024 | Breeding line | TDr9700917/TDr9902626* | 1 | 3 | 3 | 4 | 2  |
| TDr_08_01046 | Breeding line | TDr9700917/TDr9902626* | 1 | 3 | 3 | 4 | 4  |
| TDr_08_01051 | Breeding line | TDr9700917/TDr9902626* | 1 | 3 | 3 | 4 | 2  |
| TDr_08_01085 | Breeding line | TDr9700917/TDr9902626* | 1 | 3 | 3 | 4 | 2  |

[illegible]

|                |                      |                                                                |   |   |   |   |   |
|----------------|----------------------|----------------------------------------------------------------|---|---|---|---|---|
| TDr_09_00325   | Breeding line        | TDr9700973/TDr9501932*                                         | 1 | 3 | 4 | 1 | 8 |
| TDr_09_00364   | Breeding line        | TDr9700973/TDr9501932*                                         | 1 | 3 | 4 | 1 | 8 |
| TDr_09_00374   | Breeding line        | TDr9700973/TDr9501932*                                         | 1 | 3 | 4 | 1 | 8 |
| TDr_09_00385   | Breeding line        | TDr9700973/TDr9501932*                                         | 1 | 3 | 4 | 1 | 2 |
| TDr_09_00644   | Breeding line        | TDr9700973/TDr9501932*                                         | 1 | 3 | 4 | 1 | 8 |
| TDr_00_00180   | Breeding line        | TDr9800080/TDr98:75*<br>(Market variety, Pouna,<br>from Ghana) | 1 | 3 | 3 | 4 | 2 |
| TDr_11_01036   | Breeding line        | TDr9902793/TDr9700777*                                         | 1 | 3 | 3 | 4 | 2 |
| TDr_01_00037   | Breeding line        | TDr9907026/TDr98:70*<br>(Market variety, Pouna,<br>from Ghana) | 1 | 3 | 4 | 1 | 8 |
| TDr_11_01041   | Breeding line        | TDr9919177/TDr9902607*                                         | 1 | 3 | 3 | 4 | 2 |
| TDr_07_00732   | Breeding line        | TDrAmula                                                       | 1 | 3 | 4 | 1 | 8 |
| TDr_95_19158_6 | Breeding line        | TDrBulkAbuja1993OP                                             | 1 | 3 | 3 | 4 | 2 |
| TDr_95_19158_8 | Breeding line        | TDrBulkAbuja1993OP                                             | 1 | 3 | 3 | 4 | 4 |
| TDr_95_19177   | Breeding line        | TDrBulkAbuja1993OP                                             | 1 | 3 | 3 | 4 | 2 |
| TDr_3783       | Genebank<br>landrace | Benin                                                          | 2 | 1 | 1 | 5 | 7 |
| TDr_3801       | Genebank<br>landrace | Benin                                                          | 2 | 1 | 1 | 5 | 7 |
| TDr_4087       | Genebank<br>landrace | Burkina Faso                                                   | 2 | 1 | 1 | 5 | 7 |
| TDr_1940       | Genebank<br>landrace | Cote d'Ivoire                                                  | 2 | 1 | 1 | 5 | 7 |
| TDr_2859       | Genebank<br>landrace | Cote d'Ivoire                                                  | 2 | 1 | 1 | 5 | 7 |
| TDr_1958       | Genebank<br>landrace | Ghana                                                          | 2 | 1 | 1 | 5 | 7 |
| TDr_2826       | Genebank<br>landrace | Ghana                                                          | 2 | 1 | 1 | 5 | 7 |
| TDr_3373       | Genebank<br>landrace | Ghana                                                          | 2 | 1 | 1 | 5 | 7 |
| TDr_3414       | Genebank<br>landrace | Ghana                                                          | 2 | 1 | 1 | 5 | 7 |
| TDr_2034       | Genebank<br>landrace | Nigeria                                                        | 2 | 1 | 1 | 5 | 7 |
| TDr_2071       | Genebank<br>landrace | Nigeria                                                        | 2 | 1 | 1 | 5 | 7 |
| TDr_2084       | Genebank<br>landrace | Nigeria                                                        | 2 | 1 | 1 | 5 | 1 |
| TDr_2110       | Genebank<br>landrace | Nigeria                                                        | 2 | 1 | 1 | 5 | 7 |
| TDr_2161       | Genebank<br>landrace | Nigeria                                                        | 2 | 1 | 1 | 5 | 7 |
| TDr_2331       | Genebank<br>landrace | Nigeria                                                        | 2 | 1 | 1 | 5 | 7 |
| TDr_2355       | Genebank<br>landrace | Nigeria                                                        | 2 | 1 | 1 | 5 | 7 |
| TDr_2377       | Genebank<br>landrace | Nigeria                                                        | 2 | 1 | 1 | 5 | 1 |
| TDr_2504       | Genebank<br>landrace | Nigeria                                                        | 2 | 1 | 1 | 5 | 7 |

|          |                   |              |   |   |   |   |   |
|----------|-------------------|--------------|---|---|---|---|---|
| TDr_2554 | Genebank landrace | Nigeria      | 2 | 1 | 1 | 5 | 7 |
| TDr_2558 | Genebank landrace | Nigeria      | 2 | 1 | 1 | 5 | 7 |
| TDr_2561 | Genebank landrace | Nigeria      | 2 | 1 | 1 | 5 | 7 |
| TDr_2645 | Genebank landrace | Nigeria      | 2 | 1 | 1 | 5 | 1 |
| TDr_2660 | Genebank landrace | Nigeria      | 2 | 1 | 1 | 5 | 1 |
| TDr_2664 | Genebank landrace | Nigeria      | 2 | 1 | 1 | 5 | 1 |
| TDr_2688 | Genebank landrace | Nigeria      | 2 | 1 | 1 | 5 | 1 |
| TDr_2693 | Genebank landrace | Nigeria      | 2 | 1 | 1 | 5 | 7 |
| TDr_2724 | Genebank landrace | Nigeria      | 2 | 1 | 1 | 5 | 7 |
| TDr_2745 | Genebank landrace | Nigeria      | 2 | 1 | 1 | 5 | 7 |
| TDr_3134 | Genebank landrace | Nigeria      | 2 | 1 | 1 | 5 | 1 |
| TDr_3288 | Genebank landrace | Nigeria      | 2 | 1 | 1 | 5 | 7 |
| TDr_3291 | Genebank landrace | Nigeria      | 2 | 1 | 1 | 5 | 7 |
| TDr_3564 | Genebank landrace | Nigeria      | 2 | 1 | 1 | 5 | 1 |
| TDr_3592 | Genebank landrace | Nigeria      | 2 | 1 | 1 | 5 | 1 |
| TDr_3660 | Genebank landrace | Nigeria      | 2 | 1 | 1 | 5 | 7 |
| TDr_3678 | Genebank landrace | Nigeria      | 2 | 1 | 1 | 5 | 1 |
| TDr_3681 | Genebank landrace | Nigeria      | 2 | 1 | 1 | 5 | 7 |
| TDr_3721 | Genebank landrace | Nigeria      | 2 | 1 | 1 | 5 | 1 |
| TDr_4187 | Genebank landrace | Sierra Leone | 2 | 1 | 1 | 5 | 7 |
| TDr_1598 | Genebank landrace | Togo         | 2 | 1 | 1 | 5 | 1 |
| TDr_1615 | Genebank landrace | Togo         | 2 | 1 | 1 | 5 | 1 |
| TDr_1631 | Genebank landrace | Togo         | 2 | 1 | 1 | 5 | 1 |
| TDr_1723 | Genebank landrace | Togo         | 2 | 1 | 1 | 5 | 7 |
| TDr_1724 | Genebank landrace | Togo         | 2 | 1 | 1 | 5 | 7 |
| TDr_1769 | Genebank landrace | Togo         | 2 | 1 | 1 | 5 | 1 |
| TDr_1775 | Genebank landrace | Togo         | 2 | 1 | 1 | 5 | 1 |
| TDr_1807 | Genebank landrace | Togo         | 2 | 1 | 1 | 5 | 7 |

|          |                   |               |   |   |   |   |   |
|----------|-------------------|---------------|---|---|---|---|---|
| TDr_1839 | Genebank landrace | Togo          | 2 | 1 | 1 | 5 | 7 |
| TDr_2015 | Genebank landrace | Togo          | 2 | 1 | 1 | 5 | 7 |
| TDr_2028 | Genebank landrace | Togo          | 2 | 1 | 1 | 5 | 7 |
| TDr_2330 | Genebank landrace | Togo          | 2 | 1 | 1 | 5 | 7 |
| TDr_2372 | Genebank landrace | Togo          | 2 | 1 | 1 | 5 | 7 |
| TDr_2471 | Genebank landrace | Togo          | 2 | 1 | 1 | 5 | 1 |
| TDr_2681 | Genebank landrace | Togo          | 2 | 1 | 1 | 5 | 7 |
| TDr_2777 | Genebank landrace | Togo          | 2 | 1 | 1 | 5 | 1 |
| TDr_2973 | Genebank landrace | Togo          | 2 | 1 | 1 | 5 | 7 |
| TDr_2975 | Genebank landrace | Togo          | 2 | 1 | 1 | 5 | 7 |
| TDr_3446 | Genebank landrace | Togo          | 2 | 1 | 1 | 5 | 7 |
| TDr_3469 | Genebank landrace | Togo          | 2 | 1 | 1 | 5 | 7 |
| TDr_3519 | Genebank landrace | Togo          | 2 | 1 | 1 | 5 | 1 |
| TDr_3886 | Genebank landrace | Benin         | 1 | 2 | 3 | 4 | 5 |
| TDr_3956 | Genebank landrace | Benin         | 1 | 2 | 3 | 4 | 5 |
| TDr_4086 | Genebank landrace | Benin         | 1 | 2 | 3 | 4 | 5 |
| TDr_1925 | Genebank landrace | Cote d'Ivoire | 1 | 2 | 3 | 4 | 5 |
| TDr_2226 | Genebank landrace | Cote d'Ivoire | 1 | 2 | 3 | 4 | 5 |
| TDr_2400 | Genebank landrace | Cote d'Ivoire | 1 | 2 | 3 | 4 | 5 |
| TDr_2642 | Genebank landrace | Cote d'Ivoire | 1 | 2 | 3 | 4 | 5 |
| TDr_1966 | Genebank landrace | Ghana         | 1 | 2 | 3 | 4 | 5 |
| TDr_3333 | Genebank landrace | Ghana         | 1 | 2 | 3 | 4 | 5 |
| TDr_3383 | Genebank landrace | Ghana         | 1 | 2 | 3 | 4 | 5 |
| TDr_3389 | Genebank landrace | Ghana         | 1 | 2 | 3 | 4 | 5 |
| TDr_2149 | Genebank landrace | Nigeria       | 1 | 2 | 3 | 4 | 5 |
| TDr_2158 | Genebank landrace | Nigeria       | 1 | 2 | 3 | 4 | 5 |
| TDr_2333 | Genebank landrace | Nigeria       | 1 | 2 | 3 | 4 | 5 |
| TDr_3633 | Genebank landrace | Nigeria       | 1 | 2 | 3 | 4 | 5 |

|          |                   |         |   |   |   |   |    |
|----------|-------------------|---------|---|---|---|---|----|
| TDr_3637 | Genebank landrace | Nigeria | 1 | 2 | 3 | 4 | 5  |
| TDr_3983 | Genebank landrace | Nigeria | 1 | 2 | 3 | 4 | 5  |
| TDr_4152 | Genebank landrace | Nigeria | 1 | 2 | 3 | 4 | 5  |
| TDr_1489 | Genebank landrace | Togo    | 1 | 2 | 3 | 4 | 5  |
| TDr_1649 | Genebank landrace | Togo    | 1 | 2 | 3 | 4 | 5  |
| TDr_1663 | Genebank landrace | Togo    | 1 | 2 | 3 | 4 | 5  |
| TDr_1711 | Genebank landrace | Togo    | 1 | 2 | 3 | 4 | 5  |
| TDr_1764 | Genebank landrace | Togo    | 1 | 2 | 3 | 4 | 5  |
| TDr_1858 | Genebank landrace | Togo    | 1 | 2 | 3 | 4 | 5  |
| TDr_1977 | Genebank landrace | Togo    | 1 | 2 | 3 | 4 | 5  |
| TDr_2007 | Genebank landrace | Togo    | 1 | 2 | 3 | 4 | 5  |
| TDr_2035 | Genebank landrace | Togo    | 1 | 2 | 3 | 4 | 5  |
| TDr_2342 | Genebank landrace | Togo    | 1 | 2 | 3 | 4 | 5  |
| TDr_2991 | Genebank landrace | Togo    | 1 | 2 | 3 | 4 | 5  |
| TDr_2997 | Genebank landrace | Togo    | 1 | 2 | 3 | 4 | 5  |
| TDr_3010 | Genebank landrace | Togo    | 1 | 2 | 3 | 4 | 5  |
| TDr_1876 | Genebank landrace | Benin   | 1 | 3 | 2 | 2 | 9  |
| TDr_1899 | Genebank landrace | Benin   | 1 | 3 | 3 | 4 | 11 |
| TDr_1932 | Genebank landrace | Benin   | 1 | 3 | 3 | 3 | 3  |
| TDr_1935 | Genebank landrace | Benin   | 1 | 3 | 3 | 4 | 2  |
| TDr_1937 | Genebank landrace | Benin   | 1 | 3 | 2 | 2 | 9  |
| TDr_1943 | Genebank landrace | Benin   | 1 | 3 | 3 | 4 | 2  |
| TDr_2022 | Genebank landrace | Benin   | 1 | 3 | 3 | 4 | 2  |
| TDr_3782 | Genebank landrace | Benin   | 1 | 3 | 3 | 4 | 6  |
| TDr_3785 | Genebank landrace | Benin   | 1 | 3 | 3 | 4 | 2  |
| TDr_3814 | Genebank landrace | Benin   | 1 | 3 | 3 | 4 | 2  |
| TDr_3820 | Genebank landrace | Benin   | 1 | 3 | 4 | 1 | 8  |
| TDr_3824 | Genebank landrace | Benin   | 1 | 3 | 3 | 4 | 2  |

|          |                   |               |   |   |   |   |    |
|----------|-------------------|---------------|---|---|---|---|----|
| TDr_3825 | Genebank landrace | Benin         | 1 | 3 | 3 | 4 | 2  |
| TDr_3828 | Genebank landrace | Benin         | 1 | 3 | 3 | 3 | 3  |
| TDr_3842 | Genebank landrace | Benin         | 1 | 3 | 3 | 4 | 2  |
| TDr_3852 | Genebank landrace | Benin         | 1 | 3 | 3 | 4 | 2  |
| TDr_3856 | Genebank landrace | Benin         | 1 | 3 | 2 | 2 | 9  |
| TDr_3863 | Genebank landrace | Benin         | 1 | 3 | 4 | 1 | 8  |
| TDr_3882 | Genebank landrace | Benin         | 1 | 3 | 3 | 4 | 2  |
| TDr_3887 | Genebank landrace | Benin         | 1 | 3 | 2 | 2 | 9  |
| TDr_3958 | Genebank landrace | Benin         | 1 | 3 | 3 | 4 | 11 |
| TDr_3961 | Genebank landrace | Benin         | 1 | 3 | 3 | 3 | 3  |
| TDr_3965 | Genebank landrace | Benin         | 1 | 3 | 4 | 1 | 8  |
| TDr_4020 | Genebank landrace | Benin         | 1 | 3 | 4 | 1 | 8  |
| TDr_4084 | Genebank landrace | Benin         | 1 | 3 | 3 | 4 | 2  |
| TDr_4191 | Genebank landrace | Benin         | 1 | 3 | 2 | 2 | 9  |
| TDr_4192 | Genebank landrace | Benin         | 1 | 3 | 3 | 4 | 6  |
| TDr_1888 | Genebank landrace | Cote d'Ivoire | 1 | 3 | 3 | 4 | 2  |
| TDr_1913 | Genebank landrace | Cote d'Ivoire | 1 | 3 | 3 | 4 | 11 |
| TDr_1922 | Genebank landrace | Cote d'Ivoire | 1 | 3 | 3 | 4 | 11 |
| TDr_1956 | Genebank landrace | Cote d'Ivoire | 1 | 3 | 3 | 4 | 12 |
| TDr_2000 | Genebank landrace | Cote d'Ivoire | 1 | 3 | 3 | 4 | 11 |
| TDr_2009 | Genebank landrace | Cote d'Ivoire | 1 | 3 | 2 | 2 | 9  |
| TDr_2017 | Genebank landrace | Cote d'Ivoire | 1 | 3 | 3 | 4 | 2  |
| TDr_2018 | Genebank landrace | Cote d'Ivoire | 1 | 3 | 2 | 2 | 9  |
| TDr_2128 | Genebank landrace | Cote d'Ivoire | 1 | 3 | 3 | 3 | 3  |
| TDr_2159 | Genebank landrace | Cote d'Ivoire | 1 | 3 | 3 | 4 | 2  |
| TDr_2210 | Genebank landrace | Cote d'Ivoire | 1 | 3 | 4 | 1 | 8  |
| TDr_2229 | Genebank landrace | Cote d'Ivoire | 1 | 3 | 4 | 1 | 8  |
| TDr_2239 | Genebank landrace | Cote d'Ivoire | 1 | 3 | 4 | 1 | 8  |

|          |                      |                   |   |   |   |   |    |
|----------|----------------------|-------------------|---|---|---|---|----|
| TDr_2248 | Genebank<br>landrace | Cote d'Ivoire     | 1 | 3 | 3 | 3 | 3  |
| TDr_2273 | Genebank<br>landrace | Cote d'Ivoire     | 1 | 3 | 3 | 3 | 3  |
| TDr_2297 | Genebank<br>landrace | Cote d'Ivoire     | 1 | 3 | 3 | 4 | 2  |
| TDr_2365 | Genebank<br>landrace | Cote d'Ivoire     | 1 | 3 | 2 | 2 | 9  |
| TDr_2390 | Genebank<br>landrace | Cote d'Ivoire     | 1 | 3 | 3 | 4 | 2  |
| TDr_2467 | Genebank<br>landrace | Cote d'Ivoire     | 1 | 3 | 3 | 3 | 3  |
| TDr_2678 | Genebank<br>landrace | Cote d'Ivoire     | 1 | 3 | 3 | 4 | 12 |
| TDr_2990 | Genebank<br>landrace | Cote d'Ivoire     | 1 | 3 | 3 | 3 | 3  |
| TDr_2650 | Genebank<br>landrace | Equatorial Guinea | 1 | 3 | 3 | 4 | 4  |
| TDr_1881 | Genebank<br>landrace | Ghana             | 1 | 3 | 4 | 1 | 8  |
| TDr_1907 | Genebank<br>landrace | Ghana             | 1 | 3 | 3 | 3 | 3  |
| TDr_1928 | Genebank<br>landrace | Ghana             | 1 | 3 | 2 | 2 | 9  |
| TDr_1953 | Genebank<br>landrace | Ghana             | 1 | 3 | 3 | 4 | 2  |
| TDr_2880 | Genebank<br>landrace | Ghana             | 1 | 3 | 3 | 4 | 11 |
| TDr_3320 | Genebank<br>landrace | Ghana             | 1 | 3 | 2 | 2 | 9  |
| TDr_3322 | Genebank<br>landrace | Ghana             | 1 | 3 | 3 | 3 | 3  |
| TDr_3325 | Genebank<br>landrace | Ghana             | 1 | 3 | 2 | 2 | 9  |
| TDr_3327 | Genebank<br>landrace | Ghana             | 1 | 3 | 3 | 4 | 2  |
| TDr_3338 | Genebank<br>landrace | Ghana             | 1 | 3 | 3 | 4 | 12 |
| TDr_3357 | Genebank<br>landrace | Ghana             | 1 | 3 | 4 | 1 | 8  |
| TDr_3364 | Genebank<br>landrace | Ghana             | 1 | 3 | 3 | 4 | 2  |
| TDr_3368 | Genebank<br>landrace | Ghana             | 1 | 3 | 3 | 3 | 3  |
| TDr_3371 | Genebank<br>landrace | Ghana             | 1 | 3 | 3 | 4 | 11 |
| TDr_3374 | Genebank<br>landrace | Ghana             | 1 | 3 | 2 | 2 | 9  |
| TDr_3376 | Genebank<br>landrace | Ghana             | 1 | 3 | 2 | 2 | 9  |
| TDr_3400 | Genebank<br>landrace | Ghana             | 1 | 3 | 3 | 4 | 12 |
| TDr_3408 | Genebank<br>landrace | Ghana             | 1 | 3 | 3 | 4 | 12 |
| TDr_3419 | Genebank<br>landrace | Ghana             | 1 | 3 | 2 | 2 | 9  |

|          |                      |         |   |   |   |   |    |
|----------|----------------------|---------|---|---|---|---|----|
| TDr_3430 | Genebank<br>landrace | Ghana   | 1 | 3 | 3 | 4 | 2  |
| TDr_4017 | Genebank<br>landrace | Ghana   | 1 | 3 | 2 | 2 | 9  |
| TDr_4078 | Genebank<br>landrace | Guinea  | 1 | 3 | 3 | 4 | 2  |
| TDr_4168 | Genebank<br>landrace | Guinea  | 1 | 3 | 3 | 4 | 2  |
| TDr_4172 | Genebank<br>landrace | Guinea  | 1 | 3 | 3 | 4 | 11 |
| TDr_4173 | Genebank<br>landrace | Guinea  | 1 | 3 | 4 | 1 | 8  |
| TDr_4178 | Genebank<br>landrace | Guinea  | 1 | 3 | 3 | 4 | 6  |
| TDr_4180 | Genebank<br>landrace | Guinea  | 1 | 3 | 3 | 4 | 2  |
| TDr_4185 | Genebank<br>landrace | Guinea  | 1 | 3 | 3 | 4 | 2  |
| TDr_2029 | Genebank<br>landrace | Nigeria | 1 | 3 | 3 | 4 | 2  |
| TDr_2032 | Genebank<br>landrace | Nigeria | 1 | 3 | 3 | 4 | 11 |
| TDr_2033 | Genebank<br>landrace | Nigeria | 1 | 3 | 3 | 4 | 2  |
| TDr_2038 | Genebank<br>landrace | Nigeria | 1 | 3 | 3 | 4 | 2  |
| TDr_2041 | Genebank<br>landrace | Nigeria | 1 | 3 | 3 | 4 | 2  |
| TDr_2042 | Genebank<br>landrace | Nigeria | 1 | 3 | 3 | 4 | 2  |
| TDr_2048 | Genebank<br>landrace | Nigeria | 1 | 3 | 3 | 4 | 12 |
| TDr_2050 | Genebank<br>landrace | Nigeria | 1 | 3 | 3 | 4 | 2  |
| TDr_2059 | Genebank<br>landrace | Nigeria | 1 | 3 | 3 | 3 | 3  |
| TDr_2078 | Genebank<br>landrace | Nigeria | 1 | 3 | 3 | 4 | 11 |
| TDr_2083 | Genebank<br>landrace | Nigeria | 1 | 3 | 3 | 4 | 2  |
| TDr_2094 | Genebank<br>landrace | Nigeria | 1 | 3 | 3 | 3 | 3  |
| TDr_2104 | Genebank<br>landrace | Nigeria | 1 | 3 | 3 | 3 | 3  |
| TDr_2119 | Genebank<br>landrace | Nigeria | 1 | 3 | 4 | 1 | 8  |
| TDr_2121 | Genebank<br>landrace | Nigeria | 1 | 3 | 3 | 4 | 11 |
| TDr_2126 | Genebank<br>landrace | Nigeria | 1 | 3 | 3 | 3 | 3  |
| TDr_2131 | Genebank<br>landrace | Nigeria | 1 | 3 | 3 | 3 | 3  |
| TDr_2136 | Genebank<br>landrace | Nigeria | 1 | 3 | 2 | 2 | 9  |
| TDr_2148 | Genebank<br>landrace | Nigeria | 1 | 3 | 3 | 4 | 2  |

|          |                      |         |   |   |   |   |    |
|----------|----------------------|---------|---|---|---|---|----|
| TDr_2155 | Genebank<br>landrace | Nigeria | 1 | 3 | 3 | 4 | 11 |
| TDr_2163 | Genebank<br>landrace | Nigeria | 1 | 3 | 3 | 4 | 11 |
| TDr_2167 | Genebank<br>landrace | Nigeria | 1 | 3 | 2 | 2 | 9  |
| TDr_2175 | Genebank<br>landrace | Nigeria | 1 | 3 | 3 | 4 | 2  |
| TDr_2195 | Genebank<br>landrace | Nigeria | 1 | 3 | 3 | 4 | 2  |
| TDr_2197 | Genebank<br>landrace | Nigeria | 1 | 3 | 4 | 1 | 8  |
| TDr_2201 | Genebank<br>landrace | Nigeria | 1 | 3 | 3 | 4 | 2  |
| TDr_2207 | Genebank<br>landrace | Nigeria | 1 | 3 | 3 | 4 | 11 |
| TDr_2211 | Genebank<br>landrace | Nigeria | 1 | 3 | 4 | 1 | 2  |
| TDr_2212 | Genebank<br>landrace | Nigeria | 1 | 3 | 3 | 4 | 2  |
| TDr_2225 | Genebank<br>landrace | Nigeria | 1 | 3 | 4 | 1 | 8  |
| TDr_2257 | Genebank<br>landrace | Nigeria | 1 | 3 | 3 | 4 | 11 |
| TDr_2262 | Genebank<br>landrace | Nigeria | 1 | 3 | 3 | 4 | 12 |
| TDr_2266 | Genebank<br>landrace | Nigeria | 1 | 3 | 3 | 4 | 2  |
| TDr_2276 | Genebank<br>landrace | Nigeria | 1 | 3 | 3 | 4 | 2  |
| TDr_2284 | Genebank<br>landrace | Nigeria | 1 | 3 | 3 | 4 | 2  |
| TDr_2285 | Genebank<br>landrace | Nigeria | 1 | 3 | 3 | 4 | 2  |
| TDr_2287 | Genebank<br>landrace | Nigeria | 1 | 3 | 3 | 3 | 3  |
| TDr_2291 | Genebank<br>landrace | Nigeria | 1 | 3 | 2 | 2 | 9  |
| TDr_2292 | Genebank<br>landrace | Nigeria | 1 | 3 | 4 | 1 | 8  |
| TDr_2294 | Genebank<br>landrace | Nigeria | 1 | 3 | 2 | 2 | 9  |
| TDr_2295 | Genebank<br>landrace | Nigeria | 1 | 3 | 3 | 4 | 12 |
| TDr_2307 | Genebank<br>landrace | Nigeria | 1 | 3 | 3 | 4 | 2  |
| TDr_2312 | Genebank<br>landrace | Nigeria | 1 | 3 | 3 | 4 | 2  |
| TDr_2320 | Genebank<br>landrace | Nigeria | 1 | 3 | 2 | 2 | 9  |
| TDr_2323 | Genebank<br>landrace | Nigeria | 1 | 3 | 3 | 4 | 2  |
| TDr_2329 | Genebank<br>landrace | Nigeria | 1 | 3 | 3 | 4 | 2  |
| TDr_2338 | Genebank<br>landrace | Nigeria | 1 | 3 | 4 | 1 | 8  |

|          |                   |         |   |   |   |   |    |
|----------|-------------------|---------|---|---|---|---|----|
| TDr_2343 | Genebank landrace | Nigeria | 1 | 3 | 3 | 4 | 11 |
| TDr_2347 | Genebank landrace | Nigeria | 1 | 3 | 3 | 3 | 3  |
| TDr_2348 | Genebank landrace | Nigeria | 1 | 3 | 3 | 3 | 3  |
| TDr_2363 | Genebank landrace | Nigeria | 1 | 3 | 4 | 1 | 8  |
| TDr_2369 | Genebank landrace | Nigeria | 1 | 3 | 3 | 4 | 2  |
| TDr_2385 | Genebank landrace | Nigeria | 1 | 3 | 3 | 4 | 11 |
| TDr_2406 | Genebank landrace | Nigeria | 1 | 3 | 4 | 1 | 8  |
| TDr_2432 | Genebank landrace | Nigeria | 1 | 3 | 4 | 1 | 8  |
| TDr_2435 | Genebank landrace | Nigeria | 1 | 3 | 2 | 2 | 9  |
| TDr_2438 | Genebank landrace | Nigeria | 1 | 3 | 3 | 4 | 2  |
| TDr_2439 | Genebank landrace | Nigeria | 1 | 3 | 3 | 4 | 2  |
| TDr_2440 | Genebank landrace | Nigeria | 1 | 3 | 3 | 4 | 11 |
| TDr_2453 | Genebank landrace | Nigeria | 1 | 3 | 3 | 4 | 2  |
| TDr_2455 | Genebank landrace | Nigeria | 1 | 3 | 3 | 4 | 4  |
| TDr_2456 | Genebank landrace | Nigeria | 1 | 3 | 3 | 4 | 12 |
| TDr_2458 | Genebank landrace | Nigeria | 1 | 3 | 3 | 3 | 3  |
| TDr_2466 | Genebank landrace | Nigeria | 1 | 3 | 3 | 3 | 3  |
| TDr_2480 | Genebank landrace | Nigeria | 1 | 3 | 3 | 4 | 11 |
| TDr_2491 | Genebank landrace | Nigeria | 1 | 3 | 3 | 4 | 11 |
| TDr_2503 | Genebank landrace | Nigeria | 1 | 3 | 3 | 4 | 2  |
| TDr_2506 | Genebank landrace | Nigeria | 1 | 3 | 2 | 2 | 9  |
| TDr_2512 | Genebank landrace | Nigeria | 1 | 3 | 3 | 3 | 3  |
| TDr_2514 | Genebank landrace | Nigeria | 1 | 3 | 3 | 4 | 4  |
| TDr_2530 | Genebank landrace | Nigeria | 1 | 3 | 3 | 4 | 12 |
| TDr_2540 | Genebank landrace | Nigeria | 1 | 3 | 3 | 4 | 2  |
| TDr_2553 | Genebank landrace | Nigeria | 1 | 3 | 3 | 4 | 6  |
| TDr_2555 | Genebank landrace | Nigeria | 1 | 3 | 2 | 2 | 9  |
| TDr_2564 | Genebank landrace | Nigeria | 1 | 3 | 3 | 4 | 12 |

|          |                      |         |   |   |   |   |    |
|----------|----------------------|---------|---|---|---|---|----|
| TDr_2577 | Genebank<br>landrace | Nigeria | 1 | 3 | 2 | 2 | 9  |
| TDr_2593 | Genebank<br>landrace | Nigeria | 1 | 3 | 4 | 1 | 8  |
| TDr_2611 | Genebank<br>landrace | Nigeria | 1 | 3 | 3 | 4 | 12 |
| TDr_2618 | Genebank<br>landrace | Nigeria | 1 | 3 | 3 | 3 | 3  |
| TDr_2623 | Genebank<br>landrace | Nigeria | 1 | 3 | 2 | 2 | 9  |
| TDr_2630 | Genebank<br>landrace | Nigeria | 1 | 3 | 3 | 4 | 2  |
| TDr_2636 | Genebank<br>landrace | Nigeria | 1 | 3 | 2 | 2 | 9  |
| TDr_2643 | Genebank<br>landrace | Nigeria | 1 | 3 | 2 | 2 | 9  |
| TDr_2655 | Genebank<br>landrace | Nigeria | 1 | 3 | 3 | 4 | 2  |
| TDr_2663 | Genebank<br>landrace | Nigeria | 1 | 3 | 3 | 4 | 2  |
| TDr_2669 | Genebank<br>landrace | Nigeria | 1 | 3 | 3 | 4 | 2  |
| TDr_2670 | Genebank<br>landrace | Nigeria | 1 | 3 | 3 | 3 | 3  |
| TDr_2674 | Genebank<br>landrace | Nigeria | 1 | 3 | 3 | 4 | 6  |
| TDr_2683 | Genebank<br>landrace | Nigeria | 1 | 3 | 2 | 2 | 9  |
| TDr_2687 | Genebank<br>landrace | Nigeria | 1 | 3 | 2 | 2 | 9  |
| TDr_2692 | Genebank<br>landrace | Nigeria | 1 | 3 | 4 | 1 | 8  |
| TDr_2694 | Genebank<br>landrace | Nigeria | 1 | 3 | 4 | 1 | 8  |
| TDr_2698 | Genebank<br>landrace | Nigeria | 1 | 3 | 3 | 3 | 3  |
| TDr_2701 | Genebank<br>landrace | Nigeria | 1 | 3 | 3 | 4 | 2  |
| TDr_2726 | Genebank<br>landrace | Nigeria | 1 | 3 | 2 | 2 | 9  |
| TDr_2740 | Genebank<br>landrace | Nigeria | 1 | 3 | 3 | 4 | 6  |
| TDr_2741 | Genebank<br>landrace | Nigeria | 1 | 3 | 3 | 4 | 2  |
| TDr_2744 | Genebank<br>landrace | Nigeria | 1 | 3 | 3 | 4 | 6  |
| TDr_2749 | Genebank<br>landrace | Nigeria | 1 | 3 | 3 | 3 | 3  |
| TDr_2754 | Genebank<br>landrace | Nigeria | 1 | 3 | 3 | 4 | 12 |
| TDr_2756 | Genebank<br>landrace | Nigeria | 1 | 3 | 4 | 1 | 8  |
| TDr_2763 | Genebank<br>landrace | Nigeria | 1 | 3 | 4 | 1 | 8  |
| TDr_2770 | Genebank<br>landrace | Nigeria | 1 | 3 | 3 | 3 | 3  |

|          |                   |         |   |   |   |   |    |
|----------|-------------------|---------|---|---|---|---|----|
| TDr_2787 | Genebank landrace | Nigeria | 1 | 3 | 3 | 4 | 11 |
| TDr_3002 | Genebank landrace | Nigeria | 1 | 3 | 2 | 2 | 9  |
| TDr_3003 | Genebank landrace | Nigeria | 1 | 3 | 3 | 3 | 3  |
| TDr_3006 | Genebank landrace | Nigeria | 1 | 3 | 3 | 4 | 6  |
| TDr_3287 | Genebank landrace | Nigeria | 1 | 3 | 3 | 3 | 3  |
| TDr_3292 | Genebank landrace | Nigeria | 1 | 3 | 3 | 4 | 2  |
| TDr_3296 | Genebank landrace | Nigeria | 1 | 3 | 3 | 4 | 2  |
| TDr_3301 | Genebank landrace | Nigeria | 1 | 3 | 3 | 3 | 3  |
| TDr_3310 | Genebank landrace | Nigeria | 1 | 3 | 2 | 2 | 9  |
| TDr_3311 | Genebank landrace | Nigeria | 1 | 3 | 3 | 4 | 2  |
| TDr_3312 | Genebank landrace | Nigeria | 1 | 3 | 4 | 1 | 8  |
| TDr_3316 | Genebank landrace | Nigeria | 1 | 3 | 2 | 2 | 9  |
| TDr_3567 | Genebank landrace | Nigeria | 1 | 3 | 3 | 4 | 2  |
| TDr_3568 | Genebank landrace | Nigeria | 1 | 3 | 3 | 4 | 2  |
| TDr_3569 | Genebank landrace | Nigeria | 1 | 3 | 3 | 3 | 3  |
| TDr_3576 | Genebank landrace | Nigeria | 1 | 3 | 3 | 4 | 11 |
| TDr_3579 | Genebank landrace | Nigeria | 1 | 3 | 3 | 4 | 4  |
| TDr_3584 | Genebank landrace | Nigeria | 1 | 3 | 3 | 4 | 2  |
| TDr_3585 | Genebank landrace | Nigeria | 1 | 3 | 2 | 2 | 9  |
| TDr_3590 | Genebank landrace | Nigeria | 1 | 3 | 3 | 4 | 11 |
| TDr_3593 | Genebank landrace | Nigeria | 1 | 3 | 2 | 2 | 9  |
| TDr_3594 | Genebank landrace | Nigeria | 1 | 3 | 4 | 1 | 8  |
| TDr_3598 | Genebank landrace | Nigeria | 1 | 3 | 3 | 4 | 2  |
| TDr_3600 | Genebank landrace | Nigeria | 1 | 3 | 3 | 4 | 4  |
| TDr_3605 | Genebank landrace | Nigeria | 1 | 3 | 3 | 4 | 2  |
| TDr_3610 | Genebank landrace | Nigeria | 1 | 3 | 3 | 3 | 3  |
| TDr_3616 | Genebank landrace | Nigeria | 1 | 3 | 4 | 1 | 8  |
| TDr_3620 | Genebank landrace | Nigeria | 1 | 3 | 4 | 1 | 8  |

|          |                      |         |   |   |   |   |    |
|----------|----------------------|---------|---|---|---|---|----|
| TDr_3621 | Genebank<br>landrace | Nigeria | 1 | 3 | 4 | 1 | 8  |
| TDr_3623 | Genebank<br>landrace | Nigeria | 1 | 3 | 3 | 3 | 3  |
| TDr_3624 | Genebank<br>landrace | Nigeria | 1 | 3 | 3 | 4 | 6  |
| TDr_3631 | Genebank<br>landrace | Nigeria | 1 | 3 | 3 | 4 | 6  |
| TDr_3643 | Genebank<br>landrace | Nigeria | 1 | 3 | 3 | 4 | 6  |
| TDr_3647 | Genebank<br>landrace | Nigeria | 1 | 3 | 3 | 4 | 2  |
| TDr_3648 | Genebank<br>landrace | Nigeria | 1 | 3 | 4 | 1 | 8  |
| TDr_3649 | Genebank<br>landrace | Nigeria | 1 | 3 | 4 | 1 | 10 |
| TDr_3663 | Genebank<br>landrace | Nigeria | 1 | 3 | 3 | 4 | 2  |
| TDr_3668 | Genebank<br>landrace | Nigeria | 1 | 3 | 3 | 4 | 2  |
| TDr_3671 | Genebank<br>landrace | Nigeria | 1 | 3 | 3 | 3 | 3  |
| TDr_3682 | Genebank<br>landrace | Nigeria | 1 | 3 | 4 | 1 | 8  |
| TDr_3729 | Genebank<br>landrace | Nigeria | 1 | 3 | 3 | 4 | 2  |
| TDr_3765 | Genebank<br>landrace | Nigeria | 1 | 3 | 3 | 4 | 4  |
| TDr_3766 | Genebank<br>landrace | Nigeria | 1 | 3 | 3 | 4 | 2  |
| TDr_3881 | Genebank<br>landrace | Nigeria | 1 | 3 | 3 | 4 | 2  |
| TDr_3974 | Genebank<br>landrace | Nigeria | 1 | 3 | 3 | 4 | 6  |
| TDr_3978 | Genebank<br>landrace | Nigeria | 1 | 3 | 3 | 4 | 12 |
| TDr_3985 | Genebank<br>landrace | Nigeria | 1 | 3 | 2 | 2 | 9  |
| TDr_4005 | Genebank<br>landrace | Nigeria | 1 | 3 | 2 | 2 | 9  |
| TDr_4028 | Genebank<br>landrace | Nigeria | 1 | 3 | 3 | 3 | 3  |
| TDr_4029 | Genebank<br>landrace | Nigeria | 1 | 3 | 3 | 4 | 2  |
| TDr_4031 | Genebank<br>landrace | Nigeria | 1 | 3 | 3 | 4 | 6  |
| TDr_4033 | Genebank<br>landrace | Nigeria | 1 | 3 | 3 | 4 | 2  |
| TDr_4038 | Genebank<br>landrace | Nigeria | 1 | 3 | 3 | 4 | 12 |
| TDr_4067 | Genebank<br>landrace | Nigeria | 1 | 3 | 3 | 3 | 3  |
| TDr_4070 | Genebank<br>landrace | Nigeria | 1 | 3 | 3 | 4 | 11 |
| TDr_4091 | Genebank<br>landrace | Nigeria | 1 | 3 | 3 | 4 | 11 |

|          |                   |         |   |   |   |   |    |
|----------|-------------------|---------|---|---|---|---|----|
| TDr_4092 | Genebank landrace | Nigeria | 1 | 3 | 3 | 4 | 2  |
| TDr_4100 | Genebank landrace | Nigeria | 1 | 3 | 3 | 4 | 6  |
| TDr_4154 | Genebank landrace | Nigeria | 1 | 3 | 3 | 4 | 2  |
| TDr_4155 | Genebank landrace | Nigeria | 1 | 3 | 3 | 4 | 2  |
| TDr_1491 | Genebank landrace | Togo    | 1 | 3 | 3 | 4 | 11 |
| TDr_1492 | Genebank landrace | Togo    | 1 | 3 | 2 | 2 | 9  |
| TDr_1495 | Genebank landrace | Togo    | 1 | 3 | 2 | 2 | 9  |
| TDr_1499 | Genebank landrace | Togo    | 1 | 3 | 4 | 1 | 8  |
| TDr_1500 | Genebank landrace | Togo    | 1 | 3 | 3 | 4 | 2  |
| TDr_1505 | Genebank landrace | Togo    | 1 | 3 | 4 | 1 | 8  |
| TDr_1509 | Genebank landrace | Togo    | 1 | 3 | 3 | 4 | 11 |
| TDr_1510 | Genebank landrace | Togo    | 1 | 3 | 3 | 3 | 3  |
| TDr_1513 | Genebank landrace | Togo    | 1 | 3 | 3 | 3 | 3  |
| TDr_1536 | Genebank landrace | Togo    | 1 | 3 | 3 | 4 | 2  |
| TDr_1543 | Genebank landrace | Togo    | 1 | 3 | 2 | 2 | 9  |
| TDr_1556 | Genebank landrace | Togo    | 1 | 3 | 3 | 4 | 2  |
| TDr_1559 | Genebank landrace | Togo    | 1 | 3 | 3 | 3 | 3  |
| TDr_1562 | Genebank landrace | Togo    | 1 | 3 | 3 | 4 | 2  |
| TDr_1568 | Genebank landrace | Togo    | 1 | 3 | 3 | 3 | 3  |
| TDr_1569 | Genebank landrace | Togo    | 1 | 3 | 3 | 4 | 2  |
| TDr_1576 | Genebank landrace | Togo    | 1 | 3 | 2 | 2 | 9  |
| TDr_1577 | Genebank landrace | Togo    | 1 | 3 | 2 | 2 | 9  |
| TDr_1585 | Genebank landrace | Togo    | 1 | 3 | 4 | 1 | 8  |
| TDr_1601 | Genebank landrace | Togo    | 1 | 3 | 2 | 2 | 9  |
| TDr_1608 | Genebank landrace | Togo    | 1 | 3 | 3 | 4 | 2  |
| TDr_1610 | Genebank landrace | Togo    | 1 | 3 | 3 | 4 | 2  |
| TDr_1621 | Genebank landrace | Togo    | 1 | 3 | 4 | 1 | 8  |
| TDr_1622 | Genebank landrace | Togo    | 1 | 3 | 3 | 4 | 12 |

|          |                      |      |   |   |   |   |    |
|----------|----------------------|------|---|---|---|---|----|
| TDr_1628 | Genebank<br>landrace | Togo | 1 | 3 | 3 | 4 | 11 |
| TDr_1630 | Genebank<br>landrace | Togo | 1 | 3 | 3 | 3 | 3  |
| TDr_1650 | Genebank<br>landrace | Togo | 1 | 3 | 4 | 1 | 8  |
| TDr_1655 | Genebank<br>landrace | Togo | 1 | 3 | 3 | 4 | 6  |
| TDr_1657 | Genebank<br>landrace | Togo | 1 | 3 | 3 | 4 | 6  |
| TDr_1667 | Genebank<br>landrace | Togo | 1 | 3 | 3 | 4 | 2  |
| TDr_1669 | Genebank<br>landrace | Togo | 1 | 3 | 4 | 1 | 8  |
| TDr_1676 | Genebank<br>landrace | Togo | 1 | 3 | 2 | 2 | 9  |
| TDr_1684 | Genebank<br>landrace | Togo | 1 | 3 | 3 | 4 | 11 |
| TDr_1686 | Genebank<br>landrace | Togo | 1 | 3 | 3 | 3 | 3  |
| TDr_1688 | Genebank<br>landrace | Togo | 1 | 3 | 2 | 2 | 9  |
| TDr_1707 | Genebank<br>landrace | Togo | 1 | 3 | 3 | 4 | 4  |
| TDr_1709 | Genebank<br>landrace | Togo | 1 | 3 | 3 | 4 | 11 |
| TDr_1717 | Genebank<br>landrace | Togo | 1 | 3 | 3 | 4 | 12 |
| TDr_1756 | Genebank<br>landrace | Togo | 1 | 3 | 3 | 3 | 3  |
| TDr_1760 | Genebank<br>landrace | Togo | 1 | 3 | 3 | 3 | 3  |
| TDr_1761 | Genebank<br>landrace | Togo | 1 | 3 | 3 | 4 | 4  |
| TDr_1763 | Genebank<br>landrace | Togo | 1 | 3 | 4 | 1 | 8  |
| TDr_1765 | Genebank<br>landrace | Togo | 1 | 3 | 3 | 4 | 6  |
| TDr_1772 | Genebank<br>landrace | Togo | 1 | 3 | 3 | 4 | 2  |
| TDr_1790 | Genebank<br>landrace | Togo | 1 | 3 | 4 | 1 | 8  |
| TDr_1798 | Genebank<br>landrace | Togo | 1 | 3 | 3 | 4 | 2  |
| TDr_1799 | Genebank<br>landrace | Togo | 1 | 3 | 3 | 4 | 2  |
| TDr_1804 | Genebank<br>landrace | Togo | 1 | 3 | 3 | 3 | 3  |
| TDr_1809 | Genebank<br>landrace | Togo | 1 | 3 | 2 | 2 | 9  |
| TDr_1813 | Genebank<br>landrace | Togo | 1 | 3 | 3 | 4 | 2  |
| TDr_1817 | Genebank<br>landrace | Togo | 1 | 3 | 2 | 2 | 9  |
| TDr_1818 | Genebank<br>landrace | Togo | 1 | 3 | 3 | 4 | 2  |

|          |                      |      |   |   |   |   |    |
|----------|----------------------|------|---|---|---|---|----|
| TDr_1825 | Genebank<br>landrace | Togo | 1 | 3 | 3 | 3 | 3  |
| TDr_1826 | Genebank<br>landrace | Togo | 1 | 3 | 4 | 1 | 8  |
| TDr_1827 | Genebank<br>landrace | Togo | 1 | 3 | 4 | 1 | 8  |
| TDr_1828 | Genebank<br>landrace | Togo | 1 | 3 | 3 | 4 | 12 |
| TDr_1829 | Genebank<br>landrace | Togo | 1 | 3 | 2 | 2 | 9  |
| TDr_1832 | Genebank<br>landrace | Togo | 1 | 3 | 3 | 4 | 2  |
| TDr_1850 | Genebank<br>landrace | Togo | 1 | 3 | 3 | 4 | 6  |
| TDr_1851 | Genebank<br>landrace | Togo | 1 | 3 | 3 | 4 | 11 |
| TDr_1856 | Genebank<br>landrace | Togo | 1 | 3 | 3 | 4 | 2  |
| TDr_1895 | Genebank<br>landrace | Togo | 1 | 3 | 4 | 1 | 8  |
| TDr_1905 | Genebank<br>landrace | Togo | 1 | 3 | 3 | 4 | 6  |
| TDr_1939 | Genebank<br>landrace | Togo | 1 | 3 | 4 | 1 | 8  |
| TDr_2090 | Genebank<br>landrace | Togo | 1 | 3 | 3 | 4 | 6  |
| TDr_2106 | Genebank<br>landrace | Togo | 1 | 3 | 2 | 2 | 9  |
| TDr_2171 | Genebank<br>landrace | Togo | 1 | 3 | 3 | 3 | 3  |
| TDr_2237 | Genebank<br>landrace | Togo | 1 | 3 | 2 | 2 | 9  |
| TDr_2242 | Genebank<br>landrace | Togo | 1 | 3 | 3 | 3 | 3  |
| TDr_2247 | Genebank<br>landrace | Togo | 1 | 3 | 3 | 4 | 2  |
| TDr_2249 | Genebank<br>landrace | Togo | 1 | 3 | 3 | 4 | 11 |
| TDr_2349 | Genebank<br>landrace | Togo | 1 | 3 | 3 | 4 | 2  |
| TDr_2350 | Genebank<br>landrace | Togo | 1 | 3 | 3 | 4 | 2  |
| TDr_2366 | Genebank<br>landrace | Togo | 1 | 3 | 3 | 3 | 3  |
| TDr_2401 | Genebank<br>landrace | Togo | 1 | 3 | 3 | 4 | 12 |
| TDr_2425 | Genebank<br>landrace | Togo | 1 | 3 | 3 | 4 | 11 |
| TDr_2431 | Genebank<br>landrace | Togo | 1 | 3 | 3 | 3 | 3  |
| TDr_2441 | Genebank<br>landrace | Togo | 1 | 3 | 2 | 2 | 9  |
| TDr_2484 | Genebank<br>landrace | Togo | 1 | 3 | 3 | 4 | 2  |
| TDr_2502 | Genebank<br>landrace | Togo | 1 | 3 | 3 | 4 | 6  |

|          |                      |      |   |   |   |   |    |
|----------|----------------------|------|---|---|---|---|----|
| TDr_2532 | Genebank<br>landrace | Togo | 1 | 3 | 2 | 2 | 9  |
| TDr_2533 | Genebank<br>landrace | Togo | 1 | 3 | 2 | 2 | 2  |
| TDr_2572 | Genebank<br>landrace | Togo | 1 | 3 | 3 | 4 | 6  |
| TDr_2575 | Genebank<br>landrace | Togo | 1 | 3 | 3 | 4 | 2  |
| TDr_2580 | Genebank<br>landrace | Togo | 1 | 3 | 2 | 2 | 9  |
| TDr_2581 | Genebank<br>landrace | Togo | 1 | 3 | 3 | 3 | 3  |
| TDr_2591 | Genebank<br>landrace | Togo | 1 | 3 | 4 | 1 | 8  |
| TDr_2608 | Genebank<br>landrace | Togo | 1 | 3 | 3 | 4 | 11 |
| TDr_2710 | Genebank<br>landrace | Togo | 1 | 3 | 3 | 4 | 12 |
| TDr_2713 | Genebank<br>landrace | Togo | 1 | 3 | 3 | 4 | 2  |
| TDr_2782 | Genebank<br>landrace | Togo | 1 | 3 | 3 | 4 | 2  |
| TDr_2886 | Genebank<br>landrace | Togo | 1 | 3 | 2 | 2 | 9  |
| TDr_2897 | Genebank<br>landrace | Togo | 1 | 3 | 3 | 4 | 12 |
| TDr_2903 | Genebank<br>landrace | Togo | 1 | 3 | 2 | 2 | 9  |
| TDr_2904 | Genebank<br>landrace | Togo | 1 | 3 | 3 | 4 | 11 |
| TDr_2910 | Genebank<br>landrace | Togo | 1 | 3 | 3 | 4 | 11 |
| TDr_2915 | Genebank<br>landrace | Togo | 1 | 3 | 4 | 1 | 8  |
| TDr_2926 | Genebank<br>landrace | Togo | 1 | 3 | 2 | 2 | 9  |
| TDr_2928 | Genebank<br>landrace | Togo | 1 | 3 | 2 | 2 | 9  |
| TDr_2931 | Genebank<br>landrace | Togo | 1 | 3 | 4 | 1 | 8  |
| TDr_2936 | Genebank<br>landrace | Togo | 1 | 3 | 3 | 4 | 12 |
| TDr_2946 | Genebank<br>landrace | Togo | 1 | 3 | 3 | 4 | 12 |
| TDr_2948 | Genebank<br>landrace | Togo | 1 | 3 | 3 | 4 | 2  |
| TDr_2965 | Genebank<br>landrace | Togo | 1 | 3 | 3 | 4 | 12 |
| TDr_2970 | Genebank<br>landrace | Togo | 1 | 3 | 4 | 1 | 8  |
| TDr_2974 | Genebank<br>landrace | Togo | 1 | 3 | 3 | 4 | 4  |
| TDr_2984 | Genebank<br>landrace | Togo | 1 | 3 | 3 | 4 | 6  |
| TDr_2998 | Genebank<br>landrace | Togo | 1 | 3 | 2 | 2 | 9  |

|          |                   |                        |   |   |   |   |    |
|----------|-------------------|------------------------|---|---|---|---|----|
| TDr_3016 | Genebank landrace | Togo                   | 1 | 3 | 4 | 1 | 8  |
| TDr_3433 | Genebank landrace | Togo                   | 1 | 3 | 2 | 2 | 9  |
| TDr_3447 | Genebank landrace | Togo                   | 1 | 3 | 3 | 4 | 2  |
| TDr_3452 | Genebank landrace | Togo                   | 1 | 3 | 4 | 1 | 8  |
| TDr_3461 | Genebank landrace | Togo                   | 1 | 3 | 2 | 2 | 9  |
| TDr_3466 | Genebank landrace | Togo                   | 1 | 3 | 3 | 4 | 11 |
| TDr_3472 | Genebank landrace | Togo                   | 1 | 3 | 4 | 1 | 8  |
| TDr_3473 | Genebank landrace | Togo                   | 1 | 3 | 3 | 4 | 11 |
| TDr_3477 | Genebank landrace | Togo                   | 1 | 3 | 3 | 4 | 2  |
| TDr_3483 | Genebank landrace | Togo                   | 1 | 3 | 3 | 4 | 2  |
| TDr_3484 | Genebank landrace | Togo                   | 1 | 3 | 3 | 4 | 6  |
| TDr_3507 | Genebank landrace | Togo                   | 1 | 3 | 4 | 1 | 8  |
| TDr_3508 | Genebank landrace | Togo                   | 1 | 3 | 3 | 3 | 3  |
| TDr_3510 | Genebank landrace | Togo                   | 1 | 3 | 3 | 4 | 2  |
| TDr_3518 | Genebank landrace | Togo                   | 1 | 3 | 3 | 4 | 11 |
| TDr_3524 | Genebank landrace | Togo                   | 1 | 3 | 3 | 4 | 4  |
| TDr_3527 | Genebank landrace | Togo                   | 1 | 3 | 3 | 4 | 6  |
| TDr_3536 | Genebank landrace | Togo                   | 1 | 3 | 2 | 2 | 9  |
| TDr_3540 | Genebank landrace | Togo                   | 1 | 3 | 3 | 4 | 2  |
| TDr_3543 | Genebank landrace | Togo                   | 1 | 3 | 3 | 4 | 6  |
| TDr_3544 | Genebank landrace | Togo                   | 1 | 3 | 3 | 4 | 2  |
| TDr_3547 | Genebank landrace | Togo                   | 1 | 3 | 2 | 2 | 9  |
| TDr_3551 | Genebank landrace | Togo                   | 1 | 3 | 4 | 1 | 8  |
| TDr_3556 | Genebank landrace | Togo                   | 1 | 3 | 3 | 4 | 11 |
| Ehobia   | Market variety    | Bodija Market, Nigeria | 1 | 2 | 3 | 4 | 11 |
| Efuru    | Market variety    | Bodija Market, Nigeria | 1 | 2 | 3 | 4 | 4  |
| Aloshi   | Market variety    | Lafia Market, Nigeria  | 1 | 2 | 3 | 4 | 5  |
| Dente    | Market variety    | Accra Market, Ghana    | 1 | 3 | 3 | 4 | 11 |

|                               |                |                                  |   |   |   |   |    |
|-------------------------------|----------------|----------------------------------|---|---|---|---|----|
| Pouna                         | Market variety | Accra Market, Ghana              | 1 | 3 | 3 | 4 | 11 |
| Jirad_04_219/Amula            | Market variety | Bodija Market, Nigeria           | 1 | 3 | 3 | 4 | 4  |
| Jircas_99_00777/Breeding line | Market variety | Bodija Market, Nigeria           | 1 | 3 | 3 | 4 | 2  |
| Omi_efun_5                    | Market variety | Bodija Market, Nigeria           | 1 | 3 | 3 | 3 | 3  |
| Omi_efun_7                    | Market variety | Bodija Market, Nigeria           | 1 | 3 | 3 | 4 | 4  |
| TDr_Efuru                     | Market variety | Bodija Market, Nigeria           | 1 | 3 | 3 | 4 | 2  |
| TDr_Idu_Ekpeye                | Market variety | Bodija Market, Nigeria           | 1 | 3 | 3 | 4 | 2  |
| Ufenyi                        | Market variety | Bodija Market, Nigeria           | 1 | 3 | 3 | 4 | 4  |
| Ekiti                         | Market variety | Ekiti Market, Nigeria            | 1 | 3 | 3 | 4 | 2  |
| Alumaco_2                     | Market variety | Gwagwalada Market, Nigeria       | 1 | 3 | 3 | 4 | 2  |
| Makakusa                      | Market variety | Gwagwalada Market, Nigeria       | 1 | 3 | 3 | 4 | 2  |
| Obioturugu                    | Market variety | Igbariam Market, Nigeria         | 1 | 3 | 3 | 4 | 2  |
| Pepa                          | Market variety | Igbariam Market, Nigeria         | 1 | 3 | 3 | 4 | 2  |
| Alumaco_1                     | Market variety | Lafia Market, Nigeria            | 1 | 3 | 3 | 4 | 2  |
| Ogini                         | Market variety | Lafia Market, Nigeria            | 1 | 3 | 3 | 4 | 2  |
| TDr_Gbangu                    | Market variety | Lafia Market, Nigeria            | 1 | 3 | 3 | 4 | 2  |
| Amola                         | Market variety | Lafia/Gwagwalada Market, Nigeria | 1 | 3 | 3 | 4 | 2  |
| TDr_Ame                       | Market variety | Lafia/Gwagwalada Market, Nigeria | 1 | 3 | 3 | 4 | 2  |
| TDr_Amula                     | Market variety | Lafia/Gwagwalada Market, Nigeria | 1 | 3 | 3 | 4 | 2  |
| TDr_River_Omuku (Danacha)     | Market variety | Omuku Market, Nigeria            | 1 | 3 | 3 | 4 | 2  |
| Keemi                         | Market variety | Shaki Market, Nigeria            | 1 | 3 | 3 | 4 | 2  |
| Hembakwase                    | Market variety | Zakin-Bian Market, Nigeria       | 1 | 3 | 3 | 4 | 2  |
| TDr_Adaka                     | Market variety | Zakin-Bian Market, Nigeria       | 1 | 3 | 3 | 4 | 2  |

Genotypes in RED indicate a genebank landrace/market variety; \* represents a bi-parental cross

Table S3. Summary of DAPC cluster groups at different K values.

| DAPC | K = 2  | Clusters | Breeding Lines | Genebank Landraces | Market Varieties | Cluster Assigned Probability |
|------|--------|----------|----------------|--------------------|------------------|------------------------------|
|      |        | 1        | 309            | 403                | 27               | 100                          |
|      |        | 2        | 5              | 59                 | 0                | 100                          |
|      | K = 3  | 1        | 5              | 59                 | 3                | 100                          |
|      |        | 2        | 27             | 31                 | 24               | 100                          |
|      |        | 3        | 282            | 372                | 0                | 99.8                         |
|      | K = 4  | 1        | 5              | 59                 | 0                | 100                          |
|      |        | 2        | 1              | 63                 | 0                | 100                          |
|      |        | 3        | 186            | 287                | 27               | 99.8                         |
|      |        | 4        | 122            | 3                  | 0                | 97.7                         |
|      | K = 5  | 1        | 121            | 53                 | 0                | 97.7                         |
|      |        | 2        | 1              | 63                 | 0                | 100                          |
|      |        | 3        | 1              | 52                 | 1                | 100                          |
|      |        | 4        | 186            | 235                | 26               | 99.8                         |
|      |        | 5        | 5              | 59                 | 0                | 100                          |
|      | K = 12 | 1        | 3              | 19                 | 0                | 100                          |
|      |        | 2        | 81             | 106                | 18               | 96.58                        |
|      |        | 3        | 1              | 52                 | 1                | 100                          |
|      |        | 4        | 105            | 10                 | 4                | 96.63                        |
|      |        | 5        | 7              | 31                 | 1                | 92.3                         |
|      |        | 6        | 0              | 26                 | 0                | 88.46                        |
|      |        | 7        | 2              | 40                 | 0                | 100                          |
|      |        | 8        | 60             | 51                 | 0                | 99.09                        |
|      |        | 9        | 1              | 62                 | 0                | 100                          |
|      |        | 10       | 54             | 1                  | 0                | 96.36                        |
|      |        | 11       | 0              | 40                 | 3                | 97.67                        |
|      |        | 12       | 0              | 24                 | 0                | 100                          |

Figure S1. Determination of optimal number of ADMIXTURE clusters using cross-validation error rates for K=2 to K=50.

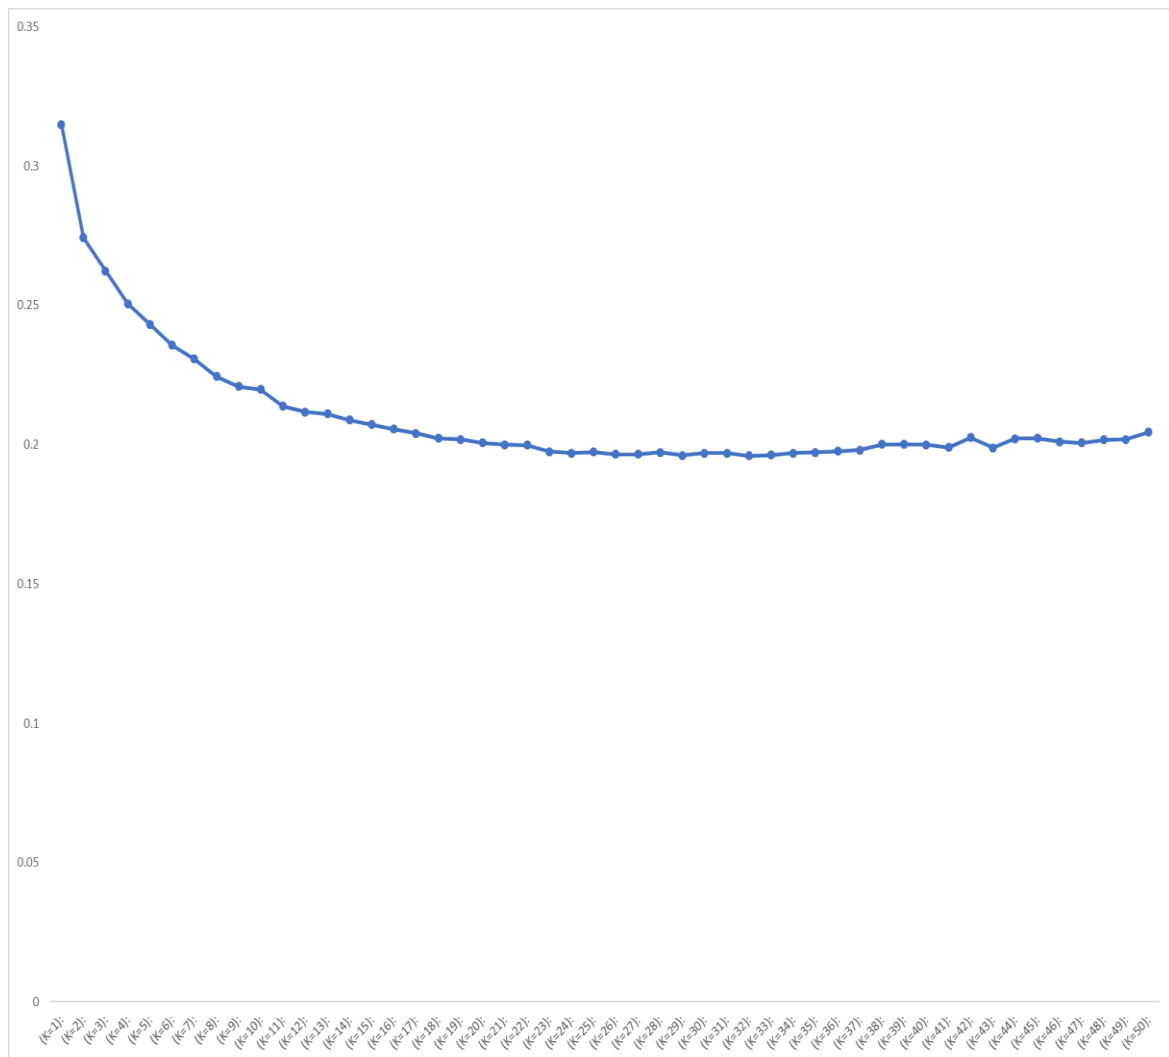

Table S4. Summary of ADMIXTURE cluster groups at different K values.

| ADMIXTURE |      | Clusters | Breeding Lines | Genebank Landraces | Market Variety |
|-----------|------|----------|----------------|--------------------|----------------|
|           | K=2  | 1        | 308            | 401                | 26             |
|           |      | 2        | 4              | 54                 | 0              |
|           |      | Admixed  | 2              | 7                  | 1              |
|           | K=3  | 1        | 5              | 52                 | 6              |
|           |      | 2        | 129            | 236                | 10             |
|           |      | 3        | 178            | 169                | 11             |
|           |      | Admixed  | 2              | 5                  | 0              |
|           | K=4  | 1        | 1              | 63                 | 0              |
|           |      | 2        | 107            | 109                | 16             |
|           |      | 3        | 172            | 150                | 3              |
|           |      | 4        | 5              | 58                 | 0              |
|           |      | Admixed  | 29             | 82                 | 8              |
|           | K=10 | 1        | 63             | 42                 | 8              |
|           |      | 2        | 43             | 1                  | 0              |
|           |      | 3        | 0              | 71                 | 1              |
|           |      | 4        | 4              | 31                 | 0              |
|           |      | 5        | 3              | 19                 | 0              |
|           |      | 6        | 101            | 1                  | 0              |
|           |      | 7        | 1              | 38                 | 0              |
|           |      | 8        | 1              | 50                 | 1              |
|           |      | 9        | 0              | 74                 | 0              |
|           |      | 10       | 1              | 63                 | 0              |
|           |      | Admixed  | 97             | 72                 | 17             |

Figure S2

. Phylogenetic tree consisting of 803 genotypes using 3,432 SNPs.

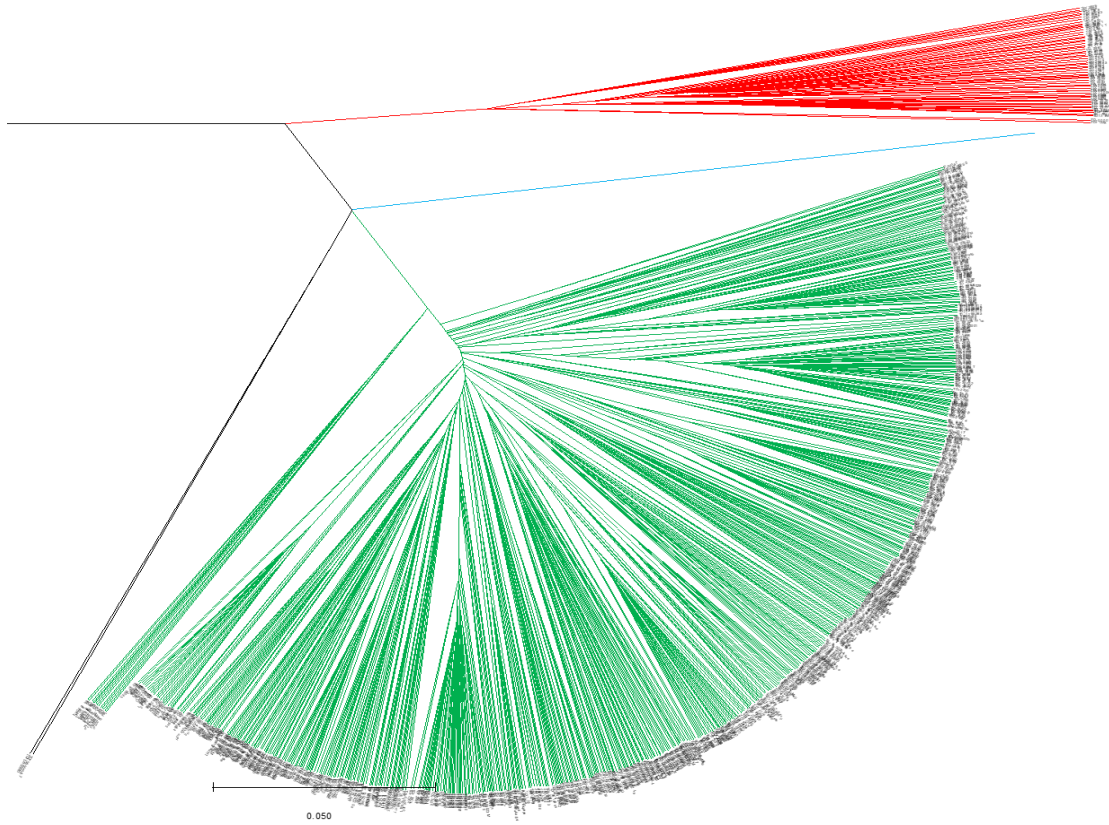

**Green:** Cluster 1 consisting of a mixture of breeding lines, genebank landraces and market varieties; **Red:** Cluster 2 consisting of majorly genebank landraces; **Black:** Cluster 3 consisting breeding lines; **Blue:** Cluster 4 consisting market variety
