# Supplementary material
Source: MDPI journal article supplement (https://www.mdpi.com/2073-4395/10/9/1437)
Supplement: s1 [file s1]

Table S2. IBS-based dissimilarity matrix.

| Genotype                      | Aloshi    | Alumaco_1 | Alumaco_2 | Amola     | Dente    |
|-------------------------------|-----------|-----------|-----------|-----------|----------|
| Aloshi                        | 0         | 0.105332  | 0.101836  | 0.112034  | 0.136801 |
| Alumaco_1                     | 0.105332  | 0         | 0.0448718 | 0.100233  | 0.132576 |
| Alumaco_2                     | 0.101836  | 0.0448718 | 0         | 0.101107  | 0.128788 |
| Amola                         | 0.112034  | 0.100233  | 0.101107  | 0         | 0.129079 |
| Dente                         | 0.136801  | 0.132576  | 0.128788  | 0.129079  | 0        |
| Ehobia                        | 0.119318  | 0.119464  | 0.117716  | 0.121503  | 0.129662 |
| Ehuru                         | 0.111888  | 0.119901  | 0.11553   | 0.119027  | 0.12602  |
| Ekiti                         | 0.111014  | 0.105332  | 0.103584  | 0.107663  | 0.129225 |
| Hembakwase                    | 0.0962995 | 0.101981  | 0.0964452 | 0.101399  | 0.125291 |
| Jirad_04_219/Amula            | 0.10373   | 0.102127  | 0.0977564 | 0.102127  | 0.122232 |
| Jircas_99_00777/Breeding Line | 0.0989219 | 0.111305  | 0.108974  | 0.119172  | 0.139277 |
| Keemi                         | 0.116259  | 0.100379  | 0.0977564 | 0.112325  | 0.124563 |
| Obioturugu                    | 0.0999417 | 0.105041  | 0.100962  | 0.107372  | 0.125728 |
| Ogini                         | 0.115239  | 0.125874  | 0.122669  | 0.130536  | 0.148019 |
| Omi_efun_5                    | 0.130536  | 0.113199  | 0.109703  | 0.114948  | 0.137966 |
| Omi_efun_7                    | 0.114365  | 0.115967  | 0.110723  | 0.118298  | 0.134907 |
| Pepa                          | 0.113345  | 0.110286  | 0.108537  | 0.100379  | 0.125437 |
| Pouna                         | 0.146125  | 0.132867  | 0.134033  | 0.137529  | 0.129662 |
| TDr_00_00180                  | 0.105624  | 0.0611888 | 0.0544872 | 0.0979021 | 0.128205 |
| TDr_00_00196                  | 0.184295  | 0.189685  | 0.187646  | 0.195513  | 0.210082 |
| TDr_00_00362                  | 0.111014  | 0.115239  | 0.112908  | 0.119027  | 0.134761 |
| TDr_00_00539                  | 0.108537  | 0.113345  | 0.109266  | 0.115967  | 0.130828 |
| TDr_00_0058                   | 0.110431  | 0.105041  | 0.103001  | 0.10067   | 0.128934 |
| TDr_01_00037                  | 0.125728  | 0.122378  | 0.122669  | 0.124709  | 0.132867 |
| TDr_01_00405                  | 0.0973193 | 0.103001  | 0.099796  | 0.100087  | 0.124563 |
| TDr_02_00515                  | 0.117716  | 0.119901  | 0.119318  | 0.124854  | 0.13447  |
| TDr_03_00180                  | 0.120921  | 0.124272  | 0.11961   | 0.122523  | 0.128351 |
| TDr_05_00046                  | 0.122086  | 0.114948  | 0.11116   | 0.114948  | 0.135344 |
| TDr_05_00303                  | 0.129662  | 0.128351  | 0.12602   | 0.12602   | 0.137675 |
| TDr_05_00356                  | 0.118881  | 0.121066  | 0.116696  | 0.114365  | 0.13039  |
| TDr_05_00389                  | 0.103584  | 0.116841  | 0.110431  | 0.120338  | 0.134324 |
| TDr_05_00432                  | 0.115676  | 0.121358  | 0.117861  | 0.120484  | 0.13243  |
| TDr_05_00466                  | 0.0955711 | 0.104167  | 0.103293  | 0.104167  | 0.12398  |
| TDr_05_00530                  | 0.111597  | 0.115822  | 0.112617  | 0.114656  | 0.135344 |
| TDr_05_00632                  | 0.118153  | 0.119172  | 0.116841  | 0.127331  | 0.128205 |
| TDr_05_00694                  | 0.122378  | 0.122815  | 0.121358  | 0.127185  | 0.132721 |
| TDr_05_00807                  | 0.12398   | 0.125     | 0.126166  | 0.125874  | 0.143357 |
| TDr_07_00157                  | 0.117716  | 0.118444  | 0.115822  | 0.118444  | 0.139132 |
| TDr_07_00732                  | 0.109266  | 0.110577  | 0.104749  | 0.10708   | 0.132139 |
| TDr_08_00001                  | 0.123543  | 0.122815  | 0.119901  | 0.118735  | 0.131556 |
| TDr_08_00003                  | 0.108683  | 0.105624  | 0.102418  | 0.101836  | 0.124563 |
| TDr_08_00008                  | 0.144231  | 0.141754  | 0.136509  | 0.139132  | 0.144085 |

|              |          |          |          |           |          |
|--------------|----------|----------|----------|-----------|----------|
| TDr_08_00013 | 0.142483 | 0.140589 | 0.141171 | 0.145542  | 0.151078 |
| TDr_08_00014 | 0.119027 | 0.118007 | 0.111305 | 0.113345  | 0.12704  |
| TDr_08_00015 | 0.106789 | 0.1081   | 0.102273 | 0.106935  | 0.119172 |
| TDr_08_00017 | 0.115676 | 0.116696 | 0.112034 | 0.114656  | 0.134178 |
| TDr_08_00023 | 0.125    | 0.118735 | 0.112908 | 0.118153  | 0.134178 |
| TDr_08_00027 | 0.136218 | 0.13549  | 0.131993 | 0.139569  | 0.147727 |
| TDr_08_00040 | 0.113199 | 0.113928 | 0.106935 | 0.1081    | 0.125    |
| TDr_08_00041 | 0.117424 | 0.112908 | 0.10708  | 0.115822  | 0.127477 |
| TDr_08_00045 | 0.107663 | 0.132284 | 0.13345  | 0.141608  | 0.155012 |
| TDr_08_00055 | 0.13039  | 0.124709 | 0.124417 | 0.126748  | 0.133741 |
| TDr_08_00071 | 0.115093 | 0.113491 | 0.109994 | 0.112325  | 0.124854 |
| TDr_08_00082 | 0.122669 | 0.119318 | 0.113782 | 0.117279  | 0.128934 |
| TDr_08_00083 | 0.1081   | 0.108537 | 0.104458 | 0.0977564 | 0.128642 |
| TDr_08_00090 | 0.143939 | 0.142628 | 0.136801 | 0.139132  | 0.145833 |
| TDr_08_00091 | 0.124854 | 0.123543 | 0.121503 | 0.126166  | 0.134033 |
| TDr_08_00092 | 0.116987 | 0.118298 | 0.113345 | 0.107809  | 0.128205 |
| TDr_08_00094 | 0.116696 | 0.113928 | 0.108392 | 0.11451   | 0.131119 |
| TDr_08_00098 | 0.119755 | 0.114365 | 0.113491 | 0.122815  | 0.128059 |
| TDr_08_00104 | 0.139569 | 0.137675 | 0.132721 | 0.133013  | 0.138258 |
| TDr_08_00105 | 0.142774 | 0.136509 | 0.131265 | 0.137092  | 0.145833 |
| TDr_08_00108 | 0.146999 | 0.153555 | 0.154429 | 0.159965  | 0.173077 |
| TDr_08_00115 | 0.114365 | 0.112471 | 0.109266 | 0.112471  | 0.126748 |
| TDr_08_00119 | 0.114365 | 0.110723 | 0.101399 | 0.112471  | 0.12704  |
| TDr_08_00122 | 0.113199 | 0.108683 | 0.104021 | 0.105769  | 0.124417 |
| TDr_08_00126 | 0.125583 | 0.133304 | 0.135052 | 0.139423  | 0.148456 |
| TDr_08_00130 | 0.115967 | 0.11116  | 0.106206 | 0.108829  | 0.127477 |
| TDr_08_00132 | 0.134178 | 0.13141  | 0.127622 | 0.137821  | 0.140443 |
| TDr_08_00133 | 0.120192 | 0.112471 | 0.111014 | 0.119172  | 0.129953 |
| TDr_08_00134 | 0.11859  | 0.114073 | 0.112325 | 0.11116   | 0.129225 |
| TDr_08_00140 | 0.127331 | 0.141754 | 0.139423 | 0.146125  | 0.157197 |
| TDr_08_00141 | 0.121503 | 0.11961  | 0.117861 | 0.116987  | 0.13243  |
| TDr_08_00146 | 0.135635 | 0.131119 | 0.128205 | 0.133741  | 0.136946 |
| TDr_08_00149 | 0.139277 | 0.127185 | 0.124854 | 0.125437  | 0.135052 |
| TDr_08_00153 | 0.11116  | 0.111305 | 0.106352 | 0.104604  | 0.126457 |
| TDr_08_00155 | 0.113491 | 0.112471 | 0.107809 | 0.114802  | 0.124709 |
| TDr_08_00161 | 0.117279 | 0.112179 | 0.109848 | 0.110723  | 0.12704  |
| TDr_08_00164 | 0.134761 | 0.132576 | 0.127622 | 0.125291  | 0.136946 |
| TDr_08_00176 | 0.109848 | 0.110868 | 0.104749 | 0.110286  | 0.126311 |
| TDr_08_00185 | 0.144376 | 0.133741 | 0.135198 | 0.131119  | 0.145396 |
| TDr_08_00194 | 0.122523 | 0.123543 | 0.115676 | 0.120047  | 0.134324 |
| TDr_08_00197 | 0.127185 | 0.118007 | 0.113345 | 0.120338  | 0.12704  |
| TDr_08_00207 | 0.119318 | 0.115093 | 0.111597 | 0.115676  | 0.131702 |
| TDr_08_00218 | 0.124272 | 0.120921 | 0.113345 | 0.115676  | 0.134907 |
| TDr_08_00229 | 0.118153 | 0.109557 | 0.108974 | 0.111305  | 0.127331 |



|              |          |          |           |          |          |
|--------------|----------|----------|-----------|----------|----------|
| TDr_08_00254 | 0.115822 | 0.116841 | 0.111597  | 0.116259 | 0.126748 |
| TDr_08_00268 | 0.141317 | 0.138549 | 0.133596  | 0.137383 | 0.139423 |
| TDr_08_00292 | 0.113928 | 0.10912  | 0.10708   | 0.111451 | 0.12602  |
| TDr_08_00589 | 0.111451 | 0.110723 | 0.108392  | 0.112471 | 0.124709 |
| TDr_08_00617 | 0.123689 | 0.119172 | 0.120047  | 0.11859  | 0.136364 |
| TDr_08_00620 | 0.119901 | 0.123252 | 0.121503  | 0.124417 | 0.127331 |
| TDr_08_00621 | 0.132721 | 0.120629 | 0.120921  | 0.130245 | 0.130245 |
| TDr_08_00632 | 0.135781 | 0.129225 | 0.133013  | 0.130099 | 0.142337 |
| TDr_08_00639 | 0.105624 | 0.109557 | 0.108392  | 0.112471 | 0.120629 |
| TDr_08_00640 | 0.162442 | 0.173077 | 0.171911  | 0.182401 | 0.189685 |
| TDr_08_00641 | 0.108683 | 0.107955 | 0.105332  | 0.102418 | 0.124854 |
| TDr_08_00645 | 0.135344 | 0.127622 | 0.129079  | 0.13345  | 0.144231 |
| TDr_08_00648 | 0.128351 | 0.120921 | 0.121795  | 0.123252 | 0.134324 |
| TDr_08_00651 | 0.128788 | 0.131556 | 0.134178  | 0.131265 | 0.141171 |
| TDr_08_00662 | 0.109994 | 0.106935 | 0.105186  | 0.109266 | 0.126166 |
| TDr_08_00662 | 0.13039  | 0.126166 | 0.126457  | 0.124709 | 0.140152 |
| TDr_08_00669 | 0.115239 | 0.110723 | 0.106061  | 0.112471 | 0.129079 |
| TDr_08_00705 | 0.121503 | 0.120484 | 0.116404  | 0.120192 | 0.131265 |
| TDr_08_00707 | 0.101981 | 0.114365 | 0.111742  | 0.107372 | 0.132139 |
| TDr_08_00710 | 0.136072 | 0.134761 | 0.131556  | 0.133887 | 0.141171 |
| TDr_08_00727 | 0.108683 | 0.111451 | 0.10067   | 0.109411 | 0.131847 |
| TDr_08_00733 | 0.121358 | 0.130828 | 0.126748  | 0.129371 | 0.142483 |
| TDr_08_00742 | 0.106935 | 0.10708  | 0.10912   | 0.113491 | 0.128351 |
| TDr_08_00744 | 0.130682 | 0.129662 | 0.126748  | 0.129371 | 0.133159 |
| TDr_08_00747 | 0.120921 | 0.12398  | 0.121649  | 0.124272 | 0.131265 |
| TDr_08_00756 | 0.104312 | 0.109994 | 0.105332  | 0.108246 | 0.126894 |
| TDr_08_00758 | 0.127914 | 0.137966 | 0.139714  | 0.142628 | 0.158945 |
| TDr_08_00764 | 0.112325 | 0.113636 | 0.109848  | 0.113636 | 0.127331 |
| TDr_08_00789 | 0.113199 | 0.1081   | 0.106935  | 0.108974 | 0.125583 |
| TDr_08_00794 | 0.116259 | 0.11553  | 0.107372  | 0.118444 | 0.13039  |
| TDr_08_00799 | 0.131702 | 0.13447  | 0.132721  | 0.130682 | 0.148747 |
| TDr_08_00810 | 0.105769 | 0.121066 | 0.114365  | 0.119901 | 0.133596 |
| TDr_08_00841 | 0.109848 | 0.108246 | 0.102127  | 0.110577 | 0.130682 |
| TDr_08_00861 | 0.110431 | 0.105624 | 0.101253  | 0.106498 | 0.127768 |
| TDr_08_00882 | 0.102418 | 0.113636 | 0.108392  | 0.107809 | 0.130828 |
| TDr_08_00896 | 0.124126 | 0.123689 | 0.120192  | 0.120192 | 0.136218 |
| TDr_08_00898 | 0.110577 | 0.113054 | 0.11014   | 0.114219 | 0.124126 |
| TDr_08_00905 | 0.104895 | 0.103293 | 0.103584  | 0.106206 | 0.126311 |
| TDr_08_00924 | 0.104604 | 0.10271  | 0.0980478 | 0.103293 | 0.127768 |
| TDr_08_00926 | 0.110868 | 0.113054 | 0.105769  | 0.11014  | 0.128205 |
| TDr_08_00945 | 0.119318 | 0.11655  | 0.113054  | 0.11451  | 0.131702 |
| TDr_08_00963 | 0.128497 | 0.122232 | 0.120775  | 0.128934 | 0.138549 |
| TDr_08_00989 | 0.112908 | 0.109848 | 0.1081    | 0.110431 | 0.127331 |
| TDr_08_00998 | 0.105478 | 0.105041 | 0.101253  | 0.105041 | 0.125437 |

|              |           |          |           |           |          |
|--------------|-----------|----------|-----------|-----------|----------|
| TDr_08_01016 | 0.127622  | 0.121941 | 0.120775  | 0.123689  | 0.133596 |
| TDr_08_01024 | 0.107372  | 0.105769 | 0.104895  | 0.101981  | 0.125583 |
| TDr_08_01026 | 0.107663  | 0.117424 | 0.111305  | 0.123543  | 0.139277 |
| TDr_08_01029 | 0.0925117 | 0.123543 | 0.119172  | 0.132284  | 0.144231 |
| TDr_08_01046 | 0.11757   | 0.114802 | 0.111888  | 0.110723  | 0.127622 |
| TDr_08_01051 | 0.112471  | 0.109411 | 0.10912   | 0.108246  | 0.128642 |
| TDr_08_01085 | 0.112179  | 0.10912  | 0.105624  | 0.10912   | 0.129225 |
| TDr_08_01090 | 0.100524  | 0.105041 | 0.10271   | 0.105624  | 0.124854 |
| TDr_08_01091 | 0.12704   | 0.120192 | 0.112034  | 0.120192  | 0.137383 |
| TDr_08_01123 | 0.108683  | 0.104458 | 0.097465  | 0.101544  | 0.125146 |
| TDr_08_01164 | 0.137092  | 0.133159 | 0.131993  | 0.131993  | 0.143939 |
| TDr_08_01228 | 0.133159  | 0.132139 | 0.129808  | 0.127185  | 0.137675 |
| TDr_08_01229 | 0.126166  | 0.122815 | 0.123106  | 0.116987  | 0.133304 |
| TDr_08_01278 | 0.118444  | 0.115093 | 0.112471  | 0.109266  | 0.12704  |
| TDr_08_01344 | 0.114073  | 0.111305 | 0.107226  | 0.111888  | 0.128788 |
| TDr_08_01464 | 0.113054  | 0.106789 | 0.107663  | 0.110577  | 0.130682 |
| TDr_08_01512 | 0.11116   | 0.1081   | 0.107226  | 0.112762  | 0.133159 |
| TDr_08_01692 | 0.108246  | 0.111014 | 0.102564  | 0.11014   | 0.124126 |
| TDr_08_01919 | 0.106206  | 0.103147 | 0.0981935 | 0.102273  | 0.134324 |
| TDr_08_01932 | 0.13447   | 0.125583 | 0.123252  | 0.130536  | 0.139569 |
| TDr_08_02381 | 0.113054  | 0.110868 | 0.110868  | 0.11116   | 0.130682 |
| TDr_08_21_2  | 0.13039   | 0.122086 | 0.119172  | 0.119464  | 0.134033 |
| TDr_08_21_3  | 0.133159  | 0.132721 | 0.131265  | 0.128934  | 0.143794 |
| TDr_08_5_1   | 0.176865  | 0.179341 | 0.176428  | 0.187209  | 0.206731 |
| TDr_08_5_2   | 0.221008  | 0.221154 | 0.222319  | 0.231352  | 0.24155  |
| TDr_09_00001 | 0.106935  | 0.103875 | 0.0983392 | 0.0930944 | 0.129225 |
| TDr_09_00002 | 0.11553   | 0.113636 | 0.105186  | 0.114219  | 0.121212 |
| TDr_09_00003 | 0.103584  | 0.108974 | 0.101399  | 0.109557  | 0.125874 |
| TDr_09_00018 | 0.117279  | 0.111305 | 0.1081    | 0.112471  | 0.133159 |
| TDr_09_00023 | 0.131265  | 0.113928 | 0.110431  | 0.115093  | 0.138695 |
| TDr_09_00028 | 0.119901  | 0.118298 | 0.110431  | 0.115676  | 0.131702 |
| TDr_09_00029 | 0.149184  | 0.150787 | 0.143794  | 0.144959  | 0.146999 |
| TDr_09_00043 | 0.120484  | 0.119755 | 0.113636  | 0.118007  | 0.132284 |
| TDr_09_00049 | 0.128934  | 0.128497 | 0.12296   | 0.124126  | 0.138112 |
| TDr_09_00050 | 0.132284  | 0.129808 | 0.127185  | 0.135927  | 0.137383 |
| TDr_09_00054 | 0.137821  | 0.135344 | 0.133013  | 0.133596  | 0.146707 |
| TDr_09_00055 | 0.138986  | 0.132139 | 0.129225  | 0.133596  | 0.146707 |
| TDr_09_00056 | 0.120629  | 0.114656 | 0.109411  | 0.11961   | 0.135344 |
| TDr_09_00057 | 0.115385  | 0.116987 | 0.111451  | 0.112908  | 0.12602  |
| TDr_09_00058 | 0.121066  | 0.118298 | 0.113928  | 0.119755  | 0.130245 |
| TDr_09_00059 | 0.112325  | 0.109848 | 0.104895  | 0.108392  | 0.123252 |
| TDr_09_00061 | 0.116113  | 0.116259 | 0.109557  | 0.112762  | 0.12296  |
| TDr_09_00063 | 0.11859   | 0.120192 | 0.114365  | 0.116113  | 0.124854 |
| TDr_09_00064 | 0.135344  | 0.123834 | 0.121795  | 0.127914  | 0.138986 |

|              |          |          |           |          |          |
|--------------|----------|----------|-----------|----------|----------|
| TDr_09_00070 | 0.141754 | 0.136946 | 0.134324  | 0.136946 | 0.139569 |
| TDr_09_00071 | 0.117716 | 0.120484 | 0.112617  | 0.120192 | 0.129225 |
| TDr_09_00082 | 0.116113 | 0.114802 | 0.111305  | 0.111888 | 0.133159 |
| TDr_09_00091 | 0.133887 | 0.131702 | 0.125874  | 0.134324 | 0.138695 |
| TDr_09_00104 | 0.113199 | 0.110431 | 0.104021  | 0.111888 | 0.128788 |
| TDr_09_00107 | 0.145979 | 0.133304 | 0.13447   | 0.142337 | 0.149038 |
| TDr_09_00108 | 0.134324 | 0.129808 | 0.125437  | 0.127477 | 0.148456 |
| TDr_09_00114 | 0.13243  | 0.130536 | 0.12704   | 0.132576 | 0.138986 |
| TDr_09_00120 | 0.114656 | 0.113928 | 0.105186  | 0.107517 | 0.120047 |
| TDr_09_00123 | 0.112471 | 0.110577 | 0.10271   | 0.110286 | 0.125728 |
| TDr_09_00124 | 0.132721 | 0.128788 | 0.122669  | 0.120629 | 0.133159 |
| TDr_09_00125 | 0.131119 | 0.124563 | 0.11757   | 0.125146 | 0.135635 |
| TDr_09_00131 | 0.132867 | 0.131847 | 0.127477  | 0.133304 | 0.13447  |
| TDr_09_00134 | 0.123397 | 0.11859  | 0.113636  | 0.11859  | 0.127622 |
| TDr_09_00155 | 0.121503 | 0.120192 | 0.119027  | 0.11553  | 0.125146 |
| TDr_09_00189 | 0.128788 | 0.121358 | 0.118735  | 0.124854 | 0.133304 |
| TDr_09_00216 | 0.134907 | 0.135927 | 0.128351  | 0.137675 | 0.138258 |
| TDr_09_00220 | 0.13141  | 0.131265 | 0.125728  | 0.135635 | 0.140297 |
| TDr_09_00226 | 0.13884  | 0.134907 | 0.129371  | 0.134907 | 0.144231 |
| TDr_09_00240 | 0.124126 | 0.13039  | 0.126603  | 0.128642 | 0.139132 |
| TDr_09_00248 | 0.117424 | 0.114948 | 0.11116   | 0.118153 | 0.129808 |
| TDr_09_00267 | 0.136946 | 0.130099 | 0.126603  | 0.129516 | 0.141463 |
| TDr_09_00280 | 0.113199 | 0.109266 | 0.102855  | 0.109848 | 0.129371 |
| TDr_09_00285 | 0.11655  | 0.113199 | 0.109703  | 0.110868 | 0.125146 |
| TDr_09_00292 | 0.119755 | 0.110868 | 0.105332  | 0.116696 | 0.130099 |
| TDr_09_00325 | 0.118153 | 0.115676 | 0.110431  | 0.115967 | 0.124417 |
| TDr_09_00364 | 0.116404 | 0.112179 | 0.109266  | 0.113928 | 0.123543 |
| TDr_09_00374 | 0.136946 | 0.134761 | 0.13039   | 0.140006 | 0.143794 |
| TDr_09_00385 | 0.109994 | 0.110723 | 0.106061  | 0.118007 | 0.132284 |
| TDr_09_00644 | 0.134761 | 0.127914 | 0.124126  | 0.132867 | 0.144522 |
| TDr_09_00715 | 0.116987 | 0.112762 | 0.104895  | 0.109848 | 0.125583 |
| TDr_09_01932 | 0.128788 | 0.132139 | 0.12602   | 0.128934 | 0.136218 |
| TDr_11_00263 | 0.112034 | 0.119172 | 0.116841  | 0.123252 | 0.132867 |
| TDr_11_00276 | 0.11553  | 0.114219 | 0.108392  | 0.116841 | 0.138695 |
| TDr_11_00787 | 0.116259 | 0.113199 | 0.11116   | 0.116113 | 0.13039  |
| TDr_11_00799 | 0.124854 | 0.119172 | 0.113054  | 0.120629 | 0.132867 |
| TDr_11_01036 | 0.118881 | 0.118735 | 0.11757   | 0.112034 | 0.135344 |
| TDr_11_01041 | 0.113636 | 0.114948 | 0.110286  | 0.110577 | 0.122815 |
| TDr_12_00150 | 0.124417 | 0.129516 | 0.124563  | 0.133596 | 0.141171 |
| TDr_12_00152 | 0.141463 | 0.135198 | 0.134907  | 0.131993 | 0.146562 |
| TDr_12_00156 | 0.106498 | 0.101399 | 0.0958625 | 0.104312 | 0.125    |
| TDr_12_00160 | 0.130245 | 0.121941 | 0.117861  | 0.122815 | 0.141171 |
| TDr_12_00168 | 0.116404 | 0.119755 | 0.117133  | 0.120629 | 0.138403 |
| TDr_12_00171 | 0.127185 | 0.119755 | 0.11859   | 0.123252 | 0.139569 |

|              |          |          |          |          |          |
|--------------|----------|----------|----------|----------|----------|
| TDr_12_00178 | 0.112908 | 0.111014 | 0.106352 | 0.113636 | 0.133159 |
| TDr_12_00179 | 0.118444 | 0.114219 | 0.111305 | 0.119464 | 0.131119 |
| TDr_12_00195 | 0.117133 | 0.114948 | 0.111451 | 0.11961  | 0.13243  |
| TDr_12_00219 | 0.125728 | 0.122086 | 0.118881 | 0.117716 | 0.13345  |
| TDr_12_00249 | 0.128059 | 0.129662 | 0.124417 | 0.125291 | 0.142483 |
| TDr_12_00250 | 0.114365 | 0.113054 | 0.108392 | 0.11859  | 0.137238 |
| TDr_12_00254 | 0.112325 | 0.106061 | 0.104895 | 0.111597 | 0.128788 |
| TDr_12_00408 | 0.135781 | 0.133887 | 0.128059 | 0.133304 | 0.145251 |
| TDr_12_00415 | 0.126894 | 0.124709 | 0.121212 | 0.126166 | 0.138695 |
| TDr_12_00416 | 0.105041 | 0.102273 | 0.099359 | 0.106352 | 0.125291 |
| TDr_12_00417 | 0.199883 | 0.206731 | 0.204983 | 0.212267 | 0.224796 |
| TDr_12_00418 | 0.114802 | 0.114656 | 0.11116  | 0.114656 | 0.137383 |
| TDr_12_00419 | 0.113928 | 0.109411 | 0.107663 | 0.113199 | 0.131556 |
| TDr_12_00420 | 0.131265 | 0.124417 | 0.123543 | 0.126748 | 0.134324 |
| TDr_12_00422 | 0.113491 | 0.116259 | 0.110723 | 0.113636 | 0.133741 |
| TDr_12_00423 | 0.128059 | 0.126748 | 0.122669 | 0.130828 | 0.140443 |
| TDr_12_00425 | 0.120775 | 0.117716 | 0.113054 | 0.115967 | 0.130536 |
| TDr_12_00426 | 0.117716 | 0.110577 | 0.107955 | 0.112325 | 0.129808 |
| TDr_12_00427 | 0.118298 | 0.120775 | 0.114948 | 0.122523 | 0.133887 |
| TDr_12_00429 | 0.123106 | 0.118007 | 0.114219 | 0.121503 | 0.141317 |
| TDr_12_00430 | 0.128788 | 0.123106 | 0.122523 | 0.122815 | 0.136218 |
| TDr_12_00432 | 0.126894 | 0.119172 | 0.115676 | 0.12296  | 0.136364 |
| TDr_12_00433 | 0.127477 | 0.116841 | 0.115676 | 0.122378 | 0.133159 |
| TDr_12_00435 | 0.117279 | 0.109557 | 0.109848 | 0.112762 | 0.129079 |
| TDr_12_00437 | 0.118735 | 0.110431 | 0.108974 | 0.111888 | 0.138695 |
| TDr_12_00438 | 0.135781 | 0.122232 | 0.121066 | 0.128351 | 0.144376 |
| TDr_12_00439 | 0.114948 | 0.111014 | 0.108974 | 0.113345 | 0.132576 |
| TDr_12_00446 | 0.141171 | 0.134033 | 0.13141  | 0.130245 | 0.142191 |
| TDr_12_00447 | 0.124709 | 0.133304 | 0.129808 | 0.136509 | 0.150204 |
| TDr_12_00454 | 0.113345 | 0.119027 | 0.115822 | 0.119901 | 0.134761 |
| TDr_12_00456 | 0.11859  | 0.120484 | 0.116113 | 0.130682 | 0.141171 |
| TDr_12_00458 | 0.111742 | 0.128205 | 0.122086 | 0.122378 | 0.139277 |
| TDr_12_00465 | 0.120629 | 0.12602  | 0.119901 | 0.125437 | 0.137092 |
| TDr_12_00467 | 0.117133 | 0.12398  | 0.11757  | 0.126894 | 0.144376 |
| TDr_12_00474 | 0.126166 | 0.137383 | 0.131265 | 0.135927 | 0.142628 |
| TDr_12_00475 | 0.112034 | 0.113345 | 0.108683 | 0.108392 | 0.129662 |
| TDr_12_00476 | 0.136655 | 0.13243  | 0.128642 | 0.128059 | 0.133304 |
| TDr_12_00478 | 0.116987 | 0.139277 | 0.133159 | 0.140734 | 0.146853 |
| TDr_12_00479 | 0.118735 | 0.115385 | 0.11451  | 0.12296  | 0.12704  |
| TDr_12_00506 | 0.12398  | 0.121503 | 0.11655  | 0.118881 | 0.132867 |
| TDr_12_00507 | 0.142774 | 0.142045 | 0.139423 | 0.146416 | 0.148456 |
| TDr_12_00509 | 0.130828 | 0.124563 | 0.121941 | 0.120192 | 0.134761 |
| TDr_13_00050 | 0.136509 | 0.13549  | 0.135198 | 0.13549  | 0.147436 |
| TDr_13_00061 | 0.130828 | 0.126603 | 0.121358 | 0.125437 | 0.140589 |

|              |           |           |           |           |           |
|--------------|-----------|-----------|-----------|-----------|-----------|
| TDr_13_00084 | 0.125437  | 0.120338  | 0.117716  | 0.117424  | 0.133741  |
| TDr_13_00125 | 0.125874  | 0.128934  | 0.12398   | 0.129808  | 0.138549  |
| TDr_13_00172 | 0.120192  | 0.119464  | 0.113054  | 0.118298  | 0.134907  |
| TDr_13_00189 | 0.134615  | 0.127477  | 0.124272  | 0.131265  | 0.136509  |
| TDr_13_00196 | 0.123543  | 0.123689  | 0.119901  | 0.122232  | 0.138549  |
| TDr_13_00198 | 0.13549   | 0.130973  | 0.128351  | 0.128934  | 0.137675  |
| TDr_13_00200 | 0.129953  | 0.13039   | 0.128642  | 0.129225  | 0.136801  |
| TDr_13_00208 | 0.118881  | 0.124272  | 0.12398   | 0.129808  | 0.145251  |
| TDr_13_00227 | 0.135198  | 0.139714  | 0.136218  | 0.14088   | 0.146999  |
| TDr_13_00256 | 0.118298  | 0.121649  | 0.115239  | 0.119027  | 0.132139  |
| TDr_13_00273 | 0.12704   | 0.118735  | 0.118153  | 0.118735  | 0.133887  |
| TDr_13_00285 | 0.128497  | 0.12602   | 0.126311  | 0.128351  | 0.133596  |
| TDr_13_00288 | 0.116841  | 0.117861  | 0.113782  | 0.113782  | 0.133596  |
| TDr_13_00294 | 0.12602   | 0.131993  | 0.129371  | 0.144522  | 0.158217  |
| TDr_13_00318 | 0.141754  | 0.150058  | 0.151807  | 0.153846  | 0.159965  |
| TDr_13_00330 | 0.134178  | 0.13345   | 0.125874  | 0.127914  | 0.134324  |
| TDr_13_00350 | 0.127331  | 0.124563  | 0.116987  | 0.120192  | 0.131847  |
| TDr_13_00354 | 0.128934  | 0.127914  | 0.125291  | 0.120921  | 0.142191  |
| TDr_13_00359 | 0.124417  | 0.123397  | 0.11961   | 0.12398   | 0.138258  |
| TDr_13_00366 | 0.133741  | 0.131847  | 0.124854  | 0.127477  | 0.135635  |
| TDr_13_00367 | 0.137529  | 0.129225  | 0.126311  | 0.128934  | 0.142337  |
| TDr_13_00391 | 0.123543  | 0.131847  | 0.124854  | 0.137092  | 0.151078  |
| TDr_13_00411 | 0.11757   | 0.122086  | 0.118007  | 0.122378  | 0.141317  |
| TDr_13_00415 | 0.151078  | 0.155012  | 0.155303  | 0.155303  | 0.164336  |
| TDr_13_00421 | 0.127477  | 0.125     | 0.120921  | 0.12296   | 0.136072  |
| TDr_13_00431 | 0.133304  | 0.13141   | 0.125874  | 0.13549   | 0.149476  |
| TDr_13_00444 | 0.129953  | 0.12398   | 0.119901  | 0.120775  | 0.132721  |
| TDr_13_00452 | 0.13345   | 0.133013  | 0.12602   | 0.127768  | 0.14292   |
| TDr_13_00458 | 0.121503  | 0.11553   | 0.112325  | 0.11961   | 0.135052  |
| TDr_1489     | 0.0823135 | 0.126748  | 0.122378  | 0.125583  | 0.154429  |
| TDr_1491     | 0.146562  | 0.133887  | 0.133013  | 0.143211  | 0.135052  |
| TDr_1492     | 0.120484  | 0.107809  | 0.102273  | 0.0926573 | 0.134033  |
| TDr_1495     | 0.120047  | 0.119318  | 0.122523  | 0.106206  | 0.141171  |
| TDr_1499     | 0.133596  | 0.142191  | 0.138986  | 0.139277  | 0.16317   |
| TDr_1500     | 0.121941  | 0.128788  | 0.124417  | 0.0932401 | 0.157343  |
| TDr_1505     | 0.123834  | 0.122523  | 0.123689  | 0.127768  | 0.135052  |
| TDr_1509     | 0.137383  | 0.126457  | 0.129371  | 0.131119  | 0.0973193 |
| TDr_1510     | 0.115822  | 0.0999417 | 0.0987762 | 0.107226  | 0.129953  |
| TDr_1513     | 0.111888  | 0.108246  | 0.105915  | 0.104749  | 0.135052  |
| TDr_1536     | 0.114073  | 0.117133  | 0.112179  | 0.119464  | 0.133159  |
| TDr_1543     | 0.117861  | 0.104895  | 0.100233  | 0.0909091 | 0.133741  |
| TDr_1556     | 0.117133  | 0.113782  | 0.109411  | 0.113782  | 0.129808  |
| TDr_1559     | 0.106061  | 0.0989219 | 0.0957168 | 0.0962995 | 0.130682  |
| TDr_1562     | 0.115093  | 0.110577  | 0.106498  | 0.112325  | 0.130099  |

|          |           |           |           |           |           |
|----------|-----------|-----------|-----------|-----------|-----------|
| TDr_1568 | 0.116987  | 0.110723  | 0.104604  | 0.110723  | 0.138986  |
| TDr_1569 | 0.106498  | 0.101399  | 0.0955711 | 0.103147  | 0.125     |
| TDr_1576 | 0.11553   | 0.111305  | 0.105478  | 0.0909091 | 0.136072  |
| TDr_1577 | 0.116841  | 0.105915  | 0.0992133 | 0.0893065 | 0.130682  |
| TDr_1585 | 0.123543  | 0.123397  | 0.121066  | 0.121066  | 0.131265  |
| TDr_1598 | 0.197552  | 0.2044    | 0.200903  | 0.211101  | 0.22567   |
| TDr_1601 | 0.137821  | 0.128059  | 0.124563  | 0.110286  | 0.145833  |
| TDr_1608 | 0.125437  | 0.124417  | 0.122669  | 0.125291  | 0.128497  |
| TDr_1610 | 0.12296   | 0.104458  | 0.107372  | 0.110577  | 0.129516  |
| TDr_1615 | 0.192308  | 0.19595   | 0.19391   | 0.204108  | 0.217512  |
| TDr_1621 | 0.0935315 | 0.120192  | 0.117861  | 0.116696  | 0.136801  |
| TDr_1622 | 0.120775  | 0.126748  | 0.120921  | 0.123834  | 0.130536  |
| TDr_1628 | 0.131265  | 0.123543  | 0.11859   | 0.124126  | 0.0976107 |
| TDr_1630 | 0.120921  | 0.108829  | 0.104458  | 0.112617  | 0.136801  |
| TDr_1631 | 0.23514   | 0.23412   | 0.233246  | 0.242861  | 0.253642  |
| TDr_1649 | 0.0863928 | 0.115967  | 0.113345  | 0.123252  | 0.138112  |
| TDr_1650 | 0.116987  | 0.117716  | 0.112471  | 0.113054  | 0.132284  |
| TDr_1655 | 0.131847  | 0.120629  | 0.119172  | 0.120047  | 0.131702  |
| TDr_1657 | 0.126894  | 0.117716  | 0.115967  | 0.115385  | 0.131993  |
| TDr_1663 | 0.0901807 | 0.118298  | 0.118298  | 0.122086  | 0.142774  |
| TDr_1667 | 0.103875  | 0.112762  | 0.110431  | 0.115385  | 0.144522  |
| TDr_1669 | 0.121358  | 0.117133  | 0.115967  | 0.116259  | 0.127914  |
| TDr_1676 | 0.116841  | 0.106206  | 0.0995047 | 0.088141  | 0.131847  |
| TDr_1684 | 0.124563  | 0.115385  | 0.116841  | 0.121503  | 0.0955711 |
| TDr_1686 | 0.120484  | 0.102855  | 0.0999417 | 0.104604  | 0.131702  |
| TDr_1688 | 0.110431  | 0.104458  | 0.10271   | 0.0893065 | 0.129808  |
| TDr_1707 | 0.10708   | 0.108683  | 0.102273  | 0.107517  | 0.129371  |
| TDr_1709 | 0.147436  | 0.133596  | 0.134178  | 0.145251  | 0.133887  |
| TDr_1711 | 0.090035  | 0.120484  | 0.117279  | 0.124854  | 0.137675  |
| TDr_1717 | 0.125583  | 0.128934  | 0.12398   | 0.124272  | 0.133596  |
| TDr_1723 | 0.16958   | 0.176719  | 0.173805  | 0.182838  | 0.202069  |
| TDr_1724 | 0.187354  | 0.191288  | 0.190122  | 0.197115  | 0.214598  |
| TDr_1756 | 0.119755  | 0.110577  | 0.105624  | 0.110868  | 0.137383  |
| TDr_1760 | 0.118298  | 0.104749  | 0.101836  | 0.103584  | 0.130973  |
| TDr_1761 | 0.124709  | 0.0657051 | 0.0747378 | 0.124563  | 0.144376  |
| TDr_1763 | 0.118007  | 0.116987  | 0.114948  | 0.11757   | 0.128934  |
| TDr_1764 | 0.0901807 | 0.117716  | 0.115385  | 0.12704   | 0.140443  |
| TDr_1765 | 0.134907  | 0.120775  | 0.120775  | 0.12398   | 0.127768  |
| TDr_1769 | 0.205128  | 0.207896  | 0.205857  | 0.218094  | 0.228001  |
| TDr_1772 | 0.113054  | 0.113782  | 0.109994  | 0.113199  | 0.125728  |
| TDr_1775 | 0.1875    | 0.199883  | 0.197844  | 0.20542   | 0.216783  |
| TDr_1790 | 0.1081    | 0.113782  | 0.109411  | 0.113491  | 0.127477  |
| TDr_1798 | 0.117861  | 0.115093  | 0.112762  | 0.112762  | 0.127914  |
| TDr_1799 | 0.1081    | 0.107372  | 0.105332  | 0.0744464 | 0.131265  |

|          |           |          |           |           |          |
|----------|-----------|----------|-----------|-----------|----------|
| TDr_1804 | 0.11451   | 0.107372 | 0.101253  | 0.10708   | 0.132721 |
| TDr_1807 | 0.186917  | 0.194347 | 0.19493   | 0.199301  | 0.217366 |
| TDr_1809 | 0.125728  | 0.117133 | 0.111597  | 0.100233  | 0.137238 |
| TDr_1813 | 0.112034  | 0.122378 | 0.115676  | 0.116259  | 0.12704  |
| TDr_1817 | 0.122815  | 0.11014  | 0.106643  | 0.0917832 | 0.136946 |
| TDr_1818 | 0.117861  | 0.118007 | 0.111888  | 0.119755  | 0.132576 |
| TDr_1825 | 0.115822  | 0.104895 | 0.100816  | 0.105769  | 0.13549  |
| TDr_1826 | 0.110723  | 0.115239 | 0.113491  | 0.116113  | 0.128642 |
| TDr_1827 | 0.11655   | 0.122523 | 0.119027  | 0.116404  | 0.129225 |
| TDr_1828 | 0.125291  | 0.129516 | 0.125728  | 0.124563  | 0.129225 |
| TDr_1829 | 0.112179  | 0.104167 | 0.0971737 | 0.0878497 | 0.131265 |
| TDr_1832 | 0.114073  | 0.123543 | 0.120338  | 0.119172  | 0.127914 |
| TDr_1839 | 0.17162   | 0.174388 | 0.171474  | 0.18109   | 0.201486 |
| TDr_1850 | 0.133596  | 0.121212 | 0.118007  | 0.120047  | 0.132284 |
| TDr_1851 | 0.129079  | 0.116404 | 0.119027  | 0.126603  | 0.126894 |
| TDr_1856 | 0.12602   | 0.112471 | 0.111014  | 0.120629  | 0.133159 |
| TDr_1858 | 0.085373  | 0.11757  | 0.113199  | 0.12398   | 0.140589 |
| TDr_1876 | 0.119464  | 0.108829 | 0.103875  | 0.0913462 | 0.133013 |
| TDr_1881 | 0.119755  | 0.120775 | 0.121066  | 0.122815  | 0.13243  |
| TDr_1888 | 0.0983392 | 0.109848 | 0.103438  | 0.113928  | 0.132867 |
| TDr_1895 | 0.125146  | 0.125291 | 0.123834  | 0.121795  | 0.13345  |
| TDr_1899 | 0.124709  | 0.112617 | 0.109703  | 0.117279  | 0.123106 |
| TDr_1905 | 0.124417  | 0.114365 | 0.110868  | 0.114365  | 0.13243  |
| TDr_1907 | 0.116987  | 0.106352 | 0.104312  | 0.104895  | 0.133741 |
| TDr_1913 | 0.131119  | 0.121649 | 0.118444  | 0.119901  | 0.10708  |
| TDr_1922 | 0.143794  | 0.132284 | 0.129662  | 0.135781  | 0.101107 |
| TDr_1925 | 0.0817308 | 0.113928 | 0.108683  | 0.117133  | 0.135781 |
| TDr_1928 | 0.135781  | 0.12398  | 0.119318  | 0.108246  | 0.141463 |
| TDr_1932 | 0.115967  | 0.102418 | 0.0962995 | 0.105041  | 0.132721 |
| TDr_1935 | 0.123252  | 0.114365 | 0.110868  | 0.10912   | 0.124272 |
| TDr_1937 | 0.105624  | 0.106643 | 0.10373   | 0.0979021 | 0.130828 |
| TDr_1939 | 0.124854  | 0.124417 | 0.122669  | 0.125     | 0.13549  |
| TDr_1940 | 0.167686  | 0.176865 | 0.176865  | 0.185023  | 0.202214 |
| TDr_1943 | 0.108392  | 0.11757  | 0.115239  | 0.114365  | 0.125437 |
| TDr_1953 | 0.108683  | 0.104749 | 0.10067   | 0.10271   | 0.123106 |
| TDr_1956 | 0.126166  | 0.126603 | 0.122232  | 0.124854  | 0.129225 |
| TDr_1958 | 0.1588    | 0.167686 | 0.165647  | 0.172057  | 0.190705 |
| TDr_1966 | 0.0992133 | 0.127331 | 0.124709  | 0.131702  | 0.153846 |
| TDr_1977 | 0.109411  | 0.136364 | 0.134324  | 0.145396  | 0.157051 |
| TDr_2000 | 0.147727  | 0.13447  | 0.133887  | 0.144085  | 0.136218 |
| TDr_2007 | 0.0821678 | 0.109411 | 0.104167  | 0.116113  | 0.133887 |
| TDr_2009 | 0.120484  | 0.1081   | 0.106935  | 0.0938228 | 0.131702 |
| TDr_2015 | 0.192308  | 0.195367 | 0.191871  | 0.202943  | 0.218386 |
| TDr_2017 | 0.122378  | 0.109994 | 0.10912   | 0.121358  | 0.134178 |

|          |           |           |           |           |           |
|----------|-----------|-----------|-----------|-----------|-----------|
| TDr_2018 | 0.126311  | 0.111305  | 0.108974  | 0.0958625 | 0.134324  |
| TDr_2022 | 0.112325  | 0.119464  | 0.116841  | 0.118007  | 0.129079  |
| TDr_2028 | 0.143794  | 0.152098  | 0.149767  | 0.159674  | 0.179779  |
| TDr_2029 | 0.107955  | 0.0955711 | 0.0941142 | 0.104604  | 0.126457  |
| TDr_2032 | 0.148601  | 0.137383  | 0.140297  | 0.142337  | 0.101836  |
| TDr_2033 | 0.112762  | 0.112325  | 0.110868  | 0.112908  | 0.131556  |
| TDr_2034 | 0.171911  | 0.176719  | 0.175845  | 0.183129  | 0.200029  |
| TDr_2035 | 0.0865385 | 0.113782  | 0.109994  | 0.121358  | 0.138549  |
| TDr_2038 | 0.0996503 | 0.104458  | 0.0968823 | 0.106789  | 0.120484  |
| TDr_2041 | 0.122815  | 0.115385  | 0.107226  | 0.110431  | 0.125     |
| TDr_2042 | 0.120921  | 0.11553   | 0.116696  | 0.119901  | 0.133887  |
| TDr_2048 | 0.124126  | 0.124563  | 0.119318  | 0.118735  | 0.131556  |
| TDr_2050 | 0.12296   | 0.116113  | 0.114073  | 0.120192  | 0.123397  |
| TDr_2059 | 0.116404  | 0.100233  | 0.0949883 | 0.104604  | 0.132284  |
| TDr_2071 | 0.170163  | 0.177302  | 0.174679  | 0.182838  | 0.200029  |
| TDr_2078 | 0.124272  | 0.120338  | 0.117424  | 0.115967  | 0.0629371 |
| TDr_2083 | 0.1081    | 0.107955  | 0.103293  | 0.115822  | 0.128934  |
| TDr_2084 | 0.192453  | 0.198427  | 0.19493   | 0.206294  | 0.216783  |
| TDr_2090 | 0.134178  | 0.120338  | 0.117133  | 0.119464  | 0.130828  |
| TDr_2094 | 0.117424  | 0.10271   | 0.097465  | 0.106206  | 0.133013  |
| TDr_2104 | 0.11451   | 0.0980478 | 0.0942599 | 0.102127  | 0.132139  |
| TDr_2106 | 0.133304  | 0.128788  | 0.120629  | 0.111014  | 0.133741  |
| TDr_2110 | 0.171183  | 0.176573  | 0.174825  | 0.182692  | 0.202797  |
| TDr_2119 | 0.124709  | 0.121358  | 0.116987  | 0.11961   | 0.131556  |
| TDr_2121 | 0.138403  | 0.129225  | 0.125728  | 0.128934  | 0.100962  |
| TDr_2126 | 0.115385  | 0.103875  | 0.0971737 | 0.107663  | 0.133596  |
| TDr_2128 | 0.111597  | 0.100962  | 0.0945513 | 0.100962  | 0.131847  |
| TDr_2131 | 0.114365  | 0.101107  | 0.0976107 | 0.104021  | 0.133159  |
| TDr_2136 | 0.114802  | 0.104749  | 0.0989219 | 0.0872669 | 0.128642  |
| TDr_2148 | 0.105332  | 0.0990676 | 0.097028  | 0.0990676 | 0.122378  |
| TDr_2149 | 0.0872669 | 0.115093  | 0.112471  | 0.124417  | 0.138695  |
| TDr_2155 | 0.137383  | 0.129662  | 0.124709  | 0.12704   | 0.101981  |
| TDr_2158 | 0.0861014 | 0.117133  | 0.109848  | 0.122086  | 0.137529  |
| TDr_2159 | 0.126166  | 0.121941  | 0.115822  | 0.124854  | 0.137383  |
| TDr_2161 | 0.177885  | 0.181818  | 0.180361  | 0.18648   | 0.206585  |
| TDr_2163 | 0.130536  | 0.117279  | 0.116113  | 0.117279  | 0.106789  |
| TDr_2167 | 0.128059  | 0.11655   | 0.115385  | 0.0981935 | 0.13986   |
| TDr_2171 | 0.115385  | 0.102127  | 0.0957168 | 0.103584  | 0.131556  |
| TDr_2175 | 0.103293  | 0.0990676 | 0.0926573 | 0.100816  | 0.122086  |
| TDr_2195 | 0.105041  | 0.111305  | 0.106643  | 0.115676  | 0.109266  |
| TDr_2197 | 0.122378  | 0.121649  | 0.118444  | 0.118153  | 0.132139  |
| TDr_2201 | 0.131119  | 0.124563  | 0.122523  | 0.128934  | 0.137966  |
| TDr_2207 | 0.119901  | 0.109557  | 0.106935  | 0.117716  | 0.124417  |
| TDr_2210 | 0.106498  | 0.11014   | 0.106061  | 0.1081    | 0.127622  |



|          |           |           |           |           |           |
|----------|-----------|-----------|-----------|-----------|-----------|
| TDr_2211 | 0.099359  | 0.10708   | 0.100087  | 0.102418  | 0.126894  |
| TDr_2212 | 0.0913462 | 0.101107  | 0.097028  | 0.104312  | 0.128788  |
| TDr_2225 | 0.111597  | 0.116696  | 0.114073  | 0.116404  | 0.128642  |
| TDr_2226 | 0.0936772 | 0.120921  | 0.120338  | 0.129662  | 0.145688  |
| TDr_2229 | 0.120338  | 0.118735  | 0.116404  | 0.118153  | 0.133304  |
| TDr_2237 | 0.112617  | 0.100816  | 0.0964452 | 0.090035  | 0.12704   |
| TDr_2239 | 0.117279  | 0.113054  | 0.109266  | 0.113345  | 0.129662  |
| TDr_2242 | 0.114219  | 0.100087  | 0.0992133 | 0.105041  | 0.135344  |
| TDr_2247 | 0.107372  | 0.114219  | 0.109848  | 0.11014   | 0.122669  |
| TDr_2248 | 0.119027  | 0.106061  | 0.101981  | 0.104312  | 0.134907  |
| TDr_2249 | 0.120775  | 0.111888  | 0.11014   | 0.116259  | 0.104895  |
| TDr_2257 | 0.12398   | 0.108683  | 0.106352  | 0.115385  | 0.125     |
| TDr_2262 | 0.117861  | 0.12296   | 0.117133  | 0.119464  | 0.129079  |
| TDr_2266 | 0.104895  | 0.100087  | 0.0957168 | 0.101836  | 0.125437  |
| TDr_2273 | 0.116113  | 0.10169   | 0.0961538 | 0.103147  | 0.135198  |
| TDr_2276 | 0.11757   | 0.115967  | 0.111305  | 0.117424  | 0.129953  |
| TDr_2284 | 0.112471  | 0.115239  | 0.108829  | 0.116987  | 0.135052  |
| TDr_2285 | 0.101544  | 0.105478  | 0.102273  | 0.112762  | 0.126166  |
| TDr_2287 | 0.116404  | 0.100524  | 0.0990676 | 0.103438  | 0.132284  |
| TDr_2291 | 0.115385  | 0.106498  | 0.103875  | 0.0898893 | 0.133304  |
| TDr_2292 | 0.110431  | 0.114073  | 0.113491  | 0.11553   | 0.128934  |
| TDr_2294 | 0.117424  | 0.104458  | 0.100379  | 0.088141  | 0.134178  |
| TDr_2295 | 0.11655   | 0.119027  | 0.115239  | 0.119318  | 0.129808  |
| TDr_2297 | 0.110431  | 0.102127  | 0.099796  | 0.101253  | 0.126311  |
| TDr_2307 | 0.115093  | 0.102127  | 0.0989219 | 0.10708   | 0.122232  |
| TDr_2312 | 0.106789  | 0.117716  | 0.109266  | 0.112471  | 0.125583  |
| TDr_2320 | 0.121795  | 0.108246  | 0.100962  | 0.0945513 | 0.133304  |
| TDr_2323 | 0.111014  | 0.110868  | 0.106498  | 0.11757   | 0.132139  |
| TDr_2329 | 0.106789  | 0.0926573 | 0.0879953 | 0.111014  | 0.128497  |
| TDr_2330 | 0.175262  | 0.180361  | 0.177448  | 0.188228  | 0.201632  |
| TDr_2331 | 0.143794  | 0.15035   | 0.145979  | 0.155303  | 0.170455  |
| TDr_2333 | 0.08581   | 0.115676  | 0.111888  | 0.123252  | 0.137821  |
| TDr_2338 | 0.1081    | 0.112908  | 0.110868  | 0.114656  | 0.131556  |
| TDr_2342 | 0.113928  | 0.136801  | 0.136218  | 0.146707  | 0.157197  |
| TDr_2343 | 0.128934  | 0.119464  | 0.117716  | 0.119755  | 0.0952797 |
| TDr_2347 | 0.11655   | 0.113199  | 0.108829  | 0.109411  | 0.116404  |
| TDr_2348 | 0.104458  | 0.110723  | 0.10373   | 0.105478  | 0.135198  |
| TDr_2349 | 0.106206  | 0.106643  | 0.101107  | 0.103438  | 0.131119  |
| TDr_2350 | 0.114656  | 0.113054  | 0.108683  | 0.120921  | 0.133741  |
| TDr_2355 | 0.184441  | 0.186334  | 0.183421  | 0.195076  | 0.209353  |
| TDr_2363 | 0.124854  | 0.121212  | 0.120047  | 0.120629  | 0.134033  |
| TDr_2365 | 0.109557  | 0.109703  | 0.103875  | 0.097465  | 0.135344  |
| TDr_2366 | 0.107517  | 0.103001  | 0.0962995 | 0.101836  | 0.132139  |
| TDr_2369 | 0.11116   | 0.113345  | 0.106352  | 0.113928  | 0.134615  |

|          |           |          |           |           |           |
|----------|-----------|----------|-----------|-----------|-----------|
| TDr_2372 | 0.163462  | 0.171474 | 0.170309  | 0.176428  | 0.200903  |
| TDr_2377 | 0.228438  | 0.231498 | 0.23208   | 0.239948  | 0.249272  |
| TDr_2385 | 0.122086  | 0.107955 | 0.106206  | 0.118444  | 0.124563  |
| TDr_2390 | 0.114802  | 0.112617 | 0.109411  | 0.11757   | 0.13447   |
| TDr_2400 | 0.0868298 | 0.112617 | 0.110577  | 0.120484  | 0.139714  |
| TDr_2401 | 0.116113  | 0.117716 | 0.112762  | 0.117133  | 0.128497  |
| TDr_2406 | 0.119172  | 0.117861 | 0.113491  | 0.114365  | 0.127768  |
| TDr_2425 | 0.119318  | 0.110431 | 0.106352  | 0.110723  | 0.0699301 |
| TDr_2431 | 0.108392  | 0.102418 | 0.097465  | 0.0933858 | 0.136801  |
| TDr_2432 | 0.117424  | 0.114073 | 0.111742  | 0.116404  | 0.129225  |
| TDr_2435 | 0.103293  | 0.10169  | 0.0981935 | 0.0844988 | 0.132284  |
| TDr_2438 | 0.107226  | 0.110577 | 0.105915  | 0.114948  | 0.130099  |
| TDr_2439 | 0.105915  | 0.100816 | 0.0976107 | 0.0973193 | 0.126457  |
| TDr_2440 | 0.122669  | 0.109411 | 0.105915  | 0.119027  | 0.122815  |
| TDr_2441 | 0.118444  | 0.10373  | 0.101981  | 0.0914918 | 0.132284  |
| TDr_2453 | 0.112908  | 0.108683 | 0.103147  | 0.102564  | 0.119464  |
| TDr_2455 | 0.127477  | 0.119464 | 0.116259  | 0.120047  | 0.132284  |
| TDr_2456 | 0.13447   | 0.138403 | 0.132284  | 0.131119  | 0.136072  |
| TDr_2458 | 0.113636  | 0.101253 | 0.095134  | 0.101544  | 0.13243   |
| TDr_2466 | 0.10067   | 0.113054 | 0.109848  | 0.113928  | 0.13345   |
| TDr_2467 | 0.131847  | 0.115385 | 0.112179  | 0.118298  | 0.139277  |
| TDr_2471 | 0.191725  | 0.195076 | 0.195076  | 0.2044    | 0.218677  |
| TDr_2480 | 0.112034  | 0.103147 | 0.100233  | 0.106643  | 0.116259  |
| TDr_2484 | 0.107517  | 0.100087 | 0.095134  | 0.101836  | 0.128642  |
| TDr_2491 | 0.12704   | 0.120192 | 0.114656  | 0.118735  | 0.107663  |
| TDr_2502 | 0.13243   | 0.119755 | 0.119172  | 0.119172  | 0.133159  |
| TDr_2503 | 0.111742  | 0.108683 | 0.102564  | 0.11451   | 0.133741  |
| TDr_2504 | 0.182255  | 0.185606 | 0.181527  | 0.193182  | 0.208625  |
| TDr_2506 | 0.120047  | 0.105915 | 0.103584  | 0.0875583 | 0.136218  |
| TDr_2512 | 0.11553   | 0.104312 | 0.0990676 | 0.104021  | 0.13141   |
| TDr_2514 | 0.117716  | 0.118153 | 0.112617  | 0.118153  | 0.133304  |
| TDr_2530 | 0.114219  | 0.11757  | 0.113491  | 0.11553   | 0.129225  |
| TDr_2532 | 0.118007  | 0.108537 | 0.099796  | 0.0919289 | 0.133596  |
| TDr_2533 | 0.107809  | 0.104749 | 0.0992133 | 0.095134  | 0.126311  |
| TDr_2540 | 0.105769  | 0.112325 | 0.107372  | 0.11553   | 0.129516  |
| TDr_2553 | 0.125291  | 0.117279 | 0.114365  | 0.113491  | 0.128351  |
| TDr_2554 | 0.180798  | 0.187063 | 0.183566  | 0.191434  | 0.208042  |
| TDr_2555 | 0.111305  | 0.101544 | 0.0983392 | 0.0861014 | 0.126894  |
| TDr_2558 | 0.175845  | 0.182692 | 0.178904  | 0.187354  | 0.206002  |
| TDr_2561 | 0.173077  | 0.178176 | 0.178176  | 0.184586  | 0.204691  |
| TDr_2564 | 0.129953  | 0.132721 | 0.128934  | 0.126894  | 0.13447   |
| TDr_2572 | 0.138403  | 0.126894 | 0.127477  | 0.128059  | 0.133887  |
| TDr_2575 | 0.101107  | 0.101836 | 0.0980478 | 0.108537  | 0.120775  |
| TDr_2577 | 0.111742  | 0.104895 | 0.0979021 | 0.0903263 | 0.126166  |

|          |           |           |           |           |          |
|----------|-----------|-----------|-----------|-----------|----------|
| TDr_2580 | 0.113054  | 0.103293  | 0.0980478 | 0.0895979 | 0.13039  |
| TDr_2581 | 0.11655   | 0.105041  | 0.101253  | 0.105624  | 0.13447  |
| TDr_2591 | 0.113928  | 0.113199  | 0.11116   | 0.109703  | 0.127477 |
| TDr_2593 | 0.119755  | 0.114948  | 0.111742  | 0.117279  | 0.129516 |
| TDr_2608 | 0.126603  | 0.114802  | 0.112179  | 0.124417  | 0.126457 |
| TDr_2611 | 0.121795  | 0.125437  | 0.11961   | 0.121941  | 0.132721 |
| TDr_2618 | 0.112034  | 0.0984848 | 0.0920746 | 0.0996503 | 0.126166 |
| TDr_2623 | 0.116259  | 0.106789  | 0.103293  | 0.0890152 | 0.131847 |
| TDr_2630 | 0.0939685 | 0.0987762 | 0.0944056 | 0.101399  | 0.121212 |
| TDr_2636 | 0.124126  | 0.114365  | 0.109994  | 0.0992133 | 0.136801 |
| TDr_2642 | 0.085373  | 0.110577  | 0.106789  | 0.120192  | 0.134178 |
| TDr_2643 | 0.131556  | 0.119172  | 0.115093  | 0.101399  | 0.137529 |
| TDr_2645 | 0.242861  | 0.243881  | 0.24359   | 0.252331  | 0.264569 |
| TDr_2650 | 0.127768  | 0.133159  | 0.127914  | 0.130536  | 0.131702 |
| TDr_2655 | 0.127331  | 0.126311  | 0.127477  | 0.130973  | 0.131847 |
| TDr_2660 | 0.200321  | 0.202214  | 0.201049  | 0.211247  | 0.224942 |
| TDr_2663 | 0.133159  | 0.125728  | 0.122232  | 0.128642  | 0.132139 |
| TDr_2664 | 0.21183   | 0.217803  | 0.216055  | 0.222174  | 0.235577 |
| TDr_2669 | 0.116696  | 0.126166  | 0.121212  | 0.121503  | 0.12704  |
| TDr_2670 | 0.131702  | 0.113491  | 0.10912   | 0.116113  | 0.137675 |
| TDr_2674 | 0.122086  | 0.114656  | 0.112325  | 0.113491  | 0.126603 |
| TDr_2678 | 0.12704   | 0.130682  | 0.123397  | 0.123689  | 0.130973 |
| TDr_2681 | 0.186772  | 0.190122  | 0.188957  | 0.196533  | 0.212267 |
| TDr_2683 | 0.130245  | 0.116987  | 0.112908  | 0.0960082 | 0.137675 |
| TDr_2687 | 0.118881  | 0.10708   | 0.10067   | 0.088141  | 0.134178 |
| TDr_2688 | 0.205857  | 0.214161  | 0.213287  | 0.22028   | 0.230186 |
| TDr_2692 | 0.116841  | 0.11553   | 0.114365  | 0.117279  | 0.133887 |
| TDr_2693 | 0.181381  | 0.182401  | 0.180361  | 0.191725  | 0.208916 |
| TDr_2694 | 0.125146  | 0.119755  | 0.115093  | 0.116841  | 0.132284 |
| TDr_2698 | 0.114365  | 0.102564  | 0.101107  | 0.1081    | 0.135781 |
| TDr_2701 | 0.117424  | 0.109703  | 0.104749  | 0.113199  | 0.130973 |
| TDr_2710 | 0.131119  | 0.133887  | 0.128934  | 0.126603  | 0.135635 |
| TDr_2713 | 0.113491  | 0.100233  | 0.0961538 | 0.108392  | 0.129371 |
| TDr_2724 | 0.134178  | 0.149184  | 0.145979  | 0.148601  | 0.172786 |
| TDr_2726 | 0.113199  | 0.10169   | 0.0973193 | 0.087704  | 0.127622 |
| TDr_2740 | 0.126603  | 0.120629  | 0.115967  | 0.117716  | 0.132576 |
| TDr_2741 | 0.11961   | 0.119464  | 0.115676  | 0.114219  | 0.134324 |
| TDr_2744 | 0.133013  | 0.125583  | 0.123834  | 0.124126  | 0.129371 |
| TDr_2745 | 0.176865  | 0.184003  | 0.180507  | 0.188957  | 0.2044   |
| TDr_2749 | 0.114948  | 0.102855  | 0.0976107 | 0.100816  | 0.133741 |
| TDr_2754 | 0.114802  | 0.126311  | 0.118735  | 0.119901  | 0.136509 |
| TDr_2756 | 0.11116   | 0.114219  | 0.111888  | 0.11451   | 0.130536 |
| TDr_2763 | 0.122086  | 0.120775  | 0.117279  | 0.118153  | 0.130099 |
| TDr_2770 | 0.123106  | 0.109848  | 0.105478  | 0.111014  | 0.131119 |

|          |           |          |           |           |          |
|----------|-----------|----------|-----------|-----------|----------|
| TDr_2777 | 0.239802  | 0.24053  | 0.24257   | 0.249563  | 0.260052 |
| TDr_2782 | 0.112325  | 0.108974 | 0.105478  | 0.108683  | 0.124417 |
| TDr_2787 | 0.119027  | 0.113054 | 0.109848  | 0.112762  | 0.119464 |
| TDr_2826 | 0.158945  | 0.170746 | 0.166667  | 0.175699  | 0.18852  |
| TDr_2859 | 0.167395  | 0.176282 | 0.170455  | 0.178904  | 0.196678 |
| TDr_2880 | 0.120775  | 0.112179 | 0.107517  | 0.11655   | 0.125    |
| TDr_2886 | 0.117716  | 0.107663 | 0.101253  | 0.0893065 | 0.133304 |
| TDr_2897 | 0.11451   | 0.119027 | 0.112325  | 0.115822  | 0.130099 |
| TDr_2903 | 0.142337  | 0.129953 | 0.126457  | 0.112762  | 0.149184 |
| TDr_2904 | 0.118735  | 0.109266 | 0.107226  | 0.113636  | 0.123834 |
| TDr_2910 | 0.123834  | 0.115239 | 0.110286  | 0.117861  | 0.124563 |
| TDr_2915 | 0.125437  | 0.124417 | 0.123834  | 0.12296   | 0.13141  |
| TDr_2926 | 0.110868  | 0.104895 | 0.103438  | 0.090035  | 0.129953 |
| TDr_2928 | 0.128497  | 0.113491 | 0.110577  | 0.0995047 | 0.133304 |
| TDr_2931 | 0.107372  | 0.117133 | 0.115676  | 0.117424  | 0.137238 |
| TDr_2936 | 0.126166  | 0.132139 | 0.126603  | 0.123106  | 0.13039  |
| TDr_2946 | 0.140006  | 0.142191 | 0.138695  | 0.138695  | 0.147436 |
| TDr_2948 | 0.115967  | 0.112034 | 0.107663  | 0.112325  | 0.129516 |
| TDr_2965 | 0.134178  | 0.138403 | 0.131993  | 0.131119  | 0.136946 |
| TDr_2970 | 0.129225  | 0.126748 | 0.124709  | 0.126457  | 0.13549  |
| TDr_2973 | 0.187937  | 0.194493 | 0.190997  | 0.199738  | 0.214015 |
| TDr_2974 | 0.11961   | 0.115385 | 0.113345  | 0.121795  | 0.135198 |
| TDr_2975 | 0.173514  | 0.178904 | 0.174825  | 0.185023  | 0.202506 |
| TDr_2984 | 0.122815  | 0.118881 | 0.109266  | 0.116259  | 0.123543 |
| TDr_2990 | 0.124854  | 0.110431 | 0.105478  | 0.115385  | 0.13986  |
| TDr_2991 | 0.0823135 | 0.115385 | 0.110723  | 0.121795  | 0.138695 |
| TDr_2997 | 0.0850816 | 0.109411 | 0.103875  | 0.116696  | 0.135052 |
| TDr_2998 | 0.121649  | 0.108683 | 0.104895  | 0.092366  | 0.132576 |
| TDr_3002 | 0.121066  | 0.109848 | 0.107226  | 0.0955711 | 0.136072 |
| TDr_3003 | 0.114656  | 0.104604 | 0.102273  | 0.106935  | 0.136946 |
| TDr_3006 | 0.124709  | 0.11757  | 0.114948  | 0.11553   | 0.130099 |
| TDr_3010 | 0.0888695 | 0.119027 | 0.116987  | 0.123689  | 0.13884  |
| TDr_3016 | 0.128351  | 0.130245 | 0.129953  | 0.13141   | 0.138695 |
| TDr_3134 | 0.235868  | 0.238054 | 0.236597  | 0.245921  | 0.254662 |
| TDr_3287 | 0.116113  | 0.108683 | 0.102273  | 0.108683  | 0.13549  |
| TDr_3288 | 0.164918  | 0.171766 | 0.169726  | 0.177593  | 0.192162 |
| TDr_3291 | 0.169726  | 0.174534 | 0.173951  | 0.180944  | 0.20134  |
| TDr_3292 | 0.118007  | 0.112325 | 0.108537  | 0.118444  | 0.135344 |
| TDr_3296 | 0.109848  | 0.10271  | 0.102127  | 0.103293  | 0.127768 |
| TDr_3301 | 0.128788  | 0.112908 | 0.108246  | 0.111742  | 0.135635 |
| TDr_3310 | 0.114802  | 0.101253 | 0.0980478 | 0.0852273 | 0.124854 |
| TDr_3311 | 0.0980478 | 0.106643 | 0.101107  | 0.103438  | 0.131702 |
| TDr_3312 | 0.120192  | 0.117133 | 0.113636  | 0.118298  | 0.131993 |
| TDr_3316 | 0.11655   | 0.10708  | 0.105332  | 0.100962  | 0.130682 |

|          |           |          |           |           |           |
|----------|-----------|----------|-----------|-----------|-----------|
| TDr_3320 | 0.132284  | 0.120192 | 0.114656  | 0.100962  | 0.133887  |
| TDr_3322 | 0.116404  | 0.105769 | 0.0984848 | 0.106935  | 0.13141   |
| TDr_3325 | 0.126603  | 0.118298 | 0.113928  | 0.097028  | 0.135781  |
| TDr_3327 | 0.116841  | 0.117861 | 0.113491  | 0.122815  | 0.128059  |
| TDr_3333 | 0.0912005 | 0.121066 | 0.114948  | 0.125728  | 0.141463  |
| TDr_3338 | 0.118153  | 0.128205 | 0.121503  | 0.122378  | 0.130536  |
| TDr_3357 | 0.132284  | 0.129225 | 0.125728  | 0.129808  | 0.137092  |
| TDr_3364 | 0.111116  | 0.116259 | 0.111014  | 0.122086  | 0.130828  |
| TDr_3368 | 0.110868  | 0.106643 | 0.103147  | 0.105769  | 0.131702  |
| TDr_3371 | 0.143502  | 0.132284 | 0.128497  | 0.133159  | 0.0990676 |
| TDr_3373 | 0.16521   | 0.17264  | 0.168269  | 0.17905   | 0.200321  |
| TDr_3374 | 0.135052  | 0.123252 | 0.118007  | 0.10373   | 0.143939  |
| TDr_3376 | 0.115822  | 0.108974 | 0.107809  | 0.0932401 | 0.133741  |
| TDr_3383 | 0.0833333 | 0.113199 | 0.112325  | 0.121066  | 0.13447   |
| TDr_3389 | 0.0799825 | 0.104604 | 0.099359  | 0.113928  | 0.129371  |
| TDr_3400 | 0.118881  | 0.123106 | 0.119027  | 0.120484  | 0.127185  |
| TDr_3408 | 0.124272  | 0.128205 | 0.12296   | 0.124417  | 0.131119  |
| TDr_3414 | 0.171329  | 0.182255 | 0.177302  | 0.184295  | 0.200903  |
| TDr_3419 | 0.104895  | 0.105915 | 0.103584  | 0.0960082 | 0.130973  |
| TDr_3430 | 0.0960082 | 0.104604 | 0.0964452 | 0.104895  | 0.124126  |
| TDr_3433 | 0.124854  | 0.111014 | 0.109266  | 0.0926573 | 0.136364  |
| TDr_3446 | 0.175408  | 0.178759 | 0.178176  | 0.184586  | 0.203234  |
| TDr_3447 | 0.103584  | 0.099359 | 0.0987762 | 0.101107  | 0.12704   |
| TDr_3452 | 0.126748  | 0.12398  | 0.121066  | 0.121066  | 0.13243   |
| TDr_3461 | 0.123252  | 0.109994 | 0.107372  | 0.0919289 | 0.131265  |
| TDr_3466 | 0.119318  | 0.1081   | 0.106061  | 0.113054  | 0.120629  |
| TDr_3469 | 0.169726  | 0.171037 | 0.172786  | 0.180361  | 0.199301  |
| TDr_3472 | 0.11961   | 0.116841 | 0.117133  | 0.11655   | 0.13141   |
| TDr_3473 | 0.119027  | 0.11451  | 0.108392  | 0.114802  | 0.104895  |
| TDr_3477 | 0.099796  | 0.104604 | 0.0996503 | 0.104604  | 0.125583  |
| TDr_3483 | 0.0971737 | 0.109848 | 0.106352  | 0.117424  | 0.134615  |
| TDr_3484 | 0.129371  | 0.117861 | 0.114073  | 0.11757   | 0.133304  |
| TDr_3507 | 0.13141   | 0.128642 | 0.125146  | 0.128059  | 0.135052  |
| TDr_3508 | 0.11859   | 0.103001 | 0.0983392 | 0.104458  | 0.131265  |
| TDr_3510 | 0.120047  | 0.12398  | 0.116696  | 0.118153  | 0.129808  |
| TDr_3518 | 0.145251  | 0.132284 | 0.133159  | 0.145688  | 0.137238  |
| TDr_3519 | 0.217803  | 0.222028 | 0.224359  | 0.230478  | 0.24359   |
| TDr_3524 | 0.119901  | 0.120629 | 0.116259  | 0.127622  | 0.130536  |
| TDr_3527 | 0.129808  | 0.118881 | 0.117424  | 0.120629  | 0.132867  |
| TDr_3536 | 0.112471  | 0.106498 | 0.101544  | 0.0936772 | 0.130973  |
| TDr_3540 | 0.127477  | 0.119464 | 0.111597  | 0.124417  | 0.12704   |
| TDr_3543 | 0.113345  | 0.110868 | 0.107955  | 0.112617  | 0.125728  |
| TDr_3544 | 0.114802  | 0.112325 | 0.105624  | 0.114948  | 0.133596  |
| TDr_3547 | 0.118153  | 0.110431 | 0.107517  | 0.0958625 | 0.135198  |

|          |           |           |           |           |          |
|----------|-----------|-----------|-----------|-----------|----------|
| TDr_3551 | 0.126457  | 0.126311  | 0.122815  | 0.123106  | 0.136509 |
| TDr_3556 | 0.116259  | 0.114948  | 0.112325  | 0.115239  | 0.121358 |
| TDr_3564 | 0.221008  | 0.224942  | 0.221737  | 0.230769  | 0.24155  |
| TDr_3567 | 0.102855  | 0.101836  | 0.0980478 | 0.0992133 | 0.125146 |
| TDr_3568 | 0.105769  | 0.114365  | 0.107955  | 0.106498  | 0.121649 |
| TDr_3569 | 0.118735  | 0.10373   | 0.0981935 | 0.103438  | 0.131119 |
| TDr_3576 | 0.136946  | 0.121358  | 0.11961   | 0.126311  | 0.127185 |
| TDr_3579 | 0.123834  | 0.124854  | 0.123397  | 0.133887  | 0.131847 |
| TDr_3584 | 0.106643  | 0.0470571 | 0.0528846 | 0.10708   | 0.134178 |
| TDr_3585 | 0.119464  | 0.106789  | 0.101836  | 0.090472  | 0.132721 |
| TDr_3590 | 0.113199  | 0.105769  | 0.102273  | 0.111597  | 0.121795 |
| TDr_3592 | 0.215181  | 0.21824   | 0.218823  | 0.224942  | 0.23514  |
| TDr_3593 | 0.12398   | 0.112179  | 0.107809  | 0.0967366 | 0.134033 |
| TDr_3594 | 0.126457  | 0.120775  | 0.121649  | 0.119027  | 0.131847 |
| TDr_3598 | 0.113636  | 0.113491  | 0.108829  | 0.113782  | 0.122815 |
| TDr_3600 | 0.129808  | 0.119172  | 0.11655   | 0.124126  | 0.134615 |
| TDr_3605 | 0.120192  | 0.128205  | 0.122086  | 0.127914  | 0.128205 |
| TDr_3610 | 0.118444  | 0.104021  | 0.101399  | 0.104021  | 0.129079 |
| TDr_3616 | 0.122232  | 0.121795  | 0.122086  | 0.121503  | 0.129953 |
| TDr_3620 | 0.13141   | 0.128642  | 0.127185  | 0.12602   | 0.13447  |
| TDr_3621 | 0.121503  | 0.115822  | 0.113491  | 0.117861  | 0.129225 |
| TDr_3623 | 0.116404  | 0.104312  | 0.0996503 | 0.105478  | 0.133159 |
| TDr_3624 | 0.133304  | 0.122378  | 0.120921  | 0.12296   | 0.132576 |
| TDr_3631 | 0.141026  | 0.128642  | 0.126311  | 0.127185  | 0.140297 |
| TDr_3633 | 0.0961538 | 0.11961   | 0.121066  | 0.126311  | 0.140297 |
| TDr_3637 | 0.0961538 | 0.125146  | 0.120775  | 0.132721  | 0.146416 |
| TDr_3643 | 0.140006  | 0.127914  | 0.124709  | 0.12704   | 0.138695 |
| TDr_3647 | 0.101253  | 0.100816  | 0.0958625 | 0.097028  | 0.127914 |
| TDr_3648 | 0.128788  | 0.131847  | 0.131556  | 0.135052  | 0.136509 |
| TDr_3649 | 0.13884   | 0.131119  | 0.12704   | 0.131119  | 0.139277 |
| TDr_3660 | 0.187791  | 0.192599  | 0.190559  | 0.199883  | 0.215909 |
| TDr_3663 | 0.120192  | 0.11859   | 0.117424  | 0.125291  | 0.135198 |
| TDr_3668 | 0.110286  | 0.118881  | 0.114219  | 0.113345  | 0.12704  |
| TDr_3671 | 0.121212  | 0.10708   | 0.105915  | 0.108537  | 0.136509 |
| TDr_3678 | 0.205274  | 0.210664  | 0.207168  | 0.218531  | 0.227855 |
| TDr_3681 | 0.191579  | 0.200758  | 0.199883  | 0.206585  | 0.219406 |
| TDr_3682 | 0.131702  | 0.127477  | 0.124563  | 0.127185  | 0.136218 |
| TDr_3721 | 0.232372  | 0.236014  | 0.236888  | 0.242133  | 0.254371 |
| TDr_3729 | 0.101544  | 0.103147  | 0.0979021 | 0.0999417 | 0.125874 |
| TDr_3765 | 0.137675  | 0.126748  | 0.12704   | 0.125291  | 0.138986 |
| TDr_3766 | 0.109703  | 0.104604  | 0.101981  | 0.10373   | 0.127914 |
| TDr_3782 | 0.134907  | 0.122232  | 0.120775  | 0.121649  | 0.134178 |
| TDr_3783 | 0.172057  | 0.173951  | 0.172786  | 0.182984  | 0.199009 |
| TDr_3785 | 0.127914  | 0.124854  | 0.121941  | 0.123397  | 0.128059 |

|          |           |           |           |           |          |
|----------|-----------|-----------|-----------|-----------|----------|
| TDr_3801 | 0.174825  | 0.182255  | 0.178759  | 0.18954   | 0.205274 |
| TDr_3814 | 0.120047  | 0.108537  | 0.10271   | 0.10912   | 0.126894 |
| TDr_3820 | 0.105186  | 0.112617  | 0.110286  | 0.105624  | 0.134178 |
| TDr_3824 | 0.116259  | 0.11553   | 0.112325  | 0.116696  | 0.130973 |
| TDr_3825 | 0.104021  | 0.101253  | 0.0977564 | 0.102418  | 0.123106 |
| TDr_3828 | 0.109994  | 0.0984848 | 0.0920746 | 0.0979021 | 0.129371 |
| TDr_3842 | 0.108537  | 0.11014   | 0.104021  | 0.113345  | 0.130536 |
| TDr_3852 | 0.105041  | 0.0990676 | 0.0973193 | 0.100524  | 0.119755 |
| TDr_3856 | 0.115093  | 0.103001  | 0.0977564 | 0.0887238 | 0.130099 |
| TDr_3863 | 0.112325  | 0.115385  | 0.115676  | 0.117424  | 0.130245 |
| TDr_3881 | 0.103584  | 0.104895  | 0.10169   | 0.113345  | 0.125    |
| TDr_3882 | 0.107226  | 0.0992133 | 0.0992133 | 0.103875  | 0.124854 |
| TDr_3886 | 0.0820221 | 0.113636  | 0.108392  | 0.120921  | 0.136364 |
| TDr_3887 | 0.128934  | 0.117424  | 0.112762  | 0.0973193 | 0.134324 |
| TDr_3956 | 0.0818765 | 0.106498  | 0.101836  | 0.115822  | 0.134178 |
| TDr_3958 | 0.120484  | 0.111014  | 0.109557  | 0.116841  | 0.101399 |
| TDr_3961 | 0.111888  | 0.0968823 | 0.0933858 | 0.0989219 | 0.126894 |
| TDr_3965 | 0.11655   | 0.118153  | 0.120484  | 0.11553   | 0.131556 |
| TDr_3974 | 0.126748  | 0.118153  | 0.115239  | 0.115822  | 0.130973 |
| TDr_3978 | 0.122815  | 0.127914  | 0.122086  | 0.121212  | 0.13141  |
| TDr_3983 | 0.0846445 | 0.111597  | 0.1081    | 0.119755  | 0.138695 |
| TDr_3985 | 0.115093  | 0.107955  | 0.105041  | 0.0890152 | 0.133304 |
| TDr_4005 | 0.126894  | 0.115967  | 0.111888  | 0.0979021 | 0.140443 |
| TDr_4017 | 0.135635  | 0.124709  | 0.120338  | 0.105769  | 0.141317 |
| TDr_4020 | 0.111014  | 0.107663  | 0.102418  | 0.107663  | 0.123397 |
| TDr_4028 | 0.117133  | 0.103875  | 0.0995047 | 0.106206  | 0.131847 |
| TDr_4029 | 0.105915  | 0.10169   | 0.0952797 | 0.109557  | 0.130245 |
| TDr_4031 | 0.136801  | 0.130245  | 0.128497  | 0.127622  | 0.138112 |
| TDr_4033 | 0.112179  | 0.104458  | 0.103584  | 0.106789  | 0.124563 |
| TDr_4038 | 0.139277  | 0.145251  | 0.139423  | 0.134761  | 0.144668 |
| TDr_4067 | 0.136946  | 0.122232  | 0.116404  | 0.124563  | 0.141754 |
| TDr_4070 | 0.130973  | 0.116259  | 0.113054  | 0.124709  | 0.126166 |
| TDr_4078 | 0.105769  | 0.100379  | 0.0960082 | 0.105624  | 0.127768 |
| TDr_4084 | 0.120484  | 0.110431  | 0.105478  | 0.108392  | 0.123543 |
| TDr_4086 | 0.0916375 | 0.122669  | 0.120921  | 0.129371  | 0.141026 |
| TDr_4087 | 0.187354  | 0.195659  | 0.193619  | 0.200321  | 0.218969 |
| TDr_4091 | 0.119464  | 0.113782  | 0.108246  | 0.114656  | 0.101836 |
| TDr_4092 | 0.113199  | 0.113928  | 0.108392  | 0.113928  | 0.138112 |
| TDr_4100 | 0.129953  | 0.116113  | 0.112617  | 0.116404  | 0.128351 |
| TDr_4152 | 0.0828963 | 0.111305  | 0.107517  | 0.117133  | 0.138986 |
| TDr_4154 | 0.123252  | 0.11116   | 0.11116   | 0.117861  | 0.130682 |
| TDr_4155 | 0.111305  | 0.110868  | 0.104167  | 0.116696  | 0.131847 |
| TDr_4168 | 0.114073  | 0.117133  | 0.11014   | 0.119755  | 0.128205 |
| TDr_4172 | 0.125583  | 0.110577  | 0.109411  | 0.115822  | 0.122523 |

|              |           |           |           |          |          |
|--------------|-----------|-----------|-----------|----------|----------|
| TDr_4173     | 0.107809  | 0.112908  | 0.109703  | 0.116987 | 0.125146 |
| TDr_4178     | 0.134615  | 0.125728  | 0.123689  | 0.121358 | 0.136801 |
| TDr_4180     | 0.111014  | 0.115239  | 0.106498  | 0.11553  | 0.128642 |
| TDr_4185     | 0.110868  | 0.110723  | 0.108683  | 0.119755 | 0.129371 |
| TDr_4187     | 0.166667  | 0.171474  | 0.165647  | 0.170892 | 0.1875   |
| TDr_4191     | 0.115967  | 0.108537  | 0.099796  | 0.092803 | 0.133304 |
| TDr_4192     | 0.125728  | 0.12296   | 0.121503  | 0.124417 | 0.134324 |
| TDr_87_00211 | 0.118007  | 0.118735  | 0.114948  | 0.120775 | 0.136509 |
| TDr_89_00727 | 0.116113  | 0.11655   | 0.11655   | 0.111888 | 0.13986  |
| TDr_89_02475 | 0.0962995 | 0.10169   | 0.0955711 | 0.102855 | 0.122669 |
| TDr_89_02617 | 0.101253  | 0.0999417 | 0.0944056 | 0.108683 | 0.124417 |
| TDr_89_02665 | 0.10067   | 0.105478  | 0.0996503 | 0.110431 | 0.12296  |
| TDr_89_02672 | 0.122815  | 0.127914  | 0.121212  | 0.126457 | 0.134033 |
| TDr_89_02677 | 0.10067   | 0.107517  | 0.103438  | 0.103438 | 0.129953 |
| TDr_93_2     | 0.127331  | 0.124272  | 0.124272  | 0.124854 | 0.137675 |
| TDr_94_01108 | 0.104458  | 0.1081    | 0.104895  | 0.101107 | 0.132284 |
| TDr_95_00965 | 0.111014  | 0.115822  | 0.10912   | 0.119318 | 0.133887 |
| TDr_95_01932 | 0.134761  | 0.129662  | 0.125583  | 0.132867 | 0.141608 |
| TDr_95_01958 | 0.112034  | 0.115385  | 0.109557  | 0.117133 | 0.126457 |
| TDr_95_18544 | 0.118153  | 0.116841  | 0.111014  | 0.116841 | 0.133741 |
| TDr_95_19158 | 0.107372  | 0.107809  | 0.104604  | 0.109557 | 0.129079 |
| TDr_95_19158 | 0.109703  | 0.110723  | 0.106935  | 0.112762 | 0.126166 |
| TDr_95_19177 | 0.106498  | 0.100524  | 0.100233  | 0.105478 | 0.124709 |
| TDr_96_00582 | 0.119172  | 0.115822  | 0.113491  | 0.114365 | 0.136509 |
| TDr_96_00604 | 0.106935  | 0.110868  | 0.10271   | 0.10912  | 0.130973 |
| TDr_96_00625 | 0.142191  | 0.137383  | 0.13243   | 0.138258 | 0.14729  |
| TDr_96_00629 | 0.129371  | 0.124272  | 0.124272  | 0.122232 | 0.144085 |
| TDr_96_01395 | 0.106643  | 0.109994  | 0.107663  | 0.112908 | 0.129516 |
| TDr_96_01724 | 0.140589  | 0.142191  | 0.138403  | 0.135781 | 0.1419   |
| TDr_96_01817 | 0.106498  | 0.11655   | 0.113054  | 0.120047 | 0.134033 |
| TDr_96_01818 | 0.125728  | 0.127914  | 0.124417  | 0.130828 | 0.136655 |
| TDr_96_02433 | 0.10912   | 0.113345  | 0.107809  | 0.110723 | 0.125874 |
| TDr_97_00205 | 0.14831   | 0.138258  | 0.135635  | 0.138549 | 0.150204 |
| TDr_97_00583 | 0.13141   | 0.131556  | 0.128642  | 0.128934 | 0.130682 |
| TDr_97_00777 | 0.131702  | 0.133013  | 0.128934  | 0.133304 | 0.14292  |
| TDr_97_00793 | 0.109557  | 0.112617  | 0.113491  | 0.115239 | 0.133304 |
| TDr_97_00903 | 0.110577  | 0.106935  | 0.103147  | 0.112179 | 0.127331 |
| TDr_97_00907 | 0.111597  | 0.109703  | 0.106789  | 0.107372 | 0.127768 |
| TDr_97_00917 | 0.122523  | 0.120047  | 0.116259  | 0.117133 | 0.125583 |
| TDr_97_00940 | 0.117861  | 0.120047  | 0.119755  | 0.115676 | 0.132867 |
| TDr_97_00960 | 0.127622  | 0.125728  | 0.122523  | 0.126894 | 0.135635 |
| TDr_97_01715 | 0.113636  | 0.117279  | 0.113491  | 0.11757  | 0.138258 |
| TDr_99_02354 | 0.105186  | 0.105915  | 0.100962  | 0.107955 | 0.122523 |
| TDr_99_02607 | 0.110577  | 0.109848  | 0.10373   | 0.108392 | 0.12704  |



|                        |          |           |           |           |          |
|------------------------|----------|-----------|-----------|-----------|----------|
| <b>TDr_99_02626</b>    | 0.117716 | 0.109703  | 0.108537  | 0.118153  | 0.131556 |
| <b>TDr_99_02674</b>    | 0.113928 | 0.108246  | 0.10067   | 0.107955  | 0.13039  |
| <b>TDr_99_02789</b>    | 0.11757  | 0.119464  | 0.113636  | 0.115967  | 0.129371 |
| <b>TDr_99_02824</b>    | 0.110286 | 0.114802  | 0.111888  | 0.105769  | 0.129953 |
| <b>TDr_Adaka</b>       | 0.106061 | 0.0441434 | 0.0520105 | 0.104458  | 0.133013 |
| <b>TDr_Ame</b>         | 0.112471 | 0.108246  | 0.099796  | 0.104167  | 0.124272 |
| <b>TDr_Amula</b>       | 0.100524 | 0.0992133 | 0.0939685 | 0.0992133 | 0.125146 |
| <b>TDr_Ehuru</b>       | 0.111305 | 0.10271   | 0.100379  | 0.109703  | 0.128059 |
| <b>TDr_Idu_Ekpeye</b>  | 0.104749 | 0.0425408 | 0.0445804 | 0.104021  | 0.131993 |
| <b>Makakusa</b>        | 0.102855 | 0.107663  | 0.10271   | 0.105915  | 0.128642 |
| <b>TDr_Gbangu</b>      | 0.108392 | 0.108246  | 0.103875  | 0.113491  | 0.125728 |
| <b>TDr_River_Omuku</b> | 0.103147 | 0.0540501 | 0.0488054 | 0.097465  | 0.128059 |
| <b>Ufenyi</b>          | 0.112325 | 0.120921  | 0.116841  | 0.11859   | 0.135198 |

| Ehobia   | Ehuru    | Ekiti     | Hembakwase | Jirad_04_219/A | Jircas_99_0077 | Keemi     |
|----------|----------|-----------|------------|----------------|----------------|-----------|
| 0.119318 | 0.111888 | 0.111014  | 0.0962995  | 0.10373        | 0.0989219      | 0.116259  |
| 0.119464 | 0.119901 | 0.105332  | 0.101981   | 0.102127       | 0.111305       | 0.100379  |
| 0.117716 | 0.11553  | 0.103584  | 0.0964452  | 0.0977564      | 0.108974       | 0.0977564 |
| 0.121503 | 0.119027 | 0.107663  | 0.101399   | 0.102127       | 0.119172       | 0.112325  |
| 0.129662 | 0.12602  | 0.129225  | 0.125291   | 0.122232       | 0.139277       | 0.124563  |
| 0        | 0.120192 | 0.124563  | 0.120047   | 0.118735       | 0.12704        | 0.120775  |
| 0.120192 | 0        | 0.120338  | 0.112325   | 0.106061       | 0.110286       | 0.117133  |
| 0.124563 | 0.120338 | 0         | 0.102418   | 0.106352       | 0.112034       | 0.105478  |
| 0.120047 | 0.112325 | 0.102418  | 0          | 0.083479       | 0.10169        | 0.0954254 |
| 0.118735 | 0.106061 | 0.106352  | 0.083479   | 0              | 0.105041       | 0.106935  |
| 0.12704  | 0.110286 | 0.112034  | 0.10169    | 0.105041       | 0              | 0.108246  |
| 0.120775 | 0.117133 | 0.105478  | 0.0954254  | 0.106935       | 0.108246       | 0         |
| 0.123106 | 0.117424 | 0.107809  | 0.0796911  | 0.0903263      | 0.105915       | 0.102273  |
| 0.136655 | 0.141754 | 0.126894  | 0.116259   | 0.115239       | 0.111888       | 0.126894  |
| 0.13039  | 0.128497 | 0.115385  | 0.116404   | 0.099359       | 0.118444       | 0.123252  |
| 0.123252 | 0.112908 | 0.114948  | 0.107517   | 0.101253       | 0.107809       | 0.113491  |
| 0.128642 | 0.110723 | 0.111888  | 0.103001   | 0.102564       | 0.11553        | 0.0981935 |
| 0.139277 | 0.135052 | 0.133013  | 0.135198   | 0.133596       | 0.145688       | 0.136801  |
| 0.120629 | 0.116404 | 0.102127  | 0.097028   | 0.0965909      | 0.111597       | 0.0945513 |
| 0.198718 | 0.202652 | 0.189831  | 0.19493    | 0.188957       | 0.180361       | 0.195367  |
| 0.101544 | 0.112179 | 0.118298  | 0.112325   | 0.113345       | 0.114948       | 0.111597  |
| 0.114219 | 0.110868 | 0.112908  | 0.111888   | 0.107955       | 0.113054       | 0.108537  |
| 0.121066 | 0.114219 | 0.104604  | 0.095134   | 0.0958625      | 0.101544       | 0.102273  |
| 0.136364 | 0.123397 | 0.118735  | 0.11655    | 0.115239       | 0.121795       | 0.112617  |
| 0.113782 | 0.108683 | 0.0958625 | 0.0971737  | 0.0821678      | 0.0983392      | 0.100816  |
| 0.102127 | 0.110431 | 0.122086  | 0.117279   | 0.118007       | 0.122523       | 0.121503  |
| 0.131556 | 0.115385 | 0.114802  | 0.112325   | 0.105769       | 0.110868       | 0.120629  |
| 0.132721 | 0.123834 | 0.117716  | 0.103875   | 0.106935       | 0.121941       | 0.108392  |
| 0.139714 | 0.123543 | 0.126748  | 0.112325   | 0.117133       | 0.124563       | 0.124417  |
| 0.132721 | 0.120047 | 0.122086  | 0.0948427  | 0.0941142      | 0.120192       | 0.114219  |
| 0.121503 | 0.107663 | 0.116404  | 0.117424   | 0.107955       | 0.107809       | 0.122232  |
| 0.131556 | 0.119172 | 0.113636  | 0.103001   | 0.106643       | 0.113199       | 0.113636  |
| 0.11116  | 0.104312 | 0.10373   | 0.0933858  | 0.0920746      | 0.0936772      | 0.104312  |
| 0.130099 | 0.119172 | 0.113345  | 0.0968823  | 0.100524       | 0.117279       | 0.114802  |
| 0.131119 | 0.109703 | 0.115239  | 0.107517   | 0.104749       | 0.0827506      | 0.111742  |
| 0.13447  | 0.11859  | 0.125     | 0.109411   | 0.103438       | 0.103584       | 0.120921  |
| 0.140443 | 0.101253 | 0.126603  | 0.119172   | 0.108829       | 0.121795       | 0.124854  |
| 0.132721 | 0.123543 | 0.11655   | 0.106789   | 0.106935       | 0.117279       | 0.109557  |
| 0.119027 | 0.111888 | 0.109557  | 0.0977564  | 0.103147       | 0.104749       | 0.10169   |
| 0.131265 | 0.120047 | 0.113636  | 0.106789   | 0.108683       | 0.122232       | 0.113636  |
| 0.11757  | 0.113345 | 0.099359  | 0.0933858  | 0.0979021      | 0.102127       | 0.101399  |
| 0.140589 | 0.136946 | 0.129953  | 0.127185   | 0.124126       | 0.138549       | 0.135198  |

|          |          |          |           |           |          |          |
|----------|----------|----------|-----------|-----------|----------|----------|
| 0.146125 | 0.13986  | 0.135781 | 0.127768  | 0.130536  | 0.144085 | 0.134907 |
| 0.125291 | 0.116404 | 0.107372 | 0.0984848 | 0.102127  | 0.108392 | 0.107663 |
| 0.121212 | 0.101253 | 0.101836 | 0.0906177 | 0.0869755 | 0.10373  | 0.097465 |
| 0.132139 | 0.112762 | 0.11655  | 0.0971737 | 0.0842075 | 0.107955 | 0.110723 |
| 0.127185 | 0.118881 | 0.115093 | 0.107663  | 0.11451   | 0.114948 | 0.107226 |
| 0.143648 | 0.137675 | 0.129225 | 0.121212  | 0.119318  | 0.136655 | 0.129808 |
| 0.121212 | 0.114365 | 0.100962 | 0.103147  | 0.0995047 | 0.111305 | 0.107663 |
| 0.121941 | 0.115093 | 0.103438 | 0.105041  | 0.101981  | 0.112034 | 0.1081   |
| 0.135781 | 0.116696 | 0.138549 | 0.134033  | 0.129225  | 0.136655 | 0.141754 |
| 0.134907 | 0.125728 | 0.125437 | 0.117133  | 0.118735  | 0.129371 | 0.11961  |
| 0.12602  | 0.111888 | 0.107517 | 0.103001  | 0.105769  | 0.10912  | 0.103147 |
| 0.13243  | 0.12296  | 0.11859  | 0.102418  | 0.0935315 | 0.11961  | 0.118881 |
| 0.120192 | 0.115093 | 0.103438 | 0.107955  | 0.109848  | 0.111742 | 0.105478 |
| 0.153409 | 0.134033 | 0.134615 | 0.126603  | 0.136655  | 0.140006 | 0.131993 |
| 0.134907 | 0.121649 | 0.118153 | 0.114219  | 0.110577  | 0.122378 | 0.11553  |
| 0.129371 | 0.112908 | 0.10708  | 0.100816  | 0.107955  | 0.111305 | 0.106789 |
| 0.124126 | 0.118153 | 0.112908 | 0.101981  | 0.097465  | 0.108974 | 0.107663 |
| 0.130682 | 0.10373  | 0.119464 | 0.105624  | 0.0909091 | 0.112617 | 0.114802 |
| 0.137675 | 0.13345  | 0.127331 | 0.126311  | 0.127331  | 0.135052 | 0.130245 |
| 0.141171 | 0.137821 | 0.126166 | 0.128351  | 0.123834  | 0.138549 | 0.134324 |
| 0.169289 | 0.163316 | 0.151369 | 0.147727  | 0.149621  | 0.145979 | 0.157197 |
| 0.123252 | 0.117279 | 0.106498 | 0.105186  | 0.103293  | 0.113054 | 0.108246 |
| 0.12296  | 0.114073 | 0.10708  | 0.099359  | 0.099796  | 0.110723 | 0.104458 |
| 0.125291 | 0.112034 | 0.104749 | 0.0981935 | 0.100087  | 0.104312 | 0.100962 |
| 0.137383 | 0.120921 | 0.129662 | 0.128934  | 0.122086  | 0.137092 | 0.131993 |
| 0.122523 | 0.115967 | 0.102855 | 0.0983392 | 0.104312  | 0.109411 | 0.101981 |
| 0.132867 | 0.123689 | 0.126894 | 0.123543  | 0.125728  | 0.126166 | 0.124563 |
| 0.136364 | 0.103584 | 0.113782 | 0.107517  | 0.090472  | 0.112179 | 0.113199 |
| 0.129516 | 0.11655  | 0.112471 | 0.10912   | 0.106352  | 0.11116  | 0.105478 |
| 0.139714 | 0.122378 | 0.143357 | 0.137383  | 0.136946  | 0.139132 | 0.143357 |
| 0.132139 | 0.122669 | 0.110723 | 0.107372  | 0.115676  | 0.116404 | 0.110431 |
| 0.140152 | 0.131847 | 0.128934 | 0.124709  | 0.124563  | 0.134033 | 0.127185 |
| 0.133887 | 0.127331 | 0.129079 | 0.11961   | 0.123834  | 0.133304 | 0.118298 |
| 0.12296  | 0.110577 | 0.110577 | 0.107517  | 0.106206  | 0.110431 | 0.106206 |
| 0.124417 | 0.114073 | 0.10271  | 0.102273  | 0.105041  | 0.105769 | 0.10067  |
| 0.126457 | 0.113782 | 0.107663 | 0.0964452 | 0.103875  | 0.111597 | 0.104458 |
| 0.140734 | 0.128351 | 0.129225 | 0.117716  | 0.12602   | 0.129371 | 0.123106 |
| 0.123106 | 0.111597 | 0.103147 | 0.0971737 | 0.0996503 | 0.10708  | 0.103147 |
| 0.142483 | 0.132721 | 0.131265 | 0.121795  | 0.121649  | 0.140734 | 0.129516 |
| 0.130536 | 0.123397 | 0.11757  | 0.110431  | 0.108246  | 0.11655  | 0.116113 |
| 0.12704  | 0.116113 | 0.111742 | 0.108392  | 0.114948  | 0.120921 | 0.11116  |
| 0.126166 | 0.119027 | 0.110577 | 0.105478  | 0.108246  | 0.113345 | 0.107955 |
| 0.130536 | 0.126311 | 0.113491 | 0.109557  | 0.112617  | 0.119172 | 0.115239 |
| 0.125874 | 0.115239 | 0.105332 | 0.101107  | 0.105332  | 0.108683 | 0.10271  |

|          |           |           |           |           |           |           |
|----------|-----------|-----------|-----------|-----------|-----------|-----------|
| 0.123252 | 0.112617  | 0.103875  | 0.100233  | 0.108829  | 0.109848  | 0.101253  |
| 0.141754 | 0.129662  | 0.130245  | 0.123689  | 0.125583  | 0.135052  | 0.128205  |
| 0.120192 | 0.109848  | 0.108974  | 0.0954254 | 0.0973193 | 0.0983392 | 0.103438  |
| 0.127914 | 0.116113  | 0.113199  | 0.0935315 | 0.0954254 | 0.0973193 | 0.102418  |
| 0.132284 | 0.095134  | 0.125437  | 0.116259  | 0.108537  | 0.122086  | 0.117279  |
| 0.124417 | 0.0523019 | 0.121941  | 0.117133  | 0.108829  | 0.115093  | 0.120484  |
| 0.141026 | 0.119901  | 0.122523  | 0.120921  | 0.113491  | 0.122378  | 0.125146  |
| 0.138549 | 0.126166  | 0.134615  | 0.127185  | 0.125874  | 0.129516  | 0.132576  |
| 0.11655  | 0.101544  | 0.112617  | 0.108683  | 0.103875  | 0.106352  | 0.113199  |
| 0.172786 | 0.161568  | 0.167686  | 0.173951  | 0.174097  | 0.160839  | 0.176136  |
| 0.120192 | 0.0903263 | 0.106935  | 0.0992133 | 0.10169   | 0.100087  | 0.0987762 |
| 0.147727 | 0.125146  | 0.130682  | 0.125291  | 0.118444  | 0.131119  | 0.13243   |
| 0.137821 | 0.118735  | 0.122523  | 0.111888  | 0.109994  | 0.121212  | 0.121066  |
| 0.129516 | 0.101107  | 0.136072  | 0.129225  | 0.121212  | 0.126894  | 0.128205  |
| 0.123543 | 0.108537  | 0.105915  | 0.101399  | 0.101836  | 0.102273  | 0.105915  |
| 0.13549  | 0.120192  | 0.127768  | 0.121795  | 0.119027  | 0.123252  | 0.124272  |
| 0.129079 | 0.110577  | 0.108246  | 0.104895  | 0.0989219 | 0.109848  | 0.110286  |
| 0.131556 | 0.111888  | 0.119172  | 0.11553   | 0.10169   | 0.123106  | 0.120047  |
| 0.118735 | 0.0990676 | 0.110723  | 0.105332  | 0.0952797 | 0.100379  | 0.112179  |
| 0.143502 | 0.117133  | 0.135198  | 0.126603  | 0.116841  | 0.133596  | 0.128788  |
| 0.122815 | 0.106935  | 0.109557  | 0.0930944 | 0.0871212 | 0.102418  | 0.101107  |
| 0.130828 | 0.100379  | 0.129225  | 0.126457  | 0.115822  | 0.124709  | 0.128642  |
| 0.115239 | 0.087704  | 0.113345  | 0.105041  | 0.099359  | 0.105332  | 0.106643  |
| 0.131993 | 0.132139  | 0.123689  | 0.110431  | 0.114365  | 0.129079  | 0.119901  |
| 0.131556 | 0.0865385 | 0.12296   | 0.116113  | 0.105478  | 0.120484  | 0.123834  |
| 0.119027 | 0.0810023 | 0.113636  | 0.10067   | 0.0944056 | 0.0910548 | 0.10373   |
| 0.14088  | 0.129371  | 0.136072  | 0.135052  | 0.13345   | 0.139714  | 0.139277  |
| 0.12296  | 0.0828963 | 0.116987  | 0.104604  | 0.097465  | 0.0973193 | 0.107663  |
| 0.129662 | 0.112908  | 0.106789  | 0.0996503 | 0.0971737 | 0.1081    | 0.108829  |
| 0.128934 | 0.109848  | 0.117424  | 0.103875  | 0.0976107 | 0.111742  | 0.106643  |
| 0.139423 | 0.105478  | 0.134324  | 0.124272  | 0.107809  | 0.131265  | 0.132867  |
| 0.122523 | 0.106935  | 0.121795  | 0.112325  | 0.108683  | 0.106206  | 0.117424  |
| 0.125728 | 0.106935  | 0.102855  | 0.0983392 | 0.0979021 | 0.10271   | 0.102273  |
| 0.126894 | 0.113054  | 0.109557  | 0.0992133 | 0.0938228 | 0.103293  | 0.104895  |
| 0.124709 | 0.0939685 | 0.109411  | 0.104312  | 0.0977564 | 0.105186  | 0.112034  |
| 0.140006 | 0.112762  | 0.123252  | 0.112325  | 0.0865385 | 0.116404  | 0.121212  |
| 0.118298 | 0.0584207 | 0.11757   | 0.109557  | 0.10271   | 0.103147  | 0.108246  |
| 0.121358 | 0.101107  | 0.0976107 | 0.0887238 | 0.0842075 | 0.100379  | 0.0964452 |
| 0.120775 | 0.0999417 | 0.10169   | 0.088141  | 0.0810023 | 0.0992133 | 0.0984848 |
| 0.126748 | 0.103584  | 0.110286  | 0.0906177 | 0.0823135 | 0.107809  | 0.10271   |
| 0.130245 | 0.122232  | 0.110577  | 0.105186  | 0.114365  | 0.115385  | 0.112034  |
| 0.140006 | 0.106352  | 0.125291  | 0.114656  | 0.101399  | 0.123689  | 0.123834  |
| 0.129079 | 0.106498  | 0.106206  | 0.0941142 | 0.0861014 | 0.108392  | 0.101253  |
| 0.120484 | 0.104604  | 0.102855  | 0.0878497 | 0.0810023 | 0.105915  | 0.10373   |

|          |           |          |           |           |           |           |
|----------|-----------|----------|-----------|-----------|-----------|-----------|
| 0.137383 | 0.113636  | 0.121795 | 0.116696  | 0.100524  | 0.116987  | 0.113345  |
| 0.122669 | 0.100379  | 0.105624 | 0.0938228 | 0.092803  | 0.107226  | 0.0983392 |
| 0.128497 | 0.115239  | 0.112325 | 0.108683  | 0.10912   | 0.118881  | 0.114073  |
| 0.121503 | 0.10708   | 0.125146 | 0.121503  | 0.114948  | 0.122378  | 0.128059  |
| 0.12704  | 0.104167  | 0.112908 | 0.103438  | 0.0861014 | 0.110723  | 0.107372  |
| 0.129516 | 0.106061  | 0.108974 | 0.0930944 | 0.0862471 | 0.10708   | 0.101107  |
| 0.128351 | 0.106352  | 0.110431 | 0.097465  | 0.0847902 | 0.107372  | 0.10373   |
| 0.117861 | 0.106643  | 0.101981 | 0.0895979 | 0.0871212 | 0.0916375 | 0.100233  |
| 0.139714 | 0.115093  | 0.123252 | 0.108246  | 0.0912005 | 0.125728  | 0.118298  |
| 0.122523 | 0.100524  | 0.103438 | 0.0895979 | 0.0827506 | 0.0980478 | 0.0961538 |
| 0.139569 | 0.123106  | 0.133304 | 0.126748  | 0.123397  | 0.130536  | 0.127768  |
| 0.140589 | 0.12704   | 0.125583 | 0.118444  | 0.115676  | 0.123689  | 0.127914  |
| 0.133596 | 0.12296   | 0.118007 | 0.106206  | 0.104021  | 0.125437  | 0.115093  |
| 0.12704  | 0.118735  | 0.108829 | 0.0979021 | 0.095134  | 0.104312  | 0.10912   |
| 0.122669 | 0.108246  | 0.107372 | 0.104312  | 0.0957168 | 0.107809  | 0.108537  |
| 0.124854 | 0.102273  | 0.107809 | 0.097465  | 0.0912005 | 0.100962  | 0.100524  |
| 0.130245 | 0.109411  | 0.109411 | 0.0958625 | 0.0942599 | 0.100524  | 0.104749  |
| 0.119172 | 0.111742  | 0.103584 | 0.0912005 | 0.0971737 | 0.102564  | 0.097465  |
| 0.121503 | 0.117279  | 0.103875 | 0.101981  | 0.106498  | 0.103438  | 0.103293  |
| 0.136655 | 0.124563  | 0.125437 | 0.11451   | 0.121941  | 0.127622  | 0.117861  |
| 0.128642 | 0.11451   | 0.112762 | 0.103875  | 0.106643  | 0.106206  | 0.109557  |
| 0.128788 | 0.125146  | 0.130973 | 0.116841  | 0.103584  | 0.129953  | 0.123397  |
| 0.139423 | 0.0979021 | 0.131702 | 0.125437  | 0.115676  | 0.132139  | 0.126166  |
| 0.193619 | 0.198427  | 0.178904 | 0.186626  | 0.188811  | 0.17701   | 0.183858  |
| 0.234557 | 0.236742  | 0.227418 | 0.231935  | 0.232663  | 0.22465   | 0.230332  |
| 0.120192 | 0.115967  | 0.10169  | 0.097465  | 0.111305  | 0.112034  | 0.0990676 |
| 0.11859  | 0.10912   | 0.108246 | 0.0996503 | 0.106206  | 0.110723  | 0.103584  |
| 0.120921 | 0.107663  | 0.102127 | 0.0981935 | 0.106206  | 0.085373  | 0.10067   |
| 0.124709 | 0.115822  | 0.105041 | 0.0973193 | 0.107955  | 0.106643  | 0.099796  |
| 0.131119 | 0.130682  | 0.117279 | 0.11655   | 0.100379  | 0.124709  | 0.124563  |
| 0.126166 | 0.114948  | 0.109703 | 0.100524  | 0.111742  | 0.114219  | 0.101836  |
| 0.153118 | 0.135198  | 0.145105 | 0.135927  | 0.140152  | 0.139423  | 0.136364  |
| 0.130536 | 0.113199  | 0.113782 | 0.107809  | 0.114656  | 0.110431  | 0.108537  |
| 0.137821 | 0.123106  | 0.124854 | 0.119755  | 0.122815  | 0.131702  | 0.122523  |
| 0.129516 | 0.125874  | 0.121795 | 0.121941  | 0.126166  | 0.124563  | 0.121795  |
| 0.138549 | 0.124417  | 0.127331 | 0.123689  | 0.126748  | 0.131847  | 0.124709  |
| 0.143794 | 0.134324  | 0.129953 | 0.12602   | 0.121503  | 0.133304  | 0.125     |
| 0.129225 | 0.114219  | 0.113054 | 0.106498  | 0.112762  | 0.108537  | 0.10169   |
| 0.127768 | 0.113054  | 0.111888 | 0.10271   | 0.107517  | 0.110286  | 0.0987762 |
| 0.125291 | 0.116696  | 0.112325 | 0.108683  | 0.111451  | 0.11451   | 0.104749  |
| 0.12296  | 0.110868  | 0.108246 | 0.099359  | 0.10708   | 0.109557  | 0.101253  |
| 0.126457 | 0.114365  | 0.107955 | 0.101399  | 0.10912   | 0.108683  | 0.0968823 |
| 0.125146 | 0.112762  | 0.115093 | 0.105332  | 0.111888  | 0.110868  | 0.104021  |
| 0.136072 | 0.124272  | 0.12602  | 0.121212  | 0.119318  | 0.128788  | 0.119027  |

|          |          |           |           |           |          |           |
|----------|----------|-----------|-----------|-----------|----------|-----------|
| 0.141026 | 0.128351 | 0.135344  | 0.126748  | 0.131265  | 0.138112 | 0.126603  |
| 0.136218 | 0.113636 | 0.113928  | 0.109703  | 0.115676  | 0.116113 | 0.107226  |
| 0.12704  | 0.112908 | 0.110577  | 0.10373   | 0.110286  | 0.1081   | 0.106789  |
| 0.144522 | 0.128059 | 0.128059  | 0.123252  | 0.128351  | 0.129953 | 0.117861  |
| 0.125583 | 0.113491 | 0.105332  | 0.0990676 | 0.10912   | 0.109848 | 0.0957168 |
| 0.148747 | 0.137238 | 0.141026  | 0.135052  | 0.138986  | 0.139423 | 0.125583  |
| 0.144085 | 0.132284 | 0.128788  | 0.115822  | 0.109266  | 0.13243  | 0.129371  |
| 0.134324 | 0.128059 | 0.13039   | 0.127622  | 0.127185  | 0.131993 | 0.121358  |
| 0.123543 | 0.106789 | 0.105624  | 0.100233  | 0.105915  | 0.108974 | 0.0989219 |
| 0.122523 | 0.107226 | 0.108392  | 0.0933858 | 0.102855  | 0.110286 | 0.0955711 |
| 0.138403 | 0.118735 | 0.122232  | 0.11655   | 0.121941  | 0.124417 | 0.117279  |
| 0.134178 | 0.121795 | 0.120047  | 0.10912   | 0.120047  | 0.122815 | 0.110723  |
| 0.140297 | 0.119464 | 0.126166  | 0.121941  | 0.128205  | 0.126894 | 0.11451   |
| 0.131702 | 0.112034 | 0.117279  | 0.107517  | 0.120192  | 0.111888 | 0.100962  |
| 0.127185 | 0.114219 | 0.116841  | 0.108537  | 0.115093  | 0.11553  | 0.102273  |
| 0.137383 | 0.117716 | 0.118881  | 0.113782  | 0.121503  | 0.118153 | 0.111888  |
| 0.145833 | 0.125    | 0.131119  | 0.123689  | 0.123252  | 0.127185 | 0.121212  |
| 0.139423 | 0.121795 | 0.126457  | 0.121066  | 0.12704   | 0.12398  | 0.120921  |
| 0.14627  | 0.129516 | 0.130682  | 0.124417  | 0.132721  | 0.134615 | 0.127477  |
| 0.133013 | 0.123252 | 0.126166  | 0.120484  | 0.125583  | 0.128351 | 0.124126  |
| 0.128934 | 0.11014  | 0.113928  | 0.102418  | 0.113636  | 0.110286 | 0.0987762 |
| 0.132139 | 0.126457 | 0.126457  | 0.120192  | 0.123252  | 0.132721 | 0.118298  |
| 0.12296  | 0.109703 | 0.110286  | 0.102855  | 0.109411  | 0.107517 | 0.102418  |
| 0.121649 | 0.111597 | 0.103147  | 0.10067   | 0.102564  | 0.105624 | 0.106935  |
| 0.123106 | 0.112471 | 0.110431  | 0.105041  | 0.110723  | 0.108246 | 0.0996503 |
| 0.120629 | 0.110868 | 0.107372  | 0.10169   | 0.107372  | 0.108392 | 0.103293  |
| 0.122378 | 0.10912  | 0.108829  | 0.105478  | 0.107372  | 0.112179 | 0.0986305 |
| 0.144376 | 0.127622 | 0.131702  | 0.12398   | 0.132576  | 0.129808 | 0.125583  |
| 0.125    | 0.11553  | 0.114073  | 0.110431  | 0.11116   | 0.111305 | 0.105332  |
| 0.143357 | 0.127477 | 0.128059  | 0.119172  | 0.128351  | 0.129079 | 0.118735  |
| 0.12704  | 0.113199 | 0.109411  | 0.104312  | 0.107955  | 0.115385 | 0.102418  |
| 0.137092 | 0.114802 | 0.123834  | 0.116113  | 0.120921  | 0.123689 | 0.115385  |
| 0.127622 | 0.119318 | 0.118153  | 0.102273  | 0.104167  | 0.118298 | 0.11961   |
| 0.130828 | 0.123106 | 0.108829  | 0.103438  | 0.0980478 | 0.109266 | 0.108829  |
| 0.129808 | 0.109848 | 0.11655   | 0.0995047 | 0.100816  | 0.107663 | 0.110431  |
| 0.129371 | 0.121066 | 0.120192  | 0.108974  | 0.100962  | 0.11859  | 0.110868  |
| 0.137675 | 0.123834 | 0.11655   | 0.105624  | 0.11014   | 0.116404 | 0.110431  |
| 0.124272 | 0.110431 | 0.106352  | 0.097465  | 0.0981935 | 0.103584 | 0.109266  |
| 0.141754 | 0.125291 | 0.127331  | 0.112034  | 0.0821678 | 0.126603 | 0.128205  |
| 0.151224 | 0.127477 | 0.136801  | 0.125874  | 0.12398   | 0.136655 | 0.131847  |
| 0.125    | 0.109703 | 0.0983392 | 0.0836247 | 0.0770688 | 0.103147 | 0.099796  |
| 0.135052 | 0.135781 | 0.123252  | 0.118735  | 0.0955711 | 0.133887 | 0.124417  |
| 0.136364 | 0.122232 | 0.123397  | 0.0955711 | 0.0651224 | 0.119464 | 0.121066  |
| 0.133741 | 0.136509 | 0.124563  | 0.11451   | 0.0960082 | 0.129371 | 0.120775  |

|          |          |          |           |           |          |          |
|----------|----------|----------|-----------|-----------|----------|----------|
| 0.125291 | 0.118153 | 0.114073 | 0.106352  | 0.0820221 | 0.116259 | 0.113782 |
| 0.131119 | 0.121941 | 0.115822 | 0.0952797 | 0.0747378 | 0.118007 | 0.11553  |
| 0.133013 | 0.117424 | 0.119755 | 0.0977564 | 0.0708042 | 0.114365 | 0.118881 |
| 0.134907 | 0.128059 | 0.122232 | 0.116259  | 0.0925117 | 0.130828 | 0.119027 |
| 0.138403 | 0.135635 | 0.130099 | 0.119755  | 0.0968823 | 0.135781 | 0.128934 |
| 0.139277 | 0.121941 | 0.119027 | 0.090035  | 0.0744464 | 0.11451  | 0.121649 |
| 0.123543 | 0.116987 | 0.110286 | 0.101981  | 0.0799825 | 0.113054 | 0.110868 |
| 0.140589 | 0.126166 | 0.130536 | 0.124854  | 0.136655  | 0.133596 | 0.124417 |
| 0.138986 | 0.124563 | 0.127477 | 0.107809  | 0.0840618 | 0.125    | 0.12602  |
| 0.119755 | 0.111742 | 0.107955 | 0.094697  | 0.0802739 | 0.104895 | 0.104749 |
| 0.217512 | 0.222319 | 0.207168 | 0.211393  | 0.215035  | 0.20236  | 0.208333 |
| 0.133304 | 0.124709 | 0.118298 | 0.112034  | 0.0850816 | 0.120775 | 0.115967 |
| 0.133887 | 0.114219 | 0.11014  | 0.0893065 | 0.0775058 | 0.110286 | 0.109266 |
| 0.13986  | 0.134761 | 0.125146 | 0.115093  | 0.0948427 | 0.132867 | 0.128642 |
| 0.130536 | 0.118444 | 0.113782 | 0.0932401 | 0.0837704 | 0.106935 | 0.114948 |
| 0.140152 | 0.126311 | 0.128351 | 0.112762  | 0.0814394 | 0.125    | 0.126603 |
| 0.129662 | 0.126311 | 0.113782 | 0.103438  | 0.0890152 | 0.119755 | 0.110868 |
| 0.126311 | 0.116259 | 0.11451  | 0.103584  | 0.0821678 | 0.116404 | 0.111305 |
| 0.13447  | 0.118298 | 0.120921 | 0.0965909 | 0.0673077 | 0.116113 | 0.118881 |
| 0.139277 | 0.128642 | 0.11961  | 0.111014  | 0.097465  | 0.112471 | 0.121066 |
| 0.135927 | 0.130828 | 0.124126 | 0.11553   | 0.0952797 | 0.130973 | 0.126748 |
| 0.132867 | 0.121941 | 0.124854 | 0.11451   | 0.0922203 | 0.130828 | 0.125146 |
| 0.138112 | 0.127477 | 0.123397 | 0.114802  | 0.0945513 | 0.128497 | 0.120484 |
| 0.128205 | 0.116696 | 0.110868 | 0.0973193 | 0.0895979 | 0.113345 | 0.107372 |
| 0.131993 | 0.128934 | 0.11553  | 0.102855  | 0.0898893 | 0.119755 | 0.111451 |
| 0.139423 | 0.135781 | 0.125583 | 0.114365  | 0.094697  | 0.132139 | 0.128205 |
| 0.122378 | 0.122523 | 0.110868 | 0.104021  | 0.0849359 | 0.118007 | 0.109411 |
| 0.143065 | 0.131265 | 0.129808 | 0.130828  | 0.128059  | 0.131119 | 0.125146 |
| 0.13884  | 0.130536 | 0.131702 | 0.123689  | 0.117716  | 0.127185 | 0.129953 |
| 0.135635 | 0.120629 | 0.119755 | 0.106498  | 0.100816  | 0.115239 | 0.115385 |
| 0.134178 | 0.125874 | 0.120047 | 0.092803  | 0.0766317 | 0.125437 | 0.121795 |
| 0.130536 | 0.121649 | 0.119318 | 0.114802  | 0.112325  | 0.122378 | 0.121941 |
| 0.14088  | 0.122378 | 0.119755 | 0.107955  | 0.107809  | 0.126311 | 0.121212 |
| 0.13243  | 0.126166 | 0.120047 | 0.117861  | 0.114802  | 0.125146 | 0.122378 |
| 0.136509 | 0.131119 | 0.127914 | 0.126603  | 0.11859   | 0.128351 | 0.134033 |
| 0.123543 | 0.111742 | 0.108537 | 0.0914918 | 0.0878497 | 0.105478 | 0.101544 |
| 0.139132 | 0.131119 | 0.120921 | 0.119318  | 0.107517  | 0.131847 | 0.126457 |
| 0.137821 | 0.137383 | 0.134761 | 0.129079  | 0.127185  | 0.125291 | 0.135927 |
| 0.131993 | 0.102127 | 0.117861 | 0.105186  | 0.0901807 | 0.107809 | 0.114073 |
| 0.125    | 0.121649 | 0.11757  | 0.113636  | 0.109994  | 0.118298 | 0.110868 |
| 0.151661 | 0.136364 | 0.139569 | 0.137675  | 0.141608  | 0.137092 | 0.13345  |
| 0.133887 | 0.128788 | 0.118298 | 0.114365  | 0.117424  | 0.123397 | 0.120629 |
| 0.146562 | 0.139423 | 0.139714 | 0.12296   | 0.107372  | 0.13549  | 0.133596 |
| 0.134761 | 0.125    | 0.124417 | 0.117279  | 0.101981  | 0.125437 | 0.123834 |

|          |          |           |           |           |          |          |
|----------|----------|-----------|-----------|-----------|----------|----------|
| 0.136364 | 0.116696 | 0.118735  | 0.112179  | 0.104749  | 0.119755 | 0.119318 |
| 0.135927 | 0.127914 | 0.127331  | 0.117861  | 0.106352  | 0.124854 | 0.129662 |
| 0.136364 | 0.116113 | 0.119318  | 0.104021  | 0.0849359 | 0.112471 | 0.120192 |
| 0.140297 | 0.119172 | 0.128788  | 0.119027  | 0.113928  | 0.12398  | 0.122086 |
| 0.139423 | 0.129662 | 0.125583  | 0.110868  | 0.0941142 | 0.126894 | 0.117716 |
| 0.14088  | 0.123834 | 0.131119  | 0.122523  | 0.121503  | 0.132721 | 0.12296  |
| 0.140297 | 0.117716 | 0.130536  | 0.123397  | 0.107226  | 0.129225 | 0.126457 |
| 0.133887 | 0.120047 | 0.124126  | 0.11553   | 0.117133  | 0.118153 | 0.123252 |
| 0.145542 | 0.129662 | 0.138112  | 0.133013  | 0.127622  | 0.14088  | 0.138695 |
| 0.128059 | 0.118007 | 0.122378  | 0.100379  | 0.0708042 | 0.11961  | 0.113928 |
| 0.13039  | 0.112762 | 0.117716  | 0.104167  | 0.100816  | 0.113491 | 0.111014 |
| 0.136509 | 0.117133 | 0.119464  | 0.122523  | 0.116259  | 0.125728 | 0.126166 |
| 0.127768 | 0.106643 | 0.11859   | 0.100379  | 0.0766317 | 0.113782 | 0.111888 |
| 0.144231 | 0.134178 | 0.135052  | 0.128205  | 0.127477  | 0.136072 | 0.137675 |
| 0.153263 | 0.135052 | 0.148164  | 0.143357  | 0.132139  | 0.149767 | 0.146999 |
| 0.135198 | 0.121358 | 0.127477  | 0.114219  | 0.12602   | 0.129662 | 0.121358 |
| 0.13447  | 0.120047 | 0.12296   | 0.112325  | 0.119755  | 0.125437 | 0.112179 |
| 0.138695 | 0.13243  | 0.129808  | 0.11859   | 0.123689  | 0.131993 | 0.121649 |
| 0.139132 | 0.134324 | 0.126166  | 0.119901  | 0.092366  | 0.132721 | 0.122086 |
| 0.139714 | 0.120629 | 0.131702  | 0.119901  | 0.123252  | 0.130099 | 0.116259 |
| 0.133887 | 0.133159 | 0.135781  | 0.120484  | 0.101981  | 0.134761 | 0.132867 |
| 0.136509 | 0.128788 | 0.129371  | 0.123397  | 0.104312  | 0.131847 | 0.13345  |
| 0.137529 | 0.11961  | 0.120775  | 0.10373   | 0.0910548 | 0.120629 | 0.120192 |
| 0.157634 | 0.148747 | 0.1537    | 0.151224  | 0.156323  | 0.15676  | 0.151078 |
| 0.137821 | 0.12398  | 0.12602   | 0.116259  | 0.0977564 | 0.124417 | 0.11961  |
| 0.139569 | 0.13243  | 0.136218  | 0.121212  | 0.105041  | 0.13141  | 0.135344 |
| 0.133013 | 0.115676 | 0.120338  | 0.106498  | 0.103438  | 0.116404 | 0.11014  |
| 0.141463 | 0.13141  | 0.133741  | 0.121066  | 0.122378  | 0.132139 | 0.122669 |
| 0.128642 | 0.119172 | 0.113928  | 0.109703  | 0.0888695 | 0.118153 | 0.118881 |
| 0.128205 | 0.128934 | 0.125728  | 0.121503  | 0.124563  | 0.113636 | 0.133304 |
| 0.137966 | 0.150058 | 0.135781  | 0.135635  | 0.138112  | 0.147873 | 0.13549  |
| 0.126166 | 0.126311 | 0.108537  | 0.110431  | 0.119901  | 0.128788 | 0.108537 |
| 0.139714 | 0.136946 | 0.115676  | 0.121358  | 0.13141   | 0.125146 | 0.122669 |
| 0.153263 | 0.151952 | 0.139423  | 0.135198  | 0.146416  | 0.123834 | 0.134761 |
| 0.149476 | 0.148164 | 0.129225  | 0.128788  | 0.131847  | 0.128205 | 0.134178 |
| 0.135052 | 0.110431 | 0.121795  | 0.112034  | 0.126748  | 0.11553  | 0.116841 |
| 0.132867 | 0.137675 | 0.125728  | 0.126457  | 0.126894  | 0.134907 | 0.126603 |
| 0.119755 | 0.118444 | 0.106206  | 0.104312  | 0.101544  | 0.109266 | 0.108829 |
| 0.118153 | 0.124126 | 0.106935  | 0.106789  | 0.106352  | 0.10708  | 0.111597 |
| 0.127622 | 0.121358 | 0.116987  | 0.0984848 | 0.0866841 | 0.115967 | 0.115822 |
| 0.126166 | 0.12602  | 0.10067   | 0.104895  | 0.119027  | 0.121795 | 0.103001 |
| 0.129225 | 0.120629 | 0.108683  | 0.10708   | 0.106935  | 0.11757  | 0.11014  |
| 0.119027 | 0.120047 | 0.0967366 | 0.0995047 | 0.0990676 | 0.106206 | 0.10373  |
| 0.130682 | 0.12704  | 0.111888  | 0.0968823 | 0.112471  | 0.120192 | 0.112471 |



|          |          |          |           |           |          |           |
|----------|----------|----------|-----------|-----------|----------|-----------|
| 0.128205 | 0.125437 | 0.110577 | 0.111597  | 0.100087  | 0.11014  | 0.119318  |
| 0.116259 | 0.107955 | 0.106206 | 0.0879953 | 0.0776515 | 0.104021 | 0.0989219 |
| 0.132867 | 0.129225 | 0.106498 | 0.106643  | 0.11961   | 0.122086 | 0.107372  |
| 0.126311 | 0.126166 | 0.10373  | 0.105915  | 0.113636  | 0.124854 | 0.105478  |
| 0.134178 | 0.117716 | 0.122378 | 0.114948  | 0.123834  | 0.121066 | 0.114219  |
| 0.213432 | 0.2162   | 0.203089 | 0.209936  | 0.20979   | 0.197115 | 0.209207  |
| 0.148164 | 0.1419   | 0.126457 | 0.130973  | 0.136364  | 0.149038 | 0.131702  |
| 0.135781 | 0.13039  | 0.125728 | 0.121212  | 0.122523  | 0.132576 | 0.114948  |
| 0.122523 | 0.127914 | 0.116841 | 0.109994  | 0.11451   | 0.125146 | 0.114802  |
| 0.208188 | 0.213578 | 0.195221 | 0.204108  | 0.206294  | 0.195659 | 0.201923  |
| 0.11961  | 0.113636 | 0.122378 | 0.112325  | 0.122086  | 0.106789 | 0.11655   |
| 0.134324 | 0.121941 | 0.114948 | 0.111597  | 0.119318  | 0.120629 | 0.110577  |
| 0.11859  | 0.124272 | 0.117279 | 0.113054  | 0.11961   | 0.125291 | 0.109994  |
| 0.12398  | 0.125    | 0.107809 | 0.109703  | 0.097028  | 0.11553  | 0.118881  |
| 0.245775 | 0.250583 | 0.238345 | 0.242279  | 0.244464  | 0.235577 | 0.243881  |
| 0.117424 | 0.107955 | 0.116987 | 0.116259  | 0.108246  | 0.11859  | 0.122815  |
| 0.129953 | 0.113491 | 0.116696 | 0.106935  | 0.117861  | 0.113928 | 0.105041  |
| 0.133741 | 0.130099 | 0.119901 | 0.115676  | 0.12398   | 0.129953 | 0.111742  |
| 0.130828 | 0.128351 | 0.116987 | 0.112471  | 0.121941  | 0.124709 | 0.108537  |
| 0.117133 | 0.110577 | 0.118153 | 0.119172  | 0.109411  | 0.11655  | 0.123689  |
| 0.126457 | 0.124563 | 0.119318 | 0.111888  | 0.116404  | 0.106352 | 0.116113  |
| 0.132576 | 0.115239 | 0.118444 | 0.109266  | 0.121649  | 0.114802 | 0.107372  |
| 0.127768 | 0.123834 | 0.101107 | 0.103293  | 0.11859   | 0.122232 | 0.104604  |
| 0.124709 | 0.129516 | 0.113199 | 0.114802  | 0.116404  | 0.124417 | 0.114656  |
| 0.11859  | 0.122815 | 0.10708  | 0.104312  | 0.0942599 | 0.109557 | 0.110577  |
| 0.123689 | 0.122669 | 0.101107 | 0.101544  | 0.113345  | 0.120775 | 0.104895  |
| 0.12296  | 0.109994 | 0.110577 | 0.0879953 | 0.0362762 | 0.107517 | 0.11116   |
| 0.135635 | 0.14831  | 0.135781 | 0.135344  | 0.139277  | 0.148456 | 0.138112  |
| 0.120192 | 0.105478 | 0.121503 | 0.116987  | 0.114219  | 0.119901 | 0.123834  |
| 0.136218 | 0.127914 | 0.121503 | 0.120192  | 0.123252  | 0.125146 | 0.113345  |
| 0.193619 | 0.196096 | 0.178613 | 0.182255  | 0.185315  | 0.169726 | 0.179779  |
| 0.202652 | 0.208042 | 0.189103 | 0.19595   | 0.198427  | 0.186917 | 0.194639  |
| 0.127185 | 0.126457 | 0.111597 | 0.111451  | 0.0964452 | 0.110286 | 0.119172  |
| 0.118444 | 0.120047 | 0.104895 | 0.105332  | 0.0912005 | 0.110286 | 0.109266  |
| 0.13884  | 0.134033 | 0.12704  | 0.124272  | 0.119172  | 0.13243  | 0.120629  |
| 0.131847 | 0.116841 | 0.119172 | 0.108829  | 0.118007  | 0.112034 | 0.1081    |
| 0.117133 | 0.104458 | 0.119901 | 0.118298  | 0.114656  | 0.121503 | 0.122232  |
| 0.130682 | 0.131993 | 0.118881 | 0.123397  | 0.125583  | 0.135344 | 0.119464  |
| 0.219551 | 0.227273 | 0.209207 | 0.217512  | 0.218823  | 0.207314 | 0.216492  |
| 0.127768 | 0.122669 | 0.111305 | 0.107663  | 0.112179  | 0.118153 | 0.104021  |
| 0.206585 | 0.207022 | 0.200321 | 0.201049  | 0.205565  | 0.188228 | 0.204983  |
| 0.128059 | 0.10373  | 0.109266 | 0.0977564 | 0.113636  | 0.10271  | 0.102564  |
| 0.126457 | 0.118735 | 0.110286 | 0.103147  | 0.108829  | 0.110723 | 0.108537  |
| 0.115239 | 0.120047 | 0.105478 | 0.10912   | 0.109848  | 0.11553  | 0.111888  |

|          |          |          |           |           |          |           |
|----------|----------|----------|-----------|-----------|----------|-----------|
| 0.116987 | 0.116259 | 0.103147 | 0.100087  | 0.0909091 | 0.103001 | 0.11014   |
| 0.206876 | 0.210227 | 0.195659 | 0.202214  | 0.200029  | 0.191142 | 0.196533  |
| 0.137529 | 0.137966 | 0.115239 | 0.115676  | 0.127185  | 0.132576 | 0.119318  |
| 0.130245 | 0.110577 | 0.117861 | 0.106061  | 0.116987  | 0.112762 | 0.107663  |
| 0.128497 | 0.13039  | 0.109703 | 0.109266  | 0.122523  | 0.131993 | 0.111451  |
| 0.125    | 0.126311 | 0.121358 | 0.109266  | 0.116404  | 0.119755 | 0.112034  |
| 0.124709 | 0.123397 | 0.105041 | 0.105478  | 0.0942599 | 0.107226 | 0.111742  |
| 0.126311 | 0.106061 | 0.115093 | 0.104749  | 0.120047  | 0.105041 | 0.105478  |
| 0.129516 | 0.118881 | 0.115385 | 0.110868  | 0.121212  | 0.10912  | 0.112471  |
| 0.134178 | 0.126748 | 0.117716 | 0.11757   | 0.121503  | 0.128351 | 0.115385  |
| 0.124272 | 0.121503 | 0.100233 | 0.0971737 | 0.112762  | 0.115239 | 0.0996503 |
| 0.129371 | 0.111742 | 0.117861 | 0.108392  | 0.118153  | 0.112762 | 0.109703  |
| 0.191871 | 0.196387 | 0.175991 | 0.17905   | 0.184732  | 0.171766 | 0.178322  |
| 0.13549  | 0.13039  | 0.120775 | 0.119172  | 0.12602   | 0.132284 | 0.11116   |
| 0.122815 | 0.134033 | 0.121795 | 0.120484  | 0.124417  | 0.129808 | 0.123543  |
| 0.128205 | 0.125437 | 0.11116  | 0.111014  | 0.116113  | 0.123252 | 0.109703  |
| 0.118735 | 0.107809 | 0.117716 | 0.111451  | 0.115093  | 0.107372 | 0.120921  |
| 0.128642 | 0.125    | 0.107226 | 0.108246  | 0.120338  | 0.130973 | 0.107809  |
| 0.129808 | 0.104604 | 0.115093 | 0.106206  | 0.120921  | 0.112034 | 0.108683  |
| 0.118007 | 0.108246 | 0.109703 | 0.0981935 | 0.110577  | 0.106935 | 0.102418  |
| 0.133741 | 0.11961  | 0.123397 | 0.116259  | 0.123689  | 0.121503 | 0.112617  |
| 0.118153 | 0.131702 | 0.115676 | 0.114073  | 0.118298  | 0.12398  | 0.115385  |
| 0.129808 | 0.126748 | 0.111888 | 0.10912   | 0.118007  | 0.120192 | 0.103147  |
| 0.126748 | 0.124854 | 0.107955 | 0.107517  | 0.099796  | 0.112762 | 0.112034  |
| 0.118444 | 0.125    | 0.115385 | 0.109994  | 0.118007  | 0.124854 | 0.108974  |
| 0.127331 | 0.133304 | 0.126894 | 0.123543  | 0.128642  | 0.137821 | 0.12398   |
| 0.115385 | 0.104458 | 0.113199 | 0.107517  | 0.104749  | 0.106352 | 0.112034  |
| 0.142628 | 0.141026 | 0.122378 | 0.124854  | 0.134033  | 0.144376 | 0.123543  |
| 0.122232 | 0.122669 | 0.104604 | 0.104458  | 0.0938228 | 0.10912  | 0.111305  |
| 0.120775 | 0.12296  | 0.1081   | 0.107955  | 0.11451   | 0.121649 | 0.105478  |
| 0.127914 | 0.124563 | 0.105915 | 0.105186  | 0.11757   | 0.110431 | 0.107372  |
| 0.136655 | 0.11961  | 0.123689 | 0.11655   | 0.127477  | 0.121212 | 0.116404  |
| 0.186772 | 0.192453 | 0.179633 | 0.182401  | 0.18954   | 0.172203 | 0.180798  |
| 0.124272 | 0.109848 | 0.112179 | 0.101253  | 0.113054  | 0.106498 | 0.105478  |
| 0.119318 | 0.115967 | 0.102564 | 0.0939685 | 0.105478  | 0.109411 | 0.0976107 |
| 0.13447  | 0.125583 | 0.118298 | 0.116696  | 0.120047  | 0.125437 | 0.111597  |
| 0.180798 | 0.187937 | 0.166084 | 0.164481  | 0.172786  | 0.158362 | 0.170455  |
| 0.125291 | 0.113199 | 0.128059 | 0.126748  | 0.121941  | 0.124709 | 0.130973  |
| 0.136655 | 0.120484 | 0.137675 | 0.13549   | 0.128934  | 0.137821 | 0.14292   |
| 0.136509 | 0.148893 | 0.136364 | 0.135344  | 0.140152  | 0.150495 | 0.138695  |
| 0.117861 | 0.107226 | 0.108974 | 0.105624  | 0.10373   | 0.101836 | 0.108974  |
| 0.129662 | 0.128642 | 0.106206 | 0.109557  | 0.119901  | 0.127331 | 0.10912   |
| 0.210227 | 0.213287 | 0.196387 | 0.2044    | 0.208333  | 0.193328 | 0.203671  |
| 0.127477 | 0.129953 | 0.112179 | 0.118735  | 0.118007  | 0.128642 | 0.109557  |

|          |          |          |           |           |          |           |
|----------|----------|----------|-----------|-----------|----------|-----------|
| 0.131702 | 0.133013 | 0.111742 | 0.115093  | 0.124854  | 0.129371 | 0.112325  |
| 0.126457 | 0.113491 | 0.115239 | 0.106352  | 0.117279  | 0.11014  | 0.107955  |
| 0.166084 | 0.174388 | 0.154283 | 0.159674  | 0.164481  | 0.151807 | 0.154283  |
| 0.116259 | 0.119027 | 0.106498 | 0.0952797 | 0.104458  | 0.112471 | 0.104167  |
| 0.144085 | 0.146853 | 0.138695 | 0.137383  | 0.134615  | 0.149913 | 0.138986  |
| 0.129225 | 0.115093 | 0.115676 | 0.101253  | 0.0874126 | 0.107663 | 0.111014  |
| 0.190414 | 0.193765 | 0.174534 | 0.179341  | 0.18648   | 0.17264  | 0.177739  |
| 0.120484 | 0.107517 | 0.113928 | 0.112908  | 0.109848  | 0.112617 | 0.115385  |
| 0.122815 | 0.112762 | 0.101399 | 0.0750291 | 0.087704  | 0.104749 | 0.0981935 |
| 0.124417 | 0.123397 | 0.105915 | 0.106061  | 0.112617  | 0.117716 | 0.105624  |
| 0.123106 | 0.124417 | 0.115385 | 0.112034  | 0.117424  | 0.11961  | 0.104895  |
| 0.135052 | 0.12296  | 0.117133 | 0.114073  | 0.11859   | 0.118153 | 0.110723  |
| 0.131265 | 0.129371 | 0.110723 | 0.11553   | 0.115093  | 0.123689 | 0.116259  |
| 0.120629 | 0.119901 | 0.107663 | 0.102855  | 0.088141  | 0.107226 | 0.111451  |
| 0.189831 | 0.192308 | 0.175991 | 0.17905   | 0.186772  | 0.171183 | 0.176282  |
| 0.125    | 0.118444 | 0.118444 | 0.112762  | 0.118444  | 0.122669 | 0.110868  |
| 0.124563 | 0.124126 | 0.104021 | 0.0925117 | 0.110431  | 0.109411 | 0.0999417 |
| 0.209207 | 0.215181 | 0.198572 | 0.204254  | 0.204108  | 0.193473 | 0.202943  |
| 0.134615 | 0.13039  | 0.119027 | 0.115967  | 0.123689  | 0.129371 | 0.11116   |
| 0.122815 | 0.118298 | 0.107809 | 0.106206  | 0.0909091 | 0.110286 | 0.113636  |
| 0.120484 | 0.119172 | 0.099359 | 0.0986305 | 0.0862471 | 0.107955 | 0.107517  |
| 0.13549  | 0.133887 | 0.121649 | 0.124709  | 0.130682  | 0.140443 | 0.121649  |
| 0.189394 | 0.195076 | 0.174679 | 0.17803   | 0.184003  | 0.171037 | 0.177302  |
| 0.135927 | 0.115967 | 0.119172 | 0.110868  | 0.121212  | 0.118735 | 0.106352  |
| 0.124854 | 0.128497 | 0.120047 | 0.119318  | 0.123834  | 0.133596 | 0.117424  |
| 0.124272 | 0.121212 | 0.102564 | 0.103001  | 0.0871212 | 0.108537 | 0.109266  |
| 0.119901 | 0.121795 | 0.102855 | 0.0986305 | 0.0897436 | 0.107955 | 0.107517  |
| 0.119172 | 0.119027 | 0.103293 | 0.100233  | 0.0878497 | 0.10373  | 0.111742  |
| 0.127185 | 0.123543 | 0.103147 | 0.10271   | 0.113928  | 0.122523 | 0.10373   |
| 0.114802 | 0.108537 | 0.10271  | 0.0891608 | 0.0782343 | 0.105186 | 0.097465  |
| 0.118007 | 0.107663 | 0.119027 | 0.115385  | 0.107955  | 0.115967 | 0.124563  |
| 0.129079 | 0.131556 | 0.124854 | 0.121503  | 0.127768  | 0.135198 | 0.125728  |
| 0.118881 | 0.108537 | 0.116696 | 0.111305  | 0.111742  | 0.112179 | 0.116696  |
| 0.131556 | 0.129953 | 0.12704  | 0.113199  | 0.120047  | 0.129225 | 0.117133  |
| 0.19697  | 0.198281 | 0.179924 | 0.184732  | 0.191579  | 0.173951 | 0.182547  |
| 0.118735 | 0.120921 | 0.110431 | 0.10912   | 0.113636  | 0.119027 | 0.107809  |
| 0.134615 | 0.133887 | 0.114073 | 0.117133  | 0.126311  | 0.137529 | 0.115822  |
| 0.118735 | 0.118298 | 0.101981 | 0.099796  | 0.0888695 | 0.10912  | 0.105769  |
| 0.115967 | 0.105041 | 0.10271  | 0.0879953 | 0.0744464 | 0.101981 | 0.100379  |
| 0.113054 | 0.113199 | 0.110868 | 0.107517  | 0.106206  | 0.102273 | 0.110577  |
| 0.131556 | 0.116841 | 0.11859  | 0.10912   | 0.125874  | 0.118444 | 0.107226  |
| 0.134761 | 0.135198 | 0.120921 | 0.121941  | 0.122378  | 0.135344 | 0.121212  |
| 0.121795 | 0.130099 | 0.112908 | 0.110431  | 0.116404  | 0.119755 | 0.111742  |
| 0.120047 | 0.113199 | 0.110868 | 0.0949883 | 0.101544  | 0.101981 | 0.102127  |

|           |          |           |           |           |           |           |
|-----------|----------|-----------|-----------|-----------|-----------|-----------|
| 0.117279  | 0.111014 | 0.106935  | 0.0922203 | 0.0932401 | 0.0980478 | 0.0984848 |
| 0.118881  | 0.11553  | 0.101253  | 0.0766317 | 0.0843531 | 0.100524  | 0.0962995 |
| 0.127185  | 0.103147 | 0.112762  | 0.102127  | 0.118007  | 0.102127  | 0.106935  |
| 0.124126  | 0.109994 | 0.128351  | 0.119464  | 0.112908  | 0.123543  | 0.128351  |
| 0.133596  | 0.117133 | 0.118007  | 0.105915  | 0.122378  | 0.112034  | 0.103147  |
| 0.124709  | 0.120484 | 0.0992133 | 0.099359  | 0.110868  | 0.118298  | 0.101544  |
| 0.127914  | 0.111451 | 0.110868  | 0.10169   | 0.115239  | 0.110431  | 0.100379  |
| 0.122815  | 0.12296  | 0.10169   | 0.099796  | 0.0909091 | 0.103584  | 0.107809  |
| 0.120047  | 0.109703 | 0.109703  | 0.0984848 | 0.108829  | 0.1081    | 0.100962  |
| 0.122086  | 0.122523 | 0.106789  | 0.104021  | 0.095134  | 0.108974  | 0.109703  |
| 0.115385  | 0.116404 | 0.103293  | 0.106061  | 0.110577  | 0.116259  | 0.100962  |
| 0.120921  | 0.131847 | 0.110868  | 0.109266  | 0.113491  | 0.122086  | 0.112325  |
| 0.130536  | 0.119901 | 0.112034  | 0.107809  | 0.11553   | 0.117424  | 0.106789  |
| 0.118153  | 0.1081   | 0.102564  | 0.0898893 | 0.0804196 | 0.10708   | 0.0984848 |
| 0.120921  | 0.123689 | 0.100087  | 0.102273  | 0.0954254 | 0.108974  | 0.107955  |
| 0.128497  | 0.128059 | 0.111451  | 0.111888  | 0.120192  | 0.112471  | 0.113199  |
| 0.129225  | 0.125583 | 0.108392  | 0.100087  | 0.11451   | 0.118153  | 0.106061  |
| 0.124126  | 0.114948 | 0.102127  | 0.0821678 | 0.0843531 | 0.094697  | 0.103584  |
| 0.122086  | 0.118735 | 0.101544  | 0.10169   | 0.0913462 | 0.108683  | 0.105915  |
| 0.124854  | 0.127331 | 0.104312  | 0.105041  | 0.117133  | 0.121358  | 0.109848  |
| 0.129516  | 0.106643 | 0.111888  | 0.100087  | 0.119172  | 0.104167  | 0.10373   |
| 0.130099  | 0.126748 | 0.104895  | 0.106206  | 0.119172  | 0.128351  | 0.104604  |
| 0.132139  | 0.124709 | 0.109848  | 0.110286  | 0.116841  | 0.116696  | 0.104604  |
| 0.11961   | 0.110723 | 0.108683  | 0.0945513 | 0.07838   | 0.107955  | 0.101107  |
| 0.0919289 | 0.113345 | 0.103438  | 0.101253  | 0.103147  | 0.116404  | 0.101981  |
| 0.125291  | 0.107372 | 0.10912   | 0.0987762 | 0.109994  | 0.107517  | 0.101836  |
| 0.128351  | 0.130536 | 0.106935  | 0.109411  | 0.120921  | 0.12398   | 0.107226  |
| 0.133596  | 0.131119 | 0.118298  | 0.0919289 | 0.122378  | 0.121358  | 0.110723  |
| 0.128205  | 0.119318 | 0.109994  | 0.0984848 | 0.112034  | 0.119172  | 0.102418  |
| 0.194347  | 0.195367 | 0.178176  | 0.184149  | 0.190122  | 0.178322  | 0.184878  |
| 0.163753  | 0.17264  | 0.152826  | 0.14831   | 0.161276  | 0.146853  | 0.152826  |
| 0.11859   | 0.104458 | 0.115822  | 0.112179  | 0.114073  | 0.112762  | 0.117279  |
| 0.123397  | 0.122378 | 0.11451   | 0.104749  | 0.118007  | 0.114073  | 0.111305  |
| 0.137966  | 0.122669 | 0.142191  | 0.137966  | 0.133741  | 0.139714  | 0.143357  |
| 0.127914  | 0.131847 | 0.113491  | 0.115676  | 0.120192  | 0.125874  | 0.116113  |
| 0.115822  | 0.127622 | 0.108974  | 0.108829  | 0.102273  | 0.112617  | 0.118007  |
| 0.12296   | 0.125146 | 0.102418  | 0.099359  | 0.105915  | 0.111014  | 0.109703  |
| 0.121795  | 0.10912  | 0.106498  | 0.0897436 | 0.0403555 | 0.105186  | 0.111742  |
| 0.126166  | 0.125437 | 0.111742  | 0.0979021 | 0.110868  | 0.120921  | 0.107955  |
| 0.200321  | 0.205711 | 0.18648   | 0.194202  | 0.19697   | 0.182838  | 0.192016  |
| 0.136364  | 0.121941 | 0.125437  | 0.113054  | 0.125437  | 0.118881  | 0.110577  |
| 0.124854  | 0.120047 | 0.107809  | 0.10708   | 0.120047  | 0.113782  | 0.105769  |
| 0.119318  | 0.121503 | 0.100233  | 0.0925117 | 0.090035  | 0.0995047 | 0.10373   |
| 0.125291  | 0.124272 | 0.114365  | 0.0990676 | 0.11116   | 0.113054  | 0.106789  |

|          |          |           |           |           |           |           |
|----------|----------|-----------|-----------|-----------|-----------|-----------|
| 0.182547 | 0.191725 | 0.170163  | 0.171474  | 0.180361  | 0.161568  | 0.172494  |
| 0.243444 | 0.245921 | 0.2331    | 0.239365  | 0.242424  | 0.231498  | 0.240093  |
| 0.120192 | 0.130828 | 0.11451   | 0.113491  | 0.117133  | 0.124272  | 0.113345  |
| 0.127185 | 0.125874 | 0.112762  | 0.0989219 | 0.111597  | 0.119901  | 0.105478  |
| 0.118735 | 0.108974 | 0.116259  | 0.112034  | 0.11014   | 0.111451  | 0.115967  |
| 0.130536 | 0.11961  | 0.109411  | 0.105186  | 0.116696  | 0.116259  | 0.101836  |
| 0.131265 | 0.113928 | 0.112762  | 0.103293  | 0.11655   | 0.110868  | 0.101107  |
| 0.117424 | 0.114948 | 0.108829  | 0.10169   | 0.109703  | 0.116259  | 0.0995047 |
| 0.118735 | 0.120047 | 0.102855  | 0.101253  | 0.0990676 | 0.106789  | 0.109557  |
| 0.125728 | 0.115676 | 0.115676  | 0.108246  | 0.118298  | 0.110286  | 0.104895  |
| 0.115676 | 0.119901 | 0.10067   | 0.099359  | 0.101544  | 0.109557  | 0.108537  |
| 0.129516 | 0.118007 | 0.107809  | 0.0887238 | 0.0833333 | 0.103584  | 0.109266  |
| 0.118881 | 0.109411 | 0.105915  | 0.0914918 | 0.0814394 | 0.104895  | 0.0989219 |
| 0.119901 | 0.13141  | 0.113636  | 0.113782  | 0.120629  | 0.122815  | 0.115967  |
| 0.129371 | 0.127768 | 0.105332  | 0.104895  | 0.116404  | 0.12296   | 0.103875  |
| 0.11655  | 0.112617 | 0.0995047 | 0.0961538 | 0.103001  | 0.11014   | 0.0957168 |
| 0.136946 | 0.122523 | 0.122523  | 0.114802  | 0.103584  | 0.12296   | 0.116696  |
| 0.13986  | 0.130682 | 0.130973  | 0.12296   | 0.128059  | 0.136072  | 0.121066  |
| 0.121358 | 0.120338 | 0.102273  | 0.0992133 | 0.0909091 | 0.106498  | 0.108392  |
| 0.114802 | 0.113199 | 0.11116   | 0.108683  | 0.0986305 | 0.107517  | 0.114365  |
| 0.13141  | 0.127185 | 0.11961   | 0.116841  | 0.101836  | 0.125291  | 0.124854  |
| 0.206439 | 0.207751 | 0.194056  | 0.200029  | 0.199009  | 0.193036  | 0.200758  |
| 0.116259 | 0.120775 | 0.104458  | 0.100233  | 0.110577  | 0.11655   | 0.103293  |
| 0.116696 | 0.111305 | 0.107226  | 0.0916375 | 0.0772145 | 0.105915  | 0.0979021 |
| 0.115822 | 0.121212 | 0.11014   | 0.107955  | 0.113345  | 0.119318  | 0.10373   |
| 0.13549  | 0.130099 | 0.120192  | 0.117716  | 0.121649  | 0.125583  | 0.10912   |
| 0.12704  | 0.122815 | 0.113491  | 0.099359  | 0.112034  | 0.110431  | 0.103001  |
| 0.202214 | 0.204983 | 0.188374  | 0.191434  | 0.193619  | 0.178904  | 0.188957  |
| 0.131556 | 0.129371 | 0.109848  | 0.105915  | 0.121795  | 0.126311  | 0.110431  |
| 0.122086 | 0.117279 | 0.0995047 | 0.102564  | 0.0913462 | 0.106935  | 0.106789  |
| 0.130973 | 0.119464 | 0.118007  | 0.106498  | 0.108683  | 0.112325  | 0.113345  |
| 0.128059 | 0.118007 | 0.106643  | 0.10271   | 0.114219  | 0.119027  | 0.103147  |
| 0.131847 | 0.129371 | 0.107226  | 0.106498  | 0.118007  | 0.121066  | 0.104604  |
| 0.124272 | 0.119172 | 0.0941142 | 0.0939685 | 0.105186  | 0.113199  | 0.101107  |
| 0.131265 | 0.117133 | 0.11014   | 0.0884324 | 0.0844988 | 0.102127  | 0.109266  |
| 0.129808 | 0.12704  | 0.113636  | 0.112325  | 0.11859   | 0.119901  | 0.101981  |
| 0.199883 | 0.204983 | 0.186626  | 0.191142  | 0.193619  | 0.179487  | 0.18546   |
| 0.121358 | 0.121212 | 0.0976107 | 0.0942599 | 0.107517  | 0.114656  | 0.102273  |
| 0.195804 | 0.198281 | 0.182547  | 0.185606  | 0.191579  | 0.177448  | 0.183129  |
| 0.195076 | 0.198427 | 0.183858  | 0.182255  | 0.191142  | 0.173805  | 0.184732  |
| 0.136801 | 0.128205 | 0.125291  | 0.120484  | 0.124709  | 0.131556  | 0.11655   |
| 0.140297 | 0.131702 | 0.127622  | 0.12398   | 0.127331  | 0.134178  | 0.118007  |
| 0.123397 | 0.108974 | 0.099359  | 0.0770688 | 0.0850816 | 0.0989219 | 0.101107  |
| 0.12704  | 0.119318 | 0.0933858 | 0.0981935 | 0.106789  | 0.11655   | 0.100379  |

|          |          |           |           |           |           |           |
|----------|----------|-----------|-----------|-----------|-----------|-----------|
| 0.127477 | 0.124126 | 0.100233  | 0.099796  | 0.112762  | 0.121649  | 0.106061  |
| 0.121066 | 0.124126 | 0.104895  | 0.103001  | 0.092366  | 0.10708   | 0.112179  |
| 0.12398  | 0.111014 | 0.110723  | 0.103001  | 0.113345  | 0.109703  | 0.100816  |
| 0.128642 | 0.111888 | 0.115093  | 0.105624  | 0.119755  | 0.112325  | 0.101107  |
| 0.123543 | 0.13447  | 0.116113  | 0.119172  | 0.121358  | 0.123834  | 0.119027  |
| 0.136801 | 0.123543 | 0.111888  | 0.113199  | 0.116841  | 0.119318  | 0.109557  |
| 0.121212 | 0.112617 | 0.0986305 | 0.0958625 | 0.0878497 | 0.106935  | 0.105041  |
| 0.130682 | 0.127622 | 0.101107  | 0.102418  | 0.118298  | 0.123397  | 0.102273  |
| 0.120047 | 0.109703 | 0.100087  | 0.0702214 | 0.0826049 | 0.0996503 | 0.0942599 |
| 0.134761 | 0.129953 | 0.111305  | 0.113199  | 0.123834  | 0.135635  | 0.115676  |
| 0.116113 | 0.104895 | 0.111014  | 0.107955  | 0.110431  | 0.110286  | 0.113928  |
| 0.138695 | 0.136801 | 0.116404  | 0.120338  | 0.128059  | 0.139569  | 0.118444  |
| 0.255828 | 0.25743  | 0.246358  | 0.251748  | 0.254225  | 0.242133  | 0.252477  |
| 0.137529 | 0.116113 | 0.123689  | 0.116841  | 0.126311  | 0.129662  | 0.122232  |
| 0.130973 | 0.121212 | 0.125583  | 0.120775  | 0.124417  | 0.125437  | 0.120338  |
| 0.215618 | 0.221008 | 0.204691  | 0.211538  | 0.211684  | 0.204545  | 0.210519  |
| 0.132139 | 0.127622 | 0.123252  | 0.118735  | 0.111597  | 0.130682  | 0.117424  |
| 0.230041 | 0.231643 | 0.219406  | 0.2213    | 0.223485  | 0.213432  | 0.220571  |
| 0.129953 | 0.109411 | 0.118153  | 0.108392  | 0.120484  | 0.120047  | 0.107955  |
| 0.13039  | 0.128788 | 0.116841  | 0.116404  | 0.0990676 | 0.121066  | 0.121212  |
| 0.130099 | 0.127622 | 0.109266  | 0.107663  | 0.115967  | 0.120484  | 0.099359  |
| 0.13884  | 0.123543 | 0.117716  | 0.115239  | 0.119172  | 0.127768  | 0.113054  |
| 0.200321 | 0.205128 | 0.187646  | 0.193619  | 0.198718  | 0.184295  | 0.192016  |
| 0.133013 | 0.13549  | 0.113636  | 0.115822  | 0.127914  | 0.137675  | 0.115967  |
| 0.13039  | 0.125291 | 0.102564  | 0.103875  | 0.116841  | 0.123106  | 0.104895  |
| 0.223485 | 0.227127 | 0.213724  | 0.21824   | 0.218969  | 0.210373  | 0.216929  |
| 0.131847 | 0.118881 | 0.117424  | 0.107372  | 0.122378  | 0.111451  | 0.107226  |
| 0.199883 | 0.202943 | 0.185752  | 0.189685  | 0.194202  | 0.182984  | 0.187791  |
| 0.13345  | 0.119318 | 0.119027  | 0.109557  | 0.121649  | 0.115967  | 0.106206  |
| 0.126748 | 0.121941 | 0.104458  | 0.101981  | 0.0913462 | 0.107517  | 0.112908  |
| 0.12398  | 0.112762 | 0.116259  | 0.103001  | 0.0812937 | 0.11961   | 0.1081    |
| 0.140297 | 0.125874 | 0.124126  | 0.122523  | 0.124417  | 0.130682  | 0.114802  |
| 0.121503 | 0.121649 | 0.105332  | 0.0999417 | 0.105624  | 0.114219  | 0.105624  |
| 0.159965 | 0.162442 | 0.144085  | 0.144814  | 0.147582  | 0.136364  | 0.148164  |
| 0.122669 | 0.124563 | 0.099796  | 0.100816  | 0.112908  | 0.122669  | 0.099796  |
| 0.132284 | 0.128934 | 0.11757   | 0.11451   | 0.121649  | 0.122378  | 0.107663  |
| 0.134324 | 0.126603 | 0.112617  | 0.11014   | 0.112617  | 0.120047  | 0.112617  |
| 0.129371 | 0.128642 | 0.11757   | 0.118298  | 0.124272  | 0.134907  | 0.115822  |
| 0.198572 | 0.202214 | 0.18007   | 0.18546   | 0.189977  | 0.179633  | 0.184441  |
| 0.118298 | 0.119901 | 0.105041  | 0.105186  | 0.0901807 | 0.106643  | 0.10912   |
| 0.136801 | 0.129079 | 0.11451   | 0.114365  | 0.120921  | 0.108246  | 0.109266  |
| 0.127331 | 0.10912  | 0.110868  | 0.0981935 | 0.116404  | 0.105769  | 0.103001  |
| 0.132139 | 0.117133 | 0.118298  | 0.107955  | 0.120047  | 0.120192  | 0.1081    |
| 0.127622 | 0.122523 | 0.10912   | 0.106352  | 0.095134  | 0.11655   | 0.11553   |

|          |          |           |           |           |           |          |
|----------|----------|-----------|-----------|-----------|-----------|----------|
| 0.252477 | 0.255245 | 0.243007  | 0.251311  | 0.25204   | 0.240822  | 0.249126 |
| 0.121212 | 0.108829 | 0.111742  | 0.0999417 | 0.078817  | 0.110723  | 0.104167 |
| 0.113345 | 0.123397 | 0.109994  | 0.111305  | 0.110577  | 0.11014   | 0.108829 |
| 0.174825 | 0.184586 | 0.169143  | 0.166084  | 0.175845  | 0.161131  | 0.172348 |
| 0.185315 | 0.190705 | 0.171474  | 0.173951  | 0.181672  | 0.168415  | 0.175554 |
| 0.121503 | 0.133013 | 0.113782  | 0.113636  | 0.118444  | 0.120338  | 0.115822 |
| 0.129225 | 0.125291 | 0.104312  | 0.103293  | 0.115093  | 0.125437  | 0.104895 |
| 0.132721 | 0.122086 | 0.110431  | 0.110868  | 0.115385  | 0.115822  | 0.106061 |
| 0.148019 | 0.145542 | 0.127768  | 0.131119  | 0.140006  | 0.151224  | 0.130973 |
| 0.118298 | 0.127185 | 0.110286  | 0.107517  | 0.112908  | 0.119464  | 0.110577 |
| 0.124854 | 0.131993 | 0.116841  | 0.113782  | 0.117133  | 0.123106  | 0.11451  |
| 0.134615 | 0.121358 | 0.12398   | 0.115967  | 0.129225  | 0.12296   | 0.11116  |
| 0.125874 | 0.123397 | 0.101836  | 0.106061  | 0.114365  | 0.122378  | 0.107955 |
| 0.133596 | 0.135198 | 0.113054  | 0.116987  | 0.125291  | 0.136509  | 0.113636 |
| 0.130245 | 0.119027 | 0.116404  | 0.108392  | 0.119318  | 0.0981935 | 0.107955 |
| 0.134761 | 0.125    | 0.120629  | 0.116404  | 0.119172  | 0.128351  | 0.113928 |
| 0.147727 | 0.135052 | 0.135344  | 0.133741  | 0.133596  | 0.143939  | 0.129225 |
| 0.125146 | 0.115967 | 0.116841  | 0.101836  | 0.0810023 | 0.116113  | 0.108392 |
| 0.138403 | 0.129808 | 0.127477  | 0.121503  | 0.12602   | 0.135198  | 0.122232 |
| 0.138986 | 0.11961  | 0.126894  | 0.118007  | 0.128934  | 0.124126  | 0.116404 |
| 0.206731 | 0.213287 | 0.193765  | 0.198281  | 0.203671  | 0.188374  | 0.199301 |
| 0.136364 | 0.10912  | 0.120192  | 0.106643  | 0.081148  | 0.109266  | 0.112325 |
| 0.192016 | 0.197698 | 0.178467  | 0.184149  | 0.18954   | 0.173077  | 0.182547 |
| 0.126166 | 0.119318 | 0.110577  | 0.108392  | 0.113782  | 0.115093  | 0.102418 |
| 0.128497 | 0.127768 | 0.114948  | 0.115967  | 0.0971737 | 0.116259  | 0.120192 |
| 0.116841 | 0.103584 | 0.115239  | 0.114219  | 0.109703  | 0.112762  | 0.118735 |
| 0.114656 | 0.106643 | 0.110431  | 0.104749  | 0.104895  | 0.107955  | 0.1081   |
| 0.126748 | 0.130973 | 0.105624  | 0.111305  | 0.119901  | 0.13141   | 0.109703 |
| 0.127622 | 0.127768 | 0.109703  | 0.108392  | 0.120192  | 0.129371  | 0.111451 |
| 0.125583 | 0.121358 | 0.107955  | 0.102273  | 0.095134  | 0.104021  | 0.111451 |
| 0.13243  | 0.130536 | 0.115676  | 0.109994  | 0.120338  | 0.122815  | 0.104604 |
| 0.116987 | 0.1081   | 0.118881  | 0.118444  | 0.113636  | 0.120484  | 0.121212 |
| 0.13986  | 0.124854 | 0.133304  | 0.122086  | 0.133304  | 0.120921  | 0.118153 |
| 0.248834 | 0.250146 | 0.238199  | 0.244755  | 0.245484  | 0.237471  | 0.244901 |
| 0.126166 | 0.123397 | 0.106789  | 0.104021  | 0.0939685 | 0.108392  | 0.112908 |
| 0.183712 | 0.189394 | 0.168998  | 0.176136  | 0.179487  | 0.165647  | 0.173077 |
| 0.190268 | 0.195659 | 0.173805  | 0.180944  | 0.184878  | 0.173951  | 0.17905  |
| 0.134761 | 0.129079 | 0.117716  | 0.110286  | 0.111014  | 0.115239  | 0.111888 |
| 0.119901 | 0.106935 | 0.1081    | 0.0965909 | 0.0804196 | 0.106498  | 0.101981 |
| 0.129225 | 0.124417 | 0.113928  | 0.113199  | 0.0958625 | 0.120484  | 0.122378 |
| 0.126311 | 0.121503 | 0.0987762 | 0.0989219 | 0.112762  | 0.118444  | 0.101981 |
| 0.121503 | 0.112034 | 0.107372  | 0.0874126 | 0.0493881 | 0.0958625 | 0.105041 |
| 0.129079 | 0.119901 | 0.11757   | 0.107517  | 0.121066  | 0.111888  | 0.106498 |
| 0.123106 | 0.123834 | 0.112471  | 0.105624  | 0.108392  | 0.121941  | 0.110431 |

|          |          |          |           |           |           |          |
|----------|----------|----------|-----------|-----------|-----------|----------|
| 0.135927 | 0.134033 | 0.115676 | 0.119318  | 0.126457  | 0.14088   | 0.118298 |
| 0.122378 | 0.122232 | 0.104749 | 0.104021  | 0.0895979 | 0.109557  | 0.113199 |
| 0.134033 | 0.133013 | 0.114365 | 0.11655   | 0.124272  | 0.135781  | 0.117861 |
| 0.128059 | 0.120047 | 0.111305 | 0.106789  | 0.116259  | 0.109994  | 0.109266 |
| 0.116113 | 0.106352 | 0.120047 | 0.116696  | 0.112179  | 0.119318  | 0.121503 |
| 0.136364 | 0.125728 | 0.113199 | 0.108974  | 0.119901  | 0.120047  | 0.108537 |
| 0.13884  | 0.122086 | 0.129079 | 0.122232  | 0.13141   | 0.126894  | 0.120338 |
| 0.13345  | 0.119318 | 0.116113 | 0.0979021 | 0.0846445 | 0.108392  | 0.113491 |
| 0.119464 | 0.11757  | 0.107663 | 0.106061  | 0.0939685 | 0.104021  | 0.107372 |
| 0.12296  | 0.129225 | 0.125728 | 0.124126  | 0.126894  | 0.137238  | 0.122232 |
| 0.186917 | 0.191142 | 0.172494 | 0.174971  | 0.179779  | 0.16623   | 0.176282 |
| 0.13986  | 0.137092 | 0.11757  | 0.122669  | 0.128934  | 0.144231  | 0.122232 |
| 0.127331 | 0.126894 | 0.106206 | 0.108392  | 0.120192  | 0.125291  | 0.109411 |
| 0.113199 | 0.102855 | 0.113928 | 0.110868  | 0.108392  | 0.114656  | 0.117424 |
| 0.112179 | 0.102418 | 0.103293 | 0.102855  | 0.102127  | 0.107517  | 0.105915 |
| 0.130973 | 0.122378 | 0.115676 | 0.112617  | 0.117424  | 0.120775  | 0.1081   |
| 0.135198 | 0.124854 | 0.119901 | 0.113636  | 0.120775  | 0.125583  | 0.111742 |
| 0.192745 | 0.195513 | 0.179779 | 0.180798  | 0.188228  | 0.172931  | 0.180653 |
| 0.123397 | 0.123543 | 0.106643 | 0.0986305 | 0.112762  | 0.118153  | 0.106643 |
| 0.116259 | 0.114073 | 0.104749 | 0.0926573 | 0.0992133 | 0.101399  | 0.101836 |
| 0.129662 | 0.129516 | 0.108246 | 0.112471  | 0.122815  | 0.134324  | 0.110868 |
| 0.19391  | 0.200758 | 0.179487 | 0.182255  | 0.190851  | 0.174388  | 0.184441 |
| 0.119755 | 0.110577 | 0.104458 | 0.0903263 | 0.0808566 | 0.0964452 | 0.097465 |
| 0.135052 | 0.119172 | 0.124417 | 0.113782  | 0.124709  | 0.121066  | 0.113345 |
| 0.133887 | 0.129371 | 0.108392 | 0.111451  | 0.119172  | 0.129808  | 0.112179 |
| 0.115385 | 0.125437 | 0.10708  | 0.108683  | 0.112034  | 0.121212  | 0.107663 |
| 0.190559 | 0.194784 | 0.17264  | 0.176282  | 0.184003  | 0.168706  | 0.176428 |
| 0.129953 | 0.116987 | 0.119901 | 0.109557  | 0.123397  | 0.114219  | 0.106789 |
| 0.113054 | 0.117861 | 0.110577 | 0.10373   | 0.11116   | 0.109848  | 0.105041 |
| 0.120629 | 0.115822 | 0.105624 | 0.0917832 | 0.0875583 | 0.099359  | 0.099796 |
| 0.125    | 0.128642 | 0.114948 | 0.105478  | 0.115239  | 0.104604  | 0.113491 |
| 0.133013 | 0.129662 | 0.115385 | 0.112325  | 0.121795  | 0.124563  | 0.107517 |
| 0.137092 | 0.121503 | 0.128205 | 0.11961   | 0.128788  | 0.127477  | 0.115967 |
| 0.123106 | 0.120338 | 0.104312 | 0.10271   | 0.0897436 | 0.10708   | 0.108974 |
| 0.130099 | 0.121795 | 0.122378 | 0.103875  | 0.116259  | 0.122523  | 0.107809 |
| 0.13549  | 0.151078 | 0.136801 | 0.137238  | 0.140006  | 0.15035   | 0.140006 |
| 0.23514  | 0.235286 | 0.222465 | 0.229604  | 0.231498  | 0.219988  | 0.228293 |
| 0.136072 | 0.121649 | 0.119318 | 0.100233  | 0.090472  | 0.115385  | 0.121941 |
| 0.131993 | 0.13039  | 0.117279 | 0.113636  | 0.124563  | 0.124709  | 0.106789 |
| 0.123106 | 0.123252 | 0.106061 | 0.106206  | 0.114802  | 0.118735  | 0.106061 |
| 0.131119 | 0.131265 | 0.114948 | 0.116259  | 0.114073  | 0.125291  | 0.114948 |
| 0.120484 | 0.117424 | 0.114802 | 0.109411  | 0.112762  | 0.114365  | 0.10373  |
| 0.125728 | 0.119755 | 0.11451  | 0.103001  | 0.115385  | 0.113491  | 0.103147 |
| 0.127914 | 0.128351 | 0.107955 | 0.110723  | 0.118444  | 0.128497  | 0.113782 |



|          |          |          |           |           |           |           |
|----------|----------|----------|-----------|-----------|-----------|-----------|
| 0.135635 | 0.120629 | 0.125874 | 0.11757   | 0.129371  | 0.123689  | 0.114802  |
| 0.121649 | 0.127331 | 0.113345 | 0.112325  | 0.114802  | 0.116696  | 0.112471  |
| 0.235723 | 0.236451 | 0.223048 | 0.232809  | 0.23208   | 0.224068  | 0.230332  |
| 0.119027 | 0.109848 | 0.106061 | 0.0907634 | 0.0772145 | 0.102418  | 0.0984848 |
| 0.11961  | 0.104604 | 0.1081   | 0.0960082 | 0.106935  | 0.104167  | 0.0952797 |
| 0.120047 | 0.120192 | 0.104458 | 0.102855  | 0.0925117 | 0.108392  | 0.111451  |
| 0.125437 | 0.136072 | 0.122669 | 0.12398   | 0.125291  | 0.134761  | 0.122669  |
| 0.141463 | 0.125    | 0.125    | 0.106498  | 0.0920746 | 0.121066  | 0.128205  |
| 0.125437 | 0.123252 | 0.109557 | 0.103293  | 0.102855  | 0.11553   | 0.10373   |
| 0.128934 | 0.128788 | 0.106643 | 0.108829  | 0.120921  | 0.125728  | 0.106643  |
| 0.123252 | 0.121066 | 0.10708  | 0.101399  | 0.110577  | 0.115093  | 0.105041  |
| 0.227855 | 0.233246 | 0.217512 | 0.225524  | 0.227418  | 0.216492  | 0.226253  |
| 0.134907 | 0.129808 | 0.109994 | 0.113345  | 0.123397  | 0.132576  | 0.114948  |
| 0.13447  | 0.120629 | 0.122086 | 0.113491  | 0.125583  | 0.119901  | 0.112762  |
| 0.121358 | 0.122669 | 0.110431 | 0.103875  | 0.106935  | 0.111451  | 0.102855  |
| 0.129662 | 0.12398  | 0.11961  | 0.115967  | 0.117279  | 0.128205  | 0.118444  |
| 0.13141  | 0.113199 | 0.121649 | 0.113636  | 0.120484  | 0.123252  | 0.116404  |
| 0.12296  | 0.116987 | 0.104749 | 0.102564  | 0.0901807 | 0.113345  | 0.112908  |
| 0.134033 | 0.117861 | 0.123689 | 0.112762  | 0.122815  | 0.118881  | 0.112325  |
| 0.138549 | 0.11859  | 0.128205 | 0.119901  | 0.129953  | 0.128059  | 0.119172  |
| 0.128059 | 0.11655  | 0.121212 | 0.10912   | 0.119172  | 0.116987  | 0.107517  |
| 0.120921 | 0.121066 | 0.105915 | 0.102273  | 0.088141  | 0.110431  | 0.112617  |
| 0.133741 | 0.13243  | 0.126311 | 0.122086  | 0.124563  | 0.13141   | 0.116696  |
| 0.138549 | 0.136946 | 0.129953 | 0.124272  | 0.127914  | 0.13884   | 0.119172  |
| 0.11757  | 0.107809 | 0.122669 | 0.119027  | 0.11655   | 0.123397  | 0.122669  |
| 0.124563 | 0.111305 | 0.123252 | 0.121066  | 0.119755  | 0.124854  | 0.129662  |
| 0.137821 | 0.135635 | 0.125728 | 0.125874  | 0.127185  | 0.134907  | 0.116696  |
| 0.117716 | 0.108246 | 0.103001 | 0.080711  | 0.0426865 | 0.0961538 | 0.100379  |
| 0.140006 | 0.111888 | 0.129371 | 0.119027  | 0.134907  | 0.124272  | 0.120921  |
| 0.138695 | 0.129225 | 0.124272 | 0.117716  | 0.118444  | 0.129079  | 0.122523  |
| 0.203671 | 0.208188 | 0.19391  | 0.199301  | 0.203234  | 0.191725  | 0.198572  |
| 0.128497 | 0.129225 | 0.11961  | 0.104895  | 0.116696  | 0.12296   | 0.114948  |
| 0.12704  | 0.112617 | 0.113491 | 0.100233  | 0.114073  | 0.11014   | 0.104458  |
| 0.128934 | 0.123834 | 0.110431 | 0.108537  | 0.099359  | 0.107955  | 0.117716  |
| 0.220571 | 0.223922 | 0.212267 | 0.2162    | 0.216055  | 0.207751  | 0.215472  |
| 0.212704 | 0.215763 | 0.202069 | 0.202506  | 0.208188  | 0.194639  | 0.2044    |
| 0.137383 | 0.121795 | 0.127331 | 0.119318  | 0.129371  | 0.122232  | 0.11859   |
| 0.246795 | 0.250146 | 0.238491 | 0.245047  | 0.248689  | 0.235723  | 0.243444  |
| 0.119464 | 0.109703 | 0.10271  | 0.0821678 | 0.0444347 | 0.100524  | 0.101544  |
| 0.139569 | 0.128642 | 0.135927 | 0.122669  | 0.106789  | 0.136946  | 0.13039   |
| 0.121212 | 0.10708  | 0.108537 | 0.0958625 | 0.0759033 | 0.1081    | 0.105915  |
| 0.136509 | 0.135198 | 0.123834 | 0.120192  | 0.126166  | 0.131847  | 0.11451   |
| 0.189685 | 0.194493 | 0.175554 | 0.178613  | 0.185169  | 0.17366   | 0.17701   |
| 0.128642 | 0.123834 | 0.118007 | 0.113491  | 0.111597  | 0.122815  | 0.115676  |

|          |          |           |           |           |          |           |
|----------|----------|-----------|-----------|-----------|----------|-----------|
| 0.196533 | 0.198427 | 0.183566  | 0.186334  | 0.191434  | 0.176428 | 0.187354  |
| 0.127185 | 0.127914 | 0.11451   | 0.105624  | 0.105478  | 0.117861 | 0.108974  |
| 0.123689 | 0.119755 | 0.112762  | 0.105915  | 0.11655   | 0.103584 | 0.109557  |
| 0.128351 | 0.122378 | 0.118881  | 0.0995047 | 0.0868298 | 0.119901 | 0.114802  |
| 0.114365 | 0.115385 | 0.108392  | 0.103293  | 0.105186  | 0.109411 | 0.106935  |
| 0.11655  | 0.116404 | 0.0962995 | 0.097028  | 0.0840618 | 0.101981 | 0.104167  |
| 0.124709 | 0.119901 | 0.108537  | 0.092366  | 0.107955  | 0.115093 | 0.100962  |
| 0.115385 | 0.105332 | 0.104749  | 0.0882867 | 0.0750291 | 0.10169  | 0.0960082 |
| 0.126603 | 0.124417 | 0.10169   | 0.0986305 | 0.113345  | 0.119901 | 0.099359  |
| 0.129662 | 0.105332 | 0.117279  | 0.106935  | 0.119318  | 0.106643 | 0.109703  |
| 0.129371 | 0.114365 | 0.103875  | 0.0847902 | 0.0843531 | 0.101399 | 0.104749  |
| 0.120775 | 0.109266 | 0.109557  | 0.092803  | 0.0786713 | 0.106789 | 0.100524  |
| 0.109848 | 0.108537 | 0.113782  | 0.109266  | 0.104749  | 0.110431 | 0.120192  |
| 0.136072 | 0.133596 | 0.114656  | 0.11655   | 0.12602   | 0.136364 | 0.115822  |
| 0.11553  | 0.105186 | 0.107809  | 0.10708   | 0.105478  | 0.107663 | 0.111305  |
| 0.113054 | 0.11757  | 0.10708   | 0.104604  | 0.111451  | 0.117133 | 0.100962  |
| 0.11757  | 0.115967 | 0.0984848 | 0.0968823 | 0.0894522 | 0.105041 | 0.105769  |
| 0.128934 | 0.116841 | 0.116841  | 0.110868  | 0.122086  | 0.116113 | 0.109557  |
| 0.129808 | 0.131702 | 0.112179  | 0.110868  | 0.120338  | 0.125146 | 0.104895  |
| 0.134033 | 0.12398  | 0.117861  | 0.114219  | 0.117861  | 0.123252 | 0.11116   |
| 0.117424 | 0.105624 | 0.113782  | 0.107517  | 0.108829  | 0.11014  | 0.114948  |
| 0.128934 | 0.125583 | 0.102855  | 0.104458  | 0.118881  | 0.125146 | 0.108974  |
| 0.138403 | 0.133304 | 0.114656  | 0.116841  | 0.126894  | 0.138403 | 0.117861  |
| 0.139569 | 0.140297 | 0.121941  | 0.125583  | 0.130973  | 0.146853 | 0.126311  |
| 0.121649 | 0.107517 | 0.106352  | 0.0965909 | 0.107809  | 0.104458 | 0.0996503 |
| 0.122523 | 0.123834 | 0.105478  | 0.104749  | 0.0958625 | 0.109703 | 0.110431  |
| 0.120338 | 0.11757  | 0.106789  | 0.0917832 | 0.106498  | 0.106061 | 0.0954254 |
| 0.141608 | 0.133887 | 0.13039   | 0.126457  | 0.130973  | 0.138112 | 0.120484  |
| 0.121358 | 0.107809 | 0.113054  | 0.0948427 | 0.0789627 | 0.113491 | 0.106061  |
| 0.146416 | 0.136364 | 0.138112  | 0.133013  | 0.135198  | 0.142045 | 0.125874  |
| 0.133887 | 0.131993 | 0.123543  | 0.120192  | 0.104895  | 0.128059 | 0.130536  |
| 0.121503 | 0.133304 | 0.118444  | 0.117424  | 0.119027  | 0.131702 | 0.119318  |
| 0.125728 | 0.121212 | 0.109266  | 0.0884324 | 0.0856643 | 0.111742 | 0.104604  |
| 0.120047 | 0.11757  | 0.101836  | 0.0976107 | 0.110577  | 0.113636 | 0.103001  |
| 0.117133 | 0.107372 | 0.121358  | 0.117716  | 0.112034  | 0.120921 | 0.123689  |
| 0.209062 | 0.210664 | 0.193182  | 0.198864  | 0.202797  | 0.191871 | 0.198135  |
| 0.114073 | 0.118298 | 0.106352  | 0.102418  | 0.111888  | 0.112617 | 0.100816  |
| 0.127331 | 0.121358 | 0.11553   | 0.0941142 | 0.0869755 | 0.111305 | 0.108537  |
| 0.127185 | 0.125874 | 0.115967  | 0.114365  | 0.119755  | 0.125437 | 0.105186  |
| 0.119755 | 0.104749 | 0.110577  | 0.106643  | 0.106498  | 0.108392 | 0.114073  |
| 0.135052 | 0.129079 | 0.117424  | 0.112617  | 0.115093  | 0.120484 | 0.114219  |
| 0.13039  | 0.128205 | 0.117424  | 0.090472  | 0.120047  | 0.126894 | 0.108683  |
| 0.13345  | 0.13039  | 0.118735  | 0.0958625 | 0.123106  | 0.129371 | 0.111742  |
| 0.120775 | 0.13141  | 0.116841  | 0.112617  | 0.115093  | 0.123397 | 0.115093  |

|          |           |           |           |           |           |           |
|----------|-----------|-----------|-----------|-----------|-----------|-----------|
| 0.128059 | 0.106061  | 0.109266  | 0.0995047 | 0.11451   | 0.100962  | 0.10373   |
| 0.135927 | 0.131119  | 0.122378  | 0.12398   | 0.125874  | 0.133013  | 0.112179  |
| 0.121649 | 0.119172  | 0.108974  | 0.0939685 | 0.0844988 | 0.113491  | 0.109848  |
| 0.131702 | 0.120484  | 0.109411  | 0.0912005 | 0.088141  | 0.106352  | 0.111742  |
| 0.182838 | 0.175408  | 0.164918  | 0.167104  | 0.174534  | 0.166521  | 0.167249  |
| 0.127477 | 0.125291  | 0.101399  | 0.103875  | 0.115967  | 0.121941  | 0.104312  |
| 0.138695 | 0.130099  | 0.123106  | 0.11859   | 0.125728  | 0.120629  | 0.114656  |
| 0.134178 | 0.109557  | 0.115967  | 0.105332  | 0.0868298 | 0.11116   | 0.115385  |
| 0.123252 | 0.114656  | 0.113491  | 0.112179  | 0.11961   | 0.111014  | 0.118444  |
| 0.122669 | 0.112034  | 0.10271   | 0.0693473 | 0.0843531 | 0.104021  | 0.0957168 |
| 0.119755 | 0.110286  | 0.0980478 | 0.0795455 | 0.0831876 | 0.0952797 | 0.0983392 |
| 0.127914 | 0.114948  | 0.106498  | 0.0763403 | 0.0887238 | 0.109266  | 0.103875  |
| 0.126748 | 0.116404  | 0.121358  | 0.113054  | 0.116404  | 0.123834  | 0.116113  |
| 0.12296  | 0.118735  | 0.104167  | 0.094697  | 0.0977564 | 0.107517  | 0.109994  |
| 0.134761 | 0.115385  | 0.123543  | 0.119027  | 0.113636  | 0.123106  | 0.121212  |
| 0.121503 | 0.112034  | 0.106206  | 0.0952797 | 0.106498  | 0.105186  | 0.103875  |
| 0.133304 | 0.115093  | 0.113636  | 0.0992133 | 0.100524  | 0.0884324 | 0.1081    |
| 0.139277 | 0.123689  | 0.126894  | 0.117716  | 0.123689  | 0.131993  | 0.117861  |
| 0.132284 | 0.106498  | 0.115822  | 0.0955711 | 0.0840618 | 0.10169   | 0.111451  |
| 0.130536 | 0.11961   | 0.116696  | 0.1081    | 0.109703  | 0.116259  | 0.116113  |
| 0.129662 | 0.106206  | 0.112034  | 0.0917832 | 0.0840618 | 0.0955711 | 0.105915  |
| 0.130245 | 0.107372  | 0.114073  | 0.0938228 | 0.0846445 | 0.100524  | 0.111451  |
| 0.121795 | 0.113199  | 0.099796  | 0.0941142 | 0.0793998 | 0.105186  | 0.0965909 |
| 0.136509 | 0.11859   | 0.121795  | 0.101253  | 0.0879953 | 0.119027  | 0.113928  |
| 0.123397 | 0.105478  | 0.107226  | 0.0925117 | 0.0836247 | 0.0962995 | 0.106643  |
| 0.141754 | 0.136655  | 0.134033  | 0.132721  | 0.141608  | 0.141171  | 0.129953  |
| 0.137966 | 0.131993  | 0.123543  | 0.122815  | 0.134033  | 0.125728  | 0.121212  |
| 0.125146 | 0.105769  | 0.109557  | 0.092803  | 0.0903263 | 0.102127  | 0.104021  |
| 0.141026 | 0.133596  | 0.136801  | 0.128788  | 0.136509  | 0.140443  | 0.126603  |
| 0.123834 | 0.118153  | 0.111742  | 0.113928  | 0.116404  | 0.117424  | 0.116987  |
| 0.134324 | 0.131847  | 0.126894  | 0.116259  | 0.112325  | 0.126748  | 0.125728  |
| 0.125291 | 0.109411  | 0.108246  | 0.0912005 | 0.0817308 | 0.111597  | 0.109994  |
| 0.153992 | 0.139277  | 0.137821  | 0.139423  | 0.133159  | 0.146125  | 0.134033  |
| 0.141463 | 0.125583  | 0.126457  | 0.122523  | 0.121795  | 0.131265  | 0.120629  |
| 0.135052 | 0.129662  | 0.134033  | 0.129225  | 0.131993  | 0.131847  | 0.123543  |
| 0.131556 | 0.0999417 | 0.113928  | 0.107663  | 0.10169   | 0.109703  | 0.113928  |
| 0.12704  | 0.105041  | 0.112034  | 0.0938228 | 0.0861014 | 0.101981  | 0.111742  |
| 0.120775 | 0.109266  | 0.106935  | 0.0884324 | 0.0868298 | 0.101544  | 0.102273  |
| 0.129371 | 0.116987  | 0.117279  | 0.108392  | 0.114656  | 0.11859   | 0.103875  |
| 0.130245 | 0.10708   | 0.11961   | 0.0979021 | 0.0872669 | 0.113345  | 0.113782  |
| 0.137092 | 0.122378  | 0.124709  | 0.106789  | 0.092366  | 0.126311  | 0.116841  |
| 0.126311 | 0.127914  | 0.118298  | 0.112034  | 0.11014   | 0.114073  | 0.113928  |
| 0.113782 | 0.0635198 | 0.109557  | 0.100962  | 0.0967366 | 0.0957168 | 0.0996503 |
| 0.122378 | 0.111742  | 0.109994  | 0.0888695 | 0.0808566 | 0.10373   | 0.100962  |

|          |          |           |           |           |           |           |
|----------|----------|-----------|-----------|-----------|-----------|-----------|
| 0.133304 | 0.11655  | 0.113636  | 0.106206  | 0.0862471 | 0.114365  | 0.112179  |
| 0.124854 | 0.111305 | 0.111305  | 0.0965909 | 0.0882867 | 0.105624  | 0.106352  |
| 0.132284 | 0.114656 | 0.116404  | 0.0987762 | 0.088141  | 0.11451   | 0.109994  |
| 0.124709 | 0.116404 | 0.107663  | 0.0894522 | 0.0852273 | 0.107809  | 0.103875  |
| 0.122523 | 0.117424 | 0.107809  | 0.107372  | 0.102855  | 0.11757   | 0.105478  |
| 0.124563 | 0.119464 | 0.106061  | 0.0907634 | 0.0871212 | 0.108246  | 0.106643  |
| 0.11757  | 0.106061 | 0.102855  | 0.081148  | 0.0434149 | 0.0986305 | 0.105186  |
| 0.126894 | 0.112471 | 0.107809  | 0.0962995 | 0.0833333 | 0.107372  | 0.106643  |
| 0.122086 | 0.121358 | 0.10708   | 0.104021  | 0.103584  | 0.112471  | 0.10271   |
| 0.126603 | 0.117133 | 0.107226  | 0.053176  | 0.0885781 | 0.106498  | 0.10373   |
| 0.130973 | 0.124417 | 0.118007  | 0.103584  | 0.111014  | 0.12602   | 0.113636  |
| 0.118735 | 0.11451  | 0.0964452 | 0.0960082 | 0.0981935 | 0.107663  | 0.0967366 |
| 0.141026 | 0.129225 | 0.121066  | 0.100524  | 0.0960082 | 0.12704   | 0.121066  |

| Obioturugu | Ogini    | Omi_efun_5 | Omi_efun_7 | Pepa      | Pouna    | TDr_00_00180 |
|------------|----------|------------|------------|-----------|----------|--------------|
| 0.0999417  | 0.115239 | 0.130536   | 0.114365   | 0.113345  | 0.146125 | 0.105624     |
| 0.105041   | 0.125874 | 0.113199   | 0.115967   | 0.110286  | 0.132867 | 0.0611888    |
| 0.100962   | 0.122669 | 0.109703   | 0.110723   | 0.108537  | 0.134033 | 0.0544872    |
| 0.107372   | 0.130536 | 0.114948   | 0.118298   | 0.100379  | 0.137529 | 0.0979021    |
| 0.125728   | 0.148019 | 0.137966   | 0.134907   | 0.125437  | 0.129662 | 0.128205     |
| 0.123106   | 0.136655 | 0.13039    | 0.123252   | 0.128642  | 0.139277 | 0.120629     |
| 0.117424   | 0.141754 | 0.128497   | 0.112908   | 0.110723  | 0.135052 | 0.116404     |
| 0.107809   | 0.126894 | 0.115385   | 0.114948   | 0.111888  | 0.133013 | 0.102127     |
| 0.0796911  | 0.116259 | 0.116404   | 0.107517   | 0.103001  | 0.135198 | 0.097028     |
| 0.0903263  | 0.115239 | 0.099359   | 0.101253   | 0.102564  | 0.133596 | 0.0965909    |
| 0.105915   | 0.111888 | 0.118444   | 0.107809   | 0.11553   | 0.145688 | 0.111597     |
| 0.102273   | 0.126894 | 0.123252   | 0.113491   | 0.0981935 | 0.136801 | 0.0945513    |
| 0          | 0.12398  | 0.113636   | 0.108537   | 0.106061  | 0.138258 | 0.0995047    |
| 0.12398    | 0        | 0.135344   | 0.138695   | 0.127477  | 0.154429 | 0.121503     |
| 0.113636   | 0.135344 | 0          | 0.114656   | 0.122669  | 0.145251 | 0.11553      |
| 0.108537   | 0.138695 | 0.114656   | 0          | 0.116404  | 0.147145 | 0.110431     |
| 0.106061   | 0.127477 | 0.122669   | 0.116404   | 0         | 0.137383 | 0.106206     |
| 0.138258   | 0.154429 | 0.145251   | 0.147145   | 0.137383  | 0        | 0.135198     |
| 0.0995047  | 0.121503 | 0.11553    | 0.110431   | 0.106206  | 0.135198 | 0            |
| 0.197407   | 0.1588   | 0.17264    | 0.194056   | 0.199446  | 0.215909 | 0.189977     |
| 0.11451    | 0.138258 | 0.127622   | 0.123397   | 0.121503  | 0.139423 | 0.110577     |
| 0.119901   | 0.137821 | 0.128642   | 0.119755   | 0.113491  | 0.137821 | 0.112179     |
| 0.0999417  | 0.124854 | 0.116841   | 0.107372   | 0.102273  | 0.134178 | 0.102418     |
| 0.116113   | 0.147145 | 0.135344   | 0.102855   | 0.119318  | 0.15676  | 0.11655      |
| 0.0984848  | 0.120192 | 0.112471   | 0.099796   | 0.0955711 | 0.130099 | 0.0977564    |
| 0.123834   | 0.144085 | 0.129079   | 0.127477   | 0.127622  | 0.140006 | 0.114656     |
| 0.116259   | 0.138549 | 0.12704    | 0.11961    | 0.109266  | 0.141754 | 0.11757      |
| 0.106352   | 0.141171 | 0.124126   | 0.107663   | 0.111014  | 0.149913 | 0.108537     |
| 0.119464   | 0.146999 | 0.137529   | 0.114073   | 0.121503  | 0.150495 | 0.122232     |
| 0.106352   | 0.138258 | 0.122378   | 0.112908   | 0.109848  | 0.151369 | 0.113491     |
| 0.114656   | 0.134033 | 0.119318   | 0.106352   | 0.118153  | 0.14831  | 0.113345     |
| 0.108974   | 0.141754 | 0.12296    | 0.10271    | 0.113928  | 0.150204 | 0.118444     |
| 0.0979021  | 0.118735 | 0.107226   | 0.099796   | 0.101981  | 0.13243  | 0.103293     |
| 0.100233   | 0.130682 | 0.126166   | 0.115822   | 0.11451   | 0.142045 | 0.111451     |
| 0.106789   | 0.139569 | 0.125146   | 0.0944056  | 0.115239  | 0.141608 | 0.113345     |
| 0.111888   | 0.145251 | 0.129953   | 0.0910548  | 0.119464  | 0.144668 | 0.116404     |
| 0.124854   | 0.148893 | 0.135635   | 0.119464   | 0.127768  | 0.137821 | 0.123834     |
| 0.11451    | 0.134178 | 0.131702   | 0.123397   | 0.109848  | 0.152826 | 0.115822     |
| 0.103147   | 0.134761 | 0.117133   | 0.103001   | 0.104895  | 0.145542 | 0.103584     |
| 0.114219   | 0.137092 | 0.12704    | 0.116113   | 0.113636  | 0.14292  | 0.113199     |
| 0.100233   | 0.12398  | 0.117716   | 0.107372   | 0.0981935 | 0.136509 | 0.101253     |
| 0.135781   | 0.153992 | 0.137821   | 0.123106   | 0.136946  | 0.147582 | 0.136218     |

|           |          |          |          |           |          |           |
|-----------|----------|----------|----------|-----------|----------|-----------|
| 0.136655  | 0.157488 | 0.147145 | 0.127477 | 0.136364  | 0.156323 | 0.136218  |
| 0.105041  | 0.129662 | 0.126311 | 0.112762 | 0.107372  | 0.137821 | 0.109266  |
| 0.0995047 | 0.125583 | 0.120484 | 0.106061 | 0.0919289 | 0.136072 | 0.0987762 |
| 0.106935  | 0.136509 | 0.119755 | 0.108246 | 0.106643  | 0.148747 | 0.108246  |
| 0.111305  | 0.137092 | 0.124417 | 0.10912  | 0.11014   | 0.147873 | 0.109703  |
| 0.134178  | 0.15035  | 0.142337 | 0.124417 | 0.129225  | 0.151224 | 0.129079  |
| 0.107663  | 0.132284 | 0.124563 | 0.111305 | 0.103584  | 0.139277 | 0.106643  |
| 0.111014  | 0.126894 | 0.121212 | 0.108829 | 0.103147  | 0.137675 | 0.106789  |
| 0.142337  | 0.16317  | 0.148164 | 0.135198 | 0.144668  | 0.164044 | 0.13141   |
| 0.123689  | 0.143065 | 0.13243  | 0.114219 | 0.11553   | 0.14627  | 0.123252  |
| 0.108974  | 0.133013 | 0.123834 | 0.11116  | 0.107809  | 0.136509 | 0.105332  |
| 0.110723  | 0.105624 | 0.117133 | 0.11961  | 0.120047  | 0.14292  | 0.11553   |
| 0.107809  | 0.125437 | 0.124417 | 0.108829 | 0.111888  | 0.132721 | 0.103001  |
| 0.138986  | 0.161859 | 0.149184 | 0.12398  | 0.136072  | 0.159819 | 0.132721  |
| 0.117861  | 0.1419   | 0.133304 | 0.115967 | 0.116696  | 0.143939 | 0.115385  |
| 0.105915  | 0.134033 | 0.124854 | 0.108683 | 0.106498  | 0.134615 | 0.106643  |
| 0.110577  | 0.129662 | 0.12398  | 0.113054 | 0.105624  | 0.13986  | 0.107809  |
| 0.113345  | 0.141171 | 0.120047 | 0.104749 | 0.107226  | 0.145251 | 0.111451  |
| 0.134907  | 0.156614 | 0.138986 | 0.123106 | 0.131119  | 0.14729  | 0.13039   |
| 0.131993  | 0.154866 | 0.138112 | 0.124272 | 0.1419    | 0.150495 | 0.129225  |
| 0.159528  | 0.134907 | 0.158945 | 0.149476 | 0.162733  | 0.180653 | 0.152681  |
| 0.104749  | 0.132576 | 0.120192 | 0.113054 | 0.108537  | 0.139569 | 0.104021  |
| 0.104458  | 0.131993 | 0.122815 | 0.111014 | 0.0977564 | 0.140152 | 0.10373   |
| 0.104458  | 0.133741 | 0.12602  | 0.106061 | 0.100962  | 0.140152 | 0.099359  |
| 0.136364  | 0.153409 | 0.141608 | 0.131847 | 0.134615  | 0.156323 | 0.133013  |
| 0.106935  | 0.127185 | 0.119755 | 0.108246 | 0.10373   | 0.138549 | 0.105624  |
| 0.128351  | 0.146562 | 0.136218 | 0.115676 | 0.126311  | 0.144522 | 0.125583  |
| 0.113199  | 0.138695 | 0.119318 | 0.107226 | 0.107955  | 0.138695 | 0.110431  |
| 0.113345  | 0.133304 | 0.124126 | 0.11757  | 0.0990676 | 0.140297 | 0.109994  |
| 0.143648  | 0.154866 | 0.147145 | 0.135635 | 0.140734  | 0.156906 | 0.139714  |
| 0.114219  | 0.139132 | 0.129953 | 0.116113 | 0.110723  | 0.147582 | 0.116113  |
| 0.130099  | 0.154138 | 0.140589 | 0.126166 | 0.128934  | 0.149184 | 0.129953  |
| 0.125583  | 0.145542 | 0.134907 | 0.120192 | 0.113054  | 0.148456 | 0.122815  |
| 0.107372  | 0.128497 | 0.127768 | 0.111888 | 0.106206  | 0.129953 | 0.103438  |
| 0.108829  | 0.126166 | 0.125437 | 0.111014 | 0.104749  | 0.137529 | 0.103147  |
| 0.104749  | 0.133159 | 0.124854 | 0.107517 | 0.101836  | 0.137238 | 0.107809  |
| 0.126311  | 0.150058 | 0.141171 | 0.122378 | 0.128642  | 0.147727 | 0.125291  |
| 0.102855  | 0.130099 | 0.125291 | 0.10912  | 0.0981935 | 0.141171 | 0.101836  |
| 0.133304  | 0.155012 | 0.13884  | 0.12704  | 0.132139  | 0.151807 | 0.129953  |
| 0.11553   | 0.138986 | 0.128642 | 0.116259 | 0.11553   | 0.147145 | 0.112471  |
| 0.114365  | 0.138403 | 0.127768 | 0.110431 | 0.111742  | 0.146853 | 0.112762  |
| 0.106498  | 0.134907 | 0.124854 | 0.112762 | 0.109994  | 0.140152 | 0.111305  |
| 0.114365  | 0.138403 | 0.128351 | 0.11655  | 0.112617  | 0.144814 | 0.116259  |
| 0.105915  | 0.132576 | 0.12398  | 0.111597 | 0.101253  | 0.142191 | 0.107517  |

|           |          |          |           |           |          |           |
|-----------|----------|----------|-----------|-----------|----------|-----------|
| 0.110868  | 0.129953 | 0.126311 | 0.1081    | 0.104167  | 0.141608 | 0.106935  |
| 0.13141   | 0.151078 | 0.138403 | 0.123689  | 0.126748  | 0.146125 | 0.132721  |
| 0.100233  | 0.131265 | 0.115093 | 0.100962  | 0.0981935 | 0.140589 | 0.103293  |
| 0.101544  | 0.129953 | 0.11757  | 0.0996503 | 0.105332  | 0.13549  | 0.102855  |
| 0.119901  | 0.145688 | 0.128934 | 0.120047  | 0.11553   | 0.134033 | 0.118007  |
| 0.122523  | 0.144231 | 0.133596 | 0.121795  | 0.116404  | 0.136364 | 0.120921  |
| 0.120775  | 0.151807 | 0.131847 | 0.11859   | 0.124563  | 0.145979 | 0.118881  |
| 0.131702  | 0.155157 | 0.136946 | 0.124854  | 0.129079  | 0.1537   | 0.126894  |
| 0.11116   | 0.130245 | 0.126603 | 0.111014  | 0.104749  | 0.13345  | 0.107226  |
| 0.182547  | 0.144814 | 0.184878 | 0.174825  | 0.176719  | 0.189685 | 0.174242  |
| 0.106935  | 0.128351 | 0.11859  | 0.11116   | 0.0984848 | 0.127185 | 0.103875  |
| 0.126603  | 0.152389 | 0.133013 | 0.120921  | 0.131556  | 0.146853 | 0.12704   |
| 0.119027  | 0.147145 | 0.126603 | 0.118298  | 0.121649  | 0.144231 | 0.117424  |
| 0.130828  | 0.158071 | 0.1419   | 0.125437  | 0.125291  | 0.148747 | 0.13243   |
| 0.105624  | 0.130536 | 0.11553  | 0.104895  | 0.103001  | 0.134324 | 0.101399  |
| 0.122523  | 0.149476 | 0.134761 | 0.121212  | 0.12398   | 0.15035  | 0.119755  |
| 0.113491  | 0.136364 | 0.121358 | 0.112179  | 0.106206  | 0.138986 | 0.104895  |
| 0.121212  | 0.142628 | 0.126748 | 0.110286  | 0.112762  | 0.141754 | 0.116987  |
| 0.111014  | 0.13039  | 0.122669 | 0.105915  | 0.110723  | 0.132139 | 0.110286  |
| 0.128497  | 0.156323 | 0.13986  | 0.120192  | 0.12704   | 0.145833 | 0.124272  |
| 0.103438  | 0.13039  | 0.119755 | 0.109994  | 0.101981  | 0.141171 | 0.102127  |
| 0.126894  | 0.153263 | 0.133596 | 0.113636  | 0.125146  | 0.148893 | 0.124417  |
| 0.112762  | 0.135052 | 0.128205 | 0.109703  | 0.105186  | 0.136218 | 0.106206  |
| 0.116113  | 0.143648 | 0.136509 | 0.119755  | 0.120775  | 0.147145 | 0.12296   |
| 0.119755  | 0.142628 | 0.126748 | 0.123106  | 0.119464  | 0.136801 | 0.121358  |
| 0.106643  | 0.127477 | 0.118881 | 0.109994  | 0.0987762 | 0.13447  | 0.104167  |
| 0.13986   | 0.153992 | 0.146562 | 0.133887  | 0.138403  | 0.158654 | 0.136509  |
| 0.112908  | 0.13549  | 0.125437 | 0.112471  | 0.103875  | 0.138695 | 0.109557  |
| 0.104749  | 0.131993 | 0.12398  | 0.111305  | 0.103001  | 0.140443 | 0.10169   |
| 0.112471  | 0.136218 | 0.125291 | 0.117279  | 0.1081    | 0.137675 | 0.104749  |
| 0.132867  | 0.1537   | 0.142191 | 0.130973  | 0.129953  | 0.141754 | 0.129808  |
| 0.116841  | 0.119901 | 0.125    | 0.104167  | 0.116841  | 0.145833 | 0.110868  |
| 0.104021  | 0.131265 | 0.11655  | 0.108537  | 0.100233  | 0.135635 | 0.0995047 |
| 0.101981  | 0.130973 | 0.118298 | 0.105041  | 0.102273  | 0.138549 | 0.0992133 |
| 0.110868  | 0.134324 | 0.124563 | 0.113054  | 0.105915  | 0.139277 | 0.106352  |
| 0.115676  | 0.144376 | 0.118881 | 0.112908  | 0.115676  | 0.141754 | 0.120775  |
| 0.112034  | 0.134324 | 0.125437 | 0.116259  | 0.105915  | 0.134907 | 0.106935  |
| 0.0973193 | 0.120192 | 0.112179 | 0.102127  | 0.092366  | 0.13039  | 0.0962995 |
| 0.100816  | 0.120192 | 0.115385 | 0.10271   | 0.092366  | 0.136509 | 0.0942599 |
| 0.101836  | 0.12704  | 0.115822 | 0.106061  | 0.0989219 | 0.138403 | 0.103438  |
| 0.114365  | 0.130828 | 0.128642 | 0.120338  | 0.114365  | 0.146562 | 0.112471  |
| 0.126457  | 0.14729  | 0.12704  | 0.11116   | 0.11859   | 0.147873 | 0.119901  |
| 0.104167  | 0.128788 | 0.112908 | 0.106352  | 0.0936772 | 0.137821 | 0.103438  |
| 0.101107  | 0.124563 | 0.107226 | 0.100087  | 0.0973193 | 0.135635 | 0.0980478 |

|           |          |           |           |           |          |           |
|-----------|----------|-----------|-----------|-----------|----------|-----------|
| 0.119464  | 0.142628 | 0.122086  | 0.108537  | 0.108974  | 0.150495 | 0.116696  |
| 0.103584  | 0.129662 | 0.11757   | 0.103438  | 0.0968823 | 0.13986  | 0.101981  |
| 0.115239  | 0.136364 | 0.126894  | 0.119755  | 0.114656  | 0.151515 | 0.110723  |
| 0.129225  | 0.14831  | 0.136509  | 0.123543  | 0.132139  | 0.153846 | 0.119755  |
| 0.11553   | 0.133741 | 0.120775  | 0.106935  | 0.101836  | 0.13986  | 0.106061  |
| 0.102564  | 0.130099 | 0.111888  | 0.109703  | 0.0949883 | 0.139714 | 0.106206  |
| 0.106643  | 0.128642 | 0.116259  | 0.103293  | 0.0984848 | 0.140589 | 0.103001  |
| 0.097028  | 0.121941 | 0.115676  | 0.100087  | 0.0967366 | 0.135344 | 0.0965909 |
| 0.118881  | 0.141171 | 0.126457  | 0.11553   | 0.115967  | 0.14088  | 0.109994  |
| 0.0999417 | 0.124854 | 0.11014   | 0.0968823 | 0.0958625 | 0.134761 | 0.0989219 |
| 0.129225  | 0.156469 | 0.13447   | 0.121503  | 0.126603  | 0.158217 | 0.128788  |
| 0.127622  | 0.147582 | 0.134324  | 0.126894  | 0.124709  | 0.147582 | 0.130973  |
| 0.118007  | 0.142337 | 0.127622  | 0.114073  | 0.117133  | 0.14292  | 0.116987  |
| 0.107955  | 0.134324 | 0.118735  | 0.112179  | 0.102127  | 0.141608 | 0.107517  |
| 0.111742  | 0.132576 | 0.123397  | 0.115676  | 0.108829  | 0.132576 | 0.103438  |
| 0.104312  | 0.132139 | 0.11859   | 0.105915  | 0.0979021 | 0.135927 | 0.104458  |
| 0.106789  | 0.133159 | 0.129808  | 0.0996503 | 0.0995047 | 0.145688 | 0.101107  |
| 0.0942599 | 0.129953 | 0.117861  | 0.101107  | 0.10067   | 0.138695 | 0.103438  |
| 0.108829  | 0.124126 | 0.119901  | 0.106643  | 0.109703  | 0.140734 | 0.099359  |
| 0.124854  | 0.150932 | 0.135344  | 0.105769  | 0.116113  | 0.158217 | 0.120629  |
| 0.107226  | 0.132721 | 0.120921  | 0.10912   | 0.104312  | 0.14088  | 0.105332  |
| 0.122232  | 0.135198 | 0.122523  | 0.123543  | 0.114948  | 0.148893 | 0.120047  |
| 0.130536  | 0.1537   | 0.136072  | 0.124272  | 0.120629  | 0.133887 | 0.133596  |
| 0.189103  | 0.145542 | 0.195221  | 0.197407  | 0.184732  | 0.210227 | 0.177593  |
| 0.237034  | 0.193765 | 0.23412   | 0.235431  | 0.234411  | 0.244755 | 0.222028  |
| 0.107226  | 0.120484 | 0.123834  | 0.108537  | 0.103147  | 0.13447  | 0.0986305 |
| 0.106206  | 0.134615 | 0.122523  | 0.10169   | 0.106206  | 0.137821 | 0.103147  |
| 0.102127  | 0.124126 | 0.120192  | 0.0917832 | 0.104749  | 0.137238 | 0.100524  |
| 0.104458  | 0.127331 | 0.121358  | 0.108683  | 0.104749  | 0.138403 | 0.101981  |
| 0.115239  | 0.137238 | 0.0426865 | 0.117424  | 0.124563  | 0.145979 | 0.114802  |
| 0.113199  | 0.136072 | 0.123397  | 0.104895  | 0.105915  | 0.141026 | 0.106061  |
| 0.144522  | 0.163607 | 0.150932  | 0.12602   | 0.139277  | 0.159528 | 0.141754  |
| 0.110286  | 0.136655 | 0.130973  | 0.109848  | 0.106498  | 0.144522 | 0.110723  |
| 0.127185  | 0.154429 | 0.140006  | 0.116841  | 0.12602   | 0.150932 | 0.119172  |
| 0.126748  | 0.144959 | 0.137529  | 0.112325  | 0.123834  | 0.145251 | 0.125146  |
| 0.126748  | 0.150204 | 0.135781  | 0.112034  | 0.123252  | 0.149038 | 0.128934  |
| 0.13141   | 0.152244 | 0.134324  | 0.122232  | 0.13141   | 0.149913 | 0.126311  |
| 0.113345  | 0.13884  | 0.123834  | 0.107372  | 0.104895  | 0.145251 | 0.107663  |
| 0.113054  | 0.13447  | 0.12704   | 0.104167  | 0.101107  | 0.137675 | 0.106206  |
| 0.115239  | 0.137529 | 0.126603  | 0.101981  | 0.105624  | 0.13986  | 0.108974  |
| 0.110868  | 0.13141  | 0.122523  | 0.108683  | 0.101544  | 0.135198 | 0.100233  |
| 0.110577  | 0.133159 | 0.124563  | 0.105186  | 0.102418  | 0.138986 | 0.106935  |
| 0.11451   | 0.136218 | 0.128788  | 0.113782  | 0.1081    | 0.13884  | 0.110286  |
| 0.12602   | 0.14627  | 0.133013  | 0.114802  | 0.116696  | 0.147436 | 0.118298  |



|          |          |          |          |           |          |           |
|----------|----------|----------|----------|-----------|----------|-----------|
| 0.129808 | 0.15676  | 0.142337 | 0.122378 | 0.129516  | 0.151224 | 0.130245  |
| 0.116259 | 0.139714 | 0.130536 | 0.111116 | 0.106935  | 0.146125 | 0.109411  |
| 0.108829 | 0.130828 | 0.122815 | 0.106935 | 0.10067   | 0.137238 | 0.106061  |
| 0.129225 | 0.152972 | 0.144085 | 0.123543 | 0.11961   | 0.152098 | 0.12296   |
| 0.110868 | 0.13345  | 0.125437 | 0.106643 | 0.0962995 | 0.138986 | 0.100816  |
| 0.13986  | 0.160402 | 0.138986 | 0.128351 | 0.133159  | 0.159819 | 0.13039   |
| 0.124709 | 0.142045 | 0.128205 | 0.130973 | 0.122669  | 0.156906 | 0.124854  |
| 0.13039  | 0.151807 | 0.136801 | 0.117424 | 0.128351  | 0.142483 | 0.124417  |
| 0.108537 | 0.13345  | 0.122815 | 0.103147 | 0.103875  | 0.138112 | 0.102273  |
| 0.104312 | 0.132139 | 0.122086 | 0.102418 | 0.0990676 | 0.133596 | 0.0992133 |
| 0.121941 | 0.145979 | 0.133304 | 0.113928 | 0.117861  | 0.146853 | 0.116841  |
| 0.120629 | 0.145251 | 0.132867 | 0.113199 | 0.119172  | 0.148164 | 0.110868  |
| 0.131119 | 0.151661 | 0.143939 | 0.116113 | 0.116841  | 0.150787 | 0.123397  |
| 0.111742 | 0.140152 | 0.129808 | 0.112762 | 0.104167  | 0.136364 | 0.11014   |
| 0.113345 | 0.144668 | 0.128788 | 0.108829 | 0.105478  | 0.146125 | 0.112908  |
| 0.117133 | 0.145833 | 0.131119 | 0.110286 | 0.113928  | 0.144668 | 0.114365  |
| 0.128497 | 0.155449 | 0.140443 | 0.120484 | 0.121503  | 0.149621 | 0.123397  |
| 0.129079 | 0.146999 | 0.141608 | 0.114948 | 0.121795  | 0.14933  | 0.122232  |
| 0.132721 | 0.155012 | 0.140589 | 0.120338 | 0.124563  | 0.156469 | 0.123834  |
| 0.127331 | 0.14088  | 0.134033 | 0.115239 | 0.129371  | 0.158362 | 0.127768  |
| 0.111305 | 0.136218 | 0.132576 | 0.110868 | 0.102564  | 0.138549 | 0.105332  |
| 0.127331 | 0.147582 | 0.140443 | 0.121649 | 0.116841  | 0.150495 | 0.118735  |
| 0.105624 | 0.133741 | 0.123397 | 0.104312 | 0.0989219 | 0.139569 | 0.102273  |
| 0.109557 | 0.127185 | 0.124709 | 0.113782 | 0.105478  | 0.135635 | 0.106789  |
| 0.110723 | 0.132721 | 0.120338 | 0.108246 | 0.105478  | 0.140006 | 0.102127  |
| 0.112034 | 0.130536 | 0.12398  | 0.109266 | 0.103875  | 0.137821 | 0.1081    |
| 0.107663 | 0.130245 | 0.125146 | 0.105186 | 0.0962995 | 0.131702 | 0.104021  |
| 0.127914 | 0.153992 | 0.140443 | 0.117861 | 0.122669  | 0.161568 | 0.125728  |
| 0.112034 | 0.136364 | 0.125146 | 0.109848 | 0.108829  | 0.146853 | 0.106643  |
| 0.128642 | 0.152972 | 0.140297 | 0.11859  | 0.128351  | 0.152681 | 0.118881  |
| 0.111451 | 0.132284 | 0.125437 | 0.108683 | 0.104167  | 0.136364 | 0.102273  |
| 0.121795 | 0.148164 | 0.137529 | 0.109703 | 0.114219  | 0.146416 | 0.120775  |
| 0.105915 | 0.135781 | 0.126603 | 0.104021 | 0.116696  | 0.144522 | 0.115676  |
| 0.106789 | 0.125874 | 0.118444 | 0.11655  | 0.106206  | 0.143648 | 0.108392  |
| 0.114219 | 0.131265 | 0.121795 | 0.103001 | 0.105769  | 0.145542 | 0.110577  |
| 0.113491 | 0.131702 | 0.127477 | 0.121212 | 0.111742  | 0.138403 | 0.11014   |
| 0.115385 | 0.139132 | 0.126457 | 0.120484 | 0.092366  | 0.147582 | 0.117279  |
| 0.104895 | 0.130973 | 0.122086 | 0.114656 | 0.100233  | 0.138258 | 0.106789  |
| 0.117424 | 0.140589 | 0.131119 | 0.121358 | 0.125874  | 0.146707 | 0.125437  |
| 0.130682 | 0.155594 | 0.140589 | 0.117133 | 0.133013  | 0.160256 | 0.130828  |
| 0.092803 | 0.120629 | 0.110868 | 0.109848 | 0.099796  | 0.134615 | 0.0958625 |
| 0.116841 | 0.147873 | 0.119172 | 0.128642 | 0.120047  | 0.144376 | 0.116696  |
| 0.103001 | 0.134907 | 0.117861 | 0.118881 | 0.118444  | 0.14831  | 0.118298  |
| 0.118735 | 0.144522 | 0.124272 | 0.120629 | 0.119901  | 0.138695 | 0.11451   |

|           |          |          |          |          |          |           |
|-----------|----------|----------|----------|----------|----------|-----------|
| 0.107955  | 0.13345  | 0.119027 | 0.110723 | 0.112617 | 0.138695 | 0.106643  |
| 0.103584  | 0.134615 | 0.121941 | 0.114802 | 0.11116  | 0.1419   | 0.108974  |
| 0.107809  | 0.132139 | 0.11859  | 0.114948 | 0.113054 | 0.144085 | 0.11116   |
| 0.119027  | 0.144814 | 0.129225 | 0.126166 | 0.11757  | 0.142774 | 0.118298  |
| 0.128059  | 0.147145 | 0.127185 | 0.128205 | 0.129808 | 0.150058 | 0.120629  |
| 0.103293  | 0.127914 | 0.121358 | 0.120629 | 0.115239 | 0.146853 | 0.109848  |
| 0.105332  | 0.128205 | 0.116987 | 0.110431 | 0.112325 | 0.133741 | 0.101981  |
| 0.13345   | 0.154575 | 0.144814 | 0.12602  | 0.125583 | 0.154283 | 0.127768  |
| 0.11757   | 0.140152 | 0.129808 | 0.123834 | 0.121066 | 0.148019 | 0.121212  |
| 0.0995047 | 0.125291 | 0.117279 | 0.111597 | 0.102418 | 0.134615 | 0.0964452 |
| 0.217657  | 0.172348 | 0.222611 | 0.220425 | 0.2162   | 0.234703 | 0.204691  |
| 0.113636  | 0.135927 | 0.121503 | 0.11757  | 0.114219 | 0.141754 | 0.107663  |
| 0.0996503 | 0.12602  | 0.121212 | 0.114656 | 0.107809 | 0.143211 | 0.107955  |
| 0.11757   | 0.141317 | 0.126603 | 0.131119 | 0.123689 | 0.148019 | 0.118298  |
| 0.0977564 | 0.131993 | 0.11961  | 0.111597 | 0.10912  | 0.143065 | 0.109848  |
| 0.11961   | 0.136364 | 0.11961  | 0.123834 | 0.125146 | 0.145688 | 0.120338  |
| 0.104458  | 0.133159 | 0.120775 | 0.120338 | 0.115239 | 0.141608 | 0.113054  |
| 0.104604  | 0.129516 | 0.116841 | 0.118735 | 0.113636 | 0.135635 | 0.107663  |
| 0.106643  | 0.130682 | 0.120338 | 0.117279 | 0.11655  | 0.144085 | 0.114656  |
| 0.110868  | 0.125874 | 0.124272 | 0.120338 | 0.119318 | 0.141608 | 0.112471  |
| 0.120047  | 0.14729  | 0.127622 | 0.124563 | 0.123252 | 0.140006 | 0.119318  |
| 0.120192  | 0.145396 | 0.126894 | 0.125    | 0.125146 | 0.141317 | 0.117424  |
| 0.119027  | 0.142191 | 0.124272 | 0.125291 | 0.123397 | 0.140443 | 0.114802  |
| 0.102418  | 0.131993 | 0.11553  | 0.108974 | 0.10912  | 0.142483 | 0.109266  |
| 0.106789  | 0.137529 | 0.126894 | 0.115967 | 0.111451 | 0.136072 | 0.105186  |
| 0.124417  | 0.143502 | 0.127622 | 0.126603 | 0.123252 | 0.148456 | 0.118735  |
| 0.107372  | 0.129953 | 0.115239 | 0.111305 | 0.114948 | 0.132867 | 0.105478  |
| 0.135052  | 0.152972 | 0.140006 | 0.130245 | 0.123106 | 0.145688 | 0.130536  |
| 0.130245  | 0.135344 | 0.136072 | 0.141463 | 0.126457 | 0.161859 | 0.128934  |
| 0.114802  | 0.132721 | 0.119755 | 0.106206 | 0.114802 | 0.141754 | 0.116696  |
| 0.110431  | 0.135927 | 0.121795 | 0.121358 | 0.120338 | 0.146416 | 0.117861  |
| 0.121066  | 0.139277 | 0.133013 | 0.122378 | 0.121358 | 0.150932 | 0.121795  |
| 0.109557  | 0.139132 | 0.130536 | 0.121066 | 0.120047 | 0.145251 | 0.121649  |
| 0.121795  | 0.134178 | 0.132576 | 0.126311 | 0.119755 | 0.147873 | 0.118735  |
| 0.126166  | 0.144668 | 0.136072 | 0.136218 | 0.130536 | 0.155449 | 0.131556  |
| 0.10067   | 0.126457 | 0.117279 | 0.106643 | 0.10067  | 0.139569 | 0.104312  |
| 0.121212  | 0.142337 | 0.126457 | 0.121358 | 0.125583 | 0.140589 | 0.126603  |
| 0.133013  | 0.133159 | 0.140006 | 0.136364 | 0.135927 | 0.150932 | 0.13345   |
| 0.112908  | 0.141026 | 0.118735 | 0.106935 | 0.10912  | 0.142483 | 0.109557  |
| 0.116404  | 0.134615 | 0.128642 | 0.119755 | 0.114948 | 0.142483 | 0.11655   |
| 0.144522  | 0.160402 | 0.145979 | 0.129225 | 0.137529 | 0.160402 | 0.135344  |
| 0.120338  | 0.143794 | 0.131993 | 0.118735 | 0.118007 | 0.150204 | 0.11757   |
| 0.130973  | 0.151224 | 0.133596 | 0.130245 | 0.136218 | 0.159091 | 0.132867  |
| 0.121795  | 0.143794 | 0.128497 | 0.119318 | 0.123252 | 0.150495 | 0.121649  |

|           |          |           |          |           |          |           |
|-----------|----------|-----------|----------|-----------|----------|-----------|
| 0.120192  | 0.145396 | 0.128351  | 0.119755 | 0.112617  | 0.145396 | 0.11014   |
| 0.125874  | 0.145542 | 0.130828  | 0.114948 | 0.125291  | 0.143794 | 0.128934  |
| 0.111451  | 0.132284 | 0.123397  | 0.112471 | 0.113491  | 0.149767 | 0.115385  |
| 0.122669  | 0.149038 | 0.13549   | 0.116696 | 0.12296   | 0.149913 | 0.118153  |
| 0.119755  | 0.140006 | 0.134033  | 0.121649 | 0.11655   | 0.143211 | 0.11757   |
| 0.125874  | 0.153409 | 0.134907  | 0.124854 | 0.123543  | 0.151369 | 0.120484  |
| 0.131119  | 0.154866 | 0.136364  | 0.123689 | 0.126748  | 0.146999 | 0.122232  |
| 0.124709  | 0.145833 | 0.136072  | 0.116696 | 0.124417  | 0.155157 | 0.121066  |
| 0.134615  | 0.156614 | 0.143065  | 0.128642 | 0.142483  | 0.155157 | 0.135344  |
| 0.110431  | 0.131556 | 0.118298  | 0.116404 | 0.112762  | 0.142045 | 0.114656  |
| 0.110723  | 0.137092 | 0.126748  | 0.10708  | 0.111305  | 0.145542 | 0.112617  |
| 0.123252  | 0.145251 | 0.129662  | 0.12398  | 0.117716  | 0.106206 | 0.124563  |
| 0.111014  | 0.132139 | 0.121795  | 0.10912  | 0.106352  | 0.141754 | 0.110868  |
| 0.133887  | 0.148893 | 0.143794  | 0.132576 | 0.143211  | 0.159674 | 0.126748  |
| 0.151078  | 0.162005 | 0.153118  | 0.143939 | 0.145542  | 0.170455 | 0.147727  |
| 0.122232  | 0.149767 | 0.136801  | 0.117424 | 0.123689  | 0.151807 | 0.119172  |
| 0.120629  | 0.145542 | 0.134033  | 0.109703 | 0.113636  | 0.147873 | 0.113199  |
| 0.121066  | 0.154429 | 0.134761  | 0.125291 | 0.127477  | 0.148601 | 0.122086  |
| 0.116841  | 0.146707 | 0.12704   | 0.126894 | 0.125     | 0.142337 | 0.11553   |
| 0.127622  | 0.153118 | 0.137529  | 0.120775 | 0.119172  | 0.143502 | 0.122523  |
| 0.123543  | 0.153409 | 0.130828  | 0.130973 | 0.123834  | 0.144085 | 0.124272  |
| 0.129953  | 0.140589 | 0.132576  | 0.118153 | 0.136072  | 0.154283 | 0.127185  |
| 0.112034  | 0.138695 | 0.123689  | 0.110723 | 0.118735  | 0.153263 | 0.117133  |
| 0.160985  | 0.169289 | 0.160985  | 0.156177 | 0.154575  | 0.165501 | 0.154138  |
| 0.114365  | 0.145979 | 0.127185  | 0.115093 | 0.115239  | 0.150932 | 0.119464  |
| 0.123397  | 0.145396 | 0.128642  | 0.123543 | 0.133013  | 0.153555 | 0.128205  |
| 0.111888  | 0.139132 | 0.12704   | 0.106498 | 0.117133  | 0.145251 | 0.114073  |
| 0.125291  | 0.160985 | 0.141026  | 0.119901 | 0.126457  | 0.156031 | 0.126603  |
| 0.107226  | 0.133887 | 0.118298  | 0.121066 | 0.11655   | 0.133013 | 0.112325  |
| 0.128642  | 0.118007 | 0.144376  | 0.129079 | 0.136509  | 0.161131 | 0.117716  |
| 0.142483  | 0.155449 | 0.141317  | 0.140297 | 0.140734  | 0.140006 | 0.133887  |
| 0.11553   | 0.131702 | 0.129225  | 0.122378 | 0.118735  | 0.140443 | 0.106061  |
| 0.127622  | 0.116696 | 0.135781  | 0.133596 | 0.130828  | 0.148747 | 0.120775  |
| 0.140006  | 0.123252 | 0.153118  | 0.142483 | 0.131556  | 0.168415 | 0.137238  |
| 0.136509  | 0.115093 | 0.149038  | 0.142191 | 0.132721  | 0.163753 | 0.125583  |
| 0.121212  | 0.14933  | 0.138695  | 0.101544 | 0.113345  | 0.147582 | 0.11961   |
| 0.127477  | 0.145396 | 0.136801  | 0.139277 | 0.127185  | 0.127914 | 0.127622  |
| 0.106206  | 0.123252 | 0.092803  | 0.113636 | 0.111742  | 0.141026 | 0.102273  |
| 0.106935  | 0.124854 | 0.0868298 | 0.104749 | 0.106352  | 0.143211 | 0.106498  |
| 0.114365  | 0.135198 | 0.126894  | 0.118007 | 0.112325  | 0.14831  | 0.109848  |
| 0.110577  | 0.129371 | 0.127768  | 0.119464 | 0.113199  | 0.136946 | 0.102273  |
| 0.107809  | 0.130973 | 0.12296   | 0.119027 | 0.0932401 | 0.14088  | 0.111451  |
| 0.0984848 | 0.115239 | 0.0824592 | 0.106498 | 0.11014   | 0.138258 | 0.0954254 |
| 0.107517  | 0.130973 | 0.129079  | 0.121941 | 0.111888  | 0.141754 | 0.104749  |

|           |          |           |          |           |          |           |
|-----------|----------|-----------|----------|-----------|----------|-----------|
| 0.107955  | 0.121503 | 0.0622086 | 0.113928 | 0.117861  | 0.145105 | 0.110431  |
| 0.0942599 | 0.115967 | 0.106498  | 0.106935 | 0.100962  | 0.138112 | 0.097028  |
| 0.114073  | 0.129371 | 0.129808  | 0.120921 | 0.115822  | 0.143065 | 0.10169   |
| 0.109557  | 0.129225 | 0.126748  | 0.121358 | 0.111888  | 0.138549 | 0.100379  |
| 0.115967  | 0.146125 | 0.137238  | 0.108246 | 0.106935  | 0.152535 | 0.116696  |
| 0.212704  | 0.172057 | 0.214161  | 0.215181 | 0.212995  | 0.22771  | 0.202652  |
| 0.138695  | 0.154283 | 0.143065  | 0.136509 | 0.138403  | 0.148747 | 0.124272  |
| 0.131556  | 0.14831  | 0.134761  | 0.129079 | 0.120775  | 0.138403 | 0.117716  |
| 0.112471  | 0.136218 | 0.125874  | 0.127768 | 0.118881  | 0.145833 | 0.101253  |
| 0.208625  | 0.165647 | 0.208916  | 0.213432 | 0.206002  | 0.218969 | 0.192453  |
| 0.116841  | 0.129225 | 0.132867  | 0.112617 | 0.112179  | 0.151369 | 0.111116  |
| 0.114073  | 0.143648 | 0.125437  | 0.119464 | 0.107372  | 0.155594 | 0.120047  |
| 0.118153  | 0.13345  | 0.13243   | 0.126166 | 0.112617  | 0.124126 | 0.117716  |
| 0.108392  | 0.127477 | 0.0472028 | 0.10912  | 0.116841  | 0.14292  | 0.109994  |
| 0.247086  | 0.205565 | 0.245047  | 0.246941 | 0.248834  | 0.253934 | 0.234411  |
| 0.120775  | 0.144522 | 0.132139  | 0.122086 | 0.125146  | 0.150932 | 0.112179  |
| 0.108246  | 0.137238 | 0.129516  | 0.105186 | 0.0980478 | 0.148601 | 0.109848  |
| 0.124272  | 0.146853 | 0.136218  | 0.134324 | 0.099796  | 0.138695 | 0.118007  |
| 0.120775  | 0.13986  | 0.132721  | 0.129079 | 0.0995047 | 0.136946 | 0.113928  |
| 0.121649  | 0.135781 | 0.112034  | 0.118298 | 0.125146  | 0.150058 | 0.117424  |
| 0.116113  | 0.113928 | 0.116987  | 0.119755 | 0.119318  | 0.152389 | 0.110431  |
| 0.111116  | 0.140152 | 0.128934  | 0.108392 | 0.102418  | 0.150058 | 0.115967  |
| 0.111597  | 0.129808 | 0.12704   | 0.117861 | 0.111888  | 0.135635 | 0.100962  |
| 0.116696  | 0.132867 | 0.131265  | 0.127622 | 0.113782  | 0.125291 | 0.11655   |
| 0.103293  | 0.126457 | 0.0511364 | 0.110431 | 0.110577  | 0.142483 | 0.106352  |
| 0.106935  | 0.125146 | 0.12296   | 0.117861 | 0.109848  | 0.136509 | 0.100962  |
| 0.0954254 | 0.120047 | 0.103584  | 0.104895 | 0.107663  | 0.136946 | 0.106352  |
| 0.141317  | 0.158654 | 0.143939  | 0.141171 | 0.13986   | 0.137675 | 0.133887  |
| 0.126748  | 0.143502 | 0.13345   | 0.124272 | 0.126166  | 0.151078 | 0.115822  |
| 0.118007  | 0.14292  | 0.126457  | 0.117279 | 0.109266  | 0.157197 | 0.121649  |
| 0.185315  | 0.141171 | 0.192599  | 0.192745 | 0.185897  | 0.206731 | 0.171766  |
| 0.201923  | 0.156031 | 0.20542   | 0.205565 | 0.198135  | 0.217512 | 0.190122  |
| 0.109557  | 0.122815 | 0.0492424 | 0.114073 | 0.114802  | 0.143502 | 0.107955  |
| 0.103438  | 0.121649 | 0.0483683 | 0.10708  | 0.109557  | 0.140297 | 0.103584  |
| 0.124709  | 0.140297 | 0.130536  | 0.13243  | 0.130536  | 0.145833 | 0.0875583 |
| 0.113928  | 0.136801 | 0.133159  | 0.109703 | 0.0979021 | 0.149621 | 0.110286  |
| 0.123689  | 0.145979 | 0.135052  | 0.120047 | 0.12602   | 0.151224 | 0.113928  |
| 0.128788  | 0.145833 | 0.131993  | 0.127185 | 0.120047  | 0.134761 | 0.121358  |
| 0.224359  | 0.176428 | 0.223776  | 0.224505 | 0.224359  | 0.23208  | 0.206731  |
| 0.11451   | 0.134761 | 0.125874  | 0.120775 | 0.104312  | 0.134761 | 0.106498  |
| 0.205274  | 0.164918 | 0.211976  | 0.199883 | 0.205274  | 0.219114 | 0.196678  |
| 0.105769  | 0.139423 | 0.129662  | 0.103001 | 0.099359  | 0.142628 | 0.107372  |
| 0.112908  | 0.137238 | 0.124563  | 0.11655  | 0.103001  | 0.138695 | 0.11014   |
| 0.111014  | 0.12602  | 0.125     | 0.110286 | 0.107517  | 0.138258 | 0.105624  |

|          |          |           |           |           |          |           |
|----------|----------|-----------|-----------|-----------|----------|-----------|
| 0.10169  | 0.11757  | 0.0606061 | 0.104749  | 0.108974  | 0.139714 | 0.102127  |
| 0.203526 | 0.157343 | 0.207022  | 0.208042  | 0.201777  | 0.221737 | 0.193182  |
| 0.122232 | 0.13141  | 0.138549  | 0.127914  | 0.127768  | 0.149476 | 0.112471  |
| 0.111451 | 0.138986 | 0.133013  | 0.120047  | 0.100379  | 0.141608 | 0.118881  |
| 0.118153 | 0.13549  | 0.13039   | 0.124126  | 0.121066  | 0.143065 | 0.107517  |
| 0.111742 | 0.136946 | 0.13243   | 0.112762  | 0.11553   | 0.149184 | 0.112471  |
| 0.104167 | 0.126748 | 0.0581294 | 0.111305  | 0.106789  | 0.142191 | 0.104895  |
| 0.108974 | 0.143211 | 0.130828  | 0.0995047 | 0.102273  | 0.144959 | 0.109411  |
| 0.112471 | 0.127477 | 0.131702  | 0.10708   | 0.106061  | 0.148164 | 0.115239  |
| 0.115967 | 0.146125 | 0.127331  | 0.118153  | 0.112471  | 0.157488 | 0.119901  |
| 0.105478 | 0.120192 | 0.124417  | 0.116404  | 0.108392  | 0.135635 | 0.0989219 |
| 0.112908 | 0.137821 | 0.133887  | 0.117133  | 0.105624  | 0.13986  | 0.119755  |
| 0.184149 | 0.144376 | 0.190559  | 0.192745  | 0.187063  | 0.206439 | 0.1706    |
| 0.12602  | 0.146853 | 0.135052  | 0.131993  | 0.102127  | 0.138403 | 0.118298  |
| 0.126166 | 0.14292  | 0.129953  | 0.129808  | 0.122086  | 0.135344 | 0.116696  |
| 0.116696 | 0.136072 | 0.127768  | 0.125874  | 0.109703  | 0.145688 | 0.106061  |
| 0.121503 | 0.13447  | 0.135781  | 0.119318  | 0.121212  | 0.154283 | 0.110577  |
| 0.115093 | 0.133304 | 0.127914  | 0.120192  | 0.118298  | 0.137675 | 0.103875  |
| 0.116259 | 0.146125 | 0.134033  | 0.10271   | 0.104895  | 0.144959 | 0.114365  |
| 0.10271  | 0.130828 | 0.126894  | 0.108392  | 0.10912   | 0.143065 | 0.106061  |
| 0.11961  | 0.147436 | 0.135927  | 0.111597  | 0.107663  | 0.151807 | 0.119755  |
| 0.11859  | 0.135635 | 0.12704   | 0.124272  | 0.118007  | 0.131265 | 0.10912   |
| 0.114802 | 0.136218 | 0.131119  | 0.126894  | 0.0952797 | 0.133596 | 0.108537  |
| 0.103875 | 0.124709 | 0.0639569 | 0.114219  | 0.114656  | 0.145688 | 0.106643  |
| 0.118881 | 0.136801 | 0.132576  | 0.129516  | 0.111597  | 0.127477 | 0.116696  |
| 0.130973 | 0.145688 | 0.14088   | 0.132576  | 0.125437  | 0.124126 | 0.128788  |
| 0.114073 | 0.134615 | 0.125437  | 0.118007  | 0.114656  | 0.143939 | 0.104021  |
| 0.130828 | 0.149038 | 0.1419    | 0.130973  | 0.135781  | 0.146416 | 0.120775  |
| 0.100816 | 0.124854 | 0.0556527 | 0.109703  | 0.106935  | 0.142628 | 0.103584  |
| 0.116259 | 0.136509 | 0.129953  | 0.119027  | 0.104312  | 0.127768 | 0.108829  |
| 0.113199 | 0.112179 | 0.128059  | 0.119755  | 0.115822  | 0.140443 | 0.105186  |
| 0.11961  | 0.143357 | 0.139423  | 0.112762  | 0.10912   | 0.154429 | 0.119755  |
| 0.186917 | 0.145396 | 0.195659  | 0.187937  | 0.184586  | 0.204254 | 0.179487  |
| 0.110431 | 0.131847 | 0.125874  | 0.112325  | 0.0961538 | 0.135927 | 0.114365  |
| 0.100816 | 0.128059 | 0.118007  | 0.106498  | 0.104021  | 0.132721 | 0.0939685 |
| 0.115385 | 0.149038 | 0.125874  | 0.117861  | 0.109848  | 0.157197 | 0.120775  |
| 0.171037 | 0.128934 | 0.182984  | 0.181381  | 0.172203  | 0.198281 | 0.165647  |
| 0.134178 | 0.14831  | 0.142628  | 0.131119  | 0.13447   | 0.162587 | 0.122378  |
| 0.143211 | 0.16317  | 0.148456  | 0.132867  | 0.146999  | 0.164336 | 0.133741  |
| 0.143939 | 0.157197 | 0.142483  | 0.141463  | 0.142774  | 0.141463 | 0.133887  |
| 0.115093 | 0.131847 | 0.126748  | 0.11757   | 0.113345  | 0.142045 | 0.0992133 |
| 0.116404 | 0.132284 | 0.129225  | 0.121795  | 0.118735  | 0.134615 | 0.105478  |
| 0.206876 | 0.16215  | 0.210664  | 0.212558  | 0.207751  | 0.226253 | 0.193328  |
| 0.122669 | 0.131847 | 0.126457  | 0.119901  | 0.116259  | 0.138549 | 0.108829  |

|           |          |           |          |           |          |           |
|-----------|----------|-----------|----------|-----------|----------|-----------|
| 0.122815  | 0.134907 | 0.133013  | 0.12704  | 0.123397  | 0.143939 | 0.107517  |
| 0.113199  | 0.134324 | 0.130099  | 0.115093 | 0.107663  | 0.13986  | 0.118007  |
| 0.164481  | 0.122378 | 0.170892  | 0.164336 | 0.164773  | 0.182401 | 0.15472   |
| 0.0980478 | 0.125    | 0.118735  | 0.11859  | 0.106498  | 0.138986 | 0.0879953 |
| 0.138695  | 0.1537   | 0.142774  | 0.145251 | 0.13986   | 0.130973 | 0.138258  |
| 0.11014   | 0.121066 | 0.11655   | 0.115239 | 0.113054  | 0.146125 | 0.108246  |
| 0.186772  | 0.141754 | 0.192016  | 0.192745 | 0.183275  | 0.204108 | 0.17264   |
| 0.118881  | 0.140297 | 0.130828  | 0.119901 | 0.120047  | 0.149038 | 0.107372  |
| 0.0865385 | 0.118735 | 0.114802  | 0.10708  | 0.10169   | 0.133304 | 0.0977564 |
| 0.115239  | 0.135781 | 0.129808  | 0.122086 | 0.0995047 | 0.133741 | 0.105769  |
| 0.114802  | 0.140589 | 0.127914  | 0.119027 | 0.106935  | 0.146707 | 0.116696  |
| 0.111888  | 0.144085 | 0.123834  | 0.11553  | 0.1081    | 0.155449 | 0.11757   |
| 0.122378  | 0.133013 | 0.12704   | 0.125437 | 0.118007  | 0.131556 | 0.109411  |
| 0.0980478 | 0.124709 | 0.0569639 | 0.106643 | 0.109703  | 0.140443 | 0.101399  |
| 0.184441  | 0.141463 | 0.191434  | 0.192453 | 0.181235  | 0.2044   | 0.176136  |
| 0.114948  | 0.134615 | 0.13243   | 0.128788 | 0.112908  | 0.129079 | 0.120047  |
| 0.104895  | 0.122815 | 0.11859   | 0.115239 | 0.112471  | 0.142337 | 0.103584  |
| 0.207022  | 0.163753 | 0.211684  | 0.21183  | 0.205565  | 0.222319 | 0.194056  |
| 0.124272  | 0.144814 | 0.135927  | 0.130828 | 0.0962995 | 0.139569 | 0.117133  |
| 0.103147  | 0.123689 | 0.0518648 | 0.10912  | 0.11014   | 0.140006 | 0.100962  |
| 0.0984848 | 0.123106 | 0.0550699 | 0.105332 | 0.105478  | 0.13884  | 0.0980478 |
| 0.129225  | 0.142774 | 0.139132  | 0.129079 | 0.133887  | 0.139277 | 0.124417  |
| 0.187791  | 0.142774 | 0.190414  | 0.189977 | 0.18546   | 0.205711 | 0.173368  |
| 0.111597  | 0.144668 | 0.134615  | 0.10912  | 0.102855  | 0.152535 | 0.114073  |
| 0.124417  | 0.142628 | 0.137238  | 0.133596 | 0.120921  | 0.122523 | 0.12398   |
| 0.0976107 | 0.125146 | 0.0530303 | 0.106789 | 0.107809  | 0.140589 | 0.10271   |
| 0.0967366 | 0.12398  | 0.0597319 | 0.107663 | 0.105478  | 0.141171 | 0.102418  |
| 0.10067   | 0.120047 | 0.0540501 | 0.107517 | 0.10708   | 0.138403 | 0.104021  |
| 0.108392  | 0.126894 | 0.125583  | 0.117861 | 0.112762  | 0.137092 | 0.0995047 |
| 0.097465  | 0.118007 | 0.105624  | 0.105186 | 0.101253  | 0.136072 | 0.0967366 |
| 0.120192  | 0.13986  | 0.135344  | 0.120921 | 0.125728  | 0.151224 | 0.111597  |
| 0.131847  | 0.147436 | 0.140006  | 0.130536 | 0.125728  | 0.135781 | 0.126166  |
| 0.116404  | 0.139277 | 0.13039   | 0.124417 | 0.122523  | 0.146562 | 0.108974  |
| 0.116259  | 0.144376 | 0.13141   | 0.113491 | 0.120047  | 0.151661 | 0.116113  |
| 0.188374  | 0.145396 | 0.198281  | 0.200758 | 0.186334  | 0.21183  | 0.17803   |
| 0.113636  | 0.135052 | 0.128788  | 0.124563 | 0.1081    | 0.124563 | 0.114948  |
| 0.123397  | 0.138695 | 0.136801  | 0.125583 | 0.127477  | 0.143065 | 0.115093  |
| 0.0979021 | 0.123106 | 0.0568182 | 0.106498 | 0.107517  | 0.143794 | 0.100087  |
| 0.0965909 | 0.116841 | 0.105624  | 0.105769 | 0.0995047 | 0.132867 | 0.0935315 |
| 0.108829  | 0.121795 | 0.124272  | 0.113636 | 0.11116   | 0.131119 | 0.107226  |
| 0.112179  | 0.14292  | 0.133741  | 0.109994 | 0.101981  | 0.151078 | 0.114656  |
| 0.122378  | 0.146999 | 0.133159  | 0.126894 | 0.125291  | 0.143794 | 0.121358  |
| 0.116987  | 0.136946 | 0.126603  | 0.125291 | 0.115239  | 0.132867 | 0.106935  |
| 0.099796  | 0.122086 | 0.120484  | 0.10169  | 0.0960082 | 0.142774 | 0.103147  |

|           |          |           |           |           |          |           |
|-----------|----------|-----------|-----------|-----------|----------|-----------|
| 0.0979021 | 0.11961  | 0.115093  | 0.0989219 | 0.0958625 | 0.140297 | 0.101836  |
| 0.0861014 | 0.111597 | 0.114948  | 0.107226  | 0.0995047 | 0.139569 | 0.0909091 |
| 0.109557  | 0.140589 | 0.129079  | 0.101836  | 0.101981  | 0.143502 | 0.112617  |
| 0.127185  | 0.147436 | 0.135927  | 0.124709  | 0.130973  | 0.151224 | 0.120338  |
| 0.1081    | 0.14088  | 0.134324  | 0.110286  | 0.100524  | 0.150787 | 0.112325  |
| 0.108537  | 0.125874 | 0.121941  | 0.116841  | 0.110577  | 0.134615 | 0.0990676 |
| 0.10708   | 0.135198 | 0.130682  | 0.108974  | 0.0968823 | 0.148893 | 0.109848  |
| 0.0984848 | 0.120484 | 0.0606061 | 0.108829  | 0.106061  | 0.140006 | 0.0986305 |
| 0.105041  | 0.132867 | 0.128351  | 0.114219  | 0.0971737 | 0.131993 | 0.11014   |
| 0.10067   | 0.125291 | 0.0511364 | 0.111597  | 0.109411  | 0.140152 | 0.102564  |
| 0.110577  | 0.129079 | 0.124854  | 0.120629  | 0.104458  | 0.120921 | 0.108683  |
| 0.111451  | 0.135781 | 0.124272  | 0.122086  | 0.114656  | 0.132284 | 0.105478  |
| 0.109994  | 0.142191 | 0.122232  | 0.113928  | 0.104458  | 0.15035  | 0.117133  |
| 0.0941142 | 0.116987 | 0.1081    | 0.109411  | 0.102855  | 0.138549 | 0.0980478 |
| 0.0977564 | 0.126457 | 0.0598776 | 0.110723  | 0.108246  | 0.142191 | 0.102273  |
| 0.121358  | 0.122669 | 0.131556  | 0.12296   | 0.105041  | 0.137529 | 0.112762  |
| 0.108683  | 0.129808 | 0.122378  | 0.119027  | 0.115385  | 0.144668 | 0.109994  |
| 0.0898893 | 0.121503 | 0.119027  | 0.107226  | 0.102418  | 0.135198 | 0.105186  |
| 0.10067   | 0.122378 | 0.0587121 | 0.105769  | 0.105624  | 0.140152 | 0.101107  |
| 0.115093  | 0.12602  | 0.129371  | 0.120192  | 0.116259  | 0.138549 | 0.106498  |
| 0.105769  | 0.141754 | 0.128205  | 0.102418  | 0.102273  | 0.143211 | 0.110868  |
| 0.110431  | 0.130099 | 0.129079  | 0.120775  | 0.110431  | 0.139132 | 0.100379  |
| 0.108392  | 0.139132 | 0.121503  | 0.118153  | 0.108392  | 0.153118 | 0.11553   |
| 0.0984848 | 0.122523 | 0.11014   | 0.109994  | 0.10373   | 0.139714 | 0.099796  |
| 0.109266  | 0.123106 | 0.113636  | 0.112908  | 0.104604  | 0.130973 | 0.0962995 |
| 0.103293  | 0.131119 | 0.130099  | 0.113636  | 0.100379  | 0.138112 | 0.111597  |
| 0.115385  | 0.130682 | 0.130536  | 0.120775  | 0.117716  | 0.141463 | 0.105041  |
| 0.0882867 | 0.137966 | 0.13549   | 0.116404  | 0.113054  | 0.146999 | 0.103875  |
| 0.10067   | 0.126166 | 0.119901  | 0.117716  | 0.108246  | 0.134324 | 0.0941142 |
| 0.193328  | 0.145688 | 0.196824  | 0.195513  | 0.189248  | 0.206585 | 0.177739  |
| 0.157488  | 0.119464 | 0.168852  | 0.164044  | 0.160693  | 0.178613 | 0.150932  |
| 0.114656  | 0.140734 | 0.129516  | 0.122378  | 0.117279  | 0.146562 | 0.11014   |
| 0.108974  | 0.128642 | 0.130536  | 0.110868  | 0.106935  | 0.143211 | 0.107955  |
| 0.144231  | 0.165938 | 0.150058  | 0.139132  | 0.148019  | 0.169726 | 0.137966  |
| 0.118153  | 0.137529 | 0.13243   | 0.129662  | 0.114365  | 0.123834 | 0.113928  |
| 0.111305  | 0.125146 | 0.0862471 | 0.114365  | 0.111597  | 0.131265 | 0.112617  |
| 0.104458  | 0.122378 | 0.0916375 | 0.109266  | 0.111451  | 0.143648 | 0.106061  |
| 0.0936772 | 0.113636 | 0.103875  | 0.105769  | 0.103875  | 0.138695 | 0.101981  |
| 0.104749  | 0.132284 | 0.121358  | 0.119172  | 0.117861  | 0.147727 | 0.108683  |
| 0.197552  | 0.15574  | 0.198427  | 0.202943  | 0.195513  | 0.21285  | 0.184003  |
| 0.117279  | 0.147727 | 0.135635  | 0.11014   | 0.104167  | 0.155303 | 0.11655   |
| 0.108974  | 0.123397 | 0.127914  | 0.109994  | 0.11014   | 0.142628 | 0.103293  |
| 0.097028  | 0.11553  | 0.0719697 | 0.104749  | 0.104312  | 0.13884  | 0.0986305 |
| 0.10271   | 0.13345  | 0.13039   | 0.117716  | 0.109703  | 0.147436 | 0.106061  |

|           |          |           |          |           |          |           |
|-----------|----------|-----------|----------|-----------|----------|-----------|
| 0.179779  | 0.129808 | 0.18648   | 0.180216 | 0.177739  | 0.201195 | 0.169143  |
| 0.243881  | 0.199446 | 0.24359   | 0.243444 | 0.24359   | 0.255682 | 0.231498  |
| 0.113928  | 0.138258 | 0.124126  | 0.129225 | 0.118298  | 0.137966 | 0.107955  |
| 0.106643  | 0.130099 | 0.119755  | 0.117861 | 0.113928  | 0.144959 | 0.110286  |
| 0.117716  | 0.136509 | 0.130245  | 0.122815 | 0.120338  | 0.14729  | 0.10708   |
| 0.107955  | 0.141026 | 0.122815  | 0.117424 | 0.100962  | 0.150058 | 0.113636  |
| 0.106352  | 0.138549 | 0.129662  | 0.109411 | 0.0973193 | 0.147582 | 0.110577  |
| 0.107372  | 0.130536 | 0.126894  | 0.122378 | 0.108246  | 0.127331 | 0.107226  |
| 0.099359  | 0.116404 | 0.0810023 | 0.106498 | 0.109557  | 0.136801 | 0.100087  |
| 0.112179  | 0.140297 | 0.131702  | 0.105624 | 0.100233  | 0.14729  | 0.111742  |
| 0.103584  | 0.119172 | 0.0933858 | 0.1081   | 0.108537  | 0.134615 | 0.0999417 |
| 0.0909091 | 0.123397 | 0.120921  | 0.108246 | 0.109266  | 0.144085 | 0.105041  |
| 0.0962995 | 0.11859  | 0.110577  | 0.109266 | 0.100379  | 0.139277 | 0.0984848 |
| 0.114219  | 0.137383 | 0.124126  | 0.123689 | 0.11655   | 0.132139 | 0.107955  |
| 0.114073  | 0.130245 | 0.128642  | 0.120047 | 0.113491  | 0.136655 | 0.102855  |
| 0.105041  | 0.126748 | 0.120775  | 0.113928 | 0.0919289 | 0.124126 | 0.0976107 |
| 0.118735  | 0.145979 | 0.12398   | 0.115967 | 0.117279  | 0.145105 | 0.111888  |
| 0.126311  | 0.156469 | 0.13243   | 0.123543 | 0.120192  | 0.160256 | 0.130245  |
| 0.0990676 | 0.121941 | 0.0606061 | 0.11116  | 0.106935  | 0.138258 | 0.099796  |
| 0.109703  | 0.123834 | 0.0910548 | 0.104604 | 0.111451  | 0.143648 | 0.1081    |
| 0.116987  | 0.136946 | 0.0447261 | 0.115967 | 0.126894  | 0.143648 | 0.118298  |
| 0.206002  | 0.160985 | 0.206002  | 0.209936 | 0.206585  | 0.218386 | 0.193619  |
| 0.10912   | 0.128205 | 0.122232  | 0.119755 | 0.107372  | 0.128205 | 0.097028  |
| 0.0967366 | 0.120484 | 0.109557  | 0.108829 | 0.101107  | 0.13884  | 0.0965909 |
| 0.113636  | 0.134178 | 0.133159  | 0.12602  | 0.107517  | 0.127768 | 0.113199  |
| 0.122815  | 0.141608 | 0.137092  | 0.132867 | 0.0971737 | 0.138986 | 0.116259  |
| 0.104167  | 0.132576 | 0.127768  | 0.112762 | 0.108537  | 0.147727 | 0.104604  |
| 0.194493  | 0.152972 | 0.200029  | 0.199883 | 0.194202  | 0.215618 | 0.181818  |
| 0.114802  | 0.132139 | 0.132576  | 0.125437 | 0.113928  | 0.140297 | 0.103293  |
| 0.0989219 | 0.119172 | 0.0560897 | 0.1081   | 0.105624  | 0.141026 | 0.101107  |
| 0.112179  | 0.141171 | 0.131702  | 0.108537 | 0.116841  | 0.149621 | 0.114948  |
| 0.106352  | 0.142628 | 0.120338  | 0.116404 | 0.0996503 | 0.149913 | 0.111742  |
| 0.111597  | 0.125437 | 0.129371  | 0.121649 | 0.116841  | 0.139423 | 0.104749  |
| 0.102564  | 0.124854 | 0.113928  | 0.112325 | 0.109557  | 0.133887 | 0.0977564 |
| 0.0941142 | 0.123397 | 0.123252  | 0.109994 | 0.111597  | 0.142337 | 0.107663  |
| 0.117133  | 0.141171 | 0.132576  | 0.127768 | 0.0932401 | 0.13447  | 0.111742  |
| 0.195659  | 0.149767 | 0.200612  | 0.200466 | 0.189831  | 0.217657 | 0.178904  |
| 0.102564  | 0.122232 | 0.122669  | 0.113491 | 0.109266  | 0.131847 | 0.0968823 |
| 0.190122  | 0.144231 | 0.195367  | 0.199592 | 0.186626  | 0.20979  | 0.180361  |
| 0.190851  | 0.143502 | 0.194056  | 0.195659 | 0.188811  | 0.211101 | 0.176719  |
| 0.120921  | 0.151661 | 0.127331  | 0.121358 | 0.11655   | 0.157488 | 0.125728  |
| 0.130536  | 0.152826 | 0.138112  | 0.135344 | 0.107226  | 0.140006 | 0.126894  |
| 0.0862471 | 0.117279 | 0.116259  | 0.103293 | 0.10169   | 0.135344 | 0.0957168 |
| 0.106498  | 0.125874 | 0.119027  | 0.113928 | 0.109703  | 0.133741 | 0.094697  |



|           |          |           |          |           |          |           |
|-----------|----------|-----------|----------|-----------|----------|-----------|
| 0.109848  | 0.125437 | 0.128205  | 0.118735 | 0.11014   | 0.136509 | 0.0980478 |
| 0.0990676 | 0.123397 | 0.0600233 | 0.11116  | 0.111305  | 0.141463 | 0.103293  |
| 0.105478  | 0.136801 | 0.126748  | 0.105624 | 0.0941142 | 0.143502 | 0.107663  |
| 0.110431  | 0.139714 | 0.128205  | 0.106498 | 0.0958625 | 0.14729  | 0.109703  |
| 0.119901  | 0.137821 | 0.12602   | 0.126457 | 0.120484  | 0.136364 | 0.111597  |
| 0.114802  | 0.141754 | 0.126457  | 0.120484 | 0.110723  | 0.154575 | 0.117861  |
| 0.0968823 | 0.119464 | 0.0560897 | 0.107809 | 0.102418  | 0.132867 | 0.0981935 |
| 0.112179  | 0.127768 | 0.128788  | 0.11961  | 0.112762  | 0.139132 | 0.102418  |
| 0.0793998 | 0.115967 | 0.112034  | 0.104895 | 0.0977564 | 0.128788 | 0.0929487 |
| 0.122086  | 0.137675 | 0.133159  | 0.12398  | 0.125583  | 0.139423 | 0.112034  |
| 0.112762  | 0.135052 | 0.12704   | 0.11961  | 0.120629  | 0.148164 | 0.104458  |
| 0.127477  | 0.142191 | 0.136218  | 0.128788 | 0.130682  | 0.145105 | 0.11859   |
| 0.25947   | 0.213287 | 0.255099  | 0.257576 | 0.25743   | 0.264569 | 0.244464  |
| 0.125437  | 0.149184 | 0.137675  | 0.120338 | 0.114365  | 0.144814 | 0.130828  |
| 0.12704   | 0.146999 | 0.130828  | 0.121941 | 0.117716  | 0.135635 | 0.126894  |
| 0.214598  | 0.170163 | 0.218094  | 0.21824  | 0.216055  | 0.226981 | 0.199301  |
| 0.123834  | 0.144376 | 0.126457  | 0.12602  | 0.102273  | 0.134761 | 0.121358  |
| 0.229021  | 0.18546  | 0.229021  | 0.231498 | 0.226399  | 0.240822 | 0.214598  |
| 0.114073  | 0.138112 | 0.13243   | 0.115093 | 0.106498  | 0.137238 | 0.123543  |
| 0.114802  | 0.137675 | 0.0431235 | 0.11553  | 0.123252  | 0.146707 | 0.114365  |
| 0.111888  | 0.135635 | 0.128205  | 0.125146 | 0.0906177 | 0.135052 | 0.108246  |
| 0.11655   | 0.149621 | 0.125583  | 0.118444 | 0.112471  | 0.158071 | 0.120484  |
| 0.199592  | 0.150204 | 0.20542   | 0.204983 | 0.198427  | 0.217512 | 0.185752  |
| 0.123252  | 0.141754 | 0.132284  | 0.125728 | 0.128497  | 0.143211 | 0.113199  |
| 0.111305  | 0.129225 | 0.127331  | 0.119901 | 0.113054  | 0.141463 | 0.102127  |
| 0.222465  | 0.178322 | 0.226544  | 0.229021 | 0.223922  | 0.238928 | 0.213287  |
| 0.107226  | 0.141171 | 0.13141   | 0.112325 | 0.0996503 | 0.152244 | 0.111451  |
| 0.195367  | 0.150058 | 0.201486  | 0.200175 | 0.191579  | 0.215326 | 0.182692  |
| 0.109703  | 0.1419   | 0.135927  | 0.110723 | 0.101544  | 0.14831  | 0.114219  |
| 0.103875  | 0.124126 | 0.0630828 | 0.110431 | 0.106206  | 0.144522 | 0.102273  |
| 0.106935  | 0.130099 | 0.113636  | 0.115822 | 0.111014  | 0.140589 | 0.105624  |
| 0.122378  | 0.153992 | 0.127331  | 0.121358 | 0.119464  | 0.157197 | 0.12602   |
| 0.099796  | 0.127914 | 0.122232  | 0.119755 | 0.111451  | 0.140734 | 0.0938228 |
| 0.145833  | 0.109848 | 0.159819  | 0.161131 | 0.153409  | 0.177739 | 0.143648  |
| 0.106206  | 0.123834 | 0.125146  | 0.114802 | 0.109703  | 0.134615 | 0.0984848 |
| 0.121649  | 0.136946 | 0.136218  | 0.13141  | 0.095134  | 0.137238 | 0.115093  |
| 0.110577  | 0.132576 | 0.126311  | 0.122669 | 0.0942599 | 0.144231 | 0.115967  |
| 0.126311  | 0.145979 | 0.135927  | 0.12704  | 0.113491  | 0.132284 | 0.119172  |
| 0.192599  | 0.145251 | 0.19697   | 0.198281 | 0.191434  | 0.209645 | 0.178176  |
| 0.099796  | 0.123252 | 0.0587121 | 0.11014  | 0.105041  | 0.140734 | 0.0987762 |
| 0.112179  | 0.130099 | 0.129371  | 0.123397 | 0.109848  | 0.157197 | 0.11757   |
| 0.104458  | 0.140734 | 0.128642  | 0.103147 | 0.104749  | 0.138695 | 0.109848  |
| 0.113345  | 0.145542 | 0.132576  | 0.106498 | 0.103438  | 0.150787 | 0.115822  |
| 0.106206  | 0.128205 | 0.0435606 | 0.109557 | 0.116404  | 0.138695 | 0.108683  |

|           |          |           |          |           |          |          |
|-----------|----------|-----------|----------|-----------|----------|----------|
| 0.256119  | 0.213432 | 0.25204   | 0.253934 | 0.251457  | 0.263258 | 0.241113 |
| 0.105041  | 0.126166 | 0.109411  | 0.109848 | 0.108246  | 0.138986 | 0.103147 |
| 0.110286  | 0.121503 | 0.103875  | 0.118881 | 0.108537  | 0.131702 | 0.110431 |
| 0.171474  | 0.141608 | 0.186334  | 0.169289 | 0.174679  | 0.193473 | 0.168124 |
| 0.183129  | 0.13549  | 0.188957  | 0.189685 | 0.179341  | 0.201049 | 0.168706 |
| 0.113491  | 0.133741 | 0.126894  | 0.125    | 0.115822  | 0.139277 | 0.111014 |
| 0.111888  | 0.127185 | 0.126457  | 0.118735 | 0.112762  | 0.137966 | 0.102127 |
| 0.111888  | 0.139423 | 0.124709  | 0.116113 | 0.104312  | 0.151952 | 0.115239 |
| 0.139714  | 0.152681 | 0.145251  | 0.137529 | 0.143794  | 0.153555 | 0.12704  |
| 0.10912   | 0.131993 | 0.125146  | 0.123252 | 0.112617  | 0.132284 | 0.105478 |
| 0.117133  | 0.137675 | 0.126748  | 0.12398  | 0.114802  | 0.135927 | 0.109994 |
| 0.114948  | 0.146853 | 0.135635  | 0.113054 | 0.106206  | 0.152681 | 0.120047 |
| 0.113491  | 0.127914 | 0.125728  | 0.118298 | 0.112908  | 0.134324 | 0.101399 |
| 0.12296   | 0.136509 | 0.133159  | 0.129516 | 0.126457  | 0.140297 | 0.111742 |
| 0.112325  | 0.126457 | 0.128351  | 0.1081   | 0.106206  | 0.153555 | 0.112179 |
| 0.114802  | 0.149621 | 0.125     | 0.11961  | 0.113345  | 0.153409 | 0.125146 |
| 0.131847  | 0.161422 | 0.136218  | 0.128497 | 0.128059  | 0.166667 | 0.136946 |
| 0.106643  | 0.128059 | 0.112762  | 0.112325 | 0.112179  | 0.143794 | 0.106498 |
| 0.124563  | 0.156177 | 0.130682  | 0.121795 | 0.120775  | 0.157925 | 0.129371 |
| 0.119901  | 0.154138 | 0.139132  | 0.113636 | 0.111451  | 0.155594 | 0.120921 |
| 0.201923  | 0.156614 | 0.208625  | 0.209353 | 0.203963  | 0.21926  | 0.191871 |
| 0.113199  | 0.134907 | 0.114365  | 0.112179 | 0.108246  | 0.140443 | 0.114219 |
| 0.189831  | 0.143357 | 0.192453  | 0.192599 | 0.186334  | 0.203963 | 0.176282 |
| 0.114948  | 0.131119 | 0.127477  | 0.118007 | 0.0925117 | 0.136364 | 0.109266 |
| 0.112617  | 0.13141  | 0.0520105 | 0.112471 | 0.11757   | 0.146562 | 0.111888 |
| 0.116113  | 0.139569 | 0.130682  | 0.117424 | 0.122815  | 0.147145 | 0.110723 |
| 0.111305  | 0.130099 | 0.125583  | 0.118444 | 0.113345  | 0.145542 | 0.097465 |
| 0.116987  | 0.132867 | 0.130099  | 0.124417 | 0.118153  | 0.13986  | 0.105769 |
| 0.117861  | 0.134324 | 0.133013  | 0.120921 | 0.120192  | 0.140152 | 0.108392 |
| 0.100087  | 0.119755 | 0.0604604 | 0.109557 | 0.11116   | 0.141317 | 0.104895 |
| 0.118881  | 0.140297 | 0.130828  | 0.129808 | 0.0979021 | 0.136801 | 0.110868 |
| 0.12296   | 0.141463 | 0.133741  | 0.123397 | 0.125583  | 0.150204 | 0.113199 |
| 0.125437  | 0.144814 | 0.144959  | 0.112179 | 0.113491  | 0.157634 | 0.126166 |
| 0.250146  | 0.204837 | 0.249854  | 0.248252 | 0.247523  | 0.257867 | 0.236597 |
| 0.103293  | 0.125874 | 0.0607517 | 0.114219 | 0.110868  | 0.145979 | 0.105769 |
| 0.183566  | 0.134761 | 0.187937  | 0.188666 | 0.177739  | 0.201486 | 0.167686 |
| 0.182547  | 0.13986  | 0.193036  | 0.192016 | 0.184003  | 0.205128 | 0.173368 |
| 0.114802  | 0.129516 | 0.125     | 0.121941 | 0.0979021 | 0.141171 | 0.106206 |
| 0.100233  | 0.120192 | 0.108974  | 0.109703 | 0.105769  | 0.13884  | 0.099796 |
| 0.112179  | 0.134178 | 0.0431235 | 0.114073 | 0.118881  | 0.144959 | 0.112325 |
| 0.107226  | 0.121649 | 0.121503  | 0.120192 | 0.109266  | 0.13447  | 0.097465 |
| 0.0945513 | 0.106061 | 0.108829  | 0.105478 | 0.101544  | 0.139277 | 0.100816 |
| 0.110868  | 0.138403 | 0.130682  | 0.113345 | 0.097465  | 0.150058 | 0.111888 |
| 0.116841  | 0.130682 | 0.125583  | 0.115822 | 0.116841  | 0.141754 | 0.108537 |

|           |          |           |          |           |          |           |
|-----------|----------|-----------|----------|-----------|----------|-----------|
| 0.124417  | 0.143794 | 0.135781  | 0.127185 | 0.131993  | 0.143211 | 0.114948  |
| 0.10271   | 0.126457 | 0.0528846 | 0.108974 | 0.111742  | 0.139569 | 0.102273  |
| 0.12602   | 0.138403 | 0.131265  | 0.125    | 0.123689  | 0.144814 | 0.115385  |
| 0.111305  | 0.137966 | 0.129662  | 0.115822 | 0.106352  | 0.138549 | 0.112617  |
| 0.123252  | 0.143211 | 0.131702  | 0.123106 | 0.129079  | 0.148164 | 0.114073  |
| 0.112034  | 0.142483 | 0.126311  | 0.118881 | 0.106206  | 0.15472  | 0.120921  |
| 0.124126  | 0.156323 | 0.13986   | 0.110577 | 0.115093  | 0.157488 | 0.125437  |
| 0.0965909 | 0.12704  | 0.121649  | 0.111305 | 0.114365  | 0.142774 | 0.112762  |
| 0.102418  | 0.118007 | 0.0584207 | 0.101981 | 0.108537  | 0.138986 | 0.10373   |
| 0.129225  | 0.142774 | 0.138549  | 0.132867 | 0.122523  | 0.121212 | 0.12704   |
| 0.179779  | 0.135344 | 0.190559  | 0.188666 | 0.178613  | 0.203817 | 0.167686  |
| 0.128642  | 0.147727 | 0.135635  | 0.127331 | 0.133304  | 0.148893 | 0.120629  |
| 0.11553   | 0.128205 | 0.132721  | 0.122669 | 0.116987  | 0.136655 | 0.104312  |
| 0.115967  | 0.139132 | 0.130536  | 0.118153 | 0.118881  | 0.144085 | 0.109411  |
| 0.108829  | 0.129662 | 0.117861  | 0.114219 | 0.112325  | 0.140152 | 0.0958625 |
| 0.110431  | 0.144085 | 0.122378  | 0.116404 | 0.108683  | 0.152826 | 0.11757   |
| 0.11553   | 0.147727 | 0.130682  | 0.121212 | 0.110868  | 0.156177 | 0.121212  |
| 0.185606  | 0.143211 | 0.192308  | 0.193036 | 0.183566  | 0.207314 | 0.174971  |
| 0.103147  | 0.119318 | 0.125874  | 0.112325 | 0.115385  | 0.138549 | 0.107372  |
| 0.097465  | 0.105478 | 0.118153  | 0.109266 | 0.10271   | 0.134033 | 0.0932401 |
| 0.118735  | 0.137238 | 0.13039   | 0.122086 | 0.11961   | 0.139569 | 0.107809  |
| 0.189685  | 0.14292  | 0.189977  | 0.195076 | 0.186772  | 0.208479 | 0.17701   |
| 0.0980478 | 0.112762 | 0.109703  | 0.107809 | 0.103875  | 0.139277 | 0.0996503 |
| 0.117424  | 0.147582 | 0.137529  | 0.110577 | 0.106352  | 0.154866 | 0.119027  |
| 0.118007  | 0.133013 | 0.130828  | 0.121649 | 0.122086  | 0.137966 | 0.106789  |
| 0.114948  | 0.134324 | 0.122232  | 0.119172 | 0.112034  | 0.126748 | 0.105186  |
| 0.184003  | 0.142191 | 0.188957  | 0.189977 | 0.184878  | 0.203963 | 0.17366   |
| 0.109703  | 0.141608 | 0.134761  | 0.107226 | 0.102418  | 0.149184 | 0.117133  |
| 0.107955  | 0.122669 | 0.123397  | 0.120047 | 0.104749  | 0.123252 | 0.108974  |
| 0.099796  | 0.108974 | 0.114365  | 0.111305 | 0.110286  | 0.142774 | 0.0961538 |
| 0.112908  | 0.111305 | 0.129808  | 0.123252 | 0.117861  | 0.148893 | 0.102273  |
| 0.119755  | 0.143211 | 0.134907  | 0.130682 | 0.0952797 | 0.137383 | 0.116113  |
| 0.122086  | 0.151952 | 0.140734  | 0.110868 | 0.1081    | 0.157488 | 0.122815  |
| 0.101981  | 0.125437 | 0.0512821 | 0.109411 | 0.11014   | 0.13884  | 0.102127  |
| 0.117133  | 0.137675 | 0.135198  | 0.11757  | 0.115093  | 0.144668 | 0.117279  |
| 0.142337  | 0.154429 | 0.142628  | 0.141608 | 0.14088   | 0.142483 | 0.131702  |
| 0.234703  | 0.191725 | 0.23412   | 0.234848 | 0.231206  | 0.245047 | 0.219406  |
| 0.104458  | 0.134615 | 0.12602   | 0.113636 | 0.121649  | 0.145396 | 0.11655   |
| 0.11961   | 0.139569 | 0.135344  | 0.131702 | 0.0954254 | 0.136946 | 0.117424  |
| 0.111305  | 0.124272 | 0.125874  | 0.116696 | 0.113636  | 0.140297 | 0.105915  |
| 0.124854  | 0.134907 | 0.129808  | 0.12704  | 0.117279  | 0.135198 | 0.112471  |
| 0.111888  | 0.132139 | 0.126166  | 0.11116  | 0.0917832 | 0.133013 | 0.107372  |
| 0.107226  | 0.137675 | 0.128497  | 0.114073 | 0.112762  | 0.146125 | 0.10708   |
| 0.118444  | 0.134324 | 0.128934  | 0.119755 | 0.121941  | 0.136072 | 0.107517  |

|           |          |           |          |           |          |           |
|-----------|----------|-----------|----------|-----------|----------|-----------|
| 0.120047  | 0.148456 | 0.136364  | 0.109703 | 0.108974  | 0.157488 | 0.120484  |
| 0.113928  | 0.135344 | 0.125583  | 0.118153 | 0.104895  | 0.139714 | 0.108537  |
| 0.236451  | 0.192016 | 0.235286  | 0.239219 | 0.236742  | 0.246795 | 0.223193  |
| 0.0967366 | 0.116404 | 0.1081    | 0.104458 | 0.102273  | 0.137092 | 0.0968823 |
| 0.10169   | 0.128059 | 0.124709  | 0.110577 | 0.0952797 | 0.135052 | 0.108829  |
| 0.102418  | 0.122669 | 0.0488054 | 0.104021 | 0.107663  | 0.139277 | 0.102564  |
| 0.127622  | 0.146416 | 0.129371  | 0.127185 | 0.127914  | 0.13447  | 0.11961   |
| 0.113054  | 0.139132 | 0.128497  | 0.121941 | 0.125583  | 0.146707 | 0.12398   |
| 0.105478  | 0.126603 | 0.11859   | 0.117279 | 0.114219  | 0.133887 | 0.064831  |
| 0.11655   | 0.128934 | 0.128788  | 0.121358 | 0.115967  | 0.14088  | 0.103001  |
| 0.105915  | 0.130245 | 0.117279  | 0.112471 | 0.10912   | 0.135198 | 0.0999417 |
| 0.230041  | 0.186772 | 0.229749  | 0.229021 | 0.229458  | 0.240385 | 0.215618  |
| 0.121066  | 0.135198 | 0.131265  | 0.124709 | 0.121941  | 0.142483 | 0.109557  |
| 0.113636  | 0.144085 | 0.135198  | 0.108537 | 0.107226  | 0.1537   | 0.11961   |
| 0.110723  | 0.130973 | 0.121795  | 0.114948 | 0.097028  | 0.142045 | 0.105332  |
| 0.122815  | 0.145396 | 0.129225  | 0.12296  | 0.111742  | 0.1419   | 0.112762  |
| 0.121358  | 0.144522 | 0.135052  | 0.117716 | 0.108246  | 0.143357 | 0.125291  |
| 0.101544  | 0.127914 | 0.0499709 | 0.1081   | 0.108829  | 0.138986 | 0.104604  |
| 0.116987  | 0.145105 | 0.134178  | 0.107809 | 0.10708   | 0.152098 | 0.117133  |
| 0.121795  | 0.151952 | 0.138695  | 0.111742 | 0.113054  | 0.156906 | 0.124563  |
| 0.11014   | 0.143211 | 0.13345   | 0.108246 | 0.100233  | 0.149621 | 0.112034  |
| 0.102418  | 0.125874 | 0.0569639 | 0.110431 | 0.106789  | 0.141317 | 0.10373   |
| 0.12602   | 0.147436 | 0.135927  | 0.13141  | 0.102127  | 0.138403 | 0.122086  |
| 0.131993  | 0.152535 | 0.139277  | 0.136218 | 0.1081    | 0.142045 | 0.124854  |
| 0.125583  | 0.147582 | 0.133159  | 0.124563 | 0.127331  | 0.152244 | 0.119027  |
| 0.129953  | 0.151078 | 0.138986  | 0.126603 | 0.133741  | 0.15778  | 0.120484  |
| 0.130682  | 0.152681 | 0.141171  | 0.136364 | 0.106498  | 0.140152 | 0.121795  |
| 0.0887238 | 0.11451  | 0.10271   | 0.105186 | 0.0965909 | 0.136946 | 0.0976107 |
| 0.131119  | 0.159528 | 0.142774  | 0.106206 | 0.121503  | 0.148456 | 0.128351  |
| 0.122815  | 0.144231 | 0.125146  | 0.118298 | 0.126311  | 0.143065 | 0.126457  |
| 0.2044    | 0.156177 | 0.208479  | 0.208042 | 0.200321  | 0.219988 | 0.190268  |
| 0.112617  | 0.132867 | 0.124854  | 0.120629 | 0.121066  | 0.146562 | 0.118007  |
| 0.106498  | 0.13141  | 0.128059  | 0.118881 | 0.101253  | 0.137821 | 0.111597  |
| 0.106352  | 0.124272 | 0.0501166 | 0.112908 | 0.113636  | 0.143794 | 0.110286  |
| 0.224213  | 0.176865 | 0.224213  | 0.222028 | 0.219551  | 0.235723 | 0.208916  |
| 0.207896  | 0.166958 | 0.212558  | 0.211247 | 0.206148  | 0.226107 | 0.199009  |
| 0.121212  | 0.151661 | 0.138403  | 0.10912  | 0.111888  | 0.157197 | 0.121358  |
| 0.250728  | 0.20542  | 0.248106  | 0.249417 | 0.249272  | 0.255828 | 0.237762  |
| 0.0875583 | 0.112762 | 0.101544  | 0.105478 | 0.097465  | 0.136072 | 0.0984848 |
| 0.129225  | 0.143065 | 0.131847  | 0.132284 | 0.124854  | 0.150932 | 0.126166  |
| 0.0989219 | 0.119755 | 0.108246  | 0.111014 | 0.105041  | 0.137821 | 0.10169   |
| 0.125583  | 0.146999 | 0.137529  | 0.133304 | 0.102855  | 0.140006 | 0.118735  |
| 0.185752  | 0.1419   | 0.190705  | 0.191142 | 0.184878  | 0.203671 | 0.171911  |
| 0.118298  | 0.140589 | 0.12296   | 0.11757  | 0.109557  | 0.143794 | 0.11757   |

|           |          |           |          |           |          |           |
|-----------|----------|-----------|----------|-----------|----------|-----------|
| 0.193182  | 0.143502 | 0.19493   | 0.196533 | 0.191434  | 0.211976 | 0.177302  |
| 0.108974  | 0.13447  | 0.116841  | 0.117861 | 0.0929487 | 0.135927 | 0.104167  |
| 0.112179  | 0.121649 | 0.127331  | 0.106498 | 0.106352  | 0.145833 | 0.108246  |
| 0.115093  | 0.133013 | 0.125     | 0.117861 | 0.111597  | 0.147873 | 0.108829  |
| 0.104312  | 0.121941 | 0.11859   | 0.112617 | 0.111888  | 0.135927 | 0.0968823 |
| 0.0957168 | 0.118298 | 0.0563811 | 0.103147 | 0.104749  | 0.138403 | 0.0981935 |
| 0.105624  | 0.126748 | 0.118153  | 0.113928 | 0.110868  | 0.137529 | 0.103147  |
| 0.0939685 | 0.115676 | 0.106498  | 0.105186 | 0.100087  | 0.136072 | 0.0964452 |
| 0.107809  | 0.127477 | 0.123543  | 0.11757  | 0.112179  | 0.13243  | 0.0995047 |
| 0.112034  | 0.142483 | 0.132139  | 0.102564 | 0.107663  | 0.145979 | 0.110431  |
| 0.0910548 | 0.119464 | 0.120192  | 0.106643 | 0.105041  | 0.13549  | 0.10169   |
| 0.0981935 | 0.118153 | 0.106935  | 0.108246 | 0.102564  | 0.139714 | 0.0977564 |
| 0.114656  | 0.132284 | 0.116404  | 0.109266 | 0.121066  | 0.147727 | 0.108974  |
| 0.124563  | 0.142483 | 0.138549  | 0.126166 | 0.126311  | 0.145688 | 0.111014  |
| 0.113345  | 0.133304 | 0.125291  | 0.119027 | 0.113928  | 0.144668 | 0.0995047 |
| 0.109411  | 0.129079 | 0.122815  | 0.121212 | 0.105332  | 0.122378 | 0.108392  |
| 0.0952797 | 0.121941 | 0.0506993 | 0.105332 | 0.103147  | 0.134178 | 0.0989219 |
| 0.115093  | 0.139714 | 0.13345   | 0.108537 | 0.106352  | 0.150787 | 0.114656  |
| 0.117424  | 0.140297 | 0.131993  | 0.129516 | 0.0981935 | 0.136218 | 0.113782  |
| 0.117279  | 0.146562 | 0.123689  | 0.120338 | 0.10912   | 0.1588   | 0.119464  |
| 0.114073  | 0.138403 | 0.128934  | 0.11859  | 0.118153  | 0.147145 | 0.101981  |
| 0.111888  | 0.129225 | 0.127622  | 0.121941 | 0.115385  | 0.139714 | 0.100962  |
| 0.124563  | 0.1419   | 0.136801  | 0.127622 | 0.128351  | 0.144231 | 0.114219  |
| 0.133887  | 0.149476 | 0.140297  | 0.131702 | 0.135344  | 0.146562 | 0.121503  |
| 0.100524  | 0.12602  | 0.117716  | 0.103293 | 0.0949883 | 0.143794 | 0.10067   |
| 0.101399  | 0.125437 | 0.0568182 | 0.111742 | 0.108974  | 0.138258 | 0.105041  |
| 0.102418  | 0.127914 | 0.124272  | 0.1081   | 0.102418  | 0.141608 | 0.0976107 |
| 0.13447   | 0.152681 | 0.138549  | 0.138403 | 0.109703  | 0.143357 | 0.126457  |
| 0.101981  | 0.123689 | 0.113636  | 0.10912  | 0.106352  | 0.141754 | 0.100962  |
| 0.134033  | 0.163607 | 0.136364  | 0.128059 | 0.12704   | 0.165938 | 0.13884   |
| 0.120047  | 0.139132 | 0.0460373 | 0.122232 | 0.130536  | 0.142045 | 0.122815  |
| 0.119318  | 0.143357 | 0.128934  | 0.127331 | 0.123397  | 0.135198 | 0.114219  |
| 0.0987762 | 0.124854 | 0.11655   | 0.112617 | 0.107226  | 0.137383 | 0.0989219 |
| 0.112617  | 0.132284 | 0.128351  | 0.120629 | 0.0968823 | 0.129953 | 0.104895  |
| 0.125146  | 0.143939 | 0.133596  | 0.122086 | 0.128059  | 0.153263 | 0.120338  |
| 0.204545  | 0.160402 | 0.211247  | 0.206731 | 0.202506  | 0.223922 | 0.191288  |
| 0.109557  | 0.127477 | 0.124126  | 0.121941 | 0.105478  | 0.124563 | 0.108246  |
| 0.105332  | 0.130536 | 0.125146  | 0.12296  | 0.106206  | 0.147145 | 0.106643  |
| 0.120338  | 0.142337 | 0.132867  | 0.128934 | 0.0958625 | 0.137383 | 0.111451  |
| 0.113491  | 0.13549  | 0.128059  | 0.119172 | 0.116113  | 0.147436 | 0.104895  |
| 0.115676  | 0.138258 | 0.125     | 0.121358 | 0.0981935 | 0.142045 | 0.111742  |
| 0.0906177 | 0.139714 | 0.132284  | 0.116113 | 0.118007  | 0.146125 | 0.105624  |
| 0.0936772 | 0.13986  | 0.134761  | 0.117716 | 0.119027  | 0.145105 | 0.109848  |
| 0.11655   | 0.135635 | 0.124126  | 0.124854 | 0.117133  | 0.131847 | 0.10912   |

|           |          |          |           |           |          |           |
|-----------|----------|----------|-----------|-----------|----------|-----------|
| 0.105478  | 0.138549 | 0.127331 | 0.103584  | 0.101981  | 0.139423 | 0.106789  |
| 0.126748  | 0.150204 | 0.136655 | 0.132139  | 0.104312  | 0.140297 | 0.121649  |
| 0.108974  | 0.131556 | 0.122669 | 0.114948  | 0.1081    | 0.145542 | 0.105915  |
| 0.0965909 | 0.12704  | 0.122523 | 0.117424  | 0.10912   | 0.144231 | 0.108974  |
| 0.175117  | 0.156906 | 0.177739 | 0.180216  | 0.168706  | 0.195076 | 0.163316  |
| 0.111597  | 0.128642 | 0.127331 | 0.118735  | 0.113928  | 0.139132 | 0.103001  |
| 0.128059  | 0.137529 | 0.137675 | 0.13345   | 0.103584  | 0.140734 | 0.120921  |
| 0.11451   | 0.137092 | 0.12296  | 0.103293  | 0.108392  | 0.14729  | 0.116113  |
| 0.117279  | 0.132576 | 0.127768 | 0.109848  | 0.116113  | 0.1419   | 0.117133  |
| 0.0793998 | 0.119755 | 0.114656 | 0.106061  | 0.100379  | 0.134615 | 0.0944056 |
| 0.0901807 | 0.119172 | 0.113199 | 0.102564  | 0.102127  | 0.135198 | 0.097028  |
| 0.0831876 | 0.122378 | 0.120484 | 0.107809  | 0.102418  | 0.135781 | 0.101399  |
| 0.122232  | 0.142191 | 0.132139 | 0.112762  | 0.11961   | 0.143648 | 0.119464  |
| 0.097465  | 0.116259 | 0.11961  | 0.111305  | 0.110577  | 0.132284 | 0.106643  |
| 0.116259  | 0.146416 | 0.129953 | 0.113491  | 0.117424  | 0.154283 | 0.119027  |
| 0.104749  | 0.126748 | 0.121066 | 0.108974  | 0.104167  | 0.141608 | 0.105478  |
| 0.106935  | 0.130682 | 0.128497 | 0.0968823 | 0.113636  | 0.146707 | 0.109411  |
| 0.125728  | 0.152972 | 0.135635 | 0.105769  | 0.119318  | 0.15472  | 0.120921  |
| 0.101836  | 0.132576 | 0.118735 | 0.0871212 | 0.104458  | 0.134324 | 0.106643  |
| 0.109703  | 0.140152 | 0.124854 | 0.109266  | 0.114948  | 0.152972 | 0.113928  |
| 0.0936772 | 0.129371 | 0.116696 | 0.0903263 | 0.0971737 | 0.136072 | 0.102273  |
| 0.100379  | 0.131119 | 0.120192 | 0.0874126 | 0.104749  | 0.13549  | 0.103147  |
| 0.101544  | 0.123252 | 0.108537 | 0.106061  | 0.0989219 | 0.132867 | 0.0926573 |
| 0.105478  | 0.137092 | 0.118007 | 0.112325  | 0.111305  | 0.14088  | 0.114656  |
| 0.097028  | 0.118153 | 0.115967 | 0.108829  | 0.104312  | 0.140297 | 0.0995047 |
| 0.138112  | 0.160402 | 0.14831  | 0.125146  | 0.137529  | 0.154866 | 0.137092  |
| 0.128497  | 0.144959 | 0.138403 | 0.125146  | 0.12296   | 0.154283 | 0.122232  |
| 0.0984848 | 0.126603 | 0.118881 | 0.0992133 | 0.0996503 | 0.141171 | 0.106206  |
| 0.135344  | 0.162879 | 0.144959 | 0.132284  | 0.123689  | 0.162005 | 0.135781  |
| 0.116696  | 0.136946 | 0.128351 | 0.12704   | 0.119027  | 0.136364 | 0.112179  |
| 0.124854  | 0.130828 | 0.135927 | 0.115385  | 0.125146  | 0.148893 | 0.126166  |
| 0.100379  | 0.127622 | 0.115239 | 0.111597  | 0.106206  | 0.138403 | 0.106352  |
| 0.142483  | 0.154283 | 0.14627  | 0.146707  | 0.118007  | 0.158362 | 0.133304  |
| 0.125874  | 0.148164 | 0.132576 | 0.127768  | 0.0973193 | 0.142045 | 0.124563  |
| 0.134615  | 0.151369 | 0.143648 | 0.11961   | 0.13345   | 0.156906 | 0.12602   |
| 0.112471  | 0.137966 | 0.129079 | 0.109703  | 0.115967  | 0.137092 | 0.109411  |
| 0.0954254 | 0.12704  | 0.118153 | 0.102855  | 0.104749  | 0.139569 | 0.103147  |
| 0.100524  | 0.124272 | 0.117716 | 0.108537  | 0.0996503 | 0.139132 | 0.102127  |
| 0.119027  | 0.140734 | 0.129225 | 0.107809  | 0.107955  | 0.142191 | 0.109848  |
| 0.108829  | 0.135781 | 0.118735 | 0.110431  | 0.114073  | 0.141026 | 0.117133  |
| 0.111888  | 0.146125 | 0.125583 | 0.119318  | 0.117424  | 0.14933  | 0.120775  |
| 0.113636  | 0.131556 | 0.127914 | 0.113199  | 0.115676  | 0.14729  | 0.114656  |
| 0.106061  | 0.128059 | 0.120338 | 0.109411  | 0.0976107 | 0.136218 | 0.0989219 |
| 0.0977564 | 0.125874 | 0.116987 | 0.106352  | 0.0986305 | 0.140152 | 0.101399  |

|           |           |          |          |           |          |           |
|-----------|-----------|----------|----------|-----------|----------|-----------|
| 0.115093  | 0.131265  | 0.115093 | 0.114365 | 0.111014  | 0.135635 | 0.109411  |
| 0.101399  | 0.127768  | 0.118007 | 0.105332 | 0.10169   | 0.139132 | 0.100087  |
| 0.106498  | 0.132284  | 0.120484 | 0.111305 | 0.108537  | 0.141317 | 0.111597  |
| 0.0986305 | 0.120921  | 0.119027 | 0.113928 | 0.106789  | 0.142483 | 0.104604  |
| 0.1081    | 0.129225  | 0.116841 | 0.11553  | 0.113345  | 0.135635 | 0.0645396 |
| 0.0964452 | 0.0942599 | 0.114219 | 0.110868 | 0.109266  | 0.135927 | 0.10067   |
| 0.0894522 | 0.112617  | 0.099359 | 0.102127 | 0.0984848 | 0.135052 | 0.0954254 |
| 0.107226  | 0.128351  | 0.113636 | 0.108246 | 0.104895  | 0.13447  | 0.105624  |
| 0.103875  | 0.12704   | 0.116987 | 0.115967 | 0.110286  | 0.134907 | 0.0611888 |
| 0.0847902 | 0.120192  | 0.115967 | 0.11116  | 0.108683  | 0.139132 | 0.101836  |
| 0.104604  | 0.125728  | 0.133159 | 0.121649 | 0.113928  | 0.141463 | 0.106498  |
| 0.0958625 | 0.121066  | 0.111014 | 0.107955 | 0.106643  | 0.132721 | 0.053176  |
| 0.0971737 | 0.141317  | 0.127477 | 0.118881 | 0.118735  | 0.143939 | 0.115093  |

| <b>TDr_00_00196</b> | <b>TDr_00_00362</b> | <b>TDr_00_00539</b> | <b>TDr_00_0058</b> | <b>TDr_01_00037</b> | <b>TDr_01_00405</b> | <b>TDr_02_00515</b> |
|---------------------|---------------------|---------------------|--------------------|---------------------|---------------------|---------------------|
| 0.184295            | 0.111014            | 0.108537            | 0.110431           | 0.125728            | 0.0973193           | 0.117716            |
| 0.189685            | 0.115239            | 0.113345            | 0.105041           | 0.122378            | 0.103001            | 0.119901            |
| 0.187646            | 0.112908            | 0.109266            | 0.103001           | 0.122669            | 0.099796            | 0.119318            |
| 0.195513            | 0.119027            | 0.115967            | 0.10067            | 0.124709            | 0.100087            | 0.124854            |
| 0.210082            | 0.134761            | 0.130828            | 0.128934           | 0.132867            | 0.124563            | 0.13447             |
| 0.198718            | 0.101544            | 0.114219            | 0.121066           | 0.136364            | 0.113782            | 0.102127            |
| 0.202652            | 0.112179            | 0.110868            | 0.114219           | 0.123397            | 0.108683            | 0.110431            |
| 0.189831            | 0.118298            | 0.112908            | 0.104604           | 0.118735            | 0.0958625           | 0.122086            |
| 0.19493             | 0.112325            | 0.111888            | 0.095134           | 0.11655             | 0.0971737           | 0.117279            |
| 0.188957            | 0.113345            | 0.107955            | 0.0958625          | 0.115239            | 0.0821678           | 0.118007            |
| 0.180361            | 0.114948            | 0.113054            | 0.101544           | 0.121795            | 0.0983392           | 0.122523            |
| 0.195367            | 0.111597            | 0.108537            | 0.102273           | 0.112617            | 0.100816            | 0.121503            |
| 0.197407            | 0.11451             | 0.119901            | 0.0999417          | 0.116113            | 0.0984848           | 0.123834            |
| 0.1588              | 0.138258            | 0.137821            | 0.124854           | 0.147145            | 0.120192            | 0.144085            |
| 0.17264             | 0.127622            | 0.128642            | 0.116841           | 0.135344            | 0.112471            | 0.129079            |
| 0.194056            | 0.123397            | 0.119755            | 0.107372           | 0.102855            | 0.099796            | 0.127477            |
| 0.199446            | 0.121503            | 0.113491            | 0.102273           | 0.119318            | 0.0955711           | 0.127622            |
| 0.215909            | 0.139423            | 0.137821            | 0.134178           | 0.15676             | 0.130099            | 0.140006            |
| 0.189977            | 0.110577            | 0.112179            | 0.102418           | 0.11655             | 0.0977564           | 0.114656            |
| 0                   | 0.203526            | 0.207168            | 0.191871           | 0.212413            | 0.188666            | 0.2044              |
| 0.203526            | 0                   | 0.0890152           | 0.117133           | 0.131847            | 0.111305            | 0.0597319           |
| 0.207168            | 0.0890152           | 0                   | 0.111451           | 0.131993            | 0.105915            | 0.0992133           |
| 0.191871            | 0.117133            | 0.111451            | 0                  | 0.112908            | 0.0941142           | 0.122669            |
| 0.212413            | 0.131847            | 0.131993            | 0.112908           | 0                   | 0.108246            | 0.134761            |
| 0.188666            | 0.111305            | 0.105915            | 0.0941142          | 0.108246            | 0                   | 0.115093            |
| 0.2044              | 0.0597319           | 0.0992133           | 0.122669           | 0.134761            | 0.115093            | 0                   |
| 0.209062            | 0.124709            | 0.124272            | 0.115385           | 0.118444            | 0.101399            | 0.124709            |
| 0.203817            | 0.132576            | 0.129225            | 0.1081             | 0.0916375           | 0.107226            | 0.134033            |
| 0.209645            | 0.137529            | 0.130973            | 0.128788           | 0.107372            | 0.118007            | 0.133159            |
| 0.205565            | 0.134033            | 0.127185            | 0.119172           | 0.114073            | 0.105478            | 0.135198            |
| 0.193765            | 0.11553             | 0.115967            | 0.114656           | 0.123834            | 0.106789            | 0.118153            |
| 0.202943            | 0.128788            | 0.123106            | 0.112762           | 0.0945513           | 0.106352            | 0.125583            |
| 0.182547            | 0.104895            | 0.10912             | 0.0961538          | 0.109703            | 0.0882867           | 0.107809            |
| 0.207605            | 0.127914            | 0.12602             | 0.111888           | 0.105041            | 0.10169             | 0.130536            |
| 0.207751            | 0.124854            | 0.123834            | 0.108829           | 0.108392            | 0.106206            | 0.125728            |
| 0.210519            | 0.131702            | 0.13039             | 0.115967           | 0.111451            | 0.108392            | 0.133741            |
| 0.217366            | 0.128351            | 0.115676            | 0.118735           | 0.128788            | 0.117279            | 0.130099            |
| 0.20877             | 0.127622            | 0.11757             | 0.107809           | 0.121649            | 0.104895            | 0.13345             |
| 0.19799             | 0.117133            | 0.119901            | 0.0973193          | 0.092803            | 0.0917832           | 0.119755            |
| 0.205857            | 0.128497            | 0.129808            | 0.114219           | 0.10912             | 0.105186            | 0.128497            |
| 0.19799             | 0.110431            | 0.112034            | 0.0996503          | 0.105332            | 0.0891608           | 0.118007            |
| 0.213724            | 0.14831             | 0.143211            | 0.128788           | 0.118735            | 0.120921            | 0.145979            |



|          |          |          |           |          |           |          |
|----------|----------|----------|-----------|----------|-----------|----------|
| 0.216346 | 0.150641 | 0.148456 | 0.131993  | 0.124854 | 0.127622  | 0.14831  |
| 0.205128 | 0.121358 | 0.119172 | 0.106206  | 0.105478 | 0.0989219 | 0.125728 |
| 0.198718 | 0.109411 | 0.105478 | 0.0930944 | 0.110723 | 0.0887238 | 0.113782 |
| 0.209353 | 0.120921 | 0.121066 | 0.109266  | 0.116987 | 0.0973193 | 0.124126 |
| 0.201486 | 0.119464 | 0.121649 | 0.107517  | 0.105624 | 0.106935  | 0.124417 |
| 0.214744 | 0.141754 | 0.132867 | 0.128059  | 0.118881 | 0.119318  | 0.143794 |
| 0.204545 | 0.120192 | 0.115967 | 0.105624  | 0.100816 | 0.0933858 | 0.126311 |
| 0.199446 | 0.123543 | 0.113782 | 0.102273  | 0.109411 | 0.0961538 | 0.125583 |
| 0.215618 | 0.126894 | 0.11859  | 0.138549  | 0.141608 | 0.128934  | 0.118153 |
| 0.20134  | 0.128642 | 0.132576 | 0.116696  | 0.114802 | 0.117861  | 0.13243  |
| 0.20236  | 0.119755 | 0.114948 | 0.102855  | 0.10708  | 0.0941142 | 0.123252 |
| 0.202943 | 0.13141  | 0.124563 | 0.113054  | 0.128351 | 0.108974  | 0.132867 |
| 0.18546  | 0.120047 | 0.112908 | 0.0973193 | 0.118444 | 0.0984848 | 0.126166 |
| 0.224213 | 0.147727 | 0.14292  | 0.129371  | 0.116696 | 0.12704   | 0.140734 |
| 0.211247 | 0.128351 | 0.127331 | 0.119318  | 0.113636 | 0.110868  | 0.133887 |
| 0.203963 | 0.119318 | 0.119172 | 0.105624  | 0.112471 | 0.0962995 | 0.122232 |
| 0.199009 | 0.124272 | 0.113928 | 0.109411  | 0.113636 | 0.100087  | 0.128934 |
| 0.204691 | 0.126457 | 0.119901 | 0.1081    | 0.117861 | 0.104021  | 0.126166 |
| 0.218386 | 0.143065 | 0.138258 | 0.126457  | 0.116696 | 0.12296   | 0.137821 |
| 0.218969 | 0.142191 | 0.143502 | 0.128205  | 0.121649 | 0.122378  | 0.140443 |
| 0.166375 | 0.170892 | 0.168706 | 0.149913  | 0.157051 | 0.151661  | 0.165064 |
| 0.204254 | 0.124854 | 0.119172 | 0.104167  | 0.102564 | 0.0980478 | 0.131265 |
| 0.201632 | 0.117861 | 0.111305 | 0.102418  | 0.104312 | 0.0922203 | 0.124854 |
| 0.203671 | 0.11757  | 0.114802 | 0.099796  | 0.107517 | 0.0925117 | 0.121358 |
| 0.20877  | 0.134324 | 0.133013 | 0.136364  | 0.139714 | 0.128788  | 0.138986 |
| 0.199155 | 0.119172 | 0.116113 | 0.104312  | 0.107663 | 0.0964452 | 0.12296  |
| 0.203089 | 0.133887 | 0.132284 | 0.119901  | 0.122378 | 0.119027  | 0.135344 |
| 0.204837 | 0.126311 | 0.120338 | 0.107955  | 0.11859  | 0.101544  | 0.133013 |
| 0.202652 | 0.120629 | 0.119318 | 0.1081    | 0.108829 | 0.0952797 | 0.129371 |
| 0.208188 | 0.144522 | 0.133887 | 0.138695  | 0.149038 | 0.134324  | 0.140443 |
| 0.207896 | 0.130828 | 0.125437 | 0.105186  | 0.109994 | 0.103147  | 0.137238 |
| 0.214161 | 0.139132 | 0.137821 | 0.128642  | 0.125874 | 0.124854  | 0.137675 |
| 0.207314 | 0.133741 | 0.13447  | 0.119755  | 0.113491 | 0.119172  | 0.136072 |
| 0.194056 | 0.108829 | 0.107517 | 0.0986305 | 0.120338 | 0.0965909 | 0.11757  |
| 0.201049 | 0.11553  | 0.116841 | 0.101253  | 0.107809 | 0.0962995 | 0.123106 |
| 0.202506 | 0.121066 | 0.117133 | 0.104167  | 0.107226 | 0.0939685 | 0.127185 |
| 0.214161 | 0.135052 | 0.136072 | 0.124272  | 0.121212 | 0.11553   | 0.135927 |
| 0.202943 | 0.114802 | 0.113782 | 0.106935  | 0.104167 | 0.0917832 | 0.125    |
| 0.217366 | 0.144376 | 0.141026 | 0.123397  | 0.120629 | 0.120484  | 0.141754 |
| 0.203963 | 0.125728 | 0.125    | 0.110868  | 0.108683 | 0.10271   | 0.130682 |
| 0.208042 | 0.122523 | 0.123543 | 0.112325  | 0.10373  | 0.107955  | 0.125437 |
| 0.204545 | 0.122232 | 0.117716 | 0.10708   | 0.109266 | 0.0971737 | 0.128934 |
| 0.206585 | 0.129808 | 0.128205 | 0.107663  | 0.112179 | 0.106789  | 0.134178 |
| 0.202797 | 0.123689 | 0.115967 | 0.105041  | 0.108683 | 0.0948427 | 0.128351 |

|          |           |           |           |          |           |          |
|----------|-----------|-----------|-----------|----------|-----------|----------|
| 0.20134  | 0.121649  | 0.117716  | 0.102418  | 0.104895 | 0.100087  | 0.126311 |
| 0.213724 | 0.144231  | 0.142045  | 0.123252  | 0.118153 | 0.122086  | 0.139277 |
| 0.199738 | 0.113636  | 0.114656  | 0.094697  | 0.10708  | 0.0897436 | 0.121503 |
| 0.20542  | 0.117279  | 0.115093  | 0.107663  | 0.108974 | 0.100087  | 0.121941 |
| 0.210664 | 0.116696  | 0.110723  | 0.120484  | 0.129953 | 0.116987  | 0.121649 |
| 0.208916 | 0.114073  | 0.110723  | 0.122815  | 0.127914 | 0.112325  | 0.114656 |
| 0.211538 | 0.129225  | 0.122669  | 0.11961   | 0.129371 | 0.114948  | 0.127185 |
| 0.218094 | 0.13345   | 0.136218  | 0.125874  | 0.133013 | 0.121212  | 0.130536 |
| 0.198718 | 0.106789  | 0.106061  | 0.106206  | 0.125    | 0.0986305 | 0.11553  |
| 0.152972 | 0.175845  | 0.182692  | 0.173514  | 0.190268 | 0.167104  | 0.174679 |
| 0.205565 | 0.107517  | 0.100087  | 0.104604  | 0.121066 | 0.0981935 | 0.113345 |
| 0.212121 | 0.135052  | 0.133741  | 0.127768  | 0.134615 | 0.121066  | 0.133887 |
| 0.207459 | 0.127185  | 0.125     | 0.116696  | 0.128497 | 0.113491  | 0.122815 |
| 0.215181 | 0.123834  | 0.112908  | 0.13345   | 0.131556 | 0.121212  | 0.121795 |
| 0.201923 | 0.112617  | 0.113345  | 0.0983392 | 0.114802 | 0.0965909 | 0.115822 |
| 0.2162   | 0.129225  | 0.133159  | 0.121358  | 0.127622 | 0.116113  | 0.127477 |
| 0.206585 | 0.108829  | 0.106935  | 0.101836  | 0.121212 | 0.101544  | 0.114365 |
| 0.20236  | 0.12296   | 0.120484  | 0.109557  | 0.126311 | 0.107809  | 0.123252 |
| 0.19799  | 0.113928  | 0.102418  | 0.100524  | 0.115822 | 0.0932401 | 0.117133 |
| 0.21722  | 0.13345   | 0.134761  | 0.124709  | 0.128351 | 0.114802  | 0.132284 |
| 0.202943 | 0.111014  | 0.114948  | 0.0979021 | 0.109703 | 0.0938228 | 0.117716 |
| 0.20338  | 0.129516  | 0.121503  | 0.119901  | 0.133159 | 0.116113  | 0.124272 |
| 0.204691 | 0.104895  | 0.10067   | 0.107809  | 0.117861 | 0.0999417 | 0.109557 |
| 0.213869 | 0.135635  | 0.134615  | 0.114948  | 0.112179 | 0.114365  | 0.134178 |
| 0.207896 | 0.118298  | 0.111116  | 0.124709  | 0.130973 | 0.113928  | 0.118881 |
| 0.20236  | 0.0973193 | 0.0919289 | 0.101981  | 0.122232 | 0.097028  | 0.104895 |
| 0.207314 | 0.143357  | 0.141171  | 0.134033  | 0.146416 | 0.132284  | 0.141608 |
| 0.200466 | 0.101253  | 0.0967366 | 0.10708   | 0.124417 | 0.10067   | 0.106498 |
| 0.203963 | 0.116404  | 0.113054  | 0.0977564 | 0.121212 | 0.0995047 | 0.122523 |
| 0.2044   | 0.118881  | 0.115239  | 0.101981  | 0.116987 | 0.103147  | 0.124126 |
| 0.215472 | 0.134615  | 0.123397  | 0.129371  | 0.142045 | 0.124126  | 0.131119 |
| 0.178759 | 0.122669  | 0.117279  | 0.106935  | 0.116987 | 0.104895  | 0.124126 |
| 0.200612 | 0.114219  | 0.109411  | 0.0926573 | 0.118153 | 0.100524  | 0.116841 |
| 0.199155 | 0.113345  | 0.106789  | 0.0987762 | 0.114365 | 0.0941142 | 0.121503 |
| 0.204837 | 0.108537  | 0.103147  | 0.104458  | 0.121503 | 0.0983392 | 0.116696 |
| 0.20877  | 0.128788  | 0.126894  | 0.109848  | 0.119901 | 0.100816  | 0.131119 |
| 0.204837 | 0.104458  | 0.0996503 | 0.110868  | 0.119755 | 0.101544  | 0.106789 |
| 0.198864 | 0.112179  | 0.111451  | 0.0955711 | 0.112908 | 0.0871212 | 0.114219 |
| 0.199155 | 0.110723  | 0.106789  | 0.0920746 | 0.112617 | 0.0874126 | 0.115676 |
| 0.202797 | 0.120484  | 0.113636  | 0.10067   | 0.113636 | 0.0913462 | 0.124563 |
| 0.203963 | 0.125437  | 0.118881  | 0.110868  | 0.124417 | 0.106789  | 0.131556 |
| 0.211976 | 0.134324  | 0.129225  | 0.118881  | 0.127477 | 0.112471  | 0.138986 |
| 0.20542  | 0.118153  | 0.111597  | 0.104458  | 0.113054 | 0.0925117 | 0.12602  |
| 0.198281 | 0.111014  | 0.111116  | 0.0955711 | 0.105915 | 0.0879953 | 0.117133 |

|          |          |          |           |           |           |          |
|----------|----------|----------|-----------|-----------|-----------|----------|
| 0.208188 | 0.124126 | 0.121066 | 0.11014   | 0.114073  | 0.1081    | 0.130245 |
| 0.201923 | 0.111451 | 0.115967 | 0.0965909 | 0.106935  | 0.0907634 | 0.11961  |
| 0.199009 | 0.118735 | 0.117716 | 0.114656  | 0.127331  | 0.109411  | 0.126311 |
| 0.208333 | 0.110577 | 0.104895 | 0.127185  | 0.128788  | 0.117279  | 0.107372 |
| 0.203671 | 0.118444 | 0.118007 | 0.102418  | 0.11014   | 0.0948427 | 0.121358 |
| 0.203234 | 0.119464 | 0.113199 | 0.102855  | 0.113782  | 0.094697  | 0.126748 |
| 0.201195 | 0.122669 | 0.116113 | 0.103147  | 0.110868  | 0.092366  | 0.128497 |
| 0.193328 | 0.112762 | 0.109703 | 0.0882867 | 0.109994  | 0.0856643 | 0.115967 |
| 0.207314 | 0.130245 | 0.125146 | 0.115676  | 0.123689  | 0.107226  | 0.134907 |
| 0.198572 | 0.111888 | 0.10708  | 0.0891608 | 0.105624  | 0.0865385 | 0.120338 |
| 0.212995 | 0.137092 | 0.133741 | 0.13447   | 0.126748  | 0.12602   | 0.13884  |
| 0.209353 | 0.138986 | 0.132721 | 0.122086  | 0.129225  | 0.114219  | 0.138403 |
| 0.205565 | 0.130536 | 0.125437 | 0.116259  | 0.123397  | 0.107809  | 0.129953 |
| 0.201923 | 0.120484 | 0.118881 | 0.105041  | 0.11859   | 0.0922203 | 0.127768 |
| 0.20338  | 0.105624 | 0.106935 | 0.112325  | 0.109266  | 0.0913462 | 0.109994 |
| 0.204983 | 0.114219 | 0.111742 | 0.0967366 | 0.103001  | 0.092366  | 0.119172 |
| 0.205711 | 0.11961  | 0.115676 | 0.0957168 | 0.0987762 | 0.092803  | 0.125146 |
| 0.202506 | 0.11553  | 0.114802 | 0.103875  | 0.0891608 | 0.0922203 | 0.122232 |
| 0.186772 | 0.119318 | 0.115967 | 0.0884324 | 0.113928  | 0.0936772 | 0.123689 |
| 0.212995 | 0.133304 | 0.13345  | 0.117279  | 0.0964452 | 0.116696  | 0.13884  |
| 0.205565 | 0.114219 | 0.116696 | 0.104895  | 0.123106  | 0.102855  | 0.118298 |
| 0.204545 | 0.129225 | 0.127914 | 0.119318  | 0.137238  | 0.114073  | 0.128642 |
| 0.218386 | 0.125874 | 0.119318 | 0.131993  | 0.137092  | 0.121795  | 0.128205 |
| 0.133304 | 0.191725 | 0.195367 | 0.182692  | 0.202069  | 0.18211   | 0.200758 |
| 0.135198 | 0.240822 | 0.239219 | 0.228001  | 0.245338  | 0.22771   | 0.239948 |
| 0.188957 | 0.114802 | 0.110868 | 0.0914918 | 0.117861  | 0.0958625 | 0.122378 |
| 0.199301 | 0.114365 | 0.112179 | 0.100087  | 0.102564  | 0.101253  | 0.117861 |
| 0.191142 | 0.110286 | 0.107809 | 0.0901807 | 0.0984848 | 0.088141  | 0.116696 |
| 0.202797 | 0.114948 | 0.106643 | 0.099796  | 0.102855  | 0.0983392 | 0.115822 |
| 0.175117 | 0.13243  | 0.129662 | 0.118444  | 0.138986  | 0.114073  | 0.130973 |
| 0.199009 | 0.119318 | 0.116841 | 0.100379  | 0.103147  | 0.102127  | 0.124854 |
| 0.222174 | 0.147436 | 0.149038 | 0.136364  | 0.126894  | 0.13345   | 0.14627  |
| 0.203089 | 0.121066 | 0.111597 | 0.104458  | 0.104895  | 0.10271   | 0.125728 |
| 0.213869 | 0.129808 | 0.129662 | 0.115822  | 0.106935  | 0.118444  | 0.129516 |
| 0.201777 | 0.133741 | 0.132721 | 0.11451   | 0.118444  | 0.117716  | 0.134033 |
| 0.21081  | 0.130536 | 0.129225 | 0.122086  | 0.113491  | 0.115967  | 0.131119 |
| 0.211393 | 0.142483 | 0.138258 | 0.125583  | 0.124854  | 0.121212  | 0.141608 |
| 0.20877  | 0.118881 | 0.114073 | 0.106935  | 0.111742  | 0.107809  | 0.125583 |
| 0.202943 | 0.118007 | 0.110286 | 0.100524  | 0.103875  | 0.0981935 | 0.121503 |
| 0.208333 | 0.120484 | 0.113636 | 0.104458  | 0.104312  | 0.0995047 | 0.125728 |
| 0.198718 | 0.118735 | 0.107517 | 0.100962  | 0.099359  | 0.095134  | 0.119318 |
| 0.203089 | 0.115822 | 0.11014  | 0.102127  | 0.0996503 | 0.0989219 | 0.120484 |
| 0.207605 | 0.122669 | 0.112325 | 0.103438  | 0.104167  | 0.100524  | 0.123834 |
| 0.209499 | 0.128642 | 0.125583 | 0.114365  | 0.106352  | 0.114365  | 0.128934 |

|          |          |          |           |           |           |          |
|----------|----------|----------|-----------|-----------|-----------|----------|
| 0.217949 | 0.138549 | 0.131993 | 0.120192  | 0.115093  | 0.127185  | 0.132721 |
| 0.209062 | 0.122378 | 0.114948 | 0.107226  | 0.0986305 | 0.101981  | 0.125874 |
| 0.20134  | 0.120775 | 0.118007 | 0.0919289 | 0.104312  | 0.0936772 | 0.123689 |
| 0.215909 | 0.139132 | 0.130828 | 0.121649  | 0.107809  | 0.119901  | 0.139714 |
| 0.20338  | 0.117279 | 0.115385 | 0.0968823 | 0.0990676 | 0.095134  | 0.121358 |
| 0.216346 | 0.14627  | 0.141463 | 0.128205  | 0.124272  | 0.128497  | 0.143939 |
| 0.202652 | 0.140152 | 0.136218 | 0.117716  | 0.134178  | 0.119464  | 0.139569 |
| 0.20134  | 0.128351 | 0.131119 | 0.114365  | 0.122086  | 0.118153  | 0.129225 |
| 0.206876 | 0.113782 | 0.111888 | 0.0983392 | 0.10169   | 0.0954254 | 0.114948 |
| 0.200612 | 0.112471 | 0.102418 | 0.0949883 | 0.102127  | 0.0961538 | 0.116259 |
| 0.213869 | 0.13447  | 0.127331 | 0.11116   | 0.106061  | 0.10912   | 0.135052 |
| 0.207022 | 0.126166 | 0.122815 | 0.109848  | 0.106206  | 0.115967  | 0.121503 |
| 0.209353 | 0.131702 | 0.129225 | 0.117424  | 0.110577  | 0.120629  | 0.135781 |
| 0.207751 | 0.123397 | 0.117424 | 0.105041  | 0.114802  | 0.105332  | 0.125728 |
| 0.205857 | 0.123252 | 0.120484 | 0.105478  | 0.106498  | 0.101107  | 0.127331 |
| 0.207022 | 0.128497 | 0.119901 | 0.109848  | 0.108246  | 0.111014  | 0.12704  |
| 0.218386 | 0.136072 | 0.131556 | 0.122378  | 0.113199  | 0.120338  | 0.140443 |
| 0.211393 | 0.13549  | 0.131265 | 0.115967  | 0.113491  | 0.116259  | 0.13549  |
| 0.215326 | 0.138549 | 0.136655 | 0.117279  | 0.106935  | 0.120484  | 0.138258 |
| 0.201777 | 0.138986 | 0.133013 | 0.120047  | 0.108537  | 0.118881  | 0.134615 |
| 0.21081  | 0.120629 | 0.115822 | 0.0996503 | 0.105332  | 0.0996503 | 0.126457 |
| 0.211101 | 0.132576 | 0.127768 | 0.119464  | 0.117861  | 0.118298  | 0.136364 |
| 0.203671 | 0.113782 | 0.108974 | 0.0971737 | 0.101399  | 0.0942599 | 0.118444 |
| 0.200612 | 0.113054 | 0.112908 | 0.111597  | 0.109411  | 0.0967366 | 0.119464 |
| 0.204108 | 0.114802 | 0.10912  | 0.102564  | 0.112034  | 0.106643  | 0.118881 |
| 0.199883 | 0.116404 | 0.115676 | 0.101544  | 0.101399  | 0.101253  | 0.117861 |
| 0.20134  | 0.114656 | 0.112471 | 0.104167  | 0.101107  | 0.097465  | 0.119318 |
| 0.216055 | 0.136946 | 0.130973 | 0.119755  | 0.111451  | 0.125874  | 0.13549  |
| 0.199883 | 0.120192 | 0.116841 | 0.108537  | 0.101399  | 0.10708   | 0.127768 |
| 0.21183  | 0.135635 | 0.130245 | 0.120192  | 0.11859   | 0.121649  | 0.134761 |
| 0.201632 | 0.11757  | 0.111888 | 0.102418  | 0.0990676 | 0.100379  | 0.121649 |
| 0.215181 | 0.130245 | 0.126311 | 0.113054  | 0.105041  | 0.115676  | 0.130536 |
| 0.196678 | 0.130682 | 0.132576 | 0.105041  | 0.117424  | 0.107663  | 0.130682 |
| 0.198718 | 0.122815 | 0.119172 | 0.103875  | 0.126457  | 0.103875  | 0.12602  |
| 0.203526 | 0.123543 | 0.116987 | 0.106935  | 0.108537  | 0.0984848 | 0.129662 |
| 0.200466 | 0.120775 | 0.117424 | 0.10912   | 0.125583  | 0.105915  | 0.12602  |
| 0.204691 | 0.126457 | 0.120192 | 0.104895  | 0.122523  | 0.104312  | 0.136655 |
| 0.203526 | 0.111597 | 0.112908 | 0.10169   | 0.112325  | 0.090035  | 0.119464 |
| 0.214889 | 0.1419   | 0.128351 | 0.120921  | 0.134178  | 0.115093  | 0.145396 |
| 0.22028  | 0.143502 | 0.13986  | 0.124854  | 0.124417  | 0.126894  | 0.141463 |
| 0.196387 | 0.112034 | 0.107517 | 0.10067   | 0.113345  | 0.0907634 | 0.120192 |
| 0.208479 | 0.130536 | 0.126311 | 0.118298  | 0.130973  | 0.11014   | 0.12704  |
| 0.209207 | 0.132721 | 0.121212 | 0.110577  | 0.129079  | 0.105624  | 0.13243  |
| 0.208042 | 0.121941 | 0.124709 | 0.118153  | 0.133741  | 0.108829  | 0.121941 |

|          |          |          |           |          |           |          |
|----------|----------|----------|-----------|----------|-----------|----------|
| 0.197552 | 0.118444 | 0.117133 | 0.10708   | 0.12704  | 0.0960082 | 0.118153 |
| 0.208916 | 0.126603 | 0.118298 | 0.111451  | 0.122669 | 0.100962  | 0.133013 |
| 0.200612 | 0.130536 | 0.121649 | 0.108392  | 0.130099 | 0.105769  | 0.131119 |
| 0.211538 | 0.125146 | 0.120921 | 0.111742  | 0.13141  | 0.108537  | 0.127768 |
| 0.210956 | 0.134761 | 0.128788 | 0.120484  | 0.141317 | 0.114948  | 0.13243  |
| 0.206585 | 0.127768 | 0.119755 | 0.112617  | 0.133159 | 0.104167  | 0.133596 |
| 0.193182 | 0.115239 | 0.113636 | 0.102127  | 0.126748 | 0.0933858 | 0.118444 |
| 0.216929 | 0.136072 | 0.127477 | 0.118881  | 0.124563 | 0.125583  | 0.140152 |
| 0.212704 | 0.133304 | 0.130245 | 0.118444  | 0.136946 | 0.113491  | 0.135927 |
| 0.196096 | 0.114365 | 0.113636 | 0.101544  | 0.117424 | 0.0922203 | 0.11961  |
| 0.139423 | 0.219406 | 0.218386 | 0.2162    | 0.222756 | 0.208333  | 0.222611 |
| 0.202069 | 0.120921 | 0.119901 | 0.105769  | 0.130099 | 0.104604  | 0.128788 |
| 0.2044   | 0.119755 | 0.11757  | 0.109848  | 0.120775 | 0.0973193 | 0.128788 |
| 0.207459 | 0.133013 | 0.13141  | 0.114948  | 0.136946 | 0.11553   | 0.129516 |
| 0.202797 | 0.118444 | 0.113054 | 0.109994  | 0.125874 | 0.0980478 | 0.123689 |
| 0.210082 | 0.137966 | 0.129662 | 0.116113  | 0.137238 | 0.112034  | 0.137092 |
| 0.204545 | 0.11961  | 0.11859  | 0.105041  | 0.127331 | 0.104167  | 0.121358 |
| 0.199738 | 0.116841 | 0.116404 | 0.0999417 | 0.130099 | 0.102855  | 0.121503 |
| 0.206439 | 0.126457 | 0.121358 | 0.108683  | 0.129808 | 0.103438  | 0.130245 |
| 0.194056 | 0.129808 | 0.12704  | 0.114073  | 0.136364 | 0.112034  | 0.127768 |
| 0.209353 | 0.129079 | 0.126894 | 0.112471  | 0.13039  | 0.113345  | 0.124709 |
| 0.210373 | 0.125728 | 0.121503 | 0.117861  | 0.13549  | 0.11116   | 0.124563 |
| 0.208333 | 0.131265 | 0.123252 | 0.114948  | 0.136072 | 0.109703  | 0.128934 |
| 0.201923 | 0.12398  | 0.119172 | 0.107372  | 0.115967 | 0.0936772 | 0.124854 |
| 0.207459 | 0.11961  | 0.11655  | 0.106789  | 0.12296  | 0.0983392 | 0.12602  |
| 0.210519 | 0.125291 | 0.131847 | 0.120629  | 0.136509 | 0.110431  | 0.124709 |
| 0.190268 | 0.115239 | 0.114802 | 0.0989219 | 0.127622 | 0.0962995 | 0.114656 |
| 0.214744 | 0.142628 | 0.137529 | 0.124563  | 0.123834 | 0.117279  | 0.142337 |
| 0.197115 | 0.136655 | 0.133887 | 0.131702  | 0.144668 | 0.127914  | 0.138695 |
| 0.192453 | 0.131119 | 0.125437 | 0.109266  | 0.118153 | 0.101399  | 0.131702 |
| 0.206439 | 0.135198 | 0.124272 | 0.117133  | 0.127768 | 0.1081    | 0.131993 |
| 0.19289  | 0.127185 | 0.121795 | 0.107955  | 0.132576 | 0.112908  | 0.129225 |
| 0.209353 | 0.136655 | 0.134761 | 0.121212  | 0.110868 | 0.111888  | 0.136946 |
| 0.200903 | 0.129079 | 0.127185 | 0.122086  | 0.129516 | 0.119172  | 0.132576 |
| 0.205274 | 0.136946 | 0.132721 | 0.131993  | 0.142628 | 0.125     | 0.141317 |
| 0.199592 | 0.113782 | 0.115676 | 0.0980478 | 0.112179 | 0.090472  | 0.120775 |
| 0.208479 | 0.143939 | 0.137383 | 0.122669  | 0.12602  | 0.114802  | 0.143065 |
| 0.189394 | 0.140589 | 0.135198 | 0.135927  | 0.145396 | 0.125728  | 0.140006 |
| 0.208042 | 0.123689 | 0.119755 | 0.110286  | 0.118298 | 0.105915  | 0.128351 |
| 0.199592 | 0.120775 | 0.126457 | 0.113199  | 0.117133 | 0.109411  | 0.128934 |
| 0.214889 | 0.151515 | 0.140006 | 0.13345   | 0.13039  | 0.136364  | 0.146853 |
| 0.208479 | 0.133741 | 0.132139 | 0.113636  | 0.110868 | 0.109557  | 0.136655 |
| 0.215909 | 0.144959 | 0.140152 | 0.117279  | 0.130828 | 0.125728  | 0.147873 |
| 0.209645 | 0.135781 | 0.127477 | 0.115093  | 0.127185 | 0.111888  | 0.138403 |

|          |          |          |           |          |           |          |
|----------|----------|----------|-----------|----------|-----------|----------|
| 0.208916 | 0.122232 | 0.119172 | 0.112325  | 0.126748 | 0.107955  | 0.12398  |
| 0.199738 | 0.137238 | 0.131265 | 0.113345  | 0.124563 | 0.108974  | 0.137821 |
| 0.200466 | 0.131847 | 0.12704  | 0.101253  | 0.11859  | 0.0992133 | 0.135635 |
| 0.214015 | 0.13141  | 0.13039  | 0.116259  | 0.126311 | 0.113928  | 0.133741 |
| 0.209645 | 0.125583 | 0.125146 | 0.113928  | 0.127477 | 0.112762  | 0.129953 |
| 0.212267 | 0.13141  | 0.127185 | 0.126748  | 0.129225 | 0.118298  | 0.128788 |
| 0.215181 | 0.127331 | 0.126603 | 0.122086  | 0.134178 | 0.11451   | 0.128497 |
| 0.204691 | 0.131119 | 0.128351 | 0.114219  | 0.127185 | 0.111014  | 0.131119 |
| 0.207314 | 0.142191 | 0.142337 | 0.129662  | 0.144668 | 0.126457  | 0.139569 |
| 0.202069 | 0.125291 | 0.123397 | 0.107809  | 0.118444 | 0.099359  | 0.126748 |
| 0.205857 | 0.119755 | 0.12398  | 0.114802  | 0.110577 | 0.106935  | 0.122086 |
| 0.209936 | 0.130245 | 0.125437 | 0.124126  | 0.134178 | 0.111597  | 0.132284 |
| 0.206439 | 0.120338 | 0.11757  | 0.104021  | 0.120484 | 0.0973193 | 0.125291 |
| 0.209499 | 0.143794 | 0.140734 | 0.139132  | 0.144231 | 0.13243   | 0.145251 |
| 0.218823 | 0.151369 | 0.150932 | 0.151078  | 0.148601 | 0.138549  | 0.151952 |
| 0.213287 | 0.13243  | 0.123252 | 0.11961   | 0.111305 | 0.116987  | 0.13039  |
| 0.209645 | 0.125    | 0.119318 | 0.111597  | 0.105041 | 0.107226  | 0.126166 |
| 0.213869 | 0.128642 | 0.129953 | 0.12398   | 0.122378 | 0.120484  | 0.130682 |
| 0.209936 | 0.128205 | 0.129516 | 0.119755  | 0.134761 | 0.111597  | 0.129953 |
| 0.218094 | 0.130536 | 0.127477 | 0.119755  | 0.114073 | 0.118881  | 0.134615 |
| 0.211684 | 0.131119 | 0.133596 | 0.122086  | 0.140006 | 0.11859   | 0.130536 |
| 0.203234 | 0.139277 | 0.133596 | 0.127622  | 0.127185 | 0.119464  | 0.138986 |
| 0.203963 | 0.132721 | 0.128205 | 0.109994  | 0.109266 | 0.107372  | 0.13447  |
| 0.223193 | 0.155157 | 0.146853 | 0.158071  | 0.160548 | 0.149913  | 0.154283 |
| 0.209207 | 0.130682 | 0.126457 | 0.116987  | 0.113345 | 0.106498  | 0.136218 |
| 0.210664 | 0.139132 | 0.143065 | 0.121066  | 0.136946 | 0.119901  | 0.141754 |
| 0.210227 | 0.124417 | 0.127768 | 0.114802  | 0.110286 | 0.111888  | 0.127331 |
| 0.218094 | 0.136655 | 0.130973 | 0.124417  | 0.118444 | 0.120921  | 0.137238 |
| 0.196824 | 0.118298 | 0.118735 | 0.11014   | 0.132139 | 0.101107  | 0.116841 |
| 0.176865 | 0.124563 | 0.120921 | 0.12398   | 0.141317 | 0.11961   | 0.12602  |
| 0.21081  | 0.138695 | 0.137675 | 0.13986   | 0.145251 | 0.130245  | 0.136364 |
| 0.197844 | 0.127185 | 0.124417 | 0.114656  | 0.125583 | 0.109994  | 0.131556 |
| 0.177885 | 0.141317 | 0.133887 | 0.120629  | 0.14088  | 0.123252  | 0.143065 |
| 0.163753 | 0.149621 | 0.153555 | 0.120192  | 0.1419   | 0.127477  | 0.15778  |
| 0.161713 | 0.143211 | 0.137821 | 0.127185  | 0.150932 | 0.124854  | 0.151661 |
| 0.214889 | 0.128788 | 0.128351 | 0.114219  | 0.10067  | 0.114802  | 0.130828 |
| 0.208625 | 0.136218 | 0.132867 | 0.131265  | 0.143357 | 0.126311  | 0.135344 |
| 0.187937 | 0.11553  | 0.112762 | 0.105624  | 0.12704  | 0.104167  | 0.120192 |
| 0.177885 | 0.119172 | 0.11961  | 0.0958625 | 0.121941 | 0.100233  | 0.121795 |
| 0.198718 | 0.125146 | 0.120921 | 0.116113  | 0.126166 | 0.103584  | 0.124563 |
| 0.199301 | 0.125437 | 0.116841 | 0.106789  | 0.124709 | 0.106498  | 0.129808 |
| 0.201777 | 0.126457 | 0.120484 | 0.108392  | 0.123397 | 0.102564  | 0.13345  |
| 0.171183 | 0.115967 | 0.115822 | 0.0961538 | 0.119027 | 0.0935315 | 0.122378 |
| 0.202652 | 0.124709 | 0.114948 | 0.110723  | 0.130973 | 0.109266  | 0.13345  |

|          |          |           |           |           |           |          |
|----------|----------|-----------|-----------|-----------|-----------|----------|
| 0.163753 | 0.121358 | 0.122669  | 0.114073  | 0.135781  | 0.106789  | 0.127768 |
| 0.19289  | 0.116987 | 0.109266  | 0.0995047 | 0.110431  | 0.0910548 | 0.122232 |
| 0.197844 | 0.127477 | 0.122378  | 0.110286  | 0.130536  | 0.108829  | 0.134761 |
| 0.202943 | 0.126166 | 0.119027  | 0.107809  | 0.123689  | 0.104604  | 0.131119 |
| 0.210227 | 0.129371 | 0.13039   | 0.0964452 | 0.102127  | 0.108683  | 0.135198 |
| 0.127477 | 0.215909 | 0.216638  | 0.207168  | 0.222756  | 0.202797  | 0.218531 |
| 0.208479 | 0.151515 | 0.146416  | 0.134907  | 0.144668  | 0.129662  | 0.145105 |
| 0.209499 | 0.128059 | 0.125     | 0.120192  | 0.131702  | 0.120192  | 0.130973 |
| 0.195659 | 0.126166 | 0.121066  | 0.111014  | 0.128059  | 0.116841  | 0.126457 |
| 0.127477 | 0.210956 | 0.214598  | 0.20338   | 0.217803  | 0.198135  | 0.214161 |
| 0.191579 | 0.119464 | 0.11757   | 0.0941142 | 0.112908  | 0.106352  | 0.120629 |
| 0.206002 | 0.131556 | 0.124417  | 0.115822  | 0.123543  | 0.106498  | 0.13447  |
| 0.200758 | 0.128934 | 0.127914  | 0.11757   | 0.126166  | 0.112325  | 0.129516 |
| 0.174679 | 0.121503 | 0.119901  | 0.112179  | 0.13039   | 0.106352  | 0.128497 |
| 0.141754 | 0.251166 | 0.25102   | 0.24155   | 0.255099  | 0.240967  | 0.249709 |
| 0.206294 | 0.106789 | 0.0984848 | 0.120775  | 0.125     | 0.107663  | 0.10912  |
| 0.206876 | 0.121941 | 0.123252  | 0.0875583 | 0.102273  | 0.103001  | 0.130682 |
| 0.208042 | 0.126311 | 0.118881  | 0.117861  | 0.127914  | 0.11757   | 0.133013 |
| 0.203963 | 0.122232 | 0.117424  | 0.117861  | 0.125874  | 0.112617  | 0.129225 |
| 0.184732 | 0.112617 | 0.106352  | 0.114073  | 0.124709  | 0.109994  | 0.113782 |
| 0.169289 | 0.13039  | 0.128205  | 0.114073  | 0.132867  | 0.113199  | 0.133013 |
| 0.206876 | 0.127768 | 0.128788  | 0.0910548 | 0.105186  | 0.102418  | 0.130973 |
| 0.199446 | 0.127914 | 0.118735  | 0.1081    | 0.125146  | 0.105186  | 0.129371 |
| 0.205128 | 0.12602  | 0.120921  | 0.11961   | 0.132576  | 0.112617  | 0.128642 |
| 0.175699 | 0.116113 | 0.114802  | 0.108537  | 0.127622  | 0.101836  | 0.122232 |
| 0.195659 | 0.125874 | 0.117279  | 0.103147  | 0.123397  | 0.103147  | 0.128497 |
| 0.193473 | 0.118444 | 0.109557  | 0.102127  | 0.121503  | 0.0875583 | 0.121358 |
| 0.212558 | 0.137821 | 0.137383  | 0.13986   | 0.144668  | 0.130536  | 0.134033 |
| 0.205857 | 0.11014  | 0.103584  | 0.123543  | 0.125728  | 0.111888  | 0.106643 |
| 0.205565 | 0.136364 | 0.125437  | 0.118298  | 0.128351  | 0.111014  | 0.141317 |
| 0.137675 | 0.189977 | 0.191871  | 0.18211   | 0.198281  | 0.175699  | 0.194639 |
| 0.132721 | 0.206294 | 0.203526  | 0.193765  | 0.211684  | 0.189394  | 0.208625 |
| 0.167104 | 0.124126 | 0.120484  | 0.113054  | 0.130099  | 0.106935  | 0.130245 |
| 0.174679 | 0.119172 | 0.114365  | 0.107809  | 0.12602   | 0.0984848 | 0.121212 |
| 0.193036 | 0.137821 | 0.134178  | 0.129079  | 0.142045  | 0.125874  | 0.132867 |
| 0.205565 | 0.125874 | 0.125146  | 0.0894522 | 0.103584  | 0.102564  | 0.133159 |
| 0.206002 | 0.109994 | 0.101399  | 0.12602   | 0.12704   | 0.111451  | 0.106206 |
| 0.200321 | 0.129079 | 0.126894  | 0.119464  | 0.127768  | 0.120921  | 0.122669 |
| 0.14292  | 0.22465  | 0.227127  | 0.2162    | 0.230915  | 0.213287  | 0.227564 |
| 0.205857 | 0.118881 | 0.114656  | 0.109266  | 0.125437  | 0.103438  | 0.124709 |
| 0.138695 | 0.209062 | 0.212704  | 0.192453  | 0.207168  | 0.195076  | 0.209062 |
| 0.20877  | 0.113928 | 0.114656  | 0.101399  | 0.0989219 | 0.100233  | 0.120629 |
| 0.199592 | 0.122815 | 0.121795  | 0.105915  | 0.119464  | 0.105915  | 0.128934 |
| 0.18954  | 0.120629 | 0.118444  | 0.0935315 | 0.122232  | 0.102273  | 0.124417 |

|          |           |           |           |           |           |          |
|----------|-----------|-----------|-----------|-----------|-----------|----------|
| 0.1706   | 0.117133  | 0.111742  | 0.102564  | 0.12398   | 0.0979021 | 0.122378 |
| 0.137821 | 0.207605  | 0.208916  | 0.198281  | 0.215326  | 0.193036  | 0.214598 |
| 0.19697  | 0.138549  | 0.129079  | 0.122523  | 0.137821  | 0.120192  | 0.139423 |
| 0.208625 | 0.124272  | 0.119172  | 0.112034  | 0.11655   | 0.105332  | 0.13243  |
| 0.203963 | 0.13447   | 0.126457  | 0.112325  | 0.128205  | 0.114948  | 0.136218 |
| 0.205711 | 0.128059  | 0.129953  | 0.116113  | 0.121212  | 0.11553   | 0.127185 |
| 0.18007  | 0.116696  | 0.114802  | 0.108537  | 0.129079  | 0.0995047 | 0.124854 |
| 0.209645 | 0.113928  | 0.114656  | 0.101107  | 0.0977564 | 0.101107  | 0.120629 |
| 0.196533 | 0.128788  | 0.129516  | 0.0917832 | 0.109703  | 0.100233  | 0.133159 |
| 0.206439 | 0.134324  | 0.129516  | 0.118007  | 0.12398   | 0.112471  | 0.137529 |
| 0.191579 | 0.121795  | 0.112325  | 0.102273  | 0.123397  | 0.100524  | 0.126166 |
| 0.207459 | 0.125437  | 0.121503  | 0.114073  | 0.113636  | 0.109703  | 0.13039  |
| 0.139132 | 0.18852   | 0.192453  | 0.181527  | 0.197407  | 0.177739  | 0.19697  |
| 0.208042 | 0.125437  | 0.119755  | 0.118444  | 0.124709  | 0.116404  | 0.131847 |
| 0.205274 | 0.12296   | 0.11961   | 0.122669  | 0.130682  | 0.111888  | 0.125291 |
| 0.199592 | 0.117279  | 0.110431  | 0.110868  | 0.12704   | 0.11553   | 0.11961  |
| 0.19799  | 0.107517  | 0.103293  | 0.120047  | 0.129225  | 0.111014  | 0.113345 |
| 0.200612 | 0.130536  | 0.124563  | 0.109557  | 0.127768  | 0.109266  | 0.13345  |
| 0.212267 | 0.121795  | 0.123689  | 0.110431  | 0.10271   | 0.106643  | 0.123543 |
| 0.199883 | 0.113199  | 0.113928  | 0.107372  | 0.112762  | 0.0989219 | 0.116113 |
| 0.212413 | 0.13447   | 0.129371  | 0.0965909 | 0.106352  | 0.108537  | 0.134178 |
| 0.201777 | 0.117424  | 0.114365  | 0.116259  | 0.126311  | 0.108392  | 0.122378 |
| 0.204108 | 0.119172  | 0.112908  | 0.109557  | 0.12602   | 0.108392  | 0.128497 |
| 0.174534 | 0.118735  | 0.120921  | 0.10912   | 0.130828  | 0.103001  | 0.124563 |
| 0.209645 | 0.126457  | 0.119027  | 0.117716  | 0.123689  | 0.11014   | 0.132284 |
| 0.208916 | 0.13884   | 0.136655  | 0.128351  | 0.132867  | 0.123397  | 0.140006 |
| 0.200175 | 0.099796  | 0.0935315 | 0.114948  | 0.121503  | 0.100379  | 0.105041 |
| 0.207314 | 0.147436  | 0.141754  | 0.127622  | 0.140589  | 0.125     | 0.145688 |
| 0.177302 | 0.117133  | 0.113491  | 0.110723  | 0.128642  | 0.0996503 | 0.125291 |
| 0.198572 | 0.113636  | 0.11553   | 0.105769  | 0.119027  | 0.11014   | 0.117716 |
| 0.182401 | 0.126311  | 0.122378  | 0.105041  | 0.126748  | 0.106206  | 0.131265 |
| 0.208916 | 0.133887  | 0.136072  | 0.0986305 | 0.107226  | 0.110577  | 0.13884  |
| 0.134324 | 0.191288  | 0.195221  | 0.169726  | 0.195804  | 0.173514  | 0.195367 |
| 0.20236  | 0.120047  | 0.11757   | 0.107517  | 0.112617  | 0.102564  | 0.126166 |
| 0.195367 | 0.115093  | 0.104458  | 0.0990676 | 0.113782  | 0.0981935 | 0.117424 |
| 0.204983 | 0.13345   | 0.128059  | 0.115676  | 0.122523  | 0.109848  | 0.135781 |
| 0.137092 | 0.180653  | 0.183712  | 0.164044  | 0.188957  | 0.162296  | 0.184732 |
| 0.210082 | 0.114073  | 0.107809  | 0.131556  | 0.131993  | 0.120192  | 0.115822 |
| 0.216492 | 0.128642  | 0.118007  | 0.13884   | 0.13986   | 0.127768  | 0.118735 |
| 0.210519 | 0.13986   | 0.140297  | 0.139569  | 0.144668  | 0.131702  | 0.133159 |
| 0.199446 | 0.0987762 | 0.0936772 | 0.111597  | 0.11961   | 0.0996503 | 0.10169  |
| 0.198135 | 0.132721  | 0.123834  | 0.114365  | 0.130536  | 0.110868  | 0.133013 |
| 0.137675 | 0.210082  | 0.213432  | 0.202214  | 0.218094  | 0.199883  | 0.214161 |
| 0.194493 | 0.133741  | 0.126311  | 0.115676  | 0.125146  | 0.111014  | 0.137238 |



|          |          |           |           |          |           |          |
|----------|----------|-----------|-----------|----------|-----------|----------|
| 0.199883 | 0.136509 | 0.129079  | 0.116696  | 0.128205 | 0.114656  | 0.137966 |
| 0.201923 | 0.120484 | 0.117716  | 0.109703  | 0.117133 | 0.106789  | 0.129516 |
| 0.145688 | 0.177302 | 0.17366   | 0.149038  | 0.175699 | 0.14933   | 0.180216 |
| 0.192599 | 0.11553  | 0.109848  | 0.103584  | 0.121503 | 0.103001  | 0.121649 |
| 0.214307 | 0.150058 | 0.146125  | 0.142191  | 0.151369 | 0.136364  | 0.148019 |
| 0.190414 | 0.12704  | 0.123689  | 0.111305  | 0.122523 | 0.105478  | 0.125874 |
| 0.142045 | 0.191434 | 0.194202  | 0.18211   | 0.193036 | 0.175991  | 0.194347 |
| 0.205565 | 0.10169  | 0.0962995 | 0.117133  | 0.124272 | 0.107226  | 0.112471 |
| 0.195367 | 0.115967 | 0.11116   | 0.100233  | 0.114656 | 0.0938228 | 0.122378 |
| 0.203671 | 0.118153 | 0.11655   | 0.103875  | 0.120047 | 0.106206  | 0.12398  |
| 0.207605 | 0.125291 | 0.120484  | 0.115093  | 0.114656 | 0.10373   | 0.132284 |
| 0.207022 | 0.129953 | 0.124563  | 0.111888  | 0.119318 | 0.107226  | 0.137821 |
| 0.199738 | 0.12296  | 0.115822  | 0.113054  | 0.130682 | 0.106643  | 0.122086 |
| 0.175699 | 0.11553  | 0.112762  | 0.108537  | 0.125583 | 0.097465  | 0.124272 |
| 0.133013 | 0.189103 | 0.18954   | 0.180944  | 0.196241 | 0.175117  | 0.194639 |
| 0.207168 | 0.122232 | 0.11859   | 0.115822  | 0.124126 | 0.114365  | 0.13039  |
| 0.195367 | 0.124126 | 0.11961   | 0.106643  | 0.120775 | 0.104021  | 0.126748 |
| 0.132576 | 0.213141 | 0.214452  | 0.201195  | 0.219406 | 0.199155  | 0.214598 |
| 0.207168 | 0.121941 | 0.117424  | 0.120775  | 0.127331 | 0.115239  | 0.129516 |
| 0.173223 | 0.113345 | 0.114656  | 0.108974  | 0.129516 | 0.100816  | 0.125    |
| 0.171474 | 0.113928 | 0.113199  | 0.105186  | 0.12398  | 0.0955711 | 0.120921 |
| 0.200175 | 0.145542 | 0.138112  | 0.126311  | 0.138403 | 0.124854  | 0.140297 |
| 0.139277 | 0.188083 | 0.190268  | 0.178759  | 0.199009 | 0.174971  | 0.19391  |
| 0.211684 | 0.129371 | 0.129225  | 0.0935315 | 0.105624 | 0.102273  | 0.13345  |
| 0.20877  | 0.135198 | 0.129225  | 0.121503  | 0.128059 | 0.120047  | 0.136364 |
| 0.17701  | 0.110723 | 0.114365  | 0.106935  | 0.128059 | 0.0981935 | 0.12296  |
| 0.176136 | 0.114802 | 0.112034  | 0.105769  | 0.124854 | 0.0944056 | 0.125291 |
| 0.171329 | 0.116404 | 0.112471  | 0.107372  | 0.128205 | 0.0986305 | 0.122815 |
| 0.200029 | 0.125    | 0.118153  | 0.1081    | 0.127477 | 0.106352  | 0.132284 |
| 0.19289  | 0.111451 | 0.11014   | 0.097465  | 0.111014 | 0.0890152 | 0.119901 |
| 0.206002 | 0.105915 | 0.0949883 | 0.121066  | 0.126166 | 0.108246  | 0.10708  |
| 0.211247 | 0.127185 | 0.124126  | 0.119027  | 0.134907 | 0.122815  | 0.124854 |
| 0.205711 | 0.099796 | 0.0973193 | 0.113199  | 0.12704  | 0.105332  | 0.104167 |
| 0.212267 | 0.130245 | 0.13447   | 0.124709  | 0.125146 | 0.119755  | 0.130828 |
| 0.138986 | 0.197407 | 0.193473  | 0.184586  | 0.202797 | 0.180507  | 0.200903 |
| 0.202943 | 0.125291 | 0.11961   | 0.110723  | 0.12398  | 0.104895  | 0.127622 |
| 0.20134  | 0.137383 | 0.130536  | 0.121066  | 0.134033 | 0.120192  | 0.140589 |
| 0.175845 | 0.111888 | 0.112617  | 0.108683  | 0.127185 | 0.0964452 | 0.122086 |
| 0.194056 | 0.114073 | 0.108392  | 0.095134  | 0.108974 | 0.0901807 | 0.120484 |
| 0.189103 | 0.110286 | 0.108683  | 0.0995047 | 0.123834 | 0.097465  | 0.11961  |
| 0.209645 | 0.128497 | 0.128351  | 0.092366  | 0.104167 | 0.107809  | 0.132576 |
| 0.207022 | 0.134907 | 0.136509  | 0.12296   | 0.138258 | 0.117133  | 0.136655 |
| 0.202797 | 0.113782 | 0.112471  | 0.113491  | 0.12704  | 0.10271   | 0.123106 |
| 0.19493  | 0.118153 | 0.118881  | 0.0814394 | 0.1081   | 0.0901807 | 0.125728 |

|          |          |           |           |          |           |          |
|----------|----------|-----------|-----------|----------|-----------|----------|
| 0.192453 | 0.117133 | 0.116113  | 0.0792541 | 0.103001 | 0.0891608 | 0.121503 |
| 0.189103 | 0.112908 | 0.115676  | 0.0930944 | 0.114219 | 0.0890152 | 0.117861 |
| 0.209353 | 0.117133 | 0.118735  | 0.104604  | 0.101253 | 0.10373   | 0.124417 |
| 0.20979  | 0.113199 | 0.106061  | 0.125728  | 0.129371 | 0.118444  | 0.109994 |
| 0.21081  | 0.127622 | 0.126603  | 0.0888695 | 0.110286 | 0.103438  | 0.131702 |
| 0.196678 | 0.123689 | 0.116259  | 0.107372  | 0.126457 | 0.102418  | 0.124854 |
| 0.206294 | 0.121941 | 0.122669  | 0.0840618 | 0.103438 | 0.0989219 | 0.129225 |
| 0.176136 | 0.114802 | 0.115822  | 0.105186  | 0.122815 | 0.0987762 | 0.122669 |
| 0.205128 | 0.117279 | 0.114219  | 0.104458  | 0.113928 | 0.100962  | 0.124272 |
| 0.175117 | 0.116696 | 0.116841  | 0.109703  | 0.129079 | 0.100087  | 0.124854 |
| 0.199592 | 0.119901 | 0.11451   | 0.106498  | 0.118007 | 0.10067   | 0.124854 |
| 0.20134  | 0.113782 | 0.11014   | 0.111742  | 0.125291 | 0.101253  | 0.120484 |
| 0.207168 | 0.129225 | 0.120338  | 0.105332  | 0.117133 | 0.0995047 | 0.133013 |
| 0.194784 | 0.11655  | 0.113199  | 0.0979021 | 0.112908 | 0.0917832 | 0.119755 |
| 0.179487 | 0.113491 | 0.11451   | 0.10912   | 0.124417 | 0.0995047 | 0.121358 |
| 0.188228 | 0.122232 | 0.118007  | 0.10912   | 0.128497 | 0.11116   | 0.126894 |
| 0.198864 | 0.124126 | 0.120192  | 0.109557  | 0.128351 | 0.111305  | 0.130536 |
| 0.196387 | 0.118444 | 0.111888  | 0.0989219 | 0.120921 | 0.0925117 | 0.125437 |
| 0.180361 | 0.114073 | 0.113636  | 0.104458  | 0.124417 | 0.0960082 | 0.121941 |
| 0.196533 | 0.131119 | 0.120192  | 0.112471  | 0.127185 | 0.106061  | 0.13141  |
| 0.209353 | 0.114219 | 0.117861  | 0.103438  | 0.10271  | 0.100816  | 0.122669 |
| 0.203234 | 0.125291 | 0.117861  | 0.104895  | 0.127185 | 0.107809  | 0.130536 |
| 0.2044   | 0.126748 | 0.121649  | 0.108392  | 0.121066 | 0.100233  | 0.13549  |
| 0.195659 | 0.119755 | 0.112034  | 0.10169   | 0.115822 | 0.0929487 | 0.120921 |
| 0.196533 | 0.111305 | 0.113491  | 0.1081    | 0.121066 | 0.0987762 | 0.119755 |
| 0.206585 | 0.118444 | 0.113636  | 0.106498  | 0.113054 | 0.099796  | 0.126311 |
| 0.199738 | 0.131119 | 0.126894  | 0.112179  | 0.129808 | 0.109848  | 0.136072 |
| 0.204691 | 0.130245 | 0.126311  | 0.116841  | 0.119318 | 0.11859   | 0.13141  |
| 0.195221 | 0.122815 | 0.120338  | 0.111742  | 0.127622 | 0.105332  | 0.129516 |
| 0.140734 | 0.190997 | 0.196387  | 0.185752  | 0.198718 | 0.181381  | 0.195367 |
| 0.147145 | 0.161859 | 0.164918  | 0.149038  | 0.17366  | 0.151952  | 0.170017 |
| 0.20338  | 0.100379 | 0.0961538 | 0.116404  | 0.126166 | 0.106206  | 0.108829 |
| 0.194202 | 0.125583 | 0.121649  | 0.087704  | 0.118153 | 0.103147  | 0.131702 |
| 0.218386 | 0.131993 | 0.121941  | 0.144231  | 0.146999 | 0.134033  | 0.122669 |
| 0.207751 | 0.126894 | 0.120338  | 0.120484  | 0.136655 | 0.116113  | 0.131265 |
| 0.172931 | 0.122086 | 0.11757   | 0.105769  | 0.130099 | 0.104021  | 0.128497 |
| 0.17803  | 0.121358 | 0.116841  | 0.102127  | 0.129371 | 0.099796  | 0.125728 |
| 0.192308 | 0.113782 | 0.109848  | 0.0986305 | 0.122086 | 0.0831876 | 0.119027 |
| 0.19697  | 0.126311 | 0.120047  | 0.113491  | 0.126166 | 0.110286  | 0.128059 |
| 0.137675 | 0.198718 | 0.203817  | 0.192308  | 0.209353 | 0.18648   | 0.206294 |
| 0.212704 | 0.128351 | 0.12704   | 0.0930944 | 0.106061 | 0.106789  | 0.136218 |
| 0.190122 | 0.125583 | 0.123106  | 0.0879953 | 0.116987 | 0.100524  | 0.128497 |
| 0.176136 | 0.111888 | 0.114656  | 0.0981935 | 0.120192 | 0.0917832 | 0.121503 |
| 0.21183  | 0.11961  | 0.121503  | 0.11116   | 0.119172 | 0.110577  | 0.129516 |

|          |          |           |           |           |           |          |
|----------|----------|-----------|-----------|-----------|-----------|----------|
| 0.133887 | 0.183566 | 0.184003  | 0.16521   | 0.191871  | 0.166667  | 0.191434 |
| 0.144668 | 0.247086 | 0.248689  | 0.238636  | 0.249563  | 0.233974  | 0.246795 |
| 0.202069 | 0.119172 | 0.112617  | 0.113345  | 0.127185  | 0.106061  | 0.125291 |
| 0.199446 | 0.124126 | 0.121358  | 0.111888  | 0.130099  | 0.107517  | 0.129079 |
| 0.201777 | 0.100524 | 0.0965909 | 0.115967  | 0.125146  | 0.105769  | 0.106061 |
| 0.20542  | 0.12398  | 0.118881  | 0.106498  | 0.117716  | 0.103875  | 0.13039  |
| 0.207605 | 0.124126 | 0.125728  | 0.0888695 | 0.100962  | 0.0999417 | 0.128205 |
| 0.202506 | 0.11553  | 0.113928  | 0.109411  | 0.115676  | 0.105624  | 0.122232 |
| 0.167686 | 0.120047 | 0.119027  | 0.100524  | 0.122232  | 0.0961538 | 0.124709 |
| 0.21081  | 0.123543 | 0.120775  | 0.0868298 | 0.104458  | 0.099359  | 0.132576 |
| 0.173368 | 0.120192 | 0.116259  | 0.0995047 | 0.12296   | 0.0995047 | 0.12398  |
| 0.200612 | 0.123252 | 0.11757   | 0.105186  | 0.123106  | 0.0961538 | 0.131119 |
| 0.195804 | 0.11553  | 0.111014  | 0.0989219 | 0.112471  | 0.092803  | 0.119027 |
| 0.200903 | 0.116841 | 0.112908  | 0.115385  | 0.127768  | 0.104895  | 0.120338 |
| 0.200758 | 0.126894 | 0.120338  | 0.109994  | 0.129662  | 0.108537  | 0.133887 |
| 0.196678 | 0.111451 | 0.106643  | 0.0933858 | 0.113636  | 0.0945513 | 0.116113 |
| 0.206876 | 0.125146 | 0.121212  | 0.112034  | 0.125874  | 0.107372  | 0.125146 |
| 0.211247 | 0.144376 | 0.137821  | 0.126603  | 0.126166  | 0.118735  | 0.143502 |
| 0.181381 | 0.112471 | 0.112325  | 0.105186  | 0.122232  | 0.0987762 | 0.122669 |
| 0.167249 | 0.117861 | 0.113345  | 0.102418  | 0.118881  | 0.0992133 | 0.116113 |
| 0.176282 | 0.129808 | 0.129079  | 0.120484  | 0.139569  | 0.114656  | 0.131847 |
| 0.13447  | 0.209499 | 0.211101  | 0.199009  | 0.214015  | 0.196096  | 0.208042 |
| 0.198427 | 0.112617 | 0.105478  | 0.105915  | 0.11859   | 0.0986305 | 0.113782 |
| 0.198864 | 0.115967 | 0.109994  | 0.0996503 | 0.111742  | 0.0897436 | 0.12296  |
| 0.204983 | 0.125874 | 0.11553   | 0.113928  | 0.125146  | 0.109557  | 0.134033 |
| 0.205128 | 0.120484 | 0.117716  | 0.117279  | 0.129079  | 0.113782  | 0.132139 |
| 0.208916 | 0.121066 | 0.12296   | 0.110286  | 0.119464  | 0.107372  | 0.128351 |
| 0.137821 | 0.199738 | 0.202797  | 0.192162  | 0.206294  | 0.186043  | 0.208188 |
| 0.201195 | 0.130536 | 0.122523  | 0.114802  | 0.131265  | 0.109557  | 0.134324 |
| 0.179487 | 0.114073 | 0.113345  | 0.105332  | 0.123834  | 0.0965909 | 0.121066 |
| 0.203526 | 0.126166 | 0.12602   | 0.118298  | 0.0960082 | 0.106935  | 0.127622 |
| 0.204983 | 0.126457 | 0.116987  | 0.105186  | 0.118153  | 0.0979021 | 0.128497 |
| 0.198281 | 0.127914 | 0.122523  | 0.110431  | 0.128059  | 0.109557  | 0.132867 |
| 0.190705 | 0.121503 | 0.113782  | 0.101981  | 0.118153  | 0.0958625 | 0.122378 |
| 0.202069 | 0.122378 | 0.114073  | 0.102564  | 0.123689  | 0.0987762 | 0.128788 |
| 0.205274 | 0.120629 | 0.112617  | 0.111597  | 0.12602   | 0.11014   | 0.129953 |
| 0.136655 | 0.200612 | 0.199883  | 0.188374  | 0.204837  | 0.185169  | 0.206731 |
| 0.195659 | 0.124709 | 0.10912   | 0.102273  | 0.118444  | 0.0973193 | 0.123834 |
| 0.141026 | 0.194202 | 0.197261  | 0.186626  | 0.204545  | 0.18109   | 0.201486 |
| 0.137966 | 0.192599 | 0.196533  | 0.182984  | 0.201777  | 0.181818  | 0.200758 |
| 0.21081  | 0.141317 | 0.132721  | 0.121503  | 0.122815  | 0.115385  | 0.141026 |
| 0.212558 | 0.129371 | 0.124563  | 0.129953  | 0.131847  | 0.123543  | 0.131993 |
| 0.193619 | 0.116259 | 0.110868  | 0.0920746 | 0.116987  | 0.0871212 | 0.119464 |
| 0.19493  | 0.118735 | 0.111014  | 0.102418  | 0.119172  | 0.0983392 | 0.123689 |

|          |          |           |           |           |           |          |
|----------|----------|-----------|-----------|-----------|-----------|----------|
| 0.199738 | 0.126457 | 0.117861  | 0.107517  | 0.121066  | 0.10169   | 0.132867 |
| 0.177593 | 0.118298 | 0.113199  | 0.107517  | 0.128642  | 0.0999417 | 0.126166 |
| 0.206439 | 0.121503 | 0.119318  | 0.0856643 | 0.100962  | 0.097028  | 0.126748 |
| 0.20877  | 0.125583 | 0.123397  | 0.0865385 | 0.100962  | 0.101399  | 0.130536 |
| 0.197844 | 0.119901 | 0.117424  | 0.118153  | 0.12704   | 0.106789  | 0.126894 |
| 0.205857 | 0.13141  | 0.122232  | 0.113054  | 0.120192  | 0.106352  | 0.135198 |
| 0.175408 | 0.111742 | 0.109557  | 0.101836  | 0.120338  | 0.0960082 | 0.119027 |
| 0.198281 | 0.127622 | 0.119318  | 0.109557  | 0.126603  | 0.107517  | 0.132576 |
| 0.194056 | 0.114365 | 0.110723  | 0.0942599 | 0.110723  | 0.0887238 | 0.115822 |
| 0.201195 | 0.138695 | 0.131556  | 0.11859   | 0.133887  | 0.118007  | 0.136946 |
| 0.203526 | 0.102273 | 0.0968823 | 0.117424  | 0.12398   | 0.103438  | 0.103438 |
| 0.206002 | 0.142337 | 0.132867  | 0.122815  | 0.136072  | 0.119901  | 0.14088  |
| 0.147727 | 0.261509 | 0.259907  | 0.251603  | 0.264569  | 0.24898   | 0.25947  |
| 0.212413 | 0.135635 | 0.13141   | 0.122815  | 0.120047  | 0.11757   | 0.136218 |
| 0.205857 | 0.137529 | 0.131556  | 0.122086  | 0.122815  | 0.117424  | 0.136655 |
| 0.140734 | 0.218386 | 0.22028   | 0.209062  | 0.228438  | 0.2044    | 0.219551 |
| 0.202943 | 0.133159 | 0.125728  | 0.122086  | 0.129516  | 0.118298  | 0.139277 |
| 0.136801 | 0.229895 | 0.229167  | 0.220862  | 0.235868  | 0.219697  | 0.231643 |
| 0.207168 | 0.122523 | 0.122086  | 0.116404  | 0.111888  | 0.111451  | 0.13039  |
| 0.178467 | 0.127914 | 0.127477  | 0.117424  | 0.133596  | 0.111597  | 0.131702 |
| 0.205274 | 0.119172 | 0.112617  | 0.1081    | 0.11961   | 0.107517  | 0.128205 |
| 0.206148 | 0.136946 | 0.130099  | 0.117424  | 0.121358  | 0.111305  | 0.139569 |
| 0.141754 | 0.203089 | 0.206439  | 0.195221  | 0.212267  | 0.190268  | 0.207751 |
| 0.204691 | 0.137238 | 0.133304  | 0.118881  | 0.136509  | 0.118881  | 0.138112 |
| 0.200029 | 0.129662 | 0.123106  | 0.107517  | 0.127477  | 0.106061  | 0.133741 |
| 0.137821 | 0.224796 | 0.225816  | 0.219843  | 0.231352  | 0.214307  | 0.233246 |
| 0.208479 | 0.126166 | 0.127477  | 0.0897436 | 0.105624  | 0.104895  | 0.134033 |
| 0.141608 | 0.200321 | 0.203671  | 0.190705  | 0.206002  | 0.183712  | 0.205857 |
| 0.210664 | 0.12602  | 0.125     | 0.0890152 | 0.109848  | 0.103293  | 0.136218 |
| 0.18211  | 0.116987 | 0.114802  | 0.108829  | 0.125874  | 0.0989219 | 0.124272 |
| 0.203526 | 0.125    | 0.121358  | 0.108974  | 0.11757   | 0.101107  | 0.123543 |
| 0.209062 | 0.136655 | 0.133013  | 0.121795  | 0.122815  | 0.11655   | 0.138695 |
| 0.195513 | 0.118153 | 0.109848  | 0.105041  | 0.123834  | 0.108246  | 0.125728 |
| 0.140443 | 0.160985 | 0.164627  | 0.146416  | 0.166375  | 0.138258  | 0.165647 |
| 0.194639 | 0.123106 | 0.115385  | 0.105041  | 0.122086  | 0.102127  | 0.128642 |
| 0.206294 | 0.120775 | 0.115967  | 0.11553   | 0.129371  | 0.114073  | 0.13039  |
| 0.203963 | 0.129516 | 0.124126  | 0.111451  | 0.127622  | 0.105332  | 0.139132 |
| 0.205128 | 0.129225 | 0.123252  | 0.11757   | 0.126166  | 0.114656  | 0.124563 |
| 0.136801 | 0.197261 | 0.197698  | 0.185897  | 0.204983  | 0.182692  | 0.202506 |
| 0.17366  | 0.114948 | 0.113928  | 0.105041  | 0.125291  | 0.0965909 | 0.123106 |
| 0.195076 | 0.129953 | 0.121358  | 0.11451   | 0.129516  | 0.107517  | 0.139569 |
| 0.208042 | 0.112617 | 0.115093  | 0.101836  | 0.0999417 | 0.101544  | 0.121941 |
| 0.209062 | 0.126748 | 0.125146  | 0.0929487 | 0.101836  | 0.104895  | 0.131119 |
| 0.172786 | 0.123106 | 0.121212  | 0.112034  | 0.129079  | 0.104458  | 0.123397 |

|          |           |           |           |          |           |          |
|----------|-----------|-----------|-----------|----------|-----------|----------|
| 0.140297 | 0.256702  | 0.258596  | 0.246795  | 0.262675 | 0.246212  | 0.254371 |
| 0.199883 | 0.121066  | 0.117133  | 0.105041  | 0.113636 | 0.0954254 | 0.11961  |
| 0.181235 | 0.123397  | 0.117716  | 0.104749  | 0.129662 | 0.102127  | 0.128934 |
| 0.15035  | 0.180216  | 0.188811  | 0.167686  | 0.183275 | 0.16623   | 0.182255 |
| 0.13549  | 0.185169  | 0.18852   | 0.17701   | 0.195221 | 0.174097  | 0.191288 |
| 0.199883 | 0.120192  | 0.115385  | 0.112617  | 0.128788 | 0.106206  | 0.126603 |
| 0.199738 | 0.129079  | 0.118444  | 0.109848  | 0.128059 | 0.107517  | 0.132867 |
| 0.204691 | 0.127622  | 0.11757   | 0.107517  | 0.120775 | 0.101107  | 0.13141  |
| 0.207459 | 0.154283  | 0.148601  | 0.136509  | 0.147145 | 0.133013  | 0.148456 |
| 0.199301 | 0.114073  | 0.11014   | 0.109411  | 0.126457 | 0.103293  | 0.120484 |
| 0.202652 | 0.117716  | 0.119027  | 0.115676  | 0.127477 | 0.106061  | 0.128205 |
| 0.208916 | 0.129808  | 0.130536  | 0.0954254 | 0.106643 | 0.114073  | 0.13447  |
| 0.191434 | 0.128059  | 0.119755  | 0.106206  | 0.124126 | 0.10708   | 0.128059 |
| 0.201486 | 0.136072  | 0.131847  | 0.119755  | 0.130973 | 0.118881  | 0.132576 |
| 0.191142 | 0.129516  | 0.12704   | 0.0907634 | 0.112471 | 0.0992133 | 0.133596 |
| 0.208188 | 0.137238  | 0.131265  | 0.119755  | 0.124272 | 0.112179  | 0.137529 |
| 0.219114 | 0.148747  | 0.140734  | 0.131265  | 0.130536 | 0.126603  | 0.147582 |
| 0.201195 | 0.127331  | 0.118735  | 0.108392  | 0.119027 | 0.101107  | 0.12296  |
| 0.214452 | 0.144376  | 0.136946  | 0.124563  | 0.125874 | 0.11757   | 0.141463 |
| 0.215909 | 0.134761  | 0.134324  | 0.0986305 | 0.104312 | 0.115239  | 0.139132 |
| 0.144668 | 0.206294  | 0.209062  | 0.199301  | 0.215472 | 0.194347  | 0.213578 |
| 0.201923 | 0.124854  | 0.119172  | 0.106498  | 0.123543 | 0.10271   | 0.126603 |
| 0.142774 | 0.191288  | 0.194056  | 0.182838  | 0.201923 | 0.180216  | 0.196824 |
| 0.202506 | 0.116696  | 0.111888  | 0.104167  | 0.121795 | 0.105332  | 0.12398  |
| 0.16958  | 0.124854  | 0.125874  | 0.116987  | 0.133741 | 0.108246  | 0.127768 |
| 0.201049 | 0.105041  | 0.0999417 | 0.11757   | 0.125    | 0.106498  | 0.104167 |
| 0.198864 | 0.0979021 | 0.0954254 | 0.110723  | 0.123689 | 0.0987762 | 0.102273 |
| 0.199592 | 0.131847  | 0.12296   | 0.113782  | 0.129371 | 0.10912   | 0.13447  |
| 0.201049 | 0.133304  | 0.123543  | 0.111742  | 0.125874 | 0.112908  | 0.130973 |
| 0.173368 | 0.118153  | 0.118007  | 0.108246  | 0.129662 | 0.100379  | 0.128934 |
| 0.204691 | 0.118881  | 0.11553   | 0.115385  | 0.12602  | 0.110723  | 0.126748 |
| 0.205565 | 0.109848  | 0.100087  | 0.121795  | 0.125146 | 0.110431  | 0.106935 |
| 0.20338  | 0.13884   | 0.139277  | 0.106206  | 0.110723 | 0.116696  | 0.140006 |
| 0.137529 | 0.253059  | 0.253205  | 0.244027  | 0.255536 | 0.242279  | 0.252477 |
| 0.176573 | 0.11553   | 0.11655   | 0.110286  | 0.131119 | 0.103875  | 0.125146 |
| 0.135635 | 0.182401  | 0.186043  | 0.176865  | 0.192453 | 0.169872  | 0.18852  |
| 0.139569 | 0.190705  | 0.192016  | 0.178759  | 0.197844 | 0.176428  | 0.197698 |
| 0.196824 | 0.128788  | 0.122523  | 0.114219  | 0.129516 | 0.104312  | 0.136946 |
| 0.194493 | 0.11655   | 0.112908  | 0.101107  | 0.112034 | 0.0958625 | 0.120047 |
| 0.175845 | 0.126748  | 0.124272  | 0.113636  | 0.132139 | 0.109557  | 0.127331 |
| 0.197698 | 0.122669  | 0.115822  | 0.103438  | 0.122815 | 0.102855  | 0.129371 |
| 0.185023 | 0.11116   | 0.109557  | 0.0980478 | 0.11859  | 0.0814394 | 0.119901 |
| 0.211247 | 0.12602   | 0.12296   | 0.0907634 | 0.107226 | 0.104167  | 0.133304 |
| 0.188666 | 0.130536  | 0.127185  | 0.108683  | 0.124563 | 0.105769  | 0.13141  |

|          |           |           |           |          |           |          |
|----------|-----------|-----------|-----------|----------|-----------|----------|
| 0.209062 | 0.141026  | 0.135344  | 0.121503  | 0.133887 | 0.121212  | 0.139569 |
| 0.175117 | 0.116696  | 0.117424  | 0.109994  | 0.129371 | 0.101836  | 0.122523 |
| 0.206294 | 0.137966  | 0.127914  | 0.119318  | 0.13141  | 0.116404  | 0.136509 |
| 0.202069 | 0.124126  | 0.120775  | 0.111305  | 0.122232 | 0.107226  | 0.132867 |
| 0.208188 | 0.1081    | 0.10271   | 0.123252  | 0.125146 | 0.112471  | 0.106352 |
| 0.206294 | 0.13243   | 0.124417  | 0.114656  | 0.124709 | 0.106206  | 0.136509 |
| 0.217803 | 0.139569  | 0.138549  | 0.105478  | 0.109411 | 0.115385  | 0.138986 |
| 0.199592 | 0.128059  | 0.121212  | 0.109703  | 0.130245 | 0.103584  | 0.13447  |
| 0.170746 | 0.113199  | 0.112471  | 0.106789  | 0.125    | 0.101544  | 0.121066 |
| 0.211247 | 0.139423  | 0.133741  | 0.121941  | 0.131702 | 0.124854  | 0.137092 |
| 0.133596 | 0.186772  | 0.187209  | 0.175991  | 0.195076 | 0.17162   | 0.192599 |
| 0.204254 | 0.147582  | 0.138695  | 0.126311  | 0.136655 | 0.122523  | 0.142045 |
| 0.198427 | 0.13039   | 0.120629  | 0.111742  | 0.127914 | 0.109703  | 0.131265 |
| 0.204691 | 0.101107  | 0.0968823 | 0.118007  | 0.123689 | 0.105769  | 0.102564 |
| 0.199592 | 0.0922203 | 0.0914918 | 0.10912   | 0.116841 | 0.0980478 | 0.100962 |
| 0.203526 | 0.129079  | 0.122232  | 0.113054  | 0.123689 | 0.107517  | 0.134907 |
| 0.206002 | 0.135635  | 0.128205  | 0.116404  | 0.123543 | 0.109994  | 0.139132 |
| 0.143502 | 0.192599  | 0.192162  | 0.183275  | 0.202069 | 0.178613  | 0.198718 |
| 0.184003 | 0.129371  | 0.124563  | 0.104021  | 0.124854 | 0.105186  | 0.132284 |
| 0.176573 | 0.11553   | 0.117133  | 0.0995047 | 0.116259 | 0.0948427 | 0.122232 |
| 0.201632 | 0.13243   | 0.126166  | 0.114656  | 0.127914 | 0.11553   | 0.135344 |
| 0.140006 | 0.193182  | 0.196241  | 0.184441  | 0.198864 | 0.178904  | 0.197552 |
| 0.191142 | 0.114656  | 0.111597  | 0.0986305 | 0.113636 | 0.092803  | 0.120192 |
| 0.212267 | 0.13345   | 0.130099  | 0.094697  | 0.10271  | 0.1081    | 0.136072 |
| 0.201195 | 0.131993  | 0.125728  | 0.112762  | 0.129225 | 0.111888  | 0.135198 |
| 0.20134  | 0.114073  | 0.107809  | 0.107955  | 0.123834 | 0.101253  | 0.116987 |
| 0.138695 | 0.186334  | 0.190851  | 0.179341  | 0.197552 | 0.175262  | 0.193036 |
| 0.207459 | 0.126894  | 0.126748  | 0.0913462 | 0.102855 | 0.106206  | 0.131265 |
| 0.194056 | 0.121941  | 0.116841  | 0.101836  | 0.122669 | 0.103875  | 0.12602  |
| 0.186772 | 0.116696  | 0.114219  | 0.104167  | 0.113928 | 0.0957168 | 0.124854 |
| 0.180944 | 0.122815  | 0.11451   | 0.108537  | 0.128497 | 0.107663  | 0.129225 |
| 0.209936 | 0.120629  | 0.115822  | 0.115385  | 0.121941 | 0.111597  | 0.129953 |
| 0.213724 | 0.134615  | 0.134761  | 0.102855  | 0.107955 | 0.114802  | 0.136655 |
| 0.176136 | 0.115967  | 0.115239  | 0.106935  | 0.127185 | 0.0979021 | 0.12296  |
| 0.205857 | 0.130828  | 0.126311  | 0.115967  | 0.123397 | 0.113928  | 0.13345  |
| 0.211247 | 0.139132  | 0.137529  | 0.141463  | 0.145979 | 0.13243   | 0.132721 |
| 0.137238 | 0.237325  | 0.238054  | 0.229167  | 0.24155  | 0.22567   | 0.237908 |
| 0.202797 | 0.133596  | 0.126748  | 0.111116  | 0.131119 | 0.110577  | 0.138549 |
| 0.208625 | 0.122523  | 0.113636  | 0.115239  | 0.128497 | 0.111742  | 0.130682 |
| 0.188666 | 0.129371  | 0.123689  | 0.105478  | 0.12398  | 0.103438  | 0.130828 |
| 0.199009 | 0.120484  | 0.118298  | 0.114948  | 0.134033 | 0.108246  | 0.128059 |
| 0.195076 | 0.118298  | 0.111451  | 0.101107  | 0.114073 | 0.100524  | 0.121212 |
| 0.205274 | 0.122669  | 0.124272  | 0.112471  | 0.119318 | 0.112471  | 0.124709 |
| 0.198427 | 0.129808  | 0.125     | 0.111742  | 0.126166 | 0.112617  | 0.13243  |

|          |          |          |           |          |           |          |
|----------|----------|----------|-----------|----------|-----------|----------|
| 0.210227 | 0.134324 | 0.13447  | 0.0990676 | 0.106206 | 0.111888  | 0.136946 |
| 0.193619 | 0.120338 | 0.116696 | 0.106643  | 0.119027 | 0.104021  | 0.126748 |
| 0.140152 | 0.236742 | 0.238636 | 0.232372  | 0.24359  | 0.226253  | 0.239365 |
| 0.191871 | 0.116259 | 0.113199 | 0.0996503 | 0.110286 | 0.0929487 | 0.119464 |
| 0.20236  | 0.116259 | 0.111116 | 0.10169   | 0.112034 | 0.0964452 | 0.121795 |
| 0.172786 | 0.116404 | 0.117133 | 0.107372  | 0.124709 | 0.0983392 | 0.121358 |
| 0.207314 | 0.125874 | 0.122232 | 0.12704   | 0.131265 | 0.117133  | 0.125874 |
| 0.206731 | 0.140443 | 0.131847 | 0.117716  | 0.135344 | 0.113636  | 0.144814 |
| 0.186626 | 0.120629 | 0.118153 | 0.111014  | 0.126603 | 0.106643  | 0.125874 |
| 0.198864 | 0.129079 | 0.11961  | 0.112471  | 0.127477 | 0.108683  | 0.13345  |
| 0.198135 | 0.110577 | 0.107517 | 0.10912   | 0.120338 | 0.102127  | 0.113491 |
| 0.131702 | 0.232663 | 0.235723 | 0.221882  | 0.237179 | 0.223339  | 0.232663 |
| 0.201049 | 0.135927 | 0.127622 | 0.116113  | 0.130245 | 0.114365  | 0.135635 |
| 0.211684 | 0.133741 | 0.128934 | 0.0961538 | 0.101544 | 0.107517  | 0.13549  |
| 0.198572 | 0.118007 | 0.115822 | 0.102855  | 0.118735 | 0.100233  | 0.126457 |
| 0.202214 | 0.122523 | 0.11859  | 0.110577  | 0.121795 | 0.113782  | 0.122232 |
| 0.207459 | 0.13039  | 0.128497 | 0.117861  | 0.115676 | 0.114365  | 0.135927 |
| 0.174242 | 0.115822 | 0.11451  | 0.10708   | 0.125291 | 0.101544  | 0.120192 |
| 0.208333 | 0.128934 | 0.131119 | 0.097465  | 0.107226 | 0.110577  | 0.133596 |
| 0.216929 | 0.138112 | 0.13884  | 0.101399  | 0.105332 | 0.114219  | 0.136364 |
| 0.209645 | 0.128497 | 0.126311 | 0.0897436 | 0.103875 | 0.104021  | 0.129079 |
| 0.177156 | 0.116113 | 0.112471 | 0.10708   | 0.127914 | 0.0983392 | 0.124854 |
| 0.208042 | 0.126603 | 0.121795 | 0.126311  | 0.125874 | 0.11961   | 0.130973 |
| 0.214889 | 0.127331 | 0.124272 | 0.127622  | 0.131556 | 0.12296   | 0.136072 |
| 0.20877  | 0.108974 | 0.104458 | 0.122669  | 0.125437 | 0.114219  | 0.106935 |
| 0.212267 | 0.111888 | 0.107955 | 0.129371  | 0.13039  | 0.117133  | 0.109266 |
| 0.213578 | 0.127768 | 0.126457 | 0.122815  | 0.129662 | 0.11961   | 0.13243  |
| 0.19289  | 0.108246 | 0.104604 | 0.0913462 | 0.115676 | 0.0759033 | 0.116987 |
| 0.220425 | 0.135198 | 0.136801 | 0.120921  | 0.108537 | 0.11859   | 0.134907 |
| 0.206876 | 0.13884  | 0.134907 | 0.124563  | 0.118007 | 0.118153  | 0.137383 |
| 0.132867 | 0.205274 | 0.209207 | 0.200612  | 0.212121 | 0.194493  | 0.208479 |
| 0.197844 | 0.130682 | 0.127331 | 0.116696  | 0.129953 | 0.113782  | 0.130973 |
| 0.20542  | 0.120484 | 0.119755 | 0.106498  | 0.11451  | 0.102127  | 0.125146 |
| 0.167686 | 0.122669 | 0.121941 | 0.112471  | 0.132139 | 0.106352  | 0.127914 |
| 0.135198 | 0.223048 | 0.225233 | 0.214889  | 0.229895 | 0.209936  | 0.223631 |
| 0.145105 | 0.211976 | 0.21183  | 0.2044    | 0.217366 | 0.201195  | 0.214889 |
| 0.212558 | 0.139277 | 0.135635 | 0.102564  | 0.106789 | 0.115093  | 0.136655 |
| 0.143939 | 0.250146 | 0.250291 | 0.243735  | 0.258159 | 0.241113  | 0.252185 |
| 0.192599 | 0.108537 | 0.10373  | 0.0948427 | 0.117716 | 0.0826049 | 0.116987 |
| 0.210373 | 0.134178 | 0.134907 | 0.126603  | 0.140152 | 0.118735  | 0.133887 |
| 0.19697  | 0.119318 | 0.114802 | 0.102418  | 0.112762 | 0.097465  | 0.121066 |
| 0.212267 | 0.126166 | 0.117861 | 0.122086  | 0.130099 | 0.118007  | 0.132867 |
| 0.133741 | 0.188666 | 0.191725 | 0.181964  | 0.195221 | 0.179341  | 0.194493 |
| 0.200612 | 0.129953 | 0.128934 | 0.115967  | 0.123689 | 0.115093  | 0.129953 |

|          |           |           |           |           |           |          |
|----------|-----------|-----------|-----------|-----------|-----------|----------|
| 0.139423 | 0.197844  | 0.197115  | 0.187063  | 0.204691  | 0.181527  | 0.201923 |
| 0.201777 | 0.125583  | 0.119027  | 0.108392  | 0.128642  | 0.10373   | 0.132576 |
| 0.181672 | 0.123252  | 0.127477  | 0.0856643 | 0.109994  | 0.101107  | 0.127914 |
| 0.200029 | 0.125     | 0.117279  | 0.112179  | 0.12602   | 0.104895  | 0.12704  |
| 0.185169 | 0.119464  | 0.110577  | 0.102855  | 0.119318  | 0.101107  | 0.119464 |
| 0.173368 | 0.109411  | 0.108392  | 0.103001  | 0.119172  | 0.0936772 | 0.114073 |
| 0.198718 | 0.122232  | 0.115676  | 0.107955  | 0.120629  | 0.105332  | 0.123397 |
| 0.189394 | 0.114073  | 0.109266  | 0.0971737 | 0.109266  | 0.0901807 | 0.119318 |
| 0.197698 | 0.126166  | 0.117861  | 0.107809  | 0.12398   | 0.104312  | 0.125583 |
| 0.208625 | 0.11961   | 0.121503  | 0.10708   | 0.0976107 | 0.105041  | 0.123397 |
| 0.194639 | 0.12398   | 0.112762  | 0.0986305 | 0.120629  | 0.0962995 | 0.127477 |
| 0.195659 | 0.117716  | 0.112908  | 0.10169   | 0.110286  | 0.0944056 | 0.119755 |
| 0.187063 | 0.107372  | 0.104895  | 0.107955  | 0.12296   | 0.103875  | 0.110577 |
| 0.203671 | 0.138258  | 0.13141   | 0.121358  | 0.134033  | 0.116987  | 0.137092 |
| 0.199446 | 0.0984848 | 0.0960082 | 0.111305  | 0.11757   | 0.0967366 | 0.105769 |
| 0.20134  | 0.119318  | 0.11655   | 0.105041  | 0.119755  | 0.102418  | 0.124854 |
| 0.174388 | 0.110431  | 0.109994  | 0.104604  | 0.122523  | 0.0958625 | 0.116259 |
| 0.199738 | 0.131119  | 0.129516  | 0.0920746 | 0.107663  | 0.103147  | 0.130245 |
| 0.207022 | 0.121795  | 0.115822  | 0.113636  | 0.125728  | 0.110431  | 0.130245 |
| 0.208042 | 0.132139  | 0.124126  | 0.112908  | 0.120629  | 0.10912   | 0.136218 |
| 0.201923 | 0.10271   | 0.0973193 | 0.118153  | 0.123543  | 0.100962  | 0.106498 |
| 0.201195 | 0.129079  | 0.121941  | 0.110723  | 0.127477  | 0.106643  | 0.129371 |
| 0.204837 | 0.137966  | 0.132284  | 0.121941  | 0.132284  | 0.119318  | 0.137092 |
| 0.208625 | 0.145251  | 0.139569  | 0.13039   | 0.142774  | 0.125728  | 0.142337 |
| 0.199155 | 0.116841  | 0.114948  | 0.0804196 | 0.101836  | 0.0920746 | 0.120629 |
| 0.17701  | 0.114802  | 0.11553   | 0.1081    | 0.126603  | 0.100524  | 0.123543 |
| 0.20134  | 0.114656  | 0.115676  | 0.10271   | 0.112471  | 0.0989219 | 0.119901 |
| 0.213869 | 0.131847  | 0.125     | 0.130682  | 0.133741  | 0.124272  | 0.136509 |
| 0.200029 | 0.120047  | 0.11553   | 0.10169   | 0.114073  | 0.0967366 | 0.121795 |
| 0.218094 | 0.15035   | 0.144668  | 0.133159  | 0.133013  | 0.125291  | 0.148019 |
| 0.177885 | 0.132867  | 0.135927  | 0.125583  | 0.143502  | 0.117716  | 0.134324 |
| 0.205711 | 0.121941  | 0.120629  | 0.119901  | 0.127331  | 0.113782  | 0.123689 |
| 0.196824 | 0.119464  | 0.115822  | 0.104312  | 0.122815  | 0.0949883 | 0.125291 |
| 0.200175 | 0.116404  | 0.115385  | 0.102127  | 0.118298  | 0.103293  | 0.116696 |
| 0.20542  | 0.109994  | 0.101107  | 0.123397  | 0.128205  | 0.112034  | 0.105915 |
| 0.14292  | 0.206294  | 0.211393  | 0.199592  | 0.211101  | 0.193473  | 0.210664 |
| 0.195076 | 0.122669  | 0.116113  | 0.105478  | 0.11961   | 0.105478  | 0.126748 |
| 0.201049 | 0.120192  | 0.113054  | 0.108537  | 0.125583  | 0.0962995 | 0.128059 |
| 0.206439 | 0.11859   | 0.116696  | 0.117716  | 0.121358  | 0.108683  | 0.12296  |
| 0.202797 | 0.100379  | 0.0973193 | 0.114365  | 0.120338  | 0.100962  | 0.104458 |
| 0.204691 | 0.125583  | 0.124854  | 0.114802  | 0.133887  | 0.11014   | 0.13549  |
| 0.204691 | 0.128788  | 0.128351  | 0.117133  | 0.119901  | 0.115967  | 0.128205 |
| 0.20338  | 0.133013  | 0.132867  | 0.121358  | 0.120047  | 0.118444  | 0.131556 |
| 0.201195 | 0.119755  | 0.116113  | 0.11655   | 0.122523  | 0.106643  | 0.118881 |



|          |           |           |           |           |           |          |
|----------|-----------|-----------|-----------|-----------|-----------|----------|
| 0.206439 | 0.113636  | 0.118153  | 0.102564  | 0.0995047 | 0.099359  | 0.121212 |
| 0.209353 | 0.127622  | 0.121066  | 0.122378  | 0.126894  | 0.119464  | 0.130828 |
| 0.199155 | 0.119172  | 0.111451  | 0.107226  | 0.122815  | 0.0952797 | 0.123252 |
| 0.20338  | 0.128059  | 0.121212  | 0.106206  | 0.128788  | 0.100087  | 0.133304 |
| 0.189248 | 0.178322  | 0.182255  | 0.168415  | 0.188083  | 0.165501  | 0.179487 |
| 0.198572 | 0.126166  | 0.116404  | 0.1081    | 0.125146  | 0.105478  | 0.13345  |
| 0.197552 | 0.126603  | 0.123252  | 0.122523  | 0.130536  | 0.11757   | 0.13447  |
| 0.207314 | 0.127622  | 0.121941  | 0.1081    | 0.116404  | 0.0990676 | 0.133741 |
| 0.194347 | 0.123689  | 0.126166  | 0.103584  | 0.125874  | 0.104167  | 0.126311 |
| 0.195221 | 0.11116   | 0.111014  | 0.10067   | 0.11451   | 0.0930944 | 0.118444 |
| 0.194056 | 0.115822  | 0.110431  | 0.0936772 | 0.115385  | 0.0936772 | 0.121066 |
| 0.199592 | 0.116696  | 0.116841  | 0.106789  | 0.112179  | 0.0983392 | 0.122815 |
| 0.205128 | 0.125728  | 0.123834  | 0.11116   | 0.108683  | 0.107372  | 0.125728 |
| 0.187063 | 0.122523  | 0.121503  | 0.0977564 | 0.128497  | 0.0945513 | 0.127477 |
| 0.209062 | 0.126166  | 0.121941  | 0.125     | 0.121649  | 0.113636  | 0.13141  |
| 0.194347 | 0.114656  | 0.111305  | 0.083479  | 0.115093  | 0.0965909 | 0.121066 |
| 0.201486 | 0.118881  | 0.120484  | 0.105478  | 0.108246  | 0.0981935 | 0.129662 |
| 0.215035 | 0.136801  | 0.135198  | 0.118153  | 0.0967366 | 0.11961   | 0.135635 |
| 0.204545 | 0.122523  | 0.117424  | 0.106498  | 0.103147  | 0.0977564 | 0.126603 |
| 0.201923 | 0.129225  | 0.125874  | 0.118444  | 0.094697  | 0.106206  | 0.125728 |
| 0.203089 | 0.114073  | 0.113054  | 0.100379  | 0.10373   | 0.0913462 | 0.122523 |
| 0.206294 | 0.119027  | 0.117133  | 0.106789  | 0.102855  | 0.0960082 | 0.124272 |
| 0.198135 | 0.113782  | 0.11014   | 0.0989219 | 0.112471  | 0.0869755 | 0.117861 |
| 0.203817 | 0.128497  | 0.122815  | 0.111597  | 0.119318  | 0.102273  | 0.134033 |
| 0.202943 | 0.11655   | 0.111742  | 0.0949883 | 0.114365  | 0.0897436 | 0.123252 |
| 0.219551 | 0.149184  | 0.14088   | 0.125291  | 0.125728  | 0.130828  | 0.147436 |
| 0.206731 | 0.136946  | 0.128059  | 0.113345  | 0.125146  | 0.117716  | 0.139277 |
| 0.203234 | 0.113345  | 0.109994  | 0.100816  | 0.111742  | 0.0885781 | 0.115676 |
| 0.219988 | 0.142628  | 0.13986   | 0.123397  | 0.118298  | 0.125146  | 0.142045 |
| 0.206002 | 0.107955  | 0.0935315 | 0.116696  | 0.13141   | 0.105041  | 0.114073 |
| 0.204545 | 0.144959  | 0.137238  | 0.114073  | 0.125291  | 0.114365  | 0.141463 |
| 0.200758 | 0.116113  | 0.117133  | 0.107372  | 0.119755  | 0.0960082 | 0.118735 |
| 0.214015 | 0.149184  | 0.146125  | 0.136364  | 0.14292   | 0.134907  | 0.149767 |
| 0.204108 | 0.141317  | 0.132139  | 0.120921  | 0.125728  | 0.118298  | 0.142774 |
| 0.205274 | 0.136072  | 0.134761  | 0.121212  | 0.117861  | 0.12296   | 0.138403 |
| 0.21081  | 0.118007  | 0.106498  | 0.109557  | 0.118444  | 0.101107  | 0.121212 |
| 0.201923 | 0.119027  | 0.111014  | 0.0933858 | 0.104895  | 0.0925117 | 0.12602  |
| 0.200321 | 0.115967  | 0.113199  | 0.0967366 | 0.111451  | 0.0859557 | 0.119464 |
| 0.206294 | 0.119027  | 0.117716  | 0.107955  | 0.100233  | 0.105332  | 0.123106 |
| 0.205711 | 0.127768  | 0.125     | 0.110577  | 0.118007  | 0.104749  | 0.129808 |
| 0.216346 | 0.136655  | 0.128642  | 0.110431  | 0.124563  | 0.107226  | 0.140152 |
| 0.198572 | 0.127914  | 0.125437  | 0.0996503 | 0.122523  | 0.105478  | 0.136072 |
| 0.200029 | 0.0976107 | 0.0930944 | 0.102564  | 0.116696  | 0.0914918 | 0.103147 |
| 0.203089 | 0.114656  | 0.117424  | 0.0960082 | 0.109266  | 0.0872669 | 0.123397 |

|          |          |          |           |          |           |          |
|----------|----------|----------|-----------|----------|-----------|----------|
| 0.195076 | 0.121503 | 0.118444 | 0.104895  | 0.119901 | 0.102855  | 0.126748 |
| 0.198572 | 0.115676 | 0.116404 | 0.092366  | 0.113199 | 0.0941142 | 0.117716 |
| 0.206585 | 0.12602  | 0.121795 | 0.103001  | 0.115676 | 0.0962995 | 0.129225 |
| 0.200175 | 0.11553  | 0.110431 | 0.10271   | 0.120338 | 0.097465  | 0.126311 |
| 0.189248 | 0.119172 | 0.117861 | 0.111014  | 0.127185 | 0.106061  | 0.124126 |
| 0.200903 | 0.11859  | 0.110577 | 0.101981  | 0.11757  | 0.101107  | 0.124126 |
| 0.188666 | 0.111888 | 0.105041 | 0.0935315 | 0.114656 | 0.0812937 | 0.114219 |
| 0.19595  | 0.117424 | 0.110577 | 0.0944056 | 0.115822 | 0.0961538 | 0.120921 |
| 0.190559 | 0.117861 | 0.113345 | 0.107955  | 0.126748 | 0.103293  | 0.124854 |
| 0.200029 | 0.118881 | 0.116404 | 0.102273  | 0.121358 | 0.104021  | 0.126166 |
| 0.19799  | 0.134615 | 0.129516 | 0.115676  | 0.12602  | 0.109266  | 0.136946 |
| 0.190122 | 0.111305 | 0.106498 | 0.104021  | 0.116696 | 0.0932401 | 0.116841 |
| 0.208333 | 0.135927 | 0.126748 | 0.11757   | 0.128497 | 0.103001  | 0.137092 |

| TDr_03_00180 | TDr_05_00046 | TDr_05_00303 | TDr_05_00356 | TDr_05_00389 | TDr_05_00432 | TDr_05_00466 |
|--------------|--------------|--------------|--------------|--------------|--------------|--------------|
| 0.120921     | 0.122086     | 0.129662     | 0.118881     | 0.103584     | 0.115676     | 0.0955711    |
| 0.124272     | 0.114948     | 0.128351     | 0.121066     | 0.116841     | 0.121358     | 0.104167     |
| 0.11961      | 0.11116      | 0.12602      | 0.116696     | 0.110431     | 0.117861     | 0.103293     |
| 0.122523     | 0.114948     | 0.12602      | 0.114365     | 0.120338     | 0.120484     | 0.104167     |
| 0.128351     | 0.135344     | 0.137675     | 0.13039      | 0.134324     | 0.13243      | 0.12398      |
| 0.131556     | 0.132721     | 0.139714     | 0.132721     | 0.121503     | 0.131556     | 0.11116      |
| 0.115385     | 0.123834     | 0.123543     | 0.120047     | 0.107663     | 0.119172     | 0.104312     |
| 0.114802     | 0.117716     | 0.126748     | 0.122086     | 0.116404     | 0.113636     | 0.10373      |
| 0.112325     | 0.103875     | 0.112325     | 0.0948427    | 0.117424     | 0.103001     | 0.0933858    |
| 0.105769     | 0.106935     | 0.117133     | 0.0941142    | 0.107955     | 0.106643     | 0.0920746    |
| 0.110868     | 0.121941     | 0.124563     | 0.120192     | 0.107809     | 0.113199     | 0.0936772    |
| 0.120629     | 0.108392     | 0.124417     | 0.114219     | 0.122232     | 0.113636     | 0.104312     |
| 0.116259     | 0.106352     | 0.119464     | 0.106352     | 0.114656     | 0.108974     | 0.0979021    |
| 0.138549     | 0.141171     | 0.146999     | 0.138258     | 0.134033     | 0.141754     | 0.118735     |
| 0.12704      | 0.124126     | 0.137529     | 0.122378     | 0.119318     | 0.12296      | 0.107226     |
| 0.11961      | 0.107663     | 0.114073     | 0.112908     | 0.106352     | 0.10271      | 0.099796     |
| 0.109266     | 0.111014     | 0.121503     | 0.109848     | 0.118153     | 0.113928     | 0.101981     |
| 0.141754     | 0.149913     | 0.150495     | 0.151369     | 0.14831      | 0.150204     | 0.13243      |
| 0.11757      | 0.108537     | 0.122232     | 0.113491     | 0.113345     | 0.118444     | 0.103293     |
| 0.209062     | 0.203817     | 0.209645     | 0.205565     | 0.193765     | 0.202943     | 0.182547     |
| 0.124709     | 0.132576     | 0.137529     | 0.134033     | 0.11553      | 0.128788     | 0.104895     |
| 0.124272     | 0.129225     | 0.130973     | 0.127185     | 0.115967     | 0.123106     | 0.10912      |
| 0.115385     | 0.1081       | 0.128788     | 0.119172     | 0.114656     | 0.112762     | 0.0961538    |
| 0.118444     | 0.0916375    | 0.107372     | 0.114073     | 0.123834     | 0.0945513    | 0.109703     |
| 0.101399     | 0.107226     | 0.118007     | 0.105478     | 0.106789     | 0.106352     | 0.0882867    |
| 0.124709     | 0.134033     | 0.133159     | 0.135198     | 0.118153     | 0.125583     | 0.107809     |
| 0            | 0.124126     | 0.120338     | 0.120047     | 0.116113     | 0.118298     | 0.099359     |
| 0.124126     | 0            | 0.111305     | 0.107517     | 0.123689     | 0.097028     | 0.1081       |
| 0.120338     | 0.111305     | 0            | 0.11014      | 0.126311     | 0.0909091    | 0.110431     |
| 0.120047     | 0.107517     | 0.11014      | 0            | 0.120192     | 0.099359     | 0.101399     |
| 0.116113     | 0.123689     | 0.126311     | 0.120192     | 0            | 0.119318     | 0.0962995    |
| 0.118298     | 0.097028     | 0.0909091    | 0.099359     | 0.119318     | 0            | 0.0984848    |
| 0.099359     | 0.1081       | 0.110431     | 0.101399     | 0.0962995    | 0.0984848    | 0            |
| 0.105478     | 0.11014      | 0.113054     | 0.0920746    | 0.119318     | 0.104021     | 0.0984848    |
| 0.101836     | 0.116987     | 0.112908     | 0.116404     | 0.113928     | 0.109703     | 0.101253     |
| 0.111888     | 0.118007     | 0.113054     | 0.112471     | 0.122232     | 0.110723     | 0.109848     |
| 0.12602      | 0.132139     | 0.129808     | 0.129516     | 0.127914     | 0.126603     | 0.115822     |
| 0.125291     | 0.12296      | 0.125        | 0.116841     | 0.125146     | 0.122086     | 0.111014     |
| 0.106061     | 0.0821678    | 0.105186     | 0.0990676    | 0.115239     | 0.0941142    | 0.0912005    |
| 0.127331     | 0.105478     | 0.125291     | 0.124709     | 0.122232     | 0.120921     | 0.111305     |
| 0.111305     | 0.0967366    | 0.112762     | 0.111305     | 0.11553      | 0.109557     | 0.0999417    |
| 0.139277     | 0.117133     | 0.131702     | 0.13986      | 0.136801     | 0.129953     | 0.129371     |

|          |           |          |          |          |          |           |
|----------|-----------|----------|----------|----------|----------|-----------|
| 0.143065 | 0.129079  | 0.1419   | 0.142483 | 0.140006 | 0.138112 | 0.134615  |
| 0.115239 | 0.105041  | 0.118735 | 0.11757  | 0.115093 | 0.112325 | 0.10708   |
| 0.101253 | 0.110577  | 0.110577 | 0.105915 | 0.107517 | 0.108537 | 0.097465  |
| 0.114219 | 0.113636  | 0.117716 | 0.101107 | 0.11553  | 0.112762 | 0.108683  |
| 0.11859  | 0.100233  | 0.123543 | 0.118298 | 0.12398  | 0.111597 | 0.111305  |
| 0.135635 | 0.11961   | 0.128351 | 0.137383 | 0.134907 | 0.125728 | 0.128351  |
| 0.114365 | 0.104458  | 0.120775 | 0.115822 | 0.116259 | 0.111451 | 0.102127  |
| 0.118298 | 0.107226  | 0.120047 | 0.120047 | 0.117279 | 0.115967 | 0.102273  |
| 0.137675 | 0.14729   | 0.135344 | 0.137092 | 0.112179 | 0.130973 | 0.123106  |
| 0.130973 | 0.112034  | 0.128642 | 0.123397 | 0.127331 | 0.11961  | 0.114365  |
| 0.115676 | 0.101981  | 0.125583 | 0.114219 | 0.118153 | 0.11655  | 0.105769  |
| 0.126457 | 0.121503  | 0.129079 | 0.119755 | 0.128351 | 0.112762 | 0.107517  |
| 0.125    | 0.114219  | 0.127622 | 0.124126 | 0.115822 | 0.120047 | 0.0990676 |
| 0.131702 | 0.116259  | 0.130245 | 0.13549  | 0.138258 | 0.126457 | 0.132576  |
| 0.125437 | 0.112034  | 0.125728 | 0.128642 | 0.125    | 0.127477 | 0.118444  |
| 0.11757  | 0.105041  | 0.119901 | 0.117861 | 0.11859  | 0.11116  | 0.101836  |
| 0.120775 | 0.110868  | 0.112617 | 0.114365 | 0.123252 | 0.112617 | 0.107372  |
| 0.111888 | 0.117133  | 0.120047 | 0.116259 | 0.116987 | 0.109266 | 0.10373   |
| 0.132867 | 0.114802  | 0.13549  | 0.138695 | 0.138258 | 0.130536 | 0.126748  |
| 0.13986  | 0.115385  | 0.134615 | 0.1419   | 0.141171 | 0.131993 | 0.128205  |
| 0.165064 | 0.150787  | 0.162442 | 0.165355 | 0.157343 | 0.158362 | 0.149621  |
| 0.116113 | 0.099796  | 0.114365 | 0.113491 | 0.118881 | 0.10708  | 0.104749  |
| 0.116696 | 0.0986305 | 0.11961  | 0.116113 | 0.116259 | 0.116404 | 0.101253  |
| 0.11553  | 0.105624  | 0.116404 | 0.116113 | 0.111305 | 0.108246 | 0.105332  |
| 0.1419   | 0.133159  | 0.144522 | 0.13549  | 0.134178 | 0.136072 | 0.131702  |
| 0.117133 | 0.10373   | 0.122669 | 0.115676 | 0.119901 | 0.117716 | 0.104895  |
| 0.130682 | 0.120192  | 0.130973 | 0.137966 | 0.128497 | 0.127185 | 0.11961   |
| 0.107663 | 0.114656  | 0.121941 | 0.114365 | 0.115676 | 0.114365 | 0.106206  |
| 0.119464 | 0.102564  | 0.120338 | 0.120921 | 0.122523 | 0.114802 | 0.108974  |
| 0.145688 | 0.146853  | 0.148019 | 0.145105 | 0.131265 | 0.14627  | 0.134907  |
| 0.126748 | 0.107517  | 0.125874 | 0.126166 | 0.119901 | 0.120338 | 0.109848  |
| 0.135635 | 0.121066  | 0.132139 | 0.135927 | 0.13549  | 0.128934 | 0.128642  |
| 0.131993 | 0.113345  | 0.127622 | 0.127622 | 0.129225 | 0.119464 | 0.119464  |
| 0.118444 | 0.116113  | 0.128351 | 0.124272 | 0.114219 | 0.117279 | 0.0980478 |
| 0.113491 | 0.10271   | 0.119318 | 0.11961  | 0.115385 | 0.11757  | 0.106498  |
| 0.116987 | 0.103584  | 0.121358 | 0.11757  | 0.122669 | 0.112617 | 0.104458  |
| 0.128642 | 0.112325  | 0.131265 | 0.133596 | 0.129371 | 0.123689 | 0.120192  |
| 0.111014 | 0.104604  | 0.118298 | 0.118298 | 0.112034 | 0.115385 | 0.104021  |
| 0.140006 | 0.112034  | 0.13243  | 0.131265 | 0.139277 | 0.128934 | 0.125728  |
| 0.119901 | 0.108537  | 0.119318 | 0.123397 | 0.126457 | 0.118153 | 0.109994  |
| 0.121066 | 0.101253  | 0.117279 | 0.121649 | 0.122378 | 0.113782 | 0.112325  |
| 0.120192 | 0.108829  | 0.125146 | 0.122523 | 0.119755 | 0.119318 | 0.108829  |
| 0.127768 | 0.103875  | 0.125146 | 0.12398  | 0.125874 | 0.116987 | 0.11116   |
| 0.113199 | 0.104458  | 0.115239 | 0.117279 | 0.117716 | 0.11116  | 0.105041  |

|           |          |          |          |          |          |           |
|-----------|----------|----------|----------|----------|----------|-----------|
| 0.117279  | 0.107663 | 0.122815 | 0.118444 | 0.113345 | 0.114948 | 0.102127  |
| 0.137529  | 0.120921 | 0.130828 | 0.137529 | 0.13243  | 0.13141  | 0.127914  |
| 0.0976107 | 0.108392 | 0.114219 | 0.107517 | 0.105915 | 0.108683 | 0.0981935 |
| 0.112908  | 0.110577 | 0.116696 | 0.106498 | 0.116841 | 0.110577 | 0.10067   |
| 0.124563  | 0.126603 | 0.128351 | 0.125728 | 0.124126 | 0.125437 | 0.108829  |
| 0.112908  | 0.13039  | 0.123106 | 0.124563 | 0.111888 | 0.12398  | 0.109703  |
| 0.123397  | 0.11961  | 0.124854 | 0.120775 | 0.129953 | 0.123397 | 0.120484  |
| 0.126457  | 0.131119 | 0.137238 | 0.138695 | 0.137966 | 0.131993 | 0.124417  |
| 0.11757   | 0.121066 | 0.128642 | 0.120484 | 0.112471 | 0.125728 | 0.102418  |
| 0.180216  | 0.190705 | 0.188666 | 0.1875   | 0.169872 | 0.185169 | 0.167978  |
| 0.109266  | 0.11655  | 0.121795 | 0.117424 | 0.111742 | 0.115967 | 0.0984848 |
| 0.126603  | 0.131556 | 0.136218 | 0.135927 | 0.137821 | 0.133887 | 0.126311  |
| 0.117279  | 0.126311 | 0.130973 | 0.128351 | 0.130536 | 0.127477 | 0.119027  |
| 0.127914  | 0.131702 | 0.134324 | 0.129371 | 0.123397 | 0.126457 | 0.122086  |
| 0.107663  | 0.111451 | 0.121066 | 0.118735 | 0.11451  | 0.114365 | 0.103001  |
| 0.123689  | 0.124272 | 0.13447  | 0.133596 | 0.136364 | 0.12602  | 0.119027  |
| 0.112908  | 0.114365 | 0.123397 | 0.113491 | 0.114802 | 0.119318 | 0.106206  |
| 0.119464  | 0.122378 | 0.127914 | 0.118298 | 0.117861 | 0.125    | 0.108974  |
| 0.114802  | 0.113054 | 0.11655  | 0.113636 | 0.109411 | 0.111888 | 0.0955711 |
| 0.122378  | 0.126748 | 0.134907 | 0.133159 | 0.134178 | 0.13141  | 0.125583  |
| 0.112179  | 0.108974 | 0.119755 | 0.102564 | 0.112908 | 0.116259 | 0.0984848 |
| 0.12602   | 0.133304 | 0.132139 | 0.135344 | 0.119172 | 0.129516 | 0.120484  |
| 0.115385  | 0.117133 | 0.122086 | 0.113345 | 0.101544 | 0.117424 | 0.104895  |
| 0.13039   | 0.112034 | 0.128934 | 0.129225 | 0.127331 | 0.121358 | 0.118153  |
| 0.125583  | 0.129079 | 0.129079 | 0.121503 | 0.116696 | 0.126457 | 0.110723  |
| 0.105186  | 0.118881 | 0.114802 | 0.113345 | 0.105332 | 0.113345 | 0.0944056 |
| 0.143357  | 0.145688 | 0.149184 | 0.14831  | 0.13243  | 0.14831  | 0.131993  |
| 0.106206  | 0.117861 | 0.120484 | 0.113491 | 0.112179 | 0.113491 | 0.100379  |
| 0.115822  | 0.114365 | 0.125728 | 0.116696 | 0.117133 | 0.121941 | 0.109411  |
| 0.109848  | 0.117133 | 0.120921 | 0.113928 | 0.113491 | 0.113636 | 0.106935  |
| 0.126748  | 0.139569 | 0.132284 | 0.132284 | 0.128934 | 0.130245 | 0.124417  |
| 0.121795  | 0.111014 | 0.132576 | 0.125874 | 0.112034 | 0.12296  | 0.102564  |
| 0.111888  | 0.110431 | 0.117424 | 0.111014 | 0.117279 | 0.115967 | 0.106935  |
| 0.113054  | 0.114802 | 0.119464 | 0.115967 | 0.116404 | 0.115093 | 0.101399  |
| 0.11116   | 0.11961  | 0.122815 | 0.11553  | 0.108683 | 0.115822 | 0.101544  |
| 0.107809  | 0.11859  | 0.127914 | 0.120629 | 0.123397 | 0.120338 | 0.107809  |
| 0.108537  | 0.124854 | 0.119027 | 0.118153 | 0.106061 | 0.116696 | 0.102418  |
| 0.101399  | 0.105186 | 0.117424 | 0.106061 | 0.108537 | 0.1081   | 0.0955711 |
| 0.102273  | 0.110723 | 0.111597 | 0.11014  | 0.106498 | 0.109848 | 0.0920746 |
| 0.10708   | 0.109994 | 0.12398  | 0.10912  | 0.111888 | 0.113199 | 0.101253  |
| 0.110286  | 0.124563 | 0.128934 | 0.120775 | 0.126457 | 0.121358 | 0.113199  |
| 0.117716  | 0.124126 | 0.126748 | 0.123252 | 0.124854 | 0.120629 | 0.11451   |
| 0.10912   | 0.108829 | 0.120775 | 0.107372 | 0.107517 | 0.111742 | 0.0986305 |
| 0.101981  | 0.109557 | 0.118007 | 0.109557 | 0.10708  | 0.109848 | 0.0912005 |

|          |           |          |           |           |          |           |
|----------|-----------|----------|-----------|-----------|----------|-----------|
| 0.115676 | 0.119464  | 0.122669 | 0.114802  | 0.120484  | 0.119172 | 0.107226  |
| 0.106206 | 0.107955  | 0.118735 | 0.10912   | 0.105769  | 0.109411 | 0.0962995 |
| 0.128642 | 0.120192  | 0.134761 | 0.123689  | 0.118298  | 0.125728 | 0.114656  |
| 0.125728 | 0.135635  | 0.129225 | 0.125728  | 0.100816  | 0.122815 | 0.109703  |
| 0.105624 | 0.112325  | 0.118153 | 0.110286  | 0.117133  | 0.110286 | 0.101253  |
| 0.11451  | 0.11014   | 0.120921 | 0.108974  | 0.112617  | 0.11451  | 0.102273  |
| 0.111888 | 0.108974  | 0.124126 | 0.104312  | 0.112325  | 0.113345 | 0.10169   |
| 0.105478 | 0.107809  | 0.120921 | 0.111888  | 0.109411  | 0.106935 | 0.0961538 |
| 0.115967 | 0.115385  | 0.125291 | 0.117716  | 0.124272  | 0.12296  | 0.111888  |
| 0.101399 | 0.106643  | 0.114219 | 0.109266  | 0.110577  | 0.107226 | 0.0920746 |
| 0.119901 | 0.128059  | 0.13243  | 0.128351  | 0.0888695 | 0.127185 | 0.11961   |
| 0.124709 | 0.134033  | 0.129662 | 0.129662  | 0.124563  | 0.134033 | 0.114802  |
| 0.125291 | 0.120629  | 0.126748 | 0.116841  | 0.12398   | 0.120047 | 0.113636  |
| 0.109994 | 0.112325  | 0.121358 | 0.114073  | 0.116841  | 0.11757  | 0.105041  |
| 0.109703 | 0.112325  | 0.122232 | 0.113491  | 0.1081    | 0.114073 | 0.0989219 |
| 0.105186 | 0.112471  | 0.120047 | 0.110723  | 0.114365  | 0.109557 | 0.101981  |
| 0.118153 | 0.0939685 | 0.11757  | 0.10912   | 0.115676  | 0.110286 | 0.10271   |
| 0.10912  | 0.0945513 | 0.10708  | 0.0948427 | 0.11655   | 0.101836 | 0.0957168 |
| 0.116987 | 0.107372  | 0.131556 | 0.120484  | 0.113928  | 0.114365 | 0.100087  |
| 0.130682 | 0.0910548 | 0.11961  | 0.125146  | 0.129662  | 0.115822 | 0.118444  |
| 0.115967 | 0.118881  | 0.125    | 0.12296   | 0.120192  | 0.119172 | 0.107226  |
| 0.129516 | 0.130099  | 0.131556 | 0.124854  | 0.126166  | 0.129225 | 0.118444  |
| 0.125583 | 0.135781  | 0.13549  | 0.128788  | 0.127768  | 0.129953 | 0.120921  |
| 0.199301 | 0.201632  | 0.20134  | 0.204545  | 0.194784  | 0.198427 | 0.181527  |
| 0.238782 | 0.243153  | 0.237908 | 0.244027  | 0.235431  | 0.24053  | 0.225379  |
| 0.11859  | 0.11451   | 0.126166 | 0.114802  | 0.116113  | 0.118298 | 0.0987762 |
| 0.114073 | 0.0962995 | 0.114948 | 0.106206  | 0.118007  | 0.107372 | 0.104167  |
| 0.103584 | 0.103875  | 0.11757  | 0.11553   | 0.106061  | 0.108537 | 0.0913462 |
| 0.113199 | 0.100962  | 0.119318 | 0.115822  | 0.121212  | 0.112325 | 0.102127  |
| 0.126894 | 0.125437  | 0.139714 | 0.124563  | 0.122086  | 0.123106 | 0.109703  |
| 0.116404 | 0.101544  | 0.117861 | 0.112908  | 0.119172  | 0.113199 | 0.104167  |
| 0.13141  | 0.131119  | 0.135198 | 0.142191  | 0.140297  | 0.137821 | 0.138112  |
| 0.112034 | 0.106498  | 0.121941 | 0.120192  | 0.119755  | 0.112908 | 0.107663  |
| 0.125437 | 0.10708   | 0.121649 | 0.122232  | 0.125291  | 0.11757  | 0.120484  |
| 0.132867 | 0.119172  | 0.126457 | 0.135781  | 0.125146  | 0.121503 | 0.11859   |
| 0.125583 | 0.113054  | 0.134324 | 0.132576  | 0.133304  | 0.123543 | 0.118881  |
| 0.134615 | 0.120629  | 0.13345  | 0.144522  | 0.131847  | 0.133741 | 0.12704   |
| 0.119172 | 0.105186  | 0.125583 | 0.116841  | 0.11757   | 0.115676 | 0.113345  |
| 0.118298 | 0.103147  | 0.118881 | 0.119172  | 0.121358  | 0.113054 | 0.108683  |
| 0.116987 | 0.103875  | 0.123689 | 0.120775  | 0.120047  | 0.116987 | 0.106789  |
| 0.108246 | 0.10067   | 0.114948 | 0.107955  | 0.115385  | 0.107663 | 0.0965909 |
| 0.116404 | 0.101836  | 0.118444 | 0.112908  | 0.119464  | 0.111451 | 0.105332  |
| 0.115967 | 0.100816  | 0.122669 | 0.119755  | 0.121358  | 0.109848 | 0.108683  |
| 0.125146 | 0.101836  | 0.129516 | 0.131847  | 0.129953  | 0.117279 | 0.117279  |

|           |           |          |          |          |          |           |
|-----------|-----------|----------|----------|----------|----------|-----------|
| 0.13447   | 0.114073  | 0.130973 | 0.13447  | 0.136072 | 0.121358 | 0.127185  |
| 0.11655   | 0.106352  | 0.122378 | 0.120921 | 0.120775 | 0.11655  | 0.11014   |
| 0.114073  | 0.100087  | 0.128934 | 0.123106 | 0.115385 | 0.112034 | 0.105332  |
| 0.127477  | 0.108537  | 0.130099 | 0.12398  | 0.132867 | 0.125146 | 0.121066  |
| 0.11116   | 0.100379  | 0.118735 | 0.109411 | 0.115967 | 0.107955 | 0.103001  |
| 0.134907  | 0.122378  | 0.138986 | 0.140152 | 0.143502 | 0.134033 | 0.13141   |
| 0.135781  | 0.130245  | 0.138695 | 0.120629 | 0.135344 | 0.13141  | 0.123543  |
| 0.129516  | 0.120192  | 0.133887 | 0.133596 | 0.130828 | 0.124854 | 0.116987  |
| 0.106789  | 0.0971737 | 0.117279 | 0.110286 | 0.112471 | 0.105332 | 0.103584  |
| 0.113636  | 0.094697  | 0.112762 | 0.105186 | 0.11116  | 0.10373  | 0.0973193 |
| 0.115239  | 0.102127  | 0.121066 | 0.123689 | 0.128497 | 0.112908 | 0.119027  |
| 0.124709  | 0.105478  | 0.117424 | 0.115967 | 0.122523 | 0.111597 | 0.112471  |
| 0.120338  | 0.11859   | 0.126166 | 0.129662 | 0.125437 | 0.123252 | 0.123834  |
| 0.120192  | 0.10708   | 0.125146 | 0.119027 | 0.122086 | 0.117279 | 0.109994  |
| 0.117716  | 0.108392  | 0.123252 | 0.118007 | 0.120192 | 0.114802 | 0.108683  |
| 0.120629  | 0.100233  | 0.123252 | 0.122669 | 0.121358 | 0.113054 | 0.11451   |
| 0.129953  | 0.111597  | 0.126748 | 0.123543 | 0.128642 | 0.124417 | 0.124709  |
| 0.124709  | 0.112179  | 0.134324 | 0.127914 | 0.126311 | 0.121795 | 0.124709  |
| 0.126894  | 0.109703  | 0.129516 | 0.13243  | 0.130828 | 0.120484 | 0.126603  |
| 0.137238  | 0.10373   | 0.129079 | 0.131993 | 0.124854 | 0.115385 | 0.119464  |
| 0.115093  | 0.106643  | 0.118298 | 0.115676 | 0.119027 | 0.108974 | 0.107226  |
| 0.125874  | 0.109557  | 0.131119 | 0.128788 | 0.130973 | 0.118881 | 0.123252  |
| 0.11116   | 0.097465  | 0.116696 | 0.112034 | 0.111888 | 0.110577 | 0.105624  |
| 0.11451   | 0.112179  | 0.115967 | 0.118298 | 0.11553  | 0.115093 | 0.104312  |
| 0.117716  | 0.10373   | 0.124709 | 0.116259 | 0.118735 | 0.113636 | 0.110431  |
| 0.109994  | 0.104167  | 0.120775 | 0.113199 | 0.120921 | 0.109411 | 0.103584  |
| 0.11116   | 0.0989219 | 0.116696 | 0.115239 | 0.119464 | 0.108246 | 0.105624  |
| 0.127914  | 0.118298  | 0.133159 | 0.13141  | 0.132139 | 0.122669 | 0.126748  |
| 0.123106  | 0.0954254 | 0.121066 | 0.120192 | 0.114802 | 0.112617 | 0.104458  |
| 0.132139  | 0.120484  | 0.131265 | 0.129516 | 0.131119 | 0.120484 | 0.121941  |
| 0.112325  | 0.0977564 | 0.116113 | 0.110868 | 0.117716 | 0.107372 | 0.100379  |
| 0.119172  | 0.106061  | 0.113345 | 0.122669 | 0.120484 | 0.113345 | 0.113636  |
| 0.120192  | 0.11553   | 0.127185 | 0.117861 | 0.118007 | 0.116113 | 0.104167  |
| 0.120775  | 0.118735  | 0.131265 | 0.116987 | 0.119755 | 0.123397 | 0.10708   |
| 0.113054  | 0.114802  | 0.121795 | 0.112179 | 0.112325 | 0.113636 | 0.104021  |
| 0.121358  | 0.119901  | 0.128642 | 0.123397 | 0.12704  | 0.126311 | 0.107663  |
| 0.118881  | 0.118298  | 0.129662 | 0.123543 | 0.126603 | 0.120047 | 0.112179  |
| 0.0527389 | 0.117133  | 0.115967 | 0.113636 | 0.112908 | 0.113054 | 0.0929487 |
| 0.131993  | 0.12704   | 0.134324 | 0.120047 | 0.134178 | 0.125291 | 0.120047  |
| 0.131265  | 0.135927  | 0.13243  | 0.13039  | 0.136946 | 0.131265 | 0.121066  |
| 0.108829  | 0.108246  | 0.113782 | 0.10067  | 0.115385 | 0.10708  | 0.0983392 |
| 0.130536  | 0.123834  | 0.134907 | 0.127331 | 0.137966 | 0.129662 | 0.11655   |
| 0.119027  | 0.119318  | 0.128059 | 0.114073 | 0.126166 | 0.11757  | 0.11116   |
| 0.123106  | 0.127477  | 0.137383 | 0.129225 | 0.132576 | 0.127768 | 0.113199  |

|          |          |          |           |          |          |          |
|----------|----------|----------|-----------|----------|----------|----------|
| 0.114365 | 0.121066 | 0.129516 | 0.117279  | 0.119755 | 0.12602  | 0.105041 |
| 0.116404 | 0.119027 | 0.125437 | 0.108246  | 0.123252 | 0.115822 | 0.106789 |
| 0.121503 | 0.122086 | 0.128788 | 0.110723  | 0.124854 | 0.115385 | 0.102855 |
| 0.128059 | 0.121941 | 0.131265 | 0.118153  | 0.132576 | 0.127768 | 0.11553  |
| 0.133596 | 0.134761 | 0.13884  | 0.126603  | 0.136364 | 0.136801 | 0.121066 |
| 0.123106 | 0.120775 | 0.131265 | 0.110577  | 0.125291 | 0.121649 | 0.109411 |
| 0.112908 | 0.114948 | 0.128059 | 0.114073  | 0.115967 | 0.124272 | 0.101544 |
| 0.127331 | 0.132284 | 0.130828 | 0.138695  | 0.133013 | 0.125583 | 0.122669 |
| 0.127185 | 0.130973 | 0.140297 | 0.119027  | 0.134033 | 0.121649 | 0.118153 |
| 0.112617 | 0.112617 | 0.124563 | 0.105624  | 0.112179 | 0.116404 | 0.10067  |
| 0.219114 | 0.22669  | 0.221445 | 0.224942  | 0.215472 | 0.221445 | 0.207459 |
| 0.12296  | 0.120921 | 0.138695 | 0.116259  | 0.124854 | 0.123543 | 0.108392 |
| 0.119172 | 0.113928 | 0.118881 | 0.106935  | 0.120484 | 0.115676 | 0.104021 |
| 0.131265 | 0.128351 | 0.137092 | 0.128351  | 0.135781 | 0.131556 | 0.121066 |
| 0.119318 | 0.118444 | 0.125437 | 0.114073  | 0.119172 | 0.11757  | 0.105332 |
| 0.127185 | 0.126603 | 0.138549 | 0.118735  | 0.131119 | 0.124563 | 0.112034 |
| 0.118444 | 0.115822 | 0.128642 | 0.116113  | 0.129371 | 0.116696 | 0.107955 |
| 0.119172 | 0.119464 | 0.126748 | 0.117133  | 0.120775 | 0.117716 | 0.104312 |
| 0.124126 | 0.114219 | 0.128788 | 0.1081    | 0.123106 | 0.119172 | 0.11014  |
| 0.121649 | 0.122523 | 0.135927 | 0.121358  | 0.12704  | 0.12602  | 0.115239 |
| 0.122378 | 0.126748 | 0.133159 | 0.128497  | 0.133596 | 0.12704  | 0.117133 |
| 0.12398  | 0.12398  | 0.133304 | 0.120484  | 0.13141  | 0.126311 | 0.123397 |
| 0.124272 | 0.122232 | 0.134178 | 0.118735  | 0.13549  | 0.129808 | 0.117279 |
| 0.115239 | 0.111742 | 0.11757  | 0.104167  | 0.115967 | 0.11116  | 0.104749 |
| 0.114073 | 0.110286 | 0.128059 | 0.113199  | 0.126457 | 0.121066 | 0.109411 |
| 0.129662 | 0.129953 | 0.141317 | 0.127914  | 0.135635 | 0.134033 | 0.11859  |
| 0.119027 | 0.117279 | 0.129808 | 0.121066  | 0.120338 | 0.120192 | 0.105041 |
| 0.13447  | 0.116404 | 0.135635 | 0.139423  | 0.139277 | 0.130973 | 0.128934 |
| 0.137238 | 0.140443 | 0.145688 | 0.136655  | 0.128934 | 0.141317 | 0.123834 |
| 0.122669 | 0.122378 | 0.126457 | 0.114219  | 0.112034 | 0.113345 | 0.104312 |
| 0.124417 | 0.122086 | 0.131702 | 0.118298  | 0.128059 | 0.123834 | 0.113928 |
| 0.122815 | 0.128642 | 0.139714 | 0.136509  | 0.12296  | 0.130099 | 0.114656 |
| 0.114802 | 0.11655  | 0.112471 | 0.0909091 | 0.123397 | 0.106061 | 0.105478 |
| 0.125291 | 0.125874 | 0.135198 | 0.129953  | 0.130099 | 0.126166 | 0.116841 |
| 0.138986 | 0.139277 | 0.144522 | 0.138403  | 0.134178 | 0.143939 | 0.126748 |
| 0.110577 | 0.106206 | 0.120775 | 0.102418  | 0.11451  | 0.114365 | 0.101253 |
| 0.124417 | 0.12704  | 0.124709 | 0.124709  | 0.128642 | 0.129371 | 0.119464 |
| 0.146125 | 0.141754 | 0.149913 | 0.140006  | 0.133159 | 0.142045 | 0.126603 |
| 0.10912  | 0.116404 | 0.123106 | 0.116404  | 0.11655  | 0.112617 | 0.103584 |
| 0.123397 | 0.110577 | 0.126311 | 0.126603  | 0.120629 | 0.128351 | 0.114948 |
| 0.138112 | 0.140152 | 0.134907 | 0.14627   | 0.135052 | 0.131119 | 0.132867 |
| 0.129953 | 0.105478 | 0.130536 | 0.128788  | 0.126311 | 0.116841 | 0.11859  |
| 0.137966 | 0.130099 | 0.144668 | 0.125146  | 0.135198 | 0.128351 | 0.126311 |
| 0.13141  | 0.130828 | 0.138403 | 0.130536  | 0.127768 | 0.129662 | 0.113928 |



|          |          |          |          |          |          |           |
|----------|----------|----------|----------|----------|----------|-----------|
| 0.121066 | 0.122232 | 0.122815 | 0.123397 | 0.124126 | 0.123106 | 0.112908  |
| 0.127622 | 0.118007 | 0.132867 | 0.127331 | 0.123689 | 0.121212 | 0.113636  |
| 0.115822 | 0.117279 | 0.128059 | 0.115822 | 0.121795 | 0.123106 | 0.105332  |
| 0.12296  | 0.126457 | 0.131993 | 0.130828 | 0.127477 | 0.131702 | 0.120047  |
| 0.124126 | 0.125    | 0.132576 | 0.117716 | 0.131556 | 0.122378 | 0.117133  |
| 0.12704  | 0.129079 | 0.134615 | 0.129079 | 0.132721 | 0.126457 | 0.124417  |
| 0.128788 | 0.130536 | 0.132284 | 0.126748 | 0.132721 | 0.126166 | 0.121503  |
| 0.126166 | 0.123543 | 0.136655 | 0.127331 | 0.121941 | 0.129079 | 0.119464  |
| 0.136946 | 0.145105 | 0.146562 | 0.142774 | 0.137092 | 0.141317 | 0.128497  |
| 0.115967 | 0.114219 | 0.121795 | 0.108974 | 0.128351 | 0.11859  | 0.103438  |
| 0.11859  | 0.108974 | 0.11451  | 0.117424 | 0.120775 | 0.113054 | 0.106643  |
| 0.128497 | 0.131702 | 0.136655 | 0.129662 | 0.129225 | 0.126166 | 0.116841  |
| 0.105186 | 0.119464 | 0.120921 | 0.115093 | 0.11757  | 0.118881 | 0.106352  |
| 0.143211 | 0.137383 | 0.144959 | 0.143794 | 0.135781 | 0.138549 | 0.132721  |
| 0.150204 | 0.146707 | 0.154283 | 0.149913 | 0.147145 | 0.14933  | 0.140006  |
| 0.126311 | 0.112034 | 0.126311 | 0.125146 | 0.125    | 0.115822 | 0.120192  |
| 0.118007 | 0.101981 | 0.123252 | 0.120921 | 0.122815 | 0.112762 | 0.117133  |
| 0.124563 | 0.113782 | 0.124563 | 0.122232 | 0.134615 | 0.114073 | 0.114948  |
| 0.12704  | 0.124126 | 0.134324 | 0.125583 | 0.136509 | 0.130536 | 0.120921  |
| 0.126748 | 0.115676 | 0.127331 | 0.125291 | 0.126603 | 0.12296  | 0.120629  |
| 0.131702 | 0.127331 | 0.132576 | 0.129079 | 0.143502 | 0.129079 | 0.117716  |
| 0.137238 | 0.121212 | 0.136072 | 0.135198 | 0.130682 | 0.129079 | 0.11859   |
| 0.125728 | 0.103293 | 0.12398  | 0.117279 | 0.121795 | 0.113782 | 0.116696  |
| 0.156614 | 0.158654 | 0.163024 | 0.161859 | 0.153555 | 0.15574  | 0.151952  |
| 0.127185 | 0.102418 | 0.121649 | 0.11757  | 0.12704  | 0.113491 | 0.115239  |
| 0.133013 | 0.134178 | 0.139423 | 0.133596 | 0.132576 | 0.133013 | 0.121649  |
| 0.117133 | 0.107517 | 0.117716 | 0.120629 | 0.121941 | 0.113928 | 0.111597  |
| 0.124417 | 0.110723 | 0.110723 | 0.113054 | 0.130973 | 0.104604 | 0.118881  |
| 0.118298 | 0.124709 | 0.134615 | 0.121212 | 0.124854 | 0.128205 | 0.111014  |
| 0.137966 | 0.141463 | 0.143502 | 0.141171 | 0.116259 | 0.137092 | 0.114365  |
| 0.139277 | 0.142191 | 0.147145 | 0.151224 | 0.148747 | 0.143648 | 0.133159  |
| 0.133013 | 0.11961  | 0.133013 | 0.128642 | 0.131119 | 0.123689 | 0.111742  |
| 0.142774 | 0.134615 | 0.143065 | 0.138695 | 0.141171 | 0.13345  | 0.12296   |
| 0.146999 | 0.139714 | 0.156031 | 0.153118 | 0.145396 | 0.150495 | 0.131265  |
| 0.146999 | 0.142628 | 0.154283 | 0.143211 | 0.141317 | 0.14729  | 0.127185  |
| 0.112471 | 0.117424 | 0.118298 | 0.123252 | 0.117861 | 0.110723 | 0.111597  |
| 0.134178 | 0.142337 | 0.142628 | 0.137383 | 0.135781 | 0.136509 | 0.129516  |
| 0.119318 | 0.118153 | 0.123397 | 0.11961  | 0.115093 | 0.113199 | 0.0971737 |
| 0.11451  | 0.118007 | 0.129662 | 0.120338 | 0.10708  | 0.113054 | 0.0961538 |
| 0.120775 | 0.119027 | 0.127768 | 0.11116  | 0.118881 | 0.121649 | 0.108246  |
| 0.127185 | 0.119901 | 0.129808 | 0.122815 | 0.128205 | 0.121941 | 0.108246  |
| 0.117716 | 0.114802 | 0.123834 | 0.117424 | 0.124563 | 0.120629 | 0.107517  |
| 0.119464 | 0.111597 | 0.127622 | 0.119464 | 0.112325 | 0.113054 | 0.0929487 |
| 0.126748 | 0.119464 | 0.13141  | 0.125    | 0.133304 | 0.12704  | 0.111597  |

|          |          |          |           |           |          |           |
|----------|----------|----------|-----------|-----------|----------|-----------|
| 0.126894 | 0.124563 | 0.136801 | 0.12602   | 0.120629  | 0.122523 | 0.099796  |
| 0.110577 | 0.103584 | 0.118444 | 0.100087  | 0.111888  | 0.106206 | 0.0939685 |
| 0.132721 | 0.122523 | 0.131847 | 0.124854  | 0.132284  | 0.126603 | 0.112908  |
| 0.12704  | 0.119464 | 0.127622 | 0.120921  | 0.127768  | 0.119755 | 0.111014  |
| 0.120921 | 0.105769 | 0.126748 | 0.125291  | 0.12398   | 0.117716 | 0.115967  |
| 0.215035 | 0.225524 | 0.222028 | 0.222611  | 0.211684  | 0.217366 | 0.201049  |
| 0.144814 | 0.13549  | 0.143648 | 0.142774  | 0.148164  | 0.13986  | 0.132284  |
| 0.13039  | 0.130099 | 0.135635 | 0.129808  | 0.13345   | 0.123689 | 0.119901  |
| 0.127914 | 0.123834 | 0.129371 | 0.125874  | 0.130099  | 0.126166 | 0.113345  |
| 0.213287 | 0.219114 | 0.2162   | 0.215909  | 0.207896  | 0.214161 | 0.197261  |
| 0.124126 | 0.111014 | 0.126166 | 0.125291  | 0.106498  | 0.120338 | 0.104312  |
| 0.115822 | 0.123106 | 0.130099 | 0.116696  | 0.125583  | 0.121066 | 0.109703  |
| 0.120484 | 0.125728 | 0.133887 | 0.123689  | 0.130536  | 0.126311 | 0.118444  |
| 0.122378 | 0.121212 | 0.134907 | 0.121212  | 0.114656  | 0.11859  | 0.103438  |
| 0.25     | 0.25845  | 0.250583 | 0.256702  | 0.244901  | 0.248252 | 0.234557  |
| 0.121066 | 0.127185 | 0.127185 | 0.123689  | 0.0987762 | 0.117861 | 0.103875  |
| 0.116113 | 0.103001 | 0.120484 | 0.119318  | 0.119172  | 0.110868 | 0.107372  |
| 0.12398  | 0.118735 | 0.131556 | 0.124563  | 0.130536  | 0.11961  | 0.118153  |
| 0.124854 | 0.119027 | 0.131556 | 0.121941  | 0.128788  | 0.118735 | 0.112617  |
| 0.125146 | 0.129808 | 0.129516 | 0.125146  | 0.0958625 | 0.120484 | 0.103293  |
| 0.134178 | 0.122815 | 0.141754 | 0.129225  | 0.120629  | 0.127477 | 0.103584  |
| 0.115822 | 0.105332 | 0.121941 | 0.121358  | 0.121212  | 0.116696 | 0.113199  |
| 0.128788 | 0.11859  | 0.128788 | 0.124709  | 0.127185  | 0.121503 | 0.108974  |
| 0.126311 | 0.132139 | 0.13243  | 0.128642  | 0.127331  | 0.129808 | 0.118153  |
| 0.122232 | 0.115822 | 0.13039  | 0.117279  | 0.114219  | 0.113782 | 0.0986305 |
| 0.12704  | 0.11655  | 0.127331 | 0.117424  | 0.128059  | 0.117133 | 0.101981  |
| 0.10912  | 0.11116  | 0.120775 | 0.0977564 | 0.114802  | 0.107955 | 0.095134  |
| 0.143648 | 0.1419   | 0.147145 | 0.152389  | 0.146707  | 0.142483 | 0.132284  |
| 0.120047 | 0.128497 | 0.127331 | 0.124417  | 0.0995047 | 0.118007 | 0.106643  |
| 0.118881 | 0.129079 | 0.133741 | 0.11859   | 0.126603  | 0.125    | 0.111305  |
| 0.193765 | 0.198427 | 0.197844 | 0.195221  | 0.186917  | 0.19493  | 0.177156  |
| 0.206585 | 0.213869 | 0.210082 | 0.212413  | 0.202943  | 0.209207 | 0.188811  |
| 0.124417 | 0.122086 | 0.135198 | 0.120338  | 0.117279  | 0.120338 | 0.101981  |
| 0.117716 | 0.116259 | 0.129371 | 0.117133  | 0.110577  | 0.114219 | 0.0958625 |
| 0.145396 | 0.13141  | 0.140734 | 0.139277  | 0.136509  | 0.134615 | 0.124126  |
| 0.113636 | 0.103147 | 0.118881 | 0.121212  | 0.120775  | 0.112179 | 0.111597  |
| 0.124563 | 0.128351 | 0.128059 | 0.124854  | 0.0979021 | 0.121358 | 0.108246  |
| 0.13345  | 0.12704  | 0.130245 | 0.132867  | 0.13447   | 0.129371 | 0.118298  |
| 0.225816 | 0.233392 | 0.229604 | 0.231935  | 0.223339  | 0.229021 | 0.212995  |
| 0.123834 | 0.119755 | 0.129079 | 0.120629  | 0.125146  | 0.118298 | 0.1081    |
| 0.209936 | 0.204108 | 0.211976 | 0.215181  | 0.203089  | 0.209936 | 0.190705  |
| 0.107226 | 0.106643 | 0.115967 | 0.112762  | 0.112908  | 0.105769 | 0.102855  |
| 0.117861 | 0.118153 | 0.125728 | 0.114073  | 0.119172  | 0.121358 | 0.110286  |
| 0.122086 | 0.117133 | 0.125874 | 0.123543  | 0.116113  | 0.119755 | 0.10373   |

|          |          |          |          |           |          |           |
|----------|----------|----------|----------|-----------|----------|-----------|
| 0.118007 | 0.11655  | 0.129079 | 0.116841 | 0.110286  | 0.113345 | 0.0952797 |
| 0.211101 | 0.213432 | 0.214307 | 0.216638 | 0.203963  | 0.212558 | 0.195367  |
| 0.139714 | 0.128934 | 0.140006 | 0.13447  | 0.139277  | 0.133304 | 0.120775  |
| 0.114948 | 0.118444 | 0.121358 | 0.112617 | 0.120047  | 0.112617 | 0.109411  |
| 0.133304 | 0.124563 | 0.135344 | 0.127477 | 0.135198  | 0.12602  | 0.118153  |
| 0.12602  | 0.115239 | 0.13039  | 0.119318 | 0.129953  | 0.117279 | 0.114656  |
| 0.120192 | 0.11961  | 0.131847 | 0.116113 | 0.115093  | 0.115822 | 0.0989219 |
| 0.108392 | 0.111597 | 0.118881 | 0.11655  | 0.113782  | 0.108392 | 0.106352  |
| 0.121795 | 0.109557 | 0.127914 | 0.123834 | 0.120775  | 0.11859  | 0.109557  |
| 0.115967 | 0.123834 | 0.129371 | 0.116259 | 0.125728  | 0.120338 | 0.111014  |
| 0.12296  | 0.114802 | 0.124126 | 0.117716 | 0.125728  | 0.11859  | 0.102273  |
| 0.113782 | 0.11757  | 0.119901 | 0.114365 | 0.120629  | 0.110286 | 0.111742  |
| 0.193182 | 0.19697  | 0.198718 | 0.196678 | 0.191579  | 0.192599 | 0.176865  |
| 0.126603 | 0.11961  | 0.13243  | 0.123397 | 0.130828  | 0.121358 | 0.113782  |
| 0.127622 | 0.126166 | 0.134907 | 0.134324 | 0.129225  | 0.130828 | 0.117716  |
| 0.12602  | 0.119318 | 0.130973 | 0.123106 | 0.128497  | 0.124563 | 0.108829  |
| 0.119755 | 0.129079 | 0.130245 | 0.124126 | 0.0989219 | 0.122669 | 0.106061  |
| 0.131119 | 0.120921 | 0.133741 | 0.124417 | 0.13243   | 0.124709 | 0.113054  |
| 0.110431 | 0.111305 | 0.115967 | 0.117716 | 0.116113  | 0.109848 | 0.106935  |
| 0.116404 | 0.113491 | 0.125146 | 0.110286 | 0.111888  | 0.114073 | 0.102127  |
| 0.119901 | 0.104749 | 0.12398  | 0.12398  | 0.121795  | 0.116696 | 0.113199  |
| 0.128497 | 0.121795 | 0.133159 | 0.129953 | 0.127768  | 0.123252 | 0.110431  |
| 0.123252 | 0.119172 | 0.133741 | 0.120921 | 0.126311  | 0.119755 | 0.108392  |
| 0.124272 | 0.120192 | 0.131556 | 0.11961  | 0.119464  | 0.118444 | 0.10067   |
| 0.121212 | 0.128497 | 0.13345  | 0.127331 | 0.131556  | 0.126166 | 0.119464  |
| 0.128934 | 0.135344 | 0.141171 | 0.135344 | 0.138986  | 0.135052 | 0.126894  |
| 0.116404 | 0.124272 | 0.120192 | 0.11961  | 0.0964452 | 0.114073 | 0.101544  |
| 0.142483 | 0.134033 | 0.141317 | 0.138112 | 0.144668  | 0.13549  | 0.126166  |
| 0.116841 | 0.118298 | 0.130828 | 0.117133 | 0.114073  | 0.117424 | 0.0967366 |
| 0.123252 | 0.114802 | 0.124709 | 0.126166 | 0.126894  | 0.121503 | 0.106352  |
| 0.128059 | 0.122232 | 0.132721 | 0.125437 | 0.125291  | 0.12602  | 0.108537  |
| 0.125146 | 0.109994 | 0.126603 | 0.126603 | 0.123543  | 0.120192 | 0.116987  |
| 0.197407 | 0.194493 | 0.198864 | 0.200903 | 0.186772  | 0.195076 | 0.177302  |
| 0.111888 | 0.115676 | 0.115676 | 0.11014  | 0.114948  | 0.107226 | 0.107226  |
| 0.110431 | 0.11014  | 0.115093 | 0.11451  | 0.113782  | 0.110431 | 0.0952797 |
| 0.116841 | 0.126748 | 0.131119 | 0.119755 | 0.12602   | 0.120921 | 0.112179  |
| 0.183858 | 0.185897 | 0.185897 | 0.184149 | 0.179924  | 0.182692 | 0.164918  |
| 0.133013 | 0.136509 | 0.134178 | 0.133013 | 0.109557  | 0.127768 | 0.11553   |
| 0.136801 | 0.146999 | 0.137675 | 0.135635 | 0.111305  | 0.130682 | 0.122815  |
| 0.145688 | 0.140734 | 0.147727 | 0.153263 | 0.151661  | 0.143648 | 0.134615  |
| 0.112471 | 0.119755 | 0.120338 | 0.120047 | 0.0939685 | 0.113636 | 0.101107  |
| 0.131847 | 0.120192 | 0.129808 | 0.123397 | 0.129079  | 0.123397 | 0.113782  |
| 0.212995 | 0.221445 | 0.213869 | 0.220862 | 0.209062  | 0.215035 | 0.19697   |
| 0.126748 | 0.125583 | 0.125583 | 0.124709 | 0.130099  | 0.121795 | 0.113928  |

|          |          |          |           |           |          |           |
|----------|----------|----------|-----------|-----------|----------|-----------|
| 0.133304 | 0.120775 | 0.132721 | 0.129808  | 0.13549   | 0.126894 | 0.114656  |
| 0.114948 | 0.115239 | 0.117861 | 0.111742  | 0.117133  | 0.110577 | 0.109411  |
| 0.176136 | 0.172057 | 0.178176 | 0.171474  | 0.167249  | 0.174971 | 0.150495  |
| 0.11961  | 0.112617 | 0.125728 | 0.116404  | 0.121503  | 0.116404 | 0.103293  |
| 0.142191 | 0.152389 | 0.152681 | 0.146562  | 0.143502  | 0.147727 | 0.138403  |
| 0.120338 | 0.115967 | 0.128497 | 0.107809  | 0.118444  | 0.119172 | 0.103438  |
| 0.19289  | 0.199009 | 0.197844 | 0.19697   | 0.188957  | 0.19289  | 0.177739  |
| 0.116259 | 0.126748 | 0.126166 | 0.121212  | 0.0957168 | 0.118881 | 0.100816  |
| 0.114219 | 0.106935 | 0.113928 | 0.105478  | 0.120484  | 0.104604 | 0.0979021 |
| 0.125437 | 0.119901 | 0.127185 | 0.125437  | 0.129079  | 0.123689 | 0.107955  |
| 0.122669 | 0.117424 | 0.116841 | 0.113928  | 0.125437  | 0.115385 | 0.10373   |
| 0.113928 | 0.122086 | 0.12704  | 0.118298  | 0.122815  | 0.120047 | 0.105478  |
| 0.124709 | 0.12704  | 0.135781 | 0.134907  | 0.130973  | 0.13141  | 0.116259  |
| 0.119027 | 0.115822 | 0.128642 | 0.114948  | 0.113636  | 0.115239 | 0.0954254 |
| 0.190268 | 0.197261 | 0.19697  | 0.197844  | 0.187209  | 0.193182 | 0.179487  |
| 0.124563 | 0.128934 | 0.131265 | 0.12602   | 0.128497  | 0.124854 | 0.114656  |
| 0.122669 | 0.115676 | 0.127622 | 0.120629  | 0.121649  | 0.117716 | 0.103438  |
| 0.214889 | 0.221008 | 0.216929 | 0.21722   | 0.210082  | 0.213724 | 0.196824  |
| 0.126311 | 0.119318 | 0.132721 | 0.124272  | 0.128788  | 0.120775 | 0.116404  |
| 0.119755 | 0.11859  | 0.132284 | 0.11655   | 0.112034  | 0.117716 | 0.0984848 |
| 0.118007 | 0.112179 | 0.127914 | 0.112762  | 0.112034  | 0.109557 | 0.0949883 |
| 0.137675 | 0.131556 | 0.14088  | 0.137675  | 0.135781  | 0.13447  | 0.121941  |
| 0.193036 | 0.198281 | 0.192745 | 0.194784  | 0.189977  | 0.192745 | 0.177302  |
| 0.120921 | 0.107517 | 0.125583 | 0.12296   | 0.123689  | 0.116841 | 0.11451   |
| 0.122669 | 0.127622 | 0.138403 | 0.133741  | 0.13447   | 0.129371 | 0.12296   |
| 0.116259 | 0.114802 | 0.127914 | 0.113345  | 0.109703  | 0.11451  | 0.0941142 |
| 0.118007 | 0.11655  | 0.127914 | 0.115967  | 0.110577  | 0.113636 | 0.0932401 |
| 0.116113 | 0.116696 | 0.128934 | 0.111742  | 0.109557  | 0.113782 | 0.0936772 |
| 0.126166 | 0.118881 | 0.127622 | 0.121212  | 0.13039   | 0.120338 | 0.106352  |
| 0.110577 | 0.10271  | 0.11961  | 0.0971737 | 0.107517  | 0.105624 | 0.0945513 |
| 0.122232 | 0.127768 | 0.12602  | 0.120484  | 0.0979021 | 0.116113 | 0.105041  |
| 0.13243  | 0.133304 | 0.141463 | 0.13884   | 0.143065  | 0.133304 | 0.123689  |
| 0.122815 | 0.125437 | 0.128642 | 0.123106  | 0.0967366 | 0.118735 | 0.10708   |
| 0.127622 | 0.116841 | 0.13141  | 0.122669  | 0.131556  | 0.122086 | 0.119172  |
| 0.196241 | 0.202943 | 0.198864 | 0.203234  | 0.196096  | 0.197698 | 0.184878  |
| 0.118007 | 0.122086 | 0.132576 | 0.124709  | 0.127185  | 0.121212 | 0.11451   |
| 0.135344 | 0.126311 | 0.135927 | 0.132139  | 0.13549   | 0.133596 | 0.11757   |
| 0.115967 | 0.115967 | 0.128205 | 0.109266  | 0.113199  | 0.113054 | 0.0964452 |
| 0.109994 | 0.104458 | 0.116987 | 0.097465  | 0.106061  | 0.105332 | 0.0913462 |
| 0.11961  | 0.121941 | 0.131847 | 0.125728  | 0.112179  | 0.124272 | 0.101836  |
| 0.11859  | 0.102564 | 0.125874 | 0.123252  | 0.123106  | 0.115967 | 0.112179  |
| 0.129953 | 0.133741 | 0.131702 | 0.130245  | 0.13243   | 0.134324 | 0.123543  |
| 0.124854 | 0.122815 | 0.133304 | 0.134178  | 0.128788  | 0.124272 | 0.111451  |
| 0.114365 | 0.102418 | 0.122815 | 0.114656  | 0.107809  | 0.112034 | 0.0980478 |

|          |          |          |           |           |          |           |
|----------|----------|----------|-----------|-----------|----------|-----------|
| 0.109848 | 0.101981 | 0.117716 | 0.106061  | 0.101836  | 0.105186 | 0.0909091 |
| 0.114948 | 0.105624 | 0.117861 | 0.100379  | 0.112471  | 0.107372 | 0.090472  |
| 0.102855 | 0.110431 | 0.11859  | 0.113054  | 0.114365  | 0.108392 | 0.105186  |
| 0.124563 | 0.132721 | 0.12602  | 0.127185  | 0.104604  | 0.121649 | 0.111116  |
| 0.11859  | 0.105186 | 0.126457 | 0.125     | 0.122232  | 0.117716 | 0.113345  |
| 0.122815 | 0.118153 | 0.124563 | 0.118735  | 0.125     | 0.119318 | 0.106206  |
| 0.113491 | 0.103001 | 0.120775 | 0.119318  | 0.11859   | 0.113199 | 0.10708   |
| 0.119464 | 0.113636 | 0.128788 | 0.116259  | 0.114948  | 0.113345 | 0.0964452 |
| 0.107372 | 0.111742 | 0.114365 | 0.108829  | 0.11451   | 0.104167 | 0.102127  |
| 0.121941 | 0.114948 | 0.134178 | 0.115822  | 0.112762  | 0.118444 | 0.0980478 |
| 0.112034 | 0.119901 | 0.128642 | 0.121649  | 0.123252  | 0.116404 | 0.105624  |
| 0.122523 | 0.120192 | 0.128351 | 0.129225  | 0.127914  | 0.122815 | 0.107372  |
| 0.111451 | 0.121066 | 0.128351 | 0.116113  | 0.12296   | 0.117861 | 0.105041  |
| 0.112471 | 0.105769 | 0.120338 | 0.0987762 | 0.110286  | 0.107517 | 0.0967366 |
| 0.118444 | 0.112617 | 0.130973 | 0.112908  | 0.11451   | 0.11553  | 0.0968823 |
| 0.129516 | 0.125437 | 0.133596 | 0.131847  | 0.127331  | 0.127185 | 0.112617  |
| 0.132867 | 0.11859  | 0.131119 | 0.127331  | 0.128351  | 0.123252 | 0.106061  |
| 0.115822 | 0.10912  | 0.121649 | 0.108829  | 0.115967  | 0.111742 | 0.10067   |
| 0.118735 | 0.114365 | 0.13039  | 0.116987  | 0.115093  | 0.112034 | 0.0962995 |
| 0.125583 | 0.11859  | 0.129662 | 0.12296   | 0.127185  | 0.123252 | 0.108683  |
| 0.107809 | 0.113636 | 0.117716 | 0.117424  | 0.114948  | 0.111305 | 0.104604  |
| 0.12704  | 0.122086 | 0.130536 | 0.123252  | 0.133304  | 0.123252 | 0.110431  |
| 0.11655  | 0.122669 | 0.129371 | 0.117133  | 0.124272  | 0.118298 | 0.1081    |
| 0.118007 | 0.108683 | 0.124709 | 0.102855  | 0.113491  | 0.109266 | 0.0981935 |
| 0.115093 | 0.120338 | 0.125    | 0.115093  | 0.117861  | 0.119755 | 0.1081    |
| 0.108537 | 0.110868 | 0.115239 | 0.106789  | 0.11451   | 0.106789 | 0.103293  |
| 0.130536 | 0.121795 | 0.131702 | 0.127914  | 0.132721  | 0.124417 | 0.11655   |
| 0.128497 | 0.113345 | 0.126457 | 0.118881  | 0.131847  | 0.114219 | 0.113345  |
| 0.128351 | 0.117861 | 0.126603 | 0.121358  | 0.124417  | 0.125728 | 0.107663  |
| 0.193619 | 0.203234 | 0.201195 | 0.202069  | 0.193765  | 0.198281 | 0.179633  |
| 0.172057 | 0.16623  | 0.178467 | 0.17264   | 0.164044  | 0.171474 | 0.150787  |
| 0.116113 | 0.128059 | 0.12602  | 0.11961   | 0.0955711 | 0.118153 | 0.103001  |
| 0.122086 | 0.112471 | 0.133159 | 0.126166  | 0.121358  | 0.119464 | 0.106643  |
| 0.142191 | 0.149767 | 0.136946 | 0.140152  | 0.114073  | 0.137238 | 0.129079  |
| 0.125146 | 0.134178 | 0.134178 | 0.128351  | 0.131993  | 0.13243  | 0.119901  |
| 0.130828 | 0.124709 | 0.136364 | 0.128497  | 0.113491  | 0.121503 | 0.101399  |
| 0.123689 | 0.121649 | 0.13447  | 0.122232  | 0.116259  | 0.120484 | 0.0968823 |
| 0.109703 | 0.111116 | 0.120192 | 0.097465  | 0.114802  | 0.113199 | 0.0945513 |
| 0.132721 | 0.116113 | 0.134178 | 0.126894  | 0.129953  | 0.124854 | 0.105915  |
| 0.204837 | 0.210664 | 0.208333 | 0.211247  | 0.199738  | 0.206294 | 0.18852   |
| 0.120775 | 0.111742 | 0.12602  | 0.124563  | 0.122086  | 0.116987 | 0.112617  |
| 0.129953 | 0.115676 | 0.129371 | 0.124709  | 0.119318  | 0.119464 | 0.104604  |
| 0.115385 | 0.113345 | 0.124709 | 0.115093  | 0.107663  | 0.11014  | 0.0862471 |
| 0.121066 | 0.114656 | 0.129516 | 0.120192  | 0.128788  | 0.121066 | 0.112908  |

|          |           |           |           |           |           |           |
|----------|-----------|-----------|-----------|-----------|-----------|-----------|
| 0.193473 | 0.189394  | 0.194347  | 0.19289   | 0.184003  | 0.192599  | 0.166084  |
| 0.245921 | 0.253788  | 0.246795  | 0.253497  | 0.240239  | 0.247086  | 0.2331    |
| 0.12704  | 0.121795  | 0.134324  | 0.132576  | 0.129808  | 0.122669  | 0.113345  |
| 0.134324 | 0.119172  | 0.134033  | 0.126748  | 0.127477  | 0.124417  | 0.106643  |
| 0.121503 | 0.126166  | 0.124126  | 0.119464  | 0.0965909 | 0.11859   | 0.102564  |
| 0.113199 | 0.119901  | 0.12602   | 0.113491  | 0.124417  | 0.114365  | 0.103875  |
| 0.111888 | 0.101399  | 0.119464  | 0.120047  | 0.116404  | 0.109557  | 0.108392  |
| 0.116113 | 0.11757   | 0.125728  | 0.121941  | 0.123834  | 0.119901  | 0.111116  |
| 0.12296  | 0.113928  | 0.133159  | 0.119172  | 0.116404  | 0.117133  | 0.0949883 |
| 0.11655  | 0.103438  | 0.121212  | 0.120629  | 0.119901  | 0.115385  | 0.108392  |
| 0.123106 | 0.116113  | 0.129225  | 0.119027  | 0.113636  | 0.119027  | 0.0965909 |
| 0.122669 | 0.115676  | 0.124709  | 0.113054  | 0.116113  | 0.115385  | 0.100524  |
| 0.112908 | 0.106498  | 0.123106  | 0.10067   | 0.109557  | 0.106789  | 0.0962995 |
| 0.123834 | 0.122669  | 0.133159  | 0.131993  | 0.123397  | 0.122086  | 0.108683  |
| 0.129516 | 0.121649  | 0.128934  | 0.122232  | 0.131702  | 0.12398   | 0.106789  |
| 0.115822 | 0.112908  | 0.120192  | 0.11553   | 0.115385  | 0.114365  | 0.0986305 |
| 0.124272 | 0.122232  | 0.128059  | 0.125728  | 0.127331  | 0.119901  | 0.114656  |
| 0.123106 | 0.131847  | 0.13243   | 0.121941  | 0.131702  | 0.126603  | 0.11757   |
| 0.119755 | 0.113054  | 0.130536  | 0.113054  | 0.110286  | 0.115385  | 0.0958625 |
| 0.11961  | 0.116113  | 0.126894  | 0.122232  | 0.0964452 | 0.116113  | 0.0971737 |
| 0.128059 | 0.12602   | 0.136218  | 0.12398   | 0.123543  | 0.123689  | 0.109411  |
| 0.209207 | 0.215618  | 0.214161  | 0.211247  | 0.2044    | 0.208333  | 0.194639  |
| 0.11757  | 0.11116   | 0.123106  | 0.122523  | 0.120047  | 0.115822  | 0.104749  |
| 0.109266 | 0.108392  | 0.120047  | 0.0981935 | 0.109703  | 0.106643  | 0.0935315 |
| 0.119464 | 0.124417  | 0.130536  | 0.122378  | 0.129225  | 0.123834  | 0.114802  |
| 0.127477 | 0.120775  | 0.136509  | 0.124272  | 0.129371  | 0.123106  | 0.116404  |
| 0.117861 | 0.112617  | 0.129225  | 0.116987  | 0.123834  | 0.11757   | 0.108829  |
| 0.201195 | 0.208188  | 0.205565  | 0.207022  | 0.197552  | 0.203234  | 0.186043  |
| 0.131702 | 0.124709  | 0.129953  | 0.128205  | 0.133887  | 0.126166  | 0.113636  |
| 0.114948 | 0.115822  | 0.126894  | 0.115239  | 0.110431  | 0.116113  | 0.0971737 |
| 0.111888 | 0.0949883 | 0.0888695 | 0.094697  | 0.121066  | 0.0827506 | 0.0961538 |
| 0.111305 | 0.115967  | 0.125874  | 0.110431  | 0.121066  | 0.116259  | 0.104604  |
| 0.129079 | 0.123834  | 0.130536  | 0.124126  | 0.130973  | 0.125874  | 0.111597  |
| 0.118881 | 0.115093  | 0.122669  | 0.119464  | 0.120484  | 0.11859   | 0.101107  |
| 0.124709 | 0.114219  | 0.124126  | 0.112471  | 0.117279  | 0.116259  | 0.10169   |
| 0.119755 | 0.117133  | 0.131993  | 0.119464  | 0.122815  | 0.117133  | 0.111014  |
| 0.200029 | 0.20877   | 0.207896  | 0.206439  | 0.195221  | 0.200903  | 0.186626  |
| 0.121212 | 0.113345  | 0.12296   | 0.115676  | 0.122523  | 0.11451   | 0.107517  |
| 0.199155 | 0.203234  | 0.201195  | 0.201195  | 0.194056  | 0.200612  | 0.183421  |
| 0.195804 | 0.200758  | 0.200175  | 0.201632  | 0.192453  | 0.199009  | 0.181235  |
| 0.119464 | 0.126748  | 0.131993  | 0.120338  | 0.130682  | 0.122378  | 0.11655   |
| 0.129079 | 0.125291  | 0.130828  | 0.124709  | 0.134178  | 0.122378  | 0.120921  |
| 0.11655  | 0.106643  | 0.118298  | 0.106061  | 0.11116   | 0.107809  | 0.094697  |
| 0.116113 | 0.113199  | 0.122815  | 0.113782  | 0.122669  | 0.116987  | 0.10271   |

|          |           |          |           |          |          |           |
|----------|-----------|----------|-----------|----------|----------|-----------|
| 0.122669 | 0.120047  | 0.124417 | 0.11859   | 0.12602  | 0.11859  | 0.107226  |
| 0.118298 | 0.118007  | 0.129953 | 0.116259  | 0.115822 | 0.116259 | 0.0999417 |
| 0.111014 | 0.0973193 | 0.119172 | 0.117716  | 0.114656 | 0.107517 | 0.106643  |
| 0.113054 | 0.10169   | 0.120338 | 0.119172  | 0.116404 | 0.111597 | 0.111014  |
| 0.129516 | 0.123106  | 0.135344 | 0.135927  | 0.131119 | 0.124563 | 0.116987  |
| 0.115967 | 0.125     | 0.13141  | 0.115676  | 0.122815 | 0.122086 | 0.107517  |
| 0.113782 | 0.110868  | 0.123689 | 0.109994  | 0.107226 | 0.112617 | 0.0916375 |
| 0.128497 | 0.120338  | 0.130245 | 0.125     | 0.131556 | 0.12296  | 0.11014   |
| 0.106789 | 0.103293  | 0.111742 | 0.0980478 | 0.115385 | 0.101544 | 0.0936772 |
| 0.134615 | 0.124709  | 0.134033 | 0.129953  | 0.135635 | 0.129371 | 0.11859   |
| 0.115385 | 0.125291  | 0.125583 | 0.119464  | 0.095134 | 0.116841 | 0.103147  |
| 0.139423 | 0.12602   | 0.138549 | 0.136218  | 0.137529 | 0.133304 | 0.124563  |
| 0.260052 | 0.267337  | 0.260344 | 0.266463  | 0.25641  | 0.260927 | 0.248397  |
| 0.119901 | 0.123106  | 0.121066 | 0.117861  | 0.127622 | 0.116113 | 0.121649  |
| 0.122669 | 0.128205  | 0.12704  | 0.123252  | 0.129516 | 0.123543 | 0.118298  |
| 0.21926  | 0.227127  | 0.2213   | 0.226253  | 0.215618 | 0.22567  | 0.203234  |
| 0.126457 | 0.122669  | 0.129079 | 0.123543  | 0.128642 | 0.127622 | 0.117133  |
| 0.231935 | 0.237179  | 0.233974 | 0.236888  | 0.229167 | 0.233392 | 0.217075  |
| 0.11757  | 0.116113  | 0.119318 | 0.111742  | 0.122086 | 0.112034 | 0.110868  |
| 0.127622 | 0.123834  | 0.138112 | 0.123252  | 0.121066 | 0.122086 | 0.1081    |
| 0.119755 | 0.11451   | 0.131119 | 0.119172  | 0.124272 | 0.115385 | 0.1081    |
| 0.116841 | 0.123543  | 0.131119 | 0.114219  | 0.127768 | 0.121795 | 0.112471  |
| 0.202506 | 0.21183   | 0.208625 | 0.209499  | 0.202069 | 0.205711 | 0.193765  |
| 0.137238 | 0.12704   | 0.138112 | 0.132576  | 0.137383 | 0.130828 | 0.11859   |
| 0.129953 | 0.119464  | 0.132576 | 0.124709  | 0.130682 | 0.122378 | 0.108974  |
| 0.22567  | 0.232372  | 0.228293 | 0.232955  | 0.224942 | 0.231206 | 0.211684  |
| 0.122669 | 0.106061  | 0.126748 | 0.124709  | 0.121649 | 0.116841 | 0.111597  |
| 0.201486 | 0.211101  | 0.204691 | 0.206439  | 0.197261 | 0.204691 | 0.186626  |
| 0.119027 | 0.106789  | 0.123689 | 0.12398   | 0.120921 | 0.115239 | 0.109703  |
| 0.119318 | 0.118735  | 0.132139 | 0.113782  | 0.111305 | 0.11757  | 0.0965909 |
| 0.119172 | 0.11451   | 0.125    | 0.105769  | 0.118735 | 0.112179 | 0.10169   |
| 0.11859  | 0.126748  | 0.132284 | 0.120921  | 0.128642 | 0.122086 | 0.113636  |
| 0.120484 | 0.11553   | 0.128059 | 0.123106  | 0.125874 | 0.124272 | 0.10912   |
| 0.16419  | 0.16215   | 0.171474 | 0.159528  | 0.153846 | 0.165647 | 0.144959  |
| 0.124272 | 0.113782  | 0.128059 | 0.120775  | 0.125583 | 0.120192 | 0.104167  |
| 0.120192 | 0.121649  | 0.13447  | 0.12398   | 0.128205 | 0.121941 | 0.112908  |
| 0.119027 | 0.122232  | 0.127477 | 0.121649  | 0.12704  | 0.124272 | 0.112325  |
| 0.131556 | 0.126311  | 0.133304 | 0.133304  | 0.133741 | 0.126603 | 0.116987  |
| 0.19697  | 0.205128  | 0.201049 | 0.20338   | 0.194784 | 0.202506 | 0.182984  |
| 0.116696 | 0.113782  | 0.127185 | 0.114656  | 0.111305 | 0.112034 | 0.0960082 |
| 0.116259 | 0.129953  | 0.135781 | 0.119755  | 0.127768 | 0.126166 | 0.107809  |
| 0.10912  | 0.113491  | 0.118153 | 0.116696  | 0.114219 | 0.10912  | 0.104749  |
| 0.117716 | 0.10169   | 0.12296  | 0.118881  | 0.121649 | 0.115093 | 0.111014  |
| 0.121066 | 0.119901  | 0.129808 | 0.119901  | 0.115385 | 0.112908 | 0.102418  |

|          |          |          |           |           |          |           |
|----------|----------|----------|-----------|-----------|----------|-----------|
| 0.255828 | 0.262238 | 0.256702 | 0.262529  | 0.251311  | 0.259033 | 0.244464  |
| 0.112908 | 0.110286 | 0.122523 | 0.100379  | 0.11451   | 0.108829 | 0.10271   |
| 0.121649 | 0.126311 | 0.137966 | 0.128642  | 0.118881  | 0.121941 | 0.104458  |
| 0.179341 | 0.180798 | 0.187791 | 0.184295  | 0.175408  | 0.180507 | 0.166812  |
| 0.186917 | 0.19595  | 0.195659 | 0.194493  | 0.184732  | 0.192453 | 0.174097  |
| 0.12398  | 0.123397 | 0.133013 | 0.131556  | 0.128497  | 0.126311 | 0.111451  |
| 0.125583 | 0.120629 | 0.129371 | 0.12296   | 0.129516  | 0.123834 | 0.108392  |
| 0.111305 | 0.118881 | 0.128497 | 0.115967  | 0.121358  | 0.116841 | 0.104895  |
| 0.150495 | 0.138549 | 0.147873 | 0.14292   | 0.151807  | 0.142045 | 0.134178  |
| 0.122815 | 0.122232 | 0.13243  | 0.127185  | 0.124709  | 0.121358 | 0.10708   |
| 0.127622 | 0.123252 | 0.13345  | 0.134615  | 0.13039   | 0.127331 | 0.113054  |
| 0.121649 | 0.107663 | 0.12602  | 0.128059  | 0.125874  | 0.122523 | 0.115239  |
| 0.125437 | 0.117279 | 0.124563 | 0.119901  | 0.122086  | 0.118153 | 0.106789  |
| 0.137529 | 0.125874 | 0.135198 | 0.131993  | 0.138549  | 0.128788 | 0.118881  |
| 0.121358 | 0.109703 | 0.128351 | 0.123397  | 0.119464  | 0.117861 | 0.105624  |
| 0.115385 | 0.124126 | 0.131702 | 0.116259  | 0.125146  | 0.120921 | 0.11014   |
| 0.126894 | 0.139132 | 0.137966 | 0.128059  | 0.135781  | 0.133596 | 0.124272  |
| 0.118007 | 0.113345 | 0.122669 | 0.103147  | 0.117279  | 0.112471 | 0.10373   |
| 0.117861 | 0.129516 | 0.134761 | 0.120484  | 0.128497  | 0.127185 | 0.117861  |
| 0.121649 | 0.106498 | 0.130099 | 0.128351  | 0.125583  | 0.117279 | 0.118735  |
| 0.208916 | 0.214744 | 0.213578 | 0.2162    | 0.207022  | 0.212704 | 0.195221  |
| 0.116113 | 0.123106 | 0.121941 | 0.117279  | 0.118881  | 0.116404 | 0.105624  |
| 0.195367 | 0.201777 | 0.199738 | 0.200903  | 0.191434  | 0.197115 | 0.178176  |
| 0.120775 | 0.116987 | 0.128642 | 0.117861  | 0.124417  | 0.119027 | 0.105624  |
| 0.128934 | 0.121358 | 0.137675 | 0.121358  | 0.119172  | 0.121649 | 0.105624  |
| 0.120484 | 0.126603 | 0.127477 | 0.123106  | 0.0967366 | 0.118153 | 0.102127  |
| 0.11655  | 0.120047 | 0.120629 | 0.118298  | 0.095134  | 0.117424 | 0.102855  |
| 0.129808 | 0.122232 | 0.132139 | 0.127477  | 0.130828  | 0.127768 | 0.114656  |
| 0.13039  | 0.117279 | 0.132139 | 0.128934  | 0.132284  | 0.123397 | 0.116404  |
| 0.123689 | 0.118444 | 0.13243  | 0.116404  | 0.113345  | 0.117861 | 0.0965909 |
| 0.119755 | 0.120338 | 0.130828 | 0.123834  | 0.127768  | 0.119172 | 0.111014  |
| 0.124126 | 0.128205 | 0.125874 | 0.125     | 0.0957168 | 0.123543 | 0.107517  |
| 0.124272 | 0.116113 | 0.128934 | 0.131847  | 0.128788  | 0.120484 | 0.122232  |
| 0.253351 | 0.256847 | 0.252185 | 0.256847  | 0.248252  | 0.248689 | 0.241113  |
| 0.122232 | 0.120484 | 0.131556 | 0.119027  | 0.115676  | 0.117861 | 0.0992133 |
| 0.184441 | 0.194347 | 0.194347 | 0.193182  | 0.181381  | 0.190559 | 0.17162   |
| 0.190997 | 0.196533 | 0.196241 | 0.197115  | 0.189977  | 0.192745 | 0.177302  |
| 0.12704  | 0.126748 | 0.13345  | 0.129079  | 0.128059  | 0.125291 | 0.113054  |
| 0.113345 | 0.1081   | 0.121503 | 0.0999417 | 0.110286  | 0.106935 | 0.0984848 |
| 0.125583 | 0.121795 | 0.136655 | 0.119755  | 0.119027  | 0.120047 | 0.10373   |
| 0.122378 | 0.117424 | 0.126166 | 0.120047  | 0.125728  | 0.123834 | 0.102855  |
| 0.112034 | 0.11116  | 0.122523 | 0.101836  | 0.112762  | 0.110286 | 0.0948427 |
| 0.119027 | 0.105041 | 0.125728 | 0.122523  | 0.121795  | 0.119027 | 0.11116   |
| 0.126748 | 0.122378 | 0.128497 | 0.122378  | 0.122523  | 0.12296  | 0.106935  |



|          |          |          |          |           |          |           |
|----------|----------|----------|----------|-----------|----------|-----------|
| 0.138403 | 0.127622 | 0.136072 | 0.134907 | 0.137675  | 0.132284 | 0.118007  |
| 0.120484 | 0.115822 | 0.126894 | 0.11553  | 0.112471  | 0.116404 | 0.0989219 |
| 0.134178 | 0.12398  | 0.135344 | 0.131556 | 0.133741  | 0.128351 | 0.118153  |
| 0.120921 | 0.121795 | 0.126748 | 0.115385 | 0.121649  | 0.120338 | 0.110431  |
| 0.124417 | 0.127914 | 0.125    | 0.123543 | 0.0983392 | 0.118298 | 0.104312  |
| 0.115239 | 0.123397 | 0.131847 | 0.117279 | 0.125874  | 0.121941 | 0.107663  |
| 0.125583 | 0.113345 | 0.127622 | 0.129953 | 0.125728  | 0.12296  | 0.121795  |
| 0.127768 | 0.11757  | 0.128059 | 0.114073 | 0.119464  | 0.114656 | 0.105041  |
| 0.120484 | 0.114948 | 0.127768 | 0.114073 | 0.104895  | 0.113491 | 0.092803  |
| 0.127477 | 0.131265 | 0.14292  | 0.13243  | 0.138695  | 0.133304 | 0.12602   |
| 0.186772 | 0.190851 | 0.196096 | 0.190268 | 0.185752  | 0.189394 | 0.173077  |
| 0.139423 | 0.128934 | 0.136801 | 0.13447  | 0.140152  | 0.135927 | 0.127185  |
| 0.128934 | 0.121649 | 0.132139 | 0.126311 | 0.127914  | 0.124272 | 0.112908  |
| 0.119755 | 0.124417 | 0.122086 | 0.115967 | 0.0942599 | 0.115093 | 0.10169   |
| 0.110577 | 0.114365 | 0.118735 | 0.115822 | 0.090035  | 0.112617 | 0.0983392 |
| 0.113636 | 0.122669 | 0.132576 | 0.11859  | 0.12398   | 0.122378 | 0.107809  |
| 0.116404 | 0.126603 | 0.128351 | 0.115822 | 0.125874  | 0.121066 | 0.109411  |
| 0.193473 | 0.200466 | 0.197844 | 0.198718 | 0.188957  | 0.196678 | 0.178904  |
| 0.125583 | 0.115385 | 0.129953 | 0.122086 | 0.123106  | 0.118298 | 0.103147  |
| 0.114073 | 0.110577 | 0.119318 | 0.11553  | 0.114802  | 0.113199 | 0.100962  |
| 0.135052 | 0.122232 | 0.132139 | 0.127477 | 0.130245  | 0.125728 | 0.115239  |
| 0.195221 | 0.198718 | 0.197844 | 0.200175 | 0.192745  | 0.197552 | 0.177448  |
| 0.114948 | 0.107372 | 0.121066 | 0.100962 | 0.108974  | 0.109703 | 0.0962995 |
| 0.120338 | 0.107517 | 0.125583 | 0.126748 | 0.122232  | 0.117716 | 0.115093  |
| 0.130536 | 0.122378 | 0.132576 | 0.12704  | 0.130099  | 0.125583 | 0.11451   |
| 0.121941 | 0.11757  | 0.13039  | 0.127185 | 0.124126  | 0.119027 | 0.107372  |
| 0.190414 | 0.196533 | 0.196533 | 0.19799  | 0.188811  | 0.191579 | 0.175554  |
| 0.119318 | 0.106498 | 0.124563 | 0.12398  | 0.118881  | 0.11553  | 0.108537  |
| 0.112034 | 0.117279 | 0.126603 | 0.119027 | 0.120629  | 0.120484 | 0.107372  |
| 0.114948 | 0.107955 | 0.122232 | 0.104458 | 0.111597  | 0.10912  | 0.0977564 |
| 0.127477 | 0.125146 | 0.133887 | 0.127185 | 0.121212  | 0.124563 | 0.108537  |
| 0.120338 | 0.120921 | 0.132284 | 0.12296  | 0.127477  | 0.119464 | 0.110723  |
| 0.121795 | 0.107809 | 0.127914 | 0.124126 | 0.124854  | 0.119172 | 0.119464  |
| 0.120629 | 0.118007 | 0.130828 | 0.115093 | 0.113199  | 0.115385 | 0.0958625 |
| 0.125583 | 0.12296  | 0.129662 | 0.118298 | 0.123397  | 0.124417 | 0.11014   |
| 0.144376 | 0.140589 | 0.148456 | 0.152826 | 0.14831   | 0.142628 | 0.133304  |
| 0.238491 | 0.244318 | 0.238199 | 0.242861 | 0.236305  | 0.236742 | 0.225379  |
| 0.128642 | 0.116404 | 0.129225 | 0.119318 | 0.12296   | 0.120484 | 0.110286  |
| 0.125146 | 0.121066 | 0.135344 | 0.125728 | 0.129953  | 0.122232 | 0.11116   |
| 0.12704  | 0.117424 | 0.129371 | 0.122669 | 0.126311  | 0.122378 | 0.107226  |
| 0.124563 | 0.127185 | 0.133596 | 0.135344 | 0.132576  | 0.131847 | 0.118153  |
| 0.117133 | 0.107517 | 0.123834 | 0.114802 | 0.116696  | 0.115676 | 0.0996503 |
| 0.120338 | 0.111014 | 0.124126 | 0.117424 | 0.12398   | 0.113928 | 0.109557  |
| 0.130973 | 0.11961  | 0.132721 | 0.126894 | 0.129079  | 0.122523 | 0.113199  |

|          |          |          |           |           |          |           |
|----------|----------|----------|-----------|-----------|----------|-----------|
| 0.123834 | 0.105769 | 0.129953 | 0.130245  | 0.124272  | 0.11859  | 0.11859   |
| 0.129953 | 0.11859  | 0.129953 | 0.131993  | 0.123106  | 0.119172 | 0.104604  |
| 0.238491 | 0.245775 | 0.237908 | 0.244318  | 0.230478  | 0.241987 | 0.225962  |
| 0.111888 | 0.106352 | 0.117133 | 0.0984848 | 0.109994  | 0.106643 | 0.0929487 |
| 0.107809 | 0.111888 | 0.115676 | 0.108392  | 0.110868  | 0.105769 | 0.100816  |
| 0.121066 | 0.113199 | 0.128351 | 0.112325  | 0.109848  | 0.112908 | 0.0954254 |
| 0.13549  | 0.129079 | 0.136946 | 0.139569  | 0.137383  | 0.129953 | 0.11859   |
| 0.133741 | 0.124417 | 0.135198 | 0.122086  | 0.128642  | 0.126748 | 0.119172  |
| 0.128497 | 0.113928 | 0.130536 | 0.125874  | 0.122232  | 0.120047 | 0.104312  |
| 0.129079 | 0.123252 | 0.134615 | 0.127622  | 0.132139  | 0.125583 | 0.112762  |
| 0.119027 | 0.115239 | 0.125437 | 0.124854  | 0.121503  | 0.114365 | 0.103875  |
| 0.233537 | 0.238782 | 0.231206 | 0.239948  | 0.228438  | 0.23412  | 0.219551  |
| 0.132139 | 0.122232 | 0.133304 | 0.128934  | 0.132867  | 0.127477 | 0.116987  |
| 0.119755 | 0.104895 | 0.124417 | 0.123543  | 0.12398   | 0.11655  | 0.113928  |
| 0.120047 | 0.111597 | 0.119464 | 0.12296   | 0.11961   | 0.112179 | 0.101107  |
| 0.128059 | 0.116987 | 0.133013 | 0.126894  | 0.128205  | 0.122815 | 0.112908  |
| 0.117279 | 0.11961  | 0.120192 | 0.115822  | 0.121795  | 0.112617 | 0.116696  |
| 0.120192 | 0.112908 | 0.127477 | 0.112034  | 0.109266  | 0.112325 | 0.0983392 |
| 0.120484 | 0.104458 | 0.123397 | 0.121649  | 0.120921  | 0.119318 | 0.113782  |
| 0.124126 | 0.109557 | 0.125874 | 0.127622  | 0.125437  | 0.119172 | 0.120629  |
| 0.122086 | 0.10373  | 0.120338 | 0.121212  | 0.120775  | 0.115676 | 0.110723  |
| 0.120775 | 0.118444 | 0.13039  | 0.113491  | 0.113928  | 0.115822 | 0.0954254 |
| 0.12602  | 0.122523 | 0.132139 | 0.123106  | 0.132284  | 0.123106 | 0.118444  |
| 0.130828 | 0.127914 | 0.136364 | 0.128497  | 0.137966  | 0.124126 | 0.122378  |
| 0.125291 | 0.130828 | 0.124417 | 0.124126  | 0.0992133 | 0.119172 | 0.109557  |
| 0.125583 | 0.132867 | 0.129662 | 0.127622  | 0.100379  | 0.118298 | 0.109848  |
| 0.128351 | 0.123397 | 0.135052 | 0.12602   | 0.134033  | 0.12398  | 0.121941  |
| 0.105332 | 0.107955 | 0.120192 | 0.095134  | 0.110723  | 0.107663 | 0.0890152 |
| 0.120047 | 0.124417 | 0.126166 | 0.128788  | 0.128059  | 0.118007 | 0.122378  |
| 0.132139 | 0.114656 | 0.129516 | 0.134761  | 0.127622  | 0.125437 | 0.121066  |
| 0.207022 | 0.213141 | 0.212267 | 0.214889  | 0.206585  | 0.209645 | 0.193328  |
| 0.13039  | 0.119318 | 0.133887 | 0.130682  | 0.129371  | 0.120484 | 0.110868  |
| 0.112034 | 0.116113 | 0.121358 | 0.111451  | 0.118881  | 0.109703 | 0.107955  |
| 0.126457 | 0.119464 | 0.137529 | 0.120338  | 0.117861  | 0.119755 | 0.103147  |
| 0.223339 | 0.234703 | 0.22771  | 0.229167  | 0.218531  | 0.226544 | 0.208188  |
| 0.216346 | 0.219843 | 0.217803 | 0.221008  | 0.213287  | 0.214598 | 0.202069  |
| 0.122086 | 0.108974 | 0.129662 | 0.128788  | 0.12602   | 0.118881 | 0.120629  |
| 0.253059 | 0.259761 | 0.253642 | 0.259761  | 0.247378  | 0.252477 | 0.239365  |
| 0.10708  | 0.109703 | 0.11757  | 0.0971737 | 0.11014   | 0.10708  | 0.0933858 |
| 0.13243  | 0.134761 | 0.137092 | 0.132721  | 0.136364  | 0.132139 | 0.125728  |
| 0.112617 | 0.106789 | 0.122523 | 0.100087  | 0.111014  | 0.108537 | 0.0960082 |
| 0.126457 | 0.120629 | 0.134907 | 0.127622  | 0.13039   | 0.123834 | 0.119755  |
| 0.18954  | 0.197115 | 0.193619 | 0.198281  | 0.189394  | 0.191871 | 0.175554  |
| 0.127914 | 0.115385 | 0.120629 | 0.129662  | 0.130682  | 0.119172 | 0.115385  |

|          |           |          |           |           |          |           |
|----------|-----------|----------|-----------|-----------|----------|-----------|
| 0.195804 | 0.206294  | 0.202506 | 0.20134   | 0.193328  | 0.201632 | 0.183858  |
| 0.121795 | 0.122669  | 0.129371 | 0.12296   | 0.124854  | 0.120921 | 0.110431  |
| 0.126166 | 0.1081    | 0.127331 | 0.12296   | 0.116113  | 0.114219 | 0.101981  |
| 0.120921 | 0.118881  | 0.127331 | 0.1081    | 0.119901  | 0.121212 | 0.108683  |
| 0.11655  | 0.115967  | 0.125583 | 0.121503  | 0.117861  | 0.117716 | 0.0990676 |
| 0.112908 | 0.110286  | 0.122523 | 0.10912   | 0.105769  | 0.108829 | 0.0887238 |
| 0.127185 | 0.112617  | 0.127768 | 0.121066  | 0.123834  | 0.11961  | 0.101253  |
| 0.10912  | 0.107663  | 0.118444 | 0.0965909 | 0.108392  | 0.105041 | 0.0945513 |
| 0.124126 | 0.115967  | 0.127622 | 0.124126  | 0.12602   | 0.118881 | 0.106643  |
| 0.10912  | 0.114073  | 0.116696 | 0.117279  | 0.112471  | 0.108246 | 0.105624  |
| 0.121066 | 0.110286  | 0.121941 | 0.109411  | 0.115967  | 0.112908 | 0.0995047 |
| 0.113054 | 0.107809  | 0.120338 | 0.0999417 | 0.109703  | 0.107517 | 0.0964452 |
| 0.118735 | 0.122523  | 0.128059 | 0.124272  | 0.092366  | 0.119027 | 0.0962995 |
| 0.137092 | 0.126311  | 0.136801 | 0.128642  | 0.137238  | 0.129516 | 0.121941  |
| 0.113054 | 0.120338  | 0.119464 | 0.11655   | 0.0925117 | 0.113928 | 0.0976107 |
| 0.112034 | 0.119318  | 0.129808 | 0.120484  | 0.123252  | 0.119901 | 0.107955  |
| 0.113636 | 0.108974  | 0.126166 | 0.109848  | 0.105915  | 0.110723 | 0.0920746 |
| 0.122378 | 0.107517  | 0.124417 | 0.121795  | 0.116113  | 0.11655  | 0.109266  |
| 0.123252 | 0.117424  | 0.13345  | 0.124709  | 0.127477  | 0.121212 | 0.112762  |
| 0.116113 | 0.121941  | 0.127768 | 0.118444  | 0.125583  | 0.120775 | 0.108829  |
| 0.11757  | 0.121941  | 0.123689 | 0.117279  | 0.0958625 | 0.115822 | 0.101836  |
| 0.128788 | 0.120338  | 0.129662 | 0.126457  | 0.129808  | 0.125583 | 0.109848  |
| 0.136801 | 0.125437  | 0.132139 | 0.130973  | 0.138112  | 0.127768 | 0.118153  |
| 0.141463 | 0.133304  | 0.140589 | 0.138258  | 0.142774  | 0.136218 | 0.127185  |
| 0.107517 | 0.0967366 | 0.114219 | 0.115676  | 0.112325  | 0.107517 | 0.0996503 |
| 0.118881 | 0.117133  | 0.130536 | 0.118298  | 0.112325  | 0.115385 | 0.0979021 |
| 0.108829 | 0.106789  | 0.121358 | 0.112325  | 0.11859   | 0.110577 | 0.099796  |
| 0.131556 | 0.128934  | 0.137675 | 0.127477  | 0.138695  | 0.122815 | 0.122815  |
| 0.116259 | 0.110431  | 0.120921 | 0.0990676 | 0.112325  | 0.108974 | 0.0987762 |
| 0.126748 | 0.138695  | 0.141317 | 0.12704   | 0.137675  | 0.131993 | 0.123252  |
| 0.134033 | 0.131993  | 0.142483 | 0.127914  | 0.126603  | 0.129371 | 0.113928  |
| 0.130682 | 0.120775  | 0.135344 | 0.134178  | 0.131993  | 0.124854 | 0.116987  |
| 0.11655  | 0.112762  | 0.121503 | 0.117716  | 0.116696  | 0.120921 | 0.102273  |
| 0.120775 | 0.11757   | 0.127477 | 0.125728  | 0.122086  | 0.121649 | 0.105332  |
| 0.125728 | 0.129225  | 0.126311 | 0.123106  | 0.100524  | 0.121649 | 0.106498  |
| 0.210373 | 0.214452  | 0.210956 | 0.214744  | 0.2044    | 0.208916 | 0.196678  |
| 0.113345 | 0.117424  | 0.125    | 0.117716  | 0.125146  | 0.116841 | 0.106643  |
| 0.121066 | 0.117279  | 0.129225 | 0.110868  | 0.120629  | 0.122523 | 0.106789  |
| 0.121503 | 0.117424  | 0.130245 | 0.119464  | 0.125146  | 0.119755 | 0.112762  |
| 0.116404 | 0.125728  | 0.12398  | 0.119027  | 0.0941142 | 0.115239 | 0.0992133 |
| 0.124709 | 0.126748  | 0.133741 | 0.125291  | 0.128642  | 0.125874 | 0.114802  |
| 0.127331 | 0.107809  | 0.120921 | 0.119464  | 0.130099  | 0.111305 | 0.109848  |
| 0.129516 | 0.11116   | 0.125437 | 0.117861  | 0.129079  | 0.110868 | 0.114948  |
| 0.123252 | 0.118881  | 0.127622 | 0.13141   | 0.127477  | 0.120921 | 0.109266  |

|          |           |           |           |           |           |           |
|----------|-----------|-----------|-----------|-----------|-----------|-----------|
| 0.105478 | 0.110431  | 0.113054  | 0.113345  | 0.11116   | 0.106061  | 0.101399  |
| 0.125291 | 0.121795  | 0.134615  | 0.124709  | 0.134178  | 0.121503  | 0.115676  |
| 0.115967 | 0.111014  | 0.125583  | 0.108683  | 0.115822  | 0.120047  | 0.10373   |
| 0.126311 | 0.116113  | 0.129516  | 0.112908  | 0.120921  | 0.119027  | 0.108246  |
| 0.179779 | 0.181818  | 0.179779  | 0.182401  | 0.175554  | 0.178613  | 0.167249  |
| 0.128205 | 0.122378  | 0.129371  | 0.125291  | 0.12602   | 0.123252  | 0.108392  |
| 0.125437 | 0.126894  | 0.135052  | 0.129225  | 0.133159  | 0.125437  | 0.116696  |
| 0.116259 | 0.119755  | 0.121795  | 0.113928  | 0.117279  | 0.113345  | 0.108683  |
| 0.121941 | 0.116696  | 0.129225  | 0.129516  | 0.120047  | 0.11961   | 0.106206  |
| 0.113199 | 0.103875  | 0.115239  | 0.0968823 | 0.116259  | 0.101544  | 0.0939685 |
| 0.117279 | 0.104749  | 0.114948  | 0.106498  | 0.111597  | 0.108246  | 0.0957168 |
| 0.112034 | 0.105624  | 0.11553   | 0.100379  | 0.119464  | 0.105915  | 0.101836  |
| 0.11961  | 0.107372  | 0.125146  | 0.129225  | 0.126748  | 0.118735  | 0.114365  |
| 0.125146 | 0.121066  | 0.131847  | 0.116696  | 0.120629  | 0.119318  | 0.101544  |
| 0.115093 | 0.122086  | 0.128205  | 0.121212  | 0.0878497 | 0.120629  | 0.111014  |
| 0.111742 | 0.114365  | 0.128642  | 0.114365  | 0.115967  | 0.116987  | 0.0983392 |
| 0.107226 | 0.11451   | 0.115093  | 0.111888  | 0.114948  | 0.108974  | 0.0996503 |
| 0.133887 | 0.0922203 | 0.12398   | 0.124272  | 0.132867  | 0.115239  | 0.119901  |
| 0.108829 | 0.109411  | 0.114073  | 0.106498  | 0.111014  | 0.104749  | 0.101836  |
| 0.112617 | 0.095134  | 0.0895979 | 0.0916375 | 0.117424  | 0.0814394 | 0.097465  |
| 0.108537 | 0.10708   | 0.114365  | 0.108246  | 0.107517  | 0.106206  | 0.0948427 |
| 0.109411 | 0.108829  | 0.112908  | 0.108246  | 0.111014  | 0.104458  | 0.100962  |
| 0.103001 | 0.107955  | 0.117279  | 0.103875  | 0.11451   | 0.109994  | 0.0995047 |
| 0.11655  | 0.115676  | 0.124417  | 0.104604  | 0.117279  | 0.114219  | 0.108683  |
| 0.104312 | 0.111014  | 0.118007  | 0.101981  | 0.110286  | 0.111305  | 0.0964452 |
| 0.135781 | 0.127914  | 0.140152  | 0.140734  | 0.140589  | 0.132867  | 0.132576  |
| 0.133159 | 0.128205  | 0.136655  | 0.135198  | 0.131556  | 0.13141   | 0.121212  |
| 0.109557 | 0.116841  | 0.119464  | 0.107517  | 0.108537  | 0.109848  | 0.0949883 |
| 0.13447  | 0.121358  | 0.130682  | 0.135052  | 0.139277  | 0.134178  | 0.123106  |
| 0.126603 | 0.125437  | 0.133304  | 0.128642  | 0.115676  | 0.122232  | 0.110286  |
| 0.133013 | 0.122815  | 0.132139  | 0.136218  | 0.12704   | 0.124563  | 0.116696  |
| 0.101253 | 0.114656  | 0.12398   | 0.104167  | 0.109848  | 0.113199  | 0.0962995 |
| 0.13345  | 0.142191  | 0.144814  | 0.13986   | 0.14292   | 0.136655  | 0.13549   |
| 0.118007 | 0.124709  | 0.130245  | 0.116259  | 0.129808  | 0.123252  | 0.121212  |
| 0.132867 | 0.109557  | 0.131993  | 0.132576  | 0.128351  | 0.121503  | 0.124417  |
| 0.11655  | 0.120629  | 0.120921  | 0.120047  | 0.116404  | 0.116259  | 0.106061  |
| 0.10912  | 0.108537  | 0.114365  | 0.113491  | 0.108974  | 0.108537  | 0.0968823 |
| 0.110431 | 0.106643  | 0.115967  | 0.104021  | 0.114656  | 0.113636  | 0.100524  |
| 0.118153 | 0.103293  | 0.117279  | 0.11553   | 0.122378  | 0.114073  | 0.111451  |
| 0.114948 | 0.116404  | 0.124563  | 0.107955  | 0.118007  | 0.112325  | 0.103584  |
| 0.122086 | 0.119172  | 0.123543  | 0.11655   | 0.128642  | 0.118881  | 0.119755  |
| 0.125874 | 0.117716  | 0.129662  | 0.12704   | 0.119318  | 0.125874  | 0.108392  |
| 0.105186 | 0.113345  | 0.115385  | 0.112471  | 0.099796  | 0.111014  | 0.0964452 |
| 0.107663 | 0.108537  | 0.120484  | 0.101544  | 0.115967  | 0.113199  | 0.095134  |

|          |          |          |           |          |          |           |
|----------|----------|----------|-----------|----------|----------|-----------|
| 0.112762 | 0.118007 | 0.123543 | 0.118007  | 0.121066 | 0.115676 | 0.102273  |
| 0.109557 | 0.105478 | 0.120338 | 0.11014   | 0.114073 | 0.111014 | 0.102273  |
| 0.114073 | 0.11553  | 0.121358 | 0.105915  | 0.121212 | 0.117279 | 0.106789  |
| 0.113491 | 0.116987 | 0.123397 | 0.102418  | 0.113636 | 0.118444 | 0.100087  |
| 0.126166 | 0.117716 | 0.128205 | 0.122086  | 0.116987 | 0.123252 | 0.106352  |
| 0.119755 | 0.11014  | 0.121503 | 0.111305  | 0.116696 | 0.1081   | 0.101981  |
| 0.104895 | 0.109848 | 0.115093 | 0.0917832 | 0.106498 | 0.105769 | 0.0882867 |
| 0.111597 | 0.112179 | 0.119755 | 0.11451   | 0.118735 | 0.110431 | 0.0955711 |
| 0.125728 | 0.11553  | 0.128642 | 0.120192  | 0.115385 | 0.120484 | 0.107663  |
| 0.11859  | 0.106935 | 0.119755 | 0.0973193 | 0.119027 | 0.106061 | 0.0984848 |
| 0.126748 | 0.117716 | 0.129953 | 0.11859   | 0.126603 | 0.121212 | 0.108683  |
| 0.118007 | 0.108974 | 0.12296  | 0.113636  | 0.110577 | 0.115093 | 0.0999417 |
| 0.125728 | 0.115239 | 0.122815 | 0.110577  | 0.12704  | 0.111742 | 0.111742  |

| TDr_05_00530 | TDr_05_00632 | TDr_05_00694 | TDr_05_00807 | TDr_07_00157 | TDr_07_00732 | TDr_08_00001 |
|--------------|--------------|--------------|--------------|--------------|--------------|--------------|
| 0.111597     | 0.118153     | 0.122378     | 0.12398      | 0.117716     | 0.109266     | 0.123543     |
| 0.115822     | 0.119172     | 0.122815     | 0.125        | 0.118444     | 0.110577     | 0.122815     |
| 0.112617     | 0.116841     | 0.121358     | 0.126166     | 0.115822     | 0.104749     | 0.119901     |
| 0.114656     | 0.127331     | 0.127185     | 0.125874     | 0.118444     | 0.10708      | 0.118735     |
| 0.135344     | 0.128205     | 0.132721     | 0.143357     | 0.139132     | 0.132139     | 0.131556     |
| 0.130099     | 0.131119     | 0.13447      | 0.140443     | 0.132721     | 0.119027     | 0.131265     |
| 0.119172     | 0.109703     | 0.11859      | 0.101253     | 0.123543     | 0.111888     | 0.120047     |
| 0.113345     | 0.115239     | 0.125        | 0.126603     | 0.11655      | 0.109557     | 0.113636     |
| 0.0968823    | 0.107517     | 0.109411     | 0.119172     | 0.106789     | 0.0977564    | 0.106789     |
| 0.100524     | 0.104749     | 0.103438     | 0.108829     | 0.106935     | 0.103147     | 0.108683     |
| 0.117279     | 0.0827506    | 0.103584     | 0.121795     | 0.117279     | 0.104749     | 0.122232     |
| 0.114802     | 0.111742     | 0.120921     | 0.124854     | 0.109557     | 0.10169      | 0.113636     |
| 0.100233     | 0.106789     | 0.111888     | 0.124854     | 0.11451      | 0.103147     | 0.114219     |
| 0.130682     | 0.139569     | 0.145251     | 0.148893     | 0.134178     | 0.134761     | 0.137092     |
| 0.126166     | 0.125146     | 0.129953     | 0.135635     | 0.131702     | 0.117133     | 0.12704      |
| 0.115822     | 0.0944056    | 0.0910548    | 0.119464     | 0.123397     | 0.103001     | 0.116113     |
| 0.11451      | 0.115239     | 0.119464     | 0.127768     | 0.109848     | 0.104895     | 0.113636     |
| 0.142045     | 0.141608     | 0.144668     | 0.137821     | 0.152826     | 0.145542     | 0.14292      |
| 0.111451     | 0.113345     | 0.116404     | 0.123834     | 0.115822     | 0.103584     | 0.113199     |
| 0.207605     | 0.207751     | 0.210519     | 0.217366     | 0.20877      | 0.19799      | 0.205857     |
| 0.127914     | 0.124854     | 0.131702     | 0.128351     | 0.127622     | 0.117133     | 0.128497     |
| 0.12602      | 0.123834     | 0.13039      | 0.115676     | 0.11757      | 0.119901     | 0.129808     |
| 0.111888     | 0.108829     | 0.115967     | 0.118735     | 0.107809     | 0.0973193    | 0.114219     |
| 0.105041     | 0.108392     | 0.111451     | 0.128788     | 0.121649     | 0.092803     | 0.10912      |
| 0.10169      | 0.106206     | 0.108392     | 0.117279     | 0.104895     | 0.0917832    | 0.105186     |
| 0.130536     | 0.125728     | 0.133741     | 0.130099     | 0.13345      | 0.119755     | 0.128497     |
| 0.105478     | 0.101836     | 0.111888     | 0.12602      | 0.125291     | 0.106061     | 0.127331     |
| 0.11014      | 0.116987     | 0.118007     | 0.132139     | 0.12296      | 0.0821678    | 0.105478     |
| 0.113054     | 0.112908     | 0.113054     | 0.129808     | 0.125        | 0.105186     | 0.125291     |
| 0.0920746    | 0.116404     | 0.112471     | 0.129516     | 0.116841     | 0.0990676    | 0.124709     |
| 0.119318     | 0.113928     | 0.122232     | 0.127914     | 0.125146     | 0.115239     | 0.122232     |
| 0.104021     | 0.109703     | 0.110723     | 0.126603     | 0.122086     | 0.0941142    | 0.120921     |
| 0.0984848    | 0.101253     | 0.109848     | 0.115822     | 0.111014     | 0.0912005    | 0.111305     |
| 0            | 0.110286     | 0.107226     | 0.130973     | 0.118007     | 0.0984848    | 0.119464     |
| 0.110286     | 0            | 0.0808566    | 0.117716     | 0.122815     | 0.10708      | 0.120484     |
| 0.107226     | 0.0808566    | 0            | 0.128059     | 0.124417     | 0.110431     | 0.125291     |
| 0.130973     | 0.117716     | 0.128059     | 0            | 0.132139     | 0.127477     | 0.133304     |
| 0.118007     | 0.122815     | 0.124417     | 0.132139     | 0            | 0.111597     | 0.121212     |
| 0.0984848    | 0.10708      | 0.110431     | 0.127477     | 0.111597     | 0            | 0.103438     |
| 0.119464     | 0.120484     | 0.125291     | 0.133304     | 0.121212     | 0.103438     | 0            |
| 0.107517     | 0.110868     | 0.115385     | 0.124272     | 0.112471     | 0.0906177    | 0.090035     |
| 0.138986     | 0.133596     | 0.139569     | 0.140589     | 0.137821     | 0.125874     | 0.0964452    |

|          |          |          |          |          |           |           |
|----------|----------|----------|----------|----------|-----------|-----------|
| 0.137529 | 0.143794 | 0.141608 | 0.144668 | 0.137238 | 0.131702  | 0.110723  |
| 0.109703 | 0.112179 | 0.119027 | 0.125874 | 0.112617 | 0.103293  | 0.0861014 |
| 0.103875 | 0.102855 | 0.106498 | 0.111597 | 0.103293 | 0.100379  | 0.114365  |
| 0.109848 | 0.105332 | 0.113345 | 0.110286 | 0.111888 | 0.107809  | 0.114802  |
| 0.119755 | 0.118735 | 0.123543 | 0.135927 | 0.118881 | 0.097028  | 0.104604  |
| 0.130099 | 0.131993 | 0.134178 | 0.140152 | 0.131556 | 0.123689  | 0.107955  |
| 0.106789 | 0.113054 | 0.112908 | 0.127331 | 0.111742 | 0.0989219 | 0.083479  |
| 0.113054 | 0.114948 | 0.120047 | 0.11961  | 0.109557 | 0.104021  | 0.0920746 |
| 0.13884  | 0.136072 | 0.140589 | 0.126748 | 0.135344 | 0.133013  | 0.146707  |
| 0.123689 | 0.127914 | 0.13039  | 0.134907 | 0.129808 | 0.113782  | 0.117861  |
| 0.111014 | 0.113491 | 0.114802 | 0.121358 | 0.115385 | 0.0976107 | 0.0885781 |
| 0.117133 | 0.113199 | 0.122378 | 0.128351 | 0.120629 | 0.121503  | 0.124417  |
| 0.121212 | 0.119027 | 0.125874 | 0.124854 | 0.121212 | 0.105186  | 0.101981  |
| 0.132576 | 0.129808 | 0.133159 | 0.144959 | 0.137238 | 0.118881  | 0.119464  |
| 0.123689 | 0.115093 | 0.11961  | 0.130245 | 0.125437 | 0.11961   | 0.0925117 |
| 0.113199 | 0.110431 | 0.118444 | 0.124417 | 0.115239 | 0.0968823 | 0.0826049 |
| 0.112908 | 0.11451  | 0.115822 | 0.120338 | 0.117279 | 0.104167  | 0.0939685 |
| 0.11014  | 0.106789 | 0.111014 | 0.112908 | 0.11655  | 0.111014  | 0.115385  |
| 0.139569 | 0.130973 | 0.134907 | 0.136509 | 0.133159 | 0.118007  | 0.100233  |
| 0.137821 | 0.138549 | 0.136655 | 0.142337 | 0.137238 | 0.121212  | 0.0955711 |
| 0.16215  | 0.158508 | 0.167395 | 0.166667 | 0.161859 | 0.150495  | 0.143211  |
| 0.109703 | 0.114802 | 0.11757  | 0.126748 | 0.113782 | 0.0936772 | 0.074155  |
| 0.112908 | 0.109848 | 0.114948 | 0.125    | 0.113199 | 0.095134  | 0.08581   |
| 0.106789 | 0.106935 | 0.108829 | 0.126748 | 0.11553  | 0.100087  | 0.0919289 |
| 0.139277 | 0.133887 | 0.142191 | 0.126603 | 0.138695 | 0.137529  | 0.136946  |
| 0.106643 | 0.108537 | 0.113928 | 0.125437 | 0.117716 | 0.100524  | 0.0912005 |
| 0.135635 | 0.122669 | 0.133013 | 0.137238 | 0.133887 | 0.121358  | 0.106206  |
| 0.110286 | 0.106352 | 0.115239 | 0.110723 | 0.11961  | 0.114365  | 0.120775  |
| 0.11655  | 0.116987 | 0.118298 | 0.12602  | 0.117424 | 0.100233  | 0.0871212 |
| 0.147145 | 0.139714 | 0.143648 | 0.124563 | 0.143357 | 0.143065  | 0.149476  |
| 0.120921 | 0.119318 | 0.122669 | 0.13447  | 0.123543 | 0.104895  | 0.0871212 |
| 0.130099 | 0.128788 | 0.135344 | 0.143939 | 0.133887 | 0.125728  | 0.104167  |
| 0.12704  | 0.133304 | 0.131119 | 0.138258 | 0.128788 | 0.113345  | 0.119464  |
| 0.11553  | 0.119464 | 0.125146 | 0.122378 | 0.110868 | 0.110286  | 0.117861  |
| 0.109994 | 0.113054 | 0.116696 | 0.124417 | 0.109994 | 0.0954254 | 0.0776515 |
| 0.109994 | 0.112179 | 0.113199 | 0.122378 | 0.113782 | 0.0971737 | 0.0957168 |
| 0.133887 | 0.127331 | 0.133304 | 0.138112 | 0.130099 | 0.109994  | 0.088141  |
| 0.107226 | 0.106206 | 0.112471 | 0.122523 | 0.113054 | 0.101399  | 0.0882867 |
| 0.133304 | 0.137238 | 0.13884  | 0.143939 | 0.129808 | 0.116987  | 0.0948427 |
| 0.122815 | 0.118298 | 0.120775 | 0.131119 | 0.121066 | 0.101836  | 0.0893065 |
| 0.111742 | 0.118881 | 0.11961  | 0.129079 | 0.120484 | 0.0960082 | 0.10271   |
| 0.114656 | 0.119172 | 0.123397 | 0.125583 | 0.112034 | 0.10271   | 0.0936772 |
| 0.116987 | 0.123252 | 0.123689 | 0.133741 | 0.121941 | 0.100087  | 0.0849359 |
| 0.111451 | 0.113636 | 0.120484 | 0.131993 | 0.116404 | 0.095134  | 0.08581   |

|          |           |           |           |          |           |           |
|----------|-----------|-----------|-----------|----------|-----------|-----------|
| 0.113782 | 0.111888  | 0.118735  | 0.125     | 0.114948 | 0.105624  | 0.0759033 |
| 0.133741 | 0.128642  | 0.132867  | 0.136801  | 0.131702 | 0.119464  | 0.090035  |
| 0.104604 | 0.0957168 | 0.104312  | 0.118735  | 0.109557 | 0.094697  | 0.11859   |
| 0.106498 | 0.0914918 | 0.0919289 | 0.123252  | 0.106789 | 0.100379  | 0.113782  |
| 0.123106 | 0.118881  | 0.130973  | 0.103438  | 0.122523 | 0.120775  | 0.125146  |
| 0.119027 | 0.112762  | 0.120192  | 0.099359  | 0.128351 | 0.11961   | 0.126603  |
| 0.124854 | 0.113636  | 0.12398   | 0.113636  | 0.128934 | 0.127477  | 0.135344  |
| 0.134324 | 0.120192  | 0.125291  | 0.122523  | 0.138695 | 0.133159  | 0.142483  |
| 0.118444 | 0.114219  | 0.120192  | 0.107517  | 0.121066 | 0.109994  | 0.125146  |
| 0.182838 | 0.182692  | 0.184295  | 0.172786  | 0.181381 | 0.181964  | 0.182255  |
| 0.114219 | 0.10912   | 0.120629  | 0.103584  | 0.111305 | 0.108683  | 0.11655   |
| 0.129808 | 0.121212  | 0.127185  | 0.13141   | 0.139132 | 0.136801  | 0.14088   |
| 0.120192 | 0.111597  | 0.122523  | 0.122378  | 0.131265 | 0.129516  | 0.132721  |
| 0.134033 | 0.120775  | 0.128788  | 0.103875  | 0.134907 | 0.122378  | 0.136072  |
| 0.114073 | 0.102273  | 0.10912   | 0.109848  | 0.11757  | 0.106789  | 0.117279  |
| 0.130973 | 0.11655   | 0.122232  | 0.120047  | 0.132721 | 0.124272  | 0.133013  |
| 0.113782 | 0.112471  | 0.116987  | 0.11451   | 0.115239 | 0.109411  | 0.115822  |
| 0.119172 | 0.11961   | 0.125583  | 0.119318  | 0.125    | 0.117716  | 0.122086  |
| 0.115676 | 0.10912   | 0.117716  | 0.078817  | 0.114802 | 0.100524  | 0.112471  |
| 0.129371 | 0.122523  | 0.123252  | 0.128934  | 0.138986 | 0.126166  | 0.141026  |
| 0.104312 | 0.109994  | 0.114219  | 0.118153  | 0.110723 | 0.0999417 | 0.106935  |
| 0.135635 | 0.119464  | 0.128351  | 0.102564  | 0.133596 | 0.126894  | 0.139132  |
| 0.119172 | 0.115239  | 0.12296   | 0.10271   | 0.116841 | 0.112179  | 0.119172  |
| 0.124272 | 0.124417  | 0.128351  | 0.136946  | 0.124272 | 0.114073  | 0.0776515 |
| 0.122086 | 0.11961   | 0.125     | 0.100379  | 0.125874 | 0.120047  | 0.124417  |
| 0.112471 | 0.105332  | 0.110431  | 0.10067   | 0.112179 | 0.103438  | 0.117133  |
| 0.144231 | 0.139714  | 0.148019  | 0.134178  | 0.141317 | 0.142483  | 0.146562  |
| 0.112034 | 0.106352  | 0.114365  | 0.0996503 | 0.115239 | 0.106206  | 0.118444  |
| 0.112908 | 0.11014   | 0.116987  | 0.116259  | 0.114656 | 0.109994  | 0.117861  |
| 0.115967 | 0.113782  | 0.118298  | 0.125437  | 0.113636 | 0.106643  | 0.11859   |
| 0.136072 | 0.130682  | 0.128205  | 0.101253  | 0.136364 | 0.135781  | 0.143065  |
| 0.124709 | 0.119027  | 0.126457  | 0.120484  | 0.122669 | 0.112179  | 0.120921  |
| 0.1081   | 0.102418  | 0.111888  | 0.116404  | 0.110431 | 0.106643  | 0.116259  |
| 0.113928 | 0.105915  | 0.113928  | 0.116696  | 0.108683 | 0.105186  | 0.117716  |
| 0.117279 | 0.110431  | 0.121358  | 0.0935315 | 0.118735 | 0.110577  | 0.121358  |
| 0.119755 | 0.110868  | 0.11859   | 0.106789  | 0.123543 | 0.111014  | 0.125     |
| 0.113491 | 0.107226  | 0.114365  | 0.104021  | 0.118444 | 0.110868  | 0.122523  |
| 0.101399 | 0.100379  | 0.112471  | 0.118153  | 0.104895 | 0.101107  | 0.104312  |
| 0.10373  | 0.0992133 | 0.10373   | 0.114948  | 0.10169  | 0.0949883 | 0.104312  |
| 0.105915 | 0.106935  | 0.109411  | 0.115967  | 0.106206 | 0.105915  | 0.108537  |
| 0.11553  | 0.117133  | 0.122232  | 0.129953  | 0.11553  | 0.110577  | 0.12602   |
| 0.117424 | 0.113782  | 0.122378  | 0.124563  | 0.122086 | 0.121503  | 0.123834  |
| 0.104167 | 0.109848  | 0.113782  | 0.111597  | 0.10708  | 0.105332  | 0.110577  |
| 0.104895 | 0.107955  | 0.107809  | 0.109703  | 0.107226 | 0.094697  | 0.102855  |



|           |           |          |          |          |           |           |
|-----------|-----------|----------|----------|----------|-----------|-----------|
| 0.115676  | 0.110286  | 0.122086 | 0.11553  | 0.112762 | 0.108974  | 0.115093  |
| 0.105041  | 0.108392  | 0.11553  | 0.115385 | 0.102127 | 0.0965909 | 0.107955  |
| 0.121649  | 0.125583  | 0.130099 | 0.121212 | 0.122815 | 0.119901  | 0.127477  |
| 0.122232  | 0.125     | 0.127768 | 0.115967 | 0.12398  | 0.117861  | 0.135344  |
| 0.104749  | 0.108683  | 0.112908 | 0.113345 | 0.115822 | 0.100962  | 0.114365  |
| 0.109266  | 0.108537  | 0.113928 | 0.112908 | 0.108974 | 0.103147  | 0.112471  |
| 0.11014   | 0.109411  | 0.111888 | 0.115239 | 0.104604 | 0.103438  | 0.1081    |
| 0.100524  | 0.0968823 | 0.105186 | 0.112325 | 0.106643 | 0.0973193 | 0.104312  |
| 0.115093  | 0.118153  | 0.119755 | 0.115239 | 0.123252 | 0.114219  | 0.120629  |
| 0.102855  | 0.0995047 | 0.105478 | 0.109411 | 0.101107 | 0.0964452 | 0.106352  |
| 0.126894  | 0.122669  | 0.127768 | 0.141026 | 0.138549 | 0.123397  | 0.133304  |
| 0.125874  | 0.121358  | 0.131702 | 0.131556 | 0.131702 | 0.126748  | 0.114802  |
| 0.115676  | 0.121649  | 0.128497 | 0.129225 | 0.117424 | 0.11859   | 0.102273  |
| 0.116987  | 0.106935  | 0.116987 | 0.124709 | 0.116404 | 0.108537  | 0.0983392 |
| 0.106789  | 0.111888  | 0.119901 | 0.106643 | 0.11757  | 0.105915  | 0.116987  |
| 0.108974  | 0.104167  | 0.107517 | 0.110286 | 0.112762 | 0.097028  | 0.111014  |
| 0.108829  | 0.108392  | 0.110868 | 0.112762 | 0.109994 | 0.088141  | 0.104167  |
| 0.0852273 | 0.100524  | 0.104167 | 0.125583 | 0.106498 | 0.0837704 | 0.105332  |
| 0.120192  | 0.118298  | 0.121649 | 0.131119 | 0.11757  | 0.099796  | 0.111451  |
| 0.123689  | 0.124417  | 0.12398  | 0.136072 | 0.128934 | 0.0980478 | 0.100962  |
| 0.118298  | 0.106206  | 0.115093 | 0.114656 | 0.120921 | 0.111597  | 0.123834  |
| 0.122523  | 0.130536  | 0.120484 | 0.133159 | 0.120484 | 0.119901  | 0.132721  |
| 0.129079  | 0.12602   | 0.13549  | 0.105624 | 0.132284 | 0.130828  | 0.136655  |
| 0.19493   | 0.199738  | 0.205128 | 0.213432 | 0.195513 | 0.188228  | 0.199883  |
| 0.233246  | 0.243881  | 0.243735 | 0.25     | 0.239073 | 0.234703  | 0.243153  |
| 0.113636  | 0.11961   | 0.12296  | 0.127185 | 0.119172 | 0.0990676 | 0.111888  |
| 0.110868  | 0.111305  | 0.114948 | 0.123543 | 0.114948 | 0.0913462 | 0.10067   |
| 0.107955  | 0.0874126 | 0.10708  | 0.121212 | 0.108537 | 0.0948427 | 0.105041  |
| 0.107372  | 0.11451   | 0.119027 | 0.124417 | 0.115239 | 0.0971737 | 0.110286  |
| 0.127185  | 0.127914  | 0.133013 | 0.140443 | 0.133013 | 0.117861  | 0.127185  |
| 0.117861  | 0.113928  | 0.11961  | 0.125291 | 0.11553  | 0.0968823 | 0.107663  |
| 0.138403  | 0.134761  | 0.136364 | 0.148747 | 0.144814 | 0.125291  | 0.136946  |
| 0.114948  | 0.112762  | 0.120775 | 0.132284 | 0.116113 | 0.0962995 | 0.102127  |
| 0.121358  | 0.12704   | 0.129516 | 0.143648 | 0.128934 | 0.103293  | 0.105915  |
| 0.130828  | 0.122523  | 0.131702 | 0.137092 | 0.131119 | 0.116841  | 0.10373   |
| 0.130828  | 0.121649  | 0.128497 | 0.141463 | 0.132284 | 0.111888  | 0.118298  |
| 0.13549   | 0.125728  | 0.13345  | 0.136509 | 0.132284 | 0.123834  | 0.108392  |
| 0.11451   | 0.109703  | 0.119755 | 0.125728 | 0.11655  | 0.0996503 | 0.112471  |
| 0.113928  | 0.108537  | 0.117424 | 0.124272 | 0.110431 | 0.0973193 | 0.099359  |
| 0.123106  | 0.111305  | 0.121066 | 0.130245 | 0.119318 | 0.0983392 | 0.107663  |
| 0.103875  | 0.111888  | 0.117279 | 0.124126 | 0.109411 | 0.0849359 | 0.101836  |
| 0.109411  | 0.111305  | 0.118444 | 0.122669 | 0.111742 | 0.095134  | 0.0995047 |
| 0.114219  | 0.114073  | 0.121503 | 0.131556 | 0.118881 | 0.0891608 | 0.100524  |
| 0.127185  | 0.123252  | 0.129225 | 0.137821 | 0.129516 | 0.0995047 | 0.112908  |

|          |           |          |          |          |           |           |
|----------|-----------|----------|----------|----------|-----------|-----------|
| 0.134178 | 0.13549   | 0.133304 | 0.144522 | 0.13447  | 0.109703  | 0.118735  |
| 0.113345 | 0.116404  | 0.11859  | 0.126603 | 0.114802 | 0.100816  | 0.104895  |
| 0.114073 | 0.115967  | 0.121358 | 0.128788 | 0.115239 | 0.0907634 | 0.103875  |
| 0.127768 | 0.129371  | 0.13039  | 0.138695 | 0.128351 | 0.104749  | 0.114073  |
| 0.10708  | 0.109557  | 0.11961  | 0.12704  | 0.111451 | 0.0939685 | 0.108537  |
| 0.138403 | 0.135052  | 0.139277 | 0.149913 | 0.138695 | 0.124709  | 0.128497  |
| 0.132867 | 0.128059  | 0.134033 | 0.134761 | 0.128205 | 0.124126  | 0.134615  |
| 0.128059 | 0.127331  | 0.135052 | 0.143357 | 0.133304 | 0.116696  | 0.129225  |
| 0.109411 | 0.11014   | 0.118444 | 0.119172 | 0.108829 | 0.0863928 | 0.0989219 |
| 0.10373  | 0.10912   | 0.114219 | 0.120775 | 0.107517 | 0.0888695 | 0.102855  |
| 0.121649 | 0.120047  | 0.125437 | 0.130536 | 0.121649 | 0.106789  | 0.110286  |
| 0.119755 | 0.121358  | 0.126457 | 0.131847 | 0.117133 | 0.101399  | 0.113928  |
| 0.127331 | 0.124272  | 0.12704  | 0.136801 | 0.130245 | 0.112471  | 0.115093  |
| 0.118153 | 0.114219  | 0.122523 | 0.135198 | 0.119901 | 0.0933858 | 0.107372  |
| 0.120921 | 0.113199  | 0.116259 | 0.136509 | 0.11451  | 0.0897436 | 0.111305  |
| 0.118881 | 0.114365  | 0.126457 | 0.133304 | 0.12296  | 0.104895  | 0.113054  |
| 0.129953 | 0.123397  | 0.129662 | 0.138549 | 0.131993 | 0.113054  | 0.118007  |
| 0.125583 | 0.12602   | 0.131119 | 0.137383 | 0.13141  | 0.116841  | 0.115385  |
| 0.129808 | 0.129371  | 0.130682 | 0.145396 | 0.133596 | 0.109994  | 0.116987  |
| 0.127622 | 0.128934  | 0.130245 | 0.14088  | 0.130828 | 0.111305  | 0.104895  |
| 0.110723 | 0.111742  | 0.118007 | 0.126311 | 0.113345 | 0.0914918 | 0.100233  |
| 0.132867 | 0.135052  | 0.132576 | 0.139714 | 0.137238 | 0.113345  | 0.115676  |
| 0.108829 | 0.109266  | 0.114073 | 0.124126 | 0.113491 | 0.0916375 | 0.107955  |
| 0.113345 | 0.111451  | 0.11655  | 0.125437 | 0.115093 | 0.103147  | 0.0894522 |
| 0.113928 | 0.109703  | 0.11859  | 0.126894 | 0.11451  | 0.101107  | 0.111888  |
| 0.10912  | 0.113928  | 0.119318 | 0.128205 | 0.116404 | 0.0933858 | 0.106498  |
| 0.108246 | 0.109266  | 0.115822 | 0.123834 | 0.114365 | 0.0922203 | 0.100962  |
| 0.133741 | 0.12398   | 0.128788 | 0.141463 | 0.136655 | 0.113636  | 0.117716  |
| 0.112617 | 0.117133  | 0.117279 | 0.128788 | 0.118735 | 0.0992133 | 0.105041  |
| 0.129225 | 0.124126  | 0.128351 | 0.142483 | 0.132721 | 0.111451  | 0.118735  |
| 0.106498 | 0.112471  | 0.11961  | 0.128205 | 0.110868 | 0.0869755 | 0.100087  |
| 0.125583 | 0.114656  | 0.120047 | 0.131847 | 0.125583 | 0.103438  | 0.101399  |
| 0.121066 | 0.115093  | 0.123106 | 0.130536 | 0.125437 | 0.111742  | 0.116696  |
| 0.121066 | 0.112179  | 0.117861 | 0.126457 | 0.110286 | 0.10912   | 0.120484  |
| 0.111888 | 0.106498  | 0.109557 | 0.121941 | 0.114802 | 0.112762  | 0.11655   |
| 0.119027 | 0.117133  | 0.120484 | 0.129079 | 0.120484 | 0.116696  | 0.118444  |
| 0.119464 | 0.119027  | 0.126457 | 0.127768 | 0.118007 | 0.114219  | 0.119172  |
| 0.103147 | 0.0977564 | 0.111014 | 0.121941 | 0.11655  | 0.0979021 | 0.119464  |
| 0.116841 | 0.118735  | 0.117716 | 0.129225 | 0.129953 | 0.121212  | 0.135781  |
| 0.135635 | 0.121503  | 0.130682 | 0.134907 | 0.125146 | 0.125437  | 0.130099  |
| 0.100379 | 0.103438  | 0.102418 | 0.114219 | 0.106789 | 0.101836  | 0.108829  |
| 0.12296  | 0.130099  | 0.132284 | 0.130682 | 0.13141  | 0.121212  | 0.128788  |
| 0.112325 | 0.115676  | 0.112617 | 0.122669 | 0.119318 | 0.11757   | 0.123397  |
| 0.122523 | 0.123252  | 0.124854 | 0.132867 | 0.130682 | 0.121358  | 0.131265  |

|           |          |          |          |          |          |           |
|-----------|----------|----------|----------|----------|----------|-----------|
| 0.114948  | 0.116841 | 0.115239 | 0.121212 | 0.118444 | 0.115239 | 0.124272  |
| 0.108537  | 0.115093 | 0.114365 | 0.122669 | 0.11757  | 0.115822 | 0.125437  |
| 0.115967  | 0.112908 | 0.113636 | 0.121358 | 0.119755 | 0.11655  | 0.125291  |
| 0.120775  | 0.126748 | 0.125146 | 0.129079 | 0.123397 | 0.118444 | 0.128059  |
| 0.132139  | 0.133159 | 0.131847 | 0.133159 | 0.129516 | 0.13039  | 0.140006  |
| 0.117279  | 0.11451  | 0.117861 | 0.122086 | 0.115239 | 0.116404 | 0.124272  |
| 0.114656  | 0.115385 | 0.115822 | 0.121212 | 0.114365 | 0.110286 | 0.121358  |
| 0.128205  | 0.121066 | 0.128497 | 0.135052 | 0.133741 | 0.116841 | 0.126748  |
| 0.122815  | 0.117133 | 0.116987 | 0.132284 | 0.127185 | 0.122523 | 0.130682  |
| 0.104167  | 0.111597 | 0.110286 | 0.118881 | 0.114073 | 0.105624 | 0.117279  |
| 0.215326  | 0.224796 | 0.226399 | 0.231206 | 0.22465  | 0.215035 | 0.224942  |
| 0.121503  | 0.122523 | 0.120338 | 0.128059 | 0.119755 | 0.117424 | 0.126166  |
| 0.110723  | 0.107663 | 0.1081   | 0.123106 | 0.113636 | 0.111014 | 0.112471  |
| 0.126603  | 0.129079 | 0.130099 | 0.136364 | 0.129516 | 0.130099 | 0.13243   |
| 0.112034  | 0.110431 | 0.110577 | 0.122669 | 0.114656 | 0.109411 | 0.119901  |
| 0.125437  | 0.120338 | 0.125728 | 0.126748 | 0.127477 | 0.125146 | 0.13447   |
| 0.110286  | 0.11451  | 0.119901 | 0.126748 | 0.120192 | 0.113782 | 0.124854  |
| 0.114219  | 0.11553  | 0.120921 | 0.123397 | 0.120921 | 0.113928 | 0.123252  |
| 0.111305  | 0.116987 | 0.114802 | 0.127768 | 0.120338 | 0.113345 | 0.122669  |
| 0.117861  | 0.120921 | 0.125146 | 0.131119 | 0.130099 | 0.117279 | 0.135052  |
| 0.120921  | 0.124854 | 0.124417 | 0.129516 | 0.132867 | 0.120629 | 0.131993  |
| 0.125146  | 0.126457 | 0.12602  | 0.129079 | 0.124563 | 0.123106 | 0.128642  |
| 0.121941  | 0.123252 | 0.130099 | 0.123252 | 0.125728 | 0.124854 | 0.13243   |
| 0.109411  | 0.111597 | 0.114073 | 0.118007 | 0.112908 | 0.10912  | 0.119027  |
| 0.114365  | 0.119755 | 0.121066 | 0.124417 | 0.123106 | 0.110286 | 0.126603  |
| 0.129662  | 0.130099 | 0.126748 | 0.133304 | 0.130245 | 0.128205 | 0.135198  |
| 0.119027  | 0.115385 | 0.11961  | 0.120629 | 0.120775 | 0.115239 | 0.124854  |
| 0.137675  | 0.131702 | 0.131265 | 0.140152 | 0.136509 | 0.122232 | 0.099796  |
| 0.138986  | 0.141463 | 0.145105 | 0.141171 | 0.13549  | 0.134324 | 0.138403  |
| 0.118881  | 0.117279 | 0.119172 | 0.122232 | 0.118881 | 0.116259 | 0.125     |
| 0.12296   | 0.120775 | 0.128497 | 0.127477 | 0.120629 | 0.117424 | 0.126457  |
| 0.127768  | 0.127914 | 0.137966 | 0.131993 | 0.128059 | 0.121649 | 0.130973  |
| 0.0533217 | 0.116696 | 0.107226 | 0.134178 | 0.127331 | 0.110431 | 0.130245  |
| 0.125     | 0.131556 | 0.136072 | 0.133596 | 0.129371 | 0.115967 | 0.120921  |
| 0.138112  | 0.131847 | 0.138695 | 0.139132 | 0.13549  | 0.136946 | 0.138112  |
| 0.102418  | 0.104021 | 0.110868 | 0.117424 | 0.105332 | 0.101253 | 0.114365  |
| 0.121503  | 0.121941 | 0.127914 | 0.129516 | 0.127914 | 0.12296  | 0.112762  |
| 0.139132  | 0.142191 | 0.145833 | 0.14831  | 0.139714 | 0.133304 | 0.141754  |
| 0.109703  | 0.103438 | 0.10912  | 0.113928 | 0.118444 | 0.108537 | 0.117279  |
| 0.118153  | 0.123252 | 0.12398  | 0.13549  | 0.128934 | 0.114948 | 0.0954254 |
| 0.140734  | 0.128934 | 0.130828 | 0.143502 | 0.1419   | 0.128788 | 0.137821  |
| 0.119464  | 0.121066 | 0.127914 | 0.137966 | 0.12704  | 0.102273 | 0.0844988 |
| 0.136509  | 0.132867 | 0.134761 | 0.13986  | 0.133013 | 0.119318 | 0.13039   |
| 0.124709  | 0.120775 | 0.12296  | 0.133013 | 0.124417 | 0.115385 | 0.127622  |

|          |          |          |          |          |          |          |
|----------|----------|----------|----------|----------|----------|----------|
| 0.119027 | 0.11655  | 0.121358 | 0.125291 | 0.124563 | 0.123397 | 0.131556 |
| 0.127914 | 0.121941 | 0.127331 | 0.134761 | 0.12704  | 0.113636 | 0.124126 |
| 0.120775 | 0.106935 | 0.114948 | 0.117133 | 0.116696 | 0.111451 | 0.121358 |
| 0.125874 | 0.115239 | 0.124126 | 0.128351 | 0.132867 | 0.125291 | 0.132284 |
| 0.121795 | 0.125146 | 0.120047 | 0.12398  | 0.126166 | 0.121795 | 0.134033 |
| 0.123834 | 0.124272 | 0.126166 | 0.131265 | 0.135781 | 0.125583 | 0.137821 |
| 0.130245 | 0.121941 | 0.125    | 0.118735 | 0.125583 | 0.125583 | 0.13345  |
| 0.126166 | 0.11961  | 0.126748 | 0.126311 | 0.130245 | 0.120047 | 0.129371 |
| 0.144522 | 0.133013 | 0.13986  | 0.135635 | 0.144522 | 0.140734 | 0.151807 |
| 0.11014  | 0.120484 | 0.114219 | 0.124563 | 0.11859  | 0.11014  | 0.115093 |
| 0.110431 | 0.11116  | 0.115967 | 0.119901 | 0.118007 | 0.104312 | 0.111888 |
| 0.129953 | 0.121066 | 0.134615 | 0.119027 | 0.137821 | 0.127622 | 0.13141  |
| 0.114802 | 0.109994 | 0.113054 | 0.107663 | 0.117424 | 0.109557 | 0.11655  |
| 0.142045 | 0.13549  | 0.14933  | 0.128205 | 0.143794 | 0.138258 | 0.144085 |
| 0.156323 | 0.147145 | 0.150787 | 0.136072 | 0.152535 | 0.14933  | 0.154866 |
| 0.124563 | 0.125    | 0.130099 | 0.140152 | 0.125728 | 0.10708  | 0.109411 |
| 0.121503 | 0.118735 | 0.125874 | 0.133596 | 0.117716 | 0.102273 | 0.104312 |
| 0.111742 | 0.126748 | 0.126894 | 0.138112 | 0.129808 | 0.109703 | 0.135344 |
| 0.125583 | 0.126311 | 0.131702 | 0.133013 | 0.123252 | 0.125    | 0.129371 |
| 0.125    | 0.128351 | 0.13141  | 0.13884  | 0.125    | 0.106935 | 0.108683 |
| 0.126748 | 0.131265 | 0.12704  | 0.138258 | 0.139277 | 0.12296  | 0.132576 |
| 0.137821 | 0.128934 | 0.135781 | 0.13039  | 0.136072 | 0.125291 | 0.129371 |
| 0.120484 | 0.115385 | 0.119318 | 0.127622 | 0.121358 | 0.109994 | 0.10912  |
| 0.163899 | 0.158508 | 0.161859 | 0.15676  | 0.158071 | 0.155449 | 0.158362 |
| 0.114365 | 0.119172 | 0.11961  | 0.132867 | 0.125728 | 0.104749 | 0.10708  |
| 0.131847 | 0.126457 | 0.128059 | 0.134615 | 0.131847 | 0.12602  | 0.133304 |
| 0.115093 | 0.111742 | 0.120047 | 0.119901 | 0.125291 | 0.104604 | 0.113345 |
| 0.116259 | 0.120484 | 0.124126 | 0.137966 | 0.13345  | 0.107809 | 0.136364 |
| 0.111014 | 0.116987 | 0.119172 | 0.12602  | 0.124709 | 0.120921 | 0.124126 |
| 0.131556 | 0.135198 | 0.14088  | 0.136072 | 0.133887 | 0.130099 | 0.143502 |
| 0.142483 | 0.145833 | 0.149476 | 0.148747 | 0.148601 | 0.141026 | 0.145105 |
| 0.121066 | 0.130828 | 0.128351 | 0.139277 | 0.125437 | 0.113199 | 0.125146 |
| 0.136946 | 0.142628 | 0.143065 | 0.141463 | 0.139569 | 0.128497 | 0.134033 |
| 0.14729  | 0.146853 | 0.151078 | 0.159382 | 0.14729  | 0.128351 | 0.142337 |
| 0.144959 | 0.155012 | 0.155157 | 0.157634 | 0.146416 | 0.134761 | 0.146999 |
| 0.114802 | 0.099796 | 0.111014 | 0.118444 | 0.118007 | 0.112762 | 0.122378 |
| 0.133013 | 0.128205 | 0.135635 | 0.140152 | 0.143211 | 0.136218 | 0.141463 |
| 0.112617 | 0.117716 | 0.126894 | 0.129371 | 0.121066 | 0.10708  | 0.116987 |
| 0.11655  | 0.11961  | 0.123543 | 0.13243  | 0.115093 | 0.105478 | 0.120047 |
| 0.117279 | 0.125    | 0.122232 | 0.125291 | 0.121649 | 0.11116  | 0.116404 |
| 0.117861 | 0.124709 | 0.128642 | 0.133159 | 0.123397 | 0.110286 | 0.118735 |
| 0.117133 | 0.119027 | 0.124709 | 0.132721 | 0.122669 | 0.109557 | 0.119172 |
| 0.113636 | 0.11553  | 0.12296  | 0.130099 | 0.116841 | 0.10169  | 0.113054 |
| 0.115967 | 0.122523 | 0.126457 | 0.134178 | 0.126166 | 0.114219 | 0.129371 |

|           |           |          |          |          |           |          |
|-----------|-----------|----------|----------|----------|-----------|----------|
| 0.121358  | 0.127331  | 0.131265 | 0.135198 | 0.125437 | 0.113782  | 0.125146 |
| 0.0939685 | 0.109557  | 0.107955 | 0.120047 | 0.11116  | 0.0965909 | 0.109994 |
| 0.120775  | 0.130245  | 0.130973 | 0.136072 | 0.127185 | 0.116696  | 0.123689 |
| 0.115967  | 0.128059  | 0.131119 | 0.134178 | 0.119464 | 0.110431  | 0.121503 |
| 0.119464  | 0.11116   | 0.11859  | 0.131847 | 0.11655  | 0.0929487 | 0.107809 |
| 0.213869  | 0.214598  | 0.223485 | 0.230624 | 0.220862 | 0.210956  | 0.222028 |
| 0.141026  | 0.144668  | 0.141026 | 0.152535 | 0.148019 | 0.132867  | 0.138695 |
| 0.124272  | 0.131119  | 0.132139 | 0.142774 | 0.13447  | 0.117279  | 0.131265 |
| 0.123252  | 0.128934  | 0.129079 | 0.136218 | 0.126748 | 0.117424  | 0.128788 |
| 0.207459  | 0.218386  | 0.22028  | 0.224213 | 0.2162   | 0.205711  | 0.215618 |
| 0.121503  | 0.119901  | 0.127914 | 0.127185 | 0.115967 | 0.101107  | 0.117133 |
| 0.108246  | 0.116259  | 0.125437 | 0.138403 | 0.118735 | 0.114365  | 0.127185 |
| 0.124272  | 0.128497  | 0.130099 | 0.138112 | 0.128642 | 0.117279  | 0.128642 |
| 0.118007  | 0.119027  | 0.128788 | 0.13243  | 0.126166 | 0.112471  | 0.124126 |
| 0.243298  | 0.252768  | 0.254079 | 0.261509 | 0.252622 | 0.248834  | 0.254953 |
| 0.11553   | 0.122669  | 0.127477 | 0.118298 | 0.119901 | 0.111451  | 0.128642 |
| 0.115239  | 0.110431  | 0.114365 | 0.127622 | 0.110868 | 0.0907634 | 0.105041 |
| 0.127477  | 0.126748  | 0.132721 | 0.133159 | 0.123106 | 0.117279  | 0.127477 |
| 0.127185  | 0.128497  | 0.133887 | 0.134907 | 0.118735 | 0.112325  | 0.126894 |
| 0.125437  | 0.124417  | 0.129225 | 0.120047 | 0.122815 | 0.112034  | 0.131265 |
| 0.130973  | 0.12704   | 0.131265 | 0.136072 | 0.129808 | 0.11757   | 0.13039  |
| 0.11553   | 0.113054  | 0.120192 | 0.130536 | 0.113199 | 0.0942599 | 0.10912  |
| 0.115967  | 0.124272  | 0.12704  | 0.130973 | 0.125    | 0.109848  | 0.11859  |
| 0.122232  | 0.11859   | 0.127185 | 0.134324 | 0.132139 | 0.124272  | 0.127768 |
| 0.111451  | 0.117133  | 0.124854 | 0.129371 | 0.117861 | 0.104749  | 0.119318 |
| 0.114802  | 0.123397  | 0.127622 | 0.132139 | 0.121212 | 0.1081    | 0.120047 |
| 0.106206  | 0.109266  | 0.103875 | 0.111597 | 0.108829 | 0.106498  | 0.117279 |
| 0.141026  | 0.145251  | 0.14831  | 0.14933  | 0.147436 | 0.139277  | 0.147436 |
| 0.120338  | 0.122523  | 0.127914 | 0.116404 | 0.124417 | 0.111014  | 0.129662 |
| 0.116259  | 0.123106  | 0.124417 | 0.142628 | 0.122669 | 0.118881  | 0.13141  |
| 0.190268  | 0.192745  | 0.199301 | 0.20877  | 0.191725 | 0.182401  | 0.19493  |
| 0.204254  | 0.209645  | 0.213578 | 0.221008 | 0.206294 | 0.199883  | 0.210956 |
| 0.119755  | 0.122232  | 0.130245 | 0.134761 | 0.125874 | 0.110723  | 0.12296  |
| 0.115676  | 0.116987  | 0.125583 | 0.127768 | 0.11859  | 0.107517  | 0.114802 |
| 0.135781  | 0.139423  | 0.142191 | 0.143211 | 0.138986 | 0.128205  | 0.136072 |
| 0.117424  | 0.114365  | 0.116259 | 0.13039  | 0.111597 | 0.0909091 | 0.106061 |
| 0.118153  | 0.123834  | 0.128642 | 0.120629 | 0.122523 | 0.112325  | 0.130682 |
| 0.132576  | 0.13447   | 0.130536 | 0.140297 | 0.135781 | 0.126748  | 0.128205 |
| 0.220862  | 0.229167  | 0.232226 | 0.239365 | 0.229895 | 0.218531  | 0.231061 |
| 0.113345  | 0.123397  | 0.121212 | 0.133304 | 0.119172 | 0.107517  | 0.119755 |
| 0.20877   | 0.209207  | 0.212267 | 0.217075 | 0.209062 | 0.196824  | 0.206731 |
| 0.104604  | 0.0977564 | 0.107226 | 0.116987 | 0.108683 | 0.0961538 | 0.111597 |
| 0.110286  | 0.120047  | 0.11961  | 0.127622 | 0.118444 | 0.111451  | 0.11757  |
| 0.11859   | 0.123397  | 0.126748 | 0.125146 | 0.118007 | 0.104895  | 0.118298 |

|          |          |          |          |          |           |          |
|----------|----------|----------|----------|----------|-----------|----------|
| 0.114219 | 0.116987 | 0.122378 | 0.129225 | 0.117133 | 0.105769  | 0.115676 |
| 0.205565 | 0.214452 | 0.214598 | 0.222902 | 0.211976 | 0.202069  | 0.21285  |
| 0.130682 | 0.137821 | 0.139423 | 0.145688 | 0.137383 | 0.122815  | 0.128642 |
| 0.10912  | 0.115093 | 0.122232 | 0.125    | 0.112034 | 0.108537  | 0.121066 |
| 0.121358 | 0.131119 | 0.130973 | 0.138112 | 0.130099 | 0.116987  | 0.123106 |
| 0.120192 | 0.115967 | 0.112908 | 0.137529 | 0.123397 | 0.113199  | 0.125146 |
| 0.112034 | 0.117424 | 0.127477 | 0.129662 | 0.119027 | 0.10708   | 0.11961  |
| 0.108392 | 0.095134 | 0.105478 | 0.116987 | 0.111888 | 0.0976107 | 0.111597 |
| 0.121795 | 0.11553  | 0.122669 | 0.133304 | 0.115093 | 0.0987762 | 0.112471 |
| 0.109557 | 0.119901 | 0.12296  | 0.141171 | 0.122378 | 0.115093  | 0.128788 |
| 0.113928 | 0.121066 | 0.126457 | 0.130973 | 0.119172 | 0.106643  | 0.116259 |
| 0.109411 | 0.114802 | 0.118153 | 0.125    | 0.116696 | 0.107663  | 0.119901 |
| 0.187646 | 0.194493 | 0.201632 | 0.207605 | 0.190559 | 0.184149  | 0.192599 |
| 0.128351 | 0.129079 | 0.133887 | 0.136655 | 0.124563 | 0.116404  | 0.127477 |
| 0.122086 | 0.13039  | 0.136364 | 0.137675 | 0.133741 | 0.122669  | 0.130828 |
| 0.116696 | 0.125    | 0.131265 | 0.138403 | 0.121941 | 0.112325  | 0.12398  |
| 0.120047 | 0.121358 | 0.127622 | 0.118153 | 0.117133 | 0.112471  | 0.133159 |
| 0.118007 | 0.13039  | 0.131993 | 0.136509 | 0.127914 | 0.111597  | 0.120629 |
| 0.113928 | 0.100962 | 0.11014  | 0.116987 | 0.11451  | 0.10373   | 0.117133 |
| 0.110868 | 0.106643 | 0.11116  | 0.122669 | 0.110868 | 0.10271   | 0.118153 |
| 0.120484 | 0.113345 | 0.121066 | 0.133741 | 0.116404 | 0.092803  | 0.109994 |
| 0.122378 | 0.129808 | 0.13345  | 0.137383 | 0.129662 | 0.114219  | 0.128205 |
| 0.122669 | 0.125146 | 0.130536 | 0.134178 | 0.117133 | 0.112179  | 0.125291 |
| 0.117279 | 0.124417 | 0.130099 | 0.136655 | 0.121941 | 0.109703  | 0.120484 |
| 0.123834 | 0.127768 | 0.130828 | 0.141754 | 0.124126 | 0.116259  | 0.126166 |
| 0.135635 | 0.136946 | 0.136218 | 0.143648 | 0.140006 | 0.129808  | 0.137383 |
| 0.109411 | 0.113928 | 0.120192 | 0.114802 | 0.112325 | 0.103293  | 0.123397 |
| 0.131993 | 0.141754 | 0.136655 | 0.146707 | 0.142483 | 0.129953  | 0.136655 |
| 0.115967 | 0.118153 | 0.12704  | 0.129808 | 0.118881 | 0.106643  | 0.117424 |
| 0.119172 | 0.121066 | 0.122669 | 0.137383 | 0.121503 | 0.111888  | 0.117133 |
| 0.120775 | 0.128497 | 0.130099 | 0.138403 | 0.122815 | 0.113491  | 0.11553  |
| 0.121066 | 0.119464 | 0.123106 | 0.138695 | 0.116987 | 0.0992133 | 0.112325 |
| 0.187209 | 0.195513 | 0.199155 | 0.203963 | 0.194202 | 0.182838  | 0.192745 |
| 0.107809 | 0.111742 | 0.117133 | 0.122232 | 0.11014  | 0.103147  | 0.116259 |
| 0.107226 | 0.11116  | 0.115385 | 0.123689 | 0.113636 | 0.0999417 | 0.106643 |
| 0.113054 | 0.120192 | 0.119464 | 0.136801 | 0.119464 | 0.115967  | 0.128205 |
| 0.177448 | 0.184003 | 0.187063 | 0.194493 | 0.180944 | 0.173077  | 0.183858 |
| 0.128351 | 0.133741 | 0.137092 | 0.125    | 0.128059 | 0.120192  | 0.138549 |
| 0.134761 | 0.135198 | 0.141171 | 0.127331 | 0.138549 | 0.131556  | 0.147582 |
| 0.145979 | 0.145833 | 0.149767 | 0.148456 | 0.150932 | 0.141026  | 0.147145 |
| 0.113928 | 0.114656 | 0.120921 | 0.111451 | 0.114802 | 0.102564  | 0.120338 |
| 0.121066 | 0.129079 | 0.131556 | 0.137238 | 0.129225 | 0.114365  | 0.121649 |
| 0.208042 | 0.215763 | 0.220862 | 0.227418 | 0.2162   | 0.204545  | 0.219114 |
| 0.11859  | 0.129808 | 0.125291 | 0.14088  | 0.12704  | 0.11451   | 0.129662 |

|           |          |          |          |          |           |          |
|-----------|----------|----------|----------|----------|-----------|----------|
| 0.125146  | 0.131119 | 0.133013 | 0.136655 | 0.13243  | 0.116113  | 0.124563 |
| 0.110286  | 0.115385 | 0.118735 | 0.125291 | 0.117861 | 0.105624  | 0.117279 |
| 0.169435  | 0.175699 | 0.175845 | 0.182984 | 0.173514 | 0.162442  | 0.172931 |
| 0.112617  | 0.12296  | 0.120775 | 0.128788 | 0.118735 | 0.105041  | 0.122523 |
| 0.147145  | 0.137675 | 0.141608 | 0.146707 | 0.152098 | 0.148601  | 0.152681 |
| 0.111305  | 0.118735 | 0.113928 | 0.127185 | 0.121503 | 0.111888  | 0.117133 |
| 0.18852   | 0.191871 | 0.198135 | 0.206148 | 0.194056 | 0.18211   | 0.194347 |
| 0.114802  | 0.11961  | 0.126748 | 0.116404 | 0.115093 | 0.108683  | 0.128788 |
| 0.102273  | 0.10708  | 0.113345 | 0.119027 | 0.109848 | 0.099359  | 0.110431 |
| 0.119901  | 0.123834 | 0.123689 | 0.13345  | 0.120192 | 0.115239  | 0.121649 |
| 0.1081    | 0.118444 | 0.119172 | 0.136509 | 0.115676 | 0.104021  | 0.125291 |
| 0.105478  | 0.118735 | 0.120338 | 0.135344 | 0.120921 | 0.112179  | 0.126166 |
| 0.124126  | 0.124854 | 0.130245 | 0.13039  | 0.125874 | 0.115967  | 0.128788 |
| 0.111742  | 0.119172 | 0.124563 | 0.128205 | 0.117279 | 0.105624  | 0.118444 |
| 0.187646  | 0.19391  | 0.199301 | 0.204691 | 0.195804 | 0.183275  | 0.194347 |
| 0.123397  | 0.124126 | 0.13243  | 0.138695 | 0.126894 | 0.119901  | 0.12602  |
| 0.113345  | 0.115822 | 0.119464 | 0.131847 | 0.114802 | 0.109848  | 0.11451  |
| 0.209353  | 0.217949 | 0.219551 | 0.228147 | 0.215472 | 0.206439  | 0.217512 |
| 0.129516  | 0.129079 | 0.133596 | 0.13549  | 0.120484 | 0.114948  | 0.128642 |
| 0.114802  | 0.123106 | 0.126166 | 0.128351 | 0.119172 | 0.106935  | 0.119755 |
| 0.111597  | 0.115239 | 0.125583 | 0.125728 | 0.117716 | 0.102564  | 0.113636 |
| 0.135344  | 0.136946 | 0.140589 | 0.144231 | 0.142337 | 0.130682  | 0.13243  |
| 0.1875    | 0.194347 | 0.19799  | 0.202797 | 0.194493 | 0.182255  | 0.192162 |
| 0.117716  | 0.113782 | 0.122669 | 0.130682 | 0.115385 | 0.0938228 | 0.1081   |
| 0.130536  | 0.133596 | 0.135781 | 0.141463 | 0.137238 | 0.123252  | 0.130828 |
| 0.114802  | 0.116987 | 0.125874 | 0.131556 | 0.115967 | 0.105186  | 0.116841 |
| 0.113636  | 0.116696 | 0.125874 | 0.130099 | 0.113928 | 0.102564  | 0.11655  |
| 0.114365  | 0.114219 | 0.124854 | 0.127914 | 0.116696 | 0.105041  | 0.117279 |
| 0.117424  | 0.122232 | 0.126166 | 0.132721 | 0.12296  | 0.110431  | 0.122378 |
| 0.10067   | 0.109266 | 0.107372 | 0.120921 | 0.109994 | 0.0983392 | 0.107372 |
| 0.11757   | 0.120921 | 0.129225 | 0.114802 | 0.116987 | 0.110286  | 0.129225 |
| 0.135344  | 0.130536 | 0.136218 | 0.138112 | 0.138258 | 0.125437  | 0.131847 |
| 0.116404  | 0.118007 | 0.129516 | 0.116841 | 0.118153 | 0.109994  | 0.126603 |
| 0.123543  | 0.118735 | 0.113928 | 0.14088  | 0.129079 | 0.117716  | 0.127331 |
| 0.193328  | 0.199592 | 0.203526 | 0.210664 | 0.196533 | 0.187209  | 0.199738 |
| 0.120921  | 0.126603 | 0.128205 | 0.136509 | 0.121795 | 0.113928  | 0.12296  |
| 0.126894  | 0.136655 | 0.13447  | 0.141317 | 0.135635 | 0.121941  | 0.127768 |
| 0.111305  | 0.114365 | 0.125291 | 0.126603 | 0.116259 | 0.104604  | 0.118298 |
| 0.0980478 | 0.107517 | 0.107663 | 0.119172 | 0.108246 | 0.0962995 | 0.108537 |
| 0.122815  | 0.112762 | 0.122523 | 0.11859  | 0.123689 | 0.113782  | 0.121941 |
| 0.116841  | 0.112908 | 0.119755 | 0.133596 | 0.116259 | 0.0926573 | 0.107517 |
| 0.125291  | 0.12602  | 0.135198 | 0.137966 | 0.13345  | 0.123543  | 0.131993 |
| 0.124272  | 0.126166 | 0.133304 | 0.137529 | 0.123689 | 0.112325  | 0.121358 |
| 0.115822  | 0.109557 | 0.116404 | 0.125874 | 0.110577 | 0.0898893 | 0.109411 |

|          |           |          |          |          |           |          |
|----------|-----------|----------|----------|----------|-----------|----------|
| 0.104604 | 0.105041  | 0.111305 | 0.118153 | 0.106061 | 0.090035  | 0.104021 |
| 0.102127 | 0.11014   | 0.114948 | 0.119755 | 0.111451 | 0.0930944 | 0.111742 |
| 0.1081   | 0.0995047 | 0.106061 | 0.11757  | 0.11014  | 0.0987762 | 0.113928 |
| 0.121941 | 0.127331  | 0.131847 | 0.11655  | 0.125146 | 0.11757   | 0.133013 |
| 0.113928 | 0.113491  | 0.118881 | 0.134178 | 0.115093 | 0.0929487 | 0.113928 |
| 0.113782 | 0.119464  | 0.12398  | 0.131119 | 0.119901 | 0.106498  | 0.117279 |
| 0.111451 | 0.108392  | 0.116113 | 0.127622 | 0.108537 | 0.0875583 | 0.10708  |
| 0.112179 | 0.115239  | 0.125    | 0.128351 | 0.119172 | 0.103147  | 0.117133 |
| 0.102418 | 0.110723  | 0.116696 | 0.121503 | 0.109411 | 0.102418  | 0.112617 |
| 0.112908 | 0.119172  | 0.129225 | 0.131119 | 0.120484 | 0.105332  | 0.119901 |
| 0.119318 | 0.117133  | 0.126603 | 0.132867 | 0.118735 | 0.107372  | 0.122815 |
| 0.121649 | 0.125583  | 0.133013 | 0.136364 | 0.124563 | 0.112908  | 0.122815 |
| 0.104458 | 0.114219  | 0.119901 | 0.130245 | 0.119901 | 0.10912   | 0.121358 |
| 0.101399 | 0.112617  | 0.111597 | 0.121066 | 0.112762 | 0.0987762 | 0.110431 |
| 0.112034 | 0.118298  | 0.128642 | 0.128788 | 0.11757  | 0.103001  | 0.116987 |
| 0.124854 | 0.127622  | 0.128642 | 0.141026 | 0.124272 | 0.119027  | 0.126603 |
| 0.125874 | 0.124272  | 0.127622 | 0.135344 | 0.121212 | 0.115967  | 0.119464 |
| 0.102127 | 0.100816  | 0.107372 | 0.120338 | 0.10708  | 0.102418  | 0.112325 |
| 0.112617 | 0.115385  | 0.12602  | 0.124709 | 0.11757  | 0.107663  | 0.116696 |
| 0.117133 | 0.128642  | 0.126166 | 0.133596 | 0.126457 | 0.110723  | 0.119755 |
| 0.108392 | 0.0995047 | 0.105769 | 0.118153 | 0.109557 | 0.0999417 | 0.115676 |
| 0.119172 | 0.128059  | 0.130245 | 0.136218 | 0.124417 | 0.111305  | 0.122086 |
| 0.108683 | 0.118735  | 0.122669 | 0.135927 | 0.115967 | 0.113928  | 0.126166 |
| 0.102273 | 0.113199  | 0.110431 | 0.122523 | 0.11451  | 0.101981  | 0.110431 |
| 0.113636 | 0.119027  | 0.121795 | 0.132139 | 0.119464 | 0.107809  | 0.120047 |
| 0.100962 | 0.108392  | 0.11757  | 0.122378 | 0.109411 | 0.10067   | 0.115239 |
| 0.118881 | 0.129808  | 0.130536 | 0.14088  | 0.128497 | 0.114802  | 0.126748 |
| 0.115676 | 0.121649  | 0.123252 | 0.135052 | 0.129371 | 0.111888  | 0.12704  |
| 0.11757  | 0.124126  | 0.128059 | 0.127914 | 0.118153 | 0.10912   | 0.117279 |
| 0.189831 | 0.198427  | 0.20236  | 0.207751 | 0.198281 | 0.187209  | 0.198864 |
| 0.167395 | 0.170746  | 0.177593 | 0.177156 | 0.170017 | 0.157488  | 0.169143 |
| 0.117861 | 0.120338  | 0.125437 | 0.117424 | 0.116404 | 0.108246  | 0.129225 |
| 0.11859  | 0.119027  | 0.125583 | 0.136218 | 0.118007 | 0.104604  | 0.11451  |
| 0.142774 | 0.139423  | 0.141317 | 0.13243  | 0.142774 | 0.134324  | 0.150932 |
| 0.128059 | 0.122378  | 0.130682 | 0.130536 | 0.131556 | 0.129225  | 0.131556 |
| 0.128497 | 0.123397  | 0.135198 | 0.131847 | 0.127914 | 0.117424  | 0.124126 |
| 0.11757  | 0.122378  | 0.131265 | 0.132576 | 0.11961  | 0.110868  | 0.120775 |
| 0.103001 | 0.108974  | 0.108537 | 0.113345 | 0.10708  | 0.104167  | 0.116696 |
| 0.118735 | 0.120629  | 0.127185 | 0.13549  | 0.121941 | 0.116113  | 0.118444 |
| 0.20134  | 0.207022  | 0.210373 | 0.21722  | 0.20542  | 0.19493   | 0.207459 |
| 0.123689 | 0.115676  | 0.121066 | 0.134615 | 0.116113 | 0.0936772 | 0.110868 |
| 0.116841 | 0.11961   | 0.125291 | 0.132721 | 0.117716 | 0.102273  | 0.110723 |
| 0.11014  | 0.110868  | 0.120338 | 0.127477 | 0.111305 | 0.097028  | 0.113928 |
| 0.11553  | 0.117716  | 0.11553  | 0.134033 | 0.118735 | 0.10708   | 0.121358 |



|           |          |          |          |          |           |          |
|-----------|----------|----------|----------|----------|-----------|----------|
| 0.185315  | 0.189248 | 0.195513 | 0.201777 | 0.182984 | 0.176282  | 0.187063 |
| 0.241259  | 0.249272 | 0.252622 | 0.260052 | 0.249709 | 0.242716  | 0.251457 |
| 0.120921  | 0.130973 | 0.136946 | 0.138258 | 0.127914 | 0.115967  | 0.126457 |
| 0.120338  | 0.120775 | 0.125291 | 0.138549 | 0.121212 | 0.112471  | 0.119464 |
| 0.117424  | 0.123689 | 0.125874 | 0.116696 | 0.11451  | 0.108974  | 0.128497 |
| 0.106789  | 0.113636 | 0.121358 | 0.132576 | 0.116696 | 0.10912   | 0.122232 |
| 0.113054  | 0.109411 | 0.117133 | 0.128059 | 0.107226 | 0.090035  | 0.105478 |
| 0.117279  | 0.11451  | 0.121649 | 0.131702 | 0.118735 | 0.109411  | 0.11553  |
| 0.115385  | 0.118444 | 0.124417 | 0.133304 | 0.119755 | 0.106935  | 0.117424 |
| 0.115093  | 0.109703 | 0.116841 | 0.127185 | 0.111888 | 0.0871212 | 0.105186 |
| 0.116404  | 0.122669 | 0.119901 | 0.127914 | 0.116987 | 0.108537  | 0.118735 |
| 0.106352  | 0.105624 | 0.11014  | 0.12602  | 0.109266 | 0.106643  | 0.11655  |
| 0.10067   | 0.114219 | 0.109994 | 0.121795 | 0.114656 | 0.099796  | 0.11116  |
| 0.120629  | 0.128351 | 0.132576 | 0.137092 | 0.126457 | 0.117133  | 0.12704  |
| 0.117861  | 0.127914 | 0.129808 | 0.13345  | 0.121649 | 0.112325  | 0.123689 |
| 0.111742  | 0.108392 | 0.11553  | 0.125291 | 0.109703 | 0.103293  | 0.112325 |
| 0.123106  | 0.115676 | 0.124272 | 0.121503 | 0.124272 | 0.11757   | 0.127185 |
| 0.117279  | 0.124709 | 0.123397 | 0.143065 | 0.129225 | 0.12398   | 0.135635 |
| 0.114802  | 0.116696 | 0.127622 | 0.127477 | 0.115385 | 0.104895  | 0.116259 |
| 0.118735  | 0.118881 | 0.125146 | 0.122086 | 0.119027 | 0.10708   | 0.113199 |
| 0.126603  | 0.127331 | 0.133596 | 0.138986 | 0.131847 | 0.119318  | 0.126603 |
| 0.205128  | 0.21285  | 0.214452 | 0.222756 | 0.214452 | 0.202506  | 0.214161 |
| 0.110286  | 0.119755 | 0.125728 | 0.129953 | 0.121066 | 0.105915  | 0.114948 |
| 0.0996503 | 0.11116  | 0.108392 | 0.122815 | 0.111014 | 0.100524  | 0.108974 |
| 0.119464  | 0.125728 | 0.130828 | 0.137383 | 0.121212 | 0.112762  | 0.125583 |
| 0.128934  | 0.131993 | 0.135052 | 0.138403 | 0.122523 | 0.114656  | 0.13039  |
| 0.116113  | 0.112762 | 0.114073 | 0.13345  | 0.116696 | 0.105332  | 0.119318 |
| 0.198281  | 0.204545 | 0.208188 | 0.215618 | 0.200903 | 0.194493  | 0.207605 |
| 0.119172  | 0.132139 | 0.133159 | 0.138258 | 0.126748 | 0.113054  | 0.126748 |
| 0.111451  | 0.11451  | 0.125437 | 0.128497 | 0.116113 | 0.103293  | 0.114656 |
| 0.0949883 | 0.10912  | 0.1081   | 0.128642 | 0.123543 | 0.0885781 | 0.126748 |
| 0.10373   | 0.113491 | 0.118007 | 0.130973 | 0.114802 | 0.107226  | 0.121212 |
| 0.118881  | 0.127185 | 0.129079 | 0.137383 | 0.124417 | 0.113054  | 0.123543 |
| 0.108392  | 0.11553  | 0.118881 | 0.124854 | 0.119172 | 0.107226  | 0.115676 |
| 0.107809  | 0.106206 | 0.113345 | 0.12602  | 0.107809 | 0.105769  | 0.113345 |
| 0.122378  | 0.12398  | 0.130536 | 0.133013 | 0.120047 | 0.113054  | 0.127331 |
| 0.197407  | 0.202506 | 0.206731 | 0.213287 | 0.202943 | 0.193036  | 0.203234 |
| 0.111305  | 0.119901 | 0.121503 | 0.126603 | 0.115385 | 0.107226  | 0.111305 |
| 0.193619  | 0.201632 | 0.2044   | 0.210373 | 0.195076 | 0.191288  | 0.201195 |
| 0.191142  | 0.200321 | 0.202214 | 0.209353 | 0.194347 | 0.189977  | 0.197844 |
| 0.115967  | 0.121358 | 0.125291 | 0.13884  | 0.126457 | 0.115676  | 0.130828 |
| 0.13549   | 0.135052 | 0.136364 | 0.13884  | 0.128788 | 0.123252  | 0.134615 |
| 0.101107  | 0.100087 | 0.105186 | 0.117279 | 0.106061 | 0.0984848 | 0.1081   |
| 0.111451  | 0.115093 | 0.11961  | 0.128497 | 0.115239 | 0.104749  | 0.113199 |

|           |          |          |          |          |           |          |
|-----------|----------|----------|----------|----------|-----------|----------|
| 0.113345  | 0.122815 | 0.126166 | 0.129808 | 0.119172 | 0.107226  | 0.121212 |
| 0.113928  | 0.116987 | 0.128788 | 0.129808 | 0.120629 | 0.105769  | 0.11859  |
| 0.110723  | 0.108246 | 0.113636 | 0.121066 | 0.108974 | 0.0891608 | 0.102564 |
| 0.112179  | 0.106789 | 0.113054 | 0.130099 | 0.111305 | 0.0903263 | 0.104604 |
| 0.125146  | 0.130828 | 0.135052 | 0.13986  | 0.13039  | 0.120192  | 0.125437 |
| 0.107226  | 0.121941 | 0.124126 | 0.133304 | 0.118881 | 0.113345  | 0.127331 |
| 0.111742  | 0.113054 | 0.124563 | 0.123252 | 0.114948 | 0.10067   | 0.111451 |
| 0.119464  | 0.127477 | 0.130245 | 0.13447  | 0.124126 | 0.111597  | 0.120047 |
| 0.0995047 | 0.103147 | 0.106498 | 0.115967 | 0.106789 | 0.0957168 | 0.108829 |
| 0.126748  | 0.13243  | 0.130828 | 0.137092 | 0.133741 | 0.120629  | 0.12296  |
| 0.113636  | 0.117861 | 0.121795 | 0.115822 | 0.113928 | 0.109266  | 0.123834 |
| 0.129516  | 0.13549  | 0.137383 | 0.143065 | 0.138549 | 0.125728  | 0.132721 |
| 0.254225  | 0.263112 | 0.26384  | 0.269522 | 0.261801 | 0.253351  | 0.264132 |
| 0.121941  | 0.119172 | 0.123689 | 0.128497 | 0.127185 | 0.118153  | 0.128059 |
| 0.119172  | 0.124272 | 0.121503 | 0.133013 | 0.129371 | 0.121795  | 0.128205 |
| 0.215763  | 0.223485 | 0.226544 | 0.232517 | 0.221591 | 0.216055  | 0.223339 |
| 0.125291  | 0.128934 | 0.132284 | 0.129808 | 0.13141  | 0.122669  | 0.125583 |
| 0.224942  | 0.235577 | 0.238345 | 0.242279 | 0.233683 | 0.228147  | 0.233683 |
| 0.11116   | 0.113928 | 0.119027 | 0.124709 | 0.116696 | 0.110286  | 0.118444 |
| 0.124417  | 0.123106 | 0.133159 | 0.138258 | 0.129371 | 0.115093  | 0.126748 |
| 0.119172  | 0.120484 | 0.127914 | 0.133887 | 0.115676 | 0.108392  | 0.12296  |
| 0.111014  | 0.11757  | 0.123834 | 0.139423 | 0.122669 | 0.11655   | 0.12704  |
| 0.200758  | 0.206148 | 0.211538 | 0.218677 | 0.206002 | 0.19697   | 0.208625 |
| 0.126166  | 0.134761 | 0.135781 | 0.140589 | 0.135198 | 0.118881  | 0.127622 |
| 0.118298  | 0.129516 | 0.130245 | 0.133304 | 0.12296  | 0.108392  | 0.123834 |
| 0.224505  | 0.230769 | 0.233537 | 0.23951  | 0.228293 | 0.219843  | 0.23208  |
| 0.118298  | 0.114656 | 0.122086 | 0.13243  | 0.111597 | 0.0932401 | 0.1081   |
| 0.199738  | 0.203671 | 0.20877  | 0.215909 | 0.202943 | 0.191579  | 0.202943 |
| 0.11757   | 0.114802 | 0.120484 | 0.130828 | 0.11757  | 0.0957168 | 0.114073 |
| 0.11757   | 0.118007 | 0.127185 | 0.130828 | 0.119318 | 0.103293  | 0.118735 |
| 0.107226  | 0.118153 | 0.114802 | 0.124854 | 0.12296  | 0.109557  | 0.11451  |
| 0.115967  | 0.122815 | 0.126457 | 0.136801 | 0.125291 | 0.122086  | 0.13141  |
| 0.119318  | 0.12296  | 0.124854 | 0.127331 | 0.114656 | 0.109411  | 0.122815 |
| 0.156031  | 0.164336 | 0.168269 | 0.173951 | 0.163024 | 0.151952  | 0.163024 |
| 0.113491  | 0.124709 | 0.126311 | 0.132576 | 0.120484 | 0.108246  | 0.11553  |
| 0.125146  | 0.126166 | 0.132721 | 0.135781 | 0.120192 | 0.113199  | 0.129516 |
| 0.121941  | 0.125    | 0.125728 | 0.13549  | 0.124563 | 0.112034  | 0.124854 |
| 0.126894  | 0.130536 | 0.126894 | 0.13986  | 0.132139 | 0.12398   | 0.126603 |
| 0.195513  | 0.201486 | 0.204837 | 0.214015 | 0.200758 | 0.191142  | 0.199592 |
| 0.112325  | 0.118007 | 0.126311 | 0.128497 | 0.118444 | 0.102418  | 0.112617 |
| 0.114219  | 0.122523 | 0.125583 | 0.140006 | 0.120921 | 0.115967  | 0.13141  |
| 0.10912   | 0.100816 | 0.10708  | 0.11655  | 0.10912  | 0.0983392 | 0.113199 |
| 0.114802  | 0.114073 | 0.119755 | 0.13039  | 0.114219 | 0.0920746 | 0.107517 |
| 0.118444  | 0.117716 | 0.128351 | 0.132576 | 0.126311 | 0.110286  | 0.121066 |

|          |          |          |          |          |           |          |
|----------|----------|----------|----------|----------|-----------|----------|
| 0.254079 | 0.259178 | 0.261364 | 0.270251 | 0.258741 | 0.252622  | 0.262529 |
| 0.104458 | 0.110431 | 0.10912  | 0.121795 | 0.118153 | 0.105332  | 0.112617 |
| 0.125146 | 0.125    | 0.133304 | 0.134907 | 0.125437 | 0.114365  | 0.126311 |
| 0.17905  | 0.17803  | 0.176719 | 0.194056 | 0.183421 | 0.173223  | 0.179341 |
| 0.184878 | 0.193473 | 0.195367 | 0.206294 | 0.188957 | 0.181381  | 0.190414 |
| 0.120484 | 0.127331 | 0.134178 | 0.136655 | 0.124563 | 0.116987  | 0.128934 |
| 0.11859  | 0.127768 | 0.130536 | 0.132721 | 0.124709 | 0.113636  | 0.122086 |
| 0.106935 | 0.116113 | 0.120047 | 0.134178 | 0.118007 | 0.109266  | 0.122086 |
| 0.142337 | 0.148019 | 0.145542 | 0.152681 | 0.1537   | 0.134178  | 0.14088  |
| 0.119318 | 0.125583 | 0.130682 | 0.133741 | 0.123106 | 0.112034  | 0.124563 |
| 0.122669 | 0.124563 | 0.132284 | 0.135927 | 0.125    | 0.113345  | 0.127331 |
| 0.124563 | 0.114802 | 0.123397 | 0.134033 | 0.117279 | 0.0962995 | 0.112617 |
| 0.11553  | 0.123834 | 0.12602  | 0.129953 | 0.122232 | 0.109411  | 0.117861 |
| 0.127331 | 0.135052 | 0.136072 | 0.141463 | 0.134907 | 0.122086  | 0.126748 |
| 0.118153 | 0.117133 | 0.125146 | 0.130828 | 0.11553  | 0.0962995 | 0.116987 |
| 0.113345 | 0.117861 | 0.122378 | 0.138258 | 0.124709 | 0.113928  | 0.127331 |
| 0.125146 | 0.13141  | 0.133596 | 0.14831  | 0.135052 | 0.129808  | 0.142045 |
| 0.106643 | 0.11757  | 0.111305 | 0.125146 | 0.123543 | 0.1081    | 0.114219 |
| 0.114656 | 0.124417 | 0.125728 | 0.140443 | 0.129516 | 0.122523  | 0.135052 |
| 0.123397 | 0.117133 | 0.121358 | 0.136072 | 0.11757  | 0.0992133 | 0.112034 |
| 0.204545 | 0.212267 | 0.217366 | 0.22567  | 0.21183  | 0.200466  | 0.213869 |
| 0.119901 | 0.104604 | 0.112325 | 0.115385 | 0.115239 | 0.118444  | 0.121358 |
| 0.192453 | 0.198718 | 0.201777 | 0.208333 | 0.19391  | 0.185752  | 0.197115 |
| 0.116113 | 0.118881 | 0.125146 | 0.13345  | 0.112617 | 0.112325  | 0.119027 |
| 0.123106 | 0.124709 | 0.129225 | 0.137238 | 0.127768 | 0.114073  | 0.125437 |
| 0.116113 | 0.120629 | 0.126311 | 0.115676 | 0.121649 | 0.109411  | 0.129225 |
| 0.111597 | 0.118444 | 0.121212 | 0.116113 | 0.111888 | 0.104604  | 0.120629 |
| 0.122232 | 0.129662 | 0.130099 | 0.137238 | 0.130682 | 0.118444  | 0.124272 |
| 0.11961  | 0.127331 | 0.13039  | 0.137821 | 0.131556 | 0.112325  | 0.120192 |
| 0.117279 | 0.11859  | 0.128642 | 0.132284 | 0.119901 | 0.106206  | 0.11961  |
| 0.124126 | 0.126311 | 0.132284 | 0.139423 | 0.114802 | 0.112471  | 0.126457 |
| 0.122086 | 0.125437 | 0.128205 | 0.11757  | 0.119755 | 0.112471  | 0.128497 |
| 0.127477 | 0.121503 | 0.124563 | 0.142774 | 0.122815 | 0.105041  | 0.11757  |
| 0.246358 | 0.25641  | 0.256556 | 0.263986 | 0.253351 | 0.247232  | 0.25539  |
| 0.116404 | 0.120338 | 0.128934 | 0.131119 | 0.124272 | 0.107663  | 0.119901 |
| 0.184441 | 0.1875   | 0.192016 | 0.205274 | 0.188228 | 0.177739  | 0.190851 |
| 0.187209 | 0.195221 | 0.198572 | 0.209207 | 0.190705 | 0.184295  | 0.195367 |
| 0.124709 | 0.124563 | 0.129953 | 0.135927 | 0.117716 | 0.120338  | 0.123252 |
| 0.10169  | 0.110868 | 0.107517 | 0.121941 | 0.113928 | 0.100816  | 0.112762 |
| 0.123252 | 0.122232 | 0.131119 | 0.133887 | 0.128205 | 0.114802  | 0.123543 |
| 0.113345 | 0.123106 | 0.127914 | 0.129225 | 0.11859  | 0.1081    | 0.116841 |
| 0.104749 | 0.110431 | 0.10708  | 0.115676 | 0.106206 | 0.101253  | 0.11553  |
| 0.118153 | 0.114802 | 0.119027 | 0.131119 | 0.112325 | 0.0942599 | 0.109994 |
| 0.120921 | 0.124854 | 0.126457 | 0.129808 | 0.125    | 0.113054  | 0.118881 |

|          |          |          |          |          |           |          |
|----------|----------|----------|----------|----------|-----------|----------|
| 0.127331 | 0.137092 | 0.134615 | 0.140006 | 0.136364 | 0.122378  | 0.131702 |
| 0.115239 | 0.118881 | 0.124563 | 0.130245 | 0.11961  | 0.105624  | 0.118153 |
| 0.128059 | 0.133741 | 0.131847 | 0.136364 | 0.132721 | 0.122815  | 0.128059 |
| 0.109848 | 0.115822 | 0.117133 | 0.128934 | 0.119172 | 0.111305  | 0.121503 |
| 0.120629 | 0.124563 | 0.130828 | 0.115239 | 0.123834 | 0.113928  | 0.131119 |
| 0.112325 | 0.118881 | 0.125146 | 0.138695 | 0.118444 | 0.114073  | 0.125146 |
| 0.126166 | 0.117861 | 0.124709 | 0.140006 | 0.120921 | 0.103438  | 0.116841 |
| 0.113491 | 0.107226 | 0.111742 | 0.126166 | 0.11757  | 0.113782  | 0.118735 |
| 0.111451 | 0.11655  | 0.124854 | 0.125583 | 0.117279 | 0.106498  | 0.120775 |
| 0.133596 | 0.135198 | 0.134178 | 0.144231 | 0.137383 | 0.125728  | 0.133304 |
| 0.182692 | 0.189831 | 0.197844 | 0.2044   | 0.187937 | 0.178904  | 0.189103 |
| 0.130099 | 0.140443 | 0.137383 | 0.143648 | 0.141171 | 0.126603  | 0.131265 |
| 0.121066 | 0.129079 | 0.131556 | 0.138403 | 0.129516 | 0.113199  | 0.118735 |
| 0.115967 | 0.118735 | 0.125291 | 0.114365 | 0.115385 | 0.11014   | 0.126457 |
| 0.110286 | 0.112762 | 0.116404 | 0.111597 | 0.114365 | 0.10067   | 0.115822 |
| 0.1081   | 0.118735 | 0.120047 | 0.138258 | 0.120047 | 0.112471  | 0.126166 |
| 0.110577 | 0.123543 | 0.123106 | 0.136655 | 0.121358 | 0.118735  | 0.127477 |
| 0.18852  | 0.197698 | 0.200175 | 0.209936 | 0.195221 | 0.183858  | 0.195804 |
| 0.122086 | 0.121358 | 0.125874 | 0.130973 | 0.122378 | 0.1081    | 0.122086 |
| 0.108829 | 0.111305 | 0.11961  | 0.128497 | 0.116113 | 0.101836  | 0.110868 |
| 0.125437 | 0.13345  | 0.129808 | 0.139569 | 0.13039  | 0.116696  | 0.123397 |
| 0.191434 | 0.197115 | 0.199592 | 0.211101 | 0.19493  | 0.185023  | 0.195221 |
| 0.10067  | 0.113928 | 0.109703 | 0.124417 | 0.113782 | 0.0992133 | 0.110577 |
| 0.121795 | 0.113782 | 0.119172 | 0.133596 | 0.114219 | 0.0984848 | 0.108974 |
| 0.122669 | 0.129808 | 0.129953 | 0.134761 | 0.129079 | 0.115385  | 0.124417 |
| 0.117279 | 0.122669 | 0.130099 | 0.13345  | 0.121941 | 0.110286  | 0.119901 |
| 0.187209 | 0.19493  | 0.197698 | 0.209207 | 0.192162 | 0.182838  | 0.194493 |
| 0.116404 | 0.11451  | 0.121358 | 0.133741 | 0.113491 | 0.0910548 | 0.106498 |
| 0.116696 | 0.119755 | 0.128934 | 0.133159 | 0.120192 | 0.107663  | 0.119318 |
| 0.107955 | 0.11451  | 0.117861 | 0.124417 | 0.114365 | 0.099796  | 0.115239 |
| 0.120484 | 0.129371 | 0.130973 | 0.132867 | 0.122815 | 0.112034  | 0.131847 |
| 0.123834 | 0.124272 | 0.131993 | 0.136218 | 0.118298 | 0.112762  | 0.128788 |
| 0.122086 | 0.115239 | 0.122378 | 0.135635 | 0.120629 | 0.0987762 | 0.113345 |
| 0.113345 | 0.118444 | 0.127331 | 0.127768 | 0.117133 | 0.102855  | 0.119464 |
| 0.124417 | 0.118444 | 0.125874 | 0.136509 | 0.12296  | 0.117133  | 0.123543 |
| 0.145833 | 0.146853 | 0.14933  | 0.151224 | 0.149038 | 0.142337  | 0.146707 |
| 0.232663 | 0.240385 | 0.242279 | 0.251457 | 0.240822 | 0.231498  | 0.24053  |
| 0.115822 | 0.113345 | 0.113491 | 0.129079 | 0.120775 | 0.117279  | 0.12398  |
| 0.12602  | 0.127331 | 0.134178 | 0.138986 | 0.121941 | 0.114073  | 0.127768 |
| 0.118298 | 0.124272 | 0.127622 | 0.135052 | 0.124126 | 0.107517  | 0.117133 |
| 0.127185 | 0.129953 | 0.133887 | 0.13549  | 0.129808 | 0.11757   | 0.129516 |
| 0.119755 | 0.117279 | 0.125    | 0.12602  | 0.114802 | 0.0987762 | 0.115967 |
| 0.117424 | 0.113491 | 0.112471 | 0.13039  | 0.119755 | 0.105769  | 0.11859  |
| 0.119318 | 0.128788 | 0.130099 | 0.13345  | 0.126603 | 0.114365  | 0.121066 |

|           |          |          |          |          |           |           |
|-----------|----------|----------|----------|----------|-----------|-----------|
| 0.119172  | 0.116696 | 0.124417 | 0.134761 | 0.11859  | 0.0967366 | 0.110431  |
| 0.122669  | 0.123397 | 0.129079 | 0.137675 | 0.12296  | 0.108683  | 0.121795  |
| 0.235868  | 0.242424 | 0.242861 | 0.250874 | 0.241696 | 0.233829  | 0.241987  |
| 0.0987762 | 0.10912  | 0.109848 | 0.121941 | 0.109557 | 0.0979021 | 0.108974  |
| 0.104604  | 0.106206 | 0.112179 | 0.119318 | 0.104895 | 0.0999417 | 0.109266  |
| 0.112325  | 0.114219 | 0.123106 | 0.125583 | 0.119027 | 0.104749  | 0.116113  |
| 0.130245  | 0.132721 | 0.138403 | 0.140006 | 0.136946 | 0.125     | 0.131702  |
| 0.120921  | 0.113782 | 0.11655  | 0.133013 | 0.125583 | 0.120921  | 0.126748  |
| 0.116841  | 0.122232 | 0.128788 | 0.129808 | 0.122378 | 0.110431  | 0.122669  |
| 0.119755  | 0.123689 | 0.131993 | 0.134761 | 0.127914 | 0.112762  | 0.122669  |
| 0.114365  | 0.114802 | 0.121066 | 0.132284 | 0.11757  | 0.104458  | 0.116987  |
| 0.230332  | 0.236014 | 0.234411 | 0.243298 | 0.23616  | 0.228001  | 0.238491  |
| 0.123397  | 0.13141  | 0.130973 | 0.138986 | 0.130973 | 0.116696  | 0.127185  |
| 0.11655   | 0.114073 | 0.118007 | 0.132721 | 0.115676 | 0.0958625 | 0.109848  |
| 0.115385  | 0.117279 | 0.124417 | 0.130973 | 0.11655  | 0.104604  | 0.115967  |
| 0.118444  | 0.126748 | 0.127768 | 0.134324 | 0.125146 | 0.116696  | 0.120775  |
| 0.112617  | 0.117133 | 0.119901 | 0.126457 | 0.125146 | 0.114656  | 0.124272  |
| 0.114656  | 0.117424 | 0.125437 | 0.127331 | 0.120192 | 0.106498  | 0.115239  |
| 0.120775  | 0.109266 | 0.117279 | 0.134324 | 0.116696 | 0.0992133 | 0.109994  |
| 0.122669  | 0.117861 | 0.121795 | 0.139132 | 0.120921 | 0.100524  | 0.113345  |
| 0.113054  | 0.110577 | 0.11655  | 0.129516 | 0.111888 | 0.0917832 | 0.106643  |
| 0.115239  | 0.118007 | 0.128642 | 0.13141  | 0.117861 | 0.104749  | 0.119318  |
| 0.13039   | 0.131993 | 0.134178 | 0.136364 | 0.124563 | 0.114656  | 0.131265  |
| 0.133159  | 0.13884  | 0.140152 | 0.14088  | 0.129079 | 0.124417  | 0.134033  |
| 0.121503  | 0.124563 | 0.133159 | 0.117279 | 0.123252 | 0.11655   | 0.131993  |
| 0.124126  | 0.128934 | 0.134324 | 0.124272 | 0.125874 | 0.117424  | 0.134033  |
| 0.133304  | 0.13345  | 0.138549 | 0.138695 | 0.128642 | 0.122815  | 0.134761  |
| 0.0992133 | 0.103438 | 0.105041 | 0.110431 | 0.103584 | 0.0986305 | 0.109994  |
| 0.122378  | 0.105624 | 0.11451  | 0.123106 | 0.128205 | 0.117133  | 0.128497  |
| 0.128059  | 0.125874 | 0.13447  | 0.134324 | 0.13243  | 0.119318  | 0.0942599 |
| 0.202652  | 0.210664 | 0.216929 | 0.225233 | 0.21285  | 0.201777  | 0.21081   |
| 0.122815  | 0.124417 | 0.125728 | 0.137529 | 0.126894 | 0.120775  | 0.122232  |
| 0.106498  | 0.116259 | 0.122815 | 0.125583 | 0.11116  | 0.105041  | 0.116113  |
| 0.121212  | 0.121066 | 0.130536 | 0.133304 | 0.124126 | 0.111888  | 0.12296   |
| 0.223048  | 0.22873  | 0.230332 | 0.238345 | 0.224796 | 0.220425  | 0.230624  |
| 0.212558  | 0.215909 | 0.219551 | 0.22669  | 0.216055 | 0.206731  | 0.21722   |
| 0.125     | 0.11757  | 0.122669 | 0.134761 | 0.121503 | 0.0999417 | 0.113636  |
| 0.246941  | 0.255245 | 0.256556 | 0.261364 | 0.255682 | 0.248106  | 0.25539   |
| 0.103293  | 0.105186 | 0.105041 | 0.112471 | 0.102127 | 0.099796  | 0.110868  |
| 0.128059  | 0.13141  | 0.127768 | 0.140443 | 0.127185 | 0.125146  | 0.135052  |
| 0.100379  | 0.114802 | 0.11116  | 0.120338 | 0.114073 | 0.10271   | 0.110868  |
| 0.13141   | 0.133013 | 0.136364 | 0.137675 | 0.122086 | 0.11859   | 0.132576  |
| 0.188666  | 0.195513 | 0.198572 | 0.205128 | 0.195076 | 0.184878  | 0.19391   |
| 0.119755  | 0.119901 | 0.121795 | 0.137383 | 0.128497 | 0.115093  | 0.122378  |

|          |           |          |          |          |           |          |
|----------|-----------|----------|----------|----------|-----------|----------|
| 0.190851 | 0.20236   | 0.205711 | 0.211101 | 0.199883 | 0.189685  | 0.200175 |
| 0.118298 | 0.122232  | 0.125291 | 0.133304 | 0.119755 | 0.115676  | 0.117424 |
| 0.117716 | 0.115822  | 0.123834 | 0.130973 | 0.115385 | 0.0990676 | 0.112179 |
| 0.117716 | 0.120484  | 0.121212 | 0.125728 | 0.119172 | 0.111305  | 0.119464 |
| 0.113928 | 0.121358  | 0.119755 | 0.12602  | 0.117424 | 0.105769  | 0.118298 |
| 0.109411 | 0.113054  | 0.120775 | 0.120629 | 0.112908 | 0.0962995 | 0.111116 |
| 0.112617 | 0.113345  | 0.119027 | 0.134324 | 0.115239 | 0.111116  | 0.114656 |
| 0.100379 | 0.108683  | 0.106498 | 0.119464 | 0.109703 | 0.099796  | 0.105624 |
| 0.117424 | 0.121066  | 0.127331 | 0.131265 | 0.124709 | 0.108392  | 0.115385 |
| 0.111742 | 0.0964452 | 0.107663 | 0.114219 | 0.114073 | 0.104167  | 0.116113 |
| 0.106498 | 0.102273  | 0.108537 | 0.122086 | 0.109411 | 0.106206  | 0.113199 |
| 0.104604 | 0.110286  | 0.107809 | 0.123397 | 0.113928 | 0.100816  | 0.108683 |
| 0.118153 | 0.121795  | 0.123106 | 0.122378 | 0.124272 | 0.106498  | 0.121941 |
| 0.127185 | 0.134907  | 0.13447  | 0.142191 | 0.135344 | 0.121358  | 0.127477 |
| 0.113928 | 0.116404  | 0.122378 | 0.113199 | 0.111888 | 0.101981  | 0.120921 |
| 0.118444 | 0.119755  | 0.126894 | 0.135198 | 0.119901 | 0.106206  | 0.115822 |
| 0.108974 | 0.114073  | 0.123543 | 0.122523 | 0.11655  | 0.100816  | 0.110723 |
| 0.116259 | 0.112908  | 0.120047 | 0.130973 | 0.11655  | 0.0944056 | 0.108974 |
| 0.125291 | 0.127185  | 0.133159 | 0.136218 | 0.117716 | 0.111597  | 0.12704  |
| 0.108246 | 0.11859   | 0.122523 | 0.137238 | 0.120775 | 0.109703  | 0.125146 |
| 0.112908 | 0.121503  | 0.122523 | 0.114802 | 0.114365 | 0.106206  | 0.125437 |
| 0.117133 | 0.128934  | 0.129079 | 0.135635 | 0.124126 | 0.112762  | 0.121795 |
| 0.127768 | 0.137238  | 0.137675 | 0.141317 | 0.131847 | 0.120484  | 0.129516 |
| 0.133887 | 0.140443  | 0.135927 | 0.146853 | 0.14292  | 0.131556  | 0.135052 |
| 0.107809 | 0.105915  | 0.111597 | 0.121649 | 0.107226 | 0.0868298 | 0.100816 |
| 0.115676 | 0.116696  | 0.126748 | 0.131265 | 0.121212 | 0.101399  | 0.120629 |
| 0.107372 | 0.106935  | 0.109411 | 0.125874 | 0.112034 | 0.100087  | 0.115239 |
| 0.137092 | 0.135781  | 0.140589 | 0.140443 | 0.131847 | 0.12398   | 0.137383 |
| 0.101107 | 0.111742  | 0.110431 | 0.118444 | 0.117133 | 0.105769  | 0.110723 |
| 0.123834 | 0.133887  | 0.133741 | 0.148747 | 0.137238 | 0.128788  | 0.1419   |
| 0.129953 | 0.131265  | 0.138112 | 0.144085 | 0.137238 | 0.124417  | 0.13141  |
| 0.123689 | 0.130245  | 0.135344 | 0.136072 | 0.133013 | 0.121066  | 0.129808 |
| 0.107809 | 0.115239  | 0.117424 | 0.124563 | 0.107517 | 0.105478  | 0.114219 |
| 0.117861 | 0.120629  | 0.123397 | 0.131702 | 0.11757  | 0.111742  | 0.119027 |
| 0.119027 | 0.121503  | 0.130973 | 0.11859  | 0.120775 | 0.117279  | 0.129516 |
| 0.206002 | 0.211393  | 0.215909 | 0.219551 | 0.214161 | 0.199009  | 0.208042 |
| 0.119464 | 0.120192  | 0.127331 | 0.13243  | 0.120047 | 0.106643  | 0.11859  |
| 0.117861 | 0.12296   | 0.121649 | 0.126457 | 0.114948 | 0.110577  | 0.117279 |
| 0.127914 | 0.125146  | 0.13141  | 0.135052 | 0.119755 | 0.111888  | 0.126457 |
| 0.112908 | 0.117424  | 0.12602  | 0.112471 | 0.112034 | 0.104749  | 0.121358 |
| 0.125    | 0.122815  | 0.129953 | 0.135052 | 0.122669 | 0.122086  | 0.123252 |
| 0.11451  | 0.122232  | 0.119755 | 0.13447  | 0.126748 | 0.109848  | 0.125583 |
| 0.116404 | 0.121212  | 0.121941 | 0.136946 | 0.130682 | 0.112617  | 0.128351 |
| 0.122378 | 0.127768  | 0.133159 | 0.133013 | 0.124417 | 0.113928  | 0.127331 |

|           |           |           |           |          |           |          |
|-----------|-----------|-----------|-----------|----------|-----------|----------|
| 0.105769  | 0.101836  | 0.106352  | 0.116987  | 0.106935 | 0.0981935 | 0.113928 |
| 0.130536  | 0.129516  | 0.135781  | 0.135344  | 0.124709 | 0.116259  | 0.131119 |
| 0.11451   | 0.118153  | 0.119172  | 0.121941  | 0.114802 | 0.104604  | 0.114219 |
| 0.108246  | 0.107809  | 0.114656  | 0.12704   | 0.109703 | 0.110868  | 0.120775 |
| 0.175117  | 0.183421  | 0.186772  | 0.193036  | 0.181818 | 0.168415  | 0.177156 |
| 0.116259  | 0.126603  | 0.127914  | 0.135927  | 0.125    | 0.108683  | 0.119755 |
| 0.132721  | 0.130245  | 0.135927  | 0.13986   | 0.12602  | 0.120775  | 0.135635 |
| 0.115385  | 0.109994  | 0.112179  | 0.116404  | 0.113636 | 0.112471  | 0.116841 |
| 0.126311  | 0.11859   | 0.128351  | 0.121795  | 0.126603 | 0.112325  | 0.115822 |
| 0.101544  | 0.106643  | 0.110868  | 0.117716  | 0.108246 | 0.0977564 | 0.11116  |
| 0.10067   | 0.0976107 | 0.105624  | 0.115676  | 0.105332 | 0.10067   | 0.108246 |
| 0.105041  | 0.108974  | 0.113491  | 0.119755  | 0.113491 | 0.101544  | 0.11553  |
| 0.122523  | 0.11859   | 0.12398   | 0.131702  | 0.124563 | 0.103293  | 0.111742 |
| 0.111451  | 0.113928  | 0.120775  | 0.129079  | 0.11757  | 0.108537  | 0.119318 |
| 0.120047  | 0.114656  | 0.124709  | 0.137675  | 0.129371 | 0.11655   | 0.126748 |
| 0.109703  | 0.110723  | 0.113782  | 0.119464  | 0.111742 | 0.100087  | 0.116987 |
| 0.102273  | 0.0849359 | 0.0521562 | 0.123397  | 0.113928 | 0.0996503 | 0.122086 |
| 0.126311  | 0.125291  | 0.122815  | 0.135781  | 0.130973 | 0.100962  | 0.100379 |
| 0.105915  | 0.0871212 | 0.0916375 | 0.11451   | 0.112325 | 0.107663  | 0.112325 |
| 0.0930944 | 0.108974  | 0.105915  | 0.134907  | 0.122815 | 0.0878497 | 0.128934 |
| 0.103875  | 0.0865385 | 0.0939685 | 0.112179  | 0.106206 | 0.102418  | 0.10912  |
| 0.105332  | 0.0871212 | 0.092803  | 0.113928  | 0.111742 | 0.105915  | 0.115239 |
| 0.105915  | 0.103438  | 0.106206  | 0.11859   | 0.105915 | 0.10067   | 0.11116  |
| 0.114219  | 0.11553   | 0.117424  | 0.119901  | 0.118881 | 0.113928  | 0.124126 |
| 0.0967366 | 0.101253  | 0.110723  | 0.120192  | 0.108392 | 0.101399  | 0.112179 |
| 0.134615  | 0.129516  | 0.138403  | 0.144085  | 0.137529 | 0.117716  | 0.130245 |
| 0.126748  | 0.126311  | 0.129079  | 0.142628  | 0.128497 | 0.109557  | 0.128788 |
| 0.106935  | 0.0983392 | 0.110431  | 0.115822  | 0.104021 | 0.104021  | 0.113345 |
| 0.131847  | 0.132867  | 0.133304  | 0.148019  | 0.13447  | 0.115239  | 0.127477 |
| 0.11961   | 0.127622  | 0.130682  | 0.120338  | 0.123689 | 0.116696  | 0.131556 |
| 0.126603  | 0.12296   | 0.128934  | 0.13986   | 0.13243  | 0.122815  | 0.112908 |
| 0.100379  | 0.109848  | 0.11553   | 0.119464  | 0.113782 | 0.103293  | 0.113491 |
| 0.147145  | 0.136509  | 0.141608  | 0.151078  | 0.141026 | 0.13549   | 0.138403 |
| 0.126166  | 0.124563  | 0.129662  | 0.135635  | 0.131993 | 0.117133  | 0.129371 |
| 0.134907  | 0.13243   | 0.135781  | 0.144376  | 0.134033 | 0.111014  | 0.125583 |
| 0.117716  | 0.111742  | 0.122086  | 0.0569639 | 0.118007 | 0.113636  | 0.125874 |
| 0.103875  | 0.0984848 | 0.105041  | 0.112471  | 0.108246 | 0.0971737 | 0.105624 |
| 0.10373   | 0.101836  | 0.114802  | 0.114948  | 0.1081   | 0.102273  | 0.111888 |
| 0.116404  | 0.116259  | 0.119901  | 0.127622  | 0.118444 | 0.100087  | 0.103584 |
| 0.116987  | 0.107809  | 0.108246  | 0.113054  | 0.111742 | 0.10912   | 0.117861 |
| 0.122378  | 0.11757   | 0.11451   | 0.125437  | 0.113928 | 0.117424  | 0.120921 |
| 0.122669  | 0.118444  | 0.123252  | 0.136509  | 0.115093 | 0.105478  | 0.125    |
| 0.108974  | 0.103293  | 0.112762  | 0.101253  | 0.112762 | 0.0990676 | 0.109848 |
| 0.104167  | 0.105478  | 0.109994  | 0.11655   | 0.107663 | 0.101253  | 0.112617 |

|           |          |          |          |          |           |          |
|-----------|----------|----------|----------|----------|-----------|----------|
| 0.113928  | 0.112034 | 0.118007 | 0.120775 | 0.109848 | 0.1081    | 0.116259 |
| 0.108392  | 0.104458 | 0.117133 | 0.11757  | 0.113636 | 0.0958625 | 0.106352 |
| 0.109994  | 0.110431 | 0.115239 | 0.122669 | 0.114656 | 0.109703  | 0.121941 |
| 0.109411  | 0.111888 | 0.116404 | 0.120629 | 0.104749 | 0.10708   | 0.112325 |
| 0.116841  | 0.122232 | 0.125291 | 0.127768 | 0.122669 | 0.108683  | 0.122669 |
| 0.103438  | 0.110286 | 0.117424 | 0.123689 | 0.109266 | 0.107517  | 0.11451  |
| 0.0987762 | 0.103001 | 0.102855 | 0.110868 | 0.102273 | 0.0999417 | 0.110431 |
| 0.108683  | 0.109994 | 0.114219 | 0.117279 | 0.106643 | 0.0999417 | 0.110431 |
| 0.11553   | 0.120338 | 0.12398  | 0.129953 | 0.121066 | 0.106789  | 0.122523 |
| 0.106643  | 0.107663 | 0.110723 | 0.122523 | 0.111014 | 0.103147  | 0.114219 |
| 0.121212  | 0.124854 | 0.124709 | 0.13447  | 0.12704  | 0.114802  | 0.129371 |
| 0.11014   | 0.114073 | 0.121795 | 0.125437 | 0.113636 | 0.101981  | 0.113054 |
| 0.114073  | 0.121212 | 0.123689 | 0.126457 | 0.122232 | 0.114073  | 0.119901 |



| <b>TDr_08_00003</b> | <b>TDr_08_00008</b> | <b>TDr_08_00013</b> | <b>TDr_08_00014</b> | <b>TDr_08_00015</b> | <b>TDr_08_00017</b> | <b>TDr_08_00023</b> |
|---------------------|---------------------|---------------------|---------------------|---------------------|---------------------|---------------------|
| 0.108683            | 0.144231            | 0.142483            | 0.119027            | 0.106789            | 0.115676            | 0.125               |
| 0.105624            | 0.141754            | 0.140589            | 0.118007            | 0.1081              | 0.116696            | 0.118735            |
| 0.102418            | 0.136509            | 0.141171            | 0.111305            | 0.102273            | 0.112034            | 0.112908            |
| 0.101836            | 0.139132            | 0.145542            | 0.113345            | 0.106935            | 0.114656            | 0.118153            |
| 0.124563            | 0.144085            | 0.151078            | 0.12704             | 0.119172            | 0.134178            | 0.134178            |
| 0.11757             | 0.140589            | 0.146125            | 0.125291            | 0.121212            | 0.132139            | 0.127185            |
| 0.113345            | 0.136946            | 0.13986             | 0.116404            | 0.101253            | 0.112762            | 0.118881            |
| 0.099359            | 0.129953            | 0.135781            | 0.107372            | 0.101836            | 0.11655             | 0.115093            |
| 0.0933858           | 0.127185            | 0.127768            | 0.0984848           | 0.0906177           | 0.0971737           | 0.107663            |
| 0.0979021           | 0.124126            | 0.130536            | 0.102127            | 0.0869755           | 0.0842075           | 0.11451             |
| 0.102127            | 0.138549            | 0.144085            | 0.108392            | 0.10373             | 0.107955            | 0.114948            |
| 0.101399            | 0.135198            | 0.134907            | 0.107663            | 0.097465            | 0.110723            | 0.107226            |
| 0.100233            | 0.135781            | 0.136655            | 0.105041            | 0.0995047           | 0.106935            | 0.111305            |
| 0.12398             | 0.153992            | 0.157488            | 0.129662            | 0.125583            | 0.136509            | 0.137092            |
| 0.117716            | 0.137821            | 0.147145            | 0.126311            | 0.120484            | 0.119755            | 0.124417            |
| 0.107372            | 0.123106            | 0.127477            | 0.112762            | 0.106061            | 0.108246            | 0.10912             |
| 0.0981935           | 0.136946            | 0.136364            | 0.107372            | 0.0919289           | 0.106643            | 0.11014             |
| 0.136509            | 0.147582            | 0.156323            | 0.137821            | 0.136072            | 0.148747            | 0.147873            |
| 0.101253            | 0.136218            | 0.136218            | 0.109266            | 0.0987762           | 0.108246            | 0.109703            |
| 0.19799             | 0.213724            | 0.216346            | 0.205128            | 0.198718            | 0.209353            | 0.201486            |
| 0.110431            | 0.14831             | 0.150641            | 0.121358            | 0.109411            | 0.120921            | 0.119464            |
| 0.112034            | 0.143211            | 0.148456            | 0.119172            | 0.105478            | 0.121066            | 0.121649            |
| 0.0996503           | 0.128788            | 0.131993            | 0.106206            | 0.0930944           | 0.109266            | 0.107517            |
| 0.105332            | 0.118735            | 0.124854            | 0.105478            | 0.110723            | 0.116987            | 0.105624            |
| 0.0891608           | 0.120921            | 0.127622            | 0.0989219           | 0.0887238           | 0.0973193           | 0.106935            |
| 0.118007            | 0.145979            | 0.14831             | 0.125728            | 0.113782            | 0.124126            | 0.124417            |
| 0.111305            | 0.139277            | 0.143065            | 0.115239            | 0.101253            | 0.114219            | 0.11859             |
| 0.0967366           | 0.117133            | 0.129079            | 0.105041            | 0.110577            | 0.113636            | 0.100233            |
| 0.112762            | 0.131702            | 0.1419              | 0.118735            | 0.110577            | 0.117716            | 0.123543            |
| 0.111305            | 0.13986             | 0.142483            | 0.11757             | 0.105915            | 0.101107            | 0.118298            |
| 0.11553             | 0.136801            | 0.140006            | 0.115093            | 0.107517            | 0.11553             | 0.12398             |
| 0.109557            | 0.129953            | 0.138112            | 0.112325            | 0.108537            | 0.112762            | 0.111597            |
| 0.0999417           | 0.129371            | 0.134615            | 0.10708             | 0.097465            | 0.108683            | 0.111305            |
| 0.107517            | 0.138986            | 0.137529            | 0.109703            | 0.103875            | 0.109848            | 0.119755            |
| 0.110868            | 0.133596            | 0.143794            | 0.112179            | 0.102855            | 0.105332            | 0.118735            |
| 0.115385            | 0.139569            | 0.141608            | 0.119027            | 0.106498            | 0.113345            | 0.123543            |
| 0.124272            | 0.140589            | 0.144668            | 0.125874            | 0.111597            | 0.110286            | 0.135927            |
| 0.112471            | 0.137821            | 0.137238            | 0.112617            | 0.103293            | 0.111888            | 0.118881            |
| 0.0906177           | 0.125874            | 0.131702            | 0.103293            | 0.100379            | 0.107809            | 0.097028            |
| 0.090035            | 0.0964452           | 0.110723            | 0.0861014           | 0.114365            | 0.114802            | 0.104604            |
| 0                   | 0.109266            | 0.111597            | 0.0814394           | 0.0977564           | 0.108683            | 0.0990676           |
| 0.109266            | 0                   | 0.102564            | 0.100962            | 0.133887            | 0.128205            | 0.126166            |

|           |           |           |           |           |           |           |
|-----------|-----------|-----------|-----------|-----------|-----------|-----------|
| 0.111597  | 0.102564  | 0         | 0.107372  | 0.131265  | 0.136655  | 0.124126  |
| 0.0814394 | 0.100962  | 0.107372  | 0         | 0.0990676 | 0.105624  | 0.104749  |
| 0.0977564 | 0.133887  | 0.131265  | 0.0990676 | 0         | 0.0890152 | 0.107955  |
| 0.108683  | 0.128205  | 0.136655  | 0.105624  | 0.0890152 | 0         | 0.121503  |
| 0.0990676 | 0.126166  | 0.124126  | 0.104749  | 0.107955  | 0.121503  | 0         |
| 0.100962  | 0.0933858 | 0.10271   | 0.099359  | 0.122669  | 0.125146  | 0.116696  |
| 0.0770688 | 0.105332  | 0.105915  | 0.0906177 | 0.103438  | 0.112617  | 0.100962  |
| 0.0818765 | 0.0944056 | 0.101399  | 0.0823135 | 0.102127  | 0.106643  | 0.105186  |
| 0.141463  | 0.159819  | 0.163607  | 0.144814  | 0.134324  | 0.13884   | 0.145542  |
| 0.113491  | 0.131847  | 0.122523  | 0.119172  | 0.118881  | 0.128642  | 0.105624  |
| 0.0836247 | 0.102564  | 0.0944056 | 0.078817  | 0.103293  | 0.108974  | 0.105478  |
| 0.109557  | 0.136072  | 0.140152  | 0.113491  | 0.114948  | 0.11859   | 0.127622  |
| 0.0912005 | 0.11859   | 0.117424  | 0.092803  | 0.107372  | 0.117716  | 0.111597  |
| 0.119755  | 0.128497  | 0.128497  | 0.12398   | 0.127477  | 0.13141   | 0.0999417 |
| 0.0948427 | 0.118444  | 0.104458  | 0.094697  | 0.115676  | 0.119318  | 0.110868  |
| 0.078817  | 0.107663  | 0.107372  | 0.0786713 | 0.106352  | 0.112325  | 0.105624  |
| 0.0855186 | 0.106789  | 0.105332  | 0.0850816 | 0.102564  | 0.107955  | 0.101253  |
| 0.104604  | 0.130828  | 0.126748  | 0.108829  | 0.0930944 | 0.0944056 | 0.120921  |
| 0.099359  | 0.0981935 | 0.10169   | 0.104167  | 0.12602   | 0.125291  | 0.127622  |
| 0.103438  | 0.097028  | 0.105769  | 0.108537  | 0.131556  | 0.130536  | 0.125     |
| 0.148164  | 0.15574   | 0.169726  | 0.149767  | 0.152972  | 0.159237  | 0.152826  |
| 0.0802739 | 0.103875  | 0.11116   | 0.0763403 | 0.10373   | 0.110286  | 0.099796  |
| 0.0796911 | 0.105041  | 0.112617  | 0.0871212 | 0.100816  | 0.106789  | 0.10271   |
| 0.0753205 | 0.11553   | 0.110577  | 0.0798368 | 0.097028  | 0.103584  | 0.101253  |
| 0.133159  | 0.152681  | 0.152972  | 0.130973  | 0.118444  | 0.120047  | 0.136072  |
| 0.0673077 | 0.106061  | 0.114219  | 0.0840618 | 0.105624  | 0.112471  | 0.0952797 |
| 0.114948  | 0.108829  | 0.117861  | 0.0926573 | 0.120629  | 0.127477  | 0.102418  |
| 0.109703  | 0.133596  | 0.135052  | 0.114219  | 0.0958625 | 0.0960082 | 0.118735  |
| 0.0754662 | 0.102564  | 0.11014   | 0.0840618 | 0.104458  | 0.116259  | 0.102855  |
| 0.143648  | 0.162005  | 0.157634  | 0.143211  | 0.123397  | 0.129371  | 0.145105  |
| 0.0906177 | 0.0990676 | 0.111888  | 0.0916375 | 0.111742  | 0.11655   | 0.112762  |
| 0.105915  | 0.11553   | 0.103875  | 0.101981  | 0.125291  | 0.135927  | 0.116987  |
| 0.108974  | 0.13549   | 0.12704   | 0.118735  | 0.119027  | 0.129953  | 0.107809  |
| 0.11116   | 0.134761  | 0.137092  | 0.107809  | 0.097028  | 0.115822  | 0.112325  |
| 0.0820221 | 0.107372  | 0.103293  | 0.0775058 | 0.0990676 | 0.105332  | 0.105332  |
| 0.0773601 | 0.104167  | 0.101253  | 0.080711  | 0.102564  | 0.114656  | 0.0983392 |
| 0.0957168 | 0.107663  | 0.103584  | 0.0967366 | 0.126457  | 0.127477  | 0.113199  |
| 0.07838   | 0.11451   | 0.109266  | 0.0805653 | 0.0954254 | 0.106643  | 0.104312  |
| 0.0968823 | 0.0968823 | 0.104458  | 0.107809  | 0.132284  | 0.13243   | 0.122815  |
| 0.0808566 | 0.109411  | 0.113782  | 0.0894522 | 0.111305  | 0.118444  | 0.106789  |
| 0.105041  | 0.125146  | 0.125146  | 0.107226  | 0.106061  | 0.112617  | 0.100087  |
| 0.0852273 | 0.104458  | 0.0689103 | 0.0827506 | 0.108392  | 0.115822  | 0.103875  |
| 0.0817308 | 0.10912   | 0.118735  | 0.0862471 | 0.113054  | 0.118735  | 0.108537  |
| 0.081148  | 0.106789  | 0.111451  | 0.087704  | 0.10169   | 0.116113  | 0.100962  |

|           |           |           |           |           |           |           |
|-----------|-----------|-----------|-----------|-----------|-----------|-----------|
| 0.0782343 | 0.101544  | 0.0933858 | 0.0789627 | 0.104312  | 0.110286  | 0.0977564 |
| 0.104895  | 0.0868298 | 0.0914918 | 0.0954254 | 0.120484  | 0.124126  | 0.115385  |
| 0.0987762 | 0.125291  | 0.132867  | 0.102127  | 0.095134  | 0.0920746 | 0.108392  |
| 0.107372  | 0.131265  | 0.134761  | 0.104604  | 0.102564  | 0.104167  | 0.111742  |
| 0.117861  | 0.139132  | 0.14292   | 0.117424  | 0.104312  | 0.113491  | 0.129225  |
| 0.11961   | 0.14088   | 0.146416  | 0.119172  | 0.0987762 | 0.117861  | 0.123397  |
| 0.123689  | 0.140589  | 0.142337  | 0.126166  | 0.094697  | 0.108537  | 0.124854  |
| 0.133741  | 0.148893  | 0.155886  | 0.137092  | 0.106206  | 0.11655   | 0.129371  |
| 0.103875  | 0.136801  | 0.138549  | 0.11451   | 0.0987762 | 0.105624  | 0.120192  |
| 0.174097  | 0.190705  | 0.191288  | 0.174534  | 0.16958   | 0.175554  | 0.186917  |
| 0.101107  | 0.13345   | 0.136364  | 0.103584  | 0.0884324 | 0.105478  | 0.113345  |
| 0.131556  | 0.152244  | 0.153118  | 0.131993  | 0.109266  | 0.112034  | 0.128934  |
| 0.123689  | 0.146999  | 0.146999  | 0.122086  | 0.0984848 | 0.102127  | 0.121649  |
| 0.125     | 0.1419    | 0.149767  | 0.127185  | 0.111451  | 0.11451   | 0.137821  |
| 0.108246  | 0.13243   | 0.139423  | 0.113345  | 0.0777972 | 0.0925117 | 0.106498  |
| 0.124854  | 0.141171  | 0.14933   | 0.128497  | 0.0999417 | 0.105915  | 0.121358  |
| 0.109411  | 0.139132  | 0.141171  | 0.113345  | 0.0798368 | 0.0995047 | 0.103875  |
| 0.11655   | 0.138112  | 0.140734  | 0.119318  | 0.0942599 | 0.106352  | 0.11655   |
| 0.0999417 | 0.125291  | 0.131702  | 0.106789  | 0.0968823 | 0.102273  | 0.115676  |
| 0.129371  | 0.155012  | 0.148893  | 0.13243   | 0.0954254 | 0.11859   | 0.123543  |
| 0.0944056 | 0.127622  | 0.130828  | 0.0939685 | 0.0823135 | 0.0763403 | 0.103438  |
| 0.124854  | 0.143502  | 0.14933   | 0.134033  | 0.106935  | 0.115239  | 0.131265  |
| 0.105186  | 0.132867  | 0.137821  | 0.110286  | 0.0916375 | 0.099359  | 0.118298  |
| 0.099796  | 0.105915  | 0.103875  | 0.0979021 | 0.119755  | 0.120484  | 0.114365  |
| 0.114219  | 0.13141   | 0.138403  | 0.11553   | 0.101836  | 0.109848  | 0.133159  |
| 0.102564  | 0.133741  | 0.138695  | 0.105624  | 0.0855186 | 0.0999417 | 0.109266  |
| 0.13986   | 0.158217  | 0.155594  | 0.13884   | 0.124272  | 0.130828  | 0.138112  |
| 0.108537  | 0.137383  | 0.142337  | 0.111888  | 0.0888695 | 0.100962  | 0.110868  |
| 0.104167  | 0.139714  | 0.143502  | 0.110723  | 0.0777972 | 0.0968823 | 0.109411  |
| 0.106352  | 0.135781  | 0.13549   | 0.104167  | 0.0977564 | 0.10169   | 0.108392  |
| 0.126166  | 0.145396  | 0.148893  | 0.126603  | 0.113782  | 0.119755  | 0.142483  |
| 0.11014   | 0.131702  | 0.133159  | 0.115822  | 0.109411  | 0.124709  | 0.107809  |
| 0.102273  | 0.133159  | 0.139569  | 0.107372  | 0.0808566 | 0.0929487 | 0.103438  |
| 0.103147  | 0.139277  | 0.141317  | 0.107663  | 0.0791084 | 0.0967366 | 0.104604  |
| 0.105041  | 0.13884   | 0.144959  | 0.107809  | 0.0955711 | 0.107955  | 0.119318  |
| 0.11014   | 0.134033  | 0.136655  | 0.121649  | 0.0977564 | 0.0949883 | 0.126748  |
| 0.108537  | 0.139423  | 0.141463  | 0.111305  | 0.0941142 | 0.110577  | 0.115822  |
| 0.0885781 | 0.119755  | 0.123543  | 0.0957168 | 0.0831876 | 0.0932401 | 0.10169   |
| 0.0920746 | 0.127914  | 0.129371  | 0.100087  | 0.0747378 | 0.0868298 | 0.105186  |
| 0.101544  | 0.123106  | 0.127477  | 0.102855  | 0.0839161 | 0.0852273 | 0.105041  |
| 0.107372  | 0.140589  | 0.140589  | 0.112179  | 0.105769  | 0.114656  | 0.115239  |
| 0.124126  | 0.133159  | 0.13986   | 0.125146  | 0.107663  | 0.105186  | 0.121503  |
| 0.0962995 | 0.128934  | 0.131847  | 0.104312  | 0.0894522 | 0.0971737 | 0.112034  |
| 0.0888695 | 0.12296   | 0.125583  | 0.0989219 | 0.0846445 | 0.0894522 | 0.106643  |

|           |          |           |           |           |           |           |
|-----------|----------|-----------|-----------|-----------|-----------|-----------|
| 0.106935  | 0.13345  | 0.129953  | 0.116987  | 0.0948427 | 0.090035  | 0.115967  |
| 0.0930944 | 0.124272 | 0.123397  | 0.0990676 | 0.0812937 | 0.0861014 | 0.104749  |
| 0.112325  | 0.144085 | 0.143211  | 0.114219  | 0.097028  | 0.112617  | 0.121358  |
| 0.127768  | 0.152244 | 0.156323  | 0.131702  | 0.120047  | 0.125146  | 0.131556  |
| 0.103001  | 0.131556 | 0.135052  | 0.113054  | 0.0859557 | 0.0802739 | 0.10912   |
| 0.094697  | 0.130536 | 0.134033  | 0.106789  | 0.0878497 | 0.0967366 | 0.113054  |
| 0.097028  | 0.121503 | 0.127331  | 0.104167  | 0.0910548 | 0.0949883 | 0.105769  |
| 0.0926573 | 0.126748 | 0.126166  | 0.0977564 | 0.0767774 | 0.0932401 | 0.099359  |
| 0.108974  | 0.135781 | 0.138695  | 0.118735  | 0.0992133 | 0.10373   | 0.121212  |
| 0.090035  | 0.125874 | 0.123252  | 0.0986305 | 0.074155  | 0.0914918 | 0.105478  |
| 0.126603  | 0.138549 | 0.141754  | 0.128497  | 0.11859   | 0.125437  | 0.135344  |
| 0.109848  | 0.113928 | 0.113636  | 0.108537  | 0.117279  | 0.109848  | 0.136072  |
| 0.0979021 | 0.107809 | 0.116259  | 0.0954254 | 0.108246  | 0.103147  | 0.12704   |
| 0.0893065 | 0.117861 | 0.118735  | 0.0874126 | 0.0996503 | 0.0957168 | 0.11553   |
| 0.0992133 | 0.127477 | 0.13039   | 0.104604  | 0.0938228 | 0.100379  | 0.116987  |
| 0.0967366 | 0.129079 | 0.129079  | 0.104167  | 0.0831876 | 0.0871212 | 0.106935  |
| 0.0861014 | 0.121649 | 0.126894  | 0.0984848 | 0.0865385 | 0.0948427 | 0.0989219 |
| 0.08581   | 0.127768 | 0.123397  | 0.0935315 | 0.094697  | 0.105915  | 0.095134  |
| 0.0930944 | 0.126311 | 0.129808  | 0.106352  | 0.106061  | 0.118153  | 0.0962995 |
| 0.099796  | 0.10912  | 0.109994  | 0.104312  | 0.117424  | 0.121649  | 0.0898893 |
| 0.111305  | 0.137821 | 0.143648  | 0.115239  | 0.0805653 | 0.0944056 | 0.108392  |
| 0.121358  | 0.141463 | 0.146416  | 0.124126  | 0.111014  | 0.119901  | 0.128059  |
| 0.127914  | 0.143939 | 0.145979  | 0.129808  | 0.109411  | 0.118881  | 0.139277  |
| 0.184149  | 0.210082 | 0.210373  | 0.18954   | 0.192453  | 0.202797  | 0.190851  |
| 0.23412   | 0.24898  | 0.244901  | 0.233974  | 0.233974  | 0.245484  | 0.236451  |
| 0.0973193 | 0.129953 | 0.137238  | 0.105624  | 0.102127  | 0.119464  | 0.105478  |
| 0.0907634 | 0.11553  | 0.122232  | 0.0935315 | 0.100816  | 0.10271   | 0.0802739 |
| 0.0922203 | 0.121066 | 0.124854  | 0.0990676 | 0.0941142 | 0.107372  | 0.0863928 |
| 0.0916375 | 0.124272 | 0.125728  | 0.0987762 | 0.097028  | 0.112034  | 0.0779429 |
| 0.122232  | 0.135344 | 0.145833  | 0.127914  | 0.122378  | 0.117279  | 0.128934  |
| 0.0936772 | 0.120484 | 0.121941  | 0.0996503 | 0.104021  | 0.116696  | 0.074155  |
| 0.125583  | 0.134033 | 0.125874  | 0.129808  | 0.127185  | 0.137238  | 0.106935  |
| 0.0939685 | 0.126311 | 0.128351  | 0.100524  | 0.101981  | 0.120192  | 0.074155  |
| 0.10708   | 0.12602  | 0.132139  | 0.118881  | 0.115385  | 0.125437  | 0.095134  |
| 0.108683  | 0.105769 | 0.113636  | 0.0863928 | 0.121358  | 0.126748  | 0.102273  |
| 0.117133  | 0.121795 | 0.128788  | 0.118444  | 0.11961   | 0.125874  | 0.0865385 |
| 0.108974  | 0.104021 | 0.0912005 | 0.0971737 | 0.126894  | 0.129079  | 0.120338  |
| 0.0917832 | 0.127914 | 0.132867  | 0.0916375 | 0.103875  | 0.109557  | 0.0903263 |
| 0.0894522 | 0.123834 | 0.119172  | 0.0936772 | 0.097465  | 0.104312  | 0.0865385 |
| 0.0977564 | 0.114656 | 0.128934  | 0.101399  | 0.104604  | 0.113199  | 0.0814394 |
| 0.0875583 | 0.120775 | 0.121649  | 0.101399  | 0.0973193 | 0.114073  | 0.076486  |
| 0.0875583 | 0.123106 | 0.11961   | 0.0912005 | 0.0979021 | 0.105041  | 0.0814394 |
| 0.0926573 | 0.118298 | 0.127622  | 0.0992133 | 0.10067   | 0.11014   | 0.0801282 |
| 0.105915  | 0.118735 | 0.129516  | 0.113345  | 0.11655   | 0.126603  | 0.090472  |

|           |          |          |           |           |           |           |
|-----------|----------|----------|-----------|-----------|-----------|-----------|
| 0.119027  | 0.128351 | 0.13039  | 0.122086  | 0.125291  | 0.136509  | 0.0936772 |
| 0.101399  | 0.123834 | 0.12296  | 0.103293  | 0.104167  | 0.115967  | 0.0935315 |
| 0.0916375 | 0.120192 | 0.122815 | 0.100524  | 0.106352  | 0.114948  | 0.0843531 |
| 0.115239  | 0.130682 | 0.132139 | 0.120921  | 0.115676  | 0.124563  | 0.0922203 |
| 0.0861014 | 0.122815 | 0.122523 | 0.0973193 | 0.0952797 | 0.109994  | 0.083479  |
| 0.115385  | 0.128497 | 0.129953 | 0.11961   | 0.127477  | 0.13986   | 0.102855  |
| 0.123543  | 0.141608 | 0.145688 | 0.125146  | 0.114073  | 0.109557  | 0.136946  |
| 0.122815  | 0.136801 | 0.139423 | 0.124709  | 0.1081    | 0.132139  | 0.109411  |
| 0.0849359 | 0.120192 | 0.122815 | 0.090035  | 0.0912005 | 0.10067   | 0.0846445 |
| 0.0914918 | 0.120629 | 0.125583 | 0.0945513 | 0.0936772 | 0.106352  | 0.0827506 |
| 0.099796  | 0.12398  | 0.128642 | 0.11014   | 0.109266  | 0.121649  | 0.0907634 |
| 0.106643  | 0.128205 | 0.133159 | 0.111742  | 0.110868  | 0.120629  | 0.0891608 |
| 0.111014  | 0.132867 | 0.126457 | 0.114948  | 0.110577  | 0.126166  | 0.0979021 |
| 0.0995047 | 0.127477 | 0.131265 | 0.100816  | 0.102855  | 0.117861  | 0.0866841 |
| 0.101399  | 0.125874 | 0.127914 | 0.104749  | 0.100962  | 0.114219  | 0.0865385 |
| 0.105769  | 0.121503 | 0.127914 | 0.106498  | 0.110286  | 0.122086  | 0.0882867 |
| 0.109557  | 0.123834 | 0.131993 | 0.112034  | 0.120192  | 0.124709  | 0.0961538 |
| 0.112179  | 0.13141  | 0.127622 | 0.116113  | 0.114073  | 0.124709  | 0.0903263 |
| 0.116404  | 0.126603 | 0.12602  | 0.116841  | 0.120921  | 0.130099  | 0.0948427 |
| 0.112762  | 0.119755 | 0.132284 | 0.115239  | 0.12398   | 0.132576  | 0.11655   |
| 0.0944056 | 0.128497 | 0.13141  | 0.100379  | 0.0992133 | 0.112762  | 0.0882867 |
| 0.108392  | 0.127622 | 0.128497 | 0.113782  | 0.114365  | 0.130828  | 0.0821678 |
| 0.0942599 | 0.121358 | 0.128059 | 0.0964452 | 0.0967366 | 0.107955  | 0.0852273 |
| 0.0777972 | 0.104021 | 0.111597 | 0.074155  | 0.0995047 | 0.112471  | 0.105186  |
| 0.0891608 | 0.121212 | 0.129371 | 0.0925117 | 0.099796  | 0.110723  | 0.0833333 |
| 0.0957168 | 0.123689 | 0.129516 | 0.10373   | 0.094697  | 0.10912   | 0.0802739 |
| 0.0907634 | 0.118444 | 0.122232 | 0.0958625 | 0.0912005 | 0.107955  | 0.0820221 |
| 0.114219  | 0.127914 | 0.128497 | 0.11757   | 0.119318  | 0.126166  | 0.0984848 |
| 0.0995047 | 0.127768 | 0.129225 | 0.0984848 | 0.103438  | 0.119027  | 0.101253  |
| 0.114948  | 0.131847 | 0.129516 | 0.11859   | 0.119172  | 0.13243   | 0.103293  |
| 0.0930944 | 0.122523 | 0.124272 | 0.102273  | 0.0990676 | 0.116113  | 0.0753205 |
| 0.103438  | 0.117424 | 0.125583 | 0.106498  | 0.109411  | 0.111305  | 0.0882867 |
| 0.112908  | 0.13243  | 0.125728 | 0.116841  | 0.107226  | 0.115239  | 0.120484  |
| 0.106498  | 0.134761 | 0.136218 | 0.106061  | 0.097028  | 0.0989219 | 0.119318  |
| 0.106061  | 0.129371 | 0.136655 | 0.107372  | 0.0989219 | 0.0990676 | 0.11014   |
| 0.109703  | 0.136509 | 0.138549 | 0.1081    | 0.103438  | 0.109703  | 0.120192  |
| 0.103438  | 0.138695 | 0.136655 | 0.112617  | 0.102418  | 0.099359  | 0.120921  |
| 0.102564  | 0.138986 | 0.13986  | 0.105624  | 0.0901807 | 0.106352  | 0.113636  |
| 0.123252  | 0.145688 | 0.151515 | 0.125146  | 0.112325  | 0.111305  | 0.138112  |
| 0.130973  | 0.14088  | 0.146125 | 0.130828  | 0.121212  | 0.121941  | 0.131556  |
| 0.0977564 | 0.130973 | 0.134761 | 0.104604  | 0.0862471 | 0.0942599 | 0.113491  |
| 0.123543  | 0.13986  | 0.143065 | 0.127768  | 0.109703  | 0.118298  | 0.127622  |
| 0.114948  | 0.13447  | 0.141463 | 0.120338  | 0.103147  | 0.100379  | 0.127477  |
| 0.125437  | 0.150204 | 0.151369 | 0.129079  | 0.100233  | 0.117279  | 0.125146  |

|           |          |          |           |           |           |          |
|-----------|----------|----------|-----------|-----------|-----------|----------|
| 0.112325  | 0.137092 | 0.135344 | 0.119172  | 0.0935315 | 0.106206  | 0.119027 |
| 0.10912   | 0.133596 | 0.138258 | 0.113928  | 0.0990676 | 0.0983392 | 0.12602  |
| 0.116259  | 0.140734 | 0.145396 | 0.118735  | 0.10271   | 0.105186  | 0.126748 |
| 0.121649  | 0.147582 | 0.145251 | 0.124417  | 0.0955711 | 0.108246  | 0.127477 |
| 0.128642  | 0.14933  | 0.147582 | 0.134615  | 0.109557  | 0.126894  | 0.134178 |
| 0.113491  | 0.142045 | 0.147582 | 0.117716  | 0.104895  | 0.101253  | 0.129516 |
| 0.105915  | 0.135927 | 0.134761 | 0.116259  | 0.0894522 | 0.107663  | 0.114365 |
| 0.122086  | 0.138112 | 0.14627  | 0.125146  | 0.123106  | 0.131119  | 0.129371 |
| 0.122815  | 0.149038 | 0.148456 | 0.123543  | 0.105186  | 0.110286  | 0.136801 |
| 0.105041  | 0.13243  | 0.137383 | 0.102855  | 0.0865385 | 0.101544  | 0.10912  |
| 0.213578  | 0.2331   | 0.232226 | 0.215763  | 0.214889  | 0.225524  | 0.2162   |
| 0.119755  | 0.144814 | 0.141317 | 0.120484  | 0.0960082 | 0.110431  | 0.121212 |
| 0.101399  | 0.130536 | 0.138403 | 0.104458  | 0.0895979 | 0.0920746 | 0.116841 |
| 0.127768  | 0.141171 | 0.14933  | 0.123543  | 0.108683  | 0.124272  | 0.130099 |
| 0.104458  | 0.139423 | 0.145833 | 0.109848  | 0.0955711 | 0.101253  | 0.118735 |
| 0.11961   | 0.146125 | 0.155157 | 0.126748  | 0.113054  | 0.112034  | 0.138258 |
| 0.112034  | 0.139714 | 0.145251 | 0.118881  | 0.0932401 | 0.110577  | 0.110868 |
| 0.11451   | 0.141317 | 0.143939 | 0.120484  | 0.0887238 | 0.107226  | 0.120338 |
| 0.109848  | 0.140734 | 0.142483 | 0.112034  | 0.103584  | 0.100524  | 0.123834 |
| 0.121941  | 0.150787 | 0.155449 | 0.128788  | 0.101399  | 0.116113  | 0.124563 |
| 0.127622  | 0.146562 | 0.152681 | 0.128934  | 0.104167  | 0.120047  | 0.126166 |
| 0.125728  | 0.136218 | 0.143502 | 0.127331  | 0.104021  | 0.112617  | 0.121941 |
| 0.121941  | 0.151078 | 0.150787 | 0.129079  | 0.101981  | 0.113199  | 0.128351 |
| 0.106498  | 0.130682 | 0.13039  | 0.105769  | 0.0973193 | 0.0933858 | 0.118735 |
| 0.109411  | 0.146416 | 0.146707 | 0.119755  | 0.0944056 | 0.0989219 | 0.117861 |
| 0.130245  | 0.148893 | 0.147727 | 0.128934  | 0.103875  | 0.118007  | 0.131702 |
| 0.116404  | 0.139714 | 0.143502 | 0.117716  | 0.0914918 | 0.108829  | 0.120484 |
| 0.0960082 | 0.103875 | 0.11757  | 0.104312  | 0.125583  | 0.133887  | 0.11961  |
| 0.130245  | 0.152681 | 0.155303 | 0.128642  | 0.120192  | 0.126457  | 0.138695 |
| 0.114802  | 0.130245 | 0.136364 | 0.111742  | 0.105332  | 0.1081    | 0.125583 |
| 0.117424  | 0.137821 | 0.143648 | 0.120484  | 0.107663  | 0.104604  | 0.129371 |
| 0.123689  | 0.145542 | 0.148164 | 0.122669  | 0.102564  | 0.119901  | 0.121941 |
| 0.118881  | 0.1419   | 0.143357 | 0.118735  | 0.11116   | 0.115385  | 0.127622 |
| 0.119464  | 0.138695 | 0.147727 | 0.120192  | 0.120484  | 0.121503  | 0.121212 |
| 0.126748  | 0.153263 | 0.157925 | 0.126894  | 0.12398   | 0.132576  | 0.137529 |
| 0.0986305 | 0.122815 | 0.130973 | 0.0996503 | 0.0912005 | 0.0808566 | 0.112617 |
| 0.107226  | 0.107517 | 0.117424 | 0.103293  | 0.11553   | 0.0999417 | 0.132867 |
| 0.131847  | 0.153992 | 0.151369 | 0.137821  | 0.131119  | 0.136218  | 0.14088  |
| 0.10708   | 0.136509 | 0.131847 | 0.112179  | 0.0903263 | 0.0939685 | 0.120775 |
| 0.0843531 | 0.113782 | 0.109411 | 0.0926573 | 0.112179  | 0.118153  | 0.112908 |
| 0.137238  | 0.145396 | 0.152972 | 0.135927  | 0.133013  | 0.138112  | 0.139569 |
| 0.0914918 | 0.108683 | 0.11859  | 0.0898893 | 0.116987  | 0.123543  | 0.108392 |
| 0.134761  | 0.143211 | 0.149038 | 0.132867  | 0.127331  | 0.124563  | 0.135635 |
| 0.116841  | 0.143065 | 0.143065 | 0.123106  | 0.11116   | 0.118881  | 0.128205 |

|           |          |          |          |           |           |           |
|-----------|----------|----------|----------|-----------|-----------|-----------|
| 0.120775  | 0.148747 | 0.1537   | 0.125    | 0.0847902 | 0.103293  | 0.124563  |
| 0.117716  | 0.129953 | 0.138403 | 0.11757  | 0.116987  | 0.12704   | 0.120629  |
| 0.107372  | 0.130682 | 0.136218 | 0.114802 | 0.0949883 | 0.0884324 | 0.124563  |
| 0.121212  | 0.144231 | 0.144814 | 0.122232 | 0.0890152 | 0.117424  | 0.119755  |
| 0.123543  | 0.145688 | 0.14627  | 0.130682 | 0.0948427 | 0.111888  | 0.127914  |
| 0.128788  | 0.152972 | 0.149476 | 0.131847 | 0.105624  | 0.119755  | 0.12296   |
| 0.130536  | 0.149767 | 0.149767 | 0.128642 | 0.0971737 | 0.106935  | 0.129079  |
| 0.119464  | 0.14627  | 0.146853 | 0.123397 | 0.0962995 | 0.113345  | 0.119755  |
| 0.142191  | 0.159674 | 0.15676  | 0.141463 | 0.10912   | 0.127622  | 0.138695  |
| 0.109266  | 0.127622 | 0.136364 | 0.110868 | 0.10067   | 0.0920746 | 0.123834  |
| 0.0967366 | 0.130536 | 0.130536 | 0.104749 | 0.0977564 | 0.108974  | 0.100816  |
| 0.117133  | 0.136946 | 0.142483 | 0.126311 | 0.113491  | 0.115676  | 0.124709  |
| 0.102855  | 0.129079 | 0.13345  | 0.107955 | 0.0890152 | 0.0909091 | 0.118007  |
| 0.132139  | 0.151369 | 0.151661 | 0.131993 | 0.124126  | 0.126311  | 0.136801  |
| 0.139132  | 0.160111 | 0.158654 | 0.146562 | 0.132867  | 0.137092  | 0.150787  |
| 0.110868  | 0.124272 | 0.133013 | 0.111014 | 0.117424  | 0.128934  | 0.0954254 |
| 0.104895  | 0.115676 | 0.126166 | 0.101253 | 0.109994  | 0.117133  | 0.0932401 |
| 0.12602   | 0.158362 | 0.152535 | 0.129662 | 0.111305  | 0.128642  | 0.127768  |
| 0.121795  | 0.145688 | 0.150641 | 0.123397 | 0.099796  | 0.112762  | 0.129953  |
| 0.106935  | 0.125291 | 0.12296  | 0.114656 | 0.114948  | 0.124709  | 0.0964452 |
| 0.130245  | 0.145979 | 0.152972 | 0.129808 | 0.107372  | 0.120047  | 0.129953  |
| 0.120338  | 0.131993 | 0.131702 | 0.121066 | 0.122523  | 0.123543  | 0.12704   |
| 0.106789  | 0.116696 | 0.12602  | 0.104021 | 0.111888  | 0.108537  | 0.113199  |
| 0.154866  | 0.173805 | 0.174971 | 0.152389 | 0.145396  | 0.159819  | 0.147582  |
| 0.103293  | 0.118153 | 0.129808 | 0.106643 | 0.11451   | 0.10912   | 0.111451  |
| 0.119318  | 0.138549 | 0.143211 | 0.121212 | 0.124417  | 0.124854  | 0.135635  |
| 0.101107  | 0.129371 | 0.126457 | 0.107372 | 0.101253  | 0.109266  | 0.103438  |
| 0.129371  | 0.151515 | 0.150932 | 0.131847 | 0.105624  | 0.122669  | 0.132284  |
| 0.115676  | 0.142191 | 0.146853 | 0.120775 | 0.097465  | 0.113636  | 0.118298  |
| 0.130099  | 0.159237 | 0.162442 | 0.138112 | 0.129662  | 0.138258  | 0.140589  |
| 0.139569  | 0.157051 | 0.160839 | 0.144376 | 0.133887  | 0.148019  | 0.141608  |
| 0.114656  | 0.144668 | 0.147873 | 0.118298 | 0.117133  | 0.127768  | 0.121649  |
| 0.125     | 0.154429 | 0.157051 | 0.133013 | 0.130973  | 0.141317  | 0.136364  |
| 0.130682  | 0.156614 | 0.159819 | 0.137238 | 0.134033  | 0.143211  | 0.139132  |
| 0.13243   | 0.162442 | 0.164481 | 0.135198 | 0.136946  | 0.145833  | 0.140297  |
| 0.111014  | 0.131993 | 0.131119 | 0.116404 | 0.103875  | 0.109848  | 0.112471  |
| 0.129225  | 0.154866 | 0.157197 | 0.129953 | 0.126166  | 0.136801  | 0.139423  |
| 0.104458  | 0.135344 | 0.139714 | 0.112179 | 0.104604  | 0.116113  | 0.114073  |
| 0.113345  | 0.136072 | 0.141608 | 0.114365 | 0.103001  | 0.115093  | 0.111305  |
| 0.108829  | 0.13884  | 0.139714 | 0.111305 | 0.0996503 | 0.10708   | 0.120192  |
| 0.108537  | 0.140297 | 0.144085 | 0.113636 | 0.112471  | 0.124272  | 0.117279  |
| 0.107809  | 0.136364 | 0.141026 | 0.110577 | 0.0971737 | 0.108974  | 0.109266  |
| 0.102273  | 0.130536 | 0.141317 | 0.110577 | 0.107955  | 0.114802  | 0.111014  |
| 0.109266  | 0.15035  | 0.146853 | 0.118444 | 0.10912   | 0.125874  | 0.120338  |

|           |          |          |          |           |           |          |
|-----------|----------|----------|----------|-----------|-----------|----------|
| 0.112908  | 0.137383 | 0.148164 | 0.122086 | 0.113345  | 0.116696  | 0.122232 |
| 0.0945513 | 0.124563 | 0.126894 | 0.101981 | 0.0932401 | 0.10067   | 0.105915 |
| 0.114365  | 0.144085 | 0.150495 | 0.116841 | 0.115093  | 0.126603  | 0.122523 |
| 0.108974  | 0.138112 | 0.142774 | 0.110868 | 0.113199  | 0.122669  | 0.116841 |
| 0.10169   | 0.12704  | 0.125291 | 0.107955 | 0.10708   | 0.111888  | 0.109848 |
| 0.210082  | 0.231061 | 0.231643 | 0.213432 | 0.211684  | 0.224359  | 0.214744 |
| 0.133159  | 0.153263 | 0.159091 | 0.13884  | 0.138258  | 0.143065  | 0.140734 |
| 0.123106  | 0.148456 | 0.146416 | 0.132867 | 0.120338  | 0.133887  | 0.131556 |
| 0.116259  | 0.146853 | 0.145396 | 0.122815 | 0.116696  | 0.130245  | 0.125291 |
| 0.206876  | 0.224942 | 0.22465  | 0.205857 | 0.207314  | 0.219988  | 0.210956 |
| 0.105478  | 0.134033 | 0.138403 | 0.114656 | 0.110868  | 0.118298  | 0.114802 |
| 0.119318  | 0.146707 | 0.146999 | 0.121212 | 0.103147  | 0.115239  | 0.120192 |
| 0.110868  | 0.139423 | 0.146125 | 0.121795 | 0.110723  | 0.127477  | 0.120775 |
| 0.115093  | 0.135781 | 0.143939 | 0.120775 | 0.114073  | 0.115676  | 0.120338 |
| 0.244755  | 0.26049  | 0.254079 | 0.246649 | 0.247523  | 0.255828  | 0.249709 |
| 0.120192  | 0.145542 | 0.147873 | 0.122378 | 0.114219  | 0.123106  | 0.126311 |
| 0.0954254 | 0.126603 | 0.124272 | 0.101981 | 0.100816  | 0.108246  | 0.105332 |
| 0.11961   | 0.146707 | 0.146999 | 0.122669 | 0.110431  | 0.124272  | 0.116113 |
| 0.113199  | 0.146999 | 0.147582 | 0.121503 | 0.108683  | 0.122523  | 0.112325 |
| 0.125728  | 0.143211 | 0.149913 | 0.130828 | 0.117716  | 0.125146  | 0.129225 |
| 0.120775  | 0.149621 | 0.150204 | 0.127914 | 0.119755  | 0.128934  | 0.128059 |
| 0.097465  | 0.128351 | 0.128351 | 0.106935 | 0.105186  | 0.112617  | 0.107372 |
| 0.109848  | 0.140152 | 0.144231 | 0.113782 | 0.112617  | 0.125291  | 0.120921 |
| 0.116987  | 0.150495 | 0.153409 | 0.11859  | 0.113928  | 0.125146  | 0.126311 |
| 0.107955  | 0.130099 | 0.14088  | 0.117133 | 0.111014  | 0.108829  | 0.113491 |
| 0.107226  | 0.140734 | 0.145396 | 0.114365 | 0.107663  | 0.120338  | 0.116259 |
| 0.104167  | 0.124563 | 0.13447  | 0.109266 | 0.092366  | 0.0875583 | 0.120484 |
| 0.140152  | 0.156469 | 0.1588   | 0.143211 | 0.131556  | 0.147145  | 0.142191 |
| 0.123252  | 0.146853 | 0.150932 | 0.125728 | 0.11757   | 0.124417  | 0.130536 |
| 0.124709  | 0.150058 | 0.150058 | 0.12398  | 0.10708   | 0.121503  | 0.123252 |
| 0.184732  | 0.208625 | 0.207459 | 0.18546  | 0.186043  | 0.19697   | 0.187646 |
| 0.199592  | 0.221445 | 0.222902 | 0.200321 | 0.199446  | 0.210373  | 0.205128 |
| 0.113636  | 0.137529 | 0.147436 | 0.120192 | 0.115822  | 0.115676  | 0.12296  |
| 0.108683  | 0.128497 | 0.139277 | 0.113199 | 0.107955  | 0.109266  | 0.113928 |
| 0.129371  | 0.152972 | 0.150932 | 0.14088  | 0.129225  | 0.13345   | 0.140443 |
| 0.0984848 | 0.128497 | 0.12704  | 0.104458 | 0.0980478 | 0.110723  | 0.107226 |
| 0.12398   | 0.147582 | 0.150495 | 0.128497 | 0.117133  | 0.122815  | 0.129808 |
| 0.122378  | 0.138695 | 0.144814 | 0.131847 | 0.11757   | 0.132867  | 0.117424 |
| 0.217366  | 0.237471 | 0.240093 | 0.219551 | 0.2213    | 0.235431  | 0.223193 |
| 0.109557  | 0.140443 | 0.143648 | 0.11553  | 0.103875  | 0.11859   | 0.116841 |
| 0.19799   | 0.213432 | 0.21081  | 0.202506 | 0.201049  | 0.211684  | 0.196824 |
| 0.0952797 | 0.129953 | 0.127622 | 0.10271  | 0.0898893 | 0.101107  | 0.100816 |
| 0.105332  | 0.136509 | 0.13447  | 0.112762 | 0.0958625 | 0.113491  | 0.106789 |
| 0.103147  | 0.134907 | 0.13986  | 0.112034 | 0.103875  | 0.117716  | 0.122086 |



|           |          |          |          |           |          |          |
|-----------|----------|----------|----------|-----------|----------|----------|
| 0.1081    | 0.127622 | 0.138986 | 0.112034 | 0.106206  | 0.108974 | 0.110723 |
| 0.202069  | 0.225379 | 0.221882 | 0.203963 | 0.203671  | 0.214598 | 0.208479 |
| 0.121358  | 0.150495 | 0.154866 | 0.12704  | 0.127331  | 0.137675 | 0.134178 |
| 0.10912   | 0.14088  | 0.139423 | 0.112471 | 0.0996503 | 0.109703 | 0.110577 |
| 0.115822  | 0.145542 | 0.148456 | 0.119755 | 0.120629  | 0.128934 | 0.125728 |
| 0.117279  | 0.137092 | 0.139714 | 0.123543 | 0.112179  | 0.122523 | 0.120192 |
| 0.105915  | 0.135052 | 0.143794 | 0.113345 | 0.106352  | 0.109411 | 0.116113 |
| 0.102564  | 0.132576 | 0.129953 | 0.104458 | 0.0942599 | 0.105186 | 0.104021 |
| 0.102564  | 0.129662 | 0.133741 | 0.109703 | 0.104749  | 0.112471 | 0.11014  |
| 0.123252  | 0.14831  | 0.147727 | 0.122232 | 0.108829  | 0.119464 | 0.120047 |
| 0.105769  | 0.136655 | 0.142483 | 0.109703 | 0.10708   | 0.118007 | 0.115967 |
| 0.110577  | 0.140297 | 0.14088  | 0.115385 | 0.102564  | 0.111742 | 0.112617 |
| 0.180653  | 0.204254 | 0.203671 | 0.182255 | 0.184295  | 0.199009 | 0.187063 |
| 0.118735  | 0.146125 | 0.150204 | 0.123543 | 0.111305  | 0.127185 | 0.113491 |
| 0.121503  | 0.150932 | 0.153846 | 0.126603 | 0.116113  | 0.13345  | 0.123834 |
| 0.108537  | 0.146416 | 0.139714 | 0.118007 | 0.110431  | 0.127185 | 0.113199 |
| 0.118298  | 0.148893 | 0.148601 | 0.121649 | 0.111451  | 0.124709 | 0.126748 |
| 0.112762  | 0.143939 | 0.147145 | 0.11961  | 0.116404  | 0.125583 | 0.121212 |
| 0.106061  | 0.133741 | 0.132284 | 0.112325 | 0.0980478 | 0.106935 | 0.104312 |
| 0.107955  | 0.135052 | 0.137092 | 0.115676 | 0.103147  | 0.112617 | 0.114073 |
| 0.101836  | 0.130682 | 0.127768 | 0.11014  | 0.107226  | 0.114073 | 0.112034 |
| 0.115093  | 0.147145 | 0.150058 | 0.119027 | 0.111451  | 0.129662 | 0.120047 |
| 0.11014   | 0.144231 | 0.143357 | 0.115239 | 0.100962  | 0.120629 | 0.111597 |
| 0.112617  | 0.13447  | 0.146125 | 0.118298 | 0.112762  | 0.112908 | 0.118735 |
| 0.11014   | 0.141608 | 0.148019 | 0.116696 | 0.112034  | 0.126748 | 0.118881 |
| 0.124854  | 0.145542 | 0.151661 | 0.131702 | 0.123834  | 0.13884  | 0.134178 |
| 0.109703  | 0.144085 | 0.142628 | 0.113345 | 0.100816  | 0.117279 | 0.119901 |
| 0.131119  | 0.151515 | 0.155303 | 0.133596 | 0.130682  | 0.141026 | 0.136364 |
| 0.104895  | 0.130245 | 0.140734 | 0.112908 | 0.107955  | 0.107226 | 0.113345 |
| 0.109848  | 0.136655 | 0.139569 | 0.118153 | 0.105915  | 0.119755 | 0.104895 |
| 0.105915  | 0.13884  | 0.140589 | 0.11655  | 0.115093  | 0.125146 | 0.121358 |
| 0.104167  | 0.130973 | 0.128642 | 0.11014  | 0.108392  | 0.114365 | 0.112034 |
| 0.180798  | 0.206731 | 0.203234 | 0.186189 | 0.185023  | 0.197115 | 0.190122 |
| 0.103438  | 0.136946 | 0.136072 | 0.109411 | 0.0948427 | 0.105186 | 0.111305 |
| 0.0952797 | 0.129662 | 0.130828 | 0.10271  | 0.0916375 | 0.112471 | 0.107517 |
| 0.123543  | 0.147436 | 0.148601 | 0.122523 | 0.10708   | 0.120047 | 0.120921 |
| 0.171911  | 0.196096 | 0.197552 | 0.176136 | 0.173805  | 0.186772 | 0.181235 |
| 0.127477  | 0.157488 | 0.160693 | 0.133741 | 0.12296   | 0.132139 | 0.137092 |
| 0.140589  | 0.163024 | 0.160402 | 0.145688 | 0.13141   | 0.140006 | 0.148456 |
| 0.1419    | 0.15676  | 0.157051 | 0.146125 | 0.136218  | 0.150932 | 0.1419   |
| 0.106935  | 0.140152 | 0.140443 | 0.115822 | 0.104167  | 0.114802 | 0.117424 |
| 0.113199  | 0.14292  | 0.146125 | 0.119464 | 0.11859   | 0.128934 | 0.121649 |
| 0.205128  | 0.226399 | 0.22669  | 0.207605 | 0.209062  | 0.220862 | 0.210082 |
| 0.110431  | 0.140734 | 0.141608 | 0.12602  | 0.121066  | 0.132284 | 0.120047 |

|           |          |          |          |           |           |          |
|-----------|----------|----------|----------|-----------|-----------|----------|
| 0.116113  | 0.143211 | 0.150787 | 0.125291 | 0.124126  | 0.131265  | 0.126603 |
| 0.107372  | 0.139714 | 0.137675 | 0.113636 | 0.0981935 | 0.110286  | 0.109994 |
| 0.160402  | 0.184586 | 0.186626 | 0.167249 | 0.166084  | 0.176428  | 0.167978 |
| 0.103875  | 0.140297 | 0.13884  | 0.110431 | 0.102564  | 0.118444  | 0.109994 |
| 0.138695  | 0.157343 | 0.164627 | 0.146416 | 0.135927  | 0.147727  | 0.148601 |
| 0.109848  | 0.129662 | 0.134033 | 0.115822 | 0.10912   | 0.108392  | 0.117133 |
| 0.183275  | 0.205711 | 0.206876 | 0.18546  | 0.184586  | 0.19697   | 0.18852  |
| 0.115967  | 0.145396 | 0.148893 | 0.120775 | 0.107663  | 0.119172  | 0.121795 |
| 0.0984848 | 0.129662 | 0.129079 | 0.104167 | 0.0945513 | 0.105186  | 0.1081   |
| 0.109994  | 0.139714 | 0.143502 | 0.115385 | 0.104312  | 0.116113  | 0.105332 |
| 0.111888  | 0.140152 | 0.1419   | 0.119901 | 0.108829  | 0.125     | 0.115967 |
| 0.119464  | 0.148601 | 0.14831  | 0.118444 | 0.103293  | 0.115967  | 0.119755 |
| 0.113636  | 0.136946 | 0.143357 | 0.116404 | 0.110286  | 0.122086  | 0.11451  |
| 0.10708   | 0.135344 | 0.145833 | 0.110431 | 0.104895  | 0.105041  | 0.112325 |
| 0.182692  | 0.207751 | 0.206002 | 0.184003 | 0.185169  | 0.193765  | 0.187937 |
| 0.115239  | 0.143794 | 0.147873 | 0.117424 | 0.107809  | 0.12602   | 0.122523 |
| 0.107517  | 0.136072 | 0.13986  | 0.112617 | 0.102418  | 0.115093  | 0.112471 |
| 0.207314  | 0.227127 | 0.22567  | 0.208042 | 0.206876  | 0.218677  | 0.210227 |
| 0.120484  | 0.144668 | 0.148747 | 0.124709 | 0.108392  | 0.125437  | 0.115239 |
| 0.111014  | 0.133741 | 0.141608 | 0.11553  | 0.110286  | 0.111597  | 0.113345 |
| 0.104021  | 0.129662 | 0.139569 | 0.109411 | 0.101544  | 0.105769  | 0.108974 |
| 0.126603  | 0.147582 | 0.153118 | 0.132576 | 0.132576  | 0.14088   | 0.136509 |
| 0.181964  | 0.205274 | 0.203817 | 0.184149 | 0.183858  | 0.198864  | 0.189831 |
| 0.100816  | 0.128205 | 0.127914 | 0.105332 | 0.101836  | 0.112471  | 0.106352 |
| 0.120047  | 0.143648 | 0.146853 | 0.126311 | 0.116696  | 0.132867  | 0.128205 |
| 0.105769  | 0.131702 | 0.1419   | 0.114365 | 0.104749  | 0.105478  | 0.114219 |
| 0.101399  | 0.131702 | 0.142774 | 0.10912  | 0.103584  | 0.109266  | 0.110723 |
| 0.106206  | 0.13039  | 0.140006 | 0.108974 | 0.104604  | 0.107955  | 0.113782 |
| 0.106352  | 0.1419   | 0.148601 | 0.114073 | 0.110868  | 0.123834  | 0.118298 |
| 0.095134  | 0.123397 | 0.125728 | 0.100524 | 0.0932401 | 0.0995047 | 0.103875 |
| 0.120484  | 0.145251 | 0.150204 | 0.12296  | 0.111597  | 0.121358  | 0.126603 |
| 0.127768  | 0.147873 | 0.150204 | 0.134615 | 0.122086  | 0.133304  | 0.124854 |
| 0.114948  | 0.149038 | 0.14933  | 0.120921 | 0.108974  | 0.120192  | 0.125146 |
| 0.120629  | 0.143357 | 0.143065 | 0.127768 | 0.114073  | 0.124709  | 0.126748 |
| 0.184295  | 0.20877  | 0.210519 | 0.189685 | 0.188811  | 0.200612  | 0.195076 |
| 0.107226  | 0.138112 | 0.14627  | 0.114073 | 0.105332  | 0.124417  | 0.11451  |
| 0.121941  | 0.14729  | 0.152535 | 0.127622 | 0.125     | 0.135344  | 0.130099 |
| 0.106061  | 0.130536 | 0.140443 | 0.111742 | 0.103001  | 0.106061  | 0.110723 |
| 0.0942599 | 0.121066 | 0.12602  | 0.10169  | 0.0932401 | 0.0986305 | 0.105332 |
| 0.105041  | 0.134761 | 0.140006 | 0.108683 | 0.10373   | 0.114948  | 0.118444 |
| 0.104604  | 0.128788 | 0.129953 | 0.107372 | 0.103293  | 0.11014   | 0.107226 |
| 0.122378  | 0.148601 | 0.152389 | 0.131265 | 0.11961   | 0.126457  | 0.127331 |
| 0.112617  | 0.142337 | 0.148747 | 0.116259 | 0.109266  | 0.127185  | 0.116113 |
| 0.0957168 | 0.126603 | 0.128059 | 0.103147 | 0.0961538 | 0.103875  | 0.104167 |

|           |          |          |           |           |           |          |
|-----------|----------|----------|-----------|-----------|-----------|----------|
| 0.0929487 | 0.119755 | 0.123834 | 0.0983392 | 0.0936772 | 0.100524  | 0.101399 |
| 0.0968823 | 0.130099 | 0.129516 | 0.104604  | 0.0964452 | 0.103584  | 0.106789 |
| 0.101399  | 0.130245 | 0.130245 | 0.106206  | 0.0939685 | 0.0996503 | 0.102564 |
| 0.126603  | 0.148747 | 0.154575 | 0.130828  | 0.120338  | 0.126311  | 0.133596 |
| 0.0984848 | 0.134324 | 0.133741 | 0.103001  | 0.101836  | 0.107809  | 0.107226 |
| 0.102127  | 0.136801 | 0.144959 | 0.113054  | 0.109266  | 0.11961   | 0.116696 |
| 0.0925117 | 0.128351 | 0.12602  | 0.101107  | 0.0949883 | 0.107372  | 0.102127 |
| 0.104021  | 0.13141  | 0.139569 | 0.108829  | 0.105915  | 0.109848  | 0.112179 |
| 0.099796  | 0.130973 | 0.135052 | 0.106643  | 0.0935315 | 0.104749  | 0.107663 |
| 0.106789  | 0.135635 | 0.145833 | 0.113345  | 0.108392  | 0.110286  | 0.114948 |
| 0.101544  | 0.135635 | 0.141754 | 0.111305  | 0.0990676 | 0.121941  | 0.11116  |
| 0.110868  | 0.145251 | 0.147582 | 0.116841  | 0.1081    | 0.130099  | 0.113199 |
| 0.112325  | 0.138258 | 0.142045 | 0.112471  | 0.0987762 | 0.112617  | 0.117861 |
| 0.0964452 | 0.127331 | 0.129662 | 0.107663  | 0.0960082 | 0.10169   | 0.107517 |
| 0.105624  | 0.131556 | 0.141754 | 0.111014  | 0.105769  | 0.10912   | 0.11116  |
| 0.114073  | 0.144085 | 0.145833 | 0.122086  | 0.107517  | 0.123397  | 0.112325 |
| 0.114219  | 0.142483 | 0.144814 | 0.119027  | 0.110868  | 0.121795  | 0.117716 |
| 0.0989219 | 0.131556 | 0.134761 | 0.101981  | 0.0874126 | 0.095134  | 0.113199 |
| 0.102418  | 0.133304 | 0.139423 | 0.113054  | 0.104604  | 0.105915  | 0.112617 |
| 0.110431  | 0.142483 | 0.147436 | 0.115822  | 0.114656  | 0.125291  | 0.123252 |
| 0.101399  | 0.129662 | 0.127914 | 0.101836  | 0.0910548 | 0.102855  | 0.10373  |
| 0.109266  | 0.144522 | 0.148893 | 0.115239  | 0.113491  | 0.125874  | 0.119755 |
| 0.115967  | 0.145396 | 0.145396 | 0.111742  | 0.0983392 | 0.116259  | 0.119172 |
| 0.0981935 | 0.123834 | 0.129079 | 0.105332  | 0.0977564 | 0.104895  | 0.106352 |
| 0.101399  | 0.136946 | 0.139569 | 0.112908  | 0.0995047 | 0.11014   | 0.111597 |
| 0.101253  | 0.138258 | 0.137092 | 0.107226  | 0.0909091 | 0.105041  | 0.107663 |
| 0.112471  | 0.143648 | 0.14831  | 0.116113  | 0.118735  | 0.129371  | 0.123543 |
| 0.115093  | 0.14831  | 0.141608 | 0.122232  | 0.113491  | 0.125874  | 0.117716 |
| 0.104167  | 0.136801 | 0.13884  | 0.11451   | 0.104312  | 0.116696  | 0.114656 |
| 0.187791  | 0.20877  | 0.209062 | 0.186772  | 0.187937  | 0.200321  | 0.191579 |
| 0.15778   | 0.18109  | 0.183712 | 0.163462  | 0.159382  | 0.173514  | 0.162442 |
| 0.115822  | 0.146999 | 0.146999 | 0.119172  | 0.109266  | 0.121649  | 0.124272 |
| 0.103438  | 0.137238 | 0.136364 | 0.11116   | 0.104458  | 0.119172  | 0.113054 |
| 0.145688  | 0.16317  | 0.164627 | 0.149621  | 0.135052  | 0.142483  | 0.149476 |
| 0.115239  | 0.147582 | 0.151661 | 0.123252  | 0.115385  | 0.130973  | 0.125728 |
| 0.112179  | 0.133159 | 0.145979 | 0.11961   | 0.111742  | 0.120338  | 0.11859  |
| 0.107372  | 0.137092 | 0.143794 | 0.115676  | 0.104895  | 0.118153  | 0.117861 |
| 0.100379  | 0.127768 | 0.137966 | 0.108683  | 0.0920746 | 0.0895979 | 0.114948 |
| 0.112617  | 0.141754 | 0.144668 | 0.115967  | 0.111888  | 0.123397  | 0.119318 |
| 0.193473  | 0.216492 | 0.21824  | 0.195076  | 0.196824  | 0.209207  | 0.204254 |
| 0.101544  | 0.130973 | 0.130099 | 0.107517  | 0.105478  | 0.113199  | 0.111451 |
| 0.102564  | 0.133159 | 0.139569 | 0.114365  | 0.107955  | 0.11859   | 0.11451  |
| 0.10373   | 0.129953 | 0.138695 | 0.109703  | 0.102127  | 0.106935  | 0.111014 |
| 0.108246  | 0.142045 | 0.143211 | 0.115093  | 0.102855  | 0.116987  | 0.11961  |

|           |          |          |           |           |           |          |
|-----------|----------|----------|-----------|-----------|-----------|----------|
| 0.176282  | 0.203089 | 0.205128 | 0.179924  | 0.181964  | 0.194056  | 0.183275 |
| 0.24359   | 0.256993 | 0.255828 | 0.241696  | 0.241696  | 0.251748  | 0.246795 |
| 0.11451   | 0.149184 | 0.15035  | 0.119318  | 0.113199  | 0.130536  | 0.11859  |
| 0.111597  | 0.140734 | 0.143939 | 0.11757   | 0.109703  | 0.119755  | 0.117716 |
| 0.115967  | 0.148893 | 0.149476 | 0.119318  | 0.109703  | 0.121212  | 0.120047 |
| 0.112034  | 0.141463 | 0.145251 | 0.11451   | 0.0990676 | 0.111451  | 0.116404 |
| 0.0944056 | 0.129079 | 0.126166 | 0.0986305 | 0.0968823 | 0.106061  | 0.104604 |
| 0.105915  | 0.140297 | 0.14088  | 0.105478  | 0.100233  | 0.11757   | 0.113782 |
| 0.109266  | 0.13549  | 0.141026 | 0.114948  | 0.110286  | 0.119172  | 0.11014  |
| 0.094697  | 0.129079 | 0.123543 | 0.101544  | 0.0986305 | 0.106643  | 0.103438 |
| 0.107663  | 0.133304 | 0.13884  | 0.113345  | 0.106061  | 0.114948  | 0.112908 |
| 0.102273  | 0.136364 | 0.141317 | 0.107955  | 0.097465  | 0.0990676 | 0.11655  |
| 0.0992133 | 0.12398  | 0.133304 | 0.107226  | 0.0987762 | 0.103293  | 0.110286 |
| 0.115676  | 0.14627  | 0.150641 | 0.120775  | 0.109703  | 0.130828  | 0.118298 |
| 0.109994  | 0.143502 | 0.14933  | 0.116841  | 0.114219  | 0.12398   | 0.123689 |
| 0.100962  | 0.133596 | 0.133304 | 0.104312  | 0.0914918 | 0.104458  | 0.100087 |
| 0.120775  | 0.142628 | 0.149038 | 0.124126  | 0.0932401 | 0.105624  | 0.118735 |
| 0.129225  | 0.147582 | 0.151369 | 0.128497  | 0.114219  | 0.125146  | 0.13039  |
| 0.104604  | 0.132867 | 0.142483 | 0.11116   | 0.102127  | 0.107517  | 0.109848 |
| 0.107663  | 0.12602  | 0.135927 | 0.111597  | 0.109266  | 0.116113  | 0.107955 |
| 0.122232  | 0.135927 | 0.145251 | 0.129371  | 0.120921  | 0.121358  | 0.127768 |
| 0.202214  | 0.221154 | 0.223193 | 0.204691  | 0.203817  | 0.213287  | 0.20979  |
| 0.104749  | 0.140297 | 0.141754 | 0.104312  | 0.0967366 | 0.117279  | 0.107372 |
| 0.0996503 | 0.125291 | 0.129662 | 0.103875  | 0.092803  | 0.099359  | 0.105186 |
| 0.106643  | 0.140443 | 0.14627  | 0.114948  | 0.104749  | 0.123834  | 0.117133 |
| 0.117861  | 0.151078 | 0.152826 | 0.125291  | 0.1081    | 0.125728  | 0.114073 |
| 0.108537  | 0.137966 | 0.137675 | 0.114802  | 0.102855  | 0.116696  | 0.112325 |
| 0.189831  | 0.220425 | 0.220134 | 0.19697   | 0.196387  | 0.207896  | 0.19799  |
| 0.112471  | 0.144814 | 0.149184 | 0.117279  | 0.117279  | 0.130536  | 0.124126 |
| 0.103001  | 0.130973 | 0.140589 | 0.110431  | 0.105478  | 0.103584  | 0.112325 |
| 0.114219  | 0.138986 | 0.143648 | 0.118444  | 0.110286  | 0.116841  | 0.120629 |
| 0.109848  | 0.137821 | 0.141026 | 0.11116   | 0.0965909 | 0.109848  | 0.11451  |
| 0.109266  | 0.143939 | 0.148893 | 0.116987  | 0.115822  | 0.12704   | 0.120629 |
| 0.101399  | 0.13141  | 0.141608 | 0.107372  | 0.104749  | 0.113054  | 0.108683 |
| 0.103438  | 0.133159 | 0.140443 | 0.103875  | 0.0948427 | 0.0996503 | 0.114802 |
| 0.112471  | 0.144522 | 0.147436 | 0.11757   | 0.105041  | 0.11859   | 0.110723 |
| 0.190997  | 0.215181 | 0.214307 | 0.192016  | 0.193182  | 0.203526  | 0.197698 |
| 0.0990676 | 0.133159 | 0.138403 | 0.104167  | 0.103875  | 0.116841  | 0.113636 |
| 0.188083  | 0.212267 | 0.211684 | 0.189977  | 0.193473  | 0.200903  | 0.191579 |
| 0.188228  | 0.212121 | 0.210373 | 0.188374  | 0.190705  | 0.203089  | 0.188811 |
| 0.126748  | 0.14627  | 0.146853 | 0.125437  | 0.113491  | 0.120047  | 0.126457 |
| 0.125874  | 0.148893 | 0.150641 | 0.13243   | 0.11757   | 0.126166  | 0.123252 |
| 0.0941142 | 0.12704  | 0.129371 | 0.100962  | 0.0855186 | 0.0935315 | 0.108683 |
| 0.10271   | 0.131847 | 0.139423 | 0.107226  | 0.105186  | 0.119318  | 0.109411 |

|           |          |          |           |           |          |          |
|-----------|----------|----------|-----------|-----------|----------|----------|
| 0.105769  | 0.137821 | 0.145105 | 0.114948  | 0.110868  | 0.119755 | 0.119172 |
| 0.105769  | 0.133741 | 0.144231 | 0.114073  | 0.108537  | 0.1081   | 0.116841 |
| 0.0906177 | 0.123543 | 0.124709 | 0.0962995 | 0.0916375 | 0.105478 | 0.101981 |
| 0.0949883 | 0.125874 | 0.12296  | 0.099796  | 0.0980478 | 0.107226 | 0.103147 |
| 0.11961   | 0.147582 | 0.151078 | 0.121503  | 0.111888  | 0.134178 | 0.121649 |
| 0.119464  | 0.145979 | 0.147727 | 0.119318  | 0.101253  | 0.11655  | 0.117424 |
| 0.099796  | 0.126603 | 0.138258 | 0.107226  | 0.102273  | 0.100962 | 0.110286 |
| 0.108392  | 0.139569 | 0.147727 | 0.114656  | 0.114656  | 0.123252 | 0.121212 |
| 0.0939685 | 0.128351 | 0.129808 | 0.099359  | 0.0912005 | 0.10067  | 0.108246 |
| 0.120338  | 0.147145 | 0.148893 | 0.125146  | 0.123106  | 0.129371 | 0.12704  |
| 0.113928  | 0.143939 | 0.14627  | 0.116696  | 0.108829  | 0.117133 | 0.11859  |
| 0.122523  | 0.14933  | 0.152535 | 0.129371  | 0.128205  | 0.137966 | 0.129516 |
| 0.253351  | 0.271125 | 0.263258 | 0.256993  | 0.255536  | 0.266754 | 0.25947  |
| 0.122232  | 0.143502 | 0.14292  | 0.125291  | 0.106061  | 0.11961  | 0.121649 |
| 0.119464  | 0.143357 | 0.142191 | 0.129225  | 0.112325  | 0.128497 | 0.121795 |
| 0.21285   | 0.232372 | 0.228001 | 0.215035  | 0.215909  | 0.223631 | 0.21926  |
| 0.115967  | 0.140734 | 0.142483 | 0.124563  | 0.112908  | 0.12704  | 0.126748 |
| 0.224942  | 0.244464 | 0.241259 | 0.227127  | 0.228001  | 0.236014 | 0.228147 |
| 0.110868  | 0.139132 | 0.138258 | 0.115385  | 0.100233  | 0.111451 | 0.112325 |
| 0.119464  | 0.134907 | 0.144814 | 0.12602   | 0.118444  | 0.119172 | 0.124417 |
| 0.105478  | 0.142774 | 0.142774 | 0.114073  | 0.103293  | 0.118007 | 0.107226 |
| 0.122378  | 0.14627  | 0.148019 | 0.119027  | 0.109411  | 0.116841 | 0.122669 |
| 0.194056  | 0.220862 | 0.21824  | 0.197115  | 0.197407  | 0.210664 | 0.203671 |
| 0.121795  | 0.145979 | 0.151224 | 0.126603  | 0.124563  | 0.132867 | 0.130245 |
| 0.109848  | 0.142483 | 0.148601 | 0.114365  | 0.115239  | 0.124709 | 0.117424 |
| 0.219843  | 0.238491 | 0.237908 | 0.222319  | 0.223193  | 0.232663 | 0.22567  |
| 0.0961538 | 0.13141  | 0.13141  | 0.103001  | 0.103001  | 0.109266 | 0.107226 |
| 0.190705  | 0.212558 | 0.214015 | 0.191434  | 0.194347  | 0.206439 | 0.198864 |
| 0.0983392 | 0.13243  | 0.133304 | 0.105478  | 0.0996503 | 0.112908 | 0.107663 |
| 0.103001  | 0.133013 | 0.139714 | 0.110723  | 0.106061  | 0.107663 | 0.11553  |
| 0.11014   | 0.128497 | 0.132867 | 0.116113  | 0.106789  | 0.106061 | 0.118881 |
| 0.127331  | 0.148601 | 0.148601 | 0.126894  | 0.112034  | 0.118298 | 0.12704  |
| 0.105624  | 0.13884  | 0.137966 | 0.116259  | 0.107809  | 0.121358 | 0.112325 |
| 0.149038  | 0.171766 | 0.174679 | 0.151807  | 0.150641  | 0.16419  | 0.158362 |
| 0.106206  | 0.13447  | 0.143211 | 0.109266  | 0.108974  | 0.118153 | 0.117279 |
| 0.11757   | 0.149913 | 0.148456 | 0.122086  | 0.109557  | 0.12398  | 0.114365 |
| 0.109994  | 0.140006 | 0.143502 | 0.111888  | 0.103438  | 0.116113 | 0.113782 |
| 0.122232  | 0.140297 | 0.144376 | 0.131702  | 0.118007  | 0.131556 | 0.118153 |
| 0.188228  | 0.209207 | 0.209207 | 0.18954   | 0.191871  | 0.204254 | 0.19493  |
| 0.101836  | 0.13039  | 0.137966 | 0.11014   | 0.103147  | 0.106206 | 0.110286 |
| 0.118881  | 0.149767 | 0.152681 | 0.120484  | 0.104167  | 0.117424 | 0.123834 |
| 0.100379  | 0.129808 | 0.13039  | 0.100816  | 0.0914918 | 0.105915 | 0.102127 |
| 0.0979021 | 0.12296  | 0.122669 | 0.103293  | 0.103584  | 0.107809 | 0.108392 |
| 0.112617  | 0.133013 | 0.145542 | 0.120047  | 0.11451   | 0.111742 | 0.119318 |

|           |          |          |          |           |           |          |
|-----------|----------|----------|----------|-----------|-----------|----------|
| 0.249709  | 0.268065 | 0.261655 | 0.255099 | 0.252185  | 0.261946  | 0.256993 |
| 0.103584  | 0.12398  | 0.130973 | 0.111888 | 0.102273  | 0.102418  | 0.112034 |
| 0.109994  | 0.140297 | 0.14729  | 0.118881 | 0.108683  | 0.122232  | 0.11553  |
| 0.174097  | 0.19391  | 0.199155 | 0.175699 | 0.174242  | 0.188957  | 0.181964 |
| 0.179633  | 0.202069 | 0.202069 | 0.181818 | 0.18007   | 0.192745  | 0.187209 |
| 0.113491  | 0.144376 | 0.149913 | 0.11859  | 0.111014  | 0.126603  | 0.121941 |
| 0.110723  | 0.143648 | 0.149476 | 0.118153 | 0.116404  | 0.123834  | 0.120921 |
| 0.113054  | 0.1419   | 0.143065 | 0.116987 | 0.0989219 | 0.113345  | 0.114802 |
| 0.136218  | 0.155449 | 0.160985 | 0.143065 | 0.141317  | 0.149038  | 0.142045 |
| 0.109994  | 0.144085 | 0.14729  | 0.115967 | 0.106352  | 0.127768  | 0.11553  |
| 0.114802  | 0.149184 | 0.151807 | 0.119027 | 0.109703  | 0.129371  | 0.120629 |
| 0.106789  | 0.130973 | 0.127477 | 0.111597 | 0.109848  | 0.11553   | 0.111451 |
| 0.109703  | 0.141171 | 0.142337 | 0.11451  | 0.111597  | 0.120484  | 0.122815 |
| 0.120629  | 0.143065 | 0.148019 | 0.128059 | 0.12602   | 0.136072  | 0.12704  |
| 0.100962  | 0.130099 | 0.13039  | 0.11014  | 0.108392  | 0.11116   | 0.109703 |
| 0.121503  | 0.147145 | 0.149767 | 0.122815 | 0.108829  | 0.11655   | 0.123252 |
| 0.138258  | 0.155449 | 0.158071 | 0.136946 | 0.123543  | 0.128642  | 0.137092 |
| 0.11014   | 0.127331 | 0.130828 | 0.114948 | 0.106789  | 0.106352  | 0.119172 |
| 0.129225  | 0.149913 | 0.150495 | 0.129662 | 0.114802  | 0.121358  | 0.132721 |
| 0.105041  | 0.131265 | 0.128351 | 0.113054 | 0.111888  | 0.11961   | 0.114073 |
| 0.200758  | 0.227273 | 0.227564 | 0.20236  | 0.203526  | 0.215035  | 0.206876 |
| 0.109994  | 0.137966 | 0.137092 | 0.119755 | 0.0935315 | 0.0893065 | 0.123689 |
| 0.184003  | 0.209062 | 0.207605 | 0.187063 | 0.189394  | 0.197407  | 0.191288 |
| 0.107955  | 0.137966 | 0.142045 | 0.113928 | 0.102564  | 0.115239  | 0.104749 |
| 0.117279  | 0.136218 | 0.148747 | 0.124417 | 0.113928  | 0.113782  | 0.122815 |
| 0.117279  | 0.149621 | 0.150495 | 0.122378 | 0.110723  | 0.121358  | 0.127768 |
| 0.1081    | 0.140734 | 0.143648 | 0.115822 | 0.101253  | 0.114219  | 0.118881 |
| 0.114948  | 0.145542 | 0.150204 | 0.121212 | 0.120338  | 0.131265  | 0.123397 |
| 0.113199  | 0.142045 | 0.146125 | 0.121212 | 0.117716  | 0.128059  | 0.120484 |
| 0.109703  | 0.137675 | 0.146416 | 0.116259 | 0.108683  | 0.112908  | 0.116404 |
| 0.112762  | 0.146853 | 0.144814 | 0.120192 | 0.105915  | 0.12296   | 0.112762 |
| 0.120629  | 0.146853 | 0.151807 | 0.124563 | 0.117861  | 0.122669  | 0.128788 |
| 0.109703  | 0.132139 | 0.132139 | 0.115093 | 0.11451   | 0.123689  | 0.116404 |
| 0.248106  | 0.262092 | 0.260635 | 0.24796  | 0.248543  | 0.258596  | 0.251311 |
| 0.10912   | 0.136218 | 0.144668 | 0.11655  | 0.108392  | 0.11116   | 0.114365 |
| 0.178322  | 0.204545 | 0.204545 | 0.178176 | 0.178467  | 0.193182  | 0.186189 |
| 0.181964  | 0.207022 | 0.206731 | 0.182401 | 0.181818  | 0.194493  | 0.189248 |
| 0.106935  | 0.138695 | 0.144814 | 0.112617 | 0.112325  | 0.121212  | 0.119755 |
| 0.10169   | 0.127622 | 0.130536 | 0.109411 | 0.0989219 | 0.100816  | 0.111014 |
| 0.119464  | 0.132867 | 0.145105 | 0.124272 | 0.116113  | 0.116259  | 0.121503 |
| 0.104312  | 0.138695 | 0.143357 | 0.108829 | 0.109411  | 0.120338  | 0.116259 |
| 0.100087  | 0.131265 | 0.137966 | 0.107226 | 0.0897436 | 0.0945513 | 0.114365 |
| 0.0986305 | 0.130973 | 0.127768 | 0.103147 | 0.101981  | 0.108829  | 0.107372 |
| 0.109557  | 0.136946 | 0.1419   | 0.116987 | 0.114073  | 0.12296   | 0.121795 |

|           |          |          |          |           |          |          |
|-----------|----------|----------|----------|-----------|----------|----------|
| 0.125     | 0.14627  | 0.152972 | 0.126603 | 0.128934  | 0.135781 | 0.130245 |
| 0.107372  | 0.134178 | 0.142045 | 0.114802 | 0.108392  | 0.106789 | 0.115239 |
| 0.120484  | 0.147873 | 0.151661 | 0.127622 | 0.125583  | 0.131556 | 0.13039  |
| 0.104021  | 0.138403 | 0.13986  | 0.118153 | 0.103293  | 0.118881 | 0.113636 |
| 0.121795  | 0.144522 | 0.151224 | 0.125728 | 0.116696  | 0.125    | 0.127331 |
| 0.116113  | 0.147582 | 0.145251 | 0.118881 | 0.103147  | 0.116113 | 0.117861 |
| 0.111014  | 0.132576 | 0.128205 | 0.116113 | 0.113199  | 0.118007 | 0.115967 |
| 0.110577  | 0.134761 | 0.140589 | 0.110723 | 0.103147  | 0.104458 | 0.121066 |
| 0.109703  | 0.13243  | 0.14292  | 0.114219 | 0.107226  | 0.110286 | 0.113199 |
| 0.123397  | 0.14292  | 0.149038 | 0.126457 | 0.122378  | 0.135927 | 0.129225 |
| 0.175408  | 0.205711 | 0.206294 | 0.179924 | 0.180216  | 0.193473 | 0.184149 |
| 0.126311  | 0.14729  | 0.15574  | 0.133159 | 0.130536  | 0.140297 | 0.133304 |
| 0.114656  | 0.143211 | 0.146707 | 0.11859  | 0.118881  | 0.127477 | 0.121649 |
| 0.113928  | 0.144231 | 0.150058 | 0.119318 | 0.107955  | 0.118007 | 0.121503 |
| 0.101836  | 0.135344 | 0.138549 | 0.109266 | 0.0961538 | 0.113199 | 0.114365 |
| 0.118298  | 0.145396 | 0.145396 | 0.116113 | 0.10271   | 0.11655  | 0.121795 |
| 0.122523  | 0.150787 | 0.148164 | 0.123834 | 0.105478  | 0.116113 | 0.125437 |
| 0.184732  | 0.210373 | 0.20979  | 0.187791 | 0.187791  | 0.199883 | 0.190559 |
| 0.114219  | 0.137821 | 0.142774 | 0.116696 | 0.112908  | 0.12296  | 0.120338 |
| 0.0980478 | 0.129808 | 0.133596 | 0.104021 | 0.0955711 | 0.112908 | 0.111451 |
| 0.116987  | 0.141463 | 0.151078 | 0.120047 | 0.121212  | 0.128934 | 0.123397 |
| 0.185897  | 0.211247 | 0.210373 | 0.188083 | 0.18954   | 0.20338  | 0.191725 |
| 0.0977564 | 0.126311 | 0.13243  | 0.106935 | 0.097028  | 0.101836 | 0.108246 |
| 0.102273  | 0.128205 | 0.127331 | 0.108246 | 0.108537  | 0.115676 | 0.109266 |
| 0.115967  | 0.144231 | 0.148601 | 0.120484 | 0.120484  | 0.129953 | 0.126166 |
| 0.107955  | 0.141754 | 0.144376 | 0.115385 | 0.106061  | 0.121649 | 0.111451 |
| 0.179341  | 0.205857 | 0.204691 | 0.181527 | 0.183566  | 0.197698 | 0.189248 |
| 0.0992133 | 0.129516 | 0.127185 | 0.107809 | 0.105769  | 0.113782 | 0.105915 |
| 0.100962  | 0.135635 | 0.142337 | 0.108392 | 0.107226  | 0.117279 | 0.115239 |
| 0.0986305 | 0.128934 | 0.134761 | 0.106935 | 0.100233  | 0.10708  | 0.109703 |
| 0.110868  | 0.144668 | 0.145251 | 0.119172 | 0.114802  | 0.127185 | 0.121358 |
| 0.113054  | 0.145105 | 0.145688 | 0.120192 | 0.105624  | 0.12296  | 0.111888 |
| 0.107809  | 0.135198 | 0.128497 | 0.114073 | 0.11116   | 0.114219 | 0.112471 |
| 0.104895  | 0.132576 | 0.142191 | 0.114365 | 0.105041  | 0.108683 | 0.113636 |
| 0.109557  | 0.140734 | 0.141026 | 0.117279 | 0.109703  | 0.118881 | 0.120047 |
| 0.142337  | 0.158654 | 0.158362 | 0.146562 | 0.133159  | 0.152244 | 0.142337 |
| 0.228875  | 0.25539  | 0.25102  | 0.234266 | 0.234848  | 0.245192 | 0.234703 |
| 0.115822  | 0.137092 | 0.145833 | 0.115093 | 0.106935  | 0.105915 | 0.128059 |
| 0.114948  | 0.148747 | 0.146707 | 0.120921 | 0.109266  | 0.127185 | 0.111742 |
| 0.110723  | 0.140443 | 0.143357 | 0.114948 | 0.112325  | 0.124417 | 0.120629 |
| 0.113491  | 0.141463 | 0.146416 | 0.121212 | 0.115093  | 0.127477 | 0.114365 |
| 0.104895  | 0.13549  | 0.137821 | 0.115822 | 0.100962  | 0.115967 | 0.106352 |
| 0.112471  | 0.137529 | 0.140734 | 0.117279 | 0.104749  | 0.11451  | 0.117424 |
| 0.114365  | 0.140297 | 0.14729  | 0.120338 | 0.120338  | 0.126603 | 0.119901 |

|           |          |          |           |           |           |          |
|-----------|----------|----------|-----------|-----------|-----------|----------|
| 0.105478  | 0.130245 | 0.12704  | 0.110286  | 0.108246  | 0.117133  | 0.113928 |
| 0.105769  | 0.143939 | 0.145396 | 0.109411  | 0.107663  | 0.124417  | 0.111597 |
| 0.232372  | 0.250146 | 0.248397 | 0.236014  | 0.233974  | 0.241987  | 0.235577 |
| 0.0984848 | 0.122086 | 0.130245 | 0.105624  | 0.0995047 | 0.104604  | 0.106352 |
| 0.0979021 | 0.128788 | 0.131119 | 0.103293  | 0.0895979 | 0.107226  | 0.105769 |
| 0.10708   | 0.130973 | 0.140006 | 0.112762  | 0.107226  | 0.107372  | 0.112908 |
| 0.124417  | 0.15035  | 0.154138 | 0.127477  | 0.11961   | 0.137529  | 0.125    |
| 0.121503  | 0.13986  | 0.144814 | 0.116696  | 0.110577  | 0.111597  | 0.130245 |
| 0.111014  | 0.1419   | 0.144231 | 0.120775  | 0.112617  | 0.117424  | 0.12296  |
| 0.113928  | 0.142191 | 0.146853 | 0.120484  | 0.117861  | 0.126457  | 0.122378 |
| 0.105332  | 0.138549 | 0.142337 | 0.106935  | 0.101981  | 0.119318  | 0.112325 |
| 0.228001  | 0.246941 | 0.239365 | 0.229604  | 0.228147  | 0.238199  | 0.231206 |
| 0.117279  | 0.146999 | 0.148164 | 0.122669  | 0.119464  | 0.133013  | 0.123397 |
| 0.10169   | 0.128788 | 0.123543 | 0.107663  | 0.107955  | 0.115093  | 0.107517 |
| 0.100816  | 0.135781 | 0.141317 | 0.105915  | 0.0980478 | 0.114219  | 0.104604 |
| 0.119318  | 0.144668 | 0.145542 | 0.126748  | 0.106643  | 0.11961   | 0.114073 |
| 0.115239  | 0.140589 | 0.140589 | 0.120629  | 0.105186  | 0.116113  | 0.119027 |
| 0.110286  | 0.129225 | 0.141171 | 0.113345  | 0.108392  | 0.105915  | 0.112034 |
| 0.102418  | 0.129225 | 0.126894 | 0.1081    | 0.107517  | 0.11116   | 0.109703 |
| 0.109848  | 0.130245 | 0.128497 | 0.114948  | 0.112617  | 0.116841  | 0.115676 |
| 0.097028  | 0.126748 | 0.123834 | 0.103584  | 0.102418  | 0.104895  | 0.105769 |
| 0.108829  | 0.132139 | 0.142337 | 0.114802  | 0.106352  | 0.109703  | 0.112908 |
| 0.120192  | 0.147873 | 0.148747 | 0.127622  | 0.111888  | 0.126311  | 0.118153 |
| 0.12704   | 0.150641 | 0.152389 | 0.133596  | 0.116696  | 0.131702  | 0.122086 |
| 0.123543  | 0.146562 | 0.150641 | 0.129516  | 0.116987  | 0.125874  | 0.128205 |
| 0.12704   | 0.151807 | 0.155303 | 0.130973  | 0.120775  | 0.127914  | 0.132867 |
| 0.125437  | 0.149913 | 0.151369 | 0.130828  | 0.111014  | 0.128642  | 0.11961  |
| 0.095134  | 0.128059 | 0.13447  | 0.0987762 | 0.0844988 | 0.0861014 | 0.111451 |
| 0.121212  | 0.136072 | 0.137821 | 0.124563  | 0.111742  | 0.115093  | 0.117133 |
| 0.103584  | 0.10067  | 0.11116  | 0.0719697 | 0.122669  | 0.125146  | 0.116113 |
| 0.200321  | 0.221591 | 0.224213 | 0.20134   | 0.202506  | 0.215472  | 0.203817 |
| 0.11961   | 0.141463 | 0.146125 | 0.123543  | 0.11451   | 0.122232  | 0.123106 |
| 0.10271   | 0.138549 | 0.137966 | 0.109266  | 0.0961538 | 0.109411  | 0.107663 |
| 0.113928  | 0.138695 | 0.146853 | 0.122232  | 0.113782  | 0.113054  | 0.121212 |
| 0.217512  | 0.239073 | 0.237034 | 0.220862  | 0.216492  | 0.228584  | 0.223631 |
| 0.209936  | 0.228584 | 0.226253 | 0.207751  | 0.209499  | 0.217512  | 0.212267 |
| 0.106935  | 0.130828 | 0.127331 | 0.111451  | 0.113491  | 0.11859   | 0.111014 |
| 0.246358  | 0.262383 | 0.259178 | 0.247086  | 0.247378  | 0.255973  | 0.250146 |
| 0.0954254 | 0.128351 | 0.133596 | 0.10169   | 0.0862471 | 0.0855186 | 0.11116  |
| 0.128059  | 0.144959 | 0.149038 | 0.130245  | 0.114802  | 0.122815  | 0.133596 |
| 0.10067   | 0.124272 | 0.128642 | 0.107809  | 0.0987762 | 0.101253  | 0.110286 |
| 0.119755  | 0.149767 | 0.150058 | 0.128351  | 0.111742  | 0.128788  | 0.117424 |
| 0.181964  | 0.207896 | 0.204108 | 0.183858  | 0.185897  | 0.198864  | 0.187209 |
| 0.107517  | 0.132284 | 0.135781 | 0.112617  | 0.110577  | 0.115967  | 0.11014  |



|           |          |          |           |           |           |          |
|-----------|----------|----------|-----------|-----------|-----------|----------|
| 0.190851  | 0.215326 | 0.215618 | 0.191871  | 0.189248  | 0.203089  | 0.195221 |
| 0.105478  | 0.132867 | 0.141608 | 0.110286  | 0.105915  | 0.119172  | 0.115093 |
| 0.105769  | 0.131119 | 0.132576 | 0.109703  | 0.105624  | 0.11655   | 0.111305 |
| 0.1081    | 0.135198 | 0.136655 | 0.113199  | 0.103293  | 0.109848  | 0.117424 |
| 0.106935  | 0.134615 | 0.138695 | 0.111742  | 0.108829  | 0.121795  | 0.116259 |
| 0.100087  | 0.129225 | 0.135635 | 0.1081    | 0.0996503 | 0.10271   | 0.110577 |
| 0.107955  | 0.135927 | 0.13884  | 0.111014  | 0.104604  | 0.11553   | 0.112617 |
| 0.0986305 | 0.122232 | 0.12602  | 0.103147  | 0.092366  | 0.0977564 | 0.107663 |
| 0.104312  | 0.138112 | 0.142483 | 0.111451  | 0.111742  | 0.122086  | 0.118881 |
| 0.104749  | 0.131556 | 0.13243  | 0.108974  | 0.0976107 | 0.101253  | 0.105624 |
| 0.101253  | 0.13039  | 0.134761 | 0.100524  | 0.0909091 | 0.097465  | 0.111451 |
| 0.0973193 | 0.124126 | 0.12704  | 0.106498  | 0.0971737 | 0.101981  | 0.11014  |
| 0.116113  | 0.137966 | 0.144668 | 0.122378  | 0.110723  | 0.11961   | 0.122815 |
| 0.121066  | 0.146707 | 0.156031 | 0.127331  | 0.124126  | 0.131556  | 0.129516 |
| 0.1081    | 0.13986  | 0.144231 | 0.112325  | 0.104458  | 0.115967  | 0.11859  |
| 0.10271   | 0.134761 | 0.142045 | 0.109557  | 0.102564  | 0.120484  | 0.110868 |
| 0.100524  | 0.127331 | 0.136072 | 0.107372  | 0.102418  | 0.105478  | 0.1081   |
| 0.105769  | 0.131993 | 0.127622 | 0.109411  | 0.103293  | 0.111597  | 0.111305 |
| 0.111597  | 0.144522 | 0.143939 | 0.11961   | 0.105332  | 0.123252  | 0.109848 |
| 0.120192  | 0.144376 | 0.147582 | 0.117716  | 0.107226  | 0.115239  | 0.117861 |
| 0.113782  | 0.141754 | 0.146125 | 0.118298  | 0.106061  | 0.117861  | 0.123106 |
| 0.110723  | 0.141317 | 0.143357 | 0.114365  | 0.114656  | 0.123543  | 0.122669 |
| 0.121066  | 0.147873 | 0.152535 | 0.12704   | 0.124709  | 0.134178  | 0.129225 |
| 0.128351  | 0.149621 | 0.156906 | 0.13549   | 0.132284  | 0.142337  | 0.137966 |
| 0.085373  | 0.120047 | 0.120921 | 0.0945513 | 0.0893065 | 0.0996503 | 0.103147 |
| 0.106352  | 0.133741 | 0.144814 | 0.114948  | 0.106789  | 0.11014   | 0.113636 |
| 0.102127  | 0.133013 | 0.132139 | 0.109848  | 0.0955711 | 0.111742  | 0.107372 |
| 0.127768  | 0.152826 | 0.151661 | 0.134033  | 0.117133  | 0.13243   | 0.122232 |
| 0.103438  | 0.124126 | 0.127331 | 0.109411  | 0.10067   | 0.103147  | 0.111888 |
| 0.137529  | 0.155012 | 0.156177 | 0.137966  | 0.122815  | 0.129662  | 0.137238 |
| 0.126748  | 0.137238 | 0.145979 | 0.132721  | 0.126894  | 0.124126  | 0.132867 |
| 0.117861  | 0.146707 | 0.148747 | 0.120921  | 0.117424  | 0.130973  | 0.124563 |
| 0.102273  | 0.13345  | 0.137238 | 0.109994  | 0.0977564 | 0.10169   | 0.118007 |
| 0.105915  | 0.140297 | 0.142045 | 0.115967  | 0.100524  | 0.114073  | 0.104458 |
| 0.124854  | 0.148456 | 0.150495 | 0.128205  | 0.11451   | 0.123106  | 0.130973 |
| 0.200175  | 0.220862 | 0.221154 | 0.200321  | 0.203526  | 0.213287  | 0.20542  |
| 0.102564  | 0.134033 | 0.138695 | 0.112034  | 0.101253  | 0.118298  | 0.11451  |
| 0.105332  | 0.138258 | 0.139132 | 0.108974  | 0.0967366 | 0.10708   | 0.118153 |
| 0.111888  | 0.142191 | 0.142191 | 0.122523  | 0.103584  | 0.120338  | 0.111888 |
| 0.110868  | 0.141171 | 0.144085 | 0.116259  | 0.104895  | 0.115239  | 0.121066 |
| 0.109557  | 0.137821 | 0.150058 | 0.113491  | 0.112908  | 0.120921  | 0.117133 |
| 0.112471  | 0.143939 | 0.141317 | 0.118153  | 0.113782  | 0.126457  | 0.120921 |
| 0.117861  | 0.146999 | 0.143502 | 0.124126  | 0.115967  | 0.126894  | 0.122523 |
| 0.11451   | 0.145396 | 0.147145 | 0.119027  | 0.109703  | 0.123252  | 0.118298 |

|           |          |          |           |           |           |           |
|-----------|----------|----------|-----------|-----------|-----------|-----------|
| 0.0979021 | 0.131702 | 0.129079 | 0.103875  | 0.0916375 | 0.101399  | 0.10169   |
| 0.124417  | 0.147145 | 0.148893 | 0.127477  | 0.113199  | 0.124417  | 0.117133  |
| 0.101981  | 0.13141  | 0.137821 | 0.107663  | 0.095134  | 0.10373   | 0.116259  |
| 0.109411  | 0.134178 | 0.14292  | 0.108392  | 0.0996503 | 0.0986305 | 0.118735  |
| 0.164044  | 0.193473 | 0.189394 | 0.1706    | 0.165355  | 0.180653  | 0.175408  |
| 0.108392  | 0.141317 | 0.145979 | 0.114073  | 0.112034  | 0.122669  | 0.119172  |
| 0.121649  | 0.150204 | 0.152535 | 0.129662  | 0.115093  | 0.130099  | 0.122232  |
| 0.106935  | 0.129079 | 0.131119 | 0.111742  | 0.0945513 | 0.0932401 | 0.116841  |
| 0.106498  | 0.130682 | 0.134178 | 0.111888  | 0.102273  | 0.116404  | 0.113491  |
| 0.0992133 | 0.133304 | 0.129516 | 0.101107  | 0.0929487 | 0.102418  | 0.108537  |
| 0.0960082 | 0.126603 | 0.133304 | 0.0987762 | 0.0868298 | 0.0925117 | 0.10912   |
| 0.103875  | 0.136218 | 0.132139 | 0.109266  | 0.0987762 | 0.10708   | 0.112617  |
| 0.104749  | 0.124854 | 0.124854 | 0.106061  | 0.109557  | 0.118153  | 0.0910548 |
| 0.107663  | 0.137383 | 0.139714 | 0.108683  | 0.106643  | 0.112325  | 0.122232  |
| 0.120921  | 0.137821 | 0.141026 | 0.119318  | 0.109411  | 0.117133  | 0.126457  |
| 0.104167  | 0.132721 | 0.134178 | 0.1081    | 0.0912005 | 0.106206  | 0.110286  |
| 0.105769  | 0.140734 | 0.138695 | 0.109703  | 0.0989219 | 0.112179  | 0.115676  |
| 0.10067   | 0.108537 | 0.106498 | 0.104895  | 0.11859   | 0.120192  | 0.0898893 |
| 0.103584  | 0.124563 | 0.131265 | 0.107517  | 0.0961538 | 0.0936772 | 0.108246  |
| 0.114948  | 0.143502 | 0.144959 | 0.11859   | 0.11014   | 0.114656  | 0.120192  |
| 0.099796  | 0.127768 | 0.133596 | 0.102855  | 0.0906177 | 0.0872669 | 0.104167  |
| 0.103584  | 0.132139 | 0.13447  | 0.106352  | 0.097028  | 0.0971737 | 0.109994  |
| 0.10067   | 0.128642 | 0.13447  | 0.106061  | 0.0812937 | 0.092803  | 0.110286  |
| 0.11014   | 0.127914 | 0.129079 | 0.109411  | 0.103001  | 0.0955711 | 0.125874  |
| 0.0976107 | 0.13141  | 0.136946 | 0.103001  | 0.0901807 | 0.097028  | 0.103438  |
| 0.128788  | 0.140734 | 0.14627  | 0.127768  | 0.131556  | 0.140443  | 0.133741  |
| 0.117716  | 0.141026 | 0.145688 | 0.120484  | 0.120484  | 0.130245  | 0.128497  |
| 0.101399  | 0.135781 | 0.134907 | 0.106498  | 0.0919289 | 0.097028  | 0.112179  |
| 0.121358  | 0.14088  | 0.145251 | 0.133741  | 0.125874  | 0.131556  | 0.126311  |
| 0.113782  | 0.141754 | 0.147582 | 0.115093  | 0.111014  | 0.124854  | 0.119901  |
| 0.109994  | 0.118153 | 0.108537 | 0.11014   | 0.124126  | 0.131265  | 0.126894  |
| 0.104458  | 0.133596 | 0.136218 | 0.108974  | 0.0932401 | 0.095134  | 0.114656  |
| 0.132576  | 0.155886 | 0.152681 | 0.136509  | 0.129516  | 0.136072  | 0.139277  |
| 0.120629  | 0.143065 | 0.141026 | 0.123106  | 0.110868  | 0.123834  | 0.121503  |
| 0.11859   | 0.131119 | 0.136364 | 0.124854  | 0.125146  | 0.137529  | 0.103438  |
| 0.112762  | 0.133159 | 0.138112 | 0.113782  | 0.0977564 | 0.0990676 | 0.12296   |
| 0.0960082 | 0.121649 | 0.128059 | 0.0976107 | 0.0914918 | 0.0980478 | 0.106498  |
| 0.0955711 | 0.122378 | 0.132284 | 0.0965909 | 0.0901807 | 0.0795455 | 0.111305  |
| 0.0942599 | 0.124854 | 0.121358 | 0.102273  | 0.105186  | 0.112617  | 0.0855186 |
| 0.112325  | 0.135635 | 0.133013 | 0.115385  | 0.099359  | 0.101836  | 0.116696  |
| 0.120629  | 0.138112 | 0.145396 | 0.125437  | 0.101253  | 0.106935  | 0.125     |
| 0.111305  | 0.134324 | 0.138403 | 0.109994  | 0.104167  | 0.116259  | 0.122378  |
| 0.0981935 | 0.131119 | 0.133741 | 0.103584  | 0.0820221 | 0.102855  | 0.107809  |
| 0.0965909 | 0.123689 | 0.127768 | 0.0976107 | 0.0888695 | 0.0773601 | 0.113199  |

|           |          |          |          |           |           |          |
|-----------|----------|----------|----------|-----------|-----------|----------|
| 0.105769  | 0.129953 | 0.13345  | 0.114656 | 0.099796  | 0.0999417 | 0.121212 |
| 0.0979021 | 0.123252 | 0.136072 | 0.104458 | 0.0945513 | 0.0917832 | 0.113636 |
| 0.105915  | 0.128351 | 0.133887 | 0.105478 | 0.0944056 | 0.0782343 | 0.12398  |
| 0.104167  | 0.135052 | 0.140589 | 0.104312 | 0.0961538 | 0.101836  | 0.115822 |
| 0.11014   | 0.143648 | 0.142191 | 0.119318 | 0.11116   | 0.115093  | 0.121795 |
| 0.0964452 | 0.130828 | 0.135781 | 0.103875 | 0.104749  | 0.112179  | 0.115093 |
| 0.0944056 | 0.125    | 0.131702 | 0.101253 | 0.0826049 | 0.0879953 | 0.111597 |
| 0.0996503 | 0.129371 | 0.128497 | 0.10708  | 0.0945513 | 0.0981935 | 0.117716 |
| 0.10708   | 0.14292  | 0.141463 | 0.11859  | 0.106061  | 0.116404  | 0.121358 |
| 0.102855  | 0.136072 | 0.136946 | 0.103875 | 0.0995047 | 0.103147  | 0.113928 |
| 0.114219  | 0.141317 | 0.140443 | 0.120484 | 0.113491  | 0.119464  | 0.124709 |
| 0.0967366 | 0.131702 | 0.136655 | 0.103584 | 0.0986305 | 0.107809  | 0.111305 |
| 0.114073  | 0.138258 | 0.134761 | 0.117716 | 0.111597  | 0.11116   | 0.128642 |

| <b>TDr_08_00027</b> | <b>TDr_08_00040</b> | <b>TDr_08_00041</b> | <b>TDr_08_00045</b> | <b>TDr_08_00055</b> | <b>TDr_08_00071</b> | <b>TDr_08_00082</b> |
|---------------------|---------------------|---------------------|---------------------|---------------------|---------------------|---------------------|
| 0.136218            | 0.113199            | 0.117424            | 0.107663            | 0.13039             | 0.115093            | 0.122669            |
| 0.13549             | 0.113928            | 0.112908            | 0.132284            | 0.124709            | 0.113491            | 0.119318            |
| 0.131993            | 0.106935            | 0.10708             | 0.13345             | 0.124417            | 0.109994            | 0.113782            |
| 0.139569            | 0.1081              | 0.115822            | 0.141608            | 0.126748            | 0.112325            | 0.117279            |
| 0.147727            | 0.125               | 0.127477            | 0.155012            | 0.133741            | 0.124854            | 0.128934            |
| 0.143648            | 0.121212            | 0.121941            | 0.135781            | 0.134907            | 0.12602             | 0.13243             |
| 0.137675            | 0.114365            | 0.115093            | 0.116696            | 0.125728            | 0.111888            | 0.12296             |
| 0.129225            | 0.100962            | 0.103438            | 0.138549            | 0.125437            | 0.107517            | 0.11859             |
| 0.121212            | 0.103147            | 0.105041            | 0.134033            | 0.117133            | 0.103001            | 0.102418            |
| 0.119318            | 0.0995047           | 0.101981            | 0.129225            | 0.118735            | 0.105769            | 0.0935315           |
| 0.136655            | 0.111305            | 0.112034            | 0.136655            | 0.129371            | 0.10912             | 0.11961             |
| 0.129808            | 0.107663            | 0.1081              | 0.141754            | 0.11961             | 0.103147            | 0.118881            |
| 0.134178            | 0.107663            | 0.111014            | 0.142337            | 0.123689            | 0.108974            | 0.110723            |
| 0.15035             | 0.132284            | 0.126894            | 0.16317             | 0.143065            | 0.133013            | 0.105624            |
| 0.142337            | 0.124563            | 0.121212            | 0.148164            | 0.13243             | 0.123834            | 0.117133            |
| 0.124417            | 0.111305            | 0.108829            | 0.135198            | 0.114219            | 0.11116             | 0.11961             |
| 0.129225            | 0.103584            | 0.103147            | 0.144668            | 0.11553             | 0.107809            | 0.120047            |
| 0.151224            | 0.139277            | 0.137675            | 0.164044            | 0.14627             | 0.136509            | 0.14292             |
| 0.129079            | 0.106643            | 0.106789            | 0.13141             | 0.123252            | 0.105332            | 0.11553             |
| 0.214744            | 0.204545            | 0.199446            | 0.215618            | 0.20134             | 0.20236             | 0.202943            |
| 0.141754            | 0.120192            | 0.123543            | 0.126894            | 0.128642            | 0.119755            | 0.13141             |
| 0.132867            | 0.115967            | 0.113782            | 0.11859             | 0.132576            | 0.114948            | 0.124563            |
| 0.128059            | 0.105624            | 0.102273            | 0.138549            | 0.116696            | 0.102855            | 0.113054            |
| 0.118881            | 0.100816            | 0.109411            | 0.141608            | 0.114802            | 0.10708             | 0.128351            |
| 0.119318            | 0.0933858           | 0.0961538           | 0.128934            | 0.117861            | 0.0941142           | 0.108974            |
| 0.143794            | 0.126311            | 0.125583            | 0.118153            | 0.13243             | 0.123252            | 0.132867            |
| 0.135635            | 0.114365            | 0.118298            | 0.137675            | 0.130973            | 0.115676            | 0.126457            |
| 0.11961             | 0.104458            | 0.107226            | 0.14729             | 0.112034            | 0.101981            | 0.121503            |
| 0.128351            | 0.120775            | 0.120047            | 0.135344            | 0.128642            | 0.125583            | 0.129079            |
| 0.137383            | 0.115822            | 0.120047            | 0.137092            | 0.123397            | 0.114219            | 0.119755            |
| 0.134907            | 0.116259            | 0.117279            | 0.112179            | 0.127331            | 0.118153            | 0.128351            |
| 0.125728            | 0.111451            | 0.115967            | 0.130973            | 0.11961             | 0.11655             | 0.112762            |
| 0.128351            | 0.102127            | 0.102273            | 0.123106            | 0.114365            | 0.105769            | 0.107517            |
| 0.130099            | 0.106789            | 0.113054            | 0.13884             | 0.123689            | 0.111014            | 0.117133            |
| 0.131993            | 0.113054            | 0.114948            | 0.136072            | 0.127914            | 0.113491            | 0.113199            |
| 0.134178            | 0.112908            | 0.120047            | 0.140589            | 0.13039             | 0.114802            | 0.122378            |
| 0.140152            | 0.127331            | 0.11961             | 0.126748            | 0.134907            | 0.121358            | 0.128351            |
| 0.131556            | 0.111742            | 0.109557            | 0.135344            | 0.129808            | 0.115385            | 0.120629            |
| 0.123689            | 0.0989219           | 0.104021            | 0.133013            | 0.113782            | 0.0976107           | 0.121503            |
| 0.107955            | 0.083479            | 0.0920746           | 0.146707            | 0.117861            | 0.0885781           | 0.124417            |
| 0.100962            | 0.0770688           | 0.0818765           | 0.141463            | 0.113491            | 0.0836247           | 0.109557            |
| 0.0933858           | 0.105332            | 0.0944056           | 0.159819            | 0.131847            | 0.102564            | 0.136072            |

|           |           |           |          |           |           |          |
|-----------|-----------|-----------|----------|-----------|-----------|----------|
| 0.10271   | 0.105915  | 0.101399  | 0.163607 | 0.122523  | 0.0944056 | 0.140152 |
| 0.099359  | 0.0906177 | 0.0823135 | 0.144814 | 0.119172  | 0.078817  | 0.113491 |
| 0.122669  | 0.103438  | 0.102127  | 0.134324 | 0.118881  | 0.103293  | 0.114948 |
| 0.125146  | 0.112617  | 0.106643  | 0.13884  | 0.128642  | 0.108974  | 0.11859  |
| 0.116696  | 0.100962  | 0.105186  | 0.145542 | 0.105624  | 0.105478  | 0.127622 |
| 0         | 0.10169   | 0.0840618 | 0.155303 | 0.124417  | 0.103584  | 0.132721 |
| 0.10169   | 0         | 0.0814394 | 0.146562 | 0.113054  | 0.0855186 | 0.113782 |
| 0.0840618 | 0.0814394 | 0         | 0.141171 | 0.118735  | 0.0812937 | 0.112471 |
| 0.155303  | 0.146562  | 0.141171  | 0        | 0.149476  | 0.143211  | 0.150495 |
| 0.124417  | 0.113054  | 0.118735  | 0.149476 | 0         | 0.115822  | 0.131265 |
| 0.103584  | 0.0855186 | 0.0812937 | 0.143211 | 0.115822  | 0         | 0.119172 |
| 0.132721  | 0.113782  | 0.112471  | 0.150495 | 0.131265  | 0.119172  | 0        |
| 0.123689  | 0.101544  | 0.099359  | 0.143794 | 0.116404  | 0.0914918 | 0.12296  |
| 0.122815  | 0.119027  | 0.122669  | 0.150787 | 0.112617  | 0.118007  | 0.142483 |
| 0.109557  | 0.0865385 | 0.097465  | 0.147145 | 0.116841  | 0.0893065 | 0.121358 |
| 0.105769  | 0.0827506 | 0.0843531 | 0.143065 | 0.120629  | 0.0750291 | 0.116404 |
| 0.090035  | 0.0847902 | 0.081148  | 0.144522 | 0.11014   | 0.0901807 | 0.114948 |
| 0.125146  | 0.106206  | 0.105769  | 0.132721 | 0.124854  | 0.107226  | 0.115385 |
| 0.106206  | 0.0980478 | 0.0973193 | 0.152535 | 0.120192  | 0.0981935 | 0.138112 |
| 0.101836  | 0.101836  | 0.0990676 | 0.160111 | 0.128059  | 0.101107  | 0.132576 |
| 0.157343  | 0.152098  | 0.149621  | 0.17162  | 0.159965  | 0.150787  | 0.161859 |
| 0.0981935 | 0.0745921 | 0.090472  | 0.143939 | 0.114802  | 0.0799825 | 0.113199 |
| 0.106935  | 0.0795455 | 0.0831876 | 0.142774 | 0.115093  | 0.0828963 | 0.116987 |
| 0.103438  | 0.0775058 | 0.0872669 | 0.141608 | 0.115093  | 0.0750291 | 0.11553  |
| 0.148456  | 0.135927  | 0.129662  | 0.134761 | 0.135635  | 0.129953  | 0.14627  |
| 0.0995047 | 0.0823135 | 0.0772145 | 0.141754 | 0.114948  | 0.0882867 | 0.111888 |
| 0.112762  | 0.115676  | 0.106498  | 0.149767 | 0.118298  | 0.102418  | 0.135344 |
| 0.128788  | 0.114802  | 0.107663  | 0.136364 | 0.12296   | 0.107663  | 0.116696 |
| 0.095134  | 0.083479  | 0.0842075 | 0.144668 | 0.115239  | 0.0812937 | 0.122086 |
| 0.154283  | 0.143794  | 0.139569  | 0.131556 | 0.148164  | 0.143648  | 0.149767 |
| 0.106498  | 0.0852273 | 0.0868298 | 0.148747 | 0.12398   | 0.0818765 | 0.126457 |
| 0.103147  | 0.0981935 | 0.0957168 | 0.156469 | 0.121795  | 0.105624  | 0.134178 |
| 0.126894  | 0.116987  | 0.11859   | 0.154575 | 0.060169  | 0.11655   | 0.129953 |
| 0.132576  | 0.112762  | 0.109994  | 0.140152 | 0.117716  | 0.107663  | 0.125146 |
| 0.100816  | 0.0821678 | 0.0779429 | 0.144231 | 0.114802  | 0.0767774 | 0.116404 |
| 0.106643  | 0.0745921 | 0.0890152 | 0.144814 | 0.111888  | 0.0776515 | 0.112908 |
| 0.106352  | 0.102564  | 0.0986305 | 0.154138 | 0.123252  | 0.0910548 | 0.13447  |
| 0.10708   | 0.0756119 | 0.0865385 | 0.141171 | 0.116987  | 0.083042  | 0.11451  |
| 0.106935  | 0.0984848 | 0.107955  | 0.158217 | 0.12296   | 0.100087  | 0.133013 |
| 0.0958625 | 0.087704  | 0.0843531 | 0.148019 | 0.121212  | 0.0861014 | 0.123397 |
| 0.119464  | 0.101107  | 0.108537  | 0.140734 | 0.0944056 | 0.104458  | 0.11961  |
| 0.10169   | 0.080711  | 0.0782343 | 0.145105 | 0.112471  | 0.0703671 | 0.121941 |
| 0.107226  | 0.0815851 | 0.0960082 | 0.153846 | 0.121795  | 0.081148  | 0.124854 |
| 0.107226  | 0.0775058 | 0.0826049 | 0.143065 | 0.114802  | 0.0791084 | 0.11553  |

|           |           |           |          |          |           |          |
|-----------|-----------|-----------|----------|----------|-----------|----------|
| 0.0987762 | 0.076049  | 0.0791084 | 0.145688 | 0.109266 | 0.0735723 | 0.121066 |
| 0.0948427 | 0.103293  | 0.0961538 | 0.158071 | 0.118153 | 0.0973193 | 0.128788 |
| 0.123397  | 0.106498  | 0.105186  | 0.137675 | 0.116696 | 0.104604  | 0.119464 |
| 0.128205  | 0.10373   | 0.104458  | 0.141026 | 0.121795 | 0.102127  | 0.110577 |
| 0.137821  | 0.118298  | 0.118735  | 0.134615 | 0.134907 | 0.115239  | 0.126603 |
| 0.144231  | 0.120629  | 0.121941  | 0.119172 | 0.132867 | 0.118735  | 0.127477 |
| 0.137821  | 0.124126  | 0.122523  | 0.144522 | 0.126166 | 0.124563  | 0.130682 |
| 0.150787  | 0.130973  | 0.130245  | 0.151661 | 0.140589 | 0.131993  | 0.137238 |
| 0.135198  | 0.113636  | 0.113199  | 0.129079 | 0.12296  | 0.110577  | 0.12602  |
| 0.189685  | 0.181235  | 0.173805  | 0.183275 | 0.18007  | 0.175845  | 0.185752 |
| 0.131847  | 0.103293  | 0.105186  | 0.129225 | 0.125437 | 0.104312  | 0.116841 |
| 0.149476  | 0.134324  | 0.13243   | 0.150058 | 0.134615 | 0.13447   | 0.135052 |
| 0.141317  | 0.126166  | 0.12602   | 0.149476 | 0.128205 | 0.124854  | 0.132139 |
| 0.139423  | 0.127768  | 0.126457  | 0.120484 | 0.133596 | 0.12704   | 0.13986  |
| 0.132576  | 0.106643  | 0.10708   | 0.138986 | 0.122378 | 0.107955  | 0.118444 |
| 0.145396  | 0.125     | 0.125146  | 0.153846 | 0.13549  | 0.124854  | 0.132139 |
| 0.13345   | 0.113928  | 0.113199  | 0.138695 | 0.123834 | 0.106789  | 0.124854 |
| 0.138549  | 0.119318  | 0.117133  | 0.14088  | 0.122523 | 0.11655   | 0.131119 |
| 0.123689  | 0.105332  | 0.105186  | 0.121649 | 0.122523 | 0.10169   | 0.11451  |
| 0.145833  | 0.130973  | 0.130828  | 0.149913 | 0.13039  | 0.129662  | 0.138403 |
| 0.121066  | 0.101544  | 0.0987762 | 0.136801 | 0.118153 | 0.0973193 | 0.116841 |
| 0.144231  | 0.127914  | 0.128059  | 0.121795 | 0.134033 | 0.131265  | 0.136218 |
| 0.135927  | 0.115239  | 0.111597  | 0.119901 | 0.127477 | 0.107517  | 0.123543 |
| 0.101981  | 0.0920746 | 0.0995047 | 0.154429 | 0.118881 | 0.092803  | 0.125728 |
| 0.131265  | 0.119901  | 0.111888  | 0.122232 | 0.132721 | 0.113636  | 0.122086 |
| 0.133596  | 0.110868  | 0.108974  | 0.122232 | 0.122523 | 0.104895  | 0.11451  |
| 0.152244  | 0.14292   | 0.137238  | 0.141754 | 0.140006 | 0.141026  | 0.142483 |
| 0.132576  | 0.115093  | 0.113199  | 0.124126 | 0.121503 | 0.111742  | 0.117279 |
| 0.13345   | 0.111014  | 0.112034  | 0.142483 | 0.120921 | 0.112034  | 0.120775 |
| 0.128642  | 0.111742  | 0.111305  | 0.135344 | 0.116404 | 0.103147  | 0.119464 |
| 0.143211  | 0.133304  | 0.127622  | 0.127477 | 0.142628 | 0.131993  | 0.134033 |
| 0.131265  | 0.111742  | 0.1081    | 0.136801 | 0.119318 | 0.106935  | 0.128205 |
| 0.127477  | 0.108246  | 0.108974  | 0.137675 | 0.124563 | 0.107809  | 0.11859  |
| 0.132139  | 0.110868  | 0.109848  | 0.140006 | 0.121649 | 0.111888  | 0.119172 |
| 0.131993  | 0.108683  | 0.109994  | 0.121795 | 0.128788 | 0.107372  | 0.116987 |
| 0.129516  | 0.113782  | 0.113636  | 0.139714 | 0.129516 | 0.11655   | 0.11859  |
| 0.135781  | 0.113928  | 0.112325  | 0.119172 | 0.127914 | 0.106789  | 0.121941 |
| 0.119901  | 0.0983392 | 0.0929487 | 0.129808 | 0.114073 | 0.097028  | 0.107517 |
| 0.123106  | 0.0983392 | 0.102564  | 0.128059 | 0.116404 | 0.0996503 | 0.106643 |
| 0.120629  | 0.102855  | 0.100379  | 0.137238 | 0.118881 | 0.100962  | 0.114365 |
| 0.135781  | 0.111305  | 0.115822  | 0.148601 | 0.129953 | 0.108829  | 0.122523 |
| 0.135344  | 0.119901  | 0.118298  | 0.139423 | 0.128351 | 0.121795  | 0.128497 |
| 0.124417  | 0.101107  | 0.102418  | 0.137238 | 0.118298 | 0.103875  | 0.112325 |
| 0.118444  | 0.0930944 | 0.0941142 | 0.135344 | 0.111742 | 0.0967366 | 0.114219 |

|           |           |           |           |           |           |          |
|-----------|-----------|-----------|-----------|-----------|-----------|----------|
| 0.127768  | 0.114073  | 0.106935  | 0.139132  | 0.116987  | 0.111597  | 0.122086 |
| 0.120338  | 0.0973193 | 0.0992133 | 0.13549   | 0.112762  | 0.0971737 | 0.112908 |
| 0.141026  | 0.120629  | 0.114948  | 0.132284  | 0.129662  | 0.116987  | 0.129225 |
| 0.142191  | 0.130828  | 0.127477  | 0.0492424 | 0.140734  | 0.126894  | 0.13884  |
| 0.122378  | 0.108683  | 0.105332  | 0.136072  | 0.116841  | 0.114948  | 0.116404 |
| 0.12398   | 0.101836  | 0.102564  | 0.137675  | 0.120192  | 0.104604  | 0.111305 |
| 0.116696  | 0.101544  | 0.101107  | 0.13884   | 0.116113  | 0.0976107 | 0.117133 |
| 0.119027  | 0.0945513 | 0.0961538 | 0.135927  | 0.112325  | 0.0984848 | 0.113054 |
| 0.124854  | 0.119901  | 0.11451   | 0.143211  | 0.127185  | 0.115093  | 0.120047 |
| 0.11757   | 0.095134  | 0.0935315 | 0.13243   | 0.118153  | 0.0967366 | 0.107226 |
| 0.138112  | 0.127331  | 0.130099  | 0.139569  | 0.136655  | 0.126603  | 0.142337 |
| 0.113782  | 0.107955  | 0.108392  | 0.151078  | 0.130682  | 0.101107  | 0.133159 |
| 0.112908  | 0.104167  | 0.0979021 | 0.143794  | 0.128059  | 0.0979021 | 0.121795 |
| 0.113928  | 0.0906177 | 0.0980478 | 0.146853  | 0.126748  | 0.0872669 | 0.118153 |
| 0.122669  | 0.106643  | 0.104167  | 0.122086  | 0.121503  | 0.0983392 | 0.124272 |
| 0.125146  | 0.10067   | 0.102273  | 0.135344  | 0.118735  | 0.102273  | 0.118298 |
| 0.115385  | 0.094697  | 0.097465  | 0.13549   | 0.112179  | 0.0945513 | 0.125437 |
| 0.120338  | 0.0882867 | 0.101544  | 0.137821  | 0.105769  | 0.0962995 | 0.114365 |
| 0.127331  | 0.10373   | 0.105624  | 0.142774  | 0.111305  | 0.0965909 | 0.122232 |
| 0.107809  | 0.102273  | 0.102418  | 0.152972  | 0.0964452 | 0.100379  | 0.132139 |
| 0.13447   | 0.111451  | 0.113054  | 0.144668  | 0.125437  | 0.111888  | 0.125291 |
| 0.141608  | 0.125     | 0.125728  | 0.145979  | 0.132867  | 0.127185  | 0.116113 |
| 0.144085  | 0.128351  | 0.12704   | 0.132721  | 0.13884   | 0.126457  | 0.131993 |
| 0.207022  | 0.192453  | 0.187354  | 0.215763  | 0.198281  | 0.188228  | 0.200466 |
| 0.24796   | 0.238636  | 0.233537  | 0.247378  | 0.236597  | 0.232372  | 0.241987 |
| 0.128642  | 0.103293  | 0.112762  | 0.140006  | 0.117861  | 0.102564  | 0.120047 |
| 0.116259  | 0.097028  | 0.0957168 | 0.140443  | 0.107809  | 0.0960082 | 0.120484 |
| 0.117716  | 0.092366  | 0.0968823 | 0.136655  | 0.110723  | 0.0960082 | 0.114365 |
| 0.12296   | 0.0958625 | 0.106206  | 0.138695  | 0.107226  | 0.0942599 | 0.116113 |
| 0.141026  | 0.126748  | 0.118735  | 0.146562  | 0.131993  | 0.122815  | 0.118444 |
| 0.116259  | 0.099359  | 0.100087  | 0.1419    | 0.103147  | 0.10271   | 0.122232 |
| 0.133013  | 0.130682  | 0.125583  | 0.154866  | 0.120775  | 0.120629  | 0.145396 |
| 0.11451   | 0.099359  | 0.100379  | 0.143648  | 0.111305  | 0.102418  | 0.126894 |
| 0.121212  | 0.101981  | 0.113199  | 0.144231  | 0.1081    | 0.111742  | 0.133304 |
| 0.106789  | 0.106789  | 0.10169   | 0.150495  | 0.114656  | 0.0979021 | 0.133159 |
| 0.13039   | 0.116696  | 0.112762  | 0.151078  | 0.110577  | 0.11451   | 0.135198 |
| 0.0930944 | 0.103875  | 0.097028  | 0.157197  | 0.120484  | 0.0914918 | 0.130245 |
| 0.118153  | 0.106206  | 0.102855  | 0.14292   | 0.10708   | 0.0996503 | 0.123252 |
| 0.112034  | 0.0962995 | 0.097028  | 0.140589  | 0.106789  | 0.0909091 | 0.121212 |
| 0.119464  | 0.104604  | 0.10067   | 0.143648  | 0.104312  | 0.103001  | 0.125437 |
| 0.115385  | 0.0868298 | 0.0977564 | 0.137238  | 0.101399  | 0.0962995 | 0.118735 |
| 0.114219  | 0.0958625 | 0.0957168 | 0.139277  | 0.101107  | 0.0930944 | 0.121941 |
| 0.11961   | 0.0954254 | 0.103438  | 0.144085  | 0.10912   | 0.0979021 | 0.123252 |
| 0.125583  | 0.110723  | 0.114365  | 0.15035   | 0.108683  | 0.107372  | 0.128642 |

|          |           |           |          |           |           |          |
|----------|-----------|-----------|----------|-----------|-----------|----------|
| 0.134033 | 0.11859   | 0.123106  | 0.153263 | 0.115093  | 0.116696  | 0.137383 |
| 0.11553  | 0.099796  | 0.101399  | 0.142628 | 0.100087  | 0.0987762 | 0.127622 |
| 0.121503 | 0.0990676 | 0.0992133 | 0.143939 | 0.105478  | 0.095134  | 0.122523 |
| 0.127622 | 0.113636  | 0.118153  | 0.145979 | 0.111014  | 0.112908  | 0.137383 |
| 0.11451  | 0.097028  | 0.0930944 | 0.140443 | 0.107809  | 0.0954254 | 0.123106 |
| 0.130099 | 0.123397  | 0.121212  | 0.160402 | 0.122815  | 0.117424  | 0.141026 |
| 0.138258 | 0.129808  | 0.120047  | 0.151952 | 0.135927  | 0.122669  | 0.129079 |
| 0.138112 | 0.122669  | 0.126311  | 0.157051 | 0.120921  | 0.125437  | 0.140297 |
| 0.115385 | 0.0917832 | 0.0962995 | 0.139569 | 0.105186  | 0.0925117 | 0.118153 |
| 0.113199 | 0.0939685 | 0.0979021 | 0.135635 | 0.105332  | 0.0917832 | 0.11655  |
| 0.120047 | 0.104604  | 0.107372  | 0.147436 | 0.110723  | 0.110868  | 0.13447  |
| 0.122523 | 0.109411  | 0.111014  | 0.14292  | 0.113199  | 0.107517  | 0.130245 |
| 0.122523 | 0.116113  | 0.113636  | 0.147873 | 0.10708   | 0.112179  | 0.143648 |
| 0.124709 | 0.107517  | 0.105624  | 0.143939 | 0.1081    | 0.101253  | 0.130099 |
| 0.121941 | 0.101544  | 0.105769  | 0.144668 | 0.107372  | 0.0990676 | 0.129953 |
| 0.123106 | 0.111742  | 0.108392  | 0.144085 | 0.107372  | 0.107517  | 0.129662 |
| 0.121358 | 0.117861  | 0.115093  | 0.149621 | 0.117279  | 0.109557  | 0.139569 |
| 0.128934 | 0.114365  | 0.115676  | 0.154283 | 0.109703  | 0.108974  | 0.136072 |
| 0.128788 | 0.116259  | 0.117861  | 0.151224 | 0.120338  | 0.109703  | 0.137966 |
| 0.125437 | 0.114948  | 0.111888  | 0.145833 | 0.120192  | 0.113636  | 0.13345  |
| 0.121649 | 0.100962  | 0.107226  | 0.13884  | 0.114073  | 0.101107  | 0.126457 |
| 0.127477 | 0.112908  | 0.116841  | 0.152244 | 0.10912   | 0.115676  | 0.135198 |
| 0.11859  | 0.102855  | 0.0989219 | 0.135781 | 0.108392  | 0.0907634 | 0.122523 |
| 0.100379 | 0.0793998 | 0.0777972 | 0.144668 | 0.115822  | 0.0839161 | 0.114802 |
| 0.117861 | 0.104749  | 0.100816  | 0.143794 | 0.108246  | 0.097028  | 0.118298 |
| 0.126748 | 0.0958625 | 0.106206  | 0.140734 | 0.100524  | 0.100962  | 0.121358 |
| 0.118298 | 0.090035  | 0.0968823 | 0.139569 | 0.0996503 | 0.0939685 | 0.115822 |
| 0.128934 | 0.116696  | 0.120047  | 0.151369 | 0.118153  | 0.112471  | 0.134907 |
| 0.124709 | 0.102855  | 0.104167  | 0.135198 | 0.112762  | 0.101253  | 0.125437 |
| 0.12704  | 0.118298  | 0.11553   | 0.146853 | 0.11451   | 0.115239  | 0.13243  |
| 0.118298 | 0.0888695 | 0.100087  | 0.137238 | 0.100524  | 0.099796  | 0.121649 |
| 0.110868 | 0.105624  | 0.10169   | 0.142045 | 0.111742  | 0.106643  | 0.131993 |
| 0.126457 | 0.11451   | 0.112325  | 0.144231 | 0.115385  | 0.109994  | 0.11961  |
| 0.130245 | 0.111014  | 0.105915  | 0.151224 | 0.131993  | 0.106206  | 0.116404 |
| 0.128934 | 0.109703  | 0.1081    | 0.134178 | 0.124563  | 0.106061  | 0.119172 |
| 0.129371 | 0.11014   | 0.105624  | 0.155303 | 0.121795  | 0.109703  | 0.118444 |
| 0.13039  | 0.110868  | 0.111014  | 0.152535 | 0.123689  | 0.107226  | 0.128497 |
| 0.132139 | 0.106206  | 0.108974  | 0.135344 | 0.128934  | 0.106643  | 0.119464 |
| 0.140006 | 0.121649  | 0.127622  | 0.149621 | 0.135927  | 0.133741  | 0.111305 |
| 0.147145 | 0.130828  | 0.125437  | 0.1419   | 0.13986   | 0.13039   | 0.131847 |
| 0.124126 | 0.102564  | 0.0977564 | 0.130245 | 0.120338  | 0.103293  | 0.102127 |
| 0.139714 | 0.120192  | 0.12296   | 0.144959 | 0.136509  | 0.124709  | 0.124417 |
| 0.13345  | 0.111305  | 0.114365  | 0.138112 | 0.132284  | 0.125437  | 0.107372 |
| 0.144522 | 0.127622  | 0.128934  | 0.14627  | 0.133741  | 0.129225  | 0.125437 |



|           |           |           |          |          |           |          |
|-----------|-----------|-----------|----------|----------|-----------|----------|
| 0.128497  | 0.108683  | 0.113491  | 0.135198 | 0.121795 | 0.116113  | 0.116696 |
| 0.128205  | 0.108392  | 0.110286  | 0.144814 | 0.131993 | 0.120775  | 0.109411 |
| 0.136509  | 0.11961   | 0.11655   | 0.140589 | 0.132721 | 0.125291  | 0.106061 |
| 0.140443  | 0.123834  | 0.124854  | 0.149184 | 0.125874 | 0.124854  | 0.123689 |
| 0.141317  | 0.124417  | 0.128351  | 0.144814 | 0.136364 | 0.130682  | 0.124272 |
| 0.133159  | 0.113054  | 0.115822  | 0.148019 | 0.134615 | 0.122232  | 0.099796 |
| 0.129079  | 0.105769  | 0.112617  | 0.137238 | 0.122086 | 0.114073  | 0.117861 |
| 0.135927  | 0.123689  | 0.121503  | 0.152826 | 0.136509 | 0.11859   | 0.144522 |
| 0.141608  | 0.125     | 0.127185  | 0.14627  | 0.137238 | 0.130099  | 0.109994 |
| 0.130536  | 0.105769  | 0.10708   | 0.131993 | 0.124417 | 0.107372  | 0.112325 |
| 0.229458  | 0.218094  | 0.216492  | 0.231498 | 0.217512 | 0.215326  | 0.227564 |
| 0.137383  | 0.119318  | 0.122086  | 0.145251 | 0.124854 | 0.118881  | 0.123543 |
| 0.127185  | 0.10912   | 0.112471  | 0.138549 | 0.128934 | 0.110723  | 0.107226 |
| 0.140152  | 0.128497  | 0.127477  | 0.147145 | 0.136946 | 0.126603  | 0.118735 |
| 0.129079  | 0.109557  | 0.110868  | 0.143648 | 0.126457 | 0.115822  | 0.110868 |
| 0.143065  | 0.125583  | 0.128059  | 0.145396 | 0.137238 | 0.13039   | 0.108246 |
| 0.138986  | 0.108974  | 0.11961   | 0.152389 | 0.128205 | 0.117861  | 0.114656 |
| 0.137092  | 0.118444  | 0.118298  | 0.144668 | 0.124272 | 0.121503  | 0.113636 |
| 0.125728  | 0.111451  | 0.115676  | 0.146125 | 0.128934 | 0.120921  | 0.104895 |
| 0.143939  | 0.123834  | 0.13039   | 0.153846 | 0.133741 | 0.128059  | 0.118444 |
| 0.144959  | 0.119901  | 0.129079  | 0.140006 | 0.13884  | 0.133159  | 0.130828 |
| 0.140443  | 0.124709  | 0.122523  | 0.140152 | 0.131702 | 0.126894  | 0.124563 |
| 0.138695  | 0.122669  | 0.126894  | 0.143648 | 0.13345  | 0.127185  | 0.121941 |
| 0.120921  | 0.114802  | 0.10708   | 0.138403 | 0.12704  | 0.105332  | 0.117861 |
| 0.137821  | 0.116259  | 0.121358  | 0.144814 | 0.128205 | 0.122815  | 0.123397 |
| 0.151078  | 0.129808  | 0.129662  | 0.151952 | 0.136509 | 0.131119  | 0.124709 |
| 0.138112  | 0.120629  | 0.117861  | 0.138986 | 0.121795 | 0.11757   | 0.114073 |
| 0.0964452 | 0.101981  | 0.100962  | 0.157343 | 0.125874 | 0.102127  | 0.135344 |
| 0.145833  | 0.139423  | 0.129079  | 0.145833 | 0.142337 | 0.134033  | 0.136946 |
| 0.129516  | 0.122815  | 0.113054  | 0.137092 | 0.127477 | 0.114219  | 0.121503 |
| 0.133304  | 0.119901  | 0.117424  | 0.136218 | 0.135052 | 0.125     | 0.112762 |
| 0.144814  | 0.123834  | 0.116404  | 0.136072 | 0.137238 | 0.124563  | 0.139132 |
| 0.135344  | 0.118444  | 0.121503  | 0.140297 | 0.130682 | 0.121795  | 0.121212 |
| 0.140589  | 0.122232  | 0.116259  | 0.144959 | 0.130099 | 0.120338  | 0.12704  |
| 0.150204  | 0.130973  | 0.127331  | 0.148164 | 0.145251 | 0.131702  | 0.140734 |
| 0.120629  | 0.106352  | 0.0960082 | 0.140443 | 0.118881 | 0.0980478 | 0.112908 |
| 0.115822  | 0.103875  | 0.105186  | 0.154575 | 0.133887 | 0.106935  | 0.120629 |
| 0.149184  | 0.136072  | 0.13447   | 0.143939 | 0.143357 | 0.136509  | 0.141463 |
| 0.129371  | 0.109557  | 0.10708   | 0.137238 | 0.126457 | 0.106206  | 0.116696 |
| 0.111888  | 0.0874126 | 0.0875583 | 0.149184 | 0.123543 | 0.088141  | 0.126603 |
| 0.145251  | 0.136218  | 0.134324  | 0.149621 | 0.141754 | 0.136072  | 0.150932 |
| 0.106206  | 0.083479  | 0.0996503 | 0.156906 | 0.120775 | 0.0859557 | 0.128205 |
| 0.145688  | 0.128497  | 0.129808  | 0.147727 | 0.140443 | 0.132139  | 0.131556 |
| 0.137675  | 0.114656  | 0.123834  | 0.152244 | 0.127768 | 0.118298  | 0.124126 |

|          |          |          |          |          |          |          |
|----------|----------|----------|----------|----------|----------|----------|
| 0.145105 | 0.122086 | 0.126311 | 0.145688 | 0.130245 | 0.123689 | 0.133596 |
| 0.123106 | 0.116404 | 0.115676 | 0.146416 | 0.12602  | 0.122086 | 0.130828 |
| 0.126748 | 0.11014  | 0.10912  | 0.15035  | 0.125874 | 0.108829 | 0.114948 |
| 0.139714 | 0.126311 | 0.124126 | 0.149913 | 0.131265 | 0.119172 | 0.134615 |
| 0.138549 | 0.122232 | 0.128497 | 0.14933  | 0.13243  | 0.131993 | 0.122669 |
| 0.150787 | 0.127185 | 0.128205 | 0.142045 | 0.130682 | 0.126748 | 0.138112 |
| 0.144376 | 0.128934 | 0.127914 | 0.145251 | 0.133013 | 0.128205 | 0.137529 |
| 0.141463 | 0.125437 | 0.124417 | 0.142045 | 0.13447  | 0.122086 | 0.136364 |
| 0.155157 | 0.141171 | 0.138986 | 0.153992 | 0.140297 | 0.140152 | 0.143939 |
| 0.120775 | 0.109703 | 0.108683 | 0.137383 | 0.126603 | 0.108974 | 0.110431 |
| 0.121649 | 0.106206 | 0.109557 | 0.149621 | 0.105041 | 0.109266 | 0.118007 |
| 0.142337 | 0.123106 | 0.125583 | 0.139714 | 0.130973 | 0.122378 | 0.130536 |
| 0.123397 | 0.110577 | 0.106643 | 0.130973 | 0.124272 | 0.114219 | 0.111014 |
| 0.148601 | 0.138695 | 0.13039  | 0.145979 | 0.148893 | 0.137092 | 0.141463 |
| 0.150932 | 0.143939 | 0.139132 | 0.149767 | 0.151515 | 0.141754 | 0.148747 |
| 0.125874 | 0.112179 | 0.114365 | 0.144522 | 0.11451  | 0.11116  | 0.131265 |
| 0.116404 | 0.106206 | 0.106935 | 0.143211 | 0.110577 | 0.102564 | 0.127622 |
| 0.15035  | 0.131993 | 0.133887 | 0.149476 | 0.13549  | 0.126603 | 0.135344 |
| 0.138549 | 0.119027 | 0.126457 | 0.151369 | 0.136801 | 0.130536 | 0.129662 |
| 0.120775 | 0.107955 | 0.111597 | 0.149913 | 0.105332 | 0.108974 | 0.13986  |
| 0.143211 | 0.131265 | 0.13141  | 0.14729  | 0.139132 | 0.132284 | 0.129953 |
| 0.126311 | 0.124854 | 0.116259 | 0.142045 | 0.127768 | 0.125583 | 0.125874 |
| 0.1081   | 0.110723 | 0.101544 | 0.136072 | 0.118881 | 0.10708  | 0.117279 |
| 0.167249 | 0.15676  | 0.151369 | 0.155012 | 0.160839 | 0.151369 | 0.161859 |
| 0.111014 | 0.108392 | 0.107372 | 0.142774 | 0.117424 | 0.102418 | 0.118735 |
| 0.1419   | 0.122086 | 0.12602  | 0.147145 | 0.134324 | 0.122815 | 0.121649 |
| 0.123689 | 0.105624 | 0.109848 | 0.148164 | 0.106206 | 0.112179 | 0.121795 |
| 0.148747 | 0.129808 | 0.133741 | 0.140006 | 0.137383 | 0.130536 | 0.138695 |
| 0.138549 | 0.115822 | 0.123543 | 0.144376 | 0.129808 | 0.120629 | 0.119464 |
| 0.152681 | 0.136364 | 0.13243  | 0.105478 | 0.147145 | 0.136218 | 0.139132 |
| 0.160402 | 0.143502 | 0.142483 | 0.159819 | 0.144085 | 0.143065 | 0.144231 |
| 0.143065 | 0.119172 | 0.121066 | 0.15035  | 0.134615 | 0.118153 | 0.126311 |
| 0.149621 | 0.13039  | 0.132284 | 0.156906 | 0.142628 | 0.13141  | 0.136364 |
| 0.158217 | 0.140734 | 0.132721 | 0.17366  | 0.144814 | 0.128351 | 0.159528 |
| 0.159382 | 0.136072 | 0.136801 | 0.161131 | 0.151224 | 0.138258 | 0.148747 |
| 0.125728 | 0.115239 | 0.111888 | 0.127477 | 0.121941 | 0.111888 | 0.134615 |
| 0.153846 | 0.136946 | 0.137092 | 0.149184 | 0.140152 | 0.133887 | 0.131265 |
| 0.134907 | 0.111014 | 0.107372 | 0.140152 | 0.130536 | 0.113199 | 0.113782 |
| 0.136218 | 0.11757  | 0.108683 | 0.141171 | 0.118735 | 0.115385 | 0.121212 |
| 0.130245 | 0.112179 | 0.113491 | 0.137238 | 0.127331 | 0.114656 | 0.127477 |
| 0.13549  | 0.116259 | 0.117861 | 0.142483 | 0.130536 | 0.113782 | 0.122232 |
| 0.132139 | 0.115239 | 0.108392 | 0.147582 | 0.125437 | 0.11014  | 0.124709 |
| 0.132139 | 0.107372 | 0.109557 | 0.141463 | 0.122815 | 0.109557 | 0.111888 |
| 0.138258 | 0.11757  | 0.117424 | 0.150204 | 0.133887 | 0.115967 | 0.125874 |

|          |           |          |           |          |           |           |
|----------|-----------|----------|-----------|----------|-----------|-----------|
| 0.141026 | 0.120047  | 0.117279 | 0.147436  | 0.132284 | 0.118444  | 0.118153  |
| 0.120338 | 0.0984848 | 0.102418 | 0.13345   | 0.114802 | 0.0995047 | 0.103584  |
| 0.140734 | 0.11655   | 0.123397 | 0.150641  | 0.133741 | 0.117279  | 0.124272  |
| 0.13447  | 0.110577  | 0.116259 | 0.144376  | 0.132139 | 0.113636  | 0.12296   |
| 0.126894 | 0.111742  | 0.106935 | 0.14933   | 0.117861 | 0.0973193 | 0.134907  |
| 0.230624 | 0.215181  | 0.214161 | 0.229167  | 0.218386 | 0.215035  | 0.222319  |
| 0.149621 | 0.136801  | 0.13986  | 0.158071  | 0.145251 | 0.138112  | 0.138695  |
| 0.146853 | 0.129953  | 0.127768 | 0.148019  | 0.128497 | 0.124272  | 0.136218  |
| 0.14292  | 0.118444  | 0.126166 | 0.145833  | 0.133013 | 0.11655   | 0.130536  |
| 0.223339 | 0.210519  | 0.208916 | 0.225087  | 0.211976 | 0.206294  | 0.219114  |
| 0.129516 | 0.114948  | 0.111305 | 0.121649  | 0.122815 | 0.104021  | 0.134615  |
| 0.137821 | 0.118298  | 0.120775 | 0.143065  | 0.128497 | 0.114073  | 0.134761  |
| 0.13986  | 0.120338  | 0.122815 | 0.152972  | 0.121795 | 0.121649  | 0.133596  |
| 0.136801 | 0.116987  | 0.115967 | 0.146416  | 0.126603 | 0.119464  | 0.113928  |
| 0.259761 | 0.248689  | 0.245921 | 0.257721  | 0.248397 | 0.246212  | 0.254371  |
| 0.139569 | 0.125     | 0.121649 | 0.0626457 | 0.138112 | 0.123106  | 0.134178  |
| 0.12704  | 0.102273  | 0.100962 | 0.145688  | 0.115967 | 0.0922203 | 0.124563  |
| 0.141317 | 0.121212  | 0.123106 | 0.151224  | 0.121795 | 0.121941  | 0.133304  |
| 0.142483 | 0.118007  | 0.120775 | 0.146562  | 0.121503 | 0.120484  | 0.131556  |
| 0.142774 | 0.128788  | 0.123106 | 0.0725524 | 0.135781 | 0.125146  | 0.133304  |
| 0.146562 | 0.122086  | 0.122523 | 0.144814  | 0.134907 | 0.121358  | 0.131847  |
| 0.127622 | 0.106935  | 0.105332 | 0.14627   | 0.118298 | 0.0957168 | 0.13039   |
| 0.137675 | 0.114656  | 0.119755 | 0.143502  | 0.131265 | 0.116259  | 0.123252  |
| 0.14627  | 0.124417  | 0.12602  | 0.144814  | 0.134615 | 0.122815  | 0.128059  |
| 0.134907 | 0.111597  | 0.110868 | 0.142191  | 0.125291 | 0.116696  | 0.116113  |
| 0.138549 | 0.11553   | 0.11655  | 0.142337  | 0.130682 | 0.113928  | 0.120338  |
| 0.120629 | 0.10373   | 0.107663 | 0.129953  | 0.121212 | 0.112325  | 0.0942599 |
| 0.157488 | 0.14292   | 0.143357 | 0.161859  | 0.139714 | 0.1419    | 0.141317  |
| 0.141754 | 0.128934  | 0.126748 | 0.0584207 | 0.139132 | 0.127622  | 0.137821  |
| 0.144085 | 0.12398   | 0.120629 | 0.143211  | 0.133304 | 0.118298  | 0.136946  |
| 0.205274 | 0.188957  | 0.187646 | 0.204691  | 0.196241 | 0.185897  | 0.198427  |
| 0.218386 | 0.204983  | 0.199301 | 0.218094  | 0.207022 | 0.200758  | 0.21183   |
| 0.137966 | 0.120192  | 0.115385 | 0.146999  | 0.131847 | 0.121212  | 0.118298  |
| 0.13243  | 0.113782  | 0.107517 | 0.140589  | 0.122232 | 0.111888  | 0.113345  |
| 0.147873 | 0.132139  | 0.129953 | 0.146416  | 0.140297 | 0.129371  | 0.130536  |
| 0.122523 | 0.106206  | 0.102564 | 0.146416  | 0.117279 | 0.0949883 | 0.127914  |
| 0.141317 | 0.128205  | 0.124854 | 0.0608974 | 0.138986 | 0.124272  | 0.136801  |
| 0.142045 | 0.121941  | 0.126457 | 0.148456  | 0.126311 | 0.128497  | 0.136364  |
| 0.241113 | 0.225962  | 0.221445 | 0.239948  | 0.227418 | 0.221154  | 0.229604  |
| 0.137675 | 0.113199  | 0.115093 | 0.144085  | 0.128059 | 0.106352  | 0.127331  |
| 0.212413 | 0.204254  | 0.197407 | 0.228147  | 0.197844 | 0.194202  | 0.21081   |
| 0.121066 | 0.104458  | 0.101107 | 0.127477  | 0.119027 | 0.0987762 | 0.124709  |
| 0.131993 | 0.111597  | 0.115239 | 0.140734  | 0.121212 | 0.112034  | 0.128351  |
| 0.137092 | 0.105624  | 0.114802 | 0.140006  | 0.121941 | 0.108392  | 0.122378  |

|          |          |          |           |          |           |          |
|----------|----------|----------|-----------|----------|-----------|----------|
| 0.128934 | 0.109703 | 0.107226 | 0.139423  | 0.120775 | 0.113928  | 0.112179 |
| 0.222028 | 0.209207 | 0.203234 | 0.222319  | 0.210373 | 0.203234  | 0.21285  |
| 0.147436 | 0.125874 | 0.130682 | 0.156469  | 0.142774 | 0.127185  | 0.130682 |
| 0.134907 | 0.110431 | 0.116113 | 0.138986  | 0.127331 | 0.112908  | 0.124854 |
| 0.142483 | 0.120047 | 0.123689 | 0.151515  | 0.135781 | 0.121066  | 0.126894 |
| 0.136072 | 0.113345 | 0.116404 | 0.14831   | 0.127622 | 0.116113  | 0.125728 |
| 0.133159 | 0.112471 | 0.109994 | 0.146853  | 0.125    | 0.114656  | 0.119901 |
| 0.123397 | 0.107372 | 0.104312 | 0.125437  | 0.123106 | 0.100233  | 0.128788 |
| 0.126894 | 0.112617 | 0.105186 | 0.151952  | 0.117861 | 0.101981  | 0.130536 |
| 0.14088  | 0.119901 | 0.122086 | 0.142337  | 0.128934 | 0.117424  | 0.134033 |
| 0.135344 | 0.110868 | 0.114219 | 0.143794  | 0.128351 | 0.107809  | 0.119464 |
| 0.133741 | 0.111597 | 0.117861 | 0.137821  | 0.119755 | 0.113199  | 0.128351 |
| 0.202652 | 0.188666 | 0.182692 | 0.207605  | 0.193619 | 0.183275  | 0.197552 |
| 0.140443 | 0.120921 | 0.122523 | 0.149767  | 0.118007 | 0.122523  | 0.135635 |
| 0.149038 | 0.12398  | 0.130536 | 0.152244  | 0.134178 | 0.125     | 0.133159 |
| 0.137821 | 0.107809 | 0.116696 | 0.151515  | 0.121795 | 0.114948  | 0.12602  |
| 0.139714 | 0.126603 | 0.124126 | 0.0759033 | 0.138258 | 0.121503  | 0.135781 |
| 0.141171 | 0.118153 | 0.120921 | 0.147873  | 0.135052 | 0.11859   | 0.12296  |
| 0.127185 | 0.112617 | 0.11014  | 0.128642  | 0.120775 | 0.106643  | 0.129371 |
| 0.131702 | 0.107226 | 0.112034 | 0.124126  | 0.121212 | 0.10912   | 0.122232 |
| 0.129953 | 0.110723 | 0.106498 | 0.148019  | 0.119172 | 0.0971737 | 0.132721 |
| 0.143794 | 0.121358 | 0.123834 | 0.148456  | 0.129808 | 0.120629  | 0.129953 |
| 0.139132 | 0.116987 | 0.117133 | 0.151078  | 0.122815 | 0.116841  | 0.128497 |
| 0.13549  | 0.11859  | 0.112617 | 0.147727  | 0.130828 | 0.11757   | 0.117279 |
| 0.138549 | 0.11961  | 0.123252 | 0.149913  | 0.125437 | 0.121795  | 0.13141  |
| 0.144814 | 0.131702 | 0.133013 | 0.156177  | 0.128788 | 0.134178  | 0.137966 |
| 0.134907 | 0.115385 | 0.112325 | 0.0757576 | 0.132576 | 0.113491  | 0.128642 |
| 0.149913 | 0.133887 | 0.136655 | 0.156031  | 0.14088  | 0.131993  | 0.134907 |
| 0.129516 | 0.110868 | 0.108392 | 0.141754  | 0.122523 | 0.111305  | 0.11655  |
| 0.135635 | 0.113491 | 0.113928 | 0.143502  | 0.11961  | 0.11655   | 0.128497 |
| 0.132867 | 0.113054 | 0.116113 | 0.147145  | 0.127622 | 0.114073  | 0.125437 |
| 0.128497 | 0.115093 | 0.111116 | 0.151807  | 0.121212 | 0.100962  | 0.13884  |
| 0.204254 | 0.187354 | 0.183421 | 0.208916  | 0.18852  | 0.181672  | 0.200612 |
| 0.128642 | 0.108829 | 0.113345 | 0.135635  | 0.120192 | 0.108974  | 0.119755 |
| 0.125146 | 0.103001 | 0.104021 | 0.132139  | 0.119027 | 0.101107  | 0.117716 |
| 0.141754 | 0.123106 | 0.122086 | 0.142337  | 0.126894 | 0.117716  | 0.136364 |
| 0.194784 | 0.177302 | 0.175408 | 0.201195  | 0.182255 | 0.175408  | 0.18211  |
| 0.149767 | 0.135198 | 0.133596 | 0.0661422 | 0.147145 | 0.13447   | 0.143502 |
| 0.156469 | 0.144814 | 0.140297 | 0.044289  | 0.152389 | 0.14292   | 0.145833 |
| 0.157488 | 0.145542 | 0.144231 | 0.163899  | 0.141463 | 0.143648  | 0.143648 |
| 0.133887 | 0.114365 | 0.109848 | 0.0808566 | 0.132139 | 0.112471  | 0.126457 |
| 0.137529 | 0.117716 | 0.12398  | 0.147727  | 0.132284 | 0.119318  | 0.126603 |
| 0.226253 | 0.210227 | 0.208333 | 0.226253  | 0.215472 | 0.207168  | 0.220571 |
| 0.137092 | 0.119318 | 0.119464 | 0.142337  | 0.126311 | 0.117424  | 0.12704  |

|          |           |           |           |          |           |          |
|----------|-----------|-----------|-----------|----------|-----------|----------|
| 0.142191 | 0.12296   | 0.125146  | 0.152098  | 0.136946 | 0.122232  | 0.130099 |
| 0.130828 | 0.114219  | 0.112908  | 0.136655  | 0.125874 | 0.11116   | 0.125146 |
| 0.181235 | 0.165501  | 0.165938  | 0.189977  | 0.167249 | 0.162733  | 0.174679 |
| 0.137238 | 0.107517  | 0.114948  | 0.141317  | 0.125    | 0.105915  | 0.119027 |
| 0.160985 | 0.146999  | 0.147145  | 0.155157  | 0.144376 | 0.147145  | 0.138986 |
| 0.127768 | 0.110577  | 0.113928  | 0.135344  | 0.12398  | 0.116259  | 0.110723 |
| 0.207896 | 0.189248  | 0.182984  | 0.206731  | 0.192453 | 0.183275  | 0.199009 |
| 0.139132 | 0.121649  | 0.118298  | 0.0756119 | 0.134761 | 0.117424  | 0.134615 |
| 0.121649 | 0.101836  | 0.101107  | 0.13884   | 0.116404 | 0.10373   | 0.106352 |
| 0.135198 | 0.111014  | 0.114073  | 0.144231  | 0.124417 | 0.115239  | 0.129225 |
| 0.132139 | 0.114656  | 0.115385  | 0.137383  | 0.122232 | 0.11451   | 0.132284 |
| 0.141463 | 0.11961   | 0.119172  | 0.141463  | 0.129516 | 0.11451   | 0.133741 |
| 0.137966 | 0.121066  | 0.113636  | 0.145251  | 0.129225 | 0.120047  | 0.129953 |
| 0.134033 | 0.112471  | 0.111451  | 0.143065  | 0.126457 | 0.116113  | 0.113491 |
| 0.206439 | 0.188957  | 0.185023  | 0.211101  | 0.197115 | 0.182984  | 0.199009 |
| 0.143648 | 0.11451   | 0.125146  | 0.151224  | 0.12704  | 0.116696  | 0.122815 |
| 0.131265 | 0.116696  | 0.107226  | 0.146416  | 0.129808 | 0.11014   | 0.11451  |
| 0.225524 | 0.212704  | 0.20877   | 0.225524  | 0.212413 | 0.209062  | 0.216929 |
| 0.140734 | 0.120921  | 0.123397  | 0.149184  | 0.121503 | 0.123397  | 0.133887 |
| 0.133304 | 0.112908  | 0.11014   | 0.145251  | 0.124854 | 0.115967  | 0.115385 |
| 0.128351 | 0.107372  | 0.104312  | 0.141754  | 0.123397 | 0.111597  | 0.111014 |
| 0.148601 | 0.131119  | 0.133887  | 0.153846  | 0.138986 | 0.132721  | 0.132139 |
| 0.203963 | 0.191434  | 0.184586  | 0.206294  | 0.196096 | 0.184878  | 0.196824 |
| 0.123689 | 0.107663  | 0.104895  | 0.148164  | 0.116404 | 0.0941142 | 0.130828 |
| 0.142628 | 0.127768  | 0.127622  | 0.152826  | 0.128059 | 0.126166  | 0.135781 |
| 0.131847 | 0.114365  | 0.111014  | 0.14292   | 0.123106 | 0.114219  | 0.112762 |
| 0.130682 | 0.109994  | 0.107226  | 0.142628  | 0.124854 | 0.111305  | 0.115093 |
| 0.130536 | 0.111888  | 0.108246  | 0.1419    | 0.124126 | 0.112034  | 0.109411 |
| 0.137675 | 0.109994  | 0.118881  | 0.143794  | 0.128059 | 0.113928  | 0.118298 |
| 0.122086 | 0.0996503 | 0.10067   | 0.131993  | 0.115093 | 0.099796  | 0.106498 |
| 0.139277 | 0.125583  | 0.121066  | 0.0623543 | 0.13986  | 0.120775  | 0.13447  |
| 0.15035  | 0.126166  | 0.133013  | 0.15676   | 0.134615 | 0.127477  | 0.131556 |
| 0.1419   | 0.122669  | 0.120775  | 0.0708042 | 0.136946 | 0.120484  | 0.134761 |
| 0.137383 | 0.116987  | 0.121212  | 0.148747  | 0.131847 | 0.122669  | 0.130536 |
| 0.208333 | 0.194639  | 0.189831  | 0.210956  | 0.201923 | 0.190705  | 0.203234 |
| 0.135927 | 0.116696  | 0.11859   | 0.146125  | 0.124563 | 0.116259  | 0.130828 |
| 0.144231 | 0.127914  | 0.131265  | 0.153555  | 0.136072 | 0.124272  | 0.131847 |
| 0.133887 | 0.110577  | 0.110431  | 0.13884   | 0.12602  | 0.111305  | 0.110723 |
| 0.121795 | 0.0955711 | 0.0992133 | 0.129371  | 0.114802 | 0.100962  | 0.10271  |
| 0.134907 | 0.111014  | 0.108829  | 0.130828  | 0.121795 | 0.110868  | 0.121066 |
| 0.126311 | 0.10912   | 0.107226  | 0.148456  | 0.114948 | 0.0961538 | 0.134615 |
| 0.144668 | 0.126894  | 0.129662  | 0.146707  | 0.140006 | 0.121795  | 0.137821 |
| 0.13986  | 0.11859   | 0.121358  | 0.148601  | 0.132867 | 0.116987  | 0.13243  |
| 0.125291 | 0.101399  | 0.10067   | 0.138403  | 0.111597 | 0.0933858 | 0.120775 |

|          |           |           |           |          |           |           |
|----------|-----------|-----------|-----------|----------|-----------|-----------|
| 0.120775 | 0.095134  | 0.0990676 | 0.137675  | 0.108829 | 0.0932401 | 0.113928  |
| 0.127331 | 0.100233  | 0.104749  | 0.134907  | 0.11451  | 0.107955  | 0.109411  |
| 0.123397 | 0.107372  | 0.102564  | 0.126311  | 0.118153 | 0.102855  | 0.124709  |
| 0.145105 | 0.133741  | 0.128059  | 0.0579837 | 0.140443 | 0.127477  | 0.137675  |
| 0.126894 | 0.108537  | 0.107226  | 0.150495  | 0.120484 | 0.097028  | 0.13141   |
| 0.134907 | 0.11014   | 0.114948  | 0.139277  | 0.128205 | 0.112325  | 0.120484  |
| 0.127622 | 0.0987762 | 0.102127  | 0.14627   | 0.115676 | 0.0901807 | 0.126894  |
| 0.13243  | 0.108537  | 0.106061  | 0.141754  | 0.125728 | 0.110723  | 0.113636  |
| 0.128497 | 0.104895  | 0.108246  | 0.132284  | 0.121795 | 0.107955  | 0.118735  |
| 0.136072 | 0.113928  | 0.110868  | 0.145105  | 0.124709 | 0.11553   | 0.116987  |
| 0.131702 | 0.111014  | 0.114365  | 0.145979  | 0.121212 | 0.115239  | 0.123106  |
| 0.143357 | 0.115385  | 0.120192  | 0.14831   | 0.12704  | 0.11553   | 0.124563  |
| 0.133741 | 0.113636  | 0.114365  | 0.138403  | 0.127914 | 0.10708   | 0.129516  |
| 0.123397 | 0.0995047 | 0.105186  | 0.134178  | 0.116404 | 0.10373   | 0.10373   |
| 0.13345  | 0.109557  | 0.109411  | 0.142483  | 0.127622 | 0.113199  | 0.114656  |
| 0.139569 | 0.117716  | 0.121649  | 0.147436  | 0.125583 | 0.120484  | 0.131556  |
| 0.136509 | 0.120192  | 0.112471  | 0.148456  | 0.134178 | 0.118298  | 0.12296   |
| 0.122086 | 0.102564  | 0.0995047 | 0.142191  | 0.121212 | 0.107372  | 0.106789  |
| 0.130828 | 0.107226  | 0.10708   | 0.144522  | 0.12296  | 0.11116   | 0.112908  |
| 0.137092 | 0.114073  | 0.119464  | 0.142628  | 0.130682 | 0.117424  | 0.124417  |
| 0.122523 | 0.106789  | 0.105186  | 0.127185  | 0.119901 | 0.100524  | 0.129079  |
| 0.139423 | 0.115239  | 0.118881  | 0.145251  | 0.133596 | 0.114802  | 0.125     |
| 0.14088  | 0.118444  | 0.118298  | 0.14088   | 0.128059 | 0.111597  | 0.130536  |
| 0.124563 | 0.10067   | 0.107226  | 0.132721  | 0.119027 | 0.106643  | 0.104021  |
| 0.135344 | 0.104749  | 0.113636  | 0.140589  | 0.124854 | 0.112471  | 0.120921  |
| 0.13141  | 0.104312  | 0.111451  | 0.136946  | 0.122669 | 0.107663  | 0.117279  |
| 0.139423 | 0.117279  | 0.124126  | 0.150495  | 0.131265 | 0.119172  | 0.128788  |
| 0.141463 | 0.115822  | 0.118881  | 0.150204  | 0.13039  | 0.11859   | 0.12704   |
| 0.130828 | 0.112762  | 0.106498  | 0.142191  | 0.13141  | 0.107372  | 0.122232  |
| 0.205711 | 0.19289   | 0.187791  | 0.207751  | 0.197261 | 0.18954   | 0.204691  |
| 0.177739 | 0.164336  | 0.158071  | 0.191434  | 0.167541 | 0.160402  | 0.170309  |
| 0.141317 | 0.125291  | 0.119318  | 0.0748834 | 0.13345  | 0.119318  | 0.136801  |
| 0.130099 | 0.113491  | 0.110431  | 0.146416  | 0.122232 | 0.104895  | 0.129079  |
| 0.156614 | 0.151078  | 0.145979  | 0.0400641 | 0.152826 | 0.143065  | 0.154138  |
| 0.144231 | 0.124417  | 0.124854  | 0.147145  | 0.133741 | 0.126311  | 0.12602   |
| 0.137383 | 0.120192  | 0.116259  | 0.144376  | 0.124854 | 0.121503  | 0.119755  |
| 0.137238 | 0.113345  | 0.108829  | 0.144814  | 0.126166 | 0.116113  | 0.114073  |
| 0.122378 | 0.0996503 | 0.106206  | 0.133741  | 0.123543 | 0.111742  | 0.0989219 |
| 0.13345  | 0.119464  | 0.114073  | 0.148893  | 0.131993 | 0.116987  | 0.120775  |
| 0.215763 | 0.202652  | 0.195513  | 0.218386  | 0.207022 | 0.195804  | 0.208625  |
| 0.128205 | 0.110723  | 0.106498  | 0.147727  | 0.116841 | 0.0971737 | 0.135052  |
| 0.133596 | 0.109994  | 0.109557  | 0.145542  | 0.122232 | 0.106643  | 0.128205  |
| 0.129225 | 0.11116   | 0.106352  | 0.143211  | 0.118735 | 0.110431  | 0.107809  |
| 0.135781 | 0.106643  | 0.115239  | 0.150058  | 0.128788 | 0.112908  | 0.128351  |

|          |           |           |           |          |           |          |
|----------|-----------|-----------|-----------|----------|-----------|----------|
| 0.196824 | 0.184003  | 0.178322  | 0.205274  | 0.187791 | 0.178322  | 0.192308 |
| 0.256265 | 0.248397  | 0.241841  | 0.255099  | 0.245192 | 0.243881  | 0.25     |
| 0.14729  | 0.120484  | 0.123834  | 0.147873  | 0.13243  | 0.120921  | 0.127914 |
| 0.136801 | 0.120192  | 0.11451   | 0.145251  | 0.131847 | 0.116259  | 0.122669 |
| 0.137966 | 0.122815  | 0.121212  | 0.0677448 | 0.133596 | 0.120921  | 0.136072 |
| 0.137238 | 0.115385  | 0.114948  | 0.139277  | 0.128788 | 0.110868  | 0.13039  |
| 0.124563 | 0.10067   | 0.0990676 | 0.145833  | 0.117279 | 0.0926573 | 0.125291 |
| 0.136946 | 0.1081    | 0.116404  | 0.144231  | 0.12704  | 0.109703  | 0.118735 |
| 0.134178 | 0.112908  | 0.111597  | 0.143794  | 0.121066 | 0.115385  | 0.115967 |
| 0.121066 | 0.104458  | 0.100816  | 0.144376  | 0.111451 | 0.0917832 | 0.129079 |
| 0.131702 | 0.111888  | 0.112325  | 0.138403  | 0.123252 | 0.113491  | 0.120192 |
| 0.129516 | 0.107955  | 0.10373   | 0.145542  | 0.128934 | 0.115093  | 0.104312 |
| 0.126166 | 0.102273  | 0.106789  | 0.132576  | 0.11859  | 0.105915  | 0.106498 |
| 0.144085 | 0.118735  | 0.12296   | 0.146999  | 0.127477 | 0.117133  | 0.128205 |
| 0.13986  | 0.115093  | 0.119318  | 0.14627   | 0.133159 | 0.11553   | 0.124854 |
| 0.129371 | 0.105769  | 0.10271   | 0.140443  | 0.118298 | 0.105624  | 0.121066 |
| 0.142483 | 0.122086  | 0.121649  | 0.14831   | 0.12704  | 0.125437  | 0.123689 |
| 0.143648 | 0.129662  | 0.126894  | 0.143357  | 0.132867 | 0.123106  | 0.137383 |
| 0.133013 | 0.108246  | 0.108974  | 0.14292   | 0.122523 | 0.111597  | 0.115385 |
| 0.126457 | 0.109848  | 0.105915  | 0.123543  | 0.116841 | 0.110577  | 0.121649 |
| 0.139569 | 0.123543  | 0.120192  | 0.147145  | 0.129079 | 0.125728  | 0.116987 |
| 0.220717 | 0.209353  | 0.202797  | 0.220425  | 0.213724 | 0.205711  | 0.212413 |
| 0.132867 | 0.109266  | 0.114656  | 0.142774  | 0.12296  | 0.108537  | 0.121066 |
| 0.12398  | 0.0992133 | 0.102855  | 0.130973  | 0.116696 | 0.102564  | 0.109266 |
| 0.137966 | 0.116404  | 0.118298  | 0.149913  | 0.12602  | 0.119464  | 0.129662 |
| 0.142191 | 0.121212  | 0.12398   | 0.152681  | 0.124709 | 0.122815  | 0.13243  |
| 0.13141  | 0.105186  | 0.112325  | 0.148893  | 0.123834 | 0.109411  | 0.127477 |
| 0.218823 | 0.199592  | 0.196824  | 0.2162    | 0.208042 | 0.197115  | 0.204691 |
| 0.143211 | 0.118153  | 0.124417  | 0.149038  | 0.134761 | 0.118881  | 0.125874 |
| 0.130828 | 0.1081    | 0.107663  | 0.141317  | 0.123834 | 0.110286  | 0.114073 |
| 0.134178 | 0.11757   | 0.11859   | 0.13243   | 0.129808 | 0.120047  | 0.127331 |
| 0.136509 | 0.113782  | 0.111014  | 0.137966  | 0.125728 | 0.107226  | 0.128205 |
| 0.142628 | 0.116113  | 0.122669  | 0.148164  | 0.136509 | 0.116841  | 0.125583 |
| 0.131556 | 0.100962  | 0.111014  | 0.135344  | 0.124272 | 0.104604  | 0.116841 |
| 0.123689 | 0.105041  | 0.102564  | 0.143502  | 0.127768 | 0.111305  | 0.103147 |
| 0.13884  | 0.114948  | 0.119755  | 0.149038  | 0.122523 | 0.118881  | 0.127914 |
| 0.212121 | 0.197261  | 0.19391   | 0.216492  | 0.20542  | 0.189248  | 0.206439 |
| 0.131556 | 0.106498  | 0.11014   | 0.137383  | 0.126603 | 0.106352  | 0.119464 |
| 0.207751 | 0.192308  | 0.188666  | 0.212995  | 0.198135 | 0.189831  | 0.203234 |
| 0.209645 | 0.194493  | 0.191434  | 0.20877   | 0.197407 | 0.188228  | 0.20134  |
| 0.140589 | 0.125728  | 0.122669  | 0.142628  | 0.13243  | 0.11655   | 0.136655 |
| 0.143794 | 0.128934  | 0.128497  | 0.148456  | 0.126311 | 0.13141   | 0.137529 |
| 0.119027 | 0.101836  | 0.0996503 | 0.138549  | 0.119027 | 0.102564  | 0.10169  |
| 0.133741 | 0.107517  | 0.113491  | 0.139569  | 0.125583 | 0.107372  | 0.119027 |

|          |           |           |           |          |           |          |
|----------|-----------|-----------|-----------|----------|-----------|----------|
| 0.137966 | 0.112908  | 0.116259  | 0.144668  | 0.130682 | 0.112179  | 0.119464 |
| 0.133596 | 0.11116   | 0.110723  | 0.146416  | 0.130973 | 0.115385  | 0.11451  |
| 0.119318 | 0.0983392 | 0.0955711 | 0.140006  | 0.114948 | 0.0909091 | 0.125291 |
| 0.121066 | 0.101836  | 0.100233  | 0.147582  | 0.114073 | 0.092366  | 0.126748 |
| 0.145105 | 0.123252  | 0.125146  | 0.150058  | 0.13345  | 0.121941  | 0.132139 |
| 0.137092 | 0.116987  | 0.11859   | 0.13884   | 0.128351 | 0.115676  | 0.13345  |
| 0.128205 | 0.108683  | 0.103293  | 0.138986  | 0.120921 | 0.10912   | 0.110577 |
| 0.137675 | 0.113782  | 0.116841  | 0.146707  | 0.132139 | 0.111014  | 0.125291 |
| 0.121503 | 0.099359  | 0.102418  | 0.135198  | 0.115093 | 0.102418  | 0.10271  |
| 0.142337 | 0.124854  | 0.125291  | 0.151661  | 0.131847 | 0.120921  | 0.128205 |
| 0.141754 | 0.119318  | 0.118298  | 0.0735723 | 0.132721 | 0.117133  | 0.131119 |
| 0.147145 | 0.128497  | 0.131847  | 0.155012  | 0.13986  | 0.128934  | 0.130099 |
| 0.267191 | 0.259615  | 0.256265  | 0.263695  | 0.260198 | 0.254516  | 0.262675 |
| 0.138986 | 0.124709  | 0.124563  | 0.138695  | 0.128205 | 0.12398   | 0.132139 |
| 0.137675 | 0.125728  | 0.124709  | 0.137383  | 0.121358 | 0.124126  | 0.13345  |
| 0.227855 | 0.217949  | 0.211684  | 0.230186  | 0.219988 | 0.212267  | 0.223339 |
| 0.137675 | 0.120192  | 0.122378  | 0.144668  | 0.123106 | 0.121503  | 0.13141  |
| 0.239073 | 0.232372  | 0.226981  | 0.239365  | 0.229167 | 0.227273  | 0.235723 |
| 0.132284 | 0.11451   | 0.119318  | 0.139569  | 0.12296  | 0.112908  | 0.122232 |
| 0.13884  | 0.122232  | 0.118298  | 0.146999  | 0.131847 | 0.121795  | 0.117716 |
| 0.139132 | 0.113199  | 0.114802  | 0.150204  | 0.121649 | 0.117133  | 0.124709 |
| 0.141171 | 0.122815  | 0.120921  | 0.142337  | 0.133304 | 0.117424  | 0.13549  |
| 0.218386 | 0.203817  | 0.197261  | 0.220425  | 0.205565 | 0.197552  | 0.210082 |
| 0.146999 | 0.125437  | 0.128205  | 0.150495  | 0.138549 | 0.125291  | 0.130536 |
| 0.139714 | 0.114365  | 0.117716  | 0.146416  | 0.133887 | 0.114802  | 0.124709 |
| 0.238054 | 0.226399  | 0.2213    | 0.243298  | 0.230478 | 0.221882  | 0.230915 |
| 0.126894 | 0.104458  | 0.104021  | 0.150495  | 0.116696 | 0.0964452 | 0.132867 |
| 0.213869 | 0.200175  | 0.192453  | 0.214452  | 0.204837 | 0.194493  | 0.208188 |
| 0.129371 | 0.106061  | 0.107663  | 0.149476  | 0.122086 | 0.0960082 | 0.132139 |
| 0.13345  | 0.111888  | 0.111742  | 0.142483  | 0.123252 | 0.115239  | 0.116404 |
| 0.128642 | 0.109703  | 0.111014  | 0.133887  | 0.125437 | 0.11451   | 0.108392 |
| 0.14088  | 0.127768  | 0.124126  | 0.143211  | 0.131556 | 0.118881  | 0.138112 |
| 0.136364 | 0.106935  | 0.116696  | 0.140443  | 0.127331 | 0.110577  | 0.125146 |
| 0.172494 | 0.157051  | 0.153992  | 0.179487  | 0.16317  | 0.1537    | 0.159237 |
| 0.135781 | 0.111597  | 0.112034  | 0.140152  | 0.128205 | 0.11116   | 0.119318 |
| 0.142483 | 0.119464  | 0.123106  | 0.151807  | 0.122086 | 0.119027  | 0.13243  |
| 0.138403 | 0.11655   | 0.112617  | 0.149184  | 0.126457 | 0.113782  | 0.127185 |
| 0.142483 | 0.123834  | 0.123689  | 0.144522  | 0.127622 | 0.122523  | 0.135344 |
| 0.210227 | 0.19391   | 0.191434  | 0.212267  | 0.200321 | 0.189394  | 0.204254 |
| 0.129079 | 0.1081    | 0.108537  | 0.141608  | 0.122669 | 0.110577  | 0.114073 |
| 0.142628 | 0.122232  | 0.118298  | 0.147873  | 0.135052 | 0.11655   | 0.134615 |
| 0.12296  | 0.10373   | 0.105041  | 0.123252  | 0.118881 | 0.0995047 | 0.128351 |
| 0.122815 | 0.104167  | 0.103147  | 0.149038  | 0.115239 | 0.0941142 | 0.129371 |
| 0.134615 | 0.117424  | 0.11553   | 0.14627   | 0.123834 | 0.119901  | 0.112617 |



|          |          |          |           |          |           |          |
|----------|----------|----------|-----------|----------|-----------|----------|
| 0.262675 | 0.254225 | 0.251748 | 0.265297  | 0.253934 | 0.252622  | 0.26049  |
| 0.123834 | 0.105478 | 0.108829 | 0.128788  | 0.117133 | 0.106789  | 0.105915 |
| 0.138695 | 0.117716 | 0.116987 | 0.152389  | 0.126457 | 0.120484  | 0.125437 |
| 0.187937 | 0.177156 | 0.177885 | 0.195221  | 0.181818 | 0.174971  | 0.186917 |
| 0.199592 | 0.187937 | 0.181672 | 0.20542   | 0.195513 | 0.179341  | 0.195076 |
| 0.145105 | 0.117133 | 0.123106 | 0.151807  | 0.131702 | 0.119027  | 0.130973 |
| 0.140006 | 0.114656 | 0.120338 | 0.145833  | 0.134178 | 0.117424  | 0.121795 |
| 0.137092 | 0.11757  | 0.113928 | 0.14088   | 0.127185 | 0.109557  | 0.132867 |
| 0.154429 | 0.139277 | 0.143502 | 0.162879  | 0.149767 | 0.137383  | 0.139423 |
| 0.142483 | 0.113928 | 0.119318 | 0.147145  | 0.131993 | 0.117861  | 0.125146 |
| 0.145833 | 0.119027 | 0.125583 | 0.152535  | 0.132721 | 0.122086  | 0.130828 |
| 0.129953 | 0.114219 | 0.108829 | 0.15035   | 0.116841 | 0.103293  | 0.136801 |
| 0.136364 | 0.11451  | 0.116987 | 0.138403  | 0.12704  | 0.115239  | 0.120775 |
| 0.140297 | 0.123397 | 0.126166 | 0.151369  | 0.133887 | 0.122086  | 0.129079 |
| 0.126457 | 0.109266 | 0.108246 | 0.145688  | 0.121795 | 0.10067   | 0.133304 |
| 0.144085 | 0.12398  | 0.125    | 0.142337  | 0.129808 | 0.118881  | 0.131702 |
| 0.15035  | 0.138695 | 0.133304 | 0.14627   | 0.136364 | 0.130973  | 0.148164 |
| 0.128351 | 0.108537 | 0.114219 | 0.133304  | 0.121941 | 0.113054  | 0.108683 |
| 0.145396 | 0.132284 | 0.128642 | 0.143357  | 0.136655 | 0.123106  | 0.139423 |
| 0.127914 | 0.111014 | 0.113199 | 0.15035   | 0.119172 | 0.101544  | 0.139132 |
| 0.224796 | 0.209062 | 0.203671 | 0.226544  | 0.21285  | 0.204254  | 0.215326 |
| 0.132867 | 0.114219 | 0.109994 | 0.13345   | 0.124709 | 0.119318  | 0.114656 |
| 0.205711 | 0.191725 | 0.185169 | 0.208625  | 0.195513 | 0.1875    | 0.196824 |
| 0.13345  | 0.107809 | 0.109994 | 0.148019  | 0.120338 | 0.111742  | 0.12602  |
| 0.138112 | 0.118298 | 0.117861 | 0.14831   | 0.128788 | 0.122815  | 0.115239 |
| 0.142774 | 0.126748 | 0.122523 | 0.0611888 | 0.137821 | 0.123689  | 0.133887 |
| 0.135052 | 0.116113 | 0.114219 | 0.0826049 | 0.130973 | 0.115385  | 0.128205 |
| 0.142774 | 0.11655  | 0.12602  | 0.14831   | 0.131702 | 0.119318  | 0.128351 |
| 0.138403 | 0.118298 | 0.121358 | 0.148893  | 0.133159 | 0.119901  | 0.127768 |
| 0.135198 | 0.115385 | 0.112325 | 0.147727  | 0.128497 | 0.115239  | 0.116696 |
| 0.139423 | 0.118735 | 0.116841 | 0.152244  | 0.122232 | 0.121212  | 0.131119 |
| 0.14292  | 0.126311 | 0.122086 | 0.0627914 | 0.139423 | 0.123252  | 0.137529 |
| 0.133159 | 0.122669 | 0.114656 | 0.152389  | 0.123834 | 0.106498  | 0.140006 |
| 0.261364 | 0.251457 | 0.247815 | 0.257284  | 0.248252 | 0.247815  | 0.254808 |
| 0.134615 | 0.11451  | 0.111451 | 0.144231  | 0.128205 | 0.117861  | 0.116404 |
| 0.200612 | 0.184003 | 0.178322 | 0.203234  | 0.190997 | 0.178904  | 0.192308 |
| 0.207459 | 0.190559 | 0.186043 | 0.20979   | 0.19289  | 0.186043  | 0.198281 |
| 0.132721 | 0.114948 | 0.117424 | 0.1537    | 0.13243  | 0.115676  | 0.129371 |
| 0.127185 | 0.105915 | 0.106935 | 0.13039   | 0.118444 | 0.106352  | 0.106935 |
| 0.140006 | 0.121649 | 0.115676 | 0.14729   | 0.128642 | 0.121503  | 0.117716 |
| 0.135927 | 0.109994 | 0.114219 | 0.14088   | 0.127477 | 0.110723  | 0.118007 |
| 0.125291 | 0.102564 | 0.106789 | 0.136072  | 0.119755 | 0.111742  | 0.105041 |
| 0.128205 | 0.106643 | 0.104458 | 0.147727  | 0.118007 | 0.0936772 | 0.130682 |
| 0.132721 | 0.115239 | 0.114219 | 0.143794  | 0.125728 | 0.117716  | 0.126748 |

|          |          |          |           |          |           |          |
|----------|----------|----------|-----------|----------|-----------|----------|
| 0.144959 | 0.126311 | 0.128497 | 0.151661  | 0.138258 | 0.126166  | 0.130245 |
| 0.134033 | 0.111305 | 0.109703 | 0.143357  | 0.125874 | 0.116987  | 0.114656 |
| 0.144814 | 0.12704  | 0.127477 | 0.152389  | 0.134324 | 0.123397  | 0.129516 |
| 0.133304 | 0.114073 | 0.11451  | 0.13884   | 0.12398  | 0.112762  | 0.13141  |
| 0.14088  | 0.126311 | 0.123834 | 0.0604604 | 0.138258 | 0.125583  | 0.136655 |
| 0.13986  | 0.118298 | 0.118444 | 0.143939  | 0.131119 | 0.113782  | 0.135052 |
| 0.128642 | 0.114948 | 0.115967 | 0.149913  | 0.119318 | 0.104021  | 0.136946 |
| 0.127914 | 0.112179 | 0.109411 | 0.14831   | 0.129079 | 0.119027  | 0.101836 |
| 0.133159 | 0.114802 | 0.110577 | 0.134324  | 0.120338 | 0.115822  | 0.112617 |
| 0.145105 | 0.132867 | 0.128934 | 0.154429  | 0.131993 | 0.127477  | 0.137092 |
| 0.200903 | 0.186043 | 0.181527 | 0.205565  | 0.1875   | 0.180361  | 0.193182 |
| 0.146853 | 0.132284 | 0.135635 | 0.155594  | 0.142483 | 0.131847  | 0.135052 |
| 0.13986  | 0.116841 | 0.120484 | 0.144814  | 0.130828 | 0.11757   | 0.125437 |
| 0.14088  | 0.122232 | 0.121212 | 0.0616259 | 0.133887 | 0.121503  | 0.132576 |
| 0.13141  | 0.113054 | 0.109411 | 0.07838   | 0.127622 | 0.110868  | 0.123106 |
| 0.139714 | 0.119027 | 0.116841 | 0.144668  | 0.128059 | 0.111305  | 0.135198 |
| 0.143648 | 0.122378 | 0.121358 | 0.143357  | 0.132576 | 0.116696  | 0.137383 |
| 0.206439 | 0.190997 | 0.186772 | 0.209645  | 0.196824 | 0.187937  | 0.197552 |
| 0.137675 | 0.117861 | 0.119755 | 0.146125  | 0.125728 | 0.113345  | 0.119464 |
| 0.12704  | 0.107517 | 0.104749 | 0.140734  | 0.119464 | 0.103875  | 0.112908 |
| 0.139569 | 0.121795 | 0.125146 | 0.14831   | 0.136655 | 0.120484  | 0.127768 |
| 0.207314 | 0.191871 | 0.186189 | 0.213432  | 0.197698 | 0.186189  | 0.20134  |
| 0.125874 | 0.100816 | 0.105332 | 0.132867  | 0.120338 | 0.104749  | 0.106206 |
| 0.128351 | 0.109703 | 0.106643 | 0.146999  | 0.116987 | 0.0987762 | 0.137821 |
| 0.143502 | 0.11961  | 0.124126 | 0.14729   | 0.133596 | 0.121212  | 0.12704  |
| 0.138403 | 0.115385 | 0.116696 | 0.145396  | 0.123252 | 0.112908  | 0.12398  |
| 0.204254 | 0.186772 | 0.184295 | 0.205711  | 0.19493  | 0.181381  | 0.194493 |
| 0.127622 | 0.108392 | 0.10708  | 0.143357  | 0.115676 | 0.0960082 | 0.130973 |
| 0.134324 | 0.111014 | 0.112034 | 0.145688  | 0.120921 | 0.109411  | 0.123397 |
| 0.126457 | 0.104604 | 0.107955 | 0.134033  | 0.121503 | 0.105041  | 0.108829 |
| 0.13986  | 0.117424 | 0.116404 | 0.140152  | 0.132576 | 0.113491  | 0.132139 |
| 0.140589 | 0.116696 | 0.121503 | 0.1537    | 0.121941 | 0.122669  | 0.132576 |
| 0.13039  | 0.11553  | 0.112762 | 0.147582  | 0.118444 | 0.104895  | 0.134907 |
| 0.135052 | 0.111742 | 0.110723 | 0.143211  | 0.125437 | 0.113928  | 0.114219 |
| 0.133013 | 0.119901 | 0.11655  | 0.146707  | 0.129225 | 0.11859   | 0.123252 |
| 0.157925 | 0.144522 | 0.144085 | 0.160256  | 0.1419   | 0.141754  | 0.143794 |
| 0.25     | 0.236597 | 0.23412  | 0.249126  | 0.237179 | 0.234411  | 0.241987 |
| 0.129371 | 0.118007 | 0.113782 | 0.152098  | 0.130536 | 0.12398   | 0.107372 |
| 0.143065 | 0.120047 | 0.122232 | 0.150641  | 0.124417 | 0.121941  | 0.132721 |
| 0.135344 | 0.112325 | 0.117133 | 0.145251  | 0.124272 | 0.113636  | 0.121212 |
| 0.141608 | 0.120921 | 0.116987 | 0.147436  | 0.134615 | 0.119318  | 0.131847 |
| 0.13243  | 0.110577 | 0.111888 | 0.137383  | 0.109411 | 0.107517  | 0.130536 |
| 0.132721 | 0.111742 | 0.113928 | 0.141171  | 0.125728 | 0.113636  | 0.127622 |
| 0.13986  | 0.119755 | 0.122815 | 0.145396  | 0.129662 | 0.119318  | 0.126603 |

|          |           |          |           |          |           |           |
|----------|-----------|----------|-----------|----------|-----------|-----------|
| 0.127185 | 0.110868  | 0.109557 | 0.151369  | 0.120775 | 0.0979021 | 0.135781  |
| 0.134761 | 0.113199  | 0.11451  | 0.149621  | 0.126311 | 0.114219  | 0.131993  |
| 0.248543 | 0.237179  | 0.23208  | 0.248543  | 0.236888 | 0.234411  | 0.246066  |
| 0.126311 | 0.101836  | 0.105186 | 0.13243   | 0.114365 | 0.10373   | 0.104895  |
| 0.124272 | 0.101253  | 0.107226 | 0.134761  | 0.11961  | 0.102855  | 0.11451   |
| 0.131993 | 0.111305  | 0.110286 | 0.138986  | 0.122086 | 0.112325  | 0.111116  |
| 0.14933  | 0.126311  | 0.128788 | 0.152535  | 0.131847 | 0.129662  | 0.134033  |
| 0.133013 | 0.122815  | 0.117716 | 0.156906  | 0.13243  | 0.12704   | 0.107809  |
| 0.139423 | 0.115239  | 0.115676 | 0.136801  | 0.127185 | 0.117716  | 0.122086  |
| 0.140297 | 0.116696  | 0.120629 | 0.150495  | 0.133013 | 0.119172  | 0.125291  |
| 0.13345  | 0.111888  | 0.117861 | 0.141317  | 0.122086 | 0.109994  | 0.11961   |
| 0.23951  | 0.231935  | 0.228293 | 0.245629  | 0.229312 | 0.228584  | 0.238199  |
| 0.142483 | 0.121503  | 0.12602  | 0.147145  | 0.136655 | 0.122232  | 0.129225  |
| 0.125146 | 0.106789  | 0.105769 | 0.147582  | 0.118153 | 0.0955711 | 0.13141   |
| 0.125728 | 0.10708   | 0.111014 | 0.144668  | 0.121649 | 0.108392  | 0.125291  |
| 0.136655 | 0.116259  | 0.119318 | 0.144231  | 0.120338 | 0.126603  | 0.13447   |
| 0.136072 | 0.117424  | 0.122815 | 0.138695  | 0.125    | 0.120192  | 0.129516  |
| 0.131702 | 0.111888  | 0.110577 | 0.142191  | 0.125583 | 0.112617  | 0.110868  |
| 0.128788 | 0.113636  | 0.10708  | 0.148019  | 0.119464 | 0.100087  | 0.129225  |
| 0.131847 | 0.115239  | 0.111305 | 0.149621  | 0.122232 | 0.10373   | 0.134615  |
| 0.125728 | 0.10271   | 0.10169  | 0.145251  | 0.118444 | 0.0941142 | 0.130245  |
| 0.130828 | 0.112762  | 0.111742 | 0.142483  | 0.120047 | 0.115822  | 0.115822  |
| 0.143648 | 0.124126  | 0.125728 | 0.151224  | 0.120921 | 0.124563  | 0.136218  |
| 0.147582 | 0.127768  | 0.129371 | 0.156031  | 0.128059 | 0.130828  | 0.13986   |
| 0.142337 | 0.130973  | 0.126166 | 0.0584207 | 0.136509 | 0.124709  | 0.136364  |
| 0.147582 | 0.133304  | 0.129953 | 0.0607517 | 0.141463 | 0.129079  | 0.141608  |
| 0.144814 | 0.126748  | 0.129808 | 0.154138  | 0.124709 | 0.13039   | 0.137092  |
| 0.120921 | 0.0958625 | 0.100087 | 0.133159  | 0.120047 | 0.103875  | 0.0954254 |
| 0.13243  | 0.123689  | 0.120921 | 0.13243   | 0.126894 | 0.11859   | 0.136072  |
| 0.101107 | 0.107226  | 0.097465 | 0.157634  | 0.124709 | 0.0960082 | 0.125437  |
| 0.222902 | 0.206294  | 0.202069 | 0.222611  | 0.20979  | 0.203817  | 0.211101  |
| 0.137529 | 0.124709  | 0.117279 | 0.151515  | 0.134615 | 0.12398   | 0.120775  |
| 0.133741 | 0.109557  | 0.116113 | 0.141608  | 0.124417 | 0.109411  | 0.121941  |
| 0.137966 | 0.118735  | 0.117133 | 0.146999  | 0.130099 | 0.119464  | 0.116259  |
| 0.237179 | 0.223485  | 0.219551 | 0.239219  | 0.223485 | 0.222174  | 0.227127  |
| 0.22465  | 0.213578  | 0.209062 | 0.230186  | 0.215035 | 0.208188  | 0.221882  |
| 0.129516 | 0.114656  | 0.109848 | 0.151369  | 0.118444 | 0.102564  | 0.13549   |
| 0.259907 | 0.25204   | 0.246649 | 0.258159  | 0.25204  | 0.246358  | 0.255682  |
| 0.121795 | 0.0979021 | 0.102127 | 0.130245  | 0.118007 | 0.106206  | 0.0968823 |
| 0.147145 | 0.130828  | 0.133013 | 0.149476  | 0.137529 | 0.131556  | 0.123689  |
| 0.125291 | 0.101399  | 0.105332 | 0.129953  | 0.117133 | 0.107372  | 0.105915  |
| 0.141171 | 0.122523  | 0.12704  | 0.149621  | 0.121358 | 0.125291  | 0.136655  |
| 0.204254 | 0.189977  | 0.184586 | 0.206585  | 0.191142 | 0.184586  | 0.196533  |
| 0.12398  | 0.115822  | 0.11655  | 0.150787  | 0.11961  | 0.11655   | 0.129079  |

|          |           |          |           |          |           |          |
|----------|-----------|----------|-----------|----------|-----------|----------|
| 0.211393 | 0.198281  | 0.190268 | 0.214015  | 0.202652 | 0.189977  | 0.20338  |
| 0.13243  | 0.114073  | 0.113345 | 0.145833  | 0.127768 | 0.111014  | 0.124709 |
| 0.131847 | 0.110286  | 0.109557 | 0.143211  | 0.117861 | 0.100524  | 0.127914 |
| 0.130099 | 0.111742  | 0.113345 | 0.138258  | 0.125437 | 0.113054  | 0.125874 |
| 0.133013 | 0.107372  | 0.114219 | 0.13447   | 0.123397 | 0.106352  | 0.124126 |
| 0.127914 | 0.104895  | 0.103875 | 0.138112  | 0.119464 | 0.106789  | 0.107955 |
| 0.13141  | 0.115385  | 0.10912  | 0.145105  | 0.130245 | 0.113199  | 0.114365 |
| 0.123252 | 0.099359  | 0.10067  | 0.129079  | 0.113345 | 0.102127  | 0.107372 |
| 0.135344 | 0.112617  | 0.115385 | 0.143502  | 0.129808 | 0.111014  | 0.120629 |
| 0.124709 | 0.111888  | 0.107372 | 0.124126  | 0.119172 | 0.107372  | 0.130682 |
| 0.12296  | 0.104604  | 0.10271  | 0.144522  | 0.122378 | 0.108829  | 0.099796 |
| 0.125146 | 0.102127  | 0.104604 | 0.132721  | 0.11553  | 0.105186  | 0.105186 |
| 0.138112 | 0.120047  | 0.118444 | 0.0862471 | 0.129662 | 0.116987  | 0.130973 |
| 0.143357 | 0.126166  | 0.129225 | 0.151515  | 0.137529 | 0.125146  | 0.130682 |
| 0.134761 | 0.116987  | 0.111305 | 0.0726981 | 0.133304 | 0.113636  | 0.127331 |
| 0.13141  | 0.111888  | 0.111742 | 0.145105  | 0.121212 | 0.114073  | 0.121649 |
| 0.12602  | 0.105332  | 0.105769 | 0.138549  | 0.123397 | 0.108392  | 0.11014  |
| 0.128642 | 0.112325  | 0.108392 | 0.143211  | 0.11757  | 0.100816  | 0.128788 |
| 0.139132 | 0.115822  | 0.119755 | 0.148456  | 0.122523 | 0.120921  | 0.128788 |
| 0.136655 | 0.118298  | 0.116696 | 0.141026  | 0.130245 | 0.112908  | 0.133887 |
| 0.136655 | 0.117716  | 0.116987 | 0.0743007 | 0.131702 | 0.116696  | 0.131556 |
| 0.136218 | 0.113491  | 0.118298 | 0.14292   | 0.133013 | 0.113054  | 0.122378 |
| 0.144814 | 0.125874  | 0.13039  | 0.151224  | 0.135781 | 0.125728  | 0.131265 |
| 0.148893 | 0.131993  | 0.136218 | 0.153555  | 0.141026 | 0.133887  | 0.135344 |
| 0.116696 | 0.095134  | 0.092366 | 0.13884   | 0.112034 | 0.0859557 | 0.114802 |
| 0.134761 | 0.112617  | 0.111597 | 0.14292   | 0.125437 | 0.115967  | 0.114802 |
| 0.127914 | 0.0984848 | 0.10708  | 0.139569  | 0.120047 | 0.105624  | 0.118444 |
| 0.146853 | 0.129662  | 0.128059 | 0.149767  | 0.12704  | 0.129808  | 0.137092 |
| 0.123689 | 0.101836  | 0.106935 | 0.131847  | 0.118153 | 0.107226  | 0.106352 |
| 0.152244 | 0.135927  | 0.134615 | 0.146416  | 0.137675 | 0.130536  | 0.145105 |
| 0.143794 | 0.130682  | 0.125874 | 0.154283  | 0.13447  | 0.131119  | 0.119464 |
| 0.145688 | 0.121503  | 0.12398  | 0.156177  | 0.130245 | 0.120775  | 0.129516 |
| 0.129225 | 0.105915  | 0.103147 | 0.136801  | 0.124854 | 0.111305  | 0.11655  |
| 0.135781 | 0.110431  | 0.114656 | 0.140734  | 0.127331 | 0.115822  | 0.123106 |
| 0.1419   | 0.130245  | 0.123689 | 0.0611888 | 0.140734 | 0.124563  | 0.135635 |
| 0.217803 | 0.206731  | 0.197552 | 0.223922  | 0.212558 | 0.201632  | 0.212413 |
| 0.129225 | 0.108246  | 0.113636 | 0.144959  | 0.120192 | 0.111014  | 0.126457 |
| 0.130245 | 0.108392  | 0.109703 | 0.138112  | 0.128205 | 0.113199  | 0.124272 |
| 0.137383 | 0.116113  | 0.120338 | 0.150495  | 0.118735 | 0.11655   | 0.130245 |
| 0.136655 | 0.118007  | 0.115822 | 0.0716783 | 0.131119 | 0.11553   | 0.133013 |
| 0.137383 | 0.120775  | 0.12296  | 0.146999  | 0.132139 | 0.119464  | 0.130536 |
| 0.136509 | 0.116404  | 0.11859  | 0.144668  | 0.128059 | 0.116841  | 0.127331 |
| 0.141026 | 0.120921  | 0.121941 | 0.150932  | 0.129662 | 0.120775  | 0.123106 |
| 0.144668 | 0.119901  | 0.121503 | 0.14933   | 0.128351 | 0.11655   | 0.126457 |

|          |           |           |          |           |           |           |
|----------|-----------|-----------|----------|-----------|-----------|-----------|
| 0.121066 | 0.10271   | 0.103147  | 0.128642 | 0.120484  | 0.0996503 | 0.125     |
| 0.146416 | 0.123106  | 0.125291  | 0.152826 | 0.125437  | 0.124709  | 0.132867  |
| 0.125437 | 0.10271   | 0.109266  | 0.137383 | 0.124854  | 0.1081    | 0.125291  |
| 0.129371 | 0.108392  | 0.106789  | 0.151224 | 0.129371  | 0.117861  | 0.106498  |
| 0.188666 | 0.173223  | 0.167832  | 0.189831 | 0.180798  | 0.168415  | 0.180361  |
| 0.136509 | 0.113199  | 0.116841  | 0.145542 | 0.132139  | 0.113345  | 0.125583  |
| 0.147145 | 0.122378  | 0.12602   | 0.149767 | 0.12704   | 0.12602   | 0.135927  |
| 0.127477 | 0.106789  | 0.108974  | 0.13884  | 0.122232  | 0.113054  | 0.115093  |
| 0.131993 | 0.107809  | 0.111451  | 0.143357 | 0.123834  | 0.108537  | 0.128934  |
| 0.125291 | 0.102855  | 0.106789  | 0.135198 | 0.113345  | 0.102418  | 0.103001  |
| 0.122378 | 0.102564  | 0.099796  | 0.137529 | 0.121795  | 0.10271   | 0.10067   |
| 0.127914 | 0.106352  | 0.111116  | 0.13986  | 0.115967  | 0.108537  | 0.107955  |
| 0.117133 | 0.105478  | 0.106789  | 0.143939 | 0.113928  | 0.106498  | 0.12602   |
| 0.13345  | 0.113054  | 0.112617  | 0.141317 | 0.125583  | 0.116113  | 0.112034  |
| 0.136801 | 0.116113  | 0.121503  | 0.14088  | 0.130682  | 0.122378  | 0.13345   |
| 0.131702 | 0.107226  | 0.105915  | 0.141026 | 0.117424  | 0.102418  | 0.119027  |
| 0.128642 | 0.104458  | 0.111888  | 0.142045 | 0.126603  | 0.109848  | 0.117716  |
| 0.111014 | 0.101399  | 0.104749  | 0.153263 | 0.0961538 | 0.103001  | 0.133013  |
| 0.122378 | 0.104895  | 0.10708   | 0.134324 | 0.120338  | 0.106789  | 0.107663  |
| 0.136655 | 0.115967  | 0.121066  | 0.13141  | 0.130245  | 0.122815  | 0.124272  |
| 0.123543 | 0.102564  | 0.104749  | 0.135781 | 0.118881  | 0.104458  | 0.110286  |
| 0.123252 | 0.105769  | 0.107955  | 0.132867 | 0.122086  | 0.109994  | 0.107372  |
| 0.124417 | 0.103147  | 0.105041  | 0.13141  | 0.120629  | 0.103293  | 0.112034  |
| 0.121358 | 0.118444  | 0.109848  | 0.140589 | 0.127477  | 0.109266  | 0.115676  |
| 0.126603 | 0.100379  | 0.105186  | 0.137675 | 0.120192  | 0.101107  | 0.107226  |
| 0.138549 | 0.128059  | 0.126457  | 0.159819 | 0.138549  | 0.122378  | 0.144814  |
| 0.139132 | 0.120484  | 0.120921  | 0.157197 | 0.137966  | 0.113054  | 0.143357  |
| 0.125437 | 0.103001  | 0.103438  | 0.125437 | 0.121066  | 0.1081    | 0.11451   |
| 0.137821 | 0.127622  | 0.124854  | 0.14831  | 0.13549   | 0.121941  | 0.152535  |
| 0.140443 | 0.117424  | 0.115822  | 0.119172 | 0.134907  | 0.11553   | 0.126894  |
| 0.108974 | 0.10373   | 0.108537  | 0.149476 | 0.120047  | 0.10912   | 0.0945513 |
| 0.129371 | 0.106061  | 0.112034  | 0.130245 | 0.126457  | 0.108537  | 0.112617  |
| 0.149913 | 0.138258  | 0.136072  | 0.160985 | 0.144959  | 0.131993  | 0.143939  |
| 0.137966 | 0.125437  | 0.121212  | 0.150495 | 0.126894  | 0.120629  | 0.136364  |
| 0.136509 | 0.123397  | 0.124417  | 0.146416 | 0.112325  | 0.120047  | 0.142483  |
| 0.128934 | 0.114948  | 0.109848  | 0.121941 | 0.128934  | 0.108392  | 0.117133  |
| 0.113054 | 0.0976107 | 0.0989219 | 0.134033 | 0.117133  | 0.0995047 | 0.109703  |
| 0.118153 | 0.103293  | 0.099359  | 0.139132 | 0.123397  | 0.0961538 | 0.108392  |
| 0.112471 | 0.101981  | 0.101836  | 0.143357 | 0.101981  | 0.0989219 | 0.127768  |
| 0.129079 | 0.113928  | 0.113782  | 0.133741 | 0.125     | 0.11116   | 0.114656  |
| 0.133596 | 0.117279  | 0.119172  | 0.142045 | 0.131556  | 0.122669  | 0.120338  |
| 0.131847 | 0.113491  | 0.115093  | 0.14933  | 0.124854  | 0.1081    | 0.130828  |
| 0.131556 | 0.104458  | 0.103438  | 0.116987 | 0.121941  | 0.100233  | 0.112762  |
| 0.119464 | 0.103438  | 0.0977564 | 0.141026 | 0.120921  | 0.0971737 | 0.109994  |

|          |           |          |          |          |          |           |
|----------|-----------|----------|----------|----------|----------|-----------|
| 0.125146 | 0.105332  | 0.106643 | 0.136509 | 0.121358 | 0.115385 | 0.111597  |
| 0.125437 | 0.101836  | 0.102273 | 0.13884  | 0.119901 | 0.101107 | 0.113054  |
| 0.12296  | 0.113345  | 0.105915 | 0.146853 | 0.125874 | 0.104167 | 0.113199  |
| 0.131119 | 0.107226  | 0.108246 | 0.134615 | 0.126457 | 0.104458 | 0.107372  |
| 0.135927 | 0.115239  | 0.115967 | 0.135344 | 0.128934 | 0.117716 | 0.121795  |
| 0.125146 | 0.0995047 | 0.101107 | 0.149038 | 0.12398  | 0.106352 | 0.0536131 |
| 0.117279 | 0.0957168 | 0.099359 | 0.126603 | 0.119318 | 0.102564 | 0.0917832 |
| 0.123397 | 0.102418  | 0.100233 | 0.135635 | 0.119318 | 0.108392 | 0.109266  |
| 0.135198 | 0.111305  | 0.114073 | 0.136655 | 0.127331 | 0.110577 | 0.120484  |
| 0.128059 | 0.108537  | 0.108392 | 0.140589 | 0.124854 | 0.11014  | 0.104021  |
| 0.138549 | 0.123689  | 0.120921 | 0.144085 | 0.134178 | 0.123252 | 0.123834  |
| 0.129225 | 0.10271   | 0.102273 | 0.133013 | 0.123689 | 0.104312 | 0.11451   |
| 0.125874 | 0.117133  | 0.114073 | 0.138403 | 0.128788 | 0.118153 | 0.111742  |

| <b>TDr_08_00083</b> | <b>TDr_08_00090</b> | <b>TDr_08_00091</b> | <b>TDr_08_00092</b> | <b>TDr_08_00094</b> | <b>TDr_08_00098</b> | <b>TDr_08_00104</b> |
|---------------------|---------------------|---------------------|---------------------|---------------------|---------------------|---------------------|
| 0.1081              | 0.143939            | 0.124854            | 0.116987            | 0.116696            | 0.119755            | 0.139569            |
| 0.108537            | 0.142628            | 0.123543            | 0.118298            | 0.113928            | 0.114365            | 0.137675            |
| 0.104458            | 0.136801            | 0.121503            | 0.113345            | 0.108392            | 0.113491            | 0.132721            |
| 0.0977564           | 0.139132            | 0.126166            | 0.107809            | 0.11451             | 0.122815            | 0.133013            |
| 0.128642            | 0.145833            | 0.134033            | 0.128205            | 0.131119            | 0.128059            | 0.138258            |
| 0.120192            | 0.153409            | 0.134907            | 0.129371            | 0.124126            | 0.130682            | 0.137675            |
| 0.115093            | 0.134033            | 0.121649            | 0.112908            | 0.118153            | 0.10373             | 0.13345             |
| 0.103438            | 0.134615            | 0.118153            | 0.10708             | 0.112908            | 0.119464            | 0.127331            |
| 0.107955            | 0.126603            | 0.114219            | 0.100816            | 0.101981            | 0.105624            | 0.126311            |
| 0.109848            | 0.136655            | 0.110577            | 0.107955            | 0.097465            | 0.0909091           | 0.127331            |
| 0.111742            | 0.140006            | 0.122378            | 0.111305            | 0.108974            | 0.112617            | 0.135052            |
| 0.105478            | 0.131993            | 0.11553             | 0.106789            | 0.107663            | 0.114802            | 0.130245            |
| 0.107809            | 0.138986            | 0.117861            | 0.105915            | 0.110577            | 0.113345            | 0.134907            |
| 0.125437            | 0.161859            | 0.1419              | 0.134033            | 0.129662            | 0.141171            | 0.156614            |
| 0.124417            | 0.149184            | 0.133304            | 0.124854            | 0.12398             | 0.120047            | 0.138986            |
| 0.108829            | 0.12398             | 0.115967            | 0.108683            | 0.113054            | 0.104749            | 0.123106            |
| 0.111888            | 0.136072            | 0.116696            | 0.106498            | 0.105624            | 0.107226            | 0.131119            |
| 0.132721            | 0.159819            | 0.143939            | 0.134615            | 0.13986             | 0.145251            | 0.14729             |
| 0.103001            | 0.132721            | 0.115385            | 0.106643            | 0.107809            | 0.111451            | 0.13039             |
| 0.18546             | 0.224213            | 0.211247            | 0.203963            | 0.199009            | 0.204691            | 0.218386            |
| 0.120047            | 0.147727            | 0.128351            | 0.119318            | 0.124272            | 0.126457            | 0.143065            |
| 0.112908            | 0.14292             | 0.127331            | 0.119172            | 0.113928            | 0.119901            | 0.138258            |
| 0.0973193           | 0.129371            | 0.119318            | 0.105624            | 0.109411            | 0.1081              | 0.126457            |
| 0.118444            | 0.116696            | 0.113636            | 0.112471            | 0.113636            | 0.117861            | 0.116696            |
| 0.0984848           | 0.12704             | 0.110868            | 0.0962995           | 0.100087            | 0.104021            | 0.12296             |
| 0.126166            | 0.140734            | 0.133887            | 0.122232            | 0.128934            | 0.126166            | 0.137821            |
| 0.125               | 0.131702            | 0.125437            | 0.11757             | 0.120775            | 0.111888            | 0.132867            |
| 0.114219            | 0.116259            | 0.112034            | 0.105041            | 0.110868            | 0.117133            | 0.114802            |
| 0.127622            | 0.130245            | 0.125728            | 0.119901            | 0.112617            | 0.120047            | 0.13549             |
| 0.124126            | 0.13549             | 0.128642            | 0.117861            | 0.114365            | 0.116259            | 0.138695            |
| 0.115822            | 0.138258            | 0.125               | 0.11859             | 0.123252            | 0.116987            | 0.138258            |
| 0.120047            | 0.126457            | 0.127477            | 0.11116             | 0.112617            | 0.109266            | 0.130536            |
| 0.0990676           | 0.132576            | 0.118444            | 0.101836            | 0.107372            | 0.10373             | 0.126748            |
| 0.121212            | 0.132576            | 0.123689            | 0.113199            | 0.112908            | 0.11014             | 0.139569            |
| 0.119027            | 0.129808            | 0.115093            | 0.110431            | 0.11451             | 0.106789            | 0.130973            |
| 0.125874            | 0.133159            | 0.11961             | 0.118444            | 0.115822            | 0.111014            | 0.134907            |
| 0.124854            | 0.144959            | 0.130245            | 0.124417            | 0.120338            | 0.112908            | 0.136509            |
| 0.121212            | 0.137238            | 0.125437            | 0.115239            | 0.117279            | 0.11655             | 0.133159            |
| 0.105186            | 0.118881            | 0.11961             | 0.0968823           | 0.104167            | 0.111014            | 0.118007            |
| 0.101981            | 0.119464            | 0.0925117           | 0.0826049           | 0.0939685           | 0.115385            | 0.100233            |
| 0.0912005           | 0.119755            | 0.0948427           | 0.078817            | 0.0855186           | 0.104604            | 0.099359            |
| 0.11859             | 0.128497            | 0.118444            | 0.107663            | 0.106789            | 0.130828            | 0.0981935           |

|           |           |           |           |           |           |           |
|-----------|-----------|-----------|-----------|-----------|-----------|-----------|
| 0.117424  | 0.128497  | 0.104458  | 0.107372  | 0.105332  | 0.126748  | 0.10169   |
| 0.092803  | 0.12398   | 0.094697  | 0.0786713 | 0.0850816 | 0.108829  | 0.104167  |
| 0.107372  | 0.127477  | 0.115676  | 0.106352  | 0.102564  | 0.0930944 | 0.12602   |
| 0.117716  | 0.13141   | 0.119318  | 0.112325  | 0.107955  | 0.0944056 | 0.125291  |
| 0.111597  | 0.0999417 | 0.110868  | 0.105624  | 0.101253  | 0.120921  | 0.127622  |
| 0.123689  | 0.122815  | 0.109557  | 0.105769  | 0.090035  | 0.125146  | 0.106206  |
| 0.101544  | 0.119027  | 0.0865385 | 0.0827506 | 0.0847902 | 0.106206  | 0.0980478 |
| 0.099359  | 0.122669  | 0.097465  | 0.0843531 | 0.081148  | 0.105769  | 0.0973193 |
| 0.143794  | 0.150787  | 0.147145  | 0.143065  | 0.144522  | 0.132721  | 0.152535  |
| 0.116404  | 0.112617  | 0.116841  | 0.120629  | 0.11014   | 0.124854  | 0.120192  |
| 0.0914918 | 0.118007  | 0.0893065 | 0.0750291 | 0.0901807 | 0.107226  | 0.0981935 |
| 0.12296   | 0.142483  | 0.121358  | 0.116404  | 0.114948  | 0.115385  | 0.138112  |
| 0         | 0.134033  | 0.10912   | 0.0977564 | 0.0942599 | 0.117133  | 0.123252  |
| 0.134033  | 0         | 0.126603  | 0.122815  | 0.123689  | 0.13141   | 0.128205  |
| 0.10912   | 0.126603  | 0         | 0.10373   | 0.092366  | 0.113199  | 0.110868  |
| 0.0977564 | 0.122815  | 0.10373   | 0         | 0.0882867 | 0.114073  | 0.0933858 |
| 0.0942599 | 0.123689  | 0.092366  | 0.0882867 | 0         | 0.103584  | 0.108246  |
| 0.117133  | 0.13141   | 0.113199  | 0.114073  | 0.103584  | 0         | 0.124126  |
| 0.123252  | 0.128205  | 0.110868  | 0.0933858 | 0.108246  | 0.124126  | 0         |
| 0.121795  | 0.130245  | 0.105915  | 0.109994  | 0.10708   | 0.126166  | 0.106935  |
| 0.14729   | 0.163899  | 0.157343  | 0.154138  | 0.150641  | 0.158654  | 0.161859  |
| 0.0965909 | 0.11757   | 0.101981  | 0.0737179 | 0.0862471 | 0.11553   | 0.099796  |
| 0.0954254 | 0.124563  | 0.0912005 | 0.0824592 | 0.0839161 | 0.107372  | 0.105041  |
| 0.0965909 | 0.116696  | 0.0865385 | 0.0789627 | 0.0844988 | 0.107955  | 0.108537  |
| 0.131702  | 0.152389  | 0.139423  | 0.134761  | 0.129808  | 0.132284  | 0.143357  |
| 0.101399  | 0.119755  | 0.0898893 | 0.081148  | 0.0849359 | 0.109848  | 0.100233  |
| 0.108246  | 0.114656  | 0.111597  | 0.113054  | 0.109557  | 0.12602   | 0.117861  |
| 0.119027  | 0.131556  | 0.109266  | 0.111888  | 0.110723  | 0.0855186 | 0.127477  |
| 0.097028  | 0.129079  | 0.099796  | 0.0712413 | 0.0753205 | 0.113636  | 0.104895  |
| 0.138112  | 0.154429  | 0.150787  | 0.143502  | 0.143794  | 0.132867  | 0.153846  |
| 0.107517  | 0.118881  | 0.103293  | 0.0907634 | 0.0965909 | 0.120921  | 0.0964452 |
| 0.120775  | 0.119901  | 0.100816  | 0.107226  | 0.106643  | 0.124272  | 0.104458  |
| 0.122086  | 0.124126  | 0.120484  | 0.119318  | 0.108829  | 0.127331  | 0.125874  |
| 0.103875  | 0.13243   | 0.123252  | 0.107809  | 0.112762  | 0.117279  | 0.13447   |
| 0.0925117 | 0.118153  | 0.0882867 | 0.085373  | 0.0844988 | 0.106789  | 0.103584  |
| 0.0971737 | 0.121066  | 0.100816  | 0.0775058 | 0.0786713 | 0.107955  | 0.0983392 |
| 0.111742  | 0.121941  | 0.109848  | 0.0611888 | 0.0990676 | 0.13039   | 0.0916375 |
| 0.0987762 | 0.121795  | 0.0654138 | 0.0878497 | 0.088141  | 0.106643  | 0.109557  |
| 0.112908  | 0.131556  | 0.110723  | 0.0979021 | 0.112179  | 0.127768  | 0.100379  |
| 0.104749  | 0.123689  | 0.0967366 | 0.0879953 | 0.0874126 | 0.120484  | 0.104167  |
| 0.112908  | 0.11553   | 0.106935  | 0.106643  | 0.105186  | 0.114365  | 0.117279  |
| 0.0942599 | 0.123106  | 0.0944056 | 0.0795455 | 0.0804196 | 0.114365  | 0.102127  |
| 0.101836  | 0.121941  | 0.0990676 | 0.0862471 | 0.0888695 | 0.121358  | 0.101253  |
| 0.102127  | 0.129516  | 0.0926573 | 0.0827506 | 0.0874126 | 0.110286  | 0.108537  |



|           |          |           |           |           |           |           |
|-----------|----------|-----------|-----------|-----------|-----------|-----------|
| 0.0907634 | 0.115822 | 0.0844988 | 0.0777972 | 0.085373  | 0.110577  | 0.0954254 |
| 0.118881  | 0.120338 | 0.104458  | 0.10067   | 0.105041  | 0.125874  | 0.0882867 |
| 0.113054  | 0.129079 | 0.119318  | 0.101253  | 0.10912   | 0.106935  | 0.120338  |
| 0.114656  | 0.128934 | 0.109848  | 0.102564  | 0.1081    | 0.110868  | 0.123106  |
| 0.120484  | 0.140589 | 0.127914  | 0.112762  | 0.11859   | 0.113491  | 0.132139  |
| 0.122232  | 0.140297 | 0.129953  | 0.120338  | 0.122086  | 0.106498  | 0.137092  |
| 0.13039   | 0.130682 | 0.129662  | 0.127331  | 0.122669  | 0.107663  | 0.139423  |
| 0.137238  | 0.141317 | 0.138549  | 0.136218  | 0.133887  | 0.120338  | 0.149184  |
| 0.110286  | 0.136218 | 0.122669  | 0.112471  | 0.112179  | 0.111742  | 0.136218  |
| 0.166521  | 0.200029 | 0.188811  | 0.181527  | 0.175991  | 0.175845  | 0.191288  |
| 0.101399  | 0.13141  | 0.118153  | 0.10067   | 0.108537  | 0.106352  | 0.128205  |
| 0.133304  | 0.135052 | 0.138986  | 0.135781  | 0.128497  | 0.121358  | 0.145542  |
| 0.128059  | 0.135344 | 0.134324  | 0.128788  | 0.122378  | 0.116987  | 0.14292   |
| 0.131702  | 0.143939 | 0.137383  | 0.128642  | 0.127768  | 0.107809  | 0.142191  |
| 0.107372  | 0.126311 | 0.115676  | 0.112471  | 0.110431  | 0.101544  | 0.128351  |
| 0.128059  | 0.138258 | 0.134615  | 0.128497  | 0.128788  | 0.112617  | 0.141171  |
| 0.116113  | 0.130099 | 0.119464  | 0.11451   | 0.111305  | 0.105624  | 0.135927  |
| 0.11859   | 0.130245 | 0.12398   | 0.124854  | 0.116987  | 0.103147  | 0.134907  |
| 0.101399  | 0.132576 | 0.119901  | 0.106206  | 0.107372  | 0.103147  | 0.122669  |
| 0.134324  | 0.131993 | 0.133304  | 0.135635  | 0.132139  | 0.117424  | 0.142191  |
| 0.106061  | 0.122086 | 0.111742  | 0.103001  | 0.103293  | 0.0964452 | 0.119464  |
| 0.127477  | 0.13884  | 0.137529  | 0.133741  | 0.130536  | 0.109994  | 0.143211  |
| 0.114219  | 0.13345  | 0.122815  | 0.109703  | 0.117861  | 0.105478  | 0.132284  |
| 0.11116   | 0.120484 | 0.0949883 | 0.0996503 | 0.0941142 | 0.11961   | 0.103584  |
| 0.122378  | 0.140443 | 0.12602   | 0.11757   | 0.11553   | 0.104895  | 0.130245  |
| 0.111305  | 0.129953 | 0.121649  | 0.105624  | 0.106789  | 0.0932401 | 0.134615  |
| 0.135198  | 0.151515 | 0.146416  | 0.144959  | 0.140297  | 0.132284  | 0.149767  |
| 0.116696  | 0.130682 | 0.125874  | 0.111597  | 0.111888  | 0.0948427 | 0.137092  |
| 0.114948  | 0.131556 | 0.122086  | 0.112179  | 0.108974  | 0.103001  | 0.134761  |
| 0.116259  | 0.121795 | 0.118153  | 0.113491  | 0.112325  | 0.104312  | 0.130536  |
| 0.133159  | 0.149767 | 0.142628  | 0.13039   | 0.127185  | 0.120629  | 0.145396  |
| 0.1081    | 0.128497 | 0.123689  | 0.11553   | 0.118444  | 0.118881  | 0.126166  |
| 0.111888  | 0.125874 | 0.114073  | 0.112617  | 0.104458  | 0.103438  | 0.130828  |
| 0.115385  | 0.128788 | 0.118153  | 0.111451  | 0.106206  | 0.101981  | 0.134324  |
| 0.114365  | 0.139714 | 0.119464  | 0.1081    | 0.113345  | 0.10912   | 0.128642  |
| 0.125291  | 0.136072 | 0.121941  | 0.121649  | 0.114365  | 0.0810023 | 0.125874  |
| 0.111451  | 0.133887 | 0.122669  | 0.108683  | 0.112179  | 0.102418  | 0.133887  |
| 0.105186  | 0.119755 | 0.104749  | 0.0989219 | 0.0986305 | 0.0847902 | 0.115967  |
| 0.104312  | 0.125    | 0.114948  | 0.0983392 | 0.101253  | 0.0804196 | 0.123834  |
| 0.110868  | 0.125146 | 0.113928  | 0.102273  | 0.105186  | 0.0828963 | 0.124563  |
| 0.113782  | 0.133887 | 0.124126  | 0.114219  | 0.113345  | 0.120484  | 0.136218  |
| 0.126748  | 0.130828 | 0.129225  | 0.121649  | 0.118735  | 0.0859557 | 0.134615  |
| 0.113491  | 0.129808 | 0.111305  | 0.106643  | 0.106352  | 0.0837704 | 0.123397  |
| 0.105769  | 0.122086 | 0.113782  | 0.0945513 | 0.104167  | 0.0850816 | 0.114802  |

|           |           |           |           |           |           |          |
|-----------|-----------|-----------|-----------|-----------|-----------|----------|
| 0.123543  | 0.127331  | 0.119901  | 0.115239  | 0.113782  | 0.0824592 | 0.119464 |
| 0.105624  | 0.125146  | 0.111597  | 0.0984848 | 0.106643  | 0.090472  | 0.117279 |
| 0.119901  | 0.14292   | 0.128205  | 0.121212  | 0.119464  | 0.121941  | 0.138258 |
| 0.130973  | 0.147582  | 0.136655  | 0.132284  | 0.13141   | 0.123106  | 0.144668 |
| 0.112325  | 0.12602   | 0.120629  | 0.11014   | 0.107517  | 0.0895979 | 0.12398  |
| 0.112471  | 0.131993  | 0.112034  | 0.104167  | 0.104749  | 0.0882867 | 0.123834 |
| 0.111305  | 0.124709  | 0.116987  | 0.104458  | 0.10708   | 0.0827506 | 0.120921 |
| 0.101399  | 0.12704   | 0.103584  | 0.101836  | 0.0986305 | 0.0926573 | 0.123252 |
| 0.123834  | 0.130828  | 0.123689  | 0.11757   | 0.113199  | 0.0815851 | 0.126457 |
| 0.104895  | 0.128205  | 0.108829  | 0.0971737 | 0.10271   | 0.076049  | 0.117133 |
| 0.128059  | 0.139132  | 0.129079  | 0.136072  | 0.133741  | 0.122232  | 0.140589 |
| 0.116259  | 0.138986  | 0.112325  | 0.110868  | 0.110868  | 0.118881  | 0.111597 |
| 0.111888  | 0.134033  | 0.110868  | 0.0965909 | 0.107955  | 0.113054  | 0.108683 |
| 0.104749  | 0.13884   | 0.100816  | 0.0888695 | 0.0958625 | 0.112908  | 0.105624 |
| 0.110286  | 0.13447   | 0.11451   | 0.104895  | 0.104021  | 0.105332  | 0.122523 |
| 0.110431  | 0.128788  | 0.117861  | 0.105041  | 0.105915  | 0.090035  | 0.12296  |
| 0.108246  | 0.116696  | 0.111014  | 0.0964452 | 0.0990676 | 0.0986305 | 0.115822 |
| 0.107955  | 0.120775  | 0.0981935 | 0.101399  | 0.0955711 | 0.105041  | 0.120775 |
| 0.0799825 | 0.123397  | 0.115676  | 0.106061  | 0.105769  | 0.117279  | 0.12398  |
| 0.120192  | 0.102418  | 0.101981  | 0.1081    | 0.101107  | 0.118444  | 0.105332 |
| 0.115093  | 0.131993  | 0.122232  | 0.114948  | 0.114656  | 0.106935  | 0.136072 |
| 0.127768  | 0.147873  | 0.129371  | 0.128205  | 0.125291  | 0.117861  | 0.144376 |
| 0.130245  | 0.141026  | 0.135635  | 0.125437  | 0.129516  | 0.113345  | 0.137238 |
| 0.180653  | 0.215909  | 0.203234  | 0.189248  | 0.188374  | 0.205711  | 0.212121 |
| 0.222174  | 0.250146  | 0.24155   | 0.237179  | 0.233683  | 0.24257   | 0.252185 |
| 0.0766317 | 0.125583  | 0.121066  | 0.106498  | 0.109994  | 0.119172  | 0.129953 |
| 0.10708   | 0.0919289 | 0.108683  | 0.103147  | 0.100816  | 0.107372  | 0.112034 |
| 0.0983392 | 0.111451  | 0.104895  | 0.0976107 | 0.0967366 | 0.101544  | 0.116113 |
| 0.109411  | 0.10271   | 0.107517  | 0.105186  | 0.0996503 | 0.114948  | 0.123397 |
| 0.125146  | 0.146416  | 0.13549   | 0.126748  | 0.123543  | 0.121066  | 0.138258 |
| 0.106789  | 0.0971737 | 0.107517  | 0.104312  | 0.100816  | 0.115822  | 0.118444 |
| 0.141317  | 0.0932401 | 0.133013  | 0.129225  | 0.129225  | 0.135198  | 0.124709 |
| 0.112034  | 0.105915  | 0.111014  | 0.0979021 | 0.10169   | 0.114656  | 0.120775 |
| 0.120484  | 0.0907634 | 0.117424  | 0.112471  | 0.111888  | 0.116696  | 0.121941 |
| 0.105478  | 0.115676  | 0.10708   | 0.104749  | 0.106789  | 0.123543  | 0.115093 |
| 0.12704   | 0.104895  | 0.123106  | 0.113782  | 0.120484  | 0.126748  | 0.123834 |
| 0.114802  | 0.122086  | 0.0965909 | 0.10912   | 0.100087  | 0.121795  | 0.110431 |
| 0.115676  | 0.105478  | 0.111742  | 0.0995047 | 0.103875  | 0.114219  | 0.122086 |
| 0.10373   | 0.0990676 | 0.100087  | 0.0945513 | 0.0983392 | 0.106935  | 0.115967 |
| 0.112325  | 0.110868  | 0.112471  | 0.106352  | 0.106643  | 0.118153  | 0.115239 |
| 0.106206  | 0.0898893 | 0.107517  | 0.104895  | 0.0961538 | 0.105624  | 0.118153 |
| 0.103001  | 0.0983392 | 0.101981  | 0.0955711 | 0.0979021 | 0.108246  | 0.114073 |
| 0.1081    | 0.099359  | 0.112325  | 0.0960082 | 0.106498  | 0.113928  | 0.115385 |
| 0.124854  | 0.104458  | 0.121503  | 0.111014  | 0.11655   | 0.123106  | 0.121066 |

|           |           |           |           |           |          |          |
|-----------|-----------|-----------|-----------|-----------|----------|----------|
| 0.124854  | 0.10067   | 0.123834  | 0.122378  | 0.117424  | 0.127185 | 0.129516 |
| 0.111597  | 0.0914918 | 0.104458  | 0.104749  | 0.104167  | 0.111597 | 0.122669 |
| 0.104167  | 0.105915  | 0.109557  | 0.105186  | 0.105769  | 0.112908 | 0.120192 |
| 0.122523  | 0.101253  | 0.117716  | 0.122086  | 0.113636  | 0.122815 | 0.129516 |
| 0.103875  | 0.101253  | 0.1081    | 0.0984848 | 0.100816  | 0.109994 | 0.115239 |
| 0.130536  | 0.111888  | 0.124854  | 0.122815  | 0.121358  | 0.129953 | 0.130245 |
| 0.129079  | 0.152972  | 0.138258  | 0.128642  | 0.129808  | 0.127331 | 0.137821 |
| 0.123106  | 0.121358  | 0.135198  | 0.125     | 0.123834  | 0.130973 | 0.135052 |
| 0.103001  | 0.0986305 | 0.106935  | 0.0932401 | 0.104312  | 0.106206 | 0.111742 |
| 0.106935  | 0.101399  | 0.106498  | 0.097465  | 0.0962995 | 0.10373  | 0.118007 |
| 0.117861  | 0.0968823 | 0.115093  | 0.107809  | 0.115093  | 0.120775 | 0.11961  |
| 0.11859   | 0.0979021 | 0.11757   | 0.112617  | 0.108829  | 0.115676 | 0.122669 |
| 0.120047  | 0.0949883 | 0.11961   | 0.113199  | 0.113782  | 0.112471 | 0.128497 |
| 0.10708   | 0.103293  | 0.111014  | 0.100816  | 0.0996503 | 0.116987 | 0.124854 |
| 0.11014   | 0.108974  | 0.112617  | 0.103875  | 0.105624  | 0.112762 | 0.123543 |
| 0.115093  | 0.0967366 | 0.119027  | 0.11116   | 0.10912   | 0.11859  | 0.120047 |
| 0.126457  | 0.102564  | 0.114948  | 0.120192  | 0.111451  | 0.118298 | 0.123834 |
| 0.122378  | 0.0944056 | 0.112617  | 0.121941  | 0.116404  | 0.118298 | 0.129953 |
| 0.124854  | 0.105041  | 0.123252  | 0.120338  | 0.119172  | 0.127185 | 0.125146 |
| 0.116259  | 0.127622  | 0.120484  | 0.118153  | 0.116987  | 0.128205 | 0.121503 |
| 0.104604  | 0.104604  | 0.109703  | 0.10067   | 0.105041  | 0.111888 | 0.126166 |
| 0.122086  | 0.109557  | 0.121941  | 0.117279  | 0.114365  | 0.121795 | 0.125583 |
| 0.110577  | 0.108537  | 0.112179  | 0.0949883 | 0.1081    | 0.111742 | 0.118444 |
| 0.0967366 | 0.127331  | 0.0992133 | 0.0799825 | 0.0861014 | 0.111305 | 0.104604 |
| 0.113345  | 0.106061  | 0.110286  | 0.0983392 | 0.101836  | 0.111597 | 0.120047 |
| 0.109703  | 0.112325  | 0.110723  | 0.104021  | 0.104021  | 0.112034 | 0.122232 |
| 0.10708   | 0.0977564 | 0.104604  | 0.0958625 | 0.0990676 | 0.107372 | 0.114073 |
| 0.125     | 0.0958625 | 0.117861  | 0.122815  | 0.119027  | 0.122669 | 0.124709 |
| 0.109411  | 0.130099  | 0.108974  | 0.102855  | 0.107226  | 0.11757  | 0.120484 |
| 0.122232  | 0.101836  | 0.117133  | 0.119755  | 0.115676  | 0.121066 | 0.125728 |
| 0.10708   | 0.0910548 | 0.1081    | 0.103147  | 0.0987762 | 0.108246 | 0.118153 |
| 0.119172  | 0.0958625 | 0.108537  | 0.10912   | 0.107372  | 0.112471 | 0.117133 |
| 0.117861  | 0.131265  | 0.11859   | 0.117424  | 0.118881  | 0.116696 | 0.125146 |
| 0.111451  | 0.143794  | 0.122378  | 0.111888  | 0.112762  | 0.116404 | 0.13243  |
| 0.119464  | 0.121212  | 0.122523  | 0.107663  | 0.115239  | 0.099359 | 0.125874 |
| 0.116404  | 0.137675  | 0.11451   | 0.113928  | 0.114802  | 0.114656 | 0.130099 |
| 0.11451   | 0.138986  | 0.119027  | 0.105624  | 0.114948  | 0.115676 | 0.130828 |
| 0.115093  | 0.133741  | 0.119027  | 0.104167  | 0.108246  | 0.108974 | 0.129953 |
| 0.136072  | 0.151224  | 0.135927  | 0.131265  | 0.124854  | 0.111305 | 0.137821 |
| 0.137092  | 0.140589  | 0.139277  | 0.126166  | 0.134907  | 0.121649 | 0.135635 |
| 0.112908  | 0.137383  | 0.109557  | 0.100816  | 0.101107  | 0.105041 | 0.125728 |
| 0.133159  | 0.148019  | 0.136218  | 0.128642  | 0.122523  | 0.119464 | 0.138695 |
| 0.132139  | 0.14292   | 0.126166  | 0.122378  | 0.115093  | 0.102418 | 0.137966 |
| 0.132721  | 0.145251  | 0.134615  | 0.134324  | 0.129079  | 0.114948 | 0.147873 |

|          |          |           |           |           |           |          |
|----------|----------|-----------|-----------|-----------|-----------|----------|
| 0.120775 | 0.130973 | 0.124126  | 0.121503  | 0.111888  | 0.112325  | 0.130099 |
| 0.125437 | 0.148164 | 0.118881  | 0.119464  | 0.109848  | 0.100379  | 0.131556 |
| 0.125    | 0.146562 | 0.12602   | 0.122232  | 0.117861  | 0.105769  | 0.141317 |
| 0.127185 | 0.137092 | 0.131993  | 0.129079  | 0.120921  | 0.115239  | 0.145251 |
| 0.134178 | 0.148456 | 0.141317  | 0.138403  | 0.128788  | 0.125437  | 0.149621 |
| 0.124272 | 0.147582 | 0.121212  | 0.12296   | 0.11655   | 0.10708   | 0.141463 |
| 0.119027 | 0.133013 | 0.120921  | 0.117716  | 0.108974  | 0.11116   | 0.132721 |
| 0.125874 | 0.135198 | 0.134178  | 0.122232  | 0.126311  | 0.131702  | 0.13549  |
| 0.135052 | 0.151078 | 0.13141   | 0.128788  | 0.124417  | 0.110286  | 0.147873 |
| 0.112325 | 0.132721 | 0.116841  | 0.112179  | 0.108392  | 0.104458  | 0.130973 |
| 0.206002 | 0.23514  | 0.223339  | 0.219551  | 0.214598  | 0.225816  | 0.231643 |
| 0.117424 | 0.140443 | 0.128059  | 0.121649  | 0.117861  | 0.11655   | 0.143939 |
| 0.116841 | 0.1419   | 0.118153  | 0.107372  | 0.105332  | 0.101981  | 0.13345  |
| 0.131847 | 0.143794 | 0.135198  | 0.129371  | 0.128788  | 0.121649  | 0.146707 |
| 0.118735 | 0.14088  | 0.118881  | 0.114802  | 0.112179  | 0.106498  | 0.13447  |
| 0.136509 | 0.155157 | 0.137529  | 0.126748  | 0.13141   | 0.108829  | 0.145542 |
| 0.119901 | 0.136801 | 0.123543  | 0.119172  | 0.11655   | 0.119318  | 0.138549 |
| 0.120338 | 0.138403 | 0.128059  | 0.119318  | 0.114948  | 0.110431  | 0.144522 |
| 0.125    | 0.145105 | 0.123106  | 0.115822  | 0.110286  | 0.0990676 | 0.134907 |
| 0.129225 | 0.146707 | 0.132576  | 0.134324  | 0.12704   | 0.121358  | 0.147873 |
| 0.134615 | 0.143357 | 0.138258  | 0.13243   | 0.127768  | 0.117716  | 0.141317 |
| 0.131847 | 0.13243  | 0.134324  | 0.13549   | 0.12296   | 0.118735  | 0.141754 |
| 0.128934 | 0.139423 | 0.137238  | 0.12704   | 0.120921  | 0.113491  | 0.147582 |
| 0.119901 | 0.135344 | 0.11859   | 0.109557  | 0.110431  | 0.103293  | 0.126894 |
| 0.122232 | 0.135635 | 0.13141   | 0.122378  | 0.11859   | 0.114656  | 0.143794 |
| 0.13549  | 0.149184 | 0.139132  | 0.133304  | 0.13243   | 0.124417  | 0.146853 |
| 0.114948 | 0.137383 | 0.125     | 0.12296   | 0.117133  | 0.10912   | 0.140589 |
| 0.118735 | 0.13447  | 0.106061  | 0.0935315 | 0.0949883 | 0.129516  | 0.104749 |
| 0.132576 | 0.159674 | 0.14292   | 0.137966  | 0.13243   | 0.134324  | 0.150932 |
| 0.11859  | 0.136946 | 0.126603  | 0.115239  | 0.116113  | 0.11014   | 0.134907 |
| 0.130536 | 0.145688 | 0.127185  | 0.121941  | 0.120192  | 0.112762  | 0.134033 |
| 0.118444 | 0.148456 | 0.136364  | 0.129371  | 0.125583  | 0.118735  | 0.139423 |
| 0.126457 | 0.138986 | 0.132721  | 0.122232  | 0.121066  | 0.118298  | 0.145688 |
| 0.114219 | 0.142483 | 0.13039   | 0.120775  | 0.123106  | 0.128205  | 0.140152 |
| 0.131702 | 0.157925 | 0.140006  | 0.133304  | 0.131556  | 0.139277  | 0.146562 |
| 0.110868 | 0.13243  | 0.113345  | 0.10169   | 0.105478  | 0.105624  | 0.120192 |
| 0.120921 | 0.13986  | 0.110577  | 0.110868  | 0.109703  | 0.124126  | 0.106643 |
| 0.133887 | 0.161859 | 0.145396  | 0.137529  | 0.130828  | 0.137675  | 0.149038 |
| 0.116113 | 0.131847 | 0.11014   | 0.113054  | 0.104312  | 0.0412296 | 0.127477 |
| 0.107372 | 0.131556 | 0.0894522 | 0.0967366 | 0.0929487 | 0.117861  | 0.104749 |
| 0.140443 | 0.1419   | 0.141754  | 0.140589  | 0.136801  | 0.132576  | 0.142774 |
| 0.104895 | 0.121212 | 0.101544  | 0.0910548 | 0.0930944 | 0.123543  | 0.106935 |
| 0.140006 | 0.134178 | 0.142774  | 0.135781  | 0.137238  | 0.129516  | 0.142628 |
| 0.129371 | 0.137529 | 0.133304  | 0.122815  | 0.12602   | 0.117133  | 0.134907 |

|           |           |          |          |          |          |          |
|-----------|-----------|----------|----------|----------|----------|----------|
| 0.126311  | 0.142337  | 0.132576 | 0.125291 | 0.125291 | 0.114365 | 0.144085 |
| 0.123543  | 0.125874  | 0.128934 | 0.120484 | 0.119901 | 0.119172 | 0.131119 |
| 0.119901  | 0.138258  | 0.119755 | 0.117133 | 0.112762 | 0.100379 | 0.128642 |
| 0.131702  | 0.138112  | 0.123397 | 0.125437 | 0.124272 | 0.106935 | 0.134324 |
| 0.127622  | 0.141608  | 0.136218 | 0.132721 | 0.123689 | 0.123543 | 0.146562 |
| 0.131993  | 0.135198  | 0.136509 | 0.130973 | 0.129808 | 0.113054 | 0.144522 |
| 0.130536  | 0.138695  | 0.13884  | 0.134178 | 0.12398  | 0.107809 | 0.143357 |
| 0.127914  | 0.141608  | 0.132721 | 0.125437 | 0.126311 | 0.11859  | 0.142483 |
| 0.136655  | 0.145688  | 0.151078 | 0.145251 | 0.140589 | 0.130828 | 0.15676  |
| 0.124417  | 0.138695  | 0.114073 | 0.116404 | 0.10912  | 0.103147 | 0.125291 |
| 0.114219  | 0.117133  | 0.10912  | 0.106498 | 0.101253 | 0.10373  | 0.124417 |
| 0.12704   | 0.13986   | 0.132139 | 0.12398  | 0.126894 | 0.113054 | 0.138403 |
| 0.120629  | 0.132284  | 0.118444 | 0.11116  | 0.109703 | 0.092366 | 0.126166 |
| 0.138258  | 0.155449  | 0.146562 | 0.136655 | 0.134324 | 0.130099 | 0.150495 |
| 0.151369  | 0.162733  | 0.149184 | 0.151515 | 0.145105 | 0.132721 | 0.149621 |
| 0.122232  | 0.103001  | 0.115385 | 0.113636 | 0.113054 | 0.120192 | 0.125728 |
| 0.114802  | 0.0973193 | 0.10912  | 0.106206 | 0.107663 | 0.117424 | 0.113928 |
| 0.130099  | 0.142045  | 0.137529 | 0.129953 | 0.130828 | 0.127185 | 0.148747 |
| 0.13141   | 0.144231  | 0.135635 | 0.129516 | 0.125146 | 0.122086 | 0.146562 |
| 0.118298  | 0.099359  | 0.119318 | 0.113491 | 0.110577 | 0.115093 | 0.119755 |
| 0.138403  | 0.143939  | 0.138549 | 0.132721 | 0.127768 | 0.124126 | 0.144231 |
| 0.125291  | 0.134324  | 0.129516 | 0.136509 | 0.119318 | 0.122378 | 0.133741 |
| 0.119027  | 0.123689  | 0.117716 | 0.104021 | 0.108683 | 0.10912  | 0.113199 |
| 0.152826  | 0.152826  | 0.165501 | 0.153555 | 0.156469 | 0.154575 | 0.166521 |
| 0.123689  | 0.120484  | 0.108683 | 0.108392 | 0.109557 | 0.114656 | 0.116987 |
| 0.133887  | 0.147873  | 0.135781 | 0.128497 | 0.126457 | 0.125437 | 0.135052 |
| 0.11655   | 0.113345  | 0.109703 | 0.11116  | 0.105041 | 0.105478 | 0.123543 |
| 0.135781  | 0.133159  | 0.136509 | 0.133596 | 0.13243  | 0.126457 | 0.143939 |
| 0.124126  | 0.142191  | 0.126894 | 0.121941 | 0.118153 | 0.115967 | 0.145105 |
| 0.112034  | 0.161568  | 0.145396 | 0.137529 | 0.140152 | 0.140589 | 0.156031 |
| 0.141026  | 0.148893  | 0.150204 | 0.144376 | 0.146707 | 0.145688 | 0.159965 |
| 0.0890152 | 0.139423  | 0.131119 | 0.121795 | 0.126457 | 0.127185 | 0.14292  |
| 0.0996503 | 0.150058  | 0.145542 | 0.131556 | 0.134761 | 0.140443 | 0.148019 |
| 0.129516  | 0.159237  | 0.146853 | 0.138112 | 0.139277 | 0.148164 | 0.1537   |
| 0.116696  | 0.167395  | 0.150641 | 0.137529 | 0.142483 | 0.151078 | 0.161568 |
| 0.123834  | 0.11859   | 0.116113 | 0.114073 | 0.120484 | 0.10373  | 0.120921 |
| 0.128934  | 0.154866  | 0.139569 | 0.131702 | 0.138112 | 0.13884  | 0.150787 |
| 0.105332  | 0.139423  | 0.125874 | 0.107517 | 0.114219 | 0.11116  | 0.133596 |
| 0.111305  | 0.137238  | 0.126894 | 0.112325 | 0.116113 | 0.118298 | 0.13141  |
| 0.121358  | 0.141463  | 0.121795 | 0.11451  | 0.115967 | 0.10912  | 0.134178 |
| 0.0814394 | 0.132721  | 0.125583 | 0.114802 | 0.122378 | 0.126894 | 0.134178 |
| 0.113928  | 0.137821  | 0.121358 | 0.110286 | 0.114073 | 0.116841 | 0.134324 |
| 0.0888695 | 0.137529  | 0.121649 | 0.10708  | 0.11116  | 0.117716 | 0.134324 |
| 0.110431  | 0.141026  | 0.130099 | 0.113782 | 0.115822 | 0.125874 | 0.141026 |

|           |          |          |           |          |           |          |
|-----------|----------|----------|-----------|----------|-----------|----------|
| 0.113491  | 0.148747 | 0.131119 | 0.120921  | 0.120629 | 0.11961   | 0.143502 |
| 0.110577  | 0.128059 | 0.111014 | 0.105186  | 0.101399 | 0.0992133 | 0.128351 |
| 0.0875583 | 0.137966 | 0.129662 | 0.119172  | 0.12296  | 0.126311  | 0.140589 |
| 0.0842075 | 0.131119 | 0.127477 | 0.114656  | 0.120484 | 0.12296   | 0.131119 |
| 0.112179  | 0.122669 | 0.114656 | 0.102418  | 0.115239 | 0.110431  | 0.115385 |
| 0.200175  | 0.23514  | 0.222465 | 0.216638  | 0.211101 | 0.219406  | 0.2331   |
| 0.107226  | 0.149767 | 0.147873 | 0.137383  | 0.142045 | 0.143939  | 0.148601 |
| 0.122232  | 0.140589 | 0.134033 | 0.127622  | 0.12704  | 0.13039   | 0.142337 |
| 0.116259  | 0.150641 | 0.128642 | 0.121649  | 0.11961  | 0.123252  | 0.140443 |
| 0.194056  | 0.231935 | 0.217512 | 0.209645  | 0.204108 | 0.217075  | 0.22669  |
| 0.105769  | 0.132576 | 0.121066 | 0.110577  | 0.11553  | 0.120921  | 0.121503 |
| 0.126603  | 0.132139 | 0.126748 | 0.123543  | 0.122086 | 0.120775  | 0.14292  |
| 0.124854  | 0.138258 | 0.126748 | 0.118298  | 0.121212 | 0.123689  | 0.132721 |
| 0.117716  | 0.144522 | 0.129516 | 0.117861  | 0.11553  | 0.115385  | 0.137238 |
| 0.233974  | 0.265152 | 0.254225 | 0.252185  | 0.243735 | 0.253497  | 0.262238 |
| 0.122232  | 0.146416 | 0.13345  | 0.122669  | 0.125583 | 0.121649  | 0.139423 |
| 0.108537  | 0.123689 | 0.111014 | 0.0955711 | 0.108683 | 0.106206  | 0.113782 |
| 0.126894  | 0.136218 | 0.136072 | 0.117424  | 0.121212 | 0.128642  | 0.14088  |
| 0.12602   | 0.135344 | 0.135198 | 0.117133  | 0.12296  | 0.126894  | 0.140589 |
| 0.119027  | 0.14933  | 0.135198 | 0.125291  | 0.125583 | 0.123106  | 0.141754 |
| 0.105915  | 0.151369 | 0.135198 | 0.128205  | 0.129079 | 0.132139  | 0.148456 |
| 0.110577  | 0.123689 | 0.112179 | 0.101107  | 0.112179 | 0.108537  | 0.115822 |
| 0.083042  | 0.132867 | 0.127477 | 0.113782  | 0.119318 | 0.126457  | 0.134324 |
| 0.120192  | 0.150495 | 0.126748 | 0.11859   | 0.125874 | 0.131265  | 0.144376 |
| 0.114656  | 0.143211 | 0.128205 | 0.113345  | 0.113928 | 0.113782  | 0.133887 |
| 0.0827506 | 0.136072 | 0.13039  | 0.108829  | 0.119027 | 0.120338  | 0.13549  |
| 0.117279  | 0.137092 | 0.115676 | 0.113928  | 0.103147 | 0.0910548 | 0.128642 |
| 0.137821  | 0.151515 | 0.150204 | 0.144376  | 0.143211 | 0.1419    | 0.157343 |
| 0.124709  | 0.145396 | 0.13447  | 0.127477  | 0.128934 | 0.121795  | 0.140734 |
| 0.128205  | 0.140152 | 0.129225 | 0.123397  | 0.123397 | 0.124417  | 0.149184 |
| 0.17366   | 0.207168 | 0.19799  | 0.188957  | 0.18546  | 0.198135  | 0.20979  |
| 0.186772  | 0.221445 | 0.21285  | 0.204108  | 0.199155 | 0.210956  | 0.222611 |
| 0.121212  | 0.147436 | 0.131265 | 0.117861  | 0.119027 | 0.118881  | 0.138986 |
| 0.112762  | 0.140152 | 0.124272 | 0.110286  | 0.113199 | 0.111305  | 0.133159 |
| 0.130245  | 0.155886 | 0.137383 | 0.135344  | 0.13243  | 0.130536  | 0.145396 |
| 0.109557  | 0.122086 | 0.10912  | 0.0986305 | 0.109994 | 0.106352  | 0.116841 |
| 0.124272  | 0.143502 | 0.132867 | 0.125583  | 0.129662 | 0.122523  | 0.140589 |
| 0.122669  | 0.133159 | 0.136509 | 0.127477  | 0.128934 | 0.133159  | 0.137238 |
| 0.209499  | 0.240967 | 0.232663 | 0.225962  | 0.21926  | 0.229895  | 0.23951  |
| 0.111888  | 0.136364 | 0.121649 | 0.110868  | 0.116404 | 0.119755  | 0.132576 |
| 0.18546   | 0.191871 | 0.21183  | 0.203963  | 0.198135 | 0.211976  | 0.215472 |
| 0.110431  | 0.120921 | 0.110577 | 0.0995047 | 0.109703 | 0.100524  | 0.11655  |
| 0.111451  | 0.133596 | 0.122378 | 0.109557  | 0.11451  | 0.115822  | 0.129808 |
| 0.0935315 | 0.136946 | 0.121066 | 0.112325  | 0.114073 | 0.122086  | 0.126748 |

|           |          |          |           |          |          |          |
|-----------|----------|----------|-----------|----------|----------|----------|
| 0.108974  | 0.138695 | 0.122815 | 0.109703  | 0.110868 | 0.112179 | 0.129662 |
| 0.192162  | 0.230624 | 0.215909 | 0.205711  | 0.201632 | 0.214307 | 0.224505 |
| 0.0960082 | 0.147582 | 0.137238 | 0.127331  | 0.132867 | 0.136801 | 0.147582 |
| 0.118735  | 0.133304 | 0.124417 | 0.109266  | 0.114219 | 0.115822 | 0.128642 |
| 0.0919289 | 0.141171 | 0.132576 | 0.119172  | 0.129371 | 0.131265 | 0.138549 |
| 0.121066  | 0.133887 | 0.129079 | 0.120338  | 0.12296  | 0.121358 | 0.132139 |
| 0.114073  | 0.142337 | 0.127914 | 0.114802  | 0.114219 | 0.114948 | 0.135635 |
| 0.112179  | 0.121503 | 0.112908 | 0.104458  | 0.113199 | 0.102855 | 0.122086 |
| 0.1081    | 0.128205 | 0.118735 | 0.10708   | 0.114948 | 0.113636 | 0.123252 |
| 0.127914  | 0.132867 | 0.130099 | 0.123689  | 0.122815 | 0.124126 | 0.144522 |
| 0.0810023 | 0.13141  | 0.123397 | 0.108537  | 0.116404 | 0.121795 | 0.131993 |
| 0.114365  | 0.131847 | 0.124709 | 0.114802  | 0.115093 | 0.117861 | 0.129225 |
| 0.173951  | 0.210082 | 0.19799  | 0.186917  | 0.18546  | 0.198718 | 0.209207 |
| 0.127768  | 0.133013 | 0.140152 | 0.119172  | 0.124709 | 0.129516 | 0.142628 |
| 0.123543  | 0.142483 | 0.134761 | 0.125437  | 0.129225 | 0.130245 | 0.145979 |
| 0.114948  | 0.129516 | 0.125874 | 0.111888  | 0.118298 | 0.121649 | 0.135344 |
| 0.119464  | 0.147145 | 0.134761 | 0.123397  | 0.126311 | 0.124709 | 0.142483 |
| 0.0894522 | 0.136072 | 0.129808 | 0.11757   | 0.125146 | 0.128497 | 0.138112 |
| 0.117716  | 0.116259 | 0.113199 | 0.109411  | 0.119901 | 0.104312 | 0.121503 |
| 0.109994  | 0.129516 | 0.120921 | 0.113054  | 0.115093 | 0.114948 | 0.129808 |
| 0.114365  | 0.121066 | 0.114219 | 0.105478  | 0.116259 | 0.112034 | 0.114073 |
| 0.115676  | 0.141317 | 0.135344 | 0.11961   | 0.123689 | 0.126166 | 0.142483 |
| 0.117424  | 0.134615 | 0.131265 | 0.112908  | 0.118153 | 0.127622 | 0.139569 |
| 0.116987  | 0.143794 | 0.13141  | 0.113928  | 0.120338 | 0.119027 | 0.135927 |
| 0.122378  | 0.137821 | 0.128934 | 0.116113  | 0.121358 | 0.124709 | 0.134907 |
| 0.133304  | 0.146707 | 0.135781 | 0.129953  | 0.135198 | 0.129808 | 0.136509 |
| 0.11757   | 0.140297 | 0.126748 | 0.117424  | 0.118298 | 0.115822 | 0.137675 |
| 0.104604  | 0.143939 | 0.143211 | 0.132721  | 0.141171 | 0.137821 | 0.143939 |
| 0.111014  | 0.140734 | 0.125728 | 0.110286  | 0.110577 | 0.113928 | 0.13345  |
| 0.106352  | 0.12704  | 0.125437 | 0.115822  | 0.118153 | 0.125291 | 0.135781 |
| 0.0802739 | 0.136509 | 0.121503 | 0.115967  | 0.115093 | 0.124272 | 0.135344 |
| 0.112908  | 0.128059 | 0.11451  | 0.106352  | 0.11451  | 0.113782 | 0.119027 |
| 0.169726  | 0.212558 | 0.194347 | 0.187354  | 0.18648  | 0.194784 | 0.202652 |
| 0.112762  | 0.130536 | 0.121358 | 0.10708   | 0.107372 | 0.109848 | 0.125583 |
| 0.104312  | 0.126748 | 0.11553  | 0.0986305 | 0.105332 | 0.111888 | 0.123543 |
| 0.127914  | 0.134033 | 0.129516 | 0.121358  | 0.12398  | 0.125    | 0.144522 |
| 0.160839  | 0.205711 | 0.188957 | 0.177593  | 0.173805 | 0.185606 | 0.19697  |
| 0.133013  | 0.153409 | 0.139277 | 0.13141   | 0.136072 | 0.131847 | 0.14933  |
| 0.145542  | 0.153409 | 0.148601 | 0.143648  | 0.143357 | 0.133304 | 0.1537   |
| 0.140443  | 0.150932 | 0.153118 | 0.143211  | 0.145542 | 0.145979 | 0.157343 |
| 0.112471  | 0.136364 | 0.125728 | 0.113491  | 0.110577 | 0.115676 | 0.134033 |
| 0.0866841 | 0.136801 | 0.131993 | 0.119464  | 0.124417 | 0.129808 | 0.137092 |
| 0.196387  | 0.230769 | 0.219843 | 0.210519  | 0.208188 | 0.22028  | 0.229312 |
| 0.117133  | 0.142483 | 0.130973 | 0.120775  | 0.120192 | 0.128497 | 0.136364 |

|           |          |          |           |          |           |          |
|-----------|----------|----------|-----------|----------|-----------|----------|
| 0.0910548 | 0.138549 | 0.135198 | 0.122669  | 0.129371 | 0.134761  | 0.142045 |
| 0.113782  | 0.13243  | 0.122669 | 0.113928  | 0.113054 | 0.114948  | 0.13039  |
| 0.146125  | 0.190997 | 0.175699 | 0.165793  | 0.166667 | 0.176428  | 0.183421 |
| 0.107372  | 0.140297 | 0.122086 | 0.115967  | 0.111597 | 0.119027  | 0.134761 |
| 0.140152  | 0.157051 | 0.146999 | 0.145833  | 0.14729  | 0.143357  | 0.158508 |
| 0.119755  | 0.133159 | 0.11961  | 0.115239  | 0.113782 | 0.106643  | 0.132284 |
| 0.172786  | 0.208625 | 0.199446 | 0.186334  | 0.1875   | 0.199301  | 0.208333 |
| 0.117424  | 0.141608 | 0.131556 | 0.116696  | 0.11961  | 0.118007  | 0.142483 |
| 0.108974  | 0.125874 | 0.116987 | 0.100087  | 0.101253 | 0.109848  | 0.12704  |
| 0.106789  | 0.131847 | 0.129662 | 0.115385  | 0.118298 | 0.122523  | 0.13447  |
| 0.118007  | 0.132867 | 0.12602  | 0.112325  | 0.11961  | 0.122378  | 0.141317 |
| 0.125     | 0.135781 | 0.125437 | 0.116987  | 0.119901 | 0.122086  | 0.142191 |
| 0.115967  | 0.146562 | 0.126894 | 0.119318  | 0.118444 | 0.126748  | 0.134033 |
| 0.114365  | 0.141754 | 0.126166 | 0.111305  | 0.111305 | 0.11116   | 0.133304 |
| 0.175117  | 0.211247 | 0.198864 | 0.187791  | 0.18546  | 0.199009  | 0.20979  |
| 0.116696  | 0.141463 | 0.125874 | 0.115967  | 0.123252 | 0.126311  | 0.134178 |
| 0.110431  | 0.132867 | 0.125728 | 0.114073  | 0.116404 | 0.119755  | 0.133159 |
| 0.196533  | 0.232372 | 0.222028 | 0.212995  | 0.206585 | 0.218386  | 0.227418 |
| 0.126311  | 0.135927 | 0.138986 | 0.118007  | 0.124126 | 0.129808  | 0.145251 |
| 0.116259  | 0.140443 | 0.125146 | 0.114365  | 0.112034 | 0.113636  | 0.13549  |
| 0.108683  | 0.13986  | 0.123106 | 0.107955  | 0.108829 | 0.11014   | 0.132284 |
| 0.105041  | 0.142045 | 0.140443 | 0.133159  | 0.139277 | 0.136509  | 0.142337 |
| 0.173223  | 0.211976 | 0.199009 | 0.186189  | 0.184149 | 0.198864  | 0.206731 |
| 0.111014  | 0.120047 | 0.11116  | 0.0986305 | 0.109703 | 0.111597  | 0.117133 |
| 0.128205  | 0.1419   | 0.130973 | 0.126311  | 0.131265 | 0.129953  | 0.136655 |
| 0.111888  | 0.13986  | 0.124854 | 0.110286  | 0.112617 | 0.113636  | 0.13549  |
| 0.11014   | 0.142483 | 0.124563 | 0.108537  | 0.111451 | 0.111305  | 0.13549  |
| 0.108829  | 0.143794 | 0.124126 | 0.107517  | 0.107226 | 0.109994  | 0.136801 |
| 0.0856643 | 0.134615 | 0.128934 | 0.112034  | 0.120775 | 0.122086  | 0.135781 |
| 0.108829  | 0.128642 | 0.113054 | 0.103438  | 0.103147 | 0.0992133 | 0.125437 |
| 0.120775  | 0.144668 | 0.134324 | 0.120921  | 0.125583 | 0.121066  | 0.141754 |
| 0.121649  | 0.13884  | 0.137529 | 0.130828  | 0.134907 | 0.131556  | 0.142628 |
| 0.119901  | 0.144668 | 0.132576 | 0.11655   | 0.121503 | 0.120484  | 0.14088  |
| 0.129662  | 0.131702 | 0.132721 | 0.125437  | 0.127768 | 0.125874  | 0.136072 |
| 0.176428  | 0.218969 | 0.202506 | 0.19289   | 0.190559 | 0.203526  | 0.214307 |
| 0.118881  | 0.136072 | 0.127768 | 0.110868  | 0.11961  | 0.119464  | 0.128497 |
| 0.0977564 | 0.139714 | 0.137529 | 0.125583  | 0.132284 | 0.135635  | 0.143794 |
| 0.111888  | 0.139277 | 0.125437 | 0.109994  | 0.113199 | 0.110431  | 0.13345  |
| 0.109994  | 0.124854 | 0.11014  | 0.102564  | 0.100524 | 0.0939685 | 0.124272 |
| 0.101253  | 0.13884  | 0.120047 | 0.112762  | 0.112471 | 0.114365  | 0.133887 |
| 0.112179  | 0.123252 | 0.111451 | 0.102127  | 0.112617 | 0.112471  | 0.114219 |
| 0.125583  | 0.150058 | 0.138549 | 0.12602   | 0.131556 | 0.133741  | 0.143357 |
| 0.11553   | 0.142045 | 0.134033 | 0.115385  | 0.122086 | 0.127768  | 0.142628 |
| 0.10271   | 0.128059 | 0.113636 | 0.0976107 | 0.104895 | 0.106206  | 0.115822 |



|           |          |          |           |          |           |          |
|-----------|----------|----------|-----------|----------|-----------|----------|
| 0.0976107 | 0.126166 | 0.10912  | 0.0968823 | 0.102127 | 0.102564  | 0.113636 |
| 0.104167  | 0.134178 | 0.118007 | 0.10169   | 0.106935 | 0.108246  | 0.128934 |
| 0.113054  | 0.121503 | 0.113782 | 0.103875  | 0.113199 | 0.102855  | 0.118007 |
| 0.127768  | 0.148747 | 0.136655 | 0.128497  | 0.129953 | 0.123397  | 0.147582 |
| 0.111888  | 0.124709 | 0.113199 | 0.100962  | 0.110577 | 0.109557  | 0.120629 |
| 0.0840618 | 0.129225 | 0.121795 | 0.11014   | 0.115385 | 0.120192  | 0.133596 |
| 0.105041  | 0.124854 | 0.109266 | 0.097028  | 0.107517 | 0.105332  | 0.11553  |
| 0.109266  | 0.141026 | 0.124272 | 0.108246  | 0.109703 | 0.113345  | 0.133159 |
| 0.11116   | 0.130682 | 0.121212 | 0.102855  | 0.107809 | 0.109703  | 0.123397 |
| 0.116404  | 0.141171 | 0.12704  | 0.111305  | 0.115385 | 0.115822  | 0.136509 |
| 0.110868  | 0.135344 | 0.121503 | 0.11014   | 0.115676 | 0.119027  | 0.128351 |
| 0.116404  | 0.144959 | 0.131702 | 0.113345  | 0.121795 | 0.124563  | 0.140297 |
| 0.121066  | 0.131847 | 0.122378 | 0.11451   | 0.116841 | 0.119318  | 0.139132 |
| 0.110431  | 0.128497 | 0.112617 | 0.105332  | 0.10708  | 0.101107  | 0.125874 |
| 0.111742  | 0.141171 | 0.125291 | 0.111305  | 0.113345 | 0.112325  | 0.13243  |
| 0.113199  | 0.139132 | 0.132576 | 0.119464  | 0.124417 | 0.128934  | 0.141463 |
| 0.11451   | 0.139277 | 0.130682 | 0.115822  | 0.120484 | 0.121795  | 0.139569 |
| 0.109703  | 0.13447  | 0.118881 | 0.105769  | 0.104021 | 0.097465  | 0.129516 |
| 0.111742  | 0.137966 | 0.123252 | 0.11014   | 0.108683 | 0.109703  | 0.134178 |
| 0.0862471 | 0.134033 | 0.128059 | 0.115239  | 0.121066 | 0.124417  | 0.137238 |
| 0.114219  | 0.121795 | 0.111742 | 0.102418  | 0.113491 | 0.102273  | 0.119464 |
| 0.0897436 | 0.136655 | 0.129516 | 0.11757   | 0.123397 | 0.125874  | 0.136072 |
| 0.120921  | 0.133741 | 0.126311 | 0.115822  | 0.117861 | 0.119755  | 0.142191 |
| 0.111888  | 0.132576 | 0.114948 | 0.108246  | 0.104749 | 0.104312  | 0.129371 |
| 0.111305  | 0.142191 | 0.121941 | 0.110868  | 0.110577 | 0.115676  | 0.132284 |
| 0.113491  | 0.13243  | 0.119464 | 0.102855  | 0.110431 | 0.110286  | 0.128059 |
| 0.0897436 | 0.136364 | 0.131265 | 0.119901  | 0.125146 | 0.132284  | 0.138112 |
| 0.121503  | 0.140443 | 0.125437 | 0.121358  | 0.121066 | 0.126748  | 0.136364 |
| 0.108537  | 0.138549 | 0.125874 | 0.111597  | 0.112471 | 0.118444  | 0.132139 |
| 0.179633  | 0.212267 | 0.201632 | 0.191142  | 0.191725 | 0.200029  | 0.211684 |
| 0.145542  | 0.186917 | 0.175408 | 0.162296  | 0.161131 | 0.172931  | 0.180507 |
| 0.11961   | 0.144959 | 0.132867 | 0.120338  | 0.124126 | 0.122232  | 0.138258 |
| 0.100816  | 0.136072 | 0.118735 | 0.108829  | 0.115822 | 0.120921  | 0.127914 |
| 0.147436  | 0.15472  | 0.153118 | 0.146707  | 0.147873 | 0.136364  | 0.15472  |
| 0.11961   | 0.150787 | 0.129079 | 0.122669  | 0.121503 | 0.128934  | 0.144085 |
| 0.109557  | 0.146562 | 0.127768 | 0.118735  | 0.120775 | 0.125583  | 0.137529 |
| 0.110286  | 0.144085 | 0.133159 | 0.11014   | 0.117716 | 0.11961   | 0.136218 |
| 0.114948  | 0.13884  | 0.113636 | 0.109266  | 0.100816 | 0.0965909 | 0.13039  |
| 0.117279  | 0.137092 | 0.12704  | 0.114219  | 0.120338 | 0.123397  | 0.133887 |
| 0.18648   | 0.221737 | 0.206731 | 0.200029  | 0.197698 | 0.208042  | 0.22028  |
| 0.112908  | 0.126603 | 0.11451  | 0.102273  | 0.113636 | 0.112325  | 0.118444 |
| 0.083042  | 0.132284 | 0.125437 | 0.106498  | 0.115239 | 0.119464  | 0.130245 |
| 0.105186  | 0.136072 | 0.121941 | 0.108537  | 0.110868 | 0.111597  | 0.132576 |
| 0.121066  | 0.135344 | 0.125874 | 0.116259  | 0.116841 | 0.125728  | 0.131556 |

|           |          |          |           |          |           |          |
|-----------|----------|----------|-----------|----------|-----------|----------|
| 0.166958  | 0.206585 | 0.193619 | 0.182255  | 0.181672 | 0.193473  | 0.205128 |
| 0.231061  | 0.260198 | 0.253059 | 0.246358  | 0.24257  | 0.250291  | 0.26049  |
| 0.117133  | 0.145105 | 0.133887 | 0.117861  | 0.123689 | 0.128205  | 0.142774 |
| 0.116841  | 0.140152 | 0.128934 | 0.116987  | 0.121066 | 0.122086  | 0.138695 |
| 0.121795  | 0.143939 | 0.13039  | 0.11961   | 0.124272 | 0.120629  | 0.1419   |
| 0.120484  | 0.13243  | 0.123543 | 0.114802  | 0.11655  | 0.117279  | 0.142045 |
| 0.105186  | 0.122086 | 0.110577 | 0.0936772 | 0.108246 | 0.102273  | 0.118007 |
| 0.110286  | 0.13447  | 0.11859  | 0.106935  | 0.11451  | 0.119027  | 0.129225 |
| 0.0894522 | 0.139277 | 0.124854 | 0.112617  | 0.117861 | 0.120338  | 0.136655 |
| 0.105769  | 0.120047 | 0.10912  | 0.0968823 | 0.109703 | 0.103438  | 0.113054 |
| 0.0843531 | 0.138258 | 0.12704  | 0.111305  | 0.117716 | 0.118735  | 0.131556 |
| 0.11451   | 0.140443 | 0.121066 | 0.107955  | 0.109703 | 0.103147  | 0.136655 |
| 0.110868  | 0.130682 | 0.115967 | 0.106643  | 0.106643 | 0.103293  | 0.129225 |
| 0.117716  | 0.140152 | 0.132139 | 0.118153  | 0.121066 | 0.124126  | 0.144522 |
| 0.0875583 | 0.137383 | 0.128497 | 0.116259  | 0.120047 | 0.124854  | 0.135344 |
| 0.102127  | 0.126603 | 0.121795 | 0.106643  | 0.109266 | 0.112617  | 0.125146 |
| 0.128351  | 0.13243  | 0.128497 | 0.127622  | 0.11859  | 0.111451  | 0.138258 |
| 0.135052  | 0.132139 | 0.132284 | 0.129953  | 0.129371 | 0.126894  | 0.149038 |
| 0.109557  | 0.137238 | 0.123689 | 0.109411  | 0.110286 | 0.112762  | 0.134033 |
| 0.103584  | 0.13039  | 0.115967 | 0.111305  | 0.1081   | 0.113199  | 0.128059 |
| 0.128059  | 0.145251 | 0.134033 | 0.126166  | 0.122378 | 0.121066  | 0.13884  |
| 0.191434  | 0.229604 | 0.213141 | 0.209645  | 0.202652 | 0.213578  | 0.225524 |
| 0.109994  | 0.133887 | 0.120047 | 0.106935  | 0.110431 | 0.116404  | 0.13447  |
| 0.111888  | 0.131119 | 0.115239 | 0.106206  | 0.105624 | 0.100233  | 0.126457 |
| 0.120629  | 0.141317 | 0.12602  | 0.111451  | 0.122232 | 0.124417  | 0.131993 |
| 0.125146  | 0.137966 | 0.139277 | 0.11859   | 0.124709 | 0.131847  | 0.144959 |
| 0.118153  | 0.130973 | 0.123834 | 0.11451   | 0.11451  | 0.120484  | 0.133304 |
| 0.184878  | 0.223922 | 0.210373 | 0.201049  | 0.198135 | 0.205857  | 0.21926  |
| 0.0874126 | 0.138695 | 0.133596 | 0.119027  | 0.124854 | 0.130245  | 0.142483 |
| 0.110577  | 0.136801 | 0.122378 | 0.107809  | 0.109848 | 0.109994  | 0.132139 |
| 0.12296   | 0.132867 | 0.129225 | 0.118153  | 0.120192 | 0.117716  | 0.13549  |
| 0.117133  | 0.129662 | 0.123106 | 0.111451  | 0.115822 | 0.115385  | 0.138403 |
| 0.0862471 | 0.137238 | 0.131265 | 0.117279  | 0.123106 | 0.12704   | 0.141608 |
| 0.0894522 | 0.129662 | 0.119318 | 0.104167  | 0.110868 | 0.113054  | 0.129079 |
| 0.115385  | 0.137821 | 0.121358 | 0.106206  | 0.108246 | 0.104021  | 0.13549  |
| 0.119172  | 0.133159 | 0.132139 | 0.114656  | 0.11757  | 0.12704   | 0.140152 |
| 0.183421  | 0.223048 | 0.206585 | 0.197844  | 0.193473 | 0.202652  | 0.220425 |
| 0.083042  | 0.129371 | 0.120192 | 0.105041  | 0.114365 | 0.115385  | 0.125583 |
| 0.180216  | 0.215472 | 0.204254 | 0.191434  | 0.189103 | 0.205565  | 0.213724 |
| 0.177739  | 0.215618 | 0.204108 | 0.191871  | 0.190122 | 0.203089  | 0.212995 |
| 0.129662  | 0.131993 | 0.131556 | 0.12602   | 0.127768 | 0.128205  | 0.145979 |
| 0.133159  | 0.136946 | 0.142628 | 0.128934  | 0.131265 | 0.130536  | 0.144522 |
| 0.106935  | 0.130245 | 0.114073 | 0.101836  | 0.101836 | 0.0973193 | 0.126166 |
| 0.0852273 | 0.126603 | 0.11859  | 0.105769  | 0.112471 | 0.117861  | 0.129516 |

|           |          |          |           |          |          |          |
|-----------|----------|----------|-----------|----------|----------|----------|
| 0.083042  | 0.134907 | 0.128059 | 0.112034  | 0.118444 | 0.120921 | 0.138403 |
| 0.11451   | 0.143357 | 0.126603 | 0.113199  | 0.109994 | 0.113928 | 0.136655 |
| 0.104895  | 0.118007 | 0.106498 | 0.095134  | 0.105624 | 0.103147 | 0.109848 |
| 0.106352  | 0.120338 | 0.107372 | 0.0960082 | 0.10708  | 0.104604 | 0.113054 |
| 0.120775  | 0.143502 | 0.137238 | 0.120338  | 0.124709 | 0.128059 | 0.145542 |
| 0.123252  | 0.134907 | 0.125437 | 0.119318  | 0.118153 | 0.121795 | 0.14627  |
| 0.106206  | 0.137383 | 0.124126 | 0.106643  | 0.1081   | 0.108246 | 0.129516 |
| 0.085373  | 0.138112 | 0.129516 | 0.114365  | 0.121066 | 0.126748 | 0.134615 |
| 0.106498  | 0.127477 | 0.115093 | 0.0976107 | 0.099359 | 0.107663 | 0.127768 |
| 0.0926573 | 0.139277 | 0.13243  | 0.121649  | 0.128642 | 0.132284 | 0.139569 |
| 0.118007  | 0.140443 | 0.130682 | 0.11961   | 0.121358 | 0.120338 | 0.139277 |
| 0.0986305 | 0.14088  | 0.138695 | 0.129371  | 0.13549  | 0.136218 | 0.144376 |
| 0.24257   | 0.270833 | 0.264277 | 0.26049   | 0.254079 | 0.264423 | 0.270251 |
| 0.126603  | 0.135635 | 0.134324 | 0.121212  | 0.125291 | 0.120192 | 0.136218 |
| 0.125291  | 0.136072 | 0.129516 | 0.123397  | 0.122815 | 0.123543 | 0.136364 |
| 0.202943  | 0.23616  | 0.223485 | 0.215618  | 0.213578 | 0.223339 | 0.232663 |
| 0.126748  | 0.135781 | 0.124272 | 0.126894  | 0.119901 | 0.12704  | 0.137238 |
| 0.215909  | 0.245629 | 0.236451 | 0.230915  | 0.227127 | 0.23514  | 0.244755 |
| 0.118153  | 0.129225 | 0.121503 | 0.114219  | 0.115676 | 0.11553  | 0.130973 |
| 0.123543  | 0.145396 | 0.13243  | 0.123106  | 0.119318 | 0.121795 | 0.138986 |
| 0.116841  | 0.130828 | 0.129808 | 0.111742  | 0.117279 | 0.122669 | 0.137821 |
| 0.128788  | 0.134615 | 0.127185 | 0.121358  | 0.123397 | 0.12296  | 0.144231 |
| 0.18648   | 0.225233 | 0.211976 | 0.20236   | 0.198572 | 0.212413 | 0.223485 |
| 0.0949883 | 0.142191 | 0.139423 | 0.125437  | 0.134178 | 0.13141  | 0.141608 |
| 0.0850816 | 0.136364 | 0.131556 | 0.114073  | 0.121358 | 0.123252 | 0.137529 |
| 0.209936  | 0.242861 | 0.231643 | 0.22669   | 0.222028 | 0.232955 | 0.242861 |
| 0.111014  | 0.125291 | 0.111742 | 0.100379  | 0.113491 | 0.110723 | 0.117716 |
| 0.183712  | 0.219843 | 0.20542  | 0.197552  | 0.19289  | 0.205274 | 0.219843 |
| 0.110868  | 0.128351 | 0.117424 | 0.10169   | 0.113054 | 0.109703 | 0.11961  |
| 0.112034  | 0.140589 | 0.125    | 0.112762  | 0.112762 | 0.112617 | 0.133887 |
| 0.120629  | 0.133741 | 0.121358 | 0.116113  | 0.112617 | 0.106352 | 0.131119 |
| 0.130828  | 0.129662 | 0.129225 | 0.128351  | 0.126603 | 0.125    | 0.150058 |
| 0.11116   | 0.142045 | 0.117716 | 0.115676  | 0.111888 | 0.119901 | 0.133013 |
| 0.143211  | 0.185752 | 0.167541 | 0.155594  | 0.153846 | 0.164773 | 0.177885 |
| 0.078817  | 0.130973 | 0.12296  | 0.111597  | 0.118298 | 0.119318 | 0.133304 |
| 0.123397  | 0.136509 | 0.137238 | 0.119172  | 0.121503 | 0.132139 | 0.141754 |
| 0.116404  | 0.143211 | 0.126457 | 0.113054  | 0.117133 | 0.122815 | 0.138549 |
| 0.120192  | 0.130682 | 0.136072 | 0.125291  | 0.128788 | 0.133013 | 0.137383 |
| 0.180653  | 0.215909 | 0.203234 | 0.195367  | 0.193619 | 0.204545 | 0.21183  |
| 0.110286  | 0.137092 | 0.12296  | 0.110723  | 0.109848 | 0.110577 | 0.130682 |
| 0.125     | 0.144231 | 0.129516 | 0.120775  | 0.118735 | 0.126457 | 0.14831  |
| 0.113491  | 0.121941 | 0.113345 | 0.102564  | 0.111888 | 0.105332 | 0.120484 |
| 0.109266  | 0.122086 | 0.108829 | 0.099796  | 0.110286 | 0.107809 | 0.110431 |
| 0.119318  | 0.143502 | 0.12704  | 0.11655   | 0.116259 | 0.114656 | 0.134178 |

|           |          |          |          |          |           |          |
|-----------|----------|----------|----------|----------|-----------|----------|
| 0.242133  | 0.265152 | 0.260635 | 0.257139 | 0.249854 | 0.26049   | 0.269814 |
| 0.115822  | 0.131847 | 0.115967 | 0.113636 | 0.111305 | 0.105332  | 0.127768 |
| 0.10912   | 0.144376 | 0.129662 | 0.117133 | 0.120047 | 0.123106  | 0.135635 |
| 0.167978  | 0.196533 | 0.189103 | 0.178613 | 0.179487 | 0.185169  | 0.194202 |
| 0.172057  | 0.205857 | 0.193182 | 0.18648  | 0.183275 | 0.19391   | 0.206148 |
| 0.114948  | 0.145251 | 0.131702 | 0.118007 | 0.120629 | 0.124272  | 0.143502 |
| 0.0856643 | 0.136364 | 0.129516 | 0.117861 | 0.121649 | 0.125874  | 0.137238 |
| 0.116841  | 0.134907 | 0.125728 | 0.114073 | 0.118153 | 0.11859   | 0.13986  |
| 0.109703  | 0.149038 | 0.152098 | 0.141608 | 0.146853 | 0.145833  | 0.153409 |
| 0.112908  | 0.144668 | 0.128788 | 0.11451  | 0.120629 | 0.124563  | 0.142045 |
| 0.117133  | 0.147145 | 0.133304 | 0.117861 | 0.121941 | 0.126457  | 0.144814 |
| 0.114948  | 0.121066 | 0.11451  | 0.107809 | 0.119464 | 0.118153  | 0.115239 |
| 0.083479  | 0.130099 | 0.12704  | 0.11451  | 0.122378 | 0.121649  | 0.133013 |
| 0.0941142 | 0.136655 | 0.133304 | 0.124272 | 0.128934 | 0.133159  | 0.136946 |
| 0.104749  | 0.130973 | 0.11655  | 0.106061 | 0.111014 | 0.112908  | 0.122232 |
| 0.128788  | 0.133741 | 0.129516 | 0.123397 | 0.124854 | 0.125291  | 0.148601 |
| 0.14292   | 0.140297 | 0.142191 | 0.135198 | 0.136364 | 0.135052  | 0.157197 |
| 0.120629  | 0.132284 | 0.119901 | 0.11553  | 0.112617 | 0.105186  | 0.130536 |
| 0.135635  | 0.136218 | 0.134615 | 0.130828 | 0.132867 | 0.127477  | 0.149621 |
| 0.116113  | 0.123106 | 0.115676 | 0.106935 | 0.120338 | 0.112617  | 0.112908 |
| 0.19289   | 0.22873  | 0.216638 | 0.206439 | 0.2044   | 0.217949  | 0.227564 |
| 0.121358  | 0.13884  | 0.121212 | 0.117424 | 0.107517 | 0.074155  | 0.132721 |
| 0.178176  | 0.212558 | 0.201049 | 0.190559 | 0.18852  | 0.201195  | 0.207314 |
| 0.113199  | 0.131265 | 0.121212 | 0.111305 | 0.114802 | 0.121066  | 0.131556 |
| 0.120192  | 0.146707 | 0.131119 | 0.120338 | 0.121503 | 0.119027  | 0.142045 |
| 0.118153  | 0.145833 | 0.134033 | 0.123252 | 0.126748 | 0.11961   | 0.144668 |
| 0.117424  | 0.138986 | 0.128059 | 0.11553  | 0.116404 | 0.114802  | 0.135781 |
| 0.0878497 | 0.141171 | 0.132867 | 0.121795 | 0.123834 | 0.128351  | 0.142045 |
| 0.0910548 | 0.133887 | 0.129371 | 0.118298 | 0.124417 | 0.128059  | 0.137675 |
| 0.113491  | 0.143211 | 0.128497 | 0.112179 | 0.11451  | 0.11757   | 0.137092 |
| 0.121212  | 0.134907 | 0.133887 | 0.116404 | 0.121649 | 0.128497  | 0.140152 |
| 0.12296   | 0.144231 | 0.132721 | 0.122232 | 0.125437 | 0.123834  | 0.141317 |
| 0.11961   | 0.128351 | 0.120629 | 0.113054 | 0.125    | 0.114365  | 0.119027 |
| 0.237908  | 0.264714 | 0.256993 | 0.252622 | 0.248252 | 0.255099  | 0.264423 |
| 0.114365  | 0.143211 | 0.128788 | 0.11451  | 0.115093 | 0.115239  | 0.137675 |
| 0.170455  | 0.208333 | 0.191871 | 0.182838 | 0.180507 | 0.192308  | 0.204837 |
| 0.173223  | 0.211101 | 0.19697  | 0.189394 | 0.185023 | 0.197407  | 0.209353 |
| 0.120338  | 0.145396 | 0.123397 | 0.115822 | 0.116987 | 0.119172  | 0.138695 |
| 0.112762  | 0.130536 | 0.116696 | 0.109703 | 0.109703 | 0.101981  | 0.130828 |
| 0.121503  | 0.143939 | 0.133013 | 0.123397 | 0.119901 | 0.117133  | 0.138112 |
| 0.0801282 | 0.134033 | 0.126311 | 0.10912  | 0.117861 | 0.122669  | 0.133741 |
| 0.112617  | 0.139132 | 0.116259 | 0.110723 | 0.100816 | 0.0971737 | 0.132721 |
| 0.110868  | 0.128059 | 0.113928 | 0.099359 | 0.110431 | 0.108246  | 0.118444 |
| 0.0926573 | 0.138403 | 0.128351 | 0.116404 | 0.119318 | 0.125291  | 0.135781 |

|           |          |          |           |          |          |          |
|-----------|----------|----------|-----------|----------|----------|----------|
| 0.0984848 | 0.140152 | 0.137675 | 0.12602   | 0.133596 | 0.136364 | 0.141608 |
| 0.112034  | 0.142628 | 0.126457 | 0.113636  | 0.112762 | 0.111742 | 0.134761 |
| 0.0939685 | 0.139132 | 0.136072 | 0.125583  | 0.131702 | 0.131847 | 0.139714 |
| 0.115093  | 0.136946 | 0.124563 | 0.114073  | 0.112034 | 0.120047 | 0.132284 |
| 0.121795  | 0.144814 | 0.133013 | 0.123397  | 0.128351 | 0.125291 | 0.140443 |
| 0.124854  | 0.135635 | 0.127331 | 0.118881  | 0.121503 | 0.123106 | 0.14292  |
| 0.120921  | 0.121212 | 0.116987 | 0.111116  | 0.121649 | 0.111305 | 0.115676 |
| 0.117861  | 0.140589 | 0.122378 | 0.112471  | 0.112179 | 0.104749 | 0.137966 |
| 0.113491  | 0.139423 | 0.124709 | 0.11451   | 0.113054 | 0.112325 | 0.135635 |
| 0.127768  | 0.144085 | 0.135781 | 0.128497  | 0.135198 | 0.128642 | 0.139132 |
| 0.170746  | 0.207168 | 0.193036 | 0.184586  | 0.180798 | 0.192308 | 0.204545 |
| 0.101836  | 0.144668 | 0.1419   | 0.13141   | 0.136946 | 0.137675 | 0.146707 |
| 0.0875583 | 0.135927 | 0.128205 | 0.118007  | 0.123252 | 0.126603 | 0.136801 |
| 0.120047  | 0.142191 | 0.128642 | 0.121066  | 0.122523 | 0.11859  | 0.139569 |
| 0.109703  | 0.134761 | 0.122086 | 0.111305  | 0.111888 | 0.110577 | 0.132139 |
| 0.121212  | 0.136655 | 0.127477 | 0.120484  | 0.121066 | 0.123834 | 0.144522 |
| 0.128642  | 0.135927 | 0.129079 | 0.123252  | 0.123543 | 0.123397 | 0.144959 |
| 0.178613  | 0.210373 | 0.200612 | 0.190997  | 0.188374 | 0.201049 | 0.211538 |
| 0.0888695 | 0.138986 | 0.126311 | 0.117861  | 0.120775 | 0.122086 | 0.136072 |
| 0.0980478 | 0.130682 | 0.119464 | 0.101399  | 0.1081   | 0.117279 | 0.127768 |
| 0.090472  | 0.139132 | 0.133159 | 0.119172  | 0.12704  | 0.134178 | 0.142045 |
| 0.178904  | 0.21183  | 0.202069 | 0.18954   | 0.190122 | 0.200175 | 0.212413 |
| 0.110286  | 0.133887 | 0.117133 | 0.109557  | 0.107517 | 0.103875 | 0.130682 |
| 0.113345  | 0.120629 | 0.11553  | 0.104167  | 0.113491 | 0.112762 | 0.114802 |
| 0.0882867 | 0.139277 | 0.13243  | 0.119901  | 0.127185 | 0.129079 | 0.139569 |
| 0.114656  | 0.137383 | 0.127914 | 0.112471  | 0.117133 | 0.120484 | 0.13884  |
| 0.172931  | 0.209353 | 0.199009 | 0.185023  | 0.186772 | 0.196241 | 0.205857 |
| 0.109994  | 0.121066 | 0.110723 | 0.0999417 | 0.112762 | 0.111451 | 0.11757  |
| 0.106498  | 0.13447  | 0.121503 | 0.106935  | 0.11451  | 0.120484 | 0.124854 |
| 0.112617  | 0.136218 | 0.117716 | 0.106935  | 0.108974 | 0.105624 | 0.129808 |
| 0.108829  | 0.144085 | 0.129953 | 0.118881  | 0.120338 | 0.128351 | 0.137675 |
| 0.123543  | 0.134033 | 0.136218 | 0.119027  | 0.121066 | 0.125291 | 0.1419   |
| 0.118007  | 0.11859  | 0.116404 | 0.107955  | 0.116987 | 0.112762 | 0.117716 |
| 0.112762  | 0.143939 | 0.127477 | 0.112034  | 0.111116 | 0.115385 | 0.135198 |
| 0.115093  | 0.137529 | 0.125437 | 0.114365  | 0.116404 | 0.122086 | 0.140443 |
| 0.13884   | 0.151078 | 0.154138 | 0.143065  | 0.146562 | 0.143794 | 0.158071 |
| 0.221008  | 0.252768 | 0.242424 | 0.236888  | 0.230769 | 0.241113 | 0.253059 |
| 0.125728  | 0.14292  | 0.125583 | 0.118298  | 0.115385 | 0.105624 | 0.140006 |
| 0.121941  | 0.137383 | 0.136072 | 0.116259  | 0.12296  | 0.129225 | 0.143211 |
| 0.0859557 | 0.134033 | 0.124272 | 0.115822  | 0.118735 | 0.122086 | 0.131702 |
| 0.117279  | 0.149038 | 0.127622 | 0.118298  | 0.120921 | 0.127768 | 0.137675 |
| 0.101399  | 0.123252 | 0.123106 | 0.108537  | 0.116404 | 0.11859  | 0.128788 |
| 0.118298  | 0.129662 | 0.123689 | 0.11757   | 0.116987 | 0.122378 | 0.126748 |
| 0.0910548 | 0.135344 | 0.131993 | 0.118298  | 0.125874 | 0.13039  | 0.135927 |

|           |          |          |           |           |           |          |
|-----------|----------|----------|-----------|-----------|-----------|----------|
| 0.117424  | 0.122086 | 0.114365 | 0.10708   | 0.116987  | 0.111888  | 0.115093 |
| 0.109266  | 0.136364 | 0.126311 | 0.113199  | 0.114656  | 0.124709  | 0.13549  |
| 0.221882  | 0.252185 | 0.243881 | 0.239802  | 0.231061  | 0.244901  | 0.252477 |
| 0.106935  | 0.129079 | 0.111742 | 0.103293  | 0.105041  | 0.103438  | 0.129079 |
| 0.11014   | 0.127622 | 0.115239 | 0.100087  | 0.106498  | 0.108392  | 0.125874 |
| 0.110577  | 0.13884  | 0.122669 | 0.108974  | 0.111597  | 0.110577  | 0.13039  |
| 0.125291  | 0.142774 | 0.140006 | 0.127477  | 0.132139  | 0.133159  | 0.146853 |
| 0.128788  | 0.146562 | 0.134761 | 0.124272  | 0.120484  | 0.110723  | 0.143357 |
| 0.111888  | 0.144231 | 0.124272 | 0.118153  | 0.118735  | 0.118007  | 0.136655 |
| 0.0871212 | 0.137238 | 0.132139 | 0.117279  | 0.122232  | 0.127622  | 0.138986 |
| 0.112325  | 0.131847 | 0.120921 | 0.106352  | 0.113054  | 0.117861  | 0.134178 |
| 0.216638  | 0.246358 | 0.237179 | 0.234266  | 0.224068  | 0.237034  | 0.245192 |
| 0.0913462 | 0.140589 | 0.134907 | 0.122086  | 0.128205  | 0.130973  | 0.14088  |
| 0.111888  | 0.119172 | 0.113199 | 0.105332  | 0.113782  | 0.111597  | 0.113054 |
| 0.107517  | 0.130828 | 0.120775 | 0.10912   | 0.107955  | 0.118298  | 0.131702 |
| 0.121066  | 0.128059 | 0.12704  | 0.122378  | 0.125291  | 0.123106  | 0.139714 |
| 0.122232  | 0.133304 | 0.126457 | 0.11859   | 0.120629  | 0.112617  | 0.13243  |
| 0.115239  | 0.141171 | 0.124417 | 0.11014   | 0.113636  | 0.111451  | 0.130973 |
| 0.112908  | 0.121358 | 0.113345 | 0.106061  | 0.115676  | 0.108829  | 0.11553  |
| 0.118007  | 0.124126 | 0.118444 | 0.110577  | 0.120484  | 0.112471  | 0.117716 |
| 0.111014  | 0.11859  | 0.112617 | 0.0980478 | 0.109994  | 0.105186  | 0.114802 |
| 0.116113  | 0.138258 | 0.127914 | 0.11014   | 0.113054  | 0.11116   | 0.135052 |
| 0.129808  | 0.137383 | 0.140734 | 0.120921  | 0.129371  | 0.130973  | 0.142337 |
| 0.134907  | 0.140734 | 0.146707 | 0.12602   | 0.131265  | 0.137529  | 0.148601 |
| 0.126748  | 0.145979 | 0.135052 | 0.128642  | 0.128351  | 0.123252  | 0.13986  |
| 0.128205  | 0.143648 | 0.136218 | 0.131265  | 0.132139  | 0.128205  | 0.143357 |
| 0.13243   | 0.137675 | 0.1419   | 0.126166  | 0.130536  | 0.133304  | 0.144376 |
| 0.108246  | 0.135927 | 0.111014 | 0.104021  | 0.094697  | 0.095134  | 0.127477 |
| 0.131119  | 0.121503 | 0.122523 | 0.120484  | 0.130099  | 0.109848  | 0.125583 |
| 0.108246  | 0.131265 | 0.102564 | 0.0979021 | 0.0979021 | 0.121649  | 0.107955 |
| 0.192453  | 0.223048 | 0.214744 | 0.206294  | 0.204837  | 0.214307  | 0.225962 |
| 0.123106  | 0.14088  | 0.135198 | 0.123543  | 0.12704   | 0.124272  | 0.140589 |
| 0.112908  | 0.133887 | 0.121795 | 0.107517  | 0.112471  | 0.11116   | 0.129225 |
| 0.11859   | 0.145688 | 0.130682 | 0.116987  | 0.116113  | 0.118298  | 0.140443 |
| 0.205565  | 0.240822 | 0.229604 | 0.224359  | 0.219406  | 0.228584  | 0.24053  |
| 0.198572  | 0.229167 | 0.222319 | 0.21183   | 0.20979   | 0.220425  | 0.228584 |
| 0.115385  | 0.123543 | 0.118735 | 0.11116   | 0.117279  | 0.113345  | 0.119172 |
| 0.236742  | 0.267337 | 0.256119 | 0.249709  | 0.247086  | 0.254225  | 0.263549 |
| 0.109411  | 0.137092 | 0.109557 | 0.105769  | 0.0964452 | 0.0965909 | 0.126603 |
| 0.137092  | 0.150204 | 0.135781 | 0.130828  | 0.129079  | 0.123106  | 0.149621 |
| 0.112908  | 0.129516 | 0.11451  | 0.108392  | 0.106935  | 0.10067   | 0.128059 |
| 0.129371  | 0.138112 | 0.140589 | 0.122815  | 0.129225  | 0.134324  | 0.145688 |
| 0.175554  | 0.208188 | 0.198427 | 0.187063  | 0.185023  | 0.199155  | 0.207896 |
| 0.119172  | 0.125291 | 0.11961  | 0.116696  | 0.110577  | 0.11859   | 0.131702 |

|           |          |          |           |          |           |          |
|-----------|----------|----------|-----------|----------|-----------|----------|
| 0.182401  | 0.217366 | 0.207022 | 0.194784  | 0.194784 | 0.203963  | 0.215618 |
| 0.114219  | 0.140734 | 0.120484 | 0.111116  | 0.114948 | 0.119172  | 0.13345  |
| 0.0903263 | 0.128205 | 0.122523 | 0.105041  | 0.115239 | 0.114802  | 0.122378 |
| 0.119464  | 0.141026 | 0.126603 | 0.114073  | 0.111451 | 0.108974  | 0.134615 |
| 0.104312  | 0.137238 | 0.122815 | 0.110286  | 0.111116 | 0.118007  | 0.127914 |
| 0.108246  | 0.135344 | 0.119464 | 0.106643  | 0.107517 | 0.105624  | 0.127185 |
| 0.111116  | 0.133887 | 0.124417 | 0.110431  | 0.115967 | 0.11757   | 0.133304 |
| 0.111742  | 0.130099 | 0.112179 | 0.104604  | 0.101399 | 0.0986305 | 0.124854 |
| 0.0818765 | 0.129662 | 0.124854 | 0.111742  | 0.116696 | 0.120047  | 0.131702 |
| 0.116404  | 0.121649 | 0.115093 | 0.106643  | 0.113928 | 0.101544  | 0.121066 |
| 0.108537  | 0.136801 | 0.117716 | 0.105478  | 0.105478 | 0.100379  | 0.131847 |
| 0.111305  | 0.127622 | 0.113491 | 0.109411  | 0.107372 | 0.100233  | 0.126457 |
| 0.112908  | 0.14292  | 0.129371 | 0.121795  | 0.122669 | 0.118735  | 0.134178 |
| 0.0965909 | 0.136218 | 0.138403 | 0.125874  | 0.131702 | 0.131556  | 0.143502 |
| 0.113345  | 0.140443 | 0.126311 | 0.111742  | 0.11553  | 0.115676  | 0.136655 |
| 0.113199  | 0.130099 | 0.122378 | 0.106061  | 0.116259 | 0.119027  | 0.125728 |
| 0.106643  | 0.134324 | 0.119901 | 0.105041  | 0.108829 | 0.108974  | 0.128788 |
| 0.106643  | 0.122669 | 0.11757  | 0.104458  | 0.111742 | 0.109848  | 0.120047 |
| 0.121795  | 0.13549  | 0.130682 | 0.11553   | 0.11961  | 0.128497  | 0.138986 |
| 0.126311  | 0.131556 | 0.127622 | 0.120629  | 0.121212 | 0.122523  | 0.143211 |
| 0.121941  | 0.141463 | 0.129371 | 0.118881  | 0.121795 | 0.118153  | 0.135344 |
| 0.0868298 | 0.136364 | 0.127768 | 0.115239  | 0.120484 | 0.123834  | 0.137238 |
| 0.0977564 | 0.141171 | 0.13549  | 0.123834  | 0.134033 | 0.136801  | 0.14088  |
| 0.104167  | 0.144085 | 0.142483 | 0.133741  | 0.140734 | 0.139714  | 0.148164 |
| 0.100524  | 0.11859  | 0.103584 | 0.0933858 | 0.102127 | 0.0999417 | 0.112762 |
| 0.113345  | 0.138403 | 0.127477 | 0.113491  | 0.11553  | 0.117133  | 0.137821 |
| 0.110577  | 0.126603 | 0.119172 | 0.109557  | 0.111597 | 0.114656  | 0.127477 |
| 0.135635  | 0.135344 | 0.145688 | 0.129079  | 0.131702 | 0.135927  | 0.148164 |
| 0.115093  | 0.129371 | 0.114365 | 0.109703  | 0.108537 | 0.100524  | 0.127914 |
| 0.141317  | 0.13549  | 0.142628 | 0.137092  | 0.135635 | 0.135198  | 0.156469 |
| 0.130536  | 0.148893 | 0.140589 | 0.130099  | 0.128934 | 0.125874  | 0.144814 |
| 0.11961   | 0.14292  | 0.132867 | 0.123543  | 0.122378 | 0.126894  | 0.146707 |
| 0.109266  | 0.140443 | 0.120484 | 0.113491  | 0.110577 | 0.104312  | 0.13345  |
| 0.110286  | 0.129516 | 0.125291 | 0.112179  | 0.11655  | 0.119027  | 0.134761 |
| 0.126894  | 0.146125 | 0.134615 | 0.126457  | 0.129371 | 0.120484  | 0.143794 |
| 0.188811  | 0.226107 | 0.211976 | 0.203817  | 0.200321 | 0.215035  | 0.222902 |
| 0.113928  | 0.131119 | 0.121941 | 0.106789  | 0.116696 | 0.119755  | 0.123252 |
| 0.114656  | 0.143211 | 0.122378 | 0.109266  | 0.108974 | 0.110577  | 0.135635 |
| 0.121212  | 0.13345  | 0.133596 | 0.116113  | 0.121941 | 0.125583  | 0.138695 |
| 0.115239  | 0.140006 | 0.129079 | 0.113928  | 0.118881 | 0.116696  | 0.135635 |
| 0.120629  | 0.144231 | 0.123106 | 0.115822  | 0.11961  | 0.123252  | 0.142483 |
| 0.121503  | 0.133741 | 0.123397 | 0.118444  | 0.119901 | 0.125     | 0.132867 |
| 0.122815  | 0.13447  | 0.127331 | 0.12296   | 0.125583 | 0.128934  | 0.135344 |
| 0.115093  | 0.136364 | 0.130973 | 0.114365  | 0.120192 | 0.125291  | 0.140443 |

|           |           |          |           |           |           |          |
|-----------|-----------|----------|-----------|-----------|-----------|----------|
| 0.112179  | 0.123252  | 0.107663 | 0.102418  | 0.109994  | 0.101107  | 0.121212 |
| 0.127914  | 0.133741  | 0.139423 | 0.123689  | 0.127185  | 0.130828  | 0.142483 |
| 0.115967  | 0.140152  | 0.11757  | 0.107663  | 0.112034  | 0.105769  | 0.130245 |
| 0.119901  | 0.140006  | 0.12296  | 0.111597  | 0.108392  | 0.107372  | 0.13884  |
| 0.167541  | 0.195804  | 0.185169 | 0.169726  | 0.172348  | 0.181527  | 0.191725 |
| 0.0839161 | 0.137238  | 0.128059 | 0.112325  | 0.120192  | 0.125291  | 0.137238 |
| 0.130099  | 0.138549  | 0.138695 | 0.123834  | 0.130245  | 0.132139  | 0.144668 |
| 0.120338  | 0.129662  | 0.115822 | 0.112908  | 0.11116   | 0.0789627 | 0.125291 |
| 0.0960082 | 0.135052  | 0.120629 | 0.100524  | 0.11451   | 0.116987  | 0.121066 |
| 0.10912   | 0.129808  | 0.112762 | 0.099359  | 0.102564  | 0.109994  | 0.128642 |
| 0.10708   | 0.132721  | 0.113636 | 0.0996503 | 0.10169   | 0.0989219 | 0.130682 |
| 0.115822  | 0.134178  | 0.117716 | 0.106061  | 0.108974  | 0.11116   | 0.131265 |
| 0.113782  | 0.102418  | 0.115676 | 0.111305  | 0.112471  | 0.116987  | 0.119901 |
| 0.0913462 | 0.13884   | 0.125291 | 0.112762  | 0.115093  | 0.113491  | 0.135927 |
| 0.12296   | 0.138695  | 0.12398  | 0.125728  | 0.125437  | 0.115093  | 0.13986  |
| 0.102418  | 0.13447   | 0.120629 | 0.107809  | 0.106935  | 0.111742  | 0.12602  |
| 0.118881  | 0.132867  | 0.113199 | 0.107663  | 0.10708   | 0.110723  | 0.130245 |
| 0.117861  | 0.10067   | 0.103438 | 0.108974  | 0.10169   | 0.117861  | 0.103584 |
| 0.120484  | 0.124854  | 0.111014 | 0.106935  | 0.107809  | 0.0954254 | 0.120192 |
| 0.122523  | 0.138549  | 0.130828 | 0.118881  | 0.122378  | 0.116987  | 0.139423 |
| 0.114365  | 0.126311  | 0.107809 | 0.102855  | 0.102564  | 0.0986305 | 0.124272 |
| 0.121066  | 0.126603  | 0.111305 | 0.106935  | 0.108683  | 0.0992133 | 0.125728 |
| 0.114656  | 0.133304  | 0.115967 | 0.102855  | 0.0999417 | 0.104749  | 0.127768 |
| 0.121795  | 0.134033  | 0.121649 | 0.113199  | 0.113782  | 0.103147  | 0.129371 |
| 0.112179  | 0.126166  | 0.115822 | 0.10271   | 0.105332  | 0.0999417 | 0.131702 |
| 0.129079  | 0.136364  | 0.135927 | 0.130682  | 0.134178  | 0.137821  | 0.138403 |
| 0.116841  | 0.140734  | 0.135635 | 0.121358  | 0.12602   | 0.132284  | 0.134033 |
| 0.11655   | 0.129371  | 0.113199 | 0.105041  | 0.10912   | 0.0976107 | 0.129079 |
| 0.131265  | 0.128059  | 0.13141  | 0.127622  | 0.13345   | 0.134178  | 0.131847 |
| 0.112034  | 0.142337  | 0.131993 | 0.11655   | 0.119755  | 0.124563  | 0.138549 |
| 0.116987  | 0.128642  | 0.106935 | 0.111597  | 0.108683  | 0.123106  | 0.116696 |
| 0.115822  | 0.129225  | 0.120338 | 0.103147  | 0.110723  | 0.104458  | 0.133013 |
| 0.141026  | 0.157051  | 0.145251 | 0.137383  | 0.14088   | 0.141317  | 0.146853 |
| 0.124417  | 0.143939  | 0.133596 | 0.122815  | 0.120192  | 0.126748  | 0.146853 |
| 0.119172  | 0.115385  | 0.130973 | 0.123106  | 0.118735  | 0.128205  | 0.130536 |
| 0.114802  | 0.137821  | 0.118444 | 0.116404  | 0.110577  | 0.100816  | 0.13141  |
| 0.114365  | 0.124854  | 0.113345 | 0.104312  | 0.104895  | 0.0922203 | 0.118153 |
| 0.110723  | 0.131119  | 0.114365 | 0.101836  | 0.103584  | 0.105186  | 0.122669 |
| 0.104458  | 0.0989219 | 0.104604 | 0.101981  | 0.101107  | 0.110286  | 0.118735 |
| 0.120775  | 0.130973  | 0.117716 | 0.115093  | 0.115385  | 0.0989219 | 0.130099 |
| 0.13141   | 0.134907  | 0.12602  | 0.125728  | 0.118735  | 0.116841  | 0.137821 |
| 0.109848  | 0.134907  | 0.125728 | 0.115822  | 0.116987  | 0.125291  | 0.134324 |
| 0.105186  | 0.128497  | 0.116404 | 0.103875  | 0.106498  | 0.097028  | 0.125583 |
| 0.109994  | 0.135927  | 0.112179 | 0.0979021 | 0.104312  | 0.102418  | 0.119318 |



|          |          |          |          |           |           |          |
|----------|----------|----------|----------|-----------|-----------|----------|
| 0.117133 | 0.133741 | 0.119318 | 0.112617 | 0.10912   | 0.0844988 | 0.126166 |
| 0.113636 | 0.127331 | 0.115239 | 0.106498 | 0.103293  | 0.101981  | 0.120629 |
| 0.120484 | 0.139714 | 0.117716 | 0.108974 | 0.110431  | 0.10708   | 0.120775 |
| 0.110577 | 0.132721 | 0.117424 | 0.104895 | 0.110723  | 0.109411  | 0.13243  |
| 0.111305 | 0.143648 | 0.123689 | 0.11961  | 0.114948  | 0.11451   | 0.137529 |
| 0.112179 | 0.134907 | 0.111451 | 0.103584 | 0.104458  | 0.113054  | 0.127331 |
| 0.1081   | 0.135198 | 0.109411 | 0.105624 | 0.0977564 | 0.0903263 | 0.124709 |
| 0.113054 | 0.132284 | 0.116404 | 0.105915 | 0.10708   | 0.083042  | 0.122378 |
| 0.106789 | 0.14088  | 0.124417 | 0.115385 | 0.112762  | 0.116113  | 0.135927 |
| 0.114802 | 0.134033 | 0.120192 | 0.107372 | 0.106206  | 0.115385  | 0.134033 |
| 0.112471 | 0.142774 | 0.13243  | 0.121649 | 0.125146  | 0.12704   | 0.139569 |
| 0.103438 | 0.131119 | 0.117279 | 0.104458 | 0.106498  | 0.110431  | 0.126166 |
| 0.125728 | 0.140589 | 0.124126 | 0.116841 | 0.118007  | 0.109994  | 0.135052 |

| <b>TDr_08_00105</b> | <b>TDr_08_00108</b> | <b>TDr_08_00115</b> | <b>TDr_08_00119</b> | <b>TDr_08_00122</b> | <b>TDr_08_00126</b> | <b>TDr_08_00130</b> |
|---------------------|---------------------|---------------------|---------------------|---------------------|---------------------|---------------------|
| 0.142774            | 0.146999            | 0.114365            | 0.114365            | 0.113199            | 0.125583            | 0.115967            |
| 0.136509            | 0.153555            | 0.112471            | 0.110723            | 0.108683            | 0.133304            | 0.111116            |
| 0.131265            | 0.154429            | 0.109266            | 0.101399            | 0.104021            | 0.135052            | 0.106206            |
| 0.137092            | 0.159965            | 0.112471            | 0.112471            | 0.105769            | 0.139423            | 0.108829            |
| 0.145833            | 0.173077            | 0.126748            | 0.12704             | 0.124417            | 0.148456            | 0.127477            |
| 0.141171            | 0.169289            | 0.123252            | 0.12296             | 0.125291            | 0.137383            | 0.122523            |
| 0.137821            | 0.163316            | 0.117279            | 0.114073            | 0.112034            | 0.120921            | 0.115967            |
| 0.126166            | 0.151369            | 0.106498            | 0.10708             | 0.104749            | 0.129662            | 0.102855            |
| 0.128351            | 0.147727            | 0.105186            | 0.099359            | 0.0981935           | 0.128934            | 0.0983392           |
| 0.123834            | 0.149621            | 0.103293            | 0.099796            | 0.100087            | 0.122086            | 0.104312            |
| 0.138549            | 0.145979            | 0.113054            | 0.110723            | 0.104312            | 0.137092            | 0.109411            |
| 0.134324            | 0.157197            | 0.108246            | 0.104458            | 0.100962            | 0.131993            | 0.101981            |
| 0.131993            | 0.159528            | 0.104749            | 0.104458            | 0.104458            | 0.136364            | 0.106935            |
| 0.154866            | 0.134907            | 0.132576            | 0.131993            | 0.133741            | 0.153409            | 0.127185            |
| 0.138112            | 0.158945            | 0.120192            | 0.122815            | 0.12602             | 0.141608            | 0.119755            |
| 0.124272            | 0.149476            | 0.113054            | 0.111014            | 0.106061            | 0.131847            | 0.108246            |
| 0.1419              | 0.162733            | 0.108537            | 0.0977564           | 0.100962            | 0.134615            | 0.10373             |
| 0.150495            | 0.180653            | 0.139569            | 0.140152            | 0.140152            | 0.156323            | 0.138549            |
| 0.129225            | 0.152681            | 0.104021            | 0.10373             | 0.099359            | 0.133013            | 0.105624            |
| 0.218969            | 0.166375            | 0.204254            | 0.201632            | 0.203671            | 0.20877             | 0.199155            |
| 0.142191            | 0.170892            | 0.124854            | 0.117861            | 0.11757             | 0.134324            | 0.119172            |
| 0.143502            | 0.168706            | 0.119172            | 0.111305            | 0.114802            | 0.133013            | 0.116113            |
| 0.128205            | 0.149913            | 0.104167            | 0.102418            | 0.099796            | 0.136364            | 0.104312            |
| 0.121649            | 0.157051            | 0.102564            | 0.104312            | 0.107517            | 0.139714            | 0.107663            |
| 0.122378            | 0.151661            | 0.0980478           | 0.0922203           | 0.0925117           | 0.128788            | 0.0964452           |
| 0.140443            | 0.165064            | 0.131265            | 0.124854            | 0.121358            | 0.138986            | 0.12296             |
| 0.13986             | 0.165064            | 0.116113            | 0.116696            | 0.11553             | 0.1419              | 0.117133            |
| 0.115385            | 0.150787            | 0.099796            | 0.0986305           | 0.105624            | 0.133159            | 0.10373             |
| 0.134615            | 0.162442            | 0.114365            | 0.11961             | 0.116404            | 0.144522            | 0.122669            |
| 0.1419              | 0.165355            | 0.113491            | 0.116113            | 0.116113            | 0.13549             | 0.115676            |
| 0.141171            | 0.157343            | 0.118881            | 0.116259            | 0.111305            | 0.134178            | 0.119901            |
| 0.131993            | 0.158362            | 0.10708             | 0.116404            | 0.108246            | 0.136072            | 0.117716            |
| 0.128205            | 0.149621            | 0.104749            | 0.101253            | 0.105332            | 0.131702            | 0.104895            |
| 0.137821            | 0.16215             | 0.109703            | 0.112908            | 0.106789            | 0.139277            | 0.106643            |
| 0.138549            | 0.158508            | 0.114802            | 0.109848            | 0.106935            | 0.133887            | 0.108537            |
| 0.136655            | 0.167395            | 0.11757             | 0.114948            | 0.108829            | 0.142191            | 0.113928            |
| 0.142337            | 0.166667            | 0.126748            | 0.125               | 0.126748            | 0.126603            | 0.125437            |
| 0.137238            | 0.161859            | 0.113782            | 0.113199            | 0.11553             | 0.138695            | 0.117716            |
| 0.121212            | 0.150495            | 0.0936772           | 0.095134            | 0.100087            | 0.137529            | 0.100524            |
| 0.0955711           | 0.143211            | 0.074155            | 0.08581             | 0.0919289           | 0.136946            | 0.0912005           |
| 0.103438            | 0.148164            | 0.0802739           | 0.0796911           | 0.0753205           | 0.133159            | 0.0673077           |
| 0.097028            | 0.15574             | 0.103875            | 0.105041            | 0.11553             | 0.152681            | 0.106061            |

|           |          |           |           |           |          |           |
|-----------|----------|-----------|-----------|-----------|----------|-----------|
| 0.105769  | 0.169726 | 0.11116   | 0.112617  | 0.110577  | 0.152972 | 0.114219  |
| 0.108537  | 0.149767 | 0.0763403 | 0.0871212 | 0.0798368 | 0.130973 | 0.0840618 |
| 0.131556  | 0.152972 | 0.10373   | 0.100816  | 0.097028  | 0.118444 | 0.105624  |
| 0.130536  | 0.159237 | 0.110286  | 0.106789  | 0.103584  | 0.120047 | 0.112471  |
| 0.125     | 0.152826 | 0.099796  | 0.10271   | 0.101253  | 0.136072 | 0.0952797 |
| 0.101836  | 0.157343 | 0.0981935 | 0.106935  | 0.103438  | 0.148456 | 0.0995047 |
| 0.101836  | 0.152098 | 0.0745921 | 0.0795455 | 0.0775058 | 0.135927 | 0.0823135 |
| 0.0990676 | 0.149621 | 0.090472  | 0.0831876 | 0.0872669 | 0.129662 | 0.0772145 |
| 0.160111  | 0.17162  | 0.143939  | 0.142774  | 0.141608  | 0.134761 | 0.141754  |
| 0.128059  | 0.159965 | 0.114802  | 0.115093  | 0.115093  | 0.135635 | 0.114948  |
| 0.101107  | 0.150787 | 0.0799825 | 0.0828963 | 0.0750291 | 0.129953 | 0.0882867 |
| 0.132576  | 0.161859 | 0.113199  | 0.116987  | 0.11553   | 0.14627  | 0.111888  |
| 0.121795  | 0.14729  | 0.0965909 | 0.0954254 | 0.0965909 | 0.131702 | 0.101399  |
| 0.130245  | 0.163899 | 0.11757   | 0.124563  | 0.116696  | 0.152389 | 0.119755  |
| 0.105915  | 0.157343 | 0.101981  | 0.0912005 | 0.0865385 | 0.139423 | 0.0898893 |
| 0.109994  | 0.154138 | 0.0737179 | 0.0824592 | 0.0789627 | 0.134761 | 0.081148  |
| 0.10708   | 0.150641 | 0.0862471 | 0.0839161 | 0.0844988 | 0.129808 | 0.0849359 |
| 0.126166  | 0.158654 | 0.11553   | 0.107372  | 0.107955  | 0.132284 | 0.109848  |
| 0.106935  | 0.161859 | 0.099796  | 0.105041  | 0.108537  | 0.143357 | 0.100233  |
| 0         | 0.154866 | 0.103293  | 0.112034  | 0.112617  | 0.15035  | 0.109266  |
| 0.154866  | 0        | 0.145979  | 0.15035   | 0.154429  | 0.163024 | 0.152826  |
| 0.103293  | 0.145979 | 0         | 0.0763403 | 0.0801282 | 0.131556 | 0.0817308 |
| 0.112034  | 0.15035  | 0.0763403 | 0         | 0.0821678 | 0.133013 | 0.081148  |
| 0.112617  | 0.154429 | 0.0801282 | 0.0821678 | 0         | 0.131847 | 0.0793998 |
| 0.15035   | 0.163024 | 0.131556  | 0.133013  | 0.131847  | 0        | 0.132284  |
| 0.109266  | 0.152826 | 0.0817308 | 0.081148  | 0.0793998 | 0.132284 | 0         |
| 0.116696  | 0.149184 | 0.106061  | 0.111014  | 0.105769  | 0.141171 | 0.113199  |
| 0.130682  | 0.1588   | 0.11655   | 0.109848  | 0.107517  | 0.130099 | 0.107955  |
| 0.112471  | 0.150495 | 0.0799825 | 0.0776515 | 0.0805653 | 0.137529 | 0.0754662 |
| 0.159674  | 0.165355 | 0.146416  | 0.145833  | 0.14292   | 0.109848 | 0.142483  |
| 0.108392  | 0.151661 | 0.0817308 | 0.0872669 | 0.0826049 | 0.141317 | 0.0882867 |
| 0.108246  | 0.163462 | 0.107809  | 0.115385  | 0.0990676 | 0.145833 | 0.102418  |
| 0.130245  | 0.164481 | 0.114656  | 0.117279  | 0.112617  | 0.1419   | 0.113345  |
| 0.135052  | 0.156177 | 0.113928  | 0.110431  | 0.106643  | 0.137383 | 0.107955  |
| 0.103293  | 0.148893 | 0.0763403 | 0.0716783 | 0.0818765 | 0.135344 | 0.081148  |
| 0.100087  | 0.152389 | 0.0824592 | 0.0859557 | 0.0792541 | 0.136218 | 0.0817308 |
| 0.10708   | 0.162296 | 0.0909091 | 0.102273  | 0.0999417 | 0.145251 | 0.0989219 |
| 0.113054  | 0.151369 | 0.0863928 | 0.069493  | 0.0706585 | 0.128497 | 0.080711  |
| 0.105624  | 0.155594 | 0.097028  | 0.101399  | 0.107226  | 0.152826 | 0.10912   |
| 0.101544  | 0.151224 | 0.0722611 | 0.0874126 | 0.0932401 | 0.13884  | 0.0840618 |
| 0.113199  | 0.152389 | 0.100233  | 0.0999417 | 0.101107  | 0.134761 | 0.101544  |
| 0.106498  | 0.158217 | 0.0839161 | 0.0833333 | 0.0821678 | 0.135635 | 0.0863928 |
| 0.103584  | 0.151807 | 0.0748834 | 0.0812937 | 0.0865385 | 0.141754 | 0.0895979 |
| 0.106498  | 0.148019 | 0.0836247 | 0.0801282 | 0.0824592 | 0.135052 | 0.083479  |

|          |          |           |           |           |          |           |
|----------|----------|-----------|-----------|-----------|----------|-----------|
| 0.108829 | 0.150641 | 0.076049  | 0.0775058 | 0.0766317 | 0.128642 | 0.0793998 |
| 0.106061 | 0.160693 | 0.0965909 | 0.101544  | 0.109703  | 0.141608 | 0.105186  |
| 0.132867 | 0.158945 | 0.101253  | 0.10067   | 0.0971737 | 0.134615 | 0.104895  |
| 0.124854 | 0.158508 | 0.104604  | 0.102855  | 0.101399  | 0.133013 | 0.102127  |
| 0.140297 | 0.168124 | 0.120629  | 0.119755  | 0.118298  | 0.133887 | 0.121941  |
| 0.142337 | 0.166084 | 0.12296   | 0.117133  | 0.119172  | 0.123689 | 0.120192  |
| 0.145542 | 0.164627 | 0.127914  | 0.123252  | 0.122669  | 0.131847 | 0.125437  |
| 0.148601 | 0.16623  | 0.134178  | 0.127768  | 0.130973  | 0.136072 | 0.131993  |
| 0.140006 | 0.159091 | 0.116259  | 0.113928  | 0.108683  | 0.125728 | 0.113199  |
| 0.192453 | 0.154138 | 0.18007   | 0.180361  | 0.175117  | 0.17264  | 0.180798  |
| 0.134615 | 0.160402 | 0.105915  | 0.10912   | 0.100962  | 0.129662 | 0.106352  |
| 0.150495 | 0.170746 | 0.135781  | 0.130828  | 0.131702  | 0.134761 | 0.132721  |
| 0.14729  | 0.167541 | 0.131119  | 0.123543  | 0.120629  | 0.129516 | 0.124563  |
| 0.147727 | 0.178467 | 0.132721  | 0.123689  | 0.125437  | 0.134615 | 0.127331  |
| 0.136218 | 0.156469 | 0.109848  | 0.102855  | 0.105478  | 0.119901 | 0.104749  |
| 0.144959 | 0.165501 | 0.128497  | 0.124417  | 0.12296   | 0.129225 | 0.125437  |
| 0.131847 | 0.160256 | 0.115676  | 0.107226  | 0.1081    | 0.122815 | 0.110286  |
| 0.137821 | 0.158362 | 0.124272  | 0.116987  | 0.117279  | 0.126166 | 0.123834  |
| 0.128497 | 0.152535 | 0.104167  | 0.10708   | 0.105624  | 0.125291 | 0.106643  |
| 0.150641 | 0.169143 | 0.135344  | 0.128059  | 0.128351  | 0.131993 | 0.130245  |
| 0.126166 | 0.151661 | 0.104167  | 0.0992133 | 0.0942599 | 0.117424 | 0.0958625 |
| 0.144959 | 0.165793 | 0.133159  | 0.127331  | 0.128205  | 0.129225 | 0.129516  |
| 0.134615 | 0.16215  | 0.114073  | 0.108537  | 0.106206  | 0.118881 | 0.110723  |
| 0.099796 | 0.154429 | 0.0967366 | 0.0973193 | 0.0955711 | 0.141463 | 0.101544  |
| 0.136946 | 0.164481 | 0.120775  | 0.116113  | 0.120192  | 0.126457 | 0.115093  |
| 0.134907 | 0.16419  | 0.111742  | 0.105041  | 0.103875  | 0.123543 | 0.105769  |
| 0.161131 | 0.163607 | 0.14292   | 0.141171  | 0.140589  | 0.106061 | 0.138986  |
| 0.136509 | 0.164918 | 0.113054  | 0.109848  | 0.108683  | 0.125728 | 0.108829  |
| 0.133304 | 0.161713 | 0.111597  | 0.10373   | 0.10373   | 0.126894 | 0.107663  |
| 0.135198 | 0.160693 | 0.113491  | 0.111451  | 0.107663  | 0.140734 | 0.11655   |
| 0.15035  | 0.175845 | 0.131556  | 0.131265  | 0.130682  | 0.13141  | 0.13549   |
| 0.133159 | 0.135344 | 0.113491  | 0.110577  | 0.111742  | 0.132576 | 0.115093  |
| 0.132284 | 0.158654 | 0.112617  | 0.103293  | 0.102418  | 0.118298 | 0.106061  |
| 0.135781 | 0.158654 | 0.113199  | 0.106206  | 0.105041  | 0.123834 | 0.1081    |
| 0.142045 | 0.158508 | 0.109848  | 0.106935  | 0.106643  | 0.123397 | 0.105624  |
| 0.132576 | 0.160111 | 0.120484  | 0.11116   | 0.119318  | 0.130536 | 0.118007  |
| 0.13884  | 0.166667 | 0.112471  | 0.108392  | 0.105769  | 0.125146 | 0.114365  |
| 0.120047 | 0.147582 | 0.0971737 | 0.0916375 | 0.092803  | 0.123543 | 0.085373  |
| 0.127622 | 0.148456 | 0.10067   | 0.0965909 | 0.0936772 | 0.124417 | 0.0987762 |
| 0.127185 | 0.154138 | 0.105478  | 0.102564  | 0.0987762 | 0.120775 | 0.099796  |
| 0.139132 | 0.159382 | 0.113928  | 0.108974  | 0.105478  | 0.141754 | 0.107663  |
| 0.136946 | 0.160111 | 0.124854  | 0.11961   | 0.120775  | 0.134907 | 0.119172  |
| 0.133304 | 0.155012 | 0.109266  | 0.0973193 | 0.103147  | 0.128642 | 0.0960082 |
| 0.122086 | 0.147582 | 0.100379  | 0.0983392 | 0.0945513 | 0.126457 | 0.0920746 |

|          |          |           |           |           |           |           |
|----------|----------|-----------|-----------|-----------|-----------|-----------|
| 0.128497 | 0.156323 | 0.112325  | 0.112034  | 0.112325  | 0.12296   | 0.114802  |
| 0.12398  | 0.153263 | 0.101107  | 0.0964452 | 0.094697  | 0.125146  | 0.097465  |
| 0.139714 | 0.157051 | 0.118298  | 0.11655   | 0.115676  | 0.0665793 | 0.110286  |
| 0.151952 | 0.164336 | 0.131119  | 0.128205  | 0.128788  | 0.126311  | 0.127185  |
| 0.128059 | 0.152681 | 0.111014  | 0.103438  | 0.102564  | 0.118735  | 0.106206  |
| 0.130245 | 0.156031 | 0.10912   | 0.097465  | 0.101836  | 0.128788  | 0.0996503 |
| 0.128205 | 0.152826 | 0.105041  | 0.10067   | 0.100379  | 0.117424  | 0.100524  |
| 0.12296  | 0.144959 | 0.0980478 | 0.0954254 | 0.0913462 | 0.12296   | 0.0949883 |
| 0.131993 | 0.159237 | 0.116404  | 0.114365  | 0.116113  | 0.127914  | 0.115093  |
| 0.124709 | 0.151078 | 0.101544  | 0.092803  | 0.0960082 | 0.129953  | 0.0944056 |
| 0.146125 | 0.174242 | 0.130245  | 0.12704   | 0.120629  | 0.153992  | 0.128059  |
| 0.12704  | 0.165938 | 0.103001  | 0.105915  | 0.106789  | 0.150641  | 0.111597  |
| 0.11451  | 0.157488 | 0.104749  | 0.105915  | 0.10067   | 0.137238  | 0.097028  |
| 0.124272 | 0.158508 | 0.0865385 | 0.0894522 | 0.0865385 | 0.132721  | 0.097465  |
| 0.127185 | 0.157051 | 0.104312  | 0.099359  | 0.100816  | 0.126603  | 0.100962  |
| 0.131702 | 0.153992 | 0.105915  | 0.0986305 | 0.0968823 | 0.126166  | 0.0958625 |
| 0.121649 | 0.146853 | 0.0981935 | 0.0912005 | 0.0909091 | 0.123397  | 0.088141  |
| 0.118735 | 0.157051 | 0.097028  | 0.0976107 | 0.0906177 | 0.130099  | 0.0907634 |
| 0.128351 | 0.145688 | 0.104604  | 0.0990676 | 0.0967366 | 0.133887  | 0.099796  |
| 0.106498 | 0.149476 | 0.104312  | 0.0996503 | 0.101981  | 0.140006  | 0.0992133 |
| 0.139277 | 0.159819 | 0.115822  | 0.106789  | 0.109994  | 0.124417  | 0.107809  |
| 0.142628 | 0.166667 | 0.12704   | 0.121795  | 0.12296   | 0.144959  | 0.121066  |
| 0.145105 | 0.171474 | 0.129516  | 0.126603  | 0.128642  | 0.137238  | 0.13345   |
| 0.213869 | 0.16623  | 0.18954   | 0.191871  | 0.189248  | 0.202506  | 0.187937  |
| 0.25102  | 0.190851 | 0.23514   | 0.236597  | 0.239802  | 0.240239  | 0.233829  |
| 0.129371 | 0.148456 | 0.103875  | 0.100087  | 0.103584  | 0.138986  | 0.102273  |
| 0.117861 | 0.151807 | 0.0967366 | 0.0926573 | 0.0938228 | 0.131265  | 0.0919289 |
| 0.123689 | 0.144814 | 0.097028  | 0.0920746 | 0.0885781 | 0.130099  | 0.0913462 |
| 0.121066 | 0.148019 | 0.0952797 | 0.0941142 | 0.094697  | 0.133013  | 0.0939685 |
| 0.138258 | 0.161422 | 0.123252  | 0.12296   | 0.127331  | 0.144085  | 0.121066  |
| 0.120484 | 0.154138 | 0.0984848 | 0.099359  | 0.100524  | 0.137675  | 0.0957168 |
| 0.135781 | 0.16419  | 0.133013  | 0.132139  | 0.127477  | 0.147436  | 0.122378  |
| 0.123689 | 0.153555 | 0.097028  | 0.099359  | 0.0955711 | 0.137383  | 0.092803  |
| 0.121358 | 0.1588   | 0.11014   | 0.106352  | 0.109848  | 0.143502  | 0.109703  |
| 0.111305 | 0.151078 | 0.100962  | 0.108246  | 0.101544  | 0.132867  | 0.106352  |
| 0.132284 | 0.160402 | 0.119318  | 0.114073  | 0.115239  | 0.143065  | 0.110723  |
| 0.100233 | 0.163316 | 0.104458  | 0.113491  | 0.100379  | 0.148893  | 0.107226  |
| 0.130828 | 0.156906 | 0.0995047 | 0.102418  | 0.090472  | 0.134033  | 0.0926573 |
| 0.124126 | 0.153118 | 0.0983392 | 0.0936772 | 0.0884324 | 0.130245  | 0.0917832 |
| 0.125146 | 0.15472  | 0.106643  | 0.0941142 | 0.102273  | 0.130973  | 0.0983392 |
| 0.119901 | 0.147727 | 0.090035  | 0.0935315 | 0.0944056 | 0.133013  | 0.0893065 |
| 0.122815 | 0.149767 | 0.0981935 | 0.090035  | 0.092366  | 0.126603  | 0.0922203 |
| 0.120921 | 0.146707 | 0.090472  | 0.0957168 | 0.095134  | 0.13549   | 0.0961538 |
| 0.123106 | 0.15472  | 0.111305  | 0.1081    | 0.108683  | 0.143794  | 0.114073  |

|          |          |           |           |           |          |           |
|----------|----------|-----------|-----------|-----------|----------|-----------|
| 0.129808 | 0.157343 | 0.118007  | 0.114802  | 0.115093  | 0.151369 | 0.121358  |
| 0.12704  | 0.158071 | 0.100379  | 0.0919289 | 0.0989219 | 0.133741 | 0.100524  |
| 0.121649 | 0.150641 | 0.0984848 | 0.0958625 | 0.0955711 | 0.136218 | 0.0992133 |
| 0.128642 | 0.162587 | 0.111305  | 0.103438  | 0.113928  | 0.144668 | 0.114948  |
| 0.126894 | 0.151807 | 0.0979021 | 0.0941142 | 0.0920746 | 0.129516 | 0.0922203 |
| 0.137529 | 0.160111 | 0.121941  | 0.122523  | 0.118153  | 0.154138 | 0.123252  |
| 0.148019 | 0.164773 | 0.13039   | 0.122523  | 0.130682  | 0.143065 | 0.131993  |
| 0.141754 | 0.158508 | 0.125     | 0.125583  | 0.117424  | 0.144959 | 0.123106  |
| 0.119318 | 0.148893 | 0.0906177 | 0.0891608 | 0.085373  | 0.130973 | 0.0901807 |
| 0.123252 | 0.149913 | 0.095134  | 0.0925117 | 0.0939685 | 0.13345  | 0.0955711 |
| 0.121649 | 0.157634 | 0.104021  | 0.106352  | 0.108392  | 0.141463 | 0.105041  |
| 0.127622 | 0.152535 | 0.109411  | 0.106789  | 0.110868  | 0.141026 | 0.110723  |
| 0.129662 | 0.163024 | 0.116404  | 0.113491  | 0.107955  | 0.140152 | 0.11655   |
| 0.12602  | 0.157343 | 0.100524  | 0.101107  | 0.090035  | 0.135927 | 0.104458  |
| 0.130536 | 0.15574  | 0.103293  | 0.0948427 | 0.0954254 | 0.139569 | 0.104021  |
| 0.124417 | 0.150495 | 0.107663  | 0.106206  | 0.102127  | 0.138112 | 0.107517  |
| 0.13345  | 0.160985 | 0.121649  | 0.109411  | 0.112617  | 0.140152 | 0.118298  |
| 0.132284 | 0.157197 | 0.117279  | 0.111116  | 0.112034  | 0.138403 | 0.111597  |
| 0.128642 | 0.157051 | 0.115967  | 0.109848  | 0.114802  | 0.146707 | 0.121358  |
| 0.126166 | 0.146707 | 0.111116  | 0.112034  | 0.110577  | 0.129662 | 0.113928  |
| 0.124417 | 0.156614 | 0.0954254 | 0.0957168 | 0.0968823 | 0.136364 | 0.101107  |
| 0.127914 | 0.162442 | 0.110868  | 0.112325  | 0.109994  | 0.143357 | 0.11014   |
| 0.128059 | 0.151807 | 0.0967366 | 0.0944056 | 0.0914918 | 0.130099 | 0.097465  |
| 0.105769 | 0.149621 | 0.0747378 | 0.0840618 | 0.0776515 | 0.130828 | 0.0798368 |
| 0.126748 | 0.153992 | 0.10067   | 0.0995047 | 0.0910548 | 0.132284 | 0.0932401 |
| 0.124272 | 0.153846 | 0.102273  | 0.0935315 | 0.0935315 | 0.133596 | 0.101544  |
| 0.117861 | 0.14831  | 0.0958625 | 0.0967366 | 0.0920746 | 0.129516 | 0.0901807 |
| 0.133741 | 0.158945 | 0.118444  | 0.118444  | 0.112325  | 0.146853 | 0.118881  |
| 0.129808 | 0.15472  | 0.10373   | 0.102855  | 0.10169   | 0.122232 | 0.0977564 |
| 0.130099 | 0.157051 | 0.120629  | 0.115385  | 0.112471  | 0.150495 | 0.119901  |
| 0.116113 | 0.150932 | 0.0888695 | 0.0894522 | 0.0973193 | 0.135635 | 0.090472  |
| 0.112179 | 0.158362 | 0.105915  | 0.103584  | 0.105624  | 0.137238 | 0.104312  |
| 0.127185 | 0.152389 | 0.115967  | 0.113054  | 0.115385  | 0.133304 | 0.112325  |
| 0.137675 | 0.162005 | 0.113928  | 0.104604  | 0.112762  | 0.137383 | 0.111451  |
| 0.132867 | 0.158362 | 0.109994  | 0.107663  | 0.108829  | 0.128788 | 0.106643  |
| 0.129516 | 0.159965 | 0.11655   | 0.111888  | 0.113636  | 0.143794 | 0.109703  |
| 0.136364 | 0.165938 | 0.110868  | 0.107955  | 0.102127  | 0.135198 | 0.110723  |
| 0.13549  | 0.161568 | 0.105041  | 0.105041  | 0.103584  | 0.134907 | 0.104312  |
| 0.1419   | 0.171474 | 0.125146  | 0.126311  | 0.129516  | 0.141317 | 0.127331  |
| 0.145251 | 0.15035  | 0.126457  | 0.129371  | 0.133741  | 0.143794 | 0.126603  |
| 0.125728 | 0.158217 | 0.100233  | 0.0964452 | 0.0967366 | 0.125146 | 0.0922203 |
| 0.138986 | 0.167686 | 0.124563  | 0.11961   | 0.12398   | 0.138986 | 0.126166  |
| 0.134761 | 0.159674 | 0.119464  | 0.115967  | 0.114802  | 0.134178 | 0.118444  |
| 0.145251 | 0.163462 | 0.13141   | 0.124417  | 0.125583  | 0.141171 | 0.130099  |

|          |          |           |           |           |          |           |
|----------|----------|-----------|-----------|-----------|----------|-----------|
| 0.133013 | 0.1588   | 0.120921  | 0.114219  | 0.112179  | 0.136218 | 0.115822  |
| 0.137383 | 0.169872 | 0.118007  | 0.112179  | 0.117133  | 0.135927 | 0.113782  |
| 0.139277 | 0.163316 | 0.121358  | 0.11757   | 0.120484  | 0.135781 | 0.120047  |
| 0.142337 | 0.167832 | 0.126457  | 0.122086  | 0.123252  | 0.140589 | 0.128351  |
| 0.145833 | 0.168998 | 0.135198  | 0.131702  | 0.131993  | 0.149913 | 0.135052  |
| 0.13884  | 0.165793 | 0.122086  | 0.111305  | 0.121503  | 0.141463 | 0.120484  |
| 0.133304 | 0.157925 | 0.117133  | 0.109557  | 0.109557  | 0.132139 | 0.110286  |
| 0.140443 | 0.170017 | 0.124563  | 0.120484  | 0.11757   | 0.151224 | 0.123252  |
| 0.144959 | 0.169289 | 0.128788  | 0.124417  | 0.126457  | 0.140589 | 0.129516  |
| 0.132139 | 0.157051 | 0.106935  | 0.105186  | 0.105478  | 0.130973 | 0.108829  |
| 0.236888 | 0.179341 | 0.216055  | 0.217803  | 0.216929  | 0.223776 | 0.212995  |
| 0.1419   | 0.162733 | 0.122523  | 0.118444  | 0.114948  | 0.137238 | 0.125291  |
| 0.131119 | 0.159528 | 0.106498  | 0.100087  | 0.105915  | 0.129953 | 0.106643  |
| 0.141171 | 0.168706 | 0.131993  | 0.130536  | 0.126457  | 0.150204 | 0.132721  |
| 0.137383 | 0.162879 | 0.112471  | 0.108683  | 0.108683  | 0.133887 | 0.110286  |
| 0.142337 | 0.169872 | 0.125     | 0.128788  | 0.129662  | 0.143502 | 0.127185  |
| 0.138258 | 0.160839 | 0.113054  | 0.109848  | 0.115385  | 0.13447  | 0.113782  |
| 0.134907 | 0.159819 | 0.120192  | 0.116113  | 0.112617  | 0.134907 | 0.11859   |
| 0.133741 | 0.165064 | 0.111742  | 0.112034  | 0.114073  | 0.134324 | 0.115093  |
| 0.146416 | 0.152389 | 0.130245  | 0.123252  | 0.122669  | 0.144085 | 0.127185  |
| 0.140734 | 0.162442 | 0.129225  | 0.127185  | 0.124563  | 0.141026 | 0.125291  |
| 0.139714 | 0.166667 | 0.126748  | 0.121503  | 0.120338  | 0.138549 | 0.126603  |
| 0.143794 | 0.165793 | 0.127331  | 0.121503  | 0.124709  | 0.13884  | 0.128351  |
| 0.129808 | 0.160548 | 0.106352  | 0.106352  | 0.104895  | 0.133304 | 0.108829  |
| 0.141463 | 0.164627 | 0.12296   | 0.112471  | 0.114219  | 0.136509 | 0.116987  |
| 0.147436 | 0.169435 | 0.135635  | 0.128351  | 0.129225  | 0.1419   | 0.132576  |
| 0.141171 | 0.153846 | 0.121795  | 0.11655   | 0.117133  | 0.131265 | 0.120192  |
| 0.107663 | 0.159382 | 0.0990676 | 0.101399  | 0.100816  | 0.152244 | 0.0930944 |
| 0.154138 | 0.165064 | 0.133596  | 0.129808  | 0.13243   | 0.122669 | 0.130828  |
| 0.135198 | 0.154575 | 0.118444  | 0.118153  | 0.114656  | 0.135781 | 0.116841  |
| 0.138695 | 0.165355 | 0.123397  | 0.119901  | 0.120484  | 0.134907 | 0.120629  |
| 0.142045 | 0.153846 | 0.124417  | 0.122086  | 0.122378  | 0.117279 | 0.121066  |
| 0.143357 | 0.166812 | 0.121358  | 0.121941  | 0.11961   | 0.141608 | 0.117716  |
| 0.143065 | 0.15778  | 0.114656  | 0.119318  | 0.122232  | 0.118007 | 0.121503  |
| 0.151515 | 0.168561 | 0.13243   | 0.130973  | 0.129808  | 0.118007 | 0.130828  |
| 0.127768 | 0.15472  | 0.1081    | 0.0990676 | 0.101981  | 0.134178 | 0.104167  |
| 0.119464 | 0.164773 | 0.104167  | 0.114948  | 0.112908  | 0.142774 | 0.110723  |
| 0.157197 | 0.157343 | 0.137529  | 0.136072  | 0.138403  | 0.127477 | 0.135344  |
| 0.129225 | 0.161131 | 0.112762  | 0.108974  | 0.108683  | 0.131847 | 0.110868  |
| 0.116696 | 0.158508 | 0.0990676 | 0.0912005 | 0.0868298 | 0.140297 | 0.0840618 |
| 0.14831  | 0.16623  | 0.136218  | 0.132721  | 0.131847  | 0.155886 | 0.13986   |
| 0.100524 | 0.152535 | 0.078817  | 0.0901807 | 0.0916375 | 0.141026 | 0.0944056 |
| 0.142628 | 0.162587 | 0.126166  | 0.132576  | 0.133741  | 0.147873 | 0.13243   |
| 0.135198 | 0.16215  | 0.124563  | 0.119901  | 0.123106  | 0.143357 | 0.125583  |

|          |          |          |          |           |          |          |
|----------|----------|----------|----------|-----------|----------|----------|
| 0.145542 | 0.167541 | 0.131119 | 0.119464 | 0.119172  | 0.124854 | 0.126311 |
| 0.134324 | 0.153409 | 0.121066 | 0.11553  | 0.119901  | 0.13986  | 0.119172 |
| 0.134178 | 0.15472  | 0.11655  | 0.106061 | 0.113636  | 0.126894 | 0.114656 |
| 0.143648 | 0.167395 | 0.130973 | 0.119318 | 0.119901  | 0.138403 | 0.122378 |
| 0.147145 | 0.1706   | 0.127477 | 0.124854 | 0.124272  | 0.142774 | 0.125874 |
| 0.148601 | 0.172348 | 0.133013 | 0.128642 | 0.128351  | 0.139569 | 0.129371 |
| 0.147436 | 0.17264  | 0.128642 | 0.127768 | 0.125728  | 0.132284 | 0.13141  |
| 0.146562 | 0.162733 | 0.12398  | 0.118735 | 0.120775  | 0.120338 | 0.118007 |
| 0.1588   | 0.168561 | 0.143794 | 0.141463 | 0.139132  | 0.127914 | 0.143065 |
| 0.126748 | 0.153992 | 0.113491 | 0.107955 | 0.10912   | 0.136364 | 0.111888 |
| 0.124417 | 0.153118 | 0.104749 | 0.105332 | 0.0971737 | 0.133741 | 0.101107 |
| 0.13986  | 0.160693 | 0.124854 | 0.126894 | 0.125146  | 0.132867 | 0.120047 |
| 0.133159 | 0.153118 | 0.114365 | 0.109411 | 0.109411  | 0.119755 | 0.107517 |
| 0.151661 | 0.165501 | 0.136655 | 0.136072 | 0.138986  | 0.10708  | 0.133887 |
| 0.161859 | 0.17162  | 0.145979 | 0.145688 | 0.143939  | 0.108537 | 0.141754 |
| 0.131265 | 0.154138 | 0.114802 | 0.112471 | 0.109266  | 0.145542 | 0.118153 |
| 0.121795 | 0.150204 | 0.104167 | 0.099796 | 0.103293  | 0.140152 | 0.107517 |
| 0.149038 | 0.17366  | 0.130245 | 0.130245 | 0.127914  | 0.146999 | 0.130682 |
| 0.1419   | 0.166521 | 0.128642 | 0.126311 | 0.125437  | 0.142483 | 0.129662 |
| 0.128497 | 0.167978 | 0.117279 | 0.109703 | 0.111742  | 0.143357 | 0.104895 |
| 0.142774 | 0.172931 | 0.129516 | 0.128059 | 0.127185  | 0.144522 | 0.132576 |
| 0.132284 | 0.146416 | 0.127185 | 0.126311 | 0.126311  | 0.125583 | 0.12704  |
| 0.11757  | 0.150932 | 0.110723 | 0.110431 | 0.106352  | 0.136801 | 0.108246 |
| 0.172348 | 0.176865 | 0.151224 | 0.152389 | 0.154138  | 0.130973 | 0.151078 |
| 0.115239 | 0.153555 | 0.101107 | 0.104021 | 0.106935  | 0.137675 | 0.108537 |
| 0.136509 | 0.165501 | 0.126166 | 0.123252 | 0.12704   | 0.146999 | 0.127185 |
| 0.121503 | 0.154866 | 0.106789 | 0.105332 | 0.0992133 | 0.132576 | 0.101981 |
| 0.146853 | 0.177885 | 0.13243  | 0.128351 | 0.125728  | 0.149184 | 0.132284 |
| 0.13986  | 0.159819 | 0.124563 | 0.120484 | 0.116987  | 0.136946 | 0.123252 |
| 0.158945 | 0.146562 | 0.136364 | 0.134615 | 0.133741  | 0.141754 | 0.134178 |
| 0.158217 | 0.180216 | 0.145251 | 0.13884  | 0.144668  | 0.158217 | 0.145105 |
| 0.135635 | 0.161131 | 0.120338 | 0.122086 | 0.113928  | 0.144668 | 0.11553  |
| 0.145979 | 0.142337 | 0.13039  | 0.13447  | 0.130973  | 0.153555 | 0.127331 |
| 0.157197 | 0.131702 | 0.134615 | 0.131119 | 0.134324  | 0.160985 | 0.132139 |
| 0.16215  | 0.142191 | 0.13986  | 0.13986  | 0.139277  | 0.156323 | 0.136218 |
| 0.133741 | 0.160111 | 0.115822 | 0.113491 | 0.11116   | 0.130245 | 0.111014 |
| 0.153992 | 0.175408 | 0.135781 | 0.139569 | 0.129079  | 0.153409 | 0.13447  |
| 0.135635 | 0.153555 | 0.104021 | 0.108974 | 0.109848  | 0.13447  | 0.10912  |
| 0.138403 | 0.149621 | 0.114073 | 0.115239 | 0.115239  | 0.135781 | 0.11451  |
| 0.135635 | 0.160839 | 0.120047 | 0.113054 | 0.114219  | 0.133887 | 0.116987 |
| 0.131265 | 0.159382 | 0.114219 | 0.11655  | 0.112471  | 0.14292  | 0.109703 |
| 0.141317 | 0.15778  | 0.108829 | 0.100962 | 0.105041  | 0.128205 | 0.108683 |
| 0.129662 | 0.147873 | 0.106206 | 0.107372 | 0.10912   | 0.134615 | 0.102273 |
| 0.1419   | 0.163024 | 0.116987 | 0.11553  | 0.116696  | 0.1419   | 0.111597 |



|          |          |           |           |           |          |           |
|----------|----------|-----------|-----------|-----------|----------|-----------|
| 0.142337 | 0.150058 | 0.11655   | 0.120629  | 0.120921  | 0.141463 | 0.116696  |
| 0.121941 | 0.146853 | 0.0964452 | 0.0955711 | 0.0917832 | 0.130682 | 0.097465  |
| 0.138258 | 0.156177 | 0.115676  | 0.120338  | 0.11451   | 0.146125 | 0.112617  |
| 0.132867 | 0.158654 | 0.114073  | 0.113782  | 0.111451  | 0.141317 | 0.108392  |
| 0.122669 | 0.151661 | 0.106789  | 0.100962  | 0.102127  | 0.139277 | 0.107226  |
| 0.23514  | 0.172348 | 0.214598  | 0.213432  | 0.212267  | 0.218823 | 0.212995  |
| 0.143648 | 0.170309 | 0.137092  | 0.139714  | 0.138258  | 0.157634 | 0.13345   |
| 0.146416 | 0.169289 | 0.129371  | 0.122086  | 0.124126  | 0.148164 | 0.128642  |
| 0.134907 | 0.168269 | 0.119027  | 0.122232  | 0.119318  | 0.140443 | 0.11859   |
| 0.229895 | 0.1706   | 0.207896  | 0.208479  | 0.209353  | 0.215035 | 0.206876  |
| 0.133159 | 0.142337 | 0.11116   | 0.108537  | 0.107372  | 0.134324 | 0.11014   |
| 0.143211 | 0.166084 | 0.121503  | 0.11655   | 0.115385  | 0.137966 | 0.116113  |
| 0.135927 | 0.166375 | 0.119172  | 0.120921  | 0.121503  | 0.144376 | 0.114365  |
| 0.139277 | 0.156614 | 0.113782  | 0.119027  | 0.118444  | 0.138112 | 0.112471  |
| 0.263403 | 0.198572 | 0.249272  | 0.248397  | 0.248397  | 0.251748 | 0.24796   |
| 0.146999 | 0.164336 | 0.120921  | 0.121212  | 0.119755  | 0.125146 | 0.119901  |
| 0.121941 | 0.153846 | 0.101107  | 0.0967366 | 0.094697  | 0.136801 | 0.101253  |
| 0.150204 | 0.170163 | 0.120921  | 0.119464  | 0.116841  | 0.145251 | 0.119318  |
| 0.145251 | 0.163462 | 0.115385  | 0.119755  | 0.115385  | 0.139132 | 0.118444  |
| 0.147582 | 0.154138 | 0.123834  | 0.126748  | 0.124126  | 0.128351 | 0.123106  |
| 0.146125 | 0.145688 | 0.124709  | 0.123252  | 0.120338  | 0.139714 | 0.122523  |
| 0.124563 | 0.151515 | 0.102273  | 0.101981  | 0.101399  | 0.136218 | 0.103001  |
| 0.132284 | 0.158071 | 0.11553   | 0.115822  | 0.114073  | 0.141608 | 0.109266  |
| 0.146999 | 0.166375 | 0.122378  | 0.125874  | 0.115676  | 0.146999 | 0.120192  |
| 0.136801 | 0.155594 | 0.108392  | 0.112471  | 0.115967  | 0.13243  | 0.107955  |
| 0.131993 | 0.152535 | 0.10912   | 0.114365  | 0.113491  | 0.139277 | 0.111597  |
| 0.124272 | 0.150641 | 0.108392  | 0.105769  | 0.106935  | 0.125437 | 0.112325  |
| 0.155303 | 0.179924 | 0.144959  | 0.137966  | 0.143211  | 0.159965 | 0.145396  |
| 0.145979 | 0.163899 | 0.127477  | 0.127185  | 0.123689  | 0.127622 | 0.124709  |
| 0.146853 | 0.16623  | 0.126311  | 0.121941  | 0.116696  | 0.139277 | 0.121795  |
| 0.214744 | 0.160402 | 0.186043  | 0.187791  | 0.185752  | 0.198135 | 0.184732  |
| 0.223776 | 0.167686 | 0.20236   | 0.203526  | 0.201486  | 0.209499 | 0.198135  |
| 0.138112 | 0.154866 | 0.115239  | 0.118735  | 0.122232  | 0.139277 | 0.112762  |
| 0.130828 | 0.153409 | 0.107663  | 0.113199  | 0.112908  | 0.13549  | 0.1081    |
| 0.145688 | 0.162733 | 0.133887  | 0.128059  | 0.132721  | 0.142191 | 0.131993  |
| 0.123252 | 0.150495 | 0.101836  | 0.0954254 | 0.0986305 | 0.136655 | 0.0990676 |
| 0.151952 | 0.16521  | 0.124709  | 0.124709  | 0.123252  | 0.128642 | 0.121358  |
| 0.140152 | 0.16419  | 0.128351  | 0.12602   | 0.123689  | 0.143357 | 0.124709  |
| 0.24155  | 0.181381 | 0.221591  | 0.223339  | 0.225087  | 0.227273 | 0.221154  |
| 0.138986 | 0.162733 | 0.112908  | 0.104167  | 0.107955  | 0.138403 | 0.113928  |
| 0.216929 | 0.162296 | 0.199301  | 0.202506  | 0.201632  | 0.210227 | 0.202652  |
| 0.126166 | 0.159819 | 0.103293  | 0.0995047 | 0.0983392 | 0.125291 | 0.0967366 |
| 0.138258 | 0.162005 | 0.110723  | 0.110723  | 0.104312  | 0.137092 | 0.106789  |
| 0.13345  | 0.144668 | 0.109994  | 0.109411  | 0.107372  | 0.13345  | 0.111597  |

|          |          |          |          |           |          |           |
|----------|----------|----------|----------|-----------|----------|-----------|
| 0.130828 | 0.149621 | 0.110577 | 0.112034 | 0.111742  | 0.132576 | 0.104895  |
| 0.228875 | 0.171911 | 0.203671 | 0.206002 | 0.205711  | 0.213141 | 0.202652  |
| 0.141171 | 0.158508 | 0.126166 | 0.128788 | 0.125291  | 0.151661 | 0.123106  |
| 0.139714 | 0.163753 | 0.111888 | 0.111305 | 0.106935  | 0.133304 | 0.106789  |
| 0.135635 | 0.164627 | 0.120629 | 0.123543 | 0.117716  | 0.145833 | 0.116404  |
| 0.134178 | 0.162005 | 0.116841 | 0.11014  | 0.115967  | 0.141171 | 0.118444  |
| 0.13447  | 0.155594 | 0.111305 | 0.112179 | 0.113345  | 0.136218 | 0.108246  |
| 0.129371 | 0.157197 | 0.105332 | 0.105332 | 0.103001  | 0.128788 | 0.102273  |
| 0.125874 | 0.144959 | 0.10912  | 0.106206 | 0.108537  | 0.134615 | 0.1081    |
| 0.146853 | 0.164773 | 0.124854 | 0.122815 | 0.116404  | 0.138986 | 0.11859   |
| 0.130245 | 0.153118 | 0.110868 | 0.109994 | 0.10708   | 0.138695 | 0.108683  |
| 0.140589 | 0.161713 | 0.115967 | 0.114219 | 0.11014   | 0.135635 | 0.110577  |
| 0.207168 | 0.160693 | 0.186334 | 0.186334 | 0.185169  | 0.198427 | 0.183275  |
| 0.146707 | 0.170746 | 0.119464 | 0.119755 | 0.117133  | 0.143211 | 0.121358  |
| 0.14627  | 0.17264  | 0.127185 | 0.122815 | 0.126894  | 0.148601 | 0.124709  |
| 0.140589 | 0.167249 | 0.117424 | 0.113054 | 0.113054  | 0.143211 | 0.112617  |
| 0.148893 | 0.157197 | 0.120775 | 0.123689 | 0.117861  | 0.127331 | 0.121795  |
| 0.132867 | 0.160693 | 0.115822 | 0.119901 | 0.116113  | 0.144231 | 0.114219  |
| 0.127914 | 0.160693 | 0.111451 | 0.110286 | 0.10708   | 0.126748 | 0.107809  |
| 0.133596 | 0.156177 | 0.108683 | 0.1081   | 0.104312  | 0.131556 | 0.108829  |
| 0.123106 | 0.158217 | 0.106643 | 0.10169  | 0.105478  | 0.138549 | 0.106498  |
| 0.143357 | 0.167978 | 0.121066 | 0.11757  | 0.120775  | 0.148019 | 0.117716  |
| 0.147145 | 0.167978 | 0.114948 | 0.113491 | 0.111742  | 0.13986  | 0.112179  |
| 0.137675 | 0.154138 | 0.11451  | 0.116259 | 0.11859   | 0.140006 | 0.111742  |
| 0.141317 | 0.171474 | 0.119318 | 0.119318 | 0.117861  | 0.144522 | 0.113928  |
| 0.143211 | 0.17162  | 0.132867 | 0.132284 | 0.135198  | 0.150787 | 0.126603  |
| 0.141754 | 0.160839 | 0.111888 | 0.113928 | 0.111014  | 0.123106 | 0.112325  |
| 0.140443 | 0.167978 | 0.132721 | 0.135635 | 0.133013  | 0.153263 | 0.129371  |
| 0.132867 | 0.154866 | 0.107372 | 0.109411 | 0.113199  | 0.135781 | 0.106935  |
| 0.136364 | 0.161568 | 0.117861 | 0.113199 | 0.110577  | 0.135781 | 0.114802  |
| 0.129516 | 0.1419   | 0.115676 | 0.116259 | 0.110431  | 0.139423 | 0.109703  |
| 0.124854 | 0.150641 | 0.108392 | 0.100524 | 0.104604  | 0.140297 | 0.110577  |
| 0.205274 | 0.15676  | 0.185897 | 0.183566 | 0.182984  | 0.196824 | 0.181964  |
| 0.136946 | 0.15574  | 0.109703 | 0.109703 | 0.101544  | 0.133741 | 0.105769  |
| 0.124709 | 0.151661 | 0.10271  | 0.103293 | 0.0983392 | 0.130536 | 0.0996503 |
| 0.144814 | 0.164773 | 0.124272 | 0.120192 | 0.116113  | 0.138112 | 0.117716  |
| 0.197261 | 0.154283 | 0.176428 | 0.177302 | 0.176136  | 0.187646 | 0.175991  |
| 0.153409 | 0.169289 | 0.129662 | 0.132867 | 0.130828  | 0.131847 | 0.128351  |
| 0.161568 | 0.172494 | 0.143648 | 0.142774 | 0.140152  | 0.136509 | 0.14292   |
| 0.157051 | 0.180798 | 0.148164 | 0.141463 | 0.14729   | 0.161713 | 0.145688  |
| 0.141317 | 0.158071 | 0.112034 | 0.109411 | 0.107955  | 0.123543 | 0.11014   |
| 0.133304 | 0.157343 | 0.117716 | 0.121795 | 0.118298  | 0.144085 | 0.113782  |
| 0.231352 | 0.171183 | 0.208188 | 0.208479 | 0.208479  | 0.219697 | 0.206002  |
| 0.141608 | 0.159237 | 0.122815 | 0.118444 | 0.120192  | 0.13986  | 0.115967  |

|          |          |           |           |           |          |           |
|----------|----------|-----------|-----------|-----------|----------|-----------|
| 0.136218 | 0.1588   | 0.119464  | 0.126166  | 0.120921  | 0.149038 | 0.116987  |
| 0.138549 | 0.153263 | 0.111597  | 0.113345  | 0.105769  | 0.132721 | 0.107663  |
| 0.184003 | 0.151807 | 0.164044  | 0.166958  | 0.166084  | 0.178467 | 0.162733  |
| 0.135635 | 0.161713 | 0.108974  | 0.110723  | 0.108974  | 0.135052 | 0.10912   |
| 0.161422 | 0.179633 | 0.150204  | 0.149621  | 0.142045  | 0.159674 | 0.145396  |
| 0.127331 | 0.14292  | 0.11116   | 0.10912   | 0.10708   | 0.141026 | 0.108974  |
| 0.210082 | 0.161568 | 0.185752  | 0.185752  | 0.18546   | 0.196387 | 0.183566  |
| 0.147436 | 0.163316 | 0.116696  | 0.116987  | 0.114656  | 0.126166 | 0.116259  |
| 0.12704  | 0.154866 | 0.102127  | 0.101836  | 0.100087  | 0.131702 | 0.0955711 |
| 0.139132 | 0.163462 | 0.114802  | 0.109557  | 0.1081    | 0.133304 | 0.114073  |
| 0.137529 | 0.165064 | 0.108829  | 0.111742  | 0.109994  | 0.138112 | 0.110431  |
| 0.143939 | 0.163899 | 0.120192  | 0.116987  | 0.110286  | 0.136364 | 0.115385  |
| 0.140152 | 0.165064 | 0.119318  | 0.116404  | 0.113491  | 0.137529 | 0.111597  |
| 0.134761 | 0.15472  | 0.107517  | 0.109848  | 0.112762  | 0.134761 | 0.106789  |
| 0.210082 | 0.157197 | 0.18546   | 0.186334  | 0.185169  | 0.195804 | 0.185023  |
| 0.143211 | 0.168706 | 0.117133  | 0.117424  | 0.115385  | 0.138258 | 0.118735  |
| 0.13345  | 0.150787 | 0.112617  | 0.113491  | 0.112325  | 0.136946 | 0.1081    |
| 0.231498 | 0.174242 | 0.208625  | 0.209499  | 0.211538  | 0.214889 | 0.20877   |
| 0.150204 | 0.174242 | 0.121795  | 0.120629  | 0.115967  | 0.143794 | 0.122232  |
| 0.134615 | 0.156906 | 0.110868  | 0.111451  | 0.11553   | 0.136364 | 0.108392  |
| 0.131702 | 0.150787 | 0.107663  | 0.107663  | 0.11116   | 0.131993 | 0.104604  |
| 0.140589 | 0.166084 | 0.132576  | 0.132576  | 0.131119  | 0.151661 | 0.129516  |
| 0.209936 | 0.158508 | 0.184441  | 0.185606  | 0.186772  | 0.197115 | 0.183712  |
| 0.125874 | 0.15778  | 0.101836  | 0.095134  | 0.0977564 | 0.135781 | 0.101107  |
| 0.142191 | 0.169726 | 0.125146  | 0.126894  | 0.128059  | 0.147145 | 0.12296   |
| 0.134324 | 0.156323 | 0.106789  | 0.111451  | 0.111451  | 0.137529 | 0.106935  |
| 0.13345  | 0.155449 | 0.106498  | 0.110286  | 0.108246  | 0.137238 | 0.10169   |
| 0.134178 | 0.151807 | 0.106935  | 0.109557  | 0.111888  | 0.132139 | 0.107663  |
| 0.131993 | 0.15778  | 0.110286  | 0.114656  | 0.114073  | 0.13986  | 0.11014   |
| 0.121649 | 0.150932 | 0.0952797 | 0.0949883 | 0.092366  | 0.129808 | 0.0930944 |
| 0.148164 | 0.161422 | 0.121795  | 0.123252  | 0.115967  | 0.125728 | 0.121941  |
| 0.144668 | 0.17162  | 0.134033  | 0.127914  | 0.129662  | 0.150495 | 0.128351  |
| 0.146125 | 0.161713 | 0.118007  | 0.117424  | 0.113345  | 0.126894 | 0.115822  |
| 0.136364 | 0.163899 | 0.123397  | 0.11757   | 0.122232  | 0.145688 | 0.121795  |
| 0.215181 | 0.162296 | 0.188811  | 0.189103  | 0.191434  | 0.203526 | 0.186626  |
| 0.137238 | 0.167686 | 0.116113  | 0.11553   | 0.114656  | 0.141317 | 0.110431  |
| 0.13884  | 0.161422 | 0.124417  | 0.131702  | 0.125     | 0.146999 | 0.12398   |
| 0.13345  | 0.153118 | 0.108537  | 0.110577  | 0.109411  | 0.132284 | 0.104895  |
| 0.121941 | 0.149476 | 0.0944056 | 0.0952797 | 0.0912005 | 0.126894 | 0.0980478 |
| 0.13447  | 0.153846 | 0.115967  | 0.11014   | 0.108974  | 0.132721 | 0.114365  |
| 0.123834 | 0.153409 | 0.105332  | 0.0995047 | 0.101544  | 0.138403 | 0.10373   |
| 0.147436 | 0.170892 | 0.127477  | 0.131556  | 0.122815  | 0.143065 | 0.117716  |
| 0.140006 | 0.164336 | 0.11859   | 0.111888  | 0.115093  | 0.145251 | 0.116696  |
| 0.125437 | 0.14627  | 0.101981  | 0.0984848 | 0.092366  | 0.132721 | 0.100962  |

|          |          |           |           |           |          |           |
|----------|----------|-----------|-----------|-----------|----------|-----------|
| 0.122378 | 0.139423 | 0.0930944 | 0.0913462 | 0.0895979 | 0.129953 | 0.0944056 |
| 0.127477 | 0.150641 | 0.104021  | 0.102564  | 0.100816  | 0.132139 | 0.10271   |
| 0.13141  | 0.156614 | 0.109411  | 0.104749  | 0.104749  | 0.125583 | 0.10169   |
| 0.151661 | 0.164336 | 0.129079  | 0.126457  | 0.12704   | 0.127477 | 0.126311  |
| 0.131119 | 0.156323 | 0.10271   | 0.0954254 | 0.099796  | 0.140152 | 0.0996503 |
| 0.129225 | 0.154429 | 0.110431  | 0.1081    | 0.107226  | 0.139714 | 0.106789  |
| 0.125146 | 0.154138 | 0.0999417 | 0.0912005 | 0.0914918 | 0.133596 | 0.0986305 |
| 0.134033 | 0.155157 | 0.107663  | 0.106789  | 0.11116   | 0.137238 | 0.102564  |
| 0.133887 | 0.159091 | 0.107809  | 0.106061  | 0.0987762 | 0.130973 | 0.101544  |
| 0.137675 | 0.157343 | 0.112471  | 0.113928  | 0.116259  | 0.136509 | 0.10708   |
| 0.133596 | 0.163462 | 0.111597  | 0.111305  | 0.109557  | 0.14088  | 0.106789  |
| 0.141463 | 0.165501 | 0.11859   | 0.111014  | 0.116841  | 0.145542 | 0.115822  |
| 0.136509 | 0.161131 | 0.113345  | 0.112179  | 0.1081    | 0.137675 | 0.109703  |
| 0.122669 | 0.150787 | 0.0983392 | 0.097465  | 0.0954254 | 0.132576 | 0.0987762 |
| 0.132721 | 0.155012 | 0.107517  | 0.11014   | 0.113054  | 0.137092 | 0.105041  |
| 0.142628 | 0.157925 | 0.122378  | 0.116259  | 0.11451   | 0.138549 | 0.119901  |
| 0.136946 | 0.161568 | 0.11553   | 0.118735  | 0.117279  | 0.142483 | 0.112762  |
| 0.128059 | 0.156469 | 0.106061  | 0.104604  | 0.101107  | 0.128934 | 0.10271   |
| 0.133596 | 0.155303 | 0.1081    | 0.105769  | 0.108683  | 0.136218 | 0.105041  |
| 0.129662 | 0.153118 | 0.117279  | 0.11757   | 0.114073  | 0.142774 | 0.112471  |
| 0.129079 | 0.159819 | 0.106498  | 0.105332  | 0.102127  | 0.128788 | 0.0990676 |
| 0.13549  | 0.160111 | 0.115822  | 0.114365  | 0.114365  | 0.142774 | 0.108974  |
| 0.143357 | 0.164773 | 0.115239  | 0.114073  | 0.107663  | 0.134615 | 0.11451   |
| 0.126166 | 0.1537   | 0.101253  | 0.0992133 | 0.095134  | 0.134615 | 0.099359  |
| 0.134907 | 0.160985 | 0.10912   | 0.106498  | 0.108246  | 0.13141  | 0.107809  |
| 0.134178 | 0.1588   | 0.107226  | 0.106643  | 0.0987762 | 0.13039  | 0.0989219 |
| 0.13986  | 0.160693 | 0.119027  | 0.119318  | 0.117861  | 0.147727 | 0.114802  |
| 0.139277 | 0.167104 | 0.123106  | 0.121358  | 0.119027  | 0.146562 | 0.116841  |
| 0.131265 | 0.159091 | 0.111305  | 0.111888  | 0.108683  | 0.134761 | 0.10708   |
| 0.211976 | 0.160548 | 0.189977  | 0.193765  | 0.191142  | 0.202943 | 0.188083  |
| 0.182255 | 0.147436 | 0.165793  | 0.162587  | 0.16317   | 0.177885 | 0.158945  |
| 0.148747 | 0.164336 | 0.120629  | 0.118298  | 0.11655   | 0.124272 | 0.118444  |
| 0.131993 | 0.147873 | 0.109703  | 0.106789  | 0.107955  | 0.136946 | 0.106935  |
| 0.164336 | 0.177302 | 0.14729   | 0.144959  | 0.144376  | 0.138695 | 0.145105  |
| 0.145542 | 0.17162  | 0.125291  | 0.124126  | 0.11655   | 0.14729  | 0.121941  |
| 0.139277 | 0.153409 | 0.118735  | 0.121649  | 0.116987  | 0.140443 | 0.113345  |
| 0.135052 | 0.155303 | 0.113636  | 0.116841  | 0.114219  | 0.136509 | 0.113199  |
| 0.125146 | 0.151807 | 0.105478  | 0.10169   | 0.106061  | 0.128642 | 0.10708   |
| 0.136509 | 0.157343 | 0.117424  | 0.11859   | 0.118298  | 0.143794 | 0.113199  |
| 0.220571 | 0.172057 | 0.198281  | 0.198572  | 0.201486  | 0.207459 | 0.195804  |
| 0.125146 | 0.156177 | 0.105769  | 0.100524  | 0.10169   | 0.137966 | 0.106498  |
| 0.129079 | 0.146999 | 0.109994  | 0.106206  | 0.109411  | 0.1419   | 0.106061  |
| 0.129371 | 0.151078 | 0.108537  | 0.106498  | 0.111451  | 0.136655 | 0.104604  |
| 0.136509 | 0.164918 | 0.112179  | 0.106352  | 0.108392  | 0.142337 | 0.110577  |

|          |          |           |           |           |          |           |
|----------|----------|-----------|-----------|-----------|----------|-----------|
| 0.202506 | 0.160111 | 0.178467  | 0.179924  | 0.179633  | 0.196096 | 0.180653  |
| 0.262238 | 0.196824 | 0.246358  | 0.246941  | 0.246358  | 0.248543 | 0.244464  |
| 0.145105 | 0.167686 | 0.120775  | 0.115822  | 0.121066  | 0.147727 | 0.120047  |
| 0.137529 | 0.163899 | 0.115239  | 0.118735  | 0.116113  | 0.143939 | 0.112762  |
| 0.147145 | 0.161859 | 0.117861  | 0.11961   | 0.116696  | 0.126166 | 0.117716  |
| 0.141463 | 0.162005 | 0.114802  | 0.11014   | 0.107226  | 0.13447  | 0.109703  |
| 0.125291 | 0.155157 | 0.0983392 | 0.0930944 | 0.0942599 | 0.134324 | 0.10169   |
| 0.136509 | 0.161422 | 0.107226  | 0.106061  | 0.103147  | 0.134761 | 0.106789  |
| 0.131702 | 0.146707 | 0.112908  | 0.113491  | 0.115239  | 0.133741 | 0.110431  |
| 0.118298 | 0.152244 | 0.0992133 | 0.0957168 | 0.0971737 | 0.134907 | 0.0987762 |
| 0.132139 | 0.146853 | 0.112471  | 0.112471  | 0.112471  | 0.132139 | 0.108829  |
| 0.131702 | 0.159237 | 0.109411  | 0.10912   | 0.105041  | 0.135198 | 0.107809  |
| 0.126311 | 0.154429 | 0.0990676 | 0.0999417 | 0.094697  | 0.131847 | 0.100962  |
| 0.146562 | 0.167686 | 0.121941  | 0.116404  | 0.120775  | 0.145105 | 0.120338  |
| 0.137092 | 0.159091 | 0.116259  | 0.116841  | 0.11451   | 0.145833 | 0.111451  |
| 0.135927 | 0.155886 | 0.110723  | 0.102564  | 0.102564  | 0.126894 | 0.105915  |
| 0.143794 | 0.168124 | 0.127331  | 0.120047  | 0.120338  | 0.12602  | 0.122815  |
| 0.146707 | 0.169872 | 0.131993  | 0.126166  | 0.123543  | 0.143794 | 0.126603  |
| 0.133159 | 0.156031 | 0.105915  | 0.108246  | 0.110577  | 0.134615 | 0.104895  |
| 0.128059 | 0.142483 | 0.111014  | 0.108974  | 0.109848  | 0.128351 | 0.108246  |
| 0.137092 | 0.157343 | 0.120921  | 0.125874  | 0.128497  | 0.141754 | 0.118444  |
| 0.222319 | 0.172931 | 0.206731  | 0.207314  | 0.208479  | 0.213869 | 0.203089  |
| 0.13884  | 0.157634 | 0.11014   | 0.102564  | 0.106352  | 0.138258 | 0.106498  |
| 0.125583 | 0.151661 | 0.0980478 | 0.0968823 | 0.0919289 | 0.13345  | 0.099359  |
| 0.138986 | 0.168561 | 0.116987  | 0.115822  | 0.112908  | 0.1419   | 0.113345  |
| 0.149913 | 0.170746 | 0.119755  | 0.120047  | 0.118298  | 0.14292  | 0.119027  |
| 0.134178 | 0.160256 | 0.111305  | 0.105186  | 0.105769  | 0.139132 | 0.107955  |
| 0.221591 | 0.167832 | 0.195221  | 0.197552  | 0.196678  | 0.205565 | 0.195076  |
| 0.140443 | 0.164481 | 0.119027  | 0.11961   | 0.116404  | 0.14831  | 0.112762  |
| 0.13243  | 0.154429 | 0.106352  | 0.107809  | 0.1081    | 0.133887 | 0.103875  |
| 0.139569 | 0.16419  | 0.118735  | 0.115239  | 0.11757   | 0.141317 | 0.119172  |
| 0.136364 | 0.160111 | 0.110868  | 0.107663  | 0.101836  | 0.133159 | 0.1081    |
| 0.136946 | 0.157488 | 0.117861  | 0.117861  | 0.113491  | 0.144231 | 0.114219  |
| 0.131702 | 0.1537   | 0.108537  | 0.108537  | 0.102127  | 0.137821 | 0.102564  |
| 0.130828 | 0.157488 | 0.105624  | 0.10708   | 0.105041  | 0.134033 | 0.104604  |
| 0.148893 | 0.170892 | 0.112908  | 0.113782  | 0.112617  | 0.142774 | 0.113928  |
| 0.220134 | 0.167249 | 0.19697   | 0.198718  | 0.191725  | 0.207896 | 0.193619  |
| 0.125583 | 0.149913 | 0.10708   | 0.105624  | 0.103293  | 0.136946 | 0.100816  |
| 0.211101 | 0.166667 | 0.192016  | 0.194056  | 0.189103  | 0.2044   | 0.188083  |
| 0.215909 | 0.158362 | 0.190705  | 0.190122  | 0.190122  | 0.199592 | 0.187063  |
| 0.147145 | 0.168561 | 0.125437  | 0.12398   | 0.121066  | 0.1419   | 0.122086  |
| 0.152389 | 0.171766 | 0.128642  | 0.127768  | 0.124563  | 0.145396 | 0.128497  |
| 0.123252 | 0.151952 | 0.100962  | 0.100087  | 0.0971737 | 0.125583 | 0.0999417 |
| 0.128351 | 0.154138 | 0.107226  | 0.109266  | 0.104021  | 0.137383 | 0.103001  |

|          |          |           |           |           |          |           |
|----------|----------|-----------|-----------|-----------|----------|-----------|
| 0.13345  | 0.159237 | 0.115822  | 0.109703  | 0.108829  | 0.140152 | 0.109557  |
| 0.134907 | 0.155157 | 0.111451  | 0.111742  | 0.114073  | 0.138986 | 0.107809  |
| 0.122086 | 0.150495 | 0.0948427 | 0.0887238 | 0.0919289 | 0.130828 | 0.0920746 |
| 0.120921 | 0.152244 | 0.0965909 | 0.090472  | 0.0939685 | 0.135198 | 0.0979021 |
| 0.146125 | 0.166667 | 0.12296   | 0.119755  | 0.123543  | 0.148456 | 0.120775  |
| 0.143648 | 0.165647 | 0.121066  | 0.114948  | 0.112908  | 0.136655 | 0.112471  |
| 0.13039  | 0.152972 | 0.10373   | 0.103438  | 0.107809  | 0.133013 | 0.101836  |
| 0.134615 | 0.157197 | 0.113491  | 0.114365  | 0.110868  | 0.143065 | 0.109848  |
| 0.126311 | 0.151515 | 0.0999417 | 0.0999417 | 0.0952797 | 0.125146 | 0.0957168 |
| 0.134324 | 0.160693 | 0.12398   | 0.124854  | 0.122815  | 0.144814 | 0.120921  |
| 0.144231 | 0.158945 | 0.11757   | 0.11553   | 0.11116   | 0.124417 | 0.113345  |
| 0.139714 | 0.164918 | 0.127331  | 0.129371  | 0.128205  | 0.150495 | 0.122232  |
| 0.271999 | 0.206294 | 0.259907  | 0.256702  | 0.258741  | 0.262092 | 0.255099  |
| 0.142045 | 0.164627 | 0.127622  | 0.124417  | 0.120338  | 0.138549 | 0.119901  |
| 0.144522 | 0.168269 | 0.127768  | 0.12398   | 0.121358  | 0.140734 | 0.123252  |
| 0.234703 | 0.179779 | 0.216783  | 0.216492  | 0.215618  | 0.223339 | 0.214015  |
| 0.1419   | 0.166521 | 0.124563  | 0.118444  | 0.121649  | 0.140734 | 0.116841  |
| 0.247086 | 0.187209 | 0.228584  | 0.228001  | 0.229167  | 0.23514  | 0.227273  |
| 0.135344 | 0.159382 | 0.116841  | 0.112762  | 0.111014  | 0.133304 | 0.110868  |
| 0.138403 | 0.159819 | 0.119901  | 0.121066  | 0.125437  | 0.1419   | 0.117424  |
| 0.143939 | 0.166521 | 0.110868  | 0.111451  | 0.108829  | 0.137821 | 0.112471  |
| 0.144814 | 0.168269 | 0.122232  | 0.11757   | 0.113491  | 0.135781 | 0.115385  |
| 0.222028 | 0.166812 | 0.199155  | 0.203234  | 0.198572  | 0.207459 | 0.195221  |
| 0.138112 | 0.164773 | 0.124272  | 0.128934  | 0.125437  | 0.147436 | 0.122086  |
| 0.136364 | 0.156031 | 0.113491  | 0.116696  | 0.112034  | 0.143065 | 0.11014   |
| 0.243444 | 0.185023 | 0.221445  | 0.223776  | 0.22669   | 0.230915 | 0.221591  |
| 0.124417 | 0.155157 | 0.103001  | 0.0936772 | 0.10067   | 0.137238 | 0.10169   |
| 0.21926  | 0.162005 | 0.197261  | 0.193765  | 0.196387  | 0.203234 | 0.194493  |
| 0.128351 | 0.152681 | 0.104604  | 0.0955711 | 0.0976107 | 0.139714 | 0.103584  |
| 0.13447  | 0.158508 | 0.108392  | 0.109557  | 0.111597  | 0.136218 | 0.107663  |
| 0.127622 | 0.154575 | 0.107663  | 0.105915  | 0.105041  | 0.138112 | 0.108392  |
| 0.145396 | 0.168269 | 0.127477  | 0.124563  | 0.121066  | 0.142774 | 0.121503  |
| 0.133887 | 0.159091 | 0.115385  | 0.108974  | 0.110431  | 0.137383 | 0.108537  |
| 0.175845 | 0.140152 | 0.150641  | 0.154138  | 0.152389  | 0.169435 | 0.152244  |
| 0.129225 | 0.151807 | 0.111888  | 0.111888  | 0.108392  | 0.140006 | 0.104749  |
| 0.150204 | 0.166084 | 0.117424  | 0.117424  | 0.115093  | 0.143502 | 0.118444  |
| 0.145833 | 0.163462 | 0.112471  | 0.109266  | 0.106643  | 0.134178 | 0.10912   |
| 0.143794 | 0.169289 | 0.127331  | 0.122086  | 0.120921  | 0.14088  | 0.125437  |
| 0.214452 | 0.164481 | 0.192745  | 0.196824  | 0.19391   | 0.203963 | 0.189103  |
| 0.128351 | 0.153846 | 0.106061  | 0.1081    | 0.108392  | 0.134761 | 0.105915  |
| 0.146562 | 0.15574  | 0.122232  | 0.11757   | 0.112617  | 0.141608 | 0.116259  |
| 0.129225 | 0.160256 | 0.106352  | 0.103438  | 0.101399  | 0.126311 | 0.0968823 |
| 0.119464 | 0.1537   | 0.102418  | 0.0962995 | 0.0986305 | 0.135198 | 0.102273  |
| 0.131556 | 0.155012 | 0.113928  | 0.115093  | 0.119172  | 0.136801 | 0.114073  |

|          |          |          |           |           |          |           |
|----------|----------|----------|-----------|-----------|----------|-----------|
| 0.266317 | 0.203817 | 0.253351 | 0.255682  | 0.254516  | 0.257576 | 0.253205  |
| 0.124272 | 0.149767 | 0.102855 | 0.10169   | 0.0981935 | 0.132721 | 0.105041  |
| 0.137675 | 0.159091 | 0.118298 | 0.116259  | 0.115967  | 0.141171 | 0.112908  |
| 0.193036 | 0.150932 | 0.17803  | 0.177739  | 0.173077  | 0.184878 | 0.174679  |
| 0.205857 | 0.157051 | 0.183275 | 0.185023  | 0.179779  | 0.195659 | 0.179341  |
| 0.144959 | 0.16521  | 0.120921 | 0.114802  | 0.117424  | 0.146416 | 0.118153  |
| 0.134907 | 0.158945 | 0.116404 | 0.116987  | 0.116987  | 0.146562 | 0.111888  |
| 0.141026 | 0.160693 | 0.114656 | 0.112908  | 0.109411  | 0.137529 | 0.111305  |
| 0.14729  | 0.171329 | 0.138112 | 0.143065  | 0.140443  | 0.160402 | 0.135927  |
| 0.145542 | 0.166667 | 0.119172 | 0.114219  | 0.115676  | 0.146416 | 0.114656  |
| 0.147145 | 0.169726 | 0.122232 | 0.116113  | 0.122232  | 0.149476 | 0.119755  |
| 0.125146 | 0.156177 | 0.109266 | 0.104021  | 0.107809  | 0.139423 | 0.10708   |
| 0.131556 | 0.155303 | 0.113636 | 0.11859   | 0.110431  | 0.138258 | 0.112908  |
| 0.134907 | 0.160693 | 0.125437 | 0.125146  | 0.124272  | 0.147436 | 0.119172  |
| 0.129516 | 0.142774 | 0.109266 | 0.104895  | 0.104895  | 0.138258 | 0.108537  |
| 0.143939 | 0.165938 | 0.124272 | 0.119318  | 0.116987  | 0.138112 | 0.118298  |
| 0.153409 | 0.176865 | 0.136072 | 0.133159  | 0.134324  | 0.148747 | 0.133596  |
| 0.128497 | 0.154283 | 0.10912  | 0.106789  | 0.103293  | 0.134033 | 0.107809  |
| 0.14729  | 0.17162  | 0.129662 | 0.129079  | 0.124126  | 0.141754 | 0.125146  |
| 0.124272 | 0.153555 | 0.1081   | 0.105186  | 0.106643  | 0.140006 | 0.109703  |
| 0.229604 | 0.172931 | 0.205857 | 0.206439  | 0.205274  | 0.212995 | 0.203089  |
| 0.13447  | 0.157051 | 0.120047 | 0.110431  | 0.111014  | 0.128351 | 0.114073  |
| 0.210519 | 0.160548 | 0.189977 | 0.187063  | 0.189103  | 0.197115 | 0.186334  |
| 0.140297 | 0.163462 | 0.112179 | 0.110431  | 0.108392  | 0.139423 | 0.108537  |
| 0.139132 | 0.153846 | 0.11859  | 0.122086  | 0.121503  | 0.137966 | 0.116404  |
| 0.14729  | 0.159674 | 0.120921 | 0.121503  | 0.119172  | 0.122815 | 0.121649  |
| 0.140152 | 0.157197 | 0.114948 | 0.11116   | 0.110868  | 0.121212 | 0.108974  |
| 0.136801 | 0.159091 | 0.117716 | 0.120047  | 0.118881  | 0.143502 | 0.11553   |
| 0.132139 | 0.1588   | 0.118881 | 0.121795  | 0.115967  | 0.142628 | 0.113782  |
| 0.137092 | 0.152389 | 0.112471 | 0.114219  | 0.114802  | 0.138258 | 0.109703  |
| 0.14831  | 0.167395 | 0.117279 | 0.115239  | 0.11553   | 0.143357 | 0.117424  |
| 0.145105 | 0.16419  | 0.119027 | 0.122523  | 0.122523  | 0.124709 | 0.124126  |
| 0.128351 | 0.147727 | 0.117133 | 0.111305  | 0.111888  | 0.141754 | 0.115239  |
| 0.264423 | 0.200758 | 0.250291 | 0.248834  | 0.251166  | 0.250146 | 0.249272  |
| 0.135052 | 0.154138 | 0.112762 | 0.113345  | 0.11655   | 0.137966 | 0.10912   |
| 0.208042 | 0.156614 | 0.180798 | 0.182838  | 0.180507  | 0.190851 | 0.178322  |
| 0.210227 | 0.160839 | 0.187063 | 0.188228  | 0.183566  | 0.193328 | 0.183712  |
| 0.138986 | 0.161276 | 0.113491 | 0.112617  | 0.109994  | 0.145396 | 0.112179  |
| 0.125291 | 0.151661 | 0.100962 | 0.100962  | 0.0983392 | 0.132576 | 0.0996503 |
| 0.137821 | 0.158362 | 0.120192 | 0.120775  | 0.122523  | 0.140734 | 0.117424  |
| 0.127622 | 0.154283 | 0.110286 | 0.111451  | 0.106789  | 0.140734 | 0.106643  |
| 0.131265 | 0.144522 | 0.1081   | 0.101399  | 0.107226  | 0.128642 | 0.108829  |
| 0.128934 | 0.158217 | 0.104312 | 0.0938228 | 0.0973193 | 0.140006 | 0.100379  |
| 0.13345  | 0.152826 | 0.118735 | 0.116404  | 0.114948  | 0.138695 | 0.115093  |

|          |          |          |           |           |          |           |
|----------|----------|----------|-----------|-----------|----------|-----------|
| 0.136946 | 0.16419  | 0.12602  | 0.129808  | 0.128351  | 0.148893 | 0.122378  |
| 0.130682 | 0.152681 | 0.111014 | 0.113636  | 0.11655   | 0.137092 | 0.107955  |
| 0.140006 | 0.159965 | 0.124126 | 0.128205  | 0.122086  | 0.144959 | 0.122232  |
| 0.140734 | 0.162733 | 0.114365 | 0.111451  | 0.107372  | 0.141026 | 0.111888  |
| 0.146562 | 0.164773 | 0.121358 | 0.126311  | 0.121941  | 0.125291 | 0.121212  |
| 0.14088  | 0.164336 | 0.118298 | 0.119172  | 0.112762  | 0.141171 | 0.112325  |
| 0.123834 | 0.157488 | 0.114073 | 0.105041  | 0.110286  | 0.141608 | 0.115093  |
| 0.134178 | 0.164336 | 0.115385 | 0.113054  | 0.113928  | 0.137966 | 0.114365  |
| 0.134761 | 0.14627  | 0.111888 | 0.113345  | 0.115093  | 0.129808 | 0.108829  |
| 0.144959 | 0.171911 | 0.129371 | 0.130536  | 0.129079  | 0.150204 | 0.123397  |
| 0.207751 | 0.15574  | 0.17905  | 0.179633  | 0.180798  | 0.193182 | 0.177156  |
| 0.141463 | 0.166084 | 0.130828 | 0.132576  | 0.132284  | 0.150787 | 0.126603  |
| 0.132139 | 0.158508 | 0.115676 | 0.120921  | 0.114219  | 0.144668 | 0.113199  |
| 0.147436 | 0.160693 | 0.118735 | 0.11961   | 0.11757   | 0.125583 | 0.116841  |
| 0.138549 | 0.152972 | 0.108392 | 0.108683  | 0.105186  | 0.118153 | 0.105041  |
| 0.1419   | 0.165064 | 0.11961  | 0.114948  | 0.110868  | 0.136946 | 0.114219  |
| 0.145542 | 0.164336 | 0.12296  | 0.119755  | 0.116259  | 0.138549 | 0.118735  |
| 0.210956 | 0.163607 | 0.187209 | 0.1875    | 0.1875    | 0.199009 | 0.183858  |
| 0.133159 | 0.150204 | 0.119318 | 0.116404  | 0.112617  | 0.137238 | 0.114802  |
| 0.131556 | 0.138986 | 0.102564 | 0.101981  | 0.0999417 | 0.132139 | 0.105041  |
| 0.13243  | 0.158217 | 0.11859  | 0.123543  | 0.12296   | 0.143211 | 0.115239  |
| 0.213869 | 0.16623  | 0.186917 | 0.191871  | 0.1875    | 0.201923 | 0.185606  |
| 0.125437 | 0.147436 | 0.101399 | 0.0979021 | 0.0932401 | 0.133596 | 0.0992133 |
| 0.126748 | 0.154866 | 0.105332 | 0.100962  | 0.104167  | 0.140443 | 0.105478  |
| 0.138112 | 0.159819 | 0.121066 | 0.123106  | 0.118735  | 0.146853 | 0.113054  |
| 0.136218 | 0.164918 | 0.114219 | 0.109557  | 0.111597  | 0.139423 | 0.110577  |
| 0.207314 | 0.15676  | 0.184149 | 0.184732  | 0.182984  | 0.196241 | 0.180798  |
| 0.122232 | 0.152098 | 0.104021 | 0.0984848 | 0.101399  | 0.136509 | 0.10271   |
| 0.133304 | 0.159382 | 0.111888 | 0.110723  | 0.111305  | 0.133887 | 0.106498  |
| 0.127477 | 0.143939 | 0.102564 | 0.100524  | 0.0958625 | 0.133013 | 0.103875  |
| 0.141754 | 0.147727 | 0.120047 | 0.118298  | 0.117133  | 0.141463 | 0.116113  |
| 0.148601 | 0.169726 | 0.116987 | 0.11553   | 0.114656  | 0.144522 | 0.118298  |
| 0.124126 | 0.156323 | 0.112908 | 0.106206  | 0.106789  | 0.138986 | 0.111888  |
| 0.13345  | 0.15574  | 0.108246 | 0.10912   | 0.11553   | 0.136655 | 0.108392  |
| 0.139277 | 0.165355 | 0.121941 | 0.117861  | 0.110868  | 0.14627  | 0.115385  |
| 0.159819 | 0.178904 | 0.14627  | 0.1419    | 0.147145  | 0.161568 | 0.146999  |
| 0.254516 | 0.189394 | 0.234848 | 0.234557  | 0.234557  | 0.241404 | 0.232663  |
| 0.133304 | 0.163462 | 0.120047 | 0.115967  | 0.119172  | 0.139714 | 0.118153  |
| 0.153118 | 0.171037 | 0.119172 | 0.11655   | 0.117424  | 0.145542 | 0.117861  |
| 0.129953 | 0.151078 | 0.114948 | 0.114365  | 0.114656  | 0.140443 | 0.113345  |
| 0.142337 | 0.162879 | 0.123252 | 0.119172  | 0.113345  | 0.136801 | 0.117861  |
| 0.134615 | 0.1537   | 0.110868 | 0.106206  | 0.107955  | 0.136072 | 0.113928  |
| 0.129662 | 0.156323 | 0.110577 | 0.108829  | 0.108537  | 0.139277 | 0.111888  |
| 0.132721 | 0.157925 | 0.117716 | 0.121503  | 0.116259  | 0.140589 | 0.116987  |



|          |          |           |           |           |          |           |
|----------|----------|-----------|-----------|-----------|----------|-----------|
| 0.124126 | 0.151952 | 0.108246  | 0.103293  | 0.105332  | 0.13986  | 0.1081    |
| 0.138695 | 0.159819 | 0.114073  | 0.110577  | 0.10912   | 0.138986 | 0.111305  |
| 0.253934 | 0.187646 | 0.234557  | 0.234557  | 0.237762  | 0.239365 | 0.234703  |
| 0.124417 | 0.147582 | 0.0977564 | 0.0965909 | 0.0957168 | 0.134324 | 0.0999417 |
| 0.127622 | 0.154283 | 0.103584  | 0.10271   | 0.0954254 | 0.129662 | 0.0987762 |
| 0.131265 | 0.150932 | 0.107226  | 0.113345  | 0.114802  | 0.134761 | 0.105041  |
| 0.145396 | 0.173805 | 0.127185  | 0.124854  | 0.130682  | 0.150641 | 0.126748  |
| 0.141608 | 0.169143 | 0.123106  | 0.123397  | 0.123397  | 0.139277 | 0.122669  |
| 0.134033 | 0.154283 | 0.115239  | 0.111742  | 0.113782  | 0.13549  | 0.114219  |
| 0.13549  | 0.159237 | 0.116987  | 0.117861  | 0.114365  | 0.145396 | 0.112471  |
| 0.134761 | 0.159674 | 0.107517  | 0.106643  | 0.106935  | 0.134761 | 0.107372  |
| 0.250728 | 0.185023 | 0.229312  | 0.230478  | 0.233392  | 0.23616  | 0.229749  |
| 0.137383 | 0.159382 | 0.124417  | 0.12704   | 0.120921  | 0.146416 | 0.120192  |
| 0.122378 | 0.153992 | 0.104167  | 0.100962  | 0.103584  | 0.138403 | 0.100816  |
| 0.137238 | 0.159237 | 0.104749  | 0.104749  | 0.102127  | 0.138695 | 0.106352  |
| 0.136801 | 0.16317  | 0.121795  | 0.117133  | 0.121503  | 0.13884  | 0.121066  |
| 0.139132 | 0.162879 | 0.122669  | 0.119464  | 0.111888  | 0.132721 | 0.119027  |
| 0.133596 | 0.155303 | 0.107517  | 0.111014  | 0.113636  | 0.13243  | 0.109703  |
| 0.125728 | 0.155594 | 0.1081    | 0.100524  | 0.10373   | 0.136509 | 0.105624  |
| 0.127622 | 0.158362 | 0.111742  | 0.108246  | 0.108246  | 0.139569 | 0.112762  |
| 0.121795 | 0.1537   | 0.0992133 | 0.0954254 | 0.0962995 | 0.137529 | 0.0999417 |
| 0.132721 | 0.156469 | 0.111305  | 0.111305  | 0.11655   | 0.135927 | 0.107372  |
| 0.146999 | 0.171329 | 0.123252  | 0.124126  | 0.122378  | 0.143211 | 0.125728  |
| 0.150058 | 0.177885 | 0.126311  | 0.128642  | 0.127185  | 0.150058 | 0.129662  |
| 0.148601 | 0.165355 | 0.12602   | 0.127768  | 0.123397  | 0.129662 | 0.125874  |
| 0.150641 | 0.1706   | 0.129808  | 0.128642  | 0.128059  | 0.132576 | 0.125874  |
| 0.150787 | 0.179196 | 0.12704   | 0.125291  | 0.124417  | 0.147582 | 0.128059  |
| 0.126894 | 0.155012 | 0.100816  | 0.0944056 | 0.0961538 | 0.126311 | 0.0995047 |
| 0.13986  | 0.165938 | 0.124563  | 0.119901  | 0.122815  | 0.13345  | 0.116841  |
| 0.10912  | 0.152972 | 0.0967366 | 0.106352  | 0.101399  | 0.144376 | 0.103293  |
| 0.228001 | 0.166958 | 0.204545  | 0.203963  | 0.203671  | 0.210519 | 0.201486  |
| 0.139714 | 0.160839 | 0.122086  | 0.126748  | 0.124709  | 0.144668 | 0.119318  |
| 0.135344 | 0.157051 | 0.109557  | 0.112179  | 0.0999417 | 0.136801 | 0.10271   |
| 0.137238 | 0.147873 | 0.115822  | 0.116404  | 0.118444  | 0.139277 | 0.114219  |
| 0.241113 | 0.181235 | 0.222319  | 0.221445  | 0.223485  | 0.228001 | 0.21926   |
| 0.230915 | 0.175408 | 0.206876  | 0.209207  | 0.210082  | 0.214598 | 0.207022  |
| 0.124709 | 0.154575 | 0.111742  | 0.108537  | 0.108537  | 0.137821 | 0.110723  |
| 0.26588  | 0.201049 | 0.249709  | 0.251748  | 0.251166  | 0.25102  | 0.246941  |
| 0.127477 | 0.150058 | 0.100816  | 0.0973193 | 0.099359  | 0.12398  | 0.101544  |
| 0.146416 | 0.172203 | 0.131702  | 0.129371  | 0.128205  | 0.152826 | 0.124272  |
| 0.12398  | 0.148601 | 0.100816  | 0.0981935 | 0.0958625 | 0.133887 | 0.101253  |
| 0.149767 | 0.174097 | 0.120775  | 0.125146  | 0.120484  | 0.143065 | 0.124417  |
| 0.208479 | 0.158217 | 0.184441  | 0.18648   | 0.18648   | 0.196533 | 0.182547  |
| 0.131119 | 0.159819 | 0.112325  | 0.112034  | 0.10912   | 0.141317 | 0.111014  |

|          |          |           |           |           |          |           |
|----------|----------|-----------|-----------|-----------|----------|-----------|
| 0.21824  | 0.164481 | 0.192453  | 0.19391   | 0.194493  | 0.198718 | 0.190559  |
| 0.132284 | 0.16419  | 0.110286  | 0.108537  | 0.107955  | 0.13986  | 0.11014   |
| 0.127622 | 0.137383 | 0.10912   | 0.10912   | 0.108246  | 0.136072 | 0.108974  |
| 0.13345  | 0.160402 | 0.118153  | 0.111451  | 0.112908  | 0.134033 | 0.115967  |
| 0.131702 | 0.154866 | 0.10912   | 0.109411  | 0.110577  | 0.134033 | 0.111014  |
| 0.126894 | 0.148601 | 0.10373   | 0.104895  | 0.105769  | 0.130099 | 0.10271   |
| 0.131847 | 0.1588   | 0.113345  | 0.112471  | 0.112471  | 0.13884  | 0.106498  |
| 0.120775 | 0.14627  | 0.0967366 | 0.0938228 | 0.0932401 | 0.129808 | 0.0977564 |
| 0.131702 | 0.157197 | 0.11116   | 0.110286  | 0.109994  | 0.137821 | 0.104604  |
| 0.130682 | 0.157634 | 0.111014  | 0.109266  | 0.106352  | 0.128059 | 0.103875  |
| 0.130973 | 0.156177 | 0.105769  | 0.103438  | 0.101107  | 0.132139 | 0.104167  |
| 0.123252 | 0.150204 | 0.100379  | 0.100379  | 0.0948427 | 0.131119 | 0.101107  |
| 0.141171 | 0.154429 | 0.119464  | 0.118881  | 0.114802  | 0.125728 | 0.115822  |
| 0.137966 | 0.164918 | 0.124709  | 0.126457  | 0.123543  | 0.148747 | 0.121649  |
| 0.141026 | 0.15778  | 0.109411  | 0.112617  | 0.110868  | 0.122378 | 0.113345  |
| 0.13243  | 0.163462 | 0.109557  | 0.109266  | 0.111597  | 0.139423 | 0.103293  |
| 0.125291 | 0.151078 | 0.105332  | 0.105915  | 0.107372  | 0.133159 | 0.103147  |
| 0.124709 | 0.146416 | 0.105915  | 0.10271   | 0.105624  | 0.135781 | 0.104604  |
| 0.14627  | 0.167104 | 0.114365  | 0.115239  | 0.113491  | 0.143939 | 0.115093  |
| 0.140297 | 0.16521  | 0.120629  | 0.119464  | 0.108974  | 0.139423 | 0.116404  |
| 0.143794 | 0.162005 | 0.115385  | 0.11451   | 0.112762  | 0.125146 | 0.114365  |
| 0.131993 | 0.157488 | 0.11553   | 0.114948  | 0.113199  | 0.141317 | 0.111014  |
| 0.137675 | 0.163462 | 0.124709  | 0.128205  | 0.124709  | 0.14729  | 0.121358  |
| 0.139423 | 0.166958 | 0.134907  | 0.13549   | 0.13345   | 0.152826 | 0.129225  |
| 0.117424 | 0.147873 | 0.0919289 | 0.0846445 | 0.0863928 | 0.130245 | 0.0952797 |
| 0.135781 | 0.156031 | 0.11116   | 0.110577  | 0.114948  | 0.137821 | 0.11014   |
| 0.126603 | 0.15472  | 0.106061  | 0.0990676 | 0.101107  | 0.134178 | 0.104167  |
| 0.151369 | 0.17366  | 0.129079  | 0.128788  | 0.12704   | 0.146416 | 0.129808  |
| 0.125583 | 0.153118 | 0.101544  | 0.100379  | 0.0968823 | 0.133159 | 0.101399  |
| 0.156177 | 0.176136 | 0.137966  | 0.13447   | 0.132139  | 0.146562 | 0.134324  |
| 0.141608 | 0.160985 | 0.126894  | 0.128642  | 0.132139  | 0.14831  | 0.126748  |
| 0.147582 | 0.172203 | 0.124126  | 0.120921  | 0.122086  | 0.14729  | 0.123106  |
| 0.129371 | 0.152826 | 0.113199  | 0.103001  | 0.106789  | 0.128788 | 0.103147  |
| 0.136509 | 0.160256 | 0.115676  | 0.110723  | 0.109557  | 0.136218 | 0.112034  |
| 0.147873 | 0.164627 | 0.124709  | 0.124126  | 0.124709  | 0.127768 | 0.123106  |
| 0.222902 | 0.176136 | 0.203817  | 0.2044    | 0.20236   | 0.21183  | 0.200466  |
| 0.134033 | 0.158071 | 0.110577  | 0.112325  | 0.108537  | 0.136655 | 0.104604  |
| 0.137092 | 0.164044 | 0.112762  | 0.105186  | 0.109848  | 0.134761 | 0.111451  |
| 0.145688 | 0.167978 | 0.115822  | 0.114365  | 0.114656  | 0.139569 | 0.115385  |
| 0.144085 | 0.15676  | 0.112471  | 0.114219  | 0.111014  | 0.122815 | 0.113199  |
| 0.142191 | 0.167104 | 0.118444  | 0.114948  | 0.114365  | 0.1419   | 0.113928  |
| 0.138112 | 0.163899 | 0.119318  | 0.118444  | 0.116696  | 0.144814 | 0.114219  |
| 0.140297 | 0.165793 | 0.124709  | 0.123252  | 0.125     | 0.147873 | 0.120775  |
| 0.144814 | 0.165938 | 0.121066  | 0.114365  | 0.119318  | 0.143939 | 0.120047  |

|          |          |           |           |           |          |           |
|----------|----------|-----------|-----------|-----------|----------|-----------|
| 0.125    | 0.157197 | 0.103875  | 0.10067   | 0.0983392 | 0.125583 | 0.0961538 |
| 0.149476 | 0.169726 | 0.121066  | 0.122232  | 0.122815  | 0.142191 | 0.124417  |
| 0.128497 | 0.159528 | 0.11116   | 0.107372  | 0.10912   | 0.130536 | 0.111014  |
| 0.133013 | 0.163753 | 0.110723  | 0.110723  | 0.11014   | 0.135052 | 0.110286  |
| 0.192016 | 0.176719 | 0.170309  | 0.172057  | 0.166812  | 0.180361 | 0.167832  |
| 0.135781 | 0.158362 | 0.111742  | 0.114365  | 0.11116   | 0.13986  | 0.108974  |
| 0.152826 | 0.161422 | 0.129953  | 0.12704   | 0.12296   | 0.146125 | 0.126603  |
| 0.128788 | 0.16215  | 0.116987  | 0.110286  | 0.103584  | 0.13345  | 0.108392  |
| 0.131847 | 0.15035  | 0.111014  | 0.108974  | 0.108392  | 0.129808 | 0.109994  |
| 0.130099 | 0.153555 | 0.104895  | 0.103438  | 0.0981935 | 0.127185 | 0.0995047 |
| 0.124563 | 0.152389 | 0.0999417 | 0.0987762 | 0.0958625 | 0.126311 | 0.0971737 |
| 0.130682 | 0.159382 | 0.109557  | 0.108392  | 0.102273  | 0.131847 | 0.106498  |
| 0.116987 | 0.151224 | 0.1081    | 0.107226  | 0.103438  | 0.135635 | 0.110868  |
| 0.135344 | 0.152098 | 0.112762  | 0.114802  | 0.113928  | 0.133887 | 0.113782  |
| 0.143939 | 0.170892 | 0.122815  | 0.118444  | 0.115822  | 0.145979 | 0.122378  |
| 0.131847 | 0.153555 | 0.111014  | 0.108683  | 0.104604  | 0.13243  | 0.105624  |
| 0.134907 | 0.16215  | 0.109703  | 0.108246  | 0.100962  | 0.138695 | 0.106061  |
| 0.108537 | 0.146562 | 0.106352  | 0.103147  | 0.101399  | 0.139423 | 0.0992133 |
| 0.122815 | 0.155594 | 0.109557  | 0.109266  | 0.107517  | 0.130682 | 0.106206  |
| 0.14292  | 0.16521  | 0.119755  | 0.119464  | 0.118881  | 0.142337 | 0.120192  |
| 0.124563 | 0.157634 | 0.104604  | 0.102273  | 0.101107  | 0.129225 | 0.10067   |
| 0.125146 | 0.157925 | 0.108974  | 0.107517  | 0.107809  | 0.129225 | 0.106206  |
| 0.131265 | 0.159091 | 0.100233  | 0.100233  | 0.101107  | 0.129516 | 0.102418  |
| 0.130828 | 0.165355 | 0.112617  | 0.111451  | 0.108829  | 0.137238 | 0.114802  |
| 0.130536 | 0.154283 | 0.101544  | 0.0992133 | 0.097465  | 0.129079 | 0.10169   |
| 0.138986 | 0.163899 | 0.12602   | 0.122523  | 0.128351  | 0.144522 | 0.126748  |
| 0.143939 | 0.158945 | 0.118153  | 0.114656  | 0.119318  | 0.143065 | 0.119464  |
| 0.132867 | 0.155449 | 0.108829  | 0.106498  | 0.105332  | 0.129953 | 0.104604  |
| 0.140589 | 0.165501 | 0.125583  | 0.121795  | 0.125583  | 0.153118 | 0.128059  |
| 0.143211 | 0.166084 | 0.11655   | 0.120047  | 0.120047  | 0.13039  | 0.118444  |
| 0.119901 | 0.152681 | 0.111597  | 0.11451   | 0.0935315 | 0.151952 | 0.114365  |
| 0.131265 | 0.151807 | 0.107809  | 0.104895  | 0.104312  | 0.125728 | 0.108537  |
| 0.151515 | 0.174097 | 0.137675  | 0.129808  | 0.131265  | 0.148601 | 0.131702  |
| 0.140734 | 0.170309 | 0.122815  | 0.121941  | 0.115239  | 0.144814 | 0.124417  |
| 0.138403 | 0.156906 | 0.121358  | 0.122232  | 0.114656  | 0.136072 | 0.124709  |
| 0.134033 | 0.163607 | 0.112325  | 0.112034  | 0.113782  | 0.122378 | 0.11451   |
| 0.120192 | 0.151515 | 0.0979021 | 0.0967366 | 0.101399  | 0.128351 | 0.101836  |
| 0.126748 | 0.151952 | 0.10271   | 0.100087  | 0.0980478 | 0.136072 | 0.101107  |
| 0.126603 | 0.153555 | 0.105186  | 0.0987762 | 0.097028  | 0.13243  | 0.099796  |
| 0.131847 | 0.154138 | 0.114219  | 0.112471  | 0.113345  | 0.131265 | 0.117279  |
| 0.136655 | 0.165064 | 0.121066  | 0.117279  | 0.11757   | 0.13549  | 0.120921  |
| 0.136364 | 0.154866 | 0.109994  | 0.109703  | 0.109994  | 0.137238 | 0.114802  |
| 0.132867 | 0.158654 | 0.103584  | 0.097465  | 0.0977564 | 0.117133 | 0.105186  |
| 0.12602  | 0.15676  | 0.10373   | 0.0984848 | 0.0955711 | 0.135344 | 0.103584  |

|          |          |          |           |           |          |           |
|----------|----------|----------|-----------|-----------|----------|-----------|
| 0.126748 | 0.150495 | 0.114073 | 0.109703  | 0.110577  | 0.13986  | 0.111597  |
| 0.124417 | 0.146416 | 0.101544 | 0.0983392 | 0.0995047 | 0.131993 | 0.0976107 |
| 0.128934 | 0.1588   | 0.111014 | 0.110723  | 0.106935  | 0.135635 | 0.114073  |
| 0.133887 | 0.151224 | 0.104604 | 0.104604  | 0.106935  | 0.126894 | 0.106498  |
| 0.13549  | 0.152826 | 0.112617 | 0.110868  | 0.112617  | 0.134907 | 0.115676  |
| 0.126166 | 0.157488 | 0.103875 | 0.104167  | 0.10271   | 0.141317 | 0.100233  |
| 0.124709 | 0.146707 | 0.103293 | 0.0957168 | 0.100379  | 0.124417 | 0.0996503 |
| 0.123834 | 0.150495 | 0.107955 | 0.103001  | 0.105041  | 0.136072 | 0.103438  |
| 0.137092 | 0.155012 | 0.113636 | 0.106643  | 0.108683  | 0.133304 | 0.109994  |
| 0.134033 | 0.154575 | 0.10912  | 0.10912   | 0.103584  | 0.133741 | 0.107226  |
| 0.138112 | 0.159237 | 0.118735 | 0.120192  | 0.122232  | 0.142191 | 0.120921  |
| 0.127914 | 0.150204 | 0.102127 | 0.0977564 | 0.0977564 | 0.129953 | 0.101107  |
| 0.132139 | 0.162587 | 0.11655  | 0.120921  | 0.121795  | 0.141171 | 0.121358  |

| <b>TDr_08_00132</b> | <b>TDr_08_00133</b> | <b>TDr_08_00134</b> | <b>TDr_08_00140</b> | <b>TDr_08_00141</b> | <b>TDr_08_00146</b> | <b>TDr_08_00149</b> |
|---------------------|---------------------|---------------------|---------------------|---------------------|---------------------|---------------------|
| 0.134178            | 0.120192            | 0.11859             | 0.127331            | 0.121503            | 0.135635            | 0.139277            |
| 0.13141             | 0.112471            | 0.114073            | 0.141754            | 0.11961             | 0.131119            | 0.127185            |
| 0.127622            | 0.111014            | 0.112325            | 0.139423            | 0.117861            | 0.128205            | 0.124854            |
| 0.137821            | 0.119172            | 0.11116             | 0.146125            | 0.116987            | 0.133741            | 0.125437            |
| 0.140443            | 0.129953            | 0.129225            | 0.157197            | 0.13243             | 0.136946            | 0.135052            |
| 0.132867            | 0.136364            | 0.129516            | 0.139714            | 0.132139            | 0.140152            | 0.133887            |
| 0.123689            | 0.103584            | 0.11655             | 0.122378            | 0.122669            | 0.131847            | 0.127331            |
| 0.126894            | 0.113782            | 0.112471            | 0.143357            | 0.110723            | 0.128934            | 0.129079            |
| 0.123543            | 0.107517            | 0.10912             | 0.137383            | 0.107372            | 0.124709            | 0.11961             |
| 0.125728            | 0.090472            | 0.106352            | 0.136946            | 0.115676            | 0.124563            | 0.123834            |
| 0.126166            | 0.112179            | 0.11116             | 0.139132            | 0.116404            | 0.134033            | 0.133304            |
| 0.124563            | 0.113199            | 0.105478            | 0.143357            | 0.110431            | 0.127185            | 0.118298            |
| 0.128351            | 0.113199            | 0.113345            | 0.143648            | 0.114219            | 0.130099            | 0.125583            |
| 0.146562            | 0.138695            | 0.133304            | 0.154866            | 0.139132            | 0.154138            | 0.145542            |
| 0.136218            | 0.119318            | 0.124126            | 0.147145            | 0.129953            | 0.140589            | 0.134907            |
| 0.115676            | 0.107226            | 0.11757             | 0.135635            | 0.116113            | 0.126166            | 0.120192            |
| 0.126311            | 0.107955            | 0.0990676           | 0.140734            | 0.110723            | 0.128934            | 0.113054            |
| 0.144522            | 0.138695            | 0.140297            | 0.156906            | 0.147582            | 0.149184            | 0.148456            |
| 0.125583            | 0.110431            | 0.109994            | 0.139714            | 0.116113            | 0.129953            | 0.122815            |
| 0.203089            | 0.204837            | 0.202652            | 0.208188            | 0.207896            | 0.214161            | 0.207314            |
| 0.133887            | 0.126311            | 0.120629            | 0.144522            | 0.130828            | 0.139132            | 0.133741            |
| 0.132284            | 0.120338            | 0.119318            | 0.133887            | 0.125437            | 0.137821            | 0.13447             |
| 0.119901            | 0.107955            | 0.1081              | 0.138695            | 0.105186            | 0.128642            | 0.119755            |
| 0.122378            | 0.11859             | 0.108829            | 0.149038            | 0.109994            | 0.125874            | 0.113491            |
| 0.119027            | 0.101544            | 0.0952797           | 0.134324            | 0.103147            | 0.124854            | 0.119172            |
| 0.135344            | 0.133013            | 0.129371            | 0.140443            | 0.137238            | 0.137675            | 0.136072            |
| 0.130682            | 0.107663            | 0.119464            | 0.145688            | 0.126748            | 0.135635            | 0.131993            |
| 0.120192            | 0.114656            | 0.102564            | 0.146853            | 0.107517            | 0.121066            | 0.113345            |
| 0.130973            | 0.121941            | 0.120338            | 0.148019            | 0.125874            | 0.132139            | 0.127622            |
| 0.137966            | 0.114365            | 0.120921            | 0.145105            | 0.126166            | 0.135927            | 0.127622            |
| 0.128497            | 0.115676            | 0.122523            | 0.131265            | 0.119901            | 0.13549             | 0.129225            |
| 0.127185            | 0.114365            | 0.114802            | 0.14627             | 0.120338            | 0.128934            | 0.119464            |
| 0.11961             | 0.106206            | 0.108974            | 0.134907            | 0.109848            | 0.128642            | 0.119464            |
| 0.135635            | 0.110286            | 0.11655             | 0.147145            | 0.120921            | 0.130099            | 0.12704             |
| 0.122669            | 0.106352            | 0.116987            | 0.139714            | 0.119318            | 0.128788            | 0.133304            |
| 0.133013            | 0.115239            | 0.118298            | 0.143648            | 0.122669            | 0.135344            | 0.131119            |
| 0.137238            | 0.110723            | 0.12602             | 0.124563            | 0.13447             | 0.143939            | 0.138258            |
| 0.133887            | 0.11961             | 0.117424            | 0.143357            | 0.123543            | 0.133887            | 0.128788            |
| 0.121358            | 0.114365            | 0.100233            | 0.143065            | 0.104895            | 0.125728            | 0.113345            |
| 0.106206            | 0.120775            | 0.0871212           | 0.149476            | 0.0871212           | 0.104167            | 0.119464            |
| 0.114948            | 0.109703            | 0.0754662           | 0.143648            | 0.0906177           | 0.105915            | 0.108974            |
| 0.108829            | 0.133596            | 0.102564            | 0.162005            | 0.0990676           | 0.11553             | 0.13549             |

|           |           |           |          |           |           |           |
|-----------|-----------|-----------|----------|-----------|-----------|-----------|
| 0.117861  | 0.135052  | 0.11014   | 0.157634 | 0.111888  | 0.103875  | 0.12704   |
| 0.0926573 | 0.114219  | 0.0840618 | 0.143211 | 0.0916375 | 0.101981  | 0.118735  |
| 0.120629  | 0.0958625 | 0.104458  | 0.123397 | 0.111742  | 0.125291  | 0.119027  |
| 0.127477  | 0.0960082 | 0.116259  | 0.129371 | 0.11655   | 0.135927  | 0.129953  |
| 0.102418  | 0.118735  | 0.102855  | 0.145105 | 0.112762  | 0.116987  | 0.107809  |
| 0.112762  | 0.128788  | 0.095134  | 0.154283 | 0.106498  | 0.103147  | 0.126894  |
| 0.115676  | 0.114802  | 0.083479  | 0.143794 | 0.0852273 | 0.0981935 | 0.116987  |
| 0.106498  | 0.107663  | 0.0842075 | 0.139569 | 0.0868298 | 0.0957168 | 0.11859   |
| 0.149767  | 0.136364  | 0.144668  | 0.131556 | 0.148747  | 0.156469  | 0.154575  |
| 0.118298  | 0.12296   | 0.115239  | 0.148164 | 0.12398   | 0.121795  | 0.060169  |
| 0.102418  | 0.107663  | 0.0812937 | 0.143648 | 0.0818765 | 0.105624  | 0.11655   |
| 0.135344  | 0.116696  | 0.122086  | 0.149767 | 0.126457  | 0.134178  | 0.129953  |
| 0.108246  | 0.119027  | 0.097028  | 0.138112 | 0.107517  | 0.120775  | 0.122086  |
| 0.114656  | 0.131556  | 0.129079  | 0.154429 | 0.118881  | 0.119901  | 0.124126  |
| 0.111597  | 0.109266  | 0.099796  | 0.150787 | 0.103293  | 0.100816  | 0.120484  |
| 0.113054  | 0.111888  | 0.0712413 | 0.143502 | 0.0907634 | 0.107226  | 0.119318  |
| 0.109557  | 0.110723  | 0.0753205 | 0.143794 | 0.0965909 | 0.106643  | 0.108829  |
| 0.12602   | 0.0855186 | 0.113636  | 0.132867 | 0.120921  | 0.124272  | 0.127331  |
| 0.117861  | 0.127477  | 0.104895  | 0.153846 | 0.0964452 | 0.104458  | 0.125874  |
| 0.116696  | 0.130682  | 0.112471  | 0.159674 | 0.108392  | 0.108246  | 0.130245  |
| 0.149184  | 0.1588    | 0.150495  | 0.165355 | 0.151661  | 0.163462  | 0.164481  |
| 0.106061  | 0.11655   | 0.0799825 | 0.146416 | 0.0817308 | 0.107809  | 0.114656  |
| 0.111014  | 0.109848  | 0.0776515 | 0.145833 | 0.0872669 | 0.115385  | 0.117279  |
| 0.105769  | 0.107517  | 0.0805653 | 0.14292  | 0.0826049 | 0.0990676 | 0.112617  |
| 0.141171  | 0.130099  | 0.137529  | 0.109848 | 0.141317  | 0.145833  | 0.1419    |
| 0.113199  | 0.107955  | 0.0754662 | 0.142483 | 0.0882867 | 0.102418  | 0.113345  |
| 0         | 0.125874  | 0.112617  | 0.144376 | 0.113491  | 0.115385  | 0.124272  |
| 0.125874  | 0         | 0.110286  | 0.139132 | 0.11961   | 0.130536  | 0.124854  |
| 0.112617  | 0.110286  | 0         | 0.145979 | 0.0871212 | 0.10912   | 0.112471  |
| 0.144376  | 0.139132  | 0.145979  | 0        | 0.150641  | 0.156906  | 0.155303  |
| 0.113491  | 0.11961   | 0.0871212 | 0.150641 | 0         | 0.109703  | 0.125291  |
| 0.115385  | 0.130536  | 0.10912   | 0.156906 | 0.109703  | 0         | 0.128059  |
| 0.124272  | 0.124854  | 0.112471  | 0.155303 | 0.125291  | 0.128059  | 0         |
| 0.122378  | 0.113345  | 0.11116   | 0.136218 | 0.116696  | 0.131993  | 0.122815  |
| 0.108392  | 0.106061  | 0.0805653 | 0.143794 | 0.0820221 | 0.111305  | 0.118153  |
| 0.11014   | 0.114802  | 0.074155  | 0.148456 | 0.0846445 | 0.108392  | 0.111742  |
| 0.11655   | 0.127914  | 0.0855186 | 0.158654 | 0.100087  | 0.104021  | 0.122523  |
| 0.109411  | 0.103584  | 0.0844988 | 0.143065 | 0.0964452 | 0.109994  | 0.11655   |
| 0.119464  | 0.132867  | 0.103001  | 0.161276 | 0.103001  | 0.102564  | 0.123689  |
| 0.111888  | 0.114802  | 0.0861014 | 0.150787 | 0.0960082 | 0.11859   | 0.120192  |
| 0.120629  | 0.111888  | 0.105915  | 0.14292  | 0.106498  | 0.119172  | 0.0939685 |
| 0.11014   | 0.118007  | 0.08581   | 0.143794 | 0.0895979 | 0.104021  | 0.116113  |
| 0.1081    | 0.120338  | 0.0895979 | 0.153992 | 0.0776515 | 0.111597  | 0.119901  |
| 0.113054  | 0.115093  | 0.0767774 | 0.148164 | 0.0820221 | 0.103147  | 0.113491  |

|          |           |           |           |           |          |          |
|----------|-----------|-----------|-----------|-----------|----------|----------|
| 0.104021 | 0.111597  | 0.0814394 | 0.139714  | 0.0793998 | 0.102564 | 0.112325 |
| 0.110577 | 0.131265  | 0.102855  | 0.152389  | 0.097028  | 0.102418 | 0.125    |
| 0.126894 | 0.101544  | 0.103438  | 0.138986  | 0.106643  | 0.132721 | 0.117716 |
| 0.129953 | 0.105769  | 0.107955  | 0.14729   | 0.11116   | 0.128788 | 0.123397 |
| 0.130245 | 0.11451   | 0.11961   | 0.130682  | 0.128934  | 0.136072 | 0.13884  |
| 0.132284 | 0.107517  | 0.120192  | 0.125146  | 0.126603  | 0.136946 | 0.134761 |
| 0.128788 | 0.109557  | 0.127477  | 0.129808  | 0.130682  | 0.137529 | 0.129808 |
| 0.133304 | 0.119027  | 0.131993  | 0.137238  | 0.140734  | 0.148747 | 0.142483 |
| 0.12704  | 0.112471  | 0.110868  | 0.123397  | 0.120775  | 0.136364 | 0.125728 |
| 0.175991 | 0.176865  | 0.177885  | 0.168269  | 0.186043  | 0.192599 | 0.1875   |
| 0.124272 | 0.104167  | 0.106643  | 0.127622  | 0.115385  | 0.129225 | 0.125    |
| 0.128788 | 0.115967  | 0.13447   | 0.139132  | 0.142337  | 0.148601 | 0.138258 |
| 0.126748 | 0.111014  | 0.127477  | 0.138549  | 0.134761  | 0.143357 | 0.132721 |
| 0.144085 | 0.123689  | 0.128788  | 0.125     | 0.136072  | 0.144959 | 0.137529 |
| 0.121503 | 0.10169   | 0.107372  | 0.127477  | 0.119027  | 0.132284 | 0.127768 |
| 0.127331 | 0.114219  | 0.128934  | 0.136509  | 0.13243   | 0.145396 | 0.138258 |
| 0.123252 | 0.105769  | 0.110577  | 0.133887  | 0.119318  | 0.132576 | 0.125146 |
| 0.121941 | 0.104167  | 0.118007  | 0.128205  | 0.127331  | 0.136801 | 0.129079 |
| 0.116696 | 0.107372  | 0.104895  | 0.118881  | 0.111305  | 0.131847 | 0.125874 |
| 0.133596 | 0.111742  | 0.127622  | 0.137238  | 0.136364  | 0.144376 | 0.136655 |
| 0.120192 | 0.0962995 | 0.102564  | 0.133741  | 0.107226  | 0.122232 | 0.120047 |
| 0.129662 | 0.121503  | 0.129808  | 0.105332  | 0.136509  | 0.145396 | 0.139423 |
| 0.131556 | 0.105915  | 0.113636  | 0.118298  | 0.119464  | 0.135052 | 0.129079 |
| 0.114219 | 0.123834  | 0.103584  | 0.154283  | 0.0995047 | 0.100524 | 0.12398  |
| 0.134178 | 0.109411  | 0.116841  | 0.126748  | 0.126457  | 0.135344 | 0.139569 |
| 0.123106 | 0.100962  | 0.108392  | 0.12704   | 0.118298  | 0.131265 | 0.124709 |
| 0.13884  | 0.135635  | 0.145979  | 0.0824592 | 0.145979  | 0.152826 | 0.147727 |
| 0.127331 | 0.102855  | 0.115239  | 0.128642  | 0.121358  | 0.134907 | 0.127768 |
| 0.126166 | 0.106061  | 0.110868  | 0.133013  | 0.11553   | 0.135781 | 0.123397 |
| 0.116696 | 0.105332  | 0.109848  | 0.143939  | 0.118007  | 0.132139 | 0.118881 |
| 0.141463 | 0.122232  | 0.12704   | 0.12704   | 0.143065  | 0.147873 | 0.14627  |
| 0.10912  | 0.120484  | 0.114802  | 0.131119  | 0.117424  | 0.13447  | 0.125291 |
| 0.117279 | 0.103001  | 0.111305  | 0.13345   | 0.11859   | 0.133596 | 0.121503 |
| 0.119027 | 0.0995047 | 0.109266  | 0.132576  | 0.115676  | 0.13447  | 0.123834 |
| 0.132576 | 0.0996503 | 0.108829  | 0.127477  | 0.116113  | 0.132284 | 0.131265 |
| 0.136218 | 0.0884324 | 0.118881  | 0.131702  | 0.127622  | 0.133596 | 0.130245 |
| 0.127622 | 0.101981  | 0.113199  | 0.126894  | 0.118735  | 0.133159 | 0.127477 |
| 0.119318 | 0.0770688 | 0.0941142 | 0.13141   | 0.106061  | 0.122232 | 0.117133 |
| 0.121649 | 0.0831876 | 0.099359  | 0.128497  | 0.107517  | 0.123397 | 0.117133 |
| 0.122378 | 0.085373  | 0.103584  | 0.130973  | 0.107372  | 0.126166 | 0.122232 |
| 0.125291 | 0.11859   | 0.114656  | 0.142628  | 0.121941  | 0.13549  | 0.131556 |
| 0.130973 | 0.0887238 | 0.121503  | 0.138986  | 0.130245  | 0.133304 | 0.133741 |
| 0.128205 | 0.0874126 | 0.103875  | 0.137383  | 0.110868  | 0.126166 | 0.120192 |
| 0.119027 | 0.0893065 | 0.102564  | 0.130828  | 0.10169   | 0.122523 | 0.115385 |

|          |           |           |          |           |           |           |
|----------|-----------|-----------|----------|-----------|-----------|-----------|
| 0.126894 | 0.0861014 | 0.11859   | 0.131993 | 0.122669  | 0.130099  | 0.119464  |
| 0.121503 | 0.0856643 | 0.10271   | 0.129516 | 0.105915  | 0.119464  | 0.11553   |
| 0.133159 | 0.117133  | 0.123397  | 0.112325 | 0.125146  | 0.140152  | 0.131265  |
| 0.141608 | 0.125874  | 0.13039   | 0.125728 | 0.133887  | 0.15035   | 0.145542  |
| 0.125291 | 0.087704  | 0.110286  | 0.126603 | 0.115822  | 0.130536  | 0.120192  |
| 0.128642 | 0.0878497 | 0.10169   | 0.140152 | 0.107226  | 0.127477  | 0.118007  |
| 0.121941 | 0.0840618 | 0.101107  | 0.135198 | 0.108974  | 0.119901  | 0.120047  |
| 0.115239 | 0.0945513 | 0.0964452 | 0.126166 | 0.106061  | 0.11961   | 0.118007  |
| 0.132139 | 0.0855186 | 0.117716  | 0.140443 | 0.127914  | 0.131265  | 0.124417  |
| 0.120775 | 0.0866841 | 0.0967366 | 0.13141  | 0.105478  | 0.124563  | 0.119755  |
| 0.137529 | 0.121795  | 0.133304  | 0.156323 | 0.127185  | 0.142191  | 0.140297  |
| 0.126311 | 0.120775  | 0.107517  | 0.152681 | 0.107226  | 0.118735  | 0.139277  |
| 0.120775 | 0.113199  | 0.103438  | 0.14831  | 0.101981  | 0.107663  | 0.134324  |
| 0.121795 | 0.111014  | 0.0939685 | 0.147582 | 0.0977564 | 0.115967  | 0.124854  |
| 0.123543 | 0.104312  | 0.103584  | 0.135927 | 0.116404  | 0.130828  | 0.121941  |
| 0.123397 | 0.08581   | 0.101399  | 0.132576 | 0.105186  | 0.130099  | 0.118007  |
| 0.120047 | 0.104604  | 0.0983392 | 0.132139 | 0.0989219 | 0.118881  | 0.110868  |
| 0.115385 | 0.1081    | 0.0989219 | 0.14088  | 0.109703  | 0.113345  | 0.10708   |
| 0.107517 | 0.118298  | 0.101544  | 0.141171 | 0.101544  | 0.12704   | 0.117279  |
| 0.104312 | 0.11859   | 0.0980478 | 0.14933  | 0.101253  | 0.105478  | 0.0933858 |
| 0.127477 | 0.107663  | 0.113636  | 0.130536 | 0.122378  | 0.135052  | 0.131119  |
| 0.135781 | 0.12296   | 0.124272  | 0.148456 | 0.136509  | 0.141026  | 0.132721  |
| 0.138549 | 0.11757   | 0.129079  | 0.128788 | 0.140152  | 0.142045  | 0.143648  |
| 0.202069 | 0.202069  | 0.188811  | 0.206585 | 0.198718  | 0.209353  | 0.201049  |
| 0.239219 | 0.242716  | 0.234703  | 0.239948 | 0.243735  | 0.24796   | 0.23616   |
| 0.115822 | 0.118735  | 0.106643  | 0.135781 | 0.111597  | 0.128059  | 0.125291  |
| 0.101981 | 0.109557  | 0.102418  | 0.13884  | 0.0980478 | 0.115385  | 0.107372  |
| 0.104021 | 0.105186  | 0.0962995 | 0.133304 | 0.100962  | 0.120921  | 0.114656  |
| 0.105769 | 0.112179  | 0.10067   | 0.138549 | 0.106789  | 0.125     | 0.107372  |
| 0.137529 | 0.120047  | 0.126894  | 0.147873 | 0.129225  | 0.138112  | 0.134178  |
| 0.104604 | 0.115967  | 0.0986305 | 0.141754 | 0.108246  | 0.118881  | 0.10271   |
| 0.118444 | 0.132139  | 0.130828  | 0.157343 | 0.129079  | 0.122523  | 0.126748  |
| 0.106352 | 0.114219  | 0.099796  | 0.143502 | 0.101836  | 0.12296   | 0.114073  |
| 0.113636 | 0.121212  | 0.107955  | 0.15574  | 0.10912   | 0.124126  | 0.115239  |
| 0.055507 | 0.124563  | 0.108683  | 0.142483 | 0.11014   | 0.107372  | 0.120629  |
| 0.100962 | 0.123689  | 0.118007  | 0.153846 | 0.119755  | 0.129516  | 0.118298  |
| 0.111451 | 0.126603  | 0.113345  | 0.157051 | 0.108392  | 0.0983392 | 0.125291  |
| 0.106498 | 0.110286  | 0.102855  | 0.142774 | 0.103438  | 0.122815  | 0.1081    |
| 0.105332 | 0.108246  | 0.097028  | 0.138695 | 0.099359  | 0.110868  | 0.109848  |
| 0.104312 | 0.112471  | 0.100379  | 0.144085 | 0.106789  | 0.126457  | 0.11116   |
| 0.105186 | 0.112762  | 0.0992133 | 0.137675 | 0.102418  | 0.120338  | 0.103584  |
| 0.104604 | 0.108392  | 0.0942599 | 0.137383 | 0.102127  | 0.112471  | 0.108246  |
| 0.106206 | 0.112034  | 0.097028  | 0.142774 | 0.103438  | 0.127477  | 0.112179  |
| 0.102855 | 0.121212  | 0.110868  | 0.151078 | 0.116987  | 0.129953  | 0.11116   |



|           |           |           |          |           |          |          |
|-----------|-----------|-----------|----------|-----------|----------|----------|
| 0.104021  | 0.131993  | 0.117279  | 0.156323 | 0.117861  | 0.129953 | 0.123397 |
| 0.112617  | 0.112325  | 0.103147  | 0.143065 | 0.0964452 | 0.121941 | 0.111888 |
| 0.0984848 | 0.116841  | 0.0983392 | 0.142337 | 0.0942599 | 0.124126 | 0.108537 |
| 0.112762  | 0.126748  | 0.111451  | 0.154283 | 0.114073  | 0.125583 | 0.11757  |
| 0.11014   | 0.111014  | 0.0968823 | 0.141171 | 0.101253  | 0.114802 | 0.110577 |
| 0.109994  | 0.133013  | 0.119464  | 0.153846 | 0.126457  | 0.128351 | 0.125    |
| 0.140006  | 0.130099  | 0.130245  | 0.144814 | 0.136072  | 0.144668 | 0.140734 |
| 0.107809  | 0.129953  | 0.122523  | 0.144085 | 0.12398   | 0.134324 | 0.129808 |
| 0.107226  | 0.104604  | 0.0913462 | 0.137092 | 0.0992133 | 0.116259 | 0.105332 |
| 0.10271   | 0.108537  | 0.0981935 | 0.136655 | 0.102564  | 0.114948 | 0.108683 |
| 0.11451   | 0.115676  | 0.106789  | 0.145542 | 0.11116   | 0.125    | 0.114948 |
| 0.107663  | 0.121066  | 0.113928  | 0.145688 | 0.118881  | 0.120484 | 0.117716 |
| 0.104167  | 0.121066  | 0.109848  | 0.146853 | 0.114802  | 0.115822 | 0.116841 |
| 0.106352  | 0.115967  | 0.0939685 | 0.146125 | 0.102127  | 0.121795 | 0.108829 |
| 0.110286  | 0.114948  | 0.100816  | 0.148019 | 0.105478  | 0.126603 | 0.111597 |
| 0.101253  | 0.11116   | 0.108683  | 0.146853 | 0.108392  | 0.118735 | 0.11451  |
| 0.110286  | 0.121649  | 0.112471  | 0.151515 | 0.118881  | 0.124563 | 0.12296  |
| 0.102418  | 0.120192  | 0.119172  | 0.148601 | 0.118007  | 0.129225 | 0.11859  |
| 0.106643  | 0.121212  | 0.118153  | 0.153409 | 0.118735  | 0.133159 | 0.128351 |
| 0.120192  | 0.128059  | 0.115093  | 0.138403 | 0.113054  | 0.125146 | 0.123543 |
| 0.110577  | 0.110868  | 0.0984848 | 0.144814 | 0.104895  | 0.124854 | 0.116841 |
| 0.105041  | 0.126894  | 0.109848  | 0.150058 | 0.119172  | 0.125146 | 0.111014 |
| 0.104895  | 0.106935  | 0.0962995 | 0.143794 | 0.0968823 | 0.120629 | 0.10912  |
| 0.103001  | 0.114365  | 0.0795455 | 0.143065 | 0.0903263 | 0.103875 | 0.113636 |
| 0.101836  | 0.108246  | 0.101981  | 0.141026 | 0.104021  | 0.119318 | 0.111305 |
| 0.105769  | 0.113054  | 0.0995047 | 0.141463 | 0.105041  | 0.122378 | 0.105915 |
| 0.102273  | 0.109266  | 0.0948427 | 0.13884  | 0.099796  | 0.113054 | 0.103293 |
| 0.100379  | 0.121941  | 0.121212  | 0.149184 | 0.120047  | 0.133596 | 0.124126 |
| 0.118298  | 0.118007  | 0.0986305 | 0.133304 | 0.108246  | 0.11859  | 0.110286 |
| 0.106643  | 0.125874  | 0.122523  | 0.156031 | 0.127185  | 0.124417 | 0.112908 |
| 0.106352  | 0.115385  | 0.0971737 | 0.142628 | 0.102127  | 0.117424 | 0.104458 |
| 0.105332  | 0.108829  | 0.109848  | 0.1419   | 0.105478  | 0.123106 | 0.117716 |
| 0.119172  | 0.116841  | 0.11757   | 0.137966 | 0.115239  | 0.131119 | 0.126894 |
| 0.130828  | 0.11655   | 0.114365  | 0.14292  | 0.117861  | 0.134324 | 0.13447  |
| 0.128642  | 0.0983392 | 0.112762  | 0.136655 | 0.109557  | 0.13447  | 0.127622 |
| 0.125874  | 0.112762  | 0.112617  | 0.145833 | 0.127185  | 0.131119 | 0.121066 |
| 0.132139  | 0.116987  | 0.108974  | 0.143065 | 0.11655   | 0.127185 | 0.125874 |
| 0.13039   | 0.103875  | 0.106935  | 0.140152 | 0.113928  | 0.130682 | 0.127914 |
| 0.149038  | 0.112908  | 0.131993  | 0.15035  | 0.138112  | 0.144959 | 0.1419   |
| 0.136072  | 0.122378  | 0.132139  | 0.141754 | 0.13447   | 0.144231 | 0.139714 |
| 0.128205  | 0.100524  | 0.0992133 | 0.136801 | 0.109411  | 0.124709 | 0.118444 |
| 0.134178  | 0.121358  | 0.125583  | 0.145979 | 0.136655  | 0.143794 | 0.139277 |
| 0.138695  | 0.104021  | 0.121358  | 0.144959 | 0.129808  | 0.13549  | 0.133887 |
| 0.136072  | 0.119755  | 0.129808  | 0.151078 | 0.137383  | 0.144231 | 0.134761 |

|          |           |           |          |           |          |          |
|----------|-----------|-----------|----------|-----------|----------|----------|
| 0.126166 | 0.111597  | 0.118444  | 0.137966 | 0.123689  | 0.129662 | 0.128059 |
| 0.140152 | 0.102273  | 0.119027  | 0.146125 | 0.127185  | 0.136655 | 0.128351 |
| 0.136509 | 0.10912   | 0.125291  | 0.144814 | 0.131993  | 0.138549 | 0.136946 |
| 0.136072 | 0.117424  | 0.126311  | 0.146707 | 0.137092  | 0.142483 | 0.129516 |
| 0.143648 | 0.12704   | 0.131556  | 0.154575 | 0.142337  | 0.143648 | 0.142045 |
| 0.140152 | 0.111305  | 0.125437  | 0.154283 | 0.127477  | 0.138986 | 0.133013 |
| 0.127331 | 0.106935  | 0.115239  | 0.138258 | 0.121941  | 0.13141  | 0.125146 |
| 0.135344 | 0.130099  | 0.123543  | 0.15472  | 0.124126  | 0.141463 | 0.136655 |
| 0.145688 | 0.115093  | 0.127768  | 0.150204 | 0.136218  | 0.143357 | 0.13884  |
| 0.122086 | 0.104021  | 0.110286  | 0.13447  | 0.11553   | 0.128205 | 0.125728 |
| 0.225962 | 0.2213    | 0.2162    | 0.227273 | 0.222902  | 0.235286 | 0.219114 |
| 0.128351 | 0.109994  | 0.119172  | 0.144814 | 0.125583  | 0.137966 | 0.131993 |
| 0.130973 | 0.107663  | 0.108683  | 0.142483 | 0.115385  | 0.131265 | 0.129662 |
| 0.134324 | 0.119464  | 0.128351  | 0.154575 | 0.140006  | 0.1419   | 0.138258 |
| 0.134324 | 0.108683  | 0.120192  | 0.143794 | 0.123689  | 0.136364 | 0.12602  |
| 0.152389 | 0.113636  | 0.132139  | 0.153118 | 0.136801  | 0.144231 | 0.140589 |
| 0.130245 | 0.118298  | 0.116696  | 0.146416 | 0.126311  | 0.136072 | 0.127185 |
| 0.131265 | 0.113782  | 0.120047  | 0.141608 | 0.130536  | 0.134178 | 0.127331 |
| 0.139714 | 0.108537  | 0.119755  | 0.149184 | 0.130245  | 0.130682 | 0.129371 |
| 0.134615 | 0.11859   | 0.129808  | 0.151952 | 0.134761  | 0.143065 | 0.134178 |
| 0.137966 | 0.119318  | 0.133741  | 0.144814 | 0.13549   | 0.141171 | 0.140152 |
| 0.126457 | 0.11859   | 0.131847  | 0.146125 | 0.132721  | 0.138403 | 0.133596 |
| 0.138695 | 0.118298  | 0.124854  | 0.144959 | 0.137966  | 0.143648 | 0.136509 |
| 0.129079 | 0.0973193 | 0.109411  | 0.141463 | 0.118153  | 0.131702 | 0.129225 |
| 0.134615 | 0.113345  | 0.119318  | 0.144668 | 0.126603  | 0.145396 | 0.127768 |
| 0.139132 | 0.122523  | 0.130245  | 0.154429 | 0.138695  | 0.146416 | 0.142483 |
| 0.122378 | 0.109557  | 0.118153  | 0.13884  | 0.128642  | 0.138986 | 0.12602  |
| 0.11859  | 0.124709  | 0.0604604 | 0.159237 | 0.102418  | 0.117133 | 0.125728 |
| 0.144376 | 0.13447   | 0.130536  | 0.130536 | 0.13986   | 0.149038 | 0.142774 |
| 0.125437 | 0.10708   | 0.116259  | 0.138986 | 0.125291  | 0.138258 | 0.133159 |
| 0.137092 | 0.113199  | 0.126748  | 0.149184 | 0.131702  | 0.136801 | 0.136364 |
| 0.133741 | 0.122669  | 0.128934  | 0.118735 | 0.13447   | 0.142774 | 0.140589 |
| 0.140589 | 0.115239  | 0.122669  | 0.148019 | 0.132576  | 0.133596 | 0.132867 |
| 0.138258 | 0.129516  | 0.126166  | 0.125874 | 0.126457  | 0.144085 | 0.137529 |
| 0.143211 | 0.135344  | 0.133741  | 0.129953 | 0.138112  | 0.147873 | 0.145979 |
| 0.126166 | 0.0981935 | 0.103001  | 0.140297 | 0.110286  | 0.127914 | 0.119901 |
| 0.124563 | 0.123689  | 0.114802  | 0.150641 | 0.108683  | 0.123397 | 0.134907 |
| 0.145396 | 0.139277  | 0.138549  | 0.129516 | 0.145542  | 0.148601 | 0.144668 |
| 0.124126 | 0.0839161 | 0.113491  | 0.134178 | 0.121649  | 0.126166 | 0.127768 |
| 0.113636 | 0.120047  | 0.0898893 | 0.14933  | 0.0922203 | 0.10169  | 0.118153 |
| 0.143502 | 0.137092  | 0.13345   | 0.157925 | 0.136364  | 0.143794 | 0.143065 |
| 0.107663 | 0.125146  | 0.0920746 | 0.157051 | 0.0865385 | 0.108246 | 0.120921 |
| 0.136655 | 0.126748  | 0.13884   | 0.154575 | 0.135052  | 0.145396 | 0.145251 |
| 0.140297 | 0.118153  | 0.122669  | 0.151224 | 0.129662  | 0.141171 | 0.133741 |

|          |          |          |          |          |          |          |
|----------|----------|----------|----------|----------|----------|----------|
| 0.132576 | 0.106935 | 0.121649 | 0.138258 | 0.131265 | 0.141317 | 0.129808 |
| 0.121649 | 0.122523 | 0.122086 | 0.139277 | 0.121795 | 0.133304 | 0.134033 |
| 0.127622 | 0.100816 | 0.114365 | 0.133013 | 0.122815 | 0.134324 | 0.13447  |
| 0.131847 | 0.105041 | 0.125    | 0.137821 | 0.131119 | 0.140006 | 0.133159 |
| 0.136801 | 0.118735 | 0.125    | 0.148019 | 0.133741 | 0.145542 | 0.13345  |
| 0.131556 | 0.116696 | 0.130828 | 0.143648 | 0.139569 | 0.145542 | 0.131993 |
| 0.13447  | 0.119318 | 0.126748 | 0.13345  | 0.139277 | 0.144668 | 0.134907 |
| 0.126894 | 0.112325 | 0.12704  | 0.120047 | 0.129371 | 0.143502 | 0.136946 |
| 0.136509 | 0.129516 | 0.143939 | 0.120921 | 0.147727 | 0.151369 | 0.149184 |
| 0.134178 | 0.103584 | 0.111305 | 0.144522 | 0.119464 | 0.131556 | 0.125291 |
| 0.117861 | 0.101544 | 0.106352 | 0.13986  | 0.112762 | 0.118735 | 0.103438 |
| 0.138258 | 0.114656 | 0.128497 | 0.133159 | 0.130828 | 0.144085 | 0.134615 |
| 0.126603 | 0.090472 | 0.113345 | 0.127622 | 0.118007 | 0.130973 | 0.125291 |
| 0.15035  | 0.130536 | 0.14292  | 0.11553  | 0.140006 | 0.15472  | 0.153992 |
| 0.157925 | 0.138112 | 0.148456 | 0.113782 | 0.152535 | 0.158217 | 0.15574  |
| 0.105769 | 0.125    | 0.113199 | 0.154283 | 0.11553  | 0.126457 | 0.114656 |
| 0.10708  | 0.113199 | 0.104021 | 0.145396 | 0.106643 | 0.12398  | 0.114219 |
| 0.139277 | 0.129079 | 0.132139 | 0.153992 | 0.139132 | 0.147145 | 0.137675 |
| 0.139423 | 0.12602  | 0.126748 | 0.151224 | 0.137238 | 0.142628 | 0.141608 |
| 0.116696 | 0.121649 | 0.110431 | 0.151224 | 0.111014 | 0.119901 | 0.112762 |
| 0.134761 | 0.122232 | 0.136655 | 0.153263 | 0.137821 | 0.143794 | 0.140443 |
| 0.121358 | 0.125728 | 0.131993 | 0.123834 | 0.13345  | 0.130682 | 0.131702 |
| 0.118881 | 0.10373  | 0.105332 | 0.145833 | 0.10708  | 0.120047 | 0.121941 |
| 0.151807 | 0.154429 | 0.157197 | 0.129808 | 0.159819 | 0.170163 | 0.16623  |
| 0.11859  | 0.106935 | 0.105915 | 0.149038 | 0.112034 | 0.120629 | 0.120775 |
| 0.137238 | 0.125291 | 0.128351 | 0.1537   | 0.135052 | 0.141026 | 0.13884  |
| 0.118735 | 0.103875 | 0.109266 | 0.141317 | 0.113636 | 0.116113 | 0.102855 |
| 0.138258 | 0.123397 | 0.134324 | 0.152389 | 0.134615 | 0.14729  | 0.140443 |
| 0.13039  | 0.107663 | 0.122378 | 0.144231 | 0.131119 | 0.136218 | 0.131119 |
| 0.14627  | 0.143065 | 0.139423 | 0.135052 | 0.143502 | 0.156469 | 0.148456 |
| 0.145251 | 0.144959 | 0.147436 | 0.160256 | 0.152972 | 0.15574  | 0.143939 |
| 0.136364 | 0.131993 | 0.124563 | 0.146707 | 0.126311 | 0.138986 | 0.133887 |
| 0.146125 | 0.142628 | 0.134324 | 0.153555 | 0.137529 | 0.146999 | 0.145396 |
| 0.148019 | 0.143648 | 0.13243  | 0.160402 | 0.137675 | 0.160256 | 0.14933  |
| 0.15676  | 0.147727 | 0.138258 | 0.158071 | 0.147873 | 0.157634 | 0.156031 |
| 0.120775 | 0.105624 | 0.119755 | 0.133741 | 0.11655  | 0.131847 | 0.124709 |
| 0.148019 | 0.139569 | 0.136218 | 0.15778  | 0.141171 | 0.147145 | 0.136218 |
| 0.13141  | 0.117133 | 0.115239 | 0.142337 | 0.117279 | 0.132867 | 0.130973 |
| 0.127477 | 0.109411 | 0.118298 | 0.133741 | 0.117716 | 0.137092 | 0.123834 |
| 0.136072 | 0.115967 | 0.120192 | 0.141754 | 0.121941 | 0.134324 | 0.128351 |
| 0.133159 | 0.12704  | 0.121941 | 0.145251 | 0.119027 | 0.134033 | 0.131265 |
| 0.128059 | 0.108537 | 0.108392 | 0.145688 | 0.115093 | 0.13447  | 0.126166 |
| 0.123397 | 0.116987 | 0.109557 | 0.136655 | 0.115967 | 0.132139 | 0.126457 |
| 0.140297 | 0.125728 | 0.121212 | 0.153263 | 0.12296  | 0.142337 | 0.130828 |

|          |           |           |          |           |          |          |
|----------|-----------|-----------|----------|-----------|----------|----------|
| 0.136072 | 0.119172  | 0.123106  | 0.147582 | 0.128642  | 0.138403 | 0.137383 |
| 0.11859  | 0.101107  | 0.10271   | 0.138549 | 0.108537  | 0.120921 | 0.114365 |
| 0.135198 | 0.127331  | 0.124563  | 0.149913 | 0.121649  | 0.138986 | 0.134761 |
| 0.130682 | 0.126894  | 0.120047  | 0.145396 | 0.119755  | 0.135927 | 0.130828 |
| 0.119318 | 0.107955  | 0.106352  | 0.146562 | 0.104604  | 0.123397 | 0.116841 |
| 0.217512 | 0.21926   | 0.212704  | 0.221445 | 0.221445  | 0.232955 | 0.217075 |
| 0.147873 | 0.145251  | 0.142191  | 0.1588   | 0.146562  | 0.147873 | 0.146562 |
| 0.134907 | 0.128788  | 0.127477  | 0.158362 | 0.131847  | 0.137238 | 0.130099 |
| 0.140297 | 0.123689  | 0.125     | 0.149184 | 0.129953  | 0.139132 | 0.13345  |
| 0.215763 | 0.21722   | 0.206876  | 0.217657 | 0.218531  | 0.225962 | 0.213578 |
| 0.124854 | 0.119027  | 0.111888  | 0.13141  | 0.112179  | 0.133013 | 0.131702 |
| 0.136072 | 0.120047  | 0.120192  | 0.144085 | 0.124563  | 0.13986  | 0.129808 |
| 0.136072 | 0.123252  | 0.124272  | 0.150787 | 0.124272  | 0.134615 | 0.122815 |
| 0.133887 | 0.113199  | 0.120047  | 0.145105 | 0.125     | 0.135927 | 0.130245 |
| 0.249563 | 0.25539   | 0.24796   | 0.250291 | 0.25641   | 0.25947  | 0.250583 |
| 0.138695 | 0.121503  | 0.124272  | 0.124854 | 0.130973  | 0.143939 | 0.138258 |
| 0.116841 | 0.101399  | 0.0983392 | 0.145542 | 0.0995047 | 0.125    | 0.114656 |
| 0.130536 | 0.124709  | 0.118735  | 0.146999 | 0.129516  | 0.143357 | 0.121941 |
| 0.131702 | 0.125874  | 0.118153  | 0.14729  | 0.129225  | 0.142483 | 0.122523 |
| 0.137238 | 0.124417  | 0.128934  | 0.123689 | 0.128351  | 0.146853 | 0.144085 |
| 0.13141  | 0.132284  | 0.125728  | 0.135344 | 0.131847  | 0.144231 | 0.139132 |
| 0.118881 | 0.105769  | 0.10271   | 0.14729  | 0.102418  | 0.126457 | 0.120775 |
| 0.132721 | 0.124854  | 0.118881  | 0.146562 | 0.118881  | 0.137383 | 0.130245 |
| 0.139569 | 0.13141   | 0.124563  | 0.149038 | 0.131847  | 0.143648 | 0.135344 |
| 0.131993 | 0.111597  | 0.116987  | 0.141754 | 0.120192  | 0.133741 | 0.127768 |
| 0.131556 | 0.119318  | 0.115676  | 0.144231 | 0.11859   | 0.137383 | 0.129371 |
| 0.125874 | 0.0961538 | 0.113782  | 0.136801 | 0.11961   | 0.129371 | 0.125728 |
| 0.146125 | 0.143794  | 0.14627   | 0.161713 | 0.15035   | 0.157197 | 0.1419   |
| 0.13884  | 0.122523  | 0.126748  | 0.125583 | 0.130828  | 0.145833 | 0.140734 |
| 0.137675 | 0.121649  | 0.122378  | 0.147436 | 0.126457  | 0.14292  | 0.131119 |
| 0.19799  | 0.198281  | 0.187646  | 0.199301 | 0.195513  | 0.207314 | 0.196096 |
| 0.207314 | 0.21081   | 0.20134   | 0.212121 | 0.211247  | 0.220717 | 0.208042 |
| 0.137675 | 0.114948  | 0.120047  | 0.145105 | 0.128205  | 0.138549 | 0.132867 |
| 0.127768 | 0.109703  | 0.115093  | 0.143065 | 0.11655   | 0.132139 | 0.124126 |
| 0.148456 | 0.127477  | 0.13345   | 0.153263 | 0.138112  | 0.142337 | 0.141317 |
| 0.117861 | 0.105332  | 0.100233  | 0.14627  | 0.101399  | 0.121358 | 0.118298 |
| 0.142483 | 0.121503  | 0.128934  | 0.127768 | 0.133304  | 0.145396 | 0.140297 |
| 0.125146 | 0.129808  | 0.125     | 0.149476 | 0.128788  | 0.137675 | 0.130536 |
| 0.229458 | 0.231789  | 0.219988  | 0.229604 | 0.230769  | 0.243735 | 0.22873  |
| 0.13243  | 0.120192  | 0.11014   | 0.153263 | 0.120047  | 0.133304 | 0.12704  |
| 0.195221 | 0.211247  | 0.202069  | 0.203234 | 0.207022  | 0.2162   | 0.206439 |
| 0.121649 | 0.101544  | 0.104312  | 0.135198 | 0.106935  | 0.126603 | 0.121795 |
| 0.127331 | 0.114219  | 0.108829  | 0.145833 | 0.114656  | 0.134907 | 0.124272 |
| 0.12602  | 0.123689  | 0.113345  | 0.135781 | 0.111597  | 0.133887 | 0.125583 |

|          |          |          |          |          |          |          |
|----------|----------|----------|----------|----------|----------|----------|
| 0.122815 | 0.109703 | 0.111888 | 0.138403 | 0.11859  | 0.131847 | 0.123834 |
| 0.213287 | 0.214161 | 0.202069 | 0.212558 | 0.21285  | 0.222611 | 0.209645 |
| 0.143648 | 0.136655 | 0.132139 | 0.153409 | 0.137092 | 0.146562 | 0.140006 |
| 0.129953 | 0.11655  | 0.112325 | 0.140006 | 0.115239 | 0.132284 | 0.128351 |
| 0.138112 | 0.134324 | 0.125146 | 0.149913 | 0.126311 | 0.139569 | 0.133596 |
| 0.132576 | 0.125    | 0.121941 | 0.149621 | 0.11961  | 0.132284 | 0.128059 |
| 0.134615 | 0.114219 | 0.116696 | 0.144959 | 0.118444 | 0.135781 | 0.130682 |
| 0.117861 | 0.102127 | 0.104895 | 0.13345  | 0.111305 | 0.128351 | 0.125    |
| 0.121066 | 0.109703 | 0.11014  | 0.141026 | 0.11014  | 0.129808 | 0.121795 |
| 0.138258 | 0.122232 | 0.126748 | 0.144522 | 0.126166 | 0.14088  | 0.129079 |
| 0.12602  | 0.120192 | 0.115967 | 0.142483 | 0.116841 | 0.136801 | 0.130245 |
| 0.129371 | 0.116259 | 0.11116  | 0.14088  | 0.118735 | 0.132867 | 0.121066 |
| 0.195367 | 0.197698 | 0.183858 | 0.199009 | 0.19493  | 0.205274 | 0.196678 |
| 0.13141  | 0.126457 | 0.119318 | 0.146707 | 0.130682 | 0.145105 | 0.120775 |
| 0.136509 | 0.132721 | 0.130245 | 0.155886 | 0.134615 | 0.148164 | 0.132867 |
| 0.126748 | 0.127622 | 0.11757  | 0.148164 | 0.126311 | 0.129953 | 0.122232 |
| 0.14088  | 0.121358 | 0.124709 | 0.130245 | 0.129079 | 0.143794 | 0.141026 |
| 0.13447  | 0.128642 | 0.125583 | 0.145979 | 0.125874 | 0.13884  | 0.133159 |
| 0.122815 | 0.100087 | 0.11655  | 0.135781 | 0.11655  | 0.128642 | 0.125583 |
| 0.126457 | 0.115385 | 0.112617 | 0.133304 | 0.114365 | 0.136655 | 0.120192 |
| 0.120629 | 0.108683 | 0.105915 | 0.146125 | 0.107372 | 0.122378 | 0.120192 |
| 0.133887 | 0.128934 | 0.122086 | 0.152389 | 0.130828 | 0.143502 | 0.129079 |
| 0.125437 | 0.122232 | 0.115093 | 0.145688 | 0.122378 | 0.142045 | 0.122669 |
| 0.133741 | 0.117716 | 0.117861 | 0.145833 | 0.122815 | 0.136364 | 0.133013 |
| 0.135927 | 0.124272 | 0.11859  | 0.150932 | 0.122086 | 0.134178 | 0.124709 |
| 0.143357 | 0.131993 | 0.132721 | 0.153409 | 0.138549 | 0.1419   | 0.128934 |
| 0.133159 | 0.113928 | 0.116113 | 0.126311 | 0.123397 | 0.136946 | 0.131556 |
| 0.14292  | 0.141463 | 0.139277 | 0.154138 | 0.141026 | 0.146125 | 0.142483 |
| 0.131847 | 0.114656 | 0.113928 | 0.142191 | 0.117716 | 0.131556 | 0.130245 |
| 0.119901 | 0.122232 | 0.11655  | 0.143939 | 0.120921 | 0.133013 | 0.122086 |
| 0.130828 | 0.124417 | 0.118444 | 0.142045 | 0.119901 | 0.129953 | 0.132139 |
| 0.118007 | 0.110723 | 0.107955 | 0.151661 | 0.10708  | 0.129953 | 0.121066 |
| 0.195221 | 0.194056 | 0.180507 | 0.19391  | 0.192162 | 0.206585 | 0.192745 |
| 0.128642 | 0.112908 | 0.106061 | 0.136072 | 0.111014 | 0.130099 | 0.119172 |
| 0.122232 | 0.111742 | 0.104895 | 0.137529 | 0.111888 | 0.123397 | 0.116841 |
| 0.137383 | 0.123689 | 0.123543 | 0.143357 | 0.127914 | 0.140589 | 0.128205 |
| 0.183712 | 0.192162 | 0.175699 | 0.189103 | 0.187354 | 0.197115 | 0.186772 |
| 0.147145 | 0.129953 | 0.132721 | 0.128642 | 0.139423 | 0.15472  | 0.147873 |
| 0.151224 | 0.136946 | 0.144959 | 0.132721 | 0.148456 | 0.155594 | 0.15574  |
| 0.146416 | 0.146416 | 0.148893 | 0.162005 | 0.154138 | 0.155449 | 0.143065 |
| 0.132139 | 0.112034 | 0.115967 | 0.124709 | 0.122378 | 0.139423 | 0.132576 |
| 0.135781 | 0.129953 | 0.123106 | 0.148456 | 0.124854 | 0.137238 | 0.131556 |
| 0.216346 | 0.218094 | 0.210373 | 0.21824  | 0.215909 | 0.228293 | 0.21824  |
| 0.136801 | 0.131847 | 0.119464 | 0.150641 | 0.125874 | 0.137675 | 0.126457 |

|          |           |          |          |          |          |          |
|----------|-----------|----------|----------|----------|----------|----------|
| 0.137238 | 0.134615  | 0.128351 | 0.148747 | 0.127185 | 0.140443 | 0.136509 |
| 0.131119 | 0.114219  | 0.110868 | 0.139132 | 0.114365 | 0.129079 | 0.125146 |
| 0.175699 | 0.180361  | 0.165064 | 0.174388 | 0.171766 | 0.183858 | 0.171183 |
| 0.129371 | 0.117424  | 0.114073 | 0.142628 | 0.116696 | 0.131993 | 0.126894 |
| 0.151661 | 0.143211  | 0.147436 | 0.16317  | 0.153846 | 0.153992 | 0.145688 |
| 0.127477 | 0.108829  | 0.116259 | 0.145688 | 0.119464 | 0.124272 | 0.127331 |
| 0.197407 | 0.196241  | 0.184441 | 0.200175 | 0.195804 | 0.206148 | 0.194056 |
| 0.137092 | 0.11757   | 0.122086 | 0.125874 | 0.127622 | 0.141171 | 0.136946 |
| 0.124272 | 0.108246  | 0.107517 | 0.138986 | 0.107809 | 0.128351 | 0.121503 |
| 0.128788 | 0.120921  | 0.112325 | 0.146416 | 0.116987 | 0.136364 | 0.12398  |
| 0.135635 | 0.122815  | 0.112762 | 0.146853 | 0.11859  | 0.135052 | 0.121212 |
| 0.136801 | 0.11553   | 0.118881 | 0.143648 | 0.120921 | 0.137092 | 0.128497 |
| 0.131556 | 0.124272  | 0.117716 | 0.148019 | 0.124709 | 0.142337 | 0.132576 |
| 0.130245 | 0.109557  | 0.114073 | 0.141754 | 0.118735 | 0.132576 | 0.127185 |
| 0.192745 | 0.193328  | 0.184441 | 0.196678 | 0.195221 | 0.207314 | 0.195513 |
| 0.13549  | 0.12296   | 0.120192 | 0.149913 | 0.12398  | 0.136946 | 0.131556 |
| 0.128934 | 0.119027  | 0.112762 | 0.143648 | 0.119172 | 0.135927 | 0.128497 |
| 0.21824  | 0.216492  | 0.206439 | 0.218677 | 0.217512 | 0.226981 | 0.214889 |
| 0.130828 | 0.126457  | 0.120484 | 0.148456 | 0.13243  | 0.145688 | 0.122815 |
| 0.13039  | 0.111451  | 0.113345 | 0.143065 | 0.120338 | 0.131847 | 0.126748 |
| 0.128351 | 0.107372  | 0.109557 | 0.138986 | 0.117424 | 0.129225 | 0.126457 |
| 0.13986  | 0.138695  | 0.13884  | 0.149621 | 0.137966 | 0.14627  | 0.142628 |
| 0.197261 | 0.199301  | 0.182547 | 0.197407 | 0.193036 | 0.206585 | 0.196241 |
| 0.119318 | 0.105332  | 0.099359 | 0.147727 | 0.10169  | 0.123689 | 0.119464 |
| 0.140006 | 0.126894  | 0.125874 | 0.153846 | 0.13141  | 0.136801 | 0.126748 |
| 0.131556 | 0.110868  | 0.113345 | 0.141317 | 0.120047 | 0.133013 | 0.126748 |
| 0.128642 | 0.10708   | 0.111597 | 0.143065 | 0.117716 | 0.128642 | 0.125291 |
| 0.129662 | 0.108392  | 0.111451 | 0.141171 | 0.116987 | 0.13141  | 0.124272 |
| 0.133304 | 0.123397  | 0.118881 | 0.143357 | 0.117424 | 0.135927 | 0.13141  |
| 0.122378 | 0.0990676 | 0.100962 | 0.13884  | 0.107955 | 0.123543 | 0.117279 |
| 0.141026 | 0.118881  | 0.12602  | 0.12398  | 0.126311 | 0.1419   | 0.142045 |
| 0.13549  | 0.132867  | 0.134761 | 0.1537   | 0.135635 | 0.145688 | 0.137383 |
| 0.135198 | 0.120338  | 0.119901 | 0.125437 | 0.126603 | 0.144814 | 0.138258 |
| 0.134761 | 0.127477  | 0.124709 | 0.150641 | 0.124126 | 0.135927 | 0.131993 |
| 0.202797 | 0.202797  | 0.188666 | 0.203817 | 0.198281 | 0.210956 | 0.203234 |
| 0.132721 | 0.121649  | 0.115967 | 0.143648 | 0.121212 | 0.13447  | 0.123252 |
| 0.13986  | 0.135781  | 0.131556 | 0.150787 | 0.134178 | 0.140443 | 0.135344 |
| 0.128934 | 0.108246  | 0.111888 | 0.144231 | 0.119464 | 0.133013 | 0.129953 |
| 0.119464 | 0.0961538 | 0.103584 | 0.13447  | 0.107955 | 0.117133 | 0.114656 |
| 0.120338 | 0.120629  | 0.113199 | 0.131556 | 0.117861 | 0.138986 | 0.127477 |
| 0.11961  | 0.10708   | 0.10373  | 0.145396 | 0.104312 | 0.121649 | 0.117424 |
| 0.142045 | 0.132721  | 0.127914 | 0.14831  | 0.132576 | 0.14729  | 0.138112 |
| 0.134324 | 0.127914  | 0.120484 | 0.151952 | 0.128934 | 0.141026 | 0.130682 |
| 0.118298 | 0.105478  | 0.101544 | 0.134761 | 0.099796 | 0.126457 | 0.116404 |

|          |           |           |          |           |          |          |
|----------|-----------|-----------|----------|-----------|----------|----------|
| 0.114365 | 0.100379  | 0.0979021 | 0.133741 | 0.0979021 | 0.11961  | 0.111888 |
| 0.124709 | 0.110723  | 0.106498  | 0.135927 | 0.111742  | 0.128788 | 0.119027 |
| 0.123106 | 0.099796  | 0.107226  | 0.134324 | 0.107809  | 0.129225 | 0.121503 |
| 0.144231 | 0.125583  | 0.132721  | 0.128351 | 0.133304  | 0.145979 | 0.144668 |
| 0.12398  | 0.103584  | 0.0996503 | 0.152389 | 0.104895  | 0.129808 | 0.120629 |
| 0.129662 | 0.121212  | 0.116113  | 0.143794 | 0.119027  | 0.134615 | 0.128934 |
| 0.119755 | 0.104604  | 0.0948427 | 0.144668 | 0.100379  | 0.12296  | 0.116404 |
| 0.128059 | 0.108537  | 0.108683  | 0.145396 | 0.118007  | 0.131556 | 0.128788 |
| 0.12704  | 0.110723  | 0.105041  | 0.135927 | 0.111451  | 0.126166 | 0.118735 |
| 0.131993 | 0.111014  | 0.112908  | 0.144668 | 0.118735  | 0.134615 | 0.127185 |
| 0.128788 | 0.117133  | 0.113782  | 0.144959 | 0.116404  | 0.130828 | 0.120484 |
| 0.132867 | 0.126166  | 0.118153  | 0.148164 | 0.126311  | 0.140734 | 0.126603 |
| 0.130245 | 0.115385  | 0.116113  | 0.144376 | 0.116404  | 0.137821 | 0.127477 |
| 0.124563 | 0.101836  | 0.105478  | 0.142191 | 0.108392  | 0.11961  | 0.11859  |
| 0.131702 | 0.111305  | 0.114948  | 0.143794 | 0.11961   | 0.131702 | 0.131265 |
| 0.130245 | 0.12704   | 0.121941  | 0.148164 | 0.124563  | 0.137821 | 0.129516 |
| 0.136801 | 0.123689  | 0.121503  | 0.147145 | 0.120047  | 0.13884  | 0.134615 |
| 0.125291 | 0.102855  | 0.109411  | 0.139132 | 0.112617  | 0.123543 | 0.12398  |
| 0.127331 | 0.109848  | 0.110577  | 0.141754 | 0.120192  | 0.132867 | 0.12602  |
| 0.132721 | 0.127477  | 0.120629  | 0.144231 | 0.123543  | 0.136509 | 0.131119 |
| 0.119901 | 0.0980478 | 0.106643  | 0.134033 | 0.108392  | 0.124854 | 0.124126 |
| 0.134178 | 0.124854  | 0.121795  | 0.14831  | 0.120047  | 0.137966 | 0.132867 |
| 0.134761 | 0.116404  | 0.116841  | 0.143939 | 0.120629  | 0.136801 | 0.130245 |
| 0.123106 | 0.103293  | 0.106643  | 0.1419   | 0.106643  | 0.121066 | 0.120047 |
| 0.133013 | 0.11757   | 0.112179  | 0.140152 | 0.118881  | 0.132721 | 0.120921 |
| 0.126748 | 0.108974  | 0.105041  | 0.13447  | 0.110577  | 0.129079 | 0.121358 |
| 0.135344 | 0.129516  | 0.122669  | 0.150058 | 0.124126  | 0.139423 | 0.130245 |
| 0.135344 | 0.128059  | 0.123543  | 0.151515 | 0.12296   | 0.134178 | 0.131702 |
| 0.13141  | 0.115093  | 0.113782  | 0.145251 | 0.116113  | 0.130536 | 0.128934 |
| 0.199883 | 0.198427  | 0.190705  | 0.201777 | 0.19799   | 0.210956 | 0.197115 |
| 0.17366  | 0.172786  | 0.159528  | 0.176428 | 0.170309  | 0.180361 | 0.171474 |
| 0.138112 | 0.119464  | 0.122232  | 0.12602  | 0.125728  | 0.143648 | 0.137966 |
| 0.120775 | 0.11553   | 0.107809  | 0.14627  | 0.113054  | 0.139423 | 0.127914 |
| 0.152535 | 0.14088   | 0.148601  | 0.134324 | 0.151807  | 0.160111 | 0.15472  |
| 0.13986  | 0.128788  | 0.126603  | 0.151661 | 0.129808  | 0.141026 | 0.133596 |
| 0.126603 | 0.122815  | 0.119464  | 0.138695 | 0.118881  | 0.137675 | 0.129953 |
| 0.128497 | 0.118007  | 0.114073  | 0.138549 | 0.121941  | 0.134615 | 0.13039  |
| 0.128497 | 0.0964452 | 0.111742  | 0.139423 | 0.116987  | 0.129953 | 0.127477 |
| 0.132284 | 0.124126  | 0.122523  | 0.149913 | 0.120775  | 0.138112 | 0.134178 |
| 0.207605 | 0.207896  | 0.194347  | 0.20979  | 0.205128  | 0.216929 | 0.208042 |
| 0.121212 | 0.111597  | 0.10271   | 0.148747 | 0.103293  | 0.127914 | 0.122523 |
| 0.125146 | 0.122232  | 0.110723  | 0.139569 | 0.112762  | 0.133013 | 0.129662 |
| 0.125728 | 0.105332  | 0.111597  | 0.138695 | 0.114219  | 0.131847 | 0.119464 |
| 0.131702 | 0.122669  | 0.114656  | 0.149913 | 0.115822  | 0.133741 | 0.127185 |

|          |           |           |          |           |          |          |
|----------|-----------|-----------|----------|-----------|----------|----------|
| 0.189248 | 0.19391   | 0.178904  | 0.192599 | 0.187937  | 0.202652 | 0.191725 |
| 0.247523 | 0.251603  | 0.246212  | 0.245047 | 0.254662  | 0.258596 | 0.247669 |
| 0.134178 | 0.129225  | 0.122378  | 0.154138 | 0.127914  | 0.14292  | 0.132576 |
| 0.133596 | 0.12602   | 0.117133  | 0.147145 | 0.121212  | 0.140006 | 0.131702 |
| 0.138549 | 0.116113  | 0.120047  | 0.125874 | 0.128205  | 0.142337 | 0.135781 |
| 0.134615 | 0.113345  | 0.114656  | 0.141463 | 0.118444  | 0.134615 | 0.126311 |
| 0.116987 | 0.102418  | 0.0984848 | 0.145396 | 0.0981935 | 0.122232 | 0.118881 |
| 0.128497 | 0.120047  | 0.112908  | 0.144085 | 0.11757   | 0.131119 | 0.123397 |
| 0.12398  | 0.119318  | 0.117133  | 0.136072 | 0.118007  | 0.13243  | 0.127622 |
| 0.11757  | 0.102127  | 0.0973193 | 0.145688 | 0.0979021 | 0.119027 | 0.115093 |
| 0.124417 | 0.119755  | 0.116404  | 0.13243  | 0.116113  | 0.132284 | 0.130682 |
| 0.134178 | 0.103584  | 0.113636  | 0.142774 | 0.118007  | 0.128934 | 0.127622 |
| 0.124709 | 0.0996503 | 0.105624  | 0.142337 | 0.107955  | 0.121795 | 0.115822 |
| 0.130973 | 0.126603  | 0.126457  | 0.148893 | 0.12704   | 0.14292  | 0.128497 |
| 0.136364 | 0.126748  | 0.119901  | 0.148164 | 0.119901  | 0.140443 | 0.133596 |
| 0.116259 | 0.109848  | 0.105332  | 0.137675 | 0.109703  | 0.128788 | 0.118735 |
| 0.121212 | 0.105478  | 0.122815  | 0.14088  | 0.13039   | 0.138986 | 0.127477 |
| 0.140734 | 0.126166  | 0.131556  | 0.144668 | 0.131847  | 0.143357 | 0.133887 |
| 0.130099 | 0.107372  | 0.110723  | 0.142483 | 0.117133  | 0.129225 | 0.125291 |
| 0.112471 | 0.116841  | 0.112325  | 0.128059 | 0.116987  | 0.129662 | 0.121649 |
| 0.136946 | 0.120629  | 0.125437  | 0.145833 | 0.130099  | 0.136655 | 0.134178 |
| 0.213724 | 0.213141  | 0.206876  | 0.213287 | 0.213578  | 0.222174 | 0.217075 |
| 0.127331 | 0.117133  | 0.114073  | 0.143794 | 0.123106  | 0.134615 | 0.122232 |
| 0.122523 | 0.101544  | 0.104604  | 0.141608 | 0.109266  | 0.121649 | 0.116841 |
| 0.134761 | 0.122232  | 0.119172  | 0.146562 | 0.122669  | 0.135927 | 0.123543 |
| 0.132284 | 0.128205  | 0.119027  | 0.149621 | 0.127768  | 0.145979 | 0.128059 |
| 0.127914 | 0.119464  | 0.110286  | 0.148164 | 0.110868  | 0.131119 | 0.122815 |
| 0.210664 | 0.20979   | 0.197115  | 0.208188 | 0.2044    | 0.219114 | 0.205857 |
| 0.135344 | 0.131847  | 0.120921  | 0.15035  | 0.126457  | 0.141754 | 0.134033 |
| 0.124709 | 0.108683  | 0.111451  | 0.139423 | 0.118153  | 0.131702 | 0.124854 |
| 0.135635 | 0.116987  | 0.118298  | 0.146853 | 0.121795  | 0.135635 | 0.131702 |
| 0.132139 | 0.114073  | 0.111888  | 0.140152 | 0.11655   | 0.133596 | 0.125291 |
| 0.13447  | 0.128642  | 0.121795  | 0.147727 | 0.124709  | 0.139714 | 0.134033 |
| 0.121941 | 0.11116   | 0.111597  | 0.141026 | 0.113636  | 0.128351 | 0.124709 |
| 0.132139 | 0.107955  | 0.113345  | 0.143357 | 0.117716  | 0.12602  | 0.129079 |
| 0.130099 | 0.119318  | 0.115093  | 0.146853 | 0.125     | 0.140297 | 0.121212 |
| 0.205128 | 0.20542   | 0.195659  | 0.208188 | 0.201486  | 0.214452 | 0.2044   |
| 0.125146 | 0.118735  | 0.111888  | 0.136655 | 0.113345  | 0.13039  | 0.124417 |
| 0.20134  | 0.205128  | 0.190122  | 0.2044   | 0.198572  | 0.211247 | 0.201195 |
| 0.198864 | 0.202069  | 0.190268  | 0.20542  | 0.199301  | 0.21285  | 0.197844 |
| 0.142045 | 0.126603  | 0.126748  | 0.148019 | 0.12704   | 0.139423 | 0.132867 |
| 0.131556 | 0.126894  | 0.128205  | 0.145688 | 0.137821  | 0.148164 | 0.127914 |
| 0.126603 | 0.100962  | 0.105186  | 0.136364 | 0.110723  | 0.120775 | 0.116841 |
| 0.126748 | 0.116841  | 0.11116   | 0.144668 | 0.114365  | 0.129662 | 0.125146 |



|          |          |           |          |           |          |          |
|----------|----------|-----------|----------|-----------|----------|----------|
| 0.130973 | 0.120484 | 0.120629  | 0.143357 | 0.119755  | 0.138549 | 0.130536 |
| 0.130682 | 0.111116 | 0.114802  | 0.143065 | 0.118007  | 0.132721 | 0.131119 |
| 0.11757  | 0.101544 | 0.0920746 | 0.142483 | 0.0981935 | 0.120192 | 0.115093 |
| 0.112617 | 0.101253 | 0.0958625 | 0.145396 | 0.100233  | 0.121649 | 0.113928 |
| 0.136655 | 0.129662 | 0.125437  | 0.148747 | 0.130973  | 0.143065 | 0.131847 |
| 0.137383 | 0.115239 | 0.118298  | 0.143939 | 0.123543  | 0.140006 | 0.130828 |
| 0.125874 | 0.107517 | 0.108829  | 0.136801 | 0.116696  | 0.132284 | 0.122815 |
| 0.133887 | 0.127185 | 0.120921  | 0.145688 | 0.122086  | 0.137966 | 0.130245 |
| 0.12296  | 0.101981 | 0.101253  | 0.137092 | 0.105915  | 0.125    | 0.114656 |
| 0.133887 | 0.13039  | 0.128497  | 0.148893 | 0.130536  | 0.139714 | 0.134033 |
| 0.135927 | 0.116696 | 0.120047  | 0.125874 | 0.125     | 0.139714 | 0.134615 |
| 0.140443 | 0.138695 | 0.13243   | 0.154575 | 0.136801  | 0.143357 | 0.142045 |
| 0.261072 | 0.263695 | 0.254225  | 0.258304 | 0.264132  | 0.269522 | 0.260344 |
| 0.130536 | 0.122086 | 0.124854  | 0.140297 | 0.127185  | 0.140152 | 0.126894 |
| 0.129225 | 0.119027 | 0.125583  | 0.14831  | 0.129371  | 0.13884  | 0.126166 |
| 0.223485 | 0.224359 | 0.21285   | 0.223339 | 0.223048  | 0.229604 | 0.220134 |
| 0.133596 | 0.117279 | 0.121212  | 0.152098 | 0.125583  | 0.140297 | 0.125    |
| 0.235868 | 0.236742 | 0.227564  | 0.233683 | 0.235431  | 0.243153 | 0.231352 |
| 0.129079 | 0.113054 | 0.114365  | 0.13884  | 0.117861  | 0.134324 | 0.123106 |
| 0.134178 | 0.120484 | 0.123543  | 0.148893 | 0.129662  | 0.137675 | 0.134907 |
| 0.128934 | 0.117861 | 0.11014   | 0.143357 | 0.120338  | 0.139132 | 0.121503 |
| 0.138258 | 0.121941 | 0.12296   | 0.143939 | 0.126457  | 0.139132 | 0.130828 |
| 0.209062 | 0.209353 | 0.199301  | 0.211538 | 0.207168  | 0.219551 | 0.208333 |
| 0.138549 | 0.135635 | 0.130828  | 0.150932 | 0.133159  | 0.14292  | 0.135781 |
| 0.132721 | 0.127477 | 0.119464  | 0.148893 | 0.121795  | 0.138549 | 0.132284 |
| 0.232809 | 0.230769 | 0.223922  | 0.235286 | 0.231206  | 0.23951  | 0.231498 |
| 0.11757  | 0.106498 | 0.0999417 | 0.147727 | 0.10169   | 0.128642 | 0.121795 |
| 0.204545 | 0.202506 | 0.192162  | 0.208479 | 0.201777  | 0.214161 | 0.205857 |
| 0.123252 | 0.106935 | 0.105041  | 0.148164 | 0.103293  | 0.129662 | 0.123106 |
| 0.131702 | 0.111888 | 0.114656  | 0.146416 | 0.120192  | 0.133741 | 0.126311 |
| 0.126894 | 0.106498 | 0.113345  | 0.143939 | 0.118298  | 0.12602  | 0.126748 |
| 0.136509 | 0.121941 | 0.127622  | 0.147145 | 0.127622  | 0.141754 | 0.130536 |
| 0.135781 | 0.115385 | 0.114656  | 0.146999 | 0.120775  | 0.132867 | 0.129225 |
| 0.163753 | 0.16317  | 0.152535  | 0.171474 | 0.160693  | 0.174242 | 0.166521 |
| 0.128205 | 0.120047 | 0.116696  | 0.144085 | 0.118153  | 0.132576 | 0.127185 |
| 0.133741 | 0.128205 | 0.116113  | 0.146125 | 0.128059  | 0.145396 | 0.123689 |
| 0.13345  | 0.115385 | 0.110868  | 0.146707 | 0.117861  | 0.136072 | 0.128934 |
| 0.12704  | 0.129079 | 0.126894  | 0.148164 | 0.127185  | 0.138986 | 0.129808 |
| 0.199738 | 0.204983 | 0.191434  | 0.20338  | 0.198718  | 0.209353 | 0.203089 |
| 0.125583 | 0.111014 | 0.111742  | 0.142628 | 0.116404  | 0.129953 | 0.125437 |
| 0.140297 | 0.122815 | 0.120338  | 0.149767 | 0.123834  | 0.141463 | 0.133741 |
| 0.119464 | 0.101107 | 0.106789  | 0.137383 | 0.109703  | 0.129662 | 0.123397 |
| 0.115822 | 0.103001 | 0.100524  | 0.144522 | 0.101107  | 0.122815 | 0.120338 |
| 0.131702 | 0.111888 | 0.11961   | 0.144959 | 0.123106  | 0.134324 | 0.127477 |

|          |           |           |          |          |          |          |
|----------|-----------|-----------|----------|----------|----------|----------|
| 0.256265 | 0.260927  | 0.252622  | 0.256119 | 0.263695 | 0.264714 | 0.255536 |
| 0.121212 | 0.102564  | 0.110286  | 0.142045 | 0.112325 | 0.119464 | 0.11961  |
| 0.128788 | 0.122378  | 0.119901  | 0.142628 | 0.11961  | 0.141317 | 0.128059 |
| 0.181235 | 0.186189  | 0.176428  | 0.186334 | 0.179341 | 0.190851 | 0.183421 |
| 0.192308 | 0.193765  | 0.181964  | 0.194202 | 0.190997 | 0.20338  | 0.195076 |
| 0.134033 | 0.127622  | 0.121941  | 0.148164 | 0.126603 | 0.144814 | 0.132139 |
| 0.135927 | 0.127477  | 0.122086  | 0.146853 | 0.124126 | 0.137675 | 0.134324 |
| 0.133887 | 0.11553   | 0.115093  | 0.145396 | 0.120921 | 0.136509 | 0.12704  |
| 0.149184 | 0.14831   | 0.145542  | 0.160693 | 0.146707 | 0.150932 | 0.14933  |
| 0.131993 | 0.122086  | 0.120484  | 0.146416 | 0.125146 | 0.141608 | 0.129225 |
| 0.135927 | 0.129225  | 0.122378  | 0.153846 | 0.132284 | 0.146416 | 0.131119 |
| 0.120921 | 0.110723  | 0.106789  | 0.150204 | 0.106789 | 0.126748 | 0.119027 |
| 0.130536 | 0.123252  | 0.121649  | 0.137675 | 0.123397 | 0.132576 | 0.128351 |
| 0.134178 | 0.135344  | 0.128205  | 0.150932 | 0.130245 | 0.137092 | 0.134324 |
| 0.121212 | 0.113345  | 0.104167  | 0.140297 | 0.105915 | 0.133159 | 0.128351 |
| 0.137092 | 0.11757   | 0.124417  | 0.143065 | 0.128497 | 0.142337 | 0.129953 |
| 0.14627  | 0.130536  | 0.138258  | 0.152244 | 0.138549 | 0.148601 | 0.137966 |
| 0.126894 | 0.107663  | 0.115967  | 0.141608 | 0.118298 | 0.125146 | 0.123834 |
| 0.140734 | 0.123834  | 0.134178  | 0.145833 | 0.132721 | 0.143357 | 0.13447  |
| 0.118298 | 0.110723  | 0.109411  | 0.149038 | 0.108537 | 0.124709 | 0.123106 |
| 0.214015 | 0.217803  | 0.20542   | 0.217949 | 0.212704 | 0.225962 | 0.21183  |
| 0.129662 | 0.0847902 | 0.114073  | 0.134178 | 0.122232 | 0.133159 | 0.125728 |
| 0.196678 | 0.199301  | 0.185752  | 0.200321 | 0.19391  | 0.208916 | 0.197698 |
| 0.125291 | 0.121795  | 0.110868  | 0.144376 | 0.11961  | 0.131119 | 0.120484 |
| 0.134907 | 0.11655   | 0.122815  | 0.149038 | 0.128059 | 0.136946 | 0.133013 |
| 0.137529 | 0.120047  | 0.125728  | 0.127185 | 0.129225 | 0.145396 | 0.141171 |
| 0.135344 | 0.113491  | 0.115093  | 0.124126 | 0.124709 | 0.139423 | 0.132284 |
| 0.135198 | 0.129079  | 0.121358  | 0.146125 | 0.129808 | 0.141608 | 0.133013 |
| 0.13345  | 0.129079  | 0.123106  | 0.146999 | 0.12602  | 0.13345  | 0.13447  |
| 0.131119 | 0.112179  | 0.118153  | 0.141754 | 0.123397 | 0.136364 | 0.128934 |
| 0.129516 | 0.123689  | 0.117133  | 0.148893 | 0.12704  | 0.139714 | 0.122086 |
| 0.137675 | 0.124854  | 0.12704   | 0.126748 | 0.129953 | 0.145542 | 0.141317 |
| 0.12296  | 0.116841  | 0.114365  | 0.151369 | 0.114948 | 0.128497 | 0.12398  |
| 0.252331 | 0.256119  | 0.249272  | 0.252477 | 0.25743  | 0.262238 | 0.250728 |
| 0.134033 | 0.113345  | 0.11553   | 0.144959 | 0.11961  | 0.13345  | 0.133013 |
| 0.190122 | 0.192162  | 0.178904  | 0.197261 | 0.18852  | 0.203817 | 0.190559 |
| 0.198135 | 0.197552  | 0.184878  | 0.198864 | 0.191288 | 0.206876 | 0.195076 |
| 0.133013 | 0.122232  | 0.113345  | 0.15035  | 0.123252 | 0.133304 | 0.129371 |
| 0.12602  | 0.10271   | 0.108392  | 0.136364 | 0.112179 | 0.124272 | 0.120629 |
| 0.135927 | 0.118153  | 0.123543  | 0.147436 | 0.126748 | 0.13884  | 0.131119 |
| 0.128642 | 0.121941  | 0.115385  | 0.145105 | 0.11859  | 0.134761 | 0.127331 |
| 0.128205 | 0.101399  | 0.108246  | 0.137966 | 0.119027 | 0.130828 | 0.120484 |
| 0.122086 | 0.104895  | 0.0980478 | 0.146999 | 0.102127 | 0.129079 | 0.118153 |
| 0.126311 | 0.128642  | 0.11655   | 0.141317 | 0.122669 | 0.135052 | 0.130828 |

|          |          |          |          |          |          |          |
|----------|----------|----------|----------|----------|----------|----------|
| 0.141463 | 0.136218 | 0.133159 | 0.15035  | 0.132284 | 0.140589 | 0.139569 |
| 0.130245 | 0.108974 | 0.116404 | 0.141463 | 0.121066 | 0.131993 | 0.129808 |
| 0.140152 | 0.13549  | 0.13039  | 0.151661 | 0.133304 | 0.139569 | 0.137383 |
| 0.130099 | 0.121066 | 0.113636 | 0.145688 | 0.115676 | 0.135052 | 0.12704  |
| 0.140006 | 0.12398  | 0.129371 | 0.127622 | 0.131993 | 0.145251 | 0.140152 |
| 0.136655 | 0.121795 | 0.120775 | 0.14933  | 0.122232 | 0.139277 | 0.130973 |
| 0.120192 | 0.111742 | 0.112762 | 0.148019 | 0.111305 | 0.124854 | 0.122086 |
| 0.131993 | 0.106061 | 0.119318 | 0.141463 | 0.125146 | 0.13141  | 0.127768 |
| 0.127331 | 0.110723 | 0.11553  | 0.137092 | 0.11961  | 0.132867 | 0.123397 |
| 0.1419   | 0.132576 | 0.130099 | 0.155449 | 0.134761 | 0.140734 | 0.129516 |
| 0.191871 | 0.190414 | 0.182401 | 0.195804 | 0.190268 | 0.204108 | 0.191725 |
| 0.143648 | 0.136072 | 0.135344 | 0.152826 | 0.136801 | 0.143357 | 0.142337 |
| 0.129953 | 0.128788 | 0.124563 | 0.143794 | 0.125728 | 0.137529 | 0.128351 |
| 0.135344 | 0.11553  | 0.121795 | 0.124709 | 0.124417 | 0.142628 | 0.135781 |
| 0.127331 | 0.111888 | 0.111451 | 0.122232 | 0.118153 | 0.134324 | 0.128059 |
| 0.133596 | 0.117861 | 0.117716 | 0.142191 | 0.121503 | 0.139132 | 0.126748 |
| 0.136946 | 0.119755 | 0.123689 | 0.144668 | 0.127185 | 0.142191 | 0.132721 |
| 0.198572 | 0.199155 | 0.187937 | 0.201923 | 0.194639 | 0.209936 | 0.197844 |
| 0.126894 | 0.123689 | 0.120629 | 0.137238 | 0.121503 | 0.135635 | 0.130245 |
| 0.120921 | 0.118007 | 0.104167 | 0.132139 | 0.111742 | 0.127914 | 0.121941 |
| 0.136655 | 0.13345  | 0.125146 | 0.145542 | 0.127185 | 0.139277 | 0.131265 |
| 0.201195 | 0.200903 | 0.187063 | 0.20338  | 0.194056 | 0.210519 | 0.198718 |
| 0.126748 | 0.103438 | 0.104749 | 0.14292  | 0.11116  | 0.124709 | 0.120775 |
| 0.120775 | 0.109411 | 0.104312 | 0.147436 | 0.103147 | 0.122232 | 0.118881 |
| 0.140006 | 0.128059 | 0.126166 | 0.147436 | 0.128497 | 0.138549 | 0.135781 |
| 0.129079 | 0.124126 | 0.118153 | 0.145251 | 0.124272 | 0.137529 | 0.12398  |
| 0.196096 | 0.198135 | 0.184878 | 0.198281 | 0.192745 | 0.203671 | 0.197407 |
| 0.118881 | 0.109266 | 0.103001 | 0.145542 | 0.10067  | 0.123543 | 0.11553  |
| 0.126457 | 0.118298 | 0.108829 | 0.145542 | 0.114656 | 0.130828 | 0.116987 |
| 0.123252 | 0.108683 | 0.106498 | 0.144959 | 0.115239 | 0.126457 | 0.120192 |
| 0.134324 | 0.125291 | 0.12398  | 0.144376 | 0.125728 | 0.141026 | 0.135344 |
| 0.129225 | 0.123397 | 0.11655  | 0.145979 | 0.12704  | 0.141463 | 0.120921 |
| 0.120192 | 0.109994 | 0.11014  | 0.146853 | 0.1081   | 0.122232 | 0.11859  |
| 0.130973 | 0.109994 | 0.11451  | 0.143065 | 0.117133 | 0.133304 | 0.126748 |
| 0.131265 | 0.125437 | 0.11655  | 0.148601 | 0.123543 | 0.132139 | 0.129079 |
| 0.14831  | 0.147145 | 0.149621 | 0.161568 | 0.152826 | 0.156177 | 0.144085 |
| 0.238345 | 0.242424 | 0.234994 | 0.24053  | 0.243153 | 0.251166 | 0.235577 |
| 0.138986 | 0.106643 | 0.12398  | 0.149038 | 0.127768 | 0.131119 | 0.131556 |
| 0.132284 | 0.12704  | 0.118735 | 0.145833 | 0.127477 | 0.144814 | 0.121941 |
| 0.129225 | 0.12398  | 0.120047 | 0.144814 | 0.118298 | 0.133887 | 0.128497 |
| 0.136946 | 0.128205 | 0.116987 | 0.150787 | 0.129225 | 0.143648 | 0.13447  |
| 0.114656 | 0.11553  | 0.111014 | 0.132576 | 0.116841 | 0.135927 | 0.117424 |
| 0.128059 | 0.122815 | 0.117133 | 0.149184 | 0.116259 | 0.130973 | 0.125291 |
| 0.134324 | 0.129371 | 0.12398  | 0.145542 | 0.126894 | 0.135198 | 0.13447  |

|           |           |          |          |          |          |          |
|-----------|-----------|----------|----------|----------|----------|----------|
| 0.119027  | 0.111742  | 0.105769 | 0.150641 | 0.106935 | 0.124563 | 0.122378 |
| 0.124854  | 0.126311  | 0.112179 | 0.142483 | 0.119755 | 0.135052 | 0.124709 |
| 0.239802  | 0.240676  | 0.233246 | 0.241113 | 0.243735 | 0.250874 | 0.239948 |
| 0.120775  | 0.100087  | 0.106061 | 0.140152 | 0.108974 | 0.119901 | 0.116841 |
| 0.11961   | 0.110286  | 0.100524 | 0.134907 | 0.106643 | 0.125728 | 0.116841 |
| 0.128497  | 0.107517  | 0.114073 | 0.141171 | 0.11757  | 0.129662 | 0.126894 |
| 0.136509  | 0.133887  | 0.134324 | 0.157343 | 0.138695 | 0.148747 | 0.136364 |
| 0.140006  | 0.116696  | 0.126166 | 0.152389 | 0.133159 | 0.135344 | 0.137821 |
| 0.137675  | 0.117861  | 0.121795 | 0.144814 | 0.125583 | 0.13243  | 0.13141  |
| 0.133887  | 0.128059  | 0.124126 | 0.147727 | 0.122669 | 0.138258 | 0.135198 |
| 0.128788  | 0.118881  | 0.114365 | 0.143794 | 0.122815 | 0.131702 | 0.120775 |
| 0.233683  | 0.236014  | 0.228001 | 0.234411 | 0.238491 | 0.245629 | 0.23208  |
| 0.138403  | 0.134033  | 0.128642 | 0.147873 | 0.130973 | 0.141608 | 0.133887 |
| 0.117279  | 0.106789  | 0.10373  | 0.147436 | 0.101981 | 0.123106 | 0.119755 |
| 0.123689  | 0.116696  | 0.102855 | 0.143939 | 0.11451  | 0.131556 | 0.113636 |
| 0.128205  | 0.123543  | 0.121649 | 0.144959 | 0.128351 | 0.134324 | 0.125146 |
| 0.127914  | 0.117716  | 0.119901 | 0.138549 | 0.124272 | 0.13345  | 0.126311 |
| 0.130536  | 0.109557  | 0.11553  | 0.141754 | 0.119027 | 0.131702 | 0.128059 |
| 0.11859   | 0.106352  | 0.108246 | 0.148164 | 0.105624 | 0.125291 | 0.120484 |
| 0.120775  | 0.111742  | 0.111597 | 0.149184 | 0.1081   | 0.126894 | 0.122086 |
| 0.117861  | 0.105915  | 0.099359 | 0.145105 | 0.100233 | 0.122815 | 0.120047 |
| 0.131702  | 0.112179  | 0.113782 | 0.141754 | 0.119901 | 0.134324 | 0.127185 |
| 0.13345   | 0.129079  | 0.124272 | 0.146416 | 0.133013 | 0.147436 | 0.124563 |
| 0.135052  | 0.133013  | 0.129371 | 0.15035  | 0.137529 | 0.150204 | 0.128788 |
| 0.139132  | 0.12398   | 0.127914 | 0.127331 | 0.132576 | 0.144376 | 0.13986  |
| 0.141463  | 0.124854  | 0.131119 | 0.13141  | 0.135781 | 0.146707 | 0.145396 |
| 0.132867  | 0.129953  | 0.125728 | 0.149038 | 0.136218 | 0.149767 | 0.128351 |
| 0.124126  | 0.0955711 | 0.104749 | 0.135052 | 0.111742 | 0.12704  | 0.120775 |
| 0.129516  | 0.107663  | 0.123543 | 0.137238 | 0.12704  | 0.133596 | 0.13141  |
| 0.0906177 | 0.127331  | 0.108537 | 0.148456 | 0.10708  | 0.102273 | 0.12398  |
| 0.211247  | 0.215326  | 0.204691 | 0.21081  | 0.21081  | 0.223193 | 0.209353 |
| 0.140152  | 0.128788  | 0.128934 | 0.14729  | 0.130682 | 0.13986  | 0.137092 |
| 0.125291  | 0.112471  | 0.107663 | 0.137383 | 0.115239 | 0.13141  | 0.124854 |
| 0.134178  | 0.113782  | 0.119172 | 0.149767 | 0.125    | 0.137383 | 0.132576 |
| 0.224942  | 0.227855  | 0.221008 | 0.229167 | 0.229749 | 0.238345 | 0.226836 |
| 0.218531  | 0.219114  | 0.208188 | 0.222465 | 0.214307 | 0.226981 | 0.214889 |
| 0.121358  | 0.110577  | 0.111305 | 0.149184 | 0.111014 | 0.124272 | 0.121212 |
| 0.252331  | 0.255536  | 0.248106 | 0.251603 | 0.25539  | 0.262821 | 0.250437 |
| 0.124709  | 0.0952797 | 0.107663 | 0.134761 | 0.112617 | 0.126457 | 0.120775 |
| 0.143939  | 0.127622  | 0.128351 | 0.156614 | 0.142045 | 0.142483 | 0.139132 |
| 0.122378  | 0.101107  | 0.107372 | 0.140589 | 0.11116  | 0.120921 | 0.11961  |
| 0.131847  | 0.130682  | 0.123252 | 0.147145 | 0.129953 | 0.146999 | 0.123834 |
| 0.195804  | 0.195804  | 0.181672 | 0.195659 | 0.194784 | 0.209207 | 0.193328 |
| 0.120484  | 0.118735  | 0.113054 | 0.148893 | 0.115676 | 0.127185 | 0.117716 |

|          |          |           |          |          |          |          |
|----------|----------|-----------|----------|----------|----------|----------|
| 0.204691 | 0.203817 | 0.193182  | 0.204545 | 0.200758 | 0.213141 | 0.20338  |
| 0.127477 | 0.119901 | 0.11014   | 0.147727 | 0.120047 | 0.133887 | 0.128788 |
| 0.113491 | 0.114365 | 0.109557  | 0.137238 | 0.108683 | 0.129808 | 0.125291 |
| 0.131265 | 0.116987 | 0.119464  | 0.142483 | 0.126166 | 0.133887 | 0.128788 |
| 0.127185 | 0.113782 | 0.111305  | 0.140734 | 0.115676 | 0.130099 | 0.126457 |
| 0.127622 | 0.106061 | 0.110577  | 0.13447  | 0.114073 | 0.125874 | 0.122815 |
| 0.129079 | 0.121795 | 0.116113  | 0.145833 | 0.11961  | 0.133741 | 0.127185 |
| 0.119464 | 0.100524 | 0.101544  | 0.135927 | 0.107372 | 0.120047 | 0.116113 |
| 0.130973 | 0.121066 | 0.116841  | 0.14627  | 0.118298 | 0.133887 | 0.128205 |
| 0.123834 | 0.10373  | 0.111742  | 0.130973 | 0.112908 | 0.130245 | 0.120775 |
| 0.127914 | 0.100233 | 0.10912   | 0.142337 | 0.115822 | 0.125583 | 0.124854 |
| 0.121358 | 0.10271  | 0.106643  | 0.140443 | 0.110431 | 0.120775 | 0.115676 |
| 0.130245 | 0.121212 | 0.121941  | 0.123106 | 0.124563 | 0.137529 | 0.13447  |
| 0.140152 | 0.134615 | 0.129516  | 0.152826 | 0.131556 | 0.141026 | 0.137675 |
| 0.133304 | 0.114656 | 0.113345  | 0.124417 | 0.121503 | 0.137383 | 0.132284 |
| 0.129371 | 0.116841 | 0.113782  | 0.144668 | 0.112617 | 0.127622 | 0.121358 |
| 0.124563 | 0.105624 | 0.106643  | 0.137821 | 0.114219 | 0.127185 | 0.121795 |
| 0.120484 | 0.107663 | 0.104895  | 0.141026 | 0.104895 | 0.127768 | 0.122669 |
| 0.13039  | 0.123689 | 0.115967  | 0.143065 | 0.125874 | 0.143211 | 0.122669 |
| 0.133159 | 0.11859  | 0.11961   | 0.143502 | 0.121358 | 0.137821 | 0.128351 |
| 0.136364 | 0.116841 | 0.119318  | 0.12398  | 0.124563 | 0.140443 | 0.134761 |
| 0.134761 | 0.127477 | 0.121212  | 0.142191 | 0.121212 | 0.137383 | 0.130828 |
| 0.1419   | 0.134615 | 0.132139  | 0.154283 | 0.133596 | 0.139569 | 0.137675 |
| 0.143939 | 0.142191 | 0.137092  | 0.153409 | 0.140006 | 0.145688 | 0.142045 |
| 0.11553  | 0.101836 | 0.0909091 | 0.138986 | 0.094697 | 0.116113 | 0.115967 |
| 0.130973 | 0.111742 | 0.115967  | 0.143357 | 0.120629 | 0.134178 | 0.128788 |
| 0.123834 | 0.112471 | 0.103875  | 0.142628 | 0.109703 | 0.127622 | 0.118444 |
| 0.132867 | 0.131702 | 0.130099  | 0.149913 | 0.137966 | 0.147727 | 0.129225 |
| 0.123397 | 0.104749 | 0.109848  | 0.140152 | 0.112471 | 0.11961  | 0.119755 |
| 0.148164 | 0.131265 | 0.139277  | 0.152098 | 0.140443 | 0.147873 | 0.142774 |
| 0.140589 | 0.125146 | 0.132284  | 0.152972 | 0.137821 | 0.140297 | 0.138112 |
| 0.134033 | 0.130245 | 0.125437  | 0.153992 | 0.132721 | 0.145105 | 0.13039  |
| 0.131265 | 0.110868 | 0.112471  | 0.137529 | 0.117424 | 0.133013 | 0.124709 |
| 0.125291 | 0.115093 | 0.114073  | 0.142628 | 0.116113 | 0.134324 | 0.123689 |
| 0.139569 | 0.120338 | 0.128351  | 0.130099 | 0.134761 | 0.147145 | 0.14292  |
| 0.212558 | 0.213724 | 0.201632  | 0.21183  | 0.210082 | 0.225379 | 0.213287 |
| 0.130099 | 0.119318 | 0.112179  | 0.143648 | 0.115093 | 0.127477 | 0.118298 |
| 0.131119 | 0.116841 | 0.112617  | 0.14292  | 0.119901 | 0.134324 | 0.129808 |
| 0.129225 | 0.120775 | 0.113054  | 0.145979 | 0.125291 | 0.137966 | 0.118881 |
| 0.132867 | 0.114802 | 0.116113  | 0.127768 | 0.123689 | 0.141317 | 0.135344 |
| 0.133304 | 0.122523 | 0.117133  | 0.150641 | 0.124126 | 0.140006 | 0.131119 |
| 0.137092 | 0.13039  | 0.121212  | 0.151224 | 0.120921 | 0.133596 | 0.127622 |
| 0.138986 | 0.133741 | 0.127768  | 0.150495 | 0.127185 | 0.134033 | 0.129516 |
| 0.135635 | 0.122232 | 0.122669  | 0.150058 | 0.129662 | 0.141463 | 0.128788 |

|           |           |          |          |          |          |           |
|-----------|-----------|----------|----------|----------|----------|-----------|
| 0.120484  | 0.0968823 | 0.103438 | 0.135198 | 0.108974 | 0.125437 | 0.121795  |
| 0.129516  | 0.128059  | 0.125    | 0.147145 | 0.13141  | 0.146416 | 0.126457  |
| 0.128059  | 0.109411  | 0.112762 | 0.142191 | 0.118881 | 0.129808 | 0.128205  |
| 0.134033  | 0.1081    | 0.116113 | 0.143794 | 0.116696 | 0.131702 | 0.13243   |
| 0.186043  | 0.184878  | 0.170746 | 0.186772 | 0.175408 | 0.191871 | 0.180361  |
| 0.133013  | 0.126603  | 0.121795 | 0.145105 | 0.121503 | 0.137383 | 0.133159  |
| 0.130536  | 0.130245  | 0.125437 | 0.145542 | 0.135052 | 0.14627  | 0.129808  |
| 0.122815  | 0.0796911 | 0.115093 | 0.134324 | 0.119172 | 0.127185 | 0.125874  |
| 0.117424  | 0.118007  | 0.106498 | 0.132139 | 0.115822 | 0.133741 | 0.131556  |
| 0.122669  | 0.106643  | 0.10912  | 0.14088  | 0.109703 | 0.128205 | 0.116987  |
| 0.124709  | 0.0999417 | 0.101544 | 0.137383 | 0.10912  | 0.120338 | 0.123689  |
| 0.125     | 0.1081    | 0.112908 | 0.144668 | 0.11116  | 0.132284 | 0.118444  |
| 0.0795455 | 0.110431  | 0.113491 | 0.141754 | 0.115822 | 0.123543 | 0.119901  |
| 0.127331  | 0.121212  | 0.118153 | 0.136801 | 0.121941 | 0.131702 | 0.133013  |
| 0.135635  | 0.112034  | 0.124126 | 0.153846 | 0.120047 | 0.137675 | 0.13345   |
| 0.123834  | 0.107226  | 0.109411 | 0.133887 | 0.114948 | 0.131702 | 0.11961   |
| 0.129808  | 0.113199  | 0.109266 | 0.143065 | 0.113054 | 0.131556 | 0.125874  |
| 0.101981  | 0.11859   | 0.103293 | 0.149621 | 0.105624 | 0.105769 | 0.0971737 |
| 0.124417  | 0.0987762 | 0.11116  | 0.135635 | 0.114656 | 0.122086 | 0.122523  |
| 0.136364  | 0.116841  | 0.121941 | 0.14729  | 0.12602  | 0.132867 | 0.133304  |
| 0.125583  | 0.0967366 | 0.105915 | 0.13447  | 0.107663 | 0.124126 | 0.122815  |
| 0.124417  | 0.0981935 | 0.112034 | 0.135344 | 0.112617 | 0.125583 | 0.123106  |
| 0.125874  | 0.0964452 | 0.105624 | 0.138549 | 0.112908 | 0.128788 | 0.122232  |
| 0.128642  | 0.0980478 | 0.112471 | 0.1419   | 0.124126 | 0.131556 | 0.128205  |
| 0.123689  | 0.103293  | 0.104895 | 0.137529 | 0.111888 | 0.130099 | 0.123543  |
| 0.135052  | 0.136218  | 0.131702 | 0.154429 | 0.12704  | 0.135927 | 0.142191  |
| 0.136218  | 0.130682  | 0.120921 | 0.152681 | 0.119755 | 0.144668 | 0.136072  |
| 0.129225  | 0.0971737 | 0.111014 | 0.135198 | 0.110723 | 0.127477 | 0.123834  |
| 0.137821  | 0.132867  | 0.121941 | 0.162442 | 0.12398  | 0.142191 | 0.133887  |
| 0.129662  | 0.122669  | 0.123397 | 0.13243  | 0.129225 | 0.140734 | 0.137966  |
| 0.110431  | 0.12704   | 0.11116  | 0.14729  | 0.111742 | 0.107226 | 0.12602   |
| 0.127914  | 0.0987762 | 0.110577 | 0.139423 | 0.110868 | 0.132284 | 0.126894  |
| 0.141754  | 0.141171  | 0.137238 | 0.153846 | 0.144814 | 0.151369 | 0.145396  |
| 0.13447   | 0.122815  | 0.120629 | 0.148601 | 0.125874 | 0.139132 | 0.129079  |
| 0.115822  | 0.13039   | 0.122669 | 0.1419   | 0.120338 | 0.134761 | 0.121795  |
| 0.131265  | 0.102127  | 0.113928 | 0.126457 | 0.122378 | 0.138549 | 0.13141   |
| 0.120921  | 0.0912005 | 0.103875 | 0.135927 | 0.103875 | 0.121503 | 0.121358  |
| 0.124563  | 0.0989219 | 0.100816 | 0.138986 | 0.105769 | 0.126311 | 0.123543  |
| 0.10169   | 0.111597  | 0.10067  | 0.144959 | 0.10912  | 0.114219 | 0.106789  |
| 0.128205  | 0.0990676 | 0.115239 | 0.137092 | 0.120775 | 0.130828 | 0.13039   |
| 0.136801  | 0.11553   | 0.122669 | 0.144231 | 0.129079 | 0.139423 | 0.134033  |
| 0.125728  | 0.120775  | 0.117424 | 0.142191 | 0.116259 | 0.133596 | 0.131702  |
| 0.117861  | 0.0957168 | 0.106061 | 0.124126 | 0.112762 | 0.125146 | 0.122086  |
| 0.125     | 0.101399  | 0.101544 | 0.140589 | 0.106498 | 0.130828 | 0.122523  |

|          |           |          |          |          |          |          |
|----------|-----------|----------|----------|----------|----------|----------|
| 0.126603 | 0.0840618 | 0.111014 | 0.141317 | 0.120921 | 0.127768 | 0.123834 |
| 0.127477 | 0.0960082 | 0.103438 | 0.138695 | 0.106352 | 0.131265 | 0.122669 |
| 0.127914 | 0.10169   | 0.109703 | 0.140589 | 0.115239 | 0.131702 | 0.129225 |
| 0.125583 | 0.102855  | 0.113782 | 0.137092 | 0.118444 | 0.133741 | 0.131556 |
| 0.134178 | 0.115822  | 0.119172 | 0.143065 | 0.123543 | 0.13243  | 0.131702 |
| 0.130973 | 0.107663  | 0.109848 | 0.146853 | 0.115093 | 0.124854 | 0.119172 |
| 0.123397 | 0.0907634 | 0.105186 | 0.134324 | 0.111014 | 0.122523 | 0.119172 |
| 0.128351 | 0.0817308 | 0.107226 | 0.143065 | 0.115676 | 0.124563 | 0.123543 |
| 0.135198 | 0.115967  | 0.114073 | 0.14292  | 0.115822 | 0.130828 | 0.129516 |
| 0.127185 | 0.114365  | 0.114219 | 0.141317 | 0.111305 | 0.129516 | 0.123252 |
| 0.138258 | 0.129225  | 0.124126 | 0.142191 | 0.125874 | 0.138549 | 0.136364 |
| 0.124563 | 0.107372  | 0.107226 | 0.140443 | 0.113928 | 0.124563 | 0.123543 |
| 0.140734 | 0.119464  | 0.121941 | 0.14729  | 0.129516 | 0.131119 | 0.134178 |

| <b>TDr_08_00153</b> | <b>TDr_08_00155</b> | <b>TDr_08_00161</b> | <b>TDr_08_00164</b> | <b>TDr_08_00176</b> | <b>TDr_08_00185</b> | <b>TDr_08_00194</b> |
|---------------------|---------------------|---------------------|---------------------|---------------------|---------------------|---------------------|
| 0.11116             | 0.113491            | 0.117279            | 0.134761            | 0.109848            | 0.144376            | 0.122523            |
| 0.111305            | 0.112471            | 0.112179            | 0.132576            | 0.110868            | 0.133741            | 0.123543            |
| 0.106352            | 0.107809            | 0.109848            | 0.127622            | 0.104749            | 0.135198            | 0.115676            |
| 0.104604            | 0.114802            | 0.110723            | 0.125291            | 0.110286            | 0.131119            | 0.120047            |
| 0.126457            | 0.124709            | 0.12704             | 0.136946            | 0.126311            | 0.145396            | 0.134324            |
| 0.12296             | 0.124417            | 0.126457            | 0.140734            | 0.123106            | 0.142483            | 0.130536            |
| 0.110577            | 0.114073            | 0.113782            | 0.128351            | 0.111597            | 0.132721            | 0.123397            |
| 0.110577            | 0.10271             | 0.107663            | 0.129225            | 0.103147            | 0.131265            | 0.11757             |
| 0.107517            | 0.102273            | 0.0964452           | 0.117716            | 0.0971737           | 0.121795            | 0.110431            |
| 0.106206            | 0.105041            | 0.103875            | 0.12602             | 0.0996503           | 0.121649            | 0.108246            |
| 0.110431            | 0.105769            | 0.111597            | 0.129371            | 0.10708             | 0.140734            | 0.11655             |
| 0.106206            | 0.10067             | 0.104458            | 0.123106            | 0.103147            | 0.129516            | 0.116113            |
| 0.107372            | 0.108829            | 0.104749            | 0.126311            | 0.102855            | 0.133304            | 0.11553             |
| 0.128497            | 0.126166            | 0.133159            | 0.150058            | 0.130099            | 0.155012            | 0.138986            |
| 0.127768            | 0.125437            | 0.124854            | 0.141171            | 0.125291            | 0.13884             | 0.128642            |
| 0.111888            | 0.111014            | 0.107517            | 0.122378            | 0.10912             | 0.12704             | 0.116259            |
| 0.106206            | 0.104749            | 0.101836            | 0.128642            | 0.0981935           | 0.132139            | 0.11553             |
| 0.129953            | 0.137529            | 0.137238            | 0.147727            | 0.141171            | 0.151807            | 0.147145            |
| 0.103438            | 0.103147            | 0.107809            | 0.125291            | 0.101836            | 0.129953            | 0.112471            |
| 0.194056            | 0.201049            | 0.202506            | 0.214161            | 0.202943            | 0.217366            | 0.203963            |
| 0.108829            | 0.11553             | 0.121066            | 0.135052            | 0.114802            | 0.144376            | 0.125728            |
| 0.107517            | 0.116841            | 0.117133            | 0.136072            | 0.113782            | 0.141026            | 0.125               |
| 0.0986305           | 0.101253            | 0.104167            | 0.124272            | 0.106935            | 0.123397            | 0.110868            |
| 0.120338            | 0.107809            | 0.107226            | 0.121212            | 0.104167            | 0.120629            | 0.108683            |
| 0.0965909           | 0.0962995           | 0.0939685           | 0.11553             | 0.0917832           | 0.120484            | 0.10271             |
| 0.11757             | 0.123106            | 0.127185            | 0.135927            | 0.125               | 0.141754            | 0.130682            |
| 0.118444            | 0.113491            | 0.116987            | 0.128642            | 0.111014            | 0.140006            | 0.119901            |
| 0.116113            | 0.10271             | 0.103584            | 0.112325            | 0.104604            | 0.112034            | 0.108537            |
| 0.128351            | 0.119318            | 0.121358            | 0.131265            | 0.118298            | 0.13243             | 0.119318            |
| 0.124272            | 0.11961             | 0.11757             | 0.133596            | 0.118298            | 0.131265            | 0.123397            |
| 0.114219            | 0.115385            | 0.122669            | 0.129371            | 0.112034            | 0.139277            | 0.126457            |
| 0.117279            | 0.11757             | 0.112617            | 0.123689            | 0.115385            | 0.128934            | 0.118153            |
| 0.0980478           | 0.106498            | 0.104458            | 0.120192            | 0.104021            | 0.125728            | 0.109994            |
| 0.11553             | 0.109994            | 0.109994            | 0.133887            | 0.107226            | 0.133304            | 0.122815            |
| 0.119464            | 0.113054            | 0.112179            | 0.127331            | 0.106206            | 0.137238            | 0.118298            |
| 0.125146            | 0.116696            | 0.113199            | 0.133304            | 0.112471            | 0.13884             | 0.120775            |
| 0.122378            | 0.124417            | 0.122378            | 0.138112            | 0.122523            | 0.143939            | 0.131119            |
| 0.110868            | 0.109994            | 0.113782            | 0.130099            | 0.113054            | 0.129808            | 0.121066            |
| 0.110286            | 0.0954254           | 0.0971737           | 0.109994            | 0.101399            | 0.116987            | 0.101836            |
| 0.117861            | 0.0776515           | 0.0957168           | 0.088141            | 0.0882867           | 0.0948427           | 0.0893065           |
| 0.11116             | 0.0820221           | 0.0773601           | 0.0957168           | 0.07838             | 0.0968823           | 0.0808566           |
| 0.134761            | 0.107372            | 0.104167            | 0.107663            | 0.11451             | 0.0968823           | 0.109411            |



|          |           |           |           |           |           |           |
|----------|-----------|-----------|-----------|-----------|-----------|-----------|
| 0.137092 | 0.103293  | 0.101253  | 0.103584  | 0.109266  | 0.104458  | 0.113782  |
| 0.107809 | 0.0775058 | 0.080711  | 0.0967366 | 0.0805653 | 0.107809  | 0.0894522 |
| 0.097028 | 0.0990676 | 0.102564  | 0.126457  | 0.0954254 | 0.132284  | 0.111305  |
| 0.115822 | 0.105332  | 0.114656  | 0.127477  | 0.106643  | 0.13243   | 0.118444  |
| 0.112325 | 0.105332  | 0.0983392 | 0.113199  | 0.104312  | 0.122815  | 0.106789  |
| 0.132576 | 0.100816  | 0.106643  | 0.106352  | 0.10708   | 0.106935  | 0.0958625 |
| 0.112762 | 0.0821678 | 0.0745921 | 0.102564  | 0.0756119 | 0.0984848 | 0.087704  |
| 0.109994 | 0.0779429 | 0.0890152 | 0.0986305 | 0.0865385 | 0.107955  | 0.0843531 |
| 0.140152 | 0.144231  | 0.144814  | 0.154138  | 0.141171  | 0.158217  | 0.148019  |
| 0.117716 | 0.114802  | 0.111888  | 0.123252  | 0.116987  | 0.12296   | 0.121212  |
| 0.107663 | 0.0767774 | 0.0776515 | 0.0910548 | 0.083042  | 0.100087  | 0.0861014 |
| 0.125146 | 0.116404  | 0.112908  | 0.13447   | 0.11451   | 0.133013  | 0.123397  |
| 0.103875 | 0.0925117 | 0.0971737 | 0.111742  | 0.0987762 | 0.112908  | 0.104749  |
| 0.13243  | 0.118153  | 0.121066  | 0.121941  | 0.121795  | 0.131556  | 0.123689  |
| 0.123252 | 0.0882867 | 0.100816  | 0.109848  | 0.0654138 | 0.110723  | 0.0967366 |
| 0.107809 | 0.085373  | 0.0775058 | 0.0611888 | 0.0878497 | 0.0979021 | 0.0879953 |
| 0.112762 | 0.0844988 | 0.0786713 | 0.0990676 | 0.088141  | 0.112179  | 0.0874126 |
| 0.117279 | 0.106789  | 0.107955  | 0.13039   | 0.106643  | 0.127768  | 0.120484  |
| 0.13447  | 0.103584  | 0.0983392 | 0.0916375 | 0.109557  | 0.100379  | 0.104167  |
| 0.135052 | 0.103293  | 0.100087  | 0.10708   | 0.113054  | 0.105624  | 0.101544  |
| 0.156177 | 0.148893  | 0.152389  | 0.162296  | 0.151369  | 0.155594  | 0.151224  |
| 0.113928 | 0.0763403 | 0.0824592 | 0.0909091 | 0.0863928 | 0.097028  | 0.0722611 |
| 0.110431 | 0.0716783 | 0.0859557 | 0.102273  | 0.069493  | 0.101399  | 0.0874126 |
| 0.106643 | 0.0818765 | 0.0792541 | 0.0999417 | 0.0706585 | 0.107226  | 0.0932401 |
| 0.137383 | 0.135344  | 0.136218  | 0.145251  | 0.128497  | 0.152826  | 0.13884   |
| 0.107955 | 0.081148  | 0.0817308 | 0.0989219 | 0.080711  | 0.10912   | 0.0840618 |
| 0.122378 | 0.108392  | 0.11014   | 0.11655   | 0.109411  | 0.119464  | 0.111888  |
| 0.113345 | 0.106061  | 0.114802  | 0.127914  | 0.103584  | 0.132867  | 0.114802  |
| 0.11116  | 0.0805653 | 0.074155  | 0.0855186 | 0.0844988 | 0.103001  | 0.0861014 |
| 0.136218 | 0.143794  | 0.148456  | 0.158654  | 0.143065  | 0.161276  | 0.150787  |
| 0.116696 | 0.0820221 | 0.0846445 | 0.100087  | 0.0964452 | 0.103001  | 0.0960082 |
| 0.131993 | 0.111305  | 0.108392  | 0.104021  | 0.109994  | 0.102564  | 0.11859   |
| 0.122815 | 0.118153  | 0.111742  | 0.122523  | 0.11655   | 0.123689  | 0.120192  |
| 0        | 0.110431  | 0.108683  | 0.126166  | 0.109411  | 0.135781  | 0.11655   |
| 0.110431 | 0         | 0.0856643 | 0.0999417 | 0.0773601 | 0.11014   | 0.0839161 |
| 0.108683 | 0.0856643 | 0         | 0.094697  | 0.0869755 | 0.106643  | 0.0912005 |
| 0.126166 | 0.0999417 | 0.094697  | 0         | 0.106206  | 0.0949883 | 0.100816  |
| 0.109411 | 0.0773601 | 0.0869755 | 0.106206  | 0         | 0.112034  | 0.0872669 |
| 0.135781 | 0.11014   | 0.106643  | 0.0949883 | 0.112034  | 0         | 0.110431  |
| 0.11655  | 0.0839161 | 0.0912005 | 0.100816  | 0.0872669 | 0.110431  | 0         |
| 0.113054 | 0.099359  | 0.104895  | 0.115385  | 0.104749  | 0.12296   | 0.111305  |
| 0.107226 | 0.0737179 | 0.0818765 | 0.099359  | 0.083479  | 0.104895  | 0.0903263 |
| 0.120047 | 0.0839161 | 0.0888695 | 0.0984848 | 0.0872669 | 0.0996503 | 0.083042  |
| 0.107517 | 0.0824592 | 0.0696387 | 0.100233  | 0.0843531 | 0.104604  | 0.0944056 |

|           |           |           |           |           |           |           |
|-----------|-----------|-----------|-----------|-----------|-----------|-----------|
| 0.11014   | 0.0696387 | 0.0891608 | 0.0914918 | 0.0791084 | 0.101399  | 0.0879953 |
| 0.131847  | 0.0913462 | 0.101253  | 0.100087  | 0.102564  | 0.100087  | 0.103001  |
| 0.106206  | 0.0986305 | 0.100962  | 0.120192  | 0.10169   | 0.126311  | 0.106498  |
| 0.110431  | 0.099359  | 0.104021  | 0.120047  | 0.100962  | 0.128788  | 0.113054  |
| 0.105186  | 0.11451   | 0.118298  | 0.130536  | 0.114365  | 0.137529  | 0.125874  |
| 0.11655   | 0.118881  | 0.122669  | 0.137238  | 0.117279  | 0.136946  | 0.129953  |
| 0.117716  | 0.122669  | 0.126457  | 0.142483  | 0.121941  | 0.144522  | 0.132576  |
| 0.123106  | 0.128642  | 0.135927  | 0.14729   | 0.128497  | 0.156906  | 0.136801  |
| 0.100524  | 0.11451   | 0.111888  | 0.133159  | 0.106498  | 0.13986   | 0.12296   |
| 0.168706  | 0.178322  | 0.179487  | 0.193473  | 0.175845  | 0.196387  | 0.17803   |
| 0.0910548 | 0.100087  | 0.103584  | 0.120192  | 0.103147  | 0.131847  | 0.112908  |
| 0.125     | 0.13141   | 0.137238  | 0.147436  | 0.129516  | 0.157051  | 0.139277  |
| 0.117133  | 0.124417  | 0.12704   | 0.142191  | 0.119318  | 0.151515  | 0.132576  |
| 0.12602   | 0.12602   | 0.126603  | 0.144668  | 0.12704   | 0.148164  | 0.140589  |
| 0.097028  | 0.103438  | 0.111305  | 0.129953  | 0.0989219 | 0.137821  | 0.117424  |
| 0.115093  | 0.121503  | 0.126748  | 0.1419    | 0.119901  | 0.150932  | 0.130245  |
| 0.0979021 | 0.111014  | 0.112179  | 0.127622  | 0.107372  | 0.136072  | 0.122378  |
| 0.110868  | 0.116404  | 0.121649  | 0.133596  | 0.11451   | 0.139132  | 0.126603  |
| 0.106498  | 0.105624  | 0.108246  | 0.123397  | 0.106643  | 0.127185  | 0.109994  |
| 0.11757   | 0.127185  | 0.129516  | 0.147873  | 0.125291  | 0.153992  | 0.134178  |
| 0.103293  | 0.0954254 | 0.10271   | 0.121649  | 0.0973193 | 0.127477  | 0.107955  |
| 0.117424  | 0.129662  | 0.129953  | 0.15035   | 0.126603  | 0.145396  | 0.136655  |
| 0.097465  | 0.107372  | 0.114073  | 0.127185  | 0.104895  | 0.133013  | 0.117861  |
| 0.125     | 0.0949883 | 0.105186  | 0.0920746 | 0.0962995 | 0.0952797 | 0.104604  |
| 0.117861  | 0.116113  | 0.119901  | 0.132139  | 0.115093  | 0.138549  | 0.127477  |
| 0.101836  | 0.105624  | 0.108246  | 0.127477  | 0.105478  | 0.137966  | 0.113491  |
| 0.13243   | 0.140297  | 0.143794  | 0.158071  | 0.137238  | 0.158362  | 0.146707  |
| 0.104312  | 0.109848  | 0.113636  | 0.129953  | 0.113199  | 0.136364  | 0.120047  |
| 0.104021  | 0.107809  | 0.109266  | 0.130828  | 0.103001  | 0.138986  | 0.11859   |
| 0.109703  | 0.102127  | 0.112617  | 0.130682  | 0.109266  | 0.129808  | 0.11961   |
| 0.127477  | 0.133304  | 0.129808  | 0.146707  | 0.132576  | 0.146707  | 0.139423  |
| 0.105332  | 0.112908  | 0.11553   | 0.128934  | 0.11014   | 0.133013  | 0.11757   |
| 0.100087  | 0.104167  | 0.10708   | 0.128351  | 0.102855  | 0.13447   | 0.11757   |
| 0.100087  | 0.107955  | 0.111451  | 0.129516  | 0.10373   | 0.136801  | 0.114656  |
| 0.104604  | 0.107226  | 0.111014  | 0.127914  | 0.101253  | 0.133741  | 0.117133  |
| 0.125437  | 0.114948  | 0.118153  | 0.134178  | 0.115093  | 0.132721  | 0.123689  |
| 0.106935  | 0.109266  | 0.112762  | 0.127914  | 0.108829  | 0.134907  | 0.11655   |
| 0.0977564 | 0.0878497 | 0.0983392 | 0.114948  | 0.0891608 | 0.123397  | 0.10067   |
| 0.103584  | 0.0933858 | 0.0992133 | 0.11961   | 0.0952797 | 0.12602   | 0.109703  |
| 0.105186  | 0.0935315 | 0.104604  | 0.120338  | 0.0995047 | 0.134033  | 0.11014   |
| 0.120047  | 0.111305  | 0.111305  | 0.129662  | 0.109994  | 0.137238  | 0.120047  |
| 0.122815  | 0.117861  | 0.11961   | 0.135052  | 0.119464  | 0.139714  | 0.128934  |
| 0.109266  | 0.0920746 | 0.102564  | 0.124709  | 0.0968823 | 0.129371  | 0.115093  |
| 0.105332  | 0.0910548 | 0.097465  | 0.116404  | 0.0987762 | 0.125728  | 0.101253  |

|           |           |           |          |           |          |           |
|-----------|-----------|-----------|----------|-----------|----------|-----------|
| 0.117861  | 0.108829  | 0.113199  | 0.124854 | 0.107226  | 0.131265 | 0.116987  |
| 0.102273  | 0.0952797 | 0.0987762 | 0.119172 | 0.0980478 | 0.121503 | 0.113636  |
| 0.117716  | 0.117133  | 0.118881  | 0.1419   | 0.114948  | 0.146562 | 0.123543  |
| 0.125874  | 0.129953  | 0.132576  | 0.144522 | 0.127477  | 0.152681 | 0.132867  |
| 0.111014  | 0.106643  | 0.109266  | 0.125291 | 0.10912   | 0.128788 | 0.11655   |
| 0.112325  | 0.0960082 | 0.101253  | 0.123397 | 0.0964452 | 0.132721 | 0.112034  |
| 0.102127  | 0.0965909 | 0.10271   | 0.11961  | 0.103147  | 0.12602  | 0.110868  |
| 0.0989219 | 0.0901807 | 0.0992133 | 0.121066 | 0.0856643 | 0.125437 | 0.101253  |
| 0.120192  | 0.112617  | 0.116113  | 0.130682 | 0.116259  | 0.129808 | 0.123106  |
| 0.0983392 | 0.0930944 | 0.0989219 | 0.119901 | 0.0929487 | 0.121358 | 0.105332  |
| 0.131119  | 0.125583  | 0.133159  | 0.141608 | 0.118735  | 0.143939 | 0.133159  |
| 0.127477  | 0.0983392 | 0.111116  | 0.121941 | 0.108392  | 0.120192 | 0.108537  |
| 0.121066  | 0.102418  | 0.104167  | 0.107955 | 0.105186  | 0.106206 | 0.116987  |
| 0.117133  | 0.087704  | 0.0882867 | 0.110431 | 0.0875583 | 0.118881 | 0.0981935 |
| 0.105478  | 0.100233  | 0.104021  | 0.123252 | 0.101253  | 0.130828 | 0.105186  |
| 0.107955  | 0.0945513 | 0.102418  | 0.125728 | 0.100816  | 0.130099 | 0.108246  |
| 0.105478  | 0.0955711 | 0.0967366 | 0.115093 | 0.0913462 | 0.122669 | 0.100524  |
| 0.109557  | 0.0979021 | 0.0874126 | 0.117716 | 0.0872669 | 0.119755 | 0.102273  |
| 0.100816  | 0.100524  | 0.0999417 | 0.120047 | 0.101544  | 0.122669 | 0.106061  |
| 0.124709  | 0.101107  | 0.0961538 | 0.108392 | 0.102127  | 0.111888 | 0.104604  |
| 0.101544  | 0.107955  | 0.112617  | 0.13447  | 0.104895  | 0.144085 | 0.122232  |
| 0.12296   | 0.124417  | 0.123834  | 0.141608 | 0.125728  | 0.134033 | 0.132284  |
| 0.116404  | 0.125728  | 0.129808  | 0.140006 | 0.126166  | 0.139714 | 0.138258  |
| 0.182838  | 0.188374  | 0.190705  | 0.207605 | 0.191434  | 0.21285  | 0.18954   |
| 0.228438  | 0.233683  | 0.237762  | 0.245338 | 0.23616   | 0.247378 | 0.236888  |
| 0.10067   | 0.100087  | 0.107372  | 0.120775 | 0.104021  | 0.125728 | 0.114948  |
| 0.106352  | 0.0929487 | 0.0920746 | 0.114219 | 0.0960082 | 0.115676 | 0.0979021 |
| 0.0944056 | 0.0929487 | 0.0944056 | 0.112471 | 0.0875583 | 0.121503 | 0.100233  |
| 0.104895  | 0.0981935 | 0.0920746 | 0.120921 | 0.0925117 | 0.121503 | 0.101107  |
| 0.127622  | 0.127331  | 0.124417  | 0.140443 | 0.129516  | 0.136364 | 0.131702  |
| 0.110431  | 0.104604  | 0.0938228 | 0.117716 | 0.0983392 | 0.121212 | 0.103147  |
| 0.135344  | 0.127185  | 0.121358  | 0.130682 | 0.13141   | 0.139714 | 0.129808  |
| 0.105478  | 0.0949883 | 0.0961538 | 0.112471 | 0.0986305 | 0.124709 | 0.10169   |
| 0.120629  | 0.107517  | 0.108392  | 0.118298 | 0.114948  | 0.121503 | 0.114219  |
| 0.11757   | 0.101836  | 0.108537  | 0.109994 | 0.106061  | 0.11553  | 0.105332  |
| 0.122232  | 0.11553   | 0.114656  | 0.124563 | 0.116259  | 0.133013 | 0.11757   |
| 0.131556  | 0.097465  | 0.106498  | 0.104749 | 0.102273  | 0.103293 | 0.109994  |
| 0.109411  | 0.100087  | 0.0995047 | 0.114656 | 0.0964452 | 0.129808 | 0.108829  |
| 0.101253  | 0.0907634 | 0.0930944 | 0.110286 | 0.092366  | 0.121358 | 0.0992133 |
| 0.105769  | 0.099359  | 0.0987762 | 0.119464 | 0.101253  | 0.124126 | 0.10373   |
| 0.10169   | 0.0917832 | 0.090035  | 0.115676 | 0.0971737 | 0.114802 | 0.0996503 |
| 0.104312  | 0.0879953 | 0.0929487 | 0.11014  | 0.0930944 | 0.120921 | 0.103147  |
| 0.105915  | 0.0986305 | 0.0942599 | 0.108246 | 0.100524  | 0.11757  | 0.101544  |
| 0.116259  | 0.113928  | 0.109848  | 0.115676 | 0.115239  | 0.115676 | 0.113928  |

|           |           |           |           |           |          |           |
|-----------|-----------|-----------|-----------|-----------|----------|-----------|
| 0.124417  | 0.117133  | 0.117424  | 0.128205  | 0.121066  | 0.126166 | 0.122378  |
| 0.103875  | 0.0922203 | 0.099796  | 0.119027  | 0.0949883 | 0.127185 | 0.107663  |
| 0.106061  | 0.0964452 | 0.0987762 | 0.120629  | 0.0995047 | 0.117133 | 0.10169   |
| 0.119755  | 0.110431  | 0.114219  | 0.124709  | 0.110868  | 0.122669 | 0.118007  |
| 0.108974  | 0.0952797 | 0.0967366 | 0.115385  | 0.0942599 | 0.119755 | 0.105478  |
| 0.134761  | 0.122815  | 0.121066  | 0.128934  | 0.125874  | 0.130973 | 0.125437  |
| 0.131556  | 0.123106  | 0.131847  | 0.14292   | 0.125874  | 0.138258 | 0.134761  |
| 0.108392  | 0.124126  | 0.121795  | 0.133741  | 0.125146  | 0.136364 | 0.13141   |
| 0.0996503 | 0.0888695 | 0.0894522 | 0.108683  | 0.0869755 | 0.111305 | 0.0987762 |
| 0.102127  | 0.0922203 | 0.0960082 | 0.113199  | 0.0958625 | 0.114365 | 0.103001  |
| 0.110431  | 0.104604  | 0.104895  | 0.113054  | 0.110577  | 0.119464 | 0.1081    |
| 0.115822  | 0.106206  | 0.113491  | 0.11961   | 0.111305  | 0.120775 | 0.115822  |
| 0.119318  | 0.114073  | 0.113782  | 0.122815  | 0.112179  | 0.13039  | 0.119901  |
| 0.107226  | 0.0999417 | 0.0984848 | 0.112762  | 0.0971737 | 0.124709 | 0.106352  |
| 0.109703  | 0.0992133 | 0.0968823 | 0.118735  | 0.100233  | 0.12398  | 0.106206  |
| 0.114948  | 0.106498  | 0.106498  | 0.117279  | 0.111597  | 0.121066 | 0.113782  |
| 0.124854  | 0.115239  | 0.11553   | 0.125437  | 0.111888  | 0.125437 | 0.123106  |
| 0.121649  | 0.108829  | 0.114948  | 0.129516  | 0.111305  | 0.135344 | 0.118735  |
| 0.125291  | 0.11451   | 0.114219  | 0.12704   | 0.116113  | 0.129371 | 0.117716  |
| 0.126603  | 0.114365  | 0.118153  | 0.124563  | 0.113928  | 0.123397 | 0.118735  |
| 0.106206  | 0.0919289 | 0.100962  | 0.11757   | 0.0967366 | 0.122232 | 0.105915  |
| 0.115239  | 0.117279  | 0.108246  | 0.123106  | 0.113928  | 0.127768 | 0.116987  |
| 0.105478  | 0.0973193 | 0.0984848 | 0.108974  | 0.0962995 | 0.120921 | 0.106935  |
| 0.10912   | 0.0840618 | 0.0791084 | 0.0983392 | 0.0804196 | 0.107372 | 0.083479  |
| 0.106206  | 0.0980478 | 0.097465  | 0.113199  | 0.0979021 | 0.128642 | 0.108829  |
| 0.107226  | 0.100233  | 0.0976107 | 0.120338  | 0.100087  | 0.119755 | 0.109848  |
| 0.0973193 | 0.094697  | 0.0897436 | 0.112179  | 0.0977564 | 0.116841 | 0.101107  |
| 0.126311  | 0.112617  | 0.119901  | 0.129808  | 0.114219  | 0.133887 | 0.119901  |
| 0.110723  | 0.101399  | 0.104895  | 0.11859   | 0.0992133 | 0.128497 | 0.111014  |
| 0.122086  | 0.122378  | 0.118298  | 0.124126  | 0.11553   | 0.123543 | 0.11859   |
| 0.105186  | 0.0926573 | 0.0920746 | 0.115093  | 0.0968823 | 0.116259 | 0.0996503 |
| 0.116404  | 0.0954254 | 0.109994  | 0.114948  | 0.108683  | 0.129225 | 0.106498  |
| 0.116259  | 0.111597  | 0.113928  | 0.126166  | 0.11116   | 0.134907 | 0.12296   |
| 0.112179  | 0.106935  | 0.113054  | 0.132576  | 0.109411  | 0.131119 | 0.121795  |
| 0.111742  | 0.103875  | 0.10912   | 0.121358  | 0.109848  | 0.133304 | 0.116113  |
| 0.0987762 | 0.101399  | 0.112179  | 0.127331  | 0.112617  | 0.134907 | 0.11859   |
| 0.109703  | 0.107372  | 0.110868  | 0.128351  | 0.104312  | 0.133596 | 0.11553   |
| 0.107955  | 0.106789  | 0.106789  | 0.128934  | 0.10169   | 0.135344 | 0.11116   |
| 0.134761  | 0.129516  | 0.126894  | 0.148164  | 0.125874  | 0.144085 | 0.135635  |
| 0.13141   | 0.128497  | 0.129953  | 0.132284  | 0.128642  | 0.142191 | 0.129371  |
| 0.106935  | 0.100233  | 0.10373   | 0.12296   | 0.0942599 | 0.128497 | 0.107226  |
| 0.116404  | 0.131265  | 0.126603  | 0.140589  | 0.125     | 0.139714 | 0.133887  |
| 0.127622  | 0.121795  | 0.122086  | 0.138695  | 0.116696  | 0.133741 | 0.125291  |
| 0.120629  | 0.124126  | 0.128788  | 0.147727  | 0.122523  | 0.144814 | 0.136655  |

|           |           |           |           |           |           |           |
|-----------|-----------|-----------|-----------|-----------|-----------|-----------|
| 0.104021  | 0.116259  | 0.113345  | 0.131119  | 0.112034  | 0.134907  | 0.120921  |
| 0.12296   | 0.116259  | 0.116259  | 0.134615  | 0.111451  | 0.132867  | 0.123543  |
| 0.12398   | 0.11961   | 0.121649  | 0.137092  | 0.114219  | 0.140297  | 0.128642  |
| 0.111597  | 0.124126  | 0.126166  | 0.139569  | 0.123689  | 0.139569  | 0.133159  |
| 0.120047  | 0.132284  | 0.130828  | 0.146562  | 0.130973  | 0.141608  | 0.139569  |
| 0.123252  | 0.11655   | 0.120629  | 0.138112  | 0.116113  | 0.13986   | 0.127914  |
| 0.0981935 | 0.113345  | 0.111305  | 0.13141   | 0.110286  | 0.134907  | 0.116841  |
| 0.130099  | 0.123689  | 0.126311  | 0.129516  | 0.124709  | 0.137383  | 0.127477  |
| 0.130536  | 0.123252  | 0.125     | 0.140152  | 0.118153  | 0.144814  | 0.132576  |
| 0.0973193 | 0.104312  | 0.106352  | 0.128205  | 0.101544  | 0.132867  | 0.117716  |
| 0.211976  | 0.211976  | 0.218386  | 0.233246  | 0.213869  | 0.23616   | 0.219551  |
| 0.104749  | 0.11757   | 0.120192  | 0.13447   | 0.121795  | 0.138258  | 0.127768  |
| 0.115822  | 0.103293  | 0.110868  | 0.128642  | 0.108974  | 0.132139  | 0.116696  |
| 0.122086  | 0.130536  | 0.129371  | 0.139277  | 0.125728  | 0.142774  | 0.136364  |
| 0.11451   | 0.109266  | 0.111305  | 0.134615  | 0.105041  | 0.137238  | 0.117716  |
| 0.132576  | 0.127622  | 0.128205  | 0.142774  | 0.126311  | 0.145396  | 0.134907  |
| 0.107809  | 0.113928  | 0.115385  | 0.131993  | 0.110868  | 0.138112  | 0.123543  |
| 0.104749  | 0.116404  | 0.118735  | 0.132721  | 0.117133  | 0.134178  | 0.125437  |
| 0.123689  | 0.116696  | 0.116113  | 0.13447   | 0.115967  | 0.133596  | 0.125728  |
| 0.11655   | 0.121795  | 0.125874  | 0.146562  | 0.123397  | 0.144231  | 0.132284  |
| 0.117861  | 0.131265  | 0.128934  | 0.144376  | 0.124126  | 0.146707  | 0.136509  |
| 0.119464  | 0.123834  | 0.129079  | 0.140152  | 0.125146  | 0.139569  | 0.134615  |
| 0.11655   | 0.127622  | 0.127622  | 0.138112  | 0.125437  | 0.144814  | 0.136364  |
| 0.117133  | 0.105769  | 0.113345  | 0.124709  | 0.107663  | 0.133741  | 0.113636  |
| 0.112471  | 0.115093  | 0.119464  | 0.135781  | 0.114073  | 0.137238  | 0.126748  |
| 0.11757   | 0.131265  | 0.130099  | 0.145833  | 0.128788  | 0.14292   | 0.143211  |
| 0.106643  | 0.116259  | 0.120338  | 0.137529  | 0.118153  | 0.136072  | 0.127331  |
| 0.127331  | 0.103147  | 0.0944056 | 0.0888695 | 0.104749  | 0.105769  | 0.104021  |
| 0.131556  | 0.128351  | 0.136509  | 0.14933   | 0.131119  | 0.154575  | 0.138549  |
| 0.116404  | 0.11553   | 0.118444  | 0.129808  | 0.115676  | 0.135635  | 0.122232  |
| 0.128934  | 0.12602   | 0.124854  | 0.135927  | 0.119172  | 0.136218  | 0.127185  |
| 0.113928  | 0.121795  | 0.127914  | 0.143357  | 0.122232  | 0.149767  | 0.128497  |
| 0.129225  | 0.119027  | 0.123106  | 0.13884   | 0.116841  | 0.139132  | 0.130682  |
| 0.122523  | 0.115822  | 0.123689  | 0.137383  | 0.120629  | 0.140297  | 0.125437  |
| 0.13447   | 0.131556  | 0.13243   | 0.148747  | 0.129953  | 0.151661  | 0.140297  |
| 0.1081    | 0.0967366 | 0.101399  | 0.120047  | 0.0992133 | 0.121212  | 0.111014  |
| 0.127477  | 0.106498  | 0.106498  | 0.11757   | 0.111014  | 0.117861  | 0.115239  |
| 0.133741  | 0.133741  | 0.134033  | 0.151224  | 0.13447   | 0.152098  | 0.142191  |
| 0.116259  | 0.104604  | 0.110723  | 0.128497  | 0.108829  | 0.13141   | 0.118007  |
| 0.115676  | 0.087704  | 0.0961538 | 0.104021  | 0.0913462 | 0.106643  | 0.0996503 |
| 0.138549  | 0.135635  | 0.138549  | 0.143211  | 0.136946  | 0.145542  | 0.140297  |
| 0.123689  | 0.0890152 | 0.0948427 | 0.097465  | 0.0961538 | 0.0971737 | 0.0925117 |
| 0.137238  | 0.129079  | 0.136072  | 0.141317  | 0.136218  | 0.142774  | 0.138112  |
| 0.127185  | 0.120192  | 0.121358  | 0.131847  | 0.119172  | 0.13447   | 0.13243   |

|          |          |          |          |          |          |          |
|----------|----------|----------|----------|----------|----------|----------|
| 0.115967 | 0.122669 | 0.126166 | 0.139569 | 0.121941 | 0.147727 | 0.132284 |
| 0.118444 | 0.121358 | 0.120775 | 0.130099 | 0.120921 | 0.133013 | 0.125437 |
| 0.120921 | 0.109266 | 0.114802 | 0.135198 | 0.111742 | 0.131993 | 0.115093 |
| 0.11553  | 0.11961  | 0.123106 | 0.138549 | 0.115967 | 0.146999 | 0.130973 |
| 0.111742 | 0.119901 | 0.122523 | 0.140589 | 0.12296  | 0.142628 | 0.132721 |
| 0.11961  | 0.128642 | 0.131556 | 0.144085 | 0.126748 | 0.14933  | 0.138549 |
| 0.116987 | 0.128642 | 0.131847 | 0.144668 | 0.128205 | 0.151369 | 0.133887 |
| 0.119027 | 0.122232 | 0.128351 | 0.140297 | 0.117133 | 0.146999 | 0.125146 |
| 0.126311 | 0.14088  | 0.143794 | 0.154283 | 0.141026 | 0.159528 | 0.146707 |
| 0.122232 | 0.110286 | 0.112617 | 0.130099 | 0.107809 | 0.130099 | 0.116987 |
| 0.114365 | 0.106789 | 0.10067  | 0.120192 | 0.104312 | 0.126894 | 0.107372 |
| 0.122523 | 0.128351 | 0.122815 | 0.14292  | 0.126457 | 0.14088  | 0.131556 |
| 0.113491 | 0.111742 | 0.111742 | 0.125728 | 0.110723 | 0.129808 | 0.113782 |
| 0.137821 | 0.13345  | 0.136946 | 0.147727 | 0.136801 | 0.157343 | 0.144522 |
| 0.150932 | 0.145688 | 0.145105 | 0.159965 | 0.143502 | 0.157634 | 0.151807 |
| 0.119464 | 0.108392 | 0.109557 | 0.119755 | 0.114073 | 0.119172 | 0.120629 |
| 0.11116  | 0.101544 | 0.100962 | 0.112325 | 0.103147 | 0.11961  | 0.105915 |
| 0.114802 | 0.128497 | 0.129662 | 0.140152 | 0.128934 | 0.146562 | 0.13986  |
| 0.116696 | 0.126603 | 0.125146 | 0.144376 | 0.121795 | 0.140297 | 0.130099 |
| 0.116113 | 0.112034 | 0.107955 | 0.118444 | 0.116841 | 0.119901 | 0.119027 |
| 0.124272 | 0.131847 | 0.131265 | 0.144376 | 0.130536 | 0.144668 | 0.135927 |
| 0.126603 | 0.128642 | 0.126311 | 0.141463 | 0.12296  | 0.137383 | 0.130099 |
| 0.123543 | 0.107809 | 0.104895 | 0.109557 | 0.109994 | 0.120047 | 0.112762 |
| 0.145396 | 0.151224 | 0.155886 | 0.166084 | 0.15574  | 0.167832 | 0.158508 |
| 0.124417 | 0.105186 | 0.106643 | 0.115385 | 0.106498 | 0.120338 | 0.106935 |
| 0.133159 | 0.125874 | 0.121503 | 0.133159 | 0.123106 | 0.138986 | 0.130828 |
| 0.114073 | 0.107663 | 0.104749 | 0.11961  | 0.106643 | 0.126311 | 0.105332 |
| 0.122232 | 0.129225 | 0.128934 | 0.141463 | 0.129953 | 0.143502 | 0.141171 |
| 0.111742 | 0.121358 | 0.119901 | 0.135635 | 0.117424 | 0.14088  | 0.130682 |
| 0.124417 | 0.13549  | 0.138986 | 0.15472  | 0.132139 | 0.157051 | 0.140443 |
| 0.133304 | 0.143502 | 0.143502 | 0.1537   | 0.140734 | 0.158654 | 0.155157 |
| 0.111014 | 0.119755 | 0.121795 | 0.13345  | 0.121358 | 0.138112 | 0.129662 |
| 0.120775 | 0.131847 | 0.13447  | 0.143502 | 0.13345  | 0.147582 | 0.138549 |
| 0.130828 | 0.131702 | 0.140443 | 0.152098 | 0.135052 | 0.1588   | 0.139569 |
| 0.131993 | 0.138403 | 0.137821 | 0.155303 | 0.135052 | 0.157634 | 0.144522 |
| 0.11961  | 0.112325 | 0.113491 | 0.122523 | 0.108392 | 0.133596 | 0.11553  |
| 0.131993 | 0.134907 | 0.13345  | 0.146562 | 0.133887 | 0.153846 | 0.142191 |
| 0.109266 | 0.106643 | 0.11451  | 0.128497 | 0.107372 | 0.132867 | 0.11451  |
| 0.108246 | 0.114365 | 0.115239 | 0.126894 | 0.115093 | 0.141171 | 0.120192 |
| 0.11655  | 0.116259 | 0.118298 | 0.129662 | 0.113199 | 0.134615 | 0.124126 |
| 0.104895 | 0.108683 | 0.114219 | 0.126166 | 0.116113 | 0.133741 | 0.123834 |
| 0.11116  | 0.108829 | 0.110286 | 0.133013 | 0.107517 | 0.138549 | 0.11757  |
| 0.103001 | 0.105915 | 0.10708  | 0.127768 | 0.108392 | 0.128934 | 0.112617 |
| 0.114948 | 0.114073 | 0.113491 | 0.133013 | 0.116259 | 0.140589 | 0.124563 |

|           |           |           |          |           |          |          |
|-----------|-----------|-----------|----------|-----------|----------|----------|
| 0.115385  | 0.121212  | 0.118298  | 0.139277 | 0.119901  | 0.139277 | 0.124417 |
| 0.107226  | 0.0984848 | 0.100524  | 0.123252 | 0.0977564 | 0.120629 | 0.104895 |
| 0.107226  | 0.11451   | 0.119464  | 0.134324 | 0.116404  | 0.137529 | 0.128497 |
| 0.10912   | 0.109411  | 0.117279  | 0.127477 | 0.112179  | 0.131847 | 0.126894 |
| 0.117861  | 0.101544  | 0.106498  | 0.114656 | 0.107226  | 0.125437 | 0.110577 |
| 0.204983  | 0.212267  | 0.215181  | 0.227127 | 0.213869  | 0.232955 | 0.214307 |
| 0.131265  | 0.137675  | 0.139714  | 0.144376 | 0.141317  | 0.147873 | 0.14729  |
| 0.124709  | 0.122086  | 0.130245  | 0.135781 | 0.124272  | 0.138695 | 0.131702 |
| 0.120192  | 0.122232  | 0.121066  | 0.137675 | 0.120629  | 0.137966 | 0.126894 |
| 0.199738  | 0.204691  | 0.209936  | 0.223631 | 0.207168  | 0.22771  | 0.210227 |
| 0.113491  | 0.106206  | 0.112908  | 0.122232 | 0.110723  | 0.129808 | 0.116696 |
| 0.11859   | 0.115385  | 0.124709  | 0.140734 | 0.113782  | 0.147727 | 0.126166 |
| 0.118298  | 0.118881  | 0.113928  | 0.132576 | 0.118153  | 0.141317 | 0.125583 |
| 0.117279  | 0.120484  | 0.117279  | 0.138258 | 0.119464  | 0.138258 | 0.124563 |
| 0.24053   | 0.247232  | 0.249563  | 0.261509 | 0.247086  | 0.262092 | 0.249563 |
| 0.120338  | 0.124417  | 0.126166  | 0.137821 | 0.118444  | 0.147436 | 0.127914 |
| 0.111597  | 0.0938228 | 0.0987762 | 0.112471 | 0.0989219 | 0.125    | 0.106352 |
| 0.10373   | 0.122669  | 0.118881  | 0.133741 | 0.12398   | 0.140734 | 0.131119 |
| 0.0984848 | 0.119172  | 0.116841  | 0.131119 | 0.121358  | 0.140734 | 0.127914 |
| 0.122086  | 0.125     | 0.127914  | 0.140443 | 0.124563  | 0.144814 | 0.132284 |
| 0.115676  | 0.125291  | 0.124417  | 0.142774 | 0.123689  | 0.142774 | 0.132867 |
| 0.116259  | 0.0961538 | 0.10169   | 0.115676 | 0.105041  | 0.126748 | 0.11014  |
| 0.103584  | 0.112325  | 0.114073  | 0.126603 | 0.115967  | 0.135927 | 0.12398  |
| 0.120338  | 0.121503  | 0.119755  | 0.137529 | 0.119318  | 0.151515 | 0.130828 |
| 0.113928  | 0.115385  | 0.112179  | 0.132867 | 0.115239  | 0.134907 | 0.119464 |
| 0.104749  | 0.113782  | 0.112617  | 0.129516 | 0.113928  | 0.133304 | 0.119027 |
| 0.111014  | 0.111305  | 0.11014   | 0.129371 | 0.105041  | 0.125291 | 0.11655  |
| 0.132721  | 0.142045  | 0.142045  | 0.15574  | 0.141608  | 0.159528 | 0.1537   |
| 0.121941  | 0.12602   | 0.129516  | 0.140006 | 0.123543  | 0.148164 | 0.129808 |
| 0.119027  | 0.11961   | 0.126894  | 0.140006 | 0.11859   | 0.152826 | 0.132139 |
| 0.178176  | 0.184586  | 0.190122  | 0.207022 | 0.18648   | 0.207314 | 0.191871 |
| 0.191871  | 0.198281  | 0.20236   | 0.215181 | 0.20134   | 0.220425 | 0.203526 |
| 0.119027  | 0.121358  | 0.119318  | 0.137383 | 0.118881  | 0.140297 | 0.120484 |
| 0.109994  | 0.114365  | 0.111451  | 0.129516 | 0.114219  | 0.131847 | 0.116696 |
| 0.131847  | 0.131265  | 0.130973  | 0.144959 | 0.128497  | 0.14729  | 0.141754 |
| 0.113491  | 0.0933858 | 0.105041  | 0.113782 | 0.100233  | 0.126894 | 0.105041 |
| 0.122378  | 0.127622  | 0.130245  | 0.140152 | 0.122815  | 0.145688 | 0.130828 |
| 0.116987  | 0.127185  | 0.123106  | 0.135344 | 0.126457  | 0.14088  | 0.133596 |
| 0.214598  | 0.220717  | 0.2213    | 0.237617 | 0.222319  | 0.243153 | 0.226253 |
| 0.112617  | 0.107372  | 0.114948  | 0.128934 | 0.10373   | 0.13447  | 0.11757  |
| 0.192599  | 0.198135  | 0.203089  | 0.211538 | 0.200321  | 0.215326 | 0.200758 |
| 0.107372  | 0.097465  | 0.101544  | 0.112908 | 0.0944056 | 0.13039  | 0.10271  |
| 0.11014   | 0.110723  | 0.111888  | 0.129371 | 0.106206  | 0.132284 | 0.116841 |
| 0.105041  | 0.107663  | 0.10912   | 0.126311 | 0.111305  | 0.128934 | 0.121358 |

|           |           |          |          |           |          |          |
|-----------|-----------|----------|----------|-----------|----------|----------|
| 0.108246  | 0.112908  | 0.106789 | 0.129225 | 0.109266  | 0.131265 | 0.118735 |
| 0.197552  | 0.20134   | 0.207751 | 0.22028  | 0.2044    | 0.22465  | 0.206002 |
| 0.116259  | 0.124126  | 0.13141  | 0.136946 | 0.127185  | 0.146562 | 0.136655 |
| 0.109848  | 0.112762  | 0.108392 | 0.128205 | 0.10912   | 0.139277 | 0.122669 |
| 0.115967  | 0.120921  | 0.121795 | 0.13141  | 0.121649  | 0.136072 | 0.131119 |
| 0.116259  | 0.116841  | 0.113636 | 0.133741 | 0.114656  | 0.130245 | 0.125874 |
| 0.112471  | 0.111888  | 0.109557 | 0.13345  | 0.112034  | 0.138403 | 0.117133 |
| 0.104749  | 0.099796  | 0.105624 | 0.116696 | 0.101399  | 0.13243  | 0.106498 |
| 0.110868  | 0.0995047 | 0.108537 | 0.119318 | 0.108974  | 0.13039  | 0.112617 |
| 0.119318  | 0.116696  | 0.125437 | 0.139714 | 0.120047  | 0.146999 | 0.127768 |
| 0.103001  | 0.108537  | 0.112034 | 0.123689 | 0.108392  | 0.132721 | 0.118735 |
| 0.112762  | 0.11014   | 0.111597 | 0.125874 | 0.108537  | 0.141026 | 0.124417 |
| 0.17905   | 0.183129  | 0.187791 | 0.200903 | 0.183566  | 0.2044   | 0.1875   |
| 0.10169   | 0.123834  | 0.121212 | 0.134033 | 0.125728  | 0.141608 | 0.131993 |
| 0.115239  | 0.124854  | 0.125146 | 0.139423 | 0.124709  | 0.148456 | 0.137383 |
| 0.109557  | 0.11655   | 0.11655  | 0.129953 | 0.118153  | 0.135198 | 0.126457 |
| 0.117861  | 0.125437  | 0.125146 | 0.139132 | 0.119172  | 0.146416 | 0.127185 |
| 0.114073  | 0.115822  | 0.119901 | 0.129808 | 0.119755  | 0.134178 | 0.127768 |
| 0.114656  | 0.10708   | 0.109411 | 0.116696 | 0.102855  | 0.133887 | 0.111742 |
| 0.104895  | 0.111305  | 0.109557 | 0.127622 | 0.104749  | 0.13141  | 0.117133 |
| 0.122086  | 0.0999417 | 0.108683 | 0.113636 | 0.110577  | 0.126457 | 0.11451  |
| 0.110286  | 0.116696  | 0.11961  | 0.135052 | 0.11859   | 0.144376 | 0.128351 |
| 0.0945513 | 0.113782  | 0.114073 | 0.130682 | 0.116841  | 0.142337 | 0.123397 |
| 0.115676  | 0.114802  | 0.11655  | 0.13549  | 0.116696  | 0.137821 | 0.121795 |
| 0.117279  | 0.116696  | 0.112034 | 0.133887 | 0.119755  | 0.14088  | 0.124272 |
| 0.13345   | 0.132867  | 0.128205 | 0.141026 | 0.133596  | 0.143939 | 0.138986 |
| 0.115385  | 0.111888  | 0.119172 | 0.136655 | 0.10912   | 0.141026 | 0.113345 |
| 0.126311  | 0.133304  | 0.134761 | 0.140297 | 0.137238  | 0.145833 | 0.143794 |
| 0.111742  | 0.112325  | 0.108246 | 0.131847 | 0.113054  | 0.13447  | 0.113782 |
| 0.101836  | 0.114656  | 0.112325 | 0.128934 | 0.113928  | 0.134761 | 0.12398  |
| 0.104895  | 0.111597  | 0.115093 | 0.127622 | 0.112908  | 0.131993 | 0.121795 |
| 0.119755  | 0.100233  | 0.107809 | 0.119464 | 0.105915  | 0.129371 | 0.112471 |
| 0.178322  | 0.180944  | 0.184732 | 0.198718 | 0.181381  | 0.203089 | 0.189394 |
| 0.109411  | 0.106498  | 0.106206 | 0.123106 | 0.106643  | 0.135635 | 0.11757  |
| 0.100962  | 0.104167  | 0.105624 | 0.114656 | 0.0979021 | 0.125437 | 0.11116  |
| 0.116404  | 0.118735  | 0.126311 | 0.139132 | 0.11859   | 0.146125 | 0.128351 |
| 0.170892  | 0.174388  | 0.176136 | 0.193036 | 0.175699  | 0.196824 | 0.178759 |
| 0.130536  | 0.134907  | 0.136946 | 0.145979 | 0.128642  | 0.153846 | 0.134033 |
| 0.139277  | 0.144814  | 0.145396 | 0.15676  | 0.13884   | 0.160256 | 0.146562 |
| 0.133887  | 0.145542  | 0.143794 | 0.154575 | 0.142191  | 0.161276 | 0.1537   |
| 0.111742  | 0.111742  | 0.116404 | 0.130099 | 0.106643  | 0.139132 | 0.116696 |
| 0.110431  | 0.117424  | 0.120047 | 0.127622 | 0.122232  | 0.135198 | 0.129662 |
| 0.199738  | 0.204691  | 0.210519 | 0.223922 | 0.207168  | 0.229749 | 0.210227 |
| 0.117861  | 0.121941  | 0.115822 | 0.13243  | 0.121795  | 0.136509 | 0.123689 |



|          |           |           |          |           |          |          |
|----------|-----------|-----------|----------|-----------|----------|----------|
| 0.113928 | 0.121795  | 0.125291  | 0.130828 | 0.124563  | 0.136946 | 0.133345 |
| 0.112762 | 0.105769  | 0.108683  | 0.125583 | 0.109994  | 0.137821 | 0.119172 |
| 0.159091 | 0.163753  | 0.163462  | 0.180944 | 0.16623   | 0.180653 | 0.170455 |
| 0.111888 | 0.108974  | 0.111597  | 0.132576 | 0.106498  | 0.134033 | 0.116259 |
| 0.139423 | 0.144668  | 0.14292   | 0.154575 | 0.144522  | 0.159819 | 0.153992 |
| 0.117861 | 0.110286  | 0.113782  | 0.130973 | 0.112762  | 0.125146 | 0.11553  |
| 0.182838 | 0.184878  | 0.1875    | 0.202943 | 0.18648   | 0.208188 | 0.190997 |
| 0.118444 | 0.118444  | 0.122523  | 0.134178 | 0.114219  | 0.143794 | 0.124854 |
| 0.105915 | 0.0989219 | 0.0971737 | 0.117861 | 0.0990676 | 0.130682 | 0.109703 |
| 0.101981 | 0.112471  | 0.113054  | 0.129662 | 0.113782  | 0.136072 | 0.121795 |
| 0.117861 | 0.116404  | 0.116113  | 0.134178 | 0.110431  | 0.136801 | 0.115239 |
| 0.113491 | 0.116987  | 0.124854  | 0.137383 | 0.11451   | 0.14729  | 0.12602  |
| 0.113491 | 0.119027  | 0.114948  | 0.132721 | 0.113054  | 0.143502 | 0.11961  |
| 0.110723 | 0.113928  | 0.111888  | 0.131119 | 0.113782  | 0.135198 | 0.117424 |
| 0.17905  | 0.184003  | 0.184586  | 0.202069 | 0.182984  | 0.209062 | 0.188666 |
| 0.111305 | 0.115967  | 0.117133  | 0.134907 | 0.116113  | 0.143648 | 0.124126 |
| 0.110286 | 0.10912   | 0.114073  | 0.130099 | 0.111888  | 0.135052 | 0.11757  |
| 0.202214 | 0.205711  | 0.212121  | 0.22465  | 0.209062  | 0.226981 | 0.210082 |
| 0.101399 | 0.123252  | 0.121795  | 0.134033 | 0.12398   | 0.142483 | 0.130828 |
| 0.111451 | 0.113491  | 0.111451  | 0.130682 | 0.113636  | 0.136509 | 0.118735 |
| 0.10912  | 0.108829  | 0.108829  | 0.131847 | 0.110431  | 0.133596 | 0.112325 |
| 0.125    | 0.132867  | 0.134324  | 0.138695 | 0.134761  | 0.143357 | 0.142774 |
| 0.179487 | 0.183275  | 0.189103  | 0.201923 | 0.186334  | 0.202797 | 0.189103 |
| 0.115239 | 0.0948427 | 0.103875  | 0.113782 | 0.100816  | 0.126894 | 0.111742 |
| 0.124854 | 0.125146  | 0.123106  | 0.137383 | 0.127914  | 0.140297 | 0.135635 |
| 0.11116  | 0.113199  | 0.110577  | 0.128934 | 0.113054  | 0.133596 | 0.116113 |
| 0.109703 | 0.111451  | 0.109411  | 0.130973 | 0.106935  | 0.133596 | 0.116113 |
| 0.109266 | 0.113636  | 0.108683  | 0.128788 | 0.10912   | 0.135198 | 0.113928 |
| 0.10912  | 0.112617  | 0.11553   | 0.13039  | 0.113928  | 0.135344 | 0.124272 |
| 0.105769 | 0.0984848 | 0.101107  | 0.121503 | 0.0968823 | 0.119172 | 0.104604 |
| 0.119464 | 0.124126  | 0.12704   | 0.136072 | 0.119318  | 0.144814 | 0.125874 |
| 0.119464 | 0.126457  | 0.128788  | 0.140734 | 0.13039   | 0.145105 | 0.143065 |
| 0.11655  | 0.121503  | 0.122669  | 0.135198 | 0.116987  | 0.144522 | 0.124709 |
| 0.121066 | 0.122815  | 0.122523  | 0.136509 | 0.119172  | 0.13243  | 0.130682 |
| 0.184732 | 0.185897  | 0.19289   | 0.20979  | 0.18954   | 0.21183  | 0.190851 |
| 0.116113 | 0.115822  | 0.111742  | 0.131265 | 0.118298  | 0.138258 | 0.122815 |
| 0.115676 | 0.127622  | 0.128205  | 0.134615 | 0.129516  | 0.139569 | 0.138695 |
| 0.112034 | 0.110868  | 0.108246  | 0.130099 | 0.110723  | 0.134178 | 0.116113 |
| 0.104604 | 0.0981935 | 0.0979021 | 0.122086 | 0.0968823 | 0.119755 | 0.104312 |
| 0.104895 | 0.113054  | 0.112762  | 0.131993 | 0.106789  | 0.138986 | 0.117133 |
| 0.116404 | 0.0971737 | 0.107663  | 0.11553  | 0.105186  | 0.12602  | 0.110868 |
| 0.128934 | 0.130099  | 0.126603  | 0.137675 | 0.127622  | 0.139423 | 0.13039  |
| 0.108392 | 0.115676  | 0.116841  | 0.133741 | 0.111451  | 0.145396 | 0.125291 |
| 0.106935 | 0.0941142 | 0.0987762 | 0.116841 | 0.10067   | 0.126748 | 0.100816 |

|          |           |           |          |           |          |          |
|----------|-----------|-----------|----------|-----------|----------|----------|
| 0.101544 | 0.0919289 | 0.0989219 | 0.114365 | 0.094697  | 0.118735 | 0.101836 |
| 0.102273 | 0.0984848 | 0.101981  | 0.121795 | 0.101544  | 0.129371 | 0.107809 |
| 0.106498 | 0.102127  | 0.106206  | 0.116987 | 0.0996503 | 0.131556 | 0.106498 |
| 0.124709 | 0.128205  | 0.134033  | 0.142191 | 0.128351  | 0.147727 | 0.134033 |
| 0.113199 | 0.0945513 | 0.101836  | 0.117861 | 0.101107  | 0.128934 | 0.109411 |
| 0.106643 | 0.108683  | 0.111888  | 0.126166 | 0.109411  | 0.131993 | 0.122086 |
| 0.113928 | 0.0897436 | 0.0973193 | 0.115093 | 0.0962995 | 0.125874 | 0.106352 |
| 0.108829 | 0.107372  | 0.107955  | 0.130973 | 0.11014   | 0.131847 | 0.114365 |
| 0.105478 | 0.102273  | 0.102273  | 0.120047 | 0.103001  | 0.13549  | 0.114802 |
| 0.112471 | 0.115385  | 0.111888  | 0.134615 | 0.114365  | 0.137238 | 0.118298 |
| 0.108392 | 0.107809  | 0.107517  | 0.131702 | 0.109994  | 0.136364 | 0.119172 |
| 0.108974 | 0.118007  | 0.11655   | 0.132284 | 0.114656  | 0.142483 | 0.125    |
| 0.116259 | 0.111014  | 0.118007  | 0.130536 | 0.108829  | 0.143065 | 0.121795 |
| 0.109703 | 0.100087  | 0.104749  | 0.124854 | 0.099359  | 0.122815 | 0.104458 |
| 0.113636 | 0.113928  | 0.109848  | 0.132576 | 0.111742  | 0.13549  | 0.115967 |
| 0.108392 | 0.121212  | 0.115967  | 0.135781 | 0.116113  | 0.142483 | 0.126457 |
| 0.113491 | 0.113491  | 0.121649  | 0.133887 | 0.116841  | 0.139423 | 0.120775 |
| 0.1081   | 0.0990676 | 0.105478  | 0.125    | 0.100087  | 0.130536 | 0.111305 |
| 0.110723 | 0.108974  | 0.109557  | 0.132284 | 0.109994  | 0.131702 | 0.117716 |
| 0.107372 | 0.115239  | 0.116404  | 0.128059 | 0.115676  | 0.136218 | 0.125728 |
| 0.107955 | 0.099796  | 0.106206  | 0.117279 | 0.0958625 | 0.13243  | 0.106206 |
| 0.107372 | 0.114948  | 0.116987  | 0.130099 | 0.116841  | 0.13447  | 0.125146 |
| 0.115822 | 0.113199  | 0.11757   | 0.135052 | 0.111597  | 0.146999 | 0.121358 |
| 0.10912  | 0.101836  | 0.105624  | 0.12602  | 0.103147  | 0.121066 | 0.108829 |
| 0.113782 | 0.109411  | 0.10708   | 0.131847 | 0.106643  | 0.135052 | 0.119318 |
| 0.104604 | 0.104604  | 0.104021  | 0.120629 | 0.103001  | 0.13549  | 0.113636 |
| 0.109703 | 0.115822  | 0.119901  | 0.13243  | 0.119755  | 0.137966 | 0.129225 |
| 0.116113 | 0.120775  | 0.117279  | 0.132721 | 0.114219  | 0.145251 | 0.128351 |
| 0.112762 | 0.1081    | 0.111305  | 0.127622 | 0.110577  | 0.131993 | 0.120629 |
| 0.182401 | 0.18648   | 0.193765  | 0.206002 | 0.189831  | 0.211247 | 0.190851 |
| 0.155012 | 0.159091  | 0.161131  | 0.176282 | 0.160985  | 0.182984 | 0.166667 |
| 0.117716 | 0.121212  | 0.124126  | 0.136655 | 0.116696  | 0.145979 | 0.123543 |
| 0.110577 | 0.10912   | 0.105624  | 0.124563 | 0.106352  | 0.13243  | 0.115822 |
| 0.14292  | 0.148747  | 0.149913  | 0.15778  | 0.145105  | 0.16419  | 0.148747 |
| 0.120629 | 0.120338  | 0.122086  | 0.140734 | 0.123397  | 0.149476 | 0.130828 |
| 0.112034 | 0.121358  | 0.118444  | 0.13447  | 0.117133  | 0.137092 | 0.125437 |
| 0.106061 | 0.11451   | 0.113345  | 0.133741 | 0.112617  | 0.136655 | 0.120338 |
| 0.1081   | 0.106935  | 0.107809  | 0.126457 | 0.101253  | 0.126166 | 0.11014  |
| 0.113345 | 0.118007  | 0.119172  | 0.131993 | 0.116987  | 0.140443 | 0.121212 |
| 0.188666 | 0.19595   | 0.200612  | 0.215181 | 0.19697   | 0.218386 | 0.199738 |
| 0.118881 | 0.097028  | 0.106061  | 0.116841 | 0.105332  | 0.130536 | 0.109266 |
| 0.101836 | 0.105915  | 0.114073  | 0.121941 | 0.109848  | 0.128351 | 0.118735 |
| 0.105624 | 0.104167  | 0.108537  | 0.127768 | 0.108683  | 0.13039  | 0.11116  |
| 0.111305 | 0.111888  | 0.111597  | 0.136072 | 0.106789  | 0.134324 | 0.120629 |

|           |           |           |          |           |          |          |
|-----------|-----------|-----------|----------|-----------|----------|----------|
| 0.173805  | 0.176719  | 0.184295  | 0.198572 | 0.18007   | 0.200029 | 0.180798 |
| 0.23616   | 0.242861  | 0.248106  | 0.258013 | 0.245629  | 0.259761 | 0.247232 |
| 0.113491  | 0.119901  | 0.119318  | 0.137092 | 0.117424  | 0.145251 | 0.130973 |
| 0.113782  | 0.114656  | 0.11961   | 0.133013 | 0.112471  | 0.138258 | 0.122232 |
| 0.114948  | 0.121358  | 0.123397  | 0.136801 | 0.11655   | 0.143502 | 0.121066 |
| 0.113054  | 0.109848  | 0.117716  | 0.131993 | 0.109411  | 0.142774 | 0.121795 |
| 0.11116   | 0.0887238 | 0.0995047 | 0.111742 | 0.097028  | 0.124854 | 0.104458 |
| 0.108683  | 0.107809  | 0.106643  | 0.127331 | 0.104749  | 0.134907 | 0.115093 |
| 0.103875  | 0.115239  | 0.112325  | 0.130973 | 0.114802  | 0.134178 | 0.120192 |
| 0.112325  | 0.0913462 | 0.0977564 | 0.110577 | 0.10169   | 0.124272 | 0.104458 |
| 0.103438  | 0.111014  | 0.113928  | 0.130536 | 0.112617  | 0.132576 | 0.117716 |
| 0.113199  | 0.105041  | 0.109411  | 0.128642 | 0.1081    | 0.134178 | 0.115239 |
| 0.105769  | 0.101981  | 0.106061  | 0.126166 | 0.0995047 | 0.123543 | 0.106061 |
| 0.109411  | 0.120484  | 0.11757   | 0.135052 | 0.117424  | 0.146125 | 0.128351 |
| 0.106061  | 0.113054  | 0.115967  | 0.130536 | 0.115239  | 0.136946 | 0.125583 |
| 0.0973193 | 0.104895  | 0.105478  | 0.124709 | 0.105915  | 0.127914 | 0.115385 |
| 0.112762  | 0.125     | 0.125874  | 0.138986 | 0.120484  | 0.144522 | 0.127622 |
| 0.129371  | 0.125874  | 0.133741  | 0.144522 | 0.123689  | 0.153263 | 0.13549  |
| 0.10912   | 0.107663  | 0.109994  | 0.132721 | 0.112179  | 0.135052 | 0.116113 |
| 0.111305  | 0.110723  | 0.11014   | 0.12704  | 0.108829  | 0.130828 | 0.113054 |
| 0.12704   | 0.12704   | 0.124709  | 0.138986 | 0.130099  | 0.137238 | 0.132576 |
| 0.197407  | 0.203526  | 0.209936  | 0.220425 | 0.205711  | 0.225962 | 0.205857 |
| 0.106935  | 0.109557  | 0.107809  | 0.128205 | 0.0995047 | 0.136072 | 0.121795 |
| 0.107955  | 0.10067   | 0.102127  | 0.12398  | 0.0973193 | 0.123689 | 0.105624 |
| 0.114365  | 0.116113  | 0.111451  | 0.133887 | 0.116841  | 0.140297 | 0.124854 |
| 0.0979021 | 0.121212  | 0.121503  | 0.134615 | 0.123106  | 0.143939 | 0.129079 |
| 0.108974  | 0.107809  | 0.107809  | 0.129079 | 0.106498  | 0.129662 | 0.120047 |
| 0.189977  | 0.192599  | 0.198427  | 0.213287 | 0.195367  | 0.21824  | 0.197552 |
| 0.112325  | 0.116696  | 0.118735  | 0.133887 | 0.121503  | 0.140297 | 0.131556 |
| 0.112471  | 0.111014  | 0.106352  | 0.130536 | 0.108246  | 0.134615 | 0.114219 |
| 0.120192  | 0.116113  | 0.120484  | 0.130099 | 0.115676  | 0.131556 | 0.127185 |
| 0.112325  | 0.108246  | 0.11116   | 0.129516 | 0.102564  | 0.137383 | 0.11961  |
| 0.110286  | 0.114948  | 0.116113  | 0.13243  | 0.117424  | 0.139423 | 0.128642 |
| 0.106206  | 0.104749  | 0.108537  | 0.123397 | 0.105769  | 0.133304 | 0.120484 |
| 0.112908  | 0.103875  | 0.109994  | 0.127768 | 0.104895  | 0.131556 | 0.116696 |
| 0.0986305 | 0.115239  | 0.118735  | 0.132721 | 0.117424  | 0.139132 | 0.126603 |
| 0.188228  | 0.192308  | 0.195804  | 0.212121 | 0.19391   | 0.216783 | 0.199592 |
| 0.105041  | 0.104458  | 0.105332  | 0.121358 | 0.106061  | 0.126311 | 0.121358 |
| 0.185897  | 0.187063  | 0.18852   | 0.208625 | 0.188083  | 0.215035 | 0.191142 |
| 0.180798  | 0.187209  | 0.193328  | 0.206731 | 0.190268  | 0.21285  | 0.190705 |
| 0.126311  | 0.122523  | 0.132721  | 0.138549 | 0.123834  | 0.14933  | 0.134761 |
| 0.112034  | 0.129225  | 0.13039   | 0.139132 | 0.13345   | 0.146999 | 0.139132 |
| 0.10271   | 0.0971737 | 0.100379  | 0.118153 | 0.097028  | 0.124563 | 0.111742 |
| 0.102564  | 0.102855  | 0.109266  | 0.120629 | 0.105041  | 0.130536 | 0.120047 |

|           |           |           |          |           |          |          |
|-----------|-----------|-----------|----------|-----------|----------|----------|
| 0.107372  | 0.112908  | 0.11116   | 0.130682 | 0.112179  | 0.134178 | 0.128059 |
| 0.11553   | 0.113199  | 0.115239  | 0.131556 | 0.113636  | 0.137092 | 0.117861 |
| 0.108829  | 0.0884324 | 0.0968823 | 0.109411 | 0.092366  | 0.119901 | 0.102127 |
| 0.115822  | 0.0893065 | 0.0980478 | 0.11116  | 0.094697  | 0.121066 | 0.104749 |
| 0.110431  | 0.121503  | 0.121212  | 0.137821 | 0.120775  | 0.147727 | 0.132576 |
| 0.116113  | 0.116696  | 0.124563  | 0.137092 | 0.112762  | 0.149621 | 0.126603 |
| 0.105186  | 0.107517  | 0.106643  | 0.128788 | 0.109411  | 0.129079 | 0.11451  |
| 0.108537  | 0.111742  | 0.115239  | 0.13039  | 0.113345  | 0.135344 | 0.126894 |
| 0.104895  | 0.097028  | 0.0981935 | 0.115967 | 0.095134  | 0.127331 | 0.107226 |
| 0.115239  | 0.12398   | 0.123689  | 0.13039  | 0.125583  | 0.137675 | 0.130682 |
| 0.116404  | 0.118444  | 0.121358  | 0.134178 | 0.112471  | 0.142628 | 0.122523 |
| 0.123252  | 0.129371  | 0.131702  | 0.136946 | 0.131847  | 0.143648 | 0.139277 |
| 0.249417  | 0.254079  | 0.257867  | 0.268648 | 0.256847  | 0.27127  | 0.258741 |
| 0.120629  | 0.122378  | 0.119172  | 0.134324 | 0.123689  | 0.145105 | 0.131993 |
| 0.120775  | 0.122523  | 0.12398   | 0.138258 | 0.121503  | 0.136801 | 0.13447  |
| 0.206002  | 0.20979   | 0.216492  | 0.230769 | 0.214307  | 0.232809 | 0.217657 |
| 0.121358  | 0.121649  | 0.121649  | 0.135635 | 0.119172  | 0.138258 | 0.131556 |
| 0.219551  | 0.226253  | 0.230332  | 0.24257  | 0.229312  | 0.241696 | 0.228875 |
| 0.112179  | 0.109557  | 0.109848  | 0.128497 | 0.112034  | 0.137529 | 0.121212 |
| 0.124272  | 0.124563  | 0.122815  | 0.137383 | 0.124709  | 0.139132 | 0.129808 |
| 0.0983392 | 0.110286  | 0.110286  | 0.128059 | 0.111888  | 0.139714 | 0.123689 |
| 0.122232  | 0.120192  | 0.125146  | 0.138258 | 0.11655   | 0.148164 | 0.129516 |
| 0.193619  | 0.196824  | 0.203234  | 0.215181 | 0.198718  | 0.220425 | 0.199155 |
| 0.11961   | 0.125728  | 0.126603  | 0.133887 | 0.129079  | 0.141754 | 0.137092 |
| 0.107663  | 0.112325  | 0.115822  | 0.133013 | 0.116259  | 0.138258 | 0.128059 |
| 0.217657  | 0.219406  | 0.226399  | 0.238636 | 0.224213  | 0.240967 | 0.222902 |
| 0.116113  | 0.0916375 | 0.101544  | 0.119027 | 0.0981935 | 0.126894 | 0.10708  |
| 0.189103  | 0.192308  | 0.196387  | 0.210082 | 0.19391   | 0.215326 | 0.196387 |
| 0.115385  | 0.0961538 | 0.10373   | 0.120921 | 0.100087  | 0.131993 | 0.109848 |
| 0.113345  | 0.115093  | 0.109266  | 0.132867 | 0.109411  | 0.134033 | 0.11859  |
| 0.116113  | 0.11116   | 0.114948  | 0.128934 | 0.109848  | 0.124854 | 0.11553  |
| 0.122232  | 0.122523  | 0.13039   | 0.139714 | 0.120921  | 0.146707 | 0.13447  |
| 0.112471  | 0.11014   | 0.108683  | 0.134033 | 0.107955  | 0.137238 | 0.117424 |
| 0.148019  | 0.148893  | 0.156177  | 0.174825 | 0.151952  | 0.176282 | 0.15472  |
| 0.101981  | 0.106352  | 0.112179  | 0.125291 | 0.113199  | 0.130828 | 0.123252 |
| 0.101107  | 0.119464  | 0.11859   | 0.135198 | 0.123106  | 0.1419   | 0.129371 |
| 0.115676  | 0.110431  | 0.11451   | 0.135198 | 0.113199  | 0.141317 | 0.124417 |
| 0.11451   | 0.123834  | 0.124417  | 0.134907 | 0.123689  | 0.138986 | 0.132284 |
| 0.187791  | 0.186043  | 0.194784  | 0.209645 | 0.191725  | 0.214598 | 0.192453 |
| 0.111305  | 0.108974  | 0.106352  | 0.130828 | 0.108829  | 0.130536 | 0.111888 |
| 0.117861  | 0.116113  | 0.125728  | 0.142628 | 0.114802  | 0.151661 | 0.124563 |
| 0.108683  | 0.0979021 | 0.104604  | 0.116259 | 0.0971737 | 0.131119 | 0.10373  |
| 0.116987  | 0.0960082 | 0.103875  | 0.109703 | 0.103438  | 0.122815 | 0.106789 |
| 0.118007  | 0.120629  | 0.11655   | 0.134615 | 0.118444  | 0.134324 | 0.124709 |

|           |           |          |          |          |          |          |
|-----------|-----------|----------|----------|----------|----------|----------|
| 0.247523  | 0.253642  | 0.25539  | 0.264714 | 0.254953 | 0.268211 | 0.256265 |
| 0.115676  | 0.106061  | 0.110431 | 0.125291 | 0.104458 | 0.119755 | 0.110431 |
| 0.107809  | 0.116259  | 0.114219 | 0.138695 | 0.115239 | 0.143939 | 0.123543 |
| 0.167541  | 0.175408  | 0.176282 | 0.189103 | 0.174679 | 0.189685 | 0.181235 |
| 0.177739  | 0.177448  | 0.183566 | 0.199592 | 0.178467 | 0.203671 | 0.183858 |
| 0.107226  | 0.119755  | 0.117133 | 0.139569 | 0.114948 | 0.145979 | 0.128497 |
| 0.107372  | 0.114365  | 0.11961  | 0.130682 | 0.118298 | 0.135927 | 0.126894 |
| 0.114365  | 0.109411  | 0.11961  | 0.130973 | 0.111888 | 0.144376 | 0.121941 |
| 0.132576  | 0.138695  | 0.143357 | 0.147727 | 0.143502 | 0.150641 | 0.149767 |
| 0.105478  | 0.117133  | 0.113636 | 0.133741 | 0.111451 | 0.145979 | 0.126457 |
| 0.110868  | 0.122523  | 0.11553  | 0.137092 | 0.11655  | 0.148456 | 0.132139 |
| 0.119755  | 0.099359  | 0.111014 | 0.116259 | 0.107663 | 0.130828 | 0.115093 |
| 0.105478  | 0.115385  | 0.117133 | 0.125874 | 0.116987 | 0.13141  | 0.125291 |
| 0.11961   | 0.122523  | 0.127768 | 0.129516 | 0.127622 | 0.135052 | 0.133887 |
| 0.107226  | 0.104604  | 0.104021 | 0.120338 | 0.105915 | 0.130536 | 0.111305 |
| 0.124272  | 0.121649  | 0.128059 | 0.140006 | 0.118007 | 0.148164 | 0.129808 |
| 0.134324  | 0.134324  | 0.140734 | 0.150641 | 0.133596 | 0.159674 | 0.141026 |
| 0.117279  | 0.112325  | 0.113782 | 0.131265 | 0.11014  | 0.124563 | 0.116987 |
| 0.13141   | 0.128205  | 0.134615 | 0.143357 | 0.125437 | 0.150058 | 0.13549  |
| 0.124126  | 0.103147  | 0.1081   | 0.113928 | 0.112325 | 0.127914 | 0.113345 |
| 0.19799   | 0.20236   | 0.207314 | 0.222174 | 0.203963 | 0.228293 | 0.206439 |
| 0.122086  | 0.11014   | 0.116259 | 0.135198 | 0.110577 | 0.138112 | 0.121795 |
| 0.182401  | 0.184441  | 0.189394 | 0.202214 | 0.189831 | 0.208625 | 0.190851 |
| 0.100233  | 0.111888  | 0.11014  | 0.125583 | 0.110286 | 0.13549  | 0.120047 |
| 0.119755  | 0.124417  | 0.120338 | 0.138403 | 0.119901 | 0.138986 | 0.126166 |
| 0.116841  | 0.121795  | 0.123252 | 0.138695 | 0.119901 | 0.146562 | 0.126166 |
| 0.110868  | 0.112617  | 0.115822 | 0.131556 | 0.110723 | 0.141171 | 0.116987 |
| 0.112179  | 0.115967  | 0.121212 | 0.132576 | 0.120192 | 0.139569 | 0.129371 |
| 0.110723  | 0.117716  | 0.120047 | 0.127622 | 0.121066 | 0.134907 | 0.128497 |
| 0.109557  | 0.115093  | 0.113345 | 0.132867 | 0.114656 | 0.140152 | 0.118298 |
| 0.0962995 | 0.116696  | 0.116696 | 0.13039  | 0.117716 | 0.141171 | 0.126894 |
| 0.116696  | 0.122815  | 0.125146 | 0.138258 | 0.118881 | 0.146416 | 0.126603 |
| 0.12704   | 0.107517  | 0.115676 | 0.120921 | 0.115822 | 0.130245 | 0.11859  |
| 0.242133  | 0.248252  | 0.251748 | 0.262238 | 0.246941 | 0.263695 | 0.252331 |
| 0.112471  | 0.114219  | 0.112179 | 0.132576 | 0.116696 | 0.137529 | 0.118881 |
| 0.174388  | 0.178176  | 0.181964 | 0.198864 | 0.17803  | 0.202943 | 0.181672 |
| 0.178322  | 0.183275  | 0.188228 | 0.20542  | 0.185169 | 0.209499 | 0.189394 |
| 0.112617  | 0.113199  | 0.112617 | 0.136218 | 0.112179 | 0.139423 | 0.123397 |
| 0.11116   | 0.106206  | 0.104749 | 0.125146 | 0.105769 | 0.121066 | 0.113199 |
| 0.120484  | 0.122523  | 0.120775 | 0.137092 | 0.123252 | 0.137966 | 0.127768 |
| 0.10912   | 0.108537  | 0.114073 | 0.124854 | 0.110723 | 0.128059 | 0.121649 |
| 0.107517  | 0.104021  | 0.106643 | 0.127914 | 0.10067  | 0.131119 | 0.107809 |
| 0.11655   | 0.0944056 | 0.100816 | 0.114802 | 0.099796 | 0.129371 | 0.106935 |
| 0.110868  | 0.117279  | 0.116987 | 0.127185 | 0.118298 | 0.131556 | 0.126603 |

|           |           |          |          |           |          |          |
|-----------|-----------|----------|----------|-----------|----------|----------|
| 0.121358  | 0.126311  | 0.131265 | 0.133596 | 0.130245  | 0.141754 | 0.138258 |
| 0.111888  | 0.113345  | 0.113928 | 0.132867 | 0.113782  | 0.133159 | 0.117716 |
| 0.115676  | 0.123834  | 0.12704  | 0.135198 | 0.127185  | 0.140443 | 0.136072 |
| 0.112325  | 0.116404  | 0.112034 | 0.131847 | 0.110431  | 0.133304 | 0.123397 |
| 0.124854  | 0.126311  | 0.126603 | 0.135344 | 0.12296   | 0.144959 | 0.127185 |
| 0.118881  | 0.115093  | 0.120921 | 0.135781 | 0.113491  | 0.148019 | 0.125291 |
| 0.126603  | 0.103584  | 0.110577 | 0.115822 | 0.113054  | 0.129808 | 0.116987 |
| 0.118298  | 0.110431  | 0.112471 | 0.130828 | 0.109994  | 0.136364 | 0.122378 |
| 0.110723  | 0.114219  | 0.11014  | 0.130536 | 0.112325  | 0.132576 | 0.120921 |
| 0.127622  | 0.129371  | 0.123834 | 0.137821 | 0.130973  | 0.143065 | 0.137238 |
| 0.171474  | 0.177885  | 0.182547 | 0.199155 | 0.179487  | 0.204691 | 0.182838 |
| 0.123834  | 0.131119  | 0.134324 | 0.136072 | 0.134178  | 0.142483 | 0.143357 |
| 0.109848  | 0.114219  | 0.117424 | 0.129662 | 0.119318  | 0.136655 | 0.128497 |
| 0.113491  | 0.118735  | 0.122523 | 0.137092 | 0.117424  | 0.145833 | 0.123106 |
| 0.109848  | 0.1081    | 0.114219 | 0.129079 | 0.106789  | 0.13549  | 0.11451  |
| 0.115822  | 0.114948  | 0.122232 | 0.137092 | 0.110723  | 0.147582 | 0.125146 |
| 0.120338  | 0.118881  | 0.127331 | 0.140734 | 0.117279  | 0.150932 | 0.129662 |
| 0.185752  | 0.184586  | 0.190414 | 0.205565 | 0.187063  | 0.211684 | 0.190705 |
| 0.107663  | 0.112908  | 0.115822 | 0.128351 | 0.115676  | 0.137675 | 0.123397 |
| 0.104604  | 0.099359  | 0.103438 | 0.123543 | 0.105915  | 0.130828 | 0.112471 |
| 0.113345  | 0.119172  | 0.123834 | 0.130536 | 0.121358  | 0.134615 | 0.130828 |
| 0.184295  | 0.18546   | 0.190122 | 0.2044   | 0.188228  | 0.208479 | 0.18954  |
| 0.106061  | 0.100816  | 0.104895 | 0.127622 | 0.0983392 | 0.124709 | 0.1081   |
| 0.118444  | 0.099796  | 0.106206 | 0.112908 | 0.106061  | 0.128059 | 0.109994 |
| 0.112325  | 0.11961   | 0.123106 | 0.132139 | 0.122669  | 0.137675 | 0.131556 |
| 0.109266  | 0.114802  | 0.112471 | 0.130536 | 0.112325  | 0.13986  | 0.125    |
| 0.180361  | 0.179779  | 0.186189 | 0.202797 | 0.182547  | 0.203963 | 0.187354 |
| 0.113636  | 0.0961538 | 0.103438 | 0.115093 | 0.105332  | 0.125583 | 0.111597 |
| 0.113054  | 0.1081    | 0.107517 | 0.123834 | 0.111742  | 0.13549  | 0.120047 |
| 0.104312  | 0.104604  | 0.106061 | 0.127331 | 0.100962  | 0.124417 | 0.109848 |
| 0.113054  | 0.115385  | 0.122669 | 0.138986 | 0.116404  | 0.143357 | 0.12296  |
| 0.100379  | 0.119901  | 0.118153 | 0.133887 | 0.119172  | 0.140006 | 0.129516 |
| 0.124563  | 0.104749  | 0.11116  | 0.11553  | 0.112471  | 0.130973 | 0.114948 |
| 0.110286  | 0.114073  | 0.114365 | 0.133304 | 0.111888  | 0.135052 | 0.119027 |
| 0.114073  | 0.117279  | 0.116113 | 0.126894 | 0.114219  | 0.140006 | 0.123689 |
| 0.133159  | 0.143939  | 0.143648 | 0.152972 | 0.143502  | 0.159674 | 0.153846 |
| 0.227855  | 0.232226  | 0.237471 | 0.25     | 0.23412   | 0.250583 | 0.236014 |
| 0.124126  | 0.117133  | 0.120921 | 0.132576 | 0.11961   | 0.138695 | 0.127331 |
| 0.0990676 | 0.120921  | 0.118881 | 0.134615 | 0.120775  | 0.145105 | 0.129662 |
| 0.10708   | 0.111742  | 0.116404 | 0.126603 | 0.113636  | 0.133304 | 0.123689 |
| 0.117133  | 0.122378  | 0.114802 | 0.13549  | 0.116404  | 0.144231 | 0.120629 |
| 0.0919289 | 0.10912   | 0.112908 | 0.120484 | 0.110723  | 0.129808 | 0.118735 |
| 0.110868  | 0.112034  | 0.111742 | 0.131847 | 0.111597  | 0.129516 | 0.123106 |
| 0.111014  | 0.120338  | 0.118881 | 0.127914 | 0.121941  | 0.132576 | 0.129371 |

|          |           |           |          |           |          |          |
|----------|-----------|-----------|----------|-----------|----------|----------|
| 0.121358 | 0.0989219 | 0.108829  | 0.114365 | 0.109266  | 0.127185 | 0.115239 |
| 0.106206 | 0.112617  | 0.10912   | 0.130099 | 0.109848  | 0.142337 | 0.117861 |
| 0.227855 | 0.232517  | 0.239219  | 0.24796  | 0.235286  | 0.250291 | 0.237179 |
| 0.105915 | 0.101544  | 0.106498  | 0.121941 | 0.100233  | 0.120484 | 0.109703 |
| 0.101253 | 0.104167  | 0.0986305 | 0.118153 | 0.0984848 | 0.130973 | 0.109703 |
| 0.1081   | 0.112179  | 0.110723  | 0.130245 | 0.113491  | 0.131993 | 0.115967 |
| 0.11961  | 0.128642  | 0.127185  | 0.140589 | 0.128788  | 0.149913 | 0.137383 |
| 0.131265 | 0.121941  | 0.123106  | 0.137966 | 0.122086  | 0.139714 | 0.13243  |
| 0.113491 | 0.116987  | 0.116404  | 0.133887 | 0.112179  | 0.136218 | 0.127768 |
| 0.107955 | 0.118153  | 0.119901  | 0.129808 | 0.119172  | 0.137383 | 0.129808 |
| 0.107517 | 0.113054  | 0.107226  | 0.124709 | 0.10708   | 0.134615 | 0.120047 |
| 0.221445 | 0.226981  | 0.232226  | 0.24359  | 0.230041  | 0.245921 | 0.229312 |
| 0.113054 | 0.122086  | 0.122669  | 0.13141  | 0.125146  | 0.140443 | 0.133741 |
| 0.117861 | 0.0968823 | 0.106206  | 0.114948 | 0.107517  | 0.126603 | 0.111451 |
| 0.101836 | 0.107372  | 0.100379  | 0.127768 | 0.104021  | 0.137383 | 0.114073 |
| 0.107226 | 0.119172  | 0.122086  | 0.133741 | 0.119901  | 0.137821 | 0.13141  |
| 0.118881 | 0.117716  | 0.117133  | 0.130828 | 0.117861  | 0.142483 | 0.124709 |
| 0.112179 | 0.115093  | 0.110723  | 0.132867 | 0.114656  | 0.134033 | 0.118881 |
| 0.119464 | 0.100524  | 0.106643  | 0.113928 | 0.10708   | 0.126748 | 0.11451  |
| 0.12602  | 0.105041  | 0.113199  | 0.118153 | 0.112471  | 0.129516 | 0.120192 |
| 0.113782 | 0.0930944 | 0.100379  | 0.113199 | 0.103147  | 0.124272 | 0.106789 |
| 0.112471 | 0.115967  | 0.112471  | 0.132284 | 0.113782  | 0.133741 | 0.117424 |
| 0.105186 | 0.124709  | 0.124417  | 0.13141  | 0.126894  | 0.142191 | 0.133741 |
| 0.108829 | 0.129808  | 0.129808  | 0.139714 | 0.134615  | 0.148164 | 0.138258 |
| 0.12602  | 0.128351  | 0.128642  | 0.140589 | 0.125291  | 0.146707 | 0.132721 |
| 0.127768 | 0.131556  | 0.13447   | 0.144376 | 0.127622  | 0.147873 | 0.131556 |
| 0.108974 | 0.127622  | 0.127622  | 0.136655 | 0.13039   | 0.145688 | 0.136655 |
| 0.106935 | 0.100816  | 0.101981  | 0.125583 | 0.0965909 | 0.125    | 0.106643 |
| 0.128059 | 0.120192  | 0.121941  | 0.128642 | 0.113636  | 0.138258 | 0.125146 |
| 0.126166 | 0.0987762 | 0.10373   | 0.105478 | 0.103584  | 0.108683 | 0.104895 |
| 0.195513 | 0.199301  | 0.204837  | 0.220571 | 0.203526  | 0.223485 | 0.206876 |
| 0.117133 | 0.121503  | 0.125     | 0.133741 | 0.121649  | 0.142191 | 0.128497 |
| 0.110431 | 0.105478  | 0.106643  | 0.12296  | 0.105332  | 0.136946 | 0.115967 |
| 0.117279 | 0.119027  | 0.117279  | 0.135635 | 0.120047  | 0.139714 | 0.123689 |
| 0.213869 | 0.220571  | 0.224942  | 0.236014 | 0.220425  | 0.240385 | 0.224068 |
| 0.202214 | 0.207459  | 0.209207  | 0.223485 | 0.210519  | 0.228147 | 0.212704 |
| 0.124272 | 0.103584  | 0.110577  | 0.117861 | 0.113345  | 0.128059 | 0.116696 |
| 0.238928 | 0.24796   | 0.251457  | 0.261072 | 0.24898   | 0.263695 | 0.249709 |
| 0.104312 | 0.103438  | 0.104604  | 0.127622 | 0.0954254 | 0.124126 | 0.106643 |
| 0.129371 | 0.129079  | 0.129662  | 0.143065 | 0.127768  | 0.140734 | 0.138986 |
| 0.109557 | 0.103438  | 0.106352  | 0.124709 | 0.101836  | 0.120629 | 0.108683 |
| 0.103584 | 0.125728  | 0.122815  | 0.134761 | 0.127914  | 0.143502 | 0.13447  |
| 0.180361 | 0.182984  | 0.187063  | 0.201923 | 0.184003  | 0.206294 | 0.18648  |
| 0.118444 | 0.112908  | 0.110577  | 0.127477 | 0.116259  | 0.13243  | 0.119318 |

|          |           |           |          |           |          |          |
|----------|-----------|-----------|----------|-----------|----------|----------|
| 0.187209 | 0.190414  | 0.196533  | 0.20877  | 0.192599  | 0.214307 | 0.194202 |
| 0.114656 | 0.109411  | 0.109994  | 0.128351 | 0.11014   | 0.137675 | 0.120192 |
| 0.107372 | 0.100379  | 0.110286  | 0.121941 | 0.11014   | 0.127477 | 0.113491 |
| 0.118444 | 0.118444  | 0.118735  | 0.126311 | 0.11655   | 0.135052 | 0.122815 |
| 0.10912  | 0.109994  | 0.108537  | 0.129808 | 0.110431  | 0.130682 | 0.116404 |
| 0.104604 | 0.1081    | 0.107226  | 0.12704  | 0.106789  | 0.130245 | 0.111597 |
| 0.107809 | 0.109848  | 0.115676  | 0.126166 | 0.112034  | 0.134615 | 0.116841 |
| 0.106643 | 0.0973193 | 0.102855  | 0.122086 | 0.0971737 | 0.120047 | 0.105186 |
| 0.108246 | 0.107663  | 0.112908  | 0.126603 | 0.111305  | 0.13039  | 0.123106 |
| 0.111888 | 0.105769  | 0.111888  | 0.119755 | 0.103875  | 0.134324 | 0.111888 |
| 0.110431 | 0.102564  | 0.102564  | 0.125    | 0.105915  | 0.13141  | 0.115967 |
| 0.110286 | 0.103001  | 0.104167  | 0.124272 | 0.0999417 | 0.121066 | 0.107372 |
| 0.115967 | 0.119172  | 0.118007  | 0.135198 | 0.116696  | 0.137529 | 0.121212 |
| 0.117716 | 0.123543  | 0.126457  | 0.134615 | 0.127477  | 0.139277 | 0.13549  |
| 0.111451 | 0.112617  | 0.116987  | 0.126311 | 0.107809  | 0.138549 | 0.119027 |
| 0.11014  | 0.109266  | 0.107809  | 0.125291 | 0.113782  | 0.132284 | 0.11655  |
| 0.105332 | 0.107955  | 0.105041  | 0.12602  | 0.105769  | 0.129808 | 0.109994 |
| 0.112617 | 0.099796  | 0.108246  | 0.118153 | 0.109848  | 0.131265 | 0.111742 |
| 0.099796 | 0.11757   | 0.113491  | 0.133013 | 0.11655   | 0.142337 | 0.128934 |
| 0.120338 | 0.115676  | 0.125583  | 0.136072 | 0.113491  | 0.145979 | 0.124126 |
| 0.115676 | 0.118881  | 0.118298  | 0.133159 | 0.112617  | 0.141608 | 0.12296  |
| 0.109994 | 0.113491  | 0.115822  | 0.129808 | 0.114802  | 0.136509 | 0.126311 |
| 0.121212 | 0.125291  | 0.129662  | 0.132576 | 0.128059  | 0.140152 | 0.136072 |
| 0.125874 | 0.13345   | 0.136072  | 0.1419   | 0.135635  | 0.143648 | 0.143065 |
| 0.105041 | 0.0820221 | 0.0948427 | 0.11116  | 0.0859557 | 0.120775 | 0.100087 |
| 0.111742 | 0.114073  | 0.11116   | 0.128934 | 0.112762  | 0.135635 | 0.118444 |
| 0.102855 | 0.101107  | 0.105769  | 0.125583 | 0.100087  | 0.128788 | 0.115676 |
| 0.111597 | 0.132867  | 0.129371  | 0.140734 | 0.134761  | 0.145688 | 0.142483 |
| 0.113491 | 0.104749  | 0.109703  | 0.124272 | 0.104021  | 0.118735 | 0.112034 |
| 0.135635 | 0.133596  | 0.141754  | 0.147873 | 0.131993  | 0.156323 | 0.14292  |
| 0.131556 | 0.132139  | 0.129225  | 0.144959 | 0.134324  | 0.140297 | 0.136509 |
| 0.112471 | 0.123543  | 0.122378  | 0.138112 | 0.121066  | 0.149184 | 0.134324 |
| 0.112617 | 0.104167  | 0.110868  | 0.131847 | 0.103147  | 0.129808 | 0.121941 |
| 0.101981 | 0.111014  | 0.111305  | 0.130245 | 0.109411  | 0.137238 | 0.121795 |
| 0.121503 | 0.125291  | 0.129371  | 0.141608 | 0.125146  | 0.145105 | 0.129662 |
| 0.199155 | 0.198572  | 0.206731  | 0.218677 | 0.201049  | 0.225087 | 0.203817 |
| 0.112325 | 0.109994  | 0.10708   | 0.127185 | 0.113345  | 0.13039  | 0.118444 |
| 0.116841 | 0.111597  | 0.112179  | 0.128497 | 0.110577  | 0.137238 | 0.117716 |
| 0.103001 | 0.120775  | 0.116987  | 0.126603 | 0.119464  | 0.137092 | 0.127185 |
| 0.112471 | 0.11451   | 0.120047  | 0.130828 | 0.109994  | 0.139277 | 0.11859  |
| 0.118153 | 0.115239  | 0.118153  | 0.133013 | 0.116259  | 0.142337 | 0.126311 |
| 0.116696 | 0.120192  | 0.112034  | 0.130973 | 0.111888  | 0.140589 | 0.126894 |
| 0.117716 | 0.125     | 0.118298  | 0.13141  | 0.119027  | 0.138986 | 0.132867 |
| 0.112034 | 0.121358  | 0.119318  | 0.132139 | 0.117424  | 0.145833 | 0.12602  |



|           |           |           |          |           |          |          |
|-----------|-----------|-----------|----------|-----------|----------|----------|
| 0.108246  | 0.0968823 | 0.103875  | 0.116404 | 0.092366  | 0.131847 | 0.104458 |
| 0.104749  | 0.124272  | 0.126894  | 0.135052 | 0.128788  | 0.140589 | 0.132139 |
| 0.112617  | 0.107955  | 0.112034  | 0.124272 | 0.107517  | 0.130682 | 0.117861 |
| 0.116841  | 0.109266  | 0.111597  | 0.13141  | 0.108537  | 0.136072 | 0.119464 |
| 0.1706    | 0.163899  | 0.167686  | 0.18546  | 0.168124  | 0.187791 | 0.176136 |
| 0.108246  | 0.112617  | 0.115239  | 0.129225 | 0.112179  | 0.134178 | 0.124854 |
| 0.108392  | 0.126457  | 0.125291  | 0.139569 | 0.128351  | 0.144522 | 0.133741 |
| 0.111742  | 0.105041  | 0.109703  | 0.126311 | 0.106935  | 0.135927 | 0.119027 |
| 0.104312  | 0.112762  | 0.111014  | 0.108392 | 0.11116   | 0.121503 | 0.117424 |
| 0.106643  | 0.100233  | 0.099359  | 0.119172 | 0.100087  | 0.13141  | 0.109266 |
| 0.102855  | 0.0961538 | 0.0987762 | 0.118881 | 0.0968823 | 0.127331 | 0.111305 |
| 0.112179  | 0.107226  | 0.103147  | 0.120921 | 0.103584  | 0.134324 | 0.112179 |
| 0.115676  | 0.111014  | 0.113054  | 0.121212 | 0.109994  | 0.124709 | 0.111888 |
| 0.107517  | 0.111597  | 0.112471  | 0.130245 | 0.112908  | 0.133741 | 0.122086 |
| 0.122815  | 0.119318  | 0.124563  | 0.138258 | 0.112471  | 0.142628 | 0.129808 |
| 0.0984848 | 0.104895  | 0.105186  | 0.122669 | 0.104749  | 0.13141  | 0.113636 |
| 0.112325  | 0.104749  | 0.105332  | 0.12602  | 0.102273  | 0.136218 | 0.112325 |
| 0.125583  | 0.102273  | 0.0996503 | 0.111014 | 0.105041  | 0.109557 | 0.107809 |
| 0.11451   | 0.102855  | 0.104312  | 0.119172 | 0.101836  | 0.129953 | 0.109266 |
| 0.119755  | 0.120338  | 0.124126  | 0.131993 | 0.116113  | 0.133159 | 0.125    |
| 0.106643  | 0.0961538 | 0.100816  | 0.119172 | 0.0962995 | 0.131702 | 0.108974 |
| 0.115093  | 0.102564  | 0.103438  | 0.120338 | 0.102418  | 0.131993 | 0.111305 |
| 0.0949883 | 0.100233  | 0.104895  | 0.123543 | 0.0989219 | 0.132867 | 0.113054 |
| 0.120192  | 0.109411  | 0.11553   | 0.126894 | 0.112762  | 0.13447  | 0.118444 |
| 0.10708   | 0.0962995 | 0.105624  | 0.125437 | 0.0984848 | 0.130973 | 0.109994 |
| 0.135344  | 0.124854  | 0.13039   | 0.132721 | 0.130828  | 0.139423 | 0.132139 |
| 0.119901  | 0.11553   | 0.120484  | 0.131847 | 0.12296   | 0.139714 | 0.123689 |
| 0.108246  | 0.104458  | 0.109994  | 0.122815 | 0.102273  | 0.13243  | 0.112617 |
| 0.131702  | 0.122669  | 0.126748  | 0.132867 | 0.124272  | 0.141026 | 0.125874 |
| 0.111014  | 0.11859   | 0.124417  | 0.13549  | 0.113491  | 0.145979 | 0.126748 |
| 0.126166  | 0.109848  | 0.107226  | 0.115676 | 0.105624  | 0.115676 | 0.115385 |
| 0.111305  | 0.105769  | 0.109557  | 0.121503 | 0.105624  | 0.132284 | 0.117133 |
| 0.139423  | 0.137092  | 0.139132  | 0.144085 | 0.139277  | 0.14729  | 0.148456 |
| 0.126311  | 0.119901  | 0.118735  | 0.132721 | 0.123252  | 0.141463 | 0.128059 |
| 0.124854  | 0.121941  | 0.120192  | 0.125437 | 0.124709  | 0.131847 | 0.127768 |
| 0.11553   | 0.113782  | 0.110577  | 0.133304 | 0.110431  | 0.137092 | 0.11961  |
| 0.109266  | 0.0917832 | 0.099359  | 0.11859  | 0.0977564 | 0.129371 | 0.101107 |
| 0.104458  | 0.0968823 | 0.0986305 | 0.121649 | 0.0979021 | 0.123689 | 0.107372 |
| 0.109266  | 0.0964452 | 0.100816  | 0.115093 | 0.102418  | 0.121795 | 0.106061 |
| 0.11859   | 0.11014   | 0.113928  | 0.126748 | 0.107663  | 0.130245 | 0.121212 |
| 0.116404  | 0.11961   | 0.121941  | 0.13447  | 0.114219  | 0.142045 | 0.125437 |
| 0.104458  | 0.10912   | 0.114365  | 0.131265 | 0.111597  | 0.135635 | 0.121649 |
| 0.101836  | 0.10067   | 0.103293  | 0.121358 | 0.0987762 | 0.126603 | 0.112325 |
| 0.106352  | 0.0941142 | 0.0990676 | 0.120047 | 0.0965909 | 0.127622 | 0.107517 |

|          |           |           |          |           |          |          |
|----------|-----------|-----------|----------|-----------|----------|----------|
| 0.116404 | 0.105332  | 0.111742  | 0.124563 | 0.111597  | 0.127477 | 0.119027 |
| 0.10912  | 0.0960082 | 0.104749  | 0.125146 | 0.0999417 | 0.125146 | 0.108246 |
| 0.115967 | 0.103147  | 0.1081    | 0.126166 | 0.10708   | 0.129079 | 0.114219 |
| 0.109266 | 0.105478  | 0.112179  | 0.126457 | 0.102127  | 0.132284 | 0.113054 |
| 0.112617 | 0.113199  | 0.112617  | 0.133596 | 0.111888  | 0.136218 | 0.124272 |
| 0.11116  | 0.101253  | 0.100087  | 0.125146 | 0.101107  | 0.127185 | 0.113782 |
| 0.107372 | 0.103584  | 0.0986305 | 0.125146 | 0.0949883 | 0.122523 | 0.104458 |
| 0.112617 | 0.0992133 | 0.105624  | 0.120192 | 0.106935  | 0.122815 | 0.114656 |
| 0.110431 | 0.111888  | 0.111014  | 0.13141  | 0.11116   | 0.137238 | 0.122086 |
| 0.113782 | 0.107955  | 0.108246  | 0.123106 | 0.106352  | 0.127768 | 0.115239 |
| 0.118153 | 0.12398   | 0.120775  | 0.135635 | 0.121212  | 0.138258 | 0.130973 |
| 0.106206 | 0.100962  | 0.104749  | 0.121941 | 0.099359  | 0.126894 | 0.111742 |
| 0.121503 | 0.118881  | 0.11859   | 0.128788 | 0.116404  | 0.132867 | 0.123834 |

| <b>TDr_08_00197</b> | <b>TDr_08_00207</b> | <b>TDr_08_00218</b> | <b>TDr_08_00229</b> | <b>TDr_08_00254</b> | <b>TDr_08_00268</b> | <b>TDr_08_00292</b> |
|---------------------|---------------------|---------------------|---------------------|---------------------|---------------------|---------------------|
| 0.127185            | 0.119318            | 0.124272            | 0.118153            | 0.115822            | 0.141317            | 0.113928            |
| 0.118007            | 0.115093            | 0.120921            | 0.109557            | 0.116841            | 0.138549            | 0.10912             |
| 0.113345            | 0.111597            | 0.113345            | 0.108974            | 0.111597            | 0.133596            | 0.10708             |
| 0.120338            | 0.115676            | 0.115676            | 0.111305            | 0.116259            | 0.137383            | 0.111451            |
| 0.12704             | 0.131702            | 0.134907            | 0.127331            | 0.126748            | 0.139423            | 0.12602             |
| 0.12704             | 0.126166            | 0.130536            | 0.125874            | 0.123252            | 0.141754            | 0.120192            |
| 0.116113            | 0.119027            | 0.126311            | 0.115239            | 0.112617            | 0.129662            | 0.109848            |
| 0.111742            | 0.110577            | 0.113491            | 0.105332            | 0.103875            | 0.130245            | 0.108974            |
| 0.108392            | 0.105478            | 0.109557            | 0.101107            | 0.100233            | 0.123689            | 0.0954254           |
| 0.114948            | 0.108246            | 0.112617            | 0.105332            | 0.108829            | 0.125583            | 0.0973193           |
| 0.120921            | 0.113345            | 0.119172            | 0.108683            | 0.109848            | 0.135052            | 0.0983392           |
| 0.11116             | 0.107955            | 0.115239            | 0.10271             | 0.101253            | 0.128205            | 0.103438            |
| 0.114365            | 0.106498            | 0.114365            | 0.105915            | 0.110868            | 0.13141             | 0.100233            |
| 0.138403            | 0.134907            | 0.138403            | 0.132576            | 0.129953            | 0.151078            | 0.131265            |
| 0.127768            | 0.124854            | 0.128351            | 0.12398             | 0.126311            | 0.138403            | 0.115093            |
| 0.110431            | 0.112762            | 0.11655             | 0.111597            | 0.1081              | 0.123689            | 0.100962            |
| 0.111742            | 0.109994            | 0.112617            | 0.101253            | 0.104167            | 0.126748            | 0.0981935           |
| 0.146853            | 0.140152            | 0.144814            | 0.142191            | 0.141608            | 0.146125            | 0.140589            |
| 0.112762            | 0.111305            | 0.116259            | 0.107517            | 0.106935            | 0.132721            | 0.103293            |
| 0.208042            | 0.204545            | 0.206585            | 0.202797            | 0.20134             | 0.213724            | 0.199738            |
| 0.122523            | 0.122232            | 0.129808            | 0.123689            | 0.121649            | 0.144231            | 0.113636            |
| 0.123543            | 0.117716            | 0.128205            | 0.115967            | 0.117716            | 0.142045            | 0.114656            |
| 0.112325            | 0.10708             | 0.107663            | 0.105041            | 0.102418            | 0.123252            | 0.094697            |
| 0.10373             | 0.109266            | 0.112179            | 0.108683            | 0.104895            | 0.118153            | 0.10708             |
| 0.107955            | 0.0971737           | 0.106789            | 0.0948427           | 0.100087            | 0.122086            | 0.0897436           |
| 0.125437            | 0.128934            | 0.134178            | 0.128351            | 0.126311            | 0.139277            | 0.121503            |
| 0.121066            | 0.120192            | 0.127768            | 0.113199            | 0.117279            | 0.137529            | 0.0976107           |
| 0.101253            | 0.108829            | 0.103875            | 0.104458            | 0.107663            | 0.120921            | 0.108392            |
| 0.117279            | 0.125146            | 0.125146            | 0.115239            | 0.122815            | 0.130828            | 0.114219            |
| 0.121649            | 0.122523            | 0.12398             | 0.117279            | 0.118444            | 0.137529            | 0.107517            |
| 0.122378            | 0.119755            | 0.125874            | 0.117716            | 0.113345            | 0.13243             | 0.105915            |
| 0.113782            | 0.119318            | 0.116987            | 0.11116             | 0.114948            | 0.13141             | 0.108683            |
| 0.112325            | 0.108829            | 0.11116             | 0.105041            | 0.102127            | 0.127914            | 0.0981935           |
| 0.111742            | 0.114656            | 0.116987            | 0.111451            | 0.113782            | 0.133741            | 0.104604            |
| 0.118881            | 0.119172            | 0.123252            | 0.113636            | 0.111888            | 0.128642            | 0.0957168           |
| 0.11961             | 0.123397            | 0.123689            | 0.120484            | 0.118735            | 0.132867            | 0.104312            |
| 0.129079            | 0.125583            | 0.133741            | 0.131993            | 0.125               | 0.136801            | 0.118735            |
| 0.120484            | 0.112034            | 0.121941            | 0.116404            | 0.114948            | 0.131702            | 0.109557            |
| 0.0960082           | 0.10271             | 0.100087            | 0.095134            | 0.105624            | 0.119464            | 0.094697            |
| 0.10271             | 0.0936772           | 0.0849359           | 0.08581             | 0.0759033           | 0.090035            | 0.11859             |
| 0.105041            | 0.0852273           | 0.0817308           | 0.081148            | 0.0782343           | 0.104895            | 0.0987762           |
| 0.125146            | 0.104458            | 0.10912             | 0.106789            | 0.101544            | 0.0868298           | 0.125291            |

|           |           |           |           |           |           |           |
|-----------|-----------|-----------|-----------|-----------|-----------|-----------|
| 0.125146  | 0.0689103 | 0.118735  | 0.111451  | 0.0933858 | 0.0914918 | 0.132867  |
| 0.107226  | 0.0827506 | 0.0862471 | 0.087704  | 0.0789627 | 0.0954254 | 0.102127  |
| 0.106061  | 0.108392  | 0.113054  | 0.10169   | 0.104312  | 0.120484  | 0.095134  |
| 0.112617  | 0.115822  | 0.118735  | 0.116113  | 0.110286  | 0.124126  | 0.0920746 |
| 0.100087  | 0.103875  | 0.108537  | 0.100962  | 0.0977564 | 0.115385  | 0.108392  |
| 0.119464  | 0.10169   | 0.107226  | 0.107226  | 0.0987762 | 0.0948427 | 0.123397  |
| 0.101107  | 0.080711  | 0.0815851 | 0.0775058 | 0.076049  | 0.103293  | 0.106498  |
| 0.108537  | 0.0782343 | 0.0960082 | 0.0826049 | 0.0791084 | 0.0961538 | 0.105186  |
| 0.140734  | 0.145105  | 0.153846  | 0.143065  | 0.145688  | 0.158071  | 0.137675  |
| 0.0944056 | 0.112471  | 0.121795  | 0.114802  | 0.109266  | 0.118153  | 0.116696  |
| 0.104458  | 0.0703671 | 0.081148  | 0.0791084 | 0.0735723 | 0.0973193 | 0.104604  |
| 0.11961   | 0.121941  | 0.124854  | 0.11553   | 0.121066  | 0.128788  | 0.119464  |
| 0.112908  | 0.0942599 | 0.101836  | 0.102127  | 0.0907634 | 0.118881  | 0.113054  |
| 0.11553   | 0.123106  | 0.121941  | 0.129516  | 0.115822  | 0.120338  | 0.129079  |
| 0.106935  | 0.0944056 | 0.0990676 | 0.0926573 | 0.0844988 | 0.104458  | 0.119318  |
| 0.106643  | 0.0795455 | 0.0862471 | 0.0827506 | 0.0777972 | 0.10067   | 0.101253  |
| 0.105186  | 0.0804196 | 0.0888695 | 0.0874126 | 0.085373  | 0.105041  | 0.10912   |
| 0.114365  | 0.114365  | 0.121358  | 0.110286  | 0.110577  | 0.125874  | 0.106935  |
| 0.117279  | 0.102127  | 0.101253  | 0.108537  | 0.0954254 | 0.0882867 | 0.120338  |
| 0.113199  | 0.106498  | 0.103584  | 0.106498  | 0.108829  | 0.106061  | 0.132867  |
| 0.152389  | 0.158217  | 0.151807  | 0.148019  | 0.150641  | 0.160693  | 0.158945  |
| 0.100233  | 0.0839161 | 0.0748834 | 0.0836247 | 0.076049  | 0.0965909 | 0.101253  |
| 0.0999417 | 0.0833333 | 0.0812937 | 0.0801282 | 0.0775058 | 0.101544  | 0.10067   |
| 0.101107  | 0.0821678 | 0.0865385 | 0.0824592 | 0.0766317 | 0.109703  | 0.0971737 |
| 0.134761  | 0.135635  | 0.141754  | 0.135052  | 0.128642  | 0.141608  | 0.134615  |
| 0.101544  | 0.0863928 | 0.0895979 | 0.083479  | 0.0793998 | 0.105186  | 0.104895  |
| 0.120629  | 0.11014   | 0.1081    | 0.113054  | 0.104021  | 0.110577  | 0.126894  |
| 0.111888  | 0.118007  | 0.120338  | 0.115093  | 0.111597  | 0.131265  | 0.101544  |
| 0.105915  | 0.08581   | 0.0895979 | 0.0767774 | 0.0814394 | 0.102855  | 0.103438  |
| 0.14292   | 0.143794  | 0.153992  | 0.148164  | 0.139714  | 0.152389  | 0.138986  |
| 0.106498  | 0.0895979 | 0.0776515 | 0.0820221 | 0.0793998 | 0.097028  | 0.106643  |
| 0.119172  | 0.104021  | 0.111597  | 0.103147  | 0.102564  | 0.102418  | 0.132721  |
| 0.0939685 | 0.116113  | 0.119901  | 0.113491  | 0.112325  | 0.125     | 0.117716  |
| 0.113054  | 0.107226  | 0.120047  | 0.107517  | 0.11014   | 0.131847  | 0.106206  |
| 0.099359  | 0.0737179 | 0.0839161 | 0.0824592 | 0.0696387 | 0.0913462 | 0.0986305 |
| 0.104895  | 0.0818765 | 0.0888695 | 0.0696387 | 0.0891608 | 0.101253  | 0.100962  |
| 0.115385  | 0.099359  | 0.0984848 | 0.100233  | 0.0914918 | 0.100087  | 0.120192  |
| 0.104749  | 0.083479  | 0.0872669 | 0.0843531 | 0.0791084 | 0.102564  | 0.10169   |
| 0.12296   | 0.104895  | 0.0996503 | 0.104604  | 0.101399  | 0.100087  | 0.126311  |
| 0.111305  | 0.0903263 | 0.083042  | 0.0944056 | 0.0879953 | 0.103001  | 0.106498  |
| 0         | 0.105769  | 0.104312  | 0.10169   | 0.0996503 | 0.113491  | 0.108246  |
| 0.105769  | 0         | 0.0952797 | 0.0879953 | 0.0658508 | 0.0942599 | 0.106498  |
| 0.104312  | 0.0952797 | 0         | 0.0897436 | 0.0821678 | 0.101253  | 0.109703  |
| 0.10169   | 0.0879953 | 0.0897436 | 0         | 0.0824592 | 0.103001  | 0.105624  |

|           |           |           |           |           |           |           |
|-----------|-----------|-----------|-----------|-----------|-----------|-----------|
| 0.0996503 | 0.0658508 | 0.0821678 | 0.0824592 | 0         | 0.0866841 | 0.107372  |
| 0.113491  | 0.0942599 | 0.101253  | 0.103001  | 0.0866841 | 0         | 0.122378  |
| 0.108246  | 0.106498  | 0.109703  | 0.105624  | 0.107372  | 0.122378  | 0         |
| 0.107517  | 0.1081    | 0.110431  | 0.101107  | 0.104021  | 0.125146  | 0.100087  |
| 0.122669  | 0.122669  | 0.127622  | 0.122378  | 0.120921  | 0.135344  | 0.113491  |
| 0.122669  | 0.125291  | 0.132284  | 0.123834  | 0.120338  | 0.135052  | 0.113491  |
| 0.123834  | 0.127914  | 0.132284  | 0.124126  | 0.125874  | 0.136218  | 0.121358  |
| 0.128934  | 0.137966  | 0.140006  | 0.134761  | 0.133887  | 0.145979  | 0.129079  |
| 0.118298  | 0.115093  | 0.125     | 0.114802  | 0.115385  | 0.134761  | 0.109994  |
| 0.187354  | 0.177739  | 0.189103  | 0.180653  | 0.177739  | 0.187791  | 0.171183  |
| 0.11116   | 0.106789  | 0.114656  | 0.108829  | 0.105041  | 0.128788  | 0.099359  |
| 0.134615  | 0.138403  | 0.137238  | 0.13549   | 0.13345   | 0.141754  | 0.128059  |
| 0.125874  | 0.13141   | 0.131119  | 0.128497  | 0.124126  | 0.140297  | 0.117279  |
| 0.129808  | 0.130682  | 0.139423  | 0.134761  | 0.131265  | 0.140734  | 0.121795  |
| 0.108392  | 0.114219  | 0.118007  | 0.110431  | 0.106935  | 0.128934  | 0.101836  |
| 0.122669  | 0.131702  | 0.133741  | 0.127622  | 0.126748  | 0.136218  | 0.120775  |
| 0.111597  | 0.118007  | 0.119464  | 0.109557  | 0.112471  | 0.13243   | 0.109994  |
| 0.118153  | 0.124272  | 0.125728  | 0.118735  | 0.118153  | 0.131702  | 0.117716  |
| 0.114656  | 0.105915  | 0.116113  | 0.109411  | 0.106498  | 0.124417  | 0.104312  |
| 0.123689  | 0.136218  | 0.139714  | 0.131847  | 0.13039   | 0.140443  | 0.125291  |
| 0.10708   | 0.103293  | 0.106206  | 0.10067   | 0.0986305 | 0.119464  | 0.0935315 |
| 0.131702  | 0.131702  | 0.140152  | 0.130245  | 0.13345   | 0.138549  | 0.125146  |
| 0.119318  | 0.115822  | 0.120484  | 0.110868  | 0.108537  | 0.129953  | 0.102564  |
| 0.1081    | 0.0976107 | 0.0897436 | 0.0967366 | 0.0920746 | 0.100962  | 0.121941  |
| 0.123689  | 0.120775  | 0.131847  | 0.121941  | 0.122523  | 0.12704   | 0.11655   |
| 0.116696  | 0.111451  | 0.118153  | 0.108537  | 0.11116   | 0.130245  | 0.100816  |
| 0.138549  | 0.142628  | 0.150495  | 0.144085  | 0.137383  | 0.14831   | 0.142191  |
| 0.117133  | 0.117133  | 0.118881  | 0.111014  | 0.115967  | 0.133013  | 0.105332  |
| 0.111014  | 0.115093  | 0.11655   | 0.111888  | 0.111305  | 0.130099  | 0.107955  |
| 0.108829  | 0.112617  | 0.117279  | 0.109703  | 0.106206  | 0.126457  | 0.0981935 |
| 0.140006  | 0.136509  | 0.141754  | 0.133887  | 0.135344  | 0.139569  | 0.122378  |
| 0.118735  | 0.113491  | 0.121358  | 0.110577  | 0.108537  | 0.127622  | 0.113928  |
| 0.112325  | 0.11553   | 0.113199  | 0.106206  | 0.108246  | 0.129079  | 0.101981  |
| 0.116113  | 0.115239  | 0.113491  | 0.112325  | 0.110286  | 0.132284  | 0.103147  |
| 0.121503  | 0.11451   | 0.118881  | 0.112471  | 0.109266  | 0.130682  | 0.101544  |
| 0.118153  | 0.120192  | 0.123689  | 0.120484  | 0.119027  | 0.126457  | 0.106352  |
| 0.11655   | 0.116259  | 0.124709  | 0.114219  | 0.109266  | 0.131847  | 0.100962  |
| 0.0968823 | 0.0980478 | 0.109703  | 0.0977564 | 0.0922203 | 0.118007  | 0.0891608 |
| 0.105332  | 0.10708   | 0.107663  | 0.0986305 | 0.0989219 | 0.123543  | 0.0891608 |
| 0.102564  | 0.106352  | 0.109557  | 0.102855  | 0.0976107 | 0.118153  | 0.0971737 |
| 0.117424  | 0.115093  | 0.115676  | 0.115967  | 0.111888  | 0.141171  | 0.104167  |
| 0.116987  | 0.125728  | 0.129808  | 0.122232  | 0.121941  | 0.132867  | 0.115676  |
| 0.106061  | 0.107517  | 0.114219  | 0.10169   | 0.100233  | 0.122815  | 0.0968823 |
| 0.102418  | 0.101253  | 0.106498  | 0.0977564 | 0.0933858 | 0.119755  | 0.0955711 |

|           |           |           |           |           |          |           |
|-----------|-----------|-----------|-----------|-----------|----------|-----------|
| 0.112325  | 0.116113  | 0.123397  | 0.116113  | 0.111742  | 0.125291 | 0.107809  |
| 0.104895  | 0.0984848 | 0.1081    | 0.099359  | 0.0958625 | 0.119027 | 0.0890152 |
| 0.12296   | 0.120921  | 0.124709  | 0.117424  | 0.117424  | 0.135052 | 0.112617  |
| 0.128205  | 0.132576  | 0.13986   | 0.128788  | 0.131119  | 0.14933  | 0.122815  |
| 0.108392  | 0.113636  | 0.115676  | 0.110723  | 0.1081    | 0.124272 | 0.0992133 |
| 0.108537  | 0.107955  | 0.113491  | 0.10067   | 0.101544  | 0.125874 | 0.0941142 |
| 0.106789  | 0.105041  | 0.10912   | 0.101544  | 0.10067   | 0.120047 | 0.101107  |
| 0.10271   | 0.100962  | 0.106498  | 0.0954254 | 0.0957168 | 0.118881 | 0.0952797 |
| 0.118444  | 0.124563  | 0.120192  | 0.118153  | 0.119318  | 0.126457 | 0.115385  |
| 0.105915  | 0.101253  | 0.108246  | 0.097465  | 0.0960082 | 0.122378 | 0.0912005 |
| 0.130536  | 0.129371  | 0.13345   | 0.131119  | 0.126748  | 0.139714 | 0.115239  |
| 0.123397  | 0.103001  | 0.114948  | 0.112908  | 0.103584  | 0.104312 | 0.111305  |
| 0.119901  | 0.101544  | 0.104749  | 0.101836  | 0.0930944 | 0.109848 | 0.112762  |
| 0.115093  | 0.0958625 | 0.100816  | 0.0955711 | 0.0917832 | 0.112617 | 0.0895979 |
| 0.108974  | 0.100233  | 0.11014   | 0.106061  | 0.105769  | 0.124563 | 0.0992133 |
| 0.103875  | 0.102127  | 0.111742  | 0.104749  | 0.10067   | 0.123543 | 0.0885781 |
| 0.097028  | 0.101399  | 0.0981935 | 0.0955711 | 0.0938228 | 0.121066 | 0.0962995 |
| 0.0967366 | 0.0952797 | 0.102564  | 0.0941142 | 0.0949883 | 0.117861 | 0.0989219 |
| 0.109266  | 0.100816  | 0.106935  | 0.101981  | 0.0967366 | 0.124272 | 0.10067   |
| 0.0879953 | 0.102273  | 0.103438  | 0.0961538 | 0.0964452 | 0.104749 | 0.114948  |
| 0.113199  | 0.117279  | 0.12398   | 0.112617  | 0.114365  | 0.132867 | 0.106352  |
| 0.125291  | 0.130828  | 0.127914  | 0.125583  | 0.12704   | 0.146125 | 0.120192  |
| 0.131847  | 0.131265  | 0.138549  | 0.131265  | 0.130973  | 0.140152 | 0.124126  |
| 0.200029  | 0.188957  | 0.196533  | 0.192162  | 0.191579  | 0.21183  | 0.187937  |
| 0.240385  | 0.237179  | 0.241259  | 0.237179  | 0.235431  | 0.247523 | 0.237617  |
| 0.106206  | 0.110868  | 0.109994  | 0.108537  | 0.101836  | 0.126457 | 0.105186  |
| 0.097028  | 0.101107  | 0.101107  | 0.0967366 | 0.0941142 | 0.114948 | 0.0977564 |
| 0.101107  | 0.0981935 | 0.10373   | 0.0973193 | 0.0917832 | 0.119901 | 0.0936772 |
| 0.100816  | 0.100524  | 0.10169   | 0.0973193 | 0.0987762 | 0.122232 | 0.10271   |
| 0.128205  | 0.128497  | 0.129953  | 0.125583  | 0.128205  | 0.139132 | 0.118735  |
| 0.099359  | 0.101981  | 0.107226  | 0.0967366 | 0.0961538 | 0.112325 | 0.104458  |
| 0.120192  | 0.127185  | 0.133887  | 0.127185  | 0.127477  | 0.128788 | 0.131119  |
| 0.103438  | 0.102273  | 0.102564  | 0.097028  | 0.094697  | 0.117861 | 0.102127  |
| 0.102855  | 0.113928  | 0.111888  | 0.111014  | 0.111014  | 0.12398  | 0.121649  |
| 0.114365  | 0.107663  | 0.104458  | 0.105332  | 0.0989219 | 0.104895 | 0.121795  |
| 0.105332  | 0.116987  | 0.119318  | 0.115239  | 0.112617  | 0.122378 | 0.117133  |
| 0.123689  | 0.0968823 | 0.104167  | 0.111451  | 0.104458  | 0.094697 | 0.124126  |
| 0.103293  | 0.108246  | 0.105624  | 0.10067   | 0.0960082 | 0.123834 | 0.10169   |
| 0.0962995 | 0.0954254 | 0.101544  | 0.0971737 | 0.0861014 | 0.107809 | 0.10169   |
| 0.0987762 | 0.104312  | 0.111014  | 0.0981935 | 0.0981935 | 0.11553  | 0.101544  |
| 0.097028  | 0.0979021 | 0.0990676 | 0.0912005 | 0.0906177 | 0.11757  | 0.0977564 |
| 0.0932401 | 0.0938228 | 0.10373   | 0.0938228 | 0.0856643 | 0.107955 | 0.100379  |
| 0.097465  | 0.10271   | 0.103293  | 0.0948427 | 0.0936772 | 0.121795 | 0.104312  |
| 0.106061  | 0.112471  | 0.113054  | 0.106352  | 0.1081    | 0.121649 | 0.118444  |

|           |           |           |           |           |          |           |
|-----------|-----------|-----------|-----------|-----------|----------|-----------|
| 0.110431  | 0.119755  | 0.117716  | 0.114219  | 0.113345  | 0.124272 | 0.126894  |
| 0.0992133 | 0.0945513 | 0.103875  | 0.103001  | 0.0875583 | 0.114219 | 0.11014   |
| 0.100524  | 0.0958625 | 0.0973193 | 0.0984848 | 0.0944056 | 0.118444 | 0.0965909 |
| 0.106643  | 0.11859   | 0.111014  | 0.115093  | 0.112762  | 0.121358 | 0.125728  |
| 0.102855  | 0.0967366 | 0.103438  | 0.0958625 | 0.0888695 | 0.115239 | 0.0983392 |
| 0.126603  | 0.122523  | 0.130682  | 0.117279  | 0.115822  | 0.13141  | 0.132284  |
| 0.133304  | 0.128642  | 0.137383  | 0.133596  | 0.128059  | 0.136655 | 0.123834  |
| 0.122086  | 0.127622  | 0.12704   | 0.119755  | 0.123834  | 0.137092 | 0.126894  |
| 0.0976107 | 0.0964452 | 0.0984848 | 0.0926573 | 0.0897436 | 0.113782 | 0.0919289 |
| 0.0954254 | 0.100087  | 0.0968823 | 0.0954254 | 0.0954254 | 0.118298 | 0.0979021 |
| 0.107517  | 0.107809  | 0.110723  | 0.109848  | 0.10373   | 0.120775 | 0.110868  |
| 0.0995047 | 0.115822  | 0.109411  | 0.108829  | 0.110286  | 0.124417 | 0.115093  |
| 0.108829  | 0.114948  | 0.118444  | 0.112034  | 0.10912   | 0.123543 | 0.120047  |
| 0.102855  | 0.103438  | 0.0999417 | 0.0958625 | 0.101107  | 0.120484 | 0.106498  |
| 0.099796  | 0.104167  | 0.10708   | 0.095134  | 0.10067   | 0.123834 | 0.101399  |
| 0.103584  | 0.111451  | 0.10708   | 0.107372  | 0.10912   | 0.125    | 0.107809  |
| 0.113782  | 0.118444  | 0.119027  | 0.109703  | 0.109994  | 0.12296  | 0.121503  |
| 0.105624  | 0.108537  | 0.116987  | 0.11553   | 0.106789  | 0.124709 | 0.122378  |
| 0.109557  | 0.117133  | 0.122086  | 0.118881  | 0.113928  | 0.12398  | 0.122815  |
| 0.108537  | 0.117279  | 0.113782  | 0.113491  | 0.105915  | 0.118007 | 0.125     |
| 0.099796  | 0.10271   | 0.099796  | 0.0965909 | 0.0948427 | 0.123543 | 0.102564  |
| 0.107663  | 0.113199  | 0.115822  | 0.113199  | 0.110286  | 0.125    | 0.125583  |
| 0.0996503 | 0.100816  | 0.100816  | 0.0976107 | 0.0976107 | 0.122232 | 0.0913462 |
| 0.107663  | 0.0852273 | 0.0872669 | 0.0785256 | 0.0843531 | 0.10373  | 0.104604  |
| 0.107372  | 0.106206  | 0.108829  | 0.0962995 | 0.0954254 | 0.121212 | 0.100816  |
| 0.0932401 | 0.101981  | 0.106935  | 0.0941142 | 0.0973193 | 0.119027 | 0.103875  |
| 0.0938228 | 0.0961538 | 0.0976107 | 0.0944056 | 0.0912005 | 0.112034 | 0.100379  |
| 0.109411  | 0.117861  | 0.121941  | 0.11757   | 0.109703  | 0.129662 | 0.125583  |
| 0.102855  | 0.10373   | 0.105769  | 0.102273  | 0.0938228 | 0.12398  | 0.108537  |
| 0.111014  | 0.123252  | 0.119172  | 0.11655   | 0.118298  | 0.13039  | 0.126311  |
| 0.0973193 | 0.0976107 | 0.0981935 | 0.0976107 | 0.0938228 | 0.118153 | 0.0995047 |
| 0.10271   | 0.105041  | 0.109411  | 0.105332  | 0.095134  | 0.113345 | 0.112179  |
| 0.112471  | 0.114802  | 0.115676  | 0.11451   | 0.107809  | 0.122232 | 0.116113  |
| 0.121795  | 0.113636  | 0.118298  | 0.115385  | 0.109848  | 0.13243  | 0.103001  |
| 0.112908  | 0.109994  | 0.11961   | 0.110868  | 0.105041  | 0.126457 | 0.097028  |
| 0.113928  | 0.116259  | 0.121795  | 0.113636  | 0.109266  | 0.124272 | 0.106789  |
| 0.115239  | 0.112617  | 0.11961   | 0.111451  | 0.107372  | 0.131993 | 0.105769  |
| 0.116113  | 0.108537  | 0.117861  | 0.103293  | 0.106498  | 0.134033 | 0.0874126 |
| 0.130973  | 0.133304  | 0.132139  | 0.133596  | 0.132139  | 0.142774 | 0.117716  |
| 0.13345   | 0.132867  | 0.13549   | 0.128497  | 0.125291  | 0.129516 | 0.124563  |
| 0.105186  | 0.108392  | 0.111305  | 0.105478  | 0.102564  | 0.123397 | 0.0968823 |
| 0.131265  | 0.129225  | 0.131556  | 0.123397  | 0.127477  | 0.138986 | 0.123252  |
| 0.124126  | 0.123543  | 0.129371  | 0.120338  | 0.12296   | 0.137383 | 0.114365  |
| 0.132284  | 0.131702  | 0.13345   | 0.128205  | 0.131119  | 0.142628 | 0.125437  |

|          |           |           |           |           |           |           |
|----------|-----------|-----------|-----------|-----------|-----------|-----------|
| 0.119464 | 0.122378  | 0.122669  | 0.113636  | 0.120629  | 0.131847  | 0.113199  |
| 0.123252 | 0.120629  | 0.12704   | 0.11859   | 0.117133  | 0.132721  | 0.105332  |
| 0.128059 | 0.128934  | 0.126894  | 0.121941  | 0.123106  | 0.138695  | 0.113636  |
| 0.124126 | 0.130536  | 0.130536  | 0.121503  | 0.125     | 0.13884   | 0.120775  |
| 0.134615 | 0.13549   | 0.137529  | 0.126748  | 0.136946  | 0.145542  | 0.131265  |
| 0.125583 | 0.124709  | 0.127622  | 0.12296   | 0.121212  | 0.13884   | 0.112325  |
| 0.120338 | 0.117133  | 0.119172  | 0.111597  | 0.115967  | 0.131556  | 0.109703  |
| 0.122815 | 0.126603  | 0.128642  | 0.127185  | 0.123689  | 0.134324  | 0.114802  |
| 0.133159 | 0.138112  | 0.133159  | 0.129079  | 0.131702  | 0.142337  | 0.120484  |
| 0.114219 | 0.11451   | 0.112179  | 0.108974  | 0.109266  | 0.127185  | 0.103001  |
| 0.219551 | 0.216929  | 0.224213  | 0.218677  | 0.216638  | 0.231643  | 0.215909  |
| 0.126603 | 0.126894  | 0.126894  | 0.118735  | 0.119901  | 0.140152  | 0.114802  |
| 0.113782 | 0.113199  | 0.113782  | 0.10912   | 0.110286  | 0.129953  | 0.104604  |
| 0.132576 | 0.136364  | 0.134033  | 0.127331  | 0.134324  | 0.139714  | 0.127768  |
| 0.120338 | 0.116841  | 0.11859   | 0.114802  | 0.114802  | 0.135635  | 0.104167  |
| 0.136072 | 0.137821  | 0.136072  | 0.129662  | 0.128788  | 0.143502  | 0.11757   |
| 0.115676 | 0.120629  | 0.119172  | 0.112471  | 0.115676  | 0.131265  | 0.116113  |
| 0.123106 | 0.123106  | 0.127185  | 0.117861  | 0.120775  | 0.136655  | 0.112471  |
| 0.123397 | 0.12398   | 0.123397  | 0.120484  | 0.119901  | 0.135781  | 0.109557  |
| 0.127622 | 0.134615  | 0.132284  | 0.125291  | 0.130536  | 0.144085  | 0.123106  |
| 0.126603 | 0.134761  | 0.129516  | 0.125437  | 0.13447   | 0.142774  | 0.125874  |
| 0.125    | 0.131119  | 0.13141   | 0.128205  | 0.131702  | 0.137383  | 0.123397  |
| 0.131993 | 0.133159  | 0.132867  | 0.126457  | 0.131993  | 0.141463  | 0.128642  |
| 0.113928 | 0.111597  | 0.11859   | 0.11014   | 0.108683  | 0.121941  | 0.0913462 |
| 0.121795 | 0.125583  | 0.120921  | 0.120047  | 0.122086  | 0.139714  | 0.111451  |
| 0.130682 | 0.134761  | 0.139423  | 0.130682  | 0.134178  | 0.145396  | 0.126457  |
| 0.121795 | 0.124126  | 0.125291  | 0.118007  | 0.120921  | 0.131847  | 0.116696  |
| 0.123252 | 0.109266  | 0.106352  | 0.0958625 | 0.100816  | 0.105915  | 0.128642  |
| 0.136218 | 0.136509  | 0.144085  | 0.134178  | 0.133596  | 0.145105  | 0.127622  |
| 0.118735 | 0.120775  | 0.125146  | 0.116696  | 0.11961   | 0.129079  | 0.0996503 |
| 0.126311 | 0.126311  | 0.129516  | 0.123397  | 0.124563  | 0.136364  | 0.116841  |
| 0.129953 | 0.126457  | 0.135781  | 0.125291  | 0.121795  | 0.142628  | 0.120192  |
| 0.122523 | 0.125728  | 0.127185  | 0.119901  | 0.122523  | 0.136072  | 0.117716  |
| 0.122523 | 0.12398   | 0.125728  | 0.126311  | 0.115239  | 0.136655  | 0.120921  |
| 0.135927 | 0.134178  | 0.139132  | 0.13039   | 0.132139  | 0.147145  | 0.130245  |
| 0.106935 | 0.104895  | 0.113054  | 0.103147  | 0.101981  | 0.116987  | 0.0823135 |
| 0.126311 | 0.10912   | 0.108537  | 0.112034  | 0.105624  | 0.10373   | 0.114802  |
| 0.13986  | 0.136364  | 0.143648  | 0.135198  | 0.137529  | 0.144376  | 0.135635  |
| 0.115967 | 0.115676  | 0.123543  | 0.111888  | 0.111305  | 0.129808  | 0.107663  |
| 0.113636 | 0.0897436 | 0.0944056 | 0.0917832 | 0.0871212 | 0.107372  | 0.114948  |
| 0.129808 | 0.140297  | 0.13884   | 0.136801  | 0.137966  | 0.145105  | 0.121795  |
| 0.103584 | 0.0995047 | 0.055507  | 0.0939685 | 0.0861014 | 0.0990676 | 0.116841  |
| 0.130245 | 0.140443  | 0.132867  | 0.135198  | 0.13345   | 0.141463  | 0.131847  |
| 0.119027 | 0.125146  | 0.127185  | 0.124563  | 0.121941  | 0.13549   | 0.116841  |



|          |          |          |          |          |          |          |
|----------|----------|----------|----------|----------|----------|----------|
| 0.124709 | 0.132576 | 0.128788 | 0.126166 | 0.125291 | 0.14088  | 0.114948 |
| 0.125437 | 0.125437 | 0.122815 | 0.119027 | 0.118735 | 0.132867 | 0.11859  |
| 0.116841 | 0.117424 | 0.121503 | 0.115967 | 0.112762 | 0.124854 | 0.10912  |
| 0.121358 | 0.129516 | 0.129808 | 0.125146 | 0.121066 | 0.137238 | 0.120629 |
| 0.128059 | 0.132721 | 0.133013 | 0.126894 | 0.13039  | 0.142774 | 0.120047 |
| 0.128642 | 0.133887 | 0.136218 | 0.13039  | 0.129225 | 0.144522 | 0.123543 |
| 0.128642 | 0.133013 | 0.137092 | 0.129516 | 0.130973 | 0.140152 | 0.124126 |
| 0.124272 | 0.128934 | 0.131265 | 0.126311 | 0.122232 | 0.138695 | 0.121503 |
| 0.144085 | 0.144959 | 0.149913 | 0.143794 | 0.141754 | 0.15035  | 0.13549  |
| 0.118444 | 0.11757  | 0.11553  | 0.113491 | 0.110286 | 0.124709 | 0.105478 |
| 0.100379 | 0.111742 | 0.108537 | 0.105041 | 0.105624 | 0.126166 | 0.106643 |
| 0.126311 | 0.124854 | 0.131847 | 0.128642 | 0.12398  | 0.142774 | 0.121212 |
| 0.11757  | 0.11553  | 0.119318 | 0.114073 | 0.111742 | 0.124709 | 0.103438 |
| 0.140443 | 0.134033 | 0.143357 | 0.141026 | 0.133741 | 0.149038 | 0.138258 |
| 0.147727 | 0.149767 | 0.15472  | 0.142483 | 0.143357 | 0.153118 | 0.145833 |
| 0.104312 | 0.11655  | 0.118007 | 0.107809 | 0.110723 | 0.123397 | 0.116696 |
| 0.105332 | 0.108246 | 0.106206 | 0.104749 | 0.102418 | 0.118881 | 0.107226 |
| 0.130828 | 0.129371 | 0.137529 | 0.127914 | 0.133159 | 0.146999 | 0.124272 |
| 0.132139 | 0.132139 | 0.133596 | 0.127477 | 0.129808 | 0.144231 | 0.124709 |
| 0.105624 | 0.106498 | 0.116113 | 0.110286 | 0.104458 | 0.114802 | 0.120338 |
| 0.131847 | 0.139423 | 0.131556 | 0.129225 | 0.139423 | 0.143065 | 0.131993 |
| 0.129225 | 0.127185 | 0.137675 | 0.128059 | 0.120484 | 0.128497 | 0.131993 |
| 0.11655  | 0.115967 | 0.116259 | 0.110723 | 0.106935 | 0.115239 | 0.105624 |
| 0.155303 | 0.157925 | 0.162296 | 0.155594 | 0.151807 | 0.170017 | 0.157488 |
| 0.106061 | 0.116259 | 0.106061 | 0.104604 | 0.1081   | 0.114365 | 0.114656 |
| 0.130536 | 0.129953 | 0.131702 | 0.128497 | 0.127914 | 0.135927 | 0.121649 |
| 0.102127 | 0.112034 | 0.111742 | 0.106206 | 0.109703 | 0.123834 | 0.11014  |
| 0.127185 | 0.136218 | 0.135927 | 0.132139 | 0.133887 | 0.146562 | 0.123834 |
| 0.124854 | 0.128059 | 0.125437 | 0.118153 | 0.122815 | 0.13549  | 0.119172 |
| 0.137821 | 0.138986 | 0.142774 | 0.134033 | 0.134615 | 0.15778  | 0.131847 |
| 0.142045 | 0.14933  | 0.148164 | 0.144085 | 0.144376 | 0.157051 | 0.143357 |
| 0.11655  | 0.124417 | 0.12296  | 0.125874 | 0.120338 | 0.141171 | 0.121649 |
| 0.132139 | 0.137092 | 0.133304 | 0.133887 | 0.131556 | 0.150058 | 0.136072 |
| 0.140152 | 0.136655 | 0.140152 | 0.132284 | 0.132867 | 0.157488 | 0.131556 |
| 0.14627  | 0.140734 | 0.143065 | 0.140734 | 0.139569 | 0.163316 | 0.138258 |
| 0.109411 | 0.114948 | 0.120484 | 0.117279 | 0.110577 | 0.126457 | 0.102855 |
| 0.134324 | 0.138695 | 0.144814 | 0.134324 | 0.137529 | 0.148747 | 0.129225 |
| 0.118007 | 0.113928 | 0.114219 | 0.107517 | 0.106352 | 0.133596 | 0.105915 |
| 0.117861 | 0.113782 | 0.120775 | 0.113491 | 0.113199 | 0.133159 | 0.104021 |
| 0.122086 | 0.115676 | 0.125    | 0.114802 | 0.114219 | 0.133013 | 0.114365 |
| 0.112762 | 0.120921 | 0.118007 | 0.117133 | 0.114219 | 0.135344 | 0.115822 |
| 0.113782 | 0.11553  | 0.117861 | 0.108246 | 0.109703 | 0.131119 | 0.104312 |
| 0.110868 | 0.111451 | 0.114073 | 0.110286 | 0.108537 | 0.132576 | 0.106935 |
| 0.123689 | 0.115239 | 0.124272 | 0.118735 | 0.115822 | 0.143939 | 0.114802 |

|           |          |          |          |           |          |           |
|-----------|----------|----------|----------|-----------|----------|-----------|
| 0.128205  | 0.122378 | 0.125    | 0.118298 | 0.122378  | 0.140006 | 0.113491  |
| 0.1081    | 0.102564 | 0.105186 | 0.10169  | 0.102273  | 0.125437 | 0.0939685 |
| 0.119172  | 0.122086 | 0.119755 | 0.121795 | 0.116259  | 0.141754 | 0.119318  |
| 0.115239  | 0.117279 | 0.118153 | 0.116696 | 0.114365  | 0.134324 | 0.115385  |
| 0.0962995 | 0.105915 | 0.107663 | 0.104749 | 0.103001  | 0.121212 | 0.105186  |
| 0.21722   | 0.216055 | 0.219551 | 0.21722  | 0.212558  | 0.229604 | 0.214452  |
| 0.133304  | 0.145542 | 0.139714 | 0.143211 | 0.137383  | 0.147436 | 0.142483  |
| 0.131702  | 0.131702 | 0.132576 | 0.127914 | 0.126748  | 0.13884  | 0.128059  |
| 0.126603  | 0.125437 | 0.127477 | 0.119901 | 0.120192  | 0.145979 | 0.120338  |
| 0.212267  | 0.209936 | 0.214307 | 0.211976 | 0.208188  | 0.224942 | 0.208333  |
| 0.111742  | 0.112617 | 0.11757  | 0.110286 | 0.107372  | 0.127622 | 0.109266  |
| 0.118881  | 0.120629 | 0.126748 | 0.120047 | 0.116259  | 0.14088  | 0.10912   |
| 0.115385  | 0.122669 | 0.125    | 0.116841 | 0.121503  | 0.136218 | 0.116987  |
| 0.123689  | 0.120192 | 0.125437 | 0.119318 | 0.122523  | 0.135198 | 0.111888  |
| 0.252185  | 0.247815 | 0.253642 | 0.250437 | 0.248397  | 0.257576 | 0.248543  |
| 0.124417  | 0.123543 | 0.133159 | 0.122669 | 0.126457  | 0.145833 | 0.116404  |
| 0.0981935 | 0.103438 | 0.101107 | 0.100524 | 0.0958625 | 0.11961  | 0.0980478 |
| 0.122669  | 0.125    | 0.129371 | 0.120047 | 0.122086  | 0.14088  | 0.115822  |
| 0.120338  | 0.122669 | 0.126166 | 0.115676 | 0.11859   | 0.141171 | 0.116987  |
| 0.127331  | 0.126166 | 0.135198 | 0.126457 | 0.128205  | 0.145542 | 0.116987  |
| 0.131702  | 0.129662 | 0.132284 | 0.126748 | 0.121795  | 0.146999 | 0.121941  |
| 0.0967366 | 0.103147 | 0.105186 | 0.100233 | 0.102273  | 0.120192 | 0.10067   |
| 0.114073  | 0.118153 | 0.11757  | 0.116987 | 0.114948  | 0.136946 | 0.11859   |
| 0.126457  | 0.126166 | 0.133159 | 0.120921 | 0.124709  | 0.141754 | 0.11553   |
| 0.116259  | 0.112762 | 0.118007 | 0.114219 | 0.115385  | 0.130682 | 0.102127  |
| 0.116113  | 0.120775 | 0.117861 | 0.118444 | 0.114365  | 0.136946 | 0.114219  |
| 0.118881  | 0.11451  | 0.11655  | 0.107517 | 0.116259  | 0.128642 | 0.10271   |
| 0.142045  | 0.147873 | 0.146125 | 0.143794 | 0.140589  | 0.155886 | 0.145396  |
| 0.125728  | 0.127185 | 0.136509 | 0.125146 | 0.127185  | 0.14627  | 0.122669  |
| 0.11961   | 0.124854 | 0.13243  | 0.125437 | 0.121358  | 0.144231 | 0.113345  |
| 0.193328  | 0.187791 | 0.19391  | 0.190122 | 0.187209  | 0.208333 | 0.185315  |
| 0.207314  | 0.202652 | 0.207605 | 0.20236  | 0.202943  | 0.219697 | 0.201632  |
| 0.124272  | 0.120484 | 0.124272 | 0.121066 | 0.121649  | 0.138112 | 0.113345  |
| 0.115822  | 0.115239 | 0.11757  | 0.110868 | 0.113491  | 0.13141  | 0.104895  |
| 0.135927  | 0.135635 | 0.138549 | 0.131556 | 0.136801  | 0.149476 | 0.132576  |
| 0.097465  | 0.105041 | 0.103293 | 0.100379 | 0.100379  | 0.121212 | 0.0984848 |
| 0.126748  | 0.127331 | 0.138403 | 0.124709 | 0.125291  | 0.145251 | 0.122523  |
| 0.120775  | 0.128059 | 0.130682 | 0.123397 | 0.125146  | 0.137821 | 0.126166  |
| 0.22771   | 0.224213 | 0.228293 | 0.22567  | 0.224505  | 0.239219 | 0.221445  |
| 0.118444  | 0.11961  | 0.116404 | 0.113199 | 0.112908  | 0.134615 | 0.110431  |
| 0.208042  | 0.200758 | 0.204837 | 0.204545 | 0.198427  | 0.209645 | 0.206148  |
| 0.105624  | 0.10271  | 0.111451 | 0.103584 | 0.0989219 | 0.121795 | 0.0929487 |
| 0.113928  | 0.110431 | 0.115967 | 0.109266 | 0.103438  | 0.128059 | 0.103584  |
| 0.112034  | 0.11553  | 0.110286 | 0.110868 | 0.113782  | 0.13345  | 0.109848  |

|          |          |          |          |          |          |           |
|----------|----------|----------|----------|----------|----------|-----------|
| 0.114365 | 0.111451 | 0.115239 | 0.112034 | 0.110868 | 0.130245 | 0.102273  |
| 0.208625 | 0.204254 | 0.210373 | 0.206002 | 0.203671 | 0.221591 | 0.204108  |
| 0.128788 | 0.132576 | 0.130245 | 0.129662 | 0.125583 | 0.146707 | 0.132139  |
| 0.113345 | 0.111305 | 0.120338 | 0.113054 | 0.107809 | 0.135635 | 0.109703  |
| 0.120047 | 0.12704  | 0.127331 | 0.125583 | 0.119755 | 0.136801 | 0.123397  |
| 0.112471 | 0.119172 | 0.120338 | 0.118007 | 0.116841 | 0.133013 | 0.118444  |
| 0.117424 | 0.113928 | 0.118007 | 0.111305 | 0.113054 | 0.132139 | 0.105624  |
| 0.106206 | 0.106206 | 0.114073 | 0.109411 | 0.103001 | 0.125874 | 0.0955711 |
| 0.105332 | 0.110286 | 0.10912  | 0.106789 | 0.104167 | 0.125874 | 0.106061  |
| 0.11757  | 0.121649 | 0.129516 | 0.123689 | 0.118735 | 0.140734 | 0.110431  |
| 0.113199 | 0.118444 | 0.111742 | 0.113491 | 0.109411 | 0.133741 | 0.110723  |
| 0.111888 | 0.115093 | 0.123834 | 0.116259 | 0.110431 | 0.13447  | 0.114365  |
| 0.19391  | 0.186043 | 0.192162 | 0.184878 | 0.185169 | 0.208042 | 0.187354  |
| 0.11859  | 0.125    | 0.127914 | 0.120629 | 0.119464 | 0.140297 | 0.119901  |
| 0.126603 | 0.133887 | 0.131847 | 0.126603 | 0.125437 | 0.145105 | 0.125583  |
| 0.117424 | 0.114219 | 0.125    | 0.117424 | 0.110431 | 0.14088  | 0.11961   |
| 0.127185 | 0.126311 | 0.133596 | 0.123106 | 0.123689 | 0.146562 | 0.116841  |
| 0.119318 | 0.124854 | 0.120775 | 0.12398  | 0.117279 | 0.137821 | 0.121795  |
| 0.106206 | 0.110577 | 0.118444 | 0.111742 | 0.10708  | 0.125874 | 0.0990676 |
| 0.107226 | 0.112762 | 0.115967 | 0.109848 | 0.11014  | 0.129225 | 0.10708   |
| 0.097028 | 0.107809 | 0.111014 | 0.107226 | 0.104604 | 0.121066 | 0.107663  |
| 0.12602  | 0.12602  | 0.126311 | 0.121066 | 0.119318 | 0.141608 | 0.120629  |
| 0.119318 | 0.11757  | 0.120775 | 0.112617 | 0.114073 | 0.140152 | 0.112762  |
| 0.121795 | 0.120921 | 0.119755 | 0.114802 | 0.118881 | 0.136218 | 0.106206  |
| 0.118153 | 0.121066 | 0.124563 | 0.11757  | 0.119901 | 0.137821 | 0.113928  |
| 0.128205 | 0.131993 | 0.137821 | 0.130536 | 0.132576 | 0.139132 | 0.131265  |
| 0.118298 | 0.11655  | 0.126748 | 0.118007 | 0.116841 | 0.137092 | 0.107955  |
| 0.128351 | 0.142337 | 0.135927 | 0.137383 | 0.133887 | 0.14831  | 0.136946  |
| 0.116113 | 0.11116  | 0.114948 | 0.109411 | 0.114365 | 0.132867 | 0.103438  |
| 0.109411 | 0.114948 | 0.118735 | 0.113782 | 0.114073 | 0.132576 | 0.111597  |
| 0.116841 | 0.119172 | 0.11859  | 0.117424 | 0.111305 | 0.135344 | 0.118153  |
| 0.100233 | 0.107226 | 0.106643 | 0.108974 | 0.104021 | 0.124272 | 0.107955  |
| 0.190268 | 0.184149 | 0.191725 | 0.188228 | 0.182692 | 0.204108 | 0.182547  |
| 0.108829 | 0.11116  | 0.11757  | 0.108829 | 0.106498 | 0.130828 | 0.106643  |
| 0.109703 | 0.106206 | 0.109994 | 0.100379 | 0.103001 | 0.125583 | 0.104895  |
| 0.119318 | 0.124563 | 0.128059 | 0.124272 | 0.119027 | 0.140152 | 0.108392  |
| 0.187209 | 0.176136 | 0.180798 | 0.177885 | 0.175845 | 0.195221 | 0.175408  |
| 0.132867 | 0.133159 | 0.1419   | 0.132576 | 0.13345  | 0.156031 | 0.127768  |
| 0.143357 | 0.142774 | 0.151224 | 0.144231 | 0.144814 | 0.157197 | 0.137966  |
| 0.144959 | 0.150787 | 0.148164 | 0.145542 | 0.144668 | 0.154138 | 0.144231  |
| 0.119318 | 0.114073 | 0.124563 | 0.112908 | 0.111451 | 0.134907 | 0.106061  |
| 0.115967 | 0.125583 | 0.121503 | 0.123252 | 0.117716 | 0.137675 | 0.12398   |
| 0.216055 | 0.207605 | 0.214307 | 0.212267 | 0.209936 | 0.228147 | 0.208916  |
| 0.124563 | 0.116987 | 0.124272 | 0.117861 | 0.11553  | 0.139569 | 0.123543  |

|           |          |          |           |           |          |           |
|-----------|----------|----------|-----------|-----------|----------|-----------|
| 0.121503  | 0.128205 | 0.126166 | 0.128497  | 0.122669  | 0.14292  | 0.125728  |
| 0.11014   | 0.113928 | 0.118298 | 0.111014  | 0.108392  | 0.133013 | 0.109994  |
| 0.173077  | 0.165793 | 0.168998 | 0.165793  | 0.16317   | 0.184586 | 0.165355  |
| 0.111597  | 0.110431 | 0.117716 | 0.111888  | 0.108683  | 0.137092 | 0.107663  |
| 0.146416  | 0.150495 | 0.156614 | 0.146416  | 0.149913  | 0.157051 | 0.1419    |
| 0.117861  | 0.117279 | 0.121066 | 0.113199  | 0.112908  | 0.129662 | 0.111014  |
| 0.190414  | 0.188083 | 0.194202 | 0.186626  | 0.184878  | 0.204254 | 0.185606  |
| 0.123106  | 0.122232 | 0.132139 | 0.119027  | 0.119901  | 0.14627  | 0.111305  |
| 0.107372  | 0.101253 | 0.106789 | 0.103293  | 0.0968823 | 0.12296  | 0.0990676 |
| 0.111597  | 0.118007 | 0.117424 | 0.11655   | 0.113636  | 0.136218 | 0.109703  |
| 0.115822  | 0.114365 | 0.122232 | 0.111451  | 0.113491  | 0.135198 | 0.107226  |
| 0.118153  | 0.119318 | 0.125437 | 0.118444  | 0.115239  | 0.140443 | 0.107517  |
| 0.12398   | 0.118735 | 0.126311 | 0.116113  | 0.119901  | 0.138986 | 0.114219  |
| 0.117133  | 0.112762 | 0.115676 | 0.111014  | 0.11655   | 0.135927 | 0.10067   |
| 0.192453  | 0.1875   | 0.192453 | 0.188957  | 0.1875    | 0.203963 | 0.182692  |
| 0.119464  | 0.119464 | 0.125583 | 0.115967  | 0.118007  | 0.139714 | 0.116987  |
| 0.11553   | 0.113491 | 0.117861 | 0.112325  | 0.10912   | 0.129953 | 0.109266  |
| 0.215618  | 0.211247 | 0.2162   | 0.210664  | 0.210664  | 0.225379 | 0.208188  |
| 0.121795  | 0.123834 | 0.130245 | 0.11859   | 0.123252  | 0.144959 | 0.116987  |
| 0.118444  | 0.113782 | 0.116113 | 0.113491  | 0.11553   | 0.135198 | 0.105769  |
| 0.112908  | 0.10912  | 0.114073 | 0.108537  | 0.112325  | 0.13345  | 0.099359  |
| 0.127914  | 0.137238 | 0.134907 | 0.134324  | 0.130828  | 0.142045 | 0.137966  |
| 0.194056  | 0.186189 | 0.191434 | 0.186189  | 0.185897  | 0.203817 | 0.185169  |
| 0.0983392 | 0.102127 | 0.103584 | 0.10271   | 0.097465  | 0.120338 | 0.103147  |
| 0.123106  | 0.127768 | 0.13447  | 0.124563  | 0.126603  | 0.137529 | 0.125583  |
| 0.115822  | 0.111742 | 0.118444 | 0.113491  | 0.116404  | 0.134033 | 0.102564  |
| 0.114073  | 0.110868 | 0.113782 | 0.106789  | 0.111742  | 0.13549  | 0.101399  |
| 0.11655   | 0.114219 | 0.114802 | 0.109266  | 0.112179  | 0.130682 | 0.101253  |
| 0.116987  | 0.120775 | 0.11961  | 0.118444  | 0.114073  | 0.137821 | 0.115676  |
| 0.106935  | 0.104021 | 0.107809 | 0.101981  | 0.10169   | 0.122815 | 0.0916375 |
| 0.127331  | 0.123543 | 0.133741 | 0.125     | 0.123252  | 0.144085 | 0.114656  |
| 0.124417  | 0.132867 | 0.130245 | 0.129953  | 0.129371  | 0.143502 | 0.128642  |
| 0.124126  | 0.11859  | 0.130828 | 0.120338  | 0.121212  | 0.145542 | 0.111451  |
| 0.113199  | 0.125437 | 0.124563 | 0.123397  | 0.121941  | 0.134324 | 0.124709  |
| 0.197844  | 0.189394 | 0.196387 | 0.191142  | 0.191434  | 0.207896 | 0.190122  |
| 0.116696  | 0.117279 | 0.120775 | 0.115239  | 0.115822  | 0.134033 | 0.111888  |
| 0.12296   | 0.134907 | 0.129371 | 0.131119  | 0.127622  | 0.14292  | 0.128642  |
| 0.116696  | 0.113199 | 0.116987 | 0.110286  | 0.113782  | 0.131993 | 0.103438  |
| 0.106061  | 0.105186 | 0.104895 | 0.0990676 | 0.104021  | 0.121941 | 0.0930944 |
| 0.117716  | 0.115676 | 0.120338 | 0.113054  | 0.11451   | 0.13447  | 0.10708   |
| 0.097465  | 0.104749 | 0.106498 | 0.104458  | 0.0992133 | 0.121795 | 0.10373   |
| 0.125146  | 0.129225 | 0.133596 | 0.130099  | 0.128059  | 0.144814 | 0.126748  |
| 0.123252  | 0.120047 | 0.123252 | 0.120921  | 0.117133  | 0.139423 | 0.116696  |
| 0.102855  | 0.100816 | 0.102564 | 0.100233  | 0.0949883 | 0.11961  | 0.0916375 |

|           |           |           |           |           |          |           |
|-----------|-----------|-----------|-----------|-----------|----------|-----------|
| 0.103293  | 0.0962995 | 0.100379  | 0.097465  | 0.0933858 | 0.115676 | 0.0903263 |
| 0.113928  | 0.105478  | 0.11014   | 0.105186  | 0.0990676 | 0.124272 | 0.0995047 |
| 0.105041  | 0.105332  | 0.114365  | 0.106206  | 0.102127  | 0.122669 | 0.0952797 |
| 0.129953  | 0.129079  | 0.142191  | 0.126457  | 0.130245  | 0.147582 | 0.124563  |
| 0.10271   | 0.103293  | 0.104458  | 0.0992133 | 0.0986305 | 0.125583 | 0.0984848 |
| 0.109848  | 0.116841  | 0.115676  | 0.115093  | 0.112471  | 0.134761 | 0.110577  |
| 0.0955711 | 0.0996503 | 0.0990676 | 0.0952797 | 0.0909091 | 0.120484 | 0.0922203 |
| 0.115822  | 0.106789  | 0.11553   | 0.107955  | 0.109994  | 0.132867 | 0.101981  |
| 0.106061  | 0.109557  | 0.114219  | 0.1081    | 0.100816  | 0.128642 | 0.101544  |
| 0.118881  | 0.115967  | 0.118881  | 0.114219  | 0.118007  | 0.135635 | 0.105332  |
| 0.111888  | 0.111305  | 0.117424  | 0.107517  | 0.111597  | 0.133013 | 0.104749  |
| 0.121212  | 0.121503  | 0.122086  | 0.117424  | 0.11655   | 0.138549 | 0.113782  |
| 0.111888  | 0.115093  | 0.119172  | 0.116259  | 0.112471  | 0.133304 | 0.104458  |
| 0.109703  | 0.105332  | 0.108246  | 0.100379  | 0.103293  | 0.123834 | 0.097028  |
| 0.113345  | 0.112179  | 0.114219  | 0.11014   | 0.113636  | 0.133013 | 0.101836  |
| 0.118007  | 0.124709  | 0.12296   | 0.119172  | 0.119755  | 0.139714 | 0.115822  |
| 0.120484  | 0.114073  | 0.121066  | 0.11757   | 0.112034  | 0.134907 | 0.11859   |
| 0.11451   | 0.111888  | 0.111888  | 0.107809  | 0.107517  | 0.12602  | 0.10067   |
| 0.113928  | 0.109266  | 0.115385  | 0.1081    | 0.111305  | 0.130099 | 0.103001  |
| 0.116696  | 0.123397  | 0.118735  | 0.119318  | 0.117279  | 0.140152 | 0.119755  |
| 0.109703  | 0.105041  | 0.11553   | 0.10708   | 0.100379  | 0.122669 | 0.0941142 |
| 0.118444  | 0.122232  | 0.120192  | 0.118153  | 0.116696  | 0.138112 | 0.117133  |
| 0.116987  | 0.117279  | 0.123689  | 0.121941  | 0.114073  | 0.136072 | 0.103147  |
| 0.113491  | 0.104167  | 0.110286  | 0.103584  | 0.105332  | 0.12296  | 0.100816  |
| 0.110577  | 0.113199  | 0.119318  | 0.109703  | 0.111742  | 0.129662 | 0.0979021 |
| 0.109848  | 0.110431  | 0.115385  | 0.105769  | 0.102564  | 0.131847 | 0.102418  |
| 0.121066  | 0.124563  | 0.122523  | 0.124272  | 0.118153  | 0.13986  | 0.118881  |
| 0.11961   | 0.118444  | 0.126603  | 0.116987  | 0.116404  | 0.144522 | 0.117424  |
| 0.116841  | 0.112471  | 0.118007  | 0.113928  | 0.110431  | 0.129225 | 0.113199  |
| 0.196678  | 0.192016  | 0.199009  | 0.18852   | 0.189103  | 0.207022 | 0.188666  |
| 0.168998  | 0.162587  | 0.167832  | 0.161131  | 0.161131  | 0.183712 | 0.160693  |
| 0.125291  | 0.120338  | 0.128205  | 0.11859   | 0.119464  | 0.14292  | 0.112908  |
| 0.112325  | 0.108829  | 0.111742  | 0.109703  | 0.105332  | 0.134033 | 0.108683  |
| 0.142628  | 0.150495  | 0.153118  | 0.148456  | 0.148164  | 0.159965 | 0.139277  |
| 0.126457  | 0.123543  | 0.13345   | 0.120921  | 0.123834  | 0.142045 | 0.117861  |
| 0.12602   | 0.121941  | 0.126894  | 0.116987  | 0.119027  | 0.136072 | 0.109848  |
| 0.125291  | 0.115967  | 0.121795  | 0.112762  | 0.112179  | 0.136509 | 0.114948  |
| 0.119172  | 0.113345  | 0.113054  | 0.106352  | 0.111014  | 0.129225 | 0.100962  |
| 0.122378  | 0.115676  | 0.124126  | 0.118881  | 0.112762  | 0.132721 | 0.118153  |
| 0.204983  | 0.199738  | 0.205274  | 0.200029  | 0.199446  | 0.216783 | 0.196387  |
| 0.0990676 | 0.106061  | 0.103438  | 0.104312  | 0.0984848 | 0.121066 | 0.103001  |
| 0.109994  | 0.109994  | 0.111451  | 0.109703  | 0.105041  | 0.130536 | 0.111014  |
| 0.114365  | 0.109703  | 0.11757   | 0.105915  | 0.109411  | 0.130536 | 0.101107  |
| 0.112762  | 0.112471  | 0.117133  | 0.113054  | 0.113054  | 0.133013 | 0.109703  |

|           |          |          |           |           |          |           |
|-----------|----------|----------|-----------|-----------|----------|-----------|
| 0.190122  | 0.182838 | 0.186626 | 0.183421  | 0.176719  | 0.199301 | 0.180653  |
| 0.245775  | 0.246066 | 0.252185 | 0.246649  | 0.243735  | 0.257284 | 0.245921  |
| 0.124854  | 0.124563 | 0.125728 | 0.117861  | 0.11961   | 0.140734 | 0.121795  |
| 0.120775  | 0.114073 | 0.122232 | 0.117279  | 0.112617  | 0.130536 | 0.112762  |
| 0.123397  | 0.12398  | 0.129808 | 0.119027  | 0.121649  | 0.143357 | 0.11014   |
| 0.112471  | 0.116259 | 0.121503 | 0.115676  | 0.109266  | 0.134178 | 0.0989219 |
| 0.0995047 | 0.097465 | 0.100379 | 0.0971737 | 0.0925117 | 0.120047 | 0.0955711 |
| 0.111888  | 0.112179 | 0.118007 | 0.105769  | 0.112179  | 0.131847 | 0.108246  |
| 0.114073  | 0.11553  | 0.116987 | 0.113491  | 0.114656  | 0.135781 | 0.108392  |
| 0.0939685 | 0.100379 | 0.101544 | 0.0986305 | 0.0936772 | 0.120629 | 0.0987762 |
| 0.11655   | 0.115385 | 0.117424 | 0.113636  | 0.111597  | 0.130682 | 0.107663  |
| 0.11757   | 0.11757  | 0.115239 | 0.11116   | 0.113199  | 0.130828 | 0.102273  |
| 0.111305  | 0.106643 | 0.11014  | 0.104895  | 0.104604  | 0.126311 | 0.100379  |
| 0.12602   | 0.126311 | 0.125146 | 0.118735  | 0.11961   | 0.143065 | 0.118881  |
| 0.118881  | 0.121503 | 0.117716 | 0.120921  | 0.117133  | 0.142045 | 0.118153  |
| 0.107809  | 0.108392 | 0.108683 | 0.106352  | 0.105769  | 0.12602  | 0.0995047 |
| 0.125     | 0.13141  | 0.127622 | 0.123252  | 0.121503  | 0.136801 | 0.11757   |
| 0.126457  | 0.131702 | 0.134907 | 0.130245  | 0.12704   | 0.143211 | 0.118735  |
| 0.114948  | 0.109703 | 0.116987 | 0.108829  | 0.112034  | 0.131702 | 0.099359  |
| 0.11451   | 0.111888 | 0.117424 | 0.107809  | 0.104895  | 0.126311 | 0.108246  |
| 0.127914  | 0.12704  | 0.128788 | 0.123252  | 0.126748  | 0.137675 | 0.116987  |
| 0.210227  | 0.206439 | 0.213724 | 0.20877   | 0.206439  | 0.221737 | 0.207168  |
| 0.113345  | 0.114802 | 0.11451  | 0.108683  | 0.107226  | 0.131556 | 0.110286  |
| 0.109411  | 0.103584 | 0.107663 | 0.100379  | 0.102127  | 0.123543 | 0.097028  |
| 0.113491  | 0.116404 | 0.121941 | 0.10912   | 0.117861  | 0.137821 | 0.111014  |
| 0.123543  | 0.125291 | 0.123834 | 0.117716  | 0.12296   | 0.144668 | 0.120484  |
| 0.106643  | 0.110723 | 0.117716 | 0.107809  | 0.110723  | 0.131265 | 0.108829  |
| 0.20338   | 0.197844 | 0.202214 | 0.198135  | 0.197552  | 0.218094 | 0.19595   |
| 0.119027  | 0.122815 | 0.122232 | 0.122815  | 0.119318  | 0.142191 | 0.12296   |
| 0.113054  | 0.110431 | 0.114802 | 0.108974  | 0.109848  | 0.129516 | 0.0995047 |
| 0.114948  | 0.122523 | 0.124272 | 0.115822  | 0.123689  | 0.13549  | 0.107517  |
| 0.110286  | 0.113491 | 0.116987 | 0.112325  | 0.108829  | 0.130828 | 0.0981935 |
| 0.119318  | 0.124854 | 0.120192 | 0.119901  | 0.119901  | 0.140443 | 0.118298  |
| 0.109703  | 0.113782 | 0.11116  | 0.11116   | 0.106206  | 0.128788 | 0.108392  |
| 0.116987  | 0.114073 | 0.112034 | 0.109411  | 0.108537  | 0.128205 | 0.101399  |
| 0.121358  | 0.118735 | 0.122815 | 0.113199  | 0.118153  | 0.142483 | 0.111014  |
| 0.203089  | 0.19697  | 0.203089 | 0.195513  | 0.194056  | 0.216929 | 0.19391   |
| 0.110577  | 0.110868 | 0.112034 | 0.109703  | 0.10912   | 0.129662 | 0.108392  |
| 0.195513  | 0.190559 | 0.196096 | 0.194347  | 0.189977  | 0.211101 | 0.188957  |
| 0.19391   | 0.191579 | 0.194784 | 0.190705  | 0.191579  | 0.210664 | 0.187646  |
| 0.120484  | 0.127477 | 0.13243  | 0.127185  | 0.122523  | 0.139277 | 0.119172  |
| 0.123689  | 0.13039  | 0.137966 | 0.126311  | 0.128934  | 0.145979 | 0.123834  |
| 0.106789  | 0.10708  | 0.109703 | 0.101544  | 0.102127  | 0.120047 | 0.0961538 |
| 0.109266  | 0.110431 | 0.112471 | 0.108974  | 0.106061  | 0.131265 | 0.107955  |

|           |           |           |           |           |          |           |
|-----------|-----------|-----------|-----------|-----------|----------|-----------|
| 0.114365  | 0.118153  | 0.117861  | 0.11757   | 0.112617  | 0.139569 | 0.114219  |
| 0.116696  | 0.113491  | 0.117861  | 0.112034  | 0.113491  | 0.134615 | 0.106061  |
| 0.0965909 | 0.0971737 | 0.0968823 | 0.0960082 | 0.092803  | 0.113636 | 0.0938228 |
| 0.0962995 | 0.0995047 | 0.100962  | 0.0954254 | 0.0910548 | 0.117424 | 0.0964452 |
| 0.127331  | 0.127331  | 0.126166  | 0.123252  | 0.121503  | 0.145542 | 0.120775  |
| 0.117279  | 0.121066  | 0.126894  | 0.11961   | 0.113199  | 0.141317 | 0.108683  |
| 0.112762  | 0.111888  | 0.11451   | 0.106643  | 0.111014  | 0.128351 | 0.100087  |
| 0.11553   | 0.121066  | 0.120192  | 0.120484  | 0.113491  | 0.135781 | 0.116841  |
| 0.111014  | 0.103147  | 0.104604  | 0.0990676 | 0.0964452 | 0.123689 | 0.0965909 |
| 0.123397  | 0.130682  | 0.128934  | 0.126603  | 0.125728  | 0.139569 | 0.127331  |
| 0.11961   | 0.119318  | 0.128934  | 0.11757   | 0.11757   | 0.141317 | 0.109557  |
| 0.127331  | 0.134033  | 0.132284  | 0.130828  | 0.129079  | 0.144085 | 0.133596  |
| 0.262238  | 0.258159  | 0.263695  | 0.25845   | 0.255828  | 0.26792  | 0.257721  |
| 0.11655   | 0.125     | 0.134907  | 0.124126  | 0.120629  | 0.137966 | 0.121941  |
| 0.121358  | 0.128059  | 0.130973  | 0.12398   | 0.119901  | 0.134907 | 0.122378  |
| 0.219988  | 0.215909  | 0.220862  | 0.2162    | 0.214161  | 0.231206 | 0.214889  |
| 0.118153  | 0.12602   | 0.125728  | 0.123397  | 0.120484  | 0.1419   | 0.120338  |
| 0.231498  | 0.230915  | 0.234994  | 0.230332  | 0.228001  | 0.241841 | 0.225816  |
| 0.110431  | 0.118881  | 0.125291  | 0.114802  | 0.112471  | 0.131847 | 0.115822  |
| 0.127185  | 0.125728  | 0.12602   | 0.119901  | 0.12602   | 0.138695 | 0.115676  |
| 0.114656  | 0.115239  | 0.117861  | 0.110868  | 0.110577  | 0.135781 | 0.107226  |
| 0.121066  | 0.126311  | 0.127768  | 0.122815  | 0.11961   | 0.137238 | 0.11014   |
| 0.204691  | 0.199738  | 0.206148  | 0.200321  | 0.199155  | 0.218531 | 0.199883  |
| 0.123397  | 0.132139  | 0.130973  | 0.13039   | 0.126894  | 0.141317 | 0.129371  |
| 0.116404  | 0.119901  | 0.120192  | 0.120484  | 0.113782  | 0.138986 | 0.116841  |
| 0.228438  | 0.225524  | 0.231643  | 0.223776  | 0.224942  | 0.239656 | 0.225087  |
| 0.100087  | 0.103293  | 0.100087  | 0.0995047 | 0.0965909 | 0.122669 | 0.0981935 |
| 0.202214  | 0.195804  | 0.201049  | 0.194056  | 0.194347  | 0.215763 | 0.193036  |
| 0.101981  | 0.102564  | 0.100816  | 0.103147  | 0.102273  | 0.124854 | 0.100087  |
| 0.114802  | 0.114802  | 0.116259  | 0.111305  | 0.113928  | 0.131265 | 0.101544  |
| 0.118735  | 0.115822  | 0.119318  | 0.112325  | 0.115239  | 0.126166 | 0.109266  |
| 0.122523  | 0.12602   | 0.132139  | 0.128642  | 0.124854  | 0.142483 | 0.117716  |
| 0.117424  | 0.112762  | 0.11859   | 0.11014   | 0.110431  | 0.13884  | 0.112034  |
| 0.167249  | 0.151807  | 0.157051  | 0.155303  | 0.155886  | 0.171766 | 0.155449  |
| 0.111305  | 0.117133  | 0.115676  | 0.114802  | 0.110431  | 0.135344 | 0.113199  |
| 0.122669  | 0.121503  | 0.127622  | 0.121212  | 0.120047  | 0.144376 | 0.114948  |
| 0.116841  | 0.115967  | 0.122086  | 0.112179  | 0.113636  | 0.13447  | 0.106789  |
| 0.120047  | 0.126166  | 0.129079  | 0.127622  | 0.124126  | 0.139714 | 0.12398   |
| 0.200321  | 0.190997  | 0.197407  | 0.193036  | 0.191288  | 0.210664 | 0.191434  |
| 0.114802  | 0.109848  | 0.111305  | 0.108392  | 0.111305  | 0.128642 | 0.103001  |
| 0.123689  | 0.122523  | 0.127477  | 0.11961   | 0.11757   | 0.144231 | 0.112179  |
| 0.1081    | 0.104895  | 0.113345  | 0.107517  | 0.100816  | 0.122232 | 0.0930944 |
| 0.097465  | 0.103293  | 0.101836  | 0.100962  | 0.0977564 | 0.115967 | 0.102855  |
| 0.122378  | 0.121503  | 0.124709  | 0.115385  | 0.119464  | 0.134761 | 0.107955  |

|           |          |           |          |           |          |           |
|-----------|----------|-----------|----------|-----------|----------|-----------|
| 0.256556  | 0.254516 | 0.258887  | 0.254516 | 0.254808  | 0.266026 | 0.255828  |
| 0.113928  | 0.111014 | 0.115093  | 0.107517 | 0.109557  | 0.124563 | 0.102127  |
| 0.120921  | 0.118007 | 0.124709  | 0.11451  | 0.116259  | 0.136509 | 0.111451  |
| 0.180653  | 0.178904 | 0.180653  | 0.177739 | 0.178904  | 0.190122 | 0.17905   |
| 0.192016  | 0.182984 | 0.190559  | 0.183858 | 0.18211   | 0.204108 | 0.183421  |
| 0.125874  | 0.123252 | 0.122378  | 0.118881 | 0.119172  | 0.142628 | 0.120484  |
| 0.118153  | 0.120192 | 0.119901  | 0.121941 | 0.114656  | 0.140152 | 0.117716  |
| 0.114948  | 0.116113 | 0.120192  | 0.114656 | 0.110868  | 0.134615 | 0.105186  |
| 0.136946  | 0.146562 | 0.141317  | 0.145979 | 0.142774  | 0.151661 | 0.144376  |
| 0.124709  | 0.120338 | 0.12296   | 0.115385 | 0.115676  | 0.140297 | 0.112617  |
| 0.127185  | 0.12602  | 0.124854  | 0.120775 | 0.121941  | 0.143648 | 0.120921  |
| 0.102273  | 0.107809 | 0.110431  | 0.108974 | 0.10373   | 0.123397 | 0.107372  |
| 0.115385  | 0.123543 | 0.120338  | 0.11859  | 0.115676  | 0.134761 | 0.119027  |
| 0.123106  | 0.128059 | 0.126311  | 0.127477 | 0.121941  | 0.140152 | 0.130828  |
| 0.105478  | 0.108683 | 0.107226  | 0.104604 | 0.105769  | 0.128934 | 0.103293  |
| 0.121358  | 0.125728 | 0.130099  | 0.128351 | 0.119901  | 0.143357 | 0.113636  |
| 0.128788  | 0.138695 | 0.143065  | 0.140152 | 0.13345   | 0.147873 | 0.125437  |
| 0.116404  | 0.114073 | 0.115822  | 0.112034 | 0.113199  | 0.126748 | 0.107517  |
| 0.126748  | 0.131702 | 0.136072  | 0.132284 | 0.12704   | 0.141171 | 0.117861  |
| 0.0999417 | 0.113054 | 0.1081    | 0.109557 | 0.105769  | 0.122523 | 0.110577  |
| 0.211976  | 0.206731 | 0.21081   | 0.207605 | 0.207022  | 0.224942 | 0.203089  |
| 0.118298  | 0.119464 | 0.126166  | 0.115967 | 0.115093  | 0.13039  | 0.108829  |
| 0.193765  | 0.189685 | 0.195513  | 0.190268 | 0.187646  | 0.206731 | 0.187209  |
| 0.113054  | 0.115385 | 0.116259  | 0.111305 | 0.106643  | 0.131265 | 0.11116   |
| 0.126166  | 0.125583 | 0.125874  | 0.121503 | 0.123834  | 0.139423 | 0.114656  |
| 0.12704   | 0.12296  | 0.132867  | 0.122378 | 0.124709  | 0.146707 | 0.116404  |
| 0.118735  | 0.116987 | 0.122232  | 0.11553  | 0.114365  | 0.137529 | 0.106643  |
| 0.119172  | 0.125291 | 0.125291  | 0.123834 | 0.119464  | 0.141171 | 0.121358  |
| 0.116841  | 0.123543 | 0.120921  | 0.122669 | 0.118881  | 0.138258 | 0.121066  |
| 0.120338  | 0.117424 | 0.119172  | 0.115093 | 0.117716  | 0.140006 | 0.106789  |
| 0.122232  | 0.120775 | 0.124272  | 0.113491 | 0.117279  | 0.1419   | 0.11451   |
| 0.126603  | 0.125728 | 0.133596  | 0.121649 | 0.124272  | 0.143939 | 0.119755  |
| 0.105769  | 0.116259 | 0.114802  | 0.111597 | 0.111305  | 0.126603 | 0.114073  |
| 0.252622  | 0.250583 | 0.252331  | 0.249709 | 0.250583  | 0.262383 | 0.251894  |
| 0.120047  | 0.117424 | 0.118007  | 0.115676 | 0.117424  | 0.140006 | 0.107372  |
| 0.188374  | 0.182838 | 0.188666  | 0.18109  | 0.18109   | 0.201923 | 0.178904  |
| 0.193473  | 0.183566 | 0.192308  | 0.185897 | 0.185023  | 0.205857 | 0.18546   |
| 0.124563  | 0.119318 | 0.123397  | 0.109994 | 0.112034  | 0.138695 | 0.110431  |
| 0.109994  | 0.10708  | 0.114073  | 0.106789 | 0.105915  | 0.125874 | 0.101981  |
| 0.123106  | 0.121941 | 0.125728  | 0.119901 | 0.123106  | 0.136655 | 0.112762  |
| 0.11116   | 0.114365 | 0.116113  | 0.113199 | 0.109411  | 0.13345  | 0.112762  |
| 0.118007  | 0.113345 | 0.111597  | 0.107809 | 0.111597  | 0.130099 | 0.0965909 |
| 0.0996503 | 0.102564 | 0.0987762 | 0.101399 | 0.0967366 | 0.123397 | 0.0968823 |
| 0.118153  | 0.119318 | 0.126311  | 0.119318 | 0.114073  | 0.135781 | 0.118881  |



|           |          |          |          |          |          |           |
|-----------|----------|----------|----------|----------|----------|-----------|
| 0.124854  | 0.133304 | 0.130973 | 0.132139 | 0.126311 | 0.143939 | 0.129953  |
| 0.120921  | 0.115676 | 0.118881 | 0.113928 | 0.117133 | 0.134761 | 0.106206  |
| 0.123834  | 0.132284 | 0.12704  | 0.131119 | 0.126748 | 0.144085 | 0.126894  |
| 0.112617  | 0.113491 | 0.116987 | 0.114656 | 0.107955 | 0.133741 | 0.108974  |
| 0.12602   | 0.125146 | 0.133304 | 0.124272 | 0.124854 | 0.145979 | 0.118881  |
| 0.119172  | 0.121795 | 0.123252 | 0.120047 | 0.11451  | 0.136801 | 0.108246  |
| 0.10067   | 0.116113 | 0.112034 | 0.11116  | 0.10912  | 0.121795 | 0.112179  |
| 0.121795  | 0.121795 | 0.119172 | 0.118298 | 0.117133 | 0.130099 | 0.10912   |
| 0.114219  | 0.117133 | 0.11859  | 0.114219 | 0.118007 | 0.132721 | 0.103875  |
| 0.124709  | 0.129371 | 0.131702 | 0.128205 | 0.126748 | 0.13884  | 0.126603  |
| 0.189248  | 0.184003 | 0.187791 | 0.182838 | 0.18109  | 0.205128 | 0.180653  |
| 0.129079  | 0.138986 | 0.136946 | 0.135198 | 0.132867 | 0.145251 | 0.13447   |
| 0.115676  | 0.124126 | 0.122669 | 0.120629 | 0.117424 | 0.139714 | 0.121649  |
| 0.125437  | 0.122815 | 0.128351 | 0.120775 | 0.121066 | 0.143648 | 0.111597  |
| 0.111597  | 0.112471 | 0.120629 | 0.107809 | 0.108683 | 0.131556 | 0.106789  |
| 0.118153  | 0.117279 | 0.123397 | 0.121358 | 0.115239 | 0.136655 | 0.108683  |
| 0.121212  | 0.123252 | 0.130828 | 0.126166 | 0.118007 | 0.142045 | 0.111451  |
| 0.195367  | 0.192745 | 0.195076 | 0.188957 | 0.187791 | 0.208333 | 0.186189  |
| 0.118735  | 0.119027 | 0.119318 | 0.118735 | 0.116113 | 0.134615 | 0.117716  |
| 0.113636  | 0.107809 | 0.113928 | 0.102564 | 0.10169  | 0.12398  | 0.105332  |
| 0.121212  | 0.125583 | 0.12296  | 0.125583 | 0.120921 | 0.139714 | 0.125146  |
| 0.197115  | 0.190705 | 0.191871 | 0.188957 | 0.188083 | 0.208916 | 0.189103  |
| 0.110431  | 0.105478 | 0.109266 | 0.10373  | 0.105186 | 0.12602  | 0.0968823 |
| 0.0965909 | 0.106206 | 0.106789 | 0.105332 | 0.101544 | 0.121503 | 0.10373   |
| 0.11961   | 0.125437 | 0.12398  | 0.125437 | 0.119027 | 0.141026 | 0.123543  |
| 0.116841  | 0.120047 | 0.11859  | 0.11451  | 0.111597 | 0.133887 | 0.112908  |
| 0.191725  | 0.182984 | 0.191725 | 0.182984 | 0.184732 | 0.203817 | 0.183712  |
| 0.0976107 | 0.104895 | 0.102855 | 0.102855 | 0.100816 | 0.119901 | 0.103293  |
| 0.113345  | 0.112471 | 0.11655  | 0.111597 | 0.107809 | 0.130099 | 0.105624  |
| 0.113928  | 0.109266 | 0.111597 | 0.10373  | 0.104895 | 0.128351 | 0.102127  |
| 0.126166  | 0.120338 | 0.128205 | 0.120629 | 0.11451  | 0.141463 | 0.118153  |
| 0.121941  | 0.120192 | 0.12398  | 0.114656 | 0.117279 | 0.1419   | 0.115093  |
| 0.0995047 | 0.115239 | 0.109411 | 0.109994 | 0.10708  | 0.119755 | 0.110431  |
| 0.113491  | 0.113491 | 0.115822 | 0.11116  | 0.116404 | 0.13345  | 0.103147  |
| 0.120484  | 0.121941 | 0.125437 | 0.114365 | 0.114073 | 0.133159 | 0.11655   |
| 0.143065  | 0.148893 | 0.148893 | 0.144231 | 0.143065 | 0.156614 | 0.144376  |
| 0.239219  | 0.235723 | 0.239219 | 0.236305 | 0.234266 | 0.251311 | 0.235286  |
| 0.123543  | 0.127914 | 0.125291 | 0.121503 | 0.121212 | 0.133596 | 0.114365  |
| 0.120338  | 0.125    | 0.125583 | 0.113928 | 0.120338 | 0.144376 | 0.117861  |
| 0.111451  | 0.11961  | 0.120484 | 0.115822 | 0.114948 | 0.134033 | 0.11859   |
| 0.125     | 0.124417 | 0.128788 | 0.116841 | 0.119172 | 0.139714 | 0.116404  |
| 0.108829  | 0.110868 | 0.114948 | 0.109411 | 0.107663 | 0.132576 | 0.105769  |
| 0.10912   | 0.116696 | 0.117861 | 0.113199 | 0.115239 | 0.131119 | 0.112762  |
| 0.116841  | 0.125874 | 0.123834 | 0.122378 | 0.117133 | 0.135344 | 0.122232  |

|           |           |          |           |           |           |           |
|-----------|-----------|----------|-----------|-----------|-----------|-----------|
| 0.0995047 | 0.110286  | 0.106498 | 0.108246  | 0.105624  | 0.122378  | 0.109266  |
| 0.120775  | 0.115239  | 0.11757  | 0.110577  | 0.112617  | 0.135781  | 0.113345  |
| 0.238054  | 0.234848  | 0.240093 | 0.235431  | 0.234557  | 0.249563  | 0.234703  |
| 0.10912   | 0.105041  | 0.110868 | 0.105332  | 0.102418  | 0.124126  | 0.0987762 |
| 0.105041  | 0.105332  | 0.109994 | 0.10271   | 0.0983392 | 0.126748  | 0.101981  |
| 0.113636  | 0.11451   | 0.115093 | 0.112471  | 0.112471  | 0.130099  | 0.101544  |
| 0.127768  | 0.133887  | 0.13243  | 0.129225  | 0.126311  | 0.145105  | 0.131993  |
| 0.131265  | 0.131265  | 0.130682 | 0.12602   | 0.125146  | 0.13549   | 0.120338  |
| 0.121066  | 0.117279  | 0.125146 | 0.11553   | 0.121066  | 0.142774  | 0.113054  |
| 0.118444  | 0.121358  | 0.122232 | 0.121358  | 0.116113  | 0.137821  | 0.121795  |
| 0.117716  | 0.118298  | 0.11655  | 0.1081    | 0.11014   | 0.133596  | 0.112034  |
| 0.236597  | 0.230478  | 0.235723 | 0.233974  | 0.230769  | 0.241987  | 0.229749  |
| 0.120921  | 0.129953  | 0.125583 | 0.124709  | 0.124126  | 0.139714  | 0.123689  |
| 0.0962995 | 0.103293  | 0.103584 | 0.103875  | 0.101544  | 0.119464  | 0.103438  |
| 0.111742  | 0.114656  | 0.113782 | 0.103001  | 0.105915  | 0.126457  | 0.103438  |
| 0.114802  | 0.124126  | 0.128497 | 0.11859   | 0.118007  | 0.136218  | 0.12398   |
| 0.115967  | 0.123834  | 0.126748 | 0.119172  | 0.115676  | 0.136509  | 0.118444  |
| 0.119755  | 0.11655   | 0.117424 | 0.112762  | 0.114802  | 0.129808  | 0.105624  |
| 0.102855  | 0.109266  | 0.1081   | 0.106061  | 0.103147  | 0.119901  | 0.103875  |
| 0.0992133 | 0.114073  | 0.111742 | 0.109703  | 0.108537  | 0.124417  | 0.11014   |
| 0.0948427 | 0.10271   | 0.099796 | 0.099796  | 0.0968823 | 0.11859   | 0.0984848 |
| 0.118007  | 0.114802  | 0.117716 | 0.114219  | 0.115967  | 0.131847  | 0.104749  |
| 0.12296   | 0.125874  | 0.132867 | 0.120921  | 0.128497  | 0.143502  | 0.120192  |
| 0.127768  | 0.130682  | 0.135344 | 0.127477  | 0.131556  | 0.147436  | 0.127331  |
| 0.12398   | 0.129808  | 0.135635 | 0.128642  | 0.128059  | 0.145979  | 0.121212  |
| 0.129225  | 0.13243   | 0.140006 | 0.129516  | 0.130973  | 0.151515  | 0.125291  |
| 0.124417  | 0.131119  | 0.132867 | 0.126166  | 0.128497  | 0.144959  | 0.126894  |
| 0.113636  | 0.105769  | 0.107517 | 0.102273  | 0.103438  | 0.126603  | 0.0945513 |
| 0.115822  | 0.123106  | 0.131847 | 0.127185  | 0.119318  | 0.130828  | 0.112471  |
| 0.119755  | 0.0990676 | 0.100233 | 0.0999417 | 0.0961538 | 0.0954254 | 0.122523  |
| 0.206876  | 0.204545  | 0.210956 | 0.206585  | 0.202214  | 0.222174  | 0.204691  |
| 0.124417  | 0.124126  | 0.128788 | 0.123543  | 0.120921  | 0.135052  | 0.122232  |
| 0.110723  | 0.113345  | 0.117133 | 0.109557  | 0.105478  | 0.133887  | 0.107372  |
| 0.12398   | 0.121066  | 0.12398  | 0.117279  | 0.121066  | 0.138403  | 0.111888  |
| 0.224068  | 0.222902  | 0.228147 | 0.224068  | 0.221737  | 0.238491  | 0.222174  |
| 0.213869  | 0.212995  | 0.216492 | 0.213578  | 0.210664  | 0.225087  | 0.206148  |
| 0.102127  | 0.110868  | 0.109994 | 0.107372  | 0.104167  | 0.120921  | 0.109266  |
| 0.249709  | 0.250583  | 0.255536 | 0.250583  | 0.248252  | 0.260052  | 0.250146  |
| 0.111888  | 0.107226  | 0.106352 | 0.102855  | 0.107226  | 0.127185  | 0.0939685 |
| 0.130245  | 0.134033  | 0.135781 | 0.129953  | 0.131993  | 0.146125  | 0.128642  |
| 0.110431  | 0.106935  | 0.111014 | 0.106935  | 0.106061  | 0.125728  | 0.10067   |
| 0.125146  | 0.128059  | 0.129516 | 0.120192  | 0.125728  | 0.143939  | 0.119464  |
| 0.191434  | 0.185606  | 0.195221 | 0.188811  | 0.182984  | 0.204108  | 0.184295  |
| 0.114073  | 0.118735  | 0.116987 | 0.10708   | 0.115822  | 0.125583  | 0.116259  |

|           |           |           |           |           |          |           |
|-----------|-----------|-----------|-----------|-----------|----------|-----------|
| 0.196533  | 0.196241  | 0.201195  | 0.195659  | 0.194202  | 0.212121 | 0.191434  |
| 0.118735  | 0.114073  | 0.118153  | 0.105041  | 0.108537  | 0.133159 | 0.110431  |
| 0.105624  | 0.10912   | 0.10912   | 0.11116   | 0.103001  | 0.126166 | 0.107226  |
| 0.123397  | 0.116696  | 0.126311  | 0.114948  | 0.112034  | 0.131119 | 0.112471  |
| 0.114365  | 0.112325  | 0.114656  | 0.10912   | 0.108537  | 0.133159 | 0.110431  |
| 0.107517  | 0.106935  | 0.11014   | 0.106643  | 0.106643  | 0.13039  | 0.0992133 |
| 0.117424  | 0.112762  | 0.118298  | 0.11451   | 0.106643  | 0.128351 | 0.110577  |
| 0.107809  | 0.101981  | 0.109848  | 0.100233  | 0.100233  | 0.119901 | 0.0945513 |
| 0.11553   | 0.11757   | 0.116696  | 0.112908  | 0.112034  | 0.132576 | 0.112762  |
| 0.107226  | 0.108392  | 0.118881  | 0.111888  | 0.106352  | 0.12602  | 0.0986305 |
| 0.113928  | 0.114219  | 0.114802  | 0.110723  | 0.106352  | 0.126603 | 0.103001  |
| 0.112325  | 0.105915  | 0.110577  | 0.103293  | 0.105332  | 0.122378 | 0.0999417 |
| 0.123543  | 0.11859   | 0.128497  | 0.117716  | 0.118298  | 0.139714 | 0.107955  |
| 0.124709  | 0.13345   | 0.128497  | 0.129079  | 0.126457  | 0.141754 | 0.127477  |
| 0.116113  | 0.116404  | 0.122815  | 0.11116   | 0.113491  | 0.137238 | 0.1081    |
| 0.108392  | 0.112762  | 0.115385  | 0.106352  | 0.109266  | 0.127185 | 0.108829  |
| 0.112617  | 0.109994  | 0.108829  | 0.107372  | 0.11116   | 0.128788 | 0.101399  |
| 0.100962  | 0.109411  | 0.108246  | 0.106498  | 0.103584  | 0.122086 | 0.105186  |
| 0.118735  | 0.119318  | 0.122523  | 0.112617  | 0.119901  | 0.1419   | 0.112762  |
| 0.119172  | 0.122378  | 0.125291  | 0.122669  | 0.114802  | 0.13884  | 0.10708   |
| 0.119172  | 0.119172  | 0.129662  | 0.118007  | 0.11655   | 0.14088  | 0.109703  |
| 0.116404  | 0.119901  | 0.119318  | 0.118153  | 0.118735  | 0.136655 | 0.118007  |
| 0.121795  | 0.134033  | 0.127331  | 0.131119  | 0.125874  | 0.14292  | 0.129808  |
| 0.131993  | 0.13986   | 0.136655  | 0.136946  | 0.134324  | 0.14729  | 0.137966  |
| 0.0945513 | 0.0948427 | 0.0962995 | 0.0916375 | 0.0895979 | 0.111597 | 0.0917832 |
| 0.116696  | 0.11553   | 0.116696  | 0.114948  | 0.11553   | 0.136072 | 0.106061  |
| 0.101981  | 0.106643  | 0.111597  | 0.10169   | 0.100816  | 0.127477 | 0.105041  |
| 0.127331  | 0.132576  | 0.138112  | 0.129079  | 0.128205  | 0.146707 | 0.129225  |
| 0.111451  | 0.10708   | 0.112908  | 0.106206  | 0.107372  | 0.122669 | 0.102855  |
| 0.130973  | 0.139423  | 0.144085  | 0.141754  | 0.134761  | 0.149476 | 0.129662  |
| 0.133013  | 0.133013  | 0.133013  | 0.13039   | 0.130682  | 0.143648 | 0.120921  |
| 0.12704   | 0.127331  | 0.128205  | 0.12296   | 0.121503  | 0.141754 | 0.123689  |
| 0.11553   | 0.10912   | 0.116113  | 0.110286  | 0.110286  | 0.130536 | 0.107226  |
| 0.111014  | 0.115093  | 0.116259  | 0.115093  | 0.110431  | 0.135635 | 0.10912   |
| 0.126457  | 0.128497  | 0.137821  | 0.125583  | 0.12704   | 0.146125 | 0.117279  |
| 0.207896  | 0.204983  | 0.209062  | 0.206148  | 0.203526  | 0.217657 | 0.202797  |
| 0.111742  | 0.109703  | 0.11553   | 0.10708   | 0.109411  | 0.127622 | 0.107809  |
| 0.121795  | 0.111305  | 0.118881  | 0.112762  | 0.108683  | 0.133887 | 0.108246  |
| 0.116113  | 0.120192  | 0.126311  | 0.114073  | 0.116113  | 0.138112 | 0.113928  |
| 0.120338  | 0.118298  | 0.125583  | 0.115676  | 0.11655   | 0.137966 | 0.106789  |
| 0.119901  | 0.121066  | 0.126894  | 0.111742  | 0.116113  | 0.139277 | 0.112762  |
| 0.121066  | 0.117279  | 0.12602   | 0.115239  | 0.115239  | 0.138112 | 0.11859   |
| 0.118881  | 0.121795  | 0.129953  | 0.119464  | 0.11655   | 0.141171 | 0.121941  |
| 0.120775  | 0.123689  | 0.124854  | 0.121358  | 0.119901  | 0.142483 | 0.118881  |

|           |          |          |           |           |          |           |
|-----------|----------|----------|-----------|-----------|----------|-----------|
| 0.105915  | 0.106206 | 0.109411 | 0.099796  | 0.100087  | 0.123834 | 0.0909091 |
| 0.125146  | 0.126311 | 0.132721 | 0.123106  | 0.12398   | 0.144814 | 0.12296   |
| 0.116696  | 0.114073 | 0.116987 | 0.10708   | 0.10708   | 0.130828 | 0.108974  |
| 0.121212  | 0.117424 | 0.118007 | 0.113636  | 0.113636  | 0.133013 | 0.10708   |
| 0.180507  | 0.170017 | 0.17701  | 0.172348  | 0.169143  | 0.186772 | 0.174242  |
| 0.116696  | 0.118735 | 0.115822 | 0.11757   | 0.113199  | 0.135198 | 0.117424  |
| 0.125583  | 0.129953 | 0.13549  | 0.123252  | 0.125     | 0.146999 | 0.12398   |
| 0.113491  | 0.115239 | 0.120192 | 0.113199  | 0.109994  | 0.126748 | 0.103147  |
| 0.115385  | 0.114219 | 0.11859  | 0.107809  | 0.107517  | 0.12398  | 0.113199  |
| 0.111014  | 0.104312 | 0.110723 | 0.103438  | 0.0990676 | 0.126894 | 0.0983392 |
| 0.11014   | 0.109266 | 0.107517 | 0.0999417 | 0.105769  | 0.122523 | 0.0942599 |
| 0.112762  | 0.1081   | 0.112471 | 0.109848  | 0.105478  | 0.127185 | 0.10271   |
| 0.104021  | 0.112762 | 0.113345 | 0.106643  | 0.106061  | 0.123689 | 0.118153  |
| 0.120629  | 0.11655  | 0.12296  | 0.113636  | 0.116841  | 0.133013 | 0.10708   |
| 0.125728  | 0.122232 | 0.128351 | 0.123106  | 0.120192  | 0.137529 | 0.107517  |
| 0.110431  | 0.108974 | 0.11451  | 0.1081    | 0.105478  | 0.128351 | 0.0968823 |
| 0.113491  | 0.111451 | 0.111742 | 0.10912   | 0.109703  | 0.129371 | 0.0912005 |
| 0.0920746 | 0.102564 | 0.105769 | 0.100233  | 0.0955711 | 0.105624 | 0.117279  |
| 0.111597  | 0.112762 | 0.112762 | 0.107517  | 0.108974  | 0.116696 | 0.0957168 |
| 0.117716  | 0.123543 | 0.126166 | 0.118007  | 0.122086  | 0.137383 | 0.110286  |
| 0.108974  | 0.104312 | 0.107517 | 0.104895  | 0.103147  | 0.121358 | 0.0893065 |
| 0.110431  | 0.112471 | 0.113054 | 0.108683  | 0.109557  | 0.121649 | 0.095134  |
| 0.110431  | 0.106352 | 0.112471 | 0.10373   | 0.106352  | 0.122815 | 0.0980478 |
| 0.118444  | 0.116987 | 0.121358 | 0.113782  | 0.114948  | 0.124126 | 0.0941142 |
| 0.105041  | 0.108829 | 0.11116  | 0.103293  | 0.102418  | 0.125291 | 0.094697  |
| 0.12398   | 0.131556 | 0.126603 | 0.130099  | 0.128642  | 0.138403 | 0.129079  |
| 0.121941  | 0.123397 | 0.119901 | 0.122523  | 0.121358  | 0.138695 | 0.114802  |
| 0.110868  | 0.108537 | 0.114948 | 0.108246  | 0.106498  | 0.123834 | 0.0944056 |
| 0.115385  | 0.133741 | 0.13141  | 0.124709  | 0.123543  | 0.131847 | 0.123689  |
| 0.12296   | 0.118007 | 0.125874 | 0.123834  | 0.120338  | 0.141463 | 0.117279  |
| 0.121503  | 0.111597 | 0.115967 | 0.108392  | 0.107809  | 0.110577 | 0.127477  |
| 0.114219  | 0.114802 | 0.113636 | 0.104604  | 0.106643  | 0.132721 | 0.0989219 |
| 0.138549  | 0.142337 | 0.140589 | 0.139132  | 0.137092  | 0.14627  | 0.13549   |
| 0.122232  | 0.128934 | 0.127477 | 0.118735  | 0.125728  | 0.1419   | 0.119464  |
| 0.113782  | 0.121358 | 0.124563 | 0.116696  | 0.115822  | 0.131702 | 0.125874  |
| 0.114073  | 0.113491 | 0.123397 | 0.115822  | 0.116404  | 0.13345  | 0.105478  |
| 0.104021  | 0.103438 | 0.10373  | 0.102273  | 0.100524  | 0.116696 | 0.092803  |
| 0.108537  | 0.104167 | 0.109703 | 0.103875  | 0.101253  | 0.117716 | 0.0804196 |
| 0.0987762 | 0.099359 | 0.110431 | 0.104021  | 0.0917832 | 0.109411 | 0.10912   |
| 0.119172  | 0.117424 | 0.123834 | 0.117133  | 0.111888  | 0.128934 | 0.110577  |
| 0.118153  | 0.125146 | 0.129516 | 0.118444  | 0.122523  | 0.130536 | 0.115676  |
| 0.118735  | 0.110286 | 0.115239 | 0.112325  | 0.114073  | 0.131119 | 0.107226  |
| 0.105332  | 0.107663 | 0.112908 | 0.104458  | 0.101836  | 0.124709 | 0.0987762 |
| 0.108683  | 0.10373  | 0.110431 | 0.100524  | 0.102564  | 0.119901 | 0.0785256 |

|          |          |          |          |          |          |           |
|----------|----------|----------|----------|----------|----------|-----------|
| 0.11116  | 0.116113 | 0.120484 | 0.111742 | 0.111451 | 0.123834 | 0.104312  |
| 0.105332 | 0.108829 | 0.105332 | 0.105041 | 0.103875 | 0.122378 | 0.0929487 |
| 0.114219 | 0.115093 | 0.114802 | 0.112179 | 0.109557 | 0.122815 | 0.0878497 |
| 0.118007 | 0.116259 | 0.113636 | 0.11014  | 0.107517 | 0.128059 | 0.10271   |
| 0.122523 | 0.11757  | 0.122232 | 0.113199 | 0.118735 | 0.141608 | 0.115385  |
| 0.112908 | 0.108537 | 0.11116  | 0.103293 | 0.10912  | 0.128205 | 0.104895  |
| 0.113199 | 0.108246 | 0.108829 | 0.100087 | 0.106206 | 0.124417 | 0.0938228 |
| 0.107663 | 0.109703 | 0.114365 | 0.105041 | 0.106206 | 0.123252 | 0.099359  |
| 0.116841 | 0.115385 | 0.122378 | 0.111597 | 0.11859  | 0.140006 | 0.10912   |
| 0.11553  | 0.108537 | 0.11757  | 0.111742 | 0.10912  | 0.131119 | 0.104895  |
| 0.127768 | 0.122815 | 0.128351 | 0.120775 | 0.122815 | 0.140734 | 0.120921  |
| 0.112034 | 0.108537 | 0.10912  | 0.100962 | 0.108537 | 0.130245 | 0.103438  |
| 0.123834 | 0.120921 | 0.126748 | 0.120047 | 0.122669 | 0.132139 | 0.11757   |

| <b>TDr_08_00589</b> | <b>TDr_08_00617</b> | <b>TDr_08_00620</b> | <b>TDr_08_00621</b> | <b>TDr_08_00632</b> | <b>TDr_08_00639</b> | <b>TDr_08_00640</b> |
|---------------------|---------------------|---------------------|---------------------|---------------------|---------------------|---------------------|
| 0.111451            | 0.123689            | 0.119901            | 0.132721            | 0.135781            | 0.105624            | 0.162442            |
| 0.110723            | 0.119172            | 0.123252            | 0.120629            | 0.129225            | 0.109557            | 0.173077            |
| 0.108392            | 0.120047            | 0.121503            | 0.120921            | 0.133013            | 0.108392            | 0.171911            |
| 0.112471            | 0.11859             | 0.124417            | 0.130245            | 0.130099            | 0.112471            | 0.182401            |
| 0.124709            | 0.136364            | 0.127331            | 0.130245            | 0.142337            | 0.120629            | 0.189685            |
| 0.127914            | 0.132284            | 0.124417            | 0.141026            | 0.138549            | 0.11655             | 0.172786            |
| 0.116113            | 0.095134            | 0.0523019           | 0.119901            | 0.126166            | 0.101544            | 0.161568            |
| 0.113199            | 0.125437            | 0.121941            | 0.122523            | 0.134615            | 0.112617            | 0.167686            |
| 0.0935315           | 0.116259            | 0.117133            | 0.120921            | 0.127185            | 0.108683            | 0.173951            |
| 0.0954254           | 0.108537            | 0.108829            | 0.113491            | 0.125874            | 0.103875            | 0.174097            |
| 0.0973193           | 0.122086            | 0.115093            | 0.122378            | 0.129516            | 0.106352            | 0.160839            |
| 0.102418            | 0.117279            | 0.120484            | 0.125146            | 0.132576            | 0.113199            | 0.176136            |
| 0.101544            | 0.119901            | 0.122523            | 0.120775            | 0.131702            | 0.11116             | 0.182547            |
| 0.129953            | 0.145688            | 0.144231            | 0.151807            | 0.155157            | 0.130245            | 0.144814            |
| 0.11757             | 0.128934            | 0.133596            | 0.131847            | 0.136946            | 0.126603            | 0.184878            |
| 0.0996503           | 0.120047            | 0.121795            | 0.11859             | 0.124854            | 0.111014            | 0.174825            |
| 0.105332            | 0.11553             | 0.116404            | 0.124563            | 0.129079            | 0.104749            | 0.176719            |
| 0.13549             | 0.134033            | 0.136364            | 0.145979            | 0.1537              | 0.13345             | 0.189685            |
| 0.102855            | 0.118007            | 0.120921            | 0.118881            | 0.126894            | 0.107226            | 0.174242            |
| 0.20542             | 0.210664            | 0.208916            | 0.211538            | 0.218094            | 0.198718            | 0.152972            |
| 0.117279            | 0.116696            | 0.114073            | 0.129225            | 0.13345             | 0.106789            | 0.175845            |
| 0.115093            | 0.110723            | 0.110723            | 0.122669            | 0.136218            | 0.106061            | 0.182692            |
| 0.107663            | 0.120484            | 0.122815            | 0.11961             | 0.125874            | 0.106206            | 0.173514            |
| 0.108974            | 0.129953            | 0.127914            | 0.129371            | 0.133013            | 0.125               | 0.190268            |
| 0.100087            | 0.116987            | 0.112325            | 0.114948            | 0.121212            | 0.0986305           | 0.167104            |
| 0.121941            | 0.121649            | 0.114656            | 0.127185            | 0.130536            | 0.11553             | 0.174679            |
| 0.112908            | 0.124563            | 0.112908            | 0.123397            | 0.126457            | 0.11757             | 0.180216            |
| 0.110577            | 0.126603            | 0.13039             | 0.11961             | 0.131119            | 0.121066            | 0.190705            |
| 0.116696            | 0.128351            | 0.123106            | 0.124854            | 0.137238            | 0.128642            | 0.188666            |
| 0.106498            | 0.125728            | 0.124563            | 0.120775            | 0.138695            | 0.120484            | 0.1875              |
| 0.116841            | 0.124126            | 0.111888            | 0.129953            | 0.137966            | 0.112471            | 0.169872            |
| 0.110577            | 0.125437            | 0.12398             | 0.123397            | 0.131993            | 0.125728            | 0.185169            |
| 0.10067             | 0.108829            | 0.109703            | 0.120484            | 0.124417            | 0.102418            | 0.167978            |
| 0.106498            | 0.123106            | 0.119027            | 0.124854            | 0.134324            | 0.118444            | 0.182838            |
| 0.0914918           | 0.118881            | 0.112762            | 0.113636            | 0.120192            | 0.114219            | 0.182692            |
| 0.0919289           | 0.130973            | 0.120192            | 0.12398             | 0.125291            | 0.120192            | 0.184295            |
| 0.123252            | 0.103438            | 0.099359            | 0.113636            | 0.122523            | 0.107517            | 0.172786            |
| 0.106789            | 0.122523            | 0.128351            | 0.128934            | 0.138695            | 0.121066            | 0.181381            |
| 0.100379            | 0.120775            | 0.11961             | 0.127477            | 0.133159            | 0.109994            | 0.181964            |
| 0.113782            | 0.125146            | 0.126603            | 0.135344            | 0.142483            | 0.125146            | 0.182255            |
| 0.107372            | 0.117861            | 0.11961             | 0.123689            | 0.133741            | 0.103875            | 0.174097            |
| 0.131265            | 0.139132            | 0.14088             | 0.140589            | 0.148893            | 0.136801            | 0.190705            |

|          |          |           |          |          |           |          |
|----------|----------|-----------|----------|----------|-----------|----------|
| 0.134761 | 0.14292  | 0.146416  | 0.142337 | 0.155886 | 0.138549  | 0.191288 |
| 0.104604 | 0.117424 | 0.119172  | 0.126166 | 0.137092 | 0.11451   | 0.174534 |
| 0.102564 | 0.104312 | 0.0987762 | 0.094697 | 0.106206 | 0.0987762 | 0.16958  |
| 0.104167 | 0.113491 | 0.117861  | 0.108537 | 0.11655  | 0.105624  | 0.175554 |
| 0.111742 | 0.129225 | 0.123397  | 0.124854 | 0.129371 | 0.120192  | 0.186917 |
| 0.128205 | 0.137821 | 0.144231  | 0.137821 | 0.150787 | 0.135198  | 0.189685 |
| 0.10373  | 0.118298 | 0.120629  | 0.124126 | 0.130973 | 0.113636  | 0.181235 |
| 0.104458 | 0.118735 | 0.121941  | 0.122523 | 0.130245 | 0.113199  | 0.173805 |
| 0.141026 | 0.134615 | 0.119172  | 0.144522 | 0.151661 | 0.129079  | 0.183275 |
| 0.121795 | 0.134907 | 0.132867  | 0.126166 | 0.140589 | 0.12296   | 0.18007  |
| 0.102127 | 0.115239 | 0.118735  | 0.124563 | 0.131993 | 0.110577  | 0.175845 |
| 0.110577 | 0.126603 | 0.127477  | 0.130682 | 0.137238 | 0.12602   | 0.185752 |
| 0.114656 | 0.120484 | 0.122232  | 0.13039  | 0.137238 | 0.110286  | 0.166521 |
| 0.128934 | 0.140589 | 0.140297  | 0.130682 | 0.141317 | 0.136218  | 0.200029 |
| 0.109848 | 0.127914 | 0.129953  | 0.129662 | 0.138549 | 0.122669  | 0.188811 |
| 0.102564 | 0.112762 | 0.120338  | 0.127331 | 0.136218 | 0.112471  | 0.181527 |
| 0.1081   | 0.11859  | 0.122086  | 0.122669 | 0.133887 | 0.112179  | 0.175991 |
| 0.110868 | 0.113491 | 0.106498  | 0.107663 | 0.120338 | 0.111742  | 0.175845 |
| 0.123106 | 0.132139 | 0.137092  | 0.139423 | 0.149184 | 0.136218  | 0.191288 |
| 0.124854 | 0.140297 | 0.142337  | 0.145542 | 0.148601 | 0.140006  | 0.192453 |
| 0.158508 | 0.168124 | 0.166084  | 0.164627 | 0.16623  | 0.159091  | 0.154138 |
| 0.104604 | 0.120629 | 0.12296   | 0.127914 | 0.134178 | 0.116259  | 0.18007  |
| 0.102855 | 0.119755 | 0.117133  | 0.123252 | 0.127768 | 0.113928  | 0.180361 |
| 0.101399 | 0.118298 | 0.119172  | 0.122669 | 0.130973 | 0.108683  | 0.175117 |
| 0.133013 | 0.133887 | 0.123689  | 0.131847 | 0.136072 | 0.125728  | 0.17264  |
| 0.102127 | 0.121941 | 0.120192  | 0.125437 | 0.131993 | 0.113199  | 0.180798 |
| 0.129953 | 0.130245 | 0.132284  | 0.128788 | 0.133304 | 0.12704   | 0.175991 |
| 0.105769 | 0.11451  | 0.107517  | 0.109557 | 0.119027 | 0.112471  | 0.176865 |
| 0.107955 | 0.11961  | 0.120192  | 0.127477 | 0.131993 | 0.110868  | 0.177885 |
| 0.14729  | 0.130682 | 0.125146  | 0.129808 | 0.137238 | 0.123397  | 0.168269 |
| 0.11116  | 0.128934 | 0.126603  | 0.130682 | 0.140734 | 0.120775  | 0.186043 |
| 0.128788 | 0.136072 | 0.136946  | 0.137529 | 0.148747 | 0.136364  | 0.192599 |
| 0.123397 | 0.13884  | 0.134761  | 0.129808 | 0.142483 | 0.125728  | 0.1875   |
| 0.110431 | 0.105186 | 0.11655   | 0.117716 | 0.123106 | 0.100524  | 0.168706 |
| 0.099359 | 0.11451  | 0.118881  | 0.122669 | 0.128642 | 0.11451   | 0.178322 |
| 0.104021 | 0.118298 | 0.122669  | 0.126457 | 0.135927 | 0.111888  | 0.179487 |
| 0.120047 | 0.130536 | 0.137238  | 0.142483 | 0.14729  | 0.133159  | 0.193473 |
| 0.100962 | 0.114365 | 0.117279  | 0.121941 | 0.128497 | 0.106498  | 0.175845 |
| 0.128788 | 0.137529 | 0.136946  | 0.144522 | 0.156906 | 0.13986   | 0.196387 |
| 0.113054 | 0.125874 | 0.129953  | 0.132576 | 0.136801 | 0.12296   | 0.17803  |
| 0.107517 | 0.122669 | 0.122669  | 0.123834 | 0.128934 | 0.118298  | 0.187354 |
| 0.1081   | 0.122669 | 0.125291  | 0.127914 | 0.137966 | 0.115093  | 0.177739 |
| 0.110431 | 0.127622 | 0.132284  | 0.132284 | 0.140006 | 0.125     | 0.189103 |
| 0.101107 | 0.122378 | 0.123834  | 0.124126 | 0.134761 | 0.114802  | 0.180653 |

|           |           |           |           |           |           |          |
|-----------|-----------|-----------|-----------|-----------|-----------|----------|
| 0.104021  | 0.120921  | 0.120338  | 0.125874  | 0.133887  | 0.115385  | 0.177739 |
| 0.125146  | 0.135344  | 0.135052  | 0.136218  | 0.145979  | 0.134761  | 0.187791 |
| 0.100087  | 0.113491  | 0.113491  | 0.121358  | 0.129079  | 0.109994  | 0.171183 |
| 0         | 0.117424  | 0.120047  | 0.124417  | 0.128351  | 0.111888  | 0.184149 |
| 0.117424  | 0         | 0.0967366 | 0.117716  | 0.129516  | 0.110431  | 0.167832 |
| 0.120047  | 0.0967366 | 0         | 0.121503  | 0.12602   | 0.105186  | 0.166375 |
| 0.124417  | 0.117716  | 0.121503  | 0         | 0.0866841 | 0.113636  | 0.179779 |
| 0.128351  | 0.129516  | 0.12602   | 0.0866841 | 0         | 0.119318  | 0.183712 |
| 0.111888  | 0.110431  | 0.105186  | 0.113636  | 0.119318  | 0         | 0.159965 |
| 0.184149  | 0.167832  | 0.166375  | 0.179779  | 0.183712  | 0.159965  | 0        |
| 0.103001  | 0.0633741 | 0.092803  | 0.112908  | 0.120921  | 0.0945513 | 0.169726 |
| 0.133159  | 0.128205  | 0.126457  | 0.0894522 | 0.0965909 | 0.12296   | 0.180944 |
| 0.123543  | 0.120629  | 0.120921  | 0.0882867 | 0.0960082 | 0.115967  | 0.181527 |
| 0.130973  | 0.108829  | 0.0965909 | 0.119318  | 0.13141   | 0.103293  | 0.17264  |
| 0.102564  | 0.113928  | 0.107809  | 0.0906177 | 0.0680361 | 0.0973193 | 0.175699 |
| 0.123252  | 0.124709  | 0.119172  | 0.0885781 | 0.0546329 | 0.117133  | 0.177156 |
| 0.109557  | 0.104021  | 0.109557  | 0.0941142 | 0.102127  | 0.102855  | 0.18007  |
| 0.116987  | 0.110286  | 0.111116  | 0.0986305 | 0.107226  | 0.109411  | 0.171183 |
| 0.109703  | 0.100087  | 0.104458  | 0.115239  | 0.120921  | 0.0939685 | 0.161276 |
| 0.123397  | 0.126311  | 0.119027  | 0.101836  | 0.0973193 | 0.122523  | 0.182838 |
| 0.10271   | 0.107955  | 0.108829  | 0.114656  | 0.123543  | 0.10067   | 0.175262 |
| 0.132284  | 0.115385  | 0.102564  | 0.100233  | 0.112617  | 0.102564  | 0.16317  |
| 0.112908  | 0.0884324 | 0.0846445 | 0.112617  | 0.125     | 0.0884324 | 0.162733 |
| 0.113928  | 0.13549   | 0.137821  | 0.134615  | 0.143211  | 0.130828  | 0.187937 |
| 0.12398   | 0.0968823 | 0.08581   | 0.118735  | 0.129371  | 0.104749  | 0.163024 |
| 0.105041  | 0.0936772 | 0.0793998 | 0.111116  | 0.118298  | 0.0907634 | 0.167686 |
| 0.143502  | 0.138549  | 0.129808  | 0.122232  | 0.128788  | 0.132721  | 0.174388 |
| 0.107809  | 0.0984848 | 0.0821678 | 0.111014  | 0.11961   | 0.0932401 | 0.166375 |
| 0.108683  | 0.115093  | 0.113054  | 0.0981935 | 0.109703  | 0.102855  | 0.178904 |
| 0.107663  | 0.113199  | 0.115239  | 0.116404  | 0.129662  | 0.114073  | 0.178759 |
| 0.131847  | 0.103293  | 0.103584  | 0.126894  | 0.134907  | 0.117861  | 0.171474 |
| 0.118153  | 0.122815  | 0.114656  | 0.11961   | 0.126166  | 0.10708   | 0.1537   |
| 0.101253  | 0.105332  | 0.110868  | 0.095134  | 0.099359  | 0.104458  | 0.178467 |
| 0.106206  | 0.10708   | 0.113491  | 0.0922203 | 0.103438  | 0.106789  | 0.174097 |
| 0.111888  | 0.0955711 | 0.0897436 | 0.118881  | 0.130099  | 0.0979021 | 0.173951 |
| 0.112617  | 0.11961   | 0.112908  | 0.112034  | 0.113636  | 0.116987  | 0.176428 |
| 0.111305  | 0.0932401 | 0.0506993 | 0.120047  | 0.12602   | 0.097028  | 0.165793 |
| 0.0939685 | 0.105332  | 0.103875  | 0.109994  | 0.114802  | 0.104749  | 0.168269 |
| 0.0957168 | 0.107663  | 0.101544  | 0.115822  | 0.11655   | 0.103875  | 0.1706   |
| 0.0932401 | 0.109848  | 0.109266  | 0.108974  | 0.117279  | 0.101981  | 0.173951 |
| 0.115093  | 0.123834  | 0.120921  | 0.127622  | 0.135344  | 0.113928  | 0.176865 |
| 0.112034  | 0.120484  | 0.112034  | 0.112325  | 0.121795  | 0.121941  | 0.180507 |
| 0.0955711 | 0.105769  | 0.108392  | 0.111014  | 0.121649  | 0.104895  | 0.17803  |
| 0.0977564 | 0.106498  | 0.108246  | 0.110577  | 0.120921  | 0.104749  | 0.174097 |



|           |           |           |           |           |           |          |
|-----------|-----------|-----------|-----------|-----------|-----------|----------|
| 0.107955  | 0.113782  | 0.114073  | 0.108537  | 0.121212  | 0.110286  | 0.17264  |
| 0.100816  | 0.105769  | 0.104312  | 0.118298  | 0.11961   | 0.102855  | 0.17162  |
| 0.117424  | 0.12296   | 0.115676  | 0.123543  | 0.127768  | 0.108392  | 0.172203 |
| 0.124709  | 0.123543  | 0.110723  | 0.138112  | 0.143794  | 0.114802  | 0.175699 |
| 0.10373   | 0.115967  | 0.105769  | 0.113928  | 0.115822  | 0.107809  | 0.172786 |
| 0.0977564 | 0.107955  | 0.109411  | 0.112908  | 0.120629  | 0.107372  | 0.180216 |
| 0.0983392 | 0.10912   | 0.108537  | 0.110286  | 0.122669  | 0.107955  | 0.174971 |
| 0.0971737 | 0.109411  | 0.110286  | 0.10708   | 0.110723  | 0.101836  | 0.167104 |
| 0.111742  | 0.120484  | 0.121358  | 0.11757   | 0.125583  | 0.11961   | 0.174971 |
| 0.0930944 | 0.107663  | 0.104749  | 0.112617  | 0.117716  | 0.101253  | 0.173223 |
| 0.126748  | 0.133159  | 0.12296   | 0.131119  | 0.145833  | 0.134615  | 0.192016 |
| 0.118153  | 0.128934  | 0.129808  | 0.139423  | 0.145688  | 0.128351  | 0.181672 |
| 0.105915  | 0.122523  | 0.129516  | 0.12398   | 0.139569  | 0.122815  | 0.183712 |
| 0.101981  | 0.115967  | 0.11859   | 0.125291  | 0.135344  | 0.113928  | 0.17803  |
| 0.108392  | 0.111305  | 0.107226  | 0.11451   | 0.126603  | 0.104604  | 0.167832 |
| 0.0983392 | 0.108246  | 0.106789  | 0.110577  | 0.115385  | 0.108246  | 0.175845 |
| 0.100524  | 0.111888  | 0.115385  | 0.112762  | 0.120484  | 0.0981935 | 0.177448 |
| 0.0932401 | 0.117424  | 0.118007  | 0.122669  | 0.129808  | 0.110723  | 0.177739 |
| 0.112179  | 0.125874  | 0.123834  | 0.128788  | 0.129225  | 0.106352  | 0.167832 |
| 0.117424  | 0.129662  | 0.134033  | 0.130536  | 0.133304  | 0.125874  | 0.190559 |
| 0.106498  | 0.11757   | 0.114365  | 0.0922203 | 0.0655594 | 0.0992133 | 0.182547 |
| 0.118881  | 0.132867  | 0.129953  | 0.134907  | 0.137383  | 0.127331  | 0.186772 |
| 0.125146  | 0.0525932 | 0.0954254 | 0.116696  | 0.13141   | 0.11553   | 0.16623  |
| 0.193619  | 0.2044    | 0.204983  | 0.209645  | 0.219697  | 0.186043  | 0.150495 |
| 0.238345  | 0.244755  | 0.243007  | 0.245921  | 0.255682  | 0.232226  | 0.175408 |
| 0.112617  | 0.120775  | 0.120192  | 0.124854  | 0.129662  | 0.106206  | 0.170892 |
| 0.104895  | 0.115676  | 0.118298  | 0.11655   | 0.126603  | 0.111014  | 0.176282 |
| 0.0952797 | 0.113054  | 0.113345  | 0.114219  | 0.118735  | 0.0941142 | 0.168415 |
| 0.107226  | 0.115676  | 0.120921  | 0.110431  | 0.121358  | 0.109848  | 0.176865 |
| 0.120921  | 0.130828  | 0.132867  | 0.134615  | 0.137383  | 0.129371  | 0.185606 |
| 0.106935  | 0.122669  | 0.123543  | 0.116259  | 0.127477  | 0.113636  | 0.180653 |
| 0.136509  | 0.142337  | 0.138549  | 0.133013  | 0.138403  | 0.141463  | 0.197407 |
| 0.109557  | 0.122378  | 0.120338  | 0.124709  | 0.125146  | 0.11655   | 0.185897 |
| 0.121795  | 0.130536  | 0.130245  | 0.134033  | 0.13884   | 0.12704   | 0.194639 |
| 0.120484  | 0.129225  | 0.133887  | 0.128934  | 0.13549   | 0.123689  | 0.174679 |
| 0.122232  | 0.135052  | 0.133596  | 0.121649  | 0.125291  | 0.127477  | 0.188957 |
| 0.123397  | 0.135344  | 0.140006  | 0.14088   | 0.15035   | 0.135344  | 0.186334 |
| 0.106206  | 0.118153  | 0.123106  | 0.120484  | 0.127331  | 0.113491  | 0.182255 |
| 0.103584  | 0.117279  | 0.120775  | 0.121649  | 0.124709  | 0.107955  | 0.181381 |
| 0.107809  | 0.118298  | 0.119464  | 0.118881  | 0.120775  | 0.111888  | 0.18211  |
| 0.104021  | 0.113636  | 0.115676  | 0.118298  | 0.128351  | 0.108392  | 0.174242 |
| 0.104604  | 0.119172  | 0.118881  | 0.119172  | 0.12398   | 0.108392  | 0.180361 |
| 0.10708   | 0.119027  | 0.120775  | 0.125437  | 0.126457  | 0.113199  | 0.185169 |
| 0.115676  | 0.130828  | 0.131993  | 0.12704   | 0.130099  | 0.127331  | 0.187354 |

|           |          |          |          |          |          |          |
|-----------|----------|----------|----------|----------|----------|----------|
| 0.125583  | 0.136364 | 0.136946 | 0.125    | 0.136509 | 0.138403 | 0.196096 |
| 0.108246  | 0.120192 | 0.122232 | 0.124272 | 0.130536 | 0.110868 | 0.181964 |
| 0.1081    | 0.126457 | 0.120921 | 0.120047 | 0.124854 | 0.111305 | 0.18007  |
| 0.123834  | 0.133741 | 0.131993 | 0.126748 | 0.138549 | 0.125    | 0.191142 |
| 0.103147  | 0.120338 | 0.118881 | 0.117424 | 0.124854 | 0.109848 | 0.18007  |
| 0.133013  | 0.140589 | 0.142628 | 0.133013 | 0.13549  | 0.137092 | 0.196824 |
| 0.121649  | 0.136218 | 0.135344 | 0.130682 | 0.140443 | 0.130099 | 0.181381 |
| 0.131119  | 0.129079 | 0.137529 | 0.105769 | 0.110868 | 0.125    | 0.176865 |
| 0.099359  | 0.108974 | 0.113345 | 0.115676 | 0.125146 | 0.10373  | 0.174242 |
| 0.100087  | 0.113491 | 0.114656 | 0.110286 | 0.121503 | 0.104749 | 0.17701  |
| 0.115676  | 0.120921 | 0.121795 | 0.123543 | 0.128059 | 0.125583 | 0.190268 |
| 0.112325  | 0.122232 | 0.124272 | 0.11757  | 0.127331 | 0.121941 | 0.185169 |
| 0.121358  | 0.123106 | 0.122523 | 0.127768 | 0.132576 | 0.123397 | 0.181964 |
| 0.111305  | 0.120629 | 0.119464 | 0.126457 | 0.132721 | 0.114219 | 0.184149 |
| 0.105624  | 0.120192 | 0.121649 | 0.124854 | 0.128497 | 0.112034 | 0.182838 |
| 0.114656  | 0.120775 | 0.125437 | 0.116987 | 0.123543 | 0.119318 | 0.18546  |
| 0.118444  | 0.13039  | 0.130682 | 0.124272 | 0.135198 | 0.126603 | 0.193036 |
| 0.120775  | 0.129808 | 0.130682 | 0.121941 | 0.128788 | 0.123397 | 0.185169 |
| 0.124126  | 0.133159 | 0.137529 | 0.128205 | 0.133013 | 0.132867 | 0.190851 |
| 0.127185  | 0.139423 | 0.131556 | 0.137092 | 0.142774 | 0.131556 | 0.181381 |
| 0.103875  | 0.120484 | 0.117861 | 0.125146 | 0.129953 | 0.112908 | 0.186043 |
| 0.12602   | 0.129516 | 0.126603 | 0.12602  | 0.131702 | 0.128059 | 0.1875   |
| 0.101399  | 0.117133 | 0.117424 | 0.116841 | 0.120775 | 0.108974 | 0.178904 |
| 0.10708   | 0.112908 | 0.114656 | 0.12398  | 0.133159 | 0.112325 | 0.171766 |
| 0.106498  | 0.113782 | 0.119027 | 0.115822 | 0.12296  | 0.108829 | 0.178759 |
| 0.108392  | 0.122086 | 0.116259 | 0.114802 | 0.121066 | 0.110723 | 0.17803  |
| 0.104312  | 0.11014  | 0.112471 | 0.11655  | 0.124563 | 0.110723 | 0.177739 |
| 0.126603  | 0.130682 | 0.136218 | 0.124272 | 0.131993 | 0.128934 | 0.18954  |
| 0.108392  | 0.12296  | 0.119464 | 0.12704  | 0.135927 | 0.11451  | 0.181527 |
| 0.12704   | 0.137238 | 0.137821 | 0.129079 | 0.13243  | 0.129371 | 0.191725 |
| 0.10373   | 0.117716 | 0.119464 | 0.121212 | 0.128351 | 0.108683 | 0.179487 |
| 0.109703  | 0.122523 | 0.123106 | 0.122815 | 0.131993 | 0.121941 | 0.188957 |
| 0.109557  | 0.130828 | 0.124709 | 0.125583 | 0.135635 | 0.121503 | 0.17803  |
| 0.101399  | 0.123252 | 0.125291 | 0.127331 | 0.134761 | 0.116841 | 0.180361 |
| 0.0995047 | 0.114073 | 0.109703 | 0.121358 | 0.122669 | 0.10912  | 0.181672 |
| 0.105186  | 0.117424 | 0.126748 | 0.131993 | 0.13447  | 0.121212 | 0.178613 |
| 0.11116   | 0.118735 | 0.12602  | 0.130099 | 0.135198 | 0.110577 | 0.184003 |
| 0.103293  | 0.116113 | 0.110286 | 0.119027 | 0.127331 | 0.10912  | 0.176428 |
| 0.114073  | 0.129808 | 0.129516 | 0.130682 | 0.143065 | 0.131265 | 0.190414 |
| 0.119464  | 0.134033 | 0.133741 | 0.131119 | 0.136218 | 0.138695 | 0.192308 |
| 0.0929487 | 0.106061 | 0.112179 | 0.113636 | 0.125437 | 0.1081   | 0.179196 |
| 0.121941  | 0.126894 | 0.135344 | 0.10271  | 0.107226 | 0.130099 | 0.188083 |
| 0.105186  | 0.123252 | 0.12296  | 0.125    | 0.133013 | 0.122669 | 0.185897 |
| 0.120629  | 0.132284 | 0.134324 | 0.10169  | 0.108829 | 0.123543 | 0.185315 |

|           |          |          |          |          |          |          |
|-----------|----------|----------|----------|----------|----------|----------|
| 0.112179  | 0.11859  | 0.122669 | 0.104021 | 0.103584 | 0.114802 | 0.171329 |
| 0.105478  | 0.11859  | 0.125874 | 0.116841 | 0.131265 | 0.116841 | 0.189103 |
| 0.102418  | 0.121358 | 0.120775 | 0.127185 | 0.132576 | 0.116404 | 0.186626 |
| 0.118881  | 0.125    | 0.131993 | 0.110431 | 0.114365 | 0.124126 | 0.189103 |
| 0.126457  | 0.126748 | 0.136946 | 0.109848 | 0.108537 | 0.130245 | 0.185315 |
| 0.104021  | 0.122669 | 0.126748 | 0.127914 | 0.138258 | 0.120629 | 0.189394 |
| 0.109557  | 0.11655  | 0.119172 | 0.104021 | 0.10708  | 0.108974 | 0.171329 |
| 0.120484  | 0.13884  | 0.129225 | 0.141171 | 0.145396 | 0.134761 | 0.18954  |
| 0.108974  | 0.125583 | 0.129371 | 0.129953 | 0.134761 | 0.125874 | 0.193182 |
| 0.0981935 | 0.110723 | 0.112471 | 0.106352 | 0.112325 | 0.104021 | 0.176573 |
| 0.218969  | 0.223631 | 0.223048 | 0.228584 | 0.236305 | 0.215763 | 0.167104 |
| 0.113782  | 0.121358 | 0.13039  | 0.111742 | 0.111888 | 0.116404 | 0.181672 |
| 0.103293  | 0.114073 | 0.117279 | 0.121358 | 0.127622 | 0.113782 | 0.181672 |
| 0.125291  | 0.130828 | 0.136364 | 0.113636 | 0.114073 | 0.129079 | 0.184441 |
| 0.0979021 | 0.117424 | 0.124709 | 0.122086 | 0.130099 | 0.116259 | 0.187063 |
| 0.115093  | 0.134033 | 0.130828 | 0.132867 | 0.136801 | 0.127914 | 0.190268 |
| 0.1081    | 0.120047 | 0.124709 | 0.105478 | 0.105915 | 0.119464 | 0.181818 |
| 0.111451  | 0.120192 | 0.119027 | 0.114656 | 0.117424 | 0.115822 | 0.18109  |
| 0.110577  | 0.127477 | 0.12602  | 0.127477 | 0.136655 | 0.123689 | 0.186917 |
| 0.115093  | 0.131702 | 0.130245 | 0.104895 | 0.112325 | 0.122669 | 0.173951 |
| 0.122523  | 0.130682 | 0.13039  | 0.103001 | 0.108392 | 0.12602  | 0.186917 |
| 0.11451   | 0.123252 | 0.125291 | 0.104895 | 0.106206 | 0.123834 | 0.184732 |
| 0.119464  | 0.11859  | 0.129953 | 0.104312 | 0.113491 | 0.118298 | 0.182401 |
| 0.101399  | 0.123252 | 0.120921 | 0.11859  | 0.127768 | 0.115676 | 0.175991 |
| 0.11014   | 0.117424 | 0.129079 | 0.108974 | 0.112325 | 0.11451  | 0.18211  |
| 0.121649  | 0.132139 | 0.135927 | 0.104458 | 0.11014  | 0.13039  | 0.187209 |
| 0.109848  | 0.122086 | 0.123834 | 0.100524 | 0.103293 | 0.113054 | 0.168415 |
| 0.127622  | 0.132576 | 0.137238 | 0.139569 | 0.146999 | 0.133741 | 0.190851 |
| 0.13447   | 0.139714 | 0.133887 | 0.143211 | 0.157343 | 0.131847 | 0.173805 |
| 0.112034  | 0.128059 | 0.124854 | 0.12398  | 0.132576 | 0.116113 | 0.17264  |
| 0.111742  | 0.124563 | 0.130973 | 0.13039  | 0.13549  | 0.127477 | 0.188083 |
| 0.126457  | 0.123252 | 0.125874 | 0.121212 | 0.126894 | 0.120921 | 0.171329 |
| 0.11553   | 0.130973 | 0.122232 | 0.127185 | 0.136364 | 0.128351 | 0.181964 |
| 0.124854  | 0.133596 | 0.127768 | 0.13884  | 0.145688 | 0.126603 | 0.179633 |
| 0.133887  | 0.135927 | 0.135927 | 0.144959 | 0.155303 | 0.131847 | 0.185752 |
| 0.092366  | 0.113054 | 0.116259 | 0.118007 | 0.127185 | 0.105478 | 0.175117 |
| 0.118153  | 0.128934 | 0.137675 | 0.131556 | 0.142483 | 0.125437 | 0.181964 |
| 0.13986   | 0.145105 | 0.142774 | 0.149184 | 0.160402 | 0.133741 | 0.175991 |
| 0.105478  | 0.115093 | 0.104312 | 0.109266 | 0.118444 | 0.112471 | 0.176573 |
| 0.115385  | 0.123252 | 0.12704  | 0.134324 | 0.141754 | 0.121503 | 0.179779 |
| 0.128059  | 0.141171 | 0.137675 | 0.14729  | 0.145396 | 0.144085 | 0.191288 |
| 0.116987  | 0.129808 | 0.134761 | 0.135052 | 0.144231 | 0.130682 | 0.191871 |
| 0.119755  | 0.140443 | 0.147145 | 0.143357 | 0.146999 | 0.1419   | 0.197552 |
| 0.113782  | 0.13243  | 0.132139 | 0.128934 | 0.13549  | 0.125728 | 0.188957 |

|          |          |          |           |           |          |          |
|----------|----------|----------|-----------|-----------|----------|----------|
| 0.121212 | 0.120338 | 0.113345 | 0.100233  | 0.100087  | 0.119172 | 0.181527 |
| 0.126603 | 0.129808 | 0.133304 | 0.127185  | 0.138986  | 0.119027 | 0.182838 |
| 0.109266 | 0.124709 | 0.115967 | 0.118007  | 0.120775  | 0.111014 | 0.17162  |
| 0.121066 | 0.123397 | 0.122815 | 0.0913462 | 0.0938228 | 0.119901 | 0.184295 |
| 0.117279 | 0.122523 | 0.129225 | 0.101544  | 0.106352  | 0.125146 | 0.182547 |
| 0.124854 | 0.121066 | 0.12398  | 0.0922203 | 0.099359  | 0.130682 | 0.184878 |
| 0.12602  | 0.121649 | 0.121358 | 0.090472  | 0.0938228 | 0.116113 | 0.175554 |
| 0.125146 | 0.127768 | 0.123106 | 0.101544  | 0.105769  | 0.116404 | 0.177593 |
| 0.141463 | 0.137675 | 0.130973 | 0.100962  | 0.106935  | 0.128351 | 0.177302 |
| 0.10708  | 0.119318 | 0.122232 | 0.125728  | 0.135781  | 0.118444 | 0.17701  |
| 0.115239 | 0.112908 | 0.116113 | 0.116987  | 0.123834  | 0.113782 | 0.181381 |
| 0.126603 | 0.112034 | 0.114073 | 0.117861  | 0.124709  | 0.114073 | 0.17701  |
| 0.110577 | 0.107663 | 0.110868 | 0.109703  | 0.117424  | 0.104749 | 0.169435 |
| 0.139569 | 0.136655 | 0.136655 | 0.133741  | 0.14933   | 0.126748 | 0.186189 |
| 0.148019 | 0.148893 | 0.138986 | 0.141317  | 0.144668  | 0.138695 | 0.188811 |
| 0.118007 | 0.129662 | 0.12704  | 0.128788  | 0.137383  | 0.130536 | 0.191434 |
| 0.110286 | 0.12398  | 0.124563 | 0.122523  | 0.129371  | 0.115822 | 0.185752 |
| 0.119755 | 0.128497 | 0.134033 | 0.117424  | 0.120192  | 0.13141  | 0.191142 |
| 0.123689 | 0.123397 | 0.137092 | 0.117279  | 0.121503  | 0.127477 | 0.184295 |
| 0.114365 | 0.123397 | 0.129225 | 0.135052  | 0.145105  | 0.12602  | 0.189831 |
| 0.126311 | 0.131847 | 0.136218 | 0.107955  | 0.11451   | 0.133013 | 0.192745 |
| 0.129808 | 0.137092 | 0.135052 | 0.128351  | 0.137821  | 0.124854 | 0.180507 |
| 0.112179 | 0.126457 | 0.127331 | 0.131119  | 0.135635  | 0.124709 | 0.185897 |
| 0.152681 | 0.150932 | 0.148019 | 0.155594  | 0.15778   | 0.152681 | 0.199009 |
| 0.111888 | 0.124709 | 0.132576 | 0.128788  | 0.13447   | 0.124417 | 0.188228 |
| 0.125    | 0.139277 | 0.138403 | 0.138403  | 0.14292   | 0.132867 | 0.192016 |
| 0.118153 | 0.116987 | 0.118735 | 0.114073  | 0.126457  | 0.120484 | 0.184295 |
| 0.122232 | 0.128351 | 0.135344 | 0.112617  | 0.120338  | 0.132721 | 0.198572 |
| 0.113782 | 0.12398  | 0.122815 | 0.0986305 | 0.114219  | 0.117861 | 0.174971 |
| 0.132284 | 0.138986 | 0.132284 | 0.151515  | 0.155449  | 0.119464 | 0.1588   |
| 0.137966 | 0.148164 | 0.150204 | 0.13447   | 0.138986  | 0.142045 | 0.195659 |
| 0.122086 | 0.130828 | 0.130828 | 0.1419    | 0.141171  | 0.126457 | 0.184732 |
| 0.130973 | 0.139423 | 0.142337 | 0.144959  | 0.150641  | 0.135635 | 0.165064 |
| 0.140152 | 0.157051 | 0.155303 | 0.158508  | 0.161568  | 0.141026 | 0.152389 |
| 0.140443 | 0.150641 | 0.154138 | 0.159382  | 0.163316  | 0.138403 | 0.157343 |
| 0.107955 | 0.11757  | 0.113199 | 0.118735  | 0.118007  | 0.118735 | 0.179341 |
| 0.129662 | 0.141026 | 0.141026 | 0.13986   | 0.148747  | 0.109557 | 0.18648  |
| 0.112471 | 0.11859  | 0.120629 | 0.124417  | 0.130682  | 0.112179 | 0.178322 |
| 0.106206 | 0.123689 | 0.128642 | 0.120192  | 0.127622  | 0.114365 | 0.174388 |
| 0.113928 | 0.12296  | 0.122378 | 0.125     | 0.135635  | 0.119172 | 0.174825 |
| 0.117133 | 0.12704  | 0.131702 | 0.136946  | 0.137383  | 0.120921 | 0.181818 |
| 0.109994 | 0.126894 | 0.122232 | 0.126311  | 0.131993  | 0.116987 | 0.184295 |
| 0.108537 | 0.124854 | 0.127477 | 0.131556  | 0.127914  | 0.10912  | 0.171183 |
| 0.109411 | 0.130099 | 0.13039  | 0.130682  | 0.141026  | 0.120775 | 0.1875   |

|           |          |          |          |          |           |          |
|-----------|----------|----------|----------|----------|-----------|----------|
| 0.11655   | 0.124709 | 0.129079 | 0.130245 | 0.137383 | 0.120047  | 0.170455 |
| 0.0999417 | 0.113928 | 0.112471 | 0.116259 | 0.127477 | 0.106643  | 0.171037 |
| 0.120629  | 0.131993 | 0.133159 | 0.142191 | 0.142045 | 0.121503  | 0.184149 |
| 0.113782  | 0.127477 | 0.13243  | 0.13884  | 0.140443 | 0.123397  | 0.184878 |
| 0.116696  | 0.128642 | 0.126311 | 0.128642 | 0.134324 | 0.124563  | 0.182838 |
| 0.216638  | 0.227127 | 0.220425 | 0.224505 | 0.232809 | 0.209353  | 0.158654 |
| 0.142337  | 0.145251 | 0.14933  | 0.146416 | 0.148893 | 0.14729   | 0.194493 |
| 0.124126  | 0.132284 | 0.13549  | 0.137529 | 0.14292  | 0.129079  | 0.192308 |
| 0.118153  | 0.131265 | 0.130973 | 0.134178 | 0.143648 | 0.122232  | 0.181964 |
| 0.21285   | 0.217803 | 0.216929 | 0.222174 | 0.230186 | 0.206148  | 0.153992 |
| 0.117861  | 0.127185 | 0.121066 | 0.133304 | 0.138403 | 0.113199  | 0.168852 |
| 0.111597  | 0.125874 | 0.125583 | 0.132576 | 0.140297 | 0.118881  | 0.182984 |
| 0.114802  | 0.129079 | 0.124126 | 0.132284 | 0.144376 | 0.11451   | 0.179779 |
| 0.114073  | 0.123689 | 0.127185 | 0.128351 | 0.137529 | 0.119318  | 0.18109  |
| 0.252477  | 0.253934 | 0.253642 | 0.256265 | 0.267191 | 0.245484  | 0.177885 |
| 0.120047  | 0.120047 | 0.110431 | 0.135781 | 0.141171 | 0.111888  | 0.17803  |
| 0.109266  | 0.126166 | 0.122378 | 0.126166 | 0.131265 | 0.117716  | 0.182692 |
| 0.122378  | 0.127914 | 0.130536 | 0.123543 | 0.135052 | 0.123252  | 0.18648  |
| 0.117424  | 0.125    | 0.129371 | 0.127622 | 0.134178 | 0.11859   | 0.182984 |
| 0.124126  | 0.121795 | 0.113054 | 0.134615 | 0.139714 | 0.114219  | 0.166667 |
| 0.124126  | 0.137529 | 0.13345  | 0.137238 | 0.143502 | 0.117133  | 0.162587 |
| 0.11014   | 0.125291 | 0.123543 | 0.128497 | 0.130099 | 0.120047  | 0.181527 |
| 0.114365  | 0.126603 | 0.129808 | 0.13884  | 0.137821 | 0.121358  | 0.180798 |
| 0.117133  | 0.134033 | 0.130828 | 0.135198 | 0.139714 | 0.0999417 | 0.181235 |
| 0.108392  | 0.11859  | 0.12704  | 0.123543 | 0.133013 | 0.118007  | 0.18007  |
| 0.11553   | 0.124854 | 0.127768 | 0.133887 | 0.13345  | 0.119027  | 0.17905  |
| 0.0981935 | 0.111597 | 0.114802 | 0.116841 | 0.125146 | 0.108683  | 0.171037 |
| 0.139714  | 0.147873 | 0.151952 | 0.13243  | 0.141317 | 0.139714  | 0.196241 |
| 0.121066  | 0.120192 | 0.109994 | 0.136801 | 0.145688 | 0.110577  | 0.174679 |
| 0.117861  | 0.131265 | 0.132139 | 0.134761 | 0.140443 | 0.122523  | 0.184003 |
| 0.188666  | 0.198572 | 0.196824 | 0.203817 | 0.213287 | 0.184878  | 0.151952 |
| 0.204108  | 0.214015 | 0.214015 | 0.216055 | 0.225233 | 0.199155  | 0.154575 |
| 0.11553   | 0.125437 | 0.130099 | 0.133596 | 0.139569 | 0.117861  | 0.176719 |
| 0.108246  | 0.119318 | 0.123689 | 0.124563 | 0.130245 | 0.112908  | 0.176428 |
| 0.133887  | 0.139132 | 0.137966 | 0.131556 | 0.143065 | 0.134178  | 0.17905  |
| 0.110577  | 0.126603 | 0.123397 | 0.126894 | 0.131702 | 0.119027  | 0.180798 |
| 0.121795  | 0.122378 | 0.108683 | 0.13986  | 0.14729  | 0.111888  | 0.176865 |
| 0.123397  | 0.128934 | 0.131556 | 0.121941 | 0.126457 | 0.131265  | 0.179633 |
| 0.224213  | 0.230915 | 0.229167 | 0.23208  | 0.244464 | 0.220425  | 0.170892 |
| 0.108537  | 0.122815 | 0.126603 | 0.130973 | 0.136364 | 0.116404  | 0.184295 |
| 0.207168  | 0.214452 | 0.214161 | 0.210956 | 0.218386 | 0.197844  | 0.153263 |
| 0.0980478 | 0.112034 | 0.107663 | 0.116113 | 0.117424 | 0.105915  | 0.181964 |
| 0.104604  | 0.119755 | 0.119464 | 0.124126 | 0.131847 | 0.111014  | 0.179779 |
| 0.116696  | 0.123397 | 0.123689 | 0.13039  | 0.129953 | 0.108537  | 0.169726 |

|          |          |          |          |          |          |          |
|----------|----------|----------|----------|----------|----------|----------|
| 0.106498 | 0.118153 | 0.123106 | 0.124563 | 0.131993 | 0.110868 | 0.172057 |
| 0.205711 | 0.218531 | 0.212121 | 0.217657 | 0.224796 | 0.201049 | 0.157343 |
| 0.127914 | 0.134615 | 0.141026 | 0.147145 | 0.146416 | 0.134615 | 0.180653 |
| 0.108683 | 0.11655  | 0.11451  | 0.125583 | 0.13243  | 0.109848 | 0.182401 |
| 0.122669 | 0.132867 | 0.13549  | 0.140152 | 0.141463 | 0.129079 | 0.184732 |
| 0.105478 | 0.134324 | 0.129953 | 0.126748 | 0.136218 | 0.127622 | 0.18648  |
| 0.105478 | 0.119172 | 0.125583 | 0.131119 | 0.135344 | 0.116841 | 0.180361 |
| 0.100962 | 0.112034 | 0.108537 | 0.116404 | 0.112762 | 0.108246 | 0.178759 |
| 0.112617 | 0.13039  | 0.126311 | 0.126603 | 0.129371 | 0.113491 | 0.170309 |
| 0.115239 | 0.131265 | 0.127768 | 0.135052 | 0.138986 | 0.12398  | 0.186043 |
| 0.109994 | 0.120775 | 0.128934 | 0.133013 | 0.133741 | 0.114656 | 0.177302 |
| 0.108974 | 0.120338 | 0.115093 | 0.125291 | 0.129808 | 0.109266 | 0.180653 |
| 0.188083 | 0.197115 | 0.197407 | 0.203234 | 0.214452 | 0.184586 | 0.150495 |
| 0.121795 | 0.127331 | 0.132867 | 0.125291 | 0.136509 | 0.122086 | 0.185023 |
| 0.12398  | 0.133887 | 0.137092 | 0.123397 | 0.131702 | 0.125146 | 0.190997 |
| 0.11859  | 0.123834 | 0.129371 | 0.125    | 0.136509 | 0.120629 | 0.185315 |
| 0.121941 | 0.122523 | 0.10912  | 0.135344 | 0.142483 | 0.104749 | 0.167978 |
| 0.118444 | 0.128934 | 0.13243  | 0.140297 | 0.138695 | 0.126311 | 0.185169 |
| 0.101544 | 0.114365 | 0.108537 | 0.115822 | 0.117716 | 0.111451 | 0.180798 |
| 0.102273 | 0.122669 | 0.114219 | 0.123252 | 0.130099 | 0.111014 | 0.172203 |
| 0.117424 | 0.130245 | 0.125583 | 0.128497 | 0.131265 | 0.124126 | 0.185897 |
| 0.117279 | 0.127477 | 0.137092 | 0.127185 | 0.134033 | 0.118153 | 0.186626 |
| 0.113782 | 0.124563 | 0.128934 | 0.125728 | 0.136946 | 0.115239 | 0.183129 |
| 0.113345 | 0.122378 | 0.128788 | 0.131119 | 0.136509 | 0.116841 | 0.180361 |
| 0.114948 | 0.128934 | 0.126311 | 0.134178 | 0.141026 | 0.112034 | 0.185752 |
| 0.126166 | 0.138986 | 0.132576 | 0.138986 | 0.147582 | 0.123543 | 0.189685 |
| 0.111305 | 0.120047 | 0.106061 | 0.128497 | 0.13447  | 0.101981 | 0.175117 |
| 0.137092 | 0.142337 | 0.14729  | 0.143502 | 0.145979 | 0.14292  | 0.190705 |
| 0.107663 | 0.121066 | 0.127477 | 0.13039  | 0.133159 | 0.115822 | 0.17701  |
| 0.110286 | 0.119027 | 0.121649 | 0.120484 | 0.120047 | 0.117861 | 0.178176 |
| 0.117424 | 0.127331 | 0.131993 | 0.138112 | 0.139714 | 0.120047 | 0.163753 |
| 0.11655  | 0.130828 | 0.125291 | 0.132867 | 0.136801 | 0.12704  | 0.183858 |
| 0.191434 | 0.201632 | 0.194639 | 0.201632 | 0.209936 | 0.187354 | 0.148601 |
| 0.101836 | 0.112034 | 0.113491 | 0.120484 | 0.12704  | 0.104458 | 0.176719 |
| 0.103001 | 0.11116  | 0.118444 | 0.120775 | 0.13141  | 0.107372 | 0.174971 |
| 0.114073 | 0.128059 | 0.126311 | 0.131265 | 0.141317 | 0.120484 | 0.183129 |
| 0.174971 | 0.194493 | 0.191288 | 0.194202 | 0.198718 | 0.173514 | 0.144668 |
| 0.130245 | 0.131119 | 0.11655  | 0.144522 | 0.151078 | 0.120338 | 0.17803  |
| 0.138695 | 0.136946 | 0.120921 | 0.143939 | 0.15574  | 0.131119 | 0.182984 |
| 0.140006 | 0.149038 | 0.152535 | 0.135344 | 0.141608 | 0.142628 | 0.196533 |
| 0.109411 | 0.114073 | 0.107663 | 0.126603 | 0.134324 | 0.101836 | 0.1706   |
| 0.120921 | 0.130536 | 0.132576 | 0.141026 | 0.140589 | 0.12704  | 0.181818 |
| 0.211393 | 0.217803 | 0.216346 | 0.225962 | 0.232517 | 0.207022 | 0.157488 |
| 0.117861 | 0.13447  | 0.134761 | 0.13884  | 0.146562 | 0.123106 | 0.179924 |

|           |          |          |          |          |           |          |
|-----------|----------|----------|----------|----------|-----------|----------|
| 0.124709  | 0.13345  | 0.137529 | 0.1419   | 0.142337 | 0.131119  | 0.185606 |
| 0.109557  | 0.118298 | 0.11655  | 0.123252 | 0.129516 | 0.110431  | 0.177156 |
| 0.164627  | 0.182401 | 0.177448 | 0.181527 | 0.1875   | 0.161131  | 0.148601 |
| 0.108392  | 0.122086 | 0.123543 | 0.127622 | 0.13243  | 0.112762  | 0.17366  |
| 0.140297  | 0.151661 | 0.150204 | 0.144959 | 0.153263 | 0.125728  | 0.190705 |
| 0.111742  | 0.118735 | 0.119318 | 0.121358 | 0.13345  | 0.119318  | 0.168269 |
| 0.188957  | 0.201486 | 0.196533 | 0.201777 | 0.208042 | 0.185752  | 0.154283 |
| 0.116696  | 0.118153 | 0.107955 | 0.131847 | 0.138695 | 0.105041  | 0.174971 |
| 0.0901807 | 0.114656 | 0.118153 | 0.12398  | 0.129662 | 0.107372  | 0.181672 |
| 0.114802  | 0.123543 | 0.124417 | 0.127914 | 0.126311 | 0.118007  | 0.183566 |
| 0.110577  | 0.131265 | 0.124272 | 0.129225 | 0.139277 | 0.117279  | 0.186043 |
| 0.110868  | 0.125728 | 0.126311 | 0.131556 | 0.138403 | 0.118153  | 0.182838 |
| 0.119027  | 0.130099 | 0.131556 | 0.128351 | 0.136364 | 0.114656  | 0.18109  |
| 0.106061  | 0.119172 | 0.123252 | 0.127622 | 0.134178 | 0.113928  | 0.18007  |
| 0.190414  | 0.195659 | 0.195367 | 0.201486 | 0.212121 | 0.184003  | 0.149913 |
| 0.115676  | 0.129079 | 0.123252 | 0.129662 | 0.13884  | 0.110431  | 0.184441 |
| 0.101836  | 0.124272 | 0.127477 | 0.129516 | 0.134033 | 0.122523  | 0.17701  |
| 0.211247  | 0.220571 | 0.217657 | 0.224068 | 0.229458 | 0.204545  | 0.154429 |
| 0.12296   | 0.127914 | 0.131119 | 0.12704  | 0.137383 | 0.122669  | 0.183858 |
| 0.107372  | 0.119901 | 0.124563 | 0.126894 | 0.134033 | 0.114656  | 0.18109  |
| 0.104749  | 0.113782 | 0.12398  | 0.121941 | 0.128788 | 0.11553   | 0.174971 |
| 0.13345   | 0.138986 | 0.143939 | 0.143648 | 0.147873 | 0.135781  | 0.185897 |
| 0.187646  | 0.197261 | 0.194056 | 0.203963 | 0.212558 | 0.185023  | 0.155303 |
| 0.11116   | 0.128351 | 0.123106 | 0.125146 | 0.134324 | 0.120775  | 0.187791 |
| 0.122232  | 0.133887 | 0.128642 | 0.136801 | 0.145105 | 0.11757   | 0.187209 |
| 0.10708   | 0.120484 | 0.125146 | 0.125728 | 0.134324 | 0.110577  | 0.179341 |
| 0.108246  | 0.118735 | 0.124272 | 0.127185 | 0.133741 | 0.113199  | 0.178759 |
| 0.106643  | 0.117133 | 0.122378 | 0.125291 | 0.132139 | 0.11014   | 0.17366  |
| 0.113491  | 0.124272 | 0.128059 | 0.135635 | 0.13345  | 0.11961   | 0.183712 |
| 0.097028  | 0.111305 | 0.11014  | 0.118007 | 0.126311 | 0.105769  | 0.172494 |
| 0.122669  | 0.116841 | 0.110431 | 0.133741 | 0.143211 | 0.108974  | 0.177739 |
| 0.125     | 0.136364 | 0.134907 | 0.127914 | 0.132721 | 0.130828  | 0.192016 |
| 0.115676  | 0.11859  | 0.11014  | 0.131119 | 0.140006 | 0.107226  | 0.174534 |
| 0.111742  | 0.137966 | 0.132721 | 0.128059 | 0.135781 | 0.13243   | 0.188666 |
| 0.192599  | 0.20338  | 0.198135 | 0.207168 | 0.216638 | 0.187646  | 0.157343 |
| 0.11116   | 0.124272 | 0.121066 | 0.13039  | 0.141026 | 0.109994  | 0.181964 |
| 0.12704   | 0.13141  | 0.140152 | 0.141026 | 0.144376 | 0.134033  | 0.186189 |
| 0.106206  | 0.11757  | 0.120484 | 0.125437 | 0.130536 | 0.112908  | 0.177593 |
| 0.0984848 | 0.107517 | 0.110431 | 0.115967 | 0.127768 | 0.10373   | 0.170746 |
| 0.112179  | 0.124709 | 0.117716 | 0.125583 | 0.129225 | 0.0725524 | 0.163462 |
| 0.111451  | 0.127477 | 0.123689 | 0.124854 | 0.132576 | 0.122815  | 0.184295 |
| 0.124854  | 0.130973 | 0.138549 | 0.131847 | 0.144522 | 0.13039   | 0.188083 |
| 0.117716  | 0.128788 | 0.136072 | 0.129662 | 0.13447  | 0.11655   | 0.187937 |
| 0.108974  | 0.121795 | 0.120338 | 0.120338 | 0.128934 | 0.111305  | 0.169872 |

|           |          |          |          |          |          |          |
|-----------|----------|----------|----------|----------|----------|----------|
| 0.101836  | 0.118735 | 0.115239 | 0.11553  | 0.125    | 0.10271  | 0.168269 |
| 0.0955711 | 0.117424 | 0.119172 | 0.122086 | 0.128642 | 0.105186 | 0.172786 |
| 0.100379  | 0.114365 | 0.105624 | 0.11757  | 0.117716 | 0.10708  | 0.17905  |
| 0.124709  | 0.121212 | 0.113054 | 0.138986 | 0.147582 | 0.115385 | 0.180361 |
| 0.108829  | 0.128642 | 0.123106 | 0.129808 | 0.132867 | 0.11961  | 0.1875   |
| 0.111014  | 0.125874 | 0.126166 | 0.132576 | 0.13447  | 0.117716 | 0.176865 |
| 0.106352  | 0.123543 | 0.117716 | 0.125    | 0.128642 | 0.113054 | 0.18211  |
| 0.103293  | 0.119318 | 0.12398  | 0.125437 | 0.133741 | 0.114656 | 0.179633 |
| 0.104021  | 0.109848 | 0.109848 | 0.121503 | 0.128059 | 0.104604 | 0.177156 |
| 0.106935  | 0.119755 | 0.126166 | 0.127914 | 0.136218 | 0.116259 | 0.180653 |
| 0.107517  | 0.122086 | 0.120047 | 0.129662 | 0.13884  | 0.103438 | 0.18007  |
| 0.117133  | 0.126166 | 0.132284 | 0.123834 | 0.129516 | 0.116259 | 0.188811 |
| 0.109848  | 0.122378 | 0.124709 | 0.13345  | 0.13884  | 0.112762 | 0.181527 |
| 0.103293  | 0.113199 | 0.114948 | 0.119318 | 0.127331 | 0.108246 | 0.174097 |
| 0.106352  | 0.119172 | 0.127914 | 0.125583 | 0.135052 | 0.11655  | 0.179487 |
| 0.119464  | 0.126748 | 0.129953 | 0.130245 | 0.131265 | 0.121212 | 0.171329 |
| 0.109703  | 0.132721 | 0.128934 | 0.136218 | 0.138695 | 0.121358 | 0.186043 |
| 0.0929487 | 0.118298 | 0.118007 | 0.115676 | 0.12398  | 0.109557 | 0.181527 |
| 0.105478  | 0.120047 | 0.123543 | 0.123543 | 0.128351 | 0.112471 | 0.180944 |
| 0.116404  | 0.128059 | 0.131556 | 0.135344 | 0.137529 | 0.12398  | 0.178759 |
| 0.101544  | 0.112617 | 0.105041 | 0.118153 | 0.118881 | 0.105624 | 0.176719 |
| 0.116404  | 0.129808 | 0.131265 | 0.137092 | 0.139569 | 0.123689 | 0.18546  |
| 0.110577  | 0.125146 | 0.125146 | 0.128642 | 0.136072 | 0.116696 | 0.18109  |
| 0.105332  | 0.115822 | 0.114365 | 0.121941 | 0.129662 | 0.108246 | 0.174097 |
| 0.108537  | 0.124272 | 0.114073 | 0.128642 | 0.13549  | 0.11116  | 0.176136 |
| 0.103438  | 0.113345 | 0.110723 | 0.122378 | 0.128934 | 0.101981 | 0.18007  |
| 0.11757   | 0.130973 | 0.134178 | 0.142045 | 0.144231 | 0.124563 | 0.185169 |
| 0.106498  | 0.130973 | 0.131847 | 0.133887 | 0.138112 | 0.121358 | 0.188666 |
| 0.104604  | 0.122669 | 0.125874 | 0.131119 | 0.136218 | 0.11451  | 0.182692 |
| 0.193473  | 0.199883 | 0.197844 | 0.207751 | 0.215181 | 0.185897 | 0.152681 |
| 0.158217  | 0.178322 | 0.176865 | 0.175408 | 0.186043 | 0.159674 | 0.14831  |
| 0.117716  | 0.120921 | 0.106061 | 0.133159 | 0.141754 | 0.105478 | 0.174242 |
| 0.114073  | 0.133596 | 0.129516 | 0.129516 | 0.134615 | 0.116404 | 0.177302 |
| 0.14729   | 0.139423 | 0.123689 | 0.145542 | 0.153846 | 0.133013 | 0.187209 |
| 0.117716  | 0.134907 | 0.132284 | 0.134033 | 0.140297 | 0.10169  | 0.184441 |
| 0.116696  | 0.131265 | 0.130099 | 0.132721 | 0.138695 | 0.101253 | 0.171766 |
| 0.109848  | 0.126166 | 0.127914 | 0.132867 | 0.134761 | 0.110431 | 0.174825 |
| 0.0958625 | 0.109266 | 0.115385 | 0.119755 | 0.127477 | 0.107809 | 0.17366  |
| 0.106352  | 0.131119 | 0.131702 | 0.131702 | 0.136218 | 0.122378 | 0.18648  |
| 0.198572  | 0.208188 | 0.206731 | 0.217803 | 0.224068 | 0.194784 | 0.157197 |
| 0.11451   | 0.131993 | 0.126748 | 0.129953 | 0.133304 | 0.124126 | 0.186772 |
| 0.115239  | 0.128934 | 0.128642 | 0.134761 | 0.136072 | 0.118444 | 0.174097 |
| 0.0986305 | 0.121649 | 0.126311 | 0.126894 | 0.131119 | 0.110286 | 0.176428 |
| 0.101107  | 0.131119 | 0.129079 | 0.129079 | 0.136509 | 0.118881 | 0.187937 |



|           |          |          |           |           |          |          |
|-----------|----------|----------|-----------|-----------|----------|----------|
| 0.179924  | 0.197407 | 0.196241 | 0.200029  | 0.205128  | 0.177885 | 0.152535 |
| 0.249272  | 0.252185 | 0.248689 | 0.253059  | 0.261655  | 0.241113 | 0.174097 |
| 0.118735  | 0.13039  | 0.135635 | 0.123397  | 0.13345   | 0.115822 | 0.189248 |
| 0.105624  | 0.13039  | 0.131265 | 0.134178  | 0.13549   | 0.120775 | 0.184003 |
| 0.11757   | 0.122232 | 0.109411 | 0.132721  | 0.13986   | 0.106789 | 0.173223 |
| 0.109266  | 0.122378 | 0.118007 | 0.130828  | 0.136218  | 0.113345 | 0.179779 |
| 0.108537  | 0.125437 | 0.122815 | 0.122815  | 0.128205  | 0.118735 | 0.181964 |
| 0.105186  | 0.124126 | 0.120921 | 0.123543  | 0.132721  | 0.105478 | 0.181527 |
| 0.110577  | 0.126311 | 0.128059 | 0.131847  | 0.132576  | 0.112325 | 0.169143 |
| 0.107372  | 0.127185 | 0.122815 | 0.125437  | 0.130536  | 0.116987 | 0.183712 |
| 0.113054  | 0.12296  | 0.125583 | 0.130245  | 0.129225  | 0.111597 | 0.16958  |
| 0.095134  | 0.121358 | 0.122523 | 0.122232  | 0.13141   | 0.113491 | 0.187209 |
| 0.101107  | 0.111597 | 0.113054 | 0.119755  | 0.129516  | 0.106935 | 0.173368 |
| 0.119318  | 0.127768 | 0.135052 | 0.125146  | 0.130828  | 0.116696 | 0.184878 |
| 0.115967  | 0.129662 | 0.129662 | 0.136655  | 0.138258  | 0.120338 | 0.185897 |
| 0.0979021 | 0.113345 | 0.114802 | 0.113636  | 0.115822  | 0.108974 | 0.177448 |
| 0.119464  | 0.117133 | 0.120921 | 0.0885781 | 0.0992133 | 0.118298 | 0.175991 |
| 0.123543  | 0.132867 | 0.131993 | 0.133741  | 0.140589  | 0.128788 | 0.189685 |
| 0.107372  | 0.120192 | 0.125437 | 0.124272  | 0.133159  | 0.114656 | 0.181381 |
| 0.115385  | 0.123543 | 0.121212 | 0.123543  | 0.128642  | 0.108392 | 0.16317  |
| 0.120338  | 0.127914 | 0.130245 | 0.131993  | 0.137092  | 0.130536 | 0.182984 |
| 0.210519  | 0.214598 | 0.209062 | 0.218969  | 0.224068  | 0.202652 | 0.156614 |
| 0.106352  | 0.121795 | 0.12296  | 0.119172  | 0.126311  | 0.107809 | 0.180653 |
| 0.10271   | 0.112034 | 0.113782 | 0.118153  | 0.127622  | 0.106498 | 0.173514 |
| 0.112325  | 0.127185 | 0.124272 | 0.134761  | 0.143939  | 0.10708  | 0.181672 |
| 0.12296   | 0.125583 | 0.13141  | 0.129953  | 0.13884   | 0.121503 | 0.186189 |
| 0.0984848 | 0.128205 | 0.124709 | 0.125583  | 0.135635  | 0.120921 | 0.185023 |
| 0.196678  | 0.20979  | 0.206585 | 0.213287  | 0.223339  | 0.194639 | 0.158217 |
| 0.120192  | 0.128642 | 0.132139 | 0.142628  | 0.142483  | 0.122232 | 0.186334 |
| 0.104021  | 0.118881 | 0.121795 | 0.12296   | 0.129808  | 0.111305 | 0.175991 |
| 0.105624  | 0.127185 | 0.120775 | 0.125437  | 0.133741  | 0.122815 | 0.186334 |
| 0.108246  | 0.121066 | 0.11961  | 0.128351  | 0.136946  | 0.114073 | 0.181381 |
| 0.119027  | 0.129225 | 0.133596 | 0.139423  | 0.139569  | 0.121358 | 0.180798 |
| 0.104749  | 0.122523 | 0.121941 | 0.122815  | 0.123834  | 0.113782 | 0.174097 |
| 0.0965909 | 0.120775 | 0.120775 | 0.122232  | 0.130245  | 0.113199 | 0.184878 |
| 0.114656  | 0.127768 | 0.125728 | 0.126311  | 0.134615  | 0.118735 | 0.186334 |
| 0.199301  | 0.207168 | 0.205128 | 0.212995  | 0.220717  | 0.193182 | 0.157343 |
| 0.105624  | 0.120775 | 0.124272 | 0.128934  | 0.130828  | 0.113491 | 0.174971 |
| 0.194639  | 0.20338  | 0.202506 | 0.210664  | 0.21722   | 0.189977 | 0.156469 |
| 0.189248  | 0.20236  | 0.199446 | 0.207022  | 0.212413  | 0.188083 | 0.153118 |
| 0.116404  | 0.128351 | 0.126894 | 0.132139  | 0.143648  | 0.12602  | 0.188957 |
| 0.128059  | 0.127768 | 0.134178 | 0.127477  | 0.134033  | 0.129808 | 0.186334 |
| 0.0930944 | 0.11553  | 0.114365 | 0.112325  | 0.12296   | 0.108246 | 0.174679 |
| 0.107809  | 0.120921 | 0.124417 | 0.129371  | 0.129516  | 0.114802 | 0.179779 |

|           |          |          |          |          |          |          |
|-----------|----------|----------|----------|----------|----------|----------|
| 0.114073  | 0.126603 | 0.126603 | 0.135635 | 0.134615 | 0.117279 | 0.182547 |
| 0.106789  | 0.122523 | 0.126603 | 0.129516 | 0.134324 | 0.11757  | 0.180216 |
| 0.10271   | 0.11961  | 0.119027 | 0.11961  | 0.124417 | 0.114656 | 0.180798 |
| 0.107955  | 0.124854 | 0.121941 | 0.127185 | 0.129371 | 0.120192 | 0.184003 |
| 0.120047  | 0.131702 | 0.137238 | 0.126748 | 0.13447  | 0.123252 | 0.185606 |
| 0.112325  | 0.126311 | 0.122523 | 0.130973 | 0.142191 | 0.118153 | 0.184586 |
| 0.103438  | 0.115093 | 0.118298 | 0.118007 | 0.13039  | 0.109848 | 0.175408 |
| 0.11757   | 0.126311 | 0.131847 | 0.137092 | 0.13986  | 0.121941 | 0.182255 |
| 0.0879953 | 0.111888 | 0.114802 | 0.119755 | 0.123689 | 0.105186 | 0.176282 |
| 0.127477  | 0.129516 | 0.136509 | 0.139132 | 0.139569 | 0.131265 | 0.182255 |
| 0.114365  | 0.120192 | 0.10708  | 0.131556 | 0.138695 | 0.104167 | 0.174388 |
| 0.129662  | 0.140152 | 0.142191 | 0.143065 | 0.147582 | 0.13549  | 0.189103 |
| 0.26049   | 0.263112 | 0.263112 | 0.265152 | 0.273164 | 0.253497 | 0.185897 |
| 0.122086  | 0.123543 | 0.118007 | 0.12296  | 0.129225 | 0.120338 | 0.182984 |
| 0.116404  | 0.127185 | 0.12602  | 0.127185 | 0.13549  | 0.124563 | 0.184003 |
| 0.219697  | 0.224942 | 0.222611 | 0.227564 | 0.237617 | 0.210956 | 0.164627 |
| 0.121649  | 0.133013 | 0.131556 | 0.128059 | 0.138112 | 0.126311 | 0.186626 |
| 0.229167  | 0.238491 | 0.235577 | 0.237617 | 0.245338 | 0.224213 | 0.169726 |
| 0.110723  | 0.11655  | 0.113636 | 0.122086 | 0.126894 | 0.112471 | 0.178904 |
| 0.116404  | 0.127185 | 0.135635 | 0.132139 | 0.138986 | 0.125728 | 0.186043 |
| 0.112034  | 0.121649 | 0.127477 | 0.126894 | 0.13345  | 0.111742 | 0.187209 |
| 0.117279  | 0.130099 | 0.124854 | 0.132721 | 0.138403 | 0.122523 | 0.186334 |
| 0.203234  | 0.210519 | 0.209062 | 0.215763 | 0.224942 | 0.197698 | 0.156906 |
| 0.127768  | 0.135344 | 0.13884  | 0.14292  | 0.142191 | 0.134761 | 0.188957 |
| 0.116696  | 0.127768 | 0.130973 | 0.139132 | 0.13986  | 0.121358 | 0.186334 |
| 0.224068  | 0.2331   | 0.231061 | 0.237179 | 0.244901 | 0.222028 | 0.168706 |
| 0.109994  | 0.126894 | 0.127477 | 0.129516 | 0.134324 | 0.120192 | 0.185169 |
| 0.199009  | 0.208333 | 0.205711 | 0.211247 | 0.218969 | 0.193182 | 0.156177 |
| 0.11451   | 0.127331 | 0.123834 | 0.128497 | 0.130099 | 0.122378 | 0.18211  |
| 0.106352  | 0.121503 | 0.126166 | 0.128788 | 0.135635 | 0.116259 | 0.181818 |
| 0.109411  | 0.115822 | 0.11757  | 0.122232 | 0.129662 | 0.118444 | 0.177593 |
| 0.121066  | 0.128934 | 0.130099 | 0.132139 | 0.140152 | 0.124563 | 0.187209 |
| 0.11014   | 0.126457 | 0.123834 | 0.129079 | 0.13447  | 0.112179 | 0.180944 |
| 0.159091  | 0.172494 | 0.163753 | 0.170163 | 0.178176 | 0.148893 | 0.138112 |
| 0.115967  | 0.123834 | 0.126166 | 0.132576 | 0.133596 | 0.120338 | 0.178904 |
| 0.120047  | 0.127622 | 0.13141  | 0.129079 | 0.137966 | 0.120338 | 0.187063 |
| 0.114802  | 0.130245 | 0.128205 | 0.132284 | 0.137383 | 0.120338 | 0.184441 |
| 0.123252  | 0.127622 | 0.127914 | 0.127914 | 0.128059 | 0.13141  | 0.181818 |
| 0.196241  | 0.204108 | 0.203234 | 0.211101 | 0.21824  | 0.18954  | 0.1537   |
| 0.105478  | 0.119464 | 0.124417 | 0.127622 | 0.132721 | 0.113636 | 0.179196 |
| 0.118153  | 0.129808 | 0.129516 | 0.139132 | 0.145105 | 0.118153 | 0.175845 |
| 0.0996503 | 0.113636 | 0.108974 | 0.119464 | 0.118153 | 0.1081   | 0.178322 |
| 0.110577  | 0.125728 | 0.121941 | 0.122523 | 0.129662 | 0.121358 | 0.184003 |
| 0.111888  | 0.12296  | 0.12704  | 0.127331 | 0.135052 | 0.120338 | 0.178904 |

|           |          |          |          |          |          |          |
|-----------|----------|----------|----------|----------|----------|----------|
| 0.255973  | 0.262675 | 0.261801 | 0.25947  | 0.268648 | 0.250146 | 0.182255 |
| 0.105186  | 0.112762 | 0.112471 | 0.115967 | 0.127477 | 0.115093 | 0.173077 |
| 0.11655   | 0.129662 | 0.127622 | 0.132284 | 0.13884  | 0.1081   | 0.173951 |
| 0.176865  | 0.193765 | 0.186189 | 0.189103 | 0.196533 | 0.175699 | 0.15035  |
| 0.185315  | 0.19493  | 0.193473 | 0.201632 | 0.204108 | 0.177448 | 0.148601 |
| 0.117424  | 0.130536 | 0.138986 | 0.12704  | 0.13447  | 0.117716 | 0.187937 |
| 0.114948  | 0.128934 | 0.131265 | 0.140006 | 0.140734 | 0.121941 | 0.185169 |
| 0.109411  | 0.127477 | 0.124854 | 0.131556 | 0.138112 | 0.118444 | 0.183712 |
| 0.143357  | 0.149767 | 0.152098 | 0.150641 | 0.153118 | 0.150932 | 0.196096 |
| 0.112762  | 0.124417 | 0.132284 | 0.123543 | 0.13039  | 0.114219 | 0.184441 |
| 0.118153  | 0.13039  | 0.136509 | 0.128351 | 0.136655 | 0.118153 | 0.188666 |
| 0.117424  | 0.132576 | 0.128497 | 0.12704  | 0.134761 | 0.126748 | 0.185023 |
| 0.115967  | 0.122378 | 0.125583 | 0.134033 | 0.132721 | 0.120338 | 0.175699 |
| 0.124854  | 0.135344 | 0.138549 | 0.14088  | 0.143357 | 0.135344 | 0.186334 |
| 0.113928  | 0.129662 | 0.125874 | 0.128497 | 0.137383 | 0.113928 | 0.168124 |
| 0.116113  | 0.126603 | 0.123689 | 0.131265 | 0.136072 | 0.11961  | 0.187209 |
| 0.129662  | 0.136946 | 0.13549  | 0.140443 | 0.144376 | 0.134615 | 0.194056 |
| 0.110286  | 0.118735 | 0.116404 | 0.119027 | 0.130828 | 0.116696 | 0.17905  |
| 0.122378  | 0.132867 | 0.127622 | 0.135781 | 0.140006 | 0.127331 | 0.187646 |
| 0.119755  | 0.131993 | 0.130245 | 0.130828 | 0.136801 | 0.129371 | 0.187354 |
| 0.207314  | 0.216346 | 0.216055 | 0.218677 | 0.227273 | 0.203817 | 0.159528 |
| 0.106352  | 0.116259 | 0.113345 | 0.108683 | 0.120192 | 0.112471 | 0.177448 |
| 0.191725  | 0.200758 | 0.198135 | 0.207459 | 0.214889 | 0.18852  | 0.154138 |
| 0.109557  | 0.119464 | 0.119172 | 0.124417 | 0.132721 | 0.115385 | 0.184149 |
| 0.115676  | 0.125    | 0.133159 | 0.131702 | 0.137966 | 0.12296  | 0.181235 |
| 0.122669  | 0.121795 | 0.106935 | 0.132576 | 0.140006 | 0.108974 | 0.173368 |
| 0.113782  | 0.116113 | 0.107955 | 0.127185 | 0.13549  | 0.104458 | 0.170892 |
| 0.122669  | 0.134033 | 0.133741 | 0.138986 | 0.139714 | 0.126166 | 0.183275 |
| 0.120047  | 0.129953 | 0.13141  | 0.139277 | 0.138549 | 0.126166 | 0.184441 |
| 0.111014  | 0.120921 | 0.129079 | 0.129371 | 0.137092 | 0.118007 | 0.176282 |
| 0.116987  | 0.127185 | 0.133596 | 0.126603 | 0.135781 | 0.119027 | 0.185752 |
| 0.121066  | 0.119318 | 0.10912  | 0.137675 | 0.142483 | 0.110868 | 0.175845 |
| 0.122669  | 0.136364 | 0.131993 | 0.13345  | 0.138258 | 0.133159 | 0.178613 |
| 0.252622  | 0.257284 | 0.254079 | 0.255828 | 0.267628 | 0.245629 | 0.179779 |
| 0.111597  | 0.122378 | 0.128205 | 0.131702 | 0.131847 | 0.115093 | 0.180361 |
| 0.183421  | 0.194493 | 0.19391  | 0.198572 | 0.204545 | 0.179341 | 0.151952 |
| 0.189685  | 0.200466 | 0.199592 | 0.201632 | 0.211976 | 0.183275 | 0.151224 |
| 0.114073  | 0.128934 | 0.132139 | 0.13039  | 0.140152 | 0.119318 | 0.178759 |
| 0.104749  | 0.111742 | 0.107955 | 0.11961  | 0.129662 | 0.110286 | 0.172057 |
| 0.116113  | 0.123689 | 0.127185 | 0.128642 | 0.134324 | 0.121066 | 0.18546  |
| 0.113199  | 0.124563 | 0.126894 | 0.134761 | 0.130536 | 0.116404 | 0.181672 |
| 0.0976107 | 0.112762 | 0.118007 | 0.117716 | 0.125146 | 0.107226 | 0.166375 |
| 0.112762  | 0.129079 | 0.123252 | 0.125583 | 0.132139 | 0.119464 | 0.184732 |
| 0.118735  | 0.129516 | 0.131556 | 0.13243  | 0.135781 | 0.121066 | 0.173805 |

|           |          |          |          |          |          |          |
|-----------|----------|----------|----------|----------|----------|----------|
| 0.126603  | 0.135344 | 0.137383 | 0.143211 | 0.144231 | 0.136801 | 0.18954  |
| 0.107809  | 0.121212 | 0.126748 | 0.125874 | 0.136801 | 0.117716 | 0.17803  |
| 0.125291  | 0.135198 | 0.135198 | 0.1419   | 0.141463 | 0.13141  | 0.18852  |
| 0.109411  | 0.121358 | 0.124854 | 0.127768 | 0.136072 | 0.114656 | 0.18109  |
| 0.121941  | 0.118444 | 0.107663 | 0.136218 | 0.143939 | 0.112617 | 0.176719 |
| 0.113928  | 0.127914 | 0.127622 | 0.137821 | 0.141754 | 0.119172 | 0.186772 |
| 0.121941  | 0.133013 | 0.129808 | 0.129225 | 0.13549  | 0.13039  | 0.187209 |
| 0.100816  | 0.123252 | 0.125291 | 0.119464 | 0.13243  | 0.11859  | 0.185315 |
| 0.107517  | 0.119172 | 0.120921 | 0.120338 | 0.129516 | 0.113054 | 0.172203 |
| 0.124126  | 0.135198 | 0.129662 | 0.136946 | 0.145542 | 0.121795 | 0.187354 |
| 0.184003  | 0.194784 | 0.194202 | 0.199738 | 0.210373 | 0.181964 | 0.147873 |
| 0.131119  | 0.142191 | 0.13986  | 0.145105 | 0.14729  | 0.137238 | 0.193473 |
| 0.117716  | 0.129662 | 0.132576 | 0.138986 | 0.137966 | 0.126748 | 0.180653 |
| 0.117861  | 0.116404 | 0.103584 | 0.130682 | 0.138695 | 0.103584 | 0.172931 |
| 0.109848  | 0.111305 | 0.100233 | 0.121212 | 0.129225 | 0.101107 | 0.170746 |
| 0.111451  | 0.12398  | 0.122523 | 0.13039  | 0.13549  | 0.116987 | 0.182547 |
| 0.115967  | 0.127914 | 0.125874 | 0.132576 | 0.140589 | 0.121212 | 0.185606 |
| 0.188083  | 0.201777 | 0.196533 | 0.207022 | 0.212121 | 0.187791 | 0.153992 |
| 0.113491  | 0.126311 | 0.128351 | 0.134761 | 0.132867 | 0.120484 | 0.170892 |
| 0.101981  | 0.120047 | 0.120629 | 0.123543 | 0.127477 | 0.106352 | 0.157051 |
| 0.123252  | 0.129371 | 0.134615 | 0.138403 | 0.139423 | 0.128205 | 0.182692 |
| 0.190414  | 0.2044   | 0.202652 | 0.208188 | 0.212121 | 0.190414 | 0.154575 |
| 0.0996503 | 0.113345 | 0.113636 | 0.120921 | 0.131556 | 0.105769 | 0.169289 |
| 0.114948  | 0.13039  | 0.128934 | 0.128642 | 0.134324 | 0.126603 | 0.186334 |
| 0.121649  | 0.13039  | 0.133304 | 0.138258 | 0.142774 | 0.126894 | 0.183712 |
| 0.112762  | 0.123543 | 0.12704  | 0.122669 | 0.127477 | 0.113345 | 0.185023 |
| 0.189103  | 0.197844 | 0.196387 | 0.202797 | 0.209645 | 0.184149 | 0.148601 |
| 0.112762  | 0.129079 | 0.125    | 0.127331 | 0.131556 | 0.118007 | 0.18211  |
| 0.109848  | 0.123252 | 0.124126 | 0.130828 | 0.140297 | 0.104604 | 0.176282 |
| 0.104604  | 0.11859  | 0.116841 | 0.12296  | 0.128642 | 0.1081   | 0.165501 |
| 0.118881  | 0.130828 | 0.13141  | 0.135198 | 0.142628 | 0.11655  | 0.164336 |
| 0.118153  | 0.128934 | 0.132721 | 0.129225 | 0.136946 | 0.117861 | 0.187209 |
| 0.120484  | 0.13243  | 0.128934 | 0.127185 | 0.134907 | 0.127768 | 0.186626 |
| 0.109703  | 0.119027 | 0.126311 | 0.124272 | 0.13345  | 0.113491 | 0.177885 |
| 0.116987  | 0.124563 | 0.127768 | 0.128642 | 0.136946 | 0.117861 | 0.180798 |
| 0.1419    | 0.149476 | 0.151807 | 0.134615 | 0.144085 | 0.1419   | 0.197261 |
| 0.238928  | 0.241259 | 0.240385 | 0.244755 | 0.254225 | 0.231643 | 0.169872 |
| 0.10373   | 0.126748 | 0.123543 | 0.121212 | 0.133013 | 0.120921 | 0.188228 |
| 0.120629  | 0.126457 | 0.131119 | 0.128788 | 0.137675 | 0.116841 | 0.184441 |
| 0.116404  | 0.126603 | 0.128934 | 0.133013 | 0.136364 | 0.12398  | 0.175554 |
| 0.12296   | 0.136655 | 0.137529 | 0.132576 | 0.14088  | 0.120921 | 0.182984 |
| 0.115239  | 0.119901 | 0.122232 | 0.116987 | 0.124126 | 0.111451 | 0.172057 |
| 0.10271   | 0.129516 | 0.124272 | 0.123397 | 0.136364 | 0.122815 | 0.183129 |
| 0.120629  | 0.128497 | 0.131993 | 0.137238 | 0.137966 | 0.125583 | 0.18007  |

|           |          |          |          |          |           |          |
|-----------|----------|----------|----------|----------|-----------|----------|
| 0.118444  | 0.130973 | 0.128642 | 0.13039  | 0.133741 | 0.12602   | 0.186917 |
| 0.116696  | 0.131847 | 0.132139 | 0.129516 | 0.133159 | 0.107372  | 0.183129 |
| 0.237471  | 0.244464 | 0.238054 | 0.245629 | 0.254225 | 0.234557  | 0.172786 |
| 0.100962  | 0.113491 | 0.112034 | 0.119027 | 0.128788 | 0.10708   | 0.170309 |
| 0.101544  | 0.11116  | 0.110577 | 0.11961  | 0.124417 | 0.100379  | 0.173805 |
| 0.106935  | 0.117716 | 0.124709 | 0.123252 | 0.130099 | 0.114802  | 0.174534 |
| 0.128351  | 0.133887 | 0.139423 | 0.128934 | 0.132867 | 0.128934  | 0.192745 |
| 0.10912   | 0.131847 | 0.129516 | 0.12602  | 0.135781 | 0.127768  | 0.19391  |
| 0.115239  | 0.127185 | 0.125728 | 0.126603 | 0.136946 | 0.116113  | 0.177593 |
| 0.117279  | 0.129516 | 0.135927 | 0.137092 | 0.138403 | 0.12602   | 0.184295 |
| 0.106061  | 0.121503 | 0.125291 | 0.122669 | 0.128642 | 0.113345  | 0.180361 |
| 0.232517  | 0.237762 | 0.235431 | 0.243881 | 0.247815 | 0.22669   | 0.16958  |
| 0.122669  | 0.134615 | 0.134324 | 0.139277 | 0.140589 | 0.130828  | 0.183858 |
| 0.113782  | 0.128351 | 0.127185 | 0.128642 | 0.129662 | 0.122815  | 0.184878 |
| 0.108537  | 0.12602  | 0.126894 | 0.128351 | 0.13345  | 0.111742  | 0.180798 |
| 0.117716  | 0.125    | 0.124126 | 0.116841 | 0.126603 | 0.12296   | 0.185606 |
| 0.117133  | 0.118881 | 0.115093 | 0.121795 | 0.127477 | 0.113928  | 0.180653 |
| 0.106935  | 0.11859  | 0.12296  | 0.124417 | 0.135052 | 0.115385  | 0.180653 |
| 0.114802  | 0.129079 | 0.124709 | 0.127914 | 0.132721 | 0.12296   | 0.185897 |
| 0.122232  | 0.130973 | 0.128934 | 0.129808 | 0.134324 | 0.128059  | 0.189248 |
| 0.109703  | 0.121358 | 0.122815 | 0.124854 | 0.131119 | 0.11961   | 0.184878 |
| 0.106643  | 0.119464 | 0.122669 | 0.12704  | 0.133887 | 0.11451   | 0.179779 |
| 0.123543  | 0.127331 | 0.136364 | 0.126748 | 0.133596 | 0.124126  | 0.183566 |
| 0.128351  | 0.129516 | 0.139132 | 0.129225 | 0.13986  | 0.131265  | 0.190705 |
| 0.125728  | 0.122232 | 0.110286 | 0.138258 | 0.144814 | 0.114073  | 0.179924 |
| 0.128351  | 0.127185 | 0.116987 | 0.139714 | 0.147436 | 0.118153  | 0.179924 |
| 0.125583  | 0.128788 | 0.134907 | 0.128788 | 0.136801 | 0.127331  | 0.189977 |
| 0.0917832 | 0.108392 | 0.113636 | 0.11451  | 0.125437 | 0.100233  | 0.173368 |
| 0.113199  | 0.123106 | 0.114948 | 0.119318 | 0.121795 | 0.12602   | 0.183712 |
| 0.125291  | 0.130536 | 0.13549  | 0.135781 | 0.148164 | 0.13141   | 0.185897 |
| 0.208625  | 0.216783 | 0.212995 | 0.2162   | 0.222756 | 0.201923  | 0.158508 |
| 0.114802  | 0.131702 | 0.133741 | 0.13141  | 0.13447  | 0.12704   | 0.183566 |
| 0.106935  | 0.115676 | 0.111597 | 0.124709 | 0.130682 | 0.105478  | 0.180944 |
| 0.112617  | 0.125437 | 0.13039  | 0.128934 | 0.134324 | 0.120192  | 0.171474 |
| 0.222611  | 0.230769 | 0.229312 | 0.231352 | 0.24053  | 0.218531  | 0.163462 |
| 0.210664  | 0.219988 | 0.217657 | 0.225233 | 0.228293 | 0.210082  | 0.164918 |
| 0.120484  | 0.134761 | 0.129516 | 0.130682 | 0.136072 | 0.129808  | 0.18546  |
| 0.252622  | 0.257284 | 0.253205 | 0.257576 | 0.269959 | 0.245047  | 0.177448 |
| 0.0917832 | 0.108974 | 0.112471 | 0.11655  | 0.123689 | 0.0999417 | 0.175408 |
| 0.124709  | 0.136946 | 0.133159 | 0.135781 | 0.139423 | 0.134033  | 0.192599 |
| 0.105478  | 0.113928 | 0.111597 | 0.11655  | 0.127185 | 0.108683  | 0.173077 |
| 0.123106  | 0.129225 | 0.135927 | 0.125146 | 0.137238 | 0.123106  | 0.18954  |
| 0.189685  | 0.199883 | 0.195804 | 0.202214 | 0.209062 | 0.184732  | 0.149476 |
| 0.111742  | 0.131556 | 0.128059 | 0.132721 | 0.137821 | 0.121066  | 0.185752 |

|           |          |          |          |          |          |          |
|-----------|----------|----------|----------|----------|----------|----------|
| 0.194202  | 0.204691 | 0.199446 | 0.209936 | 0.216492 | 0.191288 | 0.156323 |
| 0.108829  | 0.127185 | 0.128642 | 0.125728 | 0.134033 | 0.117279 | 0.184295 |
| 0.114365  | 0.126311 | 0.126311 | 0.125728 | 0.128497 | 0.115239 | 0.163899 |
| 0.113491  | 0.121066 | 0.125437 | 0.125146 | 0.136655 | 0.11961  | 0.174388 |
| 0.111742  | 0.119027 | 0.117861 | 0.126894 | 0.130245 | 0.109703 | 0.167104 |
| 0.10169   | 0.110431 | 0.120921 | 0.118298 | 0.127185 | 0.108683 | 0.174242 |
| 0.099359  | 0.125291 | 0.124709 | 0.130245 | 0.131556 | 0.118881 | 0.181818 |
| 0.0999417 | 0.111888 | 0.107226 | 0.11451  | 0.124563 | 0.104895 | 0.165793 |
| 0.11116   | 0.12398  | 0.13039  | 0.136218 | 0.137238 | 0.119901 | 0.181381 |
| 0.102855  | 0.115093 | 0.106061 | 0.116259 | 0.116987 | 0.106643 | 0.181235 |
| 0.0952797 | 0.118881 | 0.120047 | 0.118881 | 0.129516 | 0.113054 | 0.182984 |
| 0.103001  | 0.112908 | 0.112617 | 0.116696 | 0.128205 | 0.108537 | 0.17264  |
| 0.119755  | 0.119755 | 0.113636 | 0.129953 | 0.135635 | 0.105769 | 0.169289 |
| 0.125583  | 0.135198 | 0.137238 | 0.143648 | 0.142337 | 0.132867 | 0.188811 |
| 0.112617  | 0.116987 | 0.107955 | 0.127477 | 0.135781 | 0.104458 | 0.172348 |
| 0.107809  | 0.123543 | 0.119755 | 0.128497 | 0.136801 | 0.11014  | 0.180944 |
| 0.103293  | 0.116404 | 0.119901 | 0.120484 | 0.128497 | 0.108246 | 0.172931 |
| 0.114948  | 0.123689 | 0.122523 | 0.125728 | 0.130828 | 0.118444 | 0.176428 |
| 0.118444  | 0.127768 | 0.129516 | 0.125728 | 0.13549  | 0.120484 | 0.184586 |
| 0.113345  | 0.125583 | 0.124126 | 0.136364 | 0.140006 | 0.120338 | 0.185023 |
| 0.11451   | 0.116259 | 0.107809 | 0.13141  | 0.135927 | 0.106643 | 0.174825 |
| 0.118444  | 0.128934 | 0.131847 | 0.134178 | 0.135198 | 0.122815 | 0.179924 |
| 0.125874  | 0.137821 | 0.140152 | 0.143065 | 0.141754 | 0.135198 | 0.187937 |
| 0.137238  | 0.142191 | 0.143065 | 0.142774 | 0.146125 | 0.141317 | 0.192599 |
| 0.103293  | 0.114073 | 0.115239 | 0.115239 | 0.120047 | 0.10912  | 0.178467 |
| 0.109703  | 0.119318 | 0.128642 | 0.128059 | 0.135781 | 0.114948 | 0.182255 |
| 0.0952797 | 0.12296  | 0.120338 | 0.120338 | 0.127477 | 0.115967 | 0.180653 |
| 0.130245  | 0.132284 | 0.136946 | 0.130245 | 0.135344 | 0.128788 | 0.187063 |
| 0.106498  | 0.112908 | 0.111742 | 0.120192 | 0.12704  | 0.110868 | 0.174388 |
| 0.130099  | 0.140006 | 0.13884  | 0.14088  | 0.145979 | 0.136801 | 0.195076 |
| 0.127185  | 0.134178 | 0.137675 | 0.134178 | 0.142191 | 0.133013 | 0.186917 |
| 0.120921  | 0.132576 | 0.137238 | 0.12704  | 0.135052 | 0.122669 | 0.192308 |
| 0.0995047 | 0.118735 | 0.123106 | 0.120775 | 0.130828 | 0.109994 | 0.180798 |
| 0.109848  | 0.118007 | 0.118007 | 0.120921 | 0.123397 | 0.114802 | 0.179487 |
| 0.123543  | 0.122669 | 0.109848 | 0.136946 | 0.144085 | 0.113636 | 0.177739 |
| 0.206148  | 0.214307 | 0.213724 | 0.219843 | 0.226981 | 0.203526 | 0.165064 |
| 0.106789  | 0.122815 | 0.120775 | 0.130973 | 0.138112 | 0.107372 | 0.176719 |
| 0.112179  | 0.117716 | 0.12704  | 0.128497 | 0.137092 | 0.115676 | 0.180361 |
| 0.114365  | 0.121941 | 0.13039  | 0.124272 | 0.130828 | 0.116987 | 0.184878 |
| 0.113928  | 0.118007 | 0.106935 | 0.127622 | 0.138258 | 0.107226 | 0.17162  |
| 0.115239  | 0.129808 | 0.135344 | 0.127185 | 0.13549  | 0.118444 | 0.18546  |
| 0.109411  | 0.130099 | 0.131847 | 0.129225 | 0.141026 | 0.122232 | 0.187209 |
| 0.108683  | 0.134324 | 0.134615 | 0.131119 | 0.140006 | 0.122669 | 0.191434 |
| 0.116696  | 0.129808 | 0.135344 | 0.121649 | 0.126166 | 0.115239 | 0.1875   |

|           |           |           |          |           |           |          |
|-----------|-----------|-----------|----------|-----------|-----------|----------|
| 0.0965909 | 0.113782  | 0.106206  | 0.116404 | 0.117716  | 0.10708   | 0.17905  |
| 0.123689  | 0.127185  | 0.133013  | 0.125437 | 0.134907  | 0.128642  | 0.188957 |
| 0.108246  | 0.119027  | 0.123397  | 0.120775 | 0.134324  | 0.112908  | 0.175845 |
| 0.0955711 | 0.123834  | 0.123543  | 0.123252 | 0.133596  | 0.11451   | 0.189103 |
| 0.176719  | 0.184586  | 0.178467  | 0.188957 | 0.192308  | 0.1706    | 0.181964 |
| 0.116404  | 0.127768  | 0.130973  | 0.137675 | 0.138112  | 0.122232  | 0.181672 |
| 0.126457  | 0.130536  | 0.13549   | 0.130245 | 0.137675  | 0.127622  | 0.175699 |
| 0.104167  | 0.11116   | 0.116113  | 0.114073 | 0.12296   | 0.113199  | 0.175554 |
| 0.120629  | 0.121503  | 0.120629  | 0.109557 | 0.0992133 | 0.1081    | 0.16521  |
| 0.0917832 | 0.115676  | 0.117424  | 0.119464 | 0.127185  | 0.107226  | 0.178613 |
| 0.0862471 | 0.112471  | 0.115676  | 0.112471 | 0.122523  | 0.107226  | 0.176573 |
| 0.0961538 | 0.116841  | 0.119172  | 0.122378 | 0.128934  | 0.111888  | 0.184732 |
| 0.119755  | 0.128497  | 0.124126  | 0.120921 | 0.122815  | 0.120338  | 0.179487 |
| 0.108974  | 0.128497  | 0.125     | 0.130536 | 0.133304  | 0.11014   | 0.169872 |
| 0.118444  | 0.125728  | 0.11757   | 0.125437 | 0.140152  | 0.126894  | 0.18954  |
| 0.103438  | 0.119172  | 0.115967  | 0.11655  | 0.11961   | 0.108683  | 0.173951 |
| 0.0840618 | 0.126311  | 0.119901  | 0.123106 | 0.129371  | 0.108537  | 0.179633 |
| 0.117716  | 0.132867  | 0.13549   | 0.131702 | 0.140006  | 0.12704   | 0.189394 |
| 0.0827506 | 0.113636  | 0.109266  | 0.11014  | 0.113199  | 0.107809  | 0.179196 |
| 0.106643  | 0.12704   | 0.122669  | 0.126457 | 0.135927  | 0.126166  | 0.184149 |
| 0.0795455 | 0.111597  | 0.1081    | 0.11014  | 0.115239  | 0.101399  | 0.179196 |
| 0.0839161 | 0.115385  | 0.109848  | 0.108974 | 0.116696  | 0.106935  | 0.178322 |
| 0.0949883 | 0.117716  | 0.11451   | 0.106061 | 0.110868  | 0.101981  | 0.176573 |
| 0.107372  | 0.121941  | 0.123106  | 0.117861 | 0.130245  | 0.116696  | 0.180507 |
| 0.0986305 | 0.111742  | 0.109411  | 0.119901 | 0.122669  | 0.104167  | 0.177885 |
| 0.129808  | 0.143794  | 0.139423  | 0.143211 | 0.146853  | 0.14088   | 0.196241 |
| 0.122232  | 0.139423  | 0.133304  | 0.14292  | 0.144231  | 0.127768  | 0.188957 |
| 0.0910548 | 0.109411  | 0.11116   | 0.121649 | 0.122378  | 0.107372  | 0.178176 |
| 0.128497  | 0.143065  | 0.140152  | 0.134033 | 0.142337  | 0.134033  | 0.194056 |
| 0.116841  | 0.115676  | 0.118298  | 0.129953 | 0.135927  | 0.111014  | 0.177739 |
| 0.124417  | 0.140443  | 0.138112  | 0.133741 | 0.144959  | 0.129662  | 0.180944 |
| 0.102564  | 0.113928  | 0.113054  | 0.121795 | 0.126311  | 0.109557  | 0.177156 |
| 0.137675  | 0.148164  | 0.140006  | 0.139423 | 0.143939  | 0.14292   | 0.19391  |
| 0.125146  | 0.127768  | 0.126603  | 0.122815 | 0.137529  | 0.122232  | 0.186917 |
| 0.130973  | 0.13884   | 0.136509  | 0.133596 | 0.146562  | 0.128351  | 0.183712 |
| 0.111742  | 0.099796  | 0.0986305 | 0.110286 | 0.118298  | 0.0971737 | 0.174388 |
| 0.0941142 | 0.111014  | 0.109266  | 0.115967 | 0.123689  | 0.104021  | 0.177156 |
| 0.095134  | 0.111451  | 0.11116   | 0.11961  | 0.125583  | 0.103001  | 0.17264  |
| 0.112762  | 0.123834  | 0.125     | 0.124126 | 0.130099  | 0.114802  | 0.184149 |
| 0.104895  | 0.11655   | 0.112471  | 0.119755 | 0.120484  | 0.115093  | 0.182984 |
| 0.112908  | 0.122815  | 0.12602   | 0.116987 | 0.121503  | 0.124272  | 0.1875   |
| 0.114948  | 0.131847  | 0.128642  | 0.129225 | 0.132284  | 0.112617  | 0.175262 |
| 0.102418  | 0.0884324 | 0.0598776 | 0.113199 | 0.119755  | 0.0933858 | 0.16623  |
| 0.0935315 | 0.113636  | 0.117424  | 0.117716 | 0.127768  | 0.105478  | 0.174242 |

|           |          |          |          |          |          |          |
|-----------|----------|----------|----------|----------|----------|----------|
| 0.103001  | 0.122232 | 0.119901 | 0.122523 | 0.127331 | 0.117861 | 0.176428 |
| 0.0957168 | 0.117861 | 0.115822 | 0.123397 | 0.126166 | 0.107372 | 0.179341 |
| 0.0996503 | 0.118881 | 0.121503 | 0.12296  | 0.132721 | 0.111597 | 0.175699 |
| 0.0964452 | 0.117716 | 0.119755 | 0.124417 | 0.133304 | 0.111597 | 0.177448 |
| 0.113199  | 0.122815 | 0.124563 | 0.124854 | 0.133159 | 0.113782 | 0.175262 |
| 0.0986305 | 0.120484 | 0.122815 | 0.130682 | 0.137238 | 0.115239 | 0.180507 |
| 0.0954254 | 0.106789 | 0.112617 | 0.112908 | 0.120629 | 0.10271  | 0.172931 |
| 0.0971737 | 0.11553  | 0.117861 | 0.120192 | 0.126166 | 0.111742 | 0.177302 |
| 0.112762  | 0.123252 | 0.125291 | 0.125    | 0.13884  | 0.111597 | 0.173368 |
| 0.0962995 | 0.120775 | 0.123397 | 0.124563 | 0.133159 | 0.112617 | 0.18109  |
| 0.119027  | 0.133887 | 0.126894 | 0.132139 | 0.140152 | 0.117861 | 0.177885 |
| 0.105041  | 0.114365 | 0.121066 | 0.118444 | 0.128788 | 0.107372 | 0.173514 |
| 0.111888  | 0.130536 | 0.134324 | 0.125583 | 0.139423 | 0.124709 | 0.187646 |



| <b>TDr_08_00641</b> | <b>TDr_08_00645</b> | <b>TDr_08_00648</b> | <b>TDr_08_00651</b> | <b>TDr_08_00662</b> | <b>TDr_08_00662</b> | <b>TDr_08_00669</b> |
|---------------------|---------------------|---------------------|---------------------|---------------------|---------------------|---------------------|
| 0.108683            | 0.135344            | 0.128351            | 0.128788            | 0.109994            | 0.13039             | 0.115239            |
| 0.107955            | 0.127622            | 0.120921            | 0.131556            | 0.106935            | 0.126166            | 0.110723            |
| 0.105332            | 0.129079            | 0.121795            | 0.134178            | 0.105186            | 0.126457            | 0.106061            |
| 0.102418            | 0.13345             | 0.123252            | 0.131265            | 0.109266            | 0.124709            | 0.112471            |
| 0.124854            | 0.144231            | 0.134324            | 0.141171            | 0.126166            | 0.140152            | 0.129079            |
| 0.120192            | 0.147727            | 0.137821            | 0.129516            | 0.123543            | 0.13549             | 0.129079            |
| 0.0903263           | 0.125146            | 0.118735            | 0.101107            | 0.108537            | 0.120192            | 0.110577            |
| 0.106935            | 0.130682            | 0.122523            | 0.136072            | 0.105915            | 0.127768            | 0.108246            |
| 0.0992133           | 0.125291            | 0.111888            | 0.129225            | 0.101399            | 0.121795            | 0.104895            |
| 0.10169             | 0.118444            | 0.109994            | 0.121212            | 0.101836            | 0.119027            | 0.0989219           |
| 0.100087            | 0.131119            | 0.121212            | 0.126894            | 0.102273            | 0.123252            | 0.109848            |
| 0.0987762           | 0.13243             | 0.121066            | 0.128205            | 0.105915            | 0.124272            | 0.110286            |
| 0.106935            | 0.126603            | 0.119027            | 0.130828            | 0.105624            | 0.122523            | 0.113491            |
| 0.128351            | 0.152389            | 0.147145            | 0.158071            | 0.130536            | 0.149476            | 0.136364            |
| 0.11859             | 0.133013            | 0.126603            | 0.1419              | 0.11553             | 0.134761            | 0.121358            |
| 0.11116             | 0.120921            | 0.118298            | 0.125437            | 0.104895            | 0.121212            | 0.112179            |
| 0.0984848           | 0.131556            | 0.121649            | 0.125291            | 0.103001            | 0.12398             | 0.106206            |
| 0.127185            | 0.146853            | 0.144231            | 0.148747            | 0.134324            | 0.15035             | 0.138986            |
| 0.103875            | 0.12704             | 0.117424            | 0.13243             | 0.101399            | 0.119755            | 0.104895            |
| 0.205565            | 0.212121            | 0.207459            | 0.215181            | 0.201923            | 0.2162              | 0.206585            |
| 0.107517            | 0.135052            | 0.127185            | 0.123834            | 0.112617            | 0.129225            | 0.108829            |
| 0.100087            | 0.133741            | 0.125               | 0.112908            | 0.113345            | 0.133159            | 0.106935            |
| 0.104604            | 0.127768            | 0.116696            | 0.13345             | 0.0983392           | 0.121358            | 0.101836            |
| 0.121066            | 0.134615            | 0.128497            | 0.131556            | 0.114802            | 0.127622            | 0.121212            |
| 0.0981935           | 0.121066            | 0.113491            | 0.121212            | 0.0965909           | 0.116113            | 0.101544            |
| 0.113345            | 0.133887            | 0.122815            | 0.121795            | 0.115822            | 0.127477            | 0.114365            |
| 0.109266            | 0.126603            | 0.117279            | 0.127914            | 0.107663            | 0.123689            | 0.112908            |
| 0.11655             | 0.131556            | 0.126311            | 0.131702            | 0.111451            | 0.124272            | 0.114365            |
| 0.121795            | 0.136218            | 0.130973            | 0.134324            | 0.121066            | 0.13447             | 0.123397            |
| 0.117424            | 0.135927            | 0.128351            | 0.129371            | 0.118735            | 0.133596            | 0.113491            |
| 0.111742            | 0.137821            | 0.130536            | 0.123397            | 0.11451             | 0.136364            | 0.114802            |
| 0.115967            | 0.133887            | 0.127477            | 0.126457            | 0.114365            | 0.12602             | 0.119318            |
| 0.0984848           | 0.126311            | 0.119027            | 0.122086            | 0.103001            | 0.119027            | 0.106206            |
| 0.114219            | 0.129808            | 0.120192            | 0.134033            | 0.114073            | 0.130973            | 0.113782            |
| 0.10912             | 0.121212            | 0.111597            | 0.120775            | 0.102273            | 0.11655             | 0.112471            |
| 0.120629            | 0.127185            | 0.122523            | 0.128788            | 0.10912             | 0.122232            | 0.116987            |
| 0.103584            | 0.13141             | 0.122378            | 0.103875            | 0.109848            | 0.120047            | 0.11451             |
| 0.111305            | 0.139132            | 0.131265            | 0.134907            | 0.11757             | 0.132721            | 0.115239            |
| 0.108683            | 0.136801            | 0.129516            | 0.122378            | 0.106789            | 0.124272            | 0.109411            |
| 0.11655             | 0.14088             | 0.132721            | 0.136072            | 0.117279            | 0.133013            | 0.115822            |
| 0.101107            | 0.131556            | 0.123689            | 0.125               | 0.108246            | 0.124854            | 0.109411            |
| 0.13345             | 0.152244            | 0.146999            | 0.1419              | 0.13243             | 0.141171            | 0.139132            |

|           |          |           |          |           |           |           |
|-----------|----------|-----------|----------|-----------|-----------|-----------|
| 0.136364  | 0.153118 | 0.146999  | 0.149767 | 0.139423  | 0.14933   | 0.141171  |
| 0.103584  | 0.131993 | 0.122086  | 0.127185 | 0.113345  | 0.128497  | 0.113345  |
| 0.0884324 | 0.109266 | 0.0984848 | 0.111451 | 0.0777972 | 0.0999417 | 0.0798368 |
| 0.105478  | 0.112034 | 0.102127  | 0.11451  | 0.0925117 | 0.105915  | 0.0995047 |
| 0.113345  | 0.128934 | 0.121649  | 0.137821 | 0.106498  | 0.121358  | 0.103875  |
| 0.131847  | 0.149476 | 0.141317  | 0.139423 | 0.132576  | 0.145396  | 0.13345   |
| 0.103293  | 0.134324 | 0.126166  | 0.127768 | 0.106643  | 0.125     | 0.113928  |
| 0.105186  | 0.13243  | 0.12602   | 0.126457 | 0.10708   | 0.125146  | 0.113199  |
| 0.129225  | 0.150058 | 0.149476  | 0.120484 | 0.138986  | 0.153846  | 0.138695  |
| 0.125437  | 0.134615 | 0.128205  | 0.133596 | 0.122378  | 0.13549   | 0.123834  |
| 0.104312  | 0.13447  | 0.124854  | 0.12704  | 0.107955  | 0.124854  | 0.106789  |
| 0.116841  | 0.135052 | 0.132139  | 0.13986  | 0.118444  | 0.132139  | 0.124854  |
| 0.101399  | 0.133304 | 0.128059  | 0.131702 | 0.107372  | 0.128059  | 0.116113  |
| 0.13141   | 0.135052 | 0.135344  | 0.143939 | 0.126311  | 0.138258  | 0.130099  |
| 0.118153  | 0.138986 | 0.134324  | 0.137383 | 0.115676  | 0.134615  | 0.119464  |
| 0.10067   | 0.135781 | 0.128788  | 0.128642 | 0.112471  | 0.128497  | 0.11451   |
| 0.108537  | 0.128497 | 0.122378  | 0.127768 | 0.110431  | 0.128788  | 0.111305  |
| 0.106352  | 0.121358 | 0.116987  | 0.107809 | 0.101544  | 0.112617  | 0.105624  |
| 0.128205  | 0.145542 | 0.14292   | 0.142191 | 0.128351  | 0.141171  | 0.135927  |
| 0.134615  | 0.150495 | 0.14729   | 0.147727 | 0.136218  | 0.144959  | 0.131847  |
| 0.160402  | 0.170746 | 0.167541  | 0.178467 | 0.156469  | 0.165501  | 0.160256  |
| 0.105915  | 0.135781 | 0.131119  | 0.132721 | 0.109848  | 0.128497  | 0.115676  |
| 0.10912   | 0.130828 | 0.123543  | 0.123689 | 0.102855  | 0.124417  | 0.107226  |
| 0.100962  | 0.131702 | 0.120629  | 0.125437 | 0.105478  | 0.12296   | 0.1081    |
| 0.129662  | 0.134761 | 0.129516  | 0.134615 | 0.119901  | 0.129225  | 0.122815  |
| 0.106352  | 0.132721 | 0.124563  | 0.127331 | 0.104749  | 0.125437  | 0.110286  |
| 0.124272  | 0.128788 | 0.126748  | 0.144085 | 0.121503  | 0.127331  | 0.123252  |
| 0.104167  | 0.115967 | 0.111014  | 0.123689 | 0.10169   | 0.114219  | 0.105769  |
| 0.106643  | 0.13447  | 0.127477  | 0.128788 | 0.107372  | 0.128934  | 0.110577  |
| 0.127622  | 0.139132 | 0.138549  | 0.125    | 0.127477  | 0.136509  | 0.133887  |
| 0.115385  | 0.142337 | 0.134761  | 0.136072 | 0.119027  | 0.13243   | 0.119318  |
| 0.129225  | 0.148601 | 0.143357  | 0.144959 | 0.132284  | 0.145396  | 0.132576  |
| 0.125     | 0.138258 | 0.132721  | 0.137529 | 0.127768  | 0.138258  | 0.125146  |
| 0.0910548 | 0.125    | 0.117133  | 0.12602  | 0.097028  | 0.115093  | 0.0979021 |
| 0.100087  | 0.13141  | 0.124417  | 0.12602  | 0.103438  | 0.121503  | 0.111014  |
| 0.103584  | 0.137238 | 0.12704   | 0.126603 | 0.111305  | 0.126748  | 0.112179  |
| 0.120192  | 0.147436 | 0.142191  | 0.144668 | 0.129953  | 0.1419    | 0.127622  |
| 0.103147  | 0.129516 | 0.119318  | 0.12704  | 0.0989219 | 0.119901  | 0.107372  |
| 0.131847  | 0.157051 | 0.151515  | 0.148164 | 0.137821  | 0.150932  | 0.136072  |
| 0.112908  | 0.139277 | 0.132576  | 0.140589 | 0.117424  | 0.130245  | 0.122378  |
| 0.11116   | 0.134615 | 0.125874  | 0.129808 | 0.108392  | 0.122669  | 0.111597  |
| 0.106789  | 0.138403 | 0.13141   | 0.130682 | 0.114219  | 0.131702  | 0.118007  |
| 0.114656  | 0.137238 | 0.131119  | 0.139423 | 0.118007  | 0.133741  | 0.119464  |
| 0.108829  | 0.13549  | 0.128497  | 0.134761 | 0.110431  | 0.127622  | 0.109557  |

|           |           |           |           |           |           |           |
|-----------|-----------|-----------|-----------|-----------|-----------|-----------|
| 0.105041  | 0.13345   | 0.124126  | 0.131265  | 0.106935  | 0.126748  | 0.112471  |
| 0.128788  | 0.141754  | 0.140297  | 0.140734  | 0.128934  | 0.136218  | 0.13243   |
| 0.099359  | 0.128059  | 0.117279  | 0.121795  | 0.101836  | 0.120775  | 0.109994  |
| 0.103001  | 0.133159  | 0.123543  | 0.130973  | 0.102564  | 0.123252  | 0.109557  |
| 0.0633741 | 0.128205  | 0.120629  | 0.108829  | 0.113928  | 0.124709  | 0.104021  |
| 0.092803  | 0.126457  | 0.120921  | 0.0965909 | 0.107809  | 0.119172  | 0.109557  |
| 0.112908  | 0.0894522 | 0.0882867 | 0.119318  | 0.0906177 | 0.0885781 | 0.0941142 |
| 0.120921  | 0.0965909 | 0.0960082 | 0.13141   | 0.0680361 | 0.0546329 | 0.102127  |
| 0.0945513 | 0.12296   | 0.115967  | 0.103293  | 0.0973193 | 0.117133  | 0.102855  |
| 0.169726  | 0.180944  | 0.181527  | 0.17264   | 0.175699  | 0.177156  | 0.18007   |
| 0         | 0.121358  | 0.11116   | 0.1081    | 0.0968823 | 0.114365  | 0.0913462 |
| 0.121358  | 0         | 0.0454545 | 0.134178  | 0.099359  | 0.0987762 | 0.106643  |
| 0.11116   | 0.0454545 | 0         | 0.12602   | 0.0909091 | 0.094697  | 0.0964452 |
| 0.1081    | 0.134178  | 0.12602   | 0         | 0.114365  | 0.128059  | 0.122815  |
| 0.0968823 | 0.099359  | 0.0909091 | 0.114365  | 0         | 0.0608974 | 0.0777972 |
| 0.114365  | 0.0987762 | 0.094697  | 0.128059  | 0.0608974 | 0         | 0.094697  |
| 0.0913462 | 0.106643  | 0.0964452 | 0.122815  | 0.0777972 | 0.094697  | 0         |
| 0.104312  | 0.108537  | 0.106789  | 0.126166  | 0.0948427 | 0.102127  | 0.074155  |
| 0.0949883 | 0.123397  | 0.116404  | 0.106061  | 0.0948427 | 0.113782  | 0.101836  |
| 0.121795  | 0.103293  | 0.101544  | 0.134324  | 0.0910548 | 0.0954254 | 0.0995047 |
| 0.0952797 | 0.117279  | 0.109994  | 0.119172  | 0.092803  | 0.114073  | 0.0913462 |
| 0.112034  | 0.119755  | 0.117716  | 0.100087  | 0.101981  | 0.107226  | 0.111597  |
| 0.0833333 | 0.123689  | 0.114365  | 0.0955711 | 0.100379  | 0.11757   | 0.0936772 |
| 0.126894  | 0.145396  | 0.137529  | 0.144376  | 0.125583  | 0.136072  | 0.12296   |
| 0.100816  | 0.133013  | 0.12602   | 0.0926573 | 0.109703  | 0.121066  | 0.112325  |
| 0.0812937 | 0.122232  | 0.113491  | 0.0990676 | 0.0916375 | 0.110577  | 0.0919289 |
| 0.131993  | 0.13039   | 0.129516  | 0.141026  | 0.122232  | 0.126311  | 0.126311  |
| 0.0878497 | 0.125291  | 0.115967  | 0.0962995 | 0.0973193 | 0.113928  | 0.0949883 |
| 0.101544  | 0.0999417 | 0.0926573 | 0.121358  | 0.0821678 | 0.10169   | 0.0789627 |
| 0.10373   | 0.125728  | 0.117861  | 0.124126  | 0.110577  | 0.126894  | 0.108829  |
| 0.107809  | 0.127768  | 0.125728  | 0.106935  | 0.126894  | 0.131265  | 0.123397  |
| 0.112762  | 0.126603  | 0.123106  | 0.130828  | 0.108537  | 0.121649  | 0.119901  |
| 0.0906177 | 0.0954254 | 0.0863928 | 0.120047  | 0.074155  | 0.0930944 | 0.0735723 |
| 0.0964452 | 0.0922203 | 0.0843531 | 0.119755  | 0.0799825 | 0.0965909 | 0.0823135 |
| 0.0796911 | 0.120629  | 0.113345  | 0.10067   | 0.101981  | 0.121212  | 0.106061  |
| 0.110723  | 0.120775  | 0.11757   | 0.115967  | 0.099796  | 0.112034  | 0.109703  |
| 0.0814394 | 0.126748  | 0.118298  | 0.097465  | 0.102855  | 0.121503  | 0.0984848 |
| 0.0891608 | 0.114073  | 0.105041  | 0.118007  | 0.0861014 | 0.10708   | 0.0933858 |
| 0.0871212 | 0.116987  | 0.11116   | 0.117716  | 0.0887238 | 0.109703  | 0.0945513 |
| 0.0957168 | 0.113054  | 0.106643  | 0.122523  | 0.0917832 | 0.106935  | 0.0926573 |
| 0.108246  | 0.131993  | 0.125291  | 0.132721  | 0.110723  | 0.127331  | 0.113345  |
| 0.112179  | 0.119027  | 0.114948  | 0.119755  | 0.108829  | 0.118444  | 0.108246  |
| 0.0939685 | 0.118007  | 0.108392  | 0.116987  | 0.0979021 | 0.11014   | 0.0999417 |
| 0.092366  | 0.11757   | 0.106498  | 0.116259  | 0.0939685 | 0.113782  | 0.0930944 |

|           |          |           |          |           |           |           |
|-----------|----------|-----------|----------|-----------|-----------|-----------|
| 0.108683  | 0.125146 | 0.119318  | 0.120047 | 0.102418  | 0.112034  | 0.101544  |
| 0.090472  | 0.119172 | 0.110723  | 0.111451 | 0.0935315 | 0.110431  | 0.099359  |
| 0.114656  | 0.126166 | 0.11859   | 0.125437 | 0.104021  | 0.121212  | 0.108683  |
| 0.118153  | 0.141608 | 0.13549   | 0.116404 | 0.126166  | 0.140443  | 0.125     |
| 0.104749  | 0.115676 | 0.109557  | 0.11116  | 0.0949883 | 0.11014   | 0.0981935 |
| 0.0944056 | 0.117861 | 0.109703  | 0.120921 | 0.0977564 | 0.11116   | 0.100379  |
| 0.0958625 | 0.115239 | 0.112034  | 0.118881 | 0.100087  | 0.114365  | 0.103584  |
| 0.0920746 | 0.113199 | 0.100962  | 0.115676 | 0.0828963 | 0.103001  | 0.0965909 |
| 0.113636  | 0.123689 | 0.121649  | 0.126457 | 0.114656  | 0.120775  | 0.107663  |
| 0.092366  | 0.117861 | 0.110286  | 0.111014 | 0.0893065 | 0.109703  | 0.0977564 |
| 0.124854  | 0.142483 | 0.139569  | 0.131556 | 0.128205  | 0.13986   | 0.127914  |
| 0.11859   | 0.142628 | 0.136218  | 0.137238 | 0.125728  | 0.14292   | 0.128351  |
| 0.11451   | 0.130973 | 0.123106  | 0.12704  | 0.11553   | 0.130973  | 0.118153  |
| 0.101253  | 0.13345  | 0.122378  | 0.127185 | 0.107226  | 0.128788  | 0.107809  |
| 0.0942599 | 0.127914 | 0.119464  | 0.112325 | 0.0987762 | 0.118007  | 0.0984848 |
| 0.0926573 | 0.121649 | 0.111742  | 0.107809 | 0.0890152 | 0.10912   | 0.0989219 |
| 0.100379  | 0.120921 | 0.112179  | 0.119027 | 0.092366  | 0.111597  | 0.0984848 |
| 0.106206  | 0.131119 | 0.121795  | 0.126603 | 0.105186  | 0.125291  | 0.105769  |
| 0.105332  | 0.128205 | 0.121503  | 0.136801 | 0.104021  | 0.120921  | 0.110431  |
| 0.121066  | 0.138695 | 0.134324  | 0.136218 | 0.120338  | 0.131702  | 0.123543  |
| 0.100233  | 0.104167 | 0.0890152 | 0.120047 | 0.0447261 | 0.0590035 | 0.0817308 |
| 0.127185  | 0.13345  | 0.13141   | 0.139423 | 0.120338  | 0.136946  | 0.124126  |
| 0.0734266 | 0.128059 | 0.123397  | 0.104604 | 0.119318  | 0.130099  | 0.11116   |
| 0.191725  | 0.21081  | 0.206731  | 0.215326 | 0.198281  | 0.212267  | 0.198572  |
| 0.236742  | 0.24796  | 0.245921  | 0.250728 | 0.241259  | 0.250874  | 0.240093  |
| 0.102855  | 0.128934 | 0.121649  | 0.130245 | 0.103584  | 0.121649  | 0.106789  |
| 0.103293  | 0.120921 | 0.113928  | 0.126603 | 0.102564  | 0.118881  | 0.106935  |
| 0.0971737 | 0.120338 | 0.112471  | 0.123397 | 0.0941142 | 0.112762  | 0.100233  |
| 0.104749  | 0.120047 | 0.110723  | 0.129516 | 0.0984848 | 0.113928  | 0.103438  |
| 0.120484  | 0.130245 | 0.125291  | 0.139423 | 0.118298  | 0.134615  | 0.121795  |
| 0.107663  | 0.125583 | 0.118881  | 0.133596 | 0.101981  | 0.120047  | 0.103438  |
| 0.135198  | 0.140006 | 0.139132  | 0.147727 | 0.128351  | 0.133887  | 0.128934  |
| 0.10912   | 0.129662 | 0.120629  | 0.127477 | 0.104312  | 0.11859   | 0.106643  |
| 0.122523  | 0.140152 | 0.134033  | 0.139714 | 0.120338  | 0.132867  | 0.117716  |
| 0.123543  | 0.131847 | 0.127477  | 0.140734 | 0.121358  | 0.128351  | 0.123689  |
| 0.129662  | 0.121941 | 0.119318  | 0.143065 | 0.11553   | 0.118735  | 0.121941  |
| 0.127331  | 0.148456 | 0.143794  | 0.142483 | 0.13447   | 0.143502  | 0.133887  |
| 0.104895  | 0.122232 | 0.114365  | 0.127331 | 0.102418  | 0.118444  | 0.11116   |
| 0.105186  | 0.124272 | 0.118444  | 0.125874 | 0.099796  | 0.116696  | 0.105041  |
| 0.109703  | 0.117424 | 0.112762  | 0.130099 | 0.097028  | 0.116841  | 0.104021  |
| 0.100962  | 0.128205 | 0.119755  | 0.122523 | 0.102564  | 0.121795  | 0.104895  |
| 0.105041  | 0.123834 | 0.118298  | 0.125728 | 0.100524  | 0.117424  | 0.104604  |
| 0.104312  | 0.130099 | 0.121941  | 0.127622 | 0.102127  | 0.122815  | 0.103001  |
| 0.121941  | 0.130245 | 0.125874  | 0.141463 | 0.119172  | 0.124709  | 0.11655   |

|           |          |           |          |           |          |           |
|-----------|----------|-----------|----------|-----------|----------|-----------|
| 0.130973  | 0.132867 | 0.132284  | 0.148456 | 0.123252  | 0.129079 | 0.125     |
| 0.107809  | 0.126894 | 0.121066  | 0.125583 | 0.105332  | 0.124563 | 0.109703  |
| 0.106789  | 0.125291 | 0.120629  | 0.132721 | 0.100816  | 0.11655  | 0.105769  |
| 0.12602   | 0.136946 | 0.132284  | 0.135927 | 0.121503  | 0.132284 | 0.121503  |
| 0.103584  | 0.122669 | 0.113928  | 0.128934 | 0.0981935 | 0.117133 | 0.108974  |
| 0.134033  | 0.135344 | 0.131847  | 0.148893 | 0.127768  | 0.133013 | 0.135635  |
| 0.129662  | 0.136509 | 0.133887  | 0.142191 | 0.123106  | 0.135927 | 0.128351  |
| 0.124563  | 0.113928 | 0.109266  | 0.142337 | 0.108392  | 0.107226 | 0.107517  |
| 0.0942599 | 0.124709 | 0.115967  | 0.121649 | 0.097028  | 0.115676 | 0.10169   |
| 0.0984848 | 0.120775 | 0.112617  | 0.125583 | 0.095134  | 0.111451 | 0.099796  |
| 0.113491  | 0.131993 | 0.12296   | 0.130973 | 0.110431  | 0.121212 | 0.118298  |
| 0.116841  | 0.127185 | 0.122232  | 0.136655 | 0.11116   | 0.118444 | 0.115822  |
| 0.116841  | 0.127768 | 0.123106  | 0.131119 | 0.116987  | 0.128059 | 0.116696  |
| 0.106206  | 0.129371 | 0.121795  | 0.131556 | 0.109266  | 0.120921 | 0.106352  |
| 0.105186  | 0.130973 | 0.12398   | 0.125874 | 0.106789  | 0.121066 | 0.108537  |
| 0.113928  | 0.118444 | 0.112617  | 0.134033 | 0.106206  | 0.116113 | 0.111742  |
| 0.126748  | 0.13243  | 0.130099  | 0.135781 | 0.121941  | 0.131847 | 0.121649  |
| 0.123252  | 0.127185 | 0.123106  | 0.142774 | 0.114073  | 0.122815 | 0.116113  |
| 0.127185  | 0.128788 | 0.126748  | 0.146707 | 0.122086  | 0.129371 | 0.123252  |
| 0.131119  | 0.144668 | 0.139423  | 0.140734 | 0.128642  | 0.139714 | 0.134178  |
| 0.100524  | 0.13243  | 0.122523  | 0.128205 | 0.10271   | 0.123689 | 0.106498  |
| 0.120629  | 0.133596 | 0.128059  | 0.139569 | 0.115822  | 0.126603 | 0.118153  |
| 0.101544  | 0.122378 | 0.111597  | 0.125146 | 0.0987762 | 0.116841 | 0.102564  |
| 0.0990676 | 0.132139 | 0.124854  | 0.126457 | 0.108537  | 0.127477 | 0.109411  |
| 0.104895  | 0.119318 | 0.111451  | 0.122086 | 0.100087  | 0.114948 | 0.105915  |
| 0.105624  | 0.122086 | 0.111597  | 0.126603 | 0.0961538 | 0.113928 | 0.101981  |
| 0.100962  | 0.121503 | 0.115967  | 0.123106 | 0.100233  | 0.116259 | 0.0987762 |
| 0.126748  | 0.13039  | 0.13039   | 0.141026 | 0.120192  | 0.12602  | 0.125146  |
| 0.108829  | 0.137238 | 0.127914  | 0.13039  | 0.113636  | 0.130536 | 0.115967  |
| 0.125437  | 0.127331 | 0.127331  | 0.144376 | 0.121795  | 0.129953 | 0.122086  |
| 0.105332  | 0.126457 | 0.122669  | 0.125728 | 0.101981  | 0.120629 | 0.104895  |
| 0.115385  | 0.130099 | 0.124272  | 0.13141  | 0.112325  | 0.122232 | 0.117279  |
| 0.124563  | 0.134907 | 0.12704   | 0.136218 | 0.115093  | 0.130245 | 0.120921  |
| 0.110868  | 0.129079 | 0.11859   | 0.133304 | 0.104312  | 0.126457 | 0.110723  |
| 0.104895  | 0.121649 | 0.114948  | 0.123252 | 0.0986305 | 0.118444 | 0.109411  |
| 0.10912   | 0.128788 | 0.122378  | 0.133304 | 0.112179  | 0.130245 | 0.111305  |
| 0.106352  | 0.131556 | 0.120484  | 0.130245 | 0.108246  | 0.128059 | 0.11553   |
| 0.099359  | 0.127477 | 0.117279  | 0.123543 | 0.101836  | 0.12398  | 0.106498  |
| 0.124417  | 0.13447  | 0.129808  | 0.13986  | 0.123397  | 0.13884  | 0.11961   |
| 0.128642  | 0.137238 | 0.136072  | 0.142337 | 0.125874  | 0.135198 | 0.129371  |
| 0.0960082 | 0.117133 | 0.109266  | 0.120192 | 0.100524  | 0.119464 | 0.0941142 |
| 0.122086  | 0.110577 | 0.110577  | 0.138695 | 0.103293  | 0.10708  | 0.106498  |
| 0.11553   | 0.12704  | 0.124417  | 0.131556 | 0.112179  | 0.130245 | 0.113345  |
| 0.119318  | 0.101981 | 0.0961538 | 0.137675 | 0.099359  | 0.104604 | 0.104312  |

|           |           |           |          |           |           |           |
|-----------|-----------|-----------|----------|-----------|-----------|-----------|
| 0.108537  | 0.106935  | 0.0996503 | 0.132721 | 0.0967366 | 0.101981  | 0.0952797 |
| 0.112034  | 0.126748  | 0.122378  | 0.128934 | 0.108974  | 0.125874  | 0.108392  |
| 0.115093  | 0.129516  | 0.123689  | 0.13345  | 0.112325  | 0.129225  | 0.113199  |
| 0.114948  | 0.107809  | 0.0979021 | 0.137092 | 0.106061  | 0.111597  | 0.0955711 |
| 0.122523  | 0.119172  | 0.112762  | 0.140297 | 0.108683  | 0.113345  | 0.106352  |
| 0.114948  | 0.130828  | 0.124126  | 0.136509 | 0.117716  | 0.13141   | 0.113345  |
| 0.103293  | 0.108683  | 0.101399  | 0.130099 | 0.0920746 | 0.10373   | 0.090035  |
| 0.126748  | 0.148456  | 0.143794  | 0.144231 | 0.130682  | 0.142628  | 0.128642  |
| 0.125146  | 0.13345   | 0.125874  | 0.137966 | 0.121795  | 0.132284  | 0.117716  |
| 0.0989219 | 0.117716  | 0.109848  | 0.123397 | 0.0929487 | 0.107809  | 0.092366  |
| 0.215326  | 0.231789  | 0.225962  | 0.2331   | 0.220425  | 0.232663  | 0.218677  |
| 0.112179  | 0.109411  | 0.102127  | 0.138112 | 0.0977564 | 0.109703  | 0.0965909 |
| 0.106935  | 0.120775  | 0.115239  | 0.128205 | 0.106789  | 0.12398   | 0.103875  |
| 0.123106  | 0.117424  | 0.109848  | 0.144668 | 0.113345  | 0.112179  | 0.103147  |
| 0.106498  | 0.122669  | 0.117133  | 0.129225 | 0.106352  | 0.125583  | 0.105769  |
| 0.124563  | 0.134907  | 0.127331  | 0.139423 | 0.119755  | 0.134324  | 0.121795  |
| 0.109994  | 0.113345  | 0.106061  | 0.133596 | 0.0914918 | 0.0999417 | 0.0949883 |
| 0.109848  | 0.112034  | 0.10271   | 0.134907 | 0.100087  | 0.110286  | 0.0962995 |
| 0.116841  | 0.133596  | 0.125728  | 0.132867 | 0.116113  | 0.132139  | 0.112325  |
| 0.119027  | 0.111597  | 0.105478  | 0.140589 | 0.101399  | 0.105769  | 0.106643  |
| 0.119172  | 0.10912   | 0.104458  | 0.138695 | 0.105041  | 0.110286  | 0.105915  |
| 0.116113  | 0.118007  | 0.111014  | 0.130682 | 0.103438  | 0.111014  | 0.105478  |
| 0.114948  | 0.104312  | 0.0999417 | 0.131556 | 0.104312  | 0.111888  | 0.100233  |
| 0.106789  | 0.12296   | 0.117133  | 0.124854 | 0.106935  | 0.124417  | 0.111597  |
| 0.109994  | 0.110723  | 0.104895  | 0.128059 | 0.0976107 | 0.108974  | 0.0912005 |
| 0.125291  | 0.114656  | 0.106789  | 0.138695 | 0.103001  | 0.106498  | 0.103584  |
| 0.10708   | 0.0976107 | 0.0914918 | 0.13039  | 0.0912005 | 0.0996503 | 0.0955711 |
| 0.126603  | 0.146562  | 0.138112  | 0.145542 | 0.12704   | 0.141026  | 0.129662  |
| 0.13345   | 0.154283  | 0.146999  | 0.148893 | 0.13447   | 0.150204  | 0.128934  |
| 0.113054  | 0.129516  | 0.123106  | 0.129371 | 0.112617  | 0.128934  | 0.117861  |
| 0.117716  | 0.132139  | 0.127185  | 0.138403 | 0.116404  | 0.131265  | 0.114365  |
| 0.114948  | 0.127622  | 0.120047  | 0.135635 | 0.106935  | 0.12296   | 0.11014   |
| 0.125291  | 0.131556  | 0.126603  | 0.138986 | 0.120775  | 0.13447   | 0.124272  |
| 0.12296   | 0.146416  | 0.139714  | 0.136946 | 0.121649  | 0.137092  | 0.123397  |
| 0.129953  | 0.146416  | 0.138258  | 0.147727 | 0.133887  | 0.150787  | 0.132139  |
| 0.101544  | 0.122378  | 0.113345  | 0.121649 | 0.101399  | 0.122086  | 0.10373   |
| 0.123252  | 0.131265  | 0.127768  | 0.133741 | 0.123106  | 0.141463  | 0.128934  |
| 0.134761  | 0.151224  | 0.144231  | 0.150787 | 0.137238  | 0.15035   | 0.136655  |
| 0.104167  | 0.122669  | 0.117133  | 0.109703 | 0.0979021 | 0.111014  | 0.10373   |
| 0.112617  | 0.143065  | 0.134615  | 0.13884  | 0.118298  | 0.135781  | 0.118298  |
| 0.134324  | 0.146416  | 0.144085  | 0.146562 | 0.133304  | 0.143794  | 0.137092  |
| 0.123543  | 0.141171  | 0.13447   | 0.136655 | 0.121358  | 0.137675  | 0.122815  |
| 0.130682  | 0.145688  | 0.141608  | 0.149913 | 0.132284  | 0.143065  | 0.133741  |
| 0.122378  | 0.139132  | 0.130973  | 0.140443 | 0.117861  | 0.136801  | 0.120775  |

|          |           |           |          |           |           |           |
|----------|-----------|-----------|----------|-----------|-----------|-----------|
| 0.110577 | 0.0941142 | 0.0891608 | 0.123106 | 0.0952797 | 0.0979021 | 0.0909091 |
| 0.123252 | 0.130682  | 0.127477  | 0.135781 | 0.121066  | 0.13447   | 0.123106  |
| 0.112034 | 0.119464  | 0.113345  | 0.125437 | 0.103438  | 0.114219  | 0.107809  |
| 0.113636 | 0.103875  | 0.0992133 | 0.12296  | 0.0925117 | 0.0945513 | 0.101544  |
| 0.11451  | 0.112034  | 0.108246  | 0.138403 | 0.101544  | 0.105624  | 0.102127  |
| 0.116841 | 0.0995047 | 0.0977564 | 0.122669 | 0.100962  | 0.100087  | 0.103875  |
| 0.113928 | 0.101253  | 0.0960082 | 0.120921 | 0.0968823 | 0.0960082 | 0.0968823 |
| 0.113636 | 0.105915  | 0.101544  | 0.131119 | 0.0980478 | 0.10271   | 0.104458  |
| 0.127914 | 0.107372  | 0.10708   | 0.140443 | 0.107372  | 0.107663  | 0.117861  |
| 0.111597 | 0.130973  | 0.125437  | 0.130828 | 0.116113  | 0.134761  | 0.114073  |
| 0.104021 | 0.122815  | 0.116987  | 0.11859  | 0.10708   | 0.120775  | 0.10708   |
| 0.11014  | 0.124272  | 0.121066  | 0.119464 | 0.107663  | 0.11757   | 0.109994  |
| 0.102564 | 0.114948  | 0.108246  | 0.114802 | 0.101836  | 0.113491  | 0.106498  |
| 0.129516 | 0.139277  | 0.134324  | 0.139423 | 0.130828  | 0.1419    | 0.128205  |
| 0.144085 | 0.156469  | 0.150932  | 0.141754 | 0.13549   | 0.142191  | 0.145979  |
| 0.120484 | 0.130245  | 0.127622  | 0.139132 | 0.119464  | 0.129079  | 0.119464  |
| 0.112471 | 0.124272  | 0.120192  | 0.131702 | 0.111742  | 0.12398   | 0.113491  |
| 0.121941 | 0.110723  | 0.107517  | 0.137092 | 0.11014   | 0.113345  | 0.112762  |
| 0.119172 | 0.115239  | 0.106789  | 0.136364 | 0.112325  | 0.122523  | 0.107663  |
| 0.117716 | 0.13884   | 0.135052  | 0.134033 | 0.123689  | 0.137383  | 0.119901  |
| 0.124126 | 0.112034  | 0.110868  | 0.138695 | 0.11116   | 0.112908  | 0.108829  |
| 0.130828 | 0.13447   | 0.13039   | 0.144231 | 0.122815  | 0.133596  | 0.128642  |
| 0.117861 | 0.134324  | 0.128788  | 0.133013 | 0.11859   | 0.130828  | 0.121795  |
| 0.147873 | 0.156177  | 0.155012  | 0.159528 | 0.148601  | 0.153846  | 0.151515  |
| 0.119901 | 0.138695  | 0.133159  | 0.132139 | 0.119172  | 0.129662  | 0.120629  |
| 0.131847 | 0.145979  | 0.137529  | 0.144085 | 0.128205  | 0.142774  | 0.134033  |
| 0.106643 | 0.11757   | 0.114948  | 0.123252 | 0.109703  | 0.119901  | 0.109994  |
| 0.124126 | 0.13039   | 0.12398   | 0.133159 | 0.109703  | 0.11757   | 0.112617  |
| 0.112762 | 0.103584  | 0.095134  | 0.132284 | 0.103293  | 0.109994  | 0.095134  |
| 0.124563 | 0.155594  | 0.147436  | 0.14292  | 0.131993  | 0.149767  | 0.136946  |
| 0.138403 | 0.143794  | 0.137092  | 0.155012 | 0.132721  | 0.140006  | 0.133013  |
| 0.112908 | 0.138695  | 0.131993  | 0.142628 | 0.118881  | 0.130536  | 0.119755  |
| 0.125583 | 0.146125  | 0.13884   | 0.152972 | 0.13243   | 0.146707  | 0.13447   |
| 0.142628 | 0.161131  | 0.155886  | 0.161568 | 0.138986  | 0.157925  | 0.14831   |
| 0.136801 | 0.162005  | 0.155594  | 0.161859 | 0.13986   | 0.158508  | 0.142191  |
| 0.11014  | 0.120192  | 0.114948  | 0.118881 | 0.103875  | 0.112325  | 0.107663  |
| 0.128059 | 0.14831   | 0.137529  | 0.14292  | 0.131119  | 0.145105  | 0.134033  |
| 0.103001 | 0.126748  | 0.120338  | 0.134761 | 0.108974  | 0.126457  | 0.110431  |
| 0.106935 | 0.125437  | 0.116696  | 0.133159 | 0.105915  | 0.12398   | 0.111451  |
| 0.114656 | 0.139277  | 0.128788  | 0.127185 | 0.113928  | 0.129953  | 0.11014   |
| 0.109411 | 0.136364  | 0.128788  | 0.137675 | 0.11655   | 0.130245  | 0.118298  |
| 0.11014  | 0.133304  | 0.124563  | 0.136364 | 0.106206  | 0.12602   | 0.110868  |
| 0.104312 | 0.128351  | 0.120484  | 0.136072 | 0.106789  | 0.125437  | 0.11116   |
| 0.114802 | 0.136509  | 0.129225  | 0.138695 | 0.117279  | 0.135635  | 0.121066  |

|           |          |          |          |           |          |           |
|-----------|----------|----------|----------|-----------|----------|-----------|
| 0.114656  | 0.134324 | 0.127914 | 0.14088  | 0.113345  | 0.129662 | 0.120338  |
| 0.095134  | 0.129079 | 0.121795 | 0.123397 | 0.103147  | 0.122086 | 0.105186  |
| 0.113199  | 0.141608 | 0.13345  | 0.143211 | 0.115676  | 0.132284 | 0.119755  |
| 0.110431  | 0.140006 | 0.132139 | 0.140443 | 0.11553   | 0.130973 | 0.120775  |
| 0.116259  | 0.133304 | 0.126311 | 0.13141  | 0.113491  | 0.124272 | 0.120775  |
| 0.215618  | 0.22771  | 0.223922 | 0.229895 | 0.214015  | 0.226253 | 0.216638  |
| 0.132576  | 0.146125 | 0.143502 | 0.158217 | 0.137966  | 0.144959 | 0.139714  |
| 0.121649  | 0.144231 | 0.138112 | 0.143794 | 0.123252  | 0.138986 | 0.119172  |
| 0.118881  | 0.139132 | 0.13243  | 0.13986  | 0.123689  | 0.138549 | 0.125437  |
| 0.208042  | 0.223922 | 0.218677 | 0.226107 | 0.21285   | 0.225087 | 0.213724  |
| 0.111305  | 0.13884  | 0.130682 | 0.130536 | 0.115239  | 0.131847 | 0.11961   |
| 0.11116   | 0.135781 | 0.125874 | 0.134761 | 0.113928  | 0.133159 | 0.112179  |
| 0.116696  | 0.149184 | 0.13986  | 0.134761 | 0.120921  | 0.139277 | 0.123252  |
| 0.112471  | 0.131265 | 0.121941 | 0.136655 | 0.114073  | 0.133013 | 0.119027  |
| 0.245921  | 0.257139 | 0.254516 | 0.263403 | 0.252477  | 0.263258 | 0.253351  |
| 0.109411  | 0.141317 | 0.131993 | 0.112617 | 0.12296   | 0.13986  | 0.119464  |
| 0.108537  | 0.127331 | 0.121795 | 0.130099 | 0.104604  | 0.124417 | 0.115093  |
| 0.112908  | 0.137821 | 0.126748 | 0.132721 | 0.11859   | 0.129371 | 0.113054  |
| 0.110577  | 0.137529 | 0.130828 | 0.131265 | 0.115385  | 0.126748 | 0.112471  |
| 0.112034  | 0.138986 | 0.129953 | 0.11961  | 0.120047  | 0.137529 | 0.123834  |
| 0.12398   | 0.142483 | 0.136364 | 0.141754 | 0.120629  | 0.136946 | 0.125874  |
| 0.110868  | 0.132284 | 0.123834 | 0.128642 | 0.106935  | 0.124126 | 0.117424  |
| 0.1081    | 0.137675 | 0.127477 | 0.138112 | 0.116113  | 0.130682 | 0.120192  |
| 0.117279  | 0.137238 | 0.128497 | 0.135052 | 0.11859   | 0.136072 | 0.123252  |
| 0.106206  | 0.129079 | 0.120338 | 0.133596 | 0.108392  | 0.126457 | 0.113345  |
| 0.109557  | 0.133304 | 0.126311 | 0.138403 | 0.111742  | 0.127477 | 0.113782  |
| 0.103293  | 0.119464 | 0.115385 | 0.125146 | 0.105186  | 0.120047 | 0.103438  |
| 0.140734  | 0.144085 | 0.137092 | 0.152098 | 0.131556  | 0.142045 | 0.133013  |
| 0.112762  | 0.143502 | 0.135052 | 0.113928 | 0.12602   | 0.142045 | 0.122232  |
| 0.117716  | 0.136509 | 0.130682 | 0.138403 | 0.118444  | 0.136509 | 0.116696  |
| 0.185897  | 0.204108 | 0.200029 | 0.206585 | 0.191579  | 0.205857 | 0.190705  |
| 0.201049  | 0.218386 | 0.213432 | 0.221737 | 0.205274  | 0.219551 | 0.205274  |
| 0.111597  | 0.135344 | 0.12398  | 0.138695 | 0.115822  | 0.136509 | 0.118735  |
| 0.104895  | 0.125146 | 0.118735 | 0.130536 | 0.10912   | 0.12398  | 0.111451  |
| 0.130245  | 0.142045 | 0.136218 | 0.150932 | 0.126894  | 0.140006 | 0.128642  |
| 0.108683  | 0.130682 | 0.124563 | 0.131702 | 0.108537  | 0.126311 | 0.113782  |
| 0.113782  | 0.143939 | 0.135781 | 0.116113 | 0.122669  | 0.140443 | 0.121795  |
| 0.122378  | 0.12602  | 0.122523 | 0.142191 | 0.11757   | 0.119901 | 0.114073  |
| 0.222611  | 0.234994 | 0.231498 | 0.242133 | 0.224505  | 0.239948 | 0.226544  |
| 0.109557  | 0.136509 | 0.127185 | 0.136655 | 0.109994  | 0.131556 | 0.105915  |
| 0.207022  | 0.216783 | 0.213287 | 0.223339 | 0.204837  | 0.215326 | 0.208333  |
| 0.0976107 | 0.119318 | 0.109411 | 0.114802 | 0.0901807 | 0.108829 | 0.0986305 |
| 0.102127  | 0.134324 | 0.122086 | 0.130973 | 0.105769  | 0.127914 | 0.102273  |
| 0.108392  | 0.135635 | 0.127768 | 0.132867 | 0.107955  | 0.126603 | 0.117279  |



|           |          |          |          |           |          |          |
|-----------|----------|----------|----------|-----------|----------|----------|
| 0.106061  | 0.124854 | 0.116404 | 0.131993 | 0.107663  | 0.128059 | 0.112325 |
| 0.207896  | 0.219988 | 0.215909 | 0.224505 | 0.208625  | 0.219697 | 0.20542  |
| 0.124563  | 0.143357 | 0.138986 | 0.151078 | 0.127914  | 0.139277 | 0.13141  |
| 0.102127  | 0.126166 | 0.116841 | 0.121941 | 0.104895  | 0.122669 | 0.10373  |
| 0.114365  | 0.13986  | 0.131702 | 0.145251 | 0.12296   | 0.134324 | 0.123252 |
| 0.120484  | 0.14627  | 0.137529 | 0.142045 | 0.116259  | 0.12704  | 0.11859  |
| 0.106206  | 0.135198 | 0.124709 | 0.133304 | 0.107809  | 0.128497 | 0.113928 |
| 0.0996503 | 0.118153 | 0.109411 | 0.117424 | 0.0954254 | 0.109994 | 0.10067  |
| 0.112471  | 0.134178 | 0.128351 | 0.132284 | 0.108829  | 0.122232 | 0.115822 |
| 0.118881  | 0.135635 | 0.125437 | 0.13986  | 0.11553   | 0.132721 | 0.116696 |
| 0.104312  | 0.133887 | 0.125146 | 0.134907 | 0.109994  | 0.126603 | 0.112617 |
| 0.107663  | 0.125291 | 0.115093 | 0.123689 | 0.106352  | 0.126166 | 0.108683 |
| 0.185606  | 0.204108 | 0.199738 | 0.20979  | 0.189831  | 0.203817 | 0.18954  |
| 0.114073  | 0.139277 | 0.130245 | 0.133304 | 0.119172  | 0.127914 | 0.11451  |
| 0.119755  | 0.134761 | 0.126603 | 0.141608 | 0.114656  | 0.128059 | 0.116113 |
| 0.113199  | 0.128497 | 0.122378 | 0.137675 | 0.113345  | 0.130245 | 0.112179 |
| 0.107809  | 0.142045 | 0.134178 | 0.119755 | 0.121941  | 0.137966 | 0.115239 |
| 0.112179  | 0.139132 | 0.130973 | 0.143939 | 0.116696  | 0.131265 | 0.11961  |
| 0.103147  | 0.119901 | 0.112034 | 0.118007 | 0.0948427 | 0.108829 | 0.103875 |
| 0.104749  | 0.138403 | 0.127914 | 0.125146 | 0.106352  | 0.12296  | 0.109266 |
| 0.118735  | 0.130828 | 0.125    | 0.13243  | 0.113054  | 0.125874 | 0.120338 |
| 0.111305  | 0.135635 | 0.127185 | 0.137238 | 0.112908  | 0.130099 | 0.112325 |
| 0.108974  | 0.13447  | 0.128059 | 0.130828 | 0.113199  | 0.128059 | 0.111742 |
| 0.10912   | 0.130536 | 0.124126 | 0.134761 | 0.112762  | 0.131119 | 0.117133 |
| 0.111014  | 0.14933  | 0.139132 | 0.134615 | 0.122815  | 0.140589 | 0.120192 |
| 0.127477  | 0.155886 | 0.147727 | 0.141171 | 0.131119  | 0.144814 | 0.133159 |
| 0.103584  | 0.134907 | 0.126166 | 0.110577 | 0.112179  | 0.131119 | 0.111597 |
| 0.131119  | 0.144376 | 0.140297 | 0.154429 | 0.132721  | 0.141754 | 0.133596 |
| 0.107809  | 0.133887 | 0.12398  | 0.132284 | 0.106206  | 0.130099 | 0.109994 |
| 0.107517  | 0.121649 | 0.114948 | 0.135198 | 0.103001  | 0.11757  | 0.099796 |
| 0.111742  | 0.134907 | 0.129662 | 0.138549 | 0.11655   | 0.134033 | 0.118881 |
| 0.116404  | 0.136072 | 0.127331 | 0.135927 | 0.114219  | 0.128205 | 0.120338 |
| 0.192453  | 0.205128 | 0.200175 | 0.205857 | 0.190268  | 0.203671 | 0.192016 |
| 0.100524  | 0.12398  | 0.114656 | 0.121503 | 0.101544  | 0.120775 | 0.101544 |
| 0.097028  | 0.125437 | 0.11757  | 0.125874 | 0.10708   | 0.125146 | 0.101836 |
| 0.113636  | 0.133596 | 0.125437 | 0.139277 | 0.11757   | 0.133013 | 0.11961  |
| 0.179487  | 0.197698 | 0.191579 | 0.198135 | 0.181964  | 0.195367 | 0.184586 |
| 0.122523  | 0.149476 | 0.143939 | 0.11961  | 0.130245  | 0.145688 | 0.126748 |
| 0.131265  | 0.152098 | 0.149767 | 0.122815 | 0.141026  | 0.152972 | 0.136364 |
| 0.139569  | 0.143794 | 0.137092 | 0.155012 | 0.131556  | 0.14292  | 0.133887 |
| 0.0990676 | 0.132721 | 0.12602  | 0.117716 | 0.110577  | 0.130973 | 0.108246 |
| 0.113199  | 0.139569 | 0.130536 | 0.143502 | 0.120047  | 0.134907 | 0.124417 |
| 0.208333  | 0.228293 | 0.223048 | 0.228147 | 0.213141  | 0.226544 | 0.214598 |
| 0.124126  | 0.143502 | 0.135344 | 0.148601 | 0.121358  | 0.140589 | 0.124563 |

|           |          |          |          |           |          |          |
|-----------|----------|----------|----------|-----------|----------|----------|
| 0.118153  | 0.142483 | 0.134615 | 0.145251 | 0.123834  | 0.13549  | 0.123543 |
| 0.104167  | 0.123252 | 0.116841 | 0.125437 | 0.10373   | 0.123252 | 0.103438 |
| 0.168269  | 0.185606 | 0.178322 | 0.188374 | 0.167541  | 0.185023 | 0.170746 |
| 0.106789  | 0.132576 | 0.124709 | 0.134761 | 0.108683  | 0.128497 | 0.111014 |
| 0.139569  | 0.149621 | 0.145542 | 0.152098 | 0.14088   | 0.150495 | 0.146999 |
| 0.111597  | 0.136218 | 0.128059 | 0.132576 | 0.112325  | 0.129808 | 0.118153 |
| 0.188228  | 0.204691 | 0.199738 | 0.206002 | 0.1875    | 0.204108 | 0.190705 |
| 0.106643  | 0.136801 | 0.130682 | 0.114219 | 0.118735  | 0.135635 | 0.114948 |
| 0.101981  | 0.127477 | 0.116113 | 0.128788 | 0.105915  | 0.125146 | 0.10708  |
| 0.107372  | 0.127622 | 0.120338 | 0.137092 | 0.103147  | 0.120338 | 0.104021 |
| 0.110723  | 0.135635 | 0.129808 | 0.13345  | 0.116987  | 0.13447  | 0.11757  |
| 0.111014  | 0.135344 | 0.12602  | 0.139277 | 0.115239  | 0.130973 | 0.111742 |
| 0.114802  | 0.137383 | 0.128059 | 0.141026 | 0.109994  | 0.129808 | 0.113199 |
| 0.104167  | 0.128497 | 0.120921 | 0.131265 | 0.109557  | 0.129662 | 0.111305 |
| 0.186772  | 0.204983 | 0.198864 | 0.206585 | 0.18954   | 0.202943 | 0.188374 |
| 0.111451  | 0.138112 | 0.130536 | 0.13884  | 0.117133  | 0.134324 | 0.121503 |
| 0.109557  | 0.135052 | 0.125728 | 0.138986 | 0.109411  | 0.12602  | 0.111742 |
| 0.210519  | 0.225233 | 0.22028  | 0.227418 | 0.212995  | 0.225816 | 0.214161 |
| 0.111451  | 0.137238 | 0.130536 | 0.133304 | 0.118881  | 0.129953 | 0.111014 |
| 0.1081    | 0.128351 | 0.121649 | 0.131993 | 0.10912   | 0.13039  | 0.111742 |
| 0.101399  | 0.124563 | 0.114948 | 0.128497 | 0.101836  | 0.123397 | 0.108246 |
| 0.130099  | 0.147436 | 0.1419   | 0.149913 | 0.13549   | 0.143939 | 0.136364 |
| 0.187209  | 0.204545 | 0.199009 | 0.204983 | 0.188228  | 0.206585 | 0.190559 |
| 0.111014  | 0.129225 | 0.122232 | 0.13141  | 0.110286  | 0.124272 | 0.116113 |
| 0.120921  | 0.152826 | 0.143502 | 0.136655 | 0.129225  | 0.143502 | 0.127185 |
| 0.105478  | 0.128351 | 0.120484 | 0.131119 | 0.10912   | 0.129808 | 0.109703 |
| 0.101399  | 0.129225 | 0.119901 | 0.130245 | 0.105041  | 0.127768 | 0.105915 |
| 0.103875  | 0.127622 | 0.119755 | 0.131265 | 0.105186  | 0.125583 | 0.108392 |
| 0.107809  | 0.133887 | 0.128934 | 0.138986 | 0.112617  | 0.128642 | 0.116696 |
| 0.0954254 | 0.12704  | 0.118007 | 0.11961  | 0.099359  | 0.122086 | 0.105186 |
| 0.109411  | 0.142483 | 0.132576 | 0.113491 | 0.12296   | 0.138403 | 0.118007 |
| 0.123689  | 0.134907 | 0.123543 | 0.140589 | 0.118881  | 0.130245 | 0.122378 |
| 0.107372  | 0.138695 | 0.130828 | 0.114365 | 0.115385  | 0.137238 | 0.113345 |
| 0.125     | 0.148456 | 0.140589 | 0.141026 | 0.116404  | 0.129516 | 0.122523 |
| 0.188957  | 0.210373 | 0.203671 | 0.21081  | 0.195221  | 0.209499 | 0.19493  |
| 0.108683  | 0.141171 | 0.133013 | 0.127914 | 0.117279  | 0.137383 | 0.117861 |
| 0.11961   | 0.143065 | 0.137821 | 0.147873 | 0.125583  | 0.138695 | 0.128205 |
| 0.101107  | 0.127185 | 0.118735 | 0.128205 | 0.104749  | 0.126311 | 0.108246 |
| 0.0913462 | 0.126748 | 0.120338 | 0.121941 | 0.0996503 | 0.119755 | 0.101981 |
| 0.103001  | 0.129662 | 0.122378 | 0.120775 | 0.105186  | 0.124709 | 0.111888 |
| 0.111597  | 0.131556 | 0.121358 | 0.130536 | 0.107955  | 0.12398  | 0.115822 |
| 0.122669  | 0.143794 | 0.135635 | 0.143939 | 0.12602   | 0.136509 | 0.11553  |
| 0.112325  | 0.13549  | 0.125583 | 0.140006 | 0.111014  | 0.134615 | 0.111014 |
| 0.10067   | 0.129079 | 0.120921 | 0.126603 | 0.10169   | 0.122086 | 0.108683 |

|           |          |          |          |           |          |           |
|-----------|----------|----------|----------|-----------|----------|-----------|
| 0.100233  | 0.125437 | 0.117279 | 0.124709 | 0.101253  | 0.11961  | 0.106789  |
| 0.10067   | 0.13141  | 0.121503 | 0.130682 | 0.10373   | 0.122378 | 0.111014  |
| 0.100524  | 0.121066 | 0.112034 | 0.116841 | 0.0933858 | 0.108537 | 0.0980478 |
| 0.118153  | 0.145688 | 0.141026 | 0.117279 | 0.128205  | 0.144814 | 0.124709  |
| 0.109848  | 0.132721 | 0.123106 | 0.133741 | 0.10708   | 0.125728 | 0.11553   |
| 0.107955  | 0.13141  | 0.127331 | 0.136509 | 0.109557  | 0.12704  | 0.113636  |
| 0.107955  | 0.129079 | 0.118007 | 0.128059 | 0.102273  | 0.119464 | 0.111305  |
| 0.103147  | 0.130973 | 0.121649 | 0.134907 | 0.104167  | 0.128351 | 0.107372  |
| 0.099796  | 0.12296  | 0.112471 | 0.119027 | 0.101981  | 0.120921 | 0.101107  |
| 0.105041  | 0.130536 | 0.121795 | 0.134178 | 0.108974  | 0.128497 | 0.112762  |
| 0.104749  | 0.139569 | 0.130245 | 0.128351 | 0.114219  | 0.136946 | 0.113928  |
| 0.11116   | 0.131993 | 0.123252 | 0.137092 | 0.109266  | 0.127914 | 0.109848  |
| 0.107663  | 0.13141  | 0.122086 | 0.134761 | 0.112179  | 0.133159 | 0.113054  |
| 0.097028  | 0.131265 | 0.120775 | 0.126166 | 0.102127  | 0.122232 | 0.10912   |
| 0.105915  | 0.129953 | 0.120921 | 0.133887 | 0.109266  | 0.127914 | 0.112471  |
| 0.113491  | 0.129953 | 0.122086 | 0.142337 | 0.109266  | 0.125874 | 0.108974  |
| 0.113636  | 0.138549 | 0.133596 | 0.142774 | 0.112908  | 0.134178 | 0.114948  |
| 0.10067   | 0.120338 | 0.111888 | 0.124854 | 0.0984848 | 0.118881 | 0.099359  |
| 0.102127  | 0.126457 | 0.115967 | 0.13039  | 0.10373   | 0.126748 | 0.1081    |
| 0.11014   | 0.133596 | 0.126894 | 0.140443 | 0.116113  | 0.13039  | 0.118735  |
| 0.0990676 | 0.119901 | 0.111742 | 0.117133 | 0.0957168 | 0.110868 | 0.101836  |
| 0.112762  | 0.139132 | 0.129516 | 0.142191 | 0.116404  | 0.131556 | 0.118735  |
| 0.108974  | 0.127477 | 0.120775 | 0.136655 | 0.110286  | 0.128642 | 0.112034  |
| 0.101981  | 0.130099 | 0.121941 | 0.125    | 0.107663  | 0.124854 | 0.112908  |
| 0.104604  | 0.131556 | 0.123106 | 0.128788 | 0.106789  | 0.129225 | 0.109411  |
| 0.0968823 | 0.122086 | 0.111305 | 0.121649 | 0.100233  | 0.121795 | 0.100816  |
| 0.115385  | 0.139423 | 0.133304 | 0.144522 | 0.122815  | 0.136509 | 0.122815  |
| 0.121503  | 0.137383 | 0.128934 | 0.142483 | 0.11757   | 0.133596 | 0.123106  |
| 0.107955  | 0.134324 | 0.125291 | 0.13447  | 0.110431  | 0.130536 | 0.112762  |
| 0.187791  | 0.208916 | 0.203089 | 0.212558 | 0.196387  | 0.208916 | 0.194347  |
| 0.163899  | 0.180361 | 0.174242 | 0.183712 | 0.161131  | 0.178613 | 0.160839  |
| 0.107372  | 0.139569 | 0.133159 | 0.117279 | 0.118298  | 0.137821 | 0.112471  |
| 0.114219  | 0.132139 | 0.125728 | 0.137238 | 0.109703  | 0.128934 | 0.116987  |
| 0.134324  | 0.153992 | 0.151661 | 0.125    | 0.143794  | 0.151661 | 0.139714  |
| 0.113199  | 0.140443 | 0.129953 | 0.138549 | 0.120629  | 0.138112 | 0.123252  |
| 0.113636  | 0.137092 | 0.126894 | 0.136072 | 0.112034  | 0.133013 | 0.11757   |
| 0.108246  | 0.131702 | 0.124126 | 0.136218 | 0.111305  | 0.132284 | 0.111888  |
| 0.101253  | 0.122378 | 0.115385 | 0.126603 | 0.106061  | 0.124709 | 0.102273  |
| 0.118735  | 0.138695 | 0.130245 | 0.143211 | 0.117424  | 0.13141  | 0.117424  |
| 0.199301  | 0.216055 | 0.21285  | 0.217075 | 0.200612  | 0.21722  | 0.201777  |
| 0.115822  | 0.134324 | 0.127331 | 0.134761 | 0.112179  | 0.127331 | 0.120338  |
| 0.111888  | 0.135927 | 0.127185 | 0.137529 | 0.110868  | 0.127477 | 0.116696  |
| 0.10373   | 0.13039  | 0.120192 | 0.133741 | 0.105041  | 0.127768 | 0.108246  |
| 0.114073  | 0.143939 | 0.13345  | 0.138549 | 0.11014   | 0.129662 | 0.111597  |

|           |           |           |          |           |           |           |
|-----------|-----------|-----------|----------|-----------|-----------|-----------|
| 0.184149  | 0.201777  | 0.196241  | 0.20542  | 0.182255  | 0.200612  | 0.185169  |
| 0.246212  | 0.254808  | 0.25102   | 0.258159 | 0.245484  | 0.25743   | 0.248106  |
| 0.115093  | 0.135927  | 0.12602   | 0.139277 | 0.112908  | 0.130099  | 0.114365  |
| 0.117133  | 0.135344  | 0.130682  | 0.140152 | 0.114365  | 0.127477  | 0.113491  |
| 0.108392  | 0.141463  | 0.133013  | 0.116259 | 0.118153  | 0.136509  | 0.115822  |
| 0.108537  | 0.132576  | 0.12296   | 0.132721 | 0.1081    | 0.127331  | 0.114219  |
| 0.106352  | 0.124854  | 0.117279  | 0.129371 | 0.105041  | 0.117861  | 0.112908  |
| 0.105624  | 0.131993  | 0.122086  | 0.129808 | 0.111014  | 0.13141   | 0.110723  |
| 0.109848  | 0.130973  | 0.12398   | 0.137529 | 0.107955  | 0.124854  | 0.114948  |
| 0.107809  | 0.133013  | 0.124272  | 0.127331 | 0.105915  | 0.121358  | 0.113782  |
| 0.107955  | 0.128497  | 0.121212  | 0.135344 | 0.106935  | 0.125     | 0.112762  |
| 0.104895  | 0.126311  | 0.118153  | 0.133741 | 0.108537  | 0.126894  | 0.105041  |
| 0.0995047 | 0.130828  | 0.122086  | 0.12602  | 0.103147  | 0.123834  | 0.1081    |
| 0.111305  | 0.133304  | 0.125437  | 0.134324 | 0.112325  | 0.128059  | 0.113782  |
| 0.109994  | 0.139277  | 0.131993  | 0.142045 | 0.115385  | 0.132867  | 0.118881  |
| 0.0992133 | 0.114802  | 0.108392  | 0.125146 | 0.0926573 | 0.109266  | 0.0926573 |
| 0.112325  | 0.0821678 | 0.0801282 | 0.122232 | 0.0929487 | 0.0952797 | 0.0938228 |
| 0.125437  | 0.13549   | 0.129371  | 0.139423 | 0.123543  | 0.136655  | 0.124126  |
| 0.101981  | 0.12398   | 0.118153  | 0.131119 | 0.104749  | 0.128351  | 0.109703  |
| 0.113491  | 0.128788  | 0.120921  | 0.130973 | 0.108974  | 0.12296   | 0.117133  |
| 0.122815  | 0.132867  | 0.128788  | 0.13884  | 0.118007  | 0.134033  | 0.124709  |
| 0.206876  | 0.220717  | 0.215763  | 0.222611 | 0.207896  | 0.220134  | 0.211101  |
| 0.104167  | 0.125     | 0.115385  | 0.130973 | 0.0996503 | 0.122378  | 0.101981  |
| 0.0958625 | 0.125728  | 0.118444  | 0.124126 | 0.102127  | 0.121649  | 0.105041  |
| 0.111305  | 0.149038  | 0.138549  | 0.130536 | 0.120484  | 0.139714  | 0.120775  |
| 0.114073  | 0.140152  | 0.13345   | 0.134761 | 0.117133  | 0.131702  | 0.113054  |
| 0.113199  | 0.140734  | 0.13141   | 0.135927 | 0.108974  | 0.129371  | 0.112471  |
| 0.19595   | 0.216492  | 0.209499  | 0.219843 | 0.201049  | 0.215618  | 0.199301  |
| 0.109266  | 0.141463  | 0.132721  | 0.143648 | 0.121649  | 0.135635  | 0.122815  |
| 0.103001  | 0.124126  | 0.11655   | 0.130973 | 0.104021  | 0.125583  | 0.107517  |
| 0.11859   | 0.131847  | 0.128059  | 0.129371 | 0.114365  | 0.130682  | 0.119318  |
| 0.104604  | 0.130973  | 0.120484  | 0.131993 | 0.10912   | 0.129225  | 0.11116   |
| 0.110431  | 0.139132  | 0.132139  | 0.143648 | 0.118444  | 0.131847  | 0.119901  |
| 0.104021  | 0.125437  | 0.119901  | 0.132284 | 0.10708   | 0.119901  | 0.112325  |
| 0.106935  | 0.128351  | 0.118735  | 0.131702 | 0.106498  | 0.121358  | 0.103293  |
| 0.11014   | 0.133596  | 0.125146  | 0.131993 | 0.11116   | 0.128351  | 0.109703  |
| 0.19391   | 0.216783  | 0.208916  | 0.216346 | 0.200175  | 0.215326  | 0.199009  |
| 0.10169   | 0.130099  | 0.121066  | 0.130828 | 0.108829  | 0.124854  | 0.111742  |
| 0.190705  | 0.212704  | 0.206585  | 0.211976 | 0.196678  | 0.209499  | 0.198135  |
| 0.190559  | 0.207896  | 0.201195  | 0.20979  | 0.192745  | 0.206148  | 0.193619  |
| 0.118298  | 0.136509  | 0.129516  | 0.139569 | 0.118153  | 0.134761  | 0.122815  |
| 0.120629  | 0.141463  | 0.133596  | 0.134324 | 0.124272  | 0.129808  | 0.118153  |
| 0.0996503 | 0.11961   | 0.109994  | 0.124126 | 0.0968823 | 0.117279  | 0.0989219 |
| 0.101544  | 0.126748  | 0.120629  | 0.137092 | 0.105186  | 0.126457  | 0.109557  |

|           |          |          |          |           |          |          |
|-----------|----------|----------|----------|-----------|----------|----------|
| 0.109557  | 0.137383 | 0.128934 | 0.134033 | 0.110868  | 0.13039  | 0.115822 |
| 0.106935  | 0.127768 | 0.11961  | 0.13345  | 0.11116   | 0.129516 | 0.111451 |
| 0.104021  | 0.130099 | 0.120775 | 0.124709 | 0.101836  | 0.118153 | 0.110577 |
| 0.1081    | 0.129808 | 0.11961  | 0.125583 | 0.102418  | 0.123689 | 0.112908 |
| 0.116987  | 0.134324 | 0.128497 | 0.140297 | 0.116259  | 0.13141  | 0.115676 |
| 0.111014  | 0.134178 | 0.125728 | 0.137529 | 0.111451  | 0.133596 | 0.113491 |
| 0.0983392 | 0.125291 | 0.114219 | 0.12398  | 0.102273  | 0.124709 | 0.105769 |
| 0.108974  | 0.137675 | 0.130973 | 0.139277 | 0.116987  | 0.133887 | 0.121358 |
| 0.0971737 | 0.120921 | 0.111014 | 0.127477 | 0.0984848 | 0.119755 | 0.104021 |
| 0.120921  | 0.138549 | 0.135052 | 0.144522 | 0.12398   | 0.134178 | 0.123397 |
| 0.106061  | 0.137092 | 0.128934 | 0.116259 | 0.114948  | 0.13447  | 0.113199 |
| 0.12602   | 0.145105 | 0.136072 | 0.150495 | 0.129662  | 0.140734 | 0.131702 |
| 0.256847  | 0.2669   | 0.263695 | 0.269668 | 0.261072  | 0.272145 | 0.259907 |
| 0.11757   | 0.125291 | 0.116259 | 0.126894 | 0.114802  | 0.126166 | 0.114219 |
| 0.11655   | 0.135052 | 0.128934 | 0.133741 | 0.11757   | 0.13447  | 0.116696 |
| 0.21722   | 0.231935 | 0.225233 | 0.231206 | 0.218531  | 0.231061 | 0.22028  |
| 0.119464  | 0.136509 | 0.127185 | 0.142483 | 0.118444  | 0.133887 | 0.121358 |
| 0.229312  | 0.241987 | 0.237617 | 0.244172 | 0.231206  | 0.243444 | 0.230915 |
| 0.107663  | 0.122086 | 0.115093 | 0.124854 | 0.107226  | 0.12296  | 0.107226 |
| 0.118881  | 0.130682 | 0.128059 | 0.140734 | 0.118444  | 0.134761 | 0.121649 |
| 0.105769  | 0.13243  | 0.125437 | 0.132576 | 0.107372  | 0.125437 | 0.106498 |
| 0.118007  | 0.132721 | 0.125146 | 0.136946 | 0.11553   | 0.134761 | 0.117279 |
| 0.200466  | 0.218386 | 0.209645 | 0.219697 | 0.203526  | 0.217512 | 0.205274 |
| 0.123834  | 0.141754 | 0.135052 | 0.147145 | 0.125437  | 0.135927 | 0.128934 |
| 0.111597  | 0.138258 | 0.129808 | 0.141608 | 0.114656  | 0.133304 | 0.118444 |
| 0.2213    | 0.236597 | 0.2331   | 0.244901 | 0.226399  | 0.23951  | 0.225816 |
| 0.111305  | 0.137092 | 0.129808 | 0.133741 | 0.110286  | 0.122523 | 0.119027 |
| 0.195659  | 0.215909 | 0.212121 | 0.216055 | 0.200466  | 0.213287 | 0.197552 |
| 0.109994  | 0.131119 | 0.123252 | 0.133887 | 0.109266  | 0.122669 | 0.114219 |
| 0.106498  | 0.129662 | 0.122378 | 0.133304 | 0.107517  | 0.130828 | 0.111888 |
| 0.11014   | 0.132139 | 0.127185 | 0.125    | 0.11116   | 0.128351 | 0.11757  |
| 0.120047  | 0.134761 | 0.126894 | 0.138403 | 0.119318  | 0.133304 | 0.120192 |
| 0.11116   | 0.135198 | 0.124417 | 0.137092 | 0.112471  | 0.126748 | 0.112471 |
| 0.153992  | 0.173368 | 0.166667 | 0.177302 | 0.155886  | 0.173951 | 0.160839 |
| 0.104458  | 0.132576 | 0.124126 | 0.137966 | 0.109557  | 0.12704  | 0.118007 |
| 0.109703  | 0.139277 | 0.131993 | 0.134178 | 0.11451   | 0.130245 | 0.107517 |
| 0.112034  | 0.138112 | 0.13141  | 0.141171 | 0.113345  | 0.129953 | 0.119464 |
| 0.119318  | 0.129953 | 0.122086 | 0.139423 | 0.115093  | 0.125291 | 0.11655  |
| 0.194347  | 0.212267 | 0.205274 | 0.215035 | 0.197698  | 0.211393 | 0.199155 |
| 0.10271   | 0.129079 | 0.122378 | 0.13243  | 0.104604  | 0.128497 | 0.1081   |
| 0.113054  | 0.136509 | 0.130099 | 0.142483 | 0.114948  | 0.135344 | 0.118735 |
| 0.099796  | 0.122086 | 0.112471 | 0.118735 | 0.0926573 | 0.111888 | 0.102564 |
| 0.111597  | 0.127477 | 0.120775 | 0.129953 | 0.107955  | 0.120484 | 0.114948 |
| 0.115239  | 0.130245 | 0.121212 | 0.136218 | 0.111888  | 0.128788 | 0.113636 |

|           |          |          |          |          |          |          |
|-----------|----------|----------|----------|----------|----------|----------|
| 0.255536  | 0.261801 | 0.25947  | 0.266317 | 0.256265 | 0.267045 | 0.258304 |
| 0.104749  | 0.127622 | 0.119172 | 0.122815 | 0.108392 | 0.124417 | 0.112471 |
| 0.11116   | 0.13986  | 0.133741 | 0.134761 | 0.114219 | 0.134907 | 0.117716 |
| 0.18109   | 0.195513 | 0.191142 | 0.199446 | 0.180361 | 0.190268 | 0.180361 |
| 0.181672  | 0.201049 | 0.19289  | 0.2044   | 0.184441 | 0.200466 | 0.187063 |
| 0.114073  | 0.139277 | 0.129953 | 0.140589 | 0.112471 | 0.131119 | 0.11451  |
| 0.110723  | 0.13884  | 0.128934 | 0.140152 | 0.116696 | 0.133887 | 0.117279 |
| 0.106935  | 0.130973 | 0.122815 | 0.137238 | 0.108246 | 0.13039  | 0.109703 |
| 0.136509  | 0.149184 | 0.148019 | 0.160985 | 0.142483 | 0.147436 | 0.142774 |
| 0.108246  | 0.132284 | 0.125874 | 0.133887 | 0.108683 | 0.125874 | 0.112179 |
| 0.114802  | 0.137383 | 0.129225 | 0.138986 | 0.111742 | 0.132721 | 0.113199 |
| 0.118153  | 0.134907 | 0.125874 | 0.131556 | 0.113636 | 0.125874 | 0.123834 |
| 0.10912   | 0.132576 | 0.125874 | 0.133304 | 0.114219 | 0.128497 | 0.118298 |
| 0.121503  | 0.141754 | 0.13447  | 0.148019 | 0.127477 | 0.138258 | 0.13039  |
| 0.111451  | 0.133741 | 0.127331 | 0.13447  | 0.111014 | 0.127914 | 0.117716 |
| 0.117133  | 0.130682 | 0.123689 | 0.136072 | 0.116404 | 0.131556 | 0.117279 |
| 0.129225  | 0.138986 | 0.135781 | 0.144959 | 0.130536 | 0.143357 | 0.130536 |
| 0.110723  | 0.129808 | 0.123689 | 0.126748 | 0.110868 | 0.127768 | 0.114656 |
| 0.122523  | 0.138403 | 0.130536 | 0.139132 | 0.124126 | 0.13549  | 0.125874 |
| 0.119318  | 0.135781 | 0.125874 | 0.133596 | 0.11859  | 0.125874 | 0.121503 |
| 0.201632  | 0.222174 | 0.216638 | 0.224359 | 0.208479 | 0.222465 | 0.211101 |
| 0.10708   | 0.120047 | 0.111597 | 0.11757  | 0.102855 | 0.114219 | 0.106352 |
| 0.190414  | 0.210373 | 0.203671 | 0.209353 | 0.19289  | 0.207459 | 0.193765 |
| 0.101253  | 0.132284 | 0.12296  | 0.135635 | 0.109557 | 0.126748 | 0.105186 |
| 0.114948  | 0.130536 | 0.12704  | 0.139423 | 0.111888 | 0.131702 | 0.118881 |
| 0.109994  | 0.136655 | 0.128497 | 0.115822 | 0.117133 | 0.134907 | 0.11859  |
| 0.102273  | 0.135052 | 0.127477 | 0.118007 | 0.110868 | 0.130682 | 0.110286 |
| 0.112617  | 0.138695 | 0.129662 | 0.143211 | 0.120338 | 0.133741 | 0.123252 |
| 0.113491  | 0.137238 | 0.12704  | 0.142045 | 0.117716 | 0.132867 | 0.122378 |
| 0.106206  | 0.130828 | 0.124126 | 0.135344 | 0.111305 | 0.132867 | 0.113054 |
| 0.11014   | 0.13447  | 0.128351 | 0.138403 | 0.111742 | 0.13039  | 0.109703 |
| 0.113928  | 0.141463 | 0.135927 | 0.113928 | 0.122815 | 0.139423 | 0.119318 |
| 0.124854  | 0.137529 | 0.132576 | 0.135927 | 0.120629 | 0.130245 | 0.12704  |
| 0.251603  | 0.256993 | 0.254662 | 0.261801 | 0.253788 | 0.266026 | 0.251748 |
| 0.103875  | 0.130245 | 0.121212 | 0.135635 | 0.113345 | 0.130828 | 0.11014  |
| 0.18211   | 0.200612 | 0.19595  | 0.203089 | 0.18546  | 0.19799  | 0.184586 |
| 0.187209  | 0.203671 | 0.200175 | 0.208188 | 0.189394 | 0.20542  | 0.189103 |
| 0.112179  | 0.136509 | 0.128059 | 0.141317 | 0.112325 | 0.129808 | 0.115239 |
| 0.101399  | 0.128934 | 0.11961  | 0.120629 | 0.102418 | 0.123106 | 0.106789 |
| 0.11451   | 0.129516 | 0.124272 | 0.136072 | 0.112908 | 0.131847 | 0.119318 |
| 0.10373   | 0.131265 | 0.121941 | 0.138986 | 0.110577 | 0.127185 | 0.115822 |
| 0.0989219 | 0.122086 | 0.115093 | 0.128642 | 0.102273 | 0.122378 | 0.101399 |
| 0.110286  | 0.134033 | 0.125    | 0.131265 | 0.107226 | 0.124417 | 0.115385 |
| 0.11655   | 0.138258 | 0.130682 | 0.138112 | 0.118153 | 0.131847 | 0.11961  |

|           |          |          |          |          |          |          |
|-----------|----------|----------|----------|----------|----------|----------|
| 0.124417  | 0.141463 | 0.137092 | 0.14831  | 0.127185 | 0.138258 | 0.132139 |
| 0.107663  | 0.128497 | 0.121795 | 0.134178 | 0.109266 | 0.128788 | 0.112762 |
| 0.119318  | 0.143357 | 0.133741 | 0.144085 | 0.123252 | 0.136072 | 0.122669 |
| 0.107226  | 0.133596 | 0.124272 | 0.129079 | 0.111451 | 0.129808 | 0.10708  |
| 0.110431  | 0.144959 | 0.136218 | 0.116841 | 0.123397 | 0.13884  | 0.11961  |
| 0.112325  | 0.136655 | 0.125291 | 0.141754 | 0.113054 | 0.134907 | 0.111014 |
| 0.122086  | 0.131265 | 0.128351 | 0.131993 | 0.119318 | 0.127768 | 0.126894 |
| 0.114073  | 0.128788 | 0.122378 | 0.135052 | 0.110431 | 0.127331 | 0.109557 |
| 0.107955  | 0.125583 | 0.118007 | 0.132139 | 0.108683 | 0.123834 | 0.112762 |
| 0.121649  | 0.154429 | 0.145105 | 0.136218 | 0.127622 | 0.143939 | 0.128497 |
| 0.183275  | 0.203817 | 0.198281 | 0.204837 | 0.184586 | 0.203526 | 0.186917 |
| 0.128059  | 0.143357 | 0.139569 | 0.151661 | 0.130536 | 0.143357 | 0.131702 |
| 0.113782  | 0.136072 | 0.130536 | 0.142337 | 0.116841 | 0.132867 | 0.120629 |
| 0.107226  | 0.137092 | 0.129808 | 0.113054 | 0.118735 | 0.133887 | 0.113782 |
| 0.0977564 | 0.128205 | 0.119464 | 0.112034 | 0.106061 | 0.123834 | 0.104312 |
| 0.110431  | 0.129225 | 0.122232 | 0.136655 | 0.111742 | 0.130682 | 0.113199 |
| 0.116404  | 0.13345  | 0.126166 | 0.137092 | 0.115967 | 0.134033 | 0.117424 |
| 0.190851  | 0.209062 | 0.202652 | 0.210082 | 0.190997 | 0.206148 | 0.190997 |
| 0.113345  | 0.135635 | 0.127768 | 0.139277 | 0.112908 | 0.125437 | 0.118444 |
| 0.105624  | 0.125874 | 0.118881 | 0.133013 | 0.105186 | 0.123543 | 0.106061 |
| 0.114948  | 0.136946 | 0.130828 | 0.142337 | 0.120921 | 0.132576 | 0.122669 |
| 0.190851  | 0.209062 | 0.202652 | 0.209499 | 0.190414 | 0.205274 | 0.194493 |
| 0.0995047 | 0.129953 | 0.122086 | 0.126894 | 0.104312 | 0.125583 | 0.110723 |
| 0.115967  | 0.135344 | 0.125437 | 0.129662 | 0.112617 | 0.124854 | 0.123397 |
| 0.115093  | 0.14088  | 0.132721 | 0.145688 | 0.123397 | 0.133596 | 0.126311 |
| 0.108829  | 0.129662 | 0.119172 | 0.131265 | 0.104604 | 0.125583 | 0.105186 |
| 0.185169  | 0.203671 | 0.199592 | 0.207022 | 0.188811 | 0.203089 | 0.18852  |
| 0.112617  | 0.132284 | 0.125291 | 0.133013 | 0.109848 | 0.125    | 0.118298 |
| 0.104749  | 0.142191 | 0.134033 | 0.131556 | 0.112471 | 0.136364 | 0.115676 |
| 0.10271   | 0.132576 | 0.124709 | 0.129516 | 0.105186 | 0.123834 | 0.109266 |
| 0.11757   | 0.1419   | 0.133159 | 0.142337 | 0.118007 | 0.139277 | 0.121212 |
| 0.110723  | 0.136801 | 0.128934 | 0.135198 | 0.115822 | 0.131265 | 0.110577 |
| 0.119755  | 0.130682 | 0.126603 | 0.133159 | 0.116404 | 0.127185 | 0.124272 |
| 0.106935  | 0.129808 | 0.120775 | 0.133159 | 0.109411 | 0.128934 | 0.108829 |
| 0.108974  | 0.135635 | 0.125146 | 0.134324 | 0.119901 | 0.130973 | 0.116404 |
| 0.13884   | 0.144814 | 0.13986  | 0.156323 | 0.13345  | 0.141026 | 0.132867 |
| 0.236451  | 0.245629 | 0.241841 | 0.251311 | 0.236888 | 0.249709 | 0.23951  |
| 0.119318  | 0.128788 | 0.125583 | 0.13447  | 0.115093 | 0.132576 | 0.111888 |
| 0.109994  | 0.138695 | 0.129953 | 0.134178 | 0.11655  | 0.130828 | 0.109557 |
| 0.109848  | 0.135344 | 0.126603 | 0.136946 | 0.117279 | 0.129808 | 0.117279 |
| 0.121066  | 0.140152 | 0.132284 | 0.146416 | 0.116259 | 0.132576 | 0.116259 |
| 0.104312  | 0.127185 | 0.119027 | 0.127622 | 0.104749 | 0.116404 | 0.108829 |
| 0.112471  | 0.142628 | 0.130099 | 0.134615 | 0.110577 | 0.124563 | 0.112908 |
| 0.113782  | 0.136946 | 0.129079 | 0.140006 | 0.120047 | 0.129953 | 0.122378 |

|           |          |          |          |           |          |           |
|-----------|----------|----------|----------|-----------|----------|-----------|
| 0.119464  | 0.137383 | 0.128642 | 0.13141  | 0.114656  | 0.128642 | 0.121649  |
| 0.113345  | 0.135344 | 0.127185 | 0.138403 | 0.112908  | 0.131556 | 0.114365  |
| 0.237034  | 0.246795 | 0.244464 | 0.251894 | 0.237471  | 0.248543 | 0.239219  |
| 0.0979021 | 0.129808 | 0.122232 | 0.123543 | 0.104458  | 0.123397 | 0.109411  |
| 0.0949883 | 0.120775 | 0.112325 | 0.117424 | 0.0983392 | 0.118153 | 0.0983392 |
| 0.103875  | 0.12704  | 0.119172 | 0.13243  | 0.106352  | 0.125583 | 0.111888  |
| 0.122378  | 0.136509 | 0.130682 | 0.142483 | 0.120775  | 0.132139 | 0.123689  |
| 0.125291  | 0.134178 | 0.126311 | 0.140443 | 0.120775  | 0.134178 | 0.117279  |
| 0.114219  | 0.138258 | 0.129225 | 0.137821 | 0.111451  | 0.133013 | 0.117279  |
| 0.112471  | 0.140297 | 0.130973 | 0.141317 | 0.117861  | 0.13243  | 0.121066  |
| 0.107955  | 0.128205 | 0.11859  | 0.128934 | 0.106643  | 0.122669 | 0.109557  |
| 0.232663  | 0.242133 | 0.239219 | 0.245192 | 0.232809  | 0.249709 | 0.235431  |
| 0.118444  | 0.140443 | 0.134615 | 0.143211 | 0.12296   | 0.134907 | 0.12296   |
| 0.116259  | 0.129808 | 0.124272 | 0.134324 | 0.110868  | 0.124272 | 0.118735  |
| 0.105478  | 0.133013 | 0.122815 | 0.135198 | 0.10708   | 0.128351 | 0.111742  |
| 0.118444  | 0.123252 | 0.117424 | 0.137092 | 0.112762  | 0.124126 | 0.108974  |
| 0.108537  | 0.123252 | 0.116841 | 0.128642 | 0.111305  | 0.124417 | 0.112179  |
| 0.107663  | 0.129662 | 0.120047 | 0.132139 | 0.107226  | 0.128205 | 0.113054  |
| 0.116696  | 0.13141  | 0.125583 | 0.132139 | 0.110723  | 0.124417 | 0.117133  |
| 0.121212  | 0.132139 | 0.125437 | 0.134033 | 0.114948  | 0.128351 | 0.122815  |
| 0.1081    | 0.130973 | 0.123397 | 0.129953 | 0.107372  | 0.120775 | 0.117279  |
| 0.105915  | 0.128497 | 0.120629 | 0.129516 | 0.107226  | 0.130536 | 0.109266  |
| 0.117861  | 0.138403 | 0.131119 | 0.134761 | 0.11859   | 0.128205 | 0.114802  |
| 0.120338  | 0.144085 | 0.137675 | 0.13986  | 0.127477  | 0.13447  | 0.119027  |
| 0.114219  | 0.145833 | 0.135927 | 0.118298 | 0.12602   | 0.140006 | 0.123397  |
| 0.119755  | 0.145833 | 0.141463 | 0.121503 | 0.128642  | 0.144959 | 0.124272  |
| 0.119901  | 0.143065 | 0.134615 | 0.135927 | 0.12296   | 0.130828 | 0.11451   |
| 0.0960082 | 0.119172 | 0.110431 | 0.121941 | 0.0990676 | 0.120047 | 0.0967366 |
| 0.11859   | 0.121358 | 0.116113 | 0.12296  | 0.106206  | 0.116404 | 0.11553   |
| 0.121358  | 0.141608 | 0.136364 | 0.140006 | 0.129371  | 0.140734 | 0.13141   |
| 0.204983  | 0.220571 | 0.215326 | 0.221591 | 0.207168  | 0.218823 | 0.20979   |
| 0.123397  | 0.134907 | 0.126166 | 0.146999 | 0.118007  | 0.129953 | 0.121212  |
| 0.0989219 | 0.124417 | 0.111597 | 0.124854 | 0.100233  | 0.120921 | 0.101981  |
| 0.111305  | 0.129225 | 0.120484 | 0.137529 | 0.110286  | 0.131847 | 0.119318  |
| 0.222174  | 0.232517 | 0.229604 | 0.241113 | 0.224068  | 0.237179 | 0.223776  |
| 0.211976  | 0.225233 | 0.220571 | 0.227127 | 0.21183   | 0.223776 | 0.212995  |
| 0.120629  | 0.13243  | 0.126311 | 0.134615 | 0.11553   | 0.125728 | 0.122815  |
| 0.249854  | 0.259615 | 0.257867 | 0.262092 | 0.253788  | 0.263112 | 0.253205  |
| 0.0971737 | 0.120338 | 0.113345 | 0.122232 | 0.0958625 | 0.118881 | 0.0961538 |
| 0.130973  | 0.136946 | 0.13549  | 0.145833 | 0.124417  | 0.140734 | 0.129079  |
| 0.102418  | 0.127331 | 0.121212 | 0.121941 | 0.106935  | 0.125    | 0.111014  |
| 0.114802  | 0.139714 | 0.133887 | 0.133741 | 0.119901  | 0.13039  | 0.114073  |
| 0.186334  | 0.202214 | 0.199301 | 0.209062 | 0.190268  | 0.20134  | 0.189977  |
| 0.118881  | 0.13039  | 0.129225 | 0.138986 | 0.120775  | 0.130973 | 0.11757   |



|           |          |          |          |           |          |          |
|-----------|----------|----------|----------|-----------|----------|----------|
| 0.192599  | 0.209353 | 0.204691 | 0.212995 | 0.195659  | 0.21081  | 0.197407 |
| 0.108683  | 0.132139 | 0.126894 | 0.136364 | 0.10912   | 0.127477 | 0.111742 |
| 0.111888  | 0.130973 | 0.124272 | 0.137238 | 0.10912   | 0.121649 | 0.11553  |
| 0.114219  | 0.139132 | 0.129516 | 0.125874 | 0.115239  | 0.129808 | 0.10912  |
| 0.109848  | 0.132139 | 0.123397 | 0.131702 | 0.112034  | 0.127185 | 0.116987 |
| 0.097465  | 0.123543 | 0.115676 | 0.126603 | 0.102273  | 0.121795 | 0.104021 |
| 0.109411  | 0.133741 | 0.124126 | 0.138258 | 0.109557  | 0.127914 | 0.1081   |
| 0.097465  | 0.124126 | 0.11655  | 0.120775 | 0.0990676 | 0.118881 | 0.105769 |
| 0.107517  | 0.133887 | 0.126894 | 0.137821 | 0.11116   | 0.127477 | 0.117861 |
| 0.103001  | 0.117424 | 0.108974 | 0.112617 | 0.0952797 | 0.108974 | 0.101107 |
| 0.101836  | 0.123543 | 0.113928 | 0.129516 | 0.102855  | 0.122669 | 0.100233 |
| 0.10169   | 0.125437 | 0.11757  | 0.12296  | 0.10271   | 0.120192 | 0.106498 |
| 0.107663  | 0.138112 | 0.129079 | 0.119318 | 0.114219  | 0.130828 | 0.118298 |
| 0.122232  | 0.141608 | 0.13549  | 0.14729  | 0.122378  | 0.135781 | 0.127622 |
| 0.103147  | 0.136218 | 0.126311 | 0.11451  | 0.110286  | 0.131847 | 0.10912  |
| 0.106789  | 0.138695 | 0.129662 | 0.129516 | 0.110431  | 0.132576 | 0.115676 |
| 0.0999417 | 0.123689 | 0.11757  | 0.12704  | 0.101253  | 0.124272 | 0.10708  |
| 0.111888  | 0.129808 | 0.123106 | 0.129953 | 0.108829  | 0.121941 | 0.116404 |
| 0.111305  | 0.135052 | 0.126894 | 0.132284 | 0.112034  | 0.129516 | 0.109994 |
| 0.113491  | 0.134907 | 0.126166 | 0.137675 | 0.115967  | 0.133741 | 0.117716 |
| 0.106206  | 0.136655 | 0.128205 | 0.116696 | 0.113928  | 0.132576 | 0.111014 |
| 0.112179  | 0.135052 | 0.128934 | 0.141026 | 0.116113  | 0.126311 | 0.120484 |
| 0.120775  | 0.142774 | 0.13549  | 0.149038 | 0.126166  | 0.136364 | 0.128788 |
| 0.130973  | 0.14627  | 0.142774 | 0.152826 | 0.135198  | 0.142483 | 0.134324 |
| 0.0981935 | 0.123106 | 0.114073 | 0.120921 | 0.0980478 | 0.113491 | 0.104167 |
| 0.104312  | 0.13039  | 0.122815 | 0.130536 | 0.110577  | 0.131265 | 0.109411 |
| 0.101836  | 0.135198 | 0.125874 | 0.13039  | 0.102273  | 0.121795 | 0.105478 |
| 0.122232  | 0.143939 | 0.135781 | 0.137966 | 0.124417  | 0.131702 | 0.121795 |
| 0.106643  | 0.129516 | 0.12398  | 0.124417 | 0.104749  | 0.124854 | 0.112617 |
| 0.130245  | 0.14088  | 0.137675 | 0.149184 | 0.130099  | 0.141463 | 0.131556 |
| 0.127622  | 0.135927 | 0.129225 | 0.143065 | 0.124563  | 0.140006 | 0.126894 |
| 0.118153  | 0.136364 | 0.127914 | 0.138549 | 0.115093  | 0.129953 | 0.118007 |
| 0.104021  | 0.13039  | 0.120775 | 0.127331 | 0.106498  | 0.127477 | 0.108246 |
| 0.104749  | 0.12296  | 0.112762 | 0.135052 | 0.0981935 | 0.115676 | 0.102855 |
| 0.114656  | 0.143065 | 0.136364 | 0.11757  | 0.124126  | 0.142191 | 0.123252 |
| 0.204837  | 0.216638 | 0.213432 | 0.22028  | 0.207605  | 0.222756 | 0.211684 |
| 0.105186  | 0.143211 | 0.131847 | 0.129371 | 0.112908  | 0.135635 | 0.118153 |
| 0.10708   | 0.13986  | 0.13141  | 0.131265 | 0.115385  | 0.133159 | 0.109266 |
| 0.107226  | 0.135344 | 0.125728 | 0.130828 | 0.113491  | 0.12398  | 0.107372 |
| 0.104458  | 0.136364 | 0.127914 | 0.116113 | 0.115967  | 0.129371 | 0.111888 |
| 0.111888  | 0.136218 | 0.127768 | 0.138986 | 0.113491  | 0.128934 | 0.115822 |
| 0.121795  | 0.139714 | 0.131265 | 0.138403 | 0.122815  | 0.135635 | 0.121649 |
| 0.124854  | 0.138695 | 0.129371 | 0.14088  | 0.120047  | 0.135781 | 0.126748 |
| 0.111305  | 0.13039  | 0.123106 | 0.136364 | 0.109411  | 0.124563 | 0.112617 |

|           |          |          |           |           |           |           |
|-----------|----------|----------|-----------|-----------|-----------|-----------|
| 0.0981935 | 0.120775 | 0.112617 | 0.117716  | 0.0901807 | 0.108246  | 0.100379  |
| 0.116841  | 0.13884  | 0.129225 | 0.13549   | 0.11961   | 0.129516  | 0.116113  |
| 0.112179  | 0.135052 | 0.123106 | 0.125291  | 0.110577  | 0.124854  | 0.10708   |
| 0.109411  | 0.127331 | 0.120921 | 0.134178  | 0.108683  | 0.129662  | 0.108392  |
| 0.172494  | 0.190705 | 0.185169 | 0.187937  | 0.172057  | 0.188666  | 0.176428  |
| 0.109266  | 0.136801 | 0.128642 | 0.138112  | 0.114948  | 0.13243   | 0.117279  |
| 0.116987  | 0.143357 | 0.134615 | 0.138549  | 0.121503  | 0.131702  | 0.117424  |
| 0.102855  | 0.121649 | 0.118444 | 0.114802  | 0.10271   | 0.116696  | 0.107372  |
| 0.110868  | 0.117424 | 0.111597 | 0.127768  | 0.0850816 | 0.0897436 | 0.105769  |
| 0.102127  | 0.122669 | 0.114802 | 0.12602   | 0.100816  | 0.119755  | 0.108392  |
| 0.0948427 | 0.118881 | 0.108683 | 0.123689  | 0.0987762 | 0.11655   | 0.0990676 |
| 0.107372  | 0.125    | 0.115676 | 0.131265  | 0.11014   | 0.12296   | 0.109266  |
| 0.117279  | 0.119755 | 0.115676 | 0.134761  | 0.107226  | 0.11451   | 0.114219  |
| 0.110868  | 0.130536 | 0.123834 | 0.135052  | 0.111597  | 0.126457  | 0.11655   |
| 0.116841  | 0.13884  | 0.132139 | 0.129371  | 0.116987  | 0.133887  | 0.121066  |
| 0.101836  | 0.120047 | 0.111305 | 0.126894  | 0.0929487 | 0.115385  | 0.103438  |
| 0.109557  | 0.130099 | 0.12398  | 0.126748  | 0.105041  | 0.12398   | 0.108537  |
| 0.125728  | 0.137238 | 0.131993 | 0.138549  | 0.12296   | 0.131702  | 0.125874  |
| 0.103584  | 0.113928 | 0.107517 | 0.120484  | 0.0967366 | 0.107517  | 0.105186  |
| 0.118444  | 0.135198 | 0.127331 | 0.133596  | 0.115385  | 0.130536  | 0.120921  |
| 0.0980478 | 0.114219 | 0.1081   | 0.121066  | 0.0897436 | 0.108974  | 0.0987762 |
| 0.103001  | 0.114219 | 0.109266 | 0.123397  | 0.097028  | 0.106935  | 0.100524  |
| 0.100962  | 0.116841 | 0.105478 | 0.123106  | 0.0874126 | 0.106643  | 0.0926573 |
| 0.112179  | 0.12398  | 0.11961  | 0.123834  | 0.110577  | 0.124563  | 0.114656  |
| 0.0987762 | 0.126603 | 0.114073 | 0.124417  | 0.0983392 | 0.117861  | 0.102418  |
| 0.134324  | 0.151369 | 0.142045 | 0.144522  | 0.131556  | 0.141754  | 0.13243   |
| 0.12296   | 0.149038 | 0.14088  | 0.143648  | 0.120192  | 0.138549  | 0.127185  |
| 0.101107  | 0.125728 | 0.118735 | 0.122378  | 0.10067   | 0.120192  | 0.105624  |
| 0.132139  | 0.145396 | 0.136946 | 0.143211  | 0.128497  | 0.138695  | 0.130536  |
| 0.099796  | 0.13345  | 0.128788 | 0.122232  | 0.111014  | 0.129953  | 0.116259  |
| 0.128642  | 0.142774 | 0.137821 | 0.142628  | 0.129662  | 0.141317  | 0.137821  |
| 0.103875  | 0.118007 | 0.112179 | 0.128934  | 0.106061  | 0.122086  | 0.10169   |
| 0.137529  | 0.146125 | 0.138258 | 0.149767  | 0.133596  | 0.143211  | 0.133596  |
| 0.117716  | 0.138258 | 0.126311 | 0.134033  | 0.116987  | 0.133013  | 0.118444  |
| 0.131702  | 0.141171 | 0.137966 | 0.143648  | 0.132139  | 0.137966  | 0.133887  |
| 0.0944056 | 0.12602  | 0.115239 | 0.105478  | 0.0954254 | 0.113199  | 0.104458  |
| 0.101253  | 0.120921 | 0.11451  | 0.121941  | 0.101399  | 0.117133  | 0.106061  |
| 0.094697  | 0.120775 | 0.110286 | 0.121503  | 0.099796  | 0.118444  | 0.103293  |
| 0.111742  | 0.125583 | 0.121212 | 0.128351  | 0.107517  | 0.121212  | 0.108683  |
| 0.10912   | 0.125    | 0.11655  | 0.123106  | 0.104604  | 0.11655   | 0.106935  |
| 0.117716  | 0.127768 | 0.11757  | 0.134033  | 0.104749  | 0.11757   | 0.108537  |
| 0.117716  | 0.135052 | 0.127185 | 0.136946  | 0.110286  | 0.126603  | 0.114656  |
| 0.0751748 | 0.121649 | 0.112034 | 0.0990676 | 0.0925117 | 0.111742  | 0.0919289 |
| 0.0995047 | 0.121503 | 0.113636 | 0.123106  | 0.102564  | 0.119755  | 0.105186  |

|           |          |          |          |           |          |           |
|-----------|----------|----------|----------|-----------|----------|-----------|
| 0.111014  | 0.130682 | 0.128351 | 0.130536 | 0.107663  | 0.123106 | 0.115239  |
| 0.104895  | 0.126894 | 0.11961  | 0.120921 | 0.101836  | 0.121066 | 0.108829  |
| 0.105915  | 0.123252 | 0.11655  | 0.126603 | 0.106935  | 0.123834 | 0.112471  |
| 0.100379  | 0.131119 | 0.120629 | 0.130099 | 0.108392  | 0.125    | 0.109848  |
| 0.111888  | 0.13243  | 0.124854 | 0.134615 | 0.11116   | 0.13039  | 0.113782  |
| 0.107517  | 0.137092 | 0.129225 | 0.13549  | 0.112034  | 0.13039  | 0.11553   |
| 0.0958625 | 0.116404 | 0.107955 | 0.121795 | 0.0965909 | 0.116987 | 0.0957168 |
| 0.104604  | 0.129808 | 0.122232 | 0.126748 | 0.105624  | 0.122523 | 0.10912   |
| 0.108537  | 0.131702 | 0.125874 | 0.134178 | 0.108683  | 0.130536 | 0.113054  |
| 0.106643  | 0.125146 | 0.119027 | 0.13549  | 0.107663  | 0.127185 | 0.110868  |
| 0.125     | 0.142628 | 0.137675 | 0.140443 | 0.118444  | 0.132139 | 0.12602   |
| 0.099359  | 0.127768 | 0.118153 | 0.133159 | 0.100379  | 0.121358 | 0.102418  |
| 0.123106  | 0.136946 | 0.129662 | 0.134761 | 0.121212  | 0.13549  | 0.121503  |

| <b>TDr_08_00705</b> | <b>TDr_08_00707</b> | <b>TDr_08_00710</b> | <b>TDr_08_00727</b> | <b>TDr_08_00733</b> | <b>TDr_08_00742</b> | <b>TDr_08_00744</b> |
|---------------------|---------------------|---------------------|---------------------|---------------------|---------------------|---------------------|
| 0.121503            | 0.101981            | 0.136072            | 0.108683            | 0.121358            | 0.106935            | 0.130682            |
| 0.120484            | 0.114365            | 0.134761            | 0.111451            | 0.130828            | 0.10708             | 0.129662            |
| 0.116404            | 0.111742            | 0.131556            | 0.10067             | 0.126748            | 0.10912             | 0.126748            |
| 0.120192            | 0.107372            | 0.133887            | 0.109411            | 0.129371            | 0.113491            | 0.129371            |
| 0.131265            | 0.132139            | 0.141171            | 0.131847            | 0.142483            | 0.128351            | 0.133159            |
| 0.131556            | 0.118735            | 0.143502            | 0.122815            | 0.130828            | 0.115239            | 0.131993            |
| 0.111888            | 0.0990676           | 0.117133            | 0.106935            | 0.100379            | 0.087704            | 0.132139            |
| 0.119172            | 0.110723            | 0.135198            | 0.109557            | 0.129225            | 0.113345            | 0.123689            |
| 0.11553             | 0.105332            | 0.126603            | 0.0930944           | 0.126457            | 0.105041            | 0.110431            |
| 0.10169             | 0.0952797           | 0.116841            | 0.0871212           | 0.115822            | 0.099359            | 0.114365            |
| 0.123106            | 0.100379            | 0.133596            | 0.102418            | 0.124709            | 0.105332            | 0.129079            |
| 0.120047            | 0.112179            | 0.128788            | 0.101107            | 0.128642            | 0.106643            | 0.119901            |
| 0.121212            | 0.111014            | 0.128497            | 0.103438            | 0.126894            | 0.112762            | 0.116113            |
| 0.142628            | 0.13039             | 0.156323            | 0.13039             | 0.153263            | 0.135052            | 0.143648            |
| 0.126748            | 0.122669            | 0.13986             | 0.119755            | 0.133596            | 0.128205            | 0.136509            |
| 0.110286            | 0.105915            | 0.120192            | 0.109994            | 0.113636            | 0.109703            | 0.119755            |
| 0.112762            | 0.110723            | 0.12704             | 0.101981            | 0.125146            | 0.105186            | 0.120775            |
| 0.141754            | 0.132139            | 0.145833            | 0.141171            | 0.148893            | 0.136218            | 0.147145            |
| 0.116987            | 0.110286            | 0.124272            | 0.102127            | 0.124417            | 0.106206            | 0.12296             |
| 0.20236             | 0.19799             | 0.21722             | 0.202943            | 0.20338             | 0.204691            | 0.213869            |
| 0.12296             | 0.113928            | 0.13345             | 0.111014            | 0.129516            | 0.104895            | 0.135635            |
| 0.120484            | 0.102418            | 0.134761            | 0.114948            | 0.121503            | 0.10067             | 0.134615            |
| 0.109557            | 0.100524            | 0.124709            | 0.0979021           | 0.119901            | 0.107809            | 0.114948            |
| 0.126311            | 0.115822            | 0.128351            | 0.109703            | 0.133159            | 0.117861            | 0.112179            |
| 0.107809            | 0.0932401           | 0.114802            | 0.0938228           | 0.116113            | 0.0999417           | 0.114365            |
| 0.123252            | 0.117133            | 0.132284            | 0.117716            | 0.124272            | 0.109557            | 0.134178            |
| 0.119464            | 0.114802            | 0.122378            | 0.112179            | 0.12602             | 0.115385            | 0.13039             |
| 0.122378            | 0.113054            | 0.126748            | 0.108974            | 0.133304            | 0.117133            | 0.112034            |
| 0.127914            | 0.11655             | 0.134907            | 0.119755            | 0.132139            | 0.122086            | 0.128934            |
| 0.118298            | 0.113636            | 0.133159            | 0.102564            | 0.135344            | 0.113345            | 0.129225            |
| 0.117861            | 0.109411            | 0.134178            | 0.112908            | 0.119172            | 0.101544            | 0.127331            |
| 0.125               | 0.111888            | 0.13141             | 0.116259            | 0.129516            | 0.117424            | 0.121358            |
| 0.108974            | 0.0955711           | 0.125583            | 0.0984848           | 0.120484            | 0.104895            | 0.118153            |
| 0.119172            | 0.115676            | 0.129371            | 0.104312            | 0.135635            | 0.119172            | 0.124272            |
| 0.11961             | 0.10912             | 0.122523            | 0.109994            | 0.119464            | 0.115239            | 0.124417            |
| 0.125583            | 0.117716            | 0.123252            | 0.114219            | 0.128351            | 0.12296             | 0.128351            |
| 0.119318            | 0.078817            | 0.128934            | 0.118153            | 0.102564            | 0.10271             | 0.136946            |
| 0.125               | 0.114802            | 0.138986            | 0.110723            | 0.133596            | 0.116841            | 0.124272            |
| 0.117716            | 0.100524            | 0.126166            | 0.0999417           | 0.126894            | 0.112179            | 0.114073            |
| 0.122086            | 0.112471            | 0.141026            | 0.106935            | 0.139132            | 0.119172            | 0.0776515           |
| 0.11655             | 0.0999417           | 0.129371            | 0.0944056           | 0.124854            | 0.105186            | 0.099796            |
| 0.138112            | 0.125291            | 0.155012            | 0.127622            | 0.143502            | 0.132867            | 0.105915            |

|           |           |           |           |          |           |           |
|-----------|-----------|-----------|-----------|----------|-----------|-----------|
| 0.140734  | 0.131702  | 0.148893  | 0.130828  | 0.14933  | 0.137821  | 0.103875  |
| 0.119318  | 0.106789  | 0.13243   | 0.0939685 | 0.134033 | 0.110286  | 0.0979021 |
| 0.0942599 | 0.0968823 | 0.0954254 | 0.0823135 | 0.106935 | 0.0916375 | 0.119755  |
| 0.106352  | 0.102273  | 0.11859   | 0.0763403 | 0.115239 | 0.099359  | 0.120484  |
| 0.11655   | 0.115676  | 0.123543  | 0.103438  | 0.131265 | 0.118298  | 0.114365  |
| 0.138549  | 0.123689  | 0.145833  | 0.121066  | 0.144231 | 0.135927  | 0.101981  |
| 0.119318  | 0.105332  | 0.130973  | 0.101544  | 0.127914 | 0.115239  | 0.0920746 |
| 0.117133  | 0.105186  | 0.130828  | 0.0987762 | 0.128059 | 0.111597  | 0.0995047 |
| 0.14088   | 0.121649  | 0.149913  | 0.136801  | 0.121795 | 0.119901  | 0.154429  |
| 0.122523  | 0.122523  | 0.13039   | 0.118153  | 0.134033 | 0.127477  | 0.118881  |
| 0.11655   | 0.10169   | 0.129662  | 0.0973193 | 0.131265 | 0.107517  | 0.092803  |
| 0.131119  | 0.11451   | 0.138403  | 0.116841  | 0.136218 | 0.123543  | 0.125728  |
| 0.11859   | 0.101399  | 0.134324  | 0.106061  | 0.127477 | 0.114219  | 0.11116   |
| 0.130245  | 0.132576  | 0.131993  | 0.122086  | 0.13884  | 0.13345   | 0.120484  |
| 0.12398   | 0.119901  | 0.133304  | 0.111742  | 0.137529 | 0.122815  | 0.0949883 |
| 0.124854  | 0.106206  | 0.135635  | 0.103001  | 0.133741 | 0.109703  | 0.0996503 |
| 0.116987  | 0.107372  | 0.132139  | 0.103293  | 0.130536 | 0.117861  | 0.0941142 |
| 0.103147  | 0.103147  | 0.117424  | 0.0964452 | 0.109994 | 0.105478  | 0.11961   |
| 0.134907  | 0.122669  | 0.142191  | 0.119464  | 0.143211 | 0.132284  | 0.103584  |
| 0.137821  | 0.128497  | 0.150641  | 0.126166  | 0.144959 | 0.134615  | 0.099796  |
| 0.158362  | 0.152535  | 0.169143  | 0.151661  | 0.165793 | 0.16215   | 0.154429  |
| 0.124272  | 0.104167  | 0.135344  | 0.104167  | 0.133159 | 0.114073  | 0.0967366 |
| 0.116987  | 0.10708   | 0.128059  | 0.0992133 | 0.127331 | 0.108537  | 0.0973193 |
| 0.117279  | 0.105624  | 0.128351  | 0.0942599 | 0.128205 | 0.106206  | 0.0955711 |
| 0.126166  | 0.125291  | 0.131993  | 0.117424  | 0.129225 | 0.118881  | 0.141463  |
| 0.123834  | 0.106643  | 0.130245  | 0.0958625 | 0.129516 | 0.110723  | 0.101544  |
| 0.121941  | 0.116696  | 0.133596  | 0.120192  | 0.129662 | 0.131556  | 0.114219  |
| 0.104167  | 0.107372  | 0.111742  | 0.0962995 | 0.121503 | 0.105915  | 0.123834  |
| 0.118007  | 0.104895  | 0.127622  | 0.102564  | 0.129808 | 0.113636  | 0.103584  |
| 0.128205  | 0.118881  | 0.137238  | 0.133741  | 0.105332 | 0.118298  | 0.154283  |
| 0.127331  | 0.111305  | 0.136364  | 0.107226  | 0.136509 | 0.119464  | 0.0995047 |
| 0.136801  | 0.131847  | 0.144376  | 0.122232  | 0.145396 | 0.135052  | 0.100524  |
| 0.129079  | 0.125874  | 0.136655  | 0.120047  | 0.139423 | 0.129079  | 0.12398   |
| 0.110868  | 0.106498  | 0.11757   | 0.103293  | 0.117424 | 0.097465  | 0.125     |
| 0.116404  | 0.105624  | 0.127185  | 0.0954254 | 0.129662 | 0.107372  | 0.0949883 |
| 0.121649  | 0.108246  | 0.129516  | 0.10271   | 0.129953 | 0.114073  | 0.105186  |
| 0.133596  | 0.123397  | 0.147873  | 0.121649  | 0.15035  | 0.127185  | 0.0920746 |
| 0.11451   | 0.106643  | 0.125291  | 0.0973193 | 0.126603 | 0.104895  | 0.0962995 |
| 0.139132  | 0.127185  | 0.153992  | 0.127477  | 0.145396 | 0.133013  | 0.0952797 |
| 0.126603  | 0.109994  | 0.134178  | 0.107955  | 0.136655 | 0.117861  | 0.104604  |
| 0.118153  | 0.114656  | 0.123689  | 0.10708   | 0.131702 | 0.119318  | 0.1081    |
| 0.124272  | 0.105915  | 0.136218  | 0.103293  | 0.131702 | 0.115822  | 0.0976107 |
| 0.125728  | 0.116113  | 0.139714  | 0.106206  | 0.140152 | 0.120484  | 0.0897436 |
| 0.118735  | 0.109411  | 0.131847  | 0.10067   | 0.130245 | 0.110868  | 0.0967366 |

|           |           |           |           |           |           |           |
|-----------|-----------|-----------|-----------|-----------|-----------|-----------|
| 0.118153  | 0.106498  | 0.13039   | 0.0986305 | 0.13345   | 0.108537  | 0.0920746 |
| 0.131702  | 0.124417  | 0.140443  | 0.119464  | 0.138549  | 0.129953  | 0.100962  |
| 0.117716  | 0.104312  | 0.125291  | 0.0935315 | 0.125146  | 0.102564  | 0.121941  |
| 0.116987  | 0.109703  | 0.123397  | 0.10271   | 0.132284  | 0.112908  | 0.113928  |
| 0.110286  | 0.100087  | 0.126311  | 0.107955  | 0.115385  | 0.0884324 | 0.13549   |
| 0.11116   | 0.104458  | 0.119027  | 0.108829  | 0.102564  | 0.0846445 | 0.137821  |
| 0.0986305 | 0.115239  | 0.101836  | 0.114656  | 0.100233  | 0.112617  | 0.134615  |
| 0.107226  | 0.120921  | 0.0973193 | 0.123543  | 0.112617  | 0.125     | 0.143211  |
| 0.109411  | 0.0939685 | 0.122523  | 0.10067   | 0.102564  | 0.0884324 | 0.130828  |
| 0.171183  | 0.161276  | 0.182838  | 0.175262  | 0.16317   | 0.162733  | 0.187937  |
| 0.104312  | 0.0949883 | 0.121795  | 0.0952797 | 0.112034  | 0.0833333 | 0.126894  |
| 0.108537  | 0.123397  | 0.103293  | 0.117279  | 0.119755  | 0.123689  | 0.145396  |
| 0.106789  | 0.116404  | 0.101544  | 0.109994  | 0.117716  | 0.114365  | 0.137529  |
| 0.126166  | 0.106061  | 0.134324  | 0.119172  | 0.100087  | 0.0955711 | 0.144376  |
| 0.0948427 | 0.0948427 | 0.0910548 | 0.092803  | 0.101981  | 0.100379  | 0.125583  |
| 0.102127  | 0.113782  | 0.0954254 | 0.114073  | 0.107226  | 0.11757   | 0.136072  |
| 0.074155  | 0.101836  | 0.0995047 | 0.0913462 | 0.111597  | 0.0936772 | 0.12296   |
| 0         | 0.109848  | 0.0987762 | 0.100524  | 0.110577  | 0.105769  | 0.121941  |
| 0.109848  | 0         | 0.120921  | 0.0935315 | 0.0995047 | 0.0935315 | 0.121358  |
| 0.0987762 | 0.120921  | 0         | 0.111305  | 0.115822  | 0.120338  | 0.14292   |
| 0.100524  | 0.0935315 | 0.111305  | 0         | 0.119318  | 0.0868298 | 0.113491  |
| 0.110577  | 0.0995047 | 0.115822  | 0.119318  | 0         | 0.101836  | 0.144231  |
| 0.105769  | 0.0935315 | 0.120338  | 0.0868298 | 0.101836  | 0         | 0.130973  |
| 0.121941  | 0.121358  | 0.14292   | 0.113491  | 0.144231  | 0.130973  | 0         |
| 0.113636  | 0.103147  | 0.129371  | 0.109848  | 0.106789  | 0.094697  | 0.133596  |
| 0.103147  | 0.0903263 | 0.111597  | 0.0958625 | 0.103293  | 0.0801282 | 0.128351  |
| 0.125583  | 0.125583  | 0.128497  | 0.130245  | 0.114656  | 0.126166  | 0.150787  |
| 0.104458  | 0.0933858 | 0.117861  | 0.0995047 | 0.104312  | 0.0843531 | 0.129079  |
| 0.099796  | 0.10271   | 0.101544  | 0.0907634 | 0.114219  | 0.100962  | 0.123543  |
| 0.111888  | 0.109266  | 0.120338  | 0.0894522 | 0.123397  | 0.102564  | 0.123106  |
| 0.125291  | 0.104895  | 0.13141   | 0.119755  | 0.100379  | 0.102564  | 0.144668  |
| 0.113345  | 0.101399  | 0.12704   | 0.115093  | 0.116404  | 0.109848  | 0.127768  |
| 0.0941142 | 0.101981  | 0.0979021 | 0.0897436 | 0.108246  | 0.0955711 | 0.121941  |
| 0.0981935 | 0.101981  | 0.103147  | 0.0964452 | 0.110868  | 0.101107  | 0.123106  |
| 0.119027  | 0.090472  | 0.121941  | 0.0971737 | 0.107517  | 0.0805653 | 0.126457  |
| 0.109848  | 0.105478  | 0.113928  | 0.104312  | 0.109994  | 0.110431  | 0.12602   |
| 0.107372  | 0.0960082 | 0.119027  | 0.0977564 | 0.104021  | 0.076486  | 0.131119  |
| 0.0973193 | 0.0955711 | 0.106935  | 0.0740093 | 0.114656  | 0.0885781 | 0.111742  |
| 0.102273  | 0.0961538 | 0.112179  | 0.0804196 | 0.114365  | 0.0897436 | 0.119318  |
| 0.0977564 | 0.101544  | 0.104167  | 0.0773601 | 0.117716  | 0.0930944 | 0.11655   |
| 0.125728  | 0.115239  | 0.131265  | 0.111451  | 0.128788  | 0.113491  | 0.127331  |
| 0.0987762 | 0.112762  | 0.118298  | 0.10169   | 0.119901  | 0.113928  | 0.128059  |
| 0.100379  | 0.100379  | 0.117861  | 0.0901807 | 0.119464  | 0.101836  | 0.117133  |
| 0.100524  | 0.0932401 | 0.111597  | 0.0775058 | 0.116987  | 0.094697  | 0.11553   |

|           |           |           |           |          |           |           |
|-----------|-----------|-----------|-----------|----------|-----------|-----------|
| 0.0996503 | 0.105769  | 0.11655   | 0.0891608 | 0.116696 | 0.105478  | 0.119901  |
| 0.102418  | 0.0983392 | 0.114656  | 0.0793998 | 0.115093 | 0.0890152 | 0.112471  |
| 0.119901  | 0.113491  | 0.121066  | 0.10067   | 0.122086 | 0.103001  | 0.131702  |
| 0.130973  | 0.108829  | 0.142045  | 0.119901  | 0.115967 | 0.10708   | 0.143939  |
| 0.0968823 | 0.10067   | 0.109703  | 0.0793998 | 0.111597 | 0.0980478 | 0.117424  |
| 0.101399  | 0.102273  | 0.118007  | 0.0917832 | 0.119318 | 0.103147  | 0.118153  |
| 0.102273  | 0.101981  | 0.113345  | 0.0789627 | 0.12398  | 0.097028  | 0.116113  |
| 0.100233  | 0.0920746 | 0.111597  | 0.0868298 | 0.112325 | 0.0979021 | 0.110868  |
| 0.102855  | 0.11655   | 0.118881  | 0.0955711 | 0.12602  | 0.11014   | 0.126603  |
| 0.103438  | 0.0938228 | 0.114219  | 0.083042  | 0.113199 | 0.0935315 | 0.111742  |
| 0.135344  | 0.131265  | 0.142628  | 0.126603  | 0.139569 | 0.122523  | 0.132576  |
| 0.129371  | 0.112762  | 0.140443  | 0.109266  | 0.133304 | 0.121795  | 0.124272  |
| 0.122378  | 0.110431  | 0.136364  | 0.102564  | 0.132139 | 0.114219  | 0.106206  |
| 0.116987  | 0.105332  | 0.129808  | 0.0960082 | 0.134907 | 0.110868  | 0.112471  |
| 0.112325  | 0.0936772 | 0.11553   | 0.0910548 | 0.119172 | 0.0942599 | 0.121503  |
| 0.102855  | 0.0973193 | 0.109557  | 0.0789627 | 0.116404 | 0.0961538 | 0.113782  |
| 0.107955  | 0.0989219 | 0.116404  | 0.081148  | 0.115385 | 0.0962995 | 0.111014  |
| 0.114656  | 0.103584  | 0.124272  | 0.0916375 | 0.127914 | 0.111451  | 0.113054  |
| 0.118153  | 0.103875  | 0.130099  | 0.099796  | 0.124417 | 0.111451  | 0.120921  |
| 0.123397  | 0.118153  | 0.129516  | 0.109703  | 0.136946 | 0.123397  | 0.105478  |
| 0.101107  | 0.100524  | 0.0979021 | 0.0979021 | 0.105915 | 0.103147  | 0.130973  |
| 0.126311  | 0.120484  | 0.136509  | 0.11757   | 0.134033 | 0.121941  | 0.135781  |
| 0.112471  | 0.108974  | 0.127622  | 0.116841  | 0.111451 | 0.097028  | 0.140589  |
| 0.200758  | 0.195221  | 0.212995  | 0.191142  | 0.205565 | 0.194347  | 0.204108  |
| 0.239656  | 0.237908  | 0.251311  | 0.237034  | 0.243298 | 0.239656  | 0.245921  |
| 0.117133  | 0.104604  | 0.126748  | 0.107809  | 0.123106 | 0.108683  | 0.118735  |
| 0.111742  | 0.105332  | 0.117861  | 0.0893065 | 0.126166 | 0.104458  | 0.106061  |
| 0.109703  | 0.0945513 | 0.116404  | 0.0957168 | 0.120047 | 0.103875  | 0.112471  |
| 0.114656  | 0.106206  | 0.116404  | 0.102127  | 0.121795 | 0.105915  | 0.120047  |
| 0.126311  | 0.124854  | 0.140589  | 0.121358  | 0.138695 | 0.128642  | 0.135198  |
| 0.112325  | 0.106498  | 0.121649  | 0.10067   | 0.124709 | 0.110868  | 0.115967  |
| 0.132284  | 0.136655  | 0.128788  | 0.124709  | 0.142628 | 0.137529  | 0.137383  |
| 0.118444  | 0.114948  | 0.124272  | 0.101253  | 0.129662 | 0.112908  | 0.108974  |
| 0.123106  | 0.120484  | 0.122232  | 0.105041  | 0.137821 | 0.123689  | 0.111597  |
| 0.121212  | 0.119172  | 0.13141   | 0.119755  | 0.130099 | 0.126748  | 0.108246  |
| 0.120047  | 0.123252  | 0.123834  | 0.115676  | 0.133304 | 0.126748  | 0.116404  |
| 0.134615  | 0.129371  | 0.14627   | 0.125291  | 0.139423 | 0.134324  | 0.0992133 |
| 0.114802  | 0.110723  | 0.122086  | 0.101399  | 0.129225 | 0.108974  | 0.117861  |
| 0.109557  | 0.1081    | 0.115967  | 0.0938228 | 0.127768 | 0.105186  | 0.108246  |
| 0.11116   | 0.112034  | 0.116404  | 0.100087  | 0.125    | 0.107955  | 0.115967  |
| 0.112908  | 0.10271   | 0.11757   | 0.095134  | 0.125    | 0.103875  | 0.111888  |
| 0.109703  | 0.108537  | 0.116113  | 0.0919289 | 0.12704  | 0.106206  | 0.108392  |
| 0.118007  | 0.110431  | 0.124709  | 0.0987762 | 0.130973 | 0.109848  | 0.114948  |
| 0.122232  | 0.120484  | 0.127185  | 0.11757   | 0.136655 | 0.121649  | 0.120629  |

|          |          |          |           |          |           |          |
|----------|----------|----------|-----------|----------|-----------|----------|
| 0.128934 | 0.128351 | 0.129225 | 0.124854  | 0.140443 | 0.134761  | 0.117133 |
| 0.117424 | 0.111014 | 0.117424 | 0.100233  | 0.130099 | 0.112471  | 0.114948 |
| 0.110577 | 0.104167 | 0.118444 | 0.095134  | 0.12296  | 0.10912   | 0.112762 |
| 0.127768 | 0.12398  | 0.131265 | 0.116696  | 0.13549  | 0.123106  | 0.116259 |
| 0.112908 | 0.106498 | 0.11961  | 0.0913462 | 0.127914 | 0.106789  | 0.11014  |
| 0.130245 | 0.134615 | 0.13345  | 0.127914  | 0.146416 | 0.136946  | 0.138258 |
| 0.132576 | 0.12296  | 0.140152 | 0.107809  | 0.134761 | 0.123252  | 0.137092 |
| 0.101544 | 0.122232 | 0.107955 | 0.12398   | 0.121503 | 0.129516  | 0.132576 |
| 0.107955 | 0.103001 | 0.119901 | 0.0907634 | 0.121795 | 0.0977564 | 0.112762 |
| 0.109266 | 0.101399 | 0.118007 | 0.0976107 | 0.121358 | 0.106061  | 0.105041 |
| 0.121941 | 0.11961  | 0.119318 | 0.109411  | 0.130245 | 0.116987  | 0.119172 |
| 0.115967 | 0.115967 | 0.125874 | 0.112471  | 0.131847 | 0.120338  | 0.109994 |
| 0.116841 | 0.122086 | 0.125583 | 0.112471  | 0.133013 | 0.122669  | 0.121066 |
| 0.116696 | 0.114073 | 0.123689 | 0.10271   | 0.131119 | 0.110868  | 0.11451  |
| 0.114219 | 0.115093 | 0.124709 | 0.0996503 | 0.13039  | 0.113928  | 0.11553  |
| 0.119464 | 0.115967 | 0.122086 | 0.111597  | 0.12602  | 0.121795  | 0.112908 |
| 0.117133 | 0.124709 | 0.124709 | 0.112471  | 0.135927 | 0.123252  | 0.113782 |
| 0.121212 | 0.124126 | 0.120629 | 0.11014   | 0.13884  | 0.122669  | 0.120775 |
| 0.126894 | 0.125146 | 0.122523 | 0.118735  | 0.13549  | 0.130682  | 0.120047 |
| 0.133159 | 0.124417 | 0.140152 | 0.122086  | 0.135052 | 0.126166  | 0.114656 |
| 0.119464 | 0.110431 | 0.123252 | 0.0979021 | 0.133304 | 0.110431  | 0.112908 |
| 0.122378 | 0.121795 | 0.125874 | 0.115967  | 0.130973 | 0.12296   | 0.122815 |
| 0.112617 | 0.105332 | 0.114365 | 0.0933858 | 0.124417 | 0.108246  | 0.115093 |
| 0.118007 | 0.105769 | 0.129079 | 0.0961538 | 0.13039  | 0.105769  | 0.106206 |
| 0.113054 | 0.111597 | 0.122378 | 0.101981  | 0.124854 | 0.105478  | 0.118444 |
| 0.109411 | 0.106789 | 0.120192 | 0.0971737 | 0.118007 | 0.107372  | 0.113636 |
| 0.109703 | 0.104167 | 0.113491 | 0.0930944 | 0.12296  | 0.104458  | 0.109848 |
| 0.121795 | 0.125874 | 0.127331 | 0.117716  | 0.13243  | 0.127622  | 0.11961  |
| 0.121941 | 0.109703 | 0.126894 | 0.0980478 | 0.129662 | 0.112325  | 0.115676 |
| 0.129225 | 0.123689 | 0.128059 | 0.11757   | 0.13986  | 0.130682  | 0.120629 |
| 0.114365 | 0.104167 | 0.116987 | 0.0992133 | 0.125874 | 0.110577  | 0.109848 |
| 0.115676 | 0.117133 | 0.120629 | 0.106061  | 0.129808 | 0.11451   | 0.107955 |
| 0.118444 | 0.113782 | 0.129516 | 0.109703  | 0.125    | 0.118444  | 0.121212 |
| 0.121649 | 0.107955 | 0.131847 | 0.0907634 | 0.132284 | 0.109994  | 0.125583 |
| 0.113054 | 0.107517 | 0.11859  | 0.0949883 | 0.12398  | 0.100233  | 0.124854 |
| 0.119027 | 0.118444 | 0.123689 | 0.0992133 | 0.134033 | 0.114073  | 0.122669 |
| 0.12296  | 0.110723 | 0.127331 | 0.0952797 | 0.130682 | 0.111305  | 0.125146 |
| 0.115093 | 0.106643 | 0.121503 | 0.101981  | 0.12398  | 0.106643  | 0.125728 |
| 0.124709 | 0.120921 | 0.136072 | 0.111597  | 0.137383 | 0.123543  | 0.135344 |
| 0.131847 | 0.122523 | 0.140297 | 0.127185  | 0.134907 | 0.130682  | 0.138112 |
| 0.108537 | 0.101253 | 0.122815 | 0.0913462 | 0.122669 | 0.0989219 | 0.114802 |
| 0.114219 | 0.120338 | 0.121212 | 0.119464  | 0.125146 | 0.124709  | 0.135635 |
| 0.116696 | 0.110868 | 0.128934 | 0.105624  | 0.129371 | 0.114656  | 0.125874 |
| 0.106206 | 0.11757  | 0.107663 | 0.11757   | 0.125583 | 0.125437  | 0.137529 |



|           |           |          |           |          |           |           |
|-----------|-----------|----------|-----------|----------|-----------|-----------|
| 0.097465  | 0.109994  | 0.101544 | 0.10271   | 0.113636 | 0.112325  | 0.124709  |
| 0.116987  | 0.112617  | 0.131847 | 0.100379  | 0.129953 | 0.114365  | 0.127622  |
| 0.112471  | 0.115385  | 0.131993 | 0.108974  | 0.132139 | 0.11859   | 0.126894  |
| 0.100087  | 0.11961   | 0.11116  | 0.109411  | 0.128497 | 0.119318  | 0.13549   |
| 0.114073  | 0.124563  | 0.115239 | 0.124563  | 0.127914 | 0.130099  | 0.139277  |
| 0.127185  | 0.111451  | 0.137092 | 0.107663  | 0.134324 | 0.117861  | 0.13141   |
| 0.095134  | 0.108537  | 0.103584 | 0.0986305 | 0.111597 | 0.10912   | 0.125583  |
| 0.131993  | 0.128497  | 0.147436 | 0.126166  | 0.143502 | 0.13141   | 0.127477  |
| 0.125437  | 0.124854  | 0.138258 | 0.116987  | 0.138112 | 0.121066  | 0.132284  |
| 0.104749  | 0.103875  | 0.113199 | 0.0939685 | 0.115967 | 0.0995047 | 0.122669  |
| 0.219988  | 0.217075  | 0.236014 | 0.217366  | 0.226836 | 0.218531  | 0.231206  |
| 0.101107  | 0.11014   | 0.105478 | 0.106935  | 0.121358 | 0.11859   | 0.132139  |
| 0.113345  | 0.106061  | 0.125    | 0.0949883 | 0.128059 | 0.106061  | 0.126311  |
| 0.106789  | 0.126603  | 0.121649 | 0.122523  | 0.126457 | 0.128642  | 0.132576  |
| 0.119027  | 0.107955  | 0.127477 | 0.100379  | 0.132867 | 0.111742  | 0.125583  |
| 0.129808  | 0.121649  | 0.137966 | 0.116987  | 0.138695 | 0.12602   | 0.137529  |
| 0.106789  | 0.114365  | 0.113782 | 0.10912   | 0.123834 | 0.116404  | 0.128497  |
| 0.104312  | 0.112471  | 0.109557 | 0.106935  | 0.12398  | 0.111888  | 0.127768  |
| 0.120338  | 0.113054  | 0.132284 | 0.103438  | 0.133596 | 0.120338  | 0.127477  |
| 0.116404  | 0.122523  | 0.113199 | 0.114948  | 0.125    | 0.126894  | 0.13549   |
| 0.111014  | 0.120338  | 0.117716 | 0.11859   | 0.120484 | 0.123543  | 0.138258  |
| 0.105624  | 0.12398   | 0.112908 | 0.114365  | 0.121212 | 0.114365  | 0.129079  |
| 0.107955  | 0.114073  | 0.10708  | 0.114365  | 0.126166 | 0.116113  | 0.138403  |
| 0.115822  | 0.105041  | 0.128351 | 0.0965909 | 0.12704  | 0.10912   | 0.123543  |
| 0.105915  | 0.109703  | 0.111742 | 0.104167  | 0.122378 | 0.103293  | 0.13345   |
| 0.110431  | 0.124417  | 0.110723 | 0.116259  | 0.130099 | 0.125874  | 0.136801  |
| 0.0983392 | 0.105624  | 0.102127 | 0.105624  | 0.116259 | 0.113199  | 0.130245  |
| 0.136509  | 0.125437  | 0.141463 | 0.124854  | 0.145396 | 0.133304  | 0.106643  |
| 0.134324  | 0.128497  | 0.147436 | 0.12296   | 0.138258 | 0.129662  | 0.144376  |
| 0.115676  | 0.104895  | 0.132284 | 0.11014   | 0.123397 | 0.11859   | 0.128059  |
| 0.121795  | 0.113636  | 0.13345  | 0.105186  | 0.136509 | 0.119755  | 0.125437  |
| 0.117279  | 0.111451  | 0.129808 | 0.115822  | 0.120047 | 0.11757   | 0.136364  |
| 0.125583  | 0.124417  | 0.131119 | 0.11451   | 0.134761 | 0.123834  | 0.13243   |
| 0.132284  | 0.122378  | 0.141317 | 0.114219  | 0.134178 | 0.118007  | 0.130099  |
| 0.139569  | 0.131702  | 0.149184 | 0.128788  | 0.13884  | 0.129953  | 0.14292   |
| 0.111451  | 0.0989219 | 0.118444 | 0.0726981 | 0.124417 | 0.0992133 | 0.117424  |
| 0.13345   | 0.11451   | 0.139569 | 0.109557  | 0.131847 | 0.123543  | 0.122815  |
| 0.142337  | 0.131265  | 0.155157 | 0.134761  | 0.145105 | 0.136509  | 0.145979  |
| 0.105041  | 0.105624  | 0.115822 | 0.0957168 | 0.115093 | 0.105915  | 0.120047  |
| 0.125146  | 0.112325  | 0.135344 | 0.107663  | 0.13345  | 0.118735  | 0.100816  |
| 0.138986  | 0.137529  | 0.149767 | 0.138403  | 0.143211 | 0.142483  | 0.142337  |
| 0.129662  | 0.11859   | 0.142483 | 0.113928  | 0.140006 | 0.125874  | 0.0910548 |
| 0.133304  | 0.130973  | 0.146999 | 0.125437  | 0.148019 | 0.135344  | 0.136364  |
| 0.118881  | 0.120047  | 0.132867 | 0.113928  | 0.136218 | 0.129079  | 0.128642  |

|           |           |           |           |          |           |          |
|-----------|-----------|-----------|-----------|----------|-----------|----------|
| 0.100379  | 0.112617  | 0.102418  | 0.106789  | 0.117716 | 0.111451  | 0.137821 |
| 0.122669  | 0.114802  | 0.137529  | 0.11655   | 0.130682 | 0.121795  | 0.132721 |
| 0.11116   | 0.103875  | 0.114073  | 0.0942599 | 0.119172 | 0.112908  | 0.125583 |
| 0.105769  | 0.11859   | 0.0903263 | 0.111305  | 0.113491 | 0.113345  | 0.135052 |
| 0.107809  | 0.11655   | 0.104604  | 0.115676  | 0.123397 | 0.119755  | 0.135344 |
| 0.105478  | 0.12704   | 0.0903263 | 0.120047  | 0.120775 | 0.123543  | 0.140589 |
| 0.0987762 | 0.114802  | 0.0973193 | 0.115967  | 0.110577 | 0.116841  | 0.139423 |
| 0.108392  | 0.109557  | 0.106352  | 0.112762  | 0.113782 | 0.111888  | 0.133887 |
| 0.111014  | 0.126457  | 0.0999417 | 0.133159  | 0.113199 | 0.13141   | 0.148456 |
| 0.114802  | 0.109266  | 0.12296   | 0.0909091 | 0.131265 | 0.109266  | 0.119901 |
| 0.111597  | 0.1081    | 0.118298  | 0.0976107 | 0.123397 | 0.106643  | 0.120192 |
| 0.112179  | 0.113345  | 0.121795  | 0.114219  | 0.123689 | 0.105186  | 0.141754 |
| 0.104021  | 0.0999417 | 0.117133  | 0.0839161 | 0.113199 | 0.0964452 | 0.121941 |
| 0.137675  | 0.125437  | 0.142045  | 0.127477  | 0.134033 | 0.121358  | 0.149767 |
| 0.14292   | 0.137675  | 0.143502  | 0.139423  | 0.136946 | 0.141463  | 0.153846 |
| 0.12398   | 0.122523  | 0.12602   | 0.114365  | 0.137821 | 0.127768  | 0.114802 |
| 0.114802  | 0.112762  | 0.121795  | 0.105186  | 0.133013 | 0.116259  | 0.110577 |
| 0.121941  | 0.121358  | 0.116404  | 0.123689  | 0.134324 | 0.128351  | 0.142191 |
| 0.110723  | 0.120921  | 0.118881  | 0.112179  | 0.129225 | 0.122669  | 0.137092 |
| 0.124417  | 0.122086  | 0.130828  | 0.1081    | 0.137966 | 0.122669  | 0.112325 |
| 0.110431  | 0.129371  | 0.112471  | 0.122669  | 0.135052 | 0.133159  | 0.135927 |
| 0.123543  | 0.117133  | 0.132867  | 0.122378  | 0.126894 | 0.127622  | 0.126603 |
| 0.117861  | 0.112325  | 0.135052  | 0.10708   | 0.135198 | 0.124563  | 0.108974 |
| 0.153409  | 0.150204  | 0.157488  | 0.154575  | 0.152389 | 0.144668  | 0.166084 |
| 0.116987  | 0.11553   | 0.133304  | 0.106206  | 0.136364 | 0.116696  | 0.110431 |
| 0.136218  | 0.128059  | 0.142337  | 0.127185  | 0.138695 | 0.135052  | 0.13549  |
| 0.113054  | 0.113054  | 0.119464  | 0.103147  | 0.122523 | 0.11014   | 0.115239 |
| 0.119464  | 0.121503  | 0.11014   | 0.12296   | 0.133013 | 0.128205  | 0.135927 |
| 0.0967366 | 0.118298  | 0.109848  | 0.112762  | 0.119027 | 0.119172  | 0.128642 |
| 0.139714  | 0.111742  | 0.153118  | 0.133887  | 0.129371 | 0.123689  | 0.154429 |
| 0.134615  | 0.143648  | 0.138403  | 0.145105  | 0.146707 | 0.145688  | 0.14933  |
| 0.129808  | 0.118153  | 0.14088   | 0.11961   | 0.136946 | 0.12602   | 0.13549  |
| 0.139277  | 0.129079  | 0.152972  | 0.135781  | 0.144959 | 0.138112  | 0.141463 |
| 0.151369  | 0.139714  | 0.160402  | 0.13243   | 0.152389 | 0.142628  | 0.152681 |
| 0.143211  | 0.134178  | 0.16215   | 0.136218  | 0.15472  | 0.138258  | 0.152098 |
| 0.112762  | 0.11014   | 0.118298  | 0.107226  | 0.120484 | 0.11014   | 0.124272 |
| 0.13884   | 0.134761  | 0.14933   | 0.137383  | 0.145688 | 0.130099  | 0.146562 |
| 0.123106  | 0.113782  | 0.136218  | 0.114073  | 0.130245 | 0.112908  | 0.126457 |
| 0.114219  | 0.109848  | 0.127622  | 0.103147  | 0.123397 | 0.117716  | 0.128934 |
| 0.113782  | 0.109994  | 0.133596  | 0.0986305 | 0.130245 | 0.109703  | 0.121795 |
| 0.127185  | 0.116404  | 0.141171  | 0.11757   | 0.134615 | 0.120192  | 0.129079 |
| 0.123252  | 0.113636  | 0.125874  | 0.106061  | 0.136801 | 0.118007  | 0.131556 |
| 0.120921  | 0.107517  | 0.136364  | 0.108392  | 0.128934 | 0.118007  | 0.126894 |
| 0.128497  | 0.119755  | 0.138403  | 0.117133  | 0.139132 | 0.119464  | 0.134178 |

|          |           |          |           |          |           |          |
|----------|-----------|----------|-----------|----------|-----------|----------|
| 0.124272 | 0.116113  | 0.140006 | 0.110868  | 0.135198 | 0.124272  | 0.136072 |
| 0.113199 | 0.0980478 | 0.124563 | 0.0890152 | 0.123834 | 0.102418  | 0.115967 |
| 0.133304 | 0.119318  | 0.145542 | 0.11757   | 0.140152 | 0.126603  | 0.132867 |
| 0.128788 | 0.118298  | 0.142774 | 0.113054  | 0.133887 | 0.124126  | 0.127185 |
| 0.121795 | 0.113345  | 0.126166 | 0.104312  | 0.130682 | 0.120921  | 0.114656 |
| 0.219697 | 0.213869  | 0.230186 | 0.216783  | 0.220425 | 0.217657  | 0.228293 |
| 0.143939 | 0.136946  | 0.151515 | 0.137821  | 0.146416 | 0.145979  | 0.145542 |
| 0.126311 | 0.130682  | 0.136218 | 0.120192  | 0.138986 | 0.127768  | 0.136072 |
| 0.13345  | 0.121503  | 0.141026 | 0.121795  | 0.137675 | 0.123543  | 0.135927 |
| 0.213578 | 0.213869  | 0.227855 | 0.210956  | 0.2213   | 0.211247  | 0.224213 |
| 0.123252 | 0.106352  | 0.137238 | 0.11014   | 0.125146 | 0.113345  | 0.122815 |
| 0.11961  | 0.117861  | 0.13447  | 0.109994  | 0.137238 | 0.120484  | 0.13141  |
| 0.123106 | 0.127768  | 0.13884  | 0.120775  | 0.138695 | 0.11961   | 0.130536 |
| 0.123252 | 0.116259  | 0.138986 | 0.113054  | 0.133013 | 0.123834  | 0.133596 |
| 0.251748 | 0.249709  | 0.264277 | 0.251748  | 0.253642 | 0.250874  | 0.25743  |
| 0.128642 | 0.106206  | 0.143794 | 0.116987  | 0.120338 | 0.103584  | 0.136946 |
| 0.11961  | 0.108537  | 0.125146 | 0.0960082 | 0.128497 | 0.113491  | 0.115093 |
| 0.127768 | 0.127185  | 0.131556 | 0.118153  | 0.132576 | 0.118735  | 0.136946 |
| 0.123106 | 0.12398   | 0.134178 | 0.113782  | 0.134907 | 0.115822  | 0.136072 |
| 0.13039  | 0.104167  | 0.139423 | 0.122815  | 0.114802 | 0.109411  | 0.137529 |
| 0.127185 | 0.114073  | 0.144376 | 0.121941  | 0.131119 | 0.124272  | 0.140734 |
| 0.122232 | 0.113491  | 0.128351 | 0.102418  | 0.13141  | 0.115239  | 0.116841 |
| 0.129371 | 0.117716  | 0.137821 | 0.11655   | 0.134178 | 0.123252  | 0.128642 |
| 0.131556 | 0.123689  | 0.144376 | 0.126894  | 0.138112 | 0.122815  | 0.136072 |
| 0.122232 | 0.110577  | 0.135927 | 0.105041  | 0.129662 | 0.116696  | 0.128205 |
| 0.126748 | 0.113345  | 0.136072 | 0.113636  | 0.13243  | 0.117716  | 0.131265 |
| 0.107372 | 0.0995047 | 0.117861 | 0.0916375 | 0.118007 | 0.104167  | 0.11655  |
| 0.132284 | 0.142774  | 0.135781 | 0.143065  | 0.145833 | 0.145688  | 0.149621 |
| 0.129079 | 0.106352  | 0.142774 | 0.118881  | 0.11961  | 0.104312  | 0.13884  |
| 0.123834 | 0.124417  | 0.133741 | 0.113928  | 0.140006 | 0.125874  | 0.134178 |
| 0.194639 | 0.190851  | 0.208625 | 0.185606  | 0.200903 | 0.191142  | 0.203526 |
| 0.208916 | 0.20542   | 0.22028  | 0.198427  | 0.215472 | 0.20542   | 0.216055 |
| 0.125    | 0.11859   | 0.141608 | 0.112179  | 0.135927 | 0.123543  | 0.132721 |
| 0.116841 | 0.112471  | 0.134033 | 0.107517  | 0.129225 | 0.114219  | 0.127768 |
| 0.137238 | 0.135198  | 0.14627  | 0.130828  | 0.139714 | 0.129662  | 0.143502 |
| 0.116259 | 0.110723  | 0.127331 | 0.103147  | 0.130682 | 0.11655   | 0.112617 |
| 0.129808 | 0.106498  | 0.142628 | 0.120192  | 0.120338 | 0.104749  | 0.142191 |
| 0.119464 | 0.130828  | 0.125291 | 0.127331  | 0.133013 | 0.124126  | 0.133596 |
| 0.226981 | 0.225816  | 0.236305 | 0.222902  | 0.23412  | 0.226399  | 0.235577 |
| 0.119755 | 0.119755  | 0.13345  | 0.106352  | 0.135927 | 0.115676  | 0.126894 |
| 0.202652 | 0.200903  | 0.215763 | 0.203234  | 0.206002 | 0.207605  | 0.211247 |
| 0.11014  | 0.0996503 | 0.115093 | 0.0914918 | 0.117861 | 0.0967366 | 0.119027 |
| 0.114656 | 0.109411  | 0.129516 | 0.101544  | 0.129079 | 0.109994  | 0.125291 |
| 0.119464 | 0.104604  | 0.134615 | 0.108683  | 0.127477 | 0.11451   | 0.123106 |

|          |           |          |           |          |           |          |
|----------|-----------|----------|-----------|----------|-----------|----------|
| 0.117716 | 0.109266  | 0.133159 | 0.105186  | 0.126894 | 0.116841  | 0.126603 |
| 0.209062 | 0.205274  | 0.221008 | 0.2044    | 0.215326 | 0.208188  | 0.218531 |
| 0.136218 | 0.128351  | 0.149913 | 0.128351  | 0.144231 | 0.135927  | 0.138403 |
| 0.116113 | 0.110286  | 0.121358 | 0.0992133 | 0.125    | 0.104458  | 0.127622 |
| 0.132721 | 0.123106  | 0.146999 | 0.123397  | 0.137238 | 0.127768  | 0.13141  |
| 0.127185 | 0.127185  | 0.134178 | 0.118735  | 0.138403 | 0.127477  | 0.124709 |
| 0.120775 | 0.110577  | 0.139423 | 0.106206  | 0.135198 | 0.116987  | 0.128205 |
| 0.107226 | 0.102855  | 0.112179 | 0.0958625 | 0.119901 | 0.0990676 | 0.120484 |
| 0.120921 | 0.112471  | 0.127622 | 0.10373   | 0.129516 | 0.115676  | 0.118735 |
| 0.123252 | 0.120921  | 0.13141  | 0.112762  | 0.142628 | 0.123252  | 0.133013 |
| 0.123834 | 0.113345  | 0.13549  | 0.11014   | 0.133596 | 0.117133  | 0.124854 |
| 0.114656 | 0.110868  | 0.118153 | 0.0986305 | 0.125291 | 0.108246  | 0.125874 |
| 0.193182 | 0.190268  | 0.207459 | 0.185315  | 0.200612 | 0.187937  | 0.199155 |
| 0.125437 | 0.127768  | 0.134178 | 0.116987  | 0.133741 | 0.118153  | 0.137529 |
| 0.125583 | 0.125583  | 0.130536 | 0.124709  | 0.137966 | 0.127331  | 0.138549 |
| 0.123689 | 0.122523  | 0.131556 | 0.114656  | 0.135781 | 0.117861  | 0.131119 |
| 0.127914 | 0.104895  | 0.143357 | 0.114219  | 0.121358 | 0.103438  | 0.141754 |
| 0.127622 | 0.120629  | 0.1419   | 0.119172  | 0.135927 | 0.124417  | 0.13243  |
| 0.111888 | 0.107226  | 0.115676 | 0.101107  | 0.116404 | 0.104604  | 0.123689 |
| 0.120484 | 0.10912   | 0.128934 | 0.105915  | 0.124126 | 0.109994  | 0.124126 |
| 0.119901 | 0.115239  | 0.125437 | 0.106789  | 0.131993 | 0.120484  | 0.116259 |
| 0.121503 | 0.121795  | 0.125291 | 0.120338  | 0.136218 | 0.123543  | 0.135052 |
| 0.123252 | 0.120629  | 0.132284 | 0.111014  | 0.130973 | 0.112471  | 0.135052 |
| 0.127185 | 0.116696  | 0.139714 | 0.110286  | 0.13549  | 0.121358  | 0.131993 |
| 0.128205 | 0.125874  | 0.142483 | 0.117424  | 0.140006 | 0.119755  | 0.132139 |
| 0.130973 | 0.13447   | 0.143794 | 0.13243   | 0.144522 | 0.130682  | 0.139277 |
| 0.122815 | 0.0983392 | 0.131556 | 0.106789  | 0.117716 | 0.100379  | 0.130245 |
| 0.137529 | 0.134033  | 0.146853 | 0.133741  | 0.144959 | 0.139569  | 0.140006 |
| 0.123252 | 0.110431  | 0.139277 | 0.105186  | 0.133887 | 0.115967  | 0.128934 |
| 0.112179 | 0.120047  | 0.120047 | 0.11451   | 0.129516 | 0.115676  | 0.125437 |
| 0.129225 | 0.117279  | 0.141754 | 0.11553   | 0.132867 | 0.122815  | 0.12704  |
| 0.124272 | 0.118735  | 0.130973 | 0.108537  | 0.135781 | 0.123106  | 0.119464 |
| 0.191871 | 0.188666  | 0.204983 | 0.181672  | 0.198135 | 0.187791  | 0.199883 |
| 0.111305 | 0.105769  | 0.115676 | 0.0929487 | 0.121941 | 0.101981  | 0.123106 |
| 0.113054 | 0.105478  | 0.125874 | 0.100233  | 0.121649 | 0.105769  | 0.116113 |
| 0.122378 | 0.122086  | 0.135198 | 0.111597  | 0.138258 | 0.121212  | 0.130973 |
| 0.183275 | 0.171911  | 0.20134  | 0.177448  | 0.18954  | 0.181818  | 0.191288 |
| 0.137383 | 0.112908  | 0.149038 | 0.128642  | 0.125    | 0.112325  | 0.147727 |
| 0.143502 | 0.121941  | 0.152244 | 0.134761  | 0.123834 | 0.120775  | 0.15472  |
| 0.134324 | 0.145105  | 0.139277 | 0.145688  | 0.14729  | 0.145979  | 0.148456 |
| 0.120921 | 0.100816  | 0.129662 | 0.105186  | 0.118153 | 0.0987762 | 0.127768 |
| 0.129808 | 0.119901  | 0.142045 | 0.121066  | 0.135198 | 0.126311  | 0.130245 |
| 0.215618 | 0.21183   | 0.230478 | 0.211538  | 0.221591 | 0.212995  | 0.222756 |
| 0.133159 | 0.124126  | 0.142191 | 0.123834  | 0.143211 | 0.122086  | 0.13243  |

|          |           |          |           |          |           |          |
|----------|-----------|----------|-----------|----------|-----------|----------|
| 0.135052 | 0.122523  | 0.146999 | 0.125146  | 0.140152 | 0.129225  | 0.134907 |
| 0.114073 | 0.105915  | 0.119027 | 0.0971737 | 0.126457 | 0.106206  | 0.125583 |
| 0.171474 | 0.163899  | 0.189248 | 0.169143  | 0.172494 | 0.171183  | 0.177448 |
| 0.124563 | 0.112908  | 0.131847 | 0.110286  | 0.131119 | 0.114365  | 0.129079 |
| 0.143357 | 0.144522  | 0.150641 | 0.149476  | 0.149621 | 0.143648  | 0.152535 |
| 0.122378 | 0.113054  | 0.132867 | 0.104604  | 0.128351 | 0.115093  | 0.122523 |
| 0.194639 | 0.189685  | 0.207168 | 0.18648   | 0.199738 | 0.189394  | 0.201777 |
| 0.124709 | 0.104895  | 0.137238 | 0.112179  | 0.11757  | 0.101107  | 0.137383 |
| 0.115676 | 0.104312  | 0.127914 | 0.0990676 | 0.125437 | 0.108683  | 0.116987 |
| 0.116113 | 0.120484  | 0.12398  | 0.105624  | 0.134033 | 0.110868  | 0.128497 |
| 0.127622 | 0.11859   | 0.13549  | 0.111305  | 0.135927 | 0.118298  | 0.131265 |
| 0.12296  | 0.118298  | 0.135781 | 0.1081    | 0.137092 | 0.118881  | 0.129516 |
| 0.12296  | 0.117424  | 0.132576 | 0.116841  | 0.133013 | 0.124709  | 0.131556 |
| 0.118444 | 0.109703  | 0.135344 | 0.103584  | 0.131119 | 0.116696  | 0.12704  |
| 0.193182 | 0.190268  | 0.206294 | 0.185606  | 0.19799  | 0.186772  | 0.200903 |
| 0.128059 | 0.124854  | 0.137675 | 0.118735  | 0.138695 | 0.121358  | 0.132576 |
| 0.119755 | 0.113054  | 0.135198 | 0.108683  | 0.136218 | 0.11859   | 0.12398  |
| 0.213141 | 0.212558  | 0.224796 | 0.208188  | 0.219406 | 0.212267  | 0.221737 |
| 0.126894 | 0.126603  | 0.133887 | 0.119027  | 0.134907 | 0.114365  | 0.139277 |
| 0.118881 | 0.113636  | 0.134907 | 0.1081    | 0.133596 | 0.115676  | 0.129225 |
| 0.11655  | 0.107809  | 0.130536 | 0.102564  | 0.126311 | 0.113636  | 0.126311 |
| 0.137383 | 0.130682  | 0.148164 | 0.135344  | 0.138695 | 0.13243   | 0.138986 |
| 0.193328 | 0.188957  | 0.207896 | 0.186626  | 0.198427 | 0.188666  | 0.202506 |
| 0.121503 | 0.111888  | 0.127622 | 0.0987762 | 0.133013 | 0.117716  | 0.117279 |
| 0.129662 | 0.129079  | 0.143065 | 0.125     | 0.143502 | 0.124709  | 0.133596 |
| 0.120338 | 0.111888  | 0.134615 | 0.104604  | 0.127477 | 0.115385  | 0.126311 |
| 0.118007 | 0.108683  | 0.135198 | 0.100233  | 0.129808 | 0.110723  | 0.12602  |
| 0.11553  | 0.10912   | 0.13243  | 0.101544  | 0.128205 | 0.113782  | 0.128497 |
| 0.127914 | 0.113636  | 0.13986  | 0.112179  | 0.13243  | 0.120629  | 0.133013 |
| 0.113491 | 0.103584  | 0.125437 | 0.0907634 | 0.122669 | 0.102418  | 0.113928 |
| 0.127768 | 0.101544  | 0.141171 | 0.114656  | 0.118881 | 0.0992133 | 0.138695 |
| 0.127185 | 0.130682  | 0.135927 | 0.131265  | 0.137821 | 0.133596  | 0.134907 |
| 0.127477 | 0.105332  | 0.137675 | 0.11116   | 0.118881 | 0.099796  | 0.136072 |
| 0.128497 | 0.129079  | 0.131119 | 0.121212  | 0.139714 | 0.128788  | 0.13039  |
| 0.201486 | 0.191871  | 0.211684 | 0.188083  | 0.203089 | 0.194202  | 0.20542  |
| 0.123834 | 0.121503  | 0.136655 | 0.114802  | 0.136218 | 0.114219  | 0.129225 |
| 0.13447  | 0.125437  | 0.149038 | 0.125437  | 0.140734 | 0.133304  | 0.137529 |
| 0.118007 | 0.108392  | 0.133159 | 0.102273  | 0.130099 | 0.113054  | 0.128642 |
| 0.110868 | 0.0971737 | 0.12398  | 0.0898893 | 0.120629 | 0.0989219 | 0.113345 |
| 0.116404 | 0.10271   | 0.131556 | 0.109703  | 0.118007 | 0.103293  | 0.126748 |
| 0.120629 | 0.115676  | 0.129079 | 0.103147  | 0.130682 | 0.118007  | 0.11553  |
| 0.128497 | 0.125583  | 0.139569 | 0.120629  | 0.136801 | 0.12704   | 0.139423 |
| 0.126603 | 0.122815  | 0.131265 | 0.119318  | 0.138112 | 0.123397  | 0.133741 |
| 0.114073 | 0.0980478 | 0.128059 | 0.092803  | 0.120921 | 0.107372  | 0.115967 |

|          |           |          |           |          |           |          |
|----------|-----------|----------|-----------|----------|-----------|----------|
| 0.112179 | 0.0938228 | 0.124709 | 0.0836247 | 0.119318 | 0.104604  | 0.108246 |
| 0.115239 | 0.100087  | 0.128351 | 0.0962995 | 0.126457 | 0.106206  | 0.120629 |
| 0.111597 | 0.101981  | 0.114219 | 0.0926573 | 0.120775 | 0.099359  | 0.121358 |
| 0.131847 | 0.108246  | 0.146707 | 0.121358  | 0.121212 | 0.107955  | 0.138695 |
| 0.12296  | 0.111305  | 0.127914 | 0.0984848 | 0.134178 | 0.118007  | 0.118153 |
| 0.12398  | 0.110286  | 0.133887 | 0.109994  | 0.129953 | 0.116404  | 0.126166 |
| 0.115822 | 0.107663  | 0.122523 | 0.0930944 | 0.130245 | 0.113491  | 0.112179 |
| 0.120338 | 0.111305  | 0.136655 | 0.102855  | 0.131265 | 0.11451   | 0.127185 |
| 0.109703 | 0.104458  | 0.11961  | 0.0930944 | 0.123252 | 0.0989219 | 0.120047 |
| 0.120192 | 0.11116   | 0.133596 | 0.105915  | 0.131702 | 0.115822  | 0.130828 |
| 0.124272 | 0.117279  | 0.13447  | 0.11116   | 0.134907 | 0.112034  | 0.128497 |
| 0.122523 | 0.121066  | 0.126311 | 0.115822  | 0.133741 | 0.11961   | 0.134033 |
| 0.123106 | 0.115239  | 0.133304 | 0.105624  | 0.138986 | 0.116404  | 0.122669 |
| 0.118007 | 0.102855  | 0.130245 | 0.0920746 | 0.127185 | 0.105769  | 0.116696 |
| 0.119901 | 0.112908  | 0.136801 | 0.103293  | 0.132867 | 0.117279  | 0.129371 |
| 0.117279 | 0.122232  | 0.126894 | 0.11553   | 0.137821 | 0.119901  | 0.131993 |
| 0.126166 | 0.115967  | 0.143065 | 0.111597  | 0.139714 | 0.122378  | 0.129808 |
| 0.111742 | 0.103584  | 0.125437 | 0.0925117 | 0.124126 | 0.107372  | 0.117133 |
| 0.120484 | 0.108246  | 0.135635 | 0.104167  | 0.128205 | 0.115822  | 0.127331 |
| 0.126457 | 0.115385  | 0.138112 | 0.117716  | 0.135344 | 0.122378  | 0.128351 |
| 0.111305 | 0.0996503 | 0.117424 | 0.0920746 | 0.118735 | 0.10169   | 0.121358 |
| 0.129371 | 0.119172  | 0.140734 | 0.116841  | 0.136218 | 0.121795  | 0.128934 |
| 0.122669 | 0.118881  | 0.132576 | 0.106352  | 0.140297 | 0.116841  | 0.129516 |
| 0.115676 | 0.104604  | 0.128497 | 0.094697  | 0.125437 | 0.104604  | 0.118735 |
| 0.122086 | 0.113636  | 0.130536 | 0.102564  | 0.127185 | 0.109266  | 0.129225 |
| 0.112908 | 0.105041  | 0.118444 | 0.092803  | 0.121503 | 0.0989219 | 0.122378 |
| 0.13141  | 0.123834  | 0.143939 | 0.120338  | 0.137675 | 0.128205  | 0.134761 |
| 0.132576 | 0.124709  | 0.135781 | 0.120047  | 0.141754 | 0.126166  | 0.128351 |
| 0.127185 | 0.112325  | 0.137383 | 0.110577  | 0.13549  | 0.114656  | 0.125874 |
| 0.197115 | 0.19391   | 0.210519 | 0.190414  | 0.202506 | 0.192745  | 0.207459 |
| 0.167395 | 0.165064  | 0.186043 | 0.165064  | 0.174534 | 0.167978  | 0.175117 |
| 0.125728 | 0.104458  | 0.139132 | 0.113782  | 0.119464 | 0.0977564 | 0.134324 |
| 0.123252 | 0.112471  | 0.133159 | 0.109848  | 0.132139 | 0.120047  | 0.124563 |
| 0.143648 | 0.128497  | 0.15472  | 0.140443  | 0.125728 | 0.124417  | 0.157488 |
| 0.131265 | 0.126311  | 0.145833 | 0.127477  | 0.13549  | 0.12398   | 0.138695 |
| 0.123543 | 0.115093  | 0.141026 | 0.116259  | 0.129516 | 0.120629  | 0.131265 |
| 0.119027 | 0.109411  | 0.136509 | 0.107955  | 0.129371 | 0.114073  | 0.129371 |
| 0.106206 | 0.101253  | 0.121066 | 0.0887238 | 0.121795 | 0.103584  | 0.119464 |
| 0.128059 | 0.119318  | 0.142628 | 0.115822  | 0.138986 | 0.12398   | 0.130536 |
| 0.206002 | 0.200175  | 0.217366 | 0.199009  | 0.209645 | 0.199883  | 0.215181 |
| 0.122232 | 0.116113  | 0.126894 | 0.103584  | 0.136655 | 0.118153  | 0.114802 |
| 0.123543 | 0.110723  | 0.138112 | 0.109848  | 0.127768 | 0.116841  | 0.120775 |
| 0.116841 | 0.105769  | 0.132576 | 0.10169   | 0.128642 | 0.113636  | 0.121941 |
| 0.125437 | 0.116987  | 0.132721 | 0.108829  | 0.136364 | 0.119027  | 0.12704  |

|          |          |           |           |          |          |          |
|----------|----------|-----------|-----------|----------|----------|----------|
| 0.188811 | 0.17803  | 0.206294  | 0.182984  | 0.194202 | 0.18648  | 0.195659 |
| 0.245047 | 0.24796  | 0.259907  | 0.243007  | 0.252477 | 0.246212 | 0.254225 |
| 0.126457 | 0.125291 | 0.133159  | 0.121212  | 0.135344 | 0.124709 | 0.135635 |
| 0.125291 | 0.118007 | 0.140152  | 0.113345  | 0.136509 | 0.119172 | 0.130973 |
| 0.128497 | 0.10373  | 0.143065  | 0.113345  | 0.11961  | 0.102855 | 0.139714 |
| 0.120192 | 0.11757  | 0.131265  | 0.103001  | 0.135781 | 0.112617 | 0.129662 |
| 0.116259 | 0.109266 | 0.123252  | 0.0987762 | 0.127477 | 0.114802 | 0.110286 |
| 0.121649 | 0.117279 | 0.13243   | 0.110868  | 0.132576 | 0.113782 | 0.123834 |
| 0.120629 | 0.109557 | 0.138695  | 0.109848  | 0.126894 | 0.117424 | 0.129516 |
| 0.116841 | 0.106935 | 0.125291  | 0.0976107 | 0.13039  | 0.113345 | 0.112908 |
| 0.116696 | 0.106206 | 0.134178  | 0.10708   | 0.123543 | 0.114948 | 0.129953 |
| 0.118007 | 0.111597 | 0.130828  | 0.099359  | 0.129225 | 0.112179 | 0.123689 |
| 0.114656 | 0.102418 | 0.127477  | 0.0933858 | 0.123252 | 0.105332 | 0.118298 |
| 0.122086 | 0.122086 | 0.128497  | 0.120047  | 0.136218 | 0.12296  | 0.134761 |
| 0.132139 | 0.115239 | 0.141171  | 0.11553   | 0.137821 | 0.124272 | 0.128205 |
| 0.104458 | 0.10912  | 0.112908  | 0.0977564 | 0.122669 | 0.10708  | 0.118881 |
| 0.102127 | 0.115239 | 0.0989219 | 0.11116   | 0.112179 | 0.113782 | 0.13345  |
| 0.123106 | 0.126603 | 0.137092  | 0.116987  | 0.140152 | 0.130099 | 0.135198 |
| 0.117716 | 0.107517 | 0.13345   | 0.100524  | 0.131556 | 0.11451  | 0.126894 |
| 0.115239 | 0.103584 | 0.129225  | 0.10912   | 0.116259 | 0.114365 | 0.123252 |
| 0.125728 | 0.124272 | 0.13884   | 0.122232  | 0.137529 | 0.127477 | 0.131702 |
| 0.210373 | 0.207751 | 0.223776  | 0.204545  | 0.214889 | 0.206876 | 0.21926  |
| 0.115822 | 0.113491 | 0.122523  | 0.107372  | 0.128788 | 0.113199 | 0.125291 |
| 0.115093 | 0.101399 | 0.127914  | 0.090035  | 0.121649 | 0.101981 | 0.118444 |
| 0.127914 | 0.120629 | 0.140152  | 0.114802  | 0.140006 | 0.113636 | 0.132139 |
| 0.12602  | 0.123106 | 0.135052  | 0.115239  | 0.139569 | 0.115822 | 0.138986 |
| 0.125437 | 0.11757  | 0.130973  | 0.10912   | 0.135198 | 0.11961  | 0.127331 |
| 0.20236  | 0.200321 | 0.217803  | 0.198281  | 0.210956 | 0.199155 | 0.211247 |
| 0.13141  | 0.118007 | 0.142774  | 0.11859   | 0.14088  | 0.125291 | 0.133887 |
| 0.116987 | 0.108829 | 0.133304  | 0.100379  | 0.127622 | 0.11553  | 0.126457 |
| 0.128788 | 0.111597 | 0.13141   | 0.113345  | 0.133596 | 0.119755 | 0.131847 |
| 0.117424 | 0.11451  | 0.130828  | 0.099359  | 0.134761 | 0.112471 | 0.124854 |
| 0.127622 | 0.120047 | 0.1419    | 0.118007  | 0.137383 | 0.124126 | 0.131556 |
| 0.119464 | 0.108974 | 0.126457  | 0.106935  | 0.125728 | 0.115676 | 0.122232 |
| 0.115093 | 0.107809 | 0.131119  | 0.0973193 | 0.130682 | 0.111597 | 0.11961  |
| 0.12296  | 0.119172 | 0.132284  | 0.109266  | 0.131847 | 0.112762 | 0.136218 |
| 0.2044   | 0.198281 | 0.215763  | 0.19595   | 0.208333 | 0.196824 | 0.210373 |
| 0.121795 | 0.109266 | 0.131993  | 0.111888  | 0.124563 | 0.113345 | 0.119901 |
| 0.201777 | 0.19595  | 0.215472  | 0.190122  | 0.204837 | 0.194493 | 0.208916 |
| 0.197261 | 0.193765 | 0.20979   | 0.188811  | 0.207314 | 0.194347 | 0.205274 |
| 0.124417 | 0.124126 | 0.136655  | 0.115676  | 0.142337 | 0.127914 | 0.132139 |
| 0.125874 | 0.128497 | 0.132867  | 0.123543  | 0.136509 | 0.121212 | 0.140006 |
| 0.108974 | 0.101399 | 0.123543  | 0.0926573 | 0.122232 | 0.103147 | 0.113782 |
| 0.121358 | 0.110577 | 0.128351  | 0.107372  | 0.130828 | 0.116404 | 0.124417 |

|          |          |          |           |          |           |          |
|----------|----------|----------|-----------|----------|-----------|----------|
| 0.125583 | 0.114802 | 0.138695 | 0.113636  | 0.134761 | 0.117424  | 0.128642 |
| 0.120629 | 0.111305 | 0.137238 | 0.108683  | 0.13243  | 0.118298  | 0.128642 |
| 0.113928 | 0.104895 | 0.123252 | 0.0920746 | 0.125728 | 0.109848  | 0.106206 |
| 0.120338 | 0.109266 | 0.125583 | 0.0976107 | 0.130099 | 0.115385  | 0.112034 |
| 0.123106 | 0.122815 | 0.131847 | 0.124563  | 0.137238 | 0.126894  | 0.136655 |
| 0.122669 | 0.116259 | 0.135198 | 0.1081    | 0.14088  | 0.118298  | 0.131847 |
| 0.115239 | 0.105332 | 0.13039  | 0.100087  | 0.126457 | 0.110868  | 0.12296  |
| 0.129079 | 0.117133 | 0.141608 | 0.117716  | 0.137966 | 0.122086  | 0.130682 |
| 0.111451 | 0.10067  | 0.121066 | 0.095134  | 0.124709 | 0.105041  | 0.114219 |
| 0.13345  | 0.120047 | 0.143939 | 0.125583  | 0.137092 | 0.129953  | 0.132139 |
| 0.126166 | 0.102855 | 0.137821 | 0.109848  | 0.120775 | 0.0996503 | 0.133887 |
| 0.135927 | 0.129808 | 0.147582 | 0.129225  | 0.143939 | 0.133013  | 0.138986 |
| 0.256847 | 0.259178 | 0.269085 | 0.256847  | 0.262238 | 0.256847  | 0.266026 |
| 0.119901 | 0.117861 | 0.118153 | 0.111451  | 0.124709 | 0.116696  | 0.130536 |
| 0.119755 | 0.122669 | 0.127622 | 0.120338  | 0.130682 | 0.122086  | 0.130099 |
| 0.220717 | 0.216055 | 0.231789 | 0.214889  | 0.224359 | 0.216346  | 0.227564 |
| 0.128788 | 0.122378 | 0.129953 | 0.120047  | 0.135927 | 0.125     | 0.133304 |
| 0.231643 | 0.232226 | 0.245921 | 0.225816  | 0.237325 | 0.229895  | 0.239948 |
| 0.113491 | 0.109994 | 0.115239 | 0.101836  | 0.124709 | 0.108537  | 0.125    |
| 0.127622 | 0.121795 | 0.138695 | 0.118881  | 0.137675 | 0.12704   | 0.130682 |
| 0.121212 | 0.118298 | 0.129371 | 0.108974  | 0.130973 | 0.113054  | 0.13039  |
| 0.123543 | 0.120629 | 0.135781 | 0.1081    | 0.139132 | 0.122378  | 0.131847 |
| 0.207459 | 0.202214 | 0.217366 | 0.200466  | 0.213724 | 0.20338   | 0.216055 |
| 0.136946 | 0.121503 | 0.145979 | 0.126748  | 0.137675 | 0.130828  | 0.136218 |
| 0.128497 | 0.117133 | 0.141317 | 0.116259  | 0.135052 | 0.125     | 0.132139 |
| 0.228001 | 0.227418 | 0.241404 | 0.224213  | 0.235431 | 0.22771   | 0.23514  |
| 0.122378 | 0.115093 | 0.131993 | 0.100233  | 0.134178 | 0.116259  | 0.112908 |
| 0.202943 | 0.201486 | 0.215763 | 0.194784  | 0.210373 | 0.196824  | 0.208042 |
| 0.119901 | 0.11116  | 0.128642 | 0.100962  | 0.134907 | 0.116113  | 0.115676 |
| 0.119027 | 0.11116  | 0.136218 | 0.105624  | 0.134033 | 0.11757   | 0.126166 |
| 0.120338 | 0.111014 | 0.135781 | 0.104895  | 0.127477 | 0.113636  | 0.119027 |
| 0.125874 | 0.121795 | 0.134033 | 0.114802  | 0.139423 | 0.123834  | 0.13243  |
| 0.126603 | 0.115239 | 0.132139 | 0.113199  | 0.130245 | 0.11553   | 0.128497 |
| 0.162733 | 0.152244 | 0.17905  | 0.150787  | 0.166958 | 0.157197  | 0.170746 |
| 0.125146 | 0.114365 | 0.137383 | 0.112325  | 0.132284 | 0.118153  | 0.126457 |
| 0.12398  | 0.12398  | 0.131847 | 0.116987  | 0.13345  | 0.118153  | 0.139277 |
| 0.125146 | 0.116113 | 0.131847 | 0.111742  | 0.140152 | 0.120484  | 0.134324 |
| 0.119901 | 0.127185 | 0.12602  | 0.124272  | 0.132284 | 0.122523  | 0.135198 |
| 0.200175 | 0.195221 | 0.213869 | 0.193473  | 0.208188 | 0.197261  | 0.206148 |
| 0.116696 | 0.106789 | 0.135927 | 0.100962  | 0.130828 | 0.116696  | 0.123834 |
| 0.12704  | 0.117133 | 0.141026 | 0.105186  | 0.143502 | 0.120629  | 0.135052 |
| 0.11116  | 0.101836 | 0.114948 | 0.0954254 | 0.120047 | 0.102418  | 0.119172 |
| 0.114802 | 0.111305 | 0.124126 | 0.0996503 | 0.128934 | 0.115967  | 0.112034 |
| 0.122815 | 0.11757  | 0.134761 | 0.114073  | 0.131119 | 0.121066  | 0.130536 |



|          |           |          |           |          |           |          |
|----------|-----------|----------|-----------|----------|-----------|----------|
| 0.255828 | 0.255828  | 0.270688 | 0.256993  | 0.25743  | 0.256119  | 0.262092 |
| 0.116987 | 0.107955  | 0.124854 | 0.0983392 | 0.124709 | 0.107955  | 0.120338 |
| 0.127768 | 0.115239  | 0.138549 | 0.110286  | 0.134324 | 0.116696  | 0.13345  |
| 0.182255 | 0.180507  | 0.188374 | 0.177885  | 0.182401 | 0.180216  | 0.186189 |
| 0.191871 | 0.188374  | 0.202652 | 0.180507  | 0.197844 | 0.185752  | 0.19493  |
| 0.124854 | 0.121649  | 0.130682 | 0.119027  | 0.133159 | 0.12398   | 0.136072 |
| 0.130536 | 0.115676  | 0.140734 | 0.118881  | 0.136218 | 0.122669  | 0.131265 |
| 0.120047 | 0.115676  | 0.134324 | 0.105478  | 0.138549 | 0.117424  | 0.126894 |
| 0.146999 | 0.13884   | 0.157197 | 0.142045  | 0.15035  | 0.147873  | 0.149184 |
| 0.120775 | 0.119027  | 0.129225 | 0.116404  | 0.131119 | 0.118735  | 0.132576 |
| 0.123543 | 0.120047  | 0.130245 | 0.121795  | 0.136801 | 0.125291  | 0.136218 |
| 0.125437 | 0.119318  | 0.126894 | 0.109411  | 0.129662 | 0.121358  | 0.118298 |
| 0.122232 | 0.110286  | 0.135344 | 0.115239  | 0.128205 | 0.117279  | 0.129953 |
| 0.136364 | 0.12704   | 0.145105 | 0.130245  | 0.13884  | 0.13345   | 0.13447  |
| 0.122815 | 0.112034  | 0.13243  | 0.101836  | 0.125583 | 0.116404  | 0.122378 |
| 0.125291 | 0.120338  | 0.130536 | 0.11014   | 0.137092 | 0.122669  | 0.132139 |
| 0.133596 | 0.132721  | 0.141754 | 0.125146  | 0.144231 | 0.13884   | 0.142191 |
| 0.120629 | 0.108974  | 0.127622 | 0.10169   | 0.125728 | 0.109848  | 0.121066 |
| 0.127477 | 0.125146  | 0.135052 | 0.118153  | 0.139569 | 0.125728  | 0.133159 |
| 0.125437 | 0.119901  | 0.128059 | 0.110286  | 0.134907 | 0.123397  | 0.115385 |
| 0.212995 | 0.209207  | 0.225233 | 0.205128  | 0.221008 | 0.208333  | 0.221008 |
| 0.103584 | 0.109703  | 0.118153 | 0.0977564 | 0.112762 | 0.112617  | 0.124417 |
| 0.197698 | 0.194202  | 0.209936 | 0.1875    | 0.201923 | 0.193036  | 0.204545 |
| 0.117279 | 0.11961   | 0.131847 | 0.103584  | 0.127914 | 0.112325  | 0.124417 |
| 0.122815 | 0.119318  | 0.139132 | 0.114948  | 0.137529 | 0.12398   | 0.13549  |
| 0.127477 | 0.103875  | 0.139423 | 0.112908  | 0.117133 | 0.101836  | 0.141317 |
| 0.119755 | 0.0990676 | 0.134324 | 0.105186  | 0.119027 | 0.0973193 | 0.130099 |
| 0.131265 | 0.11961   | 0.143794 | 0.122523  | 0.134615 | 0.125437  | 0.136072 |
| 0.133887 | 0.122232  | 0.14088  | 0.119901  | 0.136364 | 0.126311  | 0.13141  |
| 0.121649 | 0.112325  | 0.136218 | 0.105624  | 0.133159 | 0.118735  | 0.130245 |
| 0.125291 | 0.125     | 0.132284 | 0.113054  | 0.134178 | 0.116841  | 0.137092 |
| 0.129953 | 0.105186  | 0.143939 | 0.115967  | 0.116404 | 0.104895  | 0.139423 |
| 0.125146 | 0.122232  | 0.133304 | 0.112325  | 0.13549  | 0.124854  | 0.121503 |
| 0.252185 | 0.253059  | 0.264132 | 0.251603  | 0.254079 | 0.249854  | 0.257284 |
| 0.124272 | 0.11116   | 0.139132 | 0.107663  | 0.136072 | 0.117861  | 0.131702 |
| 0.188811 | 0.186772  | 0.201049 | 0.180361  | 0.195659 | 0.184149  | 0.199155 |
| 0.195076 | 0.191288  | 0.206439 | 0.186043  | 0.200758 | 0.18954   | 0.200175 |
| 0.126166 | 0.120047  | 0.136946 | 0.110431  | 0.138258 | 0.125     | 0.130099 |
| 0.115676 | 0.104312  | 0.12704  | 0.0952797 | 0.123689 | 0.106061  | 0.11961  |
| 0.123543 | 0.118007  | 0.138403 | 0.113928  | 0.132139 | 0.123834  | 0.134761 |
| 0.124709 | 0.112762  | 0.136946 | 0.112471  | 0.129516 | 0.115967  | 0.126603 |
| 0.104458 | 0.0983392 | 0.120775 | 0.0898893 | 0.122378 | 0.103001  | 0.119755 |
| 0.121941 | 0.112034  | 0.131847 | 0.0983392 | 0.133159 | 0.114365  | 0.116841 |
| 0.121503 | 0.113928  | 0.140734 | 0.11451   | 0.130099 | 0.122086  | 0.127477 |

|          |           |          |           |          |           |          |
|----------|-----------|----------|-----------|----------|-----------|----------|
| 0.136655 | 0.125583  | 0.145979 | 0.127914  | 0.14088  | 0.134033  | 0.136801 |
| 0.119901 | 0.110577  | 0.135344 | 0.104458  | 0.130245 | 0.116113  | 0.129662 |
| 0.134178 | 0.124854  | 0.144959 | 0.124854  | 0.138695 | 0.130973  | 0.136655 |
| 0.117716 | 0.113054  | 0.130245 | 0.108974  | 0.131556 | 0.114219  | 0.127477 |
| 0.128788 | 0.103147  | 0.145396 | 0.120047  | 0.119901 | 0.106935  | 0.137966 |
| 0.121941 | 0.121358  | 0.137966 | 0.112325  | 0.140152 | 0.123106  | 0.127622 |
| 0.122086 | 0.124126  | 0.127331 | 0.111014  | 0.130973 | 0.124709  | 0.11961  |
| 0.118735 | 0.112325  | 0.133013 | 0.10708   | 0.127914 | 0.118153  | 0.125    |
| 0.116987 | 0.108537  | 0.132139 | 0.105041  | 0.126457 | 0.111451  | 0.127622 |
| 0.128351 | 0.136218  | 0.146416 | 0.128351  | 0.1419   | 0.127768  | 0.134615 |
| 0.189977 | 0.187063  | 0.201923 | 0.181235  | 0.197698 | 0.186772  | 0.197115 |
| 0.137966 | 0.128934  | 0.147873 | 0.131847  | 0.140734 | 0.137092  | 0.139277 |
| 0.127185 | 0.11757   | 0.139132 | 0.120775  | 0.134907 | 0.124272  | 0.130828 |
| 0.125    | 0.102273  | 0.136364 | 0.111888  | 0.116987 | 0.0944056 | 0.136801 |
| 0.116404 | 0.0992133 | 0.124272 | 0.101544  | 0.115093 | 0.0968823 | 0.126748 |
| 0.120629 | 0.119464  | 0.130536 | 0.109266  | 0.136218 | 0.117424  | 0.128351 |
| 0.123397 | 0.116987  | 0.136509 | 0.109703  | 0.141608 | 0.122523  | 0.13345  |
| 0.195221 | 0.192599  | 0.208042 | 0.186189  | 0.201486 | 0.190268  | 0.204983 |
| 0.121795 | 0.113054  | 0.136946 | 0.117424  | 0.130099 | 0.120921  | 0.128351 |
| 0.114073 | 0.106498  | 0.12602  | 0.103584  | 0.121795 | 0.110286  | 0.120921 |
| 0.129808 | 0.122523  | 0.143211 | 0.122232  | 0.136655 | 0.126603  | 0.132867 |
| 0.197844 | 0.19493   | 0.210956 | 0.190559  | 0.205857 | 0.193765  | 0.203817 |
| 0.117861 | 0.105041  | 0.132721 | 0.0954254 | 0.129079 | 0.104167  | 0.120629 |
| 0.122378 | 0.117133  | 0.126457 | 0.1081    | 0.130099 | 0.120629  | 0.115239 |
| 0.131993 | 0.117424  | 0.143939 | 0.123252  | 0.137383 | 0.12704   | 0.133887 |
| 0.118153 | 0.119318  | 0.121358 | 0.11553   | 0.129662 | 0.117861  | 0.130828 |
| 0.194784 | 0.189831  | 0.207022 | 0.186917  | 0.198135 | 0.188666  | 0.200758 |
| 0.122232 | 0.115239  | 0.12602  | 0.104749  | 0.129079 | 0.117279  | 0.115093 |
| 0.119901 | 0.115822  | 0.137092 | 0.110577  | 0.136072 | 0.115822  | 0.126748 |
| 0.116987 | 0.103875  | 0.130682 | 0.100087  | 0.128205 | 0.108829  | 0.123252 |
| 0.128642 | 0.116404  | 0.141754 | 0.119901  | 0.138695 | 0.122523  | 0.137529 |
| 0.123834 | 0.120921  | 0.131702 | 0.113345  | 0.136509 | 0.117133  | 0.135344 |
| 0.122086 | 0.120047  | 0.127331 | 0.110431  | 0.133887 | 0.125     | 0.118444 |
| 0.118007 | 0.112762  | 0.136655 | 0.10373   | 0.127768 | 0.114802  | 0.128934 |
| 0.125    | 0.118298  | 0.133741 | 0.111305  | 0.132139 | 0.115676  | 0.126603 |
| 0.136218 | 0.142045  | 0.140297 | 0.145542  | 0.148893 | 0.149038  | 0.148893 |
| 0.238199 | 0.234703  | 0.251603 | 0.236742  | 0.239219 | 0.234994  | 0.247378 |
| 0.121941 | 0.116113  | 0.135052 | 0.110286  | 0.129662 | 0.119901  | 0.128497 |
| 0.128934 | 0.122815  | 0.133596 | 0.113782  | 0.136655 | 0.116404  | 0.137529 |
| 0.125874 | 0.115093  | 0.137238 | 0.118007  | 0.13039  | 0.124417  | 0.126894 |
| 0.127768 | 0.119318  | 0.132139 | 0.116113  | 0.138695 | 0.127185  | 0.13549  |
| 0.110723 | 0.106935  | 0.120047 | 0.104021  | 0.122523 | 0.112762  | 0.124563 |
| 0.126166 | 0.119464  | 0.129953 | 0.108392  | 0.135344 | 0.120338  | 0.125437 |
| 0.128642 | 0.117279  | 0.140297 | 0.11961   | 0.130828 | 0.125728  | 0.132576 |

|          |           |          |           |          |           |           |
|----------|-----------|----------|-----------|----------|-----------|-----------|
| 0.120921 | 0.120921  | 0.128205 | 0.108974  | 0.132721 | 0.124126  | 0.113199  |
| 0.119172 | 0.11655   | 0.131119 | 0.115093  | 0.131847 | 0.120921  | 0.128059  |
| 0.23616  | 0.238782  | 0.253059 | 0.23616   | 0.242424 | 0.234994  | 0.244172  |
| 0.114802 | 0.100524  | 0.125291 | 0.0952797 | 0.121941 | 0.104021  | 0.116696  |
| 0.111888 | 0.102273  | 0.11859  | 0.0938228 | 0.117279 | 0.0981935 | 0.115239  |
| 0.117279 | 0.108537  | 0.130682 | 0.105332  | 0.127622 | 0.116404  | 0.125     |
| 0.126457 | 0.128205  | 0.131702 | 0.131702  | 0.142045 | 0.131993  | 0.137383  |
| 0.126457 | 0.121795  | 0.137821 | 0.115676  | 0.135052 | 0.126457  | 0.130973  |
| 0.127622 | 0.119755  | 0.138112 | 0.112762  | 0.13243  | 0.114802  | 0.133304  |
| 0.129079 | 0.119464  | 0.143939 | 0.120338  | 0.135344 | 0.124417  | 0.131265  |
| 0.121649 | 0.11757   | 0.125437 | 0.111116  | 0.129953 | 0.116696  | 0.125291  |
| 0.235577 | 0.23208   | 0.246066 | 0.230915  | 0.236888 | 0.233829  | 0.240967  |
| 0.13243  | 0.124272  | 0.142045 | 0.12602   | 0.135198 | 0.129808  | 0.13549   |
| 0.121795 | 0.113928  | 0.125    | 0.106643  | 0.132139 | 0.120338  | 0.114365  |
| 0.119172 | 0.110723  | 0.129371 | 0.104604  | 0.130973 | 0.116259  | 0.126603  |
| 0.114073 | 0.121649  | 0.12398  | 0.115822  | 0.128497 | 0.121066  | 0.129079  |
| 0.111742 | 0.113199  | 0.11553  | 0.105624  | 0.125    | 0.112908  | 0.128497  |
| 0.118153 | 0.112034  | 0.133887 | 0.105915  | 0.129953 | 0.116113  | 0.128497  |
| 0.121358 | 0.114073  | 0.125728 | 0.104458  | 0.131993 | 0.117861  | 0.113636  |
| 0.125583 | 0.119464  | 0.128205 | 0.111305  | 0.13243  | 0.123252  | 0.120192  |
| 0.118298 | 0.111888  | 0.126166 | 0.097028  | 0.129808 | 0.115676  | 0.110286  |
| 0.120192 | 0.111742  | 0.135052 | 0.103875  | 0.131119 | 0.116113  | 0.129953  |
| 0.12602  | 0.128934  | 0.133596 | 0.120484  | 0.138403 | 0.118444  | 0.138112  |
| 0.129662 | 0.133741  | 0.140734 | 0.126166  | 0.14088  | 0.123543  | 0.142337  |
| 0.129371 | 0.108683  | 0.145105 | 0.120047  | 0.120484 | 0.109557  | 0.138549  |
| 0.134324 | 0.112762  | 0.149476 | 0.123543  | 0.120192 | 0.11014   | 0.144376  |
| 0.127185 | 0.13039   | 0.133304 | 0.121649  | 0.137529 | 0.121358  | 0.141608  |
| 0.106789 | 0.0922203 | 0.11961  | 0.0808566 | 0.122378 | 0.0965909 | 0.115967  |
| 0.115967 | 0.117133  | 0.119464 | 0.114219  | 0.121649 | 0.116259  | 0.131265  |
| 0.132721 | 0.119027  | 0.145542 | 0.11757   | 0.140152 | 0.126311  | 0.0999417 |
| 0.210519 | 0.208188  | 0.224505 | 0.206148  | 0.213287 | 0.206731  | 0.217075  |
| 0.126603 | 0.121358  | 0.14292  | 0.120192  | 0.137821 | 0.124563  | 0.130536  |
| 0.112034 | 0.106789  | 0.119318 | 0.0960082 | 0.127331 | 0.104458  | 0.124709  |
| 0.124126 | 0.116841  | 0.138403 | 0.111305  | 0.134178 | 0.125874  | 0.133596  |
| 0.223631 | 0.223339  | 0.238199 | 0.222465  | 0.229895 | 0.221882  | 0.233683  |
| 0.216638 | 0.215181  | 0.223339 | 0.21081   | 0.224359 | 0.214598  | 0.224359  |
| 0.120629 | 0.119172  | 0.129079 | 0.108683  | 0.135052 | 0.124709  | 0.117861  |
| 0.25539  | 0.252477  | 0.264132 | 0.249563  | 0.255536 | 0.250728  | 0.258159  |
| 0.104167 | 0.0942599 | 0.119901 | 0.0831876 | 0.118298 | 0.0995047 | 0.114802  |
| 0.131265 | 0.129516  | 0.139714 | 0.121358  | 0.138986 | 0.128059  | 0.13986   |
| 0.115822 | 0.105624  | 0.128351 | 0.0983392 | 0.12296  | 0.104458  | 0.117716  |
| 0.128205 | 0.126748  | 0.137821 | 0.118881  | 0.133887 | 0.118881  | 0.142045  |
| 0.193328 | 0.190705  | 0.206439 | 0.1875    | 0.197552 | 0.190122  | 0.201049  |
| 0.121212 | 0.121503  | 0.131119 | 0.11451   | 0.138549 | 0.123543  | 0.125437  |

|          |          |          |           |          |           |          |
|----------|----------|----------|-----------|----------|-----------|----------|
| 0.201049 | 0.19493  | 0.213578 | 0.188811  | 0.207896 | 0.194639  | 0.209062 |
| 0.123543 | 0.118298 | 0.13345  | 0.109557  | 0.131847 | 0.116259  | 0.12602  |
| 0.120047 | 0.106061 | 0.128205 | 0.106352  | 0.12398  | 0.115967  | 0.121358 |
| 0.110431 | 0.110431 | 0.132576 | 0.0981935 | 0.128059 | 0.111305  | 0.121066 |
| 0.121503 | 0.107809 | 0.128497 | 0.109266  | 0.126894 | 0.114802  | 0.125146 |
| 0.112908 | 0.104458 | 0.130973 | 0.0971737 | 0.122669 | 0.109411  | 0.122669 |
| 0.121358 | 0.114656 | 0.136218 | 0.107372  | 0.135781 | 0.114365  | 0.124126 |
| 0.107955 | 0.100379 | 0.122815 | 0.0898893 | 0.121212 | 0.0992133 | 0.114802 |
| 0.126457 | 0.11451  | 0.138403 | 0.112762  | 0.131847 | 0.118881  | 0.124854 |
| 0.108829 | 0.103001 | 0.115239 | 0.0971737 | 0.119755 | 0.103293  | 0.123543 |
| 0.114365 | 0.105041 | 0.129225 | 0.0939685 | 0.127622 | 0.11116   | 0.119755 |
| 0.113345 | 0.10373  | 0.126166 | 0.0929487 | 0.121941 | 0.10169   | 0.115822 |
| 0.123106 | 0.103001 | 0.137675 | 0.112617  | 0.11451  | 0.0989219 | 0.135198 |
| 0.13447  | 0.127185 | 0.144959 | 0.124272  | 0.138403 | 0.132139  | 0.137529 |
| 0.122086 | 0.100816 | 0.134907 | 0.108392  | 0.118735 | 0.101107  | 0.128934 |
| 0.123106 | 0.119318 | 0.137383 | 0.109411  | 0.13549  | 0.110577  | 0.126166 |
| 0.112179 | 0.105478 | 0.128788 | 0.0990676 | 0.124272 | 0.11014   | 0.122232 |
| 0.11859  | 0.110431 | 0.127622 | 0.105478  | 0.124854 | 0.115967  | 0.119027 |
| 0.124709 | 0.121795 | 0.134324 | 0.110431  | 0.133887 | 0.115676  | 0.137092 |
| 0.121649 | 0.119027 | 0.134178 | 0.10912   | 0.138403 | 0.121649  | 0.129662 |
| 0.124563 | 0.10271  | 0.135344 | 0.106789  | 0.118881 | 0.0983392 | 0.134324 |
| 0.126457 | 0.116841 | 0.138695 | 0.115676  | 0.133013 | 0.122669  | 0.129516 |
| 0.135635 | 0.127185 | 0.145251 | 0.127477  | 0.143357 | 0.131847  | 0.136946 |
| 0.137092 | 0.13243  | 0.147873 | 0.133596  | 0.143648 | 0.13884   | 0.137238 |
| 0.112179 | 0.104604 | 0.120629 | 0.0894522 | 0.122815 | 0.106643  | 0.105332 |
| 0.119464 | 0.111597 | 0.134907 | 0.106352  | 0.131847 | 0.115385  | 0.128642 |
| 0.119027 | 0.110286 | 0.122523 | 0.100962  | 0.128788 | 0.110286  | 0.120921 |
| 0.129808 | 0.131847 | 0.135635 | 0.12602   | 0.137821 | 0.126311  | 0.142774 |
| 0.117133 | 0.103438 | 0.128788 | 0.097028  | 0.125437 | 0.106061  | 0.116987 |
| 0.133159 | 0.133741 | 0.140152 | 0.126748  | 0.144668 | 0.136946  | 0.137966 |
| 0.129953 | 0.130245 | 0.142483 | 0.12704   | 0.13884  | 0.13345   | 0.136801 |
| 0.124563 | 0.126311 | 0.130099 | 0.121358  | 0.136364 | 0.126603  | 0.134907 |
| 0.119755 | 0.106935 | 0.130828 | 0.101399  | 0.128934 | 0.109848  | 0.119901 |
| 0.114073 | 0.114948 | 0.119901 | 0.104749  | 0.127622 | 0.108829  | 0.125874 |
| 0.131847 | 0.106498 | 0.142337 | 0.119318  | 0.121795 | 0.103584  | 0.139569 |
| 0.210373 | 0.204837 | 0.22028  | 0.202214  | 0.216346 | 0.206876  | 0.21722  |
| 0.123252 | 0.116841 | 0.141026 | 0.11014   | 0.133013 | 0.111597  | 0.124854 |
| 0.115822 | 0.110286 | 0.134761 | 0.0954254 | 0.134033 | 0.10912   | 0.122086 |
| 0.121795 | 0.120921 | 0.129079 | 0.11451   | 0.13243  | 0.113928  | 0.133596 |
| 0.123106 | 0.100379 | 0.135344 | 0.10708   | 0.119464 | 0.0977564 | 0.129662 |
| 0.127914 | 0.124417 | 0.13549  | 0.116841  | 0.138549 | 0.122378  | 0.132721 |
| 0.132284 | 0.120921 | 0.137821 | 0.121795  | 0.138549 | 0.127331  | 0.125437 |
| 0.135052 | 0.128934 | 0.136218 | 0.125728  | 0.13986  | 0.127768  | 0.129371 |
| 0.121795 | 0.120629 | 0.126748 | 0.121503  | 0.13447  | 0.124417  | 0.132139 |

|           |           |          |           |          |           |          |
|-----------|-----------|----------|-----------|----------|-----------|----------|
| 0.111597  | 0.101399  | 0.115676 | 0.0917832 | 0.121649 | 0.101399  | 0.11757  |
| 0.126457  | 0.129953  | 0.131702 | 0.121212  | 0.136509 | 0.121795  | 0.139132 |
| 0.113054  | 0.104604  | 0.128788 | 0.0949883 | 0.125728 | 0.104895  | 0.11757  |
| 0.119027  | 0.11116   | 0.138258 | 0.101253  | 0.131119 | 0.114948  | 0.125    |
| 0.182401  | 0.167832  | 0.18852  | 0.175699  | 0.181964 | 0.175699  | 0.188666 |
| 0.127622  | 0.115676  | 0.1419   | 0.115967  | 0.133596 | 0.121212  | 0.132721 |
| 0.125728  | 0.128642  | 0.134761 | 0.122232  | 0.137529 | 0.122815  | 0.142191 |
| 0.0996503 | 0.107226  | 0.11451  | 0.0944056 | 0.116987 | 0.101107  | 0.116113 |
| 0.105915  | 0.101544  | 0.116404 | 0.111742  | 0.111305 | 0.113199  | 0.123252 |
| 0.111742  | 0.101544  | 0.123106 | 0.0977564 | 0.125291 | 0.104167  | 0.117716 |
| 0.110286  | 0.102127  | 0.124563 | 0.0907634 | 0.120047 | 0.100379  | 0.117424 |
| 0.113491  | 0.108829  | 0.124854 | 0.103584  | 0.128497 | 0.109703  | 0.118881 |
| 0.117279  | 0.114073  | 0.116987 | 0.108246  | 0.124709 | 0.121358  | 0.116841 |
| 0.121358  | 0.105332  | 0.135052 | 0.109703  | 0.124417 | 0.116696  | 0.125583 |
| 0.129079  | 0.124417  | 0.134615 | 0.117424  | 0.134761 | 0.116841  | 0.130682 |
| 0.112034  | 0.103875  | 0.120192 | 0.0954254 | 0.121503 | 0.105915  | 0.122378 |
| 0.121503  | 0.112179  | 0.126748 | 0.106352  | 0.127477 | 0.115967  | 0.125146 |
| 0.124854  | 0.120484  | 0.13039  | 0.111451  | 0.136655 | 0.126311  | 0.104312 |
| 0.103875  | 0.103001  | 0.113199 | 0.100379  | 0.118007 | 0.10708   | 0.115093 |
| 0.126894  | 0.112908  | 0.129808 | 0.113491  | 0.134324 | 0.121358  | 0.129953 |
| 0.103584  | 0.099796  | 0.116113 | 0.0936772 | 0.115967 | 0.102127  | 0.117133 |
| 0.103875  | 0.104167  | 0.114948 | 0.100379  | 0.116841 | 0.107663  | 0.118881 |
| 0.100087  | 0.104458  | 0.112325 | 0.0916375 | 0.115093 | 0.10067   | 0.11655  |
| 0.113636  | 0.108974  | 0.125583 | 0.102564  | 0.127477 | 0.114802  | 0.125728 |
| 0.108683  | 0.103438  | 0.11859  | 0.0882867 | 0.120484 | 0.0990676 | 0.118735 |
| 0.137238  | 0.131702  | 0.145105 | 0.130828  | 0.144959 | 0.137238  | 0.133887 |
| 0.133159  | 0.125     | 0.143357 | 0.119172  | 0.141463 | 0.130245  | 0.13447  |
| 0.110723  | 0.100233  | 0.12296  | 0.0938228 | 0.124854 | 0.104021  | 0.121066 |
| 0.130099  | 0.134761  | 0.137092 | 0.126311  | 0.146562 | 0.132139  | 0.138112 |
| 0.127185  | 0.108246  | 0.135344 | 0.116987  | 0.127914 | 0.115239  | 0.135781 |
| 0.131847  | 0.12398   | 0.142045 | 0.12398   | 0.133741 | 0.13447   | 0.108392 |
| 0.110868  | 0.105915  | 0.123397 | 0.097465  | 0.129953 | 0.101253  | 0.123543 |
| 0.140734  | 0.142191  | 0.14627  | 0.135198  | 0.141171 | 0.140152  | 0.144668 |
| 0.123252  | 0.127622  | 0.129662 | 0.121503  | 0.135344 | 0.123252  | 0.133013 |
| 0.131993  | 0.126748  | 0.139277 | 0.126748  | 0.138258 | 0.128788  | 0.126603 |
| 0.115676  | 0.0725524 | 0.123252 | 0.105769  | 0.103584 | 0.0932401 | 0.129225 |
| 0.109411  | 0.0986305 | 0.116404 | 0.0898893 | 0.117424 | 0.101544  | 0.113345 |
| 0.110723  | 0.0955711 | 0.118881 | 0.0719697 | 0.123689 | 0.0941142 | 0.11961  |
| 0.115822  | 0.112325  | 0.120484 | 0.100379  | 0.130828 | 0.112325  | 0.113636 |
| 0.106498  | 0.11116   | 0.125146 | 0.0986305 | 0.123543 | 0.107955  | 0.122378 |
| 0.113054  | 0.115093  | 0.117133 | 0.110723  | 0.127185 | 0.117716  | 0.128059 |
| 0.121212  | 0.11451   | 0.135781 | 0.107809  | 0.128351 | 0.121212  | 0.126311 |
| 0.101981  | 0.0912005 | 0.109848 | 0.092366  | 0.104749 | 0.0719697 | 0.121941 |
| 0.110577  | 0.0989219 | 0.11961  | 0.0712413 | 0.123834 | 0.0957168 | 0.117133 |

|          |           |          |           |          |          |          |
|----------|-----------|----------|-----------|----------|----------|----------|
| 0.109266 | 0.109266  | 0.122669 | 0.0999417 | 0.125146 | 0.114219 | 0.114656 |
| 0.113928 | 0.100816  | 0.124709 | 0.0842075 | 0.123106 | 0.103147 | 0.11553  |
| 0.115239 | 0.104749  | 0.122523 | 0.0805653 | 0.128497 | 0.105332 | 0.124126 |
| 0.117861 | 0.103293  | 0.131556 | 0.0957168 | 0.13141  | 0.105915 | 0.117716 |
| 0.121795 | 0.118298  | 0.133741 | 0.114802  | 0.129808 | 0.111305 | 0.133887 |
| 0.125    | 0.108974  | 0.134907 | 0.104895  | 0.13447  | 0.115385 | 0.116696 |
| 0.104312 | 0.0932401 | 0.115676 | 0.0844988 | 0.119901 | 0.10169  | 0.114365 |
| 0.108683 | 0.102855  | 0.123834 | 0.094697  | 0.123106 | 0.1081   | 0.11553  |
| 0.125728 | 0.114073  | 0.13447  | 0.110868  | 0.131702 | 0.110577 | 0.130536 |
| 0.12296  | 0.107517  | 0.129079 | 0.104312  | 0.13039  | 0.11451  | 0.120484 |
| 0.128205 | 0.121503  | 0.141317 | 0.117424  | 0.132721 | 0.121795 | 0.133304 |
| 0.115967 | 0.108974  | 0.129953 | 0.10169   | 0.127477 | 0.108683 | 0.121941 |
| 0.121358 | 0.116404  | 0.137383 | 0.115822  | 0.132576 | 0.12602  | 0.12296  |

| <b>TDr_08_00747</b> | <b>TDr_08_00756</b> | <b>TDr_08_00758</b> | <b>TDr_08_00764</b> | <b>TDr_08_00789</b> | <b>TDr_08_00794</b> | <b>TDr_08_00799</b> |
|---------------------|---------------------|---------------------|---------------------|---------------------|---------------------|---------------------|
| 0.120921            | 0.104312            | 0.127914            | 0.112325            | 0.113199            | 0.116259            | 0.131702            |
| 0.12398             | 0.109994            | 0.137966            | 0.113636            | 0.1081              | 0.11553             | 0.13447             |
| 0.121649            | 0.105332            | 0.139714            | 0.109848            | 0.106935            | 0.107372            | 0.132721            |
| 0.124272            | 0.108246            | 0.142628            | 0.113636            | 0.108974            | 0.118444            | 0.130682            |
| 0.131265            | 0.126894            | 0.158945            | 0.127331            | 0.125583            | 0.13039             | 0.148747            |
| 0.131556            | 0.119027            | 0.14088             | 0.12296             | 0.129662            | 0.128934            | 0.139423            |
| 0.0865385           | 0.0810023           | 0.129371            | 0.0828963           | 0.112908            | 0.109848            | 0.105478            |
| 0.12296             | 0.113636            | 0.136072            | 0.116987            | 0.106789            | 0.117424            | 0.134324            |
| 0.116113            | 0.10067             | 0.135052            | 0.104604            | 0.0996503           | 0.103875            | 0.124272            |
| 0.105478            | 0.0944056           | 0.13345             | 0.097465            | 0.0971737           | 0.0976107           | 0.107809            |
| 0.120484            | 0.0910548           | 0.139714            | 0.0973193           | 0.1081              | 0.111742            | 0.131265            |
| 0.123834            | 0.10373             | 0.139277            | 0.107663            | 0.108829            | 0.106643            | 0.132867            |
| 0.119755            | 0.106643            | 0.13986             | 0.112908            | 0.104749            | 0.112471            | 0.132867            |
| 0.142628            | 0.127477            | 0.153992            | 0.13549             | 0.131993            | 0.136218            | 0.1537              |
| 0.126748            | 0.118881            | 0.146562            | 0.125437            | 0.12398             | 0.125291            | 0.142191            |
| 0.123106            | 0.109994            | 0.133887            | 0.112471            | 0.111305            | 0.117279            | 0.130973            |
| 0.119464            | 0.0987762           | 0.138403            | 0.103875            | 0.103001            | 0.1081              | 0.129953            |
| 0.136801            | 0.13447             | 0.158654            | 0.138695            | 0.140443            | 0.137675            | 0.141754            |
| 0.121358            | 0.104167            | 0.136509            | 0.109557            | 0.10169             | 0.104749            | 0.129808            |
| 0.207896            | 0.20236             | 0.207314            | 0.200466            | 0.203963            | 0.2044              | 0.215472            |
| 0.118298            | 0.0973193           | 0.143357            | 0.101253            | 0.116404            | 0.118881            | 0.134615            |
| 0.11116             | 0.0919289           | 0.141171            | 0.0967366           | 0.113054            | 0.115239            | 0.123397            |
| 0.124709            | 0.101981            | 0.134033            | 0.10708             | 0.0977564           | 0.101981            | 0.129371            |
| 0.130973            | 0.122232            | 0.146416            | 0.124417            | 0.121212            | 0.116987            | 0.142045            |
| 0.113928            | 0.097028            | 0.132284            | 0.10067             | 0.0995047           | 0.103147            | 0.124126            |
| 0.118881            | 0.104895            | 0.141608            | 0.106498            | 0.122523            | 0.124126            | 0.131119            |
| 0.125583            | 0.105186            | 0.143357            | 0.106206            | 0.115822            | 0.109848            | 0.126748            |
| 0.129079            | 0.118881            | 0.145688            | 0.117861            | 0.114365            | 0.117133            | 0.139569            |
| 0.129079            | 0.114802            | 0.149184            | 0.120484            | 0.125728            | 0.120921            | 0.132284            |
| 0.121503            | 0.113345            | 0.14831             | 0.113491            | 0.116696            | 0.113928            | 0.132284            |
| 0.116696            | 0.105332            | 0.13243             | 0.112179            | 0.117133            | 0.113491            | 0.128934            |
| 0.126457            | 0.113345            | 0.14831             | 0.113491            | 0.121941            | 0.113636            | 0.130245            |
| 0.110723            | 0.0944056           | 0.131993            | 0.100379            | 0.109411            | 0.106935            | 0.124417            |
| 0.122086            | 0.112471            | 0.144231            | 0.112034            | 0.112908            | 0.115967            | 0.136072            |
| 0.11961             | 0.105332            | 0.139714            | 0.106352            | 0.11014             | 0.113782            | 0.130682            |
| 0.125               | 0.110431            | 0.148019            | 0.114365            | 0.116987            | 0.118298            | 0.128205            |
| 0.100379            | 0.10067             | 0.134178            | 0.0996503           | 0.116259            | 0.125437            | 0.101253            |
| 0.125874            | 0.112179            | 0.141317            | 0.115239            | 0.114656            | 0.113636            | 0.136364            |
| 0.120047            | 0.103438            | 0.142483            | 0.106206            | 0.109994            | 0.106643            | 0.135781            |
| 0.124417            | 0.117133            | 0.146562            | 0.118444            | 0.117861            | 0.11859             | 0.143065            |
| 0.114219            | 0.102564            | 0.13986             | 0.108537            | 0.104167            | 0.106352            | 0.126166            |
| 0.13141             | 0.133741            | 0.158217            | 0.137383            | 0.139714            | 0.135781            | 0.145396            |

|          |           |           |           |           |           |          |
|----------|-----------|-----------|-----------|-----------|-----------|----------|
| 0.138403 | 0.138695  | 0.155594  | 0.142337  | 0.143502  | 0.13549   | 0.148893 |
| 0.11553  | 0.105624  | 0.13884   | 0.111888  | 0.110723  | 0.104167  | 0.126603 |
| 0.101836 | 0.0855186 | 0.124272  | 0.0888695 | 0.0777972 | 0.0977564 | 0.113782 |
| 0.109848 | 0.0999417 | 0.130828  | 0.100962  | 0.0968823 | 0.10169   | 0.119755 |
| 0.133159 | 0.109266  | 0.138112  | 0.110868  | 0.109411  | 0.108392  | 0.142483 |
| 0.131265 | 0.133596  | 0.152244  | 0.132576  | 0.13345   | 0.128642  | 0.143211 |
| 0.119901 | 0.110868  | 0.14292   | 0.115093  | 0.111014  | 0.111742  | 0.133304 |
| 0.111888 | 0.108974  | 0.137238  | 0.113199  | 0.112034  | 0.111305  | 0.127622 |
| 0.122232 | 0.122232  | 0.141754  | 0.124126  | 0.142483  | 0.135344  | 0.127477 |
| 0.132721 | 0.122523  | 0.140006  | 0.121503  | 0.120921  | 0.116404  | 0.142628 |
| 0.113636 | 0.104895  | 0.141026  | 0.111742  | 0.112034  | 0.103147  | 0.131993 |
| 0.122086 | 0.11451   | 0.142483  | 0.117279  | 0.120775  | 0.119464  | 0.134033 |
| 0.122378 | 0.111305  | 0.135198  | 0.116696  | 0.114948  | 0.116259  | 0.133159 |
| 0.140443 | 0.129953  | 0.151515  | 0.130682  | 0.131556  | 0.121795  | 0.149767 |
| 0.12602  | 0.121649  | 0.146416  | 0.125874  | 0.122086  | 0.118153  | 0.142628 |
| 0.11757  | 0.105624  | 0.144959  | 0.111597  | 0.112179  | 0.113491  | 0.13039  |
| 0.11553  | 0.106789  | 0.140297  | 0.111888  | 0.108974  | 0.112325  | 0.127185 |
| 0.104895 | 0.0932401 | 0.132284  | 0.0948427 | 0.103001  | 0.104312  | 0.120629 |
| 0.130245 | 0.134615  | 0.149767  | 0.137092  | 0.134761  | 0.130536  | 0.145396 |
| 0.136946 | 0.134907  | 0.161131  | 0.136509  | 0.133304  | 0.135198  | 0.15035  |
| 0.164481 | 0.16419   | 0.163607  | 0.164918  | 0.161713  | 0.160693  | 0.175845 |
| 0.120775 | 0.111742  | 0.14292   | 0.113054  | 0.111597  | 0.113491  | 0.131556 |
| 0.116113 | 0.105041  | 0.141171  | 0.109848  | 0.10373   | 0.111451  | 0.131265 |
| 0.120192 | 0.103875  | 0.140589  | 0.108683  | 0.10373   | 0.107663  | 0.130682 |
| 0.126457 | 0.123543  | 0.106061  | 0.125728  | 0.126894  | 0.140734  | 0.13141  |
| 0.115093 | 0.105769  | 0.138986  | 0.108829  | 0.107663  | 0.11655   | 0.13549  |
| 0.134178 | 0.123106  | 0.13884   | 0.127331  | 0.126166  | 0.116696  | 0.141463 |
| 0.109411 | 0.100962  | 0.135635  | 0.102855  | 0.106061  | 0.105332  | 0.122232 |
| 0.116841 | 0.108392  | 0.145979  | 0.115239  | 0.110868  | 0.109848  | 0.12704  |
| 0.126748 | 0.12704   | 0.0824592 | 0.128642  | 0.133013  | 0.143939  | 0.12704  |
| 0.126457 | 0.118298  | 0.145979  | 0.121358  | 0.11553   | 0.118007  | 0.143065 |
| 0.135344 | 0.131265  | 0.152826  | 0.134907  | 0.135781  | 0.132139  | 0.147873 |
| 0.139569 | 0.124709  | 0.147727  | 0.127768  | 0.123397  | 0.118881  | 0.14627  |
| 0.117861 | 0.101836  | 0.13243   | 0.104312  | 0.104021  | 0.109703  | 0.127477 |
| 0.116113 | 0.105624  | 0.140297  | 0.109848  | 0.107809  | 0.102127  | 0.133304 |
| 0.119901 | 0.108246  | 0.143794  | 0.113636  | 0.109266  | 0.112617  | 0.129808 |
| 0.132139 | 0.127477  | 0.158071  | 0.129953  | 0.130828  | 0.130682  | 0.146707 |
| 0.115093 | 0.105478  | 0.137238  | 0.113199  | 0.103001  | 0.109266  | 0.132576 |
| 0.138549 | 0.137966  | 0.158362  | 0.136364  | 0.138986  | 0.129808  | 0.146707 |
| 0.127477 | 0.113491  | 0.146707  | 0.120047  | 0.11859   | 0.11961   | 0.139423 |
| 0.123689 | 0.116696  | 0.138549  | 0.117133  | 0.111014  | 0.108829  | 0.140006 |
| 0.120775 | 0.111451  | 0.142628  | 0.117133  | 0.115093  | 0.112617  | 0.136509 |
| 0.131847 | 0.118153  | 0.150495  | 0.118881  | 0.11655   | 0.117279  | 0.141754 |
| 0.121941 | 0.108537  | 0.144085  | 0.111014  | 0.111888  | 0.109703  | 0.133887 |



|           |           |          |           |           |           |          |
|-----------|-----------|----------|-----------|-----------|-----------|----------|
| 0.122523  | 0.11116   | 0.137383 | 0.115967  | 0.111305  | 0.106206  | 0.135344 |
| 0.12704   | 0.130245  | 0.14831  | 0.133013  | 0.130099  | 0.126457  | 0.139569 |
| 0.11655   | 0.100816  | 0.142191 | 0.105332  | 0.107955  | 0.0981935 | 0.122378 |
| 0.12398   | 0.105041  | 0.143502 | 0.107809  | 0.108683  | 0.107663  | 0.131847 |
| 0.0968823 | 0.0936772 | 0.138549 | 0.0984848 | 0.115093  | 0.113199  | 0.103293 |
| 0.08581   | 0.0793998 | 0.129808 | 0.0821678 | 0.113054  | 0.115239  | 0.103584 |
| 0.118735  | 0.11116   | 0.122232 | 0.111014  | 0.0981935 | 0.116404  | 0.126894 |
| 0.129371  | 0.118298  | 0.128788 | 0.11961   | 0.109703  | 0.129662  | 0.134907 |
| 0.104749  | 0.0907634 | 0.132721 | 0.0932401 | 0.102855  | 0.114073  | 0.117861 |
| 0.163024  | 0.167686  | 0.174388 | 0.166375  | 0.178904  | 0.178759  | 0.171474 |
| 0.100816  | 0.0812937 | 0.131993 | 0.0878497 | 0.101544  | 0.10373   | 0.107809 |
| 0.133013  | 0.122232  | 0.13039  | 0.125291  | 0.0999417 | 0.125728  | 0.127768 |
| 0.12602   | 0.113491  | 0.129516 | 0.115967  | 0.0926573 | 0.117861  | 0.125728 |
| 0.0926573 | 0.0990676 | 0.141026 | 0.0962995 | 0.121358  | 0.124126  | 0.106935 |
| 0.109703  | 0.0916375 | 0.122232 | 0.0973193 | 0.0821678 | 0.110577  | 0.126894 |
| 0.121066  | 0.110577  | 0.126311 | 0.113928  | 0.10169   | 0.126894  | 0.131265 |
| 0.112325  | 0.0919289 | 0.126311 | 0.0949883 | 0.0789627 | 0.108829  | 0.123397 |
| 0.113636  | 0.103147  | 0.125583 | 0.104458  | 0.099796  | 0.111888  | 0.125291 |
| 0.103147  | 0.0903263 | 0.125583 | 0.0933858 | 0.10271   | 0.109266  | 0.104895 |
| 0.129371  | 0.111597  | 0.128497 | 0.117861  | 0.101544  | 0.120338  | 0.13141  |
| 0.109848  | 0.0958625 | 0.130245 | 0.0995047 | 0.0907634 | 0.0894522 | 0.119755 |
| 0.106789  | 0.103293  | 0.114656 | 0.104312  | 0.114219  | 0.123397  | 0.100379 |
| 0.094697  | 0.0801282 | 0.126166 | 0.0843531 | 0.100962  | 0.102564  | 0.102564 |
| 0.133596  | 0.128351  | 0.150787 | 0.129079  | 0.123543  | 0.123106  | 0.144668 |
| 0         | 0.097028  | 0.136655 | 0.0986305 | 0.116987  | 0.115385  | 0.100233 |
| 0.097028  | 0         | 0.132284 | 0.0473485 | 0.0939685 | 0.0996503 | 0.102855 |
| 0.136655  | 0.132284  | 0        | 0.137383  | 0.12398   | 0.142191  | 0.141608 |
| 0.0986305 | 0.0473485 | 0.137383 | 0         | 0.0981935 | 0.105332  | 0.106498 |
| 0.116987  | 0.0939685 | 0.12398  | 0.0981935 | 0         | 0.104458  | 0.12398  |
| 0.115385  | 0.0996503 | 0.142191 | 0.105332  | 0.104458  | 0         | 0.120921 |
| 0.100233  | 0.102855  | 0.141608 | 0.106498  | 0.12398   | 0.120921  | 0        |
| 0.120629  | 0.107226  | 0.129079 | 0.111451  | 0.117279  | 0.111597  | 0.132867 |
| 0.117133  | 0.0912005 | 0.122378 | 0.0980478 | 0.0726981 | 0.10169   | 0.119755 |
| 0.118298  | 0.0903263 | 0.127331 | 0.0977564 | 0.0712413 | 0.104312  | 0.119755 |
| 0.100087  | 0.088141  | 0.130973 | 0.0914918 | 0.108392  | 0.108829  | 0.101836 |
| 0.111888  | 0.10373   | 0.133159 | 0.106498  | 0.105332  | 0.114802  | 0.115967 |
| 0.0869755 | 0.0692016 | 0.13243  | 0.0716783 | 0.10373   | 0.105041  | 0.107955 |
| 0.102855  | 0.0914918 | 0.126748 | 0.0986305 | 0.0901807 | 0.0981935 | 0.116841 |
| 0.107517  | 0.0815851 | 0.125874 | 0.0890152 | 0.0884324 | 0.0952797 | 0.115093 |
| 0.109994  | 0.0895979 | 0.127768 | 0.0949883 | 0.094697  | 0.0980478 | 0.114948 |
| 0.124563  | 0.107663  | 0.141463 | 0.112179  | 0.112762  | 0.112325  | 0.133596 |
| 0.118881  | 0.105478  | 0.141317 | 0.112908  | 0.11116   | 0.110431  | 0.124126 |
| 0.102418  | 0.0925117 | 0.133887 | 0.099359  | 0.0976107 | 0.10271   | 0.122232 |
| 0.106352  | 0.0891608 | 0.128788 | 0.0960082 | 0.0942599 | 0.094697  | 0.117424 |

|           |           |          |           |           |           |          |
|-----------|-----------|----------|-----------|-----------|-----------|----------|
| 0.108683  | 0.100524  | 0.13141  | 0.104749  | 0.105624  | 0.109848  | 0.128205 |
| 0.103584  | 0.0887238 | 0.129225 | 0.0955711 | 0.0941142 | 0.100379  | 0.116113 |
| 0.123106  | 0.099796  | 0.109703 | 0.105478  | 0.104312  | 0.123106  | 0.127768 |
| 0.110286  | 0.109411  | 0.13447  | 0.106061  | 0.125     | 0.121066  | 0.120775 |
| 0.115239  | 0.0910548 | 0.129808 | 0.0909091 | 0.0961538 | 0.105332  | 0.114948 |
| 0.104312  | 0.0941142 | 0.135198 | 0.102418  | 0.0980478 | 0.105769  | 0.12296  |
| 0.106935  | 0.094697  | 0.127914 | 0.0962995 | 0.097465  | 0.0967366 | 0.118881 |
| 0.107517  | 0.0926573 | 0.125    | 0.0942599 | 0.0869755 | 0.100524  | 0.118007 |
| 0.114802  | 0.106643  | 0.136946 | 0.105624  | 0.108537  | 0.107809  | 0.113345 |
| 0.105186  | 0.0865385 | 0.133159 | 0.0925117 | 0.0913462 | 0.0941142 | 0.118007 |
| 0.129808  | 0.125146  | 0.152535 | 0.128497  | 0.131702  | 0.128934  | 0.146707 |
| 0.124126  | 0.126457  | 0.14831  | 0.129516  | 0.125728  | 0.118881  | 0.129662 |
| 0.122669  | 0.12296   | 0.144522 | 0.121358  | 0.11757   | 0.109266  | 0.131702 |
| 0.116696  | 0.104749  | 0.14292  | 0.111597  | 0.105478  | 0.107955  | 0.125728 |
| 0.105624  | 0.097465  | 0.134761 | 0.10169   | 0.104021  | 0.110577  | 0.119027 |
| 0.111888  | 0.0862471 | 0.132284 | 0.0913462 | 0.0942599 | 0.100524  | 0.121212 |
| 0.114656  | 0.0968823 | 0.126894 | 0.0990676 | 0.0897436 | 0.105624  | 0.12398  |
| 0.119901  | 0.106206  | 0.139132 | 0.1081    | 0.103438  | 0.107663  | 0.128934 |
| 0.128059  | 0.106789  | 0.13447  | 0.115967  | 0.110431  | 0.104167  | 0.13243  |
| 0.133596  | 0.122523  | 0.145251 | 0.128788  | 0.123252  | 0.114656  | 0.14933  |
| 0.116259  | 0.0952797 | 0.123543 | 0.101253  | 0.08581   | 0.113636  | 0.13141  |
| 0.123689  | 0.120192  | 0.14933  | 0.122669  | 0.125874  | 0.121649  | 0.131556 |
| 0.0996503 | 0.105769  | 0.137821 | 0.107663  | 0.124272  | 0.125874  | 0.102273 |
| 0.20542   | 0.195221  | 0.203963 | 0.199155  | 0.195367  | 0.197552  | 0.212121 |
| 0.242861  | 0.237325  | 0.239948 | 0.237471  | 0.241841  | 0.239948  | 0.248397 |
| 0.126166  | 0.102855  | 0.132284 | 0.110286  | 0.107372  | 0.108974  | 0.134615 |
| 0.120484  | 0.0980478 | 0.136218 | 0.10169   | 0.104312  | 0.0960082 | 0.129516 |
| 0.117861  | 0.0954254 | 0.131265 | 0.100233  | 0.0984848 | 0.103293  | 0.127768 |
| 0.121941  | 0.100379  | 0.136801 | 0.106935  | 0.10169   | 0.0992133 | 0.133304 |
| 0.127768  | 0.120192  | 0.146999 | 0.127331  | 0.123834  | 0.125728  | 0.138549 |
| 0.12602   | 0.106789  | 0.138258 | 0.112179  | 0.109266  | 0.0942599 | 0.135344 |
| 0.143648  | 0.127622  | 0.155594 | 0.133013  | 0.137383  | 0.122378  | 0.152389 |
| 0.126311  | 0.101253  | 0.141171 | 0.104895  | 0.111888  | 0.100087  | 0.137675 |
| 0.133596  | 0.114656  | 0.153992 | 0.116841  | 0.116259  | 0.105332  | 0.144959 |
| 0.13549   | 0.120921  | 0.134907 | 0.125437  | 0.124854  | 0.115676  | 0.143357 |
| 0.134907  | 0.119464  | 0.147727 | 0.121358  | 0.120192  | 0.112471  | 0.145105 |
| 0.130536  | 0.130828  | 0.154138 | 0.131847  | 0.13243   | 0.133159  | 0.140152 |
| 0.118881  | 0.101107  | 0.136655 | 0.108246  | 0.105915  | 0.0967366 | 0.133741 |
| 0.118007  | 0.100524  | 0.136072 | 0.101544  | 0.103584  | 0.0955711 | 0.132284 |
| 0.125728  | 0.106206  | 0.139132 | 0.106643  | 0.104021  | 0.0977564 | 0.135052 |
| 0.119027  | 0.0989219 | 0.136801 | 0.101981  | 0.104895  | 0.0936772 | 0.128642 |
| 0.118735  | 0.100379  | 0.135927 | 0.105478  | 0.104895  | 0.0948427 | 0.132721 |
| 0.125     | 0.105769  | 0.140734 | 0.107663  | 0.107372  | 0.104021  | 0.131993 |
| 0.133596  | 0.11961   | 0.146125 | 0.119755  | 0.121795  | 0.105624  | 0.144959 |

|          |           |          |           |           |           |          |
|----------|-----------|----------|-----------|-----------|-----------|----------|
| 0.137092 | 0.12398   | 0.151078 | 0.128788  | 0.125     | 0.106498  | 0.148747 |
| 0.121212 | 0.102564  | 0.136946 | 0.10912   | 0.11116   | 0.0973193 | 0.137821 |
| 0.124854 | 0.102418  | 0.140589 | 0.106352  | 0.102855  | 0.0992133 | 0.133887 |
| 0.133596 | 0.11757   | 0.148456 | 0.121795  | 0.122086  | 0.114073  | 0.146416 |
| 0.120192 | 0.102127  | 0.135052 | 0.1081    | 0.102564  | 0.0989219 | 0.13243  |
| 0.143357 | 0.128497  | 0.15472  | 0.134178  | 0.131847  | 0.11859   | 0.153555 |
| 0.130245 | 0.127331  | 0.143939 | 0.126894  | 0.123689  | 0.114219  | 0.134907 |
| 0.141463 | 0.125146  | 0.135635 | 0.121503  | 0.114219  | 0.120775  | 0.146125 |
| 0.114073 | 0.0965909 | 0.133304 | 0.102273  | 0.0999417 | 0.0968823 | 0.127477 |
| 0.11859  | 0.0952797 | 0.134907 | 0.0995047 | 0.100087  | 0.085373  | 0.127914 |
| 0.126894 | 0.112034  | 0.142337 | 0.115676  | 0.11655   | 0.102418  | 0.13884  |
| 0.131993 | 0.113636  | 0.140152 | 0.118444  | 0.113491  | 0.0999417 | 0.138695 |
| 0.134907 | 0.112179  | 0.142483 | 0.114948  | 0.121941  | 0.104895  | 0.141608 |
| 0.126603 | 0.100962  | 0.143211 | 0.106352  | 0.104895  | 0.10271   | 0.135052 |
| 0.126457 | 0.102273  | 0.147727 | 0.108246  | 0.10912   | 0.0973193 | 0.136655 |
| 0.12704  | 0.111014  | 0.137238 | 0.112325  | 0.110577  | 0.099359  | 0.135781 |
| 0.130828 | 0.120047  | 0.145688 | 0.121649  | 0.125437  | 0.103147  | 0.141317 |
| 0.134907 | 0.117133  | 0.138403 | 0.119318  | 0.116404  | 0.106643  | 0.14627  |
| 0.135344 | 0.123397  | 0.145833 | 0.129662  | 0.128205  | 0.104458  | 0.149038 |
| 0.131993 | 0.125874  | 0.132576 | 0.127477  | 0.130682  | 0.125874  | 0.149184 |
| 0.125874 | 0.0987762 | 0.140152 | 0.104749  | 0.10708   | 0.0981935 | 0.134615 |
| 0.138403 | 0.118881  | 0.145396 | 0.125437  | 0.116696  | 0.108683  | 0.143357 |
| 0.120484 | 0.0971737 | 0.139132 | 0.102564  | 0.102855  | 0.0992133 | 0.129808 |
| 0.110723 | 0.10373   | 0.140734 | 0.110286  | 0.110868  | 0.109557  | 0.131993 |
| 0.116259 | 0.0964452 | 0.136072 | 0.10271   | 0.103293  | 0.0981935 | 0.12704  |
| 0.122232 | 0.10271   | 0.140006 | 0.105769  | 0.103147  | 0.097465  | 0.130682 |
| 0.11553  | 0.0989219 | 0.136801 | 0.101107  | 0.101981  | 0.0910548 | 0.124854 |
| 0.132576 | 0.120921  | 0.145979 | 0.124854  | 0.122815  | 0.106061  | 0.148019 |
| 0.123397 | 0.10912   | 0.132139 | 0.113636  | 0.112471  | 0.109411  | 0.131265 |
| 0.142045 | 0.123106  | 0.150204 | 0.126748  | 0.123252  | 0.11116   | 0.148747 |
| 0.12398  | 0.100379  | 0.138258 | 0.106935  | 0.105769  | 0.0995047 | 0.133304 |
| 0.123834 | 0.106935  | 0.142191 | 0.112325  | 0.116113  | 0.0967366 | 0.140152 |
| 0.128642 | 0.119318  | 0.136218 | 0.124709  | 0.116259  | 0.118153  | 0.141463 |
| 0.123106 | 0.112034  | 0.137092 | 0.111888  | 0.106935  | 0.102418  | 0.132139 |
| 0.115967 | 0.101107  | 0.13549  | 0.107372  | 0.105332  | 0.0999417 | 0.124709 |
| 0.122232 | 0.113199  | 0.144668 | 0.115967  | 0.112471  | 0.0965909 | 0.13039  |
| 0.124417 | 0.108683  | 0.145396 | 0.112908  | 0.111451  | 0.105478  | 0.131993 |
| 0.119172 | 0.094697  | 0.141317 | 0.0983392 | 0.105041  | 0.105478  | 0.122669 |
| 0.129079 | 0.116259  | 0.151807 | 0.118735  | 0.114656  | 0.121503  | 0.129371 |
| 0.132721 | 0.130099  | 0.142337 | 0.131993  | 0.131993  | 0.130682  | 0.141463 |
| 0.110577 | 0.0939685 | 0.135344 | 0.0976107 | 0.0932401 | 0.101836  | 0.115239 |
| 0.129953 | 0.121212  | 0.140152 | 0.122815  | 0.112034  | 0.121503  | 0.134033 |
| 0.118735 | 0.109994  | 0.143502 | 0.113345  | 0.111888  | 0.111451  | 0.123397 |
| 0.136801 | 0.118444  | 0.140589 | 0.119172  | 0.100524  | 0.114073  | 0.137092 |

|          |           |          |           |           |           |          |
|----------|-----------|----------|-----------|-----------|-----------|----------|
| 0.118735 | 0.105624  | 0.133013 | 0.106352  | 0.102855  | 0.110868  | 0.122523 |
| 0.117861 | 0.107663  | 0.143211 | 0.114219  | 0.105769  | 0.109994  | 0.130099 |
| 0.117716 | 0.106643  | 0.14627  | 0.11116   | 0.112325  | 0.116259  | 0.125291 |
| 0.129225 | 0.119901  | 0.13884  | 0.118007  | 0.0984848 | 0.115822  | 0.130973 |
| 0.130973 | 0.124563  | 0.146125 | 0.125     | 0.118298  | 0.122232  | 0.137675 |
| 0.121358 | 0.113491  | 0.14933  | 0.116259  | 0.110723  | 0.108537  | 0.130973 |
| 0.118444 | 0.101544  | 0.133304 | 0.10373   | 0.0952797 | 0.109994  | 0.123106 |
| 0.13549  | 0.127914  | 0.15472  | 0.128642  | 0.135052  | 0.12704   | 0.150058 |
| 0.123397 | 0.116404  | 0.151078 | 0.118298  | 0.118007  | 0.122523  | 0.130682 |
| 0.113491 | 0.0936772 | 0.13243  | 0.102564  | 0.0935315 | 0.100087  | 0.120484 |
| 0.224359 | 0.217949  | 0.221737 | 0.218386  | 0.221591  | 0.220571  | 0.229895 |
| 0.128788 | 0.111888  | 0.136072 | 0.117279  | 0.102418  | 0.106935  | 0.129079 |
| 0.115093 | 0.101107  | 0.143939 | 0.107663  | 0.100379  | 0.109266  | 0.12296  |
| 0.136509 | 0.120192  | 0.148164 | 0.121795  | 0.110723  | 0.121066  | 0.140589 |
| 0.121066 | 0.105624  | 0.143502 | 0.110431  | 0.101981  | 0.109703  | 0.128934 |
| 0.126894 | 0.119027  | 0.154283 | 0.12296   | 0.117716  | 0.119027  | 0.133013 |
| 0.124272 | 0.111742  | 0.138549 | 0.112471  | 0.0967366 | 0.108829  | 0.130682 |
| 0.123543 | 0.104895  | 0.139277 | 0.106789  | 0.0989219 | 0.111888  | 0.129371 |
| 0.125583 | 0.108974  | 0.148601 | 0.10912   | 0.109411  | 0.111597  | 0.127622 |
| 0.131265 | 0.118735  | 0.139423 | 0.121795  | 0.099359  | 0.119318  | 0.136801 |
| 0.134324 | 0.115967  | 0.136655 | 0.116987  | 0.104749  | 0.125583  | 0.131119 |
| 0.125728 | 0.112034  | 0.144085 | 0.1081    | 0.115385  | 0.112034  | 0.12602  |
| 0.123397 | 0.113491  | 0.141463 | 0.112762  | 0.104021  | 0.121066  | 0.128059 |
| 0.11553  | 0.10708   | 0.141171 | 0.108392  | 0.104604  | 0.101836  | 0.123397 |
| 0.12602  | 0.107663  | 0.139423 | 0.109848  | 0.0914918 | 0.108829  | 0.12602  |
| 0.13141  | 0.120921  | 0.144814 | 0.127768  | 0.108246  | 0.120047  | 0.13345  |
| 0.122815 | 0.108829  | 0.130099 | 0.111597  | 0.0926573 | 0.106789  | 0.122815 |
| 0.131556 | 0.132721  | 0.154575 | 0.134324  | 0.130245  | 0.132139  | 0.143794 |
| 0.132284 | 0.125     | 0.132576 | 0.131265  | 0.131847  | 0.134615  | 0.143648 |
| 0.120338 | 0.113928  | 0.136946 | 0.114948  | 0.11757   | 0.110431  | 0.128497 |
| 0.12296  | 0.115385  | 0.142483 | 0.123106  | 0.115822  | 0.116841  | 0.126748 |
| 0.130682 | 0.116696  | 0.112325 | 0.117716  | 0.108683  | 0.128059  | 0.130973 |
| 0.126166 | 0.118881  | 0.148893 | 0.11553   | 0.121066  | 0.120921  | 0.134615 |
| 0.129953 | 0.117424  | 0.12296  | 0.116696  | 0.126603  | 0.12296   | 0.136364 |
| 0.137238 | 0.127622  | 0.124417 | 0.137383  | 0.124272  | 0.136072  | 0.144231 |
| 0.112325 | 0.106498  | 0.137675 | 0.108392  | 0.0990676 | 0.0852273 | 0.120192 |
| 0.127331 | 0.129371  | 0.146562 | 0.131847  | 0.121066  | 0.121212  | 0.130536 |
| 0.136801 | 0.130973  | 0.128934 | 0.13345   | 0.136946  | 0.139714  | 0.148164 |
| 0.103584 | 0.0945513 | 0.136801 | 0.0952797 | 0.101981  | 0.105624  | 0.121066 |
| 0.13039  | 0.116987  | 0.144959 | 0.121503  | 0.119755  | 0.114365  | 0.139423 |
| 0.143065 | 0.132867  | 0.160256 | 0.137966  | 0.137966  | 0.140443  | 0.152972 |
| 0.131119 | 0.126748  | 0.153846 | 0.128059  | 0.120775  | 0.121795  | 0.147727 |
| 0.14292  | 0.13243   | 0.156906 | 0.130828  | 0.135198  | 0.13039   | 0.143794 |
| 0.128205 | 0.121212  | 0.148601 | 0.123397  | 0.121649  | 0.117716  | 0.13549  |

|          |           |          |          |           |           |          |
|----------|-----------|----------|----------|-----------|-----------|----------|
| 0.127477 | 0.103875  | 0.133596 | 0.111014 | 0.0914918 | 0.118444  | 0.126894 |
| 0.129371 | 0.123252  | 0.1419   | 0.124854 | 0.124854  | 0.124417  | 0.136655 |
| 0.116404 | 0.110286  | 0.128642 | 0.111597 | 0.108683  | 0.101836  | 0.122523 |
| 0.123834 | 0.110431  | 0.130536 | 0.115822 | 0.0980478 | 0.110431  | 0.130536 |
| 0.127914 | 0.115093  | 0.141608 | 0.116113 | 0.106789  | 0.117716  | 0.129953 |
| 0.125    | 0.110723  | 0.136072 | 0.113199 | 0.105332  | 0.122669  | 0.138403 |
| 0.116259 | 0.104312  | 0.13345  | 0.107372 | 0.0995047 | 0.120629  | 0.125291 |
| 0.127914 | 0.111305  | 0.108392 | 0.116113 | 0.0986305 | 0.125874  | 0.137238 |
| 0.135781 | 0.127622  | 0.114219 | 0.130099 | 0.119027  | 0.136655  | 0.13549  |
| 0.117133 | 0.106352  | 0.143065 | 0.109411 | 0.10912   | 0.101107  | 0.119464 |
| 0.124126 | 0.103147  | 0.138695 | 0.104167 | 0.105041  | 0.112762  | 0.126166 |
| 0.112471 | 0.111014  | 0.134907 | 0.114073 | 0.117279  | 0.126166  | 0.132576 |
| 0.105186 | 0.0967366 | 0.127331 | 0.101836 | 0.103584  | 0.108392  | 0.114802 |
| 0.13884  | 0.128642  | 0.106789 | 0.129953 | 0.127331  | 0.142045  | 0.14088  |
| 0.135052 | 0.138258  | 0.117861 | 0.138695 | 0.143065  | 0.149621  | 0.150787 |
| 0.131265 | 0.116113  | 0.151369 | 0.117424 | 0.118298  | 0.10067   | 0.142045 |
| 0.12704  | 0.113345  | 0.143648 | 0.118153 | 0.112617  | 0.0999417 | 0.138986 |
| 0.14292  | 0.123397  | 0.148747 | 0.124126 | 0.108974  | 0.123397  | 0.144668 |
| 0.134033 | 0.122378  | 0.144231 | 0.127185 | 0.110868  | 0.111305  | 0.132576 |
| 0.123252 | 0.113345  | 0.150058 | 0.116404 | 0.122523  | 0.102855  | 0.141026 |
| 0.137529 | 0.119755  | 0.144231 | 0.119318 | 0.107663  | 0.12704   | 0.138403 |
| 0.134324 | 0.125874  | 0.120629 | 0.131847 | 0.13039   | 0.133159  | 0.138695 |
| 0.124563 | 0.118153  | 0.144959 | 0.120338 | 0.11655   | 0.11116   | 0.135927 |
| 0.15778  | 0.14292   | 0.130099 | 0.14627  | 0.153263  | 0.144959  | 0.156906 |
| 0.119027 | 0.117279  | 0.148456 | 0.121212 | 0.121503  | 0.118735  | 0.136801 |
| 0.132721 | 0.129808  | 0.151952 | 0.130828 | 0.131119  | 0.126311  | 0.14088  |
| 0.126457 | 0.107226  | 0.136364 | 0.110577 | 0.109994  | 0.113054  | 0.125291 |
| 0.138403 | 0.121212  | 0.145688 | 0.120775 | 0.109994  | 0.124126  | 0.145396 |
| 0.119755 | 0.11014   | 0.133741 | 0.112034 | 0.0971737 | 0.110431  | 0.130245 |
| 0.13884  | 0.125728  | 0.137092 | 0.126748 | 0.136655  | 0.138549  | 0.142628 |
| 0.153846 | 0.133159  | 0.159674 | 0.135927 | 0.138258  | 0.138986  | 0.153555 |
| 0.138258 | 0.118153  | 0.146707 | 0.126748 | 0.123252  | 0.125437  | 0.143211 |
| 0.142483 | 0.134907  | 0.152681 | 0.137675 | 0.136218  | 0.136655  | 0.149476 |
| 0.156031 | 0.142337  | 0.160693 | 0.145979 | 0.145979  | 0.14292   | 0.164773 |
| 0.155449 | 0.13884   | 0.158362 | 0.142774 | 0.141608  | 0.146125  | 0.157488 |
| 0.115385 | 0.107809  | 0.129953 | 0.110868 | 0.113199  | 0.111888  | 0.132576 |
| 0.142337 | 0.129225  | 0.159528 | 0.131993 | 0.128205  | 0.136509  | 0.149038 |
| 0.120775 | 0.102127  | 0.13884  | 0.108683 | 0.107809  | 0.123106  | 0.135052 |
| 0.126457 | 0.111014  | 0.131993 | 0.116696 | 0.108246  | 0.114802  | 0.136072 |
| 0.119027 | 0.109994  | 0.141754 | 0.111597 | 0.114802  | 0.109411  | 0.127768 |
| 0.134178 | 0.115822  | 0.143502 | 0.121795 | 0.117424  | 0.119318  | 0.140006 |
| 0.125583 | 0.107517  | 0.140152 | 0.112325 | 0.108246  | 0.114219  | 0.136655 |
| 0.127622 | 0.1081    | 0.133741 | 0.116987 | 0.109411  | 0.118007  | 0.136364 |
| 0.132576 | 0.114219  | 0.147145 | 0.124854 | 0.112908  | 0.120047  | 0.143648 |

|          |           |          |          |           |          |          |
|----------|-----------|----------|----------|-----------|----------|----------|
| 0.124563 | 0.114948  | 0.144085 | 0.121503 | 0.119464  | 0.122523 | 0.139423 |
| 0.11757  | 0.100379  | 0.140297 | 0.10373  | 0.101399  | 0.106789 | 0.122523 |
| 0.14088  | 0.116987  | 0.148747 | 0.125583 | 0.121212  | 0.124272 | 0.145833 |
| 0.137238 | 0.11451   | 0.144522 | 0.120192 | 0.11757   | 0.119755 | 0.138403 |
| 0.126457 | 0.115967  | 0.143357 | 0.120484 | 0.114365  | 0.108974 | 0.145396 |
| 0.221445 | 0.214161  | 0.219988 | 0.218094 | 0.219843  | 0.219114 | 0.226399 |
| 0.151807 | 0.142774  | 0.158508 | 0.148164 | 0.140589  | 0.139569 | 0.15472  |
| 0.140297 | 0.118444  | 0.154866 | 0.124126 | 0.120629  | 0.124272 | 0.149621 |
| 0.136946 | 0.114219  | 0.148019 | 0.115239 | 0.122815  | 0.124417 | 0.142774 |
| 0.217657 | 0.210664  | 0.217949 | 0.211101 | 0.214889  | 0.21183  | 0.224942 |
| 0.125874 | 0.113054  | 0.13141  | 0.116696 | 0.119901  | 0.111888 | 0.136655 |
| 0.127768 | 0.113782  | 0.145833 | 0.117424 | 0.111597  | 0.119901 | 0.14292  |
| 0.13243  | 0.114073  | 0.149621 | 0.116259 | 0.120047  | 0.12398  | 0.144376 |
| 0.12296  | 0.111597  | 0.143065 | 0.122232 | 0.117279  | 0.122378 | 0.139277 |
| 0.252914 | 0.25      | 0.249417 | 0.249563 | 0.256265  | 0.250291 | 0.254953 |
| 0.113782 | 0.104167  | 0.13243  | 0.101981 | 0.121795  | 0.118444 | 0.123397 |
| 0.122815 | 0.107663  | 0.143794 | 0.111888 | 0.110431  | 0.106206 | 0.138549 |
| 0.133013 | 0.114365  | 0.14729  | 0.11451  | 0.122378  | 0.11757  | 0.137966 |
| 0.130973 | 0.110868  | 0.146707 | 0.112471 | 0.11859   | 0.113782 | 0.137092 |
| 0.114365 | 0.109411  | 0.126311 | 0.108683 | 0.123834  | 0.12398  | 0.127185 |
| 0.137383 | 0.120775  | 0.137383 | 0.125291 | 0.124417  | 0.128934 | 0.145251 |
| 0.122523 | 0.112908  | 0.140297 | 0.114802 | 0.111597  | 0.108246 | 0.142628 |
| 0.133741 | 0.113928  | 0.143939 | 0.119901 | 0.118735  | 0.120629 | 0.139569 |
| 0.134178 | 0.116696  | 0.153992 | 0.120921 | 0.115967  | 0.129808 | 0.144085 |
| 0.121649 | 0.110868  | 0.137675 | 0.116841 | 0.110431  | 0.116696 | 0.136509 |
| 0.131702 | 0.113636  | 0.141026 | 0.120192 | 0.112325  | 0.120047 | 0.134324 |
| 0.108246 | 0.0992133 | 0.133887 | 0.100816 | 0.0996503 | 0.103584 | 0.108829 |
| 0.154138 | 0.134324  | 0.162005 | 0.136801 | 0.138258  | 0.1419   | 0.152681 |
| 0.114219 | 0.106643  | 0.134615 | 0.107372 | 0.126894  | 0.120338 | 0.123252 |
| 0.133159 | 0.117716  | 0.147436 | 0.120484 | 0.11553   | 0.120629 | 0.146853 |
| 0.201049 | 0.187646  | 0.200175 | 0.191288 | 0.191288  | 0.191142 | 0.206002 |
| 0.214744 | 0.204837  | 0.208916 | 0.206439 | 0.206439  | 0.205128 | 0.219406 |
| 0.126748 | 0.112471  | 0.142774 | 0.119901 | 0.118444  | 0.12296  | 0.139569 |
| 0.119172 | 0.106352  | 0.137821 | 0.112617 | 0.112034  | 0.113636 | 0.136364 |
| 0.142483 | 0.131119  | 0.15035  | 0.137092 | 0.130682  | 0.131702 | 0.146853 |
| 0.122378 | 0.108974  | 0.141317 | 0.114948 | 0.110286  | 0.105186 | 0.140152 |
| 0.113782 | 0.105332  | 0.133887 | 0.106643 | 0.126166  | 0.122815 | 0.122523 |
| 0.138403 | 0.122378  | 0.141317 | 0.125146 | 0.118735  | 0.12704  | 0.138403 |
| 0.229312 | 0.22669   | 0.22873  | 0.226253 | 0.226544  | 0.224942 | 0.237471 |
| 0.131993 | 0.106352  | 0.146562 | 0.113491 | 0.108246  | 0.113636 | 0.140152 |
| 0.21285  | 0.206731  | 0.203234 | 0.209207 | 0.20979   | 0.208188 | 0.219551 |
| 0.111305 | 0.0958625 | 0.129953 | 0.099796 | 0.102418  | 0.106352 | 0.13141  |
| 0.126894 | 0.108246  | 0.146125 | 0.110723 | 0.1081    | 0.113782 | 0.134178 |
| 0.125583 | 0.113636  | 0.135198 | 0.114948 | 0.114073  | 0.118881 | 0.13549  |

|          |           |          |           |          |          |          |
|----------|-----------|----------|-----------|----------|----------|----------|
| 0.119755 | 0.105769  | 0.136655 | 0.108829  | 0.10912  | 0.113636 | 0.131993 |
| 0.216055 | 0.206731  | 0.211684 | 0.208333  | 0.20979  | 0.211393 | 0.222756 |
| 0.146125 | 0.129808  | 0.156906 | 0.136655  | 0.132284 | 0.135635 | 0.148747 |
| 0.116987 | 0.102127  | 0.139714 | 0.101981  | 0.109266 | 0.10912  | 0.134761 |
| 0.139423 | 0.126311  | 0.149038 | 0.130536  | 0.124417 | 0.125728 | 0.143794 |
| 0.135052 | 0.120775  | 0.147582 | 0.123834  | 0.118881 | 0.122232 | 0.14729  |
| 0.121066 | 0.107663  | 0.14088  | 0.113054  | 0.112179 | 0.123689 | 0.138258 |
| 0.111014 | 0.101107  | 0.13141  | 0.10067   | 0.103875 | 0.104895 | 0.132576 |
| 0.127914 | 0.115093  | 0.139569 | 0.115822  | 0.112325 | 0.11655  | 0.142774 |
| 0.129953 | 0.120338  | 0.145979 | 0.119901  | 0.116113 | 0.120338 | 0.145979 |
| 0.131702 | 0.105769  | 0.140443 | 0.116113  | 0.112908 | 0.11859  | 0.140443 |
| 0.11553  | 0.10708   | 0.138549 | 0.111888  | 0.108974 | 0.107663 | 0.135635 |
| 0.197844 | 0.189394  | 0.19697  | 0.192453  | 0.192745 | 0.192308 | 0.204545 |
| 0.134761 | 0.114365  | 0.144959 | 0.115967  | 0.122086 | 0.11553  | 0.141754 |
| 0.13986  | 0.116841  | 0.153555 | 0.120484  | 0.121066 | 0.124417 | 0.143648 |
| 0.131265 | 0.117279  | 0.146125 | 0.120047  | 0.115676 | 0.112325 | 0.138549 |
| 0.115967 | 0.104604  | 0.134907 | 0.104167  | 0.121941 | 0.121212 | 0.125    |
| 0.137821 | 0.121795  | 0.145396 | 0.125146  | 0.120192 | 0.121212 | 0.142774 |
| 0.115385 | 0.102855  | 0.130828 | 0.103584  | 0.106498 | 0.109557 | 0.134907 |
| 0.121941 | 0.103584  | 0.133887 | 0.109266  | 0.110431 | 0.114365 | 0.134178 |
| 0.125728 | 0.116113  | 0.142337 | 0.118007  | 0.115093 | 0.108829 | 0.143502 |
| 0.138403 | 0.110431  | 0.153263 | 0.116113  | 0.118444 | 0.117716 | 0.142191 |
| 0.131702 | 0.106061  | 0.145396 | 0.112034  | 0.114073 | 0.114219 | 0.13345  |
| 0.126603 | 0.113491  | 0.142337 | 0.116259  | 0.113345 | 0.121649 | 0.142628 |
| 0.135198 | 0.11451   | 0.150932 | 0.11961   | 0.11961  | 0.123834 | 0.145105 |
| 0.14088  | 0.128351  | 0.156614 | 0.129371  | 0.130536 | 0.134761 | 0.149913 |
| 0.110868 | 0.095134  | 0.129516 | 0.0984848 | 0.112471 | 0.112325 | 0.125146 |
| 0.15035  | 0.136946  | 0.154138 | 0.141463  | 0.13884  | 0.136655 | 0.155303 |
| 0.119464 | 0.106935  | 0.138403 | 0.113199  | 0.11116  | 0.118298 | 0.136946 |
| 0.132576 | 0.109848  | 0.139277 | 0.112908  | 0.105332 | 0.113928 | 0.133159 |
| 0.133596 | 0.118444  | 0.139714 | 0.120921  | 0.117424 | 0.123106 | 0.139423 |
| 0.128059 | 0.117279  | 0.145251 | 0.123543  | 0.117424 | 0.113782 | 0.147873 |
| 0.196824 | 0.190997  | 0.195367 | 0.195221  | 0.192308 | 0.188374 | 0.208479 |
| 0.112762 | 0.0996503 | 0.136946 | 0.105041  | 0.104167 | 0.107226 | 0.132576 |
| 0.11859  | 0.0979021 | 0.136946 | 0.105041  | 0.103001 | 0.106643 | 0.127331 |
| 0.128205 | 0.116841  | 0.144522 | 0.121358  | 0.116696 | 0.118881 | 0.144814 |
| 0.191725 | 0.179779  | 0.189103 | 0.182547  | 0.180507 | 0.183566 | 0.199592 |
| 0.122815 | 0.114365  | 0.140297 | 0.11451   | 0.130245 | 0.134761 | 0.129808 |
| 0.123689 | 0.123106  | 0.143211 | 0.123834  | 0.140734 | 0.137966 | 0.128059 |
| 0.154429 | 0.13549   | 0.164336 | 0.138549  | 0.140006 | 0.138986 | 0.154429 |
| 0.112471 | 0.0955711 | 0.127914 | 0.0980478 | 0.108829 | 0.109557 | 0.121795 |
| 0.135927 | 0.120775  | 0.146707 | 0.125291  | 0.122086 | 0.123397 | 0.144959 |
| 0.21824  | 0.208916  | 0.215618 | 0.211393  | 0.215763 | 0.212995 | 0.225233 |
| 0.137821 | 0.122378  | 0.143648 | 0.128642  | 0.130682 | 0.121795 | 0.144231 |

|          |           |          |           |          |          |          |
|----------|-----------|----------|-----------|----------|----------|----------|
| 0.143794 | 0.12602   | 0.14933  | 0.13141   | 0.126166 | 0.12602  | 0.149038 |
| 0.118444 | 0.105332  | 0.14088  | 0.106352  | 0.109266 | 0.109994 | 0.135052 |
| 0.181672 | 0.172057  | 0.170892 | 0.173077  | 0.17162  | 0.169726 | 0.187791 |
| 0.128642 | 0.10708   | 0.13884  | 0.109266  | 0.1081   | 0.112034 | 0.133013 |
| 0.15035  | 0.141317  | 0.165501 | 0.142337  | 0.138549 | 0.147436 | 0.155012 |
| 0.120629 | 0.111014  | 0.143357 | 0.110286  | 0.116113 | 0.118298 | 0.13141  |
| 0.199009 | 0.188811  | 0.198427 | 0.192453  | 0.191288 | 0.191725 | 0.206294 |
| 0.115676 | 0.0996503 | 0.129953 | 0.101253  | 0.119901 | 0.116841 | 0.124417 |
| 0.119464 | 0.0996503 | 0.136946 | 0.103875  | 0.103001 | 0.101107 | 0.127914 |
| 0.13243  | 0.108537  | 0.143502 | 0.113636  | 0.100233 | 0.114073 | 0.13243  |
| 0.131702 | 0.109557  | 0.149184 | 0.118153  | 0.116696 | 0.121212 | 0.139277 |
| 0.127914 | 0.113636  | 0.144814 | 0.119027  | 0.113199 | 0.119172 | 0.145688 |
| 0.131702 | 0.114219  | 0.147145 | 0.117279  | 0.10912  | 0.125874 | 0.141317 |
| 0.120484 | 0.106498  | 0.140297 | 0.108392  | 0.111305 | 0.116696 | 0.135927 |
| 0.197261 | 0.186772  | 0.197552 | 0.190705  | 0.191288 | 0.194056 | 0.204545 |
| 0.131265 | 0.115239  | 0.149913 | 0.120047  | 0.11451  | 0.119318 | 0.14292  |
| 0.129662 | 0.111597  | 0.136946 | 0.116113  | 0.105041 | 0.115093 | 0.136364 |
| 0.218677 | 0.209936  | 0.217803 | 0.210956  | 0.213287 | 0.21285  | 0.225379 |
| 0.134178 | 0.11116   | 0.146416 | 0.113636  | 0.120629 | 0.114365 | 0.139423 |
| 0.122378 | 0.105478  | 0.140734 | 0.109703  | 0.110577 | 0.116259 | 0.138403 |
| 0.115967 | 0.106061  | 0.135198 | 0.109994  | 0.107372 | 0.113636 | 0.132284 |
| 0.146125 | 0.13243   | 0.150495 | 0.137821  | 0.137238 | 0.131265 | 0.151369 |
| 0.198572 | 0.186917  | 0.195076 | 0.190268  | 0.191725 | 0.190705 | 0.200903 |
| 0.125291 | 0.112471  | 0.145105 | 0.116404  | 0.108537 | 0.1081   | 0.13986  |
| 0.138403 | 0.120921  | 0.154138 | 0.124854  | 0.126311 | 0.127331 | 0.144231 |
| 0.120629 | 0.10373   | 0.140443 | 0.110286  | 0.108246 | 0.113345 | 0.137238 |
| 0.119755 | 0.103438  | 0.141026 | 0.109703  | 0.108246 | 0.113636 | 0.137821 |
| 0.117279 | 0.103293  | 0.136218 | 0.114802  | 0.106643 | 0.114948 | 0.135927 |
| 0.130828 | 0.112179  | 0.140734 | 0.123106  | 0.113199 | 0.11859  | 0.137238 |
| 0.112325 | 0.0980478 | 0.137966 | 0.099359  | 0.101399 | 0.104749 | 0.11961  |
| 0.113199 | 0.102418  | 0.134178 | 0.102564  | 0.121795 | 0.11961  | 0.123106 |
| 0.140006 | 0.121358  | 0.150787 | 0.12296   | 0.120921 | 0.126603 | 0.145542 |
| 0.110577 | 0.0992133 | 0.135344 | 0.101399  | 0.11655  | 0.119027 | 0.124563 |
| 0.135781 | 0.125291  | 0.150058 | 0.127477  | 0.121941 | 0.122378 | 0.150932 |
| 0.206439 | 0.191579  | 0.203526 | 0.194056  | 0.195513 | 0.196241 | 0.207605 |
| 0.131119 | 0.111014  | 0.144522 | 0.114365  | 0.11116  | 0.120921 | 0.138986 |
| 0.145251 | 0.12602   | 0.150204 | 0.132867  | 0.130536 | 0.130973 | 0.14933  |
| 0.117716 | 0.10169   | 0.139569 | 0.108246  | 0.10708  | 0.113636 | 0.132867 |
| 0.112034 | 0.0945513 | 0.136801 | 0.0999417 | 0.103438 | 0.103875 | 0.118735 |
| 0.11757  | 0.101544  | 0.13884  | 0.105478  | 0.108392 | 0.117279 | 0.124854 |
| 0.12296  | 0.113636  | 0.143065 | 0.117861  | 0.110868 | 0.107226 | 0.140734 |
| 0.136364 | 0.126457  | 0.14831  | 0.128059  | 0.123689 | 0.129371 | 0.147436 |
| 0.13884  | 0.110577  | 0.152826 | 0.115385  | 0.11451  | 0.119901 | 0.146125 |
| 0.120775 | 0.104458  | 0.13243  | 0.1081    | 0.104312 | 0.103584 | 0.131847 |



|          |           |          |           |           |          |          |
|----------|-----------|----------|-----------|-----------|----------|----------|
| 0.118007 | 0.102564  | 0.132284 | 0.103875  | 0.103001  | 0.100816 | 0.125874 |
| 0.122523 | 0.102418  | 0.135344 | 0.107517  | 0.104312  | 0.105332 | 0.12602  |
| 0.112179 | 0.0990676 | 0.130245 | 0.101253  | 0.103293  | 0.107809 | 0.132867 |
| 0.112325 | 0.108246  | 0.135052 | 0.106935  | 0.12704   | 0.122232 | 0.122815 |
| 0.125583 | 0.110431  | 0.147145 | 0.115239  | 0.108537  | 0.106643 | 0.143648 |
| 0.129516 | 0.111451  | 0.143211 | 0.119755  | 0.113345  | 0.118153 | 0.139132 |
| 0.123106 | 0.104749  | 0.137966 | 0.110723  | 0.105478  | 0.105041 | 0.137092 |
| 0.122669 | 0.106061  | 0.142483 | 0.112908  | 0.109703  | 0.116841 | 0.139277 |
| 0.109411 | 0.0977564 | 0.13884  | 0.101107  | 0.105478  | 0.106789 | 0.12602  |
| 0.12398  | 0.106498  | 0.139423 | 0.114802  | 0.110723  | 0.119318 | 0.137092 |
| 0.129225 | 0.103001  | 0.143211 | 0.109557  | 0.109266  | 0.112617 | 0.138258 |
| 0.137966 | 0.106498  | 0.149621 | 0.115385  | 0.111014  | 0.118153 | 0.140006 |
| 0.122815 | 0.112908  | 0.144085 | 0.118007  | 0.108392  | 0.115822 | 0.137966 |
| 0.114802 | 0.102273  | 0.142483 | 0.10067   | 0.106206  | 0.109848 | 0.124709 |
| 0.120775 | 0.108829  | 0.139714 | 0.112179  | 0.108974  | 0.119318 | 0.137092 |
| 0.136801 | 0.112617  | 0.143502 | 0.115385  | 0.111305  | 0.122232 | 0.141463 |
| 0.13141  | 0.115385  | 0.143648 | 0.120484  | 0.112325  | 0.122669 | 0.138112 |
| 0.115822 | 0.099796  | 0.135052 | 0.105186  | 0.0976107 | 0.104458 | 0.126311 |
| 0.120775 | 0.105332  | 0.140006 | 0.111014  | 0.106643  | 0.114948 | 0.134178 |
| 0.138403 | 0.119172  | 0.144231 | 0.122815  | 0.119027  | 0.122669 | 0.141608 |
| 0.113928 | 0.0967366 | 0.131119 | 0.10271   | 0.103875  | 0.1081   | 0.131119 |
| 0.138112 | 0.115093  | 0.14831  | 0.121649  | 0.117861  | 0.122669 | 0.142774 |
| 0.126748 | 0.109266  | 0.143648 | 0.114948  | 0.108829  | 0.113928 | 0.141026 |
| 0.115385 | 0.104312  | 0.140734 | 0.104167  | 0.107372  | 0.108683 | 0.124126 |
| 0.128788 | 0.104021  | 0.138112 | 0.110577  | 0.106498  | 0.111597 | 0.131702 |
| 0.114656 | 0.0954254 | 0.137966 | 0.0984848 | 0.105186  | 0.10271  | 0.128351 |
| 0.141317 | 0.120629  | 0.149184 | 0.128059  | 0.120775  | 0.124709 | 0.141317 |
| 0.137238 | 0.121503  | 0.147436 | 0.12602   | 0.117861  | 0.120047 | 0.146853 |
| 0.128059 | 0.10912   | 0.142337 | 0.115093  | 0.112471  | 0.117279 | 0.136801 |
| 0.200612 | 0.190122  | 0.204108 | 0.194639  | 0.19697   | 0.194784 | 0.207605 |
| 0.173514 | 0.166521  | 0.174097 | 0.168998  | 0.16521   | 0.168852 | 0.187209 |
| 0.113199 | 0.0945513 | 0.131847 | 0.100524  | 0.115676  | 0.11757  | 0.123397 |
| 0.128788 | 0.116259  | 0.137238 | 0.121358  | 0.111451  | 0.111014 | 0.145105 |
| 0.125    | 0.127622  | 0.143939 | 0.126311  | 0.144959  | 0.138112 | 0.128205 |
| 0.136801 | 0.11757   | 0.1537   | 0.118881  | 0.115385  | 0.130973 | 0.141754 |
| 0.132576 | 0.114219  | 0.137821 | 0.11961   | 0.118153  | 0.125291 | 0.140734 |
| 0.131265 | 0.105041  | 0.140006 | 0.113636  | 0.107809  | 0.119318 | 0.138258 |
| 0.110286 | 0.0986305 | 0.135344 | 0.0999417 | 0.099359  | 0.10271  | 0.114073 |
| 0.132139 | 0.11757   | 0.146416 | 0.121212  | 0.114219  | 0.124272 | 0.141463 |
| 0.208042 | 0.198427  | 0.207459 | 0.201195  | 0.205565  | 0.203671 | 0.213287 |
| 0.127185 | 0.112908  | 0.144085 | 0.118298  | 0.110431  | 0.109703 | 0.142337 |
| 0.127331 | 0.114219  | 0.137821 | 0.11961   | 0.112908  | 0.118298 | 0.142483 |
| 0.120921 | 0.101981  | 0.136072 | 0.109703  | 0.105332  | 0.111305 | 0.135198 |
| 0.132139 | 0.113491  | 0.148747 | 0.119172  | 0.111305  | 0.11961  | 0.143211 |

|          |           |          |           |           |          |          |
|----------|-----------|----------|-----------|-----------|----------|----------|
| 0.198427 | 0.183275  | 0.189977 | 0.187791  | 0.182255  | 0.185315 | 0.201632 |
| 0.248252 | 0.245921  | 0.245338 | 0.247523  | 0.248397  | 0.246212 | 0.255536 |
| 0.138112 | 0.112471  | 0.152389 | 0.118153  | 0.114948  | 0.120338 | 0.144231 |
| 0.131702 | 0.115093  | 0.146853 | 0.11961   | 0.112034  | 0.119464 | 0.139569 |
| 0.116259 | 0.0976107 | 0.13345  | 0.0977564 | 0.118153  | 0.118298 | 0.122378 |
| 0.122815 | 0.110868  | 0.142337 | 0.112762  | 0.108392  | 0.116404 | 0.139132 |
| 0.121795 | 0.106935  | 0.141317 | 0.108246  | 0.10271   | 0.102273 | 0.134615 |
| 0.126311 | 0.10708   | 0.146707 | 0.112471  | 0.106061  | 0.115822 | 0.136801 |
| 0.128788 | 0.110723  | 0.136072 | 0.114656  | 0.112908  | 0.122669 | 0.136364 |
| 0.122086 | 0.107809  | 0.137529 | 0.113199  | 0.107955  | 0.106643 | 0.140734 |
| 0.127477 | 0.11116   | 0.130973 | 0.117133  | 0.113054  | 0.120775 | 0.13447  |
| 0.121212 | 0.102564  | 0.13986  | 0.109703  | 0.10271   | 0.108392 | 0.129953 |
| 0.116404 | 0.100379  | 0.142045 | 0.104895  | 0.104021  | 0.11116  | 0.125437 |
| 0.137529 | 0.111888  | 0.148601 | 0.116113  | 0.116987  | 0.119464 | 0.140734 |
| 0.13447  | 0.116113  | 0.144085 | 0.125     | 0.117133  | 0.123689 | 0.145251 |
| 0.122815 | 0.100087  | 0.13243  | 0.106061  | 0.0938228 | 0.10271  | 0.126894 |
| 0.126311 | 0.106206  | 0.131847 | 0.112762  | 0.0882867 | 0.116987 | 0.12398  |
| 0.129808 | 0.125728  | 0.147582 | 0.128205  | 0.124126  | 0.125437 | 0.147873 |
| 0.120047 | 0.104604  | 0.139277 | 0.112325  | 0.104749  | 0.115676 | 0.135781 |
| 0.120775 | 0.108829  | 0.125437 | 0.113928  | 0.114219  | 0.111742 | 0.13039  |
| 0.126894 | 0.118735  | 0.146707 | 0.124126  | 0.122669  | 0.127768 | 0.139423 |
| 0.213578 | 0.206294  | 0.213578 | 0.207022  | 0.209353  | 0.208916 | 0.217366 |
| 0.129225 | 0.101253  | 0.142045 | 0.108974  | 0.103147  | 0.10912  | 0.135052 |
| 0.11451  | 0.101107  | 0.141026 | 0.102127  | 0.105041  | 0.107517 | 0.121795 |
| 0.13141  | 0.11014   | 0.147436 | 0.114365  | 0.114365  | 0.120921 | 0.141026 |
| 0.136509 | 0.11116   | 0.14729  | 0.111597  | 0.120047  | 0.11553  | 0.140006 |
| 0.132721 | 0.112034  | 0.144959 | 0.11655   | 0.110431  | 0.116987 | 0.142628 |
| 0.208188 | 0.198281  | 0.206731 | 0.201632  | 0.203089  | 0.202069 | 0.213724 |
| 0.139569 | 0.119464  | 0.149184 | 0.128059  | 0.121358  | 0.12704  | 0.144231 |
| 0.119318 | 0.102127  | 0.137966 | 0.110723  | 0.105769  | 0.111742 | 0.133887 |
| 0.129662 | 0.114219  | 0.14831  | 0.112617  | 0.116404  | 0.123252 | 0.132284 |
| 0.120338 | 0.108392  | 0.1419   | 0.114073  | 0.105624  | 0.112179 | 0.134907 |
| 0.138695 | 0.117133  | 0.146562 | 0.124563  | 0.120192  | 0.123834 | 0.142774 |
| 0.126166 | 0.105769  | 0.138112 | 0.110577  | 0.106789  | 0.106643 | 0.131119 |
| 0.121503 | 0.101399  | 0.142191 | 0.105624  | 0.10271   | 0.108392 | 0.130828 |
| 0.132576 | 0.109557  | 0.144231 | 0.109703  | 0.114073  | 0.113345 | 0.13549  |
| 0.208188 | 0.19391   | 0.210519 | 0.199009  | 0.201049  | 0.201777 | 0.215181 |
| 0.128205 | 0.109266  | 0.135198 | 0.118444  | 0.110577  | 0.112471 | 0.131119 |
| 0.20236  | 0.194784  | 0.203526 | 0.198427  | 0.196096  | 0.19595  | 0.209936 |
| 0.200466 | 0.192599  | 0.204837 | 0.193619  | 0.196533  | 0.196387 | 0.210082 |
| 0.126457 | 0.121503  | 0.146853 | 0.12398   | 0.117861  | 0.122086 | 0.145688 |
| 0.13549  | 0.116841  | 0.147145 | 0.119027  | 0.126894  | 0.121212 | 0.137821 |
| 0.113928 | 0.0938228 | 0.136946 | 0.0989219 | 0.0919289 | 0.102273 | 0.124126 |
| 0.128351 | 0.107955  | 0.140006 | 0.11655   | 0.107809  | 0.111451 | 0.133304 |

|          |           |          |           |           |           |          |
|----------|-----------|----------|-----------|-----------|-----------|----------|
| 0.135781 | 0.112762  | 0.140734 | 0.11553   | 0.113491  | 0.118298  | 0.137821 |
| 0.122086 | 0.107809  | 0.138695 | 0.116696  | 0.109411  | 0.117716  | 0.136946 |
| 0.114802 | 0.102273  | 0.138403 | 0.107663  | 0.102418  | 0.102273  | 0.132576 |
| 0.122086 | 0.106352  | 0.141317 | 0.111451  | 0.105041  | 0.103438  | 0.136946 |
| 0.140297 | 0.114365  | 0.151661 | 0.120629  | 0.11859   | 0.124563  | 0.141754 |
| 0.125874 | 0.113636  | 0.144231 | 0.113782  | 0.108829  | 0.120921  | 0.142774 |
| 0.113782 | 0.101253  | 0.13243  | 0.106352  | 0.103438  | 0.109703  | 0.130682 |
| 0.136364 | 0.114802  | 0.144231 | 0.12398   | 0.115822  | 0.120338  | 0.143357 |
| 0.116404 | 0.0968823 | 0.133013 | 0.102855  | 0.0976107 | 0.0980478 | 0.120484 |
| 0.140443 | 0.126457  | 0.147145 | 0.130973  | 0.127768  | 0.128497  | 0.142191 |
| 0.112762 | 0.0979021 | 0.128788 | 0.0986305 | 0.115822  | 0.115676  | 0.122669 |
| 0.145251 | 0.133013  | 0.151369 | 0.139569  | 0.132284  | 0.131265  | 0.151369 |
| 0.263258 | 0.258013  | 0.260927 | 0.261072  | 0.264569  | 0.259178  | 0.263549 |
| 0.120775 | 0.114948  | 0.141171 | 0.114219  | 0.120921  | 0.11553   | 0.136801 |
| 0.129371 | 0.11859   | 0.145105 | 0.121358  | 0.122815  | 0.122669  | 0.138695 |
| 0.223048 | 0.215763  | 0.223048 | 0.219988  | 0.220862  | 0.218969  | 0.228875 |
| 0.131702 | 0.12296   | 0.150641 | 0.123689  | 0.123397  | 0.118881  | 0.138695 |
| 0.237179 | 0.229604  | 0.237471 | 0.230915  | 0.232663  | 0.22873   | 0.240676 |
| 0.115822 | 0.10271   | 0.137675 | 0.106061  | 0.108392  | 0.106206  | 0.136218 |
| 0.125    | 0.119172  | 0.147727 | 0.124854  | 0.121941  | 0.125874  | 0.139569 |
| 0.133741 | 0.104312  | 0.143065 | 0.109411  | 0.10912   | 0.112471  | 0.135781 |
| 0.127331 | 0.120047  | 0.145396 | 0.121066  | 0.112617  | 0.122086  | 0.144231 |
| 0.212121 | 0.202214  | 0.210082 | 0.203817  | 0.204691  | 0.208042  | 0.216783 |
| 0.141317 | 0.129662  | 0.152389 | 0.135635  | 0.130099  | 0.131119  | 0.14831  |
| 0.139569 | 0.118007  | 0.146853 | 0.124563  | 0.116987  | 0.120629  | 0.144522 |
| 0.231206 | 0.224505  | 0.232372 | 0.227273  | 0.22873   | 0.228001  | 0.237908 |
| 0.123834 | 0.111597  | 0.141317 | 0.115239  | 0.108537  | 0.108683  | 0.145396 |
| 0.208479 | 0.194202  | 0.203817 | 0.200175  | 0.203089  | 0.20236   | 0.214015 |
| 0.124563 | 0.110868  | 0.14292  | 0.113928  | 0.108683  | 0.111742  | 0.140589 |
| 0.121649 | 0.104167  | 0.142337 | 0.111888  | 0.111014  | 0.116113  | 0.137675 |
| 0.117424 | 0.109557  | 0.144231 | 0.109703  | 0.11757   | 0.117424  | 0.12704  |
| 0.130245 | 0.123834  | 0.145396 | 0.121941  | 0.117279  | 0.121795  | 0.146562 |
| 0.130973 | 0.105915  | 0.144376 | 0.111888  | 0.110431  | 0.117279  | 0.135635 |
| 0.168561 | 0.156031  | 0.168561 | 0.158508  | 0.155012  | 0.16419   | 0.17264  |
| 0.133304 | 0.110868  | 0.140589 | 0.120629  | 0.11451   | 0.115822  | 0.139423 |
| 0.13243  | 0.110577  | 0.145542 | 0.113928  | 0.117716  | 0.117279  | 0.139132 |
| 0.129808 | 0.112034  | 0.144668 | 0.11859   | 0.114219  | 0.121066  | 0.137675 |
| 0.137966 | 0.119901  | 0.144959 | 0.126166  | 0.118298  | 0.120775  | 0.137092 |
| 0.20338  | 0.193182  | 0.204545 | 0.198281  | 0.197407  | 0.197552  | 0.20979  |
| 0.121358 | 0.105332  | 0.140006 | 0.108683  | 0.1081    | 0.116404  | 0.136509 |
| 0.130245 | 0.112471  | 0.14831  | 0.117861  | 0.111742  | 0.122669  | 0.144231 |
| 0.114656 | 0.0960082 | 0.136218 | 0.101399  | 0.106643  | 0.109703  | 0.130099 |
| 0.122378 | 0.110431  | 0.139569 | 0.11757   | 0.107955  | 0.107226  | 0.140734 |
| 0.121649 | 0.113491  | 0.142045 | 0.119755  | 0.115967  | 0.119901  | 0.13884  |

|          |           |          |           |           |          |          |
|----------|-----------|----------|-----------|-----------|----------|----------|
| 0.26049  | 0.258159  | 0.254953 | 0.258013  | 0.260927  | 0.259033 | 0.263112 |
| 0.114656 | 0.106789  | 0.141754 | 0.107517  | 0.108392  | 0.111451 | 0.125146 |
| 0.131847 | 0.109994  | 0.141171 | 0.11655   | 0.112762  | 0.120484 | 0.139423 |
| 0.191288 | 0.178759  | 0.181964 | 0.180361  | 0.179779  | 0.181672 | 0.198281 |
| 0.194784 | 0.184003  | 0.197698 | 0.188228  | 0.184732  | 0.188666 | 0.203817 |
| 0.140589 | 0.113491  | 0.147582 | 0.119172  | 0.115385  | 0.12398  | 0.141171 |
| 0.135198 | 0.119464  | 0.143648 | 0.124563  | 0.118153  | 0.124709 | 0.141317 |
| 0.125874 | 0.111597  | 0.143648 | 0.112908  | 0.109703  | 0.115676 | 0.1419   |
| 0.1537   | 0.144085  | 0.159237 | 0.148601  | 0.145979  | 0.14088  | 0.157488 |
| 0.134178 | 0.109411  | 0.145833 | 0.116841  | 0.11014   | 0.118735 | 0.139132 |
| 0.139569 | 0.112471  | 0.153263 | 0.116404  | 0.116113  | 0.123252 | 0.145105 |
| 0.125437 | 0.116113  | 0.144668 | 0.119464  | 0.115967  | 0.109994 | 0.145251 |
| 0.129225 | 0.117861  | 0.139132 | 0.121503  | 0.119464  | 0.120484 | 0.138549 |
| 0.143648 | 0.128497  | 0.150932 | 0.132721  | 0.129516  | 0.130828 | 0.14831  |
| 0.127185 | 0.111451  | 0.140589 | 0.118007  | 0.112471  | 0.114365 | 0.13884  |
| 0.126457 | 0.121503  | 0.143648 | 0.121066  | 0.113491  | 0.120047 | 0.143648 |
| 0.139132 | 0.131556  | 0.1537   | 0.133741  | 0.127914  | 0.133596 | 0.150204 |
| 0.119172 | 0.109557  | 0.141026 | 0.113199  | 0.114365  | 0.115967 | 0.125874 |
| 0.132139 | 0.126311  | 0.146125 | 0.126166  | 0.122378  | 0.127768 | 0.144959 |
| 0.126894 | 0.119318  | 0.147582 | 0.122086  | 0.120921  | 0.111451 | 0.144376 |
| 0.216783 | 0.207168  | 0.217366 | 0.208479  | 0.209936  | 0.210373 | 0.223193 |
| 0.112034 | 0.0962995 | 0.138549 | 0.0990676 | 0.103438  | 0.102418 | 0.118735 |
| 0.199738 | 0.190997  | 0.200612 | 0.193765  | 0.19493   | 0.195659 | 0.205565 |
| 0.127477 | 0.106206  | 0.144085 | 0.111888  | 0.106935  | 0.109411 | 0.133887 |
| 0.125146 | 0.113782  | 0.144668 | 0.121503  | 0.119464  | 0.120775 | 0.142628 |
| 0.114073 | 0.101544  | 0.134761 | 0.100524  | 0.118881  | 0.121358 | 0.119027 |
| 0.113345 | 0.0926573 | 0.130536 | 0.0965909 | 0.107955  | 0.111305 | 0.123252 |
| 0.139423 | 0.123689  | 0.14729  | 0.129662  | 0.123543  | 0.123689 | 0.142628 |
| 0.140589 | 0.122523  | 0.145833 | 0.127914  | 0.122669  | 0.123106 | 0.14292  |
| 0.124272 | 0.109411  | 0.139714 | 0.114219  | 0.111305  | 0.116113 | 0.136509 |
| 0.137238 | 0.109266  | 0.144231 | 0.114948  | 0.116404  | 0.115385 | 0.139569 |
| 0.115967 | 0.106061  | 0.130536 | 0.108537  | 0.123397  | 0.120338 | 0.124126 |
| 0.13039  | 0.122523  | 0.142337 | 0.127622  | 0.122378  | 0.115822 | 0.149038 |
| 0.254516 | 0.253934  | 0.250728 | 0.253788  | 0.255245  | 0.252768 | 0.259178 |
| 0.121066 | 0.107663  | 0.139714 | 0.112471  | 0.111305  | 0.121066 | 0.136218 |
| 0.194347 | 0.183275  | 0.197261 | 0.186334  | 0.186334  | 0.188228 | 0.20338  |
| 0.200903 | 0.1875    | 0.199446 | 0.191725  | 0.189103  | 0.19391  | 0.205857 |
| 0.136072 | 0.112471  | 0.146853 | 0.120775  | 0.116404  | 0.119755 | 0.1419   |
| 0.113345 | 0.102564  | 0.139277 | 0.104749  | 0.108246  | 0.109848 | 0.124417 |
| 0.125583 | 0.11451   | 0.143939 | 0.119027  | 0.11757   | 0.119172 | 0.141317 |
| 0.132576 | 0.109848  | 0.139569 | 0.119318  | 0.11116   | 0.118007 | 0.136946 |
| 0.113782 | 0.0942599 | 0.135052 | 0.100816  | 0.0955711 | 0.10271  | 0.116987 |
| 0.121066 | 0.107372  | 0.143502 | 0.115093  | 0.107517  | 0.107955 | 0.142628 |
| 0.131993 | 0.120338  | 0.13986  | 0.121649  | 0.121358  | 0.117424 | 0.136655 |

|          |           |          |           |          |          |          |
|----------|-----------|----------|-----------|----------|----------|----------|
| 0.143939 | 0.130536  | 0.152098 | 0.136509  | 0.131847 | 0.131993 | 0.146853 |
| 0.121358 | 0.104167  | 0.140589 | 0.111888  | 0.111014 | 0.116113 | 0.135052 |
| 0.141754 | 0.130099  | 0.153409 | 0.131993  | 0.129953 | 0.130099 | 0.146416 |
| 0.127622 | 0.110431  | 0.144522 | 0.112034  | 0.111116 | 0.11451  | 0.137529 |
| 0.113636 | 0.104312  | 0.133159 | 0.105041  | 0.127768 | 0.122669 | 0.121503 |
| 0.13039  | 0.114365  | 0.14729  | 0.120338  | 0.111597 | 0.120192 | 0.146416 |
| 0.130245 | 0.119464  | 0.145688 | 0.124563  | 0.121358 | 0.113928 | 0.14627  |
| 0.122523 | 0.10912   | 0.144376 | 0.111597  | 0.108974 | 0.111116 | 0.129225 |
| 0.116987 | 0.104167  | 0.130973 | 0.110723  | 0.111305 | 0.116113 | 0.132139 |
| 0.137092 | 0.125146  | 0.154283 | 0.127914  | 0.128205 | 0.131847 | 0.148456 |
| 0.196096 | 0.185315  | 0.195221 | 0.187209  | 0.1875   | 0.189103 | 0.202797 |
| 0.147873 | 0.13243   | 0.154283 | 0.140152  | 0.134324 | 0.137092 | 0.151369 |
| 0.137383 | 0.11961   | 0.145542 | 0.125874  | 0.121795 | 0.123689 | 0.143794 |
| 0.109848 | 0.097028  | 0.131119 | 0.0986305 | 0.119318 | 0.117133 | 0.119464 |
| 0.10708  | 0.0887238 | 0.12398  | 0.0938228 | 0.109557 | 0.107955 | 0.118735 |
| 0.125583 | 0.113054  | 0.143939 | 0.117861  | 0.110286 | 0.115676 | 0.141317 |
| 0.127768 | 0.119901  | 0.14729  | 0.120338  | 0.115385 | 0.120484 | 0.146125 |
| 0.201632 | 0.189103  | 0.199009 | 0.193328  | 0.194202 | 0.193765 | 0.208625 |
| 0.133159 | 0.114219  | 0.13549  | 0.121358  | 0.118735 | 0.117716 | 0.139277 |
| 0.120484 | 0.103293  | 0.129808 | 0.111305  | 0.105769 | 0.105624 | 0.128934 |
| 0.140006 | 0.123689  | 0.148164 | 0.128205  | 0.124126 | 0.126894 | 0.144376 |
| 0.206002 | 0.190268  | 0.202214 | 0.193619  | 0.194493 | 0.19493  | 0.210082 |
| 0.117279 | 0.103001  | 0.144376 | 0.103438  | 0.108974 | 0.108537 | 0.125437 |
| 0.125291 | 0.115967  | 0.141026 | 0.121066  | 0.113199 | 0.108974 | 0.142774 |
| 0.138403 | 0.122669  | 0.146853 | 0.129516  | 0.12398  | 0.125583 | 0.142774 |
| 0.131556 | 0.104458  | 0.142045 | 0.112471  | 0.110723 | 0.115239 | 0.136801 |
| 0.196241 | 0.185752  | 0.19799  | 0.190268  | 0.192016 | 0.192453 | 0.203526 |
| 0.124854 | 0.111742  | 0.142337 | 0.113928  | 0.111888 | 0.108537 | 0.145833 |
| 0.129808 | 0.106206  | 0.14292  | 0.114219  | 0.113054 | 0.112034 | 0.13884  |
| 0.121066 | 0.103875  | 0.143211 | 0.106061  | 0.107226 | 0.109994 | 0.13039  |
| 0.135052 | 0.113782  | 0.143211 | 0.116841  | 0.119464 | 0.12602  | 0.142628 |
| 0.13549  | 0.109266  | 0.146562 | 0.111451  | 0.114365 | 0.113928 | 0.138112 |
| 0.130536 | 0.11859   | 0.144231 | 0.123397  | 0.119027 | 0.111014 | 0.148019 |
| 0.118298 | 0.107517  | 0.139277 | 0.113491  | 0.107955 | 0.115676 | 0.136072 |
| 0.131702 | 0.115385  | 0.148893 | 0.117861  | 0.11757  | 0.115385 | 0.136946 |
| 0.154283 | 0.135635  | 0.16215  | 0.136655  | 0.138695 | 0.140589 | 0.151952 |
| 0.242861 | 0.23616   | 0.240822 | 0.237179  | 0.240385 | 0.237908 | 0.248689 |
| 0.123397 | 0.115239  | 0.143502 | 0.115676  | 0.111888 | 0.112325 | 0.133304 |
| 0.135927 | 0.10912   | 0.148747 | 0.112471  | 0.119464 | 0.116987 | 0.137092 |
| 0.133159 | 0.119755  | 0.141026 | 0.122815  | 0.11757  | 0.121212 | 0.141608 |
| 0.138549 | 0.119901  | 0.150495 | 0.124417  | 0.114802 | 0.128351 | 0.146125 |
| 0.124417 | 0.105478  | 0.132867 | 0.10912   | 0.112034 | 0.107226 | 0.134615 |
| 0.126748 | 0.112762  | 0.145105 | 0.117279  | 0.113782 | 0.11655  | 0.143648 |
| 0.137092 | 0.122523  | 0.144668 | 0.127331  | 0.125    | 0.124272 | 0.14088  |

|          |           |          |           |           |          |          |
|----------|-----------|----------|-----------|-----------|----------|----------|
| 0.126748 | 0.120629  | 0.145979 | 0.122232  | 0.120192  | 0.110723 | 0.149476 |
| 0.136072 | 0.112762  | 0.1419   | 0.117279  | 0.111451  | 0.119464 | 0.142191 |
| 0.243153 | 0.234994  | 0.238199 | 0.236597  | 0.241841  | 0.239365 | 0.246941 |
| 0.117424 | 0.101981  | 0.136364 | 0.105332  | 0.103293  | 0.108683 | 0.124417 |
| 0.111014 | 0.0941142 | 0.136946 | 0.0980478 | 0.103001  | 0.100233 | 0.12704  |
| 0.118735 | 0.107663  | 0.135635 | 0.113345  | 0.109557  | 0.111742 | 0.137092 |
| 0.142191 | 0.11859   | 0.157343 | 0.122232  | 0.125437  | 0.126457 | 0.146853 |
| 0.129662 | 0.118881  | 0.148601 | 0.119901  | 0.118444  | 0.120921 | 0.136655 |
| 0.127914 | 0.11451   | 0.1419   | 0.116696  | 0.114073  | 0.119755 | 0.139277 |
| 0.13986  | 0.121503  | 0.146562 | 0.124272  | 0.120775  | 0.127914 | 0.145979 |
| 0.128642 | 0.105915  | 0.138549 | 0.112471  | 0.11014   | 0.112617 | 0.134761 |
| 0.235577 | 0.232372  | 0.237908 | 0.231352  | 0.235723  | 0.233537 | 0.241987 |
| 0.142337 | 0.123689  | 0.148164 | 0.128788  | 0.127622  | 0.124563 | 0.146416 |
| 0.127331 | 0.116259  | 0.143939 | 0.119318  | 0.113491  | 0.110723 | 0.145396 |
| 0.133159 | 0.108392  | 0.142191 | 0.113782  | 0.105332  | 0.108392 | 0.136364 |
| 0.13243  | 0.118735  | 0.141171 | 0.120338  | 0.11451   | 0.113782 | 0.137383 |
| 0.119027 | 0.107955  | 0.141463 | 0.111014  | 0.11655   | 0.113199 | 0.136509 |
| 0.119318 | 0.105624  | 0.137383 | 0.113345  | 0.109557  | 0.114656 | 0.135927 |
| 0.122523 | 0.114073  | 0.141463 | 0.118007  | 0.113345  | 0.106206 | 0.143794 |
| 0.12704  | 0.119464  | 0.143065 | 0.123689  | 0.117279  | 0.113345 | 0.146853 |
| 0.122086 | 0.111014  | 0.142191 | 0.113782  | 0.11116   | 0.106643 | 0.140734 |
| 0.123397 | 0.10708   | 0.140297 | 0.108974  | 0.107226  | 0.117279 | 0.137383 |
| 0.133596 | 0.11553   | 0.147873 | 0.115676  | 0.124709  | 0.120192 | 0.142337 |
| 0.141026 | 0.118298  | 0.151807 | 0.121066  | 0.131556  | 0.122086 | 0.142483 |
| 0.114219 | 0.108392  | 0.135781 | 0.107955  | 0.127768  | 0.122086 | 0.125    |
| 0.113928 | 0.112471  | 0.138403 | 0.111451  | 0.128059  | 0.126166 | 0.125583 |
| 0.137966 | 0.118153  | 0.147873 | 0.121503  | 0.12704   | 0.120192 | 0.142045 |
| 0.109411 | 0.0913462 | 0.135052 | 0.0949883 | 0.0932401 | 0.097465 | 0.115239 |
| 0.120921 | 0.115385  | 0.134324 | 0.119901  | 0.119027  | 0.117716 | 0.136946 |
| 0.12602  | 0.125437  | 0.143502 | 0.130536  | 0.127331  | 0.124854 | 0.139423 |
| 0.216055 | 0.205857  | 0.21081  | 0.208042  | 0.211538  | 0.21081  | 0.221008 |
| 0.135927 | 0.122232  | 0.14088  | 0.125874  | 0.121212  | 0.125146 | 0.140589 |
| 0.117279 | 0.100379  | 0.136509 | 0.104021  | 0.104895  | 0.10708  | 0.130682 |
| 0.12296  | 0.113054  | 0.143357 | 0.117279  | 0.116696  | 0.12296  | 0.138986 |
| 0.230041 | 0.222174  | 0.226836 | 0.220862  | 0.227273  | 0.223048 | 0.23412  |
| 0.21926  | 0.211101  | 0.219551 | 0.213287  | 0.214744  | 0.214598 | 0.224796 |
| 0.131119 | 0.119464  | 0.143939 | 0.121358  | 0.117861  | 0.113636 | 0.146562 |
| 0.252185 | 0.249563  | 0.250146 | 0.250583  | 0.255245  | 0.252185 | 0.258596 |
| 0.109703 | 0.0919289 | 0.132721 | 0.0938228 | 0.0926573 | 0.100087 | 0.114656 |
| 0.129225 | 0.126894  | 0.157197 | 0.130245  | 0.131119  | 0.124563 | 0.136801 |
| 0.112908 | 0.104458  | 0.14088  | 0.102855  | 0.108392  | 0.110286 | 0.123106 |
| 0.138112 | 0.113054  | 0.149476 | 0.116696  | 0.121649  | 0.122669 | 0.141026 |
| 0.19799  | 0.189831  | 0.196533 | 0.193473  | 0.192599  | 0.191579 | 0.201777 |
| 0.13345  | 0.115676  | 0.147145 | 0.117279  | 0.113199  | 0.116841 | 0.141026 |

|          |           |          |           |           |           |          |
|----------|-----------|----------|-----------|-----------|-----------|----------|
| 0.200466 | 0.194056  | 0.20338  | 0.197698  | 0.199446  | 0.198135  | 0.210956 |
| 0.131702 | 0.107517  | 0.147145 | 0.113491  | 0.114948  | 0.116841  | 0.137529 |
| 0.128205 | 0.113636  | 0.132867 | 0.116987  | 0.115822  | 0.112471  | 0.141026 |
| 0.119172 | 0.110723  | 0.143939 | 0.110286  | 0.116404  | 0.106935  | 0.129079 |
| 0.126166 | 0.104312  | 0.138112 | 0.109994  | 0.11553   | 0.112471  | 0.133159 |
| 0.11553  | 0.100087  | 0.132139 | 0.107517  | 0.104312  | 0.109703  | 0.13039  |
| 0.128059 | 0.10912   | 0.138549 | 0.113928  | 0.107517  | 0.114948  | 0.13447  |
| 0.111742 | 0.0992133 | 0.136801 | 0.100816  | 0.100524  | 0.105915  | 0.120775 |
| 0.131993 | 0.113345  | 0.138986 | 0.121649  | 0.114656  | 0.11655   | 0.138403 |
| 0.112325 | 0.101544  | 0.127477 | 0.103438  | 0.103438  | 0.106789  | 0.130973 |
| 0.11757  | 0.10067   | 0.13884  | 0.106061  | 0.10169   | 0.105332  | 0.127477 |
| 0.114802 | 0.103438  | 0.138112 | 0.103875  | 0.103584  | 0.109266  | 0.123543 |
| 0.113782 | 0.105041  | 0.125146 | 0.107809  | 0.116259  | 0.119901  | 0.126894 |
| 0.143211 | 0.128642  | 0.149621 | 0.13141   | 0.127622  | 0.127768  | 0.148456 |
| 0.111014 | 0.0938228 | 0.130245 | 0.0977564 | 0.112034  | 0.112179  | 0.119464 |
| 0.127185 | 0.105915  | 0.143502 | 0.110431  | 0.108974  | 0.115822  | 0.139423 |
| 0.11451  | 0.101399  | 0.134324 | 0.107372  | 0.102418  | 0.112762  | 0.131993 |
| 0.12296  | 0.11451   | 0.138986 | 0.11757   | 0.112908  | 0.11014   | 0.142483 |
| 0.13345  | 0.112471  | 0.144814 | 0.114365  | 0.112617  | 0.119755  | 0.137238 |
| 0.126311 | 0.114656  | 0.143211 | 0.119755  | 0.113345  | 0.119318  | 0.146999 |
| 0.112617 | 0.0971737 | 0.128642 | 0.0990676 | 0.112471  | 0.114073  | 0.123397 |
| 0.13345  | 0.117424  | 0.142483 | 0.12602   | 0.118735  | 0.122086  | 0.142483 |
| 0.146125 | 0.128934  | 0.150204 | 0.135198  | 0.13141   | 0.129516  | 0.14933  |
| 0.146416 | 0.137092  | 0.155449 | 0.142483  | 0.137821  | 0.136509  | 0.152244 |
| 0.111888 | 0.0999417 | 0.13345  | 0.105041  | 0.0980478 | 0.0979021 | 0.128497 |
| 0.122086 | 0.107226  | 0.136364 | 0.113491  | 0.108537  | 0.117424  | 0.13549  |
| 0.125728 | 0.105915  | 0.139714 | 0.109848  | 0.106352  | 0.109411  | 0.136801 |
| 0.13884  | 0.122523  | 0.151078 | 0.122669  | 0.130245  | 0.123397  | 0.141463 |
| 0.114219 | 0.10373   | 0.138695 | 0.103001  | 0.10912   | 0.112471  | 0.126166 |
| 0.138695 | 0.13345   | 0.150641 | 0.134761  | 0.130682  | 0.132576  | 0.152681 |
| 0.132284 | 0.125291  | 0.150058 | 0.132721  | 0.128642  | 0.131702  | 0.143939 |
| 0.140297 | 0.116987  | 0.152535 | 0.123252  | 0.120629  | 0.120192  | 0.142337 |
| 0.12296  | 0.10373   | 0.138403 | 0.10708   | 0.099796  | 0.112179  | 0.127331 |
| 0.129516 | 0.104458  | 0.142337 | 0.108392  | 0.0964452 | 0.11116   | 0.131847 |
| 0.114948 | 0.107372  | 0.136218 | 0.103438  | 0.12296   | 0.122523  | 0.123106 |
| 0.213287 | 0.206876  | 0.210956 | 0.209062  | 0.210227  | 0.207168  | 0.219406 |
| 0.129371 | 0.107517  | 0.144522 | 0.113199  | 0.110577  | 0.114219  | 0.137238 |
| 0.121066 | 0.104749  | 0.149038 | 0.107809  | 0.1081    | 0.10708   | 0.125728 |
| 0.13141  | 0.108974  | 0.145979 | 0.109703  | 0.116404  | 0.115093  | 0.135198 |
| 0.11116  | 0.0971737 | 0.130973 | 0.100233  | 0.11451   | 0.112617  | 0.121066 |
| 0.135198 | 0.113928  | 0.14831  | 0.11961   | 0.120484  | 0.120047  | 0.143065 |
| 0.129953 | 0.120921  | 0.149767 | 0.126603  | 0.121358  | 0.119464  | 0.145105 |
| 0.136218 | 0.126311  | 0.147582 | 0.130245  | 0.122378  | 0.120484  | 0.148456 |
| 0.137529 | 0.111888  | 0.149476 | 0.114073  | 0.114365  | 0.116841  | 0.142191 |

|           |           |          |           |           |           |          |
|-----------|-----------|----------|-----------|-----------|-----------|----------|
| 0.115385  | 0.0952797 | 0.131702 | 0.104458  | 0.102127  | 0.101981  | 0.128205 |
| 0.134907  | 0.114802  | 0.145688 | 0.115239  | 0.124272  | 0.118298  | 0.140734 |
| 0.115385  | 0.107517  | 0.142774 | 0.10708   | 0.110286  | 0.101981  | 0.125291 |
| 0.123689  | 0.107372  | 0.143794 | 0.107517  | 0.102855  | 0.110868  | 0.130682 |
| 0.182401  | 0.173368  | 0.18211  | 0.175262  | 0.175262  | 0.174534  | 0.191434 |
| 0.134324  | 0.115093  | 0.143939 | 0.120775  | 0.116404  | 0.123834  | 0.141608 |
| 0.137383  | 0.116987  | 0.146707 | 0.121212  | 0.127622  | 0.122523  | 0.142045 |
| 0.112471  | 0.0976107 | 0.136655 | 0.105624  | 0.105915  | 0.104021  | 0.115967 |
| 0.123689  | 0.110868  | 0.12398  | 0.114802  | 0.111014  | 0.126894  | 0.135052 |
| 0.119027  | 0.0989219 | 0.137092 | 0.104312  | 0.104604  | 0.10067   | 0.125437 |
| 0.113491  | 0.0939685 | 0.13447  | 0.099359  | 0.094697  | 0.101544  | 0.121358 |
| 0.12398   | 0.103875  | 0.139132 | 0.109266  | 0.106643  | 0.105915  | 0.128642 |
| 0.132139  | 0.109994  | 0.137092 | 0.114219  | 0.115385  | 0.105624  | 0.140589 |
| 0.127185  | 0.109411  | 0.137092 | 0.114219  | 0.111014  | 0.116696  | 0.131556 |
| 0.127622  | 0.113928  | 0.150058 | 0.119027  | 0.121649  | 0.121795  | 0.141317 |
| 0.121649  | 0.100087  | 0.129808 | 0.108392  | 0.0984848 | 0.105624  | 0.128642 |
| 0.123543  | 0.101981  | 0.143648 | 0.101836  | 0.108829  | 0.114802  | 0.129371 |
| 0.13039   | 0.126311  | 0.145542 | 0.129371  | 0.125     | 0.11757   | 0.14729  |
| 0.108537  | 0.101544  | 0.132721 | 0.104312  | 0.102564  | 0.100962  | 0.118444 |
| 0.129516  | 0.112908  | 0.149038 | 0.112762  | 0.117716  | 0.11961   | 0.138258 |
| 0.110577  | 0.0968823 | 0.137092 | 0.0984848 | 0.0952797 | 0.100962  | 0.124272 |
| 0.11116   | 0.101253  | 0.133887 | 0.107517  | 0.0990676 | 0.10271   | 0.121066 |
| 0.114656  | 0.0954254 | 0.132139 | 0.100524  | 0.087704  | 0.099796  | 0.121066 |
| 0.117716  | 0.1081    | 0.142774 | 0.112617  | 0.114073  | 0.101107  | 0.11655  |
| 0.113636  | 0.0906177 | 0.136072 | 0.0983392 | 0.104167  | 0.0955711 | 0.123252 |
| 0.139277  | 0.138986  | 0.153846 | 0.140006  | 0.140006  | 0.13549   | 0.154429 |
| 0.136655  | 0.128497  | 0.152098 | 0.128351  | 0.127768  | 0.127331  | 0.150641 |
| 0.110431  | 0.0967366 | 0.136072 | 0.10271   | 0.0992133 | 0.102564  | 0.126457 |
| 0.133887  | 0.133596  | 0.158071 | 0.136364  | 0.130536  | 0.127185  | 0.155449 |
| 0.116987  | 0.10708   | 0.140006 | 0.11451   | 0.114802  | 0.120192  | 0.130682 |
| 0.136801  | 0.128642  | 0.145542 | 0.133741  | 0.133159  | 0.130099  | 0.143502 |
| 0.112034  | 0.101544  | 0.139714 | 0.103147  | 0.104604  | 0.0968823 | 0.120775 |
| 0.142191  | 0.132576  | 0.149767 | 0.132139  | 0.136801  | 0.138986  | 0.152681 |
| 0.132576  | 0.117424  | 0.148601 | 0.120775  | 0.121941  | 0.121795  | 0.141317 |
| 0.137821  | 0.127622  | 0.140734 | 0.128059  | 0.127477  | 0.121503  | 0.151807 |
| 0.0981935 | 0.0862471 | 0.133159 | 0.0916375 | 0.104458  | 0.113928  | 0.10373  |
| 0.105624  | 0.0948427 | 0.133013 | 0.101399  | 0.103147  | 0.0992133 | 0.122232 |
| 0.106935  | 0.101107  | 0.134033 | 0.106206  | 0.10067   | 0.0847902 | 0.118298 |
| 0.121358  | 0.105624  | 0.140297 | 0.1081    | 0.111888  | 0.0960082 | 0.136801 |
| 0.106789  | 0.108829  | 0.134178 | 0.112471  | 0.114219  | 0.108829  | 0.126311 |
| 0.123252  | 0.117424  | 0.143939 | 0.116696  | 0.108246  | 0.116841  | 0.13141  |
| 0.131119  | 0.116841  | 0.136364 | 0.119318  | 0.112034  | 0.120921  | 0.138403 |
| 0.0920746 | 0.0635198 | 0.125874 | 0.0677448 | 0.095134  | 0.102855  | 0.106935 |
| 0.111451  | 0.10271   | 0.137383 | 0.103147  | 0.0967366 | 0.0840618 | 0.118153 |



|          |           |          |           |           |           |          |
|----------|-----------|----------|-----------|-----------|-----------|----------|
| 0.117716 | 0.104895  | 0.142483 | 0.107372  | 0.108829  | 0.0987762 | 0.126166 |
| 0.111305 | 0.106352  | 0.137821 | 0.10708   | 0.103001  | 0.100524  | 0.123543 |
| 0.115822 | 0.111742  | 0.13884  | 0.113928  | 0.106643  | 0.0837704 | 0.118444 |
| 0.120192 | 0.103001  | 0.136218 | 0.107809  | 0.104895  | 0.0992133 | 0.125728 |
| 0.126166 | 0.113054  | 0.138986 | 0.117861  | 0.112034  | 0.115676  | 0.134907 |
| 0.118881 | 0.105478  | 0.143065 | 0.11116   | 0.112325  | 0.11014   | 0.131119 |
| 0.107226 | 0.0917832 | 0.133159 | 0.0962995 | 0.0898893 | 0.0961538 | 0.110723 |
| 0.114802 | 0.0987762 | 0.140734 | 0.100962  | 0.105915  | 0.0976107 | 0.125583 |
| 0.125437 | 0.110868  | 0.139714 | 0.114219  | 0.108974  | 0.116696  | 0.137092 |
| 0.118881 | 0.105186  | 0.138112 | 0.112034  | 0.104749  | 0.1081    | 0.128205 |
| 0.13141  | 0.120921  | 0.141608 | 0.123106  | 0.119318  | 0.124126  | 0.141317 |
| 0.122669 | 0.105769  | 0.136072 | 0.112908  | 0.100962  | 0.106935  | 0.135198 |
| 0.121358 | 0.123397  | 0.144959 | 0.123543  | 0.123834  | 0.118444  | 0.139423 |

| <b>TDr_08_00810</b> | <b>TDr_08_00841</b> | <b>TDr_08_00861</b> | <b>TDr_08_00882</b> | <b>TDr_08_00896</b> | <b>TDr_08_00898</b> | <b>TDr_08_00905</b> |
|---------------------|---------------------|---------------------|---------------------|---------------------|---------------------|---------------------|
| 0.105769            | 0.109848            | 0.110431            | 0.102418            | 0.124126            | 0.110577            | 0.104895            |
| 0.121066            | 0.108246            | 0.105624            | 0.113636            | 0.123689            | 0.113054            | 0.103293            |
| 0.114365            | 0.102127            | 0.101253            | 0.108392            | 0.120192            | 0.11014             | 0.103584            |
| 0.119901            | 0.110577            | 0.106498            | 0.107809            | 0.120192            | 0.114219            | 0.106206            |
| 0.133596            | 0.130682            | 0.127768            | 0.130828            | 0.136218            | 0.124126            | 0.126311            |
| 0.122523            | 0.125728            | 0.126894            | 0.124709            | 0.140006            | 0.118298            | 0.121358            |
| 0.106935            | 0.106935            | 0.113054            | 0.0939685           | 0.112762            | 0.0584207           | 0.101107            |
| 0.121795            | 0.102855            | 0.109557            | 0.109411            | 0.123252            | 0.11757             | 0.0976107           |
| 0.112325            | 0.0983392           | 0.0992133           | 0.104312            | 0.112325            | 0.109557            | 0.0887238           |
| 0.108683            | 0.0979021           | 0.0938228           | 0.0977564           | 0.0865385           | 0.10271             | 0.0842075           |
| 0.106206            | 0.10271             | 0.103293            | 0.105186            | 0.116404            | 0.103147            | 0.100379            |
| 0.117424            | 0.102273            | 0.104895            | 0.112034            | 0.121212            | 0.108246            | 0.0964452           |
| 0.116841            | 0.104021            | 0.101981            | 0.110868            | 0.115676            | 0.112034            | 0.0973193           |
| 0.119901            | 0.131265            | 0.130973            | 0.134324            | 0.144376            | 0.134324            | 0.120192            |
| 0.125               | 0.11655             | 0.118298            | 0.124563            | 0.118881            | 0.125437            | 0.112179            |
| 0.104167            | 0.108537            | 0.105041            | 0.113054            | 0.112908            | 0.116259            | 0.102127            |
| 0.116841            | 0.100233            | 0.102273            | 0.105915            | 0.115676            | 0.105915            | 0.092366            |
| 0.145833            | 0.135635            | 0.138549            | 0.139277            | 0.141754            | 0.134907            | 0.13039             |
| 0.110868            | 0.0995047           | 0.0992133           | 0.106352            | 0.120775            | 0.106935            | 0.0962995           |
| 0.178759            | 0.200612            | 0.199155            | 0.204837            | 0.20877             | 0.204837            | 0.198864            |
| 0.122669            | 0.114219            | 0.113345            | 0.108537            | 0.128788            | 0.104458            | 0.112179            |
| 0.117279            | 0.109411            | 0.106789            | 0.103147            | 0.126894            | 0.0996503           | 0.111451            |
| 0.106935            | 0.0926573           | 0.0987762           | 0.104458            | 0.109848            | 0.110868            | 0.0955711           |
| 0.116987            | 0.118153            | 0.114365            | 0.121503            | 0.119901            | 0.119755            | 0.112908            |
| 0.104895            | 0.100524            | 0.0941142           | 0.0983392           | 0.100816            | 0.101544            | 0.0871212           |
| 0.124126            | 0.116841            | 0.121503            | 0.116696            | 0.131119            | 0.106789            | 0.114219            |
| 0.121795            | 0.111888            | 0.113054            | 0.11116             | 0.107809            | 0.108537            | 0.101399            |
| 0.111014            | 0.110431            | 0.114802            | 0.11961             | 0.11859             | 0.124854            | 0.105186            |
| 0.132576            | 0.117424            | 0.119464            | 0.122815            | 0.127914            | 0.119027            | 0.117424            |
| 0.125874            | 0.111014            | 0.115967            | 0.11553             | 0.120629            | 0.118153            | 0.106061            |
| 0.112034            | 0.117279            | 0.116404            | 0.108683            | 0.123397            | 0.106061            | 0.108537            |
| 0.12296             | 0.115967            | 0.115093            | 0.115822            | 0.120338            | 0.116696            | 0.1081              |
| 0.102564            | 0.106935            | 0.101399            | 0.101544            | 0.107809            | 0.102418            | 0.0955711           |
| 0.124709            | 0.1081              | 0.113928            | 0.117279            | 0.119755            | 0.113491            | 0.101399            |
| 0.119027            | 0.102418            | 0.105915            | 0.110431            | 0.110868            | 0.107226            | 0.100379            |
| 0.126457            | 0.111888            | 0.113928            | 0.121358            | 0.11859             | 0.114365            | 0.112471            |
| 0.120484            | 0.116404            | 0.116696            | 0.0935315           | 0.106789            | 0.104021            | 0.118153            |
| 0.122669            | 0.110431            | 0.108683            | 0.118735            | 0.123543            | 0.118444            | 0.104895            |
| 0.112179            | 0.106643            | 0.105186            | 0.110577            | 0.111014            | 0.110868            | 0.101107            |
| 0.120921            | 0.116259            | 0.117716            | 0.121358            | 0.125               | 0.122523            | 0.104312            |
| 0.11014             | 0.102273            | 0.103147            | 0.105041            | 0.11014             | 0.108537            | 0.0885781           |
| 0.131702            | 0.133159            | 0.139277            | 0.13884             | 0.134033            | 0.139423            | 0.119755            |

|          |           |           |           |           |           |           |
|----------|-----------|-----------|-----------|-----------|-----------|-----------|
| 0.133159 | 0.139569  | 0.141317  | 0.144959  | 0.136655  | 0.141463  | 0.123543  |
| 0.115822 | 0.107372  | 0.107663  | 0.107809  | 0.121649  | 0.111305  | 0.0957168 |
| 0.109411 | 0.0808566 | 0.0791084 | 0.0955711 | 0.0977564 | 0.0941142 | 0.0831876 |
| 0.124709 | 0.0929487 | 0.0967366 | 0.107955  | 0.0949883 | 0.110577  | 0.0932401 |
| 0.107809 | 0.103438  | 0.104604  | 0.119318  | 0.126748  | 0.115822  | 0.10169   |
| 0.131265 | 0.127477  | 0.132139  | 0.131993  | 0.129516  | 0.135781  | 0.119901  |
| 0.111742 | 0.108246  | 0.110868  | 0.108683  | 0.113782  | 0.113928  | 0.0983392 |
| 0.1081   | 0.108974  | 0.109848  | 0.109994  | 0.113636  | 0.112325  | 0.0929487 |
| 0.136801 | 0.137675  | 0.140006  | 0.121795  | 0.139714  | 0.119172  | 0.129808  |
| 0.119318 | 0.124563  | 0.121649  | 0.128788  | 0.129516  | 0.127914  | 0.114073  |
| 0.106935 | 0.107809  | 0.111888  | 0.107372  | 0.11655   | 0.106789  | 0.097028  |
| 0.128205 | 0.11859   | 0.119172  | 0.116987  | 0.11859   | 0.121941  | 0.107517  |
| 0.1081   | 0.111888  | 0.115385  | 0.114365  | 0.125291  | 0.111451  | 0.105186  |
| 0.128497 | 0.125874  | 0.128788  | 0.139714  | 0.136072  | 0.133887  | 0.119755  |
| 0.123689 | 0.114073  | 0.118153  | 0.119464  | 0.121941  | 0.122669  | 0.104749  |
| 0.11553  | 0.112617  | 0.111451  | 0.1081    | 0.121649  | 0.108683  | 0.0989219 |
| 0.118444 | 0.104458  | 0.106206  | 0.113345  | 0.114365  | 0.112179  | 0.0986305 |
| 0.118881 | 0.103438  | 0.101981  | 0.10912   | 0.0810023 | 0.102418  | 0.0847902 |
| 0.126166 | 0.130828  | 0.134324  | 0.128642  | 0.125874  | 0.133887  | 0.115967  |
| 0.133159 | 0.132284  | 0.135781  | 0.142045  | 0.132576  | 0.13884   | 0.120047  |
| 0.135344 | 0.158654  | 0.158654  | 0.158508  | 0.160111  | 0.166667  | 0.147582  |
| 0.113491 | 0.112617  | 0.113199  | 0.109848  | 0.120484  | 0.112471  | 0.0971737 |
| 0.110577 | 0.103293  | 0.106206  | 0.106935  | 0.11116   | 0.108392  | 0.0916375 |
| 0.111742 | 0.102418  | 0.105041  | 0.106643  | 0.119318  | 0.105769  | 0.092803  |
| 0.132576 | 0.118298  | 0.123834  | 0.123397  | 0.130536  | 0.125146  | 0.123543  |
| 0.115093 | 0.106061  | 0.1081    | 0.105624  | 0.118007  | 0.114365  | 0.085373  |
| 0.10912  | 0.117279  | 0.119027  | 0.132576  | 0.136218  | 0.127622  | 0.119318  |
| 0.120484 | 0.103001  | 0.0995047 | 0.0996503 | 0.0884324 | 0.101981  | 0.0770688 |
| 0.114802 | 0.111305  | 0.109266  | 0.108829  | 0.118881  | 0.113199  | 0.0941142 |
| 0.131119 | 0.13345   | 0.132576  | 0.127477  | 0.131702  | 0.126894  | 0.13141   |
| 0.117424 | 0.11859   | 0.115676  | 0.116113  | 0.127622  | 0.118735  | 0.106061  |
| 0.13447  | 0.133596  | 0.13447   | 0.132284  | 0.133596  | 0.133159  | 0.122232  |
| 0.125291 | 0.121503  | 0.123834  | 0.131265  | 0.130245  | 0.127477  | 0.117133  |
| 0.105332 | 0.100087  | 0.100087  | 0.104604  | 0.125437  | 0.106935  | 0.0977564 |
| 0.112908 | 0.104167  | 0.107955  | 0.107226  | 0.114948  | 0.109266  | 0.0878497 |
| 0.11553  | 0.10708   | 0.111451  | 0.111014  | 0.118153  | 0.112762  | 0.0983392 |
| 0.128934 | 0.128351  | 0.129516  | 0.127914  | 0.134178  | 0.127914  | 0.114948  |
| 0.11014  | 0.102855  | 0.10373   | 0.101253  | 0.115093  | 0.108829  | 0.0891608 |
| 0.133013 | 0.13447   | 0.136801  | 0.133741  | 0.132721  | 0.134907  | 0.123397  |
| 0.11757  | 0.11757   | 0.114656  | 0.117133  | 0.123689  | 0.11655   | 0.10067   |
| 0.118735 | 0.112325  | 0.116113  | 0.121503  | 0.118153  | 0.11655   | 0.0968823 |
| 0.113491 | 0.11553   | 0.115239  | 0.11451   | 0.120192  | 0.116259  | 0.0980478 |
| 0.121358 | 0.113199  | 0.113491  | 0.118881  | 0.123689  | 0.124709  | 0.109703  |
| 0.110577 | 0.106206  | 0.112325  | 0.112471  | 0.120484  | 0.114219  | 0.0977564 |

|          |           |           |           |           |           |           |
|----------|-----------|-----------|-----------|-----------|-----------|-----------|
| 0.108537 | 0.108246  | 0.110286  | 0.109266  | 0.119027  | 0.109266  | 0.0922203 |
| 0.127622 | 0.129079  | 0.132284  | 0.130682  | 0.126457  | 0.131847  | 0.118007  |
| 0.113928 | 0.101981  | 0.103147  | 0.101544  | 0.106352  | 0.100962  | 0.0891608 |
| 0.118153 | 0.101253  | 0.106206  | 0.111888  | 0.112617  | 0.111305  | 0.0939685 |
| 0.122815 | 0.105332  | 0.10708   | 0.0955711 | 0.11961   | 0.0932401 | 0.105332  |
| 0.114656 | 0.110868  | 0.113491  | 0.0897436 | 0.112908  | 0.0506993 | 0.103875  |
| 0.11961  | 0.095134  | 0.0922203 | 0.118881  | 0.112034  | 0.120047  | 0.109994  |
| 0.126166 | 0.099359  | 0.103438  | 0.130099  | 0.113636  | 0.12602   | 0.114802  |
| 0.10708  | 0.104458  | 0.106789  | 0.0979021 | 0.116987  | 0.097028  | 0.104749  |
| 0.1537   | 0.178467  | 0.174097  | 0.173951  | 0.176428  | 0.165793  | 0.168269  |
| 0.112762 | 0.0906177 | 0.0964452 | 0.0796911 | 0.110723  | 0.0814394 | 0.0891608 |
| 0.126603 | 0.0954254 | 0.0922203 | 0.120629  | 0.120775  | 0.126748  | 0.114073  |
| 0.123106 | 0.0863928 | 0.0843531 | 0.113345  | 0.11757   | 0.118298  | 0.105041  |
| 0.130828 | 0.120047  | 0.119755  | 0.10067   | 0.115967  | 0.097465  | 0.118007  |
| 0.108537 | 0.074155  | 0.0799825 | 0.101981  | 0.099796  | 0.102855  | 0.0861014 |
| 0.121649 | 0.0930944 | 0.0965909 | 0.121212  | 0.112034  | 0.121503  | 0.10708   |
| 0.119901 | 0.0735723 | 0.0823135 | 0.106061  | 0.109703  | 0.0984848 | 0.0933858 |
| 0.113345 | 0.0941142 | 0.0981935 | 0.119027  | 0.109848  | 0.107372  | 0.0973193 |
| 0.101399 | 0.101981  | 0.101981  | 0.090472  | 0.105478  | 0.0960082 | 0.0955711 |
| 0.12704  | 0.0979021 | 0.103147  | 0.121941  | 0.113928  | 0.119027  | 0.106935  |
| 0.115093 | 0.0897436 | 0.0964452 | 0.0971737 | 0.104312  | 0.0977564 | 0.0740093 |
| 0.116404 | 0.108246  | 0.110868  | 0.107517  | 0.109994  | 0.104021  | 0.114656  |
| 0.109848 | 0.0955711 | 0.101107  | 0.0805653 | 0.110431  | 0.076486  | 0.0885781 |
| 0.127768 | 0.121941  | 0.123106  | 0.126457  | 0.12602   | 0.131119  | 0.111742  |
| 0.120629 | 0.117133  | 0.118298  | 0.100087  | 0.111888  | 0.0869755 | 0.102855  |
| 0.107226 | 0.0912005 | 0.0903263 | 0.088141  | 0.10373   | 0.0692016 | 0.0914918 |
| 0.129079 | 0.122378  | 0.127331  | 0.130973  | 0.133159  | 0.13243   | 0.126748  |
| 0.111451 | 0.0980478 | 0.0977564 | 0.0914918 | 0.106498  | 0.0716783 | 0.0986305 |
| 0.117279 | 0.0726981 | 0.0712413 | 0.108392  | 0.105332  | 0.10373   | 0.0901807 |
| 0.111597 | 0.10169   | 0.104312  | 0.108829  | 0.114802  | 0.105041  | 0.0981935 |
| 0.132867 | 0.119755  | 0.119755  | 0.101836  | 0.115967  | 0.107955  | 0.116841  |
| 0        | 0.113054  | 0.111888  | 0.112325  | 0.118298  | 0.105915  | 0.107809  |
| 0.113054 | 0         | 0.0748834 | 0.0986305 | 0.106061  | 0.102127  | 0.090035  |
| 0.111888 | 0.0748834 | 0         | 0.0992133 | 0.103147  | 0.101253  | 0.0935315 |
| 0.112325 | 0.0986305 | 0.0992133 | 0         | 0.108246  | 0.0847902 | 0.0933858 |
| 0.118298 | 0.106061  | 0.103147  | 0.108246  | 0         | 0.111742  | 0.0967366 |
| 0.105915 | 0.102127  | 0.101253  | 0.0847902 | 0.111742  | 0         | 0.0948427 |
| 0.107809 | 0.090035  | 0.0935315 | 0.0933858 | 0.0967366 | 0.0948427 | 0         |
| 0.110431 | 0.0856643 | 0.0894522 | 0.0919289 | 0.0906177 | 0.0913462 | 0.0722611 |
| 0.11116  | 0.0884324 | 0.0939685 | 0.0984848 | 0.0945513 | 0.0996503 | 0.0668706 |
| 0.123397 | 0.112908  | 0.110868  | 0.114219  | 0.127185  | 0.113928  | 0.108537  |
| 0.126166 | 0.107517  | 0.110431  | 0.116113  | 0.102855  | 0.112617  | 0.0897436 |
| 0.119318 | 0.0992133 | 0.0968823 | 0.0952797 | 0.0925117 | 0.101399  | 0.0712413 |
| 0.109557 | 0.0938228 | 0.090035  | 0.0965909 | 0.092366  | 0.0986305 | 0.0751748 |

|           |           |           |           |           |           |           |
|-----------|-----------|-----------|-----------|-----------|-----------|-----------|
| 0.120338  | 0.107226  | 0.104895  | 0.11553   | 0.0847902 | 0.109703  | 0.0885781 |
| 0.112325  | 0.092803  | 0.0980478 | 0.0935315 | 0.0922203 | 0.0961538 | 0.0732809 |
| 0.121941  | 0.103293  | 0.103584  | 0.108392  | 0.119318  | 0.111014  | 0.105332  |
| 0.125728  | 0.121941  | 0.124854  | 0.1081    | 0.131265  | 0.108683  | 0.117861  |
| 0.112325  | 0.0939685 | 0.0983392 | 0.106352  | 0.0808566 | 0.0984848 | 0.0846445 |
| 0.116259  | 0.0987762 | 0.0935315 | 0.0960082 | 0.0955711 | 0.100379  | 0.0678904 |
| 0.113636  | 0.10169   | 0.0961538 | 0.0965909 | 0.0917832 | 0.103875  | 0.0740093 |
| 0.10373   | 0.0903263 | 0.0827506 | 0.0948427 | 0.0996503 | 0.099796  | 0.0728438 |
| 0.121503  | 0.107226  | 0.112179  | 0.116987  | 0.0804196 | 0.117279  | 0.0906177 |
| 0.1081    | 0.0926573 | 0.0882867 | 0.0948427 | 0.0888695 | 0.0916375 | 0.0710956 |
| 0.135052  | 0.129225  | 0.129225  | 0.125     | 0.133013  | 0.121795  | 0.120775  |
| 0.130828  | 0.123834  | 0.127622  | 0.124854  | 0.121795  | 0.123106  | 0.113345  |
| 0.128788  | 0.111305  | 0.115385  | 0.118153  | 0.120338  | 0.123106  | 0.104021  |
| 0.119901  | 0.106789  | 0.106498  | 0.104312  | 0.115822  | 0.108974  | 0.097465  |
| 0.118735  | 0.100087  | 0.102418  | 0.0961538 | 0.105624  | 0.099359  | 0.0884324 |
| 0.115093  | 0.0935315 | 0.0891608 | 0.0948427 | 0.0935315 | 0.0930944 | 0.0754662 |
| 0.110286  | 0.0945513 | 0.0971737 | 0.10169   | 0.0995047 | 0.104604  | 0.0828963 |
| 0.110286  | 0.0992133 | 0.101836  | 0.107517  | 0.112617  | 0.109557  | 0.0945513 |
| 0.0992133 | 0.103584  | 0.105332  | 0.111597  | 0.123106  | 0.115093  | 0.0989219 |
| 0.115239  | 0.120192  | 0.123689  | 0.128497  | 0.124563  | 0.129079  | 0.108246  |
| 0.111888  | 0.0789627 | 0.0810023 | 0.108537  | 0.107809  | 0.106206  | 0.0903263 |
| 0.133304  | 0.119901  | 0.117861  | 0.125     | 0.123397  | 0.125     | 0.109994  |
| 0.13141   | 0.114802  | 0.117133  | 0.103001  | 0.119172  | 0.0986305 | 0.113345  |
| 0.18211   | 0.192599  | 0.189103  | 0.19595   | 0.208042  | 0.198281  | 0.180653  |
| 0.222174  | 0.237034  | 0.23412   | 0.238054  | 0.246066  | 0.238928  | 0.232663  |
| 0.104312  | 0.105478  | 0.105186  | 0.111451  | 0.122086  | 0.109703  | 0.103147  |
| 0.107955  | 0.0995047 | 0.10067   | 0.11451   | 0.119027  | 0.107517  | 0.0919289 |
| 0.0954254 | 0.0971737 | 0.0957168 | 0.104021  | 0.111451  | 0.105186  | 0.0901807 |
| 0.100962  | 0.0960082 | 0.097465  | 0.111014  | 0.114656  | 0.111597  | 0.095134  |
| 0.12602   | 0.117279  | 0.116696  | 0.125583  | 0.119318  | 0.125874  | 0.114073  |
| 0.102127  | 0.101253  | 0.104167  | 0.113928  | 0.119318  | 0.112762  | 0.0992133 |
| 0.129371  | 0.130828  | 0.134615  | 0.144376  | 0.136655  | 0.139132  | 0.126457  |
| 0.106498  | 0.105915  | 0.104749  | 0.11451   | 0.120484  | 0.107517  | 0.0968823 |
| 0.122232  | 0.11553   | 0.117279  | 0.131119  | 0.128059  | 0.122669  | 0.11116   |
| 0.11014   | 0.115967  | 0.118881  | 0.133013  | 0.131702  | 0.126603  | 0.119464  |
| 0.114219  | 0.119172  | 0.117133  | 0.131556  | 0.132576  | 0.129225  | 0.112471  |
| 0.129953  | 0.128205  | 0.13345   | 0.130973  | 0.128205  | 0.132721  | 0.120629  |
| 0.110431  | 0.10169   | 0.102855  | 0.110286  | 0.122378  | 0.112034  | 0.0944056 |
| 0.109557  | 0.100233  | 0.100816  | 0.113491  | 0.11859   | 0.109994  | 0.0941142 |
| 0.105332  | 0.0992133 | 0.0977564 | 0.112762  | 0.119027  | 0.110431  | 0.0965909 |
| 0.0968823 | 0.100087  | 0.103293  | 0.108683  | 0.114948  | 0.106935  | 0.0925117 |
| 0.105915  | 0.100962  | 0.10067   | 0.111888  | 0.117279  | 0.111597  | 0.0960082 |
| 0.111014  | 0.103438  | 0.103438  | 0.117279  | 0.121795  | 0.111451  | 0.0932401 |
| 0.107372  | 0.116696  | 0.121649  | 0.132867  | 0.126311  | 0.126748  | 0.111742  |

|           |           |           |           |          |           |           |
|-----------|-----------|-----------|-----------|----------|-----------|-----------|
| 0.113491  | 0.121066  | 0.121066  | 0.133159  | 0.135344 | 0.129953  | 0.119901  |
| 0.109557  | 0.106643  | 0.107809  | 0.113782  | 0.118881 | 0.111451  | 0.101399  |
| 0.0986305 | 0.101836  | 0.103584  | 0.112471  | 0.117279 | 0.108392  | 0.0939685 |
| 0.114656  | 0.121941  | 0.120192  | 0.130245  | 0.133887 | 0.127914  | 0.11757   |
| 0.101253  | 0.100087  | 0.101253  | 0.1081    | 0.11757  | 0.109848  | 0.0884324 |
| 0.118298  | 0.129371  | 0.127914  | 0.142337  | 0.139277 | 0.135927  | 0.12704   |
| 0.133741  | 0.120629  | 0.122669  | 0.130099  | 0.130245 | 0.129225  | 0.119172  |
| 0.108537  | 0.107663  | 0.10708   | 0.135198  | 0.135927 | 0.130245  | 0.120775  |
| 0.101836  | 0.0948427 | 0.100379  | 0.108974  | 0.11116  | 0.101399  | 0.0895979 |
| 0.0976107 | 0.0979021 | 0.0958625 | 0.10708   | 0.112762 | 0.105332  | 0.0976107 |
| 0.113782  | 0.111451  | 0.112325  | 0.122086  | 0.123106 | 0.11655   | 0.101544  |
| 0.106352  | 0.113054  | 0.107809  | 0.12398   | 0.123543 | 0.11961   | 0.110431  |
| 0.114219  | 0.117133  | 0.115093  | 0.128934  | 0.133741 | 0.118153  | 0.113345  |
| 0.11116   | 0.104458  | 0.105332  | 0.121503  | 0.128351 | 0.108683  | 0.101253  |
| 0.112179  | 0.106061  | 0.10169   | 0.11553   | 0.120921 | 0.108246  | 0.100524  |
| 0.106935  | 0.105478  | 0.105478  | 0.120775  | 0.125    | 0.121649  | 0.105769  |
| 0.115676  | 0.118007  | 0.122378  | 0.128642  | 0.127622 | 0.12398   | 0.114219  |
| 0.113636  | 0.111597  | 0.115093  | 0.128934  | 0.127622 | 0.126894  | 0.108392  |
| 0.116113  | 0.119901  | 0.123397  | 0.133159  | 0.134178 | 0.13141   | 0.11553   |
| 0.116841  | 0.126748  | 0.13141   | 0.128642  | 0.136072 | 0.12602   | 0.118298  |
| 0.113054  | 0.103438  | 0.102855  | 0.114948  | 0.12296  | 0.105624  | 0.0938228 |
| 0.110431  | 0.117133  | 0.117133  | 0.128059  | 0.131993 | 0.123106  | 0.115676  |
| 0.103293  | 0.0939685 | 0.0962995 | 0.107517  | 0.116113 | 0.107517  | 0.0936772 |
| 0.113636  | 0.104895  | 0.106935  | 0.107663  | 0.120047 | 0.107955  | 0.0976107 |
| 0.106352  | 0.0952797 | 0.100233  | 0.108537  | 0.120338 | 0.109994  | 0.0941142 |
| 0.104458  | 0.0960082 | 0.097465  | 0.11451   | 0.116404 | 0.111305  | 0.0957168 |
| 0.101544  | 0.100087  | 0.0989219 | 0.1081    | 0.112617 | 0.103438  | 0.0901807 |
| 0.112471  | 0.117424  | 0.118007  | 0.133304  | 0.137529 | 0.127477  | 0.114219  |
| 0.112034  | 0.110577  | 0.114365  | 0.112179  | 0.126311 | 0.109266  | 0.10271   |
| 0.122232  | 0.121941  | 0.116696  | 0.132284  | 0.132139 | 0.129079  | 0.118153  |
| 0.104167  | 0.103293  | 0.10271   | 0.113928  | 0.11757  | 0.111888  | 0.0957168 |
| 0.113054  | 0.112471  | 0.114802  | 0.121358  | 0.123252 | 0.116404  | 0.101399  |
| 0.116987  | 0.115239  | 0.114365  | 0.120921  | 0.11553  | 0.122378  | 0.10708   |
| 0.124272  | 0.0989219 | 0.105915  | 0.111888  | 0.120192 | 0.116259  | 0.0989219 |
| 0.114802  | 0.104604  | 0.101399  | 0.0983392 | 0.106935 | 0.102418  | 0.0885781 |
| 0.120484  | 0.109994  | 0.109994  | 0.118298  | 0.119901 | 0.118881  | 0.103293  |
| 0.12704   | 0.107226  | 0.110723  | 0.113491  | 0.121212 | 0.115822  | 0.10169   |
| 0.113928  | 0.10373   | 0.101981  | 0.100379  | 0.107226 | 0.0980478 | 0.0976107 |
| 0.136655  | 0.113345  | 0.11859   | 0.124563  | 0.11014  | 0.124272  | 0.109266  |
| 0.139423  | 0.130973  | 0.126603  | 0.131119  | 0.123106 | 0.133741  | 0.114656  |
| 0.11961   | 0.0942599 | 0.0893065 | 0.0996503 | 0.105915 | 0.103438  | 0.0828963 |
| 0.125874  | 0.10373   | 0.105478  | 0.124563  | 0.118881 | 0.130973  | 0.113928  |
| 0.127768  | 0.108246  | 0.11116   | 0.112179  | 0.102127 | 0.117133  | 0.099796  |
| 0.122232  | 0.0992133 | 0.0948427 | 0.123834  | 0.112617 | 0.127622  | 0.114073  |

|          |           |           |          |           |          |           |
|----------|-----------|-----------|----------|-----------|----------|-----------|
| 0.114656 | 0.0957168 | 0.0942599 | 0.115967 | 0.105041  | 0.11451  | 0.102127  |
| 0.127477 | 0.108829  | 0.102127  | 0.115676 | 0.104167  | 0.115385 | 0.0989219 |
| 0.121503 | 0.108974  | 0.106935  | 0.111742 | 0.105769  | 0.114656 | 0.101107  |
| 0.124272 | 0.100379  | 0.101836  | 0.128205 | 0.113199  | 0.126748 | 0.109703  |
| 0.13243  | 0.113199  | 0.108537  | 0.129079 | 0.118444  | 0.131993 | 0.118444  |
| 0.129516 | 0.106206  | 0.108829  | 0.112471 | 0.105624  | 0.120629 | 0.100962  |
| 0.113782 | 0.0939685 | 0.0939685 | 0.112179 | 0.104458  | 0.11014  | 0.0939685 |
| 0.126748 | 0.133159  | 0.131993  | 0.13039  | 0.139277  | 0.125146 | 0.122669  |
| 0.137092 | 0.113199  | 0.114948  | 0.11859  | 0.114073  | 0.124126 | 0.110286  |
| 0.111742 | 0.0895979 | 0.0893065 | 0.105186 | 0.111742  | 0.105186 | 0.0922203 |
| 0.204254 | 0.220862  | 0.215326  | 0.217803 | 0.227273  | 0.221008 | 0.211538  |
| 0.11655  | 0.0976107 | 0.0920746 | 0.118735 | 0.11655   | 0.120775 | 0.106352  |
| 0.122669 | 0.0976107 | 0.100233  | 0.10708  | 0.1081    | 0.111742 | 0.090035  |
| 0.129808 | 0.111451  | 0.101544  | 0.130828 | 0.122815  | 0.129079 | 0.116404  |
| 0.123397 | 0.0995047 | 0.101544  | 0.109848 | 0.107955  | 0.111888 | 0.0965909 |
| 0.136218 | 0.118153  | 0.116404  | 0.121212 | 0.106498  | 0.124126 | 0.108537  |
| 0.118735 | 0.0922203 | 0.0960082 | 0.117133 | 0.114365  | 0.122378 | 0.104749  |
| 0.119755 | 0.0990676 | 0.0941142 | 0.114948 | 0.113054  | 0.112617 | 0.101981  |
| 0.126748 | 0.109848  | 0.113636  | 0.119901 | 0.10373   | 0.119901 | 0.100233  |
| 0.119318 | 0.0971737 | 0.0971737 | 0.122669 | 0.113782  | 0.126166 | 0.110286  |
| 0.12704  | 0.0979021 | 0.102273  | 0.128351 | 0.115093  | 0.126311 | 0.109848  |
| 0.122815 | 0.103293  | 0.107663  | 0.125874 | 0.114073  | 0.120921 | 0.113199  |
| 0.124854 | 0.0989219 | 0.103293  | 0.122378 | 0.116404  | 0.124417 | 0.105332  |
| 0.11553  | 0.106206  | 0.105915  | 0.110723 | 0.110286  | 0.108392 | 0.0890152 |
| 0.118444 | 0.0893065 | 0.0930944 | 0.111014 | 0.11116   | 0.122378 | 0.102127  |
| 0.12704  | 0.106352  | 0.105186  | 0.126311 | 0.119172  | 0.133013 | 0.115385  |
| 0.108829 | 0.0910548 | 0.0893065 | 0.111888 | 0.106206  | 0.117716 | 0.101253  |
| 0.128934 | 0.127768  | 0.132139  | 0.130245 | 0.132139  | 0.13345  | 0.116113  |
| 0.130828 | 0.129953  | 0.129371  | 0.133887 | 0.136072  | 0.125728 | 0.119172  |
| 0.111888 | 0.11655   | 0.113928  | 0.116113 | 0.11451   | 0.118735 | 0.10169   |
| 0.129371 | 0.109848  | 0.116841  | 0.116696 | 0.112179  | 0.125437 | 0.102564  |
| 0.119901 | 0.104458  | 0.103584  | 0.117133 | 0.121358  | 0.120047 | 0.104458  |
| 0.13141  | 0.116841  | 0.123252  | 0.123689 | 0.124709  | 0.122523 | 0.112471  |
| 0.131702 | 0.121795  | 0.120921  | 0.121941 | 0.129079  | 0.117279 | 0.114219  |
| 0.133741 | 0.129371  | 0.127622  | 0.128934 | 0.139569  | 0.13039  | 0.125583  |
| 0.117279 | 0.0977564 | 0.103875  | 0.105186 | 0.109994  | 0.106935 | 0.0817308 |
| 0.132284 | 0.116841  | 0.125291  | 0.128642 | 0.119464  | 0.131847 | 0.115967  |
| 0.128351 | 0.134761  | 0.133887  | 0.136364 | 0.141171  | 0.135781 | 0.129808  |
| 0.11757  | 0.101544  | 0.103293  | 0.106935 | 0.0831876 | 0.101399 | 0.0831876 |
| 0.11757  | 0.115822  | 0.119027  | 0.122086 | 0.122815  | 0.118007 | 0.104749  |
| 0.135781 | 0.139277  | 0.135781  | 0.137675 | 0.137821  | 0.133304 | 0.130828  |
| 0.121795 | 0.117716  | 0.118007  | 0.126311 | 0.128497  | 0.12602  | 0.112471  |
| 0.134178 | 0.128059  | 0.126603  | 0.139569 | 0.124854  | 0.137238 | 0.123397  |
| 0.126457 | 0.12296   | 0.117716  | 0.127477 | 0.112762  | 0.124854 | 0.11451   |

|          |           |           |          |           |          |           |
|----------|-----------|-----------|----------|-----------|----------|-----------|
| 0.123689 | 0.0872669 | 0.081148  | 0.110723 | 0.11116   | 0.109266 | 0.107372  |
| 0.113054 | 0.123252  | 0.117133  | 0.125728 | 0.124709  | 0.129516 | 0.118007  |
| 0.115239 | 0.103001  | 0.103001  | 0.112471 | 0.0971737 | 0.116841 | 0.0954254 |
| 0.125    | 0.0920746 | 0.097028  | 0.114365 | 0.111597  | 0.118153 | 0.106061  |
| 0.121503 | 0.0990676 | 0.0973193 | 0.121941 | 0.115676  | 0.125437 | 0.108974  |
| 0.125291 | 0.0984848 | 0.0891608 | 0.122815 | 0.121503  | 0.118444 | 0.114219  |
| 0.124709 | 0.100524  | 0.097028  | 0.126894 | 0.11859   | 0.117279 | 0.116259  |
| 0.116259 | 0.0920746 | 0.0990676 | 0.113199 | 0.121212  | 0.116404 | 0.107517  |
| 0.124417 | 0.117716  | 0.109557  | 0.129225 | 0.120921  | 0.132721 | 0.126457  |
| 0.120338 | 0.109557  | 0.111888  | 0.115822 | 0.103147  | 0.112325 | 0.097028  |
| 0.120338 | 0.0973193 | 0.0996503 | 0.10708  | 0.109848  | 0.109703 | 0.0964452 |
| 0.128788 | 0.112179  | 0.115967  | 0.115822 | 0.117133  | 0.114948 | 0.107226  |
| 0.116841 | 0.105186  | 0.0987762 | 0.102127 | 0.0920746 | 0.103293 | 0.0856643 |
| 0.136218 | 0.123397  | 0.125437  | 0.123543 | 0.136509  | 0.134907 | 0.12398   |
| 0.147873 | 0.146999  | 0.142045  | 0.137821 | 0.133887  | 0.13986  | 0.138258  |
| 0.115822 | 0.11553   | 0.115239  | 0.126166 | 0.132721  | 0.121503 | 0.113199  |
| 0.108974 | 0.112179  | 0.111305  | 0.11961  | 0.12704   | 0.118153 | 0.104604  |
| 0.129516 | 0.108246  | 0.103001  | 0.128788 | 0.13039   | 0.129371 | 0.124272  |
| 0.128205 | 0.104312  | 0.103147  | 0.128351 | 0.118298  | 0.133596 | 0.116841  |
| 0.120047 | 0.119172  | 0.121212  | 0.123689 | 0.128788  | 0.121649 | 0.107809  |
| 0.131702 | 0.102564  | 0.106061  | 0.133013 | 0.123834  | 0.131265 | 0.122669  |
| 0.117716 | 0.126748  | 0.126166  | 0.130099 | 0.122669  | 0.13243  | 0.117716  |
| 0.112617 | 0.11757   | 0.116696  | 0.118298 | 0.112908  | 0.122669 | 0.099796  |
| 0.144085 | 0.146125  | 0.14729   | 0.151224 | 0.160985  | 0.144231 | 0.147873  |
| 0.116113 | 0.118735  | 0.121358  | 0.121503 | 0.11757   | 0.120921 | 0.0989219 |
| 0.137092 | 0.127768  | 0.128934  | 0.132576 | 0.124854  | 0.13345  | 0.123397  |
| 0.11451  | 0.101399  | 0.10169   | 0.110286 | 0.110431  | 0.111742 | 0.0999417 |
| 0.130828 | 0.109848  | 0.107517  | 0.13039  | 0.130536  | 0.124854 | 0.124417  |
| 0.117133 | 0.0976107 | 0.0917832 | 0.11961  | 0.112471  | 0.119027 | 0.107226  |
| 0.116404 | 0.127185  | 0.136509  | 0.124126 | 0.144376  | 0.124417 | 0.129516  |
| 0.143939 | 0.131993  | 0.129662  | 0.144085 | 0.146562  | 0.145833 | 0.136364  |
| 0.129516 | 0.117861  | 0.121941  | 0.124709 | 0.133596  | 0.126748 | 0.113491  |
| 0.125874 | 0.130536  | 0.133159  | 0.135927 | 0.146853  | 0.137966 | 0.125874  |
| 0.122815 | 0.141171  | 0.142337  | 0.141608 | 0.150204  | 0.147727 | 0.131265  |
| 0.128059 | 0.138258  | 0.136218  | 0.137238 | 0.153118  | 0.143065 | 0.13243   |
| 0.115676 | 0.1081    | 0.1081    | 0.111451 | 0.114802  | 0.106789 | 0.100816  |
| 0.141171 | 0.135344  | 0.131556  | 0.136072 | 0.146125  | 0.134907 | 0.130099  |
| 0.118444 | 0.105915  | 0.105624  | 0.11014  | 0.118153  | 0.112762 | 0.0980478 |
| 0.109266 | 0.101399  | 0.102273  | 0.114365 | 0.121795  | 0.115822 | 0.097028  |
| 0.122523 | 0.115822  | 0.114073  | 0.116259 | 0.110868  | 0.115093 | 0.105041  |
| 0.124272 | 0.109994  | 0.11553   | 0.11859  | 0.131265  | 0.122086 | 0.109703  |
| 0.120338 | 0.109266  | 0.109557  | 0.10912  | 0.122378  | 0.114948 | 0.0952797 |
| 0.11014  | 0.105186  | 0.109266  | 0.114365 | 0.117716  | 0.11757  | 0.0976107 |
| 0.123834 | 0.113345  | 0.114219  | 0.120775 | 0.129953  | 0.119027 | 0.108392  |



|          |           |           |           |           |           |           |
|----------|-----------|-----------|-----------|-----------|-----------|-----------|
| 0.115822 | 0.113199  | 0.111742  | 0.11859   | 0.120484  | 0.120338  | 0.108829  |
| 0.112034 | 0.103875  | 0.102127  | 0.100816  | 0.103293  | 0.103147  | 0.0849359 |
| 0.126894 | 0.114656  | 0.115239  | 0.122378  | 0.13447   | 0.124417  | 0.114073  |
| 0.124126 | 0.11014   | 0.115385  | 0.118735  | 0.125291  | 0.123397  | 0.107809  |
| 0.113636 | 0.112471  | 0.112471  | 0.118735  | 0.120047  | 0.118153  | 0.102564  |
| 0.199883 | 0.215909  | 0.21183   | 0.213141  | 0.225233  | 0.216346  | 0.206585  |
| 0.145105 | 0.134615  | 0.13986   | 0.143502  | 0.143939  | 0.14729   | 0.129953  |
| 0.134761 | 0.121649  | 0.121358  | 0.13141   | 0.129808  | 0.125874  | 0.118735  |
| 0.126166 | 0.120338  | 0.118881  | 0.121358  | 0.134907  | 0.116696  | 0.115385  |
| 0.194347 | 0.210082  | 0.208042  | 0.210519  | 0.223485  | 0.21285   | 0.206876  |
| 0.100233 | 0.115967  | 0.115093  | 0.110868  | 0.126748  | 0.110577  | 0.1081    |
| 0.122815 | 0.112617  | 0.112325  | 0.121212  | 0.125437  | 0.116259  | 0.104458  |
| 0.13039  | 0.119901  | 0.121941  | 0.125     | 0.13039   | 0.117133  | 0.109994  |
| 0.123252 | 0.113928  | 0.111305  | 0.120192  | 0.118298  | 0.121066  | 0.106935  |
| 0.230769 | 0.25      | 0.245629  | 0.248397  | 0.257284  | 0.250146  | 0.245921  |
| 0.121066 | 0.118444  | 0.11961   | 0.104021  | 0.128642  | 0.10373   | 0.111451  |
| 0.11116  | 0.110286  | 0.104458  | 0.113345  | 0.116987  | 0.111888  | 0.0971737 |
| 0.129225 | 0.116404  | 0.11553   | 0.122669  | 0.13039   | 0.124709  | 0.11116   |
| 0.122815 | 0.116404  | 0.114656  | 0.119464  | 0.13039   | 0.123252  | 0.10912   |
| 0.113199 | 0.118735  | 0.121066  | 0.105769  | 0.123689  | 0.108392  | 0.116404  |
| 0.104458 | 0.121066  | 0.121941  | 0.125583  | 0.13243   | 0.129079  | 0.115822  |
| 0.11553  | 0.110577  | 0.10912   | 0.115385  | 0.118735  | 0.116259  | 0.0989219 |
| 0.126748 | 0.111014  | 0.114219  | 0.118153  | 0.129953  | 0.121941  | 0.106352  |
| 0.130099 | 0.122232  | 0.120484  | 0.125291  | 0.141463  | 0.123543  | 0.119901  |
| 0.119901 | 0.105915  | 0.106789  | 0.115385  | 0.112908  | 0.120338  | 0.0980478 |
| 0.121212 | 0.109266  | 0.112179  | 0.114656  | 0.124417  | 0.117861  | 0.104604  |
| 0.111742 | 0.0995047 | 0.10067   | 0.105769  | 0.0849359 | 0.107517  | 0.0890152 |
| 0.144231 | 0.135198  | 0.130245  | 0.144376  | 0.142483  | 0.144085  | 0.136072  |
| 0.122669 | 0.122086  | 0.123543  | 0.105915  | 0.13141   | 0.103001  | 0.115093  |
| 0.123543 | 0.118007  | 0.118007  | 0.124563  | 0.130536  | 0.120775  | 0.109557  |
| 0.173368 | 0.188228  | 0.182692  | 0.188374  | 0.202797  | 0.190997  | 0.180944  |
| 0.191142 | 0.202506  | 0.200175  | 0.205565  | 0.217075  | 0.209062  | 0.197261  |
| 0.119755 | 0.112471  | 0.113345  | 0.119318  | 0.118881  | 0.119027  | 0.107226  |
| 0.115967 | 0.107226  | 0.105186  | 0.115239  | 0.113345  | 0.115239  | 0.099359  |
| 0.136364 | 0.129371  | 0.128788  | 0.134761  | 0.134615  | 0.134761  | 0.124709  |
| 0.109266 | 0.107517  | 0.105769  | 0.113491  | 0.116841  | 0.110286  | 0.101399  |
| 0.121358 | 0.120192  | 0.124854  | 0.105769  | 0.128934  | 0.104604  | 0.113199  |
| 0.125583 | 0.115385  | 0.116259  | 0.129808  | 0.138695  | 0.12602   | 0.119172  |
| 0.210956 | 0.226107  | 0.220862  | 0.222756  | 0.235431  | 0.226544  | 0.216783  |
| 0.126166 | 0.107517  | 0.108683  | 0.116696  | 0.124709  | 0.114365  | 0.104895  |
| 0.17701  | 0.206731  | 0.204983  | 0.212413  | 0.214015  | 0.210082  | 0.201195  |
| 0.110431 | 0.0955711 | 0.0981935 | 0.0965909 | 0.112179  | 0.0977564 | 0.0871212 |
| 0.120775 | 0.107955  | 0.10912   | 0.106061  | 0.125437  | 0.11014   | 0.0977564 |
| 0.109848 | 0.112179  | 0.11014   | 0.114656  | 0.123543  | 0.116987  | 0.108683  |

|          |           |           |           |          |           |           |
|----------|-----------|-----------|-----------|----------|-----------|-----------|
| 0.11014  | 0.10373   | 0.10373   | 0.114656  | 0.114219 | 0.112908  | 0.099359  |
| 0.190997 | 0.208479  | 0.202943  | 0.208916  | 0.219551 | 0.210373  | 0.197698  |
| 0.132139 | 0.126603  | 0.130099  | 0.134615  | 0.139132 | 0.136072  | 0.120775  |
| 0.119901 | 0.104167  | 0.112034  | 0.108974  | 0.124272 | 0.101107  | 0.101253  |
| 0.132721 | 0.118153  | 0.123397  | 0.126748  | 0.135052 | 0.127914  | 0.116987  |
| 0.123397 | 0.115822  | 0.120484  | 0.126166  | 0.128059 | 0.124417  | 0.113199  |
| 0.119027 | 0.105332  | 0.107372  | 0.115093  | 0.116696 | 0.118007  | 0.100379  |
| 0.112762 | 0.0984848 | 0.0984848 | 0.103001  | 0.113345 | 0.10067   | 0.0906177 |
| 0.108974 | 0.108683  | 0.110723  | 0.121066  | 0.122086 | 0.117279  | 0.102564  |
| 0.127331 | 0.115093  | 0.11451   | 0.122523  | 0.130245 | 0.122232  | 0.108683  |
| 0.118881 | 0.105478  | 0.110431  | 0.116113  | 0.126748 | 0.118153  | 0.103147  |
| 0.116987 | 0.106206  | 0.112908  | 0.112179  | 0.12602  | 0.106352  | 0.103001  |
| 0.174242 | 0.187063  | 0.183566  | 0.187209  | 0.202506 | 0.193328  | 0.178613  |
| 0.129225 | 0.117861  | 0.116404  | 0.124417  | 0.133596 | 0.127331  | 0.110868  |
| 0.131702 | 0.11859   | 0.110431  | 0.126603  | 0.134907 | 0.129516  | 0.118881  |
| 0.123397 | 0.109411  | 0.109703  | 0.117424  | 0.132139 | 0.120921  | 0.109411  |
| 0.112179 | 0.115676  | 0.118298  | 0.104167  | 0.130536 | 0.104167  | 0.111305  |
| 0.128497 | 0.113928  | 0.11859   | 0.122815  | 0.131993 | 0.126603  | 0.111014  |
| 0.11655  | 0.100233  | 0.10373   | 0.10912   | 0.113054 | 0.101836  | 0.0926573 |
| 0.10912  | 0.104749  | 0.11116   | 0.109848  | 0.121358 | 0.105186  | 0.101253  |
| 0.114656 | 0.113782  | 0.114656  | 0.119172  | 0.117861 | 0.117424  | 0.103001  |
| 0.129079 | 0.113636  | 0.106643  | 0.122815  | 0.131702 | 0.12398   | 0.11655   |
| 0.122378 | 0.107226  | 0.106643  | 0.116696  | 0.129953 | 0.121066  | 0.105769  |
| 0.120484 | 0.112617  | 0.111451  | 0.116259  | 0.121066 | 0.120338  | 0.103001  |
| 0.134324 | 0.120629  | 0.120629  | 0.124563  | 0.132867 | 0.116987  | 0.109557  |
| 0.138258 | 0.130973  | 0.135344  | 0.137529  | 0.136218 | 0.13141   | 0.123689  |
| 0.115239 | 0.110286  | 0.110577  | 0.0990676 | 0.122523 | 0.0955711 | 0.101544  |
| 0.142191 | 0.131119  | 0.136072  | 0.141171  | 0.1419   | 0.14292   | 0.126748  |
| 0.118007 | 0.106643  | 0.108392  | 0.114365  | 0.113345 | 0.119318  | 0.0999417 |
| 0.11859  | 0.100233  | 0.104021  | 0.11961   | 0.128788 | 0.11553   | 0.105769  |
| 0.114948 | 0.113199  | 0.118444  | 0.124709  | 0.130099 | 0.123543  | 0.110868  |
| 0.114948 | 0.114073  | 0.11116   | 0.122669  | 0.125728 | 0.121795  | 0.106789  |
| 0.168852 | 0.1875    | 0.18546   | 0.186772  | 0.201486 | 0.192308  | 0.179341  |
| 0.114802 | 0.100233  | 0.109266  | 0.108246  | 0.121503 | 0.100379  | 0.0949883 |
| 0.11014  | 0.0987762 | 0.10169   | 0.104458  | 0.120629 | 0.10912   | 0.0952797 |
| 0.122086 | 0.117716  | 0.117716  | 0.120484  | 0.128205 | 0.119318  | 0.11014   |
| 0.162296 | 0.176573  | 0.176573  | 0.182838  | 0.192308 | 0.183129  | 0.17162   |
| 0.13039  | 0.129225  | 0.13243   | 0.117424  | 0.137675 | 0.113928  | 0.120484  |
| 0.137383 | 0.135927  | 0.140006  | 0.122378  | 0.142628 | 0.120921  | 0.126894  |
| 0.148019 | 0.134324  | 0.131702  | 0.144959  | 0.146853 | 0.144376  | 0.13986   |
| 0.112179 | 0.106061  | 0.111014  | 0.0986305 | 0.118007 | 0.0960082 | 0.101107  |
| 0.130682 | 0.117279  | 0.121941  | 0.123834  | 0.133887 | 0.125583  | 0.110577  |
| 0.197261 | 0.211538  | 0.207168  | 0.210519  | 0.223193 | 0.212267  | 0.206294  |
| 0.125583 | 0.120338  | 0.125291  | 0.126603  | 0.135198 | 0.12602   | 0.112471  |

|          |           |           |           |          |           |           |
|----------|-----------|-----------|-----------|----------|-----------|-----------|
| 0.128642 | 0.120484  | 0.123397  | 0.128205  | 0.134761 | 0.130245  | 0.116404  |
| 0.11757  | 0.104167  | 0.112325  | 0.111305  | 0.12398  | 0.106061  | 0.0983392 |
| 0.146999 | 0.165938  | 0.168561  | 0.172203  | 0.179924 | 0.173368  | 0.163607  |
| 0.118153 | 0.107955  | 0.104749  | 0.113345  | 0.125146 | 0.111888  | 0.099796  |
| 0.148601 | 0.142191  | 0.144231  | 0.148164  | 0.147436 | 0.146707  | 0.142191  |
| 0.115385 | 0.114219  | 0.113345  | 0.112617  | 0.111305 | 0.113491  | 0.0999417 |
| 0.178613 | 0.190268  | 0.185897  | 0.187209  | 0.199883 | 0.192162  | 0.176282  |
| 0.119464 | 0.115385  | 0.117716  | 0.10067   | 0.120921 | 0.0962995 | 0.107809  |
| 0.113345 | 0.0981935 | 0.0996503 | 0.10271   | 0.114802 | 0.108537  | 0.087704  |
| 0.120484 | 0.100379  | 0.101836  | 0.115676  | 0.129808 | 0.113928  | 0.102418  |
| 0.129953 | 0.113636  | 0.112179  | 0.118153  | 0.129662 | 0.118153  | 0.107809  |
| 0.123543 | 0.115093  | 0.111888  | 0.112325  | 0.123834 | 0.113782  | 0.105186  |
| 0.128205 | 0.109848  | 0.108683  | 0.123106  | 0.126748 | 0.121649  | 0.105769  |
| 0.11757  | 0.104458  | 0.103875  | 0.112762  | 0.114656 | 0.115093  | 0.0983392 |
| 0.177448 | 0.187354  | 0.182692  | 0.185169  | 0.201049 | 0.18954   | 0.18007   |
| 0.124854 | 0.119027  | 0.11553   | 0.124126  | 0.131556 | 0.117424  | 0.112325  |
| 0.116841 | 0.106643  | 0.108683  | 0.116987  | 0.123543 | 0.11757   | 0.0999417 |
| 0.198572 | 0.213432  | 0.207896  | 0.21183   | 0.221008 | 0.210664  | 0.203234  |
| 0.126311 | 0.11553   | 0.113491  | 0.121795  | 0.132721 | 0.12296   | 0.112325  |
| 0.117424 | 0.107226  | 0.107809  | 0.113782  | 0.115385 | 0.116113  | 0.100816  |
| 0.115676 | 0.10373   | 0.101107  | 0.110577  | 0.111888 | 0.113782  | 0.0935315 |
| 0.134761 | 0.131265  | 0.135635  | 0.138695  | 0.137383 | 0.138112  | 0.128059  |
| 0.176719 | 0.188083  | 0.184295  | 0.18648   | 0.204108 | 0.190559  | 0.180798  |
| 0.116841 | 0.110431  | 0.107226  | 0.114365  | 0.118298 | 0.114073  | 0.0981935 |
| 0.136655 | 0.129371  | 0.129953  | 0.131265  | 0.134324 | 0.126311  | 0.118881  |
| 0.117424 | 0.103147  | 0.104895  | 0.111742  | 0.111305 | 0.114073  | 0.0973193 |
| 0.118298 | 0.10373   | 0.102273  | 0.106789  | 0.113345 | 0.113491  | 0.094697  |
| 0.114365 | 0.101836  | 0.103584  | 0.111014  | 0.114365 | 0.114219  | 0.0942599 |
| 0.126457 | 0.109848  | 0.113928  | 0.117279  | 0.12704  | 0.119318  | 0.108683  |
| 0.11116  | 0.10271   | 0.104749  | 0.0979021 | 0.10708  | 0.100233  | 0.0843531 |
| 0.120775 | 0.119318  | 0.118153  | 0.101107  | 0.128351 | 0.100233  | 0.110577  |
| 0.127768 | 0.115239  | 0.119027  | 0.128788  | 0.135052 | 0.13141   | 0.122523  |
| 0.120484 | 0.112325  | 0.114656  | 0.101399  | 0.126311 | 0.097028  | 0.105624  |
| 0.128205 | 0.121212  | 0.126457  | 0.131265  | 0.131993 | 0.128059  | 0.117133  |
| 0.182838 | 0.192745  | 0.191871  | 0.191142  | 0.206148 | 0.195804  | 0.184878  |
| 0.126457 | 0.116841  | 0.118298  | 0.121066  | 0.127331 | 0.112617  | 0.108683  |
| 0.133596 | 0.123689  | 0.126603  | 0.132576  | 0.137966 | 0.134615  | 0.11961   |
| 0.117424 | 0.0987762 | 0.102855  | 0.108829  | 0.112762 | 0.112617  | 0.092366  |
| 0.109994 | 0.101253  | 0.10067   | 0.0976107 | 0.101544 | 0.0973193 | 0.0823135 |
| 0.105332 | 0.109703  | 0.108829  | 0.108392  | 0.122815 | 0.1081    | 0.105915  |
| 0.11451  | 0.111305  | 0.110431  | 0.116404  | 0.119755 | 0.116404  | 0.100816  |
| 0.142191 | 0.118881  | 0.124126  | 0.125437  | 0.137238 | 0.131265  | 0.115385  |
| 0.128934 | 0.10912   | 0.103875  | 0.122086  | 0.13243  | 0.125     | 0.112034  |
| 0.101253 | 0.106498  | 0.10067   | 0.103438  | 0.107663 | 0.107226  | 0.0901807 |

|           |           |           |           |           |           |           |
|-----------|-----------|-----------|-----------|-----------|-----------|-----------|
| 0.0949883 | 0.103147  | 0.10169   | 0.101544  | 0.106061  | 0.105915  | 0.0865385 |
| 0.111451  | 0.103293  | 0.100962  | 0.104021  | 0.110577  | 0.108974  | 0.0901807 |
| 0.110431  | 0.0964452 | 0.103438  | 0.100962  | 0.112762  | 0.0992133 | 0.0914918 |
| 0.124854  | 0.125437  | 0.128351  | 0.109557  | 0.130973  | 0.1081    | 0.116696  |
| 0.114802  | 0.106643  | 0.110431  | 0.115822  | 0.118298  | 0.114073  | 0.0979021 |
| 0.122815  | 0.105041  | 0.113491  | 0.112471  | 0.124272  | 0.118881  | 0.103293  |
| 0.113199  | 0.106789  | 0.101544  | 0.11014   | 0.114656  | 0.109848  | 0.0957168 |
| 0.117424  | 0.103147  | 0.104021  | 0.110868  | 0.114219  | 0.115239  | 0.0938228 |
| 0.11553   | 0.100379  | 0.107663  | 0.108392  | 0.121649  | 0.100816  | 0.0933858 |
| 0.117861  | 0.105332  | 0.104458  | 0.114802  | 0.116404  | 0.116259  | 0.10067   |
| 0.123689  | 0.110868  | 0.112325  | 0.11655   | 0.122232  | 0.108392  | 0.101253  |
| 0.128059  | 0.109411  | 0.103875  | 0.116259  | 0.127768  | 0.121212  | 0.109411  |
| 0.120775  | 0.109411  | 0.109703  | 0.114219  | 0.124272  | 0.11451   | 0.101836  |
| 0.112471  | 0.106061  | 0.104604  | 0.100379  | 0.107226  | 0.105624  | 0.087704  |
| 0.115822  | 0.104458  | 0.105041  | 0.112179  | 0.114948  | 0.118298  | 0.0962995 |
| 0.114656  | 0.104749  | 0.108246  | 0.123834  | 0.135927  | 0.119172  | 0.112325  |
| 0.123543  | 0.111597  | 0.112762  | 0.120192  | 0.13141   | 0.119027  | 0.103438  |
| 0.117861  | 0.0913462 | 0.0954254 | 0.106643  | 0.105041  | 0.106352  | 0.090472  |
| 0.120192  | 0.10271   | 0.105041  | 0.111597  | 0.109703  | 0.11451   | 0.0960082 |
| 0.125874  | 0.115385  | 0.116841  | 0.121358  | 0.128497  | 0.126311  | 0.108974  |
| 0.112179  | 0.0990676 | 0.099359  | 0.100379  | 0.115967  | 0.0986305 | 0.0912005 |
| 0.128205  | 0.111888  | 0.115676  | 0.119901  | 0.128788  | 0.120775  | 0.109848  |
| 0.124417  | 0.108392  | 0.106061  | 0.113199  | 0.127622  | 0.111451  | 0.100524  |
| 0.115385  | 0.109848  | 0.105478  | 0.103875  | 0.110431  | 0.105041  | 0.0891608 |
| 0.120629  | 0.106643  | 0.105769  | 0.110577  | 0.124417  | 0.106789  | 0.0979021 |
| 0.115239  | 0.0983392 | 0.104749  | 0.103147  | 0.121941  | 0.101107  | 0.0942599 |
| 0.129079  | 0.115385  | 0.118881  | 0.124854  | 0.13345   | 0.12398   | 0.113345  |
| 0.129079  | 0.11655   | 0.117133  | 0.124272  | 0.133741  | 0.127477  | 0.114219  |
| 0.124854  | 0.103875  | 0.110577  | 0.109557  | 0.123689  | 0.115967  | 0.099796  |
| 0.179633  | 0.192162  | 0.189831  | 0.192016  | 0.204983  | 0.194056  | 0.184878  |
| 0.149621  | 0.160402  | 0.160693  | 0.166375  | 0.175845  | 0.170163  | 0.158362  |
| 0.119027  | 0.114656  | 0.118153  | 0.0999417 | 0.126603  | 0.0961538 | 0.106498  |
| 0.11014   | 0.111305  | 0.110431  | 0.117279  | 0.124126  | 0.123106  | 0.106061  |
| 0.140734  | 0.140443  | 0.145105  | 0.124854  | 0.141317  | 0.123689  | 0.13345   |
| 0.13243   | 0.120775  | 0.122815  | 0.126748  | 0.135927  | 0.125583  | 0.121066  |
| 0.114802  | 0.116259  | 0.115676  | 0.120484  | 0.127622  | 0.122232  | 0.113054  |
| 0.115239  | 0.107372  | 0.110286  | 0.117424  | 0.124854  | 0.118007  | 0.102418  |
| 0.109411  | 0.0989219 | 0.0992133 | 0.104895  | 0.0925117 | 0.106061  | 0.0866841 |
| 0.120775  | 0.113491  | 0.114948  | 0.124417  | 0.131556  | 0.124126  | 0.108246  |
| 0.189103  | 0.199883  | 0.197261  | 0.200321  | 0.212995  | 0.201486  | 0.192308  |
| 0.116696  | 0.113782  | 0.113491  | 0.120047  | 0.119901  | 0.116841  | 0.101253  |
| 0.112179  | 0.110723  | 0.112762  | 0.117279  | 0.128205  | 0.120484  | 0.108683  |
| 0.113345  | 0.100816  | 0.104604  | 0.110577  | 0.11014   | 0.112617  | 0.0955711 |
| 0.119901  | 0.112034  | 0.113782  | 0.120338  | 0.128642  | 0.119755  | 0.106498  |

|          |           |           |           |          |          |           |
|----------|-----------|-----------|-----------|----------|----------|-----------|
| 0.161422 | 0.18007   | 0.180653  | 0.183421  | 0.197261 | 0.1875   | 0.176282  |
| 0.229604 | 0.247669  | 0.242424  | 0.247815  | 0.256119 | 0.245192 | 0.240093  |
| 0.125874 | 0.111014  | 0.108392  | 0.120775  | 0.134324 | 0.123689 | 0.113928  |
| 0.124417 | 0.112762  | 0.113928  | 0.120484  | 0.132576 | 0.123106 | 0.104604  |
| 0.119172 | 0.116259  | 0.117133  | 0.0995047 | 0.125291 | 0.10067  | 0.107517  |
| 0.120484 | 0.10708   | 0.111451  | 0.110431  | 0.122815 | 0.111888 | 0.0995047 |
| 0.111597 | 0.103147  | 0.104021  | 0.108537  | 0.114219 | 0.110577 | 0.0949883 |
| 0.121066 | 0.109994  | 0.106789  | 0.11655   | 0.128642 | 0.111014 | 0.103875  |
| 0.113054 | 0.107517  | 0.111305  | 0.116113  | 0.123252 | 0.117861 | 0.101399  |
| 0.111888 | 0.105478  | 0.106061  | 0.113491  | 0.115967 | 0.112325 | 0.0979021 |
| 0.110868 | 0.106206  | 0.11116   | 0.115093  | 0.11961  | 0.11859  | 0.103293  |
| 0.125291 | 0.101981  | 0.0987762 | 0.112325  | 0.110431 | 0.111451 | 0.0944056 |
| 0.11757  | 0.108246  | 0.106206  | 0.10373   | 0.10912  | 0.105186 | 0.0878497 |
| 0.126457 | 0.112762  | 0.105478  | 0.121358  | 0.130245 | 0.124272 | 0.117133  |
| 0.128059 | 0.112617  | 0.118153  | 0.120629  | 0.129225 | 0.125291 | 0.108246  |
| 0.111742 | 0.0890152 | 0.0890152 | 0.107809  | 0.118153 | 0.108392 | 0.0933858 |
| 0.120775 | 0.0878497 | 0.0546329 | 0.110431  | 0.102127 | 0.116841 | 0.105915  |
| 0.129225 | 0.126894  | 0.123106  | 0.129953  | 0.133304 | 0.125583 | 0.116696  |
| 0.116259 | 0.102273  | 0.103147  | 0.110577  | 0.112471 | 0.114073 | 0.0944056 |
| 0.100379 | 0.109994  | 0.110577  | 0.110431  | 0.119318 | 0.112762 | 0.103584  |
| 0.126894 | 0.118444  | 0.11757   | 0.127331  | 0.120484 | 0.128497 | 0.114656  |
| 0.189394 | 0.207751  | 0.206002  | 0.207314  | 0.215326 | 0.209936 | 0.198718  |
| 0.120192 | 0.097465  | 0.0971737 | 0.113636  | 0.125728 | 0.113345 | 0.100962  |
| 0.113345 | 0.104021  | 0.104895  | 0.103001  | 0.1081   | 0.103293 | 0.0856643 |
| 0.130828 | 0.115967  | 0.11655   | 0.122232  | 0.130828 | 0.113782 | 0.106935  |
| 0.128351 | 0.114656  | 0.111451  | 0.120629  | 0.136509 | 0.121795 | 0.110286  |
| 0.121358 | 0.109411  | 0.112908  | 0.117133  | 0.128059 | 0.116841 | 0.105624  |
| 0.187209 | 0.199738  | 0.192745  | 0.195804  | 0.209062 | 0.200758 | 0.191579  |
| 0.13141  | 0.115676  | 0.121503  | 0.12398   | 0.135198 | 0.126311 | 0.112762  |
| 0.116987 | 0.101253  | 0.103584  | 0.111597  | 0.109994 | 0.11014  | 0.095134  |
| 0.120629 | 0.113636  | 0.113054  | 0.114656  | 0.123252 | 0.118735 | 0.111597  |
| 0.117133 | 0.104895  | 0.107809  | 0.109703  | 0.121212 | 0.108537 | 0.0935315 |
| 0.125291 | 0.113054  | 0.115967  | 0.123397  | 0.130245 | 0.125146 | 0.109557  |
| 0.116259 | 0.0996503 | 0.104895  | 0.108246  | 0.119464 | 0.114073 | 0.0955711 |
| 0.124126 | 0.101107  | 0.100233  | 0.109994  | 0.113928 | 0.109994 | 0.0944056 |
| 0.12296  | 0.108392  | 0.108974  | 0.113199  | 0.127622 | 0.119318 | 0.104604  |
| 0.1875   | 0.19799   | 0.193328  | 0.195804  | 0.210519 | 0.199301 | 0.190414  |
| 0.118298 | 0.104021  | 0.108683  | 0.112034  | 0.121795 | 0.119318 | 0.0999417 |
| 0.181381 | 0.195367  | 0.191288  | 0.194639  | 0.208188 | 0.197261 | 0.185752  |
| 0.177739 | 0.192599  | 0.187063  | 0.192453  | 0.208625 | 0.196241 | 0.183858  |
| 0.125874 | 0.121503  | 0.118881  | 0.125437  | 0.130245 | 0.120484 | 0.112762  |
| 0.131119 | 0.12296   | 0.125583  | 0.129516  | 0.134324 | 0.129808 | 0.115967  |
| 0.115967 | 0.0888695 | 0.0929487 | 0.103001  | 0.104895 | 0.103875 | 0.0850816 |
| 0.119318 | 0.100962  | 0.107372  | 0.111597  | 0.123106 | 0.117133 | 0.0983392 |

|          |           |           |           |          |          |           |
|----------|-----------|-----------|-----------|----------|----------|-----------|
| 0.128497 | 0.105186  | 0.112179  | 0.11757   | 0.125    | 0.120484 | 0.107517  |
| 0.119464 | 0.106352  | 0.105186  | 0.115239  | 0.115967 | 0.115822 | 0.0990676 |
| 0.106935 | 0.101107  | 0.102273  | 0.107663  | 0.109557 | 0.109703 | 0.0897436 |
| 0.111888 | 0.104312  | 0.105769  | 0.113782  | 0.113636 | 0.111742 | 0.0932401 |
| 0.131556 | 0.116113  | 0.110577  | 0.125     | 0.135344 | 0.127914 | 0.115822  |
| 0.125874 | 0.111305  | 0.109848  | 0.112034  | 0.125874 | 0.117279 | 0.104021  |
| 0.116404 | 0.10067   | 0.0992133 | 0.108683  | 0.109703 | 0.109557 | 0.0893065 |
| 0.126748 | 0.11451   | 0.118007  | 0.120484  | 0.13141  | 0.123106 | 0.107517  |
| 0.10912  | 0.0954254 | 0.0954254 | 0.0961538 | 0.10708  | 0.105478 | 0.0849359 |
| 0.129079 | 0.118298  | 0.125583  | 0.127768  | 0.133741 | 0.13243  | 0.117424  |
| 0.115967 | 0.111597  | 0.117133  | 0.10067   | 0.125874 | 0.097465 | 0.104895  |
| 0.135052 | 0.127185  | 0.129516  | 0.134324  | 0.139132 | 0.137821 | 0.121066  |
| 0.238199 | 0.25947   | 0.256847  | 0.258741  | 0.267337 | 0.26049  | 0.255099  |
| 0.124563 | 0.114365  | 0.123397  | 0.120629  | 0.129808 | 0.113345 | 0.111451  |
| 0.131993 | 0.11859   | 0.125291  | 0.122815  | 0.133159 | 0.121941 | 0.111888  |
| 0.203817 | 0.215763  | 0.214307  | 0.215909  | 0.228584 | 0.218531 | 0.210519  |
| 0.125291 | 0.118298  | 0.121503  | 0.123397  | 0.12704  | 0.127185 | 0.115093  |
| 0.214744 | 0.229312  | 0.226981  | 0.230624  | 0.238636 | 0.232372 | 0.224359  |
| 0.118153 | 0.104749  | 0.113491  | 0.113928  | 0.125146 | 0.106935 | 0.103875  |
| 0.125291 | 0.115385  | 0.11859   | 0.122815  | 0.122378 | 0.126603 | 0.113345  |
| 0.120629 | 0.104604  | 0.104895  | 0.111451  | 0.124417 | 0.117861 | 0.101399  |
| 0.123834 | 0.115967  | 0.113345  | 0.119027  | 0.127914 | 0.117861 | 0.107226  |
| 0.189103 | 0.203089  | 0.196387  | 0.202069  | 0.215326 | 0.2044   | 0.196387  |
| 0.134033 | 0.125291  | 0.127622  | 0.130973  | 0.135781 | 0.131847 | 0.120921  |
| 0.126748 | 0.111014  | 0.116259  | 0.119318  | 0.128788 | 0.125437 | 0.11014   |
| 0.209062 | 0.228001  | 0.222756  | 0.225816  | 0.234411 | 0.228147 | 0.218094  |
| 0.113345 | 0.109557  | 0.107517  | 0.115239  | 0.120047 | 0.114656 | 0.0999417 |
| 0.186626 | 0.199738  | 0.192745  | 0.19493   | 0.207896 | 0.199009 | 0.188666  |
| 0.113491 | 0.110868  | 0.108246  | 0.116259  | 0.116696 | 0.115676 | 0.0971737 |
| 0.121358 | 0.105332  | 0.106206  | 0.114219  | 0.112034 | 0.116259 | 0.0980478 |
| 0.118881 | 0.115385  | 0.114219  | 0.112617  | 0.109266 | 0.109411 | 0.097028  |
| 0.127914 | 0.118881  | 0.118007  | 0.125437  | 0.129953 | 0.120775 | 0.112762  |
| 0.121649 | 0.108829  | 0.108537  | 0.112471  | 0.124272 | 0.113636 | 0.102418  |
| 0.140297 | 0.156031  | 0.151661  | 0.155594  | 0.166521 | 0.157051 | 0.14933   |
| 0.120775 | 0.108246  | 0.112617  | 0.115385  | 0.12398  | 0.120629 | 0.104749  |
| 0.122523 | 0.114073  | 0.111451  | 0.120047  | 0.133304 | 0.121795 | 0.111451  |
| 0.124272 | 0.11553   | 0.114073  | 0.11451   | 0.127477 | 0.118298 | 0.101544  |
| 0.12398  | 0.114365  | 0.117861  | 0.127914  | 0.137092 | 0.120629 | 0.116696  |
| 0.18211  | 0.193182  | 0.192599  | 0.196241  | 0.208625 | 0.198572 | 0.189394  |
| 0.114656 | 0.102418  | 0.102127  | 0.111597  | 0.111742 | 0.111888 | 0.0954254 |
| 0.118007 | 0.115385  | 0.111597  | 0.116696  | 0.131993 | 0.11757  | 0.106061  |
| 0.112034 | 0.10067   | 0.0989219 | 0.102564  | 0.112325 | 0.100233 | 0.0910548 |
| 0.113345 | 0.111305  | 0.106935  | 0.115239  | 0.115385 | 0.113782 | 0.099359  |
| 0.122815 | 0.110577  | 0.111742  | 0.120629  | 0.115822 | 0.119464 | 0.104458  |

|          |           |           |           |           |           |           |
|----------|-----------|-----------|-----------|-----------|-----------|-----------|
| 0.238054 | 0.255245  | 0.252914  | 0.256847  | 0.265152  | 0.260052  | 0.250583  |
| 0.115239 | 0.110286  | 0.10912   | 0.1081    | 0.107955  | 0.105769  | 0.0913462 |
| 0.118153 | 0.113199  | 0.113782  | 0.118007  | 0.125437  | 0.11655   | 0.104458  |
| 0.156906 | 0.178467  | 0.180798  | 0.181818  | 0.190122  | 0.183566  | 0.174679  |
| 0.172931 | 0.18109   | 0.182255  | 0.185897  | 0.198572  | 0.186189  | 0.175554  |
| 0.126311 | 0.114365  | 0.105041  | 0.123543  | 0.132721  | 0.12704   | 0.114948  |
| 0.130536 | 0.115676  | 0.119755  | 0.119027  | 0.129953  | 0.125437  | 0.107809  |
| 0.120047 | 0.108683  | 0.108683  | 0.112908  | 0.126748  | 0.115822  | 0.0984848 |
| 0.145542 | 0.137966  | 0.142337  | 0.145396  | 0.14729   | 0.148019  | 0.134761  |
| 0.122815 | 0.109703  | 0.104167  | 0.114219  | 0.13039   | 0.119464  | 0.110868  |
| 0.130536 | 0.112471  | 0.107809  | 0.122815  | 0.131993  | 0.12398   | 0.116841  |
| 0.114365 | 0.114948  | 0.114656  | 0.121212  | 0.122815  | 0.119172  | 0.104749  |
| 0.123689 | 0.11116   | 0.118153  | 0.118298  | 0.126311  | 0.120921  | 0.108537  |
| 0.131993 | 0.122378  | 0.125583  | 0.131847  | 0.136946  | 0.134178  | 0.118881  |
| 0.10271  | 0.10912   | 0.112325  | 0.116841  | 0.121941  | 0.11859   | 0.100379  |
| 0.125    | 0.117424  | 0.112471  | 0.120775  | 0.12704   | 0.118444  | 0.107809  |
| 0.136801 | 0.129225  | 0.129516  | 0.13549   | 0.138549  | 0.131993  | 0.122523  |
| 0.120338 | 0.114219  | 0.113054  | 0.110286  | 0.112179  | 0.109703  | 0.0964452 |
| 0.129516 | 0.125146  | 0.123397  | 0.127331  | 0.13039   | 0.122086  | 0.114656  |
| 0.118153 | 0.117861  | 0.119901  | 0.121503  | 0.121649  | 0.121212  | 0.108537  |
| 0.193765 | 0.207751  | 0.20134   | 0.205274  | 0.220862  | 0.211684  | 0.201923  |
| 0.120192 | 0.105915  | 0.0992133 | 0.113054  | 0.0855186 | 0.108683  | 0.08581   |
| 0.18109  | 0.191871  | 0.187791  | 0.190851  | 0.202943  | 0.194056  | 0.183129  |
| 0.119027 | 0.100379  | 0.104458  | 0.111014  | 0.128934  | 0.112179  | 0.103293  |
| 0.119318 | 0.113491  | 0.113782  | 0.12296   | 0.123106  | 0.123834  | 0.109703  |
| 0.117861 | 0.112908  | 0.11757   | 0.105186  | 0.127768  | 0.0999417 | 0.107955  |
| 0.11451  | 0.104895  | 0.108683  | 0.0983392 | 0.120629  | 0.0965909 | 0.0996503 |
| 0.128351 | 0.115822  | 0.121941  | 0.122086  | 0.130973  | 0.128788  | 0.112617  |
| 0.128351 | 0.116404  | 0.122523  | 0.124417  | 0.132721  | 0.126748  | 0.112617  |
| 0.117861 | 0.107955  | 0.104458  | 0.115093  | 0.116696  | 0.117424  | 0.100379  |
| 0.122669 | 0.111305  | 0.110723  | 0.121358  | 0.130245  | 0.121649  | 0.108683  |
| 0.121212 | 0.11859   | 0.122669  | 0.105915  | 0.127914  | 0.104167  | 0.111014  |
| 0.112325 | 0.121358  | 0.121066  | 0.127331  | 0.12602   | 0.124126  | 0.113782  |
| 0.231789 | 0.250728  | 0.248397  | 0.251457  | 0.260344  | 0.252622  | 0.246358  |
| 0.120192 | 0.108537  | 0.107372  | 0.112762  | 0.11553   | 0.120921  | 0.102127  |
| 0.171329 | 0.18211   | 0.180653  | 0.183421  | 0.194639  | 0.185752  | 0.175408  |
| 0.177593 | 0.188666  | 0.182547  | 0.190268  | 0.20236   | 0.19289   | 0.179924  |
| 0.123834 | 0.112762  | 0.111014  | 0.119901  | 0.122669  | 0.123106  | 0.107809  |
| 0.11451  | 0.108974  | 0.107226  | 0.104458  | 0.108683  | 0.103001  | 0.090035  |
| 0.123252 | 0.113928  | 0.112762  | 0.122523  | 0.118298  | 0.122815  | 0.108683  |
| 0.121503 | 0.104604  | 0.111888  | 0.113491  | 0.123543  | 0.119901  | 0.10373   |
| 0.102127 | 0.0977564 | 0.0948427 | 0.104604  | 0.0930944 | 0.104895  | 0.0852273 |
| 0.114656 | 0.109994  | 0.10708   | 0.111888  | 0.119318  | 0.11451   | 0.0977564 |
| 0.120629 | 0.11859   | 0.120921  | 0.122523  | 0.125583  | 0.125728  | 0.110431  |

|          |          |          |           |          |           |           |
|----------|----------|----------|-----------|----------|-----------|-----------|
| 0.135781 | 0.124417 | 0.130245 | 0.131556  | 0.136072 | 0.136509  | 0.12296   |
| 0.119027 | 0.105332 | 0.106206 | 0.113636  | 0.112908 | 0.119755  | 0.0995047 |
| 0.133887 | 0.122523 | 0.128642 | 0.127331  | 0.13243  | 0.132284  | 0.120192  |
| 0.124126 | 0.108683 | 0.113345 | 0.114656  | 0.131702 | 0.114073  | 0.10373   |
| 0.121212 | 0.119464 | 0.122086 | 0.105041  | 0.129662 | 0.10271   | 0.113636  |
| 0.123397 | 0.111742 | 0.109994 | 0.116259  | 0.128642 | 0.117133  | 0.104458  |
| 0.11859  | 0.118007 | 0.120629 | 0.123689  | 0.122669 | 0.12398   | 0.111014  |
| 0.125437 | 0.106498 | 0.106789 | 0.117716  | 0.109994 | 0.118007  | 0.101836  |
| 0.114073 | 0.10708  | 0.104749 | 0.112762  | 0.115239 | 0.113345  | 0.0995047 |
| 0.137092 | 0.129225 | 0.133304 | 0.132867  | 0.133304 | 0.126457  | 0.121941  |
| 0.169289 | 0.184732 | 0.181818 | 0.18546   | 0.19697  | 0.18954   | 0.173951  |
| 0.14088  | 0.127477 | 0.131556 | 0.135781  | 0.141463 | 0.138986  | 0.122815  |
| 0.128351 | 0.112617 | 0.119901 | 0.125291  | 0.13039  | 0.125     | 0.110577  |
| 0.118881 | 0.114219 | 0.11451  | 0.0971737 | 0.124126 | 0.097465  | 0.105769  |
| 0.110868 | 0.103584 | 0.105915 | 0.0949883 | 0.11757  | 0.0926573 | 0.0962995 |
| 0.120338 | 0.112471 | 0.109848 | 0.114656  | 0.127622 | 0.114073  | 0.104895  |
| 0.123689 | 0.117861 | 0.114365 | 0.120921  | 0.127185 | 0.120921  | 0.109994  |
| 0.178613 | 0.190559 | 0.187354 | 0.190414  | 0.204254 | 0.190705  | 0.182984  |
| 0.117716 | 0.11451  | 0.114802 | 0.117861  | 0.125291 | 0.124563  | 0.105769  |
| 0.103584 | 0.104167 | 0.102418 | 0.113636  | 0.117279 | 0.111888  | 0.0965909 |
| 0.13039  | 0.11757  | 0.122232 | 0.123252  | 0.135344 | 0.129079  | 0.113782  |
| 0.179487 | 0.194347 | 0.187354 | 0.191871  | 0.206585 | 0.194784  | 0.184732  |
| 0.113782 | 0.107955 | 0.107372 | 0.103147  | 0.112034 | 0.107226  | 0.0855186 |
| 0.11655  | 0.115385 | 0.114802 | 0.118735  | 0.119172 | 0.118735  | 0.103438  |
| 0.129079 | 0.120047 | 0.12296  | 0.124563  | 0.130828 | 0.129225  | 0.112471  |
| 0.127477 | 0.107372 | 0.105041 | 0.118298  | 0.126894 | 0.117424  | 0.106498  |
| 0.174097 | 0.188666 | 0.185169 | 0.185897  | 0.202652 | 0.18852   | 0.179341  |
| 0.112908 | 0.110286 | 0.109994 | 0.117424  | 0.119027 | 0.116259  | 0.10271   |
| 0.122523 | 0.110868 | 0.112034 | 0.116259  | 0.125146 | 0.112762  | 0.102418  |
| 0.106498 | 0.106789 | 0.104458 | 0.105769  | 0.109994 | 0.106643  | 0.0895979 |
| 0.10912  | 0.116113 | 0.115822 | 0.11655   | 0.133304 | 0.122086  | 0.10912   |
| 0.125291 | 0.111597 | 0.111014 | 0.11961   | 0.132576 | 0.122523  | 0.107517  |
| 0.120047 | 0.118007 | 0.116259 | 0.126894  | 0.123252 | 0.123106  | 0.108683  |
| 0.117133 | 0.106352 | 0.103438 | 0.114073  | 0.113345 | 0.111742  | 0.0990676 |
| 0.123834 | 0.113345 | 0.111597 | 0.120484  | 0.131702 | 0.118153  | 0.111305  |
| 0.145833 | 0.136218 | 0.130973 | 0.145688  | 0.147873 | 0.143648  | 0.137675  |
| 0.216929 | 0.236742 | 0.230332 | 0.236305  | 0.247232 | 0.239802  | 0.229749  |
| 0.131265 | 0.111451 | 0.111742 | 0.11859   | 0.112908 | 0.117716  | 0.104749  |
| 0.126311 | 0.113491 | 0.112908 | 0.120629  | 0.133304 | 0.123252  | 0.108829  |
| 0.117716 | 0.113054 | 0.116841 | 0.118735  | 0.127914 | 0.123689  | 0.106935  |
| 0.129516 | 0.113491 | 0.115239 | 0.130245  | 0.131847 | 0.127914  | 0.112617  |
| 0.102564 | 0.108392 | 0.105769 | 0.114365  | 0.12296  | 0.115822  | 0.0987762 |
| 0.121212 | 0.11014  | 0.117133 | 0.120192  | 0.125    | 0.119901  | 0.107226  |
| 0.126894 | 0.118153 | 0.122232 | 0.121212  | 0.131265 | 0.128788  | 0.112034  |



|          |           |           |           |           |           |           |
|----------|-----------|-----------|-----------|-----------|-----------|-----------|
| 0.113928 | 0.115676  | 0.114802  | 0.123689  | 0.122669  | 0.121941  | 0.106061  |
| 0.120047 | 0.109848  | 0.108392  | 0.121066  | 0.130828  | 0.122815  | 0.111014  |
| 0.220717 | 0.23616   | 0.23208   | 0.236597  | 0.246358  | 0.238928  | 0.230915  |
| 0.112179 | 0.106643  | 0.104604  | 0.103001  | 0.109557  | 0.103293  | 0.0850816 |
| 0.11014  | 0.097028  | 0.103147  | 0.102418  | 0.119755  | 0.0989219 | 0.0891608 |
| 0.114948 | 0.106498  | 0.104458  | 0.112179  | 0.114073  | 0.116259  | 0.099796  |
| 0.13549  | 0.119464  | 0.118007  | 0.13039   | 0.13986   | 0.133013  | 0.124417  |
| 0.134324 | 0.115093  | 0.117716  | 0.124272  | 0.116259  | 0.126894  | 0.112179  |
| 0.123834 | 0.110723  | 0.111597  | 0.118153  | 0.125291  | 0.116987  | 0.109266  |
| 0.125291 | 0.115093  | 0.118881  | 0.124563  | 0.131993  | 0.127477  | 0.110723  |
| 0.121066 | 0.103001  | 0.0962995 | 0.112471  | 0.12602   | 0.113054  | 0.106498  |
| 0.213141 | 0.232663  | 0.229749  | 0.231352  | 0.240822  | 0.231061  | 0.226544  |
| 0.130682 | 0.118735  | 0.12602   | 0.128205  | 0.132721  | 0.129953  | 0.116404  |
| 0.114219 | 0.114219  | 0.111888  | 0.11757   | 0.121212  | 0.118444  | 0.104021  |
| 0.120338 | 0.104895  | 0.105478  | 0.114656  | 0.12296   | 0.118444  | 0.101399  |
| 0.121941 | 0.108537  | 0.109994  | 0.122086  | 0.129808  | 0.121503  | 0.113491  |
| 0.11961  | 0.109703  | 0.118735  | 0.119755  | 0.124563  | 0.108392  | 0.10912   |
| 0.116696 | 0.103875  | 0.105332  | 0.11451   | 0.113782  | 0.114219  | 0.100087  |
| 0.112617 | 0.11116   | 0.114073  | 0.117424  | 0.121358  | 0.115093  | 0.104167  |
| 0.118881 | 0.118298  | 0.119755  | 0.12398   | 0.123252  | 0.122815  | 0.107809  |
| 0.112762 | 0.107517  | 0.107809  | 0.115822  | 0.118007  | 0.114073  | 0.0984848 |
| 0.118444 | 0.107372  | 0.104167  | 0.114802  | 0.114073  | 0.11655   | 0.0989219 |
| 0.128351 | 0.120775  | 0.115239  | 0.124709  | 0.133596  | 0.127331  | 0.114948  |
| 0.130245 | 0.125     | 0.122669  | 0.132721  | 0.138403  | 0.13243   | 0.120921  |
| 0.125583 | 0.120338  | 0.125583  | 0.108246  | 0.132284  | 0.104458  | 0.112762  |
| 0.125874 | 0.123834  | 0.126748  | 0.110577  | 0.131702  | 0.10708   | 0.11655   |
| 0.130973 | 0.121358  | 0.121066  | 0.127331  | 0.135052  | 0.131119  | 0.115822  |
| 0.112908 | 0.0936772 | 0.0916375 | 0.0967366 | 0.0919289 | 0.0999417 | 0.0796911 |
| 0.123834 | 0.113636  | 0.117424  | 0.118444  | 0.115967  | 0.114073  | 0.105769  |
| 0.12398  | 0.125437  | 0.129808  | 0.129079  | 0.126894  | 0.129662  | 0.114365  |
| 0.188957 | 0.206731  | 0.202652  | 0.206294  | 0.219843  | 0.20979   | 0.197407  |
| 0.122523 | 0.120775  | 0.121358  | 0.13141   | 0.131556  | 0.130828  | 0.112034  |
| 0.116113 | 0.102418  | 0.107955  | 0.1081    | 0.123397  | 0.101399  | 0.0957168 |
| 0.118881 | 0.111888  | 0.110431  | 0.120484  | 0.118881  | 0.121649  | 0.104604  |
| 0.207605 | 0.224505  | 0.217803  | 0.22465   | 0.232955  | 0.223776  | 0.216346  |
| 0.198864 | 0.211393  | 0.206731  | 0.210373  | 0.223048  | 0.212704  | 0.204983  |
| 0.114219 | 0.117133  | 0.117716  | 0.122815  | 0.120921  | 0.123106  | 0.106935  |
| 0.231498 | 0.252185  | 0.248106  | 0.249709  | 0.260052  | 0.250874  | 0.245484  |
| 0.111742 | 0.0945513 | 0.0936772 | 0.0964452 | 0.0898893 | 0.0999417 | 0.0802739 |
| 0.139132 | 0.129225  | 0.121358  | 0.133159  | 0.124854  | 0.130828  | 0.113491  |
| 0.114365 | 0.107372  | 0.10708   | 0.104312  | 0.105915  | 0.104021  | 0.0878497 |
| 0.129079 | 0.118881  | 0.115676  | 0.124272  | 0.135781  | 0.126894  | 0.115967  |
| 0.176428 | 0.190705  | 0.184295  | 0.18852   | 0.200029  | 0.190559  | 0.178176  |
| 0.129662 | 0.113636  | 0.119172  | 0.124272  | 0.127914  | 0.121649  | 0.113054  |

|           |           |           |           |          |           |           |
|-----------|-----------|-----------|-----------|----------|-----------|-----------|
| 0.180944  | 0.194347  | 0.191434  | 0.191288  | 0.210664 | 0.195367  | 0.185897  |
| 0.126457  | 0.106352  | 0.106643  | 0.114656  | 0.124709 | 0.119901  | 0.106643  |
| 0.0976107 | 0.111888  | 0.110431  | 0.115239  | 0.122669 | 0.119027  | 0.104604  |
| 0.120629  | 0.111597  | 0.112762  | 0.115239  | 0.111305 | 0.116404  | 0.10169   |
| 0.111014  | 0.111597  | 0.111305  | 0.111742  | 0.121503 | 0.108537  | 0.102855  |
| 0.112908  | 0.0986305 | 0.101544  | 0.105478  | 0.104749 | 0.112762  | 0.092803  |
| 0.120775  | 0.104167  | 0.10912   | 0.118881  | 0.127768 | 0.115967  | 0.0977564 |
| 0.109994  | 0.102418  | 0.102127  | 0.10169   | 0.105624 | 0.0981935 | 0.0843531 |
| 0.121795  | 0.106352  | 0.112471  | 0.114656  | 0.123834 | 0.120484  | 0.103438  |
| 0.110868  | 0.102418  | 0.102127  | 0.10169   | 0.110868 | 0.100233  | 0.0954254 |
| 0.121358  | 0.0965909 | 0.0992133 | 0.1081    | 0.108829 | 0.108974  | 0.0884324 |
| 0.113345  | 0.103438  | 0.106935  | 0.105624  | 0.106643 | 0.104458  | 0.0859557 |
| 0.111451  | 0.112034  | 0.115239  | 0.104021  | 0.122815 | 0.105769  | 0.10708   |
| 0.134761  | 0.119901  | 0.127185  | 0.130536  | 0.137383 | 0.13345   | 0.118444  |
| 0.114219  | 0.111014  | 0.110723  | 0.0962995 | 0.118298 | 0.0968823 | 0.101399  |
| 0.122815  | 0.112034  | 0.113782  | 0.117133  | 0.122815 | 0.111014  | 0.10271   |
| 0.114219  | 0.0973193 | 0.100816  | 0.109703  | 0.11014  | 0.112034  | 0.0917832 |
| 0.108974  | 0.112179  | 0.112179  | 0.11553   | 0.11655  | 0.119318  | 0.0990676 |
| 0.124126  | 0.109848  | 0.1081    | 0.116987  | 0.126166 | 0.125146  | 0.106061  |
| 0.12398   | 0.114365  | 0.113782  | 0.118007  | 0.129225 | 0.118298  | 0.105624  |
| 0.116404  | 0.110868  | 0.116113  | 0.099359  | 0.125728 | 0.101107  | 0.105041  |
| 0.126457  | 0.111888  | 0.117716  | 0.121066  | 0.129953 | 0.125728  | 0.108974  |
| 0.135635  | 0.12398   | 0.126894  | 0.130828  | 0.136509 | 0.137821  | 0.119027  |
| 0.142045  | 0.130973  | 0.136509  | 0.139569  | 0.141754 | 0.144231  | 0.127185  |
| 0.106061  | 0.0984848 | 0.0981935 | 0.102418  | 0.1081   | 0.106498  | 0.0894522 |
| 0.121503  | 0.106352  | 0.102564  | 0.114365  | 0.117133 | 0.118735  | 0.0990676 |
| 0.116404  | 0.103584  | 0.105041  | 0.109848  | 0.118735 | 0.112762  | 0.0933858 |
| 0.130973  | 0.125437  | 0.125146  | 0.130536  | 0.134178 | 0.131993  | 0.121066  |
| 0.115093  | 0.109557  | 0.108974  | 0.104749  | 0.109266 | 0.105332  | 0.0932401 |
| 0.136655  | 0.129953  | 0.128497  | 0.135052  | 0.139569 | 0.132139  | 0.125291  |
| 0.128497  | 0.121503  | 0.123252  | 0.132139  | 0.122378 | 0.133887  | 0.120629  |
| 0.13243   | 0.114656  | 0.113782  | 0.123834  | 0.131556 | 0.128497  | 0.118444  |
| 0.120338  | 0.097028  | 0.0996503 | 0.110868  | 0.103438 | 0.11553   | 0.0935315 |
| 0.120192  | 0.0971737 | 0.097465  | 0.11451   | 0.123397 | 0.11014   | 0.10067   |
| 0.123689  | 0.120484  | 0.122232  | 0.107226  | 0.127768 | 0.104604  | 0.110868  |
| 0.192016  | 0.207459  | 0.202797  | 0.204108  | 0.219697 | 0.207022  | 0.198135  |
| 0.120921  | 0.111597  | 0.112471  | 0.116113  | 0.125291 | 0.11116   | 0.103438  |
| 0.121941  | 0.109411  | 0.109994  | 0.112471  | 0.111451 | 0.115093  | 0.097465  |
| 0.121212  | 0.110723  | 0.109848  | 0.119027  | 0.128788 | 0.121358  | 0.107809  |
| 0.114948  | 0.112325  | 0.113199  | 0.0961538 | 0.118735 | 0.0976107 | 0.102127  |
| 0.131119  | 0.113345  | 0.11451   | 0.117279  | 0.128497 | 0.123397  | 0.111597  |
| 0.129371  | 0.120047  | 0.114802  | 0.124272  | 0.134324 | 0.125146  | 0.113636  |
| 0.128059  | 0.123106  | 0.121941  | 0.126748  | 0.133304 | 0.129662  | 0.117861  |
| 0.126457  | 0.111014  | 0.106061  | 0.120484  | 0.129371 | 0.123106  | 0.111888  |

|          |           |           |           |           |           |           |
|----------|-----------|-----------|-----------|-----------|-----------|-----------|
| 0.113636 | 0.0952797 | 0.0981935 | 0.0980478 | 0.109266  | 0.0995047 | 0.0894522 |
| 0.127331 | 0.118298  | 0.116841  | 0.123397  | 0.131993  | 0.129225  | 0.113636  |
| 0.116841 | 0.108392  | 0.109557  | 0.110577  | 0.111597  | 0.113199  | 0.0984848 |
| 0.127768 | 0.101836  | 0.103584  | 0.112471  | 0.111451  | 0.112179  | 0.0965909 |
| 0.16958  | 0.169872  | 0.171911  | 0.175845  | 0.187063  | 0.17264   | 0.166958  |
| 0.128205 | 0.111014  | 0.115093  | 0.119027  | 0.129953  | 0.122523  | 0.109848  |
| 0.123397 | 0.122232  | 0.11961   | 0.128497  | 0.136801  | 0.126166  | 0.115822  |
| 0.119172 | 0.101107  | 0.100524  | 0.103293  | 0.090035  | 0.106789  | 0.0763403 |
| 0.103875 | 0.10271   | 0.106789  | 0.115676  | 0.118444  | 0.118298  | 0.106498  |
| 0.112325 | 0.0960082 | 0.097465  | 0.099359  | 0.112908  | 0.1081    | 0.0901807 |
| 0.116987 | 0.0898893 | 0.0945513 | 0.0987762 | 0.106206  | 0.105478  | 0.0840618 |
| 0.118735 | 0.10067   | 0.103001  | 0.103438  | 0.114073  | 0.109266  | 0.092803  |
| 0.101253 | 0.107663  | 0.110286  | 0.125583  | 0.121358  | 0.118007  | 0.109703  |
| 0.114948 | 0.106206  | 0.111451  | 0.113345  | 0.11757   | 0.118007  | 0.10271   |
| 0.128205 | 0.115676  | 0.118298  | 0.116696  | 0.128497  | 0.111742  | 0.110723  |
| 0.109411 | 0.0925117 | 0.0939685 | 0.103147  | 0.114365  | 0.107809  | 0.0910548 |
| 0.119464 | 0.105478  | 0.104021  | 0.110868  | 0.11655   | 0.104458  | 0.106935  |
| 0.113782 | 0.121358  | 0.125728  | 0.130828  | 0.124272  | 0.129953  | 0.110286  |
| 0.110868 | 0.100962  | 0.0983392 | 0.105769  | 0.102127  | 0.106061  | 0.0910548 |
| 0.124272 | 0.114365  | 0.113199  | 0.116259  | 0.126603  | 0.117424  | 0.111451  |
| 0.110286 | 0.0957168 | 0.0930944 | 0.102273  | 0.103584  | 0.103147  | 0.0866841 |
| 0.11116  | 0.0989219 | 0.099796  | 0.107517  | 0.104167  | 0.10373   | 0.0907634 |
| 0.114073 | 0.0837704 | 0.0890152 | 0.104895  | 0.104167  | 0.103147  | 0.083479  |
| 0.118007 | 0.113345  | 0.108392  | 0.112908  | 0.107226  | 0.113491  | 0.0952797 |
| 0.108392 | 0.0932401 | 0.0984848 | 0.0983392 | 0.103147  | 0.0989219 | 0.0856643 |
| 0.133159 | 0.13141   | 0.136072  | 0.138549  | 0.143357  | 0.139714  | 0.127914  |
| 0.125583 | 0.123543  | 0.124709  | 0.129808  | 0.139277  | 0.124272  | 0.117716  |
| 0.112762 | 0.101981  | 0.0944056 | 0.100379  | 0.0999417 | 0.097465  | 0.0836247 |
| 0.133596 | 0.126603  | 0.13243   | 0.140152  | 0.136218  | 0.131702  | 0.121066  |
| 0.120484 | 0.109703  | 0.110868  | 0.106935  | 0.128934  | 0.111014  | 0.110286  |
| 0.120775 | 0.131847  | 0.129516  | 0.131702  | 0.126894  | 0.132284  | 0.121358  |
| 0.114948 | 0.101544  | 0.105624  | 0.101399  | 0.101253  | 0.107517  | 0.0916375 |
| 0.144814 | 0.133741  | 0.133159  | 0.141171  | 0.1419    | 0.136218  | 0.129662  |
| 0.131702 | 0.121795  | 0.121212  | 0.126603  | 0.130828  | 0.118735  | 0.11655   |
| 0.11014  | 0.125291  | 0.128497  | 0.134761  | 0.140152  | 0.130099  | 0.123543  |
| 0.111305 | 0.104895  | 0.105769  | 0.0855186 | 0.104312  | 0.0942599 | 0.103438  |
| 0.108829 | 0.102127  | 0.0965909 | 0.101399  | 0.097465  | 0.0999417 | 0.0849359 |
| 0.115967 | 0.0973193 | 0.0990676 | 0.102418  | 0.108683  | 0.102127  | 0.0844988 |
| 0.10912  | 0.108537  | 0.105624  | 0.118298  | 0.121941  | 0.113636  | 0.101836  |
| 0.11553  | 0.110577  | 0.113782  | 0.111014  | 0.103001  | 0.109557  | 0.0971737 |
| 0.126748 | 0.108974  | 0.111305  | 0.123106  | 0.118298  | 0.121649  | 0.108683  |
| 0.113636 | 0.111305  | 0.1081    | 0.121649  | 0.125874  | 0.121358  | 0.109848  |
| 0.104021 | 0.0897436 | 0.0952797 | 0.0808566 | 0.106935  | 0.0470571 | 0.0859557 |
| 0.115822 | 0.0971737 | 0.101253  | 0.105186  | 0.104749  | 0.104021  | 0.0828963 |

|          |           |           |           |           |          |           |
|----------|-----------|-----------|-----------|-----------|----------|-----------|
| 0.120921 | 0.113345  | 0.112179  | 0.11116   | 0.0824592 | 0.114073 | 0.0804196 |
| 0.115385 | 0.101981  | 0.103147  | 0.100962  | 0.104895  | 0.108537 | 0.0801282 |
| 0.121066 | 0.103293  | 0.109994  | 0.111888  | 0.105624  | 0.111597 | 0.0930944 |
| 0.117861 | 0.106498  | 0.102418  | 0.103438  | 0.114365  | 0.109848 | 0.0948427 |
| 0.124126 | 0.110723  | 0.108683  | 0.116696  | 0.126457  | 0.114948 | 0.108392  |
| 0.118881 | 0.105769  | 0.109557  | 0.107372  | 0.11859   | 0.111742 | 0.0967366 |
| 0.11014  | 0.0903263 | 0.0906177 | 0.0968823 | 0.0888695 | 0.10067  | 0.0786713 |
| 0.114802 | 0.109266  | 0.106643  | 0.108537  | 0.0888695 | 0.108537 | 0.0757576 |
| 0.121649 | 0.110577  | 0.106789  | 0.111597  | 0.12398   | 0.113054 | 0.105915  |
| 0.120921 | 0.10373   | 0.101399  | 0.105624  | 0.118881  | 0.114365 | 0.0979021 |
| 0.124417 | 0.120921  | 0.121795  | 0.125728  | 0.129953  | 0.120484 | 0.11014   |
| 0.112179 | 0.0984848 | 0.0981935 | 0.10708   | 0.119755  | 0.108829 | 0.0961538 |
| 0.127477 | 0.118444  | 0.118444  | 0.12296   | 0.117279  | 0.12704  | 0.107955  |

| <b>TDr_08_00924</b> | <b>TDr_08_00926</b> | <b>TDr_08_00945</b> | <b>TDr_08_00963</b> | <b>TDr_08_00989</b> | <b>TDr_08_00998</b> | <b>TDr_08_01016</b> |
|---------------------|---------------------|---------------------|---------------------|---------------------|---------------------|---------------------|
| 0.104604            | 0.110868            | 0.119318            | 0.128497            | 0.112908            | 0.105478            | 0.127622            |
| 0.10271             | 0.113054            | 0.11655             | 0.122232            | 0.109848            | 0.105041            | 0.121941            |
| 0.0980478           | 0.105769            | 0.113054            | 0.120775            | 0.1081              | 0.101253            | 0.120775            |
| 0.103293            | 0.11014             | 0.11451             | 0.128934            | 0.110431            | 0.105041            | 0.123689            |
| 0.127768            | 0.128205            | 0.131702            | 0.138549            | 0.127331            | 0.125437            | 0.133596            |
| 0.120775            | 0.126748            | 0.130245            | 0.140006            | 0.129079            | 0.120484            | 0.137383            |
| 0.0999417           | 0.103584            | 0.122232            | 0.106352            | 0.106498            | 0.104604            | 0.113636            |
| 0.10169             | 0.110286            | 0.110577            | 0.125291            | 0.106206            | 0.102855            | 0.121795            |
| 0.088141            | 0.0906177           | 0.105186            | 0.114656            | 0.0941142           | 0.0878497           | 0.116696            |
| 0.0810023           | 0.0823135           | 0.114365            | 0.101399            | 0.0861014           | 0.0810023           | 0.100524            |
| 0.0992133           | 0.107809            | 0.115385            | 0.123689            | 0.108392            | 0.105915            | 0.116987            |
| 0.0984848           | 0.10271             | 0.112034            | 0.123834            | 0.101253            | 0.10373             | 0.113345            |
| 0.100816            | 0.101836            | 0.114365            | 0.126457            | 0.104167            | 0.101107            | 0.119464            |
| 0.120192            | 0.12704             | 0.130828            | 0.14729             | 0.128788            | 0.124563            | 0.142628            |
| 0.115385            | 0.115822            | 0.128642            | 0.12704             | 0.112908            | 0.107226            | 0.122086            |
| 0.10271             | 0.106061            | 0.120338            | 0.11116             | 0.106352            | 0.100087            | 0.108537            |
| 0.092366            | 0.0989219           | 0.114365            | 0.11859             | 0.0936772           | 0.0973193           | 0.108974            |
| 0.136509            | 0.138403            | 0.146562            | 0.147873            | 0.137821            | 0.135635            | 0.150495            |
| 0.0942599           | 0.103438            | 0.112471            | 0.119901            | 0.103438            | 0.0980478           | 0.116696            |
| 0.199155            | 0.202797            | 0.203963            | 0.211976            | 0.20542             | 0.198281            | 0.208188            |
| 0.110723            | 0.120484            | 0.125437            | 0.134324            | 0.118153            | 0.111014            | 0.124126            |
| 0.106789            | 0.113636            | 0.118881            | 0.129225            | 0.111597            | 0.11116             | 0.121066            |
| 0.0920746           | 0.10067             | 0.110868            | 0.118881            | 0.104458            | 0.0955711           | 0.11014             |
| 0.112617            | 0.113636            | 0.124417            | 0.127477            | 0.113054            | 0.105915            | 0.114073            |
| 0.0874126           | 0.0913462           | 0.106789            | 0.112471            | 0.0925117           | 0.0879953           | 0.1081              |
| 0.115676            | 0.124563            | 0.131556            | 0.138986            | 0.12602             | 0.117133            | 0.130245            |
| 0.102273            | 0.10708             | 0.110286            | 0.117716            | 0.10912             | 0.101981            | 0.115676            |
| 0.110723            | 0.109994            | 0.124563            | 0.124126            | 0.108829            | 0.109557            | 0.119464            |
| 0.111597            | 0.12398             | 0.128934            | 0.126748            | 0.120775            | 0.118007            | 0.122669            |
| 0.11014             | 0.10912             | 0.120775            | 0.123252            | 0.107372            | 0.109557            | 0.114802            |
| 0.106498            | 0.111888            | 0.126457            | 0.124854            | 0.107517            | 0.10708             | 0.120484            |
| 0.109848            | 0.113199            | 0.121358            | 0.120629            | 0.111742            | 0.109848            | 0.119172            |
| 0.0920746           | 0.101253            | 0.113199            | 0.11451             | 0.0986305           | 0.0912005           | 0.107226            |
| 0.10373             | 0.105915            | 0.11553             | 0.117424            | 0.104167            | 0.104895            | 0.115676            |
| 0.0992133           | 0.106935            | 0.117133            | 0.113782            | 0.109848            | 0.107955            | 0.110286            |
| 0.10373             | 0.109411            | 0.122232            | 0.122378            | 0.113782            | 0.107809            | 0.122086            |
| 0.114948            | 0.115967            | 0.129953            | 0.124563            | 0.111597            | 0.109703            | 0.11553             |
| 0.10169             | 0.106206            | 0.11553             | 0.122086            | 0.10708             | 0.107226            | 0.112762            |
| 0.0949883           | 0.105915            | 0.110577            | 0.121503            | 0.105332            | 0.094697            | 0.108974            |
| 0.104312            | 0.108537            | 0.12602             | 0.123834            | 0.110577            | 0.102855            | 0.115093            |
| 0.0920746           | 0.101544            | 0.107372            | 0.124126            | 0.0962995           | 0.0888695           | 0.106935            |
| 0.127914            | 0.123106            | 0.140589            | 0.133159            | 0.128934            | 0.12296             | 0.13345             |

|           |           |          |           |           |           |           |
|-----------|-----------|----------|-----------|-----------|-----------|-----------|
| 0.129371  | 0.127477  | 0.140589 | 0.13986   | 0.131847  | 0.125583  | 0.129953  |
| 0.100087  | 0.102855  | 0.112179 | 0.125146  | 0.104312  | 0.0989219 | 0.116987  |
| 0.0747378 | 0.0839161 | 0.105769 | 0.107663  | 0.0894522 | 0.0846445 | 0.0948427 |
| 0.0868298 | 0.0852273 | 0.114656 | 0.105186  | 0.0971737 | 0.0894522 | 0.090035  |
| 0.105186  | 0.105041  | 0.115239 | 0.121503  | 0.112034  | 0.106643  | 0.115967  |
| 0.123106  | 0.120629  | 0.135781 | 0.135344  | 0.124417  | 0.118444  | 0.127768  |
| 0.0983392 | 0.102855  | 0.111305 | 0.119901  | 0.101107  | 0.0930944 | 0.114073  |
| 0.102564  | 0.100379  | 0.115822 | 0.118298  | 0.102418  | 0.0941142 | 0.106935  |
| 0.128059  | 0.137238  | 0.148601 | 0.139423  | 0.137238  | 0.135344  | 0.139132  |
| 0.116404  | 0.118881  | 0.129953 | 0.128351  | 0.118298  | 0.111742  | 0.116987  |
| 0.0996503 | 0.100962  | 0.108829 | 0.121795  | 0.103875  | 0.0967366 | 0.111597  |
| 0.106643  | 0.114365  | 0.122523 | 0.128497  | 0.112325  | 0.114219  | 0.122086  |
| 0.104312  | 0.110868  | 0.113782 | 0.126748  | 0.113491  | 0.105769  | 0.123543  |
| 0.125     | 0.125146  | 0.133887 | 0.130828  | 0.129808  | 0.122086  | 0.127331  |
| 0.114948  | 0.113928  | 0.124126 | 0.129225  | 0.111305  | 0.113782  | 0.119901  |
| 0.0983392 | 0.102273  | 0.114219 | 0.121649  | 0.106643  | 0.0945513 | 0.115239  |
| 0.101253  | 0.105186  | 0.113345 | 0.118735  | 0.106352  | 0.104167  | 0.113782  |
| 0.0804196 | 0.0828963 | 0.120484 | 0.0859557 | 0.0837704 | 0.0850816 | 0.0824592 |
| 0.123834  | 0.124563  | 0.136218 | 0.134615  | 0.123397  | 0.114802  | 0.119464  |
| 0.127622  | 0.127185  | 0.139132 | 0.136946  | 0.133304  | 0.122086  | 0.128497  |
| 0.148456  | 0.154138  | 0.159382 | 0.160111  | 0.155012  | 0.147582  | 0.156323  |
| 0.10067   | 0.105478  | 0.113928 | 0.124854  | 0.109266  | 0.100379  | 0.112325  |
| 0.0965909 | 0.102564  | 0.108974 | 0.11961   | 0.0973193 | 0.0983392 | 0.112034  |
| 0.0936772 | 0.0987762 | 0.105478 | 0.120775  | 0.103147  | 0.0945513 | 0.112325  |
| 0.124417  | 0.120775  | 0.141754 | 0.134907  | 0.128642  | 0.126457  | 0.12296   |
| 0.0987762 | 0.099796  | 0.107663 | 0.119172  | 0.0960082 | 0.0920746 | 0.114802  |
| 0.121649  | 0.122378  | 0.125291 | 0.130973  | 0.128205  | 0.119027  | 0.126894  |
| 0.0831876 | 0.085373  | 0.11859  | 0.0887238 | 0.0874126 | 0.0893065 | 0.0861014 |
| 0.099359  | 0.103584  | 0.114656 | 0.121503  | 0.103875  | 0.102564  | 0.11859   |
| 0.128497  | 0.130973  | 0.142628 | 0.138986  | 0.137383  | 0.130828  | 0.131993  |
| 0.107517  | 0.107372  | 0.121941 | 0.130245  | 0.110868  | 0.10169   | 0.122669  |
| 0.123397  | 0.126166  | 0.13549  | 0.133304  | 0.126166  | 0.122523  | 0.130099  |
| 0.117133  | 0.122232  | 0.131556 | 0.133741  | 0.120192  | 0.115385  | 0.119464  |
| 0.103584  | 0.105186  | 0.120047 | 0.122815  | 0.109266  | 0.105332  | 0.117861  |
| 0.0933858 | 0.0935315 | 0.111305 | 0.117861  | 0.0920746 | 0.0910548 | 0.108829  |
| 0.0992133 | 0.104604  | 0.111305 | 0.11961   | 0.102564  | 0.097465  | 0.113199  |
| 0.11961   | 0.120338  | 0.129662 | 0.135052  | 0.124709  | 0.116404  | 0.124854  |
| 0.0952797 | 0.0995047 | 0.109994 | 0.119464  | 0.0968823 | 0.0987762 | 0.107226  |
| 0.12602   | 0.134033  | 0.137238 | 0.139714  | 0.129371  | 0.125728  | 0.131265  |
| 0.109703  | 0.11014   | 0.120047 | 0.128934  | 0.115093  | 0.101253  | 0.116987  |
| 0.105332  | 0.102564  | 0.117424 | 0.116987  | 0.106061  | 0.102418  | 0.112325  |
| 0.10708   | 0.106352  | 0.115093 | 0.125728  | 0.107517  | 0.101253  | 0.116113  |
| 0.107663  | 0.109557  | 0.115676 | 0.129808  | 0.114219  | 0.106498  | 0.123397  |
| 0.0986305 | 0.102855  | 0.115967 | 0.122232  | 0.10169   | 0.0977564 | 0.116113  |

|           |           |          |           |           |           |           |
|-----------|-----------|----------|-----------|-----------|-----------|-----------|
| 0.0989219 | 0.0976107 | 0.111888 | 0.121941  | 0.100233  | 0.0933858 | 0.111742  |
| 0.123543  | 0.118153  | 0.141171 | 0.132867  | 0.122815  | 0.119755  | 0.125291  |
| 0.0891608 | 0.0971737 | 0.104167 | 0.115676  | 0.0968823 | 0.0955711 | 0.107809  |
| 0.0957168 | 0.0932401 | 0.115093 | 0.112034  | 0.0955711 | 0.0977564 | 0.107955  |
| 0.107663  | 0.109848  | 0.123834 | 0.120484  | 0.105769  | 0.106498  | 0.113782  |
| 0.101544  | 0.109266  | 0.120921 | 0.112034  | 0.108392  | 0.108246  | 0.114073  |
| 0.115822  | 0.108974  | 0.127622 | 0.112325  | 0.111014  | 0.110577  | 0.108537  |
| 0.11655   | 0.117279  | 0.135344 | 0.121795  | 0.121649  | 0.120921  | 0.121212  |
| 0.103875  | 0.101981  | 0.113928 | 0.121941  | 0.104895  | 0.104749  | 0.110286  |
| 0.1706    | 0.173951  | 0.176865 | 0.180507  | 0.17803   | 0.174097  | 0.17264   |
| 0.0871212 | 0.0957168 | 0.108246 | 0.112179  | 0.0939685 | 0.092366  | 0.108683  |
| 0.116987  | 0.113054  | 0.131993 | 0.119027  | 0.118007  | 0.11757   | 0.125146  |
| 0.11116   | 0.106643  | 0.125291 | 0.114948  | 0.108392  | 0.106498  | 0.119318  |
| 0.117716  | 0.122523  | 0.132721 | 0.119755  | 0.116987  | 0.116259  | 0.120047  |
| 0.0887238 | 0.0917832 | 0.110723 | 0.108829  | 0.0979021 | 0.0939685 | 0.102418  |
| 0.109703  | 0.106935  | 0.127331 | 0.118444  | 0.11014   | 0.113782  | 0.112034  |
| 0.0945513 | 0.0926573 | 0.113345 | 0.108246  | 0.0999417 | 0.0930944 | 0.101544  |
| 0.102273  | 0.0977564 | 0.125728 | 0.0987762 | 0.100379  | 0.100524  | 0.0996503 |
| 0.0961538 | 0.101544  | 0.115239 | 0.112762  | 0.100379  | 0.0932401 | 0.105769  |
| 0.112179  | 0.104167  | 0.131265 | 0.118298  | 0.117861  | 0.111597  | 0.11655   |
| 0.0804196 | 0.0773601 | 0.111451 | 0.10169   | 0.0901807 | 0.0775058 | 0.0891608 |
| 0.114365  | 0.117716  | 0.128788 | 0.119901  | 0.119464  | 0.116987  | 0.116696  |
| 0.0897436 | 0.0930944 | 0.113491 | 0.113928  | 0.101836  | 0.094697  | 0.105478  |
| 0.119318  | 0.11655   | 0.127331 | 0.128059  | 0.117133  | 0.11553   | 0.119901  |
| 0.107517  | 0.109994  | 0.124563 | 0.118881  | 0.102418  | 0.106352  | 0.108683  |
| 0.0815851 | 0.0895979 | 0.107663 | 0.105478  | 0.0925117 | 0.0891608 | 0.100524  |
| 0.125874  | 0.127768  | 0.141463 | 0.141317  | 0.133887  | 0.128788  | 0.13141   |
| 0.0890152 | 0.0949883 | 0.112179 | 0.112908  | 0.099359  | 0.0960082 | 0.104749  |
| 0.0884324 | 0.094697  | 0.112762 | 0.11116   | 0.0976107 | 0.0942599 | 0.105624  |
| 0.0952797 | 0.0980478 | 0.112325 | 0.110431  | 0.10271   | 0.094697  | 0.109848  |
| 0.115093  | 0.114948  | 0.133596 | 0.124126  | 0.122232  | 0.117424  | 0.128205  |
| 0.110431  | 0.11116   | 0.123397 | 0.126166  | 0.119318  | 0.109557  | 0.120338  |
| 0.0856643 | 0.0884324 | 0.112908 | 0.107517  | 0.0992133 | 0.0938228 | 0.107226  |
| 0.0894522 | 0.0939685 | 0.110868 | 0.110431  | 0.0968823 | 0.090035  | 0.104895  |
| 0.0919289 | 0.0984848 | 0.114219 | 0.116113  | 0.0952797 | 0.0965909 | 0.11553   |
| 0.0906177 | 0.0945513 | 0.127185 | 0.102855  | 0.0925117 | 0.092366  | 0.0847902 |
| 0.0913462 | 0.0996503 | 0.113928 | 0.112617  | 0.101399  | 0.0986305 | 0.109703  |
| 0.0722611 | 0.0668706 | 0.108537 | 0.0897436 | 0.0712413 | 0.0751748 | 0.0885781 |
| 0         | 0.0683275 | 0.106206 | 0.0891608 | 0.081148  | 0.0675991 | 0.085373  |
| 0.0683275 | 0         | 0.114802 | 0.0846445 | 0.0734266 | 0.0729895 | 0.0828963 |
| 0.106206  | 0.114802  | 0        | 0.130682  | 0.111597  | 0.105915  | 0.125146  |
| 0.0891608 | 0.0846445 | 0.130682 | 0         | 0.090472  | 0.0894522 | 0.0874126 |
| 0.081148  | 0.0734266 | 0.111597 | 0.090472  | 0         | 0.0724068 | 0.0872669 |
| 0.0675991 | 0.0729895 | 0.105915 | 0.0894522 | 0.0724068 | 0         | 0.0842075 |

|           |           |          |           |           |           |           |
|-----------|-----------|----------|-----------|-----------|-----------|-----------|
| 0.085373  | 0.0828963 | 0.125146 | 0.0874126 | 0.0872669 | 0.0842075 | 0         |
| 0.0689103 | 0.0786713 | 0.106352 | 0.0965909 | 0.0737179 | 0.0700758 | 0.0808566 |
| 0.104458  | 0.105478  | 0.121503 | 0.126603  | 0.111305  | 0.109703  | 0.115239  |
| 0.115822  | 0.122669  | 0.136364 | 0.133596  | 0.120629  | 0.117861  | 0.129225  |
| 0.071824  | 0.0748834 | 0.119755 | 0.0887238 | 0.0885781 | 0.0782343 | 0.0817308 |
| 0.0804196 | 0.0776515 | 0.111116 | 0.0952797 | 0.0421037 | 0.0702214 | 0.0897436 |
| 0.0801282 | 0.0627914 | 0.114656 | 0.0865385 | 0.0677448 | 0.0710956 | 0.0874126 |
| 0.0777972 | 0.0855186 | 0.10708  | 0.105478  | 0.0852273 | 0.083042  | 0.0996503 |
| 0.0865385 | 0.0843531 | 0.130682 | 0.0920746 | 0.090472  | 0.0871212 | 0.0882867 |
| 0.0690559 | 0.0744464 | 0.109411 | 0.0958625 | 0.0726981 | 0.0681818 | 0.0874126 |
| 0.120192  | 0.125874  | 0.132576 | 0.124563  | 0.116841  | 0.118735  | 0.128351  |
| 0.115967  | 0.116113  | 0.126894 | 0.12704   | 0.120192  | 0.114802  | 0.119464  |
| 0.111597  | 0.106498  | 0.117861 | 0.121795  | 0.103001  | 0.105769  | 0.115093  |
| 0.0992133 | 0.10169   | 0.110723 | 0.121941  | 0.100233  | 0.0983392 | 0.109703  |
| 0.092803  | 0.0949883 | 0.108683 | 0.118735  | 0.0964452 | 0.0916375 | 0.109411  |
| 0.0745921 | 0.0785256 | 0.110868 | 0.0935315 | 0.0779429 | 0.0716783 | 0.0894522 |
| 0.0831876 | 0.087704  | 0.113345 | 0.109411  | 0.0885781 | 0.08581   | 0.0971737 |
| 0.0957168 | 0.100816  | 0.110431 | 0.117861  | 0.0990676 | 0.0960082 | 0.108246  |
| 0.0992133 | 0.10373   | 0.110723 | 0.124854  | 0.108974  | 0.103875  | 0.123689  |
| 0.11116   | 0.113054  | 0.130536 | 0.120192  | 0.113054  | 0.110286  | 0.111742  |
| 0.0949883 | 0.0971737 | 0.115239 | 0.115967  | 0.0980478 | 0.0981935 | 0.11014   |
| 0.109994  | 0.118007  | 0.129371 | 0.126894  | 0.118298  | 0.113782  | 0.126603  |
| 0.114802  | 0.114948  | 0.132721 | 0.117424  | 0.11553   | 0.112762  | 0.114219  |
| 0.187354  | 0.19595   | 0.193328 | 0.205711  | 0.197407  | 0.188811  | 0.204545  |
| 0.232955  | 0.238345  | 0.237471 | 0.246358  | 0.240385  | 0.234411  | 0.243444  |
| 0.100524  | 0.110286  | 0.107955 | 0.128788  | 0.109411  | 0.106061  | 0.125291  |
| 0.0948427 | 0.0964452 | 0.109557 | 0.112908  | 0.0987762 | 0.0907634 | 0.105624  |
| 0.0948427 | 0.0973193 | 0.101981 | 0.110286  | 0.0984848 | 0.095134  | 0.106789  |
| 0.0989219 | 0.101399  | 0.109557 | 0.118444  | 0.102564  | 0.097465  | 0.111742  |
| 0.115239  | 0.117716  | 0.13345  | 0.125728  | 0.11655   | 0.106789  | 0.123106  |
| 0.105041  | 0.105186  | 0.111888 | 0.121358  | 0.1081    | 0.103001  | 0.112325  |
| 0.13141   | 0.128934  | 0.137675 | 0.136655  | 0.133596  | 0.129371  | 0.129079  |
| 0.0980478 | 0.102273  | 0.111014 | 0.118735  | 0.102273  | 0.0986305 | 0.114365  |
| 0.112034  | 0.115385  | 0.128788 | 0.119318  | 0.117133  | 0.110868  | 0.115239  |
| 0.120338  | 0.11961   | 0.128059 | 0.129662  | 0.125437  | 0.117424  | 0.125874  |
| 0.120921  | 0.113782  | 0.122815 | 0.12296   | 0.119027  | 0.119172  | 0.123252  |
| 0.12296   | 0.124272  | 0.133887 | 0.137238  | 0.128934  | 0.125291  | 0.129662  |
| 0.0949883 | 0.100962  | 0.107663 | 0.120921  | 0.0986305 | 0.100233  | 0.111888  |
| 0.0949883 | 0.0936772 | 0.10708  | 0.11451   | 0.0995047 | 0.0920746 | 0.105186  |
| 0.103584  | 0.100524  | 0.113636 | 0.11757   | 0.104021  | 0.0977564 | 0.111451  |
| 0.0925117 | 0.0984848 | 0.104895 | 0.115822  | 0.099359  | 0.090472  | 0.107372  |
| 0.097465  | 0.0961538 | 0.106352 | 0.113199  | 0.0976107 | 0.0965909 | 0.104749  |
| 0.0999417 | 0.0992133 | 0.107955 | 0.11859   | 0.106789  | 0.0949883 | 0.109557  |
| 0.118735  | 0.11655   | 0.125    | 0.128642  | 0.119172  | 0.114656  | 0.119027  |



|           |           |          |          |           |           |          |
|-----------|-----------|----------|----------|-----------|-----------|----------|
| 0.126894  | 0.121795  | 0.131702 | 0.128059 | 0.124417  | 0.123397  | 0.131265 |
| 0.105478  | 0.0995047 | 0.112034 | 0.117716 | 0.10067   | 0.100233  | 0.112471 |
| 0.101544  | 0.0984848 | 0.114219 | 0.119318 | 0.104895  | 0.0992133 | 0.112908 |
| 0.120484  | 0.120629  | 0.123834 | 0.13243  | 0.121503  | 0.121066  | 0.121649 |
| 0.0962995 | 0.0938228 | 0.107517 | 0.114073 | 0.0920746 | 0.0936772 | 0.105915 |
| 0.134324  | 0.129225  | 0.13243  | 0.137821 | 0.128642  | 0.128497  | 0.130245 |
| 0.122378  | 0.122232  | 0.124854 | 0.133159 | 0.126894  | 0.116259  | 0.120921 |
| 0.124854  | 0.125583  | 0.12704  | 0.135052 | 0.129953  | 0.122815  | 0.128934 |
| 0.0884324 | 0.0912005 | 0.104895 | 0.113199 | 0.0938228 | 0.0895979 | 0.101836 |
| 0.0949883 | 0.0965909 | 0.105624 | 0.115093 | 0.0936772 | 0.0955711 | 0.107226 |
| 0.108829  | 0.108683  | 0.120629 | 0.123689 | 0.108974  | 0.104167  | 0.116113 |
| 0.111888  | 0.115822  | 0.116404 | 0.119755 | 0.109411  | 0.110723  | 0.117716 |
| 0.114219  | 0.113491  | 0.121649 | 0.124709 | 0.11757   | 0.113054  | 0.119464 |
| 0.102127  | 0.105769  | 0.115385 | 0.121066 | 0.112762  | 0.107372  | 0.114948 |
| 0.101107  | 0.105915  | 0.106206 | 0.119172 | 0.105332  | 0.103438  | 0.109557 |
| 0.113054  | 0.107663  | 0.119901 | 0.122086 | 0.111451  | 0.114802  | 0.116841 |
| 0.116841  | 0.115239  | 0.130099 | 0.121795 | 0.117861  | 0.11655   | 0.120338 |
| 0.113345  | 0.107663  | 0.124272 | 0.121795 | 0.110868  | 0.111597  | 0.11655  |
| 0.120484  | 0.120629  | 0.129371 | 0.124563 | 0.121795  | 0.11553   | 0.123106 |
| 0.122086  | 0.123397  | 0.13039  | 0.131119 | 0.122232  | 0.119755  | 0.128205 |
| 0.094697  | 0.0983392 | 0.116696 | 0.11859  | 0.101836  | 0.0981935 | 0.114219 |
| 0.118007  | 0.119318  | 0.122232 | 0.130536 | 0.121358  | 0.115385  | 0.127622 |
| 0.0942599 | 0.092366  | 0.107517 | 0.114073 | 0.0976107 | 0.092803  | 0.108829 |
| 0.0981935 | 0.105624  | 0.10708  | 0.122378 | 0.10912   | 0.0941142 | 0.113345 |
| 0.0964452 | 0.0980478 | 0.102418 | 0.119464 | 0.0980478 | 0.0999417 | 0.11014  |
| 0.0995047 | 0.100233  | 0.11014  | 0.11553  | 0.101981  | 0.0977564 | 0.11116  |
| 0.0939685 | 0.100233  | 0.107809 | 0.11553  | 0.099359  | 0.0942599 | 0.106498 |
| 0.120338  | 0.120775  | 0.124854 | 0.127331 | 0.121358  | 0.116259  | 0.12296  |
| 0.103584  | 0.106352  | 0.120047 | 0.127185 | 0.106352  | 0.103584  | 0.121358 |
| 0.118153  | 0.124126  | 0.127914 | 0.129516 | 0.124417  | 0.116696  | 0.124563 |
| 0.097465  | 0.100524  | 0.111014 | 0.113782 | 0.103147  | 0.0939685 | 0.107663 |
| 0.108392  | 0.103293  | 0.122232 | 0.119755 | 0.110577  | 0.105769  | 0.112762 |
| 0.109994  | 0.106352  | 0.120921 | 0.119318 | 0.111014  | 0.105624  | 0.116696 |
| 0.103584  | 0.101107  | 0.105769 | 0.126311 | 0.109557  | 0.0989219 | 0.114656 |
| 0.0935315 | 0.08581   | 0.111742 | 0.106061 | 0.088141  | 0.0882867 | 0.107226 |
| 0.107372  | 0.104021  | 0.120047 | 0.126311 | 0.108683  | 0.100087  | 0.116696 |
| 0.100816  | 0.103875  | 0.110577 | 0.122669 | 0.105624  | 0.101399  | 0.112179 |
| 0.092366  | 0.0989219 | 0.101836 | 0.117133 | 0.104167  | 0.0914918 | 0.112762 |
| 0.10373   | 0.107372  | 0.135635 | 0.122086 | 0.114073  | 0.113054  | 0.120338 |
| 0.11961   | 0.121503  | 0.140734 | 0.126603 | 0.120047  | 0.118153  | 0.117279 |
| 0.0878497 | 0.0856643 | 0.105769 | 0.10708  | 0.0917832 | 0.0866841 | 0.106206 |
| 0.115093  | 0.116113  | 0.129225 | 0.127331 | 0.124563  | 0.114219  | 0.126457 |
| 0.0957168 | 0.0929487 | 0.125291 | 0.110868 | 0.106935  | 0.0995047 | 0.112034 |
| 0.110868  | 0.113054  | 0.13141  | 0.125437 | 0.114219  | 0.111451  | 0.120775 |

|           |           |          |           |           |           |           |
|-----------|-----------|----------|-----------|-----------|-----------|-----------|
| 0.100962  | 0.10373   | 0.120047 | 0.121066  | 0.11014   | 0.102127  | 0.113491  |
| 0.0977564 | 0.0981935 | 0.117424 | 0.114656  | 0.102273  | 0.0977564 | 0.107663  |
| 0.0976107 | 0.0992133 | 0.126603 | 0.115385  | 0.10271   | 0.102855  | 0.11451   |
| 0.106789  | 0.108392  | 0.126748 | 0.121358  | 0.113636  | 0.110868  | 0.116113  |
| 0.119027  | 0.11859   | 0.140443 | 0.133013  | 0.121503  | 0.117279  | 0.131556  |
| 0.10067   | 0.104895  | 0.121503 | 0.118735  | 0.102855  | 0.0995047 | 0.119901  |
| 0.0965909 | 0.101399  | 0.119172 | 0.119901  | 0.108392  | 0.0995047 | 0.113491  |
| 0.123834  | 0.127185  | 0.119027 | 0.134615  | 0.125728  | 0.121503  | 0.127914  |
| 0.103584  | 0.103438  | 0.135781 | 0.120484  | 0.111014  | 0.107955  | 0.119901  |
| 0.0887238 | 0.097028  | 0.112179 | 0.114365  | 0.0955711 | 0.0942599 | 0.113199  |
| 0.212413  | 0.217512  | 0.215472 | 0.228147  | 0.218969  | 0.215035  | 0.226107  |
| 0.106643  | 0.10708   | 0.125146 | 0.124709  | 0.110286  | 0.107226  | 0.122669  |
| 0.0868298 | 0.08581   | 0.116404 | 0.11014   | 0.095134  | 0.0929487 | 0.111014  |
| 0.115239  | 0.11859   | 0.128497 | 0.128059  | 0.122669  | 0.117861  | 0.127768  |
| 0.0939685 | 0.0929487 | 0.123252 | 0.116113  | 0.100524  | 0.0968823 | 0.112908  |
| 0.105624  | 0.106935  | 0.134907 | 0.124272  | 0.108683  | 0.109411  | 0.118444  |
| 0.107663  | 0.107809  | 0.118881 | 0.130682  | 0.111014  | 0.107955  | 0.123106  |
| 0.101399  | 0.103875  | 0.115239 | 0.118881  | 0.10912   | 0.101981  | 0.116841  |
| 0.0996503 | 0.0983392 | 0.127768 | 0.113636  | 0.104749  | 0.10373   | 0.113636  |
| 0.110868  | 0.115093  | 0.126166 | 0.131556  | 0.116841  | 0.111451  | 0.127185  |
| 0.112471  | 0.113491  | 0.131556 | 0.122086  | 0.119027  | 0.113636  | 0.125583  |
| 0.109411  | 0.112762  | 0.126166 | 0.119318  | 0.119172  | 0.112908  | 0.123689  |
| 0.110868  | 0.112762  | 0.126748 | 0.120775  | 0.113928  | 0.110286  | 0.123106  |
| 0.095134  | 0.0906177 | 0.11451  | 0.106789  | 0.0967366 | 0.0942599 | 0.106206  |
| 0.101253  | 0.102564  | 0.120047 | 0.126603  | 0.1081    | 0.0995047 | 0.116987  |
| 0.116841  | 0.10912   | 0.129225 | 0.126166  | 0.121066  | 0.111014  | 0.125874  |
| 0.103293  | 0.100233  | 0.124709 | 0.118735  | 0.107809  | 0.103001  | 0.114948  |
| 0.122523  | 0.123252  | 0.134033 | 0.136801  | 0.124126  | 0.124563  | 0.133013  |
| 0.126457  | 0.125437  | 0.13447  | 0.142774  | 0.128351  | 0.121212  | 0.133741  |
| 0.10373   | 0.106206  | 0.11757  | 0.109266  | 0.105624  | 0.10169   | 0.113054  |
| 0.104312  | 0.103584  | 0.126894 | 0.114802  | 0.107955  | 0.10373   | 0.118298  |
| 0.112325  | 0.112471  | 0.127622 | 0.130682  | 0.118298  | 0.112908  | 0.12398   |
| 0.11014   | 0.113491  | 0.123397 | 0.121212  | 0.115239  | 0.116841  | 0.123543  |
| 0.115967  | 0.116404  | 0.12602  | 0.136364  | 0.12602   | 0.115967  | 0.133159  |
| 0.128788  | 0.128351  | 0.13447  | 0.146562  | 0.130682  | 0.125583  | 0.138695  |
| 0.0948427 | 0.087704  | 0.109848 | 0.110577  | 0.0932401 | 0.0872669 | 0.100087  |
| 0.119464  | 0.117861  | 0.131847 | 0.132284  | 0.122815  | 0.117716  | 0.11859   |
| 0.131556  | 0.130245  | 0.141026 | 0.145833  | 0.132867  | 0.13039   | 0.142045  |
| 0.081148  | 0.0859557 | 0.122086 | 0.0866841 | 0.0882867 | 0.0849359 | 0.0805653 |
| 0.109411  | 0.111014  | 0.125874 | 0.132721  | 0.114219  | 0.108246  | 0.120775  |
| 0.133159  | 0.137092  | 0.133596 | 0.137529  | 0.133304  | 0.134033  | 0.134907  |
| 0.116841  | 0.11553   | 0.120775 | 0.130245  | 0.118444  | 0.110723  | 0.125874  |
| 0.119901  | 0.120047  | 0.130828 | 0.128642  | 0.124126  | 0.11553   | 0.121066  |
| 0.108392  | 0.108246  | 0.126603 | 0.121503  | 0.107663  | 0.101981  | 0.112179  |

|           |           |          |          |           |           |           |
|-----------|-----------|----------|----------|-----------|-----------|-----------|
| 0.102418  | 0.106643  | 0.123834 | 0.115239 | 0.107809  | 0.106206  | 0.112617  |
| 0.116841  | 0.118444  | 0.120192 | 0.124417 | 0.121358  | 0.113054  | 0.125     |
| 0.0980478 | 0.0912005 | 0.115676 | 0.106789 | 0.0981935 | 0.0960082 | 0.101544  |
| 0.106935  | 0.105332  | 0.12398  | 0.119755 | 0.112325  | 0.106352  | 0.113928  |
| 0.110723  | 0.110286  | 0.129516 | 0.12704  | 0.116987  | 0.112179  | 0.122378  |
| 0.112179  | 0.116404  | 0.132721 | 0.123252 | 0.117279  | 0.111597  | 0.120629  |
| 0.111888  | 0.110286  | 0.129516 | 0.116841 | 0.120192  | 0.112471  | 0.110723  |
| 0.11014   | 0.109994  | 0.128059 | 0.125583 | 0.116696  | 0.117133  | 0.119172  |
| 0.125     | 0.124563  | 0.139132 | 0.136364 | 0.131847  | 0.128497  | 0.134615  |
| 0.0964452 | 0.0913462 | 0.124272 | 0.11655  | 0.103584  | 0.0949883 | 0.103438  |
| 0.097028  | 0.101544  | 0.120192 | 0.115093 | 0.101836  | 0.0920746 | 0.109848  |
| 0.112762  | 0.110868  | 0.134761 | 0.113636 | 0.115822  | 0.113345  | 0.113928  |
| 0.085373  | 0.0843531 | 0.119027 | 0.106352 | 0.0983392 | 0.0903263 | 0.0929487 |
| 0.125728  | 0.120921  | 0.139277 | 0.139423 | 0.128497  | 0.122232  | 0.128934  |
| 0.136509  | 0.138112  | 0.15035  | 0.146416 | 0.13549   | 0.137383  | 0.134761  |
| 0.11553   | 0.11655   | 0.126166 | 0.12398  | 0.11655   | 0.11553   | 0.121941  |
| 0.110723  | 0.109411  | 0.112034 | 0.122378 | 0.109994  | 0.107517  | 0.113054  |
| 0.12398   | 0.125874  | 0.13549  | 0.132721 | 0.123834  | 0.123689  | 0.133304  |
| 0.117133  | 0.114656  | 0.126894 | 0.129079 | 0.120192  | 0.111888  | 0.126166  |
| 0.112471  | 0.10912   | 0.130099 | 0.122669 | 0.111451  | 0.1081    | 0.113054  |
| 0.11655   | 0.118444  | 0.136218 | 0.13141  | 0.128059  | 0.119464  | 0.128788  |
| 0.122669  | 0.121941  | 0.139423 | 0.128205 | 0.126603  | 0.116259  | 0.126748  |
| 0.104749  | 0.0999417 | 0.123834 | 0.109703 | 0.106935  | 0.103584  | 0.112617  |
| 0.153118  | 0.150641  | 0.150932 | 0.158654 | 0.15472   | 0.153409  | 0.157197  |
| 0.106206  | 0.105478  | 0.128205 | 0.120775 | 0.107517  | 0.107955  | 0.114073  |
| 0.121941  | 0.125291  | 0.134324 | 0.138549 | 0.126166  | 0.120192  | 0.128642  |
| 0.100524  | 0.105041  | 0.118153 | 0.118881 | 0.106789  | 0.0987762 | 0.109266  |
| 0.121503  | 0.128059  | 0.134178 | 0.130828 | 0.122815  | 0.123834  | 0.124709  |
| 0.107226  | 0.107663  | 0.121358 | 0.118007 | 0.110286  | 0.104312  | 0.122086  |
| 0.124563  | 0.13345   | 0.136655 | 0.147873 | 0.135781  | 0.129516  | 0.144668  |
| 0.137821  | 0.139423  | 0.142628 | 0.149184 | 0.13884   | 0.134907  | 0.151224  |
| 0.113199  | 0.117424  | 0.122669 | 0.13447  | 0.116841  | 0.112325  | 0.133596  |
| 0.128497  | 0.133304  | 0.13039  | 0.145105 | 0.135635  | 0.127331  | 0.145979  |
| 0.131556  | 0.138112  | 0.140152 | 0.150787 | 0.141317  | 0.129225  | 0.145251  |
| 0.13243   | 0.142191  | 0.141026 | 0.15574  | 0.13986   | 0.133304  | 0.152826  |
| 0.101107  | 0.106206  | 0.120192 | 0.105186 | 0.106206  | 0.104604  | 0.107809  |
| 0.131847  | 0.138695  | 0.13141  | 0.147582 | 0.131993  | 0.133887  | 0.143211  |
| 0.101836  | 0.104895  | 0.11655  | 0.123689 | 0.10373   | 0.0960082 | 0.117861  |
| 0.102855  | 0.105624  | 0.113199 | 0.118881 | 0.104458  | 0.099359  | 0.115093  |
| 0.102418  | 0.104604  | 0.125291 | 0.124854 | 0.108683  | 0.102418  | 0.115239  |
| 0.107372  | 0.115093  | 0.116841 | 0.131265 | 0.111014  | 0.108537  | 0.133013  |
| 0.104604  | 0.102418  | 0.113491 | 0.124417 | 0.103293  | 0.105769  | 0.114802  |
| 0.0987762 | 0.108246  | 0.113782 | 0.124709 | 0.103584  | 0.0984848 | 0.121503  |
| 0.112179  | 0.111742  | 0.122523 | 0.136946 | 0.110868  | 0.112471  | 0.131702  |

|           |           |          |          |           |           |          |
|-----------|-----------|----------|----------|-----------|-----------|----------|
| 0.109411  | 0.111597  | 0.126457 | 0.126311 | 0.109557  | 0.104749  | 0.123397 |
| 0.0878497 | 0.0917832 | 0.108974 | 0.111116 | 0.0882867 | 0.0875583 | 0.106789 |
| 0.112325  | 0.119172  | 0.120047 | 0.134761 | 0.11859   | 0.112908  | 0.138258 |
| 0.109266  | 0.111742  | 0.117279 | 0.131993 | 0.109411  | 0.106935  | 0.131702 |
| 0.104895  | 0.108537  | 0.113199 | 0.117133 | 0.103584  | 0.0999417 | 0.107809 |
| 0.210082  | 0.214307  | 0.213432 | 0.225233 | 0.216346  | 0.210956  | 0.219988 |
| 0.132867  | 0.136509  | 0.142045 | 0.14627  | 0.138258  | 0.134033  | 0.149767 |
| 0.120484  | 0.125     | 0.127331 | 0.134178 | 0.119172  | 0.119318  | 0.131265 |
| 0.113928  | 0.121066  | 0.127768 | 0.135198 | 0.118153  | 0.113928  | 0.13141  |
| 0.207168  | 0.211101  | 0.208479 | 0.220571 | 0.211684  | 0.207459  | 0.21824  |
| 0.108683  | 0.117279  | 0.116404 | 0.127914 | 0.114656  | 0.104895  | 0.115093 |
| 0.11116   | 0.113054  | 0.111305 | 0.125728 | 0.11014   | 0.108537  | 0.122815 |
| 0.11757   | 0.118007  | 0.125874 | 0.13243  | 0.114802  | 0.11553   | 0.12398  |
| 0.108683  | 0.110577  | 0.122815 | 0.122669 | 0.10708   | 0.0999417 | 0.119172 |
| 0.244755  | 0.251311  | 0.245484 | 0.253788 | 0.252477  | 0.245629  | 0.254953 |
| 0.109994  | 0.119755  | 0.129371 | 0.127768 | 0.11655   | 0.113491  | 0.126603 |
| 0.0968823 | 0.100233  | 0.108974 | 0.114073 | 0.0996503 | 0.0925117 | 0.104167 |
| 0.11553   | 0.113345  | 0.120629 | 0.13447  | 0.111597  | 0.113782  | 0.125437 |
| 0.111742  | 0.111888  | 0.118298 | 0.131847 | 0.108974  | 0.112908  | 0.125146 |
| 0.113491  | 0.121503  | 0.131119 | 0.131556 | 0.119464  | 0.115239  | 0.128059 |
| 0.118153  | 0.121212  | 0.123543 | 0.139132 | 0.122378  | 0.120484  | 0.134761 |
| 0.10067   | 0.106643  | 0.109266 | 0.115822 | 0.101981  | 0.0986305 | 0.106206 |
| 0.109848  | 0.11757   | 0.118444 | 0.130828 | 0.113199  | 0.109266  | 0.134033 |
| 0.119318  | 0.126166  | 0.120921 | 0.141463 | 0.121503  | 0.121649  | 0.133596 |
| 0.103293  | 0.105186  | 0.116841 | 0.11961  | 0.099359  | 0.0960082 | 0.11553  |
| 0.104604  | 0.110577  | 0.116696 | 0.12704  | 0.110286  | 0.106643  | 0.128205 |
| 0.0840618 | 0.0842075 | 0.117424 | 0.104749 | 0.0941142 | 0.0875583 | 0.101836 |
| 0.136655  | 0.138258  | 0.144085 | 0.147436 | 0.137966  | 0.13345   | 0.14831  |
| 0.11451   | 0.121358  | 0.130682 | 0.131119 | 0.119901  | 0.115967  | 0.126166 |
| 0.113928  | 0.11553   | 0.117861 | 0.127914 | 0.11116   | 0.115385  | 0.123252 |
| 0.184441  | 0.188374  | 0.185752 | 0.200175 | 0.193328  | 0.184732  | 0.196678 |
| 0.197261  | 0.203234  | 0.201486 | 0.213869 | 0.206731  | 0.199301  | 0.210956 |
| 0.111305  | 0.109703  | 0.127768 | 0.126748 | 0.106789  | 0.101107  | 0.118881 |
| 0.102273  | 0.100087  | 0.117861 | 0.119172 | 0.0977564 | 0.092366  | 0.112179 |
| 0.125291  | 0.133596  | 0.140006 | 0.137821 | 0.13039   | 0.127622  | 0.138112 |
| 0.0984848 | 0.102418  | 0.109703 | 0.116259 | 0.0992133 | 0.0958625 | 0.108392 |
| 0.110577  | 0.121503  | 0.13141  | 0.133887 | 0.118881  | 0.114948  | 0.128934 |
| 0.124126  | 0.125146  | 0.135344 | 0.134033 | 0.128642  | 0.128205  | 0.138986 |
| 0.219114  | 0.22567   | 0.221008 | 0.233974 | 0.226544  | 0.217366  | 0.231935 |
| 0.106061  | 0.114365  | 0.113199 | 0.128497 | 0.106206  | 0.102855  | 0.123252 |
| 0.202943  | 0.207751  | 0.202214 | 0.216055 | 0.212121  | 0.202943  | 0.209062 |
| 0.0888695 | 0.0968823 | 0.108537 | 0.109266 | 0.0942599 | 0.0909091 | 0.101107 |
| 0.105915  | 0.104604  | 0.115093 | 0.123689 | 0.105186  | 0.106789  | 0.118153 |
| 0.105769  | 0.116696  | 0.107663 | 0.130828 | 0.112325  | 0.106643  | 0.120338 |

|           |           |          |          |           |           |          |
|-----------|-----------|----------|----------|-----------|-----------|----------|
| 0.101399  | 0.102127  | 0.116696 | 0.11859  | 0.0980478 | 0.0949883 | 0.115093 |
| 0.201486  | 0.205711  | 0.202797 | 0.216638 | 0.207168  | 0.202069  | 0.21722  |
| 0.123689  | 0.126166  | 0.133159 | 0.144085 | 0.125     | 0.12398   | 0.143502 |
| 0.101836  | 0.104312  | 0.109848 | 0.121066 | 0.104021  | 0.103293  | 0.113491 |
| 0.116404  | 0.120921  | 0.126748 | 0.137966 | 0.122086  | 0.11757   | 0.138549 |
| 0.116113  | 0.118007  | 0.123252 | 0.128351 | 0.117424  | 0.112908  | 0.123689 |
| 0.103293  | 0.105186  | 0.119172 | 0.122523 | 0.0999417 | 0.0933858 | 0.114656 |
| 0.0941142 | 0.0971737 | 0.112325 | 0.106643 | 0.0986305 | 0.0964452 | 0.101107 |
| 0.10373   | 0.107955  | 0.114365 | 0.120629 | 0.105624  | 0.101107  | 0.111305 |
| 0.115385  | 0.113199  | 0.118735 | 0.125874 | 0.108537  | 0.111305  | 0.126457 |
| 0.102564  | 0.10912   | 0.11116  | 0.124709 | 0.109411  | 0.103438  | 0.125583 |
| 0.105624  | 0.105478  | 0.112471 | 0.12398  | 0.1081    | 0.105332  | 0.112908 |
| 0.184732  | 0.189248  | 0.186043 | 0.200758 | 0.192162  | 0.182984  | 0.197261 |
| 0.118153  | 0.113054  | 0.123543 | 0.131847 | 0.112179  | 0.114073  | 0.12398  |
| 0.118881  | 0.122523  | 0.129808 | 0.136655 | 0.11961   | 0.115093  | 0.136364 |
| 0.114073  | 0.116841  | 0.120629 | 0.131556 | 0.110431  | 0.10912   | 0.129808 |
| 0.1081    | 0.119318  | 0.12602  | 0.132867 | 0.119027  | 0.113054  | 0.127914 |
| 0.111888  | 0.116987  | 0.122523 | 0.134324 | 0.118153  | 0.114802  | 0.133741 |
| 0.0979021 | 0.10067   | 0.116404 | 0.108392 | 0.0989219 | 0.100233  | 0.104021 |
| 0.10271   | 0.105769  | 0.117424 | 0.122232 | 0.109848  | 0.104749  | 0.11553  |
| 0.108246  | 0.111305  | 0.11451  | 0.11961  | 0.108392  | 0.102127  | 0.106206 |
| 0.115967  | 0.118153  | 0.120192 | 0.136072 | 0.116987  | 0.11014   | 0.13345  |
| 0.106643  | 0.10912   | 0.116696 | 0.130245 | 0.106498  | 0.108683  | 0.126166 |
| 0.10708   | 0.108392  | 0.121212 | 0.127768 | 0.105478  | 0.0995047 | 0.119318 |
| 0.113345  | 0.116987  | 0.123397 | 0.13345  | 0.114365  | 0.112471  | 0.125583 |
| 0.127477  | 0.128497  | 0.137821 | 0.137966 | 0.126457  | 0.126311  | 0.130099 |
| 0.100379  | 0.109848  | 0.120047 | 0.12602  | 0.107226  | 0.104749  | 0.119027 |
| 0.127914  | 0.130099  | 0.137383 | 0.143357 | 0.13243   | 0.129371  | 0.145688 |
| 0.101107  | 0.101836  | 0.118735 | 0.122086 | 0.100087  | 0.0938228 | 0.114219 |
| 0.11014   | 0.111742  | 0.121941 | 0.128788 | 0.11757   | 0.11655   | 0.127622 |
| 0.108537  | 0.117133  | 0.119755 | 0.131556 | 0.115967  | 0.113199  | 0.133013 |
| 0.106789  | 0.110723  | 0.114802 | 0.121649 | 0.109557  | 0.102127  | 0.112908 |
| 0.184295  | 0.190559  | 0.184732 | 0.201486 | 0.192016  | 0.184295  | 0.19391  |
| 0.0987762 | 0.0983392 | 0.107955 | 0.118298 | 0.10067   | 0.0979021 | 0.108392 |
| 0.0944056 | 0.101253  | 0.106498 | 0.118298 | 0.101253  | 0.0949883 | 0.111014 |
| 0.115385  | 0.113199  | 0.116404 | 0.127331 | 0.108829  | 0.112179  | 0.124417 |
| 0.170455  | 0.175845  | 0.178467 | 0.191142 | 0.180798  | 0.172203  | 0.186772 |
| 0.122815  | 0.130245  | 0.13986  | 0.138258 | 0.127331  | 0.124272  | 0.133304 |
| 0.129225  | 0.137821  | 0.150932 | 0.140006 | 0.137529  | 0.135052  | 0.139714 |
| 0.136946  | 0.13884   | 0.146125 | 0.148893 | 0.139714  | 0.134907  | 0.152389 |
| 0.101107  | 0.106206  | 0.118444 | 0.125583 | 0.109411  | 0.10373   | 0.116841 |
| 0.114656  | 0.120047  | 0.120629 | 0.135052 | 0.115676  | 0.116696  | 0.137092 |
| 0.206294  | 0.213432  | 0.206439 | 0.222319 | 0.21285   | 0.205711  | 0.218823 |
| 0.120338  | 0.119901  | 0.125728 | 0.142774 | 0.120192  | 0.118298  | 0.132867 |

|           |           |          |          |           |           |          |
|-----------|-----------|----------|----------|-----------|-----------|----------|
| 0.115822  | 0.123543  | 0.126457 | 0.138549 | 0.123543  | 0.118444  | 0.140589 |
| 0.103875  | 0.101107  | 0.113345 | 0.120484 | 0.101981  | 0.104458  | 0.111742 |
| 0.16215   | 0.166667  | 0.161713 | 0.182255 | 0.170455  | 0.161859  | 0.17905  |
| 0.104458  | 0.108683  | 0.112762 | 0.128059 | 0.106352  | 0.103875  | 0.123397 |
| 0.141026  | 0.145833  | 0.144668 | 0.151515 | 0.141754  | 0.142191  | 0.149476 |
| 0.102564  | 0.106206  | 0.118153 | 0.119755 | 0.103875  | 0.105478  | 0.116841 |
| 0.181818  | 0.1875    | 0.184586 | 0.199009 | 0.190997  | 0.183566  | 0.196387 |
| 0.105478  | 0.113491  | 0.122523 | 0.127914 | 0.110577  | 0.109557  | 0.120921 |
| 0.0926573 | 0.0910548 | 0.10271  | 0.113928 | 0.0945513 | 0.0894522 | 0.11451  |
| 0.104167  | 0.108392  | 0.119464 | 0.125728 | 0.11014   | 0.110868  | 0.125146 |
| 0.106061  | 0.114948  | 0.119318 | 0.127622 | 0.109994  | 0.106935  | 0.122086 |
| 0.110431  | 0.109411  | 0.113199 | 0.125    | 0.107663  | 0.108974  | 0.120338 |
| 0.114219  | 0.116696  | 0.116987 | 0.134033 | 0.113782  | 0.113636  | 0.125583 |
| 0.100379  | 0.102564  | 0.120921 | 0.120775 | 0.100524  | 0.0942599 | 0.116696 |
| 0.183858  | 0.187791  | 0.187209 | 0.201049 | 0.189831  | 0.183858  | 0.196096 |
| 0.112325  | 0.119755  | 0.121212 | 0.133887 | 0.117716  | 0.113782  | 0.126894 |
| 0.102273  | 0.107955  | 0.118153 | 0.123543 | 0.103584  | 0.104604  | 0.122378 |
| 0.206148  | 0.208916  | 0.209207 | 0.218094 | 0.211247  | 0.20877   | 0.216929 |
| 0.110577  | 0.113345  | 0.123834 | 0.133887 | 0.112179  | 0.111742  | 0.126311 |
| 0.104895  | 0.103875  | 0.11961  | 0.122378 | 0.10067   | 0.0949883 | 0.118298 |
| 0.097028  | 0.0992133 | 0.114365 | 0.11451  | 0.095134  | 0.0871212 | 0.112762 |
| 0.127185  | 0.129371  | 0.136655 | 0.141754 | 0.128205  | 0.13039   | 0.142337 |
| 0.181381  | 0.189977  | 0.187063 | 0.200029 | 0.192599  | 0.18109   | 0.197115 |
| 0.102564  | 0.104167  | 0.113491 | 0.115967 | 0.101544  | 0.0976107 | 0.107809 |
| 0.12296   | 0.125728  | 0.133887 | 0.140152 | 0.121941  | 0.121795  | 0.130245 |
| 0.101399  | 0.101836  | 0.114365 | 0.119755 | 0.099796  | 0.0938228 | 0.11451  |
| 0.0976107 | 0.0977564 | 0.114948 | 0.118298 | 0.097465  | 0.0891608 | 0.11451  |
| 0.100087  | 0.0996503 | 0.118007 | 0.117279 | 0.0964452 | 0.0919289 | 0.111451 |
| 0.106352  | 0.112908  | 0.117861 | 0.127914 | 0.112617  | 0.106061  | 0.130536 |
| 0.0895979 | 0.0917832 | 0.105769 | 0.114365 | 0.0871212 | 0.0907634 | 0.109411 |
| 0.10912   | 0.118881  | 0.129662 | 0.128351 | 0.116841  | 0.111742  | 0.126311 |
| 0.122232  | 0.123252  | 0.129662 | 0.137675 | 0.127331  | 0.125146  | 0.137966 |
| 0.106789  | 0.115676  | 0.123252 | 0.130973 | 0.114802  | 0.109994  | 0.12398  |
| 0.117716  | 0.119027  | 0.130682 | 0.13141  | 0.120775  | 0.116259  | 0.125583 |
| 0.186334  | 0.19289   | 0.189394 | 0.204983 | 0.195804  | 0.188083  | 0.2044   |
| 0.108683  | 0.115822  | 0.123689 | 0.128788 | 0.110577  | 0.108974  | 0.121795 |
| 0.119901  | 0.125291  | 0.131993 | 0.136801 | 0.125583  | 0.120775  | 0.138258 |
| 0.0984848 | 0.103001  | 0.112908 | 0.119172 | 0.0980478 | 0.0926573 | 0.113054 |
| 0.0861014 | 0.087704  | 0.106935 | 0.108829 | 0.0874126 | 0.0872669 | 0.105624 |
| 0.104458  | 0.111888  | 0.114802 | 0.130682 | 0.114802  | 0.107955  | 0.123106 |
| 0.102855  | 0.10912   | 0.108829 | 0.114802 | 0.101253  | 0.0990676 | 0.108974 |
| 0.124126  | 0.124563  | 0.133304 | 0.134615 | 0.126311  | 0.12296   | 0.130828 |
| 0.108537  | 0.115093  | 0.11859  | 0.130973 | 0.115385  | 0.10708   | 0.132139 |
| 0.0913462 | 0.0973193 | 0.104895 | 0.112617 | 0.0964452 | 0.0884324 | 0.106498 |

|           |           |          |          |           |           |          |
|-----------|-----------|----------|----------|-----------|-----------|----------|
| 0.0865385 | 0.0919289 | 0.104458 | 0.111014 | 0.0925117 | 0.0844988 | 0.102564 |
| 0.0893065 | 0.0920746 | 0.111888 | 0.120192 | 0.0932401 | 0.0890152 | 0.111742 |
| 0.0944056 | 0.0971737 | 0.109703 | 0.109557 | 0.0948427 | 0.0952797 | 0.103438 |
| 0.117279  | 0.124126  | 0.131993 | 0.133887 | 0.121795  | 0.119027  | 0.129225 |
| 0.100233  | 0.105915  | 0.110577 | 0.117133 | 0.100379  | 0.0981935 | 0.111597 |
| 0.103001  | 0.109266  | 0.113636 | 0.124854 | 0.107809  | 0.105041  | 0.125437 |
| 0.0957168 | 0.0981935 | 0.102273 | 0.117279 | 0.0961538 | 0.0901807 | 0.106498 |
| 0.0999417 | 0.103584  | 0.115822 | 0.122669 | 0.0962995 | 0.0941142 | 0.115385 |
| 0.0962995 | 0.0955711 | 0.107517 | 0.11553  | 0.0987762 | 0.0971737 | 0.110868 |
| 0.103584  | 0.10373   | 0.120629 | 0.124854 | 0.100524  | 0.0960082 | 0.115822 |
| 0.104167  | 0.11014   | 0.11451  | 0.126894 | 0.107809  | 0.101544  | 0.121358 |
| 0.108829  | 0.114219  | 0.119464 | 0.129225 | 0.112762  | 0.10708   | 0.129225 |
| 0.104167  | 0.106643  | 0.110723 | 0.124563 | 0.104604  | 0.103875  | 0.11757  |
| 0.090035  | 0.0945513 | 0.109703 | 0.115385 | 0.090472  | 0.0914918 | 0.110723 |
| 0.100962  | 0.101981  | 0.115093 | 0.121941 | 0.099359  | 0.0933858 | 0.113199 |
| 0.110286  | 0.112471  | 0.123834 | 0.131556 | 0.118298  | 0.119318  | 0.131265 |
| 0.108392  | 0.110286  | 0.123689 | 0.129371 | 0.109703  | 0.106352  | 0.126457 |
| 0.0878497 | 0.0912005 | 0.111305 | 0.10912  | 0.0932401 | 0.0910548 | 0.109411 |
| 0.099796  | 0.100816  | 0.115676 | 0.119318 | 0.100233  | 0.0910548 | 0.112908 |
| 0.11014   | 0.115822  | 0.117279 | 0.129079 | 0.113491  | 0.111305  | 0.132867 |
| 0.0903263 | 0.0983392 | 0.110286 | 0.107517 | 0.0980478 | 0.0967366 | 0.104312 |
| 0.108392  | 0.117279  | 0.118735 | 0.132867 | 0.114656  | 0.112179  | 0.133159 |
| 0.108683  | 0.106789  | 0.110286 | 0.123252 | 0.104749  | 0.107226  | 0.122669 |
| 0.0938228 | 0.0957168 | 0.114656 | 0.117133 | 0.0930944 | 0.0964452 | 0.115967 |
| 0.0987762 | 0.106498  | 0.111742 | 0.125583 | 0.106498  | 0.099359  | 0.119172 |
| 0.0939685 | 0.0990676 | 0.104895 | 0.118444 | 0.0967366 | 0.097465  | 0.108537 |
| 0.117716  | 0.120775  | 0.119901 | 0.136655 | 0.119318  | 0.115093  | 0.136946 |
| 0.11859   | 0.117861  | 0.121941 | 0.138403 | 0.116696  | 0.117133  | 0.129079 |
| 0.100962  | 0.11014   | 0.123543 | 0.124272 | 0.106352  | 0.105332  | 0.121941 |
| 0.187209  | 0.19289   | 0.190851 | 0.2044   | 0.194056  | 0.186626  | 0.198864 |
| 0.160111  | 0.162879  | 0.160839 | 0.178759 | 0.164918  | 0.161276  | 0.175554 |
| 0.10708   | 0.115093  | 0.123543 | 0.129808 | 0.115093  | 0.107663  | 0.121358 |
| 0.106643  | 0.109411  | 0.112617 | 0.125291 | 0.112034  | 0.105478  | 0.120338 |
| 0.131993  | 0.142337  | 0.153118 | 0.145105 | 0.140297  | 0.136946  | 0.142774 |
| 0.119901  | 0.125291  | 0.119172 | 0.140297 | 0.120338  | 0.123689  | 0.132721 |
| 0.113928  | 0.118444  | 0.120192 | 0.134615 | 0.11553   | 0.111597  | 0.126166 |
| 0.099796  | 0.109266  | 0.117424 | 0.124854 | 0.106935  | 0.10067   | 0.119901 |
| 0.0849359 | 0.0839161 | 0.114802 | 0.110286 | 0.090035  | 0.0849359 | 0.103001 |
| 0.110868  | 0.115385  | 0.127622 | 0.133304 | 0.111597  | 0.111742  | 0.128642 |
| 0.192308  | 0.200903  | 0.19799  | 0.211247 | 0.200612  | 0.19493   | 0.20979  |
| 0.10271   | 0.106061  | 0.11451  | 0.120192 | 0.104021  | 0.0992133 | 0.111451 |
| 0.104895  | 0.113199  | 0.113782 | 0.126457 | 0.111451  | 0.104604  | 0.124417 |
| 0.0952797 | 0.100962  | 0.110868 | 0.119464 | 0.0980478 | 0.092366  | 0.115967 |
| 0.106498  | 0.110723  | 0.117716 | 0.130099 | 0.108392  | 0.103001  | 0.12398  |

|           |           |          |          |           |           |          |
|-----------|-----------|----------|----------|-----------|-----------|----------|
| 0.177739  | 0.181964  | 0.181381 | 0.196387 | 0.183712  | 0.175991  | 0.193765 |
| 0.24359   | 0.245192  | 0.24461  | 0.25204  | 0.249272  | 0.242133  | 0.249709 |
| 0.115385  | 0.118153  | 0.120484 | 0.134033 | 0.114656  | 0.110723  | 0.134615 |
| 0.108974  | 0.10912   | 0.124563 | 0.131702 | 0.110577  | 0.109848  | 0.127622 |
| 0.107809  | 0.116987  | 0.12602  | 0.130245 | 0.113782  | 0.109848  | 0.123252 |
| 0.101253  | 0.106643  | 0.109266 | 0.124854 | 0.100524  | 0.103584  | 0.119318 |
| 0.0979021 | 0.100379  | 0.105624 | 0.114802 | 0.0980478 | 0.0912005 | 0.106352 |
| 0.103584  | 0.11014   | 0.108392 | 0.125728 | 0.11014   | 0.108829  | 0.123106 |
| 0.104895  | 0.105915  | 0.11553  | 0.125291 | 0.108246  | 0.105478  | 0.122669 |
| 0.0981935 | 0.102127  | 0.105915 | 0.113636 | 0.0954254 | 0.0917832 | 0.105769 |
| 0.102127  | 0.106352  | 0.113345 | 0.125146 | 0.108392  | 0.102418  | 0.122523 |
| 0.0885781 | 0.0954254 | 0.113782 | 0.111597 | 0.0980478 | 0.0944056 | 0.109557 |
| 0.0925117 | 0.0941142 | 0.113928 | 0.116696 | 0.092366  | 0.0936772 | 0.112617 |
| 0.11451   | 0.118153  | 0.121941 | 0.132867 | 0.115822  | 0.108974  | 0.13141  |
| 0.107955  | 0.116841  | 0.119464 | 0.131265 | 0.114802  | 0.112034  | 0.13243  |
| 0.0930944 | 0.0938228 | 0.113928 | 0.113491 | 0.10169   | 0.100087  | 0.110868 |
| 0.106498  | 0.1081    | 0.124126 | 0.114073 | 0.109848  | 0.105332  | 0.112034 |
| 0.122815  | 0.121212  | 0.125583 | 0.130099 | 0.118881  | 0.11961   | 0.127185 |
| 0.0987762 | 0.10067   | 0.11553  | 0.121212 | 0.0971737 | 0.0903263 | 0.113636 |
| 0.103875  | 0.109557  | 0.120921 | 0.124272 | 0.108683  | 0.103584  | 0.118444 |
| 0.116696  | 0.117133  | 0.131702 | 0.124854 | 0.115967  | 0.110286  | 0.124854 |
| 0.202797  | 0.205565  | 0.207314 | 0.217657 | 0.211684  | 0.202797  | 0.213578 |
| 0.101253  | 0.107517  | 0.112179 | 0.12602  | 0.106935  | 0.102418  | 0.121649 |
| 0.090035  | 0.0936772 | 0.111451 | 0.115093 | 0.0901807 | 0.0941142 | 0.109848 |
| 0.107517  | 0.112617  | 0.123106 | 0.131993 | 0.112617  | 0.108974  | 0.12296  |
| 0.112325  | 0.11655   | 0.122086 | 0.136801 | 0.114219  | 0.112617  | 0.129516 |
| 0.106789  | 0.109848  | 0.115676 | 0.126603 | 0.1081    | 0.102418  | 0.120775 |
| 0.194784  | 0.199009  | 0.194639 | 0.209645 | 0.198427  | 0.193328  | 0.207605 |
| 0.115676  | 0.121358  | 0.121358 | 0.133159 | 0.116696  | 0.115967  | 0.137238 |
| 0.0983392 | 0.101399  | 0.113928 | 0.120775 | 0.0973193 | 0.090472  | 0.111742 |
| 0.110723  | 0.114073  | 0.126894 | 0.120921 | 0.113782  | 0.113054  | 0.122669 |
| 0.0987762 | 0.103001  | 0.10912  | 0.120921 | 0.103001  | 0.0999417 | 0.115676 |
| 0.110431  | 0.116113  | 0.119027 | 0.134907 | 0.116404  | 0.113636  | 0.136655 |
| 0.0944056 | 0.0977564 | 0.111451 | 0.121795 | 0.104458  | 0.0967366 | 0.120921 |
| 0.0920746 | 0.0945513 | 0.114365 | 0.114219 | 0.0977564 | 0.0958625 | 0.111305 |
| 0.107226  | 0.110577  | 0.119318 | 0.129953 | 0.105041  | 0.105769  | 0.123252 |
| 0.190122  | 0.196387  | 0.195513 | 0.207314 | 0.197261  | 0.190997  | 0.203817 |
| 0.0990676 | 0.105041  | 0.107372 | 0.126166 | 0.104167  | 0.101399  | 0.123252 |
| 0.190414  | 0.194347  | 0.192016 | 0.204983 | 0.196096  | 0.190414  | 0.20236  |
| 0.187937  | 0.192162  | 0.189831 | 0.202797 | 0.19391   | 0.187646  | 0.201632 |
| 0.118298  | 0.11757   | 0.120484 | 0.128497 | 0.116113  | 0.117424  | 0.126166 |
| 0.122086  | 0.121649  | 0.127185 | 0.136072 | 0.119901  | 0.120047  | 0.125291 |
| 0.0821678 | 0.0878497 | 0.109411 | 0.103438 | 0.0916375 | 0.0865385 | 0.101981 |
| 0.103001  | 0.104312  | 0.112179 | 0.121649 | 0.104604  | 0.103293  | 0.125146 |



|           |           |          |          |           |           |          |
|-----------|-----------|----------|----------|-----------|-----------|----------|
| 0.10373   | 0.112325  | 0.113491 | 0.126748 | 0.109994  | 0.106935  | 0.132576 |
| 0.101399  | 0.103875  | 0.116987 | 0.120921 | 0.100962  | 0.0958625 | 0.116259 |
| 0.0944056 | 0.0980478 | 0.104167 | 0.111305 | 0.090472  | 0.090035  | 0.104895 |
| 0.0958625 | 0.102127  | 0.106498 | 0.112179 | 0.0965909 | 0.0926573 | 0.103147 |
| 0.117279  | 0.121503  | 0.12704  | 0.135052 | 0.118881  | 0.114073  | 0.135344 |
| 0.106352  | 0.10912   | 0.112617 | 0.125874 | 0.102418  | 0.108392  | 0.123252 |
| 0.0960082 | 0.100816  | 0.11451  | 0.11553  | 0.0949883 | 0.090472  | 0.110286 |
| 0.108683  | 0.114656  | 0.116113 | 0.132867 | 0.113782  | 0.110431  | 0.132867 |
| 0.088141  | 0.0856643 | 0.103438 | 0.110577 | 0.0912005 | 0.0837704 | 0.112617 |
| 0.118298  | 0.121941  | 0.128059 | 0.134615 | 0.124563  | 0.122086  | 0.136364 |
| 0.102855  | 0.113491  | 0.120192 | 0.129371 | 0.112617  | 0.106352  | 0.124709 |
| 0.122815  | 0.12704   | 0.132576 | 0.143794 | 0.12704   | 0.124272  | 0.143502 |
| 0.255682  | 0.259324  | 0.259615 | 0.265297 | 0.261364  | 0.25539   | 0.263258 |
| 0.113782  | 0.113636  | 0.122669 | 0.124854 | 0.117133  | 0.114656  | 0.117279 |
| 0.117424  | 0.116987  | 0.12398  | 0.129079 | 0.116987  | 0.124126  | 0.121503 |
| 0.212558  | 0.217949  | 0.217366 | 0.228293 | 0.217075  | 0.214015  | 0.223339 |
| 0.11859   | 0.11961   | 0.124563 | 0.131119 | 0.117861  | 0.114219  | 0.126748 |
| 0.225816  | 0.229167  | 0.228584 | 0.236597 | 0.230624  | 0.227273  | 0.234266 |
| 0.105041  | 0.106643  | 0.113636 | 0.121066 | 0.104895  | 0.105041  | 0.113199 |
| 0.115967  | 0.114656  | 0.129225 | 0.127914 | 0.111451  | 0.107517  | 0.124417 |
| 0.103438  | 0.104458  | 0.114948 | 0.126457 | 0.102127  | 0.105478  | 0.115093 |
| 0.113345  | 0.116696  | 0.120192 | 0.12704  | 0.11116   | 0.111014  | 0.125874 |
| 0.197844  | 0.202943  | 0.198864 | 0.210373 | 0.2044    | 0.19697   | 0.211538 |
| 0.121212  | 0.125437  | 0.131556 | 0.138986 | 0.125728  | 0.120629  | 0.140152 |
| 0.111014  | 0.116987  | 0.117279 | 0.13345  | 0.115822  | 0.109557  | 0.130828 |
| 0.220425  | 0.225233  | 0.224068 | 0.233829 | 0.226981  | 0.21926   | 0.231206 |
| 0.0981935 | 0.105041  | 0.11116  | 0.120629 | 0.099796  | 0.0961538 | 0.110723 |
| 0.191288  | 0.19697   | 0.196387 | 0.21081  | 0.197552  | 0.193036  | 0.206731 |
| 0.0995047 | 0.104895  | 0.111597 | 0.116404 | 0.101107  | 0.0960082 | 0.108829 |
| 0.099796  | 0.100816  | 0.117716 | 0.121941 | 0.0979021 | 0.0916375 | 0.115822 |
| 0.104021  | 0.103293  | 0.121941 | 0.120047 | 0.103293  | 0.105478  | 0.115676 |
| 0.116841  | 0.117861  | 0.121941 | 0.127331 | 0.114948  | 0.115967  | 0.121503 |
| 0.105915  | 0.111305  | 0.114802 | 0.127185 | 0.102855  | 0.103584  | 0.12602  |
| 0.148164  | 0.154429  | 0.157051 | 0.174679 | 0.156177  | 0.149621  | 0.164481 |
| 0.105041  | 0.110723  | 0.112762 | 0.125437 | 0.106352  | 0.105332  | 0.128934 |
| 0.112325  | 0.113636  | 0.120338 | 0.136509 | 0.113054  | 0.114073  | 0.12398  |
| 0.106498  | 0.108392  | 0.115676 | 0.132139 | 0.1081    | 0.10912   | 0.121066 |
| 0.121941  | 0.119755  | 0.130536 | 0.13243  | 0.123834  | 0.125437  | 0.134761 |
| 0.187937  | 0.195659  | 0.194202 | 0.204837 | 0.195076  | 0.189977  | 0.201923 |
| 0.0983392 | 0.102273  | 0.117133 | 0.119318 | 0.0967366 | 0.088141  | 0.111742 |
| 0.109266  | 0.113782  | 0.115822 | 0.128497 | 0.109703  | 0.107226  | 0.126748 |
| 0.0942599 | 0.0987762 | 0.109848 | 0.112325 | 0.0961538 | 0.0968823 | 0.105915 |
| 0.0984848 | 0.103875  | 0.109411 | 0.112179 | 0.100379  | 0.0958625 | 0.102273 |
| 0.107663  | 0.11014   | 0.12296  | 0.124563 | 0.107809  | 0.10271   | 0.120775 |

|           |           |          |          |           |           |           |
|-----------|-----------|----------|----------|-----------|-----------|-----------|
| 0.253788  | 0.25743   | 0.253642 | 0.260781 | 0.258887  | 0.249709  | 0.258741  |
| 0.0968823 | 0.100816  | 0.114802 | 0.118153 | 0.0964452 | 0.0992133 | 0.110868  |
| 0.108829  | 0.112179  | 0.119755 | 0.130973 | 0.111597  | 0.105041  | 0.124563  |
| 0.174679  | 0.179196  | 0.179196 | 0.188666 | 0.181235  | 0.175262  | 0.1875    |
| 0.178759  | 0.184732  | 0.180653 | 0.197698 | 0.186772  | 0.178176  | 0.19391   |
| 0.113491  | 0.118881  | 0.123252 | 0.132139 | 0.11655   | 0.110868  | 0.133013  |
| 0.111014  | 0.11553   | 0.119027 | 0.13141  | 0.112325  | 0.112179  | 0.134615  |
| 0.104895  | 0.106206  | 0.11116  | 0.124417 | 0.105624  | 0.103438  | 0.122378  |
| 0.136801  | 0.139569  | 0.1419   | 0.14933  | 0.141026  | 0.136218  | 0.152826  |
| 0.109411  | 0.112471  | 0.11859  | 0.129808 | 0.113636  | 0.106206  | 0.129225  |
| 0.113928  | 0.11757   | 0.123106 | 0.132867 | 0.116404  | 0.112179  | 0.134324  |
| 0.107663  | 0.113636  | 0.112179 | 0.120775 | 0.1081    | 0.103293  | 0.111742  |
| 0.108246  | 0.112471  | 0.118881 | 0.128059 | 0.114802  | 0.109703  | 0.128934  |
| 0.123834  | 0.125146  | 0.128351 | 0.141026 | 0.125437  | 0.121795  | 0.140152  |
| 0.103001  | 0.108683  | 0.108392 | 0.122232 | 0.109557  | 0.101836  | 0.112325  |
| 0.113054  | 0.11553   | 0.117279 | 0.129662 | 0.110868  | 0.115093  | 0.123252  |
| 0.129516  | 0.127622  | 0.131702 | 0.137383 | 0.12704   | 0.128351  | 0.13243   |
| 0.099359  | 0.102127  | 0.118153 | 0.121503 | 0.103293  | 0.101981  | 0.113928  |
| 0.121066  | 0.121503  | 0.122669 | 0.133304 | 0.116841  | 0.118735  | 0.127185  |
| 0.11116   | 0.11014   | 0.118298 | 0.118735 | 0.108683  | 0.104167  | 0.111742  |
| 0.200758  | 0.206731  | 0.205857 | 0.221154 | 0.209936  | 0.201923  | 0.215909  |
| 0.078817  | 0.0801282 | 0.123834 | 0.081148 | 0.0827506 | 0.0802739 | 0.0799825 |
| 0.183421  | 0.191142  | 0.189685 | 0.20236  | 0.193182  | 0.186043  | 0.200612  |
| 0.105041  | 0.106352  | 0.120047 | 0.119901 | 0.111014  | 0.106206  | 0.117279  |
| 0.108537  | 0.111888  | 0.128788 | 0.124854 | 0.108683  | 0.101836  | 0.122232  |
| 0.109994  | 0.115385  | 0.127331 | 0.130682 | 0.114802  | 0.112034  | 0.124563  |
| 0.0979021 | 0.108246  | 0.116987 | 0.122378 | 0.10708   | 0.0996503 | 0.118007  |
| 0.114656  | 0.120047  | 0.122669 | 0.135052 | 0.119172  | 0.116404  | 0.135344  |
| 0.113199  | 0.118881  | 0.122086 | 0.132721 | 0.11859   | 0.115822  | 0.133013  |
| 0.103584  | 0.105186  | 0.118881 | 0.122232 | 0.100233  | 0.0960082 | 0.116987  |
| 0.107226  | 0.109994  | 0.118444 | 0.130245 | 0.108246  | 0.110723  | 0.124126  |
| 0.109266  | 0.120484  | 0.130099 | 0.134033 | 0.116696  | 0.113928  | 0.126457  |
| 0.112325  | 0.115093  | 0.120921 | 0.119901 | 0.113345  | 0.108829  | 0.109703  |
| 0.248106  | 0.249709  | 0.249709 | 0.257139 | 0.253497  | 0.248397  | 0.255099  |
| 0.103293  | 0.107517  | 0.119755 | 0.124272 | 0.103147  | 0.0957168 | 0.119901  |
| 0.179196  | 0.185752  | 0.181672 | 0.193473 | 0.184586  | 0.176573  | 0.190559  |
| 0.182838  | 0.188811  | 0.187063 | 0.200321 | 0.190851  | 0.180507  | 0.194784  |
| 0.106352  | 0.112034  | 0.123106 | 0.128788 | 0.111742  | 0.103438  | 0.125874  |
| 0.0941142 | 0.0989219 | 0.111451 | 0.115093 | 0.0960082 | 0.097028  | 0.113928  |
| 0.109848  | 0.109994  | 0.126311 | 0.123543 | 0.106789  | 0.10169   | 0.11859   |
| 0.101981  | 0.110577  | 0.112617 | 0.129079 | 0.108537  | 0.102855  | 0.127914  |
| 0.0820221 | 0.0836247 | 0.114219 | 0.111451 | 0.0909091 | 0.0846445 | 0.105332  |
| 0.0977564 | 0.105478  | 0.106061 | 0.11757  | 0.0967366 | 0.0939685 | 0.107372  |
| 0.113928  | 0.115239  | 0.123106 | 0.133159 | 0.11757   | 0.111597  | 0.127622  |

|           |           |          |          |           |           |          |
|-----------|-----------|----------|----------|-----------|-----------|----------|
| 0.124126  | 0.124854  | 0.133596 | 0.138986 | 0.129516  | 0.124417  | 0.139569 |
| 0.103293  | 0.103438  | 0.119755 | 0.119027 | 0.0987762 | 0.095134  | 0.115239 |
| 0.121358  | 0.125291  | 0.130245 | 0.137675 | 0.123834  | 0.120192  | 0.139423 |
| 0.107809  | 0.10912   | 0.113782 | 0.129371 | 0.107372  | 0.110431  | 0.119464 |
| 0.113054  | 0.120484  | 0.131847 | 0.13549  | 0.118444  | 0.11655   | 0.125874 |
| 0.109411  | 0.111888  | 0.116259 | 0.126894 | 0.105186  | 0.108246  | 0.12398  |
| 0.11014   | 0.112325  | 0.118735 | 0.115093 | 0.110868  | 0.106643  | 0.109266 |
| 0.097465  | 0.099359  | 0.119464 | 0.112617 | 0.104021  | 0.103001  | 0.108829 |
| 0.102127  | 0.104312  | 0.116841 | 0.119318 | 0.100524  | 0.0962995 | 0.112325 |
| 0.124854  | 0.126748  | 0.134033 | 0.140006 | 0.122378  | 0.123397  | 0.128934 |
| 0.179779  | 0.182838  | 0.182255 | 0.19493  | 0.18546   | 0.177739  | 0.192016 |
| 0.125437  | 0.130536  | 0.135198 | 0.139132 | 0.129079  | 0.128642  | 0.144376 |
| 0.112034  | 0.116841  | 0.121795 | 0.133013 | 0.115967  | 0.112617  | 0.136218 |
| 0.103438  | 0.113491  | 0.123689 | 0.129371 | 0.112617  | 0.1081    | 0.122086 |
| 0.0939685 | 0.104312  | 0.114802 | 0.120484 | 0.103438  | 0.097465  | 0.114656 |
| 0.108974  | 0.109703  | 0.113491 | 0.12704  | 0.106498  | 0.106935  | 0.122378 |
| 0.114948  | 0.112762  | 0.115967 | 0.128059 | 0.110431  | 0.113199  | 0.120484 |
| 0.186189  | 0.18954   | 0.189248 | 0.201632 | 0.19391   | 0.187063  | 0.200758 |
| 0.107809  | 0.112325  | 0.116987 | 0.133159 | 0.113782  | 0.110431  | 0.129662 |
| 0.0960082 | 0.0996503 | 0.111305 | 0.121066 | 0.104895  | 0.0942599 | 0.114073 |
| 0.116113  | 0.119464  | 0.125291 | 0.133304 | 0.120047  | 0.117279  | 0.135927 |
| 0.186189  | 0.191871  | 0.191579 | 0.20134  | 0.194493  | 0.187063  | 0.200175 |
| 0.0925117 | 0.0941142 | 0.111888 | 0.11757  | 0.0906177 | 0.0945513 | 0.113782 |
| 0.105186  | 0.108829  | 0.110577 | 0.118298 | 0.105915  | 0.101107  | 0.109557 |
| 0.114802  | 0.120484  | 0.12398  | 0.134907 | 0.118153  | 0.115385  | 0.13345  |
| 0.107663  | 0.110723  | 0.117133 | 0.130099 | 0.109848  | 0.105624  | 0.128059 |
| 0.181672  | 0.188811  | 0.184149 | 0.200321 | 0.191142  | 0.179924  | 0.198281 |
| 0.10271   | 0.1081    | 0.110723 | 0.119318 | 0.103147  | 0.099796  | 0.108246 |
| 0.107663  | 0.111597  | 0.115676 | 0.127185 | 0.108974  | 0.106498  | 0.122523 |
| 0.0936772 | 0.0987762 | 0.113054 | 0.120192 | 0.097028  | 0.095134  | 0.11553  |
| 0.114948  | 0.117716  | 0.119464 | 0.136801 | 0.115676  | 0.10912   | 0.131265 |
| 0.108392  | 0.111451  | 0.118735 | 0.131702 | 0.108829  | 0.109848  | 0.121795 |
| 0.110431  | 0.11116   | 0.116404 | 0.11655  | 0.108246  | 0.106352  | 0.109557 |
| 0.101107  | 0.102418  | 0.118444 | 0.121503 | 0.0986305 | 0.092366  | 0.115676 |
| 0.111305  | 0.110868  | 0.120484 | 0.125    | 0.116113  | 0.112179  | 0.123252 |
| 0.135635  | 0.13986   | 0.146853 | 0.150787 | 0.13986   | 0.131847  | 0.151661 |
| 0.231206  | 0.237471  | 0.234557 | 0.24257  | 0.237471  | 0.23208   | 0.241404 |
| 0.0989219 | 0.101399  | 0.124417 | 0.112908 | 0.105769  | 0.105041  | 0.116987 |
| 0.114073  | 0.114219  | 0.118298 | 0.136801 | 0.110723  | 0.112325  | 0.127185 |
| 0.110723  | 0.115822  | 0.119318 | 0.129953 | 0.113491  | 0.111305  | 0.132576 |
| 0.117279  | 0.117424  | 0.119755 | 0.137383 | 0.118298  | 0.116404  | 0.127768 |
| 0.104895  | 0.109411  | 0.112325 | 0.122378 | 0.106498  | 0.102273  | 0.113636 |
| 0.109848  | 0.112908  | 0.120192 | 0.127331 | 0.109411  | 0.107226  | 0.116841 |
| 0.11553   | 0.11859   | 0.122669 | 0.131265 | 0.11655   | 0.11553   | 0.135927 |

|           |           |          |          |           |           |          |
|-----------|-----------|----------|----------|-----------|-----------|----------|
| 0.108683  | 0.111451  | 0.116113 | 0.118007 | 0.108537  | 0.10373   | 0.109266 |
| 0.108683  | 0.114073  | 0.122815 | 0.13345  | 0.113491  | 0.109266  | 0.130245 |
| 0.231789  | 0.238345  | 0.231935 | 0.243444 | 0.240093  | 0.233537  | 0.243153 |
| 0.0914918 | 0.0965909 | 0.108246 | 0.116841 | 0.0919289 | 0.0944056 | 0.111597 |
| 0.0935315 | 0.095134  | 0.103293 | 0.113636 | 0.0954254 | 0.0935315 | 0.108683 |
| 0.100379  | 0.104021  | 0.117716 | 0.11757  | 0.0981935 | 0.0933858 | 0.114073 |
| 0.124709  | 0.125146  | 0.131265 | 0.139569 | 0.126311  | 0.120338  | 0.13986  |
| 0.104895  | 0.107955  | 0.129225 | 0.118007 | 0.112034  | 0.111597  | 0.117424 |
| 0.1081    | 0.11553   | 0.122815 | 0.129953 | 0.115239  | 0.1081    | 0.127331 |
| 0.112762  | 0.118153  | 0.123689 | 0.132867 | 0.116404  | 0.111888  | 0.134907 |
| 0.103001  | 0.107226  | 0.111305 | 0.123689 | 0.111014  | 0.100962  | 0.122232 |
| 0.226836  | 0.232517  | 0.229312 | 0.238199 | 0.23514   | 0.227127  | 0.235868 |
| 0.117279  | 0.119172  | 0.127914 | 0.136801 | 0.121503  | 0.119027  | 0.139423 |
| 0.105478  | 0.110286  | 0.11116  | 0.117424 | 0.107663  | 0.0996503 | 0.108392 |
| 0.0958625 | 0.104749  | 0.11553  | 0.125    | 0.104749  | 0.100816  | 0.119755 |
| 0.119027  | 0.116841  | 0.131119 | 0.122815 | 0.118881  | 0.117861  | 0.125437 |
| 0.109994  | 0.108974  | 0.117424 | 0.120484 | 0.109848  | 0.11116   | 0.114073 |
| 0.103875  | 0.103438  | 0.120921 | 0.120484 | 0.100233  | 0.0933858 | 0.113491 |
| 0.104458  | 0.109266  | 0.110723 | 0.11553  | 0.105478  | 0.101253  | 0.106206 |
| 0.110431  | 0.114656  | 0.118153 | 0.120921 | 0.112034  | 0.104604  | 0.111014 |
| 0.0999417 | 0.101836  | 0.109411 | 0.114802 | 0.0989219 | 0.0926573 | 0.105478 |
| 0.103293  | 0.101981  | 0.118881 | 0.123106 | 0.0987762 | 0.0945513 | 0.117279 |
| 0.11961   | 0.119464  | 0.126457 | 0.136218 | 0.120047  | 0.118444  | 0.12602  |
| 0.125291  | 0.122815  | 0.130682 | 0.137238 | 0.121649  | 0.122378  | 0.129953 |
| 0.115967  | 0.121649  | 0.131847 | 0.133159 | 0.118153  | 0.118007  | 0.126748 |
| 0.11655   | 0.127768  | 0.135344 | 0.138986 | 0.124563  | 0.123252  | 0.131702 |
| 0.120192  | 0.119172  | 0.130245 | 0.136509 | 0.116259  | 0.119027  | 0.125728 |
| 0.0779429 | 0.0795455 | 0.108392 | 0.109703 | 0.0844988 | 0.078817  | 0.10067  |
| 0.1081    | 0.113199  | 0.128934 | 0.105769 | 0.109411  | 0.111888  | 0.111305 |
| 0.119901  | 0.120338  | 0.130245 | 0.135635 | 0.122669  | 0.113491  | 0.120775 |
| 0.201195  | 0.206876  | 0.20338  | 0.218094 | 0.208625  | 0.202069  | 0.214889 |
| 0.116987  | 0.11655   | 0.129662 | 0.133013 | 0.11859   | 0.114656  | 0.130099 |
| 0.099796  | 0.0984848 | 0.107809 | 0.121649 | 0.100816  | 0.0971737 | 0.11116  |
| 0.107517  | 0.110577  | 0.122815 | 0.127331 | 0.109411  | 0.101107  | 0.120629 |
| 0.21722   | 0.221154  | 0.219988 | 0.228001 | 0.224359  | 0.217512  | 0.228293 |
| 0.206148  | 0.210373  | 0.211247 | 0.222174 | 0.213869  | 0.208479  | 0.220134 |
| 0.108683  | 0.112617  | 0.117279 | 0.113928 | 0.107663  | 0.104312  | 0.111014 |
| 0.245192  | 0.250291  | 0.25     | 0.254516 | 0.255536  | 0.246066  | 0.252768 |
| 0.0791084 | 0.080711  | 0.109557 | 0.109994 | 0.0862471 | 0.0796911 | 0.10271  |
| 0.114656  | 0.12296   | 0.136072 | 0.131847 | 0.123543  | 0.120775  | 0.129225 |
| 0.0948427 | 0.0976107 | 0.112179 | 0.116113 | 0.0932401 | 0.0965909 | 0.110286 |
| 0.118007  | 0.116987  | 0.124854 | 0.137821 | 0.112908  | 0.115676  | 0.130245 |
| 0.184295  | 0.188228  | 0.185023 | 0.198864 | 0.188811  | 0.18546   | 0.195367 |
| 0.107517  | 0.109994  | 0.127185 | 0.128205 | 0.113491  | 0.116841  | 0.125874 |

|           |           |           |          |           |           |          |
|-----------|-----------|-----------|----------|-----------|-----------|----------|
| 0.18852   | 0.195076  | 0.190997  | 0.206876 | 0.196533  | 0.189685  | 0.202214 |
| 0.104021  | 0.106206  | 0.119318  | 0.123834 | 0.108537  | 0.102564  | 0.124126 |
| 0.102564  | 0.108829  | 0.112617  | 0.121212 | 0.109994  | 0.10169   | 0.115093 |
| 0.103147  | 0.104458  | 0.126603  | 0.121795 | 0.108829  | 0.101399  | 0.114802 |
| 0.101981  | 0.110286  | 0.115239  | 0.125583 | 0.107955  | 0.102855  | 0.124709 |
| 0.092803  | 0.0964452 | 0.112471  | 0.114656 | 0.0926573 | 0.0840618 | 0.106206 |
| 0.102127  | 0.106061  | 0.119755  | 0.125146 | 0.106061  | 0.104749  | 0.124854 |
| 0.088141  | 0.0885781 | 0.108392  | 0.109411 | 0.0888695 | 0.0898893 | 0.106498 |
| 0.105478  | 0.111742  | 0.115239  | 0.128205 | 0.109703  | 0.107517  | 0.128497 |
| 0.0939685 | 0.101107  | 0.114219  | 0.108537 | 0.0976107 | 0.0971737 | 0.104167 |
| 0.0861014 | 0.0914918 | 0.113928  | 0.107663 | 0.0944056 | 0.0933858 | 0.107663 |
| 0.0909091 | 0.092803  | 0.110868  | 0.115385 | 0.0930944 | 0.0935315 | 0.108974 |
| 0.107955  | 0.116841  | 0.126457  | 0.130099 | 0.115385  | 0.107372  | 0.123106 |
| 0.120775  | 0.124126  | 0.129662  | 0.137966 | 0.124709  | 0.121649  | 0.142045 |
| 0.100816  | 0.110577  | 0.118444  | 0.127331 | 0.108829  | 0.104021  | 0.120629 |
| 0.10271   | 0.110431  | 0.115676  | 0.12602  | 0.107809  | 0.102127  | 0.122523 |
| 0.0952797 | 0.0965909 | 0.111451  | 0.115093 | 0.0939685 | 0.0868298 | 0.110431 |
| 0.102855  | 0.106498  | 0.112325  | 0.115093 | 0.105915  | 0.0979021 | 0.106643 |
| 0.111014  | 0.114656  | 0.118153  | 0.133159 | 0.111742  | 0.109848  | 0.123252 |
| 0.11116   | 0.110431  | 0.116841  | 0.125146 | 0.106643  | 0.109411  | 0.123689 |
| 0.101253  | 0.113928  | 0.119172  | 0.128059 | 0.110431  | 0.107663  | 0.121649 |
| 0.107517  | 0.116113  | 0.118444  | 0.130828 | 0.113782  | 0.110723  | 0.133159 |
| 0.118735  | 0.124417  | 0.129079  | 0.139132 | 0.125874  | 0.121066  | 0.141754 |
| 0.129225  | 0.132867  | 0.138403  | 0.142628 | 0.131119  | 0.13039   | 0.145542 |
| 0.0917832 | 0.0954254 | 0.0992133 | 0.111014 | 0.0907634 | 0.087704  | 0.102564 |
| 0.104895  | 0.103001  | 0.118153  | 0.123834 | 0.0992133 | 0.0935315 | 0.116259 |
| 0.0960082 | 0.101399  | 0.112762  | 0.11757  | 0.0981935 | 0.0971737 | 0.113491 |
| 0.123689  | 0.125583  | 0.127622  | 0.135344 | 0.122669  | 0.123106  | 0.131265 |
| 0.0958625 | 0.0986305 | 0.114365  | 0.115967 | 0.0962995 | 0.0984848 | 0.111597 |
| 0.129662  | 0.128642  | 0.131265  | 0.134324 | 0.125728  | 0.127914  | 0.133159 |
| 0.120338  | 0.122232  | 0.136509  | 0.13141  | 0.11961   | 0.112471  | 0.131993 |
| 0.117861  | 0.120047  | 0.126748  | 0.136801 | 0.120338  | 0.113491  | 0.135927 |
| 0.0891608 | 0.0907634 | 0.120484  | 0.113928 | 0.0948427 | 0.0914918 | 0.112471 |
| 0.101544  | 0.104604  | 0.119172  | 0.121358 | 0.106643  | 0.107955  | 0.125146 |
| 0.109411  | 0.120047  | 0.132284  | 0.128934 | 0.11859   | 0.117279  | 0.12602  |
| 0.200466  | 0.2044    | 0.204983  | 0.214161 | 0.209936  | 0.199009  | 0.215035 |
| 0.10373   | 0.109411  | 0.116696  | 0.128205 | 0.107955  | 0.103147  | 0.121212 |
| 0.0965909 | 0.0984848 | 0.123252  | 0.124563 | 0.103147  | 0.0983392 | 0.115822 |
| 0.11014   | 0.10912   | 0.120484  | 0.131119 | 0.110286  | 0.112762  | 0.121503 |
| 0.10271   | 0.111597  | 0.121795  | 0.126311 | 0.109557  | 0.103875  | 0.117279 |
| 0.110723  | 0.111742  | 0.125728  | 0.130536 | 0.113491  | 0.110431  | 0.128497 |
| 0.120338  | 0.116113  | 0.123397  | 0.136364 | 0.114365  | 0.114219  | 0.128497 |
| 0.12398   | 0.119464  | 0.124126  | 0.142337 | 0.11859   | 0.121941  | 0.132721 |
| 0.113054  | 0.115239  | 0.120484  | 0.130828 | 0.116696  | 0.111305  | 0.130245 |

|           |           |          |           |           |           |           |
|-----------|-----------|----------|-----------|-----------|-----------|-----------|
| 0.090035  | 0.0960082 | 0.106498 | 0.107226  | 0.0907634 | 0.0885781 | 0.103147  |
| 0.11859   | 0.119027  | 0.125146 | 0.134615  | 0.116404  | 0.117716  | 0.124417  |
| 0.0949883 | 0.095134  | 0.120192 | 0.120338  | 0.101836  | 0.094697  | 0.110431  |
| 0.0933858 | 0.0976107 | 0.116841 | 0.114365  | 0.0979021 | 0.0977564 | 0.112908  |
| 0.166958  | 0.171766  | 0.174097 | 0.189394  | 0.177885  | 0.16958   | 0.182984  |
| 0.107517  | 0.11553   | 0.120775 | 0.132867  | 0.110577  | 0.107517  | 0.134033  |
| 0.118444  | 0.118298  | 0.127331 | 0.133304  | 0.119755  | 0.118444  | 0.128934  |
| 0.0815851 | 0.0779429 | 0.121358 | 0.0827506 | 0.0826049 | 0.0827506 | 0.087704  |
| 0.106498  | 0.112179  | 0.118007 | 0.120775  | 0.115093  | 0.110286  | 0.116404  |
| 0.0925117 | 0.0903263 | 0.106643 | 0.114073  | 0.0917832 | 0.0887238 | 0.114948  |
| 0.0820221 | 0.0885781 | 0.106061 | 0.106789  | 0.0903263 | 0.0878497 | 0.104167  |
| 0.0968823 | 0.0932401 | 0.111305 | 0.11553   | 0.0955711 | 0.0942599 | 0.117861  |
| 0.106498  | 0.109557  | 0.117133 | 0.125728  | 0.120629  | 0.107663  | 0.115822  |
| 0.103001  | 0.106643  | 0.115385 | 0.125728  | 0.11014   | 0.107663  | 0.125146  |
| 0.110723  | 0.117861  | 0.126311 | 0.121795  | 0.113199  | 0.109557  | 0.124709  |
| 0.090472  | 0.0958625 | 0.109557 | 0.113199  | 0.10373   | 0.0939685 | 0.109411  |
| 0.0981935 | 0.102418  | 0.114656 | 0.122378  | 0.106206  | 0.100816  | 0.116841  |
| 0.112617  | 0.114219  | 0.132284 | 0.123689  | 0.114802  | 0.10912   | 0.112617  |
| 0.0919289 | 0.0856643 | 0.118007 | 0.0992133 | 0.090035  | 0.0933858 | 0.0986305 |
| 0.110868  | 0.114802  | 0.126457 | 0.121941  | 0.114219  | 0.112325  | 0.120484  |
| 0.08581   | 0.0839161 | 0.112762 | 0.10271   | 0.085373  | 0.0884324 | 0.0989219 |
| 0.0936772 | 0.0897436 | 0.116259 | 0.100962  | 0.0914918 | 0.0939685 | 0.0995047 |
| 0.08581   | 0.0879953 | 0.109557 | 0.111742  | 0.0909091 | 0.0884324 | 0.105624  |
| 0.10169   | 0.0962995 | 0.121066 | 0.106352  | 0.101836  | 0.097028  | 0.111014  |
| 0.0810023 | 0.08581   | 0.10708  | 0.109848  | 0.0895979 | 0.0839161 | 0.111014  |
| 0.132576  | 0.135927  | 0.119901 | 0.141317  | 0.13243   | 0.126457  | 0.132284  |
| 0.120338  | 0.125728  | 0.110577 | 0.138986  | 0.121358  | 0.116259  | 0.126748  |
| 0.0850816 | 0.0878497 | 0.121358 | 0.108683  | 0.0878497 | 0.0865385 | 0.103147  |
| 0.126603  | 0.125874  | 0.139569 | 0.137675  | 0.12296   | 0.12398   | 0.126894  |
| 0.112325  | 0.117716  | 0.116841 | 0.135635  | 0.116841  | 0.110868  | 0.130682  |
| 0.122232  | 0.125583  | 0.136072 | 0.130682  | 0.126748  | 0.124272  | 0.126894  |
| 0.092803  | 0.0879953 | 0.102564 | 0.10912   | 0.0984848 | 0.0933858 | 0.112325  |
| 0.132284  | 0.137675  | 0.130099 | 0.146853  | 0.136509  | 0.133159  | 0.137821  |
| 0.115676  | 0.11961   | 0.123689 | 0.132284  | 0.119318  | 0.117424  | 0.123543  |
| 0.126457  | 0.127185  | 0.129225 | 0.13549   | 0.129808  | 0.123543  | 0.125874  |
| 0.101981  | 0.104458  | 0.116404 | 0.118881  | 0.0995047 | 0.0984848 | 0.110723  |
| 0.0863928 | 0.0839161 | 0.112179 | 0.112617  | 0.0903263 | 0.0828963 | 0.0983392 |
| 0.0885781 | 0.0887238 | 0.103584 | 0.110431  | 0.092803  | 0.087704  | 0.0984848 |
| 0.105915  | 0.103147  | 0.113928 | 0.118735  | 0.107517  | 0.10271   | 0.108829  |
| 0.0971737 | 0.0987762 | 0.119755 | 0.107955  | 0.0990676 | 0.0977564 | 0.101253  |
| 0.106935  | 0.108829  | 0.124854 | 0.125     | 0.114948  | 0.111014  | 0.11859   |
| 0.106643  | 0.114656  | 0.109703 | 0.133159  | 0.115239  | 0.11014   | 0.120338  |
| 0.0815851 | 0.0887238 | 0.105332 | 0.103438  | 0.0887238 | 0.0871212 | 0.100233  |
| 0.0901807 | 0.0827506 | 0.104895 | 0.110577  | 0.0935315 | 0.0849359 | 0.0992133 |

|           |           |          |           |           |           |           |
|-----------|-----------|----------|-----------|-----------|-----------|-----------|
| 0.0815851 | 0.0878497 | 0.124563 | 0.0856643 | 0.0861014 | 0.0824592 | 0.085373  |
| 0.0888695 | 0.0910548 | 0.114948 | 0.112762  | 0.0872669 | 0.0847902 | 0.100233  |
| 0.0971737 | 0.0932401 | 0.113928 | 0.110868  | 0.100816  | 0.0930944 | 0.0995047 |
| 0.095134  | 0.0973193 | 0.109557 | 0.118153  | 0.0961538 | 0.0977564 | 0.110868  |
| 0.105769  | 0.114656  | 0.121066 | 0.125874  | 0.114948  | 0.108683  | 0.126166  |
| 0.0973193 | 0.106789  | 0.109994 | 0.12704   | 0.100379  | 0.102273  | 0.117133  |
| 0.07838   | 0.0796911 | 0.108829 | 0.104895  | 0.083479  | 0.07838   | 0.100524  |
| 0.0743007 | 0.0840618 | 0.118735 | 0.0949883 | 0.0782343 | 0.076049  | 0.0847902 |
| 0.103001  | 0.112471  | 0.116259 | 0.126894  | 0.110723  | 0.10708   | 0.125437  |
| 0.0990676 | 0.101836  | 0.109411 | 0.121795  | 0.104167  | 0.0979021 | 0.120921  |
| 0.116841  | 0.116404  | 0.126603 | 0.136364  | 0.118444  | 0.115967  | 0.129662  |
| 0.0938228 | 0.104167  | 0.113491 | 0.116259  | 0.101253  | 0.094697  | 0.114219  |
| 0.114365  | 0.110723  | 0.129079 | 0.123397  | 0.113345  | 0.114656  | 0.120192  |

| <b>TDr_08_01024</b> | <b>TDr_08_01026</b> | <b>TDr_08_01029</b> | <b>TDr_08_01046</b> | <b>TDr_08_01051</b> | <b>TDr_08_01085</b> | <b>TDr_08_01090</b> |
|---------------------|---------------------|---------------------|---------------------|---------------------|---------------------|---------------------|
| 0.107372            | 0.107663            | 0.0925117           | 0.11757             | 0.112471            | 0.112179            | 0.100524            |
| 0.105769            | 0.117424            | 0.123543            | 0.114802            | 0.109411            | 0.10912             | 0.105041            |
| 0.104895            | 0.111305            | 0.119172            | 0.111888            | 0.10912             | 0.105624            | 0.10271             |
| 0.101981            | 0.123543            | 0.132284            | 0.110723            | 0.108246            | 0.10912             | 0.105624            |
| 0.125583            | 0.139277            | 0.144231            | 0.127622            | 0.128642            | 0.129225            | 0.124854            |
| 0.122669            | 0.128497            | 0.121503            | 0.12704             | 0.129516            | 0.128351            | 0.117861            |
| 0.100379            | 0.115239            | 0.10708             | 0.104167            | 0.106061            | 0.106352            | 0.106643            |
| 0.105624            | 0.112325            | 0.125146            | 0.112908            | 0.108974            | 0.110431            | 0.101981            |
| 0.0938228           | 0.108683            | 0.121503            | 0.103438            | 0.0930944           | 0.097465            | 0.0895979           |
| 0.092803            | 0.10912             | 0.114948            | 0.0861014           | 0.0862471           | 0.0847902           | 0.0871212           |
| 0.107226            | 0.118881            | 0.122378            | 0.110723            | 0.10708             | 0.107372            | 0.0916375           |
| 0.0983392           | 0.114073            | 0.128059            | 0.107372            | 0.101107            | 0.10373             | 0.100233            |
| 0.103584            | 0.115239            | 0.129225            | 0.11553             | 0.102564            | 0.106643            | 0.097028            |
| 0.129662            | 0.136364            | 0.14831             | 0.133741            | 0.130099            | 0.128642            | 0.121941            |
| 0.11757             | 0.126894            | 0.136509            | 0.120775            | 0.111888            | 0.116259            | 0.115676            |
| 0.103438            | 0.119755            | 0.123543            | 0.106935            | 0.109703            | 0.103293            | 0.100087            |
| 0.0968823           | 0.114656            | 0.132139            | 0.101836            | 0.0949883           | 0.0984848           | 0.0967366           |
| 0.13986             | 0.151515            | 0.153846            | 0.13986             | 0.139714            | 0.140589            | 0.135344            |
| 0.101981            | 0.110723            | 0.119755            | 0.106061            | 0.106206            | 0.103001            | 0.0965909           |
| 0.201923            | 0.199009            | 0.208333            | 0.203671            | 0.203234            | 0.201195            | 0.193328            |
| 0.111451            | 0.118735            | 0.110577            | 0.118444            | 0.119464            | 0.122669            | 0.112762            |
| 0.115967            | 0.117716            | 0.104895            | 0.118007            | 0.113199            | 0.116113            | 0.109703            |
| 0.0965909           | 0.114656            | 0.127185            | 0.102418            | 0.102855            | 0.103147            | 0.0882867           |
| 0.106935            | 0.127331            | 0.128788            | 0.11014             | 0.113782            | 0.110868            | 0.109994            |
| 0.0907634           | 0.109411            | 0.117279            | 0.0948427           | 0.094697            | 0.092366            | 0.0856643           |
| 0.11961             | 0.126311            | 0.107372            | 0.121358            | 0.126748            | 0.128497            | 0.115967            |
| 0.106206            | 0.128642            | 0.125728            | 0.105624            | 0.11451             | 0.111888            | 0.105478            |
| 0.107955            | 0.120192            | 0.135635            | 0.112325            | 0.11014             | 0.108974            | 0.107809            |
| 0.118735            | 0.134761            | 0.129225            | 0.118153            | 0.120921            | 0.124126            | 0.120921            |
| 0.10912             | 0.123689            | 0.125728            | 0.110286            | 0.108974            | 0.104312            | 0.111888            |
| 0.105769            | 0.118298            | 0.100816            | 0.117133            | 0.112617            | 0.112325            | 0.109411            |
| 0.109411            | 0.125728            | 0.122815            | 0.110286            | 0.11451             | 0.113345            | 0.106935            |
| 0.0962995           | 0.114656            | 0.109703            | 0.101253            | 0.102273            | 0.10169             | 0.0961538           |
| 0.105041            | 0.121649            | 0.122232            | 0.104749            | 0.109266            | 0.11014             | 0.100524            |
| 0.108392            | 0.125583            | 0.125               | 0.108683            | 0.108537            | 0.109411            | 0.0968823           |
| 0.11553             | 0.130099            | 0.127768            | 0.112908            | 0.113928            | 0.111888            | 0.105186            |
| 0.115385            | 0.121212            | 0.115967            | 0.113345            | 0.112908            | 0.115239            | 0.112325            |
| 0.102127            | 0.122815            | 0.12398             | 0.115822            | 0.108974            | 0.104604            | 0.106643            |
| 0.0965909           | 0.119901            | 0.117861            | 0.100962            | 0.103147            | 0.103438            | 0.0973193           |
| 0.107955            | 0.127477            | 0.135344            | 0.114365            | 0.112471            | 0.1081              | 0.104312            |
| 0.0930944           | 0.112325            | 0.127768            | 0.103001            | 0.094697            | 0.097028            | 0.0926573           |
| 0.124272            | 0.144085            | 0.152244            | 0.131556            | 0.130536            | 0.121503            | 0.126748            |



|           |           |           |           |           |           |           |
|-----------|-----------|-----------|-----------|-----------|-----------|-----------|
| 0.123397  | 0.143211  | 0.156323  | 0.135052  | 0.134033  | 0.127331  | 0.126166  |
| 0.0990676 | 0.114219  | 0.131702  | 0.113054  | 0.106789  | 0.104167  | 0.0977564 |
| 0.0812937 | 0.097028  | 0.120047  | 0.0859557 | 0.0878497 | 0.0910548 | 0.0767774 |
| 0.0861014 | 0.112617  | 0.125146  | 0.0802739 | 0.0967366 | 0.0949883 | 0.0932401 |
| 0.104749  | 0.121358  | 0.131556  | 0.10912   | 0.113054  | 0.105769  | 0.099359  |
| 0.120338  | 0.141026  | 0.142191  | 0.122378  | 0.12398   | 0.116696  | 0.119027  |
| 0.0973193 | 0.120629  | 0.130828  | 0.108683  | 0.101836  | 0.101544  | 0.0945513 |
| 0.0992133 | 0.114948  | 0.127477  | 0.105332  | 0.102564  | 0.101107  | 0.0961538 |
| 0.13549   | 0.132284  | 0.0492424 | 0.136072  | 0.137675  | 0.13884   | 0.135927  |
| 0.112762  | 0.129662  | 0.140734  | 0.116841  | 0.120192  | 0.116113  | 0.112325  |
| 0.0971737 | 0.116987  | 0.126894  | 0.114948  | 0.104604  | 0.0976107 | 0.0984848 |
| 0.112908  | 0.129225  | 0.13884   | 0.116404  | 0.111305  | 0.117133  | 0.113054  |
| 0.105624  | 0.119901  | 0.130973  | 0.112325  | 0.112471  | 0.111305  | 0.101399  |
| 0.125146  | 0.14292   | 0.147582  | 0.12602   | 0.131993  | 0.124709  | 0.12704   |
| 0.111597  | 0.128205  | 0.136655  | 0.120629  | 0.112034  | 0.116987  | 0.103584  |
| 0.0984848 | 0.121212  | 0.132284  | 0.11014   | 0.104167  | 0.104458  | 0.101836  |
| 0.106643  | 0.119464  | 0.13141   | 0.107517  | 0.104749  | 0.10708   | 0.0986305 |
| 0.090472  | 0.121941  | 0.123106  | 0.0895979 | 0.0882867 | 0.0827506 | 0.0926573 |
| 0.117279  | 0.138258  | 0.144668  | 0.12398   | 0.123834  | 0.120921  | 0.123252  |
| 0.12398   | 0.139714  | 0.151952  | 0.128059  | 0.130245  | 0.128205  | 0.12296   |
| 0.153263  | 0.157051  | 0.164336  | 0.152681  | 0.156031  | 0.152826  | 0.144959  |
| 0.101107  | 0.118298  | 0.131119  | 0.111014  | 0.10912   | 0.105041  | 0.0980478 |
| 0.0964452 | 0.11655   | 0.128205  | 0.103438  | 0.097465  | 0.10067   | 0.0954254 |
| 0.094697  | 0.115676  | 0.128788  | 0.102564  | 0.101836  | 0.100379  | 0.0913462 |
| 0.125146  | 0.0665793 | 0.126311  | 0.118735  | 0.128788  | 0.117424  | 0.12296   |
| 0.097465  | 0.110286  | 0.127185  | 0.106206  | 0.0996503 | 0.100524  | 0.0949883 |
| 0.121503  | 0.133159  | 0.141608  | 0.125291  | 0.128642  | 0.121941  | 0.115239  |
| 0.0856643 | 0.117133  | 0.125874  | 0.087704  | 0.0878497 | 0.0840618 | 0.0945513 |
| 0.10271   | 0.123397  | 0.13039   | 0.110286  | 0.10169   | 0.101107  | 0.0964452 |
| 0.129516  | 0.112325  | 0.125728  | 0.126603  | 0.140152  | 0.135198  | 0.126166  |
| 0.105915  | 0.125146  | 0.133887  | 0.115822  | 0.107226  | 0.108974  | 0.106061  |
| 0.119464  | 0.140152  | 0.15035   | 0.130536  | 0.127477  | 0.119901  | 0.11961   |
| 0.11553   | 0.131265  | 0.145542  | 0.120192  | 0.118007  | 0.120047  | 0.118007  |
| 0.102273  | 0.117716  | 0.125874  | 0.111014  | 0.112325  | 0.102127  | 0.0989219 |
| 0.0952797 | 0.117133  | 0.129953  | 0.106643  | 0.0960082 | 0.0965909 | 0.0901807 |
| 0.0987762 | 0.118881  | 0.132576  | 0.109266  | 0.101253  | 0.10271   | 0.0992133 |
| 0.119172  | 0.1419    | 0.144522  | 0.125291  | 0.123397  | 0.11961   | 0.121066  |
| 0.0980478 | 0.114948  | 0.127477  | 0.10912   | 0.0964452 | 0.103147  | 0.0856643 |
| 0.121503  | 0.146562  | 0.152681  | 0.128788  | 0.132721  | 0.12602   | 0.125437  |
| 0.113636  | 0.123543  | 0.132867  | 0.11655   | 0.112034  | 0.110868  | 0.101253  |
| 0.104895  | 0.12296   | 0.128205  | 0.108392  | 0.108537  | 0.106789  | 0.10271   |
| 0.0984848 | 0.120921  | 0.132576  | 0.113636  | 0.107955  | 0.105041  | 0.100962  |
| 0.1081    | 0.124709  | 0.13986   | 0.115676  | 0.113491  | 0.10912   | 0.106498  |
| 0.099359  | 0.117424  | 0.128788  | 0.110723  | 0.10067   | 0.101544  | 0.0954254 |

|           |          |          |           |           |           |           |
|-----------|----------|----------|-----------|-----------|-----------|-----------|
| 0.0958625 | 0.117424 | 0.131119 | 0.1081    | 0.101544  | 0.10067   | 0.0957168 |
| 0.119027  | 0.135052 | 0.14933  | 0.124272  | 0.125874  | 0.120047  | 0.118881  |
| 0.0890152 | 0.112617 | 0.122815 | 0.0992133 | 0.0941142 | 0.101107  | 0.0952797 |
| 0.100816  | 0.117424 | 0.124709 | 0.10373   | 0.0977564 | 0.0983392 | 0.0971737 |
| 0.105769  | 0.12296  | 0.123543 | 0.115967  | 0.107955  | 0.10912   | 0.109411  |
| 0.104312  | 0.115676 | 0.110723 | 0.105769  | 0.109411  | 0.108537  | 0.110286  |
| 0.118298  | 0.123543 | 0.138112 | 0.113928  | 0.112908  | 0.110286  | 0.10708   |
| 0.11961   | 0.127768 | 0.143794 | 0.115822  | 0.120629  | 0.122669  | 0.110723  |
| 0.102855  | 0.108392 | 0.114802 | 0.107809  | 0.107372  | 0.107955  | 0.101836  |
| 0.17162   | 0.172203 | 0.175699 | 0.172786  | 0.180216  | 0.174971  | 0.167104  |
| 0.090472  | 0.114656 | 0.118153 | 0.104749  | 0.0944056 | 0.0958625 | 0.0920746 |
| 0.119172  | 0.126166 | 0.141608 | 0.115676  | 0.117861  | 0.115239  | 0.113199  |
| 0.110723  | 0.11859  | 0.13549  | 0.109557  | 0.109703  | 0.112034  | 0.100962  |
| 0.111451  | 0.125437 | 0.116404 | 0.11116   | 0.120921  | 0.118881  | 0.115676  |
| 0.0935315 | 0.104021 | 0.126166 | 0.0949883 | 0.0977564 | 0.100087  | 0.0828963 |
| 0.110431  | 0.121212 | 0.140443 | 0.11014   | 0.11116   | 0.114365  | 0.103001  |
| 0.099359  | 0.108683 | 0.125    | 0.0981935 | 0.100379  | 0.103584  | 0.0965909 |
| 0.102418  | 0.119901 | 0.130973 | 0.0968823 | 0.101399  | 0.102273  | 0.100233  |
| 0.0983392 | 0.113491 | 0.108829 | 0.10067   | 0.102273  | 0.101981  | 0.0920746 |
| 0.114656  | 0.121066 | 0.142045 | 0.109703  | 0.118007  | 0.113345  | 0.111597  |
| 0.0793998 | 0.10067  | 0.119901 | 0.0793998 | 0.0917832 | 0.0789627 | 0.0868298 |
| 0.115093  | 0.122086 | 0.115967 | 0.111597  | 0.119318  | 0.12398   | 0.112325  |
| 0.0890152 | 0.103001 | 0.10708  | 0.0980478 | 0.103147  | 0.097028  | 0.0979021 |
| 0.112471  | 0.131702 | 0.143939 | 0.117424  | 0.118153  | 0.116113  | 0.110868  |
| 0.103584  | 0.123106 | 0.110286 | 0.115239  | 0.104312  | 0.106935  | 0.107517  |
| 0.0887238 | 0.099796 | 0.109411 | 0.0910548 | 0.0941142 | 0.094697  | 0.0926573 |
| 0.129225  | 0.109703 | 0.13447  | 0.129808  | 0.135198  | 0.127914  | 0.125     |
| 0.0955711 | 0.105478 | 0.106061 | 0.0909091 | 0.102418  | 0.0962995 | 0.0942599 |
| 0.0941142 | 0.104312 | 0.125    | 0.0961538 | 0.0980478 | 0.097465  | 0.0869755 |
| 0.100379  | 0.123106 | 0.121066 | 0.105332  | 0.105769  | 0.0967366 | 0.100524  |
| 0.116113  | 0.127768 | 0.120775 | 0.114948  | 0.12296   | 0.118881  | 0.118007  |
| 0.112325  | 0.121941 | 0.125728 | 0.112325  | 0.116259  | 0.113636  | 0.10373   |
| 0.092803  | 0.103293 | 0.121941 | 0.0939685 | 0.0987762 | 0.10169   | 0.0903263 |
| 0.0980478 | 0.103584 | 0.124854 | 0.0983392 | 0.0935315 | 0.0961538 | 0.0827506 |
| 0.0935315 | 0.108392 | 0.1081   | 0.106352  | 0.0960082 | 0.0965909 | 0.0948427 |
| 0.0922203 | 0.119318 | 0.131265 | 0.0808566 | 0.0955711 | 0.0917832 | 0.0996503 |
| 0.0961538 | 0.111014 | 0.108683 | 0.0984848 | 0.100379  | 0.103875  | 0.099796  |
| 0.0732809 | 0.105332 | 0.117861 | 0.0846445 | 0.0678904 | 0.0740093 | 0.0728438 |
| 0.0689103 | 0.104458 | 0.115822 | 0.071824  | 0.0804196 | 0.0801282 | 0.0777972 |
| 0.0786713 | 0.105478 | 0.122669 | 0.0748834 | 0.0776515 | 0.0627914 | 0.0855186 |
| 0.106352  | 0.121503 | 0.136364 | 0.119755  | 0.11116   | 0.114656  | 0.10708   |
| 0.0965909 | 0.126603 | 0.133596 | 0.0887238 | 0.0952797 | 0.0865385 | 0.105478  |
| 0.0737179 | 0.111305 | 0.120629 | 0.0885781 | 0.0421037 | 0.0677448 | 0.0852273 |
| 0.0700758 | 0.109703 | 0.117861 | 0.0782343 | 0.0702214 | 0.0710956 | 0.083042  |

|           |          |          |           |           |           |           |
|-----------|----------|----------|-----------|-----------|-----------|-----------|
| 0.0808566 | 0.115239 | 0.129225 | 0.0817308 | 0.0897436 | 0.0874126 | 0.0996503 |
| 0         | 0.105478 | 0.121212 | 0.0743007 | 0.0747378 | 0.0805653 | 0.0823135 |
| 0.105478  | 0        | 0.117424 | 0.108392  | 0.112908  | 0.106498  | 0.103001  |
| 0.121212  | 0.117424 | 0        | 0.126166  | 0.124854  | 0.124272  | 0.122815  |
| 0.0743007 | 0.108392 | 0.126166 | 0         | 0.0887238 | 0.0869755 | 0.088141  |
| 0.0747378 | 0.112908 | 0.124854 | 0.0887238 | 0         | 0.0690559 | 0.0868298 |
| 0.0805653 | 0.106498 | 0.124272 | 0.0869755 | 0.0690559 | 0         | 0.0871212 |
| 0.0823135 | 0.103001 | 0.122815 | 0.088141  | 0.0868298 | 0.0871212 | 0         |
| 0.0945513 | 0.12398  | 0.13243  | 0.081148  | 0.094697  | 0.083042  | 0.103438  |
| 0.0697844 | 0.110286 | 0.115822 | 0.0796911 | 0.0696387 | 0.0824592 | 0.0780886 |
| 0.124126  | 0.138695 | 0.134324 | 0.129662  | 0.120484  | 0.11961   | 0.12398   |
| 0.11553   | 0.14088  | 0.139132 | 0.121066  | 0.120921  | 0.113636  | 0.111888  |
| 0.103293  | 0.129516 | 0.133304 | 0.11553   | 0.107517  | 0.106061  | 0.107517  |
| 0.100816  | 0.118298 | 0.131702 | 0.110723  | 0.100962  | 0.10067   | 0.0989219 |
| 0.0912005 | 0.110431 | 0.109557 | 0.0967366 | 0.095134  | 0.0989219 | 0.0948427 |
| 0.0721154 | 0.109411 | 0.11961  | 0.0750291 | 0.0777972 | 0.0740093 | 0.0833333 |
| 0.0879953 | 0.105186 | 0.121212 | 0.0882867 | 0.0913462 | 0.0869755 | 0.0828963 |
| 0.0949883 | 0.113928 | 0.12296  | 0.101981  | 0.10067   | 0.0965909 | 0.0925117 |
| 0.101981  | 0.115093 | 0.129371 | 0.11014   | 0.109994  | 0.105332  | 0.0968823 |
| 0.108392  | 0.129953 | 0.143648 | 0.116841  | 0.115822  | 0.110577  | 0.110286  |
| 0.0945513 | 0.106206 | 0.129225 | 0.0989219 | 0.0984848 | 0.103147  | 0.0888695 |
| 0.113928  | 0.133159 | 0.135781 | 0.113928  | 0.120775  | 0.116404  | 0.112034  |
| 0.112325  | 0.133304 | 0.127185 | 0.119027  | 0.116259  | 0.113345  | 0.119172  |
| 0.188374  | 0.192162 | 0.206439 | 0.196241  | 0.196678  | 0.193473  | 0.186189  |
| 0.236888  | 0.23514  | 0.240385 | 0.241259  | 0.24053   | 0.23616   | 0.233246  |
| 0.105041  | 0.114365 | 0.126894 | 0.110577  | 0.111888  | 0.107226  | 0.0973193 |
| 0.0949883 | 0.11451  | 0.126166 | 0.100816  | 0.101544  | 0.0971737 | 0.100087  |
| 0.0929487 | 0.113345 | 0.122378 | 0.10373   | 0.100962  | 0.0971737 | 0.0863928 |
| 0.10169   | 0.113054 | 0.125874 | 0.109557  | 0.105915  | 0.104458  | 0.097465  |
| 0.115093  | 0.129371 | 0.13549  | 0.119172  | 0.11553   | 0.11757   | 0.119901  |
| 0.103438  | 0.119464 | 0.127622 | 0.112179  | 0.108829  | 0.105624  | 0.102418  |
| 0.124563  | 0.141754 | 0.149621 | 0.129808  | 0.135198  | 0.128205  | 0.134324  |
| 0.101399  | 0.120629 | 0.13141  | 0.1081    | 0.102418  | 0.101836  | 0.10067   |
| 0.112762  | 0.132284 | 0.133741 | 0.111888  | 0.117861  | 0.114073  | 0.11757   |
| 0.117861  | 0.129225 | 0.139423 | 0.121649  | 0.127914  | 0.117424  | 0.113054  |
| 0.117861  | 0.136218 | 0.14088  | 0.123689  | 0.118881  | 0.115676  | 0.120338  |
| 0.120192  | 0.137966 | 0.146707 | 0.131556  | 0.129662  | 0.123834  | 0.119464  |
| 0.0983392 | 0.117861 | 0.127185 | 0.112325  | 0.0987762 | 0.0967366 | 0.0987762 |
| 0.0922203 | 0.115822 | 0.123397 | 0.102418  | 0.0944056 | 0.0944056 | 0.0990676 |
| 0.103147  | 0.116841 | 0.128497 | 0.109557  | 0.104749  | 0.100962  | 0.10067   |
| 0.0935315 | 0.11451  | 0.122378 | 0.102564  | 0.101836  | 0.0965909 | 0.0942599 |
| 0.0920746 | 0.11451  | 0.124417 | 0.100816  | 0.0992133 | 0.0948427 | 0.0989219 |
| 0.10067   | 0.119027 | 0.130099 | 0.106498  | 0.107226  | 0.101981  | 0.0984848 |
| 0.115676  | 0.136072 | 0.141317 | 0.112762  | 0.119318  | 0.114073  | 0.116113  |

|           |          |          |           |           |           |           |
|-----------|----------|----------|-----------|-----------|-----------|-----------|
| 0.127914  | 0.142774 | 0.147145 | 0.128205  | 0.127768  | 0.120775  | 0.118444  |
| 0.097465  | 0.119901 | 0.13243  | 0.10912   | 0.102564  | 0.0955711 | 0.103438  |
| 0.0981935 | 0.120629 | 0.130245 | 0.105769  | 0.104458  | 0.100379  | 0.0942599 |
| 0.120047  | 0.136364 | 0.141317 | 0.120338  | 0.124563  | 0.118153  | 0.114365  |
| 0.0917832 | 0.112471 | 0.126166 | 0.102855  | 0.0942599 | 0.0910548 | 0.092803  |
| 0.123689  | 0.141171 | 0.152826 | 0.134178  | 0.130245  | 0.127622  | 0.128205  |
| 0.118444  | 0.135052 | 0.14292  | 0.121358  | 0.127622  | 0.123834  | 0.117133  |
| 0.125291  | 0.134907 | 0.144522 | 0.123252  | 0.131265  | 0.126603  | 0.113491  |
| 0.0839161 | 0.11859  | 0.124709 | 0.0999417 | 0.0986305 | 0.0922203 | 0.0948427 |
| 0.0986305 | 0.113782 | 0.120775 | 0.102127  | 0.0955711 | 0.0952797 | 0.094697  |
| 0.104312  | 0.12704  | 0.135198 | 0.109848  | 0.113782  | 0.107663  | 0.109703  |
| 0.112325  | 0.132139 | 0.134178 | 0.113782  | 0.112471  | 0.110723  | 0.11014   |
| 0.112034  | 0.131265 | 0.137092 | 0.114656  | 0.118298  | 0.108974  | 0.113928  |
| 0.104021  | 0.123543 | 0.13141  | 0.109848  | 0.108246  | 0.107663  | 0.0965909 |
| 0.0986305 | 0.125437 | 0.132721 | 0.109703  | 0.105186  | 0.106061  | 0.101981  |
| 0.109703  | 0.123397 | 0.133887 | 0.118735  | 0.112179  | 0.106352  | 0.107226  |
| 0.115822  | 0.135635 | 0.13884  | 0.115239  | 0.119464  | 0.111305  | 0.118007  |
| 0.112908  | 0.127185 | 0.141171 | 0.114365  | 0.113928  | 0.106061  | 0.109848  |
| 0.119172  | 0.136364 | 0.139569 | 0.123834  | 0.121066  | 0.11757   | 0.119901  |
| 0.117279  | 0.121066 | 0.133887 | 0.121066  | 0.12296   | 0.121795  | 0.116841  |
| 0.0983392 | 0.119901 | 0.126311 | 0.104749  | 0.102855  | 0.0981935 | 0.0961538 |
| 0.120484  | 0.129808 | 0.144668 | 0.116696  | 0.122669  | 0.116841  | 0.115093  |
| 0.0909091 | 0.115093 | 0.122086 | 0.103438  | 0.0989219 | 0.0962995 | 0.0983392 |
| 0.10271   | 0.116404 | 0.128934 | 0.110286  | 0.106061  | 0.102855  | 0.0979021 |
| 0.0971737 | 0.113199 | 0.128642 | 0.109703  | 0.0987762 | 0.0952797 | 0.0976107 |
| 0.0999417 | 0.119755 | 0.127914 | 0.104312  | 0.105332  | 0.10271   | 0.0960082 |
| 0.0912005 | 0.115385 | 0.127622 | 0.10169   | 0.0992133 | 0.0971737 | 0.0936772 |
| 0.122232  | 0.134761 | 0.142045 | 0.128934  | 0.122086  | 0.119172  | 0.117424  |
| 0.104895  | 0.109557 | 0.121212 | 0.111014  | 0.110868  | 0.104458  | 0.103293  |
| 0.124126  | 0.137821 | 0.143065 | 0.127622  | 0.123397  | 0.121358  | 0.11757   |
| 0.0964452 | 0.118298 | 0.127331 | 0.101399  | 0.10271   | 0.100962  | 0.0992133 |
| 0.105915  | 0.12602  | 0.131265 | 0.110286  | 0.109557  | 0.105769  | 0.111305  |
| 0.109848  | 0.120921 | 0.134907 | 0.110723  | 0.113491  | 0.108829  | 0.106789  |
| 0.101107  | 0.118007 | 0.134033 | 0.106935  | 0.108829  | 0.107372  | 0.0977564 |
| 0.0925117 | 0.113199 | 0.123397 | 0.0992133 | 0.0891608 | 0.0879953 | 0.100816  |
| 0.10373   | 0.126457 | 0.137529 | 0.110431  | 0.109411  | 0.104167  | 0.102127  |
| 0.0971737 | 0.121358 | 0.137383 | 0.106498  | 0.106643  | 0.104312  | 0.0958625 |
| 0.095134  | 0.11553  | 0.119901 | 0.102418  | 0.102564  | 0.104312  | 0.0984848 |
| 0.111742  | 0.128642 | 0.137966 | 0.105332  | 0.115093  | 0.11655   | 0.114802  |
| 0.119172  | 0.141026 | 0.138112 | 0.119464  | 0.122815  | 0.119901  | 0.118735  |
| 0.0944056 | 0.104895 | 0.117716 | 0.0938228 | 0.0945513 | 0.092803  | 0.0893065 |
| 0.122815  | 0.13243  | 0.137675 | 0.117861  | 0.121795  | 0.11859   | 0.114219  |
| 0.106061  | 0.123834 | 0.128788 | 0.101399  | 0.106498  | 0.105915  | 0.104167  |
| 0.120921  | 0.130828 | 0.136655 | 0.111014  | 0.116696  | 0.11553   | 0.103001  |

|           |          |          |           |           |           |           |
|-----------|----------|----------|-----------|-----------|-----------|-----------|
| 0.108683  | 0.121503 | 0.122086 | 0.106643  | 0.10912   | 0.108246  | 0.0971737 |
| 0.107809  | 0.122086 | 0.132284 | 0.101399  | 0.101544  | 0.103875  | 0.101544  |
| 0.10912   | 0.123106 | 0.131847 | 0.103293  | 0.104895  | 0.103147  | 0.0999417 |
| 0.111305  | 0.127622 | 0.137529 | 0.105769  | 0.112908  | 0.11757   | 0.105915  |
| 0.123834  | 0.138403 | 0.136655 | 0.122086  | 0.121941  | 0.122523  | 0.113782  |
| 0.106061  | 0.126457 | 0.13141  | 0.107809  | 0.0995047 | 0.103875  | 0.104458  |
| 0.101399  | 0.115967 | 0.121212 | 0.102273  | 0.106789  | 0.104749  | 0.0916375 |
| 0.12398   | 0.139423 | 0.14088  | 0.126603  | 0.12704   | 0.123834  | 0.125583  |
| 0.114802  | 0.132284 | 0.137821 | 0.112179  | 0.112617  | 0.112908  | 0.107955  |
| 0.0987762 | 0.111305 | 0.118881 | 0.102855  | 0.097465  | 0.0995047 | 0.0919289 |
| 0.216929  | 0.211101 | 0.223339 | 0.222174  | 0.222028  | 0.214744  | 0.211538  |
| 0.111451  | 0.120484 | 0.133013 | 0.108829  | 0.111014  | 0.109557  | 0.102564  |
| 0.0916375 | 0.116696 | 0.127185 | 0.0948427 | 0.0920746 | 0.092366  | 0.0914918 |
| 0.126457  | 0.13549  | 0.138403 | 0.121795  | 0.121358  | 0.121649  | 0.115239  |
| 0.100233  | 0.120047 | 0.127914 | 0.104895  | 0.103293  | 0.105624  | 0.0968823 |
| 0.111305  | 0.133159 | 0.136364 | 0.113928  | 0.107372  | 0.110868  | 0.111742  |
| 0.115093  | 0.123252 | 0.138112 | 0.108683  | 0.112908  | 0.112034  | 0.0971737 |
| 0.105624  | 0.119027 | 0.133596 | 0.10067   | 0.109557  | 0.109266  | 0.0981935 |
| 0.103584  | 0.126603 | 0.134761 | 0.100087  | 0.105186  | 0.103438  | 0.106643  |
| 0.119464  | 0.132284 | 0.1419   | 0.112179  | 0.116113  | 0.115239  | 0.104749  |
| 0.119901  | 0.13039  | 0.13447  | 0.110286  | 0.118298  | 0.120047  | 0.109266  |
| 0.119755  | 0.129953 | 0.135781 | 0.109266  | 0.120775  | 0.117279  | 0.115239  |
| 0.115676  | 0.128497 | 0.134907 | 0.108392  | 0.111742  | 0.114073  | 0.106789  |
| 0.0958625 | 0.118298 | 0.125874 | 0.0981935 | 0.0968823 | 0.092803  | 0.0992133 |
| 0.1081    | 0.123543 | 0.129953 | 0.105769  | 0.108246  | 0.107663  | 0.0986305 |
| 0.122815  | 0.130973 | 0.143502 | 0.113491  | 0.120629  | 0.115967  | 0.111888  |
| 0.110723  | 0.117716 | 0.126748 | 0.10169   | 0.108246  | 0.105332  | 0.0957168 |
| 0.122669  | 0.144814 | 0.149184 | 0.128205  | 0.122815  | 0.12398   | 0.115239  |
| 0.127185  | 0.114365 | 0.135052 | 0.129808  | 0.127331  | 0.126748  | 0.120047  |
| 0.105624  | 0.118735 | 0.128059 | 0.108537  | 0.106061  | 0.106352  | 0.103147  |
| 0.10912   | 0.126603 | 0.129516 | 0.112617  | 0.107517  | 0.110431  | 0.111597  |
| 0.118007  | 0.104021 | 0.125583 | 0.116841  | 0.120775  | 0.117279  | 0.0989219 |
| 0.113491  | 0.132721 | 0.129225 | 0.112325  | 0.120047  | 0.117424  | 0.113928  |
| 0.119318  | 0.104749 | 0.128642 | 0.119027  | 0.123834  | 0.117133  | 0.110723  |
| 0.13039   | 0.110868 | 0.136509 | 0.135052  | 0.129953  | 0.124417  | 0.122669  |
| 0.0894522 | 0.118298 | 0.125583 | 0.0938228 | 0.0930944 | 0.0922203 | 0.0884324 |
| 0.11116   | 0.136509 | 0.145542 | 0.112908  | 0.123252  | 0.118881  | 0.117424  |
| 0.134324  | 0.119464 | 0.133741 | 0.136364  | 0.133013  | 0.131265  | 0.125728  |
| 0.0885781 | 0.122086 | 0.125874 | 0.0871212 | 0.0893065 | 0.0828963 | 0.0913462 |
| 0.107809  | 0.123252 | 0.136072 | 0.114219  | 0.113782  | 0.111742  | 0.104749  |
| 0.133887  | 0.144959 | 0.142045 | 0.137383  | 0.136072  | 0.134615  | 0.13549   |
| 0.116404  | 0.137092 | 0.143211 | 0.120192  | 0.120047  | 0.115676  | 0.11014   |
| 0.127622  | 0.143357 | 0.144814 | 0.124126  | 0.128642  | 0.121066  | 0.121941  |
| 0.114656  | 0.133596 | 0.140589 | 0.112034  | 0.112762  | 0.113054  | 0.110431  |

|           |          |           |           |           |           |           |
|-----------|----------|-----------|-----------|-----------|-----------|-----------|
| 0.111014  | 0.113345 | 0.135198  | 0.0999417 | 0.110577  | 0.110577  | 0.099796  |
| 0.122523  | 0.13447  | 0.135635  | 0.117279  | 0.122669  | 0.113928  | 0.115676  |
| 0.10169   | 0.120921 | 0.13345   | 0.0944056 | 0.100379  | 0.0945513 | 0.0977564 |
| 0.110577  | 0.125437 | 0.138258  | 0.109994  | 0.115385  | 0.115385  | 0.104604  |
| 0.118444  | 0.131847 | 0.137383  | 0.108537  | 0.115676  | 0.112762  | 0.104604  |
| 0.116696  | 0.127768 | 0.136218  | 0.114656  | 0.119464  | 0.117716  | 0.111597  |
| 0.116987  | 0.127185 | 0.134761  | 0.110286  | 0.118881  | 0.117716  | 0.104895  |
| 0.111451  | 0.109411 | 0.128642  | 0.109994  | 0.118881  | 0.11451   | 0.101981  |
| 0.128934  | 0.122815 | 0.14729   | 0.125437  | 0.133741  | 0.126748  | 0.120921  |
| 0.0992133 | 0.127477 | 0.127185  | 0.097465  | 0.101399  | 0.0979021 | 0.104312  |
| 0.0954254 | 0.121358 | 0.135052  | 0.0977564 | 0.105186  | 0.101399  | 0.0996503 |
| 0.113199  | 0.125728 | 0.133596  | 0.118153  | 0.119464  | 0.114219  | 0.116841  |
| 0.0922203 | 0.110286 | 0.120192  | 0.0823135 | 0.0964452 | 0.0859557 | 0.0979021 |
| 0.130828  | 0.100233 | 0.130536  | 0.129079  | 0.13243   | 0.12398   | 0.123106  |
| 0.13986   | 0.109557 | 0.141608  | 0.134615  | 0.140297  | 0.125728  | 0.135344  |
| 0.118298  | 0.133741 | 0.135781  | 0.120921  | 0.118444  | 0.114656  | 0.112034  |
| 0.103293  | 0.127185 | 0.129225  | 0.113199  | 0.106352  | 0.105478  | 0.106935  |
| 0.123543  | 0.136655 | 0.136364  | 0.124417  | 0.12602   | 0.12602   | 0.11757   |
| 0.123106  | 0.130099 | 0.13884   | 0.11553   | 0.11859   | 0.118881  | 0.110723  |
| 0.104458  | 0.133013 | 0.138258  | 0.11116   | 0.113345  | 0.106352  | 0.115967  |
| 0.121941  | 0.136218 | 0.143794  | 0.11553   | 0.129953  | 0.127331  | 0.114219  |
| 0.128059  | 0.118153 | 0.13447   | 0.122232  | 0.124709  | 0.118007  | 0.11859   |
| 0.107809  | 0.129079 | 0.127622  | 0.109557  | 0.10271   | 0.0986305 | 0.105915  |
| 0.15472   | 0.13141  | 0.148601  | 0.151515  | 0.157488  | 0.150787  | 0.148456  |
| 0.105478  | 0.128788 | 0.13345   | 0.108683  | 0.110286  | 0.106498  | 0.10708   |
| 0.123834  | 0.139277 | 0.137529  | 0.129662  | 0.12602   | 0.127477  | 0.124272  |
| 0.0992133 | 0.121649 | 0.139423  | 0.100379  | 0.108683  | 0.104604  | 0.0987762 |
| 0.123397  | 0.137383 | 0.132721  | 0.120775  | 0.126166  | 0.129371  | 0.120047  |
| 0.114073  | 0.123689 | 0.131847  | 0.108246  | 0.112762  | 0.112762  | 0.10373   |
| 0.131119  | 0.127914 | 0.0932401 | 0.136364  | 0.138549  | 0.135635  | 0.124563  |
| 0.146125  | 0.150787 | 0.153118  | 0.140297  | 0.143065  | 0.142191  | 0.135198  |
| 0.114802  | 0.128788 | 0.136655  | 0.120338  | 0.119027  | 0.117861  | 0.118444  |
| 0.13039   | 0.141754 | 0.143502  | 0.136801  | 0.132867  | 0.13141   | 0.126457  |
| 0.129953  | 0.143357 | 0.159382  | 0.138403  | 0.141171  | 0.140006  | 0.129808  |
| 0.133159  | 0.141026 | 0.150641  | 0.143065  | 0.141754  | 0.139714  | 0.124563  |
| 0.0992133 | 0.121941 | 0.11757   | 0.105332  | 0.107517  | 0.107226  | 0.106643  |
| 0.130536  | 0.138403 | 0.139277  | 0.139277  | 0.13447   | 0.138549  | 0.129516  |
| 0.104895  | 0.117716 | 0.125291  | 0.114802  | 0.10067   | 0.105041  | 0.104167  |
| 0.103584  | 0.118153 | 0.128934  | 0.108246  | 0.101981  | 0.104895  | 0.0979021 |
| 0.107517  | 0.120921 | 0.125     | 0.104895  | 0.106498  | 0.101253  | 0.105624  |
| 0.112179  | 0.125    | 0.130828  | 0.119755  | 0.114948  | 0.114365  | 0.110577  |
| 0.106498  | 0.111742 | 0.135052  | 0.110577  | 0.104021  | 0.101399  | 0.100816  |
| 0.103584  | 0.113782 | 0.127185  | 0.110577  | 0.103438  | 0.106643  | 0.0981935 |
| 0.116404  | 0.123106 | 0.135344  | 0.121649  | 0.109848  | 0.118007  | 0.109557  |

|           |          |           |           |           |           |           |
|-----------|----------|-----------|-----------|-----------|-----------|-----------|
| 0.111014  | 0.125    | 0.132867  | 0.118298  | 0.110286  | 0.110577  | 0.112325  |
| 0.0879953 | 0.110723 | 0.117716  | 0.0955711 | 0.0878497 | 0.0872669 | 0.0913462 |
| 0.117424  | 0.125874 | 0.137821  | 0.121795  | 0.116987  | 0.11553   | 0.113491  |
| 0.111451  | 0.122523 | 0.132139  | 0.116696  | 0.112762  | 0.110431  | 0.109848  |
| 0.0983392 | 0.125728 | 0.137092  | 0.107663  | 0.104604  | 0.105769  | 0.105478  |
| 0.213432  | 0.211684 | 0.221591  | 0.217512  | 0.217075  | 0.213287  | 0.206294  |
| 0.136218  | 0.147582 | 0.151952  | 0.140297  | 0.13986   | 0.137529  | 0.13549   |
| 0.124417  | 0.136655 | 0.134033  | 0.123252  | 0.122523  | 0.123106  | 0.120484  |
| 0.115822  | 0.125437 | 0.135635  | 0.125146  | 0.117424  | 0.120629  | 0.116841  |
| 0.207022  | 0.204983 | 0.219551  | 0.212267  | 0.213869  | 0.207751  | 0.20542   |
| 0.104458  | 0.11757  | 0.108537  | 0.114073  | 0.114802  | 0.115967  | 0.106352  |
| 0.109266  | 0.118881 | 0.129371  | 0.117716  | 0.112034  | 0.112908  | 0.105915  |
| 0.114219  | 0.128788 | 0.140443  | 0.118007  | 0.116987  | 0.119901  | 0.116113  |
| 0.109994  | 0.121066 | 0.133304  | 0.115239  | 0.109266  | 0.11014   | 0.11014   |
| 0.248397  | 0.248397 | 0.252477  | 0.24898   | 0.25204   | 0.247086  | 0.244172  |
| 0.112471  | 0.112471 | 0.0498252 | 0.11859   | 0.117861  | 0.118444  | 0.112908  |
| 0.0926573 | 0.120629 | 0.13141   | 0.102855  | 0.0986305 | 0.0980478 | 0.100379  |
| 0.115385  | 0.132867 | 0.137821  | 0.120629  | 0.11553   | 0.11553   | 0.118444  |
| 0.112762  | 0.129662 | 0.133159  | 0.118007  | 0.115822  | 0.109411  | 0.112617  |
| 0.114219  | 0.116841 | 0.0673077 | 0.119755  | 0.120484  | 0.122232  | 0.112908  |
| 0.120338  | 0.12296  | 0.131702  | 0.125     | 0.120775  | 0.124563  | 0.114073  |
| 0.0949883 | 0.123834 | 0.134615  | 0.109266  | 0.103584  | 0.102418  | 0.103001  |
| 0.114365  | 0.125728 | 0.131556  | 0.118735  | 0.111305  | 0.112762  | 0.109848  |
| 0.119464  | 0.127622 | 0.135198  | 0.126166  | 0.121941  | 0.128059  | 0.11553   |
| 0.102273  | 0.117716 | 0.127331  | 0.111014  | 0.102127  | 0.103001  | 0.105332  |
| 0.10912   | 0.120484 | 0.131847  | 0.116113  | 0.11014   | 0.109557  | 0.106935  |
| 0.0961538 | 0.112762 | 0.120629  | 0.0882867 | 0.0942599 | 0.0895979 | 0.0916375 |
| 0.145542  | 0.150787 | 0.154866  | 0.140006  | 0.141608  | 0.141317  | 0.136072  |
| 0.11757   | 0.116404 | 0.0467657 | 0.124272  | 0.123252  | 0.122669  | 0.11859   |
| 0.116696  | 0.126311 | 0.13243   | 0.121358  | 0.11655   | 0.114802  | 0.113054  |
| 0.1875    | 0.185752 | 0.19595   | 0.192162  | 0.191142  | 0.188228  | 0.18211   |
| 0.201777  | 0.198864 | 0.211393  | 0.207605  | 0.206876  | 0.200175  | 0.197261  |
| 0.110577  | 0.12398  | 0.133304  | 0.114365  | 0.108683  | 0.109848  | 0.109557  |
| 0.103584  | 0.116113 | 0.12602   | 0.10912   | 0.0996503 | 0.100816  | 0.102855  |
| 0.128642  | 0.135344 | 0.141463  | 0.131556  | 0.130828  | 0.128788  | 0.125874  |
| 0.092803  | 0.120775 | 0.133596  | 0.105332  | 0.0999417 | 0.102564  | 0.0990676 |
| 0.113054  | 0.115967 | 0.0512821 | 0.12296   | 0.119318  | 0.119027  | 0.118444  |
| 0.127768  | 0.132139 | 0.137966  | 0.127477  | 0.128205  | 0.126166  | 0.118881  |
| 0.221882  | 0.220425 | 0.227418  | 0.230041  | 0.226399  | 0.221445  | 0.217366  |
| 0.110868  | 0.124854 | 0.127185  | 0.113199  | 0.109557  | 0.111597  | 0.108683  |
| 0.203963  | 0.202797 | 0.215909  | 0.206002  | 0.21285   | 0.206148  | 0.197698  |
| 0.0855186 | 0.108246 | 0.111451  | 0.100087  | 0.0926573 | 0.0996503 | 0.0914918 |
| 0.105186  | 0.121503 | 0.129662  | 0.113636  | 0.105041  | 0.105332  | 0.099796  |
| 0.106789  | 0.115822 | 0.128642  | 0.110286  | 0.113636  | 0.112179  | 0.106643  |

|           |          |           |          |           |           |           |
|-----------|----------|-----------|----------|-----------|-----------|-----------|
| 0.103293  | 0.116696 | 0.125437  | 0.10708  | 0.0990676 | 0.101399  | 0.100233  |
| 0.203963  | 0.199592 | 0.213287  | 0.210664 | 0.207896  | 0.205565  | 0.198281  |
| 0.125291  | 0.136364 | 0.143939  | 0.132576 | 0.126894  | 0.127185  | 0.127768  |
| 0.0952797 | 0.119172 | 0.127914  | 0.104895 | 0.104458  | 0.106206  | 0.103001  |
| 0.118881  | 0.131702 | 0.13986   | 0.126166 | 0.12398   | 0.122815  | 0.11961   |
| 0.11655   | 0.126457 | 0.137821  | 0.120047 | 0.118735  | 0.115822  | 0.112325  |
| 0.102273  | 0.117424 | 0.130536  | 0.11014  | 0.0995047 | 0.104749  | 0.101544  |
| 0.0893065 | 0.112034 | 0.112325  | 0.100962 | 0.0973193 | 0.0999417 | 0.0958625 |
| 0.100087  | 0.120484 | 0.138549  | 0.108537 | 0.107517  | 0.106643  | 0.103147  |
| 0.114948  | 0.12398  | 0.130682  | 0.118735 | 0.114219  | 0.114219  | 0.112471  |
| 0.110577  | 0.118444 | 0.130973  | 0.114365 | 0.107809  | 0.109266  | 0.107517  |
| 0.100233  | 0.122669 | 0.12704   | 0.11014  | 0.110286  | 0.105332  | 0.106789  |
| 0.186043  | 0.183421 | 0.197407  | 0.194784 | 0.190559  | 0.185315  | 0.182692  |
| 0.116841  | 0.134033 | 0.137821  | 0.120047 | 0.116696  | 0.11553   | 0.118735  |
| 0.127768  | 0.13243  | 0.141171  | 0.126603 | 0.125     | 0.124709  | 0.115676  |
| 0.113345  | 0.124709 | 0.136946  | 0.119464 | 0.113491  | 0.111451  | 0.114656  |
| 0.112034  | 0.114656 | 0.0625    | 0.120192 | 0.120629  | 0.120921  | 0.112471  |
| 0.116696  | 0.128351 | 0.135927  | 0.121941 | 0.120047  | 0.11655   | 0.117716  |
| 0.0965909 | 0.11553  | 0.117861  | 0.102418 | 0.101981  | 0.105478  | 0.101107  |
| 0.105478  | 0.115676 | 0.107809  | 0.112471 | 0.110286  | 0.109411  | 0.103875  |
| 0.0999417 | 0.127914 | 0.138403  | 0.109557 | 0.108246  | 0.105041  | 0.10708   |
| 0.122523  | 0.126894 | 0.136509  | 0.123689 | 0.121212  | 0.117716  | 0.112179  |
| 0.107372  | 0.122523 | 0.133887  | 0.116696 | 0.110723  | 0.111014  | 0.109557  |
| 0.107809  | 0.120047 | 0.134033  | 0.114219 | 0.108829  | 0.106498  | 0.108829  |
| 0.112034  | 0.131265 | 0.137675  | 0.116696 | 0.112762  | 0.120629  | 0.114802  |
| 0.128205  | 0.1419   | 0.148019  | 0.123543 | 0.129225  | 0.13243   | 0.131265  |
| 0.10373   | 0.104895 | 0.0603147 | 0.11655  | 0.110868  | 0.112617  | 0.104167  |
| 0.133013  | 0.143794 | 0.147582  | 0.135635 | 0.132867  | 0.132284  | 0.131119  |
| 0.101544  | 0.119027 | 0.127185  | 0.108537 | 0.101981  | 0.105478  | 0.100816  |
| 0.112617  | 0.118153 | 0.129225  | 0.114365 | 0.121795  | 0.116259  | 0.107226  |
| 0.112471  | 0.123252 | 0.13549   | 0.116841 | 0.116404  | 0.11553   | 0.11116   |
| 0.0999417 | 0.129079 | 0.1419    | 0.109557 | 0.106789  | 0.107955  | 0.10708   |
| 0.182692  | 0.185606 | 0.195804  | 0.190268 | 0.192162  | 0.188083  | 0.180798  |
| 0.0930944 | 0.118153 | 0.121358  | 0.101836 | 0.099359  | 0.100816  | 0.0999417 |
| 0.100962  | 0.114948 | 0.120192  | 0.108246 | 0.103438  | 0.101107  | 0.0944056 |
| 0.113491  | 0.12398  | 0.130973  | 0.117279 | 0.115676  | 0.112762  | 0.112471  |
| 0.174971  | 0.173514 | 0.191288  | 0.181672 | 0.18211   | 0.17803   | 0.165793  |
| 0.125874  | 0.121795 | 0.0611888 | 0.130245 | 0.129808  | 0.131265  | 0.123689  |
| 0.134615  | 0.129079 | 0.0501166 | 0.138403 | 0.13884   | 0.136218  | 0.135344  |
| 0.149621  | 0.150787 | 0.156031  | 0.139132 | 0.141608  | 0.143065  | 0.137238  |
| 0.105332  | 0.106789 | 0.0642483 | 0.113199 | 0.108683  | 0.109266  | 0.101107  |
| 0.118007  | 0.129079 | 0.134907  | 0.121795 | 0.118735  | 0.116404  | 0.11553   |
| 0.207896  | 0.205857 | 0.215472  | 0.216055 | 0.214452  | 0.209207  | 0.204254  |
| 0.121941  | 0.130099 | 0.132139  | 0.125728 | 0.122086  | 0.118007  | 0.121795  |



|           |          |           |           |           |           |           |
|-----------|----------|-----------|-----------|-----------|-----------|-----------|
| 0.121503  | 0.131702 | 0.140152  | 0.126166  | 0.124563  | 0.121941  | 0.120484  |
| 0.099359  | 0.118007 | 0.126166  | 0.107226  | 0.104458  | 0.104458  | 0.104749  |
| 0.164044  | 0.166084 | 0.180361  | 0.17162   | 0.169726  | 0.165647  | 0.159528  |
| 0.108683  | 0.115676 | 0.127914  | 0.114219  | 0.105915  | 0.11116   | 0.100379  |
| 0.142337  | 0.148456 | 0.150204  | 0.145833  | 0.1419    | 0.145396  | 0.140152  |
| 0.104167  | 0.126894 | 0.122523  | 0.107372  | 0.104604  | 0.106061  | 0.105769  |
| 0.185752  | 0.183421 | 0.198281  | 0.191288  | 0.188811  | 0.184441  | 0.178904  |
| 0.110868  | 0.114073 | 0.0633741 | 0.118735  | 0.113928  | 0.114802  | 0.108392  |
| 0.0962995 | 0.111742 | 0.122523  | 0.10271   | 0.0938228 | 0.0984848 | 0.0906177 |
| 0.108683  | 0.118298 | 0.131702  | 0.111014  | 0.112908  | 0.109703  | 0.10271   |
| 0.106789  | 0.121649 | 0.123689  | 0.119027  | 0.108683  | 0.112179  | 0.111014  |
| 0.108537  | 0.121066 | 0.128351  | 0.117279  | 0.111305  | 0.109557  | 0.106061  |
| 0.116113  | 0.120192 | 0.133304  | 0.120192  | 0.115093  | 0.118298  | 0.108683  |
| 0.102273  | 0.115093 | 0.124709  | 0.108683  | 0.0968823 | 0.102418  | 0.103001  |
| 0.184003  | 0.184586 | 0.198281  | 0.192745  | 0.189977  | 0.187937  | 0.180361  |
| 0.111305  | 0.12704  | 0.136072  | 0.11859   | 0.117279  | 0.118153  | 0.115239  |
| 0.108537  | 0.118444 | 0.129225  | 0.114948  | 0.106643  | 0.106643  | 0.101107  |
| 0.209207  | 0.207459 | 0.216783  | 0.212995  | 0.212267  | 0.207605  | 0.204691  |
| 0.11451   | 0.131702 | 0.136946  | 0.11655   | 0.115822  | 0.113199  | 0.11757   |
| 0.103293  | 0.116404 | 0.128351  | 0.110868  | 0.102273  | 0.104312  | 0.102564  |
| 0.0977564 | 0.113491 | 0.12602   | 0.107955  | 0.0976107 | 0.101399  | 0.0987762 |
| 0.13345   | 0.142191 | 0.143065  | 0.134615  | 0.132721  | 0.13243   | 0.133304  |
| 0.184149  | 0.182401 | 0.196387  | 0.191725  | 0.191288  | 0.186626  | 0.180216  |
| 0.0930944 | 0.121941 | 0.134761  | 0.105915  | 0.100816  | 0.0990676 | 0.102564  |
| 0.122232  | 0.135635 | 0.144376  | 0.118444  | 0.125583  | 0.128205  | 0.122669  |
| 0.103001  | 0.116404 | 0.128059  | 0.10912   | 0.100524  | 0.102273  | 0.102855  |
| 0.0989219 | 0.114656 | 0.129516  | 0.105915  | 0.0976107 | 0.101399  | 0.0979021 |
| 0.101107  | 0.11451  | 0.125     | 0.107809  | 0.0965909 | 0.101544  | 0.102418  |
| 0.108829  | 0.119318 | 0.131556  | 0.116113  | 0.113054  | 0.108683  | 0.113054  |
| 0.0871212 | 0.109848 | 0.118007  | 0.0976107 | 0.0922203 | 0.0925117 | 0.0898893 |
| 0.111305  | 0.114219 | 0.0495338 | 0.121212  | 0.119027  | 0.119027  | 0.112908  |
| 0.127914  | 0.138695 | 0.145688  | 0.127331  | 0.128059  | 0.130973  | 0.118735  |
| 0.106352  | 0.111305 | 0.0579837 | 0.117716  | 0.114073  | 0.118735  | 0.10912   |
| 0.121358  | 0.131265 | 0.136801  | 0.123106  | 0.123543  | 0.118298  | 0.11655   |
| 0.188228  | 0.18852  | 0.201923  | 0.195804  | 0.194493  | 0.190414  | 0.184295  |
| 0.105915  | 0.124563 | 0.133596  | 0.111451  | 0.111597  | 0.113636  | 0.111014  |
| 0.123834  | 0.13345  | 0.142774  | 0.127622  | 0.12602   | 0.12398   | 0.123397  |
| 0.101253  | 0.112617 | 0.124854  | 0.109994  | 0.0973193 | 0.101981  | 0.0990676 |
| 0.0891608 | 0.111014 | 0.118007  | 0.0961538 | 0.0895979 | 0.088141  | 0.0901807 |
| 0.108392  | 0.114219 | 0.119464  | 0.11655   | 0.112034  | 0.116404  | 0.102418  |
| 0.0965909 | 0.123106 | 0.134761  | 0.107663  | 0.106061  | 0.106352  | 0.102855  |
| 0.127768  | 0.13447  | 0.135052  | 0.129516  | 0.132284  | 0.128788  | 0.124709  |
| 0.119172  | 0.125874 | 0.134324  | 0.120921  | 0.117861  | 0.116696  | 0.10912   |
| 0.0912005 | 0.111888 | 0.125583  | 0.0996503 | 0.095134  | 0.0968823 | 0.0895979 |

|           |          |           |           |           |           |           |
|-----------|----------|-----------|-----------|-----------|-----------|-----------|
| 0.0878497 | 0.11116  | 0.121358  | 0.0913462 | 0.0938228 | 0.0909091 | 0.083042  |
| 0.0967366 | 0.111597 | 0.124417  | 0.100233  | 0.0925117 | 0.0936772 | 0.0852273 |
| 0.0872669 | 0.11116  | 0.112325  | 0.097465  | 0.0964452 | 0.0996503 | 0.0967366 |
| 0.120921  | 0.119172 | 0.0469114 | 0.123252  | 0.124563  | 0.123397  | 0.121649  |
| 0.0948427 | 0.121941 | 0.135635  | 0.106789  | 0.099359  | 0.102273  | 0.0967366 |
| 0.106935  | 0.122086 | 0.125874  | 0.114219  | 0.11116   | 0.108537  | 0.106789  |
| 0.0885781 | 0.118298 | 0.130536  | 0.101399  | 0.0960082 | 0.099796  | 0.0962995 |
| 0.100962  | 0.11553  | 0.128642  | 0.109703  | 0.0979021 | 0.106061  | 0.0987762 |
| 0.0926573 | 0.115676 | 0.121795  | 0.101399  | 0.101544  | 0.0992133 | 0.0968823 |
| 0.10373   | 0.118007 | 0.128497  | 0.111014  | 0.10067   | 0.105624  | 0.105915  |
| 0.101981  | 0.122378 | 0.134324  | 0.11014   | 0.107955  | 0.112325  | 0.107955  |
| 0.11859   | 0.123834 | 0.138986  | 0.11859   | 0.115822  | 0.116404  | 0.110286  |
| 0.108683  | 0.120921 | 0.124709  | 0.115676  | 0.109411  | 0.107955  | 0.104458  |
| 0.0895979 | 0.114656 | 0.121649  | 0.100379  | 0.0891608 | 0.0926573 | 0.0906177 |
| 0.101981  | 0.11655  | 0.12704   | 0.109266  | 0.100379  | 0.103584  | 0.10067   |
| 0.116259  | 0.122378 | 0.134615  | 0.119464  | 0.120192  | 0.11553   | 0.110286  |
| 0.112908  | 0.124272 | 0.135344  | 0.11961   | 0.108974  | 0.113636  | 0.107517  |
| 0.0932401 | 0.108392 | 0.125291  | 0.100524  | 0.0948427 | 0.0977564 | 0.0913462 |
| 0.10169   | 0.115676 | 0.125874  | 0.106352  | 0.0992133 | 0.100962  | 0.0986305 |
| 0.117861  | 0.126894 | 0.132139  | 0.117861  | 0.115385  | 0.11451   | 0.113054  |
| 0.0866841 | 0.112034 | 0.114073  | 0.10067   | 0.0961538 | 0.100816  | 0.0941142 |
| 0.113491  | 0.123689 | 0.133887  | 0.120484  | 0.115676  | 0.116841  | 0.113636  |
| 0.106498  | 0.116404 | 0.129225  | 0.11553   | 0.106643  | 0.105769  | 0.0996503 |
| 0.0930944 | 0.11553  | 0.120192  | 0.100962  | 0.0944056 | 0.0958625 | 0.0958625 |
| 0.105041  | 0.11116  | 0.126894  | 0.11116   | 0.106352  | 0.108392  | 0.101107  |
| 0.0879953 | 0.113636 | 0.120921  | 0.100524  | 0.099796  | 0.100962  | 0.097465  |
| 0.115822  | 0.128059 | 0.136801  | 0.122232  | 0.117716  | 0.11859   | 0.116259  |
| 0.118153  | 0.125146 | 0.135344  | 0.122232  | 0.115967  | 0.119755  | 0.117133  |
| 0.102273  | 0.117424 | 0.128205  | 0.113928  | 0.105624  | 0.108537  | 0.103584  |
| 0.187937  | 0.190268 | 0.197552  | 0.19493   | 0.195367  | 0.190122  | 0.184586  |
| 0.162587  | 0.163462 | 0.176573  | 0.168706  | 0.163607  | 0.164481  | 0.153992  |
| 0.109266  | 0.109848 | 0.0608974 | 0.118881  | 0.116113  | 0.116987  | 0.111451  |
| 0.105915  | 0.119318 | 0.133887  | 0.114365  | 0.112471  | 0.112179  | 0.101399  |
| 0.13884   | 0.135344 | 0.0514277 | 0.142628  | 0.1419    | 0.139569  | 0.13986   |
| 0.122378  | 0.130536 | 0.135781  | 0.127622  | 0.120484  | 0.125437  | 0.117861  |
| 0.112908  | 0.121649 | 0.133304  | 0.117279  | 0.114802  | 0.118298  | 0.106352  |
| 0.105186  | 0.113054 | 0.129662  | 0.114802  | 0.108537  | 0.109411  | 0.102127  |
| 0.094697  | 0.113928 | 0.121212  | 0.0885781 | 0.088141  | 0.0884324 | 0.0872669 |
| 0.11859   | 0.124709 | 0.134033  | 0.123252  | 0.11116   | 0.116113  | 0.108537  |
| 0.198864  | 0.197698 | 0.209062  | 0.205565  | 0.202506  | 0.197552  | 0.191725  |
| 0.0955711 | 0.125    | 0.13549   | 0.109848  | 0.106789  | 0.104749  | 0.103293  |
| 0.108246  | 0.120484 | 0.131265  | 0.112325  | 0.113636  | 0.112179  | 0.105478  |
| 0.0957168 | 0.113491 | 0.127185  | 0.103293  | 0.0964452 | 0.104604  | 0.0981935 |
| 0.108974  | 0.120047 | 0.136072  | 0.117133  | 0.110577  | 0.113491  | 0.105915  |

|           |          |           |           |           |           |           |
|-----------|----------|-----------|-----------|-----------|-----------|-----------|
| 0.179924  | 0.181964 | 0.194202  | 0.185169  | 0.185023  | 0.181818  | 0.168415  |
| 0.245484  | 0.24257  | 0.24898   | 0.247523  | 0.250874  | 0.244755  | 0.239219  |
| 0.121358  | 0.122523 | 0.134761  | 0.121941  | 0.118881  | 0.120629  | 0.111597  |
| 0.114365  | 0.127477 | 0.133887  | 0.121066  | 0.110431  | 0.114802  | 0.106352  |
| 0.108537  | 0.109703 | 0.0569639 | 0.119901  | 0.114219  | 0.117424  | 0.110723  |
| 0.101399  | 0.11655  | 0.125874  | 0.112762  | 0.106498  | 0.107955  | 0.102418  |
| 0.0898893 | 0.119318 | 0.131265  | 0.102418  | 0.0981935 | 0.0979021 | 0.094697  |
| 0.106935  | 0.121212 | 0.130245  | 0.113928  | 0.110286  | 0.116113  | 0.104458  |
| 0.107372  | 0.114656 | 0.13039   | 0.110286  | 0.104312  | 0.109848  | 0.104312  |
| 0.0925117 | 0.119901 | 0.130682  | 0.10271   | 0.0976107 | 0.0967366 | 0.0981935 |
| 0.105478  | 0.115967 | 0.123834  | 0.110431  | 0.107955  | 0.107372  | 0.102418  |
| 0.097465  | 0.115822 | 0.134761  | 0.105041  | 0.0981935 | 0.100816  | 0.0964452 |
| 0.094697  | 0.115385 | 0.121795  | 0.100233  | 0.0925117 | 0.0933858 | 0.0954254 |
| 0.121358  | 0.124563 | 0.13447   | 0.119027  | 0.119755  | 0.11859   | 0.111888  |
| 0.112762  | 0.125583 | 0.131702  | 0.119755  | 0.114656  | 0.114948  | 0.113199  |
| 0.100233  | 0.108974 | 0.125583  | 0.103147  | 0.104749  | 0.099796  | 0.0916375 |
| 0.11014   | 0.11655  | 0.135781  | 0.104604  | 0.109411  | 0.108246  | 0.0989219 |
| 0.122669  | 0.129662 | 0.135198  | 0.123543  | 0.122523  | 0.119318  | 0.116987  |
| 0.0965909 | 0.116987 | 0.127768  | 0.107663  | 0.097028  | 0.103147  | 0.099359  |
| 0.106352  | 0.111888 | 0.111597  | 0.111305  | 0.107955  | 0.110577  | 0.0995047 |
| 0.117716  | 0.126166 | 0.136364  | 0.119464  | 0.117861  | 0.116987  | 0.117279  |
| 0.204108  | 0.20236  | 0.210227  | 0.206439  | 0.209499  | 0.20542   | 0.199301  |
| 0.108683  | 0.114219 | 0.130245  | 0.111597  | 0.111451  | 0.111451  | 0.0980478 |
| 0.0919289 | 0.115239 | 0.118735  | 0.099796  | 0.0952797 | 0.0952797 | 0.0929487 |
| 0.108829  | 0.126311 | 0.137092  | 0.113199  | 0.111888  | 0.117716  | 0.113054  |
| 0.113054  | 0.129953 | 0.137529  | 0.118298  | 0.115239  | 0.113782  | 0.115822  |
| 0.107809  | 0.121212 | 0.133159  | 0.113928  | 0.110577  | 0.10912   | 0.105332  |
| 0.19697   | 0.194347 | 0.205711  | 0.203089  | 0.199738  | 0.195659  | 0.191288  |
| 0.116113  | 0.128934 | 0.139132  | 0.124272  | 0.118298  | 0.118298  | 0.116841  |
| 0.0973193 | 0.115093 | 0.125583  | 0.105478  | 0.0992133 | 0.101836  | 0.0995047 |
| 0.110577  | 0.127185 | 0.119027  | 0.108537  | 0.117424  | 0.113345  | 0.11014   |
| 0.102127  | 0.117861 | 0.126603  | 0.110577  | 0.101399  | 0.103438  | 0.100233  |
| 0.11553   | 0.124272 | 0.137383  | 0.120484  | 0.113928  | 0.115385  | 0.115385  |
| 0.102127  | 0.11961  | 0.121066  | 0.108829  | 0.105186  | 0.102273  | 0.0999417 |
| 0.0960082 | 0.113491 | 0.130099  | 0.105041  | 0.100233  | 0.102564  | 0.0949883 |
| 0.106498  | 0.127477 | 0.135052  | 0.116404  | 0.110723  | 0.107809  | 0.110431  |
| 0.192308  | 0.191434 | 0.206585  | 0.199009  | 0.199738  | 0.195076  | 0.188957  |
| 0.107955  | 0.116987 | 0.126311  | 0.114365  | 0.105769  | 0.104895  | 0.104021  |
| 0.190268  | 0.190851 | 0.204254  | 0.200175  | 0.194784  | 0.192453  | 0.186043  |
| 0.190122  | 0.186043 | 0.200612  | 0.197698  | 0.195513  | 0.189685  | 0.182692  |
| 0.119318  | 0.129516 | 0.133596  | 0.121649  | 0.116841  | 0.116259  | 0.116259  |
| 0.120775  | 0.13884  | 0.137383  | 0.11961   | 0.123252  | 0.120047  | 0.12296   |
| 0.088141  | 0.103875 | 0.123689  | 0.0945513 | 0.0920746 | 0.0920746 | 0.0868298 |
| 0.1081    | 0.118007 | 0.128788  | 0.112471  | 0.106498  | 0.105041  | 0.104167  |

|           |          |           |          |           |           |           |
|-----------|----------|-----------|----------|-----------|-----------|-----------|
| 0.111451  | 0.119027 | 0.131556  | 0.116113 | 0.110431  | 0.108974  | 0.109557  |
| 0.105332  | 0.120192 | 0.129808  | 0.10912  | 0.100524  | 0.106352  | 0.103438  |
| 0.0855186 | 0.116987 | 0.125728  | 0.101836 | 0.0955711 | 0.0958625 | 0.0920746 |
| 0.0898893 | 0.119027 | 0.132721  | 0.102418 | 0.0979021 | 0.099359  | 0.0938228 |
| 0.125291  | 0.128497 | 0.137529  | 0.123252 | 0.119901  | 0.119901  | 0.115239  |
| 0.108829  | 0.119318 | 0.124563  | 0.116113 | 0.108683  | 0.108974  | 0.103147  |
| 0.0967366 | 0.113054 | 0.12296   | 0.102273 | 0.0968823 | 0.097465  | 0.0986305 |
| 0.111742  | 0.126603 | 0.135052  | 0.119901 | 0.113636  | 0.112179  | 0.112762  |
| 0.0917832 | 0.106352 | 0.119464  | 0.099359 | 0.090472  | 0.0913462 | 0.088141  |
| 0.124854  | 0.133596 | 0.14088   | 0.124854 | 0.123834  | 0.124126  | 0.121503  |
| 0.106498  | 0.109994 | 0.0584207 | 0.116987 | 0.114802  | 0.115385  | 0.106352  |
| 0.129079  | 0.136946 | 0.143939  | 0.131702 | 0.129225  | 0.128059  | 0.127477  |
| 0.256993  | 0.255245 | 0.259615  | 0.258159 | 0.262675  | 0.256556  | 0.253642  |
| 0.111597  | 0.130828 | 0.131702  | 0.110723 | 0.115239  | 0.114656  | 0.118735  |
| 0.118153  | 0.133596 | 0.131847  | 0.121358 | 0.117716  | 0.121212  | 0.11655   |
| 0.215035  | 0.213578 | 0.219697  | 0.219988 | 0.218677  | 0.214889  | 0.209936  |
| 0.123689  | 0.131265 | 0.133887  | 0.122523 | 0.120047  | 0.11859   | 0.115676  |
| 0.22771   | 0.228001 | 0.230915  | 0.229749 | 0.232517  | 0.227564  | 0.223485  |
| 0.099359  | 0.121795 | 0.126166  | 0.107517 | 0.108537  | 0.107372  | 0.106498  |
| 0.115822  | 0.125146 | 0.135635  | 0.119318 | 0.111014  | 0.113636  | 0.115385  |
| 0.105332  | 0.121066 | 0.13447   | 0.109703 | 0.106643  | 0.104895  | 0.106935  |
| 0.112908  | 0.123106 | 0.130682  | 0.117279 | 0.11655   | 0.114219  | 0.111888  |
| 0.200903  | 0.198281 | 0.213724  | 0.206731 | 0.203671  | 0.199883  | 0.195221  |
| 0.12398   | 0.136801 | 0.141754  | 0.126894 | 0.126457  | 0.125583  | 0.123543  |
| 0.112325  | 0.12398  | 0.135052  | 0.120192 | 0.115093  | 0.114219  | 0.113345  |
| 0.223193  | 0.223193 | 0.233392  | 0.229312 | 0.228584  | 0.223048  | 0.220134  |
| 0.0930944 | 0.121066 | 0.137966  | 0.108829 | 0.101399  | 0.100524  | 0.0984848 |
| 0.191434  | 0.190559 | 0.206876  | 0.199301 | 0.200321  | 0.195367  | 0.190122  |
| 0.0932401 | 0.120629 | 0.136655  | 0.104895 | 0.101253  | 0.103875  | 0.10271   |
| 0.100816  | 0.11451  | 0.128497  | 0.1081   | 0.100087  | 0.102418  | 0.102418  |
| 0.100962  | 0.125146 | 0.125728  | 0.102418 | 0.104604  | 0.101981  | 0.104312  |
| 0.116696  | 0.127477 | 0.13039   | 0.119901 | 0.118298  | 0.117424  | 0.115385  |
| 0.108974  | 0.116841 | 0.127622  | 0.117424 | 0.105332  | 0.11116   | 0.101253  |
| 0.15035   | 0.150932 | 0.166958  | 0.154429 | 0.155449  | 0.153409  | 0.140589  |
| 0.108683  | 0.119464 | 0.129953  | 0.11655  | 0.108537  | 0.107955  | 0.10912   |
| 0.112179  | 0.129371 | 0.138403  | 0.116259 | 0.11553   | 0.115239  | 0.114073  |
| 0.109848  | 0.115967 | 0.138112  | 0.115093 | 0.108829  | 0.105915  | 0.101544  |
| 0.123543  | 0.13141  | 0.136946  | 0.124126 | 0.126603  | 0.122815  | 0.117861  |
| 0.191871  | 0.190705 | 0.202943  | 0.200903 | 0.198135  | 0.192016  | 0.187063  |
| 0.100816  | 0.115385 | 0.127331  | 0.105769 | 0.0948427 | 0.101544  | 0.100379  |
| 0.112617  | 0.123397 | 0.135635  | 0.119027 | 0.111305  | 0.111305  | 0.105769  |
| 0.090035  | 0.111888 | 0.112471  | 0.102855 | 0.0962995 | 0.103001  | 0.0971737 |
| 0.0930944 | 0.121941 | 0.137092  | 0.103875 | 0.103147  | 0.101107  | 0.101399  |
| 0.109266  | 0.119755 | 0.131702  | 0.112179 | 0.106789  | 0.108829  | 0.108246  |

|           |          |           |           |           |           |           |
|-----------|----------|-----------|-----------|-----------|-----------|-----------|
| 0.253642  | 0.253934 | 0.261509  | 0.257721  | 0.258741  | 0.253497  | 0.250583  |
| 0.0949883 | 0.119172 | 0.118298  | 0.099359  | 0.10067   | 0.0992133 | 0.097465  |
| 0.110723  | 0.117133 | 0.137238  | 0.112762  | 0.113782  | 0.114948  | 0.100962  |
| 0.178613  | 0.174825 | 0.183858  | 0.179779  | 0.180798  | 0.177593  | 0.170017  |
| 0.182692  | 0.180944 | 0.192308  | 0.189103  | 0.188666  | 0.185169  | 0.175845  |
| 0.120921  | 0.126166 | 0.138986  | 0.121795  | 0.11961   | 0.118735  | 0.109411  |
| 0.114948  | 0.124854 | 0.133596  | 0.121066  | 0.116259  | 0.115385  | 0.115093  |
| 0.108246  | 0.118735 | 0.127185  | 0.117861  | 0.106643  | 0.106935  | 0.100233  |
| 0.13986   | 0.149767 | 0.152972  | 0.141317  | 0.140297  | 0.139132  | 0.13884   |
| 0.115967  | 0.122378 | 0.133159  | 0.121795  | 0.113491  | 0.114073  | 0.106789  |
| 0.119901  | 0.125437 | 0.137966  | 0.121649  | 0.11859   | 0.117716  | 0.114219  |
| 0.101399  | 0.125874 | 0.139277  | 0.110723  | 0.109994  | 0.109411  | 0.105915  |
| 0.111888  | 0.124126 | 0.12704   | 0.11655   | 0.115822  | 0.109994  | 0.112617  |
| 0.125437  | 0.136218 | 0.140589  | 0.128059  | 0.125583  | 0.12296   | 0.122378  |
| 0.0984848 | 0.12296  | 0.133741  | 0.107809  | 0.107955  | 0.108829  | 0.100087  |
| 0.114948  | 0.124854 | 0.130099  | 0.118735  | 0.115385  | 0.115676  | 0.113054  |
| 0.127622  | 0.136364 | 0.138986  | 0.128497  | 0.129808  | 0.12602   | 0.128934  |
| 0.101836  | 0.120775 | 0.12398   | 0.104458  | 0.103438  | 0.101107  | 0.101107  |
| 0.119172  | 0.128497 | 0.134324  | 0.12296   | 0.118444  | 0.119027  | 0.11757   |
| 0.102855  | 0.130828 | 0.137821  | 0.113928  | 0.112325  | 0.107663  | 0.11116   |
| 0.204108  | 0.201195 | 0.214598  | 0.210519  | 0.212413  | 0.204545  | 0.199592  |
| 0.0958625 | 0.118881 | 0.124417  | 0.0821678 | 0.0793998 | 0.0823135 | 0.0936772 |
| 0.18648   | 0.186772 | 0.201049  | 0.195221  | 0.195367  | 0.18954   | 0.184295  |
| 0.107226  | 0.122086 | 0.134033  | 0.107809  | 0.109703  | 0.106789  | 0.105624  |
| 0.113636  | 0.123543 | 0.135198  | 0.117424  | 0.108537  | 0.110577  | 0.110868  |
| 0.111014  | 0.113054 | 0.0521562 | 0.118881  | 0.114656  | 0.11757   | 0.110577  |
| 0.105915  | 0.106206 | 0.0654138 | 0.112908  | 0.108683  | 0.109557  | 0.101981  |
| 0.118298  | 0.129079 | 0.137238  | 0.124709  | 0.122232  | 0.118444  | 0.118444  |
| 0.11655   | 0.131119 | 0.136364  | 0.121212  | 0.120484  | 0.119318  | 0.116987  |
| 0.104895  | 0.119172 | 0.131702  | 0.113054  | 0.10271   | 0.105915  | 0.105915  |
| 0.110286  | 0.127185 | 0.135344  | 0.115822  | 0.113928  | 0.109848  | 0.111888  |
| 0.114073  | 0.11553  | 0.0517191 | 0.124854  | 0.11859   | 0.121795  | 0.11859   |
| 0.106935  | 0.132284 | 0.143357  | 0.115093  | 0.116113  | 0.114365  | 0.112325  |
| 0.251457  | 0.246795 | 0.253788  | 0.251457  | 0.252768  | 0.250146  | 0.247232  |
| 0.105478  | 0.117716 | 0.129371  | 0.110431  | 0.103001  | 0.105624  | 0.106498  |
| 0.180216  | 0.178759 | 0.190705  | 0.187791  | 0.184732  | 0.182984  | 0.176282  |
| 0.18211   | 0.183275 | 0.199009  | 0.190559  | 0.191288  | 0.184878  | 0.178759  |
| 0.107663  | 0.121066 | 0.140006  | 0.119027  | 0.11014   | 0.1081    | 0.108392  |
| 0.0936772 | 0.116987 | 0.120775  | 0.0971737 | 0.0967366 | 0.0964452 | 0.0944056 |
| 0.109994  | 0.123106 | 0.133304  | 0.11553   | 0.1081    | 0.105478  | 0.113054  |
| 0.10912   | 0.11961  | 0.129225  | 0.114365  | 0.110431  | 0.111014  | 0.106935  |
| 0.0938228 | 0.112762 | 0.121212  | 0.090035  | 0.0901807 | 0.0866841 | 0.0863928 |
| 0.092366  | 0.123543 | 0.134033  | 0.106643  | 0.0995047 | 0.10271   | 0.100379  |
| 0.115239  | 0.127185 | 0.129225  | 0.114073  | 0.116841  | 0.114219  | 0.109266  |

|           |          |           |          |           |           |           |
|-----------|----------|-----------|----------|-----------|-----------|-----------|
| 0.125437  | 0.137966 | 0.141171  | 0.128642 | 0.127914  | 0.126166  | 0.125874  |
| 0.102855  | 0.116841 | 0.129079  | 0.107517 | 0.10067   | 0.103875  | 0.105041  |
| 0.123543  | 0.134907 | 0.141608  | 0.126166 | 0.12602   | 0.123106  | 0.122523  |
| 0.105041  | 0.122232 | 0.126603  | 0.116113 | 0.109848  | 0.112179  | 0.103438  |
| 0.11757   | 0.118153 | 0.050845  | 0.121941 | 0.121503  | 0.124709  | 0.117424  |
| 0.111597  | 0.12296  | 0.131702  | 0.120629 | 0.109994  | 0.112325  | 0.105041  |
| 0.101836  | 0.131847 | 0.141171  | 0.114365 | 0.111888  | 0.108392  | 0.112471  |
| 0.105769  | 0.120047 | 0.135781  | 0.108974 | 0.103293  | 0.105624  | 0.103584  |
| 0.104021  | 0.111888 | 0.121212  | 0.108683 | 0.101544  | 0.104167  | 0.102418  |
| 0.123543  | 0.141026 | 0.145979  | 0.122378 | 0.12602   | 0.128934  | 0.127477  |
| 0.180216  | 0.181381 | 0.195076  | 0.186917 | 0.184732  | 0.180361  | 0.175117  |
| 0.130245  | 0.139277 | 0.144814  | 0.132284 | 0.129808  | 0.126894  | 0.129225  |
| 0.115676  | 0.127331 | 0.134615  | 0.120921 | 0.118153  | 0.118444  | 0.115239  |
| 0.10708   | 0.108829 | 0.0470571 | 0.116113 | 0.112762  | 0.113928  | 0.109848  |
| 0.101981  | 0.099359 | 0.0626457 | 0.109266 | 0.105041  | 0.10912   | 0.0989219 |
| 0.10708   | 0.11553  | 0.130099  | 0.114948 | 0.110723  | 0.110723  | 0.106935  |
| 0.115093  | 0.122086 | 0.131119  | 0.119755 | 0.112908  | 0.112034  | 0.111742  |
| 0.186917  | 0.184003 | 0.198572  | 0.196533 | 0.195221  | 0.188811  | 0.182401  |
| 0.109703  | 0.11961  | 0.132139  | 0.115822 | 0.115967  | 0.112179  | 0.108392  |
| 0.101981  | 0.115676 | 0.126457  | 0.106061 | 0.106789  | 0.104167  | 0.0948427 |
| 0.120338  | 0.132284 | 0.138403  | 0.126457 | 0.123397  | 0.122232  | 0.119901  |
| 0.188666  | 0.188374 | 0.203526  | 0.197115 | 0.193182  | 0.187937  | 0.183858  |
| 0.0926573 | 0.118007 | 0.118881  | 0.101399 | 0.0916375 | 0.0933858 | 0.0925117 |
| 0.0980478 | 0.127185 | 0.135344  | 0.11116  | 0.109266  | 0.105186  | 0.106061  |
| 0.11757   | 0.131556 | 0.135927  | 0.12398  | 0.119172  | 0.118007  | 0.116259  |
| 0.114802  | 0.119172 | 0.134907  | 0.115093 | 0.114073  | 0.112617  | 0.104458  |
| 0.185023  | 0.184149 | 0.197261  | 0.192308 | 0.190414  | 0.1875    | 0.178176  |
| 0.0958625 | 0.123252 | 0.131993  | 0.106935 | 0.102127  | 0.104167  | 0.102418  |
| 0.107226  | 0.120629 | 0.131993  | 0.112179 | 0.10912   | 0.113782  | 0.10912   |
| 0.0964452 | 0.115967 | 0.121503  | 0.102273 | 0.0962995 | 0.0957168 | 0.097465  |
| 0.115385  | 0.122086 | 0.125291  | 0.125874 | 0.116113  | 0.120484  | 0.107663  |
| 0.108537  | 0.127768 | 0.136509  | 0.114948 | 0.113054  | 0.111014  | 0.112179  |
| 0.103875  | 0.130099 | 0.13884   | 0.109411 | 0.109557  | 0.1081    | 0.11014   |
| 0.100087  | 0.116696 | 0.129225  | 0.107955 | 0.0987762 | 0.10373   | 0.104312  |
| 0.114656  | 0.131265 | 0.135927  | 0.118735 | 0.115967  | 0.115093  | 0.11014   |
| 0.147727  | 0.150641 | 0.15472   | 0.140734 | 0.142337  | 0.14088   | 0.137966  |
| 0.236014  | 0.2331   | 0.240676  | 0.238928 | 0.237325  | 0.235868  | 0.230041  |
| 0.1081    | 0.125291 | 0.139277  | 0.111014 | 0.105915  | 0.107955  | 0.107663  |
| 0.113054  | 0.128497 | 0.137238  | 0.119172 | 0.113782  | 0.115239  | 0.112325  |
| 0.111451  | 0.127185 | 0.131265  | 0.116696 | 0.115967  | 0.115385  | 0.109557  |
| 0.121212  | 0.121212 | 0.134907  | 0.124126 | 0.11757   | 0.121941  | 0.112617  |
| 0.105041  | 0.121358 | 0.123106  | 0.109411 | 0.1081    | 0.105478  | 0.102564  |
| 0.11116   | 0.121066 | 0.131556  | 0.113782 | 0.113928  | 0.114219  | 0.108392  |
| 0.114219  | 0.130828 | 0.134033  | 0.120921 | 0.118153  | 0.116404  | 0.115822  |

|           |          |           |           |           |           |           |
|-----------|----------|-----------|-----------|-----------|-----------|-----------|
| 0.101253  | 0.128934 | 0.140006  | 0.113199  | 0.108974  | 0.108392  | 0.108392  |
| 0.114656  | 0.121941 | 0.135927  | 0.115239  | 0.114219  | 0.115676  | 0.104604  |
| 0.236014  | 0.230478 | 0.23951   | 0.237762  | 0.24053   | 0.235286  | 0.23208   |
| 0.0919289 | 0.118735 | 0.120484  | 0.100962  | 0.0935315 | 0.0932401 | 0.0926573 |
| 0.0910548 | 0.112034 | 0.121358  | 0.102127  | 0.0952797 | 0.0961538 | 0.0984848 |
| 0.100524  | 0.115093 | 0.125874  | 0.109266  | 0.101544  | 0.103001  | 0.103293  |
| 0.13243   | 0.138258 | 0.142045  | 0.128642  | 0.130245  | 0.12704   | 0.120921  |
| 0.113199  | 0.129225 | 0.146416  | 0.116696  | 0.112471  | 0.112762  | 0.109848  |
| 0.110868  | 0.118444 | 0.127185  | 0.11757   | 0.113928  | 0.112762  | 0.108683  |
| 0.116987  | 0.128934 | 0.135052  | 0.120484  | 0.117424  | 0.116259  | 0.115967  |
| 0.109848  | 0.11859  | 0.130536  | 0.113928  | 0.113491  | 0.107372  | 0.10067   |
| 0.229312  | 0.22873  | 0.236597  | 0.232517  | 0.23412   | 0.232372  | 0.224505  |
| 0.121503  | 0.131119 | 0.136946  | 0.124709  | 0.124272  | 0.120775  | 0.121649  |
| 0.0977564 | 0.125728 | 0.135052  | 0.110577  | 0.106352  | 0.104895  | 0.105186  |
| 0.105915  | 0.11757  | 0.13243   | 0.110577  | 0.10373   | 0.10373   | 0.100816  |
| 0.120921  | 0.126748 | 0.135198  | 0.115093  | 0.118444  | 0.116404  | 0.111742  |
| 0.105478  | 0.125    | 0.130245  | 0.108683  | 0.112617  | 0.109411  | 0.112034  |
| 0.104895  | 0.11859  | 0.125291  | 0.108974  | 0.103875  | 0.10271   | 0.105041  |
| 0.0984848 | 0.124709 | 0.136946  | 0.108392  | 0.106789  | 0.104458  | 0.106206  |
| 0.103293  | 0.133013 | 0.140297  | 0.113782  | 0.112762  | 0.11014   | 0.109557  |
| 0.092803  | 0.122523 | 0.130973  | 0.106789  | 0.101399  | 0.102273  | 0.100524  |
| 0.103438  | 0.118007 | 0.127914  | 0.108974  | 0.100379  | 0.103584  | 0.103875  |
| 0.120338  | 0.136655 | 0.137821  | 0.120629  | 0.121358  | 0.11757   | 0.119318  |
| 0.124272  | 0.140297 | 0.144085  | 0.124272  | 0.126166  | 0.122669  | 0.125     |
| 0.117861  | 0.116987 | 0.0499709 | 0.125146  | 0.120629  | 0.122086  | 0.119755  |
| 0.11961   | 0.123397 | 0.0514277 | 0.129516  | 0.128788  | 0.129371  | 0.118881  |
| 0.120629  | 0.139569 | 0.140734  | 0.120629  | 0.121066  | 0.119901  | 0.124272  |
| 0.0862471 | 0.106061 | 0.118007  | 0.0844988 | 0.0828963 | 0.0846445 | 0.0817308 |
| 0.106789  | 0.128059 | 0.12602   | 0.108829  | 0.113636  | 0.115967  | 0.112471  |
| 0.116841  | 0.133159 | 0.144814  | 0.126457  | 0.125146  | 0.118153  | 0.117861  |
| 0.203671  | 0.202214 | 0.214161  | 0.208042  | 0.208479  | 0.204691  | 0.198281  |
| 0.120047  | 0.131119 | 0.138986  | 0.123834  | 0.119318  | 0.117861  | 0.111451  |
| 0.0935315 | 0.117424 | 0.128205  | 0.104895  | 0.101253  | 0.103293  | 0.100379  |
| 0.106789  | 0.122232 | 0.133013  | 0.112325  | 0.105769  | 0.108974  | 0.1081    |
| 0.221445  | 0.219114 | 0.228147  | 0.222028  | 0.22567   | 0.21926   | 0.215181  |
| 0.210082  | 0.205711 | 0.220571  | 0.211538  | 0.214015  | 0.210519  | 0.205857  |
| 0.100379  | 0.129516 | 0.139714  | 0.111451  | 0.109266  | 0.109557  | 0.1081    |
| 0.248834  | 0.246795 | 0.251748  | 0.253497  | 0.253934  | 0.246649  | 0.246066  |
| 0.0885781 | 0.105769 | 0.115385  | 0.0874126 | 0.08581   | 0.0895979 | 0.0814394 |
| 0.115385  | 0.141608 | 0.144522  | 0.121212  | 0.125728  | 0.121649  | 0.115822  |
| 0.0929487 | 0.11655  | 0.11655   | 0.0987762 | 0.0957168 | 0.0960082 | 0.0954254 |
| 0.118735  | 0.133887 | 0.137966  | 0.121358  | 0.117133  | 0.115967  | 0.118298  |
| 0.187063  | 0.184149 | 0.197844  | 0.194056  | 0.190414  | 0.186334  | 0.180507  |
| 0.114948  | 0.129225 | 0.136801  | 0.113782  | 0.115093  | 0.11451   | 0.114219  |

|           |          |           |           |           |           |           |
|-----------|----------|-----------|-----------|-----------|-----------|-----------|
| 0.191288  | 0.187209 | 0.202652  | 0.198572  | 0.197844  | 0.192599  | 0.185315  |
| 0.10912   | 0.121358 | 0.13243   | 0.113491  | 0.107809  | 0.104604  | 0.104895  |
| 0.101544  | 0.121066 | 0.13243   | 0.109703  | 0.108683  | 0.107517  | 0.102855  |
| 0.108829  | 0.122815 | 0.12398   | 0.102418  | 0.106643  | 0.105769  | 0.104021  |
| 0.106789  | 0.119027 | 0.124563  | 0.114656  | 0.108392  | 0.107226  | 0.0999417 |
| 0.0941142 | 0.111014 | 0.120629  | 0.100816  | 0.0942599 | 0.0957168 | 0.0962995 |
| 0.111597  | 0.119464 | 0.130536  | 0.115093  | 0.105624  | 0.107663  | 0.103875  |
| 0.0909091 | 0.111014 | 0.118007  | 0.0955711 | 0.0919289 | 0.0907634 | 0.0901807 |
| 0.11116   | 0.121649 | 0.132721  | 0.116404  | 0.108392  | 0.108683  | 0.111597  |
| 0.087704  | 0.114219 | 0.113636  | 0.101981  | 0.10067   | 0.103584  | 0.100087  |
| 0.0958625 | 0.111597 | 0.131119  | 0.0987762 | 0.0936772 | 0.0971737 | 0.0936772 |
| 0.0939685 | 0.116113 | 0.120192  | 0.0977564 | 0.0929487 | 0.0926573 | 0.092366  |
| 0.11014   | 0.109266 | 0.0722611 | 0.121503  | 0.117279  | 0.116113  | 0.106789  |
| 0.125291  | 0.13345  | 0.139569  | 0.125583  | 0.125437  | 0.12398   | 0.122523  |
| 0.105915  | 0.106206 | 0.0616259 | 0.114948  | 0.111014  | 0.109557  | 0.105478  |
| 0.10373   | 0.121795 | 0.132576  | 0.110723  | 0.107955  | 0.110868  | 0.105915  |
| 0.0971737 | 0.110868 | 0.123689  | 0.103001  | 0.0958625 | 0.0979021 | 0.099359  |
| 0.0980478 | 0.122523 | 0.130682  | 0.106206  | 0.104021  | 0.10373   | 0.102855  |
| 0.107372  | 0.128642 | 0.136218  | 0.114948  | 0.113054  | 0.113345  | 0.109848  |
| 0.111597  | 0.122378 | 0.128788  | 0.11655   | 0.111742  | 0.11116   | 0.107372  |
| 0.106935  | 0.108392 | 0.0574009 | 0.117716  | 0.112325  | 0.115822  | 0.108537  |
| 0.112034  | 0.124563 | 0.132139  | 0.120775  | 0.114219  | 0.113636  | 0.11451   |
| 0.122669  | 0.136946 | 0.138403  | 0.129662  | 0.126894  | 0.124854  | 0.125728  |
| 0.13345   | 0.143648 | 0.144522  | 0.134615  | 0.133887  | 0.13243   | 0.132721  |
| 0.08581   | 0.113491 | 0.123689  | 0.100379  | 0.0903263 | 0.0944056 | 0.0888695 |
| 0.101836  | 0.117861 | 0.129225  | 0.114073  | 0.0976107 | 0.102564  | 0.101981  |
| 0.102564  | 0.113636 | 0.123834  | 0.108974  | 0.103001  | 0.103293  | 0.0965909 |
| 0.123252  | 0.142774 | 0.140443  | 0.122669  | 0.125437  | 0.123689  | 0.126894  |
| 0.0954254 | 0.118153 | 0.120192  | 0.10067   | 0.0996503 | 0.0973193 | 0.097028  |
| 0.128934  | 0.136218 | 0.142337  | 0.131556  | 0.129662  | 0.126166  | 0.125874  |
| 0.121941  | 0.134761 | 0.143794  | 0.123397  | 0.121795  | 0.121503  | 0.123543  |
| 0.125     | 0.128788 | 0.142191  | 0.123252  | 0.122815  | 0.121066  | 0.116113  |
| 0.0954254 | 0.110868 | 0.124563  | 0.0977564 | 0.094697  | 0.099359  | 0.0929487 |
| 0.106935  | 0.118007 | 0.131119  | 0.109848  | 0.110286  | 0.109411  | 0.0992133 |
| 0.115385  | 0.115385 | 0.048951  | 0.124126  | 0.119318  | 0.120192  | 0.114948  |
| 0.2044    | 0.200903 | 0.213432  | 0.209645  | 0.208916  | 0.206294  | 0.199301  |
| 0.103293  | 0.121649 | 0.132139  | 0.109994  | 0.106352  | 0.110431  | 0.107226  |
| 0.106352  | 0.115967 | 0.129662  | 0.10373   | 0.0971737 | 0.097465  | 0.100087  |
| 0.108246  | 0.126311 | 0.13243   | 0.114365  | 0.113636  | 0.111014  | 0.113345  |
| 0.104895  | 0.109848 | 0.0591492 | 0.114802  | 0.109411  | 0.110286  | 0.103584  |
| 0.116113  | 0.12602  | 0.135927  | 0.121941  | 0.113054  | 0.111888  | 0.108392  |
| 0.116696  | 0.123106 | 0.134178  | 0.124854  | 0.115093  | 0.117716  | 0.116259  |
| 0.120047  | 0.129662 | 0.137238  | 0.125583  | 0.121358  | 0.123397  | 0.119901  |
| 0.120192  | 0.127185 | 0.136801  | 0.120192  | 0.120047  | 0.118007  | 0.111305  |



|           |          |          |           |           |           |           |
|-----------|----------|----------|-----------|-----------|-----------|-----------|
| 0.0872669 | 0.109703 | 0.112034 | 0.0965909 | 0.0909091 | 0.100524  | 0.0941142 |
| 0.11757   | 0.136801 | 0.137675 | 0.119901  | 0.119755  | 0.116841  | 0.119755  |
| 0.102418  | 0.116113 | 0.123397 | 0.099796  | 0.101399  | 0.0981935 | 0.0964452 |
| 0.0981935 | 0.120047 | 0.135781 | 0.1081    | 0.0980478 | 0.103293  | 0.0980478 |
| 0.171183  | 0.170309 | 0.182547 | 0.176136  | 0.179779  | 0.175991  | 0.165793  |
| 0.113782  | 0.125437 | 0.131265 | 0.118153  | 0.11451   | 0.113636  | 0.111305  |
| 0.121795  | 0.138695 | 0.138986 | 0.123252  | 0.123397  | 0.120192  | 0.119901  |
| 0.0878497 | 0.119901 | 0.130682 | 0.088141  | 0.087704  | 0.0818765 | 0.0912005 |
| 0.1081    | 0.119464 | 0.134615 | 0.108392  | 0.11553   | 0.114365  | 0.100962  |
| 0.0967366 | 0.110431 | 0.120338 | 0.101981  | 0.0942599 | 0.0983392 | 0.0895979 |
| 0.0865385 | 0.106935 | 0.123834 | 0.0958625 | 0.088141  | 0.092803  | 0.0895979 |
| 0.101399  | 0.113636 | 0.127331 | 0.101981  | 0.0962995 | 0.100962  | 0.0971737 |
| 0.1081    | 0.126166 | 0.132867 | 0.108392  | 0.118444  | 0.109994  | 0.105332  |
| 0.106061  | 0.118007 | 0.129953 | 0.11451   | 0.110577  | 0.107955  | 0.0995047 |
| 0.113491  | 0.131847 | 0.130973 | 0.119901  | 0.111305  | 0.114802  | 0.117424  |
| 0.0952797 | 0.113928 | 0.127914 | 0.101399  | 0.102418  | 0.101253  | 0.0925117 |
| 0.105041  | 0.123689 | 0.124563 | 0.109703  | 0.1081    | 0.105769  | 0.0979021 |
| 0.111014  | 0.131702 | 0.145396 | 0.115093  | 0.11757   | 0.110286  | 0.11116   |
| 0.0938228 | 0.118007 | 0.119755 | 0.0990676 | 0.0936772 | 0.0960082 | 0.0933858 |
| 0.111014  | 0.128497 | 0.120047 | 0.113054  | 0.118735  | 0.112034  | 0.110286  |
| 0.0882867 | 0.114802 | 0.11859  | 0.0964452 | 0.088141  | 0.0901807 | 0.0861014 |
| 0.0944056 | 0.117716 | 0.120047 | 0.097028  | 0.0936772 | 0.0968823 | 0.0930944 |
| 0.0917832 | 0.112762 | 0.119172 | 0.092366  | 0.092803  | 0.0922203 | 0.0843531 |
| 0.10067   | 0.120484 | 0.131556 | 0.102418  | 0.10169   | 0.0944056 | 0.104021  |
| 0.0884324 | 0.109994 | 0.121066 | 0.0957168 | 0.090035  | 0.087704  | 0.0810023 |
| 0.13039   | 0.14088  | 0.147873 | 0.13243   | 0.136364  | 0.133159  | 0.131993  |
| 0.116987  | 0.129225 | 0.144085 | 0.129808  | 0.123543  | 0.125874  | 0.120338  |
| 0.0925117 | 0.112908 | 0.112325 | 0.0971737 | 0.0894522 | 0.0941142 | 0.0929487 |
| 0.125     | 0.142191 | 0.138986 | 0.12704   | 0.123106  | 0.12602   | 0.121649  |
| 0.113345  | 0.113054 | 0.107226 | 0.125874  | 0.119027  | 0.116696  | 0.110577  |
| 0.122378  | 0.140734 | 0.145105 | 0.12704   | 0.126311  | 0.123689  | 0.114365  |
| 0.0990676 | 0.112762 | 0.118298 | 0.0996503 | 0.0995047 | 0.0916375 | 0.0957168 |
| 0.134761  | 0.140297 | 0.151952 | 0.133887  | 0.141317  | 0.136655  | 0.132284  |
| 0.116987  | 0.131265 | 0.139714 | 0.119318  | 0.121795  | 0.120921  | 0.118298  |
| 0.123106  | 0.130682 | 0.138258 | 0.125437  | 0.13141   | 0.126457  | 0.120629  |
| 0.101836  | 0.108537 | 0.106498 | 0.103875  | 0.102273  | 0.106061  | 0.101399  |
| 0.0868298 | 0.113345 | 0.118298 | 0.0979021 | 0.0890152 | 0.0837704 | 0.088141  |
| 0.0872669 | 0.116404 | 0.121941 | 0.0960082 | 0.0917832 | 0.0914918 | 0.090035  |
| 0.100233  | 0.120047 | 0.130245 | 0.106643  | 0.107955  | 0.103584  | 0.104167  |
| 0.100524  | 0.125291 | 0.126457 | 0.100816  | 0.0992133 | 0.0986305 | 0.104167  |
| 0.11553   | 0.130099 | 0.13039  | 0.113782  | 0.113636  | 0.110723  | 0.104312  |
| 0.108246  | 0.11961  | 0.13447  | 0.115239  | 0.115385  | 0.116259  | 0.104604  |
| 0.0852273 | 0.102418 | 0.105041 | 0.0939685 | 0.0903263 | 0.094697  | 0.0917832 |
| 0.087704  | 0.114219 | 0.124709 | 0.0938228 | 0.0925117 | 0.0907634 | 0.0872669 |

|           |          |          |           |           |           |           |
|-----------|----------|----------|-----------|-----------|-----------|-----------|
| 0.0852273 | 0.125728 | 0.127477 | 0.0791084 | 0.0850816 | 0.0871212 | 0.0949883 |
| 0.08581   | 0.11757  | 0.122232 | 0.0939685 | 0.0909091 | 0.0920746 | 0.083042  |
| 0.0932401 | 0.123252 | 0.132284 | 0.097028  | 0.102127  | 0.0968823 | 0.0980478 |
| 0.099359  | 0.110723 | 0.120629 | 0.104021  | 0.101253  | 0.0971737 | 0.0948427 |
| 0.112325  | 0.117279 | 0.12398  | 0.11757   | 0.115093  | 0.109266  | 0.107226  |
| 0.103001  | 0.120484 | 0.13243  | 0.110577  | 0.101107  | 0.108683  | 0.101981  |
| 0.090472  | 0.10708  | 0.112908 | 0.0890152 | 0.0836247 | 0.0833333 | 0.0812937 |
| 0.0791084 | 0.121066 | 0.123689 | 0.0793998 | 0.07838   | 0.0839161 | 0.0868298 |
| 0.107809  | 0.116841 | 0.125291 | 0.115676  | 0.109411  | 0.10912   | 0.106498  |
| 0.105624  | 0.114656 | 0.126311 | 0.116113  | 0.10169   | 0.102273  | 0.0987762 |
| 0.115239  | 0.124854 | 0.13243  | 0.118735  | 0.118881  | 0.115967  | 0.113054  |
| 0.101836  | 0.113782 | 0.121649 | 0.110868  | 0.104021  | 0.104021  | 0.0979021 |
| 0.118298  | 0.129953 | 0.127914 | 0.116259  | 0.113199  | 0.109411  | 0.11116   |

| <b>TDr_08_01091</b> | <b>TDr_08_01123</b> | <b>TDr_08_01164</b> | <b>TDr_08_01228</b> | <b>TDr_08_01229</b> | <b>TDr_08_01278</b> | <b>TDr_08_01344</b> |
|---------------------|---------------------|---------------------|---------------------|---------------------|---------------------|---------------------|
| 0.12704             | 0.108683            | 0.137092            | 0.133159            | 0.126166            | 0.118444            | 0.114073            |
| 0.120192            | 0.104458            | 0.133159            | 0.132139            | 0.122815            | 0.115093            | 0.111305            |
| 0.112034            | 0.097465            | 0.131993            | 0.129808            | 0.123106            | 0.112471            | 0.107226            |
| 0.120192            | 0.101544            | 0.131993            | 0.127185            | 0.116987            | 0.109266            | 0.111888            |
| 0.137383            | 0.125146            | 0.143939            | 0.137675            | 0.133304            | 0.12704             | 0.128788            |
| 0.139714            | 0.122523            | 0.139569            | 0.140589            | 0.133596            | 0.12704             | 0.122669            |
| 0.115093            | 0.100524            | 0.123106            | 0.12704             | 0.12296             | 0.118735            | 0.108246            |
| 0.123252            | 0.103438            | 0.133304            | 0.125583            | 0.118007            | 0.108829            | 0.107372            |
| 0.108246            | 0.0895979           | 0.126748            | 0.118444            | 0.106206            | 0.0979021           | 0.104312            |
| 0.0912005           | 0.0827506           | 0.123397            | 0.115676            | 0.104021            | 0.095134            | 0.0957168           |
| 0.125728            | 0.0980478           | 0.130536            | 0.123689            | 0.125437            | 0.104312            | 0.107809            |
| 0.118298            | 0.0961538           | 0.127768            | 0.127914            | 0.115093            | 0.10912             | 0.108537            |
| 0.118881            | 0.0999417           | 0.129225            | 0.127622            | 0.118007            | 0.107955            | 0.111742            |
| 0.141171            | 0.124854            | 0.156469            | 0.147582            | 0.142337            | 0.134324            | 0.132576            |
| 0.126457            | 0.11014             | 0.13447             | 0.134324            | 0.127622            | 0.118735            | 0.123397            |
| 0.11553             | 0.0968823           | 0.121503            | 0.126894            | 0.114073            | 0.112179            | 0.115676            |
| 0.115967            | 0.0958625           | 0.126603            | 0.124709            | 0.117133            | 0.102127            | 0.108829            |
| 0.14088             | 0.134761            | 0.158217            | 0.147582            | 0.14292             | 0.141608            | 0.132576            |
| 0.109994            | 0.0989219           | 0.128788            | 0.130973            | 0.116987            | 0.107517            | 0.103438            |
| 0.207314            | 0.198572            | 0.212995            | 0.209353            | 0.205565            | 0.201923            | 0.20338             |
| 0.130245            | 0.111888            | 0.137092            | 0.138986            | 0.130536            | 0.120484            | 0.105624            |
| 0.125146            | 0.10708             | 0.133741            | 0.132721            | 0.125437            | 0.118881            | 0.106935            |
| 0.115676            | 0.0891608           | 0.13447             | 0.122086            | 0.116259            | 0.105041            | 0.112325            |
| 0.123689            | 0.105624            | 0.126748            | 0.129225            | 0.123397            | 0.11859             | 0.109266            |
| 0.107226            | 0.0865385           | 0.12602             | 0.114219            | 0.107809            | 0.0922203           | 0.0913462           |
| 0.134907            | 0.120338            | 0.13884             | 0.138403            | 0.129953            | 0.127768            | 0.109994            |
| 0.115967            | 0.101399            | 0.119901            | 0.124709            | 0.125291            | 0.109994            | 0.109703            |
| 0.115385            | 0.106643            | 0.128059            | 0.134033            | 0.120629            | 0.112325            | 0.112325            |
| 0.125291            | 0.114219            | 0.13243             | 0.129662            | 0.126748            | 0.121358            | 0.122232            |
| 0.117716            | 0.109266            | 0.128351            | 0.129662            | 0.116841            | 0.114073            | 0.113491            |
| 0.124272            | 0.110577            | 0.0888695           | 0.124563            | 0.12398             | 0.116841            | 0.1081              |
| 0.12296             | 0.107226            | 0.127185            | 0.134033            | 0.120047            | 0.11757             | 0.114073            |
| 0.111888            | 0.0920746           | 0.11961             | 0.114802            | 0.113636            | 0.105041            | 0.0989219           |
| 0.115093            | 0.102855            | 0.126894            | 0.125874            | 0.115676            | 0.116987            | 0.106789            |
| 0.118153            | 0.0995047           | 0.122669            | 0.121358            | 0.121649            | 0.106935            | 0.111888            |
| 0.119755            | 0.105478            | 0.127768            | 0.131702            | 0.128497            | 0.116987            | 0.119901            |
| 0.115239            | 0.109411            | 0.141026            | 0.131556            | 0.129225            | 0.124709            | 0.106643            |
| 0.123252            | 0.101107            | 0.138549            | 0.131702            | 0.117424            | 0.116404            | 0.11757             |
| 0.114219            | 0.0964452           | 0.123397            | 0.126748            | 0.11859             | 0.108537            | 0.105915            |
| 0.120629            | 0.106352            | 0.133304            | 0.114802            | 0.102273            | 0.0983392           | 0.116987            |
| 0.108974            | 0.090035            | 0.126603            | 0.109848            | 0.0979021           | 0.0893065           | 0.0992133           |
| 0.135781            | 0.125874            | 0.138549            | 0.113928            | 0.107809            | 0.117861            | 0.127477            |

|           |           |          |           |           |           |           |
|-----------|-----------|----------|-----------|-----------|-----------|-----------|
| 0.138695  | 0.123252  | 0.141754 | 0.113636  | 0.116259  | 0.118735  | 0.13039   |
| 0.118735  | 0.0986305 | 0.128497 | 0.108537  | 0.0954254 | 0.0874126 | 0.104604  |
| 0.0992133 | 0.074155  | 0.11859  | 0.117279  | 0.108246  | 0.0996503 | 0.0938228 |
| 0.10373   | 0.0914918 | 0.125437 | 0.109848  | 0.103147  | 0.0957168 | 0.100379  |
| 0.121212  | 0.105478  | 0.135344 | 0.136072  | 0.12704   | 0.11553   | 0.116987  |
| 0.124854  | 0.11757   | 0.138112 | 0.113782  | 0.112908  | 0.113928  | 0.122669  |
| 0.119901  | 0.095134  | 0.127331 | 0.107955  | 0.104167  | 0.0906177 | 0.106643  |
| 0.11451   | 0.0935315 | 0.130099 | 0.108392  | 0.0979021 | 0.0980478 | 0.104167  |
| 0.143211  | 0.13243   | 0.139569 | 0.151078  | 0.143794  | 0.146853  | 0.122086  |
| 0.127185  | 0.118153  | 0.136655 | 0.130682  | 0.128059  | 0.126748  | 0.121503  |
| 0.115093  | 0.0967366 | 0.126603 | 0.101107  | 0.0979021 | 0.0872669 | 0.0983392 |
| 0.120047  | 0.107226  | 0.142337 | 0.133159  | 0.121795  | 0.118153  | 0.124272  |
| 0.123834  | 0.104895  | 0.128059 | 0.116259  | 0.111888  | 0.104749  | 0.110286  |
| 0.130828  | 0.128205  | 0.139132 | 0.138986  | 0.134033  | 0.13884   | 0.13447   |
| 0.123689  | 0.108829  | 0.129079 | 0.112325  | 0.110868  | 0.100816  | 0.11451   |
| 0.11757   | 0.0971737 | 0.136072 | 0.110868  | 0.0965909 | 0.0888695 | 0.104895  |
| 0.113199  | 0.10271   | 0.133741 | 0.110868  | 0.107955  | 0.0958625 | 0.104021  |
| 0.0815851 | 0.076049  | 0.122232 | 0.118881  | 0.113054  | 0.112908  | 0.105332  |
| 0.126457  | 0.117133  | 0.140589 | 0.111597  | 0.108683  | 0.105624  | 0.122523  |
| 0.131993  | 0.124709  | 0.146125 | 0.12704   | 0.11451   | 0.124272  | 0.127185  |
| 0.159237  | 0.151078  | 0.174242 | 0.165938  | 0.157488  | 0.158508  | 0.157051  |
| 0.116404  | 0.101544  | 0.130245 | 0.103001  | 0.104749  | 0.0865385 | 0.104312  |
| 0.114365  | 0.092803  | 0.12704  | 0.105915  | 0.105915  | 0.0894522 | 0.099359  |
| 0.116113  | 0.0960082 | 0.120629 | 0.106789  | 0.10067   | 0.0865385 | 0.100816  |
| 0.127914  | 0.129953  | 0.153992 | 0.150641  | 0.137238  | 0.132721  | 0.126603  |
| 0.115093  | 0.0944056 | 0.128059 | 0.111597  | 0.097028  | 0.097465  | 0.100962  |
| 0.132139  | 0.120775  | 0.137529 | 0.126311  | 0.120775  | 0.121795  | 0.123543  |
| 0.0855186 | 0.0866841 | 0.121795 | 0.120775  | 0.113199  | 0.111014  | 0.104312  |
| 0.117716  | 0.0967366 | 0.133304 | 0.107517  | 0.103438  | 0.0939685 | 0.103584  |
| 0.140443  | 0.13141   | 0.156323 | 0.152681  | 0.14831   | 0.147582  | 0.135927  |
| 0.127914  | 0.105478  | 0.127185 | 0.107226  | 0.101981  | 0.0977564 | 0.116404  |
| 0.131265  | 0.124563  | 0.142191 | 0.118735  | 0.107663  | 0.115967  | 0.130828  |
| 0.124417  | 0.119755  | 0.140297 | 0.139277  | 0.134324  | 0.124854  | 0.121941  |
| 0.120192  | 0.0983392 | 0.131119 | 0.127477  | 0.121066  | 0.117133  | 0.105478  |
| 0.112617  | 0.0930944 | 0.125583 | 0.0983392 | 0.102418  | 0.087704  | 0.100233  |
| 0.116113  | 0.0989219 | 0.133159 | 0.11116   | 0.104167  | 0.0882867 | 0.104021  |
| 0.130682  | 0.119901  | 0.141608 | 0.121941  | 0.107955  | 0.110431  | 0.123252  |
| 0.116259  | 0.0929487 | 0.118735 | 0.108392  | 0.105186  | 0.0875583 | 0.101253  |
| 0.129808  | 0.121358  | 0.143939 | 0.120192  | 0.106206  | 0.118881  | 0.130828  |
| 0.123106  | 0.105332  | 0.133159 | 0.108537  | 0.116987  | 0.0981935 | 0.105186  |
| 0.118444  | 0.105915  | 0.130536 | 0.123397  | 0.119901  | 0.115093  | 0.108974  |
| 0.124563  | 0.101253  | 0.129371 | 0.103001  | 0.101544  | 0.0958625 | 0.100233  |
| 0.120192  | 0.108246  | 0.13345  | 0.114948  | 0.104749  | 0.100816  | 0.11014   |
| 0.118153  | 0.097465  | 0.131119 | 0.112908  | 0.101836  | 0.0955711 | 0.106061  |

|           |           |          |          |           |           |           |
|-----------|-----------|----------|----------|-----------|-----------|-----------|
| 0.119318  | 0.0960082 | 0.126748 | 0.103584 | 0.0930944 | 0.0917832 | 0.105769  |
| 0.126457  | 0.122378  | 0.139714 | 0.104312 | 0.109848  | 0.112617  | 0.124563  |
| 0.115385  | 0.0912005 | 0.115239 | 0.111305 | 0.112762  | 0.0895979 | 0.0992133 |
| 0.111742  | 0.0930944 | 0.126748 | 0.118153 | 0.105915  | 0.101981  | 0.108392  |
| 0.120484  | 0.107663  | 0.133159 | 0.128934 | 0.122523  | 0.115967  | 0.111305  |
| 0.121358  | 0.104749  | 0.12296  | 0.129808 | 0.129516  | 0.11859   | 0.107226  |
| 0.11757   | 0.112617  | 0.131119 | 0.139423 | 0.12398   | 0.125291  | 0.11451   |
| 0.125583  | 0.117716  | 0.145833 | 0.145688 | 0.139569  | 0.135344  | 0.126603  |
| 0.11961   | 0.101253  | 0.134615 | 0.128351 | 0.122815  | 0.113928  | 0.104604  |
| 0.174971  | 0.173223  | 0.192016 | 0.181672 | 0.183712  | 0.17803   | 0.167832  |
| 0.113636  | 0.092366  | 0.124854 | 0.11859  | 0.11451   | 0.101253  | 0.0942599 |
| 0.123689  | 0.117861  | 0.142483 | 0.142628 | 0.130973  | 0.13345   | 0.127914  |
| 0.121649  | 0.110286  | 0.139569 | 0.136218 | 0.123106  | 0.122378  | 0.119464  |
| 0.126457  | 0.111014  | 0.131556 | 0.137238 | 0.12704   | 0.127185  | 0.112325  |
| 0.114656  | 0.0893065 | 0.128205 | 0.125728 | 0.11553   | 0.107226  | 0.0987762 |
| 0.120775  | 0.109703  | 0.13986  | 0.14292  | 0.130973  | 0.128788  | 0.118007  |
| 0.107663  | 0.0977564 | 0.127914 | 0.128351 | 0.118153  | 0.107809  | 0.0984848 |
| 0.102855  | 0.103438  | 0.135344 | 0.129371 | 0.122378  | 0.116987  | 0.112325  |
| 0.11655   | 0.0938228 | 0.131265 | 0.112762 | 0.110431  | 0.105332  | 0.0936772 |
| 0.118881  | 0.114219  | 0.142628 | 0.140443 | 0.136364  | 0.129808  | 0.11553   |
| 0.0955711 | 0.083042  | 0.126603 | 0.109266 | 0.102564  | 0.0960082 | 0.0910548 |
| 0.12602   | 0.113199  | 0.139569 | 0.133304 | 0.132139  | 0.134907  | 0.119172  |
| 0.11014   | 0.0935315 | 0.122523 | 0.121795 | 0.114219  | 0.110868  | 0.0942599 |
| 0.126603  | 0.111742  | 0.132576 | 0.124272 | 0.106206  | 0.112471  | 0.121503  |
| 0.114802  | 0.105186  | 0.129808 | 0.124126 | 0.122669  | 0.116696  | 0.105624  |
| 0.106643  | 0.0865385 | 0.125146 | 0.126457 | 0.12296   | 0.104749  | 0.097465  |
| 0.136946  | 0.133159  | 0.152535 | 0.14831  | 0.144522  | 0.14292   | 0.134761  |
| 0.105624  | 0.0925117 | 0.128497 | 0.129516 | 0.121358  | 0.111597  | 0.10169   |
| 0.108537  | 0.0913462 | 0.131702 | 0.125728 | 0.11757   | 0.105478  | 0.104021  |
| 0.107809  | 0.0941142 | 0.128934 | 0.118881 | 0.109266  | 0.107955  | 0.110577  |
| 0.113345  | 0.118007  | 0.146707 | 0.129662 | 0.131702  | 0.125728  | 0.119027  |
| 0.121503  | 0.1081    | 0.135052 | 0.130828 | 0.128788  | 0.119901  | 0.118735  |
| 0.107226  | 0.0926573 | 0.129225 | 0.123834 | 0.111305  | 0.106789  | 0.100087  |
| 0.112179  | 0.0882867 | 0.129225 | 0.127622 | 0.115385  | 0.106498  | 0.102418  |
| 0.116987  | 0.0948427 | 0.125    | 0.124854 | 0.118153  | 0.104312  | 0.0961538 |
| 0.0804196 | 0.0888695 | 0.133013 | 0.121795 | 0.120338  | 0.115822  | 0.105624  |
| 0.117279  | 0.0916375 | 0.121795 | 0.123106 | 0.123106  | 0.108974  | 0.099359  |
| 0.0906177 | 0.0710956 | 0.120775 | 0.113345 | 0.104021  | 0.097465  | 0.0884324 |
| 0.0865385 | 0.0690559 | 0.120192 | 0.115967 | 0.111597  | 0.0992133 | 0.092803  |
| 0.0843531 | 0.0744464 | 0.125874 | 0.116113 | 0.106498  | 0.10169   | 0.0949883 |
| 0.130682  | 0.109411  | 0.132576 | 0.126894 | 0.117861  | 0.110723  | 0.108683  |
| 0.0920746 | 0.0958625 | 0.124563 | 0.12704  | 0.121795  | 0.121941  | 0.118735  |
| 0.090472  | 0.0726981 | 0.116841 | 0.120192 | 0.103001  | 0.100233  | 0.0964452 |
| 0.0871212 | 0.0681818 | 0.118735 | 0.114802 | 0.105769  | 0.0983392 | 0.0916375 |

|           |           |          |           |           |           |           |
|-----------|-----------|----------|-----------|-----------|-----------|-----------|
| 0.0882867 | 0.0874126 | 0.128351 | 0.119464  | 0.115093  | 0.109703  | 0.109411  |
| 0.0945513 | 0.0697844 | 0.124126 | 0.11553   | 0.103293  | 0.100816  | 0.0912005 |
| 0.12398   | 0.110286  | 0.138695 | 0.14088   | 0.129516  | 0.118298  | 0.110431  |
| 0.13243   | 0.115822  | 0.134324 | 0.139132  | 0.133304  | 0.131702  | 0.109557  |
| 0.081148  | 0.0796911 | 0.129662 | 0.121066  | 0.11553   | 0.110723  | 0.0967366 |
| 0.094697  | 0.0696387 | 0.120484 | 0.120921  | 0.107517  | 0.100962  | 0.095134  |
| 0.083042  | 0.0824592 | 0.11961  | 0.113636  | 0.106061  | 0.10067   | 0.0989219 |
| 0.103438  | 0.0780886 | 0.12398  | 0.111888  | 0.107517  | 0.0989219 | 0.0948427 |
| 0         | 0.0903263 | 0.132139 | 0.123834  | 0.121503  | 0.11553   | 0.104749  |
| 0.0903263 | 0         | 0.116987 | 0.11451   | 0.10169   | 0.0995047 | 0.0913462 |
| 0.132139  | 0.116987  | 0        | 0.128934  | 0.131556  | 0.124709  | 0.123252  |
| 0.123834  | 0.11451   | 0.128934 | 0         | 0.0981935 | 0.0875583 | 0.114073  |
| 0.121503  | 0.10169   | 0.131556 | 0.0981935 | 0         | 0.10271   | 0.113199  |
| 0.11553   | 0.0995047 | 0.124709 | 0.0875583 | 0.10271   | 0         | 0.099359  |
| 0.104749  | 0.0913462 | 0.123252 | 0.114073  | 0.113199  | 0.099359  | 0         |
| 0.099359  | 0.0681818 | 0.118444 | 0.118298  | 0.108683  | 0.0992133 | 0.0948427 |
| 0.10271   | 0.083479  | 0.125291 | 0.121358  | 0.112034  | 0.102273  | 0.0967366 |
| 0.110286  | 0.092803  | 0.128205 | 0.120775  | 0.112325  | 0.102273  | 0.101981  |
| 0.124854  | 0.101253  | 0.133741 | 0.131265  | 0.123106  | 0.111888  | 0.109848  |
| 0.123689  | 0.112617  | 0.134324 | 0.129808  | 0.124854  | 0.121503  | 0.122669  |
| 0.117424  | 0.0938228 | 0.133304 | 0.128497  | 0.120338  | 0.113782  | 0.10708   |
| 0.123397  | 0.109994  | 0.138695 | 0.133013  | 0.128059  | 0.12704   | 0.125     |
| 0.120047  | 0.115093  | 0.135635 | 0.132576  | 0.128205  | 0.125728  | 0.115822  |
| 0.202506  | 0.190268  | 0.211684 | 0.20134   | 0.203671  | 0.191288  | 0.193036  |
| 0.243735  | 0.233246  | 0.246212 | 0.239365  | 0.241113  | 0.238345  | 0.238054  |
| 0.123834  | 0.103147  | 0.133013 | 0.132576  | 0.125     | 0.114365  | 0.112325  |
| 0.112034  | 0.0954254 | 0.127331 | 0.12602   | 0.113782  | 0.108974  | 0.110431  |
| 0.111742  | 0.0884324 | 0.120047 | 0.123106  | 0.114073  | 0.101399  | 0.0984848 |
| 0.113782  | 0.0992133 | 0.131702 | 0.127477  | 0.121358  | 0.109266  | 0.100816  |
| 0.124272  | 0.110577  | 0.136946 | 0.137092  | 0.124563  | 0.118007  | 0.123834  |
| 0.121066  | 0.101544  | 0.131119 | 0.128934  | 0.119027  | 0.111305  | 0.108974  |
| 0.138403  | 0.134033  | 0.146125 | 0.145688  | 0.13986   | 0.140006  | 0.13884   |
| 0.11757   | 0.100379  | 0.131119 | 0.135344  | 0.123106  | 0.115385  | 0.112762  |
| 0.120484  | 0.109703  | 0.132284 | 0.136801  | 0.129516  | 0.128788  | 0.121795  |
| 0.130828  | 0.121795  | 0.13884  | 0.121212  | 0.114802  | 0.116404  | 0.125146  |
| 0.129371  | 0.117716  | 0.139423 | 0.141026  | 0.125291  | 0.129225  | 0.127185  |
| 0.125874  | 0.12296   | 0.133887 | 0.110723  | 0.11655   | 0.113491  | 0.125437  |
| 0.117133  | 0.102855  | 0.130973 | 0.129662  | 0.11655   | 0.105915  | 0.10912   |
| 0.113928  | 0.0964452 | 0.13243  | 0.122378  | 0.112471  | 0.105332  | 0.108829  |
| 0.120484  | 0.100962  | 0.130245 | 0.130973  | 0.118153  | 0.112179  | 0.11014   |
| 0.109703  | 0.0933858 | 0.123252 | 0.125146  | 0.116696  | 0.111305  | 0.10169   |
| 0.114073  | 0.0965909 | 0.128205 | 0.121358  | 0.110868  | 0.105769  | 0.106352  |
| 0.115676  | 0.101107  | 0.129808 | 0.132284  | 0.113345  | 0.110868  | 0.111451  |
| 0.12398   | 0.114365  | 0.13986  | 0.141171  | 0.125728  | 0.127331  | 0.12296   |

|          |           |          |          |          |           |          |
|----------|-----------|----------|----------|----------|-----------|----------|
| 0.133596 | 0.125146  | 0.1419   | 0.14729  | 0.134178 | 0.136072  | 0.133159 |
| 0.117133 | 0.101107  | 0.131265 | 0.129079 | 0.120047 | 0.116987  | 0.112617 |
| 0.120192 | 0.0957168 | 0.130536 | 0.123397 | 0.118735 | 0.109557  | 0.106643 |
| 0.128059 | 0.117861  | 0.134033 | 0.137966 | 0.133887 | 0.129953  | 0.122378 |
| 0.117279 | 0.0919289 | 0.12704  | 0.126603 | 0.114073 | 0.109266  | 0.106643 |
| 0.13986  | 0.126457  | 0.152826 | 0.143357 | 0.13986  | 0.130973  | 0.135927 |
| 0.129371 | 0.115676  | 0.14292  | 0.128205 | 0.11859  | 0.119901  | 0.125437 |
| 0.131847 | 0.122815  | 0.145396 | 0.144085 | 0.134761 | 0.133741  | 0.126457 |
| 0.108537 | 0.0919289 | 0.124126 | 0.118735 | 0.103875 | 0.10373   | 0.104604 |
| 0.113636 | 0.0917832 | 0.124272 | 0.125583 | 0.115676 | 0.105915  | 0.104749 |
| 0.118735 | 0.11116   | 0.137238 | 0.135052 | 0.125728 | 0.118298  | 0.116841 |
| 0.120921 | 0.110723  | 0.132139 | 0.138986 | 0.12704  | 0.121066  | 0.121066 |
| 0.124417 | 0.115385  | 0.134761 | 0.13549  | 0.134033 | 0.129225  | 0.13039  |
| 0.123397 | 0.107663  | 0.132284 | 0.128642 | 0.11961  | 0.116841  | 0.115676 |
| 0.124126 | 0.0976107 | 0.13039  | 0.129662 | 0.118007 | 0.112325  | 0.114656 |
| 0.126166 | 0.111014  | 0.131265 | 0.131702 | 0.124126 | 0.121358  | 0.120192 |
| 0.122378 | 0.115093  | 0.137966 | 0.13986  | 0.127914 | 0.127477  | 0.126603 |
| 0.120921 | 0.113636  | 0.135052 | 0.140734 | 0.12704  | 0.13039   | 0.124854 |
| 0.131265 | 0.116404  | 0.138986 | 0.143794 | 0.129808 | 0.129953  | 0.127331 |
| 0.132576 | 0.119172  | 0.139132 | 0.134033 | 0.121503 | 0.130682  | 0.13039  |
| 0.119464 | 0.0955711 | 0.127768 | 0.132576 | 0.118881 | 0.114656  | 0.112908 |
| 0.127622 | 0.118298  | 0.133887 | 0.13986  | 0.13141  | 0.12602   | 0.122232 |
| 0.114365 | 0.0957168 | 0.123834 | 0.124854 | 0.114656 | 0.104312  | 0.105186 |
| 0.11655  | 0.0967366 | 0.128642 | 0.106643 | 0.105769 | 0.0922203 | 0.100087 |
| 0.11655  | 0.10169   | 0.131265 | 0.128497 | 0.116841 | 0.106206  | 0.110286 |
| 0.11757  | 0.10067   | 0.131702 | 0.127477 | 0.121649 | 0.117133  | 0.101399 |
| 0.111451 | 0.0962995 | 0.129662 | 0.125728 | 0.110868 | 0.108392  | 0.100233 |
| 0.136072 | 0.119755  | 0.13884  | 0.140443 | 0.131119 | 0.13039   | 0.133013 |
| 0.115239 | 0.100962  | 0.133741 | 0.129225 | 0.125437 | 0.109557  | 0.108683 |
| 0.128934 | 0.120775  | 0.135781 | 0.141754 | 0.136509 | 0.131702  | 0.129953 |
| 0.111451 | 0.0948427 | 0.127622 | 0.126311 | 0.118444 | 0.111888  | 0.104604 |
| 0.120921 | 0.108974  | 0.13243  | 0.13141  | 0.120338 | 0.121649  | 0.11961  |
| 0.117279 | 0.105332  | 0.129953 | 0.125728 | 0.118444 | 0.114219  | 0.118881 |
| 0.122523 | 0.097465  | 0.136364 | 0.120775 | 0.106789 | 0.102564  | 0.108392 |
| 0.111014 | 0.0885781 | 0.119901 | 0.123252 | 0.111888 | 0.106498  | 0.104749 |
| 0.113491 | 0.10067   | 0.139277 | 0.11553  | 0.114948 | 0.104895  | 0.111014 |
| 0.121795 | 0.0964452 | 0.136801 | 0.111888 | 0.109266 | 0.097465  | 0.112908 |
| 0.114219 | 0.0909091 | 0.119318 | 0.120921 | 0.118007 | 0.0983392 | 0.101253 |
| 0.111597 | 0.109848  | 0.14292  | 0.140443 | 0.129953 | 0.119901  | 0.122523 |
| 0.128642 | 0.112908  | 0.137821 | 0.136218 | 0.126603 | 0.132284  | 0.132576 |
| 0.102127 | 0.0872669 | 0.12296  | 0.116696 | 0.108246 | 0.097028  | 0.101107 |
| 0.127331 | 0.115676  | 0.147582 | 0.142191 | 0.126457 | 0.124854  | 0.120192 |
| 0.10912  | 0.0971737 | 0.139277 | 0.129225 | 0.120192 | 0.115093  | 0.115093 |
| 0.114656 | 0.108829  | 0.145105 | 0.139714 | 0.129808 | 0.123543  | 0.120338 |

|           |           |          |           |           |           |           |
|-----------|-----------|----------|-----------|-----------|-----------|-----------|
| 0.108537  | 0.102127  | 0.140734 | 0.123689  | 0.120192  | 0.112471  | 0.111305  |
| 0.109994  | 0.0942599 | 0.133159 | 0.130099  | 0.114656  | 0.106643  | 0.111888  |
| 0.110723  | 0.0999417 | 0.137966 | 0.130245  | 0.120921  | 0.114073  | 0.11757   |
| 0.114656  | 0.109703  | 0.149184 | 0.136509  | 0.125146  | 0.123543  | 0.12296   |
| 0.127477  | 0.113782  | 0.145396 | 0.144668  | 0.129516  | 0.129662  | 0.127622  |
| 0.10912   | 0.0980478 | 0.13549  | 0.126894  | 0.116987  | 0.113054  | 0.116841  |
| 0.109411  | 0.0980478 | 0.139569 | 0.125146  | 0.11961   | 0.104021  | 0.107809  |
| 0.138695  | 0.118881  | 0.130682 | 0.138695  | 0.132867  | 0.130099  | 0.132721  |
| 0.115239  | 0.105332  | 0.13986  | 0.135052  | 0.126603  | 0.123543  | 0.125583  |
| 0.10912   | 0.0962995 | 0.127331 | 0.127477  | 0.112325  | 0.103147  | 0.0996503 |
| 0.225524  | 0.21824   | 0.228001 | 0.222028  | 0.225233  | 0.215763  | 0.213141  |
| 0.118298  | 0.104604  | 0.143502 | 0.135781  | 0.120921  | 0.11757   | 0.114073  |
| 0.101981  | 0.087704  | 0.132721 | 0.120047  | 0.111305  | 0.102127  | 0.105332  |
| 0.122523  | 0.117279  | 0.145688 | 0.143211  | 0.130973  | 0.127331  | 0.129371  |
| 0.11116   | 0.0945513 | 0.131119 | 0.124563  | 0.115239  | 0.105478  | 0.109557  |
| 0.112617  | 0.102127  | 0.142191 | 0.136801  | 0.129225  | 0.119172  | 0.12296   |
| 0.11961   | 0.105041  | 0.1419   | 0.135927  | 0.121649  | 0.114802  | 0.111305  |
| 0.117133  | 0.100233  | 0.135635 | 0.135781  | 0.124417  | 0.116696  | 0.112908  |
| 0.102855  | 0.0990676 | 0.139423 | 0.128497  | 0.122086  | 0.10912   | 0.114948  |
| 0.118735  | 0.112034  | 0.146853 | 0.137675  | 0.129808  | 0.120338  | 0.119464  |
| 0.120629  | 0.11451   | 0.14729  | 0.13986   | 0.129079  | 0.126311  | 0.120192  |
| 0.115822  | 0.113199  | 0.140734 | 0.139714  | 0.123397  | 0.129371  | 0.119172  |
| 0.114948  | 0.107955  | 0.144814 | 0.140297  | 0.125146  | 0.126166  | 0.119172  |
| 0.109703  | 0.0884324 | 0.126166 | 0.110577  | 0.105915  | 0.100233  | 0.103147  |
| 0.111451  | 0.0986305 | 0.139569 | 0.134761  | 0.120775  | 0.115676  | 0.111597  |
| 0.122378  | 0.111888  | 0.145833 | 0.138986  | 0.133741  | 0.126894  | 0.11961   |
| 0.10708   | 0.0995047 | 0.138986 | 0.13243   | 0.11961   | 0.116259  | 0.112179  |
| 0.132721  | 0.117279  | 0.142191 | 0.117279  | 0.114656  | 0.115676  | 0.125583  |
| 0.136946  | 0.123543  | 0.147873 | 0.136655  | 0.140443  | 0.124563  | 0.124563  |
| 0.11655   | 0.10169   | 0.127768 | 0.123543  | 0.117133  | 0.113782  | 0.115239  |
| 0.115093  | 0.10373   | 0.138258 | 0.129662  | 0.120047  | 0.116987  | 0.114073  |
| 0.127185  | 0.112908  | 0.14831  | 0.140297  | 0.131556  | 0.123834  | 0.120047  |
| 0.115385  | 0.115967  | 0.132721 | 0.130828  | 0.125291  | 0.125146  | 0.116987  |
| 0.129371  | 0.116841  | 0.144376 | 0.138403  | 0.12704   | 0.124272  | 0.119901  |
| 0.142483  | 0.12704   | 0.157488 | 0.141608  | 0.137821  | 0.123397  | 0.131847  |
| 0.106206  | 0.0849359 | 0.127622 | 0.10067   | 0.0925117 | 0.0871212 | 0.0961538 |
| 0.121503  | 0.11451   | 0.131847 | 0.0810023 | 0.0885781 | 0.0939685 | 0.121066  |
| 0.142045  | 0.128642  | 0.152389 | 0.144376  | 0.143794  | 0.132867  | 0.132867  |
| 0.0861014 | 0.0759033 | 0.120338 | 0.116113  | 0.116113  | 0.110723  | 0.104604  |
| 0.12398   | 0.10708   | 0.130828 | 0.10708   | 0.112325  | 0.102273  | 0.11451   |
| 0.143357  | 0.129371  | 0.128059 | 0.148601  | 0.142191  | 0.143211  | 0.139132  |
| 0.125291  | 0.114802  | 0.133304 | 0.117716  | 0.106643  | 0.103293  | 0.116696  |
| 0.128059  | 0.122523  | 0.142774 | 0.143502  | 0.132139  | 0.135198  | 0.137238  |
| 0.115967  | 0.104895  | 0.137383 | 0.135198  | 0.129371  | 0.120192  | 0.124563  |



|           |           |          |          |          |           |           |
|-----------|-----------|----------|----------|----------|-----------|-----------|
| 0.117861  | 0.103584  | 0.129371 | 0.135052 | 0.125728 | 0.120921  | 0.112471  |
| 0.124126  | 0.111597  | 0.137092 | 0.13549  | 0.126457 | 0.124563  | 0.125146  |
| 0.102127  | 0.092803  | 0.133159 | 0.111742 | 0.113782 | 0.106643  | 0.108683  |
| 0.116259  | 0.0981935 | 0.131847 | 0.133741 | 0.124126 | 0.118735  | 0.110577  |
| 0.115967  | 0.112762  | 0.143502 | 0.133741 | 0.130536 | 0.126311  | 0.118153  |
| 0.122378  | 0.111888  | 0.13243  | 0.144231 | 0.13345  | 0.129225  | 0.11553   |
| 0.122378  | 0.115093  | 0.142628 | 0.141317 | 0.133159 | 0.129225  | 0.121649  |
| 0.123834  | 0.110431  | 0.139132 | 0.140152 | 0.129371 | 0.121941  | 0.116696  |
| 0.131702  | 0.128788  | 0.152244 | 0.150058 | 0.144522 | 0.13884   | 0.132139  |
| 0.0981935 | 0.0952797 | 0.138258 | 0.110723 | 0.105478 | 0.0968823 | 0.106789  |
| 0.107517  | 0.0944056 | 0.13039  | 0.13141  | 0.122378 | 0.114656  | 0.0992133 |
| 0.123543  | 0.117133  | 0.135927 | 0.136655 | 0.131119 | 0.123689  | 0.113491  |
| 0.0920746 | 0.0894522 | 0.135052 | 0.119172 | 0.111014 | 0.108246  | 0.103584  |
| 0.132139  | 0.130682  | 0.158217 | 0.151661 | 0.137966 | 0.13986   | 0.129953  |
| 0.140006  | 0.136801  | 0.165501 | 0.156906 | 0.1537   | 0.140152  | 0.136946  |
| 0.126603  | 0.116696  | 0.133741 | 0.139132 | 0.128642 | 0.123834  | 0.125     |
| 0.122086  | 0.106352  | 0.134178 | 0.127331 | 0.117424 | 0.11553   | 0.116696  |
| 0.131556  | 0.121941  | 0.144522 | 0.145833 | 0.133304 | 0.130536  | 0.123252  |
| 0.116259  | 0.111888  | 0.150787 | 0.134324 | 0.124417 | 0.120192  | 0.126894  |
| 0.115967  | 0.108392  | 0.135344 | 0.136946 | 0.126457 | 0.128351  | 0.121358  |
| 0.127622  | 0.124709  | 0.151369 | 0.144814 | 0.129953 | 0.125437  | 0.125728  |
| 0.125     | 0.119755  | 0.150495 | 0.145979 | 0.132576 | 0.13447   | 0.125728  |
| 0.114073  | 0.105624  | 0.137238 | 0.130682 | 0.118153 | 0.115385  | 0.120047  |
| 0.160111  | 0.152535  | 0.170163 | 0.173514 | 0.160985 | 0.159382  | 0.155594  |
| 0.114656  | 0.107663  | 0.137238 | 0.130973 | 0.121358 | 0.112471  | 0.118007  |
| 0.13243   | 0.120484  | 0.144814 | 0.135927 | 0.131847 | 0.124417  | 0.130828  |
| 0.109266  | 0.100233  | 0.128351 | 0.128205 | 0.121503 | 0.115822  | 0.105041  |
| 0.129371  | 0.121795  | 0.135344 | 0.146853 | 0.134324 | 0.129225  | 0.125146  |
| 0.116259  | 0.106352  | 0.14088  | 0.134615 | 0.12296  | 0.116696  | 0.119027  |
| 0.144668  | 0.127768  | 0.15472  | 0.152535 | 0.143211 | 0.140734  | 0.126166  |
| 0.142774  | 0.136364  | 0.156906 | 0.155594 | 0.151515 | 0.143211  | 0.137675  |
| 0.130973  | 0.11553   | 0.141026 | 0.141463 | 0.132139 | 0.128205  | 0.125     |
| 0.143065  | 0.127331  | 0.150787 | 0.150058 | 0.138403 | 0.139714  | 0.139714  |
| 0.154575  | 0.128059  | 0.159965 | 0.155449 | 0.151661 | 0.142191  | 0.143648  |
| 0.154283  | 0.134761  | 0.159674 | 0.160985 | 0.144959 | 0.138695  | 0.139277  |
| 0.116841  | 0.10169   | 0.119318 | 0.131119 | 0.122378 | 0.11961   | 0.115239  |
| 0.143211  | 0.133013  | 0.146562 | 0.146416 | 0.13884  | 0.13345   | 0.133741  |
| 0.120192  | 0.0980478 | 0.13141  | 0.126603 | 0.119901 | 0.108974  | 0.111305  |
| 0.123252  | 0.10169   | 0.133887 | 0.13141  | 0.120921 | 0.114948  | 0.113199  |
| 0.108246  | 0.101836  | 0.134033 | 0.127768 | 0.11757  | 0.107809  | 0.107226  |
| 0.127477  | 0.109411  | 0.136072 | 0.135635 | 0.126311 | 0.124417  | 0.120338  |
| 0.12296   | 0.10373   | 0.134761 | 0.127331 | 0.121503 | 0.108246  | 0.110577  |
| 0.120629  | 0.0981935 | 0.131265 | 0.130536 | 0.118298 | 0.110577  | 0.111742  |
| 0.123543  | 0.106935  | 0.13884  | 0.13549  | 0.125291 | 0.120484  | 0.115822  |

|           |           |          |          |          |          |           |
|-----------|-----------|----------|----------|----------|----------|-----------|
| 0.124272  | 0.105332  | 0.136946 | 0.13243  | 0.124563 | 0.117133 | 0.119172  |
| 0.100962  | 0.0875583 | 0.12296  | 0.120775 | 0.112325 | 0.102855 | 0.0979021 |
| 0.130682  | 0.112617  | 0.141026 | 0.141171 | 0.128351 | 0.125    | 0.124709  |
| 0.121795  | 0.107517  | 0.139423 | 0.137529 | 0.12296  | 0.124272 | 0.118444  |
| 0.123834  | 0.100233  | 0.131847 | 0.124126 | 0.114802 | 0.113491 | 0.11553   |
| 0.223485  | 0.211247  | 0.227127 | 0.222028 | 0.223776 | 0.215763 | 0.210227  |
| 0.141608  | 0.134615  | 0.150204 | 0.153846 | 0.140443 | 0.148164 | 0.144085  |
| 0.130099  | 0.118735  | 0.142483 | 0.136218 | 0.135344 | 0.125291 | 0.123252  |
| 0.131702  | 0.115676  | 0.140006 | 0.136364 | 0.129371 | 0.119027 | 0.123106  |
| 0.219114  | 0.208333  | 0.222174 | 0.217075 | 0.22028  | 0.210519 | 0.207314  |
| 0.127914  | 0.105186  | 0.140297 | 0.128205 | 0.119755 | 0.11553  | 0.113782  |
| 0.127477  | 0.108246  | 0.138403 | 0.131265 | 0.124854 | 0.119172 | 0.115967  |
| 0.128059  | 0.113491  | 0.137238 | 0.13447  | 0.128642 | 0.120338 | 0.118881  |
| 0.123252  | 0.104895  | 0.136218 | 0.133741 | 0.124709 | 0.112908 | 0.118153  |
| 0.251457  | 0.245338  | 0.258596 | 0.248834 | 0.253205 | 0.250728 | 0.247815  |
| 0.130973  | 0.112617  | 0.131702 | 0.137675 | 0.129808 | 0.124417 | 0.101399  |
| 0.116113  | 0.090472  | 0.12704  | 0.118153 | 0.110286 | 0.106935 | 0.111888  |
| 0.125437  | 0.116696  | 0.138986 | 0.141463 | 0.131847 | 0.122378 | 0.11655   |
| 0.125728  | 0.114948  | 0.141026 | 0.140589 | 0.129225 | 0.120629 | 0.116841  |
| 0.131556  | 0.114656  | 0.134033 | 0.13884  | 0.126311 | 0.126457 | 0.107809  |
| 0.131847  | 0.120484  | 0.145396 | 0.146125 | 0.136801 | 0.12704  | 0.122086  |
| 0.119318  | 0.0957168 | 0.130245 | 0.126603 | 0.116113 | 0.109848 | 0.113928  |
| 0.126457  | 0.108392  | 0.13447  | 0.136364 | 0.125    | 0.123689 | 0.122523  |
| 0.13884   | 0.120775  | 0.142483 | 0.138549 | 0.131556 | 0.122378 | 0.123834  |
| 0.117861  | 0.100962  | 0.131702 | 0.127768 | 0.115822 | 0.109266 | 0.109557  |
| 0.119755  | 0.106352  | 0.137383 | 0.136072 | 0.124126 | 0.119318 | 0.115822  |
| 0.0910548 | 0.08581   | 0.129662 | 0.11757  | 0.108537 | 0.103438 | 0.101981  |
| 0.143357  | 0.135781  | 0.157488 | 0.154138 | 0.15035  | 0.145542 | 0.135052  |
| 0.129953  | 0.114219  | 0.13243  | 0.138403 | 0.127622 | 0.127477 | 0.104749  |
| 0.131119  | 0.112762  | 0.136509 | 0.134907 | 0.126166 | 0.123106 | 0.121941  |
| 0.200466  | 0.186189  | 0.2044   | 0.198718 | 0.197552 | 0.1875   | 0.186626  |
| 0.212413  | 0.201632  | 0.21926  | 0.210664 | 0.211538 | 0.2044   | 0.198864  |
| 0.125291  | 0.108392  | 0.134178 | 0.131119 | 0.12296  | 0.112034 | 0.116987  |
| 0.115385  | 0.0973193 | 0.13039  | 0.127331 | 0.117133 | 0.108246 | 0.108829  |
| 0.131702  | 0.127622  | 0.151661 | 0.144231 | 0.138695 | 0.137092 | 0.131556  |
| 0.120338  | 0.0917832 | 0.130099 | 0.122086 | 0.113636 | 0.106789 | 0.114656  |
| 0.127477  | 0.114365  | 0.132867 | 0.13884  | 0.128351 | 0.127331 | 0.105769  |
| 0.135198  | 0.124709  | 0.139714 | 0.13986  | 0.130828 | 0.131847 | 0.125437  |
| 0.2331    | 0.218531  | 0.236451 | 0.229312 | 0.230478 | 0.223048 | 0.221591  |
| 0.122086  | 0.104312  | 0.135344 | 0.128497 | 0.123252 | 0.109411 | 0.109703  |
| 0.213432  | 0.202943  | 0.220862 | 0.211976 | 0.214015 | 0.208625 | 0.207168  |
| 0.112762  | 0.0859557 | 0.116113 | 0.123834 | 0.113054 | 0.106498 | 0.101253  |
| 0.120192  | 0.101544  | 0.130536 | 0.125146 | 0.118735 | 0.109848 | 0.107809  |
| 0.125583  | 0.107226  | 0.131265 | 0.129079 | 0.120921 | 0.110577 | 0.113782  |

|          |           |          |          |          |          |           |
|----------|-----------|----------|----------|----------|----------|-----------|
| 0.117133 | 0.0952797 | 0.129808 | 0.125583 | 0.11655  | 0.107955 | 0.111742  |
| 0.215181 | 0.202652  | 0.219406 | 0.214889 | 0.214889 | 0.20542  | 0.202214  |
| 0.135927 | 0.122523  | 0.15035  | 0.14933  | 0.138549 | 0.136364 | 0.133741  |
| 0.117279 | 0.0995047 | 0.133159 | 0.129225 | 0.120484 | 0.11451  | 0.106643  |
| 0.13243  | 0.115239  | 0.143648 | 0.141171 | 0.129225 | 0.128788 | 0.129371  |
| 0.130682 | 0.116404  | 0.138403 | 0.136218 | 0.125146 | 0.122086 | 0.119755  |
| 0.120775 | 0.0971737 | 0.132284 | 0.128059 | 0.119027 | 0.107809 | 0.109557  |
| 0.115676 | 0.0914918 | 0.121358 | 0.125583 | 0.119755 | 0.108829 | 0.104167  |
| 0.124709 | 0.10169   | 0.13447  | 0.127622 | 0.119464 | 0.112617 | 0.11553   |
| 0.127914 | 0.112762  | 0.135052 | 0.132284 | 0.126748 | 0.119318 | 0.118444  |
| 0.122378 | 0.0999417 | 0.133013 | 0.13549  | 0.121212 | 0.11757  | 0.11553   |
| 0.120775 | 0.108246  | 0.134324 | 0.128059 | 0.123106 | 0.118881 | 0.112179  |
| 0.197261 | 0.185023  | 0.206439 | 0.196678 | 0.193473 | 0.188957 | 0.186334  |
| 0.125437 | 0.116404  | 0.138695 | 0.141463 | 0.133013 | 0.123543 | 0.118007  |
| 0.129662 | 0.120629  | 0.148164 | 0.141608 | 0.137529 | 0.126311 | 0.119901  |
| 0.128642 | 0.112325  | 0.136364 | 0.133304 | 0.126603 | 0.119172 | 0.11655   |
| 0.132284 | 0.111597  | 0.136509 | 0.137821 | 0.127331 | 0.122232 | 0.10271   |
| 0.127622 | 0.114219  | 0.14088  | 0.136946 | 0.125874 | 0.126311 | 0.126894  |
| 0.116259 | 0.0979021 | 0.118735 | 0.129953 | 0.121212 | 0.113782 | 0.109411  |
| 0.122523 | 0.106206  | 0.130536 | 0.130682 | 0.121358 | 0.112471 | 0.105478  |
| 0.120484 | 0.0995047 | 0.131119 | 0.125146 | 0.116987 | 0.113928 | 0.118881  |
| 0.129371 | 0.113636  | 0.144959 | 0.13986  | 0.131702 | 0.122232 | 0.115239  |
| 0.125291 | 0.109266  | 0.133304 | 0.136072 | 0.126457 | 0.115822 | 0.111742  |
| 0.124854 | 0.103584  | 0.137821 | 0.133013 | 0.121649 | 0.113636 | 0.115967  |
| 0.130828 | 0.112471  | 0.140589 | 0.133159 | 0.129953 | 0.117861 | 0.116987  |
| 0.133304 | 0.123397  | 0.144814 | 0.13884  | 0.134761 | 0.13345  | 0.130245  |
| 0.125437 | 0.101836  | 0.127622 | 0.134178 | 0.124563 | 0.115676 | 0.0961538 |
| 0.137821 | 0.127331  | 0.150787 | 0.152972 | 0.137529 | 0.14292  | 0.140589  |
| 0.118881 | 0.0990676 | 0.13243  | 0.125291 | 0.118007 | 0.107372 | 0.11116   |
| 0.124417 | 0.113054  | 0.137092 | 0.135781 | 0.123834 | 0.121066 | 0.113782  |
| 0.127477 | 0.109703  | 0.137821 | 0.135052 | 0.122523 | 0.124417 | 0.122669  |
| 0.126311 | 0.101253  | 0.135781 | 0.125146 | 0.118735 | 0.114219 | 0.120921  |
| 0.200321 | 0.184878  | 0.203671 | 0.195367 | 0.197115 | 0.18648  | 0.186189  |
| 0.118881 | 0.097028  | 0.128351 | 0.126457 | 0.11859  | 0.109994 | 0.10708   |
| 0.111597 | 0.094697  | 0.122815 | 0.123543 | 0.11014  | 0.104458 | 0.102418  |
| 0.132284 | 0.111014  | 0.135052 | 0.134033 | 0.125    | 0.120484 | 0.118735  |
| 0.191725 | 0.169289  | 0.198572 | 0.189685 | 0.189685 | 0.182255 | 0.177302  |
| 0.136509 | 0.120775  | 0.138112 | 0.147873 | 0.140589 | 0.137238 | 0.112762  |
| 0.141171 | 0.132139  | 0.142774 | 0.147873 | 0.142628 | 0.147145 | 0.12296   |
| 0.144814 | 0.135198  | 0.160985 | 0.156177 | 0.152389 | 0.14729  | 0.137675  |
| 0.118007 | 0.102855  | 0.128059 | 0.128497 | 0.118007 | 0.113199 | 0.0945513 |
| 0.128934 | 0.114656  | 0.141608 | 0.138549 | 0.12602  | 0.12704  | 0.125     |
| 0.219114 | 0.206585  | 0.224796 | 0.216492 | 0.219988 | 0.209936 | 0.206439  |
| 0.129079 | 0.119755  | 0.147582 | 0.140734 | 0.126748 | 0.122815 | 0.11757   |

|           |           |          |          |          |           |           |
|-----------|-----------|----------|----------|----------|-----------|-----------|
| 0.132139  | 0.118735  | 0.143939 | 0.14292  | 0.128934 | 0.131119  | 0.128788  |
| 0.117861  | 0.100962  | 0.130536 | 0.126311 | 0.117861 | 0.112179  | 0.109266  |
| 0.180798  | 0.165647  | 0.189394 | 0.180216 | 0.172348 | 0.170455  | 0.168706  |
| 0.120192  | 0.103293  | 0.132576 | 0.130099 | 0.119901 | 0.108683  | 0.111305  |
| 0.149184  | 0.143357  | 0.151369 | 0.153846 | 0.149184 | 0.146125  | 0.145542  |
| 0.111305  | 0.102564  | 0.132721 | 0.127622 | 0.119755 | 0.112034  | 0.109994  |
| 0.199592  | 0.185606  | 0.20236  | 0.195804 | 0.19493  | 0.187209  | 0.188957  |
| 0.126457  | 0.105769  | 0.128351 | 0.132867 | 0.126748 | 0.121649  | 0.0971737 |
| 0.11014   | 0.0868298 | 0.13039  | 0.116841 | 0.109266 | 0.100962  | 0.105041  |
| 0.12398   | 0.107955  | 0.136946 | 0.136801 | 0.125146 | 0.115676  | 0.112762  |
| 0.129371  | 0.104604  | 0.130099 | 0.131119 | 0.129662 | 0.117279  | 0.11553   |
| 0.125874  | 0.106061  | 0.133304 | 0.132867 | 0.122378 | 0.118153  | 0.116987  |
| 0.130245  | 0.11451   | 0.146707 | 0.137821 | 0.134033 | 0.121649  | 0.107663  |
| 0.118444  | 0.0962995 | 0.131702 | 0.129225 | 0.117279 | 0.1081    | 0.106352  |
| 0.195513  | 0.184441  | 0.204108 | 0.195513 | 0.19697  | 0.186917  | 0.181964  |
| 0.129808  | 0.112617  | 0.137238 | 0.135052 | 0.126603 | 0.122669  | 0.122086  |
| 0.120338  | 0.100233  | 0.133304 | 0.130536 | 0.122669 | 0.115239  | 0.114656  |
| 0.21722   | 0.207896  | 0.22873  | 0.217803 | 0.216055 | 0.21183   | 0.208042  |
| 0.12602   | 0.115822  | 0.137238 | 0.144085 | 0.13447  | 0.12296   | 0.11655   |
| 0.11859   | 0.0987762 | 0.13039  | 0.129371 | 0.118298 | 0.106789  | 0.110577  |
| 0.111597  | 0.0941142 | 0.130099 | 0.12704  | 0.115093 | 0.106206  | 0.105624  |
| 0.135344  | 0.128351  | 0.147436 | 0.148456 | 0.135635 | 0.139569  | 0.138695  |
| 0.198572  | 0.182838  | 0.204545 | 0.19391  | 0.195659 | 0.188228  | 0.183858  |
| 0.121212  | 0.0981935 | 0.129808 | 0.123252 | 0.115967 | 0.107955  | 0.112908  |
| 0.13141   | 0.116259  | 0.144085 | 0.136364 | 0.131702 | 0.124854  | 0.123689  |
| 0.11859   | 0.0967366 | 0.126894 | 0.128788 | 0.118881 | 0.107372  | 0.108246  |
| 0.115967  | 0.0952797 | 0.128934 | 0.125874 | 0.11655  | 0.104749  | 0.107955  |
| 0.11553   | 0.0945513 | 0.130536 | 0.124272 | 0.116404 | 0.105478  | 0.107226  |
| 0.124126  | 0.107809  | 0.139132 | 0.138112 | 0.125291 | 0.120484  | 0.120775  |
| 0.100962  | 0.0869755 | 0.121795 | 0.11961  | 0.107663 | 0.0976107 | 0.0987762 |
| 0.127768  | 0.110868  | 0.13345  | 0.135052 | 0.125437 | 0.123543  | 0.101399  |
| 0.135344  | 0.121941  | 0.145688 | 0.147873 | 0.134761 | 0.132867  | 0.13141   |
| 0.129808  | 0.106206  | 0.134324 | 0.139423 | 0.126894 | 0.121503  | 0.0967366 |
| 0.128205  | 0.120921  | 0.135052 | 0.139569 | 0.129371 | 0.126603  | 0.125437  |
| 0.204691  | 0.190122  | 0.209499 | 0.201486 | 0.202069 | 0.192308  | 0.189394  |
| 0.126166  | 0.109266  | 0.137966 | 0.13141  | 0.125    | 0.116113  | 0.116113  |
| 0.133596  | 0.123689  | 0.144522 | 0.146125 | 0.133304 | 0.136072  | 0.132576  |
| 0.115385  | 0.0944056 | 0.129225 | 0.127914 | 0.11655  | 0.105915  | 0.105332  |
| 0.0989219 | 0.0872669 | 0.121795 | 0.114073 | 0.105624 | 0.0984848 | 0.0952797 |
| 0.125437  | 0.103293  | 0.135781 | 0.13039  | 0.126603 | 0.11655   | 0.11014   |
| 0.122378  | 0.0967366 | 0.129808 | 0.123543 | 0.114219 | 0.109703  | 0.115822  |
| 0.13345   | 0.121503  | 0.140589 | 0.144522 | 0.13345  | 0.124563  | 0.123689  |
| 0.129808  | 0.109994  | 0.144814 | 0.141754 | 0.13243  | 0.117716  | 0.113636  |
| 0.112617  | 0.0901807 | 0.123543 | 0.119318 | 0.113491 | 0.101107  | 0.103438  |

|           |           |          |          |          |           |           |
|-----------|-----------|----------|----------|----------|-----------|-----------|
| 0.108974  | 0.0874126 | 0.120775 | 0.117133 | 0.107517 | 0.101253  | 0.100962  |
| 0.108537  | 0.0887238 | 0.128788 | 0.122815 | 0.116113 | 0.109557  | 0.103147  |
| 0.113928  | 0.0917832 | 0.118153 | 0.126748 | 0.113928 | 0.107955  | 0.104458  |
| 0.131265  | 0.117861  | 0.138112 | 0.14088  | 0.129225 | 0.130828  | 0.109557  |
| 0.121503  | 0.0932401 | 0.129516 | 0.120921 | 0.114219 | 0.10708   | 0.112617  |
| 0.121941  | 0.105332  | 0.135781 | 0.133887 | 0.124272 | 0.116259  | 0.114802  |
| 0.117279  | 0.0919289 | 0.124709 | 0.119027 | 0.112034 | 0.100816  | 0.110431  |
| 0.118881  | 0.0938228 | 0.133887 | 0.127331 | 0.115967 | 0.106498  | 0.105624  |
| 0.113199  | 0.0960082 | 0.128205 | 0.122232 | 0.116404 | 0.106643  | 0.105478  |
| 0.119901  | 0.099796  | 0.134324 | 0.128351 | 0.120484 | 0.109266  | 0.109557  |
| 0.121358  | 0.101836  | 0.134033 | 0.13039  | 0.120192 | 0.11451   | 0.112762  |
| 0.126603  | 0.108246  | 0.143065 | 0.138549 | 0.130973 | 0.115385  | 0.115093  |
| 0.124272  | 0.103001  | 0.133159 | 0.126603 | 0.11961  | 0.113345  | 0.113054  |
| 0.104021  | 0.0871212 | 0.122232 | 0.121795 | 0.111014 | 0.100379  | 0.0980478 |
| 0.116987  | 0.0977564 | 0.131993 | 0.127185 | 0.116404 | 0.108392  | 0.109557  |
| 0.134761  | 0.114948  | 0.139277 | 0.139132 | 0.130099 | 0.121212  | 0.120338  |
| 0.125     | 0.106352  | 0.140589 | 0.136072 | 0.126748 | 0.121066  | 0.121649  |
| 0.107372  | 0.0852273 | 0.12704  | 0.121358 | 0.113199 | 0.0996503 | 0.106935  |
| 0.116404  | 0.0945513 | 0.131993 | 0.127477 | 0.117861 | 0.105478  | 0.104895  |
| 0.128497  | 0.111597  | 0.135927 | 0.138403 | 0.127622 | 0.127477  | 0.121941  |
| 0.120047  | 0.0929487 | 0.119901 | 0.126457 | 0.118881 | 0.108246  | 0.105624  |
| 0.12704   | 0.107809  | 0.139423 | 0.140443 | 0.12704  | 0.125728  | 0.120484  |
| 0.127622  | 0.10373   | 0.13243  | 0.131119 | 0.123834 | 0.114365  | 0.116987  |
| 0.106352  | 0.0935315 | 0.126311 | 0.121503 | 0.114219 | 0.106206  | 0.0995047 |
| 0.123543  | 0.099359  | 0.133304 | 0.127914 | 0.117716 | 0.106789  | 0.10708   |
| 0.11757   | 0.0942599 | 0.127914 | 0.127768 | 0.115239 | 0.111014  | 0.105186  |
| 0.130536  | 0.111014  | 0.142045 | 0.139277 | 0.131119 | 0.126894  | 0.125728  |
| 0.13141   | 0.115385  | 0.140589 | 0.13549  | 0.12296  | 0.118735  | 0.121066  |
| 0.118444  | 0.103584  | 0.137529 | 0.133013 | 0.119027 | 0.116841  | 0.11655   |
| 0.201195  | 0.188666  | 0.208916 | 0.198864 | 0.201195 | 0.191725  | 0.191142  |
| 0.173514  | 0.157488  | 0.183566 | 0.176719 | 0.168852 | 0.163462  | 0.162587  |
| 0.13039   | 0.108246  | 0.131119 | 0.138258 | 0.126894 | 0.121212  | 0.100233  |
| 0.12704   | 0.100524  | 0.133013 | 0.128497 | 0.120338 | 0.115239  | 0.116404  |
| 0.144231  | 0.136364  | 0.140589 | 0.152972 | 0.149767 | 0.152244  | 0.127477  |
| 0.134761  | 0.122232  | 0.142483 | 0.13884  | 0.13243  | 0.124126  | 0.125583  |
| 0.13141   | 0.111305  | 0.132721 | 0.131702 | 0.120921 | 0.115822  | 0.119027  |
| 0.124563  | 0.101544  | 0.139569 | 0.135927 | 0.121941 | 0.116259  | 0.11655   |
| 0.0957168 | 0.081148  | 0.132284 | 0.116696 | 0.107955 | 0.100816  | 0.0987762 |
| 0.12602   | 0.108829  | 0.141317 | 0.136801 | 0.128351 | 0.122669  | 0.123252  |
| 0.210956  | 0.194639  | 0.217512 | 0.206294 | 0.207459 | 0.200029  | 0.197698  |
| 0.123106  | 0.0983392 | 0.132284 | 0.123689 | 0.11553  | 0.113636  | 0.117716  |
| 0.126457  | 0.101981  | 0.135344 | 0.132284 | 0.121212 | 0.118153  | 0.118153  |
| 0.113928  | 0.0906177 | 0.126894 | 0.128788 | 0.117133 | 0.107955  | 0.109411  |
| 0.126311  | 0.111451  | 0.135198 | 0.133596 | 0.126311 | 0.117424  | 0.115967  |

|          |           |          |          |          |           |           |
|----------|-----------|----------|----------|----------|-----------|-----------|
| 0.19697  | 0.176282  | 0.203526 | 0.19493  | 0.190268 | 0.182547  | 0.18546   |
| 0.25204  | 0.243881  | 0.255682 | 0.247086 | 0.251457 | 0.247815  | 0.244901  |
| 0.129953 | 0.113345  | 0.144085 | 0.140734 | 0.13141  | 0.120484  | 0.119318  |
| 0.127622 | 0.105186  | 0.13884  | 0.134033 | 0.12704  | 0.120484  | 0.118735  |
| 0.126457 | 0.108392  | 0.133013 | 0.137529 | 0.12704  | 0.122232  | 0.100087  |
| 0.124272 | 0.101253  | 0.132867 | 0.126603 | 0.118735 | 0.111305  | 0.112762  |
| 0.118881 | 0.0903263 | 0.12602  | 0.118881 | 0.109266 | 0.10271   | 0.110286  |
| 0.122523 | 0.103001  | 0.130828 | 0.129225 | 0.120484 | 0.109266  | 0.109266  |
| 0.123834 | 0.0987762 | 0.136509 | 0.134907 | 0.122669 | 0.116113  | 0.115822  |
| 0.119755 | 0.0903263 | 0.125437 | 0.119464 | 0.111597 | 0.103584  | 0.110577  |
| 0.119901 | 0.100962  | 0.134324 | 0.129225 | 0.122523 | 0.117133  | 0.113054  |
| 0.1081   | 0.0912005 | 0.131265 | 0.12704  | 0.118298 | 0.105041  | 0.112908  |
| 0.106789 | 0.0962995 | 0.122086 | 0.11961  | 0.110868 | 0.102855  | 0.0952797 |
| 0.128205 | 0.110431  | 0.143211 | 0.137529 | 0.134324 | 0.122815  | 0.116113  |
| 0.128059 | 0.107663  | 0.13986  | 0.137383 | 0.126894 | 0.124417  | 0.121795  |
| 0.11553  | 0.0939685 | 0.125291 | 0.124854 | 0.112617 | 0.105769  | 0.102564  |
| 0.112908 | 0.10271   | 0.135198 | 0.13243  | 0.124854 | 0.119755  | 0.114219  |
| 0.135344 | 0.119901  | 0.13549  | 0.134761 | 0.129516 | 0.127622  | 0.127331  |
| 0.112471 | 0.0949883 | 0.13039  | 0.125    | 0.117716 | 0.106789  | 0.104749  |
| 0.120192 | 0.10708   | 0.131993 | 0.13243  | 0.120484 | 0.116259  | 0.11014   |
| 0.123397 | 0.113491  | 0.138403 | 0.137383 | 0.125728 | 0.120629  | 0.124417  |
| 0.213287 | 0.204254  | 0.223339 | 0.214161 | 0.215326 | 0.208188  | 0.204691  |
| 0.118444 | 0.10271   | 0.137238 | 0.130973 | 0.122815 | 0.11014   | 0.110431  |
| 0.104021 | 0.0891608 | 0.122815 | 0.121503 | 0.111597 | 0.103293  | 0.0965909 |
| 0.127622 | 0.105769  | 0.140589 | 0.133159 | 0.124709 | 0.11757   | 0.114948  |
| 0.129225 | 0.114656  | 0.140152 | 0.144376 | 0.132139 | 0.124417  | 0.114802  |
| 0.124563 | 0.109703  | 0.133741 | 0.134761 | 0.123689 | 0.115093  | 0.114802  |
| 0.206731 | 0.194784  | 0.214161 | 0.205565 | 0.207896 | 0.195513  | 0.195804  |
| 0.129662 | 0.114219  | 0.140006 | 0.138695 | 0.129662 | 0.126311  | 0.125146  |
| 0.114948 | 0.095134  | 0.128205 | 0.124272 | 0.113491 | 0.104604  | 0.10373   |
| 0.120629 | 0.109557  | 0.125146 | 0.130828 | 0.124417 | 0.116696  | 0.107663  |
| 0.120338 | 0.0976107 | 0.128934 | 0.125291 | 0.11859  | 0.108829  | 0.112325  |
| 0.127331 | 0.11014   | 0.142337 | 0.140152 | 0.13141  | 0.12602   | 0.12398   |
| 0.111888 | 0.0990676 | 0.133013 | 0.128497 | 0.119172 | 0.112034  | 0.113199  |
| 0.11014  | 0.0914918 | 0.132721 | 0.12704  | 0.113636 | 0.101253  | 0.112908  |
| 0.121212 | 0.11014   | 0.133304 | 0.136072 | 0.128788 | 0.11757   | 0.111742  |
| 0.20877  | 0.191871  | 0.211247 | 0.206731 | 0.204691 | 0.19697   | 0.196387  |
| 0.119172 | 0.103438  | 0.131847 | 0.129662 | 0.113928 | 0.114948  | 0.114073  |
| 0.205565 | 0.18954   | 0.20979  | 0.200903 | 0.202652 | 0.192599  | 0.19289   |
| 0.20338  | 0.189394  | 0.209645 | 0.203089 | 0.200466 | 0.192453  | 0.188666  |
| 0.133159 | 0.114219  | 0.135635 | 0.133159 | 0.127914 | 0.122523  | 0.123397  |
| 0.128497 | 0.125     | 0.142628 | 0.142774 | 0.134033 | 0.127185  | 0.121941  |
| 0.100524 | 0.0839161 | 0.124272 | 0.117424 | 0.110723 | 0.0983392 | 0.106206  |
| 0.120192 | 0.103293  | 0.130828 | 0.128351 | 0.116113 | 0.112179  | 0.111597  |

|          |           |          |          |          |          |           |
|----------|-----------|----------|----------|----------|----------|-----------|
| 0.122669 | 0.105769  | 0.13243  | 0.136946 | 0.122669 | 0.11961  | 0.116987  |
| 0.117716 | 0.0984848 | 0.131556 | 0.129371 | 0.116841 | 0.108246 | 0.109994  |
| 0.112471 | 0.0859557 | 0.123397 | 0.118298 | 0.105186 | 0.101544 | 0.108537  |
| 0.115676 | 0.0903263 | 0.125728 | 0.117716 | 0.111888 | 0.102127 | 0.110868  |
| 0.131265 | 0.11553   | 0.146853 | 0.143502 | 0.135635 | 0.123834 | 0.11655   |
| 0.128205 | 0.104895  | 0.13447  | 0.132867 | 0.121212 | 0.11961  | 0.113491  |
| 0.111451 | 0.0895979 | 0.127331 | 0.123106 | 0.110868 | 0.104312 | 0.100816  |
| 0.127331 | 0.108683  | 0.140297 | 0.138112 | 0.126166 | 0.122232 | 0.122523  |
| 0.104749 | 0.083479  | 0.126457 | 0.116696 | 0.106206 | 0.10169  | 0.101981  |
| 0.13141  | 0.120047  | 0.144085 | 0.144231 | 0.130245 | 0.133887 | 0.131556  |
| 0.126748 | 0.106061  | 0.13039  | 0.137529 | 0.123543 | 0.116696 | 0.0971737 |
| 0.135344 | 0.122815  | 0.146562 | 0.146416 | 0.135344 | 0.136364 | 0.136072  |
| 0.262383 | 0.254516  | 0.268357 | 0.260052 | 0.265006 | 0.257867 | 0.254662  |
| 0.121358 | 0.113199  | 0.135198 | 0.135344 | 0.130682 | 0.128497 | 0.122086  |
| 0.127622 | 0.119464  | 0.134178 | 0.131119 | 0.126166 | 0.125728 | 0.12398   |
| 0.225962 | 0.21285   | 0.229604 | 0.220134 | 0.221591 | 0.217657 | 0.212413  |
| 0.122669 | 0.121795  | 0.13884  | 0.131119 | 0.131119 | 0.124272 | 0.122815  |
| 0.234848 | 0.227564  | 0.243444 | 0.233974 | 0.23514  | 0.229749 | 0.228293  |
| 0.116987 | 0.105041  | 0.132576 | 0.126311 | 0.121649 | 0.118007 | 0.11451   |
| 0.125583 | 0.109266  | 0.134761 | 0.13549  | 0.126748 | 0.11961  | 0.120775  |
| 0.121795 | 0.106061  | 0.13447  | 0.134324 | 0.125583 | 0.115239 | 0.111116  |
| 0.128788 | 0.112762  | 0.137383 | 0.132867 | 0.126166 | 0.119318 | 0.11961   |
| 0.211538 | 0.200758  | 0.214015 | 0.211247 | 0.211247 | 0.200321 | 0.199738  |
| 0.134324 | 0.121503  | 0.142628 | 0.149184 | 0.135198 | 0.135344 | 0.133304  |
| 0.125291 | 0.11014   | 0.141754 | 0.141317 | 0.129371 | 0.123689 | 0.121649  |
| 0.23412  | 0.223631  | 0.238928 | 0.230332 | 0.231789 | 0.224068 | 0.224359  |
| 0.12296  | 0.0941142 | 0.128642 | 0.124126 | 0.115093 | 0.109703 | 0.118735  |
| 0.207314 | 0.193036  | 0.213869 | 0.205274 | 0.204691 | 0.196678 | 0.193473  |
| 0.121358 | 0.0948427 | 0.13141  | 0.125728 | 0.119027 | 0.11014  | 0.114219  |
| 0.118153 | 0.0992133 | 0.130245 | 0.13039  | 0.118153 | 0.106352 | 0.107226  |
| 0.109266 | 0.101107  | 0.129808 | 0.127914 | 0.117424 | 0.110577 | 0.105624  |
| 0.129371 | 0.114219  | 0.133013 | 0.132867 | 0.125    | 0.126311 | 0.122232  |
| 0.120192 | 0.104749  | 0.136072 | 0.13243  | 0.123689 | 0.112179 | 0.114219  |
| 0.165064 | 0.152826  | 0.175408 | 0.172057 | 0.169435 | 0.157051 | 0.15035   |
| 0.122523 | 0.104167  | 0.134033 | 0.133304 | 0.120775 | 0.119755 | 0.115385  |
| 0.129516 | 0.113491  | 0.139277 | 0.142628 | 0.137092 | 0.117716 | 0.114219  |
| 0.126311 | 0.111451  | 0.139569 | 0.129808 | 0.128351 | 0.111597 | 0.118298  |
| 0.134761 | 0.123689  | 0.143357 | 0.141171 | 0.132139 | 0.130828 | 0.125291  |
| 0.206585 | 0.18852   | 0.210227 | 0.201632 | 0.202797 | 0.192745 | 0.193328  |
| 0.11553  | 0.0960082 | 0.129953 | 0.123689 | 0.11553  | 0.106643 | 0.103438  |
| 0.133741 | 0.1081    | 0.137675 | 0.132867 | 0.128788 | 0.116696 | 0.11961   |
| 0.11757  | 0.0913462 | 0.120629 | 0.122523 | 0.117861 | 0.107517 | 0.104895  |
| 0.117424 | 0.097028  | 0.12602  | 0.119464 | 0.112179 | 0.107663 | 0.116404  |
| 0.120192 | 0.10271   | 0.135781 | 0.131265 | 0.120484 | 0.111014 | 0.115385  |

|           |           |          |          |          |           |           |
|-----------|-----------|----------|----------|----------|-----------|-----------|
| 0.260198  | 0.254953  | 0.26384  | 0.258159 | 0.259907 | 0.25743   | 0.254516  |
| 0.104749  | 0.0983392 | 0.122378 | 0.121649 | 0.114656 | 0.10373   | 0.103147  |
| 0.12602   | 0.106206  | 0.136364 | 0.137966 | 0.127477 | 0.118881  | 0.113636  |
| 0.186626  | 0.179341  | 0.192599 | 0.186043 | 0.186626 | 0.178904  | 0.179779  |
| 0.194784  | 0.179633  | 0.201049 | 0.192745 | 0.192162 | 0.18211   | 0.183858  |
| 0.127477  | 0.111116  | 0.145105 | 0.139132 | 0.133304 | 0.12296   | 0.11655   |
| 0.125583  | 0.110723  | 0.137383 | 0.140734 | 0.125291 | 0.121649  | 0.123106  |
| 0.125583  | 0.102564  | 0.131847 | 0.129662 | 0.120629 | 0.114073  | 0.10912   |
| 0.143211  | 0.137092  | 0.154138 | 0.157488 | 0.144668 | 0.149767  | 0.14831   |
| 0.125728  | 0.110286  | 0.137238 | 0.138258 | 0.13039  | 0.118298  | 0.115093  |
| 0.129953  | 0.109557  | 0.145833 | 0.141608 | 0.133159 | 0.119318  | 0.119318  |
| 0.125146  | 0.103293  | 0.134324 | 0.127768 | 0.116987 | 0.11859   | 0.121503  |
| 0.123397  | 0.112034  | 0.134033 | 0.134761 | 0.12398  | 0.122378  | 0.120338  |
| 0.135198  | 0.121212  | 0.142337 | 0.142483 | 0.131993 | 0.136218  | 0.134178  |
| 0.125437  | 0.099796  | 0.132284 | 0.126894 | 0.121066 | 0.111597  | 0.116259  |
| 0.130245  | 0.113636  | 0.133304 | 0.13345  | 0.12704  | 0.120192  | 0.11961   |
| 0.141171  | 0.129516  | 0.141608 | 0.143211 | 0.136509 | 0.136946  | 0.131702  |
| 0.110431  | 0.102855  | 0.126311 | 0.124417 | 0.113636 | 0.111116  | 0.105332  |
| 0.134178  | 0.118153  | 0.138112 | 0.135344 | 0.130099 | 0.127914  | 0.125874  |
| 0.120775  | 0.105332  | 0.131993 | 0.124854 | 0.11757  | 0.114219  | 0.119755  |
| 0.218823  | 0.203089  | 0.223048 | 0.217657 | 0.214161 | 0.2044    | 0.201486  |
| 0.0898893 | 0.0823135 | 0.130245 | 0.125146 | 0.121358 | 0.112762  | 0.111305  |
| 0.197407  | 0.188083  | 0.207459 | 0.198864 | 0.198281 | 0.189103  | 0.189685  |
| 0.12398   | 0.10271   | 0.129079 | 0.131556 | 0.121358 | 0.115967  | 0.115385  |
| 0.12602   | 0.106206  | 0.136072 | 0.134761 | 0.125146 | 0.115967  | 0.120338  |
| 0.127768  | 0.109411  | 0.13345  | 0.137675 | 0.127477 | 0.125583  | 0.0996503 |
| 0.121503  | 0.104312  | 0.13039  | 0.131702 | 0.122669 | 0.11553   | 0.0942599 |
| 0.129516  | 0.116113  | 0.142191 | 0.137675 | 0.130682 | 0.128205  | 0.125583  |
| 0.128059  | 0.114365  | 0.139277 | 0.140297 | 0.128642 | 0.128205  | 0.126748  |
| 0.120484  | 0.0992133 | 0.134324 | 0.130682 | 0.119318 | 0.112179  | 0.112179  |
| 0.125     | 0.111888  | 0.137092 | 0.138112 | 0.130245 | 0.120775  | 0.116113  |
| 0.130828  | 0.111597  | 0.133887 | 0.136364 | 0.12704  | 0.125437  | 0.103293  |
| 0.127768  | 0.10912   | 0.134033 | 0.128351 | 0.11757  | 0.120047  | 0.12704   |
| 0.256556  | 0.248397  | 0.259324 | 0.253351 | 0.252768 | 0.253497  | 0.248834  |
| 0.119027  | 0.100379  | 0.134615 | 0.133596 | 0.122523 | 0.111014  | 0.112471  |
| 0.19289   | 0.178904  | 0.198281 | 0.194056 | 0.192599 | 0.183421  | 0.181381  |
| 0.199155  | 0.185752  | 0.206002 | 0.199446 | 0.198864 | 0.187063  | 0.186772  |
| 0.124126  | 0.103147  | 0.137383 | 0.131702 | 0.123543 | 0.109994  | 0.113199  |
| 0.106352  | 0.0964452 | 0.122232 | 0.123543 | 0.112179 | 0.105332  | 0.100087  |
| 0.121212  | 0.1081    | 0.133596 | 0.132284 | 0.123543 | 0.116113  | 0.119901  |
| 0.122086  | 0.104021  | 0.135344 | 0.133159 | 0.122086 | 0.119027  | 0.116113  |
| 0.100962  | 0.0837704 | 0.131993 | 0.121066 | 0.112908 | 0.0999417 | 0.100524  |
| 0.122523  | 0.0936772 | 0.128497 | 0.122815 | 0.113491 | 0.106061  | 0.111014  |
| 0.122378  | 0.112762  | 0.139132 | 0.134324 | 0.123834 | 0.120775  | 0.11961   |



|          |           |          |          |          |          |           |
|----------|-----------|----------|----------|----------|----------|-----------|
| 0.136072 | 0.123252  | 0.146416 | 0.146853 | 0.134907 | 0.136218 | 0.132721  |
| 0.116404 | 0.0992133 | 0.132867 | 0.129516 | 0.11757  | 0.111888 | 0.111888  |
| 0.129808 | 0.119027  | 0.142483 | 0.143502 | 0.132721 | 0.13345  | 0.129953  |
| 0.121212 | 0.108974  | 0.133013 | 0.129079 | 0.122086 | 0.111742 | 0.115239  |
| 0.129953 | 0.115093  | 0.133887 | 0.138695 | 0.128788 | 0.122815 | 0.10708   |
| 0.129808 | 0.107663  | 0.132867 | 0.130682 | 0.125146 | 0.115093 | 0.117716  |
| 0.123834 | 0.105769  | 0.131847 | 0.123834 | 0.123543 | 0.119318 | 0.127768  |
| 0.111451 | 0.0989219 | 0.132576 | 0.128351 | 0.122232 | 0.107517 | 0.120047  |
| 0.117861 | 0.0995047 | 0.127331 | 0.128059 | 0.116987 | 0.111014 | 0.109266  |
| 0.132139 | 0.120775  | 0.145105 | 0.135927 | 0.13039  | 0.128788 | 0.127622  |
| 0.189977 | 0.179779  | 0.202652 | 0.193182 | 0.192016 | 0.183129 | 0.18109   |
| 0.135635 | 0.128934  | 0.147145 | 0.149621 | 0.139423 | 0.140152 | 0.139569  |
| 0.128351 | 0.113782  | 0.140152 | 0.139423 | 0.127185 | 0.125874 | 0.120921  |
| 0.12704  | 0.106935  | 0.128934 | 0.134324 | 0.126457 | 0.121358 | 0.0971737 |
| 0.118444 | 0.0971737 | 0.125874 | 0.129225 | 0.118735 | 0.111597 | 0.0944056 |
| 0.129662 | 0.106352  | 0.132721 | 0.130245 | 0.125291 | 0.116987 | 0.114656  |
| 0.130973 | 0.109411  | 0.136655 | 0.130682 | 0.126894 | 0.118007 | 0.118881  |
| 0.201049 | 0.18648   | 0.206731 | 0.199009 | 0.200175 | 0.188957 | 0.190997  |
| 0.125874 | 0.109266  | 0.135635 | 0.136072 | 0.126457 | 0.122232 | 0.121358  |
| 0.115239 | 0.100087  | 0.131702 | 0.125146 | 0.116987 | 0.108392 | 0.107226  |
| 0.129516 | 0.11961   | 0.142483 | 0.142045 | 0.127477 | 0.129079 | 0.127914  |
| 0.202214 | 0.187937  | 0.208479 | 0.197552 | 0.201632 | 0.190997 | 0.188957  |
| 0.105624 | 0.0913462 | 0.123543 | 0.121066 | 0.110868 | 0.102855 | 0.0981935 |
| 0.122086 | 0.10169   | 0.13039  | 0.123834 | 0.114802 | 0.11116  | 0.118444  |
| 0.129953 | 0.113636  | 0.141754 | 0.138986 | 0.127914 | 0.126603 | 0.126311  |
| 0.125437 | 0.109411  | 0.139569 | 0.136509 | 0.123397 | 0.113345 | 0.11014   |
| 0.198572 | 0.184878  | 0.206002 | 0.195659 | 0.194784 | 0.185023 | 0.185315  |
| 0.121649 | 0.0989219 | 0.130536 | 0.122232 | 0.115822 | 0.109557 | 0.115676  |
| 0.122523 | 0.105041  | 0.134033 | 0.125437 | 0.121066 | 0.1081   | 0.108392  |
| 0.105915 | 0.0919289 | 0.127622 | 0.126894 | 0.118153 | 0.106935 | 0.0996503 |
| 0.131847 | 0.112034  | 0.138986 | 0.139714 | 0.13039  | 0.118881 | 0.119464  |
| 0.123834 | 0.109557  | 0.138258 | 0.140152 | 0.131119 | 0.121358 | 0.113199  |
| 0.121795 | 0.105769  | 0.130682 | 0.128205 | 0.120629 | 0.115822 | 0.121941  |
| 0.115676 | 0.0952797 | 0.13039  | 0.127622 | 0.117424 | 0.10708  | 0.109703  |
| 0.127622 | 0.111305  | 0.13447  | 0.130828 | 0.122669 | 0.118444 | 0.11961   |
| 0.143794 | 0.137092  | 0.157634 | 0.156031 | 0.154575 | 0.145979 | 0.139277  |
| 0.244027 | 0.233537  | 0.249709 | 0.243153 | 0.245192 | 0.236305 | 0.236014  |
| 0.11116  | 0.10271   | 0.131702 | 0.132721 | 0.123397 | 0.116259 | 0.125291  |
| 0.127477 | 0.112908  | 0.137529 | 0.141171 | 0.135344 | 0.121503 | 0.114802  |
| 0.126748 | 0.107809  | 0.137675 | 0.133741 | 0.123543 | 0.122815 | 0.123397  |
| 0.128642 | 0.114365  | 0.149184 | 0.141171 | 0.135344 | 0.121795 | 0.111305  |
| 0.118298 | 0.106935  | 0.131265 | 0.131993 | 0.125583 | 0.111451 | 0.110577  |
| 0.125291 | 0.113054  | 0.132721 | 0.131993 | 0.122086 | 0.119318 | 0.114948  |
| 0.125728 | 0.119318  | 0.141317 | 0.141754 | 0.127477 | 0.126166 | 0.126457  |

|           |           |          |          |          |           |           |
|-----------|-----------|----------|----------|----------|-----------|-----------|
| 0.125583  | 0.0999417 | 0.134761 | 0.125583 | 0.117424 | 0.115822  | 0.120192  |
| 0.131993  | 0.11014   | 0.14088  | 0.137529 | 0.129371 | 0.118444  | 0.111451  |
| 0.24053   | 0.23412   | 0.245921 | 0.240239 | 0.242279 | 0.238054  | 0.232226  |
| 0.105478  | 0.0941142 | 0.12602  | 0.120047 | 0.111888 | 0.100962  | 0.0983392 |
| 0.11451   | 0.0917832 | 0.12398  | 0.122086 | 0.112179 | 0.107663  | 0.101836  |
| 0.116696  | 0.0954254 | 0.128788 | 0.124272 | 0.114365 | 0.107226  | 0.1081    |
| 0.135198  | 0.122669  | 0.151078 | 0.146853 | 0.138986 | 0.13039   | 0.125437  |
| 0.118881  | 0.109848  | 0.138549 | 0.134907 | 0.126748 | 0.119318  | 0.129516  |
| 0.121503  | 0.106643  | 0.13884  | 0.137238 | 0.126457 | 0.119901  | 0.111451  |
| 0.12704   | 0.112179  | 0.139714 | 0.1419   | 0.129371 | 0.125146  | 0.122232  |
| 0.11961   | 0.101836  | 0.137238 | 0.133013 | 0.121649 | 0.111888  | 0.109557  |
| 0.237034  | 0.228293  | 0.243007 | 0.234411 | 0.240822 | 0.231935  | 0.230478  |
| 0.131556  | 0.116696  | 0.140443 | 0.145251 | 0.132139 | 0.130828  | 0.129662  |
| 0.122669  | 0.0987762 | 0.132139 | 0.124417 | 0.116841 | 0.112034  | 0.116987  |
| 0.119172  | 0.100524  | 0.131847 | 0.126748 | 0.124126 | 0.108246  | 0.107663  |
| 0.126603  | 0.11553   | 0.135198 | 0.133304 | 0.125437 | 0.12704   | 0.121212  |
| 0.117861  | 0.111451  | 0.131702 | 0.130973 | 0.124563 | 0.123543  | 0.115967  |
| 0.118444  | 0.0992133 | 0.130536 | 0.127185 | 0.116113 | 0.108392  | 0.111014  |
| 0.123689  | 0.100379  | 0.13141  | 0.121941 | 0.114073 | 0.109848  | 0.120338  |
| 0.125874  | 0.106935  | 0.133887 | 0.130828 | 0.119464 | 0.120775  | 0.12398   |
| 0.121212  | 0.0932401 | 0.128642 | 0.117424 | 0.110723 | 0.106789  | 0.113491  |
| 0.11757   | 0.0995047 | 0.133741 | 0.125728 | 0.117861 | 0.108974  | 0.107809  |
| 0.128351  | 0.120484  | 0.1419   | 0.142337 | 0.133887 | 0.12704   | 0.118881  |
| 0.131702  | 0.125     | 0.145833 | 0.145105 | 0.139569 | 0.13039   | 0.123689  |
| 0.132284  | 0.115093  | 0.133013 | 0.137529 | 0.131993 | 0.128934  | 0.10912   |
| 0.135198  | 0.119464  | 0.136218 | 0.143357 | 0.13345  | 0.130973  | 0.10708   |
| 0.129225  | 0.121066  | 0.142774 | 0.143794 | 0.13884  | 0.127914  | 0.120921  |
| 0.0954254 | 0.0776515 | 0.126457 | 0.117861 | 0.106498 | 0.0917832 | 0.094697  |
| 0.121795  | 0.107226  | 0.125437 | 0.134615 | 0.126748 | 0.126311  | 0.122815  |
| 0.127477  | 0.119901  | 0.140152 | 0.115822 | 0.11116  | 0.10373   | 0.120921  |
| 0.215472  | 0.204108  | 0.222319 | 0.214889 | 0.214889 | 0.205128  | 0.204545  |
| 0.127477  | 0.117861  | 0.140152 | 0.136509 | 0.128934 | 0.129079  | 0.126748  |
| 0.11961   | 0.0986305 | 0.127914 | 0.127768 | 0.119027 | 0.113345  | 0.109266  |
| 0.122669  | 0.106352  | 0.13884  | 0.130245 | 0.123834 | 0.112908  | 0.115239  |
| 0.227127  | 0.21926   | 0.233392 | 0.229167 | 0.228001 | 0.226107  | 0.221737  |
| 0.218969  | 0.209645  | 0.226399 | 0.214889 | 0.220134 | 0.20979   | 0.206294  |
| 0.120921  | 0.105769  | 0.13243  | 0.127331 | 0.120629 | 0.117861  | 0.121941  |
| 0.253934  | 0.246941  | 0.259033 | 0.252185 | 0.25539  | 0.25204   | 0.249709  |
| 0.0954254 | 0.0793998 | 0.129662 | 0.11757  | 0.107372 | 0.0938228 | 0.0941142 |
| 0.128059  | 0.116696  | 0.143939 | 0.13447  | 0.134178 | 0.129079  | 0.126748  |
| 0.102127  | 0.0948427 | 0.125583 | 0.123106 | 0.112034 | 0.104312  | 0.0984848 |
| 0.129371  | 0.117424  | 0.139423 | 0.141026 | 0.136364 | 0.125437  | 0.121649  |
| 0.197698  | 0.185169  | 0.204545 | 0.194493 | 0.197115 | 0.187063  | 0.18648   |
| 0.123834  | 0.109557  | 0.139132 | 0.132576 | 0.127622 | 0.119901  | 0.119318  |

|          |           |          |          |          |           |           |
|----------|-----------|----------|----------|----------|-----------|-----------|
| 0.205711 | 0.192016  | 0.211684 | 0.200758 | 0.203089 | 0.192745  | 0.192745  |
| 0.121795 | 0.104312  | 0.134178 | 0.127622 | 0.118881 | 0.104458  | 0.109703  |
| 0.124709 | 0.0987762 | 0.132721 | 0.127914 | 0.115093 | 0.116404  | 0.116113  |
| 0.106061 | 0.101981  | 0.133013 | 0.12704  | 0.11655  | 0.107955  | 0.106789  |
| 0.122669 | 0.105478  | 0.132721 | 0.129953 | 0.121212 | 0.110286  | 0.113199  |
| 0.112617 | 0.090472  | 0.126457 | 0.123397 | 0.111451 | 0.102273  | 0.103438  |
| 0.120192 | 0.101836  | 0.137238 | 0.132139 | 0.121066 | 0.116259  | 0.114219  |
| 0.101836 | 0.0884324 | 0.123252 | 0.119027 | 0.108246 | 0.100816  | 0.0952797 |
| 0.120338 | 0.101981  | 0.139132 | 0.136072 | 0.122669 | 0.119318  | 0.118444  |
| 0.118735 | 0.0954254 | 0.117424 | 0.127477 | 0.116696 | 0.112471  | 0.104895  |
| 0.103875 | 0.0893065 | 0.129953 | 0.122232 | 0.113782 | 0.104895  | 0.110723  |
| 0.10373  | 0.0938228 | 0.124272 | 0.119755 | 0.110723 | 0.103584  | 0.0971737 |
| 0.129225 | 0.110286  | 0.132576 | 0.137675 | 0.124854 | 0.120921  | 0.106352  |
| 0.134761 | 0.121649  | 0.141608 | 0.144668 | 0.132139 | 0.13345   | 0.128205  |
| 0.122669 | 0.10373   | 0.128934 | 0.132867 | 0.121795 | 0.11553   | 0.0919289 |
| 0.123397 | 0.102127  | 0.134324 | 0.128642 | 0.121941 | 0.113345  | 0.114802  |
| 0.112471 | 0.0929487 | 0.126311 | 0.124126 | 0.113636 | 0.103584  | 0.103293  |
| 0.120629 | 0.0987762 | 0.130973 | 0.125583 | 0.11655  | 0.112325  | 0.116696  |
| 0.12296  | 0.112179  | 0.137675 | 0.137821 | 0.130828 | 0.118735  | 0.112908  |
| 0.128351 | 0.10912   | 0.135781 | 0.13243  | 0.123397 | 0.120338  | 0.118881  |
| 0.128351 | 0.105915  | 0.127331 | 0.136218 | 0.120192 | 0.118298  | 0.0981935 |
| 0.125    | 0.111888  | 0.139714 | 0.138403 | 0.125291 | 0.122815  | 0.121358  |
| 0.132721 | 0.122232  | 0.14627  | 0.144959 | 0.13447  | 0.134615  | 0.131993  |
| 0.137092 | 0.129516  | 0.147145 | 0.152244 | 0.137675 | 0.144522  | 0.13986   |
| 0.110723 | 0.0839161 | 0.120775 | 0.112762 | 0.104895 | 0.0965909 | 0.102127  |
| 0.119464 | 0.0952797 | 0.134178 | 0.129371 | 0.122669 | 0.109411  | 0.10912   |
| 0.116696 | 0.102127  | 0.128497 | 0.127477 | 0.11757  | 0.111888  | 0.107809  |
| 0.126603 | 0.127477  | 0.145979 | 0.14729  | 0.140006 | 0.131993  | 0.126457  |
| 0.106643 | 0.0987762 | 0.121358 | 0.119755 | 0.110431 | 0.103001  | 0.101544  |
| 0.1419   | 0.126166  | 0.137675 | 0.140734 | 0.136364 | 0.135927  | 0.132721  |
| 0.126748 | 0.11655   | 0.141754 | 0.1419   | 0.131993 | 0.125146  | 0.128059  |
| 0.127768 | 0.116404  | 0.147145 | 0.142628 | 0.133887 | 0.125583  | 0.118298  |
| 0.104895 | 0.0906177 | 0.13243  | 0.125583 | 0.111597 | 0.109411  | 0.106789  |
| 0.121941 | 0.105041  | 0.131702 | 0.133013 | 0.122523 | 0.114802  | 0.109557  |
| 0.131556 | 0.110577  | 0.132284 | 0.137383 | 0.126894 | 0.129079  | 0.104604  |
| 0.212704 | 0.20134   | 0.220134 | 0.212704 | 0.213578 | 0.2044    | 0.204983  |
| 0.124709 | 0.102855  | 0.135344 | 0.125874 | 0.119172 | 0.109703  | 0.111451  |
| 0.107372 | 0.095134  | 0.137529 | 0.128934 | 0.118444 | 0.106352  | 0.105478  |
| 0.122378 | 0.111597  | 0.138549 | 0.138112 | 0.131119 | 0.117861  | 0.112325  |
| 0.121649 | 0.104749  | 0.128205 | 0.134761 | 0.123397 | 0.117424  | 0.0976107 |
| 0.129953 | 0.11014   | 0.135635 | 0.13345  | 0.125    | 0.110868  | 0.116404  |
| 0.132284 | 0.114802  | 0.133304 | 0.133159 | 0.122669 | 0.117861  | 0.124563  |
| 0.131265 | 0.120192  | 0.13986  | 0.137966 | 0.125728 | 0.125583  | 0.126166  |
| 0.125583 | 0.112179  | 0.139714 | 0.135781 | 0.130536 | 0.118735  | 0.113782  |

|           |           |           |           |           |           |           |
|-----------|-----------|-----------|-----------|-----------|-----------|-----------|
| 0.115676  | 0.087704  | 0.118444  | 0.125     | 0.113928  | 0.102418  | 0.100379  |
| 0.124709  | 0.11859   | 0.14088   | 0.142774  | 0.135198  | 0.126603  | 0.117861  |
| 0.103147  | 0.0929487 | 0.128642  | 0.122378  | 0.113636  | 0.105624  | 0.10271   |
| 0.111451  | 0.0962995 | 0.134615  | 0.128351  | 0.117279  | 0.106352  | 0.113928  |
| 0.184441  | 0.167541  | 0.194202  | 0.183858  | 0.18211   | 0.171183  | 0.171474  |
| 0.125291  | 0.109266  | 0.141754  | 0.136655  | 0.125291  | 0.121358  | 0.120484  |
| 0.131265  | 0.121066  | 0.144814  | 0.145251  | 0.134178  | 0.128205  | 0.12296   |
| 0.0920746 | 0.0810023 | 0.121649  | 0.120629  | 0.109557  | 0.108246  | 0.104749  |
| 0.125728  | 0.109994  | 0.136946  | 0.131847  | 0.117861  | 0.117133  | 0.11655   |
| 0.108246  | 0.090472  | 0.131119  | 0.122232  | 0.109994  | 0.101107  | 0.104604  |
| 0.100962  | 0.0837704 | 0.124709  | 0.11553   | 0.10708   | 0.0955711 | 0.101981  |
| 0.108829  | 0.0936772 | 0.131119  | 0.124854  | 0.113199  | 0.109557  | 0.107517  |
| 0.120484  | 0.112617  | 0.138112  | 0.135344  | 0.125437  | 0.124709  | 0.11859   |
| 0.118735  | 0.103001  | 0.138986  | 0.131847  | 0.119318  | 0.117716  | 0.11655   |
| 0.126748  | 0.111014  | 0.0610431 | 0.127622  | 0.125874  | 0.11757   | 0.118153  |
| 0.11553   | 0.0939685 | 0.129079  | 0.122523  | 0.119027  | 0.105769  | 0.107809  |
| 0.114802  | 0.0961538 | 0.127477  | 0.127914  | 0.123834  | 0.108246  | 0.113491  |
| 0.121649  | 0.112908  | 0.136946  | 0.133596  | 0.123397  | 0.122378  | 0.125583  |
| 0.103875  | 0.0863928 | 0.122086  | 0.116987  | 0.109703  | 0.0996503 | 0.110431  |
| 0.123689  | 0.106789  | 0.126166  | 0.131847  | 0.125437  | 0.119172  | 0.111014  |
| 0.106498  | 0.0840618 | 0.120921  | 0.115239  | 0.110286  | 0.0952797 | 0.104312  |
| 0.105332  | 0.0895979 | 0.122669  | 0.121066  | 0.111742  | 0.101107  | 0.108392  |
| 0.0983392 | 0.0872669 | 0.13141   | 0.118444  | 0.105915  | 0.0949883 | 0.097028  |
| 0.105478  | 0.0979021 | 0.126603  | 0.113054  | 0.111014  | 0.103293  | 0.110577  |
| 0.105186  | 0.0856643 | 0.127185  | 0.119464  | 0.115385  | 0.0995047 | 0.100087  |
| 0.143357  | 0.128205  | 0.142337  | 0.142774  | 0.136655  | 0.135635  | 0.139132  |
| 0.138986  | 0.115967  | 0.139132  | 0.137821  | 0.133741  | 0.121941  | 0.129516  |
| 0.105769  | 0.0818765 | 0.11961   | 0.119755  | 0.113636  | 0.102127  | 0.105624  |
| 0.134761  | 0.122523  | 0.143357  | 0.135052  | 0.134761  | 0.128788  | 0.129662  |
| 0.129225  | 0.109703  | 0.139277  | 0.135344  | 0.130099  | 0.118007  | 0.100233  |
| 0.13039   | 0.11961   | 0.141317  | 0.119027  | 0.120484  | 0.115967  | 0.128788  |
| 0.103584  | 0.0980478 | 0.122086  | 0.120484  | 0.108829  | 0.104895  | 0.104604  |
| 0.141608  | 0.135198  | 0.148164  | 0.149184  | 0.141608  | 0.131556  | 0.136801  |
| 0.132284  | 0.122669  | 0.135344  | 0.135198  | 0.134324  | 0.124272  | 0.124272  |
| 0.131119  | 0.126457  | 0.146125  | 0.146562  | 0.138112  | 0.132139  | 0.131556  |
| 0.114802  | 0.0952797 | 0.132721  | 0.123543  | 0.118007  | 0.110868  | 0.0933858 |
| 0.100379  | 0.0826049 | 0.125291  | 0.117279  | 0.113491  | 0.0973193 | 0.0987762 |
| 0.106643  | 0.0850816 | 0.128642  | 0.0952797 | 0.0932401 | 0.0828963 | 0.0971737 |
| 0.11553   | 0.102127  | 0.130828  | 0.12602   | 0.119318  | 0.114802  | 0.111597  |
| 0.10067   | 0.099796  | 0.128497  | 0.124272  | 0.123397  | 0.111888  | 0.113054  |
| 0.118881  | 0.106643  | 0.136509  | 0.133159  | 0.125874  | 0.111451  | 0.123397  |
| 0.126748  | 0.107517  | 0.137092  | 0.133159  | 0.125583  | 0.11116   | 0.116113  |
| 0.107809  | 0.0824592 | 0.117861  | 0.123252  | 0.114219  | 0.100087  | 0.0925117 |
| 0.106498  | 0.0852273 | 0.125583  | 0.0942599 | 0.092803  | 0.0810023 | 0.0958625 |

|           |           |          |           |           |           |           |
|-----------|-----------|----------|-----------|-----------|-----------|-----------|
| 0.0862471 | 0.0810023 | 0.130973 | 0.118298  | 0.114802  | 0.113491  | 0.107955  |
| 0.104604  | 0.0850816 | 0.130099 | 0.111597  | 0.105478  | 0.0977564 | 0.0989219 |
| 0.103875  | 0.0887238 | 0.13141  | 0.0957168 | 0.0922203 | 0.0885781 | 0.102564  |
| 0.108537  | 0.0960082 | 0.132576 | 0.121358  | 0.111451  | 0.106352  | 0.106935  |
| 0.118881  | 0.106061  | 0.136509 | 0.132576  | 0.124709  | 0.11961   | 0.112325  |
| 0.116841  | 0.0964452 | 0.135635 | 0.126457  | 0.11655   | 0.104167  | 0.111451  |
| 0.0929487 | 0.0775058 | 0.122815 | 0.112471  | 0.102273  | 0.0933858 | 0.0942599 |
| 0.0882867 | 0.0728438 | 0.130099 | 0.115385  | 0.110723  | 0.108537  | 0.103001  |
| 0.118444  | 0.105332  | 0.136946 | 0.133013  | 0.125437  | 0.113928  | 0.109848  |
| 0.117424  | 0.0996503 | 0.128934 | 0.125     | 0.113928  | 0.105041  | 0.110286  |
| 0.125583  | 0.112179  | 0.137966 | 0.135198  | 0.126748  | 0.126311  | 0.122232  |
| 0.11451   | 0.097028  | 0.129225 | 0.126457  | 0.117716  | 0.107663  | 0.102127  |
| 0.118444  | 0.108246  | 0.133741 | 0.130682  | 0.121649  | 0.115967  | 0.121503  |

| <b>TDr_08_01464</b> | <b>TDr_08_01512</b> | <b>TDr_08_01692</b> | <b>TDr_08_01919</b> | <b>TDr_08_01932</b> | <b>TDr_08_02381</b> | <b>TDr_08_21_2</b> |
|---------------------|---------------------|---------------------|---------------------|---------------------|---------------------|--------------------|
| 0.113054            | 0.11116             | 0.108246            | 0.106206            | 0.13447             | 0.113054            | 0.13039            |
| 0.106789            | 0.1081              | 0.111014            | 0.103147            | 0.125583            | 0.110868            | 0.122086           |
| 0.107663            | 0.107226            | 0.102564            | 0.0981935           | 0.123252            | 0.110868            | 0.119172           |
| 0.110577            | 0.112762            | 0.11014             | 0.102273            | 0.130536            | 0.11116             | 0.119464           |
| 0.130682            | 0.133159            | 0.124126            | 0.134324            | 0.139569            | 0.130682            | 0.134033           |
| 0.124854            | 0.130245            | 0.119172            | 0.121503            | 0.136655            | 0.128642            | 0.128788           |
| 0.102273            | 0.109411            | 0.111742            | 0.117279            | 0.124563            | 0.11451             | 0.125146           |
| 0.107809            | 0.109411            | 0.103584            | 0.103875            | 0.125437            | 0.112762            | 0.130973           |
| 0.097465            | 0.0958625           | 0.0912005           | 0.101981            | 0.11451             | 0.103875            | 0.116841           |
| 0.0912005           | 0.0942599           | 0.0971737           | 0.106498            | 0.121941            | 0.106643            | 0.103584           |
| 0.100962            | 0.100524            | 0.102564            | 0.103438            | 0.127622            | 0.106206            | 0.129953           |
| 0.100524            | 0.104749            | 0.097465            | 0.103293            | 0.117861            | 0.109557            | 0.123397           |
| 0.104312            | 0.106789            | 0.0942599           | 0.108829            | 0.124854            | 0.107226            | 0.122232           |
| 0.132139            | 0.133159            | 0.129953            | 0.124126            | 0.150932            | 0.132721            | 0.135198           |
| 0.11859             | 0.129808            | 0.117861            | 0.119901            | 0.135344            | 0.120921            | 0.122523           |
| 0.105915            | 0.0996503           | 0.101107            | 0.106643            | 0.105769            | 0.10912             | 0.123543           |
| 0.0979021           | 0.0995047           | 0.10067             | 0.109703            | 0.116113            | 0.104312            | 0.114948           |
| 0.135927            | 0.145688            | 0.138695            | 0.140734            | 0.158217            | 0.14088             | 0.148893           |
| 0.104458            | 0.101107            | 0.103438            | 0.099359            | 0.120629            | 0.105332            | 0.120047           |
| 0.204983            | 0.205711            | 0.202506            | 0.186772            | 0.212995            | 0.205565            | 0.204545           |
| 0.114219            | 0.11961             | 0.11553             | 0.119318            | 0.133304            | 0.114219            | 0.129225           |
| 0.111742            | 0.115676            | 0.114802            | 0.115967            | 0.13345             | 0.116696            | 0.127914           |
| 0.0967366           | 0.0957168           | 0.103875            | 0.0884324           | 0.117279            | 0.104895            | 0.119318           |
| 0.103001            | 0.0987762           | 0.0891608           | 0.113928            | 0.0964452           | 0.123106            | 0.137238           |
| 0.092366            | 0.092803            | 0.0922203           | 0.0936772           | 0.116696            | 0.102855            | 0.114073           |
| 0.119172            | 0.125146            | 0.122232            | 0.123689            | 0.13884             | 0.118298            | 0.128642           |
| 0.105186            | 0.118153            | 0.10912             | 0.116987            | 0.130682            | 0.115967            | 0.129516           |
| 0.112471            | 0.0939685           | 0.0945513           | 0.107372            | 0.0910548           | 0.118881            | 0.130099           |
| 0.120047            | 0.11757             | 0.10708             | 0.131556            | 0.11961             | 0.125               | 0.131556           |
| 0.110723            | 0.10912             | 0.0948427           | 0.120484            | 0.125146            | 0.12296             | 0.124854           |
| 0.114365            | 0.115676            | 0.11655             | 0.113928            | 0.129662            | 0.120192            | 0.126166           |
| 0.109557            | 0.110286            | 0.101836            | 0.114365            | 0.115822            | 0.119172            | 0.129225           |
| 0.101981            | 0.10271             | 0.0957168           | 0.100087            | 0.118444            | 0.107226            | 0.118444           |
| 0.108974            | 0.108829            | 0.0852273           | 0.120192            | 0.123689            | 0.118298            | 0.122523           |
| 0.104167            | 0.108392            | 0.100524            | 0.118298            | 0.124417            | 0.106206            | 0.130536           |
| 0.107517            | 0.110868            | 0.104167            | 0.121649            | 0.12398             | 0.115093            | 0.120484           |
| 0.110286            | 0.112762            | 0.125583            | 0.131119            | 0.136072            | 0.114656            | 0.133159           |
| 0.112762            | 0.109994            | 0.106498            | 0.11757             | 0.128934            | 0.120921            | 0.120484           |
| 0.097028            | 0.088141            | 0.0837704           | 0.099796            | 0.0980478           | 0.111597            | 0.119901           |
| 0.111014            | 0.104167            | 0.105332            | 0.111451            | 0.100962            | 0.123834            | 0.132721           |
| 0.0967366           | 0.0861014           | 0.08581             | 0.0930944           | 0.099796            | 0.111305            | 0.121358           |
| 0.129079            | 0.121649            | 0.127768            | 0.126311            | 0.10912             | 0.137821            | 0.141463           |

|           |           |           |           |           |           |          |
|-----------|-----------|-----------|-----------|-----------|-----------|----------|
| 0.129079  | 0.126894  | 0.123397  | 0.129808  | 0.109994  | 0.143648  | 0.146416 |
| 0.104167  | 0.0984848 | 0.0935315 | 0.106352  | 0.104312  | 0.115239  | 0.124126 |
| 0.0831876 | 0.0865385 | 0.094697  | 0.106061  | 0.117424  | 0.0805653 | 0.111014 |
| 0.0871212 | 0.0948427 | 0.105915  | 0.118153  | 0.121649  | 0.0944056 | 0.119901 |
| 0.106935  | 0.0989219 | 0.095134  | 0.0962995 | 0.0898893 | 0.108392  | 0.128059 |
| 0.125146  | 0.115385  | 0.120338  | 0.127331  | 0.107809  | 0.13447   | 0.141608 |
| 0.10067   | 0.094697  | 0.0882867 | 0.10373   | 0.102273  | 0.111451  | 0.125    |
| 0.102273  | 0.097465  | 0.101544  | 0.105624  | 0.102418  | 0.113054  | 0.125728 |
| 0.135344  | 0.13549   | 0.137821  | 0.142774  | 0.152972  | 0.144668  | 0.145979 |
| 0.118735  | 0.112179  | 0.105769  | 0.111305  | 0.0964452 | 0.125437  | 0.132867 |
| 0.102273  | 0.0945513 | 0.0962995 | 0.0965909 | 0.100379  | 0.111888  | 0.127185 |
| 0.118298  | 0.125437  | 0.114365  | 0.122232  | 0.132139  | 0.125291  | 0.116113 |
| 0.110431  | 0.108246  | 0.107955  | 0.0799825 | 0.120192  | 0.115093  | 0.127768 |
| 0.128788  | 0.116696  | 0.120775  | 0.123397  | 0.102418  | 0.131993  | 0.147873 |
| 0.117861  | 0.111014  | 0.0981935 | 0.115676  | 0.101981  | 0.122232  | 0.129371 |
| 0.105041  | 0.0964452 | 0.101399  | 0.106061  | 0.1081    | 0.114948  | 0.128205 |
| 0.105915  | 0.0990676 | 0.0955711 | 0.105769  | 0.101107  | 0.114656  | 0.125291 |
| 0.090035  | 0.0986305 | 0.105041  | 0.117279  | 0.118444  | 0.106935  | 0.117861 |
| 0.12296   | 0.115822  | 0.120775  | 0.12398   | 0.105332  | 0.136072  | 0.144376 |
| 0.131702  | 0.121649  | 0.118735  | 0.128351  | 0.106498  | 0.139277  | 0.142628 |
| 0.153992  | 0.146853  | 0.157051  | 0.145688  | 0.149476  | 0.159819  | 0.166667 |
| 0.105915  | 0.0981935 | 0.097028  | 0.104604  | 0.104312  | 0.115822  | 0.12704  |
| 0.0986305 | 0.0912005 | 0.0976107 | 0.0990676 | 0.0996503 | 0.106789  | 0.121795 |
| 0.0968823 | 0.0909091 | 0.0906177 | 0.0967366 | 0.101981  | 0.109994  | 0.12296  |
| 0.126166  | 0.123397  | 0.130099  | 0.133887  | 0.140006  | 0.124417  | 0.144959 |
| 0.0958625 | 0.088141  | 0.0907634 | 0.099796  | 0.0992133 | 0.107809  | 0.121066 |
| 0.123397  | 0.120047  | 0.115385  | 0.107517  | 0.104312  | 0.127477  | 0.135781 |
| 0.08581   | 0.104604  | 0.1081    | 0.118298  | 0.11859   | 0.107663  | 0.12296  |
| 0.101399  | 0.0983392 | 0.0989219 | 0.101544  | 0.0980478 | 0.113636  | 0.124272 |
| 0.132576  | 0.132139  | 0.14088   | 0.141171  | 0.14933   | 0.130536  | 0.148456 |
| 0.105186  | 0.0989219 | 0.109703  | 0.101544  | 0.101253  | 0.122378  | 0.136509 |
| 0.130099  | 0.118881  | 0.113345  | 0.12704   | 0.105478  | 0.135052  | 0.141026 |
| 0.118007  | 0.110868  | 0.10708   | 0.117279  | 0.0933858 | 0.131119  | 0.132721 |
| 0.107955  | 0.105478  | 0.109557  | 0.100816  | 0.124709  | 0.101544  | 0.12296  |
| 0.0945513 | 0.0955711 | 0.0979021 | 0.100524  | 0.101107  | 0.107955  | 0.124417 |
| 0.102418  | 0.0967366 | 0.0874126 | 0.0999417 | 0.0961538 | 0.112617  | 0.123834 |
| 0.125728  | 0.115093  | 0.117716  | 0.120047  | 0.108392  | 0.13447   | 0.141608 |
| 0.100816  | 0.0913462 | 0.0872669 | 0.101544  | 0.102127  | 0.104895  | 0.125728 |
| 0.130099  | 0.122669  | 0.119755  | 0.122669  | 0.111888  | 0.144085  | 0.134033 |
| 0.108246  | 0.100524  | 0.102273  | 0.106061  | 0.104604  | 0.122232  | 0.132284 |
| 0.103875  | 0.097028  | 0.0967366 | 0.109266  | 0.0879953 | 0.113199  | 0.125291 |
| 0.102127  | 0.101399  | 0.0952797 | 0.100816  | 0.102273  | 0.117279  | 0.130828 |
| 0.111742  | 0.0981935 | 0.102564  | 0.106935  | 0.103438  | 0.12398   | 0.127914 |
| 0.104749  | 0.0955711 | 0.0941142 | 0.101981  | 0.0961538 | 0.112617  | 0.125583 |

|           |           |           |           |           |           |          |
|-----------|-----------|-----------|-----------|-----------|-----------|----------|
| 0.10067   | 0.0938228 | 0.0949883 | 0.0967366 | 0.0964452 | 0.114365  | 0.12704  |
| 0.123543  | 0.121066  | 0.117861  | 0.124272  | 0.104749  | 0.132867  | 0.146125 |
| 0.0885781 | 0.0962995 | 0.0989219 | 0.10067   | 0.114948  | 0.106352  | 0.120192 |
| 0.0983392 | 0.100524  | 0.0932401 | 0.112179  | 0.117424  | 0.106498  | 0.118881 |
| 0.108246  | 0.111888  | 0.117424  | 0.125874  | 0.129662  | 0.11757   | 0.132867 |
| 0.106789  | 0.115385  | 0.118007  | 0.123834  | 0.134033  | 0.114365  | 0.129953 |
| 0.110577  | 0.112762  | 0.122669  | 0.128788  | 0.130536  | 0.0922203 | 0.134907 |
| 0.115385  | 0.120484  | 0.129808  | 0.129225  | 0.133304  | 0.0655594 | 0.137383 |
| 0.108246  | 0.0981935 | 0.110723  | 0.106352  | 0.125874  | 0.0992133 | 0.127331 |
| 0.175845  | 0.177448  | 0.177739  | 0.167832  | 0.190559  | 0.182547  | 0.186772 |
| 0.0926573 | 0.100379  | 0.106206  | 0.105332  | 0.121066  | 0.100233  | 0.127185 |
| 0.121649  | 0.120921  | 0.131119  | 0.128205  | 0.138695  | 0.104167  | 0.13345  |
| 0.111742  | 0.112179  | 0.121795  | 0.121503  | 0.134324  | 0.0890152 | 0.13141  |
| 0.107809  | 0.119027  | 0.126603  | 0.136801  | 0.136218  | 0.120047  | 0.139423 |
| 0.0890152 | 0.092366  | 0.105186  | 0.104021  | 0.120338  | 0.0447261 | 0.120338 |
| 0.10912   | 0.111597  | 0.125291  | 0.120921  | 0.131702  | 0.0590035 | 0.136946 |
| 0.0989219 | 0.0984848 | 0.105769  | 0.110431  | 0.123543  | 0.0817308 | 0.124126 |
| 0.102855  | 0.107955  | 0.114656  | 0.118153  | 0.123397  | 0.101107  | 0.126311 |
| 0.0973193 | 0.0989219 | 0.103584  | 0.103875  | 0.118153  | 0.100524  | 0.120484 |
| 0.109557  | 0.116404  | 0.124272  | 0.130099  | 0.129516  | 0.0979021 | 0.136509 |
| 0.0789627 | 0.081148  | 0.0916375 | 0.099796  | 0.109703  | 0.0979021 | 0.11757  |
| 0.116404  | 0.115385  | 0.127914  | 0.124417  | 0.136946  | 0.105915  | 0.134033 |
| 0.0961538 | 0.0962995 | 0.111451  | 0.111451  | 0.123397  | 0.103147  | 0.121941 |
| 0.113782  | 0.111014  | 0.113054  | 0.120921  | 0.105478  | 0.130973  | 0.135781 |
| 0.111888  | 0.114656  | 0.119901  | 0.128059  | 0.133596  | 0.116259  | 0.123689 |
| 0.0862471 | 0.0968823 | 0.106206  | 0.106789  | 0.122523  | 0.0952797 | 0.120192 |
| 0.132284  | 0.126894  | 0.139132  | 0.13447   | 0.145251  | 0.123543  | 0.14933  |
| 0.0913462 | 0.0990676 | 0.1081    | 0.115967  | 0.128788  | 0.101253  | 0.122669 |
| 0.0942599 | 0.0897436 | 0.103438  | 0.110431  | 0.123252  | 0.08581   | 0.125874 |
| 0.100524  | 0.105624  | 0.107663  | 0.104167  | 0.114656  | 0.113636  | 0.121649 |
| 0.121212  | 0.12398   | 0.128934  | 0.13243   | 0.14933   | 0.13141   | 0.131556 |
| 0.115093  | 0.110286  | 0.110286  | 0.0992133 | 0.115239  | 0.111888  | 0.133304 |
| 0.0935315 | 0.0945513 | 0.0992133 | 0.103584  | 0.120192  | 0.0789627 | 0.119901 |
| 0.0891608 | 0.0971737 | 0.101836  | 0.105332  | 0.123689  | 0.0810023 | 0.117861 |
| 0.0948427 | 0.10169   | 0.107517  | 0.111597  | 0.128497  | 0.108537  | 0.125    |
| 0.0935315 | 0.0995047 | 0.112617  | 0.123106  | 0.124563  | 0.107809  | 0.123397 |
| 0.0930944 | 0.104604  | 0.109557  | 0.115093  | 0.129079  | 0.106206  | 0.125    |
| 0.0754662 | 0.0828963 | 0.0945513 | 0.0989219 | 0.108246  | 0.0903263 | 0.109994 |
| 0.0745921 | 0.0831876 | 0.0957168 | 0.0992133 | 0.11116   | 0.0949883 | 0.109994 |
| 0.0785256 | 0.087704  | 0.100816  | 0.10373   | 0.113054  | 0.0971737 | 0.118007 |
| 0.110868  | 0.113345  | 0.110431  | 0.110723  | 0.130536  | 0.115239  | 0.129371 |
| 0.0935315 | 0.109411  | 0.117861  | 0.124854  | 0.120192  | 0.115967  | 0.126894 |
| 0.0779429 | 0.0885781 | 0.0990676 | 0.108974  | 0.113054  | 0.0980478 | 0.118298 |
| 0.0716783 | 0.08581   | 0.0960082 | 0.103875  | 0.110286  | 0.0981935 | 0.113782 |



|           |           |           |           |           |           |          |
|-----------|-----------|-----------|-----------|-----------|-----------|----------|
| 0.0894522 | 0.0971737 | 0.108246  | 0.123689  | 0.111742  | 0.11014   | 0.126603 |
| 0.0721154 | 0.0879953 | 0.0949883 | 0.101981  | 0.108392  | 0.0945513 | 0.113928 |
| 0.109411  | 0.105186  | 0.113928  | 0.115093  | 0.129953  | 0.106206  | 0.133159 |
| 0.11961   | 0.121212  | 0.12296   | 0.129371  | 0.143648  | 0.129225  | 0.135781 |
| 0.0750291 | 0.0882867 | 0.101981  | 0.11014   | 0.116841  | 0.0989219 | 0.113928 |
| 0.0777972 | 0.0913462 | 0.10067   | 0.109994  | 0.115822  | 0.0984848 | 0.120775 |
| 0.0740093 | 0.0869755 | 0.0965909 | 0.105332  | 0.110577  | 0.103147  | 0.116404 |
| 0.0833333 | 0.0828963 | 0.0925117 | 0.0968823 | 0.110286  | 0.0888695 | 0.112034 |
| 0.099359  | 0.10271   | 0.110286  | 0.124854  | 0.123689  | 0.117424  | 0.123397 |
| 0.0681818 | 0.083479  | 0.092803  | 0.101253  | 0.112617  | 0.0938228 | 0.109994 |
| 0.118444  | 0.125291  | 0.128205  | 0.133741  | 0.134324  | 0.133304  | 0.138695 |
| 0.118298  | 0.121358  | 0.120775  | 0.131265  | 0.129808  | 0.128497  | 0.133013 |
| 0.108683  | 0.112034  | 0.112325  | 0.123106  | 0.124854  | 0.120338  | 0.128059 |
| 0.0992133 | 0.102273  | 0.102273  | 0.111888  | 0.121503  | 0.113782  | 0.12704  |
| 0.0948427 | 0.0967366 | 0.101981  | 0.109848  | 0.122669  | 0.10708   | 0.125    |
| 0         | 0.0855186 | 0.0983392 | 0.105915  | 0.110868  | 0.0949883 | 0.121941 |
| 0.0855186 | 0         | 0.0903263 | 0.100524  | 0.0935315 | 0.0933858 | 0.121503 |
| 0.0983392 | 0.0903263 | 0         | 0.103147  | 0.0964452 | 0.110286  | 0.115385 |
| 0.105915  | 0.100524  | 0.103147  | 0         | 0.107809  | 0.11116   | 0.125583 |
| 0.110868  | 0.0935315 | 0.0964452 | 0.107809  | 0         | 0.124854  | 0.132867 |
| 0.0949883 | 0.0933858 | 0.110286  | 0.11116   | 0.124854  | 0         | 0.127185 |
| 0.121941  | 0.121503  | 0.115385  | 0.125583  | 0.132867  | 0.127185  | 0        |
| 0.11655   | 0.125146  | 0.127185  | 0.13884   | 0.136218  | 0.126748  | 0.138549 |
| 0.194347  | 0.191871  | 0.19391   | 0.179924  | 0.206731  | 0.201923  | 0.200612 |
| 0.238782  | 0.238636  | 0.236597  | 0.224942  | 0.245047  | 0.24461   | 0.238928 |
| 0.109266  | 0.099796  | 0.101544  | 0.076486  | 0.116113  | 0.106935  | 0.12602  |
| 0.092803  | 0.0914918 | 0.094697  | 0.0958625 | 0.0874126 | 0.108537  | 0.127331 |
| 0.0948427 | 0.0917832 | 0.0874126 | 0.0882867 | 0.101981  | 0.0980478 | 0.120338 |
| 0.0989219 | 0.0938228 | 0.0914918 | 0.0906177 | 0.0941142 | 0.0980478 | 0.122086 |
| 0.118444  | 0.131702  | 0.120338  | 0.119755  | 0.135781  | 0.125146  | 0.124126 |
| 0.103001  | 0.097028  | 0.0944056 | 0.092366  | 0.0914918 | 0.107372  | 0.127331 |
| 0.129079  | 0.124272  | 0.122815  | 0.128934  | 0.103875  | 0.13345   | 0.14933  |
| 0.0980478 | 0.0941142 | 0.0949883 | 0.094697  | 0.0938228 | 0.106789  | 0.130828 |
| 0.114365  | 0.104021  | 0.1081    | 0.109848  | 0.0917832 | 0.12398   | 0.136655 |
| 0.120338  | 0.11553   | 0.115239  | 0.107955  | 0.100087  | 0.122086  | 0.136509 |
| 0.120338  | 0.110286  | 0.117861  | 0.109703  | 0.0957168 | 0.119464  | 0.132139 |
| 0.130828  | 0.127477  | 0.119901  | 0.128642  | 0.110286  | 0.134907  | 0.141754 |
| 0.100816  | 0.092803  | 0.0962995 | 0.0977564 | 0.095134  | 0.109266  | 0.122815 |
| 0.0952797 | 0.0939685 | 0.0922203 | 0.0968823 | 0.0919289 | 0.105186  | 0.12602  |
| 0.0995047 | 0.0920746 | 0.101981  | 0.0941142 | 0.0944056 | 0.104458  | 0.127622 |
| 0.0986305 | 0.0865385 | 0.085373  | 0.0920746 | 0.0879953 | 0.106498  | 0.118298 |
| 0.097465  | 0.0935315 | 0.0856643 | 0.0949883 | 0.0917832 | 0.106206  | 0.125    |
| 0.0987762 | 0.0878497 | 0.0971737 | 0.0942599 | 0.0962995 | 0.108974  | 0.129225 |
| 0.11553   | 0.104604  | 0.111014  | 0.104895  | 0.0917832 | 0.122232  | 0.130536 |

|           |           |           |           |           |           |          |
|-----------|-----------|-----------|-----------|-----------|-----------|----------|
| 0.12602   | 0.113636  | 0.121212  | 0.115093  | 0.0938228 | 0.131556  | 0.138112 |
| 0.0990676 | 0.099796  | 0.097465  | 0.100087  | 0.0971737 | 0.110723  | 0.129225 |
| 0.0983392 | 0.0958625 | 0.0955711 | 0.0777972 | 0.0920746 | 0.105041  | 0.123543 |
| 0.119901  | 0.108974  | 0.11014   | 0.111305  | 0.0961538 | 0.124563  | 0.139569 |
| 0.0939685 | 0.094697  | 0.0917832 | 0.0850816 | 0.0929487 | 0.103584  | 0.122086 |
| 0.127331  | 0.127185  | 0.123106  | 0.117279  | 0.10067   | 0.130245  | 0.144085 |
| 0.122378  | 0.123106  | 0.124563  | 0.125728  | 0.138258  | 0.127914  | 0.128642 |
| 0.123689  | 0.122378  | 0.118007  | 0.116259  | 0.113345  | 0.108246  | 0.136946 |
| 0.0913462 | 0.0897436 | 0.0912005 | 0.0897436 | 0.0952797 | 0.104749  | 0.117716 |
| 0.100816  | 0.0872669 | 0.0898893 | 0.0895979 | 0.0910548 | 0.0996503 | 0.117861 |
| 0.108246  | 0.107226  | 0.104312  | 0.109557  | 0.0973193 | 0.117861  | 0.129371 |
| 0.114802  | 0.101253  | 0.104458  | 0.10708   | 0.0960082 | 0.11451   | 0.129516 |
| 0.113928  | 0.110286  | 0.10708   | 0.113782  | 0.0968823 | 0.123252  | 0.137383 |
| 0.108829  | 0.0958625 | 0.103147  | 0.0926573 | 0.092366  | 0.109703  | 0.128788 |
| 0.100233  | 0.0965909 | 0.0977564 | 0.0971737 | 0.0942599 | 0.108974  | 0.127185 |
| 0.113054  | 0.100962  | 0.107955  | 0.100087  | 0.0919289 | 0.112179  | 0.133013 |
| 0.118007  | 0.10708   | 0.112908  | 0.112908  | 0.0910548 | 0.128497  | 0.131265 |
| 0.112471  | 0.103875  | 0.107372  | 0.104458  | 0.095134  | 0.118881  | 0.138549 |
| 0.117279  | 0.110723  | 0.119464  | 0.111597  | 0.0958625 | 0.127768  | 0.139569 |
| 0.125     | 0.112325  | 0.11553   | 0.116113  | 0.107372  | 0.134033  | 0.138549 |
| 0.0961538 | 0.0878497 | 0.0939685 | 0.095134  | 0.0983392 | 0.108974  | 0.126603 |
| 0.117424  | 0.111451  | 0.113782  | 0.107663  | 0.097465  | 0.12296   | 0.134178 |
| 0.0913462 | 0.0897436 | 0.0961538 | 0.090035  | 0.0967366 | 0.106206  | 0.127331 |
| 0.101399  | 0.101544  | 0.0913462 | 0.103001  | 0.105041  | 0.114802  | 0.120484 |
| 0.100233  | 0.0948427 | 0.0945513 | 0.0942599 | 0.0922203 | 0.104895  | 0.119901 |
| 0.0980478 | 0.0949883 | 0.0891608 | 0.0914918 | 0.0920746 | 0.100962  | 0.122086 |
| 0.0954254 | 0.0938228 | 0.0862471 | 0.0949883 | 0.0891608 | 0.105915  | 0.120047 |
| 0.117716  | 0.112325  | 0.114948  | 0.113199  | 0.0977564 | 0.12296   | 0.14088  |
| 0.107663  | 0.0955711 | 0.0935315 | 0.107226  | 0.0999417 | 0.113782  | 0.127914 |
| 0.122232  | 0.113636  | 0.113636  | 0.108974  | 0.0976107 | 0.124272  | 0.138986 |
| 0.102418  | 0.0879953 | 0.0888695 | 0.0949883 | 0.0868298 | 0.109994  | 0.120338 |
| 0.109848  | 0.0992133 | 0.109994  | 0.107955  | 0.0890152 | 0.115676  | 0.137092 |
| 0.113199  | 0.11014   | 0.109557  | 0.11451   | 0.114219  | 0.120484  | 0.127622 |
| 0.10271   | 0.107517  | 0.105186  | 0.109848  | 0.129079  | 0.108537  | 0.120629 |
| 0.0912005 | 0.0965909 | 0.103584  | 0.11116   | 0.119901  | 0.1081    | 0.123689 |
| 0.10271   | 0.115385  | 0.108683  | 0.117133  | 0.121795  | 0.116987  | 0.119172 |
| 0.100816  | 0.10271   | 0.110868  | 0.113199  | 0.123689  | 0.111597  | 0.126603 |
| 0.0926573 | 0.107955  | 0.0962995 | 0.110286  | 0.126894  | 0.107809  | 0.13039  |
| 0.112762  | 0.117861  | 0.117861  | 0.132721  | 0.137966  | 0.13141   | 0.124854 |
| 0.119901  | 0.121212  | 0.126748  | 0.134615  | 0.132576  | 0.130099  | 0.140443 |
| 0.0901807 | 0.0979021 | 0.0926573 | 0.106643  | 0.119464  | 0.104749  | 0.110431 |
| 0.118881  | 0.129516  | 0.121358  | 0.126603  | 0.136218  | 0.107517  | 0.130099 |
| 0.107663  | 0.110723  | 0.107517  | 0.124126  | 0.128788  | 0.121358  | 0.115676 |
| 0.115239  | 0.120921  | 0.117716  | 0.125583  | 0.134907  | 0.101544  | 0.129079 |

|           |           |           |          |          |           |          |
|-----------|-----------|-----------|----------|----------|-----------|----------|
| 0.105624  | 0.110431  | 0.104895  | 0.117133 | 0.124417 | 0.0965909 | 0.118007 |
| 0.102127  | 0.106935  | 0.107809  | 0.119172 | 0.12704  | 0.117279  | 0.120047 |
| 0.108974  | 0.110286  | 0.109994  | 0.122815 | 0.134178 | 0.118007  | 0.118444 |
| 0.116404  | 0.114219  | 0.112471  | 0.123834 | 0.13141  | 0.107663  | 0.125583 |
| 0.119027  | 0.128497  | 0.125291  | 0.134033 | 0.143939 | 0.108829  | 0.129371 |
| 0.109703  | 0.112762  | 0.110431  | 0.117424 | 0.133741 | 0.121066  | 0.113928 |
| 0.101253  | 0.104895  | 0.103147  | 0.113928 | 0.125291 | 0.0954254 | 0.117133 |
| 0.119172  | 0.124272  | 0.124272  | 0.129516 | 0.128642 | 0.134324  | 0.146707 |
| 0.112617  | 0.117424  | 0.119464  | 0.134615 | 0.138695 | 0.125146  | 0.118298 |
| 0.100962  | 0.102564  | 0.0967366 | 0.105769 | 0.125874 | 0.0971737 | 0.113345 |
| 0.217657  | 0.217512  | 0.218386  | 0.20877  | 0.229749 | 0.224942  | 0.222756 |
| 0.110431  | 0.115822  | 0.114365  | 0.114948 | 0.132139 | 0.101399  | 0.119901 |
| 0.100233  | 0.101253  | 0.0986305 | 0.116404 | 0.123689 | 0.108392  | 0.108829 |
| 0.121358  | 0.125874  | 0.124126  | 0.127331 | 0.137529 | 0.113491  | 0.126457 |
| 0.103875  | 0.100233  | 0.10373   | 0.118007 | 0.125874 | 0.108537  | 0.113636 |
| 0.114656  | 0.115385  | 0.121212  | 0.132284 | 0.140152 | 0.123689  | 0.122669 |
| 0.111742  | 0.109848  | 0.107226  | 0.117716 | 0.12704  | 0.0919289 | 0.122669 |
| 0.107226  | 0.115822  | 0.10912   | 0.114073 | 0.129808 | 0.104312  | 0.112908 |
| 0.113054  | 0.109411  | 0.103293  | 0.122523 | 0.130682 | 0.120338  | 0.112908 |
| 0.114656  | 0.117716  | 0.118298  | 0.125874 | 0.137821 | 0.100962  | 0.125    |
| 0.113054  | 0.119318  | 0.121941  | 0.130682 | 0.137383 | 0.106352  | 0.125728 |
| 0.11553   | 0.120921  | 0.119755  | 0.125    | 0.130828 | 0.105624  | 0.126166 |
| 0.114948  | 0.120921  | 0.119464  | 0.126457 | 0.136364 | 0.108829  | 0.120338 |
| 0.095134  | 0.106061  | 0.105478  | 0.11451  | 0.120921 | 0.109994  | 0.120338 |
| 0.103293  | 0.105186  | 0.106061  | 0.114802 | 0.12704  | 0.0983392 | 0.125583 |
| 0.118298  | 0.129516  | 0.122523  | 0.130682 | 0.141754 | 0.106643  | 0.124563 |
| 0.107372  | 0.110431  | 0.111305  | 0.11014  | 0.130245 | 0.092803  | 0.120338 |
| 0.123397  | 0.119755  | 0.121795  | 0.123543 | 0.11014  | 0.13447   | 0.137821 |
| 0.130828  | 0.133304  | 0.128351  | 0.135344 | 0.146999 | 0.136946  | 0.137092 |
| 0.104312  | 0.112325  | 0.117279  | 0.113782 | 0.127768 | 0.117716  | 0.12602  |
| 0.113636  | 0.114365  | 0.114073  | 0.127768 | 0.132139 | 0.123543  | 0.123397 |
| 0.113491  | 0.11451   | 0.121212  | 0.114802 | 0.136946 | 0.111742  | 0.13549  |
| 0.11859   | 0.120192  | 0.0968823 | 0.128642 | 0.132139 | 0.12704   | 0.128059 |
| 0.118881  | 0.118153  | 0.120775  | 0.11757  | 0.137966 | 0.127331  | 0.138258 |
| 0.132576  | 0.13243   | 0.130973  | 0.13447  | 0.141754 | 0.141317  | 0.14088  |
| 0.0930944 | 0.0917832 | 0.0973193 | 0.107517 | 0.111305 | 0.105915  | 0.106352 |
| 0.114802  | 0.120484  | 0.119318  | 0.133304 | 0.128934 | 0.127622  | 0.127185 |
| 0.13447   | 0.138403  | 0.133741  | 0.136072 | 0.148601 | 0.140297  | 0.146562 |
| 0.0875583 | 0.102564  | 0.103438  | 0.118298 | 0.120629 | 0.105624  | 0.121212 |
| 0.107955  | 0.108683  | 0.101107  | 0.111888 | 0.105478 | 0.121941  | 0.128788 |
| 0.132576  | 0.130099  | 0.135635  | 0.141171 | 0.135052 | 0.140443  | 0.150204 |
| 0.11655   | 0.100962  | 0.105915  | 0.116113 | 0.104458 | 0.126457  | 0.130682 |
| 0.117861  | 0.124417  | 0.129953  | 0.129371 | 0.134907 | 0.138549  | 0.135198 |
| 0.111888  | 0.113491  | 0.116987  | 0.127477 | 0.125437 | 0.120921  | 0.128642 |

|           |           |           |           |           |           |          |
|-----------|-----------|-----------|-----------|-----------|-----------|----------|
| 0.103584  | 0.110723  | 0.112179  | 0.121503  | 0.134615  | 0.0965909 | 0.126748 |
| 0.120921  | 0.110868  | 0.117861  | 0.116113  | 0.11961   | 0.122669  | 0.126894 |
| 0.0980478 | 0.099359  | 0.112179  | 0.112762  | 0.124417  | 0.106206  | 0.120338 |
| 0.106352  | 0.111451  | 0.120192  | 0.126311  | 0.126603  | 0.0949883 | 0.135052 |
| 0.113345  | 0.121066  | 0.118735  | 0.125728  | 0.135635  | 0.106643  | 0.120192 |
| 0.110431  | 0.121649  | 0.121358  | 0.130682  | 0.13243   | 0.100816  | 0.135927 |
| 0.112762  | 0.11961   | 0.123689  | 0.128934  | 0.134761  | 0.0996503 | 0.134178 |
| 0.107809  | 0.111742  | 0.119027  | 0.119901  | 0.128642  | 0.099359  | 0.13447  |
| 0.129662  | 0.131265  | 0.137966  | 0.132721  | 0.14933   | 0.110431  | 0.143794 |
| 0.097028  | 0.10067   | 0.108829  | 0.121066  | 0.117861  | 0.122086  | 0.120192 |
| 0.100233  | 0.0957168 | 0.0916375 | 0.112034  | 0.0983392 | 0.107809  | 0.125146 |
| 0.112471  | 0.121358  | 0.125146  | 0.12602   | 0.131265  | 0.11451   | 0.137675 |
| 0.0885781 | 0.0922203 | 0.106206  | 0.115822  | 0.123397  | 0.104895  | 0.113199 |
| 0.128351  | 0.130828  | 0.13345   | 0.134324  | 0.14627   | 0.133887  | 0.147436 |
| 0.131556  | 0.133741  | 0.144814  | 0.148601  | 0.151224  | 0.140589  | 0.155303 |
| 0.123397  | 0.11014   | 0.110431  | 0.107809  | 0.097028  | 0.127185  | 0.132576 |
| 0.109848  | 0.101544  | 0.103584  | 0.100379  | 0.0925117 | 0.115967  | 0.127185 |
| 0.124854  | 0.128205  | 0.111597  | 0.131993  | 0.136364  | 0.114073  | 0.135781 |
| 0.121795  | 0.120775  | 0.118153  | 0.130099  | 0.13447   | 0.11451   | 0.125437 |
| 0.111597  | 0.105915  | 0.108246  | 0.109994  | 0.0971737 | 0.128497  | 0.131556 |
| 0.121503  | 0.126311  | 0.126894  | 0.135344  | 0.139132  | 0.111597  | 0.132139 |
| 0.123252  | 0.122523  | 0.119027  | 0.12398   | 0.120484  | 0.130245  | 0.142337 |
| 0.103001  | 0.106061  | 0.112179  | 0.11451   | 0.102273  | 0.120484  | 0.130245 |
| 0.150495  | 0.153846  | 0.159674  | 0.153555  | 0.16317   | 0.151078  | 0.162296 |
| 0.114365  | 0.100816  | 0.106352  | 0.120338  | 0.0909091 | 0.121649  | 0.127331 |
| 0.125146  | 0.127914  | 0.12704   | 0.129079  | 0.134324  | 0.131556  | 0.132576 |
| 0.105769  | 0.100087  | 0.0962995 | 0.109703  | 0.0939685 | 0.113054  | 0.124854 |
| 0.11859   | 0.127185  | 0.114365  | 0.133596  | 0.135052  | 0.113054  | 0.13884  |
| 0.110723  | 0.121066  | 0.112908  | 0.122232  | 0.138258  | 0.103438  | 0.120775 |
| 0.135344  | 0.132576  | 0.130828  | 0.117424  | 0.151515  | 0.135052  | 0.14627  |
| 0.142483  | 0.145251  | 0.136801  | 0.138258  | 0.151369  | 0.134324  | 0.146999 |
| 0.121649  | 0.118881  | 0.115385  | 0.0979021 | 0.136072  | 0.123397  | 0.127914 |
| 0.136072  | 0.135344  | 0.129808  | 0.108829  | 0.150787  | 0.136946  | 0.14292  |
| 0.133013  | 0.129079  | 0.136655  | 0.124709  | 0.141317  | 0.145542  | 0.155594 |
| 0.135927  | 0.141317  | 0.139569  | 0.120921  | 0.155303  | 0.144959  | 0.149767 |
| 0.0961538 | 0.0986305 | 0.108246  | 0.116696  | 0.109994  | 0.107809  | 0.14088  |
| 0.136218  | 0.133741  | 0.129662  | 0.135198  | 0.14831   | 0.136218  | 0.141608 |
| 0.106789  | 0.1081    | 0.111888  | 0.108392  | 0.129662  | 0.11116   | 0.120338 |
| 0.104604  | 0.109411  | 0.109994  | 0.103584  | 0.125146  | 0.107517  | 0.121941 |
| 0.11116   | 0.112471  | 0.110431  | 0.122669  | 0.128788  | 0.116696  | 0.122378 |
| 0.11757   | 0.113928  | 0.110431  | 0.0912005 | 0.131993  | 0.117279  | 0.127914 |
| 0.1081    | 0.112034  | 0.109411  | 0.110868  | 0.125437  | 0.106643  | 0.12602  |
| 0.106935  | 0.112325  | 0.105624  | 0.0878497 | 0.121941  | 0.110431  | 0.11961  |
| 0.117716  | 0.110286  | 0.110286  | 0.114365  | 0.135344  | 0.11859   | 0.126603 |

|           |           |           |           |           |           |          |
|-----------|-----------|-----------|-----------|-----------|-----------|----------|
| 0.112617  | 0.122669  | 0.117424  | 0.11655   | 0.134033  | 0.120484  | 0.123834 |
| 0.0913462 | 0.0973193 | 0.097028  | 0.10169   | 0.112471  | 0.104458  | 0.110431 |
| 0.120484  | 0.117424  | 0.111305  | 0.0944056 | 0.13549   | 0.119027  | 0.132867 |
| 0.116841  | 0.112034  | 0.10912   | 0.0930944 | 0.133887  | 0.120921  | 0.130099 |
| 0.0952797 | 0.0968823 | 0.108246  | 0.108246  | 0.0971737 | 0.11859   | 0.136218 |
| 0.2162    | 0.215181  | 0.216929  | 0.202652  | 0.227418  | 0.220862  | 0.221591 |
| 0.1419    | 0.14088   | 0.135052  | 0.114365  | 0.148164  | 0.140152  | 0.144668 |
| 0.119318  | 0.124126  | 0.122378  | 0.123543  | 0.132284  | 0.128351  | 0.136072 |
| 0.119464  | 0.11961   | 0.112034  | 0.11757   | 0.136509  | 0.127331  | 0.127768 |
| 0.212121  | 0.212558  | 0.211393  | 0.198864  | 0.223339  | 0.217657  | 0.215763 |
| 0.108974  | 0.108246  | 0.110868  | 0.10271   | 0.116696  | 0.119172  | 0.133596 |
| 0.112034  | 0.111888  | 0.11014   | 0.119755  | 0.128497  | 0.11757   | 0.135198 |
| 0.116113  | 0.11655   | 0.110431  | 0.122669  | 0.12704   | 0.126603  | 0.129953 |
| 0.110723  | 0.121358  | 0.114656  | 0.115822  | 0.127768  | 0.120047  | 0.120484 |
| 0.250874  | 0.252768  | 0.248689  | 0.239656  | 0.260927  | 0.257284  | 0.250437 |
| 0.112908  | 0.11451   | 0.117133  | 0.123543  | 0.138986  | 0.124854  | 0.134615 |
| 0.0898893 | 0.0932401 | 0.101981  | 0.101981  | 0.10169   | 0.110286  | 0.129371 |
| 0.114948  | 0.117424  | 0.120047  | 0.120921  | 0.130245  | 0.119027  | 0.134615 |
| 0.112325  | 0.114802  | 0.11859   | 0.118298  | 0.127914  | 0.116404  | 0.132284 |
| 0.117861  | 0.121503  | 0.120047  | 0.118298  | 0.139277  | 0.125437  | 0.133741 |
| 0.123397  | 0.123252  | 0.121503  | 0.104312  | 0.137529  | 0.124563  | 0.130536 |
| 0.0954254 | 0.0935315 | 0.105478  | 0.101981  | 0.101107  | 0.113199  | 0.13141  |
| 0.117424  | 0.111742  | 0.109703  | 0.0913462 | 0.132139  | 0.118298  | 0.129808 |
| 0.123397  | 0.121503  | 0.117716  | 0.122086  | 0.13986   | 0.120775  | 0.137238 |
| 0.106789  | 0.11451   | 0.106643  | 0.112471  | 0.125583  | 0.111742  | 0.121503 |
| 0.11655   | 0.112908  | 0.108537  | 0.0933858 | 0.133013  | 0.11655   | 0.126894 |
| 0.0960082 | 0.101981  | 0.102273  | 0.111597  | 0.125291  | 0.110868  | 0.102564 |
| 0.142191  | 0.145833  | 0.135344  | 0.138549  | 0.14729   | 0.136072  | 0.149621 |
| 0.116841  | 0.11961   | 0.120484  | 0.125728  | 0.139714  | 0.130828  | 0.135052 |
| 0.116259  | 0.117279  | 0.113782  | 0.122815  | 0.130973  | 0.125583  | 0.137675 |
| 0.189394  | 0.188666  | 0.18954   | 0.175262  | 0.201777  | 0.196096  | 0.195659 |
| 0.202214  | 0.202652  | 0.201777  | 0.190705  | 0.216055  | 0.210373  | 0.210227 |
| 0.111014  | 0.121358  | 0.116404  | 0.119027  | 0.129225  | 0.120921  | 0.124854 |
| 0.104895  | 0.114656  | 0.109411  | 0.108829  | 0.121649  | 0.111597  | 0.118153 |
| 0.131702  | 0.135635  | 0.132721  | 0.122523  | 0.145251  | 0.130245  | 0.137966 |
| 0.0935315 | 0.090472  | 0.103875  | 0.103875  | 0.0983392 | 0.112179  | 0.126894 |
| 0.118735  | 0.120047  | 0.11859   | 0.125291  | 0.141317  | 0.127185  | 0.134907 |
| 0.123252  | 0.124272  | 0.126894  | 0.118735  | 0.13039   | 0.117424  | 0.137675 |
| 0.225524  | 0.226253  | 0.223048  | 0.214015  | 0.237617  | 0.232517  | 0.227127 |
| 0.106643  | 0.107372  | 0.105915  | 0.112325  | 0.123397  | 0.115093  | 0.129225 |
| 0.208479  | 0.201049  | 0.202506  | 0.182401  | 0.205128  | 0.209062  | 0.213287 |
| 0.0836247 | 0.0837704 | 0.0945513 | 0.105041  | 0.109994  | 0.0944056 | 0.129808 |
| 0.101253  | 0.10373   | 0.104604  | 0.107517  | 0.124126  | 0.107663  | 0.13141  |
| 0.109848  | 0.108537  | 0.112325  | 0.0977564 | 0.127185  | 0.109266  | 0.123689 |

|           |           |           |           |           |           |          |
|-----------|-----------|-----------|-----------|-----------|-----------|----------|
| 0.104021  | 0.112617  | 0.104167  | 0.105915  | 0.121358  | 0.113054  | 0.117279 |
| 0.204983  | 0.208333  | 0.207751  | 0.193473  | 0.22028   | 0.214598  | 0.212995 |
| 0.130973  | 0.127331  | 0.124709  | 0.107226  | 0.143939  | 0.132721  | 0.140152 |
| 0.101253  | 0.100524  | 0.103438  | 0.113345  | 0.121503  | 0.106498  | 0.131702 |
| 0.124563  | 0.122378  | 0.117424  | 0.100233  | 0.136946  | 0.124563  | 0.136072 |
| 0.114073  | 0.116259  | 0.114802  | 0.118007  | 0.125874  | 0.116987  | 0.131993 |
| 0.104167  | 0.113054  | 0.106061  | 0.111888  | 0.125874  | 0.109703  | 0.123252 |
| 0.0862471 | 0.0872669 | 0.0960082 | 0.106789  | 0.109411  | 0.0984848 | 0.133887 |
| 0.103147  | 0.0983392 | 0.110286  | 0.103875  | 0.109411  | 0.113928  | 0.131556 |
| 0.114219  | 0.114365  | 0.114073  | 0.119901  | 0.130682  | 0.122669  | 0.135927 |
| 0.110431  | 0.110286  | 0.107663  | 0.090472  | 0.129808  | 0.111888  | 0.124563 |
| 0.101253  | 0.0981935 | 0.104312  | 0.111305  | 0.118298  | 0.109411  | 0.132867 |
| 0.190268  | 0.188083  | 0.186043  | 0.176428  | 0.201777  | 0.197844  | 0.19595  |
| 0.115239  | 0.115676  | 0.120921  | 0.123252  | 0.128205  | 0.121066  | 0.132284 |
| 0.124417  | 0.127477  | 0.118444  | 0.121066  | 0.135635  | 0.117424  | 0.133013 |
| 0.114073  | 0.115967  | 0.11014   | 0.115967  | 0.126166  | 0.118153  | 0.125583 |
| 0.115967  | 0.114948  | 0.117279  | 0.11961   | 0.140589  | 0.120338  | 0.134761 |
| 0.121795  | 0.116987  | 0.112617  | 0.0971737 | 0.133596  | 0.12296   | 0.130973 |
| 0.0932401 | 0.0913462 | 0.101544  | 0.113782  | 0.109994  | 0.100233  | 0.133887 |
| 0.100087  | 0.107517  | 0.101107  | 0.107226  | 0.124709  | 0.110577  | 0.125    |
| 0.100087  | 0.0976107 | 0.1081    | 0.11014   | 0.0996503 | 0.119027  | 0.13345  |
| 0.119464  | 0.120775  | 0.113782  | 0.114073  | 0.133013  | 0.113928  | 0.133887 |
| 0.105478  | 0.109994  | 0.112908  | 0.110868  | 0.126894  | 0.114802  | 0.127185 |
| 0.109703  | 0.117716  | 0.111305  | 0.115676  | 0.129662  | 0.116113  | 0.122086 |
| 0.113928  | 0.117279  | 0.112908  | 0.118735  | 0.128642  | 0.123834  | 0.131847 |
| 0.128642  | 0.131702  | 0.125583  | 0.13549   | 0.135781  | 0.137675  | 0.13986  |
| 0.104749  | 0.1081    | 0.108392  | 0.117716  | 0.132576  | 0.114365  | 0.127914 |
| 0.136655  | 0.136509  | 0.130099  | 0.11116   | 0.145251  | 0.137529  | 0.139714 |
| 0.103438  | 0.113782  | 0.106498  | 0.111742  | 0.125146  | 0.109266  | 0.121358 |
| 0.111888  | 0.110868  | 0.114948  | 0.110286  | 0.124854  | 0.104021  | 0.128934 |
| 0.121649  | 0.116841  | 0.113928  | 0.0894522 | 0.13141   | 0.120192  | 0.130828 |
| 0.103001  | 0.101981  | 0.108392  | 0.109557  | 0.101107  | 0.119901  | 0.134615 |
| 0.1875    | 0.186772  | 0.188228  | 0.170455  | 0.198135  | 0.19595   | 0.197261 |
| 0.0952797 | 0.0936772 | 0.0989219 | 0.109703  | 0.115239  | 0.104604  | 0.126311 |
| 0.106352  | 0.0954254 | 0.100087  | 0.101544  | 0.116113  | 0.111014  | 0.122523 |
| 0.114802  | 0.112908  | 0.113491  | 0.122232  | 0.130682  | 0.122086  | 0.135052 |
| 0.178904  | 0.178176  | 0.17264   | 0.160402  | 0.191288  | 0.183858  | 0.184878 |
| 0.126603  | 0.12704   | 0.129953  | 0.133159  | 0.14627   | 0.135927  | 0.141608 |
| 0.133887  | 0.136072  | 0.137821  | 0.145688  | 0.155594  | 0.146707  | 0.147436 |
| 0.143939  | 0.146416  | 0.140006  | 0.138258  | 0.148456  | 0.136364  | 0.152244 |
| 0.104604  | 0.104749  | 0.106789  | 0.11116   | 0.13447   | 0.115385  | 0.128642 |
| 0.121941  | 0.119172  | 0.115967  | 0.0999417 | 0.134907  | 0.12398   | 0.13345  |
| 0.210956  | 0.213141  | 0.211684  | 0.200029  | 0.224796  | 0.219988  | 0.214598 |
| 0.123252  | 0.122232  | 0.109703  | 0.115239  | 0.130973  | 0.129079  | 0.129516 |

|           |           |           |           |          |          |          |
|-----------|-----------|-----------|-----------|----------|----------|----------|
| 0.124854  | 0.124417  | 0.119172  | 0.100233  | 0.139277 | 0.125437 | 0.137821 |
| 0.100379  | 0.0999417 | 0.104312  | 0.108392  | 0.118881 | 0.106206 | 0.128497 |
| 0.172057  | 0.169289  | 0.162879  | 0.143065  | 0.18007  | 0.172931 | 0.172203 |
| 0.107663  | 0.1081    | 0.100524  | 0.102564  | 0.128497 | 0.114656 | 0.123252 |
| 0.148893  | 0.145833  | 0.144959  | 0.145542  | 0.158362 | 0.145979 | 0.148747 |
| 0.107517  | 0.11116   | 0.11116   | 0.115239  | 0.119901 | 0.115676 | 0.118444 |
| 0.187937  | 0.189248  | 0.186043  | 0.177593  | 0.201486 | 0.19493  | 0.19799  |
| 0.111014  | 0.110286  | 0.110577  | 0.119318  | 0.135927 | 0.120629 | 0.132721 |
| 0.0990676 | 0.0980478 | 0.0846445 | 0.103584  | 0.120192 | 0.105769 | 0.114948 |
| 0.108246  | 0.107809  | 0.116259  | 0.104604  | 0.126748 | 0.102418 | 0.129079 |
| 0.106061  | 0.104749  | 0.104458  | 0.113782  | 0.121941 | 0.120629 | 0.124854 |
| 0.109557  | 0.110286  | 0.110577  | 0.120192  | 0.130099 | 0.119755 | 0.13447  |
| 0.113636  | 0.116696  | 0.115239  | 0.111742  | 0.134761 | 0.113345 | 0.131556 |
| 0.10271   | 0.111014  | 0.105478  | 0.111597  | 0.127331 | 0.112617 | 0.115967 |
| 0.185606  | 0.18954   | 0.186334  | 0.17905   | 0.20236  | 0.195513 | 0.197698 |
| 0.118735  | 0.119755  | 0.115385  | 0.120629  | 0.131119 | 0.118735 | 0.130536 |
| 0.106061  | 0.107955  | 0.102418  | 0.105915  | 0.12602  | 0.113928 | 0.128059 |
| 0.210519  | 0.210373  | 0.211538  | 0.199301  | 0.222611 | 0.216929 | 0.217949 |
| 0.112908  | 0.117424  | 0.121795  | 0.121503  | 0.128788 | 0.119318 | 0.131119 |
| 0.104895  | 0.11553   | 0.104167  | 0.111742  | 0.123689 | 0.113636 | 0.118735 |
| 0.100233  | 0.109411  | 0.103584  | 0.108829  | 0.120775 | 0.106061 | 0.118444 |
| 0.135927  | 0.134907  | 0.128788  | 0.111597  | 0.145105 | 0.139132 | 0.141608 |
| 0.186334  | 0.187354  | 0.187354  | 0.176865  | 0.204837 | 0.192453 | 0.195513 |
| 0.0958625 | 0.0930944 | 0.105041  | 0.108537  | 0.100962 | 0.112179 | 0.132721 |
| 0.123252  | 0.126894  | 0.118153  | 0.130682  | 0.132721 | 0.133159 | 0.135635 |
| 0.104312  | 0.112034  | 0.105624  | 0.107955  | 0.125146 | 0.112471 | 0.11757  |
| 0.0981935 | 0.109411  | 0.10271   | 0.110286  | 0.122815 | 0.106935 | 0.11961  |
| 0.103584  | 0.111597  | 0.105186  | 0.108974  | 0.122378 | 0.110577 | 0.119755 |
| 0.115967  | 0.114365  | 0.108829  | 0.0939685 | 0.132721 | 0.111888 | 0.130682 |
| 0.0930944 | 0.0964452 | 0.0958625 | 0.101107  | 0.110723 | 0.103875 | 0.113054 |
| 0.113199  | 0.114802  | 0.115676  | 0.123252  | 0.139277 | 0.124854 | 0.136946 |
| 0.128642  | 0.129662  | 0.129371  | 0.124126  | 0.139569 | 0.125437 | 0.139569 |
| 0.110868  | 0.112179  | 0.110723  | 0.117424  | 0.136946 | 0.11961  | 0.133159 |
| 0.11655   | 0.120484  | 0.118735  | 0.124563  | 0.127768 | 0.122669 | 0.13447  |
| 0.190414  | 0.191725  | 0.192308  | 0.180361  | 0.207168 | 0.200029 | 0.201923 |
| 0.110723  | 0.110577  | 0.109994  | 0.119318  | 0.127768 | 0.121503 | 0.130682 |
| 0.129808  | 0.126166  | 0.124417  | 0.105478  | 0.137529 | 0.13039  | 0.137821 |
| 0.10373   | 0.111742  | 0.103001  | 0.109703  | 0.123689 | 0.109266 | 0.114073 |
| 0.0910548 | 0.0952797 | 0.0949883 | 0.105186  | 0.109848 | 0.104458 | 0.109557 |
| 0.112617  | 0.108683  | 0.11014   | 0.10373   | 0.13141  | 0.108829 | 0.129662 |
| 0.097028  | 0.0957168 | 0.103584  | 0.107955  | 0.102127 | 0.113636 | 0.133304 |
| 0.128497  | 0.126603  | 0.127768  | 0.128934  | 0.142045 | 0.126166 | 0.13884  |
| 0.114073  | 0.119755  | 0.110723  | 0.110723  | 0.129079 | 0.111742 | 0.135198 |
| 0.0913462 | 0.0906177 | 0.100233  | 0.0926573 | 0.106935 | 0.107663 | 0.126166 |

|           |           |           |           |          |           |          |
|-----------|-----------|-----------|-----------|----------|-----------|----------|
| 0.090035  | 0.0898893 | 0.0960082 | 0.088141  | 0.103875 | 0.10169   | 0.120484 |
| 0.0980478 | 0.092366  | 0.0885781 | 0.0987762 | 0.11655  | 0.105332  | 0.113345 |
| 0.0865385 | 0.0893065 | 0.0980478 | 0.108537  | 0.111451 | 0.0987762 | 0.131265 |
| 0.11961   | 0.12296   | 0.123252  | 0.129662  | 0.144231 | 0.131847  | 0.133345 |
| 0.0955711 | 0.0968823 | 0.100962  | 0.103875  | 0.105332 | 0.110431  | 0.129808 |
| 0.114948  | 0.109848  | 0.109848  | 0.0903263 | 0.127914 | 0.112908  | 0.127331 |
| 0.0875583 | 0.0859557 | 0.0973193 | 0.102564  | 0.103438 | 0.108829  | 0.12704  |
| 0.101399  | 0.111451  | 0.105624  | 0.107663  | 0.122815 | 0.108683  | 0.121649 |
| 0.0948427 | 0.0944056 | 0.0984848 | 0.106352  | 0.116841 | 0.107372  | 0.124417 |
| 0.103584  | 0.115967  | 0.105769  | 0.111888  | 0.125583 | 0.112908  | 0.120629 |
| 0.107372  | 0.1081    | 0.103438  | 0.111305  | 0.123252 | 0.116696  | 0.124709 |
| 0.115822  | 0.118298  | 0.106935  | 0.109557  | 0.128205 | 0.110577  | 0.130245 |
| 0.105041  | 0.108974  | 0.105186  | 0.113054  | 0.127331 | 0.119027  | 0.134033 |
| 0.0938228 | 0.100087  | 0.0957168 | 0.101544  | 0.114656 | 0.104312  | 0.114656 |
| 0.104749  | 0.112471  | 0.105478  | 0.110431  | 0.124126 | 0.108829  | 0.120629 |
| 0.114948  | 0.11451   | 0.11655   | 0.109848  | 0.129079 | 0.110286  | 0.130828 |
| 0.111305  | 0.113782  | 0.110286  | 0.111742  | 0.132139 | 0.115967  | 0.133596 |
| 0.0995047 | 0.0964452 | 0.094697  | 0.108392  | 0.120338 | 0.102127  | 0.110431 |
| 0.101544  | 0.111305  | 0.102564  | 0.106935  | 0.125583 | 0.107955  | 0.118881 |
| 0.117716  | 0.11553   | 0.112617  | 0.0957168 | 0.132139 | 0.11859   | 0.129808 |
| 0.087704  | 0.0887238 | 0.0980478 | 0.105624  | 0.109994 | 0.0984848 | 0.133304 |
| 0.115676  | 0.114948  | 0.111742  | 0.0954254 | 0.133887 | 0.11859   | 0.132721 |
| 0.105478  | 0.107955  | 0.107372  | 0.113199  | 0.13039  | 0.114802  | 0.133596 |
| 0.0979021 | 0.101253  | 0.101253  | 0.106498  | 0.116404 | 0.105186  | 0.11553  |
| 0.102564  | 0.107955  | 0.100379  | 0.108246  | 0.123106 | 0.11014   | 0.124272 |
| 0.0960082 | 0.0964452 | 0.0964452 | 0.106061  | 0.118007 | 0.104749  | 0.125291 |
| 0.12296   | 0.117279  | 0.111451  | 0.0962995 | 0.135052 | 0.122669  | 0.133013 |
| 0.118881  | 0.117861  | 0.0983392 | 0.11757   | 0.126311 | 0.122669  | 0.135927 |
| 0.106206  | 0.108974  | 0.108974  | 0.105769  | 0.130245 | 0.111742  | 0.126748 |
| 0.191871  | 0.194347  | 0.192308  | 0.181818  | 0.202797 | 0.200612  | 0.201923 |
| 0.167978  | 0.162296  | 0.162587  | 0.144814  | 0.178322 | 0.169435  | 0.171911 |
| 0.109994  | 0.11451   | 0.113636  | 0.119172  | 0.137529 | 0.121649  | 0.131702 |
| 0.108683  | 0.106206  | 0.109703  | 0.0983392 | 0.11961  | 0.112179  | 0.13039  |
| 0.138695  | 0.137966  | 0.141754  | 0.14729   | 0.156031 | 0.14627   | 0.145251 |
| 0.124854  | 0.123543  | 0.118298  | 0.123834  | 0.140734 | 0.124272  | 0.138695 |
| 0.116841  | 0.121649  | 0.113199  | 0.110577  | 0.133887 | 0.118007  | 0.131556 |
| 0.109703  | 0.11451   | 0.108683  | 0.102855  | 0.129953 | 0.110286  | 0.124709 |
| 0.0965909 | 0.0987762 | 0.097028  | 0.110723  | 0.123252 | 0.109411  | 0.104895 |
| 0.115239  | 0.115385  | 0.110723  | 0.112471  | 0.133159 | 0.118735  | 0.138112 |
| 0.198135  | 0.201486  | 0.198572  | 0.187209  | 0.215763 | 0.207459  | 0.207314 |
| 0.0945513 | 0.0964452 | 0.106643  | 0.108974  | 0.106352 | 0.113782  | 0.134615 |
| 0.11014   | 0.106498  | 0.108829  | 0.0843531 | 0.122815 | 0.113636  | 0.125146 |
| 0.0990676 | 0.10912   | 0.101253  | 0.103001  | 0.121358 | 0.106061  | 0.114948 |
| 0.106789  | 0.106935  | 0.105769  | 0.113054  | 0.125583 | 0.112908  | 0.129662 |



|           |           |           |           |           |           |          |
|-----------|-----------|-----------|-----------|-----------|-----------|----------|
| 0.182984  | 0.183421  | 0.180798  | 0.16419   | 0.195659  | 0.186772  | 0.191579 |
| 0.247086  | 0.248106  | 0.246066  | 0.23412   | 0.256847  | 0.25204   | 0.250146 |
| 0.117133  | 0.120484  | 0.110577  | 0.113199  | 0.13447   | 0.11451   | 0.136218 |
| 0.11451   | 0.113491  | 0.108829  | 0.112908  | 0.133304  | 0.11451   | 0.13243  |
| 0.111597  | 0.112034  | 0.114073  | 0.119318  | 0.137966  | 0.119755  | 0.130682 |
| 0.103293  | 0.104312  | 0.105186  | 0.111597  | 0.125     | 0.113491  | 0.130536 |
| 0.0891608 | 0.0893065 | 0.097465  | 0.097465  | 0.101253  | 0.110723  | 0.125728 |
| 0.107955  | 0.109557  | 0.105478  | 0.110431  | 0.125     | 0.113782  | 0.119755 |
| 0.108974  | 0.115239  | 0.106498  | 0.0936772 | 0.126894  | 0.111305  | 0.123106 |
| 0.0891608 | 0.0884324 | 0.099796  | 0.10271   | 0.0962995 | 0.11014   | 0.127185 |
| 0.107372  | 0.110431  | 0.108392  | 0.0868298 | 0.127622  | 0.110577  | 0.121212 |
| 0.102855  | 0.103001  | 0.100379  | 0.113199  | 0.128351  | 0.109266  | 0.116113 |
| 0.0968823 | 0.0990676 | 0.0987762 | 0.10373   | 0.115385  | 0.107955  | 0.115967 |
| 0.119755  | 0.122232  | 0.110286  | 0.112034  | 0.133596  | 0.111888  | 0.133304 |
| 0.120484  | 0.115676  | 0.113345  | 0.092366  | 0.134324  | 0.11961   | 0.134033 |
| 0.0971737 | 0.0996503 | 0.100816  | 0.0967366 | 0.120338  | 0.0965909 | 0.120629 |
| 0.106498  | 0.111014  | 0.115967  | 0.118881  | 0.127914  | 0.0971737 | 0.12704  |
| 0.122232  | 0.122669  | 0.123252  | 0.129953  | 0.135781  | 0.13243   | 0.141317 |
| 0.100524  | 0.111451  | 0.10271   | 0.108246  | 0.123397  | 0.1081    | 0.119027 |
| 0.108537  | 0.109557  | 0.105478  | 0.101107  | 0.115676  | 0.112325  | 0.125291 |
| 0.118444  | 0.129371  | 0.120629  | 0.124126  | 0.13345   | 0.125437  | 0.122086 |
| 0.205711  | 0.210519  | 0.208479  | 0.195367  | 0.2213    | 0.212995  | 0.213724 |
| 0.109411  | 0.1081    | 0.099359  | 0.107517  | 0.123252  | 0.104167  | 0.123252 |
| 0.0955711 | 0.0957168 | 0.099796  | 0.101544  | 0.112325  | 0.105769  | 0.113491 |
| 0.112179  | 0.113491  | 0.106789  | 0.118444  | 0.126603  | 0.121503  | 0.130682 |
| 0.109994  | 0.117716  | 0.120047  | 0.11655   | 0.131702  | 0.120192  | 0.134033 |
| 0.104749  | 0.104312  | 0.103438  | 0.107809  | 0.12296   | 0.111451  | 0.129662 |
| 0.19799   | 0.199009  | 0.199009  | 0.189685  | 0.214161  | 0.204983  | 0.206876 |
| 0.122669  | 0.121066  | 0.113491  | 0.0942599 | 0.137092  | 0.123252  | 0.131847 |
| 0.100962  | 0.108974  | 0.103438  | 0.107809  | 0.122378  | 0.106789  | 0.115967 |
| 0.110723  | 0.114948  | 0.0945513 | 0.122523  | 0.123397  | 0.120338  | 0.130099 |
| 0.10169   | 0.105041  | 0.10271   | 0.112325  | 0.121358  | 0.11451   | 0.127477 |
| 0.120047  | 0.117861  | 0.113782  | 0.0919289 | 0.133304  | 0.121795  | 0.13447  |
| 0.108392  | 0.099796  | 0.104749  | 0.0942599 | 0.124563  | 0.110431  | 0.120484 |
| 0.10373   | 0.104167  | 0.100379  | 0.112617  | 0.128351  | 0.106352  | 0.116113 |
| 0.106352  | 0.112617  | 0.114948  | 0.115822  | 0.130099  | 0.11451   | 0.129808 |
| 0.196824  | 0.198135  | 0.196678  | 0.184732  | 0.215035  | 0.201777  | 0.204254 |
| 0.108974  | 0.104458  | 0.104167  | 0.0849359 | 0.124563  | 0.113636  | 0.123689 |
| 0.194493  | 0.195513  | 0.191434  | 0.182692  | 0.206876  | 0.198864  | 0.201632 |
| 0.192599  | 0.192745  | 0.190705  | 0.176428  | 0.206148  | 0.197552  | 0.200612 |
| 0.118007  | 0.117279  | 0.116696  | 0.126311  | 0.133596  | 0.126457  | 0.140006 |
| 0.119172  | 0.125728  | 0.125437  | 0.129516  | 0.135635  | 0.125874  | 0.136509 |
| 0.0929487 | 0.0942599 | 0.0930944 | 0.103293  | 0.11757   | 0.0981935 | 0.107372 |
| 0.110286  | 0.105186  | 0.104604  | 0.0897436 | 0.126166  | 0.110868  | 0.127622 |

|           |           |           |           |           |          |          |
|-----------|-----------|-----------|-----------|-----------|----------|----------|
| 0.11451   | 0.11116   | 0.109411  | 0.0933858 | 0.131556  | 0.114802 | 0.127477 |
| 0.106352  | 0.114365  | 0.10708   | 0.112908  | 0.126894  | 0.113345 | 0.119901 |
| 0.0874126 | 0.0849359 | 0.097465  | 0.0992133 | 0.0980478 | 0.104604 | 0.125146 |
| 0.0882867 | 0.0895979 | 0.0980478 | 0.101253  | 0.0989219 | 0.110431 | 0.128351 |
| 0.119318  | 0.123834  | 0.117424  | 0.118007  | 0.134615  | 0.117279 | 0.136655 |
| 0.110723  | 0.108829  | 0.107955  | 0.11757   | 0.13039   | 0.11859  | 0.133013 |
| 0.10067   | 0.109266  | 0.10169   | 0.109266  | 0.123543  | 0.104458 | 0.113636 |
| 0.118007  | 0.116696  | 0.110868  | 0.0960082 | 0.133596  | 0.119172 | 0.132721 |
| 0.0919289 | 0.0941142 | 0.0842075 | 0.0981935 | 0.11655   | 0.101544 | 0.111597 |
| 0.128497  | 0.125728  | 0.118153  | 0.101253  | 0.135344  | 0.127622 | 0.13447  |
| 0.107226  | 0.109703  | 0.10912   | 0.113199  | 0.135344  | 0.11859  | 0.128934 |
| 0.131847  | 0.130828  | 0.124417  | 0.107517  | 0.144814  | 0.133596 | 0.138112 |
| 0.256556  | 0.260198  | 0.260781  | 0.247378  | 0.265152  | 0.265006 | 0.260198 |
| 0.112617  | 0.110431  | 0.117424  | 0.124126  | 0.123252  | 0.11757  | 0.134324 |
| 0.121795  | 0.118444  | 0.11757   | 0.123106  | 0.129516  | 0.122086 | 0.132721 |
| 0.21926   | 0.220862  | 0.218531  | 0.204837  | 0.230186  | 0.223922 | 0.218531 |
| 0.119172  | 0.118735  | 0.117279  | 0.126603  | 0.129225  | 0.123543 | 0.131265 |
| 0.230769  | 0.231498  | 0.228584  | 0.217512  | 0.238491  | 0.235723 | 0.232955 |
| 0.10271   | 0.102855  | 0.106935  | 0.115967  | 0.118007  | 0.109703 | 0.129371 |
| 0.117424  | 0.129225  | 0.118444  | 0.119318  | 0.133596  | 0.122669 | 0.120775 |
| 0.102273  | 0.108537  | 0.11116   | 0.109994  | 0.123397  | 0.108974 | 0.123689 |
| 0.115093  | 0.113491  | 0.113491  | 0.122815  | 0.131847  | 0.122378 | 0.135052 |
| 0.202506  | 0.204108  | 0.200321  | 0.1875    | 0.216055  | 0.207459 | 0.208479 |
| 0.129662  | 0.128059  | 0.122523  | 0.10708   | 0.141171  | 0.127914 | 0.136509 |
| 0.122669  | 0.112617  | 0.112908  | 0.0907634 | 0.133304  | 0.119464 | 0.13039  |
| 0.224796  | 0.227273  | 0.225524  | 0.214452  | 0.238054  | 0.233246 | 0.226981 |
| 0.0897436 | 0.0919289 | 0.103001  | 0.102127  | 0.103293  | 0.112179 | 0.128934 |
| 0.194202  | 0.196678  | 0.197552  | 0.186772  | 0.212413  | 0.203526 | 0.206876 |
| 0.0916375 | 0.0944056 | 0.106935  | 0.10373   | 0.106061  | 0.112034 | 0.132284 |
| 0.102418  | 0.110431  | 0.107809  | 0.107517  | 0.124417  | 0.112617 | 0.122086 |
| 0.105186  | 0.111742  | 0.109994  | 0.115822  | 0.120192  | 0.11655  | 0.116113 |
| 0.117716  | 0.11757   | 0.120192  | 0.126311  | 0.133596  | 0.125    | 0.137675 |
| 0.111451  | 0.111305  | 0.104895  | 0.107809  | 0.129079  | 0.110868 | 0.124709 |
| 0.154575  | 0.153846  | 0.154138  | 0.141608  | 0.170455  | 0.159819 | 0.166084 |
| 0.112325  | 0.111014  | 0.107517  | 0.0909091 | 0.127622  | 0.113491 | 0.127331 |
| 0.112034  | 0.11655   | 0.115676  | 0.116259  | 0.130245  | 0.116987 | 0.131702 |
| 0.113491  | 0.111888  | 0.111305  | 0.11655   | 0.131119  | 0.115822 | 0.127622 |
| 0.122232  | 0.121795  | 0.126457  | 0.118298  | 0.129953  | 0.120775 | 0.136364 |
| 0.192599  | 0.194784  | 0.192162  | 0.183712  | 0.209353  | 0.202214 | 0.204108 |
| 0.10067   | 0.109557  | 0.104312  | 0.108683  | 0.122378  | 0.109411 | 0.120047 |
| 0.110723  | 0.112908  | 0.11116   | 0.11757   | 0.133013  | 0.118881 | 0.13243  |
| 0.0869755 | 0.0891608 | 0.0952797 | 0.106352  | 0.110723  | 0.099796 | 0.129662 |
| 0.094697  | 0.0933858 | 0.103875  | 0.106206  | 0.0980478 | 0.113054 | 0.129225 |
| 0.112908  | 0.121795  | 0.112471  | 0.115676  | 0.129371  | 0.118735 | 0.121795 |

|           |           |           |           |          |          |          |
|-----------|-----------|-----------|-----------|----------|----------|----------|
| 0.25641   | 0.259761  | 0.25743   | 0.24257   | 0.263549 | 0.262529 | 0.253934 |
| 0.100962  | 0.1081    | 0.106352  | 0.108974  | 0.115385 | 0.112908 | 0.115093 |
| 0.11116   | 0.114802  | 0.111014  | 0.106643  | 0.129662 | 0.11553  | 0.128205 |
| 0.17701   | 0.175117  | 0.179487  | 0.164336  | 0.189103 | 0.186626 | 0.18648  |
| 0.184295  | 0.185897  | 0.186189  | 0.172494  | 0.200758 | 0.190414 | 0.190559 |
| 0.11757   | 0.117716  | 0.111305  | 0.113636  | 0.133741 | 0.112325 | 0.13345  |
| 0.120338  | 0.116696  | 0.114365  | 0.0948427 | 0.135635 | 0.11859  | 0.131847 |
| 0.104895  | 0.109703  | 0.107372  | 0.110868  | 0.130099 | 0.11451  | 0.133013 |
| 0.144085  | 0.141608  | 0.138986  | 0.117716  | 0.153555 | 0.145542 | 0.147727 |
| 0.113199  | 0.113928  | 0.105769  | 0.111014  | 0.133159 | 0.11116  | 0.132867 |
| 0.118007  | 0.123106  | 0.112034  | 0.116404  | 0.133887 | 0.113928 | 0.133596 |
| 0.100087  | 0.100524  | 0.111888  | 0.111305  | 0.101399 | 0.116696 | 0.136072 |
| 0.119901  | 0.113345  | 0.111888  | 0.0955711 | 0.132576 | 0.118444 | 0.126748 |
| 0.128205  | 0.126311  | 0.122523  | 0.104458  | 0.137966 | 0.129953 | 0.135635 |
| 0.105332  | 0.10169   | 0.109266  | 0.0958625 | 0.110723 | 0.117279 | 0.131702 |
| 0.115676  | 0.116987  | 0.114656  | 0.123689  | 0.133304 | 0.124126 | 0.135344 |
| 0.127768  | 0.129371  | 0.129371  | 0.136072  | 0.138986 | 0.137092 | 0.148893 |
| 0.103147  | 0.108537  | 0.111451  | 0.117279  | 0.116696 | 0.113928 | 0.116113 |
| 0.120775  | 0.122086  | 0.121212  | 0.129662  | 0.137529 | 0.129516 | 0.142483 |
| 0.102418  | 0.103438  | 0.112179  | 0.111305  | 0.099359 | 0.124272 | 0.137529 |
| 0.206002  | 0.206148  | 0.205857  | 0.195076  | 0.223922 | 0.212995 | 0.215472 |
| 0.0808566 | 0.102273  | 0.112179  | 0.117716  | 0.125291 | 0.108246 | 0.124417 |
| 0.18954   | 0.187646  | 0.190559  | 0.178904  | 0.20338  | 0.197407 | 0.198718 |
| 0.106789  | 0.106935  | 0.108392  | 0.105478  | 0.123834 | 0.10912  | 0.128205 |
| 0.11553   | 0.123834  | 0.115676  | 0.11655   | 0.129953 | 0.119027 | 0.120338 |
| 0.11553   | 0.116259  | 0.116259  | 0.119755  | 0.139569 | 0.122523 | 0.131702 |
| 0.105186  | 0.10271   | 0.106206  | 0.114365  | 0.131556 | 0.112762 | 0.126311 |
| 0.122523  | 0.121212  | 0.116259  | 0.0987762 | 0.136655 | 0.124854 | 0.135781 |
| 0.123689  | 0.11859   | 0.114802  | 0.0973193 | 0.134033 | 0.120775 | 0.135198 |
| 0.105915  | 0.115676  | 0.108392  | 0.113345  | 0.128205 | 0.114073 | 0.122086 |
| 0.110723  | 0.114365  | 0.114948  | 0.114948  | 0.130682 | 0.11451  | 0.129225 |
| 0.117716  | 0.117861  | 0.119901  | 0.121649  | 0.139714 | 0.126457 | 0.135635 |
| 0.105915  | 0.107517  | 0.119172  | 0.116259  | 0.105186 | 0.127768 | 0.141317 |
| 0.253642  | 0.254371  | 0.251748  | 0.24155   | 0.261655 | 0.258887 | 0.251166 |
| 0.107372  | 0.115676  | 0.108683  | 0.111014  | 0.129953 | 0.111742 | 0.121503 |
| 0.183275  | 0.183421  | 0.184003  | 0.172931  | 0.198281 | 0.191725 | 0.190414 |
| 0.184878  | 0.187937  | 0.187646  | 0.175699  | 0.202506 | 0.19595  | 0.195804 |
| 0.111014  | 0.11553   | 0.111742  | 0.116696  | 0.132721 | 0.113928 | 0.125728 |
| 0.0987762 | 0.104167  | 0.100962  | 0.107663  | 0.11757  | 0.108392 | 0.114073 |
| 0.111305  | 0.125146  | 0.117279  | 0.116987  | 0.130973 | 0.118298 | 0.121941 |
| 0.111888  | 0.109411  | 0.107955  | 0.0884324 | 0.127477 | 0.108974 | 0.128642 |
| 0.0948427 | 0.0952797 | 0.0958625 | 0.105769  | 0.122086 | 0.10708  | 0.106643 |
| 0.0913462 | 0.094697  | 0.102855  | 0.100816  | 0.10373  | 0.109994 | 0.129953 |
| 0.120629  | 0.119901  | 0.114948  | 0.0948427 | 0.129225 | 0.120338 | 0.126603 |

|           |           |           |           |           |          |          |
|-----------|-----------|-----------|-----------|-----------|----------|----------|
| 0.131702  | 0.130682  | 0.126311  | 0.106789  | 0.140297  | 0.131702 | 0.134761 |
| 0.105041  | 0.114219  | 0.108683  | 0.112762  | 0.127331  | 0.114948 | 0.117424 |
| 0.128351  | 0.12704   | 0.122086  | 0.10373   | 0.13986   | 0.128351 | 0.134033 |
| 0.108974  | 0.105041  | 0.104749  | 0.112325  | 0.127768  | 0.112179 | 0.131556 |
| 0.117424  | 0.11757   | 0.116696  | 0.125146  | 0.136801  | 0.127914 | 0.133887 |
| 0.112034  | 0.113054  | 0.11014   | 0.119755  | 0.127331  | 0.118444 | 0.138986 |
| 0.104895  | 0.104167  | 0.115239  | 0.116696  | 0.100087  | 0.124709 | 0.137383 |
| 0.110286  | 0.109848  | 0.104895  | 0.118007  | 0.127914  | 0.113782 | 0.116841 |
| 0.106206  | 0.113345  | 0.106643  | 0.109266  | 0.121503  | 0.112034 | 0.117424 |
| 0.123397  | 0.12704   | 0.121795  | 0.133159  | 0.134324  | 0.135344 | 0.136946 |
| 0.18211   | 0.182838  | 0.18109   | 0.172931  | 0.200321  | 0.191725 | 0.193619 |
| 0.135344  | 0.13345   | 0.126748  | 0.110723  | 0.141026  | 0.133013 | 0.140443 |
| 0.121066  | 0.11859   | 0.114219  | 0.0973193 | 0.134033  | 0.122523 | 0.130828 |
| 0.108974  | 0.111451  | 0.112325  | 0.121066  | 0.136509  | 0.121503 | 0.128059 |
| 0.0995047 | 0.102855  | 0.102564  | 0.109266  | 0.126166  | 0.10912  | 0.120629 |
| 0.112471  | 0.11116   | 0.111451  | 0.118153  | 0.127477  | 0.117716 | 0.13447  |
| 0.113782  | 0.113054  | 0.113636  | 0.121503  | 0.130828  | 0.121066 | 0.13549  |
| 0.188811  | 0.187791  | 0.18954   | 0.17905   | 0.203817  | 0.197261 | 0.198864 |
| 0.117133  | 0.11553   | 0.111451  | 0.0925117 | 0.130973  | 0.117716 | 0.129808 |
| 0.108829  | 0.102564  | 0.100524  | 0.0958625 | 0.11859   | 0.108537 | 0.125    |
| 0.125437  | 0.122086  | 0.118007  | 0.101107  | 0.134615  | 0.123397 | 0.134615 |
| 0.191725  | 0.191579  | 0.190997  | 0.17905   | 0.205274  | 0.197844 | 0.198281 |
| 0.0957168 | 0.101107  | 0.0979021 | 0.101981  | 0.11655   | 0.105915 | 0.11451  |
| 0.0976107 | 0.095134  | 0.109994  | 0.108246  | 0.099796  | 0.118881 | 0.135052 |
| 0.123252  | 0.120775  | 0.116404  | 0.0989219 | 0.138549  | 0.125583 | 0.133304 |
| 0.111742  | 0.112179  | 0.106352  | 0.109266  | 0.125583  | 0.106789 | 0.128205 |
| 0.186626  | 0.188228  | 0.18648   | 0.175408  | 0.202797  | 0.194202 | 0.197552 |
| 0.0971737 | 0.0952797 | 0.107226  | 0.103438  | 0.0990676 | 0.118153 | 0.132867 |
| 0.10708   | 0.107226  | 0.106935  | 0.106352  | 0.121503  | 0.119318 | 0.128205 |
| 0.0989219 | 0.0984848 | 0.101107  | 0.10169   | 0.117424  | 0.108829 | 0.117133 |
| 0.119027  | 0.115967  | 0.108683  | 0.109266  | 0.137821  | 0.12398  | 0.133741 |
| 0.105769  | 0.114365  | 0.113782  | 0.116404  | 0.127768  | 0.11655  | 0.131265 |
| 0.100816  | 0.102418  | 0.111742  | 0.116404  | 0.0965909 | 0.122669 | 0.135927 |
| 0.104021  | 0.114073  | 0.104167  | 0.108246  | 0.127477  | 0.112471 | 0.116696 |
| 0.118007  | 0.114656  | 0.114948  | 0.11116   | 0.124563  | 0.122086 | 0.133887 |
| 0.143794  | 0.145979  | 0.138112  | 0.13986   | 0.15035   | 0.138258 | 0.149184 |
| 0.239073  | 0.238636  | 0.236305  | 0.222611  | 0.246212  | 0.244901 | 0.240093 |
| 0.116113  | 0.111014  | 0.109848  | 0.121503  | 0.130536  | 0.118444 | 0.115385 |
| 0.109703  | 0.115385  | 0.118007  | 0.119755  | 0.129662  | 0.115822 | 0.13141  |
| 0.116841  | 0.117861  | 0.109411  | 0.0930944 | 0.131556  | 0.119464 | 0.126894 |
| 0.11961   | 0.120338  | 0.11655   | 0.113345  | 0.136946  | 0.11757  | 0.134907 |
| 0.104895  | 0.103293  | 0.107372  | 0.104167  | 0.11757   | 0.106643 | 0.122232 |
| 0.109557  | 0.11116   | 0.107955  | 0.114073  | 0.122232  | 0.113636 | 0.129808 |
| 0.121649  | 0.11655   | 0.111888  | 0.0987762 | 0.133159  | 0.122232 | 0.129662 |

|           |           |           |           |           |           |           |
|-----------|-----------|-----------|-----------|-----------|-----------|-----------|
| 0.102564  | 0.0983392 | 0.112908  | 0.110868  | 0.0989219 | 0.120629  | 0.136801  |
| 0.11451   | 0.110577  | 0.112034  | 0.101836  | 0.12398   | 0.111014  | 0.130973  |
| 0.237908  | 0.242424  | 0.237762  | 0.225233  | 0.246212  | 0.244027  | 0.237762  |
| 0.0990676 | 0.0995047 | 0.0983392 | 0.10271   | 0.11116   | 0.106352  | 0.113199  |
| 0.0920746 | 0.0893065 | 0.0930944 | 0.103875  | 0.112908  | 0.100816  | 0.121358  |
| 0.103875  | 0.112179  | 0.107226  | 0.108392  | 0.122086  | 0.109994  | 0.11655   |
| 0.129079  | 0.131265  | 0.122232  | 0.126894  | 0.136218  | 0.123543  | 0.137966  |
| 0.11859   | 0.118735  | 0.116113  | 0.127768  | 0.135927  | 0.124417  | 0.121941  |
| 0.114219  | 0.114365  | 0.112908  | 0.107372  | 0.129225  | 0.117424  | 0.123106  |
| 0.120629  | 0.116987  | 0.114948  | 0.0960082 | 0.135927  | 0.119464  | 0.135635  |
| 0.108829  | 0.109848  | 0.104604  | 0.1081    | 0.124126  | 0.109703  | 0.124417  |
| 0.231498  | 0.2331    | 0.229604  | 0.219988  | 0.243298  | 0.239365  | 0.232226  |
| 0.127185  | 0.121503  | 0.11859   | 0.101107  | 0.137821  | 0.126603  | 0.132284  |
| 0.0984848 | 0.0977564 | 0.105915  | 0.104749  | 0.0968823 | 0.11655   | 0.134761  |
| 0.104895  | 0.102127  | 0.103001  | 0.100087  | 0.118735  | 0.110431  | 0.125146  |
| 0.119318  | 0.11655   | 0.118881  | 0.11859   | 0.125583  | 0.116113  | 0.131119  |
| 0.106206  | 0.106935  | 0.110723  | 0.116841  | 0.117424  | 0.116404  | 0.13141   |
| 0.105915  | 0.115676  | 0.107226  | 0.111888  | 0.124126  | 0.114656  | 0.115967  |
| 0.100087  | 0.10169   | 0.109848  | 0.110723  | 0.10169   | 0.115822  | 0.132867  |
| 0.104312  | 0.10271   | 0.116404  | 0.110868  | 0.102127  | 0.120921  | 0.136801  |
| 0.0912005 | 0.0898893 | 0.103001  | 0.105915  | 0.100379  | 0.114219  | 0.13039   |
| 0.105041  | 0.113928  | 0.105769  | 0.115676  | 0.125     | 0.108829  | 0.119172  |
| 0.116696  | 0.122086  | 0.124126  | 0.125583  | 0.132284  | 0.122523  | 0.131702  |
| 0.122669  | 0.128059  | 0.129225  | 0.129808  | 0.137383  | 0.131119  | 0.137966  |
| 0.11859   | 0.120192  | 0.118735  | 0.128642  | 0.140589  | 0.128205  | 0.135052  |
| 0.125     | 0.122815  | 0.123397  | 0.131556  | 0.144085  | 0.131993  | 0.136509  |
| 0.117861  | 0.123543  | 0.126166  | 0.129953  | 0.133741  | 0.12602   | 0.139277  |
| 0.0884324 | 0.0914918 | 0.0941142 | 0.101107  | 0.122086  | 0.102127  | 0.104895  |
| 0.104604  | 0.103001  | 0.113199  | 0.12398   | 0.115822  | 0.113928  | 0.143502  |
| 0.122523  | 0.121503  | 0.113636  | 0.120338  | 0.108974  | 0.131265  | 0.13986   |
| 0.207896  | 0.206294  | 0.205128  | 0.194056  | 0.217949  | 0.213141  | 0.208916  |
| 0.121649  | 0.120047  | 0.114802  | 0.118881  | 0.133741  | 0.118735  | 0.13345   |
| 0.0957168 | 0.097028  | 0.100524  | 0.11014   | 0.120629  | 0.105041  | 0.128497  |
| 0.109848  | 0.122523  | 0.110577  | 0.113199  | 0.13039   | 0.118298  | 0.123689  |
| 0.222174  | 0.224359  | 0.223776  | 0.210373  | 0.234557  | 0.230624  | 0.224942  |
| 0.209645  | 0.213869  | 0.213578  | 0.20134   | 0.225233  | 0.218386  | 0.216783  |
| 0.101981  | 0.102418  | 0.112617  | 0.112034  | 0.099796  | 0.122086  | 0.137966  |
| 0.251311  | 0.254079  | 0.250291  | 0.240093  | 0.26049   | 0.259178  | 0.250291  |
| 0.0893065 | 0.0929487 | 0.0935315 | 0.102855  | 0.123252  | 0.0992133 | 0.102564  |
| 0.128351  | 0.127622  | 0.120047  | 0.133741  | 0.136072  | 0.132139  | 0.0457459 |
| 0.0983392 | 0.101399  | 0.103147  | 0.107226  | 0.115967  | 0.109411  | 0.111597  |
| 0.113345  | 0.119901  | 0.122523  | 0.122523  | 0.131556  | 0.121503  | 0.13447   |
| 0.189248  | 0.191725  | 0.187354  | 0.176573  | 0.199883  | 0.195367  | 0.196096  |
| 0.114219  | 0.110577  | 0.112034  | 0.114656  | 0.114656  | 0.122086  | 0.124563  |

|           |           |           |           |           |           |          |
|-----------|-----------|-----------|-----------|-----------|-----------|----------|
| 0.19493   | 0.194784  | 0.195659  | 0.182255  | 0.211101  | 0.201923  | 0.200321 |
| 0.108392  | 0.11757   | 0.109994  | 0.116696  | 0.130099  | 0.109848  | 0.119027 |
| 0.104021  | 0.097465  | 0.109994  | 0.0884324 | 0.111451  | 0.114219  | 0.129808 |
| 0.108683  | 0.107372  | 0.110286  | 0.119318  | 0.127185  | 0.116841  | 0.121066 |
| 0.107809  | 0.108829  | 0.106206  | 0.104749  | 0.127768  | 0.115385  | 0.122523 |
| 0.0954254 | 0.104895  | 0.0979021 | 0.105478  | 0.118007  | 0.108537  | 0.113345 |
| 0.109703  | 0.109266  | 0.103147  | 0.106061  | 0.127622  | 0.113491  | 0.128788 |
| 0.0936772 | 0.0984848 | 0.0976107 | 0.104021  | 0.112179  | 0.105332  | 0.111888 |
| 0.112471  | 0.113199  | 0.107955  | 0.090472  | 0.130973  | 0.11655   | 0.129516 |
| 0.0913462 | 0.0909091 | 0.101107  | 0.108392  | 0.108683  | 0.0986305 | 0.133159 |
| 0.0980478 | 0.0996503 | 0.0967366 | 0.1081    | 0.122669  | 0.105041  | 0.111597 |
| 0.0964452 | 0.101836  | 0.10271   | 0.104749  | 0.112325  | 0.1081    | 0.112908 |
| 0.110286  | 0.112179  | 0.115676  | 0.108974  | 0.130828  | 0.117279  | 0.131702 |
| 0.130099  | 0.126166  | 0.122669  | 0.105186  | 0.13986   | 0.127768  | 0.136072 |
| 0.104604  | 0.107663  | 0.107663  | 0.112034  | 0.13243   | 0.11859   | 0.128642 |
| 0.106789  | 0.106061  | 0.103147  | 0.111305  | 0.121212  | 0.118444  | 0.124709 |
| 0.0996503 | 0.108537  | 0.099796  | 0.105332  | 0.118444  | 0.107226  | 0.114656 |
| 0.101981  | 0.095134  | 0.10912   | 0.10271   | 0.103293  | 0.112762  | 0.132139 |
| 0.108392  | 0.110868  | 0.112617  | 0.119318  | 0.128934  | 0.114219  | 0.130973 |
| 0.112034  | 0.113345  | 0.111597  | 0.120629  | 0.130245  | 0.121066  | 0.131702 |
| 0.110286  | 0.106935  | 0.109848  | 0.118298  | 0.13345   | 0.119318  | 0.127622 |
| 0.118881  | 0.113782  | 0.113199  | 0.0933858 | 0.132721  | 0.118881  | 0.130099 |
| 0.130682  | 0.127914  | 0.12296   | 0.106061  | 0.140152  | 0.129808  | 0.138695 |
| 0.138258  | 0.135198  | 0.131119  | 0.111597  | 0.145979  | 0.138549  | 0.141026 |
| 0.087704  | 0.0869755 | 0.0919289 | 0.095134  | 0.0977564 | 0.100233  | 0.11961  |
| 0.103147  | 0.116113  | 0.109411  | 0.110577  | 0.12602   | 0.112471  | 0.119027 |
| 0.0986305 | 0.101107  | 0.0952797 | 0.102855  | 0.114802  | 0.105624  | 0.123252 |
| 0.123106  | 0.125874  | 0.129079  | 0.129953  | 0.136946  | 0.128934  | 0.140152 |
| 0.101107  | 0.106206  | 0.106206  | 0.107955  | 0.114948  | 0.111888  | 0.109703 |
| 0.130828  | 0.128934  | 0.130682  | 0.136801  | 0.143211  | 0.138112  | 0.148164 |
| 0.122669  | 0.135635  | 0.12602   | 0.125437  | 0.140006  | 0.129371  | 0.124563 |
| 0.122232  | 0.125874  | 0.114219  | 0.117716  | 0.134033  | 0.11961   | 0.134907 |
| 0.0984848 | 0.0986305 | 0.100379  | 0.107663  | 0.124854  | 0.109266  | 0.113491 |
| 0.106206  | 0.104604  | 0.109266  | 0.102564  | 0.126166  | 0.103293  | 0.129953 |
| 0.116113  | 0.120047  | 0.11859   | 0.127622  | 0.140152  | 0.129516  | 0.133159 |
| 0.206876  | 0.204983  | 0.20877   | 0.194202  | 0.21722   | 0.212995  | 0.214307 |
| 0.104021  | 0.107372  | 0.103001  | 0.112617  | 0.120484  | 0.116841  | 0.126311 |
| 0.101544  | 0.100816  | 0.106935  | 0.115385  | 0.128788  | 0.113199  | 0.122086 |
| 0.108974  | 0.112617  | 0.114365  | 0.117279  | 0.124854  | 0.115676  | 0.13039  |
| 0.105915  | 0.107517  | 0.111597  | 0.116259  | 0.135198  | 0.115239  | 0.128788 |
| 0.116259  | 0.119027  | 0.113491  | 0.122523  | 0.130099  | 0.115967  | 0.124563 |
| 0.119172  | 0.116404  | 0.10271   | 0.119027  | 0.124563  | 0.123543  | 0.133596 |
| 0.124854  | 0.120047  | 0.104895  | 0.121503  | 0.127331  | 0.122523  | 0.136364 |
| 0.117133  | 0.121358  | 0.113491  | 0.113491  | 0.130682  | 0.112179  | 0.128934 |

|           |           |           |           |           |           |          |
|-----------|-----------|-----------|-----------|-----------|-----------|----------|
| 0.083042  | 0.0866841 | 0.0930944 | 0.103875  | 0.108246  | 0.0973193 | 0.129225 |
| 0.116841  | 0.120775  | 0.123397  | 0.124854  | 0.130973  | 0.125874  | 0.133013 |
| 0.106352  | 0.101253  | 0.103001  | 0.114365  | 0.120484  | 0.115093  | 0.120484 |
| 0.106789  | 0.104021  | 0.101981  | 0.115967  | 0.130828  | 0.108829  | 0.115093 |
| 0.174242  | 0.170017  | 0.174971  | 0.164481  | 0.186917  | 0.175991  | 0.188083 |
| 0.117424  | 0.113782  | 0.110286  | 0.0933858 | 0.134178  | 0.114802  | 0.132721 |
| 0.119027  | 0.121212  | 0.124126  | 0.12296   | 0.13345   | 0.125146  | 0.135198 |
| 0.0818765 | 0.0965909 | 0.108537  | 0.119027  | 0.116696  | 0.108392  | 0.11757  |
| 0.110868  | 0.108683  | 0.116841  | 0.100233  | 0.124417  | 0.0893065 | 0.131702 |
| 0.097465  | 0.0941142 | 0.0839161 | 0.102273  | 0.11655   | 0.104458  | 0.113636 |
| 0.0945513 | 0.094697  | 0.0903263 | 0.103438  | 0.118881  | 0.099796  | 0.108974 |
| 0.10067   | 0.100233  | 0.092366  | 0.109557  | 0.117716  | 0.110868  | 0.119464 |
| 0.110868  | 0.106935  | 0.1081    | 0.101981  | 0.0976107 | 0.112034  | 0.128497 |
| 0.114365  | 0.112471  | 0.105478  | 0.0938228 | 0.134033  | 0.112908  | 0.121503 |
| 0.108683  | 0.116404  | 0.11961   | 0.12602   | 0.13447   | 0.123543  | 0.132721 |
| 0.092803  | 0.0958625 | 0.101981  | 0.0987762 | 0.123252  | 0.099796  | 0.119464 |
| 0.0984848 | 0.101544  | 0.0936772 | 0.108829  | 0.119027  | 0.107226  | 0.120484 |
| 0.114073  | 0.0967366 | 0.0976107 | 0.108974  | 0.0454545 | 0.128059  | 0.132867 |
| 0.095134  | 0.0967366 | 0.0976107 | 0.113636  | 0.110723  | 0.0992133 | 0.115967 |
| 0.112034  | 0.114219  | 0.0932401 | 0.124126  | 0.125874  | 0.123106  | 0.129662 |
| 0.0898893 | 0.0891608 | 0.0906177 | 0.110431  | 0.111305  | 0.0893065 | 0.11655  |
| 0.0980478 | 0.0955711 | 0.0958625 | 0.111888  | 0.11451   | 0.100087  | 0.115385 |
| 0.0893065 | 0.0984848 | 0.0920746 | 0.109848  | 0.121795  | 0.090472  | 0.115385 |
| 0.0976107 | 0.110577  | 0.110286  | 0.116404  | 0.123397  | 0.115385  | 0.120775 |
| 0.0885781 | 0.0948427 | 0.0983392 | 0.0992133 | 0.114948  | 0.0990676 | 0.116113 |
| 0.127914  | 0.125146  | 0.127477  | 0.129516  | 0.128934  | 0.134907  | 0.145251 |
| 0.117133  | 0.112908  | 0.11961   | 0.117861  | 0.128059  | 0.123252  | 0.141463 |
| 0.0903263 | 0.0925117 | 0.0995047 | 0.111451  | 0.119318  | 0.103438  | 0.121066 |
| 0.123689  | 0.121503  | 0.128205  | 0.129079  | 0.120921  | 0.135927  | 0.146562 |
| 0.117279  | 0.117716  | 0.11655   | 0.114802  | 0.139277  | 0.115239  | 0.136655 |
| 0.12602   | 0.123834  | 0.117716  | 0.118298  | 0.114802  | 0.133596  | 0.134324 |
| 0.100962  | 0.103147  | 0.109266  | 0.11014   | 0.124417  | 0.11116   | 0.117424 |
| 0.136364  | 0.137383  | 0.142337  | 0.135927  | 0.148456  | 0.136655  | 0.141171 |
| 0.11859   | 0.118735  | 0.121066  | 0.124854  | 0.130973  | 0.124709  | 0.137966 |
| 0.129662  | 0.119027  | 0.115239  | 0.112908  | 0.103001  | 0.136946  | 0.141171 |
| 0.0996503 | 0.101836  | 0.108537  | 0.116696  | 0.124854  | 0.101981  | 0.124272 |
| 0.0895979 | 0.0874126 | 0.0990676 | 0.103147  | 0.107809  | 0.101544  | 0.119755 |
| 0.0882867 | 0.0916375 | 0.0971737 | 0.105041  | 0.112034  | 0.0987762 | 0.110868 |
| 0.103584  | 0.101107  | 0.0944056 | 0.100816  | 0.092366  | 0.111451  | 0.128205 |
| 0.104167  | 0.105186  | 0.110723  | 0.115093  | 0.120338  | 0.108246  | 0.127331 |
| 0.113345  | 0.115239  | 0.112908  | 0.128642  | 0.13039   | 0.109266  | 0.125728 |
| 0.113054  | 0.107372  | 0.112908  | 0.110577  | 0.127477  | 0.107809  | 0.13243  |
| 0.0839161 | 0.0948427 | 0.102127  | 0.105041  | 0.117861  | 0.0981935 | 0.11757  |
| 0.0887238 | 0.0912005 | 0.0976107 | 0.105769  | 0.112471  | 0.106206  | 0.113345 |

|           |           |           |           |          |          |          |
|-----------|-----------|-----------|-----------|----------|----------|----------|
| 0.0833333 | 0.10708   | 0.110286  | 0.117861  | 0.11757  | 0.11451  | 0.114073 |
| 0.0839161 | 0.0872669 | 0.099796  | 0.104749  | 0.107955 | 0.106061 | 0.118153 |
| 0.0971737 | 0.101981  | 0.104021  | 0.11451   | 0.115967 | 0.113782 | 0.111305 |
| 0.100962  | 0.103438  | 0.102855  | 0.109266  | 0.125291 | 0.109703 | 0.12296  |
| 0.11451   | 0.11116   | 0.112617  | 0.105915  | 0.129808 | 0.11655  | 0.118444 |
| 0.105186  | 0.111742  | 0.0995047 | 0.108537  | 0.122815 | 0.114219 | 0.114073 |
| 0.0871212 | 0.0933858 | 0.0913462 | 0.103584  | 0.119901 | 0.100233 | 0.101836 |
| 0.0766317 | 0.10067   | 0.103584  | 0.112034  | 0.116404 | 0.1081   | 0.111742 |
| 0.10912   | 0.111014  | 0.111888  | 0.102564  | 0.129079 | 0.113782 | 0.123252 |
| 0.103438  | 0.104749  | 0.095134  | 0.105332  | 0.12602  | 0.112471 | 0.121358 |
| 0.12296   | 0.114948  | 0.111451  | 0.115822  | 0.13243  | 0.121503 | 0.125437 |
| 0.102564  | 0.104458  | 0.100379  | 0.0968823 | 0.119901 | 0.1081   | 0.11961  |
| 0.120484  | 0.114219  | 0.106061  | 0.126748  | 0.130245 | 0.124563 | 0.122669 |



| <b>TDr_08_21_3</b> | <b>TDr_08_5_1</b> | <b>TDr_08_5_2</b> | <b>TDr_09_00001</b> | <b>TDr_09_00002</b> | <b>TDr_09_00003</b> | <b>TDr_09_00018</b> |
|--------------------|-------------------|-------------------|---------------------|---------------------|---------------------|---------------------|
| 0.133159           | 0.176865          | 0.221008          | 0.106935            | 0.11553             | 0.103584            | 0.117279            |
| 0.132721           | 0.179341          | 0.221154          | 0.103875            | 0.113636            | 0.108974            | 0.111305            |
| 0.131265           | 0.176428          | 0.222319          | 0.0983392           | 0.105186            | 0.101399            | 0.1081              |
| 0.128934           | 0.187209          | 0.231352          | 0.0930944           | 0.114219            | 0.109557            | 0.112471            |
| 0.143794           | 0.206731          | 0.24155           | 0.129225            | 0.121212            | 0.125874            | 0.133159            |
| 0.139423           | 0.193619          | 0.234557          | 0.120192            | 0.11859             | 0.120921            | 0.124709            |
| 0.0979021          | 0.198427          | 0.236742          | 0.115967            | 0.10912             | 0.107663            | 0.115822            |
| 0.131702           | 0.178904          | 0.227418          | 0.10169             | 0.108246            | 0.102127            | 0.105041            |
| 0.125437           | 0.186626          | 0.231935          | 0.097465            | 0.0996503           | 0.0981935           | 0.0973193           |
| 0.115676           | 0.188811          | 0.232663          | 0.111305            | 0.106206            | 0.106206            | 0.107955            |
| 0.132139           | 0.17701           | 0.22465           | 0.112034            | 0.110723            | 0.085373            | 0.106643            |
| 0.126166           | 0.183858          | 0.230332          | 0.0990676           | 0.103584            | 0.10067             | 0.099796            |
| 0.130536           | 0.189103          | 0.237034          | 0.107226            | 0.106206            | 0.102127            | 0.104458            |
| 0.1537             | 0.145542          | 0.193765          | 0.120484            | 0.134615            | 0.124126            | 0.127331            |
| 0.136072           | 0.195221          | 0.23412           | 0.123834            | 0.122523            | 0.120192            | 0.121358            |
| 0.124272           | 0.197407          | 0.235431          | 0.108537            | 0.10169             | 0.0917832           | 0.108683            |
| 0.120629           | 0.184732          | 0.234411          | 0.103147            | 0.106206            | 0.104749            | 0.104749            |
| 0.133887           | 0.210227          | 0.244755          | 0.13447             | 0.137821            | 0.137238            | 0.138403            |
| 0.133596           | 0.177593          | 0.222028          | 0.0986305           | 0.103147            | 0.100524            | 0.101981            |
| 0.218386           | 0.133304          | 0.135198          | 0.188957            | 0.199301            | 0.191142            | 0.202797            |
| 0.125874           | 0.191725          | 0.240822          | 0.114802            | 0.114365            | 0.110286            | 0.114948            |
| 0.119318           | 0.195367          | 0.239219          | 0.110868            | 0.112179            | 0.107809            | 0.106643            |
| 0.131993           | 0.182692          | 0.228001          | 0.0914918           | 0.100087            | 0.0901807           | 0.099796            |
| 0.137092           | 0.202069          | 0.245338          | 0.117861            | 0.102564            | 0.0984848           | 0.102855            |
| 0.121795           | 0.18211           | 0.22771           | 0.0958625           | 0.101253            | 0.088141            | 0.0983392           |
| 0.128205           | 0.200758          | 0.239948          | 0.122378            | 0.117861            | 0.116696            | 0.115822            |
| 0.125583           | 0.199301          | 0.238782          | 0.11859             | 0.114073            | 0.103584            | 0.113199            |
| 0.135781           | 0.201632          | 0.243153          | 0.11451             | 0.0962995           | 0.103875            | 0.100962            |
| 0.13549            | 0.20134           | 0.237908          | 0.126166            | 0.114948            | 0.11757             | 0.119318            |
| 0.128788           | 0.204545          | 0.244027          | 0.114802            | 0.106206            | 0.11553             | 0.115822            |
| 0.127768           | 0.194784          | 0.235431          | 0.116113            | 0.118007            | 0.106061            | 0.121212            |
| 0.129953           | 0.198427          | 0.24053           | 0.118298            | 0.107372            | 0.108537            | 0.112325            |
| 0.120921           | 0.181527          | 0.225379          | 0.0987762           | 0.104167            | 0.0913462           | 0.102127            |
| 0.129079           | 0.19493           | 0.233246          | 0.113636            | 0.110868            | 0.107955            | 0.107372            |
| 0.12602            | 0.199738          | 0.243881          | 0.11961             | 0.111305            | 0.0874126           | 0.11451             |
| 0.13549            | 0.205128          | 0.243735          | 0.12296             | 0.114948            | 0.10708             | 0.119027            |
| 0.105624           | 0.213432          | 0.25              | 0.127185            | 0.123543            | 0.121212            | 0.124417            |
| 0.132284           | 0.195513          | 0.239073          | 0.119172            | 0.114948            | 0.108537            | 0.115239            |
| 0.130828           | 0.188228          | 0.234703          | 0.0990676           | 0.0913462           | 0.0948427           | 0.0971737           |
| 0.136655           | 0.199883          | 0.243153          | 0.111888            | 0.10067             | 0.105041            | 0.110286            |
| 0.127914           | 0.184149          | 0.23412           | 0.0973193           | 0.0907634           | 0.0922203           | 0.0916375           |
| 0.143939           | 0.210082          | 0.24898           | 0.129953            | 0.11553             | 0.121066            | 0.124272            |

|          |          |          |           |           |           |           |
|----------|----------|----------|-----------|-----------|-----------|-----------|
| 0.145979 | 0.210373 | 0.244901 | 0.137238  | 0.122232  | 0.124854  | 0.125728  |
| 0.129808 | 0.18954  | 0.233974 | 0.105624  | 0.0935315 | 0.0990676 | 0.0987762 |
| 0.109411 | 0.192453 | 0.233974 | 0.102127  | 0.100816  | 0.0941142 | 0.097028  |
| 0.118881 | 0.202797 | 0.245484 | 0.119464  | 0.10271   | 0.107372  | 0.112034  |
| 0.139277 | 0.190851 | 0.236451 | 0.105478  | 0.0802739 | 0.0863928 | 0.0779429 |
| 0.144085 | 0.207022 | 0.24796  | 0.128642  | 0.116259  | 0.117716  | 0.12296   |
| 0.128351 | 0.192453 | 0.238636 | 0.103293  | 0.097028  | 0.092366  | 0.0958625 |
| 0.12704  | 0.187354 | 0.233537 | 0.112762  | 0.0957168 | 0.0968823 | 0.106206  |
| 0.132721 | 0.215763 | 0.247378 | 0.140006  | 0.140443  | 0.136655  | 0.138695  |
| 0.13884  | 0.198281 | 0.236597 | 0.117861  | 0.107809  | 0.110723  | 0.107226  |
| 0.126457 | 0.188228 | 0.232372 | 0.102564  | 0.0960082 | 0.0960082 | 0.0942599 |
| 0.131993 | 0.200466 | 0.241987 | 0.120047  | 0.120484  | 0.114365  | 0.116113  |
| 0.130245 | 0.180653 | 0.222174 | 0.0766317 | 0.10708   | 0.0983392 | 0.109411  |
| 0.141026 | 0.215909 | 0.250146 | 0.125583  | 0.0919289 | 0.111451  | 0.10271   |
| 0.135635 | 0.203234 | 0.24155  | 0.121066  | 0.108683  | 0.104895  | 0.107517  |
| 0.125437 | 0.189248 | 0.237179 | 0.106498  | 0.103147  | 0.0976107 | 0.105186  |
| 0.129516 | 0.188374 | 0.233683 | 0.109994  | 0.100816  | 0.0967366 | 0.0996503 |
| 0.113345 | 0.205711 | 0.24257  | 0.119172  | 0.107372  | 0.101544  | 0.114948  |
| 0.137238 | 0.212121 | 0.252185 | 0.129953  | 0.112034  | 0.116113  | 0.123397  |
| 0.145105 | 0.213869 | 0.25102  | 0.129371  | 0.117861  | 0.123689  | 0.121066  |
| 0.171474 | 0.16623  | 0.190851 | 0.148456  | 0.151807  | 0.144814  | 0.148019  |
| 0.129516 | 0.18954  | 0.23514  | 0.103875  | 0.0967366 | 0.097028  | 0.0952797 |
| 0.126603 | 0.191871 | 0.236597 | 0.100087  | 0.0926573 | 0.0920746 | 0.0941142 |
| 0.128642 | 0.189248 | 0.239802 | 0.103584  | 0.0938228 | 0.0885781 | 0.094697  |
| 0.137238 | 0.202506 | 0.240239 | 0.138986  | 0.131265  | 0.130099  | 0.133013  |
| 0.13345  | 0.187937 | 0.233829 | 0.102273  | 0.0919289 | 0.0913462 | 0.0939685 |
| 0.138549 | 0.202069 | 0.239219 | 0.115822  | 0.101981  | 0.104021  | 0.105769  |
| 0.11757  | 0.202069 | 0.242716 | 0.118735  | 0.109557  | 0.105186  | 0.112179  |
| 0.129079 | 0.188811 | 0.234703 | 0.106643  | 0.102418  | 0.0962995 | 0.10067   |
| 0.128788 | 0.206585 | 0.239948 | 0.135781  | 0.13884   | 0.133304  | 0.138549  |
| 0.140152 | 0.198718 | 0.243735 | 0.111597  | 0.0980478 | 0.100962  | 0.106789  |
| 0.142045 | 0.209353 | 0.24796  | 0.128059  | 0.115385  | 0.120921  | 0.125     |
| 0.143648 | 0.201049 | 0.23616  | 0.125291  | 0.107372  | 0.114656  | 0.107372  |
| 0.116404 | 0.182838 | 0.228438 | 0.10067   | 0.106352  | 0.0944056 | 0.104895  |
| 0.125728 | 0.188374 | 0.233683 | 0.100087  | 0.0929487 | 0.0929487 | 0.0981935 |
| 0.129808 | 0.190705 | 0.237762 | 0.107372  | 0.0920746 | 0.0944056 | 0.0920746 |
| 0.140006 | 0.207605 | 0.245338 | 0.120775  | 0.114219  | 0.112471  | 0.120921  |
| 0.126166 | 0.191434 | 0.23616  | 0.104021  | 0.0960082 | 0.0875583 | 0.0925117 |
| 0.139714 | 0.21285  | 0.247378 | 0.125728  | 0.115676  | 0.121503  | 0.121503  |
| 0.138258 | 0.18954  | 0.236888 | 0.114948  | 0.0979021 | 0.100233  | 0.101107  |
| 0.131847 | 0.200029 | 0.240385 | 0.106206  | 0.097028  | 0.101107  | 0.100816  |
| 0.131265 | 0.188957 | 0.237179 | 0.110868  | 0.101107  | 0.0981935 | 0.100524  |
| 0.138549 | 0.196533 | 0.241259 | 0.109994  | 0.101107  | 0.10373   | 0.10169   |
| 0.131265 | 0.192162 | 0.237179 | 0.108537  | 0.0967366 | 0.0973193 | 0.0973193 |

|           |          |          |          |           |           |           |
|-----------|----------|----------|----------|-----------|-----------|-----------|
| 0.130973  | 0.191579 | 0.235431 | 0.101836 | 0.0941142 | 0.0917832 | 0.0987762 |
| 0.140152  | 0.21183  | 0.247523 | 0.126457 | 0.114948  | 0.119901  | 0.122232  |
| 0.124126  | 0.187937 | 0.237617 | 0.105186 | 0.0977564 | 0.0936772 | 0.10271   |
| 0.125146  | 0.193619 | 0.238345 | 0.112617 | 0.104895  | 0.0952797 | 0.107226  |
| 0.0525932 | 0.2044   | 0.244755 | 0.120775 | 0.115676  | 0.113054  | 0.115676  |
| 0.0954254 | 0.204983 | 0.243007 | 0.120192 | 0.118298  | 0.113345  | 0.120921  |
| 0.116696  | 0.209645 | 0.245921 | 0.124854 | 0.11655   | 0.114219  | 0.110431  |
| 0.13141   | 0.219697 | 0.255682 | 0.129662 | 0.126603  | 0.118735  | 0.121358  |
| 0.11553   | 0.186043 | 0.232226 | 0.106206 | 0.111014  | 0.0941142 | 0.109848  |
| 0.16623   | 0.150495 | 0.175408 | 0.170892 | 0.176282  | 0.168415  | 0.176865  |
| 0.0734266 | 0.191725 | 0.236742 | 0.102855 | 0.103293  | 0.0971737 | 0.104749  |
| 0.128059  | 0.21081  | 0.24796  | 0.128934 | 0.120921  | 0.120338  | 0.120047  |
| 0.123397  | 0.206731 | 0.245921 | 0.121649 | 0.113928  | 0.112471  | 0.110723  |
| 0.104604  | 0.215326 | 0.250728 | 0.130245 | 0.126603  | 0.123397  | 0.129516  |
| 0.119318  | 0.198281 | 0.241259 | 0.103584 | 0.102564  | 0.0941142 | 0.0984848 |
| 0.130099  | 0.212267 | 0.250874 | 0.121649 | 0.118881  | 0.112762  | 0.113928  |
| 0.11116   | 0.198572 | 0.240093 | 0.106789 | 0.106935  | 0.100233  | 0.103438  |
| 0.112471  | 0.200758 | 0.239656 | 0.117133 | 0.111742  | 0.109703  | 0.114656  |
| 0.108974  | 0.195221 | 0.237908 | 0.104604 | 0.105332  | 0.0945513 | 0.106206  |
| 0.127622  | 0.212995 | 0.251311 | 0.126748 | 0.117861  | 0.116404  | 0.116404  |
| 0.116841  | 0.191142 | 0.237034 | 0.107809 | 0.0893065 | 0.0957168 | 0.102127  |
| 0.111451  | 0.205565 | 0.243298 | 0.123106 | 0.126166  | 0.120047  | 0.121795  |
| 0.097028  | 0.194347 | 0.239656 | 0.108683 | 0.104458  | 0.103875  | 0.105915  |
| 0.140589  | 0.204108 | 0.245921 | 0.118735 | 0.106061  | 0.112471  | 0.120047  |
| 0.0996503 | 0.20542  | 0.242861 | 0.126166 | 0.120484  | 0.117861  | 0.121941  |
| 0.105769  | 0.195221 | 0.237325 | 0.102855 | 0.0980478 | 0.0954254 | 0.100379  |
| 0.137821  | 0.203963 | 0.239948 | 0.132284 | 0.136218  | 0.131265  | 0.136801  |
| 0.107663  | 0.199155 | 0.237471 | 0.110286 | 0.10169   | 0.100233  | 0.106935  |
| 0.124272  | 0.195367 | 0.241841 | 0.107372 | 0.104312  | 0.0984848 | 0.10169   |
| 0.125874  | 0.197552 | 0.239948 | 0.108974 | 0.0960082 | 0.103293  | 0.0992133 |
| 0.102273  | 0.212121 | 0.248397 | 0.134615 | 0.129516  | 0.127768  | 0.133304  |
| 0.13141   | 0.18211  | 0.222174 | 0.104312 | 0.107955  | 0.0954254 | 0.100962  |
| 0.114802  | 0.192599 | 0.237034 | 0.105478 | 0.0995047 | 0.0971737 | 0.0960082 |
| 0.117133  | 0.189103 | 0.23412  | 0.105186 | 0.10067   | 0.0957168 | 0.097465  |
| 0.103001  | 0.19595  | 0.238054 | 0.111451 | 0.11451   | 0.104021  | 0.111014  |
| 0.119172  | 0.208042 | 0.246066 | 0.122086 | 0.119027  | 0.111451  | 0.114656  |
| 0.0986305 | 0.198281 | 0.238928 | 0.109703 | 0.107517  | 0.105186  | 0.111597  |
| 0.113345  | 0.180653 | 0.232663 | 0.103147 | 0.0919289 | 0.0901807 | 0.095134  |
| 0.114802  | 0.187354 | 0.232955 | 0.100524 | 0.0948427 | 0.0948427 | 0.0989219 |
| 0.114948  | 0.19595  | 0.238345 | 0.110286 | 0.0964452 | 0.0973193 | 0.101399  |
| 0.132721  | 0.193328 | 0.237471 | 0.107955 | 0.109557  | 0.101981  | 0.109557  |
| 0.117424  | 0.205711 | 0.246358 | 0.128788 | 0.112908  | 0.110286  | 0.118444  |
| 0.11553   | 0.197407 | 0.240385 | 0.109411 | 0.0987762 | 0.0984848 | 0.102564  |
| 0.112762  | 0.188811 | 0.234411 | 0.106061 | 0.0907634 | 0.095134  | 0.097465  |

|          |          |          |           |           |           |           |
|----------|----------|----------|-----------|-----------|-----------|-----------|
| 0.114219 | 0.204545 | 0.243444 | 0.125291  | 0.105624  | 0.106789  | 0.111742  |
| 0.112325 | 0.188374 | 0.236888 | 0.105041  | 0.0949883 | 0.0929487 | 0.10169   |
| 0.133304 | 0.192162 | 0.23514  | 0.114365  | 0.11451   | 0.113345  | 0.113054  |
| 0.127185 | 0.206439 | 0.240385 | 0.126894  | 0.126166  | 0.122378  | 0.125874  |
| 0.119027 | 0.196241 | 0.241259 | 0.110577  | 0.100816  | 0.10373   | 0.109557  |
| 0.116259 | 0.196678 | 0.24053  | 0.111888  | 0.101544  | 0.100962  | 0.105915  |
| 0.113345 | 0.193473 | 0.23616  | 0.107226  | 0.0971737 | 0.0971737 | 0.104458  |
| 0.119172 | 0.186189 | 0.233246 | 0.0973193 | 0.100087  | 0.0863928 | 0.097465  |
| 0.120047 | 0.202506 | 0.243735 | 0.123834  | 0.112034  | 0.111742  | 0.113782  |
| 0.115093 | 0.190268 | 0.233246 | 0.103147  | 0.0954254 | 0.0884324 | 0.0992133 |
| 0.135635 | 0.211684 | 0.246212 | 0.133013  | 0.127331  | 0.120047  | 0.131702  |
| 0.132576 | 0.20134  | 0.239365 | 0.132576  | 0.12602   | 0.123106  | 0.127477  |
| 0.128205 | 0.203671 | 0.241113 | 0.125     | 0.113782  | 0.114073  | 0.121358  |
| 0.125728 | 0.191288 | 0.238345 | 0.114365  | 0.108974  | 0.101399  | 0.109266  |
| 0.115822 | 0.193036 | 0.238054 | 0.112325  | 0.110431  | 0.0984848 | 0.100816  |
| 0.11655  | 0.194347 | 0.238782 | 0.109266  | 0.092803  | 0.0948427 | 0.0989219 |
| 0.125146 | 0.191871 | 0.238636 | 0.099796  | 0.0914918 | 0.0917832 | 0.0938228 |
| 0.127185 | 0.19391  | 0.236597 | 0.101544  | 0.094697  | 0.0874126 | 0.0914918 |
| 0.13884  | 0.179924 | 0.224942 | 0.076486  | 0.0958625 | 0.0882867 | 0.0906177 |
| 0.136218 | 0.206731 | 0.245047 | 0.116113  | 0.0874126 | 0.101981  | 0.0941142 |
| 0.126748 | 0.201923 | 0.24461  | 0.106935  | 0.108537  | 0.0980478 | 0.0980478 |
| 0.138549 | 0.200612 | 0.238928 | 0.12602   | 0.127331  | 0.120338  | 0.122086  |
| 0        | 0.212704 | 0.249854 | 0.129079  | 0.125146  | 0.122523  | 0.128059  |
| 0.212704 | 0        | 0.132139 | 0.18007   | 0.186334  | 0.183421  | 0.188957  |
| 0.249854 | 0.132139 | 0        | 0.223631  | 0.229895  | 0.230186  | 0.234557  |
| 0.129079 | 0.18007  | 0.223631 | 0         | 0.0971737 | 0.088141  | 0.095134  |
| 0.125146 | 0.186334 | 0.229895 | 0.0971737 | 0         | 0.0850816 | 0.0810023 |
| 0.122523 | 0.183421 | 0.230186 | 0.088141  | 0.0850816 | 0         | 0.0842075 |
| 0.128059 | 0.188957 | 0.234557 | 0.095134  | 0.0810023 | 0.0842075 | 0         |
| 0.136509 | 0.195076 | 0.234848 | 0.124854  | 0.12296   | 0.121503  | 0.118881  |
| 0.13039  | 0.195367 | 0.236597 | 0.0939685 | 0.0789627 | 0.0847902 | 0.0725524 |
| 0.145105 | 0.212704 | 0.249272 | 0.132284  | 0.100379  | 0.121066  | 0.113782  |
| 0.133304 | 0.192453 | 0.237471 | 0.101253  | 0.0780886 | 0.085373  | 0.080711  |
| 0.137092 | 0.207022 | 0.243007 | 0.117279  | 0.0850816 | 0.0984848 | 0.0958625 |
| 0.135781 | 0.195804 | 0.236451 | 0.111888  | 0.0989219 | 0.101544  | 0.104458  |
| 0.138403 | 0.203089 | 0.245192 | 0.117716  | 0.0887238 | 0.0945513 | 0.0954254 |
| 0.138986 | 0.206876 | 0.241987 | 0.127622  | 0.122232  | 0.118735  | 0.121649  |
| 0.126166 | 0.195513 | 0.241696 | 0.105478  | 0.0779429 | 0.0861014 | 0.0805653 |
| 0.126748 | 0.192599 | 0.239073 | 0.0987762 | 0.0706585 | 0.0863928 | 0.08581   |
| 0.127185 | 0.194784 | 0.24155  | 0.101544  | 0.07838   | 0.0824592 | 0.083042  |
| 0.123397 | 0.184878 | 0.230478 | 0.0936772 | 0.0713869 | 0.0792541 | 0.0716783 |
| 0.128059 | 0.191579 | 0.235723 | 0.0962995 | 0.0719697 | 0.0836247 | 0.0871212 |
| 0.125583 | 0.194347 | 0.239365 | 0.104895  | 0.0785256 | 0.0837704 | 0.0791084 |
| 0.136801 | 0.198572 | 0.24155  | 0.110868  | 0.0894522 | 0.0981935 | 0.0938228 |

|          |          |          |           |           |           |           |
|----------|----------|----------|-----------|-----------|-----------|-----------|
| 0.141463 | 0.209062 | 0.249126 | 0.116113  | 0.0938228 | 0.109848  | 0.092366  |
| 0.129662 | 0.193182 | 0.239365 | 0.102855  | 0.0785256 | 0.08581   | 0.0849359 |
| 0.133304 | 0.188374 | 0.233392 | 0.0977564 | 0.0842075 | 0.0844988 | 0.0757576 |
| 0.141463 | 0.207022 | 0.246212 | 0.114365  | 0.0914918 | 0.0981935 | 0.0958625 |
| 0.127768 | 0.188666 | 0.234848 | 0.0954254 | 0.0757576 | 0.0850816 | 0.0740093 |
| 0.146562 | 0.207459 | 0.24461  | 0.127331  | 0.104749  | 0.11116   | 0.0986305 |
| 0.138986 | 0.198135 | 0.236451 | 0.13141   | 0.127477  | 0.121649  | 0.131265  |
| 0.135052 | 0.19799  | 0.237179 | 0.113782  | 0.108683  | 0.103147  | 0.108392  |
| 0.119027 | 0.190122 | 0.235431 | 0.097465  | 0.0646853 | 0.0789627 | 0.076049  |
| 0.120047 | 0.190851 | 0.234411 | 0.0821678 | 0.0729895 | 0.0761946 | 0.0726981 |
| 0.130682 | 0.203234 | 0.245338 | 0.113491  | 0.0844988 | 0.0999417 | 0.0914918 |
| 0.129662 | 0.199883 | 0.241987 | 0.0973193 | 0.0861014 | 0.0913462 | 0.0875583 |
| 0.127914 | 0.199592 | 0.238782 | 0.113054  | 0.095134  | 0.100962  | 0.10067   |
| 0.132139 | 0.196241 | 0.240385 | 0.105332  | 0.0821678 | 0.0903263 | 0.0818765 |
| 0.129371 | 0.194347 | 0.237325 | 0.108683  | 0.0814394 | 0.0898893 | 0.0933858 |
| 0.127914 | 0.198135 | 0.239073 | 0.106935  | 0.0823135 | 0.0910548 | 0.0846445 |
| 0.135781 | 0.209207 | 0.247523 | 0.120921  | 0.0913462 | 0.104749  | 0.100962  |
| 0.13986  | 0.202214 | 0.245775 | 0.114219  | 0.0869755 | 0.0936772 | 0.0995047 |
| 0.139132 | 0.208188 | 0.249126 | 0.116696  | 0.0958625 | 0.10373   | 0.092366  |
| 0.146853 | 0.203089 | 0.240822 | 0.121212  | 0.114073  | 0.114656  | 0.115239  |
| 0.129953 | 0.195221 | 0.236742 | 0.0984848 | 0.0805653 | 0.0910548 | 0.08581   |
| 0.134324 | 0.202506 | 0.245484 | 0.113345  | 0.0925117 | 0.100962  | 0.0930944 |
| 0.124854 | 0.190122 | 0.234848 | 0.0977564 | 0.0740093 | 0.0865385 | 0.0789627 |
| 0.121795 | 0.186189 | 0.23208  | 0.104604  | 0.0942599 | 0.097465  | 0.0933858 |
| 0.124126 | 0.193182 | 0.238782 | 0.100233  | 0.0770688 | 0.0826049 | 0.0738636 |
| 0.125437 | 0.190122 | 0.23514  | 0.100087  | 0.0780886 | 0.0859557 | 0.0684732 |
| 0.120775 | 0.190997 | 0.237179 | 0.0983392 | 0.0766317 | 0.0815851 | 0.0716783 |
| 0.138695 | 0.204545 | 0.245192 | 0.115676  | 0.0933858 | 0.104167  | 0.090472  |
| 0.136509 | 0.191871 | 0.236305 | 0.114656  | 0.102855  | 0.0976107 | 0.104312  |
| 0.141171 | 0.206148 | 0.242133 | 0.11553   | 0.094697  | 0.101981  | 0.0944056 |
| 0.125728 | 0.188083 | 0.231935 | 0.0936772 | 0.0719697 | 0.0824592 | 0.0754662 |
| 0.130828 | 0.203671 | 0.246649 | 0.111597  | 0.0817308 | 0.0980478 | 0.0960082 |
| 0.136218 | 0.197407 | 0.238928 | 0.117279  | 0.109266  | 0.110431  | 0.115093  |
| 0.133304 | 0.186917 | 0.233392 | 0.111742  | 0.109557  | 0.104021  | 0.111305  |
| 0.121795 | 0.197261 | 0.239948 | 0.114802  | 0.102127  | 0.103875  | 0.105915  |
| 0.127768 | 0.189831 | 0.232517 | 0.119901  | 0.111888  | 0.106061  | 0.113928  |
| 0.128205 | 0.19493  | 0.242861 | 0.115385  | 0.111451  | 0.10708   | 0.116696  |
| 0.120921 | 0.194347 | 0.24053  | 0.109557  | 0.10708   | 0.0913462 | 0.10271   |
| 0.13141  | 0.210664 | 0.250146 | 0.133159  | 0.124272  | 0.125728  | 0.13039   |
| 0.138549 | 0.21285  | 0.248252 | 0.132139  | 0.126166  | 0.117716  | 0.125291  |
| 0.11961  | 0.18954  | 0.232226 | 0.103584  | 0.10373   | 0.101981  | 0.105186  |
| 0.133159 | 0.211247 | 0.250437 | 0.129079  | 0.122815  | 0.123689  | 0.122523  |
| 0.124854 | 0.2044   | 0.244464 | 0.128934  | 0.116841  | 0.115385  | 0.121212  |
| 0.133304 | 0.203817 | 0.245338 | 0.125728  | 0.119172  | 0.11655   | 0.113928  |

|          |          |          |          |          |          |          |
|----------|----------|----------|----------|----------|----------|----------|
| 0.122815 | 0.195367 | 0.236305 | 0.116113 | 0.113054 | 0.106061 | 0.108683 |
| 0.127477 | 0.203526 | 0.245047 | 0.123106 | 0.115385 | 0.111888 | 0.11451  |
| 0.127622 | 0.200758 | 0.240239 | 0.12296  | 0.119901 | 0.118444 | 0.124563 |
| 0.131265 | 0.208188 | 0.246212 | 0.121066 | 0.117424 | 0.121795 | 0.120338 |
| 0.130682 | 0.211101 | 0.247378 | 0.133013 | 0.131993 | 0.130245 | 0.126748 |
| 0.132721 | 0.200321 | 0.240967 | 0.120775 | 0.124417 | 0.119172 | 0.121795 |
| 0.122523 | 0.190705 | 0.234848 | 0.114656 | 0.108974 | 0.102273 | 0.1081   |
| 0.144522 | 0.202214 | 0.245192 | 0.124417 | 0.120775 | 0.114948 | 0.131265 |
| 0.13039  | 0.206439 | 0.245047 | 0.133596 | 0.126457 | 0.125    | 0.128205 |
| 0.120775 | 0.189831 | 0.231935 | 0.104167 | 0.104312 | 0.097028 | 0.104312 |
| 0.230478 | 0.122086 | 0.116987 | 0.206002 | 0.211684 | 0.209645 | 0.216929 |
| 0.130536 | 0.196678 | 0.239656 | 0.11451  | 0.117279 | 0.111742 | 0.118153 |
| 0.125874 | 0.192308 | 0.238199 | 0.116259 | 0.106498 | 0.108246 | 0.109994 |
| 0.136509 | 0.210519 | 0.246503 | 0.129516 | 0.128497 | 0.125291 | 0.120629 |
| 0.127185 | 0.19391  | 0.237179 | 0.115822 | 0.109266 | 0.105769 | 0.113345 |
| 0.137675 | 0.207314 | 0.248834 | 0.134178 | 0.128788 | 0.126748 | 0.126748 |
| 0.126603 | 0.194202 | 0.237179 | 0.114073 | 0.113636 | 0.110723 | 0.106643 |
| 0.126457 | 0.197552 | 0.237325 | 0.111305 | 0.113199 | 0.110286 | 0.113491 |
| 0.132867 | 0.199009 | 0.238782 | 0.125874 | 0.11757  | 0.117861 | 0.119901 |
| 0.133887 | 0.192453 | 0.231935 | 0.122815 | 0.126166 | 0.116259 | 0.111888 |
| 0.134615 | 0.205711 | 0.247232 | 0.12704  | 0.118444 | 0.121941 | 0.119901 |
| 0.128934 | 0.207605 | 0.245629 | 0.126603 | 0.117133 | 0.122669 | 0.120921 |
| 0.124272 | 0.207314 | 0.244755 | 0.122523 | 0.124126 | 0.123834 | 0.119172 |
| 0.128934 | 0.199446 | 0.241259 | 0.114656 | 0.107226 | 0.107809 | 0.113636 |
| 0.126311 | 0.200321 | 0.245338 | 0.111451 | 0.111305 | 0.109557 | 0.108392 |
| 0.134615 | 0.207459 | 0.24898  | 0.129371 | 0.128934 | 0.123689 | 0.124854 |
| 0.126311 | 0.190997 | 0.231643 | 0.109994 | 0.11451  | 0.106061 | 0.108392 |
| 0.144376 | 0.208479 | 0.245047 | 0.127768 | 0.121212 | 0.118881 | 0.121503 |
| 0.145396 | 0.192308 | 0.230041 | 0.132867 | 0.133304 | 0.130099 | 0.134178 |
| 0.128788 | 0.197844 | 0.237325 | 0.116259 | 0.116113 | 0.109411 | 0.121358 |
| 0.131119 | 0.202214 | 0.246358 | 0.129662 | 0.11961  | 0.119027 | 0.12398  |
| 0.131556 | 0.190414 | 0.231935 | 0.11757  | 0.121212 | 0.111597 | 0.122378 |
| 0.133741 | 0.199883 | 0.235868 | 0.122378 | 0.117861 | 0.120775 | 0.120192 |
| 0.141317 | 0.190268 | 0.229458 | 0.115385 | 0.116113 | 0.119901 | 0.119027 |
| 0.147436 | 0.196096 | 0.238782 | 0.134907 | 0.128642 | 0.130682 | 0.134178 |
| 0.11961  | 0.186334 | 0.231935 | 0.11116  | 0.100233 | 0.101107 | 0.106643 |
| 0.132867 | 0.201632 | 0.240822 | 0.132867 | 0.119027 | 0.118444 | 0.125728 |
| 0.151661 | 0.186626 | 0.224359 | 0.138258 | 0.132576 | 0.130536 | 0.138986 |
| 0.114948 | 0.204108 | 0.242133 | 0.120484 | 0.112471 | 0.102855 | 0.115093 |
| 0.135635 | 0.192162 | 0.236597 | 0.116404 | 0.106352 | 0.104604 | 0.107517 |
| 0.144231 | 0.210664 | 0.247815 | 0.133741 | 0.127185 | 0.130682 | 0.136801 |
| 0.141608 | 0.199592 | 0.238782 | 0.113636 | 0.103001 | 0.11116  | 0.10708  |
| 0.145251 | 0.215763 | 0.251457 | 0.131265 | 0.120629 | 0.126457 | 0.130828 |
| 0.134324 | 0.203963 | 0.243153 | 0.125291 | 0.121066 | 0.118444 | 0.125437 |

|          |          |          |           |           |           |           |
|----------|----------|----------|-----------|-----------|-----------|-----------|
| 0.124563 | 0.204983 | 0.245047 | 0.121358  | 0.121503  | 0.115093  | 0.114219  |
| 0.13345  | 0.203671 | 0.240239 | 0.117133  | 0.112908  | 0.107372  | 0.11961   |
| 0.126894 | 0.199446 | 0.237471 | 0.120775  | 0.113636  | 0.106061  | 0.116841  |
| 0.128497 | 0.208042 | 0.249272 | 0.129371  | 0.119318  | 0.108246  | 0.109994  |
| 0.127331 | 0.206002 | 0.24461  | 0.123543  | 0.123397  | 0.118735  | 0.118444  |
| 0.120629 | 0.212121 | 0.248689 | 0.127622  | 0.123689  | 0.11961   | 0.114073  |
| 0.120338 | 0.212121 | 0.251311 | 0.124417  | 0.119901  | 0.121066  | 0.11961   |
| 0.131702 | 0.203963 | 0.239656 | 0.119755  | 0.114948  | 0.109703  | 0.114365  |
| 0.137529 | 0.20542  | 0.241987 | 0.133159  | 0.135635  | 0.12602   | 0.128642  |
| 0.126457 | 0.19697  | 0.237908 | 0.125583  | 0.108246  | 0.113782  | 0.114948  |
| 0.117424 | 0.200466 | 0.243735 | 0.115967  | 0.10271   | 0.103293  | 0.0962995 |
| 0.112471 | 0.204254 | 0.243153 | 0.125874  | 0.117279  | 0.116404  | 0.11757   |
| 0.109848 | 0.197552 | 0.237617 | 0.119172  | 0.108537  | 0.105915  | 0.112034  |
| 0.140297 | 0.203526 | 0.243881 | 0.134761  | 0.131119  | 0.12704   | 0.136364  |
| 0.146707 | 0.21285  | 0.249126 | 0.14933   | 0.145396  | 0.140734  | 0.142483  |
| 0.136509 | 0.207314 | 0.245047 | 0.114073  | 0.0903263 | 0.103147  | 0.0990676 |
| 0.130245 | 0.199592 | 0.241696 | 0.105478  | 0.0869755 | 0.090472  | 0.0922203 |
| 0.135344 | 0.209062 | 0.248543 | 0.124563  | 0.121795  | 0.119172  | 0.115093  |
| 0.131702 | 0.207751 | 0.24461  | 0.129953  | 0.119901  | 0.124272  | 0.12398   |
| 0.131702 | 0.205711 | 0.248397 | 0.115967  | 0.0849359 | 0.0995047 | 0.101836  |
| 0.134907 | 0.214161 | 0.251311 | 0.134907  | 0.12398   | 0.126894  | 0.123689  |
| 0.138112 | 0.202506 | 0.240239 | 0.125583  | 0.122232  | 0.120484  | 0.123689  |
| 0.135052 | 0.203234 | 0.244464 | 0.122815  | 0.107226  | 0.107517  | 0.115093  |
| 0.156031 | 0.21285  | 0.248834 | 0.14933   | 0.139277  | 0.1419    | 0.143648  |
| 0.131847 | 0.201486 | 0.246795 | 0.123397  | 0.102564  | 0.111597  | 0.111597  |
| 0.144959 | 0.206439 | 0.242716 | 0.136801  | 0.129079  | 0.125583  | 0.130536  |
| 0.120921 | 0.206002 | 0.246941 | 0.11655   | 0.100962  | 0.105915  | 0.101253  |
| 0.135198 | 0.215326 | 0.250728 | 0.125583  | 0.11961   | 0.121358  | 0.121941  |
| 0.125583 | 0.197552 | 0.235577 | 0.118298  | 0.119901  | 0.113491  | 0.111451  |
| 0.145833 | 0.172057 | 0.210664 | 0.108246  | 0.135198  | 0.122669  | 0.134033  |
| 0.147145 | 0.210664 | 0.242279 | 0.136655  | 0.13884   | 0.137966  | 0.134178  |
| 0.140006 | 0.188374 | 0.227273 | 0.0759033 | 0.11859   | 0.115676  | 0.118007  |
| 0.145105 | 0.170746 | 0.209353 | 0.090035  | 0.131556  | 0.126894  | 0.130973  |
| 0.163024 | 0.146416 | 0.187937 | 0.129225  | 0.132284  | 0.128497  | 0.134615  |
| 0.160693 | 0.147582 | 0.193473 | 0.110286  | 0.137821  | 0.129371  | 0.138403  |
| 0.122086 | 0.20542  | 0.24257  | 0.11859   | 0.102127  | 0.102418  | 0.110868  |
| 0.147582 | 0.202069 | 0.238928 | 0.127768  | 0.134324  | 0.129371  | 0.133159  |
| 0.13243  | 0.181964 | 0.226399 | 0.107663  | 0.110723  | 0.103438  | 0.111014  |
| 0.13141  | 0.183858 | 0.231789 | 0.105769  | 0.111742  | 0.103584  | 0.110286  |
| 0.130099 | 0.191288 | 0.233974 | 0.119027  | 0.117424  | 0.116259  | 0.11859   |
| 0.138549 | 0.188083 | 0.22873  | 0.0683275 | 0.113636  | 0.109557  | 0.111888  |
| 0.132576 | 0.192016 | 0.239073 | 0.116841  | 0.110868  | 0.104749  | 0.108246  |
| 0.134324 | 0.174242 | 0.222465 | 0.0839161 | 0.106498  | 0.0989219 | 0.106206  |
| 0.138986 | 0.187063 | 0.233246 | 0.1081    | 0.116696  | 0.113491  | 0.110577  |

|          |           |           |           |           |           |           |
|----------|-----------|-----------|-----------|-----------|-----------|-----------|
| 0.130099 | 0.179924  | 0.221445  | 0.114948  | 0.116259  | 0.112471  | 0.117133  |
| 0.118153 | 0.185752  | 0.229604  | 0.106789  | 0.100524  | 0.0967366 | 0.0952797 |
| 0.143211 | 0.184295  | 0.22669   | 0.0721154 | 0.11655   | 0.11014   | 0.118298  |
| 0.139569 | 0.188228  | 0.230041  | 0.0716783 | 0.112325  | 0.111451  | 0.112034  |
| 0.137821 | 0.197844  | 0.239948  | 0.108974  | 0.0995047 | 0.102418  | 0.107663  |
| 0.231643 | 0.120047  | 0.110577  | 0.200466  | 0.209936  | 0.205565  | 0.21285   |
| 0.150641 | 0.203963  | 0.237908  | 0.0944056 | 0.134178  | 0.134761  | 0.134761  |
| 0.139132 | 0.202943  | 0.240967  | 0.120192  | 0.124126  | 0.125583  | 0.122378  |
| 0.141026 | 0.187937  | 0.227418  | 0.11451   | 0.118153  | 0.116987  | 0.11553   |
| 0.225233 | 0.103438  | 0.103584  | 0.19493   | 0.204108  | 0.20236   | 0.207314  |
| 0.134907 | 0.18211   | 0.226544  | 0.107517  | 0.106498  | 0.101253  | 0.109411  |
| 0.134178 | 0.198572  | 0.239219  | 0.116696  | 0.116841  | 0.105769  | 0.115676  |
| 0.136509 | 0.190997  | 0.233974  | 0.118735  | 0.11014   | 0.113928  | 0.115385  |
| 0.129371 | 0.185023  | 0.231206  | 0.116841  | 0.116113  | 0.112908  | 0.11757   |
| 0.259907 | 0.137238  | 0.0971737 | 0.238054  | 0.241113  | 0.241987  | 0.244901  |
| 0.125728 | 0.196533  | 0.238345  | 0.11961   | 0.120629  | 0.116259  | 0.120921  |
| 0.13447  | 0.192745  | 0.238636  | 0.103293  | 0.0952797 | 0.0979021 | 0.0999417 |
| 0.132139 | 0.196824  | 0.240385  | 0.11961   | 0.113928  | 0.109266  | 0.1081    |
| 0.131265 | 0.194493  | 0.238928  | 0.115822  | 0.111597  | 0.109848  | 0.105769  |
| 0.128059 | 0.190997  | 0.232517  | 0.117861  | 0.125291  | 0.114219  | 0.124417  |
| 0.144376 | 0.170309  | 0.217657  | 0.099796  | 0.125291  | 0.109266  | 0.120047  |
| 0.134761 | 0.192453  | 0.236597  | 0.10708   | 0.0987762 | 0.10169   | 0.105478  |
| 0.138112 | 0.183858  | 0.228293  | 0.0693473 | 0.113782  | 0.108537  | 0.114365  |
| 0.139714 | 0.192745  | 0.23514   | 0.115822  | 0.122669  | 0.117424  | 0.120629  |
| 0.127477 | 0.184295  | 0.231643  | 0.111742  | 0.111305  | 0.1081    | 0.111014  |
| 0.134033 | 0.181527  | 0.223339  | 0.0690559 | 0.111451  | 0.106498  | 0.108829  |
| 0.119027 | 0.193328  | 0.234266  | 0.115239  | 0.110431  | 0.11014   | 0.111014  |
| 0.145979 | 0.210082  | 0.242861  | 0.136655  | 0.137675  | 0.136218  | 0.131847  |
| 0.123834 | 0.199301  | 0.238782  | 0.120338  | 0.121941  | 0.122523  | 0.122815  |
| 0.137529 | 0.199301  | 0.237034  | 0.119464  | 0.117861  | 0.115822  | 0.122523  |
| 0.204545 | 0.0976107 | 0.126311  | 0.175699  | 0.184878  | 0.177885  | 0.187209  |
| 0.218531 | 0.101981  | 0.116113  | 0.185897  | 0.197115  | 0.19391   | 0.200903  |
| 0.131993 | 0.179779  | 0.225087  | 0.119755  | 0.114365  | 0.113782  | 0.11961   |
| 0.126166 | 0.185023  | 0.229167  | 0.111597  | 0.109703  | 0.107955  | 0.110286  |
| 0.148019 | 0.187063  | 0.227127  | 0.126457  | 0.133596  | 0.13039   | 0.133887  |
| 0.135198 | 0.190851  | 0.237034  | 0.106935  | 0.0983392 | 0.0971737 | 0.103001  |
| 0.125728 | 0.199155  | 0.237762  | 0.11961   | 0.122669  | 0.119464  | 0.123543  |
| 0.136072 | 0.197261  | 0.233829  | 0.121212  | 0.11757   | 0.120192  | 0.116987  |
| 0.236014 | 0.119464  | 0.120484  | 0.21183   | 0.216346  | 0.216346  | 0.2213    |
| 0.134033 | 0.190851  | 0.237034  | 0.108392  | 0.108829  | 0.106206  | 0.103584  |
| 0.220425 | 0.14088   | 0.13549   | 0.186626  | 0.190268  | 0.187354  | 0.193182  |
| 0.120047 | 0.197261  | 0.241113  | 0.105186  | 0.0936772 | 0.0887238 | 0.0962995 |
| 0.129225 | 0.190997  | 0.232226  | 0.109411  | 0.109557  | 0.102273  | 0.110431  |
| 0.131119 | 0.184149  | 0.225087  | 0.0912005 | 0.112325  | 0.103001  | 0.114073  |



|          |           |          |           |          |           |           |
|----------|-----------|----------|-----------|----------|-----------|-----------|
| 0.129371 | 0.176573  | 0.222465 | 0.107809  | 0.105041 | 0.101253  | 0.107955  |
| 0.223922 | 0.106789  | 0.124709 | 0.191871  | 0.200466 | 0.198427  | 0.20338   |
| 0.144959 | 0.186917  | 0.223485 | 0.0793998 | 0.12704  | 0.123543  | 0.125874  |
| 0.123397 | 0.201777  | 0.244464 | 0.11116   | 0.104895 | 0.102564  | 0.109848  |
| 0.142628 | 0.191579  | 0.229604 | 0.0770688 | 0.120921 | 0.121212  | 0.120629  |
| 0.141463 | 0.198281  | 0.238928 | 0.117861  | 0.111597 | 0.109266  | 0.113636  |
| 0.129808 | 0.182547  | 0.232809 | 0.111451  | 0.109848 | 0.104312  | 0.112471  |
| 0.118298 | 0.197552  | 0.241987 | 0.106352  | 0.095134 | 0.0939685 | 0.101253  |
| 0.136072 | 0.183858  | 0.22567  | 0.104895  | 0.103875 | 0.099796  | 0.108537  |
| 0.138403 | 0.199301  | 0.239948 | 0.119172  | 0.114073 | 0.112617  | 0.120775  |
| 0.132867 | 0.178322  | 0.223631 | 0.0664336 | 0.108246 | 0.104167  | 0.10708   |
| 0.125146 | 0.199446  | 0.237179 | 0.113199  | 0.104312 | 0.103147  | 0.110723  |
| 0.204545 | 0.0938228 | 0.131265 | 0.175991  | 0.181672 | 0.179341  | 0.184878  |
| 0.13243  | 0.196533  | 0.242716 | 0.118735  | 0.113928 | 0.111888  | 0.106643  |
| 0.138695 | 0.198718  | 0.23412  | 0.119755  | 0.121649 | 0.117861  | 0.116113  |
| 0.132721 | 0.188374  | 0.231643 | 0.11116   | 0.109557 | 0.109848  | 0.105186  |
| 0.126748 | 0.189685  | 0.233537 | 0.116259  | 0.119901 | 0.111451  | 0.119901  |
| 0.138403 | 0.190851  | 0.229749 | 0.0710956 | 0.117861 | 0.114365  | 0.116404  |
| 0.118881 | 0.201923  | 0.243444 | 0.111597  | 0.099796 | 0.0986305 | 0.103293  |
| 0.128934 | 0.18954   | 0.232809 | 0.105624  | 0.1081   | 0.0961538 | 0.101399  |
| 0.139423 | 0.198572  | 0.239219 | 0.112325  | 0.103147 | 0.105186  | 0.107226  |
| 0.137529 | 0.194056  | 0.235286 | 0.115385  | 0.116113 | 0.114948  | 0.112908  |
| 0.131993 | 0.188228  | 0.238782 | 0.111888  | 0.107955 | 0.103875  | 0.10067   |
| 0.135344 | 0.182255  | 0.228438 | 0.112034  | 0.113345 | 0.112471  | 0.113345  |
| 0.136364 | 0.194639  | 0.240239 | 0.115967  | 0.111742 | 0.113782  | 0.114365  |
| 0.142628 | 0.203234  | 0.238928 | 0.129516  | 0.122669 | 0.130245  | 0.130245  |
| 0.125146 | 0.192453  | 0.231643 | 0.111451  | 0.115385 | 0.111888  | 0.108974  |
| 0.143648 | 0.200466  | 0.234411 | 0.0903263 | 0.128934 | 0.130973  | 0.129516  |
| 0.129371 | 0.182692  | 0.233246 | 0.11014   | 0.111742 | 0.108829  | 0.111742  |
| 0.129371 | 0.187354  | 0.233246 | 0.105769  | 0.103875 | 0.103293  | 0.102418  |
| 0.138549 | 0.17264   | 0.215035 | 0.0735723 | 0.112179 | 0.102564  | 0.113054  |
| 0.139423 | 0.193328  | 0.237762 | 0.113491  | 0.104021 | 0.105186  | 0.111305  |
| 0.20877  | 0.113782  | 0.138403 | 0.170309  | 0.184149 | 0.176573  | 0.182984  |
| 0.116841 | 0.196387  | 0.237034 | 0.1081    | 0.103875 | 0.0983392 | 0.105332  |
| 0.120921 | 0.179779  | 0.225379 | 0.0917832 | 0.104167 | 0.0945513 | 0.0983392 |
| 0.135198 | 0.20134   | 0.239948 | 0.117716  | 0.117279 | 0.114073  | 0.119027  |
| 0.201049 | 0.109266  | 0.144085 | 0.160256  | 0.176719 | 0.16623   | 0.177593  |
| 0.133596 | 0.201195  | 0.243007 | 0.128934  | 0.131993 | 0.125291  | 0.129371  |
| 0.132139 | 0.213432  | 0.248252 | 0.141171  | 0.142774 | 0.135198  | 0.141026  |
| 0.148019 | 0.210664  | 0.243444 | 0.141026  | 0.139714 | 0.139423  | 0.135927  |
| 0.122086 | 0.189977  | 0.231789 | 0.109266  | 0.112617 | 0.105915  | 0.107955  |
| 0.139423 | 0.186626  | 0.226399 | 0.0735723 | 0.116841 | 0.116259  | 0.11655   |
| 0.226981 | 0.108683  | 0.111742 | 0.194639  | 0.204108 | 0.202943  | 0.207605  |
| 0.142191 | 0.185897  | 0.22771  | 0.113345  | 0.117279 | 0.11553   | 0.117861  |

|          |           |          |           |           |           |           |
|----------|-----------|----------|-----------|-----------|-----------|-----------|
| 0.142045 | 0.187791  | 0.22873  | 0.0750291 | 0.119755  | 0.120047  | 0.120629  |
| 0.123106 | 0.197115  | 0.236014 | 0.113782  | 0.104895  | 0.101107  | 0.105769  |
| 0.1875   | 0.13243   | 0.173951 | 0.139423  | 0.164918  | 0.157925  | 0.165793  |
| 0.134178 | 0.179341  | 0.226399 | 0.097465  | 0.106061  | 0.103438  | 0.106352  |
| 0.155303 | 0.209207  | 0.242861 | 0.141317  | 0.145251  | 0.139714  | 0.145251  |
| 0.125874 | 0.188811  | 0.229458 | 0.11655   | 0.112325  | 0.112034  | 0.109411  |
| 0.206585 | 0.0964452 | 0.131556 | 0.176865  | 0.184295  | 0.182547  | 0.1875    |
| 0.125    | 0.195513  | 0.238491 | 0.116259  | 0.116404  | 0.109994  | 0.113491  |
| 0.127914 | 0.186772  | 0.233246 | 0.102855  | 0.102127  | 0.0980478 | 0.103875  |
| 0.131847 | 0.186334  | 0.23514  | 0.105332  | 0.104312  | 0.102273  | 0.10169   |
| 0.138986 | 0.190268  | 0.235868 | 0.115967  | 0.112908  | 0.110868  | 0.114365  |
| 0.134033 | 0.19493   | 0.237617 | 0.115676  | 0.114656  | 0.108829  | 0.116113  |
| 0.138986 | 0.185897  | 0.226836 | 0.116841  | 0.117861  | 0.109411  | 0.112617  |
| 0.127185 | 0.183129  | 0.230478 | 0.110577  | 0.107809  | 0.106352  | 0.111888  |
| 0.204254 | 0.0944056 | 0.124563 | 0.173368  | 0.183421  | 0.179633  | 0.185169  |
| 0.137383 | 0.191871  | 0.237471 | 0.11757   | 0.109557  | 0.112762  | 0.121212  |
| 0.134615 | 0.185315  | 0.227418 | 0.102564  | 0.111742  | 0.101836  | 0.111742  |
| 0.225087 | 0.107372  | 0.108974 | 0.19799   | 0.206876  | 0.20338   | 0.208916  |
| 0.13243  | 0.19595   | 0.245921 | 0.117861  | 0.110723  | 0.111597  | 0.11014   |
| 0.130828 | 0.184441  | 0.230041 | 0.110723  | 0.109703  | 0.107955  | 0.109703  |
| 0.12296  | 0.177448  | 0.229167 | 0.106935  | 0.105624  | 0.105332  | 0.108537  |
| 0.141171 | 0.198281  | 0.232517 | 0.0919289 | 0.128788  | 0.126457  | 0.128497  |
| 0.206731 | 0.103293  | 0.132284 | 0.174971  | 0.183275  | 0.180653  | 0.182984  |
| 0.136072 | 0.198427  | 0.24257  | 0.106935  | 0.0954254 | 0.100087  | 0.103875  |
| 0.140443 | 0.201923  | 0.239073 | 0.124417  | 0.115239  | 0.121358  | 0.122523  |
| 0.129079 | 0.182401  | 0.230041 | 0.108683  | 0.110577  | 0.107372  | 0.110577  |
| 0.129371 | 0.181818  | 0.231789 | 0.1081    | 0.10708   | 0.104167  | 0.11116   |
| 0.126603 | 0.179341  | 0.22669  | 0.111451  | 0.108683  | 0.103438  | 0.110723  |
| 0.134615 | 0.186772  | 0.229749 | 0.0690559 | 0.111451  | 0.10708   | 0.110286  |
| 0.120775 | 0.188957  | 0.233683 | 0.103875  | 0.100524  | 0.0952797 | 0.0984848 |
| 0.123689 | 0.198572  | 0.240676 | 0.118444  | 0.120629  | 0.11451   | 0.120629  |
| 0.140006 | 0.205565  | 0.245921 | 0.121941  | 0.119172  | 0.11859   | 0.120629  |
| 0.125437 | 0.195076  | 0.240093 | 0.114656  | 0.117424  | 0.110723  | 0.117133  |
| 0.142774 | 0.204254  | 0.242279 | 0.123834  | 0.115822  | 0.11553   | 0.118153  |
| 0.212267 | 0.0989219 | 0.136072 | 0.180798  | 0.189394  | 0.18648   | 0.190268  |
| 0.133159 | 0.191434  | 0.23616  | 0.114219  | 0.107372  | 0.112034  | 0.11116   |
| 0.140589 | 0.191579  | 0.230769 | 0.0820221 | 0.123543  | 0.122378  | 0.124709  |
| 0.126166 | 0.185606  | 0.231206 | 0.1081    | 0.107663  | 0.105624  | 0.10912   |
| 0.118735 | 0.18546   | 0.232226 | 0.106206  | 0.100524  | 0.097028  | 0.097028  |
| 0.131265 | 0.183129  | 0.227564 | 0.103875  | 0.109848  | 0.0955711 | 0.109266  |
| 0.136946 | 0.194056  | 0.238782 | 0.107809  | 0.0986305 | 0.100962  | 0.101836  |
| 0.135198 | 0.195804  | 0.23412  | 0.121503  | 0.129516  | 0.117861  | 0.127768  |
| 0.140006 | 0.191579  | 0.235723 | 0.111451  | 0.112471  | 0.112471  | 0.108974  |
| 0.128642 | 0.182838  | 0.231352 | 0.0989219 | 0.100816  | 0.0920746 | 0.0996503 |

|          |          |          |           |           |           |           |
|----------|----------|----------|-----------|-----------|-----------|-----------|
| 0.124417 | 0.185897 | 0.229167 | 0.0958625 | 0.0954254 | 0.0884324 | 0.0968823 |
| 0.12602  | 0.184586 | 0.231061 | 0.10067   | 0.101399  | 0.0964452 | 0.104604  |
| 0.120047 | 0.196678 | 0.241113 | 0.108392  | 0.0962995 | 0.0901807 | 0.10067   |
| 0.128059 | 0.202943 | 0.240967 | 0.126603  | 0.127914  | 0.125583  | 0.126166  |
| 0.137238 | 0.194056 | 0.24257  | 0.107809  | 0.0995047 | 0.097465  | 0.103001  |
| 0.135635 | 0.182838 | 0.224068 | 0.0674534 | 0.107517  | 0.104895  | 0.106935  |
| 0.132721 | 0.190705 | 0.238054 | 0.101253  | 0.094697  | 0.0938228 | 0.101107  |
| 0.130245 | 0.178904 | 0.229167 | 0.108683  | 0.108537  | 0.106789  | 0.105332  |
| 0.117861 | 0.193328 | 0.238345 | 0.105332  | 0.0987762 | 0.0979021 | 0.103438  |
| 0.13039  | 0.181672 | 0.231935 | 0.112908  | 0.111014  | 0.1081    | 0.111305  |
| 0.132139 | 0.186043 | 0.233392 | 0.106498  | 0.104312  | 0.102855  | 0.104895  |
| 0.135635 | 0.190705 | 0.236305 | 0.110577  | 0.113636  | 0.109848  | 0.106643  |
| 0.132139 | 0.195367 | 0.238928 | 0.114365  | 0.109848  | 0.106061  | 0.113636  |
| 0.120921 | 0.188811 | 0.233246 | 0.107226  | 0.103293  | 0.0983392 | 0.0977564 |
| 0.128642 | 0.182255 | 0.231352 | 0.108829  | 0.107517  | 0.107517  | 0.107226  |
| 0.136218 | 0.176719 | 0.221737 | 0.109994  | 0.11014   | 0.106352  | 0.110723  |
| 0.140152 | 0.189394 | 0.23412  | 0.109557  | 0.11757   | 0.109703  | 0.122232  |
| 0.125728 | 0.191288 | 0.232517 | 0.107372  | 0.105478  | 0.0990676 | 0.106061  |
| 0.128059 | 0.184586 | 0.233392 | 0.108246  | 0.108683  | 0.103438  | 0.106643  |
| 0.137238 | 0.184441 | 0.22567  | 0.0719697 | 0.114073  | 0.112617  | 0.116404  |
| 0.11859  | 0.194347 | 0.238199 | 0.106352  | 0.0939685 | 0.0901807 | 0.100087  |
| 0.141608 | 0.187063 | 0.229458 | 0.0673077 | 0.112325  | 0.110868  | 0.113782  |
| 0.134907 | 0.192599 | 0.237617 | 0.111888  | 0.107955  | 0.105041  | 0.111451  |
| 0.121212 | 0.192016 | 0.235286 | 0.108974  | 0.105624  | 0.10067   | 0.104458  |
| 0.131702 | 0.183566 | 0.226544 | 0.101107  | 0.104749  | 0.107372  | 0.102127  |
| 0.120484 | 0.196824 | 0.240676 | 0.103584  | 0.0955711 | 0.0938228 | 0.10373   |
| 0.145396 | 0.186772 | 0.227127 | 0.0731352 | 0.114948  | 0.114948  | 0.117861  |
| 0.140152 | 0.195804 | 0.238199 | 0.111888  | 0.110868  | 0.11116   | 0.115239  |
| 0.136218 | 0.186917 | 0.231061 | 0.0995047 | 0.111597  | 0.108974  | 0.113928  |
| 0.206148 | 0.097465 | 0.127622 | 0.18109   | 0.187646  | 0.185606  | 0.187646  |
| 0.186626 | 0.126894 | 0.170163 | 0.144085  | 0.159965  | 0.152681  | 0.157925  |
| 0.127185 | 0.193036 | 0.239802 | 0.115239  | 0.11859   | 0.112179  | 0.118007  |
| 0.138695 | 0.186189 | 0.228584 | 0.102855  | 0.109703  | 0.0992133 | 0.104458  |
| 0.137529 | 0.218531 | 0.252185 | 0.143939  | 0.142337  | 0.139714  | 0.140297  |
| 0.139714 | 0.196533 | 0.238928 | 0.115822  | 0.12296   | 0.117133  | 0.121795  |
| 0.138695 | 0.18211  | 0.226836 | 0.109848  | 0.120775  | 0.108246  | 0.116696  |
| 0.135344 | 0.182255 | 0.230478 | 0.101544  | 0.115385  | 0.0981935 | 0.113928  |
| 0.117279 | 0.189831 | 0.231643 | 0.113782  | 0.108683  | 0.105478  | 0.11014   |
| 0.14088  | 0.188957 | 0.232226 | 0.110868  | 0.115676  | 0.111014  | 0.120338  |
| 0.215326 | 0.104895 | 0.12398  | 0.18648   | 0.194493  | 0.191579  | 0.198864  |
| 0.140006 | 0.198281 | 0.242716 | 0.110286  | 0.102273  | 0.103438  | 0.109266  |
| 0.138695 | 0.179779 | 0.223048 | 0.0699301 | 0.105332  | 0.0983392 | 0.107663  |
| 0.132576 | 0.180653 | 0.227127 | 0.101981  | 0.105332  | 0.0957168 | 0.105041  |
| 0.141171 | 0.194202 | 0.240385 | 0.110286  | 0.107517  | 0.104021  | 0.106352  |

|          |           |          |           |           |           |           |
|----------|-----------|----------|-----------|-----------|-----------|-----------|
| 0.204254 | 0.120338  | 0.155449 | 0.165501  | 0.178176  | 0.169726  | 0.177593  |
| 0.254953 | 0.13345   | 0.104458 | 0.232226  | 0.239073  | 0.239073  | 0.242861  |
| 0.139569 | 0.191725  | 0.236742 | 0.11655   | 0.117279  | 0.114365  | 0.112617  |
| 0.140152 | 0.19289   | 0.235286 | 0.111014  | 0.116696  | 0.110577  | 0.116987  |
| 0.129371 | 0.19289   | 0.237325 | 0.116259  | 0.119318  | 0.113491  | 0.114073  |
| 0.133304 | 0.192745  | 0.236888 | 0.111742  | 0.109266  | 0.10169   | 0.111305  |
| 0.13549  | 0.193473  | 0.239948 | 0.102564  | 0.095134  | 0.0936772 | 0.10067   |
| 0.13243  | 0.188374  | 0.232809 | 0.108829  | 0.104312  | 0.104021  | 0.108392  |
| 0.136655 | 0.177448  | 0.225087 | 0.0833333 | 0.109703  | 0.105332  | 0.10912   |
| 0.133741 | 0.195513  | 0.239656 | 0.103147  | 0.0942599 | 0.0936772 | 0.101253  |
| 0.133304 | 0.177593  | 0.223776 | 0.0756119 | 0.112179  | 0.105186  | 0.11014   |
| 0.132576 | 0.193473  | 0.238782 | 0.111597  | 0.109994  | 0.105041  | 0.109411  |
| 0.121066 | 0.188666  | 0.234848 | 0.106789  | 0.106061  | 0.0996503 | 0.10169   |
| 0.137821 | 0.192016  | 0.234703 | 0.113636  | 0.114656  | 0.112034  | 0.111742  |
| 0.139714 | 0.185752  | 0.22873  | 0.0706585 | 0.115676  | 0.112179  | 0.11655   |
| 0.120192 | 0.179924  | 0.226981 | 0.0960082 | 0.0984848 | 0.0929487 | 0.0958625 |
| 0.119318 | 0.205274  | 0.245338 | 0.119901  | 0.116259  | 0.113636  | 0.11014   |
| 0.139132 | 0.207314  | 0.24359  | 0.127768  | 0.123834  | 0.120921  | 0.129079  |
| 0.130536 | 0.180653  | 0.23208  | 0.1081    | 0.107372  | 0.103875  | 0.108246  |
| 0.13243  | 0.179633  | 0.223776 | 0.105915  | 0.104021  | 0.0984848 | 0.107809  |
| 0.134178 | 0.195367  | 0.234266 | 0.12398   | 0.122669  | 0.120338  | 0.122669  |
| 0.220862 | 0.11859   | 0.125728 | 0.195221  | 0.203234  | 0.201777  | 0.207314  |
| 0.130099 | 0.185169  | 0.22873  | 0.104749  | 0.105186  | 0.103147  | 0.0984848 |
| 0.121212 | 0.189103  | 0.237325 | 0.102855  | 0.101544  | 0.0962995 | 0.100379  |
| 0.133741 | 0.189977  | 0.237617 | 0.115093  | 0.110286  | 0.109703  | 0.110577  |
| 0.135927 | 0.195367  | 0.242133 | 0.114073  | 0.113345  | 0.11014   | 0.109557  |
| 0.137966 | 0.194493  | 0.238636 | 0.108246  | 0.106935  | 0.0999417 | 0.103147  |
| 0.214889 | 0.101253  | 0.133741 | 0.186334  | 0.191725  | 0.190268  | 0.194639  |
| 0.138695 | 0.186772  | 0.230332 | 0.0708042 | 0.118444  | 0.114365  | 0.116696  |
| 0.129225 | 0.181964  | 0.230769 | 0.106789  | 0.106935  | 0.102564  | 0.105186  |
| 0.131702 | 0.198135  | 0.238199 | 0.119172  | 0.110868  | 0.110868  | 0.117861  |
| 0.128788 | 0.193473  | 0.236742 | 0.107809  | 0.105332  | 0.103293  | 0.109411  |
| 0.139569 | 0.185606  | 0.229167 | 0.0702214 | 0.116987  | 0.109703  | 0.114073  |
| 0.129371 | 0.18007   | 0.224505 | 0.0833333 | 0.105915  | 0.102127  | 0.101253  |
| 0.130245 | 0.192308  | 0.239365 | 0.112179  | 0.109994  | 0.101836  | 0.110868  |
| 0.132867 | 0.192599  | 0.239948 | 0.115093  | 0.107955  | 0.106206  | 0.102418  |
| 0.215181 | 0.104749  | 0.123834 | 0.18109   | 0.191725  | 0.191434  | 0.193765  |
| 0.127331 | 0.182692  | 0.224213 | 0.0696387 | 0.105041  | 0.104167  | 0.103001  |
| 0.211393 | 0.0971737 | 0.135198 | 0.17905   | 0.186772  | 0.185606  | 0.189685  |
| 0.210373 | 0.0979021 | 0.128934 | 0.176573  | 0.1875    | 0.183421  | 0.188083  |
| 0.137238 | 0.205128  | 0.241696 | 0.123834  | 0.119318  | 0.115822  | 0.125437  |
| 0.130828 | 0.203671  | 0.247523 | 0.12704   | 0.120192  | 0.11553   | 0.116987  |
| 0.122378 | 0.187354  | 0.233829 | 0.102564  | 0.101836  | 0.0971737 | 0.0995047 |
| 0.135052 | 0.181964  | 0.227855 | 0.0709499 | 0.10373   | 0.100816  | 0.101399  |

|          |          |          |           |           |           |           |
|----------|----------|----------|-----------|-----------|-----------|-----------|
| 0.134907 | 0.184441 | 0.229458 | 0.0681818 | 0.112325  | 0.106498  | 0.110286  |
| 0.13141  | 0.183566 | 0.230624 | 0.111014  | 0.109703  | 0.10708   | 0.110577  |
| 0.128497 | 0.191434 | 0.235868 | 0.101981  | 0.092803  | 0.0925117 | 0.0989219 |
| 0.133741 | 0.196678 | 0.239073 | 0.10169   | 0.0942599 | 0.0945513 | 0.0995047 |
| 0.137092 | 0.191579 | 0.234848 | 0.116404  | 0.118007  | 0.116841  | 0.113054  |
| 0.135781 | 0.196678 | 0.237617 | 0.114802  | 0.116696  | 0.106789  | 0.116404  |
| 0.122815 | 0.17905  | 0.227564 | 0.105041  | 0.104312  | 0.101981  | 0.106935  |
| 0.137238 | 0.187354 | 0.230041 | 0.0693473 | 0.113782  | 0.111451  | 0.112325  |
| 0.123689 | 0.187209 | 0.231643 | 0.104167  | 0.0981935 | 0.0964452 | 0.101107  |
| 0.138986 | 0.192599 | 0.229458 | 0.0818765 | 0.122232  | 0.11961   | 0.122815  |
| 0.126748 | 0.196387 | 0.238491 | 0.110723  | 0.113491  | 0.108537  | 0.112325  |
| 0.144085 | 0.196241 | 0.234266 | 0.083479  | 0.125874  | 0.123834  | 0.126748  |
| 0.267045 | 0.138258 | 0.099359 | 0.24461   | 0.25204   | 0.251748  | 0.25641   |
| 0.125728 | 0.209936 | 0.247086 | 0.124854  | 0.113636  | 0.115093  | 0.119755  |
| 0.13141  | 0.202506 | 0.237617 | 0.125291  | 0.122815  | 0.116404  | 0.124272  |
| 0.229749 | 0.119318 | 0.110431 | 0.202943  | 0.21183   | 0.212995  | 0.211247  |
| 0.138403 | 0.200175 | 0.237325 | 0.124709  | 0.120192  | 0.121649  | 0.120192  |
| 0.242424 | 0.123543 | 0.106789 | 0.215618  | 0.224505  | 0.222756  | 0.227127  |
| 0.11961  | 0.203234 | 0.242716 | 0.114073  | 0.105186  | 0.103438  | 0.109557  |
| 0.13549  | 0.192016 | 0.230624 | 0.123252  | 0.121066  | 0.116696  | 0.121941  |
| 0.129953 | 0.189977 | 0.239365 | 0.108392  | 0.105624  | 0.10271   | 0.099796  |
| 0.137238 | 0.20134  | 0.238199 | 0.120629  | 0.116696  | 0.114073  | 0.120484  |
| 0.217075 | 0.10373  | 0.128351 | 0.186772  | 0.196241  | 0.193036  | 0.196824  |
| 0.142483 | 0.197261 | 0.234411 | 0.0842075 | 0.125146  | 0.123106  | 0.123397  |
| 0.137821 | 0.185315 | 0.230041 | 0.0693473 | 0.116696  | 0.110286  | 0.112617  |
| 0.237325 | 0.124854 | 0.115385 | 0.213141  | 0.22028   | 0.217075  | 0.223776  |
| 0.137529 | 0.190559 | 0.238199 | 0.107517  | 0.097465  | 0.0989219 | 0.104167  |
| 0.216638 | 0.101544 | 0.126457 | 0.181672  | 0.193473  | 0.18852   | 0.196387  |
| 0.135927 | 0.194202 | 0.240385 | 0.105041  | 0.101107  | 0.100524  | 0.107226  |
| 0.130682 | 0.185752 | 0.235431 | 0.108829  | 0.1081    | 0.105186  | 0.110431  |
| 0.120047 | 0.199592 | 0.238491 | 0.117424  | 0.114656  | 0.111451  | 0.111742  |
| 0.13345  | 0.206585 | 0.240822 | 0.125291  | 0.121066  | 0.116113  | 0.124272  |
| 0.137383 | 0.184295 | 0.229021 | 0.104167  | 0.109557  | 0.105186  | 0.103147  |
| 0.177593 | 0.126603 | 0.168415 | 0.144085  | 0.155012  | 0.144231  | 0.153555  |
| 0.134761 | 0.183712 | 0.225233 | 0.0662879 | 0.107226  | 0.106935  | 0.108392  |
| 0.13447  | 0.190705 | 0.242133 | 0.111451  | 0.113928  | 0.106061  | 0.106352  |
| 0.137966 | 0.188374 | 0.235723 | 0.116987  | 0.115967  | 0.111305  | 0.112471  |
| 0.134178 | 0.193619 | 0.23514  | 0.114948  | 0.113928  | 0.11655   | 0.114802  |
| 0.212995 | 0.100816 | 0.127477 | 0.18007   | 0.184586  | 0.184586  | 0.193036  |
| 0.13039  | 0.182547 | 0.230769 | 0.10912   | 0.107517  | 0.105186  | 0.111014  |
| 0.139569 | 0.182984 | 0.228875 | 0.117716  | 0.115822  | 0.109703  | 0.11757   |
| 0.121066 | 0.197407 | 0.24155  | 0.105332  | 0.0949883 | 0.0932401 | 0.101107  |
| 0.134324 | 0.197552 | 0.239656 | 0.107809  | 0.0983392 | 0.10271   | 0.103875  |
| 0.131847 | 0.188083 | 0.230478 | 0.114948  | 0.115385  | 0.112471  | 0.112762  |

|          |           |           |           |           |           |          |
|----------|-----------|-----------|-----------|-----------|-----------|----------|
| 0.263112 | 0.136946  | 0.0989219 | 0.242133  | 0.250146  | 0.248397  | 0.252477 |
| 0.118153 | 0.194493  | 0.238636  | 0.111742  | 0.106352  | 0.106935  | 0.104021 |
| 0.137966 | 0.181672  | 0.231352  | 0.106789  | 0.110431  | 0.103438  | 0.109266 |
| 0.196824 | 0.139132  | 0.168998  | 0.165355  | 0.171911  | 0.165793  | 0.173951 |
| 0.202069 | 0.100379  | 0.136946  | 0.171474  | 0.18211   | 0.179487  | 0.180653 |
| 0.136509 | 0.18954   | 0.235723  | 0.114948  | 0.117716  | 0.11014   | 0.111305 |
| 0.136655 | 0.184441  | 0.229167  | 0.0722611 | 0.116987  | 0.110286  | 0.113491 |
| 0.13549  | 0.195221  | 0.237034  | 0.11014   | 0.113782  | 0.105915  | 0.111451 |
| 0.1537   | 0.201777  | 0.235723  | 0.0960082 | 0.135781  | 0.136655  | 0.137238 |
| 0.136218 | 0.189831  | 0.233392  | 0.109703  | 0.114219  | 0.109266  | 0.108974 |
| 0.139569 | 0.192599  | 0.234994  | 0.11451   | 0.118735  | 0.113199  | 0.114073 |
| 0.141463 | 0.197115  | 0.240385  | 0.114073  | 0.102564  | 0.107809  | 0.106061 |
| 0.129516 | 0.184295  | 0.223776  | 0.0721154 | 0.113636  | 0.110723  | 0.114802 |
| 0.145396 | 0.190559  | 0.229749  | 0.0801282 | 0.122815  | 0.122232  | 0.121358 |
| 0.13447  | 0.178176  | 0.223776  | 0.103001  | 0.104895  | 0.0973193 | 0.11014  |
| 0.133741 | 0.201632  | 0.240822  | 0.121212  | 0.116404  | 0.114656  | 0.121941 |
| 0.14292  | 0.211976  | 0.247378  | 0.133304  | 0.130828  | 0.127622  | 0.137821 |
| 0.121503 | 0.198427  | 0.239948  | 0.113636  | 0.113782  | 0.110577  | 0.109703 |
| 0.136801 | 0.209062  | 0.245047  | 0.125146  | 0.123543  | 0.119172  | 0.129371 |
| 0.141754 | 0.204691  | 0.244464  | 0.115822  | 0.106643  | 0.105478  | 0.112762 |
| 0.228147 | 0.105186  | 0.125728  | 0.192599  | 0.202069  | 0.198572  | 0.202069 |
| 0.11757  | 0.201777  | 0.240676  | 0.122815  | 0.113345  | 0.1081    | 0.113636 |
| 0.209062 | 0.0992133 | 0.131119  | 0.17701   | 0.185023  | 0.180944  | 0.18852  |
| 0.127477 | 0.188957  | 0.234266  | 0.106498  | 0.106061  | 0.105478  | 0.101981 |
| 0.134178 | 0.185169  | 0.227564  | 0.118735  | 0.118007  | 0.115385  | 0.119172 |
| 0.127185 | 0.193328  | 0.233683  | 0.116696  | 0.119755  | 0.114802  | 0.120629 |
| 0.123834 | 0.188228  | 0.233246  | 0.109848  | 0.111742  | 0.109411  | 0.109994 |
| 0.140297 | 0.186917  | 0.227273  | 0.0732809 | 0.120629  | 0.115385  | 0.115385 |
| 0.138258 | 0.18954   | 0.229895  | 0.074155  | 0.115093  | 0.115385  | 0.11655  |
| 0.131556 | 0.17905   | 0.229312  | 0.113199  | 0.108974  | 0.104895  | 0.111597 |
| 0.134033 | 0.192016  | 0.238782  | 0.113636  | 0.110286  | 0.10708   | 0.105332 |
| 0.126748 | 0.198718  | 0.239365  | 0.118007  | 0.120192  | 0.121066  | 0.120775 |
| 0.14292  | 0.194202  | 0.234266  | 0.120775  | 0.107517  | 0.111888  | 0.11655  |
| 0.260344 | 0.135927  | 0.0906177 | 0.23616   | 0.244172  | 0.245047  | 0.247086 |
| 0.132139 | 0.184003  | 0.233974  | 0.11116   | 0.109557  | 0.106061  | 0.113928 |
| 0.202214 | 0.0967366 | 0.130682  | 0.170455  | 0.178467  | 0.171474  | 0.17905  |
| 0.207022 | 0.0989219 | 0.127914  | 0.173805  | 0.180944  | 0.179487  | 0.185023 |
| 0.138695 | 0.184149  | 0.231206  | 0.115093  | 0.116696  | 0.10912   | 0.109994 |
| 0.119464 | 0.192016  | 0.234411  | 0.108974  | 0.106498  | 0.10271   | 0.103584 |
| 0.130828 | 0.191725  | 0.230915  | 0.119755  | 0.118444  | 0.116113  | 0.118735 |
| 0.134615 | 0.183858  | 0.226253  | 0.0690559 | 0.108829  | 0.107955  | 0.106789 |
| 0.121066 | 0.179341  | 0.227564  | 0.112908  | 0.106935  | 0.10373   | 0.109266 |
| 0.138549 | 0.191871  | 0.240385  | 0.106789  | 0.0964452 | 0.0996503 | 0.101399 |
| 0.137529 | 0.182984  | 0.223339  | 0.0833333 | 0.11553   | 0.109994  | 0.117279 |

|          |           |          |           |           |           |           |
|----------|-----------|----------|-----------|-----------|-----------|-----------|
| 0.1419   | 0.199009  | 0.235577 | 0.0827506 | 0.127185  | 0.120775  | 0.125728  |
| 0.131265 | 0.182838  | 0.229895 | 0.111451  | 0.1081    | 0.108392  | 0.112762  |
| 0.142337 | 0.195076  | 0.233683 | 0.0826049 | 0.129371  | 0.12296   | 0.125291  |
| 0.129953 | 0.193765  | 0.236451 | 0.116259  | 0.112325  | 0.103875  | 0.112034  |
| 0.125583 | 0.200758  | 0.241404 | 0.122086  | 0.121066  | 0.11757   | 0.121941  |
| 0.136218 | 0.195367  | 0.240093 | 0.116113  | 0.114219  | 0.11014   | 0.118007  |
| 0.140152 | 0.20542   | 0.245192 | 0.118298  | 0.105915  | 0.110577  | 0.115239  |
| 0.133304 | 0.194202  | 0.236597 | 0.11757   | 0.112471  | 0.111597  | 0.113636  |
| 0.126894 | 0.182255  | 0.224942 | 0.109994  | 0.1081    | 0.105478  | 0.106935  |
| 0.142628 | 0.200903  | 0.240385 | 0.127477  | 0.117716  | 0.127331  | 0.127331  |
| 0.202214 | 0.0999417 | 0.13039  | 0.169872  | 0.178176  | 0.174388  | 0.179633  |
| 0.144959 | 0.199155  | 0.235723 | 0.0872669 | 0.128205  | 0.12704   | 0.128205  |
| 0.14088  | 0.188374  | 0.229604 | 0.0744464 | 0.113636  | 0.112179  | 0.11451   |
| 0.122378 | 0.196387  | 0.237908 | 0.114219  | 0.116987  | 0.111742  | 0.115822  |
| 0.118444 | 0.194202  | 0.234266 | 0.106498  | 0.109266  | 0.104895  | 0.104604  |
| 0.132867 | 0.196096  | 0.237617 | 0.114802  | 0.111742  | 0.110868  | 0.114948  |
| 0.134761 | 0.200321  | 0.238054 | 0.119901  | 0.117424  | 0.11451   | 0.120629  |
| 0.209499 | 0.101107  | 0.135344 | 0.176573  | 0.185752  | 0.181381  | 0.187791  |
| 0.136655 | 0.179196  | 0.220425 | 0.080711  | 0.115239  | 0.105624  | 0.116696  |
| 0.129516 | 0.168269  | 0.21183  | 0.0922203 | 0.103438  | 0.0984848 | 0.104021  |
| 0.139423 | 0.190414  | 0.230478 | 0.0761946 | 0.119172  | 0.118881  | 0.118298  |
| 0.20979  | 0.0999417 | 0.132721 | 0.178322  | 0.184586  | 0.182255  | 0.187209  |
| 0.122815 | 0.18546   | 0.231352 | 0.105915  | 0.104021  | 0.0976107 | 0.099359  |
| 0.138986 | 0.198718  | 0.241696 | 0.111888  | 0.0992133 | 0.105915  | 0.105624  |
| 0.138112 | 0.187937  | 0.230624 | 0.0734266 | 0.119318  | 0.116404  | 0.116987  |
| 0.132721 | 0.193328  | 0.233392 | 0.108537  | 0.112471  | 0.106352  | 0.106643  |
| 0.2044   | 0.0971737 | 0.128205 | 0.173805  | 0.18211   | 0.180944  | 0.182984  |
| 0.138549 | 0.190997  | 0.237179 | 0.105915  | 0.099359  | 0.102855  | 0.104312  |
| 0.133304 | 0.183129  | 0.225233 | 0.105624  | 0.10169   | 0.104312  | 0.108974  |
| 0.128059 | 0.17701   | 0.226981 | 0.107663  | 0.104021  | 0.102273  | 0.100524  |
| 0.140589 | 0.168852  | 0.212413 | 0.102127  | 0.116841  | 0.111014  | 0.111305  |
| 0.134033 | 0.194639  | 0.241696 | 0.116841  | 0.110286  | 0.106789  | 0.105041  |
| 0.137529 | 0.20338   | 0.24461  | 0.114802  | 0.102418  | 0.108537  | 0.112908  |
| 0.128788 | 0.182984  | 0.23208  | 0.107517  | 0.107372  | 0.104749  | 0.10912   |
| 0.129371 | 0.197552  | 0.237034 | 0.11014   | 0.113782  | 0.108829  | 0.11553   |
| 0.149038 | 0.20877   | 0.243007 | 0.139423  | 0.139569  | 0.140443  | 0.134033  |
| 0.246066 | 0.129225  | 0.10373  | 0.222174  | 0.229312  | 0.232226  | 0.231061  |
| 0.13447  | 0.199155  | 0.241259 | 0.123689  | 0.121795  | 0.113054  | 0.122669  |
| 0.131556 | 0.193036  | 0.243298 | 0.114365  | 0.11014   | 0.107517  | 0.102855  |
| 0.135781 | 0.181818  | 0.223048 | 0.0719697 | 0.114073  | 0.107955  | 0.109994  |
| 0.146999 | 0.184878  | 0.226981 | 0.120484  | 0.118881  | 0.115676  | 0.114219  |
| 0.125874 | 0.187354  | 0.233829 | 0.0987762 | 0.105041  | 0.0948427 | 0.0980478 |
| 0.136946 | 0.191725  | 0.233246 | 0.113054  | 0.105332  | 0.10708   | 0.105915  |
| 0.136218 | 0.186626  | 0.22669  | 0.0770688 | 0.117716  | 0.114219  | 0.115676  |

|          |           |           |           |           |           |           |
|----------|-----------|-----------|-----------|-----------|-----------|-----------|
| 0.138986 | 0.199301  | 0.238782  | 0.113636  | 0.102127  | 0.110286  | 0.109411  |
| 0.141608 | 0.187354  | 0.230915  | 0.105769  | 0.10912   | 0.105041  | 0.109994  |
| 0.247815 | 0.127477  | 0.104021  | 0.223048  | 0.229604  | 0.228438  | 0.232226  |
| 0.120921 | 0.184441  | 0.230915  | 0.10169   | 0.103293  | 0.099796  | 0.0992133 |
| 0.119172 | 0.190851  | 0.23412   | 0.10169   | 0.0971737 | 0.0957168 | 0.0971737 |
| 0.127768 | 0.182838  | 0.22873   | 0.107372  | 0.108974  | 0.106061  | 0.110431  |
| 0.142191 | 0.202506  | 0.236742  | 0.125291  | 0.124563  | 0.123689  | 0.121941  |
| 0.137529 | 0.203963  | 0.244318  | 0.132867  | 0.124272  | 0.120192  | 0.127185  |
| 0.13986  | 0.179487  | 0.224213  | 0.108392  | 0.116404  | 0.112908  | 0.115822  |
| 0.140734 | 0.184732  | 0.228001  | 0.0702214 | 0.115239  | 0.112034  | 0.114365  |
| 0.130973 | 0.186917  | 0.230478  | 0.103875  | 0.111014  | 0.105478  | 0.102273  |
| 0.244318 | 0.128642  | 0.104021  | 0.218094  | 0.226107  | 0.222319  | 0.227273  |
| 0.142628 | 0.189831  | 0.227564  | 0.0738636 | 0.120047  | 0.118881  | 0.119172  |
| 0.138695 | 0.197844  | 0.239365  | 0.108683  | 0.102418  | 0.104458  | 0.106498  |
| 0.134907 | 0.186772  | 0.232955  | 0.104312  | 0.103584  | 0.0983392 | 0.100379  |
| 0.129808 | 0.199446  | 0.237762  | 0.119027  | 0.114802  | 0.110723  | 0.115385  |
| 0.123106 | 0.205565  | 0.243298  | 0.123689  | 0.1081    | 0.111305  | 0.117133  |
| 0.127477 | 0.184586  | 0.229604  | 0.110286  | 0.109557  | 0.106061  | 0.111014  |
| 0.135344 | 0.199155  | 0.240385  | 0.112034  | 0.101107  | 0.10169   | 0.111014  |
| 0.137821 | 0.203671  | 0.244318  | 0.117133  | 0.104749  | 0.109703  | 0.112908  |
| 0.132867 | 0.193473  | 0.237617  | 0.108392  | 0.0957168 | 0.0971737 | 0.104749  |
| 0.127185 | 0.184586  | 0.2331    | 0.110286  | 0.11014   | 0.107809  | 0.112471  |
| 0.132721 | 0.198572  | 0.24359   | 0.121649  | 0.118007  | 0.115385  | 0.113345  |
| 0.135198 | 0.204545  | 0.248106  | 0.126457  | 0.121066  | 0.120192  | 0.119318  |
| 0.123543 | 0.204837  | 0.242279  | 0.124417  | 0.124563  | 0.121649  | 0.124272  |
| 0.130536 | 0.203671  | 0.243735  | 0.12704   | 0.126894  | 0.123397  | 0.126603  |
| 0.133887 | 0.202652  | 0.249709  | 0.12398   | 0.119755  | 0.115093  | 0.115967  |
| 0.115822 | 0.189248  | 0.234557  | 0.107663  | 0.104021  | 0.0996503 | 0.104604  |
| 0.123834 | 0.213287  | 0.25102   | 0.125     | 0.107372  | 0.106789  | 0.116404  |
| 0.13884  | 0.206148  | 0.24796   | 0.125437  | 0.114219  | 0.11655   | 0.11451   |
| 0.222174 | 0.104458  | 0.114219  | 0.190705  | 0.197844  | 0.198427  | 0.200758  |
| 0.138549 | 0.191288  | 0.233392  | 0.11961   | 0.122086  | 0.11451   | 0.12296   |
| 0.12398  | 0.199446  | 0.24155   | 0.109411  | 0.10373   | 0.0999417 | 0.104895  |
| 0.131119 | 0.181527  | 0.224213  | 0.119464  | 0.116404  | 0.112034  | 0.115822  |
| 0.234994 | 0.121358  | 0.106061  | 0.207605  | 0.214744  | 0.214452  | 0.219114  |
| 0.229458 | 0.113782  | 0.126166  | 0.199738  | 0.206294  | 0.205128  | 0.210664  |
| 0.1419   | 0.20134   | 0.241404  | 0.116259  | 0.103584  | 0.109411  | 0.112908  |
| 0.260052 | 0.136218  | 0.0999417 | 0.238782  | 0.242716  | 0.244464  | 0.243881  |
| 0.118444 | 0.1875    | 0.236014  | 0.108829  | 0.105478  | 0.0981935 | 0.103438  |
| 0.140297 | 0.205274  | 0.23951   | 0.135344  | 0.131119  | 0.12704   | 0.127331  |
| 0.121941 | 0.190414  | 0.233683  | 0.109411  | 0.106061  | 0.104021  | 0.101399  |
| 0.133159 | 0.200758  | 0.244027  | 0.120047  | 0.114656  | 0.114365  | 0.11116   |
| 0.206148 | 0.0957168 | 0.124126  | 0.172057  | 0.182401  | 0.181818  | 0.184149  |
| 0.138695 | 0.192599  | 0.230041  | 0.11859   | 0.107663  | 0.111742  | 0.109994  |



|          |          |          |           |           |           |           |
|----------|----------|----------|-----------|-----------|-----------|-----------|
| 0.211538 | 0.105186 | 0.128351 | 0.17803   | 0.188083  | 0.186334  | 0.190997  |
| 0.134324 | 0.189977 | 0.237617 | 0.109848  | 0.111742  | 0.107372  | 0.108537  |
| 0.136072 | 0.177739 | 0.218969 | 0.0868298 | 0.102127  | 0.0960082 | 0.107663  |
| 0.130245 | 0.192016 | 0.234411 | 0.117133  | 0.118153  | 0.112908  | 0.118444  |
| 0.131993 | 0.176282 | 0.21722  | 0.0964452 | 0.10912   | 0.102127  | 0.105624  |
| 0.119318 | 0.18109  | 0.227273 | 0.103001  | 0.102855  | 0.0990676 | 0.103438  |
| 0.13447  | 0.186043 | 0.231061 | 0.105041  | 0.11014   | 0.102564  | 0.114219  |
| 0.117861 | 0.18546  | 0.228438 | 0.103001  | 0.100524  | 0.099359  | 0.099359  |
| 0.134324 | 0.185897 | 0.228001 | 0.0664336 | 0.110577  | 0.10708   | 0.110577  |
| 0.120775 | 0.200903 | 0.241841 | 0.112908  | 0.099359  | 0.0958625 | 0.105769  |
| 0.128934 | 0.188374 | 0.231935 | 0.108537  | 0.104895  | 0.099359  | 0.107226  |
| 0.12296  | 0.186189 | 0.233246 | 0.110723  | 0.102127  | 0.101836  | 0.10067   |
| 0.126894 | 0.189248 | 0.231935 | 0.10912   | 0.118298  | 0.109848  | 0.115385  |
| 0.143502 | 0.196533 | 0.233974 | 0.081148  | 0.121503  | 0.121503  | 0.121503  |
| 0.123543 | 0.190559 | 0.233829 | 0.108392  | 0.113491  | 0.105624  | 0.109994  |
| 0.130973 | 0.188666 | 0.230478 | 0.10708   | 0.103147  | 0.103438  | 0.1081    |
| 0.124126 | 0.180361 | 0.227127 | 0.104312  | 0.102127  | 0.100962  | 0.103584  |
| 0.134615 | 0.187063 | 0.230332 | 0.10373   | 0.101253  | 0.100087  | 0.10708   |
| 0.131702 | 0.193473 | 0.240822 | 0.115967  | 0.10912   | 0.106498  | 0.100087  |
| 0.134761 | 0.196824 | 0.240385 | 0.117861  | 0.113636  | 0.108974  | 0.117133  |
| 0.124272 | 0.193328 | 0.236305 | 0.112325  | 0.113345  | 0.11014   | 0.116841  |
| 0.139277 | 0.184441 | 0.226836 | 0.0725524 | 0.115239  | 0.112617  | 0.112325  |
| 0.145251 | 0.194784 | 0.230478 | 0.081148  | 0.124126  | 0.123834  | 0.125874  |
| 0.144376 | 0.200903 | 0.238054 | 0.0878497 | 0.129079  | 0.129079  | 0.132284  |
| 0.124417 | 0.184732 | 0.231789 | 0.0964452 | 0.0890152 | 0.0898893 | 0.088141  |
| 0.128205 | 0.185023 | 0.231789 | 0.109266  | 0.109994  | 0.105915  | 0.11116   |
| 0.131265 | 0.186043 | 0.232226 | 0.101836  | 0.100524  | 0.0958625 | 0.0979021 |
| 0.133596 | 0.204108 | 0.247086 | 0.127477  | 0.122378  | 0.120629  | 0.117133  |
| 0.122086 | 0.195513 | 0.238199 | 0.111597  | 0.108246  | 0.103001  | 0.106206  |
| 0.141608 | 0.213287 | 0.247815 | 0.135198  | 0.131556  | 0.126894  | 0.136801  |
| 0.138112 | 0.197844 | 0.236451 | 0.129662  | 0.127477  | 0.125728  | 0.127185  |
| 0.140297 | 0.194202 | 0.23514  | 0.11757   | 0.119464  | 0.118881  | 0.116259  |
| 0.12704  | 0.18648  | 0.231206 | 0.106061  | 0.105041  | 0.105915  | 0.114365  |
| 0.125728 | 0.184878 | 0.231643 | 0.102418  | 0.104895  | 0.100233  | 0.100816  |
| 0.127185 | 0.200903 | 0.240676 | 0.122232  | 0.123252  | 0.116841  | 0.124709  |
| 0.221445 | 0.119172 | 0.138258 | 0.192599  | 0.200321  | 0.197115  | 0.202652  |
| 0.132576 | 0.185897 | 0.229458 | 0.110723  | 0.103584  | 0.103875  | 0.108246  |
| 0.132139 | 0.193036 | 0.237179 | 0.112034  | 0.112762  | 0.109848  | 0.111014  |
| 0.130245 | 0.196096 | 0.240822 | 0.112762  | 0.110286  | 0.106206  | 0.105915  |
| 0.125146 | 0.193036 | 0.236305 | 0.110577  | 0.114219  | 0.1081    | 0.111014  |
| 0.138695 | 0.191725 | 0.237034 | 0.117133  | 0.121941  | 0.11116   | 0.112908  |
| 0.137529 | 0.194639 | 0.235286 | 0.114219  | 0.111742  | 0.111451  | 0.11553   |
| 0.141171 | 0.197698 | 0.236597 | 0.113782  | 0.113054  | 0.113345  | 0.120629  |
| 0.139277 | 0.189103 | 0.233829 | 0.113928  | 0.118735  | 0.113199  | 0.111451  |

|           |          |          |           |           |           |           |
|-----------|----------|----------|-----------|-----------|-----------|-----------|
| 0.122378  | 0.196096 | 0.238782 | 0.107226  | 0.0922203 | 0.090472  | 0.099796  |
| 0.129953  | 0.199883 | 0.245192 | 0.123252  | 0.115822  | 0.114365  | 0.110286  |
| 0.129079  | 0.193182 | 0.236742 | 0.110723  | 0.111451  | 0.107663  | 0.110286  |
| 0.13243   | 0.193619 | 0.241259 | 0.117279  | 0.112762  | 0.106352  | 0.112762  |
| 0.192308  | 0.166667 | 0.204691 | 0.165793  | 0.172348  | 0.167978  | 0.16623   |
| 0.136946  | 0.183858 | 0.231498 | 0.0675991 | 0.11553   | 0.108537  | 0.111742  |
| 0.133596  | 0.187791 | 0.231352 | 0.123106  | 0.119755  | 0.116259  | 0.114802  |
| 0.115676  | 0.20338  | 0.245484 | 0.12296   | 0.105332  | 0.10708   | 0.113491  |
| 0.127768  | 0.193619 | 0.236014 | 0.10067   | 0.115385  | 0.0979021 | 0.112471  |
| 0.128059  | 0.187209 | 0.232517 | 0.103293  | 0.0996503 | 0.0984848 | 0.104604  |
| 0.121649  | 0.185752 | 0.231935 | 0.105624  | 0.100816  | 0.0944056 | 0.101399  |
| 0.127477  | 0.195367 | 0.238636 | 0.110868  | 0.106061  | 0.102564  | 0.108974  |
| 0.134761  | 0.199738 | 0.240385 | 0.106789  | 0.0879953 | 0.0981935 | 0.0912005 |
| 0.134761  | 0.178759 | 0.226399 | 0.0861014 | 0.117133  | 0.101399  | 0.113928  |
| 0.134324  | 0.208625 | 0.245192 | 0.123834  | 0.119027  | 0.113199  | 0.122523  |
| 0.125437  | 0.186043 | 0.231352 | 0.0977564 | 0.10169   | 0.097028  | 0.100233  |
| 0.133741  | 0.189103 | 0.235577 | 0.111888  | 0.112325  | 0.0939685 | 0.110868  |
| 0.140006  | 0.203817 | 0.245629 | 0.118735  | 0.0874126 | 0.103438  | 0.0952797 |
| 0.119027  | 0.200612 | 0.240385 | 0.116987  | 0.101981  | 0.0973193 | 0.105769  |
| 0.133304  | 0.197407 | 0.236305 | 0.119901  | 0.112762  | 0.110723  | 0.119464  |
| 0.120192  | 0.195367 | 0.237471 | 0.109994  | 0.100816  | 0.0932401 | 0.105186  |
| 0.123106  | 0.196533 | 0.238636 | 0.112034  | 0.10169   | 0.0964452 | 0.106935  |
| 0.124272  | 0.187209 | 0.234557 | 0.108829  | 0.108683  | 0.102855  | 0.104021  |
| 0.123834  | 0.203963 | 0.243444 | 0.116841  | 0.109994  | 0.114948  | 0.120484  |
| 0.120921  | 0.190851 | 0.237325 | 0.105769  | 0.0986305 | 0.0957168 | 0.0919289 |
| 0.147436  | 0.206294 | 0.243735 | 0.129371  | 0.121066  | 0.121649  | 0.133013  |
| 0.145979  | 0.193182 | 0.238491 | 0.116841  | 0.115822  | 0.112908  | 0.124854  |
| 0.122086  | 0.194347 | 0.234411 | 0.111597  | 0.106789  | 0.099796  | 0.107663  |
| 0.147582  | 0.215181 | 0.250874 | 0.129225  | 0.121795  | 0.120921  | 0.128205  |
| 0.125437  | 0.191288 | 0.23514  | 0.110286  | 0.11655   | 0.107809  | 0.114802  |
| 0.143211  | 0.205274 | 0.240093 | 0.124563  | 0.122086  | 0.113928  | 0.120047  |
| 0.122523  | 0.194784 | 0.238928 | 0.10912   | 0.109848  | 0.102855  | 0.108974  |
| 0.15035   | 0.204837 | 0.241696 | 0.131119  | 0.136509  | 0.13243   | 0.135635  |
| 0.134615  | 0.195221 | 0.235868 | 0.120921  | 0.12398   | 0.12602   | 0.121649  |
| 0.144522  | 0.199009 | 0.241404 | 0.118881  | 0.101836  | 0.105915  | 0.111451  |
| 0.109266  | 0.203089 | 0.245775 | 0.114219  | 0.112325  | 0.104749  | 0.107955  |
| 0.121066  | 0.19391  | 0.236305 | 0.10912   | 0.097028  | 0.0952797 | 0.100233  |
| 0.120338  | 0.189685 | 0.235286 | 0.109266  | 0.0995047 | 0.0962995 | 0.102127  |
| 0.132139  | 0.196824 | 0.238636 | 0.103001  | 0.0792541 | 0.0926573 | 0.0944056 |
| 0.120484  | 0.206439 | 0.243881 | 0.11757   | 0.11014   | 0.112471  | 0.113928  |
| 0.128497  | 0.210664 | 0.24898  | 0.122086  | 0.119027  | 0.120192  | 0.119901  |
| 0.138986  | 0.190559 | 0.236451 | 0.108974  | 0.114365  | 0.100962  | 0.116696  |
| 0.0979021 | 0.194056 | 0.237325 | 0.102273  | 0.0995047 | 0.0945513 | 0.101544  |
| 0.122523  | 0.190122 | 0.236014 | 0.109994  | 0.097028  | 0.0955711 | 0.104312  |

|          |          |          |           |           |           |          |
|----------|----------|----------|-----------|-----------|-----------|----------|
| 0.128497 | 0.19493  | 0.236451 | 0.122669  | 0.109994  | 0.10708   | 0.113782 |
| 0.125583 | 0.187063 | 0.235577 | 0.107517  | 0.0971737 | 0.0992133 | 0.101544 |
| 0.123689 | 0.19799  | 0.241841 | 0.120484  | 0.107517  | 0.104021  | 0.113928 |
| 0.127185 | 0.190705 | 0.237471 | 0.103293  | 0.106061  | 0.103147  | 0.111014 |
| 0.134033 | 0.18007  | 0.222174 | 0.105769  | 0.116113  | 0.110868  | 0.116404 |
| 0.131993 | 0.192016 | 0.237617 | 0.109557  | 0.108537  | 0.102127  | 0.103293 |
| 0.11655  | 0.189685 | 0.231206 | 0.107226  | 0.102127  | 0.100962  | 0.104458 |
| 0.124126 | 0.192599 | 0.233829 | 0.11451   | 0.103584  | 0.103001  | 0.108537 |
| 0.135927 | 0.177885 | 0.224359 | 0.104749  | 0.111888  | 0.108974  | 0.113636 |
| 0.130245 | 0.19493  | 0.236742 | 0.106061  | 0.109411  | 0.105624  | 0.108537 |
| 0.142191 | 0.189685 | 0.230915 | 0.106935  | 0.118735  | 0.116404  | 0.125146 |
| 0.126166 | 0.175117 | 0.221882 | 0.0976107 | 0.104167  | 0.102127  | 0.100962 |
| 0.130099 | 0.203234 | 0.241841 | 0.123397  | 0.117133  | 0.118881  | 0.123834 |

| <b>TDr_09_00023</b> | <b>TDr_09_00028</b> | <b>TDr_09_00029</b> | <b>TDr_09_00043</b> | <b>TDr_09_00049</b> | <b>TDr_09_00050</b> | <b>TDr_09_00054</b> |
|---------------------|---------------------|---------------------|---------------------|---------------------|---------------------|---------------------|
| 0.131265            | 0.119901            | 0.149184            | 0.120484            | 0.128934            | 0.132284            | 0.137821            |
| 0.113928            | 0.118298            | 0.150787            | 0.119755            | 0.128497            | 0.129808            | 0.135344            |
| 0.110431            | 0.110431            | 0.143794            | 0.113636            | 0.12296             | 0.127185            | 0.133013            |
| 0.115093            | 0.115676            | 0.144959            | 0.118007            | 0.124126            | 0.135927            | 0.133596            |
| 0.138695            | 0.131702            | 0.146999            | 0.132284            | 0.138112            | 0.137383            | 0.146707            |
| 0.131119            | 0.126166            | 0.153118            | 0.130536            | 0.137821            | 0.129516            | 0.138549            |
| 0.130682            | 0.114948            | 0.135198            | 0.113199            | 0.123106            | 0.125874            | 0.124417            |
| 0.117279            | 0.109703            | 0.145105            | 0.113782            | 0.124854            | 0.121795            | 0.127331            |
| 0.11655             | 0.100524            | 0.135927            | 0.107809            | 0.119755            | 0.121941            | 0.123689            |
| 0.100379            | 0.111742            | 0.140152            | 0.114656            | 0.122815            | 0.126166            | 0.126748            |
| 0.124709            | 0.114219            | 0.139423            | 0.110431            | 0.131702            | 0.124563            | 0.131847            |
| 0.124563            | 0.101836            | 0.136364            | 0.108537            | 0.122523            | 0.121795            | 0.124709            |
| 0.115239            | 0.113199            | 0.144522            | 0.110286            | 0.127185            | 0.126748            | 0.126748            |
| 0.137238            | 0.136072            | 0.163607            | 0.136655            | 0.154429            | 0.144959            | 0.150204            |
| 0.0426865           | 0.123397            | 0.150932            | 0.130973            | 0.140006            | 0.137529            | 0.135781            |
| 0.117424            | 0.104895            | 0.12602             | 0.109848            | 0.116841            | 0.112325            | 0.112034            |
| 0.124563            | 0.105915            | 0.139277            | 0.106498            | 0.12602             | 0.123834            | 0.123252            |
| 0.145979            | 0.141026            | 0.159528            | 0.144522            | 0.150932            | 0.145251            | 0.149038            |
| 0.114802            | 0.106061            | 0.141754            | 0.110723            | 0.119172            | 0.125146            | 0.128934            |
| 0.175117            | 0.199009            | 0.222174            | 0.203089            | 0.213869            | 0.201777            | 0.21081             |
| 0.13243             | 0.119318            | 0.147436            | 0.121066            | 0.129808            | 0.133741            | 0.130536            |
| 0.129662            | 0.116841            | 0.149038            | 0.111597            | 0.129662            | 0.132721            | 0.129225            |
| 0.118444            | 0.100379            | 0.136364            | 0.104458            | 0.115822            | 0.11451             | 0.122086            |
| 0.138986            | 0.103147            | 0.126894            | 0.104895            | 0.106935            | 0.118444            | 0.113491            |
| 0.114073            | 0.102127            | 0.13345             | 0.10271             | 0.118444            | 0.117716            | 0.115967            |
| 0.130973            | 0.124854            | 0.14627             | 0.125728            | 0.129516            | 0.134033            | 0.131119            |
| 0.126894            | 0.116404            | 0.13141             | 0.112034            | 0.125437            | 0.132867            | 0.125583            |
| 0.125437            | 0.101544            | 0.131119            | 0.106498            | 0.10708             | 0.119172            | 0.113054            |
| 0.139714            | 0.117861            | 0.135198            | 0.121941            | 0.121649            | 0.126457            | 0.134324            |
| 0.124563            | 0.112908            | 0.142191            | 0.120192            | 0.122232            | 0.135781            | 0.132576            |
| 0.122086            | 0.119172            | 0.140297            | 0.119755            | 0.125291            | 0.125146            | 0.133304            |
| 0.123106            | 0.113199            | 0.137821            | 0.112908            | 0.11757             | 0.121503            | 0.123543            |
| 0.109703            | 0.104167            | 0.138112            | 0.107663            | 0.120484            | 0.11859             | 0.118881            |
| 0.127185            | 0.117861            | 0.138403            | 0.114948            | 0.121358            | 0.130828            | 0.130828            |
| 0.127914            | 0.113928            | 0.134761            | 0.112762            | 0.12704             | 0.122523            | 0.121649            |
| 0.133013            | 0.11961             | 0.136364            | 0.120775            | 0.129516            | 0.131702            | 0.128497            |
| 0.140443            | 0.125291            | 0.148747            | 0.132284            | 0.143648            | 0.137092            | 0.141463            |
| 0.133013            | 0.11553             | 0.144814            | 0.116113            | 0.128934            | 0.131119            | 0.132284            |
| 0.117861            | 0.0968823           | 0.125291            | 0.0962995           | 0.103293            | 0.116841            | 0.111888            |
| 0.127185            | 0.107663            | 0.136946            | 0.102127            | 0.105915            | 0.10373             | 0.118298            |
| 0.122232            | 0.0936772           | 0.125583            | 0.0939685           | 0.10708             | 0.108683            | 0.117133            |
| 0.135344            | 0.120484            | 0.134033            | 0.126311            | 0.12602             | 0.105769            | 0.121795            |

|          |           |           |           |           |           |           |
|----------|-----------|-----------|-----------|-----------|-----------|-----------|
| 0.145833 | 0.121941  | 0.125874  | 0.128351  | 0.132139  | 0.113636  | 0.128788  |
| 0.127914 | 0.0996503 | 0.129808  | 0.100524  | 0.118881  | 0.0863928 | 0.118444  |
| 0.122378 | 0.104021  | 0.127185  | 0.101981  | 0.115385  | 0.121358  | 0.11961   |
| 0.117279 | 0.116696  | 0.137238  | 0.120192  | 0.125437  | 0.126748  | 0.125874  |
| 0.128934 | 0.074155  | 0.106935  | 0.074155  | 0.095134  | 0.102273  | 0.0865385 |
| 0.141026 | 0.116259  | 0.133013  | 0.11451   | 0.121212  | 0.106789  | 0.13039   |
| 0.126748 | 0.099359  | 0.130682  | 0.099359  | 0.101981  | 0.106789  | 0.116696  |
| 0.118735 | 0.100087  | 0.125583  | 0.100379  | 0.113199  | 0.10169   | 0.112762  |
| 0.146562 | 0.1419    | 0.154866  | 0.143648  | 0.144231  | 0.150495  | 0.151078  |
| 0.131993 | 0.103147  | 0.120775  | 0.111305  | 0.1081    | 0.114656  | 0.110577  |
| 0.122815 | 0.10271   | 0.120629  | 0.102418  | 0.111742  | 0.0979021 | 0.11451   |
| 0.118444 | 0.122232  | 0.145396  | 0.126894  | 0.133304  | 0.133159  | 0.135198  |
| 0.125146 | 0.106789  | 0.141317  | 0.112034  | 0.120484  | 0.105478  | 0.12704   |
| 0.146416 | 0.0971737 | 0.0932401 | 0.105915  | 0.0907634 | 0.115676  | 0.104895  |
| 0.13549  | 0.107517  | 0.133013  | 0.111014  | 0.117424  | 0.10708   | 0.123106  |
| 0.126748 | 0.104312  | 0.129225  | 0.0979021 | 0.112471  | 0.104749  | 0.113782  |
| 0.123543 | 0.100816  | 0.129225  | 0.10169   | 0.111888  | 0.106789  | 0.120484  |
| 0.121066 | 0.115822  | 0.135198  | 0.114656  | 0.116696  | 0.123543  | 0.126748  |
| 0.138258 | 0.118444  | 0.124709  | 0.120775  | 0.121941  | 0.115093  | 0.123834  |
| 0.138258 | 0.120484  | 0.135781  | 0.123689  | 0.121358  | 0.111305  | 0.132284  |
| 0.161422 | 0.154138  | 0.16419   | 0.153555  | 0.1588    | 0.151078  | 0.160402  |
| 0.123252 | 0.0984848 | 0.133013  | 0.097028  | 0.11014   | 0.100962  | 0.119318  |
| 0.12296  | 0.099359  | 0.132139  | 0.099359  | 0.106352  | 0.108246  | 0.114073  |
| 0.127331 | 0.100524  | 0.127477  | 0.0955711 | 0.109848  | 0.101544  | 0.115239  |
| 0.144085 | 0.137675  | 0.147436  | 0.137383  | 0.143502  | 0.132867  | 0.143065  |
| 0.121066 | 0.0957168 | 0.122378  | 0.092803  | 0.109703  | 0.106352  | 0.110723  |
| 0.137529 | 0.104604  | 0.118444  | 0.106352  | 0.113636  | 0.055507  | 0.100962  |
| 0.120047 | 0.115967  | 0.132139  | 0.114219  | 0.121212  | 0.124563  | 0.123689  |
| 0.126894 | 0.0986305 | 0.130828  | 0.099796  | 0.107955  | 0.108683  | 0.118007  |
| 0.147873 | 0.141754  | 0.157343  | 0.143502  | 0.15574   | 0.142483  | 0.153846  |
| 0.129225 | 0.108246  | 0.129079  | 0.101836  | 0.10912   | 0.11014   | 0.119755  |
| 0.138112 | 0.118881  | 0.122523  | 0.12296   | 0.124126  | 0.107372  | 0.129516  |
| 0.134178 | 0.10271   | 0.126748  | 0.114073  | 0.115239  | 0.120629  | 0.118298  |
| 0.127622 | 0.110431  | 0.135344  | 0.105478  | 0.120629  | 0.11757   | 0.122232  |
| 0.127331 | 0.104604  | 0.127185  | 0.0949883 | 0.107517  | 0.101836  | 0.11553   |
| 0.124417 | 0.0938228 | 0.121358  | 0.0961538 | 0.108392  | 0.108537  | 0.114656  |
| 0.140443 | 0.117716  | 0.130682  | 0.112471  | 0.118298  | 0.109994  | 0.124563  |
| 0.129516 | 0.0983392 | 0.13141   | 0.0986305 | 0.114948  | 0.106061  | 0.116259  |
| 0.136364 | 0.121212  | 0.139714  | 0.124709  | 0.121503  | 0.11553   | 0.133013  |
| 0.131702 | 0.103147  | 0.129808  | 0.10169   | 0.114219  | 0.105332  | 0.11757   |
| 0.128205 | 0.099359  | 0.120192  | 0.103438  | 0.102855  | 0.114365  | 0.105332  |
| 0.128497 | 0.101981  | 0.127185  | 0.102273  | 0.113928  | 0.107663  | 0.116987  |
| 0.129953 | 0.107226  | 0.133887  | 0.102564  | 0.111888  | 0.104458  | 0.119318  |
| 0.125583 | 0.0967366 | 0.127185  | 0.097028  | 0.111014  | 0.105332  | 0.115239  |

|          |           |          |           |          |           |          |
|----------|-----------|----------|-----------|----------|-----------|----------|
| 0.128205 | 0.0961538 | 0.127477 | 0.094697  | 0.111014 | 0.0989219 | 0.112617 |
| 0.139132 | 0.112325  | 0.128788 | 0.117861  | 0.12398  | 0.104895  | 0.122378 |
| 0.118735 | 0.104458  | 0.131119 | 0.102127  | 0.121649 | 0.121795  | 0.117133 |
| 0.120921 | 0.106935  | 0.136509 | 0.109557  | 0.121795 | 0.120484  | 0.122232 |
| 0.130828 | 0.122669  | 0.142337 | 0.122378  | 0.130536 | 0.129225  | 0.135052 |
| 0.132867 | 0.123543  | 0.138549 | 0.120338  | 0.130245 | 0.133887  | 0.133596 |
| 0.134615 | 0.116259  | 0.133013 | 0.124709  | 0.134033 | 0.128934  | 0.121649 |
| 0.137383 | 0.127477  | 0.138403 | 0.125146  | 0.13884  | 0.13549   | 0.125291 |
| 0.129371 | 0.113636  | 0.141463 | 0.11655   | 0.12704  | 0.123689  | 0.127477 |
| 0.185606 | 0.180653  | 0.197407 | 0.185897  | 0.194639 | 0.174679  | 0.188957 |
| 0.120484 | 0.107663  | 0.135198 | 0.10912   | 0.122523 | 0.123543  | 0.129662 |
| 0.130245 | 0.125583  | 0.140006 | 0.129662  | 0.140152 | 0.131847  | 0.121941 |
| 0.125291 | 0.118881  | 0.139132 | 0.120629  | 0.134033 | 0.127477  | 0.119318 |
| 0.139423 | 0.133596  | 0.147727 | 0.127477  | 0.139714 | 0.140734  | 0.143065 |
| 0.118298 | 0.101981  | 0.128351 | 0.104312  | 0.120338 | 0.121358  | 0.11553  |
| 0.134615 | 0.120047  | 0.133887 | 0.11859   | 0.132867 | 0.128351  | 0.118735 |
| 0.121795 | 0.103438  | 0.128934 | 0.106643  | 0.117716 | 0.123689  | 0.121941 |
| 0.126311 | 0.112325  | 0.132284 | 0.118444  | 0.123106 | 0.121212  | 0.120047 |
| 0.124854 | 0.106498  | 0.136655 | 0.114948  | 0.120484 | 0.119172  | 0.123252 |
| 0.140589 | 0.121649  | 0.128788 | 0.124272  | 0.122232 | 0.13141   | 0.123834 |
| 0.121358 | 0.10067   | 0.124709 | 0.101253  | 0.105041 | 0.119755  | 0.115676 |
| 0.138695 | 0.124709  | 0.142628 | 0.129662  | 0.137821 | 0.130099  | 0.133304 |
| 0.128642 | 0.110868  | 0.137529 | 0.112908  | 0.123689 | 0.126748  | 0.126748 |
| 0.135198 | 0.115967  | 0.137383 | 0.108974  | 0.111597 | 0.108246  | 0.116404 |
| 0.127768 | 0.12602   | 0.143648 | 0.126311  | 0.133596 | 0.13549   | 0.134907 |
| 0.120192 | 0.106789  | 0.127622 | 0.101253  | 0.114656 | 0.120921  | 0.119464 |
| 0.146999 | 0.138258  | 0.155594 | 0.141171  | 0.153992 | 0.134907  | 0.147727 |
| 0.127331 | 0.112179  | 0.133013 | 0.104895  | 0.116841 | 0.125437  | 0.121358 |
| 0.123834 | 0.109266  | 0.137383 | 0.111888  | 0.116259 | 0.124854  | 0.120192 |
| 0.125728 | 0.0942599 | 0.122378 | 0.100087  | 0.105332 | 0.115676  | 0.112471 |
| 0.138549 | 0.135344  | 0.152389 | 0.137675  | 0.144959 | 0.143357  | 0.145105 |
| 0.12602  | 0.102127  | 0.129371 | 0.106498  | 0.122232 | 0.11014   | 0.114219 |
| 0.117279 | 0.101253  | 0.130828 | 0.105915  | 0.11553  | 0.115967  | 0.119172 |
| 0.116696 | 0.104167  | 0.134615 | 0.104749  | 0.117279 | 0.118881  | 0.117133 |
| 0.125583 | 0.113928  | 0.144376 | 0.11451   | 0.131119 | 0.133013  | 0.131556 |
| 0.119318 | 0.119318  | 0.136655 | 0.120484  | 0.128059 | 0.131702  | 0.132576 |
| 0.125874 | 0.112762  | 0.139132 | 0.107517  | 0.122669 | 0.126603  | 0.129225 |
| 0.114073 | 0.0992133 | 0.126457 | 0.0968823 | 0.11116  | 0.119464  | 0.112471 |
| 0.115239 | 0.105041  | 0.13141  | 0.0980478 | 0.112034 | 0.120338  | 0.120921 |
| 0.117716 | 0.105186  | 0.128934 | 0.102273  | 0.115385 | 0.11961   | 0.113782 |
| 0.13345  | 0.111888  | 0.137675 | 0.111014  | 0.128788 | 0.128059  | 0.122815 |
| 0.125728 | 0.121358  | 0.136655 | 0.118735  | 0.119318 | 0.129662  | 0.12296  |
| 0.11655  | 0.1081    | 0.133596 | 0.102273  | 0.117133 | 0.125437  | 0.119027 |
| 0.106789 | 0.103001  | 0.129371 | 0.0986305 | 0.110868 | 0.117424  | 0.119172 |

|          |           |           |           |           |           |           |
|----------|-----------|-----------|-----------|-----------|-----------|-----------|
| 0.123106 | 0.112325  | 0.129079  | 0.114365  | 0.115239  | 0.125874  | 0.123252  |
| 0.115093 | 0.103438  | 0.124563  | 0.101399  | 0.112762  | 0.117861  | 0.117861  |
| 0.129371 | 0.119464  | 0.141754  | 0.120629  | 0.132284  | 0.129225  | 0.136218  |
| 0.13549  | 0.127622  | 0.149621  | 0.13141   | 0.133741  | 0.139423  | 0.14088   |
| 0.119172 | 0.112179  | 0.129808  | 0.1081    | 0.111888  | 0.121649  | 0.123689  |
| 0.11553  | 0.108829  | 0.135198  | 0.102418  | 0.117861  | 0.127914  | 0.118881  |
| 0.11757  | 0.105624  | 0.128205  | 0.101836  | 0.114073  | 0.117424  | 0.115676  |
| 0.119901 | 0.102418  | 0.134324  | 0.10067   | 0.11757   | 0.113054  | 0.120338  |
| 0.124272 | 0.121066  | 0.138403  | 0.11757   | 0.120484  | 0.130828  | 0.129371  |
| 0.110577 | 0.101544  | 0.134033  | 0.100379  | 0.109703  | 0.121795  | 0.117716  |
| 0.136946 | 0.131119  | 0.146125  | 0.131119  | 0.132284  | 0.13884   | 0.139423  |
| 0.137092 | 0.128934  | 0.145688  | 0.135344  | 0.136801  | 0.121212  | 0.141026  |
| 0.124563 | 0.119027  | 0.13986   | 0.123106  | 0.129516  | 0.114802  | 0.125291  |
| 0.118007 | 0.111305  | 0.140006  | 0.115385  | 0.128788  | 0.116404  | 0.129225  |
| 0.123834 | 0.108974  | 0.13884   | 0.112762  | 0.121795  | 0.125146  | 0.127185  |
| 0.118444 | 0.103001  | 0.129079  | 0.0980478 | 0.114365  | 0.120338  | 0.120338  |
| 0.131702 | 0.097028  | 0.124272  | 0.0941142 | 0.104021  | 0.11553   | 0.110286  |
| 0.120338 | 0.0944056 | 0.122815  | 0.0949883 | 0.1081    | 0.115239  | 0.117861  |
| 0.119755 | 0.092366  | 0.128934  | 0.094697  | 0.109848  | 0.107955  | 0.109703  |
| 0.135781 | 0.0914918 | 0.103875  | 0.0938228 | 0.0917832 | 0.100087  | 0.0957168 |
| 0.125146 | 0.107372  | 0.13345   | 0.106789  | 0.12398   | 0.122086  | 0.119464  |
| 0.124126 | 0.127331  | 0.14933   | 0.130828  | 0.136655  | 0.136509  | 0.132139  |
| 0.136509 | 0.13039   | 0.145105  | 0.133304  | 0.137092  | 0.135781  | 0.138403  |
| 0.195076 | 0.195367  | 0.212704  | 0.192453  | 0.207022  | 0.195804  | 0.203089  |
| 0.234848 | 0.236597  | 0.249272  | 0.237471  | 0.243007  | 0.236451  | 0.245192  |
| 0.124854 | 0.0939685 | 0.132284  | 0.101253  | 0.117279  | 0.111888  | 0.117716  |
| 0.12296  | 0.0789627 | 0.100379  | 0.0780886 | 0.0850816 | 0.0989219 | 0.0887238 |
| 0.121503 | 0.0847902 | 0.121066  | 0.085373  | 0.0984848 | 0.101544  | 0.0945513 |
| 0.118881 | 0.0725524 | 0.113782  | 0.080711  | 0.0958625 | 0.104458  | 0.0954254 |
| 0        | 0.123834  | 0.147873  | 0.133159  | 0.139277  | 0.139132  | 0.130682  |
| 0.123834 | 0         | 0.104167  | 0.0798368 | 0.0938228 | 0.103001  | 0.0907634 |
| 0.147873 | 0.104167  | 0         | 0.10271   | 0.105041  | 0.121795  | 0.0990676 |
| 0.133159 | 0.0798368 | 0.10271   | 0         | 0.0871212 | 0.10271   | 0.0942599 |
| 0.139277 | 0.0938228 | 0.105041  | 0.0871212 | 0         | 0.112617  | 0.0960082 |
| 0.139132 | 0.103001  | 0.121795  | 0.10271   | 0.112617  | 0         | 0.108392  |
| 0.130682 | 0.0907634 | 0.0990676 | 0.0942599 | 0.0960082 | 0.108392  | 0         |
| 0.135927 | 0.121066  | 0.129662  | 0.125146  | 0.129225  | 0.106643  | 0.130828  |
| 0.128059 | 0.0869755 | 0.117424  | 0.0837704 | 0.103001  | 0.105186  | 0.0935315 |
| 0.128351 | 0.0776515 | 0.102273  | 0.0773601 | 0.0887238 | 0.100524  | 0.0920746 |
| 0.126457 | 0.0737179 | 0.107955  | 0.083042  | 0.0976107 | 0.101544  | 0.0802739 |
| 0.122669 | 0.0786713 | 0.109411  | 0.0745921 | 0.083042  | 0.10271   | 0.0989219 |
| 0.125874 | 0.0775058 | 0.10067   | 0.0763403 | 0.0847902 | 0.10271   | 0.0887238 |
| 0.129808 | 0.0866841 | 0.115967  | 0.0799825 | 0.0925117 | 0.105769  | 0.0952797 |
| 0.13345  | 0.0871212 | 0.106498  | 0.0952797 | 0.099359  | 0.103293  | 0.0823135 |

|          |           |           |           |           |           |           |
|----------|-----------|-----------|-----------|-----------|-----------|-----------|
| 0.142191 | 0.0996503 | 0.113491  | 0.102564  | 0.101981  | 0.108829  | 0.0901807 |
| 0.134761 | 0.0855186 | 0.112179  | 0.0828963 | 0.0890152 | 0.110431  | 0.105478  |
| 0.125874 | 0.0769231 | 0.114365  | 0.0836247 | 0.0958625 | 0.0989219 | 0.0939685 |
| 0.139277 | 0.0958625 | 0.10708   | 0.0920746 | 0.090035  | 0.114073  | 0.101253  |
| 0.127331 | 0.0766317 | 0.110868  | 0.0801282 | 0.0967366 | 0.10912   | 0.0919289 |
| 0.138258 | 0.0989219 | 0.104312  | 0.101253  | 0.111451  | 0.111014  | 0.101399  |
| 0.130973 | 0.135052  | 0.155594  | 0.136801  | 0.142045  | 0.138403  | 0.136072  |
| 0.137529 | 0.107809  | 0.123397  | 0.110431  | 0.117133  | 0.109994  | 0.107372  |
| 0.123543 | 0.0804196 | 0.113491  | 0.0777972 | 0.0909091 | 0.10271   | 0.0971737 |
| 0.120775 | 0.0689103 | 0.108683  | 0.0726981 | 0.092803  | 0.102273  | 0.0935315 |
| 0.136072 | 0.0874126 | 0.102418  | 0.07838   | 0.0926573 | 0.109703  | 0.105915  |
| 0.131265 | 0.0826049 | 0.1081    | 0.0837704 | 0.0930944 | 0.102855  | 0.0914918 |
| 0.14292  | 0.0954254 | 0.0949883 | 0.0910548 | 0.0930944 | 0.10169   | 0.101107  |
| 0.132284 | 0.0844988 | 0.111451  | 0.0798368 | 0.0926573 | 0.104458  | 0.0962995 |
| 0.130099 | 0.0823135 | 0.106061  | 0.0820221 | 0.0919289 | 0.106643  | 0.0920746 |
| 0.132139 | 0.0898893 | 0.107226  | 0.0878497 | 0.095134  | 0.100524  | 0.0856643 |
| 0.136801 | 0.0936772 | 0.113054  | 0.103001  | 0.0945513 | 0.111597  | 0.0906177 |
| 0.141463 | 0.0962995 | 0.11014   | 0.088141  | 0.088141  | 0.103438  | 0.090035  |
| 0.139277 | 0.0897436 | 0.107372  | 0.100233  | 0.0944056 | 0.109994  | 0.0939685 |
| 0.135635 | 0.113782  | 0.140443  | 0.115822  | 0.121066  | 0.114802  | 0.123252  |
| 0.135052 | 0.0922203 | 0.114802  | 0.078817  | 0.08581   | 0.10373   | 0.106643  |
| 0.137383 | 0.092803  | 0.112471  | 0.0945513 | 0.104749  | 0.104021  | 0.0979021 |
| 0.125583 | 0.0856643 | 0.105624  | 0.0777972 | 0.0949883 | 0.102418  | 0.0916375 |
| 0.127185 | 0.0992133 | 0.123252  | 0.0992133 | 0.11116   | 0.100233  | 0.120629  |
| 0.122815 | 0.0861014 | 0.11451   | 0.0782343 | 0.102127  | 0.100524  | 0.0888695 |
| 0.126166 | 0.0766317 | 0.112325  | 0.0804196 | 0.0868298 | 0.107663  | 0.0925117 |
| 0.126748 | 0.0775058 | 0.104167  | 0.0757576 | 0.0859557 | 0.103584  | 0.0933858 |
| 0.143794 | 0.0933858 | 0.105769  | 0.0968823 | 0.0962995 | 0.104895  | 0.092366  |
| 0.12704  | 0.106061  | 0.130682  | 0.0987762 | 0.109848  | 0.116696  | 0.121066  |
| 0.138986 | 0.0935315 | 0.105041  | 0.0973193 | 0.090035  | 0.10708   | 0.0965909 |
| 0.126748 | 0.0804196 | 0.107955  | 0.076049  | 0.0812937 | 0.104167  | 0.095134  |
| 0.137675 | 0.0855186 | 0.104604  | 0.0855186 | 0.0843531 | 0.104021  | 0.0903263 |
| 0.128497 | 0.118298  | 0.135052  | 0.119755  | 0.125874  | 0.11553   | 0.125437  |
| 0.122086 | 0.119464  | 0.14933   | 0.120047  | 0.129371  | 0.126311  | 0.128351  |
| 0.123397 | 0.10708   | 0.129079  | 0.101544  | 0.115822  | 0.125291  | 0.117424  |
| 0.128497 | 0.115093  | 0.139423  | 0.113345  | 0.126166  | 0.121649  | 0.123397  |
| 0.129225 | 0.114365  | 0.143357  | 0.11553   | 0.127768  | 0.126748  | 0.126748  |
| 0.123106 | 0.109703  | 0.132867  | 0.103875  | 0.124854  | 0.129371  | 0.123834  |
| 0.128642 | 0.132139  | 0.150932  | 0.133013  | 0.13884   | 0.147145  | 0.143939  |
| 0.142483 | 0.124417  | 0.138549  | 0.134033  | 0.138695  | 0.138258  | 0.13039   |
| 0.111888 | 0.108392  | 0.138549  | 0.107517  | 0.118007  | 0.127477  | 0.122232  |
| 0.120484 | 0.123689  | 0.148893  | 0.133304  | 0.141754  | 0.138403  | 0.130828  |
| 0.11655  | 0.124126  | 0.151369  | 0.126166  | 0.131993  | 0.137966  | 0.136509  |
| 0.124417 | 0.121503  | 0.14933   | 0.124709  | 0.134907  | 0.138258  | 0.131556  |



|          |          |          |          |          |          |          |
|----------|----------|----------|----------|----------|----------|----------|
| 0.118298 | 0.115967 | 0.135344 | 0.118298 | 0.126748 | 0.126894 | 0.123106 |
| 0.119464 | 0.118298 | 0.150204 | 0.122669 | 0.129371 | 0.138549 | 0.133304 |
| 0.121649 | 0.124563 | 0.152681 | 0.126311 | 0.137966 | 0.137529 | 0.135781 |
| 0.13141  | 0.122378 | 0.144959 | 0.123252 | 0.126166 | 0.134178 | 0.133013 |
| 0.126457 | 0.129953 | 0.146999 | 0.137238 | 0.141026 | 0.141754 | 0.141754 |
| 0.123543 | 0.124126 | 0.158362 | 0.128788 | 0.138986 | 0.140006 | 0.13884  |
| 0.117424 | 0.109266 | 0.136509 | 0.11451  | 0.126748 | 0.124854 | 0.123689 |
| 0.146999 | 0.125728 | 0.144231 | 0.121066 | 0.131556 | 0.132576 | 0.135198 |
| 0.127331 | 0.133741 | 0.154283 | 0.13345  | 0.143939 | 0.144376 | 0.142045 |
| 0.115967 | 0.11014  | 0.13884  | 0.111597 | 0.120338 | 0.121649 | 0.123106 |
| 0.224213 | 0.219843 | 0.234557 | 0.216055 | 0.230332 | 0.223193 | 0.227273 |
| 0.120484 | 0.121941 | 0.143357 | 0.120484 | 0.126311 | 0.130245 | 0.129079 |
| 0.121358 | 0.116987 | 0.142774 | 0.114948 | 0.125728 | 0.130245 | 0.125    |
| 0.123543 | 0.127331 | 0.147582 | 0.132284 | 0.137821 | 0.133887 | 0.133013 |
| 0.122378 | 0.117133 | 0.145833 | 0.115676 | 0.127914 | 0.13447  | 0.129516 |
| 0.124417 | 0.134324 | 0.158362 | 0.131993 | 0.145979 | 0.147873 | 0.144085 |
| 0.121795 | 0.113054 | 0.139132 | 0.116841 | 0.126457 | 0.128934 | 0.122232 |
| 0.116987 | 0.117279 | 0.142483 | 0.120775 | 0.126603 | 0.131702 | 0.128497 |
| 0.119318 | 0.122232 | 0.149476 | 0.124854 | 0.130682 | 0.134033 | 0.136364 |
| 0.125    | 0.125291 | 0.152244 | 0.127914 | 0.136072 | 0.130973 | 0.133596 |
| 0.129516 | 0.12602  | 0.143939 | 0.128934 | 0.137092 | 0.136364 | 0.131702 |
| 0.126457 | 0.124417 | 0.137675 | 0.125    | 0.130245 | 0.129516 | 0.123106 |
| 0.126748 | 0.127331 | 0.144959 | 0.129662 | 0.130536 | 0.138549 | 0.137675 |
| 0.117716 | 0.113928 | 0.14292  | 0.115093 | 0.126748 | 0.12602  | 0.125728 |
| 0.128497 | 0.114219 | 0.14088  | 0.119464 | 0.124126 | 0.133596 | 0.124563 |
| 0.128642 | 0.129516 | 0.151807 | 0.135344 | 0.142337 | 0.138403 | 0.130536 |
| 0.113054 | 0.11014  | 0.141754 | 0.118007 | 0.126457 | 0.122815 | 0.124854 |
| 0.143648 | 0.117133 | 0.137383 | 0.120047 | 0.126748 | 0.11961  | 0.129516 |
| 0.139423 | 0.135635 | 0.162296 | 0.140297 | 0.14729  | 0.143939 | 0.152681 |
| 0.121066 | 0.11757  | 0.146562 | 0.12398  | 0.130099 | 0.121795 | 0.132284 |
| 0.121941 | 0.12398  | 0.150058 | 0.130099 | 0.140006 | 0.138403 | 0.133741 |
| 0.13345  | 0.125    | 0.151952 | 0.123252 | 0.141026 | 0.130099 | 0.137966 |
| 0.132139 | 0.129516 | 0.142483 | 0.125728 | 0.128059 | 0.137529 | 0.137238 |
| 0.132721 | 0.127768 | 0.152972 | 0.120484 | 0.132721 | 0.134615 | 0.135781 |
| 0.136509 | 0.141463 | 0.160548 | 0.138258 | 0.146125 | 0.141608 | 0.148601 |
| 0.119172 | 0.105478 | 0.133887 | 0.106935 | 0.120338 | 0.122232 | 0.11757  |
| 0.125437 | 0.123106 | 0.1419   | 0.129808 | 0.135927 | 0.117133 | 0.138986 |
| 0.141608 | 0.1419   | 0.163607 | 0.143357 | 0.149767 | 0.143502 | 0.154283 |
| 0.121212 | 0.118007 | 0.136509 | 0.116259 | 0.116259 | 0.126894 | 0.129516 |
| 0.130245 | 0.1081   | 0.13243  | 0.113636 | 0.118298 | 0.109703 | 0.125437 |
| 0.145542 | 0.135927 | 0.14627  | 0.133887 | 0.138549 | 0.138986 | 0.143939 |
| 0.131847 | 0.111742 | 0.130245 | 0.103001 | 0.111451 | 0.102564 | 0.121212 |
| 0.129662 | 0.131702 | 0.144959 | 0.129371 | 0.133159 | 0.13447  | 0.140006 |
| 0.130682 | 0.128642 | 0.144231 | 0.121941 | 0.129808 | 0.134907 | 0.137821 |

|           |           |          |           |           |          |           |
|-----------|-----------|----------|-----------|-----------|----------|-----------|
| 0.128205  | 0.121503  | 0.139714 | 0.120921  | 0.128205  | 0.132139 | 0.128934  |
| 0.131265  | 0.121941  | 0.138695 | 0.11961   | 0.122232  | 0.118298 | 0.125583  |
| 0.125874  | 0.117424  | 0.141463 | 0.121795  | 0.126748  | 0.123397 | 0.127768  |
| 0.132139  | 0.118153  | 0.13141  | 0.116404  | 0.131265  | 0.129662 | 0.123543  |
| 0.13447   | 0.122815  | 0.147727 | 0.129225  | 0.136509  | 0.139277 | 0.138403  |
| 0.134761  | 0.124563  | 0.134907 | 0.122523  | 0.134178  | 0.132284 | 0.12704   |
| 0.136218  | 0.12398   | 0.141026 | 0.128059  | 0.134761  | 0.137529 | 0.131702  |
| 0.135052  | 0.11757   | 0.1419   | 0.121941  | 0.130682  | 0.125291 | 0.128205  |
| 0.142337  | 0.135344  | 0.145688 | 0.136509  | 0.150787  | 0.136364 | 0.137821  |
| 0.115239  | 0.11553   | 0.140734 | 0.123106  | 0.125146  | 0.132284 | 0.125874  |
| 0.128642  | 0.099796  | 0.118881 | 0.101253  | 0.10708   | 0.116841 | 0.118007  |
| 0.129516  | 0.118153  | 0.138112 | 0.12398   | 0.133013  | 0.134324 | 0.127622  |
| 0.121358  | 0.114948  | 0.132576 | 0.114656  | 0.122232  | 0.124417 | 0.12296   |
| 0.145688  | 0.142483  | 0.156614 | 0.137529  | 0.148893  | 0.145833 | 0.147873  |
| 0.151807  | 0.15035   | 0.159528 | 0.151807  | 0.1588    | 0.153118 | 0.157488  |
| 0.138112  | 0.0926573 | 0.100962 | 0.0871212 | 0.0874126 | 0.107955 | 0.092803  |
| 0.133596  | 0.0922203 | 0.114802 | 0.0907634 | 0.0936772 | 0.109266 | 0.0935315 |
| 0.133159  | 0.125291  | 0.145251 | 0.125874  | 0.130245  | 0.140589 | 0.13243   |
| 0.130099  | 0.128059  | 0.148601 | 0.131265  | 0.133304  | 0.138403 | 0.136072  |
| 0.136509  | 0.0965909 | 0.104895 | 0.0901807 | 0.0866841 | 0.115967 | 0.0981935 |
| 0.128059  | 0.132721  | 0.145105 | 0.133013  | 0.136801  | 0.136072 | 0.130536  |
| 0.13039   | 0.124854  | 0.137529 | 0.129808  | 0.137092  | 0.122378 | 0.134907  |
| 0.123834  | 0.111305  | 0.127477 | 0.107809  | 0.115967  | 0.116113 | 0.11553   |
| 0.160548  | 0.148601  | 0.151952 | 0.142774  | 0.144522  | 0.148747 | 0.151078  |
| 0.125874  | 0.112762  | 0.130682 | 0.109266  | 0.113345  | 0.112325 | 0.114656  |
| 0.131119  | 0.132576  | 0.148456 | 0.133741  | 0.144522  | 0.134178 | 0.141754  |
| 0.128934  | 0.100379  | 0.113928 | 0.103001  | 0.107955  | 0.113345 | 0.112762  |
| 0.137966  | 0.123397  | 0.138986 | 0.126894  | 0.120484  | 0.138112 | 0.134615  |
| 0.11757   | 0.121941  | 0.143357 | 0.120192  | 0.136509  | 0.126748 | 0.124709  |
| 0.144814  | 0.136364  | 0.166521 | 0.143357  | 0.150932  | 0.143502 | 0.152244  |
| 0.142628  | 0.136801  | 0.157051 | 0.13884   | 0.150204  | 0.147145 | 0.146853  |
| 0.129662  | 0.117424  | 0.145542 | 0.120629  | 0.132576  | 0.131556 | 0.136801  |
| 0.140297  | 0.131847  | 0.161422 | 0.137675  | 0.145251  | 0.1419   | 0.14831   |
| 0.156177  | 0.138403  | 0.160693 | 0.136072  | 0.151515  | 0.143794 | 0.149913  |
| 0.145396  | 0.142483  | 0.170017 | 0.141608  | 0.157051  | 0.1537   | 0.158945  |
| 0.136801  | 0.100087  | 0.113054 | 0.103584  | 0.114656  | 0.120338 | 0.112762  |
| 0.138695  | 0.13549   | 0.155449 | 0.136072  | 0.145688  | 0.141754 | 0.152244  |
| 0.0976107 | 0.113345  | 0.145251 | 0.112762  | 0.128205  | 0.128642 | 0.127477  |
| 0.088141  | 0.109703  | 0.141026 | 0.113491  | 0.130682  | 0.123834 | 0.127331  |
| 0.126748  | 0.117716  | 0.146999 | 0.121212  | 0.130536  | 0.132139 | 0.135927  |
| 0.126748  | 0.111888  | 0.146416 | 0.114802  | 0.126748  | 0.128934 | 0.13243   |
| 0.12602   | 0.113199  | 0.142774 | 0.11553   | 0.127768  | 0.128497 | 0.125874  |
| 0.0849359 | 0.110577  | 0.143648 | 0.114365  | 0.12602   | 0.120921 | 0.125874  |
| 0.129516  | 0.116987  | 0.150641 | 0.117279  | 0.138258  | 0.134615 | 0.13345   |

|           |           |          |           |          |          |          |
|-----------|-----------|----------|-----------|----------|----------|----------|
| 0.0620629 | 0.120921  | 0.1537   | 0.126166  | 0.138403 | 0.133887 | 0.133887 |
| 0.106352  | 0.106061  | 0.135344 | 0.107517  | 0.111888 | 0.118153 | 0.118153 |
| 0.129953  | 0.115676  | 0.148747 | 0.120338  | 0.131119 | 0.130973 | 0.13884  |
| 0.126894  | 0.113491  | 0.144814 | 0.116404  | 0.127185 | 0.128497 | 0.131702 |
| 0.139423  | 0.103293  | 0.11859  | 0.100962  | 0.11553  | 0.115967 | 0.116841 |
| 0.216346  | 0.216346  | 0.234557 | 0.214889  | 0.225379 | 0.217949 | 0.225233 |
| 0.140297  | 0.136801  | 0.153846 | 0.141754  | 0.142628 | 0.145688 | 0.149767 |
| 0.13345   | 0.12704   | 0.144668 | 0.129662  | 0.127914 | 0.135927 | 0.135052 |
| 0.127185  | 0.123689  | 0.151224 | 0.120192  | 0.135635 | 0.134615 | 0.138986 |
| 0.211684  | 0.212267  | 0.230186 | 0.213141  | 0.221882 | 0.211538 | 0.223193 |
| 0.132721  | 0.110286  | 0.138112 | 0.111451  | 0.125437 | 0.120338 | 0.128205 |
| 0.126166  | 0.118881  | 0.14088  | 0.113928  | 0.131702 | 0.134178 | 0.132721 |
| 0.136364  | 0.121212  | 0.140297 | 0.11859   | 0.130828 | 0.130973 | 0.138549 |
| 0.0467657 | 0.118444  | 0.147727 | 0.12398   | 0.135052 | 0.129662 | 0.127622 |
| 0.243153  | 0.252477  | 0.261655 | 0.251894  | 0.25743  | 0.248543 | 0.258159 |
| 0.13141   | 0.124709  | 0.147582 | 0.123834  | 0.132576 | 0.136509 | 0.135927 |
| 0.131702  | 0.0999417 | 0.122815 | 0.0967366 | 0.111014 | 0.114365 | 0.114073 |
| 0.138112  | 0.112762  | 0.141463 | 0.113054  | 0.125291 | 0.13039  | 0.122232 |
| 0.137529  | 0.109266  | 0.139423 | 0.107517  | 0.125    | 0.128642 | 0.120484 |
| 0.116841  | 0.127331  | 0.152244 | 0.130828  | 0.136946 | 0.134761 | 0.136509 |
| 0.116259  | 0.123543  | 0.157197 | 0.127622  | 0.143065 | 0.131265 | 0.140589 |
| 0.133159  | 0.105186  | 0.122815 | 0.100816  | 0.114219 | 0.116404 | 0.118735 |
| 0.127768  | 0.113199  | 0.145396 | 0.117861  | 0.124563 | 0.129953 | 0.13345  |
| 0.136946  | 0.126166  | 0.152244 | 0.124126  | 0.138695 | 0.136509 | 0.144085 |
| 0.0550699 | 0.115676  | 0.144376 | 0.117716  | 0.131993 | 0.130099 | 0.124563 |
| 0.123397  | 0.111451  | 0.145396 | 0.114948  | 0.127477 | 0.129953 | 0.131993 |
| 0.102273  | 0.115093  | 0.14292  | 0.120047  | 0.12704  | 0.124272 | 0.128351 |
| 0.143502  | 0.136801  | 0.156469 | 0.136218  | 0.146125 | 0.145396 | 0.143939 |
| 0.133887  | 0.12602   | 0.148019 | 0.128351  | 0.135344 | 0.138695 | 0.139569 |
| 0.130973  | 0.122232  | 0.143357 | 0.117861  | 0.13447  | 0.135198 | 0.136946 |
| 0.193328  | 0.190122  | 0.20979  | 0.190997  | 0.201195 | 0.194347 | 0.199301 |
| 0.207605  | 0.2044    | 0.221154 | 0.203526  | 0.216055 | 0.204837 | 0.214161 |
| 0.053176  | 0.121358  | 0.15035  | 0.122523  | 0.135052 | 0.135198 | 0.131993 |
| 0.0493881 | 0.111116  | 0.140734 | 0.11757   | 0.128934 | 0.125291 | 0.121212 |
| 0.128351  | 0.140297  | 0.159674 | 0.14088   | 0.144376 | 0.144814 | 0.151807 |
| 0.133013  | 0.10067   | 0.121795 | 0.0971737 | 0.112325 | 0.113345 | 0.118298 |
| 0.132867  | 0.125583  | 0.149913 | 0.130245  | 0.134907 | 0.141171 | 0.13884  |
| 0.131556  | 0.116113  | 0.1419   | 0.12398   | 0.128059 | 0.124126 | 0.122378 |
| 0.224796  | 0.22567   | 0.238928 | 0.227127  | 0.235868 | 0.225524 | 0.23514  |
| 0.126311  | 0.113782  | 0.140734 | 0.112034  | 0.123106 | 0.128205 | 0.128205 |
| 0.212121  | 0.196387  | 0.210519 | 0.199592  | 0.203089 | 0.194202 | 0.2044   |
| 0.130973  | 0.095134  | 0.120047 | 0.0930944 | 0.107955 | 0.116259 | 0.115967 |
| 0.127622  | 0.103147  | 0.136218 | 0.108974  | 0.125    | 0.126311 | 0.125437 |
| 0.124272  | 0.117861  | 0.143357 | 0.116987  | 0.127185 | 0.122086 | 0.131119 |

|           |           |          |           |          |          |          |
|-----------|-----------|----------|-----------|----------|----------|----------|
| 0.0630828 | 0.108829  | 0.140152 | 0.115239  | 0.129225 | 0.124417 | 0.122669 |
| 0.208625  | 0.207751  | 0.225379 | 0.206876  | 0.221154 | 0.209353 | 0.21722  |
| 0.138986  | 0.125874  | 0.156614 | 0.130245  | 0.1419   | 0.140006 | 0.145542 |
| 0.132284  | 0.102564  | 0.13447  | 0.104895  | 0.118007 | 0.125146 | 0.127768 |
| 0.131702  | 0.120921  | 0.153118 | 0.124709  | 0.134615 | 0.133013 | 0.14088  |
| 0.133159  | 0.11655   | 0.138549 | 0.120047  | 0.122378 | 0.130099 | 0.132721 |
| 0.0597319 | 0.116259  | 0.144959 | 0.117424  | 0.13345  | 0.131556 | 0.128059 |
| 0.135052  | 0.0992133 | 0.118298 | 0.0992133 | 0.108246 | 0.115676 | 0.115385 |
| 0.132721  | 0.108246  | 0.133741 | 0.105332  | 0.120484 | 0.114219 | 0.12296  |
| 0.128642  | 0.121358  | 0.137238 | 0.117279  | 0.127185 | 0.134324 | 0.129953 |
| 0.124272  | 0.10912   | 0.1419   | 0.109411  | 0.126894 | 0.125    | 0.129079 |
| 0.134907  | 0.104312  | 0.12602  | 0.107809  | 0.112762 | 0.126894 | 0.123397 |
| 0.190997  | 0.186917  | 0.208333 | 0.187209  | 0.203234 | 0.192599 | 0.203671 |
| 0.13986   | 0.111888  | 0.139423 | 0.110431  | 0.124709 | 0.129808 | 0.119901 |
| 0.134178  | 0.122815  | 0.151515 | 0.120192  | 0.131847 | 0.13345  | 0.133741 |
| 0.130245  | 0.108974  | 0.14088  | 0.111014  | 0.124709 | 0.12602  | 0.125437 |
| 0.137966  | 0.120484  | 0.14831  | 0.126311  | 0.136509 | 0.136364 | 0.142191 |
| 0.128351  | 0.113199  | 0.146562 | 0.121649  | 0.129516 | 0.131993 | 0.133741 |
| 0.135927  | 0.0942599 | 0.11451  | 0.10067   | 0.112325 | 0.11859  | 0.114219 |
| 0.129953  | 0.104604  | 0.136509 | 0.112179  | 0.118007 | 0.127185 | 0.124854 |
| 0.136364  | 0.108974  | 0.121941 | 0.104312  | 0.114802 | 0.119318 | 0.117279 |
| 0.129808  | 0.117861  | 0.148019 | 0.118153  | 0.129516 | 0.13141  | 0.133159 |
| 0.131556  | 0.107955  | 0.137529 | 0.105041  | 0.121941 | 0.124126 | 0.122669 |
| 0.0652681 | 0.117133  | 0.146999 | 0.120047  | 0.134324 | 0.133304 | 0.128351 |
| 0.134761  | 0.121941  | 0.13986  | 0.115822  | 0.130973 | 0.131702 | 0.138112 |
| 0.139569  | 0.129953  | 0.14729  | 0.131993  | 0.138112 | 0.141171 | 0.146999 |
| 0.12704   | 0.115385  | 0.144668 | 0.115967  | 0.128205 | 0.130682 | 0.132139 |
| 0.137966  | 0.130682  | 0.149476 | 0.136218  | 0.13884  | 0.140152 | 0.144522 |
| 0.0584207 | 0.112034  | 0.145105 | 0.116113  | 0.133304 | 0.128788 | 0.126748 |
| 0.128934  | 0.104458  | 0.136946 | 0.111742  | 0.120775 | 0.117716 | 0.118007 |
| 0.128205  | 0.116841  | 0.145251 | 0.119464  | 0.131119 | 0.125146 | 0.136509 |
| 0.139569  | 0.108683  | 0.124854 | 0.105769  | 0.117424 | 0.118153 | 0.121649 |
| 0.197552  | 0.187646  | 0.208188 | 0.190559  | 0.20134  | 0.188083 | 0.20236  |
| 0.128642  | 0.102418  | 0.131119 | 0.105915  | 0.114948 | 0.122086 | 0.124417 |
| 0.11961   | 0.103001  | 0.13345  | 0.103293  | 0.118735 | 0.115676 | 0.118298 |
| 0.129225  | 0.120775  | 0.136655 | 0.11961   | 0.13243  | 0.133159 | 0.130828 |
| 0.184295  | 0.179924  | 0.20134  | 0.181381  | 0.195659 | 0.180653 | 0.194056 |
| 0.143939  | 0.133159  | 0.15778  | 0.136655  | 0.1419   | 0.145542 | 0.14729  |
| 0.148019  | 0.144231  | 0.15574  | 0.146562  | 0.144522 | 0.151369 | 0.152244 |
| 0.144668  | 0.137966  | 0.1588   | 0.138258  | 0.145542 | 0.146562 | 0.145688 |
| 0.128351  | 0.113782  | 0.141317 | 0.116404  | 0.127768 | 0.129371 | 0.130536 |
| 0.129371  | 0.115967  | 0.146707 | 0.122669  | 0.129371 | 0.133304 | 0.135927 |
| 0.213432  | 0.21285   | 0.231935 | 0.212267  | 0.223922 | 0.215618 | 0.226107 |
| 0.125437  | 0.11961   | 0.146562 | 0.120775  | 0.134761 | 0.136655 | 0.134324 |

|           |           |          |           |          |          |          |
|-----------|-----------|----------|-----------|----------|----------|----------|
| 0.132576  | 0.118007  | 0.151078 | 0.12704   | 0.131702 | 0.136509 | 0.142337 |
| 0.131119  | 0.10373   | 0.129516 | 0.105769  | 0.114219 | 0.12602  | 0.125146 |
| 0.170746  | 0.164627  | 0.191288 | 0.167249  | 0.182401 | 0.171183 | 0.179924 |
| 0.119172  | 0.11014   | 0.144959 | 0.113345  | 0.128205 | 0.12602  | 0.128934 |
| 0.143794  | 0.146125  | 0.159674 | 0.149913  | 0.153992 | 0.148019 | 0.156469 |
| 0.118444  | 0.115822  | 0.141317 | 0.119318  | 0.121941 | 0.129953 | 0.128497 |
| 0.192162  | 0.190414  | 0.207459 | 0.191288  | 0.2044   | 0.194347 | 0.201632 |
| 0.13039   | 0.11757   | 0.147727 | 0.120484  | 0.133887 | 0.133741 | 0.135781 |
| 0.117279  | 0.107663  | 0.136946 | 0.103001  | 0.121358 | 0.125    | 0.122378 |
| 0.130828  | 0.105186  | 0.141754 | 0.109266  | 0.125291 | 0.123689 | 0.123106 |
| 0.128934  | 0.114365  | 0.141608 | 0.114656  | 0.128642 | 0.132576 | 0.134033 |
| 0.128934  | 0.117861  | 0.13986  | 0.113199  | 0.129808 | 0.132576 | 0.133159 |
| 0.128934  | 0.118735  | 0.148601 | 0.116696  | 0.13447  | 0.130536 | 0.133741 |
| 0.0576923 | 0.112762  | 0.14292  | 0.114219  | 0.130828 | 0.130682 | 0.126311 |
| 0.195367  | 0.190122  | 0.210082 | 0.190997  | 0.204691 | 0.191434 | 0.202506 |
| 0.13549   | 0.118881  | 0.140297 | 0.121503  | 0.130536 | 0.133013 | 0.136801 |
| 0.119318  | 0.110577  | 0.143939 | 0.112034  | 0.126603 | 0.128788 | 0.129079 |
| 0.213287  | 0.212121  | 0.230041 | 0.214452  | 0.221154 | 0.216638 | 0.223048 |
| 0.137238  | 0.109557  | 0.141171 | 0.110723  | 0.127622 | 0.129225 | 0.121066 |
| 0.0546329 | 0.112908  | 0.144231 | 0.119318  | 0.133596 | 0.131702 | 0.12704  |
| 0.0546329 | 0.108246  | 0.140443 | 0.112325  | 0.127768 | 0.126166 | 0.121795 |
| 0.136946  | 0.129662  | 0.151661 | 0.134615  | 0.13986  | 0.136801 | 0.141754 |
| 0.191142  | 0.188228  | 0.209062 | 0.188811  | 0.203963 | 0.192453 | 0.205274 |
| 0.135927  | 0.102418  | 0.119755 | 0.0989219 | 0.112325 | 0.115967 | 0.117424 |
| 0.137092  | 0.128934  | 0.143065 | 0.126311  | 0.133596 | 0.138986 | 0.141317 |
| 0.0546329 | 0.111451  | 0.143939 | 0.117861  | 0.13243  | 0.131702 | 0.125874 |
| 0.0645396 | 0.110577  | 0.143065 | 0.113199  | 0.129516 | 0.128205 | 0.12704  |
| 0.0553613 | 0.111014  | 0.143211 | 0.116259  | 0.132867 | 0.128934 | 0.126311 |
| 0.125146  | 0.111451  | 0.143648 | 0.116113  | 0.127477 | 0.130245 | 0.134033 |
| 0.106061  | 0.104021  | 0.135344 | 0.106935  | 0.114802 | 0.120192 | 0.118444 |
| 0.13549   | 0.125291  | 0.149621 | 0.125583  | 0.132867 | 0.137092 | 0.139714 |
| 0.143357  | 0.124709  | 0.14729  | 0.121795  | 0.13141  | 0.137383 | 0.13447  |
| 0.13141   | 0.122378  | 0.150495 | 0.122669  | 0.131702 | 0.136509 | 0.138549 |
| 0.136509  | 0.121358  | 0.139277 | 0.124854  | 0.124563 | 0.132576 | 0.133741 |
| 0.197552  | 0.19697   | 0.215763 | 0.190851  | 0.208916 | 0.200612 | 0.207314 |
| 0.128934  | 0.118153  | 0.140152 | 0.113782  | 0.128059 | 0.129079 | 0.135781 |
| 0.134907  | 0.123543  | 0.146707 | 0.12704   | 0.134033 | 0.133596 | 0.14088  |
| 0.060169  | 0.108537  | 0.141608 | 0.113782  | 0.130099 | 0.129079 | 0.124709 |
| 0.108974  | 0.103438  | 0.133304 | 0.105769  | 0.113345 | 0.118444 | 0.119027 |
| 0.127331  | 0.113928  | 0.145251 | 0.11451   | 0.129662 | 0.116987 | 0.13243  |
| 0.133304  | 0.103875  | 0.121503 | 0.100087  | 0.116987 | 0.11451  | 0.117133 |
| 0.134178  | 0.128642  | 0.151224 | 0.133887  | 0.140297 | 0.138695 | 0.141608 |
| 0.129371  | 0.114802  | 0.146416 | 0.113345  | 0.129371 | 0.134761 | 0.133596 |
| 0.120921  | 0.0990676 | 0.129808 | 0.0999417 | 0.117424 | 0.114656 | 0.118444 |

|           |           |          |           |          |          |          |
|-----------|-----------|----------|-----------|----------|----------|----------|
| 0.118735  | 0.101836  | 0.128497 | 0.0992133 | 0.111451 | 0.108974 | 0.11655  |
| 0.117133  | 0.106643  | 0.140589 | 0.11014   | 0.123252 | 0.121941 | 0.124563 |
| 0.129516  | 0.0960082 | 0.11859  | 0.0948427 | 0.109703 | 0.120047 | 0.113636 |
| 0.135781  | 0.131993  | 0.151078 | 0.131993  | 0.136072 | 0.141754 | 0.144085 |
| 0.135635  | 0.102418  | 0.126166 | 0.100379  | 0.114365 | 0.119755 | 0.122669 |
| 0.122086  | 0.107517  | 0.142628 | 0.113636  | 0.124709 | 0.126603 | 0.130682 |
| 0.132284  | 0.100816  | 0.123689 | 0.0961538 | 0.108392 | 0.114948 | 0.118444 |
| 0.0630828 | 0.109994  | 0.144814 | 0.113199  | 0.129225 | 0.127331 | 0.127331 |
| 0.128788  | 0.100816  | 0.130099 | 0.101399  | 0.114219 | 0.122815 | 0.122232 |
| 0.0533217 | 0.114219  | 0.144376 | 0.117716  | 0.132576 | 0.13039  | 0.127477 |
| 0.12704   | 0.111305  | 0.135927 | 0.104604  | 0.123834 | 0.127185 | 0.128351 |
| 0.128497  | 0.113928  | 0.146707 | 0.110431  | 0.128497 | 0.131265 | 0.128059 |
| 0.123252  | 0.118298  | 0.140589 | 0.111597  | 0.125291 | 0.129225 | 0.130973 |
| 0.111451  | 0.109411  | 0.139277 | 0.108246  | 0.116113 | 0.123543 | 0.12296  |
| 0.0643939 | 0.110723  | 0.142628 | 0.113054  | 0.127914 | 0.129225 | 0.12398  |
| 0.129953  | 0.112179  | 0.143794 | 0.115093  | 0.130536 | 0.126894 | 0.126311 |
| 0.123397  | 0.114073  | 0.151515 | 0.115822  | 0.133596 | 0.136072 | 0.134033 |
| 0.120047  | 0.109266  | 0.140589 | 0.105478  | 0.12296  | 0.124854 | 0.125728 |
| 0.0597319 | 0.110723  | 0.145542 | 0.115676  | 0.126748 | 0.128934 | 0.124854 |
| 0.131556  | 0.11553   | 0.147727 | 0.11961   | 0.126603 | 0.130245 | 0.133741 |
| 0.130973  | 0.0957168 | 0.11655  | 0.0971737 | 0.113491 | 0.117133 | 0.113636 |
| 0.128059  | 0.114073  | 0.147436 | 0.115239  | 0.127768 | 0.130828 | 0.135781 |
| 0.123689  | 0.11553   | 0.141026 | 0.109994  | 0.131265 | 0.129953 | 0.13141  |
| 0.112617  | 0.110577  | 0.138986 | 0.109994  | 0.11961  | 0.122086 | 0.123252 |
| 0.114365  | 0.107663  | 0.142774 | 0.111451  | 0.127768 | 0.130536 | 0.127914 |
| 0.130245  | 0.101107  | 0.129516 | 0.0996503 | 0.113345 | 0.125437 | 0.123689 |
| 0.130682  | 0.11757   | 0.148019 | 0.123689  | 0.130973 | 0.132576 | 0.140152 |
| 0.13884   | 0.116113  | 0.142483 | 0.118153  | 0.133304 | 0.136072 | 0.130245 |
| 0.120338  | 0.115676  | 0.144668 | 0.115385  | 0.128788 | 0.13039  | 0.133013 |
| 0.19697   | 0.19493   | 0.211976 | 0.193765  | 0.204837 | 0.197115 | 0.206148 |
| 0.170163  | 0.16317   | 0.189248 | 0.16521   | 0.178904 | 0.169143 | 0.180216 |
| 0.133159  | 0.118881  | 0.14933  | 0.120921  | 0.132576 | 0.134761 | 0.135635 |
| 0.130682  | 0.108829  | 0.138695 | 0.107663  | 0.128059 | 0.11859  | 0.126457 |
| 0.14933   | 0.145251  | 0.155886 | 0.145833  | 0.146416 | 0.152681 | 0.153555 |
| 0.136072  | 0.125874  | 0.150495 | 0.126748  | 0.139569 | 0.139132 | 0.14292  |
| 0.0875583 | 0.115822  | 0.148893 | 0.122815  | 0.136509 | 0.12296  | 0.137821 |
| 0.0920746 | 0.111597  | 0.149913 | 0.11655   | 0.131993 | 0.12602  | 0.130682 |
| 0.107517  | 0.116841  | 0.143794 | 0.115676  | 0.125874 | 0.129225 | 0.127768 |
| 0.123252  | 0.116841  | 0.14933  | 0.115676  | 0.133159 | 0.131556 | 0.132139 |
| 0.200321  | 0.203526  | 0.222319 | 0.20236   | 0.21722  | 0.20542  | 0.215618 |
| 0.137238  | 0.108683  | 0.125728 | 0.100233  | 0.116259 | 0.117279 | 0.119027 |
| 0.129225  | 0.112617  | 0.1419   | 0.111451  | 0.122523 | 0.119464 | 0.127331 |
| 0.0706585 | 0.106789  | 0.143357 | 0.110868  | 0.125728 | 0.123543 | 0.124709 |
| 0.134907  | 0.111305  | 0.141171 | 0.113928  | 0.122669 | 0.130099 | 0.132139 |

|           |          |          |           |          |          |          |
|-----------|----------|----------|-----------|----------|----------|----------|
| 0.186917  | 0.179924 | 0.211538 | 0.181672  | 0.201195 | 0.185606 | 0.195513 |
| 0.243153  | 0.247523 | 0.259907 | 0.245192  | 0.252477 | 0.243881 | 0.253497 |
| 0.12602   | 0.116113 | 0.151807 | 0.115239  | 0.128059 | 0.132284 | 0.134907 |
| 0.123397  | 0.115822 | 0.150641 | 0.115822  | 0.133304 | 0.132576 | 0.134324 |
| 0.130099  | 0.120192 | 0.147727 | 0.122232  | 0.13243  | 0.137529 | 0.134907 |
| 0.12296   | 0.115385 | 0.139714 | 0.109557  | 0.129953 | 0.129225 | 0.129225 |
| 0.129225  | 0.099796 | 0.119755 | 0.0939685 | 0.110577 | 0.115093 | 0.115676 |
| 0.126748  | 0.11451  | 0.143502 | 0.114219  | 0.126166 | 0.129225 | 0.131847 |
| 0.083479  | 0.110286 | 0.144814 | 0.114656  | 0.133013 | 0.122669 | 0.126748 |
| 0.131556  | 0.099796 | 0.121212 | 0.095134  | 0.109703 | 0.112471 | 0.116259 |
| 0.0949883 | 0.112179 | 0.144085 | 0.117133  | 0.130536 | 0.122232 | 0.129808 |
| 0.120484  | 0.117279 | 0.147145 | 0.112325  | 0.128934 | 0.132576 | 0.130245 |
| 0.110431  | 0.1081   | 0.140297 | 0.111888  | 0.116259 | 0.123106 | 0.121941 |
| 0.128642  | 0.11553  | 0.14627  | 0.112908  | 0.128059 | 0.129079 | 0.131993 |
| 0.12704   | 0.116259 | 0.14729  | 0.119464  | 0.129953 | 0.133596 | 0.135927 |
| 0.120047  | 0.097028 | 0.131847 | 0.102273  | 0.119755 | 0.110868 | 0.114656 |
| 0.120047  | 0.11655  | 0.134178 | 0.119464  | 0.128205 | 0.123397 | 0.121066 |
| 0.128497  | 0.125874 | 0.137675 | 0.126457  | 0.134033 | 0.136801 | 0.135052 |
| 0.0613345 | 0.108537 | 0.143065 | 0.114948  | 0.127477 | 0.130245 | 0.124417 |
| 0.0879953 | 0.104021 | 0.134761 | 0.111014  | 0.118007 | 0.108829 | 0.116696 |
| 0.0407925 | 0.126166 | 0.147582 | 0.131702  | 0.136946 | 0.137092 | 0.132139 |
| 0.209353  | 0.21285  | 0.230769 | 0.214307  | 0.220134 | 0.210664 | 0.220862 |
| 0.127331  | 0.105478 | 0.141754 | 0.106061  | 0.123252 | 0.126311 | 0.122523 |
| 0.112908  | 0.103875 | 0.140152 | 0.105915  | 0.116696 | 0.121795 | 0.117716 |
| 0.131265  | 0.119318 | 0.143357 | 0.113782  | 0.129808 | 0.130536 | 0.137238 |
| 0.138695  | 0.110723 | 0.141463 | 0.107517  | 0.128497 | 0.131265 | 0.126603 |
| 0.130536  | 0.106643 | 0.136801 | 0.108974  | 0.120629 | 0.127185 | 0.127768 |
| 0.202214  | 0.201049 | 0.222756 | 0.20134   | 0.213869 | 0.204691 | 0.214015 |
| 0.130099  | 0.115822 | 0.150641 | 0.122815  | 0.134178 | 0.135781 | 0.140734 |
| 0.0614802 | 0.107517 | 0.139714 | 0.112762  | 0.130536 | 0.126603 | 0.125146 |
| 0.129225  | 0.120192 | 0.140152 | 0.120192  | 0.121358 | 0.131993 | 0.132867 |
| 0.121066  | 0.108537 | 0.137821 | 0.106789  | 0.122815 | 0.128497 | 0.125291 |
| 0.128934  | 0.114656 | 0.147436 | 0.11757   | 0.130682 | 0.132867 | 0.13549  |
| 0.114365  | 0.108537 | 0.142191 | 0.110577  | 0.123689 | 0.120338 | 0.120338 |
| 0.121649  | 0.11553  | 0.143939 | 0.109994  | 0.125146 | 0.127914 | 0.129953 |
| 0.135344  | 0.108537 | 0.140443 | 0.106789  | 0.125146 | 0.129662 | 0.125    |
| 0.202797  | 0.200466 | 0.21926  | 0.199592  | 0.214452 | 0.199155 | 0.21285  |
| 0.121941  | 0.108829 | 0.140152 | 0.10912   | 0.121358 | 0.123252 | 0.12704  |
| 0.197844  | 0.193765 | 0.21285  | 0.192599  | 0.211538 | 0.196533 | 0.205857 |
| 0.197698  | 0.195076 | 0.211538 | 0.191288  | 0.205565 | 0.194347 | 0.204254 |
| 0.126603  | 0.125437 | 0.138112 | 0.124563  | 0.130099 | 0.137238 | 0.133741 |
| 0.139714  | 0.120775 | 0.13986  | 0.11961   | 0.129516 | 0.13345  | 0.125291 |
| 0.116987  | 0.107955 | 0.136655 | 0.105624  | 0.114948 | 0.122669 | 0.121795 |
| 0.120047  | 0.105478 | 0.13884  | 0.112179  | 0.123543 | 0.125146 | 0.123397 |

|           |           |          |           |          |          |          |
|-----------|-----------|----------|-----------|----------|----------|----------|
| 0.126311  | 0.113782  | 0.146562 | 0.116696  | 0.127477 | 0.131993 | 0.13549  |
| 0.060169  | 0.112617  | 0.14627  | 0.116404  | 0.134178 | 0.129079 | 0.129953 |
| 0.130973  | 0.0960082 | 0.121212 | 0.095134  | 0.107372 | 0.11451  | 0.113345 |
| 0.129808  | 0.0980478 | 0.122378 | 0.0980478 | 0.109703 | 0.113054 | 0.115967 |
| 0.131993  | 0.116841  | 0.150495 | 0.115967  | 0.134615 | 0.132139 | 0.134761 |
| 0.129225  | 0.120775  | 0.139569 | 0.113782  | 0.129225 | 0.136364 | 0.132576 |
| 0.0562354 | 0.107226  | 0.140297 | 0.112471  | 0.124126 | 0.127768 | 0.123689 |
| 0.126894  | 0.114656  | 0.147727 | 0.118153  | 0.130099 | 0.131702 | 0.13549  |
| 0.113054  | 0.101981  | 0.133596 | 0.101399  | 0.11859  | 0.123106 | 0.118444 |
| 0.131847  | 0.121649  | 0.147727 | 0.125437  | 0.130973 | 0.130245 | 0.139277 |
| 0.127768  | 0.116987  | 0.145979 | 0.118153  | 0.131847 | 0.133159 | 0.134615 |
| 0.136655  | 0.127331  | 0.151078 | 0.133741  | 0.137238 | 0.137966 | 0.142628 |
| 0.254662  | 0.258741  | 0.269668 | 0.260781  | 0.268357 | 0.260052 | 0.267337 |
| 0.137238  | 0.112471  | 0.129516 | 0.115967  | 0.120921 | 0.128934 | 0.128351 |
| 0.133596  | 0.118153  | 0.134033 | 0.124563  | 0.130682 | 0.130828 | 0.128497 |
| 0.217657  | 0.218823  | 0.23412  | 0.217657  | 0.226981 | 0.220425 | 0.229749 |
| 0.129808  | 0.118153  | 0.13986  | 0.121358  | 0.128059 | 0.131993 | 0.132284 |
| 0.230332  | 0.228001  | 0.247086 | 0.233537  | 0.238782 | 0.231643 | 0.238345 |
| 0.134324  | 0.106352  | 0.126894 | 0.107809  | 0.111888 | 0.124854 | 0.122523 |
| 0.0435606 | 0.123106  | 0.146853 | 0.131847  | 0.137966 | 0.133741 | 0.129079 |
| 0.13243   | 0.104749  | 0.135198 | 0.10271   | 0.121941 | 0.126457 | 0.118007 |
| 0.126894  | 0.121358  | 0.139277 | 0.116113  | 0.133304 | 0.137821 | 0.136655 |
| 0.207022  | 0.204983  | 0.223485 | 0.2044    | 0.215763 | 0.205128 | 0.216783 |
| 0.129808  | 0.123397  | 0.152098 | 0.130973  | 0.13447  | 0.13549  | 0.142191 |
| 0.130682  | 0.110286  | 0.14627  | 0.118153  | 0.130682 | 0.130828 | 0.134615 |
| 0.226981  | 0.226107  | 0.24053  | 0.22465   | 0.236014 | 0.228293 | 0.233537 |
| 0.131847  | 0.10271   | 0.126748 | 0.0971737 | 0.115239 | 0.113345 | 0.120338 |
| 0.202506  | 0.200466  | 0.217512 | 0.199009  | 0.213869 | 0.202069 | 0.212267 |
| 0.137529  | 0.105478  | 0.127185 | 0.100524  | 0.116259 | 0.11757  | 0.11961  |
| 0.0638112 | 0.111014  | 0.143794 | 0.115676  | 0.129953 | 0.130682 | 0.126894 |
| 0.113782  | 0.117861  | 0.144231 | 0.121941  | 0.124272 | 0.126748 | 0.130245 |
| 0.125437  | 0.128351  | 0.140443 | 0.123689  | 0.127477 | 0.137238 | 0.13345  |
| 0.125291  | 0.112762  | 0.146416 | 0.110431  | 0.12704  | 0.128059 | 0.133596 |
| 0.162587  | 0.161713  | 0.184878 | 0.162005  | 0.176573 | 0.162733 | 0.1706   |
| 0.125583  | 0.108392  | 0.143211 | 0.112471  | 0.124417 | 0.124854 | 0.129225 |
| 0.138403  | 0.107809  | 0.137966 | 0.1081    | 0.126748 | 0.130099 | 0.127477 |
| 0.131702  | 0.11655   | 0.148164 | 0.120921  | 0.132867 | 0.133304 | 0.130099 |
| 0.134033  | 0.11451   | 0.137675 | 0.120921  | 0.129079 | 0.124563 | 0.120484 |
| 0.199155  | 0.195076  | 0.215618 | 0.194202  | 0.206148 | 0.19697  | 0.209207 |
| 0.0597319 | 0.110431  | 0.142337 | 0.115385  | 0.125    | 0.127477 | 0.126603 |
| 0.128351  | 0.123689  | 0.143357 | 0.120192  | 0.137675 | 0.139569 | 0.136364 |
| 0.129371  | 0.0990676 | 0.120484 | 0.0976107 | 0.110431 | 0.115822 | 0.114365 |
| 0.133887  | 0.10067   | 0.117133 | 0.099796  | 0.111451 | 0.111888 | 0.115967 |
| 0.0445804 | 0.118298  | 0.146416 | 0.125     | 0.134907 | 0.13039  | 0.126603 |



|           |          |          |          |          |          |          |
|-----------|----------|----------|----------|----------|----------|----------|
| 0.251603  | 0.254225 | 0.265734 | 0.257721 | 0.263549 | 0.253205 | 0.261655 |
| 0.112179  | 0.112762 | 0.135635 | 0.115967 | 0.119464 | 0.121941 | 0.121941 |
| 0.106935  | 0.120338 | 0.143794 | 0.115385 | 0.132576 | 0.130682 | 0.136218 |
| 0.187354  | 0.18211  | 0.199446 | 0.178904 | 0.183858 | 0.176136 | 0.192162 |
| 0.189685  | 0.185606 | 0.206439 | 0.187937 | 0.199301 | 0.18954  | 0.200903 |
| 0.130536  | 0.119172 | 0.151661 | 0.116841 | 0.132576 | 0.134178 | 0.137092 |
| 0.126894  | 0.116404 | 0.147436 | 0.121358 | 0.130682 | 0.133159 | 0.135781 |
| 0.123106  | 0.117279 | 0.139277 | 0.110868 | 0.130099 | 0.130536 | 0.13141  |
| 0.1419    | 0.138403 | 0.157197 | 0.144231 | 0.145688 | 0.146707 | 0.150787 |
| 0.128788  | 0.110723 | 0.151369 | 0.109848 | 0.131993 | 0.130682 | 0.132139 |
| 0.131265  | 0.115239 | 0.150641 | 0.11757  | 0.13243  | 0.133741 | 0.135781 |
| 0.138695  | 0.106061 | 0.122232 | 0.102855 | 0.11655  | 0.115822 | 0.118444 |
| 0.125     | 0.115385 | 0.14292  | 0.119755 | 0.125874 | 0.126311 | 0.135635 |
| 0.133887  | 0.122523 | 0.147145 | 0.130099 | 0.131556 | 0.131702 | 0.139277 |
| 0.129371  | 0.109848 | 0.13447  | 0.106935 | 0.121795 | 0.116113 | 0.12398  |
| 0.125437  | 0.12398  | 0.136946 | 0.119901 | 0.130682 | 0.137238 | 0.131993 |
| 0.136655  | 0.13549  | 0.143502 | 0.130828 | 0.140152 | 0.144376 | 0.142045 |
| 0.116696  | 0.114656 | 0.140152 | 0.120484 | 0.125146 | 0.125874 | 0.124417 |
| 0.129079  | 0.12704  | 0.137092 | 0.125291 | 0.136946 | 0.140589 | 0.137092 |
| 0.142191  | 0.109557 | 0.121066 | 0.104895 | 0.113345 | 0.114365 | 0.11961  |
| 0.208479  | 0.208188 | 0.229021 | 0.207896 | 0.219843 | 0.210664 | 0.218823 |
| 0.115967  | 0.118881 | 0.143211 | 0.119755 | 0.125291 | 0.130682 | 0.129225 |
| 0.195221  | 0.193473 | 0.211101 | 0.191725 | 0.204254 | 0.19595  | 0.202652 |
| 0.129079  | 0.105769 | 0.14088  | 0.104604 | 0.124709 | 0.122815 | 0.124272 |
| 0.0486597 | 0.118298 | 0.148747 | 0.12704  | 0.136946 | 0.131556 | 0.129516 |
| 0.131993  | 0.124709 | 0.149038 | 0.125583 | 0.131702 | 0.136218 | 0.137092 |
| 0.127768  | 0.116404 | 0.144522 | 0.116696 | 0.128351 | 0.130536 | 0.131119 |
| 0.129079  | 0.117133 | 0.151369 | 0.123252 | 0.132576 | 0.132139 | 0.13884  |
| 0.130828  | 0.11655  | 0.144376 | 0.118881 | 0.128788 | 0.130973 | 0.133304 |
| 0.0626457 | 0.115093 | 0.146416 | 0.119464 | 0.132867 | 0.133013 | 0.128642 |
| 0.135052  | 0.108537 | 0.138695 | 0.10708  | 0.122523 | 0.128205 | 0.121795 |
| 0.135344  | 0.12398  | 0.150058 | 0.12602  | 0.136801 | 0.138112 | 0.136655 |
| 0.143939  | 0.114219 | 0.121358 | 0.109848 | 0.121503 | 0.118735 | 0.121649 |
| 0.249709  | 0.251748 | 0.26588  | 0.25204  | 0.258159 | 0.249854 | 0.260344 |
| 0.0600233 | 0.11655  | 0.144959 | 0.118298 | 0.133159 | 0.133304 | 0.13039  |
| 0.188374  | 0.184295 | 0.206876 | 0.183129 | 0.199155 | 0.18852  | 0.196096 |
| 0.19289   | 0.189394 | 0.208479 | 0.189103 | 0.203671 | 0.194493 | 0.203234 |
| 0.12602   | 0.116113 | 0.152098 | 0.118444 | 0.135635 | 0.131993 | 0.13345  |
| 0.110286  | 0.11116  | 0.141026 | 0.113491 | 0.117861 | 0.126166 | 0.124126 |
| 0.0464744 | 0.122815 | 0.145105 | 0.127768 | 0.135344 | 0.135198 | 0.129662 |
| 0.123689  | 0.109411 | 0.146853 | 0.115822 | 0.126603 | 0.126748 | 0.13141  |
| 0.110431  | 0.112762 | 0.143502 | 0.113928 | 0.124126 | 0.128351 | 0.12398  |
| 0.13345   | 0.103438 | 0.124854 | 0.097028 | 0.114219 | 0.118444 | 0.120775 |
| 0.123689  | 0.115822 | 0.145396 | 0.124272 | 0.13039  | 0.125291 | 0.133741 |

|           |          |          |          |          |          |          |
|-----------|----------|----------|----------|----------|----------|----------|
| 0.133013  | 0.124854 | 0.148601 | 0.131265 | 0.134178 | 0.137529 | 0.141026 |
| 0.0559441 | 0.112471 | 0.142337 | 0.11859  | 0.131702 | 0.128642 | 0.126894 |
| 0.134033  | 0.123543 | 0.150495 | 0.129953 | 0.134324 | 0.135344 | 0.142045 |
| 0.133013  | 0.109994 | 0.141026 | 0.112617 | 0.128642 | 0.129953 | 0.128497 |
| 0.131847  | 0.124272 | 0.148601 | 0.127477 | 0.133304 | 0.138403 | 0.13986  |
| 0.12704   | 0.118881 | 0.14292  | 0.112471 | 0.129953 | 0.132721 | 0.135927 |
| 0.141463  | 0.114656 | 0.116841 | 0.107955 | 0.11757  | 0.114802 | 0.119172 |
| 0.120921  | 0.119172 | 0.144376 | 0.117133 | 0.131993 | 0.132139 | 0.130973 |
| 0.0571096 | 0.109557 | 0.14088  | 0.117716 | 0.129953 | 0.125146 | 0.122815 |
| 0.140734  | 0.130828 | 0.14729  | 0.129079 | 0.137238 | 0.137966 | 0.145251 |
| 0.191871  | 0.184586 | 0.207459 | 0.181381 | 0.199446 | 0.18852  | 0.199009 |
| 0.138112  | 0.126748 | 0.153992 | 0.13345  | 0.135781 | 0.138258 | 0.146707 |
| 0.130245  | 0.116259 | 0.146416 | 0.11859  | 0.13141  | 0.129225 | 0.136218 |
| 0.130099  | 0.120192 | 0.148893 | 0.121358 | 0.129808 | 0.134324 | 0.135781 |
| 0.120047  | 0.108683 | 0.139132 | 0.111305 | 0.124417 | 0.127185 | 0.128351 |
| 0.124272  | 0.116987 | 0.136364 | 0.115822 | 0.129516 | 0.132576 | 0.131119 |
| 0.130245  | 0.120047 | 0.139714 | 0.117133 | 0.131993 | 0.135927 | 0.135052 |
| 0.195076  | 0.190705 | 0.211247 | 0.192453 | 0.206439 | 0.195513 | 0.20542  |
| 0.125728  | 0.113782 | 0.143357 | 0.121066 | 0.133013 | 0.126166 | 0.134615 |
| 0.120338  | 0.106061 | 0.133887 | 0.106352 | 0.120629 | 0.116696 | 0.126603 |
| 0.129662  | 0.116259 | 0.14933  | 0.125583 | 0.131702 | 0.133887 | 0.138258 |
| 0.194493  | 0.189831 | 0.214161 | 0.192453 | 0.203526 | 0.198135 | 0.206002 |
| 0.112762  | 0.106352 | 0.140297 | 0.107809 | 0.119464 | 0.124854 | 0.121649 |
| 0.139132  | 0.106498 | 0.120047 | 0.102127 | 0.114948 | 0.115093 | 0.117716 |
| 0.128934  | 0.117861 | 0.14627  | 0.124272 | 0.130973 | 0.134907 | 0.138986 |
| 0.125291  | 0.112471 | 0.144085 | 0.107517 | 0.127622 | 0.126603 | 0.127477 |
| 0.190268  | 0.192599 | 0.210519 | 0.188228 | 0.20338  | 0.193036 | 0.203234 |
| 0.135781  | 0.104895 | 0.121066 | 0.097028 | 0.111014 | 0.113782 | 0.114365 |
| 0.124709  | 0.113928 | 0.136801 | 0.110431 | 0.122086 | 0.121941 | 0.133304 |
| 0.117716  | 0.108683 | 0.140006 | 0.11014  | 0.118298 | 0.121941 | 0.121941 |
| 0.131702  | 0.120921 | 0.148456 | 0.120338 | 0.137238 | 0.129808 | 0.141171 |
| 0.136801  | 0.108537 | 0.140152 | 0.107372 | 0.123397 | 0.131119 | 0.121795 |
| 0.142628  | 0.10708  | 0.11859  | 0.107663 | 0.116113 | 0.113636 | 0.11859  |
| 0.053176  | 0.111742 | 0.143065 | 0.117861 | 0.13243  | 0.131119 | 0.125874 |
| 0.135344  | 0.110286 | 0.141026 | 0.114073 | 0.127477 | 0.128788 | 0.13141  |
| 0.143357  | 0.13986  | 0.160111 | 0.137529 | 0.147436 | 0.147582 | 0.147582 |
| 0.23514   | 0.237471 | 0.250146 | 0.23514  | 0.244172 | 0.236742 | 0.243735 |
| 0.125291  | 0.124126 | 0.148164 | 0.122086 | 0.133159 | 0.137383 | 0.133304 |
| 0.137238  | 0.110431 | 0.13884  | 0.109266 | 0.130536 | 0.130973 | 0.122815 |
| 0.126311  | 0.114948 | 0.142774 | 0.116987 | 0.126603 | 0.125583 | 0.134324 |
| 0.133741  | 0.118881 | 0.14933  | 0.119755 | 0.13345  | 0.13243  | 0.132139 |
| 0.129516  | 0.101253 | 0.130536 | 0.105041 | 0.114073 | 0.115967 | 0.113928 |
| 0.130099  | 0.112034 | 0.135198 | 0.114948 | 0.11961  | 0.128497 | 0.128497 |
| 0.131119  | 0.117716 | 0.144376 | 0.120338 | 0.130245 | 0.127185 | 0.135344 |

|           |           |          |           |          |           |          |
|-----------|-----------|----------|-----------|----------|-----------|----------|
| 0.140006  | 0.109411  | 0.122378 | 0.104458  | 0.113491 | 0.117424  | 0.118298 |
| 0.127185  | 0.106789  | 0.146562 | 0.111451  | 0.127477 | 0.121212  | 0.129079 |
| 0.233974  | 0.236305  | 0.250728 | 0.239219  | 0.245921 | 0.239948  | 0.24461  |
| 0.113199  | 0.107663  | 0.136364 | 0.110286  | 0.116113 | 0.120338  | 0.119172 |
| 0.127768  | 0.0977564 | 0.122669 | 0.0971737 | 0.112908 | 0.119172  | 0.117716 |
| 0.0539044 | 0.111597  | 0.143794 | 0.116259  | 0.128497 | 0.123397  | 0.12398  |
| 0.135344  | 0.126311  | 0.152681 | 0.122523  | 0.135052 | 0.134615  | 0.134907 |
| 0.126311  | 0.130973  | 0.148601 | 0.129808  | 0.139132 | 0.138112  | 0.139277 |
| 0.120484  | 0.120192  | 0.152098 | 0.121358  | 0.130099 | 0.134615  | 0.139569 |
| 0.128351  | 0.116404  | 0.14831  | 0.120192  | 0.132139 | 0.132284  | 0.134324 |
| 0.119464  | 0.1081    | 0.143502 | 0.108683  | 0.123252 | 0.125146  | 0.128351 |
| 0.229021  | 0.231935  | 0.247815 | 0.233392  | 0.23951  | 0.233537  | 0.241696 |
| 0.132576  | 0.120338  | 0.149038 | 0.123252  | 0.13345  | 0.13447   | 0.141171 |
| 0.135927  | 0.105332  | 0.119755 | 0.101253  | 0.113199 | 0.113345  | 0.112179 |
| 0.123397  | 0.103875  | 0.140152 | 0.107372  | 0.121649 | 0.116841  | 0.126166 |
| 0.130536  | 0.115093  | 0.14088  | 0.117133  | 0.116841 | 0.124854  | 0.119901 |
| 0.136072  | 0.111888  | 0.128059 | 0.113054  | 0.115967 | 0.124563  | 0.127768 |
| 0.0506993 | 0.111888  | 0.144959 | 0.117133  | 0.129953 | 0.131556  | 0.125146 |
| 0.135781  | 0.108392  | 0.123397 | 0.102855  | 0.114219 | 0.114656  | 0.116404 |
| 0.141754  | 0.10912   | 0.120629 | 0.108537  | 0.11757  | 0.119755  | 0.118298 |
| 0.132139  | 0.101836  | 0.120047 | 0.0977564 | 0.112617 | 0.115967  | 0.116841 |
| 0.0603147 | 0.111597  | 0.143502 | 0.113345  | 0.13141  | 0.131265  | 0.128351 |
| 0.139277  | 0.116259  | 0.139714 | 0.114219  | 0.126457 | 0.131847  | 0.122815 |
| 0.142628  | 0.119027  | 0.143065 | 0.120192  | 0.130682 | 0.136655  | 0.124709 |
| 0.137383  | 0.128351  | 0.149476 | 0.129516  | 0.133013 | 0.139277  | 0.141608 |
| 0.139423  | 0.129225  | 0.154138 | 0.133596  | 0.136801 | 0.142483  | 0.141608 |
| 0.145105  | 0.115385  | 0.140297 | 0.118007  | 0.128788 | 0.131847  | 0.126894 |
| 0.104895  | 0.108683  | 0.141171 | 0.1081    | 0.121795 | 0.127477  | 0.124563 |
| 0.14292   | 0.109411  | 0.113345 | 0.113199  | 0.118153 | 0.121212  | 0.118881 |
| 0.127622  | 0.117424  | 0.139714 | 0.117424  | 0.129953 | 0.0837704 | 0.128642 |
| 0.208625  | 0.207168  | 0.223048 | 0.205128  | 0.218531 | 0.209062  | 0.215181 |
| 0.124126  | 0.123252  | 0.149038 | 0.125     | 0.135198 | 0.136218  | 0.132139 |
| 0.131993  | 0.10373   | 0.132139 | 0.100524  | 0.117133 | 0.124563  | 0.126311 |
| 0.0514277 | 0.119318  | 0.148019 | 0.124563  | 0.136509 | 0.134324  | 0.131119 |
| 0.225816  | 0.223485  | 0.241404 | 0.224068  | 0.231643 | 0.223048  | 0.233246 |
| 0.213287  | 0.21183   | 0.227418 | 0.21183   | 0.222611 | 0.216346  | 0.220425 |
| 0.140297  | 0.108246  | 0.118881 | 0.107663  | 0.118444 | 0.117133  | 0.118881 |
| 0.247378  | 0.252914  | 0.264714 | 0.249417  | 0.25845  | 0.248106  | 0.258887 |
| 0.10373   | 0.110723  | 0.144376 | 0.110723  | 0.121795 | 0.125437  | 0.12602  |
| 0.132576  | 0.132576  | 0.149621 | 0.134907  | 0.137821 | 0.146416  | 0.137383 |
| 0.111305  | 0.11014   | 0.137675 | 0.111305  | 0.116841 | 0.123397  | 0.121066 |
| 0.143211  | 0.113199  | 0.13986  | 0.112908  | 0.130682 | 0.130828  | 0.125    |
| 0.191725  | 0.188811  | 0.206439 | 0.190559  | 0.201632 | 0.191288  | 0.200029 |
| 0.124272  | 0.108537  | 0.131993 | 0.117861  | 0.122523 | 0.11859   | 0.121795 |

|           |           |          |           |          |          |          |
|-----------|-----------|----------|-----------|----------|----------|----------|
| 0.19595   | 0.196533  | 0.215618 | 0.194784  | 0.21081  | 0.20134  | 0.208916 |
| 0.121066  | 0.113782  | 0.149476 | 0.114948  | 0.133887 | 0.124709 | 0.129953 |
| 0.130099  | 0.10708   | 0.132867 | 0.108829  | 0.121066 | 0.110723 | 0.119464 |
| 0.127477  | 0.118735  | 0.145396 | 0.121941  | 0.13039  | 0.129953 | 0.135781 |
| 0.121358  | 0.11116   | 0.143065 | 0.112325  | 0.127185 | 0.123252 | 0.131993 |
| 0.0597319 | 0.105769  | 0.137092 | 0.109266  | 0.127622 | 0.123397 | 0.119318 |
| 0.118298  | 0.108392  | 0.144376 | 0.111014  | 0.128497 | 0.128934 | 0.126311 |
| 0.109266  | 0.104312  | 0.136509 | 0.106352  | 0.113345 | 0.118444 | 0.118444 |
| 0.123397  | 0.10912   | 0.144231 | 0.11553   | 0.126894 | 0.125874 | 0.132576 |
| 0.129662  | 0.0987762 | 0.11961  | 0.100524  | 0.113928 | 0.119318 | 0.115822 |
| 0.118881  | 0.11014   | 0.14088  | 0.106352  | 0.123543 | 0.126311 | 0.125146 |
| 0.111742  | 0.108537  | 0.136946 | 0.108829  | 0.114948 | 0.121795 | 0.119464 |
| 0.114802  | 0.11859   | 0.143502 | 0.121795  | 0.133159 | 0.127477 | 0.133304 |
| 0.135198  | 0.123543  | 0.148747 | 0.126166  | 0.132576 | 0.136509 | 0.141754 |
| 0.125146  | 0.111742  | 0.146562 | 0.114073  | 0.128059 | 0.127622 | 0.132867 |
| 0.124709  | 0.112471  | 0.134178 | 0.107517  | 0.122669 | 0.127477 | 0.129516 |
| 0.0540501 | 0.105624  | 0.136946 | 0.113782  | 0.12602  | 0.124417 | 0.120338 |
| 0.133596  | 0.106498  | 0.124417 | 0.106789  | 0.118735 | 0.11451  | 0.116841 |
| 0.134178  | 0.105624  | 0.137821 | 0.107372  | 0.125437 | 0.130536 | 0.121795 |
| 0.125291  | 0.118298  | 0.135927 | 0.116841  | 0.128788 | 0.132721 | 0.129225 |
| 0.129079  | 0.115093  | 0.144376 | 0.119464  | 0.128788 | 0.133887 | 0.130682 |
| 0.12602   | 0.115822  | 0.14627  | 0.120192  | 0.130682 | 0.131119 | 0.134907 |
| 0.136072  | 0.123252  | 0.14933  | 0.128205  | 0.133159 | 0.135344 | 0.140297 |
| 0.138403  | 0.131993  | 0.149621 | 0.136655  | 0.137529 | 0.139132 | 0.146416 |
| 0.119027  | 0.0945513 | 0.118007 | 0.0910548 | 0.108829 | 0.111597 | 0.111597 |
| 0.0607517 | 0.114073  | 0.14627  | 0.118444  | 0.133013 | 0.130828 | 0.127331 |
| 0.126166  | 0.102855  | 0.133304 | 0.104604  | 0.113636 | 0.123397 | 0.120484 |
| 0.143939  | 0.121503  | 0.14088  | 0.118007  | 0.130828 | 0.133887 | 0.126894 |
| 0.114365  | 0.110286  | 0.140443 | 0.116987  | 0.117279 | 0.122086 | 0.121503 |
| 0.133596  | 0.135052  | 0.142483 | 0.135635  | 0.137966 | 0.143939 | 0.140734 |
| 0.0397727 | 0.129225  | 0.152389 | 0.137675  | 0.144376 | 0.1419   | 0.13549  |
| 0.132284  | 0.120047  | 0.150787 | 0.120629  | 0.131702 | 0.131265 | 0.132139 |
| 0.116696  | 0.116696  | 0.143648 | 0.113782  | 0.122815 | 0.130245 | 0.130536 |
| 0.124709  | 0.101981  | 0.140297 | 0.108974  | 0.122086 | 0.123397 | 0.118444 |
| 0.132867  | 0.125291  | 0.151952 | 0.128788  | 0.134907 | 0.136509 | 0.137675 |
| 0.213432  | 0.206731  | 0.22669  | 0.202943  | 0.218677 | 0.210373 | 0.217075 |
| 0.127477  | 0.110868  | 0.138403 | 0.107955  | 0.120484 | 0.123834 | 0.132867 |
| 0.126166  | 0.114219  | 0.149621 | 0.115676  | 0.130536 | 0.132139 | 0.135344 |
| 0.135927  | 0.108829  | 0.138403 | 0.108246  | 0.122232 | 0.127622 | 0.120047 |
| 0.132284  | 0.117716  | 0.144668 | 0.115967  | 0.129662 | 0.128642 | 0.132139 |
| 0.124272  | 0.118444  | 0.152098 | 0.119318  | 0.136509 | 0.132576 | 0.132867 |
| 0.13447   | 0.114656  | 0.138986 | 0.117861  | 0.127768 | 0.135198 | 0.134324 |
| 0.137529  | 0.119464  | 0.139132 | 0.118007  | 0.130245 | 0.135635 | 0.133887 |
| 0.127477  | 0.119318  | 0.144522 | 0.116987  | 0.129808 | 0.132284 | 0.130828 |

|          |           |          |           |           |           |           |
|----------|-----------|----------|-----------|-----------|-----------|-----------|
| 0.128351 | 0.0936772 | 0.119172 | 0.092803  | 0.110577  | 0.115967  | 0.116841  |
| 0.137383 | 0.115822  | 0.137821 | 0.113491  | 0.124563  | 0.130245  | 0.119464  |
| 0.122815 | 0.110577  | 0.143939 | 0.11553   | 0.123689  | 0.125874  | 0.130828  |
| 0.120629 | 0.117716  | 0.148164 | 0.113054  | 0.128497  | 0.133887  | 0.132721  |
| 0.179341 | 0.17264   | 0.196096 | 0.174097  | 0.186626  | 0.179196  | 0.187937  |
| 0.127768 | 0.112325  | 0.148893 | 0.117861  | 0.129516  | 0.127331  | 0.136946  |
| 0.139569 | 0.117424  | 0.142045 | 0.117133  | 0.128788  | 0.131265  | 0.126603  |
| 0.123689 | 0.116696  | 0.134033 | 0.113491  | 0.119901  | 0.119172  | 0.122669  |
| 0.128205 | 0.114219  | 0.135052 | 0.112471  | 0.127622  | 0.111451  | 0.118735  |
| 0.118007 | 0.102273  | 0.133596 | 0.10373   | 0.121795  | 0.120484  | 0.120484  |
| 0.115093 | 0.107809  | 0.135344 | 0.104895  | 0.11859   | 0.122815  | 0.121649  |
| 0.123834 | 0.108974  | 0.14088  | 0.108974  | 0.12296   | 0.122815  | 0.125437  |
| 0.129662 | 0.0903263 | 0.109703 | 0.0888695 | 0.0990676 | 0.0802739 | 0.0893065 |
| 0.120921 | 0.117424  | 0.148747 | 0.118298  | 0.133741  | 0.127477  | 0.13243   |
| 0.131556 | 0.124854  | 0.144522 | 0.124272  | 0.128642  | 0.131119  | 0.136364  |
| 0.118298 | 0.104895  | 0.133887 | 0.106352  | 0.120047  | 0.125728  | 0.121649  |
| 0.130973 | 0.11116   | 0.136364 | 0.108537  | 0.127185  | 0.125583  | 0.127331  |
| 0.135781 | 0.0955711 | 0.102418 | 0.0973193 | 0.0944056 | 0.101544  | 0.0965909 |
| 0.119464 | 0.104895  | 0.126603 | 0.107517  | 0.11655   | 0.116987  | 0.117279  |
| 0.128205 | 0.121212  | 0.143211 | 0.119464  | 0.125     | 0.132721  | 0.135344  |
| 0.121795 | 0.103147  | 0.128351 | 0.103147  | 0.117424  | 0.119318  | 0.115822  |
| 0.120921 | 0.105186  | 0.127185 | 0.107226  | 0.118881  | 0.120192  | 0.117279  |
| 0.109557 | 0.11014   | 0.134178 | 0.106352  | 0.123543  | 0.128059  | 0.125437  |
| 0.117279 | 0.114948  | 0.144231 | 0.120484  | 0.129225  | 0.125291  | 0.128497  |
| 0.118444 | 0.101836  | 0.130245 | 0.0945513 | 0.11553   | 0.119172  | 0.117716  |
| 0.150495 | 0.134178  | 0.143065 | 0.125437  | 0.130973  | 0.128788  | 0.140443  |
| 0.141171 | 0.13039   | 0.148019 | 0.116696  | 0.128351  | 0.127914  | 0.139569  |
| 0.119901 | 0.10912   | 0.132576 | 0.107955  | 0.122815  | 0.125     | 0.125583  |
| 0.14831  | 0.122378  | 0.142045 | 0.129662  | 0.129079  | 0.132721  | 0.131847  |
| 0.130536 | 0.117424  | 0.151661 | 0.113636  | 0.136072  | 0.128642  | 0.132139  |
| 0.137238 | 0.120047  | 0.136801 | 0.126748  | 0.127914  | 0.107372  | 0.131265  |
| 0.116259 | 0.112471  | 0.134761 | 0.111014  | 0.120921  | 0.12602   | 0.120775  |
| 0.144959 | 0.141754  | 0.157343 | 0.135344  | 0.146125  | 0.141317  | 0.143648  |
| 0.135344 | 0.11961   | 0.137821 | 0.12602   | 0.132139  | 0.133741  | 0.142191  |
| 0.142337 | 0.109411  | 0.123543 | 0.107372  | 0.110286  | 0.117424  | 0.109266  |
| 0.131265 | 0.114073  | 0.1419   | 0.118444  | 0.130682  | 0.130828  | 0.132284  |
| 0.117716 | 0.100233  | 0.128642 | 0.099359  | 0.109557  | 0.116113  | 0.11553   |
| 0.11961  | 0.106498  | 0.135781 | 0.106498  | 0.120775  | 0.120629  | 0.11859   |
| 0.130536 | 0.0795455 | 0.101253 | 0.0810023 | 0.0859557 | 0.101253  | 0.0922203 |
| 0.124417 | 0.108683  | 0.133013 | 0.117133  | 0.121212  | 0.12602   | 0.127768  |
| 0.128934 | 0.120484  | 0.142191 | 0.127477  | 0.134178  | 0.134324  | 0.130536  |
| 0.128059 | 0.123689  | 0.14627  | 0.116696  | 0.132721  | 0.124126  | 0.135198  |
| 0.120484 | 0.10708   | 0.132576 | 0.0986305 | 0.11553   | 0.118298  | 0.118007  |
| 0.118007 | 0.107809  | 0.136218 | 0.107517  | 0.119755  | 0.122523  | 0.120775  |

|          |          |          |          |          |          |          |
|----------|----------|----------|----------|----------|----------|----------|
| 0.118444 | 0.118444 | 0.141026 | 0.112617 | 0.119901 | 0.123834 | 0.125    |
| 0.119318 | 0.10912  | 0.139277 | 0.105915 | 0.114365 | 0.122378 | 0.121503 |
| 0.120047 | 0.111888 | 0.14088  | 0.120047 | 0.127622 | 0.123689 | 0.12398  |
| 0.118007 | 0.106935 | 0.139132 | 0.110723 | 0.125291 | 0.125728 | 0.125146 |
| 0.116404 | 0.120775 | 0.153263 | 0.122232 | 0.129225 | 0.131119 | 0.138986 |
| 0.117279 | 0.110868 | 0.142191 | 0.112325 | 0.123689 | 0.125291 | 0.130245 |
| 0.101253 | 0.109411 | 0.13986  | 0.109703 | 0.11961  | 0.120047 | 0.124709 |
| 0.114948 | 0.114073 | 0.139277 | 0.106789 | 0.112908 | 0.123834 | 0.124417 |
| 0.115385 | 0.119172 | 0.150787 | 0.122378 | 0.129662 | 0.131265 | 0.139423 |
| 0.118735 | 0.108537 | 0.142191 | 0.11757  | 0.129225 | 0.129953 | 0.129953 |
| 0.135635 | 0.122523 | 0.14831  | 0.125146 | 0.137092 | 0.137821 | 0.137238 |
| 0.110577 | 0.109411 | 0.142483 | 0.108246 | 0.118444 | 0.123543 | 0.128788 |
| 0.130536 | 0.126166 | 0.147582 | 0.124709 | 0.132867 | 0.133013 | 0.140589 |

| <b>TDr_09_00055</b> | <b>TDr_09_00056</b> | <b>TDr_09_00057</b> | <b>TDr_09_00058</b> | <b>TDr_09_00059</b> | <b>TDr_09_00061</b> | <b>TDr_09_00063</b> |
|---------------------|---------------------|---------------------|---------------------|---------------------|---------------------|---------------------|
| 0.138986            | 0.120629            | 0.115385            | 0.121066            | 0.112325            | 0.116113            | 0.11859             |
| 0.132139            | 0.114656            | 0.116987            | 0.118298            | 0.109848            | 0.116259            | 0.120192            |
| 0.129225            | 0.109411            | 0.111451            | 0.113928            | 0.104895            | 0.109557            | 0.114365            |
| 0.133596            | 0.11961             | 0.112908            | 0.119755            | 0.108392            | 0.112762            | 0.116113            |
| 0.146707            | 0.135344            | 0.12602             | 0.130245            | 0.123252            | 0.12296             | 0.124854            |
| 0.143794            | 0.129225            | 0.127768            | 0.125291            | 0.12296             | 0.126457            | 0.125146            |
| 0.134324            | 0.114219            | 0.113054            | 0.116696            | 0.110868            | 0.114365            | 0.112762            |
| 0.129953            | 0.113054            | 0.111888            | 0.112325            | 0.108246            | 0.107955            | 0.115093            |
| 0.12602             | 0.106498            | 0.10271             | 0.108683            | 0.099359            | 0.101399            | 0.105332            |
| 0.121503            | 0.112762            | 0.107517            | 0.111451            | 0.10708             | 0.10912             | 0.111888            |
| 0.133304            | 0.108537            | 0.110286            | 0.11451             | 0.109557            | 0.108683            | 0.110868            |
| 0.125               | 0.10169             | 0.0987762           | 0.104749            | 0.101253            | 0.0968823           | 0.104021            |
| 0.13141             | 0.113345            | 0.113054            | 0.115239            | 0.110868            | 0.110577            | 0.11451             |
| 0.152244            | 0.13884             | 0.13447             | 0.137529            | 0.13141             | 0.133159            | 0.136218            |
| 0.134324            | 0.123834            | 0.12704             | 0.126603            | 0.122523            | 0.124563            | 0.128788            |
| 0.122232            | 0.107372            | 0.104167            | 0.101981            | 0.108683            | 0.105186            | 0.113782            |
| 0.13141             | 0.104895            | 0.101107            | 0.105624            | 0.101544            | 0.102418            | 0.1081              |
| 0.149913            | 0.145251            | 0.137675            | 0.13986             | 0.135198            | 0.138986            | 0.13884             |
| 0.126311            | 0.107663            | 0.106206            | 0.108974            | 0.100233            | 0.106935            | 0.110286            |
| 0.211393            | 0.20877             | 0.202943            | 0.208333            | 0.198718            | 0.203089            | 0.207605            |
| 0.142483            | 0.118881            | 0.118007            | 0.120484            | 0.118735            | 0.115822            | 0.122669            |
| 0.138258            | 0.114073            | 0.110286            | 0.113636            | 0.107517            | 0.11014             | 0.112325            |
| 0.125583            | 0.106935            | 0.100524            | 0.104458            | 0.100962            | 0.102127            | 0.103438            |
| 0.124854            | 0.111742            | 0.103875            | 0.104312            | 0.099359            | 0.0996503           | 0.104167            |
| 0.121212            | 0.107809            | 0.0981935           | 0.0995047           | 0.095134            | 0.0989219           | 0.100524            |
| 0.141608            | 0.125583            | 0.121503            | 0.125728            | 0.119318            | 0.120484            | 0.123834            |
| 0.134615            | 0.119172            | 0.118298            | 0.116987            | 0.108246            | 0.116404            | 0.115967            |
| 0.120629            | 0.105186            | 0.103147            | 0.103875            | 0.10067             | 0.101836            | 0.100816            |
| 0.13345             | 0.125583            | 0.118881            | 0.123689            | 0.114948            | 0.118444            | 0.122669            |
| 0.144522            | 0.116841            | 0.119172            | 0.120775            | 0.107955            | 0.112908            | 0.119755            |
| 0.131847            | 0.11757             | 0.121358            | 0.120047            | 0.115385            | 0.119464            | 0.121358            |
| 0.133741            | 0.115676            | 0.113054            | 0.116987            | 0.107663            | 0.111451            | 0.109848            |
| 0.12704             | 0.113345            | 0.108683            | 0.106789            | 0.0965909           | 0.105332            | 0.108683            |
| 0.13549             | 0.11451             | 0.113928            | 0.123106            | 0.103875            | 0.109411            | 0.114219            |
| 0.125728            | 0.109703            | 0.108537            | 0.111305            | 0.111888            | 0.111305            | 0.114073            |
| 0.13345             | 0.119755            | 0.117424            | 0.121066            | 0.117279            | 0.118444            | 0.121503            |
| 0.136509            | 0.125728            | 0.124272            | 0.130245            | 0.124126            | 0.122669            | 0.131556            |
| 0.132284            | 0.11655             | 0.110431            | 0.119318            | 0.109411            | 0.111742            | 0.118881            |
| 0.123834            | 0.0996503           | 0.0973193           | 0.0983392           | 0.0849359           | 0.095134            | 0.0891608           |
| 0.108392            | 0.112471            | 0.099359            | 0.107663            | 0.101836            | 0.0995047           | 0.100524            |
| 0.108974            | 0.0917832           | 0.0894522           | 0.0977564           | 0.0875583           | 0.0875583           | 0.0926573           |
| 0.104021            | 0.127914            | 0.123834            | 0.114656            | 0.120775            | 0.123106            | 0.118298            |

|           |           |           |           |           |           |           |
|-----------|-----------|-----------|-----------|-----------|-----------|-----------|
| 0.0912005 | 0.132867  | 0.119172  | 0.128934  | 0.121649  | 0.11961   | 0.127622  |
| 0.0971737 | 0.0916375 | 0.0936772 | 0.101399  | 0.101399  | 0.0912005 | 0.0992133 |
| 0.126894  | 0.103875  | 0.097465  | 0.104604  | 0.0973193 | 0.0979021 | 0.10067   |
| 0.129079  | 0.109557  | 0.104312  | 0.113199  | 0.114073  | 0.105041  | 0.11014   |
| 0.120338  | 0.0903263 | 0.0865385 | 0.0814394 | 0.076486  | 0.0814394 | 0.0801282 |
| 0.0930944 | 0.118153  | 0.112034  | 0.119464  | 0.115385  | 0.114219  | 0.11961   |
| 0.103875  | 0.106206  | 0.0962995 | 0.104604  | 0.0868298 | 0.0958625 | 0.0954254 |
| 0.097028  | 0.102855  | 0.097028  | 0.10067   | 0.0977564 | 0.0957168 | 0.103438  |
| 0.157197  | 0.14292   | 0.140589  | 0.143648  | 0.137238  | 0.139277  | 0.144085  |
| 0.120484  | 0.10708   | 0.106789  | 0.104312  | 0.101399  | 0.101107  | 0.10912   |
| 0.0914918 | 0.0996503 | 0.0909091 | 0.103001  | 0.0962995 | 0.0930944 | 0.0979021 |
| 0.130245  | 0.123252  | 0.121212  | 0.125437  | 0.118735  | 0.121941  | 0.123252  |
| 0.114802  | 0.115676  | 0.10373   | 0.112325  | 0.106206  | 0.103001  | 0.1081    |
| 0.122086  | 0.105478  | 0.0990676 | 0.110868  | 0.0898893 | 0.0983392 | 0.099359  |
| 0.0965909 | 0.111742  | 0.100087  | 0.112471  | 0.107517  | 0.101981  | 0.112325  |
| 0.10912   | 0.0995047 | 0.0945513 | 0.106352  | 0.104895  | 0.0955711 | 0.0960082 |
| 0.100087  | 0.103875  | 0.0983392 | 0.106643  | 0.0961538 | 0.0979021 | 0.106498  |
| 0.121795  | 0.114219  | 0.106935  | 0.118153  | 0.105624  | 0.108246  | 0.113928  |
| 0.110431  | 0.122086  | 0.115967  | 0.115239  | 0.118153  | 0.114073  | 0.115385  |
| 0.100233  | 0.130828  | 0.124126  | 0.125146  | 0.119901  | 0.122815  | 0.120921  |
| 0.163316  | 0.156906  | 0.153118  | 0.15472   | 0.147727  | 0.149767  | 0.146707  |
| 0.104458  | 0.0995047 | 0.0983392 | 0.106643  | 0.090035  | 0.0981935 | 0.090472  |
| 0.113491  | 0.102418  | 0.0936772 | 0.0941142 | 0.0935315 | 0.090035  | 0.0957168 |
| 0.100379  | 0.090472  | 0.0884324 | 0.102273  | 0.0944056 | 0.092366  | 0.095134  |
| 0.148893  | 0.134033  | 0.130245  | 0.130973  | 0.133013  | 0.126603  | 0.13549   |
| 0.107226  | 0.0926573 | 0.0917832 | 0.0983392 | 0.0893065 | 0.0922203 | 0.0961538 |
| 0.111451  | 0.106498  | 0.105332  | 0.104312  | 0.105186  | 0.104604  | 0.106206  |
| 0.126603  | 0.110286  | 0.108246  | 0.112471  | 0.112762  | 0.108392  | 0.112034  |
| 0.113345  | 0.102855  | 0.097028  | 0.100379  | 0.0992133 | 0.0942599 | 0.097028  |
| 0.157051  | 0.142774  | 0.138695  | 0.144085  | 0.137675  | 0.137383  | 0.142774  |
| 0.108392  | 0.103438  | 0.099359  | 0.106789  | 0.102418  | 0.102127  | 0.103438  |
| 0.0983392 | 0.122815  | 0.110868  | 0.126457  | 0.120338  | 0.112471  | 0.127477  |
| 0.125291  | 0.1081    | 0.109848  | 0.11116   | 0.103584  | 0.108246  | 0.112179  |
| 0.131556  | 0.109411  | 0.101253  | 0.105769  | 0.10169   | 0.104312  | 0.105915  |
| 0.097465  | 0.100087  | 0.0907634 | 0.099359  | 0.0917832 | 0.0879953 | 0.0986305 |
| 0.106498  | 0.0995047 | 0.0930944 | 0.0987762 | 0.090035  | 0.0929487 | 0.0942599 |
| 0.104749  | 0.114656  | 0.110286  | 0.119464  | 0.115676  | 0.11014   | 0.108246  |
| 0.102273  | 0.0964452 | 0.092366  | 0.101253  | 0.0971737 | 0.0930944 | 0.100524  |
| 0.103293  | 0.129808  | 0.121358  | 0.124126  | 0.114802  | 0.120921  | 0.11757   |
| 0.109994  | 0.108829  | 0.0992133 | 0.10373   | 0.0996503 | 0.103147  | 0.101544  |
| 0.123689  | 0.103293  | 0.0962995 | 0.0987762 | 0.097028  | 0.0932401 | 0.097465  |
| 0.0968823 | 0.108246  | 0.0954254 | 0.104312  | 0.0979021 | 0.0938228 | 0.10271   |
| 0.104167  | 0.105624  | 0.101544  | 0.111014  | 0.0990676 | 0.10373   | 0.103293  |
| 0.111451  | 0.10067   | 0.0971737 | 0.0981935 | 0.0912005 | 0.0938228 | 0.0948427 |



|           |           |           |           |           |           |           |
|-----------|-----------|-----------|-----------|-----------|-----------|-----------|
| 0.104458  | 0.0960082 | 0.0861014 | 0.0981935 | 0.0906177 | 0.0856643 | 0.0936772 |
| 0.094697  | 0.123834  | 0.107809  | 0.11553   | 0.11757   | 0.107955  | 0.121795  |
| 0.124126  | 0.10169   | 0.10169   | 0.101544  | 0.0977564 | 0.100379  | 0.104312  |
| 0.123397  | 0.106206  | 0.103584  | 0.107809  | 0.104021  | 0.104604  | 0.10708   |
| 0.135344  | 0.118153  | 0.117279  | 0.118298  | 0.113636  | 0.119172  | 0.119027  |
| 0.140006  | 0.123106  | 0.120775  | 0.119464  | 0.115676  | 0.118881  | 0.120775  |
| 0.14088   | 0.120484  | 0.121649  | 0.118881  | 0.118298  | 0.119172  | 0.125437  |
| 0.15035   | 0.127331  | 0.124709  | 0.120775  | 0.128351  | 0.12398   | 0.126457  |
| 0.135344  | 0.113491  | 0.107955  | 0.111888  | 0.108392  | 0.108392  | 0.113199  |
| 0.186334  | 0.182255  | 0.181381  | 0.18211   | 0.174242  | 0.180361  | 0.185169  |
| 0.127331  | 0.104895  | 0.105186  | 0.109703  | 0.100962  | 0.105041  | 0.104312  |
| 0.148456  | 0.122232  | 0.124272  | 0.117424  | 0.128205  | 0.123834  | 0.130099  |
| 0.143794  | 0.114365  | 0.118444  | 0.112762  | 0.119755  | 0.118298  | 0.121941  |
| 0.142483  | 0.127331  | 0.125874  | 0.130099  | 0.122523  | 0.125728  | 0.127622  |
| 0.13447   | 0.102418  | 0.099796  | 0.097028  | 0.102564  | 0.100524  | 0.102127  |
| 0.143502  | 0.118444  | 0.116696  | 0.116841  | 0.121795  | 0.117424  | 0.122815  |
| 0.133887  | 0.11116   | 0.105041  | 0.104021  | 0.104895  | 0.104604  | 0.103001  |
| 0.134615  | 0.114802  | 0.109557  | 0.11116   | 0.112908  | 0.109703  | 0.118007  |
| 0.129371  | 0.110723  | 0.1081    | 0.112034  | 0.10271   | 0.108537  | 0.110431  |
| 0.14627   | 0.122086  | 0.115967  | 0.116404  | 0.11757   | 0.116113  | 0.124709  |
| 0.125291  | 0.101399  | 0.0938228 | 0.100087  | 0.095134  | 0.0919289 | 0.0987762 |
| 0.139423  | 0.129225  | 0.127768  | 0.125     | 0.125     | 0.12704   | 0.130973  |
| 0.134324  | 0.108974  | 0.105186  | 0.107955  | 0.103875  | 0.106206  | 0.109848  |
| 0.0992133 | 0.117861  | 0.108246  | 0.115967  | 0.111888  | 0.108392  | 0.114948  |
| 0.130536  | 0.118881  | 0.118007  | 0.125728  | 0.119027  | 0.118735  | 0.125     |
| 0.130828  | 0.101107  | 0.100524  | 0.106206  | 0.0989219 | 0.100379  | 0.105769  |
| 0.154138  | 0.136655  | 0.136072  | 0.139132  | 0.136801  | 0.135927  | 0.140734  |
| 0.131847  | 0.108246  | 0.101544  | 0.106643  | 0.101981  | 0.105478  | 0.107663  |
| 0.13243   | 0.105915  | 0.103584  | 0.104021  | 0.104895  | 0.104895  | 0.107372  |
| 0.133159  | 0.0967366 | 0.0955711 | 0.0977564 | 0.0936772 | 0.0948427 | 0.104021  |
| 0.140152  | 0.133741  | 0.132284  | 0.135052  | 0.128642  | 0.132721  | 0.131993  |
| 0.129953  | 0.110431  | 0.109557  | 0.105332  | 0.0968823 | 0.105915  | 0.111014  |
| 0.128205  | 0.10169   | 0.100233  | 0.0992133 | 0.100087  | 0.100962  | 0.103438  |
| 0.13345   | 0.102855  | 0.100816  | 0.0977564 | 0.103293  | 0.10067   | 0.103438  |
| 0.130973  | 0.110286  | 0.113491  | 0.112762  | 0.108683  | 0.111888  | 0.117279  |
| 0.128205  | 0.122378  | 0.11859   | 0.119027  | 0.114948  | 0.117279  | 0.121795  |
| 0.132721  | 0.112034  | 0.109994  | 0.110431  | 0.106935  | 0.111597  | 0.111451  |
| 0.120629  | 0.0944056 | 0.0941142 | 0.0965909 | 0.0925117 | 0.0960082 | 0.0932401 |
| 0.12296   | 0.0949883 | 0.0949883 | 0.103584  | 0.0925117 | 0.097465  | 0.0999417 |
| 0.124272  | 0.100962  | 0.0936772 | 0.100524  | 0.0984848 | 0.0961538 | 0.0992133 |
| 0.133887  | 0.107663  | 0.10708   | 0.113636  | 0.104895  | 0.106352  | 0.107955  |
| 0.137238  | 0.120921  | 0.11451   | 0.11757   | 0.115822  | 0.113199  | 0.11859   |
| 0.128934  | 0.0986305 | 0.0995047 | 0.104021  | 0.099359  | 0.0976107 | 0.106789  |
| 0.125291  | 0.100233  | 0.0920746 | 0.0977564 | 0.090472  | 0.0965909 | 0.0949883 |

|          |           |           |           |           |           |           |
|----------|-----------|-----------|-----------|-----------|-----------|-----------|
| 0.129662 | 0.111888  | 0.105186  | 0.111451  | 0.107372  | 0.104749  | 0.109557  |
| 0.120192 | 0.0983392 | 0.0922203 | 0.103147  | 0.0935315 | 0.0920746 | 0.10067   |
| 0.137966 | 0.117861  | 0.115822  | 0.116841  | 0.11451   | 0.11451   | 0.119027  |
| 0.146707 | 0.127185  | 0.123397  | 0.128497  | 0.122378  | 0.124417  | 0.130099  |
| 0.131556 | 0.112325  | 0.102418  | 0.109557  | 0.102564  | 0.100816  | 0.106498  |
| 0.129662 | 0.0987762 | 0.0944056 | 0.104749  | 0.101836  | 0.0992133 | 0.107226  |
| 0.123834 | 0.0967366 | 0.0944056 | 0.100962  | 0.0965909 | 0.0948427 | 0.101981  |
| 0.119464 | 0.0987762 | 0.0990676 | 0.10067   | 0.0942599 | 0.0989219 | 0.0984848 |
| 0.125874 | 0.117133  | 0.113928  | 0.120484  | 0.109703  | 0.114073  | 0.115676  |
| 0.12296  | 0.102855  | 0.0964452 | 0.100962  | 0.0933858 | 0.0965909 | 0.101107  |
| 0.133887 | 0.130973  | 0.13243   | 0.130245  | 0.123252  | 0.128205  | 0.129808  |
| 0.110723 | 0.129662  | 0.122378  | 0.130973  | 0.125146  | 0.121358  | 0.132284  |
| 0.11655  | 0.11655   | 0.112471  | 0.118153  | 0.116696  | 0.110868  | 0.113345  |
| 0.113491 | 0.105915  | 0.105332  | 0.112179  | 0.111305  | 0.105769  | 0.110868  |
| 0.125437 | 0.10912   | 0.108829  | 0.11014   | 0.10169   | 0.106352  | 0.111451  |
| 0.130828 | 0.100816  | 0.0952797 | 0.0995047 | 0.0986305 | 0.097465  | 0.0987762 |
| 0.127477 | 0.092803  | 0.0939685 | 0.0920746 | 0.0865385 | 0.0935315 | 0.0878497 |
| 0.119901 | 0.0962995 | 0.0922203 | 0.101981  | 0.085373  | 0.0856643 | 0.0971737 |
| 0.128642 | 0.0977564 | 0.0968823 | 0.0941142 | 0.0920746 | 0.0949883 | 0.0942599 |
| 0.110286 | 0.095134  | 0.0919289 | 0.0944056 | 0.0879953 | 0.0917832 | 0.0962995 |
| 0.134907 | 0.109266  | 0.105186  | 0.104458  | 0.106498  | 0.106206  | 0.108974  |
| 0.141754 | 0.122815  | 0.12602   | 0.127622  | 0.118298  | 0.125     | 0.129225  |
| 0.138986 | 0.126166  | 0.126748  | 0.127185  | 0.123397  | 0.128059  | 0.125583  |
| 0.206876 | 0.195513  | 0.192599  | 0.194784  | 0.184878  | 0.191579  | 0.194347  |
| 0.241987 | 0.241696  | 0.239073  | 0.24155   | 0.230478  | 0.235723  | 0.239365  |
| 0.127622 | 0.105478  | 0.0987762 | 0.101544  | 0.0936772 | 0.0962995 | 0.104895  |
| 0.122232 | 0.0779429 | 0.0706585 | 0.07838   | 0.0713869 | 0.0719697 | 0.0785256 |
| 0.118735 | 0.0861014 | 0.0863928 | 0.0824592 | 0.0792541 | 0.0836247 | 0.0837704 |
| 0.121649 | 0.0805653 | 0.08581   | 0.083042  | 0.0716783 | 0.0871212 | 0.0791084 |
| 0.135927 | 0.128059  | 0.128351  | 0.126457  | 0.122669  | 0.125874  | 0.129808  |
| 0.121066 | 0.0869755 | 0.0776515 | 0.0737179 | 0.0786713 | 0.0775058 | 0.0866841 |
| 0.129662 | 0.117424  | 0.102273  | 0.107955  | 0.109411  | 0.10067   | 0.115967  |
| 0.125146 | 0.0837704 | 0.0773601 | 0.083042  | 0.0745921 | 0.0763403 | 0.0799825 |
| 0.129225 | 0.103001  | 0.0887238 | 0.0976107 | 0.083042  | 0.0847902 | 0.0925117 |
| 0.106643 | 0.105186  | 0.100524  | 0.101544  | 0.10271   | 0.10271   | 0.105769  |
| 0.130828 | 0.0935315 | 0.0920746 | 0.0802739 | 0.0989219 | 0.0887238 | 0.0952797 |
| 0        | 0.117716  | 0.113054  | 0.129225  | 0.116987  | 0.115239  | 0.125874  |
| 0.117716 | 0         | 0.07838   | 0.0826049 | 0.0826049 | 0.0779429 | 0.0824592 |
| 0.113054 | 0.07838   | 0         | 0.071824  | 0.078817  | 0.0400641 | 0.0842075 |
| 0.129225 | 0.0826049 | 0.071824  | 0         | 0.0856643 | 0.0693473 | 0.0761946 |
| 0.116987 | 0.0826049 | 0.078817  | 0.0856643 | 0         | 0.0772145 | 0.069493  |
| 0.115239 | 0.0779429 | 0.0400641 | 0.0693473 | 0.0772145 | 0         | 0.0849359 |
| 0.125874 | 0.0824592 | 0.0842075 | 0.0761946 | 0.069493  | 0.0849359 | 0         |
| 0.13039  | 0.0939685 | 0.0948427 | 0.0847902 | 0.0842075 | 0.0920746 | 0.0913462 |

|          |           |           |           |           |           |           |
|----------|-----------|-----------|-----------|-----------|-----------|-----------|
| 0.136218 | 0.103584  | 0.100962  | 0.0976107 | 0.0917832 | 0.100233  | 0.100962  |
| 0.124126 | 0.0882867 | 0.0751748 | 0.0907634 | 0.0750291 | 0.0735723 | 0.0868298 |
| 0.119901 | 0.090472  | 0.0831876 | 0.0871212 | 0.0795455 | 0.0833333 | 0.0878497 |
| 0.130099 | 0.109703  | 0.0936772 | 0.0999417 | 0.0833333 | 0.0894522 | 0.10067   |
| 0.11757  | 0.0785256 | 0.0782343 | 0.0810023 | 0.0777972 | 0.0801282 | 0.0852273 |
| 0.128497 | 0.099359  | 0.0976107 | 0.105332  | 0.101836  | 0.0977564 | 0.10373   |
| 0.138695 | 0.129662  | 0.126457  | 0.129808  | 0.127185  | 0.125728  | 0.134615  |
| 0.136801 | 0.113199  | 0.110868  | 0.1081    | 0.104021  | 0.113636  | 0.109703  |
| 0.11961  | 0.0753205 | 0.0747378 | 0.0833333 | 0.0708042 | 0.0699301 | 0.0706585 |
| 0.115385 | 0.0844988 | 0.0725524 | 0.0759033 | 0.0715326 | 0.0750291 | 0.0842075 |
| 0.124854 | 0.0936772 | 0.0828963 | 0.0935315 | 0.080711  | 0.0842075 | 0.0893065 |
| 0.126457 | 0.0967366 | 0.0894522 | 0.0907634 | 0.0791084 | 0.0863928 | 0.100233  |
| 0.125291 | 0.0967366 | 0.0859557 | 0.0939685 | 0.090472  | 0.0837704 | 0.0990676 |
| 0.121941 | 0.0849359 | 0.0828963 | 0.0847902 | 0.0798368 | 0.080711  | 0.0808566 |
| 0.127331 | 0.0891608 | 0.0777972 | 0.0817308 | 0.0802739 | 0.0776515 | 0.0754662 |
| 0.123834 | 0.0818765 | 0.0920746 | 0.0814394 | 0.0893065 | 0.0907634 | 0.090035  |
| 0.128788 | 0.0949883 | 0.0938228 | 0.0960082 | 0.0957168 | 0.0957168 | 0.107809  |
| 0.13141  | 0.0990676 | 0.0862471 | 0.0884324 | 0.0898893 | 0.0866841 | 0.0958625 |
| 0.133304 | 0.100962  | 0.101253  | 0.0955711 | 0.0961538 | 0.101399  | 0.0965909 |
| 0.130245 | 0.116841  | 0.111888  | 0.11553   | 0.114656  | 0.11116   | 0.118007  |
| 0.129079 | 0.0888695 | 0.0804196 | 0.0869755 | 0.078817  | 0.0761946 | 0.0777972 |
| 0.132576 | 0.100233  | 0.0990676 | 0.0930944 | 0.0916375 | 0.0948427 | 0.099359  |
| 0.119901 | 0.0759033 | 0.0782343 | 0.0795455 | 0.0786713 | 0.0801282 | 0.0840618 |
| 0.104312 | 0.0999417 | 0.0929487 | 0.103293  | 0.0968823 | 0.0942599 | 0.0999417 |
| 0.11859  | 0.0402098 | 0.0789627 | 0.0791084 | 0.0808566 | 0.076486  | 0.0789627 |
| 0.130682 | 0.0895979 | 0.0791084 | 0.0745921 | 0.0769231 | 0.076049  | 0.0793998 |
| 0.114365 | 0.0770688 | 0.0770688 | 0.0769231 | 0.0655594 | 0.0775058 | 0.0770688 |
| 0.133741 | 0.0979021 | 0.100233  | 0.0960082 | 0.0913462 | 0.100087  | 0.097028  |
| 0.127185 | 0.0986305 | 0.0989219 | 0.108683  | 0.0973193 | 0.0984848 | 0.10708   |
| 0.125146 | 0.102418  | 0.0995047 | 0.100816  | 0.0949883 | 0.101107  | 0.101253  |
| 0.11961  | 0.0866841 | 0.0814394 | 0.0868298 | 0.0387529 | 0.07838   | 0.0721154 |
| 0.123252 | 0.0932401 | 0.0909091 | 0.0925117 | 0.0808566 | 0.0922203 | 0.0882867 |
| 0.128642 | 0.11961   | 0.115239  | 0.120047  | 0.113928  | 0.113054  | 0.121066  |
| 0.133596 | 0.109703  | 0.106206  | 0.1081    | 0.112471  | 0.11014   | 0.116404  |
| 0.131702 | 0.107809  | 0.104312  | 0.102418  | 0.0995047 | 0.101544  | 0.10373   |
| 0.127477 | 0.112908  | 0.107955  | 0.112471  | 0.109557  | 0.10373   | 0.113491  |
| 0.134324 | 0.111305  | 0.0999417 | 0.11553   | 0.111742  | 0.105624  | 0.113345  |
| 0.132576 | 0.111014  | 0.108683  | 0.112325  | 0.099796  | 0.105041  | 0.105186  |
| 0.141317 | 0.131119  | 0.129371  | 0.130099  | 0.125146  | 0.13039   | 0.132576  |
| 0.142337 | 0.133887  | 0.128934  | 0.129371  | 0.126748  | 0.129953  | 0.127477  |
| 0.12602  | 0.105915  | 0.103875  | 0.110723  | 0.105478  | 0.102564  | 0.112617  |
| 0.138403 | 0.129953  | 0.125     | 0.124272  | 0.122232  | 0.124272  | 0.129371  |
| 0.134761 | 0.126311  | 0.122523  | 0.122378  | 0.118298  | 0.12296   | 0.118444  |
| 0.144376 | 0.125437  | 0.127185  | 0.120921  | 0.120338  | 0.125     | 0.126311  |

|          |          |          |          |          |           |          |
|----------|----------|----------|----------|----------|-----------|----------|
| 0.128934 | 0.116113 | 0.113491 | 0.114219 | 0.111305 | 0.112179  | 0.122815 |
| 0.134761 | 0.120775 | 0.115239 | 0.121212 | 0.11451  | 0.116259  | 0.123397 |
| 0.137238 | 0.127331 | 0.128205 | 0.128059 | 0.123689 | 0.123689  | 0.126457 |
| 0.139132 | 0.124272 | 0.11553  | 0.122086 | 0.115093 | 0.115093  | 0.125728 |
| 0.144668 | 0.139132 | 0.129225 | 0.129662 | 0.128788 | 0.130828  | 0.135927 |
| 0.136509 | 0.122232 | 0.122815 | 0.127622 | 0.120629 | 0.124709  | 0.128351 |
| 0.127477 | 0.110868 | 0.11116  | 0.110723 | 0.108683 | 0.111888  | 0.114948 |
| 0.138986 | 0.126748 | 0.120921 | 0.124854 | 0.118444 | 0.121066  | 0.119172 |
| 0.13884  | 0.13039  | 0.129516 | 0.134907 | 0.132284 | 0.129662  | 0.133304 |
| 0.128642 | 0.108829 | 0.105332 | 0.109266 | 0.10169  | 0.104895  | 0.11116  |
| 0.226981 | 0.222028 | 0.219697 | 0.218094 | 0.209936 | 0.214598  | 0.219697 |
| 0.137238 | 0.120629 | 0.116259 | 0.116404 | 0.11553  | 0.112325  | 0.122378 |
| 0.131119 | 0.113928 | 0.109266 | 0.114073 | 0.107372 | 0.108537  | 0.119172 |
| 0.140589 | 0.133304 | 0.129225 | 0.127914 | 0.129371 | 0.130828  | 0.131847 |
| 0.130973 | 0.113491 | 0.113782 | 0.117716 | 0.107809 | 0.116259  | 0.11757  |
| 0.145833 | 0.130682 | 0.133304 | 0.134907 | 0.127622 | 0.132284  | 0.133887 |
| 0.136801 | 0.116113 | 0.116404 | 0.111597 | 0.112471 | 0.116259  | 0.114656 |
| 0.135198 | 0.12296  | 0.116841 | 0.118735 | 0.110577 | 0.114656  | 0.120047 |
| 0.13141  | 0.119755 | 0.118007 | 0.125728 | 0.115822 | 0.119027  | 0.120921 |
| 0.144959 | 0.126603 | 0.129808 | 0.126166 | 0.125291 | 0.128205  | 0.128351 |
| 0.142191 | 0.126748 | 0.125291 | 0.122232 | 0.12602  | 0.125146  | 0.127331 |
| 0.133887 | 0.122232 | 0.123397 | 0.120047 | 0.116841 | 0.123252  | 0.123689 |
| 0.142337 | 0.127185 | 0.118444 | 0.128497 | 0.11859  | 0.11859   | 0.128059 |
| 0.123397 | 0.113782 | 0.106498 | 0.116259 | 0.107226 | 0.1081    | 0.119318 |
| 0.139132 | 0.114948 | 0.109994 | 0.11451  | 0.106352 | 0.109848  | 0.116113 |
| 0.148601 | 0.132576 | 0.132284 | 0.127477 | 0.129516 | 0.131265  | 0.138403 |
| 0.135344 | 0.11757  | 0.117279 | 0.112762 | 0.110723 | 0.118007  | 0.120484 |
| 0.114948 | 0.121649 | 0.118153 | 0.120921 | 0.119755 | 0.116259  | 0.118735 |
| 0.15035  | 0.136364 | 0.13345  | 0.142045 | 0.130099 | 0.132139  | 0.143648 |
| 0.135198 | 0.119464 | 0.116259 | 0.121649 | 0.117279 | 0.116696  | 0.123543 |
| 0.136655 | 0.125    | 0.119755 | 0.12398  | 0.121066 | 0.121358  | 0.125291 |
| 0.14729  | 0.126894 | 0.121941 | 0.122378 | 0.121212 | 0.123252  | 0.123106 |
| 0.139569 | 0.123543 | 0.123543 | 0.130099 | 0.11553  | 0.118735  | 0.126166 |
| 0.142483 | 0.125    | 0.119172 | 0.120484 | 0.115822 | 0.11757   | 0.118007 |
| 0.147145 | 0.134033 | 0.132576 | 0.136801 | 0.133887 | 0.13039   | 0.140443 |
| 0.12602  | 0.104749 | 0.100962 | 0.100816 | 0.100233 | 0.0999417 | 0.106498 |
| 0.107809 | 0.127331 | 0.120338 | 0.126311 | 0.120775 | 0.121358  | 0.125583 |
| 0.151078 | 0.141463 | 0.138258 | 0.142483 | 0.137821 | 0.134907  | 0.14292  |
| 0.12602  | 0.113782 | 0.107372 | 0.117133 | 0.108392 | 0.109266  | 0.114365 |
| 0.103001 | 0.112617 | 0.104167 | 0.115093 | 0.109848 | 0.103147  | 0.114073 |
| 0.145396 | 0.134907 | 0.132576 | 0.133304 | 0.129516 | 0.131556  | 0.127331 |
| 0.106643 | 0.108392 | 0.105186 | 0.112034 | 0.103001 | 0.104167  | 0.104021 |
| 0.143211 | 0.133304 | 0.129516 | 0.132867 | 0.120338 | 0.129662  | 0.128351 |
| 0.138695 | 0.125874 | 0.124126 | 0.12398  | 0.116404 | 0.121358  | 0.117716 |

|          |           |           |           |           |           |           |
|----------|-----------|-----------|-----------|-----------|-----------|-----------|
| 0.146999 | 0.125146  | 0.116987  | 0.11859   | 0.116841  | 0.115385  | 0.123106  |
| 0.135781 | 0.11655   | 0.117133  | 0.119027  | 0.109703  | 0.114365  | 0.113928  |
| 0.13243  | 0.11961   | 0.113199  | 0.113636  | 0.114802  | 0.11451   | 0.116404  |
| 0.140443 | 0.119172  | 0.114802  | 0.113491  | 0.120775  | 0.116987  | 0.122669  |
| 0.141317 | 0.125     | 0.128788  | 0.124854  | 0.120192  | 0.127768  | 0.124126  |
| 0.145979 | 0.124417  | 0.123252  | 0.119318  | 0.117861  | 0.124563  | 0.122669  |
| 0.143939 | 0.125874  | 0.119755  | 0.121941  | 0.118444  | 0.11961   | 0.12296   |
| 0.143357 | 0.11655   | 0.119755  | 0.120775  | 0.119901  | 0.116404  | 0.123252  |
| 0.151807 | 0.135781  | 0.136072  | 0.13447   | 0.13243   | 0.133887  | 0.141026  |
| 0.130245 | 0.113928  | 0.11451   | 0.111451  | 0.113199  | 0.114656  | 0.115093  |
| 0.122669 | 0.101107  | 0.099359  | 0.100962  | 0.0960082 | 0.0989219 | 0.101399  |
| 0.142483 | 0.122086  | 0.117424  | 0.115822  | 0.115822  | 0.116113  | 0.119172  |
| 0.126166 | 0.108392  | 0.107517  | 0.112617  | 0.110577  | 0.108537  | 0.111888  |
| 0.147582 | 0.133596  | 0.135052  | 0.137238  | 0.132867  | 0.13141   | 0.131556  |
| 0.152244 | 0.143211  | 0.143794  | 0.147436  | 0.143939  | 0.141026  | 0.14729   |
| 0.129808 | 0.0948427 | 0.0878497 | 0.0917832 | 0.0906177 | 0.0894522 | 0.0968823 |
| 0.12296  | 0.0859557 | 0.080711  | 0.088141  | 0.0820221 | 0.083479  | 0.0856643 |
| 0.146707 | 0.125437  | 0.120775  | 0.125291  | 0.121503  | 0.118007  | 0.128351  |
| 0.13986  | 0.127622  | 0.122086  | 0.129808  | 0.121941  | 0.124563  | 0.128205  |
| 0.126457 | 0.099359  | 0.0920746 | 0.0989219 | 0.0823135 | 0.0898893 | 0.0932401 |
| 0.141317 | 0.129953  | 0.129371  | 0.126311  | 0.129808  | 0.130099  | 0.132284  |
| 0.131119 | 0.125     | 0.122086  | 0.125728  | 0.121941  | 0.123397  | 0.127622  |
| 0.113199 | 0.105332  | 0.108246  | 0.114219  | 0.113345  | 0.109848  | 0.110577  |
| 0.168852 | 0.14729   | 0.139714  | 0.140152  | 0.136364  | 0.136072  | 0.139714  |
| 0.117279 | 0.105624  | 0.107372  | 0.108392  | 0.10373   | 0.105769  | 0.103875  |
| 0.135927 | 0.131847  | 0.13039   | 0.127914  | 0.130536  | 0.131993  | 0.129808  |
| 0.118881 | 0.103147  | 0.099359  | 0.105915  | 0.0965909 | 0.100962  | 0.104312  |
| 0.145688 | 0.129371  | 0.123252  | 0.130099  | 0.119318  | 0.121066  | 0.127914  |
| 0.134907 | 0.119464  | 0.121795  | 0.121649  | 0.118735  | 0.122523  | 0.124126  |
| 0.156031 | 0.139714  | 0.136801  | 0.140443  | 0.132576  | 0.135198  | 0.136801  |
| 0.155303 | 0.142191  | 0.136946  | 0.141754  | 0.133887  | 0.137675  | 0.143065  |
| 0.139714 | 0.124272  | 0.118444  | 0.125874  | 0.118881  | 0.118881  | 0.120192  |
| 0.149476 | 0.138986  | 0.13141   | 0.141171  | 0.130682  | 0.130682  | 0.132576  |
| 0.158071 | 0.139132  | 0.13447   | 0.13345   | 0.131702  | 0.13141   | 0.135052  |
| 0.160111 | 0.146707  | 0.139423  | 0.140443  | 0.133159  | 0.137238  | 0.140006  |
| 0.127914 | 0.109557  | 0.104021  | 0.107372  | 0.107663  | 0.104458  | 0.107809  |
| 0.146416 | 0.135344  | 0.129225  | 0.133741  | 0.131702  | 0.12704   | 0.13243   |
| 0.131556 | 0.114948  | 0.112617  | 0.115676  | 0.109557  | 0.111014  | 0.112034  |
| 0.134324 | 0.113636  | 0.111305  | 0.112325  | 0.113491  | 0.110286  | 0.114802  |
| 0.133596 | 0.120192  | 0.118444  | 0.124126  | 0.11451   | 0.116259  | 0.124272  |
| 0.136509 | 0.118444  | 0.113199  | 0.119464  | 0.111888  | 0.111305  | 0.114073  |
| 0.137821 | 0.115385  | 0.107226  | 0.106789  | 0.109994  | 0.107955  | 0.111014  |
| 0.130245 | 0.113636  | 0.110723  | 0.116404  | 0.107663  | 0.110286  | 0.110723  |
| 0.139569 | 0.117424  | 0.118007  | 0.121941  | 0.110286  | 0.122523  | 0.118007  |

|          |           |           |          |           |           |           |
|----------|-----------|-----------|----------|-----------|-----------|-----------|
| 0.137966 | 0.123106  | 0.123689  | 0.124126 | 0.120921  | 0.124417  | 0.124854  |
| 0.11961  | 0.106206  | 0.107372  | 0.109266 | 0.0944056 | 0.105769  | 0.102127  |
| 0.138549 | 0.123689  | 0.119318  | 0.124126 | 0.115093  | 0.117424  | 0.118735  |
| 0.134907 | 0.11859   | 0.113636  | 0.119027 | 0.108829  | 0.112617  | 0.112179  |
| 0.125874 | 0.105478  | 0.0967366 | 0.105041 | 0.103293  | 0.097465  | 0.103147  |
| 0.227564 | 0.219988  | 0.21824   | 0.218094 | 0.209062  | 0.214598  | 0.215035  |
| 0.148893 | 0.144231  | 0.139277  | 0.144085 | 0.134761  | 0.137675  | 0.138403  |
| 0.138549 | 0.126311  | 0.123106  | 0.127331 | 0.120338  | 0.122086  | 0.124563  |
| 0.139277 | 0.125     | 0.119172  | 0.122815 | 0.116113  | 0.116696  | 0.123252  |
| 0.220571 | 0.215909  | 0.210373  | 0.213724 | 0.204691  | 0.207896  | 0.214161  |
| 0.13141  | 0.113054  | 0.109557  | 0.113491 | 0.107663  | 0.10912   | 0.107226  |
| 0.134761 | 0.120775  | 0.112325  | 0.124417 | 0.107226  | 0.113928  | 0.113491  |
| 0.138258 | 0.11961   | 0.114656  | 0.11655  | 0.110431  | 0.115385  | 0.113491  |
| 0.13549  | 0.118007  | 0.11859   | 0.11961  | 0.118444  | 0.118735  | 0.123834  |
| 0.25641  | 0.254953  | 0.25204   | 0.251603 | 0.244027  | 0.248106  | 0.250874  |
| 0.144376 | 0.123397  | 0.117861  | 0.126457 | 0.117133  | 0.11859   | 0.122232  |
| 0.125437 | 0.104458  | 0.0939685 | 0.102273 | 0.0984848 | 0.0932401 | 0.100087  |
| 0.141754 | 0.10912   | 0.107663  | 0.113928 | 0.108392  | 0.106061  | 0.107663  |
| 0.140589 | 0.107663  | 0.105915  | 0.106643 | 0.102564  | 0.104604  | 0.103584  |
| 0.140297 | 0.128934  | 0.125728  | 0.128497 | 0.122086  | 0.123834  | 0.127768  |
| 0.144376 | 0.129516  | 0.124272  | 0.131702 | 0.118007  | 0.124709  | 0.130682  |
| 0.12398  | 0.106789  | 0.099796  | 0.102273 | 0.0981935 | 0.0973193 | 0.0989219 |
| 0.134907 | 0.119172  | 0.113345  | 0.122523 | 0.109994  | 0.113199  | 0.113636  |
| 0.141463 | 0.123106  | 0.116404  | 0.124417 | 0.121212  | 0.117716  | 0.119318  |
| 0.128934 | 0.114948  | 0.113782  | 0.115385 | 0.112762  | 0.111305  | 0.116113  |
| 0.134033 | 0.119755  | 0.115093  | 0.118153 | 0.108246  | 0.112325  | 0.110723  |
| 0.124854 | 0.115822  | 0.113782  | 0.115385 | 0.112179  | 0.113345  | 0.114948  |
| 0.155012 | 0.143939  | 0.136946  | 0.141171 | 0.133304  | 0.134761  | 0.141317  |
| 0.144814 | 0.125291  | 0.124417  | 0.127477 | 0.121066  | 0.124563  | 0.126457  |
| 0.141026 | 0.123834  | 0.115967  | 0.128351 | 0.114365  | 0.115239  | 0.120921  |
| 0.203671 | 0.195513  | 0.187646  | 0.192162 | 0.181381  | 0.186626  | 0.189103  |
| 0.215618 | 0.210664  | 0.20134   | 0.206731 | 0.196241  | 0.201195  | 0.206585  |
| 0.137821 | 0.121795  | 0.119172  | 0.119027 | 0.119027  | 0.118735  | 0.120921  |
| 0.130828 | 0.115093  | 0.111305  | 0.112325 | 0.110868  | 0.113491  | 0.115093  |
| 0.137821 | 0.138695  | 0.136072  | 0.140589 | 0.131556  | 0.137092  | 0.141608  |
| 0.126166 | 0.104021  | 0.0949883 | 0.10271  | 0.100087  | 0.0936772 | 0.100233  |
| 0.144376 | 0.125437  | 0.121649  | 0.130245 | 0.121503  | 0.123252  | 0.126311  |
| 0.141608 | 0.129371  | 0.122669  | 0.115239 | 0.115822  | 0.119027  | 0.123252  |
| 0.236888 | 0.227855  | 0.224068  | 0.225087 | 0.217803  | 0.220134  | 0.224359  |
| 0.13345  | 0.113636  | 0.106061  | 0.11116  | 0.10912   | 0.108537  | 0.107226  |
| 0.209353 | 0.204108  | 0.194202  | 0.203089 | 0.190268  | 0.194347  | 0.197115  |
| 0.124126 | 0.0984848 | 0.0973193 | 0.099796 | 0.0962995 | 0.0939685 | 0.0984848 |
| 0.129225 | 0.109703  | 0.108829  | 0.110431 | 0.106061  | 0.106935  | 0.109411  |
| 0.132576 | 0.118007  | 0.113928  | 0.118153 | 0.108537  | 0.113491  | 0.111305  |

|          |          |           |          |           |           |          |
|----------|----------|-----------|----------|-----------|-----------|----------|
| 0.129371 | 0.113636 | 0.109266  | 0.110577 | 0.107955  | 0.109411  | 0.112471 |
| 0.218969 | 0.211684 | 0.205857  | 0.208333 | 0.201923  | 0.203671  | 0.208188 |
| 0.148456 | 0.133887 | 0.129808  | 0.135781 | 0.125     | 0.126457  | 0.13039  |
| 0.135635 | 0.10708  | 0.100379  | 0.108392 | 0.102273  | 0.0990676 | 0.104749 |
| 0.140006 | 0.127768 | 0.123106  | 0.129662 | 0.119755  | 0.120047  | 0.12398  |
| 0.135052 | 0.123397 | 0.117861  | 0.117424 | 0.111597  | 0.113928  | 0.119901 |
| 0.134178 | 0.114365 | 0.113199  | 0.11655  | 0.108974  | 0.113345  | 0.11553  |
| 0.126748 | 0.100816 | 0.092366  | 0.100087 | 0.0992133 | 0.0954254 | 0.101399 |
| 0.129662 | 0.111888 | 0.104895  | 0.107372 | 0.105332  | 0.105041  | 0.106352 |
| 0.138986 | 0.120921 | 0.115385  | 0.123689 | 0.109994  | 0.113782  | 0.117133 |
| 0.134033 | 0.11451  | 0.108392  | 0.117861 | 0.106498  | 0.108246  | 0.110723 |
| 0.137966 | 0.108829 | 0.103001  | 0.110431 | 0.104604  | 0.0996503 | 0.106206 |
| 0.201632 | 0.19289  | 0.188228  | 0.190122 | 0.182838  | 0.18546   | 0.187937 |
| 0.144376 | 0.107663 | 0.109411  | 0.109266 | 0.104604  | 0.105186  | 0.106206 |
| 0.147145 | 0.126166 | 0.118881  | 0.123397 | 0.117861  | 0.117861  | 0.125583 |
| 0.137383 | 0.112325 | 0.106789  | 0.113345 | 0.105186  | 0.109557  | 0.113491 |
| 0.143939 | 0.12296  | 0.120629  | 0.125728 | 0.118444  | 0.120484  | 0.124126 |
| 0.137238 | 0.123252 | 0.118007  | 0.124563 | 0.113491  | 0.114948  | 0.11655  |
| 0.128788 | 0.105769 | 0.0990676 | 0.103001 | 0.10271   | 0.0995047 | 0.101399 |
| 0.130099 | 0.113199 | 0.107955  | 0.109266 | 0.102273  | 0.105478  | 0.106789 |
| 0.12602  | 0.108829 | 0.102418  | 0.104895 | 0.102855  | 0.0999417 | 0.101836 |
| 0.142191 | 0.119172 | 0.113928  | 0.119901 | 0.111742  | 0.113491  | 0.115967 |
| 0.138695 | 0.104895 | 0.101107  | 0.105332 | 0.0989219 | 0.0992133 | 0.100816 |
| 0.136218 | 0.120484 | 0.11553   | 0.119464 | 0.114219  | 0.11451   | 0.122523 |
| 0.140443 | 0.120921 | 0.112471  | 0.116113 | 0.110577  | 0.115239  | 0.113636 |
| 0.146416 | 0.135635 | 0.127768  | 0.130245 | 0.12296   | 0.128205  | 0.125728 |
| 0.13447  | 0.11553  | 0.112325  | 0.119755 | 0.11014   | 0.114219  | 0.116696 |
| 0.15035  | 0.137529 | 0.133741  | 0.142337 | 0.130099  | 0.130099  | 0.134324 |
| 0.13141  | 0.113636 | 0.111597  | 0.114073 | 0.11116   | 0.112617  | 0.114219 |
| 0.134033 | 0.114802 | 0.1081    | 0.100962 | 0.102418  | 0.106498  | 0.109848 |
| 0.135927 | 0.120484 | 0.116696  | 0.126457 | 0.11014   | 0.115093  | 0.115239 |
| 0.128059 | 0.108246 | 0.101253  | 0.107809 | 0.108974  | 0.102564  | 0.106498 |
| 0.198864 | 0.191288 | 0.184878  | 0.187063 | 0.180361  | 0.18211   | 0.187791 |
| 0.131702 | 0.101107 | 0.097028  | 0.105041 | 0.0986305 | 0.0960082 | 0.101981 |
| 0.120629 | 0.102855 | 0.0999417 | 0.10708  | 0.0948427 | 0.100379  | 0.103147 |
| 0.138695 | 0.119464 | 0.114802  | 0.128642 | 0.111451  | 0.114948  | 0.121795 |
| 0.195513 | 0.185897 | 0.177448  | 0.181672 | 0.171474  | 0.175845  | 0.183566 |
| 0.152826 | 0.131847 | 0.130099  | 0.134615 | 0.129079  | 0.130828  | 0.136218 |
| 0.156323 | 0.145251 | 0.140589  | 0.14627  | 0.138695  | 0.140734  | 0.144376 |
| 0.153555 | 0.143648 | 0.136072  | 0.137966 | 0.13447   | 0.137966  | 0.141317 |
| 0.131993 | 0.112762 | 0.109848  | 0.11553  | 0.109411  | 0.110286  | 0.113345 |
| 0.139132 | 0.123397 | 0.119027  | 0.12704  | 0.116259  | 0.115967  | 0.117861 |
| 0.224359 | 0.2162   | 0.212121  | 0.215472 | 0.204108  | 0.210519  | 0.212995 |
| 0.142191 | 0.121795 | 0.120338  | 0.120775 | 0.114656  | 0.116113  | 0.121795 |

|          |          |           |          |           |           |           |
|----------|----------|-----------|----------|-----------|-----------|-----------|
| 0.139132 | 0.128351 | 0.124563  | 0.130828 | 0.119464  | 0.122378  | 0.121941  |
| 0.13243  | 0.106206 | 0.100087  | 0.106352 | 0.102855  | 0.0984848 | 0.102127  |
| 0.180507 | 0.172931 | 0.164481  | 0.167249 | 0.159965  | 0.161713  | 0.169435  |
| 0.13243  | 0.114365 | 0.108829  | 0.109266 | 0.107809  | 0.106643  | 0.112325  |
| 0.151515 | 0.148893 | 0.142191  | 0.143211 | 0.139714  | 0.138549  | 0.143357  |
| 0.124126 | 0.115967 | 0.120338  | 0.11961  | 0.108829  | 0.114948  | 0.11451   |
| 0.203089 | 0.192016 | 0.189977  | 0.189831 | 0.18109   | 0.183129  | 0.18648   |
| 0.138695 | 0.119464 | 0.114219  | 0.120484 | 0.115239  | 0.114656  | 0.120338  |
| 0.124126 | 0.10373  | 0.104312  | 0.112908 | 0.097465  | 0.101253  | 0.106352  |
| 0.13884  | 0.111742 | 0.10708   | 0.103147 | 0.10169   | 0.106352  | 0.108537  |
| 0.137821 | 0.117424 | 0.115967  | 0.118735 | 0.103584  | 0.111742  | 0.112762  |
| 0.140152 | 0.117716 | 0.11451   | 0.125437 | 0.10912   | 0.112908  | 0.114802  |
| 0.139569 | 0.11859  | 0.115093  | 0.115822 | 0.11116   | 0.113491  | 0.113636  |
| 0.134178 | 0.113491 | 0.110868  | 0.113054 | 0.111014  | 0.111014  | 0.115239  |
| 0.202214 | 0.192016 | 0.188811  | 0.191871 | 0.183712  | 0.18546   | 0.187937  |
| 0.141171 | 0.123106 | 0.112325  | 0.117716 | 0.110723  | 0.111014  | 0.114365  |
| 0.130828 | 0.11451  | 0.113054  | 0.117861 | 0.106498  | 0.108246  | 0.111597  |
| 0.223922 | 0.217512 | 0.21081   | 0.21183  | 0.204837  | 0.207751  | 0.212558  |
| 0.144668 | 0.108537 | 0.107663  | 0.111014 | 0.105478  | 0.104021  | 0.106498  |
| 0.132867 | 0.112471 | 0.113054  | 0.114656 | 0.110577  | 0.114365  | 0.117133  |
| 0.129662 | 0.111305 | 0.106352  | 0.109994 | 0.108246  | 0.107955  | 0.112762  |
| 0.147873 | 0.136801 | 0.132139  | 0.137821 | 0.127914  | 0.129079  | 0.132721  |
| 0.198572 | 0.193619 | 0.187209  | 0.190559 | 0.18007   | 0.185606  | 0.187209  |
| 0.126166 | 0.105478 | 0.0944056 | 0.102127 | 0.101544  | 0.0960082 | 0.10169   |
| 0.143357 | 0.128497 | 0.121795  | 0.125728 | 0.116987  | 0.121358  | 0.120338  |
| 0.130245 | 0.112471 | 0.113054  | 0.114948 | 0.111742  | 0.111742  | 0.115967  |
| 0.132867 | 0.113054 | 0.111888  | 0.11116  | 0.108829  | 0.110868  | 0.113928  |
| 0.131556 | 0.110286 | 0.110868  | 0.112471 | 0.111014  | 0.111888  | 0.116987  |
| 0.134615 | 0.117716 | 0.112179  | 0.121066 | 0.110286  | 0.113199  | 0.113636  |
| 0.118444 | 0.103584 | 0.106206  | 0.104312 | 0.0935315 | 0.103438  | 0.103293  |
| 0.142628 | 0.124854 | 0.119901  | 0.127914 | 0.119464  | 0.122086  | 0.123106  |
| 0.143502 | 0.128934 | 0.118153  | 0.123834 | 0.118881  | 0.11859   | 0.123689  |
| 0.143794 | 0.118735 | 0.114948  | 0.124126 | 0.115385  | 0.116841  | 0.121066  |
| 0.138695 | 0.12704  | 0.119464  | 0.120775 | 0.114948  | 0.117279  | 0.125583  |
| 0.207896 | 0.197407 | 0.191579  | 0.194056 | 0.185897  | 0.189685  | 0.194784  |
| 0.138695 | 0.116259 | 0.110431  | 0.112325 | 0.104167  | 0.111742  | 0.111014  |
| 0.143502 | 0.132139 | 0.128351  | 0.133741 | 0.123834  | 0.125874  | 0.126894  |
| 0.131119 | 0.11014  | 0.113054  | 0.11116  | 0.108246  | 0.10912   | 0.113636  |
| 0.119027 | 0.103293 | 0.105332  | 0.106352 | 0.0941142 | 0.103438  | 0.100087  |
| 0.130973 | 0.113491 | 0.108829  | 0.113054 | 0.109557  | 0.108683  | 0.109703  |
| 0.125    | 0.104895 | 0.0979021 | 0.106206 | 0.100379  | 0.0968823 | 0.10169   |
| 0.144522 | 0.13141  | 0.129371  | 0.130682 | 0.121649  | 0.129225  | 0.129953  |
| 0.142628 | 0.11757  | 0.10912   | 0.115385 | 0.111305  | 0.111888  | 0.115822  |
| 0.125146 | 0.106498 | 0.100962  | 0.100816 | 0.0996503 | 0.10169   | 0.0971737 |



|          |          |           |           |           |           |           |
|----------|----------|-----------|-----------|-----------|-----------|-----------|
| 0.120047 | 0.101399 | 0.0981935 | 0.0968823 | 0.0930944 | 0.0968823 | 0.0981935 |
| 0.128934 | 0.110286 | 0.103293  | 0.1081    | 0.0976107 | 0.100816  | 0.108829  |
| 0.128788 | 0.102855 | 0.094697  | 0.101544  | 0.0992133 | 0.0939685 | 0.101107  |
| 0.145542 | 0.128351 | 0.125437  | 0.132867  | 0.123543  | 0.126748  | 0.130099  |
| 0.130536 | 0.103147 | 0.0979021 | 0.102418  | 0.099796  | 0.0971737 | 0.0990676 |
| 0.130973 | 0.114365 | 0.108829  | 0.116841  | 0.106643  | 0.108392  | 0.110868  |
| 0.128059 | 0.101544 | 0.0942599 | 0.100816  | 0.0961538 | 0.0917832 | 0.0960082 |
| 0.130536 | 0.113054 | 0.110723  | 0.110868  | 0.107955  | 0.106498  | 0.112471  |
| 0.129225 | 0.100379 | 0.0936772 | 0.104021  | 0.0981935 | 0.094697  | 0.099796  |
| 0.132721 | 0.112908 | 0.115239  | 0.116841  | 0.113345  | 0.111305  | 0.119027  |
| 0.13447  | 0.111451 | 0.103875  | 0.106935  | 0.0987762 | 0.106935  | 0.103584  |
| 0.141171 | 0.116113 | 0.110286  | 0.115093  | 0.107517  | 0.108683  | 0.116113  |
| 0.133304 | 0.114365 | 0.10912   | 0.119755  | 0.106061  | 0.109557  | 0.109703  |
| 0.124126 | 0.106352 | 0.109266  | 0.110286  | 0.097465  | 0.107955  | 0.104895  |
| 0.128934 | 0.112908 | 0.11116   | 0.111014  | 0.108392  | 0.111305  | 0.114365  |
| 0.143794 | 0.115822 | 0.110577  | 0.109266  | 0.107809  | 0.111597  | 0.118735  |
| 0.137238 | 0.121795 | 0.117133  | 0.121358  | 0.116404  | 0.11757   | 0.120047  |
| 0.124563 | 0.106498 | 0.103584  | 0.111305  | 0.105769  | 0.104604  | 0.113782  |
| 0.128934 | 0.112325 | 0.109411  | 0.11014   | 0.107226  | 0.108974  | 0.109703  |
| 0.139569 | 0.124126 | 0.117716  | 0.125437  | 0.11553   | 0.114365  | 0.119172  |
| 0.125291 | 0.101107 | 0.097028  | 0.101544  | 0.0995047 | 0.0965909 | 0.10169   |
| 0.138695 | 0.120629 | 0.113928  | 0.11961   | 0.110577  | 0.112908  | 0.120629  |
| 0.137821 | 0.113636 | 0.111014  | 0.120192  | 0.106498  | 0.109994  | 0.112762  |
| 0.119464 | 0.109848 | 0.108392  | 0.111742  | 0.101253  | 0.107955  | 0.107226  |
| 0.131119 | 0.113054 | 0.109266  | 0.109994  | 0.104749  | 0.107663  | 0.111888  |
| 0.131265 | 0.099796 | 0.0925117 | 0.100233  | 0.0990676 | 0.0917832 | 0.100962  |
| 0.137238 | 0.122086 | 0.120921  | 0.124854  | 0.115239  | 0.116404  | 0.118298  |
| 0.13986  | 0.119755 | 0.114219  | 0.123397  | 0.116987  | 0.116404  | 0.118007  |
| 0.13039  | 0.116696 | 0.112034  | 0.120047  | 0.109557  | 0.11014   | 0.121358  |
| 0.205274 | 0.197407 | 0.195367  | 0.194056  | 0.185023  | 0.191725  | 0.19391   |
| 0.177885 | 0.165647 | 0.162442  | 0.164044  | 0.1588    | 0.160839  | 0.163607  |
| 0.144668 | 0.121941 | 0.116404  | 0.120338  | 0.117133  | 0.118007  | 0.121066  |
| 0.13345  | 0.112179 | 0.107517  | 0.109703  | 0.107663  | 0.108829  | 0.106643  |
| 0.160256 | 0.143065 | 0.141026  | 0.14729   | 0.139423  | 0.141171  | 0.148019  |
| 0.139423 | 0.127477 | 0.116404  | 0.124709  | 0.120338  | 0.117133  | 0.119318  |
| 0.136946 | 0.122378 | 0.117424  | 0.118735  | 0.118153  | 0.117861  | 0.11859   |
| 0.135635 | 0.115822 | 0.114948  | 0.118881  | 0.113636  | 0.11451   | 0.11961   |
| 0.127185 | 0.113199 | 0.109994  | 0.113054  | 0.106935  | 0.109848  | 0.115239  |
| 0.135927 | 0.120192 | 0.117279  | 0.123834  | 0.114802  | 0.115967  | 0.121649  |
| 0.211247 | 0.205711 | 0.203089  | 0.201195  | 0.194493  | 0.200903  | 0.201049  |
| 0.129225 | 0.10708  | 0.0995047 | 0.105769  | 0.101399  | 0.0981935 | 0.103293  |
| 0.132867 | 0.115093 | 0.105478  | 0.113491  | 0.104749  | 0.105915  | 0.108392  |
| 0.128788 | 0.110431 | 0.106643  | 0.109994  | 0.103293  | 0.10708   | 0.110723  |
| 0.138549 | 0.116987 | 0.11116   | 0.114802  | 0.106643  | 0.109848  | 0.114073  |

|          |           |           |           |           |           |           |
|----------|-----------|-----------|-----------|-----------|-----------|-----------|
| 0.197261 | 0.183566  | 0.179779  | 0.183421  | 0.175845  | 0.177885  | 0.184149  |
| 0.253497 | 0.251457  | 0.245629  | 0.246649  | 0.238782  | 0.243444  | 0.246795  |
| 0.142191 | 0.119464  | 0.11451   | 0.120192  | 0.11116   | 0.112325  | 0.118881  |
| 0.13549  | 0.11655   | 0.114802  | 0.121941  | 0.115239  | 0.114948  | 0.121212  |
| 0.13986  | 0.121795  | 0.115676  | 0.123106  | 0.114948  | 0.117279  | 0.121212  |
| 0.133013 | 0.112908  | 0.107372  | 0.11655   | 0.101981  | 0.107809  | 0.109703  |
| 0.122669 | 0.0999417 | 0.0938228 | 0.100379  | 0.0971737 | 0.0930944 | 0.094697  |
| 0.136218 | 0.113782  | 0.10708   | 0.109266  | 0.101399  | 0.106061  | 0.104458  |
| 0.132284 | 0.117133  | 0.111888  | 0.116987  | 0.112617  | 0.111742  | 0.116259  |
| 0.121212 | 0.100524  | 0.0909091 | 0.0995047 | 0.0980478 | 0.0913462 | 0.0958625 |
| 0.133304 | 0.116404  | 0.112325  | 0.117716  | 0.111888  | 0.111888  | 0.118735  |
| 0.129371 | 0.112762  | 0.112179  | 0.118153  | 0.109703  | 0.110868  | 0.119464  |
| 0.124272 | 0.107372  | 0.112325  | 0.111597  | 0.0996503 | 0.108392  | 0.104167  |
| 0.141608 | 0.119464  | 0.111305  | 0.118735  | 0.110577  | 0.112908  | 0.11859   |
| 0.137675 | 0.122232  | 0.116113  | 0.123834  | 0.113054  | 0.111305  | 0.11757   |
| 0.131265 | 0.102418  | 0.0995047 | 0.0955711 | 0.094697  | 0.0999417 | 0.101544  |
| 0.142045 | 0.117279  | 0.115239  | 0.111014  | 0.116259  | 0.11451   | 0.119901  |
| 0.140589 | 0.129225  | 0.12398   | 0.133741  | 0.120047  | 0.121795  | 0.124854  |
| 0.130536 | 0.109266  | 0.110431  | 0.110868  | 0.106206  | 0.108537  | 0.114219  |
| 0.128642 | 0.112325  | 0.106206  | 0.109266  | 0.104021  | 0.106061  | 0.112325  |
| 0.13447  | 0.127768  | 0.126603  | 0.125874  | 0.122086  | 0.125874  | 0.129225  |
| 0.217366 | 0.215326  | 0.211538  | 0.211101  | 0.203817  | 0.207022  | 0.209499  |
| 0.136218 | 0.106206  | 0.101253  | 0.110431  | 0.100233  | 0.102564  | 0.105624  |
| 0.123252 | 0.106061  | 0.11014   | 0.107955  | 0.0971737 | 0.103875  | 0.10373   |
| 0.142191 | 0.117133  | 0.111888  | 0.112908  | 0.106789  | 0.110286  | 0.110431  |
| 0.146416 | 0.110286  | 0.106789  | 0.113054  | 0.106061  | 0.106352  | 0.107955  |
| 0.131556 | 0.114073  | 0.107372  | 0.110723  | 0.102273  | 0.104312  | 0.110286  |
| 0.211976 | 0.20236   | 0.199738  | 0.20134   | 0.191434  | 0.196678  | 0.199446  |
| 0.142483 | 0.125     | 0.120338  | 0.12602   | 0.114948  | 0.118153  | 0.121212  |
| 0.129516 | 0.105624  | 0.109703  | 0.107809  | 0.106935  | 0.111597  | 0.110577  |
| 0.136072 | 0.121503  | 0.118881  | 0.121941  | 0.111451  | 0.112908  | 0.122378  |
| 0.130536 | 0.110431  | 0.106352  | 0.116987  | 0.0992133 | 0.105041  | 0.108683  |
| 0.138112 | 0.12296   | 0.115093  | 0.125728  | 0.114073  | 0.116404  | 0.118881  |
| 0.128205 | 0.108974  | 0.105478  | 0.110286  | 0.10067   | 0.105915  | 0.106643  |
| 0.128788 | 0.11014   | 0.11014   | 0.116113  | 0.10708   | 0.110577  | 0.115676  |
| 0.138986 | 0.102855  | 0.101981  | 0.105915  | 0.101253  | 0.101836  | 0.101981  |
| 0.209936 | 0.202943  | 0.197698  | 0.201049  | 0.194056  | 0.195513  | 0.199446  |
| 0.129953 | 0.111888  | 0.106935  | 0.114365  | 0.10067   | 0.105332  | 0.10373   |
| 0.20877  | 0.197115  | 0.193036  | 0.195221  | 0.187646  | 0.190268  | 0.193619  |
| 0.208625 | 0.195513  | 0.192016  | 0.19391   | 0.187209  | 0.18954   | 0.194639  |
| 0.137238 | 0.123834  | 0.117424  | 0.13039   | 0.114365  | 0.11757   | 0.123834  |
| 0.14627  | 0.115093  | 0.116841  | 0.115822  | 0.113782  | 0.113782  | 0.116259  |
| 0.120921 | 0.104604  | 0.099359  | 0.110286  | 0.0980478 | 0.099796  | 0.110431  |
| 0.128934 | 0.111451  | 0.107372  | 0.113054  | 0.103438  | 0.10373   | 0.108829  |

|          |           |           |           |           |           |           |
|----------|-----------|-----------|-----------|-----------|-----------|-----------|
| 0.137529 | 0.116841  | 0.111305  | 0.120775  | 0.110286  | 0.113199  | 0.111597  |
| 0.132576 | 0.112762  | 0.113928  | 0.114948  | 0.11116   | 0.111742  | 0.116259  |
| 0.121212 | 0.0964452 | 0.0903263 | 0.0971737 | 0.0925117 | 0.0895979 | 0.0897436 |
| 0.121795 | 0.100524  | 0.0952797 | 0.0986305 | 0.0957168 | 0.092803  | 0.0958625 |
| 0.144668 | 0.11961   | 0.112617  | 0.123834  | 0.114802  | 0.116259  | 0.121941  |
| 0.138695 | 0.11655   | 0.111597  | 0.12398   | 0.107372  | 0.109703  | 0.115967  |
| 0.13039  | 0.110286  | 0.110286  | 0.1081    | 0.106352  | 0.109266  | 0.110577  |
| 0.135781 | 0.11859   | 0.113345  | 0.121066  | 0.11116   | 0.110577  | 0.11655   |
| 0.124854 | 0.100379  | 0.100962  | 0.105769  | 0.0961538 | 0.0984848 | 0.105624  |
| 0.142774 | 0.129953  | 0.124126  | 0.130973  | 0.122232  | 0.121358  | 0.125291  |
| 0.139569 | 0.113928  | 0.115093  | 0.118153  | 0.112617  | 0.114365  | 0.11655   |
| 0.144959 | 0.133304  | 0.129808  | 0.136072  | 0.125     | 0.126457  | 0.129808  |
| 0.264132 | 0.265006  | 0.259178  | 0.260781  | 0.25204   | 0.256702  | 0.260635  |
| 0.143794 | 0.11757   | 0.109411  | 0.115093  | 0.114802  | 0.11014   | 0.114365  |
| 0.133741 | 0.121212  | 0.121212  | 0.119901  | 0.119027  | 0.116113  | 0.121503  |
| 0.22771  | 0.222174  | 0.216929  | 0.22028   | 0.20979   | 0.214744  | 0.2213    |
| 0.134615 | 0.118881  | 0.118298  | 0.121066  | 0.116696  | 0.117279  | 0.12296   |
| 0.238636 | 0.235431  | 0.22873   | 0.230624  | 0.223339  | 0.225087  | 0.230186  |
| 0.139132 | 0.108829  | 0.100087  | 0.11014   | 0.105769  | 0.10169   | 0.10708   |
| 0.13345  | 0.124417  | 0.125583  | 0.124563  | 0.121649  | 0.123689  | 0.126748  |
| 0.138986 | 0.10373   | 0.0987762 | 0.097465  | 0.0971737 | 0.0960082 | 0.100233  |
| 0.138695 | 0.120921  | 0.115676  | 0.124272  | 0.111451  | 0.11553   | 0.119464  |
| 0.216492 | 0.206294  | 0.20134   | 0.204983  | 0.19595   | 0.199155  | 0.205128  |
| 0.145688 | 0.132867  | 0.127331  | 0.134761  | 0.121941  | 0.125437  | 0.128788  |
| 0.136364 | 0.121212  | 0.115093  | 0.121941  | 0.113782  | 0.112325  | 0.115967  |
| 0.233537 | 0.232663  | 0.22567   | 0.225816  | 0.219406  | 0.224359  | 0.223631  |
| 0.127331 | 0.104021  | 0.097028  | 0.103001  | 0.0983392 | 0.0957168 | 0.0984848 |
| 0.209936 | 0.204108  | 0.199738  | 0.20134   | 0.19289   | 0.195804  | 0.20236   |
| 0.130682 | 0.108246  | 0.0968823 | 0.102564  | 0.101107  | 0.0996503 | 0.101253  |
| 0.133013 | 0.112034  | 0.112908  | 0.111305  | 0.109848  | 0.11014   | 0.112908  |
| 0.125291 | 0.114219  | 0.122086  | 0.118735  | 0.110286  | 0.118735  | 0.113345  |
| 0.136364 | 0.125     | 0.119755  | 0.131556  | 0.114365  | 0.118735  | 0.123543  |
| 0.132139 | 0.116987  | 0.10912   | 0.112471  | 0.107517  | 0.108683  | 0.113491  |
| 0.169726 | 0.160985  | 0.159819  | 0.160256  | 0.152681  | 0.156469  | 0.159819  |
| 0.133013 | 0.114948  | 0.109703  | 0.11655   | 0.105478  | 0.106643  | 0.112325  |
| 0.143502 | 0.104167  | 0.10708   | 0.109557  | 0.103438  | 0.103438  | 0.106498  |
| 0.141754 | 0.116987  | 0.115822  | 0.115676  | 0.115385  | 0.113928  | 0.116696  |
| 0.143502 | 0.125437  | 0.116404  | 0.111888  | 0.111597  | 0.113928  | 0.121358  |
| 0.208333 | 0.198135  | 0.194056  | 0.195659  | 0.188083  | 0.191871  | 0.197261  |
| 0.129808 | 0.113199  | 0.109994  | 0.112762  | 0.107809  | 0.109848  | 0.11116   |
| 0.142191 | 0.119755  | 0.114219  | 0.127768  | 0.112325  | 0.115822  | 0.119172  |
| 0.125728 | 0.105041  | 0.095134  | 0.100233  | 0.101107  | 0.094697  | 0.102127  |
| 0.12296  | 0.102855  | 0.100524  | 0.105041  | 0.0989219 | 0.0971737 | 0.0990676 |
| 0.130973 | 0.116404  | 0.117861  | 0.118298  | 0.115967  | 0.116259  | 0.122232  |

|          |          |           |          |           |          |           |
|----------|----------|-----------|----------|-----------|----------|-----------|
| 0.261946 | 0.262821 | 0.25641   | 0.256556 | 0.248106  | 0.253642 | 0.253788  |
| 0.117861 | 0.11116  | 0.113199  | 0.115676 | 0.102855  | 0.109848 | 0.109994  |
| 0.13884  | 0.11757  | 0.112908  | 0.114802 | 0.108683  | 0.113636 | 0.113199  |
| 0.188957 | 0.181672 | 0.177302  | 0.179487 | 0.17366   | 0.175408 | 0.181672  |
| 0.198572 | 0.191871 | 0.183129  | 0.185606 | 0.179487  | 0.182692 | 0.186043  |
| 0.141463 | 0.119901 | 0.112325  | 0.122086 | 0.111597  | 0.112762 | 0.118444  |
| 0.136946 | 0.122086 | 0.117133  | 0.12398  | 0.114365  | 0.115239 | 0.118007  |
| 0.135198 | 0.115676 | 0.11014   | 0.121066 | 0.103875  | 0.109994 | 0.112471  |
| 0.154283 | 0.145542 | 0.14088   | 0.14627  | 0.136946  | 0.137821 | 0.140006  |
| 0.139132 | 0.113199 | 0.108246  | 0.115385 | 0.106061  | 0.109848 | 0.115822  |
| 0.142774 | 0.117133 | 0.111888  | 0.120192 | 0.113782  | 0.114365 | 0.120047  |
| 0.125437 | 0.108829 | 0.0983392 | 0.105769 | 0.10169   | 0.10169  | 0.104458  |
| 0.133013 | 0.118444 | 0.114948  | 0.124709 | 0.110431  | 0.113928 | 0.114365  |
| 0.138695 | 0.13141  | 0.126457  | 0.133596 | 0.11961   | 0.121358 | 0.125     |
| 0.131265 | 0.109994 | 0.105041  | 0.109557 | 0.104895  | 0.101981 | 0.105332  |
| 0.13986  | 0.122378 | 0.115967  | 0.127477 | 0.113199  | 0.118444 | 0.120047  |
| 0.14729  | 0.133887 | 0.131556  | 0.138986 | 0.124417  | 0.130536 | 0.131556  |
| 0.123543 | 0.11655  | 0.118298  | 0.118735 | 0.10708   | 0.117279 | 0.114219  |
| 0.141171 | 0.129225 | 0.122815  | 0.13345  | 0.117716  | 0.123252 | 0.12602   |
| 0.12398  | 0.108829 | 0.105041  | 0.109557 | 0.104895  | 0.10373  | 0.104749  |
| 0.222319 | 0.210664 | 0.205711  | 0.207022 | 0.199155  | 0.203526 | 0.208333  |
| 0.131265 | 0.113491 | 0.108246  | 0.115093 | 0.113345  | 0.110723 | 0.116987  |
| 0.201777 | 0.19595  | 0.189831  | 0.191142 | 0.183858  | 0.187354 | 0.190122  |
| 0.135635 | 0.107663 | 0.106206  | 0.104312 | 0.0999417 | 0.101981 | 0.105332  |
| 0.135927 | 0.121358 | 0.121066  | 0.120921 | 0.120629  | 0.122378 | 0.125728  |
| 0.144376 | 0.125728 | 0.119027  | 0.12704  | 0.118007  | 0.119755 | 0.124272  |
| 0.137529 | 0.117133 | 0.111014  | 0.118153 | 0.108246  | 0.113782 | 0.117133  |
| 0.139714 | 0.126311 | 0.119901  | 0.128205 | 0.117424  | 0.115967 | 0.120192  |
| 0.135927 | 0.122232 | 0.117279  | 0.125    | 0.113928  | 0.114219 | 0.117861  |
| 0.135927 | 0.112325 | 0.112034  | 0.116259 | 0.113054  | 0.11451  | 0.116404  |
| 0.140734 | 0.104021 | 0.104895  | 0.107955 | 0.102127  | 0.102418 | 0.104021  |
| 0.144231 | 0.126457 | 0.121212  | 0.125728 | 0.120484  | 0.121941 | 0.12296   |
| 0.131847 | 0.114948 | 0.108246  | 0.11451  | 0.113345  | 0.106352 | 0.114365  |
| 0.255682 | 0.256847 | 0.251311  | 0.252622 | 0.245047  | 0.246795 | 0.251894  |
| 0.13243  | 0.118735 | 0.114948  | 0.118007 | 0.113345  | 0.113928 | 0.116113  |
| 0.199883 | 0.18852  | 0.181527  | 0.18546  | 0.177885  | 0.183129 | 0.183858  |
| 0.202943 | 0.19391  | 0.184878  | 0.190268 | 0.184149  | 0.187063 | 0.188083  |
| 0.132867 | 0.116259 | 0.115385  | 0.121358 | 0.11116   | 0.117279 | 0.120047  |
| 0.119755 | 0.11014  | 0.113054  | 0.113782 | 0.101253  | 0.108537 | 0.105186  |
| 0.136072 | 0.123252 | 0.122378  | 0.120775 | 0.118153  | 0.121066 | 0.123834  |
| 0.131702 | 0.115385 | 0.109848  | 0.114948 | 0.107663  | 0.107663 | 0.110723  |
| 0.130099 | 0.11116  | 0.109411  | 0.109266 | 0.106352  | 0.107517 | 0.110577  |
| 0.127185 | 0.10271  | 0.0989219 | 0.103438 | 0.0996503 | 0.097028 | 0.0986305 |
| 0.134907 | 0.123543 | 0.120047  | 0.126894 | 0.113782  | 0.11757  | 0.120047  |

|          |          |           |          |           |           |           |
|----------|----------|-----------|----------|-----------|-----------|-----------|
| 0.143357 | 0.132576 | 0.128497  | 0.134761 | 0.12398   | 0.12398   | 0.129371  |
| 0.131556 | 0.113491 | 0.113199  | 0.116841 | 0.112179  | 0.112471  | 0.117279  |
| 0.141463 | 0.132721 | 0.126603  | 0.13141  | 0.122669  | 0.125     | 0.127185  |
| 0.13345  | 0.109557 | 0.109266  | 0.114656 | 0.108246  | 0.10708   | 0.111888  |
| 0.145105 | 0.124417 | 0.122378  | 0.128059 | 0.121941  | 0.121649  | 0.125291  |
| 0.137966 | 0.117861 | 0.113491  | 0.120921 | 0.106352  | 0.112471  | 0.112034  |
| 0.125874 | 0.110431 | 0.10373   | 0.110577 | 0.107663  | 0.103875  | 0.111888  |
| 0.127185 | 0.116404 | 0.116113  | 0.120921 | 0.11451   | 0.115676  | 0.122523  |
| 0.131556 | 0.112617 | 0.111451  | 0.113054 | 0.111305  | 0.109848  | 0.116113  |
| 0.144668 | 0.128934 | 0.124272  | 0.125583 | 0.119464  | 0.125874  | 0.12398   |
| 0.201049 | 0.187937 | 0.181818  | 0.187209 | 0.175554  | 0.180507  | 0.182984  |
| 0.142337 | 0.136801 | 0.131556  | 0.138112 | 0.128497  | 0.129953  | 0.132139  |
| 0.140297 | 0.124272 | 0.118153  | 0.12704  | 0.113345  | 0.116841  | 0.116987  |
| 0.140152 | 0.120629 | 0.115676  | 0.11961  | 0.114948  | 0.116696  | 0.120629  |
| 0.13447  | 0.108829 | 0.10912   | 0.112471 | 0.10373   | 0.109557  | 0.108246  |
| 0.134324 | 0.115676 | 0.11014   | 0.120775 | 0.107955  | 0.111742  | 0.113928  |
| 0.140297 | 0.122232 | 0.116404  | 0.128788 | 0.111597  | 0.114802  | 0.119901  |
| 0.203671 | 0.193765 | 0.189394  | 0.191871 | 0.182838  | 0.188957  | 0.189685  |
| 0.133741 | 0.121212 | 0.115967  | 0.122815 | 0.114365  | 0.114948  | 0.117424  |
| 0.128059 | 0.110286 | 0.103293  | 0.109848 | 0.102855  | 0.101107  | 0.106206  |
| 0.140297 | 0.12398  | 0.119901  | 0.126748 | 0.119172  | 0.119464  | 0.121358  |
| 0.204837 | 0.194056 | 0.192016  | 0.195076 | 0.183421  | 0.188666  | 0.193182  |
| 0.125437 | 0.105915 | 0.109411  | 0.109557 | 0.0996503 | 0.106935  | 0.105915  |
| 0.125583 | 0.107517 | 0.0990676 | 0.105915 | 0.103001  | 0.100962  | 0.101107  |
| 0.141317 | 0.124417 | 0.120047  | 0.129516 | 0.116696  | 0.118444  | 0.120338  |
| 0.135635 | 0.112617 | 0.105041  | 0.110431 | 0.106935  | 0.105769  | 0.11116   |
| 0.201486 | 0.192453 | 0.185752  | 0.190268 | 0.181818  | 0.183566  | 0.189831  |
| 0.126894 | 0.105624 | 0.0980478 | 0.106061 | 0.0996503 | 0.0976107 | 0.100379  |
| 0.133887 | 0.10912  | 0.108246  | 0.109848 | 0.103438  | 0.104895  | 0.10912   |
| 0.126603 | 0.108537 | 0.109411  | 0.110723 | 0.100524  | 0.106352  | 0.106498  |
| 0.137092 | 0.120775 | 0.114073  | 0.122086 | 0.11451   | 0.113054  | 0.116404  |
| 0.143357 | 0.104895 | 0.105478  | 0.109994 | 0.101253  | 0.101253  | 0.105769  |
| 0.129662 | 0.106643 | 0.101981  | 0.109703 | 0.10708   | 0.103584  | 0.1081    |
| 0.131993 | 0.111597 | 0.114219  | 0.114073 | 0.11116   | 0.112617  | 0.115385  |
| 0.133159 | 0.115093 | 0.112762  | 0.118735 | 0.11116   | 0.112908  | 0.116841  |
| 0.154575 | 0.146707 | 0.135344  | 0.139277 | 0.13549   | 0.137821  | 0.141463  |
| 0.247232 | 0.240822 | 0.233537  | 0.236597 | 0.228147  | 0.232226  | 0.232372  |
| 0.13039  | 0.122815 | 0.122232  | 0.123252 | 0.120629  | 0.118881  | 0.128059  |
| 0.144376 | 0.10912  | 0.106498  | 0.108974 | 0.101981  | 0.105186  | 0.105041  |
| 0.134033 | 0.122669 | 0.115385  | 0.122523 | 0.112034  | 0.112034  | 0.116259  |
| 0.142045 | 0.121649 | 0.11757   | 0.119464 | 0.113345  | 0.115676  | 0.118444  |
| 0.131119 | 0.106352 | 0.10169   | 0.102418 | 0.0948427 | 0.0989219 | 0.0999417 |
| 0.132867 | 0.11655  | 0.113928  | 0.114365 | 0.105624  | 0.106498  | 0.116259  |
| 0.137092 | 0.124854 | 0.119318  | 0.125    | 0.116841  | 0.116259  | 0.116987  |

|          |           |           |          |           |           |           |
|----------|-----------|-----------|----------|-----------|-----------|-----------|
| 0.125    | 0.106643  | 0.101981  | 0.109994 | 0.104167  | 0.101836  | 0.104895  |
| 0.137821 | 0.113636  | 0.102855  | 0.114656 | 0.102418  | 0.104167  | 0.113345  |
| 0.244027 | 0.241987  | 0.238782  | 0.237471 | 0.228438  | 0.233683  | 0.23616   |
| 0.119755 | 0.106935  | 0.108683  | 0.111742 | 0.0968823 | 0.106206  | 0.104021  |
| 0.127914 | 0.0976107 | 0.0917832 | 0.10271  | 0.0957168 | 0.0919289 | 0.097028  |
| 0.128642 | 0.110868  | 0.113199  | 0.111597 | 0.111305  | 0.110723  | 0.11553   |
| 0.147145 | 0.128788  | 0.123834  | 0.125146 | 0.119318  | 0.123106  | 0.126748  |
| 0.13345  | 0.12704   | 0.127622  | 0.128642 | 0.12602   | 0.125728  | 0.130828  |
| 0.132867 | 0.119464  | 0.118881  | 0.121358 | 0.112617  | 0.11961   | 0.120921  |
| 0.136072 | 0.12296   | 0.117716  | 0.12602  | 0.11116   | 0.116113  | 0.116259  |
| 0.131265 | 0.10912   | 0.10708   | 0.113636 | 0.103438  | 0.106352  | 0.11116   |
| 0.234703 | 0.238199  | 0.23208   | 0.231935 | 0.224359  | 0.229604  | 0.232663  |
| 0.141463 | 0.129808  | 0.122815  | 0.13141  | 0.119172  | 0.120047  | 0.122815  |
| 0.124126 | 0.105769  | 0.0973193 | 0.105041 | 0.100087  | 0.0962995 | 0.10169   |
| 0.129953 | 0.104021  | 0.0973193 | 0.105332 | 0.0965909 | 0.0983392 | 0.104021  |
| 0.141171 | 0.123397  | 0.11116   | 0.114219 | 0.110723  | 0.1081    | 0.118735  |
| 0.139423 | 0.109994  | 0.109411  | 0.11655  | 0.109557  | 0.108392  | 0.112325  |
| 0.129516 | 0.112908  | 0.112034  | 0.112762 | 0.111014  | 0.113928  | 0.11553   |
| 0.126603 | 0.106206  | 0.101544  | 0.106061 | 0.104895  | 0.100816  | 0.106498  |
| 0.129371 | 0.112471  | 0.105769  | 0.109411 | 0.109994  | 0.106498  | 0.107226  |
| 0.124709 | 0.103438  | 0.097028  | 0.100962 | 0.0968823 | 0.097465  | 0.0987762 |
| 0.133596 | 0.114365  | 0.111451  | 0.114219 | 0.109557  | 0.112471  | 0.114365  |
| 0.144376 | 0.113491  | 0.112617  | 0.113928 | 0.109266  | 0.109848  | 0.114365  |
| 0.149184 | 0.118881  | 0.118298  | 0.120192 | 0.114656  | 0.114365  | 0.119464  |
| 0.1419   | 0.12704   | 0.123834  | 0.132721 | 0.121941  | 0.122815  | 0.130828  |
| 0.14831  | 0.130245  | 0.128497  | 0.133596 | 0.124272  | 0.126603  | 0.130828  |
| 0.146125 | 0.115239  | 0.112908  | 0.115676 | 0.113928  | 0.112179  | 0.114365  |
| 0.126311 | 0.107372  | 0.105915  | 0.107517 | 0.103438  | 0.104604  | 0.107955  |
| 0.136072 | 0.11451   | 0.111888  | 0.113199 | 0.114656  | 0.109411  | 0.113928  |
| 0.092803 | 0.113199  | 0.112617  | 0.120921 | 0.11859   | 0.113054  | 0.116696  |
| 0.2213   | 0.210519  | 0.204108  | 0.208333 | 0.198427  | 0.201923  | 0.206148  |
| 0.137675 | 0.12398   | 0.124272  | 0.128205 | 0.120047  | 0.12296   | 0.124854  |
| 0.136509 | 0.102418  | 0.0983392 | 0.104604 | 0.102855  | 0.0958625 | 0.10271   |
| 0.13549  | 0.118298  | 0.120629  | 0.121066 | 0.11757   | 0.119027  | 0.122669  |
| 0.235577 | 0.228584  | 0.222756  | 0.222902 | 0.215326  | 0.221445  | 0.221591  |
| 0.222756 | 0.216055  | 0.211393  | 0.214452 | 0.205711  | 0.210373  | 0.212558  |
| 0.127331 | 0.110723  | 0.104021  | 0.109994 | 0.105915  | 0.105041  | 0.107517  |
| 0.255973 | 0.254808  | 0.250728  | 0.251457 | 0.243881  | 0.248252  | 0.249854  |
| 0.124563 | 0.107955  | 0.105624  | 0.109848 | 0.102273  | 0.105186  | 0.108246  |
| 0.146999 | 0.127768  | 0.129808  | 0.134615 | 0.125     | 0.12704   | 0.134178  |
| 0.121066 | 0.10912   | 0.111742  | 0.112762 | 0.0996503 | 0.108683  | 0.106789  |
| 0.141317 | 0.112762  | 0.111014  | 0.114073 | 0.110577  | 0.109411  | 0.113054  |
| 0.201486 | 0.192453  | 0.1875    | 0.189685 | 0.183566  | 0.185315  | 0.190414  |
| 0.125874 | 0.110723  | 0.106061  | 0.114365 | 0.103293  | 0.103875  | 0.114802  |

|          |           |           |           |           |           |           |
|----------|-----------|-----------|-----------|-----------|-----------|-----------|
| 0.20979  | 0.200758  | 0.196387  | 0.196241  | 0.189831  | 0.193619  | 0.197261  |
| 0.130536 | 0.111305  | 0.113636  | 0.11961   | 0.108829  | 0.112617  | 0.114802  |
| 0.131119 | 0.110431  | 0.10169   | 0.109411  | 0.104458  | 0.103001  | 0.105186  |
| 0.132576 | 0.12296   | 0.120629  | 0.12398   | 0.112617  | 0.11553   | 0.123834  |
| 0.134907 | 0.115093  | 0.110431  | 0.111451  | 0.106206  | 0.10708   | 0.114802  |
| 0.128642 | 0.105915  | 0.105915  | 0.107517  | 0.104021  | 0.104895  | 0.108246  |
| 0.132721 | 0.113491  | 0.110868  | 0.113636  | 0.107809  | 0.109848  | 0.109703  |
| 0.122523 | 0.106206  | 0.107372  | 0.106643  | 0.0999417 | 0.104021  | 0.103875  |
| 0.131119 | 0.114802  | 0.109266  | 0.120192  | 0.108537  | 0.108829  | 0.112179  |
| 0.130682 | 0.102418  | 0.0983392 | 0.102855  | 0.10169   | 0.0996503 | 0.104458  |
| 0.12602  | 0.107372  | 0.107663  | 0.113928  | 0.107517  | 0.106061  | 0.115239  |
| 0.120629 | 0.106352  | 0.11014   | 0.108537  | 0.0989219 | 0.10708   | 0.106061  |
| 0.138258 | 0.122232  | 0.116404  | 0.118298  | 0.113636  | 0.117424  | 0.119027  |
| 0.141463 | 0.130973  | 0.121066  | 0.130245  | 0.121212  | 0.121212  | 0.122815  |
| 0.13549  | 0.116259  | 0.111597  | 0.117861  | 0.110868  | 0.112034  | 0.11451   |
| 0.132721 | 0.11116   | 0.105915  | 0.106352  | 0.100816  | 0.105186  | 0.104749  |
| 0.12704  | 0.107226  | 0.106352  | 0.107372  | 0.103584  | 0.105915  | 0.110723  |
| 0.128788 | 0.108392  | 0.100816  | 0.106498  | 0.101836  | 0.101544  | 0.101399  |
| 0.138695 | 0.105186  | 0.102564  | 0.105915  | 0.10067   | 0.100962  | 0.104021  |
| 0.136509 | 0.118444  | 0.110868  | 0.125291  | 0.106643  | 0.113054  | 0.113491  |
| 0.141754 | 0.117279  | 0.114656  | 0.11859   | 0.114219  | 0.114802  | 0.11757   |
| 0.137238 | 0.118881  | 0.11451   | 0.123106  | 0.114656  | 0.114365  | 0.115676  |
| 0.14292  | 0.131556  | 0.125146  | 0.134907  | 0.12296   | 0.123834  | 0.126603  |
| 0.148456 | 0.139132  | 0.133013  | 0.137821  | 0.129953  | 0.129662  | 0.133887  |
| 0.115093 | 0.0941142 | 0.0850816 | 0.0968823 | 0.0910548 | 0.0895979 | 0.0949883 |
| 0.135198 | 0.115385  | 0.113345  | 0.113199  | 0.111742  | 0.112034  | 0.116259  |
| 0.128351 | 0.10912   | 0.103875  | 0.107517  | 0.0964452 | 0.0984848 | 0.105041  |
| 0.146416 | 0.118444  | 0.11757   | 0.120047  | 0.111597  | 0.115385  | 0.116113  |
| 0.120047 | 0.111305  | 0.113928  | 0.112325  | 0.104749  | 0.111742  | 0.108683  |
| 0.147436 | 0.134324  | 0.132867  | 0.139132  | 0.123397  | 0.13039   | 0.133159  |
| 0.141317 | 0.132867  | 0.132576  | 0.131556  | 0.127477  | 0.130099  | 0.136072  |
| 0.142628 | 0.121941  | 0.117279  | 0.122669  | 0.115676  | 0.118007  | 0.122523  |
| 0.131702 | 0.117424  | 0.108392  | 0.117861  | 0.107955  | 0.109703  | 0.115093  |
| 0.140006 | 0.112325  | 0.106498  | 0.101981  | 0.10169   | 0.103438  | 0.10708   |
| 0.142628 | 0.126603  | 0.121358  | 0.126166  | 0.119464  | 0.12296   | 0.12602   |
| 0.217366 | 0.210373  | 0.205128  | 0.206731  | 0.202943  | 0.202943  | 0.207751  |
| 0.134907 | 0.110723  | 0.107226  | 0.108246  | 0.0983392 | 0.108246  | 0.104895  |
| 0.135635 | 0.116404  | 0.112325  | 0.120629  | 0.110431  | 0.113636  | 0.118444  |
| 0.135781 | 0.107517  | 0.104021  | 0.107663  | 0.103001  | 0.101836  | 0.1081    |
| 0.136218 | 0.11757   | 0.112908  | 0.117716  | 0.111597  | 0.11451   | 0.116987  |
| 0.136946 | 0.115967  | 0.118007  | 0.123689  | 0.114656  | 0.119318  | 0.122669  |
| 0.136364 | 0.120338  | 0.116259  | 0.122232  | 0.115239  | 0.114948  | 0.12296   |
| 0.139714 | 0.124272  | 0.119318  | 0.125     | 0.116841  | 0.117133  | 0.124272  |
| 0.13986  | 0.120629  | 0.113636  | 0.11961   | 0.111451  | 0.11553   | 0.118881  |

|          |           |           |           |           |           |           |
|----------|-----------|-----------|-----------|-----------|-----------|-----------|
| 0.12704  | 0.0967366 | 0.0955711 | 0.0986305 | 0.0945513 | 0.0933858 | 0.0987762 |
| 0.14627  | 0.111305  | 0.11014   | 0.111742  | 0.107955  | 0.108246  | 0.112179  |
| 0.127622 | 0.115676  | 0.112179  | 0.116404  | 0.105624  | 0.108246  | 0.117716  |
| 0.129225 | 0.112617  | 0.114948  | 0.118298  | 0.112762  | 0.113636  | 0.119318  |
| 0.18852  | 0.176282  | 0.173951  | 0.175845  | 0.168561  | 0.171474  | 0.172203  |
| 0.135198 | 0.120629  | 0.11451   | 0.123106  | 0.114948  | 0.115239  | 0.113928  |
| 0.148164 | 0.115239  | 0.11553   | 0.117424  | 0.111888  | 0.111597  | 0.114365  |
| 0.129371 | 0.110723  | 0.105769  | 0.108537  | 0.109703  | 0.106498  | 0.113345  |
| 0.131847 | 0.114073  | 0.111742  | 0.111888  | 0.114219  | 0.111305  | 0.114948  |
| 0.125437 | 0.10271   | 0.099796  | 0.108974  | 0.0999417 | 0.0981935 | 0.110577  |
| 0.121358 | 0.101544  | 0.104167  | 0.108974  | 0.100233  | 0.102564  | 0.112617  |
| 0.129808 | 0.109703  | 0.107372  | 0.112762  | 0.106352  | 0.107809  | 0.113199  |
| 0.122815 | 0.0962995 | 0.0890152 | 0.0871212 | 0.0894522 | 0.0882867 | 0.0901807 |
| 0.134761 | 0.116696  | 0.117861  | 0.120629  | 0.114219  | 0.112762  | 0.11757   |
| 0.13549  | 0.125874  | 0.124709  | 0.12398   | 0.119027  | 0.12398   | 0.121795  |
| 0.132721 | 0.109703  | 0.103293  | 0.102564  | 0.103147  | 0.103438  | 0.106789  |
| 0.129371 | 0.110431  | 0.109266  | 0.114365  | 0.108246  | 0.109703  | 0.113636  |
| 0.112034 | 0.0968823 | 0.0936772 | 0.0976107 | 0.0903263 | 0.0920746 | 0.0980478 |
| 0.121358 | 0.106498  | 0.102127  | 0.106352  | 0.107226  | 0.105478  | 0.112617  |
| 0.136801 | 0.122232  | 0.120484  | 0.122086  | 0.113636  | 0.116841  | 0.119901  |
| 0.120484 | 0.103001  | 0.100087  | 0.103147  | 0.102273  | 0.0990676 | 0.106206  |
| 0.122815 | 0.104458  | 0.101253  | 0.106643  | 0.10373   | 0.103147  | 0.112325  |
| 0.127185 | 0.107663  | 0.106498  | 0.111597  | 0.103147  | 0.104021  | 0.111451  |
| 0.127914 | 0.116259  | 0.110431  | 0.123106  | 0.116696  | 0.108829  | 0.125291  |
| 0.128788 | 0.0990676 | 0.101107  | 0.102127  | 0.0942599 | 0.0965909 | 0.101981  |
| 0.141026 | 0.130536  | 0.12704   | 0.128351  | 0.119318  | 0.125437  | 0.120047  |
| 0.143939 | 0.125291  | 0.117133  | 0.119901  | 0.112908  | 0.117861  | 0.116259  |
| 0.126166 | 0.109266  | 0.105769  | 0.108829  | 0.102418  | 0.105624  | 0.110723  |
| 0.146416 | 0.128059  | 0.119901  | 0.121795  | 0.122378  | 0.118007  | 0.122523  |
| 0.136801 | 0.112617  | 0.116404  | 0.120047  | 0.108392  | 0.115385  | 0.120484  |
| 0.104167 | 0.122815  | 0.121941  | 0.125291  | 0.122086  | 0.121795  | 0.12398   |
| 0.133013 | 0.10912   | 0.105041  | 0.111014  | 0.103147  | 0.104895  | 0.103293  |
| 0.150058 | 0.134324  | 0.135198  | 0.138549  | 0.135635  | 0.13447   | 0.137238  |
| 0.140734 | 0.128205  | 0.125583  | 0.126603  | 0.116987  | 0.123106  | 0.124709  |
| 0.13549  | 0.106643  | 0.110723  | 0.105624  | 0.100962  | 0.105041  | 0.107226  |
| 0.132867 | 0.113928  | 0.112179  | 0.115822  | 0.109703  | 0.112908  | 0.118007  |
| 0.121358 | 0.101253  | 0.0968823 | 0.101107  | 0.0958625 | 0.0984848 | 0.101253  |
| 0.126166 | 0.101399  | 0.0996503 | 0.103293  | 0.10067   | 0.10067   | 0.103438  |
| 0.115822 | 0.088141  | 0.0470571 | 0.0777972 | 0.0824592 | 0.0463287 | 0.0890152 |
| 0.124563 | 0.114948  | 0.112325  | 0.113054  | 0.111014  | 0.110431  | 0.114656  |
| 0.134033 | 0.120921  | 0.119755  | 0.120192  | 0.118444  | 0.120775  | 0.122669  |
| 0.131993 | 0.116259  | 0.11655   | 0.116696  | 0.113491  | 0.115239  | 0.115967  |
| 0.126166 | 0.103438  | 0.100233  | 0.101836  | 0.0971737 | 0.101544  | 0.0996503 |
| 0.126894 | 0.104167  | 0.0992133 | 0.100233  | 0.103147  | 0.102273  | 0.104167  |



|          |          |          |          |           |          |          |
|----------|----------|----------|----------|-----------|----------|----------|
| 0.127622 | 0.115093 | 0.108392 | 0.114948 | 0.108829  | 0.108829 | 0.114219 |
| 0.126748 | 0.102564 | 0.104604 | 0.104458 | 0.0986305 | 0.105915 | 0.100233 |
| 0.130099 | 0.110577 | 0.10912  | 0.109848 | 0.113345  | 0.11014  | 0.114073 |
| 0.130099 | 0.109411 | 0.103293 | 0.110723 | 0.106643  | 0.104895 | 0.107955 |
| 0.13345  | 0.120338 | 0.117716 | 0.121941 | 0.112908  | 0.118444 | 0.120921 |
| 0.125    | 0.108974 | 0.112179 | 0.115822 | 0.106498  | 0.110868 | 0.110723 |
| 0.122669 | 0.107517 | 0.104604 | 0.108246 | 0.102127  | 0.105332 | 0.109266 |
| 0.125291 | 0.111597 | 0.10373  | 0.112908 | 0.103875  | 0.103293 | 0.110431 |
| 0.130099 | 0.115239 | 0.114948 | 0.120047 | 0.111014  | 0.115093 | 0.122232 |
| 0.130536 | 0.110723 | 0.111888 | 0.114948 | 0.112325  | 0.11116  | 0.115676 |
| 0.142191 | 0.125291 | 0.123834 | 0.126603 | 0.115239  | 0.123106 | 0.119755 |
| 0.126166 | 0.106935 | 0.106935 | 0.109411 | 0.101253  | 0.103875 | 0.111888 |
| 0.130099 | 0.124854 | 0.121066 | 0.129079 | 0.119464  | 0.121212 | 0.126603 |

| <b>TDr_09_00064</b> | <b>TDr_09_00070</b> | <b>TDr_09_00071</b> | <b>TDr_09_00082</b> | <b>TDr_09_00091</b> | <b>TDr_09_00104</b> | <b>TDr_09_00107</b> |
|---------------------|---------------------|---------------------|---------------------|---------------------|---------------------|---------------------|
| 0.135344            | 0.141754            | 0.117716            | 0.116113            | 0.133887            | 0.113199            | 0.145979            |
| 0.123834            | 0.136946            | 0.120484            | 0.114802            | 0.131702            | 0.110431            | 0.133304            |
| 0.121795            | 0.134324            | 0.112617            | 0.111305            | 0.125874            | 0.104021            | 0.13447             |
| 0.127914            | 0.136946            | 0.120192            | 0.111888            | 0.134324            | 0.111888            | 0.142337            |
| 0.138986            | 0.139569            | 0.129225            | 0.133159            | 0.138695            | 0.128788            | 0.149038            |
| 0.136072            | 0.141026            | 0.136218            | 0.12704             | 0.144522            | 0.125583            | 0.148747            |
| 0.124272            | 0.128351            | 0.113636            | 0.112908            | 0.128059            | 0.113491            | 0.137238            |
| 0.12602             | 0.135344            | 0.113928            | 0.110577            | 0.128059            | 0.105332            | 0.141026            |
| 0.121212            | 0.126748            | 0.109703            | 0.10373             | 0.123252            | 0.0990676           | 0.135052            |
| 0.119318            | 0.131265            | 0.115676            | 0.110286            | 0.128351            | 0.10912             | 0.138986            |
| 0.128788            | 0.138112            | 0.116113            | 0.1081              | 0.129953            | 0.109848            | 0.139423            |
| 0.119027            | 0.126603            | 0.107226            | 0.106789            | 0.117861            | 0.0957168           | 0.125583            |
| 0.12602             | 0.129808            | 0.116259            | 0.108829            | 0.129225            | 0.110868            | 0.13986             |
| 0.14627             | 0.15676             | 0.139714            | 0.130828            | 0.152972            | 0.13345             | 0.160402            |
| 0.133013            | 0.142337            | 0.130536            | 0.122815            | 0.144085            | 0.125437            | 0.138986            |
| 0.114802            | 0.122378            | 0.111116            | 0.106935            | 0.123543            | 0.106643            | 0.128351            |
| 0.116696            | 0.129516            | 0.106935            | 0.10067             | 0.11961             | 0.0962995           | 0.133159            |
| 0.147436            | 0.151224            | 0.146125            | 0.137238            | 0.152098            | 0.138986            | 0.159819            |
| 0.118298            | 0.130245            | 0.109411            | 0.106061            | 0.12296             | 0.100816            | 0.13039             |
| 0.209499            | 0.217949            | 0.209062            | 0.20134             | 0.215909            | 0.20338             | 0.216346            |
| 0.128642            | 0.138549            | 0.122378            | 0.120775            | 0.139132            | 0.117279            | 0.14627             |
| 0.125583            | 0.131993            | 0.114948            | 0.118007            | 0.130828            | 0.115385            | 0.141463            |
| 0.114365            | 0.120192            | 0.107226            | 0.0919289           | 0.121649            | 0.0968823           | 0.128205            |
| 0.106352            | 0.115093            | 0.0986305           | 0.104312            | 0.107809            | 0.0990676           | 0.124272            |
| 0.114365            | 0.127185            | 0.101981            | 0.0936772           | 0.119901            | 0.095134            | 0.128497            |
| 0.128934            | 0.132721            | 0.125874            | 0.123689            | 0.139714            | 0.121358            | 0.143939            |
| 0.125146            | 0.13447             | 0.11655             | 0.114073            | 0.127477            | 0.111116            | 0.134907            |
| 0.101836            | 0.114073            | 0.106352            | 0.100087            | 0.108537            | 0.100379            | 0.122378            |
| 0.129516            | 0.130973            | 0.122378            | 0.128934            | 0.130099            | 0.118735            | 0.138986            |
| 0.131847            | 0.13447             | 0.120921            | 0.123106            | 0.12398             | 0.109411            | 0.140152            |
| 0.129953            | 0.136072            | 0.120775            | 0.115385            | 0.132867            | 0.115967            | 0.143502            |
| 0.117279            | 0.121358            | 0.11655             | 0.112034            | 0.125146            | 0.107955            | 0.134033            |
| 0.117279            | 0.127185            | 0.11014             | 0.105332            | 0.121066            | 0.103001            | 0.13141             |
| 0.127185            | 0.134178            | 0.113345            | 0.114073            | 0.127768            | 0.10708             | 0.138403            |
| 0.123252            | 0.13549             | 0.116404            | 0.115967            | 0.129371            | 0.109557            | 0.135052            |
| 0.129225            | 0.133304            | 0.11859             | 0.121358            | 0.13039             | 0.11961             | 0.139277            |
| 0.137821            | 0.144522            | 0.126603            | 0.128788            | 0.138695            | 0.12704             | 0.149913            |
| 0.129516            | 0.13447             | 0.114802            | 0.115239            | 0.128351            | 0.111451            | 0.138695            |
| 0.0995047           | 0.109703            | 0.100816            | 0.0907634           | 0.104749            | 0.0939685           | 0.124709            |
| 0.112908            | 0.118735            | 0.104895            | 0.103875            | 0.114073            | 0.108537            | 0.128497            |
| 0.105915            | 0.119027            | 0.101399            | 0.0916375           | 0.115239            | 0.0861014           | 0.115385            |
| 0.118735            | 0.128351            | 0.123834            | 0.120192            | 0.130682            | 0.122815            | 0.128497            |

|          |           |           |           |           |           |          |
|----------|-----------|-----------|-----------|-----------|-----------|----------|
| 0.129516 | 0.13039   | 0.12296   | 0.122815  | 0.132139  | 0.122523  | 0.129953 |
| 0.113345 | 0.122086  | 0.103293  | 0.100524  | 0.120921  | 0.0973193 | 0.11961  |
| 0.11655  | 0.125291  | 0.104167  | 0.106352  | 0.115676  | 0.0952797 | 0.127477 |
| 0.126603 | 0.136509  | 0.115967  | 0.114948  | 0.124563  | 0.109994  | 0.13986  |
| 0.090472 | 0.0936772 | 0.0935315 | 0.0843531 | 0.0922203 | 0.083479  | 0.102855 |
| 0.125583 | 0.134033  | 0.11553   | 0.121503  | 0.127622  | 0.11451   | 0.130099 |
| 0.110723 | 0.11859   | 0.099796  | 0.0990676 | 0.113636  | 0.097028  | 0.123397 |
| 0.114365 | 0.123106  | 0.101399  | 0.0992133 | 0.118153  | 0.0930944 | 0.121212 |
| 0.15035  | 0.153263  | 0.142628  | 0.143939  | 0.145979  | 0.140443  | 0.160402 |
| 0.108683 | 0.115093  | 0.100087  | 0.105478  | 0.111014  | 0.107809  | 0.122815 |
| 0.107372 | 0.116696  | 0.0987762 | 0.095134  | 0.112908  | 0.0954254 | 0.117424 |
| 0.128642 | 0.137383  | 0.127622  | 0.122523  | 0.137383  | 0.123106  | 0.141026 |
| 0.124854 | 0.124854  | 0.111597  | 0.104167  | 0.122523  | 0.103875  | 0.130536 |
| 0.104458 | 0.10067   | 0.0914918 | 0.105915  | 0.101253  | 0.101253  | 0.111888 |
| 0.121503 | 0.123834  | 0.104458  | 0.109557  | 0.117716  | 0.1081    | 0.124854 |
| 0.111014 | 0.122378  | 0.104749  | 0.105186  | 0.122086  | 0.0984848 | 0.122815 |
| 0.11655  | 0.117424  | 0.104167  | 0.105769  | 0.113636  | 0.100816  | 0.121358 |
| 0.123106 | 0.127185  | 0.111597  | 0.112908  | 0.122815  | 0.109994  | 0.129953 |
| 0.121066 | 0.129516  | 0.122669  | 0.120192  | 0.129516  | 0.115239  | 0.130245 |
| 0.123106 | 0.129808  | 0.12704   | 0.121649  | 0.128642  | 0.126894  | 0.137529 |
| 0.15472  | 0.157343  | 0.158071  | 0.150641  | 0.162587  | 0.151807  | 0.160111 |
| 0.111305 | 0.118007  | 0.100379  | 0.0984848 | 0.111305  | 0.0979021 | 0.121941 |
| 0.1081   | 0.114802  | 0.0919289 | 0.0958625 | 0.103438  | 0.0941142 | 0.122523 |
| 0.108683 | 0.115093  | 0.0989219 | 0.0955711 | 0.113928  | 0.0920746 | 0.118153 |
| 0.143794 | 0.151369  | 0.133741  | 0.136218  | 0.144668  | 0.129516  | 0.154138 |
| 0.114073 | 0.121358  | 0.100524  | 0.0992133 | 0.114948  | 0.0922203 | 0.123252 |
| 0.102855 | 0.104021  | 0.112617  | 0.0984848 | 0.112762  | 0.11014   | 0.109994 |
| 0.121212 | 0.131993  | 0.112325  | 0.116841  | 0.126748  | 0.111014  | 0.133013 |
| 0.110868 | 0.117279  | 0.103147  | 0.0983392 | 0.111451  | 0.0968823 | 0.119464 |
| 0.151078 | 0.156323  | 0.143065  | 0.142337  | 0.154283  | 0.141171  | 0.153846 |
| 0.116987 | 0.117861  | 0.0964452 | 0.0942599 | 0.114073  | 0.101253  | 0.126457 |
| 0.129953 | 0.129953  | 0.121941  | 0.124126  | 0.125583  | 0.114802  | 0.128351 |
| 0.11116  | 0.123397  | 0.111888  | 0.108537  | 0.11757   | 0.110577  | 0.125    |
| 0.116259 | 0.124417  | 0.103875  | 0.106061  | 0.119755  | 0.108974  | 0.134761 |
| 0.113928 | 0.117133  | 0.0922203 | 0.0964452 | 0.110431  | 0.0952797 | 0.122815 |
| 0.109848 | 0.117424  | 0.099796  | 0.0987762 | 0.114219  | 0.0967366 | 0.121066 |
| 0.115676 | 0.128205  | 0.119027  | 0.120629  | 0.124709  | 0.115385  | 0.128934 |
| 0.115239 | 0.121066  | 0.0949883 | 0.0995047 | 0.110868  | 0.0942599 | 0.125874 |
| 0.115676 | 0.126166  | 0.127185  | 0.117133  | 0.122669  | 0.119755  | 0.130973 |
| 0.113928 | 0.122378  | 0.107663  | 0.10169   | 0.118007  | 0.105478  | 0.125437 |
| 0.106061 | 0.110431  | 0.0992133 | 0.100524  | 0.106643  | 0.102855  | 0.126603 |
| 0.112471 | 0.119755  | 0.0945513 | 0.0958625 | 0.11859   | 0.0967366 | 0.122523 |
| 0.113054 | 0.117716  | 0.103875  | 0.0973193 | 0.111014  | 0.103438  | 0.130682 |
| 0.106352 | 0.114219  | 0.103001  | 0.0984848 | 0.115093  | 0.0958625 | 0.117279 |

|          |          |           |           |          |           |          |
|----------|----------|-----------|-----------|----------|-----------|----------|
| 0.1081   | 0.113345 | 0.0875583 | 0.0944056 | 0.112762 | 0.0888695 | 0.115822 |
| 0.121649 | 0.124272 | 0.114219  | 0.118444  | 0.121358 | 0.115239  | 0.13141  |
| 0.118444 | 0.126894 | 0.11014   | 0.0965909 | 0.125728 | 0.0983392 | 0.132284 |
| 0.115676 | 0.125583 | 0.108246  | 0.1081    | 0.123834 | 0.103147  | 0.133013 |
| 0.130828 | 0.136364 | 0.120192  | 0.126457  | 0.133741 | 0.120338  | 0.140589 |
| 0.131993 | 0.136946 | 0.122232  | 0.120921  | 0.131993 | 0.118881  | 0.142628 |
| 0.12704  | 0.125    | 0.124272  | 0.120047  | 0.126748 | 0.117424  | 0.133013 |
| 0.130099 | 0.136509 | 0.130536  | 0.124854  | 0.138549 | 0.124854  | 0.13549  |
| 0.127331 | 0.138403 | 0.110868  | 0.111305  | 0.125    | 0.109848  | 0.137092 |
| 0.187354 | 0.196096 | 0.181964  | 0.18007   | 0.191142 | 0.18007   | 0.196824 |
| 0.121941 | 0.130973 | 0.107809  | 0.106789  | 0.12602  | 0.103584  | 0.134033 |
| 0.130245 | 0.132867 | 0.126894  | 0.125291  | 0.136946 | 0.122669  | 0.135344 |
| 0.125874 | 0.132284 | 0.121066  | 0.120629  | 0.132284 | 0.113928  | 0.131847 |
| 0.141463 | 0.148456 | 0.125583  | 0.132721  | 0.135927 | 0.128934  | 0.148893 |
| 0.119172 | 0.123252 | 0.105332  | 0.100816  | 0.121503 | 0.0981935 | 0.127768 |
| 0.124709 | 0.129079 | 0.124563  | 0.11655   | 0.132284 | 0.117133  | 0.133013 |
| 0.11655  | 0.125    | 0.109703  | 0.105769  | 0.121503 | 0.108974  | 0.135635 |
| 0.122232 | 0.128934 | 0.117424  | 0.110577  | 0.127768 | 0.112908  | 0.130245 |
| 0.120484 | 0.128351 | 0.111014  | 0.104167  | 0.12398  | 0.106498  | 0.134615 |
| 0.127185 | 0.129225 | 0.117424  | 0.118444  | 0.131265 | 0.11961   | 0.13345  |
| 0.11757  | 0.124854 | 0.100233  | 0.095134  | 0.116696 | 0.0913462 | 0.127914 |
| 0.136655 | 0.140443 | 0.130099  | 0.12296   | 0.13549  | 0.127914  | 0.146416 |
| 0.121649 | 0.134761 | 0.112471  | 0.10912   | 0.123106 | 0.106789  | 0.136946 |
| 0.120629 | 0.117133 | 0.114948  | 0.112762  | 0.116259 | 0.11014   | 0.138258 |
| 0.133596 | 0.137092 | 0.121212  | 0.124854  | 0.133596 | 0.120192  | 0.143357 |
| 0.11961  | 0.12398  | 0.102564  | 0.102418  | 0.11757  | 0.102127  | 0.128497 |
| 0.146125 | 0.151078 | 0.136946  | 0.140589  | 0.148456 | 0.135052  | 0.15472  |
| 0.119755 | 0.128788 | 0.10912   | 0.106352  | 0.121795 | 0.1081    | 0.134178 |
| 0.121795 | 0.125    | 0.11116   | 0.102855  | 0.122086 | 0.102564  | 0.131847 |
| 0.105624 | 0.106498 | 0.0973193 | 0.0992133 | 0.114073 | 0.0989219 | 0.11859  |
| 0.144959 | 0.148747 | 0.137821  | 0.133887  | 0.146416 | 0.13243   | 0.153555 |
| 0.107372 | 0.113491 | 0.109557  | 0.0986305 | 0.114656 | 0.101253  | 0.118298 |
| 0.116696 | 0.121066 | 0.106643  | 0.101836  | 0.121941 | 0.100087  | 0.129371 |
| 0.121649 | 0.121066 | 0.107809  | 0.103584  | 0.120192 | 0.101253  | 0.127914 |
| 0.132867 | 0.133159 | 0.113782  | 0.112471  | 0.130245 | 0.1081    | 0.142337 |
| 0.126311 | 0.135344 | 0.118881  | 0.117279  | 0.133887 | 0.11757   | 0.139277 |
| 0.126748 | 0.129953 | 0.111451  | 0.108392  | 0.127914 | 0.109848  | 0.135927 |
| 0.111742 | 0.119901 | 0.101399  | 0.0939685 | 0.11757  | 0.0884324 | 0.12704  |
| 0.118735 | 0.126894 | 0.105478  | 0.101544  | 0.120484 | 0.0962995 | 0.134324 |
| 0.11655  | 0.121795 | 0.0995047 | 0.0984848 | 0.120629 | 0.0938228 | 0.129225 |
| 0.125    | 0.131702 | 0.112034  | 0.114219  | 0.123834 | 0.107517  | 0.13243  |
| 0.128642 | 0.128059 | 0.117716  | 0.119318  | 0.13243  | 0.114073  | 0.137821 |
| 0.119172 | 0.124417 | 0.10067   | 0.104895  | 0.121503 | 0.0920746 | 0.128642 |
| 0.114656 | 0.123397 | 0.100233  | 0.0992133 | 0.121066 | 0.0936772 | 0.128497 |

|           |           |           |           |           |           |           |
|-----------|-----------|-----------|-----------|-----------|-----------|-----------|
| 0.119027  | 0.131265  | 0.112471  | 0.112908  | 0.121649  | 0.105915  | 0.130245  |
| 0.115676  | 0.127914  | 0.097465  | 0.0981935 | 0.120047  | 0.0917832 | 0.123689  |
| 0.136072  | 0.142774  | 0.119901  | 0.120629  | 0.136364  | 0.112471  | 0.141171  |
| 0.141317  | 0.147145  | 0.13243   | 0.130245  | 0.141317  | 0.126166  | 0.152826  |
| 0.112762  | 0.128205  | 0.10912   | 0.105769  | 0.120338  | 0.102855  | 0.134178  |
| 0.119318  | 0.127768  | 0.102564  | 0.104458  | 0.124563  | 0.0942599 | 0.130245  |
| 0.114073  | 0.120775  | 0.0955711 | 0.100379  | 0.118153  | 0.0910548 | 0.127622  |
| 0.116113  | 0.118444  | 0.103438  | 0.0942599 | 0.114365  | 0.092803  | 0.128205  |
| 0.12398   | 0.133596  | 0.117133  | 0.120192  | 0.128059  | 0.117279  | 0.13986   |
| 0.114365  | 0.125146  | 0.101107  | 0.0957168 | 0.117861  | 0.0919289 | 0.126457  |
| 0.13986   | 0.1419    | 0.131265  | 0.130536  | 0.134033  | 0.12704   | 0.152826  |
| 0.141171  | 0.14729   | 0.129079  | 0.123397  | 0.137966  | 0.126603  | 0.143357  |
| 0.125728  | 0.134178  | 0.120047  | 0.118735  | 0.133887  | 0.114073  | 0.13986   |
| 0.127331  | 0.136072  | 0.116987  | 0.109557  | 0.129953  | 0.109266  | 0.130973  |
| 0.12296   | 0.133159  | 0.112617  | 0.106643  | 0.122378  | 0.106643  | 0.135927  |
| 0.11553   | 0.12602   | 0.0990676 | 0.0983392 | 0.119901  | 0.0939685 | 0.127331  |
| 0.104604  | 0.113636  | 0.099796  | 0.0958625 | 0.108974  | 0.094697  | 0.127185  |
| 0.111014  | 0.121212  | 0.097465  | 0.0955711 | 0.11014   | 0.0917832 | 0.123106  |
| 0.104895  | 0.115093  | 0.100087  | 0.0777972 | 0.111305  | 0.0850816 | 0.117279  |
| 0.0917832 | 0.0938228 | 0.0971737 | 0.0920746 | 0.0961538 | 0.0929487 | 0.10067   |
| 0.122232  | 0.131556  | 0.110723  | 0.105041  | 0.124563  | 0.103584  | 0.130245  |
| 0.130536  | 0.138112  | 0.129225  | 0.123543  | 0.139569  | 0.122086  | 0.144085  |
| 0.136801  | 0.141463  | 0.129662  | 0.133304  | 0.141463  | 0.127768  | 0.146562  |
| 0.198572  | 0.209062  | 0.193182  | 0.188374  | 0.207022  | 0.188666  | 0.207459  |
| 0.24155   | 0.249126  | 0.239365  | 0.233392  | 0.246212  | 0.234848  | 0.24461   |
| 0.110868  | 0.116113  | 0.102855  | 0.0977564 | 0.114365  | 0.0954254 | 0.127331  |
| 0.0894522 | 0.0938228 | 0.0785256 | 0.0842075 | 0.0914918 | 0.0757576 | 0.104749  |
| 0.0981935 | 0.109848  | 0.08581   | 0.0844988 | 0.0981935 | 0.0850816 | 0.111116  |
| 0.0938228 | 0.092366  | 0.0849359 | 0.0757576 | 0.0958625 | 0.0740093 | 0.0986305 |
| 0.13345   | 0.142191  | 0.134761  | 0.125874  | 0.139277  | 0.127331  | 0.138258  |
| 0.0871212 | 0.0996503 | 0.0855186 | 0.0769231 | 0.0958625 | 0.0766317 | 0.0989219 |
| 0.106498  | 0.113491  | 0.112179  | 0.114365  | 0.10708   | 0.110868  | 0.104312  |
| 0.0952797 | 0.102564  | 0.0828963 | 0.0836247 | 0.0920746 | 0.0801282 | 0.101253  |
| 0.099359  | 0.101981  | 0.0890152 | 0.0958625 | 0.090035  | 0.0967366 | 0.111451  |
| 0.103293  | 0.108829  | 0.110431  | 0.0989219 | 0.114073  | 0.10912   | 0.111014  |
| 0.0823135 | 0.0901807 | 0.105478  | 0.0939685 | 0.101253  | 0.0919289 | 0.101399  |
| 0.13039   | 0.136218  | 0.124126  | 0.119901  | 0.130099  | 0.11757   | 0.128497  |
| 0.0939685 | 0.103584  | 0.0882867 | 0.090472  | 0.109703  | 0.0785256 | 0.099359  |
| 0.0948427 | 0.100962  | 0.0751748 | 0.0831876 | 0.0936772 | 0.0782343 | 0.0976107 |
| 0.0847902 | 0.0976107 | 0.0907634 | 0.0871212 | 0.0999417 | 0.0810023 | 0.105332  |
| 0.0842075 | 0.0917832 | 0.0750291 | 0.0795455 | 0.0833333 | 0.0777972 | 0.101836  |
| 0.0920746 | 0.100233  | 0.0735723 | 0.0833333 | 0.0894522 | 0.0801282 | 0.0977564 |
| 0.0913462 | 0.100962  | 0.0868298 | 0.0878497 | 0.10067   | 0.0852273 | 0.10373   |
| 0         | 0.0801282 | 0.0983392 | 0.090035  | 0.100233  | 0.0894522 | 0.0965909 |

|           |           |           |           |           |           |           |
|-----------|-----------|-----------|-----------|-----------|-----------|-----------|
| 0.0801282 | 0         | 0.100087  | 0.097028  | 0.0938228 | 0.100524  | 0.103293  |
| 0.0983392 | 0.100087  | 0         | 0.0840618 | 0.0916375 | 0.0826049 | 0.108392  |
| 0.090035  | 0.097028  | 0.0840618 | 0         | 0.0926573 | 0.0699301 | 0.103875  |
| 0.100233  | 0.0938228 | 0.0916375 | 0.0926573 | 0         | 0.0944056 | 0.111742  |
| 0.0894522 | 0.100524  | 0.0826049 | 0.0699301 | 0.0944056 | 0         | 0.0968823 |
| 0.0965909 | 0.103293  | 0.108392  | 0.103875  | 0.111742  | 0.0968823 | 0         |
| 0.134761  | 0.148164  | 0.132867  | 0.130099  | 0.143502  | 0.127477  | 0.148893  |
| 0.106352  | 0.106935  | 0.116113  | 0.111888  | 0.113928  | 0.111014  | 0.110286  |
| 0.0920746 | 0.102855  | 0.0738636 | 0.0804196 | 0.0929487 | 0.0769231 | 0.105915  |
| 0.083479  | 0.0893065 | 0.0815851 | 0.076486  | 0.0875583 | 0.0706585 | 0.0996503 |
| 0.101399  | 0.104312  | 0.0796911 | 0.0903263 | 0.0932401 | 0.090035  | 0.100087  |
| 0.0817308 | 0.0808566 | 0.0932401 | 0.090472  | 0.0887238 | 0.0828963 | 0.104021  |
| 0.0930944 | 0.0986305 | 0.0856643 | 0.097465  | 0.0901807 | 0.0884324 | 0.0955711 |
| 0.0914918 | 0.0964452 | 0.092803  | 0.0786713 | 0.0912005 | 0.0844988 | 0.105332  |
| 0.0962995 | 0.0992133 | 0.092366  | 0.083479  | 0.0939685 | 0.0884324 | 0.101107  |
| 0.0837704 | 0.0826049 | 0.0871212 | 0.0866841 | 0.0968823 | 0.0826049 | 0.0984848 |
| 0.090472  | 0.0895979 | 0.097028  | 0.0989219 | 0.0977564 | 0.0907634 | 0.105186  |
| 0.0960082 | 0.0971737 | 0.0844988 | 0.0895979 | 0.0957168 | 0.090472  | 0.112762  |
| 0.0842075 | 0.0818765 | 0.0992133 | 0.0941142 | 0.0955711 | 0.0944056 | 0.10067   |
| 0.120484  | 0.114656  | 0.11655   | 0.113491  | 0.123689  | 0.112034  | 0.13141   |
| 0.100087  | 0.102127  | 0.0804196 | 0.0799825 | 0.0930944 | 0.0799825 | 0.113636  |
| 0.0916375 | 0.0910548 | 0.102855  | 0.0916375 | 0.0887238 | 0.0948427 | 0.10169   |
| 0.0879953 | 0.0996503 | 0.0843531 | 0.0763403 | 0.0987762 | 0.0748834 | 0.108246  |
| 0.115822  | 0.123106  | 0.104895  | 0.0980478 | 0.114656  | 0.0960082 | 0.119172  |
| 0.090472  | 0.099796  | 0.0871212 | 0.088141  | 0.108829  | 0.078817  | 0.0920746 |
| 0.0897436 | 0.0929487 | 0.0846445 | 0.076049  | 0.0917832 | 0.0728438 | 0.103875  |
| 0.0833333 | 0.092366  | 0.081148  | 0.0789627 | 0.0976107 | 0.07838   | 0.101253  |
| 0.0866841 | 0.0849359 | 0.0967366 | 0.0942599 | 0.103001  | 0.0910548 | 0.0935315 |
| 0.114802  | 0.117424  | 0.103584  | 0.0996503 | 0.115385  | 0.0987762 | 0.123689  |
| 0.0999417 | 0.107517  | 0.108246  | 0.101107  | 0.103147  | 0.0967366 | 0.0945513 |
| 0.087704  | 0.0909091 | 0.0750291 | 0.0818765 | 0.0833333 | 0.076049  | 0.104458  |
| 0.0898893 | 0.0898893 | 0.0874126 | 0.0942599 | 0.097465  | 0.0872669 | 0.101981  |
| 0.129079  | 0.12704   | 0.118735  | 0.113928  | 0.128788  | 0.115967  | 0.140297  |
| 0.127914  | 0.138695  | 0.116113  | 0.113054  | 0.129662  | 0.109266  | 0.138258  |
| 0.119901  | 0.127185  | 0.103147  | 0.105624  | 0.124272  | 0.0995047 | 0.13141   |
| 0.117716  | 0.132867  | 0.113491  | 0.117716  | 0.126748  | 0.113054  | 0.128934  |
| 0.126894  | 0.135052  | 0.111597  | 0.110868  | 0.128351  | 0.10912   | 0.138112  |
| 0.125146  | 0.134178  | 0.108392  | 0.105041  | 0.122815  | 0.100379  | 0.131993  |
| 0.144376  | 0.147582  | 0.136072  | 0.132721  | 0.142628  | 0.12602   | 0.157925  |
| 0.133741  | 0.139277  | 0.133887  | 0.130828  | 0.140443  | 0.12704   | 0.144959  |
| 0.123834  | 0.13141   | 0.105041  | 0.108974  | 0.121795  | 0.101981  | 0.136801  |
| 0.125728  | 0.135344  | 0.13345   | 0.126311  | 0.134761  | 0.121649  | 0.135781  |
| 0.134033  | 0.143939  | 0.128351  | 0.122669  | 0.136364  | 0.11859   | 0.149913  |
| 0.129371  | 0.134033  | 0.125146  | 0.120338  | 0.133741  | 0.11859   | 0.14292   |

|          |          |          |          |          |          |          |
|----------|----------|----------|----------|----------|----------|----------|
| 0.123252 | 0.13345  | 0.120192 | 0.117133 | 0.127622 | 0.114219 | 0.133304 |
| 0.130245 | 0.140443 | 0.120192 | 0.119755 | 0.132867 | 0.113636 | 0.14292  |
| 0.136218 | 0.140589 | 0.128788 | 0.122815 | 0.134761 | 0.119027 | 0.151224 |
| 0.125583 | 0.13141  | 0.121066 | 0.124709 | 0.129079 | 0.122086 | 0.142045 |
| 0.138112 | 0.1419   | 0.135635 | 0.136072 | 0.142483 | 0.130828 | 0.144959 |
| 0.133159 | 0.143648 | 0.12398  | 0.123834 | 0.1419   | 0.118881 | 0.153409 |
| 0.121212 | 0.13345  | 0.119027 | 0.110723 | 0.127622 | 0.111014 | 0.133304 |
| 0.13243  | 0.138258 | 0.123834 | 0.125437 | 0.13243  | 0.120775 | 0.142774 |
| 0.141317 | 0.14627  | 0.137383 | 0.132867 | 0.140734 | 0.125291 | 0.154575 |
| 0.119755 | 0.127622 | 0.110868 | 0.107809 | 0.118881 | 0.105186 | 0.134178 |
| 0.224213 | 0.232372 | 0.219114 | 0.216055 | 0.230915 | 0.212267 | 0.229895 |
| 0.124854 | 0.135052 | 0.120047 | 0.121066 | 0.127185 | 0.11961  | 0.137238 |
| 0.124563 | 0.135344 | 0.11451  | 0.112034 | 0.127185 | 0.108537 | 0.141026 |
| 0.134615 | 0.140443 | 0.140297 | 0.132284 | 0.139277 | 0.125291 | 0.14088  |
| 0.128497 | 0.136655 | 0.115822 | 0.115093 | 0.138403 | 0.113054 | 0.140589 |
| 0.143648 | 0.149767 | 0.136509 | 0.134033 | 0.144231 | 0.127622 | 0.155157 |
| 0.115967 | 0.124417 | 0.120484 | 0.115093 | 0.123252 | 0.107517 | 0.13447  |
| 0.122232 | 0.132139 | 0.119172 | 0.116696 | 0.128351 | 0.112908 | 0.136364 |
| 0.129516 | 0.141754 | 0.126457 | 0.121941 | 0.139132 | 0.121649 | 0.145396 |
| 0.133159 | 0.137821 | 0.132139 | 0.119464 | 0.136364 | 0.122378 | 0.144085 |
| 0.130682 | 0.138258 | 0.129953 | 0.12398  | 0.139423 | 0.122523 | 0.13986  |
| 0.12704  | 0.133741 | 0.127477 | 0.123834 | 0.130828 | 0.122086 | 0.139132 |
| 0.130245 | 0.138986 | 0.124563 | 0.127622 | 0.129953 | 0.122086 | 0.137675 |
| 0.123543 | 0.132867 | 0.113199 | 0.116259 | 0.128788 | 0.106352 | 0.133887 |
| 0.122669 | 0.129953 | 0.119901 | 0.11451  | 0.121503 | 0.11451  | 0.13884  |
| 0.132721 | 0.141463 | 0.138112 | 0.129516 | 0.137966 | 0.125728 | 0.143065 |
| 0.120338 | 0.128788 | 0.116404 | 0.114219 | 0.124417 | 0.113345 | 0.133013 |
| 0.121503 | 0.127914 | 0.117279 | 0.119172 | 0.123252 | 0.119464 | 0.129808 |
| 0.151369 | 0.15778  | 0.140152 | 0.136509 | 0.146416 | 0.135927 | 0.156469 |
| 0.126894 | 0.134761 | 0.124126 | 0.117861 | 0.133596 | 0.113782 | 0.137821 |
| 0.133013 | 0.141463 | 0.131119 | 0.124854 | 0.137092 | 0.120775 | 0.147436 |
| 0.136655 | 0.1419   | 0.128642 | 0.122669 | 0.13986  | 0.118881 | 0.145833 |
| 0.13447  | 0.137092 | 0.123252 | 0.12398  | 0.130099 | 0.116696 | 0.143357 |
| 0.137675 | 0.141171 | 0.122669 | 0.122815 | 0.137966 | 0.122523 | 0.15472  |
| 0.150204 | 0.1537   | 0.136946 | 0.137675 | 0.149621 | 0.133304 | 0.153555 |
| 0.114219 | 0.124126 | 0.111742 | 0.104604 | 0.122086 | 0.099359 | 0.129516 |
| 0.133887 | 0.143794 | 0.125    | 0.125728 | 0.136218 | 0.128642 | 0.1419   |
| 0.151224 | 0.157925 | 0.139714 | 0.138695 | 0.153555 | 0.138112 | 0.160111 |
| 0.122378 | 0.130245 | 0.111451 | 0.112471 | 0.125    | 0.11014  | 0.131556 |
| 0.118298 | 0.128497 | 0.109411 | 0.106935 | 0.121795 | 0.106352 | 0.126894 |
| 0.140297 | 0.141754 | 0.137529 | 0.139423 | 0.141463 | 0.134178 | 0.147436 |
| 0.111451 | 0.117279 | 0.107809 | 0.103001 | 0.111451 | 0.10708  | 0.130828 |
| 0.135198 | 0.132867 | 0.13447  | 0.129079 | 0.134033 | 0.130536 | 0.148747 |
| 0.129225 | 0.134178 | 0.123252 | 0.123397 | 0.137966 | 0.124272 | 0.145688 |

|           |           |           |           |           |           |           |
|-----------|-----------|-----------|-----------|-----------|-----------|-----------|
| 0.128205  | 0.132284  | 0.123106  | 0.121212  | 0.131993  | 0.117424  | 0.138549  |
| 0.123397  | 0.126603  | 0.118298  | 0.116696  | 0.125146  | 0.119318  | 0.131702  |
| 0.124709  | 0.134324  | 0.120775  | 0.113345  | 0.12704   | 0.111305  | 0.136801  |
| 0.12602   | 0.133304  | 0.124126  | 0.119027  | 0.127768  | 0.116113  | 0.129662  |
| 0.133013  | 0.136509  | 0.125583  | 0.124563  | 0.133887  | 0.118444  | 0.144814  |
| 0.128642  | 0.126894  | 0.127914  | 0.121941  | 0.130973  | 0.119027  | 0.135781  |
| 0.131265  | 0.132721  | 0.124126  | 0.127185  | 0.128351  | 0.125728  | 0.139569  |
| 0.126603  | 0.135052  | 0.122378  | 0.121066  | 0.133887  | 0.117861  | 0.136072  |
| 0.143794  | 0.144376  | 0.139277  | 0.135635  | 0.149913  | 0.134761  | 0.145396  |
| 0.12398   | 0.134178  | 0.117424  | 0.11553   | 0.126603  | 0.113491  | 0.137821  |
| 0.111742  | 0.11961   | 0.104604  | 0.103875  | 0.114656  | 0.104458  | 0.123543  |
| 0.130099  | 0.136218  | 0.125874  | 0.11757   | 0.13243   | 0.120192  | 0.141317  |
| 0.125437  | 0.137092  | 0.113054  | 0.112325  | 0.128351  | 0.110286  | 0.134615  |
| 0.145688  | 0.155594  | 0.138258  | 0.140443  | 0.149184  | 0.13345   | 0.156614  |
| 0.156177  | 0.162587  | 0.146125  | 0.150932  | 0.157634  | 0.143648  | 0.157488  |
| 0.0850816 | 0.080711  | 0.0980478 | 0.0949883 | 0.10169   | 0.0976107 | 0.0971737 |
| 0.0948427 | 0.0939685 | 0.0868298 | 0.090472  | 0.0965909 | 0.0910548 | 0.101399  |
| 0.130536  | 0.131702  | 0.120484  | 0.127622  | 0.135198  | 0.120921  | 0.138549  |
| 0.131847  | 0.138549  | 0.128205  | 0.132139  | 0.137092  | 0.125728  | 0.144814  |
| 0.0983392 | 0.0992133 | 0.0847902 | 0.0965909 | 0.0948427 | 0.0893065 | 0.113636  |
| 0.128642  | 0.134178  | 0.13986   | 0.131556  | 0.140297  | 0.127768  | 0.143939  |
| 0.133304  | 0.130099  | 0.129953  | 0.125146  | 0.136218  | 0.123689  | 0.136072  |
| 0.112762  | 0.118298  | 0.11553   | 0.112179  | 0.120047  | 0.105769  | 0.125146  |
| 0.145688  | 0.150058  | 0.143794  | 0.15035   | 0.150641  | 0.145396  | 0.147582  |
| 0.109266  | 0.11655   | 0.110577  | 0.108392  | 0.11655   | 0.108683  | 0.126603  |
| 0.138986  | 0.14627   | 0.136218  | 0.130536  | 0.144522  | 0.128497  | 0.144959  |
| 0.110868  | 0.116113  | 0.105769  | 0.104167  | 0.114073  | 0.104167  | 0.124709  |
| 0.133013  | 0.133887  | 0.125874  | 0.129225  | 0.129516  | 0.124272  | 0.144814  |
| 0.127185  | 0.129516  | 0.127331  | 0.120192  | 0.132139  | 0.119318  | 0.136655  |
| 0.149476  | 0.159674  | 0.140589  | 0.135198  | 0.152389  | 0.13345   | 0.162733  |
| 0.141171  | 0.144668  | 0.145105  | 0.140297  | 0.148456  | 0.139132  | 0.15035   |
| 0.131119  | 0.140152  | 0.122232  | 0.120047  | 0.137238  | 0.116259  | 0.147873  |
| 0.146416  | 0.151078  | 0.134907  | 0.135052  | 0.151369  | 0.131556  | 0.159091  |
| 0.144814  | 0.149767  | 0.136801  | 0.127331  | 0.147436  | 0.12704   | 0.156614  |
| 0.155886  | 0.161422  | 0.142337  | 0.138695  | 0.158217  | 0.136655  | 0.167104  |
| 0.116987  | 0.125146  | 0.105769  | 0.104749  | 0.120192  | 0.104749  | 0.126166  |
| 0.145396  | 0.15472   | 0.138258  | 0.13986   | 0.149184  | 0.131993  | 0.150495  |
| 0.128788  | 0.133159  | 0.116113  | 0.110723  | 0.132867  | 0.108683  | 0.138549  |
| 0.122523  | 0.134178  | 0.116841  | 0.106498  | 0.135927  | 0.109994  | 0.13549   |
| 0.130245  | 0.139277  | 0.120192  | 0.12296   | 0.130828  | 0.115385  | 0.143794  |
| 0.130828  | 0.135198  | 0.116113  | 0.117424  | 0.132867  | 0.111888  | 0.146125  |
| 0.122815  | 0.130099  | 0.111888  | 0.10912   | 0.12602   | 0.107372  | 0.137821  |
| 0.123397  | 0.13039   | 0.114802  | 0.108537  | 0.127768  | 0.11116   | 0.135198  |
| 0.135344  | 0.139132  | 0.122669  | 0.121066  | 0.140297  | 0.115822  | 0.145688  |



|          |          |           |           |          |           |          |
|----------|----------|-----------|-----------|----------|-----------|----------|
| 0.13345  | 0.138986 | 0.129516  | 0.123252  | 0.141026 | 0.123252  | 0.142628 |
| 0.11451  | 0.126748 | 0.105332  | 0.100816  | 0.116841 | 0.0955711 | 0.130682 |
| 0.135198 | 0.140734 | 0.116987  | 0.122378  | 0.133741 | 0.11859   | 0.14729  |
| 0.126603 | 0.132721 | 0.11451   | 0.116113  | 0.134761 | 0.10912   | 0.143065 |
| 0.107663 | 0.112617 | 0.101399  | 0.100379  | 0.111451 | 0.0992133 | 0.119172 |
| 0.219843 | 0.230332 | 0.217949  | 0.21285   | 0.22567  | 0.212558  | 0.22873  |
| 0.143794 | 0.151369 | 0.140152  | 0.139714  | 0.147582 | 0.136218  | 0.162879 |
| 0.132576 | 0.137529 | 0.127768  | 0.121212  | 0.132576 | 0.115676  | 0.139423 |
| 0.132139 | 0.135927 | 0.127331  | 0.120484  | 0.140297 | 0.118153  | 0.144231 |
| 0.218386 | 0.223922 | 0.20979   | 0.206439  | 0.221591 | 0.207022  | 0.219988 |
| 0.121358 | 0.12602  | 0.11014   | 0.105624  | 0.121941 | 0.109411  | 0.132867 |
| 0.132284 | 0.132867 | 0.114365  | 0.117424  | 0.126457 | 0.108683  | 0.141171 |
| 0.13141  | 0.138695 | 0.119027  | 0.124126  | 0.133159 | 0.114802  | 0.142628 |
| 0.126603 | 0.135927 | 0.125291  | 0.11961   | 0.138258 | 0.120484  | 0.136946 |
| 0.255682 | 0.262092 | 0.251166  | 0.246941  | 0.261218 | 0.246649  | 0.256702 |
| 0.137821 | 0.145105 | 0.125437  | 0.123834  | 0.137529 | 0.120629  | 0.150204 |
| 0.108683 | 0.114219 | 0.0977564 | 0.0914918 | 0.110431 | 0.0958625 | 0.120775 |
| 0.116259 | 0.127914 | 0.120192  | 0.115967  | 0.126166 | 0.109557  | 0.128934 |
| 0.113928 | 0.124417 | 0.114948  | 0.112471  | 0.123252 | 0.106643  | 0.127185 |
| 0.136655 | 0.141608 | 0.128059  | 0.124126  | 0.138695 | 0.124417  | 0.151078 |
| 0.132284 | 0.142483 | 0.126603  | 0.121212  | 0.140443 | 0.121503  | 0.146416 |
| 0.109557 | 0.11655  | 0.100962  | 0.0949883 | 0.111597 | 0.0949883 | 0.122523 |
| 0.127768 | 0.134761 | 0.112179  | 0.116696  | 0.13243  | 0.112325  | 0.145396 |
| 0.136072 | 0.145688 | 0.126603  | 0.125     | 0.142774 | 0.119755  | 0.146125 |
| 0.12296  | 0.134033 | 0.120192  | 0.114219  | 0.132576 | 0.113054  | 0.135635 |
| 0.129225 | 0.133304 | 0.115676  | 0.113491  | 0.128934 | 0.110868  | 0.143357 |
| 0.125291 | 0.134324 | 0.118444  | 0.115093  | 0.130828 | 0.113345  | 0.141463 |
| 0.141463 | 0.139714 | 0.143939  | 0.140297  | 0.144376 | 0.13884   | 0.149184 |
| 0.139423 | 0.143502 | 0.128497  | 0.128351  | 0.135927 | 0.124563  | 0.150932 |
| 0.134178 | 0.135052 | 0.117424  | 0.122523  | 0.127768 | 0.11553   | 0.145105 |
| 0.196241 | 0.206731 | 0.189103  | 0.182547  | 0.201777 | 0.181964  | 0.204837 |
| 0.211393 | 0.218969 | 0.205711  | 0.200612  | 0.214307 | 0.200612  | 0.218823 |
| 0.129516 | 0.140297 | 0.125     | 0.123397  | 0.141463 | 0.121649  | 0.140443 |
| 0.11961  | 0.131265 | 0.117133  | 0.114365  | 0.132721 | 0.113782  | 0.131993 |
| 0.141171 | 0.154283 | 0.13986   | 0.135927  | 0.14729  | 0.130973  | 0.150641 |
| 0.111451 | 0.114365 | 0.0981935 | 0.0962995 | 0.111742 | 0.0962995 | 0.120338 |
| 0.137821 | 0.143065 | 0.126603  | 0.126748  | 0.139277 | 0.119755  | 0.153409 |
| 0.118153 | 0.123689 | 0.126748  | 0.118735  | 0.128059 | 0.118444  | 0.136655 |
| 0.230041 | 0.238199 | 0.226981  | 0.221882  | 0.236742 | 0.218677  | 0.238054 |
| 0.12398  | 0.130099 | 0.111888  | 0.109703  | 0.123106 | 0.103001  | 0.13549  |
| 0.201632 | 0.208042 | 0.198864  | 0.192016  | 0.204837 | 0.198135  | 0.209062 |
| 0.114365 | 0.12602  | 0.0976107 | 0.095134  | 0.114073 | 0.0939685 | 0.127914 |
| 0.121503 | 0.129079 | 0.107955  | 0.108683  | 0.126166 | 0.107226  | 0.133596 |
| 0.126311 | 0.133304 | 0.119464  | 0.110286  | 0.128934 | 0.109411  | 0.141026 |

|          |          |           |           |          |           |          |
|----------|----------|-----------|-----------|----------|-----------|----------|
| 0.119318 | 0.13243  | 0.113636  | 0.108537  | 0.13039  | 0.109703  | 0.131702 |
| 0.20979  | 0.221154 | 0.210227  | 0.200758  | 0.219406 | 0.202797  | 0.221882 |
| 0.140734 | 0.146853 | 0.128934  | 0.129371  | 0.147436 | 0.127622  | 0.155157 |
| 0.122086 | 0.131702 | 0.10708   | 0.107517  | 0.119172 | 0.102273  | 0.130682 |
| 0.134615 | 0.1419   | 0.125146  | 0.125874  | 0.141608 | 0.121503  | 0.150787 |
| 0.123252 | 0.130536 | 0.11757   | 0.119172  | 0.127331 | 0.113636  | 0.14088  |
| 0.125583 | 0.137821 | 0.118444  | 0.115676  | 0.136364 | 0.111888  | 0.137092 |
| 0.114365 | 0.123106 | 0.0987762 | 0.0957168 | 0.116696 | 0.0948427 | 0.127331 |
| 0.116696 | 0.121358 | 0.10373   | 0.0995047 | 0.122815 | 0.101836  | 0.13141  |
| 0.13039  | 0.132139 | 0.116259  | 0.119318  | 0.127768 | 0.112617  | 0.142483 |
| 0.12398  | 0.130099 | 0.111597  | 0.114948  | 0.129516 | 0.109703  | 0.138986 |
| 0.120629 | 0.127914 | 0.106498  | 0.109557  | 0.118007 | 0.103147  | 0.127477 |
| 0.196533 | 0.204983 | 0.18852   | 0.18546   | 0.204691 | 0.182838  | 0.201923 |
| 0.114219 | 0.125291 | 0.116696  | 0.118007  | 0.123834 | 0.110431  | 0.128351 |
| 0.131847 | 0.131556 | 0.127914  | 0.121941  | 0.135344 | 0.120775  | 0.142191 |
| 0.118007 | 0.126166 | 0.109703  | 0.113928  | 0.130536 | 0.103147  | 0.125146 |
| 0.13447  | 0.145251 | 0.124126  | 0.120484  | 0.136801 | 0.119027  | 0.150058 |
| 0.130099 | 0.138549 | 0.119755  | 0.119027  | 0.136509 | 0.115239  | 0.147436 |
| 0.113199 | 0.125437 | 0.102273  | 0.103875  | 0.119027 | 0.0995047 | 0.126457 |
| 0.120629 | 0.127914 | 0.109994  | 0.109557  | 0.123834 | 0.107226  | 0.13447  |
| 0.111888 | 0.114802 | 0.104749  | 0.0999417 | 0.111597 | 0.0979021 | 0.123397 |
| 0.125146 | 0.13039  | 0.122669  | 0.119027  | 0.133013 | 0.113199  | 0.140152 |
| 0.114365 | 0.127477 | 0.111014  | 0.107955  | 0.121066 | 0.103875  | 0.128788 |
| 0.128788 | 0.137821 | 0.120775  | 0.116841  | 0.136655 | 0.118007  | 0.136801 |
| 0.132139 | 0.14088  | 0.120629  | 0.120775  | 0.135344 | 0.115822  | 0.142774 |
| 0.140734 | 0.149184 | 0.130682  | 0.131993  | 0.141026 | 0.127914  | 0.151661 |
| 0.13141  | 0.139277 | 0.11757   | 0.113636  | 0.13345  | 0.110431  | 0.144376 |
| 0.14088  | 0.14729  | 0.135781  | 0.135927  | 0.142337 | 0.13039   | 0.158217 |
| 0.12398  | 0.13447  | 0.115967  | 0.11553   | 0.134761 | 0.113491  | 0.136655 |
| 0.112325 | 0.119027 | 0.113054  | 0.106498  | 0.120484 | 0.104167  | 0.134033 |
| 0.131119 | 0.135781 | 0.114073  | 0.117424  | 0.13345  | 0.113636  | 0.144668 |
| 0.113636 | 0.118007 | 0.103584  | 0.0996503 | 0.111888 | 0.101107  | 0.123106 |
| 0.195513 | 0.204254 | 0.188957  | 0.180944  | 0.199301 | 0.183275  | 0.201195 |
| 0.116987 | 0.128059 | 0.104021  | 0.101544  | 0.119027 | 0.097465  | 0.124709 |
| 0.113491 | 0.119901 | 0.105769  | 0.103293  | 0.116113 | 0.0939685 | 0.130245 |
| 0.130682 | 0.131265 | 0.115967  | 0.118153  | 0.126603 | 0.110286  | 0.143357 |
| 0.187209 | 0.197115 | 0.18211   | 0.174679  | 0.194493 | 0.176136  | 0.194639 |
| 0.144814 | 0.151224 | 0.136218  | 0.13345   | 0.145396 | 0.129079  | 0.160693 |
| 0.154429 | 0.155594 | 0.145251  | 0.14627   | 0.149184 | 0.141317  | 0.162442 |
| 0.142337 | 0.143794 | 0.145688  | 0.14088   | 0.149038 | 0.140589  | 0.149476 |
| 0.128351 | 0.134761 | 0.115676  | 0.109994  | 0.129516 | 0.10708   | 0.1419   |
| 0.132284 | 0.137821 | 0.119901  | 0.122086  | 0.136946 | 0.117716  | 0.147582 |
| 0.219551 | 0.22567  | 0.210664  | 0.207022  | 0.223922 | 0.207896  | 0.222902 |
| 0.128059 | 0.138258 | 0.12296   | 0.121941  | 0.13447  | 0.113199  | 0.140734 |

|          |          |          |           |          |           |          |
|----------|----------|----------|-----------|----------|-----------|----------|
| 0.134907 | 0.142774 | 0.124854 | 0.124126  | 0.139277 | 0.120629  | 0.151078 |
| 0.123543 | 0.129079 | 0.107372 | 0.108392  | 0.118881 | 0.101981  | 0.128059 |
| 0.178322 | 0.18648  | 0.168852 | 0.164336  | 0.18211  | 0.164336  | 0.188374 |
| 0.120338 | 0.127914 | 0.114948 | 0.107517  | 0.127331 | 0.107809  | 0.141463 |
| 0.150787 | 0.160693 | 0.149767 | 0.147582  | 0.158654 | 0.14292   | 0.154138 |
| 0.127768 | 0.131556 | 0.118007 | 0.115822  | 0.124854 | 0.10708   | 0.135781 |
| 0.196824 | 0.206731 | 0.189685 | 0.184878  | 0.20236  | 0.181964  | 0.201632 |
| 0.136509 | 0.144376 | 0.118881 | 0.119901  | 0.134178 | 0.112325  | 0.144814 |
| 0.123397 | 0.126311 | 0.104604 | 0.107663  | 0.124854 | 0.101253  | 0.135781 |
| 0.116841 | 0.126748 | 0.109703 | 0.103147  | 0.119464 | 0.0999417 | 0.139132 |
| 0.130099 | 0.13447  | 0.11655  | 0.114656  | 0.126311 | 0.106498  | 0.138403 |
| 0.13243  | 0.131556 | 0.113636 | 0.118153  | 0.126311 | 0.110286  | 0.141026 |
| 0.13039  | 0.136801 | 0.119172 | 0.112034  | 0.135635 | 0.116404  | 0.1419   |
| 0.123543 | 0.133741 | 0.116404 | 0.113345  | 0.133159 | 0.112179  | 0.135344 |
| 0.196533 | 0.206148 | 0.190559 | 0.185752  | 0.20236  | 0.182547  | 0.20338  |
| 0.130828 | 0.134615 | 0.116113 | 0.120338  | 0.134615 | 0.11655   | 0.146707 |
| 0.127768 | 0.133013 | 0.116259 | 0.111742  | 0.131847 | 0.10912   | 0.138403 |
| 0.217657 | 0.226399 | 0.212267 | 0.206585  | 0.221445 | 0.207168  | 0.224505 |
| 0.113345 | 0.128497 | 0.114948 | 0.11859   | 0.124417 | 0.108683  | 0.133304 |
| 0.122232 | 0.133304 | 0.117424 | 0.114948  | 0.133596 | 0.111742  | 0.13345  |
| 0.119318 | 0.13039  | 0.119464 | 0.113491  | 0.131265 | 0.110577  | 0.131993 |
| 0.137821 | 0.145688 | 0.130682 | 0.13549   | 0.144522 | 0.131702  | 0.151661 |
| 0.198135 | 0.206876 | 0.191871 | 0.187646  | 0.203963 | 0.183566  | 0.20236  |
| 0.111451 | 0.117279 | 0.097028 | 0.0954254 | 0.109703 | 0.0948427 | 0.11859  |
| 0.133887 | 0.144085 | 0.124417 | 0.128059  | 0.135344 | 0.122232  | 0.145396 |
| 0.123397 | 0.13447  | 0.118298 | 0.114656  | 0.133304 | 0.11116   | 0.138403 |
| 0.123397 | 0.133304 | 0.117424 | 0.111451  | 0.133304 | 0.110577  | 0.136072 |
| 0.123834 | 0.134907 | 0.116987 | 0.111888  | 0.132576 | 0.112471  | 0.131847 |
| 0.128934 | 0.135927 | 0.113928 | 0.117279  | 0.133013 | 0.110868  | 0.143939 |
| 0.117716 | 0.125    | 0.105624 | 0.102273  | 0.11655  | 0.0955711 | 0.131265 |
| 0.138403 | 0.145979 | 0.124272 | 0.121795  | 0.138112 | 0.120921  | 0.150204 |
| 0.128497 | 0.132284 | 0.125728 | 0.126166  | 0.136364 | 0.125291  | 0.143211 |
| 0.134033 | 0.142191 | 0.121941 | 0.118298  | 0.13549  | 0.115093  | 0.148164 |
| 0.126894 | 0.132721 | 0.124126 | 0.124563  | 0.129516 | 0.119027  | 0.142191 |
| 0.200466 | 0.212413 | 0.192453 | 0.187937  | 0.207751 | 0.186189  | 0.207022 |
| 0.130099 | 0.13884  | 0.115676 | 0.114365  | 0.128642 | 0.110577  | 0.141317 |
| 0.137238 | 0.143065 | 0.129516 | 0.130245  | 0.139569 | 0.12296   | 0.152535 |
| 0.121358 | 0.13243  | 0.118007 | 0.113782  | 0.130973 | 0.109994  | 0.132576 |
| 0.116259 | 0.123834 | 0.106206 | 0.100816  | 0.119172 | 0.0984848 | 0.128934 |
| 0.126166 | 0.138695 | 0.114656 | 0.104604  | 0.129371 | 0.106643  | 0.132139 |
| 0.110286 | 0.116113 | 0.100524 | 0.0960082 | 0.110286 | 0.097465  | 0.122378 |
| 0.133887 | 0.147873 | 0.134615 | 0.125728  | 0.144959 | 0.125146  | 0.150641 |
| 0.125291 | 0.13345  | 0.118735 | 0.115676  | 0.130828 | 0.111888  | 0.142628 |
| 0.112471 | 0.119755 | 0.103293 | 0.0932401 | 0.118007 | 0.0938228 | 0.125728 |

|          |          |           |           |          |           |          |
|----------|----------|-----------|-----------|----------|-----------|----------|
| 0.109994 | 0.117279 | 0.10169   | 0.0893065 | 0.110868 | 0.0913462 | 0.125291 |
| 0.120629 | 0.128497 | 0.109994  | 0.104604  | 0.125874 | 0.100816  | 0.136218 |
| 0.116987 | 0.125437 | 0.0973193 | 0.0980478 | 0.113782 | 0.0962995 | 0.126748 |
| 0.140152 | 0.147145 | 0.126894  | 0.131993  | 0.140152 | 0.125583  | 0.154575 |
| 0.112908 | 0.11757  | 0.0987762 | 0.0968823 | 0.112908 | 0.0948427 | 0.125    |
| 0.128497 | 0.131993 | 0.110868  | 0.114219  | 0.129079 | 0.109848  | 0.141754 |
| 0.108392 | 0.11451  | 0.0960082 | 0.0906177 | 0.110723 | 0.0917832 | 0.120775 |
| 0.120484 | 0.133887 | 0.11655   | 0.111451  | 0.129808 | 0.107663  | 0.13549  |
| 0.115967 | 0.126748 | 0.104167  | 0.10169   | 0.118298 | 0.097028  | 0.12602  |
| 0.126457 | 0.138112 | 0.120484  | 0.116841  | 0.132576 | 0.113636  | 0.136801 |
| 0.126166 | 0.133159 | 0.107372  | 0.112471  | 0.125291 | 0.10373   | 0.135052 |
| 0.123252 | 0.130245 | 0.119318  | 0.11014   | 0.132284 | 0.110723  | 0.137092 |
| 0.131119 | 0.132576 | 0.108246  | 0.113928  | 0.125583 | 0.106643  | 0.139423 |
| 0.121358 | 0.127185 | 0.105769  | 0.101836  | 0.122815 | 0.0983392 | 0.133159 |
| 0.120047 | 0.134615 | 0.117861  | 0.113345  | 0.131993 | 0.107809  | 0.134761 |
| 0.123252 | 0.129662 | 0.116113  | 0.109848  | 0.126748 | 0.107809  | 0.142337 |
| 0.131556 | 0.137675 | 0.121795  | 0.11553   | 0.137675 | 0.112908  | 0.146562 |
| 0.123543 | 0.130828 | 0.113491  | 0.107226  | 0.125291 | 0.10373   | 0.135927 |
| 0.121795 | 0.131702 | 0.116987  | 0.111888  | 0.13141  | 0.108392  | 0.135052 |
| 0.129516 | 0.135635 | 0.119464  | 0.118153  | 0.133304 | 0.113199  | 0.144814 |
| 0.115822 | 0.12602  | 0.0958625 | 0.0948427 | 0.118735 | 0.0960082 | 0.125291 |
| 0.13039  | 0.137383 | 0.115676  | 0.116404  | 0.134178 | 0.113491  | 0.145396 |
| 0.131847 | 0.13243  | 0.111305  | 0.112034  | 0.12602  | 0.106206  | 0.140152 |
| 0.119318 | 0.127185 | 0.111597  | 0.104167  | 0.121358 | 0.101544  | 0.129953 |
| 0.127477 | 0.135052 | 0.121212  | 0.110868  | 0.129516 | 0.105041  | 0.140152 |
| 0.120338 | 0.128788 | 0.101253  | 0.105478  | 0.116841 | 0.0949883 | 0.128059 |
| 0.134761 | 0.140297 | 0.120921  | 0.120484  | 0.136801 | 0.117279  | 0.146853 |
| 0.129808 | 0.135344 | 0.120921  | 0.11961   | 0.133887 | 0.114365  | 0.13986  |
| 0.129371 | 0.139277 | 0.119027  | 0.115093  | 0.128497 | 0.108392  | 0.141754 |
| 0.200758 | 0.210373 | 0.194784  | 0.192016  | 0.208042 | 0.186772  | 0.20877  |
| 0.175991 | 0.18211  | 0.170017  | 0.161713  | 0.179487 | 0.158508  | 0.18546  |
| 0.137238 | 0.141317 | 0.122523  | 0.117133  | 0.133741 | 0.114802  | 0.149621 |
| 0.119901 | 0.12398  | 0.112471  | 0.105332  | 0.125728 | 0.104458  | 0.131702 |
| 0.15574  | 0.159237 | 0.14831   | 0.148164  | 0.150495 | 0.142337  | 0.165501 |
| 0.137238 | 0.14831  | 0.124272  | 0.127622  | 0.141317 | 0.122086  | 0.144959 |
| 0.128351 | 0.143211 | 0.127331  | 0.116113  | 0.138549 | 0.118153  | 0.140734 |
| 0.128497 | 0.137821 | 0.12398   | 0.111597  | 0.135198 | 0.113636  | 0.137675 |
| 0.122086 | 0.134324 | 0.116113  | 0.111888  | 0.130536 | 0.111888  | 0.139423 |
| 0.129662 | 0.137238 | 0.121941  | 0.117716  | 0.134907 | 0.115967  | 0.145542 |
| 0.210227 | 0.219843 | 0.201049  | 0.197698  | 0.216929 | 0.194202  | 0.2162   |
| 0.115093 | 0.118007 | 0.100379  | 0.0996503 | 0.114219 | 0.101399  | 0.124854 |
| 0.121066 | 0.129225 | 0.109266  | 0.108537  | 0.123106 | 0.106206  | 0.137238 |
| 0.120775 | 0.131847 | 0.113054  | 0.107372  | 0.126603 | 0.107372  | 0.135198 |
| 0.123834 | 0.131993 | 0.115239  | 0.111597  | 0.126166 | 0.11014   | 0.141754 |

|          |          |           |           |          |           |          |
|----------|----------|-----------|-----------|----------|-----------|----------|
| 0.189831 | 0.199738 | 0.185023  | 0.174388  | 0.20236  | 0.178467  | 0.199883 |
| 0.249272 | 0.258596 | 0.246795  | 0.24257   | 0.254808 | 0.243444  | 0.252914 |
| 0.126311 | 0.133596 | 0.119464  | 0.117279  | 0.133887 | 0.116987  | 0.138986 |
| 0.129808 | 0.137092 | 0.125     | 0.116113  | 0.138549 | 0.114948  | 0.144522 |
| 0.135927 | 0.141463 | 0.123834  | 0.121649  | 0.135635 | 0.119318  | 0.149767 |
| 0.12704  | 0.132867 | 0.110286  | 0.112471  | 0.125291 | 0.104021  | 0.13884  |
| 0.109703 | 0.114365 | 0.0967366 | 0.0907634 | 0.109411 | 0.088141  | 0.119755 |
| 0.127622 | 0.129662 | 0.111451  | 0.112762  | 0.127914 | 0.108974  | 0.139423 |
| 0.124854 | 0.137675 | 0.119464  | 0.107663  | 0.131556 | 0.11116   | 0.137238 |
| 0.108246 | 0.113199 | 0.0967366 | 0.092803  | 0.10912  | 0.0925117 | 0.122378 |
| 0.125583 | 0.135198 | 0.115822  | 0.112179  | 0.132867 | 0.110723  | 0.137092 |
| 0.126894 | 0.137092 | 0.117133  | 0.112908  | 0.13243  | 0.10912   | 0.144231 |
| 0.121503 | 0.127622 | 0.10708   | 0.10373   | 0.121212 | 0.100524  | 0.132721 |
| 0.12398  | 0.130099 | 0.118881  | 0.117279  | 0.131265 | 0.114948  | 0.136364 |
| 0.134033 | 0.139569 | 0.120192  | 0.120047  | 0.133741 | 0.115093  | 0.149038 |
| 0.11014  | 0.11859  | 0.107663  | 0.0932401 | 0.114219 | 0.0912005 | 0.129516 |
| 0.122669 | 0.124126 | 0.121649  | 0.118881  | 0.126748 | 0.117133  | 0.131556 |
| 0.136946 | 0.134324 | 0.123689  | 0.129662  | 0.130245 | 0.118881  | 0.141463 |
| 0.120775 | 0.133013 | 0.115967  | 0.109994  | 0.130682 | 0.109703  | 0.135198 |
| 0.115967 | 0.123834 | 0.114365  | 0.104312  | 0.120921 | 0.108392  | 0.127185 |
| 0.13345  | 0.139569 | 0.134178  | 0.125291  | 0.142774 | 0.126166  | 0.137383 |
| 0.214307 | 0.221008 | 0.207459  | 0.207896  | 0.223631 | 0.207314  | 0.22465  |
| 0.116259 | 0.120629 | 0.110577  | 0.109557  | 0.123543 | 0.10169   | 0.133013 |
| 0.117279 | 0.126894 | 0.107809  | 0.104167  | 0.118735 | 0.0992133 | 0.133159 |
| 0.132721 | 0.142628 | 0.11451   | 0.118735  | 0.133013 | 0.112617  | 0.144522 |
| 0.116259 | 0.130536 | 0.117279  | 0.117133  | 0.125    | 0.111014  | 0.133596 |
| 0.119172 | 0.129079 | 0.112617  | 0.111597  | 0.121212 | 0.108683  | 0.14088  |
| 0.207168 | 0.217949 | 0.198572  | 0.196678  | 0.215326 | 0.194639  | 0.215472 |
| 0.135635 | 0.143211 | 0.118298  | 0.121358  | 0.136801 | 0.117279  | 0.149767 |
| 0.119464 | 0.130536 | 0.117279  | 0.108974  | 0.129662 | 0.106643  | 0.135635 |
| 0.127477 | 0.133887 | 0.118298  | 0.123689  | 0.127185 | 0.109411  | 0.140734 |
| 0.126603 | 0.128934 | 0.105769  | 0.112034  | 0.121941 | 0.102418  | 0.136072 |
| 0.133013 | 0.137966 | 0.117716  | 0.121066  | 0.139132 | 0.114656  | 0.147145 |
| 0.120484 | 0.125437 | 0.111014  | 0.11116   | 0.126311 | 0.107372  | 0.133159 |
| 0.12602  | 0.137966 | 0.115676  | 0.112617  | 0.133013 | 0.109703  | 0.1419   |
| 0.11961  | 0.130099 | 0.111305  | 0.112617  | 0.12398  | 0.105332  | 0.130828 |
| 0.208625 | 0.2162   | 0.199155  | 0.195804  | 0.212121 | 0.191725  | 0.212267 |
| 0.123689 | 0.129225 | 0.109557  | 0.11116   | 0.127768 | 0.103875  | 0.137238 |
| 0.203089 | 0.210956 | 0.193036  | 0.189394  | 0.210082 | 0.187646  | 0.205274 |
| 0.20236  | 0.209936 | 0.193765  | 0.189248  | 0.207022 | 0.188666  | 0.203671 |
| 0.135344 | 0.133304 | 0.118298  | 0.124272  | 0.127768 | 0.11553   | 0.143065 |
| 0.120775 | 0.131265 | 0.124126  | 0.125146  | 0.128059 | 0.117279  | 0.132284 |
| 0.118444 | 0.129225 | 0.107226  | 0.10271   | 0.121649 | 0.101544  | 0.133159 |
| 0.12296  | 0.127331 | 0.106789  | 0.110723  | 0.127331 | 0.103147  | 0.135344 |

|          |          |           |           |          |           |          |
|----------|----------|-----------|-----------|----------|-----------|----------|
| 0.130682 | 0.136509 | 0.11655   | 0.116696  | 0.131556 | 0.108246  | 0.144814 |
| 0.125437 | 0.136218 | 0.120047  | 0.11553   | 0.135344 | 0.111742  | 0.134033 |
| 0.105332 | 0.113199 | 0.0906177 | 0.0890152 | 0.105041 | 0.0846445 | 0.121212 |
| 0.107372 | 0.113782 | 0.0952797 | 0.095134  | 0.108829 | 0.0913462 | 0.119755 |
| 0.127331 | 0.134907 | 0.122523  | 0.119172  | 0.135781 | 0.119172  | 0.142045 |
| 0.13243  | 0.132139 | 0.111305  | 0.116987  | 0.122523 | 0.105915  | 0.144814 |
| 0.118881 | 0.130536 | 0.115822  | 0.109848  | 0.127622 | 0.107809  | 0.133887 |
| 0.130099 | 0.137383 | 0.117424  | 0.119901  | 0.133887 | 0.111451  | 0.145688 |
| 0.120338 | 0.121795 | 0.104167  | 0.105769  | 0.121503 | 0.099359  | 0.134761 |
| 0.135052 | 0.14088  | 0.125     | 0.126603  | 0.137675 | 0.125146  | 0.150058 |
| 0.131265 | 0.140297 | 0.118298  | 0.116987  | 0.13243  | 0.112617  | 0.143648 |
| 0.136946 | 0.144814 | 0.130973  | 0.129662  | 0.141608 | 0.125583  | 0.154575 |
| 0.263986 | 0.268939 | 0.260635  | 0.256993  | 0.2669   | 0.254662  | 0.261218 |
| 0.124709 | 0.132867 | 0.116696  | 0.120338  | 0.124417 | 0.113928  | 0.131847 |
| 0.125728 | 0.135344 | 0.119464  | 0.120775  | 0.132139 | 0.120775  | 0.136072 |
| 0.225233 | 0.229895 | 0.21926   | 0.214744  | 0.230769 | 0.214161  | 0.230041 |
| 0.128934 | 0.135052 | 0.123543  | 0.124563  | 0.131556 | 0.11961   | 0.1419   |
| 0.235286 | 0.243735 | 0.231643  | 0.226836  | 0.24053  | 0.226836  | 0.238636 |
| 0.119464 | 0.126748 | 0.104749  | 0.108974  | 0.116259 | 0.10373   | 0.128351 |
| 0.128351 | 0.139423 | 0.131119  | 0.123397  | 0.140589 | 0.123397  | 0.137238 |
| 0.110286 | 0.120775 | 0.106352  | 0.105332  | 0.119901 | 0.100087  | 0.12704  |
| 0.134761 | 0.136509 | 0.118881  | 0.122232  | 0.128351 | 0.111742  | 0.144231 |
| 0.210227 | 0.21926  | 0.202214  | 0.200321  | 0.216346 | 0.196824  | 0.214744 |
| 0.136801 | 0.145251 | 0.129371  | 0.127185  | 0.141754 | 0.123397  | 0.153555 |
| 0.132721 | 0.135635 | 0.117424  | 0.117861  | 0.135052 | 0.114948  | 0.147727 |
| 0.230769 | 0.241259 | 0.227127  | 0.223485  | 0.236305 | 0.220862  | 0.237325 |
| 0.109411 | 0.116696 | 0.0990676 | 0.0948427 | 0.115822 | 0.092803  | 0.123834 |
| 0.207168 | 0.214161 | 0.201777  | 0.195221  | 0.213578 | 0.19289   | 0.212267 |
| 0.112762 | 0.119755 | 0.102127  | 0.0952797 | 0.113928 | 0.094697  | 0.125728 |
| 0.123834 | 0.134033 | 0.117861  | 0.112762  | 0.131993 | 0.111305  | 0.135635 |
| 0.125146 | 0.130682 | 0.11859   | 0.112617  | 0.125728 | 0.109703  | 0.137529 |
| 0.135635 | 0.13243  | 0.120047  | 0.123689  | 0.127477 | 0.114656  | 0.145396 |
| 0.127622 | 0.129662 | 0.11553   | 0.109557  | 0.131993 | 0.106643  | 0.137383 |
| 0.167541 | 0.178613 | 0.16419   | 0.151224  | 0.170746 | 0.155594  | 0.17701  |
| 0.12296  | 0.133159 | 0.113782  | 0.114219  | 0.128205 | 0.106935  | 0.141754 |
| 0.114802 | 0.130536 | 0.115239  | 0.111014  | 0.126166 | 0.107226  | 0.130099 |
| 0.127331 | 0.134033 | 0.120484  | 0.111305  | 0.132867 | 0.109848  | 0.143794 |
| 0.115385 | 0.123834 | 0.122523  | 0.115093  | 0.125874 | 0.110723  | 0.134761 |
| 0.203526 | 0.211393 | 0.19493   | 0.189831  | 0.207314 | 0.18954   | 0.210956 |
| 0.120047 | 0.133159 | 0.116987  | 0.113345  | 0.130245 | 0.111305  | 0.136509 |
| 0.13884  | 0.137383 | 0.116259  | 0.120484  | 0.133304 | 0.112034  | 0.145688 |
| 0.114802 | 0.126166 | 0.0986305 | 0.0964452 | 0.11655  | 0.0929487 | 0.123689 |
| 0.107372 | 0.112617 | 0.0979021 | 0.0936772 | 0.110868 | 0.095134  | 0.120629 |
| 0.125874 | 0.136655 | 0.12602   | 0.11859   | 0.13549  | 0.118007  | 0.134178 |

|          |          |          |           |          |           |          |
|----------|----------|----------|-----------|----------|-----------|----------|
| 0.258596 | 0.264714 | 0.25641  | 0.255099  | 0.262966 | 0.250146  | 0.262238 |
| 0.120047 | 0.126457 | 0.115822 | 0.109557  | 0.120629 | 0.10169   | 0.130682 |
| 0.128497 | 0.139569 | 0.117279 | 0.113345  | 0.133159 | 0.11014   | 0.140589 |
| 0.182692 | 0.190559 | 0.179924 | 0.175408  | 0.189685 | 0.176573  | 0.195367 |
| 0.194347 | 0.203089 | 0.1875   | 0.182692  | 0.201049 | 0.179779  | 0.200321 |
| 0.128788 | 0.133159 | 0.120192 | 0.115385  | 0.13345  | 0.112762  | 0.141171 |
| 0.131265 | 0.136509 | 0.117716 | 0.121066  | 0.137383 | 0.114948  | 0.147727 |
| 0.131265 | 0.132721 | 0.112762 | 0.112617  | 0.126894 | 0.10708   | 0.140152 |
| 0.146562 | 0.154138 | 0.142628 | 0.143065  | 0.148019 | 0.139569  | 0.162733 |
| 0.124417 | 0.133159 | 0.11961  | 0.11451   | 0.134033 | 0.111014  | 0.137675 |
| 0.127185 | 0.136509 | 0.122669 | 0.117861  | 0.134761 | 0.113491  | 0.1419   |
| 0.111014 | 0.114802 | 0.101836 | 0.0999417 | 0.111014 | 0.100233  | 0.122815 |
| 0.128497 | 0.136946 | 0.116987 | 0.11859   | 0.132576 | 0.112762  | 0.145542 |
| 0.133304 | 0.140589 | 0.125    | 0.128059  | 0.137383 | 0.122232  | 0.14627  |
| 0.116841 | 0.121795 | 0.105915 | 0.0990676 | 0.119755 | 0.102855  | 0.131265 |
| 0.133013 | 0.13243  | 0.118298 | 0.123689  | 0.128934 | 0.11553   | 0.141608 |
| 0.141026 | 0.138695 | 0.128059 | 0.136072  | 0.139277 | 0.127622  | 0.152535 |
| 0.125437 | 0.127477 | 0.118298 | 0.110868  | 0.125728 | 0.108246  | 0.13549  |
| 0.138403 | 0.138403 | 0.124272 | 0.130245  | 0.134033 | 0.120047  | 0.144376 |
| 0.111888 | 0.115385 | 0.10708  | 0.102564  | 0.113928 | 0.103147  | 0.121066 |
| 0.217512 | 0.223048 | 0.210664 | 0.2044    | 0.221882 | 0.200903  | 0.219697 |
| 0.125583 | 0.13141  | 0.119318 | 0.115967  | 0.127914 | 0.112179  | 0.136509 |
| 0.200175 | 0.211247 | 0.191871 | 0.188811  | 0.20542  | 0.186772  | 0.205565 |
| 0.11451  | 0.122378 | 0.10912  | 0.104312  | 0.122669 | 0.099359  | 0.133013 |
| 0.129079 | 0.138695 | 0.126894 | 0.121212  | 0.138403 | 0.122086  | 0.13884  |
| 0.137238 | 0.142774 | 0.124272 | 0.121503  | 0.135198 | 0.120047  | 0.150204 |
| 0.128934 | 0.135052 | 0.11859  | 0.114656  | 0.135052 | 0.11116   | 0.142774 |
| 0.134615 | 0.140443 | 0.122523 | 0.123543  | 0.137238 | 0.120338  | 0.150787 |
| 0.127914 | 0.136364 | 0.120775 | 0.121795  | 0.132867 | 0.116841  | 0.145833 |
| 0.12704  | 0.137238 | 0.118153 | 0.115967  | 0.134615 | 0.112471  | 0.139423 |
| 0.114073 | 0.127185 | 0.112471 | 0.11553   | 0.12398  | 0.105332  | 0.130245 |
| 0.137675 | 0.142045 | 0.125291 | 0.126311  | 0.137383 | 0.120192  | 0.154429 |
| 0.115385 | 0.120921 | 0.108829 | 0.109266  | 0.117133 | 0.109557  | 0.124854 |
| 0.254953 | 0.263112 | 0.25102  | 0.248543  | 0.259615 | 0.247086  | 0.25947  |
| 0.126166 | 0.136072 | 0.118735 | 0.115385  | 0.134324 | 0.117424  | 0.140297 |
| 0.189248 | 0.201195 | 0.188228 | 0.180507  | 0.200321 | 0.177302  | 0.199592 |
| 0.199301 | 0.205128 | 0.187791 | 0.186189  | 0.204837 | 0.182984  | 0.2044   |
| 0.125728 | 0.135927 | 0.117424 | 0.115822  | 0.138258 | 0.10708   | 0.140443 |
| 0.121066 | 0.130099 | 0.108683 | 0.106789  | 0.121649 | 0.102127  | 0.135198 |
| 0.128642 | 0.137966 | 0.126748 | 0.120775  | 0.138549 | 0.121941  | 0.138112 |
| 0.127768 | 0.132139 | 0.115967 | 0.112908  | 0.131265 | 0.108246  | 0.142774 |
| 0.121212 | 0.131702 | 0.114365 | 0.108974  | 0.12704  | 0.106935  | 0.138258 |
| 0.113054 | 0.119172 | 0.099796 | 0.0955711 | 0.111597 | 0.0938228 | 0.123397 |
| 0.12602  | 0.135052 | 0.120921 | 0.116696  | 0.133304 | 0.115239  | 0.146562 |

|          |          |           |          |          |           |          |
|----------|----------|-----------|----------|----------|-----------|----------|
| 0.138549 | 0.142628 | 0.128497  | 0.127768 | 0.141754 | 0.123397  | 0.152681 |
| 0.124417 | 0.134615 | 0.117861  | 0.115093 | 0.134033 | 0.112471  | 0.135344 |
| 0.139277 | 0.146562 | 0.125146  | 0.128497 | 0.142483 | 0.124709  | 0.154575 |
| 0.125146 | 0.133596 | 0.113636  | 0.113782 | 0.131847 | 0.108537  | 0.137821 |
| 0.140589 | 0.145251 | 0.127914  | 0.124563 | 0.140006 | 0.11961   | 0.152389 |
| 0.134033 | 0.136655 | 0.113199  | 0.117424 | 0.129662 | 0.1081    | 0.144668 |
| 0.116987 | 0.116113 | 0.106643  | 0.10708  | 0.116404 | 0.107955  | 0.120047 |
| 0.129662 | 0.140152 | 0.122523  | 0.116841 | 0.134033 | 0.113928  | 0.145833 |
| 0.123252 | 0.133741 | 0.118444  | 0.112762 | 0.129953 | 0.111597  | 0.131847 |
| 0.138986 | 0.144522 | 0.128934  | 0.130245 | 0.138403 | 0.126748  | 0.149913 |
| 0.193328 | 0.20236  | 0.183858  | 0.181672 | 0.19799  | 0.178176  | 0.200175 |
| 0.1419   | 0.145688 | 0.133013  | 0.132867 | 0.143065 | 0.129662  | 0.15574  |
| 0.131702 | 0.136655 | 0.118735  | 0.118881 | 0.13549  | 0.117716  | 0.147873 |
| 0.137675 | 0.142628 | 0.122086  | 0.121066 | 0.133304 | 0.114948  | 0.151224 |
| 0.126166 | 0.132284 | 0.111742  | 0.108974 | 0.124709 | 0.107226  | 0.138258 |
| 0.131556 | 0.133304 | 0.11451   | 0.116696 | 0.128934 | 0.110286  | 0.13986  |
| 0.134033 | 0.134033 | 0.116987  | 0.121503 | 0.129662 | 0.114219  | 0.141754 |
| 0.200612 | 0.207896 | 0.191725  | 0.185752 | 0.205274 | 0.186334  | 0.206294 |
| 0.129516 | 0.136801 | 0.121503  | 0.11757  | 0.135927 | 0.118444  | 0.144231 |
| 0.120921 | 0.127622 | 0.107955  | 0.104895 | 0.124417 | 0.0999417 | 0.133304 |
| 0.133159 | 0.140443 | 0.124272  | 0.122669 | 0.139277 | 0.120047  | 0.14933  |
| 0.200612 | 0.20877  | 0.192308  | 0.186626 | 0.207314 | 0.185752  | 0.208042 |
| 0.120629 | 0.128788 | 0.107663  | 0.101981 | 0.121503 | 0.0999417 | 0.136218 |
| 0.109703 | 0.112034 | 0.101399  | 0.102127 | 0.113199 | 0.0983392 | 0.122378 |
| 0.134761 | 0.139423 | 0.122669  | 0.125146 | 0.136509 | 0.121358  | 0.150641 |
| 0.120921 | 0.129371 | 0.119027  | 0.114219 | 0.131993 | 0.1081    | 0.135052 |
| 0.19697  | 0.206294 | 0.18954   | 0.183566 | 0.202797 | 0.181235  | 0.2044   |
| 0.107226 | 0.111014 | 0.0992133 | 0.092366 | 0.111014 | 0.0984848 | 0.122523 |
| 0.127331 | 0.134324 | 0.11116   | 0.111014 | 0.126457 | 0.106352  | 0.135052 |
| 0.119172 | 0.130536 | 0.110868  | 0.106643 | 0.12296  | 0.100233  | 0.133013 |
| 0.132576 | 0.141317 | 0.122232  | 0.113928 | 0.142191 | 0.113636  | 0.144085 |
| 0.114948 | 0.127477 | 0.113636  | 0.111742 | 0.121358 | 0.10708   | 0.127622 |
| 0.110868 | 0.112617 | 0.105769  | 0.103293 | 0.111742 | 0.102127  | 0.122669 |
| 0.124854 | 0.136801 | 0.119464  | 0.112617 | 0.130973 | 0.111451  | 0.134033 |
| 0.12602  | 0.133304 | 0.120047  | 0.117861 | 0.128642 | 0.106206  | 0.137821 |
| 0.144231 | 0.143939 | 0.145833  | 0.142191 | 0.150932 | 0.140734  | 0.150787 |
| 0.241259 | 0.248252 | 0.237034  | 0.232809 | 0.247378 | 0.232517  | 0.244318 |
| 0.13141  | 0.141608 | 0.12602   | 0.125583 | 0.135781 | 0.120921  | 0.148747 |
| 0.115676 | 0.125291 | 0.114948  | 0.113054 | 0.126166 | 0.107517  | 0.128934 |
| 0.128351 | 0.133013 | 0.117133  | 0.116113 | 0.130973 | 0.111742  | 0.144522 |
| 0.129953 | 0.138403 | 0.122815  | 0.115385 | 0.136655 | 0.113928  | 0.140297 |
| 0.106789 | 0.113491 | 0.106352  | 0.101253 | 0.112617 | 0.0995047 | 0.124417 |
| 0.122523 | 0.126603 | 0.11451   | 0.114948 | 0.120484 | 0.110286  | 0.136072 |
| 0.130828 | 0.136655 | 0.122232  | 0.119755 | 0.136946 | 0.117424  | 0.144668 |



|          |          |           |           |          |           |          |
|----------|----------|-----------|-----------|----------|-----------|----------|
| 0.109703 | 0.113491 | 0.103438  | 0.101836  | 0.110868 | 0.101836  | 0.119755 |
| 0.120484 | 0.127768 | 0.118298  | 0.109411  | 0.129808 | 0.10708   | 0.131993 |
| 0.24155  | 0.249417 | 0.238491  | 0.235723  | 0.246795 | 0.232809  | 0.247232 |
| 0.119027 | 0.125437 | 0.106643  | 0.103293  | 0.11961  | 0.0986305 | 0.130828 |
| 0.113199 | 0.121358 | 0.099359  | 0.0995047 | 0.114073 | 0.0939685 | 0.12296  |
| 0.120047 | 0.129953 | 0.11757   | 0.114802  | 0.133741 | 0.110723  | 0.133304 |
| 0.129808 | 0.133596 | 0.129371  | 0.126894  | 0.139423 | 0.126894  | 0.145396 |
| 0.136509 | 0.145542 | 0.133741  | 0.129808  | 0.140297 | 0.125437  | 0.151515 |
| 0.127477 | 0.142045 | 0.125     | 0.118735  | 0.135344 | 0.112617  | 0.140734 |
| 0.129808 | 0.137675 | 0.118298  | 0.120192  | 0.135927 | 0.116404  | 0.147145 |
| 0.119755 | 0.124709 | 0.110868  | 0.111888  | 0.123543 | 0.1081    | 0.134178 |
| 0.23951  | 0.244172 | 0.232372  | 0.229312  | 0.242133 | 0.229021  | 0.239365 |
| 0.133159 | 0.141317 | 0.124854  | 0.125583  | 0.141026 | 0.121795  | 0.150787 |
| 0.108829 | 0.112908 | 0.0999417 | 0.097465  | 0.109994 | 0.0995047 | 0.121795 |
| 0.120192 | 0.125728 | 0.111888  | 0.105332  | 0.122523 | 0.102127  | 0.131702 |
| 0.121795 | 0.125    | 0.112034  | 0.115676  | 0.119755 | 0.116259  | 0.130682 |
| 0.123252 | 0.131702 | 0.113491  | 0.115093  | 0.122086 | 0.1081    | 0.129225 |
| 0.122086 | 0.131993 | 0.120775  | 0.113345  | 0.132576 | 0.111305  | 0.133596 |
| 0.111888 | 0.113054 | 0.102127  | 0.0999417 | 0.112179 | 0.102855  | 0.122815 |
| 0.114656 | 0.116113 | 0.106935  | 0.104458  | 0.114656 | 0.101836  | 0.12296  |
| 0.110577 | 0.114656 | 0.100233  | 0.097465  | 0.108829 | 0.095134  | 0.119464 |
| 0.122378 | 0.135781 | 0.117861  | 0.115093  | 0.132284 | 0.113054  | 0.135635 |
| 0.115093 | 0.126748 | 0.121649  | 0.123252  | 0.127622 | 0.113636  | 0.131847 |
| 0.120484 | 0.133304 | 0.12704   | 0.125437  | 0.131556 | 0.121358  | 0.135781 |
| 0.142045 | 0.146125 | 0.129079  | 0.128351  | 0.139423 | 0.123106  | 0.151224 |
| 0.141463 | 0.146416 | 0.134033  | 0.128642  | 0.14292  | 0.123106  | 0.155303 |
| 0.116259 | 0.129662 | 0.120192  | 0.12296   | 0.12704  | 0.116259  | 0.133304 |
| 0.12296  | 0.131993 | 0.112034  | 0.108683  | 0.127622 | 0.104312  | 0.137675 |
| 0.121941 | 0.12602  | 0.111014  | 0.112034  | 0.123689 | 0.109703  | 0.131119 |
| 0.124417 | 0.127622 | 0.119318  | 0.115967  | 0.131993 | 0.114802  | 0.123689 |
| 0.212413 | 0.219406 | 0.204108  | 0.20338   | 0.219114 | 0.201049  | 0.216929 |
| 0.130828 | 0.140443 | 0.129516  | 0.122086  | 0.138986 | 0.11859   | 0.146416 |
| 0.120047 | 0.129079 | 0.105915  | 0.105478  | 0.123834 | 0.0987762 | 0.124272 |
| 0.130099 | 0.138258 | 0.125874  | 0.120192  | 0.13884  | 0.118735  | 0.138112 |
| 0.230769 | 0.233683 | 0.223922  | 0.221154  | 0.236014 | 0.217657  | 0.235868 |
| 0.218531 | 0.228147 | 0.213724  | 0.210082  | 0.224068 | 0.207168  | 0.223048 |
| 0.11116  | 0.115822 | 0.10373   | 0.100379  | 0.113491 | 0.103001  | 0.12296  |
| 0.256993 | 0.262529 | 0.251894  | 0.247669  | 0.261364 | 0.245047  | 0.260052 |
| 0.124126 | 0.132867 | 0.11116   | 0.106061  | 0.126166 | 0.1081    | 0.138258 |
| 0.134324 | 0.143648 | 0.133013  | 0.130828  | 0.140734 | 0.126166  | 0.148456 |
| 0.117716 | 0.124126 | 0.111451  | 0.106061  | 0.120338 | 0.101981  | 0.133013 |
| 0.116696 | 0.13243  | 0.120921  | 0.116404  | 0.126894 | 0.112908  | 0.131702 |
| 0.194347 | 0.20338  | 0.189248  | 0.183275  | 0.202214 | 0.183858  | 0.200612 |
| 0.118444 | 0.125437 | 0.113928  | 0.112908  | 0.124272 | 0.111742  | 0.12704  |

|          |          |           |           |          |           |          |
|----------|----------|-----------|-----------|----------|-----------|----------|
| 0.205274 | 0.211684 | 0.195804  | 0.192162  | 0.207896 | 0.18954   | 0.210082 |
| 0.122815 | 0.130682 | 0.113928  | 0.112034  | 0.136801 | 0.108829  | 0.137238 |
| 0.114365 | 0.11757  | 0.104604  | 0.100379  | 0.118444 | 0.10271   | 0.132867 |
| 0.127768 | 0.135635 | 0.120047  | 0.120192  | 0.130973 | 0.117279  | 0.143648 |
| 0.123689 | 0.12602  | 0.112471  | 0.108829  | 0.128059 | 0.10912   | 0.136072 |
| 0.116841 | 0.126166 | 0.112908  | 0.109557  | 0.128497 | 0.106352  | 0.131556 |
| 0.125583 | 0.134907 | 0.11757   | 0.112179  | 0.130536 | 0.109266  | 0.141463 |
| 0.116841 | 0.125    | 0.105624  | 0.101399  | 0.118007 | 0.0990676 | 0.128351 |
| 0.128059 | 0.134761 | 0.113928  | 0.113782  | 0.130099 | 0.107663  | 0.142191 |
| 0.118298 | 0.126457 | 0.102418  | 0.100524  | 0.11859  | 0.0987762 | 0.127185 |
| 0.122669 | 0.133741 | 0.115822  | 0.111305  | 0.12704  | 0.11014   | 0.138258 |
| 0.11757  | 0.122815 | 0.109557  | 0.104167  | 0.119318 | 0.0986305 | 0.129662 |
| 0.132284 | 0.139277 | 0.125728  | 0.117133  | 0.136364 | 0.115967  | 0.145251 |
| 0.136946 | 0.143357 | 0.12602   | 0.129371  | 0.13986  | 0.12296   | 0.152535 |
| 0.130099 | 0.139132 | 0.117424  | 0.112908  | 0.131556 | 0.110868  | 0.144231 |
| 0.125874 | 0.134324 | 0.108829  | 0.113345  | 0.125583 | 0.105478  | 0.135344 |
| 0.119027 | 0.128351 | 0.111888  | 0.110286  | 0.126894 | 0.106789  | 0.130536 |
| 0.112034 | 0.114365 | 0.102855  | 0.101836  | 0.11553  | 0.101253  | 0.125583 |
| 0.116404 | 0.12602  | 0.112179  | 0.112617  | 0.121649 | 0.104749  | 0.127331 |
| 0.131702 | 0.134907 | 0.112034  | 0.11859   | 0.126457 | 0.107809  | 0.14088  |
| 0.131119 | 0.13986  | 0.119318  | 0.11859   | 0.130828 | 0.112471  | 0.144668 |
| 0.131556 | 0.139132 | 0.116841  | 0.118444  | 0.13447  | 0.113491  | 0.145688 |
| 0.136946 | 0.144231 | 0.128934  | 0.129953  | 0.138695 | 0.125     | 0.153118 |
| 0.141608 | 0.148893 | 0.13447   | 0.136655  | 0.146562 | 0.131702  | 0.158071 |
| 0.105332 | 0.110577 | 0.0917832 | 0.0866841 | 0.103584 | 0.0852273 | 0.116259 |
| 0.122523 | 0.134178 | 0.11655   | 0.113782  | 0.134761 | 0.112908  | 0.136655 |
| 0.115967 | 0.124126 | 0.107372  | 0.104604  | 0.119755 | 0.101399  | 0.133596 |
| 0.120047 | 0.131119 | 0.12398   | 0.127914  | 0.132284 | 0.118881  | 0.133887 |
| 0.121358 | 0.127768 | 0.111305  | 0.108537  | 0.122815 | 0.102418  | 0.134033 |
| 0.144376 | 0.139423 | 0.131119  | 0.136218  | 0.136509 | 0.127768  | 0.148893 |
| 0.138258 | 0.143794 | 0.139277  | 0.130973  | 0.145833 | 0.133304  | 0.143648 |
| 0.126457 | 0.130828 | 0.123689  | 0.120629  | 0.136364 | 0.11655   | 0.139423 |
| 0.128059 | 0.137092 | 0.113345  | 0.112908  | 0.128934 | 0.10912   | 0.143065 |
| 0.112471 | 0.122669 | 0.110577  | 0.100233  | 0.121795 | 0.0964452 | 0.134761 |
| 0.140152 | 0.147145 | 0.128642  | 0.128205  | 0.139569 | 0.121503  | 0.151952 |
| 0.21285  | 0.222756 | 0.206002  | 0.201195  | 0.219843 | 0.198572  | 0.214452 |
| 0.127185 | 0.136801 | 0.109266  | 0.113491  | 0.126603 | 0.105332  | 0.138112 |
| 0.126166 | 0.134615 | 0.113782  | 0.112179  | 0.129953 | 0.111888  | 0.14292  |
| 0.114073 | 0.125437 | 0.115385  | 0.113491  | 0.119901 | 0.106206  | 0.123252 |
| 0.131119 | 0.138112 | 0.121358  | 0.118298  | 0.130245 | 0.111014  | 0.144959 |
| 0.126894 | 0.137092 | 0.121212  | 0.116987  | 0.137675 | 0.11116   | 0.13986  |
| 0.128934 | 0.13039  | 0.119172  | 0.121358  | 0.130682 | 0.114948  | 0.139569 |
| 0.128788 | 0.131993 | 0.123106  | 0.125291  | 0.132284 | 0.11655   | 0.139714 |
| 0.124272 | 0.128642 | 0.122378  | 0.119027  | 0.13243  | 0.116113  | 0.136946 |

|           |           |           |           |           |           |           |
|-----------|-----------|-----------|-----------|-----------|-----------|-----------|
| 0.114073  | 0.124563  | 0.0976107 | 0.095134  | 0.116404  | 0.0948427 | 0.127622  |
| 0.114073  | 0.121649  | 0.119755  | 0.119027  | 0.126603  | 0.112908  | 0.128497  |
| 0.120775  | 0.132139  | 0.113928  | 0.112325  | 0.124563  | 0.110577  | 0.137821  |
| 0.129662  | 0.141317  | 0.11961   | 0.115385  | 0.132284  | 0.111597  | 0.142337  |
| 0.180507  | 0.190414  | 0.175699  | 0.169435  | 0.189831  | 0.17264   | 0.190268  |
| 0.13039   | 0.138549  | 0.11655   | 0.114656  | 0.135927  | 0.114073  | 0.145979  |
| 0.116259  | 0.130828  | 0.121649  | 0.120047  | 0.129953  | 0.113636  | 0.133013  |
| 0.123689  | 0.128642  | 0.111014  | 0.112034  | 0.125437  | 0.108246  | 0.137529  |
| 0.121212  | 0.129953  | 0.122815  | 0.112179  | 0.129079  | 0.111888  | 0.132139  |
| 0.121212  | 0.126748  | 0.108246  | 0.105478  | 0.123252  | 0.104021  | 0.13447   |
| 0.119464  | 0.129953  | 0.107955  | 0.104312  | 0.119755  | 0.10169   | 0.135344  |
| 0.123834  | 0.129079  | 0.112325  | 0.111597  | 0.127331  | 0.1081    | 0.139714  |
| 0.0847902 | 0.0967366 | 0.099796  | 0.0897436 | 0.099359  | 0.0958625 | 0.0980478 |
| 0.129953  | 0.139569  | 0.121358  | 0.114219  | 0.134615  | 0.112471  | 0.144085  |
| 0.137092  | 0.13884   | 0.118881  | 0.121358  | 0.133596  | 0.121066  | 0.145396  |
| 0.120047  | 0.125874  | 0.109703  | 0.104021  | 0.122669  | 0.0996503 | 0.135344  |
| 0.124854  | 0.133304  | 0.108683  | 0.107372  | 0.127477  | 0.106789  | 0.138695  |
| 0.0906177 | 0.0949883 | 0.0971737 | 0.0958625 | 0.0926573 | 0.0932401 | 0.0962995 |
| 0.117716  | 0.125583  | 0.110577  | 0.107226  | 0.123834  | 0.104895  | 0.133887  |
| 0.129079  | 0.13141   | 0.118153  | 0.123252  | 0.128497  | 0.111597  | 0.14292   |
| 0.11655   | 0.127622  | 0.105041  | 0.100233  | 0.121795  | 0.100233  | 0.133887  |
| 0.112762  | 0.127331  | 0.106206  | 0.106061  | 0.125291  | 0.10373   | 0.135052  |
| 0.12296   | 0.129371  | 0.10912   | 0.1081    | 0.123252  | 0.105186  | 0.133887  |
| 0.128642  | 0.133304  | 0.117716  | 0.114656  | 0.129808  | 0.112325  | 0.135781  |
| 0.117861  | 0.121066  | 0.102855  | 0.0960082 | 0.114073  | 0.0983392 | 0.132867  |
| 0.133887  | 0.135052  | 0.128497  | 0.128059  | 0.132139  | 0.125728  | 0.146853  |
| 0.133013  | 0.137675  | 0.123252  | 0.116113  | 0.13243   | 0.116113  | 0.145688  |
| 0.123689  | 0.129516  | 0.108392  | 0.104458  | 0.128934  | 0.103875  | 0.138695  |
| 0.13345   | 0.133741  | 0.122232  | 0.12296   | 0.122086  | 0.118881  | 0.137092  |
| 0.128497  | 0.138112  | 0.120484  | 0.115967  | 0.133159  | 0.113636  | 0.141754  |
| 0.126166  | 0.127622  | 0.126311  | 0.120921  | 0.129662  | 0.121795  | 0.128351  |
| 0.115967  | 0.121212  | 0.108537  | 0.107517  | 0.124417  | 0.109266  | 0.135052  |
| 0.134178  | 0.149913  | 0.13986   | 0.137966  | 0.147582  | 0.134178  | 0.145396  |
| 0.135635  | 0.137383  | 0.130536  | 0.122232  | 0.13039   | 0.119318  | 0.142483  |
| 0.102127  | 0.103293  | 0.112471  | 0.107372  | 0.106789  | 0.101544  | 0.107809  |
| 0.127768  | 0.137383  | 0.115385  | 0.116696  | 0.128642  | 0.109703  | 0.138695  |
| 0.111888  | 0.125     | 0.103875  | 0.0964452 | 0.120047  | 0.100816  | 0.133013  |
| 0.115822  | 0.13039   | 0.1081    | 0.104458  | 0.122815  | 0.0995047 | 0.127914  |
| 0.0912005 | 0.0981935 | 0.0770688 | 0.0888695 | 0.0906177 | 0.0839161 | 0.0913462 |
| 0.121503  | 0.130828  | 0.112325  | 0.113928  | 0.125291  | 0.112762  | 0.135344  |
| 0.131265  | 0.133596  | 0.122086  | 0.122523  | 0.131847  | 0.120192  | 0.148893  |
| 0.128059  | 0.137675  | 0.118881  | 0.114073  | 0.130099  | 0.112325  | 0.142774  |
| 0.11757   | 0.122523  | 0.105186  | 0.101836  | 0.119027  | 0.0992133 | 0.129953  |
| 0.115967  | 0.128788  | 0.104458  | 0.100816  | 0.124417  | 0.0973193 | 0.128059  |

|          |          |          |          |          |           |          |
|----------|----------|----------|----------|----------|-----------|----------|
| 0.123106 | 0.126603 | 0.114802 | 0.114948 | 0.129225 | 0.107372  | 0.136364 |
| 0.116404 | 0.119901 | 0.106061 | 0.101544 | 0.120775 | 0.0986305 | 0.132576 |
| 0.121503 | 0.130245 | 0.117279 | 0.111305 | 0.128497 | 0.110431  | 0.134761 |
| 0.125291 | 0.129953 | 0.110577 | 0.111014 | 0.126748 | 0.107517  | 0.138549 |
| 0.128351 | 0.139423 | 0.124417 | 0.120192 | 0.13447  | 0.114948  | 0.138112 |
| 0.121941 | 0.13447  | 0.117133 | 0.11116  | 0.129516 | 0.110286  | 0.137821 |
| 0.122232 | 0.130099 | 0.111888 | 0.108246 | 0.123689 | 0.103875  | 0.134033 |
| 0.119318 | 0.128351 | 0.109557 | 0.108246 | 0.122232 | 0.101544  | 0.136655 |
| 0.127914 | 0.138986 | 0.119027 | 0.116259 | 0.130245 | 0.109266  | 0.140589 |
| 0.126894 | 0.132139 | 0.118007 | 0.112325 | 0.130682 | 0.10912   | 0.141026 |
| 0.131265 | 0.143211 | 0.128788 | 0.12398  | 0.136801 | 0.119027  | 0.150058 |
| 0.118444 | 0.128351 | 0.112179 | 0.106789 | 0.126894 | 0.101544  | 0.128205 |
| 0.133159 | 0.1419   | 0.125437 | 0.125291 | 0.13345  | 0.120047  | 0.148747 |

| TDr_09_00108 | TDr_09_00114 | TDr_09_00120 | TDr_09_00123 | TDr_09_00124 | TDr_09_00125 | TDr_09_00131 |
|--------------|--------------|--------------|--------------|--------------|--------------|--------------|
| 0.134324     | 0.13243      | 0.114656     | 0.112471     | 0.132721     | 0.131119     | 0.132867     |
| 0.129808     | 0.130536     | 0.113928     | 0.110577     | 0.128788     | 0.124563     | 0.131847     |
| 0.125437     | 0.12704      | 0.105186     | 0.10271      | 0.122669     | 0.11757      | 0.127477     |
| 0.127477     | 0.132576     | 0.107517     | 0.110286     | 0.120629     | 0.125146     | 0.133304     |
| 0.148456     | 0.138986     | 0.120047     | 0.125728     | 0.133159     | 0.135635     | 0.13447      |
| 0.144085     | 0.134324     | 0.123543     | 0.122523     | 0.138403     | 0.134178     | 0.140297     |
| 0.132284     | 0.128059     | 0.106789     | 0.107226     | 0.118735     | 0.121795     | 0.119464     |
| 0.128788     | 0.13039      | 0.105624     | 0.108392     | 0.122232     | 0.120047     | 0.126166     |
| 0.115822     | 0.127622     | 0.100233     | 0.0933858    | 0.11655      | 0.10912      | 0.121941     |
| 0.109266     | 0.127185     | 0.105915     | 0.102855     | 0.121941     | 0.120047     | 0.128205     |
| 0.13243      | 0.131993     | 0.108974     | 0.110286     | 0.124417     | 0.122815     | 0.126894     |
| 0.129371     | 0.121358     | 0.0989219    | 0.0955711    | 0.117279     | 0.110723     | 0.11451      |
| 0.124709     | 0.13039      | 0.108537     | 0.104312     | 0.121941     | 0.120629     | 0.131119     |
| 0.142045     | 0.151807     | 0.13345      | 0.132139     | 0.145979     | 0.145251     | 0.151661     |
| 0.128205     | 0.136801     | 0.122815     | 0.122086     | 0.133304     | 0.132867     | 0.143939     |
| 0.130973     | 0.117424     | 0.103147     | 0.102418     | 0.113928     | 0.113199     | 0.116113     |
| 0.122669     | 0.128351     | 0.103875     | 0.0990676    | 0.117861     | 0.119172     | 0.116841     |
| 0.156906     | 0.142483     | 0.138112     | 0.133596     | 0.146853     | 0.148164     | 0.150787     |
| 0.124854     | 0.124417     | 0.102273     | 0.0992133    | 0.116841     | 0.110868     | 0.123397     |
| 0.202652     | 0.20134      | 0.206876     | 0.200612     | 0.213869     | 0.207022     | 0.209353     |
| 0.140152     | 0.128351     | 0.113782     | 0.112471     | 0.13447      | 0.126166     | 0.131702     |
| 0.136218     | 0.131119     | 0.111888     | 0.102418     | 0.127331     | 0.122815     | 0.129225     |
| 0.117716     | 0.114365     | 0.0983392    | 0.0949883    | 0.11116      | 0.109848     | 0.117424     |
| 0.134178     | 0.122086     | 0.10169      | 0.102127     | 0.106061     | 0.106206     | 0.110577     |
| 0.119464     | 0.118153     | 0.0954254    | 0.0961538    | 0.10912      | 0.115967     | 0.120629     |
| 0.139569     | 0.129225     | 0.114948     | 0.116259     | 0.135052     | 0.121503     | 0.135781     |
| 0.135781     | 0.129516     | 0.106789     | 0.113636     | 0.115239     | 0.124709     | 0.120338     |
| 0.130245     | 0.120192     | 0.0971737    | 0.094697     | 0.102127     | 0.105478     | 0.11859      |
| 0.138695     | 0.133887     | 0.117279     | 0.112762     | 0.121066     | 0.117424     | 0.126166     |
| 0.120629     | 0.133596     | 0.110286     | 0.105186     | 0.123689     | 0.115967     | 0.129662     |
| 0.135344     | 0.130828     | 0.112471     | 0.11116      | 0.128497     | 0.122523     | 0.125437     |
| 0.13141      | 0.124854     | 0.105332     | 0.10373      | 0.112908     | 0.111597     | 0.123252     |
| 0.123543     | 0.116987     | 0.103584     | 0.0973193    | 0.119027     | 0.112471     | 0.123834     |
| 0.132867     | 0.128059     | 0.109411     | 0.10373      | 0.121649     | 0.119755     | 0.127331     |
| 0.128059     | 0.127331     | 0.11014      | 0.10912      | 0.120047     | 0.121358     | 0.124272     |
| 0.134033     | 0.135052     | 0.118444     | 0.114219     | 0.125437     | 0.126457     | 0.12704      |
| 0.134761     | 0.143357     | 0.119172     | 0.120775     | 0.130536     | 0.131847     | 0.136801     |
| 0.128205     | 0.133304     | 0.108829     | 0.107517     | 0.121649     | 0.117133     | 0.130245     |
| 0.124126     | 0.116696     | 0.0863928    | 0.0888695    | 0.106789     | 0.101399     | 0.112471     |
| 0.134615     | 0.129225     | 0.0989219    | 0.102855     | 0.110286     | 0.113928     | 0.115093     |
| 0.123543     | 0.122815     | 0.0849359    | 0.0914918    | 0.099796     | 0.106643     | 0.111014     |
| 0.141608     | 0.136801     | 0.120192     | 0.120629     | 0.12398      | 0.128205     | 0.132867     |

|          |          |           |           |           |           |           |
|----------|----------|-----------|-----------|-----------|-----------|-----------|
| 0.145688 | 0.139423 | 0.122815  | 0.125583  | 0.128642  | 0.133159  | 0.126457  |
| 0.125146 | 0.124709 | 0.090035  | 0.0945513 | 0.11014   | 0.111742  | 0.114948  |
| 0.114073 | 0.1081   | 0.0912005 | 0.0936772 | 0.109266  | 0.110868  | 0.110577  |
| 0.109557 | 0.132139 | 0.10067   | 0.106352  | 0.121649  | 0.120629  | 0.126166  |
| 0.136946 | 0.109411 | 0.0846445 | 0.0827506 | 0.0907634 | 0.0891608 | 0.0979021 |
| 0.138258 | 0.138112 | 0.115385  | 0.113199  | 0.120047  | 0.122523  | 0.122523  |
| 0.129808 | 0.122669 | 0.0917832 | 0.0939685 | 0.104604  | 0.109411  | 0.116113  |
| 0.120047 | 0.126311 | 0.0962995 | 0.0979021 | 0.107372  | 0.111014  | 0.113636  |
| 0.151952 | 0.157051 | 0.139569  | 0.135635  | 0.147436  | 0.14292   | 0.147873  |
| 0.135927 | 0.120921 | 0.105186  | 0.105332  | 0.110723  | 0.113199  | 0.10708   |
| 0.122669 | 0.125437 | 0.0925117 | 0.0917832 | 0.110868  | 0.107517  | 0.112179  |
| 0.129079 | 0.140297 | 0.118153  | 0.11655   | 0.13447   | 0.130245  | 0.143648  |
| 0.129079 | 0.123106 | 0.103001  | 0.106935  | 0.117861  | 0.11859   | 0.120047  |
| 0.152972 | 0.121358 | 0.0986305 | 0.101399  | 0.0968823 | 0.0979021 | 0.0949883 |
| 0.138258 | 0.135198 | 0.106935  | 0.106498  | 0.115093  | 0.11757   | 0.11961   |
| 0.128642 | 0.125    | 0.0932401 | 0.097465  | 0.107809  | 0.112617  | 0.113199  |
| 0.129808 | 0.123834 | 0.104312  | 0.0962995 | 0.115093  | 0.108829  | 0.113782  |
| 0.127331 | 0.130973 | 0.106206  | 0.10373   | 0.120775  | 0.115676  | 0.112471  |
| 0.137821 | 0.135052 | 0.111742  | 0.118007  | 0.11961   | 0.122669  | 0.128497  |
| 0.148019 | 0.141754 | 0.119318  | 0.123252  | 0.121649  | 0.127622  | 0.129662  |
| 0.164773 | 0.158508 | 0.148893  | 0.149913  | 0.157634  | 0.152535  | 0.163024  |
| 0.13039  | 0.125    | 0.0906177 | 0.095134  | 0.104021  | 0.109411  | 0.116404  |
| 0.122523 | 0.125583 | 0.0891608 | 0.0925117 | 0.106352  | 0.106789  | 0.113491  |
| 0.130682 | 0.117424 | 0.085373  | 0.0939685 | 0.108392  | 0.110868  | 0.107955  |
| 0.143065 | 0.144959 | 0.130973  | 0.13345   | 0.141463  | 0.141026  | 0.140152  |
| 0.131993 | 0.123106 | 0.0901807 | 0.0955711 | 0.105041  | 0.110723  | 0.11655   |
| 0.140006 | 0.107809 | 0.107226  | 0.10271   | 0.11451   | 0.107663  | 0.104167  |
| 0.130099 | 0.129953 | 0.104604  | 0.108537  | 0.115676  | 0.121066  | 0.121066  |
| 0.130245 | 0.122523 | 0.0913462 | 0.0981935 | 0.106789  | 0.113928  | 0.109848  |
| 0.144814 | 0.144085 | 0.137092  | 0.136655  | 0.145542  | 0.145688  | 0.146853  |
| 0.136072 | 0.12398  | 0.0992133 | 0.102564  | 0.11116   | 0.118881  | 0.114802  |
| 0.144668 | 0.134324 | 0.116259  | 0.114948  | 0.125     | 0.120484  | 0.115822  |
| 0.140734 | 0.129808 | 0.105332  | 0.108683  | 0.114948  | 0.117716  | 0.116841  |
| 0.131556 | 0.108392 | 0.0996503 | 0.102127  | 0.110431  | 0.115822  | 0.119318  |
| 0.123106 | 0.124126 | 0.0888695 | 0.0922203 | 0.104604  | 0.106206  | 0.114073  |
| 0.131847 | 0.121795 | 0.0894522 | 0.0960082 | 0.104895  | 0.113491  | 0.113782  |
| 0.14292  | 0.133741 | 0.108683  | 0.113199  | 0.113054  | 0.11961   | 0.122815  |
| 0.125874 | 0.125146 | 0.0869755 | 0.0958625 | 0.110577  | 0.111305  | 0.112179  |
| 0.138258 | 0.136364 | 0.111305  | 0.114365  | 0.119464  | 0.120775  | 0.13039   |
| 0.134761 | 0.13141  | 0.0987762 | 0.103001  | 0.1081    | 0.115822  | 0.119901  |
| 0.133304 | 0.122086 | 0.0976107 | 0.0954254 | 0.107517  | 0.0995047 | 0.108829  |
| 0.128642 | 0.127622 | 0.0964452 | 0.100087  | 0.107809  | 0.115822  | 0.114948  |
| 0.137383 | 0.12704  | 0.0984848 | 0.0968823 | 0.110723  | 0.109411  | 0.118444  |
| 0.133596 | 0.119755 | 0.0926573 | 0.0954254 | 0.109848  | 0.108829  | 0.112034  |

|          |          |           |           |          |           |          |
|----------|----------|-----------|-----------|----------|-----------|----------|
| 0.128059 | 0.123834 | 0.0897436 | 0.0954254 | 0.10373  | 0.110286  | 0.10912  |
| 0.136655 | 0.137092 | 0.113782  | 0.118298  | 0.120775 | 0.124417  | 0.123543 |
| 0.123834 | 0.126894 | 0.0919289 | 0.0979021 | 0.110868 | 0.115093  | 0.120047 |
| 0.121649 | 0.131119 | 0.099359  | 0.100087  | 0.115676 | 0.112325  | 0.121358 |
| 0.136218 | 0.129079 | 0.108974  | 0.113491  | 0.120921 | 0.122232  | 0.123106 |
| 0.135344 | 0.137529 | 0.113345  | 0.114656  | 0.121795 | 0.124272  | 0.122523 |
| 0.130682 | 0.105769 | 0.115676  | 0.110286  | 0.123543 | 0.11757   | 0.127768 |
| 0.140443 | 0.110868 | 0.125146  | 0.121503  | 0.128059 | 0.127331  | 0.132576 |
| 0.130099 | 0.125    | 0.10373   | 0.104749  | 0.125583 | 0.121941  | 0.123397 |
| 0.181381 | 0.176865 | 0.174242  | 0.17701   | 0.190268 | 0.185169  | 0.181964 |
| 0.129662 | 0.124563 | 0.0942599 | 0.0984848 | 0.113491 | 0.116841  | 0.116841 |
| 0.136509 | 0.113928 | 0.124709  | 0.120775  | 0.131993 | 0.127185  | 0.127768 |
| 0.133887 | 0.109266 | 0.115967  | 0.112617  | 0.12296  | 0.122232  | 0.123106 |
| 0.142191 | 0.142337 | 0.121649  | 0.125583  | 0.130973 | 0.136655  | 0.131119 |
| 0.123106 | 0.108392 | 0.097028  | 0.095134  | 0.110431 | 0.11116   | 0.116987 |
| 0.135927 | 0.107226 | 0.115676  | 0.111451  | 0.121212 | 0.118444  | 0.128059 |
| 0.128351 | 0.107517 | 0.10169   | 0.099796  | 0.118298 | 0.115822  | 0.116696 |
| 0.132576 | 0.101544 | 0.107955  | 0.109266  | 0.121941 | 0.115967  | 0.116841 |
| 0.12296  | 0.122232 | 0.103001  | 0.101399  | 0.11961  | 0.115967  | 0.122086 |
| 0.140152 | 0.107955 | 0.119901  | 0.118007  | 0.119318 | 0.125874  | 0.125583 |
| 0.107809 | 0.12398  | 0.0907634 | 0.0976107 | 0.109411 | 0.112471  | 0.112471 |
| 0.134761 | 0.121503 | 0.121795  | 0.121358  | 0.130245 | 0.131847  | 0.133013 |
| 0.123252 | 0.129516 | 0.0977564 | 0.106061  | 0.116987 | 0.120338  | 0.122669 |
| 0.137092 | 0.132576 | 0.112762  | 0.105041  | 0.119172 | 0.109994  | 0.121066 |
| 0.130245 | 0.141463 | 0.114073  | 0.11859   | 0.126894 | 0.131993  | 0.134907 |
| 0.127331 | 0.125146 | 0.0965909 | 0.0952797 | 0.112034 | 0.113636  | 0.112179 |
| 0.143939 | 0.135635 | 0.133304  | 0.134907  | 0.142337 | 0.140152  | 0.142483 |
| 0.126894 | 0.121503 | 0.102273  | 0.0995047 | 0.115676 | 0.118444  | 0.114948 |
| 0.123689 | 0.114219 | 0.0999417 | 0.100087  | 0.11655  | 0.113491  | 0.121941 |
| 0.114219 | 0.120775 | 0.0968823 | 0.085373  | 0.102418 | 0.0999417 | 0.104895 |
| 0.134907 | 0.146125 | 0.127477  | 0.127914  | 0.13884  | 0.138695  | 0.141608 |
| 0.133741 | 0.108537 | 0.101836  | 0.0976107 | 0.113782 | 0.106352  | 0.114219 |
| 0.120629 | 0.107663 | 0.0948427 | 0.0979021 | 0.111451 | 0.113054  | 0.117133 |
| 0.122669 | 0.10708  | 0.100379  | 0.0958625 | 0.112325 | 0.107809  | 0.115093 |
| 0.130099 | 0.135198 | 0.108974  | 0.10708   | 0.122086 | 0.12398   | 0.128934 |
| 0.130245 | 0.135927 | 0.11116   | 0.112762  | 0.123106 | 0.123543  | 0.133741 |
| 0.129225 | 0.130245 | 0.101399  | 0.105332  | 0.11655  | 0.11961   | 0.118153 |
| 0.119172 | 0.120775 | 0.0895979 | 0.0976107 | 0.101544 | 0.110431  | 0.113345 |
| 0.122378 | 0.124854 | 0.0884324 | 0.0949883 | 0.108829 | 0.111888  | 0.114219 |
| 0.122232 | 0.125583 | 0.0912005 | 0.0965909 | 0.108683 | 0.115822  | 0.113491 |
| 0.124854 | 0.12704  | 0.104895  | 0.105624  | 0.120629 | 0.116404  | 0.121649 |
| 0.133159 | 0.135052 | 0.113199  | 0.115093  | 0.123689 | 0.119755  | 0.124709 |
| 0.126894 | 0.129953 | 0.0938228 | 0.0936772 | 0.108974 | 0.109411  | 0.11757  |
| 0.116259 | 0.122815 | 0.0895979 | 0.0955711 | 0.104167 | 0.110723  | 0.113054 |

|          |          |           |           |           |           |           |
|----------|----------|-----------|-----------|-----------|-----------|-----------|
| 0.120921 | 0.128934 | 0.101836  | 0.107226  | 0.116113  | 0.117716  | 0.119464  |
| 0.118444 | 0.125291 | 0.0839161 | 0.0986305 | 0.104312  | 0.112325  | 0.112034  |
| 0.135052 | 0.134907 | 0.11859   | 0.113782  | 0.12704   | 0.132139  | 0.131265  |
| 0.14292  | 0.144522 | 0.124709  | 0.120775  | 0.135198  | 0.134178  | 0.137092  |
| 0.121358 | 0.123252 | 0.0999417 | 0.102127  | 0.109848  | 0.113782  | 0.114656  |
| 0.127622 | 0.131265 | 0.0986305 | 0.0955711 | 0.113782  | 0.112471  | 0.118298  |
| 0.123834 | 0.126603 | 0.0922203 | 0.0952797 | 0.107663  | 0.110723  | 0.108974  |
| 0.117133 | 0.113491 | 0.0948427 | 0.094697  | 0.109703  | 0.11014   | 0.113928  |
| 0.129371 | 0.131847 | 0.108537  | 0.113636  | 0.118735  | 0.120921  | 0.124417  |
| 0.115676 | 0.122815 | 0.0919289 | 0.0917832 | 0.11116   | 0.110723  | 0.115385  |
| 0.14292  | 0.145396 | 0.124126  | 0.124272  | 0.137238  | 0.132139  | 0.134761  |
| 0.128205 | 0.144085 | 0.118735  | 0.125583  | 0.135052  | 0.138986  | 0.13549   |
| 0.11859  | 0.134761 | 0.103875  | 0.115676  | 0.125728  | 0.12704   | 0.134033  |
| 0.119901 | 0.133741 | 0.10373   | 0.105915  | 0.118298  | 0.121066  | 0.129225  |
| 0.125437 | 0.126457 | 0.104604  | 0.104749  | 0.116841  | 0.121066  | 0.13039   |
| 0.122378 | 0.123689 | 0.0913462 | 0.100816  | 0.108246  | 0.114802  | 0.113928  |
| 0.123106 | 0.122378 | 0.0897436 | 0.0872669 | 0.107226  | 0.101253  | 0.110286  |
| 0.124563 | 0.118007 | 0.0912005 | 0.0898893 | 0.104312  | 0.104458  | 0.10708   |
| 0.125728 | 0.116259 | 0.0897436 | 0.0895979 | 0.109557  | 0.10708   | 0.113782  |
| 0.138258 | 0.113345 | 0.0952797 | 0.0910548 | 0.0973193 | 0.0960082 | 0.0968823 |
| 0.127914 | 0.108246 | 0.104749  | 0.0996503 | 0.117861  | 0.11451   | 0.123252  |
| 0.128642 | 0.136946 | 0.117716  | 0.117861  | 0.129371  | 0.129516  | 0.137383  |
| 0.138986 | 0.135052 | 0.119027  | 0.120047  | 0.130682  | 0.129662  | 0.127914  |
| 0.198135 | 0.19799  | 0.190122  | 0.190851  | 0.203234  | 0.199883  | 0.199592  |
| 0.236451 | 0.237179 | 0.235431  | 0.234411  | 0.245338  | 0.241987  | 0.238782  |
| 0.13141  | 0.113782 | 0.097465  | 0.0821678 | 0.113491  | 0.0973193 | 0.113054  |
| 0.127477 | 0.108683 | 0.0646853 | 0.0729895 | 0.0844988 | 0.0861014 | 0.095134  |
| 0.121649 | 0.103147 | 0.0789627 | 0.0761946 | 0.0999417 | 0.0913462 | 0.100962  |
| 0.131265 | 0.108392 | 0.076049  | 0.0726981 | 0.0914918 | 0.0875583 | 0.10067   |
| 0.130973 | 0.137529 | 0.123543  | 0.120775  | 0.136072  | 0.131265  | 0.14292   |
| 0.135052 | 0.107809 | 0.0804196 | 0.0689103 | 0.0874126 | 0.0826049 | 0.0954254 |
| 0.155594 | 0.123397 | 0.113491  | 0.108683  | 0.102418  | 0.1081    | 0.0949883 |
| 0.136801 | 0.110431 | 0.0777972 | 0.0726981 | 0.07838   | 0.0837704 | 0.0910548 |
| 0.142045 | 0.117133 | 0.0909091 | 0.092803  | 0.0926573 | 0.0930944 | 0.0930944 |
| 0.138403 | 0.109994 | 0.10271   | 0.102273  | 0.109703  | 0.102855  | 0.10169   |
| 0.136072 | 0.107372 | 0.0971737 | 0.0935315 | 0.105915  | 0.0914918 | 0.101107  |
| 0.138695 | 0.136801 | 0.11961   | 0.115385  | 0.124854  | 0.126457  | 0.125291  |
| 0.129662 | 0.113199 | 0.0753205 | 0.0844988 | 0.0936772 | 0.0967366 | 0.0967366 |
| 0.126457 | 0.110868 | 0.0747378 | 0.0725524 | 0.0828963 | 0.0894522 | 0.0859557 |
| 0.129808 | 0.1081   | 0.0833333 | 0.0759033 | 0.0935315 | 0.0907634 | 0.0939685 |
| 0.127185 | 0.104021 | 0.0708042 | 0.0715326 | 0.080711  | 0.0791084 | 0.090472  |
| 0.125728 | 0.113636 | 0.0699301 | 0.0750291 | 0.0842075 | 0.0863928 | 0.0837704 |
| 0.134615 | 0.109703 | 0.0706585 | 0.0842075 | 0.0893065 | 0.100233  | 0.0990676 |
| 0.134761 | 0.106352 | 0.0920746 | 0.083479  | 0.101399  | 0.0817308 | 0.0930944 |



|           |          |           |           |           |           |           |
|-----------|----------|-----------|-----------|-----------|-----------|-----------|
| 0.148164  | 0.106935 | 0.102855  | 0.0893065 | 0.104312  | 0.0808566 | 0.0986305 |
| 0.132867  | 0.116113 | 0.0738636 | 0.0815851 | 0.0796911 | 0.0932401 | 0.0856643 |
| 0.130099  | 0.111888 | 0.0804196 | 0.076486  | 0.0903263 | 0.090472  | 0.097465  |
| 0.143502  | 0.113928 | 0.0929487 | 0.0875583 | 0.0932401 | 0.0887238 | 0.0901807 |
| 0.127477  | 0.111014 | 0.0769231 | 0.0706585 | 0.090035  | 0.0828963 | 0.0884324 |
| 0.148893  | 0.110286 | 0.105915  | 0.0996503 | 0.100087  | 0.104021  | 0.0955711 |
| 0         | 0.142628 | 0.126311  | 0.125874  | 0.141754  | 0.134615  | 0.145979  |
| 0.142628  | 0        | 0.109557  | 0.103875  | 0.113054  | 0.103584  | 0.108829  |
| 0.126311  | 0.109557 | 0         | 0.0776515 | 0.0754662 | 0.0922203 | 0.0954254 |
| 0.125874  | 0.103875 | 0.0776515 | 0         | 0.092803  | 0.0509907 | 0.0859557 |
| 0.141754  | 0.113054 | 0.0754662 | 0.092803  | 0         | 0.0954254 | 0.0942599 |
| 0.134615  | 0.103584 | 0.0922203 | 0.0509907 | 0.0954254 | 0         | 0.0862471 |
| 0.145979  | 0.108829 | 0.0954254 | 0.0859557 | 0.0942599 | 0.0862471 | 0         |
| 0.136801  | 0.107809 | 0.0824592 | 0.0840618 | 0.0938228 | 0.0965909 | 0.0913462 |
| 0.134033  | 0.104458 | 0.0837704 | 0.0856643 | 0.0939685 | 0.0964452 | 0.0967366 |
| 0.13986   | 0.105332 | 0.0916375 | 0.0812937 | 0.0907634 | 0.0859557 | 0.0868298 |
| 0.13986   | 0.11553  | 0.0977564 | 0.0888695 | 0.100087  | 0.0868298 | 0.0981935 |
| 0.140443  | 0.111451 | 0.0933858 | 0.0879953 | 0.0968823 | 0.0912005 | 0.0903263 |
| 0.141171  | 0.115093 | 0.102855  | 0.0901807 | 0.097028  | 0.0936772 | 0.101253  |
| 0.140443  | 0.128059 | 0.112617  | 0.111014  | 0.118444  | 0.117716  | 0.123834  |
| 0.137821  | 0.119318 | 0.0753205 | 0.080711  | 0.0884324 | 0.0952797 | 0.0891608 |
| 0.143065  | 0.11116  | 0.097465  | 0.0865385 | 0.0916375 | 0.0909091 | 0.0935315 |
| 0.12602   | 0.108392 | 0.0716783 | 0.0761946 | 0.0879953 | 0.0884324 | 0.0895979 |
| 0.126166  | 0.118153 | 0.0907634 | 0.100233  | 0.107663  | 0.114802  | 0.110723  |
| 0.128788  | 0.107372 | 0.0750291 | 0.0789627 | 0.092803  | 0.0920746 | 0.0979021 |
| 0.129516  | 0.103438 | 0.076049  | 0.0756119 | 0.0909091 | 0.0925117 | 0.0962995 |
| 0.126603  | 0.1081   | 0.0725524 | 0.0785256 | 0.0844988 | 0.0887238 | 0.0898893 |
| 0.144522  | 0.111451 | 0.099796  | 0.0903263 | 0.103293  | 0.0833333 | 0.0955711 |
| 0.135052  | 0.123252 | 0.101107  | 0.0939685 | 0.108683  | 0.109703  | 0.111742  |
| 0.145542  | 0.111597 | 0.101107  | 0.0901807 | 0.107809  | 0.0887238 | 0.100087  |
| 0.129516  | 0.105478 | 0.0751748 | 0.0700758 | 0.0839161 | 0.081148  | 0.090472  |
| 0.138695  | 0.114948 | 0.0863928 | 0.0856643 | 0.08581   | 0.0891608 | 0.085373  |
| 0.128351  | 0.125874 | 0.115967  | 0.114656  | 0.126166  | 0.118153  | 0.128351  |
| 0.0619172 | 0.13549  | 0.106352  | 0.109703  | 0.125291  | 0.12398   | 0.131847  |
| 0.128497  | 0.133596 | 0.100087  | 0.10169   | 0.109411  | 0.112179  | 0.118298  |
| 0.118153  | 0.125874 | 0.104021  | 0.109411  | 0.11655   | 0.121066  | 0.126894  |
| 0.111888  | 0.135344 | 0.107372  | 0.109266  | 0.124563  | 0.124126  | 0.12296   |
| 0.127622  | 0.125728 | 0.0968823 | 0.101399  | 0.114656  | 0.120921  | 0.118298  |
| 0.134033  | 0.151078 | 0.127477  | 0.122378  | 0.135052  | 0.13345   | 0.14627   |
| 0.141463  | 0.145105 | 0.125874  | 0.124272  | 0.134615  | 0.129808  | 0.140006  |
| 0.113491  | 0.130536 | 0.102564  | 0.10067   | 0.115385  | 0.117279  | 0.120192  |
| 0.130828  | 0.113491 | 0.124854  | 0.119464  | 0.132721  | 0.12704   | 0.135198  |
| 0.121941  | 0.141317 | 0.118007  | 0.112325  | 0.129953  | 0.128059  | 0.136801  |
| 0.130973  | 0.113054 | 0.118881  | 0.111742  | 0.132576  | 0.124272  | 0.133013  |

|           |           |           |           |          |          |          |
|-----------|-----------|-----------|-----------|----------|----------|----------|
| 0.118444  | 0.104312  | 0.110723  | 0.110868  | 0.123543 | 0.11961  | 0.125437 |
| 0.123689  | 0.139569  | 0.114219  | 0.109994  | 0.125    | 0.125437 | 0.133013 |
| 0.131119  | 0.141463  | 0.120192  | 0.117133  | 0.131556 | 0.128205 | 0.139569 |
| 0.126894  | 0.110723  | 0.115093  | 0.110286  | 0.127914 | 0.123397 | 0.133887 |
| 0.134178  | 0.113345  | 0.129953  | 0.123106  | 0.137238 | 0.131847 | 0.140589 |
| 0.120775  | 0.147145  | 0.122669  | 0.116404  | 0.132867 | 0.132139 | 0.141754 |
| 0.121358  | 0.106061  | 0.108392  | 0.10708   | 0.119464 | 0.120192 | 0.126311 |
| 0.135781  | 0.141171  | 0.119027  | 0.117716  | 0.124563 | 0.128497 | 0.130245 |
| 0.136801  | 0.147727  | 0.126457  | 0.124854  | 0.139277 | 0.133887 | 0.143502 |
| 0.118444  | 0.117133  | 0.102855  | 0.0983392 | 0.115093 | 0.117279 | 0.121941 |
| 0.220571  | 0.221882  | 0.216638  | 0.214161  | 0.226544 | 0.222611 | 0.219988 |
| 0.124709  | 0.105915  | 0.114365  | 0.110431  | 0.123689 | 0.125291 | 0.124126 |
| 0.117716  | 0.135344  | 0.107372  | 0.108392  | 0.11961  | 0.121503 | 0.129953 |
| 0.131265  | 0.111305  | 0.125874  | 0.121649  | 0.13549  | 0.130099 | 0.136801 |
| 0.118735  | 0.137238  | 0.106643  | 0.108829  | 0.123252 | 0.124563 | 0.133304 |
| 0.130973  | 0.147727  | 0.127622  | 0.127477  | 0.134907 | 0.135344 | 0.147582 |
| 0.12398   | 0.111014  | 0.112179  | 0.105041  | 0.120629 | 0.117279 | 0.126894 |
| 0.12296   | 0.10912   | 0.115239  | 0.106643  | 0.122232 | 0.119464 | 0.125583 |
| 0.121795  | 0.139423  | 0.116404  | 0.113345  | 0.134178 | 0.129953 | 0.137821 |
| 0.13039   | 0.119755  | 0.11859   | 0.116987  | 0.134033 | 0.126311 | 0.135927 |
| 0.137238  | 0.115239  | 0.120775  | 0.118007  | 0.131847 | 0.127914 | 0.131993 |
| 0.131556  | 0.115676  | 0.116259  | 0.115239  | 0.126457 | 0.127768 | 0.13039  |
| 0.12602   | 0.115676  | 0.119172  | 0.116113  | 0.125583 | 0.128059 | 0.130099 |
| 0.114948  | 0.135781  | 0.10373   | 0.106498  | 0.11859  | 0.120192 | 0.123106 |
| 0.120775  | 0.115967  | 0.107517  | 0.10708   | 0.120921 | 0.12398  | 0.131265 |
| 0.129371  | 0.11553   | 0.130099  | 0.121503  | 0.137383 | 0.128788 | 0.141317 |
| 0.117861  | 0.0999417 | 0.110723  | 0.0995047 | 0.119464 | 0.115239 | 0.12398  |
| 0.148164  | 0.135198  | 0.111305  | 0.119901  | 0.115676 | 0.126311 | 0.123689 |
| 0.131119  | 0.148456  | 0.133887  | 0.132284  | 0.143794 | 0.143939 | 0.144231 |
| 0.124417  | 0.128351  | 0.114365  | 0.112762  | 0.128934 | 0.123543 | 0.127331 |
| 0.125     | 0.142337  | 0.121649  | 0.11859   | 0.13243  | 0.130245 | 0.137529 |
| 0.137966  | 0.124417  | 0.114802  | 0.117861  | 0.129371 | 0.128351 | 0.137383 |
| 0.137238  | 0.136801  | 0.121066  | 0.114802  | 0.128642 | 0.124126 | 0.132576 |
| 0.130245  | 0.141754  | 0.116113  | 0.11859   | 0.132139 | 0.132284 | 0.136364 |
| 0.138403  | 0.149621  | 0.13243   | 0.133159  | 0.141171 | 0.142191 | 0.144814 |
| 0.0986305 | 0.128205  | 0.0987762 | 0.102418  | 0.114219 | 0.115239 | 0.12398  |
| 0.121503  | 0.140297  | 0.113782  | 0.125     | 0.126603 | 0.137238 | 0.141026 |
| 0.144668  | 0.149476  | 0.136364  | 0.139132  | 0.150058 | 0.152826 | 0.149913 |
| 0.129516  | 0.131993  | 0.1081    | 0.104167  | 0.121212 | 0.11961  | 0.114656 |
| 0.137675  | 0.127914  | 0.104021  | 0.10271   | 0.115093 | 0.121941 | 0.116404 |
| 0.143065  | 0.146416  | 0.131556  | 0.126748  | 0.136801 | 0.129371 | 0.132284 |
| 0.141317  | 0.127185  | 0.101253  | 0.102273  | 0.108246 | 0.109848 | 0.116841 |
| 0.12602   | 0.142774  | 0.126457  | 0.121649  | 0.135198 | 0.126311 | 0.140297 |
| 0.119172  | 0.136801  | 0.121066  | 0.11655   | 0.129225 | 0.125874 | 0.134033 |

|          |          |           |           |           |           |           |
|----------|----------|-----------|-----------|-----------|-----------|-----------|
| 0.131847 | 0.11451  | 0.11859   | 0.112908  | 0.126748  | 0.122523  | 0.127185  |
| 0.125583 | 0.125437 | 0.115239  | 0.113928  | 0.121358  | 0.119755  | 0.124709  |
| 0.106789 | 0.13345  | 0.112471  | 0.110577  | 0.125583  | 0.124563  | 0.127768  |
| 0.130536 | 0.109411 | 0.118444  | 0.111888  | 0.125728  | 0.122086  | 0.124126  |
| 0.131993 | 0.109994 | 0.118153  | 0.116841  | 0.126603  | 0.126748  | 0.131702  |
| 0.141608 | 0.106789 | 0.121358  | 0.11655   | 0.12398   | 0.121503  | 0.124126  |
| 0.138695 | 0.108829 | 0.116404  | 0.11655   | 0.125728  | 0.125291  | 0.122669  |
| 0.134907 | 0.11757  | 0.114948  | 0.11451   | 0.127185  | 0.126457  | 0.128788  |
| 0.140734 | 0.113491 | 0.132139  | 0.128205  | 0.141463  | 0.136946  | 0.141317  |
| 0.107809 | 0.141171 | 0.110577  | 0.11014   | 0.130099  | 0.12704   | 0.131993  |
| 0.13345  | 0.118735 | 0.0983392 | 0.103147  | 0.106498  | 0.111305  | 0.111888  |
| 0.140152 | 0.135344 | 0.117279  | 0.120047  | 0.125728  | 0.131119  | 0.132867  |
| 0.120921 | 0.134761 | 0.102418  | 0.113928  | 0.113782  | 0.124417  | 0.119755  |
| 0.14292  | 0.147145 | 0.131119  | 0.135344  | 0.141317  | 0.14292   | 0.144959  |
| 0.154866 | 0.155303 | 0.143357  | 0.144376  | 0.150641  | 0.1537    | 0.152535  |
| 0.140297 | 0.111014 | 0.094697  | 0.0861014 | 0.0944056 | 0.083479  | 0.102127  |
| 0.134615 | 0.114365 | 0.0840618 | 0.0812937 | 0.0855186 | 0.0868298 | 0.101399  |
| 0.13884  | 0.108392 | 0.118881  | 0.113782  | 0.125583  | 0.122815  | 0.128934  |
| 0.125291 | 0.115239 | 0.115822  | 0.121795  | 0.128934  | 0.130536  | 0.134615  |
| 0.138403 | 0.123689 | 0.0861014 | 0.0952797 | 0.0887238 | 0.099359  | 0.0894522 |
| 0.134907 | 0.116987 | 0.125728  | 0.120338  | 0.137675  | 0.131993  | 0.137529  |
| 0.13549  | 0.128059 | 0.125437  | 0.123543  | 0.131265  | 0.128788  | 0.136655  |
| 0.128642 | 0.126457 | 0.107517  | 0.109411  | 0.115385  | 0.113782  | 0.114656  |
| 0.160402 | 0.149767 | 0.137821  | 0.13884   | 0.141026  | 0.140589  | 0.139714  |
| 0.13243  | 0.128497 | 0.102273  | 0.105041  | 0.11451   | 0.113491  | 0.117861  |
| 0.123106 | 0.145396 | 0.127331  | 0.127477  | 0.138403  | 0.13884   | 0.148164  |
| 0.13141  | 0.120484 | 0.097465  | 0.0999417 | 0.103001  | 0.11014   | 0.110723  |
| 0.141608 | 0.108537 | 0.11757   | 0.115676  | 0.12398   | 0.120921  | 0.128788  |
| 0.127914 | 0.103584 | 0.117279  | 0.113928  | 0.126603  | 0.122086  | 0.131702  |
| 0.150495 | 0.15035  | 0.132867  | 0.134178  | 0.15035   | 0.146999  | 0.148456  |
| 0.153846 | 0.133596 | 0.13884   | 0.132867  | 0.143211  | 0.13986   | 0.147727  |
| 0.142045 | 0.134324 | 0.114219  | 0.116404  | 0.129079  | 0.127768  | 0.135635  |
| 0.148601 | 0.146125 | 0.129225  | 0.132576  | 0.142045  | 0.143357  | 0.146562  |
| 0.156614 | 0.149476 | 0.129371  | 0.130973  | 0.148019  | 0.14292   | 0.143794  |
| 0.151369 | 0.155594 | 0.134907  | 0.136218  | 0.149476  | 0.150204  | 0.153118  |
| 0.140152 | 0.129516 | 0.10708   | 0.10373   | 0.108537  | 0.107226  | 0.111888  |
| 0.154283 | 0.143357 | 0.12704   | 0.129808  | 0.138986  | 0.14729   | 0.142628  |
| 0.130682 | 0.13345  | 0.107226  | 0.108829  | 0.121212  | 0.123106  | 0.130099  |
| 0.127622 | 0.119318 | 0.108537  | 0.108974  | 0.124272  | 0.120047  | 0.124417  |
| 0.123397 | 0.134907 | 0.115093  | 0.112034  | 0.127331  | 0.122232  | 0.125437  |
| 0.14088  | 0.132284 | 0.107226  | 0.109411  | 0.122669  | 0.122232  | 0.13243   |
| 0.128497 | 0.131265 | 0.106498  | 0.107517  | 0.122232  | 0.125874  | 0.125874  |
| 0.129371 | 0.123397 | 0.105624  | 0.1081    | 0.121358  | 0.121795  | 0.129079  |
| 0.141026 | 0.137675 | 0.113491  | 0.11655   | 0.12398   | 0.127914  | 0.141026  |

|          |          |           |           |          |          |          |
|----------|----------|-----------|-----------|----------|----------|----------|
| 0.129225 | 0.134615 | 0.119172  | 0.118444  | 0.13141  | 0.130099 | 0.139423 |
| 0.121649 | 0.127331 | 0.0973193 | 0.097465  | 0.11451  | 0.114656 | 0.120484 |
| 0.139714 | 0.1419   | 0.112471  | 0.116113  | 0.128788 | 0.127477 | 0.136218 |
| 0.136364 | 0.133304 | 0.109411  | 0.112179  | 0.12398  | 0.121503 | 0.131702 |
| 0.136072 | 0.122815 | 0.0983392 | 0.0961538 | 0.108829 | 0.105186 | 0.10373  |
| 0.219114 | 0.218386 | 0.214307  | 0.20979   | 0.226544 | 0.22028  | 0.220862 |
| 0.154429 | 0.146125 | 0.133304  | 0.137821  | 0.142045 | 0.142774 | 0.149184 |
| 0.137675 | 0.133159 | 0.122086  | 0.118153  | 0.131119 | 0.131265 | 0.133304 |
| 0.13549  | 0.139132 | 0.117861  | 0.114802  | 0.132721 | 0.126457 | 0.13141  |
| 0.213578 | 0.211393 | 0.209936  | 0.206585  | 0.222465 | 0.216783 | 0.215618 |
| 0.130828 | 0.125437 | 0.105041  | 0.101107  | 0.119318 | 0.113636 | 0.118881 |
| 0.137383 | 0.130245 | 0.113345  | 0.109411  | 0.128788 | 0.118153 | 0.128059 |
| 0.142628 | 0.134033 | 0.107809  | 0.116696  | 0.118007 | 0.128059 | 0.128351 |
| 0.127914 | 0.134761 | 0.118444  | 0.115093  | 0.126894 | 0.128788 | 0.134907 |
| 0.247086 | 0.244901 | 0.248397  | 0.244172  | 0.260635 | 0.252914 | 0.251748 |
| 0.143502 | 0.141317 | 0.119755  | 0.116696  | 0.134324 | 0.129225 | 0.134178 |
| 0.128059 | 0.127622 | 0.0926573 | 0.090472  | 0.104895 | 0.105041 | 0.107955 |
| 0.135344 | 0.123834 | 0.106061  | 0.107663  | 0.11451  | 0.118153 | 0.118444 |
| 0.135927 | 0.124709 | 0.104021  | 0.104749  | 0.11451  | 0.116113 | 0.11757  |
| 0.136509 | 0.135781 | 0.125874  | 0.120484  | 0.13549  | 0.130973 | 0.140006 |
| 0.13884  | 0.134033 | 0.121795  | 0.119027  | 0.134615 | 0.129516 | 0.140297 |
| 0.133596 | 0.125291 | 0.097028  | 0.0960082 | 0.106935 | 0.10708  | 0.109994 |
| 0.137821 | 0.133304 | 0.109994  | 0.111888  | 0.122523 | 0.125291 | 0.13141  |
| 0.149038 | 0.135781 | 0.117716  | 0.118153  | 0.129662 | 0.139423 | 0.137092 |
| 0.124563 | 0.13141  | 0.111597  | 0.108829  | 0.123252 | 0.124854 | 0.135344 |
| 0.132867 | 0.133596 | 0.106206  | 0.108974  | 0.122815 | 0.123543 | 0.129662 |
| 0.109411 | 0.133159 | 0.109848  | 0.105332  | 0.125874 | 0.125728 | 0.13243  |
| 0.154429 | 0.137383 | 0.138549  | 0.132284  | 0.144959 | 0.139277 | 0.146853 |
| 0.142774 | 0.14292  | 0.121066  | 0.119464  | 0.135052 | 0.132284 | 0.134324 |
| 0.140734 | 0.132139 | 0.117279  | 0.113054  | 0.128934 | 0.122669 | 0.129953 |
| 0.193473 | 0.195367 | 0.186334  | 0.184732  | 0.200903 | 0.196096 | 0.196096 |
| 0.206294 | 0.203526 | 0.201777  | 0.198718  | 0.214015 | 0.208333 | 0.208333 |
| 0.128788 | 0.137092 | 0.118444  | 0.115385  | 0.130682 | 0.130828 | 0.136946 |
| 0.122086 | 0.128059 | 0.110286  | 0.109266  | 0.122523 | 0.122086 | 0.129662 |
| 0.140443 | 0.14292  | 0.135052  | 0.131119  | 0.14729  | 0.139277 | 0.152098 |
| 0.131993 | 0.127477 | 0.0954254 | 0.0920746 | 0.107663 | 0.104312 | 0.105186 |
| 0.144085 | 0.143648 | 0.122086  | 0.119027  | 0.13549  | 0.130099 | 0.137675 |
| 0.137238 | 0.118153 | 0.121066  | 0.116841  | 0.127185 | 0.119464 | 0.124709 |
| 0.225816 | 0.228001 | 0.222465  | 0.222028  | 0.233829 | 0.229312 | 0.226399 |
| 0.131993 | 0.129808 | 0.103584  | 0.102273  | 0.118735 | 0.119755 | 0.123252 |
| 0.211684 | 0.193765 | 0.194347  | 0.19391   | 0.206294 | 0.200321 | 0.200321 |
| 0.130245 | 0.124563 | 0.0936772 | 0.0926573 | 0.104167 | 0.104895 | 0.11014  |
| 0.132721 | 0.124126 | 0.106352  | 0.101836  | 0.119464 | 0.116987 | 0.121358 |
| 0.119755 | 0.122523 | 0.108829  | 0.109557  | 0.121649 | 0.118881 | 0.128205 |

|          |          |           |           |          |          |          |
|----------|----------|-----------|-----------|----------|----------|----------|
| 0.123252 | 0.127477 | 0.107372  | 0.106352  | 0.11961  | 0.120629 | 0.128497 |
| 0.21081  | 0.209499 | 0.20542   | 0.204983  | 0.216492 | 0.215763 | 0.212267 |
| 0.149038 | 0.145979 | 0.122086  | 0.124563  | 0.136946 | 0.133596 | 0.143211 |
| 0.133013 | 0.121212 | 0.101981  | 0.100379  | 0.111305 | 0.11553  | 0.118444 |
| 0.144085 | 0.140152 | 0.11655   | 0.120192  | 0.128788 | 0.131847 | 0.137966 |
| 0.134761 | 0.130245 | 0.111305  | 0.108537  | 0.123252 | 0.117861 | 0.127185 |
| 0.128642 | 0.133741 | 0.108392  | 0.111742  | 0.124709 | 0.125437 | 0.135344 |
| 0.134033 | 0.121649 | 0.0980478 | 0.0964452 | 0.103293 | 0.107517 | 0.109848 |
| 0.131993 | 0.125437 | 0.101544  | 0.100524  | 0.114073 | 0.110431 | 0.11451  |
| 0.138986 | 0.130682 | 0.114073  | 0.109266  | 0.124854 | 0.116841 | 0.128497 |
| 0.131993 | 0.131265 | 0.101836  | 0.104895  | 0.119901 | 0.120338 | 0.127331 |
| 0.134178 | 0.120047 | 0.099359  | 0.103584  | 0.109848 | 0.119027 | 0.114656 |
| 0.190559 | 0.192745 | 0.184295  | 0.185023  | 0.19799  | 0.196387 | 0.195513 |
| 0.133596 | 0.124417 | 0.107517  | 0.106789  | 0.114219 | 0.115239 | 0.118153 |
| 0.1419   | 0.127768 | 0.121358  | 0.117133  | 0.128642 | 0.125    | 0.137529 |
| 0.13243  | 0.120047 | 0.108683  | 0.100087  | 0.115676 | 0.112908 | 0.124272 |
| 0.143648 | 0.141463 | 0.120192  | 0.117133  | 0.134761 | 0.129953 | 0.133159 |
| 0.139569 | 0.134761 | 0.112034  | 0.113345  | 0.126603 | 0.125    | 0.134907 |
| 0.137529 | 0.12602  | 0.10067   | 0.0973193 | 0.10271  | 0.104312 | 0.110431 |
| 0.129225 | 0.123252 | 0.101107  | 0.103584  | 0.116259 | 0.114948 | 0.121358 |
| 0.135635 | 0.12296  | 0.100816  | 0.0983392 | 0.109848 | 0.105624 | 0.10912  |
| 0.139277 | 0.126311 | 0.116696  | 0.110723  | 0.123397 | 0.121503 | 0.130245 |
| 0.134033 | 0.12398  | 0.0986305 | 0.100816  | 0.114073 | 0.113928 | 0.11655  |
| 0.124563 | 0.134615 | 0.11451   | 0.116113  | 0.125583 | 0.130099 | 0.136509 |
| 0.145105 | 0.133596 | 0.108829  | 0.112471  | 0.12398  | 0.129953 | 0.129371 |
| 0.150787 | 0.142191 | 0.120629  | 0.127477  | 0.129371 | 0.138258 | 0.138549 |
| 0.132721 | 0.136946 | 0.113054  | 0.108246  | 0.128788 | 0.124272 | 0.128059 |
| 0.151515 | 0.14292  | 0.128934  | 0.129953  | 0.13884  | 0.138112 | 0.144231 |
| 0.125874 | 0.134761 | 0.11116   | 0.110431  | 0.122815 | 0.126457 | 0.13345  |
| 0.130828 | 0.11116  | 0.107663  | 0.103147  | 0.114073 | 0.112762 | 0.117424 |
| 0.136509 | 0.133741 | 0.112179  | 0.113782  | 0.128497 | 0.125146 | 0.129225 |
| 0.137966 | 0.129662 | 0.101107  | 0.102127  | 0.1081   | 0.108537 | 0.107372 |
| 0.192453 | 0.191725 | 0.185023  | 0.181672  | 0.196387 | 0.195076 | 0.190414 |
| 0.128205 | 0.121066 | 0.0957168 | 0.0979021 | 0.109703 | 0.113054 | 0.112762 |
| 0.127331 | 0.11961  | 0.101836  | 0.0941142 | 0.114948 | 0.109266 | 0.113928 |
| 0.13986  | 0.130973 | 0.113491  | 0.11014   | 0.127477 | 0.11859  | 0.127914 |
| 0.183275 | 0.185752 | 0.177302  | 0.17803   | 0.190997 | 0.187063 | 0.187354 |
| 0.151661 | 0.149476 | 0.131702  | 0.126311  | 0.13986  | 0.13884  | 0.144376 |
| 0.151369 | 0.153846 | 0.138986  | 0.135635  | 0.147727 | 0.144085 | 0.151369 |
| 0.153263 | 0.135344 | 0.13884   | 0.133159  | 0.146125 | 0.140443 | 0.147145 |
| 0.131119 | 0.133304 | 0.108246  | 0.106643  | 0.122232 | 0.121795 | 0.125583 |
| 0.142628 | 0.135198 | 0.11451   | 0.11757   | 0.12704  | 0.129225 | 0.136218 |
| 0.213287 | 0.214307 | 0.209353  | 0.208916  | 0.220134 | 0.217075 | 0.215909 |
| 0.139277 | 0.134178 | 0.116113  | 0.113928  | 0.125728 | 0.126748 | 0.128497 |

|          |          |           |           |          |          |          |
|----------|----------|-----------|-----------|----------|----------|----------|
| 0.146707 | 0.138986 | 0.118298  | 0.123397  | 0.129953 | 0.129808 | 0.138258 |
| 0.133304 | 0.121503 | 0.0999417 | 0.100379  | 0.110723 | 0.114656 | 0.119901 |
| 0.177593 | 0.175408 | 0.166958  | 0.162733  | 0.178322 | 0.177302 | 0.177593 |
| 0.129808 | 0.133741 | 0.107809  | 0.0995047 | 0.12296  | 0.11553  | 0.128351 |
| 0.162587 | 0.148164 | 0.138258  | 0.1419    | 0.146416 | 0.155594 | 0.151224 |
| 0.127914 | 0.134761 | 0.110868  | 0.109848  | 0.123689 | 0.120629 | 0.12704  |
| 0.190559 | 0.19391  | 0.18546   | 0.184732  | 0.200321 | 0.197261 | 0.19289  |
| 0.13986  | 0.138258 | 0.114656  | 0.111597  | 0.130099 | 0.125583 | 0.131993 |
| 0.122086 | 0.125437 | 0.102418  | 0.102855  | 0.116404 | 0.117133 | 0.122669 |
| 0.13039  | 0.119755 | 0.10373   | 0.103001  | 0.117133 | 0.114073 | 0.121066 |
| 0.140443 | 0.133304 | 0.109411  | 0.111888  | 0.121649 | 0.126457 | 0.126457 |
| 0.138403 | 0.133304 | 0.112325  | 0.106352  | 0.127477 | 0.121795 | 0.127331 |
| 0.139569 | 0.128059 | 0.113199  | 0.112179  | 0.125728 | 0.124709 | 0.13549  |
| 0.13039  | 0.132284 | 0.111597  | 0.10708   | 0.122669 | 0.125728 | 0.133013 |
| 0.191725 | 0.193328 | 0.184878  | 0.185897  | 0.199446 | 0.196387 | 0.194639 |
| 0.143211 | 0.134907 | 0.108392  | 0.115822  | 0.122086 | 0.129808 | 0.129225 |
| 0.131119 | 0.131265 | 0.110286  | 0.108683  | 0.119318 | 0.120338 | 0.129079 |
| 0.210227 | 0.212121 | 0.20979   | 0.208188  | 0.219988 | 0.216346 | 0.21722  |
| 0.136509 | 0.125    | 0.104604  | 0.105332  | 0.115676 | 0.116696 | 0.118444 |
| 0.128205 | 0.130973 | 0.110286  | 0.109848  | 0.121941 | 0.122086 | 0.13345  |
| 0.125291 | 0.127185 | 0.106498  | 0.105769  | 0.119318 | 0.121503 | 0.129079 |
| 0.14933  | 0.141608 | 0.126457  | 0.13039   | 0.136072 | 0.138549 | 0.140589 |
| 0.195076 | 0.195221 | 0.183566  | 0.186334  | 0.19697  | 0.196824 | 0.194784 |
| 0.134907 | 0.125437 | 0.0977564 | 0.0944056 | 0.108829 | 0.103147 | 0.105769 |
| 0.144814 | 0.140297 | 0.114948  | 0.123543  | 0.123689 | 0.137821 | 0.131702 |
| 0.123834 | 0.13039  | 0.111742  | 0.108683  | 0.122815 | 0.125583 | 0.133741 |
| 0.126748 | 0.131556 | 0.106789  | 0.103438  | 0.123397 | 0.122669 | 0.13141  |
| 0.124563 | 0.131119 | 0.1081    | 0.108246  | 0.123252 | 0.125146 | 0.131847 |
| 0.13549  | 0.134761 | 0.106498  | 0.108392  | 0.12602  | 0.122378 | 0.130536 |
| 0.11961  | 0.12704  | 0.097028  | 0.099796  | 0.109266 | 0.115822 | 0.118153 |
| 0.140297 | 0.142483 | 0.117424  | 0.116113  | 0.131119 | 0.128642 | 0.133596 |
| 0.145251 | 0.127622 | 0.117424  | 0.118153  | 0.12704  | 0.126311 | 0.13447  |
| 0.140297 | 0.137529 | 0.113054  | 0.114073  | 0.127914 | 0.128642 | 0.132721 |
| 0.139277 | 0.130682 | 0.113782  | 0.113345  | 0.125437 | 0.121212 | 0.129953 |
| 0.19595  | 0.200758 | 0.190851  | 0.191871  | 0.20134  | 0.200903 | 0.198572 |
| 0.141317 | 0.133013 | 0.10271   | 0.111597  | 0.115822 | 0.126166 | 0.125291 |
| 0.149038 | 0.138112 | 0.121795  | 0.122523  | 0.130536 | 0.131265 | 0.137383 |
| 0.124709 | 0.129808 | 0.107372  | 0.106935  | 0.122232 | 0.123543 | 0.129662 |
| 0.119901 | 0.125874 | 0.0964452 | 0.0989219 | 0.111014 | 0.114656 | 0.114656 |
| 0.134761 | 0.124417 | 0.105186  | 0.108537  | 0.124417 | 0.127185 | 0.125146 |
| 0.131119 | 0.12602  | 0.0980478 | 0.0944056 | 0.10708  | 0.10373  | 0.111305 |
| 0.136655 | 0.141171 | 0.128059  | 0.123543  | 0.135344 | 0.133741 | 0.138112 |
| 0.141754 | 0.128205 | 0.112179  | 0.10912   | 0.126166 | 0.12602  | 0.131265 |
| 0.128059 | 0.122378 | 0.0981935 | 0.0948427 | 0.113636 | 0.111451 | 0.116113 |

|          |          |           |           |          |          |          |
|----------|----------|-----------|-----------|----------|----------|----------|
| 0.119172 | 0.117861 | 0.0942599 | 0.0941142 | 0.109703 | 0.109266 | 0.112762 |
| 0.122232 | 0.127914 | 0.101981  | 0.0986305 | 0.119172 | 0.11553  | 0.124563 |
| 0.132576 | 0.127477 | 0.097465  | 0.092366  | 0.103875 | 0.105769 | 0.110723 |
| 0.143794 | 0.14627  | 0.125     | 0.123106  | 0.134907 | 0.133887 | 0.137675 |
| 0.136072 | 0.126894 | 0.0948427 | 0.094697  | 0.109411 | 0.1081   | 0.112762 |
| 0.134178 | 0.132576 | 0.102273  | 0.106498  | 0.122086 | 0.121066 | 0.128642 |
| 0.129808 | 0.123252 | 0.090035  | 0.0919289 | 0.105478 | 0.102127 | 0.106206 |
| 0.127622 | 0.130099 | 0.106789  | 0.105478  | 0.122523 | 0.122086 | 0.129953 |
| 0.131265 | 0.123543 | 0.0941142 | 0.0965909 | 0.1081   | 0.113782 | 0.115239 |
| 0.126311 | 0.129371 | 0.109848  | 0.108537  | 0.124126 | 0.124854 | 0.134178 |
| 0.138258 | 0.127914 | 0.0955711 | 0.104167  | 0.115093 | 0.120775 | 0.120192 |
| 0.137966 | 0.125583 | 0.113345  | 0.106206  | 0.123252 | 0.119027 | 0.130973 |
| 0.135635 | 0.13345  | 0.105769  | 0.10708   | 0.120921 | 0.121066 | 0.12602  |
| 0.123543 | 0.129808 | 0.100087  | 0.10373   | 0.116113 | 0.118881 | 0.123834 |
| 0.127185 | 0.130245 | 0.108974  | 0.106498  | 0.122669 | 0.120775 | 0.132721 |
| 0.135052 | 0.122378 | 0.111888  | 0.10708   | 0.123252 | 0.119318 | 0.121649 |
| 0.138986 | 0.139423 | 0.117279  | 0.11655   | 0.12398  | 0.128205 | 0.134033 |
| 0.121941 | 0.129662 | 0.104021  | 0.102127  | 0.117424 | 0.121649 | 0.126311 |
| 0.127768 | 0.13141  | 0.106352  | 0.106498  | 0.12296  | 0.123106 | 0.132721 |
| 0.138986 | 0.13243  | 0.113199  | 0.113928  | 0.126603 | 0.126166 | 0.131119 |
| 0.133741 | 0.125728 | 0.0945513 | 0.0938228 | 0.106206 | 0.106061 | 0.1081   |
| 0.140734 | 0.136801 | 0.111742  | 0.112179  | 0.123106 | 0.124709 | 0.134324 |
| 0.134615 | 0.133013 | 0.107372  | 0.106061  | 0.122232 | 0.121212 | 0.124417 |
| 0.124709 | 0.130099 | 0.104458  | 0.10169   | 0.114073 | 0.119464 | 0.123834 |
| 0.129953 | 0.128642 | 0.104167  | 0.104604  | 0.122523 | 0.120921 | 0.126166 |
| 0.131265 | 0.121212 | 0.0938228 | 0.0910548 | 0.108683 | 0.114073 | 0.114365 |
| 0.140152 | 0.138549 | 0.113491  | 0.118298  | 0.128642 | 0.127914 | 0.136364 |
| 0.140443 | 0.13447  | 0.119027  | 0.109266  | 0.127477 | 0.120338 | 0.128788 |
| 0.135927 | 0.135198 | 0.112179  | 0.107372  | 0.121795 | 0.121066 | 0.128934 |
| 0.198281 | 0.199592 | 0.189394  | 0.191871  | 0.204254 | 0.201486 | 0.195659 |
| 0.174679 | 0.169872 | 0.160548  | 0.158071  | 0.174242 | 0.174097 | 0.176719 |
| 0.140589 | 0.137238 | 0.114802  | 0.114948  | 0.13141  | 0.125437 | 0.133304 |
| 0.134907 | 0.120775 | 0.107663  | 0.10169   | 0.116987 | 0.118298 | 0.124709 |
| 0.157051 | 0.157488 | 0.142337  | 0.137529  | 0.153118 | 0.147145 | 0.150641 |
| 0.149038 | 0.136072 | 0.116259  | 0.11961   | 0.130245 | 0.138258 | 0.134178 |
| 0.134907 | 0.126311 | 0.115822  | 0.114802  | 0.128059 | 0.132284 | 0.135198 |
| 0.13243  | 0.129371 | 0.112762  | 0.112617  | 0.128205 | 0.128059 | 0.131265 |
| 0.109703 | 0.134324 | 0.107517  | 0.108246  | 0.121212 | 0.124854 | 0.130682 |
| 0.139423 | 0.13549  | 0.121795  | 0.116696  | 0.125291 | 0.126603 | 0.134178 |
| 0.203089 | 0.208479 | 0.197698  | 0.199592  | 0.213724 | 0.210664 | 0.20542  |
| 0.136218 | 0.129079 | 0.0996503 | 0.0968823 | 0.109557 | 0.110286 | 0.111742 |
| 0.130536 | 0.124563 | 0.103293  | 0.104604  | 0.121649 | 0.11859  | 0.124709 |
| 0.123543 | 0.130682 | 0.103001  | 0.10169   | 0.119027 | 0.118298 | 0.127914 |
| 0.135344 | 0.131119 | 0.105769  | 0.105041  | 0.120921 | 0.116987 | 0.127768 |

|          |          |           |           |          |          |          |
|----------|----------|-----------|-----------|----------|----------|----------|
| 0.18648  | 0.18954  | 0.179341  | 0.177739  | 0.193328 | 0.189103 | 0.193765 |
| 0.24155  | 0.243735 | 0.24461   | 0.241259  | 0.252477 | 0.249126 | 0.246795 |
| 0.140734 | 0.127477 | 0.115822  | 0.111888  | 0.127185 | 0.123252 | 0.131702 |
| 0.136364 | 0.135635 | 0.116696  | 0.113054  | 0.126603 | 0.127331 | 0.133741 |
| 0.137529 | 0.139423 | 0.116987  | 0.111888  | 0.133596 | 0.126166 | 0.135198 |
| 0.133596 | 0.131702 | 0.101981  | 0.104458  | 0.122378 | 0.11553  | 0.127768 |
| 0.129079 | 0.122815 | 0.0890152 | 0.0885781 | 0.104749 | 0.104895 | 0.107517 |
| 0.138549 | 0.12704  | 0.0981935 | 0.106498  | 0.119755 | 0.123689 | 0.128351 |
| 0.12704  | 0.125728 | 0.112034  | 0.11014   | 0.125146 | 0.123834 | 0.132284 |
| 0.13141  | 0.12398  | 0.0925117 | 0.0894522 | 0.104458 | 0.104021 | 0.107226 |
| 0.127477 | 0.126457 | 0.111597  | 0.112617  | 0.125    | 0.125146 | 0.13243  |
| 0.126166 | 0.135344 | 0.109411  | 0.105769  | 0.122232 | 0.120921 | 0.131993 |
| 0.126603 | 0.130536 | 0.100524  | 0.103875  | 0.11859  | 0.121066 | 0.122232 |
| 0.140443 | 0.123106 | 0.116113  | 0.1081    | 0.126894 | 0.121795 | 0.128788 |
| 0.139714 | 0.139277 | 0.112179  | 0.114656  | 0.126748 | 0.125437 | 0.136218 |
| 0.121358 | 0.108974 | 0.0955711 | 0.0919289 | 0.107517 | 0.104167 | 0.112325 |
| 0.13243  | 0.105186 | 0.113636  | 0.110577  | 0.123834 | 0.116696 | 0.123106 |
| 0.144376 | 0.133159 | 0.123834  | 0.118735  | 0.134324 | 0.125437 | 0.128642 |
| 0.123543 | 0.128351 | 0.106206  | 0.105769  | 0.120484 | 0.122378 | 0.130245 |
| 0.126894 | 0.116259 | 0.109266  | 0.100379  | 0.117716 | 0.113491 | 0.118444 |
| 0.129516 | 0.13549  | 0.122378  | 0.121358  | 0.131993 | 0.132721 | 0.141171 |
| 0.209207 | 0.214598 | 0.207022  | 0.20542   | 0.217803 | 0.2162   | 0.215035 |
| 0.128934 | 0.120921 | 0.103147  | 0.0995047 | 0.11859  | 0.113199 | 0.12398  |
| 0.121503 | 0.128059 | 0.0992133 | 0.0990676 | 0.113491 | 0.116841 | 0.123252 |
| 0.142483 | 0.137966 | 0.104749  | 0.111888  | 0.124854 | 0.128788 | 0.128205 |
| 0.138258 | 0.125583 | 0.105478  | 0.105915  | 0.117424 | 0.118735 | 0.121066 |
| 0.133887 | 0.129662 | 0.101107  | 0.104167  | 0.117424 | 0.115822 | 0.126311 |
| 0.203817 | 0.207459 | 0.196678  | 0.196241  | 0.209499 | 0.207022 | 0.204691 |
| 0.143939 | 0.140589 | 0.113491  | 0.114802  | 0.129516 | 0.130828 | 0.136072 |
| 0.124272 | 0.13141  | 0.104021  | 0.105332  | 0.120047 | 0.121649 | 0.127185 |
| 0.13345  | 0.124272 | 0.112325  | 0.110431  | 0.118444 | 0.118881 | 0.125291 |
| 0.133741 | 0.128351 | 0.099796  | 0.101981  | 0.116987 | 0.115676 | 0.121503 |
| 0.137529 | 0.137383 | 0.112617  | 0.113054  | 0.127477 | 0.125874 | 0.134324 |
| 0.128205 | 0.125437 | 0.102418  | 0.102273  | 0.118444 | 0.115093 | 0.122086 |
| 0.124709 | 0.13447  | 0.108537  | 0.106935  | 0.122232 | 0.121795 | 0.129662 |
| 0.13345  | 0.121358 | 0.100379  | 0.105478  | 0.114656 | 0.118007 | 0.120338 |
| 0.201486 | 0.206002 | 0.194347  | 0.19391   | 0.210956 | 0.206148 | 0.202652 |
| 0.132284 | 0.128059 | 0.0992133 | 0.103147  | 0.11757  | 0.116841 | 0.125583 |
| 0.19595  | 0.20134  | 0.190559  | 0.189831  | 0.206294 | 0.201777 | 0.203526 |
| 0.196387 | 0.198864 | 0.191288  | 0.188811  | 0.203234 | 0.201049 | 0.199883 |
| 0.140443 | 0.134761 | 0.114656  | 0.115676  | 0.128059 | 0.120338 | 0.130245 |
| 0.137529 | 0.126603 | 0.113491  | 0.115385  | 0.120484 | 0.121503 | 0.119755 |
| 0.115385 | 0.125146 | 0.100087  | 0.0984848 | 0.113782 | 0.113928 | 0.122669 |
| 0.131265 | 0.129953 | 0.101399  | 0.102418  | 0.119172 | 0.113782 | 0.124854 |



|          |          |           |           |           |          |          |
|----------|----------|-----------|-----------|-----------|----------|----------|
| 0.135781 | 0.139423 | 0.105624  | 0.109266  | 0.12602   | 0.125    | 0.13141  |
| 0.126166 | 0.135927 | 0.110286  | 0.109557  | 0.125728  | 0.125583 | 0.13549  |
| 0.126457 | 0.120775 | 0.0861014 | 0.090035  | 0.0986305 | 0.101399 | 0.106061 |
| 0.131702 | 0.12398  | 0.0930944 | 0.0912005 | 0.104167  | 0.104895 | 0.104895 |
| 0.143502 | 0.126748 | 0.116841  | 0.112617  | 0.125874  | 0.125728 | 0.13243  |
| 0.141317 | 0.13243  | 0.109994  | 0.109266  | 0.12602   | 0.120921 | 0.124417 |
| 0.121358 | 0.126457 | 0.104021  | 0.102418  | 0.120047  | 0.120484 | 0.126311 |
| 0.138986 | 0.137383 | 0.107663  | 0.113345  | 0.12602   | 0.125    | 0.133741 |
| 0.119027 | 0.123252 | 0.0984848 | 0.0971737 | 0.113054  | 0.111451 | 0.120484 |
| 0.142774 | 0.135052 | 0.118444  | 0.121795  | 0.127477  | 0.130245 | 0.133159 |
| 0.136072 | 0.138549 | 0.111451  | 0.108392  | 0.12602   | 0.124709 | 0.131119 |
| 0.149621 | 0.141026 | 0.125291  | 0.126311  | 0.136364  | 0.133596 | 0.142337 |
| 0.256556 | 0.252331 | 0.256993  | 0.253351  | 0.269231  | 0.264423 | 0.260344 |
| 0.137092 | 0.123252 | 0.11014   | 0.112908  | 0.115385  | 0.123397 | 0.121358 |
| 0.140443 | 0.127768 | 0.118735  | 0.115967  | 0.130682  | 0.129371 | 0.121212 |
| 0.220134 | 0.22028  | 0.212995  | 0.216346  | 0.226399  | 0.226253 | 0.222174 |
| 0.135198 | 0.129808 | 0.121649  | 0.116259  | 0.125437  | 0.127914 | 0.129371 |
| 0.229021 | 0.230332 | 0.228001  | 0.223193  | 0.237325  | 0.236597 | 0.230478 |
| 0.133304 | 0.117133 | 0.0996503 | 0.101836  | 0.108392  | 0.115822 | 0.112325 |
| 0.132284 | 0.135635 | 0.121358  | 0.117716  | 0.132721  | 0.129662 | 0.139277 |
| 0.13345  | 0.124272 | 0.0962995 | 0.100816  | 0.113199  | 0.111888 | 0.11451  |
| 0.141317 | 0.133304 | 0.114948  | 0.111305  | 0.128059  | 0.120921 | 0.128788 |
| 0.206585 | 0.208188 | 0.200612  | 0.199592  | 0.213432  | 0.210373 | 0.211247 |
| 0.144814 | 0.141171 | 0.119901  | 0.124709  | 0.135344  | 0.13141  | 0.142191 |
| 0.139277 | 0.137383 | 0.110577  | 0.111305  | 0.125437  | 0.123543 | 0.13345  |
| 0.223922 | 0.22669  | 0.222028  | 0.222465  | 0.233974  | 0.23208  | 0.229167 |
| 0.131702 | 0.127185 | 0.0945513 | 0.0938228 | 0.108829  | 0.107226 | 0.111305 |
| 0.201486 | 0.204545 | 0.19697   | 0.19595   | 0.210956  | 0.207896 | 0.2044   |
| 0.133596 | 0.126166 | 0.0981935 | 0.0936772 | 0.111597  | 0.109703 | 0.111742 |
| 0.127477 | 0.13345  | 0.106935  | 0.106498  | 0.123543  | 0.12398  | 0.131847 |
| 0.128497 | 0.136218 | 0.112034  | 0.112179  | 0.121941  | 0.125583 | 0.127331 |
| 0.140152 | 0.13039  | 0.116113  | 0.114802  | 0.128351  | 0.119464 | 0.129953 |
| 0.135344 | 0.133741 | 0.108683  | 0.103875  | 0.123834  | 0.11757  | 0.128059 |
| 0.16623  | 0.169289 | 0.157343  | 0.154283  | 0.172786  | 0.167686 | 0.169143 |
| 0.136218 | 0.130828 | 0.105186  | 0.106789  | 0.120629  | 0.118153 | 0.127768 |
| 0.136801 | 0.125583 | 0.105186  | 0.104749  | 0.115385  | 0.119318 | 0.120484 |
| 0.135927 | 0.136655 | 0.111597  | 0.112325  | 0.127914  | 0.13243  | 0.127768 |
| 0.136801 | 0.120047 | 0.115676  | 0.112325  | 0.123834  | 0.118153 | 0.120484 |
| 0.197261 | 0.200903 | 0.192453  | 0.190559  | 0.206439  | 0.201923 | 0.20134  |
| 0.12602  | 0.130245 | 0.106643  | 0.10708   | 0.122669  | 0.123106 | 0.126894 |
| 0.139569 | 0.139132 | 0.114656  | 0.113928  | 0.131847  | 0.12704  | 0.132576 |
| 0.135052 | 0.125874 | 0.0955711 | 0.0939685 | 0.105478  | 0.104749 | 0.109703 |
| 0.13141  | 0.122815 | 0.0945513 | 0.0949883 | 0.104458  | 0.104604 | 0.105478 |
| 0.128059 | 0.130828 | 0.113928  | 0.112908  | 0.128205  | 0.127477 | 0.13447  |

|          |          |           |           |          |          |          |
|----------|----------|-----------|-----------|----------|----------|----------|
| 0.253205 | 0.248106 | 0.254808  | 0.250583  | 0.266171 | 0.257576 | 0.256119 |
| 0.122815 | 0.128788 | 0.10373   | 0.107372  | 0.117424 | 0.119901 | 0.123689 |
| 0.136801 | 0.133159 | 0.111014  | 0.114365  | 0.124126 | 0.132139 | 0.132721 |
| 0.186043 | 0.177739 | 0.174534  | 0.173223  | 0.185897 | 0.182547 | 0.183421 |
| 0.192453 | 0.192016 | 0.179779  | 0.182838  | 0.195513 | 0.194202 | 0.190122 |
| 0.13884  | 0.131119 | 0.11451   | 0.112617  | 0.128497 | 0.125728 | 0.132721 |
| 0.137529 | 0.136509 | 0.111451  | 0.114802  | 0.12602  | 0.12704  | 0.135198 |
| 0.13549  | 0.129808 | 0.105332  | 0.106352  | 0.122523 | 0.121795 | 0.127914 |
| 0.156323 | 0.149184 | 0.135781  | 0.137092  | 0.145979 | 0.144085 | 0.149913 |
| 0.136801 | 0.12704  | 0.108683  | 0.105332  | 0.126457 | 0.121358 | 0.130973 |
| 0.143939 | 0.131265 | 0.114948  | 0.114219  | 0.127477 | 0.125874 | 0.134615 |
| 0.135635 | 0.124126 | 0.0996503 | 0.0995047 | 0.107517 | 0.108537 | 0.108246 |
| 0.137383 | 0.13141  | 0.108392  | 0.111742  | 0.123543 | 0.123397 | 0.127477 |
| 0.146562 | 0.137675 | 0.118735  | 0.122086  | 0.128059 | 0.13141  | 0.137238 |
| 0.131556 | 0.124417 | 0.104021  | 0.103584  | 0.120338 | 0.111742 | 0.113491 |
| 0.137821 | 0.128642 | 0.114365  | 0.113928  | 0.129225 | 0.122669 | 0.12704  |
| 0.149038 | 0.141026 | 0.129953  | 0.12602   | 0.139569 | 0.129516 | 0.134178 |
| 0.128497 | 0.132721 | 0.112908  | 0.109266  | 0.123106 | 0.122669 | 0.125583 |
| 0.142337 | 0.131993 | 0.120921  | 0.11961   | 0.134033 | 0.122815 | 0.131847 |
| 0.137092 | 0.127914 | 0.102564  | 0.102418  | 0.109557 | 0.109703 | 0.109994 |
| 0.210082 | 0.211393 | 0.202652  | 0.202797  | 0.217803 | 0.216492 | 0.212121 |
| 0.126603 | 0.131993 | 0.11451   | 0.10708   | 0.128788 | 0.121066 | 0.119027 |
| 0.197407 | 0.199009 | 0.185606  | 0.187791  | 0.201923 | 0.200612 | 0.199446 |
| 0.128934 | 0.121212 | 0.105478  | 0.100087  | 0.112762 | 0.113782 | 0.120775 |
| 0.130682 | 0.135198 | 0.119172  | 0.115822  | 0.130536 | 0.128351 | 0.135927 |
| 0.139423 | 0.138695 | 0.11859   | 0.118153  | 0.131702 | 0.132721 | 0.133013 |
| 0.134033 | 0.134178 | 0.108246  | 0.1081    | 0.125437 | 0.120047 | 0.127331 |
| 0.141463 | 0.136655 | 0.114802  | 0.117861  | 0.130828 | 0.131265 | 0.134761 |
| 0.143211 | 0.132867 | 0.114219  | 0.114948  | 0.124709 | 0.12398  | 0.131265 |
| 0.128351 | 0.133741 | 0.111305  | 0.112908  | 0.125874 | 0.129516 | 0.133887 |
| 0.137529 | 0.124854 | 0.10067   | 0.104604  | 0.112617 | 0.115385 | 0.117133 |
| 0.143648 | 0.141171 | 0.119318  | 0.11859   | 0.133304 | 0.129662 | 0.136072 |
| 0.138549 | 0.131702 | 0.107226  | 0.10708   | 0.113636 | 0.109703 | 0.110868 |
| 0.246066 | 0.25     | 0.249417  | 0.247815  | 0.259033 | 0.252768 | 0.253059 |
| 0.13039  | 0.13549  | 0.113054  | 0.111451  | 0.125874 | 0.128351 | 0.133887 |
| 0.18852  | 0.190705 | 0.179341  | 0.180944  | 0.196241 | 0.192599 | 0.190559 |
| 0.195367 | 0.193473 | 0.183858  | 0.184003  | 0.199009 | 0.197407 | 0.194493 |
| 0.135198 | 0.133304 | 0.111451  | 0.106935  | 0.124563 | 0.123834 | 0.131119 |
| 0.122086 | 0.131847 | 0.106498  | 0.105769  | 0.113491 | 0.11859  | 0.123543 |
| 0.126166 | 0.136509 | 0.119318  | 0.115676  | 0.13039  | 0.127331 | 0.136364 |
| 0.134324 | 0.130973 | 0.101836  | 0.107809  | 0.120192 | 0.123543 | 0.130536 |
| 0.113199 | 0.13345  | 0.105186  | 0.104749  | 0.121795 | 0.119901 | 0.127477 |
| 0.132721 | 0.127622 | 0.094697  | 0.0962995 | 0.11014  | 0.108246 | 0.111451 |
| 0.131702 | 0.128059 | 0.114656  | 0.115385  | 0.128351 | 0.126166 | 0.129662 |

|          |          |           |           |          |          |          |
|----------|----------|-----------|-----------|----------|----------|----------|
| 0.145979 | 0.138258 | 0.122815  | 0.124709  | 0.131847 | 0.131702 | 0.140734 |
| 0.125728 | 0.132284 | 0.111597  | 0.109994  | 0.125583 | 0.125146 | 0.131556 |
| 0.144085 | 0.140152 | 0.120629  | 0.125437  | 0.132867 | 0.133304 | 0.139132 |
| 0.132867 | 0.126894 | 0.111451  | 0.107226  | 0.125437 | 0.11859  | 0.120047 |
| 0.142774 | 0.141171 | 0.119901  | 0.11655   | 0.132139 | 0.129079 | 0.13549  |
| 0.140297 | 0.134324 | 0.109557  | 0.109411  | 0.126457 | 0.120484 | 0.127768 |
| 0.137529 | 0.127185 | 0.104167  | 0.101981  | 0.110868 | 0.107809 | 0.11014  |
| 0.126894 | 0.136072 | 0.115093  | 0.109994  | 0.126166 | 0.124854 | 0.13243  |
| 0.123689 | 0.126457 | 0.111597  | 0.107372  | 0.124709 | 0.120484 | 0.130973 |
| 0.149621 | 0.141317 | 0.114802  | 0.126311  | 0.126166 | 0.135927 | 0.135052 |
| 0.188228 | 0.192453 | 0.17905   | 0.179487  | 0.195659 | 0.190268 | 0.192016 |
| 0.150495 | 0.141026 | 0.125583  | 0.128934  | 0.136364 | 0.135927 | 0.143794 |
| 0.141463 | 0.133741 | 0.112179  | 0.113491  | 0.127622 | 0.127768 | 0.133596 |
| 0.13986  | 0.138549 | 0.11553   | 0.114802  | 0.128642 | 0.129079 | 0.133159 |
| 0.129516 | 0.126457 | 0.104021  | 0.103584  | 0.120047 | 0.119318 | 0.12398  |
| 0.139277 | 0.130682 | 0.110868  | 0.106935  | 0.123106 | 0.120047 | 0.127622 |
| 0.141463 | 0.132576 | 0.11451   | 0.109994  | 0.131119 | 0.121649 | 0.129808 |
| 0.193473 | 0.198281 | 0.188083  | 0.187937  | 0.202069 | 0.200758 | 0.195221 |
| 0.131993 | 0.129516 | 0.116987  | 0.11451   | 0.127477 | 0.12704  | 0.132284 |
| 0.124563 | 0.118298 | 0.101399  | 0.103584  | 0.11655  | 0.119318 | 0.120775 |
| 0.144959 | 0.134033 | 0.113928  | 0.118444  | 0.129079 | 0.129516 | 0.136509 |
| 0.195221 | 0.198572 | 0.186334  | 0.186189  | 0.203234 | 0.198718 | 0.197261 |
| 0.123106 | 0.130828 | 0.0996503 | 0.10067   | 0.115967 | 0.118444 | 0.122232 |
| 0.132576 | 0.125437 | 0.0968823 | 0.0987762 | 0.102127 | 0.104604 | 0.109848 |
| 0.140152 | 0.136801 | 0.115822  | 0.117716  | 0.128351 | 0.127622 | 0.138986 |
| 0.134761 | 0.125    | 0.107809  | 0.104749  | 0.122378 | 0.117279 | 0.125146 |
| 0.193619 | 0.196096 | 0.184149  | 0.18546   | 0.200175 | 0.195367 | 0.195659 |
| 0.134761 | 0.123834 | 0.0973193 | 0.095134  | 0.106352 | 0.104458 | 0.105624 |
| 0.134178 | 0.128788 | 0.100524  | 0.108829  | 0.115676 | 0.124272 | 0.122232 |
| 0.128642 | 0.130828 | 0.102564  | 0.105332  | 0.116259 | 0.120484 | 0.121941 |
| 0.137092 | 0.140443 | 0.11451   | 0.112034  | 0.131702 | 0.125728 | 0.133596 |
| 0.13549  | 0.123689 | 0.104167  | 0.104021  | 0.11553  | 0.117133 | 0.115967 |
| 0.136946 | 0.123689 | 0.103001  | 0.100233  | 0.109994 | 0.105769 | 0.107809 |
| 0.122669 | 0.128934 | 0.10708   | 0.11014   | 0.121649 | 0.124417 | 0.13345  |
| 0.138695 | 0.130682 | 0.113782  | 0.107809  | 0.125437 | 0.122086 | 0.128205 |
| 0.154866 | 0.138112 | 0.140734  | 0.130973  | 0.145396 | 0.139714 | 0.148164 |
| 0.239073 | 0.236888 | 0.232517  | 0.232955  | 0.242716 | 0.238491 | 0.236451 |
| 0.129225 | 0.138695 | 0.118881  | 0.114073  | 0.127914 | 0.127477 | 0.136801 |
| 0.137092 | 0.126457 | 0.104312  | 0.107372  | 0.117716 | 0.119027 | 0.11961  |
| 0.135781 | 0.13039  | 0.112617  | 0.114219  | 0.12602  | 0.124126 | 0.130245 |
| 0.139423 | 0.129371 | 0.113636  | 0.117861  | 0.12704  | 0.128934 | 0.135635 |
| 0.126748 | 0.109994 | 0.100379  | 0.0967366 | 0.10708  | 0.105186 | 0.11014  |
| 0.130245 | 0.126894 | 0.104458  | 0.106061  | 0.115822 | 0.112762 | 0.124126 |
| 0.141171 | 0.131702 | 0.116259  | 0.11553   | 0.126166 | 0.124272 | 0.133596 |

|          |          |           |           |          |          |          |
|----------|----------|-----------|-----------|----------|----------|----------|
| 0.137529 | 0.123397 | 0.100379  | 0.100233  | 0.108246 | 0.106352 | 0.108392 |
| 0.1419   | 0.119027 | 0.107372  | 0.104312  | 0.122815 | 0.119755 | 0.129079 |
| 0.234994 | 0.233683 | 0.234266  | 0.232663  | 0.244755 | 0.239656 | 0.238491 |
| 0.120921 | 0.126311 | 0.0992133 | 0.100524  | 0.116113 | 0.114802 | 0.11859  |
| 0.129079 | 0.118153 | 0.0916375 | 0.0932401 | 0.104749 | 0.109557 | 0.111597 |
| 0.121941 | 0.127914 | 0.109848  | 0.108829  | 0.120047 | 0.121358 | 0.13039  |
| 0.143357 | 0.127185 | 0.123397  | 0.122378  | 0.129516 | 0.127914 | 0.135198 |
| 0.132867 | 0.13884  | 0.125437  | 0.120629  | 0.136218 | 0.133159 | 0.137529 |
| 0.13141  | 0.132139 | 0.119318  | 0.113345  | 0.128642 | 0.128205 | 0.140152 |
| 0.142774 | 0.135344 | 0.113782  | 0.115385  | 0.126603 | 0.126457 | 0.132576 |
| 0.131847 | 0.125583 | 0.106352  | 0.102127  | 0.120047 | 0.113782 | 0.122815 |
| 0.227418 | 0.233974 | 0.229895  | 0.228875  | 0.239802 | 0.237034 | 0.233829 |
| 0.144668 | 0.141317 | 0.117716  | 0.118444  | 0.130536 | 0.129808 | 0.139423 |
| 0.135198 | 0.123397 | 0.099796  | 0.0973193 | 0.106206 | 0.104312 | 0.106643 |
| 0.136655 | 0.122815 | 0.0986305 | 0.099359  | 0.116696 | 0.115676 | 0.122378 |
| 0.133013 | 0.118881 | 0.116841  | 0.11116   | 0.113928 | 0.117861 | 0.121941 |
| 0.137675 | 0.121503 | 0.106643  | 0.109411  | 0.113345 | 0.119318 | 0.113782 |
| 0.119318 | 0.131993 | 0.109848  | 0.106498  | 0.123543 | 0.124272 | 0.129808 |
| 0.130973 | 0.124126 | 0.100233  | 0.0983392 | 0.108392 | 0.106789 | 0.111742 |
| 0.135198 | 0.126894 | 0.103584  | 0.100233  | 0.110577 | 0.109266 | 0.110723 |
| 0.130828 | 0.12398  | 0.0939685 | 0.0935315 | 0.105624 | 0.102273 | 0.109848 |
| 0.125146 | 0.129662 | 0.112179  | 0.106206  | 0.123834 | 0.12602  | 0.128351 |
| 0.135635 | 0.124126 | 0.110431  | 0.111451  | 0.120629 | 0.117279 | 0.118444 |
| 0.138986 | 0.128059 | 0.113199  | 0.115093  | 0.121066 | 0.121212 | 0.125291 |
| 0.141317 | 0.144959 | 0.123397  | 0.118007  | 0.134761 | 0.13141  | 0.135781 |
| 0.144814 | 0.144085 | 0.122232  | 0.124417  | 0.136218 | 0.134033 | 0.140734 |
| 0.140006 | 0.124417 | 0.113636  | 0.111742  | 0.116841 | 0.117279 | 0.118153 |
| 0.110577 | 0.130245 | 0.102273  | 0.099796  | 0.11859  | 0.120775 | 0.127477 |
| 0.145688 | 0.131847 | 0.10912   | 0.111597  | 0.112034 | 0.112762 | 0.11655  |
| 0.139132 | 0.131702 | 0.111597  | 0.114365  | 0.124126 | 0.124563 | 0.124563 |
| 0.211101 | 0.207751 | 0.20134   | 0.201195  | 0.215618 | 0.209936 | 0.21081  |
| 0.138549 | 0.138403 | 0.123834  | 0.119027  | 0.125583 | 0.130099 | 0.136509 |
| 0.130973 | 0.12296  | 0.0981935 | 0.10067   | 0.109557 | 0.114656 | 0.117279 |
| 0.128205 | 0.134761 | 0.116987  | 0.11655   | 0.128059 | 0.131119 | 0.135781 |
| 0.226544 | 0.222319 | 0.221154  | 0.218969  | 0.231935 | 0.22567  | 0.224213 |
| 0.214015 | 0.212995 | 0.208916  | 0.208479  | 0.22028  | 0.218094 | 0.214015 |
| 0.136946 | 0.125437 | 0.104167  | 0.105186  | 0.109411 | 0.107226 | 0.108974 |
| 0.249272 | 0.249709 | 0.24796   | 0.24898   | 0.260781 | 0.254225 | 0.250728 |
| 0.111451 | 0.130536 | 0.101399  | 0.100962  | 0.118881 | 0.121358 | 0.130682 |
| 0.13243  | 0.13986  | 0.123543  | 0.127477  | 0.133741 | 0.136801 | 0.14088  |
| 0.124563 | 0.129662 | 0.102855  | 0.101836  | 0.116259 | 0.115239 | 0.121649 |
| 0.137238 | 0.125146 | 0.110286  | 0.108974  | 0.119318 | 0.121503 | 0.123252 |
| 0.193619 | 0.194056 | 0.186772  | 0.184878  | 0.199301 | 0.195659 | 0.19391  |
| 0.135781 | 0.128351 | 0.106498  | 0.110431  | 0.120192 | 0.120629 | 0.11451  |

|          |          |           |           |          |          |          |
|----------|----------|-----------|-----------|----------|----------|----------|
| 0.196387 | 0.201486 | 0.193036  | 0.191434  | 0.204108 | 0.202797 | 0.199592 |
| 0.136946 | 0.131265 | 0.107663  | 0.104604  | 0.121358 | 0.120629 | 0.127914 |
| 0.127622 | 0.11757  | 0.104167  | 0.101399  | 0.115239 | 0.111597 | 0.11655  |
| 0.117716 | 0.133887 | 0.116696  | 0.111014  | 0.129225 | 0.123252 | 0.12704  |
| 0.13141  | 0.127768 | 0.10708   | 0.101981  | 0.120192 | 0.117133 | 0.126166 |
| 0.119901 | 0.125291 | 0.102273  | 0.0992133 | 0.119464 | 0.116696 | 0.125146 |
| 0.13447  | 0.131119 | 0.112471  | 0.106498  | 0.120047 | 0.122523 | 0.129225 |
| 0.118735 | 0.125291 | 0.099359  | 0.0986305 | 0.111597 | 0.114073 | 0.118444 |
| 0.136364 | 0.132721 | 0.104458  | 0.106935  | 0.122815 | 0.12296  | 0.13141  |
| 0.135344 | 0.125    | 0.100816  | 0.0980478 | 0.104604 | 0.106789 | 0.109994 |
| 0.119318 | 0.128788 | 0.106061  | 0.101544  | 0.120047 | 0.121649 | 0.124854 |
| 0.12296  | 0.126311 | 0.10067   | 0.103438  | 0.114073 | 0.116841 | 0.119755 |
| 0.140006 | 0.130245 | 0.117716  | 0.113199  | 0.130536 | 0.128642 | 0.133304 |
| 0.14729  | 0.138403 | 0.119172  | 0.120192  | 0.132576 | 0.130099 | 0.137383 |
| 0.13549  | 0.133596 | 0.108246  | 0.107226  | 0.124272 | 0.120047 | 0.127331 |
| 0.136218 | 0.129662 | 0.099359  | 0.105624  | 0.113928 | 0.123106 | 0.123106 |
| 0.120921 | 0.126603 | 0.103001  | 0.105769  | 0.119027 | 0.120047 | 0.12704  |
| 0.130828 | 0.123106 | 0.099796  | 0.0984848 | 0.114656 | 0.106061 | 0.111305 |
| 0.135198 | 0.122815 | 0.0983392 | 0.105769  | 0.114365 | 0.114802 | 0.11859  |
| 0.139714 | 0.131119 | 0.111597  | 0.10912   | 0.125874 | 0.121066 | 0.123689 |
| 0.136218 | 0.136655 | 0.112471  | 0.10708   | 0.12704  | 0.122815 | 0.131265 |
| 0.133741 | 0.135927 | 0.108829  | 0.113928  | 0.12602  | 0.124709 | 0.133741 |
| 0.145833 | 0.13986  | 0.120921  | 0.121941  | 0.131702 | 0.131556 | 0.140297 |
| 0.151369 | 0.143648 | 0.128205  | 0.130099  | 0.138695 | 0.137966 | 0.143794 |
| 0.121212 | 0.117279 | 0.0828963 | 0.0862471 | 0.100087 | 0.099359 | 0.106061 |
| 0.127622 | 0.132139 | 0.10912   | 0.107517  | 0.124563 | 0.125291 | 0.130828 |
| 0.130682 | 0.124126 | 0.0961538 | 0.0922203 | 0.113345 | 0.109703 | 0.119901 |
| 0.135927 | 0.125583 | 0.113928  | 0.118735  | 0.123252 | 0.121649 | 0.12398  |
| 0.121503 | 0.131265 | 0.104167  | 0.103438  | 0.11553  | 0.117133 | 0.121503 |
| 0.145688 | 0.137383 | 0.127185  | 0.126748  | 0.13884  | 0.130245 | 0.138403 |
| 0.132867 | 0.139423 | 0.128351  | 0.128788  | 0.14088  | 0.138112 | 0.148893 |
| 0.14292  | 0.128205 | 0.119172  | 0.114073  | 0.130536 | 0.122523 | 0.133013 |
| 0.125291 | 0.135635 | 0.104458  | 0.107517  | 0.120192 | 0.120629 | 0.130828 |
| 0.127768 | 0.11655  | 0.104021  | 0.100379  | 0.118881 | 0.112034 | 0.11961  |
| 0.143794 | 0.143648 | 0.119464  | 0.118444  | 0.134324 | 0.131556 | 0.137675 |
| 0.205128 | 0.21081  | 0.20236   | 0.202797  | 0.216638 | 0.212704 | 0.208916 |
| 0.13549  | 0.128351 | 0.0968823 | 0.106352  | 0.111742 | 0.120338 | 0.121795 |
| 0.123106 | 0.135781 | 0.11451   | 0.10912   | 0.127331 | 0.123689 | 0.129516 |
| 0.134033 | 0.120775 | 0.101253  | 0.105186  | 0.111742 | 0.114219 | 0.11451  |
| 0.135344 | 0.136364 | 0.111014  | 0.108829  | 0.125    | 0.122523 | 0.127768 |
| 0.138986 | 0.135052 | 0.116113  | 0.111014  | 0.128934 | 0.125874 | 0.13345  |
| 0.140734 | 0.135052 | 0.118735  | 0.109557  | 0.127477 | 0.119464 | 0.129662 |
| 0.141171 | 0.132284 | 0.120921  | 0.113199  | 0.126748 | 0.121649 | 0.132139 |
| 0.136655 | 0.123106 | 0.114365  | 0.111305  | 0.12398  | 0.118881 | 0.128497 |

|           |          |           |           |           |           |           |
|-----------|----------|-----------|-----------|-----------|-----------|-----------|
| 0.131702  | 0.126603 | 0.0933858 | 0.0917832 | 0.105041  | 0.103438  | 0.110431  |
| 0.137529  | 0.123397 | 0.10708   | 0.111597  | 0.114948  | 0.116841  | 0.118298  |
| 0.121503  | 0.130099 | 0.10912   | 0.102564  | 0.122815  | 0.117424  | 0.123834  |
| 0.125146  | 0.135781 | 0.110723  | 0.109411  | 0.128205  | 0.124854  | 0.134761  |
| 0.183858  | 0.181964 | 0.16623   | 0.16958   | 0.179924  | 0.179196  | 0.180361  |
| 0.140152  | 0.135927 | 0.109994  | 0.113636  | 0.127185  | 0.126166  | 0.135781  |
| 0.140006  | 0.128788 | 0.113054  | 0.114365  | 0.120629  | 0.122815  | 0.120775  |
| 0.128497  | 0.130099 | 0.100962  | 0.109266  | 0.116696  | 0.119464  | 0.118881  |
| 0.130682  | 0.104312 | 0.108392  | 0.108537  | 0.11859   | 0.117279  | 0.122523  |
| 0.11961   | 0.125874 | 0.100524  | 0.101836  | 0.117133  | 0.11553   | 0.123689  |
| 0.117861  | 0.128205 | 0.0961538 | 0.0995047 | 0.112471  | 0.114656  | 0.121649  |
| 0.124854  | 0.12704  | 0.107809  | 0.107372  | 0.119464  | 0.120484  | 0.123106  |
| 0.137966  | 0.106352 | 0.0935315 | 0.0893065 | 0.097028  | 0.0933858 | 0.0916375 |
| 0.126603  | 0.13141  | 0.113054  | 0.112325  | 0.129662  | 0.127768  | 0.135344  |
| 0.136072  | 0.139714 | 0.116987  | 0.117133  | 0.133887  | 0.128497  | 0.129662  |
| 0.121358  | 0.118298 | 0.0979021 | 0.0989219 | 0.11655   | 0.112325  | 0.120775  |
| 0.13141   | 0.133013 | 0.107663  | 0.106061  | 0.119318  | 0.123252  | 0.120921  |
| 0.138549  | 0.113636 | 0.0964452 | 0.0945513 | 0.0981935 | 0.0936772 | 0.099796  |
| 0.121649  | 0.12704  | 0.104604  | 0.100962  | 0.112762  | 0.110868  | 0.11757   |
| 0.131556  | 0.125583 | 0.116259  | 0.111742  | 0.120921  | 0.119318  | 0.125728  |
| 0.121941  | 0.12704  | 0.0999417 | 0.0965909 | 0.11451   | 0.11116   | 0.117861  |
| 0.123106  | 0.129371 | 0.103438  | 0.0992133 | 0.114802  | 0.110286  | 0.119901  |
| 0.115239  | 0.116841 | 0.101981  | 0.103875  | 0.115967  | 0.118153  | 0.120192  |
| 0.119464  | 0.135635 | 0.109994  | 0.110723  | 0.125437  | 0.124709  | 0.125583  |
| 0.123834  | 0.126603 | 0.0939685 | 0.0920746 | 0.112034  | 0.107226  | 0.117424  |
| 0.128497  | 0.138549 | 0.123689  | 0.124417  | 0.130973  | 0.127331  | 0.135198  |
| 0.125291  | 0.138258 | 0.118735  | 0.117133  | 0.128642  | 0.126166  | 0.132867  |
| 0.128497  | 0.130973 | 0.104458  | 0.101981  | 0.112034  | 0.114802  | 0.123834  |
| 0.148456  | 0.136072 | 0.115093  | 0.118735  | 0.121795  | 0.128059  | 0.130099  |
| 0.136509  | 0.134324 | 0.113345  | 0.107955  | 0.129079  | 0.123689  | 0.132139  |
| 0.139423  | 0.128497 | 0.120047  | 0.11961   | 0.130245  | 0.128934  | 0.130973  |
| 0.12398   | 0.127622 | 0.104312  | 0.103293  | 0.121212  | 0.112908  | 0.122523  |
| 0.106935  | 0.142628 | 0.134178  | 0.133741  | 0.144668  | 0.140734  | 0.143357  |
| 0.1419    | 0.130099 | 0.121358  | 0.120047  | 0.123689  | 0.129662  | 0.123252  |
| 0.145396  | 0.102127 | 0.104167  | 0.106061  | 0.106206  | 0.10373   | 0.1081    |
| 0.127622  | 0.136801 | 0.107372  | 0.105769  | 0.122232  | 0.121212  | 0.127622  |
| 0.121649  | 0.131993 | 0.0949883 | 0.0933858 | 0.111014  | 0.108246  | 0.116987  |
| 0.102273  | 0.126894 | 0.0962995 | 0.10169   | 0.115239  | 0.118007  | 0.126166  |
| 0.129808  | 0.113054 | 0.0786713 | 0.0802739 | 0.0850816 | 0.0893065 | 0.0855186 |
| 0.126603  | 0.136072 | 0.107809  | 0.105624  | 0.115385  | 0.114365  | 0.124272  |
| 0.129371  | 0.127768 | 0.118735  | 0.117133  | 0.128642  | 0.124417  | 0.12704   |
| 0.118881  | 0.122523 | 0.111451  | 0.11014   | 0.12398   | 0.125     | 0.128205  |
| 0.121212  | 0.120192 | 0.0916375 | 0.0979021 | 0.109994  | 0.110723  | 0.113054  |
| 0.0989219 | 0.127622 | 0.0961538 | 0.0995047 | 0.118007  | 0.117279  | 0.125437  |

|           |          |           |           |          |          |          |
|-----------|----------|-----------|-----------|----------|----------|----------|
| 0.119464  | 0.130973 | 0.104167  | 0.107517  | 0.118735 | 0.119755 | 0.123834 |
| 0.11451   | 0.131265 | 0.0948427 | 0.101107  | 0.109411 | 0.113928 | 0.123834 |
| 0.0925117 | 0.129953 | 0.106352  | 0.104458  | 0.123543 | 0.120484 | 0.135344 |
| 0.119901  | 0.131119 | 0.107226  | 0.0980478 | 0.119172 | 0.114656 | 0.121358 |
| 0.129079  | 0.13243  | 0.115822  | 0.112179  | 0.131265 | 0.12704  | 0.135198 |
| 0.125583  | 0.133887 | 0.107663  | 0.106935  | 0.119318 | 0.120047 | 0.132576 |
| 0.111014  | 0.128642 | 0.101253  | 0.100233  | 0.11553  | 0.118007 | 0.125583 |
| 0.119755  | 0.126603 | 0.0980478 | 0.103438  | 0.109703 | 0.115093 | 0.122086 |
| 0.128934  | 0.134324 | 0.114802  | 0.109411  | 0.128205 | 0.126603 | 0.135052 |
| 0.120338  | 0.135052 | 0.110577  | 0.101107  | 0.12398  | 0.120047 | 0.131702 |
| 0.134033  | 0.135344 | 0.121066  | 0.118881  | 0.130099 | 0.127331 | 0.135781 |
| 0.12296   | 0.128351 | 0.101253  | 0.101107  | 0.119027 | 0.113928 | 0.126748 |
| 0.128934  | 0.13986  | 0.119755  | 0.114365  | 0.128205 | 0.125728 | 0.134178 |

| <b>TDr_09_00134</b> | <b>TDr_09_00155</b> | <b>TDr_09_00189</b> | <b>TDr_09_00216</b> | <b>TDr_09_00220</b> | <b>TDr_09_00226</b> | <b>TDr_09_00240</b> |
|---------------------|---------------------|---------------------|---------------------|---------------------|---------------------|---------------------|
| 0.123397            | 0.121503            | 0.128788            | 0.134907            | 0.13141             | 0.13884             | 0.124126            |
| 0.11859             | 0.120192            | 0.121358            | 0.135927            | 0.131265            | 0.134907            | 0.13039             |
| 0.113636            | 0.119027            | 0.118735            | 0.128351            | 0.125728            | 0.129371            | 0.126603            |
| 0.11859             | 0.11553             | 0.124854            | 0.137675            | 0.135635            | 0.134907            | 0.128642            |
| 0.127622            | 0.125146            | 0.133304            | 0.138258            | 0.140297            | 0.144231            | 0.139132            |
| 0.131702            | 0.127185            | 0.137383            | 0.145833            | 0.139423            | 0.14627             | 0.133013            |
| 0.112034            | 0.114219            | 0.117716            | 0.125               | 0.121795            | 0.129516            | 0.123252            |
| 0.117279            | 0.116841            | 0.118881            | 0.131119            | 0.126457            | 0.130682            | 0.126166            |
| 0.107517            | 0.108537            | 0.113782            | 0.123689            | 0.121066            | 0.124417            | 0.120484            |
| 0.120192            | 0.115093            | 0.121503            | 0.123252            | 0.12704             | 0.132721            | 0.125583            |
| 0.111888            | 0.11553             | 0.118153            | 0.127185            | 0.12398             | 0.134615            | 0.128351            |
| 0.100962            | 0.102273            | 0.111888            | 0.121212            | 0.120921            | 0.127477            | 0.124126            |
| 0.111742            | 0.113345            | 0.117133            | 0.128497            | 0.129079            | 0.132721            | 0.127331            |
| 0.140152            | 0.144668            | 0.145833            | 0.155449            | 0.146999            | 0.155012            | 0.14088             |
| 0.129808            | 0.128788            | 0.131119            | 0.140443            | 0.141608            | 0.140589            | 0.134033            |
| 0.112762            | 0.108829            | 0.110286            | 0.120484            | 0.114948            | 0.120338            | 0.115239            |
| 0.104167            | 0.105478            | 0.113928            | 0.121503            | 0.121795            | 0.124563            | 0.129371            |
| 0.136364            | 0.146125            | 0.144668            | 0.149621            | 0.14933             | 0.156469            | 0.158362            |
| 0.11014             | 0.112908            | 0.114365            | 0.123397            | 0.122232            | 0.123834            | 0.127768            |
| 0.207751            | 0.205857            | 0.207022            | 0.218386            | 0.211393            | 0.215326            | 0.201777            |
| 0.123397            | 0.123252            | 0.128497            | 0.136072            | 0.13549             | 0.138549            | 0.138986            |
| 0.117424            | 0.120484            | 0.119901            | 0.131556            | 0.131265            | 0.136655            | 0.133013            |
| 0.105041            | 0.105478            | 0.109848            | 0.122378            | 0.115967            | 0.117279            | 0.120047            |
| 0.114802            | 0.106498            | 0.108246            | 0.113199            | 0.113491            | 0.106935            | 0.108537            |
| 0.105332            | 0.101107            | 0.111014            | 0.120338            | 0.116259            | 0.120484            | 0.118881            |
| 0.125728            | 0.127331            | 0.12704             | 0.140443            | 0.13549             | 0.138258            | 0.134615            |
| 0.120192            | 0.117716            | 0.120629            | 0.129953            | 0.124709            | 0.126894            | 0.137238            |
| 0.10708             | 0.108392            | 0.100233            | 0.111597            | 0.112179            | 0.109703            | 0.10373             |
| 0.125146            | 0.123252            | 0.123252            | 0.126748            | 0.134324            | 0.129516            | 0.129079            |
| 0.119027            | 0.118007            | 0.122669            | 0.123543            | 0.127914            | 0.13243             | 0.131993            |
| 0.122086            | 0.120192            | 0.121358            | 0.128642            | 0.126311            | 0.130828            | 0.124854            |
| 0.117279            | 0.114802            | 0.113054            | 0.124417            | 0.121795            | 0.120484            | 0.115385            |
| 0.109994            | 0.108683            | 0.11451             | 0.124709            | 0.124709            | 0.126603            | 0.119464            |
| 0.118153            | 0.120921            | 0.118881            | 0.129953            | 0.125583            | 0.129808            | 0.127622            |
| 0.114219            | 0.113199            | 0.114365            | 0.123397            | 0.12602             | 0.129371            | 0.128934            |
| 0.122523            | 0.116259            | 0.126457            | 0.129662            | 0.131119            | 0.130682            | 0.130245            |
| 0.135198            | 0.136509            | 0.133304            | 0.138549            | 0.137383            | 0.145396            | 0.14088             |
| 0.119901            | 0.11451             | 0.12296             | 0.131993            | 0.13141             | 0.133596            | 0.130828            |
| 0.0933858           | 0.0897436           | 0.104895            | 0.113054            | 0.116841            | 0.109994            | 0.111305            |
| 0.107372            | 0.111305            | 0.113054            | 0.118007            | 0.115385            | 0.116987            | 0.104895            |
| 0.0995047           | 0.101399            | 0.105769            | 0.109557            | 0.112179            | 0.116404            | 0.112762            |
| 0.127477            | 0.125874            | 0.121503            | 0.123834            | 0.13141             | 0.126603            | 0.119755            |



|           |           |           |           |           |           |          |
|-----------|-----------|-----------|-----------|-----------|-----------|----------|
| 0.131265  | 0.127914  | 0.127914  | 0.131993  | 0.127622  | 0.12602   | 0.132284 |
| 0.100816  | 0.104749  | 0.106498  | 0.112034  | 0.116113  | 0.116841  | 0.115239 |
| 0.102855  | 0.100962  | 0.110286  | 0.120192  | 0.114073  | 0.120921  | 0.12398  |
| 0.117861  | 0.114219  | 0.122086  | 0.124709  | 0.124709  | 0.130099  | 0.132576 |
| 0.0866841 | 0.0865385 | 0.0882867 | 0.0961538 | 0.0903263 | 0.0948427 | 0.11655  |
| 0.124709  | 0.121941  | 0.123106  | 0.121358  | 0.128934  | 0.128788  | 0.125437 |
| 0.107517  | 0.101544  | 0.111742  | 0.117861  | 0.114365  | 0.116259  | 0.114948 |
| 0.105624  | 0.105769  | 0.108392  | 0.115093  | 0.115676  | 0.117861  | 0.111888 |
| 0.143939  | 0.144668  | 0.144085  | 0.149621  | 0.154283  | 0.151224  | 0.145833 |
| 0.1081    | 0.107372  | 0.107372  | 0.117279  | 0.109703  | 0.120338  | 0.120192 |
| 0.101253  | 0.0990676 | 0.107517  | 0.109557  | 0.108974  | 0.109703  | 0.113636 |
| 0.130099  | 0.129953  | 0.129662  | 0.139569  | 0.136072  | 0.137966  | 0.13345  |
| 0.10708   | 0.11014   | 0.115093  | 0.126457  | 0.122378  | 0.124854  | 0.116259 |
| 0.103293  | 0.108974  | 0.0967366 | 0.102564  | 0.0944056 | 0.105041  | 0.127622 |
| 0.111014  | 0.112617  | 0.119027  | 0.114948  | 0.112617  | 0.123252  | 0.120484 |
| 0.100816  | 0.103875  | 0.11116   | 0.120192  | 0.121941  | 0.120338  | 0.118153 |
| 0.0996503 | 0.105624  | 0.10912   | 0.111451  | 0.116404  | 0.119172  | 0.116987 |
| 0.116987  | 0.112762  | 0.11859   | 0.118298  | 0.118298  | 0.127185  | 0.128205 |
| 0.124854  | 0.123543  | 0.120047  | 0.123834  | 0.129953  | 0.125146  | 0.121503 |
| 0.12602   | 0.130536  | 0.124417  | 0.13345   | 0.132284  | 0.128642  | 0.126166 |
| 0.157343  | 0.15574   | 0.150495  | 0.160985  | 0.157197  | 0.157051  | 0.146707 |
| 0.100524  | 0.103293  | 0.107663  | 0.121649  | 0.117279  | 0.115967  | 0.11116  |
| 0.101107  | 0.0948427 | 0.106206  | 0.109411  | 0.11116   | 0.109848  | 0.112034 |
| 0.090035  | 0.0954254 | 0.102127  | 0.112617  | 0.112034  | 0.114802  | 0.110577 |
| 0.135927  | 0.139569  | 0.138112  | 0.140152  | 0.138403  | 0.146707  | 0.129662 |
| 0.104458  | 0.104021  | 0.107517  | 0.118298  | 0.111597  | 0.121358  | 0.113928 |
| 0.106352  | 0.110286  | 0.101253  | 0.110286  | 0.102418  | 0.106643  | 0.120192 |
| 0.115967  | 0.114948  | 0.11116   | 0.121649  | 0.120192  | 0.121212  | 0.128059 |
| 0.0939685 | 0.100816  | 0.108683  | 0.112471  | 0.119172  | 0.118153  | 0.115093 |
| 0.146125  | 0.148019  | 0.146853  | 0.151515  | 0.148601  | 0.153409  | 0.138403 |
| 0.102127  | 0.105478  | 0.108392  | 0.118881  | 0.118007  | 0.118735  | 0.113054 |
| 0.121795  | 0.126603  | 0.118735  | 0.124563  | 0.129225  | 0.133159  | 0.125146 |
| 0.108829  | 0.111597  | 0.11451   | 0.12296   | 0.11859   | 0.128351  | 0.123543 |
| 0.107226  | 0.109703  | 0.114948  | 0.124854  | 0.121649  | 0.125291  | 0.126603 |
| 0.0999417 | 0.0992133 | 0.106498  | 0.115239  | 0.108829  | 0.11451   | 0.114365 |
| 0.0984848 | 0.0968823 | 0.106498  | 0.11553   | 0.114948  | 0.114219  | 0.118153 |
| 0.112762  | 0.118735  | 0.117279  | 0.125437  | 0.129516  | 0.12704   | 0.124563 |
| 0.0971737 | 0.100233  | 0.111597  | 0.111888  | 0.111305  | 0.116113  | 0.113928 |
| 0.124709  | 0.12398   | 0.121066  | 0.125437  | 0.135344  | 0.129371  | 0.123397 |
| 0.106352  | 0.106206  | 0.113782  | 0.123106  | 0.118735  | 0.117716  | 0.118735 |
| 0.102855  | 0.099796  | 0.103584  | 0.113782  | 0.105624  | 0.109557  | 0.108537 |
| 0.103438  | 0.104167  | 0.111451  | 0.118444  | 0.108537  | 0.117133  | 0.117279 |
| 0.0999417 | 0.10708   | 0.10708   | 0.119027  | 0.116987  | 0.122086  | 0.113782 |
| 0.0958625 | 0.095134  | 0.107372  | 0.109703  | 0.11553   | 0.118881  | 0.113491 |

|          |           |          |          |          |          |          |
|----------|-----------|----------|----------|----------|----------|----------|
| 0.101107 | 0.10067   | 0.10912  | 0.109994 | 0.106789 | 0.113928 | 0.105915 |
| 0.120484 | 0.123834  | 0.125    | 0.12296  | 0.124709 | 0.12398  | 0.118007 |
| 0.106498 | 0.101399  | 0.107809 | 0.121503 | 0.122378 | 0.122815 | 0.125    |
| 0.111305 | 0.105624  | 0.114656 | 0.118444 | 0.120775 | 0.124126 | 0.127185 |
| 0.120629 | 0.120192  | 0.120775 | 0.13039  | 0.129808 | 0.133159 | 0.139423 |
| 0.119464 | 0.121649  | 0.125437 | 0.130682 | 0.130682 | 0.137529 | 0.131556 |
| 0.126457 | 0.124854  | 0.116987 | 0.124272 | 0.121941 | 0.128205 | 0.137092 |
| 0.132721 | 0.128497  | 0.123543 | 0.135198 | 0.128788 | 0.133013 | 0.142774 |
| 0.114219 | 0.112034  | 0.119318 | 0.126603 | 0.123397 | 0.132867 | 0.131556 |
| 0.184149 | 0.182838  | 0.18546  | 0.193036 | 0.185169 | 0.190851 | 0.181381 |
| 0.106206 | 0.105186  | 0.113928 | 0.126748 | 0.123252 | 0.127185 | 0.131119 |
| 0.129371 | 0.130973  | 0.118444 | 0.13243  | 0.127185 | 0.128788 | 0.144668 |
| 0.121795 | 0.12398   | 0.112617 | 0.130099 | 0.123106 | 0.126748 | 0.139423 |
| 0.131556 | 0.125874  | 0.134033 | 0.135781 | 0.142774 | 0.146707 | 0.140734 |
| 0.109266 | 0.106789  | 0.106206 | 0.121941 | 0.114073 | 0.122086 | 0.128642 |
| 0.120921 | 0.121066  | 0.116113 | 0.131847 | 0.122815 | 0.129371 | 0.139714 |
| 0.106352 | 0.108537  | 0.111742 | 0.121649 | 0.116113 | 0.123252 | 0.134178 |
| 0.116696 | 0.114219  | 0.119464 | 0.117133 | 0.121212 | 0.126894 | 0.133159 |
| 0.114073 | 0.115093  | 0.115967 | 0.124709 | 0.124126 | 0.125146 | 0.124417 |
| 0.123689 | 0.124709  | 0.122086 | 0.124709 | 0.120629 | 0.122523 | 0.140152 |
| 0.10271  | 0.0996503 | 0.111597 | 0.112471 | 0.11014  | 0.118735 | 0.122086 |
| 0.131119 | 0.13039   | 0.12602  | 0.135927 | 0.13884  | 0.13549  | 0.135052 |
| 0.110868 | 0.113928  | 0.121795 | 0.123252 | 0.122669 | 0.130682 | 0.126166 |
| 0.11451  | 0.11553   | 0.112908 | 0.113782 | 0.120775 | 0.120047 | 0.114656 |
| 0.126603 | 0.126457  | 0.12704  | 0.130828 | 0.134907 | 0.135344 | 0.131993 |
| 0.100962 | 0.102273  | 0.111014 | 0.120047 | 0.117133 | 0.123397 | 0.125874 |
| 0.143211 | 0.147727  | 0.137238 | 0.145688 | 0.138403 | 0.145833 | 0.132576 |
| 0.106352 | 0.108246  | 0.112325 | 0.121649 | 0.119318 | 0.129662 | 0.127477 |
| 0.104895 | 0.10912   | 0.110577 | 0.125437 | 0.116404 | 0.128205 | 0.130682 |
| 0.10271  | 0.0973193 | 0.099359 | 0.103147 | 0.106643 | 0.104458 | 0.125874 |
| 0.135052 | 0.136655  | 0.135781 | 0.141317 | 0.14627  | 0.149038 | 0.149184 |
| 0.11116  | 0.112179  | 0.106935 | 0.115676 | 0.113636 | 0.116113 | 0.116841 |
| 0.104458 | 0.106061  | 0.105478 | 0.118007 | 0.111597 | 0.119901 | 0.126748 |
| 0.105332 | 0.10169   | 0.105478 | 0.122378 | 0.115093 | 0.123397 | 0.13141  |
| 0.121503 | 0.11553   | 0.120775 | 0.128642 | 0.128934 | 0.133159 | 0.128642 |
| 0.128351 | 0.120921  | 0.125    | 0.127622 | 0.127622 | 0.134178 | 0.136072 |
| 0.108683 | 0.108246  | 0.121649 | 0.12398  | 0.126894 | 0.13141  | 0.12602  |
| 0.101253 | 0.100524  | 0.105769 | 0.114219 | 0.108392 | 0.11553  | 0.118298 |
| 0.102127 | 0.101107  | 0.113054 | 0.116841 | 0.113345 | 0.120484 | 0.122086 |
| 0.105769 | 0.105915  | 0.107663 | 0.115239 | 0.107663 | 0.120629 | 0.123397 |
| 0.115385 | 0.106206  | 0.119901 | 0.130099 | 0.124272 | 0.129371 | 0.13039  |
| 0.121066 | 0.119172  | 0.122086 | 0.121795 | 0.121795 | 0.124563 | 0.131119 |
| 0.112762 | 0.105332  | 0.111451 | 0.117861 | 0.110868 | 0.121795 | 0.122232 |
| 0.107372 | 0.103438  | 0.114802 | 0.11655  | 0.111597 | 0.11553  | 0.119755 |

|           |           |           |           |           |           |          |
|-----------|-----------|-----------|-----------|-----------|-----------|----------|
| 0.114948  | 0.109557  | 0.116841  | 0.120338  | 0.11655   | 0.123106  | 0.128205 |
| 0.104021  | 0.0986305 | 0.109703  | 0.115822  | 0.112908  | 0.119172  | 0.117279 |
| 0.123543  | 0.125437  | 0.123397  | 0.135635  | 0.127185  | 0.136364  | 0.121066 |
| 0.13141   | 0.132721  | 0.133887  | 0.13884   | 0.141171  | 0.139569  | 0.133887 |
| 0.109848  | 0.109703  | 0.118735  | 0.115239  | 0.114365  | 0.123834  | 0.121066 |
| 0.108246  | 0.105186  | 0.112179  | 0.119464  | 0.113928  | 0.121066  | 0.12296  |
| 0.107663  | 0.106061  | 0.106352  | 0.111305  | 0.106061  | 0.11757   | 0.121795 |
| 0.0965909 | 0.101981  | 0.107226  | 0.118007  | 0.109848  | 0.119901  | 0.116841 |
| 0.123397  | 0.124126  | 0.126166  | 0.122378  | 0.120921  | 0.131265  | 0.132576 |
| 0.107663  | 0.0976107 | 0.111014  | 0.115093  | 0.113636  | 0.116404  | 0.119172 |
| 0.132284  | 0.13039   | 0.131265  | 0.137966  | 0.135052  | 0.138986  | 0.139132 |
| 0.128642  | 0.129662  | 0.131702  | 0.13986   | 0.140734  | 0.143794  | 0.134033 |
| 0.11961   | 0.118007  | 0.124126  | 0.127914  | 0.12704   | 0.129808  | 0.121503 |
| 0.116841  | 0.112325  | 0.121358  | 0.127477  | 0.13039   | 0.129953  | 0.130682 |
| 0.115676  | 0.114656  | 0.120192  | 0.126603  | 0.124854  | 0.127331  | 0.13039  |
| 0.108829  | 0.100233  | 0.113054  | 0.118007  | 0.112471  | 0.117279  | 0.125    |
| 0.0958625 | 0.0965909 | 0.100962  | 0.10708   | 0.103875  | 0.110723  | 0.112325 |
| 0.103147  | 0.0977564 | 0.107955  | 0.112908  | 0.107372  | 0.119464  | 0.11553  |
| 0.0926573 | 0.0971737 | 0.100087  | 0.112908  | 0.104458  | 0.111597  | 0.116113 |
| 0.092366  | 0.0942599 | 0.0919289 | 0.0910548 | 0.095134  | 0.0958625 | 0.107372 |
| 0.109703  | 0.108974  | 0.112179  | 0.128497  | 0.118881  | 0.127768  | 0.134033 |
| 0.128788  | 0.127185  | 0.133013  | 0.131265  | 0.138549  | 0.139569  | 0.138549 |
| 0.132139  | 0.129371  | 0.127914  | 0.135781  | 0.13986   | 0.139132  | 0.146853 |
| 0.196241  | 0.194347  | 0.198135  | 0.209207  | 0.202214  | 0.208188  | 0.203089 |
| 0.240385  | 0.237325  | 0.239073  | 0.247523  | 0.245775  | 0.249126  | 0.240822 |
| 0.105332  | 0.108683  | 0.106935  | 0.120921  | 0.114219  | 0.116696  | 0.121212 |
| 0.0821678 | 0.0814394 | 0.0823135 | 0.0913462 | 0.0869755 | 0.0958625 | 0.114073 |
| 0.0903263 | 0.0898893 | 0.0910548 | 0.104749  | 0.0936772 | 0.10373   | 0.114656 |
| 0.0818765 | 0.0933858 | 0.0846445 | 0.100962  | 0.0995047 | 0.092366  | 0.115239 |
| 0.132284  | 0.130099  | 0.132139  | 0.136801  | 0.141463  | 0.139277  | 0.135635 |
| 0.0844988 | 0.0823135 | 0.0898893 | 0.0936772 | 0.0962995 | 0.0897436 | 0.113782 |
| 0.111451  | 0.106061  | 0.107226  | 0.113054  | 0.11014   | 0.107372  | 0.140443 |
| 0.0798368 | 0.0820221 | 0.0878497 | 0.103001  | 0.088141  | 0.100233  | 0.115822 |
| 0.0926573 | 0.0919289 | 0.095134  | 0.0945513 | 0.088141  | 0.0944056 | 0.121066 |
| 0.104458  | 0.106643  | 0.100524  | 0.111597  | 0.103438  | 0.109994  | 0.114802 |
| 0.0962995 | 0.0920746 | 0.0856643 | 0.0906177 | 0.090035  | 0.0939685 | 0.123252 |
| 0.121941  | 0.127331  | 0.123834  | 0.128788  | 0.13141   | 0.133304  | 0.130245 |
| 0.0849359 | 0.0891608 | 0.0818765 | 0.0949883 | 0.0990676 | 0.100962  | 0.116841 |
| 0.0828963 | 0.0777972 | 0.0920746 | 0.0938228 | 0.0862471 | 0.101253  | 0.111888 |
| 0.0847902 | 0.0817308 | 0.0814394 | 0.0960082 | 0.0884324 | 0.0955711 | 0.11553  |
| 0.0798368 | 0.0802739 | 0.0893065 | 0.0957168 | 0.0898893 | 0.0961538 | 0.114656 |
| 0.080711  | 0.0776515 | 0.0907634 | 0.0957168 | 0.0866841 | 0.101399  | 0.11116  |
| 0.0808566 | 0.0754662 | 0.090035  | 0.107809  | 0.0958625 | 0.0965909 | 0.118007 |
| 0.0914918 | 0.0962995 | 0.0837704 | 0.090472  | 0.0960082 | 0.0842075 | 0.120484 |

|           |           |           |           |           |           |           |
|-----------|-----------|-----------|-----------|-----------|-----------|-----------|
| 0.0964452 | 0.0992133 | 0.0826049 | 0.0895979 | 0.0971737 | 0.0818765 | 0.114656  |
| 0.092803  | 0.092366  | 0.0871212 | 0.097028  | 0.0844988 | 0.0992133 | 0.11655   |
| 0.0786713 | 0.083479  | 0.0866841 | 0.0989219 | 0.0895979 | 0.0941142 | 0.113491  |
| 0.0912005 | 0.0939685 | 0.0968823 | 0.0977564 | 0.0957168 | 0.0955711 | 0.123689  |
| 0.0844988 | 0.0884324 | 0.0826049 | 0.0907634 | 0.090472  | 0.0944056 | 0.112034  |
| 0.105332  | 0.101107  | 0.0984848 | 0.105186  | 0.112762  | 0.10067   | 0.13141   |
| 0.136801  | 0.134033  | 0.13986   | 0.13986   | 0.140443  | 0.141171  | 0.140443  |
| 0.107809  | 0.104458  | 0.105332  | 0.11553   | 0.111451  | 0.115093  | 0.128059  |
| 0.0824592 | 0.0837704 | 0.0916375 | 0.0977564 | 0.0933858 | 0.102855  | 0.112617  |
| 0.0840618 | 0.0856643 | 0.0812937 | 0.0888695 | 0.0879953 | 0.0901807 | 0.111014  |
| 0.0938228 | 0.0939685 | 0.0907634 | 0.100087  | 0.0968823 | 0.097028  | 0.118444  |
| 0.0965909 | 0.0964452 | 0.0859557 | 0.0868298 | 0.0912005 | 0.0936772 | 0.117716  |
| 0.0913462 | 0.0967366 | 0.0868298 | 0.0981935 | 0.0903263 | 0.101253  | 0.123834  |
| 0         | 0.076486  | 0.0820221 | 0.0954254 | 0.0960082 | 0.099359  | 0.113782  |
| 0.076486  | 0         | 0.0944056 | 0.0976107 | 0.0958625 | 0.095134  | 0.11859   |
| 0.0820221 | 0.0944056 | 0         | 0.0912005 | 0.0882867 | 0.0878497 | 0.115967  |
| 0.0954254 | 0.0976107 | 0.0912005 | 0         | 0.0961538 | 0.0942599 | 0.120338  |
| 0.0960082 | 0.0958625 | 0.0882867 | 0.0961538 | 0         | 0.100087  | 0.122669  |
| 0.099359  | 0.095134  | 0.0878497 | 0.0942599 | 0.100087  | 0         | 0.11757   |
| 0.113782  | 0.11859   | 0.115967  | 0.120338  | 0.122669  | 0.11757   | 0         |
| 0.0770688 | 0.0824592 | 0.0903263 | 0.0949883 | 0.0914918 | 0.100962  | 0.115676  |
| 0.095134  | 0.102273  | 0.0912005 | 0.099359  | 0.094697  | 0.0965909 | 0.122669  |
| 0.0818765 | 0.0852273 | 0.0820221 | 0.0962995 | 0.0948427 | 0.0932401 | 0.112617  |
| 0.105041  | 0.0984848 | 0.111888  | 0.115967  | 0.119464  | 0.119318  | 0.116841  |
| 0.0805653 | 0.0868298 | 0.0777972 | 0.0935315 | 0.0964452 | 0.0995047 | 0.116841  |
| 0.0818765 | 0.078817  | 0.0872669 | 0.0945513 | 0.0936772 | 0.0996503 | 0.115239  |
| 0.0769231 | 0.08581   | 0.0843531 | 0.0957168 | 0.0910548 | 0.0952797 | 0.116404  |
| 0.097465  | 0.0984848 | 0.0879953 | 0.0941142 | 0.0981935 | 0.0828963 | 0.118007  |
| 0.106061  | 0.107372  | 0.108537  | 0.114073  | 0.112617  | 0.123252  | 0.0992133 |
| 0.0941142 | 0.0948427 | 0.097465  | 0.10067   | 0.101836  | 0.0979021 | 0.129225  |
| 0.0792541 | 0.0843531 | 0.0898893 | 0.0945513 | 0.0925117 | 0.0949883 | 0.112908  |
| 0.083479  | 0.0932401 | 0.0842075 | 0.0882867 | 0.0914918 | 0.0893065 | 0.112179  |
| 0.120921  | 0.120484  | 0.11961   | 0.128059  | 0.123397  | 0.130828  | 0.117279  |
| 0.121795  | 0.117279  | 0.125437  | 0.127477  | 0.128934  | 0.132576  | 0.133013  |
| 0.114948  | 0.108974  | 0.115967  | 0.119464  | 0.116841  | 0.118444  | 0.124417  |
| 0.11655   | 0.114948  | 0.123689  | 0.126603  | 0.126603  | 0.132576  | 0.133596  |
| 0.116404  | 0.109557  | 0.123834  | 0.125291  | 0.130828  | 0.129225  | 0.125874  |
| 0.11116   | 0.110723  | 0.119464  | 0.128205  | 0.126166  | 0.124272  | 0.136072  |
| 0.141171  | 0.13345   | 0.137529  | 0.142774  | 0.145396  | 0.149038  | 0.143357  |
| 0.132867  | 0.133013  | 0.13039   | 0.136509  | 0.141754  | 0.133741  | 0.137675  |
| 0.111014  | 0.11116   | 0.119027  | 0.125146  | 0.122815  | 0.128497  | 0.123106  |
| 0.135635  | 0.130245  | 0.129371  | 0.137238  | 0.141317  | 0.135052  | 0.143357  |
| 0.132867  | 0.126894  | 0.130973  | 0.130973  | 0.136801  | 0.138986  | 0.135052  |
| 0.130245  | 0.125437  | 0.127185  | 0.134178  | 0.135635  | 0.135198  | 0.146999  |

|          |          |          |          |          |          |          |
|----------|----------|----------|----------|----------|----------|----------|
| 0.120629 | 0.117861 | 0.122232 | 0.128059 | 0.13039  | 0.130245 | 0.133013 |
| 0.129079 | 0.122523 | 0.128642 | 0.131556 | 0.135635 | 0.134907 | 0.13447  |
| 0.130973 | 0.126748 | 0.129371 | 0.13345  | 0.138112 | 0.14292  | 0.134907 |
| 0.126748 | 0.124272 | 0.127477 | 0.13243  | 0.126603 | 0.134324 | 0.142337 |
| 0.137238 | 0.129516 | 0.135635 | 0.138258 | 0.14088  | 0.141026 | 0.149913 |
| 0.135198 | 0.13039  | 0.131556 | 0.137675 | 0.136218 | 0.142483 | 0.137675 |
| 0.115676 | 0.114656 | 0.120484 | 0.125728 | 0.129225 | 0.129079 | 0.134761 |
| 0.123689 | 0.124126 | 0.127622 | 0.138986 | 0.140443 | 0.127768 | 0.135198 |
| 0.135781 | 0.132139 | 0.133304 | 0.139714 | 0.141463 | 0.147727 | 0.142628 |
| 0.112179 | 0.113199 | 0.116404 | 0.121941 | 0.120484 | 0.124709 | 0.128059 |
| 0.222465 | 0.219114 | 0.219114 | 0.232809 | 0.223776 | 0.232372 | 0.222611 |
| 0.124854 | 0.118881 | 0.120921 | 0.130828 | 0.127622 | 0.130099 | 0.141026 |
| 0.118444 | 0.11655  | 0.12296  | 0.128497 | 0.126457 | 0.133887 | 0.129371 |
| 0.130245 | 0.133304 | 0.129225 | 0.137966 | 0.138549 | 0.136655 | 0.144376 |
| 0.123252 | 0.119318 | 0.123397 | 0.127185 | 0.131556 | 0.134907 | 0.134761 |
| 0.138112 | 0.137092 | 0.136218 | 0.142628 | 0.14729  | 0.150058 | 0.146707 |
| 0.118881 | 0.116113 | 0.119027 | 0.12398  | 0.124854 | 0.131702 | 0.134178 |
| 0.117279 | 0.119464 | 0.12296  | 0.129371 | 0.126457 | 0.13447  | 0.132576 |
| 0.128059 | 0.124126 | 0.130536 | 0.131993 | 0.138112 | 0.144085 | 0.138695 |
| 0.125    | 0.129516 | 0.125146 | 0.136218 | 0.129516 | 0.136655 | 0.143211 |
| 0.131265 | 0.127331 | 0.125583 | 0.137529 | 0.138986 | 0.135635 | 0.141317 |
| 0.126748 | 0.121941 | 0.123106 | 0.129516 | 0.129808 | 0.137238 | 0.140589 |
| 0.125    | 0.123106 | 0.130682 | 0.131847 | 0.129516 | 0.136655 | 0.141754 |
| 0.121795 | 0.11553  | 0.118153 | 0.123106 | 0.121941 | 0.133741 | 0.131556 |
| 0.120047 | 0.115822 | 0.122523 | 0.129808 | 0.128059 | 0.130828 | 0.139132 |
| 0.136509 | 0.132867 | 0.13345  | 0.143065 | 0.138695 | 0.139714 | 0.148601 |
| 0.119172 | 0.117279 | 0.118153 | 0.126603 | 0.124854 | 0.127331 | 0.134178 |
| 0.114802 | 0.121941 | 0.121358 | 0.12398  | 0.133013 | 0.128497 | 0.125437 |
| 0.140589 | 0.139277 | 0.144231 | 0.148893 | 0.152389 | 0.1537   | 0.133159 |
| 0.123106 | 0.120047 | 0.121212 | 0.128497 | 0.12704  | 0.130099 | 0.127622 |
| 0.133887 | 0.128788 | 0.131119 | 0.136072 | 0.138695 | 0.141754 | 0.138112 |
| 0.132284 | 0.128351 | 0.126894 | 0.138549 | 0.136509 | 0.138695 | 0.124272 |
| 0.129516 | 0.129371 | 0.127914 | 0.132576 | 0.134615 | 0.136509 | 0.132576 |
| 0.12398  | 0.131702 | 0.131119 | 0.138403 | 0.134615 | 0.144085 | 0.124417 |
| 0.139714 | 0.141608 | 0.138403 | 0.14627  | 0.15035  | 0.151369 | 0.134907 |
| 0.109266 | 0.105915 | 0.110286 | 0.113491 | 0.11961  | 0.123543 | 0.12398  |
| 0.13243  | 0.130828 | 0.134324 | 0.140443 | 0.134907 | 0.13884  | 0.138112 |
| 0.145105 | 0.144959 | 0.141463 | 0.15574  | 0.144085 | 0.155012 | 0.133304 |
| 0.116841 | 0.115239 | 0.119027 | 0.119027 | 0.118735 | 0.128205 | 0.127768 |
| 0.107517 | 0.11757  | 0.113491 | 0.118444 | 0.118444 | 0.128205 | 0.120192 |
| 0.137675 | 0.132576 | 0.130828 | 0.145105 | 0.143357 | 0.139714 | 0.143065 |
| 0.10912  | 0.111014 | 0.109557 | 0.115676 | 0.117716 | 0.121066 | 0.117424 |
| 0.134033 | 0.136801 | 0.13447  | 0.137966 | 0.140297 | 0.137529 | 0.137092 |
| 0.131265 | 0.12704  | 0.129079 | 0.138695 | 0.136364 | 0.133304 | 0.134033 |

|           |           |           |           |           |           |          |
|-----------|-----------|-----------|-----------|-----------|-----------|----------|
| 0.123834  | 0.119318  | 0.121358  | 0.133887  | 0.127477  | 0.13141   | 0.137092 |
| 0.119901  | 0.119172  | 0.117133  | 0.12704   | 0.126748  | 0.126311  | 0.131702 |
| 0.124126  | 0.120192  | 0.122815  | 0.126894  | 0.126311  | 0.126166  | 0.129516 |
| 0.121649  | 0.122086  | 0.119172  | 0.12704   | 0.125291  | 0.12602   | 0.138695 |
| 0.126894  | 0.125874  | 0.127331  | 0.13549   | 0.137529  | 0.137383  | 0.144522 |
| 0.12602   | 0.123252  | 0.122669  | 0.127914  | 0.127331  | 0.128351  | 0.142191 |
| 0.126894  | 0.121795  | 0.125     | 0.13345   | 0.130828  | 0.134761  | 0.144814 |
| 0.122815  | 0.124417  | 0.122086  | 0.134033  | 0.129079  | 0.131847  | 0.129079 |
| 0.13884   | 0.138986  | 0.13345   | 0.146853  | 0.139277  | 0.144376  | 0.145105 |
| 0.120192  | 0.117133  | 0.123252  | 0.122086  | 0.131119  | 0.128642  | 0.129079 |
| 0.105041  | 0.097028  | 0.11014   | 0.115093  | 0.113928  | 0.118444  | 0.124417 |
| 0.122523  | 0.124709  | 0.125583  | 0.131119  | 0.126166  | 0.13447   | 0.1419   |
| 0.118153  | 0.113054  | 0.119755  | 0.121212  | 0.122669  | 0.128934  | 0.132867 |
| 0.141026  | 0.144085  | 0.140589  | 0.148747  | 0.14088   | 0.150058  | 0.137966 |
| 0.157343  | 0.150787  | 0.154575  | 0.15574   | 0.157197  | 0.15676   | 0.144959 |
| 0.0949883 | 0.090472  | 0.0913462 | 0.08581   | 0.0954254 | 0.0891608 | 0.114073 |
| 0.0954254 | 0.0891608 | 0.085373  | 0.0909091 | 0.094697  | 0.0913462 | 0.115676 |
| 0.127622  | 0.130099  | 0.123397  | 0.136218  | 0.130099  | 0.132576  | 0.141754 |
| 0.130973  | 0.129953  | 0.131119  | 0.13549   | 0.139277  | 0.138258  | 0.141608 |
| 0.099796  | 0.0961538 | 0.0952797 | 0.0917832 | 0.0909091 | 0.10271   | 0.125    |
| 0.128642  | 0.13345   | 0.128205  | 0.137238  | 0.136946  | 0.134178  | 0.147727 |
| 0.134178  | 0.134033  | 0.129662  | 0.132867  | 0.132867  | 0.136801  | 0.120629 |
| 0.115967  | 0.114656  | 0.110286  | 0.116113  | 0.123689  | 0.119172  | 0.120775 |
| 0.143357  | 0.143211  | 0.144959  | 0.152826  | 0.148456  | 0.149476  | 0.147873 |
| 0.111888  | 0.11553   | 0.10912   | 0.110868  | 0.118444  | 0.119172  | 0.120192 |
| 0.136946  | 0.137383  | 0.133596  | 0.144668  | 0.143794  | 0.143939  | 0.141754 |
| 0.105332  | 0.100233  | 0.109266  | 0.112179  | 0.113345  | 0.118444  | 0.123252 |
| 0.12602   | 0.125     | 0.12296   | 0.135198  | 0.134033  | 0.130682  | 0.137821 |
| 0.124854  | 0.123834  | 0.120629  | 0.132284  | 0.132284  | 0.136218  | 0.135198 |
| 0.140734  | 0.143211  | 0.144668  | 0.154575  | 0.14729   | 0.152972  | 0.145833 |
| 0.14292   | 0.1419    | 0.1419    | 0.147727  | 0.150641  | 0.14729   | 0.15035  |
| 0.121503  | 0.125146  | 0.125146  | 0.140297  | 0.135344  | 0.138403  | 0.135927 |
| 0.135052  | 0.136655  | 0.136364  | 0.153846  | 0.143939  | 0.149913  | 0.141608 |
| 0.139277  | 0.135052  | 0.140589  | 0.149913  | 0.149038  | 0.14831   | 0.143211 |
| 0.143065  | 0.143211  | 0.148456  | 0.16215   | 0.153409  | 0.158508  | 0.150204 |
| 0.108829  | 0.11014   | 0.110723  | 0.11655   | 0.111305  | 0.112325  | 0.125583 |
| 0.132576  | 0.133013  | 0.140589  | 0.152535  | 0.143211  | 0.148601  | 0.145251 |
| 0.113928  | 0.11757   | 0.121358  | 0.133304  | 0.128351  | 0.134615  | 0.124854 |
| 0.114365  | 0.113054  | 0.120047  | 0.132576  | 0.126748  | 0.128351  | 0.124126 |
| 0.126457  | 0.122232  | 0.130682  | 0.130682  | 0.130099  | 0.136655  | 0.136218 |
| 0.116841  | 0.116404  | 0.121941  | 0.135927  | 0.129225  | 0.134324  | 0.133013 |
| 0.111451  | 0.112179  | 0.118298  | 0.127914  | 0.125291  | 0.132139  | 0.130245 |
| 0.113199  | 0.112762  | 0.118007  | 0.131993  | 0.126748  | 0.129808  | 0.124417 |
| 0.121066  | 0.119755  | 0.127622  | 0.138695  | 0.136946  | 0.137966  | 0.136364 |

|           |           |          |          |          |          |          |
|-----------|-----------|----------|----------|----------|----------|----------|
| 0.127914  | 0.127185  | 0.126894 | 0.137092 | 0.136509 | 0.137238 | 0.133013 |
| 0.106061  | 0.104749  | 0.114073 | 0.11757  | 0.119901 | 0.12296  | 0.122815 |
| 0.119464  | 0.124272  | 0.125728 | 0.14088  | 0.13243  | 0.140443 | 0.135052 |
| 0.113782  | 0.118881  | 0.119755 | 0.135781 | 0.127914 | 0.132721 | 0.13141  |
| 0.104749  | 0.0981935 | 0.104312 | 0.115385 | 0.113054 | 0.105624 | 0.112471 |
| 0.218094  | 0.216492  | 0.220571 | 0.230769 | 0.222611 | 0.230332 | 0.22028  |
| 0.141171  | 0.140443  | 0.140443 | 0.155886 | 0.148601 | 0.149038 | 0.148601 |
| 0.12296   | 0.120192  | 0.124854 | 0.137383 | 0.13884  | 0.136655 | 0.142628 |
| 0.123106  | 0.123834  | 0.129953 | 0.138403 | 0.137821 | 0.135344 | 0.136364 |
| 0.214015  | 0.211538  | 0.214744 | 0.223485 | 0.21824  | 0.224796 | 0.215326 |
| 0.11116   | 0.109266  | 0.116259 | 0.125    | 0.120629 | 0.119318 | 0.111305 |
| 0.11451   | 0.113491  | 0.125437 | 0.132721 | 0.128351 | 0.128788 | 0.136218 |
| 0.118298  | 0.117279  | 0.128351 | 0.133887 | 0.129516 | 0.139277 | 0.135635 |
| 0.124854  | 0.123834  | 0.122378 | 0.135781 | 0.134907 | 0.133887 | 0.131993 |
| 0.253642  | 0.251748  | 0.25204  | 0.263112 | 0.254371 | 0.258887 | 0.251748 |
| 0.125583  | 0.127477  | 0.130682 | 0.136218 | 0.139132 | 0.138403 | 0.130973 |
| 0.0967366 | 0.0957168 | 0.106789 | 0.116696 | 0.114948 | 0.104895 | 0.111451 |
| 0.109557  | 0.114073  | 0.116404 | 0.127768 | 0.124854 | 0.131702 | 0.14088  |
| 0.105186  | 0.112617  | 0.116113 | 0.12602  | 0.123106 | 0.131119 | 0.137966 |
| 0.132576  | 0.130099  | 0.130973 | 0.142628 | 0.140589 | 0.139569 | 0.128059 |
| 0.129953  | 0.131556  | 0.133013 | 0.139714 | 0.135927 | 0.143065 | 0.127768 |
| 0.101981  | 0.0983392 | 0.105624 | 0.119027 | 0.114365 | 0.108974 | 0.11116  |
| 0.115239  | 0.118007  | 0.122669 | 0.134907 | 0.128788 | 0.132721 | 0.129953 |
| 0.121795  | 0.123106  | 0.131556 | 0.143211 | 0.137383 | 0.141608 | 0.139714 |
| 0.120921  | 0.116987  | 0.121066 | 0.133013 | 0.132139 | 0.129662 | 0.128351 |
| 0.11553   | 0.118007  | 0.120338 | 0.136946 | 0.132284 | 0.133887 | 0.129662 |
| 0.124126  | 0.118153  | 0.125437 | 0.12602  | 0.129516 | 0.13345  | 0.128934 |
| 0.143211  | 0.140734  | 0.140443 | 0.15035  | 0.149767 | 0.145833 | 0.152389 |
| 0.128351  | 0.129662  | 0.131702 | 0.13549  | 0.140152 | 0.137383 | 0.131119 |
| 0.123106  | 0.119464  | 0.127622 | 0.132576 | 0.13345  | 0.131265 | 0.134615 |
| 0.191288  | 0.188811  | 0.194639 | 0.204837 | 0.197844 | 0.205274 | 0.196678 |
| 0.207896  | 0.204254  | 0.207459 | 0.21824  | 0.212704 | 0.217803 | 0.211538 |
| 0.124854  | 0.124709  | 0.126457 | 0.137821 | 0.133741 | 0.137675 | 0.133741 |
| 0.119027  | 0.11451   | 0.116259 | 0.131702 | 0.129079 | 0.129225 | 0.124126 |
| 0.13884   | 0.144522  | 0.13986  | 0.150058 | 0.145979 | 0.152826 | 0.143648 |
| 0.0995047 | 0.0952797 | 0.104604 | 0.114219 | 0.111014 | 0.105041 | 0.113928 |
| 0.127331  | 0.13039   | 0.130099 | 0.138549 | 0.141171 | 0.141317 | 0.130973 |
| 0.11961   | 0.124709  | 0.115385 | 0.130245 | 0.127622 | 0.133596 | 0.136655 |
| 0.225962  | 0.225233  | 0.226107 | 0.238636 | 0.233392 | 0.237034 | 0.231352 |
| 0.111742  | 0.107809  | 0.119172 | 0.128205 | 0.127622 | 0.125728 | 0.132867 |
| 0.197261  | 0.200612  | 0.199155 | 0.209936 | 0.200321 | 0.207168 | 0.201195 |
| 0.100087  | 0.0996503 | 0.104895 | 0.115676 | 0.111014 | 0.110868 | 0.116259 |
| 0.108974  | 0.10912   | 0.113782 | 0.120775 | 0.122523 | 0.130245 | 0.130099 |
| 0.119027  | 0.115676  | 0.119755 | 0.134033 | 0.131993 | 0.132721 | 0.124709 |

|          |          |          |          |          |          |          |
|----------|----------|----------|----------|----------|----------|----------|
| 0.112617 | 0.115093 | 0.11859  | 0.127914 | 0.127622 | 0.128934 | 0.125291 |
| 0.208333 | 0.207605 | 0.211684 | 0.220717 | 0.216638 | 0.219988 | 0.215763 |
| 0.133159 | 0.133304 | 0.13243  | 0.149621 | 0.144376 | 0.144814 | 0.143211 |
| 0.105769 | 0.108537 | 0.118153 | 0.118444 | 0.121941 | 0.12296  | 0.126311 |
| 0.126166 | 0.12398  | 0.128642 | 0.145251 | 0.137383 | 0.140152 | 0.137966 |
| 0.119755 | 0.120484 | 0.128351 | 0.132721 | 0.126311 | 0.134324 | 0.129808 |
| 0.118881 | 0.118735 | 0.122232 | 0.133304 | 0.131265 | 0.134324 | 0.13243  |
| 0.10067  | 0.101981 | 0.106935 | 0.113928 | 0.111597 | 0.109411 | 0.122669 |
| 0.105915 | 0.103438 | 0.111597 | 0.121212 | 0.116259 | 0.114656 | 0.114219 |
| 0.121649 | 0.117424 | 0.125    | 0.13345  | 0.127331 | 0.128351 | 0.137238 |
| 0.113491 | 0.115093 | 0.121212 | 0.132867 | 0.126457 | 0.13039  | 0.129371 |
| 0.106643 | 0.107372 | 0.113782 | 0.119901 | 0.120484 | 0.12296  | 0.128059 |
| 0.192162 | 0.189103 | 0.193182 | 0.204254 | 0.198427 | 0.202943 | 0.197261 |
| 0.108392 | 0.111451 | 0.11553  | 0.128642 | 0.128059 | 0.129079 | 0.137092 |
| 0.125437 | 0.123543 | 0.124417 | 0.136655 | 0.130828 | 0.132721 | 0.139569 |
| 0.116259 | 0.112908 | 0.116987 | 0.127768 | 0.121649 | 0.132284 | 0.137675 |
| 0.122232 | 0.127331 | 0.130828 | 0.137238 | 0.13549  | 0.13884  | 0.133741 |
| 0.118444 | 0.122669 | 0.124417 | 0.141608 | 0.133741 | 0.135927 | 0.134615 |
| 0.105624 | 0.105478 | 0.107226 | 0.115676 | 0.112179 | 0.108829 | 0.126457 |
| 0.109266 | 0.111742 | 0.121066 | 0.131847 | 0.123106 | 0.129953 | 0.123106 |
| 0.10169  | 0.101836 | 0.105915 | 0.112325 | 0.114948 | 0.105186 | 0.114656 |
| 0.118444 | 0.118881 | 0.124126 | 0.134615 | 0.129371 | 0.131556 | 0.134033 |
| 0.102418 | 0.107226 | 0.117424 | 0.127622 | 0.122086 | 0.129516 | 0.138986 |
| 0.122378 | 0.118735 | 0.124854 | 0.134761 | 0.133887 | 0.13549  | 0.131847 |
| 0.11757  | 0.113054 | 0.130245 | 0.137529 | 0.133159 | 0.139714 | 0.137821 |
| 0.130245 | 0.129516 | 0.141463 | 0.143502 | 0.14088  | 0.149767 | 0.148456 |
| 0.11859  | 0.120775 | 0.123689 | 0.130973 | 0.134178 | 0.13345  | 0.125146 |
| 0.135927 | 0.13549  | 0.136072 | 0.149767 | 0.144522 | 0.14729  | 0.144522 |
| 0.118735 | 0.116841 | 0.119755 | 0.131993 | 0.131119 | 0.13447  | 0.129371 |
| 0.10708  | 0.111305 | 0.106643 | 0.121212 | 0.119172 | 0.127768 | 0.129079 |
| 0.116841 | 0.120192 | 0.121941 | 0.135052 | 0.128934 | 0.130828 | 0.128642 |
| 0.105478 | 0.103293 | 0.110868 | 0.11961  | 0.112617 | 0.1081   | 0.118444 |
| 0.187937 | 0.188666 | 0.190997 | 0.203817 | 0.197407 | 0.202506 | 0.1875   |
| 0.10067  | 0.105478 | 0.111888 | 0.116259 | 0.117424 | 0.119901 | 0.122669 |
| 0.103293 | 0.106352 | 0.105478 | 0.118007 | 0.121212 | 0.121066 | 0.117716 |
| 0.120775 | 0.118298 | 0.125583 | 0.134033 | 0.127914 | 0.128642 | 0.132576 |
| 0.183712 | 0.180653 | 0.189394 | 0.198718 | 0.189977 | 0.195076 | 0.187354 |
| 0.135198 | 0.137966 | 0.142337 | 0.146416 | 0.14933  | 0.149184 | 0.137092 |
| 0.14627  | 0.145833 | 0.145542 | 0.151369 | 0.156031 | 0.150641 | 0.144085 |
| 0.146416 | 0.141608 | 0.142483 | 0.14831  | 0.149184 | 0.144376 | 0.150641 |
| 0.117279 | 0.118007 | 0.123252 | 0.127914 | 0.129662 | 0.129516 | 0.121212 |
| 0.122086 | 0.123397 | 0.12398  | 0.141463 | 0.135635 | 0.138403 | 0.135927 |
| 0.213432 | 0.214161 | 0.213869 | 0.225816 | 0.219406 | 0.223339 | 0.217657 |
| 0.127477 | 0.125874 | 0.125291 | 0.136946 | 0.130828 | 0.138549 | 0.138695 |



|           |           |          |          |          |          |          |
|-----------|-----------|----------|----------|----------|----------|----------|
| 0.127622  | 0.127477  | 0.125437 | 0.144668 | 0.135927 | 0.139277 | 0.140589 |
| 0.104895  | 0.107663  | 0.113491 | 0.11961  | 0.121941 | 0.124417 | 0.123397 |
| 0.171911  | 0.170892  | 0.174097 | 0.183129 | 0.174679 | 0.183275 | 0.174097 |
| 0.114219  | 0.113782  | 0.120484 | 0.130682 | 0.124272 | 0.126166 | 0.127477 |
| 0.144668  | 0.144231  | 0.150932 | 0.156469 | 0.154138 | 0.154575 | 0.154138 |
| 0.119901  | 0.116841  | 0.124709 | 0.125    | 0.128497 | 0.13039  | 0.129662 |
| 0.191579  | 0.187937  | 0.194056 | 0.20542  | 0.199592 | 0.203526 | 0.196096 |
| 0.121941  | 0.125291  | 0.127331 | 0.132576 | 0.139277 | 0.135635 | 0.131993 |
| 0.109411  | 0.106352  | 0.113928 | 0.125874 | 0.121503 | 0.129225 | 0.118881 |
| 0.105769  | 0.109411  | 0.112325 | 0.12398  | 0.121649 | 0.134615 | 0.131556 |
| 0.107955  | 0.111014  | 0.124126 | 0.134033 | 0.131993 | 0.133596 | 0.128497 |
| 0.118735  | 0.117424  | 0.123543 | 0.133741 | 0.129079 | 0.128934 | 0.133159 |
| 0.11961   | 0.113928  | 0.12704  | 0.132867 | 0.134324 | 0.138258 | 0.136072 |
| 0.118298  | 0.11553   | 0.120192 | 0.133887 | 0.133596 | 0.129953 | 0.130682 |
| 0.189831  | 0.189103  | 0.195513 | 0.203089 | 0.200758 | 0.202652 | 0.197844 |
| 0.11859   | 0.113782  | 0.127768 | 0.133596 | 0.130099 | 0.137821 | 0.135052 |
| 0.115239  | 0.114802  | 0.120338 | 0.133159 | 0.121795 | 0.13447  | 0.127622 |
| 0.214161  | 0.21081   | 0.214889 | 0.226836 | 0.218969 | 0.225816 | 0.216055 |
| 0.109848  | 0.111451  | 0.116987 | 0.128351 | 0.127477 | 0.129953 | 0.141463 |
| 0.11757   | 0.120047  | 0.120338 | 0.13141  | 0.132284 | 0.131265 | 0.128205 |
| 0.116696  | 0.114219  | 0.119172 | 0.13141  | 0.130828 | 0.129225 | 0.126457 |
| 0.136655  | 0.136218  | 0.129808 | 0.149621 | 0.13884  | 0.143357 | 0.141463 |
| 0.189977  | 0.190414  | 0.194493 | 0.206439 | 0.201195 | 0.203671 | 0.195367 |
| 0.0962995 | 0.0955711 | 0.103438 | 0.11655  | 0.114219 | 0.107663 | 0.117133 |
| 0.124854  | 0.12296   | 0.133159 | 0.13986  | 0.135198 | 0.143794 | 0.140443 |
| 0.117279  | 0.116259  | 0.11859  | 0.132867 | 0.133741 | 0.13039  | 0.128788 |
| 0.114073  | 0.112762  | 0.119172 | 0.13345  | 0.13141  | 0.133013 | 0.127331 |
| 0.116841  | 0.116404  | 0.117861 | 0.132139 | 0.132139 | 0.129953 | 0.126894 |
| 0.116696  | 0.120338  | 0.121503 | 0.138403 | 0.129662 | 0.135052 | 0.13345  |
| 0.107517  | 0.102418  | 0.109994 | 0.118153 | 0.120192 | 0.123834 | 0.11961  |
| 0.125583  | 0.127768  | 0.128934 | 0.139132 | 0.143794 | 0.138112 | 0.130682 |
| 0.126457  | 0.12398   | 0.127185 | 0.13884  | 0.128351 | 0.137238 | 0.141463 |
| 0.121212  | 0.124272  | 0.129516 | 0.130973 | 0.136801 | 0.137529 | 0.130099 |
| 0.123397  | 0.121503  | 0.130245 | 0.136655 | 0.13141  | 0.137675 | 0.132867 |
| 0.193182  | 0.195076  | 0.198864 | 0.209353 | 0.204108 | 0.208625 | 0.200612 |
| 0.113199  | 0.110723  | 0.125583 | 0.132576 | 0.129079 | 0.137675 | 0.134615 |
| 0.127331  | 0.129808  | 0.127768 | 0.144959 | 0.138258 | 0.142191 | 0.139132 |
| 0.116113  | 0.114219  | 0.114802 | 0.13141  | 0.130245 | 0.128934 | 0.128205 |
| 0.105769  | 0.105624  | 0.111742 | 0.115822 | 0.118153 | 0.121212 | 0.121649 |
| 0.114219  | 0.112325  | 0.122232 | 0.13039  | 0.124854 | 0.134033 | 0.127768 |
| 0.101253  | 0.0964452 | 0.105186 | 0.117424 | 0.115093 | 0.108829 | 0.111888 |
| 0.134761  | 0.13345   | 0.133741 | 0.141026 | 0.143939 | 0.143502 | 0.145105 |
| 0.119755  | 0.116696  | 0.124563 | 0.134178 | 0.130099 | 0.131993 | 0.135344 |
| 0.100524  | 0.0986305 | 0.109411 | 0.11961  | 0.116113 | 0.115967 | 0.113491 |

|           |           |          |          |          |          |          |
|-----------|-----------|----------|----------|----------|----------|----------|
| 0.0965909 | 0.0976107 | 0.106061 | 0.115385 | 0.111305 | 0.115822 | 0.106643 |
| 0.109266  | 0.105332  | 0.120192 | 0.123397 | 0.121941 | 0.132576 | 0.119027 |
| 0.101544  | 0.0996503 | 0.11014  | 0.113636 | 0.108683 | 0.110286 | 0.119755 |
| 0.132867  | 0.133304  | 0.135344 | 0.140297 | 0.144376 | 0.143065 | 0.133013 |
| 0.0962995 | 0.0952797 | 0.105186 | 0.117424 | 0.113636 | 0.111451 | 0.119172 |
| 0.113636  | 0.117279  | 0.116113 | 0.13243  | 0.124854 | 0.131119 | 0.129808 |
| 0.0967366 | 0.092803  | 0.105915 | 0.114948 | 0.109411 | 0.108683 | 0.112617 |
| 0.11553   | 0.113345  | 0.120338 | 0.131702 | 0.130828 | 0.129225 | 0.129079 |
| 0.0996503 | 0.107663  | 0.111451 | 0.115822 | 0.11961  | 0.121795 | 0.121066 |
| 0.117716  | 0.118153  | 0.120192 | 0.132139 | 0.131556 | 0.132576 | 0.129808 |
| 0.108683  | 0.105915  | 0.121649 | 0.128642 | 0.124563 | 0.13345  | 0.131847 |
| 0.11859   | 0.117279  | 0.123397 | 0.131847 | 0.129516 | 0.131993 | 0.134178 |
| 0.112762  | 0.113782  | 0.121941 | 0.132139 | 0.122232 | 0.125874 | 0.130682 |
| 0.108829  | 0.105478  | 0.117424 | 0.122378 | 0.122378 | 0.128934 | 0.124709 |
| 0.117424  | 0.114656  | 0.118444 | 0.131847 | 0.130099 | 0.131119 | 0.127477 |
| 0.110431  | 0.113491  | 0.114365 | 0.128351 | 0.123397 | 0.135198 | 0.132721 |
| 0.122232  | 0.121503  | 0.126166 | 0.138695 | 0.129953 | 0.140589 | 0.127622 |
| 0.115676  | 0.111742  | 0.114365 | 0.122815 | 0.125728 | 0.132576 | 0.124854 |
| 0.11451   | 0.114365  | 0.121066 | 0.13039  | 0.128642 | 0.130245 | 0.128934 |
| 0.121358  | 0.120338  | 0.121212 | 0.138112 | 0.130245 | 0.135927 | 0.130828 |
| 0.10067   | 0.100233  | 0.1081   | 0.114802 | 0.115676 | 0.109411 | 0.124417 |
| 0.116404  | 0.120047  | 0.122378 | 0.136946 | 0.131119 | 0.136509 | 0.133741 |
| 0.112325  | 0.114219  | 0.12296  | 0.131993 | 0.125874 | 0.129808 | 0.131993 |
| 0.110577  | 0.105186  | 0.114802 | 0.121503 | 0.125    | 0.125437 | 0.123252 |
| 0.112034  | 0.116841  | 0.12296  | 0.134033 | 0.12704  | 0.135344 | 0.130828 |
| 0.101399  | 0.106789  | 0.111451 | 0.11757  | 0.11961  | 0.121795 | 0.122232 |
| 0.117861  | 0.123252  | 0.127331 | 0.142191 | 0.134033 | 0.139132 | 0.138403 |
| 0.121066  | 0.120338  | 0.126748 | 0.132284 | 0.130536 | 0.132139 | 0.13141  |
| 0.116259  | 0.122232  | 0.122815 | 0.133013 | 0.133013 | 0.134907 | 0.127185 |
| 0.19697   | 0.195367  | 0.198572 | 0.209645 | 0.203526 | 0.20542  | 0.199446 |
| 0.162879  | 0.164773  | 0.169143 | 0.181964 | 0.175845 | 0.181818 | 0.170309 |
| 0.120338  | 0.12398   | 0.129808 | 0.130099 | 0.139423 | 0.136655 | 0.127768 |
| 0.111451  | 0.1081    | 0.109266 | 0.127622 | 0.120047 | 0.122815 | 0.118881 |
| 0.146999  | 0.149184  | 0.149767 | 0.152098 | 0.157634 | 0.156031 | 0.145979 |
| 0.123543  | 0.123689  | 0.130973 | 0.142628 | 0.137383 | 0.1419   | 0.142337 |
| 0.120775  | 0.121503  | 0.126748 | 0.136946 | 0.134033 | 0.137675 | 0.12704  |
| 0.117716  | 0.118153  | 0.12602  | 0.137092 | 0.135635 | 0.135781 | 0.126894 |
| 0.120047  | 0.116404  | 0.12398  | 0.128351 | 0.127185 | 0.132576 | 0.129808 |
| 0.121503  | 0.120775  | 0.124272 | 0.13884  | 0.129225 | 0.139277 | 0.129225 |
| 0.205857  | 0.202506  | 0.206876 | 0.217949 | 0.213869 | 0.21722  | 0.208916 |
| 0.101107  | 0.101253  | 0.10912  | 0.119901 | 0.115822 | 0.112471 | 0.118153 |
| 0.110577  | 0.111305  | 0.115676 | 0.13345  | 0.124126 | 0.128642 | 0.120921 |
| 0.112034  | 0.113345  | 0.118007 | 0.128788 | 0.126748 | 0.130682 | 0.12296  |
| 0.111888  | 0.113491  | 0.126603 | 0.131847 | 0.128642 | 0.135198 | 0.131265 |

|           |           |          |          |          |          |          |
|-----------|-----------|----------|----------|----------|----------|----------|
| 0.184295  | 0.184441  | 0.187646 | 0.199883 | 0.193473 | 0.200321 | 0.189103 |
| 0.24898   | 0.244755  | 0.246503 | 0.257576 | 0.254371 | 0.25743  | 0.248252 |
| 0.122232  | 0.120629  | 0.126166 | 0.136072 | 0.129953 | 0.133596 | 0.13549  |
| 0.118444  | 0.120629  | 0.125291 | 0.140734 | 0.130536 | 0.14088  | 0.129953 |
| 0.120775  | 0.123834  | 0.130828 | 0.134907 | 0.140152 | 0.136509 | 0.130536 |
| 0.113054  | 0.113199  | 0.122523 | 0.127768 | 0.127477 | 0.128205 | 0.13243  |
| 0.097465  | 0.0917832 | 0.101399 | 0.115967 | 0.111014 | 0.104749 | 0.114219 |
| 0.110431  | 0.107372  | 0.122232 | 0.128351 | 0.125437 | 0.13141  | 0.128351 |
| 0.11961   | 0.118298  | 0.120921 | 0.134615 | 0.129079 | 0.131847 | 0.124126 |
| 0.0957168 | 0.094697  | 0.104895 | 0.11655  | 0.109848 | 0.108246 | 0.113636 |
| 0.121212  | 0.118444  | 0.121358 | 0.13243  | 0.129516 | 0.131993 | 0.122815 |
| 0.118735  | 0.118298  | 0.120921 | 0.13345  | 0.133159 | 0.137966 | 0.128788 |
| 0.108683  | 0.105332  | 0.116404 | 0.122232 | 0.122523 | 0.124709 | 0.123689 |
| 0.119901  | 0.115967  | 0.122669 | 0.133741 | 0.12704  | 0.129516 | 0.133741 |
| 0.119464  | 0.119027  | 0.125146 | 0.140297 | 0.131847 | 0.137821 | 0.134761 |
| 0.0987762 | 0.102127  | 0.103584 | 0.112034 | 0.114073 | 0.121795 | 0.122232 |
| 0.118881  | 0.119318  | 0.118153 | 0.126894 | 0.12398  | 0.127914 | 0.135052 |
| 0.125874  | 0.124854  | 0.13039  | 0.133887 | 0.133887 | 0.131119 | 0.140589 |
| 0.113199  | 0.113054  | 0.117424 | 0.129079 | 0.130245 | 0.129225 | 0.126457 |
| 0.113054  | 0.112908  | 0.114073 | 0.121066 | 0.111451 | 0.122669 | 0.11553  |
| 0.132576  | 0.131556  | 0.131265 | 0.139132 | 0.140297 | 0.139277 | 0.135344 |
| 0.213724  | 0.213869  | 0.212121 | 0.224068 | 0.22028  | 0.222465 | 0.213287 |
| 0.109848  | 0.109994  | 0.116113 | 0.125146 | 0.122815 | 0.124709 | 0.125728 |
| 0.108829  | 0.105186  | 0.111014 | 0.119172 | 0.123834 | 0.125728 | 0.124126 |
| 0.113199  | 0.114219  | 0.128497 | 0.134615 | 0.130536 | 0.139714 | 0.136364 |
| 0.106643  | 0.112034  | 0.11961  | 0.129808 | 0.128351 | 0.13345  | 0.143211 |
| 0.1081    | 0.110577  | 0.125728 | 0.129516 | 0.12398  | 0.130536 | 0.127477 |
| 0.205128  | 0.201486  | 0.204983 | 0.214889 | 0.211684 | 0.214161 | 0.207896 |
| 0.121649  | 0.123252  | 0.128497 | 0.142191 | 0.136364 | 0.139423 | 0.138403 |
| 0.113345  | 0.109703  | 0.116987 | 0.128059 | 0.126894 | 0.127914 | 0.125146 |
| 0.121649  | 0.122669  | 0.119755 | 0.129662 | 0.131702 | 0.129808 | 0.125583 |
| 0.111451  | 0.109266  | 0.118881 | 0.127914 | 0.124417 | 0.12398  | 0.130536 |
| 0.116987  | 0.119464  | 0.12296  | 0.139277 | 0.131119 | 0.136801 | 0.134615 |
| 0.10912   | 0.111888  | 0.118298 | 0.126457 | 0.123252 | 0.126603 | 0.124126 |
| 0.119027  | 0.117716  | 0.118298 | 0.130536 | 0.129953 | 0.137383 | 0.126457 |
| 0.104458  | 0.107517  | 0.116841 | 0.128497 | 0.124709 | 0.131847 | 0.138112 |
| 0.202506  | 0.197698  | 0.2044   | 0.215472 | 0.209936 | 0.214161 | 0.206439 |
| 0.111451  | 0.112762  | 0.114219 | 0.130536 | 0.122086 | 0.126894 | 0.124709 |
| 0.194347  | 0.19595   | 0.199155 | 0.210227 | 0.204691 | 0.20979  | 0.202069 |
| 0.192745  | 0.192016  | 0.19697  | 0.207459 | 0.205711 | 0.206148 | 0.197844 |
| 0.124563  | 0.119172  | 0.128205 | 0.134033 | 0.131702 | 0.129808 | 0.140152 |
| 0.114948  | 0.119172  | 0.121212 | 0.130828 | 0.126166 | 0.135344 | 0.142774 |
| 0.108537  | 0.107809  | 0.111014 | 0.122086 | 0.122378 | 0.128934 | 0.120629 |
| 0.109557  | 0.114656  | 0.114656 | 0.128934 | 0.12398  | 0.128205 | 0.125728 |

|           |           |          |          |          |          |          |
|-----------|-----------|----------|----------|----------|----------|----------|
| 0.120192  | 0.120338  | 0.122669 | 0.136655 | 0.12704  | 0.136218 | 0.133159 |
| 0.120192  | 0.118881  | 0.120629 | 0.13141  | 0.134033 | 0.133013 | 0.130536 |
| 0.0954254 | 0.0920746 | 0.101107 | 0.110723 | 0.1081   | 0.106206 | 0.112179 |
| 0.095134  | 0.0949883 | 0.102564 | 0.11655  | 0.111597 | 0.106498 | 0.112471 |
| 0.123252  | 0.122232  | 0.126894 | 0.136509 | 0.133304 | 0.131993 | 0.133887 |
| 0.116696  | 0.114802  | 0.126748 | 0.131119 | 0.126166 | 0.130682 | 0.134324 |
| 0.115385  | 0.112034  | 0.11553  | 0.12602  | 0.126603 | 0.125    | 0.120192 |
| 0.118153  | 0.121795  | 0.126166 | 0.138112 | 0.132867 | 0.138258 | 0.132576 |
| 0.105186  | 0.104458  | 0.10912  | 0.119318 | 0.121066 | 0.125    | 0.11757  |
| 0.128059  | 0.128497  | 0.128497 | 0.142483 | 0.13549  | 0.138549 | 0.137238 |
| 0.118153  | 0.121795  | 0.122086 | 0.129662 | 0.133159 | 0.132139 | 0.12704  |
| 0.134324  | 0.130973  | 0.129225 | 0.149621 | 0.141171 | 0.143939 | 0.141463 |
| 0.262821  | 0.25947   | 0.262383 | 0.26792  | 0.266754 | 0.268648 | 0.261218 |
| 0.114802  | 0.119901  | 0.121649 | 0.121649 | 0.127768 | 0.126457 | 0.128351 |
| 0.119318  | 0.119755  | 0.122086 | 0.126166 | 0.130245 | 0.133887 | 0.13549  |
| 0.220862  | 0.21926   | 0.221008 | 0.229167 | 0.227127 | 0.231935 | 0.225087 |
| 0.120775  | 0.124417  | 0.128788 | 0.127914 | 0.134033 | 0.135344 | 0.138112 |
| 0.233246  | 0.229604  | 0.232809 | 0.241841 | 0.238345 | 0.241987 | 0.231935 |
| 0.106352  | 0.109703  | 0.112034 | 0.116696 | 0.121358 | 0.115967 | 0.122232 |
| 0.129225  | 0.128205  | 0.128205 | 0.137821 | 0.138403 | 0.137675 | 0.140152 |
| 0.0986305 | 0.105186  | 0.112179 | 0.125583 | 0.119172 | 0.128642 | 0.131119 |
| 0.121358  | 0.119755  | 0.128497 | 0.134033 | 0.13141  | 0.135052 | 0.137529 |
| 0.202652  | 0.20542   | 0.205128 | 0.21824  | 0.212704 | 0.218677 | 0.208333 |
| 0.130973  | 0.130536  | 0.131702 | 0.147727 | 0.138986 | 0.143211 | 0.1419   |
| 0.116113  | 0.120047  | 0.124709 | 0.140734 | 0.133159 | 0.136509 | 0.133159 |
| 0.229021  | 0.225962  | 0.229167 | 0.239073 | 0.23412  | 0.236305 | 0.230332 |
| 0.100087  | 0.0949883 | 0.108392 | 0.119464 | 0.110431 | 0.113199 | 0.114802 |
| 0.200175  | 0.196824  | 0.204108 | 0.21081  | 0.21081  | 0.21183  | 0.204983 |
| 0.101107  | 0.097465  | 0.108829 | 0.120775 | 0.112325 | 0.111597 | 0.119901 |
| 0.115093  | 0.111451  | 0.120484 | 0.131556 | 0.130973 | 0.129371 | 0.130973 |
| 0.120192  | 0.115676  | 0.121503 | 0.123543 | 0.132284 | 0.13243  | 0.129079 |
| 0.124563  | 0.124126  | 0.127331 | 0.130245 | 0.12704  | 0.130682 | 0.140152 |
| 0.115385  | 0.118444  | 0.122815 | 0.133304 | 0.127185 | 0.132576 | 0.130682 |
| 0.157925  | 0.159819  | 0.167395 | 0.173223 | 0.169143 | 0.179196 | 0.164481 |
| 0.113928  | 0.115239  | 0.11757  | 0.13447  | 0.129225 | 0.132284 | 0.128351 |
| 0.104312  | 0.109994  | 0.118153 | 0.129808 | 0.126311 | 0.134033 | 0.140297 |
| 0.113636  | 0.120192  | 0.120775 | 0.13243  | 0.129808 | 0.134033 | 0.133887 |
| 0.115385  | 0.120484  | 0.112325 | 0.128934 | 0.125437 | 0.132576 | 0.13447  |
| 0.198572  | 0.19493   | 0.200758 | 0.210082 | 0.203671 | 0.209353 | 0.203671 |
| 0.11451   | 0.112908  | 0.118153 | 0.131265 | 0.128934 | 0.129371 | 0.128351 |
| 0.11757   | 0.120921  | 0.129953 | 0.137529 | 0.133159 | 0.135052 | 0.136655 |
| 0.103438  | 0.103293  | 0.108537 | 0.11553  | 0.116987 | 0.111888 | 0.121358 |
| 0.100087  | 0.0958625 | 0.104312 | 0.115676 | 0.112179 | 0.105332 | 0.111888 |
| 0.123543  | 0.122232  | 0.121649 | 0.135344 | 0.135052 | 0.132284 | 0.127768 |

|           |           |          |          |          |          |          |
|-----------|-----------|----------|----------|----------|----------|----------|
| 0.259178  | 0.254662  | 0.257284 | 0.264569 | 0.261655 | 0.266171 | 0.258741 |
| 0.11451   | 0.109994  | 0.117861 | 0.121649 | 0.123397 | 0.129953 | 0.124272 |
| 0.116259  | 0.112325  | 0.12602  | 0.136509 | 0.131556 | 0.136364 | 0.135344 |
| 0.180653  | 0.182547  | 0.181964 | 0.191579 | 0.183712 | 0.190559 | 0.178176 |
| 0.190268  | 0.188374  | 0.193328 | 0.202943 | 0.196533 | 0.201632 | 0.191579 |
| 0.118881  | 0.118735  | 0.124854 | 0.136509 | 0.131556 | 0.132284 | 0.135635 |
| 0.120192  | 0.121503  | 0.125874 | 0.142191 | 0.133159 | 0.137383 | 0.138112 |
| 0.113491  | 0.112762  | 0.125    | 0.132284 | 0.127331 | 0.13039  | 0.130828 |
| 0.141608  | 0.142045  | 0.142045 | 0.156323 | 0.149913 | 0.149476 | 0.150787 |
| 0.118298  | 0.11757   | 0.125728 | 0.133013 | 0.131556 | 0.132284 | 0.132139 |
| 0.121941  | 0.120047  | 0.125    | 0.136655 | 0.134324 | 0.135344 | 0.136655 |
| 0.100524  | 0.0980478 | 0.107955 | 0.11757  | 0.11116  | 0.110431 | 0.113199 |
| 0.120338  | 0.122232  | 0.121649 | 0.137092 | 0.13039  | 0.133159 | 0.132721 |
| 0.125146  | 0.127622  | 0.128205 | 0.144522 | 0.134324 | 0.140006 | 0.138112 |
| 0.1081    | 0.102127  | 0.113782 | 0.121066 | 0.115239 | 0.119172 | 0.115822 |
| 0.124563  | 0.118298  | 0.124126 | 0.132576 | 0.129371 | 0.130099 | 0.134907 |
| 0.138695  | 0.131556  | 0.133013 | 0.141463 | 0.139132 | 0.138112 | 0.146416 |
| 0.119027  | 0.11451   | 0.122669 | 0.127331 | 0.129953 | 0.129808 | 0.127914 |
| 0.128788  | 0.125437  | 0.133013 | 0.137675 | 0.133596 | 0.132867 | 0.140297 |
| 0.105186  | 0.102418  | 0.10912  | 0.118153 | 0.113199 | 0.106352 | 0.116696 |
| 0.207605  | 0.207459  | 0.21183  | 0.223193 | 0.216492 | 0.221591 | 0.213869 |
| 0.117424  | 0.11757   | 0.120192 | 0.122523 | 0.122815 | 0.132284 | 0.133887 |
| 0.192599  | 0.193036  | 0.197698 | 0.207022 | 0.20236  | 0.208042 | 0.196241 |
| 0.107226  | 0.108246  | 0.112325 | 0.122523 | 0.117861 | 0.125874 | 0.130099 |
| 0.125583  | 0.124563  | 0.126311 | 0.137383 | 0.136801 | 0.136946 | 0.13447  |
| 0.122378  | 0.127185  | 0.129225 | 0.136218 | 0.135635 | 0.139569 | 0.130099 |
| 0.11757   | 0.118881  | 0.122086 | 0.128788 | 0.13141  | 0.131847 | 0.12704  |
| 0.123543  | 0.123397  | 0.127477 | 0.143794 | 0.137675 | 0.138112 | 0.136509 |
| 0.121212  | 0.122523  | 0.121358 | 0.141463 | 0.130682 | 0.133741 | 0.133013 |
| 0.121212  | 0.118444  | 0.118153 | 0.135344 | 0.133304 | 0.132576 | 0.133304 |
| 0.105624  | 0.11014   | 0.11451  | 0.126748 | 0.124126 | 0.130973 | 0.138695 |
| 0.126311  | 0.126748  | 0.130828 | 0.135781 | 0.13986  | 0.137383 | 0.131119 |
| 0.111014  | 0.10912   | 0.114365 | 0.119901 | 0.115239 | 0.111014 | 0.118735 |
| 0.255828  | 0.253351  | 0.254808 | 0.262966 | 0.258013 | 0.261072 | 0.251311 |
| 0.121503  | 0.120484  | 0.123689 | 0.135344 | 0.13447  | 0.134615 | 0.132139 |
| 0.184878  | 0.183566  | 0.191434 | 0.198718 | 0.19493  | 0.200029 | 0.190851 |
| 0.19289   | 0.190705  | 0.193036 | 0.204983 | 0.197698 | 0.204545 | 0.198281 |
| 0.120484  | 0.118007  | 0.125    | 0.131119 | 0.13345  | 0.135927 | 0.136655 |
| 0.111742  | 0.111888  | 0.117716 | 0.122378 | 0.124417 | 0.127185 | 0.125874 |
| 0.12602   | 0.126748  | 0.125583 | 0.136072 | 0.136946 | 0.135927 | 0.133159 |
| 0.114365  | 0.116841  | 0.118007 | 0.136072 | 0.128497 | 0.133596 | 0.127914 |
| 0.117133  | 0.113491  | 0.121941 | 0.123689 | 0.12398  | 0.131993 | 0.129516 |
| 0.0981935 | 0.0930944 | 0.107955 | 0.119318 | 0.116696 | 0.109557 | 0.118153 |
| 0.125146  | 0.122086  | 0.123834 | 0.13549  | 0.130536 | 0.137966 | 0.131993 |

|           |           |          |          |          |          |          |
|-----------|-----------|----------|----------|----------|----------|----------|
| 0.129225  | 0.132867  | 0.130536 | 0.147436 | 0.139277 | 0.140589 | 0.141317 |
| 0.120629  | 0.118153  | 0.11961  | 0.132721 | 0.133596 | 0.13345  | 0.128934 |
| 0.129953  | 0.130973  | 0.129808 | 0.145833 | 0.138258 | 0.145979 | 0.137675 |
| 0.110577  | 0.111888  | 0.117424 | 0.125291 | 0.125291 | 0.133013 | 0.129371 |
| 0.129225  | 0.129662  | 0.131119 | 0.136364 | 0.141317 | 0.140589 | 0.132576 |
| 0.115385  | 0.118153  | 0.122815 | 0.137383 | 0.128059 | 0.130536 | 0.136218 |
| 0.108246  | 0.103438  | 0.110431 | 0.11451  | 0.117133 | 0.107663 | 0.117716 |
| 0.125     | 0.122523  | 0.12398  | 0.129808 | 0.133887 | 0.136946 | 0.132139 |
| 0.116259  | 0.115239  | 0.117279 | 0.129516 | 0.126894 | 0.131119 | 0.122815 |
| 0.128788  | 0.126603  | 0.137383 | 0.140006 | 0.135635 | 0.148019 | 0.144668 |
| 0.187791  | 0.185315  | 0.19289  | 0.202506 | 0.192308 | 0.198281 | 0.191434 |
| 0.134907  | 0.134761  | 0.131556 | 0.14933  | 0.141171 | 0.144231 | 0.144668 |
| 0.121795  | 0.123397  | 0.12398  | 0.138258 | 0.13243  | 0.135781 | 0.136509 |
| 0.122232  | 0.122086  | 0.127622 | 0.133159 | 0.137238 | 0.136218 | 0.129953 |
| 0.110431  | 0.11116   | 0.119318 | 0.123106 | 0.128934 | 0.125291 | 0.118735 |
| 0.118444  | 0.11655   | 0.124126 | 0.131119 | 0.129371 | 0.128351 | 0.135198 |
| 0.123834  | 0.11961   | 0.125728 | 0.132139 | 0.130682 | 0.130245 | 0.137092 |
| 0.192745  | 0.191434  | 0.195804 | 0.207168 | 0.201923 | 0.207605 | 0.196387 |
| 0.118153  | 0.118007  | 0.126457 | 0.1419   | 0.129953 | 0.137966 | 0.125583 |
| 0.106643  | 0.108246  | 0.115822 | 0.124563 | 0.120484 | 0.125    | 0.123106 |
| 0.121503  | 0.122815  | 0.128934 | 0.141171 | 0.135927 | 0.139569 | 0.137092 |
| 0.192745  | 0.192016  | 0.196096 | 0.204254 | 0.204837 | 0.205857 | 0.198135 |
| 0.107517  | 0.107372  | 0.118153 | 0.120484 | 0.12398  | 0.125874 | 0.122232 |
| 0.10271   | 0.0999417 | 0.105186 | 0.11451  | 0.114802 | 0.103875 | 0.113636 |
| 0.12398   | 0.124709  | 0.126748 | 0.142191 | 0.13549  | 0.139423 | 0.137821 |
| 0.116259  | 0.115239  | 0.120775 | 0.131556 | 0.127185 | 0.129079 | 0.13039  |
| 0.18852   | 0.190414  | 0.192745 | 0.204983 | 0.201486 | 0.201923 | 0.19595  |
| 0.0999417 | 0.0965909 | 0.106498 | 0.113782 | 0.110286 | 0.106643 | 0.113199 |
| 0.108683  | 0.108537  | 0.119901 | 0.130099 | 0.126311 | 0.134324 | 0.129225 |
| 0.110431  | 0.109411  | 0.116696 | 0.120775 | 0.123106 | 0.126457 | 0.121358 |
| 0.124417  | 0.125437  | 0.130682 | 0.137675 | 0.127477 | 0.138695 | 0.132721 |
| 0.103001  | 0.106061  | 0.115967 | 0.12704  | 0.123252 | 0.129516 | 0.139277 |
| 0.106498  | 0.100524  | 0.1081   | 0.115093 | 0.115385 | 0.103584 | 0.115093 |
| 0.118735  | 0.117133  | 0.120338 | 0.133741 | 0.132867 | 0.131847 | 0.128205 |
| 0.114365  | 0.115676  | 0.121503 | 0.125874 | 0.130245 | 0.135344 | 0.129079 |
| 0.145105  | 0.142337  | 0.143502 | 0.149038 | 0.147873 | 0.14831  | 0.152244 |
| 0.236888  | 0.234994  | 0.238491 | 0.247232 | 0.243153 | 0.247086 | 0.240822 |
| 0.130536  | 0.126603  | 0.127768 | 0.135344 | 0.138258 | 0.141317 | 0.13243  |
| 0.104604  | 0.112325  | 0.119027 | 0.130682 | 0.126603 | 0.132867 | 0.139714 |
| 0.120192  | 0.119172  | 0.123252 | 0.136072 | 0.129371 | 0.131556 | 0.131119 |
| 0.121212  | 0.117861  | 0.128059 | 0.133596 | 0.133596 | 0.138695 | 0.140006 |
| 0.100962  | 0.10373   | 0.106352 | 0.117133 | 0.113636 | 0.121066 | 0.12296  |
| 0.110577  | 0.113636  | 0.123543 | 0.13345  | 0.122669 | 0.131556 | 0.125    |
| 0.124709  | 0.124854  | 0.123689 | 0.14088  | 0.13447  | 0.134033 | 0.135344 |

|           |           |          |          |          |          |          |
|-----------|-----------|----------|----------|----------|----------|----------|
| 0.105624  | 0.0990676 | 0.108392 | 0.112179 | 0.114802 | 0.105915 | 0.115093 |
| 0.112034  | 0.109848  | 0.119464 | 0.128497 | 0.127914 | 0.13243  | 0.129662 |
| 0.239219  | 0.236451  | 0.238199 | 0.247523 | 0.241404 | 0.248252 | 0.240239 |
| 0.107663  | 0.106643  | 0.112762 | 0.119172 | 0.121212 | 0.124854 | 0.122086 |
| 0.0992133 | 0.100524  | 0.11014  | 0.112471 | 0.118881 | 0.116404 | 0.117424 |
| 0.119464  | 0.116113  | 0.114948 | 0.129225 | 0.128934 | 0.126166 | 0.125728 |
| 0.129516  | 0.128205  | 0.127622 | 0.137821 | 0.134324 | 0.138258 | 0.137238 |
| 0.135344  | 0.131702  | 0.130536 | 0.136946 | 0.141317 | 0.145833 | 0.138695 |
| 0.121649  | 0.128788  | 0.123834 | 0.13986  | 0.132867 | 0.141463 | 0.131119 |
| 0.122232  | 0.123834  | 0.123543 | 0.140734 | 0.132576 | 0.137675 | 0.136655 |
| 0.110723  | 0.110286  | 0.112908 | 0.125146 | 0.12398  | 0.12704  | 0.13039  |
| 0.23514   | 0.23208   | 0.235868 | 0.244901 | 0.239365 | 0.242716 | 0.232955 |
| 0.12704   | 0.127477  | 0.127185 | 0.143211 | 0.137675 | 0.137821 | 0.140006 |
| 0.100962  | 0.0984848 | 0.106643 | 0.113054 | 0.112471 | 0.105041 | 0.114802 |
| 0.10912   | 0.105769  | 0.117424 | 0.12296  | 0.123543 | 0.130099 | 0.127331 |
| 0.116841  | 0.113199  | 0.113782 | 0.128059 | 0.120484 | 0.126166 | 0.135927 |
| 0.111305  | 0.116404  | 0.118153 | 0.118735 | 0.122232 | 0.121212 | 0.128351 |
| 0.119464  | 0.116696  | 0.120192 | 0.130099 | 0.129516 | 0.127331 | 0.127185 |
| 0.104604  | 0.100962  | 0.107372 | 0.11116  | 0.115822 | 0.106935 | 0.114073 |
| 0.106206  | 0.103438  | 0.107809 | 0.117133 | 0.118298 | 0.10708  | 0.113345 |
| 0.099796  | 0.0952797 | 0.104604 | 0.116841 | 0.113345 | 0.106206 | 0.114802 |
| 0.117716  | 0.11757   | 0.120775 | 0.135635 | 0.13243  | 0.133159 | 0.129225 |
| 0.111888  | 0.116113  | 0.120484 | 0.128642 | 0.129808 | 0.132576 | 0.143502 |
| 0.11757   | 0.121795  | 0.12296  | 0.130245 | 0.129953 | 0.137092 | 0.148019 |
| 0.129808  | 0.130536  | 0.130536 | 0.139569 | 0.1419   | 0.13884  | 0.131119 |
| 0.133887  | 0.133159  | 0.134907 | 0.137529 | 0.143357 | 0.143211 | 0.134324 |
| 0.115093  | 0.116113  | 0.120484 | 0.128351 | 0.126603 | 0.131993 | 0.146416 |
| 0.113345  | 0.109994  | 0.120775 | 0.124272 | 0.125146 | 0.129371 | 0.125437 |
| 0.116987  | 0.116259  | 0.11655  | 0.118298 | 0.119755 | 0.11553  | 0.129371 |
| 0.119172  | 0.124272  | 0.119901 | 0.12602  | 0.128059 | 0.12704  | 0.120192 |
| 0.209207  | 0.208479  | 0.208188 | 0.218677 | 0.214889 | 0.22028  | 0.211976 |
| 0.128497  | 0.127768  | 0.12602  | 0.140589 | 0.13447  | 0.138112 | 0.131265 |
| 0.100233  | 0.109411  | 0.112617 | 0.119901 | 0.120484 | 0.122086 | 0.122523 |
| 0.124854  | 0.12296   | 0.12296  | 0.136364 | 0.134615 | 0.135052 | 0.131702 |
| 0.226107  | 0.221591  | 0.225962 | 0.234994 | 0.229167 | 0.234557 | 0.226544 |
| 0.213287  | 0.210519  | 0.213141 | 0.225379 | 0.222465 | 0.22669  | 0.215763 |
| 0.105041  | 0.102273  | 0.108392 | 0.115676 | 0.115093 | 0.10912  | 0.115967 |
| 0.253205  | 0.251603  | 0.253351 | 0.262675 | 0.256847 | 0.261364 | 0.253059 |
| 0.115385  | 0.111742  | 0.120192 | 0.123106 | 0.124563 | 0.131702 | 0.124272 |
| 0.132284  | 0.13039   | 0.137092 | 0.13884  | 0.141754 | 0.144814 | 0.146999 |
| 0.112179  | 0.110286  | 0.114656 | 0.120192 | 0.12398  | 0.125    | 0.123689 |
| 0.11116   | 0.115093  | 0.120338 | 0.129953 | 0.129953 | 0.135927 | 0.142774 |
| 0.192016  | 0.190414  | 0.193619 | 0.204691 | 0.200612 | 0.204837 | 0.196824 |
| 0.113199  | 0.106935  | 0.118881 | 0.120047 | 0.12704  | 0.125146 | 0.133159 |

|           |           |           |          |          |          |          |
|-----------|-----------|-----------|----------|----------|----------|----------|
| 0.198864  | 0.197552  | 0.199883  | 0.210664 | 0.206002 | 0.207605 | 0.199883 |
| 0.119027  | 0.11655   | 0.118298  | 0.128788 | 0.128497 | 0.13447  | 0.132867 |
| 0.109703  | 0.107517  | 0.111597  | 0.122669 | 0.113054 | 0.114365 | 0.109557 |
| 0.124854  | 0.123252  | 0.128788  | 0.128497 | 0.128205 | 0.136218 | 0.134324 |
| 0.11757   | 0.114802  | 0.120047  | 0.128497 | 0.125291 | 0.128059 | 0.125874 |
| 0.113345  | 0.108829  | 0.114073  | 0.127185 | 0.126603 | 0.124709 | 0.121358 |
| 0.118007  | 0.117279  | 0.121066  | 0.134761 | 0.125146 | 0.132867 | 0.124563 |
| 0.106643  | 0.106498  | 0.110868  | 0.117279 | 0.121941 | 0.122378 | 0.11961  |
| 0.116987  | 0.116841  | 0.120047  | 0.13345  | 0.127914 | 0.13243  | 0.128788 |
| 0.105769  | 0.103001  | 0.109703  | 0.114948 | 0.113782 | 0.114219 | 0.121649 |
| 0.115676  | 0.114073  | 0.116696  | 0.125146 | 0.12602  | 0.13141  | 0.124563 |
| 0.108537  | 0.108974  | 0.113636  | 0.116259 | 0.121795 | 0.124854 | 0.122086 |
| 0.121503  | 0.121649  | 0.126603  | 0.132139 | 0.134761 | 0.135781 | 0.124854 |
| 0.128497  | 0.128934  | 0.127477  | 0.145542 | 0.137675 | 0.1419   | 0.139714 |
| 0.114365  | 0.120047  | 0.120921  | 0.127914 | 0.133159 | 0.131847 | 0.125874 |
| 0.108392  | 0.10912   | 0.122232  | 0.130099 | 0.124563 | 0.130245 | 0.130099 |
| 0.114948  | 0.111014  | 0.113054  | 0.126166 | 0.128788 | 0.127185 | 0.121503 |
| 0.105041  | 0.100233  | 0.109557  | 0.117133 | 0.113636 | 0.11116  | 0.111305 |
| 0.103001  | 0.108683  | 0.11451   | 0.125583 | 0.125583 | 0.128642 | 0.136364 |
| 0.118298  | 0.117279  | 0.122523  | 0.135052 | 0.128059 | 0.126457 | 0.133304 |
| 0.120047  | 0.123106  | 0.127768  | 0.130973 | 0.134178 | 0.131702 | 0.124272 |
| 0.11961   | 0.120629  | 0.12296   | 0.138695 | 0.129662 | 0.135052 | 0.133159 |
| 0.128788  | 0.130682  | 0.131265  | 0.14729  | 0.139423 | 0.141317 | 0.139132 |
| 0.137821  | 0.135927  | 0.134178  | 0.151369 | 0.14292  | 0.147145 | 0.146125 |
| 0.0922203 | 0.0926573 | 0.0996503 | 0.111014 | 0.107517 | 0.107663 | 0.111014 |
| 0.117861  | 0.114802  | 0.119755  | 0.132284 | 0.13345  | 0.129808 | 0.129953 |
| 0.106935  | 0.109411  | 0.117279  | 0.124272 | 0.116987 | 0.125291 | 0.125437 |
| 0.11859   | 0.122815  | 0.124563  | 0.130973 | 0.131847 | 0.137529 | 0.146125 |
| 0.113491  | 0.111888  | 0.119464  | 0.120047 | 0.122669 | 0.127477 | 0.123252 |
| 0.136509  | 0.131702  | 0.136655  | 0.140152 | 0.139569 | 0.139132 | 0.145105 |
| 0.139132  | 0.135198  | 0.136072  | 0.141608 | 0.14627  | 0.142628 | 0.140734 |
| 0.125583  | 0.124272  | 0.125437  | 0.133596 | 0.133887 | 0.132867 | 0.137092 |
| 0.118444  | 0.115676  | 0.123543  | 0.128205 | 0.131702 | 0.135052 | 0.129079 |
| 0.107809  | 0.108246  | 0.10912   | 0.123397 | 0.11757  | 0.128788 | 0.130682 |
| 0.128205  | 0.129225  | 0.132139  | 0.138258 | 0.139714 | 0.139569 | 0.13243  |
| 0.207896  | 0.206585  | 0.208625  | 0.219114 | 0.2162   | 0.217803 | 0.208916 |
| 0.110577  | 0.1081    | 0.120629  | 0.128205 | 0.12296  | 0.134761 | 0.131993 |
| 0.11859   | 0.118153  | 0.126311  | 0.131265 | 0.129516 | 0.137238 | 0.135927 |
| 0.104458  | 0.109848  | 0.113636  | 0.12296  | 0.121795 | 0.127477 | 0.137238 |
| 0.11859   | 0.120484  | 0.122815  | 0.129516 | 0.133596 | 0.131993 | 0.12602  |
| 0.119318  | 0.119755  | 0.125583  | 0.131702 | 0.132576 | 0.139132 | 0.136364 |
| 0.120192  | 0.118298  | 0.127914  | 0.133159 | 0.13141  | 0.132721 | 0.12704  |
| 0.125874  | 0.121358  | 0.128059  | 0.137092 | 0.131847 | 0.135198 | 0.131847 |
| 0.123397  | 0.121212  | 0.121212  | 0.131993 | 0.128497 | 0.130973 | 0.134324 |



|           |           |           |           |           |           |           |
|-----------|-----------|-----------|-----------|-----------|-----------|-----------|
| 0.10271   | 0.0981935 | 0.108392  | 0.11451   | 0.112179  | 0.113491  | 0.120047  |
| 0.111742  | 0.117133  | 0.118007  | 0.125     | 0.123543  | 0.129225  | 0.140443  |
| 0.117279  | 0.115093  | 0.122086  | 0.124709  | 0.125874  | 0.129516  | 0.128788  |
| 0.122378  | 0.118735  | 0.121358  | 0.13039   | 0.13243   | 0.140152  | 0.130682  |
| 0.170017  | 0.175699  | 0.18007   | 0.188228  | 0.190851  | 0.185169  | 0.183858  |
| 0.116696  | 0.120921  | 0.123834  | 0.139277  | 0.132867  | 0.135344  | 0.134907  |
| 0.112471  | 0.117279  | 0.122523  | 0.124563  | 0.125437  | 0.13345   | 0.141754  |
| 0.117279  | 0.115385  | 0.121212  | 0.117716  | 0.117716  | 0.126603  | 0.125583  |
| 0.115385  | 0.115822  | 0.114365  | 0.128351  | 0.123397  | 0.126748  | 0.123397  |
| 0.106935  | 0.104458  | 0.116987  | 0.122815  | 0.120484  | 0.128788  | 0.121358  |
| 0.111305  | 0.109703  | 0.11116   | 0.122232  | 0.122232  | 0.126166  | 0.119318  |
| 0.111888  | 0.113782  | 0.118735  | 0.124272  | 0.122232  | 0.130536  | 0.123689  |
| 0.0909091 | 0.0960082 | 0.0907634 | 0.10067   | 0.0930944 | 0.0914918 | 0.119901  |
| 0.120338  | 0.122232  | 0.120775  | 0.136509  | 0.129808  | 0.139277  | 0.126603  |
| 0.125146  | 0.126166  | 0.12296   | 0.136072  | 0.131702  | 0.135635  | 0.133741  |
| 0.109557  | 0.108829  | 0.114948  | 0.123689  | 0.119901  | 0.125291  | 0.122523  |
| 0.111742  | 0.108974  | 0.118881  | 0.125583  | 0.124709  | 0.127477  | 0.127331  |
| 0.0967366 | 0.095134  | 0.0933858 | 0.0910548 | 0.0948427 | 0.0961538 | 0.107663  |
| 0.117424  | 0.114656  | 0.107955  | 0.114073  | 0.116987  | 0.121795  | 0.123397  |
| 0.124126  | 0.123397  | 0.123689  | 0.131847  | 0.13243   | 0.131702  | 0.122523  |
| 0.111888  | 0.109411  | 0.107955  | 0.11961   | 0.118444  | 0.121795  | 0.126311  |
| 0.116841  | 0.114073  | 0.109703  | 0.119318  | 0.116113  | 0.123252  | 0.125437  |
| 0.112471  | 0.111451  | 0.118153  | 0.12602   | 0.121066  | 0.130245  | 0.129808  |
| 0.122523  | 0.118881  | 0.122378  | 0.126748  | 0.126748  | 0.135344  | 0.136364  |
| 0.103875  | 0.102273  | 0.111014  | 0.119464  | 0.113636  | 0.123397  | 0.120629  |
| 0.128059  | 0.126748  | 0.129371  | 0.141026  | 0.135198  | 0.133013  | 0.132284  |
| 0.119027  | 0.120338  | 0.123252  | 0.142191  | 0.134615  | 0.133013  | 0.130828  |
| 0.113782  | 0.115967  | 0.116841  | 0.121503  | 0.124126  | 0.130682  | 0.12704   |
| 0.120921  | 0.118735  | 0.126311  | 0.13039   | 0.134178  | 0.128788  | 0.131556  |
| 0.119464  | 0.123106  | 0.123397  | 0.136218  | 0.13447   | 0.137238  | 0.132721  |
| 0.125874  | 0.121358  | 0.126311  | 0.127185  | 0.133596  | 0.131119  | 0.121066  |
| 0.112179  | 0.109411  | 0.11553   | 0.124854  | 0.11961   | 0.122378  | 0.129225  |
| 0.137966  | 0.138695  | 0.136946  | 0.144231  | 0.149184  | 0.143211  | 0.146562  |
| 0.118444  | 0.113636  | 0.131119  | 0.134615  | 0.140152  | 0.137966  | 0.137821  |
| 0.107663  | 0.105769  | 0.11014   | 0.105478  | 0.110431  | 0.108246  | 0.0961538 |
| 0.122523  | 0.122378  | 0.121212  | 0.131702  | 0.12704   | 0.132139  | 0.131993  |
| 0.105769  | 0.10708   | 0.105624  | 0.116404  | 0.116404  | 0.112471  | 0.119901  |
| 0.110577  | 0.103147  | 0.112762  | 0.119172  | 0.120629  | 0.121066  | 0.125291  |
| 0.0879953 | 0.0793998 | 0.0910548 | 0.0948427 | 0.0878497 | 0.097028  | 0.114073  |
| 0.116841  | 0.11553   | 0.117861  | 0.11961   | 0.125437  | 0.126166  | 0.125146  |
| 0.123397  | 0.120921  | 0.126166  | 0.128497  | 0.132576  | 0.133596  | 0.132867  |
| 0.114656  | 0.120629  | 0.119464  | 0.136655  | 0.129371  | 0.13447   | 0.128497  |
| 0.10271   | 0.103438  | 0.113345  | 0.118881  | 0.112179  | 0.120775  | 0.119172  |
| 0.111014  | 0.106789  | 0.114073  | 0.118735  | 0.121066  | 0.122378  | 0.128059  |

|          |          |          |          |          |          |          |
|----------|----------|----------|----------|----------|----------|----------|
| 0.118444 | 0.114802 | 0.122086 | 0.124417 | 0.124126 | 0.128642 | 0.124417 |
| 0.109411 | 0.106643 | 0.108683 | 0.115385 | 0.118881 | 0.119027 | 0.117424 |
| 0.117424 | 0.112908 | 0.120775 | 0.120192 | 0.126311 | 0.123252 | 0.127185 |
| 0.117133 | 0.111451 | 0.119027 | 0.127768 | 0.123689 | 0.129953 | 0.133013 |
| 0.118153 | 0.126748 | 0.123543 | 0.136655 | 0.130828 | 0.138549 | 0.132576 |
| 0.116113 | 0.11859  | 0.119464 | 0.128788 | 0.126457 | 0.129808 | 0.125874 |
| 0.116113 | 0.110431 | 0.115093 | 0.121212 | 0.124417 | 0.129516 | 0.125291 |
| 0.114073 | 0.112762 | 0.115676 | 0.124417 | 0.120047 | 0.126603 | 0.122669 |
| 0.116841 | 0.123689 | 0.124272 | 0.133596 | 0.133596 | 0.136072 | 0.127185 |
| 0.117279 | 0.116841 | 0.122669 | 0.128788 | 0.129079 | 0.131847 | 0.125583 |
| 0.12602  | 0.125583 | 0.129371 | 0.13986  | 0.137821 | 0.141754 | 0.13345  |
| 0.110577 | 0.113345 | 0.111888 | 0.125583 | 0.120338 | 0.127768 | 0.124417 |
| 0.129079 | 0.128934 | 0.129516 | 0.132721 | 0.135635 | 0.140734 | 0.132721 |

| <b>TDr_09_00248</b> | <b>TDr_09_00267</b> | <b>TDr_09_00280</b> | <b>TDr_09_00285</b> | <b>TDr_09_00292</b> | <b>TDr_09_00325</b> | <b>TDr_09_00364</b> |
|---------------------|---------------------|---------------------|---------------------|---------------------|---------------------|---------------------|
| 0.117424            | 0.136946            | 0.113199            | 0.11655             | 0.119755            | 0.118153            | 0.116404            |
| 0.114948            | 0.130099            | 0.109266            | 0.113199            | 0.110868            | 0.115676            | 0.112179            |
| 0.11116             | 0.126603            | 0.102855            | 0.109703            | 0.105332            | 0.110431            | 0.109266            |
| 0.118153            | 0.129516            | 0.109848            | 0.110868            | 0.116696            | 0.115967            | 0.113928            |
| 0.129808            | 0.141463            | 0.129371            | 0.125146            | 0.130099            | 0.124417            | 0.123543            |
| 0.128934            | 0.132139            | 0.12296             | 0.121649            | 0.123106            | 0.120629            | 0.122378            |
| 0.11014             | 0.126457            | 0.109703            | 0.111597            | 0.112471            | 0.110868            | 0.10912             |
| 0.113928            | 0.126457            | 0.110286            | 0.103147            | 0.110431            | 0.107372            | 0.108829            |
| 0.102418            | 0.120192            | 0.102855            | 0.10067             | 0.105041            | 0.10169             | 0.105478            |
| 0.113636            | 0.123252            | 0.109411            | 0.102564            | 0.110723            | 0.107372            | 0.107372            |
| 0.110286            | 0.132721            | 0.107517            | 0.105624            | 0.108246            | 0.108392            | 0.112179            |
| 0.0987762           | 0.118298            | 0.102418            | 0.106935            | 0.0996503           | 0.103293            | 0.0986305           |
| 0.111305            | 0.127331            | 0.105624            | 0.109557            | 0.110723            | 0.112034            | 0.107663            |
| 0.136218            | 0.147582            | 0.133741            | 0.127185            | 0.132721            | 0.130536            | 0.130245            |
| 0.132576            | 0.140443            | 0.123397            | 0.124709            | 0.120338            | 0.12398             | 0.125146            |
| 0.110868            | 0.121649            | 0.104312            | 0.113782            | 0.108246            | 0.109266            | 0.105186            |
| 0.102564            | 0.116841            | 0.0989219           | 0.105478            | 0.105478            | 0.103875            | 0.0962995           |
| 0.138549            | 0.150495            | 0.139569            | 0.135635            | 0.140006            | 0.137821            | 0.131702            |
| 0.105332            | 0.118735            | 0.102273            | 0.106789            | 0.102127            | 0.1081              | 0.104021            |
| 0.21081             | 0.211101            | 0.203671            | 0.200612            | 0.204108            | 0.199883            | 0.20134             |
| 0.120629            | 0.132576            | 0.113782            | 0.113054            | 0.114802            | 0.116404            | 0.114656            |
| 0.115822            | 0.127768            | 0.108974            | 0.112908            | 0.10912             | 0.115676            | 0.112471            |
| 0.0996503           | 0.119464            | 0.0971737           | 0.111597            | 0.102564            | 0.101544            | 0.104167            |
| 0.105332            | 0.117861            | 0.101399            | 0.109411            | 0.112034            | 0.101399            | 0.101107            |
| 0.0996503           | 0.118298            | 0.0942599           | 0.0967366           | 0.106643            | 0.101253            | 0.097465            |
| 0.126457            | 0.136364            | 0.118444            | 0.119464            | 0.118881            | 0.117861            | 0.119318            |
| 0.115093            | 0.125874            | 0.11116             | 0.11451             | 0.117716            | 0.109994            | 0.11116             |
| 0.106643            | 0.109557            | 0.097465            | 0.112179            | 0.10373             | 0.104167            | 0.0989219           |
| 0.118298            | 0.131119            | 0.116696            | 0.115967            | 0.124709            | 0.120775            | 0.116696            |
| 0.115676            | 0.128788            | 0.112034            | 0.118298            | 0.116259            | 0.113199            | 0.115239            |
| 0.119027            | 0.130973            | 0.111888            | 0.11553             | 0.118735            | 0.120921            | 0.119464            |
| 0.108974            | 0.118881            | 0.110577            | 0.115093            | 0.113636            | 0.109411            | 0.108246            |
| 0.107226            | 0.123252            | 0.105624            | 0.104312            | 0.110431            | 0.103584            | 0.105624            |
| 0.110723            | 0.132867            | 0.108829            | 0.113345            | 0.113928            | 0.10912             | 0.108246            |
| 0.111742            | 0.135052            | 0.109266            | 0.111451            | 0.109703            | 0.113928            | 0.109266            |
| 0.118007            | 0.132576            | 0.114073            | 0.11655             | 0.11859             | 0.119318            | 0.115822            |
| 0.126311            | 0.139714            | 0.124126            | 0.125437            | 0.126894            | 0.128205            | 0.123834            |
| 0.113345            | 0.137238            | 0.113491            | 0.115093            | 0.11451             | 0.116404            | 0.114365            |
| 0.0914918           | 0.113345            | 0.0916375           | 0.103147            | 0.101107            | 0.0933858           | 0.0922203           |
| 0.100233            | 0.115676            | 0.107955            | 0.0894522           | 0.111888            | 0.106498            | 0.100962            |
| 0.0944056           | 0.108392            | 0.0942599           | 0.0777972           | 0.0891608           | 0.0957168           | 0.0907634           |
| 0.128497            | 0.127622            | 0.121358            | 0.104021            | 0.121212            | 0.123689            | 0.118444            |

|           |           |           |           |           |           |           |
|-----------|-----------|-----------|-----------|-----------|-----------|-----------|
| 0.13141   | 0.128497  | 0.128059  | 0.111597  | 0.129371  | 0.129516  | 0.122232  |
| 0.100379  | 0.113782  | 0.0964452 | 0.074155  | 0.0925117 | 0.10373   | 0.0958625 |
| 0.0992133 | 0.114365  | 0.0967366 | 0.0995047 | 0.099796  | 0.094697  | 0.0912005 |
| 0.112762  | 0.130828  | 0.107955  | 0.112471  | 0.110723  | 0.10912   | 0.107955  |
| 0.0882867 | 0.0821678 | 0.0852273 | 0.105186  | 0.0833333 | 0.0802739 | 0.0820221 |
| 0.121649  | 0.127477  | 0.11859   | 0.100379  | 0.117861  | 0.126748  | 0.118298  |
| 0.100962  | 0.112908  | 0.102855  | 0.0793998 | 0.104749  | 0.0958625 | 0.090035  |
| 0.107226  | 0.116841  | 0.0989219 | 0.0777972 | 0.100816  | 0.106206  | 0.0968823 |
| 0.13884   | 0.152244  | 0.135781  | 0.144668  | 0.143794  | 0.140734  | 0.139569  |
| 0.114073  | 0.10912   | 0.108392  | 0.115822  | 0.108246  | 0.100524  | 0.0996503 |
| 0.101107  | 0.115676  | 0.0907634 | 0.0839161 | 0.097028  | 0.100962  | 0.0939685 |
| 0.126457  | 0.135198  | 0.122523  | 0.114802  | 0.118298  | 0.121358  | 0.115822  |
| 0.104604  | 0.122086  | 0.110577  | 0.0967366 | 0.113345  | 0.109703  | 0.10708   |
| 0.104604  | 0.109557  | 0.108537  | 0.127331  | 0.106061  | 0.112325  | 0.0977564 |
| 0.109703  | 0.121941  | 0.112179  | 0.0992133 | 0.110286  | 0.110723  | 0.104604  |
| 0.10067   | 0.117279  | 0.0949883 | 0.0799825 | 0.0983392 | 0.104021  | 0.0958625 |
| 0.105041  | 0.114365  | 0.1081    | 0.0861014 | 0.101836  | 0.104021  | 0.0990676 |
| 0.111888  | 0.121795  | 0.111742  | 0.111305  | 0.111597  | 0.112034  | 0.107372  |
| 0.126166  | 0.125583  | 0.118444  | 0.104604  | 0.120047  | 0.122232  | 0.114073  |
| 0.124417  | 0.127914  | 0.128059  | 0.105769  | 0.126748  | 0.124272  | 0.117861  |
| 0.156614  | 0.162442  | 0.151807  | 0.149621  | 0.153992  | 0.153846  | 0.14831   |
| 0.0954254 | 0.110868  | 0.0967366 | 0.0747378 | 0.10067   | 0.102273  | 0.0958625 |
| 0.0957168 | 0.112325  | 0.0944056 | 0.0840618 | 0.0995047 | 0.0935315 | 0.0967366 |
| 0.0968823 | 0.109994  | 0.0914918 | 0.0776515 | 0.0910548 | 0.0935315 | 0.0920746 |
| 0.136364  | 0.143357  | 0.130099  | 0.130828  | 0.132284  | 0.133596  | 0.129516  |
| 0.101107  | 0.11014   | 0.097465  | 0.0798368 | 0.0932401 | 0.101544  | 0.0901807 |
| 0.110577  | 0.105041  | 0.104895  | 0.103001  | 0.101836  | 0.105769  | 0.102273  |
| 0.110868  | 0.126894  | 0.106935  | 0.114365  | 0.108246  | 0.113054  | 0.109266  |
| 0.0984848 | 0.109848  | 0.0962995 | 0.0795455 | 0.101981  | 0.0995047 | 0.0948427 |
| 0.144814  | 0.150058  | 0.143794  | 0.143065  | 0.141026  | 0.141463  | 0.13884   |
| 0.104895  | 0.119172  | 0.0968823 | 0.0903263 | 0.104021  | 0.105041  | 0.099796  |
| 0.124854  | 0.125146  | 0.120629  | 0.103875  | 0.119318  | 0.122378  | 0.113054  |
| 0.116841  | 0.111014  | 0.10912   | 0.113636  | 0.111305  | 0.105915  | 0.103293  |
| 0.106206  | 0.115239  | 0.105478  | 0.10912   | 0.106206  | 0.107226  | 0.0973193 |
| 0.0919289 | 0.117279  | 0.0973193 | 0.0840618 | 0.0980478 | 0.100233  | 0.094697  |
| 0.100962  | 0.108246  | 0.0984848 | 0.0791084 | 0.097465  | 0.0976107 | 0.0897436 |
| 0.11757   | 0.123106  | 0.108974  | 0.0983392 | 0.113199  | 0.120338  | 0.112179  |
| 0.0967366 | 0.113928  | 0.0962995 | 0.0804196 | 0.0979021 | 0.100087  | 0.0977564 |
| 0.122232  | 0.127768  | 0.120921  | 0.107372  | 0.128642  | 0.119755  | 0.116841  |
| 0.105915  | 0.116987  | 0.106935  | 0.083479  | 0.108829  | 0.109848  | 0.101107  |
| 0.099796  | 0.107663  | 0.0996503 | 0.107663  | 0.107372  | 0.0932401 | 0.0938228 |
| 0.10271   | 0.113199  | 0.100816  | 0.0852273 | 0.106206  | 0.101981  | 0.0961538 |
| 0.099796  | 0.115822  | 0.100816  | 0.0872669 | 0.108829  | 0.106935  | 0.0976107 |
| 0.0965909 | 0.113199  | 0.0976107 | 0.0785256 | 0.0962995 | 0.0941142 | 0.0944056 |

|           |          |           |           |           |           |           |
|-----------|----------|-----------|-----------|-----------|-----------|-----------|
| 0.0948427 | 0.110286 | 0.0976107 | 0.0843531 | 0.0954254 | 0.0973193 | 0.0912005 |
| 0.123543  | 0.125    | 0.122232  | 0.10373   | 0.121212  | 0.119027  | 0.112034  |
| 0.102564  | 0.125583 | 0.0913462 | 0.104604  | 0.100816  | 0.103875  | 0.100379  |
| 0.103875  | 0.12602  | 0.101399  | 0.10708   | 0.106498  | 0.108392  | 0.104312  |
| 0.120484  | 0.129516 | 0.117133  | 0.112908  | 0.113782  | 0.122086  | 0.11014   |
| 0.117861  | 0.126603 | 0.117424  | 0.114656  | 0.119027  | 0.116259  | 0.112471  |
| 0.125146  | 0.12602  | 0.116841  | 0.12398   | 0.115822  | 0.114802  | 0.11655   |
| 0.129953  | 0.131702 | 0.120775  | 0.133159  | 0.12296   | 0.121066  | 0.124563  |
| 0.112908  | 0.128059 | 0.108974  | 0.112325  | 0.108829  | 0.110723  | 0.110723  |
| 0.186043  | 0.1875   | 0.178904  | 0.171766  | 0.178759  | 0.17803   | 0.177739  |
| 0.100524  | 0.120629 | 0.101544  | 0.0990676 | 0.104895  | 0.105624  | 0.100962  |
| 0.13243   | 0.133596 | 0.122378  | 0.132139  | 0.119318  | 0.122086  | 0.121503  |
| 0.122523  | 0.128059 | 0.111597  | 0.124854  | 0.111451  | 0.111597  | 0.115967  |
| 0.128205  | 0.139569 | 0.125146  | 0.126457  | 0.122086  | 0.126603  | 0.123106  |
| 0.10271   | 0.115822 | 0.0987762 | 0.108537  | 0.100087  | 0.0961538 | 0.100233  |
| 0.123689  | 0.126603 | 0.116841  | 0.127477  | 0.114948  | 0.113928  | 0.116259  |
| 0.106498  | 0.118153 | 0.102564  | 0.109411  | 0.105915  | 0.101981  | 0.0987762 |
| 0.119464  | 0.122378 | 0.112617  | 0.118007  | 0.113054  | 0.109411  | 0.109703  |
| 0.110431  | 0.121795 | 0.105332  | 0.105769  | 0.111597  | 0.106789  | 0.104167  |
| 0.123252  | 0.125874 | 0.114365  | 0.129079  | 0.122378  | 0.120192  | 0.113491  |
| 0.0979021 | 0.115967 | 0.0933858 | 0.0961538 | 0.101981  | 0.0971737 | 0.0930944 |
| 0.133304  | 0.130973 | 0.124417  | 0.13039   | 0.124854  | 0.118007  | 0.12296   |
| 0.110431  | 0.12296  | 0.108246  | 0.105769  | 0.105478  | 0.107372  | 0.104458  |
| 0.112908  | 0.122815 | 0.115093  | 0.106206  | 0.118444  | 0.113636  | 0.109848  |
| 0.125874  | 0.138403 | 0.120484  | 0.110723  | 0.116259  | 0.122232  | 0.11553   |
| 0.0987762 | 0.118881 | 0.0971737 | 0.10373   | 0.0964452 | 0.10271   | 0.0989219 |
| 0.140152  | 0.145396 | 0.139132  | 0.140734  | 0.136072  | 0.140006  | 0.136801  |
| 0.104749  | 0.125437 | 0.102564  | 0.110286  | 0.10271   | 0.105769  | 0.101107  |
| 0.10708   | 0.116696 | 0.102855  | 0.110868  | 0.103293  | 0.103147  | 0.101981  |
| 0.0981935 | 0.108683 | 0.0992133 | 0.109557  | 0.0981935 | 0.097465  | 0.0910548 |
| 0.134615  | 0.143357 | 0.129808  | 0.131993  | 0.12704   | 0.130682  | 0.124854  |
| 0.113054  | 0.110431 | 0.103293  | 0.113636  | 0.106352  | 0.104458  | 0.101544  |
| 0.103438  | 0.117133 | 0.0939685 | 0.104895  | 0.0952797 | 0.0960082 | 0.100087  |
| 0.102855  | 0.117133 | 0.0962995 | 0.106935  | 0.100233  | 0.097465  | 0.0989219 |
| 0.114948  | 0.128059 | 0.107517  | 0.107663  | 0.108537  | 0.11451   | 0.1081    |
| 0.12296   | 0.131993 | 0.116113  | 0.120047  | 0.120338  | 0.116404  | 0.112617  |
| 0.105624  | 0.123106 | 0.107517  | 0.107955  | 0.109994  | 0.111305  | 0.103438  |
| 0.0938228 | 0.115676 | 0.0936772 | 0.0976107 | 0.0941142 | 0.0957168 | 0.0901807 |
| 0.094697  | 0.118007 | 0.0942599 | 0.0981935 | 0.0964452 | 0.0995047 | 0.0939685 |
| 0.0983392 | 0.119318 | 0.092366  | 0.105624  | 0.0980478 | 0.100233  | 0.100233  |
| 0.116696  | 0.122232 | 0.107517  | 0.10708   | 0.102418  | 0.11014   | 0.107809  |
| 0.11859   | 0.130536 | 0.114073  | 0.122378  | 0.119464  | 0.11553   | 0.11553   |
| 0.101836  | 0.121358 | 0.0976107 | 0.10912   | 0.0980478 | 0.101981  | 0.099359  |
| 0.0981935 | 0.115385 | 0.092803  | 0.0941142 | 0.0999417 | 0.0977564 | 0.0942599 |

|           |           |           |           |           |           |           |
|-----------|-----------|-----------|-----------|-----------|-----------|-----------|
| 0.114219  | 0.127622  | 0.108829  | 0.113345  | 0.11014   | 0.11116   | 0.106498  |
| 0.0983392 | 0.120484  | 0.0909091 | 0.10271   | 0.0971737 | 0.0999417 | 0.0912005 |
| 0.119901  | 0.129808  | 0.115093  | 0.116404  | 0.113199  | 0.119755  | 0.115385  |
| 0.126311  | 0.144668  | 0.122086  | 0.128934  | 0.128642  | 0.127914  | 0.127622  |
| 0.104749  | 0.116696  | 0.103438  | 0.110286  | 0.109703  | 0.104312  | 0.10169   |
| 0.102855  | 0.122669  | 0.0989219 | 0.106061  | 0.0987762 | 0.105332  | 0.0992133 |
| 0.0981935 | 0.116841  | 0.0962995 | 0.102855  | 0.0952797 | 0.10271   | 0.0971737 |
| 0.0961538 | 0.115093  | 0.0983392 | 0.0979021 | 0.0976107 | 0.0960082 | 0.0936772 |
| 0.119464  | 0.127622  | 0.114365  | 0.11655   | 0.11655   | 0.11757   | 0.111451  |
| 0.0955711 | 0.118298  | 0.0957168 | 0.0967366 | 0.10169   | 0.10067   | 0.0962995 |
| 0.127768  | 0.133887  | 0.123834  | 0.128642  | 0.131265  | 0.131702  | 0.129662  |
| 0.132576  | 0.13986   | 0.124854  | 0.106643  | 0.128497  | 0.127477  | 0.125728  |
| 0.118881  | 0.13141   | 0.114656  | 0.105769  | 0.116841  | 0.121649  | 0.110868  |
| 0.114656  | 0.12602   | 0.104312  | 0.0922203 | 0.106206  | 0.117133  | 0.108392  |
| 0.112908  | 0.122232  | 0.105186  | 0.100087  | 0.110286  | 0.101399  | 0.100233  |
| 0.0961538 | 0.117424  | 0.0913462 | 0.101399  | 0.100233  | 0.0980478 | 0.0954254 |
| 0.0878497 | 0.111451  | 0.0897436 | 0.101544  | 0.0948427 | 0.0949883 | 0.0938228 |
| 0.0939685 | 0.113782  | 0.0961538 | 0.0913462 | 0.0945513 | 0.0891608 | 0.0862471 |
| 0.095134  | 0.107663  | 0.090035  | 0.103001  | 0.0942599 | 0.0914918 | 0.0949883 |
| 0.0983392 | 0.097465  | 0.0967366 | 0.105041  | 0.0922203 | 0.0920746 | 0.0891608 |
| 0.108974  | 0.12296   | 0.106206  | 0.114802  | 0.104895  | 0.100962  | 0.105915  |
| 0.126603  | 0.134178  | 0.127331  | 0.120484  | 0.119901  | 0.122086  | 0.120047  |
| 0.129953  | 0.134324  | 0.124854  | 0.121795  | 0.124126  | 0.125437  | 0.120775  |
| 0.195221  | 0.202506  | 0.190122  | 0.186189  | 0.193182  | 0.190122  | 0.190997  |
| 0.236742  | 0.245484  | 0.234848  | 0.23208   | 0.238782  | 0.23514   | 0.237179  |
| 0.0984848 | 0.113345  | 0.0977564 | 0.104604  | 0.100233  | 0.100087  | 0.0983392 |
| 0.0805653 | 0.0925117 | 0.0740093 | 0.0942599 | 0.0770688 | 0.0780886 | 0.0766317 |
| 0.0910548 | 0.100962  | 0.0865385 | 0.097465  | 0.0826049 | 0.0859557 | 0.0815851 |
| 0.08581   | 0.0930944 | 0.0789627 | 0.0933858 | 0.0738636 | 0.0684732 | 0.0716783 |
| 0.135052  | 0.137383  | 0.125583  | 0.127185  | 0.122815  | 0.126166  | 0.126748  |
| 0.0922203 | 0.092803  | 0.0856643 | 0.0992133 | 0.0861014 | 0.0766317 | 0.0775058 |
| 0.114802  | 0.112471  | 0.105624  | 0.123252  | 0.11451   | 0.112325  | 0.104167  |
| 0.078817  | 0.0945513 | 0.0777972 | 0.0992133 | 0.0782343 | 0.0804196 | 0.0757576 |
| 0.08581   | 0.104749  | 0.0949883 | 0.11116   | 0.102127  | 0.0868298 | 0.0859557 |
| 0.10373   | 0.104021  | 0.102418  | 0.100233  | 0.100524  | 0.107663  | 0.103584  |
| 0.106643  | 0.0979021 | 0.0916375 | 0.120629  | 0.0888695 | 0.0925117 | 0.0933858 |
| 0.129079  | 0.132576  | 0.119901  | 0.104312  | 0.11859   | 0.130682  | 0.114365  |
| 0.0888695 | 0.100233  | 0.0759033 | 0.0999417 | 0.0402098 | 0.0895979 | 0.0770688 |
| 0.0804196 | 0.0990676 | 0.0782343 | 0.0929487 | 0.0789627 | 0.0791084 | 0.0770688 |
| 0.0869755 | 0.0930944 | 0.0795455 | 0.103293  | 0.0791084 | 0.0745921 | 0.0769231 |
| 0.078817  | 0.0916375 | 0.0786713 | 0.0968823 | 0.0808566 | 0.0769231 | 0.0655594 |
| 0.0761946 | 0.0948427 | 0.0801282 | 0.0942599 | 0.076486  | 0.076049  | 0.0775058 |
| 0.0777972 | 0.099359  | 0.0840618 | 0.0999417 | 0.0789627 | 0.0793998 | 0.0770688 |
| 0.100087  | 0.0916375 | 0.0879953 | 0.115822  | 0.090472  | 0.0897436 | 0.0833333 |

|           |           |           |           |           |           |           |
|-----------|-----------|-----------|-----------|-----------|-----------|-----------|
| 0.102127  | 0.0910548 | 0.0996503 | 0.123106  | 0.099796  | 0.0929487 | 0.092366  |
| 0.0804196 | 0.102855  | 0.0843531 | 0.104895  | 0.0871212 | 0.0846445 | 0.081148  |
| 0.0799825 | 0.0916375 | 0.0763403 | 0.0980478 | 0.088141  | 0.076049  | 0.0789627 |
| 0.0930944 | 0.0887238 | 0.0987762 | 0.114656  | 0.108829  | 0.0917832 | 0.0976107 |
| 0.0799825 | 0.0948427 | 0.0748834 | 0.0960082 | 0.078817  | 0.0728438 | 0.07838   |
| 0.113636  | 0.10169   | 0.108246  | 0.119172  | 0.0920746 | 0.103875  | 0.101253  |
| 0.137821  | 0.143065  | 0.12602   | 0.126166  | 0.128788  | 0.129516  | 0.126603  |
| 0.119318  | 0.11116   | 0.108392  | 0.118153  | 0.107372  | 0.103438  | 0.1081    |
| 0.0753205 | 0.097465  | 0.0716783 | 0.0907634 | 0.0750291 | 0.076049  | 0.0725524 |
| 0.080711  | 0.0865385 | 0.0761946 | 0.100233  | 0.0789627 | 0.0756119 | 0.0785256 |
| 0.0884324 | 0.0916375 | 0.0879953 | 0.107663  | 0.092803  | 0.0909091 | 0.0844988 |
| 0.0952797 | 0.0909091 | 0.0884324 | 0.114802  | 0.0920746 | 0.0925117 | 0.0887238 |
| 0.0891608 | 0.0935315 | 0.0895979 | 0.110723  | 0.0979021 | 0.0962995 | 0.0898893 |
| 0.0770688 | 0.095134  | 0.0818765 | 0.105041  | 0.0805653 | 0.0818765 | 0.0769231 |
| 0.0824592 | 0.102273  | 0.0852273 | 0.0984848 | 0.0868298 | 0.078817  | 0.08581   |
| 0.0903263 | 0.0912005 | 0.0820221 | 0.111888  | 0.0777972 | 0.0872669 | 0.0843531 |
| 0.0949883 | 0.099359  | 0.0962995 | 0.115967  | 0.0935315 | 0.0945513 | 0.0957168 |
| 0.0914918 | 0.094697  | 0.0948427 | 0.119464  | 0.0964452 | 0.0936772 | 0.0910548 |
| 0.100962  | 0.0965909 | 0.0932401 | 0.119318  | 0.0995047 | 0.0996503 | 0.0952797 |
| 0.115676  | 0.122669  | 0.112617  | 0.116841  | 0.116841  | 0.115239  | 0.116404  |
| 0         | 0.101981  | 0.0831876 | 0.103438  | 0.0847902 | 0.0828963 | 0.0820221 |
| 0.101981  | 0         | 0.0954254 | 0.111888  | 0.0958625 | 0.0925117 | 0.0925117 |
| 0.0831876 | 0.0954254 | 0         | 0.0962995 | 0.0715326 | 0.080711  | 0.0786713 |
| 0.103438  | 0.111888  | 0.0962995 | 0         | 0.0981935 | 0.0945513 | 0.0948427 |
| 0.0847902 | 0.0958625 | 0.0715326 | 0.0981935 | 0         | 0.0817308 | 0.0735723 |
| 0.0828963 | 0.0925117 | 0.080711  | 0.0945513 | 0.0817308 | 0         | 0.0745921 |
| 0.0820221 | 0.0925117 | 0.0786713 | 0.0948427 | 0.0735723 | 0.0745921 | 0         |
| 0.0967366 | 0.0967366 | 0.0971737 | 0.11859   | 0.0938228 | 0.0989219 | 0.0933858 |
| 0.100962  | 0.110286  | 0.0999417 | 0.100962  | 0.0992133 | 0.101981  | 0.0990676 |
| 0.099796  | 0.105624  | 0.101981  | 0.114948  | 0.0983392 | 0.0964452 | 0.0967366 |
| 0.0814394 | 0.0922203 | 0.0804196 | 0.0983392 | 0.0855186 | 0.080711  | 0.0670163 |
| 0.0844988 | 0.0964452 | 0.0930944 | 0.111888  | 0.0906177 | 0.0930944 | 0.0866841 |
| 0.117861  | 0.127768  | 0.112471  | 0.114073  | 0.118444  | 0.11655   | 0.115093  |
| 0.115822  | 0.131556  | 0.1081    | 0.10912   | 0.109703  | 0.110723  | 0.111305  |
| 0.101399  | 0.122086  | 0.0989219 | 0.112179  | 0.104895  | 0.107372  | 0.102127  |
| 0.112908  | 0.125437  | 0.111305  | 0.108246  | 0.105332  | 0.113345  | 0.103147  |
| 0.113054  | 0.130536  | 0.107955  | 0.111888  | 0.112762  | 0.11116   | 0.109703  |
| 0.104604  | 0.123252  | 0.10067   | 0.104021  | 0.108683  | 0.102418  | 0.101253  |
| 0.133159  | 0.145105  | 0.12602   | 0.126166  | 0.132284  | 0.131265  | 0.124854  |
| 0.130099  | 0.141463  | 0.125874  | 0.133596  | 0.13243   | 0.129662  | 0.127622  |
| 0.107663  | 0.12398   | 0.101981  | 0.099796  | 0.103293  | 0.106643  | 0.103438  |
| 0.138403  | 0.129953  | 0.124272  | 0.125291  | 0.125583  | 0.120484  | 0.124272  |
| 0.123689  | 0.137383  | 0.120629  | 0.116404  | 0.123397  | 0.120629  | 0.119172  |
| 0.128059  | 0.126311  | 0.122086  | 0.124854  | 0.121358  | 0.115967  | 0.123252  |

|          |          |           |           |          |          |          |
|----------|----------|-----------|-----------|----------|----------|----------|
| 0.11961  | 0.127185 | 0.113345  | 0.113491  | 0.112034 | 0.113928 | 0.110431 |
| 0.122523 | 0.133304 | 0.11655   | 0.114656  | 0.118153 | 0.120047 | 0.111014 |
| 0.125583 | 0.135781 | 0.121649  | 0.123834  | 0.12296  | 0.125146 | 0.121358 |
| 0.124272 | 0.13039  | 0.116259  | 0.124272  | 0.120484 | 0.117424 | 0.115967 |
| 0.134178 | 0.135927 | 0.130536  | 0.129516  | 0.136801 | 0.129079 | 0.131993 |
| 0.128642 | 0.140589 | 0.119755  | 0.11961   | 0.122815 | 0.12296  | 0.118881 |
| 0.116404 | 0.123106 | 0.113054  | 0.112908  | 0.10912  | 0.111014 | 0.107226 |
| 0.118007 | 0.136655 | 0.121066  | 0.126166  | 0.124709 | 0.127768 | 0.119027 |
| 0.133013 | 0.139423 | 0.125291  | 0.125728  | 0.126603 | 0.131993 | 0.125583 |
| 0.106206 | 0.116696 | 0.10169   | 0.105624  | 0.104749 | 0.105769 | 0.101981 |
| 0.220862 | 0.225816 | 0.215763  | 0.215618  | 0.219988 | 0.215181 | 0.216055 |
| 0.120047 | 0.126457 | 0.114365  | 0.122378  | 0.117424 | 0.113199 | 0.116696 |
| 0.114802 | 0.12704  | 0.105915  | 0.103438  | 0.110431 | 0.109703 | 0.108537 |
| 0.134178 | 0.128059 | 0.124126  | 0.125146  | 0.126603 | 0.126748 | 0.127914 |
| 0.118735 | 0.134178 | 0.108392  | 0.109411  | 0.112908 | 0.11859  | 0.105769 |
| 0.132721 | 0.146999 | 0.127331  | 0.130973  | 0.130099 | 0.129953 | 0.127331 |
| 0.11757  | 0.116696 | 0.112179  | 0.114365  | 0.112908 | 0.10373  | 0.115093 |
| 0.119464 | 0.125    | 0.116113  | 0.115676  | 0.119172 | 0.111451 | 0.110868 |
| 0.121795 | 0.136946 | 0.11757   | 0.113636  | 0.118298 | 0.120484 | 0.117861 |
| 0.128059 | 0.130682 | 0.120338  | 0.123689  | 0.11961  | 0.119172 | 0.122086 |
| 0.129953 | 0.129662 | 0.120775  | 0.124417  | 0.122086 | 0.121941 | 0.120192 |
| 0.126603 | 0.126311 | 0.119172  | 0.124854  | 0.118735 | 0.116259 | 0.11655  |
| 0.12398  | 0.132139 | 0.123834  | 0.122815  | 0.124854 | 0.123543 | 0.125583 |
| 0.113782 | 0.129225 | 0.112179  | 0.111451  | 0.112325 | 0.114219 | 0.112762 |
| 0.117861 | 0.127477 | 0.111014  | 0.117861  | 0.112034 | 0.111305 | 0.107517 |
| 0.136364 | 0.131993 | 0.125437  | 0.127914  | 0.127622 | 0.120775 | 0.127185 |
| 0.117861 | 0.118444 | 0.111888  | 0.116987  | 0.115239 | 0.108974 | 0.114802 |
| 0.120484 | 0.123689 | 0.120338  | 0.102127  | 0.121941 | 0.123252 | 0.114219 |
| 0.140734 | 0.145105 | 0.132721  | 0.126748  | 0.136072 | 0.133887 | 0.133887 |
| 0.120047 | 0.13141  | 0.116987  | 0.119755  | 0.117716 | 0.11961  | 0.119901 |
| 0.129371 | 0.137821 | 0.121358  | 0.121503  | 0.124417 | 0.124854 | 0.119901 |
| 0.124854 | 0.135635 | 0.121212  | 0.122815  | 0.120775 | 0.122669 | 0.125    |
| 0.120047 | 0.13549  | 0.119027  | 0.119755  | 0.123252 | 0.116987 | 0.119318 |
| 0.118007 | 0.136364 | 0.122523  | 0.120338  | 0.12296  | 0.11961  | 0.116987 |
| 0.139569 | 0.14627  | 0.132721  | 0.125874  | 0.128788 | 0.136509 | 0.13243  |
| 0.108246 | 0.125728 | 0.0999417 | 0.101544  | 0.102418 | 0.100524 | 0.102855 |
| 0.128205 | 0.136364 | 0.122523  | 0.107226  | 0.125583 | 0.133304 | 0.122815 |
| 0.141463 | 0.151369 | 0.138986  | 0.132139  | 0.138258 | 0.138695 | 0.13345  |
| 0.107955 | 0.127185 | 0.113054  | 0.111742  | 0.110868 | 0.112471 | 0.107226 |
| 0.112908 | 0.11553  | 0.112762  | 0.0922203 | 0.112034 | 0.106643 | 0.10373  |
| 0.131993 | 0.144231 | 0.129516  | 0.138403  | 0.13345  | 0.136218 | 0.133013 |
| 0.102273 | 0.116259 | 0.104749  | 0.0917832 | 0.109848 | 0.109703 | 0.101253 |
| 0.128059 | 0.141754 | 0.128788  | 0.135927  | 0.133013 | 0.131702 | 0.123834 |
| 0.121212 | 0.139569 | 0.11757   | 0.124417  | 0.125    | 0.123689 | 0.120192 |



|           |          |           |          |           |           |           |
|-----------|----------|-----------|----------|-----------|-----------|-----------|
| 0.122232  | 0.126603 | 0.11451   | 0.120484 | 0.121358  | 0.110723  | 0.117716  |
| 0.120921  | 0.126166 | 0.114656  | 0.117716 | 0.115385  | 0.118153  | 0.114948  |
| 0.120775  | 0.130682 | 0.118298  | 0.114073 | 0.11757   | 0.111014  | 0.112762  |
| 0.124709  | 0.126748 | 0.111742  | 0.122669 | 0.113928  | 0.114073  | 0.113491  |
| 0.126748  | 0.131702 | 0.123397  | 0.123834 | 0.125     | 0.121066  | 0.117279  |
| 0.126166  | 0.127331 | 0.115822  | 0.125291 | 0.118298  | 0.11961   | 0.117861  |
| 0.126166  | 0.132284 | 0.12398   | 0.129371 | 0.127331  | 0.120192  | 0.119901  |
| 0.120338  | 0.126748 | 0.114948  | 0.120921 | 0.115967  | 0.116696  | 0.11961   |
| 0.1419    | 0.143648 | 0.133304  | 0.137238 | 0.13345   | 0.13243   | 0.133887  |
| 0.115676  | 0.12704  | 0.110286  | 0.112471 | 0.11655   | 0.112325  | 0.114073  |
| 0.103438  | 0.117133 | 0.0960082 | 0.099359 | 0.0990676 | 0.0957168 | 0.0916375 |
| 0.124126  | 0.129662 | 0.120192  | 0.120629 | 0.11859   | 0.123106  | 0.112034  |
| 0.11451   | 0.12296  | 0.109411  | 0.106643 | 0.111014  | 0.109411  | 0.108246  |
| 0.13884   | 0.146125 | 0.134033  | 0.13447  | 0.130099  | 0.139277  | 0.132867  |
| 0.14933   | 0.157197 | 0.145105  | 0.140297 | 0.143211  | 0.146562  | 0.143648  |
| 0.0922203 | 0.101836 | 0.0912005 | 0.112908 | 0.0898893 | 0.0912005 | 0.0929487 |
| 0.0920746 | 0.10169  | 0.0866841 | 0.109557 | 0.0862471 | 0.0945513 | 0.0846445 |
| 0.123689  | 0.128059 | 0.116841  | 0.129516 | 0.123689  | 0.117133  | 0.120338  |
| 0.129953  | 0.132867 | 0.124272  | 0.122669 | 0.125291  | 0.126603  | 0.121649  |
| 0.0917832 | 0.102564 | 0.097465  | 0.113636 | 0.0973193 | 0.0916375 | 0.083479  |
| 0.132867  | 0.13141  | 0.11961   | 0.13141  | 0.125     | 0.128642  | 0.125728  |
| 0.131993  | 0.129079 | 0.129808  | 0.123543 | 0.124417  | 0.127185  | 0.125728  |
| 0.113491  | 0.122232 | 0.106935  | 0.114948 | 0.106206  | 0.115093  | 0.109848  |
| 0.138258  | 0.144668 | 0.142191  | 0.152826 | 0.141754  | 0.145688  | 0.139569  |
| 0.106789  | 0.11961  | 0.104021  | 0.114365 | 0.100087  | 0.112471  | 0.109557  |
| 0.134761  | 0.141754 | 0.129953  | 0.127477 | 0.133596  | 0.127331  | 0.128788  |
| 0.105478  | 0.111014 | 0.10271   | 0.102564 | 0.0999417 | 0.0995047 | 0.092803  |
| 0.127622  | 0.134615 | 0.119027  | 0.133159 | 0.128205  | 0.121066  | 0.124272  |
| 0.123252  | 0.127331 | 0.114365  | 0.115093 | 0.11451   | 0.114365  | 0.119901  |
| 0.136801  | 0.154283 | 0.136364  | 0.135344 | 0.140006  | 0.137238  | 0.135781  |
| 0.145105  | 0.146562 | 0.136509  | 0.141317 | 0.133741  | 0.135052  | 0.136509  |
| 0.118735  | 0.132139 | 0.115093  | 0.120775 | 0.121941  | 0.123543  | 0.116259  |
| 0.131119  | 0.14831  | 0.131556  | 0.13141  | 0.134615  | 0.13447   | 0.130099  |
| 0.133013  | 0.151661 | 0.131119  | 0.135635 | 0.135635  | 0.132576  | 0.136655  |
| 0.143794  | 0.154575 | 0.138695  | 0.136801 | 0.141463  | 0.1419    | 0.139569  |
| 0.102855  | 0.121795 | 0.10271   | 0.118881 | 0.109266  | 0.11116   | 0.099796  |
| 0.135635  | 0.145251 | 0.130536  | 0.129808 | 0.131847  | 0.134324  | 0.132867  |
| 0.109411  | 0.128642 | 0.113345  | 0.111451 | 0.110868  | 0.114219  | 0.111597  |
| 0.113054  | 0.131119 | 0.106498  | 0.116841 | 0.110723  | 0.110286  | 0.110868  |
| 0.123106  | 0.128351 | 0.120629  | 0.114656 | 0.118444  | 0.115385  | 0.114802  |
| 0.107372  | 0.133013 | 0.111597  | 0.117861 | 0.114365  | 0.116841  | 0.111888  |
| 0.109557  | 0.120629 | 0.108537  | 0.112179 | 0.110431  | 0.109703  | 0.107663  |
| 0.109557  | 0.127622 | 0.108829  | 0.109266 | 0.113345  | 0.112325  | 0.108246  |
| 0.119172  | 0.130828 | 0.110868  | 0.117716 | 0.116259  | 0.122232  | 0.115822  |

|           |          |           |           |           |           |           |
|-----------|----------|-----------|-----------|-----------|-----------|-----------|
| 0.128351  | 0.136801 | 0.119464  | 0.121649  | 0.118735  | 0.121795  | 0.117424  |
| 0.105915  | 0.118153 | 0.101107  | 0.0995047 | 0.103584  | 0.0955711 | 0.100816  |
| 0.114365  | 0.133596 | 0.114802  | 0.121358  | 0.121941  | 0.123834  | 0.115385  |
| 0.109266  | 0.13141  | 0.110286  | 0.11655   | 0.116259  | 0.117279  | 0.110286  |
| 0.0999417 | 0.120047 | 0.095134  | 0.109848  | 0.106935  | 0.10708   | 0.0986305 |
| 0.218531  | 0.222902 | 0.215181  | 0.212704  | 0.215618  | 0.211684  | 0.214307  |
| 0.135781  | 0.146853 | 0.135344  | 0.138695  | 0.13986   | 0.141754  | 0.135052  |
| 0.127768  | 0.128934 | 0.118298  | 0.126603  | 0.123106  | 0.122086  | 0.118881  |
| 0.11655   | 0.13141  | 0.116113  | 0.124126  | 0.118881  | 0.11961   | 0.116696  |
| 0.210664  | 0.219697 | 0.209936  | 0.204837  | 0.211247  | 0.207605  | 0.209645  |
| 0.110431  | 0.128788 | 0.106206  | 0.113928  | 0.111014  | 0.113782  | 0.111742  |
| 0.116696  | 0.133304 | 0.114219  | 0.122815  | 0.119318  | 0.116259  | 0.113928  |
| 0.118735  | 0.13243  | 0.117424  | 0.117861  | 0.112908  | 0.112179  | 0.109266  |
| 0.122669  | 0.133159 | 0.116696  | 0.120629  | 0.11655   | 0.122523  | 0.11961   |
| 0.251457  | 0.257284 | 0.248106  | 0.245338  | 0.250291  | 0.247232  | 0.248397  |
| 0.118444  | 0.140006 | 0.119464  | 0.12398   | 0.125728  | 0.120629  | 0.121795  |
| 0.095134  | 0.114948 | 0.0874126 | 0.104458  | 0.105332  | 0.100233  | 0.0979021 |
| 0.116404  | 0.119027 | 0.106352  | 0.122523  | 0.103584  | 0.110723  | 0.102855  |
| 0.110868  | 0.116404 | 0.105186  | 0.117861  | 0.100087  | 0.106935  | 0.0990676 |
| 0.12602   | 0.142628 | 0.121795  | 0.127768  | 0.127477  | 0.12704   | 0.120338  |
| 0.130682  | 0.139132 | 0.120921  | 0.12398   | 0.127768  | 0.121503  | 0.119172  |
| 0.0977564 | 0.119901 | 0.0941142 | 0.108829  | 0.105332  | 0.103147  | 0.101107  |
| 0.110431  | 0.131119 | 0.10912   | 0.11859   | 0.11655   | 0.122815  | 0.110577  |
| 0.122523  | 0.137966 | 0.117424  | 0.122232  | 0.120484  | 0.121503  | 0.119172  |
| 0.11961   | 0.130099 | 0.111014  | 0.114656  | 0.112908  | 0.112762  | 0.113345  |
| 0.111888  | 0.128205 | 0.109411  | 0.113928  | 0.11655   | 0.116987  | 0.11116   |
| 0.117279  | 0.126894 | 0.115676  | 0.104749  | 0.114656  | 0.114219  | 0.113345  |
| 0.145688  | 0.145105 | 0.133596  | 0.140152  | 0.134033  | 0.132139  | 0.135927  |
| 0.125583  | 0.140152 | 0.121358  | 0.125583  | 0.125874  | 0.125437  | 0.125728  |
| 0.119172  | 0.13345  | 0.116404  | 0.126748  | 0.12296   | 0.123397  | 0.117279  |
| 0.18852   | 0.202506 | 0.187791  | 0.185606  | 0.189685  | 0.186334  | 0.184586  |
| 0.206585  | 0.213578 | 0.2044    | 0.197552  | 0.207168  | 0.199446  | 0.201195  |
| 0.123834  | 0.134033 | 0.119318  | 0.121503  | 0.120047  | 0.121358  | 0.119318  |
| 0.118007  | 0.126457 | 0.110286  | 0.113345  | 0.109848  | 0.115239  | 0.111742  |
| 0.138695  | 0.145979 | 0.131847  | 0.13345   | 0.132576  | 0.135927  | 0.130682  |
| 0.0955711 | 0.117716 | 0.090472  | 0.106352  | 0.102855  | 0.102418  | 0.0962995 |
| 0.123689  | 0.144376 | 0.121795  | 0.127477  | 0.128059  | 0.125874  | 0.123543  |
| 0.123834  | 0.118007 | 0.11757   | 0.127914  | 0.119464  | 0.116113  | 0.114948  |
| 0.224942  | 0.231643 | 0.224505  | 0.215909  | 0.225233  | 0.223339  | 0.223631  |
| 0.111888  | 0.122378 | 0.103001  | 0.111014  | 0.108683  | 0.107663  | 0.106789  |
| 0.202069  | 0.205857 | 0.199301  | 0.200029  | 0.197115  | 0.20134   | 0.195513  |
| 0.0917832 | 0.114219 | 0.0919289 | 0.104895  | 0.0979021 | 0.102127  | 0.0939685 |
| 0.103875  | 0.119901 | 0.104604  | 0.113491  | 0.108537  | 0.104021  | 0.105186  |
| 0.117424  | 0.129079 | 0.10912   | 0.106352  | 0.118007  | 0.113199  | 0.109994  |

|           |          |           |           |           |          |           |
|-----------|----------|-----------|-----------|-----------|----------|-----------|
| 0.114802  | 0.124709 | 0.108537  | 0.111888  | 0.109266  | 0.10912  | 0.10708   |
| 0.209062  | 0.216638 | 0.205128  | 0.200029  | 0.20877   | 0.204254 | 0.203963  |
| 0.126603  | 0.142045 | 0.125583  | 0.13039   | 0.130682  | 0.132867 | 0.126166  |
| 0.101544  | 0.121066 | 0.107517  | 0.112034  | 0.106498  | 0.105186 | 0.0984848 |
| 0.119318  | 0.135344 | 0.116259  | 0.125146  | 0.12398   | 0.125874 | 0.117424  |
| 0.119027  | 0.126311 | 0.11014   | 0.11757   | 0.123106  | 0.117133 | 0.109848  |
| 0.116113  | 0.133013 | 0.113054  | 0.112908  | 0.112034  | 0.114219 | 0.111888  |
| 0.0961538 | 0.119755 | 0.0922203 | 0.105478  | 0.10169   | 0.102418 | 0.0939685 |
| 0.103147  | 0.119755 | 0.100379  | 0.112179  | 0.107809  | 0.107372 | 0.105332  |
| 0.119464  | 0.132284 | 0.114948  | 0.129953  | 0.122086  | 0.119318 | 0.112617  |
| 0.107226  | 0.127331 | 0.108537  | 0.109557  | 0.111888  | 0.115822 | 0.108246  |
| 0.10271   | 0.120775 | 0.104895  | 0.112034  | 0.10912   | 0.104895 | 0.104312  |
| 0.190268  | 0.199009 | 0.187209  | 0.180653  | 0.187646  | 0.184003 | 0.185752  |
| 0.113199  | 0.11961  | 0.105186  | 0.122815  | 0.103875  | 0.108974 | 0.101981  |
| 0.124126  | 0.13345  | 0.116987  | 0.123834  | 0.117716  | 0.116696 | 0.119027  |
| 0.114656  | 0.116987 | 0.110431  | 0.115822  | 0.106789  | 0.103438 | 0.104604  |
| 0.120921  | 0.138695 | 0.119318  | 0.122669  | 0.122378  | 0.122523 | 0.120484  |
| 0.113928  | 0.131993 | 0.114948  | 0.122669  | 0.120047  | 0.119318 | 0.113491  |
| 0.0984848 | 0.122378 | 0.100962  | 0.114219  | 0.104021  | 0.103875 | 0.0971737 |
| 0.108537  | 0.125146 | 0.105478  | 0.108829  | 0.11116   | 0.106643 | 0.101399  |
| 0.100962  | 0.119318 | 0.0944056 | 0.112617  | 0.108537  | 0.107226 | 0.102855  |
| 0.120921  | 0.129953 | 0.109411  | 0.117424  | 0.112471  | 0.11553  | 0.114365  |
| 0.107226  | 0.115385 | 0.101544  | 0.112471  | 0.0979021 | 0.105915 | 0.0957168 |
| 0.121066  | 0.133596 | 0.11655   | 0.116404  | 0.114365  | 0.11859  | 0.112471  |
| 0.118298  | 0.129953 | 0.116404  | 0.113345  | 0.115385  | 0.112908 | 0.110868  |
| 0.132139  | 0.138258 | 0.131702  | 0.128059  | 0.127477  | 0.125874 | 0.125583  |
| 0.112325  | 0.136218 | 0.106643  | 0.113782  | 0.116404  | 0.11451  | 0.111888  |
| 0.13141   | 0.140443 | 0.128934  | 0.134033  | 0.136072  | 0.136801 | 0.13039   |
| 0.118007  | 0.129662 | 0.111742  | 0.111888  | 0.111888  | 0.112908 | 0.112325  |
| 0.113928  | 0.112471 | 0.104749  | 0.118007  | 0.109266  | 0.103001 | 0.102418  |
| 0.114365  | 0.133304 | 0.116259  | 0.114948  | 0.118153  | 0.118298 | 0.111597  |
| 0.10271   | 0.120192 | 0.100816  | 0.110868  | 0.110868  | 0.110431 | 0.107226  |
| 0.185752  | 0.198281 | 0.185606  | 0.184295  | 0.188374  | 0.182984 | 0.183275  |
| 0.0976107 | 0.119172 | 0.100962  | 0.109557  | 0.102564  | 0.104167 | 0.0977564 |
| 0.0996503 | 0.115967 | 0.0965909 | 0.0999417 | 0.10169   | 0.101836 | 0.0939685 |
| 0.117424  | 0.132867 | 0.113782  | 0.128497  | 0.12296   | 0.119901 | 0.114948  |
| 0.179487  | 0.193473 | 0.178176  | 0.172203  | 0.179487  | 0.17701  | 0.177885  |
| 0.130682  | 0.146707 | 0.129953  | 0.133596  | 0.135052  | 0.135198 | 0.130245  |
| 0.14088   | 0.156614 | 0.138986  | 0.144668  | 0.145542  | 0.141608 | 0.140443  |
| 0.143939  | 0.146853 | 0.137092  | 0.143065  | 0.136946  | 0.134178 | 0.13884   |
| 0.1081    | 0.129662 | 0.108537  | 0.111014  | 0.113345  | 0.114948 | 0.111451  |
| 0.116404  | 0.13243  | 0.11655   | 0.121941  | 0.121941  | 0.123543 | 0.115967  |
| 0.212704  | 0.219114 | 0.213141  | 0.206585  | 0.213578  | 0.209936 | 0.209936  |
| 0.121212  | 0.128497 | 0.120484  | 0.123834  | 0.117716  | 0.119027 | 0.115239  |

|           |          |           |           |          |           |           |
|-----------|----------|-----------|-----------|----------|-----------|-----------|
| 0.11757   | 0.136218 | 0.120921  | 0.120775  | 0.125437 | 0.125874  | 0.118007  |
| 0.102127  | 0.122523 | 0.104895  | 0.113782  | 0.105624 | 0.106061  | 0.101981  |
| 0.168269  | 0.180507 | 0.164918  | 0.166812  | 0.168852 | 0.163753  | 0.167541  |
| 0.107663  | 0.118153 | 0.104895  | 0.113782  | 0.10912  | 0.109557  | 0.107226  |
| 0.14627   | 0.153846 | 0.143794  | 0.144231  | 0.144231 | 0.146416  | 0.142628  |
| 0.11859   | 0.126748 | 0.115239  | 0.113054  | 0.114219 | 0.107372  | 0.113199  |
| 0.188811  | 0.200175 | 0.188666  | 0.18211   | 0.187354 | 0.182838  | 0.186626  |
| 0.115385  | 0.135781 | 0.113491  | 0.120338  | 0.115093 | 0.118735  | 0.118153  |
| 0.106643  | 0.123543 | 0.100087  | 0.10373   | 0.101981 | 0.10708   | 0.100379  |
| 0.108829  | 0.116113 | 0.104895  | 0.11553   | 0.109411 | 0.104312  | 0.100816  |
| 0.107517  | 0.129371 | 0.10912   | 0.115093  | 0.118007 | 0.112617  | 0.112617  |
| 0.115385  | 0.134907 | 0.111742  | 0.123252  | 0.120047 | 0.115822  | 0.111742  |
| 0.121503  | 0.131702 | 0.112617  | 0.115967  | 0.112762 | 0.109411  | 0.115239  |
| 0.11757   | 0.129225 | 0.108974  | 0.112034  | 0.113199 | 0.111597  | 0.111014  |
| 0.191725  | 0.198427 | 0.187209  | 0.18211   | 0.188811 | 0.184586  | 0.184586  |
| 0.116987  | 0.135927 | 0.117716  | 0.11553   | 0.121066 | 0.114802  | 0.111014  |
| 0.113928  | 0.127914 | 0.112617  | 0.113636  | 0.112179 | 0.112325  | 0.10708   |
| 0.212267  | 0.222174 | 0.20979   | 0.206731  | 0.213141 | 0.206585  | 0.20979   |
| 0.114656  | 0.117279 | 0.106935  | 0.120192  | 0.105332 | 0.1081    | 0.10169   |
| 0.118298  | 0.130828 | 0.112908  | 0.113928  | 0.108974 | 0.115239  | 0.112617  |
| 0.115093  | 0.123834 | 0.109411  | 0.108683  | 0.106352 | 0.107955  | 0.11116   |
| 0.129808  | 0.14088  | 0.131993  | 0.13243   | 0.132721 | 0.135198  | 0.129953  |
| 0.186917  | 0.198572 | 0.18852   | 0.181672  | 0.190705 | 0.186189  | 0.186772  |
| 0.0944056 | 0.118007 | 0.0913462 | 0.109266  | 0.104895 | 0.101544  | 0.0992133 |
| 0.124126  | 0.133741 | 0.125437  | 0.123543  | 0.122378 | 0.121358  | 0.120484  |
| 0.118881  | 0.131119 | 0.112325  | 0.113928  | 0.11014  | 0.114365  | 0.114948  |
| 0.115093  | 0.128788 | 0.112034  | 0.112179  | 0.109557 | 0.112908  | 0.109703  |
| 0.119318  | 0.130099 | 0.111597  | 0.109994  | 0.109703 | 0.111597  | 0.112762  |
| 0.112471  | 0.130536 | 0.110286  | 0.116841  | 0.116259 | 0.119318  | 0.108829  |
| 0.104458  | 0.114656 | 0.0981935 | 0.100379  | 0.101544 | 0.099359  | 0.100233  |
| 0.120775  | 0.141463 | 0.116259  | 0.120484  | 0.124272 | 0.122669  | 0.120338  |
| 0.128351  | 0.127768 | 0.120921  | 0.128059  | 0.121358 | 0.120629  | 0.123252  |
| 0.115239  | 0.136801 | 0.113054  | 0.119027  | 0.11961  | 0.119755  | 0.118298  |
| 0.121503  | 0.129371 | 0.115239  | 0.121212  | 0.125874 | 0.122523  | 0.114073  |
| 0.193619  | 0.201195 | 0.191434  | 0.188083  | 0.192162 | 0.187646  | 0.18852   |
| 0.11451   | 0.127914 | 0.11116   | 0.113928  | 0.112762 | 0.109703  | 0.107372  |
| 0.123397  | 0.137675 | 0.122086  | 0.130099  | 0.129225 | 0.13141   | 0.123543  |
| 0.114802  | 0.128788 | 0.110577  | 0.11014   | 0.106352 | 0.109703  | 0.107372  |
| 0.102418  | 0.116113 | 0.100233  | 0.0989219 | 0.100087 | 0.0979021 | 0.100233  |
| 0.112908  | 0.126603 | 0.108392  | 0.112034  | 0.11116  | 0.104021  | 0.111014  |
| 0.0999417 | 0.119172 | 0.0942599 | 0.110723  | 0.105478 | 0.103001  | 0.0992133 |
| 0.128788  | 0.138112 | 0.128059  | 0.127914  | 0.129079 | 0.128351  | 0.11961   |
| 0.116113  | 0.130973 | 0.108974  | 0.115822  | 0.111742 | 0.109848  | 0.11014   |
| 0.103584  | 0.11757  | 0.0949883 | 0.10067   | 0.105332 | 0.0981935 | 0.0984848 |

|           |          |           |           |           |           |           |
|-----------|----------|-----------|-----------|-----------|-----------|-----------|
| 0.0987762 | 0.11451  | 0.0907634 | 0.0990676 | 0.101107  | 0.0957168 | 0.0948427 |
| 0.104458  | 0.123106 | 0.102273  | 0.103584  | 0.104749  | 0.104021  | 0.105186  |
| 0.0932401 | 0.117716 | 0.0939685 | 0.11014   | 0.100816  | 0.101836  | 0.0948427 |
| 0.125146  | 0.14088  | 0.123834  | 0.129808  | 0.128351  | 0.130245  | 0.127622  |
| 0.0929487 | 0.120047 | 0.0945513 | 0.107809  | 0.103438  | 0.100087  | 0.0989219 |
| 0.10912   | 0.128351 | 0.106935  | 0.11116   | 0.112034  | 0.113636  | 0.108392  |
| 0.0887238 | 0.115239 | 0.0868298 | 0.105041  | 0.100087  | 0.0961538 | 0.0944056 |
| 0.113345  | 0.128788 | 0.109703  | 0.108974  | 0.109848  | 0.109703  | 0.108829  |
| 0.0977564 | 0.115822 | 0.0996503 | 0.104458  | 0.0971737 | 0.099359  | 0.0955711 |
| 0.120775  | 0.13039  | 0.114219  | 0.114656  | 0.109994  | 0.115093  | 0.112762  |
| 0.106789  | 0.12398  | 0.105478  | 0.107955  | 0.104167  | 0.104895  | 0.10373   |
| 0.114656  | 0.127185 | 0.107809  | 0.114656  | 0.108246  | 0.111014  | 0.109848  |
| 0.109994  | 0.129516 | 0.107517  | 0.119901  | 0.112034  | 0.113928  | 0.106643  |
| 0.106061  | 0.121795 | 0.101836  | 0.104312  | 0.105186  | 0.100087  | 0.103293  |
| 0.117861  | 0.131265 | 0.112471  | 0.109703  | 0.108246  | 0.11014   | 0.109848  |
| 0.116113  | 0.121358 | 0.110431  | 0.11961   | 0.112325  | 0.109848  | 0.110431  |
| 0.115967  | 0.13141  | 0.114656  | 0.11859   | 0.118007  | 0.120192  | 0.113199  |
| 0.107955  | 0.126311 | 0.101981  | 0.102418  | 0.105041  | 0.108392  | 0.103438  |
| 0.112908  | 0.128351 | 0.110723  | 0.110286  | 0.110868  | 0.107517  | 0.109848  |
| 0.113054  | 0.132576 | 0.114656  | 0.117133  | 0.120047  | 0.118735  | 0.114948  |
| 0.0941142 | 0.119755 | 0.0939685 | 0.105478  | 0.099359  | 0.103001  | 0.0936772 |
| 0.111888  | 0.131119 | 0.109411  | 0.121212  | 0.118298  | 0.11961   | 0.111451  |
| 0.111305  | 0.130536 | 0.107372  | 0.119172  | 0.112762  | 0.116987  | 0.108829  |
| 0.11014   | 0.121503 | 0.10708   | 0.106352  | 0.107517  | 0.10067   | 0.105332  |
| 0.11014   | 0.125874 | 0.106498  | 0.106643  | 0.107517  | 0.103584  | 0.103584  |
| 0.0968823 | 0.117279 | 0.0999417 | 0.105041  | 0.0968823 | 0.0999417 | 0.0952797 |
| 0.115385  | 0.134033 | 0.114365  | 0.123252  | 0.120338  | 0.124854  | 0.114656  |
| 0.118298  | 0.127914 | 0.112908  | 0.11859   | 0.117716  | 0.118444  | 0.112617  |
| 0.113199  | 0.128934 | 0.109266  | 0.116113  | 0.114656  | 0.121212  | 0.112762  |
| 0.192162  | 0.2044   | 0.191434  | 0.189831  | 0.192162  | 0.18852   | 0.189394  |
| 0.165647  | 0.17701  | 0.160548  | 0.159237  | 0.161859  | 0.160548  | 0.160839  |
| 0.116404  | 0.136801 | 0.114802  | 0.120192  | 0.121649  | 0.123252  | 0.117424  |
| 0.108683  | 0.122669 | 0.105332  | 0.113928  | 0.11014   | 0.107372  | 0.107955  |
| 0.143939  | 0.157051 | 0.140297  | 0.147727  | 0.14627   | 0.144085  | 0.144085  |
| 0.123397  | 0.136801 | 0.121503  | 0.119901  | 0.11961   | 0.120047  | 0.122086  |
| 0.120921  | 0.131702 | 0.119901  | 0.118881  | 0.119464  | 0.119027  | 0.118153  |
| 0.11757   | 0.132721 | 0.113928  | 0.11553   | 0.114365  | 0.117133  | 0.111305  |
| 0.11553   | 0.125437 | 0.113636  | 0.102418  | 0.11116   | 0.110431  | 0.109557  |
| 0.116987  | 0.130973 | 0.114802  | 0.121649  | 0.117861  | 0.120338  | 0.113054  |
| 0.201632  | 0.215618 | 0.202652  | 0.193765  | 0.201923  | 0.199738  | 0.19799   |
| 0.101544  | 0.122523 | 0.0961538 | 0.109994  | 0.109411  | 0.106643  | 0.104021  |
| 0.106935  | 0.131993 | 0.106789  | 0.111888  | 0.112762  | 0.11116   | 0.110286  |
| 0.109266  | 0.126166 | 0.10708   | 0.110431  | 0.110431  | 0.110286  | 0.104749  |
| 0.110577  | 0.124854 | 0.107226  | 0.113199  | 0.116113  | 0.108974  | 0.103438  |

|           |          |           |           |           |           |           |
|-----------|----------|-----------|-----------|-----------|-----------|-----------|
| 0.185023  | 0.194347 | 0.175845  | 0.177156  | 0.177448  | 0.179633  | 0.18109   |
| 0.249126  | 0.253205 | 0.246941  | 0.240093  | 0.247086  | 0.24053   | 0.244901  |
| 0.118007  | 0.131119 | 0.11116   | 0.119172  | 0.112471  | 0.112908  | 0.112908  |
| 0.119755  | 0.132576 | 0.114948  | 0.122669  | 0.117716  | 0.119318  | 0.111451  |
| 0.117424  | 0.138695 | 0.11553   | 0.120047  | 0.119464  | 0.120484  | 0.117861  |
| 0.108246  | 0.128934 | 0.106643  | 0.119901  | 0.11116   | 0.113054  | 0.1081    |
| 0.0932401 | 0.115967 | 0.0895979 | 0.103438  | 0.099359  | 0.0965909 | 0.0965909 |
| 0.109703  | 0.128934 | 0.110723  | 0.107663  | 0.108537  | 0.104312  | 0.103438  |
| 0.117133  | 0.128497 | 0.112034  | 0.115385  | 0.115385  | 0.114948  | 0.113199  |
| 0.0926573 | 0.11451  | 0.0884324 | 0.106935  | 0.101399  | 0.100087  | 0.0960082 |
| 0.117279  | 0.128059 | 0.110723  | 0.11116   | 0.113491  | 0.114219  | 0.112762  |
| 0.115093  | 0.133741 | 0.103875  | 0.108392  | 0.111305  | 0.115822  | 0.10708   |
| 0.107663  | 0.119027 | 0.105186  | 0.10271   | 0.108246  | 0.0990676 | 0.103438  |
| 0.120921  | 0.128788 | 0.11116   | 0.11859   | 0.111014  | 0.109994  | 0.112617  |
| 0.112325  | 0.13447  | 0.113345  | 0.116987  | 0.121358  | 0.121212  | 0.111305  |
| 0.101544  | 0.109703 | 0.0932401 | 0.103875  | 0.0992133 | 0.097028  | 0.0920746 |
| 0.120192  | 0.124563 | 0.112179  | 0.123397  | 0.114365  | 0.112179  | 0.112179  |
| 0.124272  | 0.137383 | 0.125     | 0.135052  | 0.129808  | 0.129079  | 0.124126  |
| 0.114802  | 0.129371 | 0.107955  | 0.110723  | 0.108683  | 0.107372  | 0.106498  |
| 0.111742  | 0.117279 | 0.107809  | 0.110577  | 0.109994  | 0.105769  | 0.106935  |
| 0.135344  | 0.136801 | 0.125583  | 0.126311  | 0.121649  | 0.125     | 0.126748  |
| 0.212121  | 0.217657 | 0.212558  | 0.205711  | 0.207751  | 0.204691  | 0.208479  |
| 0.109411  | 0.124272 | 0.100816  | 0.107955  | 0.102127  | 0.10169   | 0.10373   |
| 0.106643  | 0.117716 | 0.103293  | 0.101981  | 0.103147  | 0.097465  | 0.103584  |
| 0.113928  | 0.130536 | 0.112034  | 0.111888  | 0.113636  | 0.112325  | 0.110577  |
| 0.113199  | 0.119901 | 0.106061  | 0.119027  | 0.103875  | 0.113054  | 0.101399  |
| 0.110286  | 0.121649 | 0.103147  | 0.110577  | 0.113491  | 0.107809  | 0.102564  |
| 0.201195  | 0.211976 | 0.198135  | 0.19595   | 0.199738  | 0.193182  | 0.196387  |
| 0.115385  | 0.13549  | 0.114073  | 0.122669  | 0.123834  | 0.122815  | 0.114365  |
| 0.114948  | 0.127477 | 0.108683  | 0.106498  | 0.105041  | 0.108392  | 0.105769  |
| 0.117424  | 0.13345  | 0.108246  | 0.117424  | 0.121795  | 0.112325  | 0.11757   |
| 0.106061  | 0.124709 | 0.103584  | 0.115385  | 0.111014  | 0.109994  | 0.103001  |
| 0.114219  | 0.134324 | 0.113199  | 0.120047  | 0.117716  | 0.120484  | 0.114365  |
| 0.108392  | 0.121212 | 0.103293  | 0.109848  | 0.102855  | 0.10708   | 0.103001  |
| 0.111597  | 0.134324 | 0.105624  | 0.105769  | 0.109266  | 0.112617  | 0.106498  |
| 0.1081    | 0.118007 | 0.102127  | 0.114802  | 0.0987762 | 0.105624  | 0.0968823 |
| 0.198864  | 0.209936 | 0.19697   | 0.190705  | 0.200321  | 0.19493   | 0.199592  |
| 0.104604  | 0.120629 | 0.100962  | 0.106061  | 0.109266  | 0.110577  | 0.105332  |
| 0.190997  | 0.203234 | 0.195221  | 0.188666  | 0.192453  | 0.190851  | 0.191142  |
| 0.193473  | 0.203671 | 0.190997  | 0.184441  | 0.191725  | 0.186334  | 0.190997  |
| 0.123543  | 0.13549  | 0.11961   | 0.132867  | 0.127622  | 0.124563  | 0.11757   |
| 0.121212  | 0.12296  | 0.113782  | 0.126457  | 0.109848  | 0.119027  | 0.106498  |
| 0.105186  | 0.125    | 0.0965909 | 0.0987762 | 0.104604  | 0.106789  | 0.0983392 |
| 0.104458  | 0.124272 | 0.101107  | 0.109411  | 0.107372  | 0.111014  | 0.105478  |

|           |          |           |          |           |           |           |
|-----------|----------|-----------|----------|-----------|-----------|-----------|
| 0.111014  | 0.129953 | 0.10912   | 0.113345 | 0.116841  | 0.116404  | 0.112325  |
| 0.118007  | 0.13141  | 0.116404  | 0.112179 | 0.109848  | 0.114073  | 0.110868  |
| 0.0862471 | 0.113928 | 0.0872669 | 0.102855 | 0.0987762 | 0.0939685 | 0.090472  |
| 0.0912005 | 0.115385 | 0.088141  | 0.10373  | 0.101399  | 0.0968823 | 0.0939685 |
| 0.122232  | 0.129516 | 0.112179  | 0.11961  | 0.112908  | 0.114802  | 0.113928  |
| 0.113054  | 0.132576 | 0.112325  | 0.122669 | 0.115093  | 0.113782  | 0.111451  |
| 0.112034  | 0.125146 | 0.111014  | 0.110577 | 0.105915  | 0.1081    | 0.108392  |
| 0.111888  | 0.133159 | 0.114365  | 0.118298 | 0.117424  | 0.121358  | 0.112617  |
| 0.100962  | 0.11961  | 0.0958625 | 0.101836 | 0.0992133 | 0.106352  | 0.100233  |
| 0.119172  | 0.134907 | 0.122232  | 0.124709 | 0.123252  | 0.128351  | 0.120775  |
| 0.11451   | 0.132284 | 0.112325  | 0.11859  | 0.114802  | 0.11757   | 0.113782  |
| 0.126311  | 0.140297 | 0.128497  | 0.133013 | 0.131265  | 0.131702  | 0.126166  |
| 0.261218  | 0.264423 | 0.258159  | 0.254808 | 0.260927  | 0.255245  | 0.257576  |
| 0.116113  | 0.125437 | 0.117133  | 0.123106 | 0.116987  | 0.115093  | 0.109557  |
| 0.118298  | 0.130828 | 0.117861  | 0.125583 | 0.11655   | 0.118153  | 0.11757   |
| 0.21722   | 0.22567  | 0.217366  | 0.211393 | 0.218677  | 0.21183   | 0.214452  |
| 0.122086  | 0.12704  | 0.121649  | 0.125291 | 0.119464  | 0.120775  | 0.116987  |
| 0.229895  | 0.238345 | 0.230332  | 0.224068 | 0.232226  | 0.226253  | 0.230041  |
| 0.105041  | 0.120192 | 0.105186  | 0.112617 | 0.107372  | 0.106061  | 0.101981  |
| 0.130245  | 0.137821 | 0.123397  | 0.123543 | 0.120047  | 0.125146  | 0.125146  |
| 0.104312  | 0.113928 | 0.0989219 | 0.111305 | 0.0964452 | 0.10271   | 0.0939685 |
| 0.120629  | 0.136364 | 0.115822  | 0.126457 | 0.122086  | 0.119901  | 0.115239  |
| 0.204837  | 0.212995 | 0.202652  | 0.195804 | 0.200175  | 0.198281  | 0.199738  |
| 0.125583  | 0.137529 | 0.121649  | 0.13141  | 0.128205  | 0.130973  | 0.121941  |
| 0.112471  | 0.134615 | 0.112034  | 0.118298 | 0.118881  | 0.11961   | 0.114656  |
| 0.227127  | 0.234411 | 0.226107  | 0.218677 | 0.227127  | 0.221154  | 0.223193  |
| 0.0932401 | 0.119172 | 0.0939685 | 0.106352 | 0.103147  | 0.101544  | 0.097465  |
| 0.197698  | 0.210519 | 0.198427  | 0.191579 | 0.198864  | 0.197261  | 0.196387  |
| 0.0954254 | 0.119901 | 0.094697  | 0.107372 | 0.108246  | 0.10373   | 0.10169   |
| 0.116404  | 0.126894 | 0.112471  | 0.112617 | 0.111451  | 0.113636  | 0.110431  |
| 0.118007  | 0.12296  | 0.113491  | 0.11451  | 0.114219  | 0.110577  | 0.111742  |
| 0.122378  | 0.13549  | 0.119318  | 0.129953 | 0.127331  | 0.126311  | 0.119901  |
| 0.110286  | 0.12602  | 0.109266  | 0.116113 | 0.107663  | 0.1081    | 0.108974  |
| 0.160111  | 0.169143 | 0.154429  | 0.149913 | 0.156906  | 0.152972  | 0.155594  |
| 0.106206  | 0.126894 | 0.107517  | 0.114656 | 0.111451  | 0.113636  | 0.106643  |
| 0.112908  | 0.119318 | 0.102564  | 0.121066 | 0.100379  | 0.109266  | 0.0984848 |
| 0.113491  | 0.124272 | 0.111014  | 0.116987 | 0.115239  | 0.113636  | 0.113928  |
| 0.119318  | 0.118444 | 0.113345  | 0.12602  | 0.11961   | 0.113636  | 0.111888  |
| 0.195513  | 0.204545 | 0.194202  | 0.189977 | 0.19493   | 0.192162  | 0.190997  |
| 0.112325  | 0.12398  | 0.108974  | 0.11116  | 0.112617  | 0.112179  | 0.108392  |
| 0.119464  | 0.136946 | 0.11553   | 0.12296  | 0.120921  | 0.119318  | 0.114656  |
| 0.0933858 | 0.116113 | 0.094697  | 0.105915 | 0.103293  | 0.105186  | 0.0955711 |
| 0.0976107 | 0.115676 | 0.0936772 | 0.107226 | 0.104021  | 0.102418  | 0.0980478 |
| 0.125146  | 0.131847 | 0.118007  | 0.118153 | 0.112908  | 0.11859   | 0.118298  |

|           |          |           |          |          |           |           |
|-----------|----------|-----------|----------|----------|-----------|-----------|
| 0.254953  | 0.262529 | 0.256265  | 0.248834 | 0.256119 | 0.250146  | 0.254516  |
| 0.113782  | 0.120484 | 0.105186  | 0.108246 | 0.108537 | 0.102273  | 0.105769  |
| 0.114073  | 0.127477 | 0.115676  | 0.111742 | 0.110286 | 0.111305  | 0.111597  |
| 0.179924  | 0.1875   | 0.174825  | 0.174679 | 0.179341 | 0.175117  | 0.172786  |
| 0.18546   | 0.196824 | 0.184441  | 0.178176 | 0.18546  | 0.18211   | 0.18211   |
| 0.121649  | 0.134761 | 0.113928  | 0.118153 | 0.117279 | 0.111305  | 0.113054  |
| 0.112762  | 0.131993 | 0.116696  | 0.121503 | 0.121503 | 0.122232  | 0.114073  |
| 0.108974  | 0.129662 | 0.108829  | 0.11655  | 0.116259 | 0.114365  | 0.107955  |
| 0.136801  | 0.148164 | 0.137238  | 0.140589 | 0.142628 | 0.143648  | 0.137238  |
| 0.116404  | 0.128351 | 0.109266  | 0.115239 | 0.106789 | 0.111597  | 0.113636  |
| 0.117716  | 0.133159 | 0.112617  | 0.119464 | 0.113928 | 0.115239  | 0.114948  |
| 0.102127  | 0.120484 | 0.0952797 | 0.112908 | 0.106789 | 0.104604  | 0.10169   |
| 0.111742  | 0.129808 | 0.114219  | 0.116113 | 0.116987 | 0.118881  | 0.110723  |
| 0.122086  | 0.134033 | 0.120775  | 0.125291 | 0.124417 | 0.127185  | 0.121358  |
| 0.105624  | 0.126894 | 0.0990676 | 0.110868 | 0.109703 | 0.108392  | 0.1081    |
| 0.119172  | 0.13345  | 0.114656  | 0.126457 | 0.125291 | 0.121358  | 0.116113  |
| 0.131847  | 0.14292  | 0.126457  | 0.139132 | 0.137675 | 0.133741  | 0.128497  |
| 0.117424  | 0.121795 | 0.114073  | 0.11451  | 0.115967 | 0.110868  | 0.111742  |
| 0.125728  | 0.139423 | 0.123543  | 0.134761 | 0.131847 | 0.128497  | 0.121795  |
| 0.103584  | 0.118735 | 0.0981935 | 0.113782 | 0.112034 | 0.112179  | 0.106352  |
| 0.208042  | 0.216492 | 0.204691  | 0.202506 | 0.207751 | 0.202943  | 0.204691  |
| 0.113491  | 0.132139 | 0.110431  | 0.114073 | 0.112325 | 0.110431  | 0.113345  |
| 0.194202  | 0.200612 | 0.188811  | 0.184586 | 0.192453 | 0.187646  | 0.187354  |
| 0.107663  | 0.110868 | 0.106061  | 0.11116  | 0.104458 | 0.0999417 | 0.100233  |
| 0.128642  | 0.133887 | 0.120338  | 0.121066 | 0.119318 | 0.122669  | 0.121212  |
| 0.119027  | 0.140589 | 0.115093  | 0.122815 | 0.124272 | 0.122378  | 0.120338  |
| 0.112179  | 0.130245 | 0.107372  | 0.112762 | 0.11451  | 0.11757   | 0.112034  |
| 0.11757   | 0.133304 | 0.114802  | 0.122815 | 0.122523 | 0.122669  | 0.117424  |
| 0.114948  | 0.13039  | 0.114802  | 0.121649 | 0.120192 | 0.122669  | 0.11451   |
| 0.11961   | 0.133887 | 0.118007  | 0.114656 | 0.112034 | 0.115967  | 0.113345  |
| 0.112471  | 0.117716 | 0.103875  | 0.119172 | 0.100233 | 0.10912   | 0.0989219 |
| 0.120629  | 0.141317 | 0.119901  | 0.124417 | 0.124709 | 0.123689  | 0.121649  |
| 0.110868  | 0.123106 | 0.105769  | 0.118444 | 0.117279 | 0.117716  | 0.110723  |
| 0.253059  | 0.256847 | 0.251748  | 0.246358 | 0.252768 | 0.246795  | 0.250583  |
| 0.120192  | 0.131265 | 0.115676  | 0.114365 | 0.115822 | 0.115385  | 0.115385  |
| 0.18648   | 0.196387 | 0.182838  | 0.175699 | 0.185023 | 0.178467  | 0.179633  |
| 0.189831  | 0.198864 | 0.188228  | 0.181672 | 0.188374 | 0.183566  | 0.184732  |
| 0.11655   | 0.129662 | 0.11553   | 0.11655  | 0.112762 | 0.114656  | 0.110286  |
| 0.109266  | 0.122086 | 0.105624  | 0.107517 | 0.11014  | 0.105041  | 0.105041  |
| 0.125874  | 0.134033 | 0.121066  | 0.124126 | 0.118007 | 0.122523  | 0.120484  |
| 0.11014   | 0.127914 | 0.106206  | 0.110431 | 0.114219 | 0.112908  | 0.110286  |
| 0.113199  | 0.125437 | 0.111014  | 0.104167 | 0.109994 | 0.107809  | 0.108974  |
| 0.0983392 | 0.118444 | 0.090035  | 0.105624 | 0.104167 | 0.10169   | 0.097028  |
| 0.120629  | 0.132284 | 0.117279  | 0.117424 | 0.118298 | 0.118735  | 0.114656  |



|           |          |           |          |          |           |           |
|-----------|----------|-----------|----------|----------|-----------|-----------|
| 0.126748  | 0.137238 | 0.123106  | 0.13141  | 0.128497 | 0.133013  | 0.123397  |
| 0.121649  | 0.13039  | 0.115385  | 0.114365 | 0.112325 | 0.111888  | 0.112179  |
| 0.122523  | 0.13884  | 0.12296   | 0.128934 | 0.128642 | 0.131702  | 0.121795  |
| 0.1081    | 0.127622 | 0.108829  | 0.115676 | 0.107226 | 0.107955  | 0.106789  |
| 0.122378  | 0.143065 | 0.120775  | 0.125874 | 0.123834 | 0.123397  | 0.121941  |
| 0.112908  | 0.133596 | 0.115093  | 0.125146 | 0.115822 | 0.116259  | 0.108392  |
| 0.108392  | 0.121795 | 0.104458  | 0.11655  | 0.112179 | 0.114073  | 0.109703  |
| 0.120775  | 0.134178 | 0.109557  | 0.112908 | 0.114948 | 0.118298  | 0.111597  |
| 0.116404  | 0.128351 | 0.110431  | 0.114073 | 0.109994 | 0.115093  | 0.110723  |
| 0.127185  | 0.133887 | 0.126748  | 0.126603 | 0.12398  | 0.124709  | 0.121212  |
| 0.185023  | 0.195804 | 0.182547  | 0.17803  | 0.187646 | 0.180216  | 0.181672  |
| 0.130099  | 0.142628 | 0.128497  | 0.131847 | 0.130973 | 0.134033  | 0.127331  |
| 0.116696  | 0.13243  | 0.11451   | 0.119027 | 0.120775 | 0.120338  | 0.115093  |
| 0.117424  | 0.134324 | 0.113782  | 0.118881 | 0.118298 | 0.118735  | 0.117279  |
| 0.106789  | 0.125146 | 0.106935  | 0.107372 | 0.107955 | 0.107809  | 0.107517  |
| 0.115093  | 0.129662 | 0.113199  | 0.121503 | 0.118298 | 0.115239  | 0.110868  |
| 0.115822  | 0.136218 | 0.115385  | 0.125146 | 0.120775 | 0.117716  | 0.117716  |
| 0.193182  | 0.199592 | 0.189248  | 0.184732 | 0.191142 | 0.186334  | 0.186334  |
| 0.117133  | 0.134615 | 0.116696  | 0.117133 | 0.118881 | 0.116404  | 0.113199  |
| 0.10708   | 0.123689 | 0.10373   | 0.104749 | 0.108246 | 0.102564  | 0.103438  |
| 0.119318  | 0.137966 | 0.115967  | 0.122523 | 0.122232 | 0.124126  | 0.117424  |
| 0.192308  | 0.202797 | 0.188374  | 0.185606 | 0.190559 | 0.186626  | 0.187209  |
| 0.107955  | 0.122815 | 0.105186  | 0.102127 | 0.106498 | 0.101107  | 0.104021  |
| 0.101981  | 0.117716 | 0.0942599 | 0.11014  | 0.106935 | 0.105332  | 0.0995047 |
| 0.119172  | 0.136072 | 0.118444  | 0.12296  | 0.122086 | 0.125146  | 0.114948  |
| 0.113782  | 0.126603 | 0.1081    | 0.115822 | 0.105915 | 0.107809  | 0.106061  |
| 0.188957  | 0.196533 | 0.187354  | 0.180216 | 0.187209 | 0.185606  | 0.184732  |
| 0.0971737 | 0.119027 | 0.0914918 | 0.109411 | 0.105915 | 0.105186  | 0.101981  |
| 0.107663  | 0.123106 | 0.104312  | 0.107372 | 0.107372 | 0.107809  | 0.103438  |
| 0.108246  | 0.11961  | 0.101981  | 0.101253 | 0.106498 | 0.101981  | 0.104895  |
| 0.11757   | 0.134178 | 0.111305  | 0.118735 | 0.115822 | 0.117716  | 0.116259  |
| 0.110431  | 0.117133 | 0.0995047 | 0.116259 | 0.100524 | 0.106206  | 0.0977564 |
| 0.102855  | 0.119464 | 0.100087  | 0.11451  | 0.108974 | 0.110868  | 0.106789  |
| 0.118298  | 0.129371 | 0.111742  | 0.11451  | 0.11014  | 0.111451  | 0.113782  |
| 0.115093  | 0.125874 | 0.110286  | 0.115385 | 0.113345 | 0.113491  | 0.10912   |
| 0.144668  | 0.144376 | 0.135198  | 0.142045 | 0.137966 | 0.136072  | 0.136364  |
| 0.237908  | 0.241113 | 0.236305  | 0.230041 | 0.23412  | 0.231061  | 0.232809  |
| 0.126311  | 0.13884  | 0.116841  | 0.119901 | 0.119318 | 0.12296   | 0.117133  |
| 0.111451  | 0.118153 | 0.105478  | 0.119318 | 0.100379 | 0.106352  | 0.097028  |
| 0.111888  | 0.129079 | 0.112908  | 0.117133 | 0.117716 | 0.117861  | 0.113199  |
| 0.123106  | 0.131556 | 0.112471  | 0.116404 | 0.117861 | 0.112179  | 0.114802  |
| 0.102564  | 0.111014 | 0.0986305 | 0.111888 | 0.103147 | 0.0992133 | 0.097465  |
| 0.113054  | 0.123252 | 0.104167  | 0.11451  | 0.11451  | 0.110868  | 0.105624  |
| 0.113199  | 0.13243  | 0.116259  | 0.123106 | 0.118735 | 0.120629  | 0.115385  |

|           |          |           |           |           |           |           |
|-----------|----------|-----------|-----------|-----------|-----------|-----------|
| 0.103147  | 0.121795 | 0.095134  | 0.113928  | 0.108392  | 0.109411  | 0.105041  |
| 0.117133  | 0.12296  | 0.105041  | 0.111014  | 0.107226  | 0.107663  | 0.108246  |
| 0.236742  | 0.244901 | 0.236597  | 0.232372  | 0.237325  | 0.233683  | 0.236888  |
| 0.109848  | 0.119755 | 0.102418  | 0.104604  | 0.106935  | 0.0977564 | 0.101836  |
| 0.0941142 | 0.114802 | 0.0977564 | 0.101981  | 0.0964452 | 0.0980478 | 0.0913462 |
| 0.117279  | 0.128934 | 0.109266  | 0.113491  | 0.109994  | 0.112471  | 0.11014   |
| 0.127914  | 0.135198 | 0.119318  | 0.128205  | 0.119172  | 0.122815  | 0.121066  |
| 0.130245  | 0.141317 | 0.121066  | 0.120338  | 0.125583  | 0.128642  | 0.121649  |
| 0.11859   | 0.132284 | 0.115239  | 0.117133  | 0.115967  | 0.118444  | 0.114656  |
| 0.114219  | 0.134907 | 0.114948  | 0.120338  | 0.120047  | 0.122523  | 0.115822  |
| 0.108829  | 0.125437 | 0.104021  | 0.105332  | 0.103001  | 0.108683  | 0.104021  |
| 0.23412   | 0.238491 | 0.232517  | 0.226544  | 0.234703  | 0.228438  | 0.228438  |
| 0.120775  | 0.134178 | 0.119464  | 0.125728  | 0.124272  | 0.125583  | 0.119172  |
| 0.0987762 | 0.118298 | 0.0945513 | 0.109848  | 0.105769  | 0.108537  | 0.100962  |
| 0.108974  | 0.118007 | 0.10271   | 0.104312  | 0.102855  | 0.10271   | 0.101544  |
| 0.116113  | 0.114656 | 0.115967  | 0.123397  | 0.117279  | 0.107517  | 0.112179  |
| 0.10912   | 0.11961  | 0.111305  | 0.117861  | 0.11116   | 0.112471  | 0.1081    |
| 0.120775  | 0.129225 | 0.111305  | 0.114656  | 0.112034  | 0.113928  | 0.110723  |
| 0.103293  | 0.119901 | 0.0976107 | 0.11116   | 0.110577  | 0.108974  | 0.104021  |
| 0.106643  | 0.124417 | 0.101836  | 0.117424  | 0.113345  | 0.112034  | 0.107955  |
| 0.0976107 | 0.118007 | 0.0916375 | 0.105186  | 0.104021  | 0.103293  | 0.0971737 |
| 0.119027  | 0.128642 | 0.112762  | 0.113491  | 0.110577  | 0.112471  | 0.113636  |
| 0.120775  | 0.119027 | 0.108974  | 0.119901  | 0.107955  | 0.11451   | 0.105186  |
| 0.123834  | 0.120921 | 0.113199  | 0.126748  | 0.111014  | 0.120775  | 0.108537  |
| 0.124126  | 0.139277 | 0.11961   | 0.127622  | 0.126457  | 0.12602   | 0.125728  |
| 0.125291  | 0.145105 | 0.126311  | 0.129079  | 0.129079  | 0.127768  | 0.126311  |
| 0.121941  | 0.118153 | 0.112179  | 0.128059  | 0.108829  | 0.113928  | 0.106643  |
| 0.106206  | 0.124563 | 0.108392  | 0.0983392 | 0.10708   | 0.104312  | 0.106643  |
| 0.1081    | 0.127622 | 0.109994  | 0.124417  | 0.117716  | 0.118444  | 0.109994  |
| 0.117861  | 0.126894 | 0.112471  | 0.0960082 | 0.108246  | 0.121795  | 0.11451   |
| 0.207896  | 0.216055 | 0.204837  | 0.202069  | 0.204691  | 0.200466  | 0.201923  |
| 0.122815  | 0.13243  | 0.120047  | 0.126311  | 0.122815  | 0.125874  | 0.11655   |
| 0.0992133 | 0.11961  | 0.10169   | 0.108246  | 0.100962  | 0.0999417 | 0.0967366 |
| 0.126166  | 0.138986 | 0.116113  | 0.117133  | 0.115385  | 0.118444  | 0.116696  |
| 0.223631  | 0.229458 | 0.225816  | 0.216638  | 0.226253  | 0.215618  | 0.223485  |
| 0.215181  | 0.21926  | 0.209207  | 0.207605  | 0.215763  | 0.207751  | 0.20979   |
| 0.105478  | 0.120629 | 0.10067   | 0.11655   | 0.112179  | 0.110868  | 0.105915  |
| 0.25102   | 0.25539  | 0.248543  | 0.244901  | 0.251311  | 0.24796   | 0.247669  |
| 0.109994  | 0.124272 | 0.109848  | 0.100379  | 0.107372  | 0.105186  | 0.106643  |
| 0.131556  | 0.141463 | 0.131702  | 0.124563  | 0.12602   | 0.126457  | 0.123543  |
| 0.110577  | 0.121358 | 0.107809  | 0.107372  | 0.108246  | 0.101399  | 0.104895  |
| 0.116259  | 0.118007 | 0.108829  | 0.12296   | 0.104312  | 0.114656  | 0.105624  |
| 0.189248  | 0.197698 | 0.188811  | 0.180507  | 0.188083  | 0.185606  | 0.185606  |
| 0.117424  | 0.11859  | 0.109703  | 0.113928  | 0.106352  | 0.109411  | 0.105624  |

|           |          |           |           |           |           |           |
|-----------|----------|-----------|-----------|-----------|-----------|-----------|
| 0.197552  | 0.205711 | 0.19391   | 0.191434  | 0.197552  | 0.190705  | 0.192745  |
| 0.112471  | 0.125    | 0.10708   | 0.109848  | 0.1081    | 0.110577  | 0.107372  |
| 0.10373   | 0.124126 | 0.100087  | 0.112762  | 0.110431  | 0.108246  | 0.104167  |
| 0.124126  | 0.128205 | 0.118153  | 0.114802  | 0.118298  | 0.115239  | 0.11553   |
| 0.108392  | 0.123252 | 0.105041  | 0.111305  | 0.113636  | 0.108829  | 0.109994  |
| 0.112617  | 0.124854 | 0.106935  | 0.105332  | 0.103584  | 0.105769  | 0.107809  |
| 0.109703  | 0.124563 | 0.110723  | 0.116696  | 0.114948  | 0.113928  | 0.107517  |
| 0.104458  | 0.119318 | 0.102564  | 0.100962  | 0.104749  | 0.0964452 | 0.100816  |
| 0.108683  | 0.130245 | 0.10912   | 0.113636  | 0.113054  | 0.116696  | 0.111451  |
| 0.0962995 | 0.121941 | 0.0979021 | 0.112034  | 0.105041  | 0.106935  | 0.0961538 |
| 0.110577  | 0.126894 | 0.103147  | 0.102127  | 0.105332  | 0.106935  | 0.101981  |
| 0.108974  | 0.119755 | 0.103293  | 0.104895  | 0.104895  | 0.0989219 | 0.101544  |
| 0.119318  | 0.133887 | 0.115385  | 0.119027  | 0.121649  | 0.113054  | 0.118007  |
| 0.121358  | 0.140006 | 0.122086  | 0.124854  | 0.127477  | 0.12704   | 0.121212  |
| 0.109557  | 0.130245 | 0.10708   | 0.113345  | 0.11451   | 0.114365  | 0.110577  |
| 0.110286  | 0.123397 | 0.110723  | 0.107663  | 0.105332  | 0.105769  | 0.102273  |
| 0.111888  | 0.121503 | 0.107372  | 0.104604  | 0.104895  | 0.105041  | 0.107955  |
| 0.102855  | 0.12296  | 0.100087  | 0.112471  | 0.108974  | 0.10708   | 0.103293  |
| 0.109848  | 0.116259 | 0.103584  | 0.115093  | 0.0976107 | 0.101544  | 0.0960082 |
| 0.116113  | 0.133887 | 0.113345  | 0.125146  | 0.121358  | 0.11859   | 0.114219  |
| 0.112617  | 0.131265 | 0.111305  | 0.118735  | 0.117279  | 0.118007  | 0.113345  |
| 0.116259  | 0.13345  | 0.111451  | 0.117424  | 0.120338  | 0.11961   | 0.116404  |
| 0.121066  | 0.140589 | 0.122086  | 0.128642  | 0.128351  | 0.130536  | 0.123834  |
| 0.129516  | 0.142628 | 0.129371  | 0.135344  | 0.133013  | 0.136364  | 0.129371  |
| 0.090035  | 0.112762 | 0.0837704 | 0.0938228 | 0.0932401 | 0.090472  | 0.0895979 |
| 0.118881  | 0.130828 | 0.112908  | 0.112179  | 0.110723  | 0.114365  | 0.111742  |
| 0.10271   | 0.119318 | 0.0973193 | 0.10271   | 0.106789  | 0.099359  | 0.0990676 |
| 0.124563  | 0.123689 | 0.113928  | 0.128934  | 0.113199  | 0.11859   | 0.110723  |
| 0.112471  | 0.122086 | 0.109411  | 0.108683  | 0.110431  | 0.106206  | 0.106206  |
| 0.132576  | 0.142483 | 0.128934  | 0.141317  | 0.138112  | 0.137383  | 0.131556  |
| 0.141026  | 0.141317 | 0.129808  | 0.130536  | 0.128205  | 0.130682  | 0.131847  |
| 0.12398   | 0.13243  | 0.11451   | 0.120775  | 0.113491  | 0.117424  | 0.116259  |
| 0.108683  | 0.127914 | 0.105915  | 0.108683  | 0.111888  | 0.112034  | 0.107955  |
| 0.105624  | 0.116404 | 0.10169   | 0.112325  | 0.108537  | 0.0996503 | 0.102273  |
| 0.125146  | 0.144959 | 0.120921  | 0.125728  | 0.126603  | 0.125291  | 0.122378  |
| 0.207751  | 0.2162   | 0.204691  | 0.197844  | 0.205128  | 0.201486  | 0.203817  |
| 0.106352  | 0.124126 | 0.110868  | 0.108683  | 0.107226  | 0.105915  | 0.104167  |
| 0.115822  | 0.127768 | 0.114802  | 0.109703  | 0.112908  | 0.111597  | 0.111888  |
| 0.111597  | 0.115385 | 0.10067   | 0.113636  | 0.100524  | 0.107663  | 0.0960082 |
| 0.112908  | 0.131556 | 0.111305  | 0.116404  | 0.114365  | 0.118298  | 0.114802  |
| 0.117716  | 0.13345  | 0.117279  | 0.120047  | 0.111888  | 0.115822  | 0.112617  |
| 0.118881  | 0.128788 | 0.114656  | 0.119464  | 0.120921  | 0.120775  | 0.112325  |
| 0.122232  | 0.129225 | 0.121212  | 0.124854  | 0.121358  | 0.121503  | 0.115967  |
| 0.118881  | 0.130245 | 0.108537  | 0.119464  | 0.111305  | 0.112325  | 0.110577  |

|           |           |           |           |           |           |           |
|-----------|-----------|-----------|-----------|-----------|-----------|-----------|
| 0.0917832 | 0.118007  | 0.0948427 | 0.10373   | 0.0999417 | 0.100379  | 0.0922203 |
| 0.11655   | 0.118298  | 0.108829  | 0.123252  | 0.105478  | 0.112325  | 0.103875  |
| 0.116259  | 0.124417  | 0.114365  | 0.107226  | 0.111305  | 0.10708   | 0.107955  |
| 0.117861  | 0.138258  | 0.110723  | 0.112325  | 0.112908  | 0.114219  | 0.108683  |
| 0.172203  | 0.181527  | 0.167395  | 0.170455  | 0.170163  | 0.172348  | 0.170892  |
| 0.112471  | 0.133741  | 0.113199  | 0.115385  | 0.116259  | 0.11961   | 0.112908  |
| 0.118153  | 0.121066  | 0.114219  | 0.124272  | 0.109994  | 0.11655   | 0.109848  |
| 0.106643  | 0.125583  | 0.107663  | 0.112762  | 0.108392  | 0.11116   | 0.105915  |
| 0.116404  | 0.122232  | 0.1081    | 0.112325  | 0.110868  | 0.111597  | 0.109266  |
| 0.104167  | 0.12398   | 0.101107  | 0.105624  | 0.101544  | 0.104604  | 0.103438  |
| 0.103875  | 0.123397  | 0.0952797 | 0.0977564 | 0.100962  | 0.106352  | 0.0979021 |
| 0.112325  | 0.122815  | 0.103438  | 0.10912   | 0.107955  | 0.112179  | 0.104895  |
| 0.095134  | 0.095134  | 0.0912005 | 0.106789  | 0.0919289 | 0.0879953 | 0.0909091 |
| 0.115239  | 0.137092  | 0.113636  | 0.114073  | 0.114656  | 0.116259  | 0.110723  |
| 0.119755  | 0.131119  | 0.115822  | 0.120629  | 0.123252  | 0.123397  | 0.120775  |
| 0.107663  | 0.122523  | 0.0967366 | 0.105915  | 0.105332  | 0.104604  | 0.103147  |
| 0.108392  | 0.129371  | 0.106498  | 0.107809  | 0.109266  | 0.110868  | 0.107372  |
| 0.101836  | 0.0977564 | 0.099359  | 0.106789  | 0.095134  | 0.0961538 | 0.0891608 |
| 0.106789  | 0.127768  | 0.102564  | 0.110577  | 0.103875  | 0.110431  | 0.103147  |
| 0.116113  | 0.133304  | 0.111888  | 0.118444  | 0.122815  | 0.112471  | 0.121212  |
| 0.101836  | 0.125146  | 0.10169   | 0.104749  | 0.103875  | 0.104021  | 0.099359  |
| 0.106789  | 0.125728  | 0.105186  | 0.10912   | 0.104749  | 0.109848  | 0.102564  |
| 0.10708   | 0.120484  | 0.104604  | 0.102127  | 0.106789  | 0.104604  | 0.103438  |
| 0.116841  | 0.13141   | 0.11553   | 0.115967  | 0.11859   | 0.119027  | 0.11757   |
| 0.0979021 | 0.11859   | 0.0977564 | 0.103438  | 0.0964452 | 0.0954254 | 0.0965909 |
| 0.124709  | 0.138403  | 0.123397  | 0.132284  | 0.13141   | 0.127768  | 0.123689  |
| 0.117424  | 0.13549   | 0.114948  | 0.122669  | 0.123834  | 0.123106  | 0.116404  |
| 0.104021  | 0.126748  | 0.104167  | 0.107517  | 0.111014  | 0.109703  | 0.105332  |
| 0.120775  | 0.133304  | 0.11859   | 0.135344  | 0.129808  | 0.121503  | 0.124126  |
| 0.116404  | 0.128351  | 0.110723  | 0.11553   | 0.112325  | 0.117133  | 0.118881  |
| 0.125728  | 0.128059  | 0.124417  | 0.108829  | 0.121941  | 0.118298  | 0.116259  |
| 0.11116   | 0.121941  | 0.107809  | 0.110577  | 0.108537  | 0.109848  | 0.104604  |
| 0.139569  | 0.140152  | 0.13243   | 0.136946  | 0.134324  | 0.132139  | 0.131556  |
| 0.11859   | 0.131702  | 0.118735  | 0.120047  | 0.12704   | 0.122232  | 0.117279  |
| 0.113636  | 0.105478  | 0.106498  | 0.121503  | 0.101981  | 0.106789  | 0.105332  |
| 0.115385  | 0.127331  | 0.110868  | 0.113928  | 0.114802  | 0.112908  | 0.111742  |
| 0.0980478 | 0.116987  | 0.0979021 | 0.10067   | 0.10067   | 0.105186  | 0.0981935 |
| 0.104895  | 0.125583  | 0.0983392 | 0.101399  | 0.103438  | 0.101544  | 0.101544  |
| 0.0855186 | 0.0986305 | 0.0844988 | 0.0983392 | 0.0826049 | 0.083042  | 0.0804196 |
| 0.112325  | 0.122523  | 0.112471  | 0.11757   | 0.11553   | 0.112471  | 0.108974  |
| 0.120338  | 0.130536  | 0.120192  | 0.123252  | 0.123252  | 0.120484  | 0.116987  |
| 0.11451   | 0.132284  | 0.112034  | 0.11859   | 0.11655   | 0.114948  | 0.112617  |
| 0.0996503 | 0.115967  | 0.0968823 | 0.0981935 | 0.099359  | 0.101544  | 0.0968823 |
| 0.106789  | 0.125146  | 0.099359  | 0.100087  | 0.101836  | 0.100233  | 0.102855  |

|          |          |           |           |          |          |          |
|----------|----------|-----------|-----------|----------|----------|----------|
| 0.111305 | 0.127622 | 0.112325  | 0.111305  | 0.114802 | 0.11116  | 0.107955 |
| 0.104021 | 0.124417 | 0.0971737 | 0.109557  | 0.10373  | 0.103584 | 0.10067  |
| 0.115239 | 0.131556 | 0.109266  | 0.109411  | 0.109703 | 0.112471 | 0.108974 |
| 0.10708  | 0.128642 | 0.107809  | 0.107955  | 0.110577 | 0.110723 | 0.108392 |
| 0.117424 | 0.129662 | 0.114365  | 0.11655   | 0.115093 | 0.121649 | 0.115822 |
| 0.112179 | 0.124126 | 0.112034  | 0.102855  | 0.104895 | 0.110868 | 0.102127 |
| 0.108974 | 0.120921 | 0.106498  | 0.0979021 | 0.104604 | 0.106206 | 0.105332 |
| 0.106352 | 0.122669 | 0.104749  | 0.108683  | 0.108974 | 0.105041 | 0.10271  |
| 0.116987 | 0.129808 | 0.109848  | 0.114656  | 0.112908 | 0.117716 | 0.112762 |
| 0.111888 | 0.125    | 0.108829  | 0.106352  | 0.109557 | 0.111451 | 0.111742 |
| 0.124709 | 0.136946 | 0.121066  | 0.12296   | 0.123543 | 0.125146 | 0.118735 |
| 0.1081   | 0.121503 | 0.100087  | 0.10169   | 0.100816 | 0.107955 | 0.104458 |
| 0.119901 | 0.134761 | 0.121503  | 0.121066  | 0.125437 | 0.128497 | 0.11859  |

| <b>TDr_09_00374</b> | <b>TDr_09_00385</b> | <b>TDr_09_00644</b> | <b>TDr_09_00715</b> | <b>TDr_09_01932</b> | <b>TDr_11_00263</b> | <b>TDr_11_00276</b> |
|---------------------|---------------------|---------------------|---------------------|---------------------|---------------------|---------------------|
| 0.136946            | 0.109994            | 0.134761            | 0.116987            | 0.128788            | 0.112034            | 0.11553             |
| 0.134761            | 0.110723            | 0.127914            | 0.112762            | 0.132139            | 0.119172            | 0.114219            |
| 0.13039             | 0.106061            | 0.124126            | 0.104895            | 0.12602             | 0.116841            | 0.108392            |
| 0.140006            | 0.118007            | 0.132867            | 0.109848            | 0.128934            | 0.123252            | 0.116841            |
| 0.143794            | 0.132284            | 0.144522            | 0.125583            | 0.136218            | 0.132867            | 0.138695            |
| 0.144376            | 0.125               | 0.143357            | 0.12704             | 0.137092            | 0.127622            | 0.130828            |
| 0.127622            | 0.11553             | 0.127477            | 0.113199            | 0.114802            | 0.119318            | 0.123106            |
| 0.131702            | 0.114073            | 0.128059            | 0.109411            | 0.123834            | 0.118153            | 0.108829            |
| 0.12398             | 0.110431            | 0.119172            | 0.104312            | 0.116113            | 0.102273            | 0.103438            |
| 0.132576            | 0.11116             | 0.128351            | 0.107955            | 0.120921            | 0.104167            | 0.0980478           |
| 0.129808            | 0.111305            | 0.129079            | 0.115385            | 0.123689            | 0.118298            | 0.109266            |
| 0.125583            | 0.105332            | 0.118735            | 0.102418            | 0.115385            | 0.11961             | 0.108829            |
| 0.127914            | 0.112034            | 0.128642            | 0.111451            | 0.121795            | 0.105915            | 0.106789            |
| 0.153992            | 0.136364            | 0.152972            | 0.132284            | 0.148164            | 0.135781            | 0.125874            |
| 0.140443            | 0.125146            | 0.140297            | 0.125437            | 0.137529            | 0.126603            | 0.118444            |
| 0.117861            | 0.109848            | 0.11859             | 0.108683            | 0.109703            | 0.104021            | 0.11655             |
| 0.122669            | 0.108829            | 0.128351            | 0.104167            | 0.114219            | 0.116696            | 0.106206            |
| 0.161568            | 0.146853            | 0.152681            | 0.136364            | 0.146416            | 0.144522            | 0.143648            |
| 0.125728            | 0.106643            | 0.118881            | 0.102273            | 0.120775            | 0.115676            | 0.108392            |
| 0.216055            | 0.199883            | 0.21183             | 0.201632            | 0.215181            | 0.196678            | 0.198718            |
| 0.136946            | 0.120192            | 0.135635            | 0.11757             | 0.130245            | 0.130682            | 0.122815            |
| 0.130973            | 0.116841            | 0.130245            | 0.111888            | 0.126311            | 0.132576            | 0.119172            |
| 0.119755            | 0.108537            | 0.120192            | 0.102418            | 0.113054            | 0.105041            | 0.103875            |
| 0.111451            | 0.101399            | 0.11859             | 0.0990676           | 0.105041            | 0.117424            | 0.126457            |
| 0.125874            | 0.10708             | 0.121649            | 0.100379            | 0.115676            | 0.107663            | 0.103875            |
| 0.13549             | 0.127768            | 0.134761            | 0.121649            | 0.130536            | 0.130682            | 0.12602             |
| 0.127914            | 0.123106            | 0.132139            | 0.112325            | 0.119172            | 0.120192            | 0.120775            |
| 0.118298            | 0.0954254           | 0.120484            | 0.0977564           | 0.106061            | 0.11553             | 0.118735            |
| 0.133159            | 0.121066            | 0.131265            | 0.116113            | 0.113345            | 0.127185            | 0.131265            |
| 0.13141             | 0.120192            | 0.129516            | 0.110868            | 0.122669            | 0.117861            | 0.116987            |
| 0.132139            | 0.114802            | 0.131119            | 0.117716            | 0.120484            | 0.118007            | 0.119755            |
| 0.122669            | 0.112617            | 0.120484            | 0.107372            | 0.113345            | 0.116113            | 0.123397            |
| 0.126748            | 0.104458            | 0.121941            | 0.100379            | 0.113636            | 0.104167            | 0.10708             |
| 0.133741            | 0.112617            | 0.129225            | 0.106498            | 0.125583            | 0.121066            | 0.121066            |
| 0.12398             | 0.117133            | 0.124126            | 0.112471            | 0.114656            | 0.115093            | 0.112179            |
| 0.128788            | 0.117279            | 0.128351            | 0.11961             | 0.120047            | 0.123106            | 0.117861            |
| 0.141463            | 0.128788            | 0.142483            | 0.128205            | 0.131847            | 0.130536            | 0.126457            |
| 0.136655            | 0.118735            | 0.132721            | 0.110868            | 0.125583            | 0.125437            | 0.110286            |
| 0.113636            | 0.0992133           | 0.111451            | 0.0869755           | 0.103438            | 0.111742            | 0.10912             |
| 0.117716            | 0.105041            | 0.118735            | 0.100087            | 0.101399            | 0.116696            | 0.120484            |
| 0.114219            | 0.0995047           | 0.114948            | 0.0930944           | 0.103438            | 0.112908            | 0.106498            |
| 0.127914            | 0.127768            | 0.131847            | 0.122523            | 0.117424            | 0.13243             | 0.134761            |

|           |           |          |           |           |          |           |
|-----------|-----------|----------|-----------|-----------|----------|-----------|
| 0.128497  | 0.129225  | 0.129516 | 0.124272  | 0.125583  | 0.125728 | 0.136218  |
| 0.11757   | 0.0984848 | 0.11859  | 0.102273  | 0.106498  | 0.116841 | 0.106061  |
| 0.119318  | 0.103438  | 0.119172 | 0.0990676 | 0.109411  | 0.107226 | 0.097028  |
| 0.126166  | 0.119027  | 0.13243  | 0.116113  | 0.111305  | 0.115239 | 0.0989219 |
| 0.0984848 | 0.101253  | 0.103293 | 0.0753205 | 0.0882867 | 0.120484 | 0.119318  |
| 0.128934  | 0.124709  | 0.12704  | 0.118298  | 0.110868  | 0.126457 | 0.130245  |
| 0.116696  | 0.102855  | 0.118298 | 0.0888695 | 0.105624  | 0.11451  | 0.111014  |
| 0.120047  | 0.104167  | 0.11553  | 0.100087  | 0.10169   | 0.112325 | 0.105915  |
| 0.151369  | 0.135198  | 0.146853 | 0.137238  | 0.142045  | 0.144231 | 0.151224  |
| 0.118153  | 0.112762  | 0.11451  | 0.100524  | 0.111742  | 0.115385 | 0.131993  |
| 0.112471  | 0.101253  | 0.115239 | 0.099796  | 0.106643  | 0.109994 | 0.106206  |
| 0.134907  | 0.125437  | 0.13243  | 0.121649  | 0.131993  | 0.11961  | 0.116404  |
| 0.125     | 0.109411  | 0.122232 | 0.10708   | 0.119172  | 0.117861 | 0.111451  |
| 0.0958625 | 0.130099  | 0.101836 | 0.0910548 | 0.0958625 | 0.131265 | 0.143794  |
| 0.117861  | 0.108974  | 0.117133 | 0.1081    | 0.108537  | 0.11859  | 0.122378  |
| 0.122815  | 0.102855  | 0.119755 | 0.103147  | 0.10912   | 0.117424 | 0.111888  |
| 0.119027  | 0.107226  | 0.115676 | 0.0987762 | 0.107372  | 0.118881 | 0.112762  |
| 0.122669  | 0.11757   | 0.121066 | 0.108246  | 0.112471  | 0.116696 | 0.116404  |
| 0.124709  | 0.120484  | 0.125728 | 0.118153  | 0.117133  | 0.125146 | 0.13243   |
| 0.133741  | 0.129808  | 0.130099 | 0.116113  | 0.112179  | 0.127185 | 0.137675  |
| 0.158945  | 0.15472   | 0.157051 | 0.150932  | 0.158362  | 0.152389 | 0.162005  |
| 0.118444  | 0.10373   | 0.120629 | 0.0888695 | 0.105915  | 0.115967 | 0.113928  |
| 0.118444  | 0.102855  | 0.115385 | 0.0894522 | 0.103584  | 0.113054 | 0.104604  |
| 0.112325  | 0.10169   | 0.112471 | 0.0973193 | 0.105624  | 0.115385 | 0.112762  |
| 0.146853  | 0.122232  | 0.150495 | 0.135635  | 0.137238  | 0.133304 | 0.137383  |
| 0.118881  | 0.0977564 | 0.119901 | 0.090472  | 0.104312  | 0.112325 | 0.111451  |
| 0.100379  | 0.118298  | 0.106643 | 0.106352  | 0.105332  | 0.119172 | 0.130828  |
| 0.121941  | 0.118007  | 0.125874 | 0.115385  | 0.108829  | 0.116841 | 0.11655   |
| 0.121212  | 0.0986305 | 0.122523 | 0.0971737 | 0.109848  | 0.11757  | 0.114365  |
| 0.149184  | 0.133304  | 0.156031 | 0.142628  | 0.1419    | 0.137966 | 0.14292   |
| 0.120047  | 0.108246  | 0.127185 | 0.102127  | 0.105478  | 0.115239 | 0.117861  |
| 0.133596  | 0.11859   | 0.124417 | 0.117424  | 0.123106  | 0.131119 | 0.134324  |
| 0.124126  | 0.110286  | 0.112908 | 0.104458  | 0.117716  | 0.126894 | 0.13447   |
| 0.126311  | 0.110723  | 0.122086 | 0.105186  | 0.116404  | 0.116259 | 0.112179  |
| 0.112617  | 0.101399  | 0.122378 | 0.0926573 | 0.0954254 | 0.111597 | 0.106935  |
| 0.119901  | 0.104895  | 0.118298 | 0.0920746 | 0.109994  | 0.113928 | 0.113054  |
| 0.129808  | 0.11859   | 0.124126 | 0.115093  | 0.114948  | 0.126166 | 0.132576  |
| 0.114219  | 0.0992133 | 0.11553  | 0.0968823 | 0.108683  | 0.11116  | 0.109411  |
| 0.133887  | 0.128497  | 0.123543 | 0.116259  | 0.129225  | 0.134907 | 0.131119  |
| 0.119901  | 0.111014  | 0.11859  | 0.0996503 | 0.106498  | 0.12296  | 0.121795  |
| 0.109411  | 0.102855  | 0.111014 | 0.0973193 | 0.10271   | 0.112471 | 0.121795  |
| 0.117861  | 0.10373   | 0.123252 | 0.0976107 | 0.105041  | 0.114802 | 0.113636  |
| 0.121941  | 0.105769  | 0.119172 | 0.0981935 | 0.109411  | 0.115676 | 0.118298  |
| 0.11757   | 0.102273  | 0.11655  | 0.0976107 | 0.105332  | 0.11451  | 0.115385  |

|          |           |          |           |           |          |           |
|----------|-----------|----------|-----------|-----------|----------|-----------|
| 0.109703 | 0.0938228 | 0.118298 | 0.0938228 | 0.095134  | 0.107809 | 0.109848  |
| 0.129662 | 0.12398   | 0.13039  | 0.118153  | 0.113345  | 0.122232 | 0.13243   |
| 0.125583 | 0.108537  | 0.126311 | 0.0995047 | 0.112179  | 0.116113 | 0.103001  |
| 0.126603 | 0.108392  | 0.12704  | 0.10373   | 0.109703  | 0.109557 | 0.101399  |
| 0.130682 | 0.12296   | 0.137238 | 0.117716  | 0.122523  | 0.130828 | 0.123252  |
| 0.136218 | 0.119464  | 0.137821 | 0.119464  | 0.123106  | 0.124709 | 0.125291  |
| 0.124272 | 0.12704   | 0.129079 | 0.121212  | 0.122815  | 0.125583 | 0.127331  |
| 0.131993 | 0.135927  | 0.13243  | 0.128351  | 0.131993  | 0.135635 | 0.134761  |
| 0.128934 | 0.11451   | 0.129371 | 0.108683  | 0.121941  | 0.121503 | 0.116841  |
| 0.18954  | 0.181527  | 0.191725 | 0.179487  | 0.188957  | 0.17803  | 0.180361  |
| 0.126748 | 0.108829  | 0.125437 | 0.105332  | 0.115385  | 0.124563 | 0.110868  |
| 0.13039  | 0.137238  | 0.127331 | 0.126457  | 0.130099  | 0.134907 | 0.129079  |
| 0.13039  | 0.127914  | 0.127331 | 0.122669  | 0.124272  | 0.12704  | 0.11859   |
| 0.141026 | 0.13039   | 0.144376 | 0.125728  | 0.13141   | 0.136218 | 0.133304  |
| 0.120192 | 0.113636  | 0.121795 | 0.101981  | 0.112325  | 0.115093 | 0.104312  |
| 0.12602  | 0.130536  | 0.129953 | 0.120629  | 0.122232  | 0.130245 | 0.126457  |
| 0.125146 | 0.115967  | 0.122086 | 0.104895  | 0.117279  | 0.120921 | 0.110723  |
| 0.121795 | 0.121941  | 0.129225 | 0.114365  | 0.115676  | 0.118444 | 0.121649  |
| 0.125874 | 0.109703  | 0.123689 | 0.104167  | 0.117133  | 0.113782 | 0.107955  |
| 0.127331 | 0.126894  | 0.128059 | 0.116987  | 0.120629  | 0.129516 | 0.131847  |
| 0.117716 | 0.0980478 | 0.11757  | 0.0992133 | 0.106061  | 0.109703 | 0.0907634 |
| 0.13243  | 0.129662  | 0.13986  | 0.125874  | 0.129808  | 0.125    | 0.132284  |
| 0.127622 | 0.112325  | 0.130682 | 0.110577  | 0.11451   | 0.118444 | 0.109994  |
| 0.11961  | 0.115676  | 0.120629 | 0.109848  | 0.107955  | 0.121212 | 0.125583  |
| 0.132576 | 0.123397  | 0.142045 | 0.12398   | 0.123834  | 0.128642 | 0.123106  |
| 0.120921 | 0.10912   | 0.123106 | 0.100379  | 0.106935  | 0.119318 | 0.112034  |
| 0.145979 | 0.132139  | 0.150204 | 0.138258  | 0.142191  | 0.136218 | 0.137092  |
| 0.124854 | 0.113636  | 0.126748 | 0.106935  | 0.112325  | 0.124709 | 0.111888  |
| 0.122815 | 0.112471  | 0.123252 | 0.105769  | 0.116113  | 0.116259 | 0.106935  |
| 0.106061 | 0.109411  | 0.11116  | 0.0995047 | 0.0967366 | 0.118153 | 0.102418  |
| 0.148019 | 0.131265  | 0.148747 | 0.133304  | 0.140152  | 0.141463 | 0.132139  |
| 0.112471 | 0.112034  | 0.122232 | 0.104167  | 0.113054  | 0.116987 | 0.124272  |
| 0.117424 | 0.110577  | 0.121941 | 0.103293  | 0.112471  | 0.115239 | 0.0989219 |
| 0.118007 | 0.114365  | 0.116696 | 0.10271   | 0.114802  | 0.114365 | 0.105915  |
| 0.133304 | 0.112179  | 0.132284 | 0.113928  | 0.121358  | 0.120921 | 0.111888  |
| 0.137529 | 0.126311  | 0.132139 | 0.11757   | 0.123252  | 0.11553  | 0.120192  |
| 0.127477 | 0.109266  | 0.129079 | 0.111888  | 0.116404  | 0.122378 | 0.116259  |
| 0.114219 | 0.10271   | 0.118153 | 0.0957168 | 0.101399  | 0.10708  | 0.0989219 |
| 0.120338 | 0.103584  | 0.118153 | 0.097465  | 0.108392  | 0.109994 | 0.103584  |
| 0.120775 | 0.106352  | 0.124126 | 0.100524  | 0.103293  | 0.106352 | 0.101107  |
| 0.124854 | 0.120047  | 0.127914 | 0.111014  | 0.122232  | 0.120921 | 0.105769  |
| 0.127331 | 0.127185  | 0.129516 | 0.113782  | 0.119755  | 0.119318 | 0.126311  |
| 0.121358 | 0.106352  | 0.124417 | 0.103147  | 0.110577  | 0.111014 | 0.109557  |
| 0.116259 | 0.103584  | 0.116696 | 0.0939685 | 0.105769  | 0.105624 | 0.0989219 |



|           |           |           |           |           |          |           |
|-----------|-----------|-----------|-----------|-----------|----------|-----------|
| 0.12296   | 0.121358  | 0.124563  | 0.107663  | 0.112762  | 0.116696 | 0.114656  |
| 0.122232  | 0.104895  | 0.124126  | 0.0964452 | 0.105915  | 0.109848 | 0.101107  |
| 0.134761  | 0.109557  | 0.137821  | 0.118298  | 0.12602   | 0.120921 | 0.118007  |
| 0.142045  | 0.121212  | 0.143065  | 0.127331  | 0.131265  | 0.134907 | 0.134033  |
| 0.128934  | 0.111014  | 0.127622  | 0.101399  | 0.110286  | 0.110723 | 0.106935  |
| 0.122086  | 0.110868  | 0.123397  | 0.10271   | 0.109557  | 0.113491 | 0.108829  |
| 0.119172  | 0.104458  | 0.121358  | 0.100962  | 0.105769  | 0.108829 | 0.107372  |
| 0.117424  | 0.103293  | 0.11757   | 0.0992133 | 0.111305  | 0.106789 | 0.0977564 |
| 0.136072  | 0.115239  | 0.128934  | 0.111451  | 0.120921  | 0.117279 | 0.122523  |
| 0.119755  | 0.100962  | 0.120775  | 0.0948427 | 0.108974  | 0.105332 | 0.097465  |
| 0.13884   | 0.133741  | 0.135781  | 0.127622  | 0.13243   | 0.129953 | 0.136364  |
| 0.140443  | 0.129225  | 0.141754  | 0.126311  | 0.13141   | 0.125728 | 0.120775  |
| 0.131119  | 0.125437  | 0.136509  | 0.118444  | 0.120338  | 0.118444 | 0.106789  |
| 0.13039   | 0.109557  | 0.131702  | 0.111888  | 0.121649  | 0.114219 | 0.102564  |
| 0.133013  | 0.108683  | 0.129953  | 0.104604  | 0.11961   | 0.118881 | 0.108392  |
| 0.117716  | 0.107663  | 0.122232  | 0.102418  | 0.109848  | 0.113199 | 0.10271   |
| 0.112325  | 0.0955711 | 0.113636  | 0.0879953 | 0.0992133 | 0.11014  | 0.107517  |
| 0.114948  | 0.0935315 | 0.113636  | 0.0888695 | 0.109994  | 0.109557 | 0.105186  |
| 0.113199  | 0.107226  | 0.108974  | 0.0949883 | 0.107955  | 0.11451  | 0.109848  |
| 0.0977564 | 0.0999417 | 0.0976107 | 0.0868298 | 0.0890152 | 0.114219 | 0.129079  |
| 0.12296   | 0.113782  | 0.124272  | 0.109994  | 0.115676  | 0.120484 | 0.108537  |
| 0.14088   | 0.127914  | 0.138986  | 0.120338  | 0.137092  | 0.127622 | 0.120629  |
| 0.138695  | 0.136509  | 0.141171  | 0.125728  | 0.130828  | 0.136218 | 0.133304  |
| 0.204545  | 0.191871  | 0.206148  | 0.188083  | 0.203671  | 0.197407 | 0.186917  |
| 0.245192  | 0.236305  | 0.242133  | 0.231935  | 0.246649  | 0.238928 | 0.233392  |
| 0.115676  | 0.114656  | 0.11553   | 0.0936772 | 0.111597  | 0.117279 | 0.111742  |
| 0.0933858 | 0.102855  | 0.094697  | 0.0719697 | 0.0817308 | 0.109266 | 0.109557  |
| 0.104167  | 0.0976107 | 0.101981  | 0.0824592 | 0.0980478 | 0.110431 | 0.104021  |
| 0.090472  | 0.104312  | 0.0944056 | 0.0754662 | 0.0960082 | 0.115093 | 0.111305  |
| 0.143794  | 0.12704   | 0.138986  | 0.126748  | 0.137675  | 0.128497 | 0.122086  |
| 0.0933858 | 0.106061  | 0.0935315 | 0.0804196 | 0.0855186 | 0.118298 | 0.119464  |
| 0.105769  | 0.130682  | 0.105041  | 0.107955  | 0.104604  | 0.135052 | 0.14933   |
| 0.0968823 | 0.0987762 | 0.0973193 | 0.076049  | 0.0855186 | 0.119755 | 0.120047  |
| 0.0962995 | 0.109848  | 0.090035  | 0.0812937 | 0.0843531 | 0.125874 | 0.129371  |
| 0.104895  | 0.116696  | 0.10708   | 0.104167  | 0.104021  | 0.11553  | 0.126311  |
| 0.092366  | 0.121066  | 0.0965909 | 0.095134  | 0.0903263 | 0.125437 | 0.128351  |
| 0.133741  | 0.127185  | 0.125146  | 0.11961   | 0.123252  | 0.128642 | 0.133596  |
| 0.0979021 | 0.0986305 | 0.102418  | 0.0866841 | 0.0932401 | 0.11961  | 0.109703  |
| 0.100233  | 0.0989219 | 0.0995047 | 0.0814394 | 0.0909091 | 0.115239 | 0.106206  |
| 0.0960082 | 0.108683  | 0.100816  | 0.0868298 | 0.0925117 | 0.120047 | 0.1081    |
| 0.0913462 | 0.0973193 | 0.0949883 | 0.0387529 | 0.0808566 | 0.113928 | 0.112471  |
| 0.100087  | 0.0984848 | 0.101107  | 0.07838   | 0.0922203 | 0.113054 | 0.11014   |
| 0.097028  | 0.10708   | 0.101253  | 0.0721154 | 0.0882867 | 0.121066 | 0.116404  |
| 0.0866841 | 0.114802  | 0.0999417 | 0.087704  | 0.0898893 | 0.129079 | 0.127914  |

|           |           |           |           |           |          |           |
|-----------|-----------|-----------|-----------|-----------|----------|-----------|
| 0.0849359 | 0.117424  | 0.107517  | 0.0909091 | 0.0898893 | 0.12704  | 0.138695  |
| 0.0967366 | 0.103584  | 0.108246  | 0.0750291 | 0.0874126 | 0.118735 | 0.116113  |
| 0.0942599 | 0.0996503 | 0.101107  | 0.0818765 | 0.0942599 | 0.113928 | 0.113054  |
| 0.103001  | 0.115385  | 0.103147  | 0.0833333 | 0.097465  | 0.128788 | 0.129662  |
| 0.0910548 | 0.0987762 | 0.0967366 | 0.076049  | 0.0872669 | 0.115967 | 0.109266  |
| 0.0935315 | 0.123689  | 0.0945513 | 0.104458  | 0.101981  | 0.140297 | 0.138258  |
| 0.144522  | 0.135052  | 0.145542  | 0.129516  | 0.138695  | 0.128351 | 0.0619172 |
| 0.111451  | 0.123252  | 0.111597  | 0.105478  | 0.114948  | 0.125874 | 0.13549   |
| 0.099796  | 0.101107  | 0.101107  | 0.0751748 | 0.0863928 | 0.115967 | 0.106352  |
| 0.0903263 | 0.0939685 | 0.0901807 | 0.0700758 | 0.0856643 | 0.114656 | 0.109703  |
| 0.103293  | 0.108683  | 0.107809  | 0.0839161 | 0.08581   | 0.126166 | 0.125291  |
| 0.0833333 | 0.109703  | 0.0887238 | 0.081148  | 0.0891608 | 0.118153 | 0.12398   |
| 0.0955711 | 0.111742  | 0.100087  | 0.090472  | 0.085373  | 0.128351 | 0.131847  |
| 0.097465  | 0.106061  | 0.0941142 | 0.0792541 | 0.083479  | 0.120921 | 0.121795  |
| 0.0984848 | 0.107372  | 0.0948427 | 0.0843531 | 0.0932401 | 0.120484 | 0.117279  |
| 0.0879953 | 0.108537  | 0.097465  | 0.0898893 | 0.0842075 | 0.11961  | 0.125437  |
| 0.0941142 | 0.114073  | 0.10067   | 0.0945513 | 0.0882867 | 0.128059 | 0.127477  |
| 0.0981935 | 0.112617  | 0.101836  | 0.0925117 | 0.0914918 | 0.123397 | 0.128934  |
| 0.0828963 | 0.123252  | 0.0979021 | 0.0949883 | 0.0893065 | 0.130828 | 0.132576  |
| 0.118007  | 0.0992133 | 0.129225  | 0.112908  | 0.112179  | 0.117279 | 0.133013  |
| 0.0967366 | 0.100962  | 0.099796  | 0.0814394 | 0.0844988 | 0.117861 | 0.115822  |
| 0.0967366 | 0.110286  | 0.105624  | 0.0922203 | 0.0964452 | 0.127768 | 0.131556  |
| 0.0971737 | 0.0999417 | 0.101981  | 0.0804196 | 0.0930944 | 0.112471 | 0.1081    |
| 0.11859   | 0.100962  | 0.114948  | 0.0983392 | 0.111888  | 0.114073 | 0.10912   |
| 0.0938228 | 0.0992133 | 0.0983392 | 0.0855186 | 0.0906177 | 0.118444 | 0.109703  |
| 0.0989219 | 0.101981  | 0.0964452 | 0.080711  | 0.0930944 | 0.11655  | 0.110723  |
| 0.0933858 | 0.0990676 | 0.0967366 | 0.0670163 | 0.0866841 | 0.115093 | 0.111305  |
| 0         | 0.119901  | 0.097465  | 0.0965909 | 0.083042  | 0.126603 | 0.131265  |
| 0.119901  | 0         | 0.121795  | 0.0990676 | 0.109994  | 0.116841 | 0.117424  |
| 0.097465  | 0.121795  | 0         | 0.0967366 | 0.100962  | 0.13141  | 0.133159  |
| 0.0965909 | 0.0990676 | 0.0967366 | 0         | 0.081148  | 0.116259 | 0.116259  |
| 0.083042  | 0.109994  | 0.100962  | 0.081148  | 0         | 0.117279 | 0.127185  |
| 0.126603  | 0.116841  | 0.13141   | 0.116259  | 0.117279  | 0        | 0.119755  |
| 0.131265  | 0.117424  | 0.133159  | 0.116259  | 0.127185  | 0.119755 | 0         |
| 0.118881  | 0.115822  | 0.12398   | 0.103293  | 0.108683  | 0.114365 | 0.113782  |
| 0.130099  | 0.113345  | 0.125583  | 0.112471  | 0.121941  | 0.118298 | 0.103438  |
| 0.130245  | 0.114948  | 0.132721  | 0.114948  | 0.122669  | 0.11757  | 0.0968823 |
| 0.127331  | 0.115239  | 0.128934  | 0.103875  | 0.117716  | 0.11757  | 0.108829  |
| 0.147145  | 0.133596  | 0.14729   | 0.122232  | 0.135781  | 0.126311 | 0.122232  |
| 0.139132  | 0.138112  | 0.13141   | 0.128205  | 0.128642  | 0.128788 | 0.135781  |
| 0.127768  | 0.107517  | 0.124126  | 0.103147  | 0.116113  | 0.110431 | 0.0981935 |
| 0.138403  | 0.13039   | 0.133304  | 0.124854  | 0.132576  | 0.127477 | 0.121941  |
| 0.137966  | 0.12704   | 0.138112  | 0.11859   | 0.127768  | 0.11655  | 0.110723  |
| 0.137383  | 0.130245  | 0.13141   | 0.120921  | 0.133887  | 0.128788 | 0.118881  |

|          |          |          |          |          |          |           |
|----------|----------|----------|----------|----------|----------|-----------|
| 0.128934 | 0.121212 | 0.125874 | 0.11451  | 0.125437 | 0.120338 | 0.106935  |
| 0.13884  | 0.11859  | 0.135198 | 0.115967 | 0.128059 | 0.118881 | 0.107226  |
| 0.140443 | 0.127768 | 0.139423 | 0.121941 | 0.129371 | 0.112617 | 0.119027  |
| 0.13243  | 0.125583 | 0.138112 | 0.117133 | 0.132139 | 0.130536 | 0.11451   |
| 0.142628 | 0.136364 | 0.142483 | 0.130245 | 0.14292  | 0.135198 | 0.125583  |
| 0.140297 | 0.124709 | 0.1419   | 0.121503 | 0.131265 | 0.115967 | 0.1081    |
| 0.132139 | 0.117716 | 0.126166 | 0.107809 | 0.12398  | 0.117133 | 0.108392  |
| 0.135198 | 0.13039  | 0.133887 | 0.119027 | 0.123252 | 0.132721 | 0.128934  |
| 0.145542 | 0.132576 | 0.140152 | 0.128205 | 0.135052 | 0.120629 | 0.125583  |
| 0.125437 | 0.109557 | 0.125874 | 0.097028 | 0.118735 | 0.120629 | 0.104604  |
| 0.231061 | 0.216638 | 0.227418 | 0.214307 | 0.227564 | 0.222174 | 0.213432  |
| 0.13549  | 0.122815 | 0.133596 | 0.116696 | 0.127914 | 0.124272 | 0.112617  |
| 0.132284 | 0.113782 | 0.135052 | 0.110286 | 0.119755 | 0.113199 | 0.0992133 |
| 0.138549 | 0.135198 | 0.132576 | 0.132867 | 0.136801 | 0.134615 | 0.124417  |
| 0.135344 | 0.112762 | 0.133741 | 0.111014 | 0.122523 | 0.117424 | 0.102855  |
| 0.147873 | 0.133741 | 0.142774 | 0.126748 | 0.138549 | 0.123252 | 0.121795  |
| 0.129808 | 0.117133 | 0.126748 | 0.111305 | 0.120484 | 0.125583 | 0.109848  |
| 0.133741 | 0.124272 | 0.130099 | 0.111451 | 0.124417 | 0.118153 | 0.110868  |
| 0.138695 | 0.123106 | 0.137092 | 0.117861 | 0.129371 | 0.119318 | 0.114656  |
| 0.137092 | 0.126748 | 0.132284 | 0.124709 | 0.133013 | 0.124709 | 0.117424  |
| 0.137529 | 0.128934 | 0.136218 | 0.125146 | 0.127622 | 0.129808 | 0.13039   |
| 0.130099 | 0.126748 | 0.131702 | 0.117424 | 0.124272 | 0.128788 | 0.120338  |
| 0.137675 | 0.130245 | 0.140443 | 0.117716 | 0.13243  | 0.126166 | 0.116841  |
| 0.125728 | 0.117424 | 0.13141  | 0.113928 | 0.114073 | 0.114219 | 0.101107  |
| 0.131847 | 0.119172 | 0.13141  | 0.107517 | 0.125728 | 0.122086 | 0.107517  |
| 0.1419   | 0.133887 | 0.138258 | 0.131265 | 0.141317 | 0.129516 | 0.118444  |
| 0.127477 | 0.119464 | 0.124709 | 0.112471 | 0.123106 | 0.119755 | 0.106643  |
| 0.131847 | 0.120629 | 0.132867 | 0.118298 | 0.123397 | 0.130536 | 0.133159  |
| 0.149767 | 0.123397 | 0.156031 | 0.135344 | 0.141608 | 0.127477 | 0.121358  |
| 0.128205 | 0.121066 | 0.130099 | 0.119027 | 0.120338 | 0.113199 | 0.111742  |
| 0.137238 | 0.131265 | 0.138549 | 0.122523 | 0.129079 | 0.116404 | 0.112325  |
| 0.138549 | 0.116259 | 0.143065 | 0.122669 | 0.128642 | 0.126748 | 0.121795  |
| 0.139277 | 0.120484 | 0.137383 | 0.116113 | 0.132867 | 0.125728 | 0.127477  |
| 0.137821 | 0.113782 | 0.142337 | 0.118444 | 0.129953 | 0.130682 | 0.114073  |
| 0.148019 | 0.126894 | 0.153409 | 0.134178 | 0.142774 | 0.131265 | 0.126603  |
| 0.123689 | 0.107809 | 0.126166 | 0.104021 | 0.114948 | 0.107226 | 0.0836247 |
| 0.142774 | 0.130973 | 0.143211 | 0.126311 | 0.130828 | 0.126894 | 0.118735  |
| 0.152826 | 0.127914 | 0.155886 | 0.142191 | 0.149038 | 0.133159 | 0.132284  |
| 0.125437 | 0.11655  | 0.123252 | 0.107517 | 0.112617 | 0.116259 | 0.117133  |
| 0.128351 | 0.101399 | 0.127914 | 0.109266 | 0.116404 | 0.123543 | 0.120629  |
| 0.145979 | 0.139714 | 0.133304 | 0.131265 | 0.134615 | 0.140006 | 0.138258  |
| 0.122378 | 0.108246 | 0.121941 | 0.103875 | 0.11014  | 0.119901 | 0.12602   |
| 0.137383 | 0.132576 | 0.140152 | 0.122086 | 0.129808 | 0.127914 | 0.125583  |
| 0.139277 | 0.120192 | 0.137966 | 0.118444 | 0.132867 | 0.121066 | 0.114073  |

|           |          |           |           |           |          |           |
|-----------|----------|-----------|-----------|-----------|----------|-----------|
| 0.130682  | 0.124126 | 0.130828  | 0.115676  | 0.128642  | 0.12704  | 0.119464  |
| 0.122669  | 0.120775 | 0.13039   | 0.110577  | 0.121212  | 0.115822 | 0.116404  |
| 0.130099  | 0.121795 | 0.13345   | 0.114219  | 0.119901  | 0.111305 | 0.0981935 |
| 0.129079  | 0.121358 | 0.120775  | 0.121941  | 0.121795  | 0.127185 | 0.120484  |
| 0.138986  | 0.130099 | 0.137966  | 0.121358  | 0.131119  | 0.12602  | 0.122232  |
| 0.128497  | 0.127185 | 0.123689  | 0.118153  | 0.129662  | 0.135344 | 0.135052  |
| 0.131993  | 0.134178 | 0.135344  | 0.119901  | 0.125874  | 0.13243  | 0.130973  |
| 0.130245  | 0.117861 | 0.13447   | 0.120192  | 0.125874  | 0.12398  | 0.122815  |
| 0.141317  | 0.137383 | 0.14088   | 0.134761  | 0.141317  | 0.133304 | 0.138258  |
| 0.132867  | 0.115822 | 0.129225  | 0.116404  | 0.121212  | 0.116404 | 0.10271   |
| 0.117716  | 0.105624 | 0.110577  | 0.0977564 | 0.113928  | 0.120192 | 0.118153  |
| 0.136072  | 0.133013 | 0.138258  | 0.118735  | 0.125874  | 0.127185 | 0.128934  |
| 0.131702  | 0.117279 | 0.128059  | 0.109703  | 0.114802  | 0.112034 | 0.110286  |
| 0.152826  | 0.128205 | 0.153846  | 0.133159  | 0.138549  | 0.137529 | 0.134033  |
| 0.15778   | 0.137821 | 0.158508  | 0.146562  | 0.148456  | 0.145396 | 0.149767  |
| 0.0901807 | 0.108392 | 0.0856643 | 0.090035  | 0.095134  | 0.128497 | 0.13345   |
| 0.0958625 | 0.106789 | 0.100962  | 0.083479  | 0.0917832 | 0.119318 | 0.120484  |
| 0.138258  | 0.123834 | 0.133159  | 0.119172  | 0.13039   | 0.131119 | 0.129371  |
| 0.143648  | 0.128934 | 0.140297  | 0.121358  | 0.135198  | 0.127768 | 0.119027  |
| 0.108683  | 0.109994 | 0.108829  | 0.0820221 | 0.0874126 | 0.126603 | 0.130099  |
| 0.13549   | 0.135344 | 0.135344  | 0.126894  | 0.131119  | 0.137383 | 0.129225  |
| 0.133159  | 0.122815 | 0.133887  | 0.122232  | 0.125     | 0.11961  | 0.129516  |
| 0.118444  | 0.111305 | 0.124417  | 0.113054  | 0.105332  | 0.113636 | 0.117716  |
| 0.142337  | 0.149767 | 0.154429  | 0.140152  | 0.14088   | 0.15472  | 0.157634  |
| 0.121066  | 0.1081   | 0.124126  | 0.106061  | 0.104749  | 0.116841 | 0.126166  |
| 0.147582  | 0.13549  | 0.142774  | 0.132576  | 0.138258  | 0.129662 | 0.119755  |
| 0.114219  | 0.110577 | 0.106498  | 0.0983392 | 0.111014  | 0.118735 | 0.120192  |
| 0.135198  | 0.123106 | 0.133596  | 0.119027  | 0.125874  | 0.126894 | 0.130973  |
| 0.131702  | 0.123689 | 0.130682  | 0.119027  | 0.125874  | 0.123689 | 0.116696  |
| 0.156031  | 0.13141  | 0.153555  | 0.137529  | 0.14729   | 0.134615 | 0.136364  |
| 0.151807  | 0.143211 | 0.146999  | 0.137966  | 0.149476  | 0.14292  | 0.144959  |
| 0.137383  | 0.122378 | 0.133159  | 0.118007  | 0.131847  | 0.129371 | 0.125291  |
| 0.150932  | 0.135927 | 0.143502  | 0.131265  | 0.14627   | 0.135635 | 0.136509  |
| 0.14933   | 0.137529 | 0.153555  | 0.135781  | 0.144668  | 0.136655 | 0.13986   |
| 0.162442  | 0.138695 | 0.158508  | 0.134324  | 0.1537    | 0.148019 | 0.137821  |
| 0.113928  | 0.113199 | 0.115239  | 0.107372  | 0.103147  | 0.115822 | 0.128642  |
| 0.150787  | 0.139277 | 0.149476  | 0.129662  | 0.142337  | 0.14627  | 0.146562  |
| 0.132721  | 0.112471 | 0.13141   | 0.11014   | 0.125437  | 0.125583 | 0.11451   |
| 0.128788  | 0.114365 | 0.129516  | 0.11553   | 0.121212  | 0.113199 | 0.113491  |
| 0.135927  | 0.118007 | 0.139277  | 0.117716  | 0.123689  | 0.117424 | 0.108974  |
| 0.133596  | 0.118298 | 0.130245  | 0.112762  | 0.128642  | 0.126748 | 0.121795  |
| 0.127914  | 0.114948 | 0.130973  | 0.112325  | 0.120629  | 0.124563 | 0.109703  |
| 0.131993  | 0.112034 | 0.127185  | 0.108537  | 0.124709  | 0.111451 | 0.111451  |
| 0.140152  | 0.120484 | 0.13447   | 0.116696  | 0.131993  | 0.11961  | 0.123106  |

|          |          |          |           |           |          |           |
|----------|----------|----------|-----------|-----------|----------|-----------|
| 0.139132 | 0.12296  | 0.140152 | 0.121795  | 0.136801  | 0.124126 | 0.114802  |
| 0.123689 | 0.105769 | 0.120338 | 0.0976107 | 0.116404  | 0.108392 | 0.1081    |
| 0.140006 | 0.125291 | 0.135198 | 0.118007  | 0.131847  | 0.128205 | 0.120338  |
| 0.133159 | 0.119318 | 0.131556 | 0.109703  | 0.126748  | 0.124854 | 0.121066  |
| 0.109848 | 0.109994 | 0.113199 | 0.104749  | 0.105186  | 0.109411 | 0.119901  |
| 0.227564 | 0.212267 | 0.221591 | 0.210519  | 0.22669   | 0.216055 | 0.211101  |
| 0.152681 | 0.142337 | 0.144085 | 0.13447   | 0.146562  | 0.141171 | 0.145542  |
| 0.140297 | 0.129662 | 0.132284 | 0.119464  | 0.134178  | 0.130245 | 0.130536  |
| 0.136072 | 0.123106 | 0.133887 | 0.11757   | 0.131993  | 0.128934 | 0.125437  |
| 0.223776 | 0.209936 | 0.220134 | 0.207605  | 0.220571  | 0.214889 | 0.205274  |
| 0.125583 | 0.110286 | 0.128351 | 0.109411  | 0.116259  | 0.11553  | 0.118444  |
| 0.130099 | 0.119464 | 0.133159 | 0.108974  | 0.120775  | 0.122378 | 0.123543  |
| 0.139132 | 0.120047 | 0.139277 | 0.112762  | 0.126603  | 0.126457 | 0.127914  |
| 0.136364 | 0.119318 | 0.137966 | 0.117861  | 0.132867  | 0.124854 | 0.11553   |
| 0.258159 | 0.249272 | 0.257139 | 0.247815  | 0.260198  | 0.251894 | 0.246066  |
| 0.142045 | 0.114219 | 0.136364 | 0.121212  | 0.130099  | 0.134033 | 0.128788  |
| 0.110577 | 0.102855 | 0.113928 | 0.0996503 | 0.102418  | 0.110723 | 0.111888  |
| 0.128059 | 0.121795 | 0.124126 | 0.110431  | 0.120484  | 0.129662 | 0.121795  |
| 0.12602  | 0.119464 | 0.122086 | 0.104604  | 0.118444  | 0.128205 | 0.121212  |
| 0.140297 | 0.122378 | 0.1419   | 0.125291  | 0.13447   | 0.126457 | 0.125291  |
| 0.142628 | 0.119464 | 0.140152 | 0.120921  | 0.137092  | 0.120921 | 0.123252  |
| 0.116113 | 0.106935 | 0.11859  | 0.102273  | 0.107372  | 0.107809 | 0.117716  |
| 0.13549  | 0.121358 | 0.131265 | 0.111451  | 0.125     | 0.128059 | 0.122232  |
| 0.140589 | 0.125583 | 0.138403 | 0.117716  | 0.133304  | 0.136655 | 0.134615  |
| 0.133887 | 0.117424 | 0.132867 | 0.113928  | 0.129808  | 0.124126 | 0.109266  |
| 0.136072 | 0.116987 | 0.132721 | 0.110868  | 0.128788  | 0.123397 | 0.11757   |
| 0.131847 | 0.114802 | 0.129953 | 0.113054  | 0.124272  | 0.1081   | 0.0999417 |
| 0.15035  | 0.143794 | 0.146707 | 0.136509  | 0.147436  | 0.141463 | 0.145251  |
| 0.139569 | 0.118444 | 0.137966 | 0.124272  | 0.128497  | 0.13243  | 0.133304  |
| 0.134033 | 0.128642 | 0.133013 | 0.114073  | 0.123834  | 0.128934 | 0.130682  |
| 0.201923 | 0.187791 | 0.200612 | 0.184295  | 0.201049  | 0.195659 | 0.184586  |
| 0.217949 | 0.200321 | 0.214598 | 0.197115  | 0.2162    | 0.207605 | 0.195659  |
| 0.141026 | 0.122232 | 0.139423 | 0.120192  | 0.132576  | 0.124854 | 0.115822  |
| 0.131702 | 0.115239 | 0.130973 | 0.11116   | 0.122378  | 0.11961  | 0.108537  |
| 0.153846 | 0.13243  | 0.141754 | 0.13447   | 0.146562  | 0.132721 | 0.135927  |
| 0.113928 | 0.106498 | 0.116696 | 0.0986305 | 0.103438  | 0.106789 | 0.116987  |
| 0.141754 | 0.115385 | 0.138695 | 0.123543  | 0.130099  | 0.131993 | 0.129662  |
| 0.128205 | 0.125437 | 0.128351 | 0.119027  | 0.122378  | 0.128934 | 0.128059  |
| 0.235723 | 0.224505 | 0.234703 | 0.221591  | 0.234557  | 0.224796 | 0.220425  |
| 0.130536 | 0.11553  | 0.126603 | 0.106498  | 0.127914  | 0.121358 | 0.112617  |
| 0.2044   | 0.199592 | 0.208042 | 0.192599  | 0.207896  | 0.199883 | 0.205128  |
| 0.111597 | 0.10271  | 0.113491 | 0.095134  | 0.0999417 | 0.111742 | 0.113782  |
| 0.129516 | 0.113345 | 0.121503 | 0.107517  | 0.11757   | 0.113636 | 0.119464  |
| 0.133741 | 0.115822 | 0.132139 | 0.108246  | 0.126748  | 0.113782 | 0.104749  |

|          |          |          |           |           |          |          |
|----------|----------|----------|-----------|-----------|----------|----------|
| 0.129371 | 0.114948 | 0.128059 | 0.110577  | 0.123834  | 0.117279 | 0.103875 |
| 0.220134 | 0.204837 | 0.219114 | 0.202797  | 0.220717  | 0.212121 | 0.20134  |
| 0.146707 | 0.133159 | 0.142483 | 0.126748  | 0.141171  | 0.138403 | 0.135781 |
| 0.125437 | 0.111597 | 0.124709 | 0.101981  | 0.111116  | 0.118007 | 0.116841 |
| 0.141754 | 0.125    | 0.136072 | 0.120629  | 0.134761  | 0.131119 | 0.128497 |
| 0.133596 | 0.120629 | 0.131702 | 0.111305  | 0.121649  | 0.110431 | 0.121795 |
| 0.136218 | 0.117133 | 0.136655 | 0.11014   | 0.128642  | 0.122669 | 0.110723 |
| 0.111305 | 0.105915 | 0.114656 | 0.0986305 | 0.100233  | 0.111742 | 0.118153 |
| 0.11655  | 0.111451 | 0.122523 | 0.105332  | 0.110431  | 0.107663 | 0.114365 |
| 0.132576 | 0.124563 | 0.133596 | 0.109703  | 0.120047  | 0.126311 | 0.126311 |
| 0.130245 | 0.118153 | 0.128059 | 0.107663  | 0.123834  | 0.123106 | 0.114073 |
| 0.119901 | 0.110723 | 0.123543 | 0.104021  | 0.105915  | 0.115676 | 0.12296  |
| 0.202797 | 0.1875   | 0.200612 | 0.183129  | 0.200758  | 0.19391  | 0.179633 |
| 0.124563 | 0.123543 | 0.12296  | 0.104604  | 0.11757   | 0.129953 | 0.124417 |
| 0.137238 | 0.126894 | 0.13447  | 0.117861  | 0.132867  | 0.128934 | 0.127477 |
| 0.124272 | 0.117133 | 0.116841 | 0.103438  | 0.123397  | 0.130828 | 0.119464 |
| 0.1419   | 0.118153 | 0.14088  | 0.123689  | 0.132576  | 0.131556 | 0.129808 |
| 0.138112 | 0.123397 | 0.129225 | 0.116404  | 0.130536  | 0.126311 | 0.125146 |
| 0.113345 | 0.112617 | 0.114365 | 0.101544  | 0.0999417 | 0.112908 | 0.121941 |
| 0.126311 | 0.108683 | 0.125583 | 0.107226  | 0.116696  | 0.109848 | 0.11451  |
| 0.110577 | 0.109266 | 0.116841 | 0.10373   | 0.103875  | 0.108392 | 0.121503 |
| 0.135198 | 0.11757  | 0.133596 | 0.112908  | 0.125291  | 0.125728 | 0.125146 |
| 0.125291 | 0.114365 | 0.123106 | 0.10271   | 0.117424  | 0.126311 | 0.116404 |
| 0.135927 | 0.120921 | 0.136946 | 0.11451   | 0.132139  | 0.125874 | 0.111597 |
| 0.13986  | 0.120484 | 0.137092 | 0.111116  | 0.129662  | 0.130973 | 0.127768 |
| 0.148456 | 0.13141  | 0.146562 | 0.122669  | 0.137092  | 0.134324 | 0.1419   |
| 0.133596 | 0.111305 | 0.131702 | 0.113636  | 0.12398   | 0.128788 | 0.122086 |
| 0.149476 | 0.139714 | 0.140297 | 0.130099  | 0.143357  | 0.137092 | 0.142337 |
| 0.135198 | 0.11553  | 0.135635 | 0.111451  | 0.127622  | 0.122232 | 0.107663 |
| 0.123543 | 0.115822 | 0.120775 | 0.105624  | 0.114802  | 0.121941 | 0.118153 |
| 0.134761 | 0.120629 | 0.13345  | 0.113636  | 0.126603  | 0.122086 | 0.122378 |
| 0.117861 | 0.113345 | 0.11859  | 0.107809  | 0.107663  | 0.112179 | 0.122378 |
| 0.203234 | 0.185023 | 0.200466 | 0.185315  | 0.196824  | 0.185897 | 0.182692 |
| 0.120921 | 0.108829 | 0.119318 | 0.0989219 | 0.109266  | 0.11553  | 0.112325 |
| 0.118298 | 0.104749 | 0.117861 | 0.0957168 | 0.11014   | 0.112325 | 0.112034 |
| 0.131702 | 0.123689 | 0.135052 | 0.109703  | 0.121795  | 0.124854 | 0.127768 |
| 0.194347 | 0.177302 | 0.192453 | 0.175262  | 0.191434  | 0.170892 | 0.172057 |
| 0.150495 | 0.125    | 0.146853 | 0.129953  | 0.139423  | 0.1419   | 0.140734 |
| 0.151661 | 0.133741 | 0.150058 | 0.139569  | 0.144376  | 0.1419   | 0.148019 |
| 0.152681 | 0.146125 | 0.146416 | 0.139714  | 0.147145  | 0.143211 | 0.146416 |
| 0.131119 | 0.10708  | 0.129225 | 0.113199  | 0.120047  | 0.127477 | 0.115239 |
| 0.140589 | 0.123834 | 0.136364 | 0.115093  | 0.133013  | 0.124417 | 0.124709 |
| 0.222902 | 0.207896 | 0.221008 | 0.204983  | 0.220571  | 0.214889 | 0.204983 |
| 0.1419   | 0.114365 | 0.136509 | 0.11553   | 0.130536  | 0.13039  | 0.126603 |

|          |          |          |           |          |           |          |
|----------|----------|----------|-----------|----------|-----------|----------|
| 0.141171 | 0.128497 | 0.136364 | 0.122669  | 0.134178 | 0.131119  | 0.130536 |
| 0.119901 | 0.109266 | 0.119464 | 0.105186  | 0.108829 | 0.114219  | 0.120047 |
| 0.186334 | 0.164918 | 0.182692 | 0.164627  | 0.180216 | 0.162879  | 0.161713 |
| 0.126894 | 0.113345 | 0.125874 | 0.106061  | 0.126603 | 0.119755  | 0.111597 |
| 0.152972 | 0.150204 | 0.151952 | 0.142045  | 0.151515 | 0.150787  | 0.156906 |
| 0.135781 | 0.119318 | 0.130973 | 0.108246  | 0.124417 | 0.116987  | 0.115822 |
| 0.202797 | 0.188957 | 0.198281 | 0.184003  | 0.200175 | 0.193619  | 0.18109  |
| 0.139277 | 0.112325 | 0.134178 | 0.118444  | 0.128497 | 0.13243   | 0.123397 |
| 0.12704  | 0.107372 | 0.128059 | 0.10271   | 0.114219 | 0.0898893 | 0.104749 |
| 0.124854 | 0.112471 | 0.126748 | 0.104021  | 0.118735 | 0.124417  | 0.113636 |
| 0.137821 | 0.116113 | 0.132139 | 0.105332  | 0.122086 | 0.124563  | 0.125146 |
| 0.132867 | 0.11961  | 0.131847 | 0.11116   | 0.123252 | 0.122523  | 0.124563 |
| 0.137529 | 0.119027 | 0.132721 | 0.116404  | 0.133159 | 0.126603  | 0.121066 |
| 0.136801 | 0.114802 | 0.134324 | 0.109848  | 0.127768 | 0.123543  | 0.107809 |
| 0.201923 | 0.186334 | 0.200612 | 0.185752  | 0.199883 | 0.195076  | 0.181964 |
| 0.139132 | 0.119755 | 0.138695 | 0.112471  | 0.129516 | 0.129371  | 0.130536 |
| 0.129953 | 0.113199 | 0.127185 | 0.113199  | 0.122669 | 0.114948  | 0.118153 |
| 0.222465 | 0.210956 | 0.220862 | 0.208333  | 0.223048 | 0.215618  | 0.203963 |
| 0.124854 | 0.121795 | 0.126457 | 0.105478  | 0.116987 | 0.132576  | 0.125874 |
| 0.134907 | 0.116404 | 0.133013 | 0.111451  | 0.127331 | 0.124854  | 0.108537 |
| 0.131702 | 0.112034 | 0.131265 | 0.107955  | 0.125583 | 0.121941  | 0.106789 |
| 0.148164 | 0.140443 | 0.140443 | 0.131119  | 0.139423 | 0.133741  | 0.141317 |
| 0.203817 | 0.186189 | 0.201049 | 0.183566  | 0.201777 | 0.19289   | 0.181818 |
| 0.112471 | 0.105624 | 0.113199 | 0.101836  | 0.104312 | 0.108829  | 0.117861 |
| 0.141608 | 0.125437 | 0.143502 | 0.119318  | 0.13345  | 0.132139  | 0.135344 |
| 0.133741 | 0.114365 | 0.13447  | 0.11116   | 0.127331 | 0.121649  | 0.107663 |
| 0.134033 | 0.111742 | 0.133596 | 0.110577  | 0.125291 | 0.118153  | 0.106789 |
| 0.13447  | 0.113928 | 0.13345  | 0.112762  | 0.128059 | 0.120921  | 0.106643 |
| 0.137529 | 0.120775 | 0.130973 | 0.108829  | 0.127914 | 0.12602   | 0.120484 |
| 0.128059 | 0.100524 | 0.124709 | 0.0981935 | 0.113199 | 0.1081    | 0.104604 |
| 0.138549 | 0.118881 | 0.141026 | 0.122086  | 0.132139 | 0.132576  | 0.128205 |
| 0.132139 | 0.131702 | 0.134615 | 0.122378  | 0.132721 | 0.130245  | 0.132284 |
| 0.136218 | 0.110723 | 0.137529 | 0.118007  | 0.128059 | 0.131993  | 0.126166 |
| 0.136072 | 0.125146 | 0.13447  | 0.116113  | 0.127331 | 0.114656  | 0.128351 |
| 0.209062 | 0.190851 | 0.206876 | 0.189394  | 0.204691 | 0.200758  | 0.185315 |
| 0.136072 | 0.114656 | 0.134178 | 0.105915  | 0.126166 | 0.127477  | 0.123689 |
| 0.143794 | 0.129953 | 0.137238 | 0.124126  | 0.135344 | 0.132867  | 0.134615 |
| 0.129662 | 0.113782 | 0.132139 | 0.109703  | 0.126457 | 0.119318  | 0.106789 |
| 0.122523 | 0.104021 | 0.119464 | 0.097028  | 0.114073 | 0.11014   | 0.104021 |
| 0.130099 | 0.114802 | 0.128205 | 0.111597  | 0.125437 | 0.12296   | 0.118007 |
| 0.111597 | 0.106498 | 0.116696 | 0.103584  | 0.104021 | 0.109411  | 0.117279 |
| 0.142483 | 0.133013 | 0.142337 | 0.125146  | 0.136946 | 0.135635  | 0.128934 |
| 0.139132 | 0.11655  | 0.134907 | 0.110431  | 0.129516 | 0.126457  | 0.123252 |
| 0.117861 | 0.105186 | 0.119755 | 0.0967366 | 0.112034 | 0.10169   | 0.110431 |

|          |          |          |           |          |           |           |
|----------|----------|----------|-----------|----------|-----------|-----------|
| 0.113636 | 0.101836 | 0.119027 | 0.0936772 | 0.107809 | 0.0965909 | 0.104167  |
| 0.132139 | 0.102564 | 0.126166 | 0.101399  | 0.118153 | 0.0888695 | 0.107517  |
| 0.113928 | 0.102418 | 0.114073 | 0.102418  | 0.103147 | 0.110868  | 0.116404  |
| 0.143211 | 0.122378 | 0.143065 | 0.12704   | 0.13447  | 0.13549   | 0.133741  |
| 0.114802 | 0.106789 | 0.119318 | 0.102127  | 0.106061 | 0.110577  | 0.116404  |
| 0.131847 | 0.117716 | 0.127914 | 0.106061  | 0.124272 | 0.123252  | 0.116841  |
| 0.110868 | 0.104312 | 0.113928 | 0.0964452 | 0.101836 | 0.107517  | 0.112762  |
| 0.13141  | 0.113199 | 0.133013 | 0.108246  | 0.123252 | 0.121941  | 0.106206  |
| 0.11961  | 0.105478 | 0.120047 | 0.097028  | 0.107372 | 0.112762  | 0.11451   |
| 0.135927 | 0.113345 | 0.134033 | 0.113636  | 0.129225 | 0.123834  | 0.108392  |
| 0.131847 | 0.108974 | 0.128788 | 0.101399  | 0.119318 | 0.122378  | 0.117716  |
| 0.135052 | 0.116841 | 0.129953 | 0.11014   | 0.127768 | 0.124126  | 0.120047  |
| 0.127477 | 0.115676 | 0.132284 | 0.105478  | 0.116113 | 0.117716  | 0.121503  |
| 0.129371 | 0.108246 | 0.126603 | 0.0983392 | 0.116841 | 0.111451  | 0.106789  |
| 0.134178 | 0.117133 | 0.129371 | 0.1081    | 0.124854 | 0.119464  | 0.109557  |
| 0.130973 | 0.117716 | 0.131993 | 0.113345  | 0.124563 | 0.127914  | 0.122086  |
| 0.136364 | 0.116987 | 0.133596 | 0.116113  | 0.129079 | 0.118153  | 0.122232  |
| 0.129516 | 0.109848 | 0.124417 | 0.1081    | 0.119318 | 0.107809  | 0.103438  |
| 0.134178 | 0.110723 | 0.130245 | 0.108392  | 0.124563 | 0.120921  | 0.106935  |
| 0.136946 | 0.120192 | 0.13039  | 0.112617  | 0.129953 | 0.12602   | 0.126603  |
| 0.113054 | 0.105332 | 0.115822 | 0.099796  | 0.10373  | 0.114073  | 0.117861  |
| 0.136946 | 0.121649 | 0.130682 | 0.111451  | 0.129371 | 0.125728  | 0.123106  |
| 0.132284 | 0.118444 | 0.131556 | 0.108246  | 0.122378 | 0.122815  | 0.121941  |
| 0.128205 | 0.10708  | 0.124854 | 0.101544  | 0.118298 | 0.116404  | 0.111742  |
| 0.135198 | 0.111742 | 0.132721 | 0.108829  | 0.125583 | 0.120192  | 0.111451  |
| 0.121358 | 0.106935 | 0.123543 | 0.0981935 | 0.105041 | 0.114802  | 0.11451   |
| 0.138112 | 0.125437 | 0.135927 | 0.117279  | 0.134907 | 0.128642  | 0.125728  |
| 0.13141  | 0.116404 | 0.129808 | 0.11553   | 0.126166 | 0.105332  | 0.125728  |
| 0.140006 | 0.111305 | 0.134324 | 0.110723  | 0.123106 | 0.115676  | 0.117716  |
| 0.205565 | 0.186772 | 0.20542  | 0.189394  | 0.204108 | 0.198718  | 0.187063  |
| 0.18109  | 0.162879 | 0.176282 | 0.162296  | 0.17905  | 0.155594  | 0.158508  |
| 0.135927 | 0.112471 | 0.136946 | 0.118298  | 0.128059 | 0.129953  | 0.125     |
| 0.123834 | 0.114656 | 0.124563 | 0.107372  | 0.118298 | 0.100962  | 0.121066  |
| 0.15472  | 0.136801 | 0.149621 | 0.142628  | 0.145979 | 0.147582  | 0.153992  |
| 0.144085 | 0.128497 | 0.140734 | 0.119755  | 0.13243  | 0.137238  | 0.135781  |
| 0.138403 | 0.118153 | 0.135635 | 0.120775  | 0.129662 | 0.122815  | 0.121941  |
| 0.136801 | 0.115676 | 0.131702 | 0.115967  | 0.132721 | 0.115676  | 0.115093  |
| 0.135344 | 0.109848 | 0.134033 | 0.111014  | 0.122232 | 0.108974  | 0.0981935 |
| 0.135052 | 0.120338 | 0.133741 | 0.117716  | 0.128642 | 0.114802  | 0.124417  |
| 0.217366 | 0.198864 | 0.214598 | 0.194784  | 0.212995 | 0.206731  | 0.192453  |
| 0.114365 | 0.109266 | 0.118298 | 0.105478  | 0.105041 | 0.111597  | 0.122378  |
| 0.128788 | 0.114073 | 0.126311 | 0.106206  | 0.121212 | 0.110286  | 0.113491  |
| 0.129079 | 0.111451 | 0.128059 | 0.105915  | 0.121503 | 0.113491  | 0.103293  |
| 0.131847 | 0.113054 | 0.129079 | 0.106061  | 0.121649 | 0.115967  | 0.118881  |



|          |          |          |           |          |          |           |
|----------|----------|----------|-----------|----------|----------|-----------|
| 0.199592 | 0.179341 | 0.197698 | 0.177885  | 0.194347 | 0.182547 | 0.175554  |
| 0.252914 | 0.245484 | 0.251894 | 0.242861  | 0.255245 | 0.247523 | 0.238199  |
| 0.138112 | 0.118735 | 0.133013 | 0.112325  | 0.130245 | 0.127477 | 0.123689  |
| 0.136072 | 0.118444 | 0.13447  | 0.114073  | 0.127914 | 0.118444 | 0.123689  |
| 0.138695 | 0.114365 | 0.139423 | 0.118444  | 0.128497 | 0.129808 | 0.126311  |
| 0.13243  | 0.116841 | 0.131993 | 0.104604  | 0.119901 | 0.120338 | 0.11655   |
| 0.111305 | 0.105624 | 0.113491 | 0.097465  | 0.102855 | 0.106789 | 0.111451  |
| 0.130973 | 0.114219 | 0.129953 | 0.105769  | 0.12602  | 0.124417 | 0.119755  |
| 0.133159 | 0.114073 | 0.130682 | 0.113782  | 0.128497 | 0.113199 | 0.109994  |
| 0.111888 | 0.10271  | 0.11553  | 0.0977564 | 0.102273 | 0.106789 | 0.113491  |
| 0.135927 | 0.115676 | 0.134324 | 0.114802  | 0.128934 | 0.113054 | 0.111305  |
| 0.133741 | 0.116113 | 0.128351 | 0.109994  | 0.121212 | 0.112617 | 0.109703  |
| 0.129225 | 0.108974 | 0.125    | 0.0996503 | 0.117279 | 0.113054 | 0.108974  |
| 0.134324 | 0.119901 | 0.131265 | 0.113782  | 0.128497 | 0.125437 | 0.121358  |
| 0.140297 | 0.124417 | 0.133741 | 0.113345  | 0.133304 | 0.126457 | 0.120629  |
| 0.118153 | 0.107226 | 0.113928 | 0.0967366 | 0.110577 | 0.112179 | 0.0999417 |
| 0.122232 | 0.126166 | 0.123834 | 0.11655   | 0.121941 | 0.123834 | 0.122086  |
| 0.137383 | 0.132867 | 0.135781 | 0.121212  | 0.12398  | 0.127914 | 0.136655  |
| 0.133741 | 0.10912  | 0.131847 | 0.109703  | 0.123834 | 0.120192 | 0.103875  |
| 0.123106 | 0.105186 | 0.123543 | 0.106352  | 0.115822 | 0.115676 | 0.115967  |
| 0.141754 | 0.129079 | 0.13986  | 0.125     | 0.134761 | 0.128497 | 0.121503  |
| 0.219988 | 0.206731 | 0.2213   | 0.204983  | 0.2162   | 0.206439 | 0.201777  |
| 0.125146 | 0.11014  | 0.125291 | 0.10169   | 0.11961  | 0.117133 | 0.111597  |
| 0.126457 | 0.106498 | 0.125146 | 0.0962995 | 0.115967 | 0.111451 | 0.109411  |
| 0.140152 | 0.114365 | 0.137966 | 0.10708   | 0.127622 | 0.127185 | 0.123689  |
| 0.130099 | 0.119464 | 0.125583 | 0.106352  | 0.120192 | 0.13345  | 0.12296   |
| 0.129808 | 0.111888 | 0.128497 | 0.105478  | 0.119901 | 0.113054 | 0.115676  |
| 0.216055 | 0.197552 | 0.214161 | 0.194347  | 0.21285  | 0.204254 | 0.191142  |
| 0.143648 | 0.12602  | 0.135635 | 0.11553   | 0.134615 | 0.130682 | 0.128642  |
| 0.130973 | 0.111888 | 0.131702 | 0.106935  | 0.121358 | 0.119464 | 0.104312  |
| 0.138112 | 0.109703 | 0.130973 | 0.111116  | 0.125291 | 0.114073 | 0.12398   |
| 0.128205 | 0.115822 | 0.126603 | 0.102418  | 0.115385 | 0.118735 | 0.117861  |
| 0.138986 | 0.121358 | 0.133013 | 0.113782  | 0.130245 | 0.129225 | 0.12398   |
| 0.126166 | 0.112034 | 0.125146 | 0.103875  | 0.118881 | 0.118735 | 0.110868  |
| 0.133741 | 0.112325 | 0.132139 | 0.109703  | 0.122378 | 0.111451 | 0.107372  |
| 0.125291 | 0.114073 | 0.123106 | 0.10271   | 0.120338 | 0.128642 | 0.115822  |
| 0.211976 | 0.195804 | 0.211247 | 0.196096  | 0.209645 | 0.202506 | 0.190268  |
| 0.128497 | 0.118444 | 0.12602  | 0.103293  | 0.121503 | 0.119901 | 0.116113  |
| 0.208188 | 0.193473 | 0.209499 | 0.189394  | 0.205857 | 0.198135 | 0.186772  |
| 0.20542  | 0.188666 | 0.203234 | 0.189248  | 0.206002 | 0.199446 | 0.186043  |
| 0.133741 | 0.129225 | 0.135927 | 0.114656  | 0.122086 | 0.128351 | 0.131265  |
| 0.129371 | 0.126603 | 0.126311 | 0.114656  | 0.119172 | 0.134761 | 0.132139  |
| 0.125874 | 0.109411 | 0.121066 | 0.100379  | 0.115967 | 0.104749 | 0.101253  |
| 0.128059 | 0.112179 | 0.121503 | 0.102564  | 0.11961  | 0.118007 | 0.111014  |

|          |          |          |           |           |          |          |
|----------|----------|----------|-----------|-----------|----------|----------|
| 0.135198 | 0.11961  | 0.130973 | 0.109703  | 0.129953  | 0.123106 | 0.118735 |
| 0.134324 | 0.115822 | 0.135635 | 0.113491  | 0.128497  | 0.121649 | 0.107663 |
| 0.110723 | 0.101836 | 0.113491 | 0.0945513 | 0.0981935 | 0.103293 | 0.112034 |
| 0.109557 | 0.104749 | 0.113491 | 0.0948427 | 0.100816  | 0.107372 | 0.112617 |
| 0.137383 | 0.120047 | 0.134615 | 0.115093  | 0.129808  | 0.130245 | 0.126748 |
| 0.129953 | 0.119027 | 0.13447  | 0.108246  | 0.120338  | 0.12398  | 0.122815 |
| 0.130973 | 0.11014  | 0.129079 | 0.105186  | 0.121358  | 0.118298 | 0.101107 |
| 0.138986 | 0.120775 | 0.13243  | 0.113199  | 0.129662  | 0.12602  | 0.123106 |
| 0.123397 | 0.104895 | 0.122086 | 0.100233  | 0.11116   | 0.087704 | 0.102273 |
| 0.142191 | 0.128351 | 0.133304 | 0.122523  | 0.131702  | 0.130973 | 0.13243  |
| 0.135198 | 0.112617 | 0.132721 | 0.116404  | 0.125     | 0.129808 | 0.11961  |
| 0.14729  | 0.133741 | 0.139569 | 0.125874  | 0.140006  | 0.134324 | 0.136072 |
| 0.266171 | 0.256119 | 0.263695 | 0.253497  | 0.266754  | 0.259033 | 0.252914 |
| 0.126311 | 0.122669 | 0.126166 | 0.113054  | 0.11116   | 0.120338 | 0.129953 |
| 0.131119 | 0.126603 | 0.124563 | 0.120775  | 0.118881  | 0.121066 | 0.13243  |
| 0.229749 | 0.217657 | 0.226399 | 0.214452  | 0.228584  | 0.222902 | 0.211247 |
| 0.137238 | 0.122232 | 0.13447  | 0.116696  | 0.12296   | 0.125437 | 0.128059 |
| 0.24155  | 0.227418 | 0.237908 | 0.225962  | 0.23951   | 0.235286 | 0.222174 |
| 0.118444 | 0.11451  | 0.120921 | 0.102855  | 0.105624  | 0.115676 | 0.120629 |
| 0.138986 | 0.125437 | 0.135052 | 0.123689  | 0.134324  | 0.128934 | 0.121358 |
| 0.123543 | 0.112325 | 0.121358 | 0.100087  | 0.11451   | 0.12398  | 0.115822 |
| 0.135198 | 0.122523 | 0.135344 | 0.114073  | 0.124126  | 0.125728 | 0.127768 |
| 0.217075 | 0.199155 | 0.215472 | 0.198864  | 0.214744  | 0.207022 | 0.196241 |
| 0.145979 | 0.13039  | 0.139132 | 0.121649  | 0.138695  | 0.134178 | 0.134761 |
| 0.138112 | 0.12398  | 0.133596 | 0.110577  | 0.131702  | 0.12602  | 0.122815 |
| 0.237908 | 0.22669  | 0.23514  | 0.222611  | 0.23616   | 0.229604 | 0.218531 |
| 0.113345 | 0.105332 | 0.117861 | 0.10067   | 0.103438  | 0.109703 | 0.116696 |
| 0.212267 | 0.196387 | 0.207751 | 0.194347  | 0.209353  | 0.203963 | 0.192016 |
| 0.117861 | 0.108974 | 0.120047 | 0.10169   | 0.108246  | 0.113636 | 0.116841 |
| 0.131847 | 0.116841 | 0.13345  | 0.108392  | 0.12602   | 0.124126 | 0.106935 |
| 0.13549  | 0.120192 | 0.13243  | 0.106498  | 0.12296   | 0.118735 | 0.118444 |
| 0.131993 | 0.128059 | 0.136218 | 0.114656  | 0.121795  | 0.128351 | 0.130973 |
| 0.129808 | 0.113345 | 0.127622 | 0.108683  | 0.126894  | 0.122086 | 0.115967 |
| 0.177593 | 0.152098 | 0.173368 | 0.155886  | 0.171766  | 0.15676  | 0.153263 |
| 0.133013 | 0.115676 | 0.128205 | 0.107517  | 0.123689  | 0.120629 | 0.117716 |
| 0.126603 | 0.116841 | 0.125291 | 0.10373   | 0.120484  | 0.130536 | 0.121212 |
| 0.13243  | 0.113345 | 0.137238 | 0.113928  | 0.125437  | 0.125291 | 0.11655  |
| 0.125437 | 0.123834 | 0.126748 | 0.118298  | 0.120484  | 0.127622 | 0.127914 |
| 0.207459 | 0.190414 | 0.207605 | 0.191288  | 0.206294  | 0.199155 | 0.187791 |
| 0.132139 | 0.115093 | 0.13141  | 0.108392  | 0.123689  | 0.122378 | 0.106643 |
| 0.13549  | 0.120775 | 0.137675 | 0.113782  | 0.128788  | 0.128351 | 0.12398  |
| 0.114365 | 0.1081   | 0.117716 | 0.0984848 | 0.103293  | 0.113054 | 0.118007 |
| 0.111014 | 0.106789 | 0.113491 | 0.0986305 | 0.102273  | 0.108246 | 0.11757  |
| 0.135344 | 0.119755 | 0.134615 | 0.117133  | 0.128351  | 0.122086 | 0.112179 |

|          |          |          |          |          |          |           |
|----------|----------|----------|----------|----------|----------|-----------|
| 0.262238 | 0.258013 | 0.259178 | 0.249854 | 0.265734 | 0.256847 | 0.25102   |
| 0.129516 | 0.110431 | 0.124126 | 0.104895 | 0.119318 | 0.112179 | 0.113928  |
| 0.136801 | 0.115967 | 0.136364 | 0.111014 | 0.131265 | 0.120338 | 0.115967  |
| 0.192745 | 0.177156 | 0.18852  | 0.175991 | 0.187791 | 0.166084 | 0.175991  |
| 0.197115 | 0.181235 | 0.199009 | 0.181818 | 0.19799  | 0.190851 | 0.18007   |
| 0.139423 | 0.118881 | 0.137821 | 0.111888 | 0.130682 | 0.127622 | 0.122669  |
| 0.138403 | 0.122523 | 0.134761 | 0.112617 | 0.132576 | 0.124563 | 0.121649  |
| 0.131993 | 0.11553  | 0.133304 | 0.109411 | 0.119755 | 0.122815 | 0.122523  |
| 0.154866 | 0.144522 | 0.145688 | 0.136655 | 0.147873 | 0.143065 | 0.14831   |
| 0.136509 | 0.116841 | 0.130828 | 0.111305 | 0.128059 | 0.124709 | 0.120921  |
| 0.138695 | 0.119901 | 0.137383 | 0.115822 | 0.13345  | 0.125728 | 0.124854  |
| 0.109411 | 0.1081   | 0.114802 | 0.104021 | 0.103584 | 0.109557 | 0.123252  |
| 0.135927 | 0.121503 | 0.130828 | 0.111888 | 0.127185 | 0.124126 | 0.122378  |
| 0.140152 | 0.129225 | 0.133304 | 0.120775 | 0.134907 | 0.131265 | 0.133304  |
| 0.121649 | 0.11014  | 0.126166 | 0.109266 | 0.115239 | 0.108974 | 0.11655   |
| 0.134324 | 0.124272 | 0.133596 | 0.114656 | 0.119464 | 0.123397 | 0.126311  |
| 0.140297 | 0.138986 | 0.143065 | 0.124709 | 0.129225 | 0.131993 | 0.143065  |
| 0.132284 | 0.117279 | 0.128642 | 0.107955 | 0.12296  | 0.114948 | 0.118153  |
| 0.135927 | 0.132284 | 0.136946 | 0.119755 | 0.12398  | 0.131119 | 0.136946  |
| 0.115822 | 0.111888 | 0.116259 | 0.106061 | 0.105624 | 0.111888 | 0.123543  |
| 0.222319 | 0.203526 | 0.218677 | 0.203817 | 0.220571 | 0.215181 | 0.19799   |
| 0.129225 | 0.121795 | 0.130536 | 0.117424 | 0.116404 | 0.113928 | 0.113054  |
| 0.207896 | 0.189103 | 0.20338  | 0.185315 | 0.202069 | 0.196678 | 0.185023  |
| 0.122523 | 0.113054 | 0.127331 | 0.101981 | 0.114948 | 0.120047 | 0.113928  |
| 0.136509 | 0.122086 | 0.137238 | 0.120629 | 0.129225 | 0.126166 | 0.114802  |
| 0.14088  | 0.113636 | 0.140443 | 0.119755 | 0.130099 | 0.129662 | 0.12704   |
| 0.132284 | 0.112617 | 0.130099 | 0.112908 | 0.123543 | 0.126311 | 0.116987  |
| 0.140006 | 0.124126 | 0.137238 | 0.119755 | 0.135052 | 0.128205 | 0.128205  |
| 0.137675 | 0.122669 | 0.128788 | 0.115676 | 0.130099 | 0.126748 | 0.128205  |
| 0.135635 | 0.11655  | 0.133741 | 0.113054 | 0.128642 | 0.126457 | 0.109848  |
| 0.127331 | 0.11553  | 0.122523 | 0.10271  | 0.119172 | 0.129516 | 0.120775  |
| 0.144231 | 0.118444 | 0.14088  | 0.123397 | 0.130536 | 0.129516 | 0.131556  |
| 0.118153 | 0.118881 | 0.118298 | 0.112762 | 0.110286 | 0.113928 | 0.128497  |
| 0.25743  | 0.251166 | 0.257867 | 0.245921 | 0.25947  | 0.250874 | 0.245629  |
| 0.136218 | 0.11859  | 0.137238 | 0.112762 | 0.129808 | 0.126457 | 0.11014   |
| 0.199883 | 0.182547 | 0.197115 | 0.179633 | 0.199592 | 0.189248 | 0.174679  |
| 0.201486 | 0.18648  | 0.201632 | 0.183566 | 0.199738 | 0.19289  | 0.183275  |
| 0.13345  | 0.116113 | 0.134761 | 0.114073 | 0.12704  | 0.12602  | 0.119901  |
| 0.13141  | 0.110868 | 0.126894 | 0.101544 | 0.119464 | 0.113782 | 0.108246  |
| 0.138403 | 0.12602  | 0.135052 | 0.121941 | 0.132284 | 0.123689 | 0.116404  |
| 0.136072 | 0.116696 | 0.129808 | 0.110577 | 0.126166 | 0.123689 | 0.116987  |
| 0.130973 | 0.111014 | 0.13141  | 0.109848 | 0.120775 | 0.111888 | 0.0990676 |
| 0.114948 | 0.106061 | 0.117133 | 0.100233 | 0.106789 | 0.108683 | 0.113928  |
| 0.136364 | 0.121941 | 0.133304 | 0.11553  | 0.12704  | 0.113782 | 0.118735  |

|          |          |          |          |          |          |          |
|----------|----------|----------|----------|----------|----------|----------|
| 0.144231 | 0.131265 | 0.140297 | 0.123397 | 0.136364 | 0.133304 | 0.135344 |
| 0.13447  | 0.116841 | 0.13345  | 0.111597 | 0.12602  | 0.123252 | 0.1081   |
| 0.147582 | 0.131119 | 0.140443 | 0.126166 | 0.140297 | 0.13345  | 0.134907 |
| 0.127331 | 0.116696 | 0.125728 | 0.112617 | 0.121212 | 0.117279 | 0.118444 |
| 0.143939 | 0.117861 | 0.140589 | 0.122523 | 0.131702 | 0.13243  | 0.130682 |
| 0.133596 | 0.120338 | 0.133741 | 0.1081   | 0.121941 | 0.121212 | 0.122378 |
| 0.113928 | 0.115822 | 0.114365 | 0.109411 | 0.105769 | 0.111742 | 0.129225 |
| 0.135052 | 0.120629 | 0.132284 | 0.113928 | 0.123689 | 0.110723 | 0.115385 |
| 0.133013 | 0.114219 | 0.129953 | 0.111597 | 0.126894 | 0.117716 | 0.110723 |
| 0.143794 | 0.129662 | 0.145396 | 0.120921 | 0.135635 | 0.130536 | 0.13549  |
| 0.198427 | 0.184878 | 0.198572 | 0.180507 | 0.197261 | 0.188666 | 0.178176 |
| 0.147873 | 0.134615 | 0.13986  | 0.128497 | 0.140589 | 0.134033 | 0.138986 |
| 0.139132 | 0.119755 | 0.131702 | 0.115093 | 0.128351 | 0.129371 | 0.125874 |
| 0.139569 | 0.113199 | 0.135927 | 0.119027 | 0.124709 | 0.128934 | 0.123397 |
| 0.127768 | 0.100816 | 0.124417 | 0.108683 | 0.116696 | 0.122086 | 0.114219 |
| 0.129662 | 0.118444 | 0.130099 | 0.110577 | 0.121212 | 0.121941 | 0.122523 |
| 0.131847 | 0.124417 | 0.133159 | 0.115093 | 0.122523 | 0.123543 | 0.128205 |
| 0.204254 | 0.189831 | 0.207314 | 0.186043 | 0.201632 | 0.19595  | 0.183129 |
| 0.136364 | 0.118153 | 0.13243  | 0.116113 | 0.127622 | 0.106498 | 0.122232 |
| 0.125728 | 0.110431 | 0.123834 | 0.104895 | 0.116987 | 0.105769 | 0.107809 |
| 0.142628 | 0.123252 | 0.135198 | 0.121503 | 0.131265 | 0.127622 | 0.127331 |
| 0.207751 | 0.189248 | 0.2044   | 0.185752 | 0.202506 | 0.197698 | 0.184295 |
| 0.128351 | 0.109266 | 0.126748 | 0.099359 | 0.116113 | 0.115093 | 0.106352 |
| 0.111597 | 0.109411 | 0.114365 | 0.103875 | 0.101981 | 0.109411 | 0.119027 |
| 0.137238 | 0.128059 | 0.13447  | 0.11553  | 0.134907 | 0.128642 | 0.124272 |
| 0.135635 | 0.11655  | 0.130536 | 0.104604 | 0.124272 | 0.117424 | 0.118007 |
| 0.202943 | 0.185606 | 0.200758 | 0.182401 | 0.20236  | 0.193765 | 0.180944 |
| 0.112034 | 0.106643 | 0.115967 | 0.100524 | 0.103293 | 0.104604 | 0.119755 |
| 0.131556 | 0.109848 | 0.132867 | 0.106352 | 0.121358 | 0.120629 | 0.117133 |
| 0.128059 | 0.107517 | 0.124417 | 0.101399 | 0.118444 | 0.116841 | 0.113345 |
| 0.137092 | 0.119755 | 0.136946 | 0.120047 | 0.133596 | 0.123252 | 0.120338 |
| 0.125291 | 0.114656 | 0.122815 | 0.104458 | 0.118007 | 0.128642 | 0.120484 |
| 0.113054 | 0.112034 | 0.114656 | 0.108246 | 0.104895 | 0.110868 | 0.126894 |
| 0.133741 | 0.113199 | 0.133013 | 0.111742 | 0.127622 | 0.121941 | 0.107663 |
| 0.130536 | 0.120775 | 0.125437 | 0.114073 | 0.121212 | 0.119901 | 0.126311 |
| 0.150787 | 0.143939 | 0.146853 | 0.137821 | 0.150495 | 0.141317 | 0.146562 |
| 0.242861 | 0.236597 | 0.240967 | 0.229021 | 0.24461  | 0.237762 | 0.2331   |
| 0.137966 | 0.125291 | 0.134033 | 0.121212 | 0.126603 | 0.116259 | 0.119755 |
| 0.126311 | 0.118007 | 0.125    | 0.1081   | 0.122232 | 0.130828 | 0.122378 |
| 0.135781 | 0.119318 | 0.130682 | 0.113199 | 0.128788 | 0.119027 | 0.122232 |
| 0.141463 | 0.120921 | 0.13549  | 0.116259 | 0.133596 | 0.131993 | 0.123543 |
| 0.114802 | 0.105041 | 0.115822 | 0.101253 | 0.106935 | 0.110868 | 0.116987 |
| 0.128205 | 0.114948 | 0.126603 | 0.106206 | 0.120047 | 0.111742 | 0.114365 |
| 0.137092 | 0.124709 | 0.132284 | 0.118881 | 0.131847 | 0.125    | 0.125874 |

|          |          |          |           |          |          |           |
|----------|----------|----------|-----------|----------|----------|-----------|
| 0.112471 | 0.111451 | 0.113782 | 0.104458  | 0.105769 | 0.109411 | 0.124272  |
| 0.134033 | 0.111451 | 0.129225 | 0.104749  | 0.123543 | 0.120484 | 0.124563  |
| 0.247815 | 0.237471 | 0.245338 | 0.2331    | 0.243153 | 0.237179 | 0.232809  |
| 0.12704  | 0.106206 | 0.12398  | 0.0986305 | 0.11451  | 0.108829 | 0.108537  |
| 0.115967 | 0.106789 | 0.115239 | 0.0933858 | 0.102273 | 0.113199 | 0.110286  |
| 0.131556 | 0.114219 | 0.130828 | 0.110431  | 0.123689 | 0.118881 | 0.106935  |
| 0.140734 | 0.128642 | 0.140589 | 0.120192  | 0.132867 | 0.131847 | 0.132721  |
| 0.143648 | 0.130682 | 0.138549 | 0.126894  | 0.132284 | 0.116987 | 0.123397  |
| 0.141026 | 0.112617 | 0.129808 | 0.113491  | 0.134324 | 0.121358 | 0.116696  |
| 0.137529 | 0.123397 | 0.132139 | 0.115239  | 0.131993 | 0.127768 | 0.12398   |
| 0.126603 | 0.111014 | 0.123834 | 0.105186  | 0.123689 | 0.121503 | 0.112471  |
| 0.241696 | 0.231352 | 0.240093 | 0.226399  | 0.238782 | 0.231643 | 0.224942  |
| 0.140297 | 0.128788 | 0.136946 | 0.120338  | 0.135927 | 0.131702 | 0.131119  |
| 0.111305 | 0.108537 | 0.112908 | 0.10271   | 0.100816 | 0.107955 | 0.122232  |
| 0.129953 | 0.10708  | 0.123397 | 0.0968823 | 0.119755 | 0.119027 | 0.119318  |
| 0.126603 | 0.122669 | 0.120629 | 0.109848  | 0.118735 | 0.128788 | 0.124126  |
| 0.121649 | 0.11859  | 0.124126 | 0.109848  | 0.110868 | 0.11859  | 0.127622  |
| 0.13243  | 0.115967 | 0.131702 | 0.111888  | 0.124272 | 0.121795 | 0.107517  |
| 0.112908 | 0.110431 | 0.11655  | 0.106643  | 0.103001 | 0.1081   | 0.121212  |
| 0.115093 | 0.114948 | 0.116404 | 0.11116   | 0.105769 | 0.111742 | 0.127477  |
| 0.110431 | 0.108829 | 0.112325 | 0.100379  | 0.10373  | 0.109411 | 0.113199  |
| 0.135052 | 0.113928 | 0.13345  | 0.110723  | 0.12602  | 0.119755 | 0.106935  |
| 0.130099 | 0.124126 | 0.126166 | 0.109848  | 0.11961  | 0.133741 | 0.126457  |
| 0.133159 | 0.129808 | 0.131556 | 0.11553   | 0.123252 | 0.135635 | 0.130682  |
| 0.142191 | 0.120484 | 0.14088  | 0.126894  | 0.132867 | 0.133596 | 0.133887  |
| 0.143357 | 0.120484 | 0.141171 | 0.126894  | 0.13345  | 0.137675 | 0.133596  |
| 0.128351 | 0.128497 | 0.128205 | 0.111888  | 0.118444 | 0.134907 | 0.130245  |
| 0.132139 | 0.104604 | 0.12704  | 0.106061  | 0.119027 | 0.106935 | 0.0935315 |
| 0.116841 | 0.123106 | 0.116987 | 0.112908  | 0.106935 | 0.119318 | 0.133887  |
| 0.128934 | 0.117716 | 0.124126 | 0.117716  | 0.119027 | 0.122669 | 0.129371  |
| 0.218969 | 0.204545 | 0.216492 | 0.198718  | 0.216638 | 0.209499 | 0.201049  |
| 0.139714 | 0.127622 | 0.134324 | 0.122086  | 0.133013 | 0.118881 | 0.129371  |
| 0.121941 | 0.111597 | 0.122378 | 0.102273  | 0.109703 | 0.117424 | 0.11655   |
| 0.137238 | 0.120192 | 0.137092 | 0.11961   | 0.133741 | 0.126603 | 0.114073  |
| 0.233829 | 0.221154 | 0.230769 | 0.218531  | 0.233537 | 0.226981 | 0.218823  |
| 0.223631 | 0.211538 | 0.220571 | 0.206294  | 0.223631 | 0.215326 | 0.204545  |
| 0.112762 | 0.113491 | 0.116404 | 0.108246  | 0.104895 | 0.112034 | 0.127477  |
| 0.262383 | 0.249126 | 0.255245 | 0.247669  | 0.261218 | 0.255245 | 0.244755  |
| 0.131847 | 0.104604 | 0.129953 | 0.105186  | 0.121066 | 0.110431 | 0.0941142 |
| 0.148747 | 0.13141  | 0.142483 | 0.127914  | 0.143211 | 0.130828 | 0.127622  |
| 0.127477 | 0.109557 | 0.125    | 0.0999417 | 0.116696 | 0.112471 | 0.111305  |
| 0.129079 | 0.123689 | 0.128351 | 0.110286  | 0.12296  | 0.133013 | 0.127185  |
| 0.202069 | 0.185315 | 0.200758 | 0.181818  | 0.201195 | 0.191725 | 0.185315  |
| 0.128788 | 0.121358 | 0.124854 | 0.107663  | 0.117424 | 0.122523 | 0.127477  |

|          |           |          |           |          |          |          |
|----------|-----------|----------|-----------|----------|----------|----------|
| 0.208333 | 0.195076  | 0.206439 | 0.190414  | 0.207168 | 0.200321 | 0.18546  |
| 0.132576 | 0.115239  | 0.131265 | 0.112325  | 0.123543 | 0.120192 | 0.119318 |
| 0.120338 | 0.107372  | 0.122815 | 0.10708   | 0.112471 | 0.103584 | 0.116987 |
| 0.135198 | 0.11961   | 0.139132 | 0.113782  | 0.123252 | 0.113199 | 0.109411 |
| 0.129079 | 0.112034  | 0.125146 | 0.109703  | 0.124709 | 0.118153 | 0.113491 |
| 0.125437 | 0.112471  | 0.127331 | 0.104895  | 0.120192 | 0.114219 | 0.101107 |
| 0.131556 | 0.11451   | 0.126457 | 0.111014  | 0.122523 | 0.111597 | 0.116841 |
| 0.123106 | 0.105478  | 0.121795 | 0.0999417 | 0.113491 | 0.106643 | 0.106061 |
| 0.134907 | 0.118444  | 0.129225 | 0.108537  | 0.126748 | 0.122232 | 0.11553  |
| 0.11553  | 0.108392  | 0.117716 | 0.105478  | 0.100962 | 0.116259 | 0.120047 |
| 0.13039  | 0.112179  | 0.125874 | 0.107809  | 0.119901 | 0.109557 | 0.102855 |
| 0.126457 | 0.105332  | 0.124272 | 0.10067   | 0.115967 | 0.111742 | 0.109994 |
| 0.136218 | 0.115385  | 0.13141  | 0.117424  | 0.128351 | 0.123252 | 0.125291 |
| 0.144959 | 0.134033  | 0.136072 | 0.122378  | 0.136509 | 0.132867 | 0.132867 |
| 0.134033 | 0.108537  | 0.13243  | 0.113782  | 0.121503 | 0.126311 | 0.122232 |
| 0.133596 | 0.111597  | 0.131702 | 0.102855  | 0.119027 | 0.12296  | 0.115967 |
| 0.127914 | 0.109994  | 0.128642 | 0.105041  | 0.122669 | 0.11553  | 0.101253 |
| 0.117716 | 0.108246  | 0.118444 | 0.103293  | 0.106643 | 0.104749 | 0.120192 |
| 0.125    | 0.115822  | 0.124272 | 0.103875  | 0.119464 | 0.127477 | 0.116113 |
| 0.130099 | 0.121212  | 0.131702 | 0.107809  | 0.11757  | 0.124709 | 0.127622 |
| 0.134178 | 0.114802  | 0.133741 | 0.115967  | 0.123397 | 0.128497 | 0.120338 |
| 0.138112 | 0.123689  | 0.133304 | 0.114365  | 0.131119 | 0.125437 | 0.120192 |
| 0.144085 | 0.131993  | 0.138403 | 0.120047  | 0.136801 | 0.129953 | 0.134033 |
| 0.150204 | 0.141317  | 0.141608 | 0.129079  | 0.140297 | 0.137238 | 0.142191 |
| 0.106352 | 0.0986305 | 0.111742 | 0.0957168 | 0.100233 | 0.099796 | 0.10067  |
| 0.134324 | 0.11553   | 0.131847 | 0.112034  | 0.127331 | 0.124563 | 0.108537 |
| 0.126603 | 0.106352  | 0.121212 | 0.0996503 | 0.113491 | 0.107809 | 0.111014 |
| 0.129225 | 0.132576  | 0.127331 | 0.115676  | 0.122815 | 0.133159 | 0.134033 |
| 0.128788 | 0.113199  | 0.124563 | 0.104167  | 0.120047 | 0.112908 | 0.111742 |
| 0.139277 | 0.139423  | 0.140006 | 0.124854  | 0.132576 | 0.134761 | 0.144376 |
| 0.148019 | 0.133304  | 0.143211 | 0.130099  | 0.143648 | 0.131556 | 0.127185 |
| 0.133887 | 0.123543  | 0.134033 | 0.116259  | 0.130682 | 0.129371 | 0.126166 |
| 0.138403 | 0.115822  | 0.132721 | 0.110286  | 0.121503 | 0.110286 | 0.107372 |
| 0.124272 | 0.113636  | 0.124709 | 0.104604  | 0.115822 | 0.11859  | 0.111305 |
| 0.142337 | 0.119755  | 0.13986  | 0.124417  | 0.13243  | 0.13345  | 0.131119 |
| 0.214452 | 0.203234  | 0.213141 | 0.202652  | 0.214744 | 0.211393 | 0.199738 |
| 0.130536 | 0.110868  | 0.131265 | 0.102418  | 0.119464 | 0.121649 | 0.11553  |
| 0.13447  | 0.113345  | 0.135198 | 0.113636  | 0.125146 | 0.11859  | 0.104895 |
| 0.123543 | 0.116404  | 0.122523 | 0.105332  | 0.115385 | 0.128059 | 0.117861 |
| 0.132139 | 0.11014   | 0.131993 | 0.115093  | 0.12398  | 0.126748 | 0.121503 |
| 0.134615 | 0.11757   | 0.137675 | 0.113491  | 0.126457 | 0.127185 | 0.121649 |
| 0.130536 | 0.115822  | 0.129516 | 0.114948  | 0.125583 | 0.104458 | 0.128934 |
| 0.135052 | 0.118298  | 0.130536 | 0.118881  | 0.125728 | 0.105769 | 0.130536 |
| 0.134907 | 0.117861  | 0.131847 | 0.112908  | 0.126457 | 0.125728 | 0.122815 |

|           |          |           |           |           |           |           |
|-----------|----------|-----------|-----------|-----------|-----------|-----------|
| 0.114802  | 0.102127 | 0.11553   | 0.0992133 | 0.10373   | 0.109411  | 0.113199  |
| 0.124417  | 0.124854 | 0.125146  | 0.110286  | 0.118007  | 0.132721  | 0.125728  |
| 0.13141   | 0.112034 | 0.129516  | 0.107955  | 0.11859   | 0.109411  | 0.107663  |
| 0.137092  | 0.115967 | 0.132576  | 0.113928  | 0.124272  | 0.114802  | 0.1081    |
| 0.185023  | 0.171183 | 0.184878  | 0.171766  | 0.178322  | 0.178176  | 0.172348  |
| 0.13549   | 0.120192 | 0.133596  | 0.114656  | 0.130828  | 0.125728  | 0.11961   |
| 0.128351  | 0.125874 | 0.125874  | 0.113928  | 0.122232  | 0.134615  | 0.130536  |
| 0.120921  | 0.119027 | 0.130682  | 0.110868  | 0.110723  | 0.111451  | 0.116987  |
| 0.128059  | 0.117716 | 0.128788  | 0.114802  | 0.123689  | 0.115676  | 0.120921  |
| 0.12602   | 0.106643 | 0.123252  | 0.102564  | 0.115239  | 0.0850816 | 0.104604  |
| 0.126603  | 0.106352 | 0.124417  | 0.101399  | 0.112325  | 0.10373   | 0.0981935 |
| 0.13039   | 0.108683 | 0.126166  | 0.1081    | 0.116987  | 0.0871212 | 0.111305  |
| 0.0907634 | 0.110723 | 0.0938228 | 0.0973193 | 0.0898893 | 0.117424  | 0.12296   |
| 0.137966  | 0.11655  | 0.134033  | 0.11859   | 0.130682  | 0.108974  | 0.112471  |
| 0.136072  | 0.123106 | 0.135635  | 0.120484  | 0.129371  | 0.124854  | 0.12602   |
| 0.124854  | 0.11014  | 0.122669  | 0.102855  | 0.11553   | 0.109266  | 0.104604  |
| 0.124709  | 0.107372 | 0.128642  | 0.111451  | 0.115967  | 0.116696  | 0.113782  |
| 0.0980478 | 0.101981 | 0.097028  | 0.0888695 | 0.0907634 | 0.113636  | 0.129953  |
| 0.119901  | 0.111014 | 0.124126  | 0.108683  | 0.110868  | 0.105769  | 0.109266  |
| 0.135344  | 0.108683 | 0.131702  | 0.116841  | 0.125728  | 0.11451   | 0.121795  |
| 0.121941  | 0.107809 | 0.124709  | 0.102855  | 0.109703  | 0.105478  | 0.10373   |
| 0.121066  | 0.109266 | 0.124417  | 0.106061  | 0.110868  | 0.108683  | 0.110723  |
| 0.128642  | 0.104021 | 0.130245  | 0.105186  | 0.115822  | 0.109266  | 0.0990676 |
| 0.127914  | 0.122232 | 0.13039   | 0.116987  | 0.117424  | 0.116696  | 0.109994  |
| 0.120047  | 0.10271  | 0.122815  | 0.0960082 | 0.112179  | 0.107663  | 0.105041  |
| 0.138112  | 0.128642 | 0.138549  | 0.121941  | 0.127622  | 0.129808  | 0.126311  |
| 0.137529  | 0.119901 | 0.137092  | 0.117279  | 0.12704   | 0.129516  | 0.111451  |
| 0.126748  | 0.111742 | 0.125437  | 0.104458  | 0.113054  | 0.110286  | 0.113199  |
| 0.135052  | 0.131119 | 0.133159  | 0.121795  | 0.121066  | 0.128497  | 0.139277  |
| 0.137092  | 0.116259 | 0.134615  | 0.115385  | 0.13243   | 0.133159  | 0.121503  |
| 0.130682  | 0.122669 | 0.124417  | 0.120921  | 0.12602   | 0.113345  | 0.131702  |
| 0.126603  | 0.115093 | 0.123834  | 0.106352  | 0.113782  | 0.113054  | 0.110723  |
| 0.1419    | 0.139132 | 0.141463  | 0.134761  | 0.137821  | 0.140297  | 0.114073  |
| 0.134907  | 0.130099 | 0.13447   | 0.119027  | 0.121212  | 0.128351  | 0.133013  |
| 0.111305  | 0.112034 | 0.113199  | 0.102418  | 0.106352  | 0.128351  | 0.137092  |
| 0.129953  | 0.116404 | 0.135927  | 0.11553   | 0.119172  | 0.122523  | 0.114656  |
| 0.115239  | 0.104604 | 0.120629  | 0.0979021 | 0.101836  | 0.11014   | 0.107809  |
| 0.123543  | 0.10912  | 0.124563  | 0.108829  | 0.117716  | 0.108246  | 0.083479  |
| 0.0977564 | 0.106352 | 0.0990676 | 0.0839161 | 0.0895979 | 0.119755  | 0.11859   |
| 0.127185  | 0.122086 | 0.127914  | 0.108683  | 0.113199  | 0.11014   | 0.115967  |
| 0.129953  | 0.128059 | 0.134761  | 0.11961   | 0.119464  | 0.120484  | 0.122523  |
| 0.134033  | 0.112325 | 0.138258  | 0.114365  | 0.123252  | 0.114365  | 0.103001  |
| 0.117133  | 0.099796 | 0.121649  | 0.101253  | 0.111014  | 0.114948  | 0.106498  |
| 0.121358  | 0.106643 | 0.124709  | 0.106935  | 0.115239  | 0.107226  | 0.0801282 |

|          |          |          |          |          |          |           |
|----------|----------|----------|----------|----------|----------|-----------|
| 0.127622 | 0.117861 | 0.127768 | 0.10708  | 0.114219 | 0.114656 | 0.11116   |
| 0.121212 | 0.109411 | 0.12602  | 0.101544 | 0.109848 | 0.109703 | 0.0962995 |
| 0.13039  | 0.113636 | 0.131702 | 0.115967 | 0.121649 | 0.109266 | 0.0885781 |
| 0.13039  | 0.114802 | 0.127914 | 0.109266 | 0.115822 | 0.11655  | 0.101399  |
| 0.138112 | 0.112908 | 0.129808 | 0.114073 | 0.132284 | 0.120775 | 0.116404  |
| 0.127331 | 0.112325 | 0.127768 | 0.108537 | 0.122086 | 0.118444 | 0.103584  |
| 0.127914 | 0.106498 | 0.12602  | 0.104458 | 0.119172 | 0.108246 | 0.0925117 |
| 0.127914 | 0.114073 | 0.126603 | 0.104458 | 0.114219 | 0.113199 | 0.105041  |
| 0.137383 | 0.110723 | 0.132576 | 0.110431 | 0.13243  | 0.118881 | 0.114219  |
| 0.127622 | 0.114073 | 0.125728 | 0.115239 | 0.121503 | 0.107372 | 0.105041  |
| 0.138403 | 0.11757  | 0.138258 | 0.118153 | 0.129953 | 0.108537 | 0.122523  |
| 0.126748 | 0.106498 | 0.120484 | 0.103001 | 0.123543 | 0.114948 | 0.106789  |
| 0.136218 | 0.122669 | 0.137238 | 0.123834 | 0.128059 | 0.105478 | 0.12296   |



| <b>TDr_11_00787</b> | <b>TDr_11_00799</b> | <b>TDr_11_01036</b> | <b>TDr_11_01041</b> | <b>TDr_12_00150</b> | <b>TDr_12_00152</b> | <b>TDr_12_00156</b> |
|---------------------|---------------------|---------------------|---------------------|---------------------|---------------------|---------------------|
| 0.116259            | 0.124854            | 0.118881            | 0.113636            | 0.124417            | 0.141463            | 0.106498            |
| 0.113199            | 0.119172            | 0.118735            | 0.114948            | 0.129516            | 0.135198            | 0.101399            |
| 0.11116             | 0.113054            | 0.11757             | 0.110286            | 0.124563            | 0.134907            | 0.0958625           |
| 0.116113            | 0.120629            | 0.112034            | 0.110577            | 0.133596            | 0.131993            | 0.104312            |
| 0.13039             | 0.132867            | 0.135344            | 0.122815            | 0.141171            | 0.146562            | 0.125               |
| 0.129808            | 0.129371            | 0.137675            | 0.124272            | 0.141754            | 0.151224            | 0.125               |
| 0.109848            | 0.121066            | 0.123834            | 0.110431            | 0.125291            | 0.127477            | 0.109703            |
| 0.11655             | 0.120192            | 0.11655             | 0.106352            | 0.127331            | 0.136801            | 0.0983392           |
| 0.0995047           | 0.108974            | 0.105624            | 0.097465            | 0.112034            | 0.125874            | 0.0836247           |
| 0.100816            | 0.100962            | 0.11014             | 0.0981935           | 0.0821678           | 0.12398             | 0.0770688           |
| 0.107663            | 0.11859             | 0.116404            | 0.103584            | 0.126603            | 0.136655            | 0.103147            |
| 0.110431            | 0.110868            | 0.110431            | 0.109266            | 0.128205            | 0.131847            | 0.099796            |
| 0.114219            | 0.113491            | 0.115385            | 0.104895            | 0.117424            | 0.130682            | 0.092803            |
| 0.131265            | 0.131702            | 0.139132            | 0.130973            | 0.140589            | 0.155594            | 0.120629            |
| 0.121795            | 0.127477            | 0.126457            | 0.122086            | 0.131119            | 0.140589            | 0.110868            |
| 0.103001            | 0.121212            | 0.120484            | 0.114656            | 0.121358            | 0.117133            | 0.109848            |
| 0.105769            | 0.111742            | 0.092366            | 0.100233            | 0.125874            | 0.133013            | 0.099796            |
| 0.145542            | 0.138403            | 0.147582            | 0.138258            | 0.146707            | 0.160256            | 0.134615            |
| 0.110577            | 0.11014             | 0.117279            | 0.106789            | 0.125437            | 0.130828            | 0.0958625           |
| 0.203526            | 0.200466            | 0.204691            | 0.203526            | 0.214889            | 0.22028             | 0.196387            |
| 0.123543            | 0.120775            | 0.126457            | 0.111597            | 0.1419              | 0.143502            | 0.112034            |
| 0.116987            | 0.117424            | 0.120192            | 0.112908            | 0.128351            | 0.13986             | 0.107517            |
| 0.106935            | 0.10912             | 0.104895            | 0.10169             | 0.120921            | 0.124854            | 0.10067             |
| 0.108537            | 0.125583            | 0.122523            | 0.112325            | 0.134178            | 0.124417            | 0.113345            |
| 0.0984848           | 0.105915            | 0.104312            | 0.090035            | 0.115093            | 0.126894            | 0.0907634           |
| 0.129662            | 0.12602             | 0.136655            | 0.119464            | 0.145396            | 0.141463            | 0.120192            |
| 0.113054            | 0.121358            | 0.118881            | 0.0527389           | 0.131993            | 0.131265            | 0.108829            |
| 0.114802            | 0.119901            | 0.118298            | 0.117133            | 0.12704             | 0.135927            | 0.108246            |
| 0.121795            | 0.128642            | 0.129662            | 0.115967            | 0.134324            | 0.13243             | 0.113782            |
| 0.112179            | 0.123397            | 0.123543            | 0.113636            | 0.120047            | 0.13039             | 0.10067             |
| 0.112325            | 0.12704             | 0.126603            | 0.112908            | 0.134178            | 0.136946            | 0.115385            |
| 0.113636            | 0.126311            | 0.120047            | 0.113054            | 0.125291            | 0.131265            | 0.10708             |
| 0.104021            | 0.107663            | 0.112179            | 0.0929487           | 0.120047            | 0.121066            | 0.0983392           |
| 0.111888            | 0.119027            | 0.119464            | 0.103147            | 0.116841            | 0.135635            | 0.100379            |
| 0.106498            | 0.117133            | 0.119027            | 0.0977564           | 0.118735            | 0.121503            | 0.103438            |
| 0.109557            | 0.120484            | 0.126457            | 0.111014            | 0.117716            | 0.130682            | 0.102418            |
| 0.121941            | 0.129079            | 0.127768            | 0.121941            | 0.129225            | 0.134907            | 0.114219            |
| 0.114802            | 0.120484            | 0.118007            | 0.11655             | 0.129953            | 0.125146            | 0.106789            |
| 0.112762            | 0.116696            | 0.114219            | 0.0979021           | 0.121212            | 0.125437            | 0.101836            |
| 0.11655             | 0.118444            | 0.119172            | 0.119464            | 0.135781            | 0.130099            | 0.108829            |
| 0.106061            | 0.109703            | 0.103438            | 0.102564            | 0.123252            | 0.130973            | 0.0977564           |
| 0.129371            | 0.136509            | 0.138695            | 0.138986            | 0.145688            | 0.14088             | 0.130973            |

|           |           |          |           |          |          |           |
|-----------|-----------|----------|-----------|----------|----------|-----------|
| 0.136655  | 0.138549  | 0.136655 | 0.13986   | 0.151515 | 0.146125 | 0.134761  |
| 0.107372  | 0.1081    | 0.112617 | 0.105624  | 0.125146 | 0.130828 | 0.104604  |
| 0.0989219 | 0.103438  | 0.102418 | 0.0901807 | 0.112325 | 0.121212 | 0.0862471 |
| 0.0990676 | 0.109703  | 0.099359 | 0.106352  | 0.111305 | 0.121941 | 0.0942599 |
| 0.11014   | 0.120192  | 0.120921 | 0.113636  | 0.138112 | 0.131556 | 0.113491  |
| 0.128934  | 0.129371  | 0.13039  | 0.132139  | 0.140006 | 0.147145 | 0.124126  |
| 0.109703  | 0.11014   | 0.110868 | 0.106206  | 0.121649 | 0.130828 | 0.102564  |
| 0.1081    | 0.105624  | 0.111014 | 0.108974  | 0.127622 | 0.125437 | 0.0977564 |
| 0.134178  | 0.155303  | 0.152535 | 0.135344  | 0.149621 | 0.1419   | 0.130245  |
| 0.124563  | 0.121795  | 0.123689 | 0.128934  | 0.135927 | 0.13986  | 0.120338  |
| 0.106061  | 0.109703  | 0.107226 | 0.106643  | 0.133741 | 0.13039  | 0.103293  |
| 0.119172  | 0.118444  | 0.128497 | 0.119464  | 0.111305 | 0.131847 | 0.102127  |
| 0.119464  | 0.116404  | 0.11451  | 0.115093  | 0.136072 | 0.137092 | 0.112908  |
| 0.121212  | 0.137675  | 0.138986 | 0.133741  | 0.151224 | 0.140589 | 0.137383  |
| 0.122523  | 0.11451   | 0.119027 | 0.119027  | 0.135927 | 0.139277 | 0.109557  |
| 0.107663  | 0.113928  | 0.105624 | 0.104167  | 0.131265 | 0.126166 | 0.100816  |
| 0.115239  | 0.114802  | 0.114948 | 0.108246  | 0.124854 | 0.134907 | 0.101107  |
| 0.099359  | 0.114656  | 0.115676 | 0.108974  | 0.111305 | 0.121649 | 0.105041  |
| 0.125874  | 0.130099  | 0.130828 | 0.129953  | 0.137821 | 0.135635 | 0.125728  |
| 0.132867  | 0.129516  | 0.136364 | 0.13549   | 0.1419   | 0.145251 | 0.125728  |
| 0.158362  | 0.159965  | 0.165938 | 0.161568  | 0.171474 | 0.15035  | 0.158217  |
| 0.109994  | 0.11655   | 0.110868 | 0.105041  | 0.125146 | 0.126457 | 0.100233  |
| 0.107663  | 0.111888  | 0.107955 | 0.105041  | 0.126311 | 0.129371 | 0.0964452 |
| 0.108829  | 0.113636  | 0.102127 | 0.103584  | 0.129516 | 0.133741 | 0.0967366 |
| 0.128788  | 0.143794  | 0.135198 | 0.134907  | 0.141317 | 0.143794 | 0.125146  |
| 0.106643  | 0.109703  | 0.110723 | 0.104312  | 0.127331 | 0.126603 | 0.0922203 |
| 0.128642  | 0.125874  | 0.132139 | 0.13039   | 0.149038 | 0.136072 | 0.128205  |
| 0.0983392 | 0.112762  | 0.116987 | 0.103875  | 0.112908 | 0.122378 | 0.100524  |
| 0.112762  | 0.112617  | 0.108974 | 0.106935  | 0.131993 | 0.132139 | 0.0992133 |
| 0.136655  | 0.145833  | 0.143065 | 0.140152  | 0.15035  | 0.141754 | 0.136801  |
| 0.109557  | 0.127185  | 0.11655  | 0.113928  | 0.138112 | 0.13447  | 0.109411  |
| 0.13447   | 0.131119  | 0.127185 | 0.130682  | 0.144959 | 0.144231 | 0.124709  |
| 0.127622  | 0.121066  | 0.125874 | 0.127914  | 0.1419   | 0.139714 | 0.118444  |
| 0.111742  | 0.0987762 | 0.109703 | 0.107955  | 0.134761 | 0.13141  | 0.106935  |
| 0.103875  | 0.101399  | 0.107372 | 0.106789  | 0.129516 | 0.128497 | 0.100233  |
| 0.10912   | 0.112179  | 0.110868 | 0.106789  | 0.126894 | 0.129953 | 0.10373   |
| 0.121358  | 0.127331  | 0.128351 | 0.128934  | 0.148164 | 0.132284 | 0.12296   |
| 0.109848  | 0.112617  | 0.104312 | 0.10169   | 0.125874 | 0.128642 | 0.0942599 |
| 0.133304  | 0.134907  | 0.133596 | 0.135344  | 0.144085 | 0.142191 | 0.128497  |
| 0.116113  | 0.11859   | 0.11553  | 0.11116   | 0.135635 | 0.129371 | 0.107226  |
| 0.112908  | 0.113928  | 0.115239 | 0.116113  | 0.130973 | 0.13345  | 0.105186  |
| 0.109994  | 0.116259  | 0.112617 | 0.108537  | 0.133304 | 0.132867 | 0.108392  |
| 0.11961   | 0.121795  | 0.11961  | 0.117861  | 0.132139 | 0.13549  | 0.111305  |
| 0.110868  | 0.113636  | 0.111451 | 0.103293  | 0.133596 | 0.128497 | 0.105478  |

|           |           |           |           |          |          |           |
|-----------|-----------|-----------|-----------|----------|----------|-----------|
| 0.105041  | 0.109266  | 0.107372  | 0.106498  | 0.132139 | 0.125291 | 0.102564  |
| 0.126457  | 0.124272  | 0.131993  | 0.134033  | 0.142774 | 0.129516 | 0.123397  |
| 0.097028  | 0.106789  | 0.105769  | 0.0874126 | 0.117716 | 0.124563 | 0.0968823 |
| 0.0995047 | 0.105186  | 0.11116   | 0.103293  | 0.114073 | 0.119464 | 0.0929487 |
| 0.114073  | 0.117424  | 0.118735  | 0.116113  | 0.129808 | 0.134033 | 0.106061  |
| 0.109703  | 0.126748  | 0.12602   | 0.110286  | 0.129516 | 0.133741 | 0.112179  |
| 0.121358  | 0.131993  | 0.130099  | 0.119027  | 0.130682 | 0.131119 | 0.113636  |
| 0.122669  | 0.13447   | 0.135198  | 0.127331  | 0.143065 | 0.136218 | 0.125437  |
| 0.10912   | 0.121212  | 0.110577  | 0.10912   | 0.131265 | 0.138695 | 0.1081    |
| 0.181672  | 0.178613  | 0.184003  | 0.176428  | 0.190414 | 0.192308 | 0.179196  |
| 0.104895  | 0.10912   | 0.106352  | 0.099359  | 0.124417 | 0.128642 | 0.0960082 |
| 0.121649  | 0.128788  | 0.131556  | 0.127477  | 0.13447  | 0.137238 | 0.117133  |
| 0.114948  | 0.122378  | 0.120484  | 0.117279  | 0.129808 | 0.136072 | 0.109266  |
| 0.123252  | 0.133304  | 0.130245  | 0.123543  | 0.13986  | 0.142337 | 0.120192  |
| 0.0986305 | 0.112179  | 0.108246  | 0.101836  | 0.123397 | 0.125874 | 0.100524  |
| 0.118444  | 0.130245  | 0.128059  | 0.12398   | 0.13884  | 0.135198 | 0.119464  |
| 0.109411  | 0.111305  | 0.11553   | 0.106498  | 0.11961  | 0.129371 | 0.0941142 |
| 0.113054  | 0.119027  | 0.12296   | 0.115093  | 0.124709 | 0.131847 | 0.108537  |
| 0.107517  | 0.118444  | 0.110723  | 0.106643  | 0.120921 | 0.122523 | 0.101253  |
| 0.11859   | 0.123689  | 0.127331  | 0.121503  | 0.136072 | 0.140297 | 0.122815  |
| 0.0949883 | 0.0992133 | 0.0952797 | 0.101981  | 0.111597 | 0.127185 | 0.0913462 |
| 0.12398   | 0.134033  | 0.130682  | 0.12398   | 0.137383 | 0.134907 | 0.122669  |
| 0.100233  | 0.114073  | 0.111305  | 0.106643  | 0.123543 | 0.130682 | 0.0989219 |
| 0.124854  | 0.122669  | 0.125146  | 0.125728  | 0.135344 | 0.138112 | 0.114802  |
| 0.115967  | 0.122232  | 0.124417  | 0.119172  | 0.129079 | 0.132721 | 0.110577  |
| 0.101107  | 0.113199  | 0.108683  | 0.094697  | 0.116259 | 0.130099 | 0.0939685 |
| 0.13549   | 0.144668  | 0.145396  | 0.141317  | 0.151807 | 0.142337 | 0.135344  |
| 0.107372  | 0.115967  | 0.112908  | 0.0983392 | 0.118735 | 0.131993 | 0.0976107 |
| 0.105332  | 0.112471  | 0.111451  | 0.105041  | 0.114656 | 0.131993 | 0.0932401 |
| 0.0999417 | 0.0965909 | 0.105478  | 0.105478  | 0.121503 | 0.130682 | 0.101836  |
| 0.124709  | 0.13039   | 0.131993  | 0.122669  | 0.129371 | 0.141463 | 0.115239  |
| 0.114802  | 0.120484  | 0.12704   | 0.113928  | 0.136655 | 0.139423 | 0.11961   |
| 0.104604  | 0.109994  | 0.107226  | 0.10373   | 0.113345 | 0.130973 | 0.0942599 |
| 0.101399  | 0.109994  | 0.110723  | 0.101981  | 0.11859  | 0.126603 | 0.0893065 |
| 0.0983392 | 0.118298  | 0.113491  | 0.100379  | 0.124563 | 0.131119 | 0.0996503 |
| 0.106935  | 0.119901  | 0.121212  | 0.107226  | 0.11014  | 0.123106 | 0.105915  |
| 0.102418  | 0.118881  | 0.115822  | 0.0980478 | 0.124272 | 0.133741 | 0.103438  |
| 0.0885781 | 0.103293  | 0.10169   | 0.0976107 | 0.109266 | 0.114656 | 0.0828963 |
| 0.0935315 | 0.107372  | 0.100816  | 0.092366  | 0.10373  | 0.11961  | 0.0878497 |
| 0.08581   | 0.104021  | 0.103875  | 0.0989219 | 0.107372 | 0.121503 | 0.0856643 |
| 0.111742  | 0.120047  | 0.110577  | 0.101836  | 0.135635 | 0.140734 | 0.105769  |
| 0.106061  | 0.126311  | 0.122669  | 0.117133  | 0.122086 | 0.126603 | 0.10708   |
| 0.088141  | 0.108683  | 0.105624  | 0.104167  | 0.114073 | 0.120047 | 0.0917832 |
| 0.0882867 | 0.100087  | 0.101399  | 0.0914918 | 0.113054 | 0.118153 | 0.0866841 |

|           |          |           |           |          |          |           |
|-----------|----------|-----------|-----------|----------|----------|-----------|
| 0.107226  | 0.116696 | 0.112179  | 0.112762  | 0.120338 | 0.117279 | 0.106206  |
| 0.0925117 | 0.10373  | 0.0971737 | 0.095134  | 0.111742 | 0.119172 | 0.0944056 |
| 0.113199  | 0.126457 | 0.121358  | 0.11553   | 0.128642 | 0.141026 | 0.104895  |
| 0.123397  | 0.137529 | 0.137383  | 0.119901  | 0.137966 | 0.138112 | 0.117716  |
| 0.0992133 | 0.110431 | 0.106498  | 0.102418  | 0.105332 | 0.119464 | 0.0938228 |
| 0.0891608 | 0.109411 | 0.106643  | 0.102564  | 0.115093 | 0.122815 | 0.0945513 |
| 0.0879953 | 0.104167 | 0.104312  | 0.104312  | 0.11655  | 0.119901 | 0.092803  |
| 0.100816  | 0.102127 | 0.0958625 | 0.0984848 | 0.114802 | 0.118735 | 0.0893065 |
| 0.111014  | 0.113491 | 0.121795  | 0.114219  | 0.111597 | 0.128642 | 0.102127  |
| 0.0885781 | 0.10067  | 0.0964452 | 0.0909091 | 0.109848 | 0.112908 | 0.0872669 |
| 0.119901  | 0.139277 | 0.136801  | 0.119318  | 0.14292  | 0.137821 | 0.12296   |
| 0.123252  | 0.11553  | 0.111888  | 0.120921  | 0.140443 | 0.136218 | 0.116696  |
| 0.111888  | 0.114948 | 0.109266  | 0.118007  | 0.129953 | 0.126603 | 0.108246  |
| 0.106498  | 0.104895 | 0.097465  | 0.0983392 | 0.119901 | 0.132284 | 0.097028  |
| 0.104749  | 0.111014 | 0.112908  | 0.101253  | 0.122523 | 0.132576 | 0.101107  |
| 0.0912005 | 0.10271  | 0.100816  | 0.0926573 | 0.112762 | 0.119901 | 0.0901807 |
| 0.0965909 | 0.115385 | 0.10271   | 0.107955  | 0.117861 | 0.121212 | 0.0979021 |
| 0.103584  | 0.108683 | 0.110868  | 0.0962995 | 0.117861 | 0.126748 | 0.0926573 |
| 0.11116   | 0.117133 | 0.113199  | 0.110286  | 0.132721 | 0.134615 | 0.106643  |
| 0.119901  | 0.121795 | 0.123689  | 0.126894  | 0.137966 | 0.132576 | 0.119464  |
| 0.1081    | 0.116987 | 0.111597  | 0.107809  | 0.13141  | 0.130099 | 0.104749  |
| 0.123689  | 0.119172 | 0.126603  | 0.13039   | 0.124854 | 0.140443 | 0.110431  |
| 0.121795  | 0.127768 | 0.128205  | 0.120921  | 0.13141  | 0.138549 | 0.11961   |
| 0.197261  | 0.189831 | 0.19493   | 0.194347  | 0.210664 | 0.21285  | 0.18954   |
| 0.239948  | 0.232517 | 0.242861  | 0.24053   | 0.250146 | 0.248252 | 0.232226  |
| 0.114802  | 0.119901 | 0.115385  | 0.109557  | 0.133159 | 0.132139 | 0.103584  |
| 0.102127  | 0.111888 | 0.111451  | 0.10708   | 0.124272 | 0.126166 | 0.10373   |
| 0.103875  | 0.106061 | 0.10708   | 0.0913462 | 0.125728 | 0.117716 | 0.101981  |
| 0.105915  | 0.113928 | 0.116696  | 0.10271   | 0.13039  | 0.125291 | 0.105186  |
| 0.123397  | 0.128497 | 0.129225  | 0.123106  | 0.128642 | 0.142483 | 0.111888  |
| 0.10708   | 0.115093 | 0.114365  | 0.109703  | 0.132139 | 0.124417 | 0.108392  |
| 0.129079  | 0.139423 | 0.143357  | 0.132867  | 0.150932 | 0.138549 | 0.138549  |
| 0.101544  | 0.113345 | 0.11553   | 0.103875  | 0.133013 | 0.134033 | 0.107517  |
| 0.115822  | 0.126166 | 0.127768  | 0.124854  | 0.13884  | 0.138695 | 0.118007  |
| 0.125291  | 0.121649 | 0.126748  | 0.129371  | 0.147145 | 0.138258 | 0.127477  |
| 0.117424  | 0.123397 | 0.126748  | 0.123834  | 0.143939 | 0.13039  | 0.122232  |
| 0.131702  | 0.127477 | 0.134324  | 0.132576  | 0.141317 | 0.142337 | 0.12602   |
| 0.107809  | 0.112908 | 0.111305  | 0.111014  | 0.131119 | 0.133887 | 0.105915  |
| 0.104312  | 0.107955 | 0.0999417 | 0.108683  | 0.129371 | 0.128934 | 0.103875  |
| 0.102418  | 0.112471 | 0.11553   | 0.112325  | 0.130099 | 0.129371 | 0.110723  |
| 0.0995047 | 0.109557 | 0.111742  | 0.099796  | 0.125146 | 0.126748 | 0.105478  |
| 0.101544  | 0.10373  | 0.105624  | 0.105041  | 0.13039  | 0.129953 | 0.102564  |
| 0.10373   | 0.113491 | 0.113345  | 0.105186  | 0.132576 | 0.127477 | 0.112617  |
| 0.119901  | 0.117716 | 0.126894  | 0.125146  | 0.144376 | 0.133741 | 0.123834  |

|           |          |           |           |           |          |           |
|-----------|----------|-----------|-----------|-----------|----------|-----------|
| 0.127185  | 0.132867 | 0.135052  | 0.134178  | 0.147582  | 0.139277 | 0.13141   |
| 0.103147  | 0.113491 | 0.111597  | 0.108392  | 0.136072  | 0.133887 | 0.105041  |
| 0.105624  | 0.117716 | 0.110868  | 0.105041  | 0.132721  | 0.130828 | 0.108974  |
| 0.124272  | 0.126748 | 0.128351  | 0.122815  | 0.142628  | 0.140443 | 0.121795  |
| 0.0995047 | 0.113054 | 0.10912   | 0.100379  | 0.12602   | 0.12704  | 0.101981  |
| 0.13141   | 0.128934 | 0.138112  | 0.131993  | 0.157925  | 0.144959 | 0.136801  |
| 0.128497  | 0.118153 | 0.111888  | 0.127622  | 0.134033  | 0.141463 | 0.113491  |
| 0.133596  | 0.125874 | 0.135344  | 0.125728  | 0.151078  | 0.145105 | 0.130536  |
| 0.100087  | 0.104021 | 0.107372  | 0.0968823 | 0.127477  | 0.125874 | 0.102564  |
| 0.10169   | 0.109411 | 0.109266  | 0.101399  | 0.122378  | 0.124272 | 0.10067   |
| 0.109411  | 0.11655  | 0.124563  | 0.114656  | 0.135052  | 0.134615 | 0.115385  |
| 0.112179  | 0.121066 | 0.124126  | 0.120921  | 0.13345   | 0.129808 | 0.117279  |
| 0.118298  | 0.126894 | 0.12296   | 0.118298  | 0.14627   | 0.140006 | 0.120192  |
| 0.114948  | 0.11655  | 0.116404  | 0.11116   | 0.141171  | 0.132867 | 0.111014  |
| 0.108974  | 0.114948 | 0.109557  | 0.110723  | 0.13345   | 0.133013 | 0.11116   |
| 0.115967  | 0.123689 | 0.123834  | 0.119464  | 0.137529  | 0.13039  | 0.119027  |
| 0.119464  | 0.126603 | 0.125291  | 0.128205  | 0.142774  | 0.136509 | 0.125146  |
| 0.116841  | 0.126603 | 0.130828  | 0.126166  | 0.145396  | 0.141754 | 0.122815  |
| 0.118444  | 0.132576 | 0.129225  | 0.124272  | 0.149038  | 0.133741 | 0.128497  |
| 0.124417  | 0.133596 | 0.125874  | 0.136072  | 0.143357  | 0.137675 | 0.123106  |
| 0.101399  | 0.112908 | 0.113054  | 0.104604  | 0.133159  | 0.130099 | 0.107663  |
| 0.122086  | 0.125437 | 0.130536  | 0.123252  | 0.145105  | 0.141463 | 0.12398   |
| 0.0989219 | 0.111305 | 0.107955  | 0.10067   | 0.12602   | 0.125874 | 0.101981  |
| 0.112179  | 0.108246 | 0.111888  | 0.104021  | 0.126166  | 0.133596 | 0.099796  |
| 0.104895  | 0.105332 | 0.112762  | 0.108683  | 0.132284  | 0.13243  | 0.103293  |
| 0.107372  | 0.113345 | 0.11116   | 0.102418  | 0.131265  | 0.129662 | 0.106643  |
| 0.102127  | 0.103147 | 0.109703  | 0.101253  | 0.124854  | 0.127622 | 0.103438  |
| 0.118881  | 0.130099 | 0.130245  | 0.127331  | 0.147145  | 0.139132 | 0.127768  |
| 0.115822  | 0.113345 | 0.114948  | 0.115239  | 0.133596  | 0.138112 | 0.107517  |
| 0.12398   | 0.125583 | 0.132721  | 0.128934  | 0.14729   | 0.13141  | 0.124126  |
| 0.103293  | 0.112471 | 0.114948  | 0.103875  | 0.122232  | 0.128205 | 0.103147  |
| 0.108683  | 0.121941 | 0.122669  | 0.117716  | 0.135781  | 0.128642 | 0.116113  |
| 0.114365  | 0.118298 | 0.11757   | 0.11757   | 0.126311  | 0.128788 | 0.110431  |
| 0.113782  | 0.103438 | 0.0968823 | 0.108829  | 0.122232  | 0.135781 | 0.0981935 |
| 0         | 0.117279 | 0.11014   | 0.106643  | 0.119464  | 0.10912  | 0.10067   |
| 0.117279  | 0        | 0.10708   | 0.110577  | 0.126311  | 0.136655 | 0.104021  |
| 0.11014   | 0.10708  | 0         | 0.111014  | 0.131993  | 0.136509 | 0.103584  |
| 0.106643  | 0.110577 | 0.111014  | 0         | 0.127914  | 0.126603 | 0.0971737 |
| 0.119464  | 0.126311 | 0.131993  | 0.127914  | 0         | 0.141754 | 0.0962995 |
| 0.10912   | 0.136655 | 0.136509  | 0.126603  | 0.141754  | 0        | 0.128788  |
| 0.10067   | 0.104021 | 0.103584  | 0.0971737 | 0.0962995 | 0.128788 | 0         |
| 0.129953  | 0.123689 | 0.131119  | 0.121212  | 0.125     | 0.143502 | 0.104749  |
| 0.110286  | 0.115676 | 0.120484  | 0.11553   | 0.0750291 | 0.132284 | 0.0920746 |
| 0.125728  | 0.120921 | 0.125437  | 0.117279  | 0.123106  | 0.137821 | 0.110431  |

|           |           |           |          |           |          |           |
|-----------|-----------|-----------|----------|-----------|----------|-----------|
| 0.123106  | 0.104895  | 0.116113  | 0.106498 | 0.113491  | 0.132867 | 0.100233  |
| 0.108829  | 0.113636  | 0.117861  | 0.111451 | 0.0872669 | 0.136655 | 0.0792541 |
| 0.110723  | 0.123106  | 0.124126  | 0.113345 | 0.0935315 | 0.135052 | 0.0878497 |
| 0.126603  | 0.113054  | 0.119318  | 0.11961  | 0.116404  | 0.147145 | 0.105186  |
| 0.132139  | 0.123252  | 0.137966  | 0.126894 | 0.122523  | 0.143939 | 0.114219  |
| 0.106206  | 0.115093  | 0.119318  | 0.118153 | 0.0962995 | 0.136946 | 0.0844988 |
| 0.116404  | 0.101981  | 0.114073  | 0.105332 | 0.114073  | 0.132284 | 0.0987762 |
| 0.120338  | 0.135344  | 0.131119  | 0.121503 | 0.147436  | 0.139714 | 0.127477  |
| 0.119318  | 0.126748  | 0.133887  | 0.122523 | 0.0939685 | 0.139277 | 0.0941142 |
| 0.107372  | 0.110431  | 0.115822  | 0.103875 | 0.108246  | 0.13345  | 0.0850816 |
| 0.221154  | 0.213724  | 0.22465   | 0.217949 | 0.22873   | 0.235286 | 0.21285   |
| 0.11451   | 0.112617  | 0.118298  | 0.115967 | 0.123543  | 0.144959 | 0.103293  |
| 0.103438  | 0.112617  | 0.111597  | 0.112471 | 0.0987762 | 0.134178 | 0.0747378 |
| 0.127477  | 0.123834  | 0.135635  | 0.120775 | 0.124272  | 0.144814 | 0.108974  |
| 0.11116   | 0.113345  | 0.11553   | 0.11116  | 0.0948427 | 0.128497 | 0.0836247 |
| 0.113782  | 0.123834  | 0.128642  | 0.120192 | 0.0855186 | 0.139569 | 0.0987762 |
| 0.121649  | 0.108683  | 0.122523  | 0.11553  | 0.117279  | 0.133741 | 0.0973193 |
| 0.117424  | 0.11116   | 0.118007  | 0.111888 | 0.116259  | 0.142628 | 0.0933858 |
| 0.117133  | 0.112034  | 0.120338  | 0.120047 | 0.0868298 | 0.142628 | 0.0925117 |
| 0.121941  | 0.121503  | 0.128642  | 0.121358 | 0.126311  | 0.140734 | 0.111014  |
| 0.128205  | 0.128351  | 0.135198  | 0.119464 | 0.116259  | 0.139132 | 0.105624  |
| 0.12602   | 0.11859   | 0.131847  | 0.121941 | 0.121941  | 0.138695 | 0.1081    |
| 0.125728  | 0.122086  | 0.124563  | 0.119318 | 0.113491  | 0.140734 | 0.103438  |
| 0.106206  | 0.110723  | 0.105915  | 0.107663 | 0.114948  | 0.130245 | 0.0874126 |
| 0.120192  | 0.107517  | 0.115822  | 0.105041 | 0.117279  | 0.140152 | 0.0967366 |
| 0.120629  | 0.115239  | 0.130536  | 0.120338 | 0.127622  | 0.144085 | 0.107372  |
| 0.116987  | 0.106061  | 0.11961   | 0.111742 | 0.114073  | 0.134033 | 0.0996503 |
| 0.13243   | 0.128205  | 0.131847  | 0.132721 | 0.146416  | 0.144522 | 0.124126  |
| 0.134615  | 0.129808  | 0.133741  | 0.129079 | 0.143648  | 0.151952 | 0.118153  |
| 0.109848  | 0.121941  | 0.113636  | 0.118007 | 0.126166  | 0.133887 | 0.103875  |
| 0.120047  | 0.121941  | 0.123834  | 0.119464 | 0.085373  | 0.136218 | 0.0916375 |
| 0.121649  | 0.128205  | 0.125437  | 0.116113 | 0.132139  | 0.135781 | 0.117424  |
| 0.119172  | 0.125146  | 0.127914  | 0.113636 | 0.119172  | 0.135927 | 0.108537  |
| 0.119464  | 0.128351  | 0.122378  | 0.117716 | 0.135198  | 0.136509 | 0.113782  |
| 0.13141   | 0.130682  | 0.137529  | 0.131119 | 0.141317  | 0.151369 | 0.121358  |
| 0.0983392 | 0.0844988 | 0.0866841 | 0.101836 | 0.109411  | 0.121212 | 0.0897436 |
| 0.122378  | 0.114656  | 0.120338  | 0.122086 | 0.130245  | 0.135927 | 0.114365  |
| 0.14088   | 0.143065  | 0.140589  | 0.142337 | 0.149913  | 0.152972 | 0.126748  |
| 0.100379  | 0.112179  | 0.115822  | 0.107663 | 0.11116   | 0.120338 | 0.101399  |
| 0.120484  | 0.114802  | 0.121941  | 0.116113 | 0.133596  | 0.138695 | 0.109557  |
| 0.125     | 0.151661  | 0.141317  | 0.134907 | 0.156469  | 0.141463 | 0.138549  |
| 0.121503  | 0.126603  | 0.125874  | 0.125    | 0.140152  | 0.140006 | 0.114365  |
| 0.130682  | 0.13345   | 0.135344  | 0.132721 | 0.12602   | 0.136364 | 0.125583  |
| 0.11655   | 0.123397  | 0.13141   | 0.125583 | 0.124126  | 0.142337 | 0.110577  |

|           |          |          |          |          |          |           |
|-----------|----------|----------|----------|----------|----------|-----------|
| 0.112325  | 0.121212 | 0.121358 | 0.117861 | 0.124854 | 0.136072 | 0.102273  |
| 0.120047  | 0.127185 | 0.12296  | 0.12296  | 0.134615 | 0.137675 | 0.120484  |
| 0.107955  | 0.1081   | 0.108829 | 0.110286 | 0.11757  | 0.127331 | 0.0999417 |
| 0.111888  | 0.112908 | 0.123543 | 0.117716 | 0.133159 | 0.13039  | 0.116696  |
| 0.123834  | 0.115239 | 0.128788 | 0.118881 | 0.122378 | 0.141171 | 0.104167  |
| 0.119172  | 0.12398  | 0.131119 | 0.125874 | 0.134615 | 0.142045 | 0.121358  |
| 0.12296   | 0.128059 | 0.130828 | 0.122669 | 0.134324 | 0.140589 | 0.114656  |
| 0.118881  | 0.132721 | 0.126166 | 0.120338 | 0.137821 | 0.134178 | 0.113782  |
| 0.127914  | 0.139423 | 0.140152 | 0.135781 | 0.149476 | 0.147582 | 0.13243   |
| 0.11014   | 0.100379 | 0.113636 | 0.107809 | 0.100524 | 0.127185 | 0.0965909 |
| 0.106352  | 0.11757  | 0.114802 | 0.108392 | 0.123834 | 0.125437 | 0.104749  |
| 0.118881  | 0.135635 | 0.129371 | 0.123252 | 0.132867 | 0.136218 | 0.116987  |
| 0.0973193 | 0.113782 | 0.115093 | 0.10169  | 0.111014 | 0.120775 | 0.0971737 |
| 0.131265  | 0.145688 | 0.146707 | 0.136509 | 0.14292  | 0.149476 | 0.128205  |
| 0.140589  | 0.14831  | 0.149913 | 0.144085 | 0.154283 | 0.148893 | 0.142483  |
| 0.120484  | 0.123252 | 0.13039  | 0.127185 | 0.143502 | 0.134033 | 0.121795  |
| 0.109848  | 0.119027 | 0.117424 | 0.11451  | 0.137238 | 0.131265 | 0.11553   |
| 0.131556  | 0.126166 | 0.13243  | 0.120192 | 0.140589 | 0.147145 | 0.121503  |
| 0.129371  | 0.113491 | 0.124126 | 0.116841 | 0.122669 | 0.145542 | 0.103001  |
| 0.115093  | 0.119901 | 0.125874 | 0.121212 | 0.139277 | 0.13884  | 0.120484  |
| 0.132576  | 0.128934 | 0.13549  | 0.125291 | 0.124126 | 0.145251 | 0.114656  |
| 0.127914  | 0.13243  | 0.138403 | 0.133741 | 0.129953 | 0.139423 | 0.12398   |
| 0.112034  | 0.118298 | 0.121358 | 0.120484 | 0.116113 | 0.133741 | 0.100233  |
| 0.150204  | 0.15676  | 0.160985 | 0.152244 | 0.169143 | 0.159965 | 0.152972  |
| 0.118444  | 0.118881 | 0.121941 | 0.123106 | 0.122232 | 0.139277 | 0.113636  |
| 0.125437  | 0.13141  | 0.136801 | 0.131265 | 0.128351 | 0.136655 | 0.123252  |
| 0.106643  | 0.118444 | 0.120629 | 0.111305 | 0.128497 | 0.123397 | 0.101836  |
| 0.128497  | 0.132721 | 0.132284 | 0.118298 | 0.141317 | 0.147582 | 0.120192  |
| 0.122669  | 0.111451 | 0.125    | 0.113345 | 0.11451  | 0.140297 | 0.0977564 |
| 0.138549  | 0.140443 | 0.14088  | 0.127768 | 0.14729  | 0.151807 | 0.126166  |
| 0.141608  | 0.140006 | 0.144814 | 0.140152 | 0.155886 | 0.162442 | 0.135927  |
| 0.124854  | 0.125583 | 0.129225 | 0.12398  | 0.144085 | 0.140443 | 0.111888  |
| 0.139569  | 0.137092 | 0.13549  | 0.136655 | 0.148601 | 0.152826 | 0.122815  |
| 0.139714  | 0.141026 | 0.13884  | 0.140006 | 0.163899 | 0.159965 | 0.143939  |
| 0.148456  | 0.148019 | 0.140297 | 0.139132 | 0.157197 | 0.164918 | 0.134324  |
| 0.0844988 | 0.125728 | 0.115967 | 0.110431 | 0.138112 | 0.105624 | 0.115822  |
| 0.136509  | 0.138112 | 0.137675 | 0.131847 | 0.144959 | 0.160839 | 0.125291  |
| 0.110577  | 0.120629 | 0.114948 | 0.108246 | 0.126603 | 0.129662 | 0.0984848 |
| 0.1081    | 0.122232 | 0.11451  | 0.108392 | 0.136655 | 0.126603 | 0.109994  |
| 0.114365  | 0.118881 | 0.117279 | 0.115239 | 0.11553  | 0.141608 | 0.0961538 |
| 0.121066  | 0.120047 | 0.119027 | 0.119027 | 0.137383 | 0.134615 | 0.106643  |
| 0.113054  | 0.120192 | 0.111014 | 0.108683 | 0.136072 | 0.137383 | 0.10708   |
| 0.112762  | 0.117279 | 0.115093 | 0.110723 | 0.125583 | 0.133304 | 0.099796  |
| 0.113636  | 0.121066 | 0.121212 | 0.120047 | 0.130536 | 0.138258 | 0.108246  |

|           |          |          |           |           |          |           |
|-----------|----------|----------|-----------|-----------|----------|-----------|
| 0.118735  | 0.125    | 0.12398  | 0.120484  | 0.129225  | 0.139569 | 0.110431  |
| 0.10271   | 0.109848 | 0.109411 | 0.101253  | 0.105332  | 0.124709 | 0.0847902 |
| 0.122815  | 0.122669 | 0.11961  | 0.124563  | 0.140297  | 0.140734 | 0.107809  |
| 0.118881  | 0.119027 | 0.118881 | 0.118881  | 0.136655  | 0.135635 | 0.107663  |
| 0.106352  | 0.116113 | 0.111888 | 0.113636  | 0.140734  | 0.129225 | 0.116404  |
| 0.217075  | 0.214307 | 0.22028  | 0.215618  | 0.227855  | 0.228293 | 0.209936  |
| 0.143065  | 0.144085 | 0.14627  | 0.145396  | 0.152389  | 0.149621 | 0.133304  |
| 0.129808  | 0.127622 | 0.130973 | 0.123397  | 0.141171  | 0.144231 | 0.120338  |
| 0.123252  | 0.125728 | 0.127331 | 0.120921  | 0.138112  | 0.144085 | 0.110286  |
| 0.215035  | 0.209062 | 0.215909 | 0.212413  | 0.224942  | 0.226544 | 0.204691  |
| 0.113636  | 0.122523 | 0.115967 | 0.11655   | 0.141317  | 0.133013 | 0.118444  |
| 0.112617  | 0.127914 | 0.11757  | 0.107372  | 0.13447   | 0.13345  | 0.112762  |
| 0.120775  | 0.119464 | 0.129225 | 0.114656  | 0.131556  | 0.147436 | 0.11655   |
| 0.117424  | 0.123689 | 0.119755 | 0.118007  | 0.125874  | 0.139132 | 0.105041  |
| 0.254371  | 0.245192 | 0.254662 | 0.248834  | 0.258741  | 0.25947  | 0.245192  |
| 0.121649  | 0.134615 | 0.131556 | 0.112325  | 0.135052  | 0.136072 | 0.112179  |
| 0.101544  | 0.112762 | 0.106498 | 0.10708   | 0.133596  | 0.122378 | 0.109848  |
| 0.122523  | 0.113054 | 0.124272 | 0.121649  | 0.144376  | 0.142191 | 0.118881  |
| 0.120192  | 0.110723 | 0.120775 | 0.119027  | 0.142045  | 0.143939 | 0.115676  |
| 0.120192  | 0.132284 | 0.130682 | 0.118735  | 0.135635  | 0.138112 | 0.115385  |
| 0.129225  | 0.131119 | 0.129516 | 0.13039   | 0.137675  | 0.143939 | 0.117716  |
| 0.103584  | 0.11859  | 0.109411 | 0.109994  | 0.139423  | 0.124709 | 0.115093  |
| 0.119172  | 0.122815 | 0.118881 | 0.120047  | 0.138986  | 0.135052 | 0.107955  |
| 0.130973  | 0.127622 | 0.128351 | 0.11757   | 0.140006  | 0.152681 | 0.114802  |
| 0.114073  | 0.118298 | 0.112908 | 0.113782  | 0.123689  | 0.130828 | 0.101399  |
| 0.116841  | 0.120192 | 0.118007 | 0.115385  | 0.129079  | 0.13447  | 0.103875  |
| 0.106789  | 0.106061 | 0.111451 | 0.104167  | 0.0785256 | 0.127914 | 0.0812937 |
| 0.143357  | 0.14088  | 0.145105 | 0.140152  | 0.151224  | 0.161859 | 0.135344  |
| 0.120338  | 0.13447  | 0.135198 | 0.116841  | 0.138112  | 0.133596 | 0.114948  |
| 0.114802  | 0.128351 | 0.120629 | 0.11451   | 0.140443  | 0.135927 | 0.112908  |
| 0.193182  | 0.185752 | 0.194347 | 0.187937  | 0.206294  | 0.208188 | 0.184878  |
| 0.208625  | 0.197698 | 0.210373 | 0.203089  | 0.217949  | 0.218386 | 0.198864  |
| 0.119172  | 0.125728 | 0.120921 | 0.116841  | 0.124709  | 0.140297 | 0.104167  |
| 0.108392  | 0.117861 | 0.113928 | 0.111305  | 0.124126  | 0.130973 | 0.0983392 |
| 0.135198  | 0.135052 | 0.137529 | 0.137821  | 0.13986   | 0.144668 | 0.122523  |
| 0.100524  | 0.114365 | 0.106935 | 0.106352  | 0.136072  | 0.127768 | 0.110577  |
| 0.120484  | 0.136946 | 0.133013 | 0.118444  | 0.137383  | 0.138112 | 0.116259  |
| 0.129371  | 0.129808 | 0.132867 | 0.13345   | 0.141026  | 0.144085 | 0.117861  |
| 0.229895  | 0.218386 | 0.229312 | 0.224942  | 0.236014  | 0.239073 | 0.220425  |
| 0.117133  | 0.117279 | 0.118007 | 0.110431  | 0.132576  | 0.137966 | 0.106789  |
| 0.208188  | 0.206585 | 0.211684 | 0.205565  | 0.225087  | 0.219697 | 0.210373  |
| 0.0812937 | 0.118444 | 0.105186 | 0.0964452 | 0.13141   | 0.10912  | 0.103584  |
| 0.110286  | 0.123252 | 0.121649 | 0.107663  | 0.131556  | 0.131702 | 0.10373   |
| 0.118881  | 0.121358 | 0.114802 | 0.116841  | 0.13549   | 0.135927 | 0.113491  |



|           |          |          |          |          |          |           |
|-----------|----------|----------|----------|----------|----------|-----------|
| 0.109557  | 0.115822 | 0.115676 | 0.111014 | 0.12296  | 0.130973 | 0.100962  |
| 0.211393  | 0.201632 | 0.211684 | 0.207022 | 0.220425 | 0.225816 | 0.202797  |
| 0.135052  | 0.131993 | 0.133013 | 0.133013 | 0.148456 | 0.147436 | 0.120047  |
| 0.104458  | 0.121212 | 0.104167 | 0.104458 | 0.132139 | 0.13549  | 0.104604  |
| 0.128642  | 0.126457 | 0.129225 | 0.125146 | 0.139423 | 0.141317 | 0.112762  |
| 0.123106  | 0.121503 | 0.132721 | 0.120192 | 0.130682 | 0.140152 | 0.110723  |
| 0.112617  | 0.118298 | 0.110577 | 0.11116  | 0.124563 | 0.138112 | 0.100816  |
| 0.0810023 | 0.122523 | 0.108683 | 0.100524 | 0.133159 | 0.106206 | 0.107955  |
| 0.107226  | 0.118153 | 0.112762 | 0.115385 | 0.136364 | 0.128642 | 0.116113  |
| 0.113054  | 0.128351 | 0.122378 | 0.112179 | 0.137821 | 0.13447  | 0.113199  |
| 0.114219  | 0.11961  | 0.111597 | 0.112762 | 0.130536 | 0.133304 | 0.103293  |
| 0.106206  | 0.124709 | 0.114365 | 0.107372 | 0.132139 | 0.13549  | 0.105478  |
| 0.194056  | 0.186917 | 0.19493  | 0.187937 | 0.206002 | 0.209062 | 0.181672  |
| 0.119901  | 0.111888 | 0.125437 | 0.120484 | 0.143502 | 0.139569 | 0.118881  |
| 0.125291  | 0.123397 | 0.129371 | 0.124126 | 0.147145 | 0.149621 | 0.119027  |
| 0.119318  | 0.112471 | 0.118735 | 0.119901 | 0.140006 | 0.143939 | 0.109848  |
| 0.119755  | 0.132721 | 0.129371 | 0.110723 | 0.138403 | 0.140006 | 0.112617  |
| 0.123834  | 0.123397 | 0.126457 | 0.122378 | 0.139569 | 0.133596 | 0.111742  |
| 0.0827506 | 0.124854 | 0.113054 | 0.106352 | 0.132867 | 0.107372 | 0.112617  |
| 0.114073  | 0.118007 | 0.125146 | 0.106789 | 0.127185 | 0.13345  | 0.103438  |
| 0.105624  | 0.118007 | 0.114073 | 0.113491 | 0.141171 | 0.128788 | 0.11859   |
| 0.121503  | 0.120484 | 0.123834 | 0.120629 | 0.139277 | 0.143794 | 0.113491  |
| 0.116259  | 0.107372 | 0.114802 | 0.113345 | 0.141026 | 0.14088  | 0.111742  |
| 0.11553   | 0.123543 | 0.119027 | 0.115239 | 0.129225 | 0.137238 | 0.103147  |
| 0.120338  | 0.123397 | 0.126166 | 0.111888 | 0.134907 | 0.145833 | 0.116987  |
| 0.130973  | 0.129371 | 0.144085 | 0.127477 | 0.140297 | 0.151807 | 0.12704   |
| 0.113782  | 0.125874 | 0.120484 | 0.104749 | 0.131265 | 0.134033 | 0.100816  |
| 0.13986   | 0.140006 | 0.141608 | 0.140152 | 0.147727 | 0.147873 | 0.127185  |
| 0.114219  | 0.11961  | 0.1081   | 0.111305 | 0.123252 | 0.137092 | 0.100962  |
| 0.118007  | 0.119027 | 0.117716 | 0.119464 | 0.134907 | 0.137383 | 0.106206  |
| 0.124854  | 0.123543 | 0.119318 | 0.119901 | 0.133887 | 0.137821 | 0.109557  |
| 0.111742  | 0.123543 | 0.114073 | 0.115822 | 0.142045 | 0.13345  | 0.117133  |
| 0.191288  | 0.18648  | 0.191288 | 0.192453 | 0.207605 | 0.207168 | 0.188811  |
| 0.102855  | 0.119318 | 0.105186 | 0.102564 | 0.129371 | 0.133304 | 0.10271   |
| 0.111305  | 0.112034 | 0.108392 | 0.101399 | 0.123834 | 0.123397 | 0.0925117 |
| 0.113636  | 0.126311 | 0.120047 | 0.108683 | 0.135781 | 0.13447  | 0.110577  |
| 0.184441  | 0.178759 | 0.175699 | 0.17803  | 0.193473 | 0.199738 | 0.172057  |
| 0.132721  | 0.145979 | 0.142337 | 0.12602  | 0.14729  | 0.141608 | 0.121795  |
| 0.137675  | 0.154429 | 0.153409 | 0.133887 | 0.147582 | 0.142191 | 0.130536  |
| 0.143648  | 0.139132 | 0.148019 | 0.142191 | 0.15676  | 0.158945 | 0.139423  |
| 0.111888  | 0.125728 | 0.120921 | 0.103438 | 0.130245 | 0.130682 | 0.102418  |
| 0.125728  | 0.127622 | 0.124563 | 0.12398  | 0.13884  | 0.138403 | 0.111888  |
| 0.216492  | 0.208188 | 0.214744 | 0.210956 | 0.22669  | 0.227127 | 0.206731  |
| 0.122669  | 0.126603 | 0.131119 | 0.119464 | 0.13345  | 0.143794 | 0.11553   |

|           |          |          |           |          |          |           |
|-----------|----------|----------|-----------|----------|----------|-----------|
| 0.129808  | 0.13141  | 0.13039  | 0.128934  | 0.145833 | 0.142191 | 0.115676  |
| 0.105624  | 0.120047 | 0.109994 | 0.105624  | 0.135927 | 0.134324 | 0.104604  |
| 0.17264   | 0.168706 | 0.170309 | 0.169726  | 0.180798 | 0.190559 | 0.165501  |
| 0.115822  | 0.121212 | 0.117861 | 0.110577  | 0.129225 | 0.136655 | 0.0984848 |
| 0.146853  | 0.145542 | 0.150058 | 0.142191  | 0.146853 | 0.164773 | 0.137966  |
| 0.112762  | 0.121066 | 0.123543 | 0.113928  | 0.112179 | 0.133304 | 0.0992133 |
| 0.189977  | 0.186043 | 0.191725 | 0.184732  | 0.204545 | 0.202943 | 0.182838  |
| 0.114219  | 0.127768 | 0.124417 | 0.1081    | 0.132576 | 0.13243  | 0.108829  |
| 0.0996503 | 0.104749 | 0.100816 | 0.0999417 | 0.112762 | 0.127477 | 0.081148  |
| 0.113199  | 0.118007 | 0.11757  | 0.116696  | 0.13039  | 0.1419   | 0.102855  |
| 0.115676  | 0.126311 | 0.118298 | 0.111888  | 0.131993 | 0.136801 | 0.106498  |
| 0.1081    | 0.125728 | 0.11451  | 0.107517  | 0.135198 | 0.129516 | 0.107663  |
| 0.120629  | 0.127185 | 0.125291 | 0.114802  | 0.134907 | 0.140589 | 0.110868  |
| 0.110577  | 0.11859  | 0.112617 | 0.106789  | 0.120484 | 0.131993 | 0.0990676 |
| 0.194347  | 0.186917 | 0.190851 | 0.185315  | 0.208916 | 0.206439 | 0.182255  |
| 0.121358  | 0.127914 | 0.125437 | 0.118153  | 0.136801 | 0.143065 | 0.115676  |
| 0.11451   | 0.118444 | 0.119464 | 0.112471  | 0.120047 | 0.13243  | 0.0968823 |
| 0.215181  | 0.209207 | 0.215763 | 0.211684  | 0.221008 | 0.226981 | 0.205128  |
| 0.122523  | 0.115967 | 0.123397 | 0.121358  | 0.145833 | 0.145396 | 0.118007  |
| 0.112179  | 0.118153 | 0.112179 | 0.108974  | 0.122378 | 0.135344 | 0.101253  |
| 0.1081    | 0.116113 | 0.108974 | 0.107809  | 0.121212 | 0.133013 | 0.0945513 |
| 0.136509  | 0.13549  | 0.138549 | 0.137675  | 0.142337 | 0.14627  | 0.127622  |
| 0.193619  | 0.185606 | 0.191579 | 0.186043  | 0.204983 | 0.206294 | 0.181818  |
| 0.106935  | 0.118153 | 0.108974 | 0.113345  | 0.140734 | 0.125437 | 0.111451  |
| 0.128205  | 0.12602  | 0.137529 | 0.121503  | 0.136364 | 0.146125 | 0.122232  |
| 0.112179  | 0.118444 | 0.112179 | 0.108392  | 0.119464 | 0.134761 | 0.0992133 |
| 0.1081    | 0.117861 | 0.107809 | 0.106352  | 0.121212 | 0.133887 | 0.0957168 |
| 0.110577  | 0.114802 | 0.112617 | 0.107372  | 0.120484 | 0.13345  | 0.0984848 |
| 0.11859   | 0.12398  | 0.11859  | 0.117424  | 0.130828 | 0.133013 | 0.104458  |
| 0.10067   | 0.111014 | 0.109703 | 0.0992133 | 0.105624 | 0.12704  | 0.0836247 |
| 0.117279  | 0.136072 | 0.131265 | 0.111742  | 0.137383 | 0.132867 | 0.111305  |
| 0.133887  | 0.128205 | 0.136509 | 0.129516  | 0.140006 | 0.151807 | 0.11859   |
| 0.11757   | 0.132284 | 0.126894 | 0.110868  | 0.133013 | 0.134033 | 0.108392  |
| 0.129953  | 0.126311 | 0.136364 | 0.120338  | 0.131993 | 0.141171 | 0.116696  |
| 0.198281  | 0.19289  | 0.194493 | 0.190997  | 0.208479 | 0.212995 | 0.189977  |
| 0.120338  | 0.120484 | 0.123543 | 0.11014   | 0.13141  | 0.144376 | 0.114656  |
| 0.132721  | 0.131702 | 0.131847 | 0.133304  | 0.144376 | 0.142483 | 0.119464  |
| 0.107809  | 0.116696 | 0.110431 | 0.1081    | 0.118298 | 0.130682 | 0.0965909 |
| 0.0986305 | 0.107226 | 0.107372 | 0.0995047 | 0.10271  | 0.124709 | 0.085373  |
| 0.116113  | 0.118007 | 0.118735 | 0.11116   | 0.133596 | 0.1419   | 0.11014   |
| 0.106935  | 0.116987 | 0.106352 | 0.110431  | 0.138695 | 0.127185 | 0.113199  |
| 0.135781  | 0.134178 | 0.132576 | 0.123543  | 0.141608 | 0.144376 | 0.115239  |
| 0.122232  | 0.119755 | 0.120484 | 0.114948  | 0.137966 | 0.143939 | 0.108974  |
| 0.102418  | 0.11451  | 0.106206 | 0.104458  | 0.127185 | 0.126457 | 0.102273  |

|           |          |          |           |           |          |           |
|-----------|----------|----------|-----------|-----------|----------|-----------|
| 0.101107  | 0.10912  | 0.105186 | 0.102273  | 0.11655   | 0.122815 | 0.0965909 |
| 0.101253  | 0.108392 | 0.103293 | 0.103584  | 0.109703  | 0.129662 | 0.0874126 |
| 0.0801282 | 0.120484 | 0.105769 | 0.0961538 | 0.130536  | 0.10708  | 0.105915  |
| 0.121941  | 0.138112 | 0.136218 | 0.118153  | 0.13884   | 0.136072 | 0.115967  |
| 0.106061  | 0.113491 | 0.104312 | 0.109266  | 0.136946  | 0.129225 | 0.111116  |
| 0.117279  | 0.118881 | 0.114365 | 0.114656  | 0.132139  | 0.134907 | 0.100524  |
| 0.0995047 | 0.113054 | 0.102127 | 0.103001  | 0.131847  | 0.125291 | 0.104895  |
| 0.111597  | 0.117861 | 0.112179 | 0.106935  | 0.123834  | 0.135927 | 0.0977564 |
| 0.101544  | 0.115385 | 0.100962 | 0.0995047 | 0.127185  | 0.131702 | 0.0964452 |
| 0.112034  | 0.116841 | 0.114365 | 0.111116  | 0.123397  | 0.136655 | 0.100816  |
| 0.112325  | 0.114802 | 0.119027 | 0.102418  | 0.127768  | 0.138403 | 0.107809  |
| 0.119027  | 0.119464 | 0.120775 | 0.114073  | 0.137675  | 0.145396 | 0.109266  |
| 0.108537  | 0.125874 | 0.115822 | 0.101544  | 0.133304  | 0.131119 | 0.105769  |
| 0.103147  | 0.111742 | 0.110431 | 0.10169   | 0.110723  | 0.128642 | 0.0869755 |
| 0.114365  | 0.118298 | 0.114656 | 0.110286  | 0.124854  | 0.133159 | 0.100233  |
| 0.121941  | 0.125583 | 0.119318 | 0.122232  | 0.136218  | 0.148019 | 0.106352  |
| 0.119172  | 0.120484 | 0.120921 | 0.119172  | 0.125874  | 0.13884  | 0.101836  |
| 0.101544  | 0.11014  | 0.108246 | 0.10708   | 0.0925117 | 0.13549  | 0.0754662 |
| 0.107663  | 0.119464 | 0.109703 | 0.108537  | 0.121358  | 0.132867 | 0.0973193 |
| 0.122086  | 0.120484 | 0.120047 | 0.120629  | 0.137529  | 0.13884  | 0.107372  |
| 0.0824592 | 0.119027 | 0.104312 | 0.0987762 | 0.132867  | 0.108829 | 0.105041  |
| 0.122669  | 0.121941 | 0.119755 | 0.118881  | 0.136364  | 0.136509 | 0.108537  |
| 0.106935  | 0.125146 | 0.113636 | 0.107809  | 0.131993  | 0.133887 | 0.105624  |
| 0.105186  | 0.115239 | 0.112179 | 0.106643  | 0.107517  | 0.128059 | 0.090472  |
| 0.108683  | 0.116987 | 0.120338 | 0.104021  | 0.123252  | 0.138549 | 0.0995047 |
| 0.100962  | 0.116841 | 0.104458 | 0.0986305 | 0.128059  | 0.128788 | 0.0949883 |
| 0.124126  | 0.127768 | 0.122669 | 0.122086  | 0.137238  | 0.141171 | 0.111116  |
| 0.119172  | 0.122232 | 0.121212 | 0.118298  | 0.135198  | 0.135927 | 0.109411  |
| 0.113491  | 0.12296  | 0.116696 | 0.117279  | 0.127768  | 0.13549  | 0.0935315 |
| 0.194784  | 0.188228 | 0.197698 | 0.188374  | 0.206731  | 0.207751 | 0.188228  |
| 0.166521  | 0.164918 | 0.168561 | 0.165064  | 0.176719  | 0.176573 | 0.160839  |
| 0.113491  | 0.130536 | 0.123106 | 0.109411  | 0.135635  | 0.134615 | 0.1081    |
| 0.115093  | 0.113199 | 0.115093 | 0.11655   | 0.134324  | 0.135344 | 0.114365  |
| 0.137821  | 0.158362 | 0.156177 | 0.137529  | 0.15472   | 0.142337 | 0.133013  |
| 0.133304  | 0.129662 | 0.129516 | 0.116404  | 0.139132  | 0.152681 | 0.118298  |
| 0.120629  | 0.122523 | 0.119172 | 0.117133  | 0.135781  | 0.141171 | 0.113199  |
| 0.118444  | 0.121503 | 0.112617 | 0.113491  | 0.127185  | 0.138986 | 0.103438  |
| 0.105332  | 0.105769 | 0.111742 | 0.105332  | 0.0872669 | 0.128205 | 0.0812937 |
| 0.121941  | 0.124709 | 0.123106 | 0.122815  | 0.121941  | 0.138986 | 0.105186  |
| 0.206294  | 0.197407 | 0.206002 | 0.198135  | 0.215326  | 0.219843 | 0.194784  |
| 0.10912   | 0.118881 | 0.106498 | 0.114073  | 0.141171  | 0.129371 | 0.113054  |
| 0.116259  | 0.11961  | 0.112471 | 0.121503  | 0.140443  | 0.135344 | 0.111116  |
| 0.1081    | 0.114073 | 0.11014  | 0.107517  | 0.115967  | 0.131847 | 0.0922203 |
| 0.120192  | 0.11859  | 0.126894 | 0.110286  | 0.127185  | 0.137529 | 0.106643  |

|           |          |          |          |           |          |           |
|-----------|----------|----------|----------|-----------|----------|-----------|
| 0.185315  | 0.181672 | 0.184441 | 0.183858 | 0.196678  | 0.203234 | 0.178467  |
| 0.248543  | 0.240822 | 0.25     | 0.245629 | 0.257867  | 0.257721 | 0.242279  |
| 0.123834  | 0.122815 | 0.125583 | 0.118007 | 0.13986   | 0.148164 | 0.112908  |
| 0.11859   | 0.125437 | 0.121795 | 0.123252 | 0.123252  | 0.137966 | 0.10067   |
| 0.115967  | 0.134178 | 0.125583 | 0.111597 | 0.131993  | 0.135052 | 0.107663  |
| 0.106206  | 0.119755 | 0.10912  | 0.101253 | 0.134178  | 0.129371 | 0.105478  |
| 0.100816  | 0.114073 | 0.106643 | 0.101981 | 0.132867  | 0.122523 | 0.107372  |
| 0.117861  | 0.118007 | 0.118153 | 0.106206 | 0.130682  | 0.137529 | 0.105478  |
| 0.115967  | 0.119901 | 0.115676 | 0.110723 | 0.129953  | 0.133887 | 0.105041  |
| 0.100524  | 0.111451 | 0.107517 | 0.106061 | 0.13549   | 0.127768 | 0.108829  |
| 0.11553   | 0.119464 | 0.114365 | 0.112617 | 0.130099  | 0.133741 | 0.101981  |
| 0.107809  | 0.114948 | 0.115967 | 0.113054 | 0.0932401 | 0.13447  | 0.0779429 |
| 0.104749  | 0.117424 | 0.111742 | 0.104167 | 0.112034  | 0.129079 | 0.090035  |
| 0.121795  | 0.122232 | 0.122669 | 0.119172 | 0.142191  | 0.145542 | 0.114656  |
| 0.121941  | 0.126457 | 0.122232 | 0.11961  | 0.137383  | 0.140152 | 0.108683  |
| 0.106206  | 0.108683 | 0.107372 | 0.107663 | 0.117861  | 0.130828 | 0.0920746 |
| 0.114073  | 0.119172 | 0.125728 | 0.11961  | 0.129516  | 0.129371 | 0.106061  |
| 0.118444  | 0.132576 | 0.128351 | 0.119027 | 0.141754  | 0.134907 | 0.121503  |
| 0.110723  | 0.11553  | 0.111597 | 0.109848 | 0.122378  | 0.132139 | 0.0989219 |
| 0.113491  | 0.119464 | 0.122523 | 0.115239 | 0.13039   | 0.134907 | 0.110431  |
| 0.124854  | 0.127331 | 0.13039  | 0.123689 | 0.126894  | 0.138112 | 0.112762  |
| 0.208916  | 0.204691 | 0.212413 | 0.208916 | 0.215909  | 0.223048 | 0.204691  |
| 0.115239  | 0.11014  | 0.111742 | 0.108829 | 0.129808  | 0.135781 | 0.0999417 |
| 0.104312  | 0.112325 | 0.111597 | 0.103147 | 0.1081    | 0.128934 | 0.0875583 |
| 0.118007  | 0.119318 | 0.12296  | 0.111888 | 0.128497  | 0.146125 | 0.112325  |
| 0.124563  | 0.113345 | 0.119901 | 0.119901 | 0.145542  | 0.147145 | 0.117133  |
| 0.119027  | 0.117133 | 0.122523 | 0.107372 | 0.129516  | 0.137821 | 0.103147  |
| 0.201777  | 0.19697  | 0.200612 | 0.196241 | 0.212267  | 0.216783 | 0.192308  |
| 0.125     | 0.128934 | 0.124417 | 0.121503 | 0.1419    | 0.142045 | 0.110868  |
| 0.108829  | 0.118007 | 0.111451 | 0.107663 | 0.121358  | 0.128497 | 0.0976107 |
| 0.115093  | 0.122523 | 0.125874 | 0.107517 | 0.124709  | 0.13243  | 0.106789  |
| 0.10373   | 0.120775 | 0.111888 | 0.102273 | 0.130245  | 0.126311 | 0.103001  |
| 0.123834  | 0.124563 | 0.121503 | 0.121212 | 0.139569  | 0.137966 | 0.111742  |
| 0.108392  | 0.114073 | 0.114802 | 0.109266 | 0.125     | 0.133887 | 0.0971737 |
| 0.104604  | 0.112908 | 0.113636 | 0.114219 | 0.0929487 | 0.133887 | 0.0793998 |
| 0.116259  | 0.10912  | 0.115676 | 0.113345 | 0.140734  | 0.14292  | 0.113782  |
| 0.201195  | 0.196096 | 0.198281 | 0.195076 | 0.215472  | 0.21824  | 0.191434  |
| 0.110431  | 0.116987 | 0.112762 | 0.112179 | 0.12704   | 0.131265 | 0.097465  |
| 0.200029  | 0.193473 | 0.197115 | 0.193328 | 0.212267  | 0.213578 | 0.187937  |
| 0.195221  | 0.191579 | 0.195513 | 0.193473 | 0.210664  | 0.211393 | 0.186917  |
| 0.116259  | 0.130973 | 0.121795 | 0.11655  | 0.13986   | 0.135052 | 0.115239  |
| 0.126748  | 0.11757  | 0.13141  | 0.127622 | 0.146562  | 0.145542 | 0.122232  |
| 0.0999417 | 0.106206 | 0.105769 | 0.10373  | 0.0935315 | 0.130099 | 0.0686189 |
| 0.109994  | 0.117716 | 0.115239 | 0.107372 | 0.128642  | 0.128205 | 0.0967366 |

|           |          |          |           |          |          |           |
|-----------|----------|----------|-----------|----------|----------|-----------|
| 0.118298  | 0.122815 | 0.118298 | 0.112762  | 0.131119 | 0.134761 | 0.103875  |
| 0.114802  | 0.118444 | 0.113928 | 0.109557  | 0.123834 | 0.13447  | 0.101836  |
| 0.0981935 | 0.110577 | 0.101399 | 0.104021  | 0.13141  | 0.121649 | 0.102127  |
| 0.0990676 | 0.112034 | 0.10373  | 0.105478  | 0.131702 | 0.122815 | 0.107663  |
| 0.123689  | 0.12296  | 0.123689 | 0.123106  | 0.142045 | 0.148019 | 0.113928  |
| 0.108683  | 0.127768 | 0.115093 | 0.106643  | 0.134615 | 0.132721 | 0.10708   |
| 0.105624  | 0.112762 | 0.107372 | 0.10708   | 0.116404 | 0.129662 | 0.0932401 |
| 0.122378  | 0.122815 | 0.118007 | 0.120338  | 0.138695 | 0.138549 | 0.106498  |
| 0.0960082 | 0.103147 | 0.102127 | 0.0922203 | 0.106789 | 0.124126 | 0.0775058 |
| 0.129371  | 0.128059 | 0.129371 | 0.129371  | 0.143065 | 0.138549 | 0.116987  |
| 0.114802  | 0.13039  | 0.124126 | 0.104895  | 0.13345  | 0.135052 | 0.10708   |
| 0.13447   | 0.133159 | 0.133304 | 0.135635  | 0.146999 | 0.145688 | 0.122669  |
| 0.264423  | 0.252622 | 0.262966 | 0.259761  | 0.268211 | 0.268939 | 0.251748  |
| 0.112034  | 0.131993 | 0.120484 | 0.117279  | 0.138258 | 0.132576 | 0.116259  |
| 0.119755  | 0.136509 | 0.133741 | 0.120921  | 0.139277 | 0.131265 | 0.115239  |
| 0.222174  | 0.212121 | 0.220717 | 0.218094  | 0.232372 | 0.231352 | 0.212413  |
| 0.133159  | 0.130099 | 0.123252 | 0.120921  | 0.137821 | 0.145542 | 0.114948  |
| 0.231935  | 0.226253 | 0.234848 | 0.231643  | 0.240967 | 0.24461  | 0.223048  |
| 0.104458  | 0.123543 | 0.112325 | 0.108537  | 0.135635 | 0.129953 | 0.109266  |
| 0.123834  | 0.124854 | 0.12704  | 0.122378  | 0.129662 | 0.135635 | 0.111742  |
| 0.113928  | 0.107955 | 0.113345 | 0.115093  | 0.134615 | 0.137966 | 0.107372  |
| 0.113636  | 0.127477 | 0.122086 | 0.111888  | 0.134615 | 0.135635 | 0.110577  |
| 0.207751  | 0.200321 | 0.206002 | 0.197261  | 0.217075 | 0.219551 | 0.195659  |
| 0.131119  | 0.132721 | 0.131993 | 0.132576  | 0.145396 | 0.144376 | 0.11961   |
| 0.120921  | 0.125437 | 0.119464 | 0.120921  | 0.136946 | 0.136218 | 0.107955  |
| 0.227127  | 0.219406 | 0.228584 | 0.223631  | 0.237908 | 0.242716 | 0.221445  |
| 0.105769  | 0.112617 | 0.106935 | 0.112179  | 0.136946 | 0.131265 | 0.112325  |
| 0.201486  | 0.195513 | 0.202069 | 0.19595   | 0.211976 | 0.212995 | 0.191725  |
| 0.105624  | 0.117716 | 0.108829 | 0.109411  | 0.136801 | 0.128497 | 0.111597  |
| 0.112908  | 0.119464 | 0.110286 | 0.112034  | 0.123397 | 0.134907 | 0.0987762 |
| 0.111597  | 0.122523 | 0.122086 | 0.112471  | 0.106643 | 0.128351 | 0.095134  |
| 0.115967  | 0.131556 | 0.127331 | 0.118007  | 0.139277 | 0.134761 | 0.116696  |
| 0.114073  | 0.122669 | 0.117279 | 0.109703  | 0.129516 | 0.139277 | 0.103438  |
| 0.159819  | 0.164336 | 0.160402 | 0.156906  | 0.168852 | 0.177739 | 0.145105  |
| 0.116404  | 0.116259 | 0.119318 | 0.113782  | 0.135927 | 0.134324 | 0.103438  |
| 0.122232  | 0.113054 | 0.121066 | 0.118153  | 0.143794 | 0.143065 | 0.117424  |
| 0.116404  | 0.123834 | 0.112908 | 0.112908  | 0.142628 | 0.140443 | 0.108683  |
| 0.124854  | 0.12704  | 0.129516 | 0.129516  | 0.143211 | 0.145688 | 0.118298  |
| 0.199009  | 0.19391  | 0.198135 | 0.190851  | 0.213287 | 0.214307 | 0.188083  |
| 0.112908  | 0.117424 | 0.109703 | 0.108829  | 0.123689 | 0.133159 | 0.0996503 |
| 0.113636  | 0.128642 | 0.117716 | 0.11014   | 0.138403 | 0.138549 | 0.110286  |
| 0.0823135 | 0.119755 | 0.10708  | 0.099796  | 0.13039  | 0.112762 | 0.103438  |
| 0.104604  | 0.113199 | 0.108974 | 0.110431  | 0.136655 | 0.125146 | 0.112034  |
| 0.11757   | 0.122086 | 0.11961  | 0.114073  | 0.124272 | 0.132867 | 0.105478  |

|          |          |          |          |           |          |           |
|----------|----------|----------|----------|-----------|----------|-----------|
| 0.260198 | 0.251311 | 0.260198 | 0.257284 | 0.266317  | 0.266754 | 0.251894  |
| 0.107372 | 0.11451  | 0.117861 | 0.107372 | 0.107372  | 0.128497 | 0.092366  |
| 0.116987 | 0.119172 | 0.122232 | 0.112034 | 0.13243   | 0.143357 | 0.111014  |
| 0.182838 | 0.180653 | 0.187209 | 0.173514 | 0.191871  | 0.195804 | 0.177448  |
| 0.187791 | 0.182692 | 0.186626 | 0.181964 | 0.204108  | 0.208333 | 0.179196  |
| 0.124272 | 0.124709 | 0.121066 | 0.11553  | 0.139714  | 0.14831  | 0.113054  |
| 0.123834 | 0.123106 | 0.12296  | 0.116259 | 0.138112  | 0.136801 | 0.107372  |
| 0.107517 | 0.122815 | 0.111597 | 0.104021 | 0.13345   | 0.130973 | 0.107663  |
| 0.146125 | 0.145688 | 0.147873 | 0.146707 | 0.154283  | 0.15472  | 0.134615  |
| 0.120484 | 0.119755 | 0.120775 | 0.113199 | 0.137966  | 0.143939 | 0.105478  |
| 0.122669 | 0.11961  | 0.121795 | 0.11655  | 0.137821  | 0.147582 | 0.115239  |
| 0.110868 | 0.120047 | 0.114948 | 0.118153 | 0.144668  | 0.130245 | 0.11859   |
| 0.119318 | 0.12296  | 0.119318 | 0.118735 | 0.134178  | 0.134324 | 0.107809  |
| 0.130536 | 0.130973 | 0.132576 | 0.131702 | 0.143357  | 0.14088  | 0.117861  |
| 0.109994 | 0.120338 | 0.111451 | 0.114365 | 0.136218  | 0.137238 | 0.112471  |
| 0.113636 | 0.129516 | 0.121503 | 0.11451  | 0.134324  | 0.131265 | 0.113199  |
| 0.124563 | 0.139569 | 0.136218 | 0.128642 | 0.142337  | 0.13986  | 0.127331  |
| 0.110723 | 0.121941 | 0.120047 | 0.111888 | 0.106061  | 0.128934 | 0.0960082 |
| 0.120775 | 0.134324 | 0.127768 | 0.119027 | 0.141754  | 0.136364 | 0.119464  |
| 0.111451 | 0.121212 | 0.117279 | 0.118735 | 0.14292   | 0.129953 | 0.121212  |
| 0.213287 | 0.206439 | 0.210664 | 0.203671 | 0.223193  | 0.227127 | 0.202943  |
| 0.101253 | 0.113636 | 0.113491 | 0.10708  | 0.114656  | 0.122669 | 0.0941142 |
| 0.195367 | 0.190559 | 0.196241 | 0.190997 | 0.206731  | 0.206876 | 0.187646  |
| 0.116404 | 0.116259 | 0.117861 | 0.112325 | 0.135635  | 0.138695 | 0.105478  |
| 0.119027 | 0.12704  | 0.125146 | 0.122815 | 0.127185  | 0.138986 | 0.108392  |
| 0.119901 | 0.131993 | 0.131556 | 0.115822 | 0.13447   | 0.13549  | 0.109848  |
| 0.111888 | 0.124563 | 0.123543 | 0.104895 | 0.130536  | 0.131265 | 0.104458  |
| 0.126894 | 0.12704  | 0.12602  | 0.123689 | 0.140297  | 0.142774 | 0.111597  |
| 0.124272 | 0.123834 | 0.123689 | 0.12602  | 0.141463  | 0.138403 | 0.115093  |
| 0.115239 | 0.120338 | 0.114365 | 0.112617 | 0.127768  | 0.133741 | 0.103438  |
| 0.121212 | 0.112617 | 0.120629 | 0.116259 | 0.144231  | 0.141754 | 0.114365  |
| 0.11859  | 0.131847 | 0.133159 | 0.116259 | 0.139569  | 0.134178 | 0.114365  |
| 0.112617 | 0.126166 | 0.122232 | 0.122815 | 0.147582  | 0.134324 | 0.124417  |
| 0.253934 | 0.248543 | 0.256265 | 0.25539  | 0.258596  | 0.262529 | 0.245921  |
| 0.114948 | 0.123543 | 0.113491 | 0.112908 | 0.125728  | 0.137821 | 0.100524  |
| 0.187646 | 0.180507 | 0.187937 | 0.178904 | 0.200175  | 0.202069 | 0.178467  |
| 0.195076 | 0.185897 | 0.190122 | 0.185752 | 0.205274  | 0.208042 | 0.18211   |
| 0.119755 | 0.121649 | 0.111305 | 0.115093 | 0.131993  | 0.14292  | 0.105624  |
| 0.100816 | 0.116113 | 0.115093 | 0.106352 | 0.107809  | 0.127477 | 0.0890152 |
| 0.118007 | 0.124563 | 0.125874 | 0.120338 | 0.129662  | 0.134761 | 0.108246  |
| 0.117716 | 0.120192 | 0.117133 | 0.111597 | 0.131993  | 0.13447  | 0.103001  |
| 0.105915 | 0.106643 | 0.109703 | 0.102418 | 0.0954254 | 0.130536 | 0.0815851 |
| 0.101836 | 0.115676 | 0.107372 | 0.10912  | 0.138549  | 0.127622 | 0.11014   |
| 0.120629 | 0.123689 | 0.11655  | 0.122669 | 0.132284  | 0.135052 | 0.108829  |

|          |          |          |          |           |          |           |
|----------|----------|----------|----------|-----------|----------|-----------|
| 0.131702 | 0.135344 | 0.135781 | 0.133159 | 0.142483  | 0.141754 | 0.121358  |
| 0.115822 | 0.117716 | 0.11553  | 0.110577 | 0.121941  | 0.13549  | 0.0996503 |
| 0.127768 | 0.131993 | 0.129516 | 0.131265 | 0.146416  | 0.137821 | 0.119172  |
| 0.118007 | 0.125437 | 0.118007 | 0.11451  | 0.131702  | 0.135052 | 0.104167  |
| 0.120629 | 0.135635 | 0.134615 | 0.116841 | 0.135781  | 0.133304 | 0.116113  |
| 0.10912  | 0.125    | 0.118444 | 0.107372 | 0.139132  | 0.135781 | 0.111305  |
| 0.113054 | 0.122232 | 0.119464 | 0.123543 | 0.141317  | 0.127477 | 0.122815  |
| 0.10708  | 0.120921 | 0.121649 | 0.121358 | 0.0872669 | 0.13549  | 0.085373  |
| 0.11116  | 0.118298 | 0.116113 | 0.114073 | 0.120775  | 0.131119 | 0.0987762 |
| 0.12602  | 0.128205 | 0.14088  | 0.125437 | 0.137966  | 0.151224 | 0.127331  |
| 0.187063 | 0.182547 | 0.187063 | 0.181235 | 0.200175  | 0.203526 | 0.179341  |
| 0.135344 | 0.136072 | 0.141171 | 0.138258 | 0.14933   | 0.146562 | 0.125     |
| 0.123689 | 0.125    | 0.125146 | 0.122815 | 0.13884   | 0.139569 | 0.11014   |
| 0.114219 | 0.130973 | 0.12704  | 0.110723 | 0.133741  | 0.13243  | 0.106498  |
| 0.107663 | 0.118298 | 0.116113 | 0.100379 | 0.12602   | 0.129371 | 0.0961538 |
| 0.110431 | 0.124272 | 0.116259 | 0.1081   | 0.137238  | 0.132721 | 0.108246  |
| 0.112034 | 0.128205 | 0.118735 | 0.110868 | 0.136801  | 0.132284 | 0.112179  |
| 0.195513 | 0.191871 | 0.195221 | 0.187937 | 0.207168  | 0.212558 | 0.186334  |
| 0.115385 | 0.121066 | 0.118881 | 0.120629 | 0.131993  | 0.135052 | 0.107663  |
| 0.10912  | 0.113345 | 0.111451 | 0.104749 | 0.123689  | 0.131993 | 0.0958625 |
| 0.126603 | 0.130245 | 0.124563 | 0.128351 | 0.142045  | 0.138695 | 0.115385  |
| 0.195221 | 0.188083 | 0.195513 | 0.188811 | 0.210664  | 0.211101 | 0.186043  |
| 0.103001 | 0.11859  | 0.111451 | 0.103001 | 0.110577  | 0.131119 | 0.0868298 |
| 0.104604 | 0.11961  | 0.113054 | 0.113054 | 0.142774  | 0.12602  | 0.116987  |
| 0.126457 | 0.127477 | 0.125291 | 0.124709 | 0.139277  | 0.137675 | 0.111742  |
| 0.11757  | 0.11655  | 0.114656 | 0.114073 | 0.13447   | 0.138695 | 0.107809  |
| 0.192745 | 0.187354 | 0.193036 | 0.184295 | 0.202652  | 0.207751 | 0.181527  |
| 0.105332 | 0.11859  | 0.109411 | 0.110286 | 0.13884   | 0.128788 | 0.113636  |
| 0.113491 | 0.11655  | 0.121649 | 0.10708  | 0.127477  | 0.1419   | 0.107517  |
| 0.107663 | 0.117133 | 0.115239 | 0.105624 | 0.112908  | 0.132576 | 0.0897436 |
| 0.117279 | 0.127914 | 0.12602  | 0.116696 | 0.137966  | 0.145979 | 0.117133  |
| 0.119755 | 0.11116  | 0.120338 | 0.11451  | 0.142191  | 0.14088  | 0.114073  |
| 0.11014  | 0.121066 | 0.117133 | 0.118007 | 0.141608  | 0.129225 | 0.120775  |
| 0.112471 | 0.119027 | 0.112471 | 0.108683 | 0.122378  | 0.133596 | 0.0980478 |
| 0.121503 | 0.122232 | 0.118881 | 0.115967 | 0.13549   | 0.132721 | 0.107663  |
| 0.144376 | 0.142483 | 0.149038 | 0.142337 | 0.156031  | 0.162879 | 0.138695  |
| 0.24053  | 0.229021 | 0.239073 | 0.236742 | 0.245192  | 0.251457 | 0.230769  |
| 0.106789 | 0.120629 | 0.125437 | 0.125437 | 0.0898893 | 0.138403 | 0.0879953 |
| 0.119027 | 0.112471 | 0.118444 | 0.116696 | 0.143211  | 0.143065 | 0.115385  |
| 0.119172 | 0.121941 | 0.120338 | 0.120629 | 0.136072  | 0.135344 | 0.10912   |
| 0.124563 | 0.128788 | 0.129516 | 0.115239 | 0.136218  | 0.148601 | 0.113928  |
| 0.112471 | 0.107372 | 0.113345 | 0.117424 | 0.140152  | 0.134178 | 0.108246  |
| 0.121795 | 0.117861 | 0.127622 | 0.112179 | 0.13141   | 0.138549 | 0.105332  |
| 0.123397 | 0.126748 | 0.122815 | 0.129225 | 0.140006  | 0.137529 | 0.115093  |

|           |          |          |           |           |          |           |
|-----------|----------|----------|-----------|-----------|----------|-----------|
| 0.108392  | 0.119027 | 0.112762 | 0.118007  | 0.143357  | 0.13243  | 0.121066  |
| 0.12296   | 0.123106 | 0.120338 | 0.118298  | 0.135198  | 0.143502 | 0.118444  |
| 0.241113  | 0.231643 | 0.243735 | 0.237908  | 0.249272  | 0.251166 | 0.232226  |
| 0.104604  | 0.111451 | 0.11014  | 0.10373   | 0.109266  | 0.12398  | 0.0863928 |
| 0.0958625 | 0.113199 | 0.101399 | 0.0976107 | 0.129371  | 0.127477 | 0.0968823 |
| 0.110577  | 0.115385 | 0.113199 | 0.110286  | 0.121941  | 0.130245 | 0.0984848 |
| 0.129079  | 0.128059 | 0.133741 | 0.128788  | 0.143939  | 0.149621 | 0.12398   |
| 0.11655   | 0.127768 | 0.135198 | 0.130245  | 0.0885781 | 0.140297 | 0.0965909 |
| 0.118298  | 0.118735 | 0.12296  | 0.117716  | 0.127914  | 0.136801 | 0.104749  |
| 0.124126  | 0.121941 | 0.124126 | 0.119755  | 0.140443  | 0.137966 | 0.112617  |
| 0.113491  | 0.115967 | 0.114365 | 0.110286  | 0.133596  | 0.135781 | 0.101107  |
| 0.23616   | 0.227855 | 0.236451 | 0.233829  | 0.241696  | 0.245338 | 0.227855  |
| 0.126311  | 0.130245 | 0.128059 | 0.127185  | 0.142628  | 0.137821 | 0.117133  |
| 0.104895  | 0.11757  | 0.112471 | 0.112471  | 0.140734  | 0.127477 | 0.115239  |
| 0.111305  | 0.114365 | 0.113636 | 0.111305  | 0.134615  | 0.135052 | 0.107663  |
| 0.119027  | 0.115967 | 0.126894 | 0.123689  | 0.136218  | 0.138695 | 0.109266  |
| 0.107955  | 0.129371 | 0.117861 | 0.112617  | 0.133887  | 0.134615 | 0.111305  |
| 0.112325  | 0.118881 | 0.114073 | 0.113199  | 0.120192  | 0.132284 | 0.0999417 |
| 0.107663  | 0.117133 | 0.112034 | 0.112617  | 0.139714  | 0.129662 | 0.119172  |
| 0.111888  | 0.122815 | 0.117716 | 0.121212  | 0.145688  | 0.125728 | 0.122232  |
| 0.102855  | 0.11116  | 0.104895 | 0.110723  | 0.136072  | 0.126311 | 0.112325  |
| 0.113199  | 0.121503 | 0.112325 | 0.109411  | 0.121066  | 0.134615 | 0.0999417 |
| 0.125437  | 0.116841 | 0.12602  | 0.124854  | 0.144085  | 0.144522 | 0.11859   |
| 0.129079  | 0.117861 | 0.131119 | 0.128497  | 0.149184  | 0.147873 | 0.123689  |
| 0.12296   | 0.139132 | 0.135198 | 0.117424  | 0.139569  | 0.137092 | 0.116404  |
| 0.125583  | 0.13884  | 0.138112 | 0.120338  | 0.1419    | 0.139714 | 0.120484  |
| 0.128059  | 0.118881 | 0.13039  | 0.128059  | 0.146999  | 0.146562 | 0.12296   |
| 0.101544  | 0.100233 | 0.103001 | 0.0945513 | 0.0916375 | 0.126748 | 0.0743007 |
| 0.0909091 | 0.135635 | 0.123543 | 0.117424  | 0.142191  | 0.104458 | 0.125437  |
| 0.124563  | 0.121795 | 0.130099 | 0.129516  | 0.137383  | 0.137529 | 0.120629  |
| 0.211393  | 0.203963 | 0.21081  | 0.205857  | 0.222174  | 0.222611 | 0.200466  |
| 0.119318  | 0.128497 | 0.13039  | 0.125437  | 0.124272  | 0.137821 | 0.109266  |
| 0.10067   | 0.117716 | 0.108246 | 0.100087  | 0.132721  | 0.131702 | 0.102855  |
| 0.119172  | 0.123106 | 0.121503 | 0.115093  | 0.129371  | 0.139423 | 0.105624  |
| 0.228001  | 0.219697 | 0.22771  | 0.221882  | 0.233537  | 0.236888 | 0.215618  |
| 0.213724  | 0.206002 | 0.215763 | 0.21285   | 0.223339  | 0.22669  | 0.206294  |
| 0.111597  | 0.122523 | 0.118007 | 0.118881  | 0.144231  | 0.13039  | 0.120775  |
| 0.256265  | 0.246503 | 0.255973 | 0.252185  | 0.262092  | 0.266317 | 0.247669  |
| 0.103584  | 0.103438 | 0.105332 | 0.0954254 | 0.0901807 | 0.125291 | 0.0748834 |
| 0.129225  | 0.125874 | 0.134761 | 0.131847  | 0.130682  | 0.142483 | 0.115967  |
| 0.105915  | 0.116841 | 0.113782 | 0.105041  | 0.105624  | 0.128788 | 0.0891608 |
| 0.125291  | 0.116987 | 0.124417 | 0.125291  | 0.146853  | 0.145833 | 0.120192  |
| 0.191288  | 0.181235 | 0.192745 | 0.185169  | 0.204108  | 0.202506 | 0.182984  |
| 0.120047  | 0.122523 | 0.124709 | 0.123834  | 0.132284  | 0.141754 | 0.114656  |



|           |          |          |           |           |          |           |
|-----------|----------|----------|-----------|-----------|----------|-----------|
| 0.199009  | 0.193328 | 0.198427 | 0.194056  | 0.21183   | 0.213724 | 0.188083  |
| 0.117716  | 0.123397 | 0.114219 | 0.111597  | 0.129371  | 0.13884  | 0.100087  |
| 0.108974  | 0.120192 | 0.109557 | 0.117133  | 0.139569  | 0.131556 | 0.114365  |
| 0.111597  | 0.116113 | 0.11451  | 0.115385  | 0.114802  | 0.137383 | 0.0989219 |
| 0.113054  | 0.117279 | 0.120047 | 0.109557  | 0.129371  | 0.139423 | 0.104749  |
| 0.105332  | 0.113636 | 0.10708  | 0.101836  | 0.118153  | 0.12704  | 0.0938228 |
| 0.113491  | 0.118007 | 0.121358 | 0.114656  | 0.120484  | 0.130536 | 0.0967366 |
| 0.101253  | 0.111305 | 0.108537 | 0.10067   | 0.106498  | 0.127914 | 0.0827506 |
| 0.117424  | 0.119027 | 0.117424 | 0.115967  | 0.132576  | 0.13447  | 0.105332  |
| 0.0843531 | 0.123834 | 0.10912  | 0.103584  | 0.134178  | 0.107517 | 0.109557  |
| 0.10271   | 0.110723 | 0.10912  | 0.11116   | 0.0968823 | 0.13141  | 0.0743007 |
| 0.102564  | 0.114656 | 0.111014 | 0.105769  | 0.106935  | 0.127185 | 0.088141  |
| 0.115822  | 0.128205 | 0.128934 | 0.112034  | 0.135927  | 0.134907 | 0.112179  |
| 0.128351  | 0.129371 | 0.131847 | 0.133304  | 0.145251  | 0.142774 | 0.120047  |
| 0.109557  | 0.124854 | 0.120629 | 0.102855  | 0.129371  | 0.13039  | 0.104458  |
| 0.110286  | 0.114219 | 0.119318 | 0.103001  | 0.125146  | 0.137529 | 0.109848  |
| 0.106935  | 0.114365 | 0.106352 | 0.10373   | 0.118298  | 0.130099 | 0.0945513 |
| 0.104021  | 0.118153 | 0.109848 | 0.116259  | 0.137821  | 0.125146 | 0.113199  |
| 0.118298  | 0.112034 | 0.114802 | 0.112762  | 0.138986  | 0.142628 | 0.115239  |
| 0.110286  | 0.126748 | 0.120192 | 0.109994  | 0.136801  | 0.132867 | 0.110723  |
| 0.111742  | 0.129662 | 0.124272 | 0.107955  | 0.13039   | 0.134033 | 0.105186  |
| 0.123543  | 0.125437 | 0.120047 | 0.120629  | 0.139277  | 0.137675 | 0.107663  |
| 0.133596  | 0.134033 | 0.135052 | 0.133596  | 0.144376  | 0.13986  | 0.118007  |
| 0.137675  | 0.13986  | 0.139132 | 0.139132  | 0.14729   | 0.147145 | 0.127622  |
| 0.0964452 | 0.103293 | 0.099359 | 0.0996503 | 0.125291  | 0.121066 | 0.0962995 |
| 0.113345  | 0.119027 | 0.113636 | 0.111597  | 0.125583  | 0.135927 | 0.0986305 |
| 0.109703  | 0.112762 | 0.118735 | 0.099796  | 0.123397  | 0.131119 | 0.0958625 |
| 0.131556  | 0.119464 | 0.13039  | 0.130682  | 0.149038  | 0.148893 | 0.125583  |
| 0.105478  | 0.115239 | 0.116841 | 0.106061  | 0.1081    | 0.130099 | 0.0887238 |
| 0.122669  | 0.140589 | 0.136655 | 0.130245  | 0.146562  | 0.137092 | 0.13039   |
| 0.128205  | 0.132721 | 0.134033 | 0.128788  | 0.130245  | 0.143211 | 0.118444  |
| 0.123106  | 0.123252 | 0.128642 | 0.125437  | 0.142045  | 0.14627  | 0.11655   |
| 0.105769  | 0.113782 | 0.114219 | 0.109266  | 0.111305  | 0.131847 | 0.0872669 |
| 0.112617  | 0.115676 | 0.114365 | 0.112034  | 0.125728  | 0.138695 | 0.101107  |
| 0.120484  | 0.134615 | 0.132139 | 0.114948  | 0.13447   | 0.13141  | 0.114219  |
| 0.210664  | 0.20236  | 0.208625 | 0.205711  | 0.222611  | 0.2213   | 0.200903  |
| 0.111888  | 0.114948 | 0.119172 | 0.106352  | 0.127331  | 0.140297 | 0.110286  |
| 0.108829  | 0.113636 | 0.112325 | 0.109994  | 0.117279  | 0.140443 | 0.092366  |
| 0.120047  | 0.111451 | 0.12296  | 0.115385  | 0.140152  | 0.141171 | 0.114365  |
| 0.113199  | 0.127622 | 0.123689 | 0.107955  | 0.132721  | 0.133159 | 0.103438  |
| 0.121212  | 0.128059 | 0.118298 | 0.118007  | 0.137238  | 0.142628 | 0.106206  |
| 0.118881  | 0.12602  | 0.124126 | 0.120338  | 0.13345   | 0.133304 | 0.107663  |
| 0.121649  | 0.125291 | 0.128351 | 0.125437  | 0.137092  | 0.135781 | 0.113636  |
| 0.117716  | 0.121358 | 0.124709 | 0.115676  | 0.136946  | 0.140589 | 0.11116   |

|           |           |           |           |           |          |           |
|-----------|-----------|-----------|-----------|-----------|----------|-----------|
| 0.0815851 | 0.114948  | 0.10169   | 0.0967366 | 0.127331  | 0.110286 | 0.101253  |
| 0.121795  | 0.118153  | 0.128205  | 0.124126  | 0.143939  | 0.14088  | 0.121941  |
| 0.109557  | 0.111451  | 0.1081    | 0.11014   | 0.113054  | 0.137675 | 0.0942599 |
| 0.107955  | 0.117133  | 0.116696  | 0.11553   | 0.0962995 | 0.138112 | 0.0824592 |
| 0.175991  | 0.180798  | 0.181235  | 0.172203  | 0.196387  | 0.193036 | 0.167978  |
| 0.121212  | 0.123106  | 0.11859   | 0.117424  | 0.136072  | 0.137675 | 0.106789  |
| 0.126603  | 0.117716  | 0.127768  | 0.125146  | 0.146416  | 0.147145 | 0.120338  |
| 0.0914918 | 0.112325  | 0.11451   | 0.111014  | 0.108974  | 0.124563 | 0.0957168 |
| 0.11757   | 0.125     | 0.122523  | 0.11553   | 0.141754  | 0.135198 | 0.11859   |
| 0.101253  | 0.103147  | 0.103001  | 0.100379  | 0.112325  | 0.127331 | 0.0818765 |
| 0.0968823 | 0.107809  | 0.105915  | 0.10708   | 0.0939685 | 0.126457 | 0.0708042 |
| 0.104458  | 0.110431  | 0.10912   | 0.106206  | 0.111451  | 0.131119 | 0.085373  |
| 0.117279  | 0.119172  | 0.121941  | 0.116987  | 0.142045  | 0.130828 | 0.11859   |
| 0.114948  | 0.11655   | 0.11757   | 0.11757   | 0.114073  | 0.138695 | 0.0973193 |
| 0.113345  | 0.130973  | 0.127622  | 0.110431  | 0.138112  | 0.136801 | 0.115239  |
| 0.103001  | 0.111888  | 0.103875  | 0.101544  | 0.123689  | 0.125583 | 0.100233  |
| 0.105769  | 0.114656  | 0.118298  | 0.0964452 | 0.117716  | 0.128934 | 0.0971737 |
| 0.125728  | 0.121795  | 0.125437  | 0.130099  | 0.137966  | 0.135781 | 0.120047  |
| 0.0872669 | 0.107226  | 0.109994  | 0.105332  | 0.105624  | 0.109557 | 0.0909091 |
| 0.112908  | 0.124126  | 0.122815  | 0.10708   | 0.124563  | 0.131702 | 0.110723  |
| 0.0837704 | 0.105769  | 0.104167  | 0.100962  | 0.112908  | 0.113636 | 0.090035  |
| 0.0875583 | 0.111014  | 0.111451  | 0.103584  | 0.109411  | 0.112471 | 0.092366  |
| 0.103001  | 0.104021  | 0.107372  | 0.0916375 | 0.10708   | 0.129953 | 0.0798368 |
| 0.112179  | 0.111742  | 0.106061  | 0.108974  | 0.112762  | 0.131556 | 0.0910548 |
| 0.0824592 | 0.105915  | 0.106352  | 0.0944056 | 0.112179  | 0.126894 | 0.0919289 |
| 0.129079  | 0.142628  | 0.136072  | 0.134907  | 0.153846  | 0.144668 | 0.140589  |
| 0.121795  | 0.133887  | 0.125583  | 0.127622  | 0.149767  | 0.144376 | 0.128642  |
| 0.0836247 | 0.112617  | 0.109266  | 0.101981  | 0.109266  | 0.107955 | 0.0925117 |
| 0.129225  | 0.134615  | 0.132721  | 0.129516  | 0.154866  | 0.144522 | 0.131702  |
| 0.118153  | 0.124709  | 0.123106  | 0.117861  | 0.132139  | 0.143357 | 0.108683  |
| 0.132139  | 0.131119  | 0.132721  | 0.129808  | 0.133013  | 0.138403 | 0.122086  |
| 0.0968823 | 0.113928  | 0.113491  | 0.097465  | 0.117279  | 0.121212 | 0.0914918 |
| 0.142191  | 0.139423  | 0.127622  | 0.133741  | 0.158508  | 0.147582 | 0.129516  |
| 0.127622  | 0.137966  | 0.123252  | 0.116841  | 0.140443  | 0.145833 | 0.114656  |
| 0.132284  | 0.135344  | 0.137821  | 0.133159  | 0.15035   | 0.146416 | 0.131265  |
| 0.110431  | 0.119027  | 0.116259  | 0.106935  | 0.119464  | 0.130099 | 0.103584  |
| 0.083479  | 0.109557  | 0.108829  | 0.100087  | 0.109703  | 0.110431 | 0.0967366 |
| 0.102273  | 0.0861014 | 0.0862471 | 0.0984848 | 0.113636  | 0.124272 | 0.090472  |
| 0.108829  | 0.111305  | 0.114656  | 0.110868  | 0.136801  | 0.134324 | 0.108974  |
| 0.0989219 | 0.122086  | 0.11961   | 0.113199  | 0.113199  | 0.122086 | 0.100816  |
| 0.121503  | 0.124272  | 0.118007  | 0.115093  | 0.119464  | 0.130973 | 0.10067   |
| 0.116841  | 0.120775  | 0.115967  | 0.11859   | 0.134615  | 0.141171 | 0.116987  |
| 0.0999417 | 0.110577  | 0.107226  | 0.0964452 | 0.118298  | 0.128351 | 0.0925117 |
| 0.101253  | 0.0836247 | 0.08581   | 0.0983392 | 0.108829  | 0.126166 | 0.0891608 |

|          |           |           |           |           |          |           |
|----------|-----------|-----------|-----------|-----------|----------|-----------|
| 0.104021 | 0.106498  | 0.114219  | 0.109557  | 0.105478  | 0.125437 | 0.0977564 |
| 0.102273 | 0.0986305 | 0.100524  | 0.0979021 | 0.115676  | 0.120484 | 0.0968823 |
| 0.106498 | 0.0856643 | 0.0875583 | 0.107372  | 0.112325  | 0.12704  | 0.099359  |
| 0.105624 | 0.109848  | 0.11116   | 0.101544  | 0.114656  | 0.115385 | 0.0917832 |
| 0.118298 | 0.117279  | 0.122669  | 0.118298  | 0.128497  | 0.13447  | 0.105332  |
| 0.110723 | 0.107372  | 0.116259  | 0.107809  | 0.108974  | 0.130682 | 0.0919289 |
| 0.099359 | 0.10067   | 0.106352  | 0.0935315 | 0.0859557 | 0.122232 | 0.0721154 |
| 0.101981 | 0.103875  | 0.108974  | 0.103438  | 0.103147  | 0.124272 | 0.0901807 |
| 0.114073 | 0.11655   | 0.118735  | 0.11553   | 0.128351  | 0.138112 | 0.101107  |
| 0.104312 | 0.114656  | 0.111597  | 0.109557  | 0.11655   | 0.12602  | 0.0884324 |
| 0.119464 | 0.125728  | 0.123252  | 0.11859   | 0.129662  | 0.139714 | 0.11116   |
| 0.108392 | 0.112034  | 0.115093  | 0.108392  | 0.122086  | 0.128934 | 0.0968823 |
| 0.117861 | 0.124417  | 0.121941  | 0.122523  | 0.115822  | 0.135781 | 0.106643  |

| <b>TDr_12_00160</b> | <b>TDr_12_00168</b> | <b>TDr_12_00171</b> | <b>TDr_12_00178</b> | <b>TDr_12_00179</b> | <b>TDr_12_00195</b> | <b>TDr_12_00219</b> |
|---------------------|---------------------|---------------------|---------------------|---------------------|---------------------|---------------------|
| 0.130245            | 0.116404            | 0.127185            | 0.112908            | 0.118444            | 0.117133            | 0.125728            |
| 0.121941            | 0.119755            | 0.119755            | 0.111014            | 0.114219            | 0.114948            | 0.122086            |
| 0.117861            | 0.117133            | 0.11859             | 0.106352            | 0.111305            | 0.111451            | 0.118881            |
| 0.122815            | 0.120629            | 0.123252            | 0.113636            | 0.119464            | 0.11961             | 0.117716            |
| 0.141171            | 0.138403            | 0.139569            | 0.133159            | 0.131119            | 0.13243             | 0.13345             |
| 0.135052            | 0.136364            | 0.133741            | 0.125291            | 0.131119            | 0.133013            | 0.134907            |
| 0.135781            | 0.122232            | 0.136509            | 0.118153            | 0.121941            | 0.117424            | 0.128059            |
| 0.123252            | 0.123397            | 0.124563            | 0.114073            | 0.115822            | 0.119755            | 0.122232            |
| 0.118735            | 0.0955711           | 0.11451             | 0.106352            | 0.0952797           | 0.0977564           | 0.116259            |
| 0.0955711           | 0.0651224           | 0.0960082           | 0.0820221           | 0.0747378           | 0.0708042           | 0.0925117           |
| 0.133887            | 0.119464            | 0.129371            | 0.116259            | 0.118007            | 0.114365            | 0.130828            |
| 0.124417            | 0.121066            | 0.120775            | 0.113782            | 0.11553             | 0.118881            | 0.119027            |
| 0.116841            | 0.103001            | 0.118735            | 0.107955            | 0.103584            | 0.107809            | 0.119027            |
| 0.147873            | 0.134907            | 0.144522            | 0.13345             | 0.134615            | 0.132139            | 0.144814            |
| 0.119172            | 0.117861            | 0.124272            | 0.119027            | 0.121941            | 0.11859             | 0.129225            |
| 0.128642            | 0.118881            | 0.120629            | 0.110723            | 0.114802            | 0.114948            | 0.126166            |
| 0.120047            | 0.118444            | 0.119901            | 0.112617            | 0.11116             | 0.113054            | 0.11757             |
| 0.144376            | 0.14831             | 0.138695            | 0.138695            | 0.1419              | 0.144085            | 0.142774            |
| 0.116696            | 0.118298            | 0.11451             | 0.106643            | 0.108974            | 0.11116             | 0.118298            |
| 0.208479            | 0.209207            | 0.208042            | 0.197552            | 0.208916            | 0.200612            | 0.211538            |
| 0.130536            | 0.132721            | 0.121941            | 0.118444            | 0.126603            | 0.130536            | 0.125146            |
| 0.126311            | 0.121212            | 0.124709            | 0.117133            | 0.118298            | 0.121649            | 0.120921            |
| 0.118298            | 0.110577            | 0.118153            | 0.10708             | 0.111451            | 0.108392            | 0.111742            |
| 0.130973            | 0.129079            | 0.133741            | 0.12704             | 0.122669            | 0.130099            | 0.13141             |
| 0.11014             | 0.105624            | 0.108829            | 0.0960082           | 0.100962            | 0.105769            | 0.108537            |
| 0.12704             | 0.13243             | 0.121941            | 0.118153            | 0.133013            | 0.131119            | 0.127768            |
| 0.130536            | 0.119027            | 0.123106            | 0.114365            | 0.116404            | 0.121503            | 0.128059            |
| 0.123834            | 0.119318            | 0.127477            | 0.121066            | 0.119027            | 0.122086            | 0.121941            |
| 0.134907            | 0.128059            | 0.137383            | 0.129516            | 0.125437            | 0.128788            | 0.131265            |
| 0.127331            | 0.114073            | 0.129225            | 0.117279            | 0.108246            | 0.110723            | 0.118153            |
| 0.137966            | 0.126166            | 0.132576            | 0.119755            | 0.123252            | 0.124854            | 0.132576            |
| 0.129662            | 0.11757             | 0.127768            | 0.12602             | 0.115822            | 0.115385            | 0.127768            |
| 0.11655             | 0.11116             | 0.113199            | 0.105041            | 0.106789            | 0.102855            | 0.11553             |
| 0.12296             | 0.112325            | 0.122523            | 0.114948            | 0.108537            | 0.115967            | 0.120775            |
| 0.130099            | 0.115676            | 0.123252            | 0.116841            | 0.115093            | 0.112908            | 0.126748            |
| 0.132284            | 0.112617            | 0.124854            | 0.115239            | 0.114365            | 0.113636            | 0.125146            |
| 0.130682            | 0.122669            | 0.132867            | 0.121212            | 0.122669            | 0.121358            | 0.129079            |
| 0.13141             | 0.119318            | 0.130682            | 0.118444            | 0.11757             | 0.119755            | 0.123397            |
| 0.121212            | 0.11757             | 0.121358            | 0.115239            | 0.115822            | 0.11655             | 0.118444            |
| 0.128788            | 0.123397            | 0.131265            | 0.124272            | 0.125437            | 0.125291            | 0.128059            |
| 0.123543            | 0.114948            | 0.125437            | 0.112325            | 0.10912             | 0.116259            | 0.121649            |
| 0.13986             | 0.13447             | 0.150204            | 0.137092            | 0.133596            | 0.140734            | 0.147582            |

|          |          |          |           |           |          |           |
|----------|----------|----------|-----------|-----------|----------|-----------|
| 0.143065 | 0.141463 | 0.151369 | 0.135344  | 0.138258  | 0.145396 | 0.145251  |
| 0.127768 | 0.120338 | 0.129079 | 0.119172  | 0.113928  | 0.118735 | 0.124417  |
| 0.109703 | 0.103147 | 0.100233 | 0.0935315 | 0.0990676 | 0.10271  | 0.0955711 |
| 0.118298 | 0.100379 | 0.117279 | 0.106206  | 0.0983392 | 0.105186 | 0.108246  |
| 0.127622 | 0.127477 | 0.125146 | 0.119027  | 0.12602   | 0.126748 | 0.127477  |
| 0.139714 | 0.13345  | 0.144522 | 0.128497  | 0.128205  | 0.136509 | 0.140443  |
| 0.120192 | 0.111305 | 0.127622 | 0.108683  | 0.108392  | 0.11961  | 0.123834  |
| 0.12296  | 0.114365 | 0.128934 | 0.113491  | 0.110286  | 0.11655  | 0.124854  |
| 0.144959 | 0.138112 | 0.14627  | 0.135198  | 0.144814  | 0.140589 | 0.149184  |
| 0.136509 | 0.132284 | 0.133741 | 0.121795  | 0.131993  | 0.132721 | 0.125874  |
| 0.124709 | 0.125437 | 0.129225 | 0.116113  | 0.120775  | 0.125291 | 0.124854  |
| 0.124417 | 0.107372 | 0.125437 | 0.116696  | 0.109411  | 0.106061 | 0.123689  |
| 0.133159 | 0.132139 | 0.132721 | 0.120775  | 0.125437  | 0.125    | 0.127185  |
| 0.148019 | 0.14292  | 0.145251 | 0.130973  | 0.148164  | 0.146562 | 0.137092  |
| 0.136218 | 0.126166 | 0.134615 | 0.124126  | 0.118881  | 0.12602  | 0.131993  |
| 0.128642 | 0.122378 | 0.134324 | 0.121503  | 0.119464  | 0.122232 | 0.129079  |
| 0.122523 | 0.115093 | 0.129079 | 0.111888  | 0.109848  | 0.117861 | 0.120921  |
| 0.119464 | 0.102418 | 0.114948 | 0.112325  | 0.100379  | 0.105769 | 0.115239  |
| 0.138695 | 0.137966 | 0.147873 | 0.130099  | 0.131556  | 0.141317 | 0.145251  |
| 0.138986 | 0.134761 | 0.145251 | 0.133013  | 0.137383  | 0.139277 | 0.142337  |
| 0.167686 | 0.159674 | 0.163462 | 0.1588    | 0.169872  | 0.163316 | 0.167832  |
| 0.124563 | 0.119464 | 0.13141  | 0.120921  | 0.118007  | 0.121358 | 0.126457  |
| 0.11961  | 0.115967 | 0.124417 | 0.114219  | 0.112179  | 0.11757  | 0.122086  |
| 0.12398  | 0.114802 | 0.125583 | 0.112179  | 0.117133  | 0.120484 | 0.123252  |
| 0.138986 | 0.134178 | 0.141171 | 0.136218  | 0.135927  | 0.135781 | 0.140589  |
| 0.126166 | 0.118444 | 0.130099 | 0.115822  | 0.113782  | 0.120047 | 0.128351  |
| 0.134178 | 0.138695 | 0.136072 | 0.126166  | 0.140152  | 0.136509 | 0.136072  |
| 0.121358 | 0.104021 | 0.119755 | 0.111597  | 0.102273  | 0.10912  | 0.117424  |
| 0.125583 | 0.121358 | 0.129808 | 0.118444  | 0.119027  | 0.125291 | 0.126311  |
| 0.145979 | 0.144959 | 0.151078 | 0.137966  | 0.146125  | 0.144814 | 0.146707  |
| 0.136655 | 0.129808 | 0.137383 | 0.123689  | 0.127185  | 0.131993 | 0.137092  |
| 0.143794 | 0.13549  | 0.144231 | 0.129662  | 0.136655  | 0.138549 | 0.142483  |
| 0.139277 | 0.133887 | 0.134761 | 0.128059  | 0.128351  | 0.136946 | 0.129516  |
| 0.116404 | 0.127622 | 0.120629 | 0.104021  | 0.12296   | 0.12398  | 0.111597  |
| 0.131265 | 0.121795 | 0.124126 | 0.116259  | 0.116259  | 0.11961  | 0.124126  |
| 0.126603 | 0.122086 | 0.128788 | 0.113345  | 0.116259  | 0.121649 | 0.126166  |
| 0.140589 | 0.138695 | 0.147727 | 0.131119  | 0.134615  | 0.137092 | 0.139569  |
| 0.125    | 0.116696 | 0.122523 | 0.112034  | 0.111451  | 0.114219 | 0.123689  |
| 0.139714 | 0.133741 | 0.144814 | 0.134907  | 0.132867  | 0.140297 | 0.139569  |
| 0.133887 | 0.125291 | 0.136655 | 0.120921  | 0.123543  | 0.128642 | 0.133159  |
| 0.131265 | 0.124126 | 0.132284 | 0.119464  | 0.123252  | 0.128059 | 0.124126  |
| 0.129225 | 0.123543 | 0.131702 | 0.122378  | 0.120629  | 0.128934 | 0.130536  |
| 0.131556 | 0.129371 | 0.13345  | 0.122669  | 0.12704   | 0.126894 | 0.130536  |
| 0.123397 | 0.120338 | 0.128205 | 0.113636  | 0.11859   | 0.121941 | 0.121503  |

|          |           |           |           |           |           |           |
|----------|-----------|-----------|-----------|-----------|-----------|-----------|
| 0.127477 | 0.12296   | 0.131119  | 0.120629  | 0.117133  | 0.123106  | 0.125     |
| 0.138986 | 0.137383  | 0.142628  | 0.131847  | 0.132721  | 0.138695  | 0.13884   |
| 0.123252 | 0.114365  | 0.125437  | 0.113199  | 0.105332  | 0.113636  | 0.120775  |
| 0.121941 | 0.105186  | 0.120629  | 0.112179  | 0.105478  | 0.102418  | 0.118881  |
| 0.126894 | 0.123252  | 0.132284  | 0.11859   | 0.11859   | 0.121358  | 0.125     |
| 0.135344 | 0.12296   | 0.134324  | 0.122669  | 0.125874  | 0.120775  | 0.131993  |
| 0.10271  | 0.125     | 0.10169   | 0.104021  | 0.116841  | 0.127185  | 0.110431  |
| 0.107226 | 0.133013  | 0.108829  | 0.103584  | 0.131265  | 0.132576  | 0.114365  |
| 0.130099 | 0.122669  | 0.123543  | 0.114802  | 0.116841  | 0.116404  | 0.124126  |
| 0.188083 | 0.185897  | 0.185315  | 0.171329  | 0.189103  | 0.186626  | 0.189103  |
| 0.122086 | 0.11553   | 0.119318  | 0.108537  | 0.112034  | 0.115093  | 0.114948  |
| 0.110577 | 0.12704   | 0.101981  | 0.106935  | 0.126748  | 0.129516  | 0.107809  |
| 0.110577 | 0.124417  | 0.0961538 | 0.0996503 | 0.122378  | 0.123689  | 0.0979021 |
| 0.138695 | 0.131556  | 0.137675  | 0.132721  | 0.128934  | 0.13345   | 0.137092  |
| 0.103293 | 0.112179  | 0.099359  | 0.0967366 | 0.108974  | 0.112325  | 0.106061  |
| 0.10708  | 0.130245  | 0.104604  | 0.101981  | 0.125874  | 0.129225  | 0.111597  |
| 0.106498 | 0.113345  | 0.104312  | 0.0952797 | 0.108392  | 0.113199  | 0.0955711 |
| 0.114219 | 0.116696  | 0.106206  | 0.097465  | 0.116987  | 0.112471  | 0.100087  |
| 0.120338 | 0.110868  | 0.11757   | 0.109994  | 0.112617  | 0.115385  | 0.11961   |
| 0.121212 | 0.128934  | 0.107663  | 0.101544  | 0.131847  | 0.131993  | 0.11116   |
| 0.119464 | 0.105624  | 0.11757   | 0.10271   | 0.100379  | 0.108974  | 0.109411  |
| 0.125146 | 0.129371  | 0.125583  | 0.113636  | 0.129953  | 0.132139  | 0.128497  |
| 0.124709 | 0.114656  | 0.125437  | 0.112325  | 0.114365  | 0.11859   | 0.119318  |
| 0.135635 | 0.125874  | 0.137529  | 0.124709  | 0.127622  | 0.126894  | 0.13549   |
| 0.129953 | 0.118735  | 0.136801  | 0.118735  | 0.117861  | 0.117716  | 0.129225  |
| 0.121212 | 0.109994  | 0.118444  | 0.105624  | 0.107663  | 0.106643  | 0.119901  |
| 0.140152 | 0.143502  | 0.140589  | 0.133013  | 0.143211  | 0.14627   | 0.13884   |
| 0.122815 | 0.113345  | 0.119172  | 0.106352  | 0.114219  | 0.11116   | 0.118007  |
| 0.112034 | 0.111888  | 0.100524  | 0.102855  | 0.105769  | 0.112325  | 0.0984848 |
| 0.121503 | 0.111451  | 0.114073  | 0.110868  | 0.109994  | 0.116259  | 0.115822  |
| 0.134033 | 0.123397  | 0.137092  | 0.122523  | 0.130099  | 0.125291  | 0.130973  |
| 0.125874 | 0.127768  | 0.122232  | 0.114656  | 0.127477  | 0.121503  | 0.124272  |
| 0.10373  | 0.108246  | 0.0992133 | 0.0957168 | 0.108829  | 0.108974  | 0.100379  |
| 0.105478 | 0.11116   | 0.0948427 | 0.0942599 | 0.102127  | 0.106935  | 0.101836  |
| 0.124563 | 0.112179  | 0.123834  | 0.115967  | 0.115676  | 0.111742  | 0.128205  |
| 0.118881 | 0.102127  | 0.112617  | 0.105041  | 0.104167  | 0.105769  | 0.113199  |
| 0.130973 | 0.117133  | 0.127622  | 0.11451   | 0.115385  | 0.114656  | 0.126748  |
| 0.113928 | 0.099796  | 0.114073  | 0.102127  | 0.0989219 | 0.101107  | 0.109703  |
| 0.115093 | 0.0957168 | 0.110868  | 0.100962  | 0.0977564 | 0.0976107 | 0.106789  |
| 0.116113 | 0.0929487 | 0.113054  | 0.10373   | 0.0981935 | 0.0992133 | 0.108392  |
| 0.129225 | 0.125291  | 0.13141   | 0.120047  | 0.117424  | 0.126603  | 0.126748  |
| 0.127331 | 0.110868  | 0.125437  | 0.121066  | 0.114656  | 0.115385  | 0.121358  |
| 0.124563 | 0.106935  | 0.114219  | 0.11014   | 0.102273  | 0.10271   | 0.113636  |
| 0.114219 | 0.0995047 | 0.111451  | 0.102127  | 0.0977564 | 0.102855  | 0.110868  |

|          |           |          |           |           |           |          |
|----------|-----------|----------|-----------|-----------|-----------|----------|
| 0.126457 | 0.112034  | 0.120775 | 0.113491  | 0.107663  | 0.11451   | 0.116113 |
| 0.122815 | 0.106061  | 0.120921 | 0.108683  | 0.107809  | 0.10912   | 0.111305 |
| 0.13243  | 0.123834  | 0.130828 | 0.121503  | 0.122086  | 0.123106  | 0.127622 |
| 0.137675 | 0.128788  | 0.136655 | 0.122086  | 0.132284  | 0.131847  | 0.137529 |
| 0.117861 | 0.101399  | 0.111014 | 0.106643  | 0.101399  | 0.103293  | 0.105769 |
| 0.121795 | 0.106498  | 0.116696 | 0.10912   | 0.101544  | 0.104895  | 0.112908 |
| 0.11859  | 0.105915  | 0.11553  | 0.108246  | 0.103875  | 0.103147  | 0.11757  |
| 0.114219 | 0.104167  | 0.103001 | 0.0971737 | 0.101544  | 0.0999417 | 0.105915 |
| 0.127331 | 0.10912   | 0.114656 | 0.108537  | 0.109994  | 0.110723  | 0.114656 |
| 0.115676 | 0.0971737 | 0.108829 | 0.102127  | 0.0942599 | 0.0999417 | 0.109703 |
| 0.147582 | 0.139277  | 0.145105 | 0.140734  | 0.133159  | 0.137966  | 0.149184 |
| 0.142191 | 0.129225  | 0.139714 | 0.123689  | 0.130099  | 0.130245  | 0.136509 |
| 0.126457 | 0.120192  | 0.129808 | 0.120192  | 0.114656  | 0.120921  | 0.125146 |
| 0.124854 | 0.115093  | 0.123543 | 0.112471  | 0.106643  | 0.114073  | 0.123543 |
| 0.120192 | 0.115093  | 0.120338 | 0.111305  | 0.111888  | 0.11757   | 0.12296  |
| 0.118881 | 0.107663  | 0.115239 | 0.105624  | 0.102127  | 0.108974  | 0.116404 |
| 0.129516 | 0.110723  | 0.120921 | 0.110431  | 0.106935  | 0.110286  | 0.114219 |
| 0.121358 | 0.107517  | 0.117716 | 0.104895  | 0.107809  | 0.109994  | 0.112471 |
| 0.126603 | 0.124126  | 0.125583 | 0.117133  | 0.119172  | 0.122815  | 0.123834 |
| 0.136218 | 0.128788  | 0.134907 | 0.124417  | 0.12704   | 0.134178  | 0.13141  |
| 0.107517 | 0.121358  | 0.101544 | 0.0965909 | 0.117279  | 0.118007  | 0.107663 |
| 0.130099 | 0.115676  | 0.129079 | 0.118007  | 0.120047  | 0.118444  | 0.125583 |
| 0.133159 | 0.124854  | 0.133304 | 0.122815  | 0.127477  | 0.127622  | 0.131265 |
| 0.211247 | 0.2044    | 0.203817 | 0.195367  | 0.203526  | 0.200758  | 0.208188 |
| 0.250437 | 0.244464  | 0.245338 | 0.236305  | 0.245047  | 0.240239  | 0.246212 |
| 0.129079 | 0.128934  | 0.125728 | 0.116113  | 0.123106  | 0.12296   | 0.121066 |
| 0.122815 | 0.116841  | 0.119172 | 0.113054  | 0.115385  | 0.119901  | 0.117424 |
| 0.123689 | 0.115385  | 0.11655  | 0.106061  | 0.111888  | 0.118444  | 0.121795 |
| 0.122523 | 0.121212  | 0.113928 | 0.108683  | 0.11451   | 0.124563  | 0.120338 |
| 0.120484 | 0.11655   | 0.124417 | 0.118298  | 0.119464  | 0.121649  | 0.13141  |
| 0.123689 | 0.124126  | 0.121503 | 0.115967  | 0.118298  | 0.124563  | 0.122378 |
| 0.148893 | 0.151369  | 0.14933  | 0.135344  | 0.150204  | 0.152681  | 0.144959 |
| 0.133304 | 0.126166  | 0.124709 | 0.118298  | 0.122669  | 0.126311  | 0.123252 |
| 0.141754 | 0.131993  | 0.134907 | 0.126748  | 0.129371  | 0.137966  | 0.126166 |
| 0.138403 | 0.137966  | 0.138258 | 0.126894  | 0.138549  | 0.137529  | 0.134178 |
| 0.130828 | 0.136509  | 0.131556 | 0.123106  | 0.133304  | 0.135781  | 0.133013 |
| 0.138403 | 0.134761  | 0.144376 | 0.128934  | 0.134761  | 0.137238  | 0.139132 |
| 0.129953 | 0.126311  | 0.125437 | 0.116113  | 0.120775  | 0.127331  | 0.124272 |
| 0.125    | 0.122523  | 0.127185 | 0.113491  | 0.115239  | 0.128205  | 0.11553  |
| 0.124272 | 0.122378  | 0.120921 | 0.114219  | 0.121212  | 0.128059  | 0.122086 |
| 0.122232 | 0.118298  | 0.120338 | 0.111305  | 0.11451   | 0.123689  | 0.115093 |
| 0.124272 | 0.12296   | 0.125    | 0.112179  | 0.116259  | 0.123689  | 0.115093 |
| 0.129371 | 0.118444  | 0.126311 | 0.122815  | 0.123397  | 0.126457  | 0.125728 |
| 0.125728 | 0.134033  | 0.129371 | 0.123252  | 0.130245  | 0.136218  | 0.125583 |

|          |           |          |           |           |           |           |
|----------|-----------|----------|-----------|-----------|-----------|-----------|
| 0.135344 | 0.143939  | 0.134033 | 0.13345   | 0.140443  | 0.140589  | 0.13141   |
| 0.13345  | 0.128351  | 0.125146 | 0.120192  | 0.120192  | 0.128788  | 0.121066  |
| 0.126311 | 0.122669  | 0.120338 | 0.117133  | 0.119755  | 0.122815  | 0.124709  |
| 0.134761 | 0.136364  | 0.133741 | 0.127622  | 0.132867  | 0.134761  | 0.129079  |
| 0.121649 | 0.11859   | 0.11859  | 0.114219  | 0.113636  | 0.119027  | 0.122086  |
| 0.135781 | 0.149913  | 0.14292  | 0.133304  | 0.14292   | 0.151224  | 0.142045  |
| 0.130828 | 0.121941  | 0.130973 | 0.118444  | 0.123689  | 0.131119  | 0.126894  |
| 0.113491 | 0.141317  | 0.113054 | 0.104312  | 0.139569  | 0.141463  | 0.110723  |
| 0.124854 | 0.118007  | 0.118881 | 0.110723  | 0.114219  | 0.120192  | 0.115093  |
| 0.119464 | 0.112325  | 0.111742 | 0.110868  | 0.109994  | 0.117133  | 0.110286  |
| 0.132721 | 0.129953  | 0.132576 | 0.123543  | 0.125     | 0.131556  | 0.127914  |
| 0.12704  | 0.128059  | 0.124272 | 0.11961   | 0.125437  | 0.128205  | 0.123397  |
| 0.135198 | 0.136801  | 0.133013 | 0.125437  | 0.133013  | 0.139569  | 0.133887  |
| 0.135635 | 0.132867  | 0.130245 | 0.120629  | 0.129079  | 0.130973  | 0.126748  |
| 0.130245 | 0.126894  | 0.125437 | 0.117861  | 0.122523  | 0.126748  | 0.124272  |
| 0.129371 | 0.130973  | 0.127185 | 0.122232  | 0.128642  | 0.129371  | 0.127477  |
| 0.137238 | 0.130973  | 0.134178 | 0.128059  | 0.131556  | 0.13345   | 0.13243   |
| 0.141317 | 0.136801  | 0.135635 | 0.13039   | 0.135635  | 0.138112  | 0.126603  |
| 0.135052 | 0.138986  | 0.135198 | 0.130245  | 0.134907  | 0.14292   | 0.134324  |
| 0.143357 | 0.135052  | 0.146999 | 0.133013  | 0.13447   | 0.134907  | 0.142337  |
| 0.138403 | 0.123689  | 0.128059 | 0.11961   | 0.122523  | 0.125583  | 0.124272  |
| 0.129953 | 0.137383  | 0.126311 | 0.127185  | 0.133304  | 0.135781  | 0.13039   |
| 0.124272 | 0.120629  | 0.122086 | 0.113345  | 0.11655   | 0.121649  | 0.116259  |
| 0.125291 | 0.116404  | 0.124854 | 0.113491  | 0.114656  | 0.123834  | 0.124272  |
| 0.125583 | 0.123397  | 0.121358 | 0.112034  | 0.118153  | 0.12296   | 0.120484  |
| 0.120484 | 0.120629  | 0.115967 | 0.113928  | 0.120047  | 0.125146  | 0.117424  |
| 0.124272 | 0.119172  | 0.123252 | 0.110431  | 0.111014  | 0.121358  | 0.115967  |
| 0.138403 | 0.137966  | 0.137383 | 0.128934  | 0.13884   | 0.140443  | 0.13243   |
| 0.13039  | 0.12704   | 0.130245 | 0.121212  | 0.11859   | 0.127768  | 0.125583  |
| 0.133304 | 0.138112  | 0.13141  | 0.125874  | 0.135198  | 0.139423  | 0.138112  |
| 0.124854 | 0.11859   | 0.120921 | 0.11451   | 0.115967  | 0.121941  | 0.117133  |
| 0.132576 | 0.127768  | 0.133887 | 0.125437  | 0.128059  | 0.129371  | 0.132139  |
| 0.127477 | 0.11655   | 0.128788 | 0.120338  | 0.118881  | 0.112617  | 0.130536  |
| 0.121941 | 0.110723  | 0.118881 | 0.106935  | 0.107226  | 0.119027  | 0.11451   |
| 0.129953 | 0.110286  | 0.125728 | 0.123106  | 0.108829  | 0.110723  | 0.126603  |
| 0.123689 | 0.115676  | 0.120921 | 0.104895  | 0.113636  | 0.123106  | 0.113054  |
| 0.131119 | 0.120484  | 0.125437 | 0.116113  | 0.117861  | 0.124126  | 0.119318  |
| 0.121212 | 0.11553   | 0.117279 | 0.106498  | 0.111451  | 0.113345  | 0.11961   |
| 0.125    | 0.0750291 | 0.123106 | 0.113491  | 0.0872669 | 0.0935315 | 0.116404  |
| 0.143502 | 0.132284  | 0.137821 | 0.132867  | 0.136655  | 0.135052  | 0.147145  |
| 0.104749 | 0.0920746 | 0.110431 | 0.100233  | 0.0792541 | 0.0878497 | 0.105186  |
| 0        | 0.11116   | 0.099796 | 0.0977564 | 0.114073  | 0.120047  | 0.0986305 |
| 0.11116  | 0         | 0.108683 | 0.102855  | 0.080711  | 0.0846445 | 0.109266  |
| 0.099796 | 0.108683  | 0        | 0.0894522 | 0.114219  | 0.11553   | 0.0990676 |



|           |           |           |           |           |           |           |
|-----------|-----------|-----------|-----------|-----------|-----------|-----------|
| 0.0977564 | 0.102855  | 0.0894522 | 0         | 0.107809  | 0.111742  | 0.0944056 |
| 0.114073  | 0.080711  | 0.114219  | 0.107809  | 0         | 0.0843531 | 0.107226  |
| 0.120047  | 0.0846445 | 0.11553   | 0.111742  | 0.0843531 | 0         | 0.113199  |
| 0.0986305 | 0.109266  | 0.0990676 | 0.0944056 | 0.107226  | 0.113199  | 0         |
| 0.0939685 | 0.11451   | 0.100524  | 0.0868298 | 0.120629  | 0.117861  | 0.0964452 |
| 0.123689  | 0.0865385 | 0.114219  | 0.112471  | 0.0775058 | 0.0773601 | 0.114802  |
| 0.100962  | 0.101107  | 0.0912005 | 0.0509907 | 0.106061  | 0.110577  | 0.0932401 |
| 0.151224  | 0.145251  | 0.147873  | 0.139423  | 0.140297  | 0.142483  | 0.144668  |
| 0.125146  | 0.0920746 | 0.121212  | 0.115967  | 0.092366  | 0.0566725 | 0.122378  |
| 0.105624  | 0.104021  | 0.104895  | 0.0914918 | 0.0941142 | 0.099796  | 0.104021  |
| 0.231643  | 0.22771   | 0.225379  | 0.221008  | 0.225962  | 0.224942  | 0.228875  |
| 0.0976107 | 0.10912   | 0.100962  | 0.0846445 | 0.108246  | 0.111888  | 0.0738636 |
| 0.116841  | 0.0893065 | 0.112034  | 0.10708   | 0.090472  | 0.0888695 | 0.109411  |
| 0.0960082 | 0.109266  | 0.0938228 | 0.0941142 | 0.117133  | 0.116113  | 0.0958625 |
| 0.123689  | 0.0862471 | 0.112471  | 0.11014   | 0.0798368 | 0.0823135 | 0.111597  |
| 0.122815  | 0.0926573 | 0.119172  | 0.117424  | 0.0952797 | 0.0782343 | 0.119464  |
| 0.0948427 | 0.108683  | 0.0885781 | 0.092366  | 0.108683  | 0.109703  | 0.10169   |
| 0.0973193 | 0.105332  | 0.0989219 | 0.0936772 | 0.105915  | 0.102855  | 0.0852273 |
| 0.115967  | 0.0791084 | 0.113199  | 0.104749  | 0.090472  | 0.0891608 | 0.103001  |
| 0.108246  | 0.118298  | 0.0885781 | 0.0941142 | 0.124417  | 0.113199  | 0.115385  |
| 0.0865385 | 0.10912   | 0.081148  | 0.0916375 | 0.114073  | 0.118007  | 0.0986305 |
| 0.102127  | 0.110723  | 0.103438  | 0.0850816 | 0.114219  | 0.113199  | 0.100816  |
| 0.0948427 | 0.112762  | 0.106061  | 0.0859557 | 0.117133  | 0.114365  | 0.0967366 |
| 0.113782  | 0.102273  | 0.115385  | 0.107809  | 0.0996503 | 0.107372  | 0.112471  |
| 0.100379  | 0.106935  | 0.0967366 | 0.090035  | 0.104021  | 0.110577  | 0.092366  |
| 0.0871212 | 0.112617  | 0.0913462 | 0.0925117 | 0.116404  | 0.112471  | 0.0965909 |
| 0.0933858 | 0.100524  | 0.0664336 | 0.0804196 | 0.106643  | 0.107372  | 0.0836247 |
| 0.138258  | 0.137529  | 0.146562  | 0.129662  | 0.13549   | 0.13447   | 0.134324  |
| 0.143648  | 0.135635  | 0.144085  | 0.129225  | 0.129516  | 0.134324  | 0.142628  |
| 0.126748  | 0.11553   | 0.127185  | 0.115239  | 0.113782  | 0.112179  | 0.122232  |
| 0.113636  | 0.0785256 | 0.118444  | 0.10708   | 0.0799825 | 0.0903263 | 0.118153  |
| 0.123106  | 0.121212  | 0.118007  | 0.118298  | 0.125291  | 0.123397  | 0.120921  |
| 0.127622  | 0.117279  | 0.127768  | 0.121066  | 0.116113  | 0.118007  | 0.125437  |
| 0.141317  | 0.127768  | 0.134761  | 0.13039   | 0.128934  | 0.129079  | 0.135052  |
| 0.141317  | 0.133596  | 0.139423  | 0.130682  | 0.132139  | 0.13549   | 0.137675  |
| 0.120192  | 0.0987762 | 0.113928  | 0.102855  | 0.0979021 | 0.107372  | 0.109848  |
| 0.132576  | 0.124272  | 0.133013  | 0.123689  | 0.117861  | 0.129371  | 0.12602   |
| 0.146707  | 0.1419    | 0.151224  | 0.137529  | 0.137821  | 0.14088   | 0.13986   |
| 0.123689  | 0.103147  | 0.114802  | 0.112179  | 0.101107  | 0.103875  | 0.116841  |
| 0.133887  | 0.125874  | 0.136072  | 0.122378  | 0.118881  | 0.129225  | 0.129953  |
| 0.153846  | 0.151661  | 0.155157  | 0.146999  | 0.148164  | 0.149476  | 0.154283  |
| 0.136655  | 0.132721  | 0.137092  | 0.127768  | 0.13243   | 0.132284  | 0.134761  |
| 0.13447   | 0.117133  | 0.138112  | 0.125     | 0.129371  | 0.125437  | 0.128497  |
| 0.130245  | 0.117861  | 0.127477  | 0.111451  | 0.116696  | 0.117133  | 0.123397  |

|           |           |           |           |           |           |           |
|-----------|-----------|-----------|-----------|-----------|-----------|-----------|
| 0.105915  | 0.120629  | 0.0981935 | 0.104895  | 0.108974  | 0.119027  | 0.0929487 |
| 0.128497  | 0.126603  | 0.127768  | 0.119027  | 0.124563  | 0.126166  | 0.124854  |
| 0.122232  | 0.102273  | 0.115676  | 0.106935  | 0.107226  | 0.109703  | 0.11655   |
| 0.108683  | 0.126311  | 0.107663  | 0.102418  | 0.118153  | 0.129371  | 0.112325  |
| 0.0987762 | 0.113199  | 0.0910548 | 0.0872669 | 0.115822  | 0.111305  | 0.101836  |
| 0.105186  | 0.131556  | 0.106498  | 0.10708   | 0.127477  | 0.132576  | 0.114656  |
| 0.107226  | 0.126311  | 0.10912   | 0.0971737 | 0.121649  | 0.125583  | 0.0986305 |
| 0.117133  | 0.129516  | 0.111451  | 0.114656  | 0.130682  | 0.128497  | 0.121649  |
| 0.125583  | 0.143211  | 0.116987  | 0.113199  | 0.143502  | 0.139277  | 0.123397  |
| 0.117424  | 0.0866841 | 0.107663  | 0.102418  | 0.0957168 | 0.0990676 | 0.10912   |
| 0.129371  | 0.118444  | 0.122523  | 0.114948  | 0.114948  | 0.113928  | 0.120484  |
| 0.128788  | 0.126603  | 0.132139  | 0.126603  | 0.123689  | 0.127331  | 0.129808  |
| 0.116259  | 0.095134  | 0.112325  | 0.102127  | 0.0992133 | 0.0987762 | 0.113782  |
| 0.148456  | 0.136072  | 0.14627   | 0.140734  | 0.138112  | 0.136218  | 0.148019  |
| 0.149621  | 0.14831   | 0.154429  | 0.144231  | 0.146853  | 0.14729   | 0.153263  |
| 0.135635  | 0.134033  | 0.132867  | 0.130828  | 0.133741  | 0.133887  | 0.127622  |
| 0.130828  | 0.127477  | 0.12602   | 0.121649  | 0.122523  | 0.130536  | 0.122232  |
| 0.113782  | 0.131993  | 0.104312  | 0.108392  | 0.131993  | 0.135927  | 0.109266  |
| 0.0979021 | 0.112325  | 0.100962  | 0.0863928 | 0.108537  | 0.11859   | 0.090472  |
| 0.13549   | 0.131556  | 0.136218  | 0.12602   | 0.124272  | 0.136072  | 0.132721  |
| 0.0941142 | 0.116696  | 0.0898893 | 0.0980478 | 0.125728  | 0.115967  | 0.0968823 |
| 0.125     | 0.116696  | 0.126311  | 0.117279  | 0.128059  | 0.125874  | 0.127768  |
| 0.116696  | 0.103147  | 0.123834  | 0.112179  | 0.107226  | 0.108537  | 0.120629  |
| 0.159237  | 0.164044  | 0.159382  | 0.1588    | 0.161422  | 0.161859  | 0.157343  |
| 0.122815  | 0.109848  | 0.130828  | 0.11655   | 0.115676  | 0.117861  | 0.117716  |
| 0.133596  | 0.122669  | 0.134324  | 0.121795  | 0.127331  | 0.127185  | 0.139277  |
| 0.127914  | 0.118444  | 0.118444  | 0.114656  | 0.115239  | 0.11859   | 0.120775  |
| 0.117133  | 0.132721  | 0.110868  | 0.11553   | 0.13447   | 0.134615  | 0.112617  |
| 0.0917832 | 0.105915  | 0.0878497 | 0.0840618 | 0.105915  | 0.112762  | 0.0986305 |
| 0.148164  | 0.141608  | 0.144231  | 0.134033  | 0.141317  | 0.142045  | 0.14831   |
| 0.134615  | 0.150204  | 0.130973  | 0.128059  | 0.14292   | 0.143939  | 0.139714  |
| 0.135052  | 0.136946  | 0.134615  | 0.125874  | 0.132576  | 0.135052  | 0.128205  |
| 0.14831   | 0.144085  | 0.144959  | 0.133013  | 0.144959  | 0.141608  | 0.138258  |
| 0.165647  | 0.157343  | 0.159965  | 0.151807  | 0.159382  | 0.153992  | 0.157925  |
| 0.15574   | 0.152389  | 0.151515  | 0.143939  | 0.146853  | 0.147582  | 0.151515  |
| 0.141317  | 0.129516  | 0.137092  | 0.130099  | 0.126311  | 0.129662  | 0.135344  |
| 0.146125  | 0.141317  | 0.143065  | 0.136072  | 0.138403  | 0.139714  | 0.139569  |
| 0.125437  | 0.119464  | 0.123834  | 0.117424  | 0.117424  | 0.112325  | 0.124126  |
| 0.117424  | 0.125146  | 0.120192  | 0.110286  | 0.121649  | 0.119755  | 0.124854  |
| 0.116404  | 0.107226  | 0.114802  | 0.107517  | 0.103438  | 0.111451  | 0.116259  |
| 0.135052  | 0.13345   | 0.13345   | 0.122669  | 0.126748  | 0.129225  | 0.125     |
| 0.125583  | 0.122815  | 0.121066  | 0.11757   | 0.119027  | 0.120338  | 0.11961   |
| 0.117716  | 0.117279  | 0.122232  | 0.110577  | 0.118153  | 0.114219  | 0.121941  |
| 0.137821  | 0.129516  | 0.128934  | 0.128059  | 0.12398   | 0.123834  | 0.133013  |

|           |           |           |           |           |           |           |
|-----------|-----------|-----------|-----------|-----------|-----------|-----------|
| 0.122232  | 0.118007  | 0.124709  | 0.114802  | 0.119464  | 0.11757   | 0.12704   |
| 0.114073  | 0.0958625 | 0.110431  | 0.102855  | 0.0990676 | 0.101253  | 0.112179  |
| 0.138258  | 0.136364  | 0.135781  | 0.125583  | 0.129079  | 0.131556  | 0.131119  |
| 0.134615  | 0.130973  | 0.133596  | 0.123397  | 0.126311  | 0.127914  | 0.127185  |
| 0.13986   | 0.133596  | 0.135635  | 0.129808  | 0.13039   | 0.135198  | 0.133304  |
| 0.226399  | 0.225087  | 0.222174  | 0.214598  | 0.225379  | 0.21824   | 0.225962  |
| 0.14627   | 0.14933   | 0.145833  | 0.135927  | 0.146999  | 0.147145  | 0.142337  |
| 0.136801  | 0.138112  | 0.133741  | 0.125583  | 0.128205  | 0.129808  | 0.131119  |
| 0.13549   | 0.13039   | 0.132139  | 0.126603  | 0.126311  | 0.129662  | 0.130973  |
| 0.223485  | 0.220717  | 0.216638  | 0.211684  | 0.216638  | 0.214744  | 0.220717  |
| 0.137238  | 0.133304  | 0.135927  | 0.124272  | 0.133013  | 0.133159  | 0.135052  |
| 0.136801  | 0.126166  | 0.133159  | 0.125291  | 0.125583  | 0.128059  | 0.126457  |
| 0.139423  | 0.130536  | 0.13549   | 0.126166  | 0.126166  | 0.13039   | 0.130828  |
| 0.119755  | 0.116113  | 0.124563  | 0.114365  | 0.114948  | 0.11859   | 0.127477  |
| 0.261072  | 0.254808  | 0.253642  | 0.245192  | 0.25743   | 0.25204   | 0.256265  |
| 0.129516  | 0.123834  | 0.132284  | 0.122378  | 0.129079  | 0.127768  | 0.139569  |
| 0.135344  | 0.129079  | 0.129953  | 0.124126  | 0.122086  | 0.128934  | 0.128497  |
| 0.133596  | 0.136364  | 0.136364  | 0.120629  | 0.131993  | 0.135344  | 0.12704   |
| 0.129516  | 0.135781  | 0.135781  | 0.121212  | 0.12704   | 0.134178  | 0.126166  |
| 0.13039   | 0.123834  | 0.132576  | 0.118298  | 0.129662  | 0.125146  | 0.134324  |
| 0.135052  | 0.13345   | 0.138986  | 0.128205  | 0.131702  | 0.131556  | 0.130828  |
| 0.139132  | 0.130536  | 0.136072  | 0.131119  | 0.126748  | 0.128351  | 0.131119  |
| 0.134907  | 0.133304  | 0.133887  | 0.11961   | 0.127768  | 0.128205  | 0.126603  |
| 0.139714  | 0.135198  | 0.135198  | 0.126748  | 0.13141   | 0.130099  | 0.129953  |
| 0.116113  | 0.111305  | 0.11859   | 0.112179  | 0.113636  | 0.114948  | 0.123252  |
| 0.133159  | 0.126894  | 0.12602   | 0.123689  | 0.12398   | 0.123834  | 0.122523  |
| 0.0995047 | 0.0629371 | 0.0967366 | 0.0850816 | 0.0815851 | 0.0759033 | 0.0961538 |
| 0.135781  | 0.150204  | 0.130682  | 0.129808  | 0.14292   | 0.140734  | 0.139714  |
| 0.134615  | 0.126311  | 0.135927  | 0.12398   | 0.13243   | 0.127622  | 0.139132  |
| 0.139277  | 0.129225  | 0.137092  | 0.128351  | 0.12602   | 0.127331  | 0.129808  |
| 0.205128  | 0.199738  | 0.19595   | 0.191579  | 0.198864  | 0.198427  | 0.203234  |
| 0.21824   | 0.213141  | 0.211684  | 0.204108  | 0.211101  | 0.209499  | 0.212267  |
| 0.120338  | 0.11757   | 0.121649  | 0.116404  | 0.117861  | 0.116841  | 0.129516  |
| 0.111888  | 0.112034  | 0.116987  | 0.109994  | 0.109703  | 0.109848  | 0.121066  |
| 0.133159  | 0.135927  | 0.136218  | 0.126603  | 0.133304  | 0.131119  | 0.132721  |
| 0.137529  | 0.129808  | 0.133596  | 0.12602   | 0.123397  | 0.127622  | 0.129808  |
| 0.133304  | 0.128205  | 0.137821  | 0.124417  | 0.129371  | 0.129808  | 0.140443  |
| 0.125291  | 0.134761  | 0.127185  | 0.116113  | 0.130099  | 0.132576  | 0.123397  |
| 0.238054  | 0.232955  | 0.227127  | 0.222756  | 0.232955  | 0.229604  | 0.236742  |
| 0.129371  | 0.128059  | 0.124272  | 0.11757   | 0.116113  | 0.121795  | 0.121649  |
| 0.220425  | 0.217657  | 0.213869  | 0.203671  | 0.217949  | 0.214889  | 0.215909  |
| 0.132576  | 0.121649  | 0.127477  | 0.11961   | 0.118444  | 0.117716  | 0.126311  |
| 0.128059  | 0.122669  | 0.130536  | 0.121503  | 0.120338  | 0.121066  | 0.127331  |
| 0.129953  | 0.128351  | 0.13039   | 0.116404  | 0.124563  | 0.124417  | 0.124854  |

|          |          |          |          |          |          |          |
|----------|----------|----------|----------|----------|----------|----------|
| 0.116841 | 0.110868 | 0.117279 | 0.107663 | 0.110868 | 0.109848 | 0.121066 |
| 0.220717 | 0.2162   | 0.211247 | 0.205711 | 0.2162   | 0.211684 | 0.216492 |
| 0.144376 | 0.143357 | 0.141608 | 0.13141  | 0.137821 | 0.137092 | 0.13549  |
| 0.131265 | 0.125291 | 0.126457 | 0.119755 | 0.121795 | 0.121358 | 0.125583 |
| 0.140006 | 0.136364 | 0.136364 | 0.12704  | 0.131993 | 0.132139 | 0.130828 |
| 0.134178 | 0.127331 | 0.131993 | 0.120921 | 0.123252 | 0.127185 | 0.128205 |
| 0.119027 | 0.115093 | 0.122669 | 0.110723 | 0.115676 | 0.113491 | 0.121795 |
| 0.134615 | 0.124272 | 0.129225 | 0.123106 | 0.120192 | 0.124709 | 0.128642 |
| 0.141608 | 0.130973 | 0.13447  | 0.127768 | 0.129225 | 0.131702 | 0.13243  |
| 0.137821 | 0.128934 | 0.133304 | 0.126603 | 0.127477 | 0.129953 | 0.127477 |
| 0.130828 | 0.127768 | 0.127185 | 0.117861 | 0.119901 | 0.121503 | 0.124563 |
| 0.13447  | 0.129371 | 0.127331 | 0.122086 | 0.120047 | 0.126311 | 0.125583 |
| 0.20134  | 0.198572 | 0.19391  | 0.18954  | 0.197115 | 0.19697  | 0.202943 |
| 0.129808 | 0.138695 | 0.134033 | 0.12296  | 0.132284 | 0.136509 | 0.127622 |
| 0.129371 | 0.140297 | 0.124854 | 0.115822 | 0.130099 | 0.131993 | 0.126894 |
| 0.122523 | 0.130828 | 0.125874 | 0.122086 | 0.124126 | 0.130099 | 0.122086 |
| 0.136946 | 0.129516 | 0.136218 | 0.123397 | 0.13039  | 0.129662 | 0.140297 |
| 0.136946 | 0.132721 | 0.133887 | 0.123397 | 0.129808 | 0.130828 | 0.128351 |
| 0.13986  | 0.127768 | 0.133304 | 0.127768 | 0.120192 | 0.121212 | 0.130682 |
| 0.129225 | 0.120338 | 0.125    | 0.111888 | 0.120338 | 0.122523 | 0.123543 |
| 0.137966 | 0.131993 | 0.133741 | 0.130245 | 0.129079 | 0.131847 | 0.131702 |
| 0.126748 | 0.134178 | 0.119901 | 0.118735 | 0.125437 | 0.126748 | 0.12602  |
| 0.128497 | 0.133013 | 0.13243  | 0.120775 | 0.126603 | 0.132284 | 0.124563 |
| 0.121358 | 0.119464 | 0.122669 | 0.115385 | 0.116841 | 0.118153 | 0.12296  |
| 0.140152 | 0.133013 | 0.136509 | 0.126311 | 0.125437 | 0.132576 | 0.129808 |
| 0.14729  | 0.136946 | 0.138403 | 0.134324 | 0.135198 | 0.136509 | 0.139569 |
| 0.129808 | 0.121503 | 0.129953 | 0.115093 | 0.121795 | 0.123689 | 0.130245 |
| 0.145979 | 0.148456 | 0.141754 | 0.134178 | 0.144959 | 0.143065 | 0.138549 |
| 0.118298 | 0.11553  | 0.123397 | 0.112034 | 0.11553  | 0.115385 | 0.121358 |
| 0.120338 | 0.129808 | 0.120775 | 0.111742 | 0.121066 | 0.124126 | 0.118735 |
| 0.135052 | 0.134324 | 0.133741 | 0.122669 | 0.129079 | 0.129516 | 0.126166 |
| 0.141754 | 0.137821 | 0.137238 | 0.132576 | 0.132576 | 0.136801 | 0.137821 |
| 0.203526 | 0.202506 | 0.201049 | 0.193765 | 0.20134  | 0.20236  | 0.203671 |
| 0.13141  | 0.122232 | 0.123689 | 0.114656 | 0.115239 | 0.11859  | 0.122815 |
| 0.120629 | 0.119901 | 0.11961  | 0.110868 | 0.107955 | 0.115967 | 0.116404 |
| 0.134907 | 0.127477 | 0.130973 | 0.125437 | 0.126311 | 0.125583 | 0.125437 |
| 0.191725 | 0.1875   | 0.189831 | 0.177593 | 0.186334 | 0.183275 | 0.191579 |
| 0.142337 | 0.135198 | 0.143357 | 0.133741 | 0.139569 | 0.137966 | 0.145396 |
| 0.144959 | 0.137238 | 0.145688 | 0.137529 | 0.143357 | 0.141171 | 0.149476 |
| 0.13549  | 0.152244 | 0.131847 | 0.129516 | 0.144085 | 0.143939 | 0.141463 |
| 0.126166 | 0.120192 | 0.124854 | 0.111742 | 0.120775 | 0.121212 | 0.126894 |
| 0.138549 | 0.136655 | 0.135198 | 0.125291 | 0.130828 | 0.132139 | 0.129371 |
| 0.225816 | 0.223048 | 0.220717 | 0.213141 | 0.221008 | 0.217366 | 0.224796 |
| 0.132284 | 0.129225 | 0.137383 | 0.12398  | 0.123689 | 0.129079 | 0.132139 |

|          |           |          |           |          |           |          |
|----------|-----------|----------|-----------|----------|-----------|----------|
| 0.141754 | 0.138403  | 0.138112 | 0.129371  | 0.136655 | 0.133887  | 0.130828 |
| 0.133304 | 0.126166  | 0.12704  | 0.121503  | 0.120047 | 0.122523  | 0.123834 |
| 0.180216 | 0.177448  | 0.180653 | 0.16958   | 0.174534 | 0.176719  | 0.176573 |
| 0.123106 | 0.122378  | 0.124417 | 0.118007  | 0.115093 | 0.119901  | 0.120629 |
| 0.154138 | 0.149038  | 0.145833 | 0.142628  | 0.144959 | 0.143939  | 0.144376 |
| 0.120047 | 0.100962  | 0.119318 | 0.108829  | 0.110868 | 0.105478  | 0.121066 |
| 0.203089 | 0.198864  | 0.197407 | 0.190705  | 0.19799  | 0.198427  | 0.201486 |
| 0.131702 | 0.12398   | 0.130973 | 0.117279  | 0.124563 | 0.125874  | 0.131847 |
| 0.113054 | 0.101253  | 0.116113 | 0.107663  | 0.101544 | 0.0967366 | 0.114656 |
| 0.124854 | 0.127331  | 0.122086 | 0.115967  | 0.11655  | 0.121941  | 0.120629 |
| 0.133741 | 0.128059  | 0.133596 | 0.123689  | 0.122523 | 0.129953  | 0.129808 |
| 0.132284 | 0.124563  | 0.132139 | 0.125728  | 0.121649 | 0.128788  | 0.128059 |
| 0.129079 | 0.126603  | 0.128642 | 0.124272  | 0.124854 | 0.125874  | 0.128934 |
| 0.116404 | 0.113345  | 0.119755 | 0.11014   | 0.109848 | 0.108246  | 0.124417 |
| 0.203963 | 0.199738  | 0.197407 | 0.189248  | 0.19799  | 0.198427  | 0.202943 |
| 0.135927 | 0.13549   | 0.136072 | 0.128205  | 0.124417 | 0.129225  | 0.128497 |
| 0.129371 | 0.118735  | 0.123106 | 0.119318  | 0.114365 | 0.111305  | 0.125728 |
| 0.223339 | 0.217366  | 0.2162   | 0.208916  | 0.215618 | 0.213432  | 0.219697 |
| 0.129808 | 0.137529  | 0.133159 | 0.125     | 0.131119 | 0.137966  | 0.126166 |
| 0.11451  | 0.114656  | 0.120484 | 0.109703  | 0.110868 | 0.111597  | 0.124272 |
| 0.113345 | 0.110868  | 0.115822 | 0.107955  | 0.107955 | 0.109557  | 0.118735 |
| 0.144376 | 0.142191  | 0.140152 | 0.131993  | 0.138986 | 0.137966  | 0.136072 |
| 0.201777 | 0.199301  | 0.194639 | 0.192016  | 0.198718 | 0.194202  | 0.202214 |
| 0.136946 | 0.132721  | 0.136218 | 0.130099  | 0.125146 | 0.132576  | 0.135052 |
| 0.145105 | 0.136218  | 0.137092 | 0.133887  | 0.131265 | 0.131993  | 0.13447  |
| 0.118298 | 0.110286  | 0.119901 | 0.106789  | 0.110577 | 0.107226  | 0.122815 |
| 0.115676 | 0.10912   | 0.116696 | 0.108246  | 0.107955 | 0.106935  | 0.120775 |
| 0.116113 | 0.110723  | 0.11859  | 0.11014   | 0.108392 | 0.109411  | 0.121503 |
| 0.133741 | 0.129808  | 0.132139 | 0.123106  | 0.12398  | 0.125583  | 0.125728 |
| 0.111451 | 0.0987762 | 0.110431 | 0.103147  | 0.10169  | 0.10067   | 0.112471 |
| 0.13447  | 0.123834  | 0.134033 | 0.120047  | 0.127622 | 0.126603  | 0.137238 |
| 0.128934 | 0.140734  | 0.124417 | 0.12296   | 0.134615 | 0.134178  | 0.125    |
| 0.129808 | 0.12296   | 0.133741 | 0.122086  | 0.126166 | 0.126894  | 0.135198 |
| 0.134324 | 0.129516  | 0.131556 | 0.122815  | 0.129516 | 0.131993  | 0.13039  |
| 0.210519 | 0.204837  | 0.203963 | 0.196387  | 0.204545 | 0.203526  | 0.209207 |
| 0.134324 | 0.129225  | 0.130682 | 0.125728  | 0.122232 | 0.128497  | 0.127477 |
| 0.141171 | 0.141608  | 0.138986 | 0.130536  | 0.135781 | 0.137092  | 0.132576 |
| 0.11451  | 0.10912   | 0.118735 | 0.106789  | 0.11116  | 0.107517  | 0.120775 |
| 0.109994 | 0.092366  | 0.1081   | 0.0973193 | 0.097028 | 0.0971737 | 0.108392 |
| 0.131556 | 0.126166  | 0.127622 | 0.113928  | 0.125291 | 0.121649  | 0.125291 |
| 0.138695 | 0.133887  | 0.135052 | 0.127768  | 0.128934 | 0.133159  | 0.134178 |
| 0.132867 | 0.139423  | 0.135927 | 0.126894  | 0.126311 | 0.137821  | 0.136509 |
| 0.12602  | 0.133159  | 0.122378 | 0.115967  | 0.120629 | 0.122523  | 0.121503 |
| 0.125437 | 0.116841  | 0.120629 | 0.11451   | 0.115967 | 0.118735  | 0.122669 |

|          |           |          |           |           |           |           |
|----------|-----------|----------|-----------|-----------|-----------|-----------|
| 0.121212 | 0.110286  | 0.116696 | 0.109411  | 0.111742  | 0.108974  | 0.119901  |
| 0.119027 | 0.103147  | 0.11451  | 0.107517  | 0.101107  | 0.0962995 | 0.116259  |
| 0.138403 | 0.123106  | 0.129516 | 0.122232  | 0.118153  | 0.120921  | 0.13039   |
| 0.136509 | 0.125     | 0.140152 | 0.12704   | 0.130828  | 0.128934  | 0.140152  |
| 0.135781 | 0.13039   | 0.134178 | 0.127768  | 0.125146  | 0.132284  | 0.133013  |
| 0.131847 | 0.126457  | 0.127331 | 0.119464  | 0.120921  | 0.12398   | 0.122086  |
| 0.133013 | 0.126457  | 0.131119 | 0.12296   | 0.118881  | 0.125146  | 0.127331  |
| 0.113928 | 0.110868  | 0.119318 | 0.10912   | 0.112617  | 0.111014  | 0.124272  |
| 0.128059 | 0.119172  | 0.126166 | 0.111597  | 0.111597  | 0.118153  | 0.116841  |
| 0.11757  | 0.113345  | 0.117716 | 0.109266  | 0.114802  | 0.114948  | 0.121795  |
| 0.132721 | 0.125291  | 0.128205 | 0.12296   | 0.118007  | 0.122523  | 0.127331  |
| 0.122815 | 0.130536  | 0.117716 | 0.112471  | 0.120921  | 0.123397  | 0.12296   |
| 0.13039  | 0.122086  | 0.129079 | 0.120629  | 0.119172  | 0.123689  | 0.123252  |
| 0.114219 | 0.0977564 | 0.114365 | 0.104167  | 0.103293  | 0.102273  | 0.113491  |
| 0.115822 | 0.115093  | 0.117716 | 0.110431  | 0.113345  | 0.113491  | 0.124126  |
| 0.128642 | 0.134033  | 0.126457 | 0.116841  | 0.125583  | 0.125728  | 0.127622  |
| 0.134033 | 0.121649  | 0.13039  | 0.127185  | 0.118735  | 0.111014  | 0.131265  |
| 0.116987 | 0.0917832 | 0.115967 | 0.104895  | 0.0740093 | 0.0782343 | 0.106061  |
| 0.116113 | 0.109266  | 0.118881 | 0.110431  | 0.107517  | 0.112908  | 0.120338  |
| 0.13345  | 0.13243   | 0.127768 | 0.121649  | 0.128642  | 0.129371  | 0.122232  |
| 0.134907 | 0.12398   | 0.130099 | 0.12398   | 0.119027  | 0.125874  | 0.130973  |
| 0.134033 | 0.134178  | 0.132139 | 0.122815  | 0.128642  | 0.128205  | 0.127185  |
| 0.13345  | 0.121066  | 0.130099 | 0.125146  | 0.118153  | 0.121795  | 0.123397  |
| 0.114219 | 0.0962995 | 0.114073 | 0.10271   | 0.103293  | 0.102564  | 0.114365  |
| 0.126748 | 0.120192  | 0.127477 | 0.112617  | 0.109703  | 0.11859   | 0.120192  |
| 0.124563 | 0.120338  | 0.123834 | 0.115967  | 0.113345  | 0.116404  | 0.119172  |
| 0.144522 | 0.136509  | 0.136801 | 0.124563  | 0.130099  | 0.128788  | 0.129808  |
| 0.133741 | 0.126894  | 0.13243  | 0.127477  | 0.119027  | 0.121795  | 0.133596  |
| 0.125146 | 0.124417  | 0.128497 | 0.119172  | 0.115967  | 0.116696  | 0.128205  |
| 0.210519 | 0.203089  | 0.200466 | 0.193182  | 0.20134   | 0.198281  | 0.20542   |
| 0.180507 | 0.172786  | 0.17162  | 0.166667  | 0.172203  | 0.167686  | 0.175408  |
| 0.133304 | 0.124126  | 0.134033 | 0.121212  | 0.125874  | 0.128059  | 0.136946  |
| 0.132576 | 0.130099  | 0.130099 | 0.126311  | 0.124563  | 0.123834  | 0.131265  |
| 0.14831  | 0.14292   | 0.148747 | 0.137966  | 0.152535  | 0.145688  | 0.152244  |
| 0.140297 | 0.136946  | 0.135198 | 0.129371  | 0.128788  | 0.13039   | 0.129953  |
| 0.125874 | 0.124563  | 0.125437 | 0.118444  | 0.123397  | 0.124126  | 0.127477  |
| 0.124272 | 0.119755  | 0.122086 | 0.116259  | 0.11859   | 0.116987  | 0.128788  |
| 0.101544 | 0.0754662 | 0.103438 | 0.0879953 | 0.083042  | 0.0826049 | 0.0952797 |
| 0.131265 | 0.120629  | 0.128788 | 0.125     | 0.118298  | 0.111742  | 0.131119  |
| 0.215618 | 0.211393  | 0.209645 | 0.203526  | 0.211393  | 0.206585  | 0.215181  |
| 0.141463 | 0.136072  | 0.138112 | 0.13345   | 0.13141   | 0.135344  | 0.135198  |
| 0.136655 | 0.133304  | 0.137092 | 0.122815  | 0.131847  | 0.131993  | 0.127185  |
| 0.119755 | 0.104749  | 0.116696 | 0.109703  | 0.101544  | 0.10169   | 0.116987  |
| 0.13447  | 0.123252  | 0.128497 | 0.117133  | 0.118298  | 0.128059  | 0.124709  |

|          |           |           |          |           |           |          |
|----------|-----------|-----------|----------|-----------|-----------|----------|
| 0.199009 | 0.192453  | 0.190705  | 0.185752 | 0.1875    | 0.18648   | 0.196533 |
| 0.256993 | 0.252477  | 0.250146  | 0.246649 | 0.253351  | 0.249126  | 0.253934 |
| 0.124126 | 0.133596  | 0.120192  | 0.120192 | 0.122523  | 0.127622  | 0.125146 |
| 0.12704  | 0.12398   | 0.129808  | 0.12602  | 0.117861  | 0.111597  | 0.129225 |
| 0.13141  | 0.121649  | 0.132139  | 0.119318 | 0.126311  | 0.126457  | 0.133013 |
| 0.131556 | 0.121212  | 0.130245  | 0.121795 | 0.122669  | 0.125437  | 0.126748 |
| 0.13141  | 0.127768  | 0.13039   | 0.124854 | 0.124272  | 0.124417  | 0.125437 |
| 0.13243  | 0.128497  | 0.12704   | 0.118881 | 0.120338  | 0.121066  | 0.122378 |
| 0.120629 | 0.118153  | 0.121358  | 0.109703 | 0.120775  | 0.113636  | 0.119027 |
| 0.13549  | 0.130099  | 0.132721  | 0.124563 | 0.123106  | 0.127622  | 0.129808 |
| 0.122815 | 0.121503  | 0.125583  | 0.110723 | 0.120921  | 0.115822  | 0.119464 |
| 0.120921 | 0.0925117 | 0.118153  | 0.111451 | 0.0753205 | 0.0757576 | 0.112034 |
| 0.115239 | 0.0987762 | 0.114802  | 0.104895 | 0.105769  | 0.104749  | 0.115967 |
| 0.124417 | 0.133304  | 0.119027  | 0.117279 | 0.124563  | 0.128205  | 0.12398  |
| 0.135927 | 0.132284  | 0.131993  | 0.122086 | 0.127622  | 0.129516  | 0.128497 |
| 0.115239 | 0.113928  | 0.112471  | 0.104895 | 0.108392  | 0.114073  | 0.106935 |
| 0.102127 | 0.11859   | 0.0935315 | 0.094697 | 0.114802  | 0.121066  | 0.100233 |
| 0.14088  | 0.130828  | 0.142191  | 0.13141  | 0.13141   | 0.132139  | 0.134033 |
| 0.115967 | 0.112034  | 0.119901  | 0.108246 | 0.11116   | 0.115093  | 0.121066 |
| 0.116696 | 0.121503  | 0.121795  | 0.109266 | 0.120338  | 0.117279  | 0.123543 |
| 0.119901 | 0.11859   | 0.126457  | 0.11655  | 0.120338  | 0.118735  | 0.131993 |
| 0.222028 | 0.213141  | 0.215181  | 0.205565 | 0.215181  | 0.20979   | 0.21722  |
| 0.118735 | 0.124417  | 0.111888  | 0.107226 | 0.116841  | 0.119901  | 0.116259 |
| 0.111888 | 0.0968823 | 0.110868  | 0.103584 | 0.0992133 | 0.101399  | 0.110286 |
| 0.140152 | 0.125728  | 0.135635  | 0.126603 | 0.119901  | 0.129371  | 0.128934 |
| 0.131556 | 0.141317  | 0.132284  | 0.122086 | 0.131119  | 0.137092  | 0.128788 |
| 0.131265 | 0.122378  | 0.12704   | 0.116841 | 0.119172  | 0.125437  | 0.122086 |
| 0.214889 | 0.207168  | 0.206002  | 0.203089 | 0.206294  | 0.204108  | 0.214452 |
| 0.139277 | 0.137092  | 0.136218  | 0.127477 | 0.13039   | 0.130828  | 0.130973 |
| 0.116987 | 0.110431  | 0.119755  | 0.106935 | 0.111014  | 0.109994  | 0.120629 |
| 0.125291 | 0.121066  | 0.126311  | 0.119318 | 0.116113  | 0.117716  | 0.123106 |
| 0.130536 | 0.119901  | 0.12602   | 0.122523 | 0.11757   | 0.121212  | 0.121358 |
| 0.13549  | 0.136218  | 0.13447   | 0.123689 | 0.128934  | 0.130536  | 0.129225 |
| 0.123543 | 0.114948  | 0.115822  | 0.113491 | 0.113782  | 0.119172  | 0.122232 |
| 0.121795 | 0.0907634 | 0.119901  | 0.111742 | 0.078817  | 0.0810023 | 0.10912  |
| 0.127331 | 0.13447   | 0.133013  | 0.122232 | 0.127768  | 0.134907  | 0.12398  |
| 0.21285  | 0.207459  | 0.206294  | 0.199592 | 0.206876  | 0.205274  | 0.20979  |
| 0.127914 | 0.119901  | 0.123689  | 0.118153 | 0.117279  | 0.121503  | 0.121066 |
| 0.209062 | 0.203963  | 0.207751  | 0.197844 | 0.204545  | 0.201195  | 0.209207 |
| 0.209499 | 0.201486  | 0.201486  | 0.195367 | 0.202652  | 0.200175  | 0.205565 |
| 0.138112 | 0.128059  | 0.138258  | 0.129808 | 0.127768  | 0.128205  | 0.130099 |
| 0.132576 | 0.142045  | 0.137966  | 0.125437 | 0.135052  | 0.138695  | 0.131265 |
| 0.115676 | 0.0916375 | 0.109703  | 0.102127 | 0.0782343 | 0.080711  | 0.104458 |
| 0.124854 | 0.122378  | 0.122378  | 0.117133 | 0.119755  | 0.11757   | 0.121503 |

|          |           |          |          |           |           |          |
|----------|-----------|----------|----------|-----------|-----------|----------|
| 0.134324 | 0.128934  | 0.129808 | 0.124272 | 0.122232  | 0.12704   | 0.128934 |
| 0.116841 | 0.113782  | 0.121649 | 0.110286 | 0.112325  | 0.11451   | 0.123106 |
| 0.128205 | 0.120484  | 0.128059 | 0.120484 | 0.117861  | 0.123252  | 0.126311 |
| 0.136072 | 0.127768  | 0.132139 | 0.12602  | 0.121941  | 0.127331  | 0.128934 |
| 0.123397 | 0.137238  | 0.124709 | 0.119172 | 0.127331  | 0.129225  | 0.12704  |
| 0.135198 | 0.127477  | 0.131265 | 0.124272 | 0.121066  | 0.126166  | 0.127477 |
| 0.11116  | 0.107517  | 0.11655  | 0.106643 | 0.108392  | 0.106789  | 0.11859  |
| 0.134615 | 0.133887  | 0.131265 | 0.124854 | 0.130099  | 0.129079  | 0.130099 |
| 0.10912  | 0.0941142 | 0.106352 | 0.103147 | 0.0961538 | 0.0893065 | 0.107809 |
| 0.140152 | 0.137966  | 0.135927 | 0.126894 | 0.135052  | 0.136364  | 0.131847 |
| 0.131119 | 0.121649  | 0.133887 | 0.117861 | 0.126311  | 0.125291  | 0.133596 |
| 0.142337 | 0.142774  | 0.142483 | 0.132576 | 0.141608  | 0.140006  | 0.134907 |
| 0.266463 | 0.265152  | 0.261072 | 0.254371 | 0.265443  | 0.258013  | 0.266608 |
| 0.137383 | 0.129953  | 0.134324 | 0.126166 | 0.129079  | 0.13039   | 0.132284 |
| 0.134033 | 0.134178  | 0.138258 | 0.127477 | 0.13039   | 0.12704   | 0.135052 |
| 0.229458 | 0.227855  | 0.223776 | 0.2162   | 0.226399  | 0.223922  | 0.227273 |
| 0.126166 | 0.127768  | 0.121649 | 0.118444 | 0.124854  | 0.125583  | 0.120775 |
| 0.23951  | 0.237908  | 0.236451 | 0.228875 | 0.238199  | 0.2331    | 0.238199 |
| 0.131847 | 0.125874  | 0.125    | 0.119172 | 0.123252  | 0.125146  | 0.125874 |
| 0.118007 | 0.116987  | 0.123689 | 0.116696 | 0.122232  | 0.117424  | 0.131556 |
| 0.126457 | 0.128934  | 0.128934 | 0.121649 | 0.121066  | 0.129662  | 0.124563 |
| 0.137529 | 0.12602   | 0.135052 | 0.126894 | 0.123397  | 0.128788  | 0.128642 |
| 0.219988 | 0.213432  | 0.211684 | 0.203234 | 0.211101  | 0.207751  | 0.214307 |
| 0.1419   | 0.142628  | 0.137675 | 0.130099 | 0.136801  | 0.138403  | 0.132721 |
| 0.137238 | 0.133596  | 0.135927 | 0.124272 | 0.128642  | 0.128497  | 0.129808 |
| 0.240822 | 0.232809  | 0.2331   | 0.22465  | 0.233392  | 0.230915  | 0.234557 |
| 0.138403 | 0.13243   | 0.135927 | 0.130973 | 0.126894  | 0.130828  | 0.133887 |
| 0.213141 | 0.208042  | 0.209207 | 0.199009 | 0.206002  | 0.204108  | 0.21183  |
| 0.136801 | 0.131993  | 0.135198 | 0.129079 | 0.12704   | 0.133013  | 0.133159 |
| 0.11757  | 0.114219  | 0.123543 | 0.111014 | 0.111305  | 0.110868  | 0.121503 |
| 0.113345 | 0.0945513 | 0.11553  | 0.107663 | 0.106498  | 0.0999417 | 0.117861 |
| 0.139569 | 0.128351  | 0.137092 | 0.128642 | 0.129808  | 0.132284  | 0.128642 |
| 0.12398  | 0.120921  | 0.124417 | 0.118298 | 0.119755  | 0.122523  | 0.121212 |
| 0.171183 | 0.164336  | 0.170455 | 0.159674 | 0.166084  | 0.160985  | 0.16958  |
| 0.130682 | 0.128497  | 0.12704  | 0.119755 | 0.120629  | 0.124854  | 0.123252 |
| 0.132139 | 0.138112  | 0.133159 | 0.123252 | 0.132284  | 0.136218  | 0.126748 |
| 0.13039  | 0.129079  | 0.125291 | 0.123834 | 0.121795  | 0.124854  | 0.128497 |
| 0.12602  | 0.136072  | 0.127331 | 0.118881 | 0.129662  | 0.133013  | 0.124126 |
| 0.211247 | 0.206439  | 0.204983 | 0.196533 | 0.205274  | 0.199009  | 0.206731 |
| 0.116987 | 0.111597  | 0.117424 | 0.107809 | 0.112471  | 0.110868  | 0.120047 |
| 0.136655 | 0.128351  | 0.134761 | 0.128934 | 0.12602   | 0.129371  | 0.129808 |
| 0.13039  | 0.124417  | 0.126457 | 0.119172 | 0.11859   | 0.120775  | 0.129079 |
| 0.134615 | 0.131556  | 0.130099 | 0.125146 | 0.123106  | 0.130245  | 0.126311 |
| 0.114365 | 0.11451   | 0.119172 | 0.113928 | 0.11655   | 0.116696  | 0.127622 |



|          |           |          |           |           |          |           |
|----------|-----------|----------|-----------|-----------|----------|-----------|
| 0.265443 | 0.261801  | 0.258304 | 0.255682  | 0.263549  | 0.259324 | 0.263258  |
| 0.112325 | 0.0981935 | 0.111888 | 0.104021  | 0.106935  | 0.10271  | 0.111597  |
| 0.133013 | 0.125874  | 0.129662 | 0.120047  | 0.123543  | 0.124563 | 0.13141   |
| 0.19391  | 0.189685  | 0.187646 | 0.172494  | 0.192016  | 0.188374 | 0.189103  |
| 0.201486 | 0.19493   | 0.194639 | 0.184441  | 0.19493   | 0.190997 | 0.198135  |
| 0.12602  | 0.132867  | 0.124126 | 0.118881  | 0.122669  | 0.126894 | 0.125874  |
| 0.136072 | 0.13243   | 0.133887 | 0.125146  | 0.127768  | 0.127331 | 0.127185  |
| 0.131119 | 0.126603  | 0.128351 | 0.124854  | 0.122815  | 0.124126 | 0.124272  |
| 0.151078 | 0.15472   | 0.150058 | 0.138986  | 0.151224  | 0.150204 | 0.145396  |
| 0.119318 | 0.128497  | 0.118298 | 0.113636  | 0.117716  | 0.123106 | 0.122669  |
| 0.129371 | 0.134178  | 0.12398  | 0.121066  | 0.12398   | 0.126748 | 0.127185  |
| 0.141463 | 0.138403  | 0.138986 | 0.134324  | 0.130536  | 0.138258 | 0.137529  |
| 0.133887 | 0.128497  | 0.128788 | 0.119755  | 0.126748  | 0.12602  | 0.120047  |
| 0.140443 | 0.139132  | 0.135927 | 0.128642  | 0.136801  | 0.136072 | 0.133304  |
| 0.138549 | 0.132576  | 0.133159 | 0.124126  | 0.128788  | 0.130682 | 0.132284  |
| 0.135198 | 0.124854  | 0.133013 | 0.127477  | 0.12602   | 0.128788 | 0.125728  |
| 0.146125 | 0.138403  | 0.146853 | 0.13986   | 0.140734  | 0.140006 | 0.140152  |
| 0.112471 | 0.0968823 | 0.115239 | 0.106206  | 0.104749  | 0.102273 | 0.117861  |
| 0.141171 | 0.131702  | 0.142483 | 0.132284  | 0.131702  | 0.133596 | 0.132867  |
| 0.141754 | 0.137238  | 0.138112 | 0.135198  | 0.134615  | 0.139132 | 0.13986   |
| 0.221445 | 0.218677  | 0.214598 | 0.209645  | 0.215763  | 0.214161 | 0.220425  |
| 0.112617 | 0.0981935 | 0.112471 | 0.1081    | 0.0999417 | 0.100379 | 0.109848  |
| 0.206731 | 0.203963  | 0.202506 | 0.193765  | 0.202506  | 0.198281 | 0.206585  |
| 0.125146 | 0.12704   | 0.126457 | 0.117716  | 0.124126  | 0.122523 | 0.122086  |
| 0.120192 | 0.117716  | 0.124417 | 0.115676  | 0.117424  | 0.11553  | 0.126166  |
| 0.133596 | 0.125583  | 0.132867 | 0.120047  | 0.12704   | 0.127768 | 0.134033  |
| 0.126457 | 0.119901  | 0.130682 | 0.114365  | 0.122815  | 0.122086 | 0.126894  |
| 0.137092 | 0.134033  | 0.131119 | 0.126166  | 0.132576  | 0.130973 | 0.12704   |
| 0.137092 | 0.136364  | 0.134324 | 0.126166  | 0.131993  | 0.132139 | 0.129371  |
| 0.121941 | 0.117133  | 0.124126 | 0.111305  | 0.11859   | 0.11757  | 0.125     |
| 0.130245 | 0.136218  | 0.132721 | 0.122232  | 0.127185  | 0.134033 | 0.124563  |
| 0.132284 | 0.127185  | 0.136801 | 0.12398   | 0.129808  | 0.128497 | 0.138258  |
| 0.145251 | 0.140152  | 0.141317 | 0.136655  | 0.136364  | 0.138258 | 0.141608  |
| 0.260927 | 0.256119  | 0.254371 | 0.248543  | 0.258741  | 0.252768 | 0.258741  |
| 0.118444 | 0.117133  | 0.122378 | 0.111888  | 0.116259  | 0.113491 | 0.122086  |
| 0.200466 | 0.194784  | 0.191579 | 0.186043  | 0.192453  | 0.192599 | 0.197407  |
| 0.205274 | 0.200175  | 0.197844 | 0.193473  | 0.195513  | 0.194784 | 0.201632  |
| 0.125291 | 0.128351  | 0.123397 | 0.120192  | 0.114656  | 0.116259 | 0.124563  |
| 0.112762 | 0.097465  | 0.115822 | 0.105332  | 0.100379  | 0.099359 | 0.112034  |
| 0.120047 | 0.116696  | 0.122232 | 0.116987  | 0.117279  | 0.118298 | 0.129808  |
| 0.129953 | 0.127477  | 0.125728 | 0.120484  | 0.123397  | 0.12704  | 0.123689  |
| 0.106498 | 0.0769231 | 0.100524 | 0.0882867 | 0.0859557 | 0.083479 | 0.0958625 |
| 0.134761 | 0.131702  | 0.134033 | 0.128205  | 0.123543  | 0.130682 | 0.131993  |
| 0.12704  | 0.128934  | 0.130099 | 0.117861  | 0.122232  | 0.123834 | 0.12398   |

|          |           |          |          |           |           |          |
|----------|-----------|----------|----------|-----------|-----------|----------|
| 0.141026 | 0.141171  | 0.136801 | 0.130973 | 0.137383  | 0.136946  | 0.136801 |
| 0.115822 | 0.113345  | 0.119755 | 0.11014  | 0.112179  | 0.112325  | 0.123543 |
| 0.143211 | 0.140443  | 0.138112 | 0.12704  | 0.138695  | 0.135635  | 0.13345  |
| 0.130245 | 0.128934  | 0.131265 | 0.120775 | 0.124272  | 0.124709  | 0.128351 |
| 0.135198 | 0.123397  | 0.134178 | 0.120775 | 0.128351  | 0.129079  | 0.136801 |
| 0.135344 | 0.125583  | 0.132576 | 0.126748 | 0.121503  | 0.126311  | 0.127914 |
| 0.1419   | 0.136509  | 0.140006 | 0.131265 | 0.135344  | 0.140152  | 0.140297 |
| 0.124272 | 0.0879953 | 0.120047 | 0.113054 | 0.0737179 | 0.0744464 | 0.113054 |
| 0.114948 | 0.111014  | 0.115676 | 0.109848 | 0.109848  | 0.11116   | 0.119755 |
| 0.145833 | 0.13986   | 0.138403 | 0.136072 | 0.136072  | 0.135052  | 0.136072 |
| 0.202506 | 0.195076  | 0.194784 | 0.187791 | 0.19595   | 0.188811  | 0.196533 |
| 0.145251 | 0.143357  | 0.140152 | 0.134907 | 0.139569  | 0.138549  | 0.13549  |
| 0.135635 | 0.134615  | 0.131702 | 0.123834 | 0.128205  | 0.132721  | 0.127331 |
| 0.131993 | 0.121649  | 0.132139 | 0.116404 | 0.123689  | 0.12296   | 0.133304 |
| 0.120775 | 0.115093  | 0.120921 | 0.11014  | 0.116841  | 0.116404  | 0.121503 |
| 0.134033 | 0.124563  | 0.130099 | 0.124563 | 0.122523  | 0.126748  | 0.125728 |
| 0.139132 | 0.125291  | 0.135781 | 0.129953 | 0.122378  | 0.129808  | 0.128788 |
| 0.206002 | 0.202069  | 0.200612 | 0.191871 | 0.200612  | 0.198135  | 0.206148 |
| 0.131119 | 0.128059  | 0.130682 | 0.120484 | 0.12398   | 0.123543  | 0.127185 |
| 0.11961  | 0.115676  | 0.117716 | 0.107517 | 0.114802  | 0.112617  | 0.119172 |
| 0.136509 | 0.138403  | 0.134324 | 0.124126 | 0.131993  | 0.136509  | 0.130245 |
| 0.208333 | 0.204108  | 0.200612 | 0.19595  | 0.20236   | 0.199592  | 0.206731 |
| 0.114948 | 0.10169   | 0.11655  | 0.106643 | 0.106061  | 0.103584  | 0.11451  |
| 0.141317 | 0.132139  | 0.137675 | 0.129808 | 0.128351  | 0.13141   | 0.136801 |
| 0.139277 | 0.135052  | 0.135927 | 0.125728 | 0.129516  | 0.131119  | 0.129516 |
| 0.11961  | 0.128788  | 0.117133 | 0.109266 | 0.120047  | 0.121649  | 0.119172 |
| 0.203234 | 0.197261  | 0.195513 | 0.189394 | 0.199009  | 0.193328  | 0.201049 |
| 0.138258 | 0.131702  | 0.132576 | 0.128205 | 0.125583  | 0.128351  | 0.131702 |
| 0.134761 | 0.12704   | 0.128497 | 0.120047 | 0.117133  | 0.124563  | 0.127914 |
| 0.116696 | 0.105478  | 0.117133 | 0.107809 | 0.107226  | 0.10708   | 0.11655  |
| 0.140006 | 0.13345   | 0.135781 | 0.124709 | 0.13141   | 0.129516  | 0.13345  |
| 0.127622 | 0.134178  | 0.130682 | 0.121649 | 0.126311  | 0.134907  | 0.126311 |
| 0.141026 | 0.137675  | 0.139132 | 0.130099 | 0.131556  | 0.138403  | 0.137675 |
| 0.115385 | 0.112617  | 0.120484 | 0.110577 | 0.109994  | 0.113345  | 0.11961  |
| 0.129079 | 0.126603  | 0.133304 | 0.125728 | 0.114073  | 0.119464  | 0.130973 |
| 0.138258 | 0.152972  | 0.130828 | 0.131702 | 0.145396  | 0.144376  | 0.139569 |
| 0.251311 | 0.244464  | 0.242424 | 0.234266 | 0.24359   | 0.239656  | 0.243298 |
| 0.124563 | 0.0882867 | 0.123543 | 0.116841 | 0.0766317 | 0.0799825 | 0.114219 |
| 0.131847 | 0.136364  | 0.133159 | 0.123543 | 0.130828  | 0.134761  | 0.130245 |
| 0.135781 | 0.131265  | 0.130973 | 0.119318 | 0.127477  | 0.126166  | 0.124854 |
| 0.13447  | 0.133159  | 0.129662 | 0.125874 | 0.126166  | 0.128059  | 0.129079 |
| 0.126748 | 0.130682  | 0.125728 | 0.110577 | 0.125437  | 0.129662  | 0.121358 |
| 0.133741 | 0.125437  | 0.127768 | 0.112617 | 0.123106  | 0.123834  | 0.123106 |
| 0.139132 | 0.135198  | 0.133741 | 0.123834 | 0.13549   | 0.132139  | 0.128788 |

|          |           |           |           |           |           |           |
|----------|-----------|-----------|-----------|-----------|-----------|-----------|
| 0.140152 | 0.138258  | 0.13884   | 0.132721  | 0.132139  | 0.136072  | 0.135344  |
| 0.129079 | 0.138258  | 0.127185  | 0.121649  | 0.129808  | 0.125874  | 0.127768  |
| 0.249563 | 0.24359   | 0.24359   | 0.236305  | 0.245629  | 0.240239  | 0.24359   |
| 0.112762 | 0.0977564 | 0.112617  | 0.104167  | 0.0980478 | 0.100816  | 0.110868  |
| 0.121503 | 0.116987  | 0.121066  | 0.110868  | 0.112034  | 0.114219  | 0.119027  |
| 0.114948 | 0.11014   | 0.117716  | 0.109266  | 0.111888  | 0.112617  | 0.12296   |
| 0.129079 | 0.139423  | 0.124563  | 0.122232  | 0.135927  | 0.132867  | 0.131556  |
| 0.126748 | 0.0907634 | 0.126894  | 0.118444  | 0.0866841 | 0.0801282 | 0.120192  |
| 0.124126 | 0.122523  | 0.125146  | 0.114073  | 0.116987  | 0.117716  | 0.126603  |
| 0.135781 | 0.135344  | 0.133013  | 0.125146  | 0.131265  | 0.129953  | 0.127768  |
| 0.121941 | 0.126457  | 0.11451   | 0.112762  | 0.117716  | 0.119901  | 0.118007  |
| 0.245192 | 0.237762  | 0.236888  | 0.230186  | 0.237762  | 0.235577  | 0.242716  |
| 0.142045 | 0.138695  | 0.137529  | 0.128788  | 0.13345   | 0.133596  | 0.131702  |
| 0.137238 | 0.133887  | 0.137383  | 0.129808  | 0.128059  | 0.132867  | 0.134761  |
| 0.127331 | 0.128642  | 0.125437  | 0.11961   | 0.117279  | 0.125583  | 0.123689  |
| 0.121941 | 0.129953  | 0.119172  | 0.117424  | 0.127331  | 0.132139  | 0.125     |
| 0.135635 | 0.126748  | 0.127914  | 0.12296   | 0.12296   | 0.12398   | 0.13141   |
| 0.113199 | 0.111014  | 0.120047  | 0.111014  | 0.112179  | 0.111742  | 0.121212  |
| 0.139714 | 0.131119  | 0.132867  | 0.129953  | 0.12704   | 0.131847  | 0.133741  |
| 0.137821 | 0.137383  | 0.142628  | 0.133596  | 0.13243   | 0.138695  | 0.13884   |
| 0.133159 | 0.130099  | 0.133596  | 0.126603  | 0.126894  | 0.13141   | 0.131265  |
| 0.114073 | 0.112762  | 0.117424  | 0.106643  | 0.111888  | 0.112617  | 0.119755  |
| 0.130099 | 0.138695  | 0.131702  | 0.123543  | 0.13141   | 0.137383  | 0.125874  |
| 0.133741 | 0.142337  | 0.140297  | 0.128642  | 0.136218  | 0.143065  | 0.130682  |
| 0.13986  | 0.125728  | 0.138258  | 0.124854  | 0.13243   | 0.13141   | 0.137675  |
| 0.138695 | 0.13039   | 0.139714  | 0.127768  | 0.134761  | 0.132576  | 0.14088   |
| 0.13039  | 0.1419    | 0.134615  | 0.126457  | 0.136072  | 0.139423  | 0.129953  |
| 0.101544 | 0.0769231 | 0.0984848 | 0.0879953 | 0.0798368 | 0.0808566 | 0.0976107 |
| 0.14627  | 0.137675  | 0.139714  | 0.133887  | 0.134761  | 0.13345   | 0.139132  |
| 0.135344 | 0.13141   | 0.141026  | 0.128788  | 0.129371  | 0.137383  | 0.139277  |
| 0.2213   | 0.217366  | 0.214161  | 0.206876  | 0.215909  | 0.213432  | 0.217949  |
| 0.13243  | 0.121795  | 0.129371  | 0.127914  | 0.119172  | 0.113199  | 0.13345   |
| 0.129808 | 0.123252  | 0.128205  | 0.118881  | 0.120047  | 0.119027  | 0.123543  |
| 0.119755 | 0.116113  | 0.123397  | 0.113782  | 0.119318  | 0.116841  | 0.124563  |
| 0.237908 | 0.229895  | 0.227273  | 0.220862  | 0.229312  | 0.226836  | 0.228438  |
| 0.225087 | 0.221445  | 0.21824   | 0.213287  | 0.221445  | 0.21722   | 0.224068  |
| 0.141317 | 0.139423  | 0.141171  | 0.135052  | 0.134178  | 0.134907  | 0.138549  |
| 0.262092 | 0.258741  | 0.25641   | 0.249126  | 0.259324  | 0.258596  | 0.259615  |
| 0.102127 | 0.076049  | 0.0984848 | 0.0868298 | 0.0810023 | 0.0826049 | 0.0964452 |
| 0.135344 | 0.119464  | 0.130828  | 0.124126  | 0.126457  | 0.121066  | 0.128497  |
| 0.113491 | 0.0944056 | 0.113345  | 0.104604  | 0.100816  | 0.10271   | 0.113054  |
| 0.132284 | 0.140589  | 0.133887  | 0.123689  | 0.133887  | 0.137821  | 0.128642  |
| 0.204108 | 0.201049  | 0.199301  | 0.188811  | 0.197261  | 0.195367  | 0.20134   |
| 0.134033 | 0.128059  | 0.129516  | 0.121649  | 0.125146  | 0.126166  | 0.129808  |

|          |           |          |          |           |           |          |
|----------|-----------|----------|----------|-----------|-----------|----------|
| 0.210373 | 0.205565  | 0.204983 | 0.196533 | 0.204108  | 0.199592  | 0.209645 |
| 0.121212 | 0.125728  | 0.116404 | 0.117861 | 0.112034  | 0.113636  | 0.124563 |
| 0.134324 | 0.130682  | 0.130973 | 0.120484 | 0.130099  | 0.129371  | 0.13039  |
| 0.115676 | 0.105915  | 0.117861 | 0.106789 | 0.105624  | 0.107517  | 0.115822 |
| 0.125    | 0.125437  | 0.126603 | 0.117279 | 0.120484  | 0.121795  | 0.121941 |
| 0.107663 | 0.106643  | 0.112762 | 0.102855 | 0.106061  | 0.105624  | 0.115967 |
| 0.125728 | 0.116841  | 0.123543 | 0.122378 | 0.115967  | 0.107955  | 0.126748 |
| 0.109703 | 0.0926573 | 0.109266 | 0.10169  | 0.0981935 | 0.0983392 | 0.109266 |
| 0.131702 | 0.127768  | 0.128059 | 0.120192 | 0.123397  | 0.124126  | 0.124854 |
| 0.138258 | 0.126166  | 0.129662 | 0.124126 | 0.121795  | 0.122232  | 0.127622 |
| 0.121066 | 0.0909091 | 0.117716 | 0.1081   | 0.0772145 | 0.0785256 | 0.106352 |
| 0.107517 | 0.0957168 | 0.106789 | 0.101253 | 0.100379  | 0.0996503 | 0.110577 |
| 0.128351 | 0.125583  | 0.128205 | 0.116259 | 0.125     | 0.123689  | 0.132867 |
| 0.139132 | 0.141317  | 0.13986  | 0.130828 | 0.137821  | 0.137383  | 0.131702 |
| 0.126166 | 0.119027  | 0.128059 | 0.115239 | 0.119901  | 0.121503  | 0.129516 |
| 0.131847 | 0.121212  | 0.127622 | 0.120338 | 0.117424  | 0.124272  | 0.125    |
| 0.111597 | 0.108829  | 0.113199 | 0.105915 | 0.107955  | 0.108683  | 0.117279 |
| 0.134324 | 0.131265  | 0.133887 | 0.126603 | 0.13039   | 0.129371  | 0.133013 |
| 0.127331 | 0.135635  | 0.128351 | 0.117279 | 0.126603  | 0.134615  | 0.124563 |
| 0.133887 | 0.126748  | 0.134033 | 0.128497 | 0.124709  | 0.128642  | 0.128497 |
| 0.131847 | 0.120629  | 0.13141  | 0.11859  | 0.121503  | 0.121941  | 0.130536 |
| 0.131993 | 0.13243   | 0.133013 | 0.122232 | 0.125146  | 0.130536  | 0.126603 |
| 0.141463 | 0.140152  | 0.139569 | 0.13141  | 0.139569  | 0.138549  | 0.130536 |
| 0.146125 | 0.147727  | 0.143648 | 0.134324 | 0.145105  | 0.141171  | 0.136946 |
| 0.125    | 0.118735  | 0.122815 | 0.114365 | 0.113782  | 0.118007  | 0.121941 |
| 0.116259 | 0.11553   | 0.119027 | 0.111742 | 0.110868  | 0.115093  | 0.122815 |
| 0.126603 | 0.114802  | 0.120629 | 0.110723 | 0.112179  | 0.118735  | 0.11655  |
| 0.134761 | 0.1419    | 0.138986 | 0.126166 | 0.138695  | 0.141754  | 0.13141  |
| 0.111014 | 0.095134  | 0.115239 | 0.105332 | 0.0983392 | 0.100524  | 0.116113 |
| 0.145979 | 0.136218  | 0.146999 | 0.13884  | 0.140297  | 0.141026  | 0.140297 |
| 0.123543 | 0.123689  | 0.129516 | 0.120775 | 0.126894  | 0.122669  | 0.133887 |
| 0.128642 | 0.13345   | 0.123543 | 0.120629 | 0.126748  | 0.130099  | 0.127914 |
| 0.120629 | 0.0980478 | 0.109411 | 0.10912  | 0.0980478 | 0.100524  | 0.114948 |
| 0.119027 | 0.123834  | 0.116841 | 0.113345 | 0.11451   | 0.119901  | 0.11859  |
| 0.133013 | 0.122669  | 0.135198 | 0.124417 | 0.130245  | 0.132721  | 0.134324 |
| 0.220862 | 0.216346  | 0.215472 | 0.204983 | 0.216346  | 0.213578  | 0.219551 |
| 0.135198 | 0.122232  | 0.130682 | 0.120484 | 0.118153  | 0.124417  | 0.123106 |
| 0.114656 | 0.106935  | 0.120047 | 0.106935 | 0.102273  | 0.110577  | 0.113636 |
| 0.127331 | 0.133013  | 0.130682 | 0.120192 | 0.129516  | 0.132576  | 0.120192 |
| 0.12602  | 0.121795  | 0.12704  | 0.115676 | 0.124417  | 0.122232  | 0.130245 |
| 0.128497 | 0.133887  | 0.123397 | 0.121941 | 0.118444  | 0.117424  | 0.127768 |
| 0.135198 | 0.127185  | 0.131265 | 0.129808 | 0.118735  | 0.124126  | 0.137383 |
| 0.137383 | 0.128788  | 0.136364 | 0.129371 | 0.120921  | 0.123689  | 0.134615 |
| 0.120629 | 0.132139  | 0.116404 | 0.116404 | 0.122815  | 0.125583  | 0.122232 |

|           |           |           |           |           |           |           |
|-----------|-----------|-----------|-----------|-----------|-----------|-----------|
| 0.133159  | 0.121066  | 0.127477  | 0.120484  | 0.116696  | 0.118881  | 0.127477  |
| 0.132284  | 0.139714  | 0.134178  | 0.123397  | 0.135344  | 0.136364  | 0.127185  |
| 0.115676  | 0.106498  | 0.11757   | 0.105332  | 0.0983392 | 0.106935  | 0.11116   |
| 0.121941  | 0.0917832 | 0.122086  | 0.11451   | 0.07838   | 0.0796911 | 0.113928  |
| 0.185897  | 0.188666  | 0.182547  | 0.177885  | 0.186334  | 0.185315  | 0.188666  |
| 0.136364  | 0.132139  | 0.129808  | 0.124272  | 0.126311  | 0.127622  | 0.126311  |
| 0.134178  | 0.138986  | 0.135781  | 0.125     | 0.135198  | 0.140006  | 0.132284  |
| 0.123834  | 0.0983392 | 0.120775  | 0.112034  | 0.104749  | 0.100524  | 0.116113  |
| 0.120192  | 0.131993  | 0.124417  | 0.108974  | 0.130536  | 0.129225  | 0.120338  |
| 0.113491  | 0.0999417 | 0.111305  | 0.104021  | 0.101107  | 0.0965909 | 0.113054  |
| 0.111451  | 0.092366  | 0.110431  | 0.105478  | 0.080711  | 0.0782343 | 0.105186  |
| 0.114656  | 0.101399  | 0.11451   | 0.109557  | 0.0990676 | 0.0980478 | 0.11451   |
| 0.121649  | 0.127914  | 0.122378  | 0.116841  | 0.131119  | 0.135052  | 0.127914  |
| 0.125437  | 0.111597  | 0.125874  | 0.113928  | 0.105769  | 0.097465  | 0.119464  |
| 0.140443  | 0.13039   | 0.137966  | 0.132139  | 0.122815  | 0.130245  | 0.140297  |
| 0.11961   | 0.118881  | 0.115676  | 0.1081    | 0.117716  | 0.114656  | 0.117424  |
| 0.13141   | 0.112617  | 0.124854  | 0.112034  | 0.107663  | 0.109848  | 0.121649  |
| 0.135635  | 0.131119  | 0.136364  | 0.124709  | 0.126748  | 0.13243   | 0.131702  |
| 0.120484  | 0.0955711 | 0.109557  | 0.101981  | 0.0990676 | 0.0957168 | 0.111597  |
| 0.128059  | 0.120047  | 0.127914  | 0.121795  | 0.11859   | 0.117279  | 0.12704   |
| 0.119901  | 0.101107  | 0.109557  | 0.106061  | 0.10169   | 0.099796  | 0.110723  |
| 0.12398   | 0.0990676 | 0.108683  | 0.105769  | 0.099359  | 0.097465  | 0.113928  |
| 0.0995047 | 0.100524  | 0.0990676 | 0.087704  | 0.100816  | 0.0992133 | 0.0976107 |
| 0.115676  | 0.101253  | 0.117861  | 0.108246  | 0.101836  | 0.108392  | 0.116696  |
| 0.123543  | 0.103584  | 0.117279  | 0.104458  | 0.104749  | 0.0990676 | 0.112034  |
| 0.151807  | 0.151661  | 0.152535  | 0.142337  | 0.148164  | 0.147145  | 0.145251  |
| 0.149476  | 0.146707  | 0.149913  | 0.137966  | 0.137966  | 0.143357  | 0.140297  |
| 0.126166  | 0.0995047 | 0.115239  | 0.108537  | 0.0986305 | 0.0976107 | 0.11553   |
| 0.144085  | 0.144814  | 0.140734  | 0.135198  | 0.1419    | 0.146416  | 0.138112  |
| 0.129808  | 0.126748  | 0.124709  | 0.125583  | 0.128205  | 0.129225  | 0.135781  |
| 0.133304  | 0.125291  | 0.135198  | 0.120921  | 0.129953  | 0.12602   | 0.136655  |
| 0.115239  | 0.102273  | 0.113636  | 0.107809  | 0.101399  | 0.103001  | 0.110431  |
| 0.141608  | 0.149621  | 0.144085  | 0.137383  | 0.144085  | 0.145105  | 0.14088   |
| 0.136946  | 0.136509  | 0.135635  | 0.124563  | 0.13039   | 0.128497  | 0.129808  |
| 0.142191  | 0.142337  | 0.13884   | 0.132721  | 0.142045  | 0.143648  | 0.139714  |
| 0.12296   | 0.114656  | 0.123106  | 0.113491  | 0.114656  | 0.117716  | 0.124854  |
| 0.119318  | 0.100816  | 0.111014  | 0.109848  | 0.104021  | 0.104749  | 0.118881  |
| 0.119172  | 0.102127  | 0.112617  | 0.100087  | 0.100379  | 0.110723  | 0.10912   |
| 0.127768  | 0.127331  | 0.128497  | 0.120921  | 0.118881  | 0.127185  | 0.121212  |
| 0.119027  | 0.0981935 | 0.119172  | 0.113636  | 0.109557  | 0.0968823 | 0.115967  |
| 0.1081    | 0.105915  | 0.116113  | 0.100379  | 0.111451  | 0.112179  | 0.10708   |
| 0.129079  | 0.131265  | 0.129225  | 0.115239  | 0.128059  | 0.128788  | 0.123106  |
| 0.121795  | 0.110868  | 0.11961   | 0.107372  | 0.110868  | 0.109557  | 0.116113  |
| 0.118735  | 0.0949883 | 0.108974  | 0.0973193 | 0.0955711 | 0.10708   | 0.108392  |

|           |           |          |           |           |           |           |
|-----------|-----------|----------|-----------|-----------|-----------|-----------|
| 0.115967  | 0.0968823 | 0.114948 | 0.104749  | 0.105624  | 0.104312  | 0.108829  |
| 0.118007  | 0.103293  | 0.116113 | 0.105624  | 0.108537  | 0.105186  | 0.113199  |
| 0.124272  | 0.0976107 | 0.113928 | 0.10169   | 0.101981  | 0.112617  | 0.113345  |
| 0.116696  | 0.104312  | 0.113345 | 0.108392  | 0.105769  | 0.107955  | 0.116841  |
| 0.12296   | 0.122815  | 0.125728 | 0.115239  | 0.116113  | 0.115385  | 0.123106  |
| 0.120338  | 0.103875  | 0.120192 | 0.112617  | 0.101836  | 0.103438  | 0.119318  |
| 0.0990676 | 0.0724068 | 0.095134 | 0.0843531 | 0.0791084 | 0.076049  | 0.0968823 |
| 0.114802  | 0.0948427 | 0.110577 | 0.103875  | 0.100962  | 0.0979021 | 0.104458  |
| 0.124272  | 0.122378  | 0.122086 | 0.111597  | 0.112471  | 0.118735  | 0.123252  |
| 0.121795  | 0.0962995 | 0.117279 | 0.112325  | 0.0986305 | 0.0990676 | 0.123397  |
| 0.132576  | 0.122232  | 0.134761 | 0.12398   | 0.116696  | 0.116259  | 0.127768  |
| 0.115967  | 0.118444  | 0.117861 | 0.104458  | 0.110577  | 0.114219  | 0.114948  |
| 0.12602   | 0.105478  | 0.123543 | 0.112762  | 0.107809  | 0.107663  | 0.121503  |

| TDr_12_00249 | TDr_12_00250 | TDr_12_00254 | TDr_12_00408 | TDr_12_00415 | TDr_12_00416 | TDr_12_00417 |
|--------------|--------------|--------------|--------------|--------------|--------------|--------------|
| 0.128059     | 0.114365     | 0.112325     | 0.135781     | 0.126894     | 0.105041     | 0.199883     |
| 0.129662     | 0.113054     | 0.106061     | 0.133887     | 0.124709     | 0.102273     | 0.206731     |
| 0.124417     | 0.108392     | 0.104895     | 0.128059     | 0.121212     | 0.099359     | 0.204983     |
| 0.125291     | 0.11859      | 0.111597     | 0.133304     | 0.126166     | 0.106352     | 0.212267     |
| 0.142483     | 0.137238     | 0.128788     | 0.145251     | 0.138695     | 0.125291     | 0.224796     |
| 0.138403     | 0.139277     | 0.123543     | 0.140589     | 0.138986     | 0.119755     | 0.217512     |
| 0.135635     | 0.121941     | 0.116987     | 0.126166     | 0.124563     | 0.111742     | 0.222319     |
| 0.130099     | 0.119027     | 0.110286     | 0.130536     | 0.127477     | 0.107955     | 0.207168     |
| 0.119755     | 0.090035     | 0.101981     | 0.124854     | 0.107809     | 0.094697     | 0.211393     |
| 0.0968823    | 0.0744464    | 0.0799825    | 0.136655     | 0.0840618    | 0.0802739    | 0.215035     |
| 0.135781     | 0.11451      | 0.113054     | 0.133596     | 0.125        | 0.104895     | 0.20236      |
| 0.128934     | 0.121649     | 0.110868     | 0.124417     | 0.12602      | 0.104749     | 0.208333     |
| 0.128059     | 0.103293     | 0.105332     | 0.13345      | 0.11757      | 0.0995047    | 0.217657     |
| 0.147145     | 0.127914     | 0.128205     | 0.154575     | 0.140152     | 0.125291     | 0.172348     |
| 0.127185     | 0.121358     | 0.116987     | 0.144814     | 0.129808     | 0.117279     | 0.222611     |
| 0.128205     | 0.120629     | 0.110431     | 0.12602      | 0.123834     | 0.111597     | 0.220425     |
| 0.129808     | 0.115239     | 0.112325     | 0.125583     | 0.121066     | 0.102418     | 0.2162       |
| 0.150058     | 0.146853     | 0.133741     | 0.154283     | 0.148019     | 0.134615     | 0.234703     |
| 0.120629     | 0.109848     | 0.101981     | 0.127768     | 0.121212     | 0.0964452    | 0.204691     |
| 0.210956     | 0.206585     | 0.193182     | 0.216929     | 0.212704     | 0.196096     | 0.139423     |
| 0.134761     | 0.127768     | 0.115239     | 0.136072     | 0.133304     | 0.114365     | 0.219406     |
| 0.128788     | 0.119755     | 0.113636     | 0.127477     | 0.130245     | 0.113636     | 0.218386     |
| 0.120484     | 0.112617     | 0.102127     | 0.118881     | 0.118444     | 0.101544     | 0.2162       |
| 0.141317     | 0.133159     | 0.126748     | 0.124563     | 0.136946     | 0.117424     | 0.222756     |
| 0.114948     | 0.104167     | 0.0933858    | 0.125583     | 0.113491     | 0.0922203    | 0.208333     |
| 0.13243      | 0.133596     | 0.118444     | 0.140152     | 0.135927     | 0.11961      | 0.222611     |
| 0.133596     | 0.123106     | 0.112908     | 0.127331     | 0.127185     | 0.112617     | 0.219114     |
| 0.134761     | 0.120775     | 0.114948     | 0.132284     | 0.130973     | 0.112617     | 0.22669      |
| 0.13884      | 0.131265     | 0.128059     | 0.130828     | 0.140297     | 0.124563     | 0.221445     |
| 0.126603     | 0.110577     | 0.114073     | 0.138695     | 0.119027     | 0.105624     | 0.224942     |
| 0.136364     | 0.125291     | 0.115967     | 0.133013     | 0.134033     | 0.112179     | 0.215472     |
| 0.136801     | 0.121649     | 0.124272     | 0.125583     | 0.121649     | 0.116404     | 0.221445     |
| 0.121066     | 0.109411     | 0.101544     | 0.122669     | 0.118153     | 0.10067      | 0.207459     |
| 0.132139     | 0.117279     | 0.114656     | 0.128205     | 0.122815     | 0.104167     | 0.215326     |
| 0.133159     | 0.11451      | 0.115385     | 0.121066     | 0.117133     | 0.111597     | 0.224796     |
| 0.131847     | 0.117861     | 0.115822     | 0.128497     | 0.116987     | 0.110286     | 0.226399     |
| 0.133159     | 0.122086     | 0.121212     | 0.135052     | 0.132284     | 0.118881     | 0.231206     |
| 0.129516     | 0.115239     | 0.114365     | 0.133741     | 0.127185     | 0.114073     | 0.22465      |
| 0.13039      | 0.116404     | 0.110286     | 0.116841     | 0.122523     | 0.105624     | 0.215035     |
| 0.140006     | 0.124272     | 0.121358     | 0.126748     | 0.130682     | 0.117279     | 0.224942     |
| 0.128642     | 0.113491     | 0.105915     | 0.122086     | 0.122815     | 0.105041     | 0.213578     |
| 0.14933      | 0.142045     | 0.135927     | 0.138112     | 0.149038     | 0.13243      | 0.2331       |

|          |          |           |          |          |           |          |
|----------|----------|-----------|----------|----------|-----------|----------|
| 0.147582 | 0.147582 | 0.134761  | 0.14627  | 0.148456 | 0.137383  | 0.232226 |
| 0.134615 | 0.117716 | 0.116259  | 0.125146 | 0.123543 | 0.102855  | 0.215763 |
| 0.109557 | 0.104895 | 0.0894522 | 0.123106 | 0.105186 | 0.0865385 | 0.214889 |
| 0.126894 | 0.101253 | 0.107663  | 0.131119 | 0.110286 | 0.101544  | 0.225524 |
| 0.134178 | 0.129516 | 0.114365  | 0.129371 | 0.136801 | 0.10912   | 0.2162   |
| 0.141317 | 0.133159 | 0.129079  | 0.135927 | 0.141608 | 0.130536  | 0.229458 |
| 0.124417 | 0.113054 | 0.105769  | 0.123689 | 0.125    | 0.105769  | 0.218094 |
| 0.128351 | 0.115822 | 0.112617  | 0.121503 | 0.127185 | 0.10708   | 0.216492 |
| 0.144814 | 0.148019 | 0.137238  | 0.152826 | 0.14627  | 0.131993  | 0.231498 |
| 0.136364 | 0.134615 | 0.122086  | 0.136509 | 0.137238 | 0.124417  | 0.217512 |
| 0.130682 | 0.122232 | 0.114073  | 0.11859  | 0.130099 | 0.107372  | 0.215326 |
| 0.124272 | 0.099796 | 0.117861  | 0.144522 | 0.109994 | 0.112325  | 0.227564 |
| 0.134178 | 0.124272 | 0.119027  | 0.125874 | 0.135052 | 0.112325  | 0.206002 |
| 0.148456 | 0.147582 | 0.133013  | 0.135198 | 0.151078 | 0.132721  | 0.23514  |
| 0.141317 | 0.121212 | 0.120921  | 0.134178 | 0.13141  | 0.116841  | 0.223339 |
| 0.138403 | 0.12296  | 0.117716  | 0.122232 | 0.128788 | 0.112179  | 0.219551 |
| 0.128788 | 0.11655  | 0.108974  | 0.126311 | 0.124417 | 0.108392  | 0.214598 |
| 0.125437 | 0.10708  | 0.111116  | 0.131702 | 0.110286 | 0.104458  | 0.225816 |
| 0.149621 | 0.141463 | 0.132721  | 0.13549  | 0.147873 | 0.130973  | 0.231643 |
| 0.145833 | 0.13884  | 0.133304  | 0.140443 | 0.144959 | 0.132139  | 0.236888 |
| 0.168998 | 0.165793 | 0.157925  | 0.170017 | 0.169289 | 0.157051  | 0.179341 |
| 0.135198 | 0.122086 | 0.117133  | 0.124563 | 0.128788 | 0.106935  | 0.216055 |
| 0.131702 | 0.111305 | 0.109557  | 0.120484 | 0.124417 | 0.105186  | 0.217803 |
| 0.131993 | 0.121503 | 0.109557  | 0.11757  | 0.126457 | 0.105478  | 0.216929 |
| 0.149913 | 0.141463 | 0.132139  | 0.151224 | 0.140589 | 0.130973  | 0.223776 |
| 0.135052 | 0.120484 | 0.110286  | 0.123252 | 0.129516 | 0.108829  | 0.212995 |
| 0.143648 | 0.140152 | 0.127331  | 0.135344 | 0.145688 | 0.122086  | 0.225962 |
| 0.12704  | 0.111305 | 0.106935  | 0.130099 | 0.115093 | 0.104021  | 0.2213   |
| 0.131556 | 0.125437 | 0.115239  | 0.123543 | 0.127768 | 0.110286  | 0.2162   |
| 0.154575 | 0.154283 | 0.138258  | 0.15472  | 0.150204 | 0.13447   | 0.227273 |
| 0.142337 | 0.127477 | 0.121941  | 0.124126 | 0.136218 | 0.11553   | 0.222902 |
| 0.143648 | 0.138986 | 0.13141   | 0.141463 | 0.143357 | 0.128205  | 0.235286 |
| 0.142045 | 0.133013 | 0.125146  | 0.136655 | 0.13884  | 0.125728  | 0.219114 |
| 0.120047 | 0.123252 | 0.0981935 | 0.130099 | 0.130536 | 0.0973193 | 0.211976 |
| 0.132284 | 0.11655  | 0.113345  | 0.123689 | 0.123252 | 0.104312  | 0.211976 |
| 0.130828 | 0.120629 | 0.111305  | 0.126311 | 0.125    | 0.106352  | 0.218386 |
| 0.146562 | 0.138112 | 0.13141   | 0.129516 | 0.140152 | 0.128205  | 0.233246 |
| 0.130973 | 0.116113 | 0.110286  | 0.124709 | 0.118153 | 0.101544  | 0.213869 |
| 0.141608 | 0.13986  | 0.134907  | 0.137383 | 0.144814 | 0.132867  | 0.23616  |
| 0.139569 | 0.127914 | 0.116841  | 0.127477 | 0.132576 | 0.117716  | 0.219551 |
| 0.134615 | 0.125583 | 0.120338  | 0.122815 | 0.133159 | 0.114219  | 0.219551 |
| 0.13549  | 0.124709 | 0.117133  | 0.126603 | 0.138112 | 0.11451   | 0.216929 |
| 0.137529 | 0.127622 | 0.119172  | 0.128642 | 0.133159 | 0.112179  | 0.224213 |
| 0.126748 | 0.12296  | 0.111597  | 0.127185 | 0.129079 | 0.108974  | 0.218677 |



|          |           |           |          |          |           |          |
|----------|-----------|-----------|----------|----------|-----------|----------|
| 0.136946 | 0.121212  | 0.115967  | 0.123689 | 0.131702 | 0.109266  | 0.216638 |
| 0.145542 | 0.13884   | 0.131556  | 0.134324 | 0.142337 | 0.127185  | 0.231643 |
| 0.131265 | 0.112325  | 0.109703  | 0.114802 | 0.120484 | 0.103001  | 0.215909 |
| 0.126457 | 0.104021  | 0.109557  | 0.120484 | 0.108974 | 0.0981935 | 0.218969 |
| 0.126748 | 0.122669  | 0.11655   | 0.13884  | 0.125583 | 0.110723  | 0.223631 |
| 0.136946 | 0.126748  | 0.119172  | 0.129225 | 0.129371 | 0.112471  | 0.223048 |
| 0.109848 | 0.127914  | 0.104021  | 0.141171 | 0.129953 | 0.106352  | 0.228584 |
| 0.108537 | 0.138258  | 0.10708   | 0.145396 | 0.134761 | 0.112325  | 0.236305 |
| 0.130245 | 0.120629  | 0.108974  | 0.134761 | 0.125874 | 0.104021  | 0.215763 |
| 0.185315 | 0.189394  | 0.171329  | 0.18954  | 0.193182 | 0.176573  | 0.167104 |
| 0.122523 | 0.114948  | 0.103293  | 0.126748 | 0.125146 | 0.0989219 | 0.215326 |
| 0.119172 | 0.130828  | 0.108683  | 0.148456 | 0.13345  | 0.117716  | 0.231789 |
| 0.112762 | 0.124126  | 0.101399  | 0.143794 | 0.125874 | 0.109848  | 0.225962 |
| 0.140297 | 0.136509  | 0.130099  | 0.144231 | 0.137966 | 0.123397  | 0.2331   |
| 0.108683 | 0.117716  | 0.0920746 | 0.130682 | 0.121795 | 0.0929487 | 0.220425 |
| 0.113345 | 0.13141   | 0.10373   | 0.142628 | 0.132284 | 0.107809  | 0.232663 |
| 0.106352 | 0.113345  | 0.090035  | 0.128642 | 0.117716 | 0.092366  | 0.218677 |
| 0.114073 | 0.127185  | 0.095134  | 0.131993 | 0.125437 | 0.104749  | 0.219988 |
| 0.124563 | 0.111451  | 0.108537  | 0.128497 | 0.124854 | 0.103875  | 0.217075 |
| 0.115239 | 0.137092  | 0.103584  | 0.147436 | 0.138258 | 0.113199  | 0.236014 |
| 0.124563 | 0.107663  | 0.0986305 | 0.126166 | 0.116987 | 0.0939685 | 0.217366 |
| 0.127914 | 0.134324  | 0.111597  | 0.143502 | 0.138112 | 0.115967  | 0.226836 |
| 0.130099 | 0.117861  | 0.10912   | 0.13141  | 0.121066 | 0.0995047 | 0.218531 |
| 0.139277 | 0.13141   | 0.125583  | 0.127477 | 0.132284 | 0.122669  | 0.231206 |
| 0.130973 | 0.121358  | 0.118444  | 0.13549  | 0.123397 | 0.113491  | 0.224359 |
| 0.124563 | 0.113491  | 0.101544  | 0.127914 | 0.116404 | 0.0936772 | 0.217949 |
| 0.146125 | 0.14933   | 0.133304  | 0.15472  | 0.151078 | 0.13243   | 0.221737 |
| 0.125    | 0.116259  | 0.10373   | 0.128642 | 0.118298 | 0.102564  | 0.218386 |
| 0.118298 | 0.110723  | 0.0952797 | 0.135052 | 0.118007 | 0.0935315 | 0.221591 |
| 0.122232 | 0.108537  | 0.109994  | 0.12704  | 0.122523 | 0.100087  | 0.220571 |
| 0.137675 | 0.130973  | 0.123106  | 0.150058 | 0.130682 | 0.120484  | 0.229895 |
| 0.13243  | 0.129516  | 0.113782  | 0.126748 | 0.137092 | 0.111742  | 0.204254 |
| 0.113199 | 0.106206  | 0.0939685 | 0.133159 | 0.113199 | 0.0895979 | 0.220862 |
| 0.108537 | 0.108829  | 0.0939685 | 0.131993 | 0.114948 | 0.0893065 | 0.215326 |
| 0.129079 | 0.112471  | 0.112179  | 0.13039  | 0.11859  | 0.105186  | 0.217803 |
| 0.118444 | 0.105624  | 0.104458  | 0.139277 | 0.114073 | 0.111742  | 0.227273 |
| 0.131993 | 0.120629  | 0.11014   | 0.125146 | 0.124126 | 0.105186  | 0.221008 |
| 0.118444 | 0.100962  | 0.0939685 | 0.122669 | 0.110286 | 0.0922203 | 0.211538 |
| 0.119027 | 0.10067   | 0.0965909 | 0.123834 | 0.103584 | 0.0887238 | 0.212413 |
| 0.11859  | 0.104895  | 0.101399  | 0.127185 | 0.103438 | 0.097028  | 0.217512 |
| 0.140443 | 0.121503  | 0.119172  | 0.119027 | 0.135781 | 0.112179  | 0.215472 |
| 0.133013 | 0.118735  | 0.119901  | 0.134615 | 0.120484 | 0.114365  | 0.228147 |
| 0.121503 | 0.102855  | 0.108392  | 0.125728 | 0.111014 | 0.0955711 | 0.218969 |
| 0.117279 | 0.0995047 | 0.0995047 | 0.121503 | 0.107955 | 0.0942599 | 0.215035 |

|          |           |           |          |          |           |          |
|----------|-----------|-----------|----------|----------|-----------|----------|
| 0.131556 | 0.119901  | 0.113491  | 0.127914 | 0.119901 | 0.113199  | 0.226107 |
| 0.123834 | 0.106061  | 0.101399  | 0.12398  | 0.114802 | 0.0987762 | 0.216929 |
| 0.138403 | 0.126457  | 0.115967  | 0.139423 | 0.132284 | 0.111305  | 0.211101 |
| 0.136655 | 0.13141   | 0.121212  | 0.14088  | 0.137821 | 0.118881  | 0.223339 |
| 0.122086 | 0.107809  | 0.102273  | 0.126603 | 0.112179 | 0.102855  | 0.222174 |
| 0.121941 | 0.0995047 | 0.106789  | 0.12704  | 0.112617 | 0.097465  | 0.222028 |
| 0.122523 | 0.103875  | 0.104749  | 0.123834 | 0.112908 | 0.0995047 | 0.214744 |
| 0.113782 | 0.104458  | 0.0916375 | 0.125583 | 0.107955 | 0.0919289 | 0.211538 |
| 0.127477 | 0.10912   | 0.109411  | 0.138695 | 0.115239 | 0.10912   | 0.225524 |
| 0.113782 | 0.0980478 | 0.0980478 | 0.118881 | 0.105332 | 0.0962995 | 0.21824  |
| 0.145396 | 0.13549   | 0.139569  | 0.130682 | 0.13986  | 0.127331  | 0.228001 |
| 0.144668 | 0.126894  | 0.125146  | 0.138695 | 0.135052 | 0.127477  | 0.222028 |
| 0.129516 | 0.116987  | 0.11961   | 0.132867 | 0.126603 | 0.112325  | 0.225233 |
| 0.129662 | 0.113054  | 0.104021  | 0.130099 | 0.123543 | 0.103147  | 0.215763 |
| 0.127622 | 0.116841  | 0.107809  | 0.132721 | 0.125583 | 0.0996503 | 0.213141 |
| 0.119027 | 0.109703  | 0.101253  | 0.119172 | 0.112617 | 0.100962  | 0.217657 |
| 0.128497 | 0.112762  | 0.104895  | 0.124272 | 0.117424 | 0.102564  | 0.217512 |
| 0.125291 | 0.110431  | 0.103147  | 0.124272 | 0.119464 | 0.0967366 | 0.218386 |
| 0.134033 | 0.117424  | 0.113928  | 0.129516 | 0.134615 | 0.105769  | 0.20877  |
| 0.143939 | 0.133741  | 0.125291  | 0.128642 | 0.138695 | 0.125874  | 0.229749 |
| 0.108829 | 0.121066  | 0.0954254 | 0.134324 | 0.125146 | 0.0971737 | 0.224942 |
| 0.129371 | 0.113928  | 0.117133  | 0.146707 | 0.118298 | 0.113345  | 0.222756 |
| 0.130682 | 0.132721  | 0.122523  | 0.144522 | 0.13039  | 0.120775  | 0.230478 |
| 0.211101 | 0.200321  | 0.190705  | 0.202214 | 0.206439 | 0.189831  | 0.122086 |
| 0.247378 | 0.240967  | 0.234848  | 0.245192 | 0.245047 | 0.231935  | 0.116987 |
| 0.133013 | 0.120775  | 0.114656  | 0.124417 | 0.133596 | 0.104167  | 0.206002 |
| 0.131993 | 0.124417  | 0.108974  | 0.120775 | 0.126457 | 0.104312  | 0.211684 |
| 0.130245 | 0.119172  | 0.102273  | 0.114948 | 0.125    | 0.097028  | 0.209645 |
| 0.126748 | 0.121795  | 0.1081    | 0.131265 | 0.128205 | 0.104312  | 0.216929 |
| 0.126457 | 0.123543  | 0.117424  | 0.146999 | 0.127331 | 0.115967  | 0.224213 |
| 0.129953 | 0.124126  | 0.109266  | 0.125728 | 0.133741 | 0.11014   | 0.219843 |
| 0.146999 | 0.158362  | 0.136509  | 0.144231 | 0.154283 | 0.13884   | 0.234557 |
| 0.137238 | 0.128788  | 0.11451   | 0.121066 | 0.13345  | 0.111597  | 0.216055 |
| 0.141026 | 0.138986  | 0.126748  | 0.131556 | 0.143939 | 0.120338  | 0.230332 |
| 0.141754 | 0.140006  | 0.124854  | 0.132576 | 0.144376 | 0.121649  | 0.223193 |
| 0.141754 | 0.13884   | 0.123689  | 0.135198 | 0.142045 | 0.123106  | 0.227273 |
| 0.144668 | 0.136509  | 0.127477  | 0.138986 | 0.13884  | 0.128642  | 0.226981 |
| 0.139132 | 0.122232  | 0.110868  | 0.126748 | 0.13039  | 0.108829  | 0.222028 |
| 0.129225 | 0.122815  | 0.11116   | 0.120921 | 0.129516 | 0.105332  | 0.219697 |
| 0.129662 | 0.127622  | 0.110723  | 0.124854 | 0.134907 | 0.109266  | 0.218094 |
| 0.128788 | 0.120629  | 0.108683  | 0.118444 | 0.132284 | 0.10169   | 0.209936 |
| 0.130828 | 0.124709  | 0.111888  | 0.121066 | 0.129662 | 0.104895  | 0.214598 |
| 0.135927 | 0.128351  | 0.114948  | 0.119172 | 0.133304 | 0.11116   | 0.219697 |
| 0.138112 | 0.133159  | 0.121212  | 0.13243  | 0.141317 | 0.119755  | 0.224213 |

|           |           |           |          |           |           |          |
|-----------|-----------|-----------|----------|-----------|-----------|----------|
| 0.1419    | 0.143648  | 0.13345   | 0.138258 | 0.14627   | 0.127622  | 0.232372 |
| 0.135635  | 0.12398   | 0.119027  | 0.123834 | 0.137383  | 0.110868  | 0.219114 |
| 0.136072  | 0.123834  | 0.110723  | 0.125437 | 0.132867  | 0.107809  | 0.216055 |
| 0.142483  | 0.1419    | 0.127622  | 0.13243  | 0.140734  | 0.118881  | 0.230915 |
| 0.130828  | 0.118881  | 0.111014  | 0.120775 | 0.125291  | 0.105186  | 0.212267 |
| 0.144959  | 0.153409  | 0.133304  | 0.142774 | 0.154575  | 0.134178  | 0.229895 |
| 0.134178  | 0.120775  | 0.121358  | 0.135781 | 0.136801  | 0.118444  | 0.220571 |
| 0.113345  | 0.147145  | 0.106061  | 0.141171 | 0.147727  | 0.117133  | 0.221882 |
| 0.129953  | 0.122669  | 0.108392  | 0.119027 | 0.126457  | 0.102855  | 0.216638 |
| 0.123106  | 0.116404  | 0.10708   | 0.117716 | 0.124854  | 0.0983392 | 0.214161 |
| 0.137238  | 0.132867  | 0.119464  | 0.124563 | 0.139277  | 0.115093  | 0.226544 |
| 0.131847  | 0.132139  | 0.120192  | 0.128497 | 0.133887  | 0.117279  | 0.222611 |
| 0.140589  | 0.141754  | 0.126311  | 0.130245 | 0.143502  | 0.121941  | 0.219988 |
| 0.137238  | 0.135198  | 0.115676  | 0.123689 | 0.135781  | 0.112179  | 0.222465 |
| 0.129516  | 0.13039   | 0.114656  | 0.124126 | 0.132139  | 0.113199  | 0.219114 |
| 0.135635  | 0.131556  | 0.120484  | 0.127622 | 0.133304  | 0.116404  | 0.219114 |
| 0.138258  | 0.137675  | 0.125728  | 0.138986 | 0.139714  | 0.121941  | 0.232809 |
| 0.14088   | 0.136218  | 0.129225  | 0.140443 | 0.141463  | 0.120484  | 0.223776 |
| 0.141026  | 0.142483  | 0.129079  | 0.127768 | 0.147727  | 0.124709  | 0.232372 |
| 0.149913  | 0.137675  | 0.134761  | 0.135198 | 0.142628  | 0.128059  | 0.222611 |
| 0.134178  | 0.128642  | 0.116404  | 0.118007 | 0.133013  | 0.106206  | 0.220862 |
| 0.135927  | 0.140589  | 0.123106  | 0.136655 | 0.139423  | 0.116696  | 0.225816 |
| 0.130536  | 0.119755  | 0.113054  | 0.121066 | 0.125291  | 0.10169   | 0.215763 |
| 0.129516  | 0.11961   | 0.112908  | 0.126166 | 0.125728  | 0.105624  | 0.215618 |
| 0.136801  | 0.122815  | 0.10912   | 0.124709 | 0.126603  | 0.104749  | 0.219988 |
| 0.129079  | 0.12296   | 0.111014  | 0.127768 | 0.131993  | 0.105769  | 0.215181 |
| 0.131993  | 0.118881  | 0.107226  | 0.119027 | 0.125583  | 0.101981  | 0.216055 |
| 0.142628  | 0.140297  | 0.132139  | 0.135198 | 0.145542  | 0.125437  | 0.231061 |
| 0.136364  | 0.124709  | 0.117716  | 0.13039  | 0.132576  | 0.109557  | 0.216638 |
| 0.142483  | 0.1419    | 0.126166  | 0.133887 | 0.140152  | 0.125874  | 0.227418 |
| 0.130245  | 0.121503  | 0.107809  | 0.119027 | 0.128205  | 0.097028  | 0.214307 |
| 0.14292   | 0.131265  | 0.12398   | 0.123252 | 0.135052  | 0.118735  | 0.227564 |
| 0.135198  | 0.115967  | 0.117133  | 0.132721 | 0.120629  | 0.120629  | 0.222174 |
| 0.125583  | 0.1081    | 0.108392  | 0.128934 | 0.125583  | 0.104604  | 0.213432 |
| 0.132139  | 0.106206  | 0.116404  | 0.120338 | 0.119318  | 0.107372  | 0.221154 |
| 0.123252  | 0.115093  | 0.101981  | 0.135344 | 0.126748  | 0.110431  | 0.213724 |
| 0.137966  | 0.119318  | 0.114073  | 0.131119 | 0.133887  | 0.115822  | 0.22465  |
| 0.126894  | 0.118153  | 0.105332  | 0.121503 | 0.122523  | 0.103875  | 0.217949 |
| 0.122523  | 0.0962995 | 0.114073  | 0.147436 | 0.0939685 | 0.108246  | 0.22873  |
| 0.143939  | 0.136946  | 0.132284  | 0.139714 | 0.139277  | 0.13345   | 0.235286 |
| 0.114219  | 0.0844988 | 0.0987762 | 0.127477 | 0.0941142 | 0.0850816 | 0.21285  |
| 0.0939685 | 0.123689  | 0.100962  | 0.151224 | 0.125146  | 0.105624  | 0.231643 |
| 0.11451   | 0.0865385 | 0.101107  | 0.145251 | 0.0920746 | 0.104021  | 0.22771  |
| 0.100524  | 0.114219  | 0.0912005 | 0.147873 | 0.121212  | 0.104895  | 0.225379 |

|           |           |           |          |           |           |          |
|-----------|-----------|-----------|----------|-----------|-----------|----------|
| 0.0868298 | 0.112471  | 0.0509907 | 0.139423 | 0.115967  | 0.0914918 | 0.221008 |
| 0.120629  | 0.0775058 | 0.106061  | 0.140297 | 0.092366  | 0.0941142 | 0.225962 |
| 0.117861  | 0.0773601 | 0.110577  | 0.142483 | 0.0566725 | 0.099796  | 0.224942 |
| 0.0964452 | 0.114802  | 0.0932401 | 0.144668 | 0.122378  | 0.104021  | 0.228875 |
| 0         | 0.118298  | 0.0941142 | 0.156031 | 0.121212  | 0.105769  | 0.233246 |
| 0.118298  | 0         | 0.11014   | 0.144085 | 0.0827506 | 0.101107  | 0.228001 |
| 0.0941142 | 0.11014   | 0         | 0.139132 | 0.114802  | 0.0906177 | 0.217803 |
| 0.156031  | 0.144085  | 0.139132  | 0        | 0.152535  | 0.137675  | 0.221445 |
| 0.121212  | 0.0827506 | 0.114802  | 0.152535 | 0         | 0.105769  | 0.230041 |
| 0.105769  | 0.101107  | 0.0906177 | 0.137675 | 0.105769  | 0         | 0.215181 |
| 0.233246  | 0.228001  | 0.217803  | 0.221445 | 0.230041  | 0.215181  | 0        |
| 0.0942599 | 0.108537  | 0.0828963 | 0.141026 | 0.11757   | 0.0893065 | 0.221445 |
| 0.122523  | 0.0805653 | 0.101253  | 0.137238 | 0.0919289 | 0.0948427 | 0.217949 |
| 0.0836247 | 0.117424  | 0.0961538 | 0.152244 | 0.123543  | 0.104895  | 0.235577 |
| 0.120921  | 0.0786713 | 0.104312  | 0.137383 | 0.0906177 | 0.0952797 | 0.218969 |
| 0.119172  | 0.0842075 | 0.113345  | 0.153118 | 0.0801282 | 0.116259  | 0.231498 |
| 0.101399  | 0.111888  | 0.0938228 | 0.139423 | 0.115967  | 0.0932401 | 0.218386 |
| 0.100962  | 0.107955  | 0.0939685 | 0.133741 | 0.107663  | 0.092803  | 0.221445 |
| 0.119901  | 0.0826049 | 0.103875  | 0.14627  | 0.0957168 | 0.102127  | 0.227564 |
| 0.112471  | 0.111014  | 0.0949883 | 0.144668 | 0.119172  | 0.101981  | 0.214889 |
| 0.0939685 | 0.124272  | 0.0954254 | 0.150641 | 0.118735  | 0.103001  | 0.227273 |
| 0.0987762 | 0.113345  | 0.0920746 | 0.140006 | 0.115676  | 0.0955711 | 0.228875 |
| 0.0871212 | 0.115093  | 0.0906177 | 0.143794 | 0.11655   | 0.100233  | 0.231789 |
| 0.123543  | 0.105186  | 0.109557  | 0.130682 | 0.115967  | 0.100524  | 0.223631 |
| 0.109266  | 0.109848  | 0.0879953 | 0.135344 | 0.118007  | 0.0961538 | 0.223339 |
| 0.0898893 | 0.112908  | 0.100379  | 0.15035  | 0.118444  | 0.106498  | 0.230769 |
| 0.0891608 | 0.107517  | 0.0804196 | 0.138549 | 0.11451   | 0.092366  | 0.215181 |
| 0.140443  | 0.140443  | 0.127622  | 0.136218 | 0.140152  | 0.128205  | 0.230915 |
| 0.146707  | 0.13039   | 0.130099  | 0.146853 | 0.142045  | 0.127477  | 0.215618 |
| 0.125728  | 0.116113  | 0.116696  | 0.12704  | 0.121941  | 0.107955  | 0.223193 |
| 0.119027  | 0.0872669 | 0.105915  | 0.147436 | 0.0980478 | 0.103875  | 0.22669  |
| 0.12704   | 0.127622  | 0.11655   | 0.144376 | 0.135198  | 0.11451   | 0.209645 |
| 0.133304  | 0.121358  | 0.122523  | 0.137238 | 0.12602   | 0.111742  | 0.222319 |
| 0.145251  | 0.128934  | 0.127768  | 0.136946 | 0.138258  | 0.122815  | 0.210956 |
| 0.147582  | 0.135344  | 0.127185  | 0.15472  | 0.140297  | 0.12602   | 0.218823 |
| 0.120338  | 0.099359  | 0.100816  | 0.128351 | 0.111888  | 0.0999417 | 0.214015 |
| 0.136801  | 0.129225  | 0.121649  | 0.146853 | 0.132721  | 0.119901  | 0.223776 |
| 0.154429  | 0.142191  | 0.13549   | 0.1537   | 0.148601  | 0.131702  | 0.206731 |
| 0.12704   | 0.102855  | 0.111597  | 0.13243  | 0.107809  | 0.101981  | 0.22771  |
| 0.132867  | 0.12704   | 0.118881  | 0.137966 | 0.134033  | 0.115385  | 0.21722  |
| 0.153409  | 0.150204  | 0.146707  | 0.106643 | 0.152826  | 0.145251  | 0.228438 |
| 0.14088   | 0.128934  | 0.12602   | 0.129371 | 0.137966  | 0.116987  | 0.224359 |
| 0.13345   | 0.130245  | 0.12704   | 0.133304 | 0.131119  | 0.128788  | 0.23412  |
| 0.119027  | 0.118735  | 0.113199  | 0.118881 | 0.124854  | 0.113782  | 0.226399 |

|           |          |           |          |          |           |          |
|-----------|----------|-----------|----------|----------|-----------|----------|
| 0.11014   | 0.116841 | 0.105769  | 0.139423 | 0.125    | 0.1081    | 0.223631 |
| 0.127185  | 0.127185 | 0.11757   | 0.123834 | 0.134178 | 0.119318  | 0.223485 |
| 0.121503  | 0.102564 | 0.107809  | 0.12398  | 0.11655  | 0.104604  | 0.219551 |
| 0.115239  | 0.131556 | 0.103293  | 0.141026 | 0.131265 | 0.103875  | 0.228147 |
| 0.0910548 | 0.114365 | 0.0887238 | 0.141026 | 0.112034 | 0.105915  | 0.227855 |
| 0.11757   | 0.137675 | 0.111451  | 0.143648 | 0.139714 | 0.113199  | 0.22873  |
| 0.108537  | 0.131556 | 0.102418  | 0.142191 | 0.135052 | 0.109411  | 0.232517 |
| 0.128351  | 0.13243  | 0.111451  | 0.143065 | 0.135635 | 0.107663  | 0.222028 |
| 0.120775  | 0.145542 | 0.114948  | 0.150641 | 0.146707 | 0.127185  | 0.224359 |
| 0.114656  | 0.101836 | 0.100379  | 0.140734 | 0.104749 | 0.103293  | 0.219988 |
| 0.132721  | 0.116987 | 0.10912   | 0.134033 | 0.12398  | 0.108829  | 0.227564 |
| 0.135927  | 0.135635 | 0.121649  | 0.145979 | 0.134178 | 0.120775  | 0.224359 |
| 0.111742  | 0.101836 | 0.100379  | 0.131993 | 0.105041 | 0.100379  | 0.219114 |
| 0.153555  | 0.134033 | 0.136946  | 0.152826 | 0.142191 | 0.132867  | 0.223339 |
| 0.15472   | 0.150641 | 0.148893  | 0.162442 | 0.152389 | 0.143648  | 0.230624 |
| 0.1419    | 0.13549  | 0.12704   | 0.135052 | 0.141026 | 0.120338  | 0.228875 |
| 0.137383  | 0.130099 | 0.121941  | 0.121795 | 0.134178 | 0.112325  | 0.219988 |
| 0.119755  | 0.136946 | 0.109557  | 0.143794 | 0.138695 | 0.111014  | 0.233537 |
| 0.0980478 | 0.114073 | 0.0884324 | 0.147727 | 0.121649 | 0.104458  | 0.228438 |
| 0.141463  | 0.135344 | 0.123689  | 0.130536 | 0.138258 | 0.121941  | 0.226981 |
| 0.105624  | 0.128934 | 0.10067   | 0.148019 | 0.120192 | 0.10271   | 0.232809 |
| 0.126894  | 0.128934 | 0.121649  | 0.14831  | 0.133304 | 0.124854  | 0.227564 |
| 0.121503  | 0.107517 | 0.11451   | 0.133304 | 0.11451  | 0.114219  | 0.225962 |
| 0.166958  | 0.166375 | 0.155303  | 0.16419  | 0.170746 | 0.149476  | 0.230915 |
| 0.131119  | 0.121795 | 0.115676  | 0.13447  | 0.123252 | 0.11451   | 0.227418 |
| 0.130536  | 0.12296  | 0.122669  | 0.130973 | 0.127914 | 0.122378  | 0.230041 |
| 0.129516  | 0.11961  | 0.107663  | 0.131119 | 0.129225 | 0.110286  | 0.22465  |
| 0.11961   | 0.139132 | 0.115239  | 0.140734 | 0.140589 | 0.114656  | 0.230186 |
| 0.101253  | 0.109703 | 0.0852273 | 0.138695 | 0.11553  | 0.0971737 | 0.220862 |
| 0.151515  | 0.141608 | 0.131993  | 0.150204 | 0.152389 | 0.125     | 0.194784 |
| 0.141463  | 0.143211 | 0.12602   | 0.155303 | 0.147873 | 0.133887  | 0.231643 |
| 0.140152  | 0.127331 | 0.122086  | 0.13447  | 0.139277 | 0.120338  | 0.211684 |
| 0.148456  | 0.136509 | 0.131847  | 0.141608 | 0.150787 | 0.129808  | 0.192599 |
| 0.166958  | 0.157343 | 0.148601  | 0.149913 | 0.161713 | 0.145105  | 0.172057 |
| 0.155012  | 0.148893 | 0.137529  | 0.156906 | 0.157343 | 0.132867  | 0.17264  |
| 0.14292   | 0.130973 | 0.126311  | 0.112179 | 0.133596 | 0.11961   | 0.226399 |
| 0.14627   | 0.13986  | 0.132284  | 0.152535 | 0.143357 | 0.131119  | 0.222174 |
| 0.129079  | 0.116259 | 0.115093  | 0.132139 | 0.120047 | 0.107809  | 0.21081  |
| 0.130099  | 0.126311 | 0.107372  | 0.129662 | 0.128351 | 0.106789  | 0.211247 |
| 0.115385  | 0.103147 | 0.104604  | 0.135635 | 0.119755 | 0.102855  | 0.21285  |
| 0.137821  | 0.121795 | 0.122086  | 0.131556 | 0.136072 | 0.113928  | 0.210519 |
| 0.130682  | 0.120775 | 0.114073  | 0.134907 | 0.130682 | 0.106789  | 0.217366 |
| 0.126311  | 0.112617 | 0.104458  | 0.13141  | 0.125437 | 0.105332  | 0.20542  |
| 0.13884   | 0.116987 | 0.121941  | 0.13549  | 0.128642 | 0.116113  | 0.216783 |

|           |           |           |          |           |           |          |
|-----------|-----------|-----------|----------|-----------|-----------|----------|
| 0.129079  | 0.118881  | 0.113636  | 0.141463 | 0.129079  | 0.111305  | 0.206731 |
| 0.11859   | 0.10169   | 0.0996503 | 0.124854 | 0.111597  | 0.0967366 | 0.212558 |
| 0.142774  | 0.125583  | 0.123252  | 0.13447  | 0.140152  | 0.117716  | 0.211101 |
| 0.137966  | 0.119901  | 0.11961   | 0.131993 | 0.135052  | 0.113491  | 0.213287 |
| 0.142628  | 0.133304  | 0.126894  | 0.113636 | 0.138258  | 0.124563  | 0.219697 |
| 0.230041  | 0.221591  | 0.21285   | 0.222028 | 0.226544  | 0.212267  | 0.116841 |
| 0.144376  | 0.144085  | 0.139423  | 0.146853 | 0.153992  | 0.136801  | 0.224359 |
| 0.138986  | 0.132576  | 0.124126  | 0.142337 | 0.136072  | 0.122378  | 0.223631 |
| 0.135635  | 0.129808  | 0.119318  | 0.136364 | 0.13447   | 0.116987  | 0.21183  |
| 0.226544  | 0.218677  | 0.20877   | 0.219114 | 0.221882  | 0.20236   | 0.107809 |
| 0.144085  | 0.135052  | 0.122815  | 0.122669 | 0.142337  | 0.11961   | 0.208333 |
| 0.136364  | 0.134324  | 0.120921  | 0.128351 | 0.136946  | 0.118007  | 0.221008 |
| 0.142191  | 0.131702  | 0.120338  | 0.133304 | 0.136655  | 0.11859   | 0.213724 |
| 0.126311  | 0.117861  | 0.113199  | 0.139277 | 0.125437  | 0.109703  | 0.215326 |
| 0.257139  | 0.255682  | 0.248106  | 0.254662 | 0.255973  | 0.246941  | 0.124126 |
| 0.134615  | 0.129371  | 0.121212  | 0.13447  | 0.132867  | 0.113345  | 0.218094 |
| 0.139569  | 0.130245  | 0.121503  | 0.113491 | 0.135781  | 0.117133  | 0.218094 |
| 0.13549   | 0.135781  | 0.115676  | 0.131556 | 0.138986  | 0.116841  | 0.219551 |
| 0.134324  | 0.13345   | 0.114802  | 0.131265 | 0.138112  | 0.115676  | 0.215763 |
| 0.134907  | 0.128788  | 0.120047  | 0.141171 | 0.136364  | 0.116259  | 0.211976 |
| 0.143648  | 0.133159  | 0.124126  | 0.138549 | 0.141026  | 0.113928  | 0.194202 |
| 0.143065  | 0.129371  | 0.126457  | 0.116113 | 0.139277  | 0.118881  | 0.218677 |
| 0.137675  | 0.122232  | 0.120192  | 0.130245 | 0.136509  | 0.114365  | 0.212121 |
| 0.140443  | 0.134033  | 0.12296   | 0.143502 | 0.137529  | 0.120921  | 0.217512 |
| 0.125874  | 0.117133  | 0.109557  | 0.135927 | 0.122669  | 0.104312  | 0.214598 |
| 0.136509  | 0.122815  | 0.120484  | 0.129371 | 0.134178  | 0.110577  | 0.205711 |
| 0.0990676 | 0.0786713 | 0.0865385 | 0.137092 | 0.0865385 | 0.0888695 | 0.217512 |
| 0.144085  | 0.144376  | 0.12602   | 0.156469 | 0.145251  | 0.133013  | 0.231061 |
| 0.136218  | 0.131847  | 0.12398   | 0.140443 | 0.133887  | 0.119318  | 0.219406 |
| 0.141463  | 0.135635  | 0.126894  | 0.130828 | 0.136218  | 0.11961   | 0.22028  |
| 0.203817  | 0.197407  | 0.187791  | 0.201632 | 0.202943  | 0.184878  | 0.112179 |
| 0.218386  | 0.212558  | 0.200612  | 0.212704 | 0.214015  | 0.197698  | 0.111888 |
| 0.126603  | 0.11961   | 0.114656  | 0.141608 | 0.126311  | 0.110286  | 0.212704 |
| 0.121649  | 0.114073  | 0.107955  | 0.136072 | 0.120484  | 0.104167  | 0.215618 |
| 0.142045  | 0.129516  | 0.124563  | 0.147145 | 0.137966  | 0.125437  | 0.213869 |
| 0.139714  | 0.128642  | 0.124272  | 0.111305 | 0.133304  | 0.117279  | 0.21824  |
| 0.138112  | 0.13141   | 0.122669  | 0.139132 | 0.136072  | 0.120921  | 0.218677 |
| 0.129808  | 0.133596  | 0.114656  | 0.138695 | 0.134761  | 0.123106  | 0.217949 |
| 0.234994  | 0.232663  | 0.220425  | 0.231643 | 0.234703  | 0.220717  | 0.117424 |
| 0.131556  | 0.122815  | 0.115239  | 0.129953 | 0.126311  | 0.10912   | 0.22028  |
| 0.223193  | 0.220571  | 0.200466  | 0.20877  | 0.223193  | 0.200758  | 0.143794 |
| 0.133887  | 0.124272  | 0.112617  | 0.111014 | 0.123689  | 0.107955  | 0.222611 |
| 0.130828  | 0.126166  | 0.113054  | 0.130099 | 0.128205  | 0.107809  | 0.214598 |
| 0.126311  | 0.123689  | 0.114656  | 0.115385 | 0.130682  | 0.11116   | 0.206585 |

|          |          |          |          |          |          |          |
|----------|----------|----------|----------|----------|----------|----------|
| 0.122232 | 0.112325 | 0.104749 | 0.132867 | 0.122232 | 0.102418 | 0.20979  |
| 0.219114 | 0.212121 | 0.20338  | 0.213432 | 0.21824  | 0.198427 | 0.116987 |
| 0.146562 | 0.131702 | 0.129079 | 0.142337 | 0.14627  | 0.125291 | 0.209353 |
| 0.135198 | 0.126457 | 0.115676 | 0.127477 | 0.129662 | 0.111888 | 0.226253 |
| 0.141026 | 0.128205 | 0.126457 | 0.134178 | 0.138695 | 0.120629 | 0.213141 |
| 0.136072 | 0.129662 | 0.11859  | 0.125146 | 0.133159 | 0.117133 | 0.215472 |
| 0.128497 | 0.115093 | 0.109848 | 0.135635 | 0.122086 | 0.107226 | 0.214598 |
| 0.135927 | 0.127185 | 0.11757  | 0.112179 | 0.129808 | 0.107955 | 0.223193 |
| 0.141171 | 0.130973 | 0.12398  | 0.121503 | 0.135635 | 0.120484 | 0.20979  |
| 0.138549 | 0.135635 | 0.123106 | 0.13141  | 0.136801 | 0.119901 | 0.219406 |
| 0.136801 | 0.11757  | 0.116987 | 0.125583 | 0.129808 | 0.10708  | 0.204254 |
| 0.137238 | 0.127914 | 0.119464 | 0.129808 | 0.130245 | 0.111888 | 0.219843 |
| 0.202943 | 0.196533 | 0.187209 | 0.199009 | 0.201486 | 0.183129 | 0.116841 |
| 0.136072 | 0.13986  | 0.117133 | 0.13243  | 0.140443 | 0.119172 | 0.218969 |
| 0.136801 | 0.129516 | 0.114073 | 0.142191 | 0.137383 | 0.117279 | 0.221445 |
| 0.127331 | 0.121503 | 0.11655  | 0.13447  | 0.133741 | 0.112179 | 0.214015 |
| 0.13884  | 0.132139 | 0.11757  | 0.136655 | 0.137383 | 0.113491 | 0.212995 |
| 0.139132 | 0.126603 | 0.123397 | 0.134033 | 0.140006 | 0.119027 | 0.214744 |
| 0.139423 | 0.125146 | 0.121941 | 0.111014 | 0.130973 | 0.114073 | 0.224359 |
| 0.130245 | 0.121503 | 0.111305 | 0.121358 | 0.131702 | 0.104895 | 0.211684 |
| 0.142774 | 0.134324 | 0.126166 | 0.116113 | 0.136946 | 0.127914 | 0.224213 |
| 0.130099 | 0.12398  | 0.111116 | 0.136946 | 0.133304 | 0.113782 | 0.219988 |
| 0.134761 | 0.133304 | 0.113782 | 0.130245 | 0.13447  | 0.111116 | 0.216492 |
| 0.129079 | 0.119755 | 0.111888 | 0.13884  | 0.128497 | 0.107517 | 0.211393 |
| 0.140006 | 0.131556 | 0.121358 | 0.134324 | 0.137966 | 0.119027 | 0.222611 |
| 0.147145 | 0.138986 | 0.131119 | 0.141171 | 0.142483 | 0.130536 | 0.224505 |
| 0.130828 | 0.124126 | 0.113928 | 0.129225 | 0.129079 | 0.106935 | 0.214015 |
| 0.141171 | 0.141754 | 0.135344 | 0.145105 | 0.148747 | 0.131847 | 0.220571 |
| 0.12602  | 0.114365 | 0.111116 | 0.132576 | 0.124854 | 0.106206 | 0.216492 |
| 0.127477 | 0.125146 | 0.106789 | 0.128205 | 0.13039  | 0.109994 | 0.214744 |
| 0.1419   | 0.125583 | 0.120629 | 0.129516 | 0.139277 | 0.11655  | 0.197115 |
| 0.14627  | 0.138695 | 0.129953 | 0.118153 | 0.140152 | 0.124417 | 0.218386 |
| 0.206294 | 0.201049 | 0.190268 | 0.192162 | 0.206294 | 0.186189 | 0.128934 |
| 0.132139 | 0.123689 | 0.113199 | 0.12296  | 0.123106 | 0.106498 | 0.217366 |
| 0.128059 | 0.116404 | 0.10708  | 0.124126 | 0.122815 | 0.100087 | 0.209207 |
| 0.137092 | 0.135635 | 0.121066 | 0.126748 | 0.134178 | 0.118444 | 0.221154 |
| 0.195076 | 0.183712 | 0.175845 | 0.191725 | 0.18954  | 0.17264  | 0.133159 |
| 0.148601 | 0.141026 | 0.130245 | 0.146707 | 0.143065 | 0.126166 | 0.221591 |
| 0.144231 | 0.146853 | 0.136364 | 0.153409 | 0.143939 | 0.13549  | 0.232663 |
| 0.14088  | 0.148164 | 0.128351 | 0.157634 | 0.148747 | 0.135635 | 0.232517 |
| 0.13039  | 0.120192 | 0.10912  | 0.129371 | 0.128059 | 0.106498 | 0.20979  |
| 0.139569 | 0.126166 | 0.123834 | 0.134761 | 0.139569 | 0.118298 | 0.211393 |
| 0.228875 | 0.218969 | 0.210227 | 0.218531 | 0.223048 | 0.206731 | 0.107809 |
| 0.14088  | 0.127768 | 0.123689 | 0.143939 | 0.135344 | 0.119318 | 0.210956 |

|          |           |           |          |          |           |          |
|----------|-----------|-----------|----------|----------|-----------|----------|
| 0.143065 | 0.130245  | 0.128788  | 0.140006 | 0.143065 | 0.12296   | 0.213141 |
| 0.134324 | 0.128497  | 0.117424  | 0.129225 | 0.129079 | 0.111888  | 0.217512 |
| 0.182401 | 0.172203  | 0.168124  | 0.184003 | 0.185023 | 0.164627  | 0.157488 |
| 0.130245 | 0.11859   | 0.112471  | 0.13243  | 0.129662 | 0.105769  | 0.207022 |
| 0.149913 | 0.147873  | 0.140297  | 0.165793 | 0.146999 | 0.140589  | 0.227273 |
| 0.124854 | 0.112034  | 0.108829  | 0.134907 | 0.114365 | 0.106498  | 0.209499 |
| 0.202652 | 0.199446  | 0.187209  | 0.198135 | 0.202943 | 0.184295  | 0.113054 |
| 0.132721 | 0.12602   | 0.115822  | 0.132284 | 0.131847 | 0.113782  | 0.217949 |
| 0.123106 | 0.0936772 | 0.10067   | 0.127331 | 0.10708  | 0.100962  | 0.213578 |
| 0.131119 | 0.120921  | 0.110431  | 0.135635 | 0.128205 | 0.105769  | 0.215472 |
| 0.135635 | 0.13243   | 0.118735  | 0.126457 | 0.139423 | 0.116404  | 0.216492 |
| 0.137383 | 0.133013  | 0.121649  | 0.125874 | 0.133596 | 0.11961   | 0.219697 |
| 0.134178 | 0.126894  | 0.118444  | 0.141608 | 0.137675 | 0.118735  | 0.210082 |
| 0.124709 | 0.111014  | 0.107226  | 0.134178 | 0.118881 | 0.10373   | 0.211976 |
| 0.204983 | 0.196241  | 0.1875    | 0.198427 | 0.202943 | 0.186043  | 0.11655  |
| 0.138986 | 0.128497  | 0.122378  | 0.137675 | 0.134324 | 0.114219  | 0.220134 |
| 0.133013 | 0.113491  | 0.115822  | 0.128788 | 0.121941 | 0.107955  | 0.208333 |
| 0.221445 | 0.217075  | 0.208625  | 0.21926  | 0.219114 | 0.202797  | 0.109411 |
| 0.134615 | 0.135781  | 0.115676  | 0.132721 | 0.138695 | 0.119172  | 0.2213   |
| 0.12398  | 0.11116   | 0.106498  | 0.136364 | 0.119027 | 0.105624  | 0.216492 |
| 0.120484 | 0.110868  | 0.103875  | 0.131993 | 0.118444 | 0.10067   | 0.212995 |
| 0.145979 | 0.138695  | 0.134033  | 0.144085 | 0.146853 | 0.129953  | 0.220134 |
| 0.201923 | 0.196387  | 0.186772  | 0.19799  | 0.197844 | 0.185023  | 0.120192 |
| 0.144376 | 0.133013  | 0.125146  | 0.11655  | 0.137092 | 0.118735  | 0.222902 |
| 0.144376 | 0.135927  | 0.128059  | 0.140443 | 0.137966 | 0.124272  | 0.222028 |
| 0.120775 | 0.108829  | 0.106498  | 0.133741 | 0.118153 | 0.102418  | 0.216492 |
| 0.121649 | 0.112617  | 0.102418  | 0.134033 | 0.120484 | 0.106206  | 0.212995 |
| 0.125583 | 0.111305  | 0.105769  | 0.133304 | 0.120047 | 0.102273  | 0.212267 |
| 0.139132 | 0.117861  | 0.11757   | 0.130245 | 0.133596 | 0.112034  | 0.213287 |
| 0.117133 | 0.103147  | 0.0967366 | 0.124272 | 0.107809 | 0.0967366 | 0.214015 |
| 0.134907 | 0.12704   | 0.118881  | 0.133596 | 0.133159 | 0.114802  | 0.220134 |
| 0.134324 | 0.134615  | 0.120921  | 0.143502 | 0.135781 | 0.120921  | 0.22771  |
| 0.133741 | 0.129079  | 0.120047  | 0.134761 | 0.134324 | 0.111014  | 0.221008 |
| 0.137675 | 0.133304  | 0.122523  | 0.132867 | 0.135344 | 0.117861  | 0.224068 |
| 0.212995 | 0.204837  | 0.192599  | 0.201195 | 0.209207 | 0.192016  | 0.119027 |
| 0.141463 | 0.129225  | 0.119027  | 0.134033 | 0.136509 | 0.114948  | 0.221445 |
| 0.145105 | 0.133159  | 0.128205  | 0.137966 | 0.145396 | 0.125583  | 0.211976 |
| 0.123106 | 0.109703  | 0.10708   | 0.132867 | 0.11553  | 0.103875  | 0.214744 |
| 0.113345 | 0.101107  | 0.0964452 | 0.125437 | 0.106061 | 0.0929487 | 0.21081  |
| 0.13345  | 0.123543  | 0.110431  | 0.137092 | 0.132284 | 0.106061  | 0.209353 |
| 0.143794 | 0.134178  | 0.126603  | 0.108974 | 0.138549 | 0.11961   | 0.219114 |
| 0.139714 | 0.134761  | 0.123689  | 0.137238 | 0.143502 | 0.121649  | 0.2162   |
| 0.132576 | 0.125583  | 0.111597  | 0.135927 | 0.131993 | 0.11014   | 0.218094 |
| 0.132284 | 0.121503  | 0.108974  | 0.118153 | 0.129953 | 0.106643  | 0.211976 |



|          |           |           |          |           |           |          |
|----------|-----------|-----------|----------|-----------|-----------|----------|
| 0.126603 | 0.114656  | 0.104458  | 0.114802 | 0.120484  | 0.10067   | 0.207751 |
| 0.119464 | 0.0979021 | 0.100816  | 0.129808 | 0.107809  | 0.0976107 | 0.211976 |
| 0.137383 | 0.123689  | 0.118444  | 0.111597 | 0.124854  | 0.109703  | 0.221737 |
| 0.139277 | 0.130536  | 0.124709  | 0.139423 | 0.136364  | 0.121795  | 0.223048 |
| 0.141171 | 0.131265  | 0.122815  | 0.118007 | 0.137966  | 0.118153  | 0.222028 |
| 0.133159 | 0.114802  | 0.115967  | 0.128642 | 0.129953  | 0.109848  | 0.205565 |
| 0.136655 | 0.127914  | 0.120338  | 0.110868 | 0.130245  | 0.11451   | 0.216929 |
| 0.123689 | 0.11553   | 0.106498  | 0.137238 | 0.123397  | 0.104749  | 0.214452 |
| 0.130536 | 0.122378  | 0.108683  | 0.125146 | 0.120047  | 0.104604  | 0.220425 |
| 0.124417 | 0.115385  | 0.107517  | 0.140006 | 0.123543  | 0.103438  | 0.216346 |
| 0.138695 | 0.122086  | 0.117133  | 0.129808 | 0.129953  | 0.109266  | 0.214889 |
| 0.127914 | 0.123252  | 0.109266  | 0.136801 | 0.132284  | 0.106643  | 0.217803 |
| 0.135198 | 0.130828  | 0.117716  | 0.124563 | 0.130536  | 0.111014  | 0.2213   |
| 0.118444 | 0.106789  | 0.101836  | 0.129079 | 0.113782  | 0.0983392 | 0.213578 |
| 0.127331 | 0.115967  | 0.107226  | 0.135635 | 0.125291  | 0.104021  | 0.213141 |
| 0.136072 | 0.128497  | 0.113054  | 0.131265 | 0.132576  | 0.115676  | 0.201777 |
| 0.13884  | 0.115822  | 0.121358  | 0.136364 | 0.12602   | 0.114365  | 0.214161 |
| 0.120629 | 0.0751748 | 0.100816  | 0.137092 | 0.0862471 | 0.0897436 | 0.216638 |
| 0.124417 | 0.112762  | 0.105186  | 0.134178 | 0.121212  | 0.102564  | 0.217512 |
| 0.137092 | 0.124563  | 0.120484  | 0.132576 | 0.136509  | 0.114365  | 0.207459 |
| 0.139714 | 0.129808  | 0.114948  | 0.115093 | 0.129808  | 0.108537  | 0.220862 |
| 0.139132 | 0.123689  | 0.120192  | 0.132867 | 0.135344  | 0.113199  | 0.212995 |
| 0.136509 | 0.131556  | 0.117279  | 0.128205 | 0.133013  | 0.112617  | 0.219114 |
| 0.118153 | 0.106498  | 0.10067   | 0.130245 | 0.109411  | 0.0995047 | 0.215909 |
| 0.131556 | 0.116987  | 0.109703  | 0.134615 | 0.125437  | 0.106206  | 0.210082 |
| 0.132576 | 0.121795  | 0.110723  | 0.123106 | 0.12296   | 0.101107  | 0.219843 |
| 0.141754 | 0.12398   | 0.123397  | 0.134033 | 0.137675  | 0.118735  | 0.213287 |
| 0.140297 | 0.117279  | 0.128934  | 0.133159 | 0.127477  | 0.115822  | 0.21824  |
| 0.136946 | 0.11014   | 0.11451   | 0.134761 | 0.120629  | 0.105186  | 0.213724 |
| 0.208333 | 0.198718  | 0.190559  | 0.200903 | 0.202797  | 0.188228  | 0.112325 |
| 0.181235 | 0.166958  | 0.162005  | 0.172348 | 0.175991  | 0.161713  | 0.151952 |
| 0.136655 | 0.129079  | 0.118007  | 0.135635 | 0.134033  | 0.111597  | 0.220134 |
| 0.140297 | 0.125437  | 0.121649  | 0.126457 | 0.13243   | 0.118735  | 0.210956 |
| 0.146707 | 0.149621  | 0.139714  | 0.15676  | 0.149913  | 0.139132  | 0.236305 |
| 0.141026 | 0.134033  | 0.123543  | 0.144085 | 0.136946  | 0.120921  | 0.2213   |
| 0.129225 | 0.128351  | 0.113782  | 0.138403 | 0.135052  | 0.112908  | 0.212995 |
| 0.132576 | 0.119755  | 0.111014  | 0.133887 | 0.125291  | 0.104895  | 0.214598 |
| 0.10373  | 0.0804196 | 0.0859557 | 0.137966 | 0.0906177 | 0.0850816 | 0.216055 |
| 0.13986  | 0.116259  | 0.119464  | 0.132721 | 0.125291  | 0.111305  | 0.213724 |
| 0.21722  | 0.206148  | 0.200321  | 0.212121 | 0.209936  | 0.194784  | 0.113928 |
| 0.143648 | 0.134907  | 0.129662  | 0.116404 | 0.141026  | 0.12296   | 0.223631 |
| 0.14088  | 0.127477  | 0.121358  | 0.120921 | 0.140589  | 0.11553   | 0.20542  |
| 0.125728 | 0.102418  | 0.105624  | 0.134033 | 0.113199  | 0.0948427 | 0.211247 |
| 0.133741 | 0.127331  | 0.11451   | 0.12602  | 0.130245  | 0.111014  | 0.217512 |

|          |           |           |          |           |           |          |
|----------|-----------|-----------|----------|-----------|-----------|----------|
| 0.197407 | 0.18954   | 0.180216  | 0.196387 | 0.193619  | 0.180507  | 0.138986 |
| 0.256265 | 0.252477  | 0.244318  | 0.25     | 0.25539   | 0.244318  | 0.120047 |
| 0.135927 | 0.126603  | 0.114073  | 0.139277 | 0.135344  | 0.110577  | 0.22028  |
| 0.135052 | 0.116696  | 0.118153  | 0.132284 | 0.123397  | 0.112908  | 0.215618 |
| 0.136801 | 0.127185  | 0.113491  | 0.135781 | 0.132721  | 0.112908  | 0.2162   |
| 0.134615 | 0.128205  | 0.116259  | 0.121066 | 0.13345   | 0.113345  | 0.217803 |
| 0.139132 | 0.124563  | 0.120775  | 0.111014 | 0.130682  | 0.113782  | 0.220571 |
| 0.132284 | 0.123252  | 0.116259  | 0.13447  | 0.128788  | 0.109848  | 0.213141 |
| 0.128059 | 0.114656  | 0.110868  | 0.134615 | 0.13039   | 0.109411  | 0.207459 |
| 0.139132 | 0.130099  | 0.122523  | 0.112471 | 0.135635  | 0.116987  | 0.218823 |
| 0.127331 | 0.116259  | 0.112471  | 0.133596 | 0.130245  | 0.104895  | 0.204983 |
| 0.121941 | 0.0732809 | 0.108537  | 0.13986  | 0.0843531 | 0.0948427 | 0.221154 |
| 0.121212 | 0.107517  | 0.100233  | 0.129808 | 0.111597  | 0.0979021 | 0.214598 |
| 0.13243  | 0.124272  | 0.112617  | 0.136072 | 0.135052  | 0.113782  | 0.221154 |
| 0.140734 | 0.121795  | 0.120629  | 0.132721 | 0.137821  | 0.115967  | 0.211976 |
| 0.122378 | 0.112762  | 0.0987762 | 0.122815 | 0.118881  | 0.0981935 | 0.208188 |
| 0.106935 | 0.11859   | 0.0973193 | 0.142045 | 0.125583  | 0.105769  | 0.228584 |
| 0.141026 | 0.141608  | 0.12704   | 0.131847 | 0.136364  | 0.129079  | 0.22771  |
| 0.12398  | 0.112034  | 0.107372  | 0.135781 | 0.12398   | 0.103001  | 0.214161 |
| 0.126748 | 0.120629  | 0.106935  | 0.135635 | 0.130245  | 0.104021  | 0.204983 |
| 0.12296  | 0.125     | 0.117424  | 0.145833 | 0.126166  | 0.115967  | 0.221882 |
| 0.2213   | 0.211976  | 0.202069  | 0.21824  | 0.216346  | 0.200612  | 0.121212 |
| 0.127914 | 0.115093  | 0.103147  | 0.129516 | 0.127331  | 0.102855  | 0.210519 |
| 0.118444 | 0.106498  | 0.0992133 | 0.128788 | 0.111742  | 0.0945513 | 0.215909 |
| 0.140589 | 0.13039   | 0.119901  | 0.131702 | 0.135927  | 0.113782  | 0.218531 |
| 0.13549  | 0.136072  | 0.116259  | 0.137092 | 0.141608  | 0.116259  | 0.221591 |
| 0.132576 | 0.125583  | 0.114802  | 0.124563 | 0.128788  | 0.111014  | 0.216346 |
| 0.215035 | 0.207459  | 0.200466  | 0.20877  | 0.211538  | 0.195221  | 0.116113 |
| 0.141754 | 0.124854  | 0.125437  | 0.136655 | 0.138258  | 0.119318  | 0.215618 |
| 0.123834 | 0.107226  | 0.104312  | 0.13243  | 0.119172  | 0.101399  | 0.214015 |
| 0.132139 | 0.123106  | 0.11961   | 0.130245 | 0.127768  | 0.115822  | 0.217075 |
| 0.134178 | 0.127768  | 0.11757   | 0.124126 | 0.129808  | 0.113491  | 0.217366 |
| 0.13884  | 0.123106  | 0.121649  | 0.133159 | 0.137675  | 0.11553   | 0.210082 |
| 0.13039  | 0.112617  | 0.109411  | 0.129371 | 0.127185  | 0.104458  | 0.204545 |
| 0.122523 | 0.0729895 | 0.107372  | 0.138112 | 0.0919289 | 0.092803  | 0.221737 |
| 0.133304 | 0.131556  | 0.113782  | 0.131702 | 0.137383  | 0.112034  | 0.217949 |
| 0.211538 | 0.205711  | 0.197844  | 0.206731 | 0.210956  | 0.192599  | 0.116404 |
| 0.131847 | 0.115239  | 0.114656  | 0.127914 | 0.128059  | 0.106498  | 0.204545 |
| 0.209499 | 0.20542   | 0.194347  | 0.203817 | 0.206294  | 0.190268  | 0.116987 |
| 0.207022 | 0.203234  | 0.190705  | 0.202214 | 0.206148  | 0.187209  | 0.118298 |
| 0.14088  | 0.137966  | 0.126894  | 0.127622 | 0.13884   | 0.125146  | 0.224359 |
| 0.138258 | 0.142045  | 0.11961   | 0.135781 | 0.141463  | 0.123689  | 0.22465  |
| 0.117279 | 0.0767774 | 0.0980478 | 0.129953 | 0.090472  | 0.0869755 | 0.214452 |
| 0.130536 | 0.117716  | 0.115385  | 0.127477 | 0.128497  | 0.106935  | 0.207314 |

|          |          |           |          |           |           |          |
|----------|----------|-----------|----------|-----------|-----------|----------|
| 0.136509 | 0.118444 | 0.121358  | 0.130828 | 0.133887  | 0.110286  | 0.210082 |
| 0.127477 | 0.113782 | 0.109703  | 0.136655 | 0.123689  | 0.10708   | 0.214744 |
| 0.135052 | 0.121649 | 0.117279  | 0.109848 | 0.129808  | 0.110868  | 0.216783 |
| 0.140297 | 0.126603 | 0.123397  | 0.111014 | 0.131847  | 0.112908  | 0.220862 |
| 0.134615 | 0.128788 | 0.113345  | 0.140589 | 0.136072  | 0.115385  | 0.2213   |
| 0.136801 | 0.132721 | 0.119318  | 0.130536 | 0.135052  | 0.116696  | 0.22028  |
| 0.120338 | 0.108683 | 0.104312  | 0.129808 | 0.117133  | 0.100816  | 0.212558 |
| 0.141171 | 0.125146 | 0.123397  | 0.130828 | 0.138549  | 0.117861  | 0.21183  |
| 0.115967 | 0.092366 | 0.0973193 | 0.125728 | 0.0984848 | 0.0958625 | 0.211976 |
| 0.140006 | 0.127768 | 0.126311  | 0.136946 | 0.142045  | 0.123397  | 0.214161 |
| 0.135635 | 0.125728 | 0.115239  | 0.130828 | 0.134178  | 0.110577  | 0.216492 |
| 0.145396 | 0.13549  | 0.131702  | 0.138549 | 0.148893  | 0.126748  | 0.218094 |
| 0.264569 | 0.266608 | 0.255828  | 0.264423 | 0.265152  | 0.253205  | 0.124563 |
| 0.137238 | 0.136072 | 0.125     | 0.135344 | 0.129953  | 0.12296   | 0.230915 |
| 0.137092 | 0.135052 | 0.127768  | 0.139569 | 0.133013  | 0.121358  | 0.220862 |
| 0.229312 | 0.221445 | 0.215618  | 0.228875 | 0.227855  | 0.210082  | 0.116696 |
| 0.131847 | 0.125437 | 0.114948  | 0.135198 | 0.133887  | 0.119318  | 0.22028  |
| 0.241696 | 0.231789 | 0.226836  | 0.233392 | 0.239365  | 0.222174  | 0.116259 |
| 0.13345  | 0.129079 | 0.117133  | 0.127185 | 0.130245  | 0.113054  | 0.221882 |
| 0.127477 | 0.121941 | 0.11961   | 0.142191 | 0.12602   | 0.115822  | 0.223485 |
| 0.130973 | 0.130682 | 0.113782  | 0.130245 | 0.131556  | 0.109994  | 0.213578 |
| 0.141754 | 0.134178 | 0.122815  | 0.129953 | 0.136801  | 0.120775  | 0.219406 |
| 0.218969 | 0.209936 | 0.200321  | 0.208916 | 0.211976  | 0.197698  | 0.11655  |
| 0.144085 | 0.131556 | 0.126603  | 0.136946 | 0.144376  | 0.125146  | 0.218531 |
| 0.139423 | 0.121358 | 0.121941  | 0.13549  | 0.137675  | 0.116113  | 0.210664 |
| 0.239219 | 0.233974 | 0.219697  | 0.231206 | 0.236597  | 0.220862  | 0.114365 |
| 0.143794 | 0.132139 | 0.127185  | 0.117716 | 0.137092  | 0.116404  | 0.217657 |
| 0.213287 | 0.206294 | 0.195513  | 0.207314 | 0.208916  | 0.194639  | 0.116113 |
| 0.13986  | 0.131993 | 0.124417  | 0.11553  | 0.138695  | 0.117716  | 0.2213   |
| 0.124709 | 0.112179 | 0.106643  | 0.138258 | 0.117716  | 0.104021  | 0.216346 |
| 0.119318 | 0.105624 | 0.106789  | 0.13141  | 0.107372  | 0.105041  | 0.223776 |
| 0.13884  | 0.137383 | 0.124272  | 0.131119 | 0.141171  | 0.124854  | 0.223485 |
| 0.128788 | 0.119755 | 0.110723  | 0.135344 | 0.133741  | 0.109848  | 0.209645 |
| 0.172494 | 0.16521  | 0.15472   | 0.17264  | 0.168415  | 0.151807  | 0.152535 |
| 0.134324 | 0.117424 | 0.117133  | 0.126603 | 0.134324  | 0.112471  | 0.206439 |
| 0.137529 | 0.137238 | 0.113928  | 0.133596 | 0.140443  | 0.117133  | 0.219843 |
| 0.137821 | 0.124709 | 0.117716  | 0.138549 | 0.133741  | 0.111597  | 0.216929 |
| 0.135781 | 0.136946 | 0.11655   | 0.133596 | 0.138112  | 0.123252  | 0.215472 |
| 0.209645 | 0.204983 | 0.192453  | 0.204545 | 0.208188  | 0.192162  | 0.111888 |
| 0.123543 | 0.114219 | 0.106935  | 0.13243  | 0.120629  | 0.104895  | 0.214307 |
| 0.141463 | 0.13447  | 0.121941  | 0.132284 | 0.137966  | 0.115822  | 0.208333 |
| 0.136364 | 0.127622 | 0.113636  | 0.112034 | 0.128205  | 0.107517  | 0.221882 |
| 0.139423 | 0.131847 | 0.120484  | 0.113345 | 0.135635  | 0.11757   | 0.220571 |
| 0.127914 | 0.11655  | 0.108974  | 0.138549 | 0.124126  | 0.109557  | 0.216055 |

|          |           |           |          |           |           |          |
|----------|-----------|-----------|----------|-----------|-----------|----------|
| 0.263549 | 0.262383  | 0.253934  | 0.259615 | 0.262675  | 0.252768  | 0.127331 |
| 0.118881 | 0.104895  | 0.102273  | 0.130099 | 0.11014   | 0.101399  | 0.216346 |
| 0.138403 | 0.126166  | 0.115676  | 0.135927 | 0.132284  | 0.113636  | 0.214307 |
| 0.193182 | 0.189103  | 0.17366   | 0.183129 | 0.190559  | 0.170163  | 0.157197 |
| 0.200758 | 0.194056  | 0.180653  | 0.195367 | 0.198135  | 0.180653  | 0.122815 |
| 0.134907 | 0.126748  | 0.113345  | 0.13884  | 0.133741  | 0.111014  | 0.218386 |
| 0.137675 | 0.121066  | 0.12398   | 0.133159 | 0.134178  | 0.114656  | 0.212413 |
| 0.133013 | 0.131265  | 0.118444  | 0.124709 | 0.13447   | 0.114365  | 0.21824  |
| 0.148601 | 0.147145  | 0.142191  | 0.152826 | 0.155303  | 0.138695  | 0.222174 |
| 0.13141  | 0.121212  | 0.109266  | 0.135344 | 0.13141   | 0.104895  | 0.216929 |
| 0.13447  | 0.123397  | 0.112325  | 0.13549  | 0.132721  | 0.113782  | 0.221154 |
| 0.14627  | 0.136655  | 0.130245  | 0.114656 | 0.142774  | 0.12704   | 0.2213   |
| 0.134615 | 0.122086  | 0.119172  | 0.130682 | 0.134615  | 0.113054  | 0.206148 |
| 0.141754 | 0.130099  | 0.129225  | 0.137238 | 0.143794  | 0.12602   | 0.213869 |
| 0.141608 | 0.130536  | 0.120629  | 0.119901 | 0.138403  | 0.119755  | 0.205565 |
| 0.136801 | 0.132721  | 0.121649  | 0.131702 | 0.133596  | 0.120484  | 0.222319 |
| 0.152098 | 0.147145  | 0.134615  | 0.140006 | 0.142191  | 0.135781  | 0.231789 |
| 0.11961  | 0.10708   | 0.107955  | 0.134033 | 0.107663  | 0.104749  | 0.219114 |
| 0.140734 | 0.141608  | 0.129079  | 0.134178 | 0.139277  | 0.127622  | 0.229458 |
| 0.146562 | 0.138112  | 0.13141   | 0.117861 | 0.13986   | 0.126748  | 0.226253 |
| 0.223631 | 0.215181  | 0.206148  | 0.215909 | 0.220134  | 0.2044    | 0.118881 |
| 0.11859  | 0.104604  | 0.106352  | 0.136218 | 0.104312  | 0.104604  | 0.223922 |
| 0.207168 | 0.200175  | 0.191142  | 0.200903 | 0.204254  | 0.187354  | 0.118735 |
| 0.130536 | 0.121795  | 0.11451   | 0.126603 | 0.128788  | 0.112471  | 0.216346 |
| 0.127331 | 0.118298  | 0.114219  | 0.142045 | 0.124417  | 0.112179  | 0.215181 |
| 0.133741 | 0.12704   | 0.118007  | 0.138549 | 0.134324  | 0.111014  | 0.214307 |
| 0.128059 | 0.124272  | 0.111742  | 0.134324 | 0.127768  | 0.106789  | 0.212704 |
| 0.13986  | 0.125874  | 0.123834  | 0.133887 | 0.138695  | 0.11859   | 0.209062 |
| 0.140443 | 0.128205  | 0.122669  | 0.131847 | 0.141608  | 0.118881  | 0.212267 |
| 0.128205 | 0.117133  | 0.108974  | 0.135052 | 0.125     | 0.104021  | 0.212267 |
| 0.135635 | 0.132139  | 0.115239  | 0.131119 | 0.140297  | 0.114656  | 0.2162   |
| 0.133013 | 0.13039   | 0.121066  | 0.141317 | 0.135052  | 0.116113  | 0.218823 |
| 0.151807 | 0.144231  | 0.135781  | 0.120192 | 0.143648  | 0.129662  | 0.214889 |
| 0.260781 | 0.256119  | 0.248252  | 0.256556 | 0.254662  | 0.243298  | 0.120484 |
| 0.125    | 0.115967  | 0.109266  | 0.139423 | 0.125     | 0.10373   | 0.216929 |
| 0.200612 | 0.194202  | 0.181964  | 0.193765 | 0.194493  | 0.17905   | 0.117424 |
| 0.204545 | 0.197844  | 0.186189  | 0.197407 | 0.202506  | 0.185315  | 0.114948 |
| 0.133887 | 0.115239  | 0.120484  | 0.136655 | 0.128934  | 0.112325  | 0.21183  |
| 0.119027 | 0.105624  | 0.103001  | 0.129662 | 0.110286  | 0.0977564 | 0.216492 |
| 0.125728 | 0.117279  | 0.112908  | 0.142774 | 0.125728  | 0.112908  | 0.22028  |
| 0.13447  | 0.117861  | 0.116404  | 0.129079 | 0.134178  | 0.10912   | 0.207751 |
| 0.108392 | 0.0839161 | 0.0882867 | 0.134178 | 0.0958625 | 0.0865385 | 0.206731 |
| 0.142191 | 0.129953  | 0.124126  | 0.114365 | 0.134615  | 0.115385  | 0.220425 |
| 0.130099 | 0.118444  | 0.114073  | 0.132867 | 0.13243   | 0.113199  | 0.208042 |

|          |           |          |          |           |           |          |
|----------|-----------|----------|----------|-----------|-----------|----------|
| 0.142337 | 0.131847  | 0.129225 | 0.140443 | 0.144959  | 0.12602   | 0.220862 |
| 0.12704  | 0.113928  | 0.106935 | 0.136801 | 0.121212  | 0.103147  | 0.213724 |
| 0.140443 | 0.128497  | 0.128497 | 0.137966 | 0.141608  | 0.124709  | 0.217512 |
| 0.13447  | 0.128642  | 0.117861 | 0.132867 | 0.130099  | 0.109411  | 0.213869 |
| 0.13447  | 0.130099  | 0.119901 | 0.138112 | 0.135635  | 0.115822  | 0.21824  |
| 0.140152 | 0.133159  | 0.119755 | 0.129225 | 0.134033  | 0.117133  | 0.220425 |
| 0.144668 | 0.140589  | 0.130099 | 0.117716 | 0.142628  | 0.129808  | 0.228147 |
| 0.121503 | 0.0713869 | 0.112762 | 0.143502 | 0.07838   | 0.0981935 | 0.222465 |
| 0.123543 | 0.115093  | 0.1081   | 0.133304 | 0.118881  | 0.102855  | 0.209645 |
| 0.145688 | 0.141026  | 0.128497 | 0.138258 | 0.140734  | 0.126166  | 0.224505 |
| 0.201486 | 0.190414  | 0.182255 | 0.193473 | 0.195076  | 0.182255  | 0.120338 |
| 0.146562 | 0.135781  | 0.133159 | 0.14292  | 0.147145  | 0.13141   | 0.221882 |
| 0.13986  | 0.125874  | 0.121212 | 0.131556 | 0.13986   | 0.117133  | 0.21081  |
| 0.134178 | 0.125728  | 0.114656 | 0.136655 | 0.13039   | 0.109703  | 0.219697 |
| 0.121503 | 0.120921  | 0.106643 | 0.123106 | 0.125     | 0.10373   | 0.21285  |
| 0.141171 | 0.133887  | 0.118153 | 0.127331 | 0.134178  | 0.116696  | 0.216783 |
| 0.142483 | 0.138695  | 0.123543 | 0.128642 | 0.138112  | 0.120338  | 0.220134 |
| 0.209062 | 0.200903  | 0.18954  | 0.198718 | 0.203817  | 0.186917  | 0.113928 |
| 0.135344 | 0.117861  | 0.116404 | 0.131119 | 0.131847  | 0.113199  | 0.204254 |
| 0.127331 | 0.114802  | 0.1081   | 0.123689 | 0.120921  | 0.101981  | 0.193619 |
| 0.13986  | 0.129953  | 0.123834 | 0.134761 | 0.143648  | 0.120047  | 0.212558 |
| 0.209645 | 0.200612  | 0.190997 | 0.200758 | 0.207022  | 0.189248  | 0.119464 |
| 0.122378 | 0.106935  | 0.103147 | 0.129516 | 0.113054  | 0.100524  | 0.211684 |
| 0.143794 | 0.133596  | 0.127768 | 0.117133 | 0.137966  | 0.124854  | 0.222319 |
| 0.140297 | 0.125146  | 0.124854 | 0.136364 | 0.140589  | 0.119318  | 0.215035 |
| 0.128497 | 0.12296   | 0.104021 | 0.131847 | 0.125583  | 0.106935  | 0.220134 |
| 0.201632 | 0.197844  | 0.18648  | 0.199446 | 0.198427  | 0.181235  | 0.119027 |
| 0.142191 | 0.134033  | 0.121212 | 0.115239 | 0.137529  | 0.119172  | 0.217512 |
| 0.136655 | 0.121503  | 0.115676 | 0.129225 | 0.13345   | 0.111305  | 0.208479 |
| 0.120629 | 0.1081    | 0.103147 | 0.133013 | 0.117424  | 0.0999417 | 0.206439 |
| 0.143357 | 0.128788  | 0.120338 | 0.134178 | 0.138403  | 0.117133  | 0.192162 |
| 0.135344 | 0.134761  | 0.114365 | 0.134615 | 0.136509  | 0.116987  | 0.220862 |
| 0.145542 | 0.140006  | 0.13039  | 0.115967 | 0.139132  | 0.126311  | 0.225816 |
| 0.123689 | 0.111742  | 0.10708  | 0.136655 | 0.120484  | 0.100962  | 0.214161 |
| 0.137675 | 0.119027  | 0.123106 | 0.134615 | 0.122232  | 0.11553   | 0.224359 |
| 0.142774 | 0.146562  | 0.127331 | 0.15778  | 0.144814  | 0.135781  | 0.230624 |
| 0.247086 | 0.239219  | 0.2331   | 0.246649 | 0.243881  | 0.231061  | 0.116987 |
| 0.125291 | 0.076049  | 0.114802 | 0.146707 | 0.0856643 | 0.101399  | 0.226836 |
| 0.135781 | 0.135781  | 0.116841 | 0.134761 | 0.138403  | 0.117716  | 0.220425 |
| 0.135635 | 0.122232  | 0.117861 | 0.128788 | 0.134761  | 0.114656  | 0.207168 |
| 0.136655 | 0.130245  | 0.121795 | 0.142045 | 0.137238  | 0.119755  | 0.207896 |
| 0.125437 | 0.128934  | 0.10708  | 0.127331 | 0.136218  | 0.109703  | 0.212121 |
| 0.135052 | 0.126603  | 0.116113 | 0.125583 | 0.130682  | 0.112034  | 0.215035 |
| 0.140734 | 0.128788  | 0.123252 | 0.133013 | 0.141317  | 0.11859   | 0.211393 |

|          |           |           |          |           |           |          |
|----------|-----------|-----------|----------|-----------|-----------|----------|
| 0.144668 | 0.137966  | 0.129225  | 0.115967 | 0.138258  | 0.127768  | 0.221737 |
| 0.135052 | 0.126603  | 0.118735  | 0.137238 | 0.131265  | 0.114948  | 0.2162   |
| 0.248543 | 0.242424  | 0.236014  | 0.242861 | 0.248252  | 0.232517  | 0.11757  |
| 0.118444 | 0.102127  | 0.102127  | 0.126457 | 0.112325  | 0.0960082 | 0.209499 |
| 0.126603 | 0.11553   | 0.107955  | 0.121212 | 0.120192  | 0.104749  | 0.216783 |
| 0.121212 | 0.111888  | 0.106643  | 0.135635 | 0.119172  | 0.104021  | 0.214015 |
| 0.137675 | 0.133013  | 0.117279  | 0.144814 | 0.138258  | 0.121941  | 0.222028 |
| 0.124563 | 0.0814394 | 0.11961   | 0.15035  | 0.0779429 | 0.105624  | 0.229604 |
| 0.132721 | 0.113199  | 0.113491  | 0.137529 | 0.129516  | 0.10708   | 0.206585 |
| 0.142337 | 0.124563  | 0.124854  | 0.130245 | 0.13884   | 0.116987  | 0.208916 |
| 0.132867 | 0.115967  | 0.108392  | 0.131847 | 0.125     | 0.104895  | 0.214307 |
| 0.243298 | 0.238928  | 0.229895  | 0.237034 | 0.238928  | 0.226107  | 0.114073 |
| 0.141317 | 0.129662  | 0.126166  | 0.133304 | 0.140734  | 0.121503  | 0.213432 |
| 0.143502 | 0.133304  | 0.126311  | 0.115093 | 0.137675  | 0.122523  | 0.223193 |
| 0.131556 | 0.119318  | 0.110577  | 0.13141  | 0.129225  | 0.107955  | 0.215035 |
| 0.132284 | 0.130536  | 0.115967  | 0.133304 | 0.135781  | 0.114802  | 0.21926  |
| 0.136655 | 0.131702  | 0.121795  | 0.129808 | 0.130245  | 0.115385  | 0.224505 |
| 0.124417 | 0.112762  | 0.107517  | 0.135344 | 0.117424  | 0.103438  | 0.212558 |
| 0.143065 | 0.132284  | 0.126748  | 0.113782 | 0.135781  | 0.120921  | 0.220717 |
| 0.142337 | 0.137675  | 0.131556  | 0.121212 | 0.139423  | 0.127477  | 0.228147 |
| 0.139423 | 0.133887  | 0.124563  | 0.11451  | 0.134761  | 0.11757   | 0.222611 |
| 0.122378 | 0.114802  | 0.104021  | 0.135635 | 0.121503  | 0.104895  | 0.216055 |
| 0.13345  | 0.137238  | 0.11859   | 0.135052 | 0.140152  | 0.120338  | 0.223631 |
| 0.136218 | 0.142337  | 0.121941  | 0.138403 | 0.145542  | 0.12602   | 0.228147 |
| 0.138258 | 0.13243   | 0.125146  | 0.13986  | 0.135344  | 0.11961   | 0.222611 |
| 0.140006 | 0.133304  | 0.126603  | 0.1419   | 0.137966  | 0.122232  | 0.222902 |
| 0.136072 | 0.141608  | 0.121795  | 0.139132 | 0.1419    | 0.120921  | 0.228293 |
| 0.106061 | 0.0775058 | 0.0847902 | 0.131265 | 0.0935315 | 0.0821678 | 0.218386 |
| 0.147873 | 0.140006  | 0.132721  | 0.116841 | 0.13884   | 0.127185  | 0.232809 |
| 0.145979 | 0.131993  | 0.126457  | 0.137383 | 0.144522  | 0.126457  | 0.228584 |
| 0.223193 | 0.215909  | 0.206585  | 0.21285  | 0.219114  | 0.20134   | 0.111742 |
| 0.138403 | 0.117424  | 0.122378  | 0.136509 | 0.120047  | 0.117716  | 0.214015 |
| 0.129953 | 0.12704   | 0.114219  | 0.128642 | 0.12704   | 0.108974  | 0.2213   |
| 0.128351 | 0.11757   | 0.110577  | 0.143648 | 0.126311  | 0.110868  | 0.21183  |
| 0.233683 | 0.231061  | 0.219114  | 0.231206 | 0.232517  | 0.216492  | 0.113491 |
| 0.224942 | 0.216492  | 0.208916  | 0.217803 | 0.220571  | 0.206585  | 0.118444 |
| 0.145542 | 0.138258  | 0.131847  | 0.117424 | 0.142628  | 0.126894  | 0.22465  |
| 0.260198 | 0.254953  | 0.25      | 0.256265 | 0.257576  | 0.247086  | 0.123397 |
| 0.103438 | 0.0792541 | 0.0842075 | 0.133887 | 0.092366  | 0.0839161 | 0.214307 |
| 0.130828 | 0.11859   | 0.121795  | 0.153118 | 0.121795  | 0.120047  | 0.22771  |
| 0.117133 | 0.104312  | 0.102564  | 0.129225 | 0.111888  | 0.0999417 | 0.214889 |
| 0.136509 | 0.140589  | 0.116696  | 0.13549  | 0.142337  | 0.121649  | 0.222611 |
| 0.204837 | 0.199009  | 0.184149  | 0.196533 | 0.200758  | 0.183566  | 0.107955 |
| 0.136801 | 0.125728  | 0.120192  | 0.133741 | 0.129808  | 0.114948  | 0.214744 |

|          |           |           |          |           |           |          |
|----------|-----------|-----------|----------|-----------|-----------|----------|
| 0.212558 | 0.202652  | 0.19595   | 0.20338  | 0.205857  | 0.190414  | 0.115967 |
| 0.126603 | 0.113782  | 0.11757   | 0.132867 | 0.120775  | 0.102127  | 0.219406 |
| 0.138258 | 0.129516  | 0.119318  | 0.120629 | 0.136509  | 0.113199  | 0.201632 |
| 0.114073 | 0.101544  | 0.102127  | 0.137821 | 0.120484  | 0.107372  | 0.216492 |
| 0.124854 | 0.120192  | 0.112034  | 0.129079 | 0.13039   | 0.10912   | 0.20134  |
| 0.118007 | 0.104895  | 0.0990676 | 0.131556 | 0.113928  | 0.0967366 | 0.211976 |
| 0.132867 | 0.115093  | 0.117716  | 0.128059 | 0.120047  | 0.1081    | 0.213141 |
| 0.117133 | 0.10373   | 0.0973193 | 0.126311 | 0.107226  | 0.0949883 | 0.207896 |
| 0.136801 | 0.117861  | 0.11757   | 0.129953 | 0.133596  | 0.112908  | 0.210956 |
| 0.13986  | 0.126166  | 0.11859   | 0.112617 | 0.129953  | 0.112471  | 0.2213   |
| 0.119172 | 0.0728438 | 0.105478  | 0.135635 | 0.0891608 | 0.0888695 | 0.218677 |
| 0.116404 | 0.103584  | 0.0992133 | 0.130245 | 0.106789  | 0.0992133 | 0.211247 |
| 0.128497 | 0.125583  | 0.115676  | 0.136801 | 0.132867  | 0.11014   | 0.21285  |
| 0.142774 | 0.13141   | 0.129079  | 0.141171 | 0.142483  | 0.126166  | 0.216929 |
| 0.129808 | 0.121649  | 0.110868  | 0.127622 | 0.127477  | 0.106206  | 0.212413 |
| 0.136946 | 0.124126  | 0.113928  | 0.126894 | 0.134324  | 0.109848  | 0.212558 |
| 0.119027 | 0.107663  | 0.10271   | 0.13141  | 0.116696  | 0.100087  | 0.213287 |
| 0.142337 | 0.130973  | 0.121941  | 0.115385 | 0.133887  | 0.120484  | 0.213578 |
| 0.134178 | 0.135635  | 0.112617  | 0.133741 | 0.136509  | 0.11553   | 0.217949 |
| 0.138986 | 0.133741  | 0.122378  | 0.125728 | 0.134615  | 0.118007  | 0.218677 |
| 0.13549  | 0.122669  | 0.115093  | 0.128934 | 0.128497  | 0.106352  | 0.214889 |
| 0.136218 | 0.121941  | 0.119318  | 0.133159 | 0.137383  | 0.113199  | 0.210373 |
| 0.143357 | 0.130536  | 0.129371  | 0.140297 | 0.145105  | 0.125     | 0.215763 |
| 0.144814 | 0.140152  | 0.135781  | 0.143211 | 0.145105  | 0.13141   | 0.222174 |
| 0.131556 | 0.116987  | 0.112617  | 0.111597 | 0.126311  | 0.104458  | 0.21183  |
| 0.12398  | 0.113782  | 0.107955  | 0.139277 | 0.123689  | 0.105332  | 0.216492 |
| 0.130536 | 0.120047  | 0.110723  | 0.122523 | 0.125583  | 0.104312  | 0.20877  |
| 0.137529 | 0.142191  | 0.122086  | 0.141754 | 0.145979  | 0.128788  | 0.226544 |
| 0.120775 | 0.101836  | 0.103584  | 0.129079 | 0.10912   | 0.10067   | 0.217366 |
| 0.145833 | 0.148747  | 0.136801  | 0.138403 | 0.145251  | 0.13447   | 0.233683 |
| 0.124563 | 0.126894  | 0.122232  | 0.149767 | 0.131265  | 0.11961   | 0.226107 |
| 0.135781 | 0.124417  | 0.113928  | 0.142628 | 0.133741  | 0.115676  | 0.222174 |
| 0.121941 | 0.0960082 | 0.105624  | 0.134615 | 0.105624  | 0.0971737 | 0.212704 |
| 0.125874 | 0.117133  | 0.106935  | 0.135635 | 0.125291  | 0.103438  | 0.213724 |
| 0.136946 | 0.127622  | 0.122086  | 0.139714 | 0.133741  | 0.119755  | 0.220425 |
| 0.224213 | 0.215763  | 0.205565  | 0.213869 | 0.218969  | 0.201486  | 0.12704  |
| 0.135344 | 0.125437  | 0.113782  | 0.124709 | 0.135927  | 0.112034  | 0.209499 |
| 0.11859  | 0.0996503 | 0.102273  | 0.137383 | 0.118007  | 0.104895  | 0.21722  |
| 0.133596 | 0.132721  | 0.114656  | 0.133741 | 0.136218  | 0.114948  | 0.219697 |
| 0.131119 | 0.124709  | 0.113345  | 0.132139 | 0.13141   | 0.109266  | 0.214015 |
| 0.133887 | 0.117861  | 0.120775  | 0.138403 | 0.126894  | 0.10912   | 0.219697 |
| 0.141754 | 0.119027  | 0.125437  | 0.13141  | 0.128642  | 0.118153  | 0.217366 |
| 0.141608 | 0.118881  | 0.128497  | 0.133596 | 0.129662  | 0.120338  | 0.219551 |
| 0.130682 | 0.122232  | 0.112034  | 0.138112 | 0.130973  | 0.11116   | 0.216492 |

|          |           |           |          |           |           |          |
|----------|-----------|-----------|----------|-----------|-----------|----------|
| 0.137675 | 0.125437  | 0.114656  | 0.112179 | 0.128059  | 0.107955  | 0.21824  |
| 0.133013 | 0.136801  | 0.119027  | 0.137821 | 0.14088   | 0.119318  | 0.224068 |
| 0.114365 | 0.101253  | 0.101544  | 0.13141  | 0.116696  | 0.101253  | 0.215909 |
| 0.126748 | 0.0754662 | 0.109557  | 0.143211 | 0.0885781 | 0.0958625 | 0.222465 |
| 0.186043 | 0.180798  | 0.175554  | 0.189685 | 0.186334  | 0.173514  | 0.18852  |
| 0.139132 | 0.122815  | 0.123397  | 0.13141  | 0.136801  | 0.114365  | 0.212995 |
| 0.138112 | 0.137529  | 0.120629  | 0.136801 | 0.145396  | 0.120921  | 0.211976 |
| 0.124854 | 0.108246  | 0.10912   | 0.132867 | 0.105915  | 0.101253  | 0.224942 |
| 0.122669 | 0.133741  | 0.105478  | 0.129225 | 0.136946  | 0.11014   | 0.214889 |
| 0.122086 | 0.0926573 | 0.099359  | 0.129516 | 0.104604  | 0.099359  | 0.214307 |
| 0.121795 | 0.0795455 | 0.0984848 | 0.130099 | 0.0871212 | 0.0891608 | 0.216346 |
| 0.125874 | 0.0973193 | 0.10373   | 0.133304 | 0.104604  | 0.104021  | 0.214889 |
| 0.134324 | 0.134324  | 0.118298  | 0.129516 | 0.141026  | 0.115093  | 0.221008 |
| 0.129662 | 0.0944056 | 0.111888  | 0.136509 | 0.107226  | 0.104604  | 0.209645 |
| 0.141463 | 0.126311  | 0.127477  | 0.127914 | 0.136509  | 0.120484  | 0.224942 |
| 0.124709 | 0.116841  | 0.107226  | 0.127185 | 0.120629  | 0.104312  | 0.21285  |
| 0.13039  | 0.111451  | 0.109703  | 0.126748 | 0.115822  | 0.105332  | 0.21824  |
| 0.142774 | 0.134033  | 0.123252  | 0.13039  | 0.136946  | 0.127331  | 0.23208  |
| 0.120047 | 0.101981  | 0.102273  | 0.122523 | 0.103438  | 0.0987762 | 0.222174 |
| 0.135198 | 0.123543  | 0.122086  | 0.131556 | 0.126457  | 0.11655   | 0.21926  |
| 0.120921 | 0.100524  | 0.101107  | 0.120484 | 0.107517  | 0.0949883 | 0.220134 |
| 0.120047 | 0.0981935 | 0.103438  | 0.125146 | 0.102564  | 0.0961538 | 0.223922 |
| 0.104604 | 0.104021  | 0.0844988 | 0.128642 | 0.104312  | 0.0833333 | 0.213432 |
| 0.11961  | 0.103875  | 0.108246  | 0.136946 | 0.111742  | 0.101836  | 0.230478 |
| 0.123106 | 0.0989219 | 0.100379  | 0.129662 | 0.108246  | 0.0962995 | 0.219114 |
| 0.152826 | 0.147582  | 0.142628  | 0.100816 | 0.154283  | 0.139423  | 0.227855 |
| 0.151078 | 0.144085  | 0.135635  | 0.101981 | 0.149038  | 0.130682  | 0.217366 |
| 0.120192 | 0.0962995 | 0.105041  | 0.118881 | 0.106789  | 0.10067   | 0.218823 |
| 0.144522 | 0.148893  | 0.135781  | 0.124563 | 0.150932  | 0.134615  | 0.230915 |
| 0.137238 | 0.125583  | 0.119172  | 0.136509 | 0.138695  | 0.111305  | 0.216346 |
| 0.133741 | 0.126166  | 0.123543  | 0.142628 | 0.130536  | 0.123252  | 0.228293 |
| 0.122669 | 0.0979021 | 0.103147  | 0.126894 | 0.108683  | 0.10169   | 0.219551 |
| 0.146416 | 0.143502  | 0.139714  | 0.137821 | 0.150495  | 0.136509  | 0.225524 |
| 0.138258 | 0.137383  | 0.12398   | 0.136072 | 0.136801  | 0.120192  | 0.217075 |
| 0.147873 | 0.148164  | 0.130973  | 0.138403 | 0.14933   | 0.124272  | 0.222611 |
| 0.126603 | 0.110868  | 0.113782  | 0.128497 | 0.125146  | 0.107372  | 0.225524 |
| 0.126748 | 0.101981  | 0.103438  | 0.118153 | 0.110723  | 0.0976107 | 0.219843 |
| 0.121066 | 0.100087  | 0.099796  | 0.12704  | 0.117279  | 0.100087  | 0.216783 |
| 0.134033 | 0.124709  | 0.115967  | 0.123106 | 0.132576  | 0.111014  | 0.221008 |
| 0.119755 | 0.104604  | 0.110431  | 0.128351 | 0.102273  | 0.106935  | 0.225962 |
| 0.105332 | 0.117861  | 0.103875  | 0.140734 | 0.119318  | 0.109411  | 0.2331   |
| 0.126894 | 0.128642  | 0.114365  | 0.113636 | 0.137966  | 0.112034  | 0.217075 |
| 0.123689 | 0.112617  | 0.106498  | 0.122378 | 0.115822  | 0.0971737 | 0.217075 |
| 0.120921 | 0.0987762 | 0.0981935 | 0.126894 | 0.114219  | 0.0958625 | 0.21722  |



|           |           |           |          |           |           |          |
|-----------|-----------|-----------|----------|-----------|-----------|----------|
| 0.116696  | 0.100087  | 0.101836  | 0.131119 | 0.10708   | 0.10708   | 0.218531 |
| 0.12602   | 0.10708   | 0.102127  | 0.124709 | 0.112325  | 0.0989219 | 0.214452 |
| 0.123252  | 0.103147  | 0.104021  | 0.135344 | 0.117424  | 0.100816  | 0.225379 |
| 0.126166  | 0.106061  | 0.10373   | 0.13243  | 0.115385  | 0.0967366 | 0.214889 |
| 0.13039   | 0.114365  | 0.111451  | 0.134033 | 0.122523  | 0.103293  | 0.206002 |
| 0.122815  | 0.0925117 | 0.108537  | 0.136072 | 0.109411  | 0.10067   | 0.220571 |
| 0.0986305 | 0.0747378 | 0.0817308 | 0.13141  | 0.0843531 | 0.0826049 | 0.214161 |
| 0.115822  | 0.0939685 | 0.100087  | 0.124126 | 0.105332  | 0.101544  | 0.2162   |
| 0.130828  | 0.112471  | 0.106061  | 0.132139 | 0.124417  | 0.102855  | 0.206439 |
| 0.124854  | 0.0884324 | 0.110868  | 0.131993 | 0.110577  | 0.101253  | 0.217949 |
| 0.135052  | 0.114365  | 0.121358  | 0.131993 | 0.122523  | 0.121649  | 0.213287 |
| 0.12398   | 0.109703  | 0.105915  | 0.126748 | 0.119901  | 0.0965909 | 0.202797 |
| 0.121503  | 0.100524  | 0.115385  | 0.135344 | 0.108974  | 0.113345  | 0.224213 |

| <b>TDr_12_00418</b> | <b>TDr_12_00419</b> | <b>TDr_12_00420</b> | <b>TDr_12_00422</b> | <b>TDr_12_00423</b> | <b>TDr_12_00425</b> | <b>TDr_12_00426</b> |
|---------------------|---------------------|---------------------|---------------------|---------------------|---------------------|---------------------|
| 0.114802            | 0.113928            | 0.131265            | 0.113491            | 0.128059            | 0.120775            | 0.117716            |
| 0.114656            | 0.109411            | 0.124417            | 0.116259            | 0.126748            | 0.117716            | 0.110577            |
| 0.111116            | 0.107663            | 0.123543            | 0.110723            | 0.122669            | 0.113054            | 0.107955            |
| 0.114656            | 0.113199            | 0.126748            | 0.113636            | 0.130828            | 0.115967            | 0.112325            |
| 0.137383            | 0.131556            | 0.134324            | 0.133741            | 0.140443            | 0.130536            | 0.129808            |
| 0.133304            | 0.133887            | 0.13986             | 0.130536            | 0.140152            | 0.129662            | 0.126311            |
| 0.124709            | 0.114219            | 0.134761            | 0.118444            | 0.126311            | 0.126311            | 0.116259            |
| 0.118298            | 0.11014             | 0.125146            | 0.113782            | 0.128351            | 0.113782            | 0.11451             |
| 0.112034            | 0.0893065           | 0.115093            | 0.0932401           | 0.112762            | 0.103438            | 0.103584            |
| 0.0850816           | 0.0775058           | 0.0948427           | 0.0837704           | 0.0814394           | 0.0890152           | 0.0821678           |
| 0.120775            | 0.110286            | 0.132867            | 0.106935            | 0.125               | 0.119755            | 0.116404            |
| 0.115967            | 0.109266            | 0.128642            | 0.114948            | 0.126603            | 0.110868            | 0.111305            |
| 0.113636            | 0.0996503           | 0.11757             | 0.0977564           | 0.11961             | 0.104458            | 0.104604            |
| 0.135927            | 0.12602             | 0.141317            | 0.131993            | 0.136364            | 0.133159            | 0.129516            |
| 0.121503            | 0.121212            | 0.126603            | 0.11961             | 0.11961             | 0.120775            | 0.116841            |
| 0.11757             | 0.114656            | 0.131119            | 0.111597            | 0.123834            | 0.120338            | 0.118735            |
| 0.114219            | 0.107809            | 0.123689            | 0.10912             | 0.125146            | 0.115239            | 0.113636            |
| 0.141754            | 0.143211            | 0.148019            | 0.143065            | 0.145688            | 0.141608            | 0.135635            |
| 0.107663            | 0.107955            | 0.118298            | 0.109848            | 0.120338            | 0.113054            | 0.107663            |
| 0.202069            | 0.2044              | 0.207459            | 0.202797            | 0.210082            | 0.204545            | 0.199738            |
| 0.120921            | 0.119755            | 0.133013            | 0.118444            | 0.137966            | 0.11961             | 0.116841            |
| 0.119901            | 0.11757             | 0.13141             | 0.113054            | 0.129662            | 0.11859             | 0.116404            |
| 0.105769            | 0.109848            | 0.114948            | 0.109994            | 0.116113            | 0.105041            | 0.0999417           |
| 0.130099            | 0.120775            | 0.136946            | 0.125874            | 0.137238            | 0.127331            | 0.130099            |
| 0.104604            | 0.0973193           | 0.11553             | 0.0980478           | 0.112034            | 0.104167            | 0.102855            |
| 0.128788            | 0.128788            | 0.129516            | 0.123689            | 0.137092            | 0.121358            | 0.121503            |
| 0.12296             | 0.119172            | 0.131265            | 0.119318            | 0.127185            | 0.118444            | 0.119172            |
| 0.120921            | 0.113928            | 0.128351            | 0.118444            | 0.126603            | 0.115822            | 0.119464            |
| 0.138695            | 0.118881            | 0.137092            | 0.125437            | 0.138549            | 0.128642            | 0.126748            |
| 0.116259            | 0.106935            | 0.128351            | 0.114073            | 0.118735            | 0.116113            | 0.117133            |
| 0.124854            | 0.120484            | 0.135781            | 0.119172            | 0.131119            | 0.129371            | 0.120775            |
| 0.123543            | 0.115676            | 0.131556            | 0.11757             | 0.124563            | 0.116696            | 0.117716            |
| 0.108392            | 0.104021            | 0.121066            | 0.105332            | 0.112034            | 0.107955            | 0.104312            |
| 0.121503            | 0.110723            | 0.126603            | 0.112034            | 0.125437            | 0.110286            | 0.114219            |
| 0.122523            | 0.107663            | 0.129079            | 0.110431            | 0.120338            | 0.11451             | 0.11553             |
| 0.120338            | 0.1081              | 0.130099            | 0.110577            | 0.125728            | 0.119901            | 0.120921            |
| 0.128059            | 0.123106            | 0.136364            | 0.122669            | 0.126748            | 0.126748            | 0.123397            |
| 0.119755            | 0.113636            | 0.129516            | 0.114656            | 0.127477            | 0.120192            | 0.120921            |
| 0.117424            | 0.111014            | 0.130099            | 0.109411            | 0.125146            | 0.113782            | 0.113928            |
| 0.126166            | 0.112471            | 0.13243             | 0.119901            | 0.13447             | 0.124854            | 0.123252            |
| 0.119755            | 0.101399            | 0.127768            | 0.104458            | 0.11961             | 0.112034            | 0.11451             |
| 0.144814            | 0.130536            | 0.141171            | 0.139423            | 0.146125            | 0.139714            | 0.141317            |

|           |           |          |           |          |           |           |
|-----------|-----------|----------|-----------|----------|-----------|-----------|
| 0.141317  | 0.138403  | 0.14933  | 0.145833  | 0.155157 | 0.145251  | 0.143939  |
| 0.120484  | 0.104458  | 0.123543 | 0.109848  | 0.126748 | 0.118881  | 0.120484  |
| 0.0960082 | 0.0895979 | 0.108683 | 0.0955711 | 0.113054 | 0.0932401 | 0.0887238 |
| 0.110431  | 0.0920746 | 0.124272 | 0.101253  | 0.112034 | 0.110577  | 0.107226  |
| 0.121212  | 0.116841  | 0.130099 | 0.118735  | 0.138258 | 0.110868  | 0.120338  |
| 0.137383  | 0.127185  | 0.140152 | 0.129079  | 0.143065 | 0.138986  | 0.137092  |
| 0.119318  | 0.10912   | 0.128497 | 0.109557  | 0.125583 | 0.108974  | 0.118444  |
| 0.122086  | 0.112471  | 0.127477 | 0.110868  | 0.128059 | 0.11961   | 0.118298  |
| 0.145251  | 0.138549  | 0.147145 | 0.143648  | 0.145396 | 0.152389  | 0.144668  |
| 0.124854  | 0.128934  | 0.136946 | 0.126457  | 0.137238 | 0.128205  | 0.124272  |
| 0.118881  | 0.110723  | 0.126603 | 0.115822  | 0.13039  | 0.117861  | 0.121503  |
| 0.123543  | 0.107226  | 0.118735 | 0.110868  | 0.108246 | 0.114656  | 0.113636  |
| 0.117424  | 0.116841  | 0.131847 | 0.118735  | 0.136509 | 0.119901  | 0.120338  |
| 0.140443  | 0.1419    | 0.143794 | 0.14088   | 0.155157 | 0.136801  | 0.138403  |
| 0.128059  | 0.118153  | 0.135198 | 0.118881  | 0.137529 | 0.123543  | 0.128059  |
| 0.121649  | 0.107372  | 0.129371 | 0.114802  | 0.126748 | 0.119172  | 0.119318  |
| 0.117861  | 0.105332  | 0.128788 | 0.112179  | 0.13141  | 0.11655   | 0.114948  |
| 0.11655   | 0.101981  | 0.121649 | 0.106498  | 0.108829 | 0.119318  | 0.110431  |
| 0.143939  | 0.13345   | 0.146707 | 0.13447   | 0.145542 | 0.138549  | 0.144522  |
| 0.1419    | 0.131119  | 0.141171 | 0.137383  | 0.142337 | 0.138258  | 0.134907  |
| 0.162733  | 0.159528  | 0.168706 | 0.162879  | 0.169872 | 0.160839  | 0.159819  |
| 0.122523  | 0.106498  | 0.131993 | 0.112471  | 0.125    | 0.113054  | 0.120192  |
| 0.118444  | 0.100087  | 0.130536 | 0.108683  | 0.128788 | 0.109848  | 0.116113  |
| 0.114948  | 0.105915  | 0.126457 | 0.108683  | 0.129662 | 0.115385  | 0.112617  |
| 0.137238  | 0.129953  | 0.150204 | 0.133887  | 0.143502 | 0.13447   | 0.134907  |
| 0.125291  | 0.106643  | 0.132721 | 0.110286  | 0.127185 | 0.113782  | 0.11859   |
| 0.128351  | 0.130973  | 0.134324 | 0.134324  | 0.152389 | 0.130245  | 0.131265  |
| 0.109994  | 0.107663  | 0.119464 | 0.108683  | 0.113636 | 0.118298  | 0.113782  |
| 0.119172  | 0.108683  | 0.128351 | 0.120192  | 0.132139 | 0.116696  | 0.120047  |
| 0.144814  | 0.142483  | 0.154575 | 0.143794  | 0.153118 | 0.146416  | 0.141608  |
| 0.125583  | 0.115385  | 0.140006 | 0.123689  | 0.136801 | 0.126311  | 0.130536  |
| 0.137966  | 0.131265  | 0.1419   | 0.136364  | 0.144231 | 0.136072  | 0.134178  |
| 0.131993  | 0.129662  | 0.138258 | 0.12602   | 0.140589 | 0.127185  | 0.127331  |
| 0.104749  | 0.115822  | 0.122086 | 0.11451   | 0.132576 | 0.107809  | 0.104749  |
| 0.11757   | 0.103293  | 0.130536 | 0.109266  | 0.127622 | 0.113928  | 0.116404  |
| 0.120192  | 0.110868  | 0.129371 | 0.111305  | 0.128205 | 0.115385  | 0.118735  |
| 0.13447   | 0.128642  | 0.139277 | 0.134615  | 0.142774 | 0.131993  | 0.132721  |
| 0.121795  | 0.108974  | 0.125728 | 0.105041  | 0.126311 | 0.110868  | 0.117133  |
| 0.138258  | 0.132139  | 0.142774 | 0.137238  | 0.145396 | 0.138112  | 0.134178  |
| 0.127768  | 0.116696  | 0.136364 | 0.117716  | 0.134907 | 0.123543  | 0.125437  |
| 0.126603  | 0.113782  | 0.132576 | 0.120338  | 0.136072 | 0.115676  | 0.123106  |
| 0.126894  | 0.113199  | 0.136364 | 0.116841  | 0.137821 | 0.120629  | 0.123106  |
| 0.126894  | 0.113782  | 0.134033 | 0.11859   | 0.136072 | 0.119172  | 0.127185  |
| 0.118735  | 0.10912   | 0.127331 | 0.114802  | 0.129662 | 0.112471  | 0.117861  |

|           |           |          |           |          |           |           |
|-----------|-----------|----------|-----------|----------|-----------|-----------|
| 0.119901  | 0.110286  | 0.134324 | 0.114802  | 0.128788 | 0.115676  | 0.120775  |
| 0.140152  | 0.129953  | 0.139714 | 0.135635  | 0.143502 | 0.131265  | 0.136655  |
| 0.114802  | 0.104604  | 0.127768 | 0.104167  | 0.11757  | 0.116113  | 0.112471  |
| 0.113782  | 0.103293  | 0.125291 | 0.0979021 | 0.115093 | 0.1081    | 0.111451  |
| 0.121358  | 0.114073  | 0.130828 | 0.117424  | 0.134033 | 0.120047  | 0.120192  |
| 0.13039   | 0.117279  | 0.136364 | 0.124709  | 0.130828 | 0.124709  | 0.119027  |
| 0.111742  | 0.121358  | 0.113636 | 0.122086  | 0.132867 | 0.105478  | 0.114656  |
| 0.111888  | 0.127622  | 0.114073 | 0.130099  | 0.136801 | 0.105915  | 0.117424  |
| 0.116404  | 0.113782  | 0.129079 | 0.116259  | 0.127914 | 0.119464  | 0.115822  |
| 0.181672  | 0.181672  | 0.184441 | 0.187063  | 0.190268 | 0.181818  | 0.18109   |
| 0.112179  | 0.106935  | 0.123106 | 0.106498  | 0.124563 | 0.109994  | 0.109848  |
| 0.109411  | 0.120775  | 0.117424 | 0.122669  | 0.134907 | 0.113345  | 0.112034  |
| 0.102127  | 0.115239  | 0.109848 | 0.117133  | 0.127331 | 0.106061  | 0.10271   |
| 0.138112  | 0.128205  | 0.144668 | 0.129225  | 0.139423 | 0.133596  | 0.134907  |
| 0.0977564 | 0.106789  | 0.113345 | 0.106352  | 0.119755 | 0.0914918 | 0.100087  |
| 0.109703  | 0.12398   | 0.112179 | 0.125583  | 0.134324 | 0.0999417 | 0.110286  |
| 0.0965909 | 0.103875  | 0.103147 | 0.105769  | 0.121795 | 0.0949883 | 0.0962995 |
| 0.101107  | 0.113345  | 0.106789 | 0.119027  | 0.129808 | 0.106789  | 0.104312  |
| 0.11014   | 0.106061  | 0.126603 | 0.107955  | 0.121649 | 0.114365  | 0.112471  |
| 0.105478  | 0.125     | 0.121649 | 0.127477  | 0.137966 | 0.113782  | 0.109557  |
| 0.106935  | 0.0949883 | 0.122523 | 0.100379  | 0.116987 | 0.10912   | 0.106935  |
| 0.121358  | 0.128059  | 0.126457 | 0.132867  | 0.138695 | 0.123834  | 0.12398   |
| 0.11859   | 0.106061  | 0.128642 | 0.111742  | 0.12602  | 0.116404  | 0.111888  |
| 0.132139  | 0.126311  | 0.132576 | 0.125583  | 0.137529 | 0.128497  | 0.127768  |
| 0.128788  | 0.115093  | 0.136509 | 0.121066  | 0.126894 | 0.124272  | 0.123543  |
| 0.111888  | 0.101107  | 0.120192 | 0.105624  | 0.119027 | 0.111742  | 0.104895  |
| 0.136072  | 0.143939  | 0.148164 | 0.143502  | 0.154283 | 0.138549  | 0.139277  |
| 0.117279  | 0.107663  | 0.121795 | 0.110431  | 0.12296  | 0.112471  | 0.106789  |
| 0.102418  | 0.100379  | 0.110723 | 0.101981  | 0.117716 | 0.0967366 | 0.0989219 |
| 0.106935  | 0.109266  | 0.121066 | 0.109703  | 0.119027 | 0.108829  | 0.111888  |
| 0.129079  | 0.12296   | 0.140589 | 0.128934  | 0.133013 | 0.130682  | 0.129371  |
| 0.11655   | 0.122669  | 0.129808 | 0.123397  | 0.136218 | 0.118735  | 0.119755  |
| 0.0976107 | 0.0976107 | 0.111451 | 0.0995047 | 0.118153 | 0.0922203 | 0.0990676 |
| 0.0920746 | 0.100233  | 0.101544 | 0.101544  | 0.116404 | 0.0960082 | 0.0941142 |
| 0.118735  | 0.10708   | 0.130828 | 0.109848  | 0.121212 | 0.117133  | 0.114948  |
| 0.11655   | 0.1081    | 0.122815 | 0.107955  | 0.106498 | 0.114365  | 0.113054  |
| 0.120775  | 0.111742  | 0.129079 | 0.111888  | 0.124126 | 0.122378  | 0.112617  |
| 0.106352  | 0.090035  | 0.116404 | 0.0965909 | 0.108537 | 0.104749  | 0.101981  |
| 0.106643  | 0.0868298 | 0.115239 | 0.0939685 | 0.105624 | 0.107663  | 0.101399  |
| 0.10708   | 0.08581   | 0.11859  | 0.0929487 | 0.106935 | 0.107809  | 0.103875  |
| 0.125146  | 0.116404  | 0.128497 | 0.123252  | 0.134907 | 0.118881  | 0.115239  |
| 0.124709  | 0.11014   | 0.128059 | 0.116113  | 0.124272 | 0.130682  | 0.118881  |
| 0.110286  | 0.095134  | 0.122669 | 0.100524  | 0.108683 | 0.111014  | 0.10912   |
| 0.107226  | 0.0929487 | 0.117861 | 0.0968823 | 0.109411 | 0.107955  | 0.101981  |

|          |           |          |           |          |           |           |
|----------|-----------|----------|-----------|----------|-----------|-----------|
| 0.122669 | 0.111014  | 0.127768 | 0.112908  | 0.118444 | 0.123106  | 0.116841  |
| 0.111451 | 0.0916375 | 0.126457 | 0.100233  | 0.111305 | 0.115093  | 0.105624  |
| 0.120484 | 0.116696  | 0.13549  | 0.120047  | 0.133159 | 0.123252  | 0.119027  |
| 0.133013 | 0.127185  | 0.138403 | 0.127914  | 0.136364 | 0.138112  | 0.133596  |
| 0.108829 | 0.0948427 | 0.121795 | 0.104895  | 0.113928 | 0.108683  | 0.10067   |
| 0.111014 | 0.0920746 | 0.121358 | 0.103293  | 0.107372 | 0.112908  | 0.109557  |
| 0.109557 | 0.092366  | 0.121649 | 0.105624  | 0.110868 | 0.112034  | 0.109266  |
| 0.102564 | 0.0914918 | 0.115239 | 0.0968823 | 0.111742 | 0.0971737 | 0.0981935 |
| 0.118298 | 0.101981  | 0.122523 | 0.11116   | 0.112617 | 0.11961   | 0.117133  |
| 0.104604 | 0.087704  | 0.117279 | 0.0945513 | 0.102127 | 0.105041  | 0.100233  |
| 0.143502 | 0.132721  | 0.145688 | 0.131119  | 0.142191 | 0.1419    | 0.135635  |
| 0.135781 | 0.120047  | 0.143211 | 0.124563  | 0.136801 | 0.135927  | 0.135781  |
| 0.120921 | 0.111305  | 0.130973 | 0.115239  | 0.129225 | 0.121649  | 0.124417  |
| 0.11757  | 0.102127  | 0.127331 | 0.105478  | 0.119172 | 0.114802  | 0.116696  |
| 0.114073 | 0.105332  | 0.129371 | 0.109557  | 0.12296  | 0.111305  | 0.112908  |
| 0.110431 | 0.100233  | 0.121358 | 0.103875  | 0.114656 | 0.111742  | 0.107226  |
| 0.115822 | 0.101253  | 0.125874 | 0.100233  | 0.115385 | 0.109848  | 0.115822  |
| 0.114365 | 0.0986305 | 0.124126 | 0.10373   | 0.121212 | 0.107226  | 0.10912   |
| 0.114948 | 0.116404  | 0.127331 | 0.118007  | 0.132284 | 0.117716  | 0.114073  |
| 0.132139 | 0.123689  | 0.137529 | 0.125874  | 0.140152 | 0.12704   | 0.129808  |
| 0.101399 | 0.108392  | 0.113491 | 0.108537  | 0.123689 | 0.0919289 | 0.104312  |
| 0.119901 | 0.108829  | 0.126457 | 0.113636  | 0.122669 | 0.122669  | 0.112908  |
| 0.130536 | 0.125874  | 0.136509 | 0.127185  | 0.137675 | 0.126603  | 0.126457  |
| 0.196678 | 0.192308  | 0.210519 | 0.19391   | 0.207314 | 0.194202  | 0.197552  |
| 0.239656 | 0.238199  | 0.246503 | 0.237179  | 0.248834 | 0.237179  | 0.237325  |
| 0.11451  | 0.116259  | 0.129516 | 0.115822  | 0.134178 | 0.114073  | 0.111305  |
| 0.117279 | 0.106498  | 0.128497 | 0.109266  | 0.128788 | 0.113636  | 0.113199  |
| 0.111742 | 0.108246  | 0.125291 | 0.105769  | 0.126748 | 0.110723  | 0.110286  |
| 0.118153 | 0.109994  | 0.120629 | 0.113345  | 0.126748 | 0.106643  | 0.113491  |
| 0.120484 | 0.121358  | 0.123543 | 0.122378  | 0.124417 | 0.121795  | 0.116987  |
| 0.121941 | 0.116987  | 0.127331 | 0.117133  | 0.134324 | 0.113054  | 0.117279  |
| 0.143357 | 0.142774  | 0.147582 | 0.145833  | 0.158362 | 0.139132  | 0.142483  |
| 0.120484 | 0.114948  | 0.132284 | 0.115676  | 0.131993 | 0.116841  | 0.120775  |
| 0.126311 | 0.125728  | 0.137821 | 0.127914  | 0.145979 | 0.126457  | 0.126603  |
| 0.130245 | 0.130245  | 0.133887 | 0.13447   | 0.147873 | 0.128934  | 0.131702  |
| 0.129079 | 0.125     | 0.133013 | 0.129516  | 0.144085 | 0.122232  | 0.128497  |
| 0.137238 | 0.131119  | 0.140589 | 0.130973  | 0.145833 | 0.136801  | 0.135198  |
| 0.120629 | 0.113928  | 0.133304 | 0.113491  | 0.130682 | 0.116113  | 0.12296   |
| 0.116259 | 0.109266  | 0.129225 | 0.113782  | 0.133304 | 0.116404  | 0.116841  |
| 0.116404 | 0.114073  | 0.127914 | 0.117716  | 0.134907 | 0.111597  | 0.118735  |
| 0.11553  | 0.107372  | 0.129371 | 0.107809  | 0.127622 | 0.112471  | 0.110577  |
| 0.112325 | 0.108537  | 0.130828 | 0.116259  | 0.132284 | 0.116259  | 0.114656  |
| 0.122378 | 0.119172  | 0.131847 | 0.11757   | 0.133887 | 0.114656  | 0.120047  |
| 0.124854 | 0.124563  | 0.134615 | 0.128497  | 0.143648 | 0.115967  | 0.122232  |

|           |           |           |           |           |           |           |
|-----------|-----------|-----------|-----------|-----------|-----------|-----------|
| 0.135052  | 0.135344  | 0.140443  | 0.136655  | 0.149767  | 0.124417  | 0.132139  |
| 0.120047  | 0.11451   | 0.140297  | 0.115822  | 0.136509  | 0.120484  | 0.119172  |
| 0.121066  | 0.112034  | 0.132284  | 0.115093  | 0.134033  | 0.115093  | 0.116696  |
| 0.127185  | 0.127185  | 0.139277  | 0.138403  | 0.144231  | 0.123252  | 0.128351  |
| 0.11961   | 0.108537  | 0.125291  | 0.113054  | 0.127622  | 0.107517  | 0.112908  |
| 0.137238  | 0.141026  | 0.14088   | 0.140589  | 0.155157  | 0.13447   | 0.136364  |
| 0.124709  | 0.117716  | 0.131265  | 0.118735  | 0.130973  | 0.12398   | 0.12296   |
| 0.105915  | 0.135344  | 0.111305  | 0.137238  | 0.147727  | 0.111014  | 0.10912   |
| 0.114365  | 0.107372  | 0.125874  | 0.106643  | 0.127622  | 0.112179  | 0.115239  |
| 0.110431  | 0.108392  | 0.121649  | 0.108829  | 0.127477  | 0.105041  | 0.106643  |
| 0.123689  | 0.11961   | 0.13549   | 0.123252  | 0.134907  | 0.120629  | 0.122232  |
| 0.125291  | 0.121503  | 0.130099  | 0.124563  | 0.135344  | 0.117279  | 0.119464  |
| 0.124126  | 0.129953  | 0.136801  | 0.133304  | 0.147582  | 0.126894  | 0.125583  |
| 0.124854  | 0.118444  | 0.130245  | 0.123252  | 0.138112  | 0.118881  | 0.117279  |
| 0.118881  | 0.11655   | 0.133304  | 0.119318  | 0.137092  | 0.116113  | 0.119464  |
| 0.120921  | 0.12296   | 0.129225  | 0.123397  | 0.136218  | 0.119027  | 0.12296   |
| 0.130828  | 0.128497  | 0.137966  | 0.127185  | 0.142628  | 0.12398   | 0.129371  |
| 0.127622  | 0.126457  | 0.138549  | 0.131556  | 0.14729   | 0.124854  | 0.126457  |
| 0.130099  | 0.133887  | 0.136655  | 0.134907  | 0.150058  | 0.131702  | 0.13447   |
| 0.141026  | 0.129371  | 0.144376  | 0.134761  | 0.146707  | 0.134178  | 0.132576  |
| 0.120047  | 0.114802  | 0.134178  | 0.118735  | 0.132721  | 0.11757   | 0.119464  |
| 0.126457  | 0.12704   | 0.128059  | 0.134178  | 0.146999  | 0.116696  | 0.125     |
| 0.114365  | 0.105915  | 0.124126  | 0.108392  | 0.127331  | 0.112179  | 0.116113  |
| 0.122378  | 0.103438  | 0.125146  | 0.109411  | 0.130973  | 0.114365  | 0.115676  |
| 0.117424  | 0.110431  | 0.126603  | 0.112908  | 0.130099  | 0.112908  | 0.119172  |
| 0.113199  | 0.109703  | 0.126748  | 0.11859   | 0.129953  | 0.10373   | 0.111451  |
| 0.116696  | 0.108537  | 0.127914  | 0.105769  | 0.127331  | 0.115093  | 0.110868  |
| 0.13549   | 0.132284  | 0.138549  | 0.135344  | 0.147873  | 0.129808  | 0.133741  |
| 0.122815  | 0.113782  | 0.135198  | 0.112762  | 0.133741  | 0.117133  | 0.124272  |
| 0.133596  | 0.135052  | 0.132576  | 0.133741  | 0.142774  | 0.126748  | 0.130099  |
| 0.116696  | 0.110286  | 0.132867  | 0.111014  | 0.126748  | 0.111305  | 0.111451  |
| 0.127914  | 0.119755  | 0.136801  | 0.122523  | 0.138549  | 0.120484  | 0.124417  |
| 0.124272  | 0.113199  | 0.134615  | 0.117424  | 0.123252  | 0.125583  | 0.118153  |
| 0.112617  | 0.0992133 | 0.124417  | 0.102855  | 0.121795  | 0.109848  | 0.110868  |
| 0.11451   | 0.103438  | 0.127477  | 0.11116   | 0.113782  | 0.121649  | 0.117424  |
| 0.112617  | 0.112617  | 0.123834  | 0.113345  | 0.123834  | 0.108683  | 0.11116   |
| 0.118298  | 0.111597  | 0.135635  | 0.11553   | 0.128642  | 0.122523  | 0.118007  |
| 0.115967  | 0.112471  | 0.120775  | 0.11116   | 0.120192  | 0.11553   | 0.111888  |
| 0.123543  | 0.0987762 | 0.124272  | 0.0948427 | 0.0855186 | 0.117279  | 0.116259  |
| 0.144959  | 0.134178  | 0.144814  | 0.128497  | 0.139569  | 0.133741  | 0.142628  |
| 0.103293  | 0.0747378 | 0.108974  | 0.0836247 | 0.0987762 | 0.0973193 | 0.0933858 |
| 0.0976107 | 0.116841  | 0.0960082 | 0.123689  | 0.122815  | 0.0948427 | 0.0973193 |
| 0.10912   | 0.0893065 | 0.109266  | 0.0862471 | 0.0926573 | 0.108683  | 0.105332  |
| 0.100962  | 0.112034  | 0.0938228 | 0.112471  | 0.119172  | 0.0885781 | 0.0989219 |

|           |           |           |           |           |           |           |
|-----------|-----------|-----------|-----------|-----------|-----------|-----------|
| 0.0846445 | 0.10708   | 0.0941142 | 0.11014   | 0.117424  | 0.092366  | 0.0936772 |
| 0.108246  | 0.090472  | 0.117133  | 0.0798368 | 0.0952797 | 0.108683  | 0.105915  |
| 0.111888  | 0.0888695 | 0.116113  | 0.0823135 | 0.0782343 | 0.109703  | 0.102855  |
| 0.0738636 | 0.109411  | 0.0958625 | 0.111597  | 0.119464  | 0.10169   | 0.0852273 |
| 0.0942599 | 0.122523  | 0.0836247 | 0.120921  | 0.119172  | 0.101399  | 0.100962  |
| 0.108537  | 0.0805653 | 0.117424  | 0.0786713 | 0.0842075 | 0.111888  | 0.107955  |
| 0.0828963 | 0.101253  | 0.0961538 | 0.104312  | 0.113345  | 0.0938228 | 0.0939685 |
| 0.141026  | 0.137238  | 0.152244  | 0.137383  | 0.153118  | 0.139423  | 0.133741  |
| 0.11757   | 0.0919289 | 0.123543  | 0.0906177 | 0.0801282 | 0.115967  | 0.107663  |
| 0.0893065 | 0.0948427 | 0.104895  | 0.0952797 | 0.116259  | 0.0932401 | 0.092803  |
| 0.221445  | 0.217949  | 0.235577  | 0.218969  | 0.231498  | 0.218386  | 0.221445  |
| 0         | 0.102855  | 0.100379  | 0.112034  | 0.114948  | 0.0939685 | 0.083042  |
| 0.102855  | 0         | 0.11961   | 0.0913462 | 0.0968823 | 0.102418  | 0.0981935 |
| 0.100379  | 0.11961   | 0         | 0.122378  | 0.119464  | 0.102273  | 0.0960082 |
| 0.112034  | 0.0913462 | 0.122378  | 0         | 0.0952797 | 0.109266  | 0.110286  |
| 0.114948  | 0.0968823 | 0.119464  | 0.0952797 | 0         | 0.115967  | 0.109411  |
| 0.0939685 | 0.102418  | 0.102273  | 0.109266  | 0.115967  | 0         | 0.0916375 |
| 0.083042  | 0.0981935 | 0.0960082 | 0.110286  | 0.109411  | 0.0916375 | 0         |
| 0.111305  | 0.087704  | 0.112908  | 0.0907634 | 0.0855186 | 0.10912   | 0.103147  |
| 0.103293  | 0.113491  | 0.103147  | 0.115967  | 0.118298  | 0.0897436 | 0.0983392 |
| 0.104312  | 0.11451   | 0.095134  | 0.114365  | 0.122523  | 0.0901807 | 0.0984848 |
| 0.0971737 | 0.116113  | 0.0987762 | 0.121212  | 0.122378  | 0.0938228 | 0.0942599 |
| 0.095134  | 0.104458  | 0.100816  | 0.117424  | 0.11655   | 0.0973193 | 0.08581   |
| 0.11116   | 0.10067   | 0.120629  | 0.103438  | 0.113928  | 0.109557  | 0.104167  |
| 0.0913462 | 0.102127  | 0.116841  | 0.104604  | 0.117716  | 0.0894522 | 0.097465  |
| 0.0944056 | 0.113345  | 0.092803  | 0.120775  | 0.113491  | 0.0942599 | 0.0987762 |
| 0.0802739 | 0.103584  | 0.0865385 | 0.106935  | 0.109557  | 0.0827506 | 0.0863928 |
| 0.133596  | 0.129808  | 0.13986   | 0.134615  | 0.140443  | 0.13141   | 0.13447   |
| 0.138986  | 0.127622  | 0.145833  | 0.131556  | 0.139714  | 0.137092  | 0.130828  |
| 0.119172  | 0.115093  | 0.122815  | 0.120192  | 0.124563  | 0.123689  | 0.109848  |
| 0.118881  | 0.0967366 | 0.114365  | 0.0942599 | 0.0933858 | 0.114365  | 0.112762  |
| 0.118735  | 0.121941  | 0.123252  | 0.11859   | 0.133741  | 0.113636  | 0.115822  |
| 0.127622  | 0.116841  | 0.133887  | 0.122232  | 0.128059  | 0.117861  | 0.12296   |
| 0.129662  | 0.121212  | 0.138549  | 0.122815  | 0.135344  | 0.126894  | 0.125     |
| 0.134324  | 0.124709  | 0.142628  | 0.133887  | 0.138549  | 0.135344  | 0.129371  |
| 0.107372  | 0.0933858 | 0.121503  | 0.0949883 | 0.106352  | 0.101399  | 0.104458  |
| 0.128205  | 0.115093  | 0.137383  | 0.120192  | 0.131847  | 0.125437  | 0.13141   |
| 0.140589  | 0.139132  | 0.149184  | 0.138695  | 0.148893  | 0.145396  | 0.130682  |
| 0.113782  | 0.099796  | 0.126457  | 0.105769  | 0.112179  | 0.11655   | 0.109411  |
| 0.126894  | 0.11757   | 0.137238  | 0.117133  | 0.137238  | 0.122669  | 0.125146  |
| 0.152098  | 0.145396  | 0.153992  | 0.144085  | 0.15574   | 0.148456  | 0.144522  |
| 0.128205  | 0.118007  | 0.137092  | 0.123689  | 0.139423  | 0.120484  | 0.125583  |
| 0.129808  | 0.126603  | 0.136072  | 0.131993  | 0.124126  | 0.135198  | 0.124854  |
| 0.116259  | 0.115385  | 0.13039   | 0.112908  | 0.122523  | 0.12398   | 0.117424  |

|           |           |           |          |          |           |           |
|-----------|-----------|-----------|----------|----------|-----------|-----------|
| 0.0995047 | 0.106206  | 0.106643  | 0.11655  | 0.124417 | 0.101981  | 0.0948427 |
| 0.120629  | 0.121795  | 0.129225  | 0.124272 | 0.13039  | 0.125728  | 0.119755  |
| 0.108246  | 0.0980478 | 0.119172  | 0.11014  | 0.114219 | 0.110431  | 0.105915  |
| 0.106352  | 0.118881  | 0.112908  | 0.124854 | 0.133304 | 0.105041  | 0.111305  |
| 0.0935315 | 0.106643  | 0.101253  | 0.114948 | 0.115822 | 0.0919289 | 0.092366  |
| 0.113928  | 0.129371  | 0.115822  | 0.132139 | 0.140297 | 0.106206  | 0.112179  |
| 0.101107  | 0.116841  | 0.119027  | 0.127768 | 0.131847 | 0.108537  | 0.105186  |
| 0.112762  | 0.120629  | 0.126894  | 0.125146 | 0.140589 | 0.10912   | 0.11451   |
| 0.114802  | 0.137238  | 0.122815  | 0.142045 | 0.151369 | 0.127768  | 0.118881  |
| 0.111305  | 0.0976107 | 0.107663  | 0.103875 | 0.104458 | 0.108246  | 0.108392  |
| 0.11859   | 0.106935  | 0.133304  | 0.108246 | 0.125146 | 0.111451  | 0.113636  |
| 0.130828  | 0.11859   | 0.139132  | 0.123106 | 0.135052 | 0.126603  | 0.122086  |
| 0.107517  | 0.100233  | 0.115239  | 0.101253 | 0.106789 | 0.112034  | 0.107517  |
| 0.138258  | 0.128059  | 0.154429  | 0.135781 | 0.144522 | 0.140443  | 0.135052  |
| 0.151369  | 0.146999  | 0.159965  | 0.153555 | 0.155303 | 0.149184  | 0.148456  |
| 0.127768  | 0.128934  | 0.136364  | 0.124709 | 0.143648 | 0.122086  | 0.126311  |
| 0.121212  | 0.118881  | 0.13447   | 0.11961  | 0.139714 | 0.12398   | 0.124709  |
| 0.108246  | 0.128642  | 0.118298  | 0.129371 | 0.138403 | 0.107517  | 0.10708   |
| 0.0917832 | 0.11014   | 0.0939685 | 0.112325 | 0.11757  | 0.104167  | 0.0987762 |
| 0.127914  | 0.124709  | 0.144085  | 0.125437 | 0.140297 | 0.128642  | 0.130245  |
| 0.0981935 | 0.118007  | 0.0933858 | 0.123397 | 0.131265 | 0.0989219 | 0.101981  |
| 0.126457  | 0.126457  | 0.127768  | 0.132721 | 0.13447  | 0.13039   | 0.122086  |
| 0.113782  | 0.110577  | 0.116841  | 0.111014 | 0.111597 | 0.123252  | 0.11757   |
| 0.153992  | 0.158654  | 0.161713  | 0.161713 | 0.171329 | 0.156177  | 0.152826  |
| 0.120192  | 0.114365  | 0.121795  | 0.114219 | 0.124417 | 0.116841  | 0.121941  |
| 0.128934  | 0.124272  | 0.127331  | 0.126748 | 0.124126 | 0.125     | 0.12398   |
| 0.120921  | 0.109848  | 0.130099  | 0.109703 | 0.128934 | 0.112617  | 0.111888  |
| 0.111305  | 0.128788  | 0.120484  | 0.128642 | 0.139132 | 0.112034  | 0.114219  |
| 0.092366  | 0.109266  | 0.0875583 | 0.111742 | 0.113491 | 0.0866841 | 0.0929487 |
| 0.13884   | 0.137383  | 0.150641  | 0.138986 | 0.14831  | 0.143357  | 0.138549  |
| 0.138986  | 0.143357  | 0.136218  | 0.140589 | 0.14933  | 0.134761  | 0.136655  |
| 0.127768  | 0.123689  | 0.134907  | 0.124709 | 0.137821 | 0.123834  | 0.123106  |
| 0.138112  | 0.13549   | 0.145542  | 0.135635 | 0.145833 | 0.137383  | 0.131702  |
| 0.155449  | 0.144376  | 0.166084  | 0.148019 | 0.16521  | 0.152098  | 0.1537    |
| 0.141754  | 0.144668  | 0.159382  | 0.142191 | 0.157925 | 0.145688  | 0.141171  |
| 0.133741  | 0.126748  | 0.137675  | 0.123397 | 0.140006 | 0.131556  | 0.131119  |
| 0.137383  | 0.134178  | 0.13549   | 0.136655 | 0.1419   | 0.139569  | 0.130682  |
| 0.120775  | 0.108537  | 0.132867  | 0.112179 | 0.120338 | 0.119172  | 0.112034  |
| 0.113636  | 0.121212  | 0.123106  | 0.119318 | 0.130099 | 0.118444  | 0.113054  |
| 0.110286  | 0.101836  | 0.118881  | 0.105478 | 0.118881 | 0.109557  | 0.11116   |
| 0.122815  | 0.117861  | 0.134907  | 0.122669 | 0.134033 | 0.121503  | 0.121358  |
| 0.11655   | 0.109266  | 0.128642  | 0.114073 | 0.134178 | 0.115822  | 0.115385  |
| 0.113636  | 0.109848  | 0.123689  | 0.109703 | 0.123106 | 0.110868  | 0.106061  |
| 0.12704   | 0.113636  | 0.133887  | 0.113491 | 0.128642 | 0.121066  | 0.127914  |



|          |           |          |           |           |           |           |
|----------|-----------|----------|-----------|-----------|-----------|-----------|
| 0.11757  | 0.118153  | 0.125874 | 0.115093  | 0.124417  | 0.119172  | 0.112617  |
| 0.107955 | 0.088141  | 0.11655  | 0.101107  | 0.106352  | 0.100816  | 0.103001  |
| 0.125437 | 0.119027  | 0.137529 | 0.121795  | 0.137529  | 0.122378  | 0.124272  |
| 0.122378 | 0.118298  | 0.137092 | 0.121066  | 0.135344  | 0.117861  | 0.122378  |
| 0.131993 | 0.12296   | 0.140589 | 0.126311  | 0.141171  | 0.128059  | 0.129953  |
| 0.219697 | 0.216492  | 0.228001 | 0.218094  | 0.224796  | 0.214598  | 0.2162    |
| 0.144231 | 0.141608  | 0.147582 | 0.141463  | 0.149621  | 0.138549  | 0.140734  |
| 0.131847 | 0.135052  | 0.132576 | 0.128788  | 0.1419    | 0.129662  | 0.127768  |
| 0.127622 | 0.122669  | 0.132139 | 0.121941  | 0.132721  | 0.129808  | 0.124709  |
| 0.217366 | 0.208916  | 0.226544 | 0.211976  | 0.223048  | 0.211101  | 0.212413  |
| 0.128205 | 0.126166  | 0.140297 | 0.129225  | 0.141463  | 0.129808  | 0.127914  |
| 0.126603 | 0.121941  | 0.136946 | 0.125583  | 0.137238  | 0.123252  | 0.121941  |
| 0.13243  | 0.123106  | 0.137821 | 0.126166  | 0.132576  | 0.125     | 0.126603  |
| 0.116259 | 0.114802  | 0.125437 | 0.116404  | 0.122232  | 0.116113  | 0.112762  |
| 0.251457 | 0.248543  | 0.25743  | 0.250437  | 0.258596  | 0.250728  | 0.249417  |
| 0.130682 | 0.122232  | 0.138403 | 0.124709  | 0.134907  | 0.13141   | 0.129225  |
| 0.125146 | 0.114073  | 0.134615 | 0.118298  | 0.137238  | 0.122378  | 0.123397  |
| 0.125146 | 0.127185  | 0.134615 | 0.129371  | 0.144522  | 0.125583  | 0.12398   |
| 0.125728 | 0.12602   | 0.134033 | 0.126748  | 0.140152  | 0.123543  | 0.121358  |
| 0.12602  | 0.126603  | 0.13986  | 0.124709  | 0.133159  | 0.134033  | 0.125437  |
| 0.12398  | 0.126894  | 0.141026 | 0.127622  | 0.142191  | 0.130828  | 0.118444  |
| 0.131556 | 0.117279  | 0.136072 | 0.122086  | 0.140152  | 0.124709  | 0.128351  |
| 0.124417 | 0.11859   | 0.135052 | 0.11757   | 0.13447   | 0.122815  | 0.118881  |
| 0.132139 | 0.124272  | 0.133741 | 0.130245  | 0.13345   | 0.126748  | 0.121649  |
| 0.113199 | 0.109703  | 0.125874 | 0.111888  | 0.117716  | 0.111597  | 0.111451  |
| 0.122378 | 0.113345  | 0.131556 | 0.116113  | 0.129225  | 0.119027  | 0.115676  |
| 0.092803 | 0.0849359 | 0.097028 | 0.0871212 | 0.0839161 | 0.0949883 | 0.0878497 |
| 0.13986  | 0.141026  | 0.137675 | 0.142045  | 0.14729   | 0.136218  | 0.136364  |
| 0.132867 | 0.126457  | 0.140006 | 0.126311  | 0.13447   | 0.137966  | 0.130828  |
| 0.129662 | 0.125874  | 0.140006 | 0.129516  | 0.138258  | 0.130099  | 0.124417  |
| 0.194639 | 0.187646  | 0.204691 | 0.190414  | 0.2044    | 0.191579  | 0.19289   |
| 0.209207 | 0.204837  | 0.217803 | 0.204108  | 0.215763  | 0.2044    | 0.20338   |
| 0.119172 | 0.115385  | 0.127185 | 0.116404  | 0.121066  | 0.119318  | 0.111305  |
| 0.112471 | 0.109848  | 0.119318 | 0.11116   | 0.115822  | 0.112908  | 0.105769  |
| 0.131702 | 0.129662  | 0.135635 | 0.134178  | 0.13884   | 0.135344  | 0.127914  |
| 0.126748 | 0.116259  | 0.135927 | 0.120192  | 0.137092  | 0.125437  | 0.125     |
| 0.130973 | 0.125437  | 0.141026 | 0.126748  | 0.13549   | 0.137821  | 0.130682  |
| 0.126166 | 0.127331  | 0.128059 | 0.131556  | 0.140297  | 0.117861  | 0.126457  |
| 0.229021 | 0.225233  | 0.234994 | 0.225962  | 0.235868  | 0.225962  | 0.225816  |
| 0.121503 | 0.119172  | 0.124854 | 0.114365  | 0.132139  | 0.116987  | 0.118881  |
| 0.211684 | 0.215763  | 0.215909 | 0.210664  | 0.225816  | 0.214452  | 0.211101  |
| 0.122669 | 0.113054  | 0.132721 | 0.113491  | 0.130973  | 0.121649  | 0.117133  |
| 0.123106 | 0.116404  | 0.131119 | 0.113054  | 0.130245  | 0.119464  | 0.120192  |
| 0.119464 | 0.120629  | 0.128934 | 0.116113  | 0.13243   | 0.120192  | 0.112471  |

|          |          |          |          |          |          |          |
|----------|----------|----------|----------|----------|----------|----------|
| 0.111597 | 0.110431 | 0.125728 | 0.110286 | 0.11757  | 0.112034 | 0.104895 |
| 0.210227 | 0.206148 | 0.219697 | 0.206585 | 0.217949 | 0.208042 | 0.206439 |
| 0.137383 | 0.130973 | 0.1419   | 0.127622 | 0.143065 | 0.132576 | 0.131265 |
| 0.125146 | 0.115239 | 0.13549  | 0.11859  | 0.133741 | 0.118881 | 0.119901 |
| 0.13039  | 0.126894 | 0.138403 | 0.124709 | 0.13549  | 0.125    | 0.128351 |
| 0.126311 | 0.125728 | 0.134033 | 0.120047 | 0.136946 | 0.121795 | 0.120484 |
| 0.11553  | 0.107955 | 0.130245 | 0.111597 | 0.120338 | 0.113928 | 0.108537 |
| 0.125291 | 0.117424 | 0.131847 | 0.114656 | 0.135052 | 0.123397 | 0.120921 |
| 0.129953 | 0.121212 | 0.138258 | 0.123106 | 0.140589 | 0.125146 | 0.126166 |
| 0.123834 | 0.125291 | 0.139714 | 0.127768 | 0.139423 | 0.126603 | 0.123834 |
| 0.120629 | 0.112179 | 0.130682 | 0.110868 | 0.130099 | 0.116987 | 0.11655  |
| 0.124272 | 0.119901 | 0.138986 | 0.11859  | 0.141026 | 0.120047 | 0.122523 |
| 0.192308 | 0.18852  | 0.20236  | 0.194493 | 0.204691 | 0.188666 | 0.189394 |
| 0.12602  | 0.128642 | 0.134615 | 0.132284 | 0.143065 | 0.127331 | 0.127185 |
| 0.123834 | 0.128205 | 0.129516 | 0.126603 | 0.137675 | 0.121358 | 0.125    |
| 0.120192 | 0.11757  | 0.127914 | 0.121795 | 0.135198 | 0.114219 | 0.115239 |
| 0.131993 | 0.122378 | 0.14088  | 0.12398  | 0.139714 | 0.135052 | 0.129079 |
| 0.12704  | 0.125874 | 0.134761 | 0.124854 | 0.13447  | 0.122523 | 0.122669 |
| 0.126457 | 0.12296  | 0.136801 | 0.117279 | 0.134178 | 0.125437 | 0.125583 |
| 0.118735 | 0.116404 | 0.127622 | 0.109848 | 0.131119 | 0.115676 | 0.114656 |
| 0.128934 | 0.122815 | 0.137821 | 0.127622 | 0.139569 | 0.125874 | 0.128642 |
| 0.122378 | 0.121212 | 0.127185 | 0.123397 | 0.134761 | 0.11757  | 0.116259 |
| 0.119755 | 0.116841 | 0.132721 | 0.12398  | 0.14088  | 0.121358 | 0.124126 |
| 0.117279 | 0.112325 | 0.128205 | 0.116259 | 0.126166 | 0.117133 | 0.112325 |
| 0.129953 | 0.120047 | 0.138258 | 0.122815 | 0.134761 | 0.125146 | 0.126457 |
| 0.142628 | 0.131847 | 0.147436 | 0.131119 | 0.140152 | 0.133159 | 0.135927 |
| 0.123689 | 0.114656 | 0.135198 | 0.115676 | 0.129079 | 0.126457 | 0.120775 |
| 0.138986 | 0.136655 | 0.144668 | 0.139714 | 0.147582 | 0.131847 | 0.134033 |
| 0.113345 | 0.109266 | 0.13039  | 0.113199 | 0.121649 | 0.113782 | 0.109557 |
| 0.115385 | 0.115676 | 0.123689 | 0.118444 | 0.133013 | 0.102418 | 0.113636 |
| 0.123397 | 0.120192 | 0.138112 | 0.121795 | 0.134615 | 0.123834 | 0.116404 |
| 0.133304 | 0.121649 | 0.140734 | 0.130828 | 0.147436 | 0.128788 | 0.131556 |
| 0.191871 | 0.19595  | 0.204254 | 0.195513 | 0.207168 | 0.19289  | 0.190705 |
| 0.122669 | 0.110723 | 0.133596 | 0.112034 | 0.133596 | 0.118153 | 0.118298 |
| 0.117424 | 0.100233 | 0.12398  | 0.106498 | 0.122232 | 0.10912  | 0.110723 |
| 0.127622 | 0.123543 | 0.137675 | 0.124854 | 0.136509 | 0.123106 | 0.120629 |
| 0.179487 | 0.175991 | 0.194493 | 0.175845 | 0.192162 | 0.183129 | 0.178322 |
| 0.140589 | 0.132721 | 0.150058 | 0.133159 | 0.144522 | 0.145396 | 0.137966 |
| 0.147582 | 0.137966 | 0.14831  | 0.140443 | 0.143939 | 0.153263 | 0.145251 |
| 0.141317 | 0.147145 | 0.138258 | 0.144376 | 0.14933  | 0.134178 | 0.13986  |
| 0.120047 | 0.114219 | 0.132139 | 0.114656 | 0.130099 | 0.126311 | 0.118298 |
| 0.127185 | 0.121941 | 0.137529 | 0.123252 | 0.136364 | 0.123834 | 0.12398  |
| 0.215909 | 0.213287 | 0.226253 | 0.211976 | 0.227418 | 0.213141 | 0.21183  |
| 0.128205 | 0.124417 | 0.139714 | 0.126603 | 0.13447  | 0.123689 | 0.12704  |

|          |           |          |           |          |          |          |
|----------|-----------|----------|-----------|----------|----------|----------|
| 0.132139 | 0.129516  | 0.139569 | 0.128205  | 0.140443 | 0.126748 | 0.125728 |
| 0.123106 | 0.113199  | 0.136946 | 0.116841  | 0.138112 | 0.121212 | 0.121941 |
| 0.171183 | 0.170892  | 0.184149 | 0.171329  | 0.181527 | 0.174825 | 0.167978 |
| 0.117279 | 0.112325  | 0.126748 | 0.115676  | 0.127914 | 0.111305 | 0.11553  |
| 0.148019 | 0.145688  | 0.143794 | 0.148164  | 0.147582 | 0.14933  | 0.137238 |
| 0.113054 | 0.101981  | 0.123106 | 0.112325  | 0.112325 | 0.112034 | 0.111305 |
| 0.192308 | 0.187063  | 0.203526 | 0.193619  | 0.20236  | 0.190414 | 0.192016 |
| 0.122669 | 0.117424  | 0.138549 | 0.121941  | 0.131556 | 0.13243  | 0.12296  |
| 0.108392 | 0.0859557 | 0.117279 | 0.0893065 | 0.105332 | 0.108829 | 0.100816 |
| 0.118735 | 0.109703  | 0.130536 | 0.117424  | 0.131702 | 0.109266 | 0.120775 |
| 0.128497 | 0.122669  | 0.139423 | 0.122815  | 0.131556 | 0.124563 | 0.125583 |
| 0.126748 | 0.125291  | 0.13447  | 0.123397  | 0.136218 | 0.125437 | 0.122086 |
| 0.123543 | 0.124417  | 0.13039  | 0.120192  | 0.131847 | 0.122815 | 0.118298 |
| 0.112617 | 0.107372  | 0.125    | 0.106643  | 0.117716 | 0.111597 | 0.108246 |
| 0.195221 | 0.187354  | 0.202069 | 0.190414  | 0.206148 | 0.190997 | 0.191142 |
| 0.128351 | 0.120775  | 0.13345  | 0.125     | 0.134615 | 0.125291 | 0.122815 |
| 0.123834 | 0.105186  | 0.125437 | 0.106789  | 0.122232 | 0.119318 | 0.116259 |
| 0.213141 | 0.209353  | 0.221154 | 0.210373  | 0.220862 | 0.212995 | 0.21081  |
| 0.125437 | 0.126311  | 0.132867 | 0.128788  | 0.144231 | 0.127331 | 0.123397 |
| 0.115093 | 0.110723  | 0.124563 | 0.107372  | 0.115822 | 0.114365 | 0.107226 |
| 0.1081   | 0.102855  | 0.120775 | 0.105915  | 0.117279 | 0.10912  | 0.104021 |
| 0.137675 | 0.138258  | 0.141026 | 0.135781  | 0.142774 | 0.13549  | 0.134761 |
| 0.194202 | 0.185752  | 0.203963 | 0.189394  | 0.201923 | 0.191142 | 0.192162 |
| 0.132284 | 0.118007  | 0.137383 | 0.122232  | 0.138549 | 0.123689 | 0.128205 |
| 0.134033 | 0.127331  | 0.142045 | 0.127477  | 0.138549 | 0.127768 | 0.132867 |
| 0.112762 | 0.106643  | 0.123397 | 0.109994  | 0.113199 | 0.110286 | 0.106061 |
| 0.111014 | 0.104604  | 0.122232 | 0.104458  | 0.116404 | 0.110868 | 0.104312 |
| 0.112325 | 0.104167  | 0.123543 | 0.107809  | 0.11655  | 0.109848 | 0.105624 |
| 0.121212 | 0.114802  | 0.13447  | 0.116696  | 0.128642 | 0.116696 | 0.11859  |
| 0.106206 | 0.0884324 | 0.11859  | 0.102564  | 0.106935 | 0.100816 | 0.100379 |
| 0.128934 | 0.119901  | 0.138695 | 0.122378  | 0.134907 | 0.13549  | 0.127768 |
| 0.125437 | 0.130099  | 0.13345  | 0.129662  | 0.1419   | 0.121212 | 0.126894 |
| 0.13039  | 0.116987  | 0.137529 | 0.119172  | 0.129662 | 0.13141  | 0.124563 |
| 0.130828 | 0.125874  | 0.133596 | 0.125146  | 0.138549 | 0.126894 | 0.125583 |
| 0.200029 | 0.193619  | 0.20979  | 0.196387  | 0.208333 | 0.195513 | 0.198281 |
| 0.125583 | 0.11655   | 0.135344 | 0.120484  | 0.133013 | 0.122232 | 0.123834 |
| 0.131556 | 0.129808  | 0.141608 | 0.129953  | 0.139277 | 0.130245 | 0.128934 |
| 0.1081   | 0.100524  | 0.121358 | 0.108537  | 0.112908 | 0.10912  | 0.102273 |
| 0.103001 | 0.0875583 | 0.111305 | 0.0976107 | 0.10169  | 0.100816 | 0.10067  |
| 0.119318 | 0.117279  | 0.127622 | 0.119172  | 0.130245 | 0.119172 | 0.116696 |
| 0.130245 | 0.121212  | 0.140297 | 0.124854  | 0.142045 | 0.123397 | 0.12704  |
| 0.133741 | 0.125874  | 0.136801 | 0.131265  | 0.143211 | 0.126311 | 0.127622 |
| 0.119901 | 0.118153  | 0.130536 | 0.117716  | 0.13345  | 0.114219 | 0.113782 |
| 0.115822 | 0.110577  | 0.130828 | 0.111888  | 0.127622 | 0.115093 | 0.11553  |

|           |           |          |           |           |           |           |
|-----------|-----------|----------|-----------|-----------|-----------|-----------|
| 0.112471  | 0.10373   | 0.127768 | 0.108829  | 0.121066  | 0.104458  | 0.1081    |
| 0.107663  | 0.0916375 | 0.119172 | 0.0987762 | 0.104895  | 0.102564  | 0.102418  |
| 0.124126  | 0.11655   | 0.132721 | 0.113782  | 0.132139  | 0.122232  | 0.12296   |
| 0.131265  | 0.127768  | 0.140443 | 0.128205  | 0.134907  | 0.13986   | 0.131556  |
| 0.128788  | 0.117133  | 0.13884  | 0.120484  | 0.139132  | 0.121649  | 0.126166  |
| 0.121066  | 0.11116   | 0.130245 | 0.112471  | 0.129953  | 0.115967  | 0.11553   |
| 0.123689  | 0.112617  | 0.13549  | 0.116841  | 0.134324  | 0.11655   | 0.119901  |
| 0.111305  | 0.106061  | 0.124563 | 0.109411  | 0.121066  | 0.108246  | 0.107809  |
| 0.118735  | 0.109703  | 0.129662 | 0.111305  | 0.130828  | 0.115676  | 0.11553   |
| 0.110868  | 0.109411  | 0.124417 | 0.110723  | 0.118298  | 0.113345  | 0.108537  |
| 0.122232  | 0.112325  | 0.134615 | 0.114219  | 0.127622  | 0.11655   | 0.119318  |
| 0.121649  | 0.117861  | 0.126748 | 0.117716  | 0.131119  | 0.113345  | 0.116113  |
| 0.124854  | 0.119318  | 0.133159 | 0.120921  | 0.133159  | 0.121503  | 0.116696  |
| 0.109848  | 0.0917832 | 0.120484 | 0.105041  | 0.10912   | 0.101544  | 0.105186  |
| 0.114656  | 0.108829  | 0.129953 | 0.112179  | 0.12296   | 0.109557  | 0.109411  |
| 0.12398   | 0.116987  | 0.133159 | 0.120921  | 0.138112  | 0.114219  | 0.11757   |
| 0.126166  | 0.107226  | 0.134761 | 0.109703  | 0.123106  | 0.12398   | 0.126748  |
| 0.106206  | 0.0793998 | 0.113928 | 0.0728438 | 0.0882867 | 0.106061  | 0.0986305 |
| 0.114365  | 0.107372  | 0.126457 | 0.110723  | 0.11859   | 0.106935  | 0.106498  |
| 0.125583  | 0.119755  | 0.13447  | 0.121066  | 0.134761  | 0.121649  | 0.117424  |
| 0.125     | 0.117424  | 0.133887 | 0.114073  | 0.133596  | 0.122232  | 0.124709  |
| 0.125     | 0.121212  | 0.135344 | 0.119027  | 0.135635  | 0.121358  | 0.120629  |
| 0.12296   | 0.121503  | 0.133596 | 0.118153  | 0.132139  | 0.121649  | 0.120047  |
| 0.104895  | 0.094697  | 0.119318 | 0.101253  | 0.107372  | 0.101253  | 0.109266  |
| 0.120629  | 0.111597  | 0.131847 | 0.111451  | 0.126311  | 0.116404  | 0.11451   |
| 0.119318  | 0.106498  | 0.133159 | 0.11014   | 0.132284  | 0.11451   | 0.112908  |
| 0.126748  | 0.12296   | 0.139132 | 0.123397  | 0.135052  | 0.127768  | 0.124126  |
| 0.131119  | 0.120338  | 0.136509 | 0.116404  | 0.13243   | 0.122232  | 0.124709  |
| 0.123397  | 0.106789  | 0.134615 | 0.111597  | 0.121212  | 0.120921  | 0.120775  |
| 0.198864  | 0.192745  | 0.206294 | 0.194639  | 0.204254  | 0.194056  | 0.196241  |
| 0.167686  | 0.169143  | 0.181818 | 0.163753  | 0.173368  | 0.166958  | 0.167395  |
| 0.128642  | 0.122232  | 0.137238 | 0.121795  | 0.133159  | 0.135781  | 0.126603  |
| 0.122669  | 0.122086  | 0.135052 | 0.122523  | 0.136218  | 0.124272  | 0.12704   |
| 0.149767  | 0.140443  | 0.150495 | 0.146999  | 0.148456  | 0.156323  | 0.149767  |
| 0.129225  | 0.122815  | 0.137238 | 0.128497  | 0.13549   | 0.128205  | 0.122815  |
| 0.11859   | 0.124126  | 0.125146 | 0.125728  | 0.131265  | 0.11961   | 0.116259  |
| 0.117279  | 0.113491  | 0.128205 | 0.113345  | 0.125291  | 0.120921  | 0.112034  |
| 0.0869755 | 0.0791084 | 0.102855 | 0.0842075 | 0.0888695 | 0.0912005 | 0.08581   |
| 0.127768  | 0.112034  | 0.13141  | 0.111305  | 0.124417  | 0.119755  | 0.12602   |
| 0.204837  | 0.199883  | 0.214889 | 0.201486  | 0.214307  | 0.203526  | 0.201632  |
| 0.131265  | 0.122523  | 0.143357 | 0.124126  | 0.140152  | 0.12704   | 0.130099  |
| 0.119755  | 0.120047  | 0.13447  | 0.123689  | 0.139423  | 0.124272  | 0.11859   |
| 0.108974  | 0.100816  | 0.121066 | 0.0995047 | 0.110286  | 0.111742  | 0.104895  |
| 0.122815  | 0.116404  | 0.135198 | 0.114802  | 0.136364  | 0.118007  | 0.118444  |

|           |           |          |           |           |           |           |
|-----------|-----------|----------|-----------|-----------|-----------|-----------|
| 0.188811  | 0.18007   | 0.197698 | 0.17905   | 0.193328  | 0.184878  | 0.185897  |
| 0.249126  | 0.245921  | 0.25539  | 0.246066  | 0.256556  | 0.246941  | 0.246503  |
| 0.123252  | 0.122378  | 0.128934 | 0.121358  | 0.135344  | 0.116987  | 0.119755  |
| 0.126166  | 0.109557  | 0.130099 | 0.109703  | 0.123689  | 0.11961   | 0.120921  |
| 0.125874  | 0.120338  | 0.137383 | 0.120775  | 0.131265  | 0.133887  | 0.126457  |
| 0.121941  | 0.118153  | 0.134033 | 0.119755  | 0.135198  | 0.119755  | 0.11757   |
| 0.123834  | 0.113054  | 0.132139 | 0.11553   | 0.133596  | 0.119027  | 0.120921  |
| 0.121649  | 0.11116   | 0.129662 | 0.116259  | 0.130245  | 0.119172  | 0.116987  |
| 0.111305  | 0.11451   | 0.125146 | 0.113782  | 0.124854  | 0.114656  | 0.107517  |
| 0.128497  | 0.117133  | 0.133887 | 0.119027  | 0.136509  | 0.121649  | 0.12296   |
| 0.113491  | 0.111742  | 0.123252 | 0.113636  | 0.124417  | 0.117133  | 0.109411  |
| 0.1081    | 0.07838   | 0.116404 | 0.0735723 | 0.0878497 | 0.107663  | 0.0999417 |
| 0.106206  | 0.0962995 | 0.120047 | 0.105769  | 0.112762  | 0.103147  | 0.105041  |
| 0.121795  | 0.123543  | 0.127477 | 0.119901  | 0.135344  | 0.117279  | 0.118007  |
| 0.124563  | 0.121358  | 0.136655 | 0.119755  | 0.134033  | 0.125     | 0.124272  |
| 0.105041  | 0.097465  | 0.116841 | 0.104312  | 0.120921  | 0.0999417 | 0.107372  |
| 0.0986305 | 0.112617  | 0.100233 | 0.118298  | 0.124126  | 0.0999417 | 0.0992133 |
| 0.133304  | 0.134178  | 0.139569 | 0.133159  | 0.144814  | 0.134907  | 0.130973  |
| 0.111888  | 0.104604  | 0.124854 | 0.107372  | 0.117861  | 0.107663  | 0.107226  |
| 0.109703  | 0.11961   | 0.122086 | 0.118298  | 0.125291  | 0.113928  | 0.109994  |
| 0.121941  | 0.122232  | 0.124417 | 0.120338  | 0.12296   | 0.121503  | 0.119318  |
| 0.211247  | 0.20542   | 0.220425 | 0.209645  | 0.21722   | 0.207314  | 0.208042  |
| 0.114073  | 0.10912   | 0.122669 | 0.111888  | 0.125583  | 0.108974  | 0.108829  |
| 0.104604  | 0.0929487 | 0.118735 | 0.101836  | 0.107955  | 0.100379  | 0.103438  |
| 0.129371  | 0.117424  | 0.140006 | 0.121066  | 0.134761  | 0.121066  | 0.122669  |
| 0.125146  | 0.127185  | 0.13345  | 0.129662  | 0.145396  | 0.125583  | 0.124272  |
| 0.120192  | 0.114073  | 0.132284 | 0.115093  | 0.13549   | 0.115676  | 0.116696  |
| 0.203817  | 0.198281  | 0.216492 | 0.199883  | 0.210373  | 0.201049  | 0.201195  |
| 0.129371  | 0.125291  | 0.136801 | 0.124854  | 0.138549  | 0.128642  | 0.125291  |
| 0.11116   | 0.104458  | 0.124709 | 0.104895  | 0.114802  | 0.108974  | 0.104167  |
| 0.124417  | 0.114802  | 0.132721 | 0.117861  | 0.127185  | 0.123106  | 0.122086  |
| 0.123252  | 0.115093  | 0.131556 | 0.119318  | 0.131847  | 0.118153  | 0.115967  |
| 0.126457  | 0.118881  | 0.135927 | 0.122232  | 0.137383  | 0.123397  | 0.120629  |
| 0.118298  | 0.103147  | 0.121649 | 0.105624  | 0.125146  | 0.108829  | 0.118298  |
| 0.107809  | 0.0815851 | 0.116987 | 0.0724068 | 0.0895979 | 0.109703  | 0.104604  |
| 0.122378  | 0.122086  | 0.133304 | 0.123397  | 0.140297  | 0.119318  | 0.12296   |
| 0.2044    | 0.199155  | 0.214744 | 0.20134   | 0.213578  | 0.201632  | 0.199738  |
| 0.119755  | 0.107809  | 0.126311 | 0.110868  | 0.12602   | 0.114365  | 0.11655   |
| 0.201195  | 0.191871  | 0.210956 | 0.195804  | 0.206002  | 0.196096  | 0.198572  |
| 0.19697   | 0.193182  | 0.207605 | 0.194493  | 0.208188  | 0.19391   | 0.19697   |
| 0.131702  | 0.129371  | 0.13884  | 0.131847  | 0.140589  | 0.129516  | 0.127622  |
| 0.130828  | 0.131702  | 0.136801 | 0.136218  | 0.147582  | 0.131556  | 0.131993  |
| 0.104895  | 0.0748834 | 0.109994 | 0.0724068 | 0.0893065 | 0.10271   | 0.0973193 |
| 0.117279  | 0.105624  | 0.128788 | 0.106352  | 0.127914  | 0.111888  | 0.115239  |

|          |           |          |           |           |          |           |
|----------|-----------|----------|-----------|-----------|----------|-----------|
| 0.124126 | 0.115093  | 0.134178 | 0.115239  | 0.13039   | 0.118444 | 0.122086  |
| 0.113928 | 0.108683  | 0.128351 | 0.112034  | 0.122232  | 0.111451 | 0.108683  |
| 0.12296  | 0.109557  | 0.133304 | 0.114656  | 0.130099  | 0.116696 | 0.119755  |
| 0.125583 | 0.114802  | 0.137383 | 0.118444  | 0.133013  | 0.122815 | 0.121795  |
| 0.124854 | 0.122232  | 0.132867 | 0.126457  | 0.136946  | 0.11859  | 0.121941  |
| 0.125583 | 0.120921  | 0.139132 | 0.122523  | 0.133887  | 0.124272 | 0.121212  |
| 0.109411 | 0.101544  | 0.122669 | 0.1081    | 0.11451   | 0.107809 | 0.100962  |
| 0.128788 | 0.120629  | 0.137383 | 0.120775  | 0.135635  | 0.121941 | 0.121212  |
| 0.103875 | 0.0820221 | 0.112471 | 0.0865385 | 0.0996503 | 0.102855 | 0.0965909 |
| 0.128497 | 0.128205  | 0.136218 | 0.12602   | 0.139423  | 0.124854 | 0.12704   |
| 0.126748 | 0.119755  | 0.137383 | 0.121066  | 0.131265  | 0.130099 | 0.125     |
| 0.137383 | 0.134178  | 0.142191 | 0.132284  | 0.145979  | 0.132284 | 0.132139  |
| 0.260635 | 0.260052  | 0.265152 | 0.259615  | 0.268648  | 0.257576 | 0.259178  |
| 0.131265 | 0.126603  | 0.141608 | 0.129371  | 0.142774  | 0.128497 | 0.128059  |
| 0.130245 | 0.12704   | 0.137092 | 0.127185  | 0.137383  | 0.13039  | 0.125583  |
| 0.219551 | 0.215763  | 0.230478 | 0.220571  | 0.227855  | 0.217657 | 0.217803  |
| 0.121503 | 0.12704   | 0.131847 | 0.127768  | 0.133304  | 0.123689 | 0.120338  |
| 0.232517 | 0.230478  | 0.240239 | 0.230332  | 0.242279  | 0.230041 | 0.228438  |
| 0.123106 | 0.119318  | 0.137529 | 0.120047  | 0.138112  | 0.121212 | 0.122523  |
| 0.121795 | 0.120047  | 0.127185 | 0.119901  | 0.123689  | 0.118735 | 0.118007  |
| 0.121212 | 0.115093  | 0.130099 | 0.119318  | 0.137383  | 0.118153 | 0.119755  |
| 0.128205 | 0.124126  | 0.139714 | 0.127185  | 0.133887  | 0.128642 | 0.124417  |
| 0.206294 | 0.198718  | 0.218677 | 0.205274  | 0.216055  | 0.204983 | 0.204254  |
| 0.134033 | 0.131119  | 0.141171 | 0.128059  | 0.137675  | 0.13039  | 0.127331  |
| 0.126457 | 0.119755  | 0.136218 | 0.119901  | 0.133887  | 0.123106 | 0.12296   |
| 0.229458 | 0.22567   | 0.238054 | 0.226981  | 0.238636  | 0.226107 | 0.225087  |
| 0.130245 | 0.119172  | 0.140589 | 0.119318  | 0.140589  | 0.125437 | 0.127914  |
| 0.203526 | 0.196824  | 0.212413 | 0.20134   | 0.21183   | 0.199883 | 0.20236   |
| 0.131265 | 0.117279  | 0.137529 | 0.120629  | 0.138695  | 0.123252 | 0.124854  |
| 0.114073 | 0.106206  | 0.12704  | 0.108683  | 0.118881  | 0.113928 | 0.108829  |
| 0.11014  | 0.100233  | 0.122232 | 0.111451  | 0.104749  | 0.108537 | 0.109266  |
| 0.129953 | 0.131993  | 0.13884  | 0.130099  | 0.142045  | 0.130682 | 0.124709  |
| 0.119318 | 0.114948  | 0.126457 | 0.111888  | 0.126748  | 0.118881 | 0.118735  |
| 0.165064 | 0.153118  | 0.173368 | 0.159091  | 0.168415  | 0.157343 | 0.158654  |
| 0.119901 | 0.114656  | 0.129371 | 0.116259  | 0.129371  | 0.118007 | 0.115239  |
| 0.124854 | 0.12398   | 0.138112 | 0.130536  | 0.142483  | 0.125    | 0.124272  |
| 0.124272 | 0.113491  | 0.133159 | 0.118881  | 0.139277  | 0.120047 | 0.121649  |
| 0.125146 | 0.126603  | 0.131993 | 0.131119  | 0.140734  | 0.11451  | 0.124854  |
| 0.200175 | 0.193473  | 0.212558 | 0.196241  | 0.210519  | 0.199446 | 0.200466  |
| 0.110868 | 0.108246  | 0.124709 | 0.11014   | 0.120921  | 0.113054 | 0.106498  |
| 0.127622 | 0.123252  | 0.139714 | 0.122815  | 0.140006  | 0.127185 | 0.124126  |
| 0.124563 | 0.11757   | 0.13141  | 0.113345  | 0.134033  | 0.121503 | 0.121649  |
| 0.128497 | 0.119755  | 0.135344 | 0.122815  | 0.139714  | 0.122523 | 0.125874  |
| 0.11757  | 0.114073  | 0.122669 | 0.115093  | 0.118298  | 0.113928 | 0.111451  |

|           |           |          |           |           |          |           |
|-----------|-----------|----------|-----------|-----------|----------|-----------|
| 0.258741  | 0.259033  | 0.262966 | 0.25743   | 0.267045  | 0.253934 | 0.256702  |
| 0.108246  | 0.0968823 | 0.119464 | 0.104604  | 0.106643  | 0.103438 | 0.104458  |
| 0.123397  | 0.119027  | 0.137529 | 0.119464  | 0.130828  | 0.117716 | 0.121066  |
| 0.181381  | 0.186043  | 0.18852  | 0.181235  | 0.194639  | 0.185315 | 0.179633  |
| 0.189248  | 0.184878  | 0.201923 | 0.187354  | 0.198718  | 0.186772 | 0.1875    |
| 0.119901  | 0.121358  | 0.130828 | 0.121212  | 0.134615  | 0.119172 | 0.119027  |
| 0.126748  | 0.122086  | 0.135344 | 0.121649  | 0.13243   | 0.119027 | 0.121503  |
| 0.121503  | 0.120921  | 0.137383 | 0.12398   | 0.137675  | 0.120775 | 0.117133  |
| 0.146125  | 0.143502  | 0.149476 | 0.144231  | 0.152389  | 0.143065 | 0.141754  |
| 0.116987  | 0.11757   | 0.12704  | 0.115385  | 0.132284  | 0.113636 | 0.11553   |
| 0.121503  | 0.122378  | 0.13243  | 0.120775  | 0.133887  | 0.120484 | 0.119464  |
| 0.135052  | 0.125146  | 0.143648 | 0.130245  | 0.14627   | 0.126748 | 0.130682  |
| 0.122523  | 0.119318  | 0.130245 | 0.118007  | 0.131702  | 0.120629 | 0.119901  |
| 0.132284  | 0.127914  | 0.140006 | 0.131265  | 0.139132  | 0.128059 | 0.127331  |
| 0.126311  | 0.11961   | 0.139277 | 0.124417  | 0.140734  | 0.126166 | 0.124563  |
| 0.123543  | 0.126748  | 0.135052 | 0.128059  | 0.137092  | 0.126603 | 0.120629  |
| 0.136801  | 0.141463  | 0.15035  | 0.142483  | 0.147436  | 0.139569 | 0.139423  |
| 0.11014   | 0.0990676 | 0.122815 | 0.109411  | 0.104458  | 0.106498 | 0.108392  |
| 0.133887  | 0.135927  | 0.140443 | 0.135198  | 0.142191  | 0.134033 | 0.129516  |
| 0.136801  | 0.126894  | 0.138695 | 0.130245  | 0.14627   | 0.129662 | 0.135927  |
| 0.212704  | 0.208625  | 0.220134 | 0.208479  | 0.220134  | 0.205274 | 0.21183   |
| 0.110868  | 0.097465  | 0.117133 | 0.107517  | 0.103438  | 0.115093 | 0.103001  |
| 0.198572  | 0.193036  | 0.208042 | 0.192599  | 0.205711  | 0.193473 | 0.197698  |
| 0.121066  | 0.111742  | 0.125583 | 0.11859   | 0.132867  | 0.111305 | 0.116696  |
| 0.116696  | 0.11757   | 0.126457 | 0.113345  | 0.12296   | 0.119172 | 0.11553   |
| 0.127768  | 0.117861  | 0.138403 | 0.121212  | 0.132576  | 0.131119 | 0.124563  |
| 0.124126  | 0.114802  | 0.129225 | 0.11553   | 0.128351  | 0.125728 | 0.118007  |
| 0.128642  | 0.123689  | 0.138986 | 0.12296   | 0.136364  | 0.123252 | 0.124854  |
| 0.128351  | 0.127768  | 0.137529 | 0.125     | 0.136946  | 0.12296  | 0.122523  |
| 0.113782  | 0.111742  | 0.128788 | 0.110723  | 0.125     | 0.11655  | 0.110868  |
| 0.122086  | 0.122378  | 0.133304 | 0.128059  | 0.143794  | 0.122232 | 0.120921  |
| 0.131119  | 0.124126  | 0.138549 | 0.121941  | 0.132139  | 0.135052 | 0.130245  |
| 0.138549  | 0.131265  | 0.142774 | 0.132867  | 0.150932  | 0.135781 | 0.139132  |
| 0.251894  | 0.250437  | 0.259615 | 0.252622  | 0.26049   | 0.250874 | 0.252768  |
| 0.113491  | 0.107955  | 0.129079 | 0.115093  | 0.123252  | 0.114802 | 0.10912   |
| 0.189685  | 0.183858  | 0.200321 | 0.186334  | 0.199446  | 0.184586 | 0.187354  |
| 0.192453  | 0.190122  | 0.204254 | 0.189103  | 0.206294  | 0.190559 | 0.192745  |
| 0.122086  | 0.112471  | 0.132139 | 0.110286  | 0.12602   | 0.11961  | 0.113636  |
| 0.105186  | 0.0912005 | 0.120192 | 0.105624  | 0.105041  | 0.100962 | 0.103147  |
| 0.117133  | 0.115967  | 0.126603 | 0.117861  | 0.120484  | 0.118153 | 0.113928  |
| 0.122086  | 0.112471  | 0.128642 | 0.116113  | 0.130682  | 0.11553  | 0.116841  |
| 0.0922203 | 0.0814394 | 0.106643 | 0.0856643 | 0.0929487 | 0.094697 | 0.0884324 |
| 0.12602   | 0.118153  | 0.137529 | 0.12296   | 0.138112  | 0.125    | 0.127477  |
| 0.119755  | 0.118298  | 0.131556 | 0.120484  | 0.131556  | 0.121358 | 0.115967  |

|          |           |          |           |           |          |          |
|----------|-----------|----------|-----------|-----------|----------|----------|
| 0.133741 | 0.13141   | 0.141463 | 0.130682  | 0.142337  | 0.131265 | 0.129079 |
| 0.113491 | 0.109703  | 0.126166 | 0.111014  | 0.119464  | 0.111305 | 0.10708  |
| 0.133304 | 0.128642  | 0.13986  | 0.127622  | 0.140734  | 0.130828 | 0.128934 |
| 0.123252 | 0.115967  | 0.135344 | 0.114365  | 0.13447   | 0.121649 | 0.120338 |
| 0.129079 | 0.126166  | 0.136509 | 0.123689  | 0.134178  | 0.13243  | 0.130828 |
| 0.127185 | 0.122232  | 0.137238 | 0.122669  | 0.136072  | 0.126457 | 0.121941 |
| 0.136946 | 0.128497  | 0.143794 | 0.131847  | 0.146125  | 0.13447  | 0.136364 |
| 0.11116  | 0.0826049 | 0.119464 | 0.0780886 | 0.0821678 | 0.111597 | 0.105624 |
| 0.112617 | 0.111451  | 0.120921 | 0.11014   | 0.115967  | 0.113928 | 0.106206 |
| 0.137966 | 0.131556  | 0.1419   | 0.133159  | 0.136364  | 0.130828 | 0.135635 |
| 0.190559 | 0.181818  | 0.201486 | 0.185752  | 0.197407  | 0.18954  | 0.190559 |
| 0.13884  | 0.133887  | 0.143648 | 0.134324  | 0.143648  | 0.134615 | 0.130973 |
| 0.127185 | 0.121358  | 0.136072 | 0.11859   | 0.136946  | 0.124709 | 0.119901 |
| 0.126166 | 0.116841  | 0.134178 | 0.121066  | 0.130099  | 0.131556 | 0.124126 |
| 0.115239 | 0.108537  | 0.125    | 0.113928  | 0.121503  | 0.119464 | 0.110868 |
| 0.122669 | 0.121503  | 0.135927 | 0.122232  | 0.137092  | 0.123397 | 0.119755 |
| 0.127768 | 0.12398   | 0.141026 | 0.127914  | 0.138986  | 0.12704  | 0.126603 |
| 0.196387 | 0.189103  | 0.209936 | 0.192745  | 0.207022  | 0.193036 | 0.195513 |
| 0.120338 | 0.11655   | 0.129808 | 0.11961   | 0.127768  | 0.119901 | 0.113054 |
| 0.111742 | 0.103584  | 0.121212 | 0.106352  | 0.122086  | 0.110431 | 0.10708  |
| 0.130973 | 0.127768  | 0.134907 | 0.124417  | 0.13986   | 0.126457 | 0.125146 |
| 0.199883 | 0.19289   | 0.207605 | 0.193619  | 0.206439  | 0.196533 | 0.19697  |
| 0.11116  | 0.0916375 | 0.122378 | 0.10373   | 0.109848  | 0.104604 | 0.104167 |
| 0.13345  | 0.126166  | 0.139714 | 0.128351  | 0.142628  | 0.127477 | 0.132576 |
| 0.129079 | 0.126457  | 0.137383 | 0.125437  | 0.137675  | 0.127477 | 0.126166 |
| 0.116404 | 0.11757   | 0.126748 | 0.117424  | 0.127622  | 0.113345 | 0.112908 |
| 0.192745 | 0.186626  | 0.20338  | 0.18852   | 0.202214  | 0.190559 | 0.190997 |
| 0.129808 | 0.121358  | 0.138112 | 0.123543  | 0.140152  | 0.125874 | 0.128642 |
| 0.121358 | 0.116696  | 0.13141  | 0.115093  | 0.126166  | 0.115093 | 0.120484 |
| 0.112325 | 0.095134  | 0.120338 | 0.1081    | 0.112762  | 0.105186 | 0.105624 |
| 0.127185 | 0.126311  | 0.13986  | 0.122669  | 0.136072  | 0.126748 | 0.124854 |
| 0.124417 | 0.121503  | 0.133013 | 0.125728  | 0.141171  | 0.124563 | 0.122669 |
| 0.134324 | 0.127622  | 0.142045 | 0.13039   | 0.146125  | 0.129516 | 0.132576 |
| 0.111597 | 0.107809  | 0.121941 | 0.109411  | 0.116696  | 0.112034 | 0.106643 |
| 0.127622 | 0.11451   | 0.133013 | 0.116987  | 0.127477  | 0.12602  | 0.120047 |
| 0.140006 | 0.14292   | 0.137529 | 0.143065  | 0.148601  | 0.135781 | 0.138258 |
| 0.239365 | 0.235577  | 0.248252 | 0.237471  | 0.247086  | 0.239802 | 0.239073 |
| 0.116113 | 0.0875583 | 0.118298 | 0.0824592 | 0.0856643 | 0.115676 | 0.108246 |
| 0.125728 | 0.121649  | 0.13345  | 0.129079  | 0.143648  | 0.122378 | 0.12398  |
| 0.122669 | 0.118881  | 0.131265 | 0.120775  | 0.132139  | 0.120775 | 0.117424 |
| 0.124563 | 0.121358  | 0.133741 | 0.122378  | 0.133159  | 0.128205 | 0.121358 |
| 0.117424 | 0.120338  | 0.125437 | 0.121941  | 0.137675  | 0.114073 | 0.11655  |
| 0.126748 | 0.119172  | 0.134761 | 0.116987  | 0.135344  | 0.118153 | 0.118298 |
| 0.126603 | 0.123689  | 0.136072 | 0.127622  | 0.134615  | 0.125    | 0.122523 |



|           |           |          |           |           |           |           |
|-----------|-----------|----------|-----------|-----------|-----------|-----------|
| 0.134033  | 0.126748  | 0.143794 | 0.129225  | 0.144668  | 0.13039   | 0.134615  |
| 0.123252  | 0.122086  | 0.132721 | 0.120192  | 0.139423  | 0.122523  | 0.118298  |
| 0.238491  | 0.236742  | 0.249126 | 0.238054  | 0.251457  | 0.236597  | 0.237034  |
| 0.10373   | 0.0932401 | 0.11961  | 0.105332  | 0.107372  | 0.099796  | 0.101981  |
| 0.115967  | 0.109557  | 0.128642 | 0.108829  | 0.125728  | 0.113199  | 0.11451   |
| 0.110577  | 0.110286  | 0.119464 | 0.108683  | 0.115676  | 0.113345  | 0.106789  |
| 0.131119  | 0.129662  | 0.134178 | 0.129225  | 0.139714  | 0.122232  | 0.126748  |
| 0.119464  | 0.0897436 | 0.120192 | 0.0869755 | 0.0861014 | 0.121941  | 0.11451   |
| 0.118881  | 0.112179  | 0.128351 | 0.118735  | 0.127185  | 0.119027  | 0.113054  |
| 0.127622  | 0.122669  | 0.13884  | 0.124272  | 0.137675  | 0.122815  | 0.122378  |
| 0.115822  | 0.110868  | 0.122378 | 0.109266  | 0.125874  | 0.113928  | 0.108829  |
| 0.235286  | 0.233246  | 0.245338 | 0.231935  | 0.245047  | 0.232226  | 0.233537  |
| 0.130682  | 0.12602   | 0.136946 | 0.125291  | 0.138695  | 0.125583  | 0.128059  |
| 0.133159  | 0.12296   | 0.14088  | 0.127477  | 0.141754  | 0.123397  | 0.131702  |
| 0.117716  | 0.115385  | 0.128059 | 0.112908  | 0.13243   | 0.116987  | 0.115093  |
| 0.114948  | 0.12398   | 0.124709 | 0.123543  | 0.137529  | 0.112762  | 0.116404  |
| 0.127768  | 0.123397  | 0.136655 | 0.124126  | 0.136946  | 0.125291  | 0.123689  |
| 0.11116   | 0.108246  | 0.12296  | 0.108974  | 0.11655   | 0.110723  | 0.107955  |
| 0.133304  | 0.122232  | 0.140443 | 0.125291  | 0.13986   | 0.126166  | 0.13039   |
| 0.135781  | 0.127622  | 0.142045 | 0.133887  | 0.145833  | 0.131847  | 0.134033  |
| 0.129662  | 0.119172  | 0.131556 | 0.122815  | 0.138549  | 0.121649  | 0.126457  |
| 0.110577  | 0.10708   | 0.124417 | 0.108974  | 0.118881  | 0.110431  | 0.105915  |
| 0.126603  | 0.128934  | 0.134615 | 0.130245  | 0.144522  | 0.126748  | 0.126894  |
| 0.131993  | 0.132284  | 0.135052 | 0.137092  | 0.147582  | 0.133013  | 0.13141   |
| 0.13141   | 0.126748  | 0.142337 | 0.125146  | 0.13447   | 0.141463  | 0.129079  |
| 0.131993  | 0.129371  | 0.143502 | 0.127768  | 0.138549  | 0.13884   | 0.133741  |
| 0.128934  | 0.132721  | 0.13549  | 0.137238  | 0.147145  | 0.129079  | 0.129516  |
| 0.0890152 | 0.0770688 | 0.100524 | 0.0812937 | 0.0894522 | 0.0914918 | 0.0878497 |
| 0.13986   | 0.134324  | 0.146125 | 0.130099  | 0.144085  | 0.136218  | 0.138695  |
| 0.135052  | 0.126311  | 0.139277 | 0.128788  | 0.142483  | 0.135198  | 0.135635  |
| 0.211101  | 0.206439  | 0.223193 | 0.209207  | 0.218531  | 0.208333  | 0.207605  |
| 0.133013  | 0.115239  | 0.13141  | 0.115093  | 0.121212  | 0.122378  | 0.123689  |
| 0.121358  | 0.116987  | 0.131993 | 0.11655   | 0.133159  | 0.117133  | 0.116987  |
| 0.113345  | 0.113054  | 0.126311 | 0.117861  | 0.122232  | 0.114365  | 0.109557  |
| 0.222756  | 0.222756  | 0.232226 | 0.225524  | 0.236014  | 0.223193  | 0.219551  |
| 0.215181  | 0.209936  | 0.226399 | 0.212413  | 0.222611  | 0.210373  | 0.212558  |
| 0.137238  | 0.127622  | 0.143502 | 0.129808  | 0.145542  | 0.131265  | 0.136364  |
| 0.253351  | 0.251311  | 0.259324 | 0.254079  | 0.261655  | 0.252331  | 0.254808  |
| 0.0895979 | 0.0773601 | 0.101981 | 0.0786713 | 0.0914918 | 0.0903263 | 0.0895979 |
| 0.125728  | 0.112325  | 0.127331 | 0.120338  | 0.126457  | 0.124709  | 0.116404  |
| 0.108246  | 0.0933858 | 0.119755 | 0.104895  | 0.105186  | 0.103438  | 0.105041  |
| 0.129079  | 0.129079  | 0.137092 | 0.133304  | 0.146416  | 0.126311  | 0.129371  |
| 0.195367  | 0.187791  | 0.204545 | 0.191434  | 0.204545  | 0.190851  | 0.192453  |
| 0.123834  | 0.120629  | 0.133596 | 0.119901  | 0.136218  | 0.122523  | 0.118881  |

|          |           |          |           |           |           |           |
|----------|-----------|----------|-----------|-----------|-----------|-----------|
| 0.200175 | 0.193765  | 0.21081  | 0.198864  | 0.207314  | 0.196533  | 0.194347  |
| 0.119464 | 0.112471  | 0.12398  | 0.104749  | 0.128642  | 0.114656  | 0.110723  |
| 0.122378 | 0.120047  | 0.132139 | 0.123689  | 0.139714  | 0.124272  | 0.118881  |
| 0.110431 | 0.106061  | 0.117861 | 0.107372  | 0.117279  | 0.112034  | 0.112179  |
| 0.117716 | 0.115967  | 0.124563 | 0.116987  | 0.126603  | 0.116696  | 0.115093  |
| 0.107955 | 0.101836  | 0.119464 | 0.102273  | 0.111888  | 0.109557  | 0.101253  |
| 0.12398  | 0.105624  | 0.127331 | 0.109848  | 0.119755  | 0.117133  | 0.118444  |
| 0.101544 | 0.0901807 | 0.11655  | 0.101981  | 0.104895  | 0.100816  | 0.0983392 |
| 0.122378 | 0.113636  | 0.132721 | 0.115822  | 0.130682  | 0.119318  | 0.118298  |
| 0.126894 | 0.11961   | 0.136072 | 0.117424  | 0.134033  | 0.124417  | 0.12398   |
| 0.103293 | 0.0767774 | 0.113345 | 0.0728438 | 0.0888695 | 0.107517  | 0.0995047 |
| 0.10373  | 0.0917832 | 0.118735 | 0.101544  | 0.104458  | 0.0995047 | 0.104021  |
| 0.121941 | 0.124563  | 0.13141  | 0.119464  | 0.130828  | 0.125583  | 0.121649  |
| 0.131556 | 0.12602   | 0.1419   | 0.128497  | 0.141608  | 0.12704   | 0.126894  |
| 0.120629 | 0.115676  | 0.130973 | 0.117861  | 0.127185  | 0.127768  | 0.120921  |
| 0.12398  | 0.113491  | 0.132576 | 0.115676  | 0.126166  | 0.113054  | 0.118735  |
| 0.107809 | 0.102855  | 0.118444 | 0.105915  | 0.11553   | 0.107955  | 0.104312  |
| 0.128205 | 0.119464  | 0.139714 | 0.122232  | 0.138258  | 0.124563  | 0.125583  |
| 0.123834 | 0.120629  | 0.131847 | 0.122523  | 0.138258  | 0.118444  | 0.119755  |
| 0.127768 | 0.124563  | 0.139277 | 0.127914  | 0.136946  | 0.12704   | 0.122232  |
| 0.121649 | 0.117279  | 0.136364 | 0.116259  | 0.129662  | 0.129953  | 0.119027  |
| 0.126457 | 0.117424  | 0.131556 | 0.121649  | 0.135052  | 0.121358  | 0.121795  |
| 0.13447  | 0.132139  | 0.140734 | 0.130245  | 0.141317  | 0.129662  | 0.127477  |
| 0.139132 | 0.136801  | 0.144522 | 0.136072  | 0.145396  | 0.137238  | 0.133596  |
| 0.121503 | 0.104021  | 0.126603 | 0.106498  | 0.122815  | 0.112617  | 0.116841  |
| 0.113928 | 0.109848  | 0.126603 | 0.112325  | 0.121358  | 0.112908  | 0.1081    |
| 0.118444 | 0.108829  | 0.127331 | 0.110723  | 0.129079  | 0.111597  | 0.112908  |
| 0.131556 | 0.133304  | 0.141317 | 0.140152  | 0.144814  | 0.13345   | 0.13243   |
| 0.109557 | 0.0958625 | 0.118735 | 0.103293  | 0.106789  | 0.106498  | 0.105186  |
| 0.139569 | 0.142483  | 0.145542 | 0.143211  | 0.150204  | 0.141754  | 0.136364  |
| 0.125    | 0.125     | 0.13039  | 0.129225  | 0.126603  | 0.126603  | 0.122669  |
| 0.126311 | 0.123106  | 0.131702 | 0.125874  | 0.137529  | 0.116259  | 0.121941  |
| 0.11451  | 0.092366  | 0.128642 | 0.0942599 | 0.110577  | 0.112617  | 0.11014   |
| 0.116113 | 0.110577  | 0.125874 | 0.113928  | 0.127914  | 0.105478  | 0.115239  |
| 0.130099 | 0.122523  | 0.136072 | 0.123543  | 0.130828  | 0.137238  | 0.128642  |
| 0.212704 | 0.206294  | 0.221882 | 0.206731  | 0.223048  | 0.210227  | 0.211247  |
| 0.125    | 0.113928  | 0.134178 | 0.11553   | 0.126311  | 0.11757   | 0.121212  |
| 0.108246 | 0.0986305 | 0.119464 | 0.104312  | 0.11859   | 0.109848  | 0.110868  |
| 0.121212 | 0.120338  | 0.13039  | 0.125437  | 0.140589  | 0.121649  | 0.121795  |
| 0.121941 | 0.114948  | 0.129662 | 0.120629  | 0.127914  | 0.126166  | 0.121649  |
| 0.124709 | 0.11451   | 0.13039  | 0.110868  | 0.131847  | 0.120192  | 0.118881  |
| 0.132284 | 0.117716  | 0.135927 | 0.114365  | 0.131556  | 0.123106  | 0.125291  |
| 0.135635 | 0.123397  | 0.13986  | 0.118007  | 0.133741  | 0.123252  | 0.124272  |
| 0.118881 | 0.120047  | 0.12602  | 0.121066  | 0.128642  | 0.115239  | 0.11859   |

|          |           |          |           |           |           |           |
|----------|-----------|----------|-----------|-----------|-----------|-----------|
| 0.124417 | 0.114802  | 0.135927 | 0.111742  | 0.128351  | 0.120192  | 0.121503  |
| 0.126748 | 0.128788  | 0.13447  | 0.131556  | 0.144085  | 0.126311  | 0.125583  |
| 0.107226 | 0.0979021 | 0.122815 | 0.103875  | 0.116404  | 0.108246  | 0.106061  |
| 0.10912  | 0.0802739 | 0.118298 | 0.0748834 | 0.0894522 | 0.111888  | 0.104458  |
| 0.182984 | 0.179196  | 0.190997 | 0.179341  | 0.190122  | 0.181381  | 0.180653  |
| 0.126748 | 0.119464  | 0.135927 | 0.114365  | 0.134178  | 0.119901  | 0.121212  |
| 0.129516 | 0.131265  | 0.137529 | 0.13345   | 0.14627   | 0.129079  | 0.128642  |
| 0.109557 | 0.097028  | 0.124563 | 0.104749  | 0.112034  | 0.119901  | 0.111014  |
| 0.110577 | 0.122232  | 0.122378 | 0.12704   | 0.138403  | 0.110431  | 0.116113  |
| 0.10708  | 0.0849359 | 0.118298 | 0.0894522 | 0.102564  | 0.103147  | 0.100087  |
| 0.103001 | 0.0712413 | 0.11451  | 0.0754662 | 0.0903263 | 0.105186  | 0.0995047 |
| 0.109994 | 0.0942599 | 0.11655  | 0.0917832 | 0.106643  | 0.106352  | 0.100087  |
| 0.122815 | 0.121649  | 0.128497 | 0.123543  | 0.143357  | 0.116841  | 0.124563  |
| 0.114365 | 0.102418  | 0.123252 | 0.0999417 | 0.106352  | 0.117133  | 0.107663  |
| 0.134324 | 0.124126  | 0.142045 | 0.121358  | 0.134761  | 0.133887  | 0.126748  |
| 0.110577 | 0.114365  | 0.118298 | 0.107809  | 0.121503  | 0.108683  | 0.108246  |
| 0.117716 | 0.104312  | 0.129225 | 0.104167  | 0.124563  | 0.116113  | 0.115676  |
| 0.128934 | 0.126894  | 0.137821 | 0.130245  | 0.143065  | 0.124417  | 0.130099  |
| 0.108537 | 0.0933858 | 0.115676 | 0.0976107 | 0.108974  | 0.108683  | 0.105041  |
| 0.126894 | 0.117861  | 0.133159 | 0.119172  | 0.125583  | 0.124126  | 0.123689  |
| 0.104458 | 0.0930944 | 0.12296  | 0.0917832 | 0.111597  | 0.104895  | 0.101253  |
| 0.108829 | 0.0913462 | 0.118298 | 0.0941142 | 0.109848  | 0.108683  | 0.102127  |
| 0.08581  | 0.0887238 | 0.104604 | 0.0999417 | 0.104021  | 0.0888695 | 0.0922203 |
| 0.109266 | 0.10373   | 0.115239 | 0.110286  | 0.113199  | 0.118735  | 0.108392  |
| 0.104604 | 0.0868298 | 0.120192 | 0.103293  | 0.104749  | 0.105624  | 0.100233  |
| 0.143939 | 0.141317  | 0.151661 | 0.143211  | 0.154283  | 0.141171  | 0.137529  |
| 0.137821 | 0.131119  | 0.146999 | 0.131847  | 0.148164  | 0.134761  | 0.133741  |
| 0.113928 | 0.10373   | 0.117279 | 0.0933858 | 0.106789  | 0.114073  | 0.111888  |
| 0.13884  | 0.141463  | 0.142774 | 0.144231  | 0.147145  | 0.134033  | 0.141171  |
| 0.127768 | 0.122815  | 0.135198 | 0.11655   | 0.130828  | 0.123543  | 0.126894  |
| 0.13039  | 0.126311  | 0.129953 | 0.129953  | 0.13345   | 0.130536  | 0.129225  |
| 0.101836 | 0.0968823 | 0.120047 | 0.103147  | 0.103438  | 0.106352  | 0.10271   |
| 0.138112 | 0.142774  | 0.14088  | 0.143502  | 0.150787  | 0.134178  | 0.136655  |
| 0.124709 | 0.124709  | 0.135927 | 0.13039   | 0.138258  | 0.129225  | 0.122086  |
| 0.135198 | 0.137238  | 0.144959 | 0.140589  | 0.150495  | 0.131265  | 0.134324  |
| 0.119172 | 0.112471  | 0.130099 | 0.110577  | 0.121941  | 0.11553   | 0.114802  |
| 0.11116  | 0.0962995 | 0.116841 | 0.0996503 | 0.109266  | 0.108974  | 0.106498  |
| 0.106352 | 0.0938228 | 0.119318 | 0.100962  | 0.109411  | 0.103293  | 0.101981  |
| 0.11757  | 0.113782  | 0.132576 | 0.118007  | 0.136364  | 0.118298  | 0.119901  |
| 0.114365 | 0.103584  | 0.118881 | 0.108974  | 0.107517  | 0.113636  | 0.107663  |
| 0.108974 | 0.11014   | 0.109994 | 0.119027  | 0.11757   | 0.102127  | 0.106061  |
| 0.113345 | 0.120921  | 0.130099 | 0.124563  | 0.132139  | 0.118444  | 0.115967  |
| 0.115093 | 0.0996503 | 0.124854 | 0.104167  | 0.116987  | 0.11116   | 0.104312  |
| 0.104749 | 0.0939685 | 0.118298 | 0.0955711 | 0.109557  | 0.101981  | 0.103584  |

|           |           |          |           |          |           |           |
|-----------|-----------|----------|-----------|----------|-----------|-----------|
| 0.110723  | 0.102273  | 0.116113 | 0.105915  | 0.104167 | 0.114948  | 0.106061  |
| 0.112471  | 0.101107  | 0.128059 | 0.102127  | 0.109703 | 0.102418  | 0.1081    |
| 0.110868  | 0.10067   | 0.121795 | 0.103438  | 0.113054 | 0.109266  | 0.109703  |
| 0.107663  | 0.103584  | 0.119755 | 0.104604  | 0.117133 | 0.106935  | 0.105332  |
| 0.11451   | 0.113054  | 0.123106 | 0.114656  | 0.125146 | 0.120192  | 0.112179  |
| 0.113636  | 0.097028  | 0.114656 | 0.10067   | 0.105624 | 0.103293  | 0.105769  |
| 0.0871212 | 0.0731352 | 0.100087 | 0.0796911 | 0.083479 | 0.0898893 | 0.0868298 |
| 0.108392  | 0.0967366 | 0.114073 | 0.102418  | 0.102418 | 0.113199  | 0.0987762 |
| 0.11757   | 0.111451  | 0.126748 | 0.115967  | 0.127914 | 0.120921  | 0.112325  |
| 0.115385  | 0.094697  | 0.122232 | 0.0977564 | 0.116696 | 0.104167  | 0.108392  |
| 0.120047  | 0.113928  | 0.139132 | 0.121358  | 0.118735 | 0.123397  | 0.116259  |
| 0.111597  | 0.107517  | 0.119318 | 0.106498  | 0.122523 | 0.110286  | 0.107226  |
| 0.121649  | 0.109411  | 0.125583 | 0.104604  | 0.1081   | 0.119755  | 0.118153  |

| <b>TDr_12_00427</b> | <b>TDr_12_00429</b> | <b>TDr_12_00430</b> | <b>TDr_12_00432</b> | <b>TDr_12_00433</b> | <b>TDr_12_00435</b> | <b>TDr_12_00437</b> |
|---------------------|---------------------|---------------------|---------------------|---------------------|---------------------|---------------------|
| 0.118298            | 0.123106            | 0.128788            | 0.126894            | 0.127477            | 0.117279            | 0.118735            |
| 0.120775            | 0.118007            | 0.123106            | 0.119172            | 0.116841            | 0.109557            | 0.110431            |
| 0.114948            | 0.114219            | 0.122523            | 0.115676            | 0.115676            | 0.109848            | 0.108974            |
| 0.122523            | 0.121503            | 0.122815            | 0.12296             | 0.122378            | 0.112762            | 0.111888            |
| 0.133887            | 0.141317            | 0.136218            | 0.136364            | 0.133159            | 0.129079            | 0.138695            |
| 0.13447             | 0.139277            | 0.135927            | 0.132867            | 0.138112            | 0.128205            | 0.131993            |
| 0.118298            | 0.128642            | 0.130828            | 0.121941            | 0.127477            | 0.116696            | 0.128934            |
| 0.120921            | 0.11961             | 0.124126            | 0.124854            | 0.123397            | 0.110868            | 0.11553             |
| 0.0965909           | 0.111014            | 0.11553             | 0.11451             | 0.114802            | 0.0973193           | 0.102855            |
| 0.0673077           | 0.097465            | 0.0952797           | 0.0922203           | 0.0945513           | 0.0895979           | 0.0898893           |
| 0.116113            | 0.112471            | 0.130973            | 0.130828            | 0.128497            | 0.113345            | 0.119755            |
| 0.118881            | 0.121066            | 0.126748            | 0.125146            | 0.120484            | 0.107372            | 0.111451            |
| 0.106643            | 0.110868            | 0.120047            | 0.120192            | 0.119027            | 0.102418            | 0.106789            |
| 0.130682            | 0.125874            | 0.14729             | 0.145396            | 0.142191            | 0.131993            | 0.137529            |
| 0.120338            | 0.124272            | 0.127622            | 0.126894            | 0.124272            | 0.11553             | 0.126894            |
| 0.117279            | 0.120338            | 0.124563            | 0.125               | 0.125291            | 0.108974            | 0.115967            |
| 0.11655             | 0.119318            | 0.123252            | 0.125146            | 0.123397            | 0.10912             | 0.111451            |
| 0.144085            | 0.141608            | 0.140006            | 0.141317            | 0.140443            | 0.142483            | 0.136072            |
| 0.114656            | 0.112471            | 0.119318            | 0.117424            | 0.114802            | 0.109266            | 0.105186            |
| 0.206439            | 0.194056            | 0.209353            | 0.210373            | 0.208333            | 0.201923            | 0.207459            |
| 0.126457            | 0.129808            | 0.129079            | 0.125728            | 0.131265            | 0.12398             | 0.11961             |
| 0.121358            | 0.12704             | 0.126894            | 0.121503            | 0.123252            | 0.119172            | 0.11655             |
| 0.108683            | 0.114073            | 0.112471            | 0.117861            | 0.114948            | 0.107372            | 0.106789            |
| 0.129808            | 0.136364            | 0.13039             | 0.13549             | 0.136072            | 0.115967            | 0.12296             |
| 0.103438            | 0.112034            | 0.113345            | 0.11116             | 0.109703            | 0.0936772           | 0.0983392           |
| 0.130245            | 0.127768            | 0.124709            | 0.124563            | 0.128934            | 0.124854            | 0.12602             |
| 0.124126            | 0.121649            | 0.122378            | 0.12398             | 0.124272            | 0.115239            | 0.114073            |
| 0.114219            | 0.122523            | 0.126748            | 0.12398             | 0.122232            | 0.111742            | 0.110286            |
| 0.128788            | 0.135927            | 0.133159            | 0.133304            | 0.134178            | 0.11757             | 0.128059            |
| 0.1081              | 0.121358            | 0.128497            | 0.120484            | 0.118735            | 0.104167            | 0.113199            |
| 0.123106            | 0.12704             | 0.133596            | 0.13141             | 0.13549             | 0.115967            | 0.126457            |
| 0.119172            | 0.12602             | 0.12704             | 0.126311            | 0.129808            | 0.11116             | 0.121066            |
| 0.11014             | 0.115239            | 0.117133            | 0.123397            | 0.117279            | 0.104749            | 0.109411            |
| 0.111305            | 0.117861            | 0.120921            | 0.125146            | 0.121941            | 0.109411            | 0.114365            |
| 0.116987            | 0.120921            | 0.124854            | 0.126457            | 0.123252            | 0.111597            | 0.119755            |
| 0.114802            | 0.125146            | 0.124417            | 0.12602             | 0.130099            | 0.114073            | 0.121066            |
| 0.127768            | 0.131119            | 0.129516            | 0.129079            | 0.123252            | 0.118007            | 0.124417            |
| 0.120338            | 0.130099            | 0.132867            | 0.124563            | 0.125728            | 0.112908            | 0.123106            |
| 0.113345            | 0.117279            | 0.120629            | 0.123106            | 0.124854            | 0.10912             | 0.110286            |
| 0.122669            | 0.135052            | 0.131993            | 0.128642            | 0.13243             | 0.119027            | 0.126603            |
| 0.109848            | 0.121941            | 0.127622            | 0.125728            | 0.121941            | 0.106498            | 0.109411            |
| 0.140734            | 0.150787            | 0.146562            | 0.136218            | 0.151078            | 0.130682            | 0.146416            |

|           |          |          |          |          |           |           |
|-----------|----------|----------|----------|----------|-----------|-----------|
| 0.142483  | 0.155449 | 0.152681 | 0.143502 | 0.150787 | 0.13039   | 0.146707  |
| 0.112034  | 0.128788 | 0.128934 | 0.127331 | 0.129079 | 0.105769  | 0.119755  |
| 0.103584  | 0.101399 | 0.104167 | 0.104021 | 0.101981 | 0.0973193 | 0.0944056 |
| 0.100524  | 0.116113 | 0.120047 | 0.112617 | 0.113199 | 0.0933858 | 0.0989219 |
| 0.123834  | 0.124563 | 0.126166 | 0.121941 | 0.128351 | 0.118735  | 0.117861  |
| 0.125728  | 0.143939 | 0.144959 | 0.140443 | 0.138695 | 0.120921  | 0.137821  |
| 0.111451  | 0.123834 | 0.119901 | 0.124709 | 0.122669 | 0.114802  | 0.116259  |
| 0.115676  | 0.13039  | 0.129079 | 0.122523 | 0.126894 | 0.10708   | 0.121358  |
| 0.146125  | 0.153846 | 0.140006 | 0.140152 | 0.143648 | 0.138403  | 0.144814  |
| 0.128934  | 0.133741 | 0.13884  | 0.131702 | 0.13345  | 0.12704   | 0.128205  |
| 0.120921  | 0.128059 | 0.133159 | 0.126894 | 0.127185 | 0.105332  | 0.122815  |
| 0.104895  | 0.118444 | 0.130828 | 0.124563 | 0.121941 | 0.117861  | 0.123397  |
| 0.125     | 0.129225 | 0.134615 | 0.131847 | 0.128934 | 0.119901  | 0.122232  |
| 0.145105  | 0.146707 | 0.143357 | 0.13243  | 0.139423 | 0.135344  | 0.135635  |
| 0.123106  | 0.132576 | 0.138258 | 0.134324 | 0.137238 | 0.11859   | 0.13141   |
| 0.115822  | 0.134324 | 0.13243  | 0.13549  | 0.12704  | 0.109557  | 0.122378  |
| 0.110286  | 0.12704  | 0.127768 | 0.12296  | 0.120921 | 0.110431  | 0.11859   |
| 0.0990676 | 0.121358 | 0.117716 | 0.118735 | 0.113491 | 0.103293  | 0.114656  |
| 0.134907  | 0.147873 | 0.141317 | 0.141754 | 0.147582 | 0.126894  | 0.143794  |
| 0.133741  | 0.146416 | 0.140734 | 0.139714 | 0.143794 | 0.129808  | 0.141463  |
| 0.165064  | 0.152389 | 0.162442 | 0.166667 | 0.165793 | 0.160548  | 0.164627  |
| 0.111742  | 0.130245 | 0.129225 | 0.126748 | 0.127331 | 0.106352  | 0.12296   |
| 0.112034  | 0.123252 | 0.127185 | 0.121503 | 0.121503 | 0.106352  | 0.112471  |
| 0.114073  | 0.122669 | 0.124563 | 0.120338 | 0.124709 | 0.104895  | 0.114219  |
| 0.134324  | 0.144085 | 0.141026 | 0.138549 | 0.13884  | 0.133304  | 0.136509  |
| 0.115093  | 0.127185 | 0.125291 | 0.126603 | 0.128351 | 0.108829  | 0.116987  |
| 0.139714  | 0.134615 | 0.137966 | 0.126457 | 0.138695 | 0.129079  | 0.134615  |
| 0.108537  | 0.11859  | 0.119318 | 0.11859  | 0.118298 | 0.0973193 | 0.113345  |
| 0.119755  | 0.129808 | 0.133741 | 0.131847 | 0.124854 | 0.109411  | 0.119318  |
| 0.149184  | 0.151952 | 0.144814 | 0.146125 | 0.144959 | 0.141463  | 0.144668  |
| 0.130245  | 0.134761 | 0.13549  | 0.132721 | 0.137966 | 0.118153  | 0.126603  |
| 0.130682  | 0.143065 | 0.141171 | 0.138403 | 0.143648 | 0.131702  | 0.145396  |
| 0.129371  | 0.134178 | 0.140152 | 0.133596 | 0.136509 | 0.129225  | 0.127768  |
| 0.123689  | 0.11655  | 0.117861 | 0.119464 | 0.11655  | 0.117133  | 0.112471  |
| 0.116696  | 0.121795 | 0.131265 | 0.123834 | 0.127622 | 0.105769  | 0.115093  |
| 0.116113  | 0.125874 | 0.128934 | 0.129079 | 0.127622 | 0.113345  | 0.119464  |
| 0.13447   | 0.146562 | 0.144376 | 0.140152 | 0.138112 | 0.124709  | 0.135781  |
| 0.115967  | 0.123397 | 0.124126 | 0.125146 | 0.125437 | 0.107663  | 0.114073  |
| 0.133596  | 0.144231 | 0.146707 | 0.139569 | 0.144814 | 0.133741  | 0.137238  |
| 0.125728  | 0.132284 | 0.136509 | 0.134615 | 0.136364 | 0.113636  | 0.126748  |
| 0.123397  | 0.127622 | 0.126603 | 0.125    | 0.131993 | 0.113928  | 0.121795  |
| 0.12398   | 0.134615 | 0.134761 | 0.131119 | 0.133159 | 0.111597  | 0.125583  |
| 0.123397  | 0.132284 | 0.129516 | 0.13141  | 0.132867 | 0.11859   | 0.120921  |
| 0.120484  | 0.125291 | 0.125437 | 0.128205 | 0.126457 | 0.11014   | 0.120047  |

|           |           |           |          |           |           |           |
|-----------|-----------|-----------|----------|-----------|-----------|-----------|
| 0.119901  | 0.130536  | 0.13447   | 0.131702 | 0.131993  | 0.108683  | 0.122086  |
| 0.135781  | 0.144085  | 0.142774  | 0.137383 | 0.141463  | 0.121941  | 0.139714  |
| 0.109557  | 0.123106  | 0.125874  | 0.123397 | 0.128642  | 0.0913462 | 0.111451  |
| 0.110577  | 0.115093  | 0.122523  | 0.11451  | 0.119464  | 0.101399  | 0.11014   |
| 0.127477  | 0.131702  | 0.130682  | 0.123252 | 0.11859   | 0.123252  | 0.117424  |
| 0.12602   | 0.130245  | 0.13039   | 0.125291 | 0.129953  | 0.120921  | 0.129079  |
| 0.127477  | 0.104895  | 0.103001  | 0.104895 | 0.104312  | 0.11859   | 0.108974  |
| 0.136655  | 0.112325  | 0.108392  | 0.106206 | 0.113491  | 0.127768  | 0.112325  |
| 0.123689  | 0.122669  | 0.12602   | 0.123834 | 0.118298  | 0.115676  | 0.11451   |
| 0.186917  | 0.173951  | 0.186917  | 0.184732 | 0.182401  | 0.175991  | 0.18211   |
| 0.116841  | 0.119027  | 0.119172  | 0.116113 | 0.114948  | 0.106789  | 0.109994  |
| 0.133596  | 0.111597  | 0.10912   | 0.118007 | 0.104312  | 0.12296   | 0.110723  |
| 0.125728  | 0.105478  | 0.104458  | 0.111014 | 0.0999417 | 0.117133  | 0.104895  |
| 0.132867  | 0.140589  | 0.138695  | 0.130682 | 0.131556  | 0.124854  | 0.128059  |
| 0.116113  | 0.101399  | 0.105041  | 0.103438 | 0.104312  | 0.106935  | 0.0976107 |
| 0.132139  | 0.105769  | 0.110286  | 0.111014 | 0.111888  | 0.124417  | 0.108974  |
| 0.112325  | 0.106643  | 0.105915  | 0.105478 | 0.100233  | 0.111597  | 0.0912005 |
| 0.120338  | 0.116404  | 0.111014  | 0.105624 | 0.107955  | 0.115822  | 0.105915  |
| 0.113054  | 0.122523  | 0.120338  | 0.12398  | 0.114073  | 0.105041  | 0.109703  |
| 0.132284  | 0.113199  | 0.117716  | 0.112908 | 0.10708   | 0.128351  | 0.111742  |
| 0.103438  | 0.114948  | 0.11859   | 0.114365 | 0.114365  | 0.0965909 | 0.104167  |
| 0.133596  | 0.125     | 0.120484  | 0.121212 | 0.126166  | 0.12704   | 0.122378  |
| 0.120338  | 0.126894  | 0.123543  | 0.114365 | 0.116113  | 0.10912   | 0.103293  |
| 0.127477  | 0.13549   | 0.138258  | 0.129079 | 0.138403  | 0.123543  | 0.13345   |
| 0.125583  | 0.131265  | 0.134324  | 0.125728 | 0.123397  | 0.11553   | 0.12602   |
| 0.108974  | 0.118735  | 0.115967  | 0.112034 | 0.113491  | 0.10708   | 0.107663  |
| 0.148601  | 0.139423  | 0.136655  | 0.144085 | 0.141463  | 0.141171  | 0.139423  |
| 0.10912   | 0.121795  | 0.116987  | 0.1081   | 0.112762  | 0.108392  | 0.109848  |
| 0.109411  | 0.099359  | 0.104749  | 0.115385 | 0.104021  | 0.104604  | 0.0914918 |
| 0.111597  | 0.119318  | 0.125583  | 0.112034 | 0.121066  | 0.101836  | 0.108829  |
| 0.127622  | 0.136801  | 0.131119  | 0.12602  | 0.128059  | 0.123397  | 0.12602   |
| 0.126748  | 0.119318  | 0.12704   | 0.122815 | 0.124854  | 0.11553   | 0.118444  |
| 0.109848  | 0.0971737 | 0.0979021 | 0.103293 | 0.0989219 | 0.106206  | 0.0893065 |
| 0.113636  | 0.0971737 | 0.102273  | 0.107663 | 0.103293  | 0.105915  | 0.0930944 |
| 0.119901  | 0.122669  | 0.128351  | 0.125874 | 0.122378  | 0.110723  | 0.111014  |
| 0.10373   | 0.113782  | 0.115093  | 0.114073 | 0.116404  | 0.110286  | 0.11116   |
| 0.119901  | 0.126166  | 0.126311  | 0.120921 | 0.124417  | 0.108392  | 0.122378  |
| 0.100233  | 0.110286  | 0.109848  | 0.113199 | 0.105332  | 0.0890152 | 0.102127  |
| 0.0996503 | 0.110868  | 0.112471  | 0.109411 | 0.110868  | 0.095134  | 0.101253  |
| 0.0983392 | 0.115093  | 0.113491  | 0.112762 | 0.112762  | 0.0906177 | 0.102564  |
| 0.127768  | 0.126166  | 0.131556  | 0.126166 | 0.126748  | 0.11451   | 0.120047  |
| 0.113636  | 0.131556  | 0.122086  | 0.119318 | 0.120775  | 0.106789  | 0.126603  |
| 0.104749  | 0.116841  | 0.119027  | 0.119172 | 0.113928  | 0.0967366 | 0.1081    |
| 0.10373   | 0.111451  | 0.113636  | 0.112908 | 0.110286  | 0.0942599 | 0.0995047 |

|           |          |          |          |          |           |           |
|-----------|----------|----------|----------|----------|-----------|-----------|
| 0.113636  | 0.127185 | 0.125583 | 0.123689 | 0.123106 | 0.106206  | 0.116987  |
| 0.103584  | 0.119464 | 0.119901 | 0.119755 | 0.115676 | 0.0958625 | 0.1081    |
| 0.126603  | 0.132284 | 0.13039  | 0.129953 | 0.128497 | 0.118298  | 0.123543  |
| 0.134761  | 0.1419   | 0.13447  | 0.135781 | 0.134907 | 0.125874  | 0.129953  |
| 0.100087  | 0.112179 | 0.110286 | 0.109266 | 0.108392 | 0.0981935 | 0.105769  |
| 0.105186  | 0.116113 | 0.118298 | 0.120775 | 0.111742 | 0.0968823 | 0.108246  |
| 0.103438  | 0.115239 | 0.120047 | 0.117279 | 0.114073 | 0.092803  | 0.107663  |
| 0.106643  | 0.104749 | 0.109266 | 0.115239 | 0.106789 | 0.0992133 | 0.0986305 |
| 0.102855  | 0.118735 | 0.120629 | 0.115822 | 0.114948 | 0.109703  | 0.111451  |
| 0.0990676 | 0.112034 | 0.11451  | 0.113199 | 0.107955 | 0.0884324 | 0.0986305 |
| 0.139423  | 0.146853 | 0.14729  | 0.140734 | 0.144814 | 0.126166  | 0.139569  |
| 0.128497  | 0.137675 | 0.13986  | 0.139714 | 0.140297 | 0.110577  | 0.134761  |
| 0.122086  | 0.129808 | 0.129079 | 0.123397 | 0.125146 | 0.105915  | 0.120775  |
| 0.10912   | 0.120338 | 0.126311 | 0.129371 | 0.126166 | 0.100233  | 0.115676  |
| 0.114948  | 0.119464 | 0.120192 | 0.119172 | 0.119172 | 0.103147  | 0.111597  |
| 0.113054  | 0.114656 | 0.113054 | 0.11553  | 0.114948 | 0.095134  | 0.103293  |
| 0.109411  | 0.117716 | 0.119318 | 0.120921 | 0.120921 | 0.106061  | 0.105186  |
| 0.103293  | 0.118298 | 0.121941 | 0.119755 | 0.119464 | 0.105478  | 0.106061  |
| 0.122523  | 0.125874 | 0.130682 | 0.125    | 0.126457 | 0.11451   | 0.114802  |
| 0.130682  | 0.137821 | 0.137383 | 0.130828 | 0.136364 | 0.120921  | 0.12704   |
| 0.120338  | 0.100962 | 0.106352 | 0.105624 | 0.108829 | 0.109994  | 0.0983392 |
| 0.112908  | 0.125    | 0.125728 | 0.126166 | 0.120338 | 0.120338  | 0.125583  |
| 0.132867  | 0.133887 | 0.134615 | 0.128934 | 0.124272 | 0.128934  | 0.126311  |
| 0.199009  | 0.192453 | 0.205711 | 0.207605 | 0.207314 | 0.199446  | 0.200321  |
| 0.238782  | 0.231935 | 0.247232 | 0.245629 | 0.244755 | 0.241259  | 0.245338  |
| 0.125874  | 0.122815 | 0.12704  | 0.126603 | 0.122523 | 0.114656  | 0.111451  |
| 0.11757   | 0.126166 | 0.118444 | 0.117133 | 0.124126 | 0.107226  | 0.111305  |
| 0.117861  | 0.116259 | 0.121941 | 0.122669 | 0.123834 | 0.107809  | 0.109557  |
| 0.119901  | 0.111888 | 0.119901 | 0.120921 | 0.119172 | 0.113636  | 0.108392  |
| 0.119318  | 0.125    | 0.129516 | 0.126457 | 0.126748 | 0.117716  | 0.128497  |
| 0.122232  | 0.125291 | 0.12602  | 0.124417 | 0.127331 | 0.113928  | 0.114219  |
| 0.149476  | 0.152244 | 0.143939 | 0.137675 | 0.144959 | 0.14292   | 0.14088   |
| 0.124854  | 0.127914 | 0.128934 | 0.125    | 0.129662 | 0.115093  | 0.119464  |
| 0.130682  | 0.136072 | 0.137092 | 0.130245 | 0.130536 | 0.126748  | 0.124126  |
| 0.134033  | 0.130973 | 0.136364 | 0.129516 | 0.138549 | 0.12602   | 0.133596  |
| 0.136364  | 0.133596 | 0.131702 | 0.123106 | 0.137675 | 0.125728  | 0.124563  |
| 0.13141   | 0.144959 | 0.142191 | 0.133887 | 0.142337 | 0.123397  | 0.139132  |
| 0.119755  | 0.126603 | 0.126748 | 0.122232 | 0.127185 | 0.113782  | 0.114948  |
| 0.118007  | 0.129808 | 0.125291 | 0.123397 | 0.118444 | 0.106498  | 0.109994  |
| 0.125728  | 0.126166 | 0.122232 | 0.120047 | 0.128497 | 0.116259  | 0.11451   |
| 0.115822  | 0.125291 | 0.12602  | 0.116841 | 0.11859  | 0.107226  | 0.106352  |
| 0.119027  | 0.128205 | 0.125146 | 0.123252 | 0.11859  | 0.1081    | 0.109848  |
| 0.120921  | 0.128351 | 0.127331 | 0.123689 | 0.128059 | 0.119318  | 0.116113  |
| 0.129516  | 0.133159 | 0.130682 | 0.12704  | 0.130245 | 0.123543  | 0.122669  |



|           |           |           |          |           |           |           |
|-----------|-----------|-----------|----------|-----------|-----------|-----------|
| 0.141754  | 0.137821  | 0.138258  | 0.133741 | 0.138986  | 0.132867  | 0.129953  |
| 0.126457  | 0.132139  | 0.129953  | 0.127477 | 0.124563  | 0.113199  | 0.119901  |
| 0.121941  | 0.119464  | 0.12398   | 0.123834 | 0.127622  | 0.116259  | 0.11451   |
| 0.139132  | 0.136364  | 0.139423  | 0.130828 | 0.129953  | 0.128788  | 0.121503  |
| 0.121649  | 0.122378  | 0.122523  | 0.122086 | 0.122086  | 0.106352  | 0.11451   |
| 0.145396  | 0.144085  | 0.13986   | 0.139132 | 0.137675  | 0.133887  | 0.13884   |
| 0.121795  | 0.13039   | 0.137238  | 0.131556 | 0.12602   | 0.114948  | 0.120775  |
| 0.139423  | 0.119755  | 0.115239  | 0.115676 | 0.115676  | 0.135781  | 0.115967  |
| 0.116404  | 0.11859   | 0.120775  | 0.116259 | 0.119172  | 0.10373   | 0.107517  |
| 0.113345  | 0.116987  | 0.118007  | 0.115239 | 0.116113  | 0.106498  | 0.10708   |
| 0.134178  | 0.134033  | 0.131847  | 0.126457 | 0.125583  | 0.11859   | 0.120921  |
| 0.129953  | 0.126311  | 0.127914  | 0.127768 | 0.128059  | 0.120192  | 0.12398   |
| 0.137821  | 0.135927  | 0.131993  | 0.13039  | 0.130099  | 0.123106  | 0.131265  |
| 0.128059  | 0.125     | 0.131265  | 0.126748 | 0.125     | 0.121795  | 0.120047  |
| 0.124126  | 0.129516  | 0.127331  | 0.121941 | 0.123106  | 0.11553   | 0.115822  |
| 0.130536  | 0.125146  | 0.125583  | 0.123106 | 0.130682  | 0.118153  | 0.122523  |
| 0.131993  | 0.136218  | 0.137529  | 0.129516 | 0.131847  | 0.123106  | 0.129808  |
| 0.138112  | 0.129516  | 0.138986  | 0.129808 | 0.129516  | 0.121941  | 0.128059  |
| 0.144085  | 0.136655  | 0.135635  | 0.137238 | 0.136655  | 0.133741  | 0.130828  |
| 0.138695  | 0.143211  | 0.141317  | 0.140589 | 0.141754  | 0.131556  | 0.139132  |
| 0.121795  | 0.128059  | 0.129953  | 0.126603 | 0.12398   | 0.113782  | 0.117861  |
| 0.136946  | 0.130682  | 0.129662  | 0.126311 | 0.132139  | 0.129225  | 0.127477  |
| 0.11757   | 0.120338  | 0.120775  | 0.119172 | 0.123834  | 0.112179  | 0.111014  |
| 0.113636  | 0.123689  | 0.124417  | 0.124854 | 0.122815  | 0.111451  | 0.117861  |
| 0.118298  | 0.11961   | 0.122086  | 0.118735 | 0.124854  | 0.112325  | 0.112034  |
| 0.120484  | 0.119172  | 0.121941  | 0.116259 | 0.123543  | 0.114219  | 0.111305  |
| 0.117861  | 0.122086  | 0.120192  | 0.11655  | 0.125583  | 0.112762  | 0.107517  |
| 0.138695  | 0.137092  | 0.137529  | 0.130099 | 0.137675  | 0.125728  | 0.131847  |
| 0.123106  | 0.126748  | 0.128934  | 0.126748 | 0.130245  | 0.117424  | 0.119172  |
| 0.137092  | 0.132284  | 0.136218  | 0.131702 | 0.140443  | 0.13141   | 0.13141   |
| 0.117861  | 0.124709  | 0.125146  | 0.117424 | 0.117716  | 0.113928  | 0.107517  |
| 0.129371  | 0.133013  | 0.127622  | 0.124272 | 0.13243   | 0.114073  | 0.125728  |
| 0.119318  | 0.124709  | 0.129808  | 0.128788 | 0.126166  | 0.114219  | 0.122086  |
| 0.114656  | 0.117424  | 0.13039   | 0.120338 | 0.116841  | 0.101107  | 0.107517  |
| 0.117133  | 0.121941  | 0.128205  | 0.12602  | 0.125728  | 0.106206  | 0.120192  |
| 0.112034  | 0.121503  | 0.128351  | 0.11859  | 0.122086  | 0.110723  | 0.107517  |
| 0.120338  | 0.128642  | 0.135198  | 0.131847 | 0.124563  | 0.105915  | 0.115822  |
| 0.120047  | 0.121358  | 0.119464  | 0.121941 | 0.119318  | 0.107663  | 0.105041  |
| 0.0868298 | 0.126311  | 0.116259  | 0.121941 | 0.113491  | 0.114948  | 0.117279  |
| 0.142628  | 0.140734  | 0.139132  | 0.138695 | 0.140734  | 0.130245  | 0.140152  |
| 0.0925117 | 0.111014  | 0.105624  | 0.1081   | 0.103438  | 0.0874126 | 0.0967366 |
| 0.115967  | 0.108246  | 0.0865385 | 0.102127 | 0.0948427 | 0.113782  | 0.100379  |
| 0.0791084 | 0.118298  | 0.10912   | 0.110723 | 0.112762  | 0.102273  | 0.106935  |
| 0.113199  | 0.0885781 | 0.081148  | 0.103438 | 0.106061  | 0.115385  | 0.0967366 |

|           |           |           |           |           |           |           |
|-----------|-----------|-----------|-----------|-----------|-----------|-----------|
| 0.104749  | 0.0941142 | 0.0916375 | 0.0850816 | 0.0859557 | 0.107809  | 0.090035  |
| 0.090472  | 0.124417  | 0.114073  | 0.114219  | 0.117133  | 0.0996503 | 0.104021  |
| 0.0891608 | 0.113199  | 0.118007  | 0.113199  | 0.114365  | 0.107372  | 0.110577  |
| 0.103001  | 0.115385  | 0.0986305 | 0.100816  | 0.0967366 | 0.112471  | 0.092366  |
| 0.119901  | 0.112471  | 0.0939685 | 0.0987762 | 0.0871212 | 0.123543  | 0.109266  |
| 0.0826049 | 0.111014  | 0.124272  | 0.113345  | 0.115093  | 0.105186  | 0.109848  |
| 0.103875  | 0.0949883 | 0.0954254 | 0.0920746 | 0.0906177 | 0.109557  | 0.0879953 |
| 0.14627   | 0.144668  | 0.150641  | 0.140006  | 0.143794  | 0.130682  | 0.135344  |
| 0.0957168 | 0.119172  | 0.118735  | 0.115676  | 0.11655   | 0.115967  | 0.118007  |
| 0.102127  | 0.101981  | 0.103001  | 0.0955711 | 0.100233  | 0.100524  | 0.0961538 |
| 0.227564  | 0.214889  | 0.227273  | 0.228875  | 0.231789  | 0.223631  | 0.223339  |
| 0.111305  | 0.103293  | 0.104312  | 0.0971737 | 0.095134  | 0.111116  | 0.0913462 |
| 0.087704  | 0.113491  | 0.11451   | 0.116113  | 0.104458  | 0.10067   | 0.102127  |
| 0.112908  | 0.103147  | 0.095134  | 0.0987762 | 0.100816  | 0.120629  | 0.116841  |
| 0.0907634 | 0.115967  | 0.114365  | 0.121212  | 0.117424  | 0.103438  | 0.104604  |
| 0.0855186 | 0.118298  | 0.122523  | 0.122378  | 0.11655   | 0.113928  | 0.117716  |
| 0.10912   | 0.0897436 | 0.0901807 | 0.0938228 | 0.0973193 | 0.109557  | 0.0894522 |
| 0.103147  | 0.0983392 | 0.0984848 | 0.0942599 | 0.08581   | 0.104167  | 0.097465  |
| 0         | 0.116113  | 0.113054  | 0.113199  | 0.111742  | 0.105624  | 0.112908  |
| 0.116113  | 0         | 0.104749  | 0.106935  | 0.107809  | 0.118298  | 0.104604  |
| 0.113054  | 0.104749  | 0         | 0.099796  | 0.0995047 | 0.120775  | 0.108537  |
| 0.113199  | 0.106935  | 0.099796  | 0         | 0.0909091 | 0.11451   | 0.0952797 |
| 0.111742  | 0.107809  | 0.0995047 | 0.0909091 | 0         | 0.113345  | 0.090035  |
| 0.105624  | 0.118298  | 0.120775  | 0.11451   | 0.113345  | 0         | 0.106352  |
| 0.112908  | 0.104604  | 0.108537  | 0.0952797 | 0.090035  | 0.106352  | 0         |
| 0.112762  | 0.100962  | 0.099359  | 0.099796  | 0.105624  | 0.115239  | 0.102127  |
| 0.103875  | 0.0906177 | 0.0913462 | 0.0935315 | 0.0914918 | 0.105186  | 0.0882867 |
| 0.136218  | 0.143939  | 0.146416  | 0.140152  | 0.133741  | 0.127331  | 0.135781  |
| 0.132576  | 0.137383  | 0.143648  | 0.144085  | 0.133887  | 0.125437  | 0.132139  |
| 0.118007  | 0.120775  | 0.127622  | 0.123689  | 0.124272  | 0.0735723 | 0.122815  |
| 0.0871212 | 0.125728  | 0.113636  | 0.10912   | 0.113199  | 0.10708   | 0.108829  |
| 0.12602   | 0.122086  | 0.103001  | 0.128788  | 0.123543  | 0.125291  | 0.120629  |
| 0.115967  | 0.12398   | 0.123834  | 0.12602   | 0.123397  | 0.11553   | 0.121066  |
| 0.134615  | 0.132139  | 0.142483  | 0.135927  | 0.135052  | 0.123397  | 0.124272  |
| 0.132284  | 0.137966  | 0.13986   | 0.144085  | 0.134178  | 0.133013  | 0.137675  |
| 0.100962  | 0.112471  | 0.119901  | 0.116259  | 0.111888  | 0.0821678 | 0.100524  |
| 0.118298  | 0.135635  | 0.131119  | 0.137383  | 0.134761  | 0.116113  | 0.125146  |
| 0.134178  | 0.138403  | 0.148747  | 0.147727  | 0.144231  | 0.133741  | 0.140734  |
| 0.097465  | 0.120338  | 0.120775  | 0.117133  | 0.113636  | 0.104312  | 0.115385  |
| 0.123397  | 0.131702  | 0.135635  | 0.132576  | 0.132867  | 0.119755  | 0.125874  |
| 0.155303  | 0.148456  | 0.152389  | 0.154575  | 0.151369  | 0.136218  | 0.152244  |
| 0.123543  | 0.134178  | 0.135198  | 0.136801  | 0.135052  | 0.122232  | 0.126894  |
| 0.126603  | 0.141026  | 0.129808  | 0.121503  | 0.131119  | 0.122086  | 0.126166  |
| 0.120047  | 0.129516  | 0.132284  | 0.123689  | 0.128642  | 0.118444  | 0.121649  |

|           |           |           |           |           |           |           |
|-----------|-----------|-----------|-----------|-----------|-----------|-----------|
| 0.116696  | 0.104604  | 0.104458  | 0.114802  | 0.106352  | 0.11655   | 0.104312  |
| 0.125291  | 0.127477  | 0.122669  | 0.125146  | 0.121066  | 0.122523  | 0.121649  |
| 0.110286  | 0.114219  | 0.122523  | 0.117716  | 0.110723  | 0.099359  | 0.108974  |
| 0.123543  | 0.11116   | 0.112762  | 0.106789  | 0.111742  | 0.121066  | 0.112325  |
| 0.113345  | 0.0913462 | 0.0958625 | 0.101253  | 0.0992133 | 0.116404  | 0.0948427 |
| 0.131993  | 0.109411  | 0.113928  | 0.107372  | 0.114656  | 0.127768  | 0.111451  |
| 0.125291  | 0.121358  | 0.109266  | 0.10912   | 0.0957168 | 0.120484  | 0.103875  |
| 0.132284  | 0.114365  | 0.11451   | 0.121358  | 0.121941  | 0.122815  | 0.120775  |
| 0.1419    | 0.120484  | 0.122378  | 0.120484  | 0.122232  | 0.138258  | 0.130099  |
| 0.0932401 | 0.114948  | 0.109557  | 0.107663  | 0.110577  | 0.103584  | 0.106498  |
| 0.112762  | 0.11757   | 0.126457  | 0.12398   | 0.123689  | 0.11553   | 0.114073  |
| 0.13141   | 0.135052  | 0.126748  | 0.134761  | 0.128059  | 0.127185  | 0.121358  |
| 0.104604  | 0.114073  | 0.111014  | 0.107372  | 0.109994  | 0.100087  | 0.100379  |
| 0.141171  | 0.147145  | 0.144668  | 0.148893  | 0.135198  | 0.137529  | 0.134324  |
| 0.146416  | 0.154138  | 0.153118  | 0.152098  | 0.151224  | 0.149767  | 0.151807  |
| 0.134178  | 0.134907  | 0.138549  | 0.131119  | 0.136072  | 0.127622  | 0.131993  |
| 0.131119  | 0.13243   | 0.129371  | 0.125146  | 0.128642  | 0.117279  | 0.110286  |
| 0.130682  | 0.116259  | 0.107663  | 0.121795  | 0.113636  | 0.124126  | 0.112471  |
| 0.112762  | 0.109994  | 0.103147  | 0.107663  | 0.0954254 | 0.116987  | 0.0965909 |
| 0.134033  | 0.141754  | 0.136946  | 0.130099  | 0.13447   | 0.121649  | 0.126311  |
| 0.119172  | 0.0977564 | 0.0879953 | 0.0971737 | 0.108829  | 0.126603  | 0.105332  |
| 0.12296   | 0.131556  | 0.130828  | 0.127185  | 0.126894  | 0.131556  | 0.128351  |
| 0.10912   | 0.128497  | 0.124272  | 0.118007  | 0.123543  | 0.0984848 | 0.117716  |
| 0.163607  | 0.163462  | 0.159237  | 0.153846  | 0.15472   | 0.155886  | 0.157343  |
| 0.112908  | 0.128497  | 0.126894  | 0.123252  | 0.126748  | 0.11014   | 0.117133  |
| 0.121941  | 0.131119  | 0.137966  | 0.12704   | 0.13549   | 0.121503  | 0.132867  |
| 0.11655   | 0.116404  | 0.123543  | 0.121066  | 0.121941  | 0.114656  | 0.115822  |
| 0.13549   | 0.113782  | 0.113636  | 0.11757   | 0.121066  | 0.125728  | 0.107955  |
| 0.106643  | 0.0884324 | 0.0952797 | 0.090472  | 0.0916375 | 0.112034  | 0.0962995 |
| 0.141463  | 0.13345   | 0.143211  | 0.14831   | 0.143939  | 0.136364  | 0.137529  |
| 0.145979  | 0.135344  | 0.137529  | 0.13039   | 0.13039   | 0.147582  | 0.138549  |
| 0.129516  | 0.13345   | 0.132139  | 0.132284  | 0.130245  | 0.125583  | 0.121212  |
| 0.141026  | 0.130682  | 0.144522  | 0.141754  | 0.137966  | 0.135927  | 0.131847  |
| 0.156906  | 0.145688  | 0.163024  | 0.165501  | 0.163462  | 0.141608  | 0.152681  |
| 0.150204  | 0.139569  | 0.151078  | 0.153555  | 0.151515  | 0.141608  | 0.143065  |
| 0.136946  | 0.129808  | 0.134615  | 0.132721  | 0.138258  | 0.117279  | 0.131265  |
| 0.136218  | 0.141026  | 0.140006  | 0.1419    | 0.138695  | 0.13986   | 0.136072  |
| 0.116696  | 0.121795  | 0.12398   | 0.128497  | 0.122669  | 0.109848  | 0.118007  |
| 0.12704   | 0.115822  | 0.120338  | 0.123397  | 0.123397  | 0.109703  | 0.120192  |
| 0.10708   | 0.117133  | 0.11757   | 0.117133  | 0.113054  | 0.104312  | 0.108974  |
| 0.127185  | 0.13141   | 0.13243   | 0.132284  | 0.127622  | 0.119464  | 0.116841  |
| 0.122378  | 0.124563  | 0.126748  | 0.126603  | 0.12602   | 0.106498  | 0.120775  |
| 0.115093  | 0.118735  | 0.124417  | 0.12602   | 0.120192  | 0.107663  | 0.112325  |
| 0.120921  | 0.12398   | 0.133741  | 0.133596  | 0.13039   | 0.125728  | 0.116987  |

|           |           |           |           |           |           |           |
|-----------|-----------|-----------|-----------|-----------|-----------|-----------|
| 0.118735  | 0.117424  | 0.129516  | 0.129371  | 0.12296   | 0.114219  | 0.12296   |
| 0.0989219 | 0.11014   | 0.113491  | 0.113928  | 0.109266  | 0.0952797 | 0.101107  |
| 0.129225  | 0.130828  | 0.137092  | 0.136364  | 0.133159  | 0.122669  | 0.120629  |
| 0.126748  | 0.131556  | 0.128788  | 0.129516  | 0.126311  | 0.119027  | 0.117279  |
| 0.133159  | 0.133304  | 0.136364  | 0.139714  | 0.137092  | 0.111451  | 0.129516  |
| 0.22028   | 0.208188  | 0.222319  | 0.227418  | 0.225379  | 0.221008  | 0.222756  |
| 0.145396  | 0.146416  | 0.143648  | 0.145542  | 0.140006  | 0.139132  | 0.139132  |
| 0.132139  | 0.132867  | 0.135344  | 0.131702  | 0.134033  | 0.127331  | 0.12704   |
| 0.128205  | 0.13243   | 0.128788  | 0.133887  | 0.132721  | 0.125728  | 0.125437  |
| 0.211247  | 0.207605  | 0.218823  | 0.2213    | 0.218969  | 0.214307  | 0.217803  |
| 0.134615  | 0.128642  | 0.136655  | 0.13884   | 0.137675  | 0.116696  | 0.129808  |
| 0.136218  | 0.132867  | 0.13447   | 0.133741  | 0.129953  | 0.107517  | 0.121503  |
| 0.13039   | 0.136364  | 0.134761  | 0.132867  | 0.131993  | 0.12296   | 0.125291  |
| 0.115385  | 0.122815  | 0.125291  | 0.127768  | 0.122232  | 0.111742  | 0.121066  |
| 0.250583  | 0.245775  | 0.254662  | 0.255099  | 0.257139  | 0.253351  | 0.25947   |
| 0.127768  | 0.137821  | 0.130099  | 0.127622  | 0.134033  | 0.123252  | 0.127331  |
| 0.127477  | 0.13141   | 0.131847  | 0.138112  | 0.132576  | 0.106352  | 0.122086  |
| 0.130682  | 0.133741  | 0.136509  | 0.123252  | 0.12296   | 0.125874  | 0.115967  |
| 0.129808  | 0.129662  | 0.133596  | 0.124709  | 0.124417  | 0.126457  | 0.113928  |
| 0.128642  | 0.134033  | 0.130099  | 0.131993  | 0.132867  | 0.124709  | 0.130536  |
| 0.136509  | 0.126457  | 0.141463  | 0.140443  | 0.134033  | 0.126166  | 0.124709  |
| 0.131265  | 0.13345   | 0.137383  | 0.138986  | 0.134033  | 0.111014  | 0.128497  |
| 0.12704   | 0.13039   | 0.129662  | 0.129225  | 0.124854  | 0.118444  | 0.118153  |
| 0.128059  | 0.13549   | 0.133887  | 0.136655  | 0.129662  | 0.130828  | 0.124126  |
| 0.112325  | 0.121212  | 0.120484  | 0.123543  | 0.119464  | 0.108392  | 0.117424  |
| 0.122669  | 0.125728  | 0.12704   | 0.131265  | 0.122523  | 0.116696  | 0.112908  |
| 0.069493  | 0.0967366 | 0.0965909 | 0.0938228 | 0.0949883 | 0.092366  | 0.0920746 |
| 0.143648  | 0.136218  | 0.138986  | 0.130973  | 0.131265  | 0.145833  | 0.137675  |
| 0.130536  | 0.140297  | 0.131702  | 0.130682  | 0.133596  | 0.124854  | 0.128642  |
| 0.135198  | 0.137092  | 0.138403  | 0.137383  | 0.135052  | 0.113199  | 0.12602   |
| 0.194639  | 0.185169  | 0.198135  | 0.20236   | 0.202069  | 0.193328  | 0.194784  |
| 0.210664  | 0.20236   | 0.212995  | 0.213141  | 0.21285   | 0.208479  | 0.207896  |
| 0.117133  | 0.118444  | 0.126457  | 0.128642  | 0.123106  | 0.112325  | 0.121941  |
| 0.112762  | 0.116404  | 0.119172  | 0.119901  | 0.117279  | 0.10708   | 0.114073  |
| 0.132284  | 0.130973  | 0.136946  | 0.128642  | 0.131556  | 0.130973  | 0.130099  |
| 0.128205  | 0.131556  | 0.131119  | 0.137383  | 0.133887  | 0.110868  | 0.124854  |
| 0.131265  | 0.138403  | 0.134761  | 0.131702  | 0.132867  | 0.12296   | 0.130828  |
| 0.136072  | 0.128351  | 0.126457  | 0.116113  | 0.12398   | 0.129516  | 0.120484  |
| 0.226981  | 0.219551  | 0.231352  | 0.234703  | 0.232663  | 0.230041  | 0.232372  |
| 0.126166  | 0.12602   | 0.125874  | 0.123106  | 0.124563  | 0.116113  | 0.116404  |
| 0.216346  | 0.20338   | 0.21722   | 0.214452  | 0.217075  | 0.214744  | 0.215909  |
| 0.12704   | 0.122815  | 0.126457  | 0.129808  | 0.12602   | 0.105041  | 0.11553   |
| 0.119901  | 0.128788  | 0.128351  | 0.12704   | 0.125874  | 0.111888  | 0.117424  |
| 0.127914  | 0.125728  | 0.129371  | 0.125437  | 0.125728  | 0.11553   | 0.118153  |

|          |          |          |          |          |          |          |
|----------|----------|----------|----------|----------|----------|----------|
| 0.112471 | 0.116404 | 0.121503 | 0.11961  | 0.119318 | 0.103584 | 0.116696 |
| 0.209936 | 0.20134  | 0.216346 | 0.2162   | 0.215035 | 0.212413 | 0.211247 |
| 0.137966 | 0.134907 | 0.14088  | 0.142774 | 0.136072 | 0.132284 | 0.129371 |
| 0.127477 | 0.126748 | 0.131265 | 0.124709 | 0.124417 | 0.113636 | 0.120338 |
| 0.132139 | 0.137238 | 0.137383 | 0.133741 | 0.132867 | 0.12296  | 0.124709 |
| 0.127477 | 0.125583 | 0.134761 | 0.130245 | 0.127914 | 0.123252 | 0.120629 |
| 0.114073 | 0.122086 | 0.126603 | 0.12704  | 0.120338 | 0.108974 | 0.115967 |
| 0.131119 | 0.125728 | 0.125874 | 0.13039  | 0.128642 | 0.111116 | 0.120484 |
| 0.131702 | 0.124563 | 0.136946 | 0.142337 | 0.134761 | 0.112617 | 0.128934 |
| 0.134907 | 0.136509 | 0.134033 | 0.136218 | 0.13447  | 0.112617 | 0.121941 |
| 0.122378 | 0.122523 | 0.125583 | 0.127768 | 0.120775 | 0.113491 | 0.111116 |
| 0.130973 | 0.12704  | 0.127477 | 0.124709 | 0.124417 | 0.116841 | 0.118007 |
| 0.195804 | 0.184586 | 0.199301 | 0.197115 | 0.199738 | 0.191871 | 0.194784 |
| 0.131847 | 0.134033 | 0.136509 | 0.126457 | 0.125874 | 0.129079 | 0.11655  |
| 0.132867 | 0.125146 | 0.129079 | 0.122523 | 0.121649 | 0.133596 | 0.11961  |
| 0.123689 | 0.12704  | 0.128351 | 0.123252 | 0.121795 | 0.124417 | 0.118298 |
| 0.132867 | 0.131265 | 0.132576 | 0.130973 | 0.133013 | 0.121649 | 0.12602  |
| 0.129371 | 0.133596 | 0.133159 | 0.132139 | 0.128934 | 0.123689 | 0.116987 |
| 0.131702 | 0.128642 | 0.129953 | 0.133304 | 0.135052 | 0.114948 | 0.126311 |
| 0.123397 | 0.120629 | 0.126311 | 0.122669 | 0.123543 | 0.11451  | 0.111597 |
| 0.132721 | 0.134033 | 0.135344 | 0.140734 | 0.136946 | 0.114802 | 0.129953 |
| 0.128205 | 0.120484 | 0.126748 | 0.123397 | 0.122232 | 0.126311 | 0.117861 |
| 0.127331 | 0.13039  | 0.129371 | 0.124563 | 0.123106 | 0.123397 | 0.113782 |
| 0.117861 | 0.121503 | 0.12602  | 0.129371 | 0.12296  | 0.111014 | 0.116259 |
| 0.130536 | 0.136218 | 0.136072 | 0.135927 | 0.133596 | 0.123689 | 0.123106 |
| 0.133887 | 0.143648 | 0.138258 | 0.140734 | 0.140734 | 0.134324 | 0.134033 |
| 0.124272 | 0.128788 | 0.126894 | 0.124126 | 0.12704  | 0.11451  | 0.120629 |
| 0.141317 | 0.144668 | 0.140152 | 0.143211 | 0.136218 | 0.137675 | 0.134761 |
| 0.113636 | 0.119901 | 0.124417 | 0.125437 | 0.121066 | 0.106498 | 0.118153 |
| 0.126748 | 0.117861 | 0.121212 | 0.109994 | 0.120484 | 0.118735 | 0.109411 |
| 0.126894 | 0.121795 | 0.133013 | 0.133741 | 0.124126 | 0.118881 | 0.119755 |
| 0.135344 | 0.132576 | 0.14088  | 0.144522 | 0.142483 | 0.114219 | 0.13345  |
| 0.199446 | 0.189977 | 0.203234 | 0.204254 | 0.203671 | 0.193182 | 0.197844 |
| 0.125583 | 0.121649 | 0.121795 | 0.124854 | 0.121649 | 0.111451 | 0.114656 |
| 0.118007 | 0.121941 | 0.120047 | 0.121649 | 0.118444 | 0.108246 | 0.109703 |
| 0.136946 | 0.137675 | 0.134033 | 0.133013 | 0.130682 | 0.109994 | 0.121066 |
| 0.183275 | 0.175554 | 0.189977 | 0.194784 | 0.189831 | 0.178759 | 0.182255 |
| 0.14088  | 0.143939 | 0.136801 | 0.137821 | 0.142191 | 0.134907 | 0.135781 |
| 0.142337 | 0.152098 | 0.140297 | 0.141317 | 0.143939 | 0.140443 | 0.143648 |
| 0.147436 | 0.137383 | 0.138695 | 0.129808 | 0.131847 | 0.148456 | 0.140297 |
| 0.120921 | 0.124272 | 0.125291 | 0.122523 | 0.12398  | 0.11553  | 0.118735 |
| 0.128934 | 0.132576 | 0.13243  | 0.13345  | 0.128205 | 0.124709 | 0.119172 |
| 0.22028  | 0.207605 | 0.222902 | 0.224505 | 0.224505 | 0.214307 | 0.219843 |
| 0.13141  | 0.134178 | 0.136364 | 0.134761 | 0.131265 | 0.126311 | 0.130682 |

|           |          |          |          |          |           |           |
|-----------|----------|----------|----------|----------|-----------|-----------|
| 0.134178  | 0.136072 | 0.137092 | 0.136655 | 0.133741 | 0.124709  | 0.124126  |
| 0.128642  | 0.121503 | 0.126311 | 0.128788 | 0.124709 | 0.114219  | 0.119172  |
| 0.176136  | 0.164627 | 0.181381 | 0.181235 | 0.177448 | 0.171329  | 0.170163  |
| 0.121941  | 0.121795 | 0.121941 | 0.121795 | 0.127622 | 0.113345  | 0.113636  |
| 0.140152  | 0.14729  | 0.144814 | 0.145251 | 0.144376 | 0.152244  | 0.146416  |
| 0.108392  | 0.10912  | 0.118007 | 0.116404 | 0.116113 | 0.110868  | 0.112325  |
| 0.198718  | 0.187791 | 0.198135 | 0.200903 | 0.201195 | 0.192745  | 0.194493  |
| 0.125     | 0.134761 | 0.13141  | 0.128059 | 0.129516 | 0.119027  | 0.124563  |
| 0.104604  | 0.116987 | 0.117424 | 0.117279 | 0.109994 | 0.102127  | 0.0986305 |
| 0.123397  | 0.122086 | 0.122815 | 0.117424 | 0.123834 | 0.116841  | 0.111014  |
| 0.129079  | 0.135635 | 0.130245 | 0.135927 | 0.132139 | 0.11553   | 0.123689  |
| 0.131993  | 0.133887 | 0.133741 | 0.137675 | 0.132139 | 0.108829  | 0.120775  |
| 0.127914  | 0.131847 | 0.126457 | 0.130973 | 0.130973 | 0.12398   | 0.126603  |
| 0.108537  | 0.116841 | 0.120192 | 0.121212 | 0.117424 | 0.108974  | 0.113928  |
| 0.195513  | 0.187209 | 0.201632 | 0.198864 | 0.200321 | 0.190122  | 0.19595   |
| 0.129225  | 0.131993 | 0.133013 | 0.131993 | 0.127914 | 0.122086  | 0.128788  |
| 0.118881  | 0.13039  | 0.130245 | 0.132139 | 0.124272 | 0.107372  | 0.113491  |
| 0.214889  | 0.208042 | 0.21722  | 0.219697 | 0.219988 | 0.214744  | 0.216783  |
| 0.131847  | 0.134907 | 0.131556 | 0.124126 | 0.124709 | 0.124709  | 0.115967  |
| 0.111597  | 0.118444 | 0.123252 | 0.12398  | 0.119027 | 0.10708   | 0.116113  |
| 0.108974  | 0.119027 | 0.117133 | 0.118444 | 0.11553  | 0.103584  | 0.113199  |
| 0.135344  | 0.144522 | 0.141463 | 0.143065 | 0.134615 | 0.134907  | 0.133159  |
| 0.195659  | 0.187937 | 0.198281 | 0.200466 | 0.198718 | 0.190268  | 0.193765  |
| 0.130536  | 0.135344 | 0.135781 | 0.139714 | 0.135927 | 0.110577  | 0.128642  |
| 0.132284  | 0.14088  | 0.136655 | 0.136801 | 0.137092 | 0.128642  | 0.127477  |
| 0.108974  | 0.116113 | 0.123543 | 0.120484 | 0.117279 | 0.106498  | 0.111451  |
| 0.111888  | 0.118153 | 0.120921 | 0.123397 | 0.117861 | 0.103584  | 0.109994  |
| 0.109994  | 0.11655  | 0.122815 | 0.126457 | 0.117716 | 0.10373   | 0.112762  |
| 0.126166  | 0.129808 | 0.131993 | 0.129808 | 0.122232 | 0.118735  | 0.114073  |
| 0.101544  | 0.112762 | 0.10912  | 0.112471 | 0.108392 | 0.0941142 | 0.10169   |
| 0.129516  | 0.136364 | 0.130682 | 0.129079 | 0.131702 | 0.122378  | 0.12704   |
| 0.136801  | 0.131119 | 0.129225 | 0.128205 | 0.124709 | 0.128788  | 0.120338  |
| 0.127768  | 0.134324 | 0.130099 | 0.128497 | 0.129371 | 0.120047  | 0.125583  |
| 0.130536  | 0.127185 | 0.136364 | 0.131265 | 0.128351 | 0.127477  | 0.122523  |
| 0.200612  | 0.192016 | 0.203817 | 0.206585 | 0.208333 | 0.198718  | 0.202506  |
| 0.127914  | 0.133304 | 0.130828 | 0.131265 | 0.129225 | 0.117861  | 0.118735  |
| 0.135635  | 0.136364 | 0.139423 | 0.136655 | 0.134907 | 0.131119  | 0.127622  |
| 0.108974  | 0.115239 | 0.118881 | 0.118735 | 0.113782 | 0.102127  | 0.11116   |
| 0.0942599 | 0.106935 | 0.106206 | 0.107226 | 0.107517 | 0.0941142 | 0.100816  |
| 0.120484  | 0.128497 | 0.127477 | 0.127331 | 0.125583 | 0.11451   | 0.11859   |
| 0.132576  | 0.13243  | 0.137529 | 0.14088  | 0.137383 | 0.109411  | 0.129225  |
| 0.132284  | 0.136509 | 0.134907 | 0.138549 | 0.136509 | 0.131556  | 0.124272  |
| 0.126311  | 0.125874 | 0.126894 | 0.121212 | 0.120921 | 0.120921  | 0.115676  |
| 0.116404  | 0.124126 | 0.125437 | 0.132576 | 0.12704  | 0.10169   | 0.114802  |

|           |           |          |           |           |           |           |
|-----------|-----------|----------|-----------|-----------|-----------|-----------|
| 0.110723  | 0.11553   | 0.11859  | 0.120775  | 0.11757   | 0.0989219 | 0.109994  |
| 0.103584  | 0.112179  | 0.11757  | 0.118881  | 0.111305  | 0.0996503 | 0.102855  |
| 0.129371  | 0.124854  | 0.128788 | 0.13039   | 0.126603  | 0.114073  | 0.121941  |
| 0.132721  | 0.138112  | 0.136218 | 0.132284  | 0.13141   | 0.127622  | 0.131702  |
| 0.128205  | 0.129516  | 0.137529 | 0.139132  | 0.135052  | 0.106206  | 0.125437  |
| 0.122523  | 0.123834  | 0.124272 | 0.128205  | 0.123834  | 0.115967  | 0.111014  |
| 0.124272  | 0.12704   | 0.130973 | 0.136655  | 0.131119  | 0.10373   | 0.122086  |
| 0.113345  | 0.117279  | 0.120921 | 0.121941  | 0.118153  | 0.10708   | 0.113782  |
| 0.120192  | 0.12296   | 0.121358 | 0.120629  | 0.120629  | 0.109266  | 0.111888  |
| 0.113199  | 0.11859   | 0.124563 | 0.126166  | 0.119755  | 0.108683  | 0.115385  |
| 0.122232  | 0.126166  | 0.127768 | 0.126457  | 0.127331  | 0.115676  | 0.115385  |
| 0.128351  | 0.121503  | 0.122815 | 0.118881  | 0.117133  | 0.121212  | 0.112179  |
| 0.129516  | 0.136072  | 0.129808 | 0.130245  | 0.12704   | 0.104895  | 0.119172  |
| 0.0984848 | 0.114656  | 0.112471 | 0.112908  | 0.112034  | 0.0977564 | 0.10708   |
| 0.116404  | 0.116841  | 0.121358 | 0.122669  | 0.119464  | 0.102855  | 0.110431  |
| 0.131847  | 0.118881  | 0.126894 | 0.123252  | 0.124417  | 0.123834  | 0.115967  |
| 0.123252  | 0.133304  | 0.137821 | 0.137966  | 0.133887  | 0.116696  | 0.121941  |
| 0.0779429 | 0.114802  | 0.116113 | 0.111597  | 0.110431  | 0.0973193 | 0.104312  |
| 0.112034  | 0.118007  | 0.120775 | 0.122086  | 0.114802  | 0.105186  | 0.111597  |
| 0.12704   | 0.128934  | 0.126748 | 0.130973  | 0.125146  | 0.121358  | 0.114948  |
| 0.132284  | 0.126603  | 0.126457 | 0.132139  | 0.131265  | 0.111742  | 0.123397  |
| 0.128497  | 0.131847  | 0.130245 | 0.132721  | 0.129516  | 0.123106  | 0.118735  |
| 0.130245  | 0.135927  | 0.13141  | 0.135052  | 0.130973  | 0.104167  | 0.119027  |
| 0.102855  | 0.111451  | 0.113345 | 0.110577  | 0.112034  | 0.10271   | 0.106789  |
| 0.118881  | 0.126311  | 0.12704  | 0.123106  | 0.122523  | 0.108829  | 0.11553   |
| 0.123397  | 0.123252  | 0.121358 | 0.120338  | 0.119464  | 0.109557  | 0.111597  |
| 0.130536  | 0.134761  | 0.138695 | 0.133304  | 0.129225  | 0.123397  | 0.118444  |
| 0.127331  | 0.129808  | 0.131993 | 0.13243   | 0.13447   | 0.126603  | 0.125728  |
| 0.122523  | 0.127622  | 0.130682 | 0.129662  | 0.124126  | 0.115676  | 0.117716  |
| 0.200321  | 0.190559  | 0.201486 | 0.204545  | 0.207459  | 0.195513  | 0.199592  |
| 0.172931  | 0.160839  | 0.177302 | 0.177739  | 0.174534  | 0.170746  | 0.167541  |
| 0.129808  | 0.136946  | 0.13243  | 0.130536  | 0.13141   | 0.118007  | 0.125874  |
| 0.129662  | 0.129225  | 0.134615 | 0.133596  | 0.136801  | 0.119318  | 0.123106  |
| 0.148601  | 0.154575  | 0.144522 | 0.145833  | 0.147582  | 0.144959  | 0.148164  |
| 0.128351  | 0.133741  | 0.131847 | 0.135198  | 0.129662  | 0.129371  | 0.125583  |
| 0.12296   | 0.12602   | 0.128205 | 0.126894  | 0.130099  | 0.121649  | 0.12398   |
| 0.117861  | 0.127331  | 0.127477 | 0.129662  | 0.125874  | 0.116259  | 0.119172  |
| 0.0759033 | 0.0999417 | 0.102418 | 0.0984848 | 0.0952797 | 0.0909091 | 0.0941142 |
| 0.125146  | 0.132867  | 0.137675 | 0.136655  | 0.130828  | 0.115967  | 0.120629  |
| 0.20542   | 0.200612  | 0.211538 | 0.213141  | 0.213724  | 0.205274  | 0.207314  |
| 0.133304  | 0.135198  | 0.139423 | 0.142191  | 0.139277  | 0.112471  | 0.128788  |
| 0.129662  | 0.13039   | 0.137821 | 0.134761  | 0.129808  | 0.113199  | 0.120484  |
| 0.107226  | 0.114656  | 0.120047 | 0.122232  | 0.11961   | 0.105041  | 0.112325  |
| 0.123689  | 0.127331  | 0.129516 | 0.127622  | 0.126457  | 0.120921  | 0.11451   |

|           |          |          |          |          |           |          |
|-----------|----------|----------|----------|----------|-----------|----------|
| 0.188228  | 0.183712 | 0.193765 | 0.197115 | 0.196533 | 0.186917  | 0.1875   |
| 0.25      | 0.242861 | 0.251166 | 0.253059 | 0.255099 | 0.247232  | 0.254808 |
| 0.129953  | 0.122815 | 0.127331 | 0.124272 | 0.119318 | 0.12398   | 0.120192 |
| 0.125     | 0.132721 | 0.136364 | 0.132721 | 0.129516 | 0.11553   | 0.114656 |
| 0.125583  | 0.133013 | 0.127331 | 0.128934 | 0.129808 | 0.119027  | 0.122523 |
| 0.130973  | 0.133159 | 0.131556 | 0.132284 | 0.128497 | 0.10373   | 0.118007 |
| 0.125     | 0.130099 | 0.134033 | 0.136218 | 0.130973 | 0.103875  | 0.120192 |
| 0.123397  | 0.127331 | 0.12602  | 0.122378 | 0.122086 | 0.113928  | 0.121795 |
| 0.115676  | 0.120484 | 0.125583 | 0.125437 | 0.121941 | 0.112034  | 0.119027 |
| 0.124709  | 0.129516 | 0.133159 | 0.136509 | 0.133887 | 0.10708   | 0.122523 |
| 0.118444  | 0.12296  | 0.124272 | 0.124126 | 0.120047 | 0.111597  | 0.115676 |
| 0.0810023 | 0.11757  | 0.118881 | 0.114948 | 0.114073 | 0.105915  | 0.112325 |
| 0.102418  | 0.111014 | 0.114365 | 0.114219 | 0.113054 | 0.101399  | 0.105478 |
| 0.128788  | 0.121066 | 0.127622 | 0.120775 | 0.120484 | 0.125437  | 0.116404 |
| 0.127768  | 0.130536 | 0.132139 | 0.132284 | 0.127622 | 0.121503  | 0.117133 |
| 0.114073  | 0.111597 | 0.112908 | 0.111597 | 0.115967 | 0.106352  | 0.10373  |
| 0.121649  | 0.100233 | 0.102127 | 0.105186 | 0.103438 | 0.114219  | 0.10373  |
| 0.141171  | 0.145105 | 0.141171 | 0.136364 | 0.134033 | 0.117716  | 0.130536 |
| 0.111888  | 0.117279 | 0.121212 | 0.122523 | 0.118153 | 0.105624  | 0.110577 |
| 0.119901  | 0.120921 | 0.121066 | 0.124709 | 0.119464 | 0.116841  | 0.117716 |
| 0.121066  | 0.125    | 0.127185 | 0.125874 | 0.124709 | 0.120338  | 0.126748 |
| 0.208916  | 0.203817 | 0.214452 | 0.214015 | 0.215472 | 0.209936  | 0.215763 |
| 0.120775  | 0.114219 | 0.11961  | 0.11451  | 0.111597 | 0.112471  | 0.107809 |
| 0.101107  | 0.112325 | 0.110723 | 0.110868 | 0.109703 | 0.0960082 | 0.102127 |
| 0.123834  | 0.133596 | 0.131702 | 0.134761 | 0.131556 | 0.120484  | 0.118735 |
| 0.13039   | 0.131702 | 0.134178 | 0.124709 | 0.123543 | 0.128788  | 0.11451  |
| 0.122815  | 0.122086 | 0.130099 | 0.126457 | 0.125874 | 0.118881  | 0.113345 |
| 0.205857  | 0.197552 | 0.209062 | 0.214161 | 0.212121 | 0.201632  | 0.20542  |
| 0.131993  | 0.134761 | 0.135781 | 0.134761 | 0.130973 | 0.125146  | 0.119901 |
| 0.11116   | 0.115093 | 0.120192 | 0.117716 | 0.115967 | 0.101399  | 0.111597 |
| 0.117133  | 0.126603 | 0.124709 | 0.129808 | 0.126311 | 0.112617  | 0.116696 |
| 0.127622  | 0.132721 | 0.129662 | 0.13039  | 0.129225 | 0.102127  | 0.11757  |
| 0.128497  | 0.128934 | 0.134324 | 0.132139 | 0.128642 | 0.125437  | 0.117279 |
| 0.115967  | 0.116113 | 0.119172 | 0.125437 | 0.120484 | 0.109411  | 0.110577 |
| 0.080711  | 0.11961  | 0.121795 | 0.116987 | 0.114656 | 0.105332  | 0.113782 |
| 0.125     | 0.130973 | 0.131119 | 0.122232 | 0.120775 | 0.122523  | 0.110286 |
| 0.203234  | 0.199301 | 0.209645 | 0.210664 | 0.207751 | 0.199592  | 0.203089 |
| 0.119755  | 0.125146 | 0.123252 | 0.124563 | 0.11961  | 0.111451  | 0.111742 |
| 0.201777  | 0.195804 | 0.207022 | 0.205128 | 0.207459 | 0.198718  | 0.202214 |
| 0.20134   | 0.190705 | 0.206294 | 0.203817 | 0.204983 | 0.196533  | 0.199738 |
| 0.139277  | 0.143794 | 0.140443 | 0.135635 | 0.133887 | 0.115822  | 0.124272 |
| 0.133741  | 0.135927 | 0.136072 | 0.125728 | 0.125146 | 0.13243   | 0.119901 |
| 0.0842075 | 0.106789 | 0.114219 | 0.109994 | 0.106498 | 0.0919289 | 0.102127 |
| 0.120775  | 0.120629 | 0.122232 | 0.125291 | 0.120629 | 0.110431  | 0.109848 |



|           |          |          |          |          |           |           |
|-----------|----------|----------|----------|----------|-----------|-----------|
| 0.123834  | 0.128642 | 0.129662 | 0.128934 | 0.127185 | 0.116987  | 0.113199  |
| 0.113054  | 0.118153 | 0.123543 | 0.125437 | 0.120775 | 0.103584  | 0.114365  |
| 0.122378  | 0.127768 | 0.129371 | 0.131265 | 0.128059 | 0.102418  | 0.119901  |
| 0.124709  | 0.13039  | 0.134907 | 0.136801 | 0.131847 | 0.106206  | 0.121358  |
| 0.13039   | 0.126166 | 0.126894 | 0.125583 | 0.122378 | 0.128497  | 0.120921  |
| 0.133741  | 0.136509 | 0.130828 | 0.133887 | 0.130973 | 0.108829  | 0.120775  |
| 0.105915  | 0.115676 | 0.117861 | 0.118298 | 0.112179 | 0.101107  | 0.111305  |
| 0.12704   | 0.130099 | 0.134324 | 0.132721 | 0.127477 | 0.120192  | 0.116987  |
| 0.0983392 | 0.109848 | 0.110868 | 0.113928 | 0.106643 | 0.0976107 | 0.0944056 |
| 0.132284  | 0.13243  | 0.136655 | 0.13447  | 0.127185 | 0.127185  | 0.123397  |
| 0.129953  | 0.131847 | 0.131702 | 0.124563 | 0.127768 | 0.119027  | 0.125728  |
| 0.139132  | 0.138695 | 0.138258 | 0.142483 | 0.133741 | 0.133159  | 0.13141   |
| 0.260635  | 0.251166 | 0.26384  | 0.262238 | 0.265443 | 0.261946  | 0.266026  |
| 0.136801  | 0.134907 | 0.13039  | 0.127331 | 0.128205 | 0.123252  | 0.129662  |
| 0.129079  | 0.135635 | 0.131119 | 0.13039  | 0.131265 | 0.123689  | 0.130682  |
| 0.220717  | 0.213869 | 0.22567  | 0.226981 | 0.22669  | 0.219697  | 0.225233  |
| 0.129953  | 0.126603 | 0.129662 | 0.125146 | 0.126603 | 0.123689  | 0.119318  |
| 0.231061  | 0.224213 | 0.238928 | 0.235286 | 0.235577 | 0.234703  | 0.234703  |
| 0.130099  | 0.127914 | 0.127185 | 0.125    | 0.122086 | 0.113054  | 0.119172  |
| 0.11859   | 0.124563 | 0.127914 | 0.12602  | 0.123397 | 0.115239  | 0.126311  |
| 0.126748  | 0.12602  | 0.129079 | 0.126603 | 0.122232 | 0.118444  | 0.112325  |
| 0.13549   | 0.138258 | 0.132867 | 0.135927 | 0.133887 | 0.110286  | 0.124272  |
| 0.207751  | 0.200612 | 0.214161 | 0.214015 | 0.21285  | 0.207022  | 0.207605  |
| 0.134907  | 0.137092 | 0.13986  | 0.138258 | 0.131265 | 0.129225  | 0.125146  |
| 0.127331  | 0.130099 | 0.134907 | 0.13447  | 0.129225 | 0.122815  | 0.11961   |
| 0.231206  | 0.220862 | 0.233537 | 0.23514  | 0.236305 | 0.229895  | 0.233392  |
| 0.131993  | 0.131556 | 0.138986 | 0.140006 | 0.139132 | 0.10912   | 0.124854  |
| 0.204983  | 0.197261 | 0.209062 | 0.208916 | 0.20979  | 0.201049  | 0.203089  |
| 0.130099  | 0.128497 | 0.13243  | 0.138695 | 0.13345  | 0.111014  | 0.124417  |
| 0.110868  | 0.121503 | 0.122232 | 0.124417 | 0.120338 | 0.107809  | 0.115385  |
| 0.10169   | 0.114365 | 0.115093 | 0.112034 | 0.111451 | 0.105624  | 0.109703  |
| 0.140734  | 0.14088  | 0.138403 | 0.137092 | 0.13039  | 0.112617  | 0.124563  |
| 0.120775  | 0.121503 | 0.122523 | 0.124709 | 0.126166 | 0.115676  | 0.117133  |
| 0.161568  | 0.150641 | 0.167686 | 0.171037 | 0.167249 | 0.15676   | 0.162005  |
| 0.121941  | 0.126457 | 0.128351 | 0.125291 | 0.124417 | 0.11451   | 0.112471  |
| 0.130099  | 0.127622 | 0.133887 | 0.128497 | 0.126748 | 0.128497  | 0.11655   |
| 0.12602   | 0.124126 | 0.133304 | 0.132284 | 0.133741 | 0.115093  | 0.121503  |
| 0.135052  | 0.129371 | 0.126311 | 0.120629 | 0.126748 | 0.126166  | 0.119464  |
| 0.201632  | 0.195367 | 0.206876 | 0.206731 | 0.210227 | 0.200612  | 0.201486  |
| 0.109994  | 0.117716 | 0.119318 | 0.121795 | 0.115967 | 0.103438  | 0.112471  |
| 0.13549   | 0.130682 | 0.136655 | 0.140297 | 0.134178 | 0.111451  | 0.122815  |
| 0.130973  | 0.12296  | 0.127185 | 0.127622 | 0.131993 | 0.111014  | 0.121795  |
| 0.129662  | 0.13039  | 0.134324 | 0.135927 | 0.13447  | 0.109411  | 0.122232  |
| 0.112034  | 0.11859  | 0.124272 | 0.125874 | 0.11859  | 0.110723  | 0.117133  |

|           |           |          |          |          |           |           |
|-----------|-----------|----------|----------|----------|-----------|-----------|
| 0.256993  | 0.249854  | 0.261655 | 0.262383 | 0.260635 | 0.260635  | 0.261801  |
| 0.101253  | 0.109848  | 0.113199 | 0.109266 | 0.11014  | 0.102855  | 0.102273  |
| 0.12602   | 0.129953  | 0.129225 | 0.131702 | 0.129079 | 0.119755  | 0.120921  |
| 0.186917  | 0.171911  | 0.189831 | 0.192308 | 0.185023 | 0.185315  | 0.183566  |
| 0.193036  | 0.182401  | 0.19595  | 0.196096 | 0.19697  | 0.190559  | 0.190851  |
| 0.127477  | 0.121212  | 0.127477 | 0.124126 | 0.120629 | 0.123252  | 0.118007  |
| 0.126457  | 0.130682  | 0.133159 | 0.131556 | 0.12602  | 0.121358  | 0.118444  |
| 0.130536  | 0.133596  | 0.130828 | 0.131847 | 0.126894 | 0.105332  | 0.118444  |
| 0.146707  | 0.148893  | 0.14729  | 0.148601 | 0.141317 | 0.143939  | 0.142483  |
| 0.125437  | 0.120047  | 0.124563 | 0.123543 | 0.119464 | 0.118007  | 0.111305  |
| 0.129371  | 0.126311  | 0.132284 | 0.126311 | 0.121358 | 0.12398   | 0.118444  |
| 0.140297  | 0.134324  | 0.138549 | 0.141026 | 0.13986  | 0.11451   | 0.131119  |
| 0.124854  | 0.129079  | 0.127477 | 0.130536 | 0.125583 | 0.117424  | 0.115385  |
| 0.135198  | 0.135344  | 0.134907 | 0.13447  | 0.130682 | 0.126894  | 0.125146  |
| 0.129225  | 0.119755  | 0.133887 | 0.142483 | 0.132284 | 0.111014  | 0.126166  |
| 0.134033  | 0.138258  | 0.132284 | 0.131847 | 0.129808 | 0.111742  | 0.123397  |
| 0.148456  | 0.150932  | 0.148164 | 0.142774 | 0.142483 | 0.122669  | 0.138695  |
| 0.104312  | 0.112325  | 0.111888 | 0.114073 | 0.111451 | 0.106498  | 0.108537  |
| 0.143502  | 0.145396  | 0.140006 | 0.138403 | 0.136946 | 0.116259  | 0.130828  |
| 0.138258  | 0.136655  | 0.14088  | 0.144231 | 0.1419   | 0.115967  | 0.132867  |
| 0.211247  | 0.203234  | 0.2162   | 0.219551 | 0.2213   | 0.211101  | 0.211393  |
| 0.0989219 | 0.117133  | 0.115239 | 0.113928 | 0.11014  | 0.101981  | 0.112762  |
| 0.197698  | 0.189977  | 0.203817 | 0.206002 | 0.203963 | 0.196096  | 0.199009  |
| 0.122232  | 0.125874  | 0.130099 | 0.121503 | 0.11859  | 0.117424  | 0.115093  |
| 0.116696  | 0.120338  | 0.126603 | 0.126166 | 0.125    | 0.116259  | 0.122086  |
| 0.126894  | 0.131702  | 0.128351 | 0.131119 | 0.128788 | 0.122086  | 0.124126  |
| 0.121795  | 0.129225  | 0.125291 | 0.122815 | 0.124563 | 0.114656  | 0.120192  |
| 0.130099  | 0.134324  | 0.133013 | 0.132867 | 0.128788 | 0.124417  | 0.118881  |
| 0.132721  | 0.134615  | 0.134178 | 0.130245 | 0.129079 | 0.124709  | 0.122086  |
| 0.115822  | 0.117424  | 0.125146 | 0.125291 | 0.121212 | 0.107517  | 0.115967  |
| 0.12704   | 0.128642  | 0.133159 | 0.123397 | 0.124272 | 0.12398   | 0.114073  |
| 0.131702  | 0.137675  | 0.13141  | 0.134178 | 0.135052 | 0.123106  | 0.128934  |
| 0.142337  | 0.135198  | 0.145542 | 0.148893 | 0.14627  | 0.11859   | 0.136655  |
| 0.251311  | 0.246503  | 0.254225 | 0.257576 | 0.256702 | 0.255536  | 0.257867  |
| 0.114948  | 0.120338  | 0.120775 | 0.126457 | 0.121795 | 0.107517  | 0.115385  |
| 0.191725  | 0.185169  | 0.198718 | 0.197698 | 0.197115 | 0.188083  | 0.18954   |
| 0.193619  | 0.188228  | 0.201777 | 0.201923 | 0.203671 | 0.19289   | 0.196387  |
| 0.119464  | 0.125437  | 0.132284 | 0.129516 | 0.129225 | 0.114656  | 0.126603  |
| 0.100524  | 0.112908  | 0.113928 | 0.111451 | 0.107372 | 0.100087  | 0.10708   |
| 0.115093  | 0.124272  | 0.123834 | 0.126603 | 0.12398  | 0.113782  | 0.123397  |
| 0.122378  | 0.124854  | 0.125583 | 0.126894 | 0.122815 | 0.116987  | 0.112325  |
| 0.0796911 | 0.0964452 | 0.103875 | 0.102564 | 0.103438 | 0.0903263 | 0.0935315 |
| 0.129516  | 0.133741  | 0.136509 | 0.138112 | 0.136072 | 0.108974  | 0.123543  |
| 0.124417  | 0.128642  | 0.133159 | 0.126311 | 0.122232 | 0.116987  | 0.118444  |

|           |          |          |          |          |          |          |
|-----------|----------|----------|----------|----------|----------|----------|
| 0.135781  | 0.136218 | 0.138986 | 0.138549 | 0.132721 | 0.133013 | 0.127477 |
| 0.112034  | 0.120629 | 0.118735 | 0.123543 | 0.120047 | 0.104604 | 0.113345 |
| 0.133596  | 0.133159 | 0.138549 | 0.137529 | 0.134033 | 0.128497 | 0.126457 |
| 0.122378  | 0.128934 | 0.131702 | 0.128934 | 0.127477 | 0.114656 | 0.119027 |
| 0.130536  | 0.141171 | 0.132284 | 0.129808 | 0.133596 | 0.12602  | 0.128642 |
| 0.133596  | 0.138112 | 0.135927 | 0.138403 | 0.134907 | 0.108974 | 0.123252 |
| 0.137238  | 0.140297 | 0.142191 | 0.144085 | 0.139714 | 0.116696 | 0.135052 |
| 0.078817  | 0.123252 | 0.122232 | 0.111888 | 0.118007 | 0.109848 | 0.117133 |
| 0.109994  | 0.11451  | 0.11961  | 0.124126 | 0.117424 | 0.109848 | 0.114802 |
| 0.135635  | 0.142191 | 0.137966 | 0.137238 | 0.138986 | 0.130828 | 0.131702 |
| 0.187063  | 0.185169 | 0.195804 | 0.199155 | 0.198281 | 0.190414 | 0.191871 |
| 0.137383  | 0.141608 | 0.140006 | 0.138695 | 0.134033 | 0.133159 | 0.13141  |
| 0.126603  | 0.130828 | 0.129516 | 0.13141  | 0.127331 | 0.123543 | 0.11859  |
| 0.126748  | 0.133304 | 0.129079 | 0.126603 | 0.130973 | 0.11961  | 0.124272 |
| 0.120192  | 0.12296  | 0.121941 | 0.118007 | 0.117716 | 0.110431 | 0.114802 |
| 0.134615  | 0.136218 | 0.13345  | 0.133013 | 0.131556 | 0.110286 | 0.118444 |
| 0.137092  | 0.140734 | 0.137383 | 0.139569 | 0.135781 | 0.110723 | 0.122086 |
| 0.197844  | 0.188957 | 0.203089 | 0.206731 | 0.205857 | 0.196241 | 0.196824 |
| 0.124709  | 0.127185 | 0.131119 | 0.130682 | 0.12398  | 0.119027 | 0.116696 |
| 0.114365  | 0.113928 | 0.122523 | 0.121503 | 0.115093 | 0.108392 | 0.107517 |
| 0.13243   | 0.134615 | 0.133887 | 0.131993 | 0.128205 | 0.125874 | 0.121503 |
| 0.199592  | 0.192162 | 0.206585 | 0.205857 | 0.205857 | 0.194784 | 0.196824 |
| 0.102418  | 0.11014  | 0.113491 | 0.115385 | 0.111014 | 0.101981 | 0.104604 |
| 0.136364  | 0.137092 | 0.138986 | 0.14292  | 0.138258 | 0.112325 | 0.129808 |
| 0.130536  | 0.134178 | 0.13549  | 0.136801 | 0.128351 | 0.123397 | 0.120484 |
| 0.12398   | 0.120629 | 0.123106 | 0.115676 | 0.113928 | 0.118881 | 0.111305 |
| 0.195367  | 0.185606 | 0.198572 | 0.200175 | 0.200175 | 0.190851 | 0.193473 |
| 0.133013  | 0.131993 | 0.134178 | 0.141608 | 0.13549  | 0.112762 | 0.127622 |
| 0.121066  | 0.126457 | 0.128059 | 0.129953 | 0.130245 | 0.113054 | 0.118007 |
| 0.106789  | 0.111597 | 0.112325 | 0.115676 | 0.113345 | 0.102564 | 0.106935 |
| 0.131265  | 0.121212 | 0.135344 | 0.135198 | 0.135781 | 0.12296  | 0.124417 |
| 0.126457  | 0.130099 | 0.130245 | 0.125437 | 0.124563 | 0.125728 | 0.115239 |
| 0.136364  | 0.136801 | 0.137238 | 0.142628 | 0.139132 | 0.114948 | 0.133013 |
| 0.112762  | 0.121649 | 0.119464 | 0.125146 | 0.119901 | 0.105624 | 0.113491 |
| 0.123834  | 0.133304 | 0.137821 | 0.13243  | 0.13039  | 0.115239 | 0.127185 |
| 0.148164  | 0.136364 | 0.139423 | 0.134907 | 0.132284 | 0.148601 | 0.140734 |
| 0.238782  | 0.233974 | 0.243735 | 0.243298 | 0.241841 | 0.240385 | 0.243881 |
| 0.0791084 | 0.126457 | 0.120775 | 0.117424 | 0.115676 | 0.109557 | 0.119464 |
| 0.131556  | 0.130828 | 0.130973 | 0.127914 | 0.129662 | 0.129079 | 0.114219 |
| 0.123543  | 0.127185 | 0.129371 | 0.131265 | 0.12398  | 0.119318 | 0.118444 |
| 0.127768  | 0.135198 | 0.129225 | 0.136364 | 0.130828 | 0.128205 | 0.128205 |
| 0.125     | 0.126603 | 0.126457 | 0.124272 | 0.122523 | 0.118735 | 0.115822 |
| 0.125874  | 0.121941 | 0.13141  | 0.127768 | 0.123397 | 0.117861 | 0.116987 |
| 0.130682  | 0.13141  | 0.13447  | 0.134907 | 0.129662 | 0.126166 | 0.124417 |

|           |           |          |           |           |           |           |
|-----------|-----------|----------|-----------|-----------|-----------|-----------|
| 0.136072  | 0.134178  | 0.140443 | 0.142628  | 0.139714  | 0.115822  | 0.133013  |
| 0.126748  | 0.129808  | 0.129662 | 0.128059  | 0.129225  | 0.124272  | 0.123397  |
| 0.241987  | 0.23514   | 0.243735 | 0.244172  | 0.245047  | 0.239802  | 0.243881  |
| 0.0990676 | 0.10912   | 0.113636 | 0.114656  | 0.108829  | 0.0980478 | 0.104167  |
| 0.117716  | 0.120484  | 0.120629 | 0.120192  | 0.119901  | 0.104749  | 0.112325  |
| 0.10912   | 0.117716  | 0.120192 | 0.124709  | 0.116841  | 0.104021  | 0.11451   |
| 0.131993  | 0.128934  | 0.131702 | 0.125146  | 0.123397  | 0.133304  | 0.126311  |
| 0.0798368 | 0.130973  | 0.125874 | 0.119901  | 0.11961   | 0.11757   | 0.12602   |
| 0.119464  | 0.120192  | 0.125291 | 0.120775  | 0.120192  | 0.119027  | 0.116696  |
| 0.128497  | 0.130099  | 0.134033 | 0.131847  | 0.127185  | 0.121649  | 0.120192  |
| 0.122232  | 0.115676  | 0.122523 | 0.122086  | 0.117133  | 0.113636  | 0.111305  |
| 0.234703  | 0.228147  | 0.239656 | 0.240676  | 0.241841  | 0.234848  | 0.238928  |
| 0.134761  | 0.135781  | 0.136218 | 0.13549   | 0.131702  | 0.127331  | 0.124417  |
| 0.135198  | 0.133013  | 0.137529 | 0.14088   | 0.135927  | 0.111742  | 0.127477  |
| 0.117716  | 0.127768  | 0.126457 | 0.129516  | 0.128059  | 0.114656  | 0.117861  |
| 0.129808  | 0.124417  | 0.119318 | 0.120629  | 0.119172  | 0.126748  | 0.115676  |
| 0.130099  | 0.131702  | 0.126311 | 0.124417  | 0.125291  | 0.118881  | 0.124709  |
| 0.109703  | 0.120338  | 0.119901 | 0.120629  | 0.11655   | 0.104604  | 0.116841  |
| 0.131847  | 0.132867  | 0.137966 | 0.141317  | 0.138112  | 0.113054  | 0.125583  |
| 0.137529  | 0.139714  | 0.138986 | 0.144959  | 0.139132  | 0.118444  | 0.135344  |
| 0.127914  | 0.131556  | 0.13345  | 0.137383  | 0.136218  | 0.109411  | 0.125437  |
| 0.109411  | 0.121503  | 0.119901 | 0.12296   | 0.115967  | 0.106061  | 0.112471  |
| 0.131847  | 0.133741  | 0.13243  | 0.124709  | 0.125583  | 0.131119  | 0.117424  |
| 0.134324  | 0.139423  | 0.140443 | 0.130099  | 0.128059  | 0.135635  | 0.122523  |
| 0.132576  | 0.140006  | 0.136072 | 0.133887  | 0.133596  | 0.124563  | 0.131847  |
| 0.137238  | 0.138258  | 0.136655 | 0.132139  | 0.137675  | 0.125728  | 0.131556  |
| 0.13447   | 0.134615  | 0.133887 | 0.127331  | 0.123252  | 0.133159  | 0.118298  |
| 0.0776515 | 0.0987762 | 0.105041 | 0.102855  | 0.099359  | 0.0882867 | 0.0888695 |
| 0.143648  | 0.139423  | 0.137529 | 0.137966  | 0.141171  | 0.126311  | 0.139423  |
| 0.124272  | 0.138403  | 0.141463 | 0.137238  | 0.141317  | 0.123252  | 0.137238  |
| 0.214015  | 0.204837  | 0.216055 | 0.217949  | 0.217657  | 0.211538  | 0.212413  |
| 0.122815  | 0.133159  | 0.135052 | 0.136655  | 0.13141   | 0.121212  | 0.125     |
| 0.126894  | 0.123834  | 0.124854 | 0.123252  | 0.122669  | 0.1081    | 0.120047  |
| 0.117716  | 0.118444  | 0.126166 | 0.126894  | 0.118444  | 0.111742  | 0.121649  |
| 0.226836  | 0.219988  | 0.228293 | 0.230186  | 0.229895  | 0.226107  | 0.230769  |
| 0.215181  | 0.207751  | 0.220425 | 0.220571  | 0.219988  | 0.213287  | 0.220571  |
| 0.136946  | 0.136218  | 0.141026 | 0.143502  | 0.140006  | 0.11553   | 0.13447   |
| 0.252768  | 0.247378  | 0.256847 | 0.259033  | 0.25845   | 0.255828  | 0.259615  |
| 0.0791084 | 0.0979021 | 0.103001 | 0.0996503 | 0.0973193 | 0.0903263 | 0.0888695 |
| 0.117861  | 0.132576  | 0.128642 | 0.129079  | 0.12296   | 0.123834  | 0.133741  |
| 0.0989219 | 0.112179  | 0.112617 | 0.11014   | 0.11014   | 0.10169   | 0.107517  |
| 0.132576  | 0.133304  | 0.135198 | 0.126894  | 0.126311  | 0.130682  | 0.113782  |
| 0.196533  | 0.187937  | 0.200321 | 0.202214  | 0.20134   | 0.192308  | 0.193182  |
| 0.119464  | 0.132139  | 0.129662 | 0.130973  | 0.131847  | 0.118444  | 0.125437  |

|           |          |          |          |          |           |          |
|-----------|----------|----------|----------|----------|-----------|----------|
| 0.200758  | 0.19391  | 0.206294 | 0.206731 | 0.207314 | 0.198864  | 0.20236  |
| 0.119755  | 0.122232 | 0.120921 | 0.120192 | 0.124563 | 0.112617  | 0.118444 |
| 0.132867  | 0.123689 | 0.13141  | 0.136218 | 0.133013 | 0.112325  | 0.120484 |
| 0.106352  | 0.120484 | 0.119755 | 0.113491 | 0.11116  | 0.106498  | 0.110577 |
| 0.121212  | 0.120775 | 0.123252 | 0.124272 | 0.124854 | 0.116404  | 0.119027 |
| 0.106206  | 0.111014 | 0.113491 | 0.117424 | 0.112179 | 0.100233  | 0.105769 |
| 0.119027  | 0.129953 | 0.129516 | 0.129371 | 0.12704  | 0.110431  | 0.111888 |
| 0.0980478 | 0.1081   | 0.106789 | 0.108974 | 0.108683 | 0.0958625 | 0.102273 |
| 0.123543  | 0.127477 | 0.127622 | 0.127185 | 0.121941 | 0.117861  | 0.112617 |
| 0.131847  | 0.125291 | 0.129808 | 0.130828 | 0.133159 | 0.112179  | 0.126166 |
| 0.081148  | 0.11451  | 0.117279 | 0.113345 | 0.11014  | 0.0996503 | 0.111888 |
| 0.100524  | 0.108537 | 0.107809 | 0.111451 | 0.108246 | 0.100379  | 0.10271  |
| 0.12398   | 0.130536 | 0.124563 | 0.127331 | 0.134324 | 0.120629  | 0.124417 |
| 0.136509  | 0.136364 | 0.135344 | 0.138695 | 0.131119 | 0.127622  | 0.126748 |
| 0.122086  | 0.131265 | 0.126166 | 0.123689 | 0.125146 | 0.114365  | 0.120192 |
| 0.123106  | 0.130245 | 0.125728 | 0.125291 | 0.125583 | 0.11451   | 0.113345 |
| 0.107809  | 0.113782 | 0.112471 | 0.116987 | 0.112034 | 0.100379  | 0.108537 |
| 0.129079  | 0.13039  | 0.133741 | 0.144085 | 0.13039  | 0.109994  | 0.126603 |
| 0.127622  | 0.127185 | 0.128788 | 0.125728 | 0.121649 | 0.123689  | 0.109994 |
| 0.134178  | 0.139569 | 0.13447  | 0.134907 | 0.130828 | 0.110723  | 0.120629 |
| 0.127185  | 0.129662 | 0.13039  | 0.126166 | 0.13141  | 0.117716  | 0.118881 |
| 0.129079  | 0.128934 | 0.129662 | 0.132139 | 0.125146 | 0.120775  | 0.117279 |
| 0.134761  | 0.133741 | 0.137383 | 0.137821 | 0.13345  | 0.128788  | 0.126166 |
| 0.143211  | 0.144231 | 0.142337 | 0.141608 | 0.136072 | 0.137529  | 0.134907 |
| 0.118298  | 0.121066 | 0.123834 | 0.124563 | 0.122815 | 0.099796  | 0.113199 |
| 0.11451   | 0.119318 | 0.121212 | 0.125146 | 0.121358 | 0.108537  | 0.114656 |
| 0.115239  | 0.119172 | 0.124272 | 0.121795 | 0.119464 | 0.112179  | 0.1081   |
| 0.136509  | 0.138695 | 0.140297 | 0.127914 | 0.127914 | 0.135781  | 0.123834 |
| 0.101107  | 0.113199 | 0.111305 | 0.10912  | 0.109703 | 0.10067   | 0.106789 |
| 0.150641  | 0.150204 | 0.147145 | 0.142045 | 0.142628 | 0.126311  | 0.139423 |
| 0.123252  | 0.127768 | 0.132576 | 0.131847 | 0.127477 | 0.125728  | 0.131556 |
| 0.128059  | 0.12704  | 0.130973 | 0.121212 | 0.119755 | 0.126166  | 0.120921 |
| 0.102273  | 0.120484 | 0.111305 | 0.118444 | 0.116113 | 0.105332  | 0.103293 |
| 0.120775  | 0.11655  | 0.121649 | 0.115385 | 0.120047 | 0.111597  | 0.108974 |
| 0.129808  | 0.140152 | 0.131847 | 0.130828 | 0.13141  | 0.123252  | 0.127914 |
| 0.211538  | 0.202943 | 0.215909 | 0.218094 | 0.21926  | 0.211684  | 0.215472 |
| 0.120338  | 0.130973 | 0.13141  | 0.129516 | 0.126603 | 0.113782  | 0.116987 |
| 0.105041  | 0.120338 | 0.119027 | 0.11451  | 0.11655  | 0.101981  | 0.109266 |
| 0.129371  | 0.128351 | 0.129953 | 0.123397 | 0.120775 | 0.123397  | 0.112325 |
| 0.124563  | 0.128205 | 0.12398  | 0.123543 | 0.128497 | 0.115093  | 0.121503 |
| 0.125291  | 0.124272 | 0.130245 | 0.129516 | 0.129808 | 0.118153  | 0.123397 |
| 0.127914  | 0.131265 | 0.13141  | 0.134761 | 0.131847 | 0.123397  | 0.12398  |
| 0.130973  | 0.130536 | 0.13447  | 0.132867 | 0.136946 | 0.128788  | 0.126748 |
| 0.126457  | 0.119027 | 0.126166 | 0.120484 | 0.119901 | 0.122523  | 0.115822 |

|           |           |          |          |           |           |           |
|-----------|-----------|----------|----------|-----------|-----------|-----------|
| 0.126166  | 0.120484  | 0.127331 | 0.130682 | 0.131847  | 0.105041  | 0.120192  |
| 0.132284  | 0.131556  | 0.135198 | 0.125728 | 0.124272  | 0.130682  | 0.118153  |
| 0.104895  | 0.120484  | 0.118881 | 0.114948 | 0.111451  | 0.101544  | 0.103584  |
| 0.0826049 | 0.120629  | 0.121358 | 0.117133 | 0.115093  | 0.104895  | 0.113928  |
| 0.181235  | 0.176719  | 0.183858 | 0.189248 | 0.185169  | 0.184003  | 0.181964  |
| 0.125874  | 0.130682  | 0.130828 | 0.133887 | 0.129516  | 0.118735  | 0.115822  |
| 0.135344  | 0.125291  | 0.137675 | 0.128497 | 0.129079  | 0.132284  | 0.120921  |
| 0.106352  | 0.11961   | 0.117716 | 0.112908 | 0.112908  | 0.104749  | 0.108829  |
| 0.132139  | 0.119172  | 0.122523 | 0.121503 | 0.117716  | 0.12296   | 0.115676  |
| 0.101253  | 0.111305  | 0.11553  | 0.113928 | 0.108392  | 0.101107  | 0.0955711 |
| 0.083479  | 0.111597  | 0.113782 | 0.113345 | 0.106935  | 0.097028  | 0.104312  |
| 0.104458  | 0.113345  | 0.119318 | 0.11655  | 0.113636  | 0.106061  | 0.100524  |
| 0.127477  | 0.12704   | 0.124854 | 0.119755 | 0.126166  | 0.118007  | 0.119755  |
| 0.10271   | 0.122086  | 0.124854 | 0.12296  | 0.120047  | 0.113345  | 0.115967  |
| 0.127622  | 0.136801  | 0.138403 | 0.132139 | 0.138549  | 0.116404  | 0.129225  |
| 0.118735  | 0.110431  | 0.117861 | 0.121212 | 0.120047  | 0.108683  | 0.111305  |
| 0.113054  | 0.114948  | 0.122669 | 0.124563 | 0.129516  | 0.109994  | 0.117279  |
| 0.131847  | 0.138986  | 0.137675 | 0.132576 | 0.137821  | 0.124709  | 0.129079  |
| 0.101253  | 0.112179  | 0.116987 | 0.116841 | 0.118881  | 0.0984848 | 0.105186  |
| 0.119027  | 0.126748  | 0.13039  | 0.131702 | 0.128205  | 0.110431  | 0.120921  |
| 0.101253  | 0.109848  | 0.117279 | 0.118881 | 0.115676  | 0.0929487 | 0.101399  |
| 0.10067   | 0.112179  | 0.114948 | 0.120921 | 0.114802  | 0.0961538 | 0.10373   |
| 0.106498  | 0.0996503 | 0.100962 | 0.101981 | 0.0999417 | 0.0958625 | 0.0882867 |
| 0.107517  | 0.121649  | 0.121795 | 0.114365 | 0.115239  | 0.0523019 | 0.109994  |
| 0.105478  | 0.105915  | 0.118881 | 0.113782 | 0.108537  | 0.100087  | 0.103001  |
| 0.150932  | 0.148456  | 0.152972 | 0.147582 | 0.145833  | 0.138549  | 0.143211  |
| 0.145688  | 0.14088   | 0.14627  | 0.144376 | 0.14292   | 0.128642  | 0.135635  |
| 0.108392  | 0.118735  | 0.11655  | 0.11961  | 0.119318  | 0.097465  | 0.112908  |
| 0.148747  | 0.143648  | 0.142045 | 0.145688 | 0.141317  | 0.128205  | 0.134033  |
| 0.126894  | 0.127914  | 0.130682 | 0.135198 | 0.128788  | 0.122378  | 0.125     |
| 0.123106  | 0.134033  | 0.140297 | 0.13141  | 0.136072  | 0.129371  | 0.137238  |
| 0.103584  | 0.119172  | 0.113491 | 0.1081   | 0.112179  | 0.0964452 | 0.10169   |
| 0.145979  | 0.145833  | 0.144231 | 0.140589 | 0.140297  | 0.140589  | 0.137966  |
| 0.13141   | 0.136801  | 0.134615 | 0.130973 | 0.128642  | 0.12602   | 0.128351  |
| 0.145396  | 0.144085  | 0.139569 | 0.141463 | 0.141463  | 0.134178  | 0.136801  |
| 0.118007  | 0.121941  | 0.122669 | 0.123397 | 0.116113  | 0.105915  | 0.113491  |
| 0.105041  | 0.110723  | 0.11553  | 0.11859  | 0.118881  | 0.0996503 | 0.111597  |
| 0.106061  | 0.111451  | 0.118007 | 0.114948 | 0.110577  | 0.0826049 | 0.100962  |
| 0.121358  | 0.129662  | 0.129225 | 0.126748 | 0.120921  | 0.112179  | 0.115093  |
| 0.10708   | 0.115967  | 0.122523 | 0.115385 | 0.113928  | 0.100233  | 0.115967  |
| 0.111888  | 0.118735  | 0.107226 | 0.113199 | 0.108246  | 0.112617  | 0.112617  |
| 0.128788  | 0.12602   | 0.13141  | 0.129516 | 0.128351  | 0.116404  | 0.11961   |
| 0.111888  | 0.116696  | 0.119755 | 0.113199 | 0.114073  | 0.101836  | 0.110868  |
| 0.0986305 | 0.112471  | 0.114948 | 0.117424 | 0.112471  | 0.0795455 | 0.100524  |

|           |           |           |          |           |           |           |
|-----------|-----------|-----------|----------|-----------|-----------|-----------|
| 0.10373   | 0.11553   | 0.114219  | 0.109994 | 0.109703  | 0.0971737 | 0.110868  |
| 0.109266  | 0.113491  | 0.112762  | 0.118735 | 0.113199  | 0.0992133 | 0.105624  |
| 0.102127  | 0.116259  | 0.123106  | 0.122086 | 0.116259  | 0.0842075 | 0.106352  |
| 0.108829  | 0.120047  | 0.121649  | 0.114802 | 0.11859   | 0.097028  | 0.107226  |
| 0.116841  | 0.117861  | 0.124126  | 0.121649 | 0.118444  | 0.114365  | 0.114948  |
| 0.100233  | 0.111742  | 0.125583  | 0.120775 | 0.119901  | 0.10708   | 0.116987  |
| 0.0766317 | 0.0962995 | 0.0976107 | 0.100087 | 0.0939685 | 0.0866841 | 0.0878497 |
| 0.0990676 | 0.114656  | 0.112179  | 0.110868 | 0.105332  | 0.0925117 | 0.105041  |
| 0.118444  | 0.117133  | 0.125437  | 0.122086 | 0.120338  | 0.114802  | 0.112179  |
| 0.099359  | 0.113199  | 0.121212  | 0.118153 | 0.119901  | 0.102418  | 0.105624  |
| 0.119464  | 0.130099  | 0.133741  | 0.128934 | 0.123689  | 0.119901  | 0.119027  |
| 0.111888  | 0.113199  | 0.121212  | 0.116987 | 0.114948  | 0.105332  | 0.106498  |
| 0.105624  | 0.127914  | 0.123689  | 0.123834 | 0.119464  | 0.109848  | 0.121503  |

| <b>TDr_12_00438</b> | <b>TDr_12_00439</b> | <b>TDr_12_00446</b> | <b>TDr_12_00447</b> | <b>TDr_12_00454</b> | <b>TDr_12_00456</b> | <b>TDr_12_00458</b> |
|---------------------|---------------------|---------------------|---------------------|---------------------|---------------------|---------------------|
| 0.135781            | 0.114948            | 0.141171            | 0.124709            | 0.113345            | 0.11859             | 0.111742            |
| 0.122232            | 0.111014            | 0.134033            | 0.133304            | 0.119027            | 0.120484            | 0.128205            |
| 0.121066            | 0.108974            | 0.13141             | 0.129808            | 0.115822            | 0.116113            | 0.122086            |
| 0.128351            | 0.113345            | 0.130245            | 0.136509            | 0.119901            | 0.130682            | 0.122378            |
| 0.144376            | 0.132576            | 0.142191            | 0.150204            | 0.134761            | 0.141171            | 0.139277            |
| 0.139423            | 0.122378            | 0.143065            | 0.13884             | 0.135635            | 0.134178            | 0.130536            |
| 0.135781            | 0.122523            | 0.131265            | 0.130536            | 0.120629            | 0.125874            | 0.121649            |
| 0.125583            | 0.110868            | 0.129808            | 0.131702            | 0.119755            | 0.120047            | 0.119318            |
| 0.114365            | 0.104021            | 0.130828            | 0.123689            | 0.106498            | 0.092803            | 0.114802            |
| 0.094697            | 0.0849359           | 0.128059            | 0.117716            | 0.100816            | 0.0766317           | 0.112325            |
| 0.132139            | 0.118007            | 0.131119            | 0.127185            | 0.115239            | 0.125437            | 0.122378            |
| 0.128205            | 0.109411            | 0.125146            | 0.129953            | 0.115385            | 0.121795            | 0.121941            |
| 0.124417            | 0.107372            | 0.135052            | 0.130245            | 0.114802            | 0.110431            | 0.121066            |
| 0.143502            | 0.129953            | 0.152972            | 0.135344            | 0.132721            | 0.135927            | 0.139277            |
| 0.127622            | 0.115239            | 0.140006            | 0.136072            | 0.119755            | 0.121795            | 0.133013            |
| 0.126603            | 0.111305            | 0.130245            | 0.141463            | 0.106206            | 0.121358            | 0.122378            |
| 0.123252            | 0.114948            | 0.123106            | 0.126457            | 0.114802            | 0.120338            | 0.121358            |
| 0.148456            | 0.132867            | 0.145688            | 0.161859            | 0.141754            | 0.146416            | 0.150932            |
| 0.118735            | 0.105478            | 0.130536            | 0.128934            | 0.116696            | 0.117861            | 0.121795            |
| 0.210519            | 0.190268            | 0.214744            | 0.197115            | 0.192453            | 0.206439            | 0.19289             |
| 0.125291            | 0.115239            | 0.142628            | 0.136655            | 0.131119            | 0.135198            | 0.127185            |
| 0.131847            | 0.114802            | 0.137529            | 0.133887            | 0.125437            | 0.124272            | 0.121795            |
| 0.120629            | 0.0989219           | 0.124563            | 0.131702            | 0.109266            | 0.117133            | 0.107955            |
| 0.136509            | 0.127622            | 0.123834            | 0.144668            | 0.118153            | 0.127768            | 0.132576            |
| 0.110431            | 0.0962995           | 0.117279            | 0.127914            | 0.101399            | 0.1081              | 0.112908            |
| 0.124709            | 0.114656            | 0.142337            | 0.138695            | 0.131702            | 0.131993            | 0.129225            |
| 0.129662            | 0.119027            | 0.13447             | 0.137238            | 0.122669            | 0.124417            | 0.122815            |
| 0.129953            | 0.117279            | 0.116404            | 0.140443            | 0.122378            | 0.122086            | 0.128642            |
| 0.141317            | 0.129808            | 0.135635            | 0.145688            | 0.126457            | 0.131702            | 0.139714            |
| 0.127914            | 0.121066            | 0.139423            | 0.136655            | 0.114219            | 0.118298            | 0.136509            |
| 0.135635            | 0.120338            | 0.139277            | 0.128934            | 0.112034            | 0.128059            | 0.12296             |
| 0.134033            | 0.120192            | 0.130973            | 0.141317            | 0.113345            | 0.123834            | 0.130099            |
| 0.11859             | 0.105041            | 0.128934            | 0.123834            | 0.104312            | 0.113928            | 0.114656            |
| 0.129662            | 0.119027            | 0.137675            | 0.138986            | 0.118881            | 0.12296             | 0.127768            |
| 0.130099            | 0.115385            | 0.131702            | 0.141463            | 0.117279            | 0.120775            | 0.127914            |
| 0.126748            | 0.11961             | 0.131265            | 0.145105            | 0.119172            | 0.128497            | 0.137966            |
| 0.133304            | 0.120629            | 0.140152            | 0.141171            | 0.122232            | 0.127477            | 0.131993            |
| 0.130245            | 0.120775            | 0.136509            | 0.13549             | 0.118881            | 0.120629            | 0.128059            |
| 0.128205            | 0.115239            | 0.122232            | 0.134324            | 0.116259            | 0.117424            | 0.121649            |
| 0.135198            | 0.124854            | 0.099796            | 0.138403            | 0.125               | 0.126457            | 0.130973            |
| 0.130245            | 0.116404            | 0.0960082           | 0.130245            | 0.114802            | 0.117424            | 0.123689            |
| 0.148893            | 0.139714            | 0.103875            | 0.152681            | 0.130245            | 0.137821            | 0.145542            |



|          |           |           |          |          |          |          |
|----------|-----------|-----------|----------|----------|----------|----------|
| 0.147727 | 0.143502  | 0.11757   | 0.155303 | 0.136364 | 0.143648 | 0.148164 |
| 0.128934 | 0.117716  | 0.104312  | 0.128642 | 0.111742 | 0.120484 | 0.122669 |
| 0.103875 | 0.0914918 | 0.125583  | 0.120192 | 0.105332 | 0.107663 | 0.102564 |
| 0.118007 | 0.108829  | 0.133887  | 0.126457 | 0.1081   | 0.104604 | 0.119901 |
| 0.131702 | 0.120484  | 0.11961   | 0.138695 | 0.125583 | 0.129371 | 0.121941 |
| 0.151078 | 0.138112  | 0.0964452 | 0.145833 | 0.129516 | 0.133304 | 0.144814 |
| 0.129808 | 0.120629  | 0.101981  | 0.139423 | 0.122815 | 0.119901 | 0.123834 |
| 0.129662 | 0.117861  | 0.100962  | 0.129079 | 0.113054 | 0.117424 | 0.116404 |
| 0.151952 | 0.138986  | 0.157343  | 0.145833 | 0.137092 | 0.136218 | 0.136072 |
| 0.136509 | 0.121795  | 0.125874  | 0.142337 | 0.127477 | 0.135052 | 0.137238 |
| 0.131119 | 0.11757   | 0.102127  | 0.134033 | 0.114219 | 0.125    | 0.124563 |
| 0.124709 | 0.114073  | 0.135344  | 0.136946 | 0.121503 | 0.112762 | 0.139132 |
| 0.13549  | 0.114948  | 0.118735  | 0.132576 | 0.11859  | 0.130536 | 0.118444 |
| 0.149184 | 0.137383  | 0.13447   | 0.159674 | 0.136946 | 0.145688 | 0.148456 |
| 0.139132 | 0.125     | 0.106061  | 0.14292  | 0.126603 | 0.127185 | 0.136364 |
| 0.133304 | 0.12296   | 0.0935315 | 0.137966 | 0.115239 | 0.121941 | 0.129371 |
| 0.13243  | 0.117133  | 0.0949883 | 0.13243  | 0.116113 | 0.120192 | 0.125583 |
| 0.124417 | 0.10912   | 0.129516  | 0.134324 | 0.11014  | 0.112762 | 0.118735 |
| 0.146853 | 0.140589  | 0.104749  | 0.150932 | 0.134907 | 0.134033 | 0.139423 |
| 0.147436 | 0.141171  | 0.107663  | 0.154138 | 0.135198 | 0.138695 | 0.142045 |
| 0.169435 | 0.153846  | 0.159382  | 0.165064 | 0.154575 | 0.165355 | 0.153846 |
| 0.135635 | 0.121795  | 0.0990676 | 0.133596 | 0.118444 | 0.123397 | 0.124417 |
| 0.128351 | 0.11655   | 0.101399  | 0.129808 | 0.118153 | 0.119901 | 0.122086 |
| 0.129225 | 0.117133  | 0.100816  | 0.13243  | 0.114656 | 0.120484 | 0.122378 |
| 0.1419   | 0.131265  | 0.152244  | 0.122669 | 0.135781 | 0.134907 | 0.117279 |
| 0.132576 | 0.120192  | 0.0930944 | 0.130828 | 0.116841 | 0.120629 | 0.121066 |
| 0.139132 | 0.122378  | 0.11859   | 0.144376 | 0.125437 | 0.137092 | 0.133741 |
| 0.122523 | 0.109557  | 0.124709  | 0.13447  | 0.10708  | 0.113199 | 0.122669 |
| 0.130245 | 0.118153  | 0.0604604 | 0.130536 | 0.116259 | 0.126748 | 0.128934 |
| 0.154429 | 0.13884   | 0.159237  | 0.130536 | 0.138986 | 0.149184 | 0.118735 |
| 0.138695 | 0.128642  | 0.102418  | 0.13986  | 0.125291 | 0.131702 | 0.13447  |
| 0.146416 | 0.138986  | 0.117133  | 0.149038 | 0.138258 | 0.136801 | 0.142774 |
| 0.142483 | 0.12602   | 0.125728  | 0.142774 | 0.133159 | 0.136364 | 0.140589 |
| 0.11757  | 0.106643  | 0.127331  | 0.131556 | 0.116404 | 0.128934 | 0.113928 |
| 0.131265 | 0.116259  | 0.103147  | 0.128351 | 0.11553  | 0.12602  | 0.121795 |
| 0.130099 | 0.120338  | 0.0944056 | 0.136509 | 0.118444 | 0.124854 | 0.127914 |
| 0.145833 | 0.137529  | 0.0888695 | 0.14933  | 0.129808 | 0.135927 | 0.143357 |
| 0.128788 | 0.118153  | 0.104749  | 0.131119 | 0.115676 | 0.119172 | 0.122232 |
| 0.14292  | 0.136072  | 0.105769  | 0.154575 | 0.135635 | 0.136218 | 0.149767 |
| 0.143211 | 0.127331  | 0.104021  | 0.138549 | 0.122232 | 0.127185 | 0.128497 |
| 0.130682 | 0.121795  | 0.123252  | 0.136218 | 0.118735 | 0.126311 | 0.129953 |
| 0.134761 | 0.124126  | 0.109266  | 0.136509 | 0.120775 | 0.126311 | 0.126457 |
| 0.139423 | 0.125291  | 0.106352  | 0.144085 | 0.125146 | 0.129516 | 0.135781 |
| 0.130682 | 0.118007  | 0.0958625 | 0.134178 | 0.116696 | 0.123397 | 0.125291 |

|          |           |          |          |           |          |          |
|----------|-----------|----------|----------|-----------|----------|----------|
| 0.134178 | 0.120921  | 0.100816 | 0.133596 | 0.11961   | 0.124563 | 0.121795 |
| 0.145396 | 0.131847  | 0.105915 | 0.145105 | 0.129079  | 0.136364 | 0.142628 |
| 0.126457 | 0.116696  | 0.128642 | 0.127622 | 0.0996503 | 0.116841 | 0.120192 |
| 0.121649 | 0.109848  | 0.127622 | 0.13447  | 0.112034  | 0.111742 | 0.126457 |
| 0.132139 | 0.122086  | 0.132576 | 0.139714 | 0.128059  | 0.124563 | 0.123252 |
| 0.135927 | 0.123834  | 0.137238 | 0.133887 | 0.124854  | 0.130973 | 0.125874 |
| 0.104458 | 0.100524  | 0.139569 | 0.143211 | 0.12398   | 0.13039  | 0.121212 |
| 0.11014  | 0.103293  | 0.146999 | 0.157343 | 0.132576  | 0.13549  | 0.126894 |
| 0.13039  | 0.113054  | 0.133741 | 0.131847 | 0.116113  | 0.127477 | 0.120921 |
| 0.187209 | 0.168415  | 0.190851 | 0.173805 | 0.17264   | 0.188083 | 0.171329 |
| 0.125291 | 0.10708   | 0.126603 | 0.13345  | 0.113054  | 0.117716 | 0.114948 |
| 0.114656 | 0.0976107 | 0.146562 | 0.154283 | 0.129516  | 0.132139 | 0.127622 |
| 0.106789 | 0.0914918 | 0.138112 | 0.146999 | 0.123106  | 0.127185 | 0.120047 |
| 0.138695 | 0.13039   | 0.145542 | 0.148893 | 0.129371  | 0.138403 | 0.135635 |
| 0.103001 | 0.0912005 | 0.12704  | 0.13447  | 0.112617  | 0.116404 | 0.106935 |
| 0.106498 | 0.0996503 | 0.141026 | 0.150204 | 0.128934  | 0.131265 | 0.12296  |
| 0.103584 | 0.0955711 | 0.129662 | 0.128934 | 0.117861  | 0.114365 | 0.11014  |
| 0.110431 | 0.0983392 | 0.136509 | 0.134324 | 0.115676  | 0.121795 | 0.117279 |
| 0.124417 | 0.105624  | 0.125437 | 0.128497 | 0.104895  | 0.113636 | 0.111451 |
| 0.110723 | 0.102127  | 0.141463 | 0.147436 | 0.132284  | 0.13345  | 0.129808 |
| 0.116259 | 0.105624  | 0.124854 | 0.12296  | 0.11014   | 0.105186 | 0.115822 |
| 0.130099 | 0.116259  | 0.145396 | 0.138258 | 0.123397  | 0.136509 | 0.120047 |
| 0.125874 | 0.113199  | 0.133304 | 0.129662 | 0.11859   | 0.119755 | 0.11757  |
| 0.136801 | 0.130245  | 0.106643 | 0.144376 | 0.128059  | 0.125437 | 0.136364 |
| 0.13141  | 0.122815  | 0.131556 | 0.132284 | 0.120338  | 0.12296  | 0.130682 |
| 0.120921 | 0.108829  | 0.132721 | 0.125    | 0.113928  | 0.115385 | 0.116696 |
| 0.144814 | 0.130099  | 0.154575 | 0.132576 | 0.136946  | 0.142483 | 0.112325 |
| 0.127768 | 0.111597  | 0.134324 | 0.131265 | 0.114948  | 0.123106 | 0.117716 |
| 0.108246 | 0.0926573 | 0.130245 | 0.131847 | 0.11757   | 0.115822 | 0.108683 |
| 0.120047 | 0.106789  | 0.132139 | 0.134615 | 0.110431  | 0.116841 | 0.128059 |
| 0.13345  | 0.122815  | 0.143794 | 0.143648 | 0.128497  | 0.126748 | 0.130973 |
| 0.12704  | 0.108829  | 0.128934 | 0.130828 | 0.111888  | 0.129371 | 0.119901 |
| 0.106352 | 0.0910548 | 0.127768 | 0.129953 | 0.11655   | 0.109848 | 0.104458 |
| 0.105186 | 0.0893065 | 0.132139 | 0.129371 | 0.113928  | 0.116841 | 0.103584 |
| 0.126311 | 0.111888  | 0.130245 | 0.133887 | 0.116113  | 0.116696 | 0.117133 |
| 0.119172 | 0.106206  | 0.132139 | 0.136072 | 0.11451   | 0.112179 | 0.121358 |
| 0.133013 | 0.117716  | 0.13345  | 0.125728 | 0.118735  | 0.125437 | 0.120047 |
| 0.115385 | 0.101253  | 0.116113 | 0.119172 | 0.10169   | 0.102564 | 0.104458 |
| 0.116841 | 0.103293  | 0.122523 | 0.126457 | 0.10373   | 0.104312 | 0.112325 |
| 0.10912  | 0.100233  | 0.123252 | 0.125437 | 0.106206  | 0.103584 | 0.112471 |
| 0.129225 | 0.124709  | 0.134033 | 0.13447  | 0.11757   | 0.126894 | 0.127622 |
| 0.126166 | 0.118735  | 0.136801 | 0.142774 | 0.109266  | 0.114802 | 0.130682 |
| 0.121066 | 0.107809  | 0.124126 | 0.128351 | 0.105624  | 0.107955 | 0.118298 |
| 0.111014 | 0.103001  | 0.124563 | 0.121212 | 0.10169   | 0.10373  | 0.112908 |

|          |           |          |          |          |          |           |
|----------|-----------|----------|----------|----------|----------|-----------|
| 0.125874 | 0.114948  | 0.133013 | 0.133741 | 0.113054 | 0.118298 | 0.12398   |
| 0.122815 | 0.110723  | 0.122669 | 0.127185 | 0.105624 | 0.10912  | 0.118007  |
| 0.130973 | 0.117716  | 0.144814 | 0.114365 | 0.118735 | 0.126603 | 0.104021  |
| 0.143502 | 0.126748  | 0.149184 | 0.135052 | 0.128059 | 0.129516 | 0.125583  |
| 0.113491 | 0.10169   | 0.128205 | 0.129808 | 0.108537 | 0.112617 | 0.116841  |
| 0.120629 | 0.108246  | 0.122815 | 0.127331 | 0.106061 | 0.107517 | 0.120775  |
| 0.115967 | 0.105332  | 0.12398  | 0.126748 | 0.106352 | 0.110431 | 0.117279  |
| 0.111888 | 0.0957168 | 0.115239 | 0.120047 | 0.103147 | 0.111597 | 0.0989219 |
| 0.122378 | 0.10708   | 0.132721 | 0.136946 | 0.11655  | 0.115093 | 0.127185  |
| 0.111888 | 0.0995047 | 0.117279 | 0.123543 | 0.10169  | 0.10373  | 0.112908  |
| 0.145833 | 0.138986  | 0.142191 | 0.147873 | 0.127768 | 0.138258 | 0.14831   |
| 0.138986 | 0.13243   | 0.117279 | 0.136655 | 0.123543 | 0.129662 | 0.140297  |
| 0.133741 | 0.11961   | 0.114656 | 0.140443 | 0.117133 | 0.120047 | 0.131556  |
| 0.126894 | 0.116259  | 0.115676 | 0.124563 | 0.113782 | 0.116987 | 0.123834  |
| 0.11961  | 0.112179  | 0.125583 | 0.124563 | 0.115239 | 0.114073 | 0.120047  |
| 0.118298 | 0.107372  | 0.123397 | 0.130828 | 0.104312 | 0.113636 | 0.113491  |
| 0.129516 | 0.110431  | 0.119755 | 0.133304 | 0.112325 | 0.114365 | 0.11451   |
| 0.122523 | 0.111305  | 0.121795 | 0.128351 | 0.117279 | 0.114073 | 0.121212  |
| 0.130682 | 0.11014   | 0.123543 | 0.135344 | 0.113782 | 0.127768 | 0.114802  |
| 0.141754 | 0.130245  | 0.11014  | 0.146999 | 0.127768 | 0.132139 | 0.136946  |
| 0.106643 | 0.092803  | 0.13447  | 0.136946 | 0.117716 | 0.123543 | 0.111742  |
| 0.124563 | 0.120338  | 0.137821 | 0.137092 | 0.12602  | 0.123397 | 0.13549   |
| 0.134615 | 0.126311  | 0.144376 | 0.145396 | 0.128788 | 0.131119 | 0.131556  |
| 0.207459 | 0.190997  | 0.208479 | 0.192308 | 0.197844 | 0.202214 | 0.190414  |
| 0.24898  | 0.231643  | 0.245047 | 0.230041 | 0.237325 | 0.246358 | 0.231935  |
| 0.129371 | 0.109994  | 0.127768 | 0.132867 | 0.116259 | 0.129662 | 0.11757   |
| 0.128934 | 0.11451   | 0.121212 | 0.133304 | 0.116113 | 0.11961  | 0.121212  |
| 0.123689 | 0.106061  | 0.118881 | 0.130099 | 0.109411 | 0.119027 | 0.111597  |
| 0.124854 | 0.108392  | 0.121503 | 0.134178 | 0.121358 | 0.12398  | 0.122378  |
| 0.128642 | 0.113054  | 0.143648 | 0.139423 | 0.121066 | 0.121941 | 0.13345   |
| 0.129516 | 0.11014   | 0.117133 | 0.135635 | 0.11757  | 0.12398  | 0.125     |
| 0.151807 | 0.141754  | 0.137383 | 0.162296 | 0.146562 | 0.150058 | 0.151952  |
| 0.135344 | 0.118007  | 0.120047 | 0.140297 | 0.12398  | 0.130099 | 0.123252  |
| 0.142337 | 0.126457  | 0.126748 | 0.14729  | 0.130099 | 0.140006 | 0.141026  |
| 0.138403 | 0.122815  | 0.11961  | 0.143939 | 0.121795 | 0.138403 | 0.130099  |
| 0.130536 | 0.124854  | 0.129516 | 0.152681 | 0.132284 | 0.133741 | 0.137966  |
| 0.148601 | 0.135344  | 0.114948 | 0.15035  | 0.135198 | 0.136655 | 0.14729   |
| 0.132576 | 0.11757   | 0.121649 | 0.136364 | 0.119464 | 0.125    | 0.126894  |
| 0.132284 | 0.117279  | 0.118153 | 0.13345  | 0.116259 | 0.119755 | 0.121941  |
| 0.127477 | 0.112762  | 0.120921 | 0.142045 | 0.121649 | 0.12398  | 0.122378  |
| 0.129516 | 0.110723  | 0.119755 | 0.130099 | 0.117279 | 0.121066 | 0.121212  |
| 0.131265 | 0.118007  | 0.116259 | 0.132139 | 0.116696 | 0.121358 | 0.123252  |
| 0.138403 | 0.120484  | 0.118735 | 0.143648 | 0.123543 | 0.125291 | 0.123106  |
| 0.132721 | 0.120338  | 0.121503 | 0.151369 | 0.126894 | 0.133013 | 0.136655  |

|           |           |          |          |          |           |          |
|-----------|-----------|----------|----------|----------|-----------|----------|
| 0.141463  | 0.128788  | 0.127914 | 0.15778  | 0.134761 | 0.141463  | 0.1419   |
| 0.138112  | 0.116404  | 0.117279 | 0.140152 | 0.124126 | 0.131119  | 0.128642 |
| 0.129516  | 0.114219  | 0.119172 | 0.136509 | 0.117861 | 0.124854  | 0.122669 |
| 0.137966  | 0.124417  | 0.123252 | 0.146416 | 0.133596 | 0.137092  | 0.13986  |
| 0.125728  | 0.113345  | 0.119464 | 0.135927 | 0.113782 | 0.120775  | 0.118881 |
| 0.143065  | 0.133013  | 0.129808 | 0.156469 | 0.137821 | 0.147436  | 0.145833 |
| 0.129371  | 0.117861  | 0.148164 | 0.131119 | 0.124417 | 0.125     | 0.137966 |
| 0.11553   | 0.0999417 | 0.135198 | 0.148456 | 0.128351 | 0.142337  | 0.124417 |
| 0.130099  | 0.110723  | 0.111305 | 0.133887 | 0.114365 | 0.121649  | 0.114802 |
| 0.121503  | 0.0995047 | 0.119901 | 0.132284 | 0.112762 | 0.11859   | 0.117861 |
| 0.137383  | 0.119464  | 0.115676 | 0.143794 | 0.128934 | 0.13243   | 0.129371 |
| 0.128788  | 0.115239  | 0.126311 | 0.143939 | 0.123543 | 0.130245  | 0.128351 |
| 0.141317  | 0.12398   | 0.123689 | 0.144231 | 0.127331 | 0.137529  | 0.137383 |
| 0.136509  | 0.119172  | 0.114802 | 0.140589 | 0.123106 | 0.133887  | 0.132284 |
| 0.132867  | 0.117279  | 0.121941 | 0.139277 | 0.120047 | 0.128788  | 0.128351 |
| 0.13345   | 0.118153  | 0.121358 | 0.144231 | 0.121212 | 0.131119  | 0.126894 |
| 0.143065  | 0.126603  | 0.12398  | 0.148893 | 0.128497 | 0.136072  | 0.138549 |
| 0.138695  | 0.124854  | 0.133013 | 0.152389 | 0.12704  | 0.138695  | 0.136509 |
| 0.139714  | 0.127331  | 0.128497 | 0.1537   | 0.130099 | 0.141754  | 0.138695 |
| 0.148601  | 0.134178  | 0.125437 | 0.133159 | 0.127622 | 0.138112  | 0.124272 |
| 0.136364  | 0.117861  | 0.120484 | 0.140734 | 0.120047 | 0.129371  | 0.124854 |
| 0.131993  | 0.118444  | 0.123689 | 0.145105 | 0.13141  | 0.137821  | 0.135635 |
| 0.125437  | 0.111888  | 0.120338 | 0.132721 | 0.116987 | 0.121358  | 0.121212 |
| 0.127914  | 0.116987  | 0.102127 | 0.126748 | 0.119755 | 0.121503  | 0.122815 |
| 0.127622  | 0.115239  | 0.121941 | 0.136072 | 0.117716 | 0.124417  | 0.120775 |
| 0.120775  | 0.108974  | 0.123252 | 0.133887 | 0.11961  | 0.124854  | 0.122669 |
| 0.127185  | 0.114802  | 0.114219 | 0.133887 | 0.119901 | 0.119901  | 0.125    |
| 0.1419    | 0.127477  | 0.131847 | 0.149767 | 0.128205 | 0.137238  | 0.138549 |
| 0.133887  | 0.119464  | 0.120629 | 0.123397 | 0.121066 | 0.131265  | 0.116259 |
| 0.138258  | 0.124709  | 0.132867 | 0.156031 | 0.130099 | 0.138549  | 0.143065 |
| 0.131265  | 0.112471  | 0.118298 | 0.135344 | 0.119027 | 0.122523  | 0.122669 |
| 0.141317  | 0.123106  | 0.123397 | 0.141608 | 0.120338 | 0.129079  | 0.128642 |
| 0.129516  | 0.119755  | 0.130536 | 0.127477 | 0.113199 | 0.116404  | 0.126748 |
| 0.118444  | 0.106643  | 0.133159 | 0.121358 | 0.111742 | 0.112325  | 0.121795 |
| 0.120629  | 0.116987  | 0.13243  | 0.134615 | 0.109848 | 0.120047  | 0.121649 |
| 0.115239  | 0.106061  | 0.128205 | 0.129808 | 0.121941 | 0.121941  | 0.128205 |
| 0.130536  | 0.11961   | 0.131847 | 0.133741 | 0.113636 | 0.123834  | 0.125437 |
| 0.120338  | 0.111742  | 0.132721 | 0.129079 | 0.118007 | 0.119464  | 0.116113 |
| 0.127622  | 0.114073  | 0.146416 | 0.143648 | 0.126166 | 0.085373  | 0.132139 |
| 0.144085  | 0.134033  | 0.144522 | 0.151952 | 0.133887 | 0.136218  | 0.135781 |
| 0.107372  | 0.0996503 | 0.124126 | 0.118153 | 0.103875 | 0.0916375 | 0.117424 |
| 0.0871212 | 0.0933858 | 0.138258 | 0.143648 | 0.126748 | 0.113636  | 0.123106 |
| 0.112617  | 0.100524  | 0.137529 | 0.135635 | 0.11553  | 0.0785256 | 0.121212 |
| 0.0913462 | 0.0664336 | 0.146562 | 0.144085 | 0.127185 | 0.118444  | 0.118007 |

|           |           |          |          |           |           |          |
|-----------|-----------|----------|----------|-----------|-----------|----------|
| 0.0925117 | 0.0804196 | 0.129662 | 0.129225 | 0.115239  | 0.10708   | 0.118298 |
| 0.116404  | 0.106643  | 0.13549  | 0.129516 | 0.113782  | 0.0799825 | 0.125291 |
| 0.112471  | 0.107372  | 0.13447  | 0.134324 | 0.112179  | 0.0903263 | 0.123397 |
| 0.0965909 | 0.0836247 | 0.134324 | 0.142628 | 0.122232  | 0.118153  | 0.120921 |
| 0.0898893 | 0.0891608 | 0.140443 | 0.146707 | 0.125728  | 0.119027  | 0.12704  |
| 0.112908  | 0.107517  | 0.140443 | 0.13039  | 0.116113  | 0.0872669 | 0.127622 |
| 0.100379  | 0.0804196 | 0.127622 | 0.130099 | 0.116696  | 0.105915  | 0.11655  |
| 0.15035   | 0.138549  | 0.136218 | 0.146853 | 0.12704   | 0.147436  | 0.144376 |
| 0.118444  | 0.11451   | 0.140152 | 0.142045 | 0.121941  | 0.0980478 | 0.135198 |
| 0.106498  | 0.092366  | 0.128205 | 0.127477 | 0.107955  | 0.103875  | 0.11451  |
| 0.230769  | 0.215181  | 0.230915 | 0.215618 | 0.223193  | 0.22669   | 0.209645 |
| 0.0944056 | 0.0802739 | 0.133596 | 0.138986 | 0.119172  | 0.118881  | 0.118735 |
| 0.113345  | 0.103584  | 0.129808 | 0.127622 | 0.115093  | 0.0967366 | 0.121941 |
| 0.092803  | 0.0865385 | 0.13986  | 0.145833 | 0.122815  | 0.114365  | 0.123252 |
| 0.120775  | 0.106935  | 0.134615 | 0.131556 | 0.120192  | 0.0942599 | 0.11859  |
| 0.113491  | 0.109557  | 0.140443 | 0.139714 | 0.124563  | 0.0933858 | 0.133741 |
| 0.0942599 | 0.0827506 | 0.13141  | 0.137092 | 0.123689  | 0.114365  | 0.113636 |
| 0.0987762 | 0.0863928 | 0.13447  | 0.130828 | 0.109848  | 0.112762  | 0.115822 |
| 0.112762  | 0.103875  | 0.136218 | 0.132576 | 0.118007  | 0.0871212 | 0.12602  |
| 0.100962  | 0.0906177 | 0.143939 | 0.137383 | 0.120775  | 0.125728  | 0.122086 |
| 0.099359  | 0.0913462 | 0.146416 | 0.143648 | 0.127622  | 0.113636  | 0.103001 |
| 0.099796  | 0.0935315 | 0.140152 | 0.144085 | 0.123689  | 0.10912   | 0.128788 |
| 0.105624  | 0.0914918 | 0.133741 | 0.133887 | 0.124272  | 0.113199  | 0.123543 |
| 0.115239  | 0.105186  | 0.127331 | 0.125437 | 0.0735723 | 0.10708   | 0.125291 |
| 0.102127  | 0.0882867 | 0.135781 | 0.132139 | 0.122815  | 0.108829  | 0.120629 |
| 0         | 0.0846445 | 0.145251 | 0.141026 | 0.125583  | 0.117133  | 0.126311 |
| 0.0846445 | 0         | 0.131993 | 0.133013 | 0.113491  | 0.10271   | 0.111014 |
| 0.145251  | 0.131993  | 0        | 0.151661 | 0.130682  | 0.138549  | 0.143648 |
| 0.141026  | 0.133013  | 0.151661 | 0        | 0.131993  | 0.133159  | 0.122232 |
| 0.125583  | 0.113491  | 0.130682 | 0.131993 | 0         | 0.115967  | 0.12602  |
| 0.117133  | 0.10271   | 0.138549 | 0.133159 | 0.115967  | 0         | 0.129516 |
| 0.126311  | 0.111014  | 0.143648 | 0.122232 | 0.12602   | 0.129516  | 0        |
| 0.131993  | 0.124272  | 0.140006 | 0.142774 | 0.125291  | 0.126457  | 0.135052 |
| 0.141608  | 0.121358  | 0.143211 | 0.120338 | 0.132284  | 0.135781  | 0.113491 |
| 0.140734  | 0.131556  | 0.149038 | 0.105478 | 0.138986  | 0.134907  | 0.114948 |
| 0.112325  | 0.104312  | 0.12704  | 0.120192 | 0.103293  | 0.105915  | 0.114802 |
| 0.135781  | 0.12398   | 0.120192 | 0.145396 | 0.129662  | 0.124709  | 0.139423 |
| 0.14933   | 0.138986  | 0.153846 | 0.112325 | 0.128059  | 0.142045  | 0.127331 |
| 0.123689  | 0.110723  | 0.128788 | 0.13243  | 0.112617  | 0.112908  | 0.118007 |
| 0.13884   | 0.123834  | 0.101981 | 0.135052 | 0.128059  | 0.131847  | 0.127622 |
| 0.157634  | 0.145833  | 0.14729  | 0.155886 | 0.118881  | 0.152389  | 0.155449 |
| 0.140443  | 0.128642  | 0.105041 | 0.145396 | 0.129371  | 0.133741  | 0.137092 |
| 0.136509  | 0.126748  | 0.149184 | 0.151952 | 0.125437  | 0.123397  | 0.143939 |
| 0.122086  | 0.117861  | 0.136801 | 0.143648 | 0.118881  | 0.12704   | 0.139714 |

|           |           |          |          |          |          |          |
|-----------|-----------|----------|----------|----------|----------|----------|
| 0.103001  | 0.092366  | 0.138986 | 0.138258 | 0.123397 | 0.122523 | 0.112471 |
| 0.128788  | 0.11961   | 0.13039  | 0.1419   | 0.117716 | 0.129371 | 0.12602  |
| 0.116987  | 0.104312  | 0.132867 | 0.127768 | 0.105915 | 0.113782 | 0.119464 |
| 0.0999417 | 0.102127  | 0.139423 | 0.143065 | 0.126748 | 0.127622 | 0.122232 |
| 0.0844988 | 0.0863928 | 0.137966 | 0.138112 | 0.124417 | 0.121212 | 0.125437 |
| 0.115093  | 0.105624  | 0.144668 | 0.154429 | 0.134324 | 0.133741 | 0.121649 |
| 0.109848  | 0.10067   | 0.142045 | 0.145105 | 0.129662 | 0.131119 | 0.127477 |
| 0.119755  | 0.105624  | 0.142337 | 0.13549  | 0.127331 | 0.135198 | 0.103584 |
| 0.120338  | 0.11116   | 0.156323 | 0.142483 | 0.13141  | 0.144522 | 0.119318 |
| 0.114802  | 0.0962995 | 0.126311 | 0.125583 | 0.118298 | 0.100524 | 0.128059 |
| 0.123543  | 0.116404  | 0.126311 | 0.134907 | 0.125583 | 0.127331 | 0.128642 |
| 0.133741  | 0.12398   | 0.140589 | 0.148601 | 0.127914 | 0.128788 | 0.130682 |
| 0.112471  | 0.101253  | 0.129808 | 0.125583 | 0.111597 | 0.103438 | 0.119027 |
| 0.150787  | 0.136364  | 0.15676  | 0.12602  | 0.140297 | 0.143502 | 0.115676 |
| 0.152826  | 0.146562  | 0.161422 | 0.134178 | 0.143502 | 0.152535 | 0.130536 |
| 0.137092  | 0.123834  | 0.12704  | 0.1537   | 0.13039  | 0.136801 | 0.136072 |
| 0.134907  | 0.120775  | 0.11961  | 0.145396 | 0.125    | 0.129953 | 0.128351 |
| 0.117861  | 0.102273  | 0.146853 | 0.152535 | 0.135344 | 0.138258 | 0.129662 |
| 0.0981935 | 0.0936772 | 0.138549 | 0.144814 | 0.124709 | 0.111888 | 0.126894 |
| 0.138403  | 0.12602   | 0.123689 | 0.147436 | 0.128205 | 0.132576 | 0.136509 |
| 0.102855  | 0.0922203 | 0.144959 | 0.152389 | 0.134907 | 0.125583 | 0.125728 |
| 0.128788  | 0.11553   | 0.142628 | 0.134907 | 0.125874 | 0.127622 | 0.120775 |
| 0.119027  | 0.116259  | 0.119172 | 0.135635 | 0.107372 | 0.105624 | 0.126748 |
| 0.16419   | 0.15035   | 0.169872 | 0.144085 | 0.157197 | 0.161568 | 0.13549  |
| 0.138549  | 0.118881  | 0.113345 | 0.146416 | 0.121358 | 0.11961  | 0.137821 |
| 0.137675  | 0.124417  | 0.137529 | 0.14933  | 0.120192 | 0.129516 | 0.147436 |
| 0.122378  | 0.116113  | 0.125437 | 0.136946 | 0.123252 | 0.124417 | 0.127185 |
| 0.11859   | 0.10912   | 0.144376 | 0.151515 | 0.129371 | 0.138112 | 0.128642 |
| 0.0871212 | 0.0814394 | 0.134178 | 0.135198 | 0.117716 | 0.112471 | 0.121066 |
| 0.153409  | 0.133159  | 0.157634 | 0.134178 | 0.128934 | 0.139714 | 0.125583 |
| 0.132576  | 0.123689  | 0.157197 | 0.15676  | 0.148601 | 0.149767 | 0.148164 |
| 0.135344  | 0.124126  | 0.143357 | 0.143211 | 0.130973 | 0.137966 | 0.128205 |
| 0.148893  | 0.133013  | 0.148456 | 0.141608 | 0.134615 | 0.148601 | 0.136509 |
| 0.163024  | 0.147145  | 0.150932 | 0.1537   | 0.135927 | 0.159528 | 0.143648 |
| 0.158945  | 0.140734  | 0.159674 | 0.148456 | 0.135344 | 0.155449 | 0.137238 |
| 0.141026  | 0.127768  | 0.131556 | 0.145979 | 0.115385 | 0.131702 | 0.131556 |
| 0.150495  | 0.137238  | 0.150641 | 0.156031 | 0.138549 | 0.145251 | 0.145979 |
| 0.129225  | 0.115385  | 0.133741 | 0.134761 | 0.11961  | 0.122815 | 0.120338 |
| 0.125     | 0.10708   | 0.136509 | 0.134324 | 0.109557 | 0.125    | 0.113782 |
| 0.116113  | 0.105478  | 0.135781 | 0.126603 | 0.115822 | 0.104458 | 0.128497 |
| 0.133887  | 0.120338  | 0.134907 | 0.140297 | 0.126603 | 0.132139 | 0.126166 |
| 0.126748  | 0.114656  | 0.131556 | 0.134033 | 0.11451  | 0.125    | 0.123397 |
| 0.126748  | 0.107372  | 0.129516 | 0.129371 | 0.110723 | 0.118298 | 0.11553  |
| 0.134615  | 0.121066  | 0.141754 | 0.139277 | 0.131993 | 0.128788 | 0.129516 |

|           |           |          |          |          |           |          |
|-----------|-----------|----------|----------|----------|-----------|----------|
| 0.129808  | 0.115676  | 0.140734 | 0.13039  | 0.119027 | 0.121358  | 0.126748 |
| 0.121066  | 0.0999417 | 0.123543 | 0.132139 | 0.107663 | 0.106498  | 0.120629 |
| 0.137966  | 0.125583  | 0.142191 | 0.140297 | 0.129808 | 0.135635  | 0.129953 |
| 0.136946  | 0.123106  | 0.136801 | 0.137821 | 0.127331 | 0.132867  | 0.124854 |
| 0.141026  | 0.126311  | 0.11757  | 0.146562 | 0.116259 | 0.134907  | 0.130099 |
| 0.222611  | 0.208188  | 0.227127 | 0.211538 | 0.217657 | 0.224359  | 0.207896 |
| 0.149476  | 0.13884   | 0.151661 | 0.159674 | 0.144231 | 0.150058  | 0.146416 |
| 0.139714  | 0.126457  | 0.141026 | 0.144085 | 0.131265 | 0.136509  | 0.137529 |
| 0.142191  | 0.122232  | 0.140006 | 0.142483 | 0.132284 | 0.133159  | 0.129516 |
| 0.221445  | 0.204983  | 0.224213 | 0.203089 | 0.214452 | 0.219697  | 0.206148 |
| 0.144522  | 0.12398   | 0.128642 | 0.13141  | 0.113054 | 0.132867  | 0.120192 |
| 0.139132  | 0.125583  | 0.141608 | 0.141754 | 0.119027 | 0.129808  | 0.127914 |
| 0.14088   | 0.126748  | 0.136072 | 0.142045 | 0.130099 | 0.130099  | 0.132284 |
| 0.125291  | 0.110868  | 0.136801 | 0.134615 | 0.115967 | 0.117716  | 0.128351 |
| 0.258159  | 0.241696  | 0.25947  | 0.244755 | 0.247378 | 0.25845   | 0.241404 |
| 0.140589  | 0.126166  | 0.145396 | 0.130973 | 0.124272 | 0.123689  | 0.121795 |
| 0.135927  | 0.120629  | 0.117716 | 0.138258 | 0.112034 | 0.130973  | 0.125291 |
| 0.135344  | 0.123834  | 0.137238 | 0.143502 | 0.128059 | 0.135635  | 0.139277 |
| 0.133887  | 0.125     | 0.136655 | 0.142045 | 0.13039  | 0.134178  | 0.133741 |
| 0.139132  | 0.120338  | 0.144814 | 0.129225 | 0.118735 | 0.122523  | 0.117133 |
| 0.142045  | 0.121503  | 0.145688 | 0.130099 | 0.11961  | 0.137675  | 0.123252 |
| 0.141463  | 0.125583  | 0.118007 | 0.14292  | 0.117279 | 0.132139  | 0.129079 |
| 0.13549   | 0.120775  | 0.135344 | 0.139569 | 0.125583 | 0.13141   | 0.125146 |
| 0.142628  | 0.127914  | 0.140152 | 0.145542 | 0.129225 | 0.137675  | 0.137238 |
| 0.125437  | 0.111014  | 0.138403 | 0.131847 | 0.116404 | 0.11757   | 0.123834 |
| 0.135198  | 0.116404  | 0.133013 | 0.13345  | 0.125    | 0.127622  | 0.120775 |
| 0.0986305 | 0.0865385 | 0.128205 | 0.121358 | 0.101836 | 0.0773601 | 0.117424 |
| 0.134324  | 0.125437  | 0.156614 | 0.157634 | 0.151224 | 0.145396  | 0.149913 |
| 0.140734  | 0.127185  | 0.145833 | 0.131702 | 0.127622 | 0.125583  | 0.123689 |
| 0.143065  | 0.131265  | 0.140589 | 0.143357 | 0.121212 | 0.133159  | 0.130973 |
| 0.199592  | 0.188374  | 0.207314 | 0.186772 | 0.193182 | 0.201632  | 0.184586 |
| 0.212995  | 0.196824  | 0.216929 | 0.198718 | 0.205128 | 0.210664  | 0.19799  |
| 0.130536  | 0.114365  | 0.139132 | 0.13345  | 0.115967 | 0.118007  | 0.129225 |
| 0.121503  | 0.106789  | 0.133304 | 0.129953 | 0.110431 | 0.114802  | 0.119901 |
| 0.13345   | 0.127768  | 0.146999 | 0.148601 | 0.133741 | 0.138695  | 0.141754 |
| 0.139277  | 0.122523  | 0.117861 | 0.13986  | 0.111597 | 0.130245  | 0.12602  |
| 0.143794  | 0.125874  | 0.146853 | 0.131556 | 0.125146 | 0.12602   | 0.125874 |
| 0.129371  | 0.115822  | 0.135344 | 0.144522 | 0.13345  | 0.130536  | 0.133596 |
| 0.233683  | 0.215763  | 0.235577 | 0.218531 | 0.224359 | 0.231061  | 0.217512 |
| 0.134324  | 0.116987  | 0.131847 | 0.13141  | 0.127622 | 0.127331  | 0.127185 |
| 0.218386  | 0.199883  | 0.216492 | 0.203817 | 0.200612 | 0.21926   | 0.199301 |
| 0.134907  | 0.121649  | 0.122815 | 0.134615 | 0.108974 | 0.125583  | 0.116696 |
| 0.132721  | 0.117424  | 0.129953 | 0.131556 | 0.120192 | 0.124854  | 0.126457 |
| 0.129371  | 0.112908  | 0.131265 | 0.13345  | 0.111597 | 0.133159  | 0.121358 |

|          |          |          |          |          |          |          |
|----------|----------|----------|----------|----------|----------|----------|
| 0.122378 | 0.10708  | 0.133304 | 0.125874 | 0.111014 | 0.116841 | 0.121358 |
| 0.21722  | 0.201923 | 0.218531 | 0.200612 | 0.207896 | 0.216055 | 0.200466 |
| 0.144376 | 0.131119 | 0.142774 | 0.146125 | 0.136509 | 0.141463 | 0.133159 |
| 0.135635 | 0.120338 | 0.132576 | 0.139423 | 0.120484 | 0.128934 | 0.128788 |
| 0.140006 | 0.122669 | 0.139277 | 0.14292  | 0.13039  | 0.135635 | 0.134324 |
| 0.131265 | 0.123834 | 0.13549  | 0.139132 | 0.129516 | 0.131265 | 0.13345  |
| 0.127768 | 0.113345 | 0.135781 | 0.13243  | 0.116696 | 0.118444 | 0.124417 |
| 0.134907 | 0.119318 | 0.124563 | 0.137821 | 0.113636 | 0.127622 | 0.118444 |
| 0.140734 | 0.124272 | 0.12398  | 0.138112 | 0.113928 | 0.138112 | 0.124272 |
| 0.137821 | 0.12602  | 0.13884  | 0.146853 | 0.123252 | 0.133159 | 0.129225 |
| 0.131119 | 0.117279 | 0.132139 | 0.132867 | 0.121212 | 0.124709 | 0.120192 |
| 0.13884  | 0.119172 | 0.135198 | 0.139132 | 0.120775 | 0.130973 | 0.129662 |
| 0.200175 | 0.184003 | 0.201486 | 0.184441 | 0.187937 | 0.198427 | 0.184586 |
| 0.135927 | 0.125291 | 0.139277 | 0.144376 | 0.13243  | 0.136218 | 0.138403 |
| 0.126748 | 0.116987 | 0.144085 | 0.145396 | 0.134615 | 0.139569 | 0.133887 |
| 0.126603 | 0.109848 | 0.134907 | 0.145251 | 0.130682 | 0.129225 | 0.132576 |
| 0.145396 | 0.128642 | 0.146416 | 0.126457 | 0.120921 | 0.127331 | 0.121066 |
| 0.138986 | 0.122523 | 0.137675 | 0.143939 | 0.130536 | 0.135198 | 0.129808 |
| 0.137821 | 0.123689 | 0.127768 | 0.139569 | 0.114219 | 0.128205 | 0.125437 |
| 0.128059 | 0.112471 | 0.129662 | 0.128059 | 0.11757  | 0.120775 | 0.120338 |
| 0.141171 | 0.126748 | 0.117716 | 0.145251 | 0.116404 | 0.134761 | 0.128497 |
| 0.125    | 0.114948 | 0.141754 | 0.13986  | 0.130828 | 0.134615 | 0.133013 |
| 0.134033 | 0.121358 | 0.135927 | 0.138986 | 0.126457 | 0.131119 | 0.128351 |
| 0.129808 | 0.113636 | 0.138112 | 0.133596 | 0.117861 | 0.122815 | 0.124709 |
| 0.139569 | 0.126311 | 0.136801 | 0.145979 | 0.131993 | 0.132576 | 0.138549 |
| 0.145833 | 0.13141  | 0.140734 | 0.151952 | 0.140589 | 0.14088  | 0.145105 |
| 0.137383 | 0.120338 | 0.140734 | 0.124854 | 0.116696 | 0.121649 | 0.118298 |
| 0.144231 | 0.130973 | 0.147873 | 0.155303 | 0.143065 | 0.144522 | 0.142045 |
| 0.128497 | 0.113199 | 0.134178 | 0.131119 | 0.111888 | 0.117133 | 0.124854 |
| 0.125874 | 0.108829 | 0.131847 | 0.13549  | 0.123543 | 0.125    | 0.121358 |
| 0.137675 | 0.122086 | 0.132284 | 0.13243  | 0.11961  | 0.133304 | 0.126748 |
| 0.144085 | 0.129371 | 0.122669 | 0.142628 | 0.117279 | 0.135052 | 0.132284 |
| 0.203526 | 0.185023 | 0.19697  | 0.188957 | 0.189248 | 0.202652 | 0.181818 |
| 0.13141  | 0.116696 | 0.124563 | 0.133741 | 0.114219 | 0.127331 | 0.124563 |
| 0.125    | 0.107372 | 0.12602  | 0.131119 | 0.11655  | 0.116841 | 0.120775 |
| 0.137821 | 0.124563 | 0.137675 | 0.143648 | 0.119172 | 0.130245 | 0.130682 |
| 0.189685 | 0.175262 | 0.19595  | 0.175991 | 0.175699 | 0.188228 | 0.173514 |
| 0.147582 | 0.136946 | 0.152681 | 0.135635 | 0.135344 | 0.133596 | 0.131702 |
| 0.151661 | 0.137238 | 0.160256 | 0.144376 | 0.137383 | 0.136218 | 0.134615 |
| 0.133741 | 0.126311 | 0.156614 | 0.159965 | 0.155886 | 0.150932 | 0.151078 |
| 0.132867 | 0.11553  | 0.133596 | 0.117716 | 0.115093 | 0.116841 | 0.113199 |
| 0.13884  | 0.123543 | 0.135198 | 0.14292  | 0.13243  | 0.137092 | 0.129953 |
| 0.225233 | 0.207605 | 0.224505 | 0.20979  | 0.210956 | 0.223776 | 0.206439 |
| 0.143065 | 0.12602  | 0.13447  | 0.139569 | 0.132576 | 0.13345  | 0.133013 |



|          |          |          |          |          |          |          |
|----------|----------|----------|----------|----------|----------|----------|
| 0.14292  | 0.125291 | 0.138112 | 0.147582 | 0.131556 | 0.14088  | 0.133741 |
| 0.136509 | 0.118881 | 0.132867 | 0.136509 | 0.118153 | 0.133304 | 0.125291 |
| 0.184003 | 0.164044 | 0.179487 | 0.168561 | 0.162442 | 0.180216 | 0.160256 |
| 0.12602  | 0.111305 | 0.136072 | 0.133596 | 0.120192 | 0.121358 | 0.118298 |
| 0.153555 | 0.141754 | 0.159528 | 0.164627 | 0.146853 | 0.147436 | 0.151952 |
| 0.128788 | 0.114365 | 0.128642 | 0.137529 | 0.116841 | 0.117716 | 0.128059 |
| 0.198718 | 0.18546  | 0.205274 | 0.185606 | 0.190559 | 0.198718 | 0.184003 |
| 0.141608 | 0.126311 | 0.140297 | 0.128497 | 0.121795 | 0.125583 | 0.119901 |
| 0.119172 | 0.106498 | 0.12602  | 0.123834 | 0.115676 | 0.101981 | 0.116987 |
| 0.127185 | 0.115385 | 0.13549  | 0.135052 | 0.126894 | 0.125146 | 0.121795 |
| 0.13986  | 0.125728 | 0.131556 | 0.142774 | 0.122669 | 0.130828 | 0.130682 |
| 0.138112 | 0.12602  | 0.13884  | 0.141317 | 0.120629 | 0.129371 | 0.130099 |
| 0.130536 | 0.120775 | 0.135635 | 0.141608 | 0.128205 | 0.129371 | 0.123106 |
| 0.126311 | 0.108392 | 0.134907 | 0.129808 | 0.110868 | 0.112908 | 0.122669 |
| 0.199009 | 0.185169 | 0.202069 | 0.184732 | 0.187646 | 0.199009 | 0.185752 |
| 0.141171 | 0.124709 | 0.135198 | 0.143211 | 0.129225 | 0.133013 | 0.134324 |
| 0.126166 | 0.114656 | 0.134178 | 0.128788 | 0.11451  | 0.11451  | 0.119027 |
| 0.220717 | 0.203963 | 0.223193 | 0.205857 | 0.213724 | 0.218386 | 0.205711 |
| 0.135927 | 0.12296  | 0.138695 | 0.144959 | 0.129516 | 0.136801 | 0.138986 |
| 0.125583 | 0.111451 | 0.13447  | 0.129079 | 0.112471 | 0.116841 | 0.122815 |
| 0.119172 | 0.105041 | 0.131556 | 0.129079 | 0.11014  | 0.112762 | 0.117279 |
| 0.143211 | 0.130536 | 0.146562 | 0.152535 | 0.138258 | 0.143211 | 0.13986  |
| 0.19799  | 0.181818 | 0.201632 | 0.186626 | 0.18954  | 0.19799  | 0.185023 |
| 0.140443 | 0.125146 | 0.119027 | 0.143065 | 0.117424 | 0.132576 | 0.130973 |
| 0.143648 | 0.128934 | 0.139714 | 0.149184 | 0.138112 | 0.137821 | 0.140006 |
| 0.120338 | 0.110286 | 0.134761 | 0.126748 | 0.111597 | 0.112762 | 0.122523 |
| 0.122669 | 0.107955 | 0.131265 | 0.128497 | 0.109557 | 0.112179 | 0.120484 |
| 0.122232 | 0.107809 | 0.13345  | 0.125728 | 0.111742 | 0.111742 | 0.121212 |
| 0.136364 | 0.120484 | 0.139423 | 0.141026 | 0.126748 | 0.128788 | 0.127768 |
| 0.120775 | 0.100233 | 0.120921 | 0.129225 | 0.103875 | 0.10708  | 0.118881 |
| 0.142045 | 0.127331 | 0.143939 | 0.130973 | 0.125146 | 0.125728 | 0.123252 |
| 0.131847 | 0.114219 | 0.145396 | 0.149621 | 0.137966 | 0.136218 | 0.135781 |
| 0.137966 | 0.124709 | 0.142483 | 0.129225 | 0.122815 | 0.122815 | 0.118298 |
| 0.132576 | 0.124854 | 0.136509 | 0.144522 | 0.130828 | 0.132867 | 0.139132 |
| 0.209353 | 0.190559 | 0.208333 | 0.191288 | 0.197698 | 0.203817 | 0.188228 |
| 0.138112 | 0.12398  | 0.135635 | 0.141608 | 0.125874 | 0.129662 | 0.130682 |
| 0.139423 | 0.126457 | 0.143648 | 0.148456 | 0.135635 | 0.140297 | 0.134907 |
| 0.119755 | 0.10708  | 0.133596 | 0.128788 | 0.108974 | 0.111305 | 0.119901 |
| 0.118153 | 0.10169  | 0.119172 | 0.128059 | 0.105332 | 0.103584 | 0.114802 |
| 0.131847 | 0.112179 | 0.13141  | 0.13243  | 0.11553  | 0.129225 | 0.118298 |
| 0.142191 | 0.127477 | 0.119901 | 0.1419   | 0.115676 | 0.134033 | 0.128059 |
| 0.139569 | 0.125146 | 0.144085 | 0.142191 | 0.134324 | 0.129953 | 0.137092 |
| 0.126894 | 0.114802 | 0.141026 | 0.140006 | 0.128059 | 0.130682 | 0.131119 |
| 0.131847 | 0.111597 | 0.119464 | 0.132721 | 0.107372 | 0.119901 | 0.113636 |

|          |           |          |          |          |           |          |
|----------|-----------|----------|----------|----------|-----------|----------|
| 0.127331 | 0.106789  | 0.116404 | 0.126457 | 0.10169  | 0.11451   | 0.111742 |
| 0.118444 | 0.104312  | 0.128497 | 0.124854 | 0.103293 | 0.104167  | 0.11014  |
| 0.137821 | 0.122232  | 0.124272 | 0.136072 | 0.113636 | 0.126748  | 0.119318 |
| 0.143794 | 0.129953  | 0.148893 | 0.133304 | 0.128351 | 0.126311  | 0.123543 |
| 0.138986 | 0.123106  | 0.120775 | 0.141608 | 0.115093 | 0.132284  | 0.13039  |
| 0.132139 | 0.115967  | 0.134033 | 0.135052 | 0.123106 | 0.125728  | 0.12296  |
| 0.134178 | 0.120338  | 0.118007 | 0.137966 | 0.111451 | 0.127477  | 0.122669 |
| 0.122669 | 0.106498  | 0.13243  | 0.130245 | 0.113345 | 0.115385  | 0.120775 |
| 0.13039  | 0.117424  | 0.126457 | 0.132721 | 0.11553  | 0.120775  | 0.123543 |
| 0.12398  | 0.108683  | 0.135781 | 0.130973 | 0.114365 | 0.117279  | 0.122378 |
| 0.135344 | 0.118881  | 0.132576 | 0.139132 | 0.124563 | 0.127185  | 0.126166 |
| 0.121649 | 0.111014  | 0.138112 | 0.141171 | 0.129225 | 0.128642  | 0.129662 |
| 0.136509 | 0.120047  | 0.131119 | 0.139423 | 0.11553  | 0.126894  | 0.12296  |
| 0.125291 | 0.106498  | 0.121941 | 0.131993 | 0.108392 | 0.108683  | 0.121941 |
| 0.124854 | 0.11014   | 0.134615 | 0.131847 | 0.115239 | 0.11553   | 0.123543 |
| 0.133304 | 0.118007  | 0.137238 | 0.135635 | 0.127477 | 0.13039   | 0.126748 |
| 0.134033 | 0.119318  | 0.141463 | 0.136655 | 0.124126 | 0.121795  | 0.123397 |
| 0.11757  | 0.104604  | 0.128205 | 0.126603 | 0.107955 | 0.0884324 | 0.11451  |
| 0.124272 | 0.107517  | 0.133159 | 0.129516 | 0.112908 | 0.11553   | 0.119464 |
| 0.133741 | 0.121649  | 0.135635 | 0.141026 | 0.126457 | 0.13345   | 0.125437 |
| 0.137821 | 0.121066  | 0.126603 | 0.138112 | 0.11451  | 0.12704   | 0.122523 |
| 0.138112 | 0.120192  | 0.137383 | 0.1419   | 0.127914 | 0.134033  | 0.125146 |
| 0.136364 | 0.121358  | 0.137092 | 0.1419   | 0.118007 | 0.126748  | 0.121941 |
| 0.12296  | 0.103875  | 0.124272 | 0.135198 | 0.111014 | 0.107809  | 0.12398  |
| 0.129953 | 0.116696  | 0.135927 | 0.128788 | 0.11859  | 0.122086  | 0.122523 |
| 0.133887 | 0.11655   | 0.12704  | 0.133596 | 0.11553  | 0.122232  | 0.122378 |
| 0.140152 | 0.124854  | 0.140006 | 0.143939 | 0.131702 | 0.135781  | 0.132139 |
| 0.136072 | 0.125728  | 0.141754 | 0.144231 | 0.132284 | 0.127914  | 0.131847 |
| 0.135927 | 0.119464  | 0.134907 | 0.135635 | 0.121649 | 0.121066  | 0.123834 |
| 0.205274 | 0.191434  | 0.207168 | 0.187209 | 0.19391  | 0.203526  | 0.187354 |
| 0.176719 | 0.162587  | 0.178322 | 0.165064 | 0.163316 | 0.175554  | 0.159382 |
| 0.139423 | 0.124709  | 0.14831  | 0.126311 | 0.121066 | 0.124563  | 0.120047 |
| 0.136946 | 0.11553   | 0.127185 | 0.1419   | 0.115385 | 0.127914  | 0.122815 |
| 0.155886 | 0.144085  | 0.163899 | 0.147145 | 0.141317 | 0.141608  | 0.138258 |
| 0.144959 | 0.126166  | 0.142483 | 0.148164 | 0.133013 | 0.141171  | 0.136946 |
| 0.133741 | 0.112908  | 0.13884  | 0.136072 | 0.117716 | 0.12704   | 0.12398  |
| 0.129225 | 0.110723  | 0.136364 | 0.133304 | 0.117279 | 0.120775  | 0.120047 |
| 0.104167 | 0.0903263 | 0.124417 | 0.120192 | 0.105041 | 0.0849359 | 0.113636 |
| 0.133596 | 0.115385  | 0.137821 | 0.136509 | 0.126311 | 0.119027  | 0.129079 |
| 0.2162   | 0.19799   | 0.212558 | 0.197552 | 0.203089 | 0.209207  | 0.196533 |
| 0.145542 | 0.127622  | 0.120629 | 0.144959 | 0.11757  | 0.133304  | 0.132867 |
| 0.13549  | 0.119027  | 0.127768 | 0.136364 | 0.112762 | 0.134033  | 0.123106 |
| 0.125583 | 0.106789  | 0.131556 | 0.128497 | 0.108974 | 0.107517  | 0.119027 |
| 0.131556 | 0.121795  | 0.134615 | 0.138258 | 0.125146 | 0.126603  | 0.13141  |

|          |           |          |          |          |           |          |
|----------|-----------|----------|----------|----------|-----------|----------|
| 0.197844 | 0.176136  | 0.196533 | 0.184441 | 0.183858 | 0.188811  | 0.173514 |
| 0.253497 | 0.234703  | 0.255682 | 0.240967 | 0.244172 | 0.252331  | 0.237908 |
| 0.126166 | 0.114073  | 0.144668 | 0.13986  | 0.130536 | 0.131702  | 0.131556 |
| 0.128497 | 0.117279  | 0.138258 | 0.136946 | 0.126748 | 0.118298  | 0.127477 |
| 0.139277 | 0.125437  | 0.144959 | 0.125    | 0.119755 | 0.121212  | 0.119318 |
| 0.135927 | 0.120047  | 0.133741 | 0.13884  | 0.116404 | 0.128642  | 0.120921 |
| 0.134033 | 0.120192  | 0.115822 | 0.139569 | 0.112762 | 0.129371  | 0.12398  |
| 0.133887 | 0.120921  | 0.131119 | 0.135344 | 0.123397 | 0.125728  | 0.125583 |
| 0.123834 | 0.110286  | 0.135635 | 0.129079 | 0.110431 | 0.121503  | 0.114365 |
| 0.138695 | 0.123689  | 0.114656 | 0.136946 | 0.111597 | 0.129953  | 0.125146 |
| 0.126603 | 0.112471  | 0.132576 | 0.13039  | 0.110868 | 0.123106  | 0.112179 |
| 0.119755 | 0.107372  | 0.133013 | 0.13345  | 0.111597 | 0.090035  | 0.121649 |
| 0.123689 | 0.104604  | 0.124709 | 0.134178 | 0.110286 | 0.108829  | 0.120629 |
| 0.125583 | 0.111742  | 0.143794 | 0.1419   | 0.129662 | 0.134615  | 0.134761 |
| 0.140589 | 0.126748  | 0.138403 | 0.141171 | 0.128642 | 0.132721  | 0.129371 |
| 0.116404 | 0.101107  | 0.131119 | 0.126311 | 0.115239 | 0.112617  | 0.114219 |
| 0.103293 | 0.0909091 | 0.13549  | 0.138258 | 0.121649 | 0.124563  | 0.113636 |
| 0.144085 | 0.134324  | 0.145396 | 0.148164 | 0.122523 | 0.135635  | 0.137529 |
| 0.122669 | 0.10708   | 0.133596 | 0.12704  | 0.112471 | 0.115385  | 0.119027 |
| 0.126894 | 0.10373   | 0.130536 | 0.12398  | 0.110868 | 0.118444  | 0.106643 |
| 0.126311 | 0.117716  | 0.141608 | 0.141171 | 0.123397 | 0.122523  | 0.132867 |
| 0.21824  | 0.199738  | 0.219843 | 0.20338  | 0.205711 | 0.2162    | 0.199155 |
| 0.120192 | 0.106935  | 0.13549  | 0.129225 | 0.123689 | 0.123106  | 0.123543 |
| 0.122378 | 0.103001  | 0.122815 | 0.132576 | 0.108392 | 0.106643  | 0.120775 |
| 0.139277 | 0.125728  | 0.136218 | 0.141608 | 0.128788 | 0.125874  | 0.13243  |
| 0.136801 | 0.123543  | 0.137529 | 0.142337 | 0.133013 | 0.138258  | 0.134615 |
| 0.128351 | 0.117424  | 0.129953 | 0.137675 | 0.123689 | 0.12602   | 0.129371 |
| 0.209936 | 0.196387  | 0.215618 | 0.19595  | 0.199738 | 0.207314  | 0.194056 |
| 0.139569 | 0.124563  | 0.140297 | 0.145396 | 0.130828 | 0.136655  | 0.133596 |
| 0.121649 | 0.1081    | 0.129662 | 0.126603 | 0.111742 | 0.113491  | 0.11859  |
| 0.131993 | 0.119318  | 0.136509 | 0.137529 | 0.116259 | 0.125     | 0.131265 |
| 0.134324 | 0.119027  | 0.13243  | 0.137529 | 0.114802 | 0.122378  | 0.123397 |
| 0.135198 | 0.123106  | 0.138549 | 0.1419   | 0.129079 | 0.134615  | 0.127185 |
| 0.123543 | 0.107372  | 0.131265 | 0.134033 | 0.119464 | 0.117133  | 0.119901 |
| 0.118298 | 0.106789  | 0.128642 | 0.133741 | 0.113928 | 0.0906177 | 0.11961  |
| 0.134907 | 0.122232  | 0.137092 | 0.140443 | 0.126748 | 0.134324  | 0.131556 |
| 0.211976 | 0.19697   | 0.212121 | 0.194202 | 0.196533 | 0.209353  | 0.194639 |
| 0.127331 | 0.112908  | 0.130099 | 0.13345  | 0.120338 | 0.121795  | 0.116987 |
| 0.206731 | 0.195513  | 0.206002 | 0.191579 | 0.195367 | 0.204691  | 0.191725 |
| 0.204254 | 0.188374  | 0.208188 | 0.188811 | 0.19289  | 0.204254  | 0.188374 |
| 0.141317 | 0.129516  | 0.139423 | 0.147727 | 0.123543 | 0.130536  | 0.134761 |
| 0.137529 | 0.127477  | 0.14088  | 0.145396 | 0.134615 | 0.13986   | 0.14088  |
| 0.111014 | 0.101544  | 0.12398  | 0.123834 | 0.104312 | 0.0935315 | 0.118735 |
| 0.12602  | 0.112762  | 0.128497 | 0.131847 | 0.122523 | 0.122815  | 0.120338 |

|          |          |          |          |          |           |          |
|----------|----------|----------|----------|----------|-----------|----------|
| 0.137238 | 0.120775 | 0.13884  | 0.141026 | 0.126166 | 0.128788  | 0.124272 |
| 0.128205 | 0.110286 | 0.136509 | 0.132284 | 0.115967 | 0.116259  | 0.120192 |
| 0.133741 | 0.120484 | 0.110868 | 0.134324 | 0.110431 | 0.122669  | 0.120192 |
| 0.138403 | 0.122523 | 0.113199 | 0.13986  | 0.114802 | 0.12704   | 0.125728 |
| 0.124854 | 0.117133 | 0.142774 | 0.14292  | 0.133304 | 0.137966  | 0.131119 |
| 0.138695 | 0.12602  | 0.13884  | 0.1419   | 0.119464 | 0.130245  | 0.128934 |
| 0.121066 | 0.104604 | 0.128788 | 0.124854 | 0.106789 | 0.10912   | 0.115676 |
| 0.138403 | 0.124272 | 0.136509 | 0.138403 | 0.127331 | 0.131993  | 0.127768 |
| 0.114365 | 0.100524 | 0.123834 | 0.122232 | 0.105332 | 0.0968823 | 0.113054 |
| 0.138986 | 0.123106 | 0.140297 | 0.143648 | 0.131993 | 0.134907  | 0.133013 |
| 0.137529 | 0.122815 | 0.141463 | 0.125583 | 0.122086 | 0.123543  | 0.118153 |
| 0.143211 | 0.127622 | 0.144231 | 0.150787 | 0.136218 | 0.14088   | 0.137238 |
| 0.265589 | 0.249709 | 0.267191 | 0.251603 | 0.258304 | 0.26384   | 0.252622 |
| 0.13884  | 0.125874 | 0.135781 | 0.145542 | 0.123106 | 0.133887  | 0.134907 |
| 0.137821 | 0.126894 | 0.13039  | 0.1419   | 0.128497 | 0.131993  | 0.137675 |
| 0.229458 | 0.210082 | 0.229312 | 0.210519 | 0.217512 | 0.227127  | 0.213578 |
| 0.129371 | 0.117279 | 0.128642 | 0.144231 | 0.128497 | 0.130245  | 0.13447  |
| 0.238054 | 0.224213 | 0.243153 | 0.221445 | 0.229312 | 0.236305  | 0.221591 |
| 0.136509 | 0.119464 | 0.129079 | 0.141171 | 0.117279 | 0.126894  | 0.128497 |
| 0.128205 | 0.113199 | 0.139132 | 0.138986 | 0.118881 | 0.11859   | 0.133596 |
| 0.133741 | 0.120192 | 0.132139 | 0.136364 | 0.12704  | 0.130828  | 0.129225 |
| 0.13986  | 0.12602  | 0.140589 | 0.142483 | 0.124126 | 0.128788  | 0.130099 |
| 0.215035 | 0.200612 | 0.216055 | 0.19697  | 0.204254 | 0.212121  | 0.196241 |
| 0.141317 | 0.127185 | 0.143502 | 0.148019 | 0.135198 | 0.141026  | 0.133596 |
| 0.136072 | 0.123689 | 0.137675 | 0.142191 | 0.129079 | 0.134324  | 0.126603 |
| 0.237617 | 0.220862 | 0.23951  | 0.222174 | 0.225379 | 0.234411  | 0.221445 |
| 0.144522 | 0.126603 | 0.119901 | 0.1419   | 0.113928 | 0.131702  | 0.128059 |
| 0.21081  | 0.194347 | 0.211247 | 0.191288 | 0.19799  | 0.2044    | 0.194347 |
| 0.140589 | 0.125291 | 0.12296  | 0.139714 | 0.116404 | 0.133596  | 0.127914 |
| 0.124563 | 0.112179 | 0.135198 | 0.128934 | 0.11116  | 0.112908  | 0.124709 |
| 0.124126 | 0.108537 | 0.126603 | 0.140443 | 0.111888 | 0.109266  | 0.129516 |
| 0.141026 | 0.126894 | 0.141754 | 0.145979 | 0.124126 | 0.135781  | 0.131556 |
| 0.128934 | 0.115093 | 0.135198 | 0.136509 | 0.123106 | 0.121358  | 0.118298 |
| 0.173223 | 0.155303 | 0.171911 | 0.157488 | 0.152535 | 0.16623   | 0.155012 |
| 0.129808 | 0.117424 | 0.134033 | 0.135344 | 0.122232 | 0.129225  | 0.120338 |
| 0.135344 | 0.124126 | 0.139569 | 0.141754 | 0.129808 | 0.138549  | 0.137529 |
| 0.13039  | 0.120921 | 0.136072 | 0.135927 | 0.120775 | 0.134178  | 0.130245 |
| 0.128934 | 0.116259 | 0.138986 | 0.145542 | 0.136801 | 0.13447   | 0.132867 |
| 0.208625 | 0.192162 | 0.209062 | 0.193182 | 0.197261 | 0.206294  | 0.189831 |
| 0.125146 | 0.107226 | 0.131702 | 0.127185 | 0.112617 | 0.11553   | 0.122086 |
| 0.140152 | 0.127185 | 0.13884  | 0.139569 | 0.119755 | 0.131119  | 0.128351 |
| 0.134761 | 0.120629 | 0.126457 | 0.140297 | 0.112325 | 0.124272  | 0.119755 |
| 0.137821 | 0.121358 | 0.112617 | 0.139569 | 0.113054 | 0.129079  | 0.12602  |
| 0.125437 | 0.110723 | 0.137238 | 0.128351 | 0.117861 | 0.114948  | 0.123543 |

|          |          |          |          |          |          |          |
|----------|----------|----------|----------|----------|----------|----------|
| 0.263986 | 0.247815 | 0.263258 | 0.249417 | 0.256119 | 0.261072 | 0.249563 |
| 0.120775 | 0.106352 | 0.123834 | 0.134178 | 0.112034 | 0.111742 | 0.126166 |
| 0.137383 | 0.119755 | 0.139277 | 0.13884  | 0.122232 | 0.127768 | 0.124126 |
| 0.190705 | 0.175991 | 0.189977 | 0.177593 | 0.173514 | 0.191579 | 0.175991 |
| 0.196241 | 0.182984 | 0.199883 | 0.181672 | 0.187791 | 0.197115 | 0.181818 |
| 0.132139 | 0.115967 | 0.144231 | 0.141754 | 0.129516 | 0.130099 | 0.132284 |
| 0.136364 | 0.121941 | 0.140297 | 0.1419   | 0.127331 | 0.130536 | 0.126894 |
| 0.136364 | 0.121358 | 0.135344 | 0.140152 | 0.117424 | 0.131993 | 0.122815 |
| 0.151369 | 0.13986  | 0.155594 | 0.163024 | 0.148164 | 0.151661 | 0.14831  |
| 0.121066 | 0.111888 | 0.138695 | 0.140589 | 0.124563 | 0.127477 | 0.129079 |
| 0.129371 | 0.118444 | 0.142045 | 0.141317 | 0.130536 | 0.134033 | 0.133304 |
| 0.145251 | 0.128205 | 0.122378 | 0.144668 | 0.119027 | 0.140297 | 0.132284 |
| 0.133596 | 0.116259 | 0.132867 | 0.138258 | 0.122523 | 0.132139 | 0.122378 |
| 0.138403 | 0.125728 | 0.138549 | 0.147436 | 0.13549  | 0.137821 | 0.134761 |
| 0.141754 | 0.124126 | 0.123252 | 0.131847 | 0.110286 | 0.130682 | 0.122669 |
| 0.138986 | 0.12398  | 0.14088  | 0.143065 | 0.123834 | 0.13141  | 0.128351 |
| 0.150495 | 0.136946 | 0.149184 | 0.153409 | 0.13447  | 0.143502 | 0.143939 |
| 0.122669 | 0.109703 | 0.131556 | 0.141026 | 0.114802 | 0.110431 | 0.130682 |
| 0.144959 | 0.133159 | 0.14627  | 0.148164 | 0.125728 | 0.137383 | 0.135781 |
| 0.144959 | 0.129953 | 0.120338 | 0.150787 | 0.119027 | 0.136218 | 0.134033 |
| 0.219406 | 0.201777 | 0.224505 | 0.202506 | 0.210956 | 0.217657 | 0.201195 |
| 0.111742 | 0.106061 | 0.130828 | 0.129225 | 0.105041 | 0.111742 | 0.122669 |
| 0.203526 | 0.189977 | 0.204254 | 0.188666 | 0.194784 | 0.204108 | 0.184441 |
| 0.130682 | 0.115967 | 0.128497 | 0.135635 | 0.124854 | 0.128351 | 0.126166 |
| 0.126603 | 0.114219 | 0.138403 | 0.13447  | 0.116696 | 0.117279 | 0.130536 |
| 0.14088  | 0.123543 | 0.144522 | 0.13039  | 0.122815 | 0.125146 | 0.118298 |
| 0.132867 | 0.11961  | 0.137675 | 0.122086 | 0.11859  | 0.119172 | 0.114365 |
| 0.137383 | 0.120921 | 0.140152 | 0.14088  | 0.130682 | 0.137966 | 0.129662 |
| 0.137675 | 0.123252 | 0.13549  | 0.142628 | 0.131556 | 0.13447  | 0.131119 |
| 0.128642 | 0.113054 | 0.138986 | 0.131556 | 0.114073 | 0.117861 | 0.125583 |
| 0.132284 | 0.121649 | 0.137966 | 0.139277 | 0.126748 | 0.135198 | 0.133013 |
| 0.144522 | 0.125728 | 0.144668 | 0.131993 | 0.125    | 0.125583 | 0.117861 |
| 0.145833 | 0.13345  | 0.124126 | 0.144085 | 0.119027 | 0.14088  | 0.139277 |
| 0.259178 | 0.241841 | 0.259907 | 0.241404 | 0.250728 | 0.256847 | 0.244464 |
| 0.125437 | 0.111888 | 0.138695 | 0.131556 | 0.114656 | 0.117861 | 0.123252 |
| 0.195221 | 0.179924 | 0.198572 | 0.182401 | 0.187354 | 0.194347 | 0.181672 |
| 0.200612 | 0.185315 | 0.203671 | 0.1875   | 0.192162 | 0.199738 | 0.182984 |
| 0.128788 | 0.114948 | 0.130973 | 0.131119 | 0.121503 | 0.129079 | 0.132139 |
| 0.120047 | 0.105041 | 0.124272 | 0.133741 | 0.109848 | 0.111305 | 0.124563 |
| 0.125291 | 0.114656 | 0.141171 | 0.136364 | 0.119464 | 0.122669 | 0.129516 |
| 0.131119 | 0.116113 | 0.13447  | 0.135781 | 0.123834 | 0.128205 | 0.11961  |
| 0.103584 | 0.090035 | 0.128788 | 0.119901 | 0.101836 | 0.088141 | 0.111888 |
| 0.140006 | 0.125583 | 0.118881 | 0.139714 | 0.115822 | 0.129808 | 0.130828 |
| 0.131119 | 0.115239 | 0.133596 | 0.134907 | 0.120047 | 0.128497 | 0.124563 |

|          |          |          |          |          |           |          |
|----------|----------|----------|----------|----------|-----------|----------|
| 0.141026 | 0.127477 | 0.143794 | 0.151807 | 0.136946 | 0.140152  | 0.135635 |
| 0.124854 | 0.111014 | 0.134615 | 0.131556 | 0.113782 | 0.114365  | 0.123252 |
| 0.140006 | 0.12704  | 0.141026 | 0.151078 | 0.133887 | 0.14088   | 0.134324 |
| 0.132576 | 0.121358 | 0.133013 | 0.134324 | 0.12296  | 0.128788  | 0.128059 |
| 0.143939 | 0.12602  | 0.144085 | 0.131119 | 0.124417 | 0.125583  | 0.122815 |
| 0.13884  | 0.12704  | 0.141317 | 0.140589 | 0.119901 | 0.128934  | 0.128205 |
| 0.145688 | 0.133013 | 0.122232 | 0.150058 | 0.121503 | 0.137529  | 0.138258 |
| 0.121358 | 0.109266 | 0.134033 | 0.135344 | 0.112617 | 0.0863928 | 0.12704  |
| 0.119901 | 0.107226 | 0.13345  | 0.125728 | 0.110286 | 0.113491  | 0.121503 |
| 0.143211 | 0.132576 | 0.140734 | 0.151369 | 0.137966 | 0.137966  | 0.1419   |
| 0.197552 | 0.182255 | 0.199446 | 0.182984 | 0.187646 | 0.194347  | 0.181381 |
| 0.143502 | 0.130245 | 0.145688 | 0.153118 | 0.139132 | 0.144959  | 0.142191 |
| 0.136218 | 0.122378 | 0.138112 | 0.140006 | 0.128351 | 0.133596  | 0.126748 |
| 0.137238 | 0.122523 | 0.141754 | 0.126748 | 0.119172 | 0.121212  | 0.118153 |
| 0.12602  | 0.109848 | 0.132576 | 0.121358 | 0.110577 | 0.115239  | 0.112471 |
| 0.137238 | 0.12398  | 0.137092 | 0.1419   | 0.120921 | 0.131119  | 0.126311 |
| 0.140006 | 0.127914 | 0.141608 | 0.143502 | 0.122523 | 0.132139  | 0.128205 |
| 0.20338  | 0.188957 | 0.205274 | 0.188811 | 0.193473 | 0.198718  | 0.185169 |
| 0.13141  | 0.113491 | 0.137675 | 0.134033 | 0.119755 | 0.126748  | 0.121649 |
| 0.122815 | 0.104604 | 0.126748 | 0.125146 | 0.112908 | 0.113491  | 0.115093 |
| 0.138258 | 0.123543 | 0.138112 | 0.145833 | 0.131265 | 0.138549  | 0.131993 |
| 0.203671 | 0.189831 | 0.203526 | 0.18852  | 0.19289  | 0.199883  | 0.187209 |
| 0.124563 | 0.106935 | 0.124417 | 0.130099 | 0.112034 | 0.112617  | 0.121212 |
| 0.142191 | 0.128351 | 0.11757  | 0.144231 | 0.114802 | 0.134615  | 0.131265 |
| 0.138403 | 0.124272 | 0.140006 | 0.142483 | 0.129662 | 0.136072  | 0.130682 |
| 0.122232 | 0.111888 | 0.135781 | 0.139132 | 0.126894 | 0.128351  | 0.126166 |
| 0.198864 | 0.184732 | 0.200758 | 0.184586 | 0.18954  | 0.198572  | 0.183275 |
| 0.142045 | 0.125    | 0.119755 | 0.141171 | 0.116987 | 0.131556  | 0.131119 |
| 0.133596 | 0.119172 | 0.129079 | 0.136509 | 0.121066 | 0.125146  | 0.12704  |
| 0.12602  | 0.107226 | 0.126748 | 0.13243  | 0.109994 | 0.110577  | 0.120338 |
| 0.141754 | 0.124417 | 0.142483 | 0.131556 | 0.123106 | 0.131265  | 0.119755 |
| 0.136364 | 0.118735 | 0.139132 | 0.141026 | 0.131993 | 0.134615  | 0.135635 |
| 0.143648 | 0.130099 | 0.121941 | 0.147436 | 0.119755 | 0.13549   | 0.133013 |
| 0.120629 | 0.109411 | 0.136218 | 0.127914 | 0.111888 | 0.115385  | 0.122232 |
| 0.136364 | 0.123397 | 0.136801 | 0.140443 | 0.117424 | 0.123834  | 0.135344 |
| 0.136218 | 0.128788 | 0.160256 | 0.157488 | 0.149621 | 0.147582  | 0.149184 |
| 0.24898  | 0.230478 | 0.248834 | 0.232955 | 0.235868 | 0.241696  | 0.229021 |
| 0.11961  | 0.113345 | 0.13345  | 0.136801 | 0.114948 | 0.0884324 | 0.127622 |
| 0.135344 | 0.123543 | 0.136946 | 0.143502 | 0.130099 | 0.135635  | 0.137238 |
| 0.132284 | 0.118735 | 0.131556 | 0.135781 | 0.12296  | 0.128497  | 0.124563 |
| 0.130682 | 0.120338 | 0.136946 | 0.139714 | 0.136509 | 0.133887  | 0.125874 |
| 0.128205 | 0.113199 | 0.129808 | 0.132284 | 0.11655  | 0.129662  | 0.121941 |
| 0.127622 | 0.11757  | 0.132139 | 0.134615 | 0.122086 | 0.127914  | 0.132721 |
| 0.137092 | 0.123543 | 0.135781 | 0.140589 | 0.127768 | 0.136509  | 0.129371 |

|          |           |          |          |          |           |          |
|----------|-----------|----------|----------|----------|-----------|----------|
| 0.147145 | 0.130973  | 0.118444 | 0.145688 | 0.118881 | 0.136655  | 0.134178 |
| 0.134907 | 0.121649  | 0.134178 | 0.140152 | 0.123543 | 0.134907  | 0.121649 |
| 0.244901 | 0.231643  | 0.247378 | 0.231206 | 0.237325 | 0.248106  | 0.229895 |
| 0.122086 | 0.104167  | 0.124272 | 0.13141  | 0.108683 | 0.108392  | 0.119901 |
| 0.129953 | 0.114365  | 0.122232 | 0.132867 | 0.109557 | 0.119172  | 0.121358 |
| 0.121941 | 0.106935  | 0.132576 | 0.129516 | 0.107663 | 0.113199  | 0.122296 |
| 0.127622 | 0.117861  | 0.145251 | 0.148019 | 0.138986 | 0.13986   | 0.136509 |
| 0.122086 | 0.117861  | 0.139714 | 0.144231 | 0.121795 | 0.0917832 | 0.134178 |
| 0.126457 | 0.116113  | 0.140589 | 0.13345  | 0.122378 | 0.12296   | 0.126894 |
| 0.137238 | 0.122523  | 0.135635 | 0.142774 | 0.128788 | 0.134907  | 0.128934 |
| 0.123689 | 0.109557  | 0.130828 | 0.135927 | 0.123106 | 0.12398   | 0.125874 |
| 0.241987 | 0.226107  | 0.243007 | 0.225379 | 0.232372 | 0.240239  | 0.224942 |
| 0.140297 | 0.126166  | 0.138112 | 0.144376 | 0.13243  | 0.137092  | 0.13345  |
| 0.143648 | 0.126894  | 0.119901 | 0.144814 | 0.116841 | 0.134907  | 0.134178 |
| 0.131119 | 0.118735  | 0.128934 | 0.135198 | 0.117716 | 0.127914  | 0.120192 |
| 0.127477 | 0.11014   | 0.136364 | 0.138258 | 0.130682 | 0.131265  | 0.12704  |
| 0.138258 | 0.120338  | 0.13549  | 0.143211 | 0.118444 | 0.127768  | 0.131119 |
| 0.120192 | 0.1081    | 0.133741 | 0.128642 | 0.113782 | 0.113782  | 0.124709 |
| 0.141171 | 0.125874  | 0.120629 | 0.14088  | 0.116987 | 0.13039   | 0.129953 |
| 0.145105 | 0.132721  | 0.121941 | 0.150932 | 0.122378 | 0.138986  | 0.135344 |
| 0.138112 | 0.124563  | 0.11553  | 0.1419   | 0.115385 | 0.129953  | 0.127768 |
| 0.123397 | 0.108683  | 0.135198 | 0.129808 | 0.113199 | 0.114948  | 0.122378 |
| 0.135052 | 0.124417  | 0.138986 | 0.145251 | 0.133596 | 0.137675  | 0.13986  |
| 0.137238 | 0.130973  | 0.145542 | 0.150641 | 0.137529 | 0.141608  | 0.142628 |
| 0.145105 | 0.129225  | 0.145542 | 0.128205 | 0.125874 | 0.129371  | 0.123397 |
| 0.144522 | 0.130682  | 0.149038 | 0.134907 | 0.128205 | 0.129953  | 0.124272 |
| 0.135052 | 0.126457  | 0.141608 | 0.148747 | 0.134178 | 0.140006  | 0.1419   |
| 0.102127 | 0.0868298 | 0.127331 | 0.119318 | 0.099796 | 0.0849359 | 0.111888 |
| 0.146562 | 0.132721  | 0.133887 | 0.153263 | 0.122086 | 0.137821  | 0.135052 |
| 0.140589 | 0.13141   | 0.115093 | 0.146416 | 0.123689 | 0.132721  | 0.13345  |
| 0.216055 | 0.203089  | 0.221154 | 0.202069 | 0.210227 | 0.217803  | 0.200175 |
| 0.13243  | 0.119172  | 0.142774 | 0.139423 | 0.12602  | 0.119901  | 0.130245 |
| 0.132139 | 0.118298  | 0.125583 | 0.135052 | 0.111451 | 0.126311  | 0.124126 |
| 0.126748 | 0.111742  | 0.138258 | 0.128205 | 0.115093 | 0.119172  | 0.12602  |
| 0.231789 | 0.215618  | 0.236014 | 0.218094 | 0.2213   | 0.234411  | 0.217075 |
| 0.218386 | 0.204545  | 0.222319 | 0.205565 | 0.211976 | 0.218677  | 0.205711 |
| 0.146853 | 0.130973  | 0.124854 | 0.147436 | 0.119172 | 0.137821  | 0.134178 |
| 0.260927 | 0.245338  | 0.26049  | 0.245775 | 0.249854 | 0.25947   | 0.245629 |
| 0.103875 | 0.0859557 | 0.128205 | 0.116987 | 0.103875 | 0.0872669 | 0.111014 |
| 0.128351 | 0.125874  | 0.141026 | 0.144959 | 0.13243  | 0.128642  | 0.140152 |
| 0.123397 | 0.106061  | 0.120629 | 0.131556 | 0.109994 | 0.110577  | 0.122296 |
| 0.137238 | 0.125437  | 0.138549 | 0.14627  | 0.132576 | 0.138695  | 0.140297 |
| 0.198572 | 0.187646  | 0.200758 | 0.185169 | 0.192745 | 0.200612  | 0.185897 |
| 0.136364 | 0.123106  | 0.127185 | 0.141608 | 0.124709 | 0.132284  | 0.135635 |

|          |          |          |          |          |           |          |
|----------|----------|----------|----------|----------|-----------|----------|
| 0.207168 | 0.193328 | 0.208479 | 0.190851 | 0.195804 | 0.20542   | 0.189248 |
| 0.125583 | 0.112908 | 0.128934 | 0.136072 | 0.120629 | 0.125     | 0.124854 |
| 0.134907 | 0.119027 | 0.126894 | 0.13549  | 0.108974 | 0.132284  | 0.121649 |
| 0.117424 | 0.104749 | 0.13447  | 0.126457 | 0.117716 | 0.106935  | 0.125437 |
| 0.128205 | 0.110286 | 0.127768 | 0.131993 | 0.11655  | 0.127622  | 0.120484 |
| 0.11757  | 0.105478 | 0.131702 | 0.12398  | 0.106498 | 0.109703  | 0.114219 |
| 0.126603 | 0.113928 | 0.131993 | 0.132721 | 0.122815 | 0.114656  | 0.121503 |
| 0.116987 | 0.099359 | 0.119755 | 0.128351 | 0.105624 | 0.10708   | 0.11655  |
| 0.13345  | 0.116696 | 0.131847 | 0.134907 | 0.121212 | 0.125583  | 0.121358 |
| 0.137966 | 0.119464 | 0.126166 | 0.138549 | 0.111742 | 0.130099  | 0.122378 |
| 0.11553  | 0.106061 | 0.129953 | 0.128059 | 0.109411 | 0.0895979 | 0.116841 |
| 0.119172 | 0.101836 | 0.122232 | 0.131993 | 0.108974 | 0.108392  | 0.119318 |
| 0.135635 | 0.117133 | 0.13986  | 0.125146 | 0.117279 | 0.126311  | 0.111305 |
| 0.142337 | 0.129079 | 0.143357 | 0.147873 | 0.137675 | 0.140589  | 0.136072 |
| 0.132576 | 0.120192 | 0.135052 | 0.121795 | 0.113928 | 0.117424  | 0.114656 |
| 0.130973 | 0.120338 | 0.131993 | 0.135635 | 0.122815 | 0.123106  | 0.125291 |
| 0.119172 | 0.105624 | 0.127768 | 0.125291 | 0.106643 | 0.108683  | 0.116404 |
| 0.140152 | 0.124272 | 0.120484 | 0.141026 | 0.112179 | 0.130536  | 0.127768 |
| 0.134033 | 0.11961  | 0.134178 | 0.138695 | 0.127914 | 0.131702  | 0.132139 |
| 0.140297 | 0.128205 | 0.139569 | 0.143211 | 0.122815 | 0.128351  | 0.128788 |
| 0.137675 | 0.123252 | 0.141608 | 0.124563 | 0.118735 | 0.123106  | 0.118007 |
| 0.136655 | 0.120484 | 0.135927 | 0.141317 | 0.127914 | 0.132284  | 0.12398  |
| 0.140006 | 0.12704  | 0.140734 | 0.150495 | 0.137966 | 0.139132  | 0.137238 |
| 0.145251 | 0.133159 | 0.148893 | 0.156906 | 0.139714 | 0.145833  | 0.144522 |
| 0.126457 | 0.113199 | 0.111742 | 0.127914 | 0.112762 | 0.118007  | 0.118444 |
| 0.124709 | 0.110868 | 0.135344 | 0.132576 | 0.111305 | 0.115093  | 0.12398  |
| 0.125146 | 0.115093 | 0.126748 | 0.131265 | 0.118153 | 0.118735  | 0.126457 |
| 0.14088  | 0.128205 | 0.143939 | 0.150204 | 0.137092 | 0.141463  | 0.142774 |
| 0.121212 | 0.106498 | 0.126603 | 0.135198 | 0.111305 | 0.108392  | 0.124854 |
| 0.147727 | 0.138258 | 0.151369 | 0.154138 | 0.132284 | 0.138986  | 0.144668 |
| 0.130536 | 0.121358 | 0.147582 | 0.141317 | 0.125291 | 0.124417  | 0.139714 |
| 0.126603 | 0.115385 | 0.144814 | 0.142337 | 0.132721 | 0.135927  | 0.13549  |
| 0.121503 | 0.104167 | 0.134761 | 0.128205 | 0.115967 | 0.104021  | 0.114365 |
| 0.121649 | 0.108392 | 0.13345  | 0.136218 | 0.122815 | 0.118153  | 0.119172 |
| 0.142045 | 0.123252 | 0.14627  | 0.131265 | 0.126311 | 0.125146  | 0.121503 |
| 0.219697 | 0.20236  | 0.218094 | 0.199592 | 0.205711 | 0.21824   | 0.195659 |
| 0.13345  | 0.118153 | 0.129225 | 0.137238 | 0.124126 | 0.124709  | 0.125146 |
| 0.117861 | 0.104604 | 0.135198 | 0.129516 | 0.116696 | 0.106789  | 0.121212 |
| 0.131993 | 0.121649 | 0.135635 | 0.140443 | 0.127331 | 0.131702  | 0.134178 |
| 0.135052 | 0.116841 | 0.138695 | 0.124563 | 0.116404 | 0.118735  | 0.11451  |
| 0.128788 | 0.11757  | 0.136801 | 0.138695 | 0.129662 | 0.129079  | 0.133596 |
| 0.138695 | 0.126894 | 0.138258 | 0.140734 | 0.127622 | 0.126748  | 0.13243  |
| 0.135052 | 0.128205 | 0.139277 | 0.146125 | 0.13039  | 0.12602   | 0.136364 |
| 0.122378 | 0.110286 | 0.143502 | 0.140152 | 0.126748 | 0.132867  | 0.128934 |



|           |          |          |          |           |           |          |
|-----------|----------|----------|----------|-----------|-----------|----------|
| 0.132867  | 0.119318 | 0.123397 | 0.135198 | 0.111014  | 0.124417  | 0.119027 |
| 0.131702  | 0.12602  | 0.139132 | 0.148019 | 0.131119  | 0.137529  | 0.134178 |
| 0.111305  | 0.104167 | 0.126894 | 0.128205 | 0.113928  | 0.104895  | 0.122815 |
| 0.123689  | 0.113054 | 0.134033 | 0.133596 | 0.116113  | 0.090472  | 0.123252 |
| 0.186189  | 0.175554 | 0.187209 | 0.176282 | 0.179779  | 0.187063  | 0.172931 |
| 0.138403  | 0.122523 | 0.139132 | 0.142191 | 0.126457  | 0.132284  | 0.124854 |
| 0.137383  | 0.127331 | 0.141317 | 0.144085 | 0.131556  | 0.138549  | 0.138695 |
| 0.121503  | 0.11116  | 0.130682 | 0.130536 | 0.111014  | 0.108974  | 0.11553  |
| 0.11961   | 0.105186 | 0.122378 | 0.137092 | 0.11757   | 0.131847  | 0.109848 |
| 0.115822  | 0.104604 | 0.127914 | 0.122815 | 0.108246  | 0.0995047 | 0.114802 |
| 0.11553   | 0.100524 | 0.123543 | 0.121066 | 0.107372  | 0.0901807 | 0.115676 |
| 0.118153  | 0.106643 | 0.130828 | 0.128059 | 0.113491  | 0.101836  | 0.120047 |
| 0.126894  | 0.115385 | 0.127622 | 0.14292  | 0.123689  | 0.130973  | 0.128788 |
| 0.124854  | 0.11014  | 0.138112 | 0.133596 | 0.114948  | 0.10912   | 0.117716 |
| 0.138403  | 0.128351 | 0.139714 | 0.140734 | 0.125291  | 0.134615  | 0.139132 |
| 0.123689  | 0.104895 | 0.129953 | 0.133596 | 0.111451  | 0.124563  | 0.114219 |
| 0.128497  | 0.114948 | 0.128059 | 0.137529 | 0.112179  | 0.126457  | 0.128351 |
| 0.142045  | 0.128497 | 0.109848 | 0.146707 | 0.127768  | 0.132721  | 0.136946 |
| 0.113491  | 0.10373  | 0.125874 | 0.136218 | 0.100962  | 0.109411  | 0.120338 |
| 0.131556  | 0.120047 | 0.13986  | 0.139714 | 0.11961   | 0.125437  | 0.131702 |
| 0.114365  | 0.102564 | 0.125291 | 0.131265 | 0.100962  | 0.114073  | 0.118881 |
| 0.112034  | 0.100816 | 0.129662 | 0.135052 | 0.103001  | 0.112617  | 0.121212 |
| 0.0957168 | 0.087704 | 0.125291 | 0.118735 | 0.108246  | 0.105915  | 0.114219 |
| 0.11859   | 0.108537 | 0.130973 | 0.127914 | 0.0673077 | 0.104312  | 0.129225 |
| 0.119755  | 0.10708  | 0.130973 | 0.124126 | 0.109557  | 0.115385  | 0.116113 |
| 0.154138  | 0.140006 | 0.144376 | 0.154429 | 0.130536  | 0.150058  | 0.147873 |
| 0.148601  | 0.135344 | 0.140006 | 0.142774 | 0.121503  | 0.145105  | 0.136801 |
| 0.122378  | 0.106498 | 0.129808 | 0.130536 | 0.104604  | 0.102855  | 0.116987 |
| 0.144085  | 0.134324 | 0.129953 | 0.1537   | 0.133596  | 0.148164  | 0.140734 |
| 0.134178  | 0.117133 | 0.144814 | 0.135344 | 0.125728  | 0.13039   | 0.121503 |
| 0.139423  | 0.124126 | 0.115385 | 0.146416 | 0.124272  | 0.12602   | 0.136946 |
| 0.11116   | 0.108683 | 0.127622 | 0.13039  | 0.107372  | 0.101544  | 0.117716 |
| 0.1419    | 0.133887 | 0.146125 | 0.146562 | 0.139569  | 0.148893  | 0.146707 |
| 0.138112  | 0.13039  | 0.132139 | 0.145979 | 0.127331  | 0.140443  | 0.138258 |
| 0.149184  | 0.129808 | 0.132721 | 0.144814 | 0.132284  | 0.146562  | 0.126311 |
| 0.128205  | 0.11116  | 0.133887 | 0.13345  | 0.113928  | 0.116841  | 0.120775 |
| 0.125728  | 0.106352 | 0.124709 | 0.128059 | 0.108246  | 0.114073  | 0.117133 |
| 0.114219  | 0.103293 | 0.12398  | 0.120338 | 0.104312  | 0.106935  | 0.118735 |
| 0.133887  | 0.117424 | 0.119464 | 0.137092 | 0.117861  | 0.124854  | 0.125    |
| 0.118735  | 0.108392 | 0.125874 | 0.13884  | 0.109994  | 0.109994  | 0.126457 |
| 0.111305  | 0.105624 | 0.133013 | 0.137821 | 0.123252  | 0.112762  | 0.124854 |
| 0.127331  | 0.112617 | 0.134178 | 0.134907 | 0.110431  | 0.133159  | 0.122523 |
| 0.122378  | 0.111742 | 0.128351 | 0.123543 | 0.112762  | 0.115385  | 0.111451 |
| 0.113199  | 0.101981 | 0.126166 | 0.11757  | 0.100087  | 0.103584  | 0.115093 |

|          |           |          |          |          |           |          |
|----------|-----------|----------|----------|----------|-----------|----------|
| 0.119755 | 0.103293  | 0.12398  | 0.131993 | 0.104312 | 0.103438  | 0.124563 |
| 0.126457 | 0.10708   | 0.123106 | 0.129079 | 0.113345 | 0.108392  | 0.111742 |
| 0.115239 | 0.105478  | 0.129953 | 0.125437 | 0.099796 | 0.108537  | 0.125291 |
| 0.122815 | 0.103147  | 0.135198 | 0.128059 | 0.110286 | 0.10912   | 0.119464 |
| 0.125    | 0.113782  | 0.136801 | 0.133741 | 0.121212 | 0.123834  | 0.124563 |
| 0.122378 | 0.110577  | 0.129225 | 0.127914 | 0.114802 | 0.108392  | 0.127768 |
| 0.102273 | 0.0817308 | 0.12398  | 0.117133 | 0.101399 | 0.0818765 | 0.108829 |
| 0.117424 | 0.103293  | 0.122232 | 0.129371 | 0.10169  | 0.0996503 | 0.11961  |
| 0.127477 | 0.114802  | 0.136072 | 0.131265 | 0.120775 | 0.124272  | 0.125    |
| 0.117133 | 0.108829  | 0.137383 | 0.129371 | 0.110723 | 0.099359  | 0.121941 |
| 0.132284 | 0.123397  | 0.137383 | 0.132576 | 0.119464 | 0.123834  | 0.127768 |
| 0.121212 | 0.108246  | 0.126894 | 0.129662 | 0.114802 | 0.114802  | 0.115822 |
| 0.126603 | 0.115385  | 0.13141  | 0.13884  | 0.119901 | 0.114365  | 0.134615 |

| <b>TDr_12_00465</b> | <b>TDr_12_00467</b> | <b>TDr_12_00474</b> | <b>TDr_12_00475</b> | <b>TDr_12_00476</b> | <b>TDr_12_00478</b> | <b>TDr_12_00479</b> |
|---------------------|---------------------|---------------------|---------------------|---------------------|---------------------|---------------------|
| 0.120629            | 0.117133            | 0.126166            | 0.112034            | 0.136655            | 0.116987            | 0.118735            |
| 0.12602             | 0.12398             | 0.137383            | 0.113345            | 0.13243             | 0.139277            | 0.115385            |
| 0.119901            | 0.11757             | 0.131265            | 0.108683            | 0.128642            | 0.133159            | 0.11451             |
| 0.125437            | 0.126894            | 0.135927            | 0.108392            | 0.128059            | 0.140734            | 0.12296             |
| 0.137092            | 0.144376            | 0.142628            | 0.129662            | 0.133304            | 0.146853            | 0.12704             |
| 0.14088             | 0.13243             | 0.136509            | 0.123543            | 0.139132            | 0.137821            | 0.131993            |
| 0.122378            | 0.126166            | 0.131119            | 0.111742            | 0.131119            | 0.137383            | 0.102127            |
| 0.119755            | 0.120047            | 0.127914            | 0.108537            | 0.120921            | 0.134761            | 0.117861            |
| 0.107955            | 0.117861            | 0.126603            | 0.0914918           | 0.119318            | 0.129079            | 0.105186            |
| 0.107809            | 0.114802            | 0.11859             | 0.0878497           | 0.107517            | 0.127185            | 0.0901807           |
| 0.126311            | 0.125146            | 0.128351            | 0.105478            | 0.131847            | 0.125291            | 0.107809            |
| 0.121212            | 0.122378            | 0.134033            | 0.101544            | 0.126457            | 0.135927            | 0.114073            |
| 0.109557            | 0.121795            | 0.126166            | 0.10067             | 0.121212            | 0.133013            | 0.112908            |
| 0.139132            | 0.134178            | 0.144668            | 0.126457            | 0.142337            | 0.133159            | 0.141026            |
| 0.130536            | 0.132576            | 0.136072            | 0.117279            | 0.126457            | 0.140006            | 0.118735            |
| 0.121066            | 0.126311            | 0.136218            | 0.106643            | 0.121358            | 0.136364            | 0.106935            |
| 0.120047            | 0.119755            | 0.130536            | 0.10067             | 0.125583            | 0.135927            | 0.10912             |
| 0.145251            | 0.147873            | 0.155449            | 0.139569            | 0.140589            | 0.150932            | 0.142483            |
| 0.121649            | 0.118735            | 0.131556            | 0.104312            | 0.126603            | 0.13345             | 0.109557            |
| 0.209353            | 0.200903            | 0.205274            | 0.199592            | 0.208479            | 0.189394            | 0.208042            |
| 0.136655            | 0.129079            | 0.136946            | 0.113782            | 0.143939            | 0.140589            | 0.123689            |
| 0.134761            | 0.127185            | 0.132721            | 0.115676            | 0.137383            | 0.135198            | 0.119755            |
| 0.121212            | 0.122086            | 0.131993            | 0.0980478           | 0.122669            | 0.135927            | 0.110286            |
| 0.110868            | 0.129516            | 0.142628            | 0.112179            | 0.12602             | 0.145396            | 0.118298            |
| 0.111888            | 0.119172            | 0.125               | 0.090472            | 0.114802            | 0.125728            | 0.105915            |
| 0.136946            | 0.132576            | 0.141317            | 0.120775            | 0.143065            | 0.140006            | 0.128351            |
| 0.114802            | 0.125291            | 0.138986            | 0.110577            | 0.124417            | 0.146125            | 0.10912             |
| 0.11655             | 0.125874            | 0.139277            | 0.106206            | 0.12704             | 0.141754            | 0.116404            |
| 0.112471            | 0.135198            | 0.144522            | 0.120775            | 0.124709            | 0.149913            | 0.123106            |
| 0.0909091           | 0.129953            | 0.138403            | 0.102418            | 0.124709            | 0.140006            | 0.116404            |
| 0.123397            | 0.130099            | 0.134178            | 0.11451             | 0.128642            | 0.133159            | 0.11655             |
| 0.106061            | 0.126166            | 0.143939            | 0.114365            | 0.129371            | 0.142045            | 0.112617            |
| 0.105478            | 0.116841            | 0.126748            | 0.101253            | 0.119464            | 0.126603            | 0.103584            |
| 0.0533217           | 0.125               | 0.138112            | 0.102418            | 0.121503            | 0.139132            | 0.109703            |
| 0.116696            | 0.131556            | 0.131847            | 0.104021            | 0.121941            | 0.142191            | 0.103438            |
| 0.107226            | 0.136072            | 0.138695            | 0.110868            | 0.127914            | 0.145833            | 0.10912             |
| 0.134178            | 0.133596            | 0.139132            | 0.117424            | 0.129516            | 0.14831             | 0.113928            |
| 0.127331            | 0.129371            | 0.13549             | 0.105332            | 0.127914            | 0.139714            | 0.118444            |
| 0.110431            | 0.115967            | 0.136946            | 0.101253            | 0.12296             | 0.133304            | 0.108537            |
| 0.130245            | 0.120921            | 0.138112            | 0.114365            | 0.112762            | 0.141754            | 0.117279            |
| 0.118881            | 0.119464            | 0.126748            | 0.0986305           | 0.107226            | 0.131847            | 0.10708             |
| 0.1419              | 0.138695            | 0.153263            | 0.122815            | 0.107517            | 0.153992            | 0.136509            |

|          |          |          |           |           |          |           |
|----------|----------|----------|-----------|-----------|----------|-----------|
| 0.143357 | 0.147727 | 0.157925 | 0.130973  | 0.117424  | 0.151369 | 0.131847  |
| 0.118735 | 0.120192 | 0.126894 | 0.0996503 | 0.103293  | 0.137821 | 0.112179  |
| 0.11116  | 0.120484 | 0.12398  | 0.0912005 | 0.11553   | 0.131119 | 0.0903263 |
| 0.115385 | 0.121503 | 0.132576 | 0.0808566 | 0.0999417 | 0.136218 | 0.0939685 |
| 0.127622 | 0.121212 | 0.137529 | 0.112617  | 0.132867  | 0.14088  | 0.120775  |
| 0.135344 | 0.140589 | 0.150204 | 0.120629  | 0.115822  | 0.149184 | 0.129371  |
| 0.118444 | 0.122232 | 0.130973 | 0.106352  | 0.103875  | 0.136072 | 0.109557  |
| 0.121503 | 0.116259 | 0.127331 | 0.0960082 | 0.105186  | 0.13447  | 0.10708   |
| 0.140297 | 0.144959 | 0.148164 | 0.140443  | 0.154575  | 0.143939 | 0.137238  |
| 0.130682 | 0.130099 | 0.145251 | 0.118881  | 0.133887  | 0.143357 | 0.126457  |
| 0.121795 | 0.120338 | 0.131702 | 0.0980478 | 0.106935  | 0.136509 | 0.106206  |
| 0.121212 | 0.12704  | 0.140734 | 0.112908  | 0.120629  | 0.141463 | 0.116696  |
| 0.126457 | 0.114219 | 0.131702 | 0.110868  | 0.120921  | 0.133887 | 0.116113  |
| 0.138986 | 0.142483 | 0.157925 | 0.13243   | 0.13986   | 0.161859 | 0.131847  |
| 0.132721 | 0.13039  | 0.140006 | 0.113345  | 0.110577  | 0.145396 | 0.11014   |
| 0.122232 | 0.120775 | 0.133304 | 0.10169   | 0.110868  | 0.137529 | 0.113054  |
| 0.121066 | 0.123106 | 0.131556 | 0.105478  | 0.109703  | 0.130828 | 0.104312  |
| 0.118298 | 0.128205 | 0.139277 | 0.105624  | 0.124126  | 0.137675 | 0.0412296 |
| 0.145688 | 0.140152 | 0.146562 | 0.120192  | 0.106643  | 0.149038 | 0.127477  |
| 0.143357 | 0.143065 | 0.151515 | 0.127768  | 0.119464  | 0.157197 | 0.129225  |
| 0.166812 | 0.15778  | 0.168561 | 0.15472   | 0.164773  | 0.157343 | 0.161131  |
| 0.121358 | 0.114656 | 0.13243  | 0.1081    | 0.104167  | 0.137529 | 0.112762  |
| 0.121941 | 0.119318 | 0.130973 | 0.0990676 | 0.114948  | 0.136072 | 0.108974  |
| 0.11961  | 0.122232 | 0.129808 | 0.101981  | 0.112908  | 0.138403 | 0.108683  |
| 0.141608 | 0.118007 | 0.118007 | 0.134178  | 0.142774  | 0.127477 | 0.131847  |
| 0.117716 | 0.121503 | 0.130828 | 0.104167  | 0.110723  | 0.135344 | 0.110868  |
| 0.140589 | 0.138258 | 0.143211 | 0.126166  | 0.124563  | 0.145396 | 0.124126  |
| 0.115239 | 0.129516 | 0.135344 | 0.0981935 | 0.123689  | 0.139277 | 0.0839161 |
| 0.122669 | 0.126166 | 0.133741 | 0.103001  | 0.114802  | 0.138549 | 0.113491  |
| 0.148019 | 0.125874 | 0.129953 | 0.140297  | 0.150641  | 0.129516 | 0.134178  |
| 0.132576 | 0.126457 | 0.138112 | 0.110286  | 0.108683  | 0.145542 | 0.121649  |
| 0.133596 | 0.144085 | 0.147873 | 0.127914  | 0.123397  | 0.148601 | 0.126166  |
| 0.132867 | 0.137529 | 0.145979 | 0.119901  | 0.134907  | 0.144668 | 0.127768  |
| 0.129225 | 0.122523 | 0.13447  | 0.1081    | 0.127477  | 0.133741 | 0.116259  |
| 0.119027 | 0.115822 | 0.131556 | 0.0967366 | 0.106498  | 0.133741 | 0.104604  |
| 0.123106 | 0.123689 | 0.13243  | 0.101399  | 0.106498  | 0.134033 | 0.110723  |
| 0.13884  | 0.137383 | 0.148747 | 0.120047  | 0.11757   | 0.151224 | 0.128497  |
| 0.116841 | 0.120629 | 0.129953 | 0.0992133 | 0.11014   | 0.13447  | 0.108829  |
| 0.139132 | 0.140297 | 0.151661 | 0.121212  | 0.117861  | 0.152098 | 0.13141   |
| 0.130682 | 0.125437 | 0.140297 | 0.111014  | 0.115239  | 0.142191 | 0.118007  |
| 0.122523 | 0.122523 | 0.135927 | 0.106935  | 0.126311  | 0.13986  | 0.115967  |
| 0.125728 | 0.12398  | 0.134178 | 0.104895  | 0.10912   | 0.136364 | 0.115676  |
| 0.127185 | 0.125728 | 0.139132 | 0.113054  | 0.108537  | 0.143648 | 0.123543  |
| 0.119901 | 0.126311 | 0.13039  | 0.103147  | 0.112034  | 0.135198 | 0.111888  |

|          |          |          |           |          |          |           |
|----------|----------|----------|-----------|----------|----------|-----------|
| 0.122523 | 0.115239 | 0.132139 | 0.101981  | 0.105624 | 0.137529 | 0.111305  |
| 0.136072 | 0.136655 | 0.147145 | 0.116987  | 0.10373  | 0.144376 | 0.129808  |
| 0.117716 | 0.120921 | 0.130245 | 0.0823135 | 0.114802 | 0.135635 | 0.107663  |
| 0.11553  | 0.124854 | 0.133887 | 0.092366  | 0.118153 | 0.13986  | 0.105478  |
| 0.130973 | 0.133596 | 0.135927 | 0.113054  | 0.128934 | 0.145105 | 0.115093  |
| 0.122232 | 0.127768 | 0.135927 | 0.116259  | 0.137675 | 0.142774 | 0.104312  |
| 0.127185 | 0.13884  | 0.144959 | 0.118007  | 0.131556 | 0.149184 | 0.109266  |
| 0.136364 | 0.145688 | 0.155303 | 0.127185  | 0.142483 | 0.160402 | 0.118444  |
| 0.128351 | 0.126603 | 0.131847 | 0.105478  | 0.125437 | 0.133741 | 0.112471  |
| 0.181964 | 0.179633 | 0.185752 | 0.175117  | 0.181964 | 0.175991 | 0.176573  |
| 0.125291 | 0.12296  | 0.129953 | 0.101544  | 0.123252 | 0.134761 | 0.104167  |
| 0.131556 | 0.146416 | 0.146416 | 0.122378  | 0.131265 | 0.151224 | 0.122669  |
| 0.126603 | 0.139714 | 0.138258 | 0.113345  | 0.127768 | 0.144231 | 0.117133  |
| 0.138986 | 0.136946 | 0.147727 | 0.121649  | 0.133741 | 0.150787 | 0.109703  |
| 0.120775 | 0.121649 | 0.133887 | 0.101399  | 0.123106 | 0.137238 | 0.0979021 |
| 0.13447  | 0.137092 | 0.150787 | 0.122086  | 0.141463 | 0.15035  | 0.111014  |
| 0.124272 | 0.123397 | 0.132139 | 0.10373   | 0.128934 | 0.136655 | 0.10373   |
| 0.125583 | 0.132284 | 0.139569 | 0.111451  | 0.13345  | 0.142337 | 0.105041  |
| 0.124417 | 0.122378 | 0.131702 | 0.0989219 | 0.11451  | 0.131265 | 0.105624  |
| 0.131119 | 0.141317 | 0.149184 | 0.118444  | 0.139569 | 0.155157 | 0.115822  |
| 0.11451  | 0.114219 | 0.128788 | 0.0726981 | 0.109557 | 0.134761 | 0.0957168 |
| 0.134761 | 0.134178 | 0.13884  | 0.124417  | 0.131847 | 0.145105 | 0.115093  |
| 0.123834 | 0.118007 | 0.129953 | 0.0992133 | 0.123543 | 0.136509 | 0.105915  |
| 0.13243  | 0.130099 | 0.14292  | 0.117424  | 0.122815 | 0.145979 | 0.120047  |
| 0.126166 | 0.129953 | 0.137238 | 0.112325  | 0.127331 | 0.136801 | 0.103584  |
| 0.118881 | 0.117424 | 0.127622 | 0.106498  | 0.129371 | 0.130973 | 0.0945513 |
| 0.148893 | 0.12296  | 0.124417 | 0.137675  | 0.146562 | 0.128934 | 0.136801  |
| 0.11553  | 0.116696 | 0.137383 | 0.108392  | 0.131847 | 0.13345  | 0.0952797 |
| 0.121066 | 0.126603 | 0.124272 | 0.0990676 | 0.121066 | 0.136946 | 0.101981  |
| 0.120921 | 0.12296  | 0.136072 | 0.0852273 | 0.121212 | 0.139714 | 0.105624  |
| 0.134615 | 0.136364 | 0.144231 | 0.120192  | 0.130536 | 0.148164 | 0.121066  |
| 0.13141  | 0.131702 | 0.133741 | 0.117279  | 0.132284 | 0.128351 | 0.11757   |
| 0.116841 | 0.121795 | 0.129371 | 0.0977564 | 0.116841 | 0.134761 | 0.101544  |
| 0.123252 | 0.120921 | 0.127622 | 0.103875  | 0.125291 | 0.133887 | 0.103293  |
| 0.123689 | 0.121941 | 0.128934 | 0.105186  | 0.128642 | 0.136364 | 0.106935  |
| 0.124709 | 0.129079 | 0.139569 | 0.109994  | 0.119464 | 0.141171 | 0.0831876 |
| 0.122523 | 0.117279 | 0.13039  | 0.106935  | 0.131847 | 0.135781 | 0.101399  |
| 0.112471 | 0.114219 | 0.125583 | 0.0817308 | 0.115967 | 0.129808 | 0.0831876 |
| 0.11014  | 0.115967 | 0.128788 | 0.0948427 | 0.119464 | 0.131556 | 0.081148  |
| 0.113491 | 0.116404 | 0.128351 | 0.087704  | 0.117861 | 0.130245 | 0.0859557 |
| 0.123397 | 0.12602  | 0.13447  | 0.109848  | 0.131847 | 0.141026 | 0.122086  |
| 0.121212 | 0.136364 | 0.146562 | 0.110577  | 0.132284 | 0.145833 | 0.0866841 |
| 0.115239 | 0.12602  | 0.130682 | 0.0932401 | 0.122815 | 0.132867 | 0.0882867 |
| 0.116841 | 0.115967 | 0.125583 | 0.0872669 | 0.117716 | 0.13039  | 0.0849359 |

|           |          |          |           |           |          |           |
|-----------|----------|----------|-----------|-----------|----------|-----------|
| 0.123543  | 0.133159 | 0.138695 | 0.100087  | 0.11859   | 0.142045 | 0.0805653 |
| 0.113491  | 0.119318 | 0.13039  | 0.0894522 | 0.11116   | 0.134324 | 0.0885781 |
| 0.132721  | 0.104749 | 0.110868 | 0.118298  | 0.136509  | 0.119464 | 0.122086  |
| 0.129225  | 0.128642 | 0.136509 | 0.125583  | 0.145542  | 0.133741 | 0.125874  |
| 0.112325  | 0.119027 | 0.135052 | 0.0938228 | 0.112908  | 0.136364 | 0.0871212 |
| 0.120047  | 0.123834 | 0.129953 | 0.0930944 | 0.123252  | 0.133013 | 0.0893065 |
| 0.117424  | 0.117133 | 0.124417 | 0.0922203 | 0.118881  | 0.131265 | 0.0828963 |
| 0.113928  | 0.110723 | 0.122669 | 0.0884324 | 0.117424  | 0.125728 | 0.0913462 |
| 0.115385  | 0.129371 | 0.142483 | 0.106206  | 0.121503  | 0.142045 | 0.0861014 |
| 0.115967  | 0.116841 | 0.12704  | 0.0849359 | 0.11451   | 0.128642 | 0.0759033 |
| 0.132721  | 0.144376 | 0.157488 | 0.127622  | 0.131847  | 0.152389 | 0.120338  |
| 0.130828  | 0.138403 | 0.141608 | 0.10067   | 0.0810023 | 0.144376 | 0.116113  |
| 0.125291  | 0.12704  | 0.137821 | 0.0925117 | 0.0885781 | 0.143794 | 0.116113  |
| 0.125146  | 0.124272 | 0.123397 | 0.0871212 | 0.0939685 | 0.132867 | 0.110723  |
| 0.116987  | 0.119901 | 0.131847 | 0.0961538 | 0.121066  | 0.132867 | 0.104604  |
| 0.11859   | 0.118881 | 0.132576 | 0.0930944 | 0.114802  | 0.13447  | 0.0875583 |
| 0.120192  | 0.118153 | 0.13243  | 0.0917832 | 0.120484  | 0.138403 | 0.102564  |
| 0.0968823 | 0.120775 | 0.130973 | 0.0973193 | 0.119318  | 0.133741 | 0.103438  |
| 0.128642  | 0.11757  | 0.13447  | 0.107517  | 0.133304  | 0.136072 | 0.118298  |
| 0.132139  | 0.137966 | 0.141754 | 0.111305  | 0.128934  | 0.148601 | 0.120629  |
| 0.12704   | 0.127331 | 0.141317 | 0.105915  | 0.127622  | 0.140297 | 0.105624  |
| 0.128059  | 0.138258 | 0.14088  | 0.106352  | 0.127185  | 0.146562 | 0.121212  |
| 0.133741  | 0.141317 | 0.147436 | 0.11961   | 0.132867  | 0.151661 | 0.114948  |
| 0.199883  | 0.190268 | 0.196096 | 0.186334  | 0.201632  | 0.186626 | 0.204108  |
| 0.235868  | 0.229458 | 0.238782 | 0.231935  | 0.240822  | 0.224359 | 0.242133  |
| 0.122378  | 0.115385 | 0.134907 | 0.11116   | 0.132867  | 0.138258 | 0.120484  |
| 0.117861  | 0.116113 | 0.128642 | 0.100233  | 0.119027  | 0.132576 | 0.112471  |
| 0.120775  | 0.119901 | 0.130682 | 0.101107  | 0.118444  | 0.130536 | 0.102855  |
| 0.120192  | 0.119027 | 0.134178 | 0.106643  | 0.125728  | 0.138986 | 0.115093  |
| 0.132139  | 0.132721 | 0.136509 | 0.119172  | 0.125437  | 0.141608 | 0.121212  |
| 0.129516  | 0.127768 | 0.141463 | 0.105478  | 0.123106  | 0.1419   | 0.118007  |
| 0.142483  | 0.152972 | 0.160548 | 0.133887  | 0.1419    | 0.163607 | 0.136509  |
| 0.125728  | 0.120484 | 0.138258 | 0.106935  | 0.129808  | 0.143357 | 0.116259  |
| 0.128059  | 0.132721 | 0.146125 | 0.120338  | 0.135927  | 0.149767 | 0.116259  |
| 0.137529  | 0.134615 | 0.141608 | 0.122232  | 0.117133  | 0.143502 | 0.126894  |
| 0.137238  | 0.135781 | 0.148601 | 0.11757   | 0.138986  | 0.154283 | 0.129516  |
| 0.139569  | 0.142483 | 0.147145 | 0.12602   | 0.107809  | 0.151078 | 0.12602   |
| 0.123543  | 0.125    | 0.134033 | 0.104749  | 0.127331  | 0.141463 | 0.113782  |
| 0.123543  | 0.119172 | 0.132576 | 0.100962  | 0.120338  | 0.138258 | 0.107372  |
| 0.130099  | 0.120484 | 0.136801 | 0.100816  | 0.126311  | 0.142483 | 0.117133  |
| 0.11553   | 0.115822 | 0.133887 | 0.100233  | 0.120775  | 0.137821 | 0.108392  |
| 0.118735  | 0.11757  | 0.13039  | 0.0999417 | 0.121358  | 0.134907 | 0.109266  |
| 0.126166  | 0.118007 | 0.140443 | 0.106498  | 0.125583  | 0.14292  | 0.114365  |
| 0.13447   | 0.137675 | 0.150204 | 0.114219  | 0.133887  | 0.151224 | 0.122378  |

|          |          |          |           |          |          |          |
|----------|----------|----------|-----------|----------|----------|----------|
| 0.137092 | 0.141171 | 0.1537   | 0.124126  | 0.143794 | 0.157925 | 0.130245 |
| 0.123252 | 0.122669 | 0.136946 | 0.111742  | 0.125    | 0.139714 | 0.111451 |
| 0.12398  | 0.122815 | 0.137675 | 0.104604  | 0.125728 | 0.138695 | 0.112471 |
| 0.130099 | 0.137966 | 0.149621 | 0.122086  | 0.136218 | 0.153555 | 0.125    |
| 0.116696 | 0.122523 | 0.133304 | 0.099359  | 0.128642 | 0.138112 | 0.11014  |
| 0.143357 | 0.15472  | 0.153555 | 0.129516  | 0.1419   | 0.160111 | 0.131556 |
| 0.137238 | 0.130245 | 0.138403 | 0.0986305 | 0.121503 | 0.144668 | 0.129516 |
| 0.136801 | 0.141754 | 0.149621 | 0.128205  | 0.140297 | 0.149476 | 0.131993 |
| 0.121066 | 0.116113 | 0.13243  | 0.0987762 | 0.113782 | 0.136364 | 0.1081   |
| 0.114802 | 0.11859  | 0.133159 | 0.102418  | 0.125    | 0.139132 | 0.104167 |
| 0.128642 | 0.132139 | 0.141171 | 0.114219  | 0.126603 | 0.150058 | 0.121212 |
| 0.124126 | 0.132284 | 0.142191 | 0.115239  | 0.137238 | 0.152826 | 0.11961  |
| 0.132576 | 0.136364 | 0.144814 | 0.12398   | 0.141026 | 0.149913 | 0.114656 |
| 0.129516 | 0.12398  | 0.139714 | 0.109266  | 0.13243  | 0.145105 | 0.116841 |
| 0.129371 | 0.131702 | 0.141608 | 0.105915  | 0.130828 | 0.144959 | 0.115239 |
| 0.127914 | 0.131119 | 0.138403 | 0.110286  | 0.134324 | 0.141463 | 0.119027 |
| 0.132576 | 0.138403 | 0.14627  | 0.113491  | 0.140443 | 0.15574  | 0.119027 |
| 0.134615 | 0.134615 | 0.15035  | 0.11961   | 0.134907 | 0.144085 | 0.118735 |
| 0.136509 | 0.144085 | 0.151369 | 0.123543  | 0.13884  | 0.155012 | 0.128205 |
| 0.132576 | 0.124417 | 0.134907 | 0.12398   | 0.138112 | 0.133304 | 0.127768 |
| 0.120047 | 0.118007 | 0.139569 | 0.108246  | 0.128205 | 0.141463 | 0.107955 |
| 0.13549  | 0.136364 | 0.14627  | 0.125728  | 0.136364 | 0.151369 | 0.127185 |
| 0.119027 | 0.122523 | 0.132721 | 0.0999417 | 0.122523 | 0.138986 | 0.113054 |
| 0.119755 | 0.120338 | 0.125874 | 0.101544  | 0.107226 | 0.132139 | 0.111742 |
| 0.123252 | 0.12296  | 0.128788 | 0.102418  | 0.125583 | 0.138258 | 0.110868 |
| 0.116987 | 0.11961  | 0.136509 | 0.100524  | 0.133304 | 0.138695 | 0.112471 |
| 0.119318 | 0.116987 | 0.13243  | 0.102855  | 0.122815 | 0.13345  | 0.107226 |
| 0.139277 | 0.137821 | 0.148019 | 0.123689  | 0.142774 | 0.152826 | 0.125437 |
| 0.120484 | 0.113782 | 0.126894 | 0.107809  | 0.130973 | 0.127914 | 0.11655  |
| 0.137383 | 0.142337 | 0.153409 | 0.126166  | 0.143211 | 0.155886 | 0.123252 |
| 0.116113 | 0.118444 | 0.134178 | 0.104021  | 0.126311 | 0.142191 | 0.107517 |
| 0.132867 | 0.129953 | 0.142774 | 0.114948  | 0.130828 | 0.149038 | 0.112617 |
| 0.125728 | 0.130682 | 0.131265 | 0.107226  | 0.126894 | 0.133159 | 0.116259 |
| 0.127477 | 0.114073 | 0.126603 | 0.0836247 | 0.118735 | 0.132284 | 0.117133 |
| 0.119172 | 0.119464 | 0.13141  | 0.0983392 | 0.122378 | 0.14088  | 0.100379 |
| 0.125146 | 0.128351 | 0.130682 | 0.0844988 | 0.114656 | 0.143065 | 0.112179 |
| 0.127914 | 0.122378 | 0.137529 | 0.0866841 | 0.120338 | 0.140589 | 0.115822 |
| 0.113636 | 0.117716 | 0.131119 | 0.101836  | 0.122086 | 0.142337 | 0.107663 |
| 0.119172 | 0.135198 | 0.141317 | 0.109411  | 0.130245 | 0.149913 | 0.11116  |
| 0.135927 | 0.136509 | 0.151369 | 0.121212  | 0.135927 | 0.152972 | 0.120338 |
| 0.108537 | 0.113782 | 0.121358 | 0.0897436 | 0.114365 | 0.126748 | 0.101399 |
| 0.127622 | 0.141317 | 0.141317 | 0.120192  | 0.132576 | 0.146707 | 0.123689 |
| 0.117279 | 0.127768 | 0.133596 | 0.0987762 | 0.124272 | 0.1419   | 0.103147 |
| 0.127768 | 0.134761 | 0.139423 | 0.113928  | 0.133013 | 0.151224 | 0.114802 |

|          |          |          |           |          |          |          |
|----------|----------|----------|-----------|----------|----------|----------|
| 0.121066 | 0.13039  | 0.130682 | 0.102855  | 0.123689 | 0.137529 | 0.112179 |
| 0.116113 | 0.128934 | 0.132139 | 0.0979021 | 0.117861 | 0.137821 | 0.101107 |
| 0.118007 | 0.129079 | 0.13549  | 0.107372  | 0.129371 | 0.14088  | 0.103875 |
| 0.125437 | 0.135052 | 0.137675 | 0.109848  | 0.12602  | 0.13986  | 0.116841 |
| 0.133304 | 0.145251 | 0.147582 | 0.120338  | 0.136801 | 0.154429 | 0.12704  |
| 0.121358 | 0.128934 | 0.135344 | 0.099359  | 0.129225 | 0.142191 | 0.102855 |
| 0.122523 | 0.127768 | 0.127185 | 0.100816  | 0.121649 | 0.13549  | 0.111597 |
| 0.137238 | 0.136946 | 0.15472  | 0.128351  | 0.146853 | 0.1537   | 0.13243  |
| 0.12602  | 0.138258 | 0.140297 | 0.111888  | 0.132721 | 0.148601 | 0.107809 |
| 0.111742 | 0.122815 | 0.12602  | 0.0999417 | 0.119901 | 0.131702 | 0.101981 |
| 0.222319 | 0.210956 | 0.218823 | 0.214015  | 0.223776 | 0.206731 | 0.22771  |
| 0.127622 | 0.129662 | 0.134324 | 0.107372  | 0.128205 | 0.140589 | 0.113782 |
| 0.116841 | 0.121212 | 0.124709 | 0.0933858 | 0.115093 | 0.139132 | 0.099796 |
| 0.133887 | 0.138549 | 0.142628 | 0.121503  | 0.137383 | 0.149184 | 0.126457 |
| 0.122232 | 0.122815 | 0.133887 | 0.0949883 | 0.120192 | 0.138695 | 0.105769 |
| 0.128059 | 0.135344 | 0.138549 | 0.106352  | 0.131847 | 0.148893 | 0.112179 |
| 0.117861 | 0.126894 | 0.135344 | 0.101399  | 0.125437 | 0.145396 | 0.11655  |
| 0.12296  | 0.125    | 0.129371 | 0.104458  | 0.13141  | 0.130682 | 0.109411 |
| 0.115967 | 0.134615 | 0.132284 | 0.100962  | 0.118298 | 0.134178 | 0.097465 |
| 0.12398  | 0.132139 | 0.137966 | 0.112471  | 0.135635 | 0.138403 | 0.120338 |
| 0.123834 | 0.142483 | 0.13986  | 0.119901  | 0.131119 | 0.148747 | 0.120775 |
| 0.12602  | 0.135927 | 0.144085 | 0.116259  | 0.137383 | 0.147727 | 0.117133 |
| 0.123397 | 0.135052 | 0.134178 | 0.111888  | 0.134761 | 0.144231 | 0.113636 |
| 0.11553  | 0.123397 | 0.133013 | 0.0821678 | 0.116113 | 0.133741 | 0.104312 |
| 0.121066 | 0.124272 | 0.137675 | 0.100524  | 0.125146 | 0.140734 | 0.115385 |
| 0.131993 | 0.141608 | 0.140734 | 0.112325  | 0.135781 | 0.14933  | 0.123689 |
| 0.124272 | 0.121358 | 0.131556 | 0.104312  | 0.12398  | 0.138986 | 0.110723 |
| 0.140006 | 0.143211 | 0.149038 | 0.12704   | 0.120192 | 0.153846 | 0.128788 |
| 0.142774 | 0.120338 | 0.105478 | 0.120192  | 0.145396 | 0.112325 | 0.13243  |
| 0.125291 | 0.132284 | 0.138986 | 0.103293  | 0.129662 | 0.128059 | 0.112617 |
| 0.126457 | 0.135781 | 0.134907 | 0.105915  | 0.124709 | 0.142045 | 0.112908 |
| 0.135052 | 0.113491 | 0.114948 | 0.114802  | 0.139423 | 0.127331 | 0.118007 |
| 0        | 0.13141  | 0.141026 | 0.112325  | 0.125874 | 0.143211 | 0.116113 |
| 0.13141  | 0        | 0.122086 | 0.116113  | 0.137821 | 0.126311 | 0.128642 |
| 0.141026 | 0.122086 | 0        | 0.121358  | 0.13986  | 0.117279 | 0.135344 |
| 0.112325 | 0.116113 | 0.121358 | 0         | 0.100087 | 0.134324 | 0.10373  |
| 0.125874 | 0.137821 | 0.13986  | 0.100087  | 0        | 0.143794 | 0.126311 |
| 0.143211 | 0.126311 | 0.117279 | 0.134324  | 0.143794 | 0        | 0.135781 |
| 0.116113 | 0.128642 | 0.135344 | 0.10373   | 0.126311 | 0.135781 | 0        |
| 0.130099 | 0.130099 | 0.137092 | 0.109557  | 0.108537 | 0.137821 | 0.117133 |
| 0.145105 | 0.150932 | 0.160548 | 0.140006  | 0.152389 | 0.154575 | 0.136509 |
| 0.129662 | 0.129953 | 0.1419   | 0.118153  | 0.110723 | 0.147582 | 0.124563 |
| 0.135052 | 0.143794 | 0.154283 | 0.123252  | 0.137383 | 0.158508 | 0.132284 |
| 0.131119 | 0.135781 | 0.142483 | 0.113491  | 0.129371 | 0.145833 | 0.119027 |



|          |          |          |           |          |          |           |
|----------|----------|----------|-----------|----------|----------|-----------|
| 0.12398  | 0.134761 | 0.133887 | 0.111305  | 0.133596 | 0.142191 | 0.112762  |
| 0.131993 | 0.134907 | 0.137529 | 0.11961   | 0.134033 | 0.144085 | 0.120775  |
| 0.127477 | 0.123689 | 0.129516 | 0.0897436 | 0.118444 | 0.135198 | 0.102273  |
| 0.133741 | 0.138695 | 0.141317 | 0.111742  | 0.131702 | 0.147582 | 0.10708   |
| 0.124126 | 0.138403 | 0.144231 | 0.111742  | 0.130828 | 0.149913 | 0.120484  |
| 0.125874 | 0.147145 | 0.151224 | 0.121066  | 0.142483 | 0.151952 | 0.112617  |
| 0.13345  | 0.140734 | 0.145979 | 0.121358  | 0.135781 | 0.154575 | 0.107372  |
| 0.130828 | 0.126166 | 0.131702 | 0.120192  | 0.13345  | 0.137092 | 0.116987  |
| 0.145688 | 0.142191 | 0.140443 | 0.138258  | 0.145396 | 0.145542 | 0.131556  |
| 0.115676 | 0.124126 | 0.130245 | 0.0831876 | 0.103438 | 0.13884  | 0.104458  |
| 0.120921 | 0.125874 | 0.137821 | 0.105041  | 0.129079 | 0.143502 | 0.101253  |
| 0.137238 | 0.136072 | 0.143357 | 0.123106  | 0.136072 | 0.146416 | 0.115822  |
| 0.123543 | 0.121503 | 0.127331 | 0.0960082 | 0.11451  | 0.139132 | 0.0948427 |
| 0.147582 | 0.112908 | 0.116696 | 0.134907  | 0.145251 | 0.127622 | 0.134033  |
| 0.156614 | 0.133013 | 0.130973 | 0.146853  | 0.149913 | 0.134907 | 0.137821  |
| 0.129516 | 0.136801 | 0.147873 | 0.111888  | 0.135635 | 0.15035  | 0.120629  |
| 0.129953 | 0.131993 | 0.141317 | 0.105332  | 0.126457 | 0.148164 | 0.11961   |
| 0.117279 | 0.142045 | 0.151369 | 0.123834  | 0.139132 | 0.149767 | 0.126748  |
| 0.128205 | 0.138403 | 0.134324 | 0.111451  | 0.123252 | 0.14729  | 0.123689  |
| 0.134033 | 0.13345  | 0.14627  | 0.114948  | 0.131993 | 0.149913 | 0.11961   |
| 0.133159 | 0.1419   | 0.147145 | 0.124854  | 0.134907 | 0.153992 | 0.124854  |
| 0.141317 | 0.126457 | 0.131119 | 0.127185  | 0.138695 | 0.133013 | 0.127185  |
| 0.125146 | 0.133013 | 0.134761 | 0.10373   | 0.128934 | 0.145688 | 0.111305  |
| 0.166812 | 0.133304 | 0.13884  | 0.159091  | 0.169143 | 0.143648 | 0.156469  |
| 0.124563 | 0.130099 | 0.139423 | 0.104021  | 0.119901 | 0.15035  | 0.115093  |
| 0.133013 | 0.141463 | 0.149038 | 0.119755  | 0.132721 | 0.149184 | 0.130536  |
| 0.122378 | 0.129079 | 0.137529 | 0.110577  | 0.124417 | 0.141754 | 0.106789  |
| 0.121795 | 0.143065 | 0.15472  | 0.121941  | 0.141317 | 0.156614 | 0.126894  |
| 0.116841 | 0.134615 | 0.130828 | 0.110577  | 0.125583 | 0.137092 | 0.11553   |
| 0.14088  | 0.131265 | 0.136218 | 0.132576  | 0.1537   | 0.129662 | 0.140734  |
| 0.141608 | 0.146853 | 0.157051 | 0.141754  | 0.152681 | 0.159819 | 0.144959  |
| 0.129225 | 0.127185 | 0.142337 | 0.119755  | 0.141171 | 0.145396 | 0.126748  |
| 0.141026 | 0.134615 | 0.15035  | 0.135052  | 0.147727 | 0.138549 | 0.140297  |
| 0.155449 | 0.145251 | 0.161276 | 0.13549   | 0.156031 | 0.150641 | 0.147145  |
| 0.149913 | 0.141463 | 0.150495 | 0.136364  | 0.157197 | 0.145396 | 0.151224  |
| 0.126166 | 0.130828 | 0.144814 | 0.116113  | 0.131702 | 0.148747 | 0.103293  |
| 0.140297 | 0.149038 | 0.145542 | 0.134324  | 0.137092 | 0.155012 | 0.139277  |
| 0.120484 | 0.118735 | 0.133887 | 0.113636  | 0.12602  | 0.133741 | 0.112179  |
| 0.128205 | 0.123543 | 0.130245 | 0.11116   | 0.130828 | 0.136509 | 0.119027  |
| 0.12602  | 0.125728 | 0.133887 | 0.104895  | 0.129516 | 0.136364 | 0.107226  |
| 0.124563 | 0.123397 | 0.137675 | 0.11655   | 0.13447  | 0.13986  | 0.124417  |
| 0.127331 | 0.121212 | 0.138112 | 0.104749  | 0.127331 | 0.136509 | 0.116404  |
| 0.122086 | 0.115676 | 0.129662 | 0.110868  | 0.125291 | 0.128059 | 0.116113  |
| 0.12704  | 0.128788 | 0.137529 | 0.116987  | 0.134615 | 0.144376 | 0.124854  |

|          |          |          |           |          |          |           |
|----------|----------|----------|-----------|----------|----------|-----------|
| 0.133013 | 0.125728 | 0.13243  | 0.111597  | 0.126894 | 0.13141  | 0.119755  |
| 0.10912  | 0.117861 | 0.132721 | 0.0958625 | 0.118153 | 0.138112 | 0.0987762 |
| 0.131265 | 0.125437 | 0.142045 | 0.122378  | 0.137675 | 0.137821 | 0.125874  |
| 0.123543 | 0.123252 | 0.13549  | 0.114948  | 0.133741 | 0.14292  | 0.123689  |
| 0.130536 | 0.134033 | 0.143357 | 0.106498  | 0.125583 | 0.143502 | 0.110868  |
| 0.219114 | 0.209207 | 0.21824  | 0.212267  | 0.22465  | 0.205857 | 0.220425  |
| 0.138403 | 0.144231 | 0.159965 | 0.140589  | 0.148601 | 0.156614 | 0.144959  |
| 0.131847 | 0.140297 | 0.145251 | 0.125291  | 0.143794 | 0.141608 | 0.128205  |
| 0.132284 | 0.129662 | 0.141608 | 0.121649  | 0.136946 | 0.14933  | 0.123106  |
| 0.20979  | 0.206294 | 0.211247 | 0.208479  | 0.215909 | 0.19799  | 0.21722   |
| 0.132576 | 0.125    | 0.132867 | 0.111116  | 0.131702 | 0.126894 | 0.123397  |
| 0.119901 | 0.127185 | 0.143794 | 0.111014  | 0.136218 | 0.15035  | 0.123834  |
| 0.133304 | 0.131847 | 0.143794 | 0.11859   | 0.13243  | 0.142191 | 0.12296   |
| 0.129953 | 0.130828 | 0.130828 | 0.112908  | 0.124126 | 0.134761 | 0.11553   |
| 0.248543 | 0.244172 | 0.250583 | 0.247232  | 0.250583 | 0.235577 | 0.253059  |
| 0.123397 | 0.126311 | 0.130973 | 0.121212  | 0.142337 | 0.132284 | 0.12296   |
| 0.124854 | 0.126311 | 0.138549 | 0.100524  | 0.121941 | 0.139277 | 0.105186  |
| 0.133304 | 0.13243  | 0.146707 | 0.12296   | 0.13884  | 0.144522 | 0.128497  |
| 0.136509 | 0.130682 | 0.140006 | 0.120047  | 0.138549 | 0.1419   | 0.126457  |
| 0.128351 | 0.126311 | 0.131265 | 0.123543  | 0.140297 | 0.125291 | 0.126457  |
| 0.136801 | 0.127477 | 0.137675 | 0.124709  | 0.142628 | 0.129371 | 0.130536  |
| 0.126603 | 0.128934 | 0.14292  | 0.103438  | 0.125728 | 0.138403 | 0.109266  |
| 0.125583 | 0.124126 | 0.140152 | 0.116987  | 0.134907 | 0.140006 | 0.12398   |
| 0.131556 | 0.139132 | 0.137966 | 0.123834  | 0.132721 | 0.146562 | 0.130828  |
| 0.124272 | 0.123397 | 0.129516 | 0.104604  | 0.121358 | 0.134324 | 0.112471  |
| 0.121212 | 0.116841 | 0.136072 | 0.111451  | 0.132576 | 0.137675 | 0.123397  |
| 0.107955 | 0.117861 | 0.121066 | 0.0926573 | 0.106206 | 0.129662 | 0.0920746 |
| 0.13986  | 0.148019 | 0.157634 | 0.142045  | 0.153263 | 0.160111 | 0.144668  |
| 0.127331 | 0.127914 | 0.132576 | 0.124272  | 0.142774 | 0.131847 | 0.123106  |
| 0.123834 | 0.130245 | 0.14627  | 0.118444  | 0.135781 | 0.147582 | 0.126311  |
| 0.193473 | 0.184441 | 0.194639 | 0.185169  | 0.199883 | 0.184295 | 0.199155  |
| 0.207751 | 0.199301 | 0.205711 | 0.196824  | 0.212121 | 0.194202 | 0.212558  |
| 0.131702 | 0.129079 | 0.132284 | 0.112325  | 0.12704  | 0.13243  | 0.11757   |
| 0.127914 | 0.123543 | 0.129371 | 0.104749  | 0.121212 | 0.131847 | 0.112034  |
| 0.137821 | 0.140443 | 0.149184 | 0.135635  | 0.14627  | 0.145833 | 0.131847  |
| 0.128205 | 0.132284 | 0.139277 | 0.102127  | 0.124709 | 0.14088  | 0.108246  |
| 0.124563 | 0.125728 | 0.130099 | 0.125291  | 0.143502 | 0.127914 | 0.121503  |
| 0.134615 | 0.135198 | 0.144522 | 0.126603  | 0.138112 | 0.144959 | 0.13447   |
| 0.229021 | 0.217366 | 0.224068 | 0.217512  | 0.2331   | 0.212558 | 0.231789  |
| 0.121795 | 0.128788 | 0.135198 | 0.110868  | 0.134907 | 0.139714 | 0.120775  |
| 0.211393 | 0.200903 | 0.211684 | 0.204837  | 0.212558 | 0.197261 | 0.212413  |
| 0.116841 | 0.121212 | 0.13986  | 0.105041  | 0.127622 | 0.139714 | 0.0989219 |
| 0.118735 | 0.128059 | 0.13039  | 0.108974  | 0.130973 | 0.138986 | 0.113345  |
| 0.130828 | 0.123834 | 0.13549  | 0.111451  | 0.128788 | 0.133596 | 0.124272  |

|          |          |          |          |          |          |          |
|----------|----------|----------|----------|----------|----------|----------|
| 0.124126 | 0.119755 | 0.126748 | 0.103584 | 0.120629 | 0.126894 | 0.112617 |
| 0.208479 | 0.198864 | 0.209062 | 0.201049 | 0.216346 | 0.197261 | 0.215326 |
| 0.135052 | 0.13447  | 0.151078 | 0.13141  | 0.14729  | 0.143357 | 0.136655 |
| 0.114073 | 0.126311 | 0.137966 | 0.108974 | 0.133596 | 0.144522 | 0.113928 |
| 0.128934 | 0.126311 | 0.143794 | 0.124709 | 0.137675 | 0.145979 | 0.131993 |
| 0.126894 | 0.125728 | 0.140006 | 0.119172 | 0.13447  | 0.141026 | 0.120921 |
| 0.127185 | 0.122815 | 0.128934 | 0.105186 | 0.123397 | 0.135781 | 0.115676 |
| 0.118007 | 0.121795 | 0.140734 | 0.105332 | 0.131119 | 0.142337 | 0.100087 |
| 0.131993 | 0.127622 | 0.140443 | 0.106206 | 0.12704  | 0.134761 | 0.114365 |
| 0.120921 | 0.129079 | 0.145105 | 0.116987 | 0.137238 | 0.149038 | 0.124563 |
| 0.12296  | 0.120338 | 0.136364 | 0.113782 | 0.131993 | 0.134178 | 0.121941 |
| 0.116987 | 0.126603 | 0.13884  | 0.110723 | 0.131556 | 0.143357 | 0.115676 |
| 0.194056 | 0.183275 | 0.191434 | 0.184586 | 0.200175 | 0.184003 | 0.198864 |
| 0.134178 | 0.132721 | 0.144668 | 0.123252 | 0.143211 | 0.145688 | 0.130536 |
| 0.134615 | 0.133741 | 0.144522 | 0.125437 | 0.142483 | 0.149913 | 0.128642 |
| 0.129516 | 0.13243  | 0.140006 | 0.116259 | 0.134761 | 0.143357 | 0.120921 |
| 0.128205 | 0.126457 | 0.13141  | 0.119901 | 0.143648 | 0.125437 | 0.124272 |
| 0.127331 | 0.126166 | 0.142483 | 0.119318 | 0.132867 | 0.144668 | 0.127477 |
| 0.123834 | 0.126457 | 0.144522 | 0.109994 | 0.128205 | 0.146707 | 0.103293 |
| 0.119318 | 0.116987 | 0.12398  | 0.109848 | 0.126311 | 0.132867 | 0.112179 |
| 0.129808 | 0.134178 | 0.141171 | 0.104312 | 0.125146 | 0.145688 | 0.110431 |
| 0.130536 | 0.130245 | 0.141317 | 0.120775 | 0.141026 | 0.144959 | 0.125437 |
| 0.131702 | 0.129079 | 0.139569 | 0.117279 | 0.13549  | 0.142337 | 0.126894 |
| 0.128934 | 0.127477 | 0.131847 | 0.107809 | 0.127477 | 0.134615 | 0.118007 |
| 0.134615 | 0.132284 | 0.143939 | 0.119027 | 0.130536 | 0.147873 | 0.126311 |
| 0.140297 | 0.140589 | 0.151952 | 0.128788 | 0.134178 | 0.15472  | 0.129079 |
| 0.120192 | 0.118153 | 0.127477 | 0.110431 | 0.137092 | 0.126748 | 0.115676 |
| 0.135781 | 0.141608 | 0.154429 | 0.137383 | 0.147436 | 0.153409 | 0.139714 |
| 0.127914 | 0.123834 | 0.129079 | 0.104749 | 0.120338 | 0.133596 | 0.113199 |
| 0.127914 | 0.125583 | 0.138403 | 0.112617 | 0.13345  | 0.137966 | 0.125146 |
| 0.127768 | 0.122815 | 0.13884  | 0.119755 | 0.133887 | 0.128497 | 0.125    |
| 0.131265 | 0.136218 | 0.146125 | 0.109848 | 0.128351 | 0.142191 | 0.11451  |
| 0.194784 | 0.183712 | 0.195076 | 0.182401 | 0.200321 | 0.180361 | 0.19697  |
| 0.115385 | 0.124709 | 0.132867 | 0.103875 | 0.125583 | 0.139714 | 0.107955 |
| 0.115967 | 0.121503 | 0.12704  | 0.10271  | 0.12296  | 0.133596 | 0.110868 |
| 0.121503 | 0.129371 | 0.145396 | 0.116696 | 0.13549  | 0.149038 | 0.12602  |
| 0.183566 | 0.176865 | 0.184441 | 0.175845 | 0.191434 | 0.171766 | 0.186043 |
| 0.135344 | 0.135052 | 0.137675 | 0.132284 | 0.152535 | 0.136655 | 0.130536 |
| 0.13884  | 0.14088  | 0.149038 | 0.140734 | 0.154283 | 0.142483 | 0.136364 |
| 0.1419   | 0.151224 | 0.159965 | 0.144376 | 0.152681 | 0.160985 | 0.14729  |
| 0.12296  | 0.114802 | 0.126748 | 0.110577 | 0.134907 | 0.121941 | 0.114073 |
| 0.129516 | 0.125728 | 0.144668 | 0.121503 | 0.137383 | 0.143648 | 0.128497 |
| 0.213869 | 0.201632 | 0.211247 | 0.211101 | 0.220862 | 0.199738 | 0.219843 |
| 0.12704  | 0.127622 | 0.138986 | 0.120192 | 0.134033 | 0.141171 | 0.131265 |

|          |          |          |           |          |          |           |
|----------|----------|----------|-----------|----------|----------|-----------|
| 0.131265 | 0.129225 | 0.145833 | 0.128497  | 0.14088  | 0.145105 | 0.132867  |
| 0.118153 | 0.12398  | 0.137092 | 0.110431  | 0.129225 | 0.138112 | 0.109848  |
| 0.175262 | 0.161568 | 0.174388 | 0.162296  | 0.17701  | 0.161713 | 0.17803   |
| 0.119901 | 0.122232 | 0.134761 | 0.113345  | 0.128351 | 0.136946 | 0.121212  |
| 0.149184 | 0.160548 | 0.155886 | 0.145251  | 0.143939 | 0.163316 | 0.142628  |
| 0.117716 | 0.130828 | 0.138112 | 0.108829  | 0.129079 | 0.138549 | 0.107663  |
| 0.19289  | 0.178613 | 0.191434 | 0.182255  | 0.201632 | 0.183712 | 0.19799   |
| 0.122086 | 0.121503 | 0.129079 | 0.119318  | 0.139569 | 0.129516 | 0.117861  |
| 0.111597 | 0.111888 | 0.126748 | 0.092803  | 0.117424 | 0.132721 | 0.110577  |
| 0.126311 | 0.123106 | 0.135927 | 0.110431  | 0.135635 | 0.1419   | 0.122669  |
| 0.117716 | 0.132284 | 0.142191 | 0.112908  | 0.134615 | 0.144959 | 0.121649  |
| 0.119464 | 0.125874 | 0.143065 | 0.115822  | 0.136655 | 0.144959 | 0.122815  |
| 0.134033 | 0.126457 | 0.139569 | 0.11757   | 0.136655 | 0.145542 | 0.128351  |
| 0.124563 | 0.124563 | 0.127477 | 0.104312  | 0.122815 | 0.134033 | 0.111888  |
| 0.194056 | 0.183858 | 0.192308 | 0.184878  | 0.200175 | 0.180798 | 0.197407  |
| 0.13243  | 0.13243  | 0.139714 | 0.119172  | 0.131556 | 0.141026 | 0.123834  |
| 0.124709 | 0.123252 | 0.134324 | 0.110868  | 0.130536 | 0.137966 | 0.118444  |
| 0.213432 | 0.206148 | 0.211393 | 0.207459  | 0.221008 | 0.198718 | 0.217075  |
| 0.135927 | 0.133013 | 0.143502 | 0.122378  | 0.142337 | 0.143065 | 0.131119  |
| 0.125    | 0.122378 | 0.129371 | 0.105915  | 0.124417 | 0.133887 | 0.114073  |
| 0.120338 | 0.119172 | 0.129079 | 0.101836  | 0.119172 | 0.131847 | 0.110286  |
| 0.136218 | 0.140006 | 0.149621 | 0.136364  | 0.143502 | 0.145979 | 0.136946  |
| 0.190705 | 0.179633 | 0.190705 | 0.180653  | 0.200903 | 0.180944 | 0.197261  |
| 0.126457 | 0.131702 | 0.140734 | 0.102418  | 0.125583 | 0.143211 | 0.110577  |
| 0.136946 | 0.137238 | 0.145105 | 0.122232  | 0.129953 | 0.14933  | 0.126603  |
| 0.122086 | 0.122669 | 0.126748 | 0.103584  | 0.120629 | 0.133887 | 0.11116   |
| 0.125583 | 0.121503 | 0.127331 | 0.103584  | 0.120338 | 0.130099 | 0.112325  |
| 0.121941 | 0.122815 | 0.125437 | 0.101399  | 0.120192 | 0.129371 | 0.11014   |
| 0.129079 | 0.119464 | 0.138986 | 0.115822  | 0.131993 | 0.141754 | 0.121941  |
| 0.109994 | 0.116404 | 0.128934 | 0.0958625 | 0.118735 | 0.135198 | 0.102564  |
| 0.124854 | 0.124272 | 0.130973 | 0.121795  | 0.140589 | 0.133159 | 0.121795  |
| 0.137675 | 0.136218 | 0.148456 | 0.129371  | 0.14088  | 0.150641 | 0.132284  |
| 0.125437 | 0.125437 | 0.128351 | 0.117133  | 0.142628 | 0.130536 | 0.120338  |
| 0.129953 | 0.132284 | 0.142191 | 0.123397  | 0.137238 | 0.14729  | 0.127185  |
| 0.196241 | 0.184586 | 0.196824 | 0.186772  | 0.206148 | 0.187646 | 0.203963  |
| 0.129662 | 0.130536 | 0.136946 | 0.116113  | 0.128205 | 0.144085 | 0.117861  |
| 0.135927 | 0.136509 | 0.148164 | 0.129662  | 0.142045 | 0.147145 | 0.134324  |
| 0.12296  | 0.121503 | 0.127331 | 0.099796  | 0.120629 | 0.133013 | 0.110577  |
| 0.109994 | 0.115239 | 0.127185 | 0.094697  | 0.114656 | 0.133159 | 0.0961538 |
| 0.130973 | 0.129516 | 0.132721 | 0.113054  | 0.130099 | 0.13345  | 0.11655   |
| 0.126166 | 0.131993 | 0.145105 | 0.105624  | 0.125583 | 0.143502 | 0.111451  |
| 0.131702 | 0.137821 | 0.142483 | 0.123106  | 0.136946 | 0.1537   | 0.130682  |
| 0.129225 | 0.126603 | 0.14292  | 0.120921  | 0.14088  | 0.140443 | 0.126748  |
| 0.126311 | 0.121941 | 0.131556 | 0.0973193 | 0.120192 | 0.134324 | 0.105769  |

|          |          |          |           |          |          |           |
|----------|----------|----------|-----------|----------|----------|-----------|
| 0.114802 | 0.116259 | 0.129079 | 0.0945513 | 0.120629 | 0.128351 | 0.101253  |
| 0.110577 | 0.11553  | 0.125437 | 0.092366  | 0.123689 | 0.128788 | 0.106643  |
| 0.119755 | 0.119172 | 0.140734 | 0.104749  | 0.127622 | 0.14292  | 0.10067   |
| 0.129225 | 0.125146 | 0.135927 | 0.126166  | 0.145833 | 0.131119 | 0.125874  |
| 0.126748 | 0.133741 | 0.144231 | 0.0995047 | 0.128497 | 0.141754 | 0.108246  |
| 0.12398  | 0.121066 | 0.136218 | 0.109557  | 0.130973 | 0.138403 | 0.121795  |
| 0.122815 | 0.128351 | 0.13884  | 0.0958625 | 0.122523 | 0.141317 | 0.106061  |
| 0.122086 | 0.120338 | 0.131702 | 0.102418  | 0.125291 | 0.130682 | 0.112908  |
| 0.110868 | 0.121941 | 0.133304 | 0.10169   | 0.12398  | 0.137821 | 0.11014   |
| 0.12602  | 0.126603 | 0.124854 | 0.105478  | 0.125437 | 0.134615 | 0.113345  |
| 0.125728 | 0.124272 | 0.135927 | 0.110431  | 0.125728 | 0.140443 | 0.118298  |
| 0.127477 | 0.12602  | 0.138549 | 0.118007  | 0.136801 | 0.14627  | 0.126166  |
| 0.116696 | 0.122523 | 0.140589 | 0.109848  | 0.129225 | 0.145396 | 0.119755  |
| 0.109848 | 0.11859  | 0.130245 | 0.101836  | 0.121795 | 0.136218 | 0.10271   |
| 0.121358 | 0.121358 | 0.128934 | 0.104021  | 0.125437 | 0.134033 | 0.111888  |
| 0.13243  | 0.127768 | 0.141463 | 0.117133  | 0.136801 | 0.132867 | 0.129371  |
| 0.131993 | 0.127914 | 0.138986 | 0.114948  | 0.137821 | 0.144376 | 0.119027  |
| 0.113782 | 0.120192 | 0.127477 | 0.094697  | 0.120484 | 0.128497 | 0.0944056 |
| 0.123689 | 0.123106 | 0.128351 | 0.10373   | 0.120484 | 0.134324 | 0.109557  |
| 0.126457 | 0.124126 | 0.141026 | 0.11757   | 0.136364 | 0.136218 | 0.122232  |
| 0.118298 | 0.124709 | 0.140734 | 0.105332  | 0.127914 | 0.143794 | 0.103293  |
| 0.125291 | 0.121503 | 0.141317 | 0.118153  | 0.139277 | 0.14292  | 0.125728  |
| 0.117716 | 0.125291 | 0.143648 | 0.110577  | 0.13141  | 0.143502 | 0.121941  |
| 0.113054 | 0.126166 | 0.134324 | 0.103293  | 0.121503 | 0.140589 | 0.105624  |
| 0.124709 | 0.116841 | 0.130245 | 0.103875  | 0.125583 | 0.136218 | 0.116696  |
| 0.108246 | 0.122232 | 0.131847 | 0.105769  | 0.125146 | 0.138695 | 0.108683  |
| 0.125583 | 0.125874 | 0.143648 | 0.120775  | 0.137821 | 0.14088  | 0.131556  |
| 0.120338 | 0.134615 | 0.145396 | 0.119901  | 0.139277 | 0.14729  | 0.124854  |
| 0.123106 | 0.126894 | 0.136218 | 0.115385  | 0.130099 | 0.13986  | 0.116259  |
| 0.194493 | 0.187209 | 0.19595  | 0.188811  | 0.206148 | 0.187937 | 0.199009  |
| 0.169435 | 0.158071 | 0.171183 | 0.160548  | 0.177302 | 0.159382 | 0.172203  |
| 0.125728 | 0.121358 | 0.126603 | 0.117133  | 0.144085 | 0.131993 | 0.119464  |
| 0.129371 | 0.128497 | 0.13986  | 0.107663  | 0.131993 | 0.13884  | 0.120484  |
| 0.144814 | 0.143357 | 0.150641 | 0.145833  | 0.160839 | 0.145833 | 0.13884   |
| 0.130682 | 0.14088  | 0.140589 | 0.125291  | 0.135344 | 0.14831  | 0.129371  |
| 0.135781 | 0.130245 | 0.134615 | 0.11757   | 0.125291 | 0.136509 | 0.123106  |
| 0.127768 | 0.122815 | 0.13447  | 0.113636  | 0.129808 | 0.135781 | 0.116841  |
| 0.109994 | 0.118735 | 0.119318 | 0.090035  | 0.108246 | 0.130245 | 0.0958625 |
| 0.129808 | 0.130099 | 0.141171 | 0.118298  | 0.138549 | 0.142191 | 0.122086  |
| 0.206002 | 0.196387 | 0.199301 | 0.194784  | 0.210373 | 0.194784 | 0.207314  |
| 0.13243  | 0.133013 | 0.145833 | 0.106061  | 0.127185 | 0.143939 | 0.112471  |
| 0.128788 | 0.120338 | 0.138112 | 0.110868  | 0.134324 | 0.135635 | 0.122815  |
| 0.120338 | 0.117424 | 0.127914 | 0.104167  | 0.121795 | 0.128642 | 0.109411  |
| 0.126894 | 0.125728 | 0.134761 | 0.114802  | 0.133596 | 0.142191 | 0.12296   |

|           |          |          |           |          |          |           |
|-----------|----------|----------|-----------|----------|----------|-----------|
| 0.192016  | 0.18211  | 0.186772 | 0.176428  | 0.195804 | 0.176719 | 0.193619  |
| 0.243881  | 0.239802 | 0.247086 | 0.240239  | 0.250583 | 0.232663 | 0.251603  |
| 0.128205  | 0.127331 | 0.138403 | 0.123397  | 0.139569 | 0.144085 | 0.129225  |
| 0.131119  | 0.13141  | 0.142191 | 0.116113  | 0.136364 | 0.146999 | 0.124563  |
| 0.124417  | 0.120921 | 0.128788 | 0.117279  | 0.1419   | 0.130099 | 0.120775  |
| 0.11757   | 0.11961  | 0.138549 | 0.106061  | 0.131556 | 0.147145 | 0.118298  |
| 0.122378  | 0.126748 | 0.139569 | 0.0968823 | 0.120338 | 0.141171 | 0.102127  |
| 0.123689  | 0.126894 | 0.134178 | 0.108974  | 0.125437 | 0.137238 | 0.116841  |
| 0.124417  | 0.120047 | 0.131702 | 0.110286  | 0.129662 | 0.128642 | 0.121066  |
| 0.126457  | 0.126748 | 0.139569 | 0.101544  | 0.121212 | 0.14088  | 0.105624  |
| 0.123397  | 0.119027 | 0.128059 | 0.108974  | 0.130099 | 0.128497 | 0.120921  |
| 0.117133  | 0.127622 | 0.133159 | 0.0995047 | 0.124709 | 0.131556 | 0.101253  |
| 0.11116   | 0.121941 | 0.13447  | 0.0990676 | 0.120775 | 0.135781 | 0.102855  |
| 0.127622  | 0.128788 | 0.140443 | 0.122815  | 0.138112 | 0.142045 | 0.125437  |
| 0.128934  | 0.123397 | 0.141171 | 0.117716  | 0.137675 | 0.143065 | 0.126457  |
| 0.121066  | 0.117861 | 0.127768 | 0.0973193 | 0.123397 | 0.134033 | 0.113345  |
| 0.128059  | 0.134178 | 0.136509 | 0.115676  | 0.127477 | 0.142774 | 0.108392  |
| 0.12398   | 0.136218 | 0.150787 | 0.124417  | 0.139714 | 0.153555 | 0.128497  |
| 0.123252  | 0.11859  | 0.128788 | 0.102418  | 0.123252 | 0.131847 | 0.111742  |
| 0.124272  | 0.11757  | 0.125146 | 0.112471  | 0.125437 | 0.122378 | 0.112762  |
| 0.13039   | 0.134178 | 0.136801 | 0.120338  | 0.124854 | 0.1419   | 0.12296   |
| 0.209207  | 0.203671 | 0.208916 | 0.203234  | 0.217657 | 0.19799  | 0.211101  |
| 0.119901  | 0.121066 | 0.131847 | 0.106061  | 0.133887 | 0.137238 | 0.11859   |
| 0.109848  | 0.120629 | 0.134615 | 0.095134  | 0.119172 | 0.139714 | 0.103584  |
| 0.130245  | 0.127914 | 0.137238 | 0.111742  | 0.126748 | 0.143794 | 0.121358  |
| 0.136801  | 0.130099 | 0.145833 | 0.121795  | 0.141754 | 0.145105 | 0.131119  |
| 0.124854  | 0.12602  | 0.134761 | 0.111597  | 0.13039  | 0.143648 | 0.119464  |
| 0.202943  | 0.193619 | 0.201195 | 0.193765  | 0.209936 | 0.188228 | 0.207751  |
| 0.127914  | 0.12704  | 0.145688 | 0.119901  | 0.140152 | 0.146999 | 0.129225  |
| 0.123106  | 0.11961  | 0.125437 | 0.100233  | 0.119027 | 0.130245 | 0.107517  |
| 0.0987762 | 0.132284 | 0.138403 | 0.108537  | 0.130245 | 0.143502 | 0.117279  |
| 0.114219  | 0.120338 | 0.138403 | 0.105624  | 0.12704  | 0.143794 | 0.118153  |
| 0.127914  | 0.123543 | 0.140152 | 0.11961   | 0.137238 | 0.140297 | 0.127477  |
| 0.116841  | 0.11859  | 0.130245 | 0.106498  | 0.123252 | 0.136801 | 0.115239  |
| 0.115676  | 0.123543 | 0.132867 | 0.0992133 | 0.127622 | 0.135344 | 0.102127  |
| 0.129371  | 0.127914 | 0.139277 | 0.118153  | 0.137238 | 0.140589 | 0.124563  |
| 0.202652  | 0.192162 | 0.203234 | 0.194639  | 0.209353 | 0.191142 | 0.203089  |
| 0.120629  | 0.117133 | 0.13345  | 0.107955  | 0.12704  | 0.135052 | 0.120484  |
| 0.199738  | 0.1875   | 0.199155 | 0.186772  | 0.204108 | 0.184441 | 0.205128  |
| 0.196387  | 0.184732 | 0.198718 | 0.187209  | 0.207459 | 0.186043 | 0.202652  |
| 0.121212  | 0.130536 | 0.149476 | 0.122815  | 0.134907 | 0.152826 | 0.128351  |
| 0.136946  | 0.138986 | 0.146853 | 0.127768  | 0.141026 | 0.150495 | 0.129808  |
| 0.110431  | 0.118881 | 0.125874 | 0.0895979 | 0.117716 | 0.127768 | 0.0965909 |
| 0.119901  | 0.118735 | 0.131556 | 0.104604  | 0.126311 | 0.137821 | 0.118881  |

|          |          |          |           |          |          |          |
|----------|----------|----------|-----------|----------|----------|----------|
| 0.120629 | 0.119755 | 0.137529 | 0.113491  | 0.135198 | 0.136509 | 0.121649 |
| 0.124126 | 0.123834 | 0.128788 | 0.105041  | 0.123252 | 0.133013 | 0.112034 |
| 0.120629 | 0.123834 | 0.135781 | 0.095134  | 0.118881 | 0.139132 | 0.102418 |
| 0.120047 | 0.126457 | 0.140734 | 0.097465  | 0.118881 | 0.139714 | 0.103293 |
| 0.129225 | 0.132139 | 0.141171 | 0.123543  | 0.140589 | 0.143939 | 0.129079 |
| 0.117133 | 0.124417 | 0.143065 | 0.112908  | 0.138403 | 0.14933  | 0.121649 |
| 0.121358 | 0.11757  | 0.125437 | 0.0967366 | 0.117279 | 0.129079 | 0.106061 |
| 0.127914 | 0.123834 | 0.140734 | 0.118444  | 0.13549  | 0.140006 | 0.127768 |
| 0.104749 | 0.112908 | 0.123106 | 0.0912005 | 0.116987 | 0.128788 | 0.107226 |
| 0.129953 | 0.130245 | 0.143648 | 0.127768  | 0.137821 | 0.142337 | 0.130099 |
| 0.119755 | 0.117424 | 0.128497 | 0.114948  | 0.141026 | 0.128934 | 0.121358 |
| 0.132721 | 0.135635 | 0.151661 | 0.13141   | 0.145542 | 0.148601 | 0.135198 |
| 0.255682 | 0.250728 | 0.259761 | 0.253497  | 0.261801 | 0.24359  | 0.263986 |
| 0.122232 | 0.137675 | 0.147582 | 0.120921  | 0.137092 | 0.149184 | 0.119172 |
| 0.12296  | 0.138695 | 0.13986  | 0.124563  | 0.136655 | 0.139423 | 0.118735 |
| 0.220717 | 0.211393 | 0.219843 | 0.209207  | 0.221591 | 0.208042 | 0.225524 |
| 0.128205 | 0.130245 | 0.141608 | 0.12398   | 0.136364 | 0.147582 | 0.126311 |
| 0.228438 | 0.224068 | 0.229312 | 0.224213  | 0.238054 | 0.218386 | 0.235577 |
| 0.113491 | 0.128642 | 0.13884  | 0.111014  | 0.130973 | 0.143648 | 0.113054 |
| 0.132867 | 0.134615 | 0.137821 | 0.117279  | 0.126166 | 0.141171 | 0.121358 |
| 0.126166 | 0.123543 | 0.136946 | 0.113199  | 0.13345  | 0.13884  | 0.121649 |
| 0.122378 | 0.129079 | 0.145688 | 0.114073  | 0.134615 | 0.149621 | 0.12398  |
| 0.204837 | 0.195513 | 0.203089 | 0.198572  | 0.212995 | 0.192453 | 0.212267 |
| 0.131119 | 0.132284 | 0.149767 | 0.128351  | 0.142191 | 0.148747 | 0.13243  |
| 0.127331 | 0.123834 | 0.141026 | 0.119318  | 0.136946 | 0.142628 | 0.125437 |
| 0.228001 | 0.2213   | 0.224796 | 0.219406  | 0.230041 | 0.213287 | 0.232517 |
| 0.127914 | 0.128497 | 0.142191 | 0.105041  | 0.125    | 0.141171 | 0.110577 |
| 0.201777 | 0.190414 | 0.198864 | 0.193473  | 0.209645 | 0.189977 | 0.204254 |
| 0.125728 | 0.132721 | 0.141463 | 0.104895  | 0.126311 | 0.142191 | 0.106935 |
| 0.128059 | 0.123689 | 0.128642 | 0.1081    | 0.12398  | 0.136072 | 0.115967 |
| 0.114219 | 0.128788 | 0.138403 | 0.107955  | 0.124709 | 0.143211 | 0.105915 |
| 0.120921 | 0.129953 | 0.149767 | 0.119027  | 0.137238 | 0.150495 | 0.124854 |
| 0.125437 | 0.123106 | 0.137383 | 0.11451   | 0.132721 | 0.140152 | 0.121212 |
| 0.16419  | 0.153118 | 0.167978 | 0.153555  | 0.1706   | 0.150058 | 0.163462 |
| 0.125437 | 0.119901 | 0.135344 | 0.112179  | 0.131556 | 0.136946 | 0.119464 |
| 0.135344 | 0.133013 | 0.140297 | 0.120047  | 0.142045 | 0.140734 | 0.127914 |
| 0.13039  | 0.126311 | 0.139423 | 0.110723  | 0.132139 | 0.138403 | 0.120921 |
| 0.134178 | 0.133596 | 0.146707 | 0.122378  | 0.137383 | 0.144814 | 0.131993 |
| 0.198135 | 0.189394 | 0.197261 | 0.193036  | 0.203963 | 0.186043 | 0.204983 |
| 0.126894 | 0.120775 | 0.130973 | 0.105186  | 0.119027 | 0.130536 | 0.111305 |
| 0.125    | 0.129662 | 0.141026 | 0.113199  | 0.137821 | 0.14088  | 0.125437 |
| 0.118735 | 0.123397 | 0.140006 | 0.107226  | 0.128642 | 0.145688 | 0.105769 |
| 0.124709 | 0.13141  | 0.13986  | 0.103001  | 0.120921 | 0.14088  | 0.107955 |
| 0.126311 | 0.125728 | 0.128351 | 0.112762  | 0.124272 | 0.13345  | 0.113054 |

|          |          |          |           |          |          |           |
|----------|----------|----------|-----------|----------|----------|-----------|
| 0.253788 | 0.249417 | 0.257867 | 0.252477  | 0.25845  | 0.241696 | 0.25947   |
| 0.113491 | 0.12602  | 0.132721 | 0.10373   | 0.120484 | 0.140152 | 0.106061  |
| 0.133304 | 0.126311 | 0.13884  | 0.115093  | 0.132721 | 0.138986 | 0.122086  |
| 0.180507 | 0.174097 | 0.180216 | 0.178904  | 0.190122 | 0.16958  | 0.18648   |
| 0.188957 | 0.18109  | 0.188957 | 0.181818  | 0.195367 | 0.17803  | 0.192308  |
| 0.129808 | 0.13039  | 0.139423 | 0.119755  | 0.13884  | 0.142774 | 0.125583  |
| 0.126457 | 0.124417 | 0.140152 | 0.117861  | 0.134907 | 0.142628 | 0.126894  |
| 0.115676 | 0.120921 | 0.143357 | 0.109994  | 0.134615 | 0.146125 | 0.118735  |
| 0.140297 | 0.144959 | 0.163607 | 0.145396  | 0.153992 | 0.155012 | 0.147727  |
| 0.128059 | 0.124272 | 0.139714 | 0.118881  | 0.135635 | 0.141317 | 0.125874  |
| 0.132284 | 0.13141  | 0.142483 | 0.121066  | 0.140443 | 0.146999 | 0.127185  |
| 0.131847 | 0.134761 | 0.145542 | 0.11014   | 0.127768 | 0.144522 | 0.115967  |
| 0.124854 | 0.122232 | 0.139132 | 0.115967  | 0.133596 | 0.138695 | 0.121503  |
| 0.131119 | 0.129953 | 0.14831  | 0.128934  | 0.141026 | 0.144376 | 0.131556  |
| 0.130682 | 0.127477 | 0.13884  | 0.106352  | 0.130682 | 0.131119 | 0.11451   |
| 0.117716 | 0.130245 | 0.143939 | 0.11757   | 0.136072 | 0.147873 | 0.122232  |
| 0.129225 | 0.141463 | 0.156323 | 0.129079  | 0.144085 | 0.161713 | 0.132576  |
| 0.11655  | 0.129662 | 0.137821 | 0.10708   | 0.118881 | 0.144668 | 0.109703  |
| 0.12398  | 0.135927 | 0.151078 | 0.124126  | 0.136801 | 0.156177 | 0.12704   |
| 0.132139 | 0.136509 | 0.146707 | 0.111597  | 0.127185 | 0.149767 | 0.111014  |
| 0.210956 | 0.200466 | 0.208333 | 0.203526  | 0.216492 | 0.19799  | 0.216055  |
| 0.121066 | 0.129225 | 0.133304 | 0.102855  | 0.128934 | 0.136946 | 0.0745921 |
| 0.197407 | 0.183421 | 0.194202 | 0.187937  | 0.201195 | 0.184149 | 0.20134   |
| 0.123106 | 0.119027 | 0.133013 | 0.1081    | 0.131265 | 0.141317 | 0.11859   |
| 0.134761 | 0.132139 | 0.139423 | 0.11451   | 0.130682 | 0.138112 | 0.119464  |
| 0.124563 | 0.125146 | 0.127768 | 0.118881  | 0.144376 | 0.127331 | 0.120338  |
| 0.121212 | 0.119755 | 0.124417 | 0.110577  | 0.136072 | 0.124272 | 0.116113  |
| 0.129225 | 0.127185 | 0.142337 | 0.12296   | 0.13884  | 0.143939 | 0.128497  |
| 0.127185 | 0.128642 | 0.144376 | 0.122378  | 0.137966 | 0.141608 | 0.128205  |
| 0.127768 | 0.124272 | 0.129808 | 0.107809  | 0.126894 | 0.131993 | 0.114802  |
| 0.13345  | 0.130245 | 0.141608 | 0.119901  | 0.140152 | 0.140006 | 0.128059  |
| 0.130245 | 0.122086 | 0.128497 | 0.120775  | 0.140734 | 0.131556 | 0.123397  |
| 0.135344 | 0.140297 | 0.146416 | 0.116841  | 0.133013 | 0.143357 | 0.117424  |
| 0.246649 | 0.24257  | 0.249272 | 0.247378  | 0.252477 | 0.234848 | 0.256119  |
| 0.128934 | 0.124563 | 0.13243  | 0.109266  | 0.125146 | 0.133159 | 0.115385  |
| 0.189394 | 0.177448 | 0.188811 | 0.177885  | 0.196678 | 0.178467 | 0.191871  |
| 0.19391  | 0.182255 | 0.191871 | 0.184732  | 0.199738 | 0.182692 | 0.196387  |
| 0.13549  | 0.127622 | 0.136946 | 0.116404  | 0.136364 | 0.137383 | 0.117861  |
| 0.110723 | 0.118298 | 0.130828 | 0.100379  | 0.122086 | 0.139132 | 0.10067   |
| 0.131993 | 0.132284 | 0.135198 | 0.115239  | 0.125874 | 0.141171 | 0.118153  |
| 0.123252 | 0.121503 | 0.135781 | 0.111742  | 0.131119 | 0.137966 | 0.121649  |
| 0.112034 | 0.115822 | 0.121066 | 0.0885781 | 0.114948 | 0.121503 | 0.097028  |
| 0.125437 | 0.131847 | 0.137966 | 0.104312  | 0.127768 | 0.1419   | 0.108392  |
| 0.125874 | 0.125583 | 0.139277 | 0.114073  | 0.136364 | 0.135927 | 0.124272  |



|          |          |          |           |          |          |          |
|----------|----------|----------|-----------|----------|----------|----------|
| 0.130536 | 0.134615 | 0.149184 | 0.131847  | 0.141026 | 0.148747 | 0.134178 |
| 0.122523 | 0.122815 | 0.128059 | 0.105186  | 0.121941 | 0.13141  | 0.113636 |
| 0.132721 | 0.131556 | 0.149913 | 0.127331  | 0.141754 | 0.144231 | 0.129953 |
| 0.11859  | 0.127331 | 0.131993 | 0.112617  | 0.131119 | 0.135927 | 0.118735 |
| 0.127914 | 0.127914 | 0.130536 | 0.124854  | 0.143939 | 0.131847 | 0.123106 |
| 0.122232 | 0.124854 | 0.140589 | 0.113345  | 0.13447  | 0.145979 | 0.122296 |
| 0.135198 | 0.141608 | 0.150058 | 0.114365  | 0.129079 | 0.149913 | 0.113491 |
| 0.117279 | 0.129516 | 0.13447  | 0.104895  | 0.126603 | 0.134033 | 0.101399 |
| 0.124854 | 0.123106 | 0.126311 | 0.105186  | 0.120775 | 0.126166 | 0.111305 |
| 0.139714 | 0.140006 | 0.146125 | 0.126457  | 0.132139 | 0.153846 | 0.128205 |
| 0.188811 | 0.180361 | 0.187063 | 0.180507  | 0.193473 | 0.177302 | 0.193619 |
| 0.133304 | 0.137675 | 0.154866 | 0.134033  | 0.143502 | 0.149767 | 0.137821 |
| 0.131847 | 0.125146 | 0.140297 | 0.119464  | 0.135927 | 0.138695 | 0.125583 |
| 0.124417 | 0.119172 | 0.128497 | 0.117861  | 0.138986 | 0.128642 | 0.118444 |
| 0.120192 | 0.112908 | 0.121358 | 0.109266  | 0.13243  | 0.122669 | 0.111014 |
| 0.120338 | 0.126166 | 0.1419   | 0.113199  | 0.135198 | 0.144668 | 0.121358 |
| 0.12398  | 0.129516 | 0.144376 | 0.114802  | 0.135635 | 0.151515 | 0.124126 |
| 0.194639 | 0.185023 | 0.193182 | 0.18546   | 0.202506 | 0.184295 | 0.201486 |
| 0.128788 | 0.120047 | 0.136946 | 0.116113  | 0.133741 | 0.133304 | 0.121066 |
| 0.118153 | 0.113491 | 0.128351 | 0.106352  | 0.124854 | 0.129953 | 0.115385 |
| 0.131556 | 0.128351 | 0.14292  | 0.123834  | 0.139132 | 0.143939 | 0.131702 |
| 0.195221 | 0.185897 | 0.195221 | 0.186043  | 0.203671 | 0.184586 | 0.200321 |
| 0.112908 | 0.120192 | 0.136509 | 0.0996503 | 0.121358 | 0.135198 | 0.10373  |
| 0.131119 | 0.134907 | 0.143357 | 0.105332  | 0.127622 | 0.145542 | 0.115239 |
| 0.127622 | 0.128497 | 0.145688 | 0.122815  | 0.137529 | 0.142337 | 0.130099 |
| 0.126603 | 0.12398  | 0.135635 | 0.114219  | 0.133596 | 0.143065 | 0.122669 |
| 0.192162 | 0.179341 | 0.191579 | 0.185315  | 0.199446 | 0.181527 | 0.197552 |
| 0.127477 | 0.131265 | 0.140589 | 0.106643  | 0.124854 | 0.141317 | 0.111888 |
| 0.126603 | 0.12398  | 0.131265 | 0.111305  | 0.121941 | 0.134033 | 0.121212 |
| 0.114365 | 0.121358 | 0.136509 | 0.102564  | 0.125437 | 0.131119 | 0.106935 |
| 0.128059 | 0.122815 | 0.14088  | 0.119755  | 0.141171 | 0.128788 | 0.126748 |
| 0.132284 | 0.131119 | 0.143357 | 0.119901  | 0.139569 | 0.14292  | 0.124272 |
| 0.130536 | 0.13986  | 0.148019 | 0.111742  | 0.128497 | 0.145833 | 0.114948 |
| 0.125    | 0.124417 | 0.129079 | 0.104167  | 0.118881 | 0.134178 | 0.112908 |
| 0.131119 | 0.136364 | 0.13986  | 0.111451  | 0.13141  | 0.140297 | 0.120775 |
| 0.14292  | 0.14729  | 0.159528 | 0.143939  | 0.154866 | 0.159965 | 0.145979 |
| 0.235868 | 0.231789 | 0.236742 | 0.230769  | 0.246066 | 0.225816 | 0.241259 |
| 0.119027 | 0.13243  | 0.137675 | 0.1081    | 0.127768 | 0.137238 | 0.102564 |
| 0.135635 | 0.13039  | 0.144085 | 0.121795  | 0.142337 | 0.140443 | 0.128788 |
| 0.125874 | 0.121795 | 0.138112 | 0.116987  | 0.134324 | 0.13243  | 0.120484 |
| 0.136801 | 0.126894 | 0.137966 | 0.122086  | 0.13884  | 0.144522 | 0.131702 |
| 0.130828 | 0.124126 | 0.137529 | 0.113199  | 0.13141  | 0.134178 | 0.116696 |
| 0.125874 | 0.125    | 0.133159 | 0.114656  | 0.131119 | 0.14088  | 0.120192 |
| 0.128934 | 0.125437 | 0.142045 | 0.122086  | 0.136801 | 0.1419   | 0.130536 |

|          |          |          |           |          |          |           |
|----------|----------|----------|-----------|----------|----------|-----------|
| 0.130828 | 0.136946 | 0.14627  | 0.109703  | 0.129079 | 0.146416 | 0.113491  |
| 0.129953 | 0.129662 | 0.136072 | 0.116987  | 0.137238 | 0.142045 | 0.126603  |
| 0.235577 | 0.230332 | 0.238782 | 0.234848  | 0.243444 | 0.226399 | 0.244172  |
| 0.11014  | 0.120338 | 0.130828 | 0.097465  | 0.122086 | 0.137966 | 0.10271   |
| 0.112179 | 0.123543 | 0.133159 | 0.104167  | 0.124709 | 0.137675 | 0.105624  |
| 0.124272 | 0.122815 | 0.128059 | 0.100524  | 0.118153 | 0.13141  | 0.110723  |
| 0.13549  | 0.13986  | 0.148019 | 0.128059  | 0.142483 | 0.153118 | 0.132139  |
| 0.122378 | 0.138986 | 0.141317 | 0.112908  | 0.131702 | 0.142337 | 0.105332  |
| 0.127622 | 0.123543 | 0.130536 | 0.114656  | 0.13345  | 0.135927 | 0.118153  |
| 0.127622 | 0.125    | 0.143939 | 0.120192  | 0.137821 | 0.14088  | 0.127477  |
| 0.123689 | 0.119318 | 0.129516 | 0.110723  | 0.128351 | 0.13345  | 0.115676  |
| 0.231498 | 0.224505 | 0.232955 | 0.225524  | 0.236742 | 0.218531 | 0.236597  |
| 0.130973 | 0.130682 | 0.146125 | 0.126457  | 0.139714 | 0.146562 | 0.131993  |
| 0.128497 | 0.132576 | 0.143357 | 0.107955  | 0.125583 | 0.146999 | 0.112908  |
| 0.123543 | 0.12704  | 0.132576 | 0.108246  | 0.126748 | 0.138549 | 0.117279  |
| 0.125728 | 0.13243  | 0.139132 | 0.119172  | 0.133887 | 0.140152 | 0.12296   |
| 0.112908 | 0.133304 | 0.142045 | 0.117424  | 0.135052 | 0.143065 | 0.112471  |
| 0.12398  | 0.125146 | 0.126603 | 0.107226  | 0.117861 | 0.13345  | 0.113054  |
| 0.130099 | 0.133887 | 0.14088  | 0.104604  | 0.125728 | 0.143648 | 0.108683  |
| 0.133159 | 0.139277 | 0.14831  | 0.112034  | 0.128497 | 0.14933  | 0.113199  |
| 0.125583 | 0.130536 | 0.13986  | 0.103001  | 0.122086 | 0.143502 | 0.107372  |
| 0.12602  | 0.123689 | 0.13039  | 0.104312  | 0.119901 | 0.13549  | 0.112471  |
| 0.136509 | 0.136218 | 0.146707 | 0.123543  | 0.139423 | 0.146562 | 0.129662  |
| 0.139569 | 0.140443 | 0.149476 | 0.130973  | 0.144231 | 0.146999 | 0.135344  |
| 0.127331 | 0.128497 | 0.133159 | 0.123106  | 0.145688 | 0.130973 | 0.123689  |
| 0.129953 | 0.127914 | 0.137821 | 0.125728  | 0.148601 | 0.136218 | 0.128351  |
| 0.137383 | 0.141754 | 0.148164 | 0.12704   | 0.143502 | 0.150641 | 0.130828  |
| 0.107955 | 0.113199 | 0.119027 | 0.0839161 | 0.109411 | 0.128497 | 0.0944056 |
| 0.128788 | 0.136946 | 0.153555 | 0.123397  | 0.138112 | 0.154283 | 0.110286  |
| 0.133887 | 0.136801 | 0.140589 | 0.120047  | 0.107955 | 0.145979 | 0.121503  |
| 0.207022 | 0.200612 | 0.205274 | 0.20338   | 0.216638 | 0.195221 | 0.213869  |
| 0.128351 | 0.135635 | 0.14292  | 0.12296   | 0.138258 | 0.143939 | 0.12704   |
| 0.113199 | 0.122523 | 0.137092 | 0.105769  | 0.132721 | 0.139277 | 0.111014  |
| 0.130828 | 0.130828 | 0.132867 | 0.11116   | 0.126457 | 0.129808 | 0.117861  |
| 0.224505 | 0.217803 | 0.223631 | 0.219697  | 0.229749 | 0.210082 | 0.229312  |
| 0.217512 | 0.206148 | 0.210519 | 0.20542   | 0.221008 | 0.201923 | 0.219697  |
| 0.130245 | 0.136364 | 0.145396 | 0.113199  | 0.129079 | 0.146707 | 0.114656  |
| 0.245775 | 0.241113 | 0.250437 | 0.247086  | 0.252477 | 0.237471 | 0.255828  |
| 0.10912  | 0.111451 | 0.117861 | 0.083042  | 0.109994 | 0.125874 | 0.0961538 |
| 0.131265 | 0.148747 | 0.14933  | 0.112471  | 0.133304 | 0.156177 | 0.124126  |
| 0.108246 | 0.122232 | 0.133887 | 0.100524  | 0.119318 | 0.136946 | 0.101981  |
| 0.140443 | 0.136072 | 0.148019 | 0.12602   | 0.13986  | 0.146999 | 0.134178  |
| 0.192162 | 0.183712 | 0.189248 | 0.182984  | 0.201195 | 0.182401 | 0.19697   |
| 0.127914 | 0.135198 | 0.135781 | 0.11553   | 0.128788 | 0.142337 | 0.116696  |

|          |          |          |           |          |          |           |
|----------|----------|----------|-----------|----------|----------|-----------|
| 0.198718 | 0.187646 | 0.195513 | 0.190997  | 0.204254 | 0.186043 | 0.2044    |
| 0.128788 | 0.123834 | 0.138695 | 0.115239  | 0.131119 | 0.143794 | 0.118153  |
| 0.127622 | 0.125291 | 0.138695 | 0.107372  | 0.129079 | 0.13447  | 0.116113  |
| 0.121503 | 0.125874 | 0.136072 | 0.103293  | 0.127622 | 0.136801 | 0.109411  |
| 0.123834 | 0.120338 | 0.132284 | 0.114948  | 0.129662 | 0.131265 | 0.119318  |
| 0.119318 | 0.115239 | 0.122523 | 0.100524  | 0.116404 | 0.131119 | 0.105186  |
| 0.124272 | 0.125728 | 0.137092 | 0.112762  | 0.13243  | 0.139569 | 0.118298  |
| 0.110868 | 0.120192 | 0.126603 | 0.0935315 | 0.116696 | 0.134033 | 0.100233  |
| 0.125874 | 0.120629 | 0.136072 | 0.115239  | 0.133741 | 0.132721 | 0.120192  |
| 0.122815 | 0.122815 | 0.142045 | 0.108392  | 0.130099 | 0.141317 | 0.101399  |
| 0.114365 | 0.118153 | 0.128059 | 0.0932401 | 0.119901 | 0.128497 | 0.0990676 |
| 0.111597 | 0.121503 | 0.131119 | 0.0986305 | 0.120629 | 0.138258 | 0.10067   |
| 0.127185 | 0.121941 | 0.127768 | 0.117716  | 0.137675 | 0.12296  | 0.119755  |
| 0.132721 | 0.134178 | 0.150204 | 0.125583  | 0.141754 | 0.147145 | 0.132576  |
| 0.120338 | 0.115093 | 0.124126 | 0.113491  | 0.134907 | 0.126894 | 0.116404  |
| 0.127185 | 0.121358 | 0.137092 | 0.110431  | 0.125728 | 0.13986  | 0.119172  |
| 0.11859  | 0.119464 | 0.125583 | 0.100962  | 0.119464 | 0.130973 | 0.109411  |
| 0.129079 | 0.131119 | 0.142191 | 0.107663  | 0.128205 | 0.135344 | 0.110286  |
| 0.134615 | 0.125291 | 0.143357 | 0.118153  | 0.13549  | 0.143211 | 0.127768  |
| 0.116696 | 0.128059 | 0.145542 | 0.116841  | 0.135052 | 0.149184 | 0.122378  |
| 0.124854 | 0.119318 | 0.128642 | 0.115676  | 0.13884  | 0.127914 | 0.118881  |
| 0.125874 | 0.123543 | 0.138986 | 0.116404  | 0.136946 | 0.143211 | 0.123106  |
| 0.132139 | 0.133013 | 0.149621 | 0.130536  | 0.144085 | 0.149476 | 0.135198  |
| 0.136218 | 0.139714 | 0.156614 | 0.137821  | 0.148456 | 0.151807 | 0.141608  |
| 0.117424 | 0.11859  | 0.132576 | 0.090472  | 0.114802 | 0.132721 | 0.100087  |
| 0.127622 | 0.123834 | 0.128205 | 0.105332  | 0.121795 | 0.135927 | 0.114073  |
| 0.114365 | 0.118735 | 0.131265 | 0.107226  | 0.124854 | 0.136364 | 0.113636  |
| 0.140297 | 0.139132 | 0.152535 | 0.128788  | 0.144085 | 0.151807 | 0.134324  |
| 0.109848 | 0.125    | 0.13345  | 0.101544  | 0.116841 | 0.139423 | 0.103293  |
| 0.12704  | 0.142191 | 0.158217 | 0.131265  | 0.145396 | 0.157488 | 0.133013  |
| 0.136364 | 0.139277 | 0.13986  | 0.121941  | 0.130536 | 0.145833 | 0.126603  |
| 0.130682 | 0.13039  | 0.143211 | 0.12296   | 0.14088  | 0.147145 | 0.126166  |
| 0.117424 | 0.124709 | 0.130828 | 0.099796  | 0.121795 | 0.133304 | 0.106789  |
| 0.12398  | 0.122523 | 0.137383 | 0.108392  | 0.132721 | 0.139277 | 0.120338  |
| 0.128351 | 0.128351 | 0.13243  | 0.122086  | 0.144668 | 0.134907 | 0.124417  |
| 0.20979  | 0.198135 | 0.208916 | 0.198864  | 0.213869 | 0.19799  | 0.213724  |
| 0.129079 | 0.122086 | 0.134615 | 0.110577  | 0.119755 | 0.137383 | 0.11757   |
| 0.127477 | 0.121649 | 0.133596 | 0.0976107 | 0.127768 | 0.135198 | 0.108392  |
| 0.131119 | 0.131119 | 0.144231 | 0.11961   | 0.138112 | 0.141171 | 0.124563  |
| 0.123106 | 0.116987 | 0.124563 | 0.112179  | 0.135344 | 0.126166 | 0.115967  |
| 0.133741 | 0.130245 | 0.137238 | 0.117279  | 0.137238 | 0.145251 | 0.122232  |
| 0.120338 | 0.13549  | 0.143648 | 0.119318  | 0.134615 | 0.146416 | 0.124563  |
| 0.120775 | 0.137966 | 0.152244 | 0.120921  | 0.13884  | 0.14627  | 0.129662  |
| 0.127914 | 0.125583 | 0.140734 | 0.118444  | 0.138112 | 0.142045 | 0.121941  |

|           |          |          |           |           |          |           |
|-----------|----------|----------|-----------|-----------|----------|-----------|
| 0.114219  | 0.121212 | 0.138112 | 0.105624  | 0.127622  | 0.138258 | 0.100379  |
| 0.134615  | 0.136072 | 0.145979 | 0.124272  | 0.141026  | 0.146416 | 0.126311  |
| 0.12296   | 0.121503 | 0.128497 | 0.0957168 | 0.120338  | 0.133596 | 0.104458  |
| 0.117279  | 0.126311 | 0.135635 | 0.0981935 | 0.125437  | 0.134033 | 0.104895  |
| 0.180653  | 0.170746 | 0.177739 | 0.171474  | 0.186772  | 0.176136 | 0.180507  |
| 0.125291  | 0.120921 | 0.140152 | 0.112908  | 0.133741  | 0.140589 | 0.124854  |
| 0.139423  | 0.134761 | 0.145833 | 0.123252  | 0.143211  | 0.140152 | 0.129662  |
| 0.122378  | 0.122086 | 0.134907 | 0.0968823 | 0.119172  | 0.138549 | 0.0791084 |
| 0.133304  | 0.126603 | 0.13884  | 0.117716  | 0.128351  | 0.142191 | 0.117716  |
| 0.110286  | 0.11757  | 0.124854 | 0.0932401 | 0.119901  | 0.131993 | 0.109848  |
| 0.110286  | 0.11961  | 0.125146 | 0.0935315 | 0.116696  | 0.129371 | 0.0955711 |
| 0.116113  | 0.119901 | 0.126894 | 0.0973193 | 0.122815  | 0.134907 | 0.109557  |
| 0.128934  | 0.133304 | 0.143502 | 0.115676  | 0.132139  | 0.143357 | 0.117716  |
| 0.118444  | 0.118735 | 0.129808 | 0.104895  | 0.13039   | 0.130245 | 0.115093  |
| 0.124709  | 0.138112 | 0.147436 | 0.118735  | 0.126748  | 0.145833 | 0.114073  |
| 0.118153  | 0.124563 | 0.132139 | 0.099359  | 0.127768  | 0.13549  | 0.110431  |
| 0.108392  | 0.127331 | 0.134907 | 0.10271   | 0.123834  | 0.137383 | 0.107955  |
| 0.13243   | 0.137383 | 0.142045 | 0.113928  | 0.13039   | 0.15035  | 0.121795  |
| 0.110868  | 0.12398  | 0.128642 | 0.0909091 | 0.112617  | 0.13345  | 0.092366  |
| 0.0925117 | 0.133596 | 0.140006 | 0.107809  | 0.128934  | 0.141317 | 0.11451   |
| 0.112325  | 0.119027 | 0.13039  | 0.0891608 | 0.113782  | 0.132867 | 0.0955711 |
| 0.113199  | 0.12398  | 0.130973 | 0.0912005 | 0.114365  | 0.134907 | 0.0941142 |
| 0.114948  | 0.117279 | 0.122815 | 0.0929487 | 0.112908  | 0.131119 | 0.101981  |
| 0.116841  | 0.128788 | 0.136364 | 0.0898893 | 0.120047  | 0.137675 | 0.105332  |
| 0.107809  | 0.107226 | 0.124417 | 0.0907634 | 0.123834  | 0.137383 | 0.101836  |
| 0.142774  | 0.143648 | 0.157925 | 0.13039   | 0.140443  | 0.152535 | 0.13884   |
| 0.137238  | 0.135198 | 0.152389 | 0.120775  | 0.138695  | 0.142045 | 0.133887  |
| 0.116259  | 0.124126 | 0.128788 | 0.0939685 | 0.124126  | 0.136218 | 0.0957168 |
| 0.140589  | 0.14292  | 0.158654 | 0.123834  | 0.138258  | 0.15676  | 0.133159  |
| 0.127477  | 0.120192 | 0.133304 | 0.120338  | 0.135927  | 0.137238 | 0.126166  |
| 0.137966  | 0.140297 | 0.146999 | 0.125583  | 0.121358  | 0.145105 | 0.125583  |
| 0.106789  | 0.117861 | 0.127477 | 0.0981935 | 0.120192  | 0.133741 | 0.103438  |
| 0.150641  | 0.140152 | 0.153555 | 0.137675  | 0.14831   | 0.153992 | 0.139714  |
| 0.13141   | 0.138112 | 0.144231 | 0.127477  | 0.13986   | 0.147873 | 0.12398   |
| 0.136655  | 0.133741 | 0.142483 | 0.129225  | 0.146853  | 0.14729  | 0.131265  |
| 0.126457  | 0.121795 | 0.131119 | 0.10708   | 0.123834  | 0.140589 | 0.106206  |
| 0.116113  | 0.116404 | 0.125437 | 0.0929487 | 0.117861  | 0.133741 | 0.0949883 |
| 0.113928  | 0.118007 | 0.123834 | 0.0458916 | 0.0999417 | 0.130973 | 0.105332  |
| 0.123397  | 0.12602  | 0.137383 | 0.104895  | 0.124563  | 0.139569 | 0.111305  |
| 0.122232  | 0.128059 | 0.139132 | 0.108974  | 0.13039   | 0.144814 | 0.0979021 |
| 0.12704   | 0.136655 | 0.138695 | 0.114073  | 0.127331  | 0.145833 | 0.118735  |
| 0.131993  | 0.127331 | 0.132284 | 0.110577  | 0.127331  | 0.134761 | 0.127477  |
| 0.117133  | 0.112179 | 0.127331 | 0.0968823 | 0.127331  | 0.130973 | 0.097465  |
| 0.112034  | 0.116113 | 0.122815 | 0.0474942 | 0.100379  | 0.132284 | 0.102273  |

|          |          |          |           |           |          |           |
|----------|----------|----------|-----------|-----------|----------|-----------|
| 0.118881 | 0.123543 | 0.138112 | 0.0971737 | 0.11655   | 0.136801 | 0.08581   |
| 0.118881 | 0.115385 | 0.124126 | 0.0750291 | 0.109266  | 0.13447  | 0.104749  |
| 0.116113 | 0.122815 | 0.128642 | 0.0498252 | 0.0919289 | 0.134907 | 0.104895  |
| 0.114656 | 0.112034 | 0.125437 | 0.097028  | 0.121649  | 0.137238 | 0.108974  |
| 0.127622 | 0.125874 | 0.136364 | 0.116696  | 0.132284  | 0.136509 | 0.11757   |
| 0.115385 | 0.120338 | 0.127914 | 0.099796  | 0.118298  | 0.132721 | 0.112617  |
| 0.106935 | 0.111888 | 0.11655  | 0.0837704 | 0.107517  | 0.12602  | 0.0939685 |
| 0.114802 | 0.119172 | 0.134907 | 0.0901807 | 0.115967  | 0.13447  | 0.0852273 |
| 0.12398  | 0.124272 | 0.131265 | 0.113054  | 0.13243   | 0.133741 | 0.117716  |
| 0.111888 | 0.124126 | 0.130828 | 0.097465  | 0.124709  | 0.136218 | 0.110286  |
| 0.12296  | 0.126457 | 0.141608 | 0.114656  | 0.136364  | 0.139714 | 0.126311  |
| 0.121212 | 0.120338 | 0.125291 | 0.102418  | 0.124417  | 0.131847 | 0.110577  |
| 0.121649 | 0.131265 | 0.145833 | 0.111014  | 0.127768  | 0.141608 | 0.111888  |

| <b>TDr_12_00506</b> | <b>TDr_12_00507</b> | <b>TDr_12_00509</b> | <b>TDr_13_00050</b> | <b>TDr_13_00061</b> | <b>TDr_13_00084</b> | <b>TDr_13_00125</b> |
|---------------------|---------------------|---------------------|---------------------|---------------------|---------------------|---------------------|
| 0.12398             | 0.142774            | 0.130828            | 0.136509            | 0.130828            | 0.125437            | 0.125874            |
| 0.121503            | 0.142045            | 0.124563            | 0.13549             | 0.126603            | 0.120338            | 0.128934            |
| 0.11655             | 0.139423            | 0.121941            | 0.135198            | 0.121358            | 0.117716            | 0.12398             |
| 0.118881            | 0.146416            | 0.120192            | 0.13549             | 0.125437            | 0.117424            | 0.129808            |
| 0.132867            | 0.148456            | 0.134761            | 0.147436            | 0.140589            | 0.133741            | 0.138549            |
| 0.125               | 0.151661            | 0.133887            | 0.146562            | 0.134761            | 0.136364            | 0.135927            |
| 0.121649            | 0.136364            | 0.128788            | 0.139423            | 0.125               | 0.116696            | 0.127914            |
| 0.11757             | 0.139569            | 0.118298            | 0.139714            | 0.124417            | 0.118735            | 0.127331            |
| 0.113636            | 0.137675            | 0.114365            | 0.12296             | 0.117279            | 0.112179            | 0.117861            |
| 0.109994            | 0.141608            | 0.117424            | 0.107372            | 0.101981            | 0.104749            | 0.106352            |
| 0.118298            | 0.137092            | 0.123397            | 0.13549             | 0.125437            | 0.119755            | 0.124854            |
| 0.110868            | 0.13345             | 0.120629            | 0.133596            | 0.123834            | 0.119318            | 0.129662            |
| 0.116404            | 0.144522            | 0.120338            | 0.130973            | 0.121795            | 0.120192            | 0.125874            |
| 0.134615            | 0.160402            | 0.143794            | 0.151224            | 0.143794            | 0.145396            | 0.145542            |
| 0.128642            | 0.145979            | 0.131993            | 0.133596            | 0.128497            | 0.128351            | 0.130828            |
| 0.119755            | 0.129225            | 0.118735            | 0.130245            | 0.119318            | 0.119755            | 0.114948            |
| 0.114948            | 0.137529            | 0.118007            | 0.136218            | 0.123252            | 0.112617            | 0.125291            |
| 0.142483            | 0.160402            | 0.150204            | 0.159091            | 0.150495            | 0.145396            | 0.143794            |
| 0.11655             | 0.135344            | 0.11757             | 0.132867            | 0.121649            | 0.11014             | 0.128934            |
| 0.199592            | 0.214889            | 0.208479            | 0.215909            | 0.209645            | 0.208916            | 0.199738            |
| 0.120775            | 0.151515            | 0.133741            | 0.144959            | 0.135781            | 0.122232            | 0.137238            |
| 0.126457            | 0.140006            | 0.132139            | 0.140152            | 0.127477            | 0.119172            | 0.131265            |
| 0.113199            | 0.13345             | 0.113636            | 0.117279            | 0.115093            | 0.112325            | 0.113345            |
| 0.117133            | 0.13039             | 0.110868            | 0.130828            | 0.127185            | 0.126748            | 0.124563            |
| 0.109411            | 0.136364            | 0.109557            | 0.125728            | 0.111888            | 0.107955            | 0.108974            |
| 0.128934            | 0.146853            | 0.136655            | 0.147873            | 0.138403            | 0.12398             | 0.137821            |
| 0.123397            | 0.138112            | 0.129953            | 0.137966            | 0.13141             | 0.121066            | 0.127622            |
| 0.110577            | 0.140152            | 0.105478            | 0.130099            | 0.130828            | 0.122232            | 0.118007            |
| 0.126311            | 0.134907            | 0.130536            | 0.144668            | 0.138403            | 0.122815            | 0.132867            |
| 0.126603            | 0.14627             | 0.128788            | 0.125146            | 0.130536            | 0.123397            | 0.127331            |
| 0.120629            | 0.135052            | 0.126311            | 0.135198            | 0.127768            | 0.124126            | 0.123689            |
| 0.128351            | 0.131119            | 0.116841            | 0.128351            | 0.129662            | 0.123106            | 0.121212            |
| 0.114948            | 0.132867            | 0.11859             | 0.126311            | 0.113928            | 0.112908            | 0.113636            |
| 0.118153            | 0.140734            | 0.119464            | 0.136509            | 0.124709            | 0.119027            | 0.127914            |
| 0.123252            | 0.128934            | 0.121066            | 0.132867            | 0.120775            | 0.11655             | 0.121941            |
| 0.12398             | 0.130828            | 0.127914            | 0.134761            | 0.12296             | 0.121358            | 0.127331            |
| 0.13549             | 0.143502            | 0.137966            | 0.13986             | 0.133013            | 0.125291            | 0.134761            |
| 0.128934            | 0.1419              | 0.12704             | 0.133013            | 0.124417            | 0.124563            | 0.12704             |
| 0.114948            | 0.128788            | 0.102273            | 0.119318            | 0.115385            | 0.123397            | 0.113636            |
| 0.0954254           | 0.137821            | 0.0844988           | 0.13039             | 0.127622            | 0.131556            | 0.124126            |
| 0.0843531           | 0.137238            | 0.0914918           | 0.134761            | 0.116841            | 0.120775            | 0.117716            |
| 0.113782            | 0.145396            | 0.108683            | 0.143211            | 0.143065            | 0.148747            | 0.129953            |

|           |          |           |          |          |           |          |
|-----------|----------|-----------|----------|----------|-----------|----------|
| 0.109411  | 0.152972 | 0.11859   | 0.149038 | 0.143065 | 0.1537    | 0.138403 |
| 0.0926573 | 0.135927 | 0.0898893 | 0.132867 | 0.123106 | 0.125     | 0.11757  |
| 0.112179  | 0.133013 | 0.116987  | 0.127331 | 0.11116  | 0.0847902 | 0.116987 |
| 0.118153  | 0.138112 | 0.123543  | 0.124563 | 0.118881 | 0.103293  | 0.12704  |
| 0.112908  | 0.139569 | 0.108392  | 0.135635 | 0.128205 | 0.124563  | 0.120629 |
| 0.111888  | 0.145251 | 0.106206  | 0.145688 | 0.137675 | 0.145105  | 0.123106 |
| 0.0874126 | 0.136218 | 0.083479  | 0.128497 | 0.114656 | 0.122086  | 0.116404 |
| 0.0875583 | 0.134324 | 0.0996503 | 0.129808 | 0.123834 | 0.126311  | 0.115676 |
| 0.149184  | 0.149621 | 0.156906  | 0.147727 | 0.152244 | 0.145688  | 0.146416 |
| 0.123543  | 0.141754 | 0.120775  | 0.140443 | 0.127768 | 0.130245  | 0.12602  |
| 0.088141  | 0.136072 | 0.0859557 | 0.132139 | 0.118298 | 0.123689  | 0.122086 |
| 0.126603  | 0.150932 | 0.128205  | 0.131556 | 0.124126 | 0.133596  | 0.130828 |
| 0.107372  | 0.140443 | 0.104895  | 0.140006 | 0.129371 | 0.126311  | 0.123543 |
| 0.131556  | 0.1419   | 0.121212  | 0.134178 | 0.137529 | 0.142337  | 0.125874 |
| 0.0894522 | 0.141754 | 0.101544  | 0.142774 | 0.133304 | 0.132576  | 0.128934 |
| 0.0967366 | 0.140589 | 0.0910548 | 0.135781 | 0.122815 | 0.125291  | 0.120484 |
| 0.0929487 | 0.136801 | 0.0930944 | 0.137238 | 0.12602  | 0.125291  | 0.119901 |
| 0.117861  | 0.132576 | 0.123543  | 0.129516 | 0.117133 | 0.114365  | 0.119172 |
| 0.104749  | 0.142774 | 0.106935  | 0.142628 | 0.134907 | 0.144085  | 0.131119 |
| 0.116696  | 0.14831  | 0.100524  | 0.142628 | 0.135198 | 0.145542  | 0.134324 |
| 0.158508  | 0.16623  | 0.152535  | 0.162587 | 0.16215  | 0.167541  | 0.153409 |
| 0.0990676 | 0.136218 | 0.078817  | 0.126166 | 0.124563 | 0.131119  | 0.121066 |
| 0.0912005 | 0.132721 | 0.0901807 | 0.132576 | 0.119901 | 0.119464  | 0.11553  |
| 0.0868298 | 0.131847 | 0.0916375 | 0.133741 | 0.123106 | 0.119172  | 0.119901 |
| 0.140297  | 0.155886 | 0.141026  | 0.147873 | 0.143357 | 0.124854  | 0.13986  |
| 0.0840618 | 0.13986  | 0.0944056 | 0.13243  | 0.125583 | 0.126311  | 0.119172 |
| 0.113636  | 0.143502 | 0.107663  | 0.136655 | 0.140297 | 0.132576  | 0.121649 |
| 0.120047  | 0.137092 | 0.125146  | 0.126748 | 0.118153 | 0.106935  | 0.122523 |
| 0.0898893 | 0.13345  | 0.0920746 | 0.13884  | 0.122669 | 0.121649  | 0.122086 |
| 0.14933   | 0.157925 | 0.157051  | 0.154575 | 0.151224 | 0.138258  | 0.139277 |
| 0.0922203 | 0.136364 | 0.0865385 | 0.135052 | 0.129662 | 0.131265  | 0.121795 |
| 0.10169   | 0.143794 | 0.108246  | 0.145396 | 0.141171 | 0.141317  | 0.133304 |
| 0.118153  | 0.143065 | 0.120921  | 0.145251 | 0.133741 | 0.129808  | 0.134033 |
| 0.115676  | 0.138549 | 0.123689  | 0.137238 | 0.127185 | 0.115967  | 0.118444 |
| 0.087704  | 0.135635 | 0.0890152 | 0.129079 | 0.120192 | 0.122669  | 0.121358 |
| 0.0961538 | 0.138549 | 0.0948427 | 0.136072 | 0.121358 | 0.126166  | 0.120775 |
| 0.104021  | 0.143211 | 0.097465  | 0.141317 | 0.131847 | 0.139569  | 0.130099 |
| 0.0913462 | 0.136946 | 0.0961538 | 0.136218 | 0.119172 | 0.121941  | 0.120921 |
| 0.106643  | 0.145542 | 0.0971737 | 0.142774 | 0.13447  | 0.147727  | 0.133013 |
| 0.0996503 | 0.140297 | 0.0925117 | 0.138112 | 0.13243  | 0.132284  | 0.125437 |
| 0.113636  | 0.129808 | 0.103584  | 0.130245 | 0.119027 | 0.124709  | 0.125437 |
| 0.0897436 | 0.140297 | 0.0995047 | 0.140443 | 0.125146 | 0.132576  | 0.125437 |
| 0.0944056 | 0.13884  | 0.055507  | 0.132867 | 0.127185 | 0.128788  | 0.122815 |
| 0.0917832 | 0.136801 | 0.0939685 | 0.135198 | 0.124563 | 0.126166  | 0.119027 |

|           |          |           |          |          |           |          |
|-----------|----------|-----------|----------|----------|-----------|----------|
| 0.0871212 | 0.137966 | 0.0861014 | 0.13345  | 0.121941 | 0.125291  | 0.118735 |
| 0.107372  | 0.145105 | 0.0990676 | 0.141463 | 0.13549  | 0.14088   | 0.132867 |
| 0.114948  | 0.121795 | 0.116841  | 0.131847 | 0.116841 | 0.114948  | 0.11859  |
| 0.115385  | 0.128059 | 0.116987  | 0.119755 | 0.113782 | 0.121212  | 0.126603 |
| 0.123252  | 0.141171 | 0.129808  | 0.140443 | 0.13243  | 0.120338  | 0.129808 |
| 0.12704   | 0.137675 | 0.134761  | 0.147145 | 0.132139 | 0.113345  | 0.133304 |
| 0.134324  | 0.14729  | 0.135052  | 0.143357 | 0.128934 | 0.100233  | 0.127185 |
| 0.141754  | 0.145396 | 0.144231  | 0.146999 | 0.13549  | 0.100087  | 0.138986 |
| 0.121503  | 0.144085 | 0.130682  | 0.1419   | 0.125728 | 0.119172  | 0.119027 |
| 0.179779  | 0.191288 | 0.191871  | 0.197552 | 0.188957 | 0.181527  | 0.182838 |
| 0.112617  | 0.134324 | 0.123543  | 0.130682 | 0.122378 | 0.110577  | 0.123252 |
| 0.143065  | 0.146416 | 0.141171  | 0.145688 | 0.139132 | 0.0941142 | 0.130682 |
| 0.134615  | 0.144085 | 0.13447   | 0.141608 | 0.130973 | 0.0891608 | 0.127477 |
| 0.13884   | 0.146562 | 0.136655  | 0.149913 | 0.140443 | 0.123106  | 0.135781 |
| 0.118298  | 0.133304 | 0.121358  | 0.132284 | 0.117861 | 0.0952797 | 0.121066 |
| 0.135781  | 0.143794 | 0.137675  | 0.143065 | 0.136801 | 0.0979021 | 0.13447  |
| 0.118298  | 0.137092 | 0.122815  | 0.133741 | 0.120775 | 0.0909091 | 0.123106 |
| 0.125146  | 0.138986 | 0.129662  | 0.133304 | 0.118881 | 0.100379  | 0.122669 |
| 0.112325  | 0.137529 | 0.11859   | 0.130973 | 0.120047 | 0.112617  | 0.114802 |
| 0.135344  | 0.149767 | 0.142483  | 0.146999 | 0.132867 | 0.102418  | 0.137529 |
| 0.107663  | 0.138403 | 0.113928  | 0.125437 | 0.113928 | 0.106789  | 0.11655  |
| 0.13345   | 0.143211 | 0.140006  | 0.148019 | 0.136218 | 0.117716  | 0.130682 |
| 0.118735  | 0.142483 | 0.125874  | 0.135344 | 0.129079 | 0.111451  | 0.121795 |
| 0.100816  | 0.142337 | 0.0910548 | 0.136364 | 0.128642 | 0.137821  | 0.132721 |
| 0.13039   | 0.143065 | 0.131119  | 0.14292  | 0.128205 | 0.127477  | 0.129371 |
| 0.116987  | 0.132867 | 0.126748  | 0.13243  | 0.121212 | 0.103875  | 0.123252 |
| 0.144959  | 0.160256 | 0.153846  | 0.156906 | 0.148601 | 0.133596  | 0.1419   |
| 0.121503  | 0.137966 | 0.128059  | 0.130828 | 0.123397 | 0.111014  | 0.124854 |
| 0.119755  | 0.137966 | 0.120775  | 0.135198 | 0.121649 | 0.0914918 | 0.124854 |
| 0.114365  | 0.140443 | 0.121795  | 0.13039  | 0.117716 | 0.118444  | 0.124417 |
| 0.139423  | 0.152972 | 0.147727  | 0.143794 | 0.13549  | 0.126894  | 0.136655 |
| 0.11757   | 0.135781 | 0.121795  | 0.134178 | 0.126457 | 0.123689  | 0.113054 |
| 0.115822  | 0.139277 | 0.117716  | 0.128059 | 0.12296  | 0.0872669 | 0.123252 |
| 0.119027  | 0.135781 | 0.118007  | 0.126603 | 0.117716 | 0.081148  | 0.117133 |
| 0.122086  | 0.137675 | 0.126311  | 0.139569 | 0.127477 | 0.110723  | 0.125728 |
| 0.122815  | 0.137821 | 0.128497  | 0.124854 | 0.112762 | 0.11116   | 0.124709 |
| 0.118007  | 0.133304 | 0.12602   | 0.137238 | 0.124854 | 0.109266  | 0.129516 |
| 0.104749  | 0.130828 | 0.112471  | 0.123397 | 0.11451  | 0.107372  | 0.118007 |
| 0.109411  | 0.133159 | 0.116841  | 0.119901 | 0.108392 | 0.102418  | 0.116841 |
| 0.111014  | 0.137092 | 0.11553   | 0.120047 | 0.108246 | 0.106643  | 0.118444 |
| 0.125874  | 0.133596 | 0.120775  | 0.130828 | 0.126603 | 0.123834  | 0.120192 |
| 0.132721  | 0.137529 | 0.130245  | 0.128642 | 0.121503 | 0.115239  | 0.124417 |
| 0.114219  | 0.133304 | 0.118444  | 0.124126 | 0.107663 | 0.107809  | 0.121358 |
| 0.108246  | 0.134033 | 0.110723  | 0.11553  | 0.101981 | 0.106206  | 0.113054 |



|          |          |          |          |          |           |          |
|----------|----------|----------|----------|----------|-----------|----------|
| 0.120775 | 0.134907 | 0.125874 | 0.121066 | 0.112179 | 0.112617  | 0.125    |
| 0.107809 | 0.133887 | 0.116404 | 0.127622 | 0.114656 | 0.111014  | 0.122523 |
| 0.123252 | 0.144959 | 0.137092 | 0.143357 | 0.133596 | 0.113345  | 0.13447  |
| 0.136072 | 0.142045 | 0.143211 | 0.144814 | 0.140589 | 0.135198  | 0.135635 |
| 0.114219 | 0.137383 | 0.120192 | 0.124126 | 0.112034 | 0.0999417 | 0.117279 |
| 0.113782 | 0.136072 | 0.120047 | 0.128642 | 0.112762 | 0.110577  | 0.122669 |
| 0.111742 | 0.134615 | 0.115676 | 0.121066 | 0.113054 | 0.110577  | 0.113928 |
| 0.104749 | 0.13549  | 0.11014  | 0.121941 | 0.110431 | 0.099796  | 0.115676 |
| 0.12398  | 0.143357 | 0.125291 | 0.128059 | 0.115967 | 0.117861  | 0.124126 |
| 0.10708  | 0.129371 | 0.114802 | 0.122523 | 0.104895 | 0.103584  | 0.111597 |
| 0.130828 | 0.128059 | 0.133304 | 0.142774 | 0.137383 | 0.129371  | 0.137092 |
| 0.10708  | 0.148601 | 0.117716 | 0.143502 | 0.135198 | 0.135052  | 0.13549  |
| 0.112325 | 0.142191 | 0.106643 | 0.132139 | 0.129371 | 0.125728  | 0.126457 |
| 0.102273 | 0.143211 | 0.103293 | 0.135198 | 0.120192 | 0.120921  | 0.124563 |
| 0.11451  | 0.139132 | 0.116696 | 0.137238 | 0.124563 | 0.112471  | 0.125146 |
| 0.107955 | 0.132576 | 0.11655  | 0.117861 | 0.111888 | 0.103584  | 0.120921 |
| 0.108683 | 0.130099 | 0.100962 | 0.124417 | 0.113491 | 0.110723  | 0.110868 |
| 0.101107 | 0.135635 | 0.105915 | 0.129953 | 0.116987 | 0.112179  | 0.117861 |
| 0.111888 | 0.141171 | 0.116113 | 0.129371 | 0.127477 | 0.121503  | 0.116113 |
| 0.105478 | 0.135052 | 0.104458 | 0.134907 | 0.125437 | 0.134615  | 0.11961  |
| 0.121941 | 0.140443 | 0.126457 | 0.138549 | 0.120921 | 0.0965909 | 0.122669 |
| 0.128788 | 0.150204 | 0.130682 | 0.135198 | 0.128642 | 0.126748  | 0.126894 |
| 0.135635 | 0.144231 | 0.141608 | 0.145251 | 0.134324 | 0.124563  | 0.13345  |
| 0.192162 | 0.210664 | 0.199592 | 0.215763 | 0.203963 | 0.204983  | 0.203671 |
| 0.236597 | 0.247815 | 0.238782 | 0.251457 | 0.243153 | 0.245047  | 0.240239 |
| 0.116404 | 0.133741 | 0.113636 | 0.131265 | 0.125291 | 0.121358  | 0.117133 |
| 0.106352 | 0.127185 | 0.103001 | 0.120629 | 0.121066 | 0.121503  | 0.112908 |
| 0.104604 | 0.130682 | 0.11116  | 0.126457 | 0.118444 | 0.115093  | 0.107372 |
| 0.107517 | 0.136801 | 0.10708  | 0.130828 | 0.125437 | 0.114219  | 0.11961  |
| 0.130245 | 0.145542 | 0.131847 | 0.129662 | 0.130682 | 0.128205  | 0.131265 |
| 0.1081   | 0.135927 | 0.111742 | 0.131702 | 0.128642 | 0.121503  | 0.121941 |
| 0.13243  | 0.14627  | 0.130245 | 0.144959 | 0.144231 | 0.139714  | 0.138695 |
| 0.113636 | 0.133887 | 0.103001 | 0.129371 | 0.121941 | 0.120921  | 0.11961  |
| 0.118298 | 0.138549 | 0.111451 | 0.133159 | 0.129808 | 0.128205  | 0.122232 |
| 0.109703 | 0.138986 | 0.102564 | 0.13447  | 0.134907 | 0.132139  | 0.118298 |
| 0.125437 | 0.143939 | 0.121212 | 0.140006 | 0.137821 | 0.128934  | 0.125583 |
| 0.103001 | 0.145396 | 0.106643 | 0.143211 | 0.138695 | 0.146999  | 0.135781 |
| 0.112617 | 0.134907 | 0.108392 | 0.133304 | 0.125874 | 0.125146  | 0.11655  |
| 0.104167 | 0.132576 | 0.105186 | 0.129516 | 0.124126 | 0.116987  | 0.117133 |
| 0.115093 | 0.133304 | 0.112034 | 0.132867 | 0.12398  | 0.11859   | 0.119027 |
| 0.109848 | 0.129516 | 0.103001 | 0.120338 | 0.116404 | 0.116841  | 0.109703 |
| 0.103147 | 0.131556 | 0.104167 | 0.129662 | 0.121358 | 0.115385  | 0.114365 |
| 0.114073 | 0.127331 | 0.104021 | 0.128351 | 0.117716 | 0.123106  | 0.113928 |
| 0.118298 | 0.140297 | 0.111451 | 0.135198 | 0.129225 | 0.128205  | 0.123397 |

|           |          |           |          |          |           |          |
|-----------|----------|-----------|----------|----------|-----------|----------|
| 0.128497  | 0.141754 | 0.117279  | 0.132867 | 0.134178 | 0.132284  | 0.126603 |
| 0.109411  | 0.137529 | 0.107809  | 0.13447  | 0.123252 | 0.123106  | 0.118298 |
| 0.106935  | 0.139423 | 0.103001  | 0.129079 | 0.123397 | 0.121212  | 0.116696 |
| 0.121795  | 0.141463 | 0.111451  | 0.134033 | 0.137966 | 0.131993  | 0.125146 |
| 0.106352  | 0.134178 | 0.10708   | 0.130536 | 0.124272 | 0.117424  | 0.119318 |
| 0.126894  | 0.147436 | 0.130828  | 0.148747 | 0.145688 | 0.138549  | 0.131702 |
| 0.137675  | 0.143065 | 0.141317  | 0.12602  | 0.119172 | 0.131847  | 0.125583 |
| 0.127914  | 0.146416 | 0.127185  | 0.142774 | 0.136801 | 0.11451   | 0.125437 |
| 0.104021  | 0.131556 | 0.101253  | 0.126457 | 0.121066 | 0.11859   | 0.115239 |
| 0.10271   | 0.126748 | 0.102273  | 0.121649 | 0.11655  | 0.112908  | 0.113928 |
| 0.115093  | 0.136801 | 0.108246  | 0.135198 | 0.129225 | 0.126748  | 0.121358 |
| 0.121941  | 0.129371 | 0.109848  | 0.126311 | 0.125874 | 0.122523  | 0.119755 |
| 0.116404  | 0.132284 | 0.116841  | 0.140297 | 0.134033 | 0.127185  | 0.124709 |
| 0.107517  | 0.137675 | 0.10912   | 0.134033 | 0.131265 | 0.123834  | 0.119901 |
| 0.11757   | 0.132576 | 0.111014  | 0.136801 | 0.12704  | 0.119318  | 0.119172 |
| 0.113491  | 0.130828 | 0.109557  | 0.13447  | 0.129079 | 0.121358  | 0.117133 |
| 0.118444  | 0.145105 | 0.115676  | 0.137966 | 0.138695 | 0.133887  | 0.12704  |
| 0.118444  | 0.143357 | 0.117716  | 0.140297 | 0.136364 | 0.127477  | 0.126748 |
| 0.128205  | 0.139714 | 0.121066  | 0.137529 | 0.133304 | 0.13141   | 0.126311 |
| 0.120192  | 0.143065 | 0.117424  | 0.137092 | 0.134033 | 0.137092  | 0.131702 |
| 0.112908  | 0.131993 | 0.102273  | 0.128059 | 0.121212 | 0.122232  | 0.120921 |
| 0.11553   | 0.144231 | 0.116259  | 0.141754 | 0.139569 | 0.126603  | 0.126166 |
| 0.112762  | 0.129516 | 0.104749  | 0.128788 | 0.11757  | 0.11451   | 0.114656 |
| 0.0922203 | 0.138403 | 0.0917832 | 0.135927 | 0.124417 | 0.120484  | 0.117716 |
| 0.112034  | 0.13345  | 0.109848  | 0.133013 | 0.125    | 0.121358  | 0.115385 |
| 0.106643  | 0.136218 | 0.109703  | 0.131702 | 0.123689 | 0.110723  | 0.118153 |
| 0.10373   | 0.133013 | 0.101253  | 0.123834 | 0.120192 | 0.117716  | 0.114948 |
| 0.128351  | 0.145979 | 0.122378  | 0.137383 | 0.139277 | 0.130682  | 0.122669 |
| 0.101399  | 0.139714 | 0.108246  | 0.132576 | 0.120192 | 0.124126  | 0.120775 |
| 0.127914  | 0.133304 | 0.121941  | 0.140152 | 0.137966 | 0.130828  | 0.13039  |
| 0.109266  | 0.131265 | 0.103875  | 0.122086 | 0.118444 | 0.115676  | 0.110577 |
| 0.116404  | 0.134615 | 0.11014   | 0.129808 | 0.132867 | 0.128642  | 0.121212 |
| 0.123543  | 0.140006 | 0.119901  | 0.127914 | 0.121066 | 0.12704   | 0.115822 |
| 0.120629  | 0.138258 | 0.12602   | 0.125583 | 0.114073 | 0.119464  | 0.116404 |
| 0.120484  | 0.125    | 0.121503  | 0.130682 | 0.11655  | 0.112325  | 0.120047 |
| 0.114802  | 0.151661 | 0.126603  | 0.13345  | 0.123397 | 0.121212  | 0.127185 |
| 0.121941  | 0.141317 | 0.125874  | 0.135344 | 0.13141  | 0.121358  | 0.12296  |
| 0.116113  | 0.134907 | 0.125     | 0.132721 | 0.125583 | 0.117861  | 0.12296  |
| 0.133596  | 0.156469 | 0.140152  | 0.12602  | 0.124126 | 0.124854  | 0.134615 |
| 0.138695  | 0.141463 | 0.140006  | 0.136364 | 0.142337 | 0.136072  | 0.137675 |
| 0.109557  | 0.138549 | 0.114365  | 0.125583 | 0.110577 | 0.102273  | 0.120484 |
| 0.133887  | 0.153846 | 0.136655  | 0.13447  | 0.130245 | 0.105915  | 0.128497 |
| 0.125874  | 0.151661 | 0.132721  | 0.117133 | 0.117861 | 0.120629  | 0.126603 |
| 0.136072  | 0.155157 | 0.137092  | 0.138112 | 0.127477 | 0.0981935 | 0.127768 |

|          |          |          |          |          |           |          |
|----------|----------|----------|----------|----------|-----------|----------|
| 0.122378 | 0.146999 | 0.127768 | 0.125    | 0.111451 | 0.104895  | 0.119027 |
| 0.118881 | 0.148164 | 0.13243  | 0.129371 | 0.116696 | 0.108974  | 0.124563 |
| 0.129225 | 0.149476 | 0.132284 | 0.125437 | 0.117133 | 0.119027  | 0.126166 |
| 0.129953 | 0.154283 | 0.134761 | 0.128497 | 0.123397 | 0.0929487 | 0.124854 |
| 0.132867 | 0.153409 | 0.14088  | 0.13345  | 0.119027 | 0.11014   | 0.127185 |
| 0.12704  | 0.150204 | 0.128934 | 0.130245 | 0.118735 | 0.116841  | 0.127185 |
| 0.118881 | 0.146707 | 0.12602  | 0.12704  | 0.113199 | 0.105769  | 0.11757  |
| 0.137966 | 0.106643 | 0.129371 | 0.133304 | 0.118881 | 0.139423  | 0.123834 |
| 0.134033 | 0.152826 | 0.137966 | 0.131119 | 0.124854 | 0.125     | 0.134178 |
| 0.115385 | 0.145251 | 0.116987 | 0.128788 | 0.113782 | 0.1081    | 0.119318 |
| 0.21722  | 0.228438 | 0.224359 | 0.23412  | 0.226399 | 0.223631  | 0.223485 |
| 0.126894 | 0.152098 | 0.128205 | 0.129808 | 0.116259 | 0.0995047 | 0.120629 |
| 0.11757  | 0.145396 | 0.118007 | 0.126603 | 0.115385 | 0.106206  | 0.121795 |
| 0.137238 | 0.153992 | 0.137092 | 0.136072 | 0.13039  | 0.106643  | 0.129225 |
| 0.117133 | 0.144085 | 0.123689 | 0.131993 | 0.112908 | 0.11655   | 0.124272 |
| 0.137238 | 0.15574  | 0.139423 | 0.124126 | 0.122523 | 0.124417  | 0.13039  |
| 0.122669 | 0.148456 | 0.120484 | 0.135198 | 0.12398  | 0.101981  | 0.125728 |
| 0.125146 | 0.144522 | 0.125583 | 0.124854 | 0.117424 | 0.0948427 | 0.119755 |
| 0.123397 | 0.155303 | 0.123543 | 0.126603 | 0.120047 | 0.116696  | 0.125291 |
| 0.131702 | 0.148456 | 0.134178 | 0.141026 | 0.129516 | 0.104604  | 0.127477 |
| 0.135635 | 0.152389 | 0.135198 | 0.129808 | 0.132284 | 0.104458  | 0.122669 |
| 0.132576 | 0.154575 | 0.136801 | 0.121503 | 0.123689 | 0.114802  | 0.125146 |
| 0.132867 | 0.151369 | 0.135052 | 0.131119 | 0.128642 | 0.106352  | 0.121066 |
| 0.119755 | 0.136218 | 0.122232 | 0.122086 | 0.118444 | 0.11655   | 0.122523 |
| 0.125874 | 0.152244 | 0.126894 | 0.126166 | 0.121649 | 0.104312  | 0.121649 |
| 0.13884  | 0.157634 | 0.140443 | 0.136509 | 0.122086 | 0.103001  | 0.128788 |
| 0.123834 | 0.145833 | 0.128642 | 0.126748 | 0.117861 | 0.092366  | 0.11961  |
| 0.101981 | 0.14729  | 0.105041 | 0.149184 | 0.136801 | 0.138986  | 0.13039  |
| 0.135052 | 0.155886 | 0.145396 | 0.151952 | 0.143648 | 0.138258  | 0.1419   |
| 0.128059 | 0.118881 | 0.129371 | 0.125437 | 0.118881 | 0.123397  | 0.117716 |
| 0.131847 | 0.152389 | 0.133741 | 0.123397 | 0.12704  | 0.122523  | 0.129371 |
| 0.127622 | 0.155449 | 0.137092 | 0.143939 | 0.139714 | 0.112471  | 0.12602  |
| 0.130099 | 0.145105 | 0.129662 | 0.135052 | 0.131119 | 0.12398   | 0.131993 |
| 0.130099 | 0.150932 | 0.129953 | 0.143794 | 0.135781 | 0.134761  | 0.134907 |
| 0.137092 | 0.160548 | 0.1419   | 0.154283 | 0.142483 | 0.133887  | 0.137529 |
| 0.109557 | 0.140006 | 0.118153 | 0.123252 | 0.113491 | 0.111305  | 0.11961  |
| 0.108537 | 0.152389 | 0.110723 | 0.137383 | 0.129371 | 0.133596  | 0.134033 |
| 0.137821 | 0.154575 | 0.147582 | 0.158508 | 0.145833 | 0.142191  | 0.144085 |
| 0.117133 | 0.136509 | 0.124563 | 0.132284 | 0.119027 | 0.112762  | 0.120775 |
| 0        | 0.14729  | 0.099796 | 0.14831  | 0.13447  | 0.127914  | 0.13243  |
| 0.14729  | 0        | 0.137529 | 0.137092 | 0.129079 | 0.142628  | 0.123252 |
| 0.099796 | 0.137529 | 0        | 0.13039  | 0.125874 | 0.13039   | 0.12296  |
| 0.14831  | 0.137092 | 0.13039  | 0        | 0.112325 | 0.136072  | 0.112034 |
| 0.13447  | 0.129079 | 0.125874 | 0.112325 | 0        | 0.126603  | 0.118007 |

|          |          |          |          |           |           |          |
|----------|----------|----------|----------|-----------|-----------|----------|
| 0.127914 | 0.142628 | 0.13039  | 0.136072 | 0.126603  | 0         | 0.13039  |
| 0.13243  | 0.123252 | 0.12296  | 0.112034 | 0.118007  | 0.13039   | 0        |
| 0.123543 | 0.139132 | 0.125146 | 0.119755 | 0.109411  | 0.109848  | 0.112908 |
| 0.130682 | 0.146853 | 0.131993 | 0.143211 | 0.127914  | 0.0965909 | 0.133159 |
| 0.134178 | 0.152098 | 0.134907 | 0.135927 | 0.121503  | 0.104458  | 0.130536 |
| 0.138549 | 0.15035  | 0.136364 | 0.141463 | 0.134324  | 0.0913462 | 0.138986 |
| 0.137383 | 0.1419   | 0.136946 | 0.141463 | 0.130828  | 0.0971737 | 0.129079 |
| 0.128351 | 0.149767 | 0.132576 | 0.146416 | 0.136072  | 0.102418  | 0.13141  |
| 0.147873 | 0.154429 | 0.150058 | 0.148747 | 0.135198  | 0.112325  | 0.132284 |
| 0.116696 | 0.149476 | 0.123834 | 0.122815 | 0.11655   | 0.119027  | 0.120047 |
| 0.112617 | 0.138695 | 0.113345 | 0.140297 | 0.118881  | 0.109411  | 0.121212 |
| 0.134178 | 0.143939 | 0.138112 | 0.141754 | 0.139277  | 0.123106  | 0.133159 |
| 0.116113 | 0.139569 | 0.122669 | 0.126603 | 0.113345  | 0.111742  | 0.111888 |
| 0.143065 | 0.160402 | 0.144376 | 0.1588   | 0.148456  | 0.136655  | 0.139714 |
| 0.15035  | 0.161568 | 0.153992 | 0.157634 | 0.154283  | 0.144814  | 0.14933  |
| 0.122378 | 0.139423 | 0.112325 | 0.137529 | 0.131265  | 0.124417  | 0.127768 |
| 0.120484 | 0.131119 | 0.111888 | 0.128642 | 0.125     | 0.123397  | 0.108392 |
| 0.136946 | 0.152826 | 0.136509 | 0.143939 | 0.13884   | 0.112179  | 0.135052 |
| 0.133887 | 0.157051 | 0.133741 | 0.133304 | 0.120629  | 0.112034  | 0.123834 |
| 0.114948 | 0.141026 | 0.113636 | 0.13447  | 0.128205  | 0.131847  | 0.125874 |
| 0.138258 | 0.160839 | 0.137238 | 0.13447  | 0.137821  | 0.106789  | 0.128788 |
| 0.134178 | 0.14627  | 0.137529 | 0.135927 | 0.128788  | 0.133887  | 0.120338 |
| 0.116841 | 0.139714 | 0.11553  | 0.113636 | 0.116404  | 0.12704   | 0.116113 |
| 0.162296 | 0.167104 | 0.161568 | 0.165793 | 0.168269  | 0.156177  | 0.152535 |
| 0.11859  | 0.13884  | 0.107372 | 0.121503 | 0.117861  | 0.134907  | 0.121066 |
| 0.133741 | 0.137675 | 0.133013 | 0.11451  | 0.0977564 | 0.140152  | 0.119901 |
| 0.112325 | 0.13549  | 0.109848 | 0.135344 | 0.119755  | 0.109703  | 0.12296  |
| 0.140006 | 0.149184 | 0.135781 | 0.139423 | 0.137238  | 0.112617  | 0.135198 |
| 0.127768 | 0.150641 | 0.129662 | 0.135927 | 0.119464  | 0.0971737 | 0.122669 |
| 0.141317 | 0.151952 | 0.148456 | 0.154429 | 0.152826  | 0.144814  | 0.138258 |
| 0.151369 | 0.161713 | 0.148893 | 0.159237 | 0.152098  | 0.133596  | 0.146562 |
| 0.129662 | 0.144376 | 0.126894 | 0.140443 | 0.138258  | 0.131119  | 0.134178 |
| 0.139423 | 0.145979 | 0.137821 | 0.149038 | 0.147727  | 0.143211  | 0.141026 |
| 0.141317 | 0.155449 | 0.143502 | 0.160256 | 0.152244  | 0.155303  | 0.146416 |
| 0.146562 | 0.165064 | 0.149038 | 0.157634 | 0.15574   | 0.148893  | 0.150495 |
| 0.12398  | 0.118298 | 0.123834 | 0.140589 | 0.127622  | 0.119318  | 0.127622 |
| 0.13986  | 0.149621 | 0.146707 | 0.156177 | 0.14933   | 0.138403  | 0.143502 |
| 0.120921 | 0.139132 | 0.11961  | 0.129371 | 0.125437  | 0.125     | 0.123689 |
| 0.123106 | 0.135781 | 0.123834 | 0.129808 | 0.126457  | 0.119027  | 0.118007 |
| 0.118298 | 0.145251 | 0.125437 | 0.13141  | 0.121941  | 0.118007  | 0.122523 |
| 0.124126 | 0.139423 | 0.123689 | 0.135781 | 0.133304  | 0.129371  | 0.128351 |
| 0.118444 | 0.141608 | 0.12704  | 0.14088  | 0.131993  | 0.117279  | 0.127622 |
| 0.116696 | 0.138986 | 0.11859  | 0.129808 | 0.12296   | 0.123106  | 0.119172 |
| 0.130973 | 0.144231 | 0.130828 | 0.14729  | 0.134907  | 0.125437  | 0.134033 |

|          |          |          |          |          |          |          |
|----------|----------|----------|----------|----------|----------|----------|
| 0.125    | 0.143502 | 0.131847 | 0.134033 | 0.129516 | 0.129079 | 0.127477 |
| 0.105478 | 0.135344 | 0.110868 | 0.120921 | 0.116404 | 0.118298 | 0.116696 |
| 0.129371 | 0.141463 | 0.125437 | 0.141317 | 0.137383 | 0.130536 | 0.133887 |
| 0.125728 | 0.143939 | 0.123834 | 0.135635 | 0.134033 | 0.131556 | 0.129953 |
| 0.116987 | 0.125583 | 0.104021 | 0.13039  | 0.120338 | 0.121066 | 0.121503 |
| 0.216929 | 0.22465  | 0.22028  | 0.228875 | 0.221737 | 0.222465 | 0.219114 |
| 0.147582 | 0.149184 | 0.142774 | 0.149038 | 0.14831  | 0.143794 | 0.147727 |
| 0.128497 | 0.148747 | 0.13447  | 0.148893 | 0.14088  | 0.128497 | 0.13884  |
| 0.128934 | 0.148601 | 0.128497 | 0.140297 | 0.136072 | 0.126603 | 0.138695 |
| 0.209062 | 0.224068 | 0.216783 | 0.227127 | 0.219406 | 0.217512 | 0.217366 |
| 0.119027 | 0.129953 | 0.118298 | 0.133887 | 0.12704  | 0.128934 | 0.122086 |
| 0.129662 | 0.136801 | 0.130973 | 0.137529 | 0.131556 | 0.124709 | 0.131265 |
| 0.12704  | 0.141171 | 0.128642 | 0.143648 | 0.135344 | 0.131993 | 0.136218 |
| 0.126894 | 0.143648 | 0.125291 | 0.128934 | 0.122669 | 0.126311 | 0.125291 |
| 0.246941 | 0.253205 | 0.25204  | 0.262092 | 0.253497 | 0.25743  | 0.248834 |
| 0.132284 | 0.141463 | 0.136509 | 0.139277 | 0.137092 | 0.13141  | 0.134178 |
| 0.110723 | 0.125437 | 0.105624 | 0.127622 | 0.116113 | 0.11451  | 0.121358 |
| 0.132576 | 0.144085 | 0.126894 | 0.138112 | 0.135052 | 0.123834 | 0.138258 |
| 0.129953 | 0.144376 | 0.125437 | 0.140152 | 0.137092 | 0.125    | 0.133013 |
| 0.132867 | 0.143502 | 0.14088  | 0.140734 | 0.137092 | 0.133741 | 0.131847 |
| 0.126457 | 0.146707 | 0.137675 | 0.139277 | 0.137092 | 0.136072 | 0.130099 |
| 0.11655  | 0.126603 | 0.108537 | 0.131119 | 0.118153 | 0.121795 | 0.122232 |
| 0.125146 | 0.141317 | 0.122378 | 0.137966 | 0.134033 | 0.127477 | 0.130536 |
| 0.129371 | 0.146999 | 0.135052 | 0.152972 | 0.144085 | 0.129953 | 0.139714 |
| 0.122086 | 0.138549 | 0.120192 | 0.127622 | 0.123397 | 0.121795 | 0.123397 |
| 0.128642 | 0.140443 | 0.121795 | 0.13447  | 0.13141  | 0.123689 | 0.129371 |
| 0.116841 | 0.142045 | 0.121649 | 0.106352 | 0.102127 | 0.112179 | 0.110577 |
| 0.153118 | 0.160839 | 0.147727 | 0.156031 | 0.150058 | 0.13243  | 0.148893 |
| 0.13447  | 0.140734 | 0.138986 | 0.140006 | 0.142191 | 0.135635 | 0.134907 |
| 0.133304 | 0.137821 | 0.132867 | 0.140297 | 0.134033 | 0.127185 | 0.137821 |
| 0.189248 | 0.206585 | 0.195804 | 0.205565 | 0.197844 | 0.198572 | 0.196387 |
| 0.203817 | 0.214452 | 0.210082 | 0.220134 | 0.210956 | 0.213724 | 0.209207 |
| 0.125728 | 0.141317 | 0.12704  | 0.130099 | 0.125291 | 0.127768 | 0.127622 |
| 0.120484 | 0.138695 | 0.121795 | 0.126894 | 0.121212 | 0.119027 | 0.120921 |
| 0.135635 | 0.152972 | 0.143065 | 0.148456 | 0.144522 | 0.135635 | 0.144522 |
| 0.113199 | 0.123252 | 0.104604 | 0.129225 | 0.11655  | 0.118735 | 0.118881 |
| 0.134033 | 0.139714 | 0.142045 | 0.141317 | 0.13884  | 0.135781 | 0.136218 |
| 0.128934 | 0.145979 | 0.131702 | 0.144668 | 0.141026 | 0.11757  | 0.140152 |
| 0.222465 | 0.234557 | 0.230186 | 0.241113 | 0.234266 | 0.232955 | 0.226107 |
| 0.119027 | 0.1419   | 0.123252 | 0.143211 | 0.129079 | 0.121649 | 0.134907 |
| 0.200466 | 0.212558 | 0.209062 | 0.217366 | 0.211101 | 0.214744 | 0.20236  |
| 0.116113 | 0.117133 | 0.115385 | 0.133887 | 0.121503 | 0.113782 | 0.119172 |
| 0.115676 | 0.135344 | 0.122523 | 0.1419   | 0.129516 | 0.121212 | 0.128059 |
| 0.122523 | 0.128788 | 0.114219 | 0.116404 | 0.11451  | 0.121649 | 0.106352 |

|          |          |          |          |          |          |          |
|----------|----------|----------|----------|----------|----------|----------|
| 0.118444 | 0.137821 | 0.119755 | 0.128351 | 0.120047 | 0.122815 | 0.121795 |
| 0.20542  | 0.220425 | 0.210519 | 0.223485 | 0.216346 | 0.214452 | 0.213432 |
| 0.137238 | 0.14729  | 0.133596 | 0.148601 | 0.145833 | 0.141026 | 0.137966 |
| 0.120921 | 0.137383 | 0.123689 | 0.138403 | 0.126311 | 0.120921 | 0.129808 |
| 0.132576 | 0.144959 | 0.12602  | 0.139277 | 0.138549 | 0.134324 | 0.136801 |
| 0.125874 | 0.140589 | 0.121941 | 0.133159 | 0.130973 | 0.129371 | 0.137383 |
| 0.121503 | 0.143211 | 0.121649 | 0.128205 | 0.122232 | 0.123543 | 0.123689 |
| 0.117861 | 0.119172 | 0.115676 | 0.134178 | 0.123543 | 0.113491 | 0.120921 |
| 0.117279 | 0.127622 | 0.110431 | 0.135344 | 0.120338 | 0.120775 | 0.120629 |
| 0.131847 | 0.140443 | 0.13345  | 0.136509 | 0.13345  | 0.12602  | 0.132867 |
| 0.121941 | 0.137238 | 0.119755 | 0.135635 | 0.129662 | 0.125437 | 0.125291 |
| 0.117424 | 0.135052 | 0.123106 | 0.139277 | 0.12398  | 0.118298 | 0.126894 |
| 0.189248 | 0.205711 | 0.193182 | 0.207605 | 0.200175 | 0.198572 | 0.197261 |
| 0.134907 | 0.144668 | 0.127477 | 0.138403 | 0.135344 | 0.125    | 0.133304 |
| 0.137966 | 0.152681 | 0.130828 | 0.149621 | 0.136072 | 0.118153 | 0.138112 |
| 0.120629 | 0.14729  | 0.128351 | 0.142483 | 0.130099 | 0.118298 | 0.130099 |
| 0.128351 | 0.141317 | 0.138986 | 0.145251 | 0.138403 | 0.135635 | 0.134907 |
| 0.12602  | 0.143357 | 0.124709 | 0.136218 | 0.136655 | 0.130682 | 0.13345  |
| 0.122232 | 0.116841 | 0.118881 | 0.136509 | 0.123834 | 0.114365 | 0.122378 |
| 0.11859  | 0.135635 | 0.119027 | 0.131119 | 0.124563 | 0.121795 | 0.128934 |
| 0.118007 | 0.123689 | 0.108829 | 0.129079 | 0.120484 | 0.120047 | 0.12398  |
| 0.133013 | 0.14831  | 0.128788 | 0.142045 | 0.132867 | 0.121066 | 0.133159 |
| 0.126894 | 0.143648 | 0.123834 | 0.138549 | 0.13345  | 0.121649 | 0.131119 |
| 0.126166 | 0.146125 | 0.126894 | 0.132867 | 0.128351 | 0.12296  | 0.125437 |
| 0.128934 | 0.141608 | 0.127914 | 0.143794 | 0.135781 | 0.131847 | 0.136655 |
| 0.135198 | 0.149913 | 0.137675 | 0.151515 | 0.143502 | 0.137529 | 0.141754 |
| 0.124126 | 0.133887 | 0.13039  | 0.133159 | 0.128934 | 0.124126 | 0.130973 |
| 0.142628 | 0.150641 | 0.138112 | 0.143794 | 0.145396 | 0.140589 | 0.1419   |
| 0.11757  | 0.139569 | 0.121795 | 0.128059 | 0.12296  | 0.125437 | 0.123543 |
| 0.120192 | 0.138112 | 0.124126 | 0.138258 | 0.13141  | 0.111742 | 0.129662 |
| 0.120338 | 0.140589 | 0.122232 | 0.139277 | 0.136801 | 0.12704  | 0.127185 |
| 0.121212 | 0.127768 | 0.109411 | 0.134907 | 0.122815 | 0.123543 | 0.12602  |
| 0.184732 | 0.201195 | 0.192745 | 0.207459 | 0.194202 | 0.200175 | 0.191288 |
| 0.115822 | 0.128205 | 0.121503 | 0.136509 | 0.122086 | 0.118444 | 0.123543 |
| 0.114365 | 0.130536 | 0.116259 | 0.133596 | 0.120629 | 0.112034 | 0.118881 |
| 0.132139 | 0.135198 | 0.13345  | 0.133887 | 0.131993 | 0.125437 | 0.131702 |
| 0.182255 | 0.198135 | 0.184149 | 0.195076 | 0.189977 | 0.187791 | 0.185897 |
| 0.141608 | 0.148456 | 0.144959 | 0.14831  | 0.151078 | 0.138403 | 0.143502 |
| 0.148601 | 0.147582 | 0.157488 | 0.150058 | 0.153409 | 0.145396 | 0.146999 |
| 0.153992 | 0.165793 | 0.150641 | 0.158071 | 0.150641 | 0.131847 | 0.150058 |
| 0.121066 | 0.135198 | 0.127331 | 0.131847 | 0.131702 | 0.124854 | 0.127914 |
| 0.128497 | 0.142337 | 0.126894 | 0.139569 | 0.137383 | 0.129371 | 0.133887 |
| 0.211101 | 0.222902 | 0.216783 | 0.226544 | 0.220862 | 0.221591 | 0.215035 |
| 0.125728 | 0.145396 | 0.129371 | 0.145251 | 0.140152 | 0.136801 | 0.135781 |

|          |          |          |          |          |          |          |
|----------|----------|----------|----------|----------|----------|----------|
| 0.131993 | 0.144085 | 0.129808 | 0.142191 | 0.142337 | 0.134324 | 0.134761 |
| 0.118298 | 0.133596 | 0.122815 | 0.13549  | 0.123689 | 0.119172 | 0.125146 |
| 0.167249 | 0.184003 | 0.177302 | 0.184732 | 0.180507 | 0.179196 | 0.171766 |
| 0.120921 | 0.143502 | 0.121066 | 0.13345  | 0.127477 | 0.11655  | 0.133013 |
| 0.149621 | 0.160256 | 0.157634 | 0.161568 | 0.157925 | 0.144959 | 0.151807 |
| 0.115239 | 0.137529 | 0.122378 | 0.131265 | 0.126166 | 0.128642 | 0.126457 |
| 0.189831 | 0.205128 | 0.193182 | 0.205857 | 0.198718 | 0.196533 | 0.195804 |
| 0.128642 | 0.137238 | 0.134324 | 0.13447  | 0.136364 | 0.126311 | 0.132576 |
| 0.116113 | 0.138403 | 0.111014 | 0.126603 | 0.114219 | 0.117861 | 0.115676 |
| 0.118881 | 0.143211 | 0.123397 | 0.13986  | 0.13243  | 0.113345 | 0.129225 |
| 0.125146 | 0.13549  | 0.124417 | 0.137383 | 0.129079 | 0.125146 | 0.129662 |
| 0.127768 | 0.132284 | 0.132284 | 0.137383 | 0.132284 | 0.121358 | 0.133741 |
| 0.123106 | 0.145688 | 0.130828 | 0.143502 | 0.134907 | 0.118735 | 0.136072 |
| 0.120921 | 0.14292  | 0.122232 | 0.128497 | 0.120192 | 0.120047 | 0.122523 |
| 0.190122 | 0.205128 | 0.191142 | 0.207896 | 0.198718 | 0.197407 | 0.199592 |
| 0.125583 | 0.145833 | 0.129808 | 0.146853 | 0.135052 | 0.129079 | 0.135635 |
| 0.119901 | 0.136946 | 0.125583 | 0.137092 | 0.123834 | 0.118735 | 0.13141  |
| 0.212704 | 0.223631 | 0.217512 | 0.228147 | 0.217512 | 0.218823 | 0.218386 |
| 0.131702 | 0.144085 | 0.129225 | 0.1419   | 0.136218 | 0.120629 | 0.137092 |
| 0.119901 | 0.138112 | 0.12296  | 0.129808 | 0.124417 | 0.121066 | 0.125    |
| 0.117279 | 0.136364 | 0.117424 | 0.126894 | 0.118881 | 0.119901 | 0.121212 |
| 0.142483 | 0.147873 | 0.139132 | 0.145396 | 0.142337 | 0.141608 | 0.138549 |
| 0.18648  | 0.202652 | 0.195367 | 0.208042 | 0.200321 | 0.198135 | 0.197698 |
| 0.11553  | 0.125583 | 0.106061 | 0.133887 | 0.120338 | 0.121649 | 0.121503 |
| 0.129225 | 0.145979 | 0.134324 | 0.146999 | 0.142774 | 0.135344 | 0.139569 |
| 0.120775 | 0.13986  | 0.123543 | 0.125728 | 0.119464 | 0.120484 | 0.120921 |
| 0.119027 | 0.139569 | 0.120338 | 0.128059 | 0.121503 | 0.120484 | 0.120338 |
| 0.117424 | 0.138258 | 0.121066 | 0.132284 | 0.122232 | 0.120921 | 0.121649 |
| 0.125437 | 0.140443 | 0.122086 | 0.13884  | 0.129079 | 0.12602  | 0.129662 |
| 0.107809 | 0.136509 | 0.113491 | 0.122086 | 0.115239 | 0.118881 | 0.118444 |
| 0.130245 | 0.140297 | 0.135344 | 0.138403 | 0.137383 | 0.132284 | 0.130099 |
| 0.137238 | 0.156031 | 0.135052 | 0.147727 | 0.136218 | 0.121795 | 0.142337 |
| 0.126748 | 0.141463 | 0.133887 | 0.140734 | 0.135052 | 0.129371 | 0.133596 |
| 0.131265 | 0.140152 | 0.125874 | 0.137383 | 0.132576 | 0.133304 | 0.139277 |
| 0.192308 | 0.20877  | 0.200903 | 0.211538 | 0.206439 | 0.204254 | 0.203526 |
| 0.12398  | 0.143939 | 0.124126 | 0.144085 | 0.135781 | 0.125146 | 0.133741 |
| 0.13549  | 0.145833 | 0.134761 | 0.143065 | 0.141754 | 0.134615 | 0.140006 |
| 0.119318 | 0.138112 | 0.120629 | 0.12398  | 0.118881 | 0.117279 | 0.122378 |
| 0.105186 | 0.131847 | 0.108537 | 0.118007 | 0.112617 | 0.11451  | 0.114948 |
| 0.120047 | 0.142628 | 0.126311 | 0.140152 | 0.129225 | 0.126748 | 0.123689 |
| 0.115239 | 0.123834 | 0.103147 | 0.129808 | 0.118298 | 0.121066 | 0.123252 |
| 0.135635 | 0.149476 | 0.132576 | 0.145833 | 0.138986 | 0.129516 | 0.142774 |
| 0.129371 | 0.150204 | 0.128642 | 0.144231 | 0.133596 | 0.119172 | 0.132721 |
| 0.111014 | 0.130099 | 0.109703 | 0.128205 | 0.109994 | 0.115385 | 0.116987 |

|          |          |          |          |          |          |          |
|----------|----------|----------|----------|----------|----------|----------|
| 0.104458 | 0.130536 | 0.106061 | 0.120775 | 0.111014 | 0.115239 | 0.112179 |
| 0.115093 | 0.137092 | 0.11553  | 0.123834 | 0.114948 | 0.117424 | 0.120192 |
| 0.117861 | 0.119464 | 0.117716 | 0.135635 | 0.122086 | 0.116404 | 0.120921 |
| 0.135781 | 0.14292  | 0.143502 | 0.142191 | 0.14292  | 0.137238 | 0.137383 |
| 0.115822 | 0.130536 | 0.109557 | 0.133596 | 0.119755 | 0.119027 | 0.122378 |
| 0.120338 | 0.137675 | 0.121066 | 0.136364 | 0.127185 | 0.123834 | 0.12602  |
| 0.111888 | 0.123689 | 0.101544 | 0.128205 | 0.113782 | 0.114219 | 0.120484 |
| 0.118735 | 0.141026 | 0.119755 | 0.128934 | 0.124709 | 0.11961  | 0.127331 |
| 0.115676 | 0.13447  | 0.118735 | 0.13345  | 0.123106 | 0.11451  | 0.123106 |
| 0.121212 | 0.144376 | 0.123689 | 0.127914 | 0.123689 | 0.121795 | 0.122523 |
| 0.120921 | 0.138549 | 0.121066 | 0.141317 | 0.129225 | 0.124417 | 0.131556 |
| 0.131119 | 0.148747 | 0.127477 | 0.141608 | 0.129808 | 0.117133 | 0.131265 |
| 0.124417 | 0.131847 | 0.126311 | 0.13345  | 0.128642 | 0.119755 | 0.130099 |
| 0.106206 | 0.13986  | 0.11655  | 0.12602  | 0.117716 | 0.121066 | 0.120921 |
| 0.122086 | 0.14088  | 0.119318 | 0.124126 | 0.125146 | 0.122378 | 0.123689 |
| 0.120629 | 0.142045 | 0.128642 | 0.143648 | 0.137383 | 0.116259 | 0.133013 |
| 0.126311 | 0.145396 | 0.130536 | 0.14292  | 0.130828 | 0.126311 | 0.136072 |
| 0.113928 | 0.141754 | 0.117861 | 0.130828 | 0.116987 | 0.105478 | 0.123106 |
| 0.116841 | 0.140589 | 0.116113 | 0.128788 | 0.122523 | 0.117133 | 0.125728 |
| 0.127477 | 0.142191 | 0.124417 | 0.136509 | 0.134615 | 0.125146 | 0.13141  |
| 0.116696 | 0.122378 | 0.120629 | 0.136801 | 0.124126 | 0.119027 | 0.119755 |
| 0.129225 | 0.1419   | 0.126748 | 0.136801 | 0.135198 | 0.127768 | 0.132576 |
| 0.126311 | 0.137238 | 0.131119 | 0.136509 | 0.131119 | 0.119318 | 0.133159 |
| 0.10708  | 0.140734 | 0.114802 | 0.128934 | 0.118298 | 0.121358 | 0.122378 |
| 0.113491 | 0.138986 | 0.122378 | 0.13884  | 0.128497 | 0.116987 | 0.129662 |
| 0.117424 | 0.131265 | 0.119901 | 0.134907 | 0.122815 | 0.11655  | 0.123689 |
| 0.128642 | 0.147436 | 0.128788 | 0.14088  | 0.138112 | 0.13243  | 0.134033 |
| 0.127185 | 0.144231 | 0.130828 | 0.142045 | 0.134615 | 0.126894 | 0.136072 |
| 0.11859  | 0.140006 | 0.124854 | 0.138695 | 0.13243  | 0.125    | 0.138258 |
| 0.192016 | 0.207896 | 0.200029 | 0.209499 | 0.204691 | 0.203671 | 0.199446 |
| 0.168415 | 0.17905  | 0.170017 | 0.182401 | 0.175554 | 0.172786 | 0.169143 |
| 0.129079 | 0.139714 | 0.136801 | 0.138695 | 0.137383 | 0.127914 | 0.133887 |
| 0.123397 | 0.136946 | 0.118881 | 0.135052 | 0.129079 | 0.121358 | 0.123834 |
| 0.1537   | 0.148893 | 0.159091 | 0.152826 | 0.15472  | 0.147873 | 0.149184 |
| 0.129953 | 0.146999 | 0.137092 | 0.152972 | 0.143794 | 0.127331 | 0.142045 |
| 0.123397 | 0.145396 | 0.129953 | 0.137966 | 0.13345  | 0.126603 | 0.129079 |
| 0.123252 | 0.146707 | 0.126603 | 0.137529 | 0.127185 | 0.121212 | 0.126311 |
| 0.111597 | 0.144668 | 0.118735 | 0.11655  | 0.104749 | 0.112179 | 0.112034 |
| 0.126166 | 0.145542 | 0.126894 | 0.143065 | 0.129516 | 0.124709 | 0.134178 |
| 0.198572 | 0.214452 | 0.207168 | 0.216929 | 0.212413 | 0.210227 | 0.209207 |
| 0.11655  | 0.126894 | 0.106206 | 0.133741 | 0.118153 | 0.122086 | 0.125146 |
| 0.124854 | 0.13141  | 0.117133 | 0.133304 | 0.123834 | 0.126311 | 0.120629 |
| 0.117861 | 0.141026 | 0.121212 | 0.125437 | 0.117133 | 0.117279 | 0.117716 |
| 0.121795 | 0.142337 | 0.122232 | 0.13549  | 0.126311 | 0.126748 | 0.135635 |



|          |          |          |          |          |           |          |
|----------|----------|----------|----------|----------|-----------|----------|
| 0.182255 | 0.201049 | 0.190268 | 0.202652 | 0.191434 | 0.190997  | 0.187646 |
| 0.246066 | 0.250291 | 0.250583 | 0.256556 | 0.250291 | 0.252768  | 0.246503 |
| 0.135344 | 0.151807 | 0.129953 | 0.146707 | 0.134033 | 0.119027  | 0.136364 |
| 0.12602  | 0.145688 | 0.129662 | 0.142045 | 0.130245 | 0.124563  | 0.135781 |
| 0.129516 | 0.137529 | 0.136364 | 0.136801 | 0.137529 | 0.129516  | 0.13141  |
| 0.126748 | 0.135344 | 0.129225 | 0.135198 | 0.127768 | 0.120921  | 0.131556 |
| 0.109703 | 0.124126 | 0.10373  | 0.128642 | 0.11655  | 0.11116   | 0.120338 |
| 0.121503 | 0.141171 | 0.122523 | 0.136946 | 0.132139 | 0.124126  | 0.129808 |
| 0.123689 | 0.139569 | 0.122378 | 0.126894 | 0.125291 | 0.124272  | 0.119172 |
| 0.112034 | 0.122669 | 0.10169  | 0.126894 | 0.114219 | 0.119318  | 0.11859  |
| 0.121795 | 0.139714 | 0.12398  | 0.129662 | 0.127477 | 0.121212  | 0.119318 |
| 0.117279 | 0.142774 | 0.12296  | 0.126603 | 0.116841 | 0.109411  | 0.124709 |
| 0.1081   | 0.139423 | 0.114073 | 0.129371 | 0.120484 | 0.120047  | 0.121649 |
| 0.130099 | 0.148601 | 0.129371 | 0.144959 | 0.133741 | 0.116987  | 0.133159 |
| 0.128497 | 0.141754 | 0.126311 | 0.136364 | 0.135344 | 0.129079  | 0.132139 |
| 0.113928 | 0.133304 | 0.114948 | 0.126166 | 0.120192 | 0.0996503 | 0.125146 |
| 0.130245 | 0.142628 | 0.128059 | 0.134324 | 0.125146 | 0.0769231 | 0.125437 |
| 0.137821 | 0.137092 | 0.138549 | 0.141317 | 0.135927 | 0.129953  | 0.136509 |
| 0.118153 | 0.142191 | 0.119755 | 0.127185 | 0.122086 | 0.117861  | 0.125    |
| 0.113928 | 0.140589 | 0.119318 | 0.131993 | 0.126603 | 0.122378  | 0.115239 |
| 0.131993 | 0.144376 | 0.131847 | 0.129953 | 0.129225 | 0.130828  | 0.128934 |
| 0.204983 | 0.218823 | 0.213869 | 0.223339 | 0.215909 | 0.215181  | 0.208625 |
| 0.123834 | 0.142337 | 0.121066 | 0.137821 | 0.126603 | 0.110723  | 0.126894 |
| 0.106206 | 0.138986 | 0.117424 | 0.127185 | 0.116841 | 0.119901  | 0.11859  |
| 0.123397 | 0.144814 | 0.129371 | 0.142337 | 0.133741 | 0.126603  | 0.131993 |
| 0.132576 | 0.146707 | 0.128642 | 0.140152 | 0.139132 | 0.12296   | 0.13447  |
| 0.120921 | 0.137966 | 0.11961  | 0.131993 | 0.123689 | 0.124709  | 0.133887 |
| 0.199301 | 0.213724 | 0.205857 | 0.215035 | 0.207605 | 0.207751  | 0.205857 |
| 0.131847 | 0.147145 | 0.128205 | 0.142045 | 0.137238 | 0.13039   | 0.135781 |
| 0.119172 | 0.137966 | 0.118735 | 0.126748 | 0.119027 | 0.119755  | 0.122523 |
| 0.12602  | 0.135781 | 0.128205 | 0.133304 | 0.134033 | 0.121941  | 0.126166 |
| 0.122523 | 0.135198 | 0.123543 | 0.133304 | 0.125874 | 0.118444  | 0.129079 |
| 0.124563 | 0.14627  | 0.128497 | 0.143502 | 0.138403 | 0.129808  | 0.129953 |
| 0.120775 | 0.140152 | 0.115967 | 0.132139 | 0.125    | 0.116987  | 0.127914 |
| 0.118444 | 0.142774 | 0.123834 | 0.129516 | 0.117716 | 0.110286  | 0.123834 |
| 0.126894 | 0.144231 | 0.124126 | 0.135927 | 0.134907 | 0.119318  | 0.13345  |
| 0.19697  | 0.210519 | 0.200903 | 0.214744 | 0.209353 | 0.206294  | 0.207896 |
| 0.117861 | 0.137529 | 0.116841 | 0.131265 | 0.127622 | 0.121941  | 0.123834 |
| 0.19289  | 0.206731 | 0.200903 | 0.210664 | 0.204108 | 0.207168  | 0.200612 |
| 0.191579 | 0.20979  | 0.199883 | 0.211684 | 0.204254 | 0.202652  | 0.201049 |
| 0.133013 | 0.138112 | 0.134907 | 0.134178 | 0.136072 | 0.129516  | 0.133741 |
| 0.137383 | 0.147727 | 0.136364 | 0.141754 | 0.142483 | 0.126603  | 0.140734 |
| 0.109994 | 0.136655 | 0.116841 | 0.125146 | 0.112471 | 0.102127  | 0.120047 |
| 0.120629 | 0.136218 | 0.118153 | 0.132867 | 0.125146 | 0.120921  | 0.12602  |

|          |          |           |          |          |          |          |
|----------|----------|-----------|----------|----------|----------|----------|
| 0.128642 | 0.140734 | 0.125291  | 0.138549 | 0.130536 | 0.126603 | 0.129662 |
| 0.120192 | 0.139569 | 0.120921  | 0.128351 | 0.123834 | 0.120192 | 0.122378 |
| 0.108537 | 0.121212 | 0.0987762 | 0.124854 | 0.113636 | 0.11757  | 0.116841 |
| 0.109994 | 0.122086 | 0.0996503 | 0.126894 | 0.116259 | 0.116113 | 0.11859  |
| 0.134615 | 0.151369 | 0.13039   | 0.145979 | 0.139132 | 0.120338 | 0.133013 |
| 0.128351 | 0.138403 | 0.129371  | 0.140297 | 0.134907 | 0.121358 | 0.129953 |
| 0.115385 | 0.135344 | 0.11757   | 0.124126 | 0.120775 | 0.116259 | 0.119318 |
| 0.126603 | 0.143648 | 0.122378  | 0.13884  | 0.136364 | 0.127768 | 0.135198 |
| 0.111597 | 0.137092 | 0.111742  | 0.120629 | 0.111742 | 0.111014 | 0.111451 |
| 0.133887 | 0.142774 | 0.129079  | 0.143502 | 0.140443 | 0.134178 | 0.13549  |
| 0.13039  | 0.136364 | 0.13345   | 0.133596 | 0.132576 | 0.128642 | 0.129371 |
| 0.138403 | 0.144668 | 0.136218  | 0.145396 | 0.145251 | 0.139277 | 0.139423 |
| 0.25845  | 0.265297 | 0.265006  | 0.271853 | 0.26588  | 0.266317 | 0.258887 |
| 0.128497 | 0.139714 | 0.135052  | 0.144522 | 0.133304 | 0.125291 | 0.131265 |
| 0.128642 | 0.140734 | 0.131993  | 0.146707 | 0.136364 | 0.127185 | 0.134033 |
| 0.215909 | 0.229167 | 0.221591  | 0.234557 | 0.226253 | 0.223776 | 0.221882 |
| 0.127185 | 0.1419   | 0.129662  | 0.135635 | 0.13141  | 0.127185 | 0.131119 |
| 0.229458 | 0.238054 | 0.233974  | 0.243153 | 0.236597 | 0.237034 | 0.2331   |
| 0.119464 | 0.135344 | 0.12398   | 0.139569 | 0.125728 | 0.119172 | 0.126894 |
| 0.126894 | 0.145688 | 0.128788  | 0.13039  | 0.128788 | 0.130973 | 0.131993 |
| 0.122523 | 0.142774 | 0.123543  | 0.136801 | 0.131993 | 0.115239 | 0.130245 |
| 0.132139 | 0.138695 | 0.129371  | 0.137966 | 0.136072 | 0.125437 | 0.130536 |
| 0.201486 | 0.2162   | 0.208625  | 0.21926  | 0.212704 | 0.210227 | 0.211247 |
| 0.135635 | 0.143939 | 0.13141   | 0.142045 | 0.141608 | 0.135927 | 0.140152 |
| 0.12602  | 0.144814 | 0.125583  | 0.141171 | 0.133741 | 0.129225 | 0.13345  |
| 0.22465  | 0.232955 | 0.228584  | 0.241259 | 0.231789 | 0.234557 | 0.229458 |
| 0.114365 | 0.129079 | 0.107809  | 0.133013 | 0.117424 | 0.121358 | 0.124709 |
| 0.197844 | 0.211101 | 0.202652  | 0.215909 | 0.21081  | 0.207459 | 0.207605 |
| 0.116841 | 0.128642 | 0.10912   | 0.13549  | 0.120775 | 0.120338 | 0.123397 |
| 0.122378 | 0.141463 | 0.122815  | 0.129953 | 0.123397 | 0.12296  | 0.122523 |
| 0.114948 | 0.139277 | 0.119755  | 0.124854 | 0.121795 | 0.128351 | 0.124417 |
| 0.133596 | 0.138403 | 0.134033  | 0.135927 | 0.135781 | 0.125728 | 0.13345  |
| 0.120047 | 0.141754 | 0.123689  | 0.135198 | 0.128934 | 0.119172 | 0.13039  |
| 0.152098 | 0.180216 | 0.161276  | 0.174242 | 0.170892 | 0.168124 | 0.16419  |
| 0.120338 | 0.138258 | 0.119901  | 0.133741 | 0.129225 | 0.124709 | 0.128934 |
| 0.130828 | 0.143502 | 0.129516  | 0.140443 | 0.138258 | 0.123252 | 0.135052 |
| 0.119755 | 0.144376 | 0.128059  | 0.144231 | 0.133013 | 0.122378 | 0.132721 |
| 0.125291 | 0.142337 | 0.131556  | 0.146562 | 0.139714 | 0.118298 | 0.138258 |
| 0.192162 | 0.210664 | 0.202214  | 0.211101 | 0.205711 | 0.206148 | 0.204545 |
| 0.115967 | 0.137966 | 0.115822  | 0.125    | 0.120484 | 0.120047 | 0.120775 |
| 0.125728 | 0.139569 | 0.133741  | 0.140006 | 0.134324 | 0.126311 | 0.134324 |
| 0.118007 | 0.120775 | 0.116987  | 0.132284 | 0.121649 | 0.115967 | 0.121941 |
| 0.112617 | 0.128205 | 0.100524  | 0.128934 | 0.115385 | 0.11553  | 0.119755 |
| 0.123252 | 0.142628 | 0.124563  | 0.13141  | 0.128934 | 0.12296  | 0.124272 |

|          |          |          |          |          |          |          |
|----------|----------|----------|----------|----------|----------|----------|
| 0.254225 | 0.261946 | 0.258159 | 0.265006 | 0.259324 | 0.262383 | 0.256702 |
| 0.106935 | 0.133887 | 0.117279 | 0.12704  | 0.119901 | 0.119755 | 0.122523 |
| 0.125583 | 0.143502 | 0.12602  | 0.140152 | 0.130099 | 0.125583 | 0.128934 |
| 0.178322 | 0.189248 | 0.181672 | 0.192308 | 0.184586 | 0.192308 | 0.181381 |
| 0.184441 | 0.200903 | 0.192162 | 0.203089 | 0.195659 | 0.195513 | 0.197698 |
| 0.130245 | 0.151078 | 0.13243  | 0.145396 | 0.135635 | 0.120921 | 0.135635 |
| 0.128351 | 0.141317 | 0.127331 | 0.138549 | 0.134907 | 0.131847 | 0.133741 |
| 0.12398  | 0.136364 | 0.124709 | 0.134178 | 0.130536 | 0.118735 | 0.129953 |
| 0.150641 | 0.153118 | 0.145542 | 0.152098 | 0.151952 | 0.147727 | 0.147582 |
| 0.126748 | 0.146416 | 0.129225 | 0.142191 | 0.130099 | 0.116841 | 0.133013 |
| 0.133304 | 0.153555 | 0.132576 | 0.147873 | 0.136655 | 0.121649 | 0.134324 |
| 0.119172 | 0.126894 | 0.110868 | 0.134907 | 0.121358 | 0.123252 | 0.121649 |
| 0.125874 | 0.135344 | 0.123397 | 0.132284 | 0.131265 | 0.124709 | 0.125146 |
| 0.132721 | 0.143065 | 0.13141  | 0.141754 | 0.142774 | 0.134761 | 0.136946 |
| 0.120921 | 0.129225 | 0.113782 | 0.132867 | 0.120484 | 0.123543 | 0.11961  |
| 0.134761 | 0.139569 | 0.13345  | 0.140589 | 0.132867 | 0.122815 | 0.132867 |
| 0.145105 | 0.146707 | 0.148164 | 0.146562 | 0.144959 | 0.137238 | 0.14292  |
| 0.112617 | 0.135781 | 0.121503 | 0.12602  | 0.120338 | 0.123397 | 0.123834 |
| 0.136946 | 0.139714 | 0.13884  | 0.140443 | 0.13884  | 0.128788 | 0.13884  |
| 0.121503 | 0.124563 | 0.109411 | 0.13141  | 0.121358 | 0.122669 | 0.124563 |
| 0.207314 | 0.223193 | 0.212704 | 0.226253 | 0.218531 | 0.214015 | 0.214161 |
| 0.119172 | 0.140589 | 0.131556 | 0.120338 | 0.114365 | 0.106935 | 0.122523 |
| 0.191434 | 0.207605 | 0.198572 | 0.206002 | 0.201486 | 0.200758 | 0.196533 |
| 0.120047 | 0.139423 | 0.121358 | 0.137821 | 0.127768 | 0.112471 | 0.125437 |
| 0.129371 | 0.144668 | 0.128934 | 0.133741 | 0.126603 | 0.127331 | 0.12602  |
| 0.131702 | 0.138549 | 0.135927 | 0.140443 | 0.139132 | 0.130828 | 0.128934 |
| 0.123397 | 0.136072 | 0.126457 | 0.134761 | 0.127914 | 0.122815 | 0.128205 |
| 0.129371 | 0.142337 | 0.127477 | 0.140734 | 0.137383 | 0.130536 | 0.134761 |
| 0.130245 | 0.139423 | 0.125728 | 0.138986 | 0.137383 | 0.131119 | 0.133596 |
| 0.120338 | 0.140006 | 0.121941 | 0.131993 | 0.125437 | 0.123543 | 0.126603 |
| 0.130099 | 0.143357 | 0.127914 | 0.137675 | 0.134615 | 0.118735 | 0.131993 |
| 0.13243  | 0.141026 | 0.136946 | 0.141463 | 0.138403 | 0.136218 | 0.136655 |
| 0.12296  | 0.124563 | 0.115239 | 0.135781 | 0.12602  | 0.128788 | 0.127185 |
| 0.250874 | 0.257139 | 0.254225 | 0.262821 | 0.254516 | 0.256702 | 0.250728 |
| 0.124709 | 0.142045 | 0.123689 | 0.129662 | 0.125146 | 0.123252 | 0.123397 |
| 0.184295 | 0.198427 | 0.188228 | 0.203526 | 0.194639 | 0.194202 | 0.191725 |
| 0.185315 | 0.205565 | 0.194784 | 0.208625 | 0.196533 | 0.198135 | 0.196241 |
| 0.122523 | 0.145979 | 0.129079 | 0.14292  | 0.131119 | 0.124563 | 0.133159 |
| 0.109703 | 0.134033 | 0.116841 | 0.123106 | 0.11655  | 0.118444 | 0.122669 |
| 0.127768 | 0.144231 | 0.128205 | 0.131556 | 0.126166 | 0.123689 | 0.127622 |
| 0.118735 | 0.138403 | 0.120338 | 0.135344 | 0.131119 | 0.122523 | 0.128788 |
| 0.11451  | 0.139714 | 0.121649 | 0.116259 | 0.109703 | 0.111014 | 0.111451 |
| 0.115967 | 0.128059 | 0.105624 | 0.131119 | 0.118735 | 0.117716 | 0.124272 |
| 0.121066 | 0.141317 | 0.12704  | 0.13447  | 0.131702 | 0.12602  | 0.123834 |

|          |          |          |          |          |          |          |
|----------|----------|----------|----------|----------|----------|----------|
| 0.135635 | 0.146853 | 0.13345  | 0.143794 | 0.140443 | 0.135344 | 0.13549  |
| 0.120047 | 0.14088  | 0.123106 | 0.129662 | 0.123106 | 0.122378 | 0.121649 |
| 0.134615 | 0.143502 | 0.131265 | 0.146562 | 0.139714 | 0.134615 | 0.141171 |
| 0.11961  | 0.135781 | 0.124417 | 0.144959 | 0.130245 | 0.123689 | 0.129662 |
| 0.131556 | 0.137821 | 0.138112 | 0.141171 | 0.138986 | 0.135635 | 0.134615 |
| 0.130828 | 0.139132 | 0.127477 | 0.138112 | 0.132139 | 0.12296  | 0.133887 |
| 0.125146 | 0.128205 | 0.114219 | 0.133304 | 0.122669 | 0.126311 | 0.123834 |
| 0.121503 | 0.145833 | 0.127185 | 0.12704  | 0.119318 | 0.11451  | 0.126311 |
| 0.120338 | 0.136801 | 0.122232 | 0.127914 | 0.122523 | 0.120629 | 0.120484 |
| 0.132576 | 0.144376 | 0.134178 | 0.149184 | 0.141754 | 0.135781 | 0.142045 |
| 0.183129 | 0.199009 | 0.18852  | 0.201486 | 0.195221 | 0.19595  | 0.194639 |
| 0.141026 | 0.147582 | 0.138258 | 0.147145 | 0.145542 | 0.136655 | 0.142337 |
| 0.129079 | 0.14088  | 0.125728 | 0.137238 | 0.136801 | 0.130245 | 0.13243  |
| 0.129516 | 0.137821 | 0.137238 | 0.139423 | 0.136946 | 0.126894 | 0.131119 |
| 0.11655  | 0.133596 | 0.125146 | 0.128788 | 0.125437 | 0.116841 | 0.125146 |
| 0.128059 | 0.136946 | 0.131702 | 0.138549 | 0.134615 | 0.121941 | 0.133741 |
| 0.13141  | 0.138258 | 0.13447  | 0.135781 | 0.133013 | 0.124709 | 0.135052 |
| 0.190122 | 0.204837 | 0.197552 | 0.21081  | 0.200466 | 0.201777 | 0.202214 |
| 0.126603 | 0.141026 | 0.128497 | 0.136218 | 0.128497 | 0.129225 | 0.126166 |
| 0.113345 | 0.137092 | 0.118153 | 0.130536 | 0.122815 | 0.11655  | 0.120192 |
| 0.130245 | 0.144376 | 0.125437 | 0.13986  | 0.139423 | 0.132576 | 0.133596 |
| 0.190997 | 0.206585 | 0.196387 | 0.212267 | 0.204837 | 0.20236  | 0.202214 |
| 0.109557 | 0.137966 | 0.115822 | 0.125    | 0.121066 | 0.120921 | 0.121941 |
| 0.11757  | 0.120921 | 0.1081   | 0.13039  | 0.119755 | 0.121941 | 0.122378 |
| 0.130682 | 0.143648 | 0.129371 | 0.140006 | 0.138403 | 0.130099 | 0.132867 |
| 0.128788 | 0.144959 | 0.12602  | 0.13986  | 0.128642 | 0.115093 | 0.130973 |
| 0.187063 | 0.204691 | 0.194493 | 0.205711 | 0.199155 | 0.199883 | 0.19595  |
| 0.117716 | 0.125437 | 0.106498 | 0.130828 | 0.115822 | 0.121212 | 0.120484 |
| 0.116259 | 0.142628 | 0.120484 | 0.135781 | 0.127477 | 0.124417 | 0.127185 |
| 0.108974 | 0.137675 | 0.116113 | 0.128788 | 0.123397 | 0.120338 | 0.123689 |
| 0.126748 | 0.141463 | 0.132721 | 0.140734 | 0.137675 | 0.13345  | 0.131847 |
| 0.131556 | 0.146562 | 0.128205 | 0.140006 | 0.13549  | 0.120775 | 0.134324 |
| 0.124563 | 0.123834 | 0.112179 | 0.130973 | 0.120629 | 0.125728 | 0.122669 |
| 0.119901 | 0.1419   | 0.121503 | 0.128059 | 0.120047 | 0.120192 | 0.122378 |
| 0.122232 | 0.144522 | 0.127914 | 0.142045 | 0.136655 | 0.124272 | 0.133741 |
| 0.155012 | 0.162442 | 0.152826 | 0.159382 | 0.150787 | 0.134324 | 0.150495 |
| 0.233683 | 0.245775 | 0.240239 | 0.253497 | 0.24461  | 0.243298 | 0.239656 |
| 0.123252 | 0.150495 | 0.128934 | 0.132576 | 0.122523 | 0.114802 | 0.128642 |
| 0.13141  | 0.14729  | 0.13039  | 0.142774 | 0.13884  | 0.124126 | 0.135052 |
| 0.125437 | 0.13549  | 0.122669 | 0.136801 | 0.129662 | 0.126311 | 0.12704  |
| 0.127914 | 0.151952 | 0.131265 | 0.148601 | 0.141171 | 0.122669 | 0.136509 |
| 0.119901 | 0.134033 | 0.119755 | 0.131265 | 0.121795 | 0.11553  | 0.119755 |
| 0.122815 | 0.136946 | 0.121503 | 0.135052 | 0.125291 | 0.128642 | 0.134615 |
| 0.131119 | 0.13884  | 0.126311 | 0.136946 | 0.134761 | 0.133741 | 0.13039  |

|          |          |          |          |          |          |          |
|----------|----------|----------|----------|----------|----------|----------|
| 0.11961  | 0.125    | 0.106352 | 0.134178 | 0.12296  | 0.12398  | 0.125    |
| 0.122232 | 0.147727 | 0.124126 | 0.145251 | 0.130536 | 0.122232 | 0.126166 |
| 0.235723 | 0.242279 | 0.238782 | 0.252622 | 0.243735 | 0.245047 | 0.238491 |
| 0.105041 | 0.137529 | 0.112762 | 0.124854 | 0.118881 | 0.11757  | 0.115967 |
| 0.112908 | 0.125    | 0.112471 | 0.130682 | 0.119464 | 0.114073 | 0.121503 |
| 0.118298 | 0.139132 | 0.121358 | 0.125874 | 0.119027 | 0.121795 | 0.122232 |
| 0.141754 | 0.157343 | 0.134033 | 0.147582 | 0.140443 | 0.127477 | 0.138986 |
| 0.130682 | 0.152972 | 0.134033 | 0.133304 | 0.125874 | 0.124272 | 0.13141  |
| 0.124563 | 0.141317 | 0.129079 | 0.138258 | 0.127331 | 0.127185 | 0.129079 |
| 0.128351 | 0.141608 | 0.125    | 0.139132 | 0.137821 | 0.130099 | 0.132576 |
| 0.125583 | 0.139423 | 0.120484 | 0.136072 | 0.128059 | 0.115093 | 0.128351 |
| 0.22873  | 0.241113 | 0.237034 | 0.246795 | 0.234994 | 0.239802 | 0.235577 |
| 0.133741 | 0.14292  | 0.128934 | 0.142191 | 0.139423 | 0.135198 | 0.134178 |
| 0.116404 | 0.123252 | 0.106061 | 0.133596 | 0.119464 | 0.122232 | 0.121795 |
| 0.11553  | 0.138403 | 0.120629 | 0.137675 | 0.127622 | 0.117861 | 0.126748 |
| 0.126457 | 0.14088  | 0.127185 | 0.143648 | 0.133596 | 0.110723 | 0.128642 |
| 0.124126 | 0.13447  | 0.127185 | 0.141317 | 0.128934 | 0.121212 | 0.127185 |
| 0.121503 | 0.139423 | 0.119901 | 0.125291 | 0.121649 | 0.121503 | 0.120192 |
| 0.11655  | 0.126311 | 0.108537 | 0.127914 | 0.11961  | 0.122086 | 0.120775 |
| 0.123106 | 0.128497 | 0.113636 | 0.135635 | 0.121795 | 0.125146 | 0.123252 |
| 0.116696 | 0.123252 | 0.106352 | 0.126894 | 0.117133 | 0.120484 | 0.123252 |
| 0.123252 | 0.139714 | 0.122815 | 0.126748 | 0.116404 | 0.121212 | 0.121941 |
| 0.13549  | 0.144668 | 0.133013 | 0.140734 | 0.138549 | 0.12296  | 0.138258 |
| 0.140006 | 0.14831  | 0.135781 | 0.14292  | 0.142191 | 0.128351 | 0.140443 |
| 0.133887 | 0.140443 | 0.140443 | 0.142337 | 0.138112 | 0.13243  | 0.138403 |
| 0.136509 | 0.142191 | 0.141608 | 0.14729  | 0.144814 | 0.136509 | 0.140152 |
| 0.139277 | 0.150204 | 0.133596 | 0.144814 | 0.142045 | 0.123834 | 0.141463 |
| 0.107517 | 0.144959 | 0.114365 | 0.113054 | 0.105041 | 0.106935 | 0.112908 |
| 0.133013 | 0.120047 | 0.132284 | 0.143502 | 0.134615 | 0.126311 | 0.129079 |
| 0.104312 | 0.143211 | 0.101836 | 0.143939 | 0.135052 | 0.141026 | 0.126311 |
| 0.202797 | 0.220425 | 0.20877  | 0.225816 | 0.21722  | 0.2162   | 0.211101 |
| 0.129371 | 0.145833 | 0.133013 | 0.14627  | 0.130973 | 0.126748 | 0.13447  |
| 0.11655  | 0.134178 | 0.120775 | 0.13549  | 0.122815 | 0.118007 | 0.126894 |
| 0.124272 | 0.142774 | 0.127331 | 0.133013 | 0.128205 | 0.123689 | 0.127914 |
| 0.222319 | 0.231789 | 0.228875 | 0.236888 | 0.229458 | 0.227273 | 0.224505 |
| 0.21183  | 0.219843 | 0.216055 | 0.226399 | 0.21926  | 0.219406 | 0.217512 |
| 0.122523 | 0.126457 | 0.108974 | 0.133013 | 0.120921 | 0.128059 | 0.125291 |
| 0.248543 | 0.255973 | 0.252185 | 0.264277 | 0.25539  | 0.25845  | 0.257139 |
| 0.1081   | 0.144668 | 0.116987 | 0.112471 | 0.103875 | 0.108392 | 0.110286 |
| 0.134324 | 0.155157 | 0.133304 | 0.1419   | 0.130973 | 0.131119 | 0.135052 |
| 0.107517 | 0.137383 | 0.116113 | 0.125583 | 0.118444 | 0.120629 | 0.122523 |
| 0.13447  | 0.148019 | 0.132576 | 0.140006 | 0.138986 | 0.125146 | 0.137238 |
| 0.188228 | 0.202652 | 0.195076 | 0.206002 | 0.197115 | 0.197261 | 0.196533 |
| 0.11961  | 0.136072 | 0.121795 | 0.145542 | 0.129079 | 0.126603 | 0.131993 |

|          |          |           |          |          |          |          |
|----------|----------|-----------|----------|----------|----------|----------|
| 0.194202 | 0.208625 | 0.201632  | 0.212558 | 0.205711 | 0.202652 | 0.207168 |
| 0.118735 | 0.143939 | 0.121795  | 0.141171 | 0.129371 | 0.121358 | 0.128205 |
| 0.121649 | 0.130245 | 0.1081    | 0.125728 | 0.120921 | 0.125437 | 0.113636 |
| 0.117279 | 0.147436 | 0.123543  | 0.130682 | 0.120338 | 0.118735 | 0.120338 |
| 0.119901 | 0.135198 | 0.120629  | 0.130973 | 0.123834 | 0.11961  | 0.124709 |
| 0.113054 | 0.135927 | 0.117861  | 0.123543 | 0.114656 | 0.11655  | 0.116987 |
| 0.123834 | 0.140589 | 0.126311  | 0.139277 | 0.124563 | 0.120338 | 0.132721 |
| 0.107226 | 0.134761 | 0.110868  | 0.119755 | 0.111742 | 0.115385 | 0.116696 |
| 0.121649 | 0.141608 | 0.120338  | 0.135927 | 0.133159 | 0.128059 | 0.127622 |
| 0.123834 | 0.118444 | 0.121066  | 0.137529 | 0.124563 | 0.114802 | 0.120192 |
| 0.113345 | 0.141171 | 0.120192  | 0.125874 | 0.115822 | 0.106643 | 0.122523 |
| 0.107663 | 0.137238 | 0.114219  | 0.123106 | 0.116841 | 0.118735 | 0.119755 |
| 0.125291 | 0.139714 | 0.131556  | 0.139277 | 0.131265 | 0.125583 | 0.125146 |
| 0.134324 | 0.146416 | 0.131847  | 0.145396 | 0.145251 | 0.134324 | 0.139714 |
| 0.123397 | 0.135781 | 0.127622  | 0.13039  | 0.130245 | 0.125728 | 0.127622 |
| 0.118298 | 0.137383 | 0.11961   | 0.135198 | 0.127768 | 0.125291 | 0.130682 |
| 0.115239 | 0.136946 | 0.117133  | 0.125728 | 0.117716 | 0.114948 | 0.115967 |
| 0.120192 | 0.122378 | 0.108974  | 0.130682 | 0.121503 | 0.120484 | 0.117133 |
| 0.127768 | 0.148893 | 0.126457  | 0.137675 | 0.137529 | 0.122523 | 0.132576 |
| 0.128788 | 0.131265 | 0.128059  | 0.133741 | 0.133887 | 0.12296  | 0.130973 |
| 0.127331 | 0.135635 | 0.131556  | 0.136655 | 0.133013 | 0.125874 | 0.131847 |
| 0.127185 | 0.142191 | 0.125583  | 0.137966 | 0.13549  | 0.128642 | 0.129953 |
| 0.135781 | 0.145251 | 0.133887  | 0.144231 | 0.141754 | 0.134033 | 0.137675 |
| 0.145396 | 0.148456 | 0.139423  | 0.146853 | 0.146125 | 0.141608 | 0.14088  |
| 0.105915 | 0.125583 | 0.0996503 | 0.12398  | 0.111305 | 0.112034 | 0.113636 |
| 0.122232 | 0.140734 | 0.122669  | 0.128642 | 0.123834 | 0.122232 | 0.121503 |
| 0.113345 | 0.134761 | 0.115239  | 0.128497 | 0.11961  | 0.116841 | 0.129808 |
| 0.142191 | 0.148747 | 0.135052  | 0.144814 | 0.140589 | 0.127331 | 0.139714 |
| 0.105332 | 0.136655 | 0.116841  | 0.127477 | 0.120338 | 0.121358 | 0.123543 |
| 0.144959 | 0.14627  | 0.144522  | 0.143794 | 0.143065 | 0.135344 | 0.144814 |
| 0.136801 | 0.148019 | 0.136364  | 0.13243  | 0.128788 | 0.133304 | 0.132284 |
| 0.13345  | 0.152535 | 0.132139  | 0.147727 | 0.135927 | 0.121212 | 0.137383 |
| 0.11757  | 0.143065 | 0.120338  | 0.128934 | 0.118298 | 0.112908 | 0.122378 |
| 0.116841 | 0.146416 | 0.122523  | 0.137821 | 0.130099 | 0.106935 | 0.129808 |
| 0.13345  | 0.140297 | 0.142045  | 0.140734 | 0.141463 | 0.133741 | 0.135344 |
| 0.207314 | 0.222028 | 0.209499  | 0.223339 | 0.217949 | 0.216346 | 0.21183  |
| 0.11553  | 0.136946 | 0.120047  | 0.135927 | 0.127622 | 0.125437 | 0.129371 |
| 0.117133 | 0.14933  | 0.126894  | 0.132284 | 0.121941 | 0.120629 | 0.120192 |
| 0.127477 | 0.143648 | 0.126166  | 0.140006 | 0.136072 | 0.118735 | 0.132576 |
| 0.127622 | 0.136509 | 0.127185  | 0.131119 | 0.128642 | 0.124417 | 0.129516 |
| 0.126603 | 0.150058 | 0.134324  | 0.148456 | 0.134615 | 0.124272 | 0.137529 |
| 0.125437 | 0.142191 | 0.129953  | 0.145833 | 0.134324 | 0.127768 | 0.13141  |
| 0.129953 | 0.144959 | 0.131265  | 0.145105 | 0.132721 | 0.133159 | 0.137092 |
| 0.127185 | 0.147436 | 0.129953  | 0.145251 | 0.13345  | 0.116113 | 0.13345  |

|          |          |          |          |          |          |          |
|----------|----------|----------|----------|----------|----------|----------|
| 0.116696 | 0.119464 | 0.112762 | 0.133304 | 0.121503 | 0.112325 | 0.119172 |
| 0.136509 | 0.147145 | 0.130245 | 0.141171 | 0.137529 | 0.121941 | 0.138695 |
| 0.110286 | 0.145979 | 0.120047 | 0.128351 | 0.11451  | 0.116113 | 0.119464 |
| 0.120629 | 0.149621 | 0.121941 | 0.127622 | 0.121066 | 0.110723 | 0.126603 |
| 0.17905  | 0.193473 | 0.180944 | 0.191871 | 0.187354 | 0.181964 | 0.185606 |
| 0.123106 | 0.143648 | 0.124126 | 0.138258 | 0.133159 | 0.125728 | 0.131119 |
| 0.135781 | 0.144376 | 0.135927 | 0.144522 | 0.144085 | 0.126166 | 0.140297 |
| 0.120484 | 0.137821 | 0.122086 | 0.11961  | 0.112179 | 0.112908 | 0.122086 |
| 0.118298 | 0.142045 | 0.120484 | 0.140734 | 0.130099 | 0.118007 | 0.119318 |
| 0.115676 | 0.140006 | 0.114948 | 0.12296  | 0.112908 | 0.112762 | 0.116987 |
| 0.111597 | 0.139714 | 0.11553  | 0.125291 | 0.113491 | 0.10373  | 0.121941 |
| 0.120338 | 0.142045 | 0.119318 | 0.129371 | 0.117279 | 0.114802 | 0.119027 |
| 0.115967 | 0.137092 | 0.113491 | 0.13141  | 0.133887 | 0.125583 | 0.117279 |
| 0.122086 | 0.145833 | 0.127185 | 0.131993 | 0.124563 | 0.123252 | 0.119027 |
| 0.122523 | 0.13141  | 0.125291 | 0.142628 | 0.13345  | 0.122815 | 0.131119 |
| 0.121212 | 0.135927 | 0.115822 | 0.126457 | 0.118735 | 0.108974 | 0.126311 |
| 0.114948 | 0.132867 | 0.11859  | 0.133013 | 0.119464 | 0.117279 | 0.126748 |
| 0.108974 | 0.136801 | 0.105332 | 0.132576 | 0.12602  | 0.134907 | 0.121941 |
| 0.113928 | 0.123689 | 0.114365 | 0.125583 | 0.103875 | 0.110723 | 0.116404 |
| 0.127914 | 0.137675 | 0.126894 | 0.134615 | 0.133304 | 0.12296  | 0.129516 |
| 0.108683 | 0.125728 | 0.113199 | 0.130828 | 0.103875 | 0.11014  | 0.118444 |
| 0.114802 | 0.123397 | 0.115239 | 0.128205 | 0.105915 | 0.111014 | 0.11757  |
| 0.112179 | 0.139423 | 0.115822 | 0.126748 | 0.109411 | 0.104604 | 0.119901 |
| 0.124563 | 0.138112 | 0.129662 | 0.121941 | 0.119464 | 0.123397 | 0.122086 |
| 0.114073 | 0.141608 | 0.114219 | 0.124563 | 0.113054 | 0.108829 | 0.120338 |
| 0.141463 | 0.108974 | 0.123543 | 0.109411 | 0.106352 | 0.14088  | 0.106643 |
| 0.133887 | 0.112471 | 0.120921 | 0.118444 | 0.108974 | 0.133887 | 0.107809 |
| 0.114948 | 0.128205 | 0.119755 | 0.122232 | 0.111888 | 0.109994 | 0.118298 |
| 0.134324 | 0.135927 | 0.13039  | 0.138403 | 0.136218 | 0.136072 | 0.135344 |
| 0.131702 | 0.144959 | 0.131265 | 0.143357 | 0.139714 | 0.127914 | 0.134178 |
| 0.107226 | 0.148164 | 0.116404 | 0.140152 | 0.133013 | 0.140734 | 0.130682 |
| 0.121212 | 0.139132 | 0.118735 | 0.116259 | 0.112908 | 0.109266 | 0.113782 |
| 0.146416 | 0.142191 | 0.143939 | 0.139423 | 0.134033 | 0.135635 | 0.13141  |
| 0.130973 | 0.144522 | 0.13141  | 0.144959 | 0.137821 | 0.121941 | 0.138986 |
| 0.128642 | 0.149184 | 0.124709 | 0.141754 | 0.138112 | 0.140297 | 0.129079 |
| 0.125728 | 0.133741 | 0.127331 | 0.134178 | 0.125874 | 0.116404 | 0.122378 |
| 0.109557 | 0.128059 | 0.10912  | 0.125583 | 0.109703 | 0.112762 | 0.110577 |
| 0.114073 | 0.140734 | 0.117424 | 0.128351 | 0.115967 | 0.112908 | 0.117133 |
| 0.108974 | 0.13243  | 0.108246 | 0.137529 | 0.127768 | 0.120921 | 0.118735 |
| 0.121795 | 0.13884  | 0.125146 | 0.116841 | 0.114365 | 0.123252 | 0.120484 |
| 0.128934 | 0.145105 | 0.131119 | 0.128059 | 0.127622 | 0.116404 | 0.12704  |
| 0.121649 | 0.126166 | 0.119755 | 0.118444 | 0.106352 | 0.125437 | 0.10169  |
| 0.109703 | 0.13141  | 0.117424 | 0.127477 | 0.115967 | 0.103293 | 0.124126 |
| 0.110431 | 0.142337 | 0.118153 | 0.125291 | 0.110868 | 0.110431 | 0.116987 |

|          |          |          |          |          |          |          |
|----------|----------|----------|----------|----------|----------|----------|
| 0.118444 | 0.138403 | 0.124126 | 0.113782 | 0.108974 | 0.11961  | 0.123543 |
| 0.116696 | 0.138403 | 0.109848 | 0.114365 | 0.115385 | 0.118153 | 0.11655  |
| 0.120047 | 0.143794 | 0.12398  | 0.125583 | 0.114656 | 0.117716 | 0.122232 |
| 0.120047 | 0.141463 | 0.11961  | 0.12296  | 0.117861 | 0.119755 | 0.124854 |
| 0.121358 | 0.142191 | 0.127914 | 0.137383 | 0.128497 | 0.122523 | 0.128497 |
| 0.109994 | 0.144814 | 0.119172 | 0.130099 | 0.118298 | 0.124272 | 0.126166 |
| 0.11116  | 0.140443 | 0.112762 | 0.111451 | 0.102855 | 0.10271  | 0.109557 |
| 0.113199 | 0.140734 | 0.115967 | 0.11553  | 0.111014 | 0.118735 | 0.119172 |
| 0.117133 | 0.14292  | 0.126894 | 0.136072 | 0.127185 | 0.121503 | 0.130682 |
| 0.119901 | 0.140734 | 0.121795 | 0.124272 | 0.121795 | 0.114656 | 0.12704  |
| 0.130099 | 0.142774 | 0.132867 | 0.13884  | 0.133741 | 0.129808 | 0.127331 |
| 0.114073 | 0.135198 | 0.115676 | 0.132721 | 0.118881 | 0.112908 | 0.121795 |
| 0.130828 | 0.144959 | 0.125728 | 0.129079 | 0.122815 | 0.132284 | 0.120775 |



| <b>TDr_13_00172</b> | <b>TDr_13_00189</b> | <b>TDr_13_00196</b> | <b>TDr_13_00198</b> | <b>TDr_13_00200</b> | <b>TDr_13_00208</b> | <b>TDr_13_00227</b> |
|---------------------|---------------------|---------------------|---------------------|---------------------|---------------------|---------------------|
| 0.120192            | 0.134615            | 0.123543            | 0.13549             | 0.129953            | 0.118881            | 0.135198            |
| 0.119464            | 0.127477            | 0.123689            | 0.130973            | 0.13039             | 0.124272            | 0.139714            |
| 0.113054            | 0.124272            | 0.119901            | 0.128351            | 0.128642            | 0.12398             | 0.136218            |
| 0.118298            | 0.131265            | 0.122232            | 0.128934            | 0.129225            | 0.129808            | 0.14088             |
| 0.134907            | 0.136509            | 0.138549            | 0.137675            | 0.136801            | 0.145251            | 0.146999            |
| 0.136364            | 0.140297            | 0.139423            | 0.14088             | 0.140297            | 0.133887            | 0.145542            |
| 0.116113            | 0.119172            | 0.129662            | 0.123834            | 0.117716            | 0.120047            | 0.129662            |
| 0.119318            | 0.128788            | 0.125583            | 0.131119            | 0.130536            | 0.124126            | 0.138112            |
| 0.104021            | 0.119027            | 0.110868            | 0.122523            | 0.123397            | 0.11553             | 0.133013            |
| 0.0849359           | 0.113928            | 0.0941142           | 0.121503            | 0.107226            | 0.117133            | 0.127622            |
| 0.112471            | 0.12398             | 0.126894            | 0.132721            | 0.129225            | 0.118153            | 0.14088             |
| 0.120192            | 0.122086            | 0.117716            | 0.12296             | 0.126457            | 0.123252            | 0.138695            |
| 0.111451            | 0.122669            | 0.119755            | 0.125874            | 0.131119            | 0.124709            | 0.134615            |
| 0.132284            | 0.149038            | 0.140006            | 0.153409            | 0.154866            | 0.145833            | 0.156614            |
| 0.123397            | 0.13549             | 0.134033            | 0.134907            | 0.136364            | 0.136072            | 0.143065            |
| 0.112471            | 0.116696            | 0.121649            | 0.124854            | 0.123689            | 0.116696            | 0.128642            |
| 0.113491            | 0.12296             | 0.11655             | 0.123543            | 0.126748            | 0.124417            | 0.142483            |
| 0.149767            | 0.149913            | 0.143211            | 0.151369            | 0.146999            | 0.155157            | 0.155157            |
| 0.115385            | 0.118153            | 0.11757             | 0.120484            | 0.122232            | 0.121066            | 0.135344            |
| 0.200466            | 0.214015            | 0.209645            | 0.212267            | 0.215181            | 0.204691            | 0.207314            |
| 0.131847            | 0.13141             | 0.125583            | 0.13141             | 0.127331            | 0.131119            | 0.142191            |
| 0.12704             | 0.13039             | 0.125146            | 0.127185            | 0.126603            | 0.128351            | 0.142337            |
| 0.101253            | 0.116259            | 0.113928            | 0.126748            | 0.122086            | 0.114219            | 0.129662            |
| 0.11859             | 0.126311            | 0.127477            | 0.129225            | 0.134178            | 0.127185            | 0.144668            |
| 0.0992133           | 0.113928            | 0.112762            | 0.118298            | 0.11451             | 0.111014            | 0.126457            |
| 0.135635            | 0.133741            | 0.129953            | 0.128788            | 0.128497            | 0.131119            | 0.139569            |
| 0.115822            | 0.12296             | 0.124126            | 0.12704             | 0.128788            | 0.126166            | 0.136946            |
| 0.117279            | 0.126457            | 0.125               | 0.129079            | 0.130536            | 0.123543            | 0.145105            |
| 0.128059            | 0.131993            | 0.132576            | 0.134615            | 0.132284            | 0.136655            | 0.146562            |
| 0.115822            | 0.130828            | 0.117716            | 0.129079            | 0.126748            | 0.127331            | 0.142774            |
| 0.121795            | 0.127477            | 0.131556            | 0.132721            | 0.132721            | 0.121941            | 0.137092            |
| 0.123106            | 0.131702            | 0.122378            | 0.126457            | 0.126166            | 0.129079            | 0.141317            |
| 0.105332            | 0.120047            | 0.117133            | 0.124417            | 0.121503            | 0.119464            | 0.128497            |
| 0.120775            | 0.125874            | 0.121795            | 0.123834            | 0.130245            | 0.126166            | 0.144522            |
| 0.106935            | 0.115239            | 0.125146            | 0.124272            | 0.121941            | 0.11961             | 0.133013            |
| 0.114948            | 0.124126            | 0.120047            | 0.126166            | 0.125               | 0.126748            | 0.13986             |
| 0.117133            | 0.128351            | 0.12398             | 0.131265            | 0.118735            | 0.126311            | 0.135635            |
| 0.116696            | 0.132867            | 0.126166            | 0.135781            | 0.125583            | 0.130245            | 0.144522            |
| 0.111451            | 0.125291            | 0.121795            | 0.125583            | 0.125583            | 0.120047            | 0.140734            |
| 0.121358            | 0.132284            | 0.134033            | 0.137821            | 0.13345             | 0.129371            | 0.151807            |
| 0.107372            | 0.121212            | 0.123543            | 0.128788            | 0.130536            | 0.119464            | 0.142191            |
| 0.130682            | 0.144231            | 0.145688            | 0.152972            | 0.149767            | 0.14627             | 0.159674            |

|           |           |           |          |           |           |          |
|-----------|-----------|-----------|----------|-----------|-----------|----------|
| 0.136218  | 0.144814  | 0.14627   | 0.149476 | 0.149767  | 0.146853  | 0.15676  |
| 0.114802  | 0.122232  | 0.130682  | 0.131847 | 0.128642  | 0.123397  | 0.141463 |
| 0.0949883 | 0.0890152 | 0.0948427 | 0.105624 | 0.0971737 | 0.0962995 | 0.10912  |
| 0.0884324 | 0.117424  | 0.111888  | 0.119755 | 0.106935  | 0.113345  | 0.127622 |
| 0.124563  | 0.119755  | 0.127914  | 0.12296  | 0.129079  | 0.119755  | 0.138695 |
| 0.126748  | 0.139714  | 0.138549  | 0.150787 | 0.144376  | 0.141463  | 0.155157 |
| 0.11014   | 0.126311  | 0.122232  | 0.127185 | 0.128934  | 0.125437  | 0.141171 |
| 0.10912   | 0.124126  | 0.128497  | 0.128205 | 0.127914  | 0.124417  | 0.138986 |
| 0.15035   | 0.149913  | 0.14933   | 0.142045 | 0.145251  | 0.142045  | 0.153992 |
| 0.125874  | 0.131265  | 0.13243   | 0.130682 | 0.133013  | 0.13447   | 0.140297 |
| 0.108829  | 0.119172  | 0.131993  | 0.126748 | 0.128205  | 0.122086  | 0.140152 |
| 0.114948  | 0.134615  | 0.122669  | 0.138112 | 0.137529  | 0.136364  | 0.143939 |
| 0.119901  | 0.131702  | 0.127622  | 0.131993 | 0.130536  | 0.127914  | 0.136655 |
| 0.138258  | 0.138112  | 0.141608  | 0.135198 | 0.138695  | 0.141608  | 0.145688 |
| 0.119755  | 0.123397  | 0.136218  | 0.136509 | 0.13884   | 0.132721  | 0.151078 |
| 0.117133  | 0.125437  | 0.132721  | 0.130973 | 0.134178  | 0.125437  | 0.145251 |
| 0.112762  | 0.124272  | 0.123689  | 0.129808 | 0.12398   | 0.126311  | 0.140589 |
| 0.100379  | 0.106935  | 0.123543  | 0.113054 | 0.107809  | 0.11859   | 0.130828 |
| 0.128642  | 0.134324  | 0.146562  | 0.144522 | 0.143357  | 0.142483  | 0.15676  |
| 0.134178  | 0.143648  | 0.147145  | 0.148601 | 0.147436  | 0.146562  | 0.1588   |
| 0.15472   | 0.167395  | 0.1706    | 0.172348 | 0.17264   | 0.162733  | 0.168561 |
| 0.11655   | 0.130973  | 0.127477  | 0.133013 | 0.128642  | 0.12398   | 0.143794 |
| 0.106061  | 0.119318  | 0.124854  | 0.128642 | 0.127768  | 0.118735  | 0.141463 |
| 0.113636  | 0.119901  | 0.124272  | 0.128351 | 0.125728  | 0.120775  | 0.139132 |
| 0.126894  | 0.138403  | 0.142774  | 0.139569 | 0.132284  | 0.120338  | 0.127914 |
| 0.114656  | 0.122378  | 0.125874  | 0.129371 | 0.13141   | 0.118007  | 0.143065 |
| 0.127622  | 0.131847  | 0.136801  | 0.131556 | 0.13447   | 0.126894  | 0.136509 |
| 0.100816  | 0.105041  | 0.118735  | 0.116696 | 0.119318  | 0.112325  | 0.129516 |
| 0.114365  | 0.125     | 0.125     | 0.130828 | 0.126748  | 0.12704   | 0.143939 |
| 0.133013  | 0.137821  | 0.148019  | 0.143648 | 0.13345   | 0.120047  | 0.120921 |
| 0.122815  | 0.131119  | 0.133741  | 0.139569 | 0.139277  | 0.129371  | 0.147727 |
| 0.134324  | 0.140006  | 0.145542  | 0.145542 | 0.144668  | 0.143502  | 0.151369 |
| 0.13447   | 0.133159  | 0.13345   | 0.131993 | 0.134907  | 0.136946  | 0.149184 |
| 0.120921  | 0.11553   | 0.111742  | 0.11961  | 0.116987  | 0.119027  | 0.126311 |
| 0.109266  | 0.11961   | 0.119901  | 0.128642 | 0.128642  | 0.122232  | 0.14088  |
| 0.114802  | 0.123106  | 0.122523  | 0.131556 | 0.131847  | 0.128351  | 0.143794 |
| 0.135198  | 0.138549  | 0.140589  | 0.144085 | 0.144668  | 0.140297  | 0.154283 |
| 0.111742  | 0.115967  | 0.12296   | 0.126748 | 0.128205  | 0.117133  | 0.141026 |
| 0.131993  | 0.146999  | 0.142628  | 0.14933  | 0.151369  | 0.146999  | 0.159528 |
| 0.115093  | 0.130973  | 0.132721  | 0.138549 | 0.133887  | 0.125146  | 0.146707 |
| 0.116841  | 0.121358  | 0.128059  | 0.128642 | 0.128642  | 0.124272  | 0.144085 |
| 0.117424  | 0.129516  | 0.132721  | 0.133887 | 0.133013  | 0.128934  | 0.144959 |
| 0.121503  | 0.129808  | 0.133013  | 0.136218 | 0.137092  | 0.131265  | 0.149913 |
| 0.115967  | 0.125146  | 0.126894  | 0.13039  | 0.129516  | 0.126311  | 0.143794 |

|           |           |           |           |           |           |           |
|-----------|-----------|-----------|-----------|-----------|-----------|-----------|
| 0.112762  | 0.121066  | 0.13039   | 0.129225  | 0.130973  | 0.122232  | 0.141754  |
| 0.124854  | 0.137238  | 0.142774  | 0.144522  | 0.140152  | 0.138695  | 0.15035   |
| 0.10912   | 0.120629  | 0.120047  | 0.123543  | 0.124126  | 0.121503  | 0.13549   |
| 0.109266  | 0.121066  | 0.117279  | 0.124854  | 0.12602   | 0.125146  | 0.141463  |
| 0.124709  | 0.123397  | 0.122523  | 0.121066  | 0.121649  | 0.127768  | 0.137675  |
| 0.115967  | 0.122815  | 0.129225  | 0.12398   | 0.121358  | 0.123106  | 0.130973  |
| 0.118007  | 0.0913462 | 0.101544  | 0.0922203 | 0.090472  | 0.101544  | 0.100962  |
| 0.120775  | 0.0938228 | 0.106352  | 0.099359  | 0.0938228 | 0.105769  | 0.106935  |
| 0.111014  | 0.119901  | 0.125146  | 0.130682  | 0.116113  | 0.116404  | 0.128351  |
| 0.17162   | 0.184295  | 0.182547  | 0.184878  | 0.175554  | 0.177593  | 0.177302  |
| 0.112034  | 0.113636  | 0.11451   | 0.116841  | 0.113928  | 0.113636  | 0.127914  |
| 0.119464  | 0.103875  | 0.112034  | 0.0995047 | 0.101253  | 0.105915  | 0.107372  |
| 0.113345  | 0.0992133 | 0.108246  | 0.0977564 | 0.0960082 | 0.101544  | 0.10708   |
| 0.125437  | 0.12296   | 0.138403  | 0.122669  | 0.120921  | 0.131119  | 0.140443  |
| 0.103438  | 0.0925117 | 0.101544  | 0.100962  | 0.0968823 | 0.0980478 | 0.107372  |
| 0.114219  | 0.0945513 | 0.105624  | 0.100087  | 0.0960082 | 0.10271   | 0.107663  |
| 0.107809  | 0.101544  | 0.102127  | 0.103875  | 0.0968823 | 0.104458  | 0.117861  |
| 0.11116   | 0.105769  | 0.107809  | 0.105478  | 0.0987762 | 0.108392  | 0.111014  |
| 0.103875  | 0.11859   | 0.11655   | 0.12704   | 0.114802  | 0.109557  | 0.126457  |
| 0.114073  | 0.0903263 | 0.104604  | 0.0903263 | 0.0973193 | 0.106352  | 0.0999417 |
| 0.0942599 | 0.111305  | 0.115676  | 0.120047  | 0.115967  | 0.112762  | 0.133159  |
| 0.119172  | 0.113491  | 0.123397  | 0.120775  | 0.110577  | 0.113782  | 0.113199  |
| 0.112908  | 0.113345  | 0.119755  | 0.123543  | 0.116841  | 0.111888  | 0.13141   |
| 0.125583  | 0.135052  | 0.135344  | 0.140589  | 0.139423  | 0.133887  | 0.148456  |
| 0.116404  | 0.123834  | 0.127914  | 0.125     | 0.116259  | 0.127914  | 0.135781  |
| 0.110286  | 0.110431  | 0.115093  | 0.110723  | 0.104312  | 0.111305  | 0.127622  |
| 0.128642  | 0.130536  | 0.141608  | 0.136072  | 0.13345   | 0.108392  | 0.114219  |
| 0.111597  | 0.115822  | 0.116113  | 0.113199  | 0.107372  | 0.116113  | 0.130099  |
| 0.108683  | 0.0980478 | 0.106789  | 0.105332  | 0.0995047 | 0.0986305 | 0.119027  |
| 0.101836  | 0.110431  | 0.117716  | 0.122669  | 0.120629  | 0.125874  | 0.136655  |
| 0.122523  | 0.130536  | 0.129953  | 0.138403  | 0.125291  | 0.137238  | 0.13549   |
| 0.115239  | 0.125     | 0.121503  | 0.125291  | 0.124709  | 0.116259  | 0.124417  |
| 0.103001  | 0.0920746 | 0.0990676 | 0.0984848 | 0.100524  | 0.0920746 | 0.117716  |
| 0.103001  | 0.097028  | 0.0973193 | 0.0891608 | 0.097028  | 0.0990676 | 0.109557  |
| 0.112471  | 0.114365  | 0.121941  | 0.122815  | 0.126894  | 0.113199  | 0.129225  |
| 0.0971737 | 0.111597  | 0.115676  | 0.121503  | 0.11859   | 0.121212  | 0.120921  |
| 0.116841  | 0.118153  | 0.125437  | 0.118444  | 0.117279  | 0.116404  | 0.132721  |
| 0.0954254 | 0.106061  | 0.108974  | 0.114219  | 0.116259  | 0.107517  | 0.126457  |
| 0.0980478 | 0.106935  | 0.110723  | 0.112179  | 0.111888  | 0.11014   | 0.125     |
| 0.0912005 | 0.105332  | 0.110286  | 0.116404  | 0.110286  | 0.109994  | 0.124563  |
| 0.115676  | 0.12398   | 0.129516  | 0.132721  | 0.129516  | 0.128059  | 0.139132  |
| 0.106789  | 0.119755  | 0.12704   | 0.123252  | 0.116841  | 0.125583  | 0.136364  |
| 0.0981935 | 0.112325  | 0.116987  | 0.117279  | 0.120192  | 0.116696  | 0.131847  |
| 0.0960082 | 0.106352  | 0.112179  | 0.111597  | 0.112471  | 0.117133  | 0.128497  |

|           |           |          |          |           |          |          |
|-----------|-----------|----------|----------|-----------|----------|----------|
| 0.101544  | 0.113928  | 0.122378 | 0.120629 | 0.110723  | 0.119172 | 0.134615 |
| 0.10169   | 0.110577  | 0.118444 | 0.116696 | 0.116987  | 0.111451 | 0.128934 |
| 0.120921  | 0.125437  | 0.131847 | 0.127768 | 0.127185  | 0.109411 | 0.122815 |
| 0.13345   | 0.138258  | 0.137383 | 0.136218 | 0.134761  | 0.128642 | 0.14729  |
| 0.0944056 | 0.109994  | 0.108537 | 0.114656 | 0.110286  | 0.109994 | 0.125437 |
| 0.100379  | 0.115385  | 0.115676 | 0.119464 | 0.118881  | 0.118881 | 0.133741 |
| 0.0945513 | 0.115385  | 0.112762 | 0.117716 | 0.117716  | 0.11451  | 0.126748 |
| 0.0977564 | 0.104604  | 0.104604 | 0.111597 | 0.104895  | 0.101981 | 0.120921 |
| 0.102127  | 0.116259  | 0.115967 | 0.122378 | 0.122378  | 0.123834 | 0.131702 |
| 0.092803  | 0.0981935 | 0.112762 | 0.111888 | 0.115093  | 0.110431 | 0.128788 |
| 0.133159  | 0.131847  | 0.143502 | 0.13243  | 0.142628  | 0.139132 | 0.152244 |
| 0.111742  | 0.133741  | 0.133741 | 0.144231 | 0.141317  | 0.140152 | 0.150058 |
| 0.113782  | 0.124126  | 0.130536 | 0.13345  | 0.133159  | 0.129371 | 0.144522 |
| 0.106643  | 0.118735  | 0.126311 | 0.129225 | 0.129225  | 0.121941 | 0.13884  |
| 0.108683  | 0.110577  | 0.118153 | 0.11553  | 0.121649  | 0.116696 | 0.132139 |
| 0.0980478 | 0.106352  | 0.113345 | 0.110431 | 0.112762  | 0.107809 | 0.129662 |
| 0.099359  | 0.111451  | 0.121066 | 0.121649 | 0.11961   | 0.111742 | 0.131265 |
| 0.112179  | 0.120192  | 0.118735 | 0.121358 | 0.123689  | 0.119027 | 0.137966 |
| 0.112762  | 0.126311  | 0.125728 | 0.130682 | 0.128934  | 0.119901 | 0.132721 |
| 0.124417  | 0.126603  | 0.135635 | 0.13243  | 0.134761  | 0.128642 | 0.14933  |
| 0.106206  | 0.0949883 | 0.106643 | 0.100816 | 0.0996503 | 0.099359 | 0.110431 |
| 0.120338  | 0.135052  | 0.120192 | 0.135927 | 0.134178  | 0.13447  | 0.143794 |
| 0.126894  | 0.128497  | 0.127331 | 0.120629 | 0.120338  | 0.131702 | 0.137529 |
| 0.199446  | 0.208042  | 0.206002 | 0.212121 | 0.212121  | 0.203963 | 0.20542  |
| 0.237471  | 0.249272  | 0.24461  | 0.248689 | 0.251311  | 0.239656 | 0.241987 |
| 0.120775  | 0.129371  | 0.123543 | 0.127622 | 0.124417  | 0.119755 | 0.133159 |
| 0.113636  | 0.119318  | 0.123397 | 0.123689 | 0.119901  | 0.114948 | 0.135635 |
| 0.106061  | 0.108246  | 0.118735 | 0.11961  | 0.121066  | 0.109703 | 0.12602  |
| 0.116841  | 0.109994  | 0.118444 | 0.114073 | 0.11961   | 0.114365 | 0.128642 |
| 0.125874  | 0.132139  | 0.13447  | 0.134761 | 0.136218  | 0.135052 | 0.142337 |
| 0.117424  | 0.118153  | 0.122815 | 0.124563 | 0.12398   | 0.11757  | 0.135344 |
| 0.141463  | 0.13141   | 0.147727 | 0.134907 | 0.141026  | 0.1419   | 0.145688 |
| 0.121795  | 0.116404  | 0.129225 | 0.122523 | 0.128059  | 0.121941 | 0.136509 |
| 0.126748  | 0.131265  | 0.136509 | 0.134178 | 0.134761  | 0.130682 | 0.150787 |
| 0.123397  | 0.129662  | 0.139277 | 0.132284 | 0.137529  | 0.125291 | 0.136364 |
| 0.127768  | 0.123543  | 0.138403 | 0.12704  | 0.131702  | 0.128205 | 0.137821 |
| 0.13243   | 0.140443  | 0.141317 | 0.145979 | 0.143939  | 0.143357 | 0.151807 |
| 0.11961   | 0.119172  | 0.125    | 0.124417 | 0.125874  | 0.11655  | 0.135781 |
| 0.113199  | 0.114802  | 0.128788 | 0.123252 | 0.119755  | 0.119755 | 0.136072 |
| 0.113636  | 0.113491  | 0.124854 | 0.119318 | 0.121941  | 0.120775 | 0.13447  |
| 0.114802  | 0.120775  | 0.120192 | 0.117861 | 0.118444  | 0.119901 | 0.13243  |
| 0.11451   | 0.116987  | 0.127768 | 0.124563 | 0.11961   | 0.116404 | 0.133887 |
| 0.116404  | 0.122669  | 0.124126 | 0.122669 | 0.12296   | 0.123252 | 0.141026 |
| 0.124709  | 0.12602   | 0.133013 | 0.128642 | 0.131265  | 0.126603 | 0.143794 |

|           |          |           |          |          |          |          |
|-----------|----------|-----------|----------|----------|----------|----------|
| 0.134324  | 0.133304 | 0.136509  | 0.126894 | 0.132721 | 0.135052 | 0.144376 |
| 0.120775  | 0.124126 | 0.125583  | 0.127914 | 0.124126 | 0.122378 | 0.139277 |
| 0.113345  | 0.119027 | 0.124563  | 0.121941 | 0.127185 | 0.121066 | 0.135635 |
| 0.12704   | 0.127768 | 0.133887  | 0.130973 | 0.128351 | 0.133887 | 0.149913 |
| 0.111305  | 0.116113 | 0.118444  | 0.119027 | 0.125728 | 0.117861 | 0.134761 |
| 0.136801  | 0.129662 | 0.144814  | 0.135781 | 0.139569 | 0.136072 | 0.145396 |
| 0.106789  | 0.130536 | 0.131993  | 0.141608 | 0.138695 | 0.134907 | 0.140734 |
| 0.13345   | 0.109411 | 0.109994  | 0.106789 | 0.108829 | 0.11757  | 0.113491 |
| 0.112471  | 0.118444 | 0.118153  | 0.121358 | 0.116404 | 0.114948 | 0.132139 |
| 0.110577  | 0.111888 | 0.116841  | 0.11655  | 0.11655  | 0.11451  | 0.128205 |
| 0.125583  | 0.125728 | 0.126603  | 0.12398  | 0.125728 | 0.127185 | 0.141463 |
| 0.124563  | 0.122086 | 0.126748  | 0.121503 | 0.125291 | 0.126457 | 0.136946 |
| 0.127768  | 0.124126 | 0.131702  | 0.124126 | 0.122669 | 0.128788 | 0.141317 |
| 0.124126  | 0.121649 | 0.126894  | 0.12602  | 0.126894 | 0.122815 | 0.13884  |
| 0.120192  | 0.122086 | 0.125874  | 0.123252 | 0.121795 | 0.124417 | 0.138986 |
| 0.122815  | 0.119172 | 0.127331  | 0.122669 | 0.125    | 0.122086 | 0.13345  |
| 0.126894  | 0.12704  | 0.13549   | 0.127914 | 0.13345  | 0.134033 | 0.146853 |
| 0.126311  | 0.125291 | 0.137529  | 0.127331 | 0.130828 | 0.129079 | 0.139277 |
| 0.126166  | 0.12602  | 0.137383  | 0.128351 | 0.134761 | 0.131847 | 0.144376 |
| 0.129516  | 0.138695 | 0.144522  | 0.142191 | 0.144814 | 0.129079 | 0.145105 |
| 0.120775  | 0.124709 | 0.126748  | 0.126166 | 0.126166 | 0.120338 | 0.1419   |
| 0.130682  | 0.126748 | 0.131702  | 0.127331 | 0.132284 | 0.126748 | 0.143648 |
| 0.118298  | 0.111742 | 0.123397  | 0.115822 | 0.12398  | 0.114948 | 0.133304 |
| 0.114073  | 0.122669 | 0.123834  | 0.125291 | 0.129371 | 0.120921 | 0.137238 |
| 0.11757   | 0.113928 | 0.125     | 0.118298 | 0.127331 | 0.115967 | 0.13345  |
| 0.111014  | 0.114073 | 0.121066  | 0.11961  | 0.120192 | 0.116696 | 0.13243  |
| 0.112762  | 0.113491 | 0.117279  | 0.117861 | 0.119901 | 0.11961  | 0.133887 |
| 0.130099  | 0.129079 | 0.138986  | 0.128497 | 0.131993 | 0.130245 | 0.141317 |
| 0.121795  | 0.121358 | 0.130099  | 0.127185 | 0.134178 | 0.117861 | 0.137383 |
| 0.13345   | 0.120775 | 0.137966  | 0.123689 | 0.135344 | 0.13447  | 0.14088  |
| 0.114219  | 0.121941 | 0.121358  | 0.118153 | 0.119901 | 0.120192 | 0.134761 |
| 0.119901  | 0.121795 | 0.131119  | 0.129662 | 0.125874 | 0.125874 | 0.141317 |
| 0.111305  | 0.127185 | 0.12602   | 0.135344 | 0.13243  | 0.12398  | 0.133304 |
| 0.0981935 | 0.120484 | 0.122232  | 0.135052 | 0.130973 | 0.122815 | 0.138258 |
| 0.107955  | 0.111888 | 0.123834  | 0.119172 | 0.12296  | 0.118881 | 0.127914 |
| 0.1081    | 0.112908 | 0.115239  | 0.12398  | 0.128059 | 0.132721 | 0.139423 |
| 0.108829  | 0.123543 | 0.128788  | 0.131119 | 0.130828 | 0.126166 | 0.140152 |
| 0.110286  | 0.117716 | 0.118881  | 0.125874 | 0.122669 | 0.120338 | 0.135781 |
| 0.11757   | 0.133159 | 0.122378  | 0.134615 | 0.134324 | 0.137821 | 0.149476 |
| 0.127331  | 0.13039  | 0.141171  | 0.142045 | 0.140589 | 0.134178 | 0.147582 |
| 0.0999417 | 0.116696 | 0.104167  | 0.121358 | 0.114656 | 0.113782 | 0.13243  |
| 0.122232  | 0.108683 | 0.0987762 | 0.105186 | 0.107226 | 0.117133 | 0.125583 |
| 0.102273  | 0.126311 | 0.113199  | 0.131556 | 0.126311 | 0.129516 | 0.143211 |
| 0.115676  | 0.107663 | 0.0910548 | 0.106498 | 0.10912  | 0.111451 | 0.116987 |

|           |           |           |          |           |          |          |
|-----------|-----------|-----------|----------|-----------|----------|----------|
| 0.106935  | 0.102418  | 0.0872669 | 0.10708  | 0.0971737 | 0.114656 | 0.113199 |
| 0.107226  | 0.118153  | 0.115822  | 0.127477 | 0.121649  | 0.130682 | 0.143502 |
| 0.109703  | 0.129371  | 0.111305  | 0.132576 | 0.125583  | 0.128497 | 0.139277 |
| 0.11655   | 0.112325  | 0.101836  | 0.114656 | 0.0986305 | 0.121649 | 0.123397 |
| 0.121503  | 0.115239  | 0.0910548 | 0.11757  | 0.108537  | 0.128351 | 0.120775 |
| 0.102564  | 0.131556  | 0.114365  | 0.137675 | 0.131556  | 0.13243  | 0.145542 |
| 0.107809  | 0.103293  | 0.0887238 | 0.111451 | 0.102418  | 0.111451 | 0.114948 |
| 0.12398   | 0.141026  | 0.141026  | 0.143648 | 0.142191  | 0.143065 | 0.150641 |
| 0.11655   | 0.131265  | 0.112034  | 0.139714 | 0.135052  | 0.135635 | 0.146707 |
| 0.104604  | 0.103875  | 0.105915  | 0.113199 | 0.109411  | 0.107663 | 0.127185 |
| 0.219551  | 0.228147  | 0.227855  | 0.22873  | 0.232517  | 0.222028 | 0.224359 |
| 0.108246  | 0.106352  | 0.0935315 | 0.113928 | 0.101107  | 0.112762 | 0.114802 |
| 0.0980478 | 0.118881  | 0.106643  | 0.129371 | 0.116841  | 0.120629 | 0.137238 |
| 0.119172  | 0.112908  | 0.101253  | 0.115822 | 0.119027  | 0.126894 | 0.122815 |
| 0.11014   | 0.124854  | 0.114948  | 0.132139 | 0.127768  | 0.125146 | 0.142045 |
| 0.114219  | 0.133304  | 0.115822  | 0.140297 | 0.131847  | 0.140589 | 0.151369 |
| 0.110431  | 0.105041  | 0.0919289 | 0.106206 | 0.108537  | 0.10912  | 0.127768 |
| 0.105915  | 0.111305  | 0.092366  | 0.112179 | 0.105186  | 0.11451  | 0.118881 |
| 0.110286  | 0.123543  | 0.113345  | 0.131993 | 0.125291  | 0.132284 | 0.1419   |
| 0.114219  | 0.11116   | 0.0913462 | 0.109411 | 0.121358  | 0.114365 | 0.120484 |
| 0.122523  | 0.112762  | 0.0958625 | 0.113928 | 0.109266  | 0.11451  | 0.122378 |
| 0.117716  | 0.106789  | 0.101253  | 0.107372 | 0.10912   | 0.121358 | 0.120484 |
| 0.110723  | 0.111742  | 0.0992133 | 0.114656 | 0.0957168 | 0.121941 | 0.122232 |
| 0.099359  | 0.121066  | 0.116404  | 0.127768 | 0.120484  | 0.122815 | 0.138258 |
| 0.108974  | 0.112325  | 0.0948427 | 0.111451 | 0.103875  | 0.120775 | 0.130099 |
| 0.116987  | 0.0999417 | 0.0844988 | 0.115093 | 0.109848  | 0.119755 | 0.120338 |
| 0.104312  | 0.102127  | 0.0863928 | 0.105624 | 0.10067   | 0.105624 | 0.11116  |
| 0.132867  | 0.139423  | 0.137966  | 0.144668 | 0.142045  | 0.142337 | 0.156323 |
| 0.127768  | 0.143065  | 0.138112  | 0.154429 | 0.145105  | 0.13549  | 0.142483 |
| 0.105915  | 0.126748  | 0.124417  | 0.134324 | 0.129662  | 0.127331 | 0.13141  |
| 0.113782  | 0.127622  | 0.121212  | 0.133741 | 0.131119  | 0.135198 | 0.144522 |
| 0.119464  | 0.122232  | 0.125437  | 0.121649 | 0.127477  | 0.103584 | 0.119318 |
| 0.127477  | 0.133741  | 0.124126  | 0.125874 | 0.13345   | 0.130828 | 0.145688 |
| 0.123689  | 0.138695  | 0.138403  | 0.147145 | 0.140734  | 0.126166 | 0.142191 |
| 0.129516  | 0.141317  | 0.144231  | 0.151224 | 0.145979  | 0.131702 | 0.140443 |
| 0.0897436 | 0.111742  | 0.111742  | 0.121066 | 0.121358  | 0.120192 | 0.138258 |
| 0.118444  | 0.131702  | 0.130828  | 0.142483 | 0.135781  | 0.13345  | 0.145396 |
| 0.135198  | 0.147582  | 0.149913  | 0.151952 | 0.154575  | 0.137092 | 0.145542 |
| 0.102273  | 0.10708   | 0.120484  | 0.112617 | 0.107372  | 0.116987 | 0.131556 |
| 0.123543  | 0.130682  | 0.134178  | 0.138549 | 0.137383  | 0.128351 | 0.147873 |
| 0.139132  | 0.146853  | 0.152098  | 0.15035  | 0.1419    | 0.149767 | 0.154429 |
| 0.125146  | 0.131993  | 0.134907  | 0.136364 | 0.136946  | 0.132576 | 0.150058 |
| 0.119755  | 0.143211  | 0.135927  | 0.141463 | 0.141463  | 0.146416 | 0.148747 |
| 0.109411  | 0.127914  | 0.121503  | 0.134324 | 0.130828  | 0.136072 | 0.135198 |

|           |           |           |           |           |          |          |
|-----------|-----------|-----------|-----------|-----------|----------|----------|
| 0.109848  | 0.0965909 | 0.104458  | 0.0913462 | 0.0971737 | 0.102418 | 0.112325 |
| 0.112908  | 0.133159  | 0.130536  | 0.138986  | 0.129079  | 0.13141  | 0.132284 |
| 0         | 0.11553   | 0.112908  | 0.128934  | 0.119027  | 0.116696 | 0.120484 |
| 0.11553   | 0         | 0.114219  | 0.0912005 | 0.107809  | 0.103438 | 0.109266 |
| 0.112908  | 0.114219  | 0         | 0.109266  | 0.0990676 | 0.115967 | 0.115385 |
| 0.128934  | 0.0912005 | 0.109266  | 0         | 0.0999417 | 0.105478 | 0.107226 |
| 0.119027  | 0.107809  | 0.0990676 | 0.0999417 | 0         | 0.113054 | 0.113345 |
| 0.116696  | 0.103438  | 0.115967  | 0.105478  | 0.113054  | 0        | 0.10373  |
| 0.120484  | 0.109266  | 0.115385  | 0.107226  | 0.113345  | 0.10373  | 0        |
| 0.095134  | 0.119464  | 0.1081    | 0.13141   | 0.125     | 0.13141  | 0.142191 |
| 0.114073  | 0.111888  | 0.118007  | 0.117716  | 0.120921  | 0.119464 | 0.136655 |
| 0.122815  | 0.12704   | 0.132867  | 0.12704   | 0.121212  | 0.124417 | 0.138695 |
| 0.0916375 | 0.116841  | 0.105769  | 0.119464  | 0.1081    | 0.112762 | 0.125    |
| 0.129079  | 0.14292   | 0.143211  | 0.146999  | 0.138258  | 0.116113 | 0.13039  |
| 0.134324  | 0.147582  | 0.151369  | 0.148747  | 0.138549  | 0.13243  | 0.134178 |
| 0.129662  | 0.130682  | 0.134761  | 0.123106  | 0.135344  | 0.130973 | 0.145542 |
| 0.122232  | 0.12704   | 0.128205  | 0.122669  | 0.120338  | 0.126748 | 0.142191 |
| 0.137821  | 0.114365  | 0.112325  | 0.110577  | 0.120484  | 0.122232 | 0.130682 |
| 0.114656  | 0.112471  | 0.0958625 | 0.122378  | 0.104604  | 0.128205 | 0.123543 |
| 0.128934  | 0.126748  | 0.13549   | 0.132576  | 0.132284  | 0.136364 | 0.151807 |
| 0.121066  | 0.109266  | 0.10373   | 0.1081    | 0.120338  | 0.11655  | 0.124709 |
| 0.120775  | 0.131993  | 0.130828  | 0.138112  | 0.136655  | 0.121795 | 0.122378 |
| 0.110723  | 0.13039   | 0.123106  | 0.136218  | 0.129516  | 0.125437 | 0.143794 |
| 0.159382  | 0.15778   | 0.164481  | 0.156614  | 0.153409  | 0.136509 | 0.146707 |
| 0.114802  | 0.130099  | 0.127768  | 0.137675  | 0.13447   | 0.131847 | 0.148164 |
| 0.11859   | 0.138258  | 0.127185  | 0.146999  | 0.141754  | 0.142045 | 0.145251 |
| 0.114073  | 0.112762  | 0.116841  | 0.115385  | 0.120921  | 0.113054 | 0.129371 |
| 0.134761  | 0.117424  | 0.105478  | 0.11451   | 0.118298  | 0.116841 | 0.135781 |
| 0.111742  | 0.106061  | 0.0935315 | 0.100233  | 0.105769  | 0.112471 | 0.111888 |
| 0.139277  | 0.150204  | 0.147582  | 0.152826  | 0.148747  | 0.137383 | 0.153409 |
| 0.149038  | 0.141608  | 0.137821  | 0.13345   | 0.143939  | 0.148601 | 0.145688 |
| 0.133159  | 0.137092  | 0.13243   | 0.136801  | 0.139423  | 0.137092 | 0.146416 |
| 0.142045  | 0.148893  | 0.143065  | 0.144814  | 0.143357  | 0.146853 | 0.152972 |
| 0.142483  | 0.150495  | 0.161859  | 0.160693  | 0.160985  | 0.149038 | 0.161568 |
| 0.147145  | 0.159237  | 0.151369  | 0.155157  | 0.157488  | 0.149621 | 0.161276 |
| 0.116987  | 0.111888  | 0.13141   | 0.117424  | 0.127622  | 0.118298 | 0.134033 |
| 0.145396  | 0.145251  | 0.143794  | 0.151952  | 0.143794  | 0.152244 | 0.156906 |
| 0.123252  | 0.127185  | 0.130099  | 0.132721  | 0.132139  | 0.126894 | 0.139423 |
| 0.118153  | 0.121503  | 0.126166  | 0.12704   | 0.129079  | 0.119464 | 0.130536 |
| 0.112179  | 0.124272  | 0.116113  | 0.13039   | 0.121649  | 0.124272 | 0.141463 |
| 0.129662  | 0.13447   | 0.129808  | 0.134178  | 0.135635  | 0.135344 | 0.146707 |
| 0.116987  | 0.125     | 0.126457  | 0.131119  | 0.134033  | 0.121503 | 0.136946 |
| 0.113491  | 0.128205  | 0.126457  | 0.132284  | 0.129662  | 0.120338 | 0.134615 |
| 0.128934  | 0.131119  | 0.128788  | 0.135198  | 0.137529  | 0.130536 | 0.145688 |

|          |          |           |          |          |          |          |
|----------|----------|-----------|----------|----------|----------|----------|
| 0.118881 | 0.133013 | 0.133304  | 0.137383 | 0.135344 | 0.131265 | 0.139714 |
| 0.103147 | 0.12602  | 0.112325  | 0.125437 | 0.120192 | 0.120484 | 0.136801 |
| 0.134324 | 0.137383 | 0.133596  | 0.139714 | 0.137675 | 0.137092 | 0.147873 |
| 0.128351 | 0.137529 | 0.133159  | 0.135198 | 0.136655 | 0.137821 | 0.14627  |
| 0.112908 | 0.11859  | 0.132867  | 0.12704  | 0.13141  | 0.121795 | 0.142483 |
| 0.215472 | 0.22465  | 0.226107  | 0.227273 | 0.22873  | 0.221737 | 0.22028  |
| 0.149038 | 0.149476 | 0.146853  | 0.143648 | 0.145105 | 0.150641 | 0.155594 |
| 0.138112 | 0.135052 | 0.136509  | 0.135052 | 0.142337 | 0.139132 | 0.150787 |
| 0.133596 | 0.13345  | 0.135781  | 0.132576 | 0.139569 | 0.134324 | 0.15035  |
| 0.213724 | 0.221737 | 0.219988  | 0.22465  | 0.225524 | 0.217075 | 0.219697 |
| 0.117279 | 0.12704  | 0.135198  | 0.133741 | 0.137238 | 0.121212 | 0.138986 |
| 0.123834 | 0.133013 | 0.132721  | 0.132139 | 0.129516 | 0.13039  | 0.143211 |
| 0.129662 | 0.133304 | 0.131265  | 0.136509 | 0.136801 | 0.139132 | 0.149621 |
| 0.121358 | 0.128788 | 0.131702  | 0.133741 | 0.129371 | 0.131993 | 0.140443 |
| 0.24898  | 0.260198 | 0.254662  | 0.261364 | 0.261364 | 0.253788 | 0.250291 |
| 0.132284 | 0.135927 | 0.134178  | 0.133013 | 0.133013 | 0.124563 | 0.145251 |
| 0.107226 | 0.116696 | 0.128642  | 0.124563 | 0.131556 | 0.120775 | 0.139423 |
| 0.126457 | 0.127477 | 0.133304  | 0.131847 | 0.130099 | 0.135927 | 0.140297 |
| 0.127914 | 0.131265 | 0.13039   | 0.129808 | 0.133596 | 0.133596 | 0.141463 |
| 0.130536 | 0.133304 | 0.137383  | 0.137675 | 0.135927 | 0.124563 | 0.139423 |
| 0.125874 | 0.14088  | 0.134761  | 0.140297 | 0.135635 | 0.129225 | 0.138549 |
| 0.113054 | 0.121066 | 0.135635  | 0.129225 | 0.130682 | 0.123689 | 0.142628 |
| 0.130099 | 0.135781 | 0.130536  | 0.131702 | 0.132576 | 0.136072 | 0.145979 |
| 0.136946 | 0.137383 | 0.135344  | 0.143502 | 0.135052 | 0.14292  | 0.152535 |
| 0.112179 | 0.128059 | 0.128059  | 0.132139 | 0.130099 | 0.12398  | 0.136218 |
| 0.124854 | 0.132867 | 0.129953  | 0.13141  | 0.130245 | 0.130828 | 0.142483 |
| 0.087704 | 0.120192 | 0.0942599 | 0.125437 | 0.113491 | 0.118735 | 0.127477 |
| 0.150495 | 0.140734 | 0.138112  | 0.136072 | 0.142774 | 0.147727 | 0.148893 |
| 0.133596 | 0.136072 | 0.136072  | 0.13549  | 0.134033 | 0.129079 | 0.147727 |
| 0.126603 | 0.13549  | 0.134033  | 0.135781 | 0.133741 | 0.135781 | 0.145105 |
| 0.188083 | 0.20134  | 0.199883  | 0.200175 | 0.20542  | 0.195221 | 0.199883 |
| 0.204983 | 0.214744 | 0.213287  | 0.218531 | 0.218823 | 0.209207 | 0.214744 |
| 0.11757  | 0.130828 | 0.131119  | 0.138986 | 0.133159 | 0.132576 | 0.142774 |
| 0.113782 | 0.12704  | 0.126457  | 0.129953 | 0.126748 | 0.125    | 0.13549  |
| 0.135344 | 0.1419   | 0.138403  | 0.143939 | 0.145979 | 0.142483 | 0.149184 |
| 0.11116  | 0.117424 | 0.130245  | 0.124417 | 0.130536 | 0.120629 | 0.139569 |
| 0.134033 | 0.139714 | 0.137966  | 0.135052 | 0.134761 | 0.128642 | 0.145251 |
| 0.135052 | 0.127331 | 0.127331  | 0.120921 | 0.132867 | 0.133741 | 0.134033 |
| 0.224505 | 0.235723 | 0.235431  | 0.236888 | 0.238636 | 0.230186 | 0.230186 |
| 0.12602  | 0.12704  | 0.127914  | 0.12704  | 0.133159 | 0.134324 | 0.147145 |
| 0.204545 | 0.216346 | 0.216346  | 0.214307 | 0.217512 | 0.202943 | 0.203817 |
| 0.110868 | 0.110431 | 0.122378  | 0.117133 | 0.121503 | 0.110431 | 0.13345  |
| 0.122669 | 0.130682 | 0.124272  | 0.130682 | 0.130099 | 0.124854 | 0.141171 |
| 0.111451 | 0.129079 | 0.127622  | 0.132576 | 0.130245 | 0.126166 | 0.132576 |



|          |          |          |          |          |          |          |
|----------|----------|----------|----------|----------|----------|----------|
| 0.112034 | 0.123834 | 0.121795 | 0.133159 | 0.125    | 0.125583 | 0.135198 |
| 0.207751 | 0.218969 | 0.214307 | 0.218094 | 0.220425 | 0.210227 | 0.213432 |
| 0.139277 | 0.149038 | 0.138549 | 0.144668 | 0.144668 | 0.146125 | 0.151369 |
| 0.115967 | 0.124272 | 0.126311 | 0.125146 | 0.127768 | 0.121066 | 0.137966 |
| 0.135781 | 0.13884  | 0.135052 | 0.137383 | 0.137383 | 0.140006 | 0.14933  |
| 0.131702 | 0.134178 | 0.124563 | 0.135344 | 0.133013 | 0.133013 | 0.144085 |
| 0.11655  | 0.131265 | 0.130099 | 0.136218 | 0.131265 | 0.129808 | 0.142337 |
| 0.111742 | 0.107809 | 0.123252 | 0.115967 | 0.121503 | 0.110431 | 0.130828 |
| 0.109703 | 0.123543 | 0.132284 | 0.13141  | 0.132576 | 0.120047 | 0.136655 |
| 0.124854 | 0.131702 | 0.134324 | 0.13549  | 0.133741 | 0.134033 | 0.143648 |
| 0.122232 | 0.130245 | 0.12704  | 0.128788 | 0.13141  | 0.129662 | 0.141026 |
| 0.117716 | 0.124563 | 0.125437 | 0.123397 | 0.12398  | 0.119901 | 0.13884  |
| 0.190122 | 0.202214 | 0.19697  | 0.203963 | 0.207751 | 0.195804 | 0.196678 |
| 0.127622 | 0.129808 | 0.132139 | 0.130973 | 0.13039  | 0.137092 | 0.14088  |
| 0.137383 | 0.129953 | 0.128788 | 0.126748 | 0.13345  | 0.13549  | 0.143065 |
| 0.12704  | 0.121649 | 0.125437 | 0.123689 | 0.136509 | 0.128642 | 0.137966 |
| 0.130682 | 0.134615 | 0.136072 | 0.134324 | 0.134907 | 0.123834 | 0.145105 |
| 0.132139 | 0.135198 | 0.132284 | 0.136364 | 0.13986  | 0.138112 | 0.144231 |
| 0.115239 | 0.112471 | 0.130828 | 0.119172 | 0.123543 | 0.116841 | 0.134033 |
| 0.119172 | 0.126603 | 0.116404 | 0.125146 | 0.12398  | 0.117279 | 0.137383 |
| 0.113928 | 0.117861 | 0.133887 | 0.124272 | 0.130973 | 0.125437 | 0.141171 |
| 0.133887 | 0.130536 | 0.125874 | 0.125291 | 0.130828 | 0.134907 | 0.142483 |
| 0.122815 | 0.127914 | 0.125583 | 0.13141  | 0.129079 | 0.131702 | 0.140443 |
| 0.120629 | 0.129808 | 0.132139 | 0.135927 | 0.133596 | 0.130973 | 0.140297 |
| 0.133013 | 0.136946 | 0.132284 | 0.140734 | 0.137238 | 0.140734 | 0.150932 |
| 0.138695 | 0.14088  | 0.136509 | 0.143502 | 0.143794 | 0.146999 | 0.156031 |
| 0.123252 | 0.129516 | 0.127768 | 0.127185 | 0.125728 | 0.120484 | 0.139423 |
| 0.146416 | 0.144522 | 0.140734 | 0.140152 | 0.142483 | 0.145979 | 0.150641 |
| 0.114073 | 0.130828 | 0.130536 | 0.136364 | 0.132284 | 0.129953 | 0.141317 |
| 0.124563 | 0.122378 | 0.121795 | 0.116259 | 0.127914 | 0.125    | 0.131702 |
| 0.125291 | 0.133304 | 0.132721 | 0.136801 | 0.136218 | 0.132721 | 0.143794 |
| 0.11655  | 0.120775 | 0.137092 | 0.131847 | 0.135927 | 0.129225 | 0.145833 |
| 0.188811 | 0.19799  | 0.200903 | 0.203526 | 0.207605 | 0.191288 | 0.197698 |
| 0.113782 | 0.120921 | 0.123834 | 0.121795 | 0.121795 | 0.116841 | 0.136072 |
| 0.119901 | 0.116841 | 0.122086 | 0.119755 | 0.120338 | 0.118881 | 0.137821 |
| 0.123106 | 0.13549  | 0.131993 | 0.133741 | 0.129662 | 0.131702 | 0.144814 |
| 0.179924 | 0.194347 | 0.190559 | 0.195513 | 0.194056 | 0.185023 | 0.189394 |
| 0.141317 | 0.144959 | 0.143794 | 0.141171 | 0.142628 | 0.132721 | 0.15574  |
| 0.148019 | 0.150204 | 0.146125 | 0.143502 | 0.146707 | 0.141754 | 0.155449 |
| 0.151078 | 0.143357 | 0.138695 | 0.132576 | 0.143648 | 0.149184 | 0.149476 |
| 0.122815 | 0.129371 | 0.124417 | 0.127331 | 0.125    | 0.11655  | 0.137238 |
| 0.134907 | 0.138258 | 0.133887 | 0.137383 | 0.133304 | 0.136801 | 0.14729  |
| 0.211393 | 0.225816 | 0.224359 | 0.225816 | 0.230186 | 0.218531 | 0.219114 |
| 0.131556 | 0.138112 | 0.13345  | 0.137821 | 0.143939 | 0.138986 | 0.14831  |

|          |          |          |          |          |          |          |
|----------|----------|----------|----------|----------|----------|----------|
| 0.138403 | 0.141463 | 0.137966 | 0.138258 | 0.140006 | 0.140589 | 0.151369 |
| 0.116259 | 0.124272 | 0.123106 | 0.122815 | 0.125437 | 0.119901 | 0.138549 |
| 0.170163 | 0.186334 | 0.183129 | 0.188374 | 0.186043 | 0.173514 | 0.178467 |
| 0.121503 | 0.128351 | 0.12602  | 0.123397 | 0.13039  | 0.125146 | 0.140006 |
| 0.1537   | 0.151224 | 0.150641 | 0.154138 | 0.152098 | 0.158217 | 0.157343 |
| 0.10912  | 0.135781 | 0.117133 | 0.132284 | 0.126166 | 0.130245 | 0.13986  |
| 0.188666 | 0.200175 | 0.200466 | 0.201632 | 0.206002 | 0.19493  | 0.199009 |
| 0.126603 | 0.129662 | 0.131702 | 0.132284 | 0.129662 | 0.121795 | 0.141317 |
| 0.109411 | 0.120921 | 0.11014  | 0.125583 | 0.123252 | 0.120338 | 0.13549  |
| 0.122378 | 0.128059 | 0.125437 | 0.121358 | 0.127477 | 0.127477 | 0.137383 |
| 0.128934 | 0.134615 | 0.133741 | 0.130828 | 0.13549  | 0.131702 | 0.143648 |
| 0.123106 | 0.129079 | 0.13345  | 0.137238 | 0.134033 | 0.13141  | 0.144231 |
| 0.13039  | 0.131993 | 0.130536 | 0.137238 | 0.132867 | 0.129662 | 0.13986  |
| 0.115967 | 0.12602  | 0.123689 | 0.131556 | 0.129808 | 0.126603 | 0.138549 |
| 0.189831 | 0.202214 | 0.198135 | 0.203089 | 0.205711 | 0.192599 | 0.20134  |
| 0.129662 | 0.131847 | 0.133304 | 0.137383 | 0.136509 | 0.136509 | 0.146999 |
| 0.114948 | 0.127622 | 0.127331 | 0.133741 | 0.132576 | 0.126748 | 0.138986 |
| 0.212121 | 0.224213 | 0.220134 | 0.224213 | 0.223922 | 0.218094 | 0.216638 |
| 0.128205 | 0.131556 | 0.130973 | 0.130682 | 0.130973 | 0.136801 | 0.143211 |
| 0.117279 | 0.126166 | 0.126166 | 0.130828 | 0.129662 | 0.126748 | 0.140443 |
| 0.111451 | 0.124126 | 0.124709 | 0.129953 | 0.126457 | 0.12296  | 0.134324 |
| 0.144522 | 0.148164 | 0.140589 | 0.144085 | 0.145542 | 0.146707 | 0.151369 |
| 0.19289  | 0.203817 | 0.198281 | 0.204108 | 0.205565 | 0.195076 | 0.202943 |
| 0.114365 | 0.118298 | 0.133159 | 0.126748 | 0.134615 | 0.122669 | 0.141317 |
| 0.135344 | 0.138986 | 0.136072 | 0.144231 | 0.140734 | 0.142191 | 0.15472  |
| 0.11553  | 0.127622 | 0.123834 | 0.134907 | 0.128205 | 0.128788 | 0.134907 |
| 0.113491 | 0.125874 | 0.125583 | 0.132576 | 0.128497 | 0.126166 | 0.139569 |
| 0.111888 | 0.123397 | 0.124272 | 0.13243  | 0.128351 | 0.123397 | 0.137966 |
| 0.126311 | 0.133741 | 0.129079 | 0.132576 | 0.133159 | 0.134324 | 0.144522 |
| 0.107517 | 0.123397 | 0.112034 | 0.125728 | 0.117861 | 0.120484 | 0.135344 |
| 0.131702 | 0.137092 | 0.131556 | 0.133887 | 0.130682 | 0.12602  | 0.144376 |
| 0.137529 | 0.131847 | 0.130682 | 0.128934 | 0.131556 | 0.133304 | 0.142628 |
| 0.129371 | 0.133304 | 0.134178 | 0.128351 | 0.130973 | 0.123397 | 0.145251 |
| 0.13039  | 0.134324 | 0.124417 | 0.136072 | 0.135198 | 0.134907 | 0.145105 |
| 0.196096 | 0.206148 | 0.206731 | 0.206439 | 0.213141 | 0.199738 | 0.206439 |
| 0.128934 | 0.132576 | 0.130828 | 0.136364 | 0.132576 | 0.135781 | 0.147145 |
| 0.142774 | 0.14088  | 0.136509 | 0.139132 | 0.140297 | 0.145542 | 0.151078 |
| 0.114365 | 0.121212 | 0.12296  | 0.13141  | 0.127622 | 0.126457 | 0.135781 |
| 0.101107 | 0.118735 | 0.107663 | 0.122523 | 0.117279 | 0.116987 | 0.131847 |
| 0.119755 | 0.126894 | 0.130099 | 0.136509 | 0.127768 | 0.127185 | 0.134761 |
| 0.113199 | 0.118298 | 0.136655 | 0.126457 | 0.13345  | 0.121795 | 0.141317 |
| 0.133887 | 0.136655 | 0.133159 | 0.137529 | 0.13986  | 0.134615 | 0.148601 |
| 0.131119 | 0.129808 | 0.125728 | 0.128934 | 0.133887 | 0.134761 | 0.147873 |
| 0.104312 | 0.11757  | 0.122815 | 0.125437 | 0.128351 | 0.114365 | 0.127477 |

|           |          |           |          |          |          |          |
|-----------|----------|-----------|----------|----------|----------|----------|
| 0.0968823 | 0.118007 | 0.117424  | 0.124126 | 0.121503 | 0.111597 | 0.126748 |
| 0.108974  | 0.124563 | 0.112034  | 0.125437 | 0.124854 | 0.118735 | 0.134178 |
| 0.110286  | 0.110723 | 0.125874  | 0.116841 | 0.125291 | 0.111014 | 0.13141  |
| 0.135781  | 0.142045 | 0.137675  | 0.141171 | 0.136801 | 0.129808 | 0.148456 |
| 0.114948  | 0.117424 | 0.131993  | 0.130828 | 0.136655 | 0.122378 | 0.143648 |
| 0.125     | 0.131847 | 0.125728  | 0.132139 | 0.130973 | 0.131265 | 0.143502 |
| 0.109848  | 0.114656 | 0.129808  | 0.122523 | 0.127477 | 0.120192 | 0.138549 |
| 0.11553   | 0.124709 | 0.125291  | 0.133159 | 0.129079 | 0.125    | 0.143065 |
| 0.115093  | 0.122232 | 0.118153  | 0.123397 | 0.121649 | 0.119901 | 0.136218 |
| 0.115093  | 0.124563 | 0.125437  | 0.133013 | 0.132721 | 0.125437 | 0.138549 |
| 0.124126  | 0.127768 | 0.126894  | 0.133596 | 0.131556 | 0.132721 | 0.144085 |
| 0.129371  | 0.126894 | 0.126603  | 0.126603 | 0.131556 | 0.131556 | 0.139132 |
| 0.119464  | 0.129516 | 0.131556  | 0.134178 | 0.128642 | 0.128934 | 0.143211 |
| 0.106206  | 0.127914 | 0.114219  | 0.126166 | 0.122378 | 0.122378 | 0.139569 |
| 0.115967  | 0.125437 | 0.127477  | 0.13039  | 0.131265 | 0.125146 | 0.14088  |
| 0.124417  | 0.131265 | 0.130099  | 0.124563 | 0.133596 | 0.126603 | 0.137675 |
| 0.123397  | 0.137529 | 0.13345   | 0.137238 | 0.138112 | 0.13141  | 0.145396 |
| 0.106061  | 0.116113 | 0.116696  | 0.12602  | 0.121066 | 0.117861 | 0.135927 |
| 0.115093  | 0.124272 | 0.127185  | 0.131265 | 0.126894 | 0.125437 | 0.138258 |
| 0.128934  | 0.136655 | 0.131993  | 0.132576 | 0.134324 | 0.13549  | 0.143357 |
| 0.113199  | 0.113636 | 0.129079  | 0.118298 | 0.125583 | 0.112179 | 0.133741 |
| 0.130973  | 0.134324 | 0.130245  | 0.135781 | 0.138403 | 0.135198 | 0.146853 |
| 0.125146  | 0.127914 | 0.130536  | 0.128205 | 0.129371 | 0.123834 | 0.142483 |
| 0.105041  | 0.129371 | 0.113345  | 0.12704  | 0.122086 | 0.122378 | 0.136364 |
| 0.121358  | 0.127914 | 0.129079  | 0.130536 | 0.128497 | 0.12704  | 0.141026 |
| 0.113928  | 0.119901 | 0.120775  | 0.124272 | 0.121358 | 0.114948 | 0.134761 |
| 0.133304  | 0.141026 | 0.13345   | 0.140152 | 0.13986  | 0.139569 | 0.147727 |
| 0.129808  | 0.132867 | 0.131993  | 0.127331 | 0.140734 | 0.132576 | 0.144522 |
| 0.12296   | 0.132721 | 0.131265  | 0.133013 | 0.136218 | 0.12602  | 0.142628 |
| 0.19493   | 0.205565 | 0.201195  | 0.207022 | 0.209645 | 0.200903 | 0.203817 |
| 0.168706  | 0.176428 | 0.176136  | 0.179341 | 0.180216 | 0.171766 | 0.179633 |
| 0.128497  | 0.134178 | 0.133013  | 0.130973 | 0.129516 | 0.122523 | 0.144085 |
| 0.116404  | 0.121503 | 0.131119  | 0.129371 | 0.136364 | 0.124709 | 0.136072 |
| 0.151369  | 0.149767 | 0.151515  | 0.146853 | 0.147436 | 0.144814 | 0.154429 |
| 0.137529  | 0.137092 | 0.13447   | 0.14292  | 0.137675 | 0.142628 | 0.155449 |
| 0.122232  | 0.133159 | 0.129662  | 0.140734 | 0.134324 | 0.128788 | 0.13986  |
| 0.119464  | 0.128642 | 0.130682  | 0.133013 | 0.133013 | 0.122523 | 0.133596 |
| 0.0882867 | 0.118153 | 0.0983392 | 0.125437 | 0.114073 | 0.118153 | 0.130682 |
| 0.124126  | 0.134761 | 0.135635  | 0.135927 | 0.138549 | 0.13243  | 0.146416 |
| 0.202652  | 0.213287 | 0.210956  | 0.217366 | 0.218823 | 0.20979  | 0.214161 |
| 0.115385  | 0.120192 | 0.135344  | 0.13039  | 0.134178 | 0.124272 | 0.144668 |
| 0.11757   | 0.129662 | 0.134615  | 0.134907 | 0.134324 | 0.127914 | 0.136655 |
| 0.112617  | 0.123543 | 0.124709  | 0.130828 | 0.127622 | 0.120338 | 0.134033 |
| 0.125291  | 0.132721 | 0.123689  | 0.135927 | 0.13243  | 0.130099 | 0.146125 |

|          |           |          |           |           |          |          |
|----------|-----------|----------|-----------|-----------|----------|----------|
| 0.184878 | 0.195804  | 0.198135 | 0.201049  | 0.199592  | 0.187937 | 0.195804 |
| 0.244027 | 0.25845   | 0.256119 | 0.254662  | 0.256993  | 0.249126 | 0.249417 |
| 0.13447  | 0.130536  | 0.13141  | 0.126166  | 0.136655  | 0.130536 | 0.143357 |
| 0.121649 | 0.137238  | 0.132576 | 0.136072  | 0.136364  | 0.128497 | 0.144231 |
| 0.129516 | 0.136072  | 0.133741 | 0.134033  | 0.132576  | 0.125    | 0.144814 |
| 0.119172 | 0.129225  | 0.130682 | 0.132139  | 0.131847  | 0.126311 | 0.142337 |
| 0.107663 | 0.113054  | 0.127331 | 0.122669  | 0.12704   | 0.118298 | 0.136072 |
| 0.12296  | 0.125146  | 0.125728 | 0.127185  | 0.126311  | 0.131265 | 0.141171 |
| 0.116987 | 0.128788  | 0.129371 | 0.134615  | 0.130245  | 0.126457 | 0.137238 |
| 0.109411 | 0.115093  | 0.131993 | 0.12704   | 0.129371  | 0.119755 | 0.13986  |
| 0.115385 | 0.128351  | 0.125728 | 0.133013  | 0.125728  | 0.124272 | 0.133013 |
| 0.11116  | 0.12296   | 0.121212 | 0.128497  | 0.125291  | 0.123834 | 0.138986 |
| 0.106935 | 0.127185  | 0.112325 | 0.128351  | 0.124563  | 0.122523 | 0.137092 |
| 0.130973 | 0.12704   | 0.127622 | 0.12704   | 0.13345   | 0.130828 | 0.141026 |
| 0.128788 | 0.136509  | 0.131847 | 0.138549  | 0.136509  | 0.137675 | 0.148456 |
| 0.107809 | 0.109994  | 0.11116  | 0.108829  | 0.120484  | 0.115822 | 0.12602  |
| 0.109266 | 0.0957168 | 0.099796 | 0.0820221 | 0.0939685 | 0.103001 | 0.103875 |
| 0.131119 | 0.130973  | 0.133887 | 0.135052  | 0.134178  | 0.136218 | 0.144085 |
| 0.112908 | 0.12296   | 0.12296  | 0.131993  | 0.128788  | 0.125583 | 0.136364 |
| 0.118298 | 0.122232  | 0.132139 | 0.129225  | 0.128351  | 0.113199 | 0.129225 |
| 0.124709 | 0.133887  | 0.132721 | 0.133304  | 0.135052  | 0.135635 | 0.139132 |
| 0.207605 | 0.219406  | 0.217366 | 0.222319  | 0.218531  | 0.212413 | 0.215326 |
| 0.119172 | 0.118153  | 0.117279 | 0.118444  | 0.12398   | 0.121358 | 0.137383 |
| 0.106206 | 0.124126  | 0.111597 | 0.126166  | 0.119172  | 0.120047 | 0.138695 |
| 0.128642 | 0.133741  | 0.13141  | 0.137529  | 0.13345   | 0.136655 | 0.151515 |
| 0.129662 | 0.130682  | 0.130682 | 0.131847  | 0.132139  | 0.13447  | 0.142628 |
| 0.12296  | 0.131556  | 0.122232 | 0.13243   | 0.129808  | 0.124272 | 0.139714 |
| 0.200466 | 0.214889  | 0.210227 | 0.214307  | 0.215763  | 0.2044   | 0.209062 |
| 0.133596 | 0.141026  | 0.131702 | 0.138403  | 0.139569  | 0.140443 | 0.149476 |
| 0.111888 | 0.121066  | 0.125146 | 0.128642  | 0.126603  | 0.126311 | 0.135635 |
| 0.126894 | 0.126457  | 0.12296  | 0.123834  | 0.132576  | 0.130536 | 0.138986 |
| 0.118735 | 0.129079  | 0.127622 | 0.130245  | 0.129662  | 0.125    | 0.140443 |
| 0.129808 | 0.136946  | 0.130536 | 0.136655  | 0.138112  | 0.137238 | 0.145396 |
| 0.114948 | 0.120338  | 0.119172 | 0.121503  | 0.124417  | 0.12296  | 0.132576 |
| 0.10912  | 0.122086  | 0.122378 | 0.131702  | 0.123834  | 0.123543 | 0.141026 |
| 0.125146 | 0.126457  | 0.125    | 0.12704   | 0.130245  | 0.133159 | 0.13986  |
| 0.199301 | 0.211393  | 0.20877  | 0.212267  | 0.214015  | 0.203817 | 0.210519 |
| 0.123397 | 0.128788  | 0.125    | 0.126457  | 0.125583  | 0.12704  | 0.139569 |
| 0.197552 | 0.20877   | 0.207314 | 0.213432  | 0.21285   | 0.201195 | 0.20877  |
| 0.196824 | 0.205711  | 0.202506 | 0.205711  | 0.209499  | 0.198718 | 0.204545 |
| 0.129225 | 0.135781  | 0.138403 | 0.132284  | 0.131993  | 0.134907 | 0.145688 |
| 0.133887 | 0.132576  | 0.13141  | 0.130828  | 0.129662  | 0.140152 | 0.143648 |
| 0.101836 | 0.113345  | 0.111014 | 0.121795  | 0.11655   | 0.116841 | 0.134324 |
| 0.11859  | 0.12398   | 0.120192 | 0.126311  | 0.126894  | 0.126311 | 0.137966 |

|          |          |          |          |          |          |          |
|----------|----------|----------|----------|----------|----------|----------|
| 0.125437 | 0.134615 | 0.129953 | 0.132576 | 0.135198 | 0.133159 | 0.144814 |
| 0.114948 | 0.12704  | 0.127914 | 0.134324 | 0.131993 | 0.124417 | 0.139277 |
| 0.107372 | 0.114219 | 0.126457 | 0.124709 | 0.124126 | 0.118298 | 0.138695 |
| 0.11116  | 0.116259 | 0.128788 | 0.126457 | 0.129371 | 0.118881 | 0.141026 |
| 0.136072 | 0.13243  | 0.128351 | 0.127185 | 0.133887 | 0.136218 | 0.142337 |
| 0.125146 | 0.131993 | 0.13141  | 0.134907 | 0.134324 | 0.129662 | 0.144231 |
| 0.108683 | 0.121649 | 0.122523 | 0.127185 | 0.123106 | 0.122523 | 0.132721 |
| 0.130682 | 0.138112 | 0.129662 | 0.131119 | 0.13549  | 0.13549  | 0.145105 |
| 0.106935 | 0.118444 | 0.105624 | 0.119901 | 0.121941 | 0.118444 | 0.129808 |
| 0.136218 | 0.140443 | 0.134324 | 0.136364 | 0.138112 | 0.138986 | 0.145979 |
| 0.128351 | 0.132576 | 0.134324 | 0.128205 | 0.129953 | 0.120338 | 0.1419   |
| 0.141026 | 0.146125 | 0.140297 | 0.141463 | 0.141171 | 0.144376 | 0.153118 |
| 0.258741 | 0.267045 | 0.264714 | 0.266171 | 0.26792  | 0.261801 | 0.260927 |
| 0.126457 | 0.125437 | 0.129225 | 0.127768 | 0.127477 | 0.127185 | 0.140006 |
| 0.13243  | 0.128497 | 0.130245 | 0.133159 | 0.131702 | 0.131993 | 0.143648 |
| 0.217366 | 0.229167 | 0.228875 | 0.230915 | 0.229167 | 0.221882 | 0.225962 |
| 0.126603 | 0.130828 | 0.122669 | 0.134907 | 0.131119 | 0.134033 | 0.145979 |
| 0.23208  | 0.240967 | 0.236597 | 0.241841 | 0.238928 | 0.235723 | 0.235723 |
| 0.117424 | 0.121649 | 0.124272 | 0.121066 | 0.119901 | 0.119318 | 0.136509 |
| 0.123106 | 0.132576 | 0.130828 | 0.13549  | 0.135781 | 0.13345  | 0.143065 |
| 0.120484 | 0.126457 | 0.123252 | 0.126457 | 0.129079 | 0.127914 | 0.138112 |
| 0.128059 | 0.133159 | 0.135781 | 0.13549  | 0.133159 | 0.132576 | 0.144522 |
| 0.204691 | 0.213869 | 0.212704 | 0.217366 | 0.218531 | 0.208333 | 0.213578 |
| 0.13884  | 0.142483 | 0.138112 | 0.139277 | 0.138986 | 0.143939 | 0.148019 |
| 0.130973 | 0.136655 | 0.134033 | 0.136946 | 0.13549  | 0.136655 | 0.147436 |
| 0.222902 | 0.237034 | 0.23412  | 0.237325 | 0.238782 | 0.233246 | 0.230915 |
| 0.113782 | 0.121503 | 0.13549  | 0.131702 | 0.135198 | 0.121503 | 0.144522 |
| 0.199592 | 0.209353 | 0.210227 | 0.213432 | 0.214307 | 0.203234 | 0.206148 |
| 0.111014 | 0.118444 | 0.13243  | 0.129225 | 0.135344 | 0.12398  | 0.141754 |
| 0.115385 | 0.129808 | 0.128351 | 0.137383 | 0.130973 | 0.127768 | 0.141754 |
| 0.112034 | 0.134615 | 0.11451  | 0.132867 | 0.121503 | 0.130245 | 0.143065 |
| 0.128059 | 0.13345  | 0.132576 | 0.134033 | 0.133159 | 0.13549  | 0.145688 |
| 0.122378 | 0.128934 | 0.127477 | 0.126894 | 0.133596 | 0.126603 | 0.142337 |
| 0.1588   | 0.173805 | 0.167395 | 0.177302 | 0.174971 | 0.162733 | 0.170892 |
| 0.124126 | 0.130682 | 0.126603 | 0.128934 | 0.133013 | 0.130682 | 0.139714 |
| 0.129079 | 0.132721 | 0.130682 | 0.13039  | 0.128351 | 0.136801 | 0.14088  |
| 0.119755 | 0.129516 | 0.13039  | 0.13447  | 0.138258 | 0.128642 | 0.139714 |
| 0.134907 | 0.129516 | 0.131265 | 0.120192 | 0.131265 | 0.132139 | 0.140589 |
| 0.198281 | 0.210373 | 0.207751 | 0.21183  | 0.213578 | 0.202797 | 0.207168 |
| 0.114802 | 0.126894 | 0.121649 | 0.134761 | 0.127768 | 0.127477 | 0.141463 |
| 0.12398  | 0.137238 | 0.136072 | 0.136655 | 0.136655 | 0.131702 | 0.149184 |
| 0.113054 | 0.112034 | 0.124854 | 0.118153 | 0.123689 | 0.114656 | 0.133304 |
| 0.113491 | 0.116259 | 0.131702 | 0.124126 | 0.129371 | 0.121212 | 0.139277 |
| 0.118298 | 0.127768 | 0.130099 | 0.13447  | 0.131556 | 0.128059 | 0.141463 |

|           |          |           |          |          |          |          |
|-----------|----------|-----------|----------|----------|----------|----------|
| 0.254225  | 0.26486  | 0.260781  | 0.262238 | 0.264277 | 0.257867 | 0.254079 |
| 0.1081    | 0.128059 | 0.111451  | 0.12602  | 0.119027 | 0.123397 | 0.134761 |
| 0.121212  | 0.136801 | 0.133304  | 0.140297 | 0.137675 | 0.129516 | 0.143502 |
| 0.18007   | 0.193619 | 0.184878  | 0.192745 | 0.190414 | 0.181964 | 0.184586 |
| 0.189394  | 0.195076 | 0.196241  | 0.200612 | 0.202652 | 0.190997 | 0.198572 |
| 0.130245  | 0.131265 | 0.127185  | 0.130973 | 0.133887 | 0.13243  | 0.142045 |
| 0.130099  | 0.138403 | 0.130536  | 0.138986 | 0.137529 | 0.136946 | 0.144814 |
| 0.120775  | 0.127622 | 0.129662  | 0.127914 | 0.128788 | 0.126457 | 0.139277 |
| 0.153555  | 0.151369 | 0.147582  | 0.145542 | 0.148456 | 0.154575 | 0.156906 |
| 0.127914  | 0.125437 | 0.121941  | 0.125437 | 0.126894 | 0.129225 | 0.14088  |
| 0.131265  | 0.13141  | 0.12704   | 0.130828 | 0.134033 | 0.134615 | 0.145688 |
| 0.115676  | 0.119901 | 0.136509  | 0.126603 | 0.137092 | 0.127477 | 0.139132 |
| 0.127622  | 0.133013 | 0.127768  | 0.131847 | 0.128934 | 0.13243  | 0.141463 |
| 0.139423  | 0.1419   | 0.13549   | 0.13549  | 0.141026 | 0.144522 | 0.148893 |
| 0.113345  | 0.124854 | 0.133596  | 0.129516 | 0.133596 | 0.12398  | 0.140297 |
| 0.126311  | 0.128497 | 0.130828  | 0.132867 | 0.131119 | 0.130828 | 0.141026 |
| 0.134907  | 0.141754 | 0.144085  | 0.140297 | 0.140006 | 0.142628 | 0.150495 |
| 0.109703  | 0.13141  | 0.111597  | 0.129371 | 0.122086 | 0.128205 | 0.136364 |
| 0.130245  | 0.135052 | 0.138258  | 0.137092 | 0.131556 | 0.136218 | 0.140297 |
| 0.11655   | 0.121941 | 0.136218  | 0.131847 | 0.13447  | 0.126603 | 0.146125 |
| 0.209936  | 0.218531 | 0.219697  | 0.219406 | 0.22465  | 0.213287 | 0.217075 |
| 0.0949883 | 0.114948 | 0.113491  | 0.120192 | 0.107955 | 0.125146 | 0.128642 |
| 0.192599  | 0.206439 | 0.203526  | 0.210519 | 0.207896 | 0.197407 | 0.204108 |
| 0.119755  | 0.129225 | 0.124272  | 0.125146 | 0.123397 | 0.127768 | 0.141171 |
| 0.123252  | 0.13243  | 0.128642  | 0.135052 | 0.133304 | 0.13243  | 0.139714 |
| 0.128788  | 0.136509 | 0.131265  | 0.134178 | 0.130973 | 0.125728 | 0.142045 |
| 0.122232  | 0.128788 | 0.129662  | 0.127331 | 0.123543 | 0.116841 | 0.141026 |
| 0.132284  | 0.136801 | 0.132139  | 0.138549 | 0.136509 | 0.135344 | 0.146707 |
| 0.134615  | 0.13447  | 0.133887  | 0.136509 | 0.136218 | 0.135927 | 0.145542 |
| 0.11655   | 0.126311 | 0.128351  | 0.138549 | 0.131556 | 0.129225 | 0.141754 |
| 0.127477  | 0.127914 | 0.128788  | 0.130828 | 0.129953 | 0.135781 | 0.137529 |
| 0.132721  | 0.138695 | 0.132576  | 0.135781 | 0.131993 | 0.130828 | 0.147436 |
| 0.120921  | 0.124272 | 0.141754  | 0.13243  | 0.137966 | 0.130973 | 0.145251 |
| 0.248834  | 0.261509 | 0.259761  | 0.259178 | 0.260344 | 0.253642 | 0.252768 |
| 0.116259  | 0.129516 | 0.127477  | 0.135927 | 0.130099 | 0.128059 | 0.13884  |
| 0.184295  | 0.196387 | 0.193182  | 0.197844 | 0.199883 | 0.191725 | 0.196678 |
| 0.19289   | 0.202069 | 0.198572  | 0.2044   | 0.203234 | 0.195367 | 0.201486 |
| 0.127768  | 0.130536 | 0.130245  | 0.129662 | 0.132867 | 0.133159 | 0.14627  |
| 0.106206  | 0.126457 | 0.109557  | 0.126748 | 0.118298 | 0.120921 | 0.137238 |
| 0.11961   | 0.127914 | 0.129371  | 0.135781 | 0.133741 | 0.133741 | 0.141026 |
| 0.125146  | 0.128788 | 0.127331  | 0.129079 | 0.130828 | 0.127914 | 0.140443 |
| 0.0938228 | 0.119318 | 0.0995047 | 0.12398  | 0.112325 | 0.116113 | 0.129808 |
| 0.114219  | 0.115239 | 0.133013  | 0.127768 | 0.130973 | 0.12398  | 0.144085 |
| 0.125146  | 0.134324 | 0.128788  | 0.134615 | 0.13345  | 0.128788 | 0.137821 |

|          |          |          |          |          |          |          |
|----------|----------|----------|----------|----------|----------|----------|
| 0.141171 | 0.140443 | 0.137238 | 0.139277 | 0.141026 | 0.143939 | 0.147436 |
| 0.115967 | 0.128642 | 0.126311 | 0.13447  | 0.130682 | 0.128642 | 0.139423 |
| 0.140734 | 0.142337 | 0.136801 | 0.139423 | 0.140589 | 0.144085 | 0.150787 |
| 0.125146 | 0.130536 | 0.129371 | 0.129662 | 0.131119 | 0.124709 | 0.144814 |
| 0.134178 | 0.13549  | 0.135781 | 0.136655 | 0.136364 | 0.128205 | 0.149184 |
| 0.124417 | 0.132721 | 0.134178 | 0.137092 | 0.136509 | 0.131847 | 0.145833 |
| 0.117861 | 0.119172 | 0.138112 | 0.129079 | 0.13549  | 0.128205 | 0.142191 |
| 0.111597 | 0.123689 | 0.123689 | 0.133887 | 0.123689 | 0.128351 | 0.137675 |
| 0.117133 | 0.119901 | 0.12398  | 0.13039  | 0.128059 | 0.120775 | 0.13447  |
| 0.137238 | 0.142337 | 0.138549 | 0.143211 | 0.14088  | 0.144959 | 0.154575 |
| 0.18546  | 0.198718 | 0.194347 | 0.201923 | 0.201049 | 0.191142 | 0.198718 |
| 0.143065 | 0.145251 | 0.141171 | 0.140006 | 0.142337 | 0.144085 | 0.152826 |
| 0.133159 | 0.135927 | 0.13039  | 0.132139 | 0.137383 | 0.137675 | 0.145251 |
| 0.128934 | 0.131993 | 0.13141  | 0.130828 | 0.129079 | 0.123543 | 0.144814 |
| 0.115967 | 0.120775 | 0.119901 | 0.120192 | 0.11961  | 0.111451 | 0.133887 |
| 0.124563 | 0.129371 | 0.130245 | 0.13345  | 0.131993 | 0.129953 | 0.141317 |
| 0.124709 | 0.134178 | 0.135927 | 0.136509 | 0.135927 | 0.129808 | 0.144668 |
| 0.19391  | 0.202797 | 0.204545 | 0.205711 | 0.20979  | 0.198135 | 0.203671 |
| 0.121941 | 0.132284 | 0.127331 | 0.13549  | 0.13549  | 0.127331 | 0.132867 |
| 0.108974 | 0.122232 | 0.116113 | 0.127477 | 0.124854 | 0.11961  | 0.131556 |
| 0.134324 | 0.138549 | 0.13447  | 0.135635 | 0.135927 | 0.13884  | 0.145833 |
| 0.196824 | 0.206002 | 0.204837 | 0.205711 | 0.210373 | 0.200175 | 0.206876 |
| 0.104021 | 0.129808 | 0.113199 | 0.128351 | 0.123689 | 0.122815 | 0.136218 |
| 0.113782 | 0.118298 | 0.136655 | 0.131119 | 0.132867 | 0.125874 | 0.143357 |
| 0.13447  | 0.138695 | 0.133741 | 0.139569 | 0.136072 | 0.141026 | 0.14831  |
| 0.126166 | 0.123106 | 0.124272 | 0.124854 | 0.127477 | 0.130099 | 0.135635 |
| 0.189685 | 0.201777 | 0.200029 | 0.203817 | 0.206148 | 0.19391  | 0.200321 |
| 0.11451  | 0.119901 | 0.133013 | 0.128351 | 0.135635 | 0.12398  | 0.141754 |
| 0.120629 | 0.128642 | 0.129225 | 0.135344 | 0.135052 | 0.130973 | 0.145833 |
| 0.11014  | 0.128642 | 0.116404 | 0.126311 | 0.124563 | 0.123689 | 0.137383 |
| 0.127914 | 0.133887 | 0.136509 | 0.135052 | 0.140589 | 0.130682 | 0.145251 |
| 0.12602  | 0.131119 | 0.129079 | 0.128788 | 0.130828 | 0.132576 | 0.143648 |
| 0.118735 | 0.120921 | 0.135198 | 0.123543 | 0.134324 | 0.125291 | 0.142191 |
| 0.114656 | 0.126457 | 0.126166 | 0.132576 | 0.129662 | 0.125874 | 0.141026 |
| 0.123106 | 0.130536 | 0.131702 | 0.129953 | 0.128497 | 0.131993 | 0.143357 |
| 0.152972 | 0.14292  | 0.139423 | 0.136509 | 0.144376 | 0.150204 | 0.147873 |
| 0.236597 | 0.247815 | 0.246649 | 0.249272 | 0.246066 | 0.244027 | 0.243444 |
| 0.11451  | 0.122815 | 0.128934 | 0.13447  | 0.124563 | 0.132139 | 0.140006 |
| 0.128205 | 0.13039  | 0.129516 | 0.13039  | 0.135344 | 0.135344 | 0.144376 |
| 0.124272 | 0.129079 | 0.127914 | 0.134615 | 0.132284 | 0.130536 | 0.140734 |
| 0.132867 | 0.136801 | 0.131847 | 0.141463 | 0.135635 | 0.133304 | 0.146707 |
| 0.114073 | 0.116841 | 0.123252 | 0.120047 | 0.123252 | 0.120047 | 0.124417 |
| 0.12602  | 0.13345  | 0.122086 | 0.132867 | 0.128497 | 0.129662 | 0.1419   |
| 0.130828 | 0.135927 | 0.132721 | 0.137966 | 0.135927 | 0.136801 | 0.14292  |

|           |          |           |          |          |          |          |
|-----------|----------|-----------|----------|----------|----------|----------|
| 0.117279  | 0.123543 | 0.136364  | 0.128788 | 0.136072 | 0.125583 | 0.145979 |
| 0.126603  | 0.129079 | 0.131993  | 0.131119 | 0.132867 | 0.123543 | 0.134615 |
| 0.236014  | 0.246941 | 0.245484  | 0.246941 | 0.247523 | 0.241404 | 0.239073 |
| 0.103875  | 0.123834 | 0.109266  | 0.126457 | 0.115967 | 0.123543 | 0.136655 |
| 0.110577  | 0.119755 | 0.119172  | 0.118298 | 0.119172 | 0.115385 | 0.134033 |
| 0.113636  | 0.124854 | 0.125146  | 0.128351 | 0.126894 | 0.124272 | 0.135927 |
| 0.139714  | 0.134324 | 0.129371  | 0.128497 | 0.136655 | 0.13986  | 0.146562 |
| 0.117861  | 0.128205 | 0.129953  | 0.138695 | 0.130245 | 0.136946 | 0.145396 |
| 0.122815  | 0.131119 | 0.130536  | 0.13549  | 0.136072 | 0.129079 | 0.143939 |
| 0.13447   | 0.138403 | 0.134033  | 0.134615 | 0.136072 | 0.137238 | 0.148019 |
| 0.121212  | 0.123689 | 0.120192  | 0.121066 | 0.125146 | 0.126603 | 0.137092 |
| 0.231352  | 0.241987 | 0.240239  | 0.243153 | 0.241113 | 0.236451 | 0.236451 |
| 0.136072  | 0.139423 | 0.137966  | 0.137675 | 0.138258 | 0.138549 | 0.146416 |
| 0.114365  | 0.120629 | 0.136946  | 0.126166 | 0.134615 | 0.120921 | 0.143065 |
| 0.122232  | 0.125    | 0.125583  | 0.128205 | 0.129953 | 0.124709 | 0.140152 |
| 0.125874  | 0.126894 | 0.125437  | 0.119901 | 0.128351 | 0.122523 | 0.135052 |
| 0.121795  | 0.122523 | 0.125146  | 0.125146 | 0.123106 | 0.11961  | 0.135635 |
| 0.113636  | 0.126311 | 0.12602   | 0.129516 | 0.127185 | 0.125146 | 0.136218 |
| 0.112471  | 0.118153 | 0.133304  | 0.128934 | 0.13039  | 0.124563 | 0.144668 |
| 0.116404  | 0.121503 | 0.138403  | 0.129079 | 0.13549  | 0.129079 | 0.143357 |
| 0.109994  | 0.11655  | 0.129953  | 0.125583 | 0.13141  | 0.123252 | 0.139569 |
| 0.113636  | 0.127477 | 0.125146  | 0.133887 | 0.127185 | 0.127477 | 0.137383 |
| 0.13141   | 0.130973 | 0.129225  | 0.13243  | 0.130099 | 0.139423 | 0.14088  |
| 0.135344  | 0.136655 | 0.133741  | 0.135198 | 0.13549  | 0.143648 | 0.144814 |
| 0.133887  | 0.139569 | 0.141026  | 0.140734 | 0.136364 | 0.130828 | 0.149767 |
| 0.13884   | 0.141026 | 0.140443  | 0.135781 | 0.136655 | 0.133159 | 0.151515 |
| 0.129371  | 0.129516 | 0.131556  | 0.133887 | 0.13243  | 0.142628 | 0.143794 |
| 0.0871212 | 0.114656 | 0.0968823 | 0.123689 | 0.114073 | 0.115239 | 0.13243  |
| 0.124563  | 0.115967 | 0.140152  | 0.122086 | 0.130828 | 0.124417 | 0.136946 |
| 0.127914  | 0.135344 | 0.141754  | 0.14088  | 0.14292  | 0.137675 | 0.147873 |
| 0.208625  | 0.21926  | 0.218969  | 0.220425 | 0.223048 | 0.212558 | 0.215472 |
| 0.125874  | 0.13884  | 0.129808  | 0.137092 | 0.139132 | 0.131847 | 0.145542 |
| 0.117716  | 0.123106 | 0.123689  | 0.124272 | 0.125728 | 0.120192 | 0.134178 |
| 0.117861  | 0.128205 | 0.129371  | 0.135198 | 0.133741 | 0.129662 | 0.13986  |
| 0.22028   | 0.232955 | 0.231498  | 0.235868 | 0.235868 | 0.227418 | 0.228293 |
| 0.213287  | 0.2213   | 0.218969  | 0.221882 | 0.223048 | 0.216929 | 0.216055 |
| 0.119027  | 0.121795 | 0.137529  | 0.127914 | 0.13549  | 0.126166 | 0.143648 |
| 0.251166  | 0.261801 | 0.256265  | 0.258596 | 0.262092 | 0.253059 | 0.252477 |
| 0.0888695 | 0.116113 | 0.100087  | 0.121649 | 0.112034 | 0.113491 | 0.127768 |
| 0.125874  | 0.135927 | 0.123106  | 0.137675 | 0.135635 | 0.140589 | 0.145833 |
| 0.105186  | 0.12602  | 0.111451  | 0.127477 | 0.120775 | 0.120775 | 0.135052 |
| 0.133304  | 0.132867 | 0.131702  | 0.13141  | 0.131993 | 0.137821 | 0.143357 |
| 0.188811  | 0.200903 | 0.199446  | 0.204983 | 0.205857 | 0.193619 | 0.201486 |
| 0.123397  | 0.128788 | 0.126748  | 0.135781 | 0.133159 | 0.131119 | 0.143939 |



|          |          |          |          |          |          |          |
|----------|----------|----------|----------|----------|----------|----------|
| 0.196241 | 0.208625 | 0.206585 | 0.209499 | 0.211247 | 0.199883 | 0.208625 |
| 0.124563 | 0.129079 | 0.125583 | 0.125874 | 0.130828 | 0.129079 | 0.140734 |
| 0.107955 | 0.123834 | 0.128205 | 0.129079 | 0.133159 | 0.119755 | 0.131702 |
| 0.112325 | 0.123543 | 0.117133 | 0.127331 | 0.120629 | 0.126748 | 0.140734 |
| 0.120484 | 0.126166 | 0.128497 | 0.124126 | 0.127331 | 0.126457 | 0.138986 |
| 0.109266 | 0.120192 | 0.119901 | 0.127768 | 0.122815 | 0.120192 | 0.132139 |
| 0.117133 | 0.13039  | 0.12602  | 0.134761 | 0.130099 | 0.125728 | 0.141754 |
| 0.101107 | 0.120192 | 0.107955 | 0.121941 | 0.114948 | 0.119318 | 0.133013 |
| 0.126311 | 0.133741 | 0.130536 | 0.132576 | 0.135198 | 0.132284 | 0.142191 |
| 0.112179 | 0.109703 | 0.126603 | 0.116696 | 0.12398  | 0.109703 | 0.131556 |
| 0.103147 | 0.117861 | 0.119318 | 0.130973 | 0.121941 | 0.120484 | 0.137383 |
| 0.106498 | 0.124126 | 0.108392 | 0.124417 | 0.117133 | 0.120921 | 0.136364 |
| 0.126166 | 0.127768 | 0.131847 | 0.131847 | 0.132139 | 0.119318 | 0.132139 |
| 0.138986 | 0.140297 | 0.135635 | 0.136218 | 0.141171 | 0.143211 | 0.152244 |
| 0.126603 | 0.128497 | 0.127914 | 0.126748 | 0.126166 | 0.120629 | 0.137529 |
| 0.122086 | 0.12602  | 0.128934 | 0.13447  | 0.133013 | 0.130099 | 0.144959 |
| 0.109703 | 0.121795 | 0.121795 | 0.12704  | 0.126457 | 0.121503 | 0.132284 |
| 0.107663 | 0.120629 | 0.130245 | 0.128497 | 0.130828 | 0.122669 | 0.138403 |
| 0.12602  | 0.128497 | 0.124709 | 0.129079 | 0.13141  | 0.132867 | 0.139569 |
| 0.12704  | 0.130099 | 0.136218 | 0.134178 | 0.129808 | 0.131556 | 0.142337 |
| 0.125583 | 0.130099 | 0.128934 | 0.128934 | 0.128351 | 0.11961  | 0.144376 |
| 0.13039  | 0.135781 | 0.128788 | 0.132576 | 0.132576 | 0.133741 | 0.143357 |
| 0.138986 | 0.143211 | 0.137092 | 0.139714 | 0.140589 | 0.141463 | 0.150787 |
| 0.145396 | 0.147582 | 0.142628 | 0.140589 | 0.143502 | 0.148164 | 0.152244 |
| 0.103293 | 0.107517 | 0.122378 | 0.120047 | 0.122378 | 0.113928 | 0.130245 |
| 0.115239 | 0.127622 | 0.127622 | 0.132284 | 0.130536 | 0.128205 | 0.136655 |
| 0.116259 | 0.123689 | 0.116696 | 0.124272 | 0.12602  | 0.119901 | 0.133304 |
| 0.133741 | 0.135927 | 0.136218 | 0.134761 | 0.135344 | 0.141171 | 0.14088  |
| 0.10708  | 0.127622 | 0.110723 | 0.12704  | 0.118881 | 0.123834 | 0.136072 |
| 0.136509 | 0.140152 | 0.141608 | 0.135781 | 0.140734 | 0.141026 | 0.14627  |
| 0.128351 | 0.137529 | 0.137238 | 0.137529 | 0.138695 | 0.140734 | 0.13986  |
| 0.134033 | 0.131556 | 0.129516 | 0.129808 | 0.136509 | 0.135344 | 0.144376 |
| 0.105041 | 0.128205 | 0.120338 | 0.131119 | 0.125874 | 0.123543 | 0.137529 |
| 0.120629 | 0.120192 | 0.121941 | 0.119027 | 0.127768 | 0.121941 | 0.132721 |
| 0.13345  | 0.138549 | 0.138258 | 0.135344 | 0.132721 | 0.128351 | 0.146416 |
| 0.208479 | 0.216492 | 0.218823 | 0.219697 | 0.222028 | 0.210373 | 0.213287 |
| 0.123397 | 0.130536 | 0.127622 | 0.134324 | 0.132284 | 0.132284 | 0.147727 |
| 0.111014 | 0.128351 | 0.11553  | 0.134761 | 0.127185 | 0.127477 | 0.143502 |
| 0.123689 | 0.125874 | 0.128205 | 0.127914 | 0.129079 | 0.131702 | 0.138986 |
| 0.12296  | 0.129516 | 0.130099 | 0.126603 | 0.127185 | 0.116696 | 0.13447  |
| 0.127477 | 0.132576 | 0.128497 | 0.132867 | 0.135781 | 0.133159 | 0.143939 |
| 0.131847 | 0.132284 | 0.131702 | 0.129953 | 0.138986 | 0.131702 | 0.143357 |
| 0.134324 | 0.13447  | 0.129516 | 0.128934 | 0.140589 | 0.133887 | 0.145251 |
| 0.131265 | 0.12296  | 0.124126 | 0.122669 | 0.12704  | 0.130245 | 0.138695 |

|           |          |           |          |          |          |          |
|-----------|----------|-----------|----------|----------|----------|----------|
| 0.113491  | 0.110431 | 0.125874  | 0.117716 | 0.124126 | 0.111597 | 0.134033 |
| 0.128642  | 0.129079 | 0.132576  | 0.128205 | 0.133159 | 0.139277 | 0.137821 |
| 0.105915  | 0.120047 | 0.117133  | 0.12704  | 0.120338 | 0.121795 | 0.138695 |
| 0.109848  | 0.124854 | 0.123106  | 0.134761 | 0.127768 | 0.12398  | 0.141171 |
| 0.182547  | 0.185315 | 0.185023  | 0.190268 | 0.194056 | 0.17803  | 0.189394 |
| 0.128934  | 0.135198 | 0.131702  | 0.134033 | 0.13549  | 0.134907 | 0.145396 |
| 0.127622  | 0.137966 | 0.134761  | 0.13243  | 0.135052 | 0.140297 | 0.143794 |
| 0.0992133 | 0.109266 | 0.11655   | 0.117424 | 0.112179 | 0.115385 | 0.128497 |
| 0.11655   | 0.112034 | 0.118153  | 0.121358 | 0.117279 | 0.106206 | 0.116696 |
| 0.107226  | 0.11961  | 0.109411  | 0.123106 | 0.12398  | 0.120484 | 0.131556 |
| 0.10169   | 0.118153 | 0.112908  | 0.122232 | 0.117279 | 0.115239 | 0.132139 |
| 0.112179  | 0.119901 | 0.108829  | 0.123106 | 0.128351 | 0.122232 | 0.135635 |
| 0.120629  | 0.121358 | 0.130973  | 0.122815 | 0.122815 | 0.116113 | 0.131265 |
| 0.116841  | 0.13039  | 0.127185  | 0.135052 | 0.129516 | 0.127185 | 0.135635 |
| 0.124854  | 0.128788 | 0.134907  | 0.129953 | 0.134615 | 0.133159 | 0.146562 |
| 0.106643  | 0.118444 | 0.115239  | 0.115822 | 0.121066 | 0.110868 | 0.12602  |
| 0.112325  | 0.122086 | 0.117424  | 0.125    | 0.127331 | 0.12296  | 0.141026 |
| 0.123834  | 0.131847 | 0.136509  | 0.135344 | 0.135635 | 0.132721 | 0.148456 |
| 0.0973193 | 0.107955 | 0.110286  | 0.11553  | 0.114948 | 0.116987 | 0.127477 |
| 0.12704   | 0.128934 | 0.125728  | 0.122523 | 0.134761 | 0.129225 | 0.141463 |
| 0.097028  | 0.112617 | 0.108829  | 0.121941 | 0.114656 | 0.114073 | 0.129225 |
| 0.0987762 | 0.110868 | 0.108537  | 0.121649 | 0.11553  | 0.11553  | 0.12398  |
| 0.10169   | 0.106498 | 0.0898893 | 0.116404 | 0.105624 | 0.10708  | 0.124854 |
| 0.100087  | 0.126748 | 0.117424  | 0.13141  | 0.124417 | 0.125583 | 0.132576 |
| 0.0986305 | 0.117716 | 0.113054  | 0.124417 | 0.119464 | 0.115967 | 0.13345  |
| 0.125437  | 0.143065 | 0.146853  | 0.14831  | 0.147436 | 0.142774 | 0.150641 |
| 0.119027  | 0.139569 | 0.146853  | 0.14627  | 0.147145 | 0.141317 | 0.148019 |
| 0.106206  | 0.118298 | 0.119172  | 0.119464 | 0.12704  | 0.118007 | 0.13345  |
| 0.132867  | 0.135344 | 0.136801  | 0.140006 | 0.144085 | 0.140589 | 0.153409 |
| 0.129953  | 0.126894 | 0.13447   | 0.131265 | 0.137383 | 0.12398  | 0.140297 |
| 0.120047  | 0.135635 | 0.135344  | 0.144376 | 0.146125 | 0.137092 | 0.142337 |
| 0.107226  | 0.120484 | 0.11553   | 0.122232 | 0.118444 | 0.122232 | 0.134761 |
| 0.134761  | 0.136655 | 0.144522  | 0.14627  | 0.142774 | 0.141317 | 0.145688 |
| 0.133013  | 0.136072 | 0.125874  | 0.132576 | 0.128788 | 0.132867 | 0.142483 |
| 0.140297  | 0.140443 | 0.140152  | 0.139277 | 0.140734 | 0.132284 | 0.144231 |
| 0.110286  | 0.121503 | 0.120921  | 0.126748 | 0.11655  | 0.116841 | 0.131119 |
| 0.0955711 | 0.112908 | 0.119027  | 0.123689 | 0.121358 | 0.112034 | 0.128059 |
| 0.0887238 | 0.112179 | 0.108974  | 0.123543 | 0.119172 | 0.120047 | 0.135781 |
| 0.118881  | 0.11757  | 0.131265  | 0.124854 | 0.123689 | 0.12398  | 0.139714 |
| 0.102855  | 0.126311 | 0.115239  | 0.126603 | 0.121358 | 0.124563 | 0.136801 |
| 0.112908  | 0.112471 | 0.109266  | 0.124709 | 0.111597 | 0.12296  | 0.136655 |
| 0.106789  | 0.127622 | 0.124126  | 0.137529 | 0.13141  | 0.12296  | 0.131702 |
| 0.10912   | 0.109266 | 0.119172  | 0.11014  | 0.110723 | 0.106643 | 0.12704  |
| 0.085373  | 0.110286 | 0.109411  | 0.124563 | 0.121066 | 0.118735 | 0.137675 |

|           |          |          |          |          |          |          |
|-----------|----------|----------|----------|----------|----------|----------|
| 0.100962  | 0.12296  | 0.114219 | 0.127331 | 0.12704  | 0.128205 | 0.136946 |
| 0.0957168 | 0.119464 | 0.118007 | 0.126457 | 0.122669 | 0.118298 | 0.139277 |
| 0.0865385 | 0.11116  | 0.113491 | 0.128351 | 0.126894 | 0.125437 | 0.136509 |
| 0.106352  | 0.121649 | 0.118153 | 0.126311 | 0.123106 | 0.121358 | 0.135635 |
| 0.119318  | 0.129371 | 0.127914 | 0.133159 | 0.13549  | 0.125583 | 0.138403 |
| 0.111451  | 0.128205 | 0.117716 | 0.135198 | 0.135781 | 0.128205 | 0.145396 |
| 0.0869755 | 0.114802 | 0.097028 | 0.121503 | 0.113054 | 0.111597 | 0.129662 |
| 0.0992133 | 0.121503 | 0.112179 | 0.126457 | 0.122086 | 0.121212 | 0.140152 |
| 0.11655   | 0.129808 | 0.123397 | 0.13243  | 0.133596 | 0.125437 | 0.141171 |
| 0.108829  | 0.122669 | 0.11451  | 0.124417 | 0.126457 | 0.120629 | 0.134907 |
| 0.121358  | 0.138986 | 0.126457 | 0.13986  | 0.134324 | 0.132576 | 0.143065 |
| 0.114656  | 0.122378 | 0.124126 | 0.124709 | 0.125874 | 0.120629 | 0.135198 |
| 0.112471  | 0.135052 | 0.122523 | 0.133887 | 0.127477 | 0.131265 | 0.145833 |

| <b>TDr_13_00256</b> | <b>TDr_13_00273</b> | <b>TDr_13_00285</b> | <b>TDr_13_00288</b> | <b>TDr_13_00294</b> | <b>TDr_13_00318</b> | <b>TDr_13_00330</b> |
|---------------------|---------------------|---------------------|---------------------|---------------------|---------------------|---------------------|
| 0.118298            | 0.12704             | 0.128497            | 0.116841            | 0.12602             | 0.141754            | 0.134178            |
| 0.121649            | 0.118735            | 0.12602             | 0.117861            | 0.131993            | 0.150058            | 0.13345             |
| 0.115239            | 0.118153            | 0.126311            | 0.113782            | 0.129371            | 0.151807            | 0.125874            |
| 0.119027            | 0.118735            | 0.128351            | 0.113782            | 0.144522            | 0.153846            | 0.127914            |
| 0.132139            | 0.133887            | 0.133596            | 0.133596            | 0.158217            | 0.159965            | 0.134324            |
| 0.128059            | 0.13039             | 0.136509            | 0.127768            | 0.144231            | 0.153263            | 0.135198            |
| 0.118007            | 0.112762            | 0.117133            | 0.106643            | 0.134178            | 0.135052            | 0.121358            |
| 0.122378            | 0.117716            | 0.119464            | 0.11859             | 0.135052            | 0.148164            | 0.127477            |
| 0.100379            | 0.104167            | 0.122523            | 0.100379            | 0.128205            | 0.143357            | 0.114219            |
| 0.0708042           | 0.100816            | 0.116259            | 0.0766317           | 0.127477            | 0.132139            | 0.12602             |
| 0.11961             | 0.113491            | 0.125728            | 0.113782            | 0.136072            | 0.149767            | 0.129662            |
| 0.113928            | 0.111014            | 0.126166            | 0.111888            | 0.137675            | 0.146999            | 0.121358            |
| 0.110431            | 0.110723            | 0.123252            | 0.111014            | 0.133887            | 0.151078            | 0.122232            |
| 0.131556            | 0.137092            | 0.145251            | 0.132139            | 0.148893            | 0.162005            | 0.149767            |
| 0.118298            | 0.126748            | 0.129662            | 0.121795            | 0.143794            | 0.153118            | 0.136801            |
| 0.116404            | 0.10708             | 0.12398             | 0.10912             | 0.132576            | 0.143939            | 0.117424            |
| 0.112762            | 0.111305            | 0.117716            | 0.106352            | 0.143211            | 0.145542            | 0.123689            |
| 0.142045            | 0.145542            | 0.106206            | 0.141754            | 0.159674            | 0.170455            | 0.151807            |
| 0.114656            | 0.112617            | 0.124563            | 0.110868            | 0.126748            | 0.147727            | 0.119172            |
| 0.202069            | 0.205857            | 0.209936            | 0.206439            | 0.209499            | 0.218823            | 0.213287            |
| 0.125291            | 0.119755            | 0.130245            | 0.120338            | 0.143794            | 0.151369            | 0.13243             |
| 0.123397            | 0.12398             | 0.125437            | 0.11757             | 0.140734            | 0.150932            | 0.123252            |
| 0.107809            | 0.114802            | 0.124126            | 0.104021            | 0.139132            | 0.151078            | 0.11961             |
| 0.118444            | 0.110577            | 0.134178            | 0.120484            | 0.144231            | 0.148601            | 0.111305            |
| 0.099359            | 0.106935            | 0.111597            | 0.0973193           | 0.13243             | 0.138549            | 0.116987            |
| 0.126748            | 0.122086            | 0.132284            | 0.125291            | 0.145251            | 0.151952            | 0.13039             |
| 0.115967            | 0.11859             | 0.128497            | 0.105186            | 0.143211            | 0.150204            | 0.126311            |
| 0.114219            | 0.108974            | 0.131702            | 0.119464            | 0.137383            | 0.146707            | 0.112034            |
| 0.121795            | 0.11451             | 0.136655            | 0.120921            | 0.144959            | 0.154283            | 0.126311            |
| 0.108974            | 0.117424            | 0.129662            | 0.115093            | 0.143794            | 0.149913            | 0.125146            |
| 0.128351            | 0.120775            | 0.129225            | 0.11757             | 0.135781            | 0.147145            | 0.125               |
| 0.11859             | 0.113054            | 0.126166            | 0.118881            | 0.138549            | 0.14933             | 0.115822            |
| 0.103438            | 0.106643            | 0.116841            | 0.106352            | 0.132721            | 0.140006            | 0.120192            |
| 0.11014             | 0.110431            | 0.129953            | 0.114802            | 0.142045            | 0.156323            | 0.124563            |
| 0.120484            | 0.11116             | 0.121066            | 0.109994            | 0.13549             | 0.147145            | 0.125               |
| 0.114219            | 0.115967            | 0.134615            | 0.113054            | 0.14933             | 0.150787            | 0.130099            |
| 0.124563            | 0.119901            | 0.119027            | 0.107663            | 0.128205            | 0.136072            | 0.140152            |
| 0.11859             | 0.118007            | 0.137821            | 0.117424            | 0.143794            | 0.152535            | 0.125728            |
| 0.11014             | 0.104312            | 0.127622            | 0.109557            | 0.138258            | 0.14933             | 0.10708             |
| 0.115093            | 0.111888            | 0.13141             | 0.11655             | 0.144085            | 0.154866            | 0.109411            |
| 0.109266            | 0.0967366           | 0.117133            | 0.102855            | 0.132139            | 0.139132            | 0.110868            |
| 0.127622            | 0.130536            | 0.136946            | 0.129079            | 0.151369            | 0.160111            | 0.124272            |

|           |           |          |           |          |          |           |
|-----------|-----------|----------|-----------|----------|----------|-----------|
| 0.136364  | 0.130536  | 0.142483 | 0.13345   | 0.151661 | 0.158654 | 0.133013  |
| 0.110868  | 0.104749  | 0.126311 | 0.107955  | 0.131993 | 0.146562 | 0.111014  |
| 0.10067   | 0.0977564 | 0.113491 | 0.0890152 | 0.124126 | 0.132867 | 0.117424  |
| 0.0920746 | 0.108974  | 0.115676 | 0.0909091 | 0.126311 | 0.137092 | 0.128934  |
| 0.123834  | 0.100816  | 0.124709 | 0.118007  | 0.136801 | 0.150787 | 0.0954254 |
| 0.120775  | 0.121649  | 0.142337 | 0.123397  | 0.148601 | 0.150932 | 0.125874  |
| 0.109703  | 0.106206  | 0.123106 | 0.110577  | 0.138695 | 0.143939 | 0.112179  |
| 0.108683  | 0.109557  | 0.125583 | 0.106643  | 0.13039  | 0.139132 | 0.114365  |
| 0.137383  | 0.149621  | 0.139714 | 0.130973  | 0.145979 | 0.149767 | 0.144522  |
| 0.126603  | 0.105041  | 0.130973 | 0.124272  | 0.148893 | 0.151515 | 0.11451   |
| 0.108974  | 0.109266  | 0.122378 | 0.114219  | 0.137092 | 0.141754 | 0.111116  |
| 0.110431  | 0.118007  | 0.130536 | 0.111014  | 0.141463 | 0.148747 | 0.131265  |
| 0.124417  | 0.114219  | 0.12704  | 0.120629  | 0.138258 | 0.151369 | 0.122232  |
| 0.138695  | 0.117133  | 0.13986  | 0.132284  | 0.155449 | 0.162733 | 0.103001  |
| 0.114073  | 0.10912   | 0.132139 | 0.118444  | 0.146562 | 0.149184 | 0.115385  |
| 0.116404  | 0.106498  | 0.12398  | 0.111116  | 0.136655 | 0.151515 | 0.113636  |
| 0.10912   | 0.101253  | 0.126894 | 0.109703  | 0.134324 | 0.145105 | 0.113054  |
| 0.103147  | 0.10373   | 0.113054 | 0.092366  | 0.130099 | 0.132721 | 0.120192  |
| 0.125291  | 0.124417  | 0.138403 | 0.126166  | 0.150495 | 0.149621 | 0.125728  |
| 0.126748  | 0.124417  | 0.13986  | 0.133159  | 0.151661 | 0.161859 | 0.131265  |
| 0.153992  | 0.153118  | 0.160693 | 0.153118  | 0.165501 | 0.17162  | 0.154138  |
| 0.113491  | 0.104749  | 0.124854 | 0.114365  | 0.136655 | 0.145979 | 0.114802  |
| 0.107955  | 0.105332  | 0.126894 | 0.109411  | 0.136072 | 0.145688 | 0.112471  |
| 0.10912   | 0.0971737 | 0.125146 | 0.109411  | 0.138986 | 0.143939 | 0.109266  |
| 0.136364  | 0.133741  | 0.132867 | 0.119755  | 0.10708  | 0.108537 | 0.145542  |
| 0.111888  | 0.101107  | 0.120047 | 0.107517  | 0.133887 | 0.141754 | 0.118153  |
| 0.134178  | 0.117861  | 0.138258 | 0.126603  | 0.15035  | 0.157925 | 0.105769  |
| 0.103584  | 0.101544  | 0.114656 | 0.090472  | 0.130536 | 0.138112 | 0.125     |
| 0.111305  | 0.106352  | 0.128497 | 0.113345  | 0.14292  | 0.148456 | 0.113199  |
| 0.144522  | 0.13986   | 0.133159 | 0.127622  | 0.11553  | 0.113782 | 0.154283  |
| 0.119464  | 0.112762  | 0.130828 | 0.118007  | 0.140006 | 0.152535 | 0.11553   |
| 0.131556  | 0.118735  | 0.144085 | 0.130973  | 0.15472  | 0.158217 | 0.126457  |
| 0.125291  | 0.103438  | 0.134615 | 0.125291  | 0.153992 | 0.15574  | 0.114656  |
| 0.122232  | 0.114365  | 0.122523 | 0.113491  | 0.137821 | 0.150932 | 0.119464  |
| 0.110286  | 0.106789  | 0.128351 | 0.111742  | 0.13345  | 0.145688 | 0.108392  |
| 0.112617  | 0.10067   | 0.122815 | 0.111742  | 0.136946 | 0.145105 | 0.109557  |
| 0.130099  | 0.120192  | 0.14292  | 0.125728  | 0.147727 | 0.159965 | 0.119755  |
| 0.107809  | 0.104312  | 0.126457 | 0.110723  | 0.136801 | 0.143502 | 0.114073  |
| 0.130099  | 0.126894  | 0.14088  | 0.129808  | 0.157343 | 0.157634 | 0.119172  |
| 0.116987  | 0.107372  | 0.131556 | 0.113782  | 0.144522 | 0.151807 | 0.120629  |
| 0.118444  | 0.100379  | 0.126311 | 0.11757   | 0.140443 | 0.147727 | 0.104312  |
| 0.11757   | 0.111742  | 0.124854 | 0.11553   | 0.134033 | 0.149767 | 0.11655   |
| 0.11553   | 0.108537  | 0.131847 | 0.119318  | 0.143357 | 0.15472  | 0.118007  |
| 0.113491  | 0.105041  | 0.128642 | 0.114073  | 0.141026 | 0.142483 | 0.107809  |

|           |           |          |           |          |          |          |
|-----------|-----------|----------|-----------|----------|----------|----------|
| 0.110286  | 0.105624  | 0.12398  | 0.111742  | 0.133741 | 0.143357 | 0.110723 |
| 0.124709  | 0.126166  | 0.142774 | 0.124709  | 0.149038 | 0.153118 | 0.123397 |
| 0.105478  | 0.106643  | 0.121212 | 0.103438  | 0.138258 | 0.145833 | 0.116696 |
| 0.10708   | 0.115239  | 0.126603 | 0.110577  | 0.139569 | 0.148019 | 0.118007 |
| 0.119318  | 0.112908  | 0.112034 | 0.107663  | 0.136655 | 0.148893 | 0.129662 |
| 0.122232  | 0.116113  | 0.114073 | 0.110868  | 0.136655 | 0.138986 | 0.12704  |
| 0.125728  | 0.116987  | 0.117861 | 0.109703  | 0.133741 | 0.141317 | 0.128788 |
| 0.135781  | 0.123834  | 0.124709 | 0.117424  | 0.14933  | 0.144668 | 0.137383 |
| 0.118444  | 0.113782  | 0.114073 | 0.104749  | 0.126748 | 0.138695 | 0.130536 |
| 0.17701   | 0.181381  | 0.17701  | 0.169435  | 0.186189 | 0.188811 | 0.191434 |
| 0.111597  | 0.104021  | 0.11014  | 0.102564  | 0.129516 | 0.144085 | 0.120484 |
| 0.130973  | 0.122815  | 0.124272 | 0.114948  | 0.139277 | 0.156469 | 0.130245 |
| 0.125437  | 0.116987  | 0.121066 | 0.108246  | 0.134324 | 0.150932 | 0.127622 |
| 0.130828  | 0.11859   | 0.119464 | 0.114802  | 0.139423 | 0.141754 | 0.139132 |
| 0.116113  | 0.10708   | 0.107663 | 0.101836  | 0.130828 | 0.13549  | 0.119464 |
| 0.134761  | 0.120775  | 0.11757  | 0.113491  | 0.1419   | 0.142191 | 0.129079 |
| 0.114073  | 0.10708   | 0.109994 | 0.106498  | 0.128205 | 0.145979 | 0.119464 |
| 0.114802  | 0.111597  | 0.112179 | 0.104021  | 0.137675 | 0.14292  | 0.12398  |
| 0.109266  | 0.1081    | 0.113345 | 0.0999417 | 0.125437 | 0.137675 | 0.122523 |
| 0.12296   | 0.118298  | 0.121795 | 0.117133  | 0.142045 | 0.143502 | 0.12602  |
| 0.0909091 | 0.0976107 | 0.114219 | 0.0839161 | 0.127477 | 0.139423 | 0.114365 |
| 0.131265  | 0.123397  | 0.123689 | 0.113199  | 0.134033 | 0.136946 | 0.137821 |
| 0.109266  | 0.106643  | 0.105186 | 0.0964452 | 0.121358 | 0.141463 | 0.127768 |
| 0.119901  | 0.120192  | 0.141754 | 0.121941  | 0.149767 | 0.153846 | 0.114802 |
| 0.117133  | 0.124126  | 0.112471 | 0.105186  | 0.13884  | 0.135052 | 0.131265 |
| 0.106352  | 0.103147  | 0.111014 | 0.0967366 | 0.128642 | 0.138258 | 0.116113 |
| 0.143065  | 0.138695  | 0.134907 | 0.127331  | 0.106789 | 0.117861 | 0.151369 |
| 0.109411  | 0.104167  | 0.114073 | 0.101836  | 0.129953 | 0.138695 | 0.117424 |
| 0.10912   | 0.105041  | 0.117279 | 0.103584  | 0.127331 | 0.143065 | 0.118298 |
| 0.101107  | 0.112762  | 0.126166 | 0.108392  | 0.142045 | 0.149621 | 0.10067  |
| 0.119464  | 0.126166  | 0.132576 | 0.114802  | 0.14088  | 0.150787 | 0.142045 |
| 0.120338  | 0.120338  | 0.128788 | 0.116841  | 0.136218 | 0.147873 | 0.115822 |
| 0.109557  | 0.0973193 | 0.112179 | 0.105186  | 0.123397 | 0.146999 | 0.11553  |
| 0.111888  | 0.0996503 | 0.115967 | 0.0987762 | 0.125437 | 0.142045 | 0.115239 |
| 0.115822  | 0.10708   | 0.115822 | 0.102127  | 0.123543 | 0.137821 | 0.126166 |
| 0.103147  | 0.109848  | 0.117133 | 0.0920746 | 0.136509 | 0.133887 | 0.132721 |
| 0.112325  | 0.109703  | 0.114948 | 0.103293  | 0.134907 | 0.13986  | 0.121503 |
| 0.097028  | 0.0964452 | 0.107226 | 0.0856643 | 0.12398  | 0.138258 | 0.113199 |
| 0.0964452 | 0.097028  | 0.112762 | 0.085373  | 0.125728 | 0.136509 | 0.11553  |
| 0.0913462 | 0.101544  | 0.110868 | 0.0843531 | 0.120921 | 0.138112 | 0.11655  |
| 0.124272  | 0.120192  | 0.134761 | 0.119027  | 0.139277 | 0.15035  | 0.126166 |
| 0.11655   | 0.115093  | 0.113636 | 0.106352  | 0.139423 | 0.146416 | 0.12398  |
| 0.103584  | 0.101836  | 0.115822 | 0.0983392 | 0.128497 | 0.13549  | 0.11655  |
| 0.0949883 | 0.0920746 | 0.113345 | 0.0903263 | 0.122232 | 0.137383 | 0.11553  |

|           |           |          |           |          |          |           |
|-----------|-----------|----------|-----------|----------|----------|-----------|
| 0.103438  | 0.109848  | 0.113928 | 0.0929487 | 0.128934 | 0.134761 | 0.121941  |
| 0.0992133 | 0.0954254 | 0.113199 | 0.0922203 | 0.130828 | 0.13986  | 0.118298  |
| 0.127477  | 0.121358  | 0.125728 | 0.110286  | 0.100233 | 0.109557 | 0.133741  |
| 0.127185  | 0.135052  | 0.133596 | 0.120192  | 0.130536 | 0.141608 | 0.135781  |
| 0.097465  | 0.0977564 | 0.118153 | 0.0823135 | 0.129079 | 0.134615 | 0.120921  |
| 0.101399  | 0.105186  | 0.119464 | 0.0964452 | 0.13243  | 0.140297 | 0.118444  |
| 0.0979021 | 0.101399  | 0.114219 | 0.0859557 | 0.12398  | 0.125728 | 0.114656  |
| 0.104312  | 0.0996503 | 0.116841 | 0.0979021 | 0.123106 | 0.135344 | 0.112034  |
| 0.0981935 | 0.107517  | 0.123543 | 0.0920746 | 0.132139 | 0.140006 | 0.126603  |
| 0.0952797 | 0.0944056 | 0.117133 | 0.0894522 | 0.130682 | 0.136801 | 0.116696  |
| 0.138258  | 0.13039   | 0.135927 | 0.135052  | 0.158217 | 0.165501 | 0.133741  |
| 0.110723  | 0.13141   | 0.136655 | 0.119172  | 0.151661 | 0.156906 | 0.139132  |
| 0.105478  | 0.122378  | 0.131119 | 0.111014  | 0.137966 | 0.1537   | 0.128642  |
| 0.0968823 | 0.114656  | 0.123689 | 0.108246  | 0.13986  | 0.140152 | 0.123834  |
| 0.106789  | 0.0992133 | 0.113491 | 0.103584  | 0.129953 | 0.136946 | 0.125     |
| 0.097028  | 0.100233  | 0.112471 | 0.0885781 | 0.128351 | 0.131556 | 0.123397  |
| 0.10067   | 0.0957168 | 0.121358 | 0.0922203 | 0.130828 | 0.133741 | 0.11014   |
| 0.108829  | 0.0916375 | 0.125146 | 0.106206  | 0.13345  | 0.144814 | 0.110431  |
| 0.121066  | 0.112034  | 0.12602  | 0.115822  | 0.134324 | 0.148601 | 0.107809  |
| 0.117861  | 0.0983392 | 0.131265 | 0.123397  | 0.14627  | 0.151224 | 0.097028  |
| 0.122086  | 0.107809  | 0.11451  | 0.104895  | 0.133887 | 0.140589 | 0.127185  |
| 0.120192  | 0.125146  | 0.137675 | 0.113199  | 0.147436 | 0.155303 | 0.132576  |
| 0.126457  | 0.117424  | 0.112471 | 0.109848  | 0.140297 | 0.146707 | 0.136509  |
| 0.19697   | 0.200466  | 0.204254 | 0.197552  | 0.203526 | 0.21285  | 0.207314  |
| 0.237908  | 0.243735  | 0.243153 | 0.237617  | 0.243881 | 0.249126 | 0.245047  |
| 0.125583  | 0.115967  | 0.125874 | 0.119172  | 0.134761 | 0.14933  | 0.114073  |
| 0.108246  | 0.10271   | 0.117279 | 0.108537  | 0.131119 | 0.145396 | 0.0903263 |
| 0.113782  | 0.103293  | 0.116404 | 0.105915  | 0.12704  | 0.140734 | 0.103147  |
| 0.114948  | 0.0962995 | 0.11757  | 0.112034  | 0.136364 | 0.142483 | 0.0990676 |
| 0.115239  | 0.128642  | 0.129516 | 0.121358  | 0.145688 | 0.151807 | 0.138112  |
| 0.11553   | 0.099796  | 0.118153 | 0.114948  | 0.142483 | 0.15035  | 0.0926573 |
| 0.140734  | 0.118881  | 0.138112 | 0.132576  | 0.156614 | 0.159528 | 0.100962  |
| 0.123106  | 0.101253  | 0.12398  | 0.114656  | 0.137529 | 0.151807 | 0.0871212 |
| 0.125146  | 0.10708   | 0.133013 | 0.122232  | 0.148893 | 0.1588   | 0.0874126 |
| 0.132284  | 0.116841  | 0.134324 | 0.124417  | 0.145833 | 0.153118 | 0.107955  |
| 0.125874  | 0.118007  | 0.127622 | 0.12296   | 0.147873 | 0.157488 | 0.092803  |
| 0.130245  | 0.122669  | 0.142483 | 0.126166  | 0.147582 | 0.152244 | 0.129808  |
| 0.113928  | 0.101107  | 0.122086 | 0.108392  | 0.133596 | 0.143211 | 0.0948427 |
| 0.11451   | 0.099359  | 0.117424 | 0.107517  | 0.135052 | 0.143794 | 0.0878497 |
| 0.111451  | 0.100962  | 0.115822 | 0.112617  | 0.137238 | 0.147436 | 0.0917832 |
| 0.113199  | 0.0960082 | 0.115822 | 0.110577  | 0.132867 | 0.143939 | 0.0906177 |
| 0.114656  | 0.0989219 | 0.116113 | 0.108537  | 0.13141  | 0.141026 | 0.0894522 |
| 0.115093  | 0.101399  | 0.119172 | 0.111888  | 0.131556 | 0.14729  | 0.0968823 |
| 0.12398   | 0.111742  | 0.130099 | 0.125437  | 0.145688 | 0.156177 | 0.0850816 |

|           |           |          |           |          |          |           |
|-----------|-----------|----------|-----------|----------|----------|-----------|
| 0.134178  | 0.11961   | 0.136218 | 0.137092  | 0.155594 | 0.162587 | 0.080711  |
| 0.117424  | 0.104604  | 0.125874 | 0.113054  | 0.138258 | 0.146125 | 0.0980478 |
| 0.11553   | 0.103875  | 0.11757  | 0.112325  | 0.140443 | 0.150932 | 0.0949883 |
| 0.126603  | 0.114656  | 0.13243  | 0.128351  | 0.149184 | 0.157634 | 0.10169   |
| 0.113491  | 0.104458  | 0.120192 | 0.110286  | 0.13345  | 0.143648 | 0.0976107 |
| 0.137821  | 0.123543  | 0.141317 | 0.134615  | 0.156614 | 0.157488 | 0.0971737 |
| 0.107809  | 0.13345   | 0.140152 | 0.120921  | 0.14292  | 0.154866 | 0.140297  |
| 0.141171  | 0.118735  | 0.135344 | 0.134761  | 0.147145 | 0.155303 | 0.111014  |
| 0.110577  | 0.0983392 | 0.117279 | 0.102418  | 0.131119 | 0.143357 | 0.094697  |
| 0.11014   | 0.103147  | 0.120047 | 0.113928  | 0.135344 | 0.144376 | 0.0861014 |
| 0.130099  | 0.106498  | 0.125728 | 0.113782  | 0.141317 | 0.150641 | 0.0944056 |
| 0.12704   | 0.111305  | 0.131119 | 0.124417  | 0.14292  | 0.1537   | 0.083479  |
| 0.131993  | 0.111888  | 0.132867 | 0.119755  | 0.144959 | 0.152535 | 0.102127  |
| 0.120192  | 0.105041  | 0.122523 | 0.118153  | 0.141026 | 0.157343 | 0.0949883 |
| 0.117133  | 0.097028  | 0.124709 | 0.113054  | 0.144085 | 0.150787 | 0.090472  |
| 0.123252  | 0.11014   | 0.125583 | 0.119755  | 0.140589 | 0.154575 | 0.0913462 |
| 0.122086  | 0.115093  | 0.131119 | 0.121212  | 0.148747 | 0.15574  | 0.08581   |
| 0.131119  | 0.113928  | 0.126166 | 0.122669  | 0.14088  | 0.157197 | 0.0954254 |
| 0.128642  | 0.118444  | 0.13447  | 0.128934  | 0.150058 | 0.15676  | 0.0891608 |
| 0.129079  | 0.124417  | 0.1419   | 0.132867  | 0.137966 | 0.144959 | 0.114073  |
| 0.115676  | 0.103438  | 0.124126 | 0.11451   | 0.13884  | 0.14933  | 0.0922203 |
| 0.12704   | 0.117133  | 0.129662 | 0.12296   | 0.146125 | 0.157197 | 0.101836  |
| 0.110286  | 0.0960082 | 0.120192 | 0.109411  | 0.134033 | 0.145105 | 0.0912005 |
| 0.112471  | 0.099359  | 0.120629 | 0.106643  | 0.13447  | 0.140297 | 0.112908  |
| 0.11655   | 0.0990676 | 0.11859  | 0.111014  | 0.130099 | 0.143211 | 0.0898893 |
| 0.112325  | 0.0957168 | 0.123106 | 0.109411  | 0.139277 | 0.146562 | 0.0912005 |
| 0.114073  | 0.0916375 | 0.112034 | 0.108246  | 0.132867 | 0.143648 | 0.0929487 |
| 0.132867  | 0.117716  | 0.136072 | 0.131702  | 0.152826 | 0.15778  | 0.0901807 |
| 0.115822  | 0.105624  | 0.133013 | 0.117279  | 0.128205 | 0.137821 | 0.108392  |
| 0.129225  | 0.110577  | 0.138258 | 0.128059  | 0.153846 | 0.158508 | 0.0856643 |
| 0.116404  | 0.0977564 | 0.118735 | 0.109703  | 0.133159 | 0.146562 | 0.090035  |
| 0.121212  | 0.113928  | 0.125874 | 0.114802  | 0.138549 | 0.148456 | 0.095134  |
| 0.116404  | 0.120192  | 0.127185 | 0.112034  | 0.137529 | 0.145396 | 0.128497  |
| 0.10271   | 0.118153  | 0.128934 | 0.110286  | 0.134033 | 0.149767 | 0.13345   |
| 0.11014   | 0.106352  | 0.118881 | 0.0973193 | 0.131265 | 0.140589 | 0.120484  |
| 0.100379  | 0.11757   | 0.135635 | 0.113782  | 0.145688 | 0.14831  | 0.123252  |
| 0.113636  | 0.114802  | 0.129371 | 0.115093  | 0.146707 | 0.149913 | 0.13039   |
| 0.107809  | 0.108392  | 0.123252 | 0.10169   | 0.136509 | 0.144085 | 0.127185  |
| 0.100524  | 0.123834  | 0.132867 | 0.111014  | 0.14292  | 0.154283 | 0.143502  |
| 0.127185  | 0.125437  | 0.136218 | 0.120775  | 0.149476 | 0.148893 | 0.134033  |
| 0.0965909 | 0.104749  | 0.116987 | 0.0971737 | 0.128205 | 0.142483 | 0.121795  |
| 0.117424  | 0.129371  | 0.128788 | 0.116259  | 0.148456 | 0.149621 | 0.135635  |
| 0.0866841 | 0.118444  | 0.126603 | 0.095134  | 0.136072 | 0.14831  | 0.134033  |
| 0.107663  | 0.122523  | 0.132139 | 0.112325  | 0.14627  | 0.154429 | 0.132867  |



|           |          |          |           |          |          |          |
|-----------|----------|----------|-----------|----------|----------|----------|
| 0.102418  | 0.114948 | 0.126603 | 0.102127  | 0.140734 | 0.144231 | 0.130828 |
| 0.0957168 | 0.114948 | 0.123689 | 0.0992133 | 0.138112 | 0.146853 | 0.133741 |
| 0.0990676 | 0.113928 | 0.127331 | 0.0987762 | 0.136218 | 0.14729  | 0.133887 |
| 0.10912   | 0.120484 | 0.129808 | 0.113782  | 0.148019 | 0.153263 | 0.127622 |
| 0.114656  | 0.132721 | 0.135927 | 0.111742  | 0.153555 | 0.15472  | 0.1419   |
| 0.101836  | 0.116987 | 0.135635 | 0.101836  | 0.134033 | 0.150641 | 0.13549  |
| 0.100379  | 0.10912  | 0.121649 | 0.100379  | 0.136946 | 0.148893 | 0.12704  |
| 0.140734  | 0.134033 | 0.145979 | 0.131993  | 0.152826 | 0.162442 | 0.135052 |
| 0.104749  | 0.12398  | 0.134178 | 0.105041  | 0.142191 | 0.152389 | 0.141026 |
| 0.103293  | 0.108829 | 0.120775 | 0.100379  | 0.132867 | 0.143648 | 0.120338 |
| 0.219988  | 0.227564 | 0.224359 | 0.219114  | 0.223339 | 0.230624 | 0.228875 |
| 0.111305  | 0.11859  | 0.130828 | 0.107517  | 0.138258 | 0.151369 | 0.127768 |
| 0.0976107 | 0.106935 | 0.11859  | 0.100233  | 0.128059 | 0.146999 | 0.128934 |
| 0.107663  | 0.133304 | 0.139132 | 0.115239  | 0.154429 | 0.159965 | 0.136364 |
| 0.103875  | 0.108246 | 0.123106 | 0.101253  | 0.135781 | 0.153555 | 0.124709 |
| 0.104458  | 0.125146 | 0.135052 | 0.106789  | 0.144522 | 0.155303 | 0.143648 |
| 0.108246  | 0.111451 | 0.126603 | 0.112034  | 0.140443 | 0.149184 | 0.122086 |
| 0.108392  | 0.113636 | 0.122086 | 0.107517  | 0.135052 | 0.148456 | 0.126311 |
| 0.0932401 | 0.112762 | 0.13141  | 0.104604  | 0.141171 | 0.146416 | 0.134178 |
| 0.114948  | 0.11757  | 0.135052 | 0.114073  | 0.147145 | 0.154138 | 0.134907 |
| 0.109557  | 0.126457 | 0.126748 | 0.111014  | 0.144668 | 0.153118 | 0.138549 |
| 0.107663  | 0.12398  | 0.134761 | 0.107372  | 0.148893 | 0.152098 | 0.131119 |
| 0.110577  | 0.123689 | 0.128059 | 0.109994  | 0.135198 | 0.151224 | 0.136072 |
| 0.103584  | 0.11553  | 0.127185 | 0.100087  | 0.137529 | 0.149767 | 0.127622 |
| 0.106498  | 0.114073 | 0.121358 | 0.100379  | 0.134324 | 0.151807 | 0.131993 |
| 0.114802  | 0.123543 | 0.133741 | 0.112471  | 0.150787 | 0.152826 | 0.137092 |
| 0.0962995 | 0.116404 | 0.12398  | 0.101253  | 0.136364 | 0.146562 | 0.123834 |
| 0.126311  | 0.126311 | 0.140589 | 0.129808  | 0.15676  | 0.161422 | 0.12704  |
| 0.125583  | 0.134907 | 0.148601 | 0.125583  | 0.12602  | 0.134178 | 0.1537   |
| 0.118298  | 0.125583 | 0.127914 | 0.111597  | 0.140297 | 0.143502 | 0.13039  |
| 0.100524  | 0.127331 | 0.128788 | 0.103438  | 0.143502 | 0.152535 | 0.136801 |
| 0.128059  | 0.128642 | 0.130682 | 0.119027  | 0.115676 | 0.130536 | 0.136072 |
| 0.115676  | 0.120921 | 0.137238 | 0.123543  | 0.147582 | 0.156614 | 0.129516 |
| 0.124126  | 0.125874 | 0.136072 | 0.121503  | 0.112908 | 0.133013 | 0.136801 |
| 0.130245  | 0.137821 | 0.143357 | 0.127331  | 0.116696 | 0.130973 | 0.147873 |
| 0.0831876 | 0.105041 | 0.123106 | 0.0960082 | 0.134907 | 0.146853 | 0.111888 |
| 0.103438  | 0.129079 | 0.136072 | 0.11451   | 0.145251 | 0.149913 | 0.135635 |
| 0.13884   | 0.143502 | 0.146416 | 0.139132  | 0.127622 | 0.134907 | 0.15035  |
| 0.104458  | 0.101253 | 0.115822 | 0.0948427 | 0.134033 | 0.137821 | 0.120629 |
| 0.116696  | 0.112617 | 0.134178 | 0.116113  | 0.143065 | 0.15035  | 0.122378 |
| 0.149476  | 0.138695 | 0.143939 | 0.139569  | 0.160402 | 0.161568 | 0.139423 |
| 0.123834  | 0.113345 | 0.138112 | 0.122669  | 0.144376 | 0.153992 | 0.112325 |
| 0.122815  | 0.140297 | 0.141754 | 0.126603  | 0.1588   | 0.157634 | 0.137529 |
| 0.11655   | 0.118881 | 0.139277 | 0.113345  | 0.148456 | 0.154283 | 0.131265 |

|           |           |          |           |          |          |           |
|-----------|-----------|----------|-----------|----------|----------|-----------|
| 0.119027  | 0.109411  | 0.123106 | 0.111742  | 0.136655 | 0.144814 | 0.124417  |
| 0.120047  | 0.121212  | 0.133159 | 0.111888  | 0.139714 | 0.14933  | 0.127768  |
| 0.095134  | 0.114073  | 0.122815 | 0.0916375 | 0.129079 | 0.134324 | 0.129662  |
| 0.119464  | 0.111888  | 0.12704  | 0.116841  | 0.14292  | 0.147582 | 0.130682  |
| 0.1081    | 0.118007  | 0.132867 | 0.105769  | 0.143211 | 0.151369 | 0.134761  |
| 0.13141   | 0.117716  | 0.12704  | 0.119464  | 0.146999 | 0.148747 | 0.123106  |
| 0.125     | 0.120921  | 0.121212 | 0.1081    | 0.138258 | 0.138549 | 0.135344  |
| 0.13141   | 0.119464  | 0.124417 | 0.112762  | 0.116113 | 0.13243  | 0.130973  |
| 0.142191  | 0.136655  | 0.138695 | 0.125     | 0.13039  | 0.134178 | 0.145542  |
| 0         | 0.115385  | 0.128788 | 0.0879953 | 0.139132 | 0.143794 | 0.127185  |
| 0.115385  | 0         | 0.12296  | 0.103438  | 0.13243  | 0.144376 | 0.114073  |
| 0.128788  | 0.12296   | 0        | 0.110431  | 0.13039  | 0.146707 | 0.137383  |
| 0.0879953 | 0.103438  | 0.110431 | 0         | 0.120775 | 0.12602  | 0.129516  |
| 0.139132  | 0.13243   | 0.13039  | 0.120775  | 0        | 0.11655  | 0.150058  |
| 0.143794  | 0.144376  | 0.146707 | 0.12602   | 0.11655  | 0        | 0.15676   |
| 0.127185  | 0.114073  | 0.137383 | 0.129516  | 0.150058 | 0.15676  | 0         |
| 0.119755  | 0.108392  | 0.129371 | 0.115385  | 0.141463 | 0.150495 | 0.0884324 |
| 0.128642  | 0.127768  | 0.140006 | 0.13039   | 0.152098 | 0.160548 | 0.127914  |
| 0.112471  | 0.127914  | 0.13345  | 0.111014  | 0.142045 | 0.1537   | 0.137675  |
| 0.126457  | 0.110723  | 0.129079 | 0.119172  | 0.144959 | 0.154866 | 0.0945513 |
| 0.106352  | 0.126166  | 0.134324 | 0.115676  | 0.150787 | 0.15778  | 0.132139  |
| 0.121795  | 0.129079  | 0.132576 | 0.116841  | 0.114948 | 0.12602  | 0.136509  |
| 0.104749  | 0.117279  | 0.134178 | 0.102127  | 0.141026 | 0.147436 | 0.117133  |
| 0.16419   | 0.160985  | 0.157197 | 0.154283  | 0.13345  | 0.137529 | 0.148893  |
| 0.103875  | 0.112617  | 0.132721 | 0.106498  | 0.147436 | 0.151515 | 0.114802  |
| 0.116696  | 0.132721  | 0.144959 | 0.123106  | 0.152389 | 0.154138 | 0.141608  |
| 0.115676  | 0.0524476 | 0.123252 | 0.104312  | 0.13243  | 0.146707 | 0.110868  |
| 0.132284  | 0.131702  | 0.140443 | 0.127914  | 0.152535 | 0.157488 | 0.129516  |
| 0.11014   | 0.118298  | 0.128788 | 0.108974  | 0.142045 | 0.151952 | 0.125437  |
| 0.141171  | 0.144376  | 0.146416 | 0.135927  | 0.142483 | 0.155012 | 0.153555  |
| 0.147436  | 0.138403  | 0.151224 | 0.148019  | 0.165647 | 0.166812 | 0.13884   |
| 0.136218  | 0.128934  | 0.137675 | 0.129808  | 0.147436 | 0.160256 | 0.13141   |
| 0.145396  | 0.143065  | 0.145979 | 0.137529  | 0.151369 | 0.165064 | 0.144959  |
| 0.149621  | 0.14729   | 0.155157 | 0.147873  | 0.161713 | 0.168415 | 0.150932  |
| 0.148747  | 0.146125  | 0.151078 | 0.144376  | 0.156469 | 0.172203 | 0.153846  |
| 0.127914  | 0.109557  | 0.116259 | 0.109266  | 0.140006 | 0.143794 | 0.114073  |
| 0.139132  | 0.135927  | 0.136218 | 0.135927  | 0.155303 | 0.167249 | 0.145688  |
| 0.118444  | 0.114656  | 0.124272 | 0.115822  | 0.133741 | 0.148019 | 0.129662  |
| 0.120629  | 0.114802  | 0.125874 | 0.114219  | 0.135927 | 0.151369 | 0.124854  |
| 0.102418  | 0.118444  | 0.129516 | 0.0986305 | 0.138112 | 0.146562 | 0.134324  |
| 0.133596  | 0.122232  | 0.13447  | 0.127185  | 0.142191 | 0.158217 | 0.126457  |
| 0.119464  | 0.114802  | 0.127914 | 0.115385  | 0.134761 | 0.143794 | 0.125146  |
| 0.121503  | 0.114802  | 0.126748 | 0.118007  | 0.132721 | 0.151078 | 0.124272  |
| 0.126748  | 0.121212  | 0.131119 | 0.118007  | 0.142045 | 0.154283 | 0.132139  |

|           |          |          |           |          |          |          |
|-----------|----------|----------|-----------|----------|----------|----------|
| 0.117279  | 0.12398  | 0.128642 | 0.119027  | 0.143065 | 0.153846 | 0.137238 |
| 0.0957168 | 0.103584 | 0.121066 | 0.0971737 | 0.131702 | 0.141026 | 0.122086 |
| 0.135344  | 0.126894 | 0.138549 | 0.129808  | 0.146853 | 0.160548 | 0.134907 |
| 0.129662  | 0.125583 | 0.136655 | 0.125874  | 0.14292  | 0.15778  | 0.126894 |
| 0.120921  | 0.111014 | 0.130245 | 0.119755  | 0.144376 | 0.150495 | 0.112325 |
| 0.220862  | 0.223485 | 0.222902 | 0.216783  | 0.225087 | 0.230332 | 0.225962 |
| 0.150641  | 0.14627  | 0.149476 | 0.145396  | 0.159819 | 0.169435 | 0.143211 |
| 0.128059  | 0.127185 | 0.140589 | 0.128059  | 0.15472  | 0.158508 | 0.130828 |
| 0.128205  | 0.128497 | 0.138403 | 0.126457  | 0.149038 | 0.158945 | 0.132139 |
| 0.212121  | 0.217366 | 0.217075 | 0.214161  | 0.218677 | 0.225962 | 0.220134 |
| 0.125874  | 0.123252 | 0.133159 | 0.121212  | 0.13243  | 0.144959 | 0.124854 |
| 0.125437  | 0.126894 | 0.135344 | 0.118444  | 0.143357 | 0.153846 | 0.128205 |
| 0.124854  | 0.120192 | 0.124272 | 0.120484  | 0.149767 | 0.155012 | 0.128205 |
| 0.116841  | 0.122378 | 0.12704  | 0.115385  | 0.135927 | 0.151078 | 0.136509 |
| 0.248834  | 0.257576 | 0.256119 | 0.25204   | 0.25539  | 0.259761 | 0.256847 |
| 0.123689  | 0.13039  | 0.128934 | 0.118153  | 0.130245 | 0.140443 | 0.132867 |
| 0.114656  | 0.107372 | 0.12602  | 0.112034  | 0.14627  | 0.149476 | 0.109848 |
| 0.13243   | 0.125437 | 0.128642 | 0.126894  | 0.149184 | 0.155886 | 0.125874 |
| 0.13039   | 0.123106 | 0.125437 | 0.124272  | 0.143939 | 0.155886 | 0.123543 |
| 0.12602   | 0.134761 | 0.129225 | 0.123106  | 0.129953 | 0.141026 | 0.138986 |
| 0.133013  | 0.133013 | 0.133596 | 0.127768  | 0.139569 | 0.150641 | 0.140152 |
| 0.121066  | 0.109994 | 0.124854 | 0.11757   | 0.143065 | 0.148601 | 0.112762 |
| 0.134033  | 0.123834 | 0.132284 | 0.125291  | 0.139132 | 0.156614 | 0.127185 |
| 0.128934  | 0.127185 | 0.127185 | 0.129516  | 0.147145 | 0.159965 | 0.138403 |
| 0.112908  | 0.113491 | 0.123689 | 0.112908  | 0.133741 | 0.147436 | 0.129079 |
| 0.12704   | 0.12296  | 0.129079 | 0.122086  | 0.138258 | 0.152244 | 0.128351 |
| 0.0726981 | 0.107372 | 0.119027 | 0.0802739 | 0.128205 | 0.13345  | 0.129079 |
| 0.144231  | 0.135781 | 0.147145 | 0.146853  | 0.16419  | 0.168269 | 0.139423 |
| 0.125291  | 0.133741 | 0.129371 | 0.118007  | 0.133887 | 0.142337 | 0.134761 |
| 0.128205  | 0.131702 | 0.138695 | 0.121212  | 0.145833 | 0.156614 | 0.128059 |
| 0.19493   | 0.198135 | 0.199009 | 0.193765  | 0.196533 | 0.207314 | 0.201486 |
| 0.206294  | 0.210373 | 0.214744 | 0.206585  | 0.211976 | 0.219551 | 0.216055 |
| 0.11451   | 0.124417 | 0.12704  | 0.117716  | 0.139132 | 0.153992 | 0.137383 |
| 0.110431  | 0.113345 | 0.120629 | 0.11014   | 0.131556 | 0.146125 | 0.124272 |
| 0.136655  | 0.13986  | 0.141608 | 0.136946  | 0.144959 | 0.159819 | 0.14729  |
| 0.11655   | 0.107517 | 0.129371 | 0.11451   | 0.142045 | 0.14933  | 0.114656 |
| 0.126894  | 0.133596 | 0.130682 | 0.121066  | 0.132867 | 0.142191 | 0.133741 |
| 0.136655  | 0.131119 | 0.130828 | 0.135781  | 0.154283 | 0.161568 | 0.125728 |
| 0.228438  | 0.231061 | 0.229604 | 0.225524  | 0.230041 | 0.238491 | 0.234994 |
| 0.114802  | 0.120338 | 0.129662 | 0.11655   | 0.143211 | 0.151952 | 0.124563 |
| 0.212267  | 0.209353 | 0.214598 | 0.20877   | 0.212704 | 0.219988 | 0.206002 |
| 0.119172  | 0.101981 | 0.112179 | 0.101399  | 0.131556 | 0.141754 | 0.113782 |
| 0.118153  | 0.114073 | 0.124563 | 0.114073  | 0.142483 | 0.151807 | 0.119464 |
| 0.124417  | 0.120921 | 0.127622 | 0.114802  | 0.135052 | 0.149913 | 0.127477 |

|          |           |          |          |          |          |          |
|----------|-----------|----------|----------|----------|----------|----------|
| 0.1081   | 0.113636  | 0.122669 | 0.109266 | 0.13447  | 0.147873 | 0.122232 |
| 0.212558 | 0.214307  | 0.218969 | 0.209353 | 0.212704 | 0.220862 | 0.219114 |
| 0.142628 | 0.138549  | 0.146125 | 0.136509 | 0.152681 | 0.166375 | 0.141608 |
| 0.124272 | 0.110286  | 0.118444 | 0.116987 | 0.137821 | 0.149184 | 0.12296  |
| 0.136509 | 0.131265  | 0.141171 | 0.130682 | 0.15035  | 0.162005 | 0.133741 |
| 0.128059 | 0.125146  | 0.135635 | 0.126311 | 0.144231 | 0.152681 | 0.128788 |
| 0.113491 | 0.115822  | 0.124272 | 0.114073 | 0.134324 | 0.148601 | 0.132576 |
| 0.121212 | 0.0973193 | 0.112179 | 0.104312 | 0.135344 | 0.142628 | 0.110868 |
| 0.121212 | 0.110431  | 0.125291 | 0.119172 | 0.140006 | 0.148747 | 0.117861 |
| 0.126748 | 0.126748  | 0.136655 | 0.117716 | 0.144376 | 0.156906 | 0.124563 |
| 0.126457 | 0.119755  | 0.127914 | 0.118298 | 0.135927 | 0.154866 | 0.127477 |
| 0.124272 | 0.10912   | 0.121066 | 0.112908 | 0.140734 | 0.145979 | 0.11859  |
| 0.192308 | 0.196387  | 0.201049 | 0.192016 | 0.196241 | 0.209353 | 0.200029 |
| 0.132721 | 0.124563  | 0.124854 | 0.12602  | 0.14831  | 0.153555 | 0.126166 |
| 0.133741 | 0.123252  | 0.138695 | 0.135781 | 0.154575 | 0.157488 | 0.128059 |
| 0.127768 | 0.118153  | 0.137092 | 0.124854 | 0.147145 | 0.15676  | 0.118007 |
| 0.128205 | 0.127914  | 0.127914 | 0.11655  | 0.127768 | 0.145542 | 0.13884  |
| 0.131993 | 0.129953  | 0.135781 | 0.126457 | 0.146416 | 0.160111 | 0.129516 |
| 0.125    | 0.101399  | 0.111014 | 0.104021 | 0.134761 | 0.144085 | 0.110868 |
| 0.123397 | 0.114948  | 0.125728 | 0.114656 | 0.132576 | 0.147436 | 0.123252 |
| 0.120192 | 0.111451  | 0.129225 | 0.11961  | 0.145105 | 0.15035  | 0.113345 |
| 0.128788 | 0.119755  | 0.136364 | 0.128205 | 0.150787 | 0.155449 | 0.125437 |
| 0.13141  | 0.116841  | 0.123252 | 0.12296  | 0.143211 | 0.1537   | 0.125437 |
| 0.114948 | 0.116404  | 0.127185 | 0.117279 | 0.137529 | 0.152972 | 0.134033 |
| 0.126457 | 0.120629  | 0.124126 | 0.120047 | 0.150204 | 0.155449 | 0.130682 |
| 0.130682 | 0.131556  | 0.127768 | 0.126603 | 0.155012 | 0.161713 | 0.138112 |
| 0.119318 | 0.119318  | 0.127477 | 0.112617 | 0.127914 | 0.139277 | 0.129079 |
| 0.145979 | 0.140443  | 0.143065 | 0.138695 | 0.154283 | 0.166812 | 0.141754 |
| 0.113345 | 0.115967  | 0.120629 | 0.112762 | 0.138258 | 0.148747 | 0.131556 |
| 0.12704  | 0.118298  | 0.124417 | 0.124126 | 0.146125 | 0.154866 | 0.11961  |
| 0.13039  | 0.125146  | 0.132721 | 0.125437 | 0.13986  | 0.153555 | 0.130828 |
| 0.124272 | 0.111742  | 0.131556 | 0.120484 | 0.147145 | 0.154429 | 0.115385 |
| 0.195367 | 0.196241  | 0.19799  | 0.191871 | 0.19697  | 0.206585 | 0.202506 |
| 0.119755 | 0.104604  | 0.112762 | 0.107517 | 0.136509 | 0.144668 | 0.119901 |
| 0.113345 | 0.106935  | 0.117133 | 0.110431 | 0.131847 | 0.146125 | 0.114656 |
| 0.124709 | 0.128788  | 0.135781 | 0.118007 | 0.145251 | 0.156031 | 0.126603 |
| 0.187063 | 0.185023  | 0.190851 | 0.18211  | 0.190122 | 0.199155 | 0.193619 |
| 0.13447  | 0.140297  | 0.13447  | 0.128059 | 0.137821 | 0.146853 | 0.144522 |
| 0.137966 | 0.149621  | 0.143794 | 0.13243  | 0.143065 | 0.14831  | 0.145396 |
| 0.147145 | 0.138403  | 0.153555 | 0.150932 | 0.167395 | 0.168852 | 0.140589 |
| 0.117424 | 0.12296   | 0.123834 | 0.111305 | 0.124854 | 0.134761 | 0.124563 |
| 0.135927 | 0.127768  | 0.136218 | 0.12602  | 0.144231 | 0.155303 | 0.132284 |
| 0.215909 | 0.219114  | 0.219406 | 0.216783 | 0.21926  | 0.230915 | 0.222756 |
| 0.126748 | 0.128497  | 0.137238 | 0.127331 | 0.139714 | 0.153992 | 0.135635 |

|           |          |          |           |          |          |          |
|-----------|----------|----------|-----------|----------|----------|----------|
| 0.139423  | 0.133596 | 0.140006 | 0.133013  | 0.147145 | 0.162005 | 0.135781 |
| 0.122232  | 0.108537 | 0.116987 | 0.10912   | 0.137529 | 0.144231 | 0.11859  |
| 0.174679  | 0.177593 | 0.177302 | 0.174097  | 0.179779 | 0.18852  | 0.181818 |
| 0.117861  | 0.119318 | 0.128642 | 0.117861  | 0.138695 | 0.147436 | 0.121212 |
| 0.145688  | 0.143357 | 0.141026 | 0.145105  | 0.163607 | 0.171183 | 0.154575 |
| 0.104312  | 0.116841 | 0.126457 | 0.105186  | 0.142337 | 0.144085 | 0.13039  |
| 0.192308  | 0.195513 | 0.199301 | 0.193473  | 0.197407 | 0.205565 | 0.202069 |
| 0.124709  | 0.124417 | 0.126166 | 0.116841  | 0.127477 | 0.140589 | 0.132139 |
| 0.102564  | 0.1081   | 0.122086 | 0.104895  | 0.126894 | 0.145542 | 0.122232 |
| 0.124563  | 0.118735 | 0.122815 | 0.122523  | 0.145105 | 0.153263 | 0.123834 |
| 0.125874  | 0.121503 | 0.133741 | 0.122669  | 0.145833 | 0.154283 | 0.128059 |
| 0.12296   | 0.125874 | 0.135198 | 0.115093  | 0.144959 | 0.155157 | 0.131556 |
| 0.128205  | 0.120338 | 0.128497 | 0.122378  | 0.137966 | 0.151661 | 0.131556 |
| 0.108829  | 0.112908 | 0.124854 | 0.109703  | 0.134907 | 0.147436 | 0.125583 |
| 0.194639  | 0.196387 | 0.199301 | 0.191725  | 0.195367 | 0.207022 | 0.202069 |
| 0.127768  | 0.122815 | 0.127768 | 0.123106  | 0.151515 | 0.159382 | 0.129953 |
| 0.119464  | 0.120629 | 0.128497 | 0.11655   | 0.135927 | 0.153118 | 0.125146 |
| 0.210519  | 0.21722  | 0.219551 | 0.212558  | 0.217366 | 0.22465  | 0.223776 |
| 0.133887  | 0.123689 | 0.128351 | 0.12602   | 0.15035  | 0.15676  | 0.125874 |
| 0.110723  | 0.11451  | 0.123834 | 0.113928  | 0.133887 | 0.148456 | 0.129516 |
| 0.110431  | 0.111888 | 0.118007 | 0.111014  | 0.13039  | 0.145542 | 0.125728 |
| 0.140006  | 0.141171 | 0.141463 | 0.135344  | 0.153263 | 0.163462 | 0.137238 |
| 0.192162  | 0.195659 | 0.199738 | 0.191288  | 0.196096 | 0.205711 | 0.202506 |
| 0.120921  | 0.107226 | 0.127914 | 0.118298  | 0.143502 | 0.153409 | 0.110868 |
| 0.127331  | 0.127331 | 0.128497 | 0.123834  | 0.151952 | 0.160111 | 0.13447  |
| 0.110723  | 0.113054 | 0.123543 | 0.109848  | 0.133304 | 0.14933  | 0.131556 |
| 0.11014   | 0.113345 | 0.119755 | 0.111014  | 0.135927 | 0.148747 | 0.128642 |
| 0.110577  | 0.110286 | 0.120192 | 0.109411  | 0.131702 | 0.147727 | 0.128205 |
| 0.128788  | 0.121212 | 0.131702 | 0.123543  | 0.138258 | 0.155449 | 0.127768 |
| 0.0954254 | 0.107663 | 0.116987 | 0.0992133 | 0.131702 | 0.136364 | 0.12296  |
| 0.124563  | 0.128934 | 0.128934 | 0.114656  | 0.127331 | 0.139277 | 0.134324 |
| 0.138549  | 0.131556 | 0.136509 | 0.134178  | 0.157051 | 0.168415 | 0.128788 |
| 0.125437  | 0.12602  | 0.125437 | 0.116696  | 0.127914 | 0.144522 | 0.130536 |
| 0.130245  | 0.126457 | 0.136946 | 0.129953  | 0.150787 | 0.155157 | 0.13243  |
| 0.196241  | 0.203526 | 0.203234 | 0.198572  | 0.199883 | 0.210956 | 0.206294 |
| 0.120629  | 0.118007 | 0.120629 | 0.11451   | 0.143502 | 0.1537   | 0.129808 |
| 0.140297  | 0.134178 | 0.141171 | 0.134178  | 0.14831  | 0.162587 | 0.134907 |
| 0.112179  | 0.111305 | 0.122378 | 0.110431  | 0.133304 | 0.147582 | 0.127477 |
| 0.0945513 | 0.101836 | 0.119027 | 0.0965909 | 0.129662 | 0.136946 | 0.120338 |
| 0.123106  | 0.117861 | 0.121066 | 0.117279  | 0.136364 | 0.150058 | 0.13141  |
| 0.123543  | 0.111305 | 0.130245 | 0.122378  | 0.146416 | 0.151661 | 0.111742 |
| 0.136072  | 0.13549  | 0.128788 | 0.131119  | 0.144668 | 0.15574  | 0.139714 |
| 0.12398   | 0.118444 | 0.133596 | 0.130973  | 0.148601 | 0.158217 | 0.125874 |
| 0.109411  | 0.107663 | 0.122523 | 0.10708   | 0.137821 | 0.144814 | 0.115967 |

|           |          |          |           |          |          |          |
|-----------|----------|----------|-----------|----------|----------|----------|
| 0.10373   | 0.1081   | 0.120047 | 0.102564  | 0.13039  | 0.141171 | 0.114073 |
| 0.102127  | 0.10708  | 0.121941 | 0.100379  | 0.128788 | 0.142774 | 0.121503 |
| 0.120047  | 0.103147 | 0.115385 | 0.104021  | 0.135052 | 0.142337 | 0.112034 |
| 0.12602   | 0.134761 | 0.133887 | 0.119901  | 0.130828 | 0.143648 | 0.137821 |
| 0.120047  | 0.107809 | 0.132867 | 0.119755  | 0.149038 | 0.154575 | 0.11553  |
| 0.124272  | 0.11757  | 0.128351 | 0.118735  | 0.140443 | 0.153555 | 0.125    |
| 0.114948  | 0.107663 | 0.126311 | 0.114073  | 0.143065 | 0.147436 | 0.110431 |
| 0.112762  | 0.111305 | 0.119755 | 0.11451   | 0.133304 | 0.149621 | 0.128059 |
| 0.114656  | 0.107372 | 0.115822 | 0.105041  | 0.136364 | 0.145396 | 0.117133 |
| 0.113491  | 0.114656 | 0.124563 | 0.114656  | 0.13345  | 0.151224 | 0.131993 |
| 0.11961   | 0.112034 | 0.120192 | 0.11553   | 0.138986 | 0.151515 | 0.122378 |
| 0.124272  | 0.118153 | 0.135344 | 0.128351  | 0.149476 | 0.15472  | 0.125874 |
| 0.119901  | 0.122815 | 0.128642 | 0.114656  | 0.139277 | 0.154429 | 0.128205 |
| 0.0999417 | 0.105186 | 0.121795 | 0.100233  | 0.134761 | 0.140006 | 0.124563 |
| 0.114073  | 0.112908 | 0.120775 | 0.110868  | 0.132576 | 0.149184 | 0.128205 |
| 0.131265  | 0.122523 | 0.125728 | 0.130099  | 0.146562 | 0.161131 | 0.130536 |
| 0.120921  | 0.124709 | 0.132576 | 0.121795  | 0.140297 | 0.158362 | 0.127185 |
| 0.104167  | 0.105041 | 0.121941 | 0.104167  | 0.131702 | 0.149184 | 0.120629 |
| 0.111742  | 0.11116  | 0.124272 | 0.109994  | 0.130828 | 0.143939 | 0.127622 |
| 0.13141   | 0.125583 | 0.134033 | 0.125583  | 0.142337 | 0.156906 | 0.13039  |
| 0.11859   | 0.101107 | 0.113345 | 0.104312  | 0.133013 | 0.143794 | 0.114365 |
| 0.130828  | 0.127622 | 0.137529 | 0.12704   | 0.145833 | 0.156906 | 0.128642 |
| 0.121795  | 0.125583 | 0.129371 | 0.11451   | 0.140589 | 0.156323 | 0.126894 |
| 0.0976107 | 0.104604 | 0.122086 | 0.0996503 | 0.136218 | 0.141463 | 0.123689 |
| 0.114802  | 0.113345 | 0.124126 | 0.113928  | 0.134178 | 0.144668 | 0.129225 |
| 0.116987  | 0.105915 | 0.11553  | 0.109703  | 0.134615 | 0.145105 | 0.119464 |
| 0.134907  | 0.126748 | 0.141026 | 0.128788  | 0.143211 | 0.162442 | 0.133013 |
| 0.126457  | 0.127331 | 0.134907 | 0.125874  | 0.143794 | 0.154575 | 0.126894 |
| 0.127768  | 0.12398  | 0.131265 | 0.124854  | 0.13549  | 0.152681 | 0.129371 |
| 0.194784  | 0.199155 | 0.205274 | 0.196533  | 0.202214 | 0.21183  | 0.204545 |
| 0.172057  | 0.171183 | 0.17701  | 0.168852  | 0.175991 | 0.185315 | 0.175408 |
| 0.125728  | 0.128059 | 0.127477 | 0.116113  | 0.127914 | 0.141317 | 0.131993 |
| 0.124417  | 0.11859  | 0.125874 | 0.120338  | 0.140589 | 0.150495 | 0.122815 |
| 0.141608  | 0.152972 | 0.143357 | 0.136655  | 0.146416 | 0.153409 | 0.150204 |
| 0.13243   | 0.126311 | 0.127477 | 0.127185  | 0.14627  | 0.160256 | 0.137529 |
| 0.120338  | 0.123252 | 0.123543 | 0.121795  | 0.143794 | 0.150787 | 0.134178 |
| 0.121649  | 0.120484 | 0.130099 | 0.118153  | 0.137821 | 0.152389 | 0.129079 |
| 0.0767774 | 0.107663 | 0.118444 | 0.081148  | 0.124126 | 0.138403 | 0.127914 |
| 0.122523  | 0.125437 | 0.133304 | 0.123689  | 0.143357 | 0.159674 | 0.129662 |
| 0.202797  | 0.210373 | 0.208333 | 0.202214  | 0.209062 | 0.220425 | 0.21722  |
| 0.12398   | 0.109994 | 0.130973 | 0.117861  | 0.148893 | 0.152098 | 0.117716 |
| 0.132576  | 0.123834 | 0.131702 | 0.124417  | 0.13884  | 0.151078 | 0.124854 |
| 0.111597  | 0.111888 | 0.125    | 0.111305  | 0.135344 | 0.148747 | 0.126894 |
| 0.123397  | 0.119901 | 0.137383 | 0.121941  | 0.144814 | 0.15676  | 0.128497 |

|           |          |          |           |          |          |          |
|-----------|----------|----------|-----------|----------|----------|----------|
| 0.187354  | 0.193182 | 0.195513 | 0.189103  | 0.195076 | 0.206439 | 0.195367 |
| 0.24796   | 0.251457 | 0.251457 | 0.246212  | 0.252185 | 0.256265 | 0.252185 |
| 0.12704   | 0.123834 | 0.136364 | 0.129662  | 0.147582 | 0.155449 | 0.124272 |
| 0.12296   | 0.125874 | 0.131993 | 0.123252  | 0.144376 | 0.161276 | 0.129516 |
| 0.123834  | 0.12704  | 0.126166 | 0.117424  | 0.129516 | 0.141463 | 0.131847 |
| 0.117279  | 0.121358 | 0.128351 | 0.112617  | 0.140734 | 0.154138 | 0.124709 |
| 0.115967  | 0.105186 | 0.129079 | 0.113928  | 0.139132 | 0.14729  | 0.10912  |
| 0.121649  | 0.114948 | 0.124563 | 0.11961   | 0.143357 | 0.150058 | 0.125874 |
| 0.123252  | 0.117133 | 0.126748 | 0.117424  | 0.133304 | 0.149038 | 0.128351 |
| 0.11859   | 0.106643 | 0.124709 | 0.114802  | 0.142628 | 0.144376 | 0.112617 |
| 0.122523  | 0.118735 | 0.126311 | 0.114656  | 0.135781 | 0.147727 | 0.130536 |
| 0.107809  | 0.110723 | 0.127331 | 0.111014  | 0.134761 | 0.149621 | 0.124854 |
| 0.0983392 | 0.107372 | 0.120192 | 0.0995047 | 0.134615 | 0.142774 | 0.124709 |
| 0.129371  | 0.117716 | 0.135198 | 0.131993  | 0.14933  | 0.154283 | 0.124854 |
| 0.132139  | 0.123106 | 0.133887 | 0.126603  | 0.144522 | 0.157051 | 0.132867 |
| 0.113491  | 0.107372 | 0.115239 | 0.108829  | 0.136655 | 0.145396 | 0.116841 |
| 0.121358  | 0.10912  | 0.125437 | 0.104167  | 0.134324 | 0.143939 | 0.121795 |
| 0.128642  | 0.135635 | 0.141463 | 0.121066  | 0.149767 | 0.156177 | 0.133741 |
| 0.112179  | 0.111888 | 0.120921 | 0.111014  | 0.133596 | 0.147582 | 0.126894 |
| 0.116404  | 0.117279 | 0.12602  | 0.112617  | 0.128205 | 0.141608 | 0.118881 |
| 0.114656  | 0.128059 | 0.129516 | 0.119027  | 0.143939 | 0.152098 | 0.134907 |
| 0.208625  | 0.213869 | 0.214744 | 0.208042  | 0.212558 | 0.222756 | 0.221591 |
| 0.116696  | 0.112325 | 0.124854 | 0.120484  | 0.140152 | 0.149184 | 0.116841 |
| 0.0955711 | 0.104021 | 0.118298 | 0.0976107 | 0.134761 | 0.144959 | 0.122815 |
| 0.120629  | 0.11655  | 0.121212 | 0.117133  | 0.145833 | 0.152535 | 0.132721 |
| 0.133887  | 0.121649 | 0.130682 | 0.126894  | 0.147436 | 0.156177 | 0.128205 |
| 0.122815  | 0.118153 | 0.13039  | 0.121358  | 0.141317 | 0.152098 | 0.121503 |
| 0.204108  | 0.205274 | 0.207314 | 0.203817  | 0.20542  | 0.215326 | 0.214744 |
| 0.134615  | 0.127622 | 0.138112 | 0.128205  | 0.147873 | 0.163899 | 0.133304 |
| 0.111451  | 0.109411 | 0.120192 | 0.108829  | 0.134033 | 0.147436 | 0.126748 |
| 0.118298  | 0.122086 | 0.136655 | 0.119172  | 0.143211 | 0.153118 | 0.125437 |
| 0.11655   | 0.121795 | 0.129953 | 0.111888  | 0.138549 | 0.155157 | 0.121066 |
| 0.131993  | 0.126457 | 0.138112 | 0.125291  | 0.144668 | 0.159819 | 0.131556 |
| 0.11655   | 0.115385 | 0.127622 | 0.113636  | 0.139423 | 0.151952 | 0.121649 |
| 0.106643  | 0.109266 | 0.127331 | 0.109848  | 0.132721 | 0.149621 | 0.12602  |
| 0.130245  | 0.115385 | 0.125874 | 0.124126  | 0.143794 | 0.1537   | 0.125728 |
| 0.203234  | 0.205565 | 0.211976 | 0.200321  | 0.208916 | 0.212995 | 0.212121 |
| 0.123252  | 0.11859  | 0.123543 | 0.115385  | 0.131556 | 0.147873 | 0.120775 |
| 0.197407  | 0.20236  | 0.203526 | 0.200321  | 0.204837 | 0.215326 | 0.208042 |
| 0.19697   | 0.199301 | 0.20338  | 0.19697   | 0.200903 | 0.211393 | 0.202652 |
| 0.129953  | 0.134615 | 0.135781 | 0.119755  | 0.146707 | 0.159237 | 0.129808 |
| 0.13141   | 0.129079 | 0.131119 | 0.127331  | 0.149913 | 0.156906 | 0.130973 |
| 0.10373   | 0.101107 | 0.119755 | 0.102273  | 0.129808 | 0.141754 | 0.118444 |
| 0.122815  | 0.112617 | 0.126603 | 0.11757   | 0.137238 | 0.150058 | 0.120338 |

|           |          |          |           |          |          |          |
|-----------|----------|----------|-----------|----------|----------|----------|
| 0.127622  | 0.120921 | 0.13141  | 0.121795  | 0.138258 | 0.154866 | 0.128934 |
| 0.113928  | 0.116259 | 0.12296  | 0.114802  | 0.134178 | 0.152244 | 0.131847 |
| 0.113928  | 0.105186 | 0.120047 | 0.110431  | 0.139714 | 0.145251 | 0.108829 |
| 0.117133  | 0.106061 | 0.127914 | 0.117424  | 0.141463 | 0.148456 | 0.111742 |
| 0.129516  | 0.122523 | 0.135927 | 0.133887  | 0.149184 | 0.156177 | 0.125    |
| 0.124126  | 0.124417 | 0.13345  | 0.11859   | 0.143502 | 0.156906 | 0.125728 |
| 0.108246  | 0.111742 | 0.11757  | 0.108537  | 0.128788 | 0.144231 | 0.124709 |
| 0.132867  | 0.125291 | 0.136946 | 0.126166  | 0.142337 | 0.154866 | 0.131556 |
| 0.0983392 | 0.101253 | 0.11961  | 0.0980478 | 0.126457 | 0.142774 | 0.11655  |
| 0.13986   | 0.128788 | 0.13986  | 0.131119  | 0.144085 | 0.161568 | 0.133013 |
| 0.122669  | 0.124417 | 0.12704  | 0.117716  | 0.127477 | 0.140006 | 0.129225 |
| 0.143794  | 0.138549 | 0.145542 | 0.135635  | 0.150641 | 0.164627 | 0.138986 |
| 0.25743   | 0.26588  | 0.263258 | 0.258887  | 0.265152 | 0.270979 | 0.268065 |
| 0.131265  | 0.11961  | 0.123397 | 0.116404  | 0.147727 | 0.15035  | 0.122086 |
| 0.126457  | 0.124126 | 0.12704  | 0.121503  | 0.147873 | 0.153118 | 0.126894 |
| 0.21926   | 0.223922 | 0.225379 | 0.219843  | 0.226107 | 0.231935 | 0.226107 |
| 0.123543  | 0.12296  | 0.132284 | 0.119755  | 0.146999 | 0.156906 | 0.130099 |
| 0.231935  | 0.234848 | 0.237471 | 0.232517  | 0.236742 | 0.243153 | 0.240822 |
| 0.126311  | 0.110286 | 0.11961  | 0.113782  | 0.139569 | 0.145688 | 0.116841 |
| 0.115385  | 0.12704  | 0.130828 | 0.120338  | 0.143502 | 0.153118 | 0.133013 |
| 0.125     | 0.115093 | 0.121795 | 0.120921  | 0.140006 | 0.151369 | 0.119901 |
| 0.12296   | 0.127622 | 0.135781 | 0.118007  | 0.146999 | 0.159237 | 0.131556 |
| 0.207751  | 0.206002 | 0.210082 | 0.208625  | 0.208479 | 0.217512 | 0.215181 |
| 0.142191  | 0.13345  | 0.142774 | 0.134033  | 0.150495 | 0.164773 | 0.136218 |
| 0.134615  | 0.123834 | 0.136364 | 0.125583  | 0.143211 | 0.156614 | 0.126894 |
| 0.226253  | 0.233829 | 0.235577 | 0.22771   | 0.234266 | 0.240967 | 0.234848 |
| 0.121212  | 0.109848 | 0.131119 | 0.119464  | 0.144376 | 0.150495 | 0.115822 |
| 0.198572  | 0.207314 | 0.20877  | 0.200321  | 0.205711 | 0.213287 | 0.210373 |
| 0.120484  | 0.111742 | 0.128642 | 0.117861  | 0.145979 | 0.151807 | 0.118298 |
| 0.113199  | 0.114948 | 0.124563 | 0.112325  | 0.136364 | 0.147145 | 0.129371 |
| 0.0996503 | 0.11451  | 0.125874 | 0.101981  | 0.144376 | 0.143794 | 0.132139 |
| 0.12704   | 0.132576 | 0.136655 | 0.119172  | 0.145251 | 0.156323 | 0.132721 |
| 0.121941  | 0.122815 | 0.129516 | 0.120192  | 0.13986  | 0.149767 | 0.124417 |
| 0.162442  | 0.161859 | 0.1706   | 0.158945  | 0.166958 | 0.178904 | 0.170746 |
| 0.127477  | 0.120775 | 0.131265 | 0.121066  | 0.137821 | 0.151515 | 0.124417 |
| 0.134178  | 0.121066 | 0.125146 | 0.126311  | 0.148019 | 0.155594 | 0.127331 |
| 0.124854  | 0.121066 | 0.132721 | 0.119027  | 0.138986 | 0.148601 | 0.131119 |
| 0.135052  | 0.131265 | 0.129808 | 0.132721  | 0.153555 | 0.161713 | 0.121212 |
| 0.198135  | 0.202797 | 0.205711 | 0.199592  | 0.204108 | 0.213141 | 0.206731 |
| 0.108246  | 0.111742 | 0.121649 | 0.110286  | 0.131993 | 0.148019 | 0.129079 |
| 0.126166  | 0.127914 | 0.13549  | 0.122086  | 0.145542 | 0.158945 | 0.13243  |
| 0.120484  | 0.106789 | 0.115239 | 0.105332  | 0.140734 | 0.144522 | 0.112471 |
| 0.116259  | 0.107517 | 0.128788 | 0.113345  | 0.144959 | 0.148164 | 0.112325 |
| 0.115239  | 0.118444 | 0.124563 | 0.115822  | 0.137238 | 0.148019 | 0.131702 |



|           |          |          |           |          |          |          |
|-----------|----------|----------|-----------|----------|----------|----------|
| 0.256993  | 0.261072 | 0.261072 | 0.259324  | 0.257721 | 0.266171 | 0.261218 |
| 0.0989219 | 0.109994 | 0.122523 | 0.100087  | 0.137238 | 0.139569 | 0.124709 |
| 0.124854  | 0.119318 | 0.124272 | 0.11961   | 0.141026 | 0.152389 | 0.128788 |
| 0.185169  | 0.188957 | 0.192162 | 0.183421  | 0.186772 | 0.196678 | 0.18648  |
| 0.189248  | 0.191288 | 0.197698 | 0.188666  | 0.195513 | 0.20338  | 0.199883 |
| 0.126894  | 0.119901 | 0.136509 | 0.130099  | 0.147727 | 0.154429 | 0.12704  |
| 0.13345   | 0.125583 | 0.134033 | 0.125874  | 0.14292  | 0.155449 | 0.130099 |
| 0.12296   | 0.122378 | 0.132576 | 0.116841  | 0.142045 | 0.154866 | 0.127768 |
| 0.153409  | 0.147582 | 0.153409 | 0.148456  | 0.1588   | 0.172494 | 0.144231 |
| 0.125437  | 0.118153 | 0.130973 | 0.126894  | 0.144522 | 0.155886 | 0.124417 |
| 0.128788  | 0.119464 | 0.135781 | 0.130536  | 0.151661 | 0.158071 | 0.127768 |
| 0.126311  | 0.112325 | 0.132721 | 0.121358  | 0.146853 | 0.156469 | 0.114219 |
| 0.131556  | 0.122815 | 0.130973 | 0.120484  | 0.138986 | 0.151807 | 0.12704  |
| 0.141317  | 0.13141  | 0.143357 | 0.134324  | 0.148164 | 0.162733 | 0.132139 |
| 0.121358  | 0.114948 | 0.129225 | 0.119027  | 0.140443 | 0.152681 | 0.119755 |
| 0.123543  | 0.127914 | 0.135781 | 0.117133  | 0.142337 | 0.15574  | 0.128351 |
| 0.135635  | 0.142045 | 0.147873 | 0.128351  | 0.155594 | 0.165501 | 0.136364 |
| 0.0984848 | 0.113345 | 0.125    | 0.101981  | 0.140589 | 0.140589 | 0.130099 |
| 0.130682  | 0.135635 | 0.140006 | 0.121941  | 0.149184 | 0.156469 | 0.134324 |
| 0.123689  | 0.114365 | 0.133013 | 0.120775  | 0.148601 | 0.152389 | 0.113928 |
| 0.211538  | 0.214452 | 0.216492 | 0.211538  | 0.213432 | 0.223922 | 0.220134 |
| 0.0945513 | 0.110868 | 0.115822 | 0.0930944 | 0.134324 | 0.133741 | 0.126748 |
| 0.195076  | 0.197407 | 0.201777 | 0.192745  | 0.199883 | 0.209207 | 0.205711 |
| 0.122523  | 0.11553  | 0.125146 | 0.118444  | 0.1419   | 0.159674 | 0.119755 |
| 0.114656  | 0.123689 | 0.127768 | 0.116696  | 0.142483 | 0.152972 | 0.134324 |
| 0.12398   | 0.128934 | 0.128059 | 0.115822  | 0.126748 | 0.140734 | 0.134615 |
| 0.11859   | 0.12296  | 0.125291 | 0.111597  | 0.123106 | 0.136218 | 0.127477 |
| 0.136218  | 0.127185 | 0.139714 | 0.129225  | 0.144814 | 0.156469 | 0.132284 |
| 0.135635  | 0.127768 | 0.140006 | 0.129808  | 0.145688 | 0.159091 | 0.128788 |
| 0.116113  | 0.116113 | 0.126894 | 0.112908  | 0.136072 | 0.153846 | 0.134615 |
| 0.132867  | 0.120921 | 0.126748 | 0.123543  | 0.147582 | 0.155157 | 0.125728 |
| 0.12704   | 0.131119 | 0.132284 | 0.119172  | 0.132139 | 0.143794 | 0.135927 |
| 0.127477  | 0.120484 | 0.135052 | 0.125437  | 0.151807 | 0.155594 | 0.117133 |
| 0.250146  | 0.257721 | 0.255682 | 0.249563  | 0.254371 | 0.261072 | 0.260781 |
| 0.115822  | 0.117279 | 0.125437 | 0.112908  | 0.134033 | 0.149184 | 0.132284 |
| 0.187646  | 0.190559 | 0.197552 | 0.187354  | 0.193036 | 0.204983 | 0.193328 |
| 0.193036  | 0.19595  | 0.201195 | 0.193036  | 0.195221 | 0.207459 | 0.201049 |
| 0.121212  | 0.118007 | 0.135198 | 0.122669  | 0.142337 | 0.148456 | 0.130099 |
| 0.0996503 | 0.108683 | 0.120047 | 0.0987762 | 0.133013 | 0.140297 | 0.125437 |
| 0.115093  | 0.125583 | 0.126748 | 0.115385  | 0.139423 | 0.152244 | 0.134178 |
| 0.128497  | 0.122378 | 0.130828 | 0.120921  | 0.137383 | 0.157197 | 0.126311 |
| 0.0843531 | 0.106206 | 0.120484 | 0.083479  | 0.127622 | 0.138112 | 0.125583 |
| 0.118153  | 0.107955 | 0.129225 | 0.118153  | 0.144814 | 0.15035  | 0.118007 |
| 0.125874  | 0.124709 | 0.135781 | 0.121212  | 0.139714 | 0.153118 | 0.130099 |

|           |          |          |          |          |          |          |
|-----------|----------|----------|----------|----------|----------|----------|
| 0.1419    | 0.13345  | 0.141317 | 0.136072 | 0.150204 | 0.16215  | 0.136509 |
| 0.112034  | 0.115822 | 0.122232 | 0.10912  | 0.134324 | 0.151807 | 0.131993 |
| 0.141463  | 0.132721 | 0.140006 | 0.134761 | 0.151515 | 0.160548 | 0.136364 |
| 0.12296   | 0.11655  | 0.124126 | 0.117133 | 0.141171 | 0.152826 | 0.124854 |
| 0.122378  | 0.131702 | 0.129662 | 0.11655  | 0.131556 | 0.140297 | 0.134761 |
| 0.123106  | 0.125728 | 0.133887 | 0.121066 | 0.144814 | 0.159674 | 0.130828 |
| 0.125291  | 0.113928 | 0.136364 | 0.121795 | 0.149913 | 0.154283 | 0.11553  |
| 0.109703  | 0.117861 | 0.126603 | 0.111451 | 0.135198 | 0.146562 | 0.127622 |
| 0.110868  | 0.114656 | 0.119901 | 0.108246 | 0.130536 | 0.142191 | 0.129371 |
| 0.131847  | 0.13039  | 0.128059 | 0.123689 | 0.155012 | 0.157634 | 0.138112 |
| 0.187063  | 0.191142 | 0.19697  | 0.187063 | 0.191871 | 0.201195 | 0.198864 |
| 0.144959  | 0.136218 | 0.144959 | 0.137966 | 0.154138 | 0.164044 | 0.139277 |
| 0.13447   | 0.127477 | 0.135344 | 0.128934 | 0.143939 | 0.1588   | 0.129953 |
| 0.120629  | 0.125291 | 0.124126 | 0.113345 | 0.128059 | 0.139714 | 0.130973 |
| 0.113199  | 0.114365 | 0.121649 | 0.10708  | 0.123543 | 0.136364 | 0.122086 |
| 0.123543  | 0.125    | 0.133159 | 0.117424 | 0.144376 | 0.158945 | 0.125728 |
| 0.123106  | 0.128934 | 0.134761 | 0.117861 | 0.14627  | 0.155886 | 0.129662 |
| 0.195221  | 0.198135 | 0.198427 | 0.194639 | 0.19799  | 0.207022 | 0.205274 |
| 0.129953  | 0.122669 | 0.13549  | 0.120921 | 0.13884  | 0.152535 | 0.128934 |
| 0.112034  | 0.112325 | 0.121358 | 0.110868 | 0.128205 | 0.145979 | 0.123543 |
| 0.136218  | 0.127768 | 0.137092 | 0.129225 | 0.148601 | 0.160256 | 0.134324 |
| 0.195221  | 0.201049 | 0.199592 | 0.198427 | 0.201777 | 0.210227 | 0.203817 |
| 0.0995047 | 0.108829 | 0.119027 | 0.101253 | 0.135781 | 0.142774 | 0.125874 |
| 0.123834  | 0.109557 | 0.130828 | 0.11859  | 0.147582 | 0.149621 | 0.111742 |
| 0.134033  | 0.128497 | 0.138695 | 0.128205 | 0.147873 | 0.158071 | 0.131847 |
| 0.125437  | 0.116696 | 0.127768 | 0.123106 | 0.146853 | 0.152389 | 0.121795 |
| 0.193036  | 0.19799  | 0.198864 | 0.190997 | 0.193765 | 0.206585 | 0.201632 |
| 0.11961   | 0.108246 | 0.125437 | 0.116987 | 0.145979 | 0.151515 | 0.111014 |
| 0.116404  | 0.116113 | 0.121066 | 0.114948 | 0.140443 | 0.151224 | 0.126748 |
| 0.105332  | 0.108246 | 0.123106 | 0.105041 | 0.133159 | 0.143939 | 0.126748 |
| 0.133013  | 0.126894 | 0.135635 | 0.125437 | 0.140152 | 0.157051 | 0.13345  |
| 0.127331  | 0.118881 | 0.126457 | 0.122669 | 0.145833 | 0.154283 | 0.123397 |
| 0.122086  | 0.11451  | 0.131119 | 0.118881 | 0.150495 | 0.151369 | 0.114656 |
| 0.111014  | 0.115385 | 0.124417 | 0.110431 | 0.134178 | 0.149913 | 0.129516 |
| 0.12296   | 0.117424 | 0.13141  | 0.119464 | 0.144959 | 0.156031 | 0.124854 |
| 0.146416  | 0.140589 | 0.151661 | 0.152244 | 0.165501 | 0.165793 | 0.139569 |
| 0.239656  | 0.240822 | 0.240239 | 0.236451 | 0.24359  | 0.250874 | 0.241841 |
| 0.112908  | 0.118735 | 0.132139 | 0.113491 | 0.139277 | 0.151515 | 0.131119 |
| 0.132139  | 0.121358 | 0.125437 | 0.126894 | 0.147145 | 0.1588   | 0.129079 |
| 0.129079  | 0.123543 | 0.13345  | 0.125    | 0.138549 | 0.153118 | 0.127477 |
| 0.127477  | 0.124563 | 0.129225 | 0.122232 | 0.140734 | 0.151807 | 0.134907 |
| 0.125291  | 0.113054 | 0.11859  | 0.115093 | 0.141463 | 0.144959 | 0.114073 |
| 0.124709  | 0.119464 | 0.131702 | 0.122378 | 0.139714 | 0.150787 | 0.125146 |
| 0.134761  | 0.130099 | 0.137383 | 0.128642 | 0.142774 | 0.156177 | 0.128788 |

|           |           |          |           |          |          |          |
|-----------|-----------|----------|-----------|----------|----------|----------|
| 0.123834  | 0.113345  | 0.13345  | 0.120338  | 0.148747 | 0.154866 | 0.10912  |
| 0.129079  | 0.11451   | 0.131993 | 0.127622  | 0.144376 | 0.152244 | 0.125146 |
| 0.239073  | 0.245775  | 0.244027 | 0.238199  | 0.239802 | 0.248834 | 0.245338 |
| 0.099359  | 0.102273  | 0.120629 | 0.101399  | 0.133596 | 0.141754 | 0.122815 |
| 0.116259  | 0.104312  | 0.116841 | 0.106352  | 0.133304 | 0.142628 | 0.113199 |
| 0.109703  | 0.112908  | 0.120484 | 0.109411  | 0.13345  | 0.147727 | 0.125583 |
| 0.134324  | 0.126166  | 0.138403 | 0.136946  | 0.158362 | 0.160402 | 0.127768 |
| 0.116841  | 0.124417  | 0.137529 | 0.11859   | 0.140297 | 0.1537   | 0.136218 |
| 0.122086  | 0.123543  | 0.129662 | 0.122378  | 0.133596 | 0.151952 | 0.135344 |
| 0.135781  | 0.128788  | 0.137238 | 0.129371  | 0.144668 | 0.15778  | 0.129516 |
| 0.119027  | 0.112034  | 0.130099 | 0.118444  | 0.138695 | 0.146562 | 0.120047 |
| 0.231498  | 0.238782  | 0.239656 | 0.232955  | 0.237762 | 0.245047 | 0.240676 |
| 0.137675  | 0.132721  | 0.139423 | 0.131847  | 0.14831  | 0.161131 | 0.133741 |
| 0.12296   | 0.108392  | 0.129662 | 0.120047  | 0.146999 | 0.150787 | 0.109994 |
| 0.119172  | 0.108683  | 0.132284 | 0.119172  | 0.141754 | 0.150495 | 0.123397 |
| 0.129516  | 0.124272  | 0.127477 | 0.119901  | 0.147436 | 0.152681 | 0.118298 |
| 0.125437  | 0.112908  | 0.122815 | 0.112908  | 0.143648 | 0.147727 | 0.123834 |
| 0.108537  | 0.116696  | 0.121358 | 0.109703  | 0.134033 | 0.144522 | 0.127622 |
| 0.120484  | 0.112034  | 0.128642 | 0.115822  | 0.144522 | 0.14831  | 0.112179 |
| 0.125583  | 0.113636  | 0.134907 | 0.121795  | 0.14933  | 0.154283 | 0.114365 |
| 0.118007  | 0.11014   | 0.126457 | 0.115967  | 0.146707 | 0.150495 | 0.112617 |
| 0.110577  | 0.113199  | 0.122232 | 0.112908  | 0.134324 | 0.151224 | 0.127622 |
| 0.135344  | 0.12398   | 0.12602  | 0.127477  | 0.149476 | 0.155012 | 0.127622 |
| 0.137529  | 0.132867  | 0.134033 | 0.131702  | 0.15574  | 0.160693 | 0.129808 |
| 0.126166  | 0.132867  | 0.130245 | 0.120921  | 0.133304 | 0.14292  | 0.137092 |
| 0.13345   | 0.134033  | 0.136655 | 0.124709  | 0.135635 | 0.148164 | 0.137383 |
| 0.135344  | 0.13039   | 0.131556 | 0.13039   | 0.150932 | 0.159091 | 0.130828 |
| 0.0796911 | 0.0989219 | 0.118153 | 0.0805653 | 0.126166 | 0.137821 | 0.124126 |
| 0.13549   | 0.115967  | 0.119464 | 0.113636  | 0.14292  | 0.148456 | 0.119318 |
| 0.127768  | 0.117279  | 0.138258 | 0.122232  | 0.143648 | 0.151515 | 0.121503 |
| 0.211393  | 0.214015  | 0.216346 | 0.209645  | 0.212121 | 0.223193 | 0.215618 |
| 0.124272  | 0.128351  | 0.133596 | 0.120775  | 0.141608 | 0.1588   | 0.13141  |
| 0.121358  | 0.10708   | 0.119318 | 0.110577  | 0.13986  | 0.147145 | 0.118298 |
| 0.115093  | 0.11859   | 0.129371 | 0.115676  | 0.139132 | 0.153118 | 0.133596 |
| 0.223631  | 0.227418  | 0.229167 | 0.221591  | 0.230769 | 0.238928 | 0.231352 |
| 0.215763  | 0.218386  | 0.221591 | 0.213724  | 0.217366 | 0.226399 | 0.222611 |
| 0.124417  | 0.115093  | 0.134907 | 0.123252  | 0.146125 | 0.153118 | 0.114365 |
| 0.251311  | 0.259761  | 0.256556 | 0.251603  | 0.253788 | 0.26049  | 0.25845  |
| 0.0802739 | 0.101836  | 0.116987 | 0.0820221 | 0.123252 | 0.137238 | 0.126166 |
| 0.122815  | 0.129225  | 0.140006 | 0.122815  | 0.157051 | 0.162587 | 0.138695 |
| 0.0957168 | 0.106498  | 0.122815 | 0.099796  | 0.134907 | 0.137529 | 0.124709 |
| 0.134615  | 0.126166  | 0.131702 | 0.12704   | 0.150787 | 0.158362 | 0.129225 |
| 0.193328  | 0.194493  | 0.199155 | 0.192453  | 0.196387 | 0.208042 | 0.199883 |
| 0.125     | 0.106935  | 0.131119 | 0.119464  | 0.143502 | 0.151369 | 0.124854 |

|           |          |          |           |          |          |          |
|-----------|----------|----------|-----------|----------|----------|----------|
| 0.199301  | 0.205128 | 0.204254 | 0.195804  | 0.204108 | 0.213141 | 0.209353 |
| 0.118007  | 0.115967 | 0.13141  | 0.11859   | 0.139423 | 0.150787 | 0.128059 |
| 0.123543  | 0.117133 | 0.123834 | 0.115676  | 0.138258 | 0.147582 | 0.118735 |
| 0.103438  | 0.120047 | 0.130828 | 0.0996503 | 0.137966 | 0.14729  | 0.133013 |
| 0.118881  | 0.11859  | 0.12704  | 0.115967  | 0.143502 | 0.148456 | 0.123689 |
| 0.107663  | 0.106498 | 0.118444 | 0.104749  | 0.128205 | 0.144231 | 0.125583 |
| 0.119318  | 0.120192 | 0.128642 | 0.119318  | 0.139277 | 0.156177 | 0.12704  |
| 0.0939685 | 0.103584 | 0.118153 | 0.0945513 | 0.132867 | 0.138695 | 0.124126 |
| 0.128497  | 0.121795 | 0.131993 | 0.123543  | 0.139714 | 0.152244 | 0.127477 |
| 0.121941  | 0.10067  | 0.113199 | 0.10708   | 0.136364 | 0.142774 | 0.113636 |
| 0.105041  | 0.105041 | 0.122232 | 0.103293  | 0.129953 | 0.14627  | 0.123252 |
| 0.0987762 | 0.104312 | 0.120629 | 0.0984848 | 0.133596 | 0.139423 | 0.12398  |
| 0.122523  | 0.123689 | 0.127768 | 0.115822  | 0.129662 | 0.142774 | 0.133741 |
| 0.143794  | 0.133304 | 0.141754 | 0.135635  | 0.149184 | 0.161713 | 0.131702 |
| 0.119464  | 0.123834 | 0.125874 | 0.113054  | 0.128934 | 0.137383 | 0.125437 |
| 0.116696  | 0.11553  | 0.120484 | 0.112908  | 0.139569 | 0.151807 | 0.127914 |
| 0.108392  | 0.108392 | 0.117133 | 0.107517  | 0.127477 | 0.146125 | 0.125146 |
| 0.123834  | 0.111888 | 0.125583 | 0.113054  | 0.140006 | 0.148456 | 0.11116  |
| 0.131993  | 0.117716 | 0.123834 | 0.124126  | 0.145542 | 0.154283 | 0.125437 |
| 0.12602   | 0.129225 | 0.135052 | 0.117279  | 0.146562 | 0.154429 | 0.129953 |
| 0.122815  | 0.12398  | 0.125728 | 0.114656  | 0.124126 | 0.141026 | 0.129953 |
| 0.131119  | 0.124126 | 0.134615 | 0.123543  | 0.141171 | 0.156031 | 0.131265 |
| 0.142045  | 0.133304 | 0.144959 | 0.135927  | 0.148601 | 0.165501 | 0.13345  |
| 0.146125  | 0.141463 | 0.146999 | 0.141754  | 0.157634 | 0.165793 | 0.138403 |
| 0.104604  | 0.102855 | 0.124417 | 0.109557  | 0.136509 | 0.145251 | 0.108829 |
| 0.115093  | 0.115676 | 0.120338 | 0.112471  | 0.135344 | 0.150787 | 0.128934 |
| 0.119027  | 0.115239 | 0.127185 | 0.114948  | 0.135781 | 0.148019 | 0.120047 |
| 0.139714  | 0.130973 | 0.134761 | 0.134178  | 0.153846 | 0.157343 | 0.130245 |
| 0.0981935 | 0.109848 | 0.123834 | 0.101107  | 0.137092 | 0.140006 | 0.125437 |
| 0.136364  | 0.142191 | 0.146853 | 0.128205  | 0.156031 | 0.161568 | 0.137675 |
| 0.119755  | 0.129371 | 0.133159 | 0.123252  | 0.147873 | 0.155449 | 0.140589 |
| 0.13039   | 0.119901 | 0.139714 | 0.133304  | 0.150058 | 0.156469 | 0.127914 |
| 0.103438  | 0.114802 | 0.12704  | 0.104604  | 0.128934 | 0.146416 | 0.123106 |
| 0.122232  | 0.116404 | 0.117279 | 0.118444  | 0.141026 | 0.151515 | 0.120921 |
| 0.12398   | 0.131847 | 0.130973 | 0.117861  | 0.132867 | 0.13986  | 0.133741 |
| 0.20979   | 0.214744 | 0.21824  | 0.208625  | 0.21081  | 0.224505 | 0.216346 |
| 0.116841  | 0.116841 | 0.119464 | 0.112762  | 0.141754 | 0.149621 | 0.125437 |
| 0.0968823 | 0.117861 | 0.131556 | 0.0968823 | 0.136364 | 0.147436 | 0.130245 |
| 0.130245  | 0.119755 | 0.124126 | 0.121503  | 0.144085 | 0.152535 | 0.12398  |
| 0.11757   | 0.125728 | 0.124854 | 0.112325  | 0.125874 | 0.138112 | 0.127622 |
| 0.127331  | 0.124417 | 0.135781 | 0.123834  | 0.143794 | 0.155449 | 0.131556 |
| 0.122669  | 0.126457 | 0.13141  | 0.126457  | 0.141463 | 0.1537   | 0.123397 |
| 0.13039   | 0.126894 | 0.134761 | 0.128934  | 0.145979 | 0.157634 | 0.125874 |
| 0.125583  | 0.115676 | 0.132284 | 0.129662  | 0.145542 | 0.153409 | 0.123689 |

|           |           |          |           |          |          |           |
|-----------|-----------|----------|-----------|----------|----------|-----------|
| 0.11859   | 0.101981  | 0.114802 | 0.105478  | 0.132139 | 0.142628 | 0.114365  |
| 0.13549   | 0.125     | 0.128497 | 0.127914  | 0.149621 | 0.157197 | 0.126311  |
| 0.100524  | 0.110431  | 0.127331 | 0.0938228 | 0.133596 | 0.144085 | 0.124854  |
| 0.110868  | 0.113199  | 0.128642 | 0.112034  | 0.133741 | 0.149767 | 0.12704   |
| 0.178322  | 0.182692  | 0.181527 | 0.182984  | 0.183129 | 0.193619 | 0.183712  |
| 0.131993  | 0.124126  | 0.13549  | 0.124417  | 0.143211 | 0.156614 | 0.130682  |
| 0.135344  | 0.127477  | 0.13039  | 0.128934  | 0.152389 | 0.158508 | 0.129662  |
| 0.0976107 | 0.106935  | 0.113928 | 0.090035  | 0.132139 | 0.137092 | 0.126603  |
| 0.133596  | 0.116696  | 0.120192 | 0.114948  | 0.134033 | 0.147727 | 0.125291  |
| 0.103001  | 0.103293  | 0.122523 | 0.10067   | 0.129371 | 0.145396 | 0.118881  |
| 0.102127  | 0.102418  | 0.120484 | 0.105332  | 0.12704  | 0.142483 | 0.11655   |
| 0.105624  | 0.106498  | 0.122815 | 0.10067   | 0.130828 | 0.150058 | 0.123252  |
| 0.123106  | 0.106789  | 0.126311 | 0.112908  | 0.143939 | 0.148601 | 0.0961538 |
| 0.119318  | 0.119318  | 0.128934 | 0.11553   | 0.134907 | 0.148601 | 0.128205  |
| 0.129079  | 0.123834  | 0.13141  | 0.125     | 0.150495 | 0.160693 | 0.13039   |
| 0.11553   | 0.114073  | 0.126894 | 0.106206  | 0.137238 | 0.149184 | 0.118298  |
| 0.114219  | 0.109266  | 0.131702 | 0.109557  | 0.14088  | 0.150204 | 0.123397  |
| 0.119901  | 0.0983392 | 0.13243  | 0.121941  | 0.144522 | 0.150641 | 0.0973193 |
| 0.103293  | 0.105915  | 0.111742 | 0.097465  | 0.134324 | 0.139569 | 0.115676  |
| 0.117279  | 0.119027  | 0.137092 | 0.119318  | 0.144814 | 0.155303 | 0.125291  |
| 0.104167  | 0.103001  | 0.109994 | 0.0965909 | 0.129079 | 0.138986 | 0.118298  |
| 0.106789  | 0.103001  | 0.113199 | 0.097465  | 0.132576 | 0.140734 | 0.116841  |
| 0.0962995 | 0.108246  | 0.120775 | 0.0945513 | 0.126748 | 0.143065 | 0.12704   |
| 0.106352  | 0.120338  | 0.126166 | 0.100524  | 0.140589 | 0.146416 | 0.13243   |
| 0.100524  | 0.099359  | 0.119755 | 0.0973193 | 0.127477 | 0.141463 | 0.115822  |
| 0.147727  | 0.134324  | 0.148601 | 0.138112  | 0.1537   | 0.16215  | 0.136218  |
| 0.139569  | 0.130536  | 0.143648 | 0.133741  | 0.150787 | 0.161859 | 0.133304  |
| 0.104021  | 0.1081    | 0.120338 | 0.0912005 | 0.135635 | 0.147582 | 0.118153  |
| 0.128351  | 0.135635  | 0.142337 | 0.131847  | 0.159965 | 0.162296 | 0.126457  |
| 0.128642  | 0.125437  | 0.127185 | 0.125728  | 0.131993 | 0.15035  | 0.13345   |
| 0.119027  | 0.123689  | 0.137675 | 0.121649  | 0.150641 | 0.150932 | 0.128788  |
| 0.105041  | 0.114073  | 0.114073 | 0.100379  | 0.130245 | 0.14627  | 0.115093  |
| 0.143065  | 0.145396  | 0.147727 | 0.133741  | 0.152244 | 0.156906 | 0.143502  |
| 0.134907  | 0.125     | 0.125874 | 0.125     | 0.150204 | 0.153992 | 0.129808  |
| 0.136946  | 0.120629  | 0.141026 | 0.134033  | 0.138549 | 0.14933  | 0.106498  |
| 0.115093  | 0.115676  | 0.112762 | 0.104021  | 0.125146 | 0.134178 | 0.130099  |
| 0.0948427 | 0.100962  | 0.118735 | 0.0939685 | 0.126748 | 0.138986 | 0.11451   |
| 0.0827506 | 0.104021  | 0.118881 | 0.0958625 | 0.131556 | 0.148747 | 0.11961   |
| 0.121066  | 0.10067   | 0.123106 | 0.115239  | 0.137238 | 0.145979 | 0.0850816 |
| 0.103293  | 0.11553   | 0.115822 | 0.0901807 | 0.135781 | 0.140443 | 0.122086  |
| 0.107517  | 0.129371  | 0.130828 | 0.106352  | 0.142337 | 0.145833 | 0.132139  |
| 0.125     | 0.126166  | 0.138986 | 0.115093  | 0.140589 | 0.153409 | 0.138549  |
| 0.108974  | 0.101981  | 0.109266 | 0.100524  | 0.12398  | 0.131556 | 0.112908  |
| 0.0770688 | 0.108246  | 0.125728 | 0.095134  | 0.134033 | 0.14831  | 0.117424  |

|           |          |          |           |          |          |          |
|-----------|----------|----------|-----------|----------|----------|----------|
| 0.0955711 | 0.116841 | 0.128205 | 0.0996503 | 0.142045 | 0.146416 | 0.122523 |
| 0.0926573 | 0.107809 | 0.122086 | 0.0973193 | 0.127185 | 0.14088  | 0.11553  |
| 0.0747378 | 0.112325 | 0.127185 | 0.100379  | 0.138695 | 0.146853 | 0.120921 |
| 0.100962  | 0.11116  | 0.128059 | 0.100379  | 0.132576 | 0.138986 | 0.12296  |
| 0.122378  | 0.122378 | 0.129662 | 0.120921  | 0.132139 | 0.148456 | 0.135052 |
| 0.105478  | 0.106935 | 0.127622 | 0.111597  | 0.13447  | 0.151078 | 0.122815 |
| 0.0789627 | 0.10169  | 0.118881 | 0.0795455 | 0.123106 | 0.132721 | 0.123689 |
| 0.0944056 | 0.111888 | 0.126166 | 0.0961538 | 0.133887 | 0.14729  | 0.121941 |
| 0.121358  | 0.120775 | 0.127185 | 0.118735  | 0.131702 | 0.151807 | 0.134033 |
| 0.106643  | 0.108974 | 0.126748 | 0.105478  | 0.135052 | 0.146125 | 0.121941 |
| 0.123834  | 0.127914 | 0.127914 | 0.118881  | 0.136509 | 0.152535 | 0.137966 |
| 0.117424  | 0.11451  | 0.122669 | 0.112762  | 0.127477 | 0.146999 | 0.11961  |
| 0.116113  | 0.126311 | 0.127185 | 0.107955  | 0.139569 | 0.150932 | 0.132867 |

| TDr_13_00350 | TDr_13_00354 | TDr_13_00359 | TDr_13_00366 | TDr_13_00367 | TDr_13_00391 | TDr_13_00411 |
|--------------|--------------|--------------|--------------|--------------|--------------|--------------|
| 0.127331     | 0.128934     | 0.124417     | 0.133741     | 0.137529     | 0.123543     | 0.11757      |
| 0.124563     | 0.127914     | 0.123397     | 0.131847     | 0.129225     | 0.131847     | 0.122086     |
| 0.116987     | 0.125291     | 0.11961      | 0.124854     | 0.126311     | 0.124854     | 0.118007     |
| 0.120192     | 0.120921     | 0.12398      | 0.127477     | 0.128934     | 0.137092     | 0.122378     |
| 0.131847     | 0.142191     | 0.138258     | 0.135635     | 0.142337     | 0.151078     | 0.141317     |
| 0.13447      | 0.138695     | 0.139132     | 0.139714     | 0.133887     | 0.136509     | 0.137529     |
| 0.120047     | 0.13243      | 0.134324     | 0.120629     | 0.133159     | 0.128788     | 0.11961      |
| 0.12296      | 0.129808     | 0.126166     | 0.131702     | 0.135781     | 0.129371     | 0.120775     |
| 0.112325     | 0.11859      | 0.119901     | 0.119901     | 0.120484     | 0.123397     | 0.10373      |
| 0.119755     | 0.123689     | 0.092366     | 0.123252     | 0.101981     | 0.104312     | 0.0910548    |
| 0.125437     | 0.131993     | 0.132721     | 0.130099     | 0.134761     | 0.131847     | 0.120629     |
| 0.112179     | 0.121649     | 0.122086     | 0.116259     | 0.132867     | 0.13345      | 0.120192     |
| 0.120629     | 0.121066     | 0.116841     | 0.127622     | 0.123543     | 0.129953     | 0.112034     |
| 0.145542     | 0.154429     | 0.146707     | 0.153118     | 0.153409     | 0.140589     | 0.138695     |
| 0.134033     | 0.134761     | 0.12704      | 0.137529     | 0.130828     | 0.132576     | 0.123689     |
| 0.109703     | 0.125291     | 0.126894     | 0.120775     | 0.130973     | 0.118153     | 0.110723     |
| 0.113636     | 0.127477     | 0.125        | 0.119172     | 0.123834     | 0.136072     | 0.118735     |
| 0.147873     | 0.148601     | 0.142337     | 0.143502     | 0.144085     | 0.154283     | 0.153263     |
| 0.113199     | 0.122086     | 0.11553      | 0.122523     | 0.124272     | 0.127185     | 0.117133     |
| 0.209645     | 0.213869     | 0.209936     | 0.218094     | 0.211684     | 0.203234     | 0.203963     |
| 0.125        | 0.128642     | 0.128205     | 0.130536     | 0.131119     | 0.139277     | 0.132721     |
| 0.119318     | 0.129953     | 0.129516     | 0.127477     | 0.133596     | 0.133596     | 0.128205     |
| 0.111597     | 0.12398      | 0.119755     | 0.119755     | 0.122086     | 0.127622     | 0.109994     |
| 0.105041     | 0.122378     | 0.134761     | 0.114073     | 0.140006     | 0.127185     | 0.109266     |
| 0.107226     | 0.120484     | 0.111597     | 0.118881     | 0.11859      | 0.119464     | 0.107372     |
| 0.126166     | 0.130682     | 0.129953     | 0.134615     | 0.130536     | 0.138986     | 0.13447      |
| 0.118007     | 0.124563     | 0.12704      | 0.126748     | 0.131702     | 0.137238     | 0.125728     |
| 0.101981     | 0.113782     | 0.124126     | 0.115676     | 0.127331     | 0.121212     | 0.103293     |
| 0.123252     | 0.124563     | 0.134324     | 0.127331     | 0.132576     | 0.136072     | 0.12398      |
| 0.120921     | 0.122232     | 0.125583     | 0.125291     | 0.129079     | 0.135198     | 0.117279     |
| 0.122815     | 0.134615     | 0.136509     | 0.126603     | 0.143502     | 0.130682     | 0.121795     |
| 0.112762     | 0.114073     | 0.130536     | 0.12296      | 0.129079     | 0.129079     | 0.113782     |
| 0.117133     | 0.114948     | 0.120921     | 0.120629     | 0.117716     | 0.11859      | 0.116696     |
| 0.121503     | 0.111742     | 0.125583     | 0.125        | 0.126748     | 0.137821     | 0.120484     |
| 0.118735     | 0.126748     | 0.126311     | 0.128351     | 0.131265     | 0.128934     | 0.115385     |
| 0.125874     | 0.126894     | 0.131702     | 0.13141      | 0.12704      | 0.135781     | 0.119318     |
| 0.133596     | 0.138112     | 0.133013     | 0.13884      | 0.138258     | 0.13039      | 0.127622     |
| 0.117716     | 0.129808     | 0.123252     | 0.125        | 0.139277     | 0.136072     | 0.121358     |
| 0.102273     | 0.109703     | 0.125        | 0.106935     | 0.12296      | 0.125291     | 0.109994     |
| 0.104312     | 0.135344     | 0.129371     | 0.108683     | 0.132576     | 0.129371     | 0.10912      |
| 0.104895     | 0.12602      | 0.121795     | 0.106935     | 0.130245     | 0.120338     | 0.106789     |
| 0.115676     | 0.158362     | 0.145688     | 0.125291     | 0.145979     | 0.131993     | 0.116696     |

|           |          |          |           |          |          |          |
|-----------|----------|----------|-----------|----------|----------|----------|
| 0.126166  | 0.152535 | 0.150641 | 0.12296   | 0.152972 | 0.131702 | 0.12602  |
| 0.101253  | 0.129662 | 0.123397 | 0.114656  | 0.129808 | 0.121066 | 0.104021 |
| 0.109994  | 0.111305 | 0.099796 | 0.114948  | 0.107372 | 0.122523 | 0.111888 |
| 0.117133  | 0.128642 | 0.112762 | 0.124709  | 0.120047 | 0.123543 | 0.108537 |
| 0.0932401 | 0.127768 | 0.129953 | 0.0964452 | 0.129953 | 0.12704  | 0.113199 |
| 0.116404  | 0.15035  | 0.138549 | 0.120775  | 0.143211 | 0.126311 | 0.1081   |
| 0.106206  | 0.131993 | 0.119027 | 0.107955  | 0.131265 | 0.124854 | 0.110723 |
| 0.106935  | 0.133887 | 0.126457 | 0.111597  | 0.13141  | 0.116259 | 0.101544 |
| 0.143211  | 0.149476 | 0.151369 | 0.149913  | 0.14729  | 0.142045 | 0.136072 |
| 0.110577  | 0.13549  | 0.136801 | 0.105332  | 0.139132 | 0.127768 | 0.118881 |
| 0.102564  | 0.126603 | 0.130536 | 0.108974  | 0.132284 | 0.125583 | 0.10708  |
| 0.127622  | 0.135344 | 0.129662 | 0.13986   | 0.129953 | 0.125874 | 0.117279 |
| 0.114802  | 0.130099 | 0.13141  | 0.118298  | 0.138403 | 0.125291 | 0.119027 |
| 0.0973193 | 0.142045 | 0.144231 | 0.099359  | 0.143939 | 0.134324 | 0.123689 |
| 0.10912   | 0.137529 | 0.135635 | 0.119318  | 0.138549 | 0.129516 | 0.117716 |
| 0.106206  | 0.129953 | 0.129516 | 0.113491  | 0.132721 | 0.136509 | 0.104021 |
| 0.107663  | 0.130828 | 0.125146 | 0.110577  | 0.127768 | 0.119318 | 0.108683 |
| 0.117424  | 0.127185 | 0.122086 | 0.115093  | 0.124126 | 0.122378 | 0.10912  |
| 0.113928  | 0.148747 | 0.146562 | 0.119755  | 0.144231 | 0.133741 | 0.113199 |
| 0.121795  | 0.149038 | 0.1419   | 0.128497  | 0.142774 | 0.132284 | 0.11757  |
| 0.150204  | 0.17366  | 0.166521 | 0.167978  | 0.172931 | 0.146416 | 0.150932 |
| 0.104167  | 0.130245 | 0.128642 | 0.117279  | 0.129516 | 0.127185 | 0.110723 |
| 0.099796  | 0.130245 | 0.126311 | 0.109703  | 0.128059 | 0.126311 | 0.110431 |
| 0.103293  | 0.127914 | 0.125437 | 0.111742  | 0.127185 | 0.126311 | 0.106352 |
| 0.140152  | 0.146999 | 0.142483 | 0.143357  | 0.144522 | 0.125583 | 0.136801 |
| 0.107517  | 0.130682 | 0.129662 | 0.104895  | 0.132576 | 0.12704  | 0.108246 |
| 0.10708   | 0.139277 | 0.139423 | 0.116696  | 0.134761 | 0.121358 | 0.118881 |
| 0.113199  | 0.129079 | 0.12602  | 0.121649  | 0.122232 | 0.125728 | 0.10373  |
| 0.104021  | 0.132139 | 0.126748 | 0.110431  | 0.136655 | 0.131993 | 0.105332 |
| 0.145396  | 0.153992 | 0.151224 | 0.151224  | 0.153263 | 0.123834 | 0.145833 |
| 0.106643  | 0.139132 | 0.137238 | 0.111014  | 0.137821 | 0.13345  | 0.10708  |
| 0.12398   | 0.147145 | 0.142628 | 0.119901  | 0.143794 | 0.130682 | 0.120047 |
| 0.114219  | 0.137675 | 0.141608 | 0.112762  | 0.140443 | 0.131702 | 0.121941 |
| 0.11116   | 0.114802 | 0.116696 | 0.116113  | 0.124272 | 0.126603 | 0.123543 |
| 0.101544  | 0.128497 | 0.126603 | 0.112034  | 0.131847 | 0.128642 | 0.107809 |
| 0.100962  | 0.129662 | 0.125146 | 0.107955  | 0.131265 | 0.126311 | 0.104895 |
| 0.112325  | 0.140152 | 0.144376 | 0.118444  | 0.144376 | 0.141463 | 0.109557 |
| 0.103147  | 0.128934 | 0.121795 | 0.116841  | 0.130536 | 0.12296  | 0.109994 |
| 0.11961   | 0.146562 | 0.140297 | 0.119901  | 0.144668 | 0.137383 | 0.120047 |
| 0.105915  | 0.13986  | 0.130099 | 0.119027  | 0.135927 | 0.130099 | 0.112762 |
| 0.105332  | 0.130828 | 0.132139 | 0.105624  | 0.131847 | 0.129225 | 0.11655  |
| 0.108246  | 0.129371 | 0.132139 | 0.106498  | 0.139423 | 0.127185 | 0.115967 |
| 0.106206  | 0.137529 | 0.133596 | 0.116113  | 0.131556 | 0.137675 | 0.116259 |
| 0.104749  | 0.127914 | 0.127477 | 0.110286  | 0.129225 | 0.128059 | 0.110723 |



|           |          |          |          |          |          |           |
|-----------|----------|----------|----------|----------|----------|-----------|
| 0.102418  | 0.133159 | 0.129808 | 0.104458 | 0.139423 | 0.120484 | 0.106935  |
| 0.118881  | 0.146999 | 0.144231 | 0.114802 | 0.143065 | 0.128497 | 0.115239  |
| 0.107226  | 0.124272 | 0.124709 | 0.120338 | 0.131993 | 0.131993 | 0.105624  |
| 0.110286  | 0.119755 | 0.123689 | 0.114365 | 0.126311 | 0.129808 | 0.112179  |
| 0.12398   | 0.128497 | 0.123397 | 0.123397 | 0.131847 | 0.137092 | 0.126457  |
| 0.124563  | 0.134033 | 0.137092 | 0.129225 | 0.136218 | 0.135052 | 0.127331  |
| 0.122523  | 0.117424 | 0.117279 | 0.135052 | 0.107955 | 0.128351 | 0.131119  |
| 0.129371  | 0.120192 | 0.121503 | 0.145105 | 0.11451  | 0.137821 | 0.135635  |
| 0.115822  | 0.13141  | 0.127477 | 0.12602  | 0.133013 | 0.124854 | 0.124709  |
| 0.185752  | 0.191142 | 0.184295 | 0.189831 | 0.192745 | 0.180507 | 0.185897  |
| 0.112471  | 0.121941 | 0.119172 | 0.117716 | 0.124126 | 0.130828 | 0.117861  |
| 0.124272  | 0.110723 | 0.115239 | 0.13884  | 0.112034 | 0.13447  | 0.134324  |
| 0.120192  | 0.107517 | 0.106789 | 0.135052 | 0.110868 | 0.13039  | 0.128788  |
| 0.131702  | 0.137092 | 0.136364 | 0.134033 | 0.138695 | 0.144231 | 0.133013  |
| 0.111742  | 0.11014  | 0.112325 | 0.123689 | 0.11116  | 0.122815 | 0.11859   |
| 0.12398   | 0.113345 | 0.122523 | 0.137383 | 0.112908 | 0.133596 | 0.130828  |
| 0.113491  | 0.112762 | 0.107663 | 0.119901 | 0.108829 | 0.128642 | 0.121795  |
| 0.114802  | 0.121941 | 0.110723 | 0.124417 | 0.110431 | 0.123543 | 0.117861  |
| 0.112762  | 0.121358 | 0.120921 | 0.122086 | 0.129371 | 0.117133 | 0.112325  |
| 0.121795  | 0.116404 | 0.118881 | 0.130828 | 0.112471 | 0.132867 | 0.135052  |
| 0.105186  | 0.123689 | 0.112179 | 0.1081   | 0.122669 | 0.122378 | 0.10708   |
| 0.133013  | 0.134324 | 0.129225 | 0.137966 | 0.135052 | 0.126894 | 0.135198  |
| 0.116259  | 0.128351 | 0.122669 | 0.122669 | 0.133159 | 0.127622 | 0.124563  |
| 0.110577  | 0.142191 | 0.137092 | 0.112325 | 0.135927 | 0.126603 | 0.108974  |
| 0.12704   | 0.14292  | 0.134033 | 0.123252 | 0.137529 | 0.134324 | 0.124563  |
| 0.113345  | 0.123397 | 0.122378 | 0.113345 | 0.119755 | 0.125874 | 0.118153  |
| 0.143648  | 0.148747 | 0.144231 | 0.150058 | 0.144231 | 0.120629 | 0.144959  |
| 0.118153  | 0.124126 | 0.127185 | 0.116404 | 0.119318 | 0.131847 | 0.120338  |
| 0.112617  | 0.108974 | 0.110868 | 0.122523 | 0.107663 | 0.13039  | 0.11655   |
| 0.0999417 | 0.123397 | 0.111305 | 0.102855 | 0.12704  | 0.133159 | 0.11116   |
| 0.138986  | 0.144668 | 0.132576 | 0.141026 | 0.138403 | 0.138695 | 0.135927  |
| 0.108974  | 0.129516 | 0.128205 | 0.120047 | 0.131702 | 0.117716 | 0.112617  |
| 0.112179  | 0.108246 | 0.104312 | 0.119172 | 0.102564 | 0.126748 | 0.11757   |
| 0.111305  | 0.103001 | 0.103147 | 0.121212 | 0.106061 | 0.126166 | 0.116696  |
| 0.11961   | 0.128788 | 0.128351 | 0.123689 | 0.133013 | 0.130099 | 0.118298  |
| 0.12704   | 0.13039  | 0.118298 | 0.128788 | 0.123834 | 0.122669 | 0.112908  |
| 0.118153  | 0.129371 | 0.133596 | 0.121649 | 0.131265 | 0.13243  | 0.122669  |
| 0.104604  | 0.124272 | 0.116841 | 0.107809 | 0.122669 | 0.117716 | 0.099796  |
| 0.110723  | 0.12398  | 0.117133 | 0.112471 | 0.11655  | 0.122669 | 0.104749  |
| 0.109411  | 0.125874 | 0.114656 | 0.10912  | 0.118444 | 0.121941 | 0.0999417 |
| 0.112034  | 0.13549  | 0.126894 | 0.130099 | 0.136218 | 0.139423 | 0.123834  |
| 0.122378  | 0.132721 | 0.129079 | 0.122669 | 0.13141  | 0.128205 | 0.109703  |
| 0.109994  | 0.123834 | 0.120192 | 0.111451 | 0.128059 | 0.126603 | 0.106935  |
| 0.107517  | 0.123689 | 0.111888 | 0.1081   | 0.119464 | 0.116259 | 0.103584  |

|           |          |          |           |          |          |           |
|-----------|----------|----------|-----------|----------|----------|-----------|
| 0.113054  | 0.133304 | 0.126166 | 0.113054  | 0.128788 | 0.126748 | 0.112617  |
| 0.103293  | 0.123543 | 0.123106 | 0.104458  | 0.121941 | 0.128059 | 0.107809  |
| 0.127185  | 0.136655 | 0.130099 | 0.133013  | 0.136218 | 0.118153 | 0.129079  |
| 0.129225  | 0.136364 | 0.13884  | 0.138258  | 0.143794 | 0.13447  | 0.127622  |
| 0.113199  | 0.124417 | 0.11553  | 0.11116   | 0.11553  | 0.122232 | 0.109557  |
| 0.106352  | 0.12602  | 0.11859  | 0.113345  | 0.129953 | 0.124709 | 0.10271   |
| 0.105478  | 0.12602  | 0.118881 | 0.106352  | 0.127331 | 0.118007 | 0.0986305 |
| 0.106935  | 0.11757  | 0.110723 | 0.115967  | 0.114219 | 0.11859  | 0.105915  |
| 0.122086  | 0.131556 | 0.116259 | 0.115967  | 0.127622 | 0.125    | 0.114073  |
| 0.106352  | 0.121941 | 0.111888 | 0.108392  | 0.124709 | 0.119755 | 0.105624  |
| 0.134178  | 0.144522 | 0.150787 | 0.135344  | 0.151369 | 0.150495 | 0.137238  |
| 0.127331  | 0.145833 | 0.134324 | 0.136946  | 0.144814 | 0.145979 | 0.130682  |
| 0.117424  | 0.133304 | 0.124417 | 0.126457  | 0.129953 | 0.132576 | 0.118153  |
| 0.11553   | 0.130536 | 0.120192 | 0.128351  | 0.125437 | 0.13447  | 0.115385  |
| 0.116696  | 0.123252 | 0.126894 | 0.121358  | 0.125728 | 0.125728 | 0.120047  |
| 0.109848  | 0.124854 | 0.121795 | 0.111597  | 0.121503 | 0.123252 | 0.103001  |
| 0.101544  | 0.128205 | 0.120775 | 0.105915  | 0.126311 | 0.122523 | 0.106061  |
| 0.103584  | 0.111597 | 0.118153 | 0.108246  | 0.126894 | 0.119027 | 0.112179  |
| 0.100379  | 0.131993 | 0.130099 | 0.109994  | 0.135344 | 0.12398  | 0.11451   |
| 0.0925117 | 0.136364 | 0.13447  | 0.0971737 | 0.139132 | 0.120484 | 0.102273  |
| 0.115967  | 0.114073 | 0.11451  | 0.128497  | 0.111597 | 0.130245 | 0.120484  |
| 0.127185  | 0.135781 | 0.125437 | 0.131556  | 0.132139 | 0.142337 | 0.130245  |
| 0.130245  | 0.135344 | 0.131702 | 0.131702  | 0.134907 | 0.138112 | 0.135052  |
| 0.199592  | 0.209062 | 0.207751 | 0.205711  | 0.214161 | 0.202506 | 0.203234  |
| 0.241696  | 0.248543 | 0.24461  | 0.248397  | 0.251311 | 0.240239 | 0.244464  |
| 0.105478  | 0.124563 | 0.129953 | 0.115967  | 0.134907 | 0.125583 | 0.122815  |
| 0.0869755 | 0.121795 | 0.119901 | 0.0849359 | 0.12398  | 0.122232 | 0.107226  |
| 0.090472  | 0.119172 | 0.124272 | 0.0995047 | 0.126894 | 0.120484 | 0.107517  |
| 0.0922203 | 0.115093 | 0.12398  | 0.101836  | 0.123689 | 0.123689 | 0.115093  |
| 0.133596  | 0.133159 | 0.130099 | 0.136509  | 0.128059 | 0.13039  | 0.123834  |
| 0.0922203 | 0.125291 | 0.128059 | 0.0965909 | 0.132721 | 0.124854 | 0.111305  |
| 0.114802  | 0.145251 | 0.148601 | 0.104895  | 0.145105 | 0.137529 | 0.127477  |
| 0.0907634 | 0.125874 | 0.131265 | 0.0901807 | 0.133013 | 0.129808 | 0.107809  |
| 0.0936772 | 0.130245 | 0.133304 | 0.0866841 | 0.136801 | 0.137092 | 0.115967  |
| 0.109266  | 0.140589 | 0.138403 | 0.115967  | 0.136072 | 0.122378 | 0.116113  |
| 0.0935315 | 0.13243  | 0.136072 | 0.0981935 | 0.130536 | 0.134907 | 0.11553   |
| 0.12296   | 0.146707 | 0.13986  | 0.126457  | 0.141317 | 0.131119 | 0.113199  |
| 0.0859557 | 0.125437 | 0.127622 | 0.099359  | 0.129953 | 0.125    | 0.105332  |
| 0.080711  | 0.120775 | 0.122086 | 0.0920746 | 0.129371 | 0.122086 | 0.108246  |
| 0.088141  | 0.125291 | 0.129808 | 0.0989219 | 0.126311 | 0.125728 | 0.114219  |
| 0.0820221 | 0.121503 | 0.121941 | 0.0823135 | 0.129808 | 0.121941 | 0.113345  |
| 0.083479  | 0.118007 | 0.124563 | 0.0898893 | 0.130099 | 0.123397 | 0.109848  |
| 0.0856643 | 0.128351 | 0.128205 | 0.0932401 | 0.132284 | 0.127622 | 0.110577  |
| 0.0948427 | 0.130536 | 0.131847 | 0.0983392 | 0.128642 | 0.133304 | 0.112762  |

|           |          |           |           |           |          |          |
|-----------|----------|-----------|-----------|-----------|----------|----------|
| 0.0939685 | 0.131702 | 0.138549  | 0.0992133 | 0.134178  | 0.130099 | 0.118298 |
| 0.0868298 | 0.120484 | 0.128205  | 0.0847902 | 0.13986   | 0.129953 | 0.11553  |
| 0.090472  | 0.127622 | 0.132139  | 0.0965909 | 0.131556  | 0.125146 | 0.112179 |
| 0.0965909 | 0.135198 | 0.137092  | 0.0948427 | 0.140297  | 0.136218 | 0.120047 |
| 0.0910548 | 0.120921 | 0.125728  | 0.0893065 | 0.127768  | 0.123689 | 0.105769 |
| 0.101399  | 0.138549 | 0.144814  | 0.113636  | 0.143939  | 0.136072 | 0.125146 |
| 0.134615  | 0.13884  | 0.125291  | 0.138403  | 0.134907  | 0.13549  | 0.128642 |
| 0.114365  | 0.108392 | 0.115239  | 0.123689  | 0.116987  | 0.128059 | 0.126457 |
| 0.0840618 | 0.118881 | 0.115822  | 0.0861014 | 0.125728  | 0.125437 | 0.107517 |
| 0.0812937 | 0.113782 | 0.121795  | 0.0952797 | 0.120338  | 0.123543 | 0.109411 |
| 0.0855186 | 0.125583 | 0.128934  | 0.0887238 | 0.137675  | 0.131265 | 0.115385 |
| 0.0868298 | 0.122815 | 0.130536  | 0.099359  | 0.131993  | 0.128788 | 0.113782 |
| 0.101399  | 0.128934 | 0.134615  | 0.0894522 | 0.137529  | 0.136655 | 0.114656 |
| 0.0954254 | 0.127622 | 0.130973  | 0.099796  | 0.128642  | 0.134178 | 0.115967 |
| 0.0891608 | 0.130099 | 0.129953  | 0.0961538 | 0.13345   | 0.134033 | 0.114656 |
| 0.085373  | 0.123397 | 0.131119  | 0.0952797 | 0.128205  | 0.129662 | 0.110286 |
| 0.0909091 | 0.136218 | 0.13549   | 0.0917832 | 0.137238  | 0.132867 | 0.116113 |
| 0.094697  | 0.130099 | 0.139277  | 0.0909091 | 0.136946  | 0.132867 | 0.123689 |
| 0.0913462 | 0.132576 | 0.138258  | 0.10271   | 0.134178  | 0.136801 | 0.119172 |
| 0.115676  | 0.141754 | 0.141608  | 0.125     | 0.147727  | 0.120629 | 0.120775 |
| 0.0920746 | 0.123689 | 0.129953  | 0.0917832 | 0.132867  | 0.131993 | 0.113491 |
| 0.10169   | 0.128059 | 0.132867  | 0.102564  | 0.13141   | 0.129079 | 0.122232 |
| 0.0866841 | 0.116841 | 0.124272  | 0.097465  | 0.11961   | 0.129808 | 0.106935 |
| 0.109557  | 0.129516 | 0.122669  | 0.113636  | 0.13141   | 0.123543 | 0.114948 |
| 0.0862471 | 0.123689 | 0.125291  | 0.0973193 | 0.125     | 0.124417 | 0.106206 |
| 0.0945513 | 0.117133 | 0.126603  | 0.0916375 | 0.128642  | 0.127185 | 0.115093 |
| 0.0846445 | 0.120338 | 0.121649  | 0.083479  | 0.125728  | 0.125728 | 0.109848 |
| 0.0958625 | 0.138258 | 0.143648  | 0.108683  | 0.13549   | 0.133159 | 0.118444 |
| 0.106789  | 0.123834 | 0.128934  | 0.109994  | 0.135344  | 0.122815 | 0.111305 |
| 0.100962  | 0.133159 | 0.140297  | 0.108829  | 0.135344  | 0.133887 | 0.124417 |
| 0.083479  | 0.119172 | 0.121358  | 0.0820221 | 0.126894  | 0.122232 | 0.113054 |
| 0.0917832 | 0.13039  | 0.135198  | 0.0874126 | 0.131119  | 0.125    | 0.105332 |
| 0.119318  | 0.131119 | 0.127768  | 0.126603  | 0.137383  | 0.11961  | 0.113636 |
| 0.120484  | 0.129371 | 0.119027  | 0.130099  | 0.129225  | 0.129516 | 0.117716 |
| 0.109848  | 0.131556 | 0.129371  | 0.115093  | 0.132576  | 0.127914 | 0.112034 |
| 0.119027  | 0.126166 | 0.113491  | 0.119901  | 0.128934  | 0.13243  | 0.118298 |
| 0.117424  | 0.13243  | 0.124126  | 0.125874  | 0.13549   | 0.138403 | 0.121358 |
| 0.11451   | 0.120192 | 0.116841  | 0.121212  | 0.125291  | 0.133741 | 0.120484 |
| 0.137238  | 0.140589 | 0.122669  | 0.139277  | 0.124126  | 0.129953 | 0.116113 |
| 0.131265  | 0.147145 | 0.145542  | 0.13884   | 0.145251  | 0.139423 | 0.133741 |
| 0.11553   | 0.121503 | 0.103001  | 0.120484  | 0.114656  | 0.12398  | 0.100233 |
| 0.130828  | 0.113782 | 0.0979021 | 0.13549   | 0.0941142 | 0.125    | 0.116696 |
| 0.127477  | 0.131993 | 0.112325  | 0.131556  | 0.116696  | 0.116696 | 0.103147 |
| 0.12602   | 0.104312 | 0.100962  | 0.136218  | 0.0898893 | 0.126311 | 0.123834 |

|          |          |           |          |           |          |           |
|----------|----------|-----------|----------|-----------|----------|-----------|
| 0.121649 | 0.108392 | 0.0863928 | 0.12602  | 0.0980478 | 0.117279 | 0.112179  |
| 0.122523 | 0.131993 | 0.108537  | 0.124272 | 0.125728  | 0.128059 | 0.107226  |
| 0.130536 | 0.135927 | 0.11859   | 0.136072 | 0.115967  | 0.125874 | 0.108537  |
| 0.122232 | 0.109266 | 0.090472  | 0.132721 | 0.0968823 | 0.127768 | 0.120629  |
| 0.137383 | 0.119755 | 0.0980478 | 0.141463 | 0.105624  | 0.126894 | 0.121503  |
| 0.130099 | 0.136946 | 0.114073  | 0.135344 | 0.128934  | 0.128934 | 0.107517  |
| 0.121941 | 0.109557 | 0.0884324 | 0.123689 | 0.10067   | 0.121649 | 0.11451   |
| 0.121795 | 0.143794 | 0.147727  | 0.130536 | 0.148019  | 0.14831  | 0.133304  |
| 0.134178 | 0.138695 | 0.121649  | 0.138258 | 0.120192  | 0.133304 | 0.11451   |
| 0.112325 | 0.111014 | 0.104458  | 0.121941 | 0.10271   | 0.124854 | 0.114219  |
| 0.219988 | 0.233537 | 0.228438  | 0.226981 | 0.232809  | 0.227564 | 0.225962  |
| 0.121212 | 0.108246 | 0.0917832 | 0.127914 | 0.0981935 | 0.126457 | 0.113782  |
| 0.118881 | 0.128642 | 0.11014   | 0.124709 | 0.118007  | 0.126457 | 0.110577  |
| 0.13447  | 0.118298 | 0.0939685 | 0.144085 | 0.0933858 | 0.127768 | 0.116841  |
| 0.11961  | 0.129371 | 0.112325  | 0.125437 | 0.123397  | 0.132721 | 0.111014  |
| 0.139714 | 0.138403 | 0.11757   | 0.140297 | 0.131265  | 0.13447  | 0.111597  |
| 0.12398  | 0.107517 | 0.104167  | 0.128642 | 0.0989219 | 0.13039  | 0.123252  |
| 0.124709 | 0.10708  | 0.0987762 | 0.130245 | 0.101981  | 0.122086 | 0.11757   |
| 0.131119 | 0.130682 | 0.112762  | 0.134033 | 0.119172  | 0.12296  | 0.10912   |
| 0.13243  | 0.116259 | 0.109994  | 0.141754 | 0.0977564 | 0.131556 | 0.128497  |
| 0.129371 | 0.107663 | 0.103147  | 0.136946 | 0.0879953 | 0.130828 | 0.124272  |
| 0.125146 | 0.121795 | 0.107663  | 0.130099 | 0.0971737 | 0.127185 | 0.118007  |
| 0.128642 | 0.113636 | 0.0954254 | 0.13447  | 0.108829  | 0.126894 | 0.123543  |
| 0.117279 | 0.124126 | 0.116987  | 0.121649 | 0.126603  | 0.131556 | 0.0984848 |
| 0.110286 | 0.112471 | 0.0965909 | 0.126311 | 0.105332  | 0.128351 | 0.117716  |
| 0.134907 | 0.117861 | 0.0981935 | 0.138403 | 0.102855  | 0.128788 | 0.119027  |
| 0.120775 | 0.102273 | 0.0936772 | 0.12602  | 0.0922203 | 0.11553  | 0.116259  |
| 0.11961  | 0.146853 | 0.138549  | 0.123689 | 0.144959  | 0.142628 | 0.119172  |
| 0.145396 | 0.152535 | 0.144814  | 0.147436 | 0.152389  | 0.134907 | 0.135635  |
| 0.125    | 0.135344 | 0.124709  | 0.128205 | 0.134907  | 0.125874 | 0.107372  |
| 0.129953 | 0.138258 | 0.111888  | 0.132576 | 0.125583  | 0.127622 | 0.105624  |
| 0.128351 | 0.129662 | 0.126894  | 0.136509 | 0.125728  | 0.120775 | 0.126748  |
| 0.129953 | 0.117279 | 0.128205  | 0.134033 | 0.133159  | 0.141317 | 0.125146  |
| 0.131993 | 0.142045 | 0.138403  | 0.13345  | 0.1419    | 0.126457 | 0.133013  |
| 0.141317 | 0.151369 | 0.134324  | 0.14627  | 0.147145  | 0.131119 | 0.134761  |
| 0.105332 | 0.123834 | 0.111451  | 0.114948 | 0.124854  | 0.127185 | 0.10373   |
| 0.126457 | 0.139132 | 0.123252  | 0.131993 | 0.134907  | 0.138695 | 0.128934  |
| 0.148164 | 0.149767 | 0.14729   | 0.149913 | 0.153992  | 0.133013 | 0.145688  |
| 0.11961  | 0.126748 | 0.123689  | 0.11961  | 0.124854  | 0.127185 | 0.111305  |
| 0.120484 | 0.136946 | 0.133887  | 0.114948 | 0.138258  | 0.134178 | 0.116841  |
| 0.131119 | 0.152826 | 0.157051  | 0.141026 | 0.160839  | 0.14627  | 0.139714  |
| 0.111888 | 0.136509 | 0.133741  | 0.113636 | 0.137238  | 0.137529 | 0.11553   |
| 0.128642 | 0.143939 | 0.133304  | 0.13447  | 0.13447   | 0.135927 | 0.113636  |
| 0.125    | 0.13884  | 0.120629  | 0.128205 | 0.137821  | 0.128788 | 0.116404  |

|           |          |           |           |           |          |          |
|-----------|----------|-----------|-----------|-----------|----------|----------|
| 0.123397  | 0.112179 | 0.112034  | 0.131847  | 0.106789  | 0.133887 | 0.12704  |
| 0.108392  | 0.135052 | 0.123834  | 0.125874  | 0.128788  | 0.120338 | 0.116113 |
| 0.122232  | 0.137821 | 0.114656  | 0.128934  | 0.121066  | 0.120775 | 0.110723 |
| 0.12704   | 0.114365 | 0.112471  | 0.126748  | 0.109266  | 0.131993 | 0.13039  |
| 0.128205  | 0.112325 | 0.0958625 | 0.13549   | 0.10373   | 0.130828 | 0.123106 |
| 0.122669  | 0.110577 | 0.122378  | 0.132576  | 0.1081    | 0.138112 | 0.136218 |
| 0.120338  | 0.120484 | 0.104604  | 0.132284  | 0.120338  | 0.136655 | 0.129516 |
| 0.126748  | 0.122232 | 0.128205  | 0.136364  | 0.11655   | 0.121795 | 0.125437 |
| 0.142191  | 0.130682 | 0.123543  | 0.151807  | 0.124709  | 0.122378 | 0.143794 |
| 0.119755  | 0.128642 | 0.112471  | 0.126457  | 0.106352  | 0.121795 | 0.104749 |
| 0.108392  | 0.127768 | 0.127914  | 0.110723  | 0.126166  | 0.129079 | 0.117279 |
| 0.129371  | 0.140006 | 0.13345   | 0.129079  | 0.134324  | 0.132576 | 0.134178 |
| 0.115385  | 0.13039  | 0.111014  | 0.119172  | 0.115676  | 0.116841 | 0.102127 |
| 0.141463  | 0.152098 | 0.142045  | 0.144959  | 0.150787  | 0.114948 | 0.141026 |
| 0.150495  | 0.160548 | 0.1537    | 0.154866  | 0.15778   | 0.12602  | 0.147436 |
| 0.0884324 | 0.127914 | 0.137675  | 0.0945513 | 0.132139  | 0.136509 | 0.117133 |
| 0         | 0.125728 | 0.122669  | 0.0958625 | 0.130536  | 0.133159 | 0.105915 |
| 0.125728  | 0        | 0.118153  | 0.134761  | 0.11116   | 0.14088  | 0.138695 |
| 0.122669  | 0.118153 | 0         | 0.134907  | 0.106643  | 0.128788 | 0.119318 |
| 0.0958625 | 0.134761 | 0.134907  | 0         | 0.143065  | 0.13549  | 0.11553  |
| 0.130536  | 0.11116  | 0.106643  | 0.143065  | 0         | 0.134324 | 0.129808 |
| 0.133159  | 0.14088  | 0.128788  | 0.13549   | 0.134324  | 0        | 0.11116  |
| 0.105915  | 0.138695 | 0.119318  | 0.11553   | 0.129808  | 0.11116  | 0        |
| 0.148456  | 0.154138 | 0.161568  | 0.14729   | 0.157197  | 0.150495 | 0.15676  |
| 0.106789  | 0.134615 | 0.120192  | 0.112325  | 0.122232  | 0.121941 | 0.092366 |
| 0.136509  | 0.147145 | 0.134178  | 0.14292   | 0.136801  | 0.131556 | 0.123834 |
| 0.108392  | 0.13039  | 0.12296   | 0.108683  | 0.122669  | 0.125583 | 0.11757  |
| 0.11859   | 0.095134 | 0.120338  | 0.13345   | 0.11014   | 0.143357 | 0.128351 |
| 0.127622  | 0.112325 | 0.0952797 | 0.13345   | 0.0938228 | 0.122669 | 0.112325 |
| 0.143211  | 0.149184 | 0.148456  | 0.15574   | 0.156323  | 0.135635 | 0.142191 |
| 0.144231  | 0.137966 | 0.136655  | 0.149767  | 0.137821  | 0.150641 | 0.150787 |
| 0.125437  | 0.127622 | 0.133013  | 0.134761  | 0.145833  | 0.140006 | 0.130245 |
| 0.136364  | 0.144376 | 0.143065  | 0.147145  | 0.156469  | 0.146853 | 0.14088  |
| 0.140589  | 0.162005 | 0.165355  | 0.151078  | 0.167686  | 0.154283 | 0.149767 |
| 0.14729   | 0.156469 | 0.150787  | 0.154575  | 0.160402  | 0.151952 | 0.147436 |
| 0.109266  | 0.130099 | 0.144231  | 0.113636  | 0.136364  | 0.134033 | 0.119901 |
| 0.142045  | 0.143065 | 0.145542  | 0.144959  | 0.143794  | 0.1537   | 0.148019 |
| 0.122815  | 0.123252 | 0.127477  | 0.12602   | 0.131847  | 0.13243  | 0.123543 |
| 0.120047  | 0.124272 | 0.126748  | 0.125874  | 0.125583  | 0.126457 | 0.117279 |
| 0.125728  | 0.130245 | 0.114365  | 0.127477  | 0.125728  | 0.127477 | 0.109557 |
| 0.119318  | 0.128205 | 0.130973  | 0.128351  | 0.14292   | 0.139714 | 0.126457 |
| 0.119755  | 0.130099 | 0.133159  | 0.124709  | 0.126166  | 0.132867 | 0.118153 |
| 0.118007  | 0.12398  | 0.121212  | 0.127622  | 0.131993  | 0.122669 | 0.119027 |
| 0.125583  | 0.133013 | 0.132867  | 0.136946  | 0.140443  | 0.140443 | 0.130682 |

|          |          |           |          |          |          |           |
|----------|----------|-----------|----------|----------|----------|-----------|
| 0.13039  | 0.133741 | 0.125437  | 0.137383 | 0.129225 | 0.131847 | 0.124417  |
| 0.109411 | 0.122378 | 0.117279  | 0.116696 | 0.116404 | 0.120192 | 0.105478  |
| 0.123689 | 0.129662 | 0.135052  | 0.130973 | 0.145833 | 0.14088  | 0.131119  |
| 0.120629 | 0.127477 | 0.13141   | 0.126457 | 0.142483 | 0.137821 | 0.126311  |
| 0.102564 | 0.132721 | 0.138403  | 0.111305 | 0.139277 | 0.134033 | 0.115239  |
| 0.222028 | 0.231206 | 0.224068  | 0.228147 | 0.230186 | 0.220862 | 0.22567   |
| 0.139569 | 0.143502 | 0.142774  | 0.148601 | 0.155012 | 0.15035  | 0.143502  |
| 0.128059 | 0.13549  | 0.132721  | 0.128934 | 0.136801 | 0.145833 | 0.132576  |
| 0.127914 | 0.129808 | 0.139277  | 0.134615 | 0.137529 | 0.140734 | 0.132139  |
| 0.217657 | 0.223922 | 0.220862  | 0.221737 | 0.227564 | 0.219988 | 0.220134  |
| 0.112179 | 0.134761 | 0.137821  | 0.118881 | 0.140734 | 0.127622 | 0.11961   |
| 0.11757  | 0.13141  | 0.134178  | 0.130099 | 0.139132 | 0.14088  | 0.123252  |
| 0.12602  | 0.138112 | 0.139423  | 0.122815 | 0.139714 | 0.144376 | 0.133741  |
| 0.127331 | 0.13039  | 0.125     | 0.131119 | 0.129079 | 0.129953 | 0.117861  |
| 0.256702 | 0.258304 | 0.256993  | 0.260198 | 0.262529 | 0.250583 | 0.260052  |
| 0.125728 | 0.13345  | 0.139132  | 0.134761 | 0.138549 | 0.130682 | 0.124709  |
| 0.101836 | 0.128497 | 0.13447   | 0.112034 | 0.137966 | 0.133013 | 0.112179  |
| 0.119901 | 0.129079 | 0.133013  | 0.121358 | 0.135052 | 0.144959 | 0.13345   |
| 0.119027 | 0.125291 | 0.133013  | 0.119027 | 0.134178 | 0.144668 | 0.131702  |
| 0.133013 | 0.134615 | 0.135635  | 0.139423 | 0.138549 | 0.124272 | 0.121795  |
| 0.128934 | 0.140152 | 0.136801  | 0.139132 | 0.144959 | 0.127185 | 0.130245  |
| 0.104458 | 0.134033 | 0.141171  | 0.110577 | 0.141463 | 0.136801 | 0.114802  |
| 0.119172 | 0.12602  | 0.129371  | 0.125874 | 0.143065 | 0.137821 | 0.127768  |
| 0.130682 | 0.133741 | 0.139423  | 0.137092 | 0.137675 | 0.147582 | 0.139569  |
| 0.12602  | 0.123543 | 0.125437  | 0.126311 | 0.127185 | 0.130682 | 0.115967  |
| 0.120629 | 0.12398  | 0.12704   | 0.128205 | 0.13986  | 0.137821 | 0.125437  |
| 0.125146 | 0.125874 | 0.0992133 | 0.128934 | 0.10271  | 0.105915 | 0.0961538 |
| 0.143357 | 0.137092 | 0.13986   | 0.146853 | 0.13345  | 0.150932 | 0.14933   |
| 0.127331 | 0.134178 | 0.1419    | 0.13549  | 0.142483 | 0.131993 | 0.128642  |
| 0.121503 | 0.134761 | 0.138695  | 0.130536 | 0.140734 | 0.143939 | 0.129516  |
| 0.193473 | 0.203817 | 0.201049  | 0.200466 | 0.207751 | 0.198427 | 0.200321  |
| 0.208916 | 0.216055 | 0.213578  | 0.214452 | 0.221445 | 0.211538 | 0.21285   |
| 0.131119 | 0.132721 | 0.124417  | 0.13345  | 0.129953 | 0.129079 | 0.121941  |
| 0.120629 | 0.124563 | 0.119755  | 0.125874 | 0.125291 | 0.125291 | 0.115822  |
| 0.143357 | 0.146707 | 0.135781  | 0.14831  | 0.13986  | 0.142191 | 0.138549  |
| 0.100524 | 0.129225 | 0.134907  | 0.108392 | 0.136655 | 0.138112 | 0.113199  |
| 0.129516 | 0.136946 | 0.141171  | 0.135927 | 0.141463 | 0.133304 | 0.128205  |
| 0.124709 | 0.125437 | 0.132284  | 0.128205 | 0.124417 | 0.144522 | 0.133013  |
| 0.229604 | 0.237034 | 0.236888  | 0.234557 | 0.238928 | 0.225816 | 0.233537  |
| 0.118881 | 0.125728 | 0.125583  | 0.120921 | 0.129079 | 0.139569 | 0.127477  |
| 0.204108 | 0.218531 | 0.215763  | 0.208188 | 0.220134 | 0.200903 | 0.209207  |
| 0.102855 | 0.122232 | 0.133159  | 0.107809 | 0.131119 | 0.132867 | 0.112908  |
| 0.118153 | 0.13345  | 0.129516  | 0.116987 | 0.133887 | 0.140006 | 0.12296   |
| 0.11859  | 0.128351 | 0.128788  | 0.125583 | 0.137238 | 0.125    | 0.121941  |

|          |          |          |          |          |          |          |
|----------|----------|----------|----------|----------|----------|----------|
| 0.121503 | 0.125728 | 0.120921 | 0.124417 | 0.129371 | 0.123543 | 0.112908 |
| 0.211976 | 0.218823 | 0.218677 | 0.221008 | 0.220425 | 0.211684 | 0.213869 |
| 0.13243  | 0.136655 | 0.141171 | 0.141463 | 0.155157 | 0.145542 | 0.140443 |
| 0.114365 | 0.125874 | 0.133013 | 0.115822 | 0.129516 | 0.135927 | 0.125583 |
| 0.12602  | 0.130536 | 0.135344 | 0.135635 | 0.146416 | 0.14292  | 0.131119 |
| 0.121941 | 0.134324 | 0.129808 | 0.129516 | 0.131265 | 0.138258 | 0.124709 |
| 0.121358 | 0.129371 | 0.123689 | 0.125437 | 0.128934 | 0.130973 | 0.119464 |
| 0.101107 | 0.121358 | 0.136072 | 0.109848 | 0.13345  | 0.132284 | 0.119318 |
| 0.1081   | 0.135927 | 0.140734 | 0.119172 | 0.142191 | 0.134615 | 0.11961  |
| 0.117424 | 0.129225 | 0.134615 | 0.128788 | 0.137821 | 0.143357 | 0.125728 |
| 0.115093 | 0.123397 | 0.127331 | 0.127331 | 0.136364 | 0.133741 | 0.120775 |
| 0.112325 | 0.127331 | 0.135052 | 0.112325 | 0.133596 | 0.136801 | 0.12296  |
| 0.19289  | 0.200903 | 0.199883 | 0.199301 | 0.205711 | 0.197552 | 0.197407 |
| 0.118735 | 0.128205 | 0.133013 | 0.120484 | 0.136801 | 0.142337 | 0.133741 |
| 0.12704  | 0.12398  | 0.134615 | 0.132284 | 0.128788 | 0.144522 | 0.140297 |
| 0.11961  | 0.122086 | 0.127477 | 0.121358 | 0.129516 | 0.137966 | 0.135198 |
| 0.126748 | 0.135635 | 0.141608 | 0.134324 | 0.139569 | 0.132576 | 0.128351 |
| 0.122086 | 0.126894 | 0.132284 | 0.132576 | 0.143357 | 0.141317 | 0.132139 |
| 0.103438 | 0.127477 | 0.13986  | 0.109557 | 0.13549  | 0.137821 | 0.121066 |
| 0.114948 | 0.125874 | 0.126894 | 0.123397 | 0.130099 | 0.124854 | 0.118298 |
| 0.10271  | 0.130245 | 0.139132 | 0.109411 | 0.141754 | 0.139423 | 0.114802 |
| 0.122378 | 0.123106 | 0.128497 | 0.131119 | 0.123252 | 0.13986  | 0.133304 |
| 0.11859  | 0.126603 | 0.129953 | 0.117133 | 0.133741 | 0.140443 | 0.131556 |
| 0.12602  | 0.129662 | 0.128351 | 0.131265 | 0.130973 | 0.133304 | 0.12296  |
| 0.125291 | 0.139714 | 0.137821 | 0.125583 | 0.137821 | 0.145396 | 0.134178 |
| 0.13447  | 0.145688 | 0.143794 | 0.133596 | 0.145251 | 0.149621 | 0.142191 |
| 0.120192 | 0.128497 | 0.132721 | 0.129516 | 0.13447  | 0.127477 | 0.124417 |
| 0.138112 | 0.137383 | 0.141026 | 0.144522 | 0.149476 | 0.146853 | 0.14088  |
| 0.122086 | 0.130099 | 0.122086 | 0.125874 | 0.126166 | 0.127914 | 0.117279 |
| 0.112762 | 0.117279 | 0.127914 | 0.121795 | 0.118007 | 0.137821 | 0.124854 |
| 0.12398  | 0.129953 | 0.134178 | 0.129516 | 0.143502 | 0.135927 | 0.125874 |
| 0.103875 | 0.134033 | 0.140589 | 0.11553  | 0.144085 | 0.137966 | 0.119464 |
| 0.191579 | 0.201923 | 0.20236  | 0.200029 | 0.209062 | 0.198281 | 0.195221 |
| 0.106935 | 0.124563 | 0.127622 | 0.111888 | 0.127331 | 0.132576 | 0.123106 |
| 0.108974 | 0.122232 | 0.121212 | 0.110723 | 0.128205 | 0.128788 | 0.11961  |
| 0.118881 | 0.130973 | 0.133159 | 0.129079 | 0.135781 | 0.141317 | 0.124563 |
| 0.187063 | 0.193619 | 0.191142 | 0.194056 | 0.19493  | 0.188228 | 0.186334 |
| 0.13447  | 0.142483 | 0.147582 | 0.146416 | 0.145833 | 0.140297 | 0.135781 |
| 0.142337 | 0.149767 | 0.151952 | 0.150495 | 0.150204 | 0.137383 | 0.140734 |
| 0.141608 | 0.139132 | 0.13549  | 0.14831  | 0.136655 | 0.150641 | 0.151369 |
| 0.117133 | 0.128059 | 0.129662 | 0.123834 | 0.131993 | 0.124709 | 0.120192 |
| 0.123397 | 0.130536 | 0.131847 | 0.128642 | 0.14729  | 0.140589 | 0.130245 |
| 0.214452 | 0.224796 | 0.220862 | 0.224942 | 0.230186 | 0.220571 | 0.222756 |
| 0.125    | 0.132721 | 0.134907 | 0.127331 | 0.145396 | 0.139277 | 0.129225 |

|          |          |          |          |          |          |          |
|----------|----------|----------|----------|----------|----------|----------|
| 0.126603 | 0.130245 | 0.137092 | 0.137383 | 0.147873 | 0.142337 | 0.131993 |
| 0.112325 | 0.125291 | 0.133013 | 0.116696 | 0.130973 | 0.135635 | 0.125874 |
| 0.17264  | 0.187937 | 0.181964 | 0.181672 | 0.190414 | 0.172348 | 0.176282 |
| 0.118153 | 0.123252 | 0.125437 | 0.124563 | 0.127768 | 0.130973 | 0.124126 |
| 0.152389 | 0.153409 | 0.152972 | 0.151224 | 0.15035  | 0.158508 | 0.155449 |
| 0.121795 | 0.135635 | 0.125291 | 0.126457 | 0.122669 | 0.123834 | 0.113782 |
| 0.196387 | 0.203234 | 0.201049 | 0.198427 | 0.208333 | 0.199301 | 0.199155 |
| 0.124126 | 0.131847 | 0.133159 | 0.133741 | 0.138986 | 0.130828 | 0.126603 |
| 0.11014  | 0.11961  | 0.109848 | 0.116841 | 0.123252 | 0.122086 | 0.104167 |
| 0.11757  | 0.127622 | 0.128642 | 0.123689 | 0.124272 | 0.142045 | 0.123543 |
| 0.11655  | 0.128934 | 0.13345  | 0.121795 | 0.137821 | 0.143065 | 0.127477 |
| 0.120338 | 0.127185 | 0.136655 | 0.131119 | 0.138403 | 0.141026 | 0.124563 |
| 0.124417 | 0.137092 | 0.13141  | 0.129371 | 0.136655 | 0.137238 | 0.13243  |
| 0.120775 | 0.124417 | 0.122523 | 0.127185 | 0.125437 | 0.128059 | 0.118007 |
| 0.195513 | 0.203526 | 0.202797 | 0.201049 | 0.211538 | 0.196387 | 0.199738 |
| 0.121649 | 0.138112 | 0.135927 | 0.125437 | 0.136801 | 0.147873 | 0.13549  |
| 0.117716 | 0.126311 | 0.130245 | 0.124417 | 0.134033 | 0.12704  | 0.121649 |
| 0.214307 | 0.223193 | 0.218969 | 0.225379 | 0.224505 | 0.216929 | 0.219114 |
| 0.120484 | 0.129079 | 0.13447  | 0.118153 | 0.135635 | 0.14729  | 0.13549  |
| 0.125    | 0.129516 | 0.122086 | 0.125291 | 0.127914 | 0.126748 | 0.117861 |
| 0.12296  | 0.122523 | 0.119464 | 0.123834 | 0.122086 | 0.123543 | 0.112908 |
| 0.136509 | 0.140734 | 0.140589 | 0.13884  | 0.150495 | 0.144085 | 0.136946 |
| 0.19391  | 0.201923 | 0.200903 | 0.20236  | 0.206148 | 0.198572 | 0.199592 |
| 0.102855 | 0.13039  | 0.138695 | 0.1081   | 0.139569 | 0.136655 | 0.114948 |
| 0.128497 | 0.139714 | 0.140734 | 0.127914 | 0.141317 | 0.146562 | 0.139132 |
| 0.124709 | 0.125146 | 0.119172 | 0.12704  | 0.128788 | 0.127331 | 0.114656 |
| 0.122378 | 0.125728 | 0.118298 | 0.124709 | 0.129371 | 0.124709 | 0.114365 |
| 0.122232 | 0.125    | 0.120192 | 0.125146 | 0.12602  | 0.125728 | 0.11451  |
| 0.119755 | 0.124272 | 0.128497 | 0.128205 | 0.140152 | 0.138403 | 0.126894 |
| 0.110577 | 0.12296  | 0.114948 | 0.112908 | 0.11757  | 0.119318 | 0.1081   |
| 0.125437 | 0.134033 | 0.137675 | 0.136801 | 0.137383 | 0.129516 | 0.127331 |
| 0.128351 | 0.134033 | 0.133596 | 0.135344 | 0.129225 | 0.148747 | 0.138403 |
| 0.124272 | 0.134907 | 0.134178 | 0.133304 | 0.138258 | 0.131847 | 0.126457 |
| 0.124417 | 0.136509 | 0.132576 | 0.131993 | 0.134615 | 0.135198 | 0.130099 |
| 0.19799  | 0.207168 | 0.207314 | 0.205565 | 0.213432 | 0.203526 | 0.206294 |
| 0.123543 | 0.134178 | 0.134324 | 0.124417 | 0.134324 | 0.145396 | 0.13039  |
| 0.129808 | 0.133159 | 0.139423 | 0.136801 | 0.146707 | 0.146707 | 0.13549  |
| 0.121795 | 0.125437 | 0.120338 | 0.124709 | 0.124126 | 0.125583 | 0.114656 |
| 0.110868 | 0.122378 | 0.115822 | 0.114073 | 0.113782 | 0.116696 | 0.105478 |
| 0.122815 | 0.134324 | 0.13243  | 0.126311 | 0.133596 | 0.129808 | 0.126166 |
| 0.102273 | 0.131556 | 0.139277 | 0.111014 | 0.140734 | 0.138112 | 0.114656 |
| 0.135781 | 0.140006 | 0.138695 | 0.133159 | 0.143357 | 0.152389 | 0.140589 |
| 0.123397 | 0.122669 | 0.126894 | 0.127768 | 0.127768 | 0.140589 | 0.131993 |
| 0.108829 | 0.130536 | 0.128642 | 0.117861 | 0.131265 | 0.122232 | 0.109557 |



|          |          |           |          |          |          |          |
|----------|----------|-----------|----------|----------|----------|----------|
| 0.105186 | 0.126603 | 0.124709  | 0.111597 | 0.124417 | 0.11451  | 0.105041 |
| 0.11553  | 0.123543 | 0.114656  | 0.121358 | 0.125728 | 0.11757  | 0.106061 |
| 0.103438 | 0.12398  | 0.135198  | 0.108974 | 0.131702 | 0.134324 | 0.118153 |
| 0.131556 | 0.137238 | 0.139423  | 0.137383 | 0.145542 | 0.133596 | 0.127622 |
| 0.10373  | 0.128642 | 0.136655  | 0.112179 | 0.140152 | 0.140443 | 0.113491 |
| 0.116987 | 0.125583 | 0.126894  | 0.122815 | 0.137092 | 0.137092 | 0.126457 |
| 0.100379 | 0.125874 | 0.130973  | 0.106498 | 0.135635 | 0.135052 | 0.11451  |
| 0.123543 | 0.126894 | 0.123543  | 0.127622 | 0.126457 | 0.128205 | 0.119027 |
| 0.107372 | 0.124417 | 0.121066  | 0.114073 | 0.12398  | 0.132139 | 0.118298 |
| 0.126603 | 0.126166 | 0.122815  | 0.12602  | 0.126311 | 0.127477 | 0.115676 |
| 0.114656 | 0.13141  | 0.129225  | 0.119901 | 0.131265 | 0.138549 | 0.127622 |
| 0.120192 | 0.12296  | 0.126311  | 0.127185 | 0.124563 | 0.136801 | 0.133159 |
| 0.114073 | 0.127622 | 0.132721  | 0.123397 | 0.137383 | 0.137383 | 0.122086 |
| 0.113054 | 0.128642 | 0.122086  | 0.118298 | 0.121795 | 0.122669 | 0.106206 |
| 0.122523 | 0.126457 | 0.123397  | 0.125146 | 0.123397 | 0.130682 | 0.118007 |
| 0.123106 | 0.132576 | 0.133013  | 0.127477 | 0.126603 | 0.143502 | 0.132576 |
| 0.124709 | 0.134178 | 0.131993  | 0.130245 | 0.138986 | 0.134324 | 0.126603 |
| 0.118444 | 0.127331 | 0.110868  | 0.122815 | 0.124272 | 0.128059 | 0.104895 |
| 0.11961  | 0.126457 | 0.120484  | 0.122815 | 0.128642 | 0.126894 | 0.117424 |
| 0.121212 | 0.125146 | 0.131993  | 0.13141  | 0.13986  | 0.138986 | 0.127477 |
| 0.101981 | 0.125728 | 0.13549   | 0.111305 | 0.133741 | 0.132867 | 0.117861 |
| 0.121503 | 0.126894 | 0.134907  | 0.129079 | 0.142191 | 0.13986  | 0.129808 |
| 0.117716 | 0.128351 | 0.131702  | 0.12704  | 0.134907 | 0.141317 | 0.121066 |
| 0.115676 | 0.128351 | 0.118007  | 0.118007 | 0.116259 | 0.123834 | 0.105624 |
| 0.119172 | 0.130099 | 0.129079  | 0.124709 | 0.131119 | 0.13345  | 0.123689 |
| 0.106498 | 0.12296  | 0.127768  | 0.109994 | 0.125437 | 0.132721 | 0.119464 |
| 0.123543 | 0.130099 | 0.134907  | 0.133159 | 0.147145 | 0.140734 | 0.13039  |
| 0.120921 | 0.122815 | 0.135198  | 0.128788 | 0.142191 | 0.137238 | 0.130973 |
| 0.124272 | 0.132576 | 0.128351  | 0.125437 | 0.136801 | 0.133887 | 0.119755 |
| 0.199738 | 0.205711 | 0.205274  | 0.204983 | 0.210519 | 0.200321 | 0.202506 |
| 0.169726 | 0.182984 | 0.179924  | 0.179924 | 0.188957 | 0.171766 | 0.171911 |
| 0.12398  | 0.133741 | 0.139423  | 0.130099 | 0.140006 | 0.13243  | 0.126457 |
| 0.115385 | 0.131556 | 0.136655  | 0.126166 | 0.136072 | 0.132576 | 0.120775 |
| 0.146853 | 0.153118 | 0.155012  | 0.153846 | 0.152681 | 0.143648 | 0.141463 |
| 0.132721 | 0.136072 | 0.13884   | 0.137092 | 0.137092 | 0.148456 | 0.1419   |
| 0.129371 | 0.137966 | 0.127914  | 0.136946 | 0.130245 | 0.128497 | 0.125437 |
| 0.124272 | 0.130828 | 0.127768  | 0.130973 | 0.133887 | 0.126603 | 0.124417 |
| 0.121066 | 0.125291 | 0.0968823 | 0.126311 | 0.106206 | 0.113199 | 0.097028 |
| 0.122232 | 0.129662 | 0.133887  | 0.131265 | 0.135635 | 0.133013 | 0.12296  |
| 0.206585 | 0.216346 | 0.213287  | 0.213578 | 0.217949 | 0.212704 | 0.211684 |
| 0.104458 | 0.134324 | 0.140297  | 0.114656 | 0.143502 | 0.138549 | 0.115676 |
| 0.115385 | 0.132721 | 0.13141   | 0.120921 | 0.147436 | 0.134033 | 0.121358 |
| 0.116841 | 0.12398  | 0.120047  | 0.120921 | 0.127331 | 0.124417 | 0.115239 |
| 0.11961  | 0.132576 | 0.128642  | 0.128351 | 0.133596 | 0.136218 | 0.126748 |

|          |          |          |          |          |          |          |
|----------|----------|----------|----------|----------|----------|----------|
| 0.187937 | 0.199446 | 0.197844 | 0.19697  | 0.19697  | 0.188811 | 0.192453 |
| 0.249417 | 0.257721 | 0.253788 | 0.253497 | 0.259033 | 0.248252 | 0.253351 |
| 0.124417 | 0.11961  | 0.129371 | 0.131993 | 0.12704  | 0.142191 | 0.136218 |
| 0.122086 | 0.132139 | 0.130828 | 0.130536 | 0.134615 | 0.134615 | 0.12398  |
| 0.12296  | 0.132139 | 0.135198 | 0.134907 | 0.137238 | 0.132867 | 0.125728 |
| 0.116113 | 0.12704  | 0.132721 | 0.124272 | 0.138258 | 0.138549 | 0.11859  |
| 0.100524 | 0.124563 | 0.132867 | 0.108683 | 0.133159 | 0.136946 | 0.109703 |
| 0.112325 | 0.130828 | 0.128059 | 0.124272 | 0.133887 | 0.14292  | 0.126457 |
| 0.122669 | 0.127185 | 0.124126 | 0.131702 | 0.134324 | 0.124126 | 0.116404 |
| 0.101399 | 0.130973 | 0.13549  | 0.107517 | 0.137238 | 0.132284 | 0.111451 |
| 0.119318 | 0.128205 | 0.119901 | 0.130099 | 0.136218 | 0.12398  | 0.11859  |
| 0.123834 | 0.131847 | 0.117133 | 0.128497 | 0.126457 | 0.125291 | 0.109703 |
| 0.114073 | 0.126748 | 0.124272 | 0.120775 | 0.118444 | 0.122523 | 0.11014  |
| 0.124709 | 0.121649 | 0.129953 | 0.129662 | 0.12704  | 0.140443 | 0.135344 |
| 0.118735 | 0.13141  | 0.132721 | 0.131265 | 0.141171 | 0.139714 | 0.129953 |
| 0.11116  | 0.117716 | 0.116987 | 0.112908 | 0.114073 | 0.130973 | 0.115385 |
| 0.122232 | 0.106352 | 0.105041 | 0.130682 | 0.107372 | 0.131265 | 0.125583 |
| 0.124272 | 0.134324 | 0.13884  | 0.132721 | 0.141171 | 0.144376 | 0.128788 |
| 0.121212 | 0.122815 | 0.122669 | 0.121795 | 0.126748 | 0.127622 | 0.11757  |
| 0.118444 | 0.12704  | 0.125728 | 0.121649 | 0.130973 | 0.114073 | 0.109848 |
| 0.13243  | 0.133159 | 0.127477 | 0.134761 | 0.127477 | 0.128351 | 0.120921 |
| 0.21183  | 0.220717 | 0.219988 | 0.219114 | 0.224068 | 0.212413 | 0.215181 |
| 0.111451 | 0.115967 | 0.11961  | 0.118735 | 0.120192 | 0.133596 | 0.124126 |
| 0.111888 | 0.12602  | 0.119464 | 0.119464 | 0.115676 | 0.120338 | 0.10708  |
| 0.123252 | 0.137966 | 0.134615 | 0.125874 | 0.136655 | 0.143939 | 0.132721 |
| 0.123397 | 0.127914 | 0.133304 | 0.122232 | 0.135344 | 0.146707 | 0.135198 |
| 0.115239 | 0.132284 | 0.127477 | 0.121941 | 0.130973 | 0.134178 | 0.123834 |
| 0.206148 | 0.213287 | 0.213724 | 0.214889 | 0.218969 | 0.207605 | 0.209499 |
| 0.124417 | 0.130099 | 0.13345  | 0.131993 | 0.148019 | 0.145688 | 0.135052 |
| 0.120192 | 0.126166 | 0.121358 | 0.121649 | 0.12602  | 0.124854 | 0.118881 |
| 0.121503 | 0.100087 | 0.126457 | 0.129371 | 0.127914 | 0.136655 | 0.118444 |
| 0.111597 | 0.127768 | 0.130245 | 0.122086 | 0.134033 | 0.138695 | 0.11961  |
| 0.121503 | 0.129225 | 0.132576 | 0.131702 | 0.142774 | 0.140443 | 0.129516 |
| 0.111597 | 0.122815 | 0.124126 | 0.121503 | 0.132284 | 0.132576 | 0.119901 |
| 0.121795 | 0.131265 | 0.11655  | 0.125291 | 0.126748 | 0.128205 | 0.107955 |
| 0.120629 | 0.125146 | 0.13141  | 0.11859  | 0.132867 | 0.142483 | 0.133304 |
| 0.204691 | 0.213869 | 0.210519 | 0.211976 | 0.21722  | 0.207896 | 0.208042 |
| 0.110431 | 0.121066 | 0.127622 | 0.120921 | 0.137529 | 0.131993 | 0.119027 |
| 0.201486 | 0.211538 | 0.208479 | 0.207022 | 0.216346 | 0.202943 | 0.206585 |
| 0.198427 | 0.205274 | 0.208916 | 0.207168 | 0.210373 | 0.203089 | 0.203817 |
| 0.12296  | 0.13447  | 0.137529 | 0.126748 | 0.138986 | 0.142483 | 0.123106 |
| 0.125291 | 0.130099 | 0.136072 | 0.123252 | 0.136072 | 0.148893 | 0.136218 |
| 0.110723 | 0.121941 | 0.108392 | 0.117716 | 0.121795 | 0.123834 | 0.103875 |
| 0.115239 | 0.121212 | 0.127185 | 0.121358 | 0.133013 | 0.132721 | 0.122378 |

|           |          |          |          |          |          |           |
|-----------|----------|----------|----------|----------|----------|-----------|
| 0.120047  | 0.128351 | 0.130536 | 0.130536 | 0.141026 | 0.137529 | 0.126894  |
| 0.125     | 0.129516 | 0.122086 | 0.128788 | 0.130245 | 0.129953 | 0.120484  |
| 0.0961538 | 0.123689 | 0.129079 | 0.104312 | 0.135198 | 0.132576 | 0.107372  |
| 0.101981  | 0.126603 | 0.135781 | 0.108392 | 0.138112 | 0.135198 | 0.108829  |
| 0.126603  | 0.120047 | 0.131847 | 0.133887 | 0.128642 | 0.141463 | 0.134324  |
| 0.121212  | 0.130099 | 0.134615 | 0.125874 | 0.138403 | 0.140152 | 0.121649  |
| 0.119318  | 0.124709 | 0.119027 | 0.121066 | 0.122815 | 0.121649 | 0.112179  |
| 0.121795  | 0.129808 | 0.13345  | 0.131993 | 0.144231 | 0.136946 | 0.127185  |
| 0.106206  | 0.117133 | 0.105041 | 0.117861 | 0.116696 | 0.121358 | 0.0996503 |
| 0.127622  | 0.132139 | 0.13549  | 0.134615 | 0.146853 | 0.142483 | 0.13039   |
| 0.120047  | 0.130973 | 0.134615 | 0.129079 | 0.136655 | 0.130245 | 0.125728  |
| 0.132139  | 0.136364 | 0.13884  | 0.141171 | 0.150495 | 0.144376 | 0.137821  |
| 0.262092  | 0.267483 | 0.26384  | 0.268794 | 0.268211 | 0.258596 | 0.265443  |
| 0.121358  | 0.129371 | 0.136218 | 0.118153 | 0.136801 | 0.137383 | 0.129079  |
| 0.127331  | 0.139714 | 0.13549  | 0.12296  | 0.136364 | 0.144814 | 0.129516  |
| 0.220134  | 0.229895 | 0.227127 | 0.228584 | 0.235868 | 0.222174 | 0.227273  |
| 0.124126  | 0.129225 | 0.125291 | 0.12704  | 0.127914 | 0.13549  | 0.124272  |
| 0.2331    | 0.240822 | 0.236597 | 0.240385 | 0.245047 | 0.233974 | 0.237034  |
| 0.111742  | 0.125    | 0.130973 | 0.110286 | 0.129808 | 0.139132 | 0.124126  |
| 0.131993  | 0.131556 | 0.130536 | 0.132284 | 0.129371 | 0.131119 | 0.121066  |
| 0.115676  | 0.125146 | 0.130245 | 0.114219 | 0.131119 | 0.139569 | 0.127185  |
| 0.122669  | 0.128059 | 0.136946 | 0.131993 | 0.138403 | 0.143065 | 0.123106  |
| 0.207168  | 0.214307 | 0.214452 | 0.215618 | 0.221154 | 0.210373 | 0.21285   |
| 0.129371  | 0.13243  | 0.138403 | 0.137821 | 0.149767 | 0.145396 | 0.137966  |
| 0.120047  | 0.128934 | 0.134615 | 0.130828 | 0.143939 | 0.141317 | 0.130099  |
| 0.229749  | 0.238345 | 0.23412  | 0.23412  | 0.239656 | 0.229458 | 0.234557  |
| 0.102564  | 0.135052 | 0.13986  | 0.110431 | 0.142191 | 0.13549  | 0.115239  |
| 0.205274  | 0.215618 | 0.211393 | 0.211684 | 0.214015 | 0.206439 | 0.208625  |
| 0.109703  | 0.131993 | 0.139132 | 0.114073 | 0.137383 | 0.138258 | 0.117424  |
| 0.122523  | 0.129953 | 0.122815 | 0.122815 | 0.127477 | 0.127185 | 0.118007  |
| 0.119755  | 0.133013 | 0.119755 | 0.124126 | 0.117424 | 0.120921 | 0.108246  |
| 0.121503  | 0.128934 | 0.137821 | 0.129079 | 0.140734 | 0.144522 | 0.124563  |
| 0.118153  | 0.126457 | 0.129225 | 0.128351 | 0.131556 | 0.130973 | 0.124709  |
| 0.167686  | 0.177448 | 0.174679 | 0.174971 | 0.175554 | 0.16623  | 0.166667  |
| 0.116696  | 0.123543 | 0.128642 | 0.126311 | 0.139714 | 0.131556 | 0.12296   |
| 0.118735  | 0.129371 | 0.136218 | 0.121066 | 0.137092 | 0.145251 | 0.13549   |
| 0.124563  | 0.13345  | 0.138258 | 0.129516 | 0.131556 | 0.139132 | 0.125291  |
| 0.119901  | 0.125583 | 0.133304 | 0.128351 | 0.121941 | 0.144959 | 0.130828  |
| 0.201632  | 0.209645 | 0.208625 | 0.208042 | 0.214161 | 0.202214 | 0.207314  |
| 0.120775  | 0.126457 | 0.11961  | 0.122523 | 0.124272 | 0.126311 | 0.117716  |
| 0.125     | 0.133596 | 0.137238 | 0.137238 | 0.140443 | 0.145105 | 0.128934  |
| 0.103001  | 0.125    | 0.132721 | 0.111742 | 0.13039  | 0.133304 | 0.114219  |
| 0.0987762 | 0.125728 | 0.137238 | 0.107809 | 0.137821 | 0.136655 | 0.112325  |
| 0.126603  | 0.127622 | 0.125146 | 0.130682 | 0.127768 | 0.126894 | 0.11655   |

|          |          |          |          |          |          |          |
|----------|----------|----------|----------|----------|----------|----------|
| 0.25845  | 0.262383 | 0.259615 | 0.266026 | 0.266317 | 0.257576 | 0.265006 |
| 0.113782 | 0.128205 | 0.118153 | 0.122232 | 0.116404 | 0.118153 | 0.107809 |
| 0.128059 | 0.142191 | 0.133304 | 0.127768 | 0.136801 | 0.138549 | 0.132576 |
| 0.178759 | 0.192599 | 0.1875   | 0.193036 | 0.191288 | 0.179341 | 0.185315 |
| 0.191871 | 0.200175 | 0.19799  | 0.197407 | 0.203234 | 0.195076 | 0.195513 |
| 0.125728 | 0.125583 | 0.131556 | 0.130682 | 0.125437 | 0.139132 | 0.13549  |
| 0.123834 | 0.13039  | 0.132867 | 0.131119 | 0.144522 | 0.135198 | 0.128059 |
| 0.119172 | 0.128351 | 0.13345  | 0.128788 | 0.136946 | 0.137529 | 0.120192 |
| 0.142628 | 0.144522 | 0.144668 | 0.151661 | 0.15778  | 0.153409 | 0.147727 |
| 0.119901 | 0.123543 | 0.125437 | 0.128059 | 0.125728 | 0.138258 | 0.131993 |
| 0.125291 | 0.126311 | 0.13141  | 0.131993 | 0.128788 | 0.143065 | 0.137675 |
| 0.103001 | 0.136655 | 0.143794 | 0.112034 | 0.141171 | 0.140006 | 0.11655  |
| 0.11961  | 0.127914 | 0.128351 | 0.126894 | 0.140006 | 0.133013 | 0.125    |
| 0.126457 | 0.130682 | 0.138403 | 0.137529 | 0.147145 | 0.145688 | 0.133304 |
| 0.110286 | 0.135781 | 0.13884  | 0.118153 | 0.140006 | 0.135927 | 0.116841 |
| 0.120629 | 0.12602  | 0.133741 | 0.130828 | 0.135198 | 0.141608 | 0.125146 |
| 0.131265 | 0.139569 | 0.147582 | 0.138258 | 0.146707 | 0.150787 | 0.134907 |
| 0.120921 | 0.13243  | 0.120629 | 0.124709 | 0.117716 | 0.118298 | 0.110286 |
| 0.126894 | 0.131119 | 0.141463 | 0.134178 | 0.143502 | 0.144959 | 0.130536 |
| 0.103001 | 0.137529 | 0.142045 | 0.11116  | 0.142628 | 0.139714 | 0.115676 |
| 0.212413 | 0.21722  | 0.21824  | 0.221154 | 0.224942 | 0.217075 | 0.218969 |
| 0.122232 | 0.133741 | 0.123397 | 0.123106 | 0.122815 | 0.121358 | 0.10169  |
| 0.196533 | 0.208042 | 0.203526 | 0.203526 | 0.211393 | 0.202069 | 0.202506 |
| 0.11553  | 0.128788 | 0.128642 | 0.117279 | 0.131847 | 0.141171 | 0.126166 |
| 0.128059 | 0.132867 | 0.127477 | 0.13447  | 0.129516 | 0.129516 | 0.122378 |
| 0.126603 | 0.130245 | 0.13243  | 0.135927 | 0.136509 | 0.129808 | 0.126166 |
| 0.117716 | 0.130099 | 0.128788 | 0.126166 | 0.135781 | 0.128788 | 0.122523 |
| 0.125146 | 0.130245 | 0.133887 | 0.135052 | 0.146707 | 0.141463 | 0.130536 |
| 0.122523 | 0.126166 | 0.13447  | 0.13039  | 0.144668 | 0.13884  | 0.129079 |
| 0.125728 | 0.128497 | 0.124563 | 0.127768 | 0.130973 | 0.132139 | 0.119172 |
| 0.117716 | 0.128059 | 0.132867 | 0.119464 | 0.135198 | 0.140734 | 0.131556 |
| 0.125583 | 0.136218 | 0.138695 | 0.13549  | 0.143065 | 0.137238 | 0.12602  |
| 0.109411 | 0.140734 | 0.146125 | 0.115239 | 0.146999 | 0.143794 | 0.121795 |
| 0.251894 | 0.259033 | 0.258304 | 0.262092 | 0.260052 | 0.25102  | 0.25845  |
| 0.123106 | 0.130536 | 0.123106 | 0.128059 | 0.129225 | 0.128351 | 0.116259 |
| 0.18852  | 0.196824 | 0.194639 | 0.197261 | 0.202214 | 0.195221 | 0.196241 |
| 0.196824 | 0.202214 | 0.203817 | 0.201195 | 0.206731 | 0.196824 | 0.20338  |
| 0.123252 | 0.131847 | 0.132284 | 0.127914 | 0.133741 | 0.134615 | 0.127477 |
| 0.116259 | 0.124854 | 0.120047 | 0.120047 | 0.119464 | 0.120338 | 0.107955 |
| 0.128788 | 0.13447  | 0.129079 | 0.131702 | 0.131119 | 0.130536 | 0.120484 |
| 0.117424 | 0.125728 | 0.126457 | 0.127331 | 0.138112 | 0.136072 | 0.125437 |
| 0.115822 | 0.124417 | 0.101836 | 0.124854 | 0.112034 | 0.114656 | 0.10169  |
| 0.106206 | 0.134033 | 0.137383 | 0.112325 | 0.138258 | 0.139132 | 0.115385 |
| 0.125291 | 0.130682 | 0.127331 | 0.127622 | 0.138112 | 0.131993 | 0.119901 |

|          |          |          |          |          |          |          |
|----------|----------|----------|----------|----------|----------|----------|
| 0.12704  | 0.133013 | 0.137529 | 0.137529 | 0.150058 | 0.145105 | 0.133304 |
| 0.12398  | 0.126457 | 0.122232 | 0.126311 | 0.125728 | 0.128351 | 0.118298 |
| 0.129808 | 0.136072 | 0.13884  | 0.138258 | 0.151078 | 0.14292  | 0.136655 |
| 0.119464 | 0.135052 | 0.131993 | 0.119172 | 0.136072 | 0.141317 | 0.125437 |
| 0.129079 | 0.134178 | 0.137529 | 0.13549  | 0.13986  | 0.13345  | 0.126894 |
| 0.11961  | 0.130828 | 0.135344 | 0.126311 | 0.139714 | 0.141171 | 0.123252 |
| 0.105478 | 0.138258 | 0.141317 | 0.112762 | 0.142774 | 0.140152 | 0.11757  |
| 0.126603 | 0.136364 | 0.116404 | 0.128642 | 0.13039  | 0.124854 | 0.108392 |
| 0.122523 | 0.123834 | 0.121066 | 0.127185 | 0.12602  | 0.123106 | 0.115676 |
| 0.131556 | 0.145688 | 0.143211 | 0.128642 | 0.141463 | 0.147873 | 0.139277 |
| 0.191434 | 0.201486 | 0.198427 | 0.196678 | 0.203089 | 0.192599 | 0.197115 |
| 0.134178 | 0.138112 | 0.14088  | 0.142628 | 0.151661 | 0.145542 | 0.138695 |
| 0.121066 | 0.128497 | 0.130682 | 0.129516 | 0.143211 | 0.137675 | 0.127914 |
| 0.121795 | 0.13039  | 0.133159 | 0.131993 | 0.136072 | 0.131119 | 0.126311 |
| 0.114365 | 0.124417 | 0.122523 | 0.121941 | 0.128351 | 0.123689 | 0.116259 |
| 0.117716 | 0.128642 | 0.13549  | 0.129371 | 0.136364 | 0.140734 | 0.125728 |
| 0.121941 | 0.130536 | 0.137092 | 0.130099 | 0.144376 | 0.14292  | 0.123543 |
| 0.198135 | 0.207896 | 0.206002 | 0.203671 | 0.213869 | 0.199883 | 0.203234 |
| 0.123834 | 0.130099 | 0.131702 | 0.129953 | 0.140443 | 0.128205 | 0.122815 |
| 0.116113 | 0.124126 | 0.119901 | 0.120484 | 0.124854 | 0.121066 | 0.114219 |
| 0.124854 | 0.130828 | 0.133887 | 0.135344 | 0.144668 | 0.142337 | 0.130536 |
| 0.196678 | 0.2044   | 0.204837 | 0.20338  | 0.209499 | 0.206585 | 0.205857 |
| 0.114073 | 0.129371 | 0.124563 | 0.120775 | 0.122815 | 0.122815 | 0.109557 |
| 0.10169  | 0.133887 | 0.142191 | 0.107809 | 0.139277 | 0.136364 | 0.113782 |
| 0.125291 | 0.129225 | 0.136946 | 0.134033 | 0.147145 | 0.1419   | 0.131556 |
| 0.120192 | 0.119172 | 0.123106 | 0.123689 | 0.123689 | 0.137092 | 0.130536 |
| 0.193619 | 0.200175 | 0.199738 | 0.201777 | 0.205857 | 0.197407 | 0.200466 |
| 0.10067  | 0.129371 | 0.138258 | 0.108537 | 0.139423 | 0.136218 | 0.113636 |
| 0.119901 | 0.131702 | 0.129225 | 0.118735 | 0.13447  | 0.140297 | 0.126748 |
| 0.114948 | 0.126748 | 0.120192 | 0.121066 | 0.122815 | 0.12398  | 0.111305 |
| 0.126311 | 0.134324 | 0.139714 | 0.13447  | 0.143502 | 0.133304 | 0.128497 |
| 0.117716 | 0.125728 | 0.134907 | 0.118298 | 0.132867 | 0.142774 | 0.134178 |
| 0.103438 | 0.133887 | 0.140734 | 0.111014 | 0.141026 | 0.137529 | 0.115822 |
| 0.122669 | 0.124854 | 0.120338 | 0.12296  | 0.124417 | 0.130536 | 0.118735 |
| 0.123252 | 0.13243  | 0.132284 | 0.120921 | 0.143065 | 0.139569 | 0.121066 |
| 0.143211 | 0.137238 | 0.13884  | 0.147873 | 0.136509 | 0.149913 | 0.152389 |
| 0.239073 | 0.244464 | 0.244318 | 0.247523 | 0.252768 | 0.242861 | 0.243007 |
| 0.132139 | 0.137238 | 0.119027 | 0.130099 | 0.129225 | 0.13243  | 0.112179 |
| 0.118735 | 0.129662 | 0.135927 | 0.120192 | 0.135052 | 0.144085 | 0.134907 |
| 0.122669 | 0.125728 | 0.131702 | 0.128497 | 0.138695 | 0.132284 | 0.127768 |
| 0.123689 | 0.134033 | 0.133013 | 0.128642 | 0.135344 | 0.140006 | 0.133741 |
| 0.108392 | 0.120775 | 0.128788 | 0.112762 | 0.129953 | 0.129079 | 0.118735 |
| 0.118298 | 0.127185 | 0.126166 | 0.125583 | 0.129662 | 0.135781 | 0.124854 |
| 0.125146 | 0.13141  | 0.132721 | 0.131847 | 0.145542 | 0.135927 | 0.127331 |

|           |          |           |          |          |          |           |
|-----------|----------|-----------|----------|----------|----------|-----------|
| 0.104895  | 0.135635 | 0.141608  | 0.11014  | 0.143065 | 0.136072 | 0.114365  |
| 0.115967  | 0.133596 | 0.131993  | 0.128497 | 0.129371 | 0.135198 | 0.131265  |
| 0.238491  | 0.248252 | 0.242861  | 0.246649 | 0.250728 | 0.237617 | 0.245629  |
| 0.109557  | 0.124272 | 0.118881  | 0.119172 | 0.11859  | 0.120921 | 0.107372  |
| 0.104895  | 0.121066 | 0.122086  | 0.109557 | 0.125291 | 0.127914 | 0.116404  |
| 0.119027  | 0.123252 | 0.122523  | 0.123397 | 0.125146 | 0.124563 | 0.113054  |
| 0.127914  | 0.126311 | 0.130828  | 0.134033 | 0.128497 | 0.143939 | 0.139714  |
| 0.134907  | 0.13884  | 0.121212  | 0.134033 | 0.130828 | 0.132867 | 0.113782  |
| 0.126748  | 0.136218 | 0.125874  | 0.13549  | 0.130536 | 0.130828 | 0.122815  |
| 0.123252  | 0.129516 | 0.13549   | 0.134033 | 0.143648 | 0.13986  | 0.130099  |
| 0.111742  | 0.119464 | 0.121941  | 0.123689 | 0.124563 | 0.135635 | 0.126748  |
| 0.235868  | 0.241259 | 0.239365  | 0.238491 | 0.246066 | 0.235868 | 0.237179  |
| 0.128642  | 0.131993 | 0.135344  | 0.135635 | 0.146125 | 0.143211 | 0.133159  |
| 0.101107  | 0.131265 | 0.142483  | 0.108974 | 0.1419   | 0.134324 | 0.112617  |
| 0.110431  | 0.13243  | 0.127622  | 0.119172 | 0.131119 | 0.131702 | 0.121649  |
| 0.117279  | 0.120338 | 0.123397  | 0.122232 | 0.123106 | 0.141171 | 0.129662  |
| 0.11553   | 0.129662 | 0.132721  | 0.118444 | 0.13243  | 0.139423 | 0.128788  |
| 0.123106  | 0.125    | 0.120484  | 0.125146 | 0.123397 | 0.127477 | 0.113928  |
| 0.102127  | 0.13345  | 0.142045  | 0.110577 | 0.139714 | 0.137383 | 0.11451   |
| 0.106061  | 0.133887 | 0.140734  | 0.113054 | 0.143357 | 0.1419   | 0.118735  |
| 0.0996503 | 0.130973 | 0.136072  | 0.110431 | 0.136364 | 0.13549  | 0.113491  |
| 0.121649  | 0.125874 | 0.120192  | 0.125146 | 0.124272 | 0.126894 | 0.116259  |
| 0.121941  | 0.124709 | 0.133596  | 0.122232 | 0.135344 | 0.145251 | 0.13549   |
| 0.125874  | 0.13243  | 0.136072  | 0.125    | 0.139569 | 0.15035  | 0.141171  |
| 0.128788  | 0.139423 | 0.1419    | 0.136655 | 0.145105 | 0.13345  | 0.128059  |
| 0.132576  | 0.138549 | 0.144522  | 0.138695 | 0.145396 | 0.139277 | 0.134178  |
| 0.124854  | 0.130828 | 0.134761  | 0.122815 | 0.137092 | 0.146707 | 0.139569  |
| 0.118735  | 0.123252 | 0.0992133 | 0.121941 | 0.107663 | 0.11553  | 0.0984848 |
| 0.114219  | 0.135927 | 0.146562  | 0.119755 | 0.1419   | 0.139277 | 0.126311  |
| 0.119027  | 0.142483 | 0.138549  | 0.125728 | 0.144085 | 0.122815 | 0.114219  |
| 0.210519  | 0.219697 | 0.216346  | 0.21722  | 0.223631 | 0.214307 | 0.217366  |
| 0.127477  | 0.129953 | 0.133887  | 0.132139 | 0.137383 | 0.130682 | 0.128497  |
| 0.111451  | 0.126166 | 0.130973  | 0.114365 | 0.130099 | 0.137675 | 0.122378  |
| 0.128205  | 0.126894 | 0.123834  | 0.131993 | 0.129079 | 0.131702 | 0.120192  |
| 0.227418  | 0.235723 | 0.231498  | 0.233829 | 0.237617 | 0.228584 | 0.231352  |
| 0.218386  | 0.223776 | 0.218969  | 0.222756 | 0.230915 | 0.219551 | 0.22028   |
| 0.104021  | 0.133013 | 0.144522  | 0.111597 | 0.143648 | 0.13986  | 0.116696  |
| 0.253934  | 0.259907 | 0.256847  | 0.260052 | 0.264714 | 0.253351 | 0.25641   |
| 0.116404  | 0.125    | 0.0992133 | 0.123397 | 0.109411 | 0.113199 | 0.0964452 |
| 0.134178  | 0.137821 | 0.126894  | 0.13447  | 0.138549 | 0.146416 | 0.138695  |
| 0.114948  | 0.127622 | 0.120192  | 0.121066 | 0.120484 | 0.119318 | 0.104895  |
| 0.124126  | 0.127768 | 0.133741  | 0.123834 | 0.136655 | 0.148019 | 0.138258  |
| 0.193619  | 0.20338  | 0.200029  | 0.199446 | 0.207022 | 0.197407 | 0.199301  |
| 0.115676  | 0.133887 | 0.13141   | 0.123252 | 0.132284 | 0.13549  | 0.120775  |

|           |          |          |          |          |          |          |
|-----------|----------|----------|----------|----------|----------|----------|
| 0.20134   | 0.208188 | 0.208042 | 0.209207 | 0.212704 | 0.206585 | 0.207314 |
| 0.118298  | 0.124563 | 0.126166 | 0.126457 | 0.125874 | 0.137821 | 0.124563 |
| 0.108683  | 0.13243  | 0.133741 | 0.116259 | 0.137529 | 0.126748 | 0.114948 |
| 0.126457  | 0.128059 | 0.115093 | 0.124709 | 0.126166 | 0.126166 | 0.107955 |
| 0.113636  | 0.124272 | 0.127622 | 0.123834 | 0.13141  | 0.128788 | 0.120775 |
| 0.116987  | 0.121795 | 0.116696 | 0.119901 | 0.119901 | 0.121649 | 0.112179 |
| 0.116696  | 0.127914 | 0.129225 | 0.125146 | 0.136218 | 0.129516 | 0.120921 |
| 0.108246  | 0.124126 | 0.113491 | 0.118153 | 0.114656 | 0.120192 | 0.105478 |
| 0.119172  | 0.126311 | 0.129371 | 0.125    | 0.142191 | 0.134324 | 0.122815 |
| 0.106789  | 0.125    | 0.139714 | 0.114365 | 0.133304 | 0.132721 | 0.115967 |
| 0.118153  | 0.13141  | 0.110577 | 0.121941 | 0.126311 | 0.123106 | 0.101399 |
| 0.113345  | 0.124854 | 0.116259 | 0.118881 | 0.116259 | 0.117424 | 0.10271  |
| 0.124854  | 0.132867 | 0.137966 | 0.134761 | 0.133887 | 0.123106 | 0.121212 |
| 0.129516  | 0.131702 | 0.136218 | 0.136509 | 0.14933  | 0.148164 | 0.136655 |
| 0.119464  | 0.125437 | 0.131702 | 0.129662 | 0.132284 | 0.128788 | 0.120192 |
| 0.118153  | 0.13141  | 0.128934 | 0.118153 | 0.13243  | 0.13884  | 0.125583 |
| 0.117133  | 0.122815 | 0.117716 | 0.120629 | 0.121212 | 0.121795 | 0.113199 |
| 0.106061  | 0.132721 | 0.13549  | 0.112179 | 0.139569 | 0.134324 | 0.115822 |
| 0.11859   | 0.124563 | 0.133159 | 0.119172 | 0.131993 | 0.141317 | 0.133013 |
| 0.117279  | 0.129079 | 0.135052 | 0.12602  | 0.138549 | 0.142045 | 0.123834 |
| 0.11757   | 0.130245 | 0.134761 | 0.128351 | 0.13447  | 0.131556 | 0.120629 |
| 0.120047  | 0.129225 | 0.130245 | 0.131702 | 0.13986  | 0.136946 | 0.127477 |
| 0.128934  | 0.133159 | 0.137383 | 0.137675 | 0.148747 | 0.144668 | 0.13345  |
| 0.137675  | 0.1419   | 0.142337 | 0.144668 | 0.151661 | 0.149621 | 0.143648 |
| 0.0964452 | 0.121941 | 0.125583 | 0.108683 | 0.127914 | 0.126748 | 0.106206 |
| 0.122086  | 0.126894 | 0.120047 | 0.129662 | 0.129662 | 0.130828 | 0.118153 |
| 0.112034  | 0.124709 | 0.122232 | 0.119901 | 0.12602  | 0.130973 | 0.120338 |
| 0.126311  | 0.132576 | 0.138549 | 0.125146 | 0.138549 | 0.146707 | 0.136655 |
| 0.115676  | 0.128642 | 0.119464 | 0.118007 | 0.118881 | 0.119755 | 0.107663 |
| 0.133159  | 0.14088  | 0.14627  | 0.136946 | 0.144522 | 0.15035  | 0.137092 |
| 0.138986  | 0.137675 | 0.130536 | 0.141317 | 0.13345  | 0.130828 | 0.127185 |
| 0.126311  | 0.128205 | 0.133304 | 0.130682 | 0.133013 | 0.139132 | 0.13345  |
| 0.115676  | 0.128351 | 0.113636 | 0.120921 | 0.126748 | 0.125291 | 0.112617 |
| 0.118444  | 0.121503 | 0.129225 | 0.121941 | 0.118735 | 0.138258 | 0.124709 |
| 0.128059  | 0.134033 | 0.138549 | 0.135927 | 0.141754 | 0.133013 | 0.125874 |
| 0.210956  | 0.21722  | 0.216783 | 0.215326 | 0.223193 | 0.215035 | 0.211684 |
| 0.117716  | 0.133013 | 0.128205 | 0.119172 | 0.13549  | 0.137529 | 0.124854 |
| 0.124563  | 0.13141  | 0.116696 | 0.127185 | 0.123689 | 0.129225 | 0.107809 |
| 0.11655   | 0.124563 | 0.133159 | 0.113636 | 0.132867 | 0.142191 | 0.132139 |
| 0.119318  | 0.129371 | 0.133013 | 0.127185 | 0.134178 | 0.128059 | 0.120629 |
| 0.122669  | 0.131265 | 0.129953 | 0.131119 | 0.133159 | 0.1419   | 0.131847 |
| 0.121212  | 0.122523 | 0.13549  | 0.128205 | 0.138986 | 0.138695 | 0.128059 |
| 0.123689  | 0.124126 | 0.137675 | 0.126894 | 0.141463 | 0.135927 | 0.129371 |
| 0.122669  | 0.121941 | 0.127331 | 0.126748 | 0.126166 | 0.139277 | 0.131556 |

|           |           |          |           |          |          |           |
|-----------|-----------|----------|-----------|----------|----------|-----------|
| 0.103147  | 0.122815  | 0.130536 | 0.110723  | 0.13345  | 0.133159 | 0.114365  |
| 0.122669  | 0.129225  | 0.132576 | 0.120047  | 0.133741 | 0.146562 | 0.135635  |
| 0.119172  | 0.128059  | 0.113054 | 0.123834  | 0.124126 | 0.126748 | 0.110286  |
| 0.126603  | 0.13345   | 0.118153 | 0.127768  | 0.128351 | 0.131556 | 0.108974  |
| 0.177448  | 0.189248  | 0.189685 | 0.187937  | 0.190268 | 0.185897 | 0.183129  |
| 0.121795  | 0.127185  | 0.129953 | 0.129953  | 0.143065 | 0.138112 | 0.129225  |
| 0.125437  | 0.132576  | 0.137675 | 0.125728  | 0.136801 | 0.147873 | 0.135781  |
| 0.118298  | 0.128934  | 0.125    | 0.115967  | 0.123252 | 0.119755 | 0.104749  |
| 0.121358  | 0.122669  | 0.128351 | 0.126894  | 0.124272 | 0.129808 | 0.122086  |
| 0.111742  | 0.114802  | 0.110286 | 0.120775  | 0.120192 | 0.120775 | 0.0999417 |
| 0.11116   | 0.122086  | 0.109994 | 0.119027  | 0.119027 | 0.124854 | 0.102855  |
| 0.113782  | 0.118881  | 0.11116  | 0.123106  | 0.121649 | 0.121941 | 0.105478  |
| 0.0936772 | 0.125583  | 0.133887 | 0.105332  | 0.12602  | 0.123106 | 0.109266  |
| 0.121941  | 0.134033  | 0.125437 | 0.13039   | 0.133887 | 0.12398  | 0.11655   |
| 0.125291  | 0.137966  | 0.1419   | 0.130536  | 0.146562 | 0.143357 | 0.126894  |
| 0.112908  | 0.119755  | 0.121649 | 0.119901  | 0.122523 | 0.128934 | 0.117716  |
| 0.119172  | 0.123689  | 0.128497 | 0.125874  | 0.126748 | 0.13549  | 0.118153  |
| 0.0965909 | 0.136946  | 0.135927 | 0.0919289 | 0.139423 | 0.118444 | 0.100816  |
| 0.111451  | 0.125583  | 0.116404 | 0.116404  | 0.122232 | 0.118153 | 0.100524  |
| 0.123397  | 0.0996503 | 0.130682 | 0.129225  | 0.13447  | 0.135635 | 0.118881  |
| 0.112034  | 0.12296   | 0.116696 | 0.116696  | 0.122232 | 0.122815 | 0.103147  |
| 0.109703  | 0.122378  | 0.117861 | 0.11961   | 0.119318 | 0.121941 | 0.106061  |
| 0.117861  | 0.111597  | 0.102127 | 0.119027  | 0.103875 | 0.121066 | 0.107809  |
| 0.122086  | 0.130973  | 0.11451  | 0.124417  | 0.127622 | 0.124126 | 0.0980478 |
| 0.111014  | 0.127768  | 0.115967 | 0.115967  | 0.122378 | 0.124709 | 0.109994  |
| 0.125     | 0.149913  | 0.148893 | 0.129662  | 0.152681 | 0.140734 | 0.134761  |
| 0.120629  | 0.145833  | 0.149184 | 0.127914  | 0.15035  | 0.145396 | 0.134178  |
| 0.114802  | 0.125437  | 0.120921 | 0.11859   | 0.127622 | 0.127331 | 0.104167  |
| 0.118735  | 0.137821  | 0.142045 | 0.128351  | 0.143211 | 0.148747 | 0.131702  |
| 0.130099  | 0.131702  | 0.135052 | 0.13243   | 0.135635 | 0.135052 | 0.132576  |
| 0.12602   | 0.146853  | 0.14088  | 0.127477  | 0.136801 | 0.115822 | 0.111305  |
| 0.110868  | 0.123543  | 0.112908 | 0.119027  | 0.11961  | 0.124563 | 0.104312  |
| 0.142191  | 0.140297  | 0.143939 | 0.144522  | 0.142774 | 0.145396 | 0.14292   |
| 0.125291  | 0.135635  | 0.13345  | 0.137529  | 0.136655 | 0.145396 | 0.132721  |
| 0.105186  | 0.13243   | 0.143065 | 0.108683  | 0.145688 | 0.124709 | 0.121941  |
| 0.120629  | 0.128642  | 0.126457 | 0.129662  | 0.13345  | 0.124126 | 0.116113  |
| 0.109703  | 0.12704   | 0.121358 | 0.110868  | 0.116987 | 0.119027 | 0.102855  |
| 0.105478  | 0.125437  | 0.111014 | 0.120047  | 0.124417 | 0.126457 | 0.105624  |
| 0.088141  | 0.121795  | 0.129808 | 0.0872669 | 0.132139 | 0.12602  | 0.113636  |
| 0.11757   | 0.132284  | 0.12398  | 0.123106  | 0.125437 | 0.12602  | 0.108392  |
| 0.125291  | 0.121941  | 0.108683 | 0.129079  | 0.115676 | 0.127331 | 0.118153  |
| 0.122086  | 0.131556  | 0.129079 | 0.124417  | 0.13141  | 0.126748 | 0.117861  |
| 0.109848  | 0.122523  | 0.124126 | 0.113928  | 0.123543 | 0.122086 | 0.116696  |
| 0.107955  | 0.123834  | 0.109994 | 0.117861  | 0.121941 | 0.123689 | 0.102273  |



|          |          |          |          |          |          |           |
|----------|----------|----------|----------|----------|----------|-----------|
| 0.120047 | 0.130682 | 0.117716 | 0.116259 | 0.124417 | 0.116259 | 0.100087  |
| 0.102273 | 0.12602  | 0.113345 | 0.112471 | 0.125    | 0.124709 | 0.105915  |
| 0.113199 | 0.129953 | 0.114948 | 0.123397 | 0.127477 | 0.127185 | 0.107517  |
| 0.112325 | 0.125874 | 0.114073 | 0.125146 | 0.122232 | 0.12398  | 0.106643  |
| 0.127331 | 0.128351 | 0.125874 | 0.136946 | 0.128205 | 0.13141  | 0.126894  |
| 0.117424 | 0.128351 | 0.123543 | 0.129371 | 0.125291 | 0.123543 | 0.109994  |
| 0.112471 | 0.119901 | 0.097028 | 0.121795 | 0.104021 | 0.109266 | 0.0895979 |
| 0.113928 | 0.123106 | 0.112762 | 0.113054 | 0.120338 | 0.122669 | 0.100962  |
| 0.125437 | 0.132284 | 0.12602  | 0.131265 | 0.130099 | 0.131847 | 0.121795  |
| 0.122086 | 0.123397 | 0.124709 | 0.129953 | 0.127914 | 0.121795 | 0.103875  |
| 0.126166 | 0.13884  | 0.129953 | 0.13549  | 0.145979 | 0.130536 | 0.126603  |
| 0.112762 | 0.12398  | 0.11859  | 0.124709 | 0.124709 | 0.127331 | 0.11757   |
| 0.129225 | 0.134033 | 0.121358 | 0.131265 | 0.136801 | 0.125437 | 0.110723  |

| <b>TDr_13_00415</b> | <b>TDr_13_00421</b> | <b>TDr_13_00431</b> | <b>TDr_13_00444</b> | <b>TDr_13_00452</b> | <b>TDr_13_00458</b> | <b>TDr_1489</b> |
|---------------------|---------------------|---------------------|---------------------|---------------------|---------------------|-----------------|
| 0.151078            | 0.127477            | 0.133304            | 0.129953            | 0.13345             | 0.121503            | 0.0823135       |
| 0.155012            | 0.125               | 0.13141             | 0.12398             | 0.133013            | 0.11553             | 0.126748        |
| 0.155303            | 0.120921            | 0.125874            | 0.119901            | 0.12602             | 0.112325            | 0.122378        |
| 0.155303            | 0.12296             | 0.13549             | 0.120775            | 0.127768            | 0.11961             | 0.125583        |
| 0.164336            | 0.136072            | 0.149476            | 0.132721            | 0.14292             | 0.135052            | 0.154429        |
| 0.157634            | 0.137821            | 0.139569            | 0.133013            | 0.141463            | 0.128642            | 0.128205        |
| 0.148747            | 0.12398             | 0.13243             | 0.115676            | 0.13141             | 0.119172            | 0.128934        |
| 0.1537              | 0.12602             | 0.136218            | 0.120338            | 0.133741            | 0.113928            | 0.125728        |
| 0.151224            | 0.116259            | 0.121212            | 0.106498            | 0.121066            | 0.109703            | 0.121503        |
| 0.156323            | 0.0977564           | 0.105041            | 0.103438            | 0.122378            | 0.0888695           | 0.124563        |
| 0.15676             | 0.124417            | 0.13141             | 0.116404            | 0.132139            | 0.118153            | 0.113636        |
| 0.151078            | 0.11961             | 0.135344            | 0.11014             | 0.122669            | 0.118881            | 0.133304        |
| 0.160985            | 0.114365            | 0.123397            | 0.111888            | 0.125291            | 0.107226            | 0.128642        |
| 0.169289            | 0.145979            | 0.145396            | 0.139132            | 0.160985            | 0.133887            | 0.118007        |
| 0.160985            | 0.127185            | 0.128642            | 0.12704             | 0.141026            | 0.118298            | 0.144376        |
| 0.156177            | 0.115093            | 0.123543            | 0.106498            | 0.119901            | 0.121066            | 0.129079        |
| 0.154575            | 0.115239            | 0.133013            | 0.117133            | 0.126457            | 0.11655             | 0.136509        |
| 0.165501            | 0.150932            | 0.153555            | 0.145251            | 0.156031            | 0.133013            | 0.161131        |
| 0.154138            | 0.119464            | 0.128205            | 0.114073            | 0.126603            | 0.112325            | 0.117716        |
| 0.223193            | 0.209207            | 0.210664            | 0.210227            | 0.218094            | 0.196824            | 0.176865        |
| 0.155157            | 0.130682            | 0.139132            | 0.124417            | 0.136655            | 0.118298            | 0.124563        |
| 0.146853            | 0.126457            | 0.143065            | 0.127768            | 0.130973            | 0.118735            | 0.120921        |
| 0.158071            | 0.116987            | 0.121066            | 0.114802            | 0.124417            | 0.11014             | 0.12398         |
| 0.160548            | 0.113345            | 0.136946            | 0.110286            | 0.118444            | 0.132139            | 0.141317        |
| 0.149913            | 0.106498            | 0.119901            | 0.111888            | 0.120921            | 0.101107            | 0.11961         |
| 0.154283            | 0.136218            | 0.141754            | 0.127331            | 0.137238            | 0.116841            | 0.12602         |
| 0.156614            | 0.127185            | 0.133013            | 0.117133            | 0.124417            | 0.118298            | 0.137966        |
| 0.158654            | 0.102418            | 0.134178            | 0.107517            | 0.110723            | 0.124709            | 0.141463        |
| 0.163024            | 0.121649            | 0.139423            | 0.117716            | 0.110723            | 0.134615            | 0.143502        |
| 0.161859            | 0.11757             | 0.133596            | 0.120629            | 0.113054            | 0.121212            | 0.141171        |
| 0.153555            | 0.12704             | 0.132576            | 0.121941            | 0.130973            | 0.124854            | 0.116259        |
| 0.15574             | 0.113491            | 0.133013            | 0.113928            | 0.104604            | 0.128205            | 0.137092        |
| 0.151952            | 0.115239            | 0.121649            | 0.111597            | 0.118881            | 0.111014            | 0.114365        |
| 0.163899            | 0.114365            | 0.131847            | 0.115093            | 0.116259            | 0.111014            | 0.131556        |
| 0.158508            | 0.119172            | 0.126457            | 0.111742            | 0.120484            | 0.116987            | 0.135198        |
| 0.161859            | 0.11961             | 0.128059            | 0.120047            | 0.124126            | 0.119172            | 0.14088         |
| 0.15676             | 0.132867            | 0.134615            | 0.119901            | 0.137966            | 0.12602             | 0.136072        |
| 0.158071            | 0.125728            | 0.131847            | 0.125291            | 0.13345             | 0.124709            | 0.133887        |
| 0.155449            | 0.104749            | 0.12602             | 0.104604            | 0.107809            | 0.120921            | 0.130099        |
| 0.158362            | 0.10708             | 0.133304            | 0.113345            | 0.136364            | 0.124126            | 0.143502        |
| 0.154866            | 0.103293            | 0.119318            | 0.101107            | 0.129371            | 0.115676            | 0.130099        |
| 0.173805            | 0.118153            | 0.138549            | 0.129371            | 0.151515            | 0.142191            | 0.159237        |

|          |          |          |           |          |          |          |
|----------|----------|----------|-----------|----------|----------|----------|
| 0.174971 | 0.129808 | 0.143211 | 0.126457  | 0.150932 | 0.146853 | 0.162442 |
| 0.152389 | 0.106643 | 0.121212 | 0.107372  | 0.131847 | 0.120775 | 0.138112 |
| 0.145396 | 0.11451  | 0.124417 | 0.101253  | 0.105624 | 0.097465 | 0.129662 |
| 0.159819 | 0.10912  | 0.124854 | 0.109266  | 0.122669 | 0.113636 | 0.138258 |
| 0.147582 | 0.111451 | 0.135635 | 0.103438  | 0.132284 | 0.118298 | 0.140589 |
| 0.167249 | 0.111014 | 0.1419   | 0.123689  | 0.148747 | 0.138549 | 0.152681 |
| 0.15676  | 0.108392 | 0.122086 | 0.105624  | 0.129808 | 0.115822 | 0.136364 |
| 0.151369 | 0.107372 | 0.12602  | 0.109848  | 0.133741 | 0.123543 | 0.13243  |
| 0.155012 | 0.142774 | 0.147145 | 0.148164  | 0.140006 | 0.144376 | 0.105478 |
| 0.160839 | 0.117424 | 0.134324 | 0.106206  | 0.137383 | 0.129808 | 0.147145 |
| 0.151369 | 0.102418 | 0.122815 | 0.112179  | 0.130536 | 0.120629 | 0.136218 |
| 0.161859 | 0.118735 | 0.121649 | 0.121795  | 0.138695 | 0.119464 | 0.139132 |
| 0.152826 | 0.123689 | 0.133887 | 0.11655   | 0.135781 | 0.124126 | 0.112034 |
| 0.152826 | 0.120484 | 0.147873 | 0.113345  | 0.133159 | 0.142191 | 0.161568 |
| 0.165501 | 0.108683 | 0.135781 | 0.109703  | 0.136509 | 0.126894 | 0.145396 |
| 0.153555 | 0.108392 | 0.128497 | 0.11116   | 0.133596 | 0.121941 | 0.137529 |
| 0.156469 | 0.109557 | 0.126457 | 0.105041  | 0.13243  | 0.118153 | 0.140152 |
| 0.154575 | 0.114656 | 0.125437 | 0.105478  | 0.126457 | 0.115967 | 0.140589 |
| 0.166521 | 0.116987 | 0.135052 | 0.123543  | 0.143939 | 0.145105 | 0.156031 |
| 0.172348 | 0.115239 | 0.136509 | 0.121503  | 0.146853 | 0.13986  | 0.158945 |
| 0.176865 | 0.153555 | 0.165501 | 0.154866  | 0.177885 | 0.159819 | 0.146562 |
| 0.151224 | 0.101107 | 0.126166 | 0.106789  | 0.13243  | 0.124563 | 0.136364 |
| 0.152389 | 0.104021 | 0.123252 | 0.105332  | 0.128351 | 0.120484 | 0.134615 |
| 0.154138 | 0.106935 | 0.12704  | 0.0992133 | 0.125728 | 0.116987 | 0.133741 |
| 0.130973 | 0.137675 | 0.146999 | 0.132576  | 0.149184 | 0.136946 | 0.141754 |
| 0.151078 | 0.108537 | 0.127185 | 0.101981  | 0.132284 | 0.123252 | 0.134178 |
| 0.151807 | 0.11859  | 0.137238 | 0.118735  | 0.138258 | 0.13039  | 0.14627  |
| 0.154429 | 0.106935 | 0.125291 | 0.103875  | 0.123397 | 0.107663 | 0.143065 |
| 0.157197 | 0.105915 | 0.128351 | 0.109266  | 0.134324 | 0.122378 | 0.139423 |
| 0.129808 | 0.149038 | 0.1537   | 0.141317  | 0.152389 | 0.144231 | 0.135052 |
| 0.159819 | 0.112034 | 0.135052 | 0.113636  | 0.134615 | 0.131119 | 0.143502 |
| 0.170163 | 0.120629 | 0.141026 | 0.116113  | 0.14729  | 0.136218 | 0.156469 |
| 0.16623  | 0.120775 | 0.13884  | 0.102855  | 0.140443 | 0.131119 | 0.148456 |
| 0.145396 | 0.124417 | 0.133159 | 0.114073  | 0.122232 | 0.111742 | 0.124417 |
| 0.151224 | 0.105186 | 0.125874 | 0.107663  | 0.129225 | 0.121358 | 0.13549  |
| 0.155886 | 0.106643 | 0.121503 | 0.104749  | 0.128934 | 0.119901 | 0.138986 |
| 0.166084 | 0.115385 | 0.133159 | 0.11961   | 0.141463 | 0.135635 | 0.15472  |
| 0.15574  | 0.106498 | 0.123106 | 0.106643  | 0.129953 | 0.117424 | 0.132139 |
| 0.167832 | 0.120338 | 0.138986 | 0.126311  | 0.143502 | 0.14088  | 0.157051 |
| 0.158508 | 0.106935 | 0.130828 | 0.105332  | 0.141171 | 0.130682 | 0.140443 |
| 0.155303 | 0.106061 | 0.130536 | 0.102127  | 0.127185 | 0.124854 | 0.137821 |
| 0.157925 | 0.116259 | 0.129953 | 0.112034  | 0.136218 | 0.128059 | 0.138986 |
| 0.162296 | 0.106061 | 0.131702 | 0.111742  | 0.135927 | 0.125437 | 0.142774 |
| 0.155594 | 0.104604 | 0.128497 | 0.106206  | 0.132139 | 0.118153 | 0.134033 |

|          |           |          |           |          |           |          |
|----------|-----------|----------|-----------|----------|-----------|----------|
| 0.151807 | 0.1081    | 0.127914 | 0.109703  | 0.133887 | 0.122815  | 0.134615 |
| 0.170017 | 0.114365  | 0.135927 | 0.123834  | 0.146562 | 0.13549   | 0.15778  |
| 0.157488 | 0.114656  | 0.121649 | 0.11014   | 0.123834 | 0.119172  | 0.131847 |
| 0.152681 | 0.111888  | 0.125    | 0.118153  | 0.122232 | 0.113782  | 0.132284 |
| 0.150932 | 0.124709  | 0.139277 | 0.116987  | 0.128351 | 0.12398   | 0.138986 |
| 0.148019 | 0.132576  | 0.138403 | 0.118735  | 0.135344 | 0.122815  | 0.132284 |
| 0.155594 | 0.128788  | 0.138403 | 0.114073  | 0.112617 | 0.0986305 | 0.151515 |
| 0.15778  | 0.13447   | 0.14292  | 0.126457  | 0.120338 | 0.114219  | 0.155449 |
| 0.152681 | 0.124417  | 0.132867 | 0.120484  | 0.132721 | 0.117861  | 0.119464 |
| 0.199009 | 0.188228  | 0.192016 | 0.184295  | 0.198572 | 0.174971  | 0.1588   |
| 0.147873 | 0.119901  | 0.131847 | 0.106643  | 0.124126 | 0.112762  | 0.124563 |
| 0.156177 | 0.138695  | 0.145979 | 0.11757   | 0.13039  | 0.103584  | 0.155594 |
| 0.155012 | 0.133159  | 0.137529 | 0.114948  | 0.12398  | 0.095134  | 0.147436 |
| 0.159528 | 0.132139  | 0.144085 | 0.123252  | 0.133159 | 0.132284  | 0.14292  |
| 0.148601 | 0.119172  | 0.128205 | 0.109703  | 0.109703 | 0.103293  | 0.131993 |
| 0.153846 | 0.129662  | 0.142774 | 0.119901  | 0.11757  | 0.109994  | 0.149767 |
| 0.151515 | 0.120629  | 0.134033 | 0.109994  | 0.112617 | 0.095134  | 0.136946 |
| 0.153409 | 0.116987  | 0.136218 | 0.113054  | 0.119464 | 0.0967366 | 0.139714 |
| 0.150204 | 0.11553   | 0.128059 | 0.113054  | 0.121503 | 0.118298  | 0.111742 |
| 0.157488 | 0.133304  | 0.142337 | 0.119464  | 0.11014  | 0.109848  | 0.153118 |
| 0.154575 | 0.106206  | 0.127185 | 0.103147  | 0.12296  | 0.112762  | 0.133887 |
| 0.152389 | 0.136364  | 0.138695 | 0.122523  | 0.133013 | 0.119027  | 0.129371 |
| 0.144668 | 0.116696  | 0.135052 | 0.11014   | 0.128205 | 0.119172  | 0.123689 |
| 0.166084 | 0.110431  | 0.13549  | 0.115239  | 0.135927 | 0.128642  | 0.154429 |
| 0.15778  | 0.119027  | 0.132721 | 0.126457  | 0.138403 | 0.119755  | 0.13884  |
| 0.14292  | 0.117279  | 0.129808 | 0.107226  | 0.121212 | 0.11014   | 0.125728 |
| 0.130099 | 0.148456  | 0.151952 | 0.136364  | 0.145688 | 0.133741  | 0.137092 |
| 0.14627  | 0.121212  | 0.130828 | 0.110577  | 0.120775 | 0.112034  | 0.126748 |
| 0.153263 | 0.121503  | 0.131119 | 0.109994  | 0.109994 | 0.0971737 | 0.136655 |
| 0.144959 | 0.118735  | 0.126311 | 0.113054  | 0.124126 | 0.110431  | 0.138549 |
| 0.156906 | 0.136801  | 0.14088  | 0.125291  | 0.145396 | 0.130245  | 0.142628 |
| 0.144085 | 0.116113  | 0.137092 | 0.11451   | 0.130828 | 0.117133  | 0.116404 |
| 0.146125 | 0.118735  | 0.127768 | 0.101399  | 0.109848 | 0.0976107 | 0.127185 |
| 0.14729  | 0.121358  | 0.128934 | 0.10169   | 0.107517 | 0.0917832 | 0.136509 |
| 0.151224 | 0.121503  | 0.132576 | 0.110286  | 0.13039  | 0.11961   | 0.124126 |
| 0.160985 | 0.11757   | 0.124854 | 0.110431  | 0.130536 | 0.112471  | 0.144376 |
| 0.144231 | 0.120921  | 0.13345  | 0.111742  | 0.124854 | 0.119027  | 0.124417 |
| 0.147873 | 0.0989219 | 0.123397 | 0.0999417 | 0.124417 | 0.107226  | 0.129516 |
| 0.153118 | 0.106206  | 0.121941 | 0.100524  | 0.121503 | 0.107226  | 0.124563 |
| 0.150641 | 0.105478  | 0.125291 | 0.105041  | 0.128059 | 0.107663  | 0.13345  |
| 0.150932 | 0.128205  | 0.134324 | 0.118153  | 0.134178 | 0.121358  | 0.136655 |
| 0.158654 | 0.120775  | 0.138549 | 0.118881  | 0.130828 | 0.118007  | 0.147873 |
| 0.15472  | 0.107517  | 0.126166 | 0.106789  | 0.122815 | 0.110286  | 0.135781 |
| 0.153409 | 0.107955  | 0.120192 | 0.0987762 | 0.123834 | 0.104312  | 0.129516 |

|          |           |          |           |          |          |           |
|----------|-----------|----------|-----------|----------|----------|-----------|
| 0.157197 | 0.114073  | 0.128642 | 0.109266  | 0.124709 | 0.122086 | 0.144668  |
| 0.15472  | 0.105478  | 0.123834 | 0.0992133 | 0.123397 | 0.114073 | 0.131119  |
| 0.13141  | 0.128788  | 0.139277 | 0.121649  | 0.137383 | 0.123689 | 0.127914  |
| 0.148601 | 0.13345   | 0.137529 | 0.139423  | 0.132721 | 0.131847 | 0.0932401 |
| 0.151515 | 0.108683  | 0.129662 | 0.100379  | 0.120775 | 0.108246 | 0.136364  |
| 0.157488 | 0.110286  | 0.12602  | 0.108683  | 0.126166 | 0.112762 | 0.138549  |
| 0.150787 | 0.106498  | 0.127477 | 0.104604  | 0.129371 | 0.112762 | 0.135635  |
| 0.148456 | 0.10708   | 0.124272 | 0.0987762 | 0.120047 | 0.10373  | 0.124563  |
| 0.160111 | 0.114656  | 0.13243  | 0.109266  | 0.129371 | 0.116259 | 0.144668  |
| 0.152535 | 0.107663  | 0.120484 | 0.100233  | 0.121795 | 0.106352 | 0.127768  |
| 0.170163 | 0.137238  | 0.144814 | 0.128351  | 0.135344 | 0.14088  | 0.15472   |
| 0.173514 | 0.130973  | 0.135927 | 0.128205  | 0.146853 | 0.134615 | 0.152535  |
| 0.160985 | 0.121358  | 0.131847 | 0.121503  | 0.134324 | 0.12296  | 0.143211  |
| 0.159382 | 0.112471  | 0.124417 | 0.115822  | 0.129225 | 0.116696 | 0.140734  |
| 0.155594 | 0.118007  | 0.130828 | 0.105041  | 0.125146 | 0.119027 | 0.126166  |
| 0.150495 | 0.114365  | 0.125146 | 0.105769  | 0.11859  | 0.110723 | 0.135344  |
| 0.153846 | 0.100816  | 0.127914 | 0.100087  | 0.127185 | 0.121066 | 0.132576  |
| 0.159674 | 0.106352  | 0.12704  | 0.0962995 | 0.114365 | 0.112908 | 0.130828  |
| 0.153555 | 0.120338  | 0.129079 | 0.109703  | 0.133596 | 0.122232 | 0.117424  |
| 0.16317  | 0.0909091 | 0.134324 | 0.0939685 | 0.135052 | 0.138258 | 0.151515  |
| 0.151078 | 0.121649  | 0.131556 | 0.113054  | 0.113054 | 0.103438 | 0.135052  |
| 0.162296 | 0.127331  | 0.132576 | 0.124854  | 0.13884  | 0.120775 | 0.14627   |
| 0.156031 | 0.131847  | 0.144959 | 0.120921  | 0.135198 | 0.125583 | 0.145833  |
| 0.21285  | 0.201486  | 0.206439 | 0.206002  | 0.215326 | 0.197552 | 0.172057  |
| 0.248834 | 0.246795  | 0.242716 | 0.246941  | 0.250728 | 0.235577 | 0.210664  |
| 0.14933  | 0.123397  | 0.136801 | 0.11655   | 0.125583 | 0.118298 | 0.108246  |
| 0.139277 | 0.102564  | 0.129079 | 0.100962  | 0.11961  | 0.119901 | 0.135198  |
| 0.1419   | 0.111597  | 0.125583 | 0.105915  | 0.121358 | 0.113491 | 0.122669  |
| 0.143648 | 0.111597  | 0.130536 | 0.101253  | 0.121941 | 0.111451 | 0.134033  |
| 0.160548 | 0.125874  | 0.131119 | 0.128934  | 0.137966 | 0.11757  | 0.144814  |
| 0.148601 | 0.112762  | 0.132576 | 0.100379  | 0.123397 | 0.121941 | 0.136364  |
| 0.151952 | 0.130682  | 0.148456 | 0.113928  | 0.138986 | 0.143357 | 0.166521  |
| 0.142774 | 0.109266  | 0.133741 | 0.103001  | 0.126894 | 0.120192 | 0.143357  |
| 0.144522 | 0.113345  | 0.144522 | 0.107955  | 0.120484 | 0.136509 | 0.150932  |
| 0.148747 | 0.112325  | 0.134178 | 0.113345  | 0.138112 | 0.126748 | 0.143502  |
| 0.151078 | 0.114656  | 0.141754 | 0.112762  | 0.134615 | 0.124709 | 0.152244  |
| 0.168852 | 0.117279  | 0.135927 | 0.118881  | 0.145688 | 0.134907 | 0.156031  |
| 0.14729  | 0.105624  | 0.131847 | 0.103147  | 0.129371 | 0.119464 | 0.139714  |
| 0.139714 | 0.107372  | 0.13039  | 0.099359  | 0.123252 | 0.121795 | 0.136801  |
| 0.140152 | 0.108392  | 0.127914 | 0.105915  | 0.130099 | 0.121649 | 0.140443  |
| 0.136364 | 0.10373   | 0.130536 | 0.0965909 | 0.119318 | 0.118735 | 0.132576  |
| 0.136072 | 0.105769  | 0.131993 | 0.100962  | 0.121066 | 0.122523 | 0.135198  |
| 0.139714 | 0.103875  | 0.129808 | 0.104312  | 0.127914 | 0.124126 | 0.136801  |
| 0.145688 | 0.109266  | 0.138986 | 0.110868  | 0.133013 | 0.127185 | 0.149476  |

|          |          |          |           |          |           |          |
|----------|----------|----------|-----------|----------|-----------|----------|
| 0.150058 | 0.11655  | 0.14627  | 0.116113  | 0.133887 | 0.129516  | 0.159674 |
| 0.143794 | 0.110577 | 0.136218 | 0.105769  | 0.125874 | 0.127331  | 0.140589 |
| 0.15035  | 0.108392 | 0.130536 | 0.104167  | 0.129225 | 0.120192  | 0.135198 |
| 0.150641 | 0.11655  | 0.144522 | 0.114073  | 0.129516 | 0.132139  | 0.152389 |
| 0.145396 | 0.108683 | 0.128497 | 0.104167  | 0.124272 | 0.119318  | 0.13345  |
| 0.147582 | 0.126603 | 0.144959 | 0.124709  | 0.144814 | 0.136655  | 0.162733 |
| 0.160402 | 0.13243  | 0.123106 | 0.13141   | 0.141608 | 0.127914  | 0.150495 |
| 0.149767 | 0.128497 | 0.145396 | 0.120484  | 0.108537 | 0.103584  | 0.15035  |
| 0.137821 | 0.102273 | 0.127331 | 0.097465  | 0.11757  | 0.117279  | 0.132867 |
| 0.13884  | 0.105041 | 0.127477 | 0.0999417 | 0.115676 | 0.113928  | 0.134178 |
| 0.141026 | 0.11451  | 0.138403 | 0.103001  | 0.12398  | 0.126603  | 0.15035  |
| 0.140589 | 0.113491 | 0.13884  | 0.11014   | 0.120921 | 0.122086  | 0.146999 |
| 0.139714 | 0.117861 | 0.148164 | 0.110723  | 0.128788 | 0.131702  | 0.148456 |
| 0.143357 | 0.111888 | 0.136946 | 0.105332  | 0.12602  | 0.124854  | 0.140734 |
| 0.143211 | 0.11553  | 0.137383 | 0.100233  | 0.125    | 0.123834  | 0.143211 |
| 0.144959 | 0.10912  | 0.133596 | 0.109266  | 0.12296  | 0.120629  | 0.144668 |
| 0.152826 | 0.110868 | 0.144668 | 0.112179  | 0.135198 | 0.132284  | 0.154575 |
| 0.148456 | 0.118444 | 0.143794 | 0.113345  | 0.134033 | 0.132284  | 0.14729  |
| 0.149476 | 0.119172 | 0.143939 | 0.118444  | 0.130682 | 0.136218  | 0.152972 |
| 0.147873 | 0.120192 | 0.141754 | 0.123252  | 0.137821 | 0.135198  | 0.145833 |
| 0.138258 | 0.106789 | 0.134761 | 0.105478  | 0.127622 | 0.123252  | 0.136801 |
| 0.144668 | 0.11961  | 0.141754 | 0.111014  | 0.134615 | 0.127331  | 0.154283 |
| 0.142191 | 0.104021 | 0.129953 | 0.10271   | 0.119027 | 0.114365  | 0.136364 |
| 0.152826 | 0.114365 | 0.127477 | 0.102564  | 0.133159 | 0.115093  | 0.135344 |
| 0.141754 | 0.100087 | 0.133596 | 0.0999417 | 0.128205 | 0.11451   | 0.140006 |
| 0.145688 | 0.112471 | 0.127331 | 0.0995047 | 0.121066 | 0.114365  | 0.137238 |
| 0.139569 | 0.109557 | 0.128788 | 0.092803  | 0.124272 | 0.119901  | 0.135781 |
| 0.142337 | 0.121066 | 0.147582 | 0.114219  | 0.135198 | 0.131702  | 0.156031 |
| 0.149767 | 0.1081   | 0.13549  | 0.110577  | 0.123106 | 0.123689  | 0.13141  |
| 0.154429 | 0.124126 | 0.142774 | 0.106498  | 0.133596 | 0.130682  | 0.153555 |
| 0.140152 | 0.106061 | 0.132576 | 0.0983392 | 0.119027 | 0.119027  | 0.137529 |
| 0.14088  | 0.104749 | 0.138258 | 0.111014  | 0.125874 | 0.125874  | 0.14729  |
| 0.15472  | 0.116841 | 0.129662 | 0.118735  | 0.126894 | 0.123689  | 0.134615 |
| 0.157634 | 0.126166 | 0.119755 | 0.120192  | 0.130973 | 0.116696  | 0.136364 |
| 0.150204 | 0.118444 | 0.125437 | 0.106643  | 0.128497 | 0.122669  | 0.138549 |
| 0.15676  | 0.118881 | 0.13141  | 0.118444  | 0.132721 | 0.111451  | 0.140443 |
| 0.160985 | 0.121941 | 0.136801 | 0.120629  | 0.132284 | 0.125     | 0.14088  |
| 0.152244 | 0.123106 | 0.131265 | 0.111305  | 0.118298 | 0.113345  | 0.127768 |
| 0.169143 | 0.122232 | 0.128351 | 0.128497  | 0.141317 | 0.11451   | 0.14729  |
| 0.159965 | 0.139277 | 0.136655 | 0.123397  | 0.147582 | 0.140297  | 0.151807 |
| 0.152972 | 0.113636 | 0.123252 | 0.101836  | 0.120192 | 0.0977564 | 0.126166 |
| 0.159237 | 0.122815 | 0.133596 | 0.127914  | 0.117133 | 0.0917832 | 0.148164 |
| 0.164044 | 0.109848 | 0.122669 | 0.118444  | 0.132721 | 0.105915  | 0.141608 |
| 0.159382 | 0.130828 | 0.134324 | 0.118444  | 0.110868 | 0.0878497 | 0.144231 |

|          |          |           |          |          |           |          |
|----------|----------|-----------|----------|----------|-----------|----------|
| 0.1588   | 0.11655  | 0.121795  | 0.114656 | 0.11553  | 0.0840618 | 0.134033 |
| 0.161422 | 0.115676 | 0.127331  | 0.115239 | 0.13447  | 0.105915  | 0.141317 |
| 0.161859 | 0.117861 | 0.127185  | 0.11859  | 0.134615 | 0.112762  | 0.142045 |
| 0.157343 | 0.117716 | 0.139277  | 0.120775 | 0.112617 | 0.0986305 | 0.14831  |
| 0.166958 | 0.131119 | 0.130536  | 0.129516 | 0.11961  | 0.101253  | 0.151515 |
| 0.166375 | 0.121795 | 0.12296   | 0.11961  | 0.139132 | 0.109703  | 0.141608 |
| 0.155303 | 0.115676 | 0.122669  | 0.107663 | 0.115239 | 0.0852273 | 0.131993 |
| 0.16419  | 0.13447  | 0.130973  | 0.131119 | 0.140734 | 0.138695  | 0.150204 |
| 0.170746 | 0.123252 | 0.127914  | 0.129225 | 0.140589 | 0.11553   | 0.152389 |
| 0.149476 | 0.11451  | 0.122378  | 0.110286 | 0.114656 | 0.0971737 | 0.125    |
| 0.230915 | 0.227418 | 0.230041  | 0.22465  | 0.230186 | 0.220862  | 0.194784 |
| 0.153992 | 0.120192 | 0.128934  | 0.120921 | 0.111305 | 0.092366  | 0.13884  |
| 0.158654 | 0.114365 | 0.124272  | 0.109848 | 0.128788 | 0.109266  | 0.137383 |
| 0.161713 | 0.121795 | 0.127331  | 0.130099 | 0.120484 | 0.0875583 | 0.150641 |
| 0.161713 | 0.114219 | 0.126748  | 0.109703 | 0.128642 | 0.111742  | 0.138986 |
| 0.171329 | 0.124417 | 0.124126  | 0.128934 | 0.139132 | 0.113491  | 0.14831  |
| 0.156177 | 0.116841 | 0.125     | 0.112617 | 0.112034 | 0.0866841 | 0.143357 |
| 0.152826 | 0.121941 | 0.12398   | 0.111888 | 0.114219 | 0.0929487 | 0.138549 |
| 0.163607 | 0.112908 | 0.121941  | 0.11655  | 0.13549  | 0.106643  | 0.141463 |
| 0.163462 | 0.128497 | 0.131119  | 0.116404 | 0.113782 | 0.0884324 | 0.13345  |
| 0.159237 | 0.126894 | 0.137966  | 0.123543 | 0.113636 | 0.0952797 | 0.143211 |
| 0.153846 | 0.123252 | 0.12704   | 0.121066 | 0.11757  | 0.090472  | 0.14831  |
| 0.15472  | 0.126748 | 0.13549   | 0.121941 | 0.121066 | 0.0916375 | 0.143939 |
| 0.155886 | 0.11014  | 0.121503  | 0.114656 | 0.125728 | 0.112034  | 0.136364 |
| 0.157343 | 0.117133 | 0.132867  | 0.115822 | 0.107955 | 0.0962995 | 0.137529 |
| 0.16419  | 0.138549 | 0.137675  | 0.122378 | 0.11859  | 0.0871212 | 0.153409 |
| 0.15035  | 0.118881 | 0.124417  | 0.116113 | 0.10912  | 0.0814394 | 0.133159 |
| 0.169872 | 0.113345 | 0.137529  | 0.125437 | 0.144376 | 0.134178  | 0.157634 |
| 0.144085 | 0.146416 | 0.14933   | 0.136946 | 0.151515 | 0.135198  | 0.134178 |
| 0.157197 | 0.121358 | 0.120192  | 0.123252 | 0.129371 | 0.117716  | 0.128934 |
| 0.161568 | 0.11961  | 0.129516  | 0.124417 | 0.138112 | 0.112471  | 0.139714 |
| 0.13549  | 0.137821 | 0.147436  | 0.127185 | 0.128642 | 0.121066  | 0.125583 |
| 0.166812 | 0.124563 | 0.133013  | 0.122378 | 0.121795 | 0.116841  | 0.14088  |
| 0.133304 | 0.130099 | 0.141463  | 0.129079 | 0.143065 | 0.134615  | 0.131265 |
| 0.13884  | 0.139423 | 0.149038  | 0.137529 | 0.15472  | 0.130828  | 0.136218 |
| 0.159091 | 0.104021 | 0.119755  | 0.110577 | 0.121941 | 0.110577  | 0.132576 |
| 0.169143 | 0.119901 | 0.132721  | 0.124417 | 0.141317 | 0.125583  | 0.1537   |
| 0.143648 | 0.15035  | 0.149184  | 0.141754 | 0.156614 | 0.137092  | 0.129662 |
| 0.156469 | 0.115093 | 0.130536  | 0.106789 | 0.126894 | 0.11553   | 0.140734 |
| 0.162296 | 0.11859  | 0.133741  | 0.112325 | 0.140006 | 0.127768  | 0.141317 |
| 0.167104 | 0.13884  | 0.137675  | 0.13549  | 0.149184 | 0.150641  | 0.151952 |
| 0.161568 | 0.107372 | 0.133013  | 0.109848 | 0.135781 | 0.129662  | 0.148456 |
| 0.165793 | 0.121503 | 0.11451   | 0.135344 | 0.139423 | 0.135927  | 0.154429 |
| 0.168269 | 0.117861 | 0.0977564 | 0.119755 | 0.137238 | 0.119464  | 0.152826 |

|          |          |          |           |          |           |          |
|----------|----------|----------|-----------|----------|-----------|----------|
| 0.156177 | 0.134907 | 0.140152 | 0.109703  | 0.112617 | 0.0971737 | 0.144814 |
| 0.152535 | 0.121066 | 0.119901 | 0.12296   | 0.135198 | 0.122669  | 0.138258 |
| 0.159382 | 0.114802 | 0.11859  | 0.114073  | 0.134761 | 0.111742  | 0.139277 |
| 0.15778  | 0.130099 | 0.138258 | 0.112762  | 0.117424 | 0.106061  | 0.150204 |
| 0.164481 | 0.127768 | 0.127185 | 0.116841  | 0.105478 | 0.0935315 | 0.147582 |
| 0.156614 | 0.137675 | 0.146999 | 0.115385  | 0.11451  | 0.100233  | 0.152826 |
| 0.153409 | 0.13447  | 0.141754 | 0.120921  | 0.118298 | 0.105769  | 0.148747 |
| 0.136509 | 0.131847 | 0.142045 | 0.113054  | 0.116841 | 0.112471  | 0.137383 |
| 0.146707 | 0.148164 | 0.145251 | 0.129371  | 0.135781 | 0.111888  | 0.153409 |
| 0.16419  | 0.103875 | 0.116696 | 0.115676  | 0.132284 | 0.11014   | 0.141171 |
| 0.160985 | 0.112617 | 0.132721 | 0.0524476 | 0.131702 | 0.118298  | 0.144376 |
| 0.157197 | 0.132721 | 0.144959 | 0.123252  | 0.140443 | 0.128788  | 0.146416 |
| 0.154283 | 0.106498 | 0.123106 | 0.104312  | 0.127914 | 0.108974  | 0.135927 |
| 0.13345  | 0.147436 | 0.152389 | 0.13243   | 0.152535 | 0.142045  | 0.142483 |
| 0.137529 | 0.151515 | 0.154138 | 0.146707  | 0.157488 | 0.151952  | 0.155012 |
| 0.148893 | 0.114802 | 0.141608 | 0.110868  | 0.129516 | 0.125437  | 0.153555 |
| 0.148456 | 0.106789 | 0.136509 | 0.108392  | 0.11859  | 0.127622  | 0.143211 |
| 0.154138 | 0.134615 | 0.147145 | 0.13039   | 0.095134 | 0.112325  | 0.149184 |
| 0.161568 | 0.120192 | 0.134178 | 0.12296   | 0.120338 | 0.0952797 | 0.148456 |
| 0.14729  | 0.112325 | 0.14292  | 0.108683  | 0.13345  | 0.13345   | 0.15574  |
| 0.157197 | 0.122232 | 0.136801 | 0.122669  | 0.11014  | 0.0938228 | 0.156323 |
| 0.150495 | 0.121941 | 0.131556 | 0.125583  | 0.143357 | 0.122669  | 0.135635 |
| 0.15676  | 0.092366 | 0.123834 | 0.11757   | 0.128351 | 0.112325  | 0.142191 |
| 0        | 0.162879 | 0.172494 | 0.155157  | 0.159819 | 0.154866  | 0.162587 |
| 0.162879 | 0        | 0.129953 | 0.114948  | 0.129808 | 0.120775  | 0.14627  |
| 0.172494 | 0.129953 | 0        | 0.133887  | 0.145251 | 0.124272  | 0.150932 |
| 0.155157 | 0.114948 | 0.133887 | 0         | 0.132284 | 0.11859   | 0.146707 |
| 0.159819 | 0.129808 | 0.145251 | 0.132284  | 0        | 0.119755  | 0.150787 |
| 0.154866 | 0.120775 | 0.124272 | 0.11859   | 0.119755 | 0         | 0.140589 |
| 0.162587 | 0.14627  | 0.150932 | 0.146707  | 0.150787 | 0.140589  | 0        |
| 0.168561 | 0.154575 | 0.158945 | 0.142191  | 0.144231 | 0.129662  | 0.160693 |
| 0.155012 | 0.137821 | 0.146853 | 0.129808  | 0.133596 | 0.127768  | 0.115385 |
| 0.161859 | 0.14729  | 0.156614 | 0.141608  | 0.149184 | 0.138403  | 0.103584 |
| 0.176573 | 0.146562 | 0.159382 | 0.148456  | 0.164481 | 0.155157  | 0.133159 |
| 0.172203 | 0.147727 | 0.160548 | 0.148456  | 0.157197 | 0.148456  | 0.115967 |
| 0.151078 | 0.122232 | 0.135344 | 0.110431  | 0.121212 | 0.132576  | 0.135635 |
| 0.164627 | 0.145688 | 0.153846 | 0.139714  | 0.145542 | 0.137092  | 0.147727 |
| 0.152389 | 0.124417 | 0.13141  | 0.11757   | 0.135635 | 0.120775  | 0.12704  |
| 0.155449 | 0.12398  | 0.131847 | 0.116841  | 0.128205 | 0.118007  | 0.126894 |
| 0.164044 | 0.119172 | 0.131702 | 0.123689  | 0.127477 | 0.113782  | 0.136655 |
| 0.153555 | 0.133159 | 0.141608 | 0.125728  | 0.13039  | 0.125728  | 0.111888 |
| 0.152535 | 0.120192 | 0.137092 | 0.117424  | 0.130828 | 0.121212  | 0.142628 |
| 0.152535 | 0.123106 | 0.129225 | 0.118007  | 0.13345  | 0.115676  | 0.112617 |
| 0.158362 | 0.132721 | 0.143502 | 0.123834  | 0.142191 | 0.12296   | 0.131847 |



|          |          |          |          |          |           |           |
|----------|----------|----------|----------|----------|-----------|-----------|
| 0.156177 | 0.122378 | 0.134033 | 0.12602  | 0.139714 | 0.116987  | 0.128205  |
| 0.154138 | 0.099359 | 0.118007 | 0.106789 | 0.120192 | 0.108246  | 0.126166  |
| 0.156469 | 0.136946 | 0.146853 | 0.128351 | 0.137383 | 0.13039   | 0.113054  |
| 0.153118 | 0.134178 | 0.143794 | 0.126748 | 0.133741 | 0.128788  | 0.112908  |
| 0.161568 | 0.115822 | 0.133304 | 0.106352 | 0.129662 | 0.131993  | 0.14088   |
| 0.232663 | 0.223339 | 0.223339 | 0.224359 | 0.231935 | 0.213578  | 0.190122  |
| 0.166521 | 0.151078 | 0.158362 | 0.144522 | 0.14831  | 0.141608  | 0.134178  |
| 0.163753 | 0.136072 | 0.146562 | 0.129516 | 0.130682 | 0.13039   | 0.143065  |
| 0.157197 | 0.129225 | 0.141754 | 0.128788 | 0.136364 | 0.128788  | 0.136801  |
| 0.226544 | 0.221008 | 0.219551 | 0.219114 | 0.226399 | 0.21183   | 0.185752  |
| 0.152535 | 0.123397 | 0.131847 | 0.120921 | 0.133159 | 0.132576  | 0.105041  |
| 0.161713 | 0.129371 | 0.140152 | 0.126894 | 0.128642 | 0.129808  | 0.136655  |
| 0.157051 | 0.130828 | 0.143648 | 0.119318 | 0.137675 | 0.130682  | 0.144231  |
| 0.15778  | 0.121941 | 0.126603 | 0.123252 | 0.138986 | 0.113928  | 0.139423  |
| 0.259178 | 0.258013 | 0.254516 | 0.260198 | 0.262238 | 0.244755  | 0.225962  |
| 0.148601 | 0.131119 | 0.134907 | 0.13447  | 0.130973 | 0.127477  | 0.0909091 |
| 0.163462 | 0.113636 | 0.12704  | 0.106206 | 0.126894 | 0.128351  | 0.138695  |
| 0.147145 | 0.133741 | 0.148601 | 0.122523 | 0.131556 | 0.128351  | 0.146562  |
| 0.144231 | 0.129371 | 0.151224 | 0.122232 | 0.133596 | 0.125728  | 0.140152  |
| 0.148893 | 0.13345  | 0.136072 | 0.135635 | 0.137966 | 0.12602   | 0.0888695 |
| 0.153846 | 0.136946 | 0.144522 | 0.135927 | 0.143502 | 0.132721  | 0.106352  |
| 0.162005 | 0.113928 | 0.128497 | 0.109411 | 0.130099 | 0.129808  | 0.138695  |
| 0.154283 | 0.135344 | 0.144085 | 0.123834 | 0.13141  | 0.125874  | 0.112617  |
| 0.159382 | 0.137238 | 0.147145 | 0.129808 | 0.13884  | 0.130973  | 0.137821  |
| 0.15676  | 0.117133 | 0.129662 | 0.118735 | 0.133596 | 0.114073  | 0.134324  |
| 0.148747 | 0.129516 | 0.145251 | 0.125    | 0.130828 | 0.125     | 0.109411  |
| 0.159674 | 0.099359 | 0.106643 | 0.108246 | 0.126603 | 0.0916375 | 0.128205  |
| 0.16623  | 0.152535 | 0.159819 | 0.139569 | 0.145688 | 0.128205  | 0.161568  |
| 0.148164 | 0.135927 | 0.14088  | 0.135198 | 0.132867 | 0.132576  | 0.0922203 |
| 0.161859 | 0.132721 | 0.141754 | 0.131993 | 0.134907 | 0.131702  | 0.139714  |
| 0.208479 | 0.199738 | 0.202069 | 0.197844 | 0.207168 | 0.19289   | 0.161859  |
| 0.220134 | 0.213141 | 0.214889 | 0.214452 | 0.219988 | 0.20338   | 0.179924  |
| 0.158071 | 0.121941 | 0.128059 | 0.125291 | 0.141026 | 0.117716  | 0.131556  |
| 0.152826 | 0.117861 | 0.124854 | 0.115385 | 0.132576 | 0.111305  | 0.132721  |
| 0.16215  | 0.140297 | 0.145542 | 0.141026 | 0.143357 | 0.129953  | 0.140006  |
| 0.158362 | 0.110577 | 0.130099 | 0.105769 | 0.129371 | 0.128788  | 0.13447   |
| 0.153555 | 0.132284 | 0.138695 | 0.135927 | 0.133596 | 0.131847  | 0.0909091 |
| 0.153118 | 0.133596 | 0.148747 | 0.130245 | 0.130828 | 0.114802  | 0.148164  |
| 0.241113 | 0.23412  | 0.231789 | 0.23514  | 0.238636 | 0.224359  | 0.197698  |
| 0.15778  | 0.125437 | 0.137092 | 0.121503 | 0.126457 | 0.123834  | 0.132721  |
| 0.218823 | 0.208042 | 0.215035 | 0.208479 | 0.219551 | 0.207896  | 0.182984  |
| 0.150204 | 0.115822 | 0.129808 | 0.101107 | 0.11859  | 0.122669  | 0.129225  |
| 0.158508 | 0.125583 | 0.136655 | 0.118153 | 0.131847 | 0.120775  | 0.137821  |
| 0.155449 | 0.124272 | 0.117279 | 0.120629 | 0.130536 | 0.121795  | 0.121066  |

|          |          |          |          |          |          |           |
|----------|----------|----------|----------|----------|----------|-----------|
| 0.153118 | 0.118735 | 0.125146 | 0.115093 | 0.135198 | 0.114219 | 0.125728  |
| 0.226399 | 0.214744 | 0.221154 | 0.21722  | 0.223339 | 0.208188 | 0.178322  |
| 0.164044 | 0.142191 | 0.155303 | 0.136801 | 0.144085 | 0.137383 | 0.111888  |
| 0.151807 | 0.125    | 0.137529 | 0.113199 | 0.124563 | 0.12398  | 0.138695  |
| 0.156469 | 0.13986  | 0.14831  | 0.131556 | 0.13884  | 0.133013 | 0.118007  |
| 0.153555 | 0.12704  | 0.142483 | 0.128642 | 0.128642 | 0.125728 | 0.140152  |
| 0.157051 | 0.117716 | 0.127914 | 0.118735 | 0.137966 | 0.116696 | 0.131993  |
| 0.149621 | 0.11961  | 0.129516 | 0.10373  | 0.119464 | 0.125583 | 0.126894  |
| 0.158654 | 0.116987 | 0.130973 | 0.11014  | 0.131702 | 0.131119 | 0.130099  |
| 0.161276 | 0.129225 | 0.140589 | 0.129079 | 0.129371 | 0.132867 | 0.141171  |
| 0.152535 | 0.128642 | 0.14088  | 0.122669 | 0.127622 | 0.122669 | 0.107955  |
| 0.151807 | 0.125    | 0.13549  | 0.114073 | 0.125437 | 0.122815 | 0.134615  |
| 0.210227 | 0.196824 | 0.198572 | 0.199301 | 0.208625 | 0.191434 | 0.16419   |
| 0.142774 | 0.134324 | 0.150641 | 0.12602  | 0.133013 | 0.125437 | 0.146562  |
| 0.160693 | 0.141171 | 0.149621 | 0.130828 | 0.134033 | 0.11655  | 0.147582  |
| 0.153555 | 0.132284 | 0.140152 | 0.11757  | 0.13243  | 0.118735 | 0.139277  |
| 0.149913 | 0.133887 | 0.140297 | 0.131993 | 0.136072 | 0.131119 | 0.0852273 |
| 0.156031 | 0.136801 | 0.147873 | 0.127914 | 0.133159 | 0.130245 | 0.115822  |
| 0.150787 | 0.122815 | 0.128642 | 0.104604 | 0.11859  | 0.127914 | 0.135635  |
| 0.144522 | 0.121795 | 0.13345  | 0.119901 | 0.118735 | 0.11757  | 0.116841  |
| 0.159674 | 0.112762 | 0.130828 | 0.108246 | 0.127185 | 0.132139 | 0.145688  |
| 0.15574  | 0.135927 | 0.143211 | 0.126457 | 0.131702 | 0.118007 | 0.138549  |
| 0.139714 | 0.129516 | 0.146416 | 0.120629 | 0.130536 | 0.124126 | 0.139132  |
| 0.15676  | 0.122669 | 0.132284 | 0.11961  | 0.140589 | 0.118735 | 0.134615  |
| 0.159528 | 0.129225 | 0.144668 | 0.122378 | 0.138112 | 0.131119 | 0.145833  |
| 0.165501 | 0.136364 | 0.150058 | 0.131556 | 0.141463 | 0.139714 | 0.155594  |
| 0.147727 | 0.122669 | 0.131119 | 0.12398  | 0.125728 | 0.124272 | 0.0944056 |
| 0.163024 | 0.149621 | 0.154575 | 0.138695 | 0.142483 | 0.140152 | 0.133596  |
| 0.156614 | 0.114948 | 0.128934 | 0.118881 | 0.13549  | 0.116841 | 0.130973  |
| 0.150787 | 0.127768 | 0.136801 | 0.122086 | 0.124126 | 0.109848 | 0.133304  |
| 0.153846 | 0.132867 | 0.144231 | 0.128351 | 0.137675 | 0.124563 | 0.101107  |
| 0.164627 | 0.11451  | 0.134324 | 0.112908 | 0.132721 | 0.135344 | 0.139569  |
| 0.207751 | 0.194347 | 0.197552 | 0.201777 | 0.209936 | 0.196241 | 0.160839  |
| 0.148456 | 0.11553  | 0.135927 | 0.113636 | 0.122669 | 0.122086 | 0.13243   |
| 0.148747 | 0.120775 | 0.134761 | 0.109266 | 0.125583 | 0.113928 | 0.123397  |
| 0.159237 | 0.130682 | 0.137675 | 0.129371 | 0.129079 | 0.128788 | 0.140589  |
| 0.200903 | 0.188666 | 0.189831 | 0.189977 | 0.200466 | 0.18211  | 0.151952  |
| 0.152389 | 0.140152 | 0.148893 | 0.142045 | 0.143502 | 0.142045 | 0.0990676 |
| 0.15472  | 0.148019 | 0.147727 | 0.149038 | 0.142628 | 0.145251 | 0.105186  |
| 0.168852 | 0.15574  | 0.158654 | 0.142191 | 0.148019 | 0.129953 | 0.16215   |
| 0.141754 | 0.127768 | 0.133013 | 0.12296  | 0.124417 | 0.122669 | 0.0948427 |
| 0.155303 | 0.135198 | 0.147145 | 0.129516 | 0.135344 | 0.129225 | 0.112762  |
| 0.227127 | 0.223048 | 0.2213   | 0.222902 | 0.227855 | 0.213869 | 0.184003  |
| 0.158654 | 0.127768 | 0.144085 | 0.131993 | 0.138986 | 0.131119 | 0.135344  |

|          |           |          |          |          |          |           |
|----------|-----------|----------|----------|----------|----------|-----------|
| 0.157051 | 0.140734  | 0.153846 | 0.13447  | 0.136218 | 0.133887 | 0.119172  |
| 0.149476 | 0.125291  | 0.137238 | 0.112034 | 0.124272 | 0.125728 | 0.131119  |
| 0.191434 | 0.176865  | 0.180944 | 0.180216 | 0.191288 | 0.175845 | 0.134907  |
| 0.150058 | 0.123252  | 0.136946 | 0.121941 | 0.128059 | 0.122523 | 0.131702  |
| 0.168852 | 0.151952  | 0.159819 | 0.144522 | 0.156177 | 0.143648 | 0.160693  |
| 0.161859 | 0.111451  | 0.124272 | 0.118881 | 0.132867 | 0.118298 | 0.129516  |
| 0.209936 | 0.198572  | 0.200029 | 0.199301 | 0.207459 | 0.192599 | 0.165064  |
| 0.146707 | 0.127768  | 0.136218 | 0.129079 | 0.132284 | 0.129371 | 0.099796  |
| 0.152244 | 0.112325  | 0.124854 | 0.11014  | 0.121503 | 0.109266 | 0.126603  |
| 0.150641 | 0.131119  | 0.140152 | 0.119027 | 0.128642 | 0.116404 | 0.136072  |
| 0.15778  | 0.122815  | 0.137675 | 0.124126 | 0.130536 | 0.129371 | 0.133304  |
| 0.160985 | 0.126603  | 0.135635 | 0.126457 | 0.132867 | 0.128497 | 0.138258  |
| 0.157197 | 0.132139  | 0.142337 | 0.123252 | 0.13986  | 0.121503 | 0.135052  |
| 0.157634 | 0.11859   | 0.121212 | 0.116113 | 0.134178 | 0.113491 | 0.133741  |
| 0.208188 | 0.199738  | 0.200029 | 0.197261 | 0.207459 | 0.191725 | 0.16419   |
| 0.1588   | 0.131119  | 0.146853 | 0.126894 | 0.136509 | 0.129225 | 0.144522  |
| 0.155449 | 0.125437  | 0.13884  | 0.119172 | 0.134615 | 0.122669 | 0.128351  |
| 0.228438 | 0.22028   | 0.220571 | 0.221008 | 0.228875 | 0.212267 | 0.184149  |
| 0.147145 | 0.132284  | 0.152389 | 0.124854 | 0.130973 | 0.126311 | 0.145688  |
| 0.157197 | 0.11961   | 0.124563 | 0.11655  | 0.134907 | 0.11014  | 0.132721  |
| 0.151078 | 0.116987  | 0.123689 | 0.112471 | 0.130245 | 0.110723 | 0.130682  |
| 0.160256 | 0.142191  | 0.149476 | 0.138258 | 0.143794 | 0.133596 | 0.129371  |
| 0.208042 | 0.200466  | 0.199009 | 0.200612 | 0.204108 | 0.192162 | 0.164336  |
| 0.161276 | 0.116113  | 0.130099 | 0.108392 | 0.130828 | 0.130245 | 0.142337  |
| 0.162733 | 0.133596  | 0.149038 | 0.126748 | 0.139277 | 0.134615 | 0.153409  |
| 0.159237 | 0.119318  | 0.121649 | 0.115385 | 0.131702 | 0.112179 | 0.132721  |
| 0.157488 | 0.115822  | 0.125146 | 0.116259 | 0.134615 | 0.111888 | 0.131556  |
| 0.154138 | 0.117133  | 0.125    | 0.116113 | 0.135927 | 0.10912  | 0.129371  |
| 0.151078 | 0.133013  | 0.141171 | 0.124126 | 0.131702 | 0.12704  | 0.116404  |
| 0.152972 | 0.10169   | 0.118298 | 0.107372 | 0.122523 | 0.109703 | 0.128497  |
| 0.148019 | 0.131993  | 0.136946 | 0.13039  | 0.130682 | 0.128642 | 0.0932401 |
| 0.157634 | 0.142774  | 0.15035  | 0.128642 | 0.138258 | 0.120775 | 0.147727  |
| 0.148019 | 0.130828  | 0.138986 | 0.125728 | 0.130099 | 0.127477 | 0.0955711 |
| 0.156323 | 0.131556  | 0.144376 | 0.130245 | 0.12704  | 0.130245 | 0.147873  |
| 0.212704 | 0.203089  | 0.208042 | 0.205565 | 0.212558 | 0.200612 | 0.167249  |
| 0.152535 | 0.127185  | 0.143502 | 0.122378 | 0.131993 | 0.126457 | 0.14292   |
| 0.15472  | 0.13986   | 0.151807 | 0.133887 | 0.137383 | 0.13243  | 0.125291  |
| 0.157488 | 0.115822  | 0.123397 | 0.115676 | 0.131119 | 0.111305 | 0.133013  |
| 0.152389 | 0.0984848 | 0.117133 | 0.106498 | 0.121649 | 0.106498 | 0.125291  |
| 0.151807 | 0.124417  | 0.134033 | 0.121649 | 0.140297 | 0.121649 | 0.119464  |
| 0.159237 | 0.114365  | 0.133304 | 0.107517 | 0.126166 | 0.130828 | 0.140006  |
| 0.160111 | 0.138258  | 0.144959 | 0.132284 | 0.142191 | 0.129953 | 0.143211  |
| 0.155886 | 0.136364  | 0.145105 | 0.124272 | 0.135052 | 0.121358 | 0.140443  |
| 0.159674 | 0.109557  | 0.116841 | 0.108537 | 0.127768 | 0.120775 | 0.124709  |

|          |          |          |          |          |           |           |
|----------|----------|----------|----------|----------|-----------|-----------|
| 0.153409 | 0.106206 | 0.118153 | 0.104604 | 0.123834 | 0.114219  | 0.120192  |
| 0.155303 | 0.111014 | 0.124126 | 0.109703 | 0.124563 | 0.111451  | 0.120629  |
| 0.150495 | 0.120192 | 0.133596 | 0.105186 | 0.119755 | 0.126748  | 0.129225  |
| 0.147145 | 0.13549  | 0.137821 | 0.135635 | 0.13447  | 0.133013  | 0.0979021 |
| 0.162442 | 0.115822 | 0.130973 | 0.108392 | 0.129371 | 0.129662  | 0.141463  |
| 0.152681 | 0.127914 | 0.138403 | 0.119901 | 0.128642 | 0.122815  | 0.112179  |
| 0.15676  | 0.113636 | 0.125874 | 0.10708  | 0.123397 | 0.125437  | 0.137529  |
| 0.15574  | 0.120192 | 0.127768 | 0.113928 | 0.13345  | 0.113054  | 0.132139  |
| 0.150058 | 0.112471 | 0.133159 | 0.109703 | 0.121941 | 0.117861  | 0.135198  |
| 0.15676  | 0.120047 | 0.128205 | 0.119027 | 0.132721 | 0.113782  | 0.133741  |
| 0.153846 | 0.124709 | 0.136946 | 0.114948 | 0.128059 | 0.122232  | 0.136946  |
| 0.155886 | 0.131119 | 0.142774 | 0.123397 | 0.132139 | 0.113199  | 0.141317  |
| 0.155886 | 0.124709 | 0.133159 | 0.124563 | 0.131847 | 0.125437  | 0.136946  |
| 0.158945 | 0.105624 | 0.118444 | 0.110723 | 0.126457 | 0.11451   | 0.128642  |
| 0.156177 | 0.117716 | 0.12704  | 0.115822 | 0.13447  | 0.112617  | 0.134615  |
| 0.155886 | 0.132284 | 0.148893 | 0.126311 | 0.133596 | 0.116113  | 0.126166  |
| 0.162733 | 0.132721 | 0.143502 | 0.123252 | 0.141608 | 0.129079  | 0.13447   |
| 0.15472  | 0.112471 | 0.124126 | 0.106498 | 0.129225 | 0.103293  | 0.128497  |
| 0.157051 | 0.120047 | 0.126748 | 0.113491 | 0.13243  | 0.111742  | 0.131993  |
| 0.152244 | 0.136218 | 0.145833 | 0.125583 | 0.133741 | 0.123834  | 0.110868  |
| 0.154866 | 0.121358 | 0.130973 | 0.105769 | 0.123834 | 0.123252  | 0.13039   |
| 0.153992 | 0.135635 | 0.14292  | 0.12704  | 0.133159 | 0.131119  | 0.118735  |
| 0.157488 | 0.124854 | 0.140297 | 0.12296  | 0.130828 | 0.130245  | 0.138549  |
| 0.158945 | 0.106206 | 0.121066 | 0.111014 | 0.126457 | 0.109557  | 0.131847  |
| 0.153992 | 0.127768 | 0.133887 | 0.115676 | 0.131119 | 0.118007  | 0.13039   |
| 0.147436 | 0.117133 | 0.132576 | 0.10708  | 0.119318 | 0.119027  | 0.132867  |
| 0.157488 | 0.136509 | 0.146707 | 0.129662 | 0.135198 | 0.130536  | 0.118735  |
| 0.163316 | 0.135052 | 0.143502 | 0.125    | 0.129662 | 0.129079  | 0.136801  |
| 0.15676  | 0.127622 | 0.136655 | 0.125437 | 0.131556 | 0.127477  | 0.127331  |
| 0.210664 | 0.201632 | 0.203963 | 0.201486 | 0.21081  | 0.197115  | 0.167832  |
| 0.190268 | 0.177739 | 0.181235 | 0.173805 | 0.188083 | 0.170017  | 0.138695  |
| 0.148601 | 0.131702 | 0.139277 | 0.128642 | 0.131847 | 0.127477  | 0.0949883 |
| 0.159237 | 0.124272 | 0.133887 | 0.120047 | 0.138695 | 0.123252  | 0.128059  |
| 0.156906 | 0.148164 | 0.150495 | 0.150641 | 0.144522 | 0.150058  | 0.11116   |
| 0.162587 | 0.138112 | 0.147436 | 0.127768 | 0.141171 | 0.131265  | 0.142191  |
| 0.154575 | 0.128934 | 0.136218 | 0.123252 | 0.140443 | 0.120921  | 0.128059  |
| 0.161713 | 0.127622 | 0.13549  | 0.12398  | 0.137675 | 0.117279  | 0.122669  |
| 0.160839 | 0.101107 | 0.111305 | 0.109994 | 0.127768 | 0.0957168 | 0.124417  |
| 0.162296 | 0.129662 | 0.140734 | 0.124563 | 0.140297 | 0.124272  | 0.134033  |
| 0.221591 | 0.209353 | 0.211976 | 0.210956 | 0.221737 | 0.203963  | 0.175554  |
| 0.162587 | 0.114802 | 0.13345  | 0.110868 | 0.131265 | 0.133596  | 0.145105  |
| 0.151952 | 0.129808 | 0.135635 | 0.123252 | 0.131119 | 0.12704   | 0.109994  |
| 0.156614 | 0.116113 | 0.122232 | 0.111597 | 0.131702 | 0.112471  | 0.125146  |
| 0.157925 | 0.125291 | 0.140734 | 0.125146 | 0.130973 | 0.12398   | 0.139569  |

|          |          |          |          |           |          |           |
|----------|----------|----------|----------|-----------|----------|-----------|
| 0.204983 | 0.188666 | 0.19799  | 0.193473 | 0.205128  | 0.182692 | 0.154866  |
| 0.254808 | 0.254516 | 0.250146 | 0.253205 | 0.258741  | 0.245338 | 0.221008  |
| 0.155449 | 0.135052 | 0.14729  | 0.128497 | 0.131702  | 0.116259 | 0.143211  |
| 0.163607 | 0.127477 | 0.14088  | 0.126166 | 0.140443  | 0.124417 | 0.137966  |
| 0.148164 | 0.131847 | 0.13884  | 0.129953 | 0.131119  | 0.127331 | 0.0919289 |
| 0.159965 | 0.123543 | 0.13345  | 0.124563 | 0.129225  | 0.129516 | 0.138112  |
| 0.15574  | 0.111742 | 0.129225 | 0.104312 | 0.124126  | 0.124126 | 0.142337  |
| 0.155886 | 0.124417 | 0.138986 | 0.116987 | 0.13039   | 0.123689 | 0.136072  |
| 0.153992 | 0.122523 | 0.131847 | 0.120047 | 0.132284  | 0.116841 | 0.110868  |
| 0.158071 | 0.109994 | 0.12602  | 0.104021 | 0.126457  | 0.127622 | 0.136509  |
| 0.15035  | 0.128205 | 0.131702 | 0.122232 | 0.131265  | 0.119027 | 0.107226  |
| 0.161859 | 0.116987 | 0.12398  | 0.112179 | 0.133741  | 0.105186 | 0.133596  |
| 0.161131 | 0.104895 | 0.119755 | 0.112034 | 0.125146  | 0.109994 | 0.128788  |
| 0.15778  | 0.138258 | 0.143502 | 0.124126 | 0.131702  | 0.115676 | 0.140589  |
| 0.155594 | 0.135198 | 0.144522 | 0.128351 | 0.134761  | 0.128934 | 0.114219  |
| 0.144522 | 0.121503 | 0.13141  | 0.112908 | 0.119901  | 0.10708  | 0.132576  |
| 0.152389 | 0.129079 | 0.135781 | 0.105915 | 0.111742  | 0.090472 | 0.150932  |
| 0.160839 | 0.131993 | 0.140734 | 0.135344 | 0.13243   | 0.133596 | 0.149767  |
| 0.156614 | 0.119901 | 0.123689 | 0.113636 | 0.130536  | 0.113636 | 0.131847  |
| 0.145688 | 0.117424 | 0.131993 | 0.115239 | 0.132721  | 0.115239 | 0.110431  |
| 0.1588   | 0.125    | 0.131119 | 0.127477 | 0.13884   | 0.116696 | 0.14831   |
| 0.225379 | 0.214598 | 0.215472 | 0.215618 | 0.225816  | 0.207751 | 0.182838  |
| 0.149767 | 0.125583 | 0.138986 | 0.114365 | 0.124563  | 0.109411 | 0.132867  |
| 0.156031 | 0.103001 | 0.119318 | 0.1081   | 0.125291  | 0.108974 | 0.127477  |
| 0.160402 | 0.124563 | 0.144085 | 0.121795 | 0.132284  | 0.130245 | 0.139423  |
| 0.144814 | 0.133741 | 0.15472  | 0.125728 | 0.133887  | 0.126603 | 0.144814  |
| 0.159091 | 0.12296  | 0.138112 | 0.121649 | 0.124854  | 0.121941 | 0.136072  |
| 0.215909 | 0.210082 | 0.210956 | 0.209645 | 0.217803  | 0.204691 | 0.172786  |
| 0.159819 | 0.137966 | 0.144376 | 0.131702 | 0.136364  | 0.13345  | 0.116696  |
| 0.155012 | 0.118007 | 0.125583 | 0.113199 | 0.135052  | 0.112034 | 0.132576  |
| 0.161276 | 0.119901 | 0.139714 | 0.121795 | 0.0909091 | 0.126748 | 0.135052  |
| 0.156323 | 0.121941 | 0.133887 | 0.121503 | 0.126166  | 0.126166 | 0.137675  |
| 0.15574  | 0.136801 | 0.145833 | 0.125583 | 0.136072  | 0.126748 | 0.111116  |
| 0.151078 | 0.124272 | 0.130973 | 0.11859  | 0.128788  | 0.112762 | 0.114365  |
| 0.157488 | 0.116987 | 0.129225 | 0.115385 | 0.133159  | 0.107809 | 0.13243   |
| 0.14729  | 0.129808 | 0.147873 | 0.119755 | 0.129662  | 0.125    | 0.142045  |
| 0.219697 | 0.208042 | 0.210373 | 0.209062 | 0.216638  | 0.201777 | 0.172786  |
| 0.146416 | 0.127185 | 0.134761 | 0.118881 | 0.129079  | 0.119464 | 0.110286  |
| 0.215909 | 0.203671 | 0.201923 | 0.204691 | 0.216929  | 0.198572 | 0.166667  |
| 0.209062 | 0.204983 | 0.206439 | 0.201923 | 0.212121  | 0.19697  | 0.165064  |
| 0.159528 | 0.13243  | 0.140589 | 0.13345  | 0.13141   | 0.132576 | 0.146707  |
| 0.146125 | 0.135344 | 0.155157 | 0.129079 | 0.133159  | 0.131993 | 0.150204  |
| 0.151661 | 0.112617 | 0.121941 | 0.105769 | 0.123252  | 0.101399 | 0.127477  |
| 0.155012 | 0.128497 | 0.134907 | 0.118153 | 0.125146  | 0.120192 | 0.11655   |

|          |          |          |          |          |          |           |
|----------|----------|----------|----------|----------|----------|-----------|
| 0.153409 | 0.13447  | 0.140006 | 0.123543 | 0.13141  | 0.126748 | 0.114948  |
| 0.159819 | 0.121358 | 0.128642 | 0.117133 | 0.136655 | 0.113054 | 0.134178  |
| 0.154866 | 0.105915 | 0.123397 | 0.102855 | 0.122669 | 0.125583 | 0.135927  |
| 0.160111 | 0.111451 | 0.125728 | 0.106352 | 0.124709 | 0.129662 | 0.140297  |
| 0.159091 | 0.137238 | 0.148601 | 0.129516 | 0.132139 | 0.119318 | 0.139569  |
| 0.161568 | 0.128642 | 0.141754 | 0.124709 | 0.13141  | 0.128497 | 0.137966  |
| 0.150932 | 0.11655  | 0.124126 | 0.114365 | 0.128934 | 0.11116  | 0.129079  |
| 0.156323 | 0.135344 | 0.144959 | 0.128497 | 0.13345  | 0.131993 | 0.11553   |
| 0.150932 | 0.108392 | 0.122378 | 0.101544 | 0.118444 | 0.102418 | 0.124417  |
| 0.153409 | 0.137092 | 0.147582 | 0.128788 | 0.136946 | 0.130828 | 0.122815  |
| 0.147873 | 0.129225 | 0.13447  | 0.12704  | 0.131993 | 0.125291 | 0.0962995 |
| 0.162879 | 0.143357 | 0.155012 | 0.136218 | 0.142045 | 0.134761 | 0.128788  |
| 0.267483 | 0.26486  | 0.265152 | 0.265589 | 0.271416 | 0.254225 | 0.229312  |
| 0.153263 | 0.132284 | 0.140734 | 0.120192 | 0.125728 | 0.130099 | 0.147727  |
| 0.156614 | 0.133304 | 0.14088  | 0.126748 | 0.132576 | 0.127622 | 0.146707  |
| 0.236305 | 0.227273 | 0.223193 | 0.227418 | 0.233537 | 0.218386 | 0.192308  |
| 0.158071 | 0.124563 | 0.138549 | 0.123543 | 0.127622 | 0.126748 | 0.149038  |
| 0.239656 | 0.238491 | 0.238782 | 0.237471 | 0.246212 | 0.228438 | 0.202652  |
| 0.145979 | 0.123252 | 0.137238 | 0.112034 | 0.118153 | 0.119901 | 0.141608  |
| 0.158654 | 0.124854 | 0.128642 | 0.127914 | 0.13986  | 0.118881 | 0.146125  |
| 0.141754 | 0.128351 | 0.145251 | 0.119755 | 0.129079 | 0.124417 | 0.140297  |
| 0.163316 | 0.129808 | 0.143502 | 0.129371 | 0.130245 | 0.133159 | 0.143211  |
| 0.21926  | 0.214598 | 0.214889 | 0.209499 | 0.220862 | 0.204254 | 0.17701   |
| 0.160402 | 0.140589 | 0.151952 | 0.130245 | 0.137821 | 0.13549  | 0.126894  |
| 0.155157 | 0.138258 | 0.143794 | 0.124709 | 0.134615 | 0.128205 | 0.118153  |
| 0.240967 | 0.233392 | 0.233392 | 0.23412  | 0.240239 | 0.224505 | 0.200466  |
| 0.161276 | 0.113782 | 0.130973 | 0.11014  | 0.131993 | 0.132284 | 0.138549  |
| 0.216783 | 0.20542  | 0.210082 | 0.209645 | 0.218677 | 0.202943 | 0.174242  |
| 0.162005 | 0.117133 | 0.129662 | 0.109994 | 0.128934 | 0.130973 | 0.13986   |
| 0.157051 | 0.120047 | 0.125874 | 0.118444 | 0.134178 | 0.116987 | 0.133741  |
| 0.161276 | 0.104749 | 0.118735 | 0.116259 | 0.128497 | 0.115967 | 0.137675  |
| 0.158654 | 0.130973 | 0.140589 | 0.131702 | 0.129953 | 0.13345  | 0.147582  |
| 0.153555 | 0.125    | 0.138695 | 0.119901 | 0.129808 | 0.119027 | 0.13141   |
| 0.18648  | 0.166958 | 0.170455 | 0.164481 | 0.181672 | 0.161568 | 0.13345   |
| 0.150058 | 0.130245 | 0.140734 | 0.11961  | 0.129225 | 0.123397 | 0.110723  |
| 0.148019 | 0.132867 | 0.152972 | 0.122815 | 0.131847 | 0.128059 | 0.142191  |
| 0.157925 | 0.123543 | 0.141317 | 0.121358 | 0.135927 | 0.124272 | 0.142483  |
| 0.151807 | 0.134324 | 0.148893 | 0.130682 | 0.131265 | 0.116696 | 0.1419    |
| 0.21285  | 0.204983 | 0.208188 | 0.205711 | 0.213287 | 0.201632 | 0.171474  |
| 0.156177 | 0.114802 | 0.125    | 0.115822 | 0.134178 | 0.115239 | 0.132284  |
| 0.165938 | 0.130682 | 0.141754 | 0.130245 | 0.137821 | 0.13345  | 0.127768  |
| 0.15035  | 0.117716 | 0.129662 | 0.104458 | 0.121649 | 0.123397 | 0.128497  |
| 0.160111 | 0.109703 | 0.128934 | 0.104021 | 0.122669 | 0.129662 | 0.143794  |
| 0.157634 | 0.120921 | 0.128205 | 0.119901 | 0.134178 | 0.110286 | 0.138112  |

|          |          |          |          |          |           |           |
|----------|----------|----------|----------|----------|-----------|-----------|
| 0.262383 | 0.261801 | 0.261509 | 0.264569 | 0.268357 | 0.250583  | 0.230915  |
| 0.156177 | 0.104895 | 0.118298 | 0.110577 | 0.124272 | 0.106498  | 0.132867  |
| 0.156469 | 0.128497 | 0.136655 | 0.120775 | 0.140006 | 0.128059  | 0.132867  |
| 0.195221 | 0.187063 | 0.190268 | 0.191579 | 0.190414 | 0.179341  | 0.156177  |
| 0.207751 | 0.195221 | 0.200175 | 0.195367 | 0.206439 | 0.189248  | 0.164044  |
| 0.160256 | 0.136946 | 0.142774 | 0.123106 | 0.13243  | 0.11757   | 0.136946  |
| 0.152535 | 0.136218 | 0.142045 | 0.129662 | 0.136072 | 0.126166  | 0.112617  |
| 0.163024 | 0.125728 | 0.139132 | 0.124126 | 0.132576 | 0.127331  | 0.135052  |
| 0.167249 | 0.154138 | 0.161422 | 0.147582 | 0.14933  | 0.144668  | 0.137238  |
| 0.155012 | 0.130828 | 0.143648 | 0.120775 | 0.131556 | 0.114073  | 0.136655  |
| 0.163316 | 0.136218 | 0.144085 | 0.128788 | 0.133159 | 0.120047  | 0.143794  |
| 0.163462 | 0.115676 | 0.135198 | 0.107663 | 0.132721 | 0.133887  | 0.147145  |
| 0.14831  | 0.128788 | 0.1419   | 0.124563 | 0.130099 | 0.124272  | 0.109557  |
| 0.157197 | 0.141171 | 0.149913 | 0.131702 | 0.138986 | 0.131702  | 0.121649  |
| 0.159382 | 0.11859  | 0.134033 | 0.112325 | 0.133013 | 0.129808  | 0.118298  |
| 0.158071 | 0.129516 | 0.137675 | 0.129662 | 0.129953 | 0.127331  | 0.144376  |
| 0.164044 | 0.140734 | 0.149476 | 0.142337 | 0.139423 | 0.140297  | 0.153555  |
| 0.159237 | 0.106498 | 0.121649 | 0.114802 | 0.126748 | 0.11451   | 0.135927  |
| 0.161713 | 0.135781 | 0.139277 | 0.135635 | 0.135635 | 0.135635  | 0.148893  |
| 0.16317  | 0.113345 | 0.132576 | 0.110286 | 0.131265 | 0.135052  | 0.150641  |
| 0.224796 | 0.216638 | 0.218094 | 0.217949 | 0.224068 | 0.20979   | 0.180216  |
| 0.159382 | 0.112762 | 0.123834 | 0.112325 | 0.131265 | 0.110868  | 0.138695  |
| 0.207751 | 0.20134  | 0.203089 | 0.201777 | 0.21285  | 0.199446  | 0.16521   |
| 0.152098 | 0.125583 | 0.142483 | 0.120775 | 0.131847 | 0.120775  | 0.13986   |
| 0.158508 | 0.120921 | 0.129953 | 0.127477 | 0.139714 | 0.113491  | 0.140152  |
| 0.15035  | 0.13141  | 0.137529 | 0.131847 | 0.130099 | 0.127185  | 0.0859557 |
| 0.145542 | 0.124563 | 0.129808 | 0.123834 | 0.129662 | 0.121212  | 0.0977564 |
| 0.15676  | 0.138403 | 0.147145 | 0.128351 | 0.135052 | 0.128934  | 0.115385  |
| 0.15676  | 0.137821 | 0.148019 | 0.128059 | 0.133304 | 0.129808  | 0.115385  |
| 0.1588   | 0.12296  | 0.128205 | 0.120484 | 0.137966 | 0.119027  | 0.130536  |
| 0.145833 | 0.131556 | 0.146999 | 0.122086 | 0.132576 | 0.125583  | 0.14088   |
| 0.148456 | 0.131265 | 0.139132 | 0.134907 | 0.134907 | 0.132576  | 0.090472  |
| 0.16317  | 0.119172 | 0.137238 | 0.11553  | 0.135635 | 0.137383  | 0.144522  |
| 0.260198 | 0.258159 | 0.255536 | 0.261801 | 0.262383 | 0.248106  | 0.226399  |
| 0.155886 | 0.119755 | 0.130828 | 0.119027 | 0.135635 | 0.116404  | 0.134615  |
| 0.206731 | 0.192745 | 0.196533 | 0.19493  | 0.202797 | 0.189977  | 0.158654  |
| 0.210664 | 0.201049 | 0.202506 | 0.197698 | 0.206439 | 0.195076  | 0.166375  |
| 0.164773 | 0.131265 | 0.141171 | 0.12296  | 0.13986  | 0.123543  | 0.132139  |
| 0.157488 | 0.105624 | 0.120775 | 0.113345 | 0.125    | 0.11014   | 0.130682  |
| 0.159528 | 0.126894 | 0.129225 | 0.122378 | 0.141608 | 0.116841  | 0.142045  |
| 0.152826 | 0.130099 | 0.141754 | 0.12296  | 0.131993 | 0.121503  | 0.113782  |
| 0.157925 | 0.101399 | 0.115967 | 0.108829 | 0.12602  | 0.0992133 | 0.116259  |
| 0.160839 | 0.114802 | 0.127622 | 0.109411 | 0.130973 | 0.130099  | 0.139569  |
| 0.156614 | 0.132139 | 0.138549 | 0.123543 | 0.134033 | 0.122086  | 0.117861  |

|          |          |          |          |          |          |           |
|----------|----------|----------|----------|----------|----------|-----------|
| 0.15778  | 0.142337 | 0.150495 | 0.13141  | 0.142191 | 0.135781 | 0.125728  |
| 0.157634 | 0.120921 | 0.125874 | 0.11757  | 0.134761 | 0.114073 | 0.132284  |
| 0.160548 | 0.141608 | 0.148893 | 0.133013 | 0.142337 | 0.135344 | 0.123252  |
| 0.157197 | 0.127477 | 0.138258 | 0.122669 | 0.128205 | 0.120047 | 0.136509  |
| 0.152244 | 0.131556 | 0.137383 | 0.131993 | 0.131119 | 0.132867 | 0.092803  |
| 0.160548 | 0.127331 | 0.139277 | 0.127477 | 0.133304 | 0.131847 | 0.136946  |
| 0.164773 | 0.117279 | 0.131847 | 0.109266 | 0.133159 | 0.13549  | 0.152535  |
| 0.162005 | 0.115676 | 0.123834 | 0.118735 | 0.136218 | 0.109703 | 0.136946  |
| 0.153263 | 0.117716 | 0.125874 | 0.113782 | 0.13447  | 0.110577 | 0.12296   |
| 0.163462 | 0.136946 | 0.15035  | 0.131265 | 0.140297 | 0.137092 | 0.155012  |
| 0.204108 | 0.195367 | 0.198864 | 0.193473 | 0.20542  | 0.189977 | 0.161859  |
| 0.162005 | 0.145688 | 0.152972 | 0.135344 | 0.142045 | 0.133887 | 0.129371  |
| 0.157343 | 0.132867 | 0.148019 | 0.129225 | 0.133887 | 0.12602  | 0.114219  |
| 0.146999 | 0.127477 | 0.137675 | 0.127914 | 0.129079 | 0.125874 | 0.0910548 |
| 0.143065 | 0.122669 | 0.126166 | 0.116113 | 0.123397 | 0.115239 | 0.0955711 |
| 0.160402 | 0.128059 | 0.138549 | 0.123834 | 0.129953 | 0.125291 | 0.137966  |
| 0.162587 | 0.128497 | 0.141026 | 0.129225 | 0.130099 | 0.133013 | 0.141026  |
| 0.209936 | 0.200612 | 0.203234 | 0.202214 | 0.212704 | 0.196678 | 0.16623   |
| 0.151661 | 0.131847 | 0.137092 | 0.122378 | 0.136946 | 0.122378 | 0.107372  |
| 0.154138 | 0.118881 | 0.128205 | 0.115822 | 0.124854 | 0.112617 | 0.111305  |
| 0.155012 | 0.136364 | 0.150932 | 0.130973 | 0.135635 | 0.130099 | 0.118298  |
| 0.208188 | 0.204691 | 0.207314 | 0.203671 | 0.209207 | 0.19697  | 0.168852  |
| 0.159965 | 0.105769 | 0.121503 | 0.113199 | 0.127185 | 0.112617 | 0.121212  |
| 0.161568 | 0.116696 | 0.132721 | 0.106061 | 0.130536 | 0.131702 | 0.14729   |
| 0.155157 | 0.140589 | 0.145542 | 0.129371 | 0.137238 | 0.130828 | 0.117279  |
| 0.151515 | 0.126166 | 0.138112 | 0.120775 | 0.128351 | 0.114365 | 0.141026  |
| 0.20542  | 0.196678 | 0.199301 | 0.200321 | 0.207314 | 0.19391  | 0.164044  |
| 0.160256 | 0.109557 | 0.13141  | 0.108246 | 0.126894 | 0.129225 | 0.136655  |
| 0.149476 | 0.123543 | 0.13345  | 0.116987 | 0.130682 | 0.12398  | 0.132867  |
| 0.153263 | 0.110431 | 0.127331 | 0.112034 | 0.129225 | 0.116404 | 0.116841  |
| 0.157634 | 0.132867 | 0.143357 | 0.129516 | 0.136801 | 0.130099 | 0.108683  |
| 0.144959 | 0.133304 | 0.149913 | 0.120629 | 0.13345  | 0.126457 | 0.143211  |
| 0.16215  | 0.114073 | 0.131847 | 0.108392 | 0.129953 | 0.136072 | 0.150495  |
| 0.156906 | 0.119027 | 0.124854 | 0.118007 | 0.131993 | 0.110723 | 0.134178  |
| 0.160111 | 0.130099 | 0.142045 | 0.119755 | 0.135198 | 0.124126 | 0.138258  |
| 0.166375 | 0.15472  | 0.157634 | 0.144668 | 0.146416 | 0.129225 | 0.158508  |
| 0.248543 | 0.244464 | 0.249709 | 0.244901 | 0.250728 | 0.235868 | 0.212121  |
| 0.166084 | 0.120921 | 0.130245 | 0.116987 | 0.13884  | 0.112617 | 0.142774  |
| 0.145979 | 0.133741 | 0.152098 | 0.124563 | 0.137092 | 0.127185 | 0.143939  |
| 0.152826 | 0.130973 | 0.138549 | 0.122086 | 0.132576 | 0.124709 | 0.10708   |
| 0.155886 | 0.134907 | 0.147145 | 0.125437 | 0.143502 | 0.122815 | 0.136655  |
| 0.144668 | 0.121358 | 0.133596 | 0.114802 | 0.12296  | 0.118298 | 0.126311  |
| 0.152535 | 0.125146 | 0.139714 | 0.124417 | 0.121795 | 0.121795 | 0.135344  |
| 0.15676  | 0.13345  | 0.142483 | 0.130682 | 0.13884  | 0.126894 | 0.113928  |



|          |           |          |          |          |           |           |
|----------|-----------|----------|----------|----------|-----------|-----------|
| 0.163607 | 0.114948  | 0.135052 | 0.108392 | 0.132867 | 0.133159  | 0.145251  |
| 0.159237 | 0.128642  | 0.142337 | 0.120047 | 0.136364 | 0.122378  | 0.134178  |
| 0.245629 | 0.244464  | 0.246212 | 0.246941 | 0.25102  | 0.23616   | 0.214744  |
| 0.156323 | 0.103875  | 0.119027 | 0.107226 | 0.120921 | 0.108974  | 0.121358  |
| 0.146999 | 0.116113  | 0.130973 | 0.106352 | 0.119755 | 0.11859   | 0.132721  |
| 0.155886 | 0.11655   | 0.12296  | 0.114948 | 0.131556 | 0.110577  | 0.129079  |
| 0.158071 | 0.139132  | 0.151952 | 0.13345  | 0.137238 | 0.12296   | 0.149038  |
| 0.167978 | 0.127185  | 0.133013 | 0.125    | 0.140443 | 0.117133  | 0.149038  |
| 0.158362 | 0.125437  | 0.132721 | 0.126457 | 0.134907 | 0.120338  | 0.125437  |
| 0.154575 | 0.136801  | 0.14933  | 0.129371 | 0.136364 | 0.130245  | 0.114073  |
| 0.153555 | 0.125583  | 0.138986 | 0.115822 | 0.126603 | 0.113782  | 0.130536  |
| 0.244464 | 0.238345  | 0.237471 | 0.24053  | 0.245775 | 0.230915  | 0.205711  |
| 0.157634 | 0.138986  | 0.147436 | 0.132139 | 0.137092 | 0.13039   | 0.117133  |
| 0.160985 | 0.113199  | 0.13243  | 0.107226 | 0.128205 | 0.133159  | 0.140589  |
| 0.157488 | 0.121649  | 0.138549 | 0.110431 | 0.131702 | 0.122086  | 0.134178  |
| 0.148893 | 0.134033  | 0.143939 | 0.120484 | 0.126894 | 0.110577  | 0.1419    |
| 0.152098 | 0.127622  | 0.137529 | 0.111451 | 0.125146 | 0.12602   | 0.1419    |
| 0.15472  | 0.117133  | 0.124126 | 0.119318 | 0.132139 | 0.113199  | 0.136072  |
| 0.159382 | 0.115093  | 0.12704  | 0.110577 | 0.129808 | 0.132139  | 0.143357  |
| 0.16623  | 0.118735  | 0.134178 | 0.111305 | 0.129662 | 0.134907  | 0.150787  |
| 0.159237 | 0.114656  | 0.124854 | 0.108683 | 0.127331 | 0.128205  | 0.141171  |
| 0.158217 | 0.116841  | 0.123543 | 0.116987 | 0.134178 | 0.112617  | 0.136072  |
| 0.145396 | 0.133741  | 0.15035  | 0.125146 | 0.131847 | 0.126894  | 0.148601  |
| 0.14729  | 0.137675  | 0.15778  | 0.132576 | 0.137529 | 0.130536  | 0.153409  |
| 0.148456 | 0.133013  | 0.136218 | 0.134907 | 0.132867 | 0.134907  | 0.0954254 |
| 0.153118 | 0.137675  | 0.144376 | 0.134907 | 0.134907 | 0.134907  | 0.0977564 |
| 0.148019 | 0.137529  | 0.154429 | 0.131556 | 0.133013 | 0.129225  | 0.152098  |
| 0.159091 | 0.10169   | 0.111597 | 0.105332 | 0.121649 | 0.0945513 | 0.123834  |
| 0.157488 | 0.13039   | 0.140006 | 0.115676 | 0.127914 | 0.138403  | 0.145542  |
| 0.161713 | 0.117716  | 0.137238 | 0.116696 | 0.144085 | 0.131265  | 0.152098  |
| 0.222611 | 0.215909  | 0.221445 | 0.215763 | 0.223048 | 0.206731  | 0.180653  |
| 0.162296 | 0.131993  | 0.145688 | 0.125146 | 0.14292  | 0.125146  | 0.134615  |
| 0.150932 | 0.123252  | 0.13141  | 0.114073 | 0.12602  | 0.121649  | 0.137238  |
| 0.158362 | 0.125146  | 0.129808 | 0.121503 | 0.136946 | 0.112762  | 0.134178  |
| 0.238345 | 0.233392  | 0.233683 | 0.230624 | 0.240822 | 0.223048  | 0.197844  |
| 0.225524 | 0.224359  | 0.222902 | 0.219843 | 0.225962 | 0.214015  | 0.189103  |
| 0.161276 | 0.118153  | 0.133887 | 0.110723 | 0.132867 | 0.134324  | 0.148164  |
| 0.260198 | 0.257576  | 0.257867 | 0.258887 | 0.265589 | 0.248106  | 0.222902  |
| 0.15676  | 0.0990676 | 0.110431 | 0.105041 | 0.124272 | 0.0933858 | 0.122378  |
| 0.168124 | 0.134907  | 0.136072 | 0.126311 | 0.146125 | 0.125146  | 0.155886  |
| 0.155303 | 0.103438  | 0.118881 | 0.107663 | 0.125437 | 0.108537  | 0.130245  |
| 0.148164 | 0.131556  | 0.155449 | 0.12704  | 0.13549  | 0.129371  | 0.148456  |
| 0.206585 | 0.196678  | 0.201049 | 0.195076 | 0.207896 | 0.193328  | 0.164044  |
| 0.161276 | 0.118735  | 0.137675 | 0.112762 | 0.136364 | 0.127622  | 0.146125  |

|          |           |          |          |          |          |           |
|----------|-----------|----------|----------|----------|----------|-----------|
| 0.214889 | 0.204983  | 0.206439 | 0.206294 | 0.215618 | 0.198718 | 0.168269  |
| 0.161859 | 0.123106  | 0.135344 | 0.122086 | 0.134615 | 0.115967 | 0.13884   |
| 0.156323 | 0.118153  | 0.131556 | 0.115676 | 0.129953 | 0.125    | 0.109994  |
| 0.163024 | 0.115822  | 0.131265 | 0.120629 | 0.127622 | 0.112179 | 0.137383  |
| 0.149038 | 0.121941  | 0.133596 | 0.122669 | 0.129662 | 0.120629 | 0.119901  |
| 0.150641 | 0.112762  | 0.122669 | 0.110868 | 0.129516 | 0.105915 | 0.128788  |
| 0.160839 | 0.128497  | 0.13549  | 0.121358 | 0.135344 | 0.122523 | 0.13141   |
| 0.153846 | 0.0987762 | 0.118298 | 0.10912  | 0.117861 | 0.10708  | 0.120921  |
| 0.153118 | 0.133013  | 0.143502 | 0.122378 | 0.129953 | 0.125583 | 0.11553   |
| 0.150932 | 0.119755  | 0.133159 | 0.103293 | 0.121649 | 0.126894 | 0.127331  |
| 0.155303 | 0.113928  | 0.123834 | 0.108246 | 0.131556 | 0.108246 | 0.132284  |
| 0.158654 | 0.0995047 | 0.118735 | 0.107517 | 0.122086 | 0.109557 | 0.128351  |
| 0.149184 | 0.127622  | 0.131119 | 0.12602  | 0.133013 | 0.123397 | 0.0912005 |
| 0.159674 | 0.1419    | 0.153555 | 0.133304 | 0.137383 | 0.133887 | 0.125874  |
| 0.145542 | 0.124272  | 0.130973 | 0.124709 | 0.125583 | 0.122669 | 0.0945513 |
| 0.153846 | 0.125291  | 0.13549  | 0.114656 | 0.128059 | 0.125146 | 0.136655  |
| 0.153409 | 0.114073  | 0.122232 | 0.112179 | 0.127622 | 0.107517 | 0.130973  |
| 0.161276 | 0.114656  | 0.131265 | 0.109848 | 0.132576 | 0.127622 | 0.13243   |
| 0.143794 | 0.13039   | 0.146707 | 0.121503 | 0.132284 | 0.125583 | 0.142337  |
| 0.158508 | 0.128497  | 0.137821 | 0.127768 | 0.131556 | 0.128351 | 0.140443  |
| 0.143939 | 0.128788  | 0.136072 | 0.127185 | 0.127768 | 0.128351 | 0.0967366 |
| 0.151661 | 0.135344  | 0.144376 | 0.127331 | 0.132867 | 0.127914 | 0.114073  |
| 0.159965 | 0.138986  | 0.148601 | 0.133304 | 0.137383 | 0.131265 | 0.126166  |
| 0.162005 | 0.147727  | 0.153555 | 0.140006 | 0.143211 | 0.136509 | 0.132284  |
| 0.153118 | 0.108246  | 0.118153 | 0.100233 | 0.120338 | 0.118881 | 0.132721  |
| 0.158945 | 0.11961   | 0.128934 | 0.117133 | 0.132284 | 0.115385 | 0.134178  |
| 0.151224 | 0.118007  | 0.136072 | 0.11757  | 0.120484 | 0.116404 | 0.126166  |
| 0.144522 | 0.137821  | 0.157051 | 0.133304 | 0.134178 | 0.13243  | 0.151807  |
| 0.159237 | 0.105332  | 0.121358 | 0.109848 | 0.123834 | 0.111305 | 0.13243   |
| 0.163024 | 0.140006  | 0.14729  | 0.140734 | 0.139277 | 0.141608 | 0.158654  |
| 0.168561 | 0.129225  | 0.132139 | 0.133159 | 0.145396 | 0.121795 | 0.151661  |
| 0.1588   | 0.138112  | 0.148601 | 0.125728 | 0.133013 | 0.118444 | 0.149184  |
| 0.156323 | 0.118444  | 0.125728 | 0.11655  | 0.126748 | 0.115385 | 0.126603  |
| 0.150932 | 0.127622  | 0.138986 | 0.121066 | 0.127185 | 0.110286 | 0.133159  |
| 0.14831  | 0.129371  | 0.137529 | 0.133304 | 0.129225 | 0.129516 | 0.0926573 |
| 0.21926  | 0.216346  | 0.216638 | 0.214744 | 0.222902 | 0.209499 | 0.182255  |
| 0.153409 | 0.123106  | 0.139423 | 0.115967 | 0.129371 | 0.129079 | 0.134761  |
| 0.165793 | 0.114802  | 0.13345  | 0.123106 | 0.129808 | 0.114365 | 0.138403  |
| 0.144376 | 0.129516  | 0.148747 | 0.120921 | 0.129371 | 0.124417 | 0.143502  |
| 0.142774 | 0.124417  | 0.134324 | 0.12398  | 0.129808 | 0.123397 | 0.100524  |
| 0.165647 | 0.130973  | 0.14088  | 0.125874 | 0.136946 | 0.121212 | 0.139714  |
| 0.157197 | 0.136218  | 0.139714 | 0.125    | 0.128205 | 0.128788 | 0.137383  |
| 0.158508 | 0.134907  | 0.1419   | 0.125146 | 0.129225 | 0.129516 | 0.138403  |
| 0.154283 | 0.133596  | 0.142045 | 0.121795 | 0.129079 | 0.116259 | 0.143211  |

|          |           |          |           |           |           |          |
|----------|-----------|----------|-----------|-----------|-----------|----------|
| 0.150204 | 0.117279  | 0.131847 | 0.103438  | 0.119464  | 0.121795  | 0.130973 |
| 0.145251 | 0.135635  | 0.152244 | 0.124417  | 0.131702  | 0.12704   | 0.151078 |
| 0.160693 | 0.111116  | 0.131556 | 0.115093  | 0.126166  | 0.111888  | 0.132139 |
| 0.162587 | 0.118007  | 0.129371 | 0.114948  | 0.136218  | 0.110286  | 0.137529 |
| 0.191288 | 0.185169  | 0.190705 | 0.18007   | 0.194056  | 0.180944  | 0.168561 |
| 0.156906 | 0.133596  | 0.144085 | 0.128205  | 0.132867  | 0.126166  | 0.116113 |
| 0.145396 | 0.13549   | 0.153555 | 0.128351  | 0.136218  | 0.129225  | 0.134907 |
| 0.153409 | 0.110577  | 0.125146 | 0.106935  | 0.127622  | 0.114802  | 0.14292  |
| 0.151224 | 0.125874  | 0.138403 | 0.114656  | 0.124854  | 0.114948  | 0.12704  |
| 0.150932 | 0.110431  | 0.124417 | 0.101836  | 0.118153  | 0.106206  | 0.124709 |
| 0.15472  | 0.111597  | 0.118881 | 0.105041  | 0.122232  | 0.102418  | 0.128205 |
| 0.15472  | 0.113345  | 0.129079 | 0.108537  | 0.120192  | 0.108246  | 0.128497 |
| 0.143648 | 0.111597  | 0.136655 | 0.102127  | 0.128642  | 0.119901  | 0.13986  |
| 0.15472  | 0.126457  | 0.129079 | 0.122815  | 0.137383  | 0.113491  | 0.106935 |
| 0.160985 | 0.133013  | 0.142628 | 0.124126  | 0.127622  | 0.130828  | 0.146707 |
| 0.152972 | 0.120921  | 0.128205 | 0.11553   | 0.121649  | 0.112325  | 0.125291 |
| 0.161568 | 0.116987  | 0.131556 | 0.111597  | 0.125583  | 0.119464  | 0.126311 |
| 0.162005 | 0.0979021 | 0.134033 | 0.099796  | 0.13884   | 0.136218  | 0.155886 |
| 0.1588   | 0.106643  | 0.118298 | 0.104749  | 0.118735  | 0.106498  | 0.131119 |
| 0.16317  | 0.122086  | 0.138986 | 0.124272  | 0.0965909 | 0.123397  | 0.131993 |
| 0.158217 | 0.106352  | 0.116841 | 0.105624  | 0.121066  | 0.107372  | 0.128205 |
| 0.155886 | 0.107517  | 0.121212 | 0.101253  | 0.118735  | 0.105915  | 0.130536 |
| 0.151515 | 0.110431  | 0.122378 | 0.108829  | 0.106789  | 0.0933858 | 0.128788 |
| 0.158945 | 0.112617  | 0.120484 | 0.118881  | 0.127331  | 0.112762  | 0.140589 |
| 0.154283 | 0.108246  | 0.122523 | 0.103438  | 0.126166  | 0.109266  | 0.132139 |
| 0.16215  | 0.13447   | 0.106789 | 0.133159  | 0.144231  | 0.144522  | 0.160111 |
| 0.159237 | 0.128934  | 0.114948 | 0.133741  | 0.144231  | 0.138986  | 0.143502 |
| 0.155449 | 0.111742  | 0.117861 | 0.109266  | 0.125583  | 0.107517  | 0.129808 |
| 0.166667 | 0.129079  | 0.141026 | 0.133013  | 0.132721  | 0.143211  | 0.155303 |
| 0.154138 | 0.133159  | 0.143939 | 0.131847  | 0.138258  | 0.123689  | 0.119755 |
| 0.166667 | 0.120629  | 0.131119 | 0.120775  | 0.144959  | 0.127768  | 0.141608 |
| 0.149767 | 0.112762  | 0.120921 | 0.114948  | 0.128351  | 0.103875  | 0.128497 |
| 0.159819 | 0.145542  | 0.134761 | 0.146562  | 0.1419    | 0.141608  | 0.160693 |
| 0.160402 | 0.134761  | 0.147582 | 0.123252  | 0.131702  | 0.126748  | 0.14933  |
| 0.145542 | 0.122815  | 0.14729  | 0.119755  | 0.131993  | 0.136364  | 0.147582 |
| 0.14933  | 0.119027  | 0.126894 | 0.117716  | 0.128497  | 0.119172  | 0.125146 |
| 0.152098 | 0.0996503 | 0.114219 | 0.0989219 | 0.125146  | 0.10912   | 0.129953 |
| 0.161568 | 0.10912   | 0.119901 | 0.109266  | 0.126457  | 0.107226  | 0.132139 |
| 0.136364 | 0.111014  | 0.137821 | 0.102127  | 0.124854  | 0.125437  | 0.141317 |
| 0.15472  | 0.11014   | 0.119464 | 0.116696  | 0.125437  | 0.120775  | 0.137821 |
| 0.16215  | 0.117861  | 0.135052 | 0.129371  | 0.119172  | 0.115093  | 0.144668 |
| 0.15778  | 0.118735  | 0.109703 | 0.128205  | 0.130828  | 0.119172  | 0.131556 |
| 0.140297 | 0.113491  | 0.126311 | 0.104021  | 0.115967  | 0.112471  | 0.120192 |
| 0.160256 | 0.103147  | 0.114802 | 0.111451  | 0.125728  | 0.108829  | 0.134324 |

|          |          |          |          |          |           |          |
|----------|----------|----------|----------|----------|-----------|----------|
| 0.158654 | 0.106206 | 0.118153 | 0.11859  | 0.127331 | 0.111305  | 0.139714 |
| 0.156031 | 0.100087 | 0.119027 | 0.109848 | 0.125    | 0.116841  | 0.131847 |
| 0.162587 | 0.109848 | 0.12296  | 0.114073 | 0.130099 | 0.112034  | 0.141608 |
| 0.149184 | 0.113928 | 0.120921 | 0.11116  | 0.127477 | 0.10912   | 0.126166 |
| 0.157197 | 0.12602  | 0.13447  | 0.125583 | 0.134324 | 0.120338  | 0.123689 |
| 0.158362 | 0.112908 | 0.119318 | 0.111597 | 0.133159 | 0.112179  | 0.131847 |
| 0.152535 | 0.100379 | 0.108829 | 0.105186 | 0.120629 | 0.0906177 | 0.121941 |
| 0.15574  | 0.106789 | 0.118444 | 0.113636 | 0.121503 | 0.108392  | 0.135344 |
| 0.157343 | 0.127331 | 0.13141  | 0.121941 | 0.132721 | 0.120192  | 0.124417 |
| 0.158362 | 0.12398  | 0.126894 | 0.106935 | 0.128497 | 0.113636  | 0.128642 |
| 0.158654 | 0.131265 | 0.142045 | 0.131119 | 0.140152 | 0.130828  | 0.123689 |
| 0.150787 | 0.116987 | 0.124854 | 0.11451  | 0.124709 | 0.108974  | 0.119901 |
| 0.163753 | 0.113345 | 0.136946 | 0.126603 | 0.135927 | 0.121649  | 0.138986 |

| TDr_1491 | TDr_1492  | TDr_1495 | TDr_1499 | TDr_1500  | TDr_1505 | TDr_1509  |
|----------|-----------|----------|----------|-----------|----------|-----------|
| 0.146562 | 0.120484  | 0.120047 | 0.133596 | 0.121941  | 0.123834 | 0.137383  |
| 0.133887 | 0.107809  | 0.119318 | 0.142191 | 0.128788  | 0.122523 | 0.126457  |
| 0.133013 | 0.102273  | 0.122523 | 0.138986 | 0.124417  | 0.123689 | 0.129371  |
| 0.143211 | 0.0926573 | 0.106206 | 0.139277 | 0.0932401 | 0.127768 | 0.131119  |
| 0.135052 | 0.134033  | 0.141171 | 0.16317  | 0.157343  | 0.135052 | 0.0973193 |
| 0.137966 | 0.126166  | 0.139714 | 0.153263 | 0.149476  | 0.135052 | 0.132867  |
| 0.150058 | 0.126311  | 0.136946 | 0.151952 | 0.148164  | 0.110431 | 0.137675  |
| 0.135781 | 0.108537  | 0.115676 | 0.139423 | 0.129225  | 0.121795 | 0.125728  |
| 0.135635 | 0.110431  | 0.121358 | 0.135198 | 0.128788  | 0.112034 | 0.126457  |
| 0.138112 | 0.119901  | 0.13141  | 0.146416 | 0.131847  | 0.126748 | 0.126894  |
| 0.147873 | 0.128788  | 0.125146 | 0.123834 | 0.128205  | 0.11553  | 0.134907  |
| 0.13549  | 0.108537  | 0.122669 | 0.134761 | 0.134178  | 0.116841 | 0.126603  |
| 0.142483 | 0.11553   | 0.127622 | 0.140006 | 0.136509  | 0.121212 | 0.127477  |
| 0.155449 | 0.131702  | 0.116696 | 0.123252 | 0.115093  | 0.14933  | 0.145396  |
| 0.141317 | 0.129225  | 0.135781 | 0.153118 | 0.149038  | 0.138695 | 0.136801  |
| 0.140297 | 0.122378  | 0.133596 | 0.142483 | 0.142191  | 0.101544 | 0.139277  |
| 0.140734 | 0.118735  | 0.130828 | 0.131556 | 0.132721  | 0.113345 | 0.127185  |
| 0.140006 | 0.140443  | 0.148747 | 0.168415 | 0.163753  | 0.147582 | 0.127914  |
| 0.133887 | 0.106061  | 0.120775 | 0.137238 | 0.125583  | 0.11961  | 0.127622  |
| 0.21081  | 0.197844  | 0.177885 | 0.163753 | 0.161713  | 0.214889 | 0.208625  |
| 0.138695 | 0.127185  | 0.141317 | 0.149621 | 0.143211  | 0.128788 | 0.136218  |
| 0.137675 | 0.124417  | 0.133887 | 0.153555 | 0.137821  | 0.128351 | 0.132867  |
| 0.13986  | 0.114656  | 0.120629 | 0.120192 | 0.127185  | 0.114219 | 0.131265  |
| 0.145251 | 0.125583  | 0.14088  | 0.1419   | 0.150932  | 0.10067  | 0.143357  |
| 0.130245 | 0.109994  | 0.123252 | 0.127477 | 0.124854  | 0.114802 | 0.126311  |
| 0.136364 | 0.131556  | 0.143065 | 0.15778  | 0.151661  | 0.130828 | 0.135344  |
| 0.139277 | 0.133013  | 0.142774 | 0.146999 | 0.146999  | 0.112471 | 0.134178  |
| 0.142191 | 0.11961   | 0.134615 | 0.139714 | 0.142628  | 0.117424 | 0.142337  |
| 0.147145 | 0.133013  | 0.143065 | 0.156031 | 0.154283  | 0.118298 | 0.142628  |
| 0.151224 | 0.128642  | 0.138695 | 0.153118 | 0.143211  | 0.123252 | 0.137383  |
| 0.148747 | 0.131119  | 0.141171 | 0.145396 | 0.141317  | 0.117861 | 0.135781  |
| 0.143648 | 0.123689  | 0.13345  | 0.150495 | 0.14729   | 0.110723 | 0.136509  |
| 0.133159 | 0.111742  | 0.12296  | 0.131265 | 0.127185  | 0.111597 | 0.129516  |
| 0.142483 | 0.121066  | 0.136946 | 0.14729  | 0.144959  | 0.114802 | 0.133013  |
| 0.145833 | 0.130828  | 0.142628 | 0.146853 | 0.155012  | 0.099796 | 0.128205  |
| 0.149476 | 0.128351  | 0.143065 | 0.151078 | 0.155157  | 0.111014 | 0.135635  |
| 0.148747 | 0.139277  | 0.141463 | 0.159382 | 0.157634  | 0.118444 | 0.140152  |
| 0.148601 | 0.125437  | 0.139569 | 0.14729  | 0.146416  | 0.118007 | 0.143211  |
| 0.141026 | 0.113199  | 0.128497 | 0.128351 | 0.134761  | 0.112762 | 0.136218  |
| 0.145105 | 0.125146  | 0.134033 | 0.142337 | 0.146999  | 0.122378 | 0.141463  |
| 0.139569 | 0.114656  | 0.125    | 0.130682 | 0.13243   | 0.111014 | 0.129225  |
| 0.157051 | 0.144668  | 0.154429 | 0.156614 | 0.162442  | 0.131993 | 0.154866  |

|          |           |           |          |          |          |          |
|----------|-----------|-----------|----------|----------|----------|----------|
| 0.160839 | 0.147873  | 0.157051  | 0.159819 | 0.164481 | 0.131119 | 0.157197 |
| 0.144376 | 0.118298  | 0.133013  | 0.137238 | 0.135198 | 0.116404 | 0.129953 |
| 0.133887 | 0.117133  | 0.130973  | 0.134033 | 0.136946 | 0.103875 | 0.126166 |
| 0.148019 | 0.127768  | 0.141317  | 0.143211 | 0.145833 | 0.109848 | 0.136801 |
| 0.141608 | 0.121649  | 0.136364  | 0.139132 | 0.140297 | 0.112471 | 0.139423 |
| 0.160402 | 0.143065  | 0.149621  | 0.158217 | 0.159382 | 0.125728 | 0.153846 |
| 0.143502 | 0.119172  | 0.13039   | 0.140734 | 0.136072 | 0.115239 | 0.136946 |
| 0.142483 | 0.121066  | 0.132284  | 0.132721 | 0.136801 | 0.111888 | 0.137092 |
| 0.159819 | 0.15035   | 0.156906  | 0.17366  | 0.161131 | 0.127477 | 0.149184 |
| 0.144085 | 0.134615  | 0.142628  | 0.144814 | 0.151224 | 0.121941 | 0.140152 |
| 0.143065 | 0.118153  | 0.13141   | 0.128351 | 0.138258 | 0.111888 | 0.133887 |
| 0.144231 | 0.126311  | 0.136364  | 0.159528 | 0.148747 | 0.134615 | 0.131265 |
| 0.141026 | 0.0890152 | 0.0996503 | 0.129516 | 0.116696 | 0.123834 | 0.128934 |
| 0.148893 | 0.139423  | 0.150058  | 0.159237 | 0.167395 | 0.11859  | 0.154866 |
| 0.150204 | 0.131119  | 0.145542  | 0.146853 | 0.150641 | 0.116113 | 0.139569 |
| 0.144376 | 0.121795  | 0.131556  | 0.138112 | 0.137529 | 0.114073 | 0.131702 |
| 0.146707 | 0.126457  | 0.134761  | 0.139277 | 0.142483 | 0.120484 | 0.138112 |
| 0.145688 | 0.127185  | 0.140443  | 0.148164 | 0.151078 | 0.10373  | 0.13884  |
| 0.159965 | 0.14292   | 0.148019  | 0.1537   | 0.161568 | 0.120921 | 0.150787 |
| 0.158217 | 0.135635  | 0.145979  | 0.157197 | 0.16215  | 0.133741 | 0.153992 |
| 0.180216 | 0.161131  | 0.142337  | 0.131702 | 0.142191 | 0.160111 | 0.175408 |
| 0.145251 | 0.120338  | 0.13039   | 0.134615 | 0.13986  | 0.115822 | 0.135781 |
| 0.13884  | 0.122086  | 0.13447   | 0.131119 | 0.13986  | 0.113491 | 0.139569 |
| 0.144668 | 0.113928  | 0.130973  | 0.134324 | 0.139277 | 0.11116  | 0.129079 |
| 0.158217 | 0.144668  | 0.153555  | 0.160985 | 0.156323 | 0.130245 | 0.153409 |
| 0.145105 | 0.11553   | 0.127331  | 0.132139 | 0.136218 | 0.111014 | 0.13447  |
| 0.145251 | 0.136364  | 0.146125  | 0.148019 | 0.15676  | 0.120775 | 0.148019 |
| 0.144959 | 0.131993  | 0.142628  | 0.143648 | 0.147727 | 0.105624 | 0.139569 |
| 0.147436 | 0.124563  | 0.134324  | 0.13243  | 0.138258 | 0.119755 | 0.136218 |
| 0.160256 | 0.146707  | 0.153555  | 0.160402 | 0.158071 | 0.133741 | 0.15778  |
| 0.152972 | 0.126311  | 0.137529  | 0.137675 | 0.147873 | 0.11655  | 0.141171 |
| 0.15574  | 0.138986  | 0.146999  | 0.160256 | 0.157634 | 0.131847 | 0.147145 |
| 0.143939 | 0.133887  | 0.145396  | 0.14933  | 0.156031 | 0.124709 | 0.136218 |
| 0.133304 | 0.111014  | 0.120775  | 0.130828 | 0.131993 | 0.11961  | 0.131993 |
| 0.143502 | 0.119755  | 0.131847  | 0.131702 | 0.138403 | 0.112325 | 0.134907 |
| 0.143502 | 0.121795  | 0.13447   | 0.140443 | 0.137821 | 0.113491 | 0.13345  |
| 0.1537   | 0.13345   | 0.143502  | 0.152098 | 0.155303 | 0.122523 | 0.146562 |
| 0.140734 | 0.121358  | 0.13345   | 0.135052 | 0.135052 | 0.108392 | 0.133887 |
| 0.158654 | 0.138112  | 0.147582  | 0.1588   | 0.157634 | 0.133596 | 0.153846 |
| 0.155157 | 0.129662  | 0.138549  | 0.139569 | 0.144522 | 0.11553  | 0.142191 |
| 0.142045 | 0.11655   | 0.132139  | 0.140152 | 0.14627  | 0.109411 | 0.134324 |
| 0.14933  | 0.124417  | 0.137092  | 0.136655 | 0.140734 | 0.114948 | 0.138695 |
| 0.148164 | 0.12296   | 0.133304  | 0.140152 | 0.143065 | 0.120484 | 0.144814 |
| 0.144085 | 0.125874  | 0.133887  | 0.132284 | 0.140734 | 0.117279 | 0.134324 |

|          |          |          |          |          |          |          |
|----------|----------|----------|----------|----------|----------|----------|
| 0.144376 | 0.120338 | 0.131556 | 0.132867 | 0.139569 | 0.110577 | 0.137529 |
| 0.157051 | 0.141171 | 0.150058 | 0.157488 | 0.163316 | 0.126457 | 0.148747 |
| 0.143357 | 0.121649 | 0.136072 | 0.131556 | 0.138258 | 0.102855 | 0.129225 |
| 0.137966 | 0.122086 | 0.130973 | 0.140152 | 0.140443 | 0.107955 | 0.129662 |
| 0.148164 | 0.130828 | 0.139423 | 0.157051 | 0.150641 | 0.11757  | 0.141026 |
| 0.150204 | 0.130828 | 0.142337 | 0.155303 | 0.154138 | 0.113199 | 0.141026 |
| 0.13447  | 0.1419   | 0.144959 | 0.158508 | 0.159382 | 0.118735 | 0.13986  |
| 0.138986 | 0.141171 | 0.150641 | 0.161568 | 0.163316 | 0.118007 | 0.148747 |
| 0.142045 | 0.126457 | 0.135635 | 0.141026 | 0.138403 | 0.118735 | 0.109557 |
| 0.195659 | 0.184732 | 0.165064 | 0.152389 | 0.157343 | 0.179341 | 0.18648  |
| 0.138403 | 0.112908 | 0.125583 | 0.142628 | 0.136801 | 0.11014  | 0.128059 |
| 0.143794 | 0.138695 | 0.146125 | 0.161131 | 0.162005 | 0.120192 | 0.14831  |
| 0.137092 | 0.131993 | 0.13884  | 0.155886 | 0.155594 | 0.114948 | 0.137529 |
| 0.155012 | 0.142628 | 0.152972 | 0.161568 | 0.161859 | 0.118881 | 0.14292  |
| 0.132721 | 0.118881 | 0.13243  | 0.138986 | 0.13986  | 0.103875 | 0.131119 |
| 0.140006 | 0.130536 | 0.146707 | 0.157925 | 0.158508 | 0.112325 | 0.145105 |
| 0.133013 | 0.119755 | 0.13447  | 0.14831  | 0.142191 | 0.107663 | 0.134033 |
| 0.134615 | 0.129808 | 0.139277 | 0.151369 | 0.143211 | 0.112762 | 0.13884  |
| 0.143648 | 0.118153 | 0.129079 | 0.139714 | 0.134178 | 0.11014  | 0.134761 |
| 0.138403 | 0.14088  | 0.152972 | 0.160402 | 0.16215  | 0.118298 | 0.14933  |
| 0.145105 | 0.11961  | 0.135781 | 0.13243  | 0.136218 | 0.107226 | 0.137383 |
| 0.146707 | 0.136946 | 0.144959 | 0.152389 | 0.15472  | 0.120484 | 0.145688 |
| 0.145688 | 0.12602  | 0.138112 | 0.142628 | 0.138258 | 0.11014  | 0.130099 |
| 0.14933  | 0.13549  | 0.141463 | 0.152681 | 0.152098 | 0.124272 | 0.146562 |
| 0.153846 | 0.138258 | 0.142483 | 0.156031 | 0.155449 | 0.115385 | 0.142337 |
| 0.133159 | 0.118153 | 0.134907 | 0.142337 | 0.13884  | 0.107809 | 0.129225 |
| 0.159674 | 0.146707 | 0.152681 | 0.160693 | 0.158362 | 0.129953 | 0.159528 |
| 0.135927 | 0.126748 | 0.137675 | 0.145979 | 0.142774 | 0.110868 | 0.131993 |
| 0.138258 | 0.123252 | 0.136218 | 0.145979 | 0.141608 | 0.113199 | 0.128205 |
| 0.138986 | 0.125437 | 0.136655 | 0.14292  | 0.146125 | 0.111888 | 0.136509 |
| 0.153555 | 0.143211 | 0.149476 | 0.164773 | 0.157488 | 0.132576 | 0.149038 |
| 0.143939 | 0.129516 | 0.125874 | 0.122815 | 0.128059 | 0.115676 | 0.141171 |
| 0.131993 | 0.117861 | 0.130536 | 0.141171 | 0.138258 | 0.1081   | 0.135344 |
| 0.129662 | 0.121941 | 0.133159 | 0.142337 | 0.136218 | 0.1081   | 0.131556 |
| 0.144085 | 0.124709 | 0.135927 | 0.141608 | 0.137238 | 0.111451 | 0.136072 |
| 0.146562 | 0.133596 | 0.146853 | 0.150204 | 0.153118 | 0.114802 | 0.146125 |
| 0.145833 | 0.126748 | 0.137966 | 0.147727 | 0.143065 | 0.106789 | 0.134907 |
| 0.136364 | 0.113491 | 0.125874 | 0.131265 | 0.13243  | 0.100816 | 0.130099 |
| 0.137821 | 0.113199 | 0.128497 | 0.131556 | 0.13243  | 0.101107 | 0.131847 |
| 0.139423 | 0.117424 | 0.133304 | 0.138112 | 0.142191 | 0.106206 | 0.138695 |
| 0.142628 | 0.122669 | 0.13039  | 0.140152 | 0.141026 | 0.120192 | 0.13141  |
| 0.149184 | 0.13447  | 0.145105 | 0.150787 | 0.15574  | 0.105186 | 0.147582 |
| 0.13884  | 0.116841 | 0.135635 | 0.141317 | 0.13986  | 0.106206 | 0.131993 |
| 0.134907 | 0.112325 | 0.127331 | 0.129225 | 0.133304 | 0.104604 | 0.133887 |

|          |           |          |          |          |           |          |
|----------|-----------|----------|----------|----------|-----------|----------|
| 0.151224 | 0.133596  | 0.145979 | 0.145251 | 0.152826 | 0.107809  | 0.143211 |
| 0.146125 | 0.114802  | 0.13039  | 0.129953 | 0.133159 | 0.0992133 | 0.130536 |
| 0.150787 | 0.128788  | 0.141754 | 0.143357 | 0.141026 | 0.121941  | 0.138403 |
| 0.153118 | 0.136655  | 0.143502 | 0.159382 | 0.150641 | 0.11757   | 0.139277 |
| 0.140297 | 0.120338  | 0.136801 | 0.138403 | 0.143065 | 0.105332  | 0.139277 |
| 0.143065 | 0.119027  | 0.132867 | 0.141171 | 0.141754 | 0.107517  | 0.13447  |
| 0.142191 | 0.117861  | 0.13141  | 0.140006 | 0.139714 | 0.107226  | 0.138549 |
| 0.135198 | 0.118444  | 0.126457 | 0.129808 | 0.124563 | 0.106643  | 0.129516 |
| 0.142774 | 0.130973  | 0.143065 | 0.154575 | 0.154283 | 0.116841  | 0.143211 |
| 0.136364 | 0.11553   | 0.127331 | 0.128059 | 0.134761 | 0.10169   | 0.133013 |
| 0.156906 | 0.141026  | 0.150787 | 0.159965 | 0.159674 | 0.119318  | 0.146562 |
| 0.155594 | 0.141463  | 0.150058 | 0.155449 | 0.160985 | 0.131119  | 0.146416 |
| 0.151515 | 0.132139  | 0.138403 | 0.151661 | 0.144959 | 0.122378  | 0.13884  |
| 0.143211 | 0.128205  | 0.139714 | 0.142191 | 0.138695 | 0.11961   | 0.13345  |
| 0.137675 | 0.125     | 0.139714 | 0.143648 | 0.139277 | 0.115239  | 0.133741 |
| 0.142483 | 0.121649  | 0.136072 | 0.133013 | 0.135927 | 0.0961538 | 0.136218 |
| 0.145251 | 0.118881  | 0.135344 | 0.129079 | 0.141317 | 0.0986305 | 0.133741 |
| 0.136801 | 0.115385  | 0.129808 | 0.136655 | 0.139569 | 0.108246  | 0.129662 |
| 0.138258 | 0.0979021 | 0.108829 | 0.124709 | 0.120921 | 0.116696  | 0.135198 |
| 0.151369 | 0.136072  | 0.150787 | 0.141317 | 0.155303 | 0.109994  | 0.14831  |
| 0.134324 | 0.123397  | 0.136946 | 0.145542 | 0.144959 | 0.107809  | 0.136218 |
| 0.146999 | 0.127914  | 0.14292  | 0.155594 | 0.149767 | 0.14088   | 0.141608 |
| 0.147145 | 0.140006  | 0.145105 | 0.163024 | 0.160693 | 0.122086  | 0.147582 |
| 0.210664 | 0.188374  | 0.170746 | 0.146416 | 0.147582 | 0.20542   | 0.202069 |
| 0.242279 | 0.227273  | 0.209353 | 0.187937 | 0.193473 | 0.24257   | 0.238928 |
| 0.136655 | 0.0759033 | 0.090035 | 0.129225 | 0.110286 | 0.11859   | 0.127768 |
| 0.13884  | 0.11859   | 0.131556 | 0.132284 | 0.137821 | 0.102127  | 0.134324 |
| 0.137966 | 0.115676  | 0.126894 | 0.128497 | 0.129371 | 0.102418  | 0.129371 |
| 0.134178 | 0.118007  | 0.130973 | 0.134615 | 0.138403 | 0.110868  | 0.133159 |
| 0.142628 | 0.129662  | 0.140297 | 0.156177 | 0.145396 | 0.136801  | 0.138695 |
| 0.136801 | 0.117424  | 0.131847 | 0.138403 | 0.142483 | 0.100087  | 0.13549  |
| 0.157051 | 0.145542  | 0.161422 | 0.160693 | 0.170017 | 0.113054  | 0.155449 |
| 0.13884  | 0.120629  | 0.137675 | 0.136072 | 0.141608 | 0.103584  | 0.136072 |
| 0.150204 | 0.132576  | 0.145251 | 0.151515 | 0.157051 | 0.114656  | 0.145688 |
| 0.147145 | 0.131556  | 0.1419   | 0.143794 | 0.1537   | 0.120338  | 0.141754 |
| 0.146853 | 0.136801  | 0.14831  | 0.149913 | 0.158945 | 0.112762  | 0.152244 |
| 0.155303 | 0.139714  | 0.149476 | 0.158071 | 0.160111 | 0.127914  | 0.146416 |
| 0.142191 | 0.124272  | 0.138986 | 0.139132 | 0.146707 | 0.109557  | 0.135344 |
| 0.136946 | 0.118444  | 0.13141  | 0.13447  | 0.139423 | 0.104021  | 0.129225 |
| 0.141754 | 0.125874  | 0.141171 | 0.13345  | 0.140443 | 0.107372  | 0.133741 |
| 0.133887 | 0.118881  | 0.130682 | 0.131702 | 0.133159 | 0.107663  | 0.131702 |
| 0.137675 | 0.118881  | 0.130682 | 0.13141  | 0.137238 | 0.104458  | 0.12704  |
| 0.143065 | 0.120192  | 0.132576 | 0.135052 | 0.140006 | 0.107809  | 0.13243  |
| 0.141171 | 0.131119  | 0.146416 | 0.144814 | 0.155886 | 0.116987  | 0.145396 |



|          |          |          |          |          |           |          |
|----------|----------|----------|----------|----------|-----------|----------|
| 0.144668 | 0.140152 | 0.151078 | 0.149767 | 0.161422 | 0.125146  | 0.15472  |
| 0.145105 | 0.122232 | 0.134907 | 0.136801 | 0.142337 | 0.105769  | 0.138258 |
| 0.140297 | 0.120047 | 0.135052 | 0.127331 | 0.138695 | 0.104749  | 0.13986  |
| 0.148456 | 0.137238 | 0.151369 | 0.147436 | 0.158217 | 0.120192  | 0.149184 |
| 0.139132 | 0.116259 | 0.131556 | 0.12704  | 0.136655 | 0.104749  | 0.131993 |
| 0.15035  | 0.147873 | 0.159091 | 0.156614 | 0.167104 | 0.126166  | 0.150495 |
| 0.153846 | 0.142045 | 0.148601 | 0.156614 | 0.151369 | 0.140152  | 0.154283 |
| 0.133596 | 0.134324 | 0.146125 | 0.149476 | 0.155594 | 0.129516  | 0.143357 |
| 0.13884  | 0.114219 | 0.129225 | 0.129371 | 0.134907 | 0.10708   | 0.12704  |
| 0.132867 | 0.116404 | 0.132576 | 0.130973 | 0.136218 | 0.10373   | 0.129808 |
| 0.143211 | 0.129079 | 0.142045 | 0.148019 | 0.149476 | 0.108537  | 0.138986 |
| 0.13986  | 0.127768 | 0.143357 | 0.14292  | 0.150204 | 0.107226  | 0.14729  |
| 0.147727 | 0.135635 | 0.146562 | 0.143794 | 0.153118 | 0.111888  | 0.142628 |
| 0.14292  | 0.121503 | 0.135052 | 0.139277 | 0.143065 | 0.108829  | 0.132576 |
| 0.1419   | 0.125146 | 0.136655 | 0.135052 | 0.143211 | 0.11014   | 0.133013 |
| 0.1419   | 0.125146 | 0.136364 | 0.140589 | 0.148456 | 0.110723  | 0.140589 |
| 0.147727 | 0.140297 | 0.153846 | 0.149913 | 0.16215  | 0.11655   | 0.152535 |
| 0.150641 | 0.135344 | 0.143939 | 0.149038 | 0.153409 | 0.111305  | 0.143211 |
| 0.14729  | 0.138403 | 0.149913 | 0.14831  | 0.158508 | 0.112325  | 0.148601 |
| 0.15035  | 0.135927 | 0.141608 | 0.143211 | 0.150204 | 0.125583  | 0.145251 |
| 0.145105 | 0.118735 | 0.131119 | 0.133013 | 0.143794 | 0.102855  | 0.135635 |
| 0.146562 | 0.132139 | 0.14831  | 0.151661 | 0.154575 | 0.121795  | 0.145251 |
| 0.136509 | 0.115093 | 0.131556 | 0.131119 | 0.138695 | 0.10271   | 0.130536 |
| 0.141317 | 0.120775 | 0.13141  | 0.135635 | 0.136801 | 0.118881  | 0.129808 |
| 0.133741 | 0.121941 | 0.134615 | 0.135635 | 0.141463 | 0.109266  | 0.131847 |
| 0.135052 | 0.123543 | 0.13447  | 0.132576 | 0.1419   | 0.11116   | 0.134324 |
| 0.136509 | 0.116259 | 0.130099 | 0.136655 | 0.139569 | 0.099796  | 0.132867 |
| 0.151807 | 0.137383 | 0.150932 | 0.14933  | 0.162442 | 0.113928  | 0.150787 |
| 0.143211 | 0.122378 | 0.135927 | 0.137529 | 0.138695 | 0.113199  | 0.139277 |
| 0.146999 | 0.133159 | 0.143502 | 0.153555 | 0.158508 | 0.115239  | 0.149476 |
| 0.137966 | 0.118007 | 0.131265 | 0.135781 | 0.134324 | 0.107372  | 0.129662 |
| 0.149476 | 0.131847 | 0.14627  | 0.144668 | 0.1537   | 0.103147  | 0.142337 |
| 0.14292  | 0.129371 | 0.135635 | 0.136655 | 0.148019 | 0.115822  | 0.14627  |
| 0.144959 | 0.125291 | 0.136509 | 0.13986  | 0.137821 | 0.128642  | 0.146562 |
| 0.141608 | 0.124854 | 0.139569 | 0.139714 | 0.148456 | 0.0844988 | 0.136509 |
| 0.140006 | 0.125583 | 0.137092 | 0.141026 | 0.148019 | 0.125728  | 0.138112 |
| 0.144814 | 0.129225 | 0.13549  | 0.13884  | 0.140297 | 0.115967  | 0.137675 |
| 0.140152 | 0.12398  | 0.136655 | 0.140006 | 0.139132 | 0.110431  | 0.131847 |
| 0.155886 | 0.144085 | 0.148601 | 0.163899 | 0.157197 | 0.138112  | 0.144959 |
| 0.162442 | 0.140443 | 0.152826 | 0.159965 | 0.164918 | 0.105624  | 0.160839 |
| 0.135927 | 0.111888 | 0.122815 | 0.143939 | 0.134324 | 0.115822  | 0.125291 |
| 0.134615 | 0.135052 | 0.14831  | 0.165647 | 0.15574  | 0.141317  | 0.146125 |
| 0.150204 | 0.136946 | 0.144085 | 0.157343 | 0.152389 | 0.129516  | 0.141317 |
| 0.130973 | 0.134615 | 0.144959 | 0.159965 | 0.151515 | 0.137092  | 0.143065 |

|          |          |          |          |          |          |          |
|----------|----------|----------|----------|----------|----------|----------|
| 0.128059 | 0.125874 | 0.133013 | 0.151807 | 0.143939 | 0.130099 | 0.136072 |
| 0.14292  | 0.132576 | 0.144959 | 0.159382 | 0.146853 | 0.126311 | 0.138403 |
| 0.143939 | 0.135052 | 0.141608 | 0.153992 | 0.147582 | 0.129662 | 0.139714 |
| 0.139714 | 0.128205 | 0.138258 | 0.157925 | 0.151515 | 0.135344 | 0.139569 |
| 0.141463 | 0.140152 | 0.148456 | 0.166958 | 0.155012 | 0.14292  | 0.14627  |
| 0.143211 | 0.127331 | 0.136509 | 0.157343 | 0.148893 | 0.130973 | 0.13986  |
| 0.12602  | 0.122086 | 0.131847 | 0.148601 | 0.137529 | 0.126311 | 0.132284 |
| 0.155303 | 0.13447  | 0.141608 | 0.149913 | 0.156906 | 0.112179 | 0.152535 |
| 0.147873 | 0.139277 | 0.150787 | 0.161713 | 0.157343 | 0.133596 | 0.143357 |
| 0.133887 | 0.120338 | 0.129808 | 0.145105 | 0.132867 | 0.11961  | 0.131119 |
| 0.231643 | 0.211684 | 0.192599 | 0.172057 | 0.17264  | 0.226399 | 0.222174 |
| 0.138986 | 0.127768 | 0.138112 | 0.155449 | 0.141754 | 0.133741 | 0.137383 |
| 0.143357 | 0.123689 | 0.13549  | 0.144376 | 0.144668 | 0.126748 | 0.134178 |
| 0.136218 | 0.134907 | 0.145542 | 0.166084 | 0.159382 | 0.137675 | 0.13549  |
| 0.140589 | 0.124709 | 0.135635 | 0.148019 | 0.142191 | 0.123397 | 0.136655 |
| 0.14933  | 0.137821 | 0.145833 | 0.16521  | 0.157925 | 0.140006 | 0.1419   |
| 0.134761 | 0.123834 | 0.137383 | 0.152098 | 0.145688 | 0.131556 | 0.139569 |
| 0.136655 | 0.123106 | 0.131702 | 0.1537   | 0.141171 | 0.131119 | 0.130682 |
| 0.145979 | 0.129516 | 0.141026 | 0.156906 | 0.150204 | 0.136946 | 0.136218 |
| 0.135344 | 0.13345  | 0.130682 | 0.145688 | 0.139569 | 0.129808 | 0.141026 |
| 0.137529 | 0.132139 | 0.144522 | 0.163024 | 0.151078 | 0.134615 | 0.140006 |
| 0.13039  | 0.132284 | 0.141754 | 0.165501 | 0.153555 | 0.132721 | 0.1419   |
| 0.13039  | 0.130245 | 0.137966 | 0.163462 | 0.151515 | 0.138258 | 0.138695 |
| 0.147582 | 0.125583 | 0.135927 | 0.141608 | 0.141608 | 0.117279 | 0.13986  |
| 0.138549 | 0.121212 | 0.131847 | 0.152681 | 0.143065 | 0.131265 | 0.136072 |
| 0.132576 | 0.135344 | 0.148893 | 0.163024 | 0.158945 | 0.141026 | 0.150495 |
| 0.123689 | 0.124126 | 0.133013 | 0.147145 | 0.140734 | 0.127768 | 0.137238 |
| 0.157197 | 0.143357 | 0.148456 | 0.150932 | 0.159674 | 0.131556 | 0.150641 |
| 0.15676  | 0.143211 | 0.141608 | 0.1537   | 0.148456 | 0.145979 | 0.156031 |
| 0.148601 | 0.130973 | 0.134615 | 0.135927 | 0.135344 | 0.115385 | 0.138549 |
| 0.149767 | 0.137966 | 0.148601 | 0.159528 | 0.155449 | 0.131702 | 0.145251 |
| 0.148164 | 0.128205 | 0.136509 | 0.143648 | 0.137238 | 0.131556 | 0.145979 |
| 0.141608 | 0.129225 | 0.141026 | 0.155449 | 0.149913 | 0.126166 | 0.140297 |
| 0.146853 | 0.127185 | 0.134615 | 0.145251 | 0.141463 | 0.130828 | 0.149038 |
| 0.157051 | 0.142337 | 0.15035  | 0.161276 | 0.150495 | 0.144814 | 0.145542 |
| 0.141754 | 0.119755 | 0.135052 | 0.13549  | 0.136364 | 0.116113 | 0.134324 |
| 0.152681 | 0.141171 | 0.147727 | 0.156031 | 0.157197 | 0.131702 | 0.137092 |
| 0.159819 | 0.145396 | 0.138549 | 0.150641 | 0.145396 | 0.148747 | 0.155012 |
| 0.144959 | 0.126748 | 0.140297 | 0.147145 | 0.151224 | 0.103293 | 0.139277 |
| 0.151369 | 0.129662 | 0.139423 | 0.141317 | 0.146562 | 0.12398  | 0.13986  |
| 0.161713 | 0.144376 | 0.145979 | 0.155449 | 0.165064 | 0.118298 | 0.149621 |
| 0.148893 | 0.126894 | 0.137821 | 0.143502 | 0.149038 | 0.123834 | 0.146707 |
| 0.159237 | 0.140443 | 0.149038 | 0.160256 | 0.157634 | 0.140589 | 0.156177 |
| 0.152098 | 0.138258 | 0.147727 | 0.152244 | 0.15574  | 0.127622 | 0.14933  |

|          |           |           |          |          |          |          |
|----------|-----------|-----------|----------|----------|----------|----------|
| 0.133596 | 0.131119  | 0.143211  | 0.155303 | 0.148893 | 0.119318 | 0.138403 |
| 0.146562 | 0.134178  | 0.141026  | 0.146416 | 0.150495 | 0.127622 | 0.143502 |
| 0.149038 | 0.133159  | 0.142045  | 0.142483 | 0.147145 | 0.116987 | 0.145396 |
| 0.141608 | 0.137092  | 0.148893  | 0.150495 | 0.159237 | 0.111888 | 0.145251 |
| 0.137821 | 0.13243   | 0.143065  | 0.161859 | 0.151369 | 0.13141  | 0.143794 |
| 0.13345  | 0.136801  | 0.144814  | 0.160693 | 0.155157 | 0.117424 | 0.151952 |
| 0.143939 | 0.139423  | 0.143357  | 0.160985 | 0.157488 | 0.127622 | 0.143794 |
| 0.148601 | 0.137092  | 0.146853  | 0.149038 | 0.149621 | 0.118298 | 0.152244 |
| 0.145688 | 0.146416  | 0.152972  | 0.161568 | 0.161276 | 0.134033 | 0.156906 |
| 0.147436 | 0.136218  | 0.145396  | 0.149621 | 0.148747 | 0.127914 | 0.139132 |
| 0.138403 | 0.128934  | 0.143065  | 0.14729  | 0.146125 | 0.109557 | 0.135927 |
| 0.151224 | 0.137675  | 0.145979  | 0.155157 | 0.151078 | 0.116259 | 0.136218 |
| 0.148019 | 0.129808  | 0.137529  | 0.147873 | 0.144376 | 0.109266 | 0.135927 |
| 0.165647 | 0.147436  | 0.151369  | 0.161713 | 0.156469 | 0.140006 | 0.155303 |
| 0.166812 | 0.160256  | 0.165064  | 0.168415 | 0.172203 | 0.143794 | 0.167249 |
| 0.13884  | 0.13141   | 0.144959  | 0.150932 | 0.153846 | 0.114073 | 0.145688 |
| 0.144231 | 0.125437  | 0.136364  | 0.140589 | 0.14729  | 0.109266 | 0.142045 |
| 0.137966 | 0.127622  | 0.144376  | 0.162005 | 0.156469 | 0.130099 | 0.143065 |
| 0.136655 | 0.133013  | 0.143065  | 0.165355 | 0.150787 | 0.144231 | 0.145542 |
| 0.149767 | 0.134761  | 0.147145  | 0.151078 | 0.154575 | 0.113636 | 0.144959 |
| 0.137821 | 0.145833  | 0.156469  | 0.167686 | 0.160402 | 0.136364 | 0.143794 |
| 0.150641 | 0.140006  | 0.146853  | 0.154283 | 0.151952 | 0.134033 | 0.1537   |
| 0.150787 | 0.130245  | 0.14088   | 0.149767 | 0.147436 | 0.119901 | 0.148019 |
| 0.168561 | 0.155012  | 0.161859  | 0.176573 | 0.172203 | 0.151078 | 0.164627 |
| 0.154575 | 0.137821  | 0.14729   | 0.146562 | 0.147727 | 0.122232 | 0.145688 |
| 0.158945 | 0.146853  | 0.156614  | 0.159382 | 0.160548 | 0.135344 | 0.153846 |
| 0.142191 | 0.129808  | 0.141608  | 0.148456 | 0.148456 | 0.110431 | 0.139714 |
| 0.144231 | 0.133596  | 0.149184  | 0.164481 | 0.157197 | 0.121212 | 0.145542 |
| 0.129662 | 0.127768  | 0.138403  | 0.155157 | 0.148456 | 0.132576 | 0.137092 |
| 0.160693 | 0.115385  | 0.103584  | 0.133159 | 0.115967 | 0.135635 | 0.147727 |
| 0        | 0.141171  | 0.149767  | 0.173223 | 0.165064 | 0.151807 | 0.142337 |
| 0.141171 | 0         | 0.0706585 | 0.143939 | 0.122669 | 0.130973 | 0.131993 |
| 0.149767 | 0.0706585 | 0         | 0.130099 | 0.108829 | 0.140734 | 0.14088  |
| 0.173223 | 0.143939  | 0.130099  | 0        | 0.119172 | 0.139423 | 0.167541 |
| 0.165064 | 0.122669  | 0.108829  | 0.119172 | 0        | 0.155157 | 0.155012 |
| 0.151807 | 0.130973  | 0.140734  | 0.139423 | 0.155157 | 0        | 0.141171 |
| 0.142337 | 0.131993  | 0.14088   | 0.167541 | 0.155012 | 0.141171 | 0        |
| 0.13447  | 0.113345  | 0.125728  | 0.139569 | 0.131993 | 0.121358 | 0.130536 |
| 0.137821 | 0.118444  | 0.131119  | 0.133304 | 0.131556 | 0.113928 | 0.134178 |
| 0.140589 | 0.125291  | 0.136801  | 0.14831  | 0.141026 | 0.13039  | 0.137529 |
| 0.136218 | 0.0463287 | 0.0697844 | 0.141026 | 0.116259 | 0.125437 | 0.129662 |
| 0.141608 | 0.124563  | 0.136364  | 0.136801 | 0.136218 | 0.126748 | 0.133596 |
| 0.135781 | 0.088141  | 0.101399  | 0.132721 | 0.116987 | 0.127331 | 0.130973 |
| 0.137238 | 0.10708   | 0.120338  | 0.146999 | 0.135344 | 0.125583 | 0.131265 |

|           |           |           |          |          |           |           |
|-----------|-----------|-----------|----------|----------|-----------|-----------|
| 0.142628  | 0.118298  | 0.122815  | 0.142483 | 0.133159 | 0.137092  | 0.134907  |
| 0.14088   | 0.113928  | 0.128934  | 0.136946 | 0.13141  | 0.115822  | 0.128497  |
| 0.143794  | 0.0603147 | 0.0750291 | 0.139569 | 0.11451  | 0.129808  | 0.132284  |
| 0.13986   | 0.0502622 | 0.0772145 | 0.140589 | 0.116696 | 0.126166  | 0.128934  |
| 0.155303  | 0.125437  | 0.134615  | 0.109994 | 0.147582 | 0.0920746 | 0.142337  |
| 0.226399  | 0.20877   | 0.192308  | 0.167978 | 0.172057 | 0.222028  | 0.220134  |
| 0.149184  | 0.0639569 | 0.0748834 | 0.158945 | 0.137092 | 0.145979  | 0.14729   |
| 0.139714  | 0.126166  | 0.138258  | 0.158217 | 0.151224 | 0.132139  | 0.137821  |
| 0.144231  | 0.11553   | 0.125874  | 0.14933  | 0.138549 | 0.126748  | 0.134178  |
| 0.220571  | 0.201777  | 0.181818  | 0.163899 | 0.166812 | 0.221445  | 0.213432  |
| 0.155012  | 0.126311  | 0.12704   | 0.11116  | 0.131265 | 0.107226  | 0.139423  |
| 0.150495  | 0.128205  | 0.139423  | 0.144814 | 0.148019 | 0.112617  | 0.138695  |
| 0.135635  | 0.125583  | 0.134178  | 0.147145 | 0.14627  | 0.125728  | 0.105478  |
| 0.141608  | 0.12398   | 0.134324  | 0.14729  | 0.140589 | 0.133159  | 0.133887  |
| 0.257284  | 0.240239  | 0.222902  | 0.200029 | 0.207314 | 0.256702  | 0.249563  |
| 0.148164  | 0.12704   | 0.138549  | 0.153555 | 0.142774 | 0.11757   | 0.134907  |
| 0.152535  | 0.119755  | 0.13243   | 0.107517 | 0.140443 | 0.0942599 | 0.139277  |
| 0.137092  | 0.121795  | 0.137966  | 0.14831  | 0.151515 | 0.12602   | 0.136072  |
| 0.130682  | 0.118007  | 0.133596  | 0.145688 | 0.144231 | 0.122815  | 0.129662  |
| 0.152535  | 0.129371  | 0.131265  | 0.145105 | 0.137821 | 0.123106  | 0.139569  |
| 0.147873  | 0.106935  | 0.108829  | 0.129662 | 0.113636 | 0.134761  | 0.143357  |
| 0.148456  | 0.125874  | 0.131847  | 0.107517 | 0.141608 | 0.0925117 | 0.138986  |
| 0.136364  | 0.0523019 | 0.0705128 | 0.145251 | 0.116987 | 0.126166  | 0.129225  |
| 0.139132  | 0.120629  | 0.130682  | 0.152972 | 0.145979 | 0.133304  | 0.0512821 |
| 0.140297  | 0.117133  | 0.130682  | 0.145979 | 0.138112 | 0.128934  | 0.13141   |
| 0.13986   | 0.0587121 | 0.0751748 | 0.137675 | 0.113199 | 0.125291  | 0.128642  |
| 0.140297  | 0.125583  | 0.133887  | 0.148893 | 0.137821 | 0.129516  | 0.131702  |
| 0.0451632 | 0.141463  | 0.151515  | 0.1706   | 0.165064 | 0.150641  | 0.142628  |
| 0.150641  | 0.129516  | 0.136946  | 0.15574  | 0.145251 | 0.116259  | 0.13447   |
| 0.15472   | 0.129516  | 0.137529  | 0.144668 | 0.149621 | 0.114802  | 0.138549  |
| 0.203671  | 0.181672  | 0.164918  | 0.140297 | 0.143502 | 0.201923  | 0.196824  |
| 0.215326  | 0.194784  | 0.177448  | 0.15574  | 0.158362 | 0.212995  | 0.211101  |
| 0.145979  | 0.122815  | 0.129079  | 0.144376 | 0.133304 | 0.135781  | 0.13447   |
| 0.135781  | 0.116696  | 0.127622  | 0.144668 | 0.137966 | 0.126166  | 0.129808  |
| 0.138986  | 0.123689  | 0.128788  | 0.154866 | 0.144085 | 0.141026  | 0.144668  |
| 0.152098  | 0.124272  | 0.134615  | 0.107663 | 0.142045 | 0.0926573 | 0.136801  |
| 0.149621  | 0.130536  | 0.140589  | 0.155303 | 0.144231 | 0.114365  | 0.137238  |
| 0.129079  | 0.124272  | 0.131702  | 0.1537   | 0.147582 | 0.126166  | 0.135927  |
| 0.232517  | 0.218677  | 0.19697   | 0.175554 | 0.178467 | 0.234266  | 0.224213  |
| 0.134907  | 0.116404  | 0.129953  | 0.144959 | 0.139714 | 0.122378  | 0.130099  |
| 0.215763  | 0.201923  | 0.181672  | 0.1588   | 0.168706 | 0.209936  | 0.217657  |
| 0.146562  | 0.119901  | 0.132284  | 0.128642 | 0.141463 | 0.0571096 | 0.132721  |
| 0.142628  | 0.120629  | 0.133304  | 0.146562 | 0.138403 | 0.113782  | 0.129953  |
| 0.139569  | 0.103293  | 0.113928  | 0.12602  | 0.107372 | 0.122669  | 0.135052  |

|           |           |           |          |          |           |          |
|-----------|-----------|-----------|----------|----------|-----------|----------|
| 0.136946  | 0.115239  | 0.121503  | 0.139423 | 0.128934 | 0.12296   | 0.132721 |
| 0.218677  | 0.197552  | 0.17701   | 0.157343 | 0.158217 | 0.216055  | 0.208625 |
| 0.148456  | 0.0524476 | 0.064831  | 0.1419   | 0.118007 | 0.139714  | 0.137238 |
| 0.141754  | 0.124417  | 0.137966  | 0.1419   | 0.141026 | 0.0977564 | 0.129662 |
| 0.143502  | 0.0483683 | 0.0645396 | 0.145979 | 0.120338 | 0.130973  | 0.132867 |
| 0.145833  | 0.121503  | 0.133013  | 0.152389 | 0.142483 | 0.126311  | 0.139569 |
| 0.144959  | 0.121212  | 0.129225  | 0.145979 | 0.132284 | 0.126894  | 0.134907 |
| 0.142774  | 0.120484  | 0.133741  | 0.129808 | 0.144959 | 0.0524476 | 0.133304 |
| 0.150641  | 0.121066  | 0.124709  | 0.103584 | 0.132721 | 0.101107  | 0.137966 |
| 0.153263  | 0.128934  | 0.139277  | 0.145833 | 0.151078 | 0.115093  | 0.136509 |
| 0.133159  | 0.055507  | 0.0734266 | 0.136218 | 0.110577 | 0.125     | 0.125728 |
| 0.143211  | 0.12296   | 0.132139  | 0.140152 | 0.141026 | 0.0989219 | 0.129953 |
| 0.206002  | 0.18109   | 0.164044  | 0.140297 | 0.142337 | 0.199883  | 0.195367 |
| 0.132721  | 0.120629  | 0.137383  | 0.149476 | 0.152098 | 0.127477  | 0.135781 |
| 0.0597319 | 0.123106  | 0.138695  | 0.15778  | 0.152535 | 0.137821  | 0.128351 |
| 0.131556  | 0.114802  | 0.128934  | 0.144522 | 0.143357 | 0.127477  | 0.130245 |
| 0.151515  | 0.129516  | 0.13141   | 0.142337 | 0.138549 | 0.115385  | 0.137383 |
| 0.140152  | 0.0476399 | 0.0675991 | 0.146707 | 0.120775 | 0.126457  | 0.131265 |
| 0.145105  | 0.127477  | 0.139277  | 0.137383 | 0.151078 | 0.04662   | 0.135927 |
| 0.139714  | 0.116841  | 0.128642  | 0.141317 | 0.133159 | 0.114073  | 0.137821 |
| 0.152244  | 0.127914  | 0.14088   | 0.114219 | 0.149767 | 0.095134  | 0.144231 |
| 0.0670163 | 0.118735  | 0.131702  | 0.1537   | 0.143794 | 0.131702  | 0.129516 |
| 0.132867  | 0.11757   | 0.136655  | 0.143211 | 0.142337 | 0.122378  | 0.129225 |
| 0.143211  | 0.122086  | 0.128642  | 0.144814 | 0.133159 | 0.133013  | 0.134615 |
| 0.136946  | 0.125437  | 0.139569  | 0.150495 | 0.143794 | 0.128497  | 0.108829 |
| 0.13884   | 0.134324  | 0.145833  | 0.160839 | 0.157634 | 0.135344  | 0.105186 |
| 0.139132  | 0.122378  | 0.13447   | 0.14627  | 0.137238 | 0.112325  | 0.128788 |
| 0.144814  | 0.0627914 | 0.0722611 | 0.157197 | 0.133304 | 0.140734  | 0.144376 |
| 0.143357  | 0.11757   | 0.129662  | 0.14088  | 0.13039  | 0.12704   | 0.13243  |
| 0.127622  | 0.110286  | 0.125     | 0.141171 | 0.136801 | 0.120338  | 0.128059 |
| 0.142337  | 0.0699301 | 0.067162  | 0.125583 | 0.1081   | 0.126311  | 0.131702 |
| 0.15778   | 0.127914  | 0.137383  | 0.111014 | 0.143939 | 0.0965909 | 0.145688 |
| 0.206731  | 0.182692  | 0.16215   | 0.130245 | 0.147436 | 0.193328  | 0.20134  |
| 0.137238  | 0.119901  | 0.129662  | 0.134761 | 0.138258 | 0.0999417 | 0.124854 |
| 0.128497  | 0.107372  | 0.11655   | 0.134761 | 0.128351 | 0.112762  | 0.122232 |
| 0.150641  | 0.128059  | 0.136072  | 0.145251 | 0.152826 | 0.116259  | 0.137383 |
| 0.19493   | 0.174097  | 0.154138  | 0.135927 | 0.133596 | 0.191725  | 0.188957 |
| 0.160402  | 0.137529  | 0.145833  | 0.159091 | 0.15035  | 0.122815  | 0.146562 |
| 0.160402  | 0.150932  | 0.153409  | 0.170163 | 0.162005 | 0.128351  | 0.153846 |
| 0.0460373 | 0.142337  | 0.150932  | 0.173514 | 0.168269 | 0.150058  | 0.144085 |
| 0.1419    | 0.125146  | 0.129953  | 0.140297 | 0.134178 | 0.111597  | 0.132721 |
| 0.141754  | 0.048951  | 0.0627914 | 0.143939 | 0.120338 | 0.127185  | 0.130536 |
| 0.220862  | 0.200321  | 0.181235  | 0.16419  | 0.160402 | 0.220571  | 0.216055 |
| 0.141317  | 0.118444  | 0.129953  | 0.14729  | 0.137383 | 0.126457  | 0.131556 |

|           |           |           |          |          |           |          |
|-----------|-----------|-----------|----------|----------|-----------|----------|
| 0.142628  | 0.0477855 | 0.064831  | 0.147145 | 0.121795 | 0.133013  | 0.13549  |
| 0.137675  | 0.121503  | 0.129516  | 0.136946 | 0.138986 | 0.099796  | 0.132284 |
| 0.182547  | 0.148601  | 0.129225  | 0.13345  | 0.123834 | 0.178467  | 0.175991 |
| 0.138549  | 0.11014   | 0.121649  | 0.139277 | 0.125    | 0.120484  | 0.129371 |
| 0.149184  | 0.146416  | 0.15472   | 0.174971 | 0.164773 | 0.149184  | 0.055507 |
| 0.147727  | 0.128059  | 0.128205  | 0.140006 | 0.135344 | 0.127331  | 0.134761 |
| 0.201049  | 0.182255  | 0.163462  | 0.142628 | 0.141171 | 0.199592  | 0.195367 |
| 0.147727  | 0.128059  | 0.140152  | 0.149621 | 0.140589 | 0.114219  | 0.139132 |
| 0.130828  | 0.110868  | 0.119464  | 0.137966 | 0.133304 | 0.115967  | 0.130099 |
| 0.133887  | 0.112179  | 0.128934  | 0.140734 | 0.134033 | 0.125146  | 0.131993 |
| 0.146853  | 0.118153  | 0.134907  | 0.14088  | 0.145833 | 0.119464  | 0.13039  |
| 0.151807  | 0.12602   | 0.138112  | 0.142337 | 0.146707 | 0.111305  | 0.136509 |
| 0.135781  | 0.123397  | 0.13549   | 0.146999 | 0.142045 | 0.128205  | 0.120484 |
| 0.141171  | 0.118007  | 0.130099  | 0.143065 | 0.133159 | 0.12602   | 0.129079 |
| 0.203963  | 0.184295  | 0.164336  | 0.142628 | 0.141463 | 0.200175  | 0.197407 |
| 0.133887  | 0.125291  | 0.132721  | 0.148601 | 0.144814 | 0.124854  | 0.100524 |
| 0.143939  | 0.109411  | 0.121795  | 0.139132 | 0.136509 | 0.120338  | 0.13039  |
| 0.2213    | 0.206002  | 0.184003  | 0.16317  | 0.16521  | 0.221008  | 0.213578 |
| 0.132721  | 0.120047  | 0.137092  | 0.151807 | 0.150058 | 0.123689  | 0.134907 |
| 0.141026  | 0.121941  | 0.130245  | 0.145251 | 0.133013 | 0.128205  | 0.133596 |
| 0.135781  | 0.116696  | 0.125583  | 0.140006 | 0.130973 | 0.126166  | 0.128642 |
| 0.136801  | 0.0743007 | 0.0814394 | 0.155012 | 0.132576 | 0.137675  | 0.139277 |
| 0.201777  | 0.181235  | 0.16419   | 0.13986  | 0.143357 | 0.201777  | 0.195804 |
| 0.151807  | 0.123689  | 0.139277  | 0.112617 | 0.145251 | 0.094697  | 0.141463 |
| 0.136072  | 0.128934  | 0.143065  | 0.154866 | 0.151369 | 0.132284  | 0.105624 |
| 0.136072  | 0.121358  | 0.13141   | 0.142628 | 0.13447  | 0.128205  | 0.130099 |
| 0.13986   | 0.11757   | 0.129079  | 0.139714 | 0.128934 | 0.124709  | 0.133887 |
| 0.140589  | 0.119172  | 0.130099  | 0.138986 | 0.131702 | 0.128351  | 0.127331 |
| 0.140443  | 0.0549242 | 0.0754662 | 0.142045 | 0.117861 | 0.123834  | 0.128642 |
| 0.139132  | 0.113928  | 0.128351  | 0.136072 | 0.128497 | 0.116987  | 0.123834 |
| 0.149621  | 0.129953  | 0.14088   | 0.153846 | 0.145105 | 0.117279  | 0.134324 |
| 0.121066  | 0.120629  | 0.129808  | 0.161422 | 0.153555 | 0.135635  | 0.12296  |
| 0.149913  | 0.129079  | 0.137966  | 0.149184 | 0.1419   | 0.116987  | 0.134033 |
| 0.146562  | 0.127768  | 0.140734  | 0.156906 | 0.151078 | 0.128788  | 0.142337 |
| 0.209062  | 0.185023  | 0.167104  | 0.14627  | 0.143648 | 0.204691  | 0.200758 |
| 0.137529  | 0.121941  | 0.137821  | 0.145833 | 0.143794 | 0.126166  | 0.107955 |
| 0.146707  | 0.0539044 | 0.0657051 | 0.149184 | 0.12296  | 0.13447   | 0.138403 |
| 0.137821  | 0.117279  | 0.130245  | 0.142628 | 0.133596 | 0.127331  | 0.128934 |
| 0.13884   | 0.114802  | 0.131265  | 0.138112 | 0.129371 | 0.116987  | 0.126457 |
| 0.138549  | 0.115676  | 0.126603  | 0.138112 | 0.13345  | 0.123106  | 0.090035 |
| 0.152389  | 0.124854  | 0.13549   | 0.108829 | 0.144959 | 0.0906177 | 0.143211 |
| 0.143357  | 0.123106  | 0.136364  | 0.160985 | 0.154575 | 0.131702  | 0.139132 |
| 0.0828963 | 0.118881  | 0.130973  | 0.147436 | 0.1419   | 0.13039   | 0.131702 |
| 0.14933   | 0.120338  | 0.13243   | 0.107809 | 0.132284 | 0.10271   | 0.134907 |

|           |           |           |          |          |           |           |
|-----------|-----------|-----------|----------|----------|-----------|-----------|
| 0.144814  | 0.115239  | 0.125291  | 0.110286 | 0.12398  | 0.105478  | 0.130099  |
| 0.138549  | 0.110431  | 0.123106  | 0.133159 | 0.125583 | 0.120775  | 0.131993  |
| 0.145688  | 0.119901  | 0.132867  | 0.131265 | 0.144376 | 0.0492424 | 0.131265  |
| 0.154283  | 0.136655  | 0.143211  | 0.161422 | 0.150932 | 0.121941  | 0.143065  |
| 0.152681  | 0.126894  | 0.137238  | 0.113491 | 0.144959 | 0.0967366 | 0.144959  |
| 0.136801  | 0.0559441 | 0.0785256 | 0.141026 | 0.11451  | 0.121941  | 0.125874  |
| 0.14729   | 0.120047  | 0.13243   | 0.111597 | 0.137821 | 0.0933858 | 0.137529  |
| 0.13986   | 0.11757   | 0.129953  | 0.141171 | 0.13039  | 0.129079  | 0.131847  |
| 0.13447   | 0.119464  | 0.128934  | 0.138986 | 0.137821 | 0.0971737 | 0.124417  |
| 0.140589  | 0.119464  | 0.133013  | 0.144231 | 0.136072 | 0.13243   | 0.129371  |
| 0.133013  | 0.119464  | 0.133596  | 0.138403 | 0.138695 | 0.118153  | 0.104895  |
| 0.0770688 | 0.119755  | 0.136218  | 0.149184 | 0.141608 | 0.133596  | 0.13141   |
| 0.149621  | 0.124126  | 0.132139  | 0.138695 | 0.145688 | 0.112908  | 0.133159  |
| 0.141608  | 0.116696  | 0.129079  | 0.144085 | 0.129808 | 0.120921  | 0.128934  |
| 0.137383  | 0.119172  | 0.13039   | 0.144231 | 0.131119 | 0.128059  | 0.129079  |
| 0.135344  | 0.120629  | 0.119027  | 0.134907 | 0.126166 | 0.126311  | 0.13549   |
| 0.145105  | 0.112617  | 0.126457  | 0.145251 | 0.140297 | 0.123834  | 0.136509  |
| 0.133596  | 0.113928  | 0.126311  | 0.138986 | 0.138403 | 0.118735  | 0.125874  |
| 0.137966  | 0.11451   | 0.127477  | 0.143648 | 0.133741 | 0.126311  | 0.129371  |
| 0.138695  | 0.0493881 | 0.0626457 | 0.140297 | 0.114365 | 0.129079  | 0.130099  |
| 0.146562  | 0.123397  | 0.13986   | 0.127477 | 0.143502 | 0.0562354 | 0.136218  |
| 0.141317  | 0.0537587 | 0.0734266 | 0.140589 | 0.114948 | 0.126457  | 0.133013  |
| 0.146853  | 0.12602   | 0.13549   | 0.142045 | 0.143502 | 0.112762  | 0.134178  |
| 0.143939  | 0.122232  | 0.131993  | 0.144376 | 0.132721 | 0.122669  | 0.126894  |
| 0.125874  | 0.113491  | 0.12704   | 0.142045 | 0.131265 | 0.121503  | 0.122523  |
| 0.14088   | 0.118298  | 0.133304  | 0.136072 | 0.136072 | 0.099796  | 0.125291  |
| 0.143065  | 0.0560897 | 0.0754662 | 0.144959 | 0.116696 | 0.133159  | 0.131265  |
| 0.143065  | 0.114365  | 0.127914  | 0.145833 | 0.14292  | 0.118881  | 0.137966  |
| 0.13884   | 0.106643  | 0.121649  | 0.142774 | 0.130828 | 0.121358  | 0.132284  |
| 0.208479  | 0.184149  | 0.169726  | 0.14627  | 0.148893 | 0.202943  | 0.196678  |
| 0.176136  | 0.150932  | 0.134761  | 0.125874 | 0.119464 | 0.172057  | 0.171329  |
| 0.148456  | 0.128205  | 0.138549  | 0.148019 | 0.1419   | 0.113782  | 0.134907  |
| 0.143357  | 0.117861  | 0.126166  | 0.114073 | 0.134178 | 0.11451   | 0.135052  |
| 0.164918  | 0.152826  | 0.160256  | 0.173805 | 0.167686 | 0.130245  | 0.152244  |
| 0.139132  | 0.124126  | 0.137383  | 0.157634 | 0.145105 | 0.134761  | 0.0568182 |
| 0.140152  | 0.121066  | 0.131993  | 0.146999 | 0.130099 | 0.132284  | 0.0983392 |
| 0.141463  | 0.116259  | 0.126894  | 0.138986 | 0.126748 | 0.128059  | 0.138112  |
| 0.14292   | 0.122669  | 0.131847  | 0.143065 | 0.130245 | 0.128059  | 0.134324  |
| 0.148164  | 0.11655   | 0.128351  | 0.148893 | 0.143939 | 0.125146  | 0.136364  |
| 0.213578  | 0.191288  | 0.176573  | 0.1537   | 0.153992 | 0.210956  | 0.205565  |
| 0.157488  | 0.128497  | 0.139132  | 0.110431 | 0.145688 | 0.0957168 | 0.144814  |
| 0.147145  | 0.0756119 | 0.0839161 | 0.111451 | 0.115822 | 0.11859   | 0.136218  |
| 0.135781  | 0.116696  | 0.126748  | 0.136509 | 0.127185 | 0.124417  | 0.133013  |
| 0.144668  | 0.119172  | 0.136218  | 0.147145 | 0.140152 | 0.124563  | 0.13986   |

|           |           |           |          |          |           |           |
|-----------|-----------|-----------|----------|----------|-----------|-----------|
| 0.198135  | 0.177593  | 0.157925  | 0.140006 | 0.136801 | 0.198135  | 0.195659  |
| 0.251166  | 0.23616   | 0.219406  | 0.195076 | 0.199446 | 0.253497  | 0.248106  |
| 0.0748834 | 0.123689  | 0.134907  | 0.153409 | 0.142337 | 0.133159  | 0.129808  |
| 0.146853  | 0.113782  | 0.129953  | 0.149621 | 0.144668 | 0.124126  | 0.134178  |
| 0.149184  | 0.125146  | 0.13549   | 0.150495 | 0.13884  | 0.116259  | 0.133887  |
| 0.147873  | 0.12296   | 0.135927  | 0.138403 | 0.145979 | 0.110286  | 0.135198  |
| 0.147436  | 0.119027  | 0.134033  | 0.110286 | 0.141754 | 0.0926573 | 0.139423  |
| 0.128351  | 0.113636  | 0.127185  | 0.142483 | 0.137821 | 0.122523  | 0.0981935 |
| 0.138403  | 0.0843531 | 0.0996503 | 0.13447  | 0.112908 | 0.126457  | 0.131847  |
| 0.150641  | 0.118153  | 0.132576  | 0.109703 | 0.141754 | 0.0926573 | 0.137383  |
| 0.137383  | 0.0743007 | 0.090472  | 0.135198 | 0.108683 | 0.125146  | 0.131993  |
| 0.138403  | 0.122815  | 0.13345   | 0.144668 | 0.140006 | 0.124126  | 0.13447   |
| 0.143794  | 0.117133  | 0.131265  | 0.142191 | 0.130245 | 0.122232  | 0.127914  |
| 0.0617716 | 0.118444  | 0.134324  | 0.152244 | 0.145542 | 0.131702  | 0.125728  |
| 0.140006  | 0.0539044 | 0.0712413 | 0.145105 | 0.119755 | 0.126894  | 0.130245  |
| 0.128934  | 0.106643  | 0.120484  | 0.134033 | 0.130245 | 0.112908  | 0.123834  |
| 0.129225  | 0.130828  | 0.143794  | 0.156469 | 0.156177 | 0.119318  | 0.140443  |
| 0.154866  | 0.137238  | 0.14729   | 0.153846 | 0.160256 | 0.114656  | 0.145688  |
| 0.140443  | 0.11757   | 0.130828  | 0.140589 | 0.13243  | 0.126457  | 0.132721  |
| 0.139714  | 0.124126  | 0.131847  | 0.134324 | 0.129371 | 0.121649  | 0.134907  |
| 0.14292   | 0.131702  | 0.141171  | 0.156469 | 0.146853 | 0.138258  | 0.139277  |
| 0.217949  | 0.201195  | 0.18211   | 0.160693 | 0.165647 | 0.218823  | 0.215181  |
| 0.0861014 | 0.113928  | 0.12602   | 0.143648 | 0.133741 | 0.121649  | 0.125291  |
| 0.143648  | 0.117279  | 0.134324  | 0.140297 | 0.132139 | 0.118298  | 0.130973  |
| 0.139277  | 0.122232  | 0.136946  | 0.14729  | 0.141463 | 0.126457  | 0.110286  |
| 0.134761  | 0.120921  | 0.136218  | 0.14831  | 0.144814 | 0.129808  | 0.134033  |
| 0.144959  | 0.117716  | 0.130682  | 0.143939 | 0.138986 | 0.11961   | 0.140734  |
| 0.213141  | 0.194639  | 0.175262  | 0.156177 | 0.153846 | 0.210519  | 0.204545  |
| 0.1419    | 0.0520105 | 0.0754662 | 0.146999 | 0.117279 | 0.130245  | 0.132721  |
| 0.139423  | 0.115093  | 0.12602   | 0.13986  | 0.134615 | 0.12398   | 0.12704   |
| 0.142191  | 0.123397  | 0.133159  | 0.147873 | 0.145833 | 0.11655   | 0.137383  |
| 0.146853  | 0.120775  | 0.132284  | 0.138549 | 0.143502 | 0.107226  | 0.133013  |
| 0.138112  | 0.0546329 | 0.0719697 | 0.141171 | 0.118444 | 0.126457  | 0.131265  |
| 0.128205  | 0.0817308 | 0.0955711 | 0.135635 | 0.121649 | 0.120921  | 0.128642  |
| 0.138403  | 0.12398   | 0.129662  | 0.146999 | 0.140589 | 0.123252  | 0.131847  |
| 0.132284  | 0.120192  | 0.137238  | 0.146999 | 0.14292  | 0.124709  | 0.13039   |
| 0.213432  | 0.190268  | 0.17264   | 0.151515 | 0.150641 | 0.211976  | 0.203671  |
| 0.13141   | 0.0607517 | 0.0766317 | 0.137675 | 0.114656 | 0.120921  | 0.123689  |
| 0.212558  | 0.185897  | 0.168561  | 0.148893 | 0.145979 | 0.206439  | 0.203089  |
| 0.207751  | 0.186334  | 0.164918  | 0.144085 | 0.146125 | 0.202506  | 0.198572  |
| 0.152098  | 0.135927  | 0.141317  | 0.148456 | 0.15778  | 0.117424  | 0.140297  |
| 0.133159  | 0.128934  | 0.145979  | 0.15778  | 0.157197 | 0.130536  | 0.135927  |
| 0.129371  | 0.112034  | 0.119755  | 0.136801 | 0.134761 | 0.11655   | 0.125437  |
| 0.133596  | 0.0646853 | 0.0837704 | 0.138986 | 0.118007 | 0.120192  | 0.129662  |



|           |           |           |          |          |           |          |
|-----------|-----------|-----------|----------|----------|-----------|----------|
| 0.137529  | 0.0575466 | 0.0763403 | 0.141463 | 0.116404 | 0.123834  | 0.129225 |
| 0.143065  | 0.120484  | 0.13141   | 0.144085 | 0.131556 | 0.130828  | 0.13243  |
| 0.146562  | 0.114948  | 0.127622  | 0.110577 | 0.140297 | 0.0917832 | 0.137383 |
| 0.151807  | 0.121941  | 0.132284  | 0.107663 | 0.142045 | 0.0920746 | 0.137966 |
| 0.0616259 | 0.120629  | 0.133013  | 0.151807 | 0.144814 | 0.137966  | 0.125874 |
| 0.148893  | 0.126603  | 0.137821  | 0.142628 | 0.146416 | 0.116841  | 0.13884  |
| 0.13243   | 0.115093  | 0.125437  | 0.13986  | 0.129662 | 0.124272  | 0.124417 |
| 0.138986  | 0.0543415 | 0.0716783 | 0.141754 | 0.11553  | 0.127914  | 0.131556 |
| 0.128934  | 0.109266  | 0.119318  | 0.135198 | 0.129079 | 0.113782  | 0.127914 |
| 0.141317  | 0.0587121 | 0.0681818 | 0.148747 | 0.12602  | 0.132284  | 0.138549 |
| 0.143939  | 0.124563  | 0.134324  | 0.149621 | 0.138258 | 0.114802  | 0.133887 |
| 0.144376  | 0.0559441 | 0.069493  | 0.152681 | 0.128205 | 0.13884   | 0.138403 |
| 0.262966  | 0.250874  | 0.230624  | 0.205128 | 0.210956 | 0.265589  | 0.259615 |
| 0.142045  | 0.131993  | 0.144668  | 0.150932 | 0.155303 | 0.0992133 | 0.136072 |
| 0.142774  | 0.133887  | 0.13986   | 0.156614 | 0.153409 | 0.113636  | 0.131847 |
| 0.226253  | 0.208625  | 0.18954   | 0.172786 | 0.17162  | 0.227418  | 0.221154 |
| 0.144522  | 0.136801  | 0.143648  | 0.154866 | 0.151952 | 0.128497  | 0.135052 |
| 0.237762  | 0.221591  | 0.199009  | 0.180798 | 0.18109  | 0.238345  | 0.231206 |
| 0.139714  | 0.123834  | 0.137092  | 0.144522 | 0.148019 | 0.0983392 | 0.129371 |
| 0.145688  | 0.128351  | 0.138112  | 0.15574  | 0.14729  | 0.136655  | 0.139132 |
| 0.134615  | 0.114656  | 0.134907  | 0.141171 | 0.138549 | 0.119464  | 0.128934 |
| 0.152389  | 0.127768  | 0.143065  | 0.147582 | 0.151952 | 0.11451   | 0.136218 |
| 0.217075  | 0.197407  | 0.178322  | 0.150787 | 0.152535 | 0.20979   | 0.208479 |
| 0.143939  | 0.055507  | 0.0710956 | 0.1537   | 0.128934 | 0.136655  | 0.138258 |
| 0.141317  | 0.0563811 | 0.0731352 | 0.14088  | 0.116113 | 0.126748  | 0.131847 |
| 0.236451  | 0.217657  | 0.198281  | 0.176573 | 0.179487 | 0.232955  | 0.229021 |
| 0.151224  | 0.124854  | 0.134324  | 0.106498 | 0.140589 | 0.0958625 | 0.140006 |
| 0.209645  | 0.194347  | 0.175262  | 0.151515 | 0.149767 | 0.208188  | 0.206002 |
| 0.152535  | 0.12296   | 0.133304  | 0.109848 | 0.143648 | 0.0930944 | 0.141026 |
| 0.139132  | 0.118007  | 0.133013  | 0.143648 | 0.133159 | 0.129516  | 0.131702 |
| 0.146562  | 0.128059  | 0.134907  | 0.150787 | 0.140297 | 0.12704   | 0.133013 |
| 0.153846  | 0.133596  | 0.142774  | 0.151369 | 0.158362 | 0.115676  | 0.142337 |
| 0.139132  | 0.114802  | 0.127185  | 0.140734 | 0.130245 | 0.121941  | 0.127331 |
| 0.178467  | 0.160256  | 0.143502  | 0.118007 | 0.119464 | 0.170309  | 0.171911 |
| 0.135635  | 0.0486597 | 0.0721154 | 0.137821 | 0.116841 | 0.123397  | 0.127622 |
| 0.13447   | 0.120921  | 0.135635  | 0.144522 | 0.144522 | 0.126894  | 0.134324 |
| 0.145542  | 0.126166  | 0.137675  | 0.139569 | 0.136655 | 0.133013  | 0.137821 |
| 0.133013  | 0.120629  | 0.132721  | 0.150058 | 0.147727 | 0.125146  | 0.134907 |
| 0.208333  | 0.188666  | 0.17162   | 0.146125 | 0.149621 | 0.204545  | 0.200903 |
| 0.142045  | 0.117424  | 0.128934  | 0.141317 | 0.131702 | 0.127768  | 0.131702 |
| 0.155303  | 0.127477  | 0.130828  | 0.129808 | 0.13447  | 0.11859   | 0.141754 |
| 0.145542  | 0.121212  | 0.135927  | 0.128497 | 0.142191 | 0.0581294 | 0.129953 |
| 0.151224  | 0.123689  | 0.136655  | 0.11116  | 0.146416 | 0.092366  | 0.141754 |
| 0.138258  | 0.124417  | 0.132721  | 0.148893 | 0.141608 | 0.133304  | 0.130245 |

|           |           |           |           |          |           |          |
|-----------|-----------|-----------|-----------|----------|-----------|----------|
| 0.258741  | 0.245192  | 0.22669   | 0.200612  | 0.206148 | 0.264277  | 0.257721 |
| 0.143794  | 0.121795  | 0.131847  | 0.146853  | 0.138112 | 0.121649  | 0.126748 |
| 0.138258  | 0.122378  | 0.133304  | 0.138112  | 0.131702 | 0.130682  | 0.11655  |
| 0.191288  | 0.174534  | 0.157197  | 0.147436  | 0.14831  | 0.185169  | 0.188228 |
| 0.202652  | 0.178904  | 0.163899  | 0.138112  | 0.134907 | 0.196533  | 0.193182 |
| 0.0776515 | 0.123252  | 0.131847  | 0.14831   | 0.139277 | 0.135635  | 0.129371 |
| 0.138403  | 0.0514277 | 0.0737179 | 0.143211  | 0.116404 | 0.130245  | 0.13039  |
| 0.147727  | 0.119901  | 0.131119  | 0.136509  | 0.140297 | 0.113928  | 0.137092 |
| 0.14729   | 0.0678904 | 0.0738636 | 0.161422  | 0.135781 | 0.149038  | 0.15035  |
| 0.0767774 | 0.119172  | 0.130973  | 0.147727  | 0.140152 | 0.130099  | 0.127331 |
| 0.0713869 | 0.122815  | 0.136072  | 0.153992  | 0.145251 | 0.134324  | 0.130973 |
| 0.14933   | 0.130245  | 0.137966  | 0.112179  | 0.150932 | 0.097465  | 0.142191 |
| 0.137383  | 0.0527389 | 0.0633741 | 0.140443  | 0.117133 | 0.124272  | 0.12704  |
| 0.1419    | 0.0546329 | 0.0649767 | 0.148747  | 0.126603 | 0.134615  | 0.135927 |
| 0.155157  | 0.122086  | 0.116404  | 0.0979021 | 0.127331 | 0.103875  | 0.142191 |
| 0.151224  | 0.130682  | 0.143065  | 0.146999  | 0.1537   | 0.11451   | 0.135927 |
| 0.160111  | 0.142483  | 0.154575  | 0.160548  | 0.163753 | 0.123106  | 0.151224 |
| 0.149767  | 0.127185  | 0.137529  | 0.151661  | 0.141463 | 0.125583  | 0.13039  |
| 0.15574   | 0.136655  | 0.14729   | 0.155303  | 0.159674 | 0.113491  | 0.143939 |
| 0.159237  | 0.130245  | 0.144085  | 0.118007  | 0.154138 | 0.0936772 | 0.142483 |
| 0.218531  | 0.196241  | 0.18007   | 0.160402  | 0.160693 | 0.219988  | 0.211976 |
| 0.145833  | 0.131993  | 0.14292   | 0.145979  | 0.152972 | 0.114656  | 0.142774 |
| 0.203234  | 0.186772  | 0.165064  | 0.147727  | 0.145688 | 0.20236   | 0.196387 |
| 0.134178  | 0.116841  | 0.130973  | 0.142191  | 0.139277 | 0.121066  | 0.12704  |
| 0.144085  | 0.123543  | 0.133013  | 0.147145  | 0.141608 | 0.134178  | 0.134615 |
| 0.146999  | 0.124709  | 0.132139  | 0.150058  | 0.140734 | 0.120192  | 0.131993 |
| 0.139569  | 0.123689  | 0.134907  | 0.143211  | 0.137675 | 0.113054  | 0.133887 |
| 0.141171  | 0.0483683 | 0.0636655 | 0.144231  | 0.119755 | 0.133887  | 0.131119 |
| 0.142628  | 0.048951  | 0.0627914 | 0.143648  | 0.123252 | 0.128934  | 0.13345  |
| 0.145542  | 0.12296   | 0.128059  | 0.140734  | 0.131993 | 0.128351  | 0.13345  |
| 0.133741  | 0.120775  | 0.13549   | 0.143502  | 0.143502 | 0.124709  | 0.134761 |
| 0.150641  | 0.126311  | 0.137529  | 0.152535  | 0.144085 | 0.117424  | 0.136801 |
| 0.158654  | 0.136364  | 0.139132  | 0.112179  | 0.147727 | 0.0936772 | 0.14831  |
| 0.254516  | 0.24155   | 0.223048  | 0.200758  | 0.203671 | 0.256265  | 0.252914 |
| 0.143502  | 0.121503  | 0.131556  | 0.145688  | 0.13345  | 0.130973  | 0.13345  |
| 0.200175  | 0.179633  | 0.162587  | 0.137092  | 0.136801 | 0.192599  | 0.187791 |
| 0.203817  | 0.180361  | 0.165647  | 0.140152  | 0.138112 | 0.198281  | 0.195804 |
| 0.140734  | 0.127185  | 0.134907  | 0.140006  | 0.137966 | 0.128205  | 0.134761 |
| 0.144522  | 0.116404  | 0.129079  | 0.145251  | 0.133887 | 0.117716  | 0.127185 |
| 0.143939  | 0.122523  | 0.135781  | 0.151661  | 0.143211 | 0.132867  | 0.137092 |
| 0.13549   | 0.0543415 | 0.0769231 | 0.13884   | 0.113491 | 0.125291  | 0.125437 |
| 0.141463  | 0.119464  | 0.123397  | 0.132284  | 0.122378 | 0.128059  | 0.134033 |
| 0.151661  | 0.122086  | 0.136509  | 0.111014  | 0.143065 | 0.0962995 | 0.141608 |
| 0.140734  | 0.0756119 | 0.0874126 | 0.141463  | 0.122523 | 0.127331  | 0.137675 |

|           |           |           |          |          |           |          |
|-----------|-----------|-----------|----------|----------|-----------|----------|
| 0.145979  | 0.0566725 | 0.0696387 | 0.153992 | 0.128934 | 0.136655  | 0.140589 |
| 0.13884   | 0.117424  | 0.131265  | 0.144231 | 0.134907 | 0.132139  | 0.130245 |
| 0.143502  | 0.0547786 | 0.0689103 | 0.150058 | 0.128788 | 0.131847  | 0.137821 |
| 0.1419    | 0.123397  | 0.131702  | 0.145833 | 0.144376 | 0.115676  | 0.129225 |
| 0.148601  | 0.130682  | 0.140152  | 0.156323 | 0.145251 | 0.11451   | 0.137675 |
| 0.150204  | 0.126166  | 0.137966  | 0.143357 | 0.145688 | 0.114656  | 0.137821 |
| 0.157634  | 0.135927  | 0.147727  | 0.122523 | 0.158071 | 0.0952797 | 0.148747 |
| 0.140297  | 0.128788  | 0.134761  | 0.150641 | 0.147436 | 0.124854  | 0.13141  |
| 0.138258  | 0.119755  | 0.125728  | 0.139569 | 0.131702 | 0.12602   | 0.129662 |
| 0.137383  | 0.13141   | 0.144085  | 0.159091 | 0.155594 | 0.133304  | 0.106935 |
| 0.204545  | 0.179924  | 0.160256  | 0.136801 | 0.141171 | 0.195221  | 0.192162 |
| 0.146707  | 0.0579837 | 0.0726981 | 0.156177 | 0.132867 | 0.13884   | 0.142774 |
| 0.140006  | 0.0472028 | 0.0659965 | 0.143357 | 0.117716 | 0.130099  | 0.131993 |
| 0.146853  | 0.126603  | 0.137529  | 0.152535 | 0.143211 | 0.112762  | 0.132721 |
| 0.138258  | 0.117133  | 0.127768  | 0.141317 | 0.135198 | 0.109703  | 0.126457 |
| 0.149476  | 0.122815  | 0.136364  | 0.142337 | 0.148456 | 0.113345  | 0.132721 |
| 0.155449  | 0.129371  | 0.142045  | 0.146562 | 0.152098 | 0.116696  | 0.139569 |
| 0.207751  | 0.188374  | 0.168706  | 0.143794 | 0.143211 | 0.202506  | 0.196824 |
| 0.139569  | 0.0689103 | 0.0795455 | 0.132139 | 0.117279 | 0.122086  | 0.134178 |
| 0.13447   | 0.106061  | 0.109411  | 0.121795 | 0.119755 | 0.119318  | 0.121503 |
| 0.141171  | 0.048951  | 0.0636655 | 0.146853 | 0.120047 | 0.13039   | 0.132576 |
| 0.20542   | 0.182255  | 0.165501  | 0.148164 | 0.148164 | 0.203963  | 0.200029 |
| 0.143502  | 0.117133  | 0.121941  | 0.134324 | 0.124709 | 0.121649  | 0.126457 |
| 0.152972  | 0.129808  | 0.139277  | 0.115239 | 0.150787 | 0.0926573 | 0.144668 |
| 0.142774  | 0.0467657 | 0.0632284 | 0.148747 | 0.120192 | 0.13141   | 0.133887 |
| 0.0729895 | 0.115385  | 0.130682  | 0.148601 | 0.143648 | 0.125437  | 0.127914 |
| 0.203526  | 0.18007   | 0.161859  | 0.141608 | 0.13986  | 0.198864  | 0.193473 |
| 0.150787  | 0.121503  | 0.130973  | 0.111014 | 0.142191 | 0.0930944 | 0.13986  |
| 0.134178  | 0.113636  | 0.124272  | 0.135198 | 0.135198 | 0.125437  | 0.105478 |
| 0.142045  | 0.114802  | 0.120775  | 0.129079 | 0.120921 | 0.122232  | 0.129079 |
| 0.14292   | 0.115385  | 0.110868  | 0.12296  | 0.116259 | 0.125728  | 0.132284 |
| 0.133741  | 0.122523  | 0.139277  | 0.147582 | 0.148456 | 0.125583  | 0.135344 |
| 0.157051  | 0.131556  | 0.142483  | 0.119901 | 0.154866 | 0.094697  | 0.145833 |
| 0.13986   | 0.11757   | 0.129953  | 0.145833 | 0.134761 | 0.127914  | 0.131556 |
| 0.138986  | 0.116987  | 0.130245  | 0.152535 | 0.144959 | 0.122378  | 0.130682 |
| 0.0432692 | 0.141026  | 0.150204  | 0.170746 | 0.166375 | 0.153992  | 0.143939 |
| 0.246941  | 0.22669   | 0.207896  | 0.18648  | 0.190268 | 0.243153  | 0.237471 |
| 0.142337  | 0.131993  | 0.137966  | 0.152389 | 0.153263 | 0.127477  | 0.136364 |
| 0.131847  | 0.123834  | 0.138549  | 0.147436 | 0.146562 | 0.127185  | 0.134033 |
| 0.140443  | 0.0560897 | 0.0652681 | 0.135052 | 0.115822 | 0.126166  | 0.131847 |
| 0.136218  | 0.124709  | 0.135635  | 0.148019 | 0.140152 | 0.13447   | 0.124709 |
| 0.131119  | 0.109411  | 0.123834  | 0.127185 | 0.137383 | 0.111888  | 0.131265 |
| 0.143648  | 0.121066  | 0.131702  | 0.147582 | 0.139423 | 0.122086  | 0.138258 |
| 0.140297  | 0.0562354 | 0.0689103 | 0.142191 | 0.121795 | 0.127477  | 0.134324 |

|           |           |           |          |          |           |          |
|-----------|-----------|-----------|----------|----------|-----------|----------|
| 0.155594  | 0.129808  | 0.138403  | 0.113491 | 0.149621 | 0.0929487 | 0.146416 |
| 0.115385  | 0.11757   | 0.133741  | 0.140589 | 0.135635 | 0.13141   | 0.131556 |
| 0.244901  | 0.229895  | 0.211393  | 0.186189 | 0.189977 | 0.245192  | 0.242133 |
| 0.142483  | 0.114365  | 0.125874  | 0.137092 | 0.126894 | 0.118298  | 0.125728 |
| 0.134033  | 0.113782  | 0.128788  | 0.134178 | 0.134178 | 0.0944056 | 0.121066 |
| 0.140006  | 0.117133  | 0.128351  | 0.141317 | 0.132867 | 0.125146  | 0.127914 |
| 0.0594406 | 0.127185  | 0.138986  | 0.160402 | 0.153992 | 0.139277  | 0.133887 |
| 0.144522  | 0.138549  | 0.146562  | 0.160402 | 0.160402 | 0.134033  | 0.138258 |
| 0.134615  | 0.109994  | 0.121795  | 0.146707 | 0.130099 | 0.129371  | 0.133596 |
| 0.139277  | 0.050845  | 0.0649767 | 0.141463 | 0.115239 | 0.129079  | 0.133596 |
| 0.0977564 | 0.113345  | 0.12602   | 0.142774 | 0.136946 | 0.122815  | 0.128205 |
| 0.240239  | 0.222902  | 0.203234  | 0.182401 | 0.185606 | 0.237325  | 0.233392 |
| 0.139714  | 0.0480769 | 0.0651224 | 0.147145 | 0.123834 | 0.132139  | 0.134033 |
| 0.154138  | 0.12602   | 0.136072  | 0.110868 | 0.146707 | 0.0894522 | 0.141171 |
| 0.126748  | 0.11757   | 0.13345   | 0.139714 | 0.135635 | 0.126748  | 0.124854 |
| 0.135052  | 0.120047  | 0.134178  | 0.149476 | 0.146853 | 0.12398   | 0.140734 |
| 0.143211  | 0.126457  | 0.140297  | 0.146562 | 0.150641 | 0.0986305 | 0.132284 |
| 0.137966  | 0.119172  | 0.130682  | 0.147145 | 0.13345  | 0.13039   | 0.128205 |
| 0.1537    | 0.128205  | 0.138549  | 0.116841 | 0.14831  | 0.092803  | 0.143939 |
| 0.155886  | 0.129516  | 0.143357  | 0.122523 | 0.155157 | 0.092366  | 0.145542 |
| 0.150641  | 0.122523  | 0.136072  | 0.112325 | 0.14729  | 0.0920746 | 0.137966 |
| 0.140006  | 0.122378  | 0.133013  | 0.147727 | 0.132284 | 0.128351  | 0.130536 |
| 0.130973  | 0.124417  | 0.139714  | 0.156177 | 0.153263 | 0.127185  | 0.134907 |
| 0.13549   | 0.125728  | 0.142191  | 0.159237 | 0.159528 | 0.131993  | 0.14088  |
| 0.151224  | 0.132721  | 0.138986  | 0.159528 | 0.149038 | 0.118881  | 0.137383 |
| 0.153263  | 0.138258  | 0.146562  | 0.157488 | 0.150204 | 0.119464  | 0.144668 |
| 0.136509  | 0.126748  | 0.14729   | 0.159091 | 0.157634 | 0.128059  | 0.139569 |
| 0.139714  | 0.118007  | 0.132139  | 0.141026 | 0.128205 | 0.125146  | 0.128205 |
| 0.153846  | 0.135344  | 0.148893  | 0.145833 | 0.162733 | 0.0434149 | 0.143502 |
| 0.152535  | 0.134324  | 0.143794  | 0.154429 | 0.156177 | 0.127768  | 0.141317 |
| 0.217803  | 0.197261  | 0.176428  | 0.160256 | 0.158217 | 0.217803  | 0.210956 |
| 0.144085  | 0.121503  | 0.128934  | 0.150058 | 0.144231 | 0.124854  | 0.135781 |
| 0.137966  | 0.121503  | 0.13243   | 0.138403 | 0.140443 | 0.0989219 | 0.129662 |
| 0.141608  | 0.124854  | 0.127622  | 0.143211 | 0.135052 | 0.136072  | 0.133887 |
| 0.232663  | 0.217949  | 0.192745  | 0.175408 | 0.176573 | 0.229167  | 0.22873  |
| 0.222174  | 0.205128  | 0.18546   | 0.164918 | 0.164918 | 0.217512  | 0.218823 |
| 0.155886  | 0.131265  | 0.142774  | 0.116696 | 0.151661 | 0.0932401 | 0.148456 |
| 0.25539   | 0.240967  | 0.221008  | 0.197261 | 0.204837 | 0.255682  | 0.25204  |
| 0.135635  | 0.119172  | 0.129808  | 0.13986  | 0.127914 | 0.125728  | 0.129953 |
| 0.152244  | 0.137529  | 0.151078  | 0.162005 | 0.156177 | 0.146707  | 0.148601 |
| 0.146416  | 0.120338  | 0.13243   | 0.142483 | 0.133741 | 0.121941  | 0.128497 |
| 0.133159  | 0.123689  | 0.13986   | 0.153409 | 0.151661 | 0.126748  | 0.136801 |
| 0.20236   | 0.183566  | 0.163316  | 0.143648 | 0.141317 | 0.198281  | 0.194056 |
| 0.145979  | 0.127185  | 0.141026  | 0.144668 | 0.151952 | 0.127914  | 0.127185 |

|           |           |           |          |          |           |          |
|-----------|-----------|-----------|----------|----------|-----------|----------|
| 0.210373  | 0.186626  | 0.168998  | 0.149038 | 0.149621 | 0.206294  | 0.199155 |
| 0.134615  | 0.121358  | 0.135781  | 0.14729  | 0.141463 | 0.126166  | 0.131556 |
| 0.149476  | 0.100087  | 0.103438  | 0.103875 | 0.119318 | 0.10373   | 0.137675 |
| 0.1419    | 0.125146  | 0.136364  | 0.148164 | 0.143211 | 0.127331  | 0.141171 |
| 0.134033  | 0.105915  | 0.113054  | 0.134761 | 0.122523 | 0.121212  | 0.127477 |
| 0.134178  | 0.112471  | 0.124854  | 0.138403 | 0.129079 | 0.123397  | 0.129079 |
| 0.143794  | 0.109848  | 0.125728  | 0.147145 | 0.139277 | 0.121066  | 0.129371 |
| 0.140297  | 0.116259  | 0.126894  | 0.137238 | 0.127622 | 0.118153  | 0.124709 |
| 0.13549   | 0.0534674 | 0.0728438 | 0.140297 | 0.114948 | 0.125583  | 0.126894 |
| 0.149913  | 0.122086  | 0.134761  | 0.130536 | 0.147436 | 0.0479312 | 0.134615 |
| 0.136509  | 0.118007  | 0.12602   | 0.142191 | 0.136072 | 0.120484  | 0.129953 |
| 0.142191  | 0.118444  | 0.130828  | 0.143211 | 0.133304 | 0.119755  | 0.129516 |
| 0.149038  | 0.125874  | 0.135344  | 0.144814 | 0.134033 | 0.116113  | 0.13549  |
| 0.144376  | 0.0568182 | 0.0680361 | 0.151807 | 0.126166 | 0.134178  | 0.136655 |
| 0.139569  | 0.119027  | 0.129953  | 0.142337 | 0.13447  | 0.112762  | 0.133596 |
| 0.135635  | 0.115676  | 0.129225  | 0.141026 | 0.138695 | 0.120192  | 0.105478 |
| 0.13345   | 0.113199  | 0.126457  | 0.140006 | 0.131556 | 0.123834  | 0.126311 |
| 0.150058  | 0.11757   | 0.124417  | 0.106498 | 0.137383 | 0.0996503 | 0.139132 |
| 0.132867  | 0.121066  | 0.136946  | 0.144668 | 0.144959 | 0.124417  | 0.132139 |
| 0.154575  | 0.125     | 0.13884   | 0.145105 | 0.154429 | 0.114656  | 0.137821 |
| 0.146125  | 0.126457  | 0.135052  | 0.144814 | 0.138986 | 0.108537  | 0.133741 |
| 0.140152  | 0.0499709 | 0.0693473 | 0.140297 | 0.119027 | 0.126166  | 0.130682 |
| 0.144959  | 0.0530303 | 0.0680361 | 0.152681 | 0.126748 | 0.13447   | 0.138112 |
| 0.145542  | 0.0588578 | 0.0726981 | 0.1588   | 0.134615 | 0.142045  | 0.142483 |
| 0.1419    | 0.111742  | 0.124709  | 0.109994 | 0.134761 | 0.0941142 | 0.135344 |
| 0.139569  | 0.120192  | 0.130828  | 0.142045 | 0.13243  | 0.130245  | 0.133304 |
| 0.139132  | 0.113636  | 0.125728  | 0.139277 | 0.133159 | 0.11553   | 0.134324 |
| 0.134178  | 0.129371  | 0.144085  | 0.158217 | 0.158508 | 0.131265  | 0.137238 |
| 0.145396  | 0.121066  | 0.134324  | 0.14933  | 0.135635 | 0.120921  | 0.13039  |
| 0.157343  | 0.145251  | 0.153555  | 0.160985 | 0.164773 | 0.12296   | 0.149038 |
| 0.143939  | 0.135052  | 0.143648  | 0.159819 | 0.150787 | 0.144231  | 0.141463 |
| 0.0674534 | 0.121503  | 0.138258  | 0.155012 | 0.151515 | 0.136509  | 0.133159 |
| 0.134615  | 0.112034  | 0.128497  | 0.139714 | 0.133596 | 0.121503  | 0.134761 |
| 0.130682  | 0.112179  | 0.13039   | 0.140734 | 0.135198 | 0.118735  | 0.127914 |
| 0.150787  | 0.132867  | 0.142337  | 0.1588   | 0.147436 | 0.117279  | 0.138112 |
| 0.222319  | 0.19799   | 0.180944  | 0.156906 | 0.166521 | 0.215618  | 0.213724 |
| 0.134615  | 0.118735  | 0.127331  | 0.137383 | 0.135635 | 0.122378  | 0.104749 |
| 0.144668  | 0.121503  | 0.137383  | 0.148601 | 0.137529 | 0.127185  | 0.141317 |
| 0.129662  | 0.11961   | 0.136364  | 0.144376 | 0.147582 | 0.122086  | 0.130682 |
| 0.146999  | 0.124126  | 0.133304  | 0.145979 | 0.136655 | 0.114656  | 0.134615 |
| 0.138112  | 0.128059  | 0.1419    | 0.147873 | 0.141754 | 0.128497  | 0.13243  |
| 0.143648  | 0.114656  | 0.127914  | 0.146416 | 0.144085 | 0.116259  | 0.133887 |
| 0.140006  | 0.116841  | 0.125728  | 0.148893 | 0.145105 | 0.119901  | 0.13345  |
| 0.0673077 | 0.120775  | 0.133159  | 0.153992 | 0.145542 | 0.130828  | 0.130099 |

|          |           |           |          |          |           |          |
|----------|-----------|-----------|----------|----------|-----------|----------|
| 0.145105 | 0.118153  | 0.132867  | 0.125728 | 0.143211 | 0.0544872 | 0.134178 |
| 0.133741 | 0.125146  | 0.142191  | 0.1537   | 0.158071 | 0.126457  | 0.140297 |
| 0.1419   | 0.120775  | 0.136364  | 0.145833 | 0.140006 | 0.123834  | 0.133013 |
| 0.140589 | 0.125583  | 0.135052  | 0.14831  | 0.143939 | 0.12602   | 0.133159 |
| 0.196678 | 0.170309  | 0.16958   | 0.163316 | 0.161276 | 0.182401  | 0.188374 |
| 0.139569 | 0.0514277 | 0.0769231 | 0.14088  | 0.114948 | 0.126748  | 0.133304 |
| 0.135635 | 0.128205  | 0.129225  | 0.142191 | 0.144231 | 0.129225  | 0.137238 |
| 0.145979 | 0.133013  | 0.142774  | 0.145542 | 0.151078 | 0.102564  | 0.14088  |
| 0.140297 | 0.113054  | 0.122815  | 0.136655 | 0.136655 | 0.113199  | 0.138112 |
| 0.132139 | 0.1081    | 0.122523  | 0.136946 | 0.134033 | 0.114365  | 0.126457 |
| 0.129808 | 0.113636  | 0.125146  | 0.139277 | 0.136364 | 0.112034  | 0.129371 |
| 0.133887 | 0.113054  | 0.127768  | 0.145105 | 0.140734 | 0.114073  | 0.130245 |
| 0.14292  | 0.127331  | 0.141171  | 0.138112 | 0.148893 | 0.11116   | 0.140734 |
| 0.136801 | 0.0874126 | 0.100087  | 0.134907 | 0.125    | 0.128351  | 0.127914 |
| 0.152389 | 0.129808  | 0.144522  | 0.155449 | 0.152826 | 0.117716  | 0.14088  |
| 0.139423 | 0.109848  | 0.123106  | 0.128205 | 0.128497 | 0.106789  | 0.136364 |
| 0.148019 | 0.126311  | 0.133741  | 0.140589 | 0.137092 | 0.104021  | 0.133304 |
| 0.151078 | 0.13549   | 0.150495  | 0.143357 | 0.157051 | 0.114365  | 0.150641 |
| 0.143502 | 0.126166  | 0.13884   | 0.143065 | 0.14831  | 0.0916375 | 0.132867 |
| 0.143794 | 0.120047  | 0.134761  | 0.14831  | 0.144814 | 0.115822  | 0.139277 |
| 0.143211 | 0.123834  | 0.137383  | 0.136364 | 0.141608 | 0.0910548 | 0.134907 |
| 0.144376 | 0.122669  | 0.137675  | 0.144231 | 0.145105 | 0.0930944 | 0.132576 |
| 0.133596 | 0.120629  | 0.129225  | 0.1419   | 0.136946 | 0.115239  | 0.126748 |
| 0.149476 | 0.129225  | 0.137529  | 0.146707 | 0.141754 | 0.11859   | 0.142045 |
| 0.138403 | 0.121358  | 0.134615  | 0.137966 | 0.137092 | 0.106643  | 0.13243  |
| 0.159674 | 0.138549  | 0.147727  | 0.150204 | 0.162442 | 0.124709  | 0.154866 |
| 0.152681 | 0.129808  | 0.138112  | 0.136801 | 0.148456 | 0.122669  | 0.14933  |
| 0.140443 | 0.117861  | 0.133159  | 0.136218 | 0.141463 | 0.0903263 | 0.132721 |
| 0.154575 | 0.136072  | 0.14729   | 0.149767 | 0.164918 | 0.124563  | 0.149476 |
| 0.135927 | 0.125     | 0.134761  | 0.148019 | 0.138986 | 0.125728  | 0.132284 |
| 0.150787 | 0.141317  | 0.146125  | 0.155594 | 0.152972 | 0.13447   | 0.142774 |
| 0.142337 | 0.119755  | 0.133887  | 0.146853 | 0.138695 | 0.112908  | 0.133159 |
| 0.15676  | 0.140006  | 0.150932  | 0.163024 | 0.163899 | 0.141317  | 0.154866 |
| 0.146853 | 0.133887  | 0.143065  | 0.151661 | 0.153992 | 0.122378  | 0.136509 |
| 0.151224 | 0.141463  | 0.153263  | 0.151078 | 0.154283 | 0.130245  | 0.147582 |
| 0.145979 | 0.126603  | 0.136946  | 0.145833 | 0.144959 | 0.111597  | 0.13447  |
| 0.141463 | 0.123834  | 0.13447   | 0.131702 | 0.138695 | 0.0942599 | 0.132284 |
| 0.143065 | 0.122232  | 0.133741  | 0.134761 | 0.135927 | 0.117716  | 0.133013 |
| 0.136509 | 0.123834  | 0.137966  | 0.13549  | 0.142774 | 0.107955  | 0.13141  |
| 0.148456 | 0.128788  | 0.136509  | 0.147727 | 0.14831  | 0.095134  | 0.136655 |
| 0.149767 | 0.136801  | 0.140152  | 0.157488 | 0.15574  | 0.12296   | 0.13884  |
| 0.148893 | 0.126603  | 0.138112  | 0.13243  | 0.139132 | 0.121795  | 0.14088  |
| 0.13986  | 0.117861  | 0.132867  | 0.139423 | 0.135344 | 0.106352  | 0.131556 |
| 0.14292  | 0.121212  | 0.135052  | 0.134324 | 0.135781 | 0.114073  | 0.131702 |

|          |          |          |          |          |          |          |
|----------|----------|----------|----------|----------|----------|----------|
| 0.141608 | 0.127768 | 0.13549  | 0.142045 | 0.147582 | 0.117716 | 0.137383 |
| 0.145396 | 0.118735 | 0.131702 | 0.130682 | 0.135052 | 0.114219 | 0.137966 |
| 0.145542 | 0.130536 | 0.141171 | 0.141317 | 0.145688 | 0.121358 | 0.136364 |
| 0.146707 | 0.118298 | 0.131556 | 0.144814 | 0.132576 | 0.121941 | 0.134033 |
| 0.133741 | 0.108537 | 0.119464 | 0.144668 | 0.13039  | 0.127622 | 0.131847 |
| 0.138695 | 0.113782 | 0.128205 | 0.14729  | 0.135927 | 0.125291 | 0.128642 |
| 0.135781 | 0.115239 | 0.128205 | 0.144376 | 0.130973 | 0.123834 | 0.128059 |
| 0.136364 | 0.121649 | 0.132867 | 0.136509 | 0.140297 | 0.117424 | 0.135344 |
| 0.137675 | 0.108974 | 0.122523 | 0.141317 | 0.129662 | 0.127185 | 0.126748 |
| 0.142774 | 0.110868 | 0.123834 | 0.144959 | 0.133013 | 0.117133 | 0.132139 |
| 0.144814 | 0.097465 | 0.112762 | 0.147873 | 0.131265 | 0.125874 | 0.133304 |
| 0.131119 | 0.103293 | 0.117133 | 0.137383 | 0.126311 | 0.120629 | 0.126603 |
| 0.147873 | 0.129371 | 0.13447  | 0.151515 | 0.145688 | 0.12398  | 0.13986  |

| TDr_1510  | TDr_1513  | TDr_1536  | TDr_1543  | TDr_1556  | TDr_1559  | TDr_1562  |
|-----------|-----------|-----------|-----------|-----------|-----------|-----------|
| 0.115822  | 0.111888  | 0.114073  | 0.117861  | 0.117133  | 0.106061  | 0.115093  |
| 0.0999417 | 0.108246  | 0.117133  | 0.104895  | 0.113782  | 0.0989219 | 0.110577  |
| 0.0987762 | 0.105915  | 0.112179  | 0.100233  | 0.109411  | 0.0957168 | 0.106498  |
| 0.107226  | 0.104749  | 0.119464  | 0.0909091 | 0.113782  | 0.0962995 | 0.112325  |
| 0.129953  | 0.135052  | 0.133159  | 0.133741  | 0.129808  | 0.130682  | 0.130099  |
| 0.119755  | 0.118153  | 0.127622  | 0.126166  | 0.129225  | 0.119027  | 0.130682  |
| 0.118444  | 0.124126  | 0.121358  | 0.12602   | 0.120629  | 0.120047  | 0.12704   |
| 0.106206  | 0.106935  | 0.116987  | 0.10067   | 0.108683  | 0.0967366 | 0.111888  |
| 0.104312  | 0.106789  | 0.0984848 | 0.104895  | 0.10708   | 0.0995047 | 0.0968823 |
| 0.101544  | 0.106352  | 0.0866841 | 0.119027  | 0.106935  | 0.0990676 | 0.112471  |
| 0.109266  | 0.10708   | 0.115967  | 0.121795  | 0.11757   | 0.106206  | 0.120192  |
| 0.108829  | 0.111597  | 0.115822  | 0.103001  | 0.11014   | 0.10373   | 0.112471  |
| 0.106206  | 0.106935  | 0.114365  | 0.110577  | 0.107809  | 0.0984848 | 0.107517  |
| 0.123252  | 0.124854  | 0.135198  | 0.129371  | 0.130973  | 0.115239  | 0.130973  |
| 0.092803  | 0.0868298 | 0.126894  | 0.127768  | 0.12296   | 0.0824592 | 0.129079  |
| 0.113636  | 0.104749  | 0.118007  | 0.119464  | 0.119027  | 0.106498  | 0.121941  |
| 0.111742  | 0.106352  | 0.112325  | 0.113199  | 0.0932401 | 0.11014   | 0.111888  |
| 0.141026  | 0.143211  | 0.14831   | 0.136946  | 0.14088   | 0.138258  | 0.141754  |
| 0.102273  | 0.106498  | 0.109848  | 0.102273  | 0.111451  | 0.0954254 | 0.104749  |
| 0.187937  | 0.177885  | 0.198718  | 0.199301  | 0.201777  | 0.171183  | 0.202652  |
| 0.11553   | 0.119172  | 0.125146  | 0.125437  | 0.126457  | 0.115967  | 0.124709  |
| 0.112762  | 0.11961   | 0.120921  | 0.116841  | 0.120484  | 0.115822  | 0.114948  |
| 0.105624  | 0.0958625 | 0.116113  | 0.106789  | 0.108392  | 0.0961538 | 0.110723  |
| 0.12704   | 0.121941  | 0.126166  | 0.124709  | 0.123397  | 0.119027  | 0.130973  |
| 0.104167  | 0.100233  | 0.103584  | 0.106498  | 0.102564  | 0.0935315 | 0.109266  |
| 0.120192  | 0.121795  | 0.124563  | 0.129808  | 0.13345   | 0.122378  | 0.13345   |
| 0.119318  | 0.11451   | 0.120775  | 0.127185  | 0.117716  | 0.119464  | 0.126748  |
| 0.118153  | 0.118007  | 0.119027  | 0.119901  | 0.114802  | 0.111597  | 0.119464  |
| 0.123397  | 0.129662  | 0.127768  | 0.129808  | 0.123834  | 0.127622  | 0.13141   |
| 0.11961   | 0.120338  | 0.11116   | 0.122815  | 0.117424  | 0.119464  | 0.125     |
| 0.115093  | 0.10708   | 0.118881  | 0.128205  | 0.124563  | 0.112325  | 0.133304  |
| 0.113199  | 0.113054  | 0.121649  | 0.121941  | 0.120629  | 0.113054  | 0.12704   |
| 0.0971737 | 0.0961538 | 0.108246  | 0.108246  | 0.107517  | 0.0929487 | 0.111597  |
| 0.112617  | 0.11655   | 0.117279  | 0.117861  | 0.117133  | 0.113636  | 0.115967  |
| 0.117716  | 0.11961   | 0.125     | 0.124709  | 0.119027  | 0.11553   | 0.122523  |
| 0.126894  | 0.123543  | 0.122232  | 0.128642  | 0.124709  | 0.12296   | 0.126457  |
| 0.129371  | 0.13243   | 0.125291  | 0.133159  | 0.132721  | 0.130099  | 0.134178  |
| 0.121066  | 0.115093  | 0.121649  | 0.123397  | 0.122669  | 0.116841  | 0.126166  |
| 0.10708   | 0.105478  | 0.11116   | 0.110286  | 0.109557  | 0.10169   | 0.114219  |
| 0.116987  | 0.120047  | 0.116404  | 0.118735  | 0.119172  | 0.113054  | 0.129371  |
| 0.104458  | 0.113345  | 0.108829  | 0.108537  | 0.107809  | 0.102273  | 0.109266  |
| 0.135344  | 0.136072  | 0.13884   | 0.140297  | 0.136364  | 0.130536  | 0.15035   |



|          |          |           |           |           |           |          |
|----------|----------|-----------|-----------|-----------|-----------|----------|
| 0.139714 | 0.141608 | 0.139714  | 0.144085  | 0.141026  | 0.141317  | 0.146853 |
| 0.112179 | 0.114365 | 0.111305  | 0.113636  | 0.110577  | 0.110577  | 0.118444 |
| 0.104604 | 0.103001 | 0.0996503 | 0.112471  | 0.0971737 | 0.107955  | 0.10912  |
| 0.116113 | 0.115093 | 0.10708   | 0.124272  | 0.108974  | 0.114802  | 0.125874 |
| 0.114073 | 0.111305 | 0.120192  | 0.117279  | 0.109266  | 0.111014  | 0.120338 |
| 0.134907 | 0.136218 | 0.130245  | 0.13549   | 0.132139  | 0.132139  | 0.138258 |
| 0.111014 | 0.11757  | 0.112179  | 0.116259  | 0.115239  | 0.107372  | 0.11757  |
| 0.107372 | 0.108683 | 0.113491  | 0.117861  | 0.108392  | 0.109557  | 0.117424 |
| 0.140152 | 0.141171 | 0.137238  | 0.142483  | 0.147582  | 0.141463  | 0.150204 |
| 0.130536 | 0.118735 | 0.127331  | 0.130536  | 0.125437  | 0.122815  | 0.133887 |
| 0.113199 | 0.115385 | 0.114656  | 0.113782  | 0.11014   | 0.109557  | 0.115967 |
| 0.113782 | 0.121212 | 0.127477  | 0.122232  | 0.124709  | 0.111888  | 0.125874 |
| 0.105332 | 0.111305 | 0.121358  | 0.0814394 | 0.113928  | 0.0888695 | 0.110431 |
| 0.139423 | 0.137238 | 0.141463  | 0.132721  | 0.137821  | 0.137529  | 0.141026 |
| 0.125874 | 0.126894 | 0.121795  | 0.125583  | 0.121358  | 0.121649  | 0.130099 |
| 0.107517 | 0.112325 | 0.11451   | 0.114802  | 0.110286  | 0.10708   | 0.113782 |
| 0.114219 | 0.116113 | 0.115967  | 0.122378  | 0.114073  | 0.11116   | 0.115822 |
| 0.11116  | 0.118298 | 0.10912   | 0.126894  | 0.116841  | 0.117716  | 0.125874 |
| 0.133596 | 0.13141  | 0.134178  | 0.134178  | 0.134324  | 0.134324  | 0.141026 |
| 0.135635 | 0.138403 | 0.135635  | 0.131265  | 0.141317  | 0.129662  | 0.1419   |
| 0.153555 | 0.149621 | 0.160839  | 0.159382  | 0.15778   | 0.147873  | 0.163024 |
| 0.104021 | 0.114073 | 0.120047  | 0.114219  | 0.108829  | 0.106206  | 0.116987 |
| 0.108974 | 0.115239 | 0.113054  | 0.11655   | 0.100962  | 0.107372  | 0.11553  |
| 0.109848 | 0.115239 | 0.114219  | 0.112471  | 0.105041  | 0.10912   | 0.116696 |
| 0.13447  | 0.135781 | 0.133887  | 0.14292   | 0.128205  | 0.134615  | 0.1419   |
| 0.10912  | 0.11451  | 0.116987  | 0.109703  | 0.108683  | 0.102273  | 0.111597 |
| 0.13141  | 0.127477 | 0.136072  | 0.133159  | 0.128059  | 0.123397  | 0.140297 |
| 0.117133 | 0.109411 | 0.115967  | 0.12704   | 0.108537  | 0.116987  | 0.125728 |
| 0.115239 | 0.118298 | 0.120192  | 0.121941  | 0.108392  | 0.109557  | 0.121212 |
| 0.142337 | 0.133741 | 0.141754  | 0.145251  | 0.145688  | 0.136655  | 0.153263 |
| 0.117279 | 0.117716 | 0.121941  | 0.119027  | 0.115093  | 0.115967  | 0.12296  |
| 0.132867 | 0.137092 | 0.134324  | 0.134033  | 0.13447   | 0.132139  | 0.142337 |
| 0.130973 | 0.123834 | 0.128351  | 0.131265  | 0.126166  | 0.126457  | 0.130828 |
| 0.109266 | 0.108246 | 0.11655   | 0.104895  | 0.11116   | 0.103001  | 0.114948 |
| 0.106643 | 0.114365 | 0.116259  | 0.108683  | 0.108829  | 0.105915  | 0.114073 |
| 0.11451  | 0.115239 | 0.118298  | 0.114219  | 0.110286  | 0.10708   | 0.113491 |
| 0.128497 | 0.126894 | 0.129662  | 0.126166  | 0.133013  | 0.127768  | 0.133013 |
| 0.107372 | 0.115093 | 0.113199  | 0.116113  | 0.107517  | 0.108392  | 0.116259 |
| 0.132867 | 0.141171 | 0.134615  | 0.133741  | 0.138549  | 0.128934  | 0.140589 |
| 0.11451  | 0.120192 | 0.124126  | 0.123834  | 0.11757   | 0.112617  | 0.124563 |
| 0.118007 | 0.117861 | 0.122086  | 0.112762  | 0.113782  | 0.110868  | 0.123689 |
| 0.113928 | 0.113782 | 0.115676  | 0.120921  | 0.11553   | 0.111451  | 0.115239 |
| 0.114219 | 0.120775 | 0.125     | 0.118007  | 0.117861  | 0.114073  | 0.124272 |
| 0.107517 | 0.113491 | 0.114802  | 0.117133  | 0.108246  | 0.110286  | 0.118735 |

|           |          |           |          |           |           |          |
|-----------|----------|-----------|----------|-----------|-----------|----------|
| 0.106352  | 0.113199 | 0.114219  | 0.114219 | 0.109703  | 0.108537  | 0.115822 |
| 0.133596  | 0.133159 | 0.133013  | 0.135344 | 0.131119  | 0.132576  | 0.143939 |
| 0.105915  | 0.104021 | 0.114365  | 0.115822 | 0.104312  | 0.106935  | 0.114802 |
| 0.112471  | 0.106206 | 0.113928  | 0.117133 | 0.109994  | 0.108537  | 0.109411 |
| 0.11859   | 0.123689 | 0.12296   | 0.12704  | 0.126894  | 0.124854  | 0.130099 |
| 0.120629  | 0.128642 | 0.122378  | 0.131702 | 0.122232  | 0.127477  | 0.13039  |
| 0.124417  | 0.120192 | 0.125     | 0.136946 | 0.126311  | 0.131556  | 0.130682 |
| 0.130682  | 0.127622 | 0.135635  | 0.137383 | 0.131993  | 0.127914  | 0.141026 |
| 0.112179  | 0.114365 | 0.119172  | 0.120921 | 0.116987  | 0.10912   | 0.120775 |
| 0.178322  | 0.174388 | 0.174825  | 0.181818 | 0.184295  | 0.171183  | 0.1875   |
| 0.103001  | 0.106935 | 0.114656  | 0.109411 | 0.11014   | 0.104312  | 0.114802 |
| 0.126748  | 0.125437 | 0.139277  | 0.136364 | 0.133304  | 0.128351  | 0.136509 |
| 0.120338  | 0.116696 | 0.128788  | 0.128788 | 0.124563  | 0.120484  | 0.129225 |
| 0.134761  | 0.133159 | 0.127185  | 0.137675 | 0.136364  | 0.136072  | 0.138695 |
| 0.108974  | 0.105915 | 0.113928  | 0.11655  | 0.106206  | 0.106789  | 0.117279 |
| 0.126457  | 0.12398  | 0.129953  | 0.130245 | 0.12602   | 0.125437  | 0.135635 |
| 0.110431  | 0.111451 | 0.11014   | 0.118298 | 0.110868  | 0.11116   | 0.121066 |
| 0.123106  | 0.114219 | 0.113782  | 0.127185 | 0.123252  | 0.120921  | 0.128497 |
| 0.113782  | 0.109848 | 0.109994  | 0.116404 | 0.113636  | 0.107517  | 0.119755 |
| 0.136218  | 0.127622 | 0.133596  | 0.141171 | 0.125874  | 0.136364  | 0.138403 |
| 0.114073  | 0.103147 | 0.0986305 | 0.11757  | 0.106061  | 0.108392  | 0.117133 |
| 0.130245  | 0.123397 | 0.130245  | 0.134615 | 0.136801  | 0.128934  | 0.139132 |
| 0.112908  | 0.117716 | 0.109703  | 0.120192 | 0.118007  | 0.118007  | 0.119464 |
| 0.126457  | 0.128934 | 0.121795  | 0.129079 | 0.131556  | 0.126894  | 0.134178 |
| 0.120775  | 0.126457 | 0.119027  | 0.134178 | 0.125583  | 0.127622  | 0.132576 |
| 0.102127  | 0.111014 | 0.109994  | 0.115822 | 0.107517  | 0.1081    | 0.114219 |
| 0.13884   | 0.131993 | 0.141754  | 0.143502 | 0.140152  | 0.133741  | 0.147145 |
| 0.108683  | 0.116696 | 0.111597  | 0.121795 | 0.112325  | 0.116987  | 0.124854 |
| 0.107809  | 0.108246 | 0.114802  | 0.117424 | 0.108246  | 0.109411  | 0.112908 |
| 0.123106  | 0.114802 | 0.109411  | 0.119318 | 0.114219  | 0.118007  | 0.120047 |
| 0.135052  | 0.136072 | 0.127768  | 0.140006 | 0.136655  | 0.136364  | 0.143648 |
| 0.118444  | 0.109266 | 0.122523  | 0.124272 | 0.120338  | 0.11014   | 0.123834 |
| 0.105915  | 0.101399 | 0.115822  | 0.109994 | 0.109266  | 0.105186  | 0.113345 |
| 0.105624  | 0.102273 | 0.114073  | 0.11553  | 0.109557  | 0.109266  | 0.114219 |
| 0.11014   | 0.114365 | 0.116259  | 0.11859  | 0.10912   | 0.114365  | 0.120775 |
| 0.118153  | 0.121795 | 0.110868  | 0.131265 | 0.122378  | 0.117716  | 0.129953 |
| 0.112762  | 0.115822 | 0.115093  | 0.122086 | 0.114948  | 0.11757   | 0.119027 |
| 0.0980478 | 0.097028 | 0.105041  | 0.109703 | 0.0952797 | 0.0976107 | 0.108392 |
| 0.101836  | 0.102855 | 0.102418  | 0.107372 | 0.104604  | 0.0987762 | 0.112179 |
| 0.104895  | 0.105624 | 0.104604  | 0.115093 | 0.102418  | 0.108246  | 0.111742 |
| 0.11655   | 0.113199 | 0.125291  | 0.116841 | 0.113491  | 0.113782  | 0.122523 |
| 0.123689  | 0.118881 | 0.124854  | 0.131265 | 0.124417  | 0.124709  | 0.136946 |
| 0.10373   | 0.104458 | 0.108683  | 0.111014 | 0.103293  | 0.103584  | 0.110868 |
| 0.0960082 | 0.099359 | 0.102418  | 0.108537 | 0.105769  | 0.0984848 | 0.112471 |

|           |           |          |           |          |           |          |
|-----------|-----------|----------|-----------|----------|-----------|----------|
| 0.117861  | 0.115093  | 0.115239 | 0.133013  | 0.114802 | 0.121503  | 0.131702 |
| 0.104895  | 0.103584  | 0.107517 | 0.112179  | 0.106498 | 0.103584  | 0.116404 |
| 0.117716  | 0.118153  | 0.120921 | 0.125     | 0.111742 | 0.113782  | 0.123106 |
| 0.125291  | 0.128934  | 0.125    | 0.130828  | 0.135052 | 0.127185  | 0.135344 |
| 0.114802  | 0.108246  | 0.104895 | 0.119755  | 0.110577 | 0.110577  | 0.121649 |
| 0.10067   | 0.101981  | 0.106498 | 0.114948  | 0.104021 | 0.103438  | 0.109848 |
| 0.105041  | 0.104895  | 0.101253 | 0.114365  | 0.101399 | 0.106643  | 0.118007 |
| 0.104167  | 0.0979021 | 0.105624 | 0.110577  | 0.100816 | 0.0981935 | 0.109557 |
| 0.120192  | 0.123252  | 0.108246 | 0.127477  | 0.12296  | 0.120629  | 0.123543 |
| 0.0980478 | 0.10169   | 0.101836 | 0.109411  | 0.10373  | 0.0981935 | 0.106935 |
| 0.13141   | 0.133887  | 0.134033 | 0.136072  | 0.134761 | 0.131265  | 0.13884  |
| 0.126603  | 0.13141   | 0.127768 | 0.135635  | 0.127331 | 0.130536  | 0.13549  |
| 0.119901  | 0.120921  | 0.11757  | 0.126311  | 0.121503 | 0.118298  | 0.125291 |
| 0.108974  | 0.114948  | 0.107809 | 0.124417  | 0.108246 | 0.110577  | 0.120484 |
| 0.111305  | 0.113199  | 0.107226 | 0.120338  | 0.110577 | 0.111742  | 0.115822 |
| 0.106789  | 0.104604  | 0.11116  | 0.11757   | 0.1081   | 0.106935  | 0.117716 |
| 0.1081    | 0.109411  | 0.112471 | 0.113928  | 0.112034 | 0.112325  | 0.110286 |
| 0.111888  | 0.109994  | 0.110431 | 0.110431  | 0.109411 | 0.105624  | 0.110286 |
| 0.108392  | 0.103584  | 0.122669 | 0.0912005 | 0.110868 | 0.0878497 | 0.114365 |
| 0.129662  | 0.125146  | 0.128788 | 0.131993  | 0.125437 | 0.121941  | 0.135344 |
| 0.11116   | 0.107517  | 0.116696 | 0.117279  | 0.106643 | 0.110431  | 0.11859  |
| 0.120338  | 0.121941  | 0.122378 | 0.127914  | 0.12602  | 0.11961   | 0.126603 |
| 0.13243   | 0.13141   | 0.130099 | 0.138549  | 0.132576 | 0.134324  | 0.138986 |
| 0.181964  | 0.183858  | 0.191288 | 0.188083  | 0.192016 | 0.174242  | 0.187063 |
| 0.226399  | 0.231789  | 0.233974 | 0.22873   | 0.239073 | 0.222465  | 0.233246 |
| 0.107663  | 0.105769  | 0.119027 | 0.0683275 | 0.116841 | 0.0839161 | 0.1081   |
| 0.110723  | 0.111742  | 0.117424 | 0.113636  | 0.110868 | 0.106498  | 0.116696 |
| 0.103438  | 0.103584  | 0.116259 | 0.109557  | 0.104749 | 0.0989219 | 0.113491 |
| 0.111014  | 0.110286  | 0.11859  | 0.111888  | 0.108246 | 0.106206  | 0.110577 |
| 0.0976107 | 0.088141  | 0.126748 | 0.126748  | 0.12602  | 0.0849359 | 0.129516 |
| 0.113345  | 0.109703  | 0.117716 | 0.111888  | 0.113199 | 0.110577  | 0.116987 |
| 0.145251  | 0.141026  | 0.146999 | 0.146416  | 0.142774 | 0.143648  | 0.150641 |
| 0.112762  | 0.113491  | 0.121212 | 0.114802  | 0.11553  | 0.114365  | 0.117279 |
| 0.128205  | 0.130682  | 0.130536 | 0.126748  | 0.127768 | 0.12602   | 0.138258 |
| 0.128642  | 0.123834  | 0.132139 | 0.128934  | 0.128497 | 0.120921  | 0.134615 |
| 0.127477  | 0.127331  | 0.135927 | 0.13243   | 0.125874 | 0.125874  | 0.13345  |
| 0.131556  | 0.134324  | 0.133596 | 0.136509  | 0.137821 | 0.130245  | 0.139569 |
| 0.114948  | 0.113636  | 0.120192 | 0.118444  | 0.115385 | 0.113636  | 0.117424 |
| 0.112617  | 0.111305  | 0.118444 | 0.113199  | 0.107226 | 0.110723  | 0.118007 |
| 0.115676  | 0.112325  | 0.124126 | 0.119464  | 0.106789 | 0.116404  | 0.121941 |
| 0.109557  | 0.113491  | 0.11451  | 0.111888  | 0.109994 | 0.107663  | 0.110286 |
| 0.111014  | 0.110286  | 0.116259 | 0.111305  | 0.107955 | 0.110286  | 0.122523 |
| 0.112034  | 0.114802  | 0.124272 | 0.114073  | 0.111014 | 0.110723  | 0.118007 |
| 0.128788  | 0.122523  | 0.130245 | 0.130828  | 0.122815 | 0.123397  | 0.135344 |

|           |          |           |          |          |          |          |
|-----------|----------|-----------|----------|----------|----------|----------|
| 0.133159  | 0.134178 | 0.139277  | 0.135198 | 0.130099 | 0.13039  | 0.139132 |
| 0.116113  | 0.116841 | 0.120192  | 0.116113 | 0.111888 | 0.114802 | 0.122669 |
| 0.110723  | 0.106498 | 0.12296   | 0.117424 | 0.10912  | 0.108537 | 0.121066 |
| 0.132867  | 0.135927 | 0.130828  | 0.132867 | 0.12602  | 0.127768 | 0.140297 |
| 0.108683  | 0.109994 | 0.115385  | 0.111888 | 0.107372 | 0.11116  | 0.115822 |
| 0.138549  | 0.13549  | 0.143794  | 0.146125 | 0.137821 | 0.135198 | 0.145688 |
| 0.130682  | 0.127622 | 0.123397  | 0.14088  | 0.128497 | 0.129371 | 0.141026 |
| 0.13345   | 0.119318 | 0.134907  | 0.132284 | 0.131265 | 0.123397 | 0.137675 |
| 0.107226  | 0.108537 | 0.115093  | 0.107226 | 0.106498 | 0.105624 | 0.113491 |
| 0.108829  | 0.108974 | 0.112034  | 0.109411 | 0.107517 | 0.1081   | 0.11655  |
| 0.121212  | 0.124272 | 0.127331  | 0.122669 | 0.122232 | 0.121358 | 0.12398  |
| 0.123106  | 0.120047 | 0.122232  | 0.122232 | 0.125874 | 0.121795 | 0.127914 |
| 0.130099  | 0.124417 | 0.125437  | 0.13243  | 0.125874 | 0.129079 | 0.141026 |
| 0.113928  | 0.114365 | 0.126457  | 0.116841 | 0.111451 | 0.113199 | 0.121066 |
| 0.11757   | 0.113054 | 0.122232  | 0.116404 | 0.112179 | 0.112762 | 0.119755 |
| 0.121358  | 0.120047 | 0.130682  | 0.121941 | 0.118298 | 0.118007 | 0.127622 |
| 0.133304  | 0.132576 | 0.130682  | 0.135927 | 0.127914 | 0.131993 | 0.138695 |
| 0.128351  | 0.126748 | 0.130099  | 0.129225 | 0.125291 | 0.126748 | 0.136946 |
| 0.134615  | 0.128351 | 0.136655  | 0.134324 | 0.132139 | 0.129808 | 0.137966 |
| 0.124854  | 0.124126 | 0.136218  | 0.133013 | 0.130245 | 0.124417 | 0.136364 |
| 0.109411  | 0.113054 | 0.123106  | 0.107372 | 0.109557 | 0.109557 | 0.119172 |
| 0.128642  | 0.131119 | 0.128351  | 0.133013 | 0.120629 | 0.127622 | 0.130828 |
| 0.113345  | 0.106498 | 0.120629  | 0.111597 | 0.108537 | 0.108829 | 0.110868 |
| 0.111451  | 0.116841 | 0.114656  | 0.117861 | 0.112179 | 0.109266 | 0.117716 |
| 0.110868  | 0.110723 | 0.118444  | 0.114365 | 0.110431 | 0.113345 | 0.116259 |
| 0.114219  | 0.110286 | 0.115385  | 0.116841 | 0.109703 | 0.112325 | 0.122232 |
| 0.111597  | 0.110868 | 0.114802  | 0.111888 | 0.107663 | 0.108246 | 0.115822 |
| 0.132721  | 0.128788 | 0.135927  | 0.133596 | 0.127914 | 0.131993 | 0.140152 |
| 0.112471  | 0.114365 | 0.118007  | 0.118298 | 0.114948 | 0.112034 | 0.120484 |
| 0.13141   | 0.129516 | 0.139277  | 0.130245 | 0.130973 | 0.127185 | 0.13447  |
| 0.11014   | 0.11553  | 0.117716  | 0.112762 | 0.112325 | 0.108537 | 0.116696 |
| 0.125437  | 0.121212 | 0.123689  | 0.128642 | 0.120629 | 0.124709 | 0.131993 |
| 0.125583  | 0.113199 | 0.117424  | 0.126748 | 0.124563 | 0.111451 | 0.11961  |
| 0.11451   | 0.113491 | 0.108974  | 0.121795 | 0.109703 | 0.111451 | 0.123106 |
| 0.110577  | 0.1081   | 0.114365  | 0.121066 | 0.113054 | 0.112762 | 0.113636 |
| 0.120629  | 0.122232 | 0.118881  | 0.120047 | 0.120192 | 0.117279 | 0.121066 |
| 0.114948  | 0.11451  | 0.117279  | 0.119027 | 0.111014 | 0.115093 | 0.121212 |
| 0.108246  | 0.108392 | 0.115239  | 0.119027 | 0.108683 | 0.110723 | 0.120047 |
| 0.126603  | 0.136655 | 0.11553   | 0.137383 | 0.136072 | 0.125583 | 0.130536 |
| 0.129662  | 0.126603 | 0.141608  | 0.134615 | 0.137383 | 0.133304 | 0.138258 |
| 0.0984848 | 0.109994 | 0.0961538 | 0.106643 | 0.10708  | 0.099796 | 0.108246 |
| 0.125437  | 0.117424 | 0.116404  | 0.135052 | 0.125583 | 0.117716 | 0.137821 |
| 0.119464  | 0.125146 | 0.107226  | 0.13345  | 0.122815 | 0.117279 | 0.129516 |
| 0.123834  | 0.120192 | 0.114802  | 0.13345  | 0.121066 | 0.122232 | 0.128934 |

|          |          |          |          |          |          |          |
|----------|----------|----------|----------|----------|----------|----------|
| 0.117424 | 0.110286 | 0.107517 | 0.122669 | 0.11757  | 0.110577 | 0.128059 |
| 0.117424 | 0.121649 | 0.103438 | 0.126748 | 0.119027 | 0.118153 | 0.12398  |
| 0.112325 | 0.119755 | 0.111451 | 0.129225 | 0.120338 | 0.114219 | 0.123834 |
| 0.124126 | 0.124854 | 0.116259 | 0.125    | 0.11961  | 0.121941 | 0.133013 |
| 0.129079 | 0.130099 | 0.115385 | 0.137821 | 0.130682 | 0.126311 | 0.13884  |
| 0.116259 | 0.126311 | 0.103147 | 0.121795 | 0.120775 | 0.112617 | 0.116987 |
| 0.115093 | 0.107372 | 0.104604 | 0.122086 | 0.114073 | 0.104458 | 0.121941 |
| 0.132139 | 0.129662 | 0.135635 | 0.131556 | 0.134907 | 0.13141  | 0.13549  |
| 0.120047 | 0.128351 | 0.119755 | 0.136072 | 0.130682 | 0.125437 | 0.128642 |
| 0.107809 | 0.106789 | 0.102855 | 0.113928 | 0.106789 | 0.105332 | 0.116113 |
| 0.21081  | 0.211247 | 0.21285  | 0.210519 | 0.217366 | 0.20542  | 0.216783 |
| 0.120775 | 0.113636 | 0.110286 | 0.122815 | 0.11655  | 0.113636 | 0.12704  |
| 0.108537 | 0.121212 | 0.101836 | 0.117861 | 0.109266 | 0.109848 | 0.113636 |
| 0.132867 | 0.123106 | 0.118881 | 0.134907 | 0.128642 | 0.123689 | 0.133887 |
| 0.112179 | 0.119318 | 0.105478 | 0.122669 | 0.114073 | 0.109703 | 0.113491 |
| 0.120338 | 0.130099 | 0.118881 | 0.134033 | 0.134178 | 0.123106 | 0.128642 |
| 0.119172 | 0.118444 | 0.109557 | 0.121503 | 0.115822 | 0.110868 | 0.121066 |
| 0.112034 | 0.113054 | 0.111116 | 0.121358 | 0.115385 | 0.106061 | 0.127914 |
| 0.116696 | 0.12704  | 0.10708  | 0.127185 | 0.122378 | 0.115093 | 0.120921 |
| 0.121795 | 0.115822 | 0.117133 | 0.13141  | 0.124563 | 0.118735 | 0.12398  |
| 0.12398  | 0.120338 | 0.11757  | 0.13243  | 0.126748 | 0.124417 | 0.133741 |
| 0.128497 | 0.123397 | 0.117133 | 0.132284 | 0.126603 | 0.12602  | 0.133596 |
| 0.122669 | 0.123397 | 0.113054 | 0.127622 | 0.12602  | 0.120192 | 0.13039  |
| 0.109848 | 0.109703 | 0.104312 | 0.119464 | 0.106498 | 0.107663 | 0.125728 |
| 0.118007 | 0.120192 | 0.108974 | 0.116841 | 0.120775 | 0.112325 | 0.116987 |
| 0.129225 | 0.125    | 0.116113 | 0.133887 | 0.126748 | 0.126748 | 0.134615 |
| 0.115385 | 0.10708  | 0.105478 | 0.120338 | 0.114656 | 0.107372 | 0.121066 |
| 0.133741 | 0.136509 | 0.135781 | 0.134907 | 0.131556 | 0.129516 | 0.141754 |
| 0.134761 | 0.134324 | 0.126603 | 0.140297 | 0.134033 | 0.129371 | 0.139277 |
| 0.11961  | 0.109557 | 0.115822 | 0.126603 | 0.11451  | 0.110723 | 0.131993 |
| 0.122815 | 0.125    | 0.104458 | 0.132139 | 0.125    | 0.118298 | 0.128788 |
| 0.120338 | 0.113782 | 0.128497 | 0.126166 | 0.123397 | 0.11553  | 0.129516 |
| 0.120484 | 0.128205 | 0.12602  | 0.124563 | 0.127331 | 0.122086 | 0.12704  |
| 0.118735 | 0.123543 | 0.125728 | 0.123397 | 0.121212 | 0.115676 | 0.128788 |
| 0.133887 | 0.130245 | 0.133887 | 0.137675 | 0.138112 | 0.129662 | 0.137529 |
| 0.113636 | 0.111116 | 0.104895 | 0.11655  | 0.104749 | 0.110868 | 0.116987 |
| 0.12602  | 0.130828 | 0.129516 | 0.13447  | 0.127331 | 0.125291 | 0.134615 |
| 0.133741 | 0.136509 | 0.136364 | 0.13986  | 0.136509 | 0.128059 | 0.144376 |
| 0.112179 | 0.119027 | 0.107226 | 0.124417 | 0.116404 | 0.116113 | 0.124854 |
| 0.120921 | 0.123106 | 0.118298 | 0.124126 | 0.118444 | 0.116696 | 0.130973 |
| 0.139132 | 0.135781 | 0.145251 | 0.139423 | 0.141608 | 0.138986 | 0.144231 |
| 0.11961  | 0.123834 | 0.125437 | 0.123689 | 0.12704  | 0.11859  | 0.130828 |
| 0.129371 | 0.129808 | 0.13141  | 0.135781 | 0.14088  | 0.129808 | 0.14729  |
| 0.125437 | 0.126457 | 0.121941 | 0.133304 | 0.131993 | 0.12296  | 0.134907 |

|           |           |           |           |          |           |          |
|-----------|-----------|-----------|-----------|----------|-----------|----------|
| 0.125     | 0.119027  | 0.118007  | 0.129371  | 0.117279 | 0.123106  | 0.125437 |
| 0.123689  | 0.118007  | 0.122523  | 0.128351  | 0.127622 | 0.119172  | 0.134033 |
| 0.123252  | 0.118153  | 0.112179  | 0.129662  | 0.116987 | 0.113491  | 0.128934 |
| 0.127185  | 0.121503  | 0.124272  | 0.13447   | 0.125    | 0.128205  | 0.131119 |
| 0.130099  | 0.126166  | 0.116113  | 0.129808  | 0.126457 | 0.126457  | 0.128788 |
| 0.132721  | 0.12704   | 0.13039   | 0.134178  | 0.131119 | 0.132284  | 0.135198 |
| 0.132139  | 0.129079  | 0.121649  | 0.135635  | 0.134033 | 0.129662  | 0.137529 |
| 0.126894  | 0.119464  | 0.124272  | 0.135344  | 0.121503 | 0.120338  | 0.130536 |
| 0.139423  | 0.130536  | 0.141463  | 0.146707  | 0.136946 | 0.134615  | 0.145688 |
| 0.118444  | 0.120629  | 0.102418  | 0.133596  | 0.119464 | 0.121503  | 0.126748 |
| 0.114656  | 0.114802  | 0.118444  | 0.122232  | 0.114802 | 0.114802  | 0.121212 |
| 0.124272  | 0.125874  | 0.129516  | 0.13447   | 0.127914 | 0.126748  | 0.131119 |
| 0.115822  | 0.114219  | 0.0986305 | 0.127185  | 0.115385 | 0.118007  | 0.118007 |
| 0.133741  | 0.135927  | 0.138112  | 0.142191  | 0.134761 | 0.132721  | 0.142045 |
| 0.148019  | 0.151369  | 0.146562  | 0.158217  | 0.143794 | 0.151078  | 0.154283 |
| 0.129662  | 0.124854  | 0.134324  | 0.126457  | 0.125146 | 0.124272  | 0.132139 |
| 0.122815  | 0.120047  | 0.125728  | 0.119318  | 0.119755 | 0.118007  | 0.125583 |
| 0.123252  | 0.124272  | 0.130245  | 0.128205  | 0.130099 | 0.12398   | 0.133013 |
| 0.127477  | 0.126748  | 0.114365  | 0.130973  | 0.133159 | 0.121212  | 0.132867 |
| 0.12602   | 0.125874  | 0.127477  | 0.128351  | 0.124709 | 0.127622  | 0.136946 |
| 0.131847  | 0.125583  | 0.125728  | 0.14292   | 0.126166 | 0.131993  | 0.140443 |
| 0.13243   | 0.126457  | 0.127477  | 0.139714  | 0.132867 | 0.122669  | 0.140443 |
| 0.123543  | 0.117279  | 0.109557  | 0.126457  | 0.118153 | 0.119027  | 0.130682 |
| 0.152389  | 0.155449  | 0.164044  | 0.153555  | 0.152535 | 0.152535  | 0.158362 |
| 0.124417  | 0.12398   | 0.119172  | 0.133159  | 0.120192 | 0.123106  | 0.132721 |
| 0.13141   | 0.131847  | 0.131702  | 0.141608  | 0.137092 | 0.129225  | 0.143502 |
| 0.11757   | 0.116841  | 0.123689  | 0.125728  | 0.117424 | 0.118007  | 0.123834 |
| 0.135635  | 0.128205  | 0.127477  | 0.13039   | 0.130828 | 0.13345   | 0.142191 |
| 0.120775  | 0.118007  | 0.113782  | 0.125728  | 0.121212 | 0.115676  | 0.12296  |
| 0.12704   | 0.126894  | 0.136655  | 0.111888  | 0.142628 | 0.112617  | 0.131847 |
| 0.13447   | 0.137821  | 0.140589  | 0.136218  | 0.141608 | 0.135781  | 0.137238 |
| 0.113345  | 0.118444  | 0.125291  | 0.0463287 | 0.124563 | 0.088141  | 0.10708  |
| 0.125728  | 0.131119  | 0.136801  | 0.0697844 | 0.136364 | 0.101399  | 0.120338 |
| 0.139569  | 0.133304  | 0.14831   | 0.141026  | 0.136801 | 0.132721  | 0.146999 |
| 0.131993  | 0.131556  | 0.141026  | 0.116259  | 0.136218 | 0.116987  | 0.135344 |
| 0.121358  | 0.113928  | 0.13039   | 0.125437  | 0.126748 | 0.127331  | 0.125583 |
| 0.130536  | 0.134178  | 0.137529  | 0.129662  | 0.133596 | 0.130973  | 0.131265 |
| 0         | 0.10067   | 0.11859   | 0.106935  | 0.110577 | 0.0849359 | 0.110286 |
| 0.10067   | 0         | 0.11961   | 0.11553   | 0.106935 | 0.0824592 | 0.120629 |
| 0.11859   | 0.11961   | 0         | 0.125874  | 0.115822 | 0.116113  | 0.117861 |
| 0.106935  | 0.11553   | 0.125874  | 0         | 0.122815 | 0.0840618 | 0.103001 |
| 0.110577  | 0.106935  | 0.115822  | 0.122815  | 0        | 0.110723  | 0.121795 |
| 0.0849359 | 0.0824592 | 0.116113  | 0.0840618 | 0.110723 | 0         | 0.106352 |
| 0.110286  | 0.120629  | 0.117861  | 0.103001  | 0.121795 | 0.106352  | 0        |

|           |           |          |           |           |           |           |
|-----------|-----------|----------|-----------|-----------|-----------|-----------|
| 0.090035  | 0.0852273 | 0.121212 | 0.119755  | 0.117279  | 0.0808566 | 0.121649  |
| 0.0996503 | 0.103584  | 0.101399 | 0.113054  | 0.0995047 | 0.0983392 | 0.114656  |
| 0.109848  | 0.120484  | 0.125    | 0.0501166 | 0.123397  | 0.0855186 | 0.10708   |
| 0.107663  | 0.11655   | 0.123689 | 0.043852  | 0.119464  | 0.0827506 | 0.103147  |
| 0.121941  | 0.112762  | 0.126603 | 0.123106  | 0.11451   | 0.120338  | 0.128788  |
| 0.207896  | 0.208625  | 0.214015 | 0.207605  | 0.215035  | 0.197844  | 0.211538  |
| 0.134761  | 0.139277  | 0.144376 | 0.0651224 | 0.144231  | 0.106352  | 0.12704   |
| 0.125874  | 0.12602   | 0.132284 | 0.123252  | 0.132139  | 0.119318  | 0.130682  |
| 0.110868  | 0.11859   | 0.118153 | 0.114656  | 0.122669  | 0.112179  | 0.108974  |
| 0.20236   | 0.204837  | 0.205565 | 0.201777  | 0.208916  | 0.193182  | 0.207751  |
| 0.116113  | 0.110723  | 0.127477 | 0.121649  | 0.113345  | 0.112179  | 0.124417  |
| 0.117424  | 0.113199  | 0.128205 | 0.123834  | 0.11116   | 0.11553   | 0.124563  |
| 0.122378  | 0.124563  | 0.121503 | 0.122378  | 0.122815  | 0.120484  | 0.116113  |
| 0.0895979 | 0.0810023 | 0.121649 | 0.119901  | 0.118007  | 0.07838   | 0.122378  |
| 0.240239  | 0.241259  | 0.247523 | 0.241113  | 0.250874  | 0.234848  | 0.248543  |
| 0.118298  | 0.122523  | 0.121795 | 0.123252  | 0.128059  | 0.120775  | 0.130099  |
| 0.115967  | 0.110577  | 0.12296  | 0.115676  | 0.109703  | 0.113199  | 0.121066  |
| 0.117716  | 0.121358  | 0.125583 | 0.122378  | 0.114365  | 0.123689  | 0.123397  |
| 0.11655   | 0.119901  | 0.120629 | 0.118881  | 0.112908  | 0.122523  | 0.121066  |
| 0.113054  | 0.105332  | 0.125    | 0.124126  | 0.128059  | 0.105041  | 0.13243   |
| 0.115967  | 0.104458  | 0.123834 | 0.105478  | 0.124272  | 0.0898893 | 0.119027  |
| 0.118007  | 0.112908  | 0.129662 | 0.120629  | 0.10912   | 0.114365  | 0.124563  |
| 0.10912   | 0.115093  | 0.123106 | 0.0429779 | 0.120047  | 0.0850816 | 0.106352  |
| 0.118298  | 0.124272  | 0.127914 | 0.120921  | 0.121649  | 0.118444  | 0.121358  |
| 0.0833333 | 0.0779429 | 0.118298 | 0.115385  | 0.111451  | 0.071824  | 0.115822  |
| 0.104167  | 0.115676  | 0.121358 | 0.0517191 | 0.117133  | 0.0821678 | 0.0990676 |
| 0.105478  | 0.113199  | 0.092366 | 0.122669  | 0.11553   | 0.103001  | 0.116987  |
| 0.133887  | 0.13986   | 0.141463 | 0.137383  | 0.143065  | 0.133159  | 0.138695  |
| 0.121649  | 0.125291  | 0.121941 | 0.126603  | 0.131702  | 0.121503  | 0.132284  |
| 0.119318  | 0.113345  | 0.130682 | 0.125437  | 0.111888  | 0.118881  | 0.125874  |
| 0.179341  | 0.182984  | 0.188666 | 0.177302  | 0.187354  | 0.16958   | 0.185897  |
| 0.19595   | 0.196678  | 0.200029 | 0.193328  | 0.201923  | 0.185315  | 0.19697   |
| 0.0884324 | 0.0818765 | 0.117861 | 0.125146  | 0.115676  | 0.0777972 | 0.120921  |
| 0.081148  | 0.0763403 | 0.114656 | 0.113491  | 0.112179  | 0.0713869 | 0.115093  |
| 0.124272  | 0.127622  | 0.134178 | 0.124272  | 0.13549   | 0.118298  | 0.132576  |
| 0.117279  | 0.1081    | 0.123689 | 0.116696  | 0.109557  | 0.116259  | 0.120629  |
| 0.120338  | 0.124272  | 0.124709 | 0.126166  | 0.129225  | 0.118444  | 0.128351  |
| 0.125728  | 0.132284  | 0.128351 | 0.122523  | 0.124709  | 0.125     | 0.124709  |
| 0.215763  | 0.215035  | 0.219551 | 0.219551  | 0.222028  | 0.208625  | 0.221154  |
| 0.110286  | 0.113928  | 0.123689 | 0.110868  | 0.11451   | 0.110723  | 0.116841  |
| 0.20338   | 0.191288  | 0.207751 | 0.198427  | 0.206731  | 0.190122  | 0.210227  |
| 0.108829  | 0.106643  | 0.122523 | 0.116113  | 0.113345  | 0.112179  | 0.112471  |
| 0.111597  | 0.109703  | 0.118007 | 0.116841  | 0.104458  | 0.112617  | 0.116696  |
| 0.112034  | 0.100524  | 0.121649 | 0.101836  | 0.112179  | 0.0938228 | 0.116259  |

|           |           |          |           |          |           |          |
|-----------|-----------|----------|-----------|----------|-----------|----------|
| 0.0855186 | 0.0751748 | 0.112617 | 0.115239  | 0.108392 | 0.0725524 | 0.114802 |
| 0.197844  | 0.201195  | 0.203963 | 0.200466  | 0.204691 | 0.189831  | 0.201777 |
| 0.119464  | 0.12602   | 0.129953 | 0.0527389 | 0.132139 | 0.0977564 | 0.115239 |
| 0.112471  | 0.114948  | 0.121503 | 0.122086  | 0.113782 | 0.116113  | 0.11757  |
| 0.113636  | 0.120192  | 0.129371 | 0.0463287 | 0.129808 | 0.0910548 | 0.107955 |
| 0.125583  | 0.11961   | 0.123543 | 0.121212  | 0.114365 | 0.121941  | 0.122523 |
| 0.0844988 | 0.0828963 | 0.117716 | 0.115093  | 0.112908 | 0.0738636 | 0.114948 |
| 0.113199  | 0.105186  | 0.124272 | 0.116404  | 0.113636 | 0.115385  | 0.113928 |
| 0.116404  | 0.109266  | 0.122523 | 0.116987  | 0.109848 | 0.111305  | 0.124126 |
| 0.120484  | 0.11451   | 0.126603 | 0.123397  | 0.112762 | 0.117424  | 0.128205 |
| 0.104458  | 0.11014   | 0.116113 | 0.0482226 | 0.114219 | 0.0812937 | 0.100233 |
| 0.119172  | 0.114656  | 0.120047 | 0.120338  | 0.116987 | 0.120192  | 0.11961  |
| 0.176136  | 0.179487  | 0.186917 | 0.180798  | 0.18648  | 0.169872  | 0.185606 |
| 0.120921  | 0.124854  | 0.125583 | 0.121503  | 0.11757  | 0.125728  | 0.121066 |
| 0.118735  | 0.123834  | 0.125437 | 0.12398   | 0.124417 | 0.119464  | 0.120047 |
| 0.117424  | 0.121066  | 0.110431 | 0.109557  | 0.118444 | 0.114073  | 0.114365 |
| 0.11757   | 0.122669  | 0.120192 | 0.124854  | 0.126748 | 0.119172  | 0.129371 |
| 0.114948  | 0.117716  | 0.128059 | 0.0435606 | 0.125    | 0.0882867 | 0.106061 |
| 0.115822  | 0.111597  | 0.124563 | 0.118735  | 0.120338 | 0.120047  | 0.120338 |
| 0.118007  | 0.114073  | 0.11655  | 0.112471  | 0.111451 | 0.107372  | 0.117279 |
| 0.122086  | 0.119318  | 0.128788 | 0.124126  | 0.117279 | 0.121649  | 0.129808 |
| 0.110286  | 0.118298  | 0.123397 | 0.117279  | 0.120338 | 0.112179  | 0.115967 |
| 0.111742  | 0.114219  | 0.122232 | 0.111451  | 0.11014  | 0.113054  | 0.114219 |
| 0.0865385 | 0.0855186 | 0.118007 | 0.118881  | 0.11553  | 0.0756119 | 0.117279 |
| 0.122232  | 0.121503  | 0.122523 | 0.122232  | 0.121212 | 0.114802  | 0.112471 |
| 0.134033  | 0.135927  | 0.129371 | 0.133741  | 0.136218 | 0.129808  | 0.128059 |
| 0.111888  | 0.114073  | 0.120338 | 0.119172  | 0.119318 | 0.111451  | 0.118444 |
| 0.129225  | 0.135198  | 0.140589 | 0.0607517 | 0.140734 | 0.104312  | 0.123543 |
| 0.0843531 | 0.0810023 | 0.116404 | 0.113199  | 0.109557 | 0.0708042 | 0.115967 |
| 0.113782  | 0.118881  | 0.120775 | 0.10912   | 0.111888 | 0.113928  | 0.115093 |
| 0.109266  | 0.113199  | 0.118881 | 0.0623543 | 0.119027 | 0.0855186 | 0.111116 |
| 0.123252  | 0.118735  | 0.130536 | 0.125874  | 0.118153 | 0.122523  | 0.129516 |
| 0.184441  | 0.177885  | 0.192016 | 0.181527  | 0.186334 | 0.172057  | 0.190414 |
| 0.112617  | 0.109266  | 0.117861 | 0.116987  | 0.110723 | 0.11451   | 0.113054 |
| 0.102127  | 0.104895  | 0.110286 | 0.101253  | 0.107517 | 0.100524  | 0.102855 |
| 0.120192  | 0.112471  | 0.123689 | 0.124563  | 0.111305 | 0.11859   | 0.126457 |
| 0.170017  | 0.167832  | 0.179341 | 0.171183  | 0.177156 | 0.157925  | 0.172203 |
| 0.128205  | 0.129808  | 0.132867 | 0.136655  | 0.136801 | 0.128934  | 0.138258 |
| 0.139569  | 0.143794  | 0.137821 | 0.144814  | 0.145833 | 0.139423  | 0.147873 |
| 0.136218  | 0.140443  | 0.146416 | 0.139714  | 0.144814 | 0.13549   | 0.138986 |
| 0.10708   | 0.112471  | 0.113491 | 0.119901  | 0.115967 | 0.11014   | 0.117133 |
| 0.113928  | 0.121649  | 0.124709 | 0.0460373 | 0.125146 | 0.0887238 | 0.106206 |
| 0.201777  | 0.204254  | 0.206439 | 0.200321  | 0.210956 | 0.191434  | 0.207168 |
| 0.11757   | 0.118881  | 0.124272 | 0.114948  | 0.118007 | 0.11451   | 0.118881 |



|           |           |          |           |           |           |           |
|-----------|-----------|----------|-----------|-----------|-----------|-----------|
| 0.118298  | 0.12398   | 0.129371 | 0.0474942 | 0.131556  | 0.0916375 | 0.111742  |
| 0.114802  | 0.113199  | 0.121795 | 0.11859   | 0.109411  | 0.116696  | 0.116696  |
| 0.160256  | 0.152244  | 0.169872 | 0.145979  | 0.167104  | 0.137383  | 0.156323  |
| 0.103147  | 0.107372  | 0.115676 | 0.108683  | 0.110286  | 0.10067   | 0.101253  |
| 0.141463  | 0.144522  | 0.146999 | 0.142337  | 0.145688  | 0.140152  | 0.145688  |
| 0.110577  | 0.113636  | 0.105332 | 0.122815  | 0.11655   | 0.110723  | 0.127914  |
| 0.176719  | 0.180944  | 0.187209 | 0.179633  | 0.186189  | 0.172203  | 0.185315  |
| 0.113782  | 0.118007  | 0.122232 | 0.122815  | 0.12296   | 0.113636  | 0.122086  |
| 0.100379  | 0.108683  | 0.103584 | 0.103293  | 0.107517  | 0.0961538 | 0.0938228 |
| 0.111305  | 0.118153  | 0.118881 | 0.106643  | 0.108537  | 0.111742  | 0.114656  |
| 0.110868  | 0.11655   | 0.126603 | 0.112908  | 0.113928  | 0.113928  | 0.120921  |
| 0.118153  | 0.11014   | 0.124272 | 0.123106  | 0.11014   | 0.113636  | 0.121212  |
| 0.107955  | 0.116259  | 0.12602  | 0.120192  | 0.112179  | 0.113928  | 0.122378  |
| 0.0827506 | 0.0761946 | 0.115385 | 0.116259  | 0.110286  | 0.0729895 | 0.113491  |
| 0.178467  | 0.182692  | 0.1875   | 0.182255  | 0.186772  | 0.17162   | 0.185315  |
| 0.115093  | 0.121358  | 0.127331 | 0.123543  | 0.119027  | 0.114073  | 0.116404  |
| 0.105624  | 0.107226  | 0.118444 | 0.104167  | 0.11451   | 0.097028  | 0.104604  |
| 0.201049  | 0.201195  | 0.207459 | 0.204837  | 0.209936  | 0.196241  | 0.208479  |
| 0.119755  | 0.121066  | 0.124417 | 0.119755  | 0.115822  | 0.123106  | 0.125437  |
| 0.0840618 | 0.0786713 | 0.116113 | 0.118735  | 0.112762  | 0.0743007 | 0.114802  |
| 0.0791084 | 0.0763403 | 0.111742 | 0.112908  | 0.10373   | 0.0684732 | 0.112762  |
| 0.132867  | 0.135344  | 0.136946 | 0.0719697 | 0.14292   | 0.107372  | 0.121358  |
| 0.17803   | 0.180798  | 0.186772 | 0.179779  | 0.187209  | 0.171474  | 0.183421  |
| 0.119901  | 0.111305  | 0.126603 | 0.118735  | 0.107226  | 0.117424  | 0.126166  |
| 0.13039   | 0.132576  | 0.12602  | 0.127477  | 0.127914  | 0.122669  | 0.12296   |
| 0.0802739 | 0.0780886 | 0.11757  | 0.116113  | 0.11014   | 0.0725524 | 0.11451   |
| 0.0791084 | 0.0798368 | 0.112617 | 0.113199  | 0.107226  | 0.0687646 | 0.11014   |
| 0.0789627 | 0.0776515 | 0.114219 | 0.114802  | 0.107955  | 0.0709499 | 0.114365  |
| 0.10708   | 0.115676  | 0.123397 | 0.0499709 | 0.118007  | 0.0824592 | 0.104021  |
| 0.0958625 | 0.103001  | 0.100816 | 0.111888  | 0.102127  | 0.0968823 | 0.113782  |
| 0.119172  | 0.121358  | 0.117716 | 0.125583  | 0.128351  | 0.121066  | 0.127185  |
| 0.132867  | 0.131265  | 0.127914 | 0.121212  | 0.133304  | 0.125146  | 0.120484  |
| 0.115676  | 0.117279  | 0.120629 | 0.123834  | 0.126894  | 0.116696  | 0.126603  |
| 0.131556  | 0.125874  | 0.12602  | 0.126894  | 0.121795  | 0.124126  | 0.128205  |
| 0.18211   | 0.185752  | 0.192016 | 0.186189  | 0.190414  | 0.176136  | 0.188374  |
| 0.118444  | 0.115967  | 0.119901 | 0.119901  | 0.117716  | 0.116841  | 0.111014  |
| 0.121795  | 0.130099  | 0.132867 | 0.0541958 | 0.133304  | 0.097465  | 0.11553   |
| 0.0799825 | 0.0792541 | 0.114365 | 0.112908  | 0.105769  | 0.0705128 | 0.115093  |
| 0.0958625 | 0.101836  | 0.101399 | 0.113345  | 0.0995047 | 0.0962995 | 0.115239  |
| 0.111597  | 0.108537  | 0.118881 | 0.11451   | 0.115822  | 0.104749  | 0.11757   |
| 0.121941  | 0.111305  | 0.125437 | 0.115822  | 0.113345  | 0.118881  | 0.126166  |
| 0.127185  | 0.127331  | 0.129516 | 0.122232  | 0.123543  | 0.124709  | 0.125874  |
| 0.106935  | 0.114948  | 0.123834 | 0.113054  | 0.11553   | 0.10912   | 0.118735  |
| 0.106352  | 0.0965909 | 0.114802 | 0.115093  | 0.101544  | 0.099796  | 0.115239  |

|           |           |           |           |           |           |           |
|-----------|-----------|-----------|-----------|-----------|-----------|-----------|
| 0.105041  | 0.094697  | 0.108246  | 0.112617  | 0.0976107 | 0.0964452 | 0.115385  |
| 0.10373   | 0.100962  | 0.0976107 | 0.105769  | 0.106206  | 0.0965909 | 0.0962995 |
| 0.11116   | 0.104604  | 0.121066  | 0.112908  | 0.113928  | 0.115385  | 0.113928  |
| 0.124417  | 0.130099  | 0.123834  | 0.129079  | 0.133013  | 0.124272  | 0.133304  |
| 0.115822  | 0.111888  | 0.123689  | 0.118153  | 0.102564  | 0.113636  | 0.123543  |
| 0.104895  | 0.114365  | 0.119464  | 0.0480769 | 0.114656  | 0.0831876 | 0.0980478 |
| 0.109848  | 0.108537  | 0.121212  | 0.114802  | 0.105915  | 0.111742  | 0.121649  |
| 0.0820221 | 0.0798368 | 0.114948  | 0.113199  | 0.109848  | 0.0699301 | 0.114219  |
| 0.109266  | 0.109411  | 0.116259  | 0.112762  | 0.11116   | 0.112617  | 0.115822  |
| 0.0859557 | 0.0796911 | 0.118007  | 0.115967  | 0.11116   | 0.074155  | 0.114656  |
| 0.111305  | 0.112617  | 0.117133  | 0.111305  | 0.112908  | 0.107372  | 0.107955  |
| 0.106643  | 0.113491  | 0.120338  | 0.116841  | 0.114073  | 0.107663  | 0.111742  |
| 0.111597  | 0.104749  | 0.122086  | 0.117424  | 0.105332  | 0.108246  | 0.120192  |
| 0.0995047 | 0.105478  | 0.101836  | 0.111742  | 0.0987762 | 0.0961538 | 0.116841  |
| 0.0804196 | 0.0782343 | 0.115385  | 0.113345  | 0.107372  | 0.0712413 | 0.11553   |
| 0.115093  | 0.11757   | 0.118298  | 0.114219  | 0.114073  | 0.116113  | 0.120775  |
| 0.107372  | 0.112179  | 0.125728  | 0.108246  | 0.122669  | 0.101981  | 0.106061  |
| 0.106643  | 0.110577  | 0.105769  | 0.109557  | 0.109703  | 0.104458  | 0.103875  |
| 0.0818765 | 0.0808566 | 0.117424  | 0.112471  | 0.106498  | 0.0709499 | 0.115822  |
| 0.110577  | 0.117133  | 0.122232  | 0.0456002 | 0.123543  | 0.0868298 | 0.106643  |
| 0.11116   | 0.10373   | 0.12398   | 0.117279  | 0.116259  | 0.113636  | 0.115967  |
| 0.10912   | 0.116841  | 0.125437  | 0.0464744 | 0.120338  | 0.0856643 | 0.101107  |
| 0.111742  | 0.106352  | 0.125146  | 0.120775  | 0.105186  | 0.112179  | 0.121212  |
| 0.103875  | 0.105186  | 0.103584  | 0.115239  | 0.104604  | 0.10169   | 0.116841  |
| 0.101836  | 0.1081    | 0.111451  | 0.107372  | 0.107226  | 0.0981935 | 0.110723  |
| 0.108392  | 0.111451  | 0.118881  | 0.115385  | 0.109411  | 0.110868  | 0.112617  |
| 0.112617  | 0.119464  | 0.128642  | 0.0523019 | 0.124417  | 0.0885781 | 0.107226  |
| 0.120775  | 0.120921  | 0.12398   | 0.113199  | 0.126748  | 0.115385  | 0.0955711 |
| 0.105478  | 0.11553   | 0.118298  | 0.103147  | 0.11553   | 0.097465  | 0.103875  |
| 0.180944  | 0.185169  | 0.188228  | 0.184441  | 0.192453  | 0.176136  | 0.190122  |
| 0.153555  | 0.151952  | 0.164336  | 0.14831   | 0.162442  | 0.144085  | 0.128934  |
| 0.115676  | 0.118153  | 0.122086  | 0.122669  | 0.123689  | 0.117279  | 0.122523  |
| 0.114656  | 0.107226  | 0.122815  | 0.112908  | 0.114219  | 0.105769  | 0.0859557 |
| 0.142628  | 0.145105  | 0.140589  | 0.145251  | 0.148019  | 0.143065  | 0.152972  |
| 0.11655   | 0.125437  | 0.129953  | 0.122378  | 0.120192  | 0.117279  | 0.11961   |
| 0.0977564 | 0.0885781 | 0.121941  | 0.120484  | 0.113928  | 0.085373  | 0.119755  |
| 0.0961538 | 0.0855186 | 0.124126  | 0.111014  | 0.119318  | 0.0770688 | 0.108537  |
| 0.10169   | 0.108829  | 0.092366  | 0.11859   | 0.107372  | 0.099796  | 0.112617  |
| 0.112471  | 0.112617  | 0.124126  | 0.111305  | 0.123689  | 0.102127  | 0.10912   |
| 0.189248  | 0.192599  | 0.200321  | 0.189248  | 0.201923  | 0.182984  | 0.199009  |
| 0.121795  | 0.113782  | 0.125874  | 0.123252  | 0.112034  | 0.119318  | 0.123397  |
| 0.110286  | 0.107809  | 0.124272  | 0.071824  | 0.115093  | 0.0847902 | 0.110431  |
| 0.0855186 | 0.0745921 | 0.11116   | 0.106789  | 0.108683  | 0.0684732 | 0.106352  |
| 0.120629  | 0.11757   | 0.119755  | 0.116841  | 0.109411  | 0.11553   | 0.11553   |

|           |           |          |           |           |           |           |
|-----------|-----------|----------|-----------|-----------|-----------|-----------|
| 0.171766  | 0.169289  | 0.184586 | 0.173805  | 0.179196  | 0.160548  | 0.174242  |
| 0.239365  | 0.240093  | 0.24257  | 0.240239  | 0.245921  | 0.232226  | 0.243881  |
| 0.111742  | 0.113928  | 0.124272 | 0.117861  | 0.11859   | 0.110723  | 0.115385  |
| 0.108829  | 0.111014  | 0.12398  | 0.107955  | 0.120921  | 0.0999417 | 0.104895  |
| 0.114948  | 0.117424  | 0.11961  | 0.121358  | 0.120921  | 0.113054  | 0.123252  |
| 0.108683  | 0.108246  | 0.124126 | 0.118007  | 0.10708   | 0.109994  | 0.120192  |
| 0.11116   | 0.109848  | 0.121066 | 0.113491  | 0.104604  | 0.109848  | 0.117133  |
| 0.110723  | 0.114948  | 0.120338 | 0.112471  | 0.112617  | 0.109411  | 0.108246  |
| 0.0930944 | 0.0839161 | 0.11757  | 0.0831876 | 0.110723  | 0.0539044 | 0.11014   |
| 0.112908  | 0.109266  | 0.12398  | 0.113491  | 0.106643  | 0.111305  | 0.119755  |
| 0.0952797 | 0.0893065 | 0.115385 | 0.0716783 | 0.115822  | 0.0607517 | 0.103584  |
| 0.108537  | 0.112762  | 0.108537 | 0.11757   | 0.11451   | 0.106643  | 0.107517  |
| 0.103147  | 0.103584  | 0.101981 | 0.112762  | 0.104458  | 0.0968823 | 0.116404  |
| 0.10912   | 0.114802  | 0.121649 | 0.11553   | 0.120338  | 0.111888  | 0.118007  |
| 0.111888  | 0.118735  | 0.124126 | 0.0469114 | 0.124272  | 0.0849359 | 0.102418  |
| 0.105186  | 0.108246  | 0.109266 | 0.104021  | 0.0992133 | 0.104749  | 0.103875  |
| 0.121212  | 0.114073  | 0.12296  | 0.128205  | 0.122523  | 0.11961   | 0.128059  |
| 0.126748  | 0.122815  | 0.13345  | 0.134907  | 0.120192  | 0.127477  | 0.134761  |
| 0.0823135 | 0.0821678 | 0.116404 | 0.111742  | 0.109266  | 0.0722611 | 0.111597  |
| 0.099359  | 0.0855186 | 0.115385 | 0.119464  | 0.116404  | 0.0849359 | 0.125146  |
| 0.0981935 | 0.0890152 | 0.125583 | 0.128788  | 0.124854  | 0.0875583 | 0.131265  |
| 0.199446  | 0.20134   | 0.204983 | 0.201486  | 0.20542   | 0.189394  | 0.206294  |
| 0.101399  | 0.109994  | 0.112471 | 0.110723  | 0.104749  | 0.103875  | 0.105332  |
| 0.103584  | 0.105186  | 0.103001 | 0.113491  | 0.102855  | 0.100524  | 0.119172  |
| 0.116113  | 0.120338  | 0.120775 | 0.118735  | 0.115676  | 0.113928  | 0.111888  |
| 0.119464  | 0.122232  | 0.122669 | 0.118298  | 0.117861  | 0.121358  | 0.123106  |
| 0.115967  | 0.113199  | 0.118298 | 0.113636  | 0.107663  | 0.111451  | 0.113782  |
| 0.188228  | 0.191579  | 0.196387 | 0.188811  | 0.198281  | 0.180798  | 0.194202  |
| 0.112325  | 0.120921  | 0.127185 | 0.0493881 | 0.124417  | 0.0868298 | 0.105478  |
| 0.0842075 | 0.0773601 | 0.113928 | 0.111888  | 0.105915  | 0.0692016 | 0.114073  |
| 0.117861  | 0.121795  | 0.122232 | 0.120192  | 0.124709  | 0.118881  | 0.126457  |
| 0.107663  | 0.104895  | 0.118735 | 0.115239  | 0.102564  | 0.106935  | 0.117716  |
| 0.110868  | 0.115967  | 0.125728 | 0.0464744 | 0.121212  | 0.0850816 | 0.104604  |
| 0.102418  | 0.107226  | 0.112908 | 0.074155  | 0.110431  | 0.0859557 | 0.104312  |
| 0.107372  | 0.11655   | 0.105624 | 0.115239  | 0.113054  | 0.107517  | 0.106935  |
| 0.114948  | 0.117424  | 0.122815 | 0.115822  | 0.111888  | 0.118298  | 0.11859   |
| 0.189685  | 0.194202  | 0.194347 | 0.188228  | 0.19799   | 0.178759  | 0.192745  |
| 0.104749  | 0.113928  | 0.115239 | 0.0514277 | 0.115967  | 0.0821678 | 0.0999417 |
| 0.182984  | 0.189248  | 0.192308 | 0.184441  | 0.191579  | 0.176428  | 0.189248  |
| 0.183421  | 0.186772  | 0.190705 | 0.18546   | 0.190268  | 0.17366   | 0.187646  |
| 0.126894  | 0.115093  | 0.129516 | 0.130099  | 0.118007  | 0.122669  | 0.129953  |
| 0.125146  | 0.129662  | 0.127477 | 0.130682  | 0.12296   | 0.132284  | 0.132576  |
| 0.103293  | 0.111014  | 0.103293 | 0.106498  | 0.107809  | 0.0996503 | 0.101107  |
| 0.100233  | 0.113491  | 0.113636 | 0.0571096 | 0.113491  | 0.0817308 | 0.0983392 |

|           |           |          |           |           |           |          |
|-----------|-----------|----------|-----------|-----------|-----------|----------|
| 0.106498  | 0.117424  | 0.120484 | 0.0493881 | 0.117424  | 0.0833333 | 0.104895 |
| 0.0823135 | 0.080711  | 0.118444 | 0.11553   | 0.111597  | 0.0713869 | 0.11451  |
| 0.108246  | 0.106061  | 0.119318 | 0.10912   | 0.102564  | 0.1081    | 0.118007 |
| 0.111451  | 0.108683  | 0.121358 | 0.116113  | 0.102855  | 0.111305  | 0.122669 |
| 0.112471  | 0.116404  | 0.125    | 0.116841  | 0.121941  | 0.110577  | 0.119318 |
| 0.113199  | 0.109848  | 0.123397 | 0.123106  | 0.107226  | 0.116259  | 0.123834 |
| 0.0804196 | 0.0770688 | 0.111597 | 0.109557  | 0.107372  | 0.069493  | 0.11116  |
| 0.109411  | 0.116259  | 0.122232 | 0.0499709 | 0.120338  | 0.085373  | 0.10373  |
| 0.0996503 | 0.104458  | 0.100816 | 0.10373   | 0.103293  | 0.0948427 | 0.092803 |
| 0.120775  | 0.124709  | 0.130973 | 0.0552156 | 0.128497  | 0.0958625 | 0.112762 |
| 0.114948  | 0.117424  | 0.122232 | 0.120192  | 0.122378  | 0.112471  | 0.124126 |
| 0.125874  | 0.128934  | 0.136946 | 0.0547786 | 0.135927  | 0.10067   | 0.115822 |
| 0.251457  | 0.253059  | 0.254079 | 0.250874  | 0.258887  | 0.242279  | 0.255973 |
| 0.12296   | 0.125437  | 0.129662 | 0.129662  | 0.125728  | 0.130682  | 0.130099 |
| 0.124563  | 0.119464  | 0.128642 | 0.127768  | 0.118881  | 0.126166  | 0.128205 |
| 0.208042  | 0.211101  | 0.215035 | 0.207459  | 0.216055  | 0.200029  | 0.213432 |
| 0.12398   | 0.123543  | 0.125146 | 0.128934  | 0.11859   | 0.124709  | 0.126166 |
| 0.221591  | 0.222611  | 0.224796 | 0.221008  | 0.232226  | 0.214161  | 0.224942 |
| 0.118298  | 0.117279  | 0.124709 | 0.119172  | 0.116987  | 0.119901  | 0.123689 |
| 0.0965909 | 0.0850816 | 0.125437 | 0.126603  | 0.120921  | 0.0824592 | 0.127622 |
| 0.108537  | 0.114802  | 0.119901 | 0.111742  | 0.106643  | 0.116259  | 0.11655  |
| 0.119318  | 0.116841  | 0.12602  | 0.125728  | 0.112471  | 0.118881  | 0.132576 |
| 0.190122  | 0.195513  | 0.200903 | 0.193328  | 0.201923  | 0.185897  | 0.199883 |
| 0.122232  | 0.125     | 0.13243  | 0.0540501 | 0.134907  | 0.0964452 | 0.113928 |
| 0.107955  | 0.118881  | 0.125437 | 0.0502622 | 0.121212  | 0.083042  | 0.104312 |
| 0.219406  | 0.218094  | 0.223193 | 0.21824   | 0.223922  | 0.211976  | 0.224505 |
| 0.114948  | 0.112471  | 0.124563 | 0.117861  | 0.106352  | 0.11451   | 0.121795 |
| 0.189685  | 0.190414  | 0.19493  | 0.189103  | 0.197698  | 0.180798  | 0.195367 |
| 0.115676  | 0.112325  | 0.127331 | 0.118881  | 0.109703  | 0.117279  | 0.122232 |
| 0.0824592 | 0.0814394 | 0.11451  | 0.114802  | 0.108246  | 0.071824  | 0.119318 |
| 0.112034  | 0.115967  | 0.106789 | 0.123397  | 0.113928  | 0.108974  | 0.125    |
| 0.123397  | 0.119755  | 0.131265 | 0.131265  | 0.117133  | 0.122669  | 0.132284 |
| 0.106061  | 0.109994  | 0.115385 | 0.11014   | 0.110286  | 0.103001  | 0.104167 |
| 0.151807  | 0.145833  | 0.157343 | 0.155886  | 0.1537    | 0.138258  | 0.161568 |
| 0.106643  | 0.112908  | 0.120338 | 0.0428322 | 0.115239  | 0.0799825 | 0.101836 |
| 0.11859   | 0.120192  | 0.123252 | 0.120338  | 0.112617  | 0.122523  | 0.121358 |
| 0.113636  | 0.112908  | 0.120921 | 0.12296   | 0.0476399 | 0.113491  | 0.122232 |
| 0.124709  | 0.127768  | 0.128497 | 0.11859   | 0.121941  | 0.126311  | 0.12398  |
| 0.184586  | 0.188811  | 0.191871 | 0.188374  | 0.192016  | 0.176282  | 0.19289  |
| 0.0812937 | 0.0791084 | 0.113345 | 0.113054  | 0.106206  | 0.0709499 | 0.116113 |
| 0.115822  | 0.109557  | 0.124563 | 0.125146  | 0.108392  | 0.115385  | 0.125    |
| 0.112471  | 0.10271   | 0.122378 | 0.117133  | 0.113782  | 0.112617  | 0.113782 |
| 0.117279  | 0.112471  | 0.125146 | 0.119901  | 0.111597  | 0.116259  | 0.126748 |
| 0.0909091 | 0.0831876 | 0.117133 | 0.122378  | 0.118444  | 0.0773601 | 0.123397 |

|           |           |           |           |          |           |           |
|-----------|-----------|-----------|-----------|----------|-----------|-----------|
| 0.245775  | 0.249709  | 0.251603  | 0.247232  | 0.256119 | 0.238636  | 0.25204   |
| 0.109557  | 0.109994  | 0.10373   | 0.119755  | 0.107372 | 0.103875  | 0.118735  |
| 0.104895  | 0.0960082 | 0.121503  | 0.119464  | 0.11553  | 0.0898893 | 0.112325  |
| 0.17803   | 0.170892  | 0.17803   | 0.175408  | 0.176428 | 0.167395  | 0.177593  |
| 0.172494  | 0.176428  | 0.184732  | 0.177448  | 0.184878 | 0.165647  | 0.183129  |
| 0.112471  | 0.117861  | 0.121503  | 0.119755  | 0.117861 | 0.109994  | 0.115239  |
| 0.109703  | 0.119464  | 0.123397  | 0.0499709 | 0.122378 | 0.083042  | 0.10169   |
| 0.112617  | 0.105186  | 0.123397  | 0.114656  | 0.102855 | 0.106352  | 0.119755  |
| 0.135781  | 0.141171  | 0.146853  | 0.0675991 | 0.146707 | 0.110868  | 0.126894  |
| 0.106643  | 0.113199  | 0.121795  | 0.112762  | 0.116404 | 0.106789  | 0.11116   |
| 0.110577  | 0.119755  | 0.121649  | 0.121649  | 0.117716 | 0.111305  | 0.115093  |
| 0.124417  | 0.113199  | 0.132867  | 0.124709  | 0.113491 | 0.120192  | 0.124854  |
| 0.110431  | 0.111742  | 0.119464  | 0.0469114 | 0.122232 | 0.0849359 | 0.105332  |
| 0.118735  | 0.127622  | 0.133013  | 0.0528846 | 0.132284 | 0.0964452 | 0.112762  |
| 0.113928  | 0.105332  | 0.122669  | 0.11655   | 0.114948 | 0.10708   | 0.127477  |
| 0.120775  | 0.115676  | 0.129516  | 0.127768  | 0.114219 | 0.119464  | 0.126748  |
| 0.134615  | 0.126894  | 0.141317  | 0.139277  | 0.125146 | 0.131847  | 0.142045  |
| 0.11116   | 0.114802  | 0.106789  | 0.122523  | 0.112762 | 0.111305  | 0.122669  |
| 0.12704   | 0.120775  | 0.134324  | 0.13345   | 0.120484 | 0.128934  | 0.136509  |
| 0.128497  | 0.11961   | 0.132284  | 0.127622  | 0.118444 | 0.124563  | 0.132139  |
| 0.195076  | 0.201049  | 0.203817  | 0.195076  | 0.208042 | 0.188811  | 0.201923  |
| 0.11451   | 0.110868  | 0.113054  | 0.131119  | 0.113782 | 0.117279  | 0.132139  |
| 0.180944  | 0.186043  | 0.189103  | 0.184149  | 0.191288 | 0.174388  | 0.188957  |
| 0.113054  | 0.114948  | 0.115967  | 0.113054  | 0.112034 | 0.111451  | 0.121941  |
| 0.0920746 | 0.0852273 | 0.120921  | 0.124126  | 0.118444 | 0.0793998 | 0.124854  |
| 0.116259  | 0.119318  | 0.121212  | 0.120047  | 0.124854 | 0.117279  | 0.123106  |
| 0.10708   | 0.114219  | 0.116987  | 0.119027  | 0.119464 | 0.109266  | 0.117424  |
| 0.11451   | 0.11961   | 0.128497  | 0.0463287 | 0.124854 | 0.0872669 | 0.107663  |
| 0.115676  | 0.119027  | 0.128788  | 0.048951  | 0.126603 | 0.0901807 | 0.106498  |
| 0.0874126 | 0.0773601 | 0.115967  | 0.11859   | 0.110868 | 0.0744464 | 0.117861  |
| 0.115239  | 0.119172  | 0.124272  | 0.115239  | 0.110431 | 0.117133  | 0.118007  |
| 0.11553   | 0.12296   | 0.123106  | 0.122815  | 0.130245 | 0.11655   | 0.128205  |
| 0.129953  | 0.121941  | 0.131119  | 0.132284  | 0.122523 | 0.129808  | 0.137675  |
| 0.242424  | 0.244901  | 0.245338  | 0.243007  | 0.251894 | 0.235868  | 0.247523  |
| 0.0839161 | 0.0826049 | 0.119172  | 0.117133  | 0.111451 | 0.0726981 | 0.116404  |
| 0.173223  | 0.176282  | 0.181964  | 0.175845  | 0.179487 | 0.166084  | 0.180653  |
| 0.178613  | 0.182547  | 0.188811  | 0.178322  | 0.185752 | 0.170017  | 0.184003  |
| 0.108829  | 0.119464  | 0.11553   | 0.122523  | 0.112762 | 0.108683  | 0.121503  |
| 0.101836  | 0.106352  | 0.102418  | 0.115239  | 0.105769 | 0.0999417 | 0.117133  |
| 0.0907634 | 0.0847902 | 0.121649  | 0.122232  | 0.117716 | 0.0804196 | 0.125874  |
| 0.101253  | 0.113054  | 0.121358  | 0.0464744 | 0.115385 | 0.0818765 | 0.0981935 |
| 0.102273  | 0.105915  | 0.0885781 | 0.117424  | 0.106498 | 0.0980478 | 0.112908  |
| 0.11451   | 0.109703  | 0.124709  | 0.11655   | 0.106206 | 0.115822  | 0.121649  |
| 0.119901  | 0.113345  | 0.103001  | 0.0759033 | 0.119172 | 0.0894522 | 0.115093  |

|           |           |          |           |          |           |          |
|-----------|-----------|----------|-----------|----------|-----------|----------|
| 0.121941  | 0.128788  | 0.134178 | 0.0560897 | 0.135198 | 0.0976107 | 0.115676 |
| 0.0833333 | 0.0782343 | 0.115093 | 0.117424  | 0.112325 | 0.0724068 | 0.114948 |
| 0.119464  | 0.127185  | 0.130536 | 0.0553613 | 0.131847 | 0.097465  | 0.112617 |
| 0.114948  | 0.116259  | 0.118735 | 0.116987  | 0.109557 | 0.118881  | 0.11451  |
| 0.118153  | 0.12296   | 0.121358 | 0.125437  | 0.131119 | 0.118881  | 0.129953 |
| 0.115676  | 0.109411  | 0.126748 | 0.119172  | 0.108246 | 0.114073  | 0.124272 |
| 0.129808  | 0.119755  | 0.135052 | 0.129808  | 0.122086 | 0.128205  | 0.134615 |
| 0.113928  | 0.121649  | 0.11014  | 0.123543  | 0.118735 | 0.112908  | 0.117279 |
| 0.0862471 | 0.0785256 | 0.113636 | 0.115967  | 0.112325 | 0.0773601 | 0.114656 |
| 0.131993  | 0.133887  | 0.128497 | 0.129371  | 0.133304 | 0.127477  | 0.124563 |
| 0.173514  | 0.179779  | 0.182255 | 0.177302  | 0.182984 | 0.167541  | 0.18007  |
| 0.126166  | 0.13243   | 0.136946 | 0.0617716 | 0.138258 | 0.103293  | 0.121941 |
| 0.112762  | 0.11757   | 0.123543 | 0.04662   | 0.12602  | 0.0878497 | 0.108246 |
| 0.114365  | 0.11859   | 0.119318 | 0.121066  | 0.123834 | 0.117716  | 0.125583 |
| 0.104312  | 0.111451  | 0.112762 | 0.114219  | 0.114365 | 0.104458  | 0.115239 |
| 0.118735  | 0.108392  | 0.12398  | 0.122523  | 0.107226 | 0.116259  | 0.122086 |
| 0.121503  | 0.112908  | 0.125291 | 0.12704   | 0.11116  | 0.122523  | 0.128059 |
| 0.181381  | 0.183566  | 0.190122 | 0.186043  | 0.18852  | 0.175117  | 0.188811 |
| 0.112617  | 0.111014  | 0.121649 | 0.069493  | 0.121212 | 0.087704  | 0.105186 |
| 0.104895  | 0.103875  | 0.107517 | 0.104895  | 0.109703 | 0.0901807 | 0.10708  |
| 0.116841  | 0.11961   | 0.128788 | 0.0457459 | 0.131265 | 0.090472  | 0.108246 |
| 0.18109   | 0.184149  | 0.191579 | 0.180507  | 0.193473 | 0.173368  | 0.186772 |
| 0.101399  | 0.105332  | 0.100524 | 0.111888  | 0.102127 | 0.0971737 | 0.116987 |
| 0.121649  | 0.11451   | 0.130099 | 0.123106  | 0.115385 | 0.120629  | 0.127331 |
| 0.113199  | 0.120047  | 0.128059 | 0.0456002 | 0.127622 | 0.090035  | 0.107517 |
| 0.100816  | 0.112034  | 0.118881 | 0.113928  | 0.112908 | 0.105624  | 0.111451 |
| 0.173368  | 0.182255  | 0.183858 | 0.176573  | 0.187209 | 0.169143  | 0.179924 |
| 0.11655   | 0.10912   | 0.123834 | 0.115967  | 0.112034 | 0.114948  | 0.122815 |
| 0.113928  | 0.112325  | 0.117424 | 0.11014   | 0.112617 | 0.105915  | 0.105041 |
| 0.101981  | 0.107955  | 0.104021 | 0.115676  | 0.102418 | 0.0986305 | 0.114656 |
| 0.111305  | 0.112617  | 0.121795 | 0.110723  | 0.119318 | 0.10271   | 0.110577 |
| 0.116987  | 0.120338  | 0.123689 | 0.120192  | 0.113345 | 0.120629  | 0.120921 |
| 0.126894  | 0.118881  | 0.130682 | 0.126603  | 0.116841 | 0.125     | 0.133159 |
| 0.0823135 | 0.0786713 | 0.114948 | 0.112908  | 0.112179 | 0.0728438 | 0.115385 |
| 0.119318  | 0.121795  | 0.123106 | 0.112617  | 0.123252 | 0.116841  | 0.114219 |
| 0.134324  | 0.138549  | 0.141608 | 0.138403  | 0.143211 | 0.133596  | 0.139423 |
| 0.226981  | 0.230624  | 0.232517 | 0.226981  | 0.236451 | 0.220717  | 0.232372 |
| 0.119464  | 0.124272  | 0.112179 | 0.125583  | 0.123397 | 0.116987  | 0.118444 |
| 0.116841  | 0.121066  | 0.12296  | 0.118881  | 0.111451 | 0.121066  | 0.119318 |
| 0.111451  | 0.114219  | 0.123689 | 0.0546329 | 0.122378 | 0.0865385 | 0.106061 |
| 0.113928  | 0.119901  | 0.126748 | 0.121795  | 0.116987 | 0.114073  | 0.121066 |
| 0.111742  | 0.106935  | 0.113782 | 0.109411  | 0.107226 | 0.107809  | 0.117716 |
| 0.121066  | 0.11655   | 0.118444 | 0.11757   | 0.111888 | 0.113928  | 0.117716 |
| 0.115385  | 0.115239  | 0.127331 | 0.0571096 | 0.127768 | 0.0936772 | 0.109994 |

|           |           |           |           |          |           |          |
|-----------|-----------|-----------|-----------|----------|-----------|----------|
| 0.125146  | 0.115676  | 0.131556  | 0.125728  | 0.11655  | 0.121795  | 0.129953 |
| 0.112034  | 0.107226  | 0.120484  | 0.116987  | 0.113345 | 0.101981  | 0.111597 |
| 0.226981  | 0.230332  | 0.231935  | 0.230478  | 0.236451 | 0.221882  | 0.23616  |
| 0.101544  | 0.104604  | 0.101253  | 0.110286  | 0.102855 | 0.0932401 | 0.114802 |
| 0.10708   | 0.107809  | 0.113491  | 0.111451  | 0.106935 | 0.108392  | 0.110723 |
| 0.0844988 | 0.0753205 | 0.11451   | 0.111888  | 0.110868 | 0.0692016 | 0.114656 |
| 0.115822  | 0.127622  | 0.132139  | 0.123397  | 0.128788 | 0.120921  | 0.126748 |
| 0.12602   | 0.129953  | 0.118444  | 0.133887  | 0.12704  | 0.123543  | 0.127331 |
| 0.105332  | 0.110431  | 0.119901  | 0.108537  | 0.119464 | 0.101399  | 0.113345 |
| 0.110868  | 0.11859   | 0.126311  | 0.0467657 | 0.122669 | 0.0865385 | 0.104895 |
| 0.102273  | 0.112908  | 0.115385  | 0.108974  | 0.111451 | 0.100379  | 0.105624 |
| 0.222902  | 0.223631  | 0.229895  | 0.224359  | 0.233246 | 0.216638  | 0.229749 |
| 0.118007  | 0.122232  | 0.128788  | 0.0469114 | 0.129808 | 0.0936772 | 0.10912  |
| 0.121941  | 0.112471  | 0.129516  | 0.121066  | 0.113054 | 0.117716  | 0.126457 |
| 0.108537  | 0.104604  | 0.11757   | 0.117279  | 0.100524 | 0.103147  | 0.109848 |
| 0.121503  | 0.124854  | 0.11859   | 0.118881  | 0.123397 | 0.117861  | 0.124272 |
| 0.120921  | 0.123689  | 0.122669  | 0.127622  | 0.124272 | 0.126894  | 0.12602  |
| 0.0844988 | 0.0796911 | 0.114219  | 0.115967  | 0.107955 | 0.0750291 | 0.119318 |
| 0.123252  | 0.114948  | 0.127622  | 0.12296   | 0.114073 | 0.120484  | 0.130973 |
| 0.12602   | 0.119755  | 0.136218  | 0.125146  | 0.120921 | 0.126166  | 0.134324 |
| 0.117861  | 0.111305  | 0.125728  | 0.119318  | 0.109557 | 0.118007  | 0.122669 |
| 0.0847902 | 0.0817308 | 0.112762  | 0.114802  | 0.10708  | 0.0729895 | 0.113491 |
| 0.121795  | 0.12602   | 0.122669  | 0.124126  | 0.119027 | 0.127477  | 0.125437 |
| 0.125146  | 0.132576  | 0.131265  | 0.128351  | 0.126457 | 0.132576  | 0.132284 |
| 0.122523  | 0.126457  | 0.125437  | 0.128934  | 0.133159 | 0.125     | 0.131702 |
| 0.126311  | 0.129079  | 0.127185  | 0.129808  | 0.134907 | 0.126748  | 0.134615 |
| 0.12704   | 0.130099  | 0.127914  | 0.128788  | 0.123397 | 0.130682  | 0.129808 |
| 0.0996503 | 0.102127  | 0.0888695 | 0.113928  | 0.101544 | 0.0945513 | 0.109994 |
| 0.131265  | 0.121503  | 0.141171  | 0.13039   | 0.13345  | 0.132576  | 0.133159 |
| 0.126457  | 0.124854  | 0.128497  | 0.128788  | 0.128059 | 0.119318  | 0.136509 |
| 0.194347  | 0.199446  | 0.204254  | 0.197261  | 0.206731 | 0.188374  | 0.200903 |
| 0.116259  | 0.118153  | 0.129662  | 0.11859   | 0.128351 | 0.107663  | 0.11553  |
| 0.111014  | 0.111451  | 0.123834  | 0.117424  | 0.112034 | 0.112908  | 0.115822 |
| 0.0890152 | 0.0824592 | 0.117861  | 0.121941  | 0.11655  | 0.076049  | 0.12296  |
| 0.213869  | 0.216929  | 0.216492  | 0.215618  | 0.224505 | 0.208188  | 0.220717 |
| 0.201923  | 0.206439  | 0.20979   | 0.20542   | 0.209936 | 0.19595   | 0.208188 |
| 0.125437  | 0.118298  | 0.133596  | 0.126603  | 0.121212 | 0.125     | 0.135781 |
| 0.240967  | 0.244901  | 0.243881  | 0.24155   | 0.251311 | 0.234994  | 0.247815 |
| 0.0964452 | 0.103584  | 0.0888695 | 0.114219  | 0.10271  | 0.095134  | 0.109411 |
| 0.128205  | 0.130099  | 0.129371  | 0.138403  | 0.132139 | 0.127768  | 0.135344 |
| 0.104021  | 0.108246  | 0.104312  | 0.116841  | 0.106498 | 0.101836  | 0.119318 |
| 0.122232  | 0.126166  | 0.125146  | 0.123106  | 0.119755 | 0.126457  | 0.124709 |
| 0.177448  | 0.182255  | 0.18852   | 0.180653  | 0.18954  | 0.170309  | 0.184878 |
| 0.119318  | 0.118881  | 0.126603  | 0.126603  | 0.112762 | 0.118881  | 0.120047 |

|           |           |           |           |           |           |           |
|-----------|-----------|-----------|-----------|-----------|-----------|-----------|
| 0.182838  | 0.189103  | 0.193328  | 0.188083  | 0.194639  | 0.175991  | 0.189103  |
| 0.107372  | 0.111888  | 0.113491  | 0.116404  | 0.108974  | 0.106643  | 0.11655   |
| 0.113199  | 0.102564  | 0.12398   | 0.0980478 | 0.116841  | 0.094697  | 0.117424  |
| 0.120775  | 0.120629  | 0.0502622 | 0.127768  | 0.115385  | 0.117716  | 0.122086  |
| 0.104458  | 0.105186  | 0.113199  | 0.103584  | 0.115093  | 0.0981935 | 0.104312  |
| 0.07838   | 0.0729895 | 0.108974  | 0.109848  | 0.107372  | 0.0686189 | 0.112908  |
| 0.106061  | 0.107955  | 0.121795  | 0.105478  | 0.119027  | 0.0960082 | 0.102127  |
| 0.10169   | 0.101544  | 0.0984848 | 0.113054  | 0.103001  | 0.0968823 | 0.116696  |
| 0.105915  | 0.113636  | 0.11961   | 0.0447261 | 0.117716  | 0.0824592 | 0.101981  |
| 0.116259  | 0.106789  | 0.123543  | 0.116841  | 0.117861  | 0.116696  | 0.120192  |
| 0.108683  | 0.112908  | 0.104312  | 0.113054  | 0.110868  | 0.105041  | 0.10912   |
| 0.103875  | 0.106061  | 0.0980478 | 0.116987  | 0.104312  | 0.0999417 | 0.117133  |
| 0.111888  | 0.103293  | 0.125     | 0.121795  | 0.122232  | 0.103584  | 0.124563  |
| 0.122669  | 0.125437  | 0.131119  | 0.0541958 | 0.130099  | 0.0980478 | 0.114073  |
| 0.107663  | 0.113928  | 0.116404  | 0.114365  | 0.117424  | 0.108392  | 0.120338  |
| 0.113054  | 0.113491  | 0.117716  | 0.113636  | 0.114656  | 0.107372  | 0.109703  |
| 0.0770688 | 0.0748834 | 0.110286  | 0.109703  | 0.105769  | 0.0678904 | 0.111597  |
| 0.116404  | 0.109266  | 0.123106  | 0.11553   | 0.113054  | 0.112179  | 0.120047  |
| 0.11553   | 0.117424  | 0.121358  | 0.119027  | 0.111305  | 0.118881  | 0.119464  |
| 0.116259  | 0.111451  | 0.125874  | 0.122378  | 0.11116   | 0.11553   | 0.125146  |
| 0.115676  | 0.116404  | 0.116259  | 0.121212  | 0.121941  | 0.113199  | 0.121358  |
| 0.110577  | 0.115676  | 0.122232  | 0.0450175 | 0.121795  | 0.0839161 | 0.105186  |
| 0.121795  | 0.127477  | 0.131993  | 0.0524476 | 0.13447   | 0.0962995 | 0.115239  |
| 0.129953  | 0.134761  | 0.138403  | 0.0582751 | 0.141463  | 0.103875  | 0.123689  |
| 0.103875  | 0.102273  | 0.114365  | 0.108537  | 0.0981935 | 0.100816  | 0.112762  |
| 0.083479  | 0.0786713 | 0.118444  | 0.113782  | 0.109557  | 0.0734266 | 0.113054  |
| 0.111014  | 0.11116   | 0.11451   | 0.108392  | 0.106789  | 0.106789  | 0.110868  |
| 0.128497  | 0.130973  | 0.130245  | 0.130536  | 0.124563  | 0.131847  | 0.133596  |
| 0.109703  | 0.112179  | 0.101836  | 0.116696  | 0.1081    | 0.106935  | 0.123834  |
| 0.135052  | 0.127622  | 0.142045  | 0.140589  | 0.127331  | 0.134907  | 0.1419    |
| 0.10271   | 0.0958625 | 0.133304  | 0.132139  | 0.129079  | 0.0909091 | 0.13549   |
| 0.115676  | 0.122232  | 0.123834  | 0.122378  | 0.124272  | 0.116987  | 0.121649  |
| 0.0983392 | 0.106061  | 0.104167  | 0.109703  | 0.113928  | 0.0987762 | 0.104021  |
| 0.109266  | 0.113782  | 0.118007  | 0.106061  | 0.11116   | 0.109411  | 0.113199  |
| 0.118881  | 0.125728  | 0.12296   | 0.12704   | 0.130973  | 0.12398   | 0.131556  |
| 0.199738  | 0.196678  | 0.205565  | 0.197698  | 0.203089  | 0.190268  | 0.206294  |
| 0.114073  | 0.115093  | 0.114365  | 0.112325  | 0.111597  | 0.107517  | 0.107517  |
| 0.11655   | 0.11553   | 0.0620629 | 0.120047  | 0.109703  | 0.112034  | 0.117279  |
| 0.114656  | 0.118007  | 0.122815  | 0.119318  | 0.112179  | 0.118298  | 0.120338  |
| 0.111305  | 0.116113  | 0.11655   | 0.120629  | 0.116987  | 0.112325  | 0.120192  |
| 0.113491  | 0.119755  | 0.116113  | 0.120192  | 0.112762  | 0.11014   | 0.119172  |
| 0.119027  | 0.120629  | 0.125728  | 0.11553   | 0.126457  | 0.115676  | 0.0949883 |
| 0.124417  | 0.125146  | 0.127622  | 0.116259  | 0.128351  | 0.120192  | 0.100087  |
| 0.112325  | 0.117133  | 0.120484  | 0.118735  | 0.119755  | 0.113054  | 0.11451   |



|           |           |           |           |           |           |          |
|-----------|-----------|-----------|-----------|-----------|-----------|----------|
| 0.108246  | 0.103438  | 0.120484  | 0.113782  | 0.112179  | 0.113345  | 0.115093 |
| 0.121358  | 0.126457  | 0.124563  | 0.12602   | 0.11859   | 0.12704   | 0.126166 |
| 0.116113  | 0.117133  | 0.0592949 | 0.118153  | 0.112471  | 0.111014  | 0.113345 |
| 0.11451   | 0.116696  | 0.111014  | 0.118881  | 0.114365  | 0.110868  | 0.112034 |
| 0.167686  | 0.171911  | 0.178759  | 0.170309  | 0.177156  | 0.16317   | 0.171037 |
| 0.108829  | 0.11655   | 0.123689  | 0.048514  | 0.117424  | 0.0844988 | 0.104312 |
| 0.125     | 0.127477  | 0.125583  | 0.127331  | 0.122232  | 0.128642  | 0.131556 |
| 0.118735  | 0.115385  | 0.109703  | 0.129516  | 0.114219  | 0.117424  | 0.128788 |
| 0.118298  | 0.106789  | 0.125     | 0.112179  | 0.118444  | 0.101253  | 0.127185 |
| 0.104604  | 0.105624  | 0.106061  | 0.106352  | 0.110868  | 0.101253  | 0.092803 |
| 0.100524  | 0.107955  | 0.104021  | 0.108683  | 0.105332  | 0.0971737 | 0.103001 |
| 0.111014  | 0.109703  | 0.106352  | 0.111597  | 0.113491  | 0.107372  | 0.097465 |
| 0.122086  | 0.118153  | 0.127914  | 0.124709  | 0.120192  | 0.120484  | 0.128934 |
| 0.106643  | 0.105915  | 0.116259  | 0.0842075 | 0.11553   | 0.08581   | 0.108537 |
| 0.123106  | 0.120921  | 0.126894  | 0.130099  | 0.122378  | 0.121795  | 0.131993 |
| 0.11014   | 0.0817308 | 0.11859   | 0.106352  | 0.108246  | 0.10067   | 0.112617 |
| 0.116987  | 0.115093  | 0.11553   | 0.120775  | 0.11451   | 0.114802  | 0.11859  |
| 0.13141   | 0.126603  | 0.128788  | 0.13345   | 0.126894  | 0.123106  | 0.135344 |
| 0.112471  | 0.110286  | 0.112179  | 0.121212  | 0.117861  | 0.114656  | 0.120775 |
| 0.113636  | 0.117861  | 0.123252  | 0.120338  | 0.122815  | 0.118444  | 0.125437 |
| 0.108392  | 0.101836  | 0.11014   | 0.118881  | 0.112617  | 0.108829  | 0.11553  |
| 0.111014  | 0.108829  | 0.109848  | 0.120629  | 0.114365  | 0.11116   | 0.118444 |
| 0.104312  | 0.0977564 | 0.0952797 | 0.11451   | 0.0992133 | 0.101544  | 0.114365 |
| 0.117861  | 0.117133  | 0.107955  | 0.12602   | 0.108974  | 0.112762  | 0.130536 |
| 0.10067   | 0.105478  | 0.105041  | 0.117861  | 0.103438  | 0.100524  | 0.113636 |
| 0.141463  | 0.133741  | 0.149038  | 0.135927  | 0.136072  | 0.137238  | 0.144522 |
| 0.12398   | 0.122669  | 0.138258  | 0.122815  | 0.124417  | 0.125     | 0.129079 |
| 0.0995047 | 0.107226  | 0.10271   | 0.113782  | 0.11451   | 0.105478  | 0.1081   |
| 0.134033  | 0.135344  | 0.129079  | 0.131702  | 0.127477  | 0.134761  | 0.141463 |
| 0.111597  | 0.120775  | 0.123543  | 0.11859   | 0.124854  | 0.11553   | 0.11961  |
| 0.129371  | 0.128351  | 0.129079  | 0.136946  | 0.131847  | 0.12602   | 0.139132 |
| 0.106352  | 0.11116   | 0.106352  | 0.11655   | 0.108829  | 0.105332  | 0.115822 |
| 0.144376  | 0.137821  | 0.139132  | 0.137966  | 0.132867  | 0.139277  | 0.148019 |
| 0.125146  | 0.125583  | 0.123106  | 0.130099  | 0.11859   | 0.129662  | 0.13141  |
| 0.134761  | 0.126166  | 0.140006  | 0.136509  | 0.131119  | 0.130828  | 0.143065 |
| 0.117861  | 0.120921  | 0.114656  | 0.123106  | 0.115385  | 0.117424  | 0.122378 |
| 0.104604  | 0.100087  | 0.11014   | 0.117716  | 0.10912   | 0.106206  | 0.114073 |
| 0.111451  | 0.109557  | 0.105332  | 0.117279  | 0.104604  | 0.109266  | 0.11451  |
| 0.121503  | 0.116987  | 0.119172  | 0.120338  | 0.112908  | 0.114948  | 0.125728 |
| 0.113345  | 0.114073  | 0.113345  | 0.121795  | 0.120484  | 0.113199  | 0.125728 |
| 0.121066  | 0.120921  | 0.112908  | 0.128351  | 0.122669  | 0.119172  | 0.134324 |
| 0.118153  | 0.108392  | 0.120192  | 0.122815  | 0.117133  | 0.111888  | 0.128205 |
| 0.100379  | 0.108392  | 0.113491  | 0.113782  | 0.107517  | 0.107226  | 0.115385 |
| 0.113636  | 0.107955  | 0.101399  | 0.115967  | 0.103293  | 0.109411  | 0.117279 |

|           |          |           |           |          |           |           |
|-----------|----------|-----------|-----------|----------|-----------|-----------|
| 0.114073  | 0.112179 | 0.108829  | 0.125437  | 0.111014 | 0.111305  | 0.130536  |
| 0.108537  | 0.104895 | 0.113199  | 0.11553   | 0.105769 | 0.104604  | 0.119172  |
| 0.120047  | 0.119027 | 0.11014   | 0.125583  | 0.112617 | 0.116113  | 0.122815  |
| 0.108974  | 0.103293 | 0.106935  | 0.110431  | 0.106206 | 0.101836  | 0.114073  |
| 0.104458  | 0.111888 | 0.11757   | 0.106789  | 0.115967 | 0.100524  | 0.111888  |
| 0.104167  | 0.111014 | 0.116113  | 0.111451  | 0.113054 | 0.101399  | 0.11014   |
| 0.0954254 | 0.10373  | 0.0875583 | 0.112908  | 0.101107 | 0.0917832 | 0.110431  |
| 0.102127  | 0.105769 | 0.104167  | 0.119027  | 0.108683 | 0.104895  | 0.120921  |
| 0.104021  | 0.108829 | 0.115967  | 0.106352  | 0.112908 | 0.102127  | 0.109994  |
| 0.107663  | 0.110723 | 0.105332  | 0.107955  | 0.111014 | 0.104312  | 0.099359  |
| 0.119027  | 0.123834 | 0.120484  | 0.105041  | 0.125583 | 0.110431  | 0.0999417 |
| 0.0948427 | 0.104895 | 0.110577  | 0.0954254 | 0.107809 | 0.0920746 | 0.104604  |
| 0.122669  | 0.126894 | 0.113928  | 0.122669  | 0.124563 | 0.120192  | 0.120484  |

| TDr_1568  | TDr_1569  | TDr_1576  | TDr_1577  | TDr_1585  | TDr_1598 | TDr_1601 |
|-----------|-----------|-----------|-----------|-----------|----------|----------|
| 0.116987  | 0.106498  | 0.11553   | 0.116841  | 0.123543  | 0.197552 | 0.137821 |
| 0.110723  | 0.101399  | 0.111305  | 0.105915  | 0.123397  | 0.2044   | 0.128059 |
| 0.104604  | 0.0955711 | 0.105478  | 0.0992133 | 0.121066  | 0.200903 | 0.124563 |
| 0.110723  | 0.103147  | 0.0909091 | 0.0893065 | 0.121066  | 0.211101 | 0.110286 |
| 0.138986  | 0.125     | 0.136072  | 0.130682  | 0.131265  | 0.22567  | 0.145833 |
| 0.128205  | 0.116259  | 0.132867  | 0.126311  | 0.134178  | 0.213432 | 0.148164 |
| 0.125437  | 0.107955  | 0.129225  | 0.126166  | 0.117716  | 0.2162   | 0.1419   |
| 0.110577  | 0.106206  | 0.106498  | 0.10373   | 0.122378  | 0.203089 | 0.126457 |
| 0.111597  | 0.0879953 | 0.106643  | 0.105915  | 0.114948  | 0.209936 | 0.130973 |
| 0.100087  | 0.0776515 | 0.11961   | 0.113636  | 0.123834  | 0.20979  | 0.136364 |
| 0.11014   | 0.104021  | 0.122086  | 0.124854  | 0.121066  | 0.197115 | 0.149038 |
| 0.119318  | 0.0989219 | 0.107372  | 0.105478  | 0.114219  | 0.209207 | 0.131702 |
| 0.107955  | 0.0942599 | 0.114073  | 0.109557  | 0.115967  | 0.212704 | 0.138695 |
| 0.121503  | 0.115967  | 0.129371  | 0.129225  | 0.146125  | 0.172057 | 0.154283 |
| 0.0622086 | 0.106498  | 0.129808  | 0.126748  | 0.137238  | 0.214161 | 0.143065 |
| 0.113928  | 0.106935  | 0.120921  | 0.121358  | 0.108246  | 0.215181 | 0.136509 |
| 0.117861  | 0.100962  | 0.115822  | 0.111888  | 0.106935  | 0.212995 | 0.138403 |
| 0.145105  | 0.138112  | 0.143065  | 0.138549  | 0.152535  | 0.22771  | 0.148747 |
| 0.110431  | 0.097028  | 0.10169   | 0.100379  | 0.116696  | 0.202652 | 0.124272 |
| 0.163753  | 0.19289   | 0.197844  | 0.202943  | 0.210227  | 0.127477 | 0.208479 |
| 0.121358  | 0.116987  | 0.127477  | 0.126166  | 0.129371  | 0.215909 | 0.151515 |
| 0.122669  | 0.109266  | 0.122378  | 0.119027  | 0.13039   | 0.216638 | 0.146416 |
| 0.114073  | 0.0995047 | 0.110286  | 0.107809  | 0.0964452 | 0.207168 | 0.134907 |
| 0.135781  | 0.110431  | 0.130536  | 0.123689  | 0.102127  | 0.222756 | 0.144668 |
| 0.106789  | 0.0910548 | 0.108829  | 0.104604  | 0.108683  | 0.202797 | 0.129662 |
| 0.127768  | 0.122232  | 0.134761  | 0.131119  | 0.135198  | 0.218531 | 0.145105 |
| 0.126894  | 0.110577  | 0.132721  | 0.12704   | 0.120921  | 0.215035 | 0.144814 |
| 0.124563  | 0.103584  | 0.122523  | 0.119464  | 0.105769  | 0.225524 | 0.13549  |
| 0.136801  | 0.118444  | 0.131847  | 0.127622  | 0.126748  | 0.222028 | 0.143648 |
| 0.12602   | 0.100087  | 0.124854  | 0.120921  | 0.125291  | 0.222611 | 0.142774 |
| 0.120629  | 0.111888  | 0.132284  | 0.127768  | 0.12398   | 0.211684 | 0.148164 |
| 0.122523  | 0.106206  | 0.126603  | 0.119755  | 0.117716  | 0.217366 | 0.13986  |
| 0.099796  | 0.0939685 | 0.112908  | 0.111014  | 0.115967  | 0.201049 | 0.132284 |
| 0.121358  | 0.0939685 | 0.120775  | 0.115967  | 0.119464  | 0.213869 | 0.141026 |
| 0.127331  | 0.109557  | 0.130245  | 0.128059  | 0.11116   | 0.214598 | 0.144668 |
| 0.131265  | 0.107955  | 0.130973  | 0.131119  | 0.11859   | 0.223485 | 0.141026 |
| 0.135198  | 0.120047  | 0.136072  | 0.134178  | 0.131847  | 0.230624 | 0.152535 |
| 0.125437  | 0.11116   | 0.127185  | 0.119464  | 0.11655   | 0.220862 | 0.148019 |
| 0.113782  | 0.0965909 | 0.116696  | 0.110431  | 0.0929487 | 0.210956 | 0.132867 |
| 0.125146  | 0.109994  | 0.123689  | 0.121503  | 0.107809  | 0.222028 | 0.138695 |
| 0.112908  | 0.0945513 | 0.114365  | 0.108974  | 0.10169   | 0.210082 | 0.133159 |
| 0.137383  | 0.124563  | 0.144085  | 0.138112  | 0.12704   | 0.231061 | 0.153263 |

|          |           |           |           |           |          |          |
|----------|-----------|-----------|-----------|-----------|----------|----------|
| 0.148164 | 0.126894  | 0.150495  | 0.142774  | 0.125291  | 0.231643 | 0.159091 |
| 0.122086 | 0.101981  | 0.116841  | 0.110868  | 0.107955  | 0.213432 | 0.13884  |
| 0.113345 | 0.0932401 | 0.115093  | 0.113199  | 0.10708   | 0.211684 | 0.138258 |
| 0.116696 | 0.10067   | 0.126603  | 0.122669  | 0.111888  | 0.224359 | 0.143065 |
| 0.122232 | 0.105915  | 0.122523  | 0.116841  | 0.109848  | 0.214744 | 0.140734 |
| 0.141026 | 0.120338  | 0.140734  | 0.13447   | 0.126894  | 0.230624 | 0.149621 |
| 0.120047 | 0.0984848 | 0.11655   | 0.110577  | 0.111742  | 0.215181 | 0.136801 |
| 0.117279 | 0.102418  | 0.123397  | 0.116259  | 0.106935  | 0.214161 | 0.13986  |
| 0.147436 | 0.13345   | 0.150641  | 0.144376  | 0.14933   | 0.229167 | 0.158071 |
| 0.132284 | 0.114802  | 0.133741  | 0.132139  | 0.117861  | 0.218386 | 0.145251 |
| 0.118444 | 0.0995047 | 0.117279  | 0.113636  | 0.0973193 | 0.215035 | 0.138112 |
| 0.118153 | 0.103584  | 0.124272  | 0.12296   | 0.134907  | 0.222319 | 0.138695 |
| 0.113491 | 0.110577  | 0.0875583 | 0.0842075 | 0.112179  | 0.200175 | 0.107226 |
| 0.148747 | 0.128059  | 0.137966  | 0.131119  | 0.122669  | 0.23514  | 0.149767 |
| 0.131119 | 0.111014  | 0.129662  | 0.127477  | 0.114656  | 0.222465 | 0.147873 |
| 0.120921 | 0.105186  | 0.119172  | 0.114656  | 0.102418  | 0.216638 | 0.137383 |
| 0.120629 | 0.101399  | 0.12296   | 0.120484  | 0.115239  | 0.211101 | 0.142045 |
| 0.11961  | 0.0992133 | 0.126311  | 0.12296   | 0.110431  | 0.219406 | 0.143939 |
| 0.143502 | 0.128351  | 0.140589  | 0.131119  | 0.115385  | 0.2331   | 0.148601 |
| 0.142337 | 0.121941  | 0.138258  | 0.132867  | 0.122669  | 0.23514  | 0.143648 |
| 0.150058 | 0.146853  | 0.156177  | 0.158654  | 0.151661  | 0.172348 | 0.170309 |
| 0.11655  | 0.0964452 | 0.115676  | 0.114073  | 0.106789  | 0.214598 | 0.137092 |
| 0.120629 | 0.0955711 | 0.120338  | 0.113782  | 0.100962  | 0.213432 | 0.139714 |
| 0.120921 | 0.0917832 | 0.11451   | 0.111451  | 0.102127  | 0.212267 | 0.138258 |
| 0.141463 | 0.130682  | 0.146125  | 0.141317  | 0.139277  | 0.218823 | 0.157634 |
| 0.116696 | 0.097465  | 0.112617  | 0.108392  | 0.107226  | 0.212995 | 0.13345  |
| 0.136072 | 0.11859   | 0.135198  | 0.130682  | 0.119318  | 0.217512 | 0.147873 |
| 0.119172 | 0.101107  | 0.127331  | 0.126894  | 0.107955  | 0.21926  | 0.145251 |
| 0.123106 | 0.10271   | 0.124563  | 0.120047  | 0.106352  | 0.212704 | 0.142191 |
| 0.147582 | 0.138549  | 0.149913  | 0.145396  | 0.146562  | 0.221445 | 0.1588   |
| 0.128642 | 0.108537  | 0.121649  | 0.119755  | 0.104604  | 0.221445 | 0.146562 |
| 0.138403 | 0.120921  | 0.138986  | 0.135927  | 0.123397  | 0.232955 | 0.147873 |
| 0.137383 | 0.114365  | 0.134761  | 0.130828  | 0.116841  | 0.217075 | 0.146562 |
| 0.115385 | 0.107226  | 0.107226  | 0.10912   | 0.117861  | 0.204983 | 0.131265 |
| 0.121212 | 0.0984848 | 0.11451   | 0.109411  | 0.101544  | 0.212267 | 0.137675 |
| 0.118298 | 0.100524  | 0.119464  | 0.117279  | 0.106498  | 0.215181 | 0.139714 |
| 0.139277 | 0.123252  | 0.134324  | 0.127477  | 0.114656  | 0.227127 | 0.144376 |
| 0.119901 | 0.0977564 | 0.116404  | 0.112179  | 0.107226  | 0.213869 | 0.141317 |
| 0.139277 | 0.120629  | 0.137529  | 0.131847  | 0.125437  | 0.232955 | 0.147873 |
| 0.124417 | 0.104895  | 0.128497  | 0.126894  | 0.110577  | 0.214307 | 0.14729  |
| 0.128205 | 0.1081    | 0.119172  | 0.115239  | 0.0962995 | 0.21722  | 0.133304 |
| 0.122378 | 0.102564  | 0.122086  | 0.117279  | 0.105915  | 0.216055 | 0.145542 |
| 0.125    | 0.105186  | 0.119755  | 0.118153  | 0.107663  | 0.219551 | 0.139714 |
| 0.118298 | 0.10169   | 0.121795  | 0.116696  | 0.104749  | 0.21722  | 0.143211 |

|          |           |          |          |           |          |          |
|----------|-----------|----------|----------|-----------|----------|----------|
| 0.122378 | 0.102273  | 0.116259 | 0.114365 | 0.103001  | 0.212558 | 0.137383 |
| 0.140006 | 0.125437  | 0.141754 | 0.134324 | 0.121212  | 0.229604 | 0.147436 |
| 0.113491 | 0.0939685 | 0.119318 | 0.115385 | 0.105186  | 0.214452 | 0.142483 |
| 0.11655  | 0.0999417 | 0.120629 | 0.113782 | 0.116696  | 0.216638 | 0.142337 |
| 0.124709 | 0.113928  | 0.131993 | 0.127477 | 0.128642  | 0.227127 | 0.145251 |
| 0.129079 | 0.112471  | 0.133159 | 0.13243  | 0.126311  | 0.220425 | 0.14933  |
| 0.130245 | 0.116259  | 0.142191 | 0.13884  | 0.128642  | 0.224505 | 0.146416 |
| 0.137383 | 0.127477  | 0.142045 | 0.140443 | 0.134324  | 0.232809 | 0.148893 |
| 0.120047 | 0.106643  | 0.121503 | 0.123397 | 0.124563  | 0.209353 | 0.14729  |
| 0.170455 | 0.171037  | 0.184149 | 0.184878 | 0.182838  | 0.158654 | 0.194493 |
| 0.114656 | 0.095134  | 0.113199 | 0.110431 | 0.116259  | 0.215618 | 0.132576 |
| 0.134324 | 0.129079  | 0.141608 | 0.140006 | 0.133304  | 0.22771  | 0.146125 |
| 0.127914 | 0.121795  | 0.13345  | 0.132139 | 0.126311  | 0.223922 | 0.143502 |
| 0.14088  | 0.123397  | 0.143211 | 0.140443 | 0.13141   | 0.229895 | 0.158217 |
| 0.113345 | 0.103147  | 0.115676 | 0.11553  | 0.113491  | 0.214015 | 0.137966 |
| 0.129662 | 0.122086  | 0.132284 | 0.130973 | 0.124272  | 0.226253 | 0.144959 |
| 0.120338 | 0.105186  | 0.119755 | 0.120775 | 0.120775  | 0.216638 | 0.139714 |
| 0.124272 | 0.113199  | 0.133304 | 0.128788 | 0.121795  | 0.219697 | 0.143939 |
| 0.116113 | 0.0980478 | 0.119318 | 0.118298 | 0.113345  | 0.213869 | 0.136946 |
| 0.140006 | 0.124563  | 0.145542 | 0.142774 | 0.126166  | 0.230186 | 0.151515 |
| 0.110868 | 0.0890152 | 0.11757  | 0.113054 | 0.104312  | 0.216783 | 0.137821 |
| 0.135198 | 0.123834  | 0.140152 | 0.133887 | 0.130682  | 0.220425 | 0.146416 |
| 0.124272 | 0.102418  | 0.126603 | 0.124126 | 0.120921  | 0.217657 | 0.145979 |
| 0.136072 | 0.115967  | 0.132867 | 0.127185 | 0.114656  | 0.228293 | 0.145542 |
| 0.124563 | 0.11757   | 0.14088  | 0.137238 | 0.126457  | 0.221445 | 0.151807 |
| 0.114948 | 0.100379  | 0.116987 | 0.11451  | 0.115967  | 0.214161 | 0.142774 |
| 0.144085 | 0.140297  | 0.148747 | 0.144522 | 0.143357  | 0.219988 | 0.158508 |
| 0.121503 | 0.10373   | 0.125583 | 0.120192 | 0.120484  | 0.218094 | 0.148164 |
| 0.119464 | 0.101399  | 0.121212 | 0.11757  | 0.114365  | 0.219843 | 0.140589 |
| 0.122523 | 0.106789  | 0.124272 | 0.119755 | 0.108974  | 0.219114 | 0.139569 |
| 0.139423 | 0.122523  | 0.145833 | 0.138403 | 0.145396  | 0.226399 | 0.15472  |
| 0.115822 | 0.112034  | 0.126894 | 0.124126 | 0.113636  | 0.199883 | 0.145105 |
| 0.113199 | 0.103875  | 0.114656 | 0.11014  | 0.112471  | 0.215909 | 0.134615 |
| 0.111742 | 0.102127  | 0.115239 | 0.115385 | 0.112471  | 0.21183  | 0.13986  |
| 0.11859  | 0.100816  | 0.122378 | 0.118735 | 0.118735  | 0.213141 | 0.143502 |
| 0.120484 | 0.103293  | 0.13447  | 0.125291 | 0.120047  | 0.225233 | 0.143939 |
| 0.120338 | 0.103147  | 0.124417 | 0.123397 | 0.118153  | 0.216346 | 0.14729  |
| 0.108829 | 0.0849359 | 0.114073 | 0.107809 | 0.102564  | 0.206585 | 0.129953 |
| 0.109411 | 0.0878497 | 0.112325 | 0.109266 | 0.104895  | 0.210082 | 0.132867 |
| 0.111597 | 0.0917832 | 0.119172 | 0.111742 | 0.108537  | 0.214307 | 0.136509 |
| 0.126457 | 0.108974  | 0.120047 | 0.117279 | 0.113199  | 0.213432 | 0.142045 |
| 0.126311 | 0.11116   | 0.134761 | 0.131993 | 0.117133  | 0.225233 | 0.14627  |
| 0.109557 | 0.0882867 | 0.11859  | 0.109411 | 0.103584  | 0.216346 | 0.138258 |
| 0.104749 | 0.0875583 | 0.112908 | 0.106935 | 0.0999417 | 0.210956 | 0.134033 |

|           |           |           |           |           |          |           |
|-----------|-----------|-----------|-----------|-----------|----------|-----------|
| 0.123397  | 0.106789  | 0.138258  | 0.131702  | 0.107809  | 0.219988 | 0.149767  |
| 0.111014  | 0.0879953 | 0.117424  | 0.111451  | 0.0983392 | 0.213432 | 0.136218  |
| 0.125     | 0.110723  | 0.125874  | 0.122523  | 0.125728  | 0.211684 | 0.147582  |
| 0.132867  | 0.117716  | 0.137821  | 0.132139  | 0.137092  | 0.221591 | 0.151952  |
| 0.118298  | 0.0955711 | 0.121795  | 0.116696  | 0.107663  | 0.217512 | 0.140297  |
| 0.110286  | 0.0878497 | 0.116987  | 0.112762  | 0.104604  | 0.217075 | 0.13986   |
| 0.110577  | 0.0872669 | 0.11553   | 0.110431  | 0.105769  | 0.213287 | 0.137529  |
| 0.112325  | 0.0913462 | 0.113491  | 0.109848  | 0.105478  | 0.206294 | 0.13549   |
| 0.124272  | 0.100962  | 0.130682  | 0.121795  | 0.123834  | 0.223485 | 0.141608  |
| 0.105332  | 0.0875583 | 0.112617  | 0.107517  | 0.100233  | 0.211247 | 0.134615  |
| 0.136946  | 0.12296   | 0.141026  | 0.139423  | 0.131847  | 0.227127 | 0.150204  |
| 0.13243   | 0.120775  | 0.141171  | 0.137529  | 0.124126  | 0.222028 | 0.153846  |
| 0.124563  | 0.112325  | 0.128351  | 0.12296   | 0.114802  | 0.223776 | 0.140443  |
| 0.117133  | 0.102855  | 0.125     | 0.124272  | 0.113491  | 0.215763 | 0.148164  |
| 0.119172  | 0.0979021 | 0.124709  | 0.118444  | 0.11553   | 0.210227 | 0.144085  |
| 0.112617  | 0.0913462 | 0.120484  | 0.116841  | 0.0952797 | 0.2162   | 0.1419    |
| 0.122669  | 0.0973193 | 0.117424  | 0.112034  | 0.0968823 | 0.215181 | 0.14088   |
| 0.117424  | 0.097028  | 0.111305  | 0.10912   | 0.108246  | 0.216929 | 0.135052  |
| 0.11655   | 0.10169   | 0.0944056 | 0.0930944 | 0.108246  | 0.202652 | 0.114365  |
| 0.134033  | 0.112471  | 0.13549   | 0.133887  | 0.0971737 | 0.227418 | 0.148164  |
| 0.120484  | 0.104458  | 0.119027  | 0.120921  | 0.11859   | 0.220862 | 0.140152  |
| 0.123834  | 0.110431  | 0.132867  | 0.130099  | 0.136218  | 0.221591 | 0.144668  |
| 0.130099  | 0.118153  | 0.143211  | 0.139569  | 0.137821  | 0.231643 | 0.150641  |
| 0.179924  | 0.185752  | 0.184295  | 0.188228  | 0.197844  | 0.120047 | 0.203963  |
| 0.221445  | 0.229604  | 0.22669   | 0.230041  | 0.239948  | 0.110577 | 0.237908  |
| 0.114948  | 0.106789  | 0.0721154 | 0.0716783 | 0.108974  | 0.200466 | 0.0944056 |
| 0.116259  | 0.100524  | 0.11655   | 0.112325  | 0.0995047 | 0.209936 | 0.134178  |
| 0.112471  | 0.0967366 | 0.11014   | 0.111451  | 0.102418  | 0.205565 | 0.134761  |
| 0.117133  | 0.0952797 | 0.118298  | 0.112034  | 0.107663  | 0.21285  | 0.134761  |
| 0.0620629 | 0.106352  | 0.129953  | 0.126894  | 0.139423  | 0.216346 | 0.140297  |
| 0.120921  | 0.106061  | 0.115676  | 0.113491  | 0.103293  | 0.216346 | 0.136801  |
| 0.1537    | 0.135344  | 0.148747  | 0.144814  | 0.11859   | 0.234557 | 0.153846  |
| 0.126166  | 0.107517  | 0.120338  | 0.116404  | 0.100962  | 0.214889 | 0.141754  |
| 0.138403  | 0.111888  | 0.131119  | 0.127185  | 0.11553   | 0.225379 | 0.142628  |
| 0.133887  | 0.118153  | 0.130973  | 0.128497  | 0.115967  | 0.217949 | 0.145688  |
| 0.133887  | 0.118153  | 0.13884   | 0.131702  | 0.116841  | 0.225233 | 0.149767  |
| 0.137966  | 0.11961   | 0.138549  | 0.134907  | 0.125874  | 0.227564 | 0.148893  |
| 0.123106  | 0.106206  | 0.123689  | 0.11859   | 0.105478  | 0.219988 | 0.144231  |
| 0.123689  | 0.107372  | 0.119318  | 0.113636  | 0.0967366 | 0.21824  | 0.139277  |
| 0.124126  | 0.109266  | 0.124126  | 0.119027  | 0.105041  | 0.218094 | 0.144085  |
| 0.120921  | 0.0944056 | 0.115093  | 0.108829  | 0.103293  | 0.209062 | 0.134761  |
| 0.124417  | 0.105769  | 0.117424  | 0.112617  | 0.097465  | 0.214598 | 0.137675  |
| 0.124854  | 0.102127  | 0.118735  | 0.112179  | 0.103147  | 0.215035 | 0.138403  |
| 0.13345   | 0.11451   | 0.135198  | 0.126603  | 0.107663  | 0.219843 | 0.143794  |

|          |           |          |          |           |          |          |
|----------|-----------|----------|----------|-----------|----------|----------|
| 0.138986 | 0.126748  | 0.140734 | 0.132721 | 0.112617  | 0.230332 | 0.151369 |
| 0.129516 | 0.105332  | 0.116987 | 0.11451  | 0.101399  | 0.217949 | 0.140152 |
| 0.123252 | 0.100816  | 0.122378 | 0.116113 | 0.100379  | 0.21285  | 0.139714 |
| 0.141026 | 0.116841  | 0.133741 | 0.134761 | 0.111451  | 0.22567  | 0.147582 |
| 0.123252 | 0.0955711 | 0.11859  | 0.10912  | 0.0992133 | 0.212558 | 0.136218 |
| 0.142628 | 0.130682  | 0.14729  | 0.143065 | 0.119172  | 0.22873  | 0.162879 |
| 0.129225 | 0.121649  | 0.139714 | 0.136364 | 0.136072  | 0.219114 | 0.154429 |
| 0.134615 | 0.127331  | 0.1419   | 0.133304 | 0.122815  | 0.218386 | 0.146125 |
| 0.119172 | 0.0973193 | 0.112471 | 0.109411 | 0.0983392 | 0.214307 | 0.133304 |
| 0.118444 | 0.097465  | 0.116113 | 0.112179 | 0.0961538 | 0.20979  | 0.137821 |
| 0.13141  | 0.11451   | 0.128788 | 0.12398  | 0.108829  | 0.226544 | 0.142045 |
| 0.130099 | 0.114656  | 0.127477 | 0.121503 | 0.105186  | 0.22028  | 0.142774 |
| 0.139423 | 0.120484  | 0.136218 | 0.131702 | 0.10373   | 0.220862 | 0.149184 |
| 0.127914 | 0.106061  | 0.119464 | 0.113782 | 0.104749  | 0.218094 | 0.141171 |
| 0.127185 | 0.104749  | 0.124272 | 0.118881 | 0.0981935 | 0.216492 | 0.140443 |
| 0.126894 | 0.114073  | 0.125728 | 0.119755 | 0.104312  | 0.220571 | 0.140443 |
| 0.137092 | 0.11757   | 0.14088  | 0.135781 | 0.115385  | 0.230769 | 0.155886 |
| 0.136509 | 0.119901  | 0.13243  | 0.127914 | 0.113054  | 0.222611 | 0.148601 |
| 0.137238 | 0.12296   | 0.140443 | 0.132721 | 0.105624  | 0.230332 | 0.149038 |
| 0.133013 | 0.122815  | 0.135052 | 0.13141  | 0.112471  | 0.22028  | 0.148601 |
| 0.128351 | 0.105915  | 0.114365 | 0.109266 | 0.0999417 | 0.218531 | 0.135781 |
| 0.136801 | 0.118153  | 0.133596 | 0.13141  | 0.120047  | 0.222902 | 0.146853 |
| 0.119464 | 0.101107  | 0.114802 | 0.110286 | 0.095134  | 0.215181 | 0.135344 |
| 0.121649 | 0.0995047 | 0.121358 | 0.11655  | 0.109848  | 0.212704 | 0.138695 |
| 0.118735 | 0.103584  | 0.121941 | 0.116259 | 0.106935  | 0.215618 | 0.13986  |
| 0.121795 | 0.0955711 | 0.123834 | 0.117279 | 0.10708   | 0.211684 | 0.141754 |
| 0.117424 | 0.100816  | 0.115385 | 0.110286 | 0.0986305 | 0.214307 | 0.135052 |
| 0.139132 | 0.123689  | 0.140006 | 0.133159 | 0.109848  | 0.227564 | 0.152681 |
| 0.12296  | 0.105769  | 0.125291 | 0.119318 | 0.109994  | 0.212267 | 0.142337 |
| 0.140152 | 0.120338  | 0.135198 | 0.131556 | 0.113199  | 0.221591 | 0.144085 |
| 0.121795 | 0.0976107 | 0.118007 | 0.109703 | 0.104749  | 0.210519 | 0.13447  |
| 0.136801 | 0.116404  | 0.131847 | 0.126748 | 0.105186  | 0.22669  | 0.146562 |
| 0.124126 | 0.108392  | 0.128205 | 0.124854 | 0.109411  | 0.216055 | 0.141171 |
| 0.114802 | 0.1081    | 0.120338 | 0.121066 | 0.119901  | 0.211101 | 0.145542 |
| 0.118735 | 0.10271   | 0.122815 | 0.118881 | 0.106352  | 0.217075 | 0.143065 |
| 0.125    | 0.109848  | 0.122669 | 0.119027 | 0.116113  | 0.214307 | 0.144085 |
| 0.12398  | 0.109411  | 0.11961  | 0.118881 | 0.111888  | 0.22028  | 0.14627  |
| 0.120484 | 0.101253  | 0.124563 | 0.118881 | 0.113636  | 0.215618 | 0.145396 |
| 0.129225 | 0.105332  | 0.140297 | 0.136655 | 0.140734  | 0.227855 | 0.152389 |
| 0.139569 | 0.124709  | 0.140734 | 0.135635 | 0.129225  | 0.228293 | 0.149621 |
| 0.110431 | 0.0847902 | 0.107809 | 0.107663 | 0.116404  | 0.209936 | 0.133304 |
| 0.122232 | 0.114073  | 0.138258 | 0.134615 | 0.13986   | 0.226399 | 0.14627  |
| 0.118007 | 0.0958625 | 0.136364 | 0.130973 | 0.133596  | 0.225087 | 0.14933  |
| 0.124709 | 0.110431  | 0.135781 | 0.133596 | 0.135635  | 0.222174 | 0.145833 |

|          |           |          |          |          |          |          |
|----------|-----------|----------|----------|----------|----------|----------|
| 0.114802 | 0.102855  | 0.125583 | 0.123397 | 0.129808 | 0.214598 | 0.135927 |
| 0.119464 | 0.0990676 | 0.129079 | 0.126311 | 0.13039  | 0.225379 | 0.146999 |
| 0.11757  | 0.101253  | 0.131556 | 0.127914 | 0.135198 | 0.21824  | 0.147145 |
| 0.12704  | 0.112179  | 0.131119 | 0.127185 | 0.133304 | 0.225962 | 0.142337 |
| 0.129079 | 0.11859   | 0.142774 | 0.137966 | 0.142628 | 0.230041 | 0.144376 |
| 0.118881 | 0.10169   | 0.125583 | 0.119901 | 0.133304 | 0.221591 | 0.144085 |
| 0.113636 | 0.0996503 | 0.123252 | 0.11961  | 0.126894 | 0.21285  | 0.139423 |
| 0.141463 | 0.124854  | 0.13447  | 0.131993 | 0.113636 | 0.222028 | 0.146853 |
| 0.129079 | 0.111597  | 0.140152 | 0.135052 | 0.138258 | 0.226544 | 0.153992 |
| 0.111305 | 0.0967366 | 0.117716 | 0.113491 | 0.124563 | 0.212267 | 0.136801 |
| 0.206731 | 0.212558  | 0.211101 | 0.213287 | 0.219697 | 0.116841 | 0.224359 |
| 0.11757  | 0.107955  | 0.125437 | 0.122378 | 0.131993 | 0.219697 | 0.144231 |
| 0.118153 | 0.088141  | 0.119027 | 0.118298 | 0.12296  | 0.216492 | 0.141608 |
| 0.125874 | 0.11655   | 0.137529 | 0.137092 | 0.140589 | 0.228001 | 0.147582 |
| 0.115093 | 0.101107  | 0.121795 | 0.121066 | 0.126311 | 0.218094 | 0.141463 |
| 0.124417 | 0.106352  | 0.137529 | 0.135344 | 0.141171 | 0.224796 | 0.149621 |
| 0.119172 | 0.100816  | 0.122378 | 0.117861 | 0.128059 | 0.214598 | 0.138549 |
| 0.112617 | 0.103001  | 0.124272 | 0.122378 | 0.129953 | 0.2162   | 0.140734 |
| 0.118735 | 0.0989219 | 0.129225 | 0.126748 | 0.133159 | 0.22028  | 0.145396 |
| 0.117424 | 0.11014   | 0.130828 | 0.131556 | 0.133304 | 0.208188 | 0.146416 |
| 0.129516 | 0.113491  | 0.137092 | 0.128788 | 0.136364 | 0.222319 | 0.143648 |
| 0.129371 | 0.113928  | 0.136364 | 0.129516 | 0.139714 | 0.227418 | 0.145542 |
| 0.12296  | 0.109266  | 0.133159 | 0.126311 | 0.137092 | 0.225379 | 0.140006 |
| 0.114219 | 0.0952797 | 0.122669 | 0.119027 | 0.111451 | 0.221008 | 0.139132 |
| 0.12296  | 0.101107  | 0.120629 | 0.117279 | 0.129516 | 0.222756 | 0.139132 |
| 0.129808 | 0.121066  | 0.137966 | 0.136946 | 0.141026 | 0.222611 | 0.149476 |
| 0.115676 | 0.0999417 | 0.125583 | 0.123106 | 0.126311 | 0.208188 | 0.13884  |
| 0.140734 | 0.123543  | 0.142191 | 0.136801 | 0.11757  | 0.227127 | 0.151661 |
| 0.13039  | 0.132139  | 0.140297 | 0.137821 | 0.146562 | 0.211538 | 0.159674 |
| 0.119027 | 0.107663  | 0.129808 | 0.127331 | 0.116259 | 0.217657 | 0.144231 |
| 0.121358 | 0.106498  | 0.135635 | 0.132867 | 0.134907 | 0.224359 | 0.150058 |
| 0.126748 | 0.120629  | 0.129953 | 0.124854 | 0.130099 | 0.207896 | 0.146416 |
| 0.133013 | 0.10912   | 0.131265 | 0.123543 | 0.130536 | 0.219114 | 0.138403 |
| 0.125728 | 0.117861  | 0.125437 | 0.123252 | 0.134033 | 0.209207 | 0.144231 |
| 0.13243  | 0.132721  | 0.142045 | 0.13549  | 0.143357 | 0.21824  | 0.159965 |
| 0.111597 | 0.0958625 | 0.122378 | 0.114948 | 0.106498 | 0.212267 | 0.140589 |
| 0.126894 | 0.118153  | 0.137675 | 0.133741 | 0.125583 | 0.22465  | 0.148601 |
| 0.13141  | 0.138112  | 0.137821 | 0.14292  | 0.143502 | 0.205857 | 0.156614 |
| 0.119755 | 0.0987762 | 0.125874 | 0.123689 | 0.110868 | 0.220425 | 0.144959 |
| 0.125    | 0.105478  | 0.129371 | 0.125728 | 0.116987 | 0.216929 | 0.147582 |
| 0.143502 | 0.135344  | 0.141463 | 0.143939 | 0.125583 | 0.22465  | 0.149184 |
| 0.131847 | 0.110868  | 0.125437 | 0.123834 | 0.104021 | 0.22028  | 0.142774 |
| 0.134033 | 0.120921  | 0.141317 | 0.135635 | 0.13039  | 0.228875 | 0.149038 |
| 0.129516 | 0.116404  | 0.137383 | 0.134033 | 0.120338 | 0.221737 | 0.14831  |



|           |           |           |           |           |          |           |
|-----------|-----------|-----------|-----------|-----------|----------|-----------|
| 0.129079  | 0.118298  | 0.130536  | 0.131556  | 0.121066  | 0.222465 | 0.143794  |
| 0.127477  | 0.116696  | 0.133887  | 0.129953  | 0.121503  | 0.219114 | 0.147727  |
| 0.118881  | 0.103147  | 0.134324  | 0.128351  | 0.112908  | 0.215472 | 0.149038  |
| 0.133013  | 0.12602   | 0.137383  | 0.137529  | 0.11859   | 0.22465  | 0.149476  |
| 0.133304  | 0.112325  | 0.133596  | 0.133159  | 0.132867  | 0.226107 | 0.146853  |
| 0.137383  | 0.125437  | 0.139714  | 0.135198  | 0.12704   | 0.227273 | 0.143648  |
| 0.135344  | 0.120192  | 0.137675  | 0.136655  | 0.13141   | 0.22873  | 0.145105  |
| 0.131265  | 0.120484  | 0.137092  | 0.137821  | 0.121795  | 0.221737 | 0.150641  |
| 0.139714  | 0.136801  | 0.147873  | 0.14627   | 0.142483  | 0.22028  | 0.155594  |
| 0.117279  | 0.0957168 | 0.135344  | 0.129662  | 0.120921  | 0.220862 | 0.150641  |
| 0.12398   | 0.103584  | 0.126894  | 0.125583  | 0.111014  | 0.223485 | 0.14627   |
| 0.128642  | 0.121066  | 0.138549  | 0.136655  | 0.130245  | 0.222902 | 0.149476  |
| 0.119027  | 0.0971737 | 0.129808  | 0.125874  | 0.119755  | 0.216783 | 0.145396  |
| 0.143065  | 0.131702  | 0.146853  | 0.14292   | 0.144376  | 0.225087 | 0.159819  |
| 0.153846  | 0.141026  | 0.160548  | 0.15778   | 0.150495  | 0.230332 | 0.169435  |
| 0.137238  | 0.122086  | 0.134907  | 0.126894  | 0.112325  | 0.225962 | 0.143211  |
| 0.13039   | 0.109411  | 0.123689  | 0.120629  | 0.102564  | 0.222028 | 0.139569  |
| 0.133741  | 0.122378  | 0.129662  | 0.127477  | 0.132721  | 0.231206 | 0.143502  |
| 0.125437  | 0.117279  | 0.135052  | 0.13141   | 0.138403  | 0.224068 | 0.142774  |
| 0.137383  | 0.116696  | 0.130973  | 0.126457  | 0.111305  | 0.228147 | 0.148601  |
| 0.129225  | 0.116404  | 0.145833  | 0.142483  | 0.139277  | 0.230186 | 0.155012  |
| 0.131847  | 0.120192  | 0.14088   | 0.137821  | 0.134033  | 0.220862 | 0.15035   |
| 0.124417  | 0.105478  | 0.131119  | 0.126311  | 0.115239  | 0.22567  | 0.143502  |
| 0.156177  | 0.154138  | 0.156469  | 0.153118  | 0.161568  | 0.232663 | 0.166521  |
| 0.122378  | 0.099359  | 0.136946  | 0.134178  | 0.115822  | 0.223339 | 0.151078  |
| 0.134033  | 0.118007  | 0.146853  | 0.143794  | 0.133304  | 0.223339 | 0.158362  |
| 0.12602   | 0.106789  | 0.128351  | 0.126748  | 0.106352  | 0.224359 | 0.144522  |
| 0.139714  | 0.120192  | 0.137383  | 0.133741  | 0.129662  | 0.231935 | 0.14831   |
| 0.116987  | 0.108246  | 0.13039   | 0.128788  | 0.131993  | 0.213578 | 0.141608  |
| 0.128205  | 0.126166  | 0.113054  | 0.112908  | 0.14088   | 0.190122 | 0.134178  |
| 0.142628  | 0.14088   | 0.143794  | 0.13986   | 0.155303  | 0.226399 | 0.149184  |
| 0.118298  | 0.113928  | 0.0603147 | 0.0502622 | 0.125437  | 0.20877  | 0.0639569 |
| 0.122815  | 0.128934  | 0.0750291 | 0.0772145 | 0.134615  | 0.192308 | 0.0748834 |
| 0.142483  | 0.136946  | 0.139569  | 0.140589  | 0.109994  | 0.167978 | 0.158945  |
| 0.133159  | 0.13141   | 0.11451   | 0.116696  | 0.147582  | 0.172057 | 0.137092  |
| 0.137092  | 0.115822  | 0.129808  | 0.126166  | 0.0920746 | 0.222028 | 0.145979  |
| 0.134907  | 0.128497  | 0.132284  | 0.128934  | 0.142337  | 0.220134 | 0.14729   |
| 0.090035  | 0.0996503 | 0.109848  | 0.107663  | 0.121941  | 0.207896 | 0.134761  |
| 0.0852273 | 0.103584  | 0.120484  | 0.11655   | 0.112762  | 0.208625 | 0.139277  |
| 0.121212  | 0.101399  | 0.125     | 0.123689  | 0.126603  | 0.214015 | 0.144376  |
| 0.119755  | 0.113054  | 0.0501166 | 0.043852  | 0.123106  | 0.207605 | 0.0651224 |
| 0.117279  | 0.0995047 | 0.123397  | 0.119464  | 0.11451   | 0.215035 | 0.144231  |
| 0.0808566 | 0.0983392 | 0.0855186 | 0.0827506 | 0.120338  | 0.197844 | 0.106352  |
| 0.121649  | 0.114656  | 0.10708   | 0.103147  | 0.128788  | 0.211538 | 0.12704   |

|           |           |           |           |           |          |           |
|-----------|-----------|-----------|-----------|-----------|----------|-----------|
| 0         | 0.102855  | 0.119172  | 0.118735  | 0.132721  | 0.20236  | 0.140589  |
| 0.102855  | 0         | 0.113636  | 0.111742  | 0.117861  | 0.206439 | 0.135927  |
| 0.119172  | 0.113636  | 0         | 0.0511364 | 0.123689  | 0.206439 | 0.0773601 |
| 0.118735  | 0.111742  | 0.0511364 | 0         | 0.122378  | 0.210373 | 0.0708042 |
| 0.132721  | 0.117861  | 0.123689  | 0.122378  | 0         | 0.217949 | 0.143357  |
| 0.20236   | 0.206439  | 0.206439  | 0.210373  | 0.217949  | 0        | 0.21824   |
| 0.140589  | 0.135927  | 0.0773601 | 0.0708042 | 0.143357  | 0.21824  | 0         |
| 0.13345   | 0.116259  | 0.127914  | 0.126603  | 0.129808  | 0.219551 | 0.140589  |
| 0.123689  | 0.115239  | 0.120775  | 0.113345  | 0.124709  | 0.211538 | 0.135781  |
| 0.196533  | 0.201195  | 0.201195  | 0.204545  | 0.214452  | 0.105769 | 0.215035  |
| 0.124272  | 0.115239  | 0.122232  | 0.123543  | 0.0731352 | 0.206002 | 0.146562  |
| 0.125583  | 0.104312  | 0.128788  | 0.125146  | 0.115239  | 0.221008 | 0.145833  |
| 0.129079  | 0.113928  | 0.125583  | 0.122815  | 0.123397  | 0.213724 | 0.141463  |
| 0.0581294 | 0.10271   | 0.12398   | 0.122378  | 0.130245  | 0.210373 | 0.142483  |
| 0.23412   | 0.239073  | 0.241113  | 0.242716  | 0.254079  | 0.113928 | 0.248543  |
| 0.131119  | 0.112471  | 0.130245  | 0.122523  | 0.128351  | 0.216638 | 0.146125  |
| 0.126748  | 0.108392  | 0.117716  | 0.116404  | 0.0496795 | 0.216055 | 0.139132  |
| 0.129079  | 0.116259  | 0.126166  | 0.120192  | 0.123106  | 0.220134 | 0.140297  |
| 0.123834  | 0.115385  | 0.125291  | 0.11961   | 0.123689  | 0.216055 | 0.141463  |
| 0.114802  | 0.116841  | 0.132284  | 0.127768  | 0.130099  | 0.207022 | 0.145251  |
| 0.104312  | 0.107226  | 0.106935  | 0.108537  | 0.134761  | 0.192162 | 0.124272  |
| 0.127331  | 0.111597  | 0.121503  | 0.119318  | 0.0505536 | 0.21285  | 0.142628  |
| 0.11961   | 0.114365  | 0.0502622 | 0.0463287 | 0.120921  | 0.208625 | 0.0699301 |
| 0.12704   | 0.115385  | 0.127914  | 0.120775  | 0.131265  | 0.214598 | 0.142045  |
| 0.0594406 | 0.0964452 | 0.121503  | 0.115822  | 0.124563  | 0.20877  | 0.134761  |
| 0.114073  | 0.106498  | 0.0581294 | 0.0530303 | 0.120921  | 0.20134  | 0.076049  |
| 0.103438  | 0.0833333 | 0.124417  | 0.119027  | 0.128934  | 0.211976 | 0.14088   |
| 0.141754  | 0.140589  | 0.141754  | 0.140443  | 0.151807  | 0.225233 | 0.148601  |
| 0.131847  | 0.117279  | 0.132721  | 0.127331  | 0.129662  | 0.215326 | 0.145688  |
| 0.122815  | 0.11116   | 0.13039   | 0.126166  | 0.11451   | 0.219697 | 0.146562  |
| 0.176136  | 0.181672  | 0.176136  | 0.179779  | 0.193473  | 0.115967 | 0.196096  |
| 0.189831  | 0.194202  | 0.194784  | 0.199009  | 0.206876  | 0.110431 | 0.210664  |
| 0.0575466 | 0.103584  | 0.124854  | 0.122669  | 0.129953  | 0.202797 | 0.143648  |
| 0.0552156 | 0.0971737 | 0.11757   | 0.115385  | 0.126166  | 0.208333 | 0.134907  |
| 0.129225  | 0.120192  | 0.127477  | 0.124709  | 0.142774  | 0.208042 | 0.131702  |
| 0.128642  | 0.110286  | 0.119027  | 0.118881  | 0.0483683 | 0.216783 | 0.142774  |
| 0.131702  | 0.117133  | 0.132576  | 0.125146  | 0.131847  | 0.218094 | 0.145251  |
| 0.128934  | 0.126894  | 0.125437  | 0.121503  | 0.133741  | 0.215326 | 0.134033  |
| 0.208188  | 0.216638  | 0.216929  | 0.219988  | 0.228438  | 0.116841 | 0.228438  |
| 0.120775  | 0.102127  | 0.115239  | 0.110723  | 0.119464  | 0.217366 | 0.135198  |
| 0.195513  | 0.201049  | 0.20134   | 0.201777  | 0.2044    | 0.132721 | 0.207896  |
| 0.123106  | 0.106789  | 0.118444  | 0.117133  | 0.087704  | 0.217075 | 0.138112  |
| 0.120629  | 0.101107  | 0.121212  | 0.115822  | 0.116987  | 0.213724 | 0.140297  |
| 0.116987  | 0.108829  | 0.102127  | 0.101981  | 0.108683  | 0.204837 | 0.123543  |

|           |           |           |           |           |          |           |
|-----------|-----------|-----------|-----------|-----------|----------|-----------|
| 0.0622086 | 0.0980478 | 0.115822  | 0.112762  | 0.12296   | 0.203089 | 0.133741  |
| 0.193473  | 0.199009  | 0.199301  | 0.199155  | 0.208188  | 0.117279 | 0.211976  |
| 0.125583  | 0.124417  | 0.0588578 | 0.0560897 | 0.132139  | 0.205565 | 0.0639569 |
| 0.126748  | 0.106643  | 0.12296   | 0.119318  | 0.10708   | 0.222465 | 0.143794  |
| 0.125874  | 0.118881  | 0.0597319 | 0.0499709 | 0.125437  | 0.211684 | 0.0575466 |
| 0.128788  | 0.103438  | 0.126457  | 0.119901  | 0.125146  | 0.213724 | 0.138549  |
| 0.0635198 | 0.097028  | 0.116841  | 0.116404  | 0.126894  | 0.208188 | 0.142045  |
| 0.126603  | 0.10912   | 0.123106  | 0.11859   | 0.0874126 | 0.219406 | 0.139569  |
| 0.121066  | 0.114073  | 0.118444  | 0.117424  | 0.0620629 | 0.20542  | 0.138112  |
| 0.128059  | 0.109703  | 0.129808  | 0.125291  | 0.114802  | 0.21824  | 0.145396  |
| 0.112325  | 0.10708   | 0.0525932 | 0.0486597 | 0.121503  | 0.20134  | 0.0748834 |
| 0.129079  | 0.108392  | 0.125291  | 0.121941  | 0.110868  | 0.217512 | 0.140589  |
| 0.173223  | 0.177885  | 0.17905   | 0.182401  | 0.194056  | 0.121212 | 0.197552  |
| 0.129371  | 0.119755  | 0.126748  | 0.121358  | 0.121649  | 0.220717 | 0.14088   |
| 0.125728  | 0.123106  | 0.126894  | 0.123252  | 0.13549   | 0.219114 | 0.143357  |
| 0.122669  | 0.114802  | 0.116841  | 0.109411  | 0.121066  | 0.21081  | 0.137966  |
| 0.127768  | 0.111742  | 0.122815  | 0.124709  | 0.127331  | 0.210664 | 0.148893  |
| 0.120775  | 0.115239  | 0.0546329 | 0.0486597 | 0.123543  | 0.209499 | 0.0620629 |
| 0.130682  | 0.113782  | 0.124272  | 0.122669  | 0.0932401 | 0.221737 | 0.1419    |
| 0.120921  | 0.0981935 | 0.115385  | 0.112325  | 0.11961   | 0.205565 | 0.135635  |
| 0.135198  | 0.11655   | 0.126748  | 0.124854  | 0.0444347 | 0.218094 | 0.143502  |
| 0.123106  | 0.117861  | 0.118735  | 0.115093  | 0.13345   | 0.214452 | 0.136946  |
| 0.123106  | 0.109411  | 0.11757   | 0.112762  | 0.122086  | 0.214452 | 0.140152  |
| 0.0699301 | 0.10169   | 0.118881  | 0.11553   | 0.12602   | 0.207605 | 0.139423  |
| 0.129516  | 0.112034  | 0.128642  | 0.120921  | 0.126748  | 0.219697 | 0.142774  |
| 0.141026  | 0.126748  | 0.141317  | 0.132139  | 0.137383  | 0.223048 | 0.143794  |
| 0.123252  | 0.102273  | 0.122669  | 0.118444  | 0.120484  | 0.211101 | 0.145251  |
| 0.135635  | 0.131847  | 0.0735723 | 0.0670163 | 0.138112  | 0.217949 | 0.0431235 |
| 0.0595862 | 0.0936772 | 0.118735  | 0.113345  | 0.12704   | 0.209207 | 0.137529  |
| 0.121066  | 0.112325  | 0.114656  | 0.107226  | 0.123252  | 0.212121 | 0.130536  |
| 0.113345  | 0.110723  | 0.0670163 | 0.0659965 | 0.122815  | 0.19391  | 0.0817308 |
| 0.134324  | 0.119172  | 0.126457  | 0.127477  | 0.043852  | 0.213432 | 0.14729   |
| 0.179196  | 0.183275  | 0.184441  | 0.186043  | 0.177593  | 0.125728 | 0.198864  |
| 0.120484  | 0.103001  | 0.121358  | 0.11655   | 0.106352  | 0.214161 | 0.142191  |
| 0.115239  | 0.0968823 | 0.105332  | 0.0973193 | 0.112179  | 0.204837 | 0.124126  |
| 0.125146  | 0.107372  | 0.128351  | 0.124709  | 0.114219  | 0.221737 | 0.144231  |
| 0.170017  | 0.169143  | 0.167686  | 0.171911  | 0.187646  | 0.13141  | 0.187063  |
| 0.139277  | 0.125583  | 0.141608  | 0.135635  | 0.140006  | 0.220425 | 0.15778   |
| 0.147436  | 0.131702  | 0.152098  | 0.147582  | 0.14933   | 0.227127 | 0.162733  |
| 0.146416  | 0.141754  | 0.144959  | 0.141026  | 0.153846  | 0.226399 | 0.148601  |
| 0.120192  | 0.107663  | 0.121941  | 0.116841  | 0.120921  | 0.208916 | 0.143065  |
| 0.122378  | 0.11655   | 0.0565268 | 0.0488054 | 0.125146  | 0.207022 | 0.0592949 |
| 0.194784  | 0.20236   | 0.200321  | 0.200466  | 0.215909  | 0.111888 | 0.2162    |
| 0.121941  | 0.11553   | 0.12398   | 0.117716  | 0.129953  | 0.20542  | 0.134324  |

|           |           |           |           |           |          |           |
|-----------|-----------|-----------|-----------|-----------|----------|-----------|
| 0.125583  | 0.121212  | 0.0547786 | 0.053176  | 0.128351  | 0.211393 | 0.057838  |
| 0.124709  | 0.106061  | 0.120629  | 0.120192  | 0.107955  | 0.214598 | 0.140589  |
| 0.15472   | 0.159382  | 0.153263  | 0.151369  | 0.173223  | 0.154575 | 0.165355  |
| 0.113054  | 0.100816  | 0.106061  | 0.106789  | 0.121649  | 0.203526 | 0.130099  |
| 0.146707  | 0.13884   | 0.149038  | 0.1419    | 0.154429  | 0.223193 | 0.153846  |
| 0.107663  | 0.0592949 | 0.124563  | 0.123252  | 0.125874  | 0.208333 | 0.141608  |
| 0.178759  | 0.180507  | 0.18109   | 0.185023  | 0.189103  | 0.119755 | 0.197552  |
| 0.126311  | 0.10912   | 0.126894  | 0.120629  | 0.126457  | 0.217366 | 0.146562  |
| 0.111451  | 0.0936772 | 0.105624  | 0.102564  | 0.117424  | 0.210956 | 0.12704   |
| 0.121795  | 0.106352  | 0.113054  | 0.105624  | 0.123397  | 0.211976 | 0.131847  |
| 0.124563  | 0.10271   | 0.116987  | 0.11451   | 0.115385  | 0.215618 | 0.137821  |
| 0.121066  | 0.104167  | 0.124854  | 0.122086  | 0.111597  | 0.214744 | 0.145396  |
| 0.123689  | 0.113491  | 0.121649  | 0.118298  | 0.127331  | 0.206294 | 0.13986   |
| 0.0620629 | 0.0955711 | 0.11655   | 0.112034  | 0.125146  | 0.207896 | 0.139714  |
| 0.178759  | 0.178759  | 0.178467  | 0.184149  | 0.191725  | 0.115676 | 0.200175  |
| 0.127331  | 0.113054  | 0.124126  | 0.119027  | 0.126894  | 0.214307 | 0.141463  |
| 0.113199  | 0.103875  | 0.107663  | 0.105478  | 0.120338  | 0.205128 | 0.130828  |
| 0.195513  | 0.202797  | 0.203671  | 0.204108  | 0.214598  | 0.109994 | 0.216346  |
| 0.128205  | 0.114802  | 0.128497  | 0.121066  | 0.12398   | 0.222756 | 0.142628  |
| 0.0592949 | 0.0977564 | 0.120192  | 0.11655   | 0.127914  | 0.208042 | 0.141026  |
| 0.0630828 | 0.092803  | 0.113491  | 0.112471  | 0.123252  | 0.206585 | 0.13345   |
| 0.134033  | 0.129953  | 0.0844988 | 0.0802739 | 0.137675  | 0.212267 | 0.0630828 |
| 0.176573  | 0.178613  | 0.17803   | 0.182547  | 0.194493  | 0.121066 | 0.196533  |
| 0.13243   | 0.112034  | 0.122232  | 0.117716  | 0.0506993 | 0.220571 | 0.142483  |
| 0.138549  | 0.121066  | 0.135344  | 0.127331  | 0.132867  | 0.219697 | 0.144231  |
| 0.0587121 | 0.0971737 | 0.11757   | 0.113345  | 0.124417  | 0.208333 | 0.138695  |
| 0.0645396 | 0.0948427 | 0.115239  | 0.111014  | 0.123252  | 0.207459 | 0.138112  |
| 0.0576923 | 0.0955711 | 0.115967  | 0.11553   | 0.12602   | 0.207022 | 0.140006  |
| 0.116404  | 0.105624  | 0.0496795 | 0.0463287 | 0.122378  | 0.209207 | 0.0731352 |
| 0.102855  | 0.0451632 | 0.112762  | 0.108537  | 0.115239  | 0.21081  | 0.135052  |
| 0.131119  | 0.110431  | 0.131702  | 0.125146  | 0.128059  | 0.216055 | 0.149913  |
| 0.137529  | 0.128205  | 0.126457  | 0.119027  | 0.135344  | 0.223339 | 0.131556  |
| 0.126748  | 0.110431  | 0.130536  | 0.123689  | 0.126603  | 0.217803 | 0.148747  |
| 0.134178  | 0.108246  | 0.133596  | 0.127622  | 0.128497  | 0.221737 | 0.140152  |
| 0.179487  | 0.182401  | 0.182401  | 0.18546   | 0.197115  | 0.125146 | 0.201486  |
| 0.125437  | 0.108246  | 0.127768  | 0.116259  | 0.124126  | 0.216783 | 0.144231  |
| 0.127331  | 0.123543  | 0.0635198 | 0.0587121 | 0.133013  | 0.211976 | 0.0560897 |
| 0.0607517 | 0.0919289 | 0.115822  | 0.112179  | 0.123252  | 0.206294 | 0.136946  |
| 0.0990676 | 0.0460373 | 0.113928  | 0.111742  | 0.114073  | 0.207314 | 0.137383  |
| 0.115967  | 0.107226  | 0.11859   | 0.111451  | 0.124854  | 0.204108 | 0.137383  |
| 0.13243   | 0.110577  | 0.120775  | 0.118881  | 0.0437063 | 0.216783 | 0.140152  |
| 0.133596  | 0.121066  | 0.13243   | 0.123252  | 0.134324  | 0.212995 | 0.135781  |
| 0.12296   | 0.116259  | 0.116259  | 0.113782  | 0.128642  | 0.216055 | 0.137966  |
| 0.11451   | 0.0859557 | 0.117133  | 0.113491  | 0.0750291 | 0.206731 | 0.138549  |

|           |           |           |           |           |          |           |
|-----------|-----------|-----------|-----------|-----------|----------|-----------|
| 0.110286  | 0.0715326 | 0.10912   | 0.107809  | 0.0818765 | 0.20542  | 0.133159  |
| 0.107809  | 0.07838   | 0.108683  | 0.106206  | 0.120484  | 0.209353 | 0.133013  |
| 0.120484  | 0.107955  | 0.120192  | 0.116841  | 0.0879953 | 0.217657 | 0.139277  |
| 0.132867  | 0.120047  | 0.135198  | 0.131265  | 0.136509  | 0.221008 | 0.152826  |
| 0.129516  | 0.111451  | 0.118735  | 0.11859   | 0.0553613 | 0.219697 | 0.145688  |
| 0.115093  | 0.107809  | 0.0553613 | 0.0505536 | 0.120192  | 0.204691 | 0.0735723 |
| 0.124417  | 0.104312  | 0.117424  | 0.115239  | 0.0549242 | 0.213432 | 0.139423  |
| 0.0654138 | 0.0948427 | 0.115239  | 0.111597  | 0.12296   | 0.206585 | 0.138695  |
| 0.122086  | 0.101107  | 0.119755  | 0.114656  | 0.106789  | 0.216638 | 0.138549  |
| 0.0597319 | 0.0976107 | 0.11859   | 0.11757   | 0.126894  | 0.20877  | 0.141171  |
| 0.122378  | 0.105186  | 0.118007  | 0.110868  | 0.118735  | 0.212267 | 0.139423  |
| 0.122669  | 0.112762  | 0.122086  | 0.114073  | 0.129516  | 0.214307 | 0.139714  |
| 0.11859   | 0.100233  | 0.120921  | 0.118735  | 0.110868  | 0.217803 | 0.14088   |
| 0.10708   | 0.0488054 | 0.11553   | 0.108683  | 0.117424  | 0.212121 | 0.136364  |
| 0.0661422 | 0.092366  | 0.117424  | 0.112908  | 0.121941  | 0.209062 | 0.137966  |
| 0.115093  | 0.115967  | 0.115676  | 0.114365  | 0.126603  | 0.202069 | 0.135635  |
| 0.11757   | 0.111742  | 0.111451  | 0.112179  | 0.126166  | 0.212121 | 0.134615  |
| 0.111305  | 0.0941142 | 0.114219  | 0.114656  | 0.119027  | 0.211684 | 0.137092  |
| 0.0678904 | 0.0955711 | 0.113928  | 0.108829  | 0.123689  | 0.209645 | 0.135344  |
| 0.121649  | 0.110868  | 0.0549242 | 0.0480769 | 0.125     | 0.206002 | 0.0614802 |
| 0.124854  | 0.107663  | 0.11961   | 0.117424  | 0.0894522 | 0.217366 | 0.143065  |
| 0.121358  | 0.11553   | 0.0502622 | 0.0486597 | 0.122669  | 0.210956 | 0.0702214 |
| 0.119027  | 0.103001  | 0.123106  | 0.120629  | 0.111014  | 0.216783 | 0.147436  |
| 0.105624  | 0.0467657 | 0.117861  | 0.113636  | 0.117133  | 0.212413 | 0.138695  |
| 0.110577  | 0.0945513 | 0.109411  | 0.108974  | 0.12296   | 0.206002 | 0.132867  |
| 0.124417  | 0.100524  | 0.116841  | 0.114073  | 0.10912   | 0.216929 | 0.140589  |
| 0.122232  | 0.114948  | 0.0540501 | 0.0472028 | 0.127914  | 0.207459 | 0.0699301 |
| 0.13039   | 0.117279  | 0.118444  | 0.115676  | 0.121503  | 0.215618 | 0.134324  |
| 0.116841  | 0.10169   | 0.104604  | 0.101544  | 0.121941  | 0.207896 | 0.126603  |
| 0.180944  | 0.181818  | 0.184149  | 0.187209  | 0.196824  | 0.121358 | 0.203526  |
| 0.155012  | 0.157634  | 0.149476  | 0.151952  | 0.168561  | 0.149038 | 0.166812  |
| 0.128205  | 0.112471  | 0.125     | 0.120775  | 0.125437  | 0.214598 | 0.148456  |
| 0.121066  | 0.114656  | 0.116987  | 0.114219  | 0.0856643 | 0.206876 | 0.136072  |
| 0.152244  | 0.136218  | 0.155157  | 0.14831   | 0.152681  | 0.231352 | 0.161713  |
| 0.129662  | 0.116841  | 0.124709  | 0.119027  | 0.136218  | 0.213724 | 0.143211  |
| 0.0898893 | 0.10708   | 0.121649  | 0.117133  | 0.13345   | 0.204254 | 0.143939  |
| 0.090035  | 0.105478  | 0.111305  | 0.109703  | 0.124854  | 0.203817 | 0.134178  |
| 0.104021  | 0.0801282 | 0.118881  | 0.114365  | 0.126311  | 0.211393 | 0.140297  |
| 0.118298  | 0.1081    | 0.115093  | 0.109411  | 0.129516  | 0.213141 | 0.135052  |
| 0.184878  | 0.191871  | 0.192162  | 0.193765  | 0.206002  | 0.120047 | 0.209207  |
| 0.134615  | 0.114219  | 0.125583  | 0.123106  | 0.0476399 | 0.220425 | 0.146416  |
| 0.118444  | 0.114656  | 0.0735723 | 0.0734266 | 0.0917832 | 0.199301 | 0.094697  |
| 0.0712413 | 0.0945513 | 0.114365  | 0.107809  | 0.120047  | 0.204837 | 0.137238  |
| 0.124126  | 0.0996503 | 0.125     | 0.11553   | 0.121941  | 0.218386 | 0.143211  |

|           |           |           |           |           |          |           |
|-----------|-----------|-----------|-----------|-----------|----------|-----------|
| 0.170892  | 0.173514  | 0.173223  | 0.176573  | 0.189685  | 0.138403 | 0.193473  |
| 0.230041  | 0.239656  | 0.24053   | 0.243298  | 0.247669  | 0.116841 | 0.245338  |
| 0.123106  | 0.11553   | 0.122523  | 0.118007  | 0.132284  | 0.217075 | 0.140152  |
| 0.115822  | 0.108537  | 0.114073  | 0.107226  | 0.129662  | 0.212413 | 0.135781  |
| 0.125146  | 0.108829  | 0.126311  | 0.119464  | 0.129662  | 0.213869 | 0.146853  |
| 0.118881  | 0.0999417 | 0.121795  | 0.117279  | 0.112908  | 0.216055 | 0.144085  |
| 0.128642  | 0.108537  | 0.118444  | 0.113928  | 0.0506993 | 0.215909 | 0.137821  |
| 0.123834  | 0.105186  | 0.11859   | 0.110577  | 0.119318  | 0.212267 | 0.135635  |
| 0.0805653 | 0.10067   | 0.0872669 | 0.0836247 | 0.122669  | 0.197261 | 0.105769  |
| 0.126894  | 0.109703  | 0.116987  | 0.115967  | 0.0434149 | 0.2162   | 0.139277  |
| 0.0897436 | 0.102564  | 0.0780886 | 0.0726981 | 0.125146  | 0.198864 | 0.092803  |
| 0.114948  | 0.0980478 | 0.11961   | 0.119172  | 0.122669  | 0.215035 | 0.142483  |
| 0.106643  | 0.0474942 | 0.115676  | 0.112034  | 0.118735  | 0.208188 | 0.137966  |
| 0.118735  | 0.117279  | 0.119318  | 0.117133  | 0.130536  | 0.215618 | 0.139569  |
| 0.119172  | 0.111305  | 0.0530303 | 0.0511364 | 0.124854  | 0.209353 | 0.0724068 |
| 0.112179  | 0.100816  | 0.105769  | 0.101836  | 0.112908  | 0.205565 | 0.127185  |
| 0.123543  | 0.118298  | 0.131702  | 0.130099  | 0.121358  | 0.222756 | 0.142337  |
| 0.131993  | 0.115676  | 0.137821  | 0.134761  | 0.11961   | 0.228293 | 0.151369  |
| 0.0668706 | 0.0954254 | 0.114948  | 0.112179  | 0.123252  | 0.208916 | 0.139277  |
| 0.0882867 | 0.10373   | 0.123543  | 0.120192  | 0.122523  | 0.199446 | 0.139423  |
| 0.0661422 | 0.109557  | 0.132284  | 0.129225  | 0.139132  | 0.215472 | 0.14292   |
| 0.193036  | 0.19391   | 0.202069  | 0.204545  | 0.214161  | 0.11451  | 0.211538  |
| 0.117133  | 0.109557  | 0.113345  | 0.108537  | 0.122815  | 0.207896 | 0.134761  |
| 0.10708   | 0.043852  | 0.117279  | 0.112179  | 0.118007  | 0.212704 | 0.137529  |
| 0.126603  | 0.109994  | 0.125728  | 0.11655   | 0.12296   | 0.216492 | 0.145979  |
| 0.126457  | 0.11451   | 0.12296   | 0.119027  | 0.12398   | 0.218969 | 0.14292   |
| 0.122669  | 0.0952797 | 0.11451   | 0.110868  | 0.118153  | 0.216346 | 0.137966  |
| 0.184149  | 0.187063  | 0.188811  | 0.191871  | 0.205274  | 0.122232 | 0.20877   |
| 0.123689  | 0.116987  | 0.0560897 | 0.0483683 | 0.128788  | 0.210664 | 0.0696387 |
| 0.0614802 | 0.0938228 | 0.115967  | 0.112034  | 0.120192  | 0.207605 | 0.133596  |
| 0.128059  | 0.107955  | 0.123106  | 0.119755  | 0.119464  | 0.215909 | 0.138403  |
| 0.115822  | 0.0980478 | 0.120775  | 0.115676  | 0.108683  | 0.216783 | 0.139569  |
| 0.119901  | 0.114073  | 0.0534674 | 0.0480769 | 0.124126  | 0.207168 | 0.0705128 |
| 0.105624  | 0.0989219 | 0.0796911 | 0.0719697 | 0.118007  | 0.200175 | 0.0996503 |
| 0.114073  | 0.0977564 | 0.113782  | 0.114802  | 0.124126  | 0.215909 | 0.138695  |
| 0.126603  | 0.110286  | 0.121941  | 0.116259  | 0.122378  | 0.216783 | 0.142191  |
| 0.187354  | 0.187354  | 0.187646  | 0.190122  | 0.202069  | 0.120775 | 0.204983  |
| 0.116987  | 0.102418  | 0.0587121 | 0.0506993 | 0.116841  | 0.202506 | 0.07838   |
| 0.178322  | 0.185023  | 0.183858  | 0.187791  | 0.198281  | 0.120775 | 0.202652  |
| 0.180216  | 0.183712  | 0.183129  | 0.184732  | 0.198427  | 0.120921 | 0.200758  |
| 0.129516  | 0.111451  | 0.133013  | 0.130536  | 0.116841  | 0.222611 | 0.147145  |
| 0.135052  | 0.121941  | 0.13243   | 0.129662  | 0.129953  | 0.225524 | 0.146853  |
| 0.110868  | 0.0872669 | 0.108537  | 0.109266  | 0.114802  | 0.208916 | 0.131702  |
| 0.113345  | 0.10373   | 0.0603147 | 0.0546329 | 0.114656  | 0.205565 | 0.0831876 |

|           |           |           |           |           |          |           |
|-----------|-----------|-----------|-----------|-----------|----------|-----------|
| 0.119901  | 0.107663  | 0.0546329 | 0.0472028 | 0.122378  | 0.208916 | 0.0775058 |
| 0.0659965 | 0.0960082 | 0.116404  | 0.11451   | 0.124709  | 0.208042 | 0.141026  |
| 0.124563  | 0.104167  | 0.111451  | 0.108974  | 0.0565268 | 0.212121 | 0.134324  |
| 0.128059  | 0.105624  | 0.116696  | 0.115385  | 0.0477855 | 0.219114 | 0.138986  |
| 0.122669  | 0.120338  | 0.120629  | 0.119901  | 0.133013  | 0.213724 | 0.140006  |
| 0.122232  | 0.10271   | 0.12398   | 0.123543  | 0.117424  | 0.220571 | 0.145396  |
| 0.0591492 | 0.0906177 | 0.114802  | 0.110868  | 0.121066  | 0.204691 | 0.13243   |
| 0.121358  | 0.113199  | 0.0523019 | 0.0486597 | 0.123834  | 0.208042 | 0.0722611 |
| 0.107517  | 0.0920746 | 0.105769  | 0.102127  | 0.116987  | 0.208188 | 0.126894  |
| 0.127768  | 0.122523  | 0.0639569 | 0.0591492 | 0.131119  | 0.212704 | 0.0518648 |
| 0.126311  | 0.108829  | 0.125146  | 0.118298  | 0.123543  | 0.215035 | 0.143357  |
| 0.129953  | 0.127622  | 0.0690559 | 0.0604604 | 0.133013  | 0.213724 | 0.0482226 |
| 0.24359   | 0.249709  | 0.252331  | 0.254225  | 0.262383  | 0.112034 | 0.260052  |
| 0.137821  | 0.120629  | 0.136072  | 0.131265  | 0.119027  | 0.229167 | 0.144085  |
| 0.133887  | 0.114073  | 0.136218  | 0.131993  | 0.127622  | 0.219114 | 0.1419    |
| 0.202214  | 0.206876  | 0.208625  | 0.210519  | 0.220717  | 0.117279 | 0.218677  |
| 0.127477  | 0.113199  | 0.131265  | 0.130245  | 0.12704   | 0.219697 | 0.148601  |
| 0.214889  | 0.221882  | 0.219551  | 0.224068  | 0.235723  | 0.112179 | 0.2331    |
| 0.127622  | 0.108392  | 0.128788  | 0.122815  | 0.109994  | 0.221882 | 0.137675  |
| 0.0627914 | 0.105041  | 0.131847  | 0.125     | 0.137238  | 0.215326 | 0.140152  |
| 0.124854  | 0.107663  | 0.11757   | 0.111305  | 0.115676  | 0.2162   | 0.137529  |
| 0.125728  | 0.104167  | 0.130682  | 0.125     | 0.116259  | 0.221154 | 0.146853  |
| 0.18954   | 0.194202  | 0.192162  | 0.19493   | 0.206585  | 0.122669 | 0.209207  |
| 0.127185  | 0.122815  | 0.0665793 | 0.0571096 | 0.134324  | 0.214744 | 0.0565268 |
| 0.121941  | 0.112034  | 0.0514277 | 0.0460373 | 0.123252  | 0.209499 | 0.0731352 |
| 0.212413  | 0.2162    | 0.218531  | 0.222465  | 0.229458  | 0.115822 | 0.228875  |
| 0.127768  | 0.110286  | 0.118735  | 0.118298  | 0.0544872 | 0.2162   | 0.143357  |
| 0.185315  | 0.187937  | 0.187354  | 0.192162  | 0.199738  | 0.117861 | 0.208479  |
| 0.13141   | 0.111305  | 0.120338  | 0.116987  | 0.0525932 | 0.218094 | 0.14292   |
| 0.0649767 | 0.0967366 | 0.117716  | 0.112617  | 0.126894  | 0.21081  | 0.139423  |
| 0.111742  | 0.0560897 | 0.125437  | 0.120338  | 0.127331  | 0.217075 | 0.140734  |
| 0.127477  | 0.112034  | 0.134178  | 0.131119  | 0.120921  | 0.22465  | 0.148893  |
| 0.117133  | 0.104021  | 0.115093  | 0.10912   | 0.121649  | 0.209062 | 0.135344  |
| 0.145688  | 0.128788  | 0.153555  | 0.156906  | 0.165647  | 0.145833 | 0.176136  |
| 0.115093  | 0.106643  | 0.0492424 | 0.0421037 | 0.119901  | 0.204983 | 0.0692016 |
| 0.129079  | 0.11451   | 0.122086  | 0.118735  | 0.125437  | 0.21722  | 0.145251  |
| 0.120047  | 0.103147  | 0.12296   | 0.119318  | 0.120192  | 0.214307 | 0.143502  |
| 0.130245  | 0.121795  | 0.12704   | 0.117279  | 0.128351  | 0.215181 | 0.13447   |
| 0.18109   | 0.187209  | 0.186334  | 0.188228  | 0.20134   | 0.119755 | 0.201923  |
| 0.0626457 | 0.0926573 | 0.115676  | 0.112034  | 0.121649  | 0.207605 | 0.136801  |
| 0.114656  | 0.104458  | 0.124563  | 0.123543  | 0.116259  | 0.208042 | 0.14831   |
| 0.121795  | 0.106061  | 0.119464  | 0.114948  | 0.0916375 | 0.218386 | 0.140589  |
| 0.131847  | 0.112034  | 0.123397  | 0.120921  | 0.0445804 | 0.218823 | 0.139569  |
| 0.0635198 | 0.102564  | 0.124126  | 0.121941  | 0.131556  | 0.209936 | 0.140297  |

|           |           |           |           |           |          |           |
|-----------|-----------|-----------|-----------|-----------|----------|-----------|
| 0.239365  | 0.245484  | 0.248106  | 0.251166  | 0.257284  | 0.115967 | 0.252622  |
| 0.109848  | 0.0521562 | 0.121212  | 0.11757   | 0.119901  | 0.214889 | 0.137966  |
| 0.104895  | 0.106061  | 0.120338  | 0.116404  | 0.125146  | 0.206439 | 0.141463  |
| 0.172494  | 0.165501  | 0.177156  | 0.177302  | 0.179633  | 0.152535 | 0.184878  |
| 0.174825  | 0.173368  | 0.176282  | 0.180507  | 0.190414  | 0.128059 | 0.197407  |
| 0.118881  | 0.115967  | 0.120338  | 0.114073  | 0.131847  | 0.214307 | 0.140006  |
| 0.120484  | 0.114948  | 0.0540501 | 0.0477855 | 0.127914  | 0.211538 | 0.0708042 |
| 0.120775  | 0.100962  | 0.121649  | 0.115093  | 0.112179  | 0.215035 | 0.138695  |
| 0.141026  | 0.138986  | 0.0780886 | 0.0738636 | 0.144959  | 0.219551 | 0.0453089 |
| 0.120629  | 0.113345  | 0.117133  | 0.114073  | 0.130973  | 0.213432 | 0.142045  |
| 0.12398   | 0.11757   | 0.121649  | 0.118298  | 0.133741  | 0.217366 | 0.143065  |
| 0.13549   | 0.11859   | 0.127331  | 0.125146  | 0.0453089 | 0.218094 | 0.144959  |
| 0.114802  | 0.111597  | 0.0588578 | 0.0528846 | 0.121066  | 0.203234 | 0.0619172 |
| 0.129516  | 0.123106  | 0.0627914 | 0.0576923 | 0.13141   | 0.210082 | 0.0530303 |
| 0.118007  | 0.106643  | 0.115093  | 0.116696  | 0.0689103 | 0.20236  | 0.138258  |
| 0.125437  | 0.107372  | 0.13447   | 0.13141   | 0.115676  | 0.223193 | 0.145979  |
| 0.136364  | 0.124417  | 0.142774  | 0.139714  | 0.12602   | 0.231206 | 0.15574   |
| 0.113199  | 0.0549242 | 0.12602   | 0.121503  | 0.125     | 0.216783 | 0.139277  |
| 0.131993  | 0.115385  | 0.136072  | 0.13447   | 0.119901  | 0.22771  | 0.152535  |
| 0.141026  | 0.12296   | 0.129953  | 0.125728  | 0.0423951 | 0.224505 | 0.146125  |
| 0.193328  | 0.196824  | 0.195659  | 0.197552  | 0.212121  | 0.125583 | 0.215909  |
| 0.116259  | 0.0984848 | 0.129079  | 0.128351  | 0.115822  | 0.218677 | 0.149621  |
| 0.179487  | 0.184441  | 0.181527  | 0.186043  | 0.196241  | 0.119318 | 0.200321  |
| 0.123834  | 0.108974  | 0.113928  | 0.111116  | 0.119901  | 0.21285  | 0.134178  |
| 0.0582751 | 0.104895  | 0.122086  | 0.124272  | 0.136218  | 0.210519 | 0.140589  |
| 0.123543  | 0.113928  | 0.12704   | 0.123106  | 0.125437  | 0.21285  | 0.146416  |
| 0.122815  | 0.103584  | 0.121358  | 0.116259  | 0.121212  | 0.211538 | 0.140734  |
| 0.122378  | 0.11655   | 0.0562354 | 0.0493881 | 0.125728  | 0.205274 | 0.057838  |
| 0.12296   | 0.119464  | 0.0562354 | 0.0528846 | 0.122232  | 0.207605 | 0.0575466 |
| 0.0623543 | 0.0981935 | 0.120047  | 0.11757   | 0.126311  | 0.209645 | 0.141754  |
| 0.12398   | 0.112034  | 0.120484  | 0.116259  | 0.123543  | 0.216492 | 0.140734  |
| 0.127185  | 0.11553   | 0.126311  | 0.122669  | 0.126748  | 0.215909 | 0.144814  |
| 0.138695  | 0.124417  | 0.134324  | 0.133013  | 0.0502622 | 0.21285  | 0.151661  |
| 0.236305  | 0.24155   | 0.24359   | 0.245775  | 0.254516  | 0.111116 | 0.247815  |
| 0.0626457 | 0.0976107 | 0.117133  | 0.118153  | 0.131265  | 0.20877  | 0.140006  |
| 0.1706    | 0.173805  | 0.176428  | 0.177448  | 0.188811  | 0.124709 | 0.19493   |
| 0.179196  | 0.178904  | 0.178904  | 0.181381  | 0.191871  | 0.122815 | 0.197407  |
| 0.117279  | 0.104458  | 0.121941  | 0.120921  | 0.125     | 0.207751 | 0.147727  |
| 0.106789  | 0.0502622 | 0.114948  | 0.112179  | 0.120629  | 0.212413 | 0.135198  |
| 0.0622086 | 0.105041  | 0.128059  | 0.12296   | 0.13141   | 0.210956 | 0.140443  |
| 0.117861  | 0.105332  | 0.0566725 | 0.0492424 | 0.121212  | 0.206876 | 0.0740093 |
| 0.0964452 | 0.0789627 | 0.11451   | 0.116987  | 0.122232  | 0.200903 | 0.140297  |
| 0.130536  | 0.108974  | 0.120629  | 0.118444  | 0.050845  | 0.217803 | 0.14292   |
| 0.121358  | 0.112325  | 0.083479  | 0.0766317 | 0.125     | 0.203963 | 0.083042  |



|           |           |           |           |           |          |           |
|-----------|-----------|-----------|-----------|-----------|----------|-----------|
| 0.129808  | 0.12602   | 0.0662879 | 0.0603147 | 0.134615  | 0.218823 | 0.0530303 |
| 0.0603147 | 0.0987762 | 0.120338  | 0.115239  | 0.12602   | 0.209062 | 0.137966  |
| 0.128205  | 0.123252  | 0.0632284 | 0.0584207 | 0.130973  | 0.215472 | 0.0592949 |
| 0.123397  | 0.101836  | 0.123689  | 0.121795  | 0.118881  | 0.212995 | 0.142774  |
| 0.129808  | 0.114656  | 0.131265  | 0.125874  | 0.130536  | 0.218823 | 0.146853  |
| 0.12296   | 0.106935  | 0.12296   | 0.120775  | 0.112325  | 0.217803 | 0.144668  |
| 0.141463  | 0.123397  | 0.132721  | 0.130245  | 0.0469114 | 0.225233 | 0.148019  |
| 0.118298  | 0.102273  | 0.124417  | 0.125146  | 0.125728  | 0.213141 | 0.142045  |
| 0.0617716 | 0.0979021 | 0.118007  | 0.11757   | 0.121941  | 0.202069 | 0.136509  |
| 0.137238  | 0.125291  | 0.136946  | 0.130099  | 0.134178  | 0.2213   | 0.14292   |
| 0.171766  | 0.172348  | 0.174679  | 0.179196  | 0.188228  | 0.119755 | 0.194347  |
| 0.132867  | 0.126457  | 0.0696387 | 0.0642483 | 0.136509  | 0.216929 | 0.0493881 |
| 0.120629  | 0.116259  | 0.0559441 | 0.0499709 | 0.124272  | 0.207314 | 0.0642483 |
| 0.126603  | 0.109411  | 0.126603  | 0.125     | 0.125291  | 0.2162   | 0.14831   |
| 0.116259  | 0.0990676 | 0.117133  | 0.114073  | 0.118153  | 0.212267 | 0.139132  |
| 0.123397  | 0.102418  | 0.127185  | 0.124417  | 0.112471  | 0.217075 | 0.144814  |
| 0.127914  | 0.105186  | 0.131702  | 0.128642  | 0.113782  | 0.221882 | 0.152535  |
| 0.177885  | 0.184586  | 0.182547  | 0.187063  | 0.195513  | 0.121503 | 0.20134   |
| 0.114948  | 0.110286  | 0.0817308 | 0.0772145 | 0.120338  | 0.197844 | 0.0874126 |
| 0.109848  | 0.0973193 | 0.104312  | 0.103293  | 0.112908  | 0.188666 | 0.128059  |
| 0.124126  | 0.119755  | 0.0568182 | 0.053176  | 0.126894  | 0.210519 | 0.0587121 |
| 0.177593  | 0.183129  | 0.181964  | 0.185315  | 0.19697   | 0.125291 | 0.201632  |
| 0.102273  | 0.0483683 | 0.111305  | 0.112325  | 0.118153  | 0.207022 | 0.136509  |
| 0.135927  | 0.117279  | 0.128059  | 0.124126  | 0.0410839 | 0.221154 | 0.146562  |
| 0.120484  | 0.114656  | 0.0557984 | 0.0530303 | 0.126748  | 0.210956 | 0.0591492 |
| 0.119755  | 0.112179  | 0.115967  | 0.112034  | 0.126603  | 0.21285  | 0.135344  |
| 0.173951  | 0.176865  | 0.176865  | 0.178467  | 0.193619  | 0.120484 | 0.195659  |
| 0.132284  | 0.114219  | 0.120629  | 0.116404  | 0.0470571 | 0.214598 | 0.140297  |
| 0.118881  | 0.104312  | 0.112471  | 0.10708   | 0.116404  | 0.203526 | 0.131556  |
| 0.10373   | 0.0576923 | 0.114802  | 0.113491  | 0.11961   | 0.202069 | 0.138549  |
| 0.11859   | 0.113345  | 0.108974  | 0.110577  | 0.12602   | 0.192745 | 0.136509  |
| 0.128351  | 0.111451  | 0.123106  | 0.11859   | 0.122086  | 0.21824  | 0.145396  |
| 0.140589  | 0.121649  | 0.131265  | 0.128788  | 0.0439977 | 0.222902 | 0.146853  |
| 0.0598776 | 0.0965909 | 0.116113  | 0.112471  | 0.125874  | 0.20979  | 0.136364  |
| 0.13039   | 0.109703  | 0.118153  | 0.114802  | 0.125     | 0.22028  | 0.131119  |
| 0.142483  | 0.142191  | 0.144231  | 0.140297  | 0.153992  | 0.225087 | 0.150495  |
| 0.222611  | 0.226981  | 0.229021  | 0.231498  | 0.240239  | 0.10912  | 0.238199  |
| 0.122669  | 0.106061  | 0.125583  | 0.128934  | 0.130099  | 0.220134 | 0.144085  |
| 0.129371  | 0.111597  | 0.124126  | 0.121358  | 0.123689  | 0.218677 | 0.145251  |
| 0.114948  | 0.114073  | 0.0610431 | 0.0571096 | 0.117424  | 0.201049 | 0.0643939 |
| 0.128205  | 0.115385  | 0.125291  | 0.120192  | 0.130099  | 0.206439 | 0.144959  |
| 0.121358  | 0.107955  | 0.112908  | 0.111305  | 0.0976107 | 0.211538 | 0.13141   |
| 0.122815  | 0.10067   | 0.122232  | 0.116841  | 0.120047  | 0.213578 | 0.136364  |
| 0.120338  | 0.117133  | 0.0661422 | 0.0619172 | 0.122523  | 0.206148 | 0.0639569 |

|           |           |           |           |           |          |           |
|-----------|-----------|-----------|-----------|-----------|----------|-----------|
| 0.135927  | 0.119318  | 0.128934  | 0.123834  | 0.0405012 | 0.219697 | 0.14627   |
| 0.122232  | 0.114948  | 0.119318  | 0.117133  | 0.123834  | 0.211247 | 0.140734  |
| 0.222028  | 0.229604  | 0.229312  | 0.233246  | 0.238199  | 0.113491 | 0.24053   |
| 0.103584  | 0.0488054 | 0.111742  | 0.108392  | 0.115967  | 0.205128 | 0.13345   |
| 0.11961   | 0.0962995 | 0.114073  | 0.109557  | 0.102855  | 0.212995 | 0.134907  |
| 0.0547786 | 0.0941142 | 0.11655   | 0.113199  | 0.122523  | 0.207896 | 0.13447   |
| 0.128351  | 0.128059  | 0.128934  | 0.125583  | 0.13986   | 0.219988 | 0.139569  |
| 0.126311  | 0.111742  | 0.138549  | 0.136655  | 0.137821  | 0.224359 | 0.149476  |
| 0.109703  | 0.10271   | 0.112034  | 0.106643  | 0.127914  | 0.203963 | 0.130245  |
| 0.119901  | 0.116113  | 0.0525932 | 0.0480769 | 0.121795  | 0.206585 | 0.0632284 |
| 0.111305  | 0.106643  | 0.111597  | 0.108246  | 0.121358  | 0.209936 | 0.131556  |
| 0.215909  | 0.223193  | 0.222611  | 0.225962  | 0.234994  | 0.111116 | 0.23208   |
| 0.125874  | 0.118881  | 0.0600233 | 0.0511364 | 0.125728  | 0.21081  | 0.0557984 |
| 0.136509  | 0.114073  | 0.12398   | 0.120338  | 0.039627  | 0.219697 | 0.142774  |
| 0.118444  | 0.107372  | 0.117861  | 0.113054  | 0.121212  | 0.212121 | 0.138986  |
| 0.125874  | 0.114219  | 0.122378  | 0.120192  | 0.126894  | 0.216638 | 0.134761  |
| 0.131119  | 0.112179  | 0.131993  | 0.129516  | 0.114073  | 0.224213 | 0.140006  |
| 0.0603147 | 0.097028  | 0.118298  | 0.115239  | 0.125728  | 0.208188 | 0.136801  |
| 0.133741  | 0.117133  | 0.125     | 0.124563  | 0.0476399 | 0.21926  | 0.146416  |
| 0.141463  | 0.12398   | 0.131265  | 0.126457  | 0.0448718 | 0.222902 | 0.143065  |
| 0.129516  | 0.111451  | 0.121066  | 0.11859   | 0.0472028 | 0.218531 | 0.1419    |
| 0.0675991 | 0.0967366 | 0.119172  | 0.114365  | 0.128642  | 0.20877  | 0.139714  |
| 0.130245  | 0.118007  | 0.129662  | 0.123106  | 0.127768  | 0.222174 | 0.144376  |
| 0.133013  | 0.123397  | 0.133304  | 0.128205  | 0.130245  | 0.228147 | 0.143357  |
| 0.131847  | 0.120192  | 0.135344  | 0.130245  | 0.133159  | 0.222319 | 0.150058  |
| 0.135927  | 0.120192  | 0.137966  | 0.134033  | 0.136364  | 0.221154 | 0.153263  |
| 0.13549   | 0.124709  | 0.134324  | 0.128642  | 0.128934  | 0.224796 | 0.148747  |
| 0.101981  | 0.0754662 | 0.115676  | 0.111742  | 0.121941  | 0.211976 | 0.140589  |
| 0.143502  | 0.125146  | 0.134761  | 0.13345   | 0.0976107 | 0.227273 | 0.145396  |
| 0.129371  | 0.117133  | 0.13345   | 0.131265  | 0.124563  | 0.226544 | 0.146416  |
| 0.192308  | 0.195513  | 0.19697   | 0.200903  | 0.209353  | 0.106206 | 0.211684  |
| 0.118298  | 0.114219  | 0.123252  | 0.119901  | 0.130973  | 0.213724 | 0.137092  |
| 0.124126  | 0.104895  | 0.119755  | 0.114948  | 0.10708   | 0.217803 | 0.141171  |
| 0.0557984 | 0.103875  | 0.121649  | 0.121795  | 0.129079  | 0.204254 | 0.142483  |
| 0.210664  | 0.215618  | 0.216783  | 0.218386  | 0.228875  | 0.110286 | 0.225962  |
| 0.198718  | 0.205128  | 0.203963  | 0.20877   | 0.213724  | 0.125146 | 0.217512  |
| 0.137675  | 0.120775  | 0.129808  | 0.125874  | 0.0474942 | 0.221154 | 0.144522  |
| 0.234848  | 0.243298  | 0.24155   | 0.244318  | 0.251894  | 0.117279 | 0.249563  |
| 0.0976107 | 0.0798368 | 0.115676  | 0.111451  | 0.126311  | 0.211976 | 0.140006  |
| 0.132867  | 0.117716  | 0.142483  | 0.140297  | 0.140589  | 0.223922 | 0.148164  |
| 0.1081    | 0.0454545 | 0.120047  | 0.115822  | 0.119901  | 0.211101 | 0.138258  |
| 0.132721  | 0.113782  | 0.126603  | 0.122086  | 0.12704   | 0.224068 | 0.144814  |
| 0.177739  | 0.18007   | 0.179487  | 0.182838  | 0.196241  | 0.116987 | 0.195659  |
| 0.123397  | 0.109411  | 0.127477  | 0.125291  | 0.123252  | 0.215035 | 0.144522  |

|           |           |           |           |           |          |           |
|-----------|-----------|-----------|-----------|-----------|----------|-----------|
| 0.179633  | 0.18546   | 0.18546   | 0.189394  | 0.198135  | 0.113345 | 0.202797  |
| 0.114365  | 0.102127  | 0.122232  | 0.114802  | 0.123252  | 0.215326 | 0.142483  |
| 0.116113  | 0.112034  | 0.101544  | 0.0999417 | 0.0710956 | 0.19697  | 0.118007  |
| 0.123397  | 0.101253  | 0.126311  | 0.12296   | 0.124709  | 0.212413 | 0.141026  |
| 0.112325  | 0.104167  | 0.107663  | 0.105186  | 0.114802  | 0.197261 | 0.126166  |
| 0.0585664 | 0.0929487 | 0.110723  | 0.108537  | 0.118444  | 0.205857 | 0.132721  |
| 0.114219  | 0.105186  | 0.105769  | 0.104458  | 0.123689  | 0.20877  | 0.13039   |
| 0.099359  | 0.0472028 | 0.115093  | 0.111451  | 0.114948  | 0.205274 | 0.137092  |
| 0.118153  | 0.110868  | 0.0520105 | 0.0472028 | 0.119755  | 0.207459 | 0.0708042 |
| 0.126748  | 0.109557  | 0.122378  | 0.118444  | 0.0866841 | 0.217803 | 0.141463  |
| 0.109557  | 0.0958625 | 0.113928  | 0.114948  | 0.120192  | 0.211393 | 0.137092  |
| 0.107372  | 0.0476399 | 0.118153  | 0.114219  | 0.117716  | 0.209499 | 0.138695  |
| 0.111597  | 0.11014   | 0.127331  | 0.123106  | 0.123397  | 0.207022 | 0.146999  |
| 0.130828  | 0.12296   | 0.0635198 | 0.0546329 | 0.130099  | 0.21285  | 0.0569639 |
| 0.122523  | 0.100962  | 0.118444  | 0.113054  | 0.121212  | 0.210082 | 0.139277  |
| 0.121795  | 0.106643  | 0.118007  | 0.112617  | 0.119318  | 0.211393 | 0.135635  |
| 0.057838  | 0.0916375 | 0.110868  | 0.108683  | 0.119172  | 0.205128 | 0.133159  |
| 0.128642  | 0.113782  | 0.117279  | 0.114802  | 0.0515734 | 0.208625 | 0.133159  |
| 0.125146  | 0.109411  | 0.120192  | 0.117716  | 0.121212  | 0.216492 | 0.143357  |
| 0.123543  | 0.105478  | 0.127914  | 0.122523  | 0.110577  | 0.21926  | 0.144376  |
| 0.124417  | 0.108392  | 0.12704   | 0.122232  | 0.12398   | 0.215181 | 0.144959  |
| 0.119318  | 0.112034  | 0.0549242 | 0.0463287 | 0.121503  | 0.208042 | 0.0632284 |
| 0.12704   | 0.125874  | 0.0670163 | 0.0581294 | 0.130973  | 0.214598 | 0.053176  |
| 0.135781  | 0.132576  | 0.0725524 | 0.0680361 | 0.137383  | 0.218677 | 0.0409382 |
| 0.114073  | 0.0957168 | 0.111116  | 0.106643  | 0.0588578 | 0.210082 | 0.131702  |
| 0.0625    | 0.0939685 | 0.117861  | 0.114802  | 0.126166  | 0.207168 | 0.137529  |
| 0.118881  | 0.0862471 | 0.111305  | 0.107663  | 0.11553   | 0.20877  | 0.132139  |
| 0.136364  | 0.12296   | 0.134907  | 0.127477  | 0.13039   | 0.227127 | 0.146999  |
| 0.109994  | 0.0514277 | 0.118735  | 0.114802  | 0.121212  | 0.2162   | 0.140734  |
| 0.138549  | 0.124563  | 0.145542  | 0.142191  | 0.127914  | 0.231935 | 0.154429  |
| 0.0662879 | 0.111116  | 0.135927  | 0.132867  | 0.145688  | 0.21824  | 0.143648  |
| 0.124709  | 0.121212  | 0.123834  | 0.120484  | 0.133013  | 0.21722  | 0.140297  |
| 0.111742  | 0.0930944 | 0.112034  | 0.106061  | 0.120629  | 0.210082 | 0.131119  |
| 0.119755  | 0.106643  | 0.111597  | 0.105915  | 0.118444  | 0.211101 | 0.131847  |
| 0.131993  | 0.112471  | 0.132867  | 0.129516  | 0.135344  | 0.218677 | 0.152244  |
| 0.19391   | 0.200903  | 0.199155  | 0.200466  | 0.205711  | 0.129371 | 0.212995  |
| 0.120192  | 0.106206  | 0.116987  | 0.113636  | 0.118298  | 0.208042 | 0.138986  |
| 0.120921  | 0.0967366 | 0.122669  | 0.11553   | 0.127185  | 0.215181 | 0.144668  |
| 0.124854  | 0.112034  | 0.122815  | 0.117716  | 0.119755  | 0.219114 | 0.1419    |
| 0.123252  | 0.105186  | 0.121795  | 0.118444  | 0.122232  | 0.213141 | 0.141463  |
| 0.119318  | 0.109703  | 0.126311  | 0.122378  | 0.130245  | 0.215326 | 0.147436  |
| 0.128059  | 0.118444  | 0.116696  | 0.11451   | 0.121212  | 0.217075 | 0.129953  |
| 0.133159  | 0.123543  | 0.119172  | 0.116696  | 0.122523  | 0.216638 | 0.13039   |
| 0.120775  | 0.116404  | 0.121358  | 0.119172  | 0.128788  | 0.215326 | 0.140152  |

|          |           |           |           |           |          |           |
|----------|-----------|-----------|-----------|-----------|----------|-----------|
| 0.123106 | 0.102127  | 0.11757   | 0.115093  | 0.0888695 | 0.213869 | 0.13986   |
| 0.130099 | 0.120484  | 0.130099  | 0.123252  | 0.128497  | 0.221445 | 0.145105  |
| 0.118153 | 0.0989219 | 0.122815  | 0.117424  | 0.120338  | 0.215035 | 0.141026  |
| 0.11859  | 0.0987762 | 0.120921  | 0.121358  | 0.128351  | 0.217803 | 0.143794  |
| 0.168852 | 0.1706    | 0.171766  | 0.168415  | 0.175699  | 0.183858 | 0.184149  |
| 0.118444 | 0.109994  | 0.057838  | 0.0506993 | 0.124417  | 0.208333 | 0.0725524 |
| 0.124709 | 0.11859   | 0.126748  | 0.128059  | 0.126311  | 0.212558 | 0.14933   |
| 0.11961  | 0.0965909 | 0.131847  | 0.126457  | 0.113054  | 0.223776 | 0.149476  |
| 0.121212 | 0.116259  | 0.11859   | 0.111451  | 0.116696  | 0.21081  | 0.127185  |
| 0.11014  | 0.094697  | 0.105478  | 0.104167  | 0.115822  | 0.211101 | 0.131265  |
| 0.110431 | 0.0859557 | 0.110431  | 0.111451  | 0.116696  | 0.210227 | 0.131847  |
| 0.115093 | 0.0987762 | 0.114219  | 0.111742  | 0.118444  | 0.21285  | 0.136218  |
| 0.127914 | 0.108974  | 0.128497  | 0.121941  | 0.105624  | 0.220134 | 0.142045  |
| 0.110723 | 0.107226  | 0.0903263 | 0.0855186 | 0.124563  | 0.202943 | 0.107663  |
| 0.12602  | 0.11116   | 0.130973  | 0.127914  | 0.12296   | 0.223776 | 0.150058  |
| 0.115676 | 0.101399  | 0.110431  | 0.107663  | 0.10912   | 0.205857 | 0.13039   |
| 0.122815 | 0.100087  | 0.121066  | 0.122378  | 0.113345  | 0.212413 | 0.144522  |
| 0.136655 | 0.114802  | 0.133741  | 0.13039   | 0.0995047 | 0.228875 | 0.146416  |
| 0.117133 | 0.100816  | 0.125874  | 0.125146  | 0.108537  | 0.220425 | 0.140589  |
| 0.126166 | 0.110431  | 0.125583  | 0.121649  | 0.119318  | 0.217803 | 0.135927  |
| 0.11451  | 0.0958625 | 0.120629  | 0.121358  | 0.107955  | 0.218094 | 0.145542  |
| 0.117424 | 0.0987762 | 0.123834  | 0.121649  | 0.108829  | 0.216638 | 0.142045  |
| 0.107226 | 0.0894522 | 0.116841  | 0.112325  | 0.115239  | 0.21285  | 0.137675  |
| 0.116987 | 0.100962  | 0.128351  | 0.123543  | 0.120047  | 0.225524 | 0.141317  |
| 0.112034 | 0.0875583 | 0.120484  | 0.113054  | 0.113345  | 0.213869 | 0.144814  |
| 0.148456 | 0.134761  | 0.142337  | 0.139569  | 0.108683  | 0.224068 | 0.153555  |
| 0.133304 | 0.125728  | 0.127185  | 0.126457  | 0.106352  | 0.214452 | 0.145105  |
| 0.112034 | 0.0989219 | 0.11961   | 0.114802  | 0.107809  | 0.215618 | 0.138695  |
| 0.145979 | 0.126748  | 0.138986  | 0.135927  | 0.107663  | 0.230624 | 0.149038  |
| 0.125583 | 0.115093  | 0.120629  | 0.117279  | 0.130682  | 0.210227 | 0.144959  |
| 0.134324 | 0.111888  | 0.1419    | 0.136509  | 0.126603  | 0.2213   | 0.152244  |
| 0.114219 | 0.0958625 | 0.121212  | 0.112325  | 0.117279  | 0.216055 | 0.139132  |
| 0.146707 | 0.135052  | 0.14292   | 0.137821  | 0.140443  | 0.223193 | 0.151224  |
| 0.134761 | 0.117279  | 0.136218  | 0.13549   | 0.123252  | 0.216783 | 0.147436  |
| 0.144085 | 0.127477  | 0.14088   | 0.13986   | 0.118881  | 0.224942 | 0.158508  |
| 0.124854 | 0.109994  | 0.122523  | 0.119464  | 0.120921  | 0.220571 | 0.14627   |
| 0.113928 | 0.0885781 | 0.120921  | 0.114948  | 0.103293  | 0.214889 | 0.140006  |
| 0.11116  | 0.0936772 | 0.121066  | 0.116841  | 0.107517  | 0.214452 | 0.142191  |
| 0.127914 | 0.110431  | 0.122086  | 0.117861  | 0.102418  | 0.218969 | 0.138549  |
| 0.118881 | 0.0981935 | 0.127331  | 0.123106  | 0.114365  | 0.2213   | 0.141171  |
| 0.128642 | 0.107955  | 0.134761  | 0.129953  | 0.127331  | 0.227273 | 0.146562  |
| 0.123689 | 0.109703  | 0.124854  | 0.120629  | 0.11014   | 0.212413 | 0.145979  |
| 0.117279 | 0.0916375 | 0.118444  | 0.113928  | 0.109848  | 0.212413 | 0.141608  |
| 0.113928 | 0.0929487 | 0.120921  | 0.114073  | 0.107955  | 0.216929 | 0.141171  |

|           |           |          |          |          |          |          |
|-----------|-----------|----------|----------|----------|----------|----------|
| 0.11116   | 0.0942599 | 0.128059 | 0.121503 | 0.113636 | 0.214161 | 0.1419   |
| 0.109411  | 0.0898893 | 0.117279 | 0.111014 | 0.104021 | 0.210664 | 0.137821 |
| 0.118881  | 0.101107  | 0.128205 | 0.12398  | 0.112325 | 0.223339 | 0.146416 |
| 0.113636  | 0.0920746 | 0.115385 | 0.108829 | 0.123689 | 0.212558 | 0.13447  |
| 0.111451  | 0.105332  | 0.109703 | 0.106935 | 0.126748 | 0.202797 | 0.124126 |
| 0.110286  | 0.0916375 | 0.113199 | 0.111014 | 0.122378 | 0.217949 | 0.136072 |
| 0.0962995 | 0.0776515 | 0.114656 | 0.109266 | 0.119172 | 0.20979  | 0.13549  |
| 0.10912   | 0.0893065 | 0.121358 | 0.116841 | 0.111597 | 0.212121 | 0.13986  |
| 0.111014  | 0.103438  | 0.109848 | 0.107372 | 0.122815 | 0.202943 | 0.129225 |
| 0.115822  | 0.0980478 | 0.11116  | 0.108392 | 0.118881 | 0.214744 | 0.130536 |
| 0.123689  | 0.111742  | 0.109411 | 0.103438 | 0.12704  | 0.206002 | 0.121212 |
| 0.104167  | 0.0936772 | 0.099796 | 0.097028 | 0.115385 | 0.201923 | 0.124709 |
| 0.130245  | 0.111597  | 0.123543 | 0.123397 | 0.127477 | 0.218386 | 0.13447  |

| TDr_1608 | TDr_1610 | TDr_1615 | TDr_1621  | TDr_1622 | TDr_1628  | TDr_1630  |
|----------|----------|----------|-----------|----------|-----------|-----------|
| 0.125437 | 0.12296  | 0.192308 | 0.0935315 | 0.120775 | 0.131265  | 0.120921  |
| 0.124417 | 0.104458 | 0.19595  | 0.120192  | 0.126748 | 0.123543  | 0.108829  |
| 0.122669 | 0.107372 | 0.19391  | 0.117861  | 0.120921 | 0.11859   | 0.104458  |
| 0.125291 | 0.110577 | 0.204108 | 0.116696  | 0.123834 | 0.124126  | 0.112617  |
| 0.128497 | 0.129516 | 0.217512 | 0.136801  | 0.130536 | 0.0976107 | 0.136801  |
| 0.135781 | 0.122523 | 0.208188 | 0.11961   | 0.134324 | 0.11859   | 0.12398   |
| 0.13039  | 0.127914 | 0.213578 | 0.113636  | 0.121941 | 0.124272  | 0.125     |
| 0.125728 | 0.116841 | 0.195221 | 0.122378  | 0.114948 | 0.117279  | 0.107809  |
| 0.121212 | 0.109994 | 0.204108 | 0.112325  | 0.111597 | 0.113054  | 0.109703  |
| 0.122523 | 0.11451  | 0.206294 | 0.122086  | 0.119318 | 0.11961   | 0.097028  |
| 0.132576 | 0.125146 | 0.195659 | 0.106789  | 0.120629 | 0.125291  | 0.11553   |
| 0.114948 | 0.114802 | 0.201923 | 0.11655   | 0.110577 | 0.109994  | 0.118881  |
| 0.131556 | 0.112471 | 0.208625 | 0.116841  | 0.114073 | 0.118153  | 0.108392  |
| 0.14831  | 0.136218 | 0.165647 | 0.129225  | 0.143648 | 0.13345   | 0.127477  |
| 0.134761 | 0.125874 | 0.208916 | 0.132867  | 0.125437 | 0.13243   | 0.0472028 |
| 0.129079 | 0.127768 | 0.213432 | 0.112617  | 0.119464 | 0.126166  | 0.10912   |
| 0.120775 | 0.118881 | 0.206002 | 0.112179  | 0.107372 | 0.112617  | 0.116841  |
| 0.138403 | 0.145833 | 0.218969 | 0.151369  | 0.155594 | 0.124126  | 0.14292   |
| 0.117716 | 0.101253 | 0.192453 | 0.111116  | 0.120047 | 0.117716  | 0.109994  |
| 0.209499 | 0.195659 | 0.127477 | 0.191579  | 0.206002 | 0.200758  | 0.174679  |
| 0.128059 | 0.126166 | 0.210956 | 0.119464  | 0.131556 | 0.128934  | 0.121503  |
| 0.125    | 0.121066 | 0.214598 | 0.11757   | 0.124417 | 0.127914  | 0.119901  |
| 0.120192 | 0.111014 | 0.20338  | 0.0941142 | 0.115822 | 0.11757   | 0.112179  |
| 0.131702 | 0.128059 | 0.217803 | 0.112908  | 0.123543 | 0.126166  | 0.13039   |
| 0.120192 | 0.116841 | 0.198135 | 0.106352  | 0.106498 | 0.112325  | 0.106352  |
| 0.130973 | 0.126457 | 0.214161 | 0.120629  | 0.13447  | 0.129516  | 0.128497  |
| 0.13039  | 0.127914 | 0.213287 | 0.124126  | 0.115822 | 0.120484  | 0.122378  |
| 0.130099 | 0.123834 | 0.219114 | 0.111014  | 0.123106 | 0.125728  | 0.121212  |
| 0.135635 | 0.129371 | 0.2162   | 0.126166  | 0.130099 | 0.133887  | 0.134907  |
| 0.129808 | 0.125874 | 0.215909 | 0.125291  | 0.116696 | 0.123689  | 0.121212  |
| 0.13345  | 0.130099 | 0.207896 | 0.106498  | 0.125583 | 0.130536  | 0.114656  |
| 0.123689 | 0.126166 | 0.214161 | 0.120338  | 0.121066 | 0.126311  | 0.11859   |
| 0.119901 | 0.113345 | 0.197261 | 0.104312  | 0.109703 | 0.118444  | 0.103438  |
| 0.124272 | 0.123252 | 0.207459 | 0.121503  | 0.108246 | 0.124272  | 0.118007  |
| 0.131119 | 0.128934 | 0.218386 | 0.119901  | 0.116259 | 0.128497  | 0.119027  |
| 0.132139 | 0.129079 | 0.22028  | 0.127914  | 0.125437 | 0.130099  | 0.128788  |
| 0.142774 | 0.136218 | 0.224213 | 0.127185  | 0.138403 | 0.138112  | 0.13243   |
| 0.13447  | 0.126748 | 0.2162   | 0.115967  | 0.118735 | 0.128642  | 0.126166  |
| 0.117279 | 0.117424 | 0.205711 | 0.101107  | 0.114365 | 0.117279  | 0.112471  |
| 0.131265 | 0.128788 | 0.215618 | 0.117133  | 0.127185 | 0.128642  | 0.124126  |
| 0.123106 | 0.116259 | 0.206876 | 0.105478  | 0.119318 | 0.110868  | 0.115093  |
| 0.148456 | 0.146853 | 0.224942 | 0.134033  | 0.146707 | 0.139423  | 0.135781  |

|          |          |          |          |          |          |          |
|----------|----------|----------|----------|----------|----------|----------|
| 0.146416 | 0.145396 | 0.22465  | 0.138403 | 0.146999 | 0.146125 | 0.143939 |
| 0.132867 | 0.122815 | 0.205857 | 0.114656 | 0.121212 | 0.121795 | 0.120775 |
| 0.120338 | 0.116696 | 0.207314 | 0.110868 | 0.103147 | 0.110723 | 0.114073 |
| 0.133887 | 0.130245 | 0.219988 | 0.118298 | 0.115239 | 0.127477 | 0.115676 |
| 0.131556 | 0.125291 | 0.210956 | 0.114802 | 0.120192 | 0.120775 | 0.120338 |
| 0.146853 | 0.14292  | 0.223339 | 0.129516 | 0.137821 | 0.13986  | 0.136801 |
| 0.129953 | 0.118444 | 0.210519 | 0.114948 | 0.118298 | 0.120338 | 0.116987 |
| 0.127768 | 0.126166 | 0.208916 | 0.111305 | 0.120775 | 0.122815 | 0.115967 |
| 0.148019 | 0.145833 | 0.225087 | 0.121649 | 0.143065 | 0.152972 | 0.146416 |
| 0.128497 | 0.133013 | 0.211976 | 0.122815 | 0.128497 | 0.121795 | 0.126603 |
| 0.124272 | 0.11655  | 0.206294 | 0.104021 | 0.114073 | 0.121649 | 0.119464 |
| 0.136218 | 0.130536 | 0.219114 | 0.134615 | 0.134761 | 0.133596 | 0.113928 |
| 0.122232 | 0.116259 | 0.194056 | 0.105769 | 0.126603 | 0.124854 | 0.117716 |
| 0.140589 | 0.150641 | 0.231935 | 0.132576 | 0.132139 | 0.138258 | 0.144522 |
| 0.134033 | 0.128642 | 0.217512 | 0.121066 | 0.126748 | 0.126748 | 0.129516 |
| 0.127622 | 0.121649 | 0.209645 | 0.110577 | 0.123543 | 0.118298 | 0.117861 |
| 0.12704  | 0.11961  | 0.204108 | 0.11553  | 0.122086 | 0.121212 | 0.11553  |
| 0.13039  | 0.123252 | 0.217075 | 0.120921 | 0.120775 | 0.123689 | 0.115385 |
| 0.142337 | 0.140443 | 0.22669  | 0.121503 | 0.14292  | 0.132721 | 0.137238 |
| 0.146416 | 0.134907 | 0.229895 | 0.133159 | 0.143211 | 0.135927 | 0.139277 |
| 0.169289 | 0.168269 | 0.1706   | 0.142337 | 0.166084 | 0.166375 | 0.156614 |
| 0.129371 | 0.119027 | 0.207896 | 0.11116  | 0.121503 | 0.119172 | 0.113782 |
| 0.122086 | 0.122232 | 0.208479 | 0.108537 | 0.11655  | 0.120921 | 0.119027 |
| 0.124126 | 0.119318 | 0.209353 | 0.107372 | 0.115385 | 0.121503 | 0.118444 |
| 0.148164 | 0.140443 | 0.215035 | 0.134324 | 0.137966 | 0.144376 | 0.138112 |
| 0.128642 | 0.11859  | 0.206876 | 0.11014  | 0.116113 | 0.114365 | 0.112471 |
| 0.134907 | 0.140297 | 0.215763 | 0.124854 | 0.136072 | 0.136072 | 0.133887 |
| 0.128788 | 0.123689 | 0.21722  | 0.119027 | 0.120047 | 0.123252 | 0.113199 |
| 0.127477 | 0.125    | 0.206876 | 0.111888 | 0.120192 | 0.124272 | 0.120047 |
| 0.158362 | 0.149184 | 0.217657 | 0.13141  | 0.144085 | 0.150787 | 0.145105 |
| 0.131847 | 0.129953 | 0.218531 | 0.112179 | 0.124563 | 0.124272 | 0.125    |
| 0.137238 | 0.139132 | 0.225962 | 0.133013 | 0.13986  | 0.134615 | 0.135927 |
| 0.130099 | 0.13345  | 0.213578 | 0.131702 | 0.129808 | 0.122815 | 0.130245 |
| 0.124709 | 0.120192 | 0.199738 | 0.113491 | 0.11859  | 0.118298 | 0.117279 |
| 0.122086 | 0.122232 | 0.204691 | 0.106206 | 0.115385 | 0.118881 | 0.120484 |
| 0.130245 | 0.121066 | 0.209936 | 0.112908 | 0.124709 | 0.113928 | 0.117279 |
| 0.135781 | 0.137675 | 0.223631 | 0.122232 | 0.140734 | 0.132576 | 0.138258 |
| 0.124272 | 0.120629 | 0.207168 | 0.110723 | 0.113782 | 0.118153 | 0.119464 |
| 0.138695 | 0.137966 | 0.22771  | 0.129808 | 0.147727 | 0.141317 | 0.138258 |
| 0.131702 | 0.126894 | 0.210227 | 0.116696 | 0.126166 | 0.125583 | 0.124563 |
| 0.131702 | 0.126603 | 0.212267 | 0.111742 | 0.118881 | 0.115385 | 0.123689 |
| 0.131702 | 0.125437 | 0.209936 | 0.112617 | 0.120629 | 0.122669 | 0.120192 |
| 0.132576 | 0.127477 | 0.214307 | 0.11757  | 0.126748 | 0.125    | 0.125437 |
| 0.127914 | 0.119901 | 0.211976 | 0.110286 | 0.120047 | 0.116841 | 0.119318 |

|          |          |          |          |          |          |           |
|----------|----------|----------|----------|----------|----------|-----------|
| 0.126748 | 0.120192 | 0.208188 | 0.107372 | 0.116259 | 0.121503 | 0.122523  |
| 0.13884  | 0.145979 | 0.224942 | 0.127622 | 0.14088  | 0.136218 | 0.135198  |
| 0.128059 | 0.120338 | 0.208333 | 0.109266 | 0.10912  | 0.116987 | 0.111888  |
| 0.124126 | 0.118153 | 0.21285  | 0.117861 | 0.111597 | 0.114802 | 0.114073  |
| 0.132284 | 0.131265 | 0.217803 | 0.127185 | 0.125874 | 0.129079 | 0.123689  |
| 0.13549  | 0.130973 | 0.216929 | 0.121066 | 0.125583 | 0.124126 | 0.127185  |
| 0.137529 | 0.134178 | 0.222174 | 0.133304 | 0.132576 | 0.132284 | 0.128351  |
| 0.14292  | 0.143648 | 0.230186 | 0.138403 | 0.140297 | 0.144376 | 0.137529  |
| 0.129079 | 0.122232 | 0.206148 | 0.113199 | 0.118881 | 0.11451  | 0.119318  |
| 0.192308 | 0.181964 | 0.153992 | 0.168852 | 0.182984 | 0.179779 | 0.18109   |
| 0.121649 | 0.118881 | 0.208042 | 0.111305 | 0.11116  | 0.116696 | 0.112471  |
| 0.144231 | 0.139132 | 0.223922 | 0.13884  | 0.135781 | 0.149184 | 0.131265  |
| 0.138112 | 0.13243  | 0.218677 | 0.130682 | 0.125874 | 0.13986  | 0.121941  |
| 0.143794 | 0.13986  | 0.226107 | 0.130536 | 0.134761 | 0.134761 | 0.136655  |
| 0.123252 | 0.123689 | 0.21285  | 0.115239 | 0.113928 | 0.120921 | 0.114073  |
| 0.138986 | 0.138549 | 0.225087 | 0.131847 | 0.133159 | 0.139277 | 0.133013  |
| 0.119172 | 0.125437 | 0.213724 | 0.11961  | 0.112179 | 0.123252 | 0.119027  |
| 0.126311 | 0.13345  | 0.213578 | 0.123252 | 0.11961  | 0.123106 | 0.123252  |
| 0.130682 | 0.121503 | 0.213869 | 0.106352 | 0.117861 | 0.127768 | 0.116259  |
| 0.136218 | 0.141026 | 0.227855 | 0.137238 | 0.13447  | 0.13884  | 0.138986  |
| 0.120192 | 0.121795 | 0.210956 | 0.11014  | 0.109994 | 0.120775 | 0.113054  |
| 0.138986 | 0.137675 | 0.2213   | 0.125146 | 0.137238 | 0.138695 | 0.133013  |
| 0.127768 | 0.123543 | 0.211247 | 0.113345 | 0.120484 | 0.11961  | 0.123834  |
| 0.136072 | 0.135927 | 0.224213 | 0.122815 | 0.13141  | 0.130536 | 0.133596  |
| 0.140297 | 0.136946 | 0.217657 | 0.125874 | 0.127768 | 0.13243  | 0.12296   |
| 0.118444 | 0.114219 | 0.210664 | 0.113054 | 0.113782 | 0.114073 | 0.111597  |
| 0.154866 | 0.148019 | 0.217949 | 0.13141  | 0.145833 | 0.149621 | 0.143065  |
| 0.124126 | 0.115239 | 0.211101 | 0.116696 | 0.117424 | 0.116259 | 0.122232  |
| 0.120629 | 0.122815 | 0.214889 | 0.119901 | 0.111597 | 0.120047 | 0.117279  |
| 0.124272 | 0.124417 | 0.21183  | 0.111888 | 0.119901 | 0.12398  | 0.122378  |
| 0.149621 | 0.142774 | 0.224942 | 0.136655 | 0.14292  | 0.144376 | 0.139277  |
| 0.134761 | 0.126166 | 0.194347 | 0.100233 | 0.122815 | 0.13039  | 0.123252  |
| 0.121649 | 0.120338 | 0.210082 | 0.115967 | 0.112617 | 0.119901 | 0.113928  |
| 0.121358 | 0.118881 | 0.208042 | 0.115093 | 0.112325 | 0.121941 | 0.111305  |
| 0.13141  | 0.121358 | 0.210519 | 0.110868 | 0.121212 | 0.125    | 0.120192  |
| 0.129808 | 0.134907 | 0.223485 | 0.126748 | 0.125437 | 0.13039  | 0.118298  |
| 0.125874 | 0.116696 | 0.21285  | 0.110577 | 0.116259 | 0.117133 | 0.121066  |
| 0.118735 | 0.115385 | 0.206876 | 0.1081   | 0.104458 | 0.109994 | 0.106935  |
| 0.120484 | 0.113928 | 0.207168 | 0.108683 | 0.11116  | 0.11757  | 0.108683  |
| 0.125    | 0.121066 | 0.211101 | 0.117279 | 0.113054 | 0.118007 | 0.110577  |
| 0.127331 | 0.127768 | 0.208479 | 0.116404 | 0.111305 | 0.125874 | 0.122815  |
| 0.134178 | 0.135198 | 0.220571 | 0.127914 | 0.125728 | 0.13243  | 0.122669  |
| 0.119172 | 0.118153 | 0.211684 | 0.114656 | 0.11014  | 0.114802 | 0.10708   |
| 0.119318 | 0.113928 | 0.207459 | 0.104895 | 0.108537 | 0.11553  | 0.0999417 |



|          |          |          |          |          |          |           |
|----------|----------|----------|----------|----------|----------|-----------|
| 0.131265 | 0.13141  | 0.21824  | 0.115093 | 0.122815 | 0.12398  | 0.119172  |
| 0.124417 | 0.115822 | 0.207022 | 0.104458 | 0.109266 | 0.114219 | 0.109994  |
| 0.136655 | 0.125437 | 0.204983 | 0.11757  | 0.118881 | 0.128788 | 0.121066  |
| 0.134033 | 0.135635 | 0.219551 | 0.108537 | 0.129371 | 0.140443 | 0.133304  |
| 0.123252 | 0.125146 | 0.212267 | 0.114073 | 0.117716 | 0.118007 | 0.115239  |
| 0.122523 | 0.117424 | 0.213869 | 0.114802 | 0.112034 | 0.116987 | 0.109266  |
| 0.123106 | 0.120629 | 0.207751 | 0.115967 | 0.112908 | 0.119901 | 0.11014   |
| 0.120484 | 0.116841 | 0.20542  | 0.106352 | 0.105915 | 0.116113 | 0.11014   |
| 0.130099 | 0.131702 | 0.219114 | 0.127914 | 0.127477 | 0.128059 | 0.123252  |
| 0.118735 | 0.115676 | 0.208333 | 0.105186 | 0.108246 | 0.113491 | 0.104895  |
| 0.142483 | 0.140006 | 0.222174 | 0.140297 | 0.138403 | 0.137238 | 0.136218  |
| 0.136218 | 0.136364 | 0.217075 | 0.128205 | 0.131265 | 0.13447  | 0.133741  |
| 0.135344 | 0.129371 | 0.22028  | 0.119755 | 0.124854 | 0.128642 | 0.124709  |
| 0.125291 | 0.119027 | 0.210519 | 0.11553  | 0.119172 | 0.120338 | 0.112908  |
| 0.123252 | 0.123106 | 0.207314 | 0.113782 | 0.115967 | 0.118881 | 0.118153  |
| 0.119318 | 0.119464 | 0.212121 | 0.108974 | 0.112034 | 0.116113 | 0.110723  |
| 0.124126 | 0.11961  | 0.212558 | 0.108246 | 0.111888 | 0.11655  | 0.121358  |
| 0.122378 | 0.112034 | 0.211393 | 0.110868 | 0.11014  | 0.110431 | 0.114656  |
| 0.123543 | 0.11757  | 0.198864 | 0.10271  | 0.119755 | 0.122669 | 0.115822  |
| 0.132284 | 0.136509 | 0.223339 | 0.116696 | 0.128497 | 0.12704  | 0.127768  |
| 0.128351 | 0.127331 | 0.217657 | 0.119172 | 0.11757  | 0.126603 | 0.120047  |
| 0.136072 | 0.127768 | 0.215763 | 0.133596 | 0.135198 | 0.129953 | 0.120484  |
| 0.139132 | 0.141026 | 0.225233 | 0.134907 | 0.134178 | 0.136509 | 0.129371  |
| 0.202943 | 0.187937 | 0.103438 | 0.18211  | 0.198572 | 0.190997 | 0.185023  |
| 0.240967 | 0.227418 | 0.103584 | 0.226544 | 0.239219 | 0.233974 | 0.231206  |
| 0.120192 | 0.11451  | 0.19493  | 0.107517 | 0.116696 | 0.118735 | 0.116841  |
| 0.124126 | 0.118153 | 0.204108 | 0.106498 | 0.116841 | 0.11014  | 0.116113  |
| 0.125583 | 0.116987 | 0.20236  | 0.101253 | 0.105769 | 0.113928 | 0.112908  |
| 0.122378 | 0.11553  | 0.207314 | 0.109411 | 0.115676 | 0.115385 | 0.11757   |
| 0.13345  | 0.127185 | 0.211684 | 0.132721 | 0.126166 | 0.136364 | 0.0467657 |
| 0.12704  | 0.123689 | 0.212267 | 0.110286 | 0.118881 | 0.121212 | 0.118444  |
| 0.144668 | 0.151224 | 0.230186 | 0.138112 | 0.14088  | 0.140297 | 0.147727  |
| 0.129662 | 0.120192 | 0.213141 | 0.111451 | 0.113928 | 0.11859  | 0.12398   |
| 0.127914 | 0.135635 | 0.221882 | 0.125437 | 0.131702 | 0.130828 | 0.135052  |
| 0.135927 | 0.134615 | 0.211538 | 0.120338 | 0.134178 | 0.130973 | 0.129662  |
| 0.135052 | 0.138986 | 0.223193 | 0.128205 | 0.132721 | 0.138549 | 0.127622  |
| 0.138549 | 0.139277 | 0.220571 | 0.13141  | 0.134761 | 0.138258 | 0.13549   |
| 0.126311 | 0.125    | 0.215909 | 0.113054 | 0.120775 | 0.11961  | 0.118007  |
| 0.123106 | 0.119172 | 0.210373 | 0.109557 | 0.112325 | 0.114656 | 0.11859   |
| 0.127331 | 0.122815 | 0.213724 | 0.113491 | 0.124417 | 0.11655  | 0.11961   |
| 0.120338 | 0.116113 | 0.204691 | 0.107663 | 0.107226 | 0.110431 | 0.118444  |
| 0.122086 | 0.116696 | 0.207896 | 0.10912  | 0.113928 | 0.115385 | 0.118735  |
| 0.124563 | 0.123252 | 0.214161 | 0.107226 | 0.113491 | 0.113491 | 0.123834  |
| 0.132576 | 0.132139 | 0.218386 | 0.121358 | 0.132284 | 0.13141  | 0.126603  |

|          |          |          |          |          |          |          |
|----------|----------|----------|----------|----------|----------|----------|
| 0.137529 | 0.135927 | 0.223922 | 0.12602  | 0.132867 | 0.138695 | 0.135927 |
| 0.127768 | 0.127331 | 0.20979  | 0.11014  | 0.114365 | 0.119027 | 0.125291 |
| 0.121212 | 0.120484 | 0.206439 | 0.105624 | 0.117424 | 0.124126 | 0.11961  |
| 0.132576 | 0.140297 | 0.221591 | 0.121941 | 0.126457 | 0.133159 | 0.138258 |
| 0.115676 | 0.118153 | 0.207022 | 0.109411 | 0.108683 | 0.114802 | 0.120484 |
| 0.139423 | 0.144231 | 0.219988 | 0.132867 | 0.141171 | 0.142628 | 0.136946 |
| 0.137675 | 0.13549  | 0.213578 | 0.130828 | 0.137383 | 0.142628 | 0.127914 |
| 0.133159 | 0.139132 | 0.211393 | 0.125437 | 0.130245 | 0.134033 | 0.134761 |
| 0.122086 | 0.117861 | 0.209936 | 0.105041 | 0.113345 | 0.107809 | 0.118444 |
| 0.118153 | 0.114802 | 0.206585 | 0.101107 | 0.109411 | 0.116696 | 0.115093 |
| 0.131119 | 0.132721 | 0.222465 | 0.119318 | 0.128788 | 0.118007 | 0.126894 |
| 0.131265 | 0.126457 | 0.216783 | 0.113636 | 0.118153 | 0.128059 | 0.128788 |
| 0.133304 | 0.13141  | 0.215618 | 0.118881 | 0.128059 | 0.128351 | 0.134907 |
| 0.12296  | 0.123106 | 0.214015 | 0.11116  | 0.11451  | 0.118298 | 0.124854 |
| 0.120192 | 0.123834 | 0.211538 | 0.109266 | 0.113491 | 0.117279 | 0.123834 |
| 0.124854 | 0.129953 | 0.214744 | 0.116259 | 0.125437 | 0.128351 | 0.122378 |
| 0.137383 | 0.138403 | 0.223485 | 0.125    | 0.132721 | 0.133887 | 0.135781 |
| 0.13884  | 0.137821 | 0.21824  | 0.120629 | 0.128351 | 0.129516 | 0.134907 |
| 0.136655 | 0.135344 | 0.224796 | 0.119318 | 0.128788 | 0.139277 | 0.133887 |
| 0.142628 | 0.136364 | 0.215326 | 0.111305 | 0.136218 | 0.135635 | 0.131993 |
| 0.127768 | 0.11655  | 0.210664 | 0.110431 | 0.116696 | 0.118735 | 0.122669 |
| 0.128934 | 0.13141  | 0.219697 | 0.128788 | 0.133304 | 0.13243  | 0.133159 |
| 0.118298 | 0.116113 | 0.209936 | 0.106206 | 0.114219 | 0.117424 | 0.116696 |
| 0.126603 | 0.124126 | 0.204837 | 0.113928 | 0.122815 | 0.117861 | 0.120629 |
| 0.123106 | 0.118881 | 0.211247 | 0.111014 | 0.119318 | 0.112908 | 0.11655  |
| 0.122086 | 0.11961  | 0.207605 | 0.113782 | 0.116259 | 0.112179 | 0.122523 |
| 0.118881 | 0.116696 | 0.209645 | 0.111742 | 0.113928 | 0.109266 | 0.11961  |
| 0.140297 | 0.136072 | 0.223776 | 0.125583 | 0.130099 | 0.139132 | 0.136364 |
| 0.129662 | 0.123106 | 0.209936 | 0.110286 | 0.119464 | 0.120047 | 0.119318 |
| 0.132284 | 0.133887 | 0.220134 | 0.128351 | 0.133159 | 0.139277 | 0.137966 |
| 0.119464 | 0.11757  | 0.207605 | 0.109411 | 0.108974 | 0.112762 | 0.117861 |
| 0.134178 | 0.131993 | 0.220571 | 0.116259 | 0.120775 | 0.126603 | 0.132867 |
| 0.130245 | 0.128934 | 0.214889 | 0.11553  | 0.122378 | 0.126457 | 0.124854 |
| 0.130536 | 0.125437 | 0.205274 | 0.118444 | 0.123543 | 0.127914 | 0.11553  |
| 0.129808 | 0.123252 | 0.215035 | 0.113636 | 0.112617 | 0.120775 | 0.117424 |
| 0.127622 | 0.125728 | 0.209062 | 0.122523 | 0.127914 | 0.119464 | 0.123689 |
| 0.130973 | 0.127331 | 0.215909 | 0.115967 | 0.11757  | 0.129225 | 0.119755 |
| 0.123397 | 0.120921 | 0.212413 | 0.11655  | 0.107372 | 0.114656 | 0.118007 |
| 0.141171 | 0.138112 | 0.224942 | 0.141317 | 0.13447  | 0.131556 | 0.125874 |
| 0.144231 | 0.144085 | 0.226544 | 0.133013 | 0.13345  | 0.147436 | 0.139132 |
| 0.120338 | 0.110286 | 0.204691 | 0.118444 | 0.112762 | 0.11655  | 0.105041 |
| 0.136801 | 0.13549  | 0.223485 | 0.137238 | 0.136801 | 0.139423 | 0.119755 |
| 0.138112 | 0.13039  | 0.220717 | 0.133304 | 0.126166 | 0.130536 | 0.116113 |
| 0.133741 | 0.132139 | 0.216638 | 0.135927 | 0.133159 | 0.13549  | 0.124563 |

|          |          |          |          |          |          |          |
|----------|----------|----------|----------|----------|----------|----------|
| 0.125583 | 0.126603 | 0.211684 | 0.124272 | 0.125291 | 0.126166 | 0.114365 |
| 0.128205 | 0.126311 | 0.216638 | 0.133013 | 0.125583 | 0.126166 | 0.114948 |
| 0.129808 | 0.129662 | 0.214744 | 0.133159 | 0.128059 | 0.13039  | 0.11859  |
| 0.131119 | 0.130973 | 0.220717 | 0.135052 | 0.126457 | 0.130828 | 0.127477 |
| 0.138986 | 0.135635 | 0.226544 | 0.144085 | 0.136364 | 0.142191 | 0.126311 |
| 0.132576 | 0.129808 | 0.218677 | 0.135052 | 0.134324 | 0.131702 | 0.117861 |
| 0.124126 | 0.119318 | 0.20877  | 0.122815 | 0.120921 | 0.120338 | 0.113199 |
| 0.142337 | 0.136364 | 0.219114 | 0.122669 | 0.128351 | 0.133304 | 0.139277 |
| 0.136072 | 0.13447  | 0.221882 | 0.142337 | 0.136946 | 0.136655 | 0.125437 |
| 0.122378 | 0.116987 | 0.20236  | 0.11961  | 0.118007 | 0.11859  | 0.109703 |
| 0.223631 | 0.21183  | 0.107809 | 0.208333 | 0.221008 | 0.213724 | 0.215326 |
| 0.131847 | 0.127622 | 0.217366 | 0.128205 | 0.126603 | 0.13243  | 0.116259 |
| 0.135052 | 0.122669 | 0.208916 | 0.126166 | 0.121941 | 0.123106 | 0.114802 |
| 0.132576 | 0.132139 | 0.226544 | 0.140297 | 0.136946 | 0.137821 | 0.125437 |
| 0.128788 | 0.121941 | 0.211976 | 0.129225 | 0.125583 | 0.126166 | 0.116404 |
| 0.1419   | 0.132721 | 0.223048 | 0.141463 | 0.137238 | 0.132576 | 0.122232 |
| 0.129662 | 0.129808 | 0.211101 | 0.129808 | 0.123252 | 0.125    | 0.116113 |
| 0.127768 | 0.124709 | 0.212413 | 0.127914 | 0.121941 | 0.126603 | 0.112762 |
| 0.132139 | 0.128205 | 0.211247 | 0.134615 | 0.136218 | 0.13039  | 0.115385 |
| 0.132867 | 0.13243  | 0.207605 | 0.128642 | 0.132867 | 0.136364 | 0.122815 |
| 0.135344 | 0.128788 | 0.218823 | 0.136655 | 0.13447  | 0.134761 | 0.125291 |
| 0.131702 | 0.133887 | 0.2213   | 0.13884  | 0.133741 | 0.132867 | 0.127768 |
| 0.134033 | 0.132721 | 0.218969 | 0.137675 | 0.129953 | 0.131993 | 0.122232 |
| 0.127331 | 0.125728 | 0.214307 | 0.116696 | 0.107517 | 0.12296  | 0.111742 |
| 0.12704  | 0.125437 | 0.217803 | 0.129808 | 0.121503 | 0.125291 | 0.121066 |
| 0.139714 | 0.142191 | 0.221445 | 0.144522 | 0.139132 | 0.14088  | 0.125291 |
| 0.126457 | 0.122232 | 0.204983 | 0.12398  | 0.125583 | 0.126748 | 0.110868 |
| 0.141026 | 0.140006 | 0.224213 | 0.128642 | 0.141608 | 0.136072 | 0.136801 |
| 0.144085 | 0.142483 | 0.203089 | 0.13141  | 0.141754 | 0.142045 | 0.134615 |
| 0.131265 | 0.132284 | 0.214452 | 0.113054 | 0.119027 | 0.130099 | 0.115967 |
| 0.136509 | 0.133159 | 0.219697 | 0.132867 | 0.129808 | 0.130099 | 0.117716 |
| 0.137529 | 0.129516 | 0.206148 | 0.120192 | 0.127914 | 0.132284 | 0.128351 |
| 0.131847 | 0.132284 | 0.20979  | 0.132576 | 0.119901 | 0.133304 | 0.129953 |
| 0.140297 | 0.129662 | 0.206294 | 0.125    | 0.127185 | 0.131847 | 0.130828 |
| 0.145251 | 0.141608 | 0.211247 | 0.132867 | 0.143794 | 0.143794 | 0.130828 |
| 0.125291 | 0.121649 | 0.208479 | 0.11116  | 0.111014 | 0.11859  | 0.112908 |
| 0.143794 | 0.136946 | 0.215909 | 0.131702 | 0.136218 | 0.13243  | 0.124126 |
| 0.141608 | 0.14933  | 0.19799  | 0.126894 | 0.15035  | 0.142191 | 0.134761 |
| 0.128205 | 0.123106 | 0.21722  | 0.123397 | 0.123834 | 0.12296  | 0.11553  |
| 0.128497 | 0.128934 | 0.209062 | 0.119027 | 0.129662 | 0.12704  | 0.126894 |
| 0.148747 | 0.148601 | 0.224068 | 0.129953 | 0.136801 | 0.141171 | 0.143648 |
| 0.13447  | 0.128497 | 0.216783 | 0.118298 | 0.130973 | 0.128642 | 0.125291 |
| 0.148893 | 0.140297 | 0.227127 | 0.133887 | 0.137529 | 0.143648 | 0.128934 |
| 0.14088  | 0.136072 | 0.219406 | 0.12704  | 0.131556 | 0.135344 | 0.122669 |

|          |          |          |          |          |          |           |
|----------|----------|----------|----------|----------|----------|-----------|
| 0.128497 | 0.126603 | 0.217512 | 0.128934 | 0.124709 | 0.131993 | 0.126311  |
| 0.13884  | 0.138695 | 0.217366 | 0.122086 | 0.131265 | 0.136218 | 0.125291  |
| 0.138112 | 0.133596 | 0.213724 | 0.117279 | 0.123834 | 0.129662 | 0.121358  |
| 0.135052 | 0.13345  | 0.221737 | 0.12704  | 0.133013 | 0.133304 | 0.128788  |
| 0.136509 | 0.135781 | 0.219988 | 0.135198 | 0.132721 | 0.131265 | 0.131702  |
| 0.135052 | 0.132576 | 0.22465  | 0.133741 | 0.132139 | 0.136509 | 0.133741  |
| 0.142337 | 0.139569 | 0.225524 | 0.137238 | 0.129516 | 0.136801 | 0.129371  |
| 0.139132 | 0.134324 | 0.217075 | 0.121212 | 0.13039  | 0.139132 | 0.131993  |
| 0.150787 | 0.15035  | 0.219697 | 0.138986 | 0.143211 | 0.149621 | 0.140443  |
| 0.128059 | 0.128205 | 0.212121 | 0.125874 | 0.125437 | 0.124854 | 0.116841  |
| 0.127185 | 0.128497 | 0.217366 | 0.123252 | 0.126894 | 0.120192 | 0.122378  |
| 0.140589 | 0.138403 | 0.217075 | 0.133159 | 0.135344 | 0.124272 | 0.12704   |
| 0.128059 | 0.126457 | 0.214161 | 0.121212 | 0.118444 | 0.120484 | 0.115385  |
| 0.15472  | 0.149038 | 0.218677 | 0.13243  | 0.143357 | 0.149767 | 0.135927  |
| 0.158508 | 0.158945 | 0.225962 | 0.144959 | 0.153846 | 0.155012 | 0.151078  |
| 0.130828 | 0.132139 | 0.220134 | 0.124854 | 0.128205 | 0.128205 | 0.136509  |
| 0.128059 | 0.127914 | 0.217657 | 0.112179 | 0.11757  | 0.12602  | 0.127331  |
| 0.13549  | 0.129808 | 0.223922 | 0.134761 | 0.13141  | 0.138112 | 0.13039   |
| 0.132721 | 0.139277 | 0.220862 | 0.137821 | 0.134178 | 0.139423 | 0.125     |
| 0.128934 | 0.134615 | 0.221737 | 0.118881 | 0.130099 | 0.122815 | 0.131119  |
| 0.136801 | 0.137529 | 0.227564 | 0.140734 | 0.139132 | 0.139714 | 0.129079  |
| 0.145833 | 0.140734 | 0.219988 | 0.127622 | 0.14088  | 0.144376 | 0.129953  |
| 0.132576 | 0.132139 | 0.220134 | 0.11961  | 0.123252 | 0.133741 | 0.117861  |
| 0.163753 | 0.157197 | 0.226544 | 0.152535 | 0.161713 | 0.157051 | 0.15778   |
| 0.136072 | 0.129225 | 0.221008 | 0.123397 | 0.129371 | 0.130828 | 0.121941  |
| 0.146562 | 0.141754 | 0.219551 | 0.131847 | 0.140152 | 0.143648 | 0.126603  |
| 0.129516 | 0.128788 | 0.219114 | 0.120921 | 0.126894 | 0.119318 | 0.123252  |
| 0.130682 | 0.136364 | 0.226399 | 0.133159 | 0.128642 | 0.137675 | 0.138986  |
| 0.13039  | 0.128788 | 0.21183  | 0.132576 | 0.129808 | 0.130682 | 0.113928  |
| 0.143065 | 0.136801 | 0.185752 | 0.105041 | 0.136655 | 0.144231 | 0.139423  |
| 0.139714 | 0.144231 | 0.220571 | 0.155012 | 0.150495 | 0.135635 | 0.141608  |
| 0.126166 | 0.11553  | 0.201777 | 0.126311 | 0.128205 | 0.125583 | 0.12398   |
| 0.138258 | 0.125874 | 0.181818 | 0.12704  | 0.139423 | 0.134178 | 0.134324  |
| 0.158217 | 0.14933  | 0.163899 | 0.11116  | 0.144814 | 0.147145 | 0.14729   |
| 0.151224 | 0.138549 | 0.166812 | 0.131265 | 0.148019 | 0.14627  | 0.140589  |
| 0.132139 | 0.126748 | 0.221445 | 0.107226 | 0.112617 | 0.125728 | 0.133159  |
| 0.137821 | 0.134178 | 0.213432 | 0.139423 | 0.138695 | 0.105478 | 0.133887  |
| 0.125874 | 0.110868 | 0.20236  | 0.116113 | 0.117424 | 0.122378 | 0.0895979 |
| 0.12602  | 0.11859  | 0.204837 | 0.110723 | 0.113199 | 0.124563 | 0.0810023 |
| 0.132284 | 0.118153 | 0.205565 | 0.127477 | 0.128205 | 0.121503 | 0.121649  |
| 0.123252 | 0.114656 | 0.201777 | 0.121649 | 0.123834 | 0.122378 | 0.119901  |
| 0.132139 | 0.122669 | 0.208916 | 0.113345 | 0.11116  | 0.122815 | 0.118007  |
| 0.119318 | 0.112179 | 0.193182 | 0.112179 | 0.11553  | 0.120484 | 0.07838   |
| 0.130682 | 0.108974 | 0.207751 | 0.124417 | 0.124563 | 0.116113 | 0.122378  |

|           |          |           |           |           |           |           |
|-----------|----------|-----------|-----------|-----------|-----------|-----------|
| 0.13345   | 0.123689 | 0.196533  | 0.124272  | 0.125583  | 0.129079  | 0.0581294 |
| 0.116259  | 0.115239 | 0.201195  | 0.115239  | 0.104312  | 0.113928  | 0.10271   |
| 0.127914  | 0.120775 | 0.201195  | 0.122232  | 0.128788  | 0.125583  | 0.12398   |
| 0.126603  | 0.113345 | 0.204545  | 0.123543  | 0.125146  | 0.122815  | 0.122378  |
| 0.129808  | 0.124709 | 0.214452  | 0.0731352 | 0.115239  | 0.123397  | 0.130245  |
| 0.219551  | 0.211538 | 0.105769  | 0.206002  | 0.221008  | 0.213724  | 0.210373  |
| 0.140589  | 0.135781 | 0.215035  | 0.146562  | 0.145833  | 0.141463  | 0.142483  |
| 0         | 0.137092 | 0.216055  | 0.132139  | 0.129371  | 0.131119  | 0.131847  |
| 0.137092  | 0        | 0.202214  | 0.123252  | 0.128934  | 0.11961   | 0.119172  |
| 0.216055  | 0.202214 | 0         | 0.200758  | 0.214889  | 0.206439  | 0.203671  |
| 0.132139  | 0.123252 | 0.200758  | 0         | 0.115822  | 0.125146  | 0.126166  |
| 0.129371  | 0.128934 | 0.214889  | 0.115822  | 0         | 0.117424  | 0.121941  |
| 0.131119  | 0.11961  | 0.206439  | 0.125146  | 0.117424  | 0         | 0.128351  |
| 0.131847  | 0.119172 | 0.203671  | 0.126166  | 0.121941  | 0.128351  | 0         |
| 0.250146  | 0.24155  | 0.11014   | 0.23951   | 0.253934  | 0.246358  | 0.243881  |
| 0.130828  | 0.128059 | 0.211684  | 0.103584  | 0.125583  | 0.135198  | 0.125146  |
| 0.126166  | 0.11757  | 0.210227  | 0.0799825 | 0.111888  | 0.120047  | 0.123397  |
| 0.128497  | 0.124563 | 0.213432  | 0.127185  | 0.127914  | 0.120338  | 0.13039   |
| 0.125874  | 0.124272 | 0.211684  | 0.124272  | 0.124709  | 0.115093  | 0.126311  |
| 0.131993  | 0.130099 | 0.204983  | 0.100087  | 0.128205  | 0.133741  | 0.108246  |
| 0.134033  | 0.124563 | 0.1875    | 0.116987  | 0.128788  | 0.13141   | 0.110868  |
| 0.127622  | 0.124272 | 0.209353  | 0.0756119 | 0.112471  | 0.117716  | 0.12602   |
| 0.120775  | 0.115676 | 0.201632  | 0.123543  | 0.125728  | 0.120192  | 0.121212  |
| 0.130828  | 0.123106 | 0.206439  | 0.128059  | 0.126748  | 0.0976107 | 0.126894  |
| 0.126457  | 0.116987 | 0.206439  | 0.121358  | 0.11451   | 0.123543  | 0.046183  |
| 0.12398   | 0.111014 | 0.197844  | 0.117716  | 0.123397  | 0.118444  | 0.118007  |
| 0.126748  | 0.119318 | 0.207896  | 0.126603  | 0.124417  | 0.122378  | 0.10271   |
| 0.139132  | 0.142483 | 0.219697  | 0.155012  | 0.150787  | 0.135635  | 0.141026  |
| 0.135927  | 0.127331 | 0.21183   | 0.101107  | 0.124563  | 0.131265  | 0.128205  |
| 0.135927  | 0.131993 | 0.211247  | 0.119755  | 0.0511364 | 0.121358  | 0.122086  |
| 0.197698  | 0.182984 | 0.101107  | 0.180361  | 0.191288  | 0.192162  | 0.184149  |
| 0.211101  | 0.198718 | 0.0949883 | 0.193765  | 0.207022  | 0.200903  | 0.198427  |
| 0.13243   | 0.117424 | 0.197844  | 0.122669  | 0.122815  | 0.126603  | 0.0472028 |
| 0.123689  | 0.113054 | 0.203671  | 0.120047  | 0.117279  | 0.119901  | 0.044289  |
| 0.137092  | 0.125    | 0.201049  | 0.135781  | 0.148456  | 0.137966  | 0.129662  |
| 0.125146  | 0.121212 | 0.208625  | 0.0743007 | 0.109411  | 0.118444  | 0.124417  |
| 0.134324  | 0.13039  | 0.216055  | 0.103875  | 0.126457  | 0.135781  | 0.125146  |
| 0.134761  | 0.131119 | 0.210373  | 0.135781  | 0.134178  | 0.122815  | 0.131702  |
| 0.229167  | 0.213869 | 0.101107  | 0.215618  | 0.226544  | 0.221882  | 0.214744  |
| 0.0692016 | 0.120629 | 0.20979   | 0.118007  | 0.116404  | 0.119318  | 0.118007  |
| 0.208333  | 0.207605 | 0.132721  | 0.190997  | 0.208916  | 0.205128  | 0.206148  |
| 0.122523  | 0.120338 | 0.215326  | 0.0979021 | 0.103875  | 0.118153  | 0.123834  |
| 0.127331  | 0.124854 | 0.205857  | 0.11553   | 0.108392  | 0.119755  | 0.11961   |
| 0.127185  | 0.11451  | 0.199301  | 0.101107  | 0.119318  | 0.122523  | 0.117133  |

|          |          |          |           |           |           |           |
|----------|----------|----------|-----------|-----------|-----------|-----------|
| 0.127768 | 0.112762 | 0.198135 | 0.114219  | 0.113491  | 0.117279  | 0.0565268 |
| 0.212413 | 0.200321 | 0.10067  | 0.196241  | 0.212995  | 0.20542   | 0.200321  |
| 0.133159 | 0.119318 | 0.199446 | 0.132139  | 0.136946  | 0.132284  | 0.132139  |
| 0.127622 | 0.127185 | 0.218094 | 0.11553   | 0.111014  | 0.120921  | 0.128059  |
| 0.128205 | 0.116696 | 0.2044   | 0.128934  | 0.132867  | 0.126457  | 0.123106  |
| 0.128788 | 0.121358 | 0.209936 | 0.126603  | 0.121795  | 0.120047  | 0.127185  |
| 0.127331 | 0.11757  | 0.205565 | 0.120484  | 0.113928  | 0.121212  | 0.0517191 |
| 0.121649 | 0.120047 | 0.216492 | 0.101981  | 0.106498  | 0.120192  | 0.127622  |
| 0.133304 | 0.119755 | 0.198718 | 0.0786713 | 0.116987  | 0.112034  | 0.125874  |
| 0.130099 | 0.128497 | 0.20979  | 0.12296   | 0.0488054 | 0.121358  | 0.121503  |
| 0.123106 | 0.113345 | 0.195804 | 0.118881  | 0.121649  | 0.117279  | 0.115676  |
| 0.128497 | 0.128934 | 0.211101 | 0.116696  | 0.114802  | 0.123543  | 0.127185  |
| 0.199446 | 0.182984 | 0.106643 | 0.178322  | 0.192162  | 0.187791  | 0.185023  |
| 0.12704  | 0.122232 | 0.213141 | 0.128934  | 0.128788  | 0.119755  | 0.131265  |
| 0.129225 | 0.123543 | 0.211247 | 0.13549   | 0.13447   | 0.123106  | 0.124126  |
| 0.125583 | 0.116696 | 0.203526 | 0.126894  | 0.126457  | 0.122669  | 0.121941  |
| 0.135635 | 0.129662 | 0.205711 | 0.0941142 | 0.12398   | 0.133013  | 0.128205  |
| 0.122523 | 0.116841 | 0.202797 | 0.126166  | 0.127768  | 0.12398   | 0.124709  |
| 0.125728 | 0.126166 | 0.219114 | 0.107517  | 0.10708   | 0.120775  | 0.129662  |
| 0.123834 | 0.118444 | 0.204691 | 0.108829  | 0.11655   | 0.11859   | 0.122523  |
| 0.128788 | 0.125146 | 0.215472 | 0.0785256 | 0.114802  | 0.123834  | 0.133596  |
| 0.125146 | 0.118881 | 0.206876 | 0.128788  | 0.128642  | 0.118735  | 0.120338  |
| 0.124272 | 0.121212 | 0.208916 | 0.122378  | 0.120484  | 0.115239  | 0.123834  |
| 0.127622 | 0.118153 | 0.201195 | 0.120775  | 0.120921  | 0.122669  | 0.0595862 |
| 0.132139 | 0.11859  | 0.215326 | 0.127331  | 0.11757   | 0.0546329 | 0.126457  |
| 0.137529 | 0.131556 | 0.216638 | 0.137966  | 0.131119  | 0.0530303 | 0.139132  |
| 0.12704  | 0.122232 | 0.207896 | 0.0960082 | 0.117716  | 0.127331  | 0.118153  |
| 0.135927 | 0.13141  | 0.212704 | 0.141608  | 0.142045  | 0.137675  | 0.138112  |
| 0.128351 | 0.118881 | 0.205711 | 0.120921  | 0.118444  | 0.120484  | 0.0512821 |
| 0.126311 | 0.122378 | 0.205711 | 0.122086  | 0.122523  | 0.113782  | 0.121212  |
| 0.129371 | 0.11553  | 0.186626 | 0.112034  | 0.123543  | 0.121212  | 0.123106  |
| 0.132284 | 0.127477 | 0.20877  | 0.0759033 | 0.114802  | 0.123834  | 0.131556  |
| 0.19697  | 0.186917 | 0.116404 | 0.163899  | 0.19493   | 0.185023  | 0.18546   |
| 0.123106 | 0.122669 | 0.210664 | 0.113636  | 0.110577  | 0.120192  | 0.120047  |
| 0.113199 | 0.110431 | 0.198718 | 0.113928  | 0.11116   | 0.116987  | 0.111888  |
| 0.131847 | 0.127622 | 0.213869 | 0.121795  | 0.048514  | 0.120484  | 0.121503  |
| 0.190122 | 0.173368 | 0.120921 | 0.169289  | 0.180507  | 0.180216  | 0.175699  |
| 0.142483 | 0.13884  | 0.214598 | 0.111451  | 0.134615  | 0.142191  | 0.134761  |
| 0.148601 | 0.147873 | 0.225087 | 0.124272  | 0.141608  | 0.151515  | 0.147582  |
| 0.141463 | 0.143065 | 0.218823 | 0.15676   | 0.152826  | 0.140006  | 0.140443  |
| 0.122815 | 0.118881 | 0.202506 | 0.0929487 | 0.120484  | 0.125146  | 0.118881  |
| 0.123252 | 0.114656 | 0.202652 | 0.128059  | 0.129371  | 0.122378  | 0.124272  |
| 0.214889 | 0.202797 | 0.094697 | 0.202214  | 0.214598  | 0.206731  | 0.20542   |
| 0.128642 | 0.117133 | 0.203671 | 0.126166  | 0.128059  | 0.114948  | 0.11859   |

|          |           |           |           |           |           |           |
|----------|-----------|-----------|-----------|-----------|-----------|-----------|
| 0.130245 | 0.118735  | 0.203234  | 0.130099  | 0.13141   | 0.126748  | 0.127768  |
| 0.125    | 0.128351  | 0.209062  | 0.115239  | 0.113928  | 0.121503  | 0.127185  |
| 0.176865 | 0.156323  | 0.146999  | 0.156031  | 0.174534  | 0.161422  | 0.16419   |
| 0.127622 | 0.0610431 | 0.198281  | 0.113491  | 0.120629  | 0.113636  | 0.114656  |
| 0.144085 | 0.144814  | 0.219988  | 0.155594  | 0.150204  | 0.112617  | 0.145688  |
| 0.119318 | 0.124126  | 0.203089  | 0.119755  | 0.118735  | 0.12398   | 0.115093  |
| 0.195076 | 0.185023  | 0.101399  | 0.176573  | 0.191871  | 0.186043  | 0.183858  |
| 0.127768 | 0.126457  | 0.21183   | 0.102564  | 0.120484  | 0.130682  | 0.124126  |
| 0.118735 | 0.111014  | 0.207168  | 0.115967  | 0.108829  | 0.114073  | 0.111014  |
| 0.126457 | 0.126311  | 0.207605  | 0.123106  | 0.122086  | 0.11859   | 0.125437  |
| 0.118444 | 0.12296   | 0.211538  | 0.114802  | 0.108537  | 0.119901  | 0.121212  |
| 0.131556 | 0.128205  | 0.212413  | 0.118298  | 0.0496795 | 0.121941  | 0.118298  |
| 0.128642 | 0.123834  | 0.201632  | 0.125874  | 0.125437  | 0.124272  | 0.124709  |
| 0.126748 | 0.113491  | 0.203234  | 0.120484  | 0.116259  | 0.120338  | 0.0520105 |
| 0.195659 | 0.182401  | 0.102273  | 0.178613  | 0.193619  | 0.187791  | 0.184732  |
| 0.125583 | 0.121941  | 0.207896  | 0.126603  | 0.120629  | 0.0961538 | 0.129225  |
| 0.123397 | 0.120921  | 0.200175  | 0.11859   | 0.114948  | 0.120775  | 0.113928  |
| 0.212995 | 0.202652  | 0.0939685 | 0.200903  | 0.212413  | 0.207459  | 0.205565  |
| 0.127622 | 0.123106  | 0.213724  | 0.129225  | 0.126748  | 0.121212  | 0.129808  |
| 0.125728 | 0.117424  | 0.201632  | 0.121212  | 0.116404  | 0.121941  | 0.0506993 |
| 0.125146 | 0.112179  | 0.201049  | 0.11655   | 0.112034  | 0.120775  | 0.0474942 |
| 0.13141  | 0.128934  | 0.20877   | 0.139132  | 0.143357  | 0.122086  | 0.138258  |
| 0.195221 | 0.18546   | 0.106206  | 0.180216  | 0.193182  | 0.18852   | 0.18546   |
| 0.128351 | 0.124417  | 0.215035  | 0.07838   | 0.10912   | 0.123689  | 0.129953  |
| 0.133887 | 0.124417  | 0.213578  | 0.13345   | 0.127477  | 0.0496795 | 0.134907  |
| 0.126603 | 0.118007  | 0.202797  | 0.120629  | 0.114073  | 0.118153  | 0.0454545 |
| 0.125146 | 0.113928  | 0.203963  | 0.11859   | 0.114948  | 0.117279  | 0.0553613 |
| 0.127914 | 0.11553   | 0.200903  | 0.11757   | 0.115967  | 0.119755  | 0.046183  |
| 0.12398  | 0.115093  | 0.203963  | 0.119464  | 0.122232  | 0.121941  | 0.120047  |
| 0.115676 | 0.111451  | 0.206148  | 0.112034  | 0.106643  | 0.11014   | 0.10067   |
| 0.13141  | 0.126894  | 0.214598  | 0.10067   | 0.125291  | 0.134324  | 0.126894  |
| 0.128788 | 0.13039   | 0.220425  | 0.140297  | 0.135781  | 0.112762  | 0.139423  |
| 0.129371 | 0.125728  | 0.213432  | 0.0968823 | 0.125     | 0.132284  | 0.122523  |
| 0.13447  | 0.127914  | 0.215326  | 0.131119  | 0.127768  | 0.127185  | 0.132284  |
| 0.20338  | 0.186917  | 0.10912   | 0.181381  | 0.196096  | 0.193765  | 0.189831  |
| 0.131265 | 0.114802  | 0.210373  | 0.122669  | 0.118735  | 0.0563811 | 0.12296   |
| 0.131119 | 0.124272  | 0.204983  | 0.134178  | 0.136364  | 0.131119  | 0.130682  |
| 0.126894 | 0.114802  | 0.204837  | 0.120047  | 0.112617  | 0.117861  | 0.0495338 |
| 0.114802 | 0.109703  | 0.204108  | 0.114073  | 0.105769  | 0.112471  | 0.100087  |
| 0.127622 | 0.11553   | 0.198864  | 0.111742  | 0.122086  | 0.106352  | 0.120775  |
| 0.130099 | 0.124126  | 0.210956  | 0.0743007 | 0.10912   | 0.11961   | 0.127331  |
| 0.136801 | 0.128205  | 0.206876  | 0.134324  | 0.135052  | 0.130973  | 0.129371  |
| 0.124417 | 0.124272  | 0.209062  | 0.128934  | 0.126748  | 0.11859   | 0.121941  |
| 0.120047 | 0.112617  | 0.204691  | 0.0791084 | 0.105186  | 0.120629  | 0.11553   |

|          |          |           |           |           |           |           |
|----------|----------|-----------|-----------|-----------|-----------|-----------|
| 0.114656 | 0.115093 | 0.20338   | 0.0847902 | 0.102418  | 0.114656  | 0.111888  |
| 0.118881 | 0.111742 | 0.204691  | 0.112908  | 0.112471  | 0.114802  | 0.111116  |
| 0.126311 | 0.121212 | 0.215618  | 0.0996503 | 0.103584  | 0.119027  | 0.124126  |
| 0.132867 | 0.133304 | 0.21926   | 0.106206  | 0.129662  | 0.140152  | 0.133013  |
| 0.128934 | 0.123834 | 0.214452  | 0.0810023 | 0.10912   | 0.120484  | 0.126748  |
| 0.122086 | 0.114073 | 0.198572  | 0.120484  | 0.122086  | 0.119464  | 0.11553   |
| 0.123834 | 0.11757  | 0.210519  | 0.0826049 | 0.106643  | 0.117716  | 0.123397  |
| 0.125728 | 0.117133 | 0.202214  | 0.115676  | 0.114948  | 0.119318  | 0.0553613 |
| 0.123252 | 0.120775 | 0.209645  | 0.111451  | 0.111597  | 0.118007  | 0.120192  |
| 0.127622 | 0.118444 | 0.204983  | 0.118444  | 0.116259  | 0.120629  | 0.0456002 |
| 0.124709 | 0.112908 | 0.206731  | 0.11757   | 0.110431  | 0.0515734 | 0.119027  |
| 0.126166 | 0.117861 | 0.207605  | 0.130973  | 0.126748  | 0.117424  | 0.117279  |
| 0.129953 | 0.126894 | 0.213724  | 0.118444  | 0.0533217 | 0.115385  | 0.115822  |
| 0.117279 | 0.114802 | 0.204254  | 0.113636  | 0.109994  | 0.114656  | 0.107517  |
| 0.12704  | 0.114948 | 0.202652  | 0.117279  | 0.113054  | 0.117424  | 0.0557984 |
| 0.131119 | 0.126311 | 0.196824  | 0.121358  | 0.126748  | 0.121503  | 0.124272  |
| 0.130099 | 0.124709 | 0.206876  | 0.126457  | 0.123397  | 0.124563  | 0.117424  |
| 0.124709 | 0.118153 | 0.206148  | 0.120192  | 0.115385  | 0.11655   | 0.112325  |
| 0.125291 | 0.11553  | 0.206439  | 0.11757   | 0.113345  | 0.122378  | 0.0540501 |
| 0.125437 | 0.116259 | 0.199301  | 0.125     | 0.125437  | 0.123397  | 0.124417  |
| 0.12602  | 0.122086 | 0.214452  | 0.100524  | 0.103584  | 0.119027  | 0.122086  |
| 0.122815 | 0.112471 | 0.20542   | 0.124126  | 0.127768  | 0.122815  | 0.122669  |
| 0.131556 | 0.129371 | 0.210373  | 0.11655   | 0.050845  | 0.118444  | 0.117716  |
| 0.116987 | 0.117424 | 0.209207  | 0.115967  | 0.107955  | 0.117861  | 0.104895  |
| 0.123106 | 0.109266 | 0.201049  | 0.118298  | 0.114948  | 0.100962  | 0.108974  |
| 0.125291 | 0.121066 | 0.21081   | 0.112617  | 0.111014  | 0.120047  | 0.122815  |
| 0.126894 | 0.120338 | 0.203089  | 0.12704   | 0.124272  | 0.125728  | 0.124417  |
| 0.131556 | 0.115385 | 0.208916  | 0.125874  | 0.12398   | 0.123689  | 0.133741  |
| 0.125    | 0.115239 | 0.202652  | 0.120484  | 0.120338  | 0.122378  | 0.115239  |
| 0.201049 | 0.185752 | 0.103875  | 0.183129  | 0.198427  | 0.189685  | 0.189248  |
| 0.171911 | 0.156614 | 0.143794  | 0.153118  | 0.167832  | 0.155303  | 0.165355  |
| 0.129953 | 0.124854 | 0.211976  | 0.0960082 | 0.119464  | 0.130245  | 0.124563  |
| 0.131265 | 0.116841 | 0.202797  | 0.0903263 | 0.123397  | 0.11757   | 0.123543  |
| 0.148747 | 0.150641 | 0.230186  | 0.129371  | 0.146125  | 0.155449  | 0.150932  |
| 0.129662 | 0.123689 | 0.209645  | 0.132139  | 0.128497  | 0.0981935 | 0.129516  |
| 0.128059 | 0.116259 | 0.198718  | 0.118881  | 0.124563  | 0.109411  | 0.083042  |
| 0.127622 | 0.120484 | 0.203526  | 0.116696  | 0.120921  | 0.12704   | 0.0855186 |
| 0.127622 | 0.119027 | 0.205565  | 0.122523  | 0.11859   | 0.119172  | 0.100087  |
| 0.128497 | 0.124854 | 0.208479  | 0.125146  | 0.122378  | 0.125     | 0.113491  |
| 0.209062 | 0.192599 | 0.0999417 | 0.191434  | 0.207022  | 0.197407  | 0.193765  |
| 0.128788 | 0.125728 | 0.216055  | 0.0802739 | 0.11655   | 0.125291  | 0.131556  |
| 0.127768 | 0.117133 | 0.19697   | 0.0920746 | 0.11961   | 0.119901  | 0.120921  |
| 0.122815 | 0.112179 | 0.200758  | 0.113928  | 0.113491  | 0.118735  | 0.0632284 |
| 0.131119 | 0.119027 | 0.212558  | 0.122232  | 0.119464  | 0.11859   | 0.124563  |



|          |          |          |           |           |           |           |
|----------|----------|----------|-----------|-----------|-----------|-----------|
| 0.190705 | 0.180944 | 0.128205 | 0.17162   | 0.188957  | 0.188374  | 0.177739  |
| 0.246066 | 0.238928 | 0.113054 | 0.233974  | 0.249272  | 0.241987  | 0.239802  |
| 0.126311 | 0.124417 | 0.20979  | 0.128205  | 0.128059  | 0.121649  | 0.118881  |
| 0.130682 | 0.125583 | 0.210373 | 0.12704   | 0.122815  | 0.12398   | 0.116841  |
| 0.129808 | 0.124709 | 0.210082 | 0.0964452 | 0.119027  | 0.130973  | 0.123543  |
| 0.128788 | 0.122232 | 0.212267 | 0.117861  | 0.0527389 | 0.115093  | 0.116696  |
| 0.124272 | 0.119755 | 0.212413 | 0.0815851 | 0.107663  | 0.119027  | 0.127622  |
| 0.122086 | 0.116404 | 0.2044   | 0.120192  | 0.113345  | 0.0920746 | 0.120192  |
| 0.123689 | 0.115093 | 0.194056 | 0.112762  | 0.116113  | 0.11961   | 0.0795455 |
| 0.121358 | 0.118298 | 0.211538 | 0.0757576 | 0.109411  | 0.116696  | 0.122378  |
| 0.122086 | 0.110868 | 0.194784 | 0.114656  | 0.120629  | 0.120629  | 0.0901807 |
| 0.129808 | 0.123543 | 0.210664 | 0.125291  | 0.121358  | 0.126603  | 0.113054  |
| 0.114802 | 0.11553  | 0.207896 | 0.116404  | 0.111014  | 0.115385  | 0.105332  |
| 0.12398  | 0.120921 | 0.208042 | 0.129371  | 0.128059  | 0.11961   | 0.117424  |
| 0.124709 | 0.118444 | 0.202652 | 0.125146  | 0.125583  | 0.122086  | 0.124563  |
| 0.118881 | 0.116404 | 0.199155 | 0.112034  | 0.109848  | 0.106643  | 0.112908  |
| 0.129079 | 0.129808 | 0.219551 | 0.127768  | 0.125583  | 0.132284  | 0.121066  |
| 0.136946 | 0.136218 | 0.222465 | 0.126603  | 0.0530303 | 0.125874  | 0.130099  |
| 0.124854 | 0.114802 | 0.204254 | 0.116841  | 0.11553   | 0.11757   | 0.0527389 |
| 0.125    | 0.11961  | 0.197407 | 0.0989219 | 0.120338  | 0.120921  | 0.0843531 |
| 0.134907 | 0.127768 | 0.211976 | 0.135635  | 0.125874  | 0.132284  | 0.0514277 |
| 0.215181 | 0.20134  | 0.106935 | 0.195513  | 0.212267  | 0.205857  | 0.202797  |
| 0.11859  | 0.110577 | 0.201195 | 0.117861  | 0.116841  | 0.108392  | 0.114656  |
| 0.119318 | 0.115676 | 0.210082 | 0.11655   | 0.106206  | 0.116113  | 0.104604  |
| 0.133304 | 0.116841 | 0.210664 | 0.124126  | 0.116696  | 0.0537587 | 0.12296   |
| 0.128205 | 0.126603 | 0.211976 | 0.124854  | 0.12704   | 0.119172  | 0.131265  |
| 0.130828 | 0.119027 | 0.21081  | 0.121941  | 0.113928  | 0.115967  | 0.122232  |
| 0.206585 | 0.194784 | 0.105041 | 0.188666  | 0.201632  | 0.19697   | 0.192162  |
| 0.126894 | 0.117716 | 0.20542  | 0.128205  | 0.128934  | 0.125437  | 0.126457  |
| 0.127331 | 0.114948 | 0.202943 | 0.116987  | 0.112471  | 0.11859   | 0.0528846 |
| 0.123397 | 0.123834 | 0.20979  | 0.119755  | 0.121941  | 0.128642  | 0.126748  |
| 0.124854 | 0.122669 | 0.211538 | 0.116259  | 0.0488054 | 0.115822  | 0.113636  |
| 0.126603 | 0.118298 | 0.20134  | 0.126166  | 0.127477  | 0.124563  | 0.123834  |
| 0.120775 | 0.110431 | 0.194639 | 0.115093  | 0.117279  | 0.119901  | 0.107517  |
| 0.130682 | 0.124126 | 0.212995 | 0.126748  | 0.121358  | 0.124854  | 0.117716  |
| 0.125728 | 0.124709 | 0.211247 | 0.122669  | 0.122523  | 0.114656  | 0.127331  |
| 0.202797 | 0.193328 | 0.103001 | 0.190122  | 0.200758  | 0.193765  | 0.194784  |
| 0.120192 | 0.110431 | 0.19697  | 0.11655   | 0.119901  | 0.11553   | 0.116841  |
| 0.203963 | 0.187209 | 0.106498 | 0.184003  | 0.197552  | 0.192016  | 0.187791  |
| 0.201777 | 0.186189 | 0.100233 | 0.183858  | 0.196824  | 0.190122  | 0.18852   |
| 0.133013 | 0.137238 | 0.216783 | 0.124709  | 0.0563811 | 0.125728  | 0.122378  |
| 0.133304 | 0.133159 | 0.219114 | 0.13345   | 0.133887  | 0.126311  | 0.136364  |
| 0.117861 | 0.118881 | 0.203963 | 0.116259  | 0.114948  | 0.112617  | 0.109848  |
| 0.120338 | 0.112034 | 0.200029 | 0.118153  | 0.116841  | 0.117716  | 0.113199  |

|          |           |          |           |           |          |           |
|----------|-----------|----------|-----------|-----------|----------|-----------|
| 0.123106 | 0.11451   | 0.20134  | 0.12296   | 0.12602   | 0.120484 | 0.12296   |
| 0.12602  | 0.121795  | 0.204837 | 0.118298  | 0.115239  | 0.121941 | 0.0527389 |
| 0.122815 | 0.116259  | 0.210373 | 0.0827506 | 0.107663  | 0.111742 | 0.12296   |
| 0.122815 | 0.11859   | 0.212121 | 0.0789627 | 0.106789  | 0.116404 | 0.122669  |
| 0.127914 | 0.12398   | 0.207314 | 0.133304  | 0.132284  | 0.119755 | 0.120192  |
| 0.131556 | 0.128788  | 0.211247 | 0.122669  | 0.0482226 | 0.118444 | 0.122378  |
| 0.121795 | 0.112325  | 0.201486 | 0.114656  | 0.114219  | 0.114219 | 0.0502622 |
| 0.123689 | 0.115967  | 0.202214 | 0.122378  | 0.125437  | 0.12398  | 0.121212  |
| 0.115385 | 0.106498  | 0.2044   | 0.113782  | 0.108683  | 0.113345 | 0.109411  |
| 0.130973 | 0.121503  | 0.206876 | 0.131993  | 0.133887  | 0.128351 | 0.128788  |
| 0.128351 | 0.126166  | 0.211247 | 0.0967366 | 0.119901  | 0.128934 | 0.12296   |
| 0.132284 | 0.125437  | 0.209645 | 0.136509  | 0.13549   | 0.134907 | 0.133596  |
| 0.259033 | 0.251894  | 0.109703 | 0.247232  | 0.263112  | 0.255245 | 0.254808  |
| 0.133159 | 0.135052  | 0.2213   | 0.127768  | 0.123252  | 0.130245 | 0.133887  |
| 0.128642 | 0.133741  | 0.211538 | 0.126457  | 0.121941  | 0.125437 | 0.12704   |
| 0.225524 | 0.209062  | 0.104167 | 0.209353  | 0.222902  | 0.213578 | 0.21081   |
| 0.129808 | 0.128497  | 0.212121 | 0.132576  | 0.121358  | 0.12602  | 0.125291  |
| 0.232663 | 0.222319  | 0.103438 | 0.222028  | 0.233829  | 0.225087 | 0.224359  |
| 0.124417 | 0.128059  | 0.216055 | 0.120484  | 0.116259  | 0.124417 | 0.128351  |
| 0.133887 | 0.126457  | 0.210956 | 0.132284  | 0.125437  | 0.133304 | 0.0486597 |
| 0.125146 | 0.121795  | 0.209207 | 0.120047  | 0.120484  | 0.111742 | 0.124126  |
| 0.133596 | 0.129953  | 0.213578 | 0.125583  | 0.0511364 | 0.123689 | 0.122669  |
| 0.210227 | 0.197261  | 0.102564 | 0.192599  | 0.206439  | 0.198281 | 0.197844  |
| 0.133013 | 0.121503  | 0.208042 | 0.136946  | 0.134761  | 0.133304 | 0.128788  |
| 0.129225 | 0.119464  | 0.202797 | 0.125     | 0.127185  | 0.127477 | 0.121795  |
| 0.229312 | 0.220134  | 0.110286 | 0.21285   | 0.229312  | 0.221445 | 0.219843  |
| 0.129225 | 0.120338  | 0.210664 | 0.0824592 | 0.112034  | 0.121649 | 0.125874  |
| 0.204254 | 0.189831  | 0.102127 | 0.190705  | 0.200466  | 0.195513 | 0.195659  |
| 0.12704  | 0.120192  | 0.21285  | 0.0808566 | 0.109848  | 0.122086 | 0.128059  |
| 0.126166 | 0.118735  | 0.206439 | 0.120775  | 0.117716  | 0.123834 | 0.0528846 |
| 0.11961  | 0.120047  | 0.212995 | 0.124126  | 0.120192  | 0.123689 | 0.11014   |
| 0.135635 | 0.137238  | 0.218823 | 0.126748  | 0.0543415 | 0.125146 | 0.124709  |
| 0.13345  | 0.0613345 | 0.203817 | 0.114365  | 0.122378  | 0.111014 | 0.120192  |
| 0.168415 | 0.159819  | 0.13884  | 0.146416  | 0.164918  | 0.161131 | 0.1537    |
| 0.120338 | 0.112034  | 0.198864 | 0.121941  | 0.123543  | 0.118007 | 0.119318  |
| 0.12704  | 0.125146  | 0.211976 | 0.125146  | 0.124709  | 0.119755 | 0.129808  |
| 0.13549  | 0.124854  | 0.207896 | 0.11961   | 0.116841  | 0.126748 | 0.11961   |
| 0.130536 | 0.130099  | 0.208479 | 0.129808  | 0.13141   | 0.122086 | 0.130973  |
| 0.203817 | 0.187354  | 0.102273 | 0.187063  | 0.199738  | 0.194493 | 0.189394  |
| 0.122669 | 0.113782  | 0.202069 | 0.116987  | 0.113928  | 0.121503 | 0.0520105 |
| 0.133013 | 0.131702  | 0.202797 | 0.117424  | 0.0590035 | 0.123106 | 0.120047  |
| 0.125    | 0.119027  | 0.215472 | 0.102418  | 0.106352  | 0.119755 | 0.122523  |
| 0.12602  | 0.122086  | 0.214161 | 0.0769231 | 0.11116   | 0.117861 | 0.126457  |
| 0.126748 | 0.120775  | 0.203817 | 0.124272  | 0.119172  | 0.121212 | 0.0453089 |

|          |          |          |           |           |          |           |
|----------|----------|----------|-----------|-----------|----------|-----------|
| 0.257139 | 0.245921 | 0.111305 | 0.245921  | 0.259178  | 0.251894 | 0.24796   |
| 0.113054 | 0.119027 | 0.20877  | 0.120484  | 0.111888  | 0.119172 | 0.10912   |
| 0.126166 | 0.116113 | 0.2044   | 0.119901  | 0.11655   | 0.07838  | 0.100087  |
| 0.186772 | 0.173805 | 0.146125 | 0.168852  | 0.183275  | 0.175117 | 0.17905   |
| 0.192599 | 0.184003 | 0.109411 | 0.176136  | 0.189103  | 0.183566 | 0.181964  |
| 0.127331 | 0.121358 | 0.207605 | 0.129808  | 0.127331  | 0.119172 | 0.11961   |
| 0.124563 | 0.116841 | 0.204545 | 0.124126  | 0.121941  | 0.124854 | 0.121212  |
| 0.127477 | 0.125291 | 0.210956 | 0.115676  | 0.050845  | 0.116696 | 0.117424  |
| 0.141026 | 0.139423 | 0.211393 | 0.147873  | 0.14831   | 0.144522 | 0.142337  |
| 0.126166 | 0.121358 | 0.207896 | 0.125437  | 0.124126  | 0.118007 | 0.118444  |
| 0.128934 | 0.121503 | 0.211247 | 0.131993  | 0.130973  | 0.121358 | 0.122086  |
| 0.131119 | 0.126603 | 0.214889 | 0.0750291 | 0.115385  | 0.121795 | 0.130682  |
| 0.121795 | 0.109994 | 0.19799  | 0.122232  | 0.124417  | 0.122669 | 0.118153  |
| 0.127768 | 0.118298 | 0.204545 | 0.134033  | 0.133304  | 0.129225 | 0.131702  |
| 0.132284 | 0.124854 | 0.196824 | 0.0744464 | 0.112179  | 0.122086 | 0.122815  |
| 0.133887 | 0.132576 | 0.216783 | 0.125583  | 0.0540501 | 0.122232 | 0.12296   |
| 0.142191 | 0.144959 | 0.228001 | 0.135344  | 0.0646853 | 0.135198 | 0.13447   |
| 0.123106 | 0.120921 | 0.212121 | 0.123834  | 0.116696  | 0.125146 | 0.109848  |
| 0.137821 | 0.136801 | 0.223339 | 0.125437  | 0.0536131 | 0.128788 | 0.127477  |
| 0.132576 | 0.127185 | 0.220134 | 0.0814394 | 0.11859   | 0.12704  | 0.135635  |
| 0.215181 | 0.200758 | 0.103147 | 0.196096  | 0.211101  | 0.206148 | 0.199883  |
| 0.129079 | 0.124272 | 0.214598 | 0.122815  | 0.123834  | 0.131119 | 0.112908  |
| 0.197844 | 0.187791 | 0.109994 | 0.181964  | 0.19493   | 0.191725 | 0.186626  |
| 0.126748 | 0.12398  | 0.207314 | 0.121649  | 0.118881  | 0.111597 | 0.123106  |
| 0.131993 | 0.124854 | 0.204691 | 0.129516  | 0.124417  | 0.129371 | 0.0496795 |
| 0.129371 | 0.122815 | 0.209062 | 0.0989219 | 0.123834  | 0.130828 | 0.123689  |
| 0.125728 | 0.122669 | 0.205711 | 0.097028  | 0.118444  | 0.128351 | 0.116841  |
| 0.127622 | 0.114073 | 0.197698 | 0.128351  | 0.126166  | 0.123834 | 0.123106  |
| 0.126166 | 0.116696 | 0.202652 | 0.124272  | 0.127622  | 0.124709 | 0.123689  |
| 0.128788 | 0.118153 | 0.201195 | 0.118153  | 0.116841  | 0.121795 | 0.0523019 |
| 0.125728 | 0.124709 | 0.209207 | 0.124126  | 0.127768  | 0.117279 | 0.125583  |
| 0.133013 | 0.125583 | 0.213578 | 0.100524  | 0.126603  | 0.132721 | 0.126457  |
| 0.13549  | 0.134178 | 0.209353 | 0.081148  | 0.120921  | 0.13141  | 0.139714  |
| 0.253205 | 0.243735 | 0.104167 | 0.242279  | 0.254662  | 0.245047 | 0.246066  |
| 0.129953 | 0.120775 | 0.204691 | 0.121066  | 0.116841  | 0.124126 | 0.0520105 |
| 0.191288 | 0.180944 | 0.104895 | 0.175117  | 0.186043  | 0.17905  | 0.178904  |
| 0.197552 | 0.182838 | 0.105041 | 0.18109   | 0.189977  | 0.188228 | 0.185169  |
| 0.126311 | 0.123834 | 0.201632 | 0.122669  | 0.125146  | 0.12398  | 0.121212  |
| 0.120484 | 0.114219 | 0.207751 | 0.115385  | 0.112325  | 0.117861 | 0.10373   |
| 0.129808 | 0.119755 | 0.207751 | 0.129371  | 0.124563  | 0.129225 | 0.0472028 |
| 0.119901 | 0.113054 | 0.200175 | 0.119755  | 0.123689  | 0.120484 | 0.118881  |
| 0.123543 | 0.119318 | 0.19595  | 0.114656  | 0.117424  | 0.121212 | 0.103875  |
| 0.126166 | 0.121358 | 0.211684 | 0.0782343 | 0.11014   | 0.117133 | 0.127185  |
| 0.124272 | 0.121795 | 0.199301 | 0.122086  | 0.128059  | 0.121941 | 0.12296   |

|          |           |          |           |           |           |           |
|----------|-----------|----------|-----------|-----------|-----------|-----------|
| 0.131847 | 0.123543  | 0.210664 | 0.138403  | 0.136509  | 0.133304  | 0.133741  |
| 0.127331 | 0.114948  | 0.202943 | 0.119901  | 0.115967  | 0.119755  | 0.0482226 |
| 0.129953 | 0.121941  | 0.209645 | 0.13243   | 0.135781  | 0.131993  | 0.126894  |
| 0.129516 | 0.125     | 0.208042 | 0.118298  | 0.110577  | 0.118444  | 0.123834  |
| 0.133304 | 0.129371  | 0.217075 | 0.102855  | 0.126894  | 0.130682  | 0.12704   |
| 0.130245 | 0.131265  | 0.211101 | 0.118735  | 0.0550699 | 0.120338  | 0.122523  |
| 0.132139 | 0.133159  | 0.219697 | 0.0836247 | 0.119901  | 0.128351  | 0.136946  |
| 0.132867 | 0.125437  | 0.211101 | 0.128351  | 0.12704   | 0.128788  | 0.115822  |
| 0.123834 | 0.114656  | 0.197407 | 0.111451  | 0.116259  | 0.117716  | 0.0517191 |
| 0.134615 | 0.126603  | 0.214889 | 0.136801  | 0.129953  | 0.0521562 | 0.135927  |
| 0.194784 | 0.182401  | 0.104312 | 0.173077  | 0.188666  | 0.18109   | 0.182692  |
| 0.13345  | 0.129225  | 0.210227 | 0.142337  | 0.136946  | 0.132576  | 0.133596  |
| 0.125291 | 0.113491  | 0.201486 | 0.124563  | 0.127331  | 0.122086  | 0.12398   |
| 0.128351 | 0.123252  | 0.21183  | 0.0973193 | 0.118735  | 0.129808  | 0.124126  |
| 0.120047 | 0.116696  | 0.206439 | 0.0919289 | 0.11451   | 0.125291  | 0.114365  |
| 0.13039  | 0.128788  | 0.211247 | 0.117716  | 0.050845  | 0.116696  | 0.118881  |
| 0.134033 | 0.128642  | 0.214015 | 0.118735  | 0.04662   | 0.121503  | 0.124272  |
| 0.199446 | 0.188228  | 0.110723 | 0.18007   | 0.193619  | 0.188666  | 0.186189  |
| 0.128351 | 0.11655   | 0.19289  | 0.114802  | 0.123397  | 0.120484  | 0.121212  |
| 0.117424 | 0.114656  | 0.182838 | 0.105332  | 0.115093  | 0.108683  | 0.113491  |
| 0.127331 | 0.116113  | 0.203234 | 0.129808  | 0.132576  | 0.126457  | 0.12602   |
| 0.197698 | 0.183275  | 0.105186 | 0.182401  | 0.197698  | 0.192745  | 0.185315  |
| 0.121503 | 0.112908  | 0.203234 | 0.114365  | 0.108392  | 0.115967  | 0.105915  |
| 0.130973 | 0.125583  | 0.216783 | 0.0766317 | 0.114073  | 0.120192  | 0.133159  |
| 0.126894 | 0.117716  | 0.203671 | 0.126457  | 0.130099  | 0.124272  | 0.125     |
| 0.120047 | 0.115822  | 0.209062 | 0.126311  | 0.120921  | 0.111014  | 0.114656  |
| 0.195804 | 0.179341  | 0.107372 | 0.18109   | 0.192308  | 0.18648   | 0.181964  |
| 0.127331 | 0.121358  | 0.209353 | 0.0750291 | 0.114219  | 0.118298  | 0.128059  |
| 0.122086 | 0.114073  | 0.200612 | 0.113491  | 0.112762  | 0.0574009 | 0.118444  |
| 0.117716 | 0.115822  | 0.196824 | 0.109411  | 0.111305  | 0.115967  | 0.109703  |
| 0.136946 | 0.0887238 | 0.186334 | 0.105624  | 0.127331  | 0.119755  | 0.126603  |
| 0.12398  | 0.123543  | 0.211538 | 0.125     | 0.125146  | 0.118735  | 0.129079  |
| 0.130682 | 0.129371  | 0.219114 | 0.0824592 | 0.11757   | 0.124854  | 0.13345   |
| 0.12602  | 0.114219  | 0.204545 | 0.120629  | 0.112908  | 0.120484  | 0.0474942 |
| 0.119027 | 0.127331  | 0.214744 | 0.127914  | 0.126894  | 0.128059  | 0.130536  |
| 0.140152 | 0.14292   | 0.218677 | 0.1537    | 0.151515  | 0.138695  | 0.139132  |
| 0.238636 | 0.22567   | 0.101836 | 0.225087  | 0.238054  | 0.231643  | 0.230915  |
| 0.13549  | 0.128642  | 0.214889 | 0.133596  | 0.131702  | 0.13141   | 0.122232  |
| 0.129953 | 0.12602   | 0.212558 | 0.125146  | 0.12704   | 0.11655   | 0.129516  |
| 0.125437 | 0.112471  | 0.197261 | 0.113636  | 0.121066  | 0.114365  | 0.120338  |
| 0.128497 | 0.128351  | 0.201195 | 0.128059  | 0.129371  | 0.127914  | 0.126603  |
| 0.120775 | 0.116259  | 0.205128 | 0.100816  | 0.120484  | 0.116696  | 0.121212  |
| 0.126894 | 0.11859   | 0.206876 | 0.120338  | 0.118735  | 0.116987  | 0.124417  |
| 0.129079 | 0.114656  | 0.202652 | 0.123689  | 0.131993  | 0.127331  | 0.122232  |

|          |          |           |           |          |          |           |
|----------|----------|-----------|-----------|----------|----------|-----------|
| 0.130682 | 0.128205 | 0.213578  | 0.0743007 | 0.11757  | 0.127477 | 0.132284  |
| 0.12602  | 0.12296  | 0.206585  | 0.120629  | 0.122232 | 0.121066 | 0.121795  |
| 0.241259 | 0.230041 | 0.105041  | 0.223339  | 0.23951  | 0.234557 | 0.230041  |
| 0.116696 | 0.111597 | 0.202506  | 0.112762  | 0.107955 | 0.112617 | 0.104604  |
| 0.11961  | 0.118007 | 0.209499  | 0.110723  | 0.108246 | 0.114948 | 0.121795  |
| 0.12704  | 0.112325 | 0.201486  | 0.11757   | 0.11451  | 0.120629 | 0.0426865 |
| 0.135635 | 0.128497 | 0.214452  | 0.1419    | 0.140589 | 0.124272 | 0.125874  |
| 0.138258 | 0.136655 | 0.219406  | 0.138986  | 0.138258 | 0.137675 | 0.122669  |
| 0.126603 | 0.1081   | 0.195804  | 0.124709  | 0.132139 | 0.125437 | 0.112762  |
| 0.125146 | 0.119172 | 0.199883  | 0.124417  | 0.126894 | 0.121941 | 0.120921  |
| 0.122086 | 0.116404 | 0.202943  | 0.121358  | 0.118881 | 0.112179 | 0.111116  |
| 0.231643 | 0.223339 | 0.100087  | 0.222174  | 0.233683 | 0.226107 | 0.223631  |
| 0.128497 | 0.116696 | 0.202652  | 0.130973  | 0.133741 | 0.125874 | 0.125437  |
| 0.129225 | 0.126748 | 0.215326  | 0.076049  | 0.112034 | 0.121358 | 0.130245  |
| 0.124854 | 0.121503 | 0.208042  | 0.118007  | 0.113782 | 0.115822 | 0.115967  |
| 0.129079 | 0.122232 | 0.210519  | 0.127768  | 0.125583 | 0.121795 | 0.124854  |
| 0.127914 | 0.131265 | 0.217512  | 0.122523  | 0.120629 | 0.126748 | 0.129808  |
| 0.124126 | 0.116113 | 0.2044    | 0.122232  | 0.115967 | 0.122378 | 0.0447261 |
| 0.129079 | 0.12602  | 0.213432  | 0.0796911 | 0.115967 | 0.125583 | 0.129516  |
| 0.131265 | 0.130536 | 0.220862  | 0.0827506 | 0.120192 | 0.128934 | 0.136072  |
| 0.12398  | 0.120338 | 0.213578  | 0.0751748 | 0.108829 | 0.120192 | 0.126457  |
| 0.125874 | 0.115822 | 0.204983  | 0.122815  | 0.113345 | 0.119172 | 0.0511364 |
| 0.130245 | 0.13039  | 0.215472  | 0.131556  | 0.130536 | 0.122669 | 0.135052  |
| 0.132139 | 0.13345  | 0.219988  | 0.136364  | 0.135344 | 0.126311 | 0.135781  |
| 0.131556 | 0.129662 | 0.21824   | 0.107809  | 0.128642 | 0.135635 | 0.130245  |
| 0.135927 | 0.134907 | 0.218531  | 0.109557  | 0.128934 | 0.140297 | 0.133741  |
| 0.131702 | 0.130682 | 0.218969  | 0.133013  | 0.13345  | 0.126457 | 0.134761  |
| 0.125874 | 0.112908 | 0.207314  | 0.116696  | 0.115385 | 0.117424 | 0.0971737 |
| 0.134178 | 0.138403 | 0.227564  | 0.114219  | 0.117279 | 0.131556 | 0.13986   |
| 0.142774 | 0.135344 | 0.2213    | 0.127477  | 0.135781 | 0.132284 | 0.125728  |
| 0.213287 | 0.199155 | 0.0910548 | 0.194202  | 0.20979  | 0.203089 | 0.200612  |
| 0.129079 | 0.130682 | 0.208188  | 0.128934  | 0.128497 | 0.131993 | 0.119318  |
| 0.124417 | 0.121941 | 0.214015  | 0.112617  | 0.112179 | 0.120338 | 0.12398   |
| 0.13039  | 0.120338 | 0.198718  | 0.121503  | 0.121649 | 0.125437 | 0.0448718 |
| 0.22669  | 0.217803 | 0.10271   | 0.214889  | 0.227273 | 0.220571 | 0.219551  |
| 0.215326 | 0.208479 | 0.112034  | 0.200612  | 0.217366 | 0.213287 | 0.204691  |
| 0.130973 | 0.126457 | 0.217366  | 0.0792541 | 0.117861 | 0.127185 | 0.135781  |
| 0.254079 | 0.238782 | 0.110286  | 0.239948  | 0.253497 | 0.246795 | 0.244318  |
| 0.123834 | 0.115822 | 0.206439  | 0.117861  | 0.114802 | 0.118298 | 0.0968823 |
| 0.136655 | 0.135344 | 0.2213    | 0.140297  | 0.140734 | 0.135198 | 0.128351  |
| 0.117424 | 0.117279 | 0.207605  | 0.115822  | 0.113345 | 0.117424 | 0.106789  |
| 0.129516 | 0.127331 | 0.214744  | 0.129662  | 0.130973 | 0.123689 | 0.131119  |
| 0.193473 | 0.184295 | 0.0992133 | 0.179633  | 0.193765 | 0.187063 | 0.183129  |
| 0.125728 | 0.132284 | 0.207168  | 0.126748  | 0.121358 | 0.120775 | 0.121795  |

|          |           |          |           |           |           |           |
|----------|-----------|----------|-----------|-----------|-----------|-----------|
| 0.202943 | 0.18852   | 0.108392 | 0.182401  | 0.201195  | 0.193328  | 0.186772  |
| 0.124854 | 0.121212  | 0.209207 | 0.125874  | 0.12398   | 0.12398   | 0.116259  |
| 0.13039  | 0.118007  | 0.193765 | 0.0745921 | 0.11961   | 0.120484  | 0.122378  |
| 0.131556 | 0.121212  | 0.206876 | 0.125291  | 0.127768  | 0.123689  | 0.122086  |
| 0.126894 | 0.0641026 | 0.192599 | 0.110723  | 0.125146  | 0.111451  | 0.113636  |
| 0.119464 | 0.110868  | 0.199446 | 0.115239  | 0.111305  | 0.116841  | 0.050845  |
| 0.125291 | 0.121649  | 0.205565 | 0.121649  | 0.118881  | 0.121212  | 0.11116   |
| 0.115385 | 0.110577  | 0.200903 | 0.112034  | 0.106061  | 0.115967  | 0.10067   |
| 0.120775 | 0.113054  | 0.20134  | 0.121212  | 0.122232  | 0.122232  | 0.117424  |
| 0.126457 | 0.122523  | 0.215472 | 0.102127  | 0.111014  | 0.121795  | 0.125437  |
| 0.129953 | 0.11961   | 0.207605 | 0.123106  | 0.119755  | 0.120338  | 0.112325  |
| 0.116404 | 0.113345  | 0.20542  | 0.114802  | 0.111451  | 0.116987  | 0.103438  |
| 0.126166 | 0.122815  | 0.205565 | 0.0971737 | 0.122378  | 0.129079  | 0.107955  |
| 0.129371 | 0.123397  | 0.207896 | 0.133887  | 0.13141   | 0.129953  | 0.134761  |
| 0.123397 | 0.120338  | 0.204545 | 0.0938228 | 0.117279  | 0.127477  | 0.119172  |
| 0.124709 | 0.113199  | 0.205857 | 0.114656  | 0.110431  | 0.0524476 | 0.117861  |
| 0.121941 | 0.110431  | 0.20134  | 0.115385  | 0.112617  | 0.113491  | 0.0480769 |
| 0.127768 | 0.123252  | 0.204545 | 0.0737179 | 0.112325  | 0.118735  | 0.126166  |
| 0.128934 | 0.126457  | 0.210664 | 0.124709  | 0.125146  | 0.11553   | 0.126166  |
| 0.129079 | 0.129808  | 0.214015 | 0.119027  | 0.0506993 | 0.12296   | 0.119901  |
| 0.128497 | 0.123106  | 0.210519 | 0.0939685 | 0.119464  | 0.127622  | 0.123397  |
| 0.126894 | 0.115967  | 0.199883 | 0.122378  | 0.125437  | 0.12398   | 0.12296   |
| 0.131702 | 0.123397  | 0.20877  | 0.133596  | 0.134324  | 0.132284  | 0.133304  |
| 0.134615 | 0.131265  | 0.214015 | 0.142628  | 0.141608  | 0.136655  | 0.137675  |
| 0.118153 | 0.115093  | 0.205128 | 0.0804196 | 0.103584  | 0.109994  | 0.113345  |
| 0.125728 | 0.116841  | 0.20338  | 0.119755  | 0.117279  | 0.120775  | 0.0506993 |
| 0.120629 | 0.115822  | 0.20236  | 0.114656  | 0.112762  | 0.11451   | 0.119901  |
| 0.13141  | 0.134178  | 0.2213   | 0.135927  | 0.134615  | 0.128788  | 0.139714  |
| 0.116696 | 0.118007  | 0.20979  | 0.119464  | 0.114656  | 0.119901  | 0.108974  |
| 0.14292  | 0.147727  | 0.226107 | 0.133741  | 0.0639569 | 0.136218  | 0.133741  |
| 0.137966 | 0.134033  | 0.212704 | 0.141026  | 0.129516  | 0.137675  | 0.0533217 |
| 0.126457 | 0.12602   | 0.209936 | 0.135344  | 0.134324  | 0.123252  | 0.11961   |
| 0.125437 | 0.113636  | 0.206294 | 0.118298  | 0.119318  | 0.120484  | 0.111014  |
| 0.123834 | 0.122232  | 0.207314 | 0.122232  | 0.119464  | 0.111014  | 0.118444  |
| 0.133741 | 0.131556  | 0.216055 | 0.105624  | 0.124126  | 0.136946  | 0.129808  |
| 0.214307 | 0.201923  | 0.115967 | 0.195804  | 0.212558  | 0.210519  | 0.203671  |
| 0.127185 | 0.114219  | 0.20134  | 0.115967  | 0.112908  | 0.0540501 | 0.119755  |
| 0.135781 | 0.119901  | 0.20877  | 0.125146  | 0.125     | 0.121795  | 0.117861  |
| 0.123397 | 0.122086  | 0.212413 | 0.122669  | 0.124272  | 0.116987  | 0.128788  |
| 0.127331 | 0.12398   | 0.207896 | 0.0957168 | 0.121503  | 0.127622  | 0.120775  |
| 0.13039  | 0.125291  | 0.20979  | 0.127331  | 0.125146  | 0.127477  | 0.119755  |
| 0.135052 | 0.113636  | 0.208916 | 0.126457  | 0.124272  | 0.123397  | 0.128205  |
| 0.131702 | 0.120192  | 0.213432 | 0.127768  | 0.125291  | 0.122669  | 0.132139  |
| 0.125728 | 0.118881  | 0.206876 | 0.129079  | 0.130099  | 0.117861  | 0.121212  |

|          |          |          |          |          |          |          |
|----------|----------|----------|----------|----------|----------|----------|
| 0.119901 | 0.119464 | 0.212121 | 0.099359 | 0.104167 | 0.117861 | 0.12296  |
| 0.128059 | 0.129371 | 0.216783 | 0.133159 | 0.130682 | 0.125728 | 0.131702 |
| 0.129225 | 0.119172 | 0.209207 | 0.120629 | 0.120484 | 0.118153 | 0.117133 |
| 0.131119 | 0.127477 | 0.211684 | 0.131265 | 0.123252 | 0.125874 | 0.116987 |
| 0.184878 | 0.172494 | 0.182692 | 0.166667 | 0.181964 | 0.18109  | 0.173951 |
| 0.126603 | 0.11859  | 0.201923 | 0.125583 | 0.126311 | 0.124563 | 0.121212 |
| 0.130828 | 0.130099 | 0.204108 | 0.127477 | 0.130828 | 0.125    | 0.13243  |
| 0.133596 | 0.126166 | 0.220571 | 0.120047 | 0.121941 | 0.124854 | 0.115676 |
| 0.132867 | 0.127768 | 0.209062 | 0.110577 | 0.132284 | 0.131993 | 0.12398  |
| 0.120921 | 0.108829 | 0.207022 | 0.116696 | 0.111597 | 0.110723 | 0.110286 |
| 0.122086 | 0.113782 | 0.201777 | 0.116113 | 0.115967 | 0.117133 | 0.109994 |
| 0.122378 | 0.113782 | 0.211101 | 0.121358 | 0.115093 | 0.112471 | 0.113782 |
| 0.129662 | 0.129516 | 0.213141 | 0.114656 | 0.124126 | 0.129079 | 0.125146 |
| 0.125291 | 0.121358 | 0.19799  | 0.118735 | 0.120921 | 0.121212 | 0.115822 |
| 0.137092 | 0.133741 | 0.219114 | 0.130245 | 0.127477 | 0.130682 | 0.125291 |
| 0.124417 | 0.116696 | 0.206439 | 0.108537 | 0.113928 | 0.121503 | 0.116404 |
| 0.128059 | 0.123252 | 0.20979  | 0.11655  | 0.115822 | 0.124563 | 0.123252 |
| 0.132576 | 0.137092 | 0.223922 | 0.11757  | 0.131119 | 0.126748 | 0.129808 |
| 0.13345  | 0.124854 | 0.214889 | 0.115822 | 0.114802 | 0.11859  | 0.113491 |
| 0.129953 | 0.121649 | 0.211101 | 0.119901 | 0.119755 | 0.126748 | 0.121941 |
| 0.126166 | 0.124563 | 0.213141 | 0.113491 | 0.109557 | 0.119464 | 0.111742 |
| 0.126748 | 0.125437 | 0.213141 | 0.11757  | 0.114802 | 0.119464 | 0.114948 |
| 0.123252 | 0.117279 | 0.206148 | 0.115239 | 0.11014  | 0.111888 | 0.103875 |
| 0.128351 | 0.129371 | 0.219406 | 0.121212 | 0.116404 | 0.128934 | 0.113345 |
| 0.127477 | 0.117424 | 0.210956 | 0.113345 | 0.104167 | 0.117861 | 0.109848 |
| 0.146125 | 0.145396 | 0.22028  | 0.119464 | 0.136801 | 0.141463 | 0.142191 |
| 0.140589 | 0.127331 | 0.211538 | 0.11014  | 0.128934 | 0.131847 | 0.13345  |
| 0.125728 | 0.114219 | 0.212121 | 0.110723 | 0.105624 | 0.116696 | 0.113928 |
| 0.134324 | 0.142045 | 0.226544 | 0.122232 | 0.129662 | 0.136655 | 0.144668 |
| 0.136655 | 0.120775 | 0.206731 | 0.117279 | 0.128205 | 0.129371 | 0.120775 |
| 0.134324 | 0.139132 | 0.218677 | 0.125437 | 0.141026 | 0.135198 | 0.13243  |
| 0.123252 | 0.120484 | 0.212267 | 0.11961  | 0.102855 | 0.124126 | 0.110286 |
| 0.142628 | 0.144522 | 0.222611 | 0.144231 | 0.145833 | 0.146125 | 0.139569 |
| 0.130682 | 0.13141  | 0.207751 | 0.130536 | 0.128059 | 0.12602  | 0.13141  |
| 0.138549 | 0.139277 | 0.218823 | 0.117716 | 0.132721 | 0.133887 | 0.13986  |
| 0.137092 | 0.122378 | 0.219697 | 0.114802 | 0.12398  | 0.128059 | 0.122669 |
| 0.128788 | 0.121066 | 0.21285  | 0.107372 | 0.111305 | 0.120047 | 0.110577 |
| 0.125146 | 0.123252 | 0.211538 | 0.111014 | 0.111742 | 0.117861 | 0.112762 |
| 0.124126 | 0.123689 | 0.209353 | 0.114073 | 0.119172 | 0.119464 | 0.125146 |
| 0.130245 | 0.126894 | 0.218969 | 0.122815 | 0.113636 | 0.124417 | 0.11553  |
| 0.132721 | 0.13345  | 0.221737 | 0.131119 | 0.125437 | 0.130682 | 0.121212 |
| 0.138549 | 0.126166 | 0.210373 | 0.106352 | 0.121649 | 0.130099 | 0.120921 |
| 0.119027 | 0.114802 | 0.210664 | 0.104312 | 0.110286 | 0.113199 | 0.116841 |
| 0.124417 | 0.121358 | 0.210519 | 0.113782 | 0.112179 | 0.11655  | 0.112908 |

|          |          |          |          |          |          |           |
|----------|----------|----------|----------|----------|----------|-----------|
| 0.125728 | 0.120047 | 0.210956 | 0.118298 | 0.12602  | 0.123106 | 0.11451   |
| 0.124563 | 0.120921 | 0.208916 | 0.107226 | 0.114365 | 0.117861 | 0.110723  |
| 0.127914 | 0.130682 | 0.217512 | 0.113782 | 0.118881 | 0.124709 | 0.118735  |
| 0.129662 | 0.121358 | 0.209353 | 0.120775 | 0.106935 | 0.127622 | 0.108829  |
| 0.124272 | 0.104895 | 0.19493  | 0.124417 | 0.129808 | 0.12398  | 0.11014   |
| 0.129225 | 0.120047 | 0.211538 | 0.12296  | 0.122523 | 0.120484 | 0.108683  |
| 0.124563 | 0.111888 | 0.205711 | 0.117716 | 0.116696 | 0.116696 | 0.0941142 |
| 0.119901 | 0.112471 | 0.208625 | 0.114219 | 0.120775 | 0.120775 | 0.109557  |
| 0.124709 | 0.108537 | 0.194202 | 0.119027 | 0.128497 | 0.120047 | 0.110868  |
| 0.13039  | 0.115967 | 0.210082 | 0.120047 | 0.119027 | 0.123106 | 0.113345  |
| 0.13447  | 0.117133 | 0.202214 | 0.125291 | 0.123689 | 0.117861 | 0.130245  |
| 0.116987 | 0.104895 | 0.19289  | 0.113928 | 0.119027 | 0.115239 | 0.105186  |
| 0.141317 | 0.127768 | 0.21722  | 0.127477 | 0.132284 | 0.132576 | 0.129225  |



| TDr_1631 | TDr_1649  | TDr_1650  | TDr_1655 | TDr_1657  | TDr_1663  | TDr_1667 |
|----------|-----------|-----------|----------|-----------|-----------|----------|
| 0.23514  | 0.0863928 | 0.116987  | 0.131847 | 0.126894  | 0.0901807 | 0.103875 |
| 0.23412  | 0.115967  | 0.117716  | 0.120629 | 0.117716  | 0.118298  | 0.112762 |
| 0.233246 | 0.113345  | 0.112471  | 0.119172 | 0.115967  | 0.118298  | 0.110431 |
| 0.242861 | 0.123252  | 0.113054  | 0.120047 | 0.115385  | 0.122086  | 0.115385 |
| 0.253642 | 0.138112  | 0.132284  | 0.131702 | 0.131993  | 0.142774  | 0.144522 |
| 0.245775 | 0.117424  | 0.129953  | 0.133741 | 0.130828  | 0.117133  | 0.126457 |
| 0.250583 | 0.107955  | 0.113491  | 0.130099 | 0.128351  | 0.110577  | 0.124563 |
| 0.238345 | 0.116987  | 0.116696  | 0.119901 | 0.116987  | 0.118153  | 0.119318 |
| 0.242279 | 0.116259  | 0.106935  | 0.115676 | 0.112471  | 0.119172  | 0.111888 |
| 0.244464 | 0.108246  | 0.117861  | 0.12398  | 0.121941  | 0.109411  | 0.116404 |
| 0.235577 | 0.11859   | 0.113928  | 0.129953 | 0.124709  | 0.11655   | 0.106352 |
| 0.243881 | 0.122815  | 0.105041  | 0.111742 | 0.108537  | 0.123689  | 0.116113 |
| 0.247086 | 0.120775  | 0.108246  | 0.124272 | 0.120775  | 0.121649  | 0.116113 |
| 0.205565 | 0.144522  | 0.137238  | 0.146853 | 0.13986   | 0.135781  | 0.113928 |
| 0.245047 | 0.132139  | 0.129516  | 0.136218 | 0.132721  | 0.112034  | 0.116987 |
| 0.246941 | 0.122086  | 0.105186  | 0.134324 | 0.129079  | 0.118298  | 0.119755 |
| 0.248834 | 0.125146  | 0.0980478 | 0.099796 | 0.0995047 | 0.125146  | 0.119318 |
| 0.253934 | 0.150932  | 0.148601  | 0.138695 | 0.136946  | 0.150058  | 0.152389 |
| 0.234411 | 0.112179  | 0.109848  | 0.118007 | 0.113928  | 0.117424  | 0.110431 |
| 0.141754 | 0.206294  | 0.206876  | 0.208042 | 0.203963  | 0.184732  | 0.169289 |
| 0.251166 | 0.106789  | 0.121941  | 0.126311 | 0.122232  | 0.112617  | 0.13039  |
| 0.25102  | 0.0984848 | 0.123252  | 0.118881 | 0.117424  | 0.106352  | 0.128205 |
| 0.24155  | 0.120775  | 0.0875583 | 0.117861 | 0.117861  | 0.114073  | 0.114073 |
| 0.255099 | 0.125     | 0.102273  | 0.127914 | 0.125874  | 0.124709  | 0.132867 |
| 0.240967 | 0.107663  | 0.103001  | 0.11757  | 0.112617  | 0.109994  | 0.113199 |
| 0.249709 | 0.10912   | 0.130682  | 0.133013 | 0.129225  | 0.113782  | 0.133013 |
| 0.25     | 0.121066  | 0.116113  | 0.12398  | 0.124854  | 0.125146  | 0.134178 |
| 0.25845  | 0.127185  | 0.103001  | 0.118735 | 0.119027  | 0.129808  | 0.122815 |
| 0.250583 | 0.127185  | 0.120484  | 0.131556 | 0.131556  | 0.129516  | 0.141754 |
| 0.256702 | 0.123689  | 0.119318  | 0.124563 | 0.121941  | 0.125146  | 0.129225 |
| 0.244901 | 0.0987762 | 0.119172  | 0.130536 | 0.128788  | 0.0958625 | 0.120629 |
| 0.248252 | 0.117861  | 0.110868  | 0.11961  | 0.118735  | 0.120484  | 0.127477 |
| 0.234557 | 0.103875  | 0.107372  | 0.118153 | 0.112617  | 0.103293  | 0.103584 |
| 0.243298 | 0.11553   | 0.115239  | 0.127477 | 0.127185  | 0.125437  | 0.130973 |
| 0.252768 | 0.122669  | 0.110431  | 0.126748 | 0.128497  | 0.124417  | 0.12704  |
| 0.254079 | 0.127477  | 0.114365  | 0.132721 | 0.133887  | 0.129225  | 0.131265 |
| 0.261509 | 0.118298  | 0.127622  | 0.133159 | 0.134907  | 0.120047  | 0.136072 |
| 0.252622 | 0.119901  | 0.110868  | 0.123106 | 0.118735  | 0.122815  | 0.129808 |
| 0.248834 | 0.111451  | 0.0907634 | 0.117279 | 0.112325  | 0.112034  | 0.11757  |
| 0.254953 | 0.128642  | 0.105041  | 0.127477 | 0.126894  | 0.131265  | 0.13039  |
| 0.244755 | 0.120192  | 0.0954254 | 0.11961  | 0.113199  | 0.125728  | 0.120775 |
| 0.26049  | 0.145542  | 0.126603  | 0.146707 | 0.146999  | 0.143211  | 0.149621 |

|          |           |           |          |           |           |          |
|----------|-----------|-----------|----------|-----------|-----------|----------|
| 0.254079 | 0.147873  | 0.124272  | 0.146999 | 0.147582  | 0.149913  | 0.150204 |
| 0.246649 | 0.122378  | 0.101981  | 0.122669 | 0.121503  | 0.130828  | 0.127914 |
| 0.247523 | 0.114219  | 0.100816  | 0.110431 | 0.108683  | 0.117716  | 0.119755 |
| 0.255828 | 0.123106  | 0.108246  | 0.124272 | 0.122523  | 0.125146  | 0.128934 |
| 0.249709 | 0.126311  | 0.105332  | 0.116113 | 0.112325  | 0.129225  | 0.128059 |
| 0.259761 | 0.139569  | 0.12704   | 0.141317 | 0.142483  | 0.142774  | 0.146562 |
| 0.248689 | 0.125     | 0.102273  | 0.121212 | 0.118007  | 0.128788  | 0.122086 |
| 0.245921 | 0.121649  | 0.100962  | 0.123106 | 0.120775  | 0.123106  | 0.122523 |
| 0.257721 | 0.0626457 | 0.145688  | 0.151224 | 0.146562  | 0.0725524 | 0.144814 |
| 0.248397 | 0.138112  | 0.115967  | 0.121795 | 0.121503  | 0.135781  | 0.134907 |
| 0.246212 | 0.123106  | 0.0922203 | 0.121941 | 0.120484  | 0.125146  | 0.121358 |
| 0.254371 | 0.134178  | 0.124563  | 0.133304 | 0.131556  | 0.133304  | 0.131847 |
| 0.233974 | 0.122232  | 0.108537  | 0.126894 | 0.12602   | 0.119027  | 0.105915 |
| 0.265152 | 0.146416  | 0.123689  | 0.136218 | 0.135344  | 0.14933   | 0.151369 |
| 0.254225 | 0.13345   | 0.111014  | 0.136072 | 0.135198  | 0.135198  | 0.135198 |
| 0.252185 | 0.122669  | 0.0955711 | 0.117424 | 0.117133  | 0.125291  | 0.128205 |
| 0.243735 | 0.125583  | 0.108683  | 0.121212 | 0.12296   | 0.125583  | 0.129079 |
| 0.253497 | 0.121649  | 0.106206  | 0.128642 | 0.126894  | 0.123106  | 0.132139 |
| 0.262238 | 0.139423  | 0.113782  | 0.14088  | 0.140589  | 0.141754  | 0.148456 |
| 0.263403 | 0.146999  | 0.121941  | 0.150204 | 0.145251  | 0.147582  | 0.146125 |
| 0.198572 | 0.164336  | 0.153846  | 0.170163 | 0.163462  | 0.154138  | 0.145688 |
| 0.249272 | 0.120921  | 0.101107  | 0.120921 | 0.115385  | 0.123834  | 0.124709 |
| 0.248397 | 0.121212  | 0.0967366 | 0.119464 | 0.119755  | 0.126748  | 0.123252 |
| 0.248397 | 0.119755  | 0.094697  | 0.116841 | 0.115385  | 0.124126  | 0.120338 |
| 0.251748 | 0.125146  | 0.136801  | 0.145251 | 0.139132  | 0.128351  | 0.139714 |
| 0.24796  | 0.119901  | 0.101253  | 0.119318 | 0.118444  | 0.123106  | 0.122523 |
| 0.249563 | 0.138695  | 0.116841  | 0.130536 | 0.131702  | 0.137238  | 0.13141  |
| 0.25539  | 0.121503  | 0.101399  | 0.124709 | 0.125874  | 0.124417  | 0.132284 |
| 0.24796  | 0.124272  | 0.0983392 | 0.118735 | 0.118153  | 0.128934  | 0.125728 |
| 0.250291 | 0.124854  | 0.145542  | 0.146999 | 0.14729   | 0.123689  | 0.135344 |
| 0.25641  | 0.130973  | 0.0995047 | 0.129516 | 0.129225  | 0.128351  | 0.131847 |
| 0.25947  | 0.143939  | 0.125     | 0.143357 | 0.142483  | 0.146853  | 0.144231 |
| 0.250583 | 0.138258  | 0.114656  | 0.121941 | 0.122523  | 0.144085  | 0.139132 |
| 0.24053  | 0.120338  | 0.111597  | 0.10373  | 0.0984848 | 0.122086  | 0.115676 |
| 0.247232 | 0.124417  | 0.0938228 | 0.122669 | 0.119172  | 0.125     | 0.125291 |
| 0.249563 | 0.126166  | 0.0987762 | 0.118881 | 0.116841  | 0.127914  | 0.124417 |
| 0.261509 | 0.137821  | 0.112471  | 0.133741 | 0.131119  | 0.140443  | 0.142774 |
| 0.247086 | 0.118444  | 0.0989219 | 0.12398  | 0.121358  | 0.124563  | 0.123689 |
| 0.262092 | 0.147436  | 0.125     | 0.140734 | 0.140734  | 0.144814  | 0.142774 |
| 0.249563 | 0.127914  | 0.106352  | 0.131119 | 0.127914  | 0.132284  | 0.132867 |
| 0.252185 | 0.124417  | 0.0981935 | 0.122669 | 0.120338  | 0.127331  | 0.131702 |
| 0.247815 | 0.123543  | 0.103438  | 0.125    | 0.122669  | 0.126166  | 0.129662 |
| 0.253642 | 0.133159  | 0.101107  | 0.129371 | 0.126166  | 0.135198  | 0.132284 |
| 0.250437 | 0.122669  | 0.100524  | 0.120047 | 0.115676  | 0.126457  | 0.126748 |

|          |          |           |          |          |          |          |
|----------|----------|-----------|----------|----------|----------|----------|
| 0.248397 | 0.126457 | 0.0958625 | 0.122086 | 0.11859  | 0.128205 | 0.121795 |
| 0.257576 | 0.145833 | 0.11961   | 0.14088  | 0.141171 | 0.145542 | 0.146999 |
| 0.248543 | 0.116404 | 0.0980478 | 0.115822 | 0.116987 | 0.116987 | 0.121941 |
| 0.252477 | 0.120047 | 0.109266  | 0.122378 | 0.117424 | 0.124126 | 0.124126 |
| 0.253934 | 0.120047 | 0.126166  | 0.127914 | 0.125    | 0.121795 | 0.137529 |
| 0.253642 | 0.110431 | 0.122378  | 0.130536 | 0.129371 | 0.113054 | 0.13345  |
| 0.256265 | 0.135781 | 0.126166  | 0.123543 | 0.127622 | 0.134615 | 0.137238 |
| 0.267191 | 0.141171 | 0.131265  | 0.135052 | 0.134178 | 0.139714 | 0.143502 |
| 0.245484 | 0.111888 | 0.117716  | 0.123252 | 0.11859  | 0.114219 | 0.117133 |
| 0.177885 | 0.17803  | 0.182692  | 0.18648  | 0.182984 | 0.166667 | 0.162587 |
| 0.245921 | 0.109411 | 0.108537  | 0.112908 | 0.110577 | 0.112034 | 0.12398  |
| 0.257139 | 0.141317 | 0.127331  | 0.137821 | 0.137529 | 0.138986 | 0.142483 |
| 0.254516 | 0.131993 | 0.121795  | 0.126748 | 0.130828 | 0.129953 | 0.136364 |
| 0.263403 | 0.112617 | 0.130099  | 0.132721 | 0.131265 | 0.11961  | 0.141754 |
| 0.252477 | 0.12296  | 0.104604  | 0.11859  | 0.115385 | 0.120047 | 0.120629 |
| 0.263258 | 0.13986  | 0.124417  | 0.129371 | 0.126748 | 0.137529 | 0.136946 |
| 0.253351 | 0.119464 | 0.115093  | 0.113054 | 0.112471 | 0.123834 | 0.125874 |
| 0.251748 | 0.128642 | 0.11961   | 0.127768 | 0.123106 | 0.13039  | 0.127185 |
| 0.249709 | 0.106206 | 0.108537  | 0.127185 | 0.12398  | 0.104167 | 0.114073 |
| 0.264277 | 0.143794 | 0.125146  | 0.131556 | 0.134178 | 0.139423 | 0.144376 |
| 0.251748 | 0.116987 | 0.0960082 | 0.118153 | 0.113782 | 0.122815 | 0.121941 |
| 0.253642 | 0.120338 | 0.128497  | 0.132576 | 0.134907 | 0.114802 | 0.131119 |
| 0.250874 | 0.103584 | 0.113491  | 0.118735 | 0.115822 | 0.109411 | 0.124272 |
| 0.25743  | 0.136946 | 0.115093  | 0.136946 | 0.136072 | 0.137529 | 0.140734 |
| 0.252914 | 0.113782 | 0.122815  | 0.133013 | 0.130973 | 0.114365 | 0.137383 |
| 0.25     | 0.104167 | 0.107663  | 0.114365 | 0.110868 | 0.109411 | 0.120775 |
| 0.249417 | 0.13243  | 0.143794  | 0.14729  | 0.146707 | 0.126311 | 0.137383 |
| 0.249563 | 0.101981 | 0.111888  | 0.11451  | 0.112471 | 0.108683 | 0.125291 |
| 0.256265 | 0.121795 | 0.110431  | 0.122378 | 0.11859  | 0.123834 | 0.124417 |
| 0.250291 | 0.118444 | 0.106206  | 0.11757  | 0.113782 | 0.12398  | 0.128934 |
| 0.254953 | 0.123397 | 0.138549  | 0.137966 | 0.137092 | 0.127185 | 0.145251 |
| 0.230769 | 0.121066 | 0.11116   | 0.129225 | 0.122815 | 0.113199 | 0.104458 |
| 0.25     | 0.118444 | 0.110286  | 0.116404 | 0.116404 | 0.118735 | 0.121066 |
| 0.245629 | 0.11961  | 0.104458  | 0.11553  | 0.114656 | 0.121066 | 0.121941 |
| 0.248397 | 0.104021 | 0.113345  | 0.122669 | 0.119464 | 0.105769 | 0.125583 |
| 0.257284 | 0.128642 | 0.116987  | 0.13039  | 0.13039  | 0.123689 | 0.13243  |
| 0.250146 | 0.10373  | 0.111888  | 0.124709 | 0.123252 | 0.108392 | 0.129079 |
| 0.245921 | 0.111451 | 0.0971737 | 0.11116  | 0.10912  | 0.116404 | 0.115822 |
| 0.244755 | 0.109994 | 0.0968823 | 0.11553  | 0.111742 | 0.113491 | 0.118153 |
| 0.251311 | 0.119755 | 0.100233  | 0.113345 | 0.111888 | 0.121503 | 0.121212 |
| 0.245484 | 0.129371 | 0.108974  | 0.120629 | 0.118298 | 0.131119 | 0.123543 |
| 0.253788 | 0.127768 | 0.114073  | 0.13447  | 0.131847 | 0.131556 | 0.139132 |
| 0.252477 | 0.11655  | 0.0996503 | 0.111597 | 0.108974 | 0.119464 | 0.122378 |
| 0.245629 | 0.113491 | 0.0925117 | 0.113782 | 0.112908 | 0.115239 | 0.120484 |

|           |           |           |          |          |           |          |
|-----------|-----------|-----------|----------|----------|-----------|----------|
| 0.254953  | 0.126603  | 0.104167  | 0.125437 | 0.125146 | 0.128059  | 0.134761 |
| 0.248397  | 0.112471  | 0.0926573 | 0.115385 | 0.112762 | 0.114219  | 0.120338 |
| 0.248397  | 0.112471  | 0.120629  | 0.132867 | 0.129662 | 0.116841  | 0.12296  |
| 0.252477  | 0.0498252 | 0.13141   | 0.137821 | 0.133159 | 0.0673077 | 0.131702 |
| 0.24898   | 0.11859   | 0.102855  | 0.120629 | 0.118007 | 0.119755  | 0.125    |
| 0.25204   | 0.117861  | 0.0986305 | 0.11553  | 0.115822 | 0.120484  | 0.120775 |
| 0.247086  | 0.118444  | 0.0980478 | 0.11553  | 0.109411 | 0.122232  | 0.124563 |
| 0.244172  | 0.112908  | 0.100379  | 0.118444 | 0.112617 | 0.112908  | 0.114073 |
| 0.251457  | 0.130973  | 0.116113  | 0.125437 | 0.125728 | 0.131556  | 0.131847 |
| 0.245338  | 0.112617  | 0.090472  | 0.116696 | 0.114948 | 0.114656  | 0.120484 |
| 0.258596  | 0.131702  | 0.12704   | 0.138986 | 0.141026 | 0.134033  | 0.145396 |
| 0.248834  | 0.137675  | 0.118153  | 0.141463 | 0.140589 | 0.13884   | 0.146125 |
| 0.253205  | 0.129808  | 0.110286  | 0.131847 | 0.129225 | 0.126311  | 0.136801 |
| 0.250728  | 0.124417  | 0.106935  | 0.122378 | 0.120629 | 0.126457  | 0.12704  |
| 0.247815  | 0.101399  | 0.111888  | 0.11655  | 0.116841 | 0.107809  | 0.122086 |
| 0.250874  | 0.112908  | 0.0898893 | 0.114948 | 0.112325 | 0.117861  | 0.123397 |
| 0.252768  | 0.11451   | 0.0932401 | 0.117424 | 0.114802 | 0.121503  | 0.123252 |
| 0.248689  | 0.117133  | 0.101981  | 0.120047 | 0.11859  | 0.120047  | 0.121503 |
| 0.239656  | 0.123543  | 0.101981  | 0.120921 | 0.118298 | 0.118298  | 0.104312 |
| 0.260927  | 0.138986  | 0.10169   | 0.130245 | 0.127914 | 0.139277  | 0.137529 |
| 0.257284  | 0.124854  | 0.110286  | 0.119027 | 0.116404 | 0.125437  | 0.124563 |
| 0.250437  | 0.134615  | 0.129371  | 0.134615 | 0.132284 | 0.133741  | 0.130536 |
| 0.259907  | 0.125728  | 0.13447   | 0.132139 | 0.131265 | 0.128059  | 0.144376 |
| 0.137238  | 0.196533  | 0.192745  | 0.196824 | 0.194493 | 0.190997  | 0.170309 |
| 0.0971737 | 0.238345  | 0.238636  | 0.240385 | 0.238928 | 0.232517  | 0.217657 |
| 0.238054  | 0.11961   | 0.103293  | 0.11961  | 0.115822 | 0.117861  | 0.099796 |
| 0.241113  | 0.120629  | 0.0952797 | 0.113928 | 0.111597 | 0.125291  | 0.125291 |
| 0.241987  | 0.116259  | 0.0979021 | 0.109266 | 0.109848 | 0.114219  | 0.109266 |
| 0.244901  | 0.120921  | 0.0999417 | 0.1081   | 0.105769 | 0.124417  | 0.120047 |
| 0.243153  | 0.13141   | 0.131702  | 0.138112 | 0.137529 | 0.116841  | 0.116259 |
| 0.252477  | 0.124709  | 0.0999417 | 0.112762 | 0.109266 | 0.127331  | 0.123543 |
| 0.261655  | 0.147582  | 0.122815  | 0.141463 | 0.139423 | 0.152244  | 0.157197 |
| 0.251894  | 0.123834  | 0.0967366 | 0.113054 | 0.107517 | 0.130828  | 0.127622 |
| 0.25743   | 0.132576  | 0.111014  | 0.125291 | 0.125    | 0.136946  | 0.143065 |
| 0.248543  | 0.136509  | 0.114365  | 0.13039  | 0.128642 | 0.134761  | 0.131265 |
| 0.258159  | 0.135927  | 0.114073  | 0.122232 | 0.120484 | 0.136509  | 0.140589 |
| 0.25641   | 0.144376  | 0.125437  | 0.141754 | 0.140589 | 0.140297  | 0.144376 |
| 0.254953  | 0.123397  | 0.104458  | 0.10912  | 0.107663 | 0.128934  | 0.129516 |
| 0.25204   | 0.117861  | 0.0939685 | 0.107663 | 0.105915 | 0.125728  | 0.124272 |
| 0.251603  | 0.126457  | 0.102273  | 0.113928 | 0.106643 | 0.128497  | 0.131702 |
| 0.244027  | 0.117133  | 0.0984848 | 0.108392 | 0.102564 | 0.122086  | 0.118007 |
| 0.248106  | 0.11859   | 0.0932401 | 0.106061 | 0.104604 | 0.123834  | 0.124709 |
| 0.250874  | 0.122232  | 0.100087  | 0.107663 | 0.103584 | 0.127768  | 0.130682 |
| 0.255682  | 0.137821  | 0.108683  | 0.116259 | 0.113928 | 0.136655  | 0.132284 |

|          |          |           |          |           |          |          |
|----------|----------|-----------|----------|-----------|----------|----------|
| 0.262092 | 0.145105 | 0.114219  | 0.127914 | 0.124417  | 0.141608 | 0.142483 |
| 0.251166 | 0.125437 | 0.0977564 | 0.120192 | 0.114948  | 0.128059 | 0.126603 |
| 0.246941 | 0.123834 | 0.0914918 | 0.115967 | 0.112471  | 0.124126 | 0.121212 |
| 0.261218 | 0.137529 | 0.110431  | 0.126166 | 0.123252  | 0.138695 | 0.140443 |
| 0.246649 | 0.120629 | 0.0958625 | 0.109557 | 0.106643  | 0.124417 | 0.121503 |
| 0.256702 | 0.150204 | 0.120775  | 0.128934 | 0.127185  | 0.151078 | 0.146416 |
| 0.247086 | 0.143502 | 0.128059  | 0.135344 | 0.135927  | 0.136509 | 0.13884  |
| 0.244901 | 0.141317 | 0.127622  | 0.123834 | 0.124709  | 0.135781 | 0.134033 |
| 0.248397 | 0.119755 | 0.0926573 | 0.106061 | 0.104021  | 0.125874 | 0.121795 |
| 0.244172 | 0.116696 | 0.090472  | 0.107663 | 0.104749  | 0.120484 | 0.119027 |
| 0.260635 | 0.134324 | 0.104895  | 0.11451  | 0.11451   | 0.13549  | 0.134615 |
| 0.252914 | 0.129225 | 0.105041  | 0.118153 | 0.116113  | 0.130973 | 0.129516 |
| 0.251748 | 0.134178 | 0.107955  | 0.118444 | 0.11757   | 0.140006 | 0.140297 |
| 0.253642 | 0.125583 | 0.0967366 | 0.109557 | 0.105186  | 0.132576 | 0.129953 |
| 0.251748 | 0.127477 | 0.0957168 | 0.114073 | 0.112617  | 0.130099 | 0.131556 |
| 0.25204  | 0.130682 | 0.106789  | 0.116404 | 0.116113  | 0.130973 | 0.133013 |
| 0.263112 | 0.136218 | 0.116696  | 0.127768 | 0.12602   | 0.142628 | 0.139714 |
| 0.254371 | 0.139132 | 0.114948  | 0.124854 | 0.123106  | 0.140589 | 0.135927 |
| 0.258887 | 0.138403 | 0.104895  | 0.131702 | 0.131119  | 0.139569 | 0.143065 |
| 0.251748 | 0.130973 | 0.111451  | 0.14088  | 0.137966  | 0.128059 | 0.127768 |
| 0.251457 | 0.118444 | 0.095134  | 0.116404 | 0.110868  | 0.12602  | 0.130682 |
| 0.257284 | 0.140006 | 0.114948  | 0.119027 | 0.116404  | 0.142628 | 0.139132 |
| 0.248106 | 0.119464 | 0.0874126 | 0.106352 | 0.105186  | 0.121795 | 0.120921 |
| 0.245338 | 0.12398  | 0.104458  | 0.122523 | 0.117861  | 0.127768 | 0.12398  |
| 0.250291 | 0.125728 | 0.105332  | 0.103584 | 0.100087  | 0.127477 | 0.127768 |
| 0.247232 | 0.120629 | 0.100233  | 0.110723 | 0.106935  | 0.12704  | 0.121503 |
| 0.248397 | 0.121795 | 0.0979021 | 0.102855 | 0.0990676 | 0.120338 | 0.119172 |
| 0.258159 | 0.142045 | 0.110577  | 0.128059 | 0.12602   | 0.140297 | 0.142628 |
| 0.249272 | 0.114219 | 0.102855  | 0.121795 | 0.119464  | 0.122378 | 0.119464 |
| 0.257139 | 0.136364 | 0.113928  | 0.124126 | 0.122086  | 0.1419   | 0.140152 |
| 0.247815 | 0.121212 | 0.0996503 | 0.110431 | 0.104604  | 0.125291 | 0.120921 |
| 0.260198 | 0.130099 | 0.102418  | 0.120484 | 0.118444  | 0.13447  | 0.137092 |
| 0.251894 | 0.134033 | 0.110723  | 0.129662 | 0.128205  | 0.126457 | 0.120921 |
| 0.246066 | 0.128788 | 0.111888  | 0.121795 | 0.121212  | 0.125291 | 0.123252 |
| 0.254371 | 0.121649 | 0.101544  | 0.122523 | 0.120192  | 0.120192 | 0.129225 |
| 0.245192 | 0.134615 | 0.112762  | 0.113054 | 0.110723  | 0.132284 | 0.131119 |
| 0.254662 | 0.131556 | 0.106498  | 0.124272 | 0.120775  | 0.130682 | 0.129516 |
| 0.248834 | 0.112325 | 0.10708   | 0.121649 | 0.119027  | 0.118735 | 0.13039  |
| 0.258741 | 0.135052 | 0.133596  | 0.144376 | 0.142045  | 0.135635 | 0.137675 |
| 0.25947  | 0.136072 | 0.122378  | 0.142191 | 0.143939  | 0.138112 | 0.143939 |
| 0.245192 | 0.112179 | 0.109848  | 0.118881 | 0.115676  | 0.115385 | 0.117716 |
| 0.261072 | 0.129516 | 0.135344  | 0.133596 | 0.129516  | 0.13039  | 0.135052 |
| 0.254808 | 0.123834 | 0.129079  | 0.136364 | 0.135781  | 0.123834 | 0.13345  |
| 0.253642 | 0.132284 | 0.129953  | 0.136364 | 0.135781  | 0.132576 | 0.138986 |

|          |          |          |          |          |          |          |
|----------|----------|----------|----------|----------|----------|----------|
| 0.245192 | 0.122378 | 0.124126 | 0.120629 | 0.121212 | 0.118298 | 0.128205 |
| 0.25743  | 0.129079 | 0.122086 | 0.131993 | 0.12704  | 0.129662 | 0.131702 |
| 0.25204  | 0.127768 | 0.128934 | 0.135344 | 0.134178 | 0.125146 | 0.131556 |
| 0.256265 | 0.139569 | 0.128497 | 0.12704  | 0.126166 | 0.134324 | 0.130828 |
| 0.257139 | 0.134615 | 0.139569 | 0.13549  | 0.134324 | 0.134907 | 0.143648 |
| 0.255682 | 0.129371 | 0.130245 | 0.135781 | 0.13345  | 0.128788 | 0.133159 |
| 0.248106 | 0.121212 | 0.121503 | 0.115676 | 0.114802 | 0.120047 | 0.124126 |
| 0.254662 | 0.13447  | 0.113491 | 0.131556 | 0.131265 | 0.141171 | 0.138549 |
| 0.255973 | 0.132867 | 0.135781 | 0.138986 | 0.138112 | 0.136364 | 0.141026 |
| 0.246941 | 0.113345 | 0.117133 | 0.116841 | 0.115676 | 0.116259 | 0.113928 |
| 0.124126 | 0.218094 | 0.218094 | 0.219551 | 0.215763 | 0.211976 | 0.194202 |
| 0.251457 | 0.130682 | 0.125146 | 0.125146 | 0.125728 | 0.12602  | 0.12398  |
| 0.248543 | 0.122232 | 0.114073 | 0.127185 | 0.12602  | 0.126603 | 0.126894 |
| 0.25743  | 0.138403 | 0.134615 | 0.134615 | 0.134033 | 0.13986  | 0.141026 |
| 0.250437 | 0.124709 | 0.118298 | 0.129371 | 0.126748 | 0.124709 | 0.127622 |
| 0.258596 | 0.134907 | 0.137238 | 0.144522 | 0.140152 | 0.133159 | 0.142191 |
| 0.250728 | 0.13141  | 0.122378 | 0.125583 | 0.123543 | 0.134033 | 0.130828 |
| 0.249417 | 0.129225 | 0.123397 | 0.12398  | 0.121358 | 0.125437 | 0.118444 |
| 0.250583 | 0.127768 | 0.127477 | 0.130682 | 0.129808 | 0.128642 | 0.136509 |
| 0.245775 | 0.137821 | 0.13141  | 0.133741 | 0.129662 | 0.134033 | 0.126457 |
| 0.254662 | 0.130099 | 0.131847 | 0.136509 | 0.133596 | 0.130099 | 0.141463 |
| 0.255099 | 0.127622 | 0.138112 | 0.123252 | 0.124709 | 0.131993 | 0.140443 |
| 0.257139 | 0.134033 | 0.132576 | 0.12296  | 0.124417 | 0.132867 | 0.134033 |
| 0.253351 | 0.123252 | 0.106352 | 0.125874 | 0.126457 | 0.124709 | 0.126166 |
| 0.25947  | 0.127331 | 0.122086 | 0.115967 | 0.113928 | 0.130536 | 0.124709 |
| 0.258159 | 0.140589 | 0.135927 | 0.135344 | 0.133887 | 0.139132 | 0.142045 |
| 0.241696 | 0.126166 | 0.120629 | 0.123834 | 0.125    | 0.120338 | 0.121503 |
| 0.25947  | 0.145396 | 0.117716 | 0.137238 | 0.136655 | 0.144814 | 0.145688 |
| 0.244755 | 0.130973 | 0.138258 | 0.143502 | 0.142045 | 0.129225 | 0.130099 |
| 0.247378 | 0.124272 | 0.112034 | 0.128059 | 0.13039  | 0.118735 | 0.11961  |
| 0.25845  | 0.123689 | 0.130973 | 0.135635 | 0.134178 | 0.122523 | 0.137675 |
| 0.241404 | 0.121795 | 0.125291 | 0.139277 | 0.133741 | 0.117133 | 0.123252 |
| 0.248543 | 0.123397 | 0.124854 | 0.133304 | 0.136509 | 0.128351 | 0.136801 |
| 0.244172 | 0.126311 | 0.126311 | 0.13243  | 0.130682 | 0.126311 | 0.127477 |
| 0.250583 | 0.130973 | 0.138549 | 0.146707 | 0.140006 | 0.131265 | 0.137675 |
| 0.247232 | 0.121212 | 0.100524 | 0.12296  | 0.120047 | 0.123543 | 0.124709 |
| 0.250583 | 0.142337 | 0.121941 | 0.13884  | 0.138549 | 0.140297 | 0.142628 |
| 0.235577 | 0.132284 | 0.139277 | 0.144522 | 0.1419   | 0.125291 | 0.129371 |
| 0.253059 | 0.12296  | 0.105186 | 0.128497 | 0.126457 | 0.126457 | 0.130536 |
| 0.246941 | 0.132284 | 0.110723 | 0.132576 | 0.129953 | 0.132867 | 0.126457 |
| 0.253205 | 0.141463 | 0.125437 | 0.144085 | 0.144376 | 0.143502 | 0.146707 |
| 0.25204  | 0.136509 | 0.105624 | 0.126894 | 0.125437 | 0.14088  | 0.137675 |
| 0.262092 | 0.139277 | 0.127622 | 0.138112 | 0.140152 | 0.140734 | 0.139277 |
| 0.253497 | 0.137092 | 0.116113 | 0.135052 | 0.137092 | 0.137092 | 0.137092 |

|          |           |           |          |          |           |           |
|----------|-----------|-----------|----------|----------|-----------|-----------|
| 0.25743  | 0.13141   | 0.11451   | 0.123834 | 0.125    | 0.133741  | 0.136072  |
| 0.248834 | 0.134178  | 0.121358  | 0.138258 | 0.133013 | 0.131847  | 0.130099  |
| 0.24898  | 0.132284  | 0.107226  | 0.126457 | 0.127914 | 0.130536  | 0.125874  |
| 0.260198 | 0.135927  | 0.116696  | 0.127477 | 0.131265 | 0.133304  | 0.14088   |
| 0.254662 | 0.134178  | 0.128642  | 0.133304 | 0.13039  | 0.137383  | 0.134761  |
| 0.261364 | 0.133013  | 0.124563  | 0.131847 | 0.129808 | 0.137675  | 0.140297  |
| 0.261364 | 0.133013  | 0.131556  | 0.130099 | 0.133596 | 0.135927  | 0.135635  |
| 0.253788 | 0.124563  | 0.120775  | 0.135927 | 0.133596 | 0.124563  | 0.129225  |
| 0.250291 | 0.145251  | 0.139423  | 0.140297 | 0.141463 | 0.139423  | 0.138549  |
| 0.248834 | 0.123689  | 0.114656  | 0.13243  | 0.13039  | 0.12602   | 0.133013  |
| 0.257576 | 0.13039   | 0.107372  | 0.125437 | 0.123106 | 0.134761  | 0.133013  |
| 0.256119 | 0.128934  | 0.12602   | 0.128642 | 0.125437 | 0.129225  | 0.133596  |
| 0.25204  | 0.118153  | 0.112034  | 0.126894 | 0.124272 | 0.123106  | 0.127768  |
| 0.25539  | 0.130245  | 0.14627   | 0.149184 | 0.143939 | 0.129953  | 0.139569  |
| 0.259761 | 0.140443  | 0.149476  | 0.155886 | 0.155886 | 0.141026  | 0.150641  |
| 0.256847 | 0.132867  | 0.109848  | 0.125874 | 0.123543 | 0.138986  | 0.140152  |
| 0.256702 | 0.125728  | 0.101836  | 0.119901 | 0.119027 | 0.133013  | 0.128934  |
| 0.258304 | 0.13345   | 0.128497  | 0.129079 | 0.125291 | 0.134615  | 0.140152  |
| 0.256993 | 0.139132  | 0.13447   | 0.133013 | 0.133013 | 0.135635  | 0.136801  |
| 0.260198 | 0.134761  | 0.112034  | 0.121358 | 0.119027 | 0.139423  | 0.139132  |
| 0.262529 | 0.138549  | 0.137966  | 0.135052 | 0.134178 | 0.138549  | 0.144959  |
| 0.250583 | 0.130682  | 0.133013  | 0.144959 | 0.144668 | 0.124272  | 0.127185  |
| 0.260052 | 0.124709  | 0.112179  | 0.13345  | 0.131702 | 0.121795  | 0.130245  |
| 0.259178 | 0.148601  | 0.163462  | 0.147145 | 0.144231 | 0.148893  | 0.153846  |
| 0.258013 | 0.131119  | 0.113636  | 0.133741 | 0.129371 | 0.13345   | 0.136946  |
| 0.254516 | 0.134907  | 0.12704   | 0.148601 | 0.151224 | 0.136072  | 0.144522  |
| 0.260198 | 0.13447   | 0.106206  | 0.122523 | 0.122232 | 0.135635  | 0.135927  |
| 0.262238 | 0.130973  | 0.126894  | 0.131556 | 0.133596 | 0.137966  | 0.143502  |
| 0.244755 | 0.127477  | 0.128351  | 0.128351 | 0.125728 | 0.12602   | 0.132721  |
| 0.225962 | 0.0909091 | 0.138695  | 0.146562 | 0.140152 | 0.0888695 | 0.106352  |
| 0.257284 | 0.148164  | 0.152535  | 0.137092 | 0.130682 | 0.152535  | 0.147873  |
| 0.240239 | 0.12704   | 0.119755  | 0.121795 | 0.118007 | 0.129371  | 0.106935  |
| 0.222902 | 0.138549  | 0.13243   | 0.137966 | 0.133596 | 0.131265  | 0.108829  |
| 0.200029 | 0.153555  | 0.107517  | 0.14831  | 0.145688 | 0.145105  | 0.129662  |
| 0.207314 | 0.142774  | 0.140443  | 0.151515 | 0.144231 | 0.137821  | 0.113636  |
| 0.256702 | 0.11757   | 0.0942599 | 0.12602  | 0.122815 | 0.123106  | 0.134761  |
| 0.249563 | 0.134907  | 0.139277  | 0.136072 | 0.129662 | 0.139569  | 0.143357  |
| 0.240239 | 0.118298  | 0.115967  | 0.117716 | 0.11655  | 0.113054  | 0.115967  |
| 0.241259 | 0.122523  | 0.110577  | 0.121358 | 0.119901 | 0.105332  | 0.104458  |
| 0.247523 | 0.121795  | 0.12296   | 0.125583 | 0.120629 | 0.125     | 0.123834  |
| 0.241113 | 0.123252  | 0.115676  | 0.122378 | 0.118881 | 0.124126  | 0.105478  |
| 0.250874 | 0.128059  | 0.109703  | 0.114365 | 0.112908 | 0.128059  | 0.124272  |
| 0.234848 | 0.120775  | 0.113199  | 0.123689 | 0.122523 | 0.105041  | 0.0898893 |
| 0.248543 | 0.130099  | 0.121066  | 0.123397 | 0.121066 | 0.13243   | 0.119027  |

|          |           |           |           |           |           |          |
|----------|-----------|-----------|-----------|-----------|-----------|----------|
| 0.23412  | 0.131119  | 0.126748  | 0.129079  | 0.123834  | 0.114802  | 0.104312 |
| 0.239073 | 0.112471  | 0.108392  | 0.116259  | 0.115385  | 0.116841  | 0.107226 |
| 0.241113 | 0.130245  | 0.117716  | 0.126166  | 0.125291  | 0.132284  | 0.106935 |
| 0.242716 | 0.122523  | 0.116404  | 0.120192  | 0.11961   | 0.127768  | 0.108537 |
| 0.254079 | 0.128351  | 0.0496795 | 0.123106  | 0.123689  | 0.130099  | 0.134761 |
| 0.113928 | 0.216638  | 0.216055  | 0.220134  | 0.216055  | 0.207022  | 0.192162 |
| 0.248543 | 0.146125  | 0.139132  | 0.140297  | 0.141463  | 0.145251  | 0.124272 |
| 0.250146 | 0.130828  | 0.126166  | 0.128497  | 0.125874  | 0.131993  | 0.134033 |
| 0.24155  | 0.128059  | 0.11757   | 0.124563  | 0.124272  | 0.130099  | 0.124563 |
| 0.11014  | 0.211684  | 0.210227  | 0.213432  | 0.211684  | 0.204983  | 0.1875   |
| 0.23951  | 0.103584  | 0.0799825 | 0.127185  | 0.124272  | 0.100087  | 0.116987 |
| 0.253934 | 0.125583  | 0.111888  | 0.127914  | 0.124709  | 0.128205  | 0.128788 |
| 0.246358 | 0.135198  | 0.120047  | 0.120338  | 0.115093  | 0.133741  | 0.13141  |
| 0.243881 | 0.125146  | 0.123397  | 0.13039   | 0.126311  | 0.108246  | 0.110868 |
| 0        | 0.250728  | 0.25102   | 0.253059  | 0.250728  | 0.242861  | 0.229749 |
| 0.250728 | 0         | 0.127331  | 0.129662  | 0.127622  | 0.0661422 | 0.125583 |
| 0.25102  | 0.127331  | 0         | 0.119755  | 0.120047  | 0.127914  | 0.130536 |
| 0.253059 | 0.129662  | 0.119755  | 0         | 0.0463287 | 0.136364  | 0.126748 |
| 0.250728 | 0.127622  | 0.120047  | 0.0463287 | 0         | 0.13141   | 0.124417 |
| 0.242861 | 0.0661422 | 0.127914  | 0.136364  | 0.13141   | 0         | 0.113636 |
| 0.229749 | 0.125583  | 0.130536  | 0.126748  | 0.124417  | 0.113636  | 0        |
| 0.251311 | 0.129079  | 0.0509907 | 0.119172  | 0.120047  | 0.128788  | 0.130828 |
| 0.240676 | 0.122523  | 0.117279  | 0.11757   | 0.118444  | 0.124272  | 0.108246 |
| 0.247232 | 0.124709  | 0.124126  | 0.124126  | 0.119172  | 0.129662  | 0.131702 |
| 0.242279 | 0.120047  | 0.11859   | 0.121212  | 0.119464  | 0.104021  | 0.106935 |
| 0.236305 | 0.122232  | 0.112617  | 0.117279  | 0.114948  | 0.123689  | 0.104749 |
| 0.244901 | 0.115385  | 0.123252  | 0.129662  | 0.127622  | 0.112762  | 0.120629 |
| 0.259907 | 0.152535  | 0.148747  | 0.135052  | 0.130099  | 0.151952  | 0.148456 |
| 0.250583 | 0.0467657 | 0.128059  | 0.133013  | 0.128642  | 0.064831  | 0.127768 |
| 0.252331 | 0.129808  | 0.114656  | 0.129808  | 0.127768  | 0.126311  | 0.129808 |
| 0.136364 | 0.189248  | 0.188666  | 0.195367  | 0.189831  | 0.182838  | 0.164773 |
| 0.122669 | 0.204691  | 0.20236   | 0.207022  | 0.202943  | 0.195076  | 0.178176 |
| 0.238345 | 0.121941  | 0.126311  | 0.130973  | 0.126311  | 0.105332  | 0.106789 |
| 0.244172 | 0.118735  | 0.120192  | 0.120484  | 0.116113  | 0.103875  | 0.104458 |
| 0.236888 | 0.138549  | 0.136509  | 0.135927  | 0.135635  | 0.134178  | 0.127768 |
| 0.249126 | 0.124854  | 0.048514  | 0.122523  | 0.119901  | 0.124854  | 0.130973 |
| 0.249563 | 0.0477855 | 0.129079  | 0.133159  | 0.133741  | 0.0693473 | 0.128497 |
| 0.245047 | 0.135052  | 0.132139  | 0.10912   | 0.108829  | 0.134761  | 0.137675 |
| 0.118881 | 0.223631  | 0.224796  | 0.228875  | 0.224213  | 0.216638  | 0.204108 |
| 0.249417 | 0.120192  | 0.108829  | 0.116987  | 0.113782  | 0.127477  | 0.126311 |
| 0.142337 | 0.212121  | 0.201923  | 0.21183   | 0.208333  | 0.201632  | 0.180653 |
| 0.255828 | 0.110286  | 0.0826049 | 0.119318  | 0.116696  | 0.116696  | 0.128059 |
| 0.244901 | 0.123834  | 0.112179  | 0.114219  | 0.113928  | 0.127622  | 0.126166 |
| 0.237471 | 0.122232  | 0.104167  | 0.119901  | 0.118735  | 0.119318  | 0.109994 |



|          |           |           |           |           |           |           |
|----------|-----------|-----------|-----------|-----------|-----------|-----------|
| 0.236014 | 0.11757   | 0.115239  | 0.116696  | 0.113491  | 0.105041  | 0.0977564 |
| 0.132139 | 0.207751  | 0.206585  | 0.208042  | 0.207751  | 0.199883  | 0.183275  |
| 0.238782 | 0.13549   | 0.127331  | 0.130828  | 0.128497  | 0.136072  | 0.111305  |
| 0.254808 | 0.118298  | 0.104895  | 0.111014  | 0.11014   | 0.124417  | 0.129371  |
| 0.241987 | 0.130245  | 0.122669  | 0.122378  | 0.125291  | 0.130536  | 0.112471  |
| 0.247232 | 0.13141   | 0.119755  | 0.118007  | 0.115676  | 0.133159  | 0.109557  |
| 0.24461  | 0.121503  | 0.121212  | 0.128497  | 0.120047  | 0.109848  | 0.107226  |
| 0.255245 | 0.107372  | 0.088141  | 0.121066  | 0.118153  | 0.116404  | 0.12602   |
| 0.242424 | 0.129516  | 0.0639569 | 0.122815  | 0.120484  | 0.128934  | 0.119901  |
| 0.251748 | 0.126603  | 0.110577  | 0.128642  | 0.126311  | 0.126894  | 0.130973  |
| 0.236597 | 0.122815  | 0.110286  | 0.116987  | 0.11553   | 0.124563  | 0.0992133 |
| 0.252185 | 0.122669  | 0.106061  | 0.113928  | 0.113054  | 0.128205  | 0.129662  |
| 0.133741 | 0.191288  | 0.188666  | 0.193619  | 0.188957  | 0.186626  | 0.168269  |
| 0.253351 | 0.129662  | 0.119464  | 0.0402098 | 0.044289  | 0.134324  | 0.126457  |
| 0.249709 | 0.133013  | 0.131847  | 0.116113  | 0.111451  | 0.137966  | 0.133304  |
| 0.243735 | 0.129662  | 0.115093  | 0.103438  | 0.100233  | 0.138112  | 0.125291  |
| 0.245629 | 0.0604604 | 0.124272  | 0.133304  | 0.125146  | 0.0761946 | 0.117279  |
| 0.242133 | 0.126311  | 0.118153  | 0.121941  | 0.119901  | 0.127768  | 0.109994  |
| 0.256993 | 0.114073  | 0.0942599 | 0.121941  | 0.117861  | 0.121066  | 0.13039   |
| 0.246066 | 0.104604  | 0.111888  | 0.110723  | 0.111014  | 0.111888  | 0.102564  |
| 0.253059 | 0.132284  | 0.0518648 | 0.126457  | 0.125291  | 0.130828  | 0.136364  |
| 0.249417 | 0.128351  | 0.126603  | 0.112908  | 0.108537  | 0.133304  | 0.128059  |
| 0.247378 | 0.12602   | 0.11553   | 0.0528846 | 0.0517191 | 0.133596  | 0.121066  |
| 0.242861 | 0.123834  | 0.119464  | 0.129079  | 0.123834  | 0.109848  | 0.108974  |
| 0.25204  | 0.130973  | 0.119027  | 0.120775  | 0.116696  | 0.134761  | 0.131847  |
| 0.249854 | 0.141608  | 0.132576  | 0.132284  | 0.129371  | 0.144814  | 0.145396  |
| 0.24461  | 0.0533217 | 0.117716  | 0.125     | 0.121503  | 0.0754662 | 0.120338  |
| 0.245629 | 0.143502  | 0.132139  | 0.137966  | 0.137383  | 0.143794  | 0.124272  |
| 0.243881 | 0.118444  | 0.119901  | 0.125146  | 0.119027  | 0.106498  | 0.105624  |
| 0.245338 | 0.121941  | 0.118153  | 0.0989219 | 0.0980478 | 0.126603  | 0.125146  |
| 0.228293 | 0.129662  | 0.115967  | 0.126166  | 0.124709  | 0.123834  | 0.0935315 |
| 0.250146 | 0.130536  | 0.0533217 | 0.126166  | 0.126748  | 0.132576  | 0.13549   |
| 0.143211 | 0.190851  | 0.17803   | 0.19697   | 0.190268  | 0.182692  | 0.16521   |
| 0.248543 | 0.11757   | 0.101253  | 0.109994  | 0.106206  | 0.123106  | 0.123397  |
| 0.240093 | 0.113491  | 0.103875  | 0.113491  | 0.109994  | 0.11757   | 0.111451  |
| 0.253205 | 0.125728  | 0.112617  | 0.12398   | 0.123689  | 0.127768  | 0.128642  |
| 0.157051 | 0.184003  | 0.180216  | 0.186626  | 0.182547  | 0.17701   | 0.150204  |
| 0.255973 | 0.0571096 | 0.135198  | 0.144231  | 0.136072  | 0.0751748 | 0.131119  |
| 0.257139 | 0.0623543 | 0.147145  | 0.152098  | 0.14831   | 0.0775058 | 0.144231  |
| 0.257576 | 0.151078  | 0.14933   | 0.137966  | 0.133304  | 0.153409  | 0.152826  |
| 0.244172 | 0.057838  | 0.115239  | 0.122815  | 0.122523  | 0.0770688 | 0.116404  |
| 0.241696 | 0.126748  | 0.121503  | 0.120629  | 0.120629  | 0.126166  | 0.108683  |
| 0.118007 | 0.211393  | 0.210519  | 0.214307  | 0.210227  | 0.204691  | 0.186917  |
| 0.239219 | 0.126894  | 0.12602   | 0.123106  | 0.119318  | 0.125146  | 0.129808  |

|          |           |           |          |           |           |          |
|----------|-----------|-----------|----------|-----------|-----------|----------|
| 0.241696 | 0.130828  | 0.126166  | 0.125583 | 0.125291  | 0.130828  | 0.111014 |
| 0.248397 | 0.119464  | 0.103438  | 0.113054 | 0.111305  | 0.12704   | 0.125583 |
| 0.181964 | 0.171911  | 0.168998  | 0.176282 | 0.171037  | 0.158217  | 0.135198 |
| 0.238491 | 0.119755  | 0.108392  | 0.118881 | 0.118298  | 0.121503  | 0.113054 |
| 0.253788 | 0.149038  | 0.152244  | 0.146999 | 0.144085  | 0.149913  | 0.1537   |
| 0.238636 | 0.123397  | 0.122232  | 0.129225 | 0.12602   | 0.122815  | 0.113199 |
| 0.139277 | 0.192453  | 0.186334  | 0.194202 | 0.191579  | 0.186043  | 0.170309 |
| 0.251457 | 0.0534674 | 0.122815  | 0.12602  | 0.126603  | 0.0773601 | 0.126603 |
| 0.245921 | 0.116113  | 0.110577  | 0.117861 | 0.116113  | 0.121649  | 0.114365 |
| 0.247232 | 0.124709  | 0.116841  | 0.104312 | 0.0987762 | 0.131702  | 0.126166 |
| 0.249417 | 0.117279  | 0.112908  | 0.117861 | 0.117279  | 0.125728  | 0.128642 |
| 0.251457 | 0.123397  | 0.107955  | 0.127477 | 0.12398   | 0.124563  | 0.128642 |
| 0.23951  | 0.124854  | 0.120775  | 0.127477 | 0.121066  | 0.128642  | 0.128059 |
| 0.241404 | 0.115676  | 0.117716  | 0.125874 | 0.120921  | 0.105186  | 0.1081   |
| 0.132576 | 0.192162  | 0.18546   | 0.192453 | 0.190122  | 0.188374  | 0.168852 |
| 0.248106 | 0.129953  | 0.121212  | 0.125    | 0.121795  | 0.136655  | 0.130536 |
| 0.237179 | 0.126311  | 0.112617  | 0.122232 | 0.118735  | 0.125728  | 0.111451 |
| 0.11553  | 0.210956  | 0.210373  | 0.212995 | 0.210664  | 0.202214  | 0.189394 |
| 0.257139 | 0.129371  | 0.121503  | 0.044289 | 0.0457459 | 0.134033  | 0.126457 |
| 0.244172 | 0.119027  | 0.122232  | 0.126311 | 0.122815  | 0.107372  | 0.109703 |
| 0.240676 | 0.119901  | 0.113199  | 0.118153 | 0.117279  | 0.105332  | 0.106498 |
| 0.243153 | 0.13986   | 0.13345   | 0.13549  | 0.131993  | 0.137238  | 0.118881 |
| 0.139132 | 0.187646  | 0.188811  | 0.194639 | 0.193473  | 0.185315  | 0.16521  |
| 0.25641  | 0.12602   | 0.0499709 | 0.123397 | 0.120775  | 0.130099  | 0.135344 |
| 0.25     | 0.136801  | 0.127477  | 0.12602  | 0.121066  | 0.140589  | 0.138258 |
| 0.24359  | 0.119027  | 0.11961   | 0.122232 | 0.121649  | 0.105624  | 0.108246 |
| 0.24359  | 0.123106  | 0.113491  | 0.12398  | 0.122232  | 0.105332  | 0.107955 |
| 0.241113 | 0.120921  | 0.117716  | 0.123252 | 0.120047  | 0.107809  | 0.104604 |
| 0.244464 | 0.124563  | 0.115239  | 0.122232 | 0.118153  | 0.130099  | 0.107955 |
| 0.244318 | 0.110431  | 0.105769  | 0.111305 | 0.110723  | 0.113345  | 0.107809 |
| 0.250146 | 0.0434149 | 0.125     | 0.130828 | 0.125874  | 0.0681818 | 0.12704  |
| 0.257721 | 0.13986   | 0.131993  | 0.120921 | 0.119755  | 0.142191  | 0.136364 |
| 0.252477 | 0.0527389 | 0.119755  | 0.129371 | 0.126457  | 0.0719697 | 0.126748 |
| 0.25204  | 0.137092  | 0.121358  | 0.12398  | 0.121649  | 0.137092  | 0.117861 |
| 0.139132 | 0.196096  | 0.193182  | 0.199301 | 0.195513  | 0.191434  | 0.171329 |
| 0.25     | 0.125146  | 0.117279  | 0.118153 | 0.111742  | 0.132139  | 0.129808 |
| 0.241113 | 0.13549   | 0.128788  | 0.129371 | 0.128205  | 0.134615  | 0.116841 |
| 0.244172 | 0.118153  | 0.119901  | 0.121649 | 0.118735  | 0.105041  | 0.105915 |
| 0.240239 | 0.111305  | 0.1081    | 0.113636 | 0.109557  | 0.114219  | 0.112179 |
| 0.239365 | 0.112471  | 0.11859   | 0.117133 | 0.115676  | 0.114802  | 0.113928 |
| 0.251166 | 0.128059  | 0.0488054 | 0.120192 | 0.122232  | 0.129225  | 0.131265 |
| 0.248834 | 0.13039   | 0.131556  | 0.130682 | 0.127477  | 0.135927  | 0.136801 |
| 0.249854 | 0.126457  | 0.122378  | 0.117716 | 0.115093  | 0.13345   | 0.127622 |
| 0.244027 | 0.119172  | 0.0675991 | 0.118881 | 0.118881  | 0.117716  | 0.111305 |

|          |           |           |          |          |           |          |
|----------|-----------|-----------|----------|----------|-----------|----------|
| 0.23951  | 0.114365  | 0.0767774 | 0.113782 | 0.113199 | 0.114073  | 0.106498 |
| 0.243444 | 0.11451   | 0.111305  | 0.118881 | 0.113345 | 0.117133  | 0.10373  |
| 0.252622 | 0.109411  | 0.0823135 | 0.119318 | 0.116113 | 0.115822  | 0.124854 |
| 0.254225 | 0.0559441 | 0.13345   | 0.138986 | 0.134907 | 0.0696387 | 0.132867 |
| 0.255245 | 0.126311  | 0.0525932 | 0.122815 | 0.120484 | 0.129808  | 0.13447  |
| 0.236742 | 0.122086  | 0.113928  | 0.117424 | 0.11451  | 0.123543  | 0.104021 |
| 0.251603 | 0.12296   | 0.048951  | 0.117133 | 0.117133 | 0.124126  | 0.126166 |
| 0.242424 | 0.118735  | 0.113782  | 0.121358 | 0.11961  | 0.107372  | 0.107372 |
| 0.251894 | 0.113636  | 0.101107  | 0.107517 | 0.105186 | 0.125     | 0.124126 |
| 0.24461  | 0.121503  | 0.122086  | 0.124126 | 0.12296  | 0.107517  | 0.1081   |
| 0.244318 | 0.125583  | 0.109848  | 0.113345 | 0.110723 | 0.128788  | 0.119755 |
| 0.249563 | 0.129662  | 0.120921  | 0.116259 | 0.108974 | 0.13345   | 0.130828 |
| 0.25102  | 0.119755  | 0.104312  | 0.124126 | 0.12296  | 0.12296   | 0.126457 |
| 0.24359  | 0.112325  | 0.108829  | 0.118153 | 0.113782 | 0.11757   | 0.113491 |
| 0.244318 | 0.120338  | 0.115676  | 0.122086 | 0.120338 | 0.107226  | 0.107809 |
| 0.237034 | 0.130245  | 0.121795  | 0.107809 | 0.103147 | 0.131119  | 0.117133 |
| 0.247086 | 0.129516  | 0.118735  | 0.128642 | 0.122523 | 0.128934  | 0.119318 |
| 0.246941 | 0.122378  | 0.109266  | 0.120338 | 0.118007 | 0.122378  | 0.118298 |
| 0.245192 | 0.119172  | 0.11655   | 0.120338 | 0.11859  | 0.110431  | 0.107517 |
| 0.239802 | 0.124563  | 0.120192  | 0.119318 | 0.118735 | 0.124272  | 0.105915 |
| 0.252622 | 0.110577  | 0.0887238 | 0.121941 | 0.118735 | 0.117861  | 0.128642 |
| 0.244464 | 0.128642  | 0.112617  | 0.121066 | 0.124272 | 0.128934  | 0.107663 |
| 0.249709 | 0.124563  | 0.103875  | 0.125728 | 0.120775 | 0.124563  | 0.128351 |
| 0.246503 | 0.111742  | 0.113491  | 0.11961  | 0.118153 | 0.116696  | 0.113199 |
| 0.240967 | 0.11757   | 0.112034  | 0.116696 | 0.11553  | 0.121066  | 0.120775 |
| 0.25102  | 0.113345  | 0.102855  | 0.108683 | 0.107517 | 0.125     | 0.124417 |
| 0.238345 | 0.129516  | 0.120775  | 0.125146 | 0.125437 | 0.132139  | 0.111451 |
| 0.24796  | 0.130682  | 0.11553   | 0.125728 | 0.122232 | 0.13447   | 0.120192 |
| 0.243153 | 0.12296   | 0.115093  | 0.123543 | 0.119755 | 0.125874  | 0.116841 |
| 0.13039  | 0.195221  | 0.192599  | 0.199592 | 0.194639 | 0.189394  | 0.173951 |
| 0.178759 | 0.16958   | 0.163462  | 0.167249 | 0.163753 | 0.162005  | 0.130828 |
| 0.249563 | 0.0541958 | 0.120921  | 0.129371 | 0.127331 | 0.0737179 | 0.125874 |
| 0.24359  | 0.125437  | 0.0820221 | 0.121941 | 0.121066 | 0.122815  | 0.114365 |
| 0.25845  | 0.0668706 | 0.150787  | 0.154575 | 0.149913 | 0.0770688 | 0.147582 |
| 0.250146 | 0.130828  | 0.128497  | 0.12704  | 0.122669 | 0.132867  | 0.133741 |
| 0.236888 | 0.12398   | 0.126311  | 0.12602  | 0.122232 | 0.108246  | 0.105041 |
| 0.241987 | 0.121503  | 0.115385  | 0.127914 | 0.124126 | 0.113054  | 0.101107 |
| 0.244027 | 0.11451   | 0.117133  | 0.124417 | 0.123252 | 0.113054  | 0.116259 |
| 0.248397 | 0.126748  | 0.120338  | 0.128788 | 0.124126 | 0.128497  | 0.119464 |
| 0.134033 | 0.203526  | 0.201195  | 0.208188 | 0.202069 | 0.196241  | 0.180507 |
| 0.258596 | 0.129079  | 0.0527389 | 0.124126 | 0.124126 | 0.129953  | 0.136072 |
| 0.234848 | 0.125437  | 0.0855186 | 0.120775 | 0.119901 | 0.121649  | 0.10271  |
| 0.238928 | 0.121358  | 0.113491  | 0.124563 | 0.120192 | 0.107372  | 0.103293 |
| 0.252477 | 0.128205  | 0.112179  | 0.115676 | 0.113345 | 0.13345   | 0.111305 |

|           |          |           |           |           |           |           |
|-----------|----------|-----------|-----------|-----------|-----------|-----------|
| 0.163753  | 0.188957 | 0.181381  | 0.191871  | 0.188083  | 0.17701   | 0.15574   |
| 0.0917832 | 0.246941 | 0.246066  | 0.247815  | 0.247232  | 0.24053   | 0.224796  |
| 0.25      | 0.126894 | 0.125728  | 0.11961   | 0.11553   | 0.13243   | 0.131556  |
| 0.248543  | 0.126603 | 0.121649  | 0.124272  | 0.118444  | 0.127185  | 0.11961   |
| 0.249417  | 0.050845 | 0.122232  | 0.126603  | 0.122232  | 0.0700758 | 0.122815  |
| 0.25102   | 0.119755 | 0.10373   | 0.125     | 0.121212  | 0.121795  | 0.124417  |
| 0.252914  | 0.127185 | 0.0505536 | 0.11757   | 0.118735  | 0.127185  | 0.131556  |
| 0.242861  | 0.119755 | 0.113928  | 0.117424  | 0.11655   | 0.128497  | 0.124417  |
| 0.232226  | 0.120775 | 0.115239  | 0.127185  | 0.125146  | 0.106498  | 0.08581   |
| 0.250874  | 0.123689 | 0.0456002 | 0.119901  | 0.116696  | 0.12602   | 0.13039   |
| 0.234411  | 0.119755 | 0.117424  | 0.125874  | 0.122086  | 0.106061  | 0.0839161 |
| 0.250583  | 0.12602  | 0.116113  | 0.127768  | 0.127185  | 0.12602   | 0.123689  |
| 0.242279  | 0.111305 | 0.110723  | 0.118007  | 0.117133  | 0.113054  | 0.110723  |
| 0.248252  | 0.127768 | 0.123689  | 0.115239  | 0.109703  | 0.132139  | 0.13039   |
| 0.244027  | 0.125583 | 0.119172  | 0.122378  | 0.121503  | 0.125291  | 0.109557  |
| 0.241404  | 0.117716 | 0.106061  | 0.0967366 | 0.0979021 | 0.122086  | 0.116841  |
| 0.255099  | 0.134033 | 0.118298  | 0.125     | 0.124709  | 0.13549   | 0.133741  |
| 0.258596  | 0.134033 | 0.122086  | 0.137821  | 0.134324  | 0.134907  | 0.139569  |
| 0.24359   | 0.121066 | 0.11553   | 0.122232  | 0.118735  | 0.108829  | 0.104458  |
| 0.237325  | 0.109848 | 0.118007  | 0.130828  | 0.126748  | 0.0906177 | 0.102564  |
| 0.244901  | 0.132867 | 0.132284  | 0.137238  | 0.134615  | 0.11655   | 0.119172  |
| 0.122378  | 0.208188 | 0.210519  | 0.21285   | 0.210519  | 0.198864  | 0.183712  |
| 0.245484  | 0.118881 | 0.113928  | 0.1081    | 0.104895  | 0.125583  | 0.120921  |
| 0.246795  | 0.112617 | 0.110868  | 0.115822  | 0.115822  | 0.115822  | 0.11116   |
| 0.250874  | 0.128642 | 0.115239  | 0.122232  | 0.116987  | 0.133596  | 0.128351  |
| 0.253642  | 0.131993 | 0.118881  | 0.0506993 | 0.048951  | 0.136072  | 0.127914  |
| 0.248689  | 0.125    | 0.108392  | 0.112471  | 0.111014  | 0.130536  | 0.108683  |
| 0.135344  | 0.199883 | 0.200175  | 0.204254  | 0.200175  | 0.195221  | 0.176282  |
| 0.243298  | 0.129225 | 0.11961   | 0.128351  | 0.126894  | 0.13243   | 0.112617  |
| 0.244027  | 0.118298 | 0.113928  | 0.121503  | 0.119464  | 0.106061  | 0.105769  |
| 0.248252  | 0.115822 | 0.113782  | 0.130099  | 0.128351  | 0.121649  | 0.131847  |
| 0.250583  | 0.118444 | 0.102418  | 0.11961   | 0.115822  | 0.121066  | 0.122232  |
| 0.24155   | 0.129225 | 0.118735  | 0.121941  | 0.122815  | 0.128642  | 0.103875  |
| 0.236014  | 0.117279 | 0.109411  | 0.114656  | 0.112325  | 0.119901  | 0.105915  |
| 0.250291  | 0.124854 | 0.115822  | 0.127768  | 0.125728  | 0.126311  | 0.121941  |
| 0.252914  | 0.128642 | 0.118735  | 0.0505536 | 0.0488054 | 0.133304  | 0.127185  |
| 0.131847  | 0.200466 | 0.196387  | 0.201923  | 0.19697   | 0.195513  | 0.177156  |
| 0.237762  | 0.118153 | 0.110577  | 0.117279  | 0.114948  | 0.120484  | 0.104458  |
| 0.140006  | 0.198135 | 0.193765  | 0.200758  | 0.195221  | 0.190559  | 0.173077  |
| 0.135198  | 0.19391  | 0.192453  | 0.196533  | 0.19391   | 0.189248  | 0.171474  |
| 0.254953  | 0.130973 | 0.116987  | 0.131847  | 0.129516  | 0.128642  | 0.133887  |
| 0.258159  | 0.135344 | 0.129225  | 0.0505536 | 0.0552156 | 0.13884   | 0.134178  |
| 0.245338  | 0.119901 | 0.103293  | 0.118735  | 0.116696  | 0.121066  | 0.117279  |
| 0.24053   | 0.117716 | 0.106935  | 0.117424  | 0.115385  | 0.120921  | 0.11014   |

|           |           |           |           |           |           |          |
|-----------|-----------|-----------|-----------|-----------|-----------|----------|
| 0.240676  | 0.123397  | 0.112325  | 0.120192  | 0.121358  | 0.128059  | 0.110577 |
| 0.242716  | 0.122232  | 0.119027  | 0.124272  | 0.12398   | 0.109411  | 0.107955 |
| 0.249417  | 0.119027  | 0.055507  | 0.112908  | 0.113199  | 0.122523  | 0.125437 |
| 0.253205  | 0.125146  | 0.0467657 | 0.117861  | 0.118153  | 0.127185  | 0.128934 |
| 0.251311  | 0.127914  | 0.127622  | 0.11859   | 0.110431  | 0.132867  | 0.129953 |
| 0.253205  | 0.120484  | 0.112034  | 0.12602   | 0.121941  | 0.125437  | 0.130099 |
| 0.238199  | 0.114802  | 0.113345  | 0.118007  | 0.115385  | 0.102273  | 0.105478 |
| 0.243881  | 0.127477  | 0.116696  | 0.119901  | 0.119901  | 0.129516  | 0.106498 |
| 0.244901  | 0.11451   | 0.105769  | 0.115385  | 0.113636  | 0.116259  | 0.112471 |
| 0.243298  | 0.135052  | 0.126603  | 0.126603  | 0.12602   | 0.135927  | 0.112908 |
| 0.246795  | 0.0525932 | 0.120775  | 0.127185  | 0.125146  | 0.0756119 | 0.121649 |
| 0.246649  | 0.138403  | 0.131702  | 0.131119  | 0.13141   | 0.136655  | 0.119755 |
| 0.0901807 | 0.259615  | 0.261364  | 0.262238  | 0.259907  | 0.250583  | 0.236597 |
| 0.25743   | 0.125583  | 0.115385  | 0.11655   | 0.119464  | 0.134615  | 0.13986  |
| 0.246795  | 0.131556  | 0.126894  | 0.126603  | 0.128059  | 0.128642  | 0.134178 |
| 0.11757   | 0.217949  | 0.219988  | 0.221737  | 0.220862  | 0.21183   | 0.196678 |
| 0.251457  | 0.132139  | 0.127477  | 0.117279  | 0.117861  | 0.133304  | 0.13884  |
| 0.106352  | 0.228875  | 0.23208   | 0.23208   | 0.227418  | 0.224213  | 0.207314 |
| 0.253934  | 0.125     | 0.106935  | 0.114219  | 0.11451   | 0.129662  | 0.132284 |
| 0.247086  | 0.130099  | 0.131556  | 0.13447   | 0.13243   | 0.111742  | 0.117861 |
| 0.251166  | 0.129225  | 0.110868  | 0.0587121 | 0.0537587 | 0.133887  | 0.120192 |
| 0.254953  | 0.12602   | 0.113199  | 0.128642  | 0.126603  | 0.129516  | 0.130973 |
| 0.136655  | 0.206439  | 0.201486  | 0.207022  | 0.200903  | 0.200029  | 0.180798 |
| 0.245047  | 0.137092  | 0.127768  | 0.13039   | 0.130682  | 0.137675  | 0.118153 |
| 0.241841  | 0.128059  | 0.116404  | 0.122232  | 0.120775  | 0.128059  | 0.107372 |
| 0.112908  | 0.227273  | 0.22669   | 0.228438  | 0.225233  | 0.221445  | 0.205711 |
| 0.250874  | 0.127477  | 0.0525932 | 0.118444  | 0.11757   | 0.129225  | 0.127768 |
| 0.132139  | 0.200758  | 0.198135  | 0.202506  | 0.198718  | 0.194056  | 0.175991 |
| 0.255099  | 0.127331  | 0.0547786 | 0.123252  | 0.120047  | 0.128497  | 0.135781 |
| 0.247232  | 0.120921  | 0.118881  | 0.123252  | 0.120629  | 0.106352  | 0.1081   |
| 0.249417  | 0.118735  | 0.122232  | 0.126311  | 0.124854  | 0.121066  | 0.11757  |
| 0.256119  | 0.132139  | 0.119318  | 0.13243   | 0.133013  | 0.130682  | 0.134761 |
| 0.240239  | 0.120047  | 0.112179  | 0.121795  | 0.119464  | 0.122086  | 0.118007 |
| 0.17905   | 0.161713  | 0.159965  | 0.166958  | 0.161131  | 0.152681  | 0.133159 |
| 0.238199  | 0.122378  | 0.112179  | 0.11859   | 0.115093  | 0.123252  | 0.104021 |
| 0.253351  | 0.131993  | 0.11859   | 0.0501166 | 0.0501166 | 0.13549   | 0.12296  |
| 0.249854  | 0.133159  | 0.113636  | 0.119464  | 0.117424  | 0.131993  | 0.128497 |
| 0.247815  | 0.132576  | 0.126457  | 0.105769  | 0.102855  | 0.132284  | 0.13549  |
| 0.134615  | 0.196824  | 0.196241  | 0.202069  | 0.196533  | 0.190414  | 0.176136 |
| 0.240822  | 0.118298  | 0.114802  | 0.122378  | 0.121212  | 0.108392  | 0.106643 |
| 0.243298  | 0.128934  | 0.111742  | 0.132721  | 0.127768  | 0.129225  | 0.121358 |
| 0.253934  | 0.109557  | 0.085373  | 0.12296   | 0.120047  | 0.11451   | 0.128205 |
| 0.255536  | 0.130099  | 0.0493881 | 0.121066  | 0.120775  | 0.128351  | 0.133596 |
| 0.243735  | 0.124709  | 0.124417  | 0.127622  | 0.125583  | 0.110723  | 0.112179 |

|           |           |           |           |           |           |          |
|-----------|-----------|-----------|-----------|-----------|-----------|----------|
| 0.0868298 | 0.25743   | 0.256265  | 0.256847  | 0.253934  | 0.252185  | 0.233829 |
| 0.247815  | 0.114802  | 0.118007  | 0.118881  | 0.119172  | 0.115385  | 0.111888 |
| 0.241987  | 0.129371  | 0.116841  | 0.123252  | 0.118881  | 0.121795  | 0.108974 |
| 0.174679  | 0.182984  | 0.178322  | 0.177448  | 0.175117  | 0.173368  | 0.143065 |
| 0.141754  | 0.187063  | 0.185023  | 0.191142  | 0.18648   | 0.182692  | 0.167249 |
| 0.249563  | 0.128788  | 0.123834  | 0.116259  | 0.11451   | 0.133741  | 0.124126 |
| 0.244464  | 0.126894  | 0.121066  | 0.123689  | 0.122815  | 0.127477  | 0.107372 |
| 0.251457  | 0.11961   | 0.101544  | 0.126311  | 0.121358  | 0.123397  | 0.125146 |
| 0.245775  | 0.148019  | 0.142483  | 0.144814  | 0.142483  | 0.147436  | 0.129371 |
| 0.247523  | 0.126166  | 0.11859   | 0.117716  | 0.113054  | 0.129662  | 0.126748 |
| 0.251457  | 0.131265  | 0.125437  | 0.11961   | 0.112325  | 0.137092  | 0.131265 |
| 0.254516  | 0.129662  | 0.0556527 | 0.123834  | 0.123543  | 0.131993  | 0.134615 |
| 0.235577  | 0.120629  | 0.119172  | 0.120338  | 0.119464  | 0.120921  | 0.102564 |
| 0.241841  | 0.135927  | 0.126894  | 0.129225  | 0.127185  | 0.135927  | 0.116404 |
| 0.238491  | 0.128497  | 0.0710956 | 0.126166  | 0.123252  | 0.124417  | 0.111888 |
| 0.257284  | 0.126894  | 0.114073  | 0.131265  | 0.128059  | 0.127477  | 0.130099 |
| 0.262966  | 0.138695  | 0.12704   | 0.142774  | 0.140443  | 0.136655  | 0.1419   |
| 0.249417  | 0.11961   | 0.120484  | 0.124854  | 0.123106  | 0.119901  | 0.118153 |
| 0.259178  | 0.131119  | 0.120047  | 0.136364  | 0.133159  | 0.131119  | 0.138986 |
| 0.258596  | 0.134033  | 0.0536131 | 0.127331  | 0.127914  | 0.133741  | 0.13986  |
| 0.136655  | 0.206439  | 0.205565  | 0.211101  | 0.209062  | 0.203234  | 0.184878 |
| 0.250728  | 0.122086  | 0.108974  | 0.125     | 0.126166  | 0.124126  | 0.127622 |
| 0.142628  | 0.193765  | 0.190851  | 0.199301  | 0.193182  | 0.18648   | 0.168415 |
| 0.246649  | 0.126457  | 0.113054  | 0.0926573 | 0.0874126 | 0.134033  | 0.125    |
| 0.241113  | 0.129953  | 0.128497  | 0.131993  | 0.127622  | 0.113928  | 0.109848 |
| 0.246649  | 0.0498252 | 0.122669  | 0.129662  | 0.123543  | 0.0638112 | 0.121503 |
| 0.244172  | 0.0592949 | 0.116113  | 0.125437  | 0.121358  | 0.0796911 | 0.119318 |
| 0.237908  | 0.129079  | 0.122669  | 0.122669  | 0.123834  | 0.128497  | 0.109557 |
| 0.241696  | 0.127622  | 0.118298  | 0.121795  | 0.122378  | 0.124709  | 0.109266 |
| 0.241404  | 0.122669  | 0.120047  | 0.125583  | 0.123252  | 0.111305  | 0.105186 |
| 0.251166  | 0.129225  | 0.114656  | 0.0482226 | 0.050845  | 0.136218  | 0.124272 |
| 0.252331  | 0.0525932 | 0.127185  | 0.131265  | 0.126603  | 0.0686189 | 0.124563 |
| 0.246941  | 0.137238  | 0.0617716 | 0.134324  | 0.129371  | 0.133741  | 0.137238 |
| 0.0852273 | 0.251748  | 0.252914  | 0.252914  | 0.25204   | 0.240967  | 0.229021 |
| 0.244027  | 0.12296   | 0.121503  | 0.127622  | 0.124126  | 0.106352  | 0.106352 |
| 0.144814  | 0.185752  | 0.183421  | 0.188083  | 0.182838  | 0.181381  | 0.160402 |
| 0.136509  | 0.192016  | 0.187937  | 0.194056  | 0.189394  | 0.188228  | 0.170746 |
| 0.243298  | 0.129808  | 0.116987  | 0.124272  | 0.12398   | 0.133596  | 0.118444 |
| 0.245047  | 0.113199  | 0.114948  | 0.116987  | 0.11757   | 0.114073  | 0.112034 |
| 0.243298  | 0.128642  | 0.12602   | 0.128934  | 0.125728  | 0.112034  | 0.113491 |
| 0.238345  | 0.121066  | 0.112908  | 0.116696  | 0.114948  | 0.123689  | 0.106498 |
| 0.236451  | 0.114802  | 0.116259  | 0.122378  | 0.121503  | 0.112762  | 0.105769 |
| 0.253642  | 0.126457  | 0.0486597 | 0.119172  | 0.120338  | 0.125874  | 0.129953 |
| 0.237179  | 0.128934  | 0.126311  | 0.119901  | 0.11961   | 0.124563  | 0.102127 |

|          |           |           |           |           |           |           |
|----------|-----------|-----------|-----------|-----------|-----------|-----------|
| 0.25     | 0.137383  | 0.127477  | 0.133596  | 0.13243   | 0.135344  | 0.117861  |
| 0.242861 | 0.122086  | 0.120338  | 0.125874  | 0.120921  | 0.106935  | 0.107226  |
| 0.247815 | 0.133741  | 0.126166  | 0.127622  | 0.128788  | 0.13141   | 0.114802  |
| 0.247378 | 0.123689  | 0.117279  | 0.112908  | 0.113782  | 0.126894  | 0.124563  |
| 0.25204  | 0.0537587 | 0.128642  | 0.136218  | 0.129225  | 0.067162  | 0.127477  |
| 0.252477 | 0.125291  | 0.113345  | 0.131702  | 0.128205  | 0.127331  | 0.127914  |
| 0.25641  | 0.136509  | 0.0598776 | 0.133013  | 0.13039   | 0.135052  | 0.141463  |
| 0.249272 | 0.129371  | 0.119755  | 0.130245  | 0.130245  | 0.127622  | 0.126166  |
| 0.236742 | 0.111888  | 0.11451   | 0.12704   | 0.118298  | 0.0958625 | 0.103147  |
| 0.252477 | 0.140734  | 0.129953  | 0.12704   | 0.122378  | 0.141026  | 0.142191  |
| 0.139569 | 0.188374  | 0.183421  | 0.186334  | 0.183421  | 0.183712  | 0.161276  |
| 0.249272 | 0.140152  | 0.13549   | 0.132576  | 0.133741  | 0.13986   | 0.123252  |
| 0.241696 | 0.126166  | 0.11655   | 0.12296   | 0.121212  | 0.125     | 0.106061  |
| 0.250291 | 0.0479312 | 0.123689  | 0.127477  | 0.12398   | 0.0662879 | 0.127477  |
| 0.243735 | 0.0574009 | 0.112471  | 0.119755  | 0.119172  | 0.0795455 | 0.11859   |
| 0.249709 | 0.121941  | 0.10912   | 0.126603  | 0.122523  | 0.12602   | 0.128059  |
| 0.255099 | 0.126748  | 0.111888  | 0.129079  | 0.126166  | 0.127914  | 0.130245  |
| 0.144231 | 0.191579  | 0.188957  | 0.197698  | 0.192162  | 0.186334  | 0.170892  |
| 0.233974 | 0.127768  | 0.118153  | 0.125146  | 0.123689  | 0.117279  | 0.0962995 |
| 0.226836 | 0.121212  | 0.107226  | 0.120047  | 0.114802  | 0.118881  | 0.100524  |
| 0.241696 | 0.128205  | 0.123252  | 0.12296   | 0.120629  | 0.12704   | 0.11014   |
| 0.138695 | 0.197698  | 0.191579  | 0.196824  | 0.190414  | 0.18954   | 0.168269  |
| 0.241404 | 0.111888  | 0.108683  | 0.119755  | 0.115093  | 0.117424  | 0.106061  |
| 0.25641  | 0.130682  | 0.0496795 | 0.121941  | 0.126311  | 0.128351  | 0.138258  |
| 0.244172 | 0.130973  | 0.123106  | 0.124272  | 0.125728  | 0.127477  | 0.111451  |
| 0.251311 | 0.126748  | 0.118881  | 0.112762  | 0.106643  | 0.129662  | 0.128205  |
| 0.137383 | 0.188811  | 0.189103  | 0.191725  | 0.186772  | 0.185897  | 0.165501  |
| 0.250728 | 0.126166  | 0.0504079 | 0.121795  | 0.119755  | 0.124126  | 0.127622  |
| 0.239073 | 0.127331  | 0.106352  | 0.115676  | 0.113054  | 0.128205  | 0.118298  |
| 0.237617 | 0.113928  | 0.113054  | 0.117133  | 0.113636  | 0.117716  | 0.106935  |
| 0.225087 | 0.116259  | 0.116259  | 0.125874  | 0.123543  | 0.117716  | 0.100816  |
| 0.254079 | 0.129516  | 0.117279  | 0.0496795 | 0.0490967 | 0.13884   | 0.127477  |
| 0.257576 | 0.135052  | 0.0557984 | 0.125437  | 0.127185  | 0.133596  | 0.141171  |
| 0.241259 | 0.121066  | 0.118735  | 0.123397  | 0.121358  | 0.106206  | 0.108246  |
| 0.251166 | 0.128934  | 0.119318  | 0.126894  | 0.125437  | 0.133013  | 0.125728  |
| 0.254516 | 0.151224  | 0.150932  | 0.138112  | 0.132867  | 0.151224  | 0.148893  |
| 0.103001 | 0.238345  | 0.236305  | 0.238054  | 0.234557  | 0.229312  | 0.213578  |
| 0.254808 | 0.136946  | 0.123834  | 0.134033  | 0.134324  | 0.130828  | 0.132576  |
| 0.253934 | 0.127622  | 0.11655   | 0.0498252 | 0.0501166 | 0.137529  | 0.126166  |
| 0.234557 | 0.125728  | 0.11116   | 0.120775  | 0.121941  | 0.120484  | 0.102127  |
| 0.239365 | 0.129953  | 0.121212  | 0.127622  | 0.125291  | 0.127914  | 0.130536  |
| 0.245629 | 0.120192  | 0.0977564 | 0.0680361 | 0.0680361 | 0.118444  | 0.110286  |
| 0.245629 | 0.126603  | 0.112325  | 0.112325  | 0.109994  | 0.127477  | 0.109994  |
| 0.238199 | 0.127622  | 0.118298  | 0.120921  | 0.11859   | 0.120921  | 0.108974  |

|           |           |           |           |           |           |          |
|-----------|-----------|-----------|-----------|-----------|-----------|----------|
| 0.254953  | 0.133304  | 0.053176  | 0.12398   | 0.12398   | 0.13243   | 0.135344 |
| 0.242424  | 0.128351  | 0.11757   | 0.113199  | 0.111451  | 0.128642  | 0.115822 |
| 0.0965909 | 0.239802  | 0.240676  | 0.238928  | 0.238345  | 0.228438  | 0.217075 |
| 0.240676  | 0.111116  | 0.109994  | 0.115239  | 0.112034  | 0.112034  | 0.105915 |
| 0.246503  | 0.113199  | 0.0968823 | 0.10708   | 0.103001  | 0.122232  | 0.120484 |
| 0.24257   | 0.121795  | 0.116259  | 0.120629  | 0.118007  | 0.102855  | 0.104895 |
| 0.250583  | 0.135344  | 0.13447   | 0.124272  | 0.115239  | 0.140006  | 0.137675 |
| 0.255536  | 0.13884   | 0.135052  | 0.137966  | 0.137675  | 0.139423  | 0.139423 |
| 0.235431  | 0.120192  | 0.121649  | 0.124563  | 0.119901  | 0.121941  | 0.114365 |
| 0.238636  | 0.127185  | 0.117279  | 0.120775  | 0.121066  | 0.128059  | 0.105332 |
| 0.243444  | 0.12296   | 0.112762  | 0.113054  | 0.109266  | 0.128788  | 0.122669 |
| 0.0989219 | 0.2331    | 0.230478  | 0.234266  | 0.232226  | 0.223776  | 0.210082 |
| 0.241987  | 0.127331  | 0.123543  | 0.123543  | 0.123834  | 0.128205  | 0.110723 |
| 0.254371  | 0.130973  | 0.0514277 | 0.123689  | 0.123397  | 0.126894  | 0.134761 |
| 0.247669  | 0.124854  | 0.113199  | 0.112034  | 0.107663  | 0.127477  | 0.114656 |
| 0.249854  | 0.129371  | 0.119464  | 0.105769  | 0.105186  | 0.132284  | 0.127622 |
| 0.253351  | 0.124709  | 0.110723  | 0.115676  | 0.118298  | 0.131119  | 0.136946 |
| 0.242279  | 0.120921  | 0.119755  | 0.120047  | 0.119172  | 0.106935  | 0.108974 |
| 0.254808  | 0.130828  | 0.0559441 | 0.12704   | 0.126748  | 0.129953  | 0.136364 |
| 0.257284  | 0.135052  | 0.0572552 | 0.128059  | 0.131265  | 0.135927  | 0.140006 |
| 0.251748  | 0.12602   | 0.0479312 | 0.119027  | 0.118735  | 0.127768  | 0.133887 |
| 0.245775  | 0.118881  | 0.119464  | 0.123543  | 0.120338  | 0.107809  | 0.105478 |
| 0.254516  | 0.133741  | 0.125874  | 0.048951  | 0.0498252 | 0.137821  | 0.128788 |
| 0.257284  | 0.137966  | 0.127477  | 0.0499709 | 0.0514277 | 0.143211  | 0.135927 |
| 0.253205  | 0.0546329 | 0.128642  | 0.132139  | 0.130682  | 0.0686189 | 0.131556 |
| 0.254662  | 0.0566725 | 0.131265  | 0.135052  | 0.133013  | 0.0709499 | 0.13243  |
| 0.260635  | 0.136364  | 0.128205  | 0.048951  | 0.0506993 | 0.13986   | 0.134033 |
| 0.246066  | 0.108974  | 0.112471  | 0.120921  | 0.122378  | 0.111888  | 0.113345 |
| 0.263112  | 0.124563  | 0.101253  | 0.13447   | 0.134178  | 0.127477  | 0.142628 |
| 0.255099  | 0.138986  | 0.121503  | 0.136655  | 0.137529  | 0.136655  | 0.13549  |
| 0.119318  | 0.208333  | 0.206294  | 0.206294  | 0.204545  | 0.200758  | 0.180944 |
| 0.246066  | 0.134033  | 0.121503  | 0.133741  | 0.128788  | 0.132576  | 0.121212 |
| 0.250728  | 0.120047  | 0.102273  | 0.113054  | 0.11014   | 0.128205  | 0.127914 |
| 0.237762  | 0.128351  | 0.122523  | 0.128351  | 0.12398   | 0.109411  | 0.108246 |
| 0.104458  | 0.223776  | 0.223776  | 0.226399  | 0.225524  | 0.218823  | 0.199009 |
| 0.135635  | 0.216783  | 0.210664  | 0.21824   | 0.213869  | 0.209207  | 0.189977 |
| 0.253497  | 0.135927  | 0.0581294 | 0.128059  | 0.127768  | 0.13447   | 0.138258 |
| 0.0930944 | 0.249417  | 0.249417  | 0.251748  | 0.248834  | 0.24155   | 0.229312 |
| 0.247815  | 0.108392  | 0.11451   | 0.121503  | 0.119172  | 0.107226  | 0.115093 |
| 0.251894  | 0.141026  | 0.135781  | 0.138112  | 0.136946  | 0.141026  | 0.142191 |
| 0.243735  | 0.111597  | 0.113928  | 0.117133  | 0.118007  | 0.113636  | 0.111014 |
| 0.255828  | 0.133013  | 0.121649  | 0.0450175 | 0.0482226 | 0.138549  | 0.129225 |
| 0.129225  | 0.194347  | 0.188811  | 0.195513  | 0.188811  | 0.185606  | 0.169289 |
| 0.246503  | 0.134178  | 0.121066  | 0.119901  | 0.117861  | 0.134761  | 0.13039  |



|          |           |           |           |           |           |          |
|----------|-----------|-----------|-----------|-----------|-----------|----------|
| 0.130828 | 0.196533  | 0.195367  | 0.201777  | 0.196824  | 0.191288  | 0.171474 |
| 0.248834 | 0.125728  | 0.115822  | 0.123397  | 0.117279  | 0.127477  | 0.124563 |
| 0.233974 | 0.12602   | 0.0732809 | 0.123106  | 0.121358  | 0.116404  | 0.105332 |
| 0.246212 | 0.120775  | 0.123106  | 0.120775  | 0.121066  | 0.121649  | 0.124272 |
| 0.231643 | 0.116696  | 0.107663  | 0.115822  | 0.114656  | 0.117861  | 0.103875 |
| 0.240239 | 0.115385  | 0.114219  | 0.120338  | 0.115676  | 0.102564  | 0.102855 |
| 0.246066 | 0.12296   | 0.115676  | 0.125583  | 0.120629  | 0.127622  | 0.117424 |
| 0.238782 | 0.109848  | 0.107809  | 0.115093  | 0.112179  | 0.113636  | 0.107226 |
| 0.241259 | 0.126603  | 0.113491  | 0.120192  | 0.119318  | 0.125437  | 0.104458 |
| 0.253642 | 0.11014   | 0.0871212 | 0.125583  | 0.122669  | 0.112179  | 0.126748 |
| 0.246066 | 0.125     | 0.111305  | 0.11859   | 0.120921  | 0.125291  | 0.120338 |
| 0.242716 | 0.113199  | 0.111742  | 0.116113  | 0.114365  | 0.116696  | 0.109703 |
| 0.244027 | 0.0687646 | 0.121212  | 0.130245  | 0.126457  | 0.0670163 | 0.107517 |
| 0.247232 | 0.134907  | 0.128205  | 0.131702  | 0.128497  | 0.136364  | 0.117133 |
| 0.245921 | 0.0520105 | 0.114365  | 0.123397  | 0.11961   | 0.0724068 | 0.118735 |
| 0.244901 | 0.126748  | 0.110723  | 0.117424  | 0.113054  | 0.127622  | 0.124126 |
| 0.241259 | 0.116696  | 0.113199  | 0.11961   | 0.117279  | 0.105332  | 0.104749 |
| 0.245338 | 0.126311  | 0.0575466 | 0.123106  | 0.120775  | 0.121066  | 0.124563 |
| 0.252331 | 0.128059  | 0.11757   | 0.0549242 | 0.0517191 | 0.133304  | 0.123689 |
| 0.253642 | 0.123252  | 0.109557  | 0.125874  | 0.124126  | 0.125583  | 0.129953 |
| 0.249272 | 0.0524476 | 0.118298  | 0.127331  | 0.120338  | 0.0751748 | 0.119755 |
| 0.241841 | 0.125146  | 0.11757   | 0.12602   | 0.120775  | 0.128059  | 0.104458 |
| 0.244901 | 0.136072  | 0.125874  | 0.129662  | 0.126166  | 0.136946  | 0.118007 |
| 0.247232 | 0.141608  | 0.137238  | 0.140152  | 0.137529  | 0.141608  | 0.123252 |
| 0.245047 | 0.119318  | 0.0557984 | 0.111742  | 0.113782  | 0.119901  | 0.121941 |
| 0.242424 | 0.11961   | 0.116696  | 0.12398   | 0.121941  | 0.107955  | 0.107955 |
| 0.242279 | 0.118007  | 0.104312  | 0.107226  | 0.106643  | 0.124126  | 0.103438 |
| 0.256556 | 0.138695  | 0.129371  | 0.0515734 | 0.0550699 | 0.141317  | 0.134615 |
| 0.248252 | 0.115239  | 0.115239  | 0.123397  | 0.121066  | 0.11757   | 0.112325 |
| 0.262529 | 0.140589  | 0.127185  | 0.143211  | 0.143211  | 0.138258  | 0.146707 |
| 0.249417 | 0.139132  | 0.13884   | 0.14292   | 0.141171  | 0.122815  | 0.121358 |
| 0.251603 | 0.132576  | 0.127622  | 0.113928  | 0.114802  | 0.138986  | 0.13345  |
| 0.243881 | 0.116113  | 0.114656  | 0.118735  | 0.117861  | 0.116113  | 0.116696 |
| 0.245484 | 0.124126  | 0.112762  | 0.10373   | 0.0981935 | 0.126166  | 0.124417 |
| 0.251311 | 0.0498252 | 0.129079  | 0.133741  | 0.133159  | 0.0699301 | 0.127622 |
| 0.13986  | 0.208188  | 0.203526  | 0.211393  | 0.208479  | 0.202652  | 0.18546  |
| 0.241259 | 0.126311  | 0.108537  | 0.116404  | 0.110868  | 0.128059  | 0.120775 |
| 0.250728 | 0.120921  | 0.118298  | 0.122669  | 0.117716  | 0.123543  | 0.125291 |
| 0.251748 | 0.128059  | 0.11553   | 0.0467657 | 0.0499709 | 0.131847  | 0.124272 |
| 0.246358 | 0.0574009 | 0.117716  | 0.127914  | 0.122378  | 0.0766317 | 0.121795 |
| 0.253205 | 0.129808  | 0.120775  | 0.125437  | 0.123106  | 0.13039   | 0.129516 |
| 0.248834 | 0.126603  | 0.115239  | 0.12602   | 0.123689  | 0.135635  | 0.121358 |
| 0.251311 | 0.134033  | 0.120629  | 0.12704   | 0.120921  | 0.138112  | 0.122086 |
| 0.248834 | 0.129225  | 0.123689  | 0.116696  | 0.109994  | 0.133304  | 0.126894 |

|          |           |           |           |           |          |          |
|----------|-----------|-----------|-----------|-----------|----------|----------|
| 0.253497 | 0.10912   | 0.0872669 | 0.120775  | 0.116696  | 0.116113 | 0.126603 |
| 0.254079 | 0.134178  | 0.124272  | 0.0482226 | 0.0511364 | 0.137966 | 0.130973 |
| 0.249126 | 0.119318  | 0.114365  | 0.119901  | 0.114948  | 0.125437 | 0.122232 |
| 0.252477 | 0.130245  | 0.121212  | 0.128788  | 0.124417  | 0.127914 | 0.125874 |
| 0.212995 | 0.174679  | 0.169435  | 0.180507  | 0.178467  | 0.176428 | 0.172057 |
| 0.240967 | 0.126311  | 0.114656  | 0.121941  | 0.121941  | 0.128059 | 0.107663 |
| 0.243153 | 0.136946  | 0.124709  | 0.0588578 | 0.0579837 | 0.137238 | 0.124126 |
| 0.255245 | 0.124272  | 0.107372  | 0.123106  | 0.120484  | 0.126603 | 0.128642 |
| 0.244901 | 0.128788  | 0.112179  | 0.124709  | 0.122378  | 0.121212 | 0.111888 |
| 0.248689 | 0.113928  | 0.109266  | 0.116259  | 0.114219  | 0.11859  | 0.112471 |
| 0.245192 | 0.117716  | 0.104604  | 0.119172  | 0.119464  | 0.120047 | 0.11451  |
| 0.251311 | 0.119755  | 0.113054  | 0.121212  | 0.114219  | 0.122086 | 0.11655  |
| 0.251603 | 0.127914  | 0.10169   | 0.118881  | 0.118881  | 0.129662 | 0.128788 |
| 0.237034 | 0.12296   | 0.119172  | 0.125     | 0.123834  | 0.116841 | 0.100524 |
| 0.254953 | 0.125146  | 0.119901  | 0.13243   | 0.131556  | 0.129225 | 0.135344 |
| 0.243153 | 0.119172  | 0.102855  | 0.115093  | 0.114802  | 0.117716 | 0.11451  |
| 0.247669 | 0.123106  | 0.104167  | 0.126603  | 0.125728  | 0.125437 | 0.121941 |
| 0.260344 | 0.143357  | 0.102273  | 0.130245  | 0.127914  | 0.13986  | 0.138403 |
| 0.250146 | 0.120629  | 0.101981  | 0.124709  | 0.125     | 0.121503 | 0.126748 |
| 0.248397 | 0.114802  | 0.11451   | 0.129079  | 0.125874  | 0.121503 | 0.132284 |
| 0.251311 | 0.11655   | 0.101107  | 0.123252  | 0.119172  | 0.120338 | 0.123543 |
| 0.250437 | 0.117424  | 0.105769  | 0.126748  | 0.126166  | 0.120338 | 0.125874 |
| 0.246066 | 0.113345  | 0.108392  | 0.119172  | 0.115967  | 0.115093 | 0.11859  |
| 0.254662 | 0.125437  | 0.109703  | 0.129225  | 0.129808  | 0.125437 | 0.127768 |
| 0.25     | 0.117279  | 0.106206  | 0.120775  | 0.113491  | 0.119027 | 0.120192 |
| 0.255536 | 0.142337  | 0.11553   | 0.140006  | 0.142045  | 0.147582 | 0.148164 |
| 0.250874 | 0.133596  | 0.104458  | 0.133304  | 0.13039   | 0.13884  | 0.134761 |
| 0.251166 | 0.111451  | 0.101544  | 0.121358  | 0.117861  | 0.116987 | 0.124272 |
| 0.260344 | 0.138986  | 0.106643  | 0.134324  | 0.129662  | 0.140443 | 0.143357 |
| 0.246358 | 0.0990676 | 0.125583  | 0.124126  | 0.121212  | 0.109266 | 0.128205 |
| 0.25102  | 0.137821  | 0.124417  | 0.142774  | 0.141317  | 0.131119 | 0.132576 |
| 0.247232 | 0.113054  | 0.112471  | 0.125874  | 0.117716  | 0.113928 | 0.122378 |
| 0.255245 | 0.146125  | 0.135052  | 0.123689  | 0.129808  | 0.14729  | 0.146416 |
| 0.25     | 0.136801  | 0.119027  | 0.118444  | 0.119318  | 0.137966 | 0.136509 |
| 0.253788 | 0.138258  | 0.122523  | 0.133596  | 0.128642  | 0.132721 | 0.134761 |
| 0.257576 | 0.105624  | 0.115239  | 0.13039   | 0.128642  | 0.11116  | 0.128642 |
| 0.250146 | 0.113054  | 0.0955711 | 0.126457  | 0.124417  | 0.119172 | 0.122669 |
| 0.249417 | 0.116404  | 0.100962  | 0.120775  | 0.118153  | 0.120484 | 0.124272 |
| 0.252477 | 0.125291  | 0.101107  | 0.11014   | 0.109266  | 0.129662 | 0.128788 |
| 0.254808 | 0.122669  | 0.112762  | 0.125583  | 0.121795  | 0.122669 | 0.126166 |
| 0.259615 | 0.128642  | 0.12398   | 0.132139  | 0.128934  | 0.125728 | 0.135927 |
| 0.248834 | 0.128059  | 0.105624  | 0.128642  | 0.129225  | 0.125146 | 0.121066 |
| 0.247669 | 0.0986305 | 0.105041  | 0.114365  | 0.117279  | 0.105624 | 0.121358 |
| 0.247815 | 0.118007  | 0.100524  | 0.122378  | 0.119464  | 0.121795 | 0.124417 |

|          |          |          |          |          |          |          |
|----------|----------|----------|----------|----------|----------|----------|
| 0.247378 | 0.125437 | 0.110286 | 0.122815 | 0.121066 | 0.122523 | 0.128642 |
| 0.25     | 0.116987 | 0.097465 | 0.116696 | 0.117279 | 0.117279 | 0.123106 |
| 0.252185 | 0.128788 | 0.106061 | 0.129079 | 0.128497 | 0.127331 | 0.131702 |
| 0.246941 | 0.115967 | 0.113928 | 0.123834 | 0.122086 | 0.116259 | 0.120047 |
| 0.232517 | 0.118735 | 0.120192 | 0.124563 | 0.120484 | 0.119318 | 0.116404 |
| 0.250583 | 0.125146 | 0.116696 | 0.124272 | 0.119318 | 0.124563 | 0.119901 |
| 0.243298 | 0.107955 | 0.113199 | 0.120775 | 0.119318 | 0.10912  | 0.114073 |
| 0.244755 | 0.118153 | 0.105624 | 0.114365 | 0.114948 | 0.120775 | 0.123106 |
| 0.235286 | 0.119755 | 0.11451  | 0.120921 | 0.119755 | 0.121212 | 0.113345 |
| 0.249417 | 0.12398  | 0.111451 | 0.120192 | 0.120192 | 0.123397 | 0.114656 |
| 0.245921 | 0.12602  | 0.126311 | 0.127185 | 0.122523 | 0.127768 | 0.113782 |
| 0.2331   | 0.111451 | 0.108829 | 0.117279 | 0.112908 | 0.116404 | 0.112034 |
| 0.253059 | 0.128788 | 0.125583 | 0.133741 | 0.130828 | 0.129371 | 0.129662 |

| TDr_1669  | TDr_1676  | TDr_1684  | TDr_1686  | TDr_1688  | TDr_1707  | TDr_1709 |
|-----------|-----------|-----------|-----------|-----------|-----------|----------|
| 0.121358  | 0.116841  | 0.124563  | 0.120484  | 0.110431  | 0.10708   | 0.147436 |
| 0.117133  | 0.106206  | 0.115385  | 0.102855  | 0.104458  | 0.108683  | 0.133596 |
| 0.115967  | 0.0995047 | 0.116841  | 0.0999417 | 0.10271   | 0.102273  | 0.134178 |
| 0.116259  | 0.088141  | 0.121503  | 0.104604  | 0.0893065 | 0.107517  | 0.145251 |
| 0.127914  | 0.131847  | 0.0955711 | 0.131702  | 0.129808  | 0.129371  | 0.133887 |
| 0.132576  | 0.127768  | 0.124709  | 0.11859   | 0.123689  | 0.12296   | 0.135635 |
| 0.115239  | 0.123834  | 0.129516  | 0.122815  | 0.122669  | 0.109994  | 0.14831  |
| 0.118444  | 0.101107  | 0.113199  | 0.10708   | 0.101107  | 0.110577  | 0.135781 |
| 0.109266  | 0.103293  | 0.114802  | 0.104312  | 0.101544  | 0.0879953 | 0.135344 |
| 0.121649  | 0.11859   | 0.116404  | 0.0942599 | 0.113345  | 0.0362762 | 0.139277 |
| 0.114802  | 0.122232  | 0.124417  | 0.109557  | 0.120775  | 0.107517  | 0.148456 |
| 0.107372  | 0.104604  | 0.114656  | 0.110577  | 0.104895  | 0.11116   | 0.138112 |
| 0.11116   | 0.111597  | 0.116696  | 0.103293  | 0.106935  | 0.0954254 | 0.141317 |
| 0.140152  | 0.129808  | 0.132867  | 0.126457  | 0.125146  | 0.120047  | 0.158654 |
| 0.128934  | 0.12704   | 0.131265  | 0.0511364 | 0.12296   | 0.103584  | 0.143939 |
| 0.108392  | 0.117861  | 0.127622  | 0.110431  | 0.117861  | 0.104895  | 0.141171 |
| 0.102418  | 0.111888  | 0.113782  | 0.110577  | 0.109848  | 0.107663  | 0.13986  |
| 0.150058  | 0.135635  | 0.125291  | 0.142483  | 0.136509  | 0.136946  | 0.137675 |
| 0.115967  | 0.100962  | 0.11655   | 0.106352  | 0.100962  | 0.106352  | 0.133887 |
| 0.206876  | 0.199446  | 0.205128  | 0.175699  | 0.195659  | 0.193473  | 0.212558 |
| 0.127768  | 0.127914  | 0.12602   | 0.116113  | 0.125874  | 0.118444  | 0.137821 |
| 0.128788  | 0.118735  | 0.120921  | 0.114802  | 0.117279  | 0.109557  | 0.137383 |
| 0.0910548 | 0.1081    | 0.11961   | 0.108537  | 0.103147  | 0.102127  | 0.13986  |
| 0.105186  | 0.125146  | 0.132576  | 0.127622  | 0.123397  | 0.121503  | 0.144668 |
| 0.102418  | 0.105186  | 0.112617  | 0.101836  | 0.103147  | 0.0875583 | 0.130536 |
| 0.130973  | 0.129371  | 0.128642  | 0.122232  | 0.128497  | 0.121358  | 0.134033 |
| 0.115822  | 0.128788  | 0.126311  | 0.122232  | 0.12704   | 0.10912   | 0.143648 |
| 0.105332  | 0.11859   | 0.132139  | 0.115822  | 0.11655   | 0.11116   | 0.1419   |
| 0.121941  | 0.128788  | 0.13243   | 0.13039   | 0.127331  | 0.120775  | 0.147145 |
| 0.121358  | 0.124709  | 0.128642  | 0.117279  | 0.117424  | 0.0977564 | 0.152389 |
| 0.121212  | 0.127185  | 0.127331  | 0.114219  | 0.128059  | 0.114802  | 0.146707 |
| 0.116696  | 0.121503  | 0.129808  | 0.113782  | 0.117133  | 0.107955  | 0.142483 |
| 0.113199  | 0.108974  | 0.118153  | 0.0986305 | 0.101981  | 0.095134  | 0.132284 |
| 0.11553   | 0.115967  | 0.122232  | 0.111451  | 0.114802  | 0.106206  | 0.141026 |
| 0.113054  | 0.124272  | 0.11859   | 0.117133  | 0.123397  | 0.109266  | 0.145251 |
| 0.120192  | 0.12704   | 0.127185  | 0.124854  | 0.127622  | 0.103875  | 0.14831  |
| 0.130536  | 0.130973  | 0.134324  | 0.129371  | 0.132139  | 0.111597  | 0.14933  |
| 0.113199  | 0.125     | 0.132139  | 0.117861  | 0.121212  | 0.108829  | 0.147436 |
| 0.0942599 | 0.109848  | 0.124272  | 0.104749  | 0.1081    | 0.106498  | 0.139277 |
| 0.10912   | 0.11859   | 0.127768  | 0.119318  | 0.120047  | 0.117279  | 0.147436 |
| 0.097465  | 0.109848  | 0.116987  | 0.107955  | 0.107226  | 0.104167  | 0.140152 |
| 0.128351  | 0.140152  | 0.150495  | 0.130099  | 0.140734  | 0.124563  | 0.156469 |

|           |          |          |          |           |           |          |
|-----------|----------|----------|----------|-----------|-----------|----------|
| 0.128351  | 0.144231 | 0.153409 | 0.14088  | 0.145396  | 0.13447   | 0.1588   |
| 0.106935  | 0.113782 | 0.11859  | 0.117133 | 0.114365  | 0.109266  | 0.143211 |
| 0.105186  | 0.112617 | 0.113928 | 0.111014 | 0.107663  | 0.092366  | 0.131556 |
| 0.112617  | 0.125291 | 0.125146 | 0.108829 | 0.120338  | 0.0875583 | 0.147145 |
| 0.107372  | 0.120921 | 0.126311 | 0.113491 | 0.116259  | 0.120484  | 0.142191 |
| 0.127622  | 0.137675 | 0.14627  | 0.134907 | 0.138549  | 0.120629  | 0.157488 |
| 0.106935  | 0.114656 | 0.124417 | 0.111597 | 0.11553   | 0.10373   | 0.14292  |
| 0.105332  | 0.119755 | 0.12602  | 0.110868 | 0.11655   | 0.107663  | 0.143357 |
| 0.14627   | 0.143502 | 0.144814 | 0.142191 | 0.142337  | 0.129953  | 0.161859 |
| 0.118298  | 0.131265 | 0.134615 | 0.125291 | 0.130682  | 0.121212  | 0.139714 |
| 0.0957168 | 0.116259 | 0.122815 | 0.116696 | 0.113928  | 0.112325  | 0.1419   |
| 0.13039   | 0.123252 | 0.128059 | 0.116113 | 0.120338  | 0.0942599 | 0.141317 |
| 0.110577  | 0.083042 | 0.120192 | 0.114656 | 0.0827506 | 0.117279  | 0.137821 |
| 0.123689  | 0.132867 | 0.150495 | 0.143211 | 0.136072  | 0.137092  | 0.151515 |
| 0.112179  | 0.127477 | 0.126748 | 0.128205 | 0.13039   | 0.115676  | 0.150204 |
| 0.101107  | 0.113782 | 0.11859  | 0.113345 | 0.108829  | 0.113928  | 0.144376 |
| 0.112179  | 0.119318 | 0.125874 | 0.113928 | 0.119027  | 0.103147  | 0.143211 |
| 0.108537  | 0.126457 | 0.131265 | 0.113782 | 0.120338  | 0.0910548 | 0.1419   |
| 0.115822  | 0.134324 | 0.144376 | 0.133887 | 0.13549   | 0.128642  | 0.157343 |
| 0.124563  | 0.132284 | 0.146999 | 0.136801 | 0.131993  | 0.124272  | 0.155303 |
| 0.151515  | 0.158071 | 0.166375 | 0.155594 | 0.152535  | 0.150641  | 0.179924 |
| 0.102273  | 0.11553  | 0.122378 | 0.108392 | 0.10912   | 0.108392  | 0.144959 |
| 0.101981  | 0.115822 | 0.125874 | 0.112471 | 0.114365  | 0.105769  | 0.137966 |
| 0.101399  | 0.114073 | 0.115676 | 0.115967 | 0.113491  | 0.106935  | 0.143211 |
| 0.136218  | 0.141608 | 0.146999 | 0.13243  | 0.139277  | 0.125437  | 0.159965 |
| 0.103001  | 0.109266 | 0.120192 | 0.107955 | 0.111597  | 0.112325  | 0.145396 |
| 0.118881  | 0.132721 | 0.139569 | 0.131993 | 0.131556  | 0.125874  | 0.146125 |
| 0.105769  | 0.124854 | 0.13141  | 0.111597 | 0.119318  | 0.0961538 | 0.143794 |
| 0.10271   | 0.118881 | 0.124563 | 0.116987 | 0.115676  | 0.113782  | 0.14627  |
| 0.14729   | 0.146562 | 0.149038 | 0.141754 | 0.144231  | 0.136801  | 0.161713 |
| 0.102418  | 0.118881 | 0.131847 | 0.120192 | 0.11859   | 0.11961   | 0.15035  |
| 0.126457  | 0.137383 | 0.143648 | 0.133741 | 0.137383  | 0.129371  | 0.157197 |
| 0.120775  | 0.130245 | 0.135344 | 0.127768 | 0.129371  | 0.125728  | 0.1419   |
| 0.116259  | 0.103584 | 0.120338 | 0.113928 | 0.104749  | 0.111014  | 0.132721 |
| 0.0961538 | 0.112325 | 0.121503 | 0.115385 | 0.113782  | 0.111305  | 0.142045 |
| 0.10169   | 0.114073 | 0.119755 | 0.112179 | 0.112617  | 0.11014   | 0.142045 |
| 0.115676  | 0.126603 | 0.137529 | 0.132867 | 0.129516  | 0.129371  | 0.15574  |
| 0.105041  | 0.115967 | 0.119318 | 0.115239 | 0.113928  | 0.105041  | 0.141608 |
| 0.126748  | 0.135927 | 0.151515 | 0.134907 | 0.133304  | 0.125291  | 0.159528 |
| 0.11014   | 0.12398  | 0.130828 | 0.119464 | 0.119027  | 0.11655   | 0.1537   |
| 0.0967366 | 0.114073 | 0.126457 | 0.116259 | 0.116113  | 0.118881  | 0.142045 |
| 0.103147  | 0.118153 | 0.126166 | 0.112762 | 0.120775  | 0.11451   | 0.147873 |
| 0.105186  | 0.11757  | 0.133159 | 0.118007 | 0.117861  | 0.11655   | 0.146125 |
| 0.100233  | 0.116987 | 0.120921 | 0.114219 | 0.118444  | 0.107517  | 0.143794 |

|           |          |           |           |          |           |          |
|-----------|----------|-----------|-----------|----------|-----------|----------|
| 0.102273  | 0.114948 | 0.124709  | 0.115385  | 0.114365 | 0.116259  | 0.140589 |
| 0.120192  | 0.136946 | 0.141754  | 0.130682  | 0.136946 | 0.128642  | 0.155886 |
| 0.10067   | 0.11859  | 0.11553   | 0.102127  | 0.114219 | 0.10271   | 0.145396 |
| 0.11014   | 0.114365 | 0.117133  | 0.108392  | 0.11553  | 0.0981935 | 0.139714 |
| 0.125291  | 0.126603 | 0.134033  | 0.11859   | 0.124854 | 0.111597  | 0.147873 |
| 0.123543  | 0.129808 | 0.130828  | 0.12704   | 0.127768 | 0.114802  | 0.151952 |
| 0.128497  | 0.13884  | 0.135198  | 0.123543  | 0.133887 | 0.116841  | 0.13243  |
| 0.130099  | 0.137821 | 0.139714  | 0.133013  | 0.13345  | 0.125146  | 0.141317 |
| 0.120047  | 0.121358 | 0.0999417 | 0.118007  | 0.119027 | 0.108683  | 0.139714 |
| 0.181527  | 0.180798 | 0.181235  | 0.18007   | 0.17905  | 0.171037  | 0.196241 |
| 0.110868  | 0.1081   | 0.117279  | 0.106206  | 0.109557 | 0.103293  | 0.140734 |
| 0.132284  | 0.137675 | 0.137238  | 0.129079  | 0.133304 | 0.119464  | 0.144085 |
| 0.123834  | 0.127477 | 0.128497  | 0.120338  | 0.126311 | 0.115385  | 0.137092 |
| 0.128642  | 0.138112 | 0.135052  | 0.133596  | 0.138403 | 0.125146  | 0.152098 |
| 0.106935  | 0.116113 | 0.11859   | 0.108392  | 0.111742 | 0.105186  | 0.131556 |
| 0.124126  | 0.130682 | 0.136072  | 0.126457  | 0.127477 | 0.120047  | 0.142045 |
| 0.117424  | 0.120192 | 0.123252  | 0.113345  | 0.113782 | 0.103438  | 0.133013 |
| 0.122232  | 0.129371 | 0.131556  | 0.122232  | 0.126748 | 0.107372  | 0.132284 |
| 0.113491  | 0.117716 | 0.123689  | 0.110577  | 0.113345 | 0.0995047 | 0.142774 |
| 0.128351  | 0.137821 | 0.144376  | 0.135927  | 0.136072 | 0.117861  | 0.135781 |
| 0.102418  | 0.11655  | 0.126894  | 0.105041  | 0.113636 | 0.0916375 | 0.143065 |
| 0.13141   | 0.134178 | 0.138112  | 0.129662  | 0.13243  | 0.118007  | 0.145833 |
| 0.115239  | 0.123252 | 0.122815  | 0.116696  | 0.117716 | 0.104167  | 0.145688 |
| 0.116841  | 0.128642 | 0.136072  | 0.128205  | 0.131265 | 0.11655   | 0.149621 |
| 0.122523  | 0.133741 | 0.134178  | 0.121649  | 0.131702 | 0.108246  | 0.154138 |
| 0.112908  | 0.113928 | 0.116696  | 0.110868  | 0.113636 | 0.0992133 | 0.134324 |
| 0.140297  | 0.143939 | 0.153992  | 0.137675  | 0.141026 | 0.133887  | 0.162005 |
| 0.114802  | 0.119901 | 0.120921  | 0.116841  | 0.120192 | 0.100816  | 0.136801 |
| 0.111597  | 0.118735 | 0.115967  | 0.110431  | 0.112325 | 0.0996503 | 0.138258 |
| 0.108246  | 0.120629 | 0.129808  | 0.116696  | 0.120047 | 0.103584  | 0.1419   |
| 0.142628  | 0.139569 | 0.144085  | 0.136509  | 0.134324 | 0.108829  | 0.152681 |
| 0.11553   | 0.126748 | 0.130099  | 0.119901  | 0.121212 | 0.111742  | 0.144231 |
| 0.110577  | 0.111014 | 0.122232  | 0.105915  | 0.109266 | 0.0995047 | 0.135198 |
| 0.10912   | 0.114219 | 0.120484  | 0.106789  | 0.112179 | 0.10067   | 0.130245 |
| 0.115385  | 0.118153 | 0.125291  | 0.115385  | 0.114656 | 0.105769  | 0.144376 |
| 0.118735  | 0.129953 | 0.141463  | 0.112908  | 0.124417 | 0.0849359 | 0.142483 |
| 0.116259  | 0.121941 | 0.123543  | 0.120338  | 0.117861 | 0.107517  | 0.144085 |
| 0.0989219 | 0.106352 | 0.119901  | 0.0980478 | 0.104604 | 0.0890152 | 0.136072 |
| 0.10067   | 0.109848 | 0.119318  | 0.103293  | 0.104604 | 0.0840618 | 0.136655 |
| 0.106643  | 0.11757  | 0.126166  | 0.105186  | 0.110577 | 0.0842075 | 0.138258 |
| 0.109266  | 0.118444 | 0.120921  | 0.116841  | 0.116696 | 0.117424  | 0.144085 |
| 0.115822  | 0.130828 | 0.141463  | 0.11961   | 0.12704  | 0.104749  | 0.147436 |
| 0.101981  | 0.113199 | 0.121503  | 0.099359  | 0.110286 | 0.0941142 | 0.137966 |
| 0.0986305 | 0.109266 | 0.121649  | 0.0960082 | 0.106643 | 0.0875583 | 0.13345  |

|           |           |          |           |           |           |          |
|-----------|-----------|----------|-----------|-----------|-----------|----------|
| 0.106206  | 0.134033  | 0.133596 | 0.11553   | 0.128205  | 0.101836  | 0.14831  |
| 0.0949883 | 0.114365  | 0.119464 | 0.102273  | 0.10912   | 0.0961538 | 0.145542 |
| 0.123834  | 0.125728  | 0.127622 | 0.117716  | 0.120484  | 0.112762  | 0.150787 |
| 0.134615  | 0.131556  | 0.135198 | 0.127331  | 0.131847  | 0.120629  | 0.154866 |
| 0.109266  | 0.118735  | 0.126166 | 0.111014  | 0.116113  | 0.0882867 | 0.140006 |
| 0.103584  | 0.111305  | 0.121941 | 0.102127  | 0.11014   | 0.0942599 | 0.141608 |
| 0.102418  | 0.112762  | 0.128059 | 0.103001  | 0.109557  | 0.0895979 | 0.141317 |
| 0.103001  | 0.109848  | 0.11553  | 0.105332  | 0.106935  | 0.0916375 | 0.136072 |
| 0.119318  | 0.126457  | 0.13884  | 0.117861  | 0.119755  | 0.0910548 | 0.143357 |
| 0.0957168 | 0.108392  | 0.120775 | 0.100962  | 0.106352  | 0.08581   | 0.135781 |
| 0.130245  | 0.13447   | 0.142483 | 0.131702  | 0.137383  | 0.129662  | 0.157488 |
| 0.126603  | 0.136364  | 0.138549 | 0.127768  | 0.136072  | 0.11757   | 0.154138 |
| 0.116113  | 0.125     | 0.131556 | 0.115822  | 0.124126  | 0.108537  | 0.15035  |
| 0.109848  | 0.123689  | 0.122378 | 0.109266  | 0.119318  | 0.103438  | 0.145542 |
| 0.113928  | 0.122523  | 0.123834 | 0.109557  | 0.115822  | 0.101981  | 0.135052 |
| 0.0954254 | 0.117424  | 0.123397 | 0.106789  | 0.11655   | 0.0960082 | 0.142191 |
| 0.0935315 | 0.111742  | 0.121503 | 0.11451   | 0.112908  | 0.101981  | 0.145833 |
| 0.105478  | 0.109703  | 0.117716 | 0.106643  | 0.108537  | 0.102273  | 0.135344 |
| 0.101981  | 0.0913462 | 0.122086 | 0.112471  | 0.0933858 | 0.111597  | 0.138549 |
| 0.101107  | 0.132139  | 0.13986  | 0.125583  | 0.133013  | 0.125291  | 0.14729  |
| 0.113199  | 0.118298  | 0.120775 | 0.111742  | 0.11655   | 0.110868  | 0.136072 |
| 0.13141   | 0.129808  | 0.137238 | 0.121503  | 0.126894  | 0.102564  | 0.149621 |
| 0.134761  | 0.138112  | 0.139714 | 0.127477  | 0.134033  | 0.119027  | 0.145979 |
| 0.192453  | 0.183858  | 0.192745 | 0.184295  | 0.181527  | 0.193328  | 0.210082 |
| 0.236597  | 0.228293  | 0.23514  | 0.231643  | 0.223339  | 0.234266  | 0.242861 |
| 0.10708   | 0.0693473 | 0.115822 | 0.111742  | 0.0690559 | 0.115239  | 0.136655 |
| 0.0987762 | 0.113782  | 0.122669 | 0.111305  | 0.111451  | 0.110431  | 0.137675 |
| 0.10169   | 0.108537  | 0.117424 | 0.1081    | 0.106498  | 0.11014   | 0.136218 |
| 0.105478  | 0.114365  | 0.120629 | 0.111014  | 0.108829  | 0.111014  | 0.131847 |
| 0.133159  | 0.127768  | 0.136946 | 0.0550699 | 0.123397  | 0.102273  | 0.143502 |
| 0.105186  | 0.113199  | 0.126166 | 0.115676  | 0.111451  | 0.115093  | 0.136801 |
| 0.122815  | 0.145396  | 0.152244 | 0.144376  | 0.145396  | 0.14292   | 0.156469 |
| 0.100816  | 0.117861  | 0.124126 | 0.117716  | 0.114948  | 0.120047  | 0.136218 |
| 0.114219  | 0.124563  | 0.138695 | 0.131993  | 0.127477  | 0.12704   | 0.146125 |
| 0.116404  | 0.129953  | 0.136509 | 0.130099  | 0.129953  | 0.124272  | 0.145396 |
| 0.118735  | 0.13345   | 0.144085 | 0.124563  | 0.131993  | 0.128351  | 0.143939 |
| 0.12398   | 0.134907  | 0.141463 | 0.128934  | 0.134033  | 0.124854  | 0.155012 |
| 0.106789  | 0.119172  | 0.123106 | 0.114948  | 0.119755  | 0.115822  | 0.143939 |
| 0.099796  | 0.113345  | 0.116404 | 0.113782  | 0.115093  | 0.113782  | 0.136946 |
| 0.102273  | 0.122523  | 0.124417 | 0.115385  | 0.118153  | 0.115385  | 0.141171 |
| 0.0981935 | 0.109994  | 0.121212 | 0.112762  | 0.108246  | 0.112179  | 0.133304 |
| 0.0973193 | 0.113199  | 0.117716 | 0.111305  | 0.112325  | 0.113345  | 0.134761 |
| 0.0989219 | 0.113636  | 0.119318 | 0.116113  | 0.110723  | 0.114948  | 0.141317 |
| 0.109557  | 0.127768  | 0.136072 | 0.12296   | 0.129225  | 0.125291  | 0.141463 |

|           |          |          |          |          |           |          |
|-----------|----------|----------|----------|----------|-----------|----------|
| 0.11655   | 0.134761 | 0.145688 | 0.134033 | 0.133304 | 0.134324  | 0.139714 |
| 0.100962  | 0.112179 | 0.126603 | 0.120192 | 0.115676 | 0.118444  | 0.143939 |
| 0.0949883 | 0.116696 | 0.125    | 0.114219 | 0.113491 | 0.115093  | 0.140297 |
| 0.111597  | 0.13243  | 0.142774 | 0.132576 | 0.128934 | 0.130828  | 0.144376 |
| 0.0949883 | 0.112325 | 0.119755 | 0.113054 | 0.110868 | 0.113345  | 0.13884  |
| 0.122523  | 0.145396 | 0.146125 | 0.135635 | 0.143357 | 0.141463  | 0.149184 |
| 0.133596  | 0.137821 | 0.149038 | 0.124563 | 0.132867 | 0.109411  | 0.154429 |
| 0.125291  | 0.133304 | 0.135781 | 0.13141  | 0.133596 | 0.133159  | 0.137383 |
| 0.097028  | 0.109994 | 0.117716 | 0.111597 | 0.106206 | 0.109848  | 0.138549 |
| 0.0960082 | 0.111888 | 0.118153 | 0.108829 | 0.108974 | 0.105332  | 0.132284 |
| 0.106935  | 0.122523 | 0.129662 | 0.123252 | 0.122815 | 0.125874  | 0.144959 |
| 0.10708   | 0.125291 | 0.139423 | 0.124854 | 0.123543 | 0.125728  | 0.139277 |
| 0.109994  | 0.13141  | 0.137092 | 0.135344 | 0.129662 | 0.13243   | 0.146853 |
| 0.101981  | 0.115239 | 0.121795 | 0.120921 | 0.11553  | 0.124126  | 0.143211 |
| 0.0983392 | 0.118007 | 0.123106 | 0.116987 | 0.118007 | 0.118153  | 0.140734 |
| 0.105624  | 0.122669 | 0.131556 | 0.121066 | 0.120338 | 0.125437  | 0.140443 |
| 0.119027  | 0.134907 | 0.143211 | 0.133013 | 0.136946 | 0.12602   | 0.15035  |
| 0.114365  | 0.128788 | 0.137383 | 0.132139 | 0.132284 | 0.129516  | 0.149767 |
| 0.108974  | 0.132721 | 0.141608 | 0.129662 | 0.133887 | 0.13345   | 0.145833 |
| 0.11116   | 0.129953 | 0.139714 | 0.128351 | 0.129662 | 0.128934  | 0.152389 |
| 0.0977564 | 0.110431 | 0.122523 | 0.11961  | 0.111888 | 0.117279  | 0.145688 |
| 0.119901  | 0.131119 | 0.137966 | 0.130099 | 0.128205 | 0.126894  | 0.145105 |
| 0.0941142 | 0.10912  | 0.117424 | 0.111014 | 0.109411 | 0.115676  | 0.133596 |
| 0.108829  | 0.11859  | 0.122232 | 0.114656 | 0.113928 | 0.104749  | 0.140152 |
| 0.105332  | 0.11655  | 0.120484 | 0.112908 | 0.11655  | 0.114656  | 0.134033 |
| 0.103147  | 0.122815 | 0.121503 | 0.112762 | 0.116987 | 0.114219  | 0.132139 |
| 0.101107  | 0.110577 | 0.119172 | 0.113345 | 0.11116  | 0.113345  | 0.135927 |
| 0.116113  | 0.13549  | 0.140589 | 0.133887 | 0.136072 | 0.131847  | 0.15035  |
| 0.106935  | 0.121358 | 0.125583 | 0.117424 | 0.116987 | 0.114802  | 0.143794 |
| 0.11859   | 0.131265 | 0.138403 | 0.132867 | 0.132721 | 0.129953  | 0.146707 |
| 0.102273  | 0.111451 | 0.117716 | 0.113928 | 0.110868 | 0.113054  | 0.136509 |
| 0.107372  | 0.125    | 0.133304 | 0.129808 | 0.128788 | 0.124272  | 0.147436 |
| 0.107809  | 0.128059 | 0.136655 | 0.124126 | 0.123397 | 0.1081    | 0.141463 |
| 0.117716  | 0.122232 | 0.134615 | 0.109266 | 0.11757  | 0.0999417 | 0.145251 |
| 0.103584  | 0.119172 | 0.130973 | 0.114073 | 0.116841 | 0.106789  | 0.143357 |
| 0.11859   | 0.122815 | 0.127622 | 0.118298 | 0.120192 | 0.106061  | 0.14088  |
| 0.109411  | 0.118881 | 0.128351 | 0.112908 | 0.118007 | 0.111451  | 0.145105 |
| 0.109994  | 0.120047 | 0.11757  | 0.113782 | 0.115385 | 0.104167  | 0.140152 |
| 0.139423  | 0.138986 | 0.140006 | 0.123689 | 0.129079 | 0.0785256 | 0.151224 |
| 0.124709  | 0.135052 | 0.152681 | 0.130828 | 0.13447  | 0.127914  | 0.161859 |
| 0.115093  | 0.107955 | 0.114802 | 0.101399 | 0.103875 | 0.0812937 | 0.135344 |
| 0.139132  | 0.134907 | 0.139714 | 0.116113 | 0.133159 | 0.0995047 | 0.135781 |
| 0.130536  | 0.133304 | 0.135198 | 0.111305 | 0.126894 | 0.0629371 | 0.150204 |
| 0.136072  | 0.133887 | 0.135198 | 0.11859  | 0.12602  | 0.0967366 | 0.130682 |



|          |          |          |          |          |           |          |
|----------|----------|----------|----------|----------|-----------|----------|
| 0.131119 | 0.11961  | 0.126748 | 0.112179 | 0.123689 | 0.0850816 | 0.129808 |
| 0.126748 | 0.127768 | 0.13141  | 0.113636 | 0.12398  | 0.0815851 | 0.14292  |
| 0.128351 | 0.128205 | 0.130099 | 0.114948 | 0.123834 | 0.0759033 | 0.140734 |
| 0.131119 | 0.126603 | 0.129953 | 0.123252 | 0.122523 | 0.0961538 | 0.139714 |
| 0.143065 | 0.137675 | 0.140443 | 0.125874 | 0.136509 | 0.0990676 | 0.144085 |
| 0.129371 | 0.122232 | 0.134033 | 0.117133 | 0.122815 | 0.0786713 | 0.144376 |
| 0.126457 | 0.120192 | 0.12296  | 0.109557 | 0.120484 | 0.0865385 | 0.12602  |
| 0.116113 | 0.130245 | 0.143502 | 0.135927 | 0.129371 | 0.137092  | 0.156469 |
| 0.139277 | 0.136509 | 0.137529 | 0.122669 | 0.134178 | 0.0865385 | 0.145251 |
| 0.118881 | 0.114365 | 0.120921 | 0.104312 | 0.110577 | 0.0888695 | 0.133013 |
| 0.218677 | 0.212121 | 0.217512 | 0.214598 | 0.205711 | 0.217512  | 0.231061 |
| 0.131556 | 0.124417 | 0.132139 | 0.113199 | 0.122378 | 0.092803  | 0.13986  |
| 0.117279 | 0.11859  | 0.124272 | 0.109703 | 0.113345 | 0.0849359 | 0.141026 |
| 0.136072 | 0.135052 | 0.133741 | 0.125874 | 0.131556 | 0.097028  | 0.137675 |
| 0.122086 | 0.11757  | 0.130245 | 0.111888 | 0.116113 | 0.0871212 | 0.142045 |
| 0.140152 | 0.13447  | 0.13345  | 0.117716 | 0.129225 | 0.0839161 | 0.14729  |
| 0.124709 | 0.122815 | 0.126748 | 0.111597 | 0.119027 | 0.0949883 | 0.136218 |
| 0.128351 | 0.118881 | 0.121649 | 0.111451 | 0.115676 | 0.0878497 | 0.136364 |
| 0.131265 | 0.12704  | 0.128059 | 0.112325 | 0.122669 | 0.069493  | 0.143648 |
| 0.13345  | 0.13039  | 0.13549  | 0.121212 | 0.125728 | 0.0967366 | 0.136218 |
| 0.137383 | 0.129662 | 0.133887 | 0.120484 | 0.12704  | 0.0965909 | 0.138986 |
| 0.138986 | 0.129225 | 0.136655 | 0.123543 | 0.131265 | 0.0938228 | 0.130973 |
| 0.134033 | 0.124854 | 0.129662 | 0.119464 | 0.122523 | 0.0949883 | 0.131265 |
| 0.111014 | 0.118444 | 0.130828 | 0.108392 | 0.116696 | 0.092366  | 0.145833 |
| 0.128497 | 0.118153 | 0.124126 | 0.117424 | 0.112908 | 0.0920746 | 0.137675 |
| 0.141463 | 0.13549  | 0.142628 | 0.125437 | 0.135198 | 0.0986305 | 0.134324 |
| 0.125583 | 0.120775 | 0.127914 | 0.111014 | 0.116404 | 0.0865385 | 0.125437 |
| 0.118007 | 0.135344 | 0.140152 | 0.138403 | 0.133013 | 0.128205  | 0.156614 |
| 0.14292  | 0.139569 | 0.145542 | 0.131847 | 0.13345  | 0.121358  | 0.157634 |
| 0.117279 | 0.125583 | 0.129225 | 0.116404 | 0.125    | 0.101836  | 0.151224 |
| 0.132139 | 0.13141  | 0.137675 | 0.11757  | 0.127622 | 0.0773601 | 0.145396 |
| 0.129079 | 0.125146 | 0.137238 | 0.123834 | 0.120775 | 0.117424  | 0.149913 |
| 0.126603 | 0.125583 | 0.131556 | 0.124272 | 0.121212 | 0.107955  | 0.13986  |
| 0.128934 | 0.124126 | 0.139132 | 0.123397 | 0.116841 | 0.117861  | 0.148019 |
| 0.14292  | 0.140152 | 0.137966 | 0.129516 | 0.136072 | 0.121066  | 0.157634 |
| 0.103438 | 0.116987 | 0.123834 | 0.104604 | 0.111451 | 0.0926573 | 0.142045 |
| 0.125728 | 0.134907 | 0.132721 | 0.121358 | 0.132576 | 0.106206  | 0.153263 |
| 0.138403 | 0.140006 | 0.146562 | 0.134324 | 0.137675 | 0.129662  | 0.160111 |
| 0.109266 | 0.12398  | 0.130828 | 0.112471 | 0.123397 | 0.0920746 | 0.144668 |
| 0.11655  | 0.125146 | 0.129371 | 0.122086 | 0.128642 | 0.116841  | 0.153118 |
| 0.126603 | 0.141317 | 0.146999 | 0.138549 | 0.140443 | 0.142045  | 0.160839 |
| 0.108537 | 0.122378 | 0.135052 | 0.120192 | 0.121795 | 0.121649  | 0.147727 |
| 0.131119 | 0.137966 | 0.152972 | 0.127622 | 0.13447  | 0.106352  | 0.156031 |
| 0.118153 | 0.134033 | 0.144085 | 0.123397 | 0.13141  | 0.102127  | 0.150058 |

|           |           |           |           |           |           |           |
|-----------|-----------|-----------|-----------|-----------|-----------|-----------|
| 0.121795  | 0.127477  | 0.129953  | 0.121795  | 0.123689  | 0.112179  | 0.13243   |
| 0.122232  | 0.130536  | 0.139714  | 0.123397  | 0.129371  | 0.110577  | 0.148893  |
| 0.113054  | 0.130099  | 0.136946  | 0.112179  | 0.124854  | 0.087704  | 0.150495  |
| 0.121066  | 0.135781  | 0.137383  | 0.128059  | 0.132867  | 0.120192  | 0.140734  |
| 0.135635  | 0.130536  | 0.135344  | 0.128059  | 0.129953  | 0.0942599 | 0.138112  |
| 0.129225  | 0.131702  | 0.143502  | 0.132139  | 0.13141   | 0.125437  | 0.136072  |
| 0.130682  | 0.132576  | 0.135052  | 0.130099  | 0.130245  | 0.113491  | 0.142774  |
| 0.123689  | 0.136072  | 0.14292   | 0.12398   | 0.130828  | 0.118735  | 0.147727  |
| 0.142628  | 0.145979  | 0.152535  | 0.136218  | 0.142483  | 0.127477  | 0.148893  |
| 0.121066  | 0.134033  | 0.128934  | 0.112908  | 0.12704   | 0.0726981 | 0.144231  |
| 0.109994  | 0.123834  | 0.127185  | 0.113491  | 0.12296   | 0.107372  | 0.135781  |
| 0.124854  | 0.132284  | 0.127185  | 0.123689  | 0.129079  | 0.119027  | 0.147145  |
| 0.11757   | 0.125291  | 0.129516  | 0.112908  | 0.122086  | 0.0802739 | 0.146853  |
| 0.143065  | 0.139132  | 0.147145  | 0.133741  | 0.138258  | 0.128205  | 0.16419   |
| 0.148601  | 0.156614  | 0.159965  | 0.147436  | 0.152244  | 0.13345   | 0.168269  |
| 0.112762  | 0.127185  | 0.138403  | 0.129079  | 0.128351  | 0.129079  | 0.139423  |
| 0.104458  | 0.119172  | 0.130682  | 0.12602   | 0.120629  | 0.125146  | 0.143357  |
| 0.134033  | 0.12602   | 0.133741  | 0.123543  | 0.12398   | 0.125874  | 0.137092  |
| 0.141171  | 0.129371  | 0.139423  | 0.125437  | 0.12704   | 0.0992133 | 0.13986   |
| 0.110577  | 0.125874  | 0.137092  | 0.126311  | 0.128205  | 0.128934  | 0.146853  |
| 0.141463  | 0.143065  | 0.137675  | 0.127185  | 0.13986   | 0.10271   | 0.13345   |
| 0.136801  | 0.137821  | 0.147582  | 0.130682  | 0.137821  | 0.105915  | 0.150932  |
| 0.114802  | 0.127768  | 0.139569  | 0.115967  | 0.125437  | 0.0961538 | 0.14933   |
| 0.162005  | 0.154283  | 0.159382  | 0.15676   | 0.148747  | 0.159674  | 0.16623   |
| 0.113928  | 0.135344  | 0.137238  | 0.117133  | 0.129516  | 0.099359  | 0.152535  |
| 0.128497  | 0.144085  | 0.147145  | 0.129662  | 0.145251  | 0.106643  | 0.159819  |
| 0.109411  | 0.123834  | 0.129808  | 0.118735  | 0.125     | 0.108246  | 0.139569  |
| 0.130099  | 0.13141   | 0.13884   | 0.133596  | 0.130828  | 0.126603  | 0.145688  |
| 0.129808  | 0.125874  | 0.130973  | 0.114073  | 0.125     | 0.0916375 | 0.128205  |
| 0.138695  | 0.112617  | 0.137821  | 0.134324  | 0.109411  | 0.128205  | 0.161568  |
| 0.148456  | 0.136364  | 0.139132  | 0.140297  | 0.13986   | 0.140297  | 0.0451632 |
| 0.125874  | 0.0523019 | 0.120629  | 0.117133  | 0.0587121 | 0.125583  | 0.141463  |
| 0.131847  | 0.0705128 | 0.130682  | 0.130682  | 0.0751748 | 0.133887  | 0.151515  |
| 0.107517  | 0.145251  | 0.152972  | 0.145979  | 0.137675  | 0.148893  | 0.1706    |
| 0.141608  | 0.116987  | 0.145979  | 0.138112  | 0.113199  | 0.137821  | 0.165064  |
| 0.0925117 | 0.126166  | 0.133304  | 0.128934  | 0.125291  | 0.129516  | 0.150641  |
| 0.138986  | 0.129225  | 0.0512821 | 0.13141   | 0.128642  | 0.131702  | 0.142628  |
| 0.118007  | 0.10912   | 0.118298  | 0.0833333 | 0.104167  | 0.105478  | 0.133887  |
| 0.112908  | 0.115093  | 0.124272  | 0.0779429 | 0.115676  | 0.113199  | 0.13986   |
| 0.129662  | 0.123106  | 0.127914  | 0.118298  | 0.121358  | 0.092366  | 0.141463  |
| 0.120629  | 0.0429779 | 0.120921  | 0.115385  | 0.0517191 | 0.122669  | 0.137383  |
| 0.10912   | 0.120047  | 0.121649  | 0.111451  | 0.117133  | 0.11553   | 0.143065  |
| 0.114365  | 0.0850816 | 0.118444  | 0.071824  | 0.0821678 | 0.103001  | 0.133159  |
| 0.124563  | 0.106352  | 0.121358  | 0.115822  | 0.0990676 | 0.116987  | 0.138695  |

|           |           |           |           |           |           |          |
|-----------|-----------|-----------|-----------|-----------|-----------|----------|
| 0.127331  | 0.11961   | 0.12704   | 0.0594406 | 0.114073  | 0.103438  | 0.141754 |
| 0.111597  | 0.114365  | 0.115385  | 0.0964452 | 0.106498  | 0.0833333 | 0.140589 |
| 0.121503  | 0.0502622 | 0.127914  | 0.121503  | 0.0581294 | 0.124417  | 0.141754 |
| 0.119318  | 0.0463287 | 0.120775  | 0.115822  | 0.0530303 | 0.119027  | 0.140443 |
| 0.0505536 | 0.120921  | 0.131265  | 0.124563  | 0.120921  | 0.128934  | 0.151807 |
| 0.21285   | 0.208625  | 0.214598  | 0.20877   | 0.20134   | 0.211976  | 0.225233 |
| 0.142628  | 0.0699301 | 0.142045  | 0.134761  | 0.076049  | 0.14088   | 0.148601 |
| 0.127622  | 0.120775  | 0.130828  | 0.126457  | 0.12398   | 0.126748  | 0.139132 |
| 0.124272  | 0.115676  | 0.123106  | 0.116987  | 0.111014  | 0.119318  | 0.142483 |
| 0.209353  | 0.201632  | 0.206439  | 0.206439  | 0.197844  | 0.207896  | 0.219697 |
| 0.0756119 | 0.123543  | 0.128059  | 0.121358  | 0.117716  | 0.126603  | 0.155012 |
| 0.112471  | 0.125728  | 0.126748  | 0.11451   | 0.123397  | 0.124417  | 0.150787 |
| 0.117716  | 0.120192  | 0.0976107 | 0.123543  | 0.118444  | 0.122378  | 0.135635 |
| 0.12602   | 0.121212  | 0.126894  | 0.046183  | 0.118007  | 0.10271   | 0.141026 |
| 0.251311  | 0.240676  | 0.247232  | 0.242279  | 0.236305  | 0.244901  | 0.259907 |
| 0.129079  | 0.122523  | 0.124709  | 0.120047  | 0.122232  | 0.115385  | 0.152535 |
| 0.0509907 | 0.117279  | 0.124126  | 0.11859   | 0.112617  | 0.123252  | 0.148747 |
| 0.119172  | 0.11757   | 0.124126  | 0.121212  | 0.117279  | 0.129662  | 0.135052 |
| 0.120047  | 0.118444  | 0.119172  | 0.119464  | 0.114948  | 0.127622  | 0.130099 |
| 0.128788  | 0.124272  | 0.129662  | 0.104021  | 0.123689  | 0.112762  | 0.151952 |
| 0.130828  | 0.108246  | 0.131702  | 0.106935  | 0.104749  | 0.120629  | 0.148456 |
| 0         | 0.121066  | 0.125874  | 0.117424  | 0.115239  | 0.125874  | 0.148164 |
| 0.121066  | 0         | 0.120192  | 0.11553   | 0.0521562 | 0.121358  | 0.138695 |
| 0.125874  | 0.120192  | 0         | 0.121212  | 0.11757   | 0.125291  | 0.141171 |
| 0.117424  | 0.11553   | 0.121212  | 0         | 0.110286  | 0.0984848 | 0.139132 |
| 0.115239  | 0.0521562 | 0.11757   | 0.110286  | 0         | 0.114656  | 0.138403 |
| 0.125874  | 0.121358  | 0.125291  | 0.0984848 | 0.114656  | 0         | 0.137092 |
| 0.148164  | 0.138695  | 0.141171  | 0.139132  | 0.138403  | 0.137092  | 0        |
| 0.129808  | 0.126166  | 0.127185  | 0.123106  | 0.125583  | 0.118153  | 0.149476 |
| 0.114656  | 0.12704   | 0.125437  | 0.116404  | 0.12296   | 0.127768  | 0.152972 |
| 0.190122  | 0.17803   | 0.186334  | 0.181964  | 0.175699  | 0.189248  | 0.203671 |
| 0.20236   | 0.194056  | 0.202069  | 0.197407  | 0.190851  | 0.201777  | 0.216783 |
| 0.126603  | 0.122378  | 0.125728  | 0.0496795 | 0.117424  | 0.103001  | 0.143648 |
| 0.123106  | 0.11451   | 0.121066  | 0.0429779 | 0.110723  | 0.0971737 | 0.136072 |
| 0.135052  | 0.125583  | 0.139132  | 0.125437  | 0.122669  | 0.123397  | 0.141026 |
| 0.0514277 | 0.119755  | 0.128059  | 0.122232  | 0.113928  | 0.124854  | 0.150058 |
| 0.131119  | 0.12602   | 0.128788  | 0.123252  | 0.125146  | 0.117133  | 0.150495 |
| 0.132721  | 0.121795  | 0.131265  | 0.125728  | 0.122669  | 0.127768  | 0.129662 |
| 0.223631  | 0.217366  | 0.220717  | 0.216638  | 0.214161  | 0.220134  | 0.232226 |
| 0.116404  | 0.106935  | 0.118735  | 0.114073  | 0.106935  | 0.117279  | 0.137529 |
| 0.204545  | 0.201195  | 0.214452  | 0.207751  | 0.197115  | 0.208333  | 0.214889 |
| 0.0855186 | 0.113054  | 0.120775  | 0.116696  | 0.112471  | 0.119318  | 0.144522 |
| 0.116841  | 0.11553   | 0.116841  | 0.113345  | 0.114948  | 0.117716  | 0.140297 |
| 0.104749  | 0.101399  | 0.125437  | 0.112617  | 0.103438  | 0.115239  | 0.142483 |

|           |           |          |           |           |           |           |
|-----------|-----------|----------|-----------|-----------|-----------|-----------|
| 0.118153  | 0.111014  | 0.121066 | 0.0505536 | 0.109557  | 0.0971737 | 0.138403  |
| 0.206294  | 0.199738  | 0.201632 | 0.199301  | 0.195076  | 0.202797  | 0.218677  |
| 0.131702  | 0.0546329 | 0.128205 | 0.126748  | 0.0639569 | 0.130245  | 0.146707  |
| 0.107809  | 0.118444  | 0.118007 | 0.119464  | 0.119318  | 0.119172  | 0.14088   |
| 0.127331  | 0.0514277 | 0.12296  | 0.119755  | 0.0557984 | 0.126457  | 0.142628  |
| 0.122378  | 0.122523  | 0.13141  | 0.125583  | 0.11757   | 0.121795  | 0.146125  |
| 0.121212  | 0.115822  | 0.122378 | 0.0448718 | 0.109994  | 0.100524  | 0.143794  |
| 0.08581   | 0.114802  | 0.122232 | 0.118444  | 0.113928  | 0.123689  | 0.144522  |
| 0.0645396 | 0.119755  | 0.124563 | 0.119318  | 0.111305  | 0.124272  | 0.14831   |
| 0.11116   | 0.125874  | 0.125728 | 0.116696  | 0.125291  | 0.129516  | 0.151807  |
| 0.116696  | 0.0454545 | 0.116113 | 0.112908  | 0.0536131 | 0.113199  | 0.131702  |
| 0.106643  | 0.123397  | 0.119172 | 0.122086  | 0.120192  | 0.12296   | 0.141463  |
| 0.190705  | 0.18211   | 0.1875   | 0.182838  | 0.177448  | 0.186917  | 0.20542   |
| 0.121212  | 0.121066  | 0.12296  | 0.122086  | 0.119027  | 0.130536  | 0.130682  |
| 0.129516  | 0.123543  | 0.122523 | 0.122815  | 0.122378  | 0.128059  | 0.0556527 |
| 0.120629  | 0.113199  | 0.121503 | 0.116841  | 0.111451  | 0.120338  | 0.131265  |
| 0.127477  | 0.122086  | 0.127768 | 0.123689  | 0.119172  | 0.11961   | 0.151515  |
| 0.121941  | 0.0486597 | 0.120775 | 0.11757   | 0.0518648 | 0.124272  | 0.141026  |
| 0.088141  | 0.119755  | 0.125146 | 0.122815  | 0.11859   | 0.12398   | 0.145105  |
| 0.114802  | 0.111451  | 0.124126 | 0.117716  | 0.10912   | 0.112471  | 0.14088   |
| 0.0544872 | 0.123106  | 0.13141  | 0.125     | 0.121066  | 0.129079  | 0.151078  |
| 0.127185  | 0.11655   | 0.119901 | 0.117279  | 0.11655   | 0.122815  | 0.0641026 |
| 0.116696  | 0.11014   | 0.11961  | 0.114656  | 0.111014  | 0.124563  | 0.132576  |
| 0.121795  | 0.116987  | 0.125583 | 0.0530303 | 0.113782  | 0.101399  | 0.14292   |
| 0.117861  | 0.121503  | 0.099796 | 0.120192  | 0.117133  | 0.121066  | 0.136364  |
| 0.131702  | 0.133887  | 0.103438 | 0.132576  | 0.128934  | 0.129662  | 0.13884   |
| 0.118881  | 0.116987  | 0.121212 | 0.112762  | 0.115822  | 0.112179  | 0.140589  |
| 0.136509  | 0.0652681 | 0.139132 | 0.134178  | 0.0705128 | 0.137675  | 0.140443  |
| 0.118735  | 0.115967  | 0.121358 | 0.0429779 | 0.109848  | 0.097465  | 0.142191  |
| 0.120775  | 0.110723  | 0.116987 | 0.113491  | 0.108683  | 0.11961   | 0.127914  |
| 0.117716  | 0.0645396 | 0.12296  | 0.118298  | 0.0659965 | 0.118007  | 0.142628  |
| 0.0530303 | 0.124563  | 0.13141  | 0.127331  | 0.120484  | 0.133159  | 0.154575  |
| 0.173951  | 0.183129  | 0.194639 | 0.185606  | 0.175845  | 0.192308  | 0.204983  |
| 0.105915  | 0.115967  | 0.116987 | 0.11553   | 0.113345  | 0.116696  | 0.13549   |
| 0.108829  | 0.0976107 | 0.108537 | 0.107663  | 0.0976107 | 0.111451  | 0.126457  |
| 0.113782  | 0.126166  | 0.12398  | 0.115239  | 0.125     | 0.127477  | 0.151224  |
| 0.182255  | 0.169872  | 0.180507 | 0.174097  | 0.166667  | 0.174097  | 0.195221  |
| 0.140152  | 0.135344  | 0.136072 | 0.131119  | 0.133304  | 0.126748  | 0.161568  |
| 0.147727  | 0.144085  | 0.149184 | 0.1419    | 0.142337  | 0.129079  | 0.160985  |
| 0.150204  | 0.13986   | 0.141463 | 0.139423  | 0.140443  | 0.142045  | 0.0437063 |
| 0.116987  | 0.116841  | 0.120484 | 0.114656  | 0.115967  | 0.109703  | 0.142774  |
| 0.123543  | 0.0421037 | 0.121212 | 0.119172  | 0.0549242 | 0.126748  | 0.140589  |
| 0.210519  | 0.197844  | 0.20877  | 0.205565  | 0.197552  | 0.211101  | 0.223193  |
| 0.127185  | 0.115676  | 0.124854 | 0.114365  | 0.115676  | 0.121941  | 0.141317  |

|           |           |           |           |           |           |           |
|-----------|-----------|-----------|-----------|-----------|-----------|-----------|
| 0.127622  | 0.0511364 | 0.125291  | 0.123543  | 0.0584207 | 0.129079  | 0.143502  |
| 0.106643  | 0.119027  | 0.11859   | 0.119172  | 0.116696  | 0.119755  | 0.139132  |
| 0.166667  | 0.151078  | 0.163753  | 0.162296  | 0.144959  | 0.164918  | 0.183712  |
| 0.11451   | 0.10708   | 0.117424  | 0.106935  | 0.105332  | 0.108392  | 0.138549  |
| 0.150787  | 0.144231  | 0.0686189 | 0.144959  | 0.142191  | 0.135052  | 0.145979  |
| 0.125437  | 0.121503  | 0.130099  | 0.109411  | 0.118007  | 0.0907634 | 0.147145  |
| 0.1875    | 0.179196  | 0.187791  | 0.182547  | 0.177448  | 0.190705  | 0.202506  |
| 0.127477  | 0.122086  | 0.127768  | 0.118444  | 0.118881  | 0.113199  | 0.147436  |
| 0.11116   | 0.101981  | 0.115239  | 0.101836  | 0.100816  | 0.0925117 | 0.131702  |
| 0.118881  | 0.10912   | 0.121503  | 0.115967  | 0.105915  | 0.117716  | 0.133304  |
| 0.112034  | 0.114802  | 0.120484  | 0.115239  | 0.112762  | 0.121941  | 0.146562  |
| 0.109703  | 0.123543  | 0.125437  | 0.115239  | 0.122086  | 0.123689  | 0.152098  |
| 0.12398   | 0.120629  | 0.108537  | 0.116696  | 0.116259  | 0.119318  | 0.136072  |
| 0.119755  | 0.113782  | 0.121503  | 0.0463287 | 0.114365  | 0.0929487 | 0.14088   |
| 0.188083  | 0.181235  | 0.187791  | 0.182838  | 0.178613  | 0.189248  | 0.204254  |
| 0.117716  | 0.119901  | 0.0906177 | 0.120629  | 0.117279  | 0.122669  | 0.133013  |
| 0.118444  | 0.104604  | 0.120192  | 0.107663  | 0.104604  | 0.112617  | 0.142774  |
| 0.20979   | 0.201486  | 0.206876  | 0.203089  | 0.19799   | 0.206876  | 0.219551  |
| 0.123834  | 0.118735  | 0.122669  | 0.121212  | 0.119027  | 0.127914  | 0.132139  |
| 0.125146  | 0.116259  | 0.122523  | 0.0453089 | 0.11451   | 0.0983392 | 0.142483  |
| 0.115822  | 0.112762  | 0.117861  | 0.0423951 | 0.106352  | 0.0945513 | 0.134907  |
| 0.134324  | 0.0767774 | 0.132867  | 0.129079  | 0.0820221 | 0.131702  | 0.137383  |
| 0.189685  | 0.178759  | 0.187937  | 0.183275  | 0.177302  | 0.187646  | 0.201195  |
| 0.0511364 | 0.120338  | 0.131265  | 0.123106  | 0.116841  | 0.127477  | 0.149767  |
| 0.125437  | 0.129079  | 0.101544  | 0.129516  | 0.125291  | 0.126311  | 0.136364  |
| 0.119318  | 0.116259  | 0.119318  | 0.0467657 | 0.112471  | 0.0919289 | 0.137238  |
| 0.115239  | 0.113054  | 0.121066  | 0.0493881 | 0.107517  | 0.0942599 | 0.140734  |
| 0.11859   | 0.116696  | 0.11859   | 0.0434149 | 0.109411  | 0.0938228 | 0.138549  |
| 0.116113  | 0.0495338 | 0.120192  | 0.113491  | 0.0518648 | 0.118153  | 0.140443  |
| 0.109848  | 0.110577  | 0.112762  | 0.0958625 | 0.104167  | 0.0844988 | 0.138549  |
| 0.127331  | 0.126603  | 0.125874  | 0.120921  | 0.123106  | 0.115385  | 0.14933   |
| 0.134324  | 0.116404  | 0.116841  | 0.13141   | 0.114656  | 0.126457  | 0.120192  |
| 0.125291  | 0.122523  | 0.123252  | 0.11859   | 0.11961   | 0.116259  | 0.149621  |
| 0.12398   | 0.129953  | 0.135052  | 0.128934  | 0.126457  | 0.126311  | 0.147727  |
| 0.192016  | 0.184586  | 0.190559  | 0.184441  | 0.179924  | 0.193182  | 0.209353  |
| 0.117279  | 0.120047  | 0.0960082 | 0.116404  | 0.115676  | 0.118735  | 0.137821  |
| 0.131993  | 0.053176  | 0.130828  | 0.127914  | 0.0633741 | 0.131119  | 0.145833  |
| 0.117861  | 0.114219  | 0.119027  | 0.046183  | 0.109848  | 0.092803  | 0.136655  |
| 0.111888  | 0.112908  | 0.111597  | 0.0944056 | 0.105332  | 0.0772145 | 0.136509  |
| 0.120338  | 0.113491  | 0.0786713 | 0.118881  | 0.111451  | 0.110723  | 0.138258  |
| 0.048514  | 0.118007  | 0.132721  | 0.120775  | 0.115676  | 0.13039   | 0.151807  |
| 0.130099  | 0.125291  | 0.131556  | 0.126603  | 0.122378  | 0.129516  | 0.1419    |
| 0.123543  | 0.113199  | 0.117716  | 0.117716  | 0.115239  | 0.12296   | 0.0823135 |
| 0.0725524 | 0.118444  | 0.121212  | 0.107226  | 0.10912   | 0.106935  | 0.146125  |

|           |           |           |           |           |           |           |
|-----------|-----------|-----------|-----------|-----------|-----------|-----------|
| 0.078817  | 0.109557  | 0.119901  | 0.105332  | 0.107517  | 0.0983392 | 0.142191  |
| 0.117424  | 0.104458  | 0.117133  | 0.105186  | 0.103001  | 0.0914918 | 0.136218  |
| 0.088141  | 0.117424  | 0.122232  | 0.11553   | 0.113636  | 0.118735  | 0.147436  |
| 0.134324  | 0.129516  | 0.135198  | 0.126457  | 0.129516  | 0.118298  | 0.155449  |
| 0.0584207 | 0.11859   | 0.128934  | 0.119318  | 0.117716  | 0.128351  | 0.150641  |
| 0.115385  | 0.0523019 | 0.117716  | 0.111305  | 0.0523019 | 0.115093  | 0.136801  |
| 0.0565268 | 0.112908  | 0.125874  | 0.117133  | 0.112617  | 0.12296   | 0.147873  |
| 0.116404  | 0.113345  | 0.119027  | 0.0482226 | 0.108974  | 0.0983392 | 0.140734  |
| 0.106061  | 0.114656  | 0.111888  | 0.115385  | 0.112617  | 0.111888  | 0.13447   |
| 0.124709  | 0.11553   | 0.124417  | 0.0425408 | 0.11553   | 0.099359  | 0.141754  |
| 0.113054  | 0.113199  | 0.0941142 | 0.114802  | 0.107663  | 0.113345  | 0.133013  |
| 0.122378  | 0.116113  | 0.116841  | 0.113928  | 0.113491  | 0.119172  | 0.0732809 |
| 0.107226  | 0.11757   | 0.120921  | 0.111597  | 0.116987  | 0.118007  | 0.148747  |
| 0.111742  | 0.11014   | 0.116113  | 0.100962  | 0.104895  | 0.0849359 | 0.143357  |
| 0.11451   | 0.112908  | 0.118881  | 0.0469114 | 0.110286  | 0.0990676 | 0.137966  |
| 0.123252  | 0.113782  | 0.124126  | 0.117133  | 0.112034  | 0.123834  | 0.135927  |
| 0.123397  | 0.109557  | 0.124272  | 0.113199  | 0.111014  | 0.11757   | 0.144814  |
| 0.114219  | 0.113782  | 0.114219  | 0.106061  | 0.110868  | 0.0894522 | 0.131265  |
| 0.117424  | 0.111451  | 0.119464  | 0.0472028 | 0.108537  | 0.0961538 | 0.139132  |
| 0.123397  | 0.0457459 | 0.120484  | 0.117861  | 0.0550699 | 0.120192  | 0.137821  |
| 0.0863928 | 0.115967  | 0.124563  | 0.114656  | 0.116841  | 0.121358  | 0.145688  |
| 0.119901  | 0.0477855 | 0.122523  | 0.118444  | 0.0539044 | 0.12398   | 0.141317  |
| 0.107372  | 0.120921  | 0.122815  | 0.11116   | 0.117716  | 0.119901  | 0.146853  |
| 0.114365  | 0.115676  | 0.11757   | 0.0992133 | 0.111888  | 0.0861014 | 0.145105  |
| 0.114073  | 0.107517  | 0.10708   | 0.103584  | 0.103438  | 0.11116   | 0.127622  |
| 0.104021  | 0.115822  | 0.112471  | 0.116259  | 0.112617  | 0.111888  | 0.141463  |
| 0.125437  | 0.0463287 | 0.121941  | 0.119318  | 0.0594406 | 0.124272  | 0.141317  |
| 0.120192  | 0.111888  | 0.125146  | 0.125728  | 0.115385  | 0.12398   | 0.140443  |
| 0.11655   | 0.103293  | 0.123252  | 0.109557  | 0.10271   | 0.117716  | 0.138549  |
| 0.195804  | 0.183712  | 0.187646  | 0.187646  | 0.183421  | 0.191434  | 0.204983  |
| 0.164336  | 0.151661  | 0.161131  | 0.160839  | 0.144959  | 0.162879  | 0.177593  |
| 0.123252  | 0.121649  | 0.125     | 0.121212  | 0.121649  | 0.118298  | 0.150787  |
| 0.0837704 | 0.114219  | 0.122523  | 0.119318  | 0.108392  | 0.122232  | 0.140152  |
| 0.151952  | 0.14627   | 0.150495  | 0.142337  | 0.146562  | 0.13447   | 0.163462  |
| 0.129662  | 0.121358  | 0.0474942 | 0.122669  | 0.120484  | 0.126748  | 0.136509  |
| 0.129808  | 0.118298  | 0.088141  | 0.0793998 | 0.117424  | 0.108537  | 0.138403  |
| 0.122378  | 0.11116   | 0.125     | 0.0812937 | 0.106789  | 0.108974  | 0.13884   |
| 0.122378  | 0.119318  | 0.12296   | 0.0964452 | 0.114656  | 0.0439977 | 0.142045  |
| 0.123543  | 0.112034  | 0.124126  | 0.112471  | 0.112908  | 0.119464  | 0.145251  |
| 0.201195  | 0.192308  | 0.198281  | 0.192453  | 0.18852   | 0.19799   | 0.211538  |
| 0.0547786 | 0.12602   | 0.131702  | 0.123543  | 0.11757   | 0.127914  | 0.152826  |
| 0.0875583 | 0.0725524 | 0.123689  | 0.116113  | 0.0728438 | 0.12398   | 0.145688  |
| 0.116987  | 0.111014  | 0.121941  | 0.0595862 | 0.106643  | 0.0930944 | 0.136946  |
| 0.117424  | 0.118444  | 0.12704   | 0.122086  | 0.11553   | 0.117716  | 0.14729   |

|           |           |           |           |           |           |           |
|-----------|-----------|-----------|-----------|-----------|-----------|-----------|
| 0.184878  | 0.17366   | 0.184295  | 0.178467  | 0.169872  | 0.182547  | 0.198427  |
| 0.245484  | 0.236888  | 0.242861  | 0.241404  | 0.234557  | 0.242861  | 0.250583  |
| 0.125437  | 0.113928  | 0.11961   | 0.11553   | 0.116259  | 0.12398   | 0.0734266 |
| 0.124563  | 0.111597  | 0.123106  | 0.109703  | 0.112471  | 0.118444  | 0.145688  |
| 0.126894  | 0.120629  | 0.123106  | 0.116113  | 0.117424  | 0.114073  | 0.146562  |
| 0.107517  | 0.120484  | 0.124417  | 0.108392  | 0.114656  | 0.122086  | 0.147582  |
| 0.0514277 | 0.11655   | 0.12602   | 0.11757   | 0.111888  | 0.123106  | 0.144814  |
| 0.11451   | 0.10912   | 0.0850816 | 0.113636  | 0.110286  | 0.118298  | 0.130973  |
| 0.115239  | 0.0821678 | 0.120775  | 0.0779429 | 0.0812937 | 0.101253  | 0.140443  |
| 0.0493881 | 0.11451   | 0.125728  | 0.118444  | 0.113636  | 0.124272  | 0.147727  |
| 0.120629  | 0.071824  | 0.121212  | 0.0844988 | 0.0750291 | 0.106643  | 0.138258  |
| 0.119318  | 0.119172  | 0.121066  | 0.108829  | 0.113928  | 0.090472  | 0.137529  |
| 0.113928  | 0.111742  | 0.115676  | 0.0976107 | 0.108537  | 0.0847902 | 0.141754  |
| 0.125146  | 0.116841  | 0.11961   | 0.116113  | 0.117424  | 0.123106  | 0.0585664 |
| 0.122086  | 0.046183  | 0.122086  | 0.117424  | 0.0552156 | 0.119172  | 0.138549  |
| 0.110431  | 0.103584  | 0.113928  | 0.107226  | 0.0992133 | 0.106935  | 0.127768  |
| 0.121795  | 0.12602   | 0.134615  | 0.115967  | 0.126311  | 0.108683  | 0.129516  |
| 0.122086  | 0.133596  | 0.135781  | 0.125874  | 0.134761  | 0.132284  | 0.150495  |
| 0.115239  | 0.113054  | 0.121941  | 0.0464744 | 0.11014   | 0.097465  | 0.140443  |
| 0.119755  | 0.119318  | 0.126748  | 0.0862471 | 0.116987  | 0.105186  | 0.139132  |
| 0.13345   | 0.126603  | 0.135781  | 0.0562354 | 0.125437  | 0.104312  | 0.144668  |
| 0.20877   | 0.200758  | 0.208188  | 0.202652  | 0.196387  | 0.200903  | 0.219114  |
| 0.11655   | 0.107372  | 0.11014   | 0.11014   | 0.108246  | 0.115676  | 0.0831876 |
| 0.112617  | 0.113928  | 0.118735  | 0.0986305 | 0.11014   | 0.0840618 | 0.144231  |
| 0.117861  | 0.118881  | 0.0965909 | 0.118444  | 0.115385  | 0.115239  | 0.138695  |
| 0.122086  | 0.116987  | 0.123252  | 0.122086  | 0.116696  | 0.127914  | 0.133304  |
| 0.11451   | 0.114365  | 0.128205  | 0.11859   | 0.112325  | 0.116259  | 0.146707  |
| 0.199592  | 0.189831  | 0.19697   | 0.190851  | 0.185752  | 0.196678  | 0.214889  |
| 0.123106  | 0.0472028 | 0.124854  | 0.120192  | 0.0574009 | 0.125437  | 0.144522  |
| 0.113636  | 0.112034  | 0.11859   | 0.0472028 | 0.108246  | 0.0955711 | 0.13884   |
| 0.116113  | 0.120921  | 0.129225  | 0.120484  | 0.117424  | 0.112034  | 0.1419    |
| 0.109411  | 0.118298  | 0.121941  | 0.106206  | 0.114219  | 0.11757   | 0.144522  |
| 0.122232  | 0.0486597 | 0.121941  | 0.11757   | 0.0579837 | 0.122523  | 0.138986  |
| 0.113491  | 0.0737179 | 0.116987  | 0.104167  | 0.0754662 | 0.10912   | 0.131993  |
| 0.119027  | 0.117716  | 0.120775  | 0.112034  | 0.112471  | 0.0913462 | 0.141026  |
| 0.118735  | 0.11655   | 0.121066  | 0.118444  | 0.115093  | 0.124854  | 0.130828  |
| 0.200758  | 0.190705  | 0.194056  | 0.19289   | 0.187209  | 0.195513  | 0.21285   |
| 0.112908  | 0.0509907 | 0.112325  | 0.110868  | 0.0541958 | 0.112325  | 0.132867  |
| 0.191142  | 0.18546   | 0.19289   | 0.185606  | 0.183712  | 0.19289   | 0.210227  |
| 0.191871  | 0.184441  | 0.1875    | 0.185752  | 0.18007   | 0.193619  | 0.206585  |
| 0.114948  | 0.131119  | 0.132139  | 0.121941  | 0.131119  | 0.130682  | 0.151807  |
| 0.128351  | 0.129079  | 0.131556  | 0.128934  | 0.127914  | 0.130682  | 0.133741  |
| 0.11116   | 0.107809  | 0.114073  | 0.106789  | 0.104895  | 0.090472  | 0.130536  |
| 0.110431  | 0.0546329 | 0.117133  | 0.109557  | 0.0592949 | 0.111014  | 0.136509  |

|           |           |          |           |           |           |          |
|-----------|-----------|----------|-----------|-----------|-----------|----------|
| 0.117861  | 0.0495338 | 0.11961  | 0.114365  | 0.0541958 | 0.11553   | 0.137821 |
| 0.119901  | 0.114802  | 0.124272 | 0.0493881 | 0.111888  | 0.0948427 | 0.142483 |
| 0.055507  | 0.109557  | 0.124563 | 0.11553   | 0.109848  | 0.120775  | 0.148893 |
| 0.0493881 | 0.115093  | 0.124854 | 0.116113  | 0.111888  | 0.123106  | 0.148893 |
| 0.130245  | 0.118735  | 0.11655  | 0.117716  | 0.118444  | 0.126457  | 0.060169 |
| 0.114365  | 0.121503  | 0.126894 | 0.114365  | 0.121795  | 0.122523  | 0.149476 |
| 0.11451   | 0.10912   | 0.115385 | 0.0463287 | 0.107955  | 0.0929487 | 0.134761 |
| 0.119318  | 0.0492424 | 0.119901 | 0.116113  | 0.0541958 | 0.123106  | 0.141026 |
| 0.110723  | 0.104167  | 0.11451  | 0.103147  | 0.0986305 | 0.0868298 | 0.128351 |
| 0.131556  | 0.0556527 | 0.130682 | 0.125728  | 0.0646853 | 0.126311  | 0.142191 |
| 0.119901  | 0.118881  | 0.123106 | 0.11553   | 0.119172  | 0.112325  | 0.146562 |
| 0.131993  | 0.060169  | 0.133741 | 0.125874  | 0.0668706 | 0.131993  | 0.145542 |
| 0.259033  | 0.251311  | 0.255536 | 0.255245  | 0.246649  | 0.252914  | 0.260927 |
| 0.118881  | 0.128934  | 0.130245 | 0.130828  | 0.130099  | 0.127622  | 0.14088  |
| 0.123689  | 0.129371  | 0.125728 | 0.124854  | 0.125291  | 0.126603  | 0.138403 |
| 0.219697  | 0.207896  | 0.216783 | 0.21183   | 0.204983  | 0.215909  | 0.225962 |
| 0.128351  | 0.128788  | 0.13039  | 0.122523  | 0.131993  | 0.118735  | 0.143357 |
| 0.231498  | 0.22028   | 0.227127 | 0.226253  | 0.217366  | 0.225379  | 0.237762 |
| 0.110431  | 0.122232  | 0.118881 | 0.122086  | 0.120484  | 0.122378  | 0.137383 |
| 0.130973  | 0.125874  | 0.132139 | 0.0511364 | 0.121795  | 0.101836  | 0.145688 |
| 0.113491  | 0.113345  | 0.118735 | 0.113199  | 0.108683  | 0.121649  | 0.134907 |
| 0.116987  | 0.127331  | 0.124854 | 0.115239  | 0.125     | 0.127477  | 0.152972 |
| 0.201777  | 0.194056  | 0.200321 | 0.197698  | 0.189685  | 0.201195  | 0.214452 |
| 0.131265  | 0.0568182 | 0.128934 | 0.123689  | 0.0608974 | 0.130682  | 0.144522 |
| 0.11961   | 0.0492424 | 0.121066 | 0.116987  | 0.0536131 | 0.121941  | 0.140443 |
| 0.22669   | 0.217803  | 0.223485 | 0.222028  | 0.213724  | 0.220862  | 0.236742 |
| 0.0549242 | 0.118007  | 0.125437 | 0.118735  | 0.115093  | 0.125728  | 0.150932 |
| 0.197261  | 0.188666  | 0.195804 | 0.190559  | 0.186626  | 0.194347  | 0.207314 |
| 0.0550699 | 0.118735  | 0.127622 | 0.122378  | 0.115822  | 0.125583  | 0.151661 |
| 0.121212  | 0.114365  | 0.121795 | 0.0477855 | 0.112617  | 0.0973193 | 0.139132 |
| 0.122232  | 0.121503  | 0.123689 | 0.107372  | 0.117424  | 0.08581   | 0.146562 |
| 0.117279  | 0.131993  | 0.13447  | 0.120775  | 0.129953  | 0.127768  | 0.152098 |
| 0.116841  | 0.110577  | 0.117133 | 0.113345  | 0.107372  | 0.110723  | 0.137675 |
| 0.1588    | 0.15574   | 0.160256 | 0.153846  | 0.149038  | 0.151807  | 0.179633 |
| 0.118298  | 0.0435606 | 0.11655  | 0.114802  | 0.0493881 | 0.118298  | 0.135344 |
| 0.120629  | 0.119027  | 0.120629 | 0.121503  | 0.117861  | 0.127622  | 0.13447  |
| 0.117133  | 0.124563  | 0.125    | 0.115676  | 0.11961   | 0.11859   | 0.14729  |
| 0.128497  | 0.119901  | 0.128205 | 0.125     | 0.116696  | 0.129371  | 0.131847 |
| 0.196824  | 0.186189  | 0.191579 | 0.189248  | 0.185315  | 0.194493  | 0.206585 |
| 0.118881  | 0.112325  | 0.121212 | 0.0437063 | 0.109703  | 0.0944056 | 0.14088  |
| 0.114948  | 0.125     | 0.129516 | 0.116696  | 0.122669  | 0.120192  | 0.154429 |
| 0.0906177 | 0.115239  | 0.120047 | 0.115967  | 0.114073  | 0.122378  | 0.143502 |
| 0.0499709 | 0.120047  | 0.130099 | 0.122232  | 0.117716  | 0.125146  | 0.148601 |
| 0.123252  | 0.120484  | 0.125    | 0.0469114 | 0.116113  | 0.099359  | 0.138549 |



|           |           |          |           |           |           |           |
|-----------|-----------|----------|-----------|-----------|-----------|-----------|
| 0.254808  | 0.248834  | 0.252768 | 0.250437  | 0.243007  | 0.251311  | 0.256702  |
| 0.118298  | 0.117861  | 0.120338 | 0.104604  | 0.114073  | 0.0856643 | 0.142337  |
| 0.119172  | 0.117861  | 0.105478 | 0.0912005 | 0.110577  | 0.111597  | 0.136801  |
| 0.177156  | 0.17701   | 0.181527 | 0.180361  | 0.171474  | 0.178613  | 0.194784  |
| 0.186189  | 0.17701   | 0.183566 | 0.180944  | 0.175554  | 0.183275  | 0.203526  |
| 0.125291  | 0.114073  | 0.117716 | 0.11451   | 0.114948  | 0.11859   | 0.0724068 |
| 0.121649  | 0.0498252 | 0.121941 | 0.115239  | 0.0574009 | 0.118153  | 0.13986   |
| 0.106498  | 0.117716  | 0.123106 | 0.10912   | 0.112762  | 0.120775  | 0.150058  |
| 0.143065  | 0.0703671 | 0.146853 | 0.13986   | 0.0793998 | 0.143065  | 0.147873  |
| 0.121795  | 0.114365  | 0.115093 | 0.113345  | 0.112034  | 0.11859   | 0.0767774 |
| 0.126894  | 0.119172  | 0.119901 | 0.116404  | 0.121795  | 0.12398   | 0.0710956 |
| 0.0512821 | 0.125437  | 0.132576 | 0.125291  | 0.121066  | 0.133159  | 0.150204  |
| 0.118298  | 0.0488054 | 0.120338 | 0.114219  | 0.0528846 | 0.120047  | 0.138549  |
| 0.13039   | 0.0533217 | 0.131265 | 0.123397  | 0.0641026 | 0.128934  | 0.140152  |
| 0.0699301 | 0.11553   | 0.129662 | 0.117716  | 0.110286  | 0.121795  | 0.152535  |
| 0.116404  | 0.128497  | 0.128059 | 0.119318  | 0.128205  | 0.123106  | 0.149767  |
| 0.127622  | 0.14088   | 0.1419   | 0.130828  | 0.139714  | 0.140443  | 0.157197  |
| 0.123397  | 0.123543  | 0.123689 | 0.106498  | 0.117424  | 0.0840618 | 0.147727  |
| 0.119172  | 0.13447   | 0.134907 | 0.122669  | 0.134761  | 0.13345   | 0.156031  |
| 0.0556527 | 0.127185  | 0.136072 | 0.129079  | 0.122523  | 0.13345   | 0.153992  |
| 0.207896  | 0.196387  | 0.203817 | 0.200612  | 0.19493   | 0.204983  | 0.219697  |
| 0.113928  | 0.128351  | 0.134324 | 0.110723  | 0.126311  | 0.085373  | 0.144668  |
| 0.191434  | 0.181672  | 0.189394 | 0.185023  | 0.180798  | 0.193473  | 0.204108  |
| 0.116841  | 0.112034  | 0.11451  | 0.113928  | 0.112617  | 0.117424  | 0.132721  |
| 0.128497  | 0.123689  | 0.130828 | 0.0530303 | 0.11961   | 0.104604  | 0.144959  |
| 0.125291  | 0.120192  | 0.120921 | 0.11859   | 0.116696  | 0.11655   | 0.148164  |
| 0.121649  | 0.117424  | 0.122232 | 0.114948  | 0.115967  | 0.111742  | 0.140152  |
| 0.125583  | 0.0493881 | 0.122378 | 0.114219  | 0.0557984 | 0.122378  | 0.139132  |
| 0.119755  | 0.0505536 | 0.122669 | 0.118007  | 0.0569639 | 0.126748  | 0.143794  |
| 0.121795  | 0.115239  | 0.12296  | 0.0474942 | 0.113782  | 0.100233  | 0.144668  |
| 0.11757   | 0.115967  | 0.122815 | 0.118444  | 0.115093  | 0.124854  | 0.132576  |
| 0.127768  | 0.121795  | 0.127477 | 0.122232  | 0.119464  | 0.11961   | 0.150641  |
| 0.0582751 | 0.134178  | 0.140734 | 0.134907  | 0.129225  | 0.136946  | 0.156031  |
| 0.251166  | 0.243153  | 0.25     | 0.245047  | 0.237908  | 0.243881  | 0.252477  |
| 0.122086  | 0.117279  | 0.124709 | 0.04662   | 0.112325  | 0.0987762 | 0.144376  |
| 0.185169  | 0.178904  | 0.178759 | 0.17701   | 0.172203  | 0.184295  | 0.199883  |
| 0.18648   | 0.180216  | 0.18852  | 0.186189  | 0.179924  | 0.187937  | 0.202652  |
| 0.118153  | 0.12296   | 0.123106 | 0.114073  | 0.119172  | 0.114948  | 0.141317  |
| 0.116404  | 0.114219  | 0.116987 | 0.10067   | 0.111014  | 0.0866841 | 0.144231  |
| 0.126894  | 0.123834  | 0.13039  | 0.0499709 | 0.119755  | 0.102127  | 0.144814  |
| 0.118444  | 0.0480769 | 0.114656 | 0.113199  | 0.0536131 | 0.11757   | 0.136364  |
| 0.118881  | 0.118444  | 0.121795 | 0.0955711 | 0.110286  | 0.0521562 | 0.141754  |
| 0.0539044 | 0.118444  | 0.126457 | 0.120338  | 0.114948  | 0.126457  | 0.149913  |
| 0.123689  | 0.0743007 | 0.128059 | 0.113782  | 0.0777972 | 0.110868  | 0.140152  |

|           |           |           |           |           |           |           |
|-----------|-----------|-----------|-----------|-----------|-----------|-----------|
| 0.131847  | 0.0585664 | 0.132721  | 0.126894  | 0.0649767 | 0.130099  | 0.143939  |
| 0.120921  | 0.114365  | 0.121212  | 0.0460373 | 0.111742  | 0.0941142 | 0.138258  |
| 0.129079  | 0.0543415 | 0.129662  | 0.124709  | 0.0630828 | 0.127914  | 0.144085  |
| 0.119901  | 0.118007  | 0.118153  | 0.116404  | 0.11655   | 0.121941  | 0.140443  |
| 0.131847  | 0.124709  | 0.130682  | 0.121358  | 0.126748  | 0.118735  | 0.152098  |
| 0.112179  | 0.122523  | 0.125583  | 0.11655   | 0.118444  | 0.125874  | 0.150204  |
| 0.0575466 | 0.128497  | 0.142628  | 0.132721  | 0.129662  | 0.133887  | 0.155303  |
| 0.122669  | 0.125146  | 0.124417  | 0.113636  | 0.11757   | 0.0897436 | 0.138258  |
| 0.118298  | 0.115822  | 0.119172  | 0.0515734 | 0.110577  | 0.0979021 | 0.139423  |
| 0.129953  | 0.130973  | 0.104895  | 0.129953  | 0.127768  | 0.129953  | 0.13884   |
| 0.184586  | 0.178322  | 0.184295  | 0.179924  | 0.171329  | 0.180507  | 0.200466  |
| 0.134033  | 0.0622086 | 0.136364  | 0.129953  | 0.0715326 | 0.134615  | 0.148164  |
| 0.124126  | 0.0467657 | 0.121212  | 0.120338  | 0.055507  | 0.125     | 0.142045  |
| 0.126311  | 0.120921  | 0.123397  | 0.116696  | 0.119464  | 0.113199  | 0.146562  |
| 0.117133  | 0.114656  | 0.117716  | 0.111014  | 0.112034  | 0.106061  | 0.140297  |
| 0.108537  | 0.124709  | 0.119901  | 0.111451  | 0.121795  | 0.122815  | 0.147145  |
| 0.112762  | 0.128642  | 0.126166  | 0.117424  | 0.125437  | 0.126166  | 0.153409  |
| 0.193036  | 0.183566  | 0.188957  | 0.186626  | 0.180361  | 0.190997  | 0.207168  |
| 0.118444  | 0.0745921 | 0.122523  | 0.11553   | 0.0769231 | 0.114948  | 0.140152  |
| 0.112179  | 0.103293  | 0.109557  | 0.110431  | 0.100087  | 0.10169   | 0.132139  |
| 0.126457  | 0.0502622 | 0.124417  | 0.120629  | 0.0584207 | 0.128788  | 0.141463  |
| 0.191579  | 0.184149  | 0.190122  | 0.186043  | 0.177156  | 0.193328  | 0.204837  |
| 0.111888  | 0.113491  | 0.112762  | 0.099359  | 0.106789  | 0.0847902 | 0.143502  |
| 0.0488054 | 0.124126  | 0.133596  | 0.125146  | 0.121212  | 0.128351  | 0.152972  |
| 0.125146  | 0.0512821 | 0.124563  | 0.118735  | 0.0571096 | 0.123689  | 0.1419    |
| 0.119464  | 0.112617  | 0.115093  | 0.111014  | 0.112617  | 0.118881  | 0.0729895 |
| 0.190268  | 0.178176  | 0.182401  | 0.182692  | 0.170892  | 0.187937  | 0.202069  |
| 0.0504079 | 0.116404  | 0.127914  | 0.123834  | 0.112034  | 0.127914  | 0.148747  |
| 0.111888  | 0.10912   | 0.0967366 | 0.11451   | 0.10271   | 0.115967  | 0.135344  |
| 0.113345  | 0.113491  | 0.114802  | 0.104021  | 0.107663  | 0.0914918 | 0.139714  |
| 0.120921  | 0.111451  | 0.125291  | 0.119172  | 0.108246  | 0.119464  | 0.14729   |
| 0.118444  | 0.117424  | 0.12398   | 0.11961   | 0.115967  | 0.124854  | 0.131702  |
| 0.0560897 | 0.125291  | 0.137383  | 0.130099  | 0.125291  | 0.133304  | 0.155594  |
| 0.121358  | 0.115385  | 0.122523  | 0.0435606 | 0.109557  | 0.0968823 | 0.141026  |
| 0.120484  | 0.113345  | 0.120775  | 0.124854  | 0.112179  | 0.121066  | 0.138112  |
| 0.151807  | 0.139714  | 0.13986   | 0.13986   | 0.139714  | 0.139569  | 0.0409382 |
| 0.234848  | 0.228875  | 0.232226  | 0.231061  | 0.22567   | 0.234557  | 0.244901  |
| 0.125874  | 0.127768  | 0.13141   | 0.11859   | 0.121066  | 0.0941142 | 0.14088   |
| 0.122086  | 0.120192  | 0.120338  | 0.121212  | 0.117279  | 0.129079  | 0.132139  |
| 0.112908  | 0.0547786 | 0.121358  | 0.114948  | 0.0646853 | 0.116696  | 0.139277  |
| 0.126457  | 0.123689  | 0.114219  | 0.121503  | 0.117861  | 0.12296   | 0.138549  |
| 0.100379  | 0.110431  | 0.117861  | 0.113491  | 0.109266  | 0.120192  | 0.130245  |
| 0.115822  | 0.115385  | 0.127477  | 0.11961   | 0.114219  | 0.119318  | 0.143357  |
| 0.119464  | 0.0607517 | 0.125583  | 0.115967  | 0.0625    | 0.125291  | 0.142337  |

|           |           |          |           |           |           |           |
|-----------|-----------|----------|-----------|-----------|-----------|-----------|
| 0.0493881 | 0.124126  | 0.136509 | 0.127185  | 0.123543  | 0.133887  | 0.152098  |
| 0.122523  | 0.113636  | 0.115239 | 0.114365  | 0.117133  | 0.121066  | 0.113928  |
| 0.236305  | 0.230332  | 0.236305 | 0.231643  | 0.22567   | 0.233683  | 0.245192  |
| 0.112034  | 0.110723  | 0.113491 | 0.0983392 | 0.104312  | 0.0843531 | 0.141608  |
| 0.103001  | 0.108392  | 0.112034 | 0.112034  | 0.109266  | 0.109994  | 0.134907  |
| 0.115093  | 0.111742  | 0.118881 | 0.0402098 | 0.10912   | 0.094697  | 0.137675  |
| 0.135052  | 0.122378  | 0.126894 | 0.124272  | 0.125874  | 0.131556  | 0.0576923 |
| 0.132721  | 0.135781  | 0.13447  | 0.121649  | 0.13345   | 0.0980478 | 0.144231  |
| 0.120775  | 0.108392  | 0.122232 | 0.105915  | 0.107809  | 0.109411  | 0.136946  |
| 0.118153  | 0.0472028 | 0.123397 | 0.118153  | 0.0536131 | 0.124272  | 0.137238  |
| 0.115967  | 0.108829  | 0.117424 | 0.107809  | 0.105624  | 0.113928  | 0.0957168 |
| 0.232809  | 0.221882  | 0.229021 | 0.227273  | 0.214598  | 0.227273  | 0.238782  |
| 0.125874  | 0.0479312 | 0.125291 | 0.121795  | 0.0575466 | 0.126457  | 0.140006  |
| 0.0502622 | 0.120338  | 0.129808 | 0.123106  | 0.119464  | 0.128934  | 0.153555  |
| 0.116696  | 0.116841  | 0.113782 | 0.109703  | 0.11451   | 0.113782  | 0.127622  |
| 0.125     | 0.121941  | 0.132284 | 0.119464  | 0.117279  | 0.122086  | 0.130682  |
| 0.114219  | 0.126894  | 0.122669 | 0.127622  | 0.125146  | 0.124417  | 0.14088   |
| 0.121503  | 0.11553   | 0.121503 | 0.0448718 | 0.110868  | 0.0976107 | 0.137383  |
| 0.0576923 | 0.124272  | 0.134324 | 0.125     | 0.121941  | 0.128205  | 0.151661  |
| 0.0546329 | 0.126748  | 0.137966 | 0.129808  | 0.126166  | 0.135052  | 0.155303  |
| 0.0499709 | 0.117716  | 0.127477 | 0.119027  | 0.116841  | 0.126311  | 0.14831   |
| 0.121212  | 0.115239  | 0.122086 | 0.0460373 | 0.111451  | 0.0938228 | 0.14088   |
| 0.125291  | 0.123397  | 0.125    | 0.124709  | 0.122815  | 0.128497  | 0.129808  |
| 0.131847  | 0.126748  | 0.13039  | 0.128642  | 0.126457  | 0.133596  | 0.134615  |
| 0.131556  | 0.128788  | 0.128351 | 0.123106  | 0.126166  | 0.120484  | 0.15035   |
| 0.13447   | 0.129662  | 0.135052 | 0.128351  | 0.128497  | 0.124272  | 0.155886  |
| 0.129662  | 0.127768  | 0.132576 | 0.128205  | 0.126311  | 0.133741  | 0.135052  |
| 0.116841  | 0.116696  | 0.116841 | 0.0917832 | 0.11116   | 0.048951  | 0.140589  |
| 0.100087  | 0.130245  | 0.140297 | 0.136801  | 0.131702  | 0.135344  | 0.152098  |
| 0.122669  | 0.13243   | 0.137529 | 0.119464  | 0.130099  | 0.119172  | 0.151661  |
| 0.206294  | 0.196533  | 0.202214 | 0.200175  | 0.194784  | 0.207168  | 0.217803  |
| 0.124126  | 0.117861  | 0.127622 | 0.114219  | 0.119318  | 0.120629  | 0.14088   |
| 0.104895  | 0.118153  | 0.11859  | 0.118298  | 0.116987  | 0.116259  | 0.138258  |
| 0.123397  | 0.118881  | 0.12398  | 0.0450175 | 0.119464  | 0.10271   | 0.141026  |
| 0.223485  | 0.216055  | 0.222611 | 0.219697  | 0.209062  | 0.21824   | 0.235286  |
| 0.207751  | 0.204983  | 0.212121 | 0.204545  | 0.200321  | 0.212704  | 0.222465  |
| 0.0552156 | 0.126748  | 0.139423 | 0.129516  | 0.12296   | 0.133304  | 0.154429  |
| 0.248834  | 0.239656  | 0.247669 | 0.243007  | 0.238199  | 0.245338  | 0.254225  |
| 0.115385  | 0.116113  | 0.118007 | 0.0882867 | 0.10912   | 0.0501166 | 0.137966  |
| 0.137529  | 0.139132  | 0.143357 | 0.126166  | 0.136509  | 0.109266  | 0.155157  |
| 0.114219  | 0.116404  | 0.118881 | 0.100233  | 0.110286  | 0.0833333 | 0.145251  |
| 0.123397  | 0.121212  | 0.125437 | 0.123689  | 0.119172  | 0.129516  | 0.131119  |
| 0.190559  | 0.180507  | 0.187063 | 0.18211   | 0.17701   | 0.18852   | 0.201195  |
| 0.123397  | 0.125874  | 0.121358 | 0.118444  | 0.124417  | 0.114656  | 0.146562  |

|           |           |           |           |           |           |           |
|-----------|-----------|-----------|-----------|-----------|-----------|-----------|
| 0.192162  | 0.186772  | 0.190997  | 0.186917  | 0.181818  | 0.193036  | 0.208333  |
| 0.118735  | 0.115967  | 0.119027  | 0.10708   | 0.11655   | 0.110868  | 0.135198  |
| 0.0726981 | 0.100524  | 0.127768  | 0.115239  | 0.097028  | 0.121941  | 0.14831   |
| 0.125728  | 0.123543  | 0.133304  | 0.115239  | 0.120629  | 0.0922203 | 0.143357  |
| 0.112034  | 0.10373   | 0.11757   | 0.109411  | 0.101981  | 0.11116   | 0.137238  |
| 0.117716  | 0.108829  | 0.119755  | 0.0445804 | 0.107372  | 0.0888695 | 0.134178  |
| 0.118881  | 0.107372  | 0.120047  | 0.108683  | 0.101253  | 0.112762  | 0.144668  |
| 0.112471  | 0.114365  | 0.112179  | 0.0952797 | 0.106789  | 0.0798368 | 0.139423  |
| 0.117279  | 0.0448718 | 0.118444  | 0.111742  | 0.0544872 | 0.116113  | 0.135198  |
| 0.087704  | 0.117861  | 0.124126  | 0.117133  | 0.116696  | 0.122086  | 0.150204  |
| 0.117716  | 0.113782  | 0.119464  | 0.108974  | 0.110286  | 0.0909091 | 0.134761  |
| 0.114073  | 0.114802  | 0.116404  | 0.0971737 | 0.107809  | 0.0826049 | 0.140734  |
| 0.122378  | 0.121358  | 0.125291  | 0.10373   | 0.119318  | 0.110723  | 0.150495  |
| 0.130536  | 0.0552156 | 0.130536  | 0.12704   | 0.0636655 | 0.129662  | 0.144668  |
| 0.118153  | 0.115676  | 0.119901  | 0.116987  | 0.112471  | 0.110577  | 0.141317  |
| 0.112471  | 0.114948  | 0.0935315 | 0.112179  | 0.109411  | 0.115093  | 0.137092  |
| 0.114656  | 0.108392  | 0.117861  | 0.0453089 | 0.10373   | 0.090472  | 0.130536  |
| 0.057838  | 0.112762  | 0.128642  | 0.121649  | 0.111305  | 0.125728  | 0.147727  |
| 0.11757   | 0.11655   | 0.121066  | 0.117861  | 0.115385  | 0.123397  | 0.130536  |
| 0.111014  | 0.126311  | 0.125     | 0.11451   | 0.122232  | 0.123543  | 0.152244  |
| 0.119755  | 0.121358  | 0.126166  | 0.115967  | 0.118444  | 0.115093  | 0.146707  |
| 0.119901  | 0.0469114 | 0.123397  | 0.11757   | 0.0553613 | 0.120484  | 0.139277  |
| 0.129079  | 0.0566725 | 0.129371  | 0.128497  | 0.0633741 | 0.130245  | 0.145833  |
| 0.137238  | 0.0636655 | 0.138986  | 0.131119  | 0.0715326 | 0.135198  | 0.145542  |
| 0.0581294 | 0.108974  | 0.121941  | 0.108537  | 0.104312  | 0.113199  | 0.138986  |
| 0.119901  | 0.115676  | 0.123397  | 0.0450175 | 0.11014   | 0.0995047 | 0.138403  |
| 0.111014  | 0.109411  | 0.121503  | 0.111597  | 0.103584  | 0.109848  | 0.139132  |
| 0.129371  | 0.128642  | 0.132867  | 0.131702  | 0.126603  | 0.134615  | 0.132139  |
| 0.11757   | 0.115676  | 0.120484  | 0.104749  | 0.113054  | 0.0840618 | 0.144814  |
| 0.127477  | 0.141026  | 0.14292   | 0.131556  | 0.141608  | 0.140297  | 0.158508  |
| 0.137383  | 0.131993  | 0.14088   | 0.0581294 | 0.129371  | 0.10708   | 0.143939  |
| 0.129079  | 0.121358  | 0.124417  | 0.118007  | 0.122232  | 0.123543  | 0.060169  |
| 0.116696  | 0.107809  | 0.125728  | 0.105332  | 0.105769  | 0.0925117 | 0.136655  |
| 0.11859   | 0.106789  | 0.11451   | 0.112471  | 0.105624  | 0.114802  | 0.129225  |
| 0.132867  | 0.125146  | 0.129662  | 0.121212  | 0.12398   | 0.118007  | 0.152535  |
| 0.206439  | 0.196387  | 0.206148  | 0.204983  | 0.193473  | 0.20877   | 0.224068  |
| 0.109994  | 0.11451   | 0.0962995 | 0.116404  | 0.11014   | 0.114948  | 0.137238  |
| 0.124417  | 0.119318  | 0.129371  | 0.114802  | 0.117279  | 0.0920746 | 0.145542  |
| 0.116696  | 0.11859   | 0.123689  | 0.11757   | 0.116259  | 0.125728  | 0.130536  |
| 0.120921  | 0.11757   | 0.124417  | 0.115093  | 0.115239  | 0.109266  | 0.147873  |
| 0.123397  | 0.123834  | 0.120775  | 0.114656  | 0.12296   | 0.118153  | 0.140443  |
| 0.119901  | 0.112762  | 0.12398   | 0.126311  | 0.11451   | 0.124854  | 0.141026  |
| 0.121212  | 0.112034  | 0.124417  | 0.130828  | 0.117279  | 0.126166  | 0.139132  |
| 0.123106  | 0.118298  | 0.119318  | 0.117279  | 0.117716  | 0.121649  | 0.0690559 |

|           |           |          |          |           |           |          |
|-----------|-----------|----------|----------|-----------|-----------|----------|
| 0.0861014 | 0.113928  | 0.123689 | 0.116404 | 0.110431  | 0.11553   | 0.142774 |
| 0.125146  | 0.12296   | 0.13243  | 0.124272 | 0.122378  | 0.131265  | 0.132284 |
| 0.120192  | 0.118298  | 0.124854 | 0.110577 | 0.115676  | 0.0901807 | 0.141317 |
| 0.119464  | 0.120484  | 0.123252 | 0.111597 | 0.11757   | 0.094697  | 0.138258 |
| 0.172931  | 0.170455  | 0.180507 | 0.174097 | 0.166958  | 0.176428  | 0.193473 |
| 0.121649  | 0.0504079 | 0.120775 | 0.114365 | 0.0541958 | 0.119318  | 0.142191 |
| 0.124417  | 0.125146  | 0.130828 | 0.130245 | 0.125146  | 0.129079  | 0.136218 |
| 0.110286  | 0.129662  | 0.135052 | 0.115822 | 0.125291  | 0.0866841 | 0.144522 |
| 0.115093  | 0.114073  | 0.126166 | 0.120047 | 0.110286  | 0.122378  | 0.139714 |
| 0.112762  | 0.104749  | 0.11451  | 0.104312 | 0.103001  | 0.0882867 | 0.13039  |
| 0.108392  | 0.109411  | 0.11655  | 0.103438 | 0.107372  | 0.0894522 | 0.130682 |
| 0.117133  | 0.108246  | 0.117716 | 0.110431 | 0.10912   | 0.0926573 | 0.135635 |
| 0.107226  | 0.127768  | 0.130828 | 0.125291 | 0.122232  | 0.120338  | 0.141171 |
| 0.116841  | 0.0863928 | 0.117133 | 0.11014  | 0.0849359 | 0.103147  | 0.137092 |
| 0.124272  | 0.127622  | 0.136218 | 0.125437 | 0.127622  | 0.119027  | 0.152681 |
| 0.106061  | 0.10708   | 0.124126 | 0.110431 | 0.103875  | 0.106061  | 0.141463 |
| 0.107955  | 0.119172  | 0.119318 | 0.119318 | 0.120629  | 0.101544  | 0.148601 |
| 0.104021  | 0.132139  | 0.142191 | 0.126166 | 0.135052  | 0.124126  | 0.146707 |
| 0.106643  | 0.122232  | 0.123834 | 0.114219 | 0.123689  | 0.0868298 | 0.143794 |
| 0.116841  | 0.121649  | 0.130536 | 0.117133 | 0.116696  | 0.113928  | 0.144668 |
| 0.102855  | 0.116987  | 0.120047 | 0.104895 | 0.11757   | 0.0897436 | 0.144959 |
| 0.106061  | 0.119027  | 0.121795 | 0.111888 | 0.120192  | 0.0888695 | 0.145542 |
| 0.112179  | 0.115239  | 0.113345 | 0.099359 | 0.112325  | 0.0847902 | 0.13447  |
| 0.116113  | 0.125291  | 0.133013 | 0.112325 | 0.122378  | 0.0875583 | 0.145105 |
| 0.105332  | 0.11655   | 0.121358 | 0.10708  | 0.109557  | 0.0875583 | 0.136364 |
| 0.110286  | 0.136364  | 0.152244 | 0.140589 | 0.138112  | 0.144376  | 0.162005 |
| 0.104458  | 0.126457  | 0.13884  | 0.126894 | 0.124126  | 0.133887  | 0.153846 |
| 0.104167  | 0.115967  | 0.123106 | 0.107372 | 0.111305  | 0.0948427 | 0.142774 |
| 0.108392  | 0.135927  | 0.143648 | 0.138112 | 0.133304  | 0.137821  | 0.15574  |
| 0.124709  | 0.120192  | 0.125291 | 0.115967 | 0.113199  | 0.117424  | 0.136509 |
| 0.126457  | 0.135635  | 0.134907 | 0.134907 | 0.134761  | 0.11451   | 0.14933  |
| 0.11655   | 0.114365  | 0.122378 | 0.107809 | 0.112325  | 0.0871212 | 0.141754 |
| 0.139132  | 0.13986   | 0.145251 | 0.137092 | 0.140734  | 0.139423  | 0.159965 |
| 0.121649  | 0.130536  | 0.128934 | 0.128934 | 0.129371  | 0.128934  | 0.145688 |
| 0.118735  | 0.140734  | 0.140589 | 0.133013 | 0.139569  | 0.135927  | 0.14831  |
| 0.118735  | 0.11859   | 0.125728 | 0.122232 | 0.118881  | 0.106206  | 0.143648 |
| 0.100524  | 0.117861  | 0.121212 | 0.104604 | 0.11553   | 0.092366  | 0.141754 |
| 0.103584  | 0.117133  | 0.121358 | 0.10271  | 0.113928  | 0.0919289 | 0.1419   |
| 0.10169   | 0.118735  | 0.122086 | 0.120921 | 0.117279  | 0.120338  | 0.133596 |
| 0.113636  | 0.125437  | 0.12704  | 0.115676 | 0.119901  | 0.0935315 | 0.146125 |
| 0.126603  | 0.130536  | 0.128934 | 0.118444 | 0.129662  | 0.0954254 | 0.149767 |
| 0.107663  | 0.124126  | 0.12602  | 0.118444 | 0.119464  | 0.113782  | 0.15035  |
| 0.105915  | 0.112179  | 0.120484 | 0.111451 | 0.111597  | 0.0992133 | 0.139277 |
| 0.106061  | 0.117861  | 0.119755 | 0.107226 | 0.114073  | 0.0868298 | 0.144085 |

|           |           |          |           |           |           |          |
|-----------|-----------|----------|-----------|-----------|-----------|----------|
| 0.112325  | 0.124126  | 0.131265 | 0.112325  | 0.121503  | 0.0840618 | 0.139277 |
| 0.0983392 | 0.111597  | 0.123689 | 0.103293  | 0.108974  | 0.0930944 | 0.142774 |
| 0.111014  | 0.126311  | 0.127914 | 0.112762  | 0.121358  | 0.0888695 | 0.145542 |
| 0.122669  | 0.114073  | 0.118298 | 0.105478  | 0.11116   | 0.0929487 | 0.146999 |
| 0.122815  | 0.104895  | 0.11961  | 0.107372  | 0.105186  | 0.107955  | 0.135781 |
| 0.120192  | 0.110723  | 0.116113 | 0.10708   | 0.110723  | 0.0925117 | 0.136364 |
| 0.116696  | 0.113636  | 0.118735 | 0.0907634 | 0.106061  | 0.0476399 | 0.135198 |
| 0.107955  | 0.118881  | 0.123689 | 0.106498  | 0.113636  | 0.0840618 | 0.136072 |
| 0.117716  | 0.105915  | 0.115385 | 0.106643  | 0.107372  | 0.105186  | 0.13884  |
| 0.117861  | 0.108392  | 0.122523 | 0.109994  | 0.106935  | 0.0925117 | 0.142483 |
| 0.127477  | 0.10373   | 0.123397 | 0.125437  | 0.102855  | 0.11553   | 0.14627  |
| 0.112617  | 0.0976107 | 0.114073 | 0.101836  | 0.0990676 | 0.105041  | 0.131702 |
| 0.124709  | 0.124854  | 0.136946 | 0.124126  | 0.120775  | 0.0981935 | 0.14729  |

| TDr_1711  | TDr_1717 | TDr_1723 | TDr_1724 | TDr_1756  | TDr_1760  | TDr_1761  |
|-----------|----------|----------|----------|-----------|-----------|-----------|
| 0.090035  | 0.125583 | 0.16958  | 0.187354 | 0.119755  | 0.118298  | 0.124709  |
| 0.120484  | 0.128934 | 0.176719 | 0.191288 | 0.110577  | 0.104749  | 0.0657051 |
| 0.117279  | 0.12398  | 0.173805 | 0.190122 | 0.105624  | 0.101836  | 0.0747378 |
| 0.124854  | 0.124272 | 0.182838 | 0.197115 | 0.110868  | 0.103584  | 0.124563  |
| 0.137675  | 0.133596 | 0.202069 | 0.214598 | 0.137383  | 0.130973  | 0.144376  |
| 0.120192  | 0.136218 | 0.193619 | 0.202652 | 0.127185  | 0.118444  | 0.13884   |
| 0.105478  | 0.127914 | 0.196096 | 0.208042 | 0.126457  | 0.120047  | 0.134033  |
| 0.121503  | 0.121503 | 0.178613 | 0.189103 | 0.111597  | 0.104895  | 0.12704   |
| 0.116987  | 0.120192 | 0.182255 | 0.19595  | 0.111451  | 0.105332  | 0.124272  |
| 0.114219  | 0.123252 | 0.185315 | 0.198427 | 0.0964452 | 0.0912005 | 0.119172  |
| 0.119901  | 0.125146 | 0.169726 | 0.186917 | 0.110286  | 0.110286  | 0.13243   |
| 0.123834  | 0.113345 | 0.179779 | 0.194639 | 0.119172  | 0.109266  | 0.120629  |
| 0.126748  | 0.118007 | 0.185315 | 0.201923 | 0.109557  | 0.103438  | 0.124709  |
| 0.143502  | 0.14292  | 0.141171 | 0.156031 | 0.122815  | 0.121649  | 0.140297  |
| 0.13345   | 0.126457 | 0.192599 | 0.20542  | 0.0492424 | 0.0483683 | 0.130536  |
| 0.124272  | 0.117279 | 0.192745 | 0.205565 | 0.114073  | 0.10708   | 0.13243   |
| 0.126166  | 0.109266 | 0.185897 | 0.198135 | 0.114802  | 0.109557  | 0.130536  |
| 0.151078  | 0.157197 | 0.206731 | 0.217512 | 0.143502  | 0.140297  | 0.145833  |
| 0.115822  | 0.121649 | 0.171766 | 0.190122 | 0.107955  | 0.103584  | 0.0875583 |
| 0.205857  | 0.205565 | 0.137675 | 0.132721 | 0.167104  | 0.174679  | 0.193036  |
| 0.11014   | 0.136364 | 0.189977 | 0.206294 | 0.124126  | 0.119172  | 0.137821  |
| 0.103584  | 0.125437 | 0.191871 | 0.203526 | 0.120484  | 0.114365  | 0.134178  |
| 0.123543  | 0.118298 | 0.18211  | 0.193765 | 0.113054  | 0.107809  | 0.129079  |
| 0.125728  | 0.128351 | 0.198281 | 0.211684 | 0.130099  | 0.12602   | 0.142045  |
| 0.111888  | 0.111014 | 0.175699 | 0.189394 | 0.106935  | 0.0984848 | 0.125874  |
| 0.106643  | 0.141317 | 0.194639 | 0.208625 | 0.130245  | 0.121212  | 0.132867  |
| 0.120047  | 0.118881 | 0.193765 | 0.206585 | 0.124417  | 0.117716  | 0.145396  |
| 0.128497  | 0.129079 | 0.198427 | 0.213869 | 0.122086  | 0.116259  | 0.13141   |
| 0.127331  | 0.133741 | 0.197844 | 0.210082 | 0.135198  | 0.129371  | 0.140734  |
| 0.124417  | 0.11859  | 0.195221 | 0.212413 | 0.120338  | 0.117133  | 0.139277  |
| 0.0995047 | 0.126603 | 0.186917 | 0.202943 | 0.117279  | 0.110577  | 0.136509  |
| 0.118007  | 0.125    | 0.19493  | 0.209207 | 0.120338  | 0.114219  | 0.134615  |
| 0.106643  | 0.111305 | 0.177156 | 0.188811 | 0.101981  | 0.0958625 | 0.124126  |
| 0.120338  | 0.116259 | 0.190268 | 0.204254 | 0.119755  | 0.115676  | 0.135781  |
| 0.122523  | 0.123106 | 0.192745 | 0.209645 | 0.122232  | 0.116987  | 0.139423  |
| 0.127914  | 0.124417 | 0.199301 | 0.213578 | 0.130245  | 0.125583  | 0.142191  |
| 0.116404  | 0.142628 | 0.20877  | 0.221008 | 0.134761  | 0.127768  | 0.143211  |
| 0.124417  | 0.122669 | 0.191725 | 0.206294 | 0.125874  | 0.11859   | 0.138986  |
| 0.111014  | 0.118881 | 0.182401 | 0.199883 | 0.110723  | 0.107517  | 0.128205  |
| 0.129662  | 0.13141  | 0.19493  | 0.210956 | 0.12296   | 0.114802  | 0.136072  |
| 0.123252  | 0.124709 | 0.184732 | 0.199592 | 0.113636  | 0.108683  | 0.129371  |
| 0.146853  | 0.150058 | 0.208625 | 0.221445 | 0.137529  | 0.128497  | 0.152972  |

|           |          |          |          |          |          |          |
|-----------|----------|----------|----------|----------|----------|----------|
| 0.150932  | 0.150058 | 0.207459 | 0.222902 | 0.147436 | 0.139277 | 0.150932 |
| 0.125728  | 0.12398  | 0.18546  | 0.200321 | 0.120192 | 0.113199 | 0.14088  |
| 0.11757   | 0.10708  | 0.186043 | 0.199446 | 0.115822 | 0.107955 | 0.129225 |
| 0.124417  | 0.121503 | 0.19697  | 0.210373 | 0.115676 | 0.109266 | 0.13345  |
| 0.130536  | 0.123252 | 0.187646 | 0.205128 | 0.12296  | 0.113928 | 0.140443 |
| 0.141754  | 0.144085 | 0.205274 | 0.218386 | 0.137966 | 0.13243  | 0.147873 |
| 0.128934  | 0.12398  | 0.188957 | 0.204983 | 0.120192 | 0.113782 | 0.132139 |
| 0.126748  | 0.120629 | 0.187646 | 0.199301 | 0.115385 | 0.107517 | 0.129953 |
| 0.0584207 | 0.143211 | 0.204691 | 0.218094 | 0.146999 | 0.140589 | 0.146416 |
| 0.139132  | 0.133304 | 0.196241 | 0.207022 | 0.131847 | 0.122232 | 0.140297 |
| 0.127622  | 0.118298 | 0.185897 | 0.200758 | 0.121212 | 0.111888 | 0.129371 |
| 0.137821  | 0.136946 | 0.198427 | 0.21183  | 0.118298 | 0.113345 | 0.130536 |
| 0.124709  | 0.128205 | 0.17366  | 0.186772 | 0.121212 | 0.112762 | 0.130245 |
| 0.145396  | 0.140152 | 0.207168 | 0.221445 | 0.147436 | 0.140152 | 0.155886 |
| 0.13447   | 0.129225 | 0.19799  | 0.21285  | 0.131265 | 0.124272 | 0.137383 |
| 0.127477  | 0.123397 | 0.188957 | 0.204108 | 0.117861 | 0.110286 | 0.135344 |
| 0.128934  | 0.123397 | 0.18546  | 0.199155 | 0.119027 | 0.113199 | 0.13243  |
| 0.121795  | 0.124417 | 0.198135 | 0.210956 | 0.118881 | 0.111305 | 0.130536 |
| 0.140734  | 0.149184 | 0.20979  | 0.222611 | 0.138986 | 0.133159 | 0.145396 |
| 0.145979  | 0.146853 | 0.214744 | 0.223776 | 0.138112 | 0.130828 | 0.145688 |
| 0.163899  | 0.16623  | 0.160402 | 0.167686 | 0.154866 | 0.153409 | 0.162733 |
| 0.127477  | 0.126311 | 0.186043 | 0.20236  | 0.115239 | 0.107663 | 0.133887 |
| 0.127185  | 0.121941 | 0.187791 | 0.203526 | 0.118735 | 0.113199 | 0.128059 |
| 0.123689  | 0.116696 | 0.185752 | 0.201486 | 0.122232 | 0.112908 | 0.132721 |
| 0.127622  | 0.139277 | 0.198135 | 0.209499 | 0.139277 | 0.13549  | 0.142191 |
| 0.124709  | 0.121795 | 0.184732 | 0.198135 | 0.112762 | 0.1081   | 0.131993 |
| 0.13884   | 0.137675 | 0.19799  | 0.207314 | 0.137675 | 0.127768 | 0.148456 |
| 0.122523  | 0.121649 | 0.198281 | 0.21081  | 0.114948 | 0.109703 | 0.127477 |
| 0.126748  | 0.122378 | 0.187646 | 0.20134  | 0.120047 | 0.115093 | 0.13345  |
| 0.125583  | 0.147436 | 0.199301 | 0.212121 | 0.145105 | 0.143065 | 0.153263 |
| 0.130828  | 0.126457 | 0.195513 | 0.211247 | 0.128205 | 0.11655  | 0.138112 |
| 0.145833  | 0.14292  | 0.207314 | 0.220717 | 0.138549 | 0.132139 | 0.142337 |
| 0.140734  | 0.131119 | 0.196096 | 0.208042 | 0.132867 | 0.124126 | 0.141317 |
| 0.121941  | 0.119027 | 0.178176 | 0.191871 | 0.119027 | 0.109994 | 0.131847 |
| 0.12602   | 0.11961  | 0.184586 | 0.198281 | 0.121358 | 0.114365 | 0.131265 |
| 0.129516  | 0.126894 | 0.190122 | 0.20236  | 0.119318 | 0.111451 | 0.130973 |
| 0.140006  | 0.140006 | 0.207022 | 0.215181 | 0.137383 | 0.129516 | 0.144959 |
| 0.123543  | 0.11859  | 0.18648  | 0.20134  | 0.118881 | 0.114219 | 0.128497 |
| 0.148164  | 0.152826 | 0.207314 | 0.220425 | 0.140297 | 0.131847 | 0.14729  |
| 0.129808  | 0.132139 | 0.191871 | 0.203526 | 0.120484 | 0.116696 | 0.141754 |
| 0.125728  | 0.11961  | 0.193328 | 0.207314 | 0.124272 | 0.115822 | 0.135927 |
| 0.127185  | 0.124854 | 0.187791 | 0.202652 | 0.120484 | 0.115239 | 0.135635 |
| 0.136509  | 0.13243  | 0.19391  | 0.207605 | 0.124272 | 0.11757  | 0.138549 |
| 0.125146  | 0.125437 | 0.190122 | 0.20236  | 0.121066 | 0.110868 | 0.131556 |



|          |          |          |          |          |           |          |
|----------|----------|----------|----------|----------|-----------|----------|
| 0.127185 | 0.121358 | 0.187209 | 0.202943 | 0.121649 | 0.113491  | 0.136801 |
| 0.14627  | 0.144231 | 0.208333 | 0.219697 | 0.138112 | 0.13141   | 0.149476 |
| 0.122669 | 0.113345 | 0.185315 | 0.201632 | 0.113345 | 0.104895  | 0.132576 |
| 0.121066 | 0.117861 | 0.188666 | 0.204108 | 0.11553  | 0.108246  | 0.133887 |
| 0.120192 | 0.131265 | 0.198572 | 0.214015 | 0.125437 | 0.119318  | 0.139132 |
| 0.109994 | 0.132139 | 0.196824 | 0.214015 | 0.130099 | 0.123689  | 0.137966 |
| 0.136801 | 0.134761 | 0.203817 | 0.216055 | 0.133596 | 0.124563  | 0.131556 |
| 0.145688 | 0.140443 | 0.213287 | 0.225233 | 0.139569 | 0.130245  | 0.143065 |
| 0.110577 | 0.122523 | 0.184878 | 0.199155 | 0.117861 | 0.112908  | 0.134178 |
| 0.174679 | 0.184003 | 0.151952 | 0.154575 | 0.176719 | 0.176428  | 0.17905  |
| 0.112762 | 0.117716 | 0.185897 | 0.201049 | 0.111597 | 0.104895  | 0.130245 |
| 0.143502 | 0.136509 | 0.204108 | 0.218386 | 0.135344 | 0.125146  | 0.142045 |
| 0.135052 | 0.130682 | 0.200029 | 0.213432 | 0.12398  | 0.118735  | 0.136218 |
| 0.113928 | 0.138403 | 0.206585 | 0.221737 | 0.138695 | 0.130536  | 0.150932 |
| 0.12602  | 0.118444 | 0.191579 | 0.205274 | 0.115822 | 0.10912   | 0.126894 |
| 0.142045 | 0.136509 | 0.205857 | 0.219551 | 0.136509 | 0.12398   | 0.140006 |
| 0.122232 | 0.116696 | 0.190705 | 0.205274 | 0.118735 | 0.111451  | 0.128642 |
| 0.129079 | 0.123834 | 0.194639 | 0.208916 | 0.125    | 0.116841  | 0.137238 |
| 0.106352 | 0.124417 | 0.190851 | 0.20542  | 0.11859  | 0.112471  | 0.135198 |
| 0.142774 | 0.133741 | 0.208625 | 0.22028  | 0.141608 | 0.134033  | 0.14627  |
| 0.118881 | 0.113928 | 0.185606 | 0.198427 | 0.112179 | 0.107517  | 0.130828 |
| 0.11961  | 0.140006 | 0.200903 | 0.215472 | 0.135927 | 0.129225  | 0.139714 |
| 0.104312 | 0.125874 | 0.191142 | 0.20542  | 0.123543 | 0.114219  | 0.129662 |
| 0.13884  | 0.134178 | 0.203526 | 0.216055 | 0.132721 | 0.127768  | 0.143502 |
| 0.114219 | 0.133159 | 0.201049 | 0.214744 | 0.126748 | 0.119172  | 0.142483 |
| 0.106643 | 0.117716 | 0.187646 | 0.204837 | 0.112471 | 0.106352  | 0.131119 |
| 0.134615 | 0.147436 | 0.200175 | 0.208916 | 0.142774 | 0.137821  | 0.15035  |
| 0.107372 | 0.120484 | 0.191288 | 0.206439 | 0.119901 | 0.112617  | 0.137092 |
| 0.126894 | 0.11553  | 0.191288 | 0.206439 | 0.118444 | 0.112034  | 0.130682 |
| 0.120338 | 0.120629 | 0.191142 | 0.205128 | 0.12296  | 0.113636  | 0.131702 |
| 0.123252 | 0.146853 | 0.206002 | 0.219406 | 0.139569 | 0.136364  | 0.146853 |
| 0.122669 | 0.123543 | 0.173368 | 0.191142 | 0.119755 | 0.115967  | 0.136364 |
| 0.122086 | 0.118007 | 0.188228 | 0.202506 | 0.112471 | 0.107226  | 0.129371 |
| 0.123543 | 0.118007 | 0.182692 | 0.200175 | 0.113345 | 0.105186  | 0.128788 |
| 0.105915 | 0.124563 | 0.188374 | 0.205565 | 0.119318 | 0.115239  | 0.134761 |
| 0.13141  | 0.130536 | 0.202797 | 0.217075 | 0.118881 | 0.113345  | 0.134615 |
| 0.103001 | 0.120775 | 0.190997 | 0.209062 | 0.119027 | 0.115239  | 0.134761 |
| 0.115093 | 0.109557 | 0.180944 | 0.197261 | 0.107226 | 0.099359  | 0.124709 |
| 0.11451  | 0.113928 | 0.184441 | 0.197261 | 0.111305 | 0.102273  | 0.125291 |
| 0.121358 | 0.11553  | 0.188374 | 0.203234 | 0.109703 | 0.100087  | 0.133596 |
| 0.130682 | 0.117861 | 0.185752 | 0.201486 | 0.127768 | 0.117861  | 0.140006 |
| 0.131119 | 0.127914 | 0.200175 | 0.213869 | 0.126748 | 0.119172  | 0.137821 |
| 0.119901 | 0.11116  | 0.193328 | 0.206731 | 0.106789 | 0.0977564 | 0.13039  |
| 0.115967 | 0.115385 | 0.184732 | 0.199301 | 0.101107 | 0.092366  | 0.127622 |

|           |          |           |          |          |           |          |
|-----------|----------|-----------|----------|----------|-----------|----------|
| 0.126166  | 0.123252 | 0.196678  | 0.210956 | 0.118881 | 0.112179  | 0.138112 |
| 0.11757   | 0.116696 | 0.1875    | 0.201777 | 0.110577 | 0.103584  | 0.128642 |
| 0.116404  | 0.126311 | 0.185752  | 0.198864 | 0.12398  | 0.116113  | 0.135344 |
| 0.0467657 | 0.13243  | 0.19595   | 0.211393 | 0.133304 | 0.12602   | 0.141463 |
| 0.124272  | 0.121358 | 0.192162  | 0.207605 | 0.114365 | 0.10912   | 0.131556 |
| 0.123252  | 0.11655  | 0.191142  | 0.206876 | 0.108683 | 0.0996503 | 0.130828 |
| 0.122669  | 0.114802 | 0.188228  | 0.200175 | 0.109848 | 0.100816  | 0.128788 |
| 0.11859   | 0.113054 | 0.18211   | 0.197261 | 0.109557 | 0.102855  | 0.125874 |
| 0.129953  | 0.131119 | 0.200466  | 0.212413 | 0.125291 | 0.115385  | 0.131702 |
| 0.114219  | 0.112762 | 0.186189  | 0.201632 | 0.108392 | 0.0973193 | 0.127622 |
| 0.13243   | 0.136509 | 0.2044    | 0.21926  | 0.134178 | 0.13039   | 0.151661 |
| 0.138403  | 0.134907 | 0.198718  | 0.210664 | 0.131119 | 0.127331  | 0.144231 |
| 0.127622  | 0.126166 | 0.197552  | 0.211538 | 0.12296  | 0.117133  | 0.138695 |
| 0.127477  | 0.123106 | 0.1875    | 0.2044   | 0.112034 | 0.108246  | 0.137092 |
| 0.104749  | 0.121941 | 0.186626  | 0.198864 | 0.116987 | 0.108829  | 0.131556 |
| 0.116841  | 0.116259 | 0.189394  | 0.202214 | 0.111014 | 0.104895  | 0.131702 |
| 0.11961   | 0.117279 | 0.188666  | 0.202652 | 0.121358 | 0.114656  | 0.135635 |
| 0.120484  | 0.113782 | 0.18954   | 0.201777 | 0.116404 | 0.109411  | 0.132721 |
| 0.125728  | 0.122815 | 0.175262  | 0.190705 | 0.119027 | 0.108829  | 0.122523 |
| 0.139714  | 0.130973 | 0.201777  | 0.216055 | 0.129225 | 0.121649  | 0.145251 |
| 0.130828  | 0.125583 | 0.196096  | 0.210373 | 0.120921 | 0.111597  | 0.130245 |
| 0.135052  | 0.137675 | 0.195659  | 0.210227 | 0.124854 | 0.118153  | 0.137966 |
| 0.123834  | 0.137529 | 0.204545  | 0.218531 | 0.131993 | 0.126166  | 0.148019 |
| 0.199301  | 0.199301 | 0.0976107 | 0.101981 | 0.179779 | 0.185023  | 0.187063 |
| 0.238782  | 0.237034 | 0.126311  | 0.116113 | 0.225087 | 0.229167  | 0.227127 |
| 0.120338  | 0.119464 | 0.175699  | 0.185897 | 0.119755 | 0.111597  | 0.126457 |
| 0.121941  | 0.117861 | 0.184878  | 0.197115 | 0.114365 | 0.109703  | 0.133596 |
| 0.122523  | 0.115822 | 0.177885  | 0.19391  | 0.113782 | 0.107955  | 0.13039  |
| 0.122815  | 0.122523 | 0.187209  | 0.200903 | 0.11961  | 0.110286  | 0.133887 |
| 0.133887  | 0.130973 | 0.193328  | 0.207605 | 0.053176 | 0.0493881 | 0.128351 |
| 0.12602   | 0.122232 | 0.190122  | 0.2044   | 0.121358 | 0.11116   | 0.140297 |
| 0.148019  | 0.143357 | 0.20979   | 0.221154 | 0.15035  | 0.140734  | 0.159674 |
| 0.128351  | 0.117861 | 0.190997  | 0.203526 | 0.122523 | 0.11757   | 0.14088  |
| 0.135344  | 0.13447  | 0.201195  | 0.216055 | 0.135052 | 0.128934  | 0.144376 |
| 0.138695  | 0.135198 | 0.194347  | 0.204837 | 0.135198 | 0.125291  | 0.144814 |
| 0.139569  | 0.136946 | 0.199301  | 0.214161 | 0.131993 | 0.121212  | 0.151807 |
| 0.144814  | 0.141026 | 0.203671  | 0.215618 | 0.137821 | 0.130828  | 0.137821 |
| 0.125291  | 0.123834 | 0.195513  | 0.210664 | 0.121795 | 0.115093  | 0.138695 |
| 0.124417  | 0.115967 | 0.187646  | 0.20134  | 0.119172 | 0.111305  | 0.136072 |
| 0.127477  | 0.128351 | 0.192162  | 0.206731 | 0.119027 | 0.112325  | 0.140589 |
| 0.121066  | 0.114365 | 0.181381  | 0.196241 | 0.119027 | 0.110868  | 0.131556 |
| 0.124563  | 0.115239 | 0.186626  | 0.201195 | 0.118735 | 0.113491  | 0.137092 |
| 0.126457  | 0.120921 | 0.189103  | 0.206585 | 0.120921 | 0.115093  | 0.141608 |
| 0.139423  | 0.134178 | 0.196241  | 0.211393 | 0.129516 | 0.11961   | 0.141171 |

|          |          |          |          |          |           |          |
|----------|----------|----------|----------|----------|-----------|----------|
| 0.143502 | 0.135052 | 0.206731 | 0.218969 | 0.140297 | 0.131265  | 0.154283 |
| 0.128497 | 0.117424 | 0.189103 | 0.205711 | 0.125    | 0.117133  | 0.13986  |
| 0.128351 | 0.122523 | 0.182547 | 0.200612 | 0.123397 | 0.114365  | 0.135927 |
| 0.135927 | 0.127768 | 0.201777 | 0.214307 | 0.141463 | 0.132721  | 0.14729  |
| 0.124563 | 0.11553  | 0.181964 | 0.200612 | 0.121649 | 0.113782  | 0.130973 |
| 0.150932 | 0.145105 | 0.204837 | 0.218823 | 0.140443 | 0.131993  | 0.150641 |
| 0.142774 | 0.140734 | 0.193473 | 0.206294 | 0.128788 | 0.122086  | 0.140443 |
| 0.14292  | 0.132139 | 0.195367 | 0.203526 | 0.137092 | 0.128059  | 0.14292  |
| 0.121066 | 0.117279 | 0.186334 | 0.201777 | 0.118444 | 0.110286  | 0.135052 |
| 0.119464 | 0.113054 | 0.184732 | 0.198718 | 0.115385 | 0.109266  | 0.131119 |
| 0.135052 | 0.128934 | 0.200903 | 0.214015 | 0.130682 | 0.122523  | 0.14729  |
| 0.132284 | 0.122669 | 0.196096 | 0.208333 | 0.130828 | 0.122086  | 0.139277 |
| 0.134324 | 0.129953 | 0.196096 | 0.208333 | 0.136946 | 0.129662  | 0.152098 |
| 0.128351 | 0.123106 | 0.191288 | 0.207896 | 0.124854 | 0.119027  | 0.13884  |
| 0.129662 | 0.119464 | 0.188811 | 0.204254 | 0.124709 | 0.11451   | 0.144522 |
| 0.131702 | 0.127622 | 0.194639 | 0.207459 | 0.126457 | 0.116259  | 0.13986  |
| 0.13549  | 0.132576 | 0.204837 | 0.21824  | 0.137821 | 0.131702  | 0.150058 |
| 0.140152 | 0.13345  | 0.197844 | 0.212704 | 0.133741 | 0.129079  | 0.145979 |
| 0.137383 | 0.131265 | 0.205274 | 0.217803 | 0.137675 | 0.129225  | 0.152826 |
| 0.131119 | 0.134615 | 0.196678 | 0.211538 | 0.133741 | 0.124126  | 0.143648 |
| 0.125583 | 0.119172 | 0.18852  | 0.206585 | 0.123834 | 0.118007  | 0.138695 |
| 0.140152 | 0.13345  | 0.202506 | 0.213578 | 0.134033 | 0.126457  | 0.145979 |
| 0.121358 | 0.116404 | 0.187791 | 0.2044   | 0.119318 | 0.110286  | 0.131847 |
| 0.125583 | 0.126748 | 0.185606 | 0.197552 | 0.121503 | 0.113345  | 0.13345  |
| 0.125874 | 0.12296  | 0.189685 | 0.207168 | 0.120047 | 0.109848  | 0.132576 |
| 0.125437 | 0.123397 | 0.186334 | 0.199446 | 0.121358 | 0.115239  | 0.135927 |
| 0.125728 | 0.117279 | 0.184586 | 0.201195 | 0.119318 | 0.111742  | 0.130682 |
| 0.139569 | 0.134033 | 0.201923 | 0.217949 | 0.141026 | 0.131702  | 0.153846 |
| 0.118444 | 0.128642 | 0.187791 | 0.200321 | 0.122232 | 0.115239  | 0.13243  |
| 0.137966 | 0.133013 | 0.200612 | 0.214598 | 0.139423 | 0.130973  | 0.141754 |
| 0.124272 | 0.114073 | 0.184295 | 0.197115 | 0.120192 | 0.11116   | 0.13447  |
| 0.128497 | 0.123834 | 0.201049 | 0.2162   | 0.132576 | 0.122378  | 0.146562 |
| 0.13243  | 0.128934 | 0.195659 | 0.207605 | 0.124854 | 0.11961   | 0.132721 |
| 0.133304 | 0.130682 | 0.184586 | 0.195659 | 0.115822 | 0.108537  | 0.135927 |
| 0.120338 | 0.114802 | 0.193182 | 0.208625 | 0.119172 | 0.108392  | 0.135198 |
| 0.13447  | 0.128351 | 0.185752 | 0.197698 | 0.125728 | 0.117861  | 0.135052 |
| 0.135198 | 0.120629 | 0.194347 | 0.210373 | 0.120921 | 0.113928  | 0.137529 |
| 0.116841 | 0.11451  | 0.187937 | 0.203089 | 0.116841 | 0.111305  | 0.137821 |
| 0.138112 | 0.140443 | 0.206294 | 0.217949 | 0.124709 | 0.124126  | 0.13986  |
| 0.133596 | 0.135927 | 0.208188 | 0.218386 | 0.140297 | 0.130973  | 0.144668 |
| 0.114948 | 0.112908 | 0.184878 | 0.198864 | 0.104167 | 0.0983392 | 0.122523 |
| 0.134615 | 0.139277 | 0.205128 | 0.21824  | 0.120338 | 0.111888  | 0.133159 |
| 0.126311 | 0.129225 | 0.199738 | 0.213141 | 0.11757  | 0.112034  | 0.135927 |
| 0.135927 | 0.137092 | 0.19595  | 0.211684 | 0.121649 | 0.116987  | 0.136218 |

|          |          |          |          |          |          |          |
|----------|----------|----------|----------|----------|----------|----------|
| 0.12398  | 0.128351 | 0.191579 | 0.204108 | 0.116404 | 0.109994 | 0.126603 |
| 0.13243  | 0.12602  | 0.198864 | 0.211101 | 0.117861 | 0.109703 | 0.133304 |
| 0.127622 | 0.127331 | 0.198427 | 0.209499 | 0.116841 | 0.109848 | 0.131119 |
| 0.139132 | 0.129808 | 0.203234 | 0.212267 | 0.129516 | 0.121066 | 0.132721 |
| 0.136218 | 0.141463 | 0.203817 | 0.218386 | 0.126603 | 0.121649 | 0.142045 |
| 0.131847 | 0.135635 | 0.197407 | 0.212558 | 0.11961  | 0.114073 | 0.129516 |
| 0.12398  | 0.126894 | 0.187791 | 0.200612 | 0.114656 | 0.107955 | 0.124563 |
| 0.140443 | 0.130828 | 0.201632 | 0.212704 | 0.141608 | 0.136072 | 0.147145 |
| 0.133887 | 0.136218 | 0.202943 | 0.214015 | 0.126311 | 0.120484 | 0.137966 |
| 0.119318 | 0.11961  | 0.184878 | 0.197698 | 0.110286 | 0.104167 | 0.125437 |
| 0.219406 | 0.22028  | 0.112179 | 0.111888 | 0.212704 | 0.215618 | 0.213869 |
| 0.132867 | 0.129662 | 0.194639 | 0.209207 | 0.119172 | 0.112471 | 0.131702 |
| 0.126457 | 0.125874 | 0.187646 | 0.204837 | 0.115385 | 0.109848 | 0.129662 |
| 0.140006 | 0.140006 | 0.204691 | 0.217803 | 0.127185 | 0.119318 | 0.135635 |
| 0.126311 | 0.129516 | 0.190414 | 0.204108 | 0.116404 | 0.11116  | 0.134178 |
| 0.13447  | 0.138258 | 0.2044   | 0.215763 | 0.121066 | 0.115822 | 0.13884  |
| 0.137966 | 0.130099 | 0.191579 | 0.2044   | 0.119318 | 0.112908 | 0.135344 |
| 0.130828 | 0.124417 | 0.19289  | 0.20338  | 0.111305 | 0.105769 | 0.127914 |
| 0.130536 | 0.135198 | 0.194639 | 0.210664 | 0.117133 | 0.112762 | 0.132284 |
| 0.140297 | 0.137092 | 0.185169 | 0.20236  | 0.118444 | 0.116404 | 0.130973 |
| 0.131702 | 0.138403 | 0.198135 | 0.212995 | 0.126457 | 0.119172 | 0.136946 |
| 0.130682 | 0.137383 | 0.20236  | 0.213141 | 0.128642 | 0.119901 | 0.128642 |
| 0.133596 | 0.135052 | 0.202069 | 0.21285  | 0.123106 | 0.117279 | 0.131556 |
| 0.124854 | 0.113199 | 0.193328 | 0.208479 | 0.112325 | 0.10708  | 0.130973 |
| 0.128642 | 0.12602  | 0.194784 | 0.207896 | 0.121941 | 0.114073 | 0.130099 |
| 0.140734 | 0.143065 | 0.199592 | 0.212995 | 0.130536 | 0.121503 | 0.13345  |
| 0.127185 | 0.131265 | 0.188374 | 0.196824 | 0.114365 | 0.106789 | 0.127768 |
| 0.145833 | 0.140589 | 0.207314 | 0.216929 | 0.139132 | 0.133304 | 0.146999 |
| 0.131702 | 0.143357 | 0.186772 | 0.198718 | 0.13345  | 0.129953 | 0.148601 |
| 0.127622 | 0.121212 | 0.193182 | 0.205128 | 0.115967 | 0.110431 | 0.133741 |
| 0.125583 | 0.133159 | 0.201632 | 0.210664 | 0.118007 | 0.114802 | 0.138695 |
| 0.123689 | 0.130973 | 0.184586 | 0.19799  | 0.129225 | 0.119901 | 0.141754 |
| 0.127331 | 0.123834 | 0.193473 | 0.207751 | 0.131702 | 0.127914 | 0.137821 |
| 0.127914 | 0.130245 | 0.184441 | 0.199301 | 0.129079 | 0.123543 | 0.140443 |
| 0.132576 | 0.14627  | 0.194639 | 0.205711 | 0.132284 | 0.129371 | 0.149184 |
| 0.124272 | 0.118444 | 0.185169 | 0.196824 | 0.112325 | 0.104749 | 0.135635 |
| 0.142774 | 0.135781 | 0.199883 | 0.212121 | 0.12704  | 0.121212 | 0.14627  |
| 0.131847 | 0.147582 | 0.184295 | 0.194202 | 0.13243  | 0.131847 | 0.145833 |
| 0.123106 | 0.126311 | 0.199155 | 0.212558 | 0.11757  | 0.112034 | 0.131847 |
| 0.13447  | 0.133304 | 0.189248 | 0.203817 | 0.125728 | 0.120484 | 0.135635 |
| 0.140734 | 0.137821 | 0.206585 | 0.214452 | 0.141317 | 0.138695 | 0.152972 |
| 0.138986 | 0.132867 | 0.195804 | 0.210082 | 0.12704  | 0.121795 | 0.143065 |
| 0.140006 | 0.140297 | 0.205565 | 0.220134 | 0.130099 | 0.126894 | 0.148456 |
| 0.142191 | 0.134033 | 0.197844 | 0.210956 | 0.125291 | 0.121212 | 0.144522 |

|           |          |          |          |           |           |          |
|-----------|----------|----------|----------|-----------|-----------|----------|
| 0.135635  | 0.127185 | 0.198572 | 0.213724 | 0.127768  | 0.119027  | 0.135635 |
| 0.134907  | 0.137821 | 0.196387 | 0.209207 | 0.127622  | 0.120921  | 0.144522 |
| 0.133596  | 0.126603 | 0.188083 | 0.204983 | 0.11757   | 0.113782  | 0.135344 |
| 0.136072  | 0.13549  | 0.20134  | 0.214744 | 0.130828  | 0.12704   | 0.1419   |
| 0.136072  | 0.134033 | 0.199883 | 0.213287 | 0.131119  | 0.126457  | 0.138403 |
| 0.13549   | 0.135781 | 0.200175 | 0.218531 | 0.138986  | 0.129953  | 0.143939 |
| 0.134033  | 0.133741 | 0.20542  | 0.218823 | 0.133159  | 0.126748  | 0.145979 |
| 0.129079  | 0.135781 | 0.195221 | 0.209207 | 0.132576  | 0.125     | 0.142483 |
| 0.147727  | 0.145105 | 0.199883 | 0.214744 | 0.142774  | 0.13549   | 0.149184 |
| 0.125291  | 0.128205 | 0.19493  | 0.206294 | 0.11451   | 0.110431  | 0.136655 |
| 0.133741  | 0.131702 | 0.198135 | 0.210373 | 0.124417  | 0.113345  | 0.13986  |
| 0.129371  | 0.138695 | 0.199009 | 0.214744 | 0.12704   | 0.120629  | 0.141608 |
| 0.118007  | 0.121212 | 0.193765 | 0.206585 | 0.117716  | 0.11014   | 0.136946 |
| 0.133887  | 0.145833 | 0.196533 | 0.211976 | 0.139132  | 0.131556  | 0.144959 |
| 0.142337  | 0.156614 | 0.207314 | 0.219551 | 0.153992  | 0.146125  | 0.159819 |
| 0.134761  | 0.128059 | 0.201486 | 0.216055 | 0.137383  | 0.124272  | 0.14729  |
| 0.127331  | 0.121503 | 0.193473 | 0.208916 | 0.131119  | 0.120629  | 0.143357 |
| 0.134178  | 0.134761 | 0.203817 | 0.216055 | 0.132721  | 0.124563  | 0.146707 |
| 0.1419    | 0.138695 | 0.201049 | 0.213578 | 0.124417  | 0.119755  | 0.135781 |
| 0.13549   | 0.130536 | 0.200466 | 0.214452 | 0.13345   | 0.125874  | 0.14831  |
| 0.142483  | 0.140734 | 0.207751 | 0.221445 | 0.129953  | 0.125291  | 0.13986  |
| 0.131993  | 0.143939 | 0.198427 | 0.211538 | 0.129079  | 0.125291  | 0.142191 |
| 0.128642  | 0.129516 | 0.200321 | 0.21285  | 0.121941  | 0.115822  | 0.138549 |
| 0.148164  | 0.161859 | 0.208479 | 0.220134 | 0.158071  | 0.152826  | 0.16215  |
| 0.135927  | 0.132721 | 0.199738 | 0.213141 | 0.121941  | 0.117861  | 0.140297 |
| 0.14088   | 0.141754 | 0.202069 | 0.214889 | 0.128059  | 0.124854  | 0.145542 |
| 0.135198  | 0.131993 | 0.197844 | 0.214452 | 0.125291  | 0.115385  | 0.141026 |
| 0.132867  | 0.134907 | 0.207168 | 0.219988 | 0.141026  | 0.132576  | 0.143357 |
| 0.132576  | 0.131702 | 0.19289  | 0.20338  | 0.117716  | 0.111305  | 0.129953 |
| 0.0922203 | 0.139714 | 0.161859 | 0.179924 | 0.131556  | 0.132721  | 0.140006 |
| 0.150641  | 0.15472  | 0.203671 | 0.215326 | 0.145979  | 0.135781  | 0.138986 |
| 0.129516  | 0.129516 | 0.181672 | 0.194784 | 0.122815  | 0.116696  | 0.123689 |
| 0.136946  | 0.137529 | 0.164918 | 0.177448 | 0.129079  | 0.127622  | 0.128788 |
| 0.15574   | 0.144668 | 0.140297 | 0.15574  | 0.144376  | 0.144668  | 0.154866 |
| 0.145251  | 0.149621 | 0.143502 | 0.158362 | 0.133304  | 0.137966  | 0.144085 |
| 0.116259  | 0.114802 | 0.201923 | 0.212995 | 0.135781  | 0.126166  | 0.141026 |
| 0.13447   | 0.138549 | 0.196824 | 0.211101 | 0.13447   | 0.129808  | 0.144668 |
| 0.121649  | 0.119318 | 0.179341 | 0.19595  | 0.0884324 | 0.081148  | 0.124272 |
| 0.125291  | 0.113345 | 0.182984 | 0.196678 | 0.0818765 | 0.0763403 | 0.127622 |
| 0.121941  | 0.130682 | 0.188666 | 0.200029 | 0.117861  | 0.114656  | 0.134178 |
| 0.126603  | 0.125437 | 0.177302 | 0.193328 | 0.125146  | 0.113491  | 0.124272 |
| 0.131702  | 0.111888 | 0.187354 | 0.201923 | 0.115676  | 0.112179  | 0.13549  |
| 0.121503  | 0.118881 | 0.16958  | 0.185315 | 0.0777972 | 0.0713869 | 0.118298 |
| 0.132284  | 0.125874 | 0.185897 | 0.19697  | 0.120921  | 0.115093  | 0.132576 |

|           |           |           |           |           |           |          |
|-----------|-----------|-----------|-----------|-----------|-----------|----------|
| 0.131847  | 0.122815  | 0.176136  | 0.189831  | 0.0575466 | 0.0552156 | 0.129225 |
| 0.117279  | 0.11116   | 0.181672  | 0.194202  | 0.103584  | 0.0971737 | 0.120192 |
| 0.132721  | 0.13039   | 0.176136  | 0.194784  | 0.124854  | 0.11757   | 0.127477 |
| 0.127331  | 0.126166  | 0.179779  | 0.199009  | 0.122669  | 0.115385  | 0.124709 |
| 0.129662  | 0.11451   | 0.193473  | 0.206876  | 0.129953  | 0.126166  | 0.142774 |
| 0.215326  | 0.219697  | 0.115967  | 0.110431  | 0.202797  | 0.208333  | 0.208042 |
| 0.145688  | 0.146562  | 0.196096  | 0.210664  | 0.143648  | 0.134907  | 0.131702 |
| 0.135927  | 0.135927  | 0.197698  | 0.211101  | 0.13243   | 0.123689  | 0.137092 |
| 0.127331  | 0.131993  | 0.182984  | 0.198718  | 0.117424  | 0.113054  | 0.125    |
| 0.21183   | 0.211247  | 0.101107  | 0.0949883 | 0.197844  | 0.203671  | 0.201049 |
| 0.101107  | 0.119755  | 0.180361  | 0.193765  | 0.122669  | 0.120047  | 0.135781 |
| 0.124563  | 0.0511364 | 0.191288  | 0.207022  | 0.122815  | 0.117279  | 0.148456 |
| 0.131265  | 0.121358  | 0.192162  | 0.200903  | 0.126603  | 0.119901  | 0.137966 |
| 0.128205  | 0.122086  | 0.184149  | 0.198427  | 0.0472028 | 0.044289  | 0.129662 |
| 0.250583  | 0.252331  | 0.136364  | 0.122669  | 0.238345  | 0.244172  | 0.236888 |
| 0.0467657 | 0.129808  | 0.189248  | 0.204691  | 0.121941  | 0.118735  | 0.138549 |
| 0.128059  | 0.114656  | 0.188666  | 0.20236   | 0.126311  | 0.120192  | 0.136509 |
| 0.133013  | 0.129808  | 0.195367  | 0.207022  | 0.130973  | 0.120484  | 0.135927 |
| 0.128642  | 0.127768  | 0.189831  | 0.202943  | 0.126311  | 0.116113  | 0.135635 |
| 0.064831  | 0.126311  | 0.182838  | 0.195076  | 0.105332  | 0.103875  | 0.134178 |
| 0.127768  | 0.129808  | 0.164773  | 0.178176  | 0.106789  | 0.104458  | 0.127768 |
| 0.129808  | 0.114656  | 0.190122  | 0.20236   | 0.126603  | 0.123106  | 0.135052 |
| 0.126166  | 0.12704   | 0.17803   | 0.194056  | 0.122378  | 0.11451   | 0.125583 |
| 0.127185  | 0.125437  | 0.186334  | 0.202069  | 0.125728  | 0.121066  | 0.139132 |
| 0.123106  | 0.116404  | 0.181964  | 0.197407  | 0.0496795 | 0.0429779 | 0.125437 |
| 0.125583  | 0.12296   | 0.175699  | 0.190851  | 0.117424  | 0.110723  | 0.122669 |
| 0.118153  | 0.127768  | 0.189248  | 0.201777  | 0.103001  | 0.0971737 | 0.123397 |
| 0.149476  | 0.152972  | 0.203671  | 0.216783  | 0.143648  | 0.136072  | 0.141026 |
| 0         | 0.126166  | 0.190268  | 0.204545  | 0.126166  | 0.12296   | 0.138695 |
| 0.126166  | 0         | 0.190851  | 0.203089  | 0.122669  | 0.116841  | 0.149184 |
| 0.190268  | 0.190851  | 0         | 0.0979021 | 0.178904  | 0.183566  | 0.188228 |
| 0.204545  | 0.203089  | 0.0979021 | 0         | 0.19289   | 0.196096  | 0.200466 |
| 0.126166  | 0.122669  | 0.178904  | 0.19289   | 0         | 0.0448718 | 0.126457 |
| 0.12296   | 0.116841  | 0.183566  | 0.196096  | 0.0448718 | 0         | 0.125583 |
| 0.138695  | 0.149184  | 0.188228  | 0.200466  | 0.126457  | 0.125583  | 0        |
| 0.129662  | 0.112179  | 0.187646  | 0.20338   | 0.125583  | 0.121212  | 0.138403 |
| 0.0476399 | 0.127477  | 0.190705  | 0.204691  | 0.127185  | 0.122232  | 0.135344 |
| 0.134615  | 0.136946  | 0.192308  | 0.203963  | 0.132867  | 0.125     | 0.135781 |
| 0.222902  | 0.226399  | 0.11014   | 0.109266  | 0.210664  | 0.217075  | 0.216783 |
| 0.123543  | 0.122086  | 0.187646  | 0.202506  | 0.11859   | 0.112762  | 0.132867 |
| 0.214598  | 0.209936  | 0.139714  | 0.139714  | 0.204691  | 0.2044    | 0.203234 |
| 0.108683  | 0.109557  | 0.190851  | 0.206876  | 0.124709  | 0.115093  | 0.134033 |
| 0.124272  | 0.111742  | 0.188666  | 0.201195  | 0.11961   | 0.113782  | 0.135052 |
| 0.124126  | 0.120629  | 0.178613  | 0.189685  | 0.120921  | 0.110431  | 0.129079 |

|           |           |           |           |           |           |          |
|-----------|-----------|-----------|-----------|-----------|-----------|----------|
| 0.122378  | 0.114802  | 0.180361  | 0.191434  | 0.0544872 | 0.0501166 | 0.125    |
| 0.209936  | 0.20877   | 0.105624  | 0.0971737 | 0.194202  | 0.200321  | 0.200903 |
| 0.137675  | 0.133304  | 0.178176  | 0.193619  | 0.128934  | 0.123397  | 0.129516 |
| 0.12398   | 0.116987  | 0.19595   | 0.209645  | 0.124563  | 0.119027  | 0.143794 |
| 0.132139  | 0.129808  | 0.186043  | 0.201486  | 0.127185  | 0.116696  | 0.128059 |
| 0.13447   | 0.122232  | 0.192162  | 0.205565  | 0.128642  | 0.123689  | 0.13039  |
| 0.125146  | 0.121066  | 0.181672  | 0.196824  | 0.0502622 | 0.0473485 | 0.128351 |
| 0.107809  | 0.108683  | 0.192016  | 0.208916  | 0.127914  | 0.118298  | 0.138403 |
| 0.13141   | 0.113636  | 0.178904  | 0.191434  | 0.123252  | 0.11859   | 0.138403 |
| 0.126457  | 0.0492424 | 0.190851  | 0.204254  | 0.123252  | 0.11859   | 0.147727 |
| 0.124126  | 0.124126  | 0.17162   | 0.18648   | 0.115967  | 0.110723  | 0.12296  |
| 0.123689  | 0.118444  | 0.191871  | 0.204691  | 0.126603  | 0.121941  | 0.142337 |
| 0.191434  | 0.191142  | 0.0871212 | 0.0990676 | 0.178904  | 0.181235  | 0.187354 |
| 0.128059  | 0.129225  | 0.192453  | 0.206148  | 0.130973  | 0.119318  | 0.136509 |
| 0.137529  | 0.135781  | 0.195804  | 0.20542   | 0.130245  | 0.120338  | 0.136364 |
| 0.134178  | 0.126311  | 0.181381  | 0.198281  | 0.121941  | 0.11553   | 0.134761 |
| 0.0582751 | 0.123834  | 0.179779  | 0.198427  | 0.126166  | 0.122378  | 0.13549  |
| 0.128205  | 0.127622  | 0.18211   | 0.197552  | 0.12296   | 0.115967  | 0.124417 |
| 0.113636  | 0.111014  | 0.197552  | 0.210373  | 0.132284  | 0.119755  | 0.141026 |
| 0.107955  | 0.124272  | 0.182838  | 0.197407  | 0.122232  | 0.118735  | 0.130973 |
| 0.129808  | 0.118735  | 0.19391   | 0.206439  | 0.133887  | 0.125728  | 0.142337 |
| 0.129953  | 0.133741  | 0.188228  | 0.202797  | 0.121212  | 0.11451   | 0.132576 |
| 0.127622  | 0.124417  | 0.18852   | 0.198718  | 0.123834  | 0.115676  | 0.133159 |
| 0.130099  | 0.124854  | 0.180798  | 0.193328  | 0.060169  | 0.0517191 | 0.127477 |
| 0.13141   | 0.121795  | 0.19289   | 0.205128  | 0.124417  | 0.119172  | 0.139277 |
| 0.139714  | 0.134761  | 0.201195  | 0.213432  | 0.137966  | 0.131556  | 0.144085 |
| 0.0557984 | 0.120484  | 0.182255  | 0.199738  | 0.11757   | 0.110868  | 0.132721 |
| 0.143065  | 0.141608  | 0.193182  | 0.207751  | 0.141317  | 0.132284  | 0.128497 |
| 0.125874  | 0.119172  | 0.181235  | 0.197261  | 0.0498252 | 0.04662   | 0.125583 |
| 0.125583  | 0.124417  | 0.187063  | 0.200175  | 0.123543  | 0.117424  | 0.131702 |
| 0.131847  | 0.124563  | 0.164773  | 0.179924  | 0.118444  | 0.116987  | 0.120775 |
| 0.13447   | 0.118735  | 0.190122  | 0.204691  | 0.132139  | 0.128351  | 0.142337 |
| 0.191579  | 0.194202  | 0.111742  | 0.108829  | 0.183129  | 0.186334  | 0.184586 |
| 0.119464  | 0.115676  | 0.185606  | 0.20338   | 0.121212  | 0.117424  | 0.13986  |
| 0.115385  | 0.111888  | 0.177739  | 0.189977  | 0.112762  | 0.102273  | 0.124417 |
| 0.12704   | 0.0451632 | 0.194056  | 0.205128  | 0.124126  | 0.116259  | 0.147145 |
| 0.18648   | 0.182692  | 0.106061  | 0.120047  | 0.171911  | 0.17366   | 0.179196 |
| 0.0552156 | 0.134178  | 0.193619  | 0.20877   | 0.134761  | 0.130973  | 0.144668 |
| 0.057838  | 0.143502  | 0.202943  | 0.217803  | 0.145542  | 0.139423  | 0.144959 |
| 0.151807  | 0.155012  | 0.205128  | 0.218823  | 0.145105  | 0.136655  | 0.139569 |
| 0.0597319 | 0.119172  | 0.180361  | 0.196678  | 0.117424  | 0.115093  | 0.12704  |
| 0.128934  | 0.129225  | 0.182547  | 0.195659  | 0.12398   | 0.116113  | 0.124854 |
| 0.210664  | 0.212704  | 0.101981  | 0.0981935 | 0.198718  | 0.204545  | 0.20542  |
| 0.125291  | 0.127331  | 0.18211   | 0.192599  | 0.119172  | 0.115093  | 0.13141  |

|           |          |           |           |           |           |          |
|-----------|----------|-----------|-----------|-----------|-----------|----------|
| 0.131556  | 0.132139 | 0.181381  | 0.197407  | 0.127768  | 0.120484  | 0.12398  |
| 0.122232  | 0.117861 | 0.186626  | 0.206731  | 0.126311  | 0.11961   | 0.140297 |
| 0.17264   | 0.171474 | 0.129808  | 0.138549  | 0.157488  | 0.160693  | 0.161276 |
| 0.124854  | 0.124854 | 0.176136  | 0.194202  | 0.113491  | 0.106206  | 0.11961  |
| 0.147145  | 0.152389 | 0.202506  | 0.216492  | 0.14831   | 0.140443  | 0.148601 |
| 0.121212  | 0.119172 | 0.18211   | 0.195804  | 0.110431  | 0.109266  | 0.125874 |
| 0.193473  | 0.192016 | 0.0888695 | 0.0990676 | 0.178322  | 0.182401  | 0.185315 |
| 0.0576923 | 0.125291 | 0.187354  | 0.20542   | 0.124126  | 0.11859   | 0.134907 |
| 0.122378  | 0.118298 | 0.183566  | 0.200175  | 0.111888  | 0.104021  | 0.124126 |
| 0.128351  | 0.126311 | 0.181964  | 0.200321  | 0.126603  | 0.115822  | 0.133013 |
| 0.120921  | 0.111305 | 0.18648   | 0.203671  | 0.123252  | 0.114219  | 0.137821 |
| 0.122669  | 0.048951 | 0.188811  | 0.205128  | 0.11859   | 0.113636  | 0.148893 |
| 0.129079  | 0.129662 | 0.182692  | 0.19493   | 0.123834  | 0.117424  | 0.137238 |
| 0.122815  | 0.119318 | 0.180798  | 0.196533  | 0.0496795 | 0.0447261 | 0.125728 |
| 0.192599  | 0.193473 | 0.0885781 | 0.101107  | 0.18007   | 0.183566  | 0.187646 |
| 0.134178  | 0.124563 | 0.188666  | 0.202943  | 0.12398   | 0.121066  | 0.139423 |
| 0.129953  | 0.122378 | 0.177739  | 0.190559  | 0.113054  | 0.107517  | 0.126748 |
| 0.211976  | 0.211976 | 0.100379  | 0.0977564 | 0.196241  | 0.203817  | 0.205857 |
| 0.131556  | 0.128351 | 0.19391   | 0.206148  | 0.130973  | 0.11961   | 0.136509 |
| 0.125583  | 0.116259 | 0.185606  | 0.197552  | 0.048951  | 0.0448718 | 0.125583 |
| 0.120921  | 0.115385 | 0.181818  | 0.194056  | 0.0480769 | 0.0425408 | 0.120047 |
| 0.139714  | 0.144376 | 0.192162  | 0.2044    | 0.137966  | 0.128059  | 0.13243  |
| 0.191579  | 0.194202 | 0.0898893 | 0.099796  | 0.178176  | 0.180216  | 0.186043 |
| 0.130828  | 0.115385 | 0.19289   | 0.207751  | 0.129371  | 0.122669  | 0.140152 |
| 0.133741  | 0.132284 | 0.197844  | 0.208042  | 0.13141   | 0.127622  | 0.141608 |
| 0.12296   | 0.11655  | 0.18007   | 0.198427  | 0.0521562 | 0.0431235 | 0.126748 |
| 0.126166  | 0.118881 | 0.181235  | 0.194639  | 0.0533217 | 0.0463287 | 0.125583 |
| 0.124272  | 0.117279 | 0.177885  | 0.193036  | 0.0514277 | 0.043852  | 0.124563 |
| 0.129371  | 0.126457 | 0.179779  | 0.197844  | 0.120338  | 0.111305  | 0.124709 |
| 0.113491  | 0.112034 | 0.182838  | 0.198864  | 0.100379  | 0.095134  | 0.118735 |
| 0.0458916 | 0.128934 | 0.188666  | 0.205857  | 0.125728  | 0.120484  | 0.134761 |
| 0.142337  | 0.141463 | 0.201195  | 0.214015  | 0.137966  | 0.132721  | 0.141754 |
| 0.0546329 | 0.130973 | 0.187791  | 0.203234  | 0.121941  | 0.118444  | 0.136801 |
| 0.134907  | 0.127331 | 0.201049  | 0.210082  | 0.132867  | 0.126457  | 0.134615 |
| 0.197115  | 0.196533 | 0.0895979 | 0.101544  | 0.182838  | 0.188666  | 0.190997 |
| 0.129662  | 0.120629 | 0.191725  | 0.203089  | 0.120629  | 0.115093  | 0.140734 |
| 0.136801  | 0.135927 | 0.184295  | 0.198572  | 0.132721  | 0.124563  | 0.126311 |
| 0.121795  | 0.115385 | 0.184732  | 0.197552  | 0.0530303 | 0.0454545 | 0.123543 |
| 0.11116   | 0.107663 | 0.178759  | 0.195367  | 0.100379  | 0.0977564 | 0.121649 |
| 0.114656  | 0.126603 | 0.181964  | 0.19391   | 0.114948  | 0.112034  | 0.133596 |
| 0.129953  | 0.113636 | 0.192308  | 0.203963  | 0.133159  | 0.12296   | 0.138403 |
| 0.135781  | 0.134615 | 0.189977  | 0.202797  | 0.129662  | 0.126457  | 0.135198 |
| 0.128642  | 0.132139 | 0.1875    | 0.20236   | 0.122232  | 0.117279  | 0.133013 |
| 0.122232  | 0.111451 | 0.179633  | 0.195367  | 0.114656  | 0.106789  | 0.13243  |



|           |           |           |           |           |           |          |
|-----------|-----------|-----------|-----------|-----------|-----------|----------|
| 0.118298  | 0.108974  | 0.18007   | 0.193765  | 0.109266  | 0.104895  | 0.129371 |
| 0.120192  | 0.11961   | 0.181672  | 0.194202  | 0.105332  | 0.101253  | 0.12398  |
| 0.106935  | 0.106352  | 0.192016  | 0.208625  | 0.125583  | 0.117716  | 0.136655 |
| 0.0520105 | 0.129516  | 0.195367  | 0.209645  | 0.130682  | 0.12398   | 0.140297 |
| 0.130536  | 0.115093  | 0.189103  | 0.206294  | 0.127914  | 0.120921  | 0.141026 |
| 0.122232  | 0.123689  | 0.175554  | 0.193036  | 0.119027  | 0.110286  | 0.119901 |
| 0.126603  | 0.112034  | 0.186626  | 0.203817  | 0.123397  | 0.118735  | 0.135052 |
| 0.124709  | 0.118298  | 0.180653  | 0.193182  | 0.0544872 | 0.0477855 | 0.12296  |
| 0.118153  | 0.114948  | 0.190414  | 0.204691  | 0.122523  | 0.11757   | 0.136218 |
| 0.12398   | 0.120484  | 0.181672  | 0.196824  | 0.0456002 | 0.0406469 | 0.12602  |
| 0.12602   | 0.11553   | 0.186043  | 0.200029  | 0.118735  | 0.111742  | 0.134178 |
| 0.135052  | 0.13243   | 0.188083  | 0.202069  | 0.121066  | 0.114948  | 0.131847 |
| 0.120192  | 0.0563811 | 0.18954   | 0.205857  | 0.114948  | 0.109994  | 0.144959 |
| 0.115385  | 0.118298  | 0.181818  | 0.198718  | 0.104604  | 0.10169   | 0.121503 |
| 0.125728  | 0.118444  | 0.181672  | 0.19595   | 0.0537587 | 0.0490967 | 0.123397 |
| 0.131556  | 0.124854  | 0.173514  | 0.190414  | 0.11961   | 0.116987  | 0.133596 |
| 0.129953  | 0.129953  | 0.182984  | 0.198718  | 0.117424  | 0.1081    | 0.134907 |
| 0.124272  | 0.122232  | 0.188083  | 0.199155  | 0.110868  | 0.10708   | 0.129808 |
| 0.125146  | 0.11961   | 0.183421  | 0.198864  | 0.055507  | 0.0499709 | 0.123106 |
| 0.124709  | 0.124417  | 0.174825  | 0.191434  | 0.122669  | 0.115093  | 0.123834 |
| 0.111305  | 0.1081    | 0.18648   | 0.204254  | 0.125874  | 0.117424  | 0.13986  |
| 0.128497  | 0.129662  | 0.182984  | 0.199009  | 0.122378  | 0.11655   | 0.125583 |
| 0.124417  | 0.0553613 | 0.18852   | 0.202214  | 0.117716  | 0.111888  | 0.144231 |
| 0.11655   | 0.115967  | 0.183566  | 0.198718  | 0.106643  | 0.0999417 | 0.124417 |
| 0.119755  | 0.117424  | 0.180944  | 0.192599  | 0.109266  | 0.103147  | 0.123252 |
| 0.116404  | 0.114948  | 0.191579  | 0.205857  | 0.121066  | 0.117861  | 0.137675 |
| 0.130536  | 0.129079  | 0.178613  | 0.197552  | 0.126166  | 0.118298  | 0.12704  |
| 0.132576  | 0.125     | 0.190268  | 0.203089  | 0.130536  | 0.125874  | 0.13141  |
| 0.125146  | 0.125728  | 0.183129  | 0.197698  | 0.116404  | 0.109411  | 0.111451 |
| 0.19391   | 0.19799   | 0.0910548 | 0.100087  | 0.183129  | 0.187209  | 0.190414 |
| 0.170892  | 0.170017  | 0.124854  | 0.134761  | 0.157197  | 0.161276  | 0.162442 |
| 0.0546329 | 0.124272  | 0.185169  | 0.203526  | 0.122523  | 0.119318  | 0.135927 |
| 0.129079  | 0.12296   | 0.184149  | 0.193473  | 0.122086  | 0.116259  | 0.129953 |
| 0.0649767 | 0.146853  | 0.206876  | 0.222028  | 0.151515  | 0.145105  | 0.148601 |
| 0.129808  | 0.129808  | 0.191579  | 0.206148  | 0.126894  | 0.121066  | 0.139714 |
| 0.12704   | 0.125874  | 0.179196  | 0.194056  | 0.0812937 | 0.0792541 | 0.129662 |
| 0.128934  | 0.124854  | 0.180507  | 0.195659  | 0.0875583 | 0.0782343 | 0.13243  |
| 0.118444  | 0.122523  | 0.186626  | 0.199446  | 0.0992133 | 0.0942599 | 0.125437 |
| 0.133013  | 0.131556  | 0.187209  | 0.200903  | 0.11757   | 0.110577  | 0.131556 |
| 0.203089  | 0.206294  | 0.0987762 | 0.0990676 | 0.187937  | 0.192599  | 0.195513 |
| 0.129225  | 0.116404  | 0.197115  | 0.210519  | 0.129516  | 0.12398   | 0.143211 |
| 0.12704   | 0.125583  | 0.17366   | 0.189103  | 0.12296   | 0.114802  | 0.126748 |
| 0.123252  | 0.117716  | 0.177156  | 0.194056  | 0.0641026 | 0.0603147 | 0.127622 |
| 0.131265  | 0.124854  | 0.189831  | 0.205857  | 0.126894  | 0.119318  | 0.134761 |

|           |           |           |           |           |           |          |
|-----------|-----------|-----------|-----------|-----------|-----------|----------|
| 0.190851  | 0.187937  | 0.111014  | 0.120047  | 0.172203  | 0.175991  | 0.182692 |
| 0.246795  | 0.246503  | 0.126748  | 0.118881  | 0.234848  | 0.239219  | 0.23514  |
| 0.134324  | 0.134615  | 0.189977  | 0.204545  | 0.121795  | 0.113928  | 0.13141  |
| 0.132576  | 0.128497  | 0.18852   | 0.203089  | 0.116841  | 0.106061  | 0.133159 |
| 0.0544872 | 0.123543  | 0.185897  | 0.203089  | 0.120338  | 0.117424  | 0.13345  |
| 0.121649  | 0.057838  | 0.190414  | 0.204691  | 0.116404  | 0.110577  | 0.140006 |
| 0.12704   | 0.111014  | 0.190268  | 0.203963  | 0.125874  | 0.119464  | 0.136655 |
| 0.123106  | 0.121066  | 0.182255  | 0.196533  | 0.119027  | 0.116987  | 0.135052 |
| 0.124126  | 0.119755  | 0.173368  | 0.186772  | 0.0780886 | 0.0716783 | 0.122378 |
| 0.125583  | 0.113345  | 0.188228  | 0.204837  | 0.125291  | 0.11859   | 0.137238 |
| 0.121941  | 0.124854  | 0.175262  | 0.1875    | 0.0898893 | 0.0808566 | 0.122523 |
| 0.130828  | 0.126457  | 0.192016  | 0.20338   | 0.115385  | 0.106935  | 0.131702 |
| 0.113491  | 0.111742  | 0.183421  | 0.197115  | 0.10271   | 0.0989219 | 0.123106 |
| 0.13141   | 0.13141   | 0.191142  | 0.203089  | 0.121212  | 0.112179  | 0.129371 |
| 0.129516  | 0.12602   | 0.180216  | 0.195076  | 0.121941  | 0.116404  | 0.125146 |
| 0.120775  | 0.112034  | 0.177302  | 0.19391   | 0.116113  | 0.109703  | 0.130099 |
| 0.135635  | 0.13039   | 0.197407  | 0.213432  | 0.125728  | 0.112908  | 0.134761 |
| 0.13039   | 0.0552156 | 0.201777  | 0.214598  | 0.129516  | 0.125146  | 0.154866 |
| 0.124417  | 0.120047  | 0.180361  | 0.195804  | 0.0536131 | 0.0460373 | 0.125874 |
| 0.110577  | 0.124563  | 0.177593  | 0.190122  | 0.0872669 | 0.0805653 | 0.128351 |
| 0.136509  | 0.130973  | 0.191288  | 0.205274  | 0.0584207 | 0.0537587 | 0.128351 |
| 0.206585  | 0.211247  | 0.120047  | 0.113345  | 0.194639  | 0.202214  | 0.202214 |
| 0.121941  | 0.123689  | 0.181672  | 0.193036  | 0.114656  | 0.109994  | 0.127768 |
| 0.115093  | 0.11014   | 0.186772  | 0.200758  | 0.104604  | 0.0964452 | 0.125    |
| 0.131702  | 0.119755  | 0.189685  | 0.202214  | 0.12296   | 0.117133  | 0.142191 |
| 0.131556  | 0.128059  | 0.193036  | 0.204691  | 0.127768  | 0.120775  | 0.138258 |
| 0.131265  | 0.119901  | 0.190414  | 0.203526  | 0.124563  | 0.117861  | 0.128642 |
| 0.199738  | 0.201195  | 0.0965909 | 0.0995047 | 0.186043  | 0.191579  | 0.196533 |
| 0.128788  | 0.129662  | 0.181527  | 0.197552  | 0.126748  | 0.118881  | 0.125874 |
| 0.120775  | 0.116987  | 0.182255  | 0.195659  | 0.0520105 | 0.0476399 | 0.124854 |
| 0.118298  | 0.129662  | 0.18852   | 0.206876  | 0.128497  | 0.123543  | 0.134615 |
| 0.119464  | 0.0530303 | 0.186772  | 0.202506  | 0.114219  | 0.108683  | 0.140734 |
| 0.130828  | 0.13141   | 0.17366   | 0.193765  | 0.12296   | 0.116841  | 0.125874 |
| 0.119755  | 0.120629  | 0.174242  | 0.191142  | 0.111305  | 0.102564  | 0.126166 |
| 0.128788  | 0.128497  | 0.189103  | 0.204545  | 0.116841  | 0.109557  | 0.133741 |
| 0.128788  | 0.126166  | 0.189394  | 0.20542   | 0.127914  | 0.11859   | 0.13549  |
| 0.200903  | 0.198864  | 0.100379  | 0.0983392 | 0.189248  | 0.190997  | 0.195367 |
| 0.120047  | 0.120338  | 0.175117  | 0.190268  | 0.118007  | 0.109557  | 0.120629 |
| 0.195659  | 0.197407  | 0.0939685 | 0.0986305 | 0.18109   | 0.188083  | 0.190997 |
| 0.195221  | 0.195804  | 0.0932401 | 0.0996503 | 0.182984  | 0.187646  | 0.192016 |
| 0.130536  | 0.0524476 | 0.195804  | 0.21183   | 0.127914  | 0.120921  | 0.149476 |
| 0.132284  | 0.13986   | 0.199301  | 0.215326  | 0.138986  | 0.128205  | 0.139569 |
| 0.123252  | 0.120921  | 0.185023  | 0.196678  | 0.113054  | 0.106061  | 0.120338 |
| 0.120192  | 0.11961   | 0.174388  | 0.192162  | 0.114656  | 0.107372  | 0.124563 |

|           |           |           |           |           |           |          |
|-----------|-----------|-----------|-----------|-----------|-----------|----------|
| 0.126166  | 0.128788  | 0.17803   | 0.192308  | 0.120629  | 0.113928  | 0.122669 |
| 0.126457  | 0.120921  | 0.181818  | 0.196678  | 0.0539044 | 0.0509907 | 0.130245 |
| 0.122669  | 0.107226  | 0.187354  | 0.203671  | 0.122086  | 0.114219  | 0.136655 |
| 0.128497  | 0.108683  | 0.191725  | 0.205128  | 0.12296   | 0.115967  | 0.136655 |
| 0.133887  | 0.132139  | 0.188083  | 0.201777  | 0.123689  | 0.114365  | 0.131556 |
| 0.123252  | 0.0533217 | 0.190268  | 0.205711  | 0.122378  | 0.115093  | 0.147727 |
| 0.120192  | 0.116696  | 0.179633  | 0.193036  | 0.0523019 | 0.0458916 | 0.122523 |
| 0.128788  | 0.126748  | 0.181818  | 0.197844  | 0.122669  | 0.116841  | 0.125    |
| 0.119318  | 0.116696  | 0.180216  | 0.197115  | 0.108537  | 0.101253  | 0.121649 |
| 0.137238  | 0.134033  | 0.18648   | 0.202214  | 0.132867  | 0.122086  | 0.125    |
| 0.0539044 | 0.123252  | 0.187646  | 0.204545  | 0.124417  | 0.116841  | 0.132576 |
| 0.139714  | 0.139423  | 0.189831  | 0.203234  | 0.136218  | 0.126894  | 0.13039  |
| 0.258887  | 0.262383  | 0.134761  | 0.124854  | 0.247523  | 0.252477  | 0.245484 |
| 0.128934  | 0.126311  | 0.204983  | 0.218386  | 0.137675  | 0.128934  | 0.150495 |
| 0.128788  | 0.11859   | 0.197552  | 0.211247  | 0.128497  | 0.125     | 0.139569 |
| 0.218386  | 0.219551  | 0.118153  | 0.10708   | 0.204983  | 0.209936  | 0.20877  |
| 0.134324  | 0.120338  | 0.196096  | 0.206585  | 0.12296   | 0.118881  | 0.136364 |
| 0.229312  | 0.232226  | 0.120629  | 0.110723  | 0.219988  | 0.223776  | 0.223193 |
| 0.125437  | 0.119318  | 0.196824  | 0.210519  | 0.129225  | 0.120484  | 0.143211 |
| 0.134324  | 0.12704   | 0.190851  | 0.207168  | 0.0512821 | 0.0495338 | 0.129953 |
| 0.129079  | 0.125583  | 0.185023  | 0.20134   | 0.12296   | 0.113928  | 0.133741 |
| 0.128205  | 0.0544872 | 0.195513  | 0.208625  | 0.123252  | 0.118007  | 0.150058 |
| 0.206294  | 0.204254  | 0.097028  | 0.0987762 | 0.189977  | 0.196096  | 0.196678 |
| 0.138403  | 0.13549   | 0.189977  | 0.20542   | 0.131702  | 0.122086  | 0.126166 |
| 0.129953  | 0.128205  | 0.178613  | 0.193182  | 0.124709  | 0.11655   | 0.127331 |
| 0.230624  | 0.228875  | 0.116404  | 0.112034  | 0.215181  | 0.219843  | 0.219551 |
| 0.13345   | 0.116841  | 0.187354  | 0.202506  | 0.125874  | 0.119464  | 0.136946 |
| 0.200903  | 0.200903  | 0.0957168 | 0.099796  | 0.18954   | 0.190705  | 0.192162 |
| 0.133013  | 0.112617  | 0.190705  | 0.205274  | 0.128642  | 0.124272  | 0.139132 |
| 0.125728  | 0.119027  | 0.184003  | 0.197698  | 0.0525932 | 0.0467657 | 0.127477 |
| 0.120047  | 0.120921  | 0.193182  | 0.204837  | 0.111597  | 0.105478  | 0.125583 |
| 0.130536  | 0.0574009 | 0.198427  | 0.212413  | 0.127914  | 0.122669  | 0.151224 |
| 0.12398   | 0.126311  | 0.180216  | 0.19595   | 0.116696  | 0.110868  | 0.118444 |
| 0.163024  | 0.167395  | 0.117861  | 0.135927  | 0.14729   | 0.150787  | 0.157197 |
| 0.123397  | 0.123397  | 0.174679  | 0.191288  | 0.118735  | 0.110286  | 0.119318 |
| 0.132721  | 0.130099  | 0.190122  | 0.205565  | 0.132139  | 0.121066  | 0.137966 |
| 0.135927  | 0.115822  | 0.186334  | 0.20236   | 0.121066  | 0.113199  | 0.140297 |
| 0.133596  | 0.13447   | 0.189831  | 0.2044    | 0.132721  | 0.124272  | 0.136801 |
| 0.197552  | 0.197552  | 0.0949883 | 0.0973193 | 0.180653  | 0.187646  | 0.192599 |
| 0.125437  | 0.115239  | 0.181672  | 0.196533  | 0.0488054 | 0.0456002 | 0.126603 |
| 0.130536  | 0.0600233 | 0.17803   | 0.19289   | 0.118007  | 0.117424  | 0.145105 |
| 0.109994  | 0.107663  | 0.192745  | 0.207314  | 0.122232  | 0.118444  | 0.137675 |
| 0.130536  | 0.11451   | 0.19493   | 0.207751  | 0.13141   | 0.121503  | 0.139277 |
| 0.127768  | 0.123689  | 0.186043  | 0.198572  | 0.0502622 | 0.0441434 | 0.124272 |

|           |           |           |           |           |           |          |
|-----------|-----------|-----------|-----------|-----------|-----------|----------|
| 0.258741  | 0.255828  | 0.135198  | 0.124709  | 0.243881  | 0.248834  | 0.244464 |
| 0.114073  | 0.114948  | 0.189248  | 0.202652  | 0.10912   | 0.103293  | 0.124563 |
| 0.133596  | 0.11961   | 0.183129  | 0.197115  | 0.0962995 | 0.0887238 | 0.135052 |
| 0.184878  | 0.181672  | 0.141171  | 0.147873  | 0.17701   | 0.176428  | 0.17701  |
| 0.187791  | 0.190414  | 0.0965909 | 0.102418  | 0.175845  | 0.181381  | 0.18546  |
| 0.136218  | 0.130682  | 0.185752  | 0.200903  | 0.121066  | 0.116696  | 0.135344 |
| 0.127622  | 0.126457  | 0.18211   | 0.197552  | 0.121503  | 0.112762  | 0.126748 |
| 0.121795  | 0.0559441 | 0.187354  | 0.201632  | 0.119755  | 0.110723  | 0.141317 |
| 0.148456  | 0.14933   | 0.194493  | 0.209936  | 0.146125  | 0.137383  | 0.13447  |
| 0.13039   | 0.128642  | 0.186626  | 0.200029  | 0.122232  | 0.114656  | 0.132139 |
| 0.134615  | 0.134033  | 0.18852   | 0.203671  | 0.120921  | 0.115093  | 0.13549  |
| 0.132721  | 0.117861  | 0.193328  | 0.206731  | 0.133013  | 0.12602   | 0.140589 |
| 0.122523  | 0.125146  | 0.176136  | 0.190997  | 0.121358  | 0.113782  | 0.122232 |
| 0.135781  | 0.135781  | 0.185606  | 0.201923  | 0.132867  | 0.122086  | 0.120047 |
| 0.126603  | 0.116987  | 0.173805  | 0.18954   | 0.120484  | 0.116987  | 0.135052 |
| 0.125291  | 0.0527389 | 0.196096  | 0.209207  | 0.121795  | 0.117716  | 0.148601 |
| 0.138549  | 0.0636655 | 0.207022  | 0.219551  | 0.135344  | 0.132721  | 0.158945 |
| 0.11859   | 0.119464  | 0.190851  | 0.206002  | 0.111597  | 0.104895  | 0.126166 |
| 0.129225  | 0.0543415 | 0.204108  | 0.216055  | 0.128059  | 0.123106  | 0.153118 |
| 0.135052  | 0.120775  | 0.200321  | 0.211684  | 0.134178  | 0.132139  | 0.146416 |
| 0.211538  | 0.212704  | 0.100524  | 0.106935  | 0.194639  | 0.199301  | 0.204837 |
| 0.124854  | 0.127185  | 0.194202  | 0.207896  | 0.112617  | 0.10708   | 0.13039  |
| 0.193328  | 0.19391   | 0.095134  | 0.105915  | 0.179633  | 0.18546   | 0.1875   |
| 0.129225  | 0.122232  | 0.186917  | 0.202069  | 0.11961   | 0.116404  | 0.137092 |
| 0.132721  | 0.123106  | 0.184295  | 0.198281  | 0.0528846 | 0.0476399 | 0.12602  |
| 0.0493881 | 0.126603  | 0.183712  | 0.197407  | 0.123106  | 0.117279  | 0.133013 |
| 0.0600233 | 0.120629  | 0.180653  | 0.197552  | 0.116841  | 0.112179  | 0.129079 |
| 0.129516  | 0.127768  | 0.178467  | 0.194493  | 0.125437  | 0.115822  | 0.125728 |
| 0.127185  | 0.128351  | 0.183421  | 0.195659  | 0.125728  | 0.117861  | 0.123689 |
| 0.125437  | 0.117861  | 0.177593  | 0.193036  | 0.0511364 | 0.0496795 | 0.127768 |
| 0.132867  | 0.128497  | 0.189977  | 0.202214  | 0.126457  | 0.115385  | 0.131993 |
| 0.0480769 | 0.125     | 0.189394  | 0.204254  | 0.12704   | 0.120338  | 0.139569 |
| 0.136801  | 0.120484  | 0.18954   | 0.201486  | 0.136509  | 0.135927  | 0.144959 |
| 0.249272  | 0.251311  | 0.13039   | 0.121358  | 0.24053   | 0.246649  | 0.237034 |
| 0.128059  | 0.121358  | 0.183129  | 0.197698  | 0.0517191 | 0.0473485 | 0.127185 |
| 0.188228  | 0.186772  | 0.0914918 | 0.0952797 | 0.174825  | 0.176282  | 0.182692 |
| 0.195076  | 0.191871  | 0.0925117 | 0.0945513 | 0.177885  | 0.182838  | 0.187209 |
| 0.135198  | 0.126166  | 0.182984  | 0.19697   | 0.114219  | 0.113054  | 0.13141  |
| 0.117133  | 0.113054  | 0.187354  | 0.201923  | 0.105186  | 0.0999417 | 0.121212 |
| 0.131119  | 0.126457  | 0.187646  | 0.20134   | 0.0492424 | 0.0434149 | 0.128497 |
| 0.125     | 0.124709  | 0.176282  | 0.193182  | 0.117133  | 0.108974  | 0.122378 |
| 0.118153  | 0.119027  | 0.174971  | 0.191579  | 0.0971737 | 0.0962995 | 0.123106 |
| 0.129225  | 0.113782  | 0.190414  | 0.2044    | 0.126311  | 0.120484  | 0.138549 |
| 0.129953  | 0.129079  | 0.178904  | 0.194347  | 0.122086  | 0.114219  | 0.120629 |

|           |           |           |           |           |           |          |
|-----------|-----------|-----------|-----------|-----------|-----------|----------|
| 0.136946  | 0.139277  | 0.189103  | 0.208625  | 0.136072  | 0.125874  | 0.128205 |
| 0.123689  | 0.119318  | 0.182547  | 0.19595   | 0.0502622 | 0.0423951 | 0.123689 |
| 0.133596  | 0.133304  | 0.186334  | 0.203817  | 0.131265  | 0.120484  | 0.128934 |
| 0.12296   | 0.113345  | 0.187646  | 0.204545  | 0.124709  | 0.118298  | 0.136946 |
| 0.0495338 | 0.130536  | 0.19289   | 0.206876  | 0.127331  | 0.124126  | 0.137238 |
| 0.127477  | 0.055507  | 0.188374  | 0.204691  | 0.119027  | 0.115239  | 0.148456 |
| 0.138695  | 0.121795  | 0.202506  | 0.212413  | 0.137821  | 0.132867  | 0.143939 |
| 0.132139  | 0.127477  | 0.192453  | 0.205274  | 0.116113  | 0.112908  | 0.132721 |
| 0.116696  | 0.117279  | 0.179341  | 0.191579  | 0.0514277 | 0.048514  | 0.124854 |
| 0.13884   | 0.132721  | 0.200321  | 0.211101  | 0.134178  | 0.128351  | 0.143502 |
| 0.188228  | 0.187646  | 0.0885781 | 0.0979021 | 0.176282  | 0.18007   | 0.181527 |
| 0.139423  | 0.137092  | 0.192745  | 0.207022  | 0.137383  | 0.126603  | 0.129808 |
| 0.125728  | 0.128059  | 0.178467  | 0.194202  | 0.123106  | 0.117279  | 0.12602  |
| 0.0463287 | 0.123834  | 0.187354  | 0.204837  | 0.124709  | 0.115676  | 0.133159 |
| 0.0613345 | 0.118735  | 0.185169  | 0.198864  | 0.113199  | 0.108246  | 0.126603 |
| 0.123834  | 0.048951  | 0.192308  | 0.203671  | 0.117716  | 0.113345  | 0.144814 |
| 0.125728  | 0.0479312 | 0.193328  | 0.207896  | 0.124563  | 0.119027  | 0.150495 |
| 0.193473  | 0.192308  | 0.0929487 | 0.103147  | 0.178613  | 0.184732  | 0.192308 |
| 0.127622  | 0.124709  | 0.174825  | 0.186772  | 0.118881  | 0.113345  | 0.121795 |
| 0.122815  | 0.11757   | 0.163316  | 0.180216  | 0.112034  | 0.107372  | 0.123689 |
| 0.130682  | 0.130099  | 0.184586  | 0.198281  | 0.125437  | 0.11757   | 0.12602  |
| 0.19697   | 0.197552  | 0.0944056 | 0.0979021 | 0.179487  | 0.183858  | 0.189685 |
| 0.112617  | 0.11116   | 0.178759  | 0.194784  | 0.10271   | 0.0986305 | 0.120192 |
| 0.128788  | 0.115385  | 0.198427  | 0.207459  | 0.13345   | 0.124126  | 0.143065 |
| 0.125291  | 0.128788  | 0.183566  | 0.199592  | 0.125     | 0.117133  | 0.125874 |
| 0.129516  | 0.127477  | 0.192162  | 0.201777  | 0.118444  | 0.108537  | 0.126603 |
| 0.193036  | 0.191288  | 0.0866841 | 0.097465  | 0.175554  | 0.178759  | 0.185169 |
| 0.126894  | 0.114073  | 0.189831  | 0.202069  | 0.128934  | 0.120484  | 0.136801 |
| 0.128934  | 0.118735  | 0.180798  | 0.192162  | 0.116696  | 0.111742  | 0.131847 |
| 0.117279  | 0.114073  | 0.173514  | 0.192453  | 0.104458  | 0.103001  | 0.122232 |
| 0.119901  | 0.13243   | 0.159237  | 0.178759  | 0.120484  | 0.11961   | 0.128059 |
| 0.129371  | 0.131702  | 0.191725  | 0.206876  | 0.132284  | 0.118298  | 0.138986 |
| 0.131993  | 0.118298  | 0.199301  | 0.211538  | 0.138112  | 0.130245  | 0.144231 |
| 0.124126  | 0.116841  | 0.182692  | 0.197261  | 0.0498252 | 0.0425408 | 0.126166 |
| 0.13345   | 0.125874  | 0.193182  | 0.208333  | 0.12704   | 0.120629  | 0.138695 |
| 0.151078  | 0.152826  | 0.200903  | 0.215181  | 0.143211  | 0.135052  | 0.141171 |
| 0.235868  | 0.237617  | 0.123689  | 0.112617  | 0.225379  | 0.228875  | 0.226544 |
| 0.137675  | 0.129225  | 0.197698  | 0.209645  | 0.124272  | 0.11553   | 0.134761 |
| 0.130099  | 0.129516  | 0.190414  | 0.204983  | 0.130973  | 0.119318  | 0.138549 |
| 0.125874  | 0.125291  | 0.177156  | 0.191725  | 0.120047  | 0.113054  | 0.121212 |
| 0.131847  | 0.131847  | 0.182838  | 0.193328  | 0.129225  | 0.123689  | 0.133596 |
| 0.11859   | 0.122378  | 0.18211   | 0.198427  | 0.12296   | 0.11451   | 0.128497 |
| 0.127331  | 0.119755  | 0.190268  | 0.199301  | 0.125     | 0.118298  | 0.130245 |
| 0.130099  | 0.128642  | 0.180216  | 0.195659  | 0.124563  | 0.117861  | 0.124563 |

|           |          |           |           |           |           |           |
|-----------|----------|-----------|-----------|-----------|-----------|-----------|
| 0.134324  | 0.117716 | 0.196096  | 0.207168  | 0.134615  | 0.129079  | 0.143357  |
| 0.134033  | 0.125583 | 0.182401  | 0.195513  | 0.120338  | 0.112762  | 0.136946  |
| 0.236742  | 0.239073 | 0.125437  | 0.11961   | 0.224796  | 0.230332  | 0.226253  |
| 0.114219  | 0.11014  | 0.177739  | 0.193182  | 0.102855  | 0.0979021 | 0.124417  |
| 0.11655   | 0.112762 | 0.18648   | 0.200466  | 0.119464  | 0.112471  | 0.134907  |
| 0.122815  | 0.115239 | 0.183712  | 0.197115  | 0.0470571 | 0.0394814 | 0.12398   |
| 0.138695  | 0.1419   | 0.193473  | 0.208916  | 0.129371  | 0.122086  | 0.138986  |
| 0.1419    | 0.137238 | 0.203089  | 0.215909  | 0.125583  | 0.122378  | 0.138403  |
| 0.123834  | 0.131702 | 0.176282  | 0.191725  | 0.11014   | 0.1081    | 0.0608974 |
| 0.128205  | 0.128205 | 0.18007   | 0.193473  | 0.124709  | 0.116259  | 0.123834  |
| 0.125146  | 0.124854 | 0.183129  | 0.19595   | 0.112617  | 0.106206  | 0.128351  |
| 0.231789  | 0.235577 | 0.118444  | 0.112908  | 0.218094  | 0.224796  | 0.224505  |
| 0.129516  | 0.130973 | 0.183712  | 0.196824  | 0.128059  | 0.120192  | 0.126603  |
| 0.130245  | 0.11451  | 0.194056  | 0.208042  | 0.134615  | 0.125583  | 0.140443  |
| 0.128497  | 0.118007 | 0.185606  | 0.200758  | 0.118881  | 0.1081    | 0.134033  |
| 0.131265  | 0.128059 | 0.191871  | 0.206148  | 0.128642  | 0.119027  | 0.133596  |
| 0.126311  | 0.122815 | 0.200612  | 0.216055  | 0.13243   | 0.126894  | 0.145833  |
| 0.123106  | 0.118444 | 0.183421  | 0.196533  | 0.0490967 | 0.0453089 | 0.122815  |
| 0.130973  | 0.117279 | 0.19391   | 0.206731  | 0.132139  | 0.127477  | 0.143794  |
| 0.135198  | 0.120921 | 0.199592  | 0.213578  | 0.13986   | 0.13141   | 0.144231  |
| 0.127331  | 0.115385 | 0.191434  | 0.205711  | 0.125874  | 0.121212  | 0.138403  |
| 0.124854  | 0.118153 | 0.183129  | 0.196824  | 0.0482226 | 0.0447261 | 0.128934  |
| 0.13243   | 0.133304 | 0.196824  | 0.209353  | 0.134761  | 0.122815  | 0.137966  |
| 0.135781  | 0.137529 | 0.200175  | 0.215618  | 0.137238  | 0.125874  | 0.140734  |
| 0.0533217 | 0.128497 | 0.195513  | 0.209207  | 0.128788  | 0.121212  | 0.139277  |
| 0.0539044 | 0.134907 | 0.193473  | 0.208625  | 0.134615  | 0.128497  | 0.141026  |
| 0.137092  | 0.136509 | 0.201777  | 0.214598  | 0.136801  | 0.124854  | 0.141463  |
| 0.114656  | 0.120484 | 0.18546   | 0.198572  | 0.0957168 | 0.0884324 | 0.126894  |
| 0.124709  | 0.121503 | 0.210373  | 0.222902  | 0.145688  | 0.136072  | 0.14627   |
| 0.140589  | 0.137092 | 0.203526  | 0.216055  | 0.126311  | 0.11961   | 0.145251  |
| 0.207896  | 0.209936 | 0.0989219 | 0.0957168 | 0.195076  | 0.199738  | 0.19799   |
| 0.13884   | 0.132139 | 0.189831  | 0.201486  | 0.11961   | 0.113199  | 0.131265  |
| 0.125146  | 0.115822 | 0.190705  | 0.208188  | 0.122523  | 0.118444  | 0.14088   |
| 0.130828  | 0.122378 | 0.178904  | 0.189977  | 0.0454545 | 0.0451632 | 0.123834  |
| 0.223631  | 0.224796 | 0.119901  | 0.112325  | 0.214598  | 0.217512  | 0.21722   |
| 0.216638  | 0.215472 | 0.113491  | 0.108829  | 0.202069  | 0.206439  | 0.206148  |
| 0.13549   | 0.119755 | 0.194639  | 0.210082  | 0.138986  | 0.130245  | 0.143648  |
| 0.249272  | 0.250728 | 0.131265  | 0.124563  | 0.237325  | 0.243444  | 0.238491  |
| 0.114656  | 0.122815 | 0.184295  | 0.199155  | 0.0977564 | 0.0922203 | 0.124854  |
| 0.142045  | 0.144085 | 0.199446  | 0.215181  | 0.132721  | 0.125146  | 0.137675  |
| 0.111451  | 0.116404 | 0.185169  | 0.198864  | 0.104749  | 0.100962  | 0.125728  |
| 0.134324  | 0.131993 | 0.19493   | 0.208625  | 0.134324  | 0.122669  | 0.138112  |
| 0.193619  | 0.193619 | 0.0895979 | 0.0971737 | 0.178759  | 0.182547  | 0.184878  |
| 0.134907  | 0.125583 | 0.188811  | 0.201923  | 0.125     | 0.115676  | 0.144814  |

|           |           |           |           |           |           |          |
|-----------|-----------|-----------|-----------|-----------|-----------|----------|
| 0.198427  | 0.199009  | 0.0973193 | 0.0984848 | 0.181527  | 0.184441  | 0.189685 |
| 0.129953  | 0.12704   | 0.191434  | 0.203963  | 0.111014  | 0.107809  | 0.130245 |
| 0.125291  | 0.119172  | 0.171037  | 0.184149  | 0.121795  | 0.117133  | 0.129371 |
| 0.124709  | 0.130536  | 0.190851  | 0.199883  | 0.119464  | 0.11655   | 0.134033 |
| 0.118007  | 0.125291  | 0.172494  | 0.184732  | 0.112179  | 0.106643  | 0.118881 |
| 0.118153  | 0.114073  | 0.179341  | 0.194784  | 0.0505536 | 0.0444347 | 0.121649 |
| 0.128059  | 0.123689  | 0.182547  | 0.19595   | 0.111451  | 0.103875  | 0.129516 |
| 0.112908  | 0.108829  | 0.178467  | 0.192453  | 0.0995047 | 0.0945513 | 0.121649 |
| 0.125291  | 0.12704   | 0.178904  | 0.19493   | 0.120921  | 0.112762  | 0.122669 |
| 0.111742  | 0.109994  | 0.193619  | 0.20877   | 0.126894  | 0.119901  | 0.140006 |
| 0.13039   | 0.121649  | 0.187209  | 0.200029  | 0.112617  | 0.107372  | 0.126311 |
| 0.114219  | 0.11451   | 0.181527  | 0.196387  | 0.102564  | 0.097028  | 0.12296  |
| 0.069493  | 0.127185  | 0.182838  | 0.197407  | 0.108246  | 0.103875  | 0.135344 |
| 0.136801  | 0.133304  | 0.188666  | 0.20236   | 0.13447   | 0.125437  | 0.12602  |
| 0.0562354 | 0.121212  | 0.182401  | 0.198427  | 0.118007  | 0.112471  | 0.12704  |
| 0.126311  | 0.117861  | 0.186043  | 0.197115  | 0.117279  | 0.111742  | 0.134178 |
| 0.119172  | 0.115676  | 0.179196  | 0.194639  | 0.0469114 | 0.0390443 | 0.121795 |
| 0.124126  | 0.115676  | 0.185315  | 0.19697   | 0.127914  | 0.121212  | 0.134907 |
| 0.128788  | 0.129079  | 0.188811  | 0.204837  | 0.127331  | 0.119464  | 0.136072 |
| 0.123106  | 0.0511364 | 0.192745  | 0.206148  | 0.121066  | 0.114073  | 0.14933  |
| 0.0549242 | 0.118735  | 0.186334  | 0.202652  | 0.119027  | 0.115822  | 0.130973 |
| 0.125291  | 0.127331  | 0.180653  | 0.192599  | 0.123252  | 0.113345  | 0.125    |
| 0.136509  | 0.135635  | 0.18954   | 0.203234  | 0.133013  | 0.123397  | 0.128351 |
| 0.14088   | 0.140589  | 0.194784  | 0.209062  | 0.13884   | 0.130099  | 0.13243  |
| 0.120629  | 0.107517  | 0.181818  | 0.196678  | 0.11451   | 0.106935  | 0.127914 |
| 0.124126  | 0.12296   | 0.180944  | 0.197552  | 0.0495338 | 0.0445804 | 0.127622 |
| 0.120484  | 0.116113  | 0.181964  | 0.196241  | 0.120484  | 0.113199  | 0.124272 |
| 0.135052  | 0.13447   | 0.200903  | 0.215472  | 0.140589  | 0.130099  | 0.140297 |
| 0.117424  | 0.117133  | 0.189103  | 0.204545  | 0.111014  | 0.104312  | 0.127331 |
| 0.136655  | 0.0608974 | 0.207459  | 0.222028  | 0.137238  | 0.131993  | 0.159091 |
| 0.143065  | 0.134907  | 0.196678  | 0.20979   | 0.0582751 | 0.0547786 | 0.134907 |
| 0.135344  | 0.140297  | 0.193619  | 0.204983  | 0.126603  | 0.117279  | 0.132139 |
| 0.121503  | 0.126166  | 0.183275  | 0.197844  | 0.108683  | 0.103438  | 0.120047 |
| 0.12602   | 0.123106  | 0.183129  | 0.199155  | 0.121358  | 0.111451  | 0.13243  |
| 0.053176  | 0.129808  | 0.19391   | 0.205857  | 0.128059  | 0.122232  | 0.138549 |
| 0.209207  | 0.210664  | 0.112762  | 0.118298  | 0.200175  | 0.201923  | 0.203963 |
| 0.127331  | 0.11859   | 0.181818  | 0.194347  | 0.117716  | 0.113636  | 0.13549  |
| 0.124272  | 0.127477  | 0.190414  | 0.201486  | 0.117861  | 0.112325  | 0.138258 |
| 0.129371  | 0.127914  | 0.191434  | 0.206002  | 0.129662  | 0.118881  | 0.129662 |
| 0.0566725 | 0.123689  | 0.184003  | 0.203234  | 0.122815  | 0.116987  | 0.133304 |
| 0.13141   | 0.130245  | 0.190268  | 0.204254  | 0.118298  | 0.111305  | 0.13549  |
| 0.129371  | 0.127622  | 0.189394  | 0.20338   | 0.130536  | 0.121503  | 0.132284 |
| 0.133013  | 0.130099  | 0.193619  | 0.204691  | 0.131847  | 0.124854  | 0.13243  |
| 0.134324  | 0.133741  | 0.187937  | 0.200758  | 0.120629  | 0.112762  | 0.128788 |

|           |          |          |          |          |           |          |
|-----------|----------|----------|----------|----------|-----------|----------|
| 0.11014   | 0.1081   | 0.191142 | 0.20542  | 0.123543 | 0.117424  | 0.130536 |
| 0.134033  | 0.131119 | 0.19697  | 0.211247 | 0.13345  | 0.122378  | 0.140443 |
| 0.122378  | 0.126457 | 0.192016 | 0.201632 | 0.117133 | 0.111888  | 0.133741 |
| 0.133013  | 0.128059 | 0.192453 | 0.205565 | 0.118444 | 0.111451  | 0.13243  |
| 0.177156  | 0.179196 | 0.168415 | 0.173951 | 0.172786 | 0.170746  | 0.182401 |
| 0.128788  | 0.129371 | 0.179487 | 0.19493  | 0.120921 | 0.112762  | 0.12704  |
| 0.132139  | 0.133596 | 0.185752 | 0.200321 | 0.132139 | 0.125146  | 0.13884  |
| 0.125583  | 0.124417 | 0.197844 | 0.210664 | 0.119755 | 0.110723  | 0.138403 |
| 0.130973  | 0.133887 | 0.184295 | 0.198864 | 0.126603 | 0.11961   | 0.134761 |
| 0.11961   | 0.118735 | 0.183129 | 0.200029 | 0.110286 | 0.103001  | 0.12398  |
| 0.123689  | 0.122232 | 0.186334 | 0.198281 | 0.109994 | 0.101544  | 0.120775 |
| 0.124272  | 0.120484 | 0.188666 | 0.2044   | 0.114656 | 0.10912   | 0.125146 |
| 0.128934  | 0.131847 | 0.195076 | 0.208188 | 0.129516 | 0.118735  | 0.144668 |
| 0.124854  | 0.126894 | 0.176136 | 0.190414 | 0.11553  | 0.110286  | 0.124854 |
| 0.125     | 0.128497 | 0.199301 | 0.21183  | 0.126748 | 0.119464  | 0.143065 |
| 0.121649  | 0.118444 | 0.181964 | 0.19391  | 0.116404 | 0.109994  | 0.130682 |
| 0.12296   | 0.119755 | 0.185897 | 0.201923 | 0.125    | 0.121795  | 0.137821 |
| 0.14292   | 0.133304 | 0.203234 | 0.21722  | 0.132721 | 0.123106  | 0.144959 |
| 0.119027  | 0.120775 | 0.19391  | 0.209645 | 0.116696 | 0.110577  | 0.130682 |
| 0.115822  | 0.125437 | 0.193036 | 0.207022 | 0.124272 | 0.118444  | 0.136218 |
| 0.117861  | 0.116404 | 0.189248 | 0.206439 | 0.115239 | 0.107955  | 0.129808 |
| 0.11961   | 0.11757  | 0.193036 | 0.207896 | 0.116113 | 0.110286  | 0.129808 |
| 0.116113  | 0.112034 | 0.184878 | 0.196824 | 0.103584 | 0.0992133 | 0.122232 |
| 0.129953  | 0.117716 | 0.201632 | 0.212413 | 0.113928 | 0.111014  | 0.131993 |
| 0.119172  | 0.111014 | 0.187937 | 0.206002 | 0.110431 | 0.101981  | 0.134033 |
| 0.146853  | 0.13986  | 0.203089 | 0.214161 | 0.143939 | 0.140734  | 0.151224 |
| 0.13986   | 0.132576 | 0.190559 | 0.201632 | 0.130245 | 0.125291  | 0.144522 |
| 0.11014   | 0.108392 | 0.190559 | 0.203671 | 0.113054 | 0.105478  | 0.130245 |
| 0.136509  | 0.132139 | 0.205565 | 0.219551 | 0.144376 | 0.13447   | 0.154575 |
| 0.101253  | 0.131847 | 0.18546  | 0.20236  | 0.123397 | 0.116404  | 0.133887 |
| 0.140006  | 0.140006 | 0.203817 | 0.211393 | 0.133013 | 0.130099  | 0.13884  |
| 0.113199  | 0.104749 | 0.188666 | 0.204983 | 0.109994 | 0.104167  | 0.131265 |
| 0.148893  | 0.147145 | 0.204254 | 0.216783 | 0.142483 | 0.13549   | 0.150641 |
| 0.136946  | 0.125291 | 0.193473 | 0.204837 | 0.131993 | 0.123834  | 0.143939 |
| 0.133741  | 0.135781 | 0.197844 | 0.210373 | 0.139277 | 0.132867  | 0.147436 |
| 0.105478  | 0.128205 | 0.201632 | 0.214161 | 0.125    | 0.118881  | 0.13345  |
| 0.118735  | 0.119027 | 0.192162 | 0.207022 | 0.10912  | 0.101836  | 0.127477 |
| 0.122378  | 0.120921 | 0.18648  | 0.198427 | 0.110723 | 0.104021  | 0.133159 |
| 0.127477  | 0.120192 | 0.189831 | 0.206148 | 0.126603 | 0.116404  | 0.14088  |
| 0.121941  | 0.118444 | 0.199155 | 0.214598 | 0.11961  | 0.111451  | 0.133596 |
| 0.127914  | 0.122378 | 0.204837 | 0.217075 | 0.124126 | 0.118298  | 0.136655 |
| 0.134324  | 0.130245 | 0.183858 | 0.200758 | 0.122378 | 0.115385  | 0.136655 |
| 0.0999417 | 0.116259 | 0.18648  | 0.20542  | 0.112179 | 0.109266  | 0.128497 |
| 0.124272  | 0.119027 | 0.186626 | 0.200029 | 0.111451 | 0.105915  | 0.133887 |



|          |          |          |          |           |          |           |
|----------|----------|----------|----------|-----------|----------|-----------|
| 0.126166 | 0.127331 | 0.191434 | 0.205128 | 0.114802  | 0.108974 | 0.126457  |
| 0.121795 | 0.118298 | 0.187354 | 0.201049 | 0.109848  | 0.106061 | 0.128205  |
| 0.130099 | 0.124272 | 0.194784 | 0.206731 | 0.118444  | 0.112034 | 0.137675  |
| 0.111961 | 0.111742 | 0.184295 | 0.199446 | 0.111451  | 0.104167 | 0.133887  |
| 0.111859 | 0.130828 | 0.176573 | 0.189685 | 0.110431  | 0.106935 | 0.0603147 |
| 0.129953 | 0.129079 | 0.189103 | 0.203089 | 0.1081    | 0.105186 | 0.129371  |
| 0.111305 | 0.118881 | 0.184732 | 0.198427 | 0.0944056 | 0.087704 | 0.121503  |
| 0.122086 | 0.123834 | 0.187937 | 0.200758 | 0.107809  | 0.101399 | 0.122086  |
| 0.121649 | 0.126603 | 0.175554 | 0.193328 | 0.111451  | 0.105915 | 0.0645396 |
| 0.125291 | 0.120921 | 0.187354 | 0.201049 | 0.115967  | 0.110723 | 0.131702  |
| 0.127914 | 0.124417 | 0.185315 | 0.200758 | 0.125583  | 0.123252 | 0.123834  |
| 0.116259 | 0.12296  | 0.173077 | 0.18648  | 0.103147  | 0.097028 | 0.0818765 |
| 0.128351 | 0.131847 | 0.198281 | 0.211684 | 0.128059  | 0.126311 | 0.133304  |

| TDr_1763  | TDr_1764  | TDr_1765 | TDr_1769 | TDr_1772 | TDr_1775 | TDr_1790  |
|-----------|-----------|----------|----------|----------|----------|-----------|
| 0.118007  | 0.0901807 | 0.134907 | 0.205128 | 0.113054 | 0.1875   | 0.1081    |
| 0.116987  | 0.117716  | 0.120775 | 0.207896 | 0.113782 | 0.199883 | 0.113782  |
| 0.114948  | 0.115385  | 0.120775 | 0.205857 | 0.109994 | 0.197844 | 0.109411  |
| 0.11757   | 0.12704   | 0.12398  | 0.218094 | 0.113199 | 0.20542  | 0.113491  |
| 0.128934  | 0.140443  | 0.127768 | 0.228001 | 0.125728 | 0.216783 | 0.127477  |
| 0.131847  | 0.117133  | 0.130682 | 0.219551 | 0.127768 | 0.206585 | 0.128059  |
| 0.116841  | 0.104458  | 0.131993 | 0.227273 | 0.122669 | 0.207022 | 0.10373   |
| 0.119172  | 0.119901  | 0.118881 | 0.209207 | 0.111305 | 0.200321 | 0.109266  |
| 0.108829  | 0.118298  | 0.123397 | 0.217512 | 0.107663 | 0.201049 | 0.0977564 |
| 0.118007  | 0.114656  | 0.125583 | 0.218823 | 0.112179 | 0.205565 | 0.113636  |
| 0.112034  | 0.121503  | 0.135344 | 0.207314 | 0.118153 | 0.188228 | 0.10271   |
| 0.1081    | 0.122232  | 0.119464 | 0.216492 | 0.104021 | 0.204983 | 0.102564  |
| 0.113928  | 0.123689  | 0.128788 | 0.224359 | 0.11451  | 0.205274 | 0.105769  |
| 0.136801  | 0.145979  | 0.145833 | 0.176428 | 0.134761 | 0.164918 | 0.139423  |
| 0.133159  | 0.135052  | 0.131993 | 0.223776 | 0.125874 | 0.211976 | 0.129662  |
| 0.109703  | 0.120047  | 0.127185 | 0.224505 | 0.120775 | 0.199883 | 0.103001  |
| 0.0979021 | 0.12602   | 0.120047 | 0.224359 | 0.104312 | 0.205274 | 0.099359  |
| 0.149621  | 0.151224  | 0.134761 | 0.23208  | 0.134761 | 0.219114 | 0.142628  |
| 0.110286  | 0.113928  | 0.121358 | 0.206731 | 0.106498 | 0.196678 | 0.107372  |
| 0.205565  | 0.206002  | 0.200321 | 0.14292  | 0.205857 | 0.138695 | 0.20877   |
| 0.125874  | 0.109994  | 0.129079 | 0.22465  | 0.118881 | 0.209062 | 0.113928  |
| 0.125146  | 0.101399  | 0.126894 | 0.227127 | 0.114656 | 0.212704 | 0.114656  |
| 0.0894522 | 0.12602   | 0.119464 | 0.2162   | 0.109266 | 0.192453 | 0.101399  |
| 0.103584  | 0.12704   | 0.127768 | 0.230915 | 0.125437 | 0.207168 | 0.0989219 |
| 0.102564  | 0.111451  | 0.120921 | 0.213287 | 0.103438 | 0.195076 | 0.100233  |
| 0.133159  | 0.106206  | 0.122669 | 0.227564 | 0.124709 | 0.209062 | 0.120629  |
| 0.113636  | 0.124563  | 0.13345  | 0.225816 | 0.123834 | 0.209936 | 0.107226  |
| 0.103147  | 0.128351  | 0.12704  | 0.233392 | 0.119755 | 0.204108 | 0.106643  |
| 0.118881  | 0.128059  | 0.130245 | 0.229604 | 0.129079 | 0.211976 | 0.115967  |
| 0.121212  | 0.124854  | 0.132867 | 0.231935 | 0.120629 | 0.215181 | 0.112762  |
| 0.120775  | 0.0979021 | 0.13447  | 0.223339 | 0.125146 | 0.203089 | 0.112908  |
| 0.112179  | 0.121358  | 0.129371 | 0.229021 | 0.118298 | 0.209936 | 0.105769  |
| 0.111597  | 0.108246  | 0.118298 | 0.212995 | 0.1081   | 0.190705 | 0.102855  |
| 0.117424  | 0.118153  | 0.132576 | 0.220862 | 0.113345 | 0.20877  | 0.104604  |
| 0.114365  | 0.123834  | 0.13447  | 0.229167 | 0.123397 | 0.209207 | 0.0977564 |
| 0.116259  | 0.128642  | 0.130536 | 0.232226 | 0.121212 | 0.212267 | 0.107226  |
| 0.13039   | 0.120629  | 0.140297 | 0.239365 | 0.133304 | 0.217075 | 0.116987  |
| 0.111597  | 0.122523  | 0.135781 | 0.229895 | 0.119172 | 0.209062 | 0.108683  |
| 0.0909091 | 0.112325  | 0.126748 | 0.218531 | 0.107517 | 0.196824 | 0.0961538 |
| 0.106061  | 0.130682  | 0.128205 | 0.231061 | 0.119755 | 0.206731 | 0.111597  |
| 0.0984848 | 0.12398   | 0.122378 | 0.217366 | 0.109557 | 0.19799  | 0.0952797 |
| 0.128497  | 0.147582  | 0.138695 | 0.237471 | 0.140443 | 0.213432 | 0.129953  |

|           |           |          |          |          |          |           |
|-----------|-----------|----------|----------|----------|----------|-----------|
| 0.12704   | 0.150495  | 0.144814 | 0.240093 | 0.143648 | 0.21081  | 0.127622  |
| 0.104458  | 0.128497  | 0.131847 | 0.219551 | 0.11553  | 0.202506 | 0.10271   |
| 0.0980478 | 0.117133  | 0.11757  | 0.2213   | 0.103875 | 0.201049 | 0.0898893 |
| 0.110723  | 0.122815  | 0.132867 | 0.235431 | 0.11859  | 0.211684 | 0.101107  |
| 0.107226  | 0.129808  | 0.117424 | 0.223193 | 0.116841 | 0.196824 | 0.100816  |
| 0.122523  | 0.141317  | 0.142045 | 0.241113 | 0.137675 | 0.212413 | 0.121066  |
| 0.106206  | 0.128205  | 0.121941 | 0.225962 | 0.113199 | 0.204254 | 0.104458  |
| 0.102564  | 0.124854  | 0.126457 | 0.221445 | 0.115093 | 0.197407 | 0.101107  |
| 0.146416  | 0.0608974 | 0.148456 | 0.239948 | 0.144085 | 0.228147 | 0.127477  |
| 0.117279  | 0.138986  | 0.126311 | 0.227418 | 0.128059 | 0.197844 | 0.119027  |
| 0.0949883 | 0.124272  | 0.128497 | 0.221154 | 0.106352 | 0.194202 | 0.0987762 |
| 0.127914  | 0.136801  | 0.136364 | 0.229604 | 0.127331 | 0.21081  | 0.124709  |
| 0.109557  | 0.124272  | 0.122669 | 0.209499 | 0.111888 | 0.18546  | 0.110431  |
| 0.122086  | 0.143502  | 0.133159 | 0.240967 | 0.136364 | 0.191871 | 0.120921  |
| 0.10912   | 0.132867  | 0.136509 | 0.232663 | 0.121649 | 0.21183  | 0.110577  |
| 0.0986305 | 0.125583  | 0.127477 | 0.225962 | 0.110868 | 0.203963 | 0.0995047 |
| 0.109994  | 0.129662  | 0.128934 | 0.21926  | 0.116404 | 0.198135 | 0.109703  |
| 0.106352  | 0.122523  | 0.133159 | 0.229895 | 0.119755 | 0.211976 | 0.100524  |
| 0.116841  | 0.140589  | 0.137238 | 0.23951  | 0.132576 | 0.215472 | 0.11655   |
| 0.123252  | 0.151952  | 0.140152 | 0.24155  | 0.138986 | 0.216929 | 0.126166  |
| 0.150495  | 0.16521   | 0.16419  | 0.181381 | 0.162733 | 0.162296 | 0.159819  |
| 0.101836  | 0.124709  | 0.128351 | 0.221591 | 0.112908 | 0.199301 | 0.103293  |
| 0.0954254 | 0.124709  | 0.12602  | 0.223339 | 0.104167 | 0.202506 | 0.0995047 |
| 0.0986305 | 0.123252  | 0.123689 | 0.225087 | 0.107955 | 0.201632 | 0.0983392 |
| 0.136655  | 0.128642  | 0.143357 | 0.227273 | 0.138403 | 0.210227 | 0.125291  |
| 0.0990676 | 0.121358  | 0.124709 | 0.221154 | 0.113928 | 0.202652 | 0.0967366 |
| 0.117861  | 0.142483  | 0.125146 | 0.229458 | 0.13243  | 0.195221 | 0.121649  |
| 0.105332  | 0.121503  | 0.129808 | 0.231789 | 0.120192 | 0.211247 | 0.101544  |
| 0.100233  | 0.128934  | 0.125    | 0.219988 | 0.11014  | 0.202069 | 0.104312  |
| 0.14627   | 0.127768  | 0.149476 | 0.229604 | 0.153263 | 0.203234 | 0.135198  |
| 0.101399  | 0.133304  | 0.128788 | 0.230769 | 0.120047 | 0.207022 | 0.106935  |
| 0.121358  | 0.145396  | 0.137675 | 0.243735 | 0.133304 | 0.2162   | 0.126603  |
| 0.118298  | 0.140297  | 0.130536 | 0.22873  | 0.12704  | 0.206439 | 0.121795  |
| 0.113491  | 0.122378  | 0.116987 | 0.214598 | 0.112617 | 0.192599 | 0.107372  |
| 0.0933858 | 0.127622  | 0.127185 | 0.220717 | 0.107372 | 0.198135 | 0.097465  |
| 0.105041  | 0.130245  | 0.123106 | 0.2213   | 0.114948 | 0.203089 | 0.101544  |
| 0.113782  | 0.140152  | 0.135344 | 0.237617 | 0.128934 | 0.211538 | 0.112908  |
| 0.100233  | 0.122815  | 0.126457 | 0.222319 | 0.10373  | 0.200321 | 0.0944056 |
| 0.126894  | 0.145688  | 0.14088  | 0.243153 | 0.13447  | 0.215326 | 0.13039   |
| 0.105041  | 0.130828  | 0.133596 | 0.226253 | 0.11757  | 0.200758 | 0.10271   |
| 0.097465  | 0.126748  | 0.120775 | 0.22771  | 0.118444 | 0.208042 | 0.105624  |
| 0.105041  | 0.127331  | 0.128059 | 0.224213 | 0.11961  | 0.200758 | 0.10271   |
| 0.103293  | 0.138403  | 0.130682 | 0.228293 | 0.116404 | 0.204837 | 0.111451  |
| 0.100379  | 0.124709  | 0.123397 | 0.22567  | 0.113199 | 0.204545 | 0.103584  |

|           |          |          |          |          |          |           |
|-----------|----------|----------|----------|----------|----------|-----------|
| 0.100379  | 0.125291 | 0.125146 | 0.224505 | 0.112908 | 0.198427 | 0.0989219 |
| 0.121212  | 0.145251 | 0.137821 | 0.239219 | 0.134615 | 0.209645 | 0.121795  |
| 0.0984848 | 0.122523 | 0.126166 | 0.221445 | 0.110431 | 0.206148 | 0.0929487 |
| 0.110577  | 0.121795 | 0.123397 | 0.224213 | 0.108537 | 0.207168 | 0.0980478 |
| 0.126603  | 0.122378 | 0.128934 | 0.230915 | 0.122815 | 0.214452 | 0.112034  |
| 0.123397  | 0.108683 | 0.131556 | 0.229167 | 0.126603 | 0.214161 | 0.107663  |
| 0.126894  | 0.13986  | 0.121941 | 0.23208  | 0.130973 | 0.210956 | 0.116113  |
| 0.131702  | 0.14729  | 0.126457 | 0.244464 | 0.136364 | 0.218386 | 0.117424  |
| 0.119027  | 0.111888 | 0.131265 | 0.220425 | 0.116404 | 0.197844 | 0.105915  |
| 0.180798  | 0.176865 | 0.179633 | 0.170892 | 0.184295 | 0.153263 | 0.181964  |
| 0.108683  | 0.113782 | 0.122378 | 0.222611 | 0.109557 | 0.207022 | 0.0976107 |
| 0.130682  | 0.143939 | 0.12602  | 0.234994 | 0.136509 | 0.216783 | 0.119318  |
| 0.124563  | 0.135781 | 0.122523 | 0.231498 | 0.127185 | 0.213287 | 0.109411  |
| 0.131702  | 0.116113 | 0.142191 | 0.242133 | 0.136655 | 0.223339 | 0.114802  |
| 0.108537  | 0.122669 | 0.11757  | 0.224505 | 0.109994 | 0.204837 | 0.0901807 |
| 0.126311  | 0.140443 | 0.119901 | 0.239948 | 0.131556 | 0.215326 | 0.108829  |
| 0.113782  | 0.121795 | 0.114073 | 0.226544 | 0.105915 | 0.208333 | 0.0986305 |
| 0.116259  | 0.129808 | 0.119464 | 0.226981 | 0.119755 | 0.202652 | 0.11014   |
| 0.110723  | 0.106498 | 0.130828 | 0.225816 | 0.119755 | 0.200903 | 0.0996503 |
| 0.127331  | 0.142628 | 0.125291 | 0.236305 | 0.13345  | 0.215763 | 0.115093  |
| 0.103147  | 0.120192 | 0.127331 | 0.222902 | 0.106352 | 0.203234 | 0.0914918 |
| 0.130682  | 0.120338 | 0.133013 | 0.23412  | 0.135927 | 0.206002 | 0.117861  |
| 0.11655   | 0.104749 | 0.124126 | 0.226399 | 0.115676 | 0.207605 | 0.0967366 |
| 0.112617  | 0.142191 | 0.133596 | 0.235577 | 0.126894 | 0.211247 | 0.119027  |
| 0.122378  | 0.113782 | 0.138403 | 0.229312 | 0.131993 | 0.21285  | 0.111305  |
| 0.108974  | 0.105332 | 0.122378 | 0.22669  | 0.106352 | 0.206731 | 0.0958625 |
| 0.141317  | 0.133887 | 0.141317 | 0.22873  | 0.146562 | 0.203234 | 0.129953  |
| 0.114948  | 0.106643 | 0.125146 | 0.226253 | 0.113491 | 0.209207 | 0.099796  |
| 0.110286  | 0.126166 | 0.118735 | 0.226544 | 0.108246 | 0.20979  | 0.102418  |
| 0.105186  | 0.122815 | 0.12704  | 0.224942 | 0.113636 | 0.208188 | 0.106352  |
| 0.140152  | 0.122523 | 0.138403 | 0.237471 | 0.140152 | 0.219551 | 0.13141   |
| 0.109266  | 0.121358 | 0.125583 | 0.210956 | 0.126166 | 0.17701  | 0.110431  |
| 0.107517  | 0.120192 | 0.115385 | 0.226107 | 0.107517 | 0.206731 | 0.0955711 |
| 0.105769  | 0.124854 | 0.116259 | 0.220862 | 0.108683 | 0.204983 | 0.0981935 |
| 0.113491  | 0.105769 | 0.129808 | 0.222756 | 0.116696 | 0.212413 | 0.0965909 |
| 0.116841  | 0.128934 | 0.138695 | 0.235431 | 0.124709 | 0.214015 | 0.112179  |
| 0.110286  | 0.104604 | 0.12602  | 0.226544 | 0.114365 | 0.210082 | 0.0977564 |
| 0.101399  | 0.113199 | 0.119172 | 0.216783 | 0.104895 | 0.201195 | 0.0871212 |
| 0.0984848 | 0.110577 | 0.124126 | 0.219114 | 0.106061 | 0.202943 | 0.0888695 |
| 0.102418  | 0.121503 | 0.125146 | 0.22567  | 0.114365 | 0.207751 | 0.0968823 |
| 0.109703  | 0.13141  | 0.135344 | 0.221008 | 0.113199 | 0.202214 | 0.108537  |
| 0.116259  | 0.133887 | 0.134033 | 0.233974 | 0.128497 | 0.216055 | 0.109266  |
| 0.0992133 | 0.118881 | 0.128642 | 0.226544 | 0.106206 | 0.212121 | 0.0942599 |
| 0.0958625 | 0.114948 | 0.128205 | 0.217366 | 0.102855 | 0.202943 | 0.0909091 |

|           |           |          |          |          |          |           |
|-----------|-----------|----------|----------|----------|----------|-----------|
| 0.108392  | 0.128934  | 0.138986 | 0.231935 | 0.123252 | 0.209062 | 0.101107  |
| 0.092803  | 0.113054  | 0.127768 | 0.221882 | 0.110868 | 0.203963 | 0.0855186 |
| 0.120775  | 0.115967  | 0.132139 | 0.220425 | 0.124854 | 0.202797 | 0.108246  |
| 0.133596  | 0.0512821 | 0.137966 | 0.227418 | 0.127185 | 0.215909 | 0.111451  |
| 0.105332  | 0.12296   | 0.127477 | 0.230041 | 0.113199 | 0.206002 | 0.100087  |
| 0.0999417 | 0.119318  | 0.128205 | 0.226399 | 0.109557 | 0.21285  | 0.0926573 |
| 0.102564  | 0.119027  | 0.126166 | 0.221445 | 0.111597 | 0.206148 | 0.0996503 |
| 0.0990676 | 0.118444  | 0.118881 | 0.217366 | 0.108683 | 0.197698 | 0.0914918 |
| 0.120338  | 0.127477  | 0.135198 | 0.2331   | 0.122086 | 0.213432 | 0.112762  |
| 0.0917832 | 0.114365  | 0.124709 | 0.218531 | 0.104312 | 0.202943 | 0.0859557 |
| 0.130099  | 0.132867  | 0.139714 | 0.236451 | 0.135344 | 0.220862 | 0.116113  |
| 0.122086  | 0.13884   | 0.13986  | 0.229312 | 0.128497 | 0.211976 | 0.123834  |
| 0.113636  | 0.128351  | 0.130828 | 0.230478 | 0.123252 | 0.214015 | 0.113054  |
| 0.106789  | 0.127331  | 0.131847 | 0.223048 | 0.109411 | 0.208625 | 0.106498  |
| 0.114656  | 0.105769  | 0.125437 | 0.221591 | 0.109703 | 0.207168 | 0.101253  |
| 0.0935315 | 0.118735  | 0.123252 | 0.225524 | 0.106643 | 0.208479 | 0.0836247 |
| 0.090472  | 0.120047  | 0.124272 | 0.226253 | 0.107372 | 0.201049 | 0.0837704 |
| 0.103875  | 0.11859   | 0.126894 | 0.223048 | 0.105915 | 0.202506 | 0.0945513 |
| 0.103875  | 0.125291  | 0.118735 | 0.214015 | 0.112325 | 0.182401 | 0.105041  |
| 0.0983392 | 0.141317  | 0.13039  | 0.237617 | 0.123397 | 0.205128 | 0.109994  |
| 0.112179  | 0.127185  | 0.117424 | 0.232517 | 0.115093 | 0.209062 | 0.0944056 |
| 0.126894  | 0.134907  | 0.137675 | 0.227127 | 0.129225 | 0.213287 | 0.129808  |
| 0.135198  | 0.125728  | 0.136072 | 0.236014 | 0.134033 | 0.220425 | 0.120047  |
| 0.190851  | 0.199155  | 0.197261 | 0.119464 | 0.190851 | 0.14088  | 0.197261  |
| 0.237034  | 0.237762  | 0.233829 | 0.120484 | 0.237034 | 0.13549  | 0.241113  |
| 0.106935  | 0.11961   | 0.121212 | 0.21183  | 0.108392 | 0.186626 | 0.105186  |
| 0.0983392 | 0.122669  | 0.11757  | 0.216346 | 0.108829 | 0.190268 | 0.0936772 |
| 0.0971737 | 0.119464  | 0.120192 | 0.216346 | 0.106206 | 0.187354 | 0.0887238 |
| 0.103001  | 0.123543  | 0.116987 | 0.2213   | 0.103584 | 0.193182 | 0.0962995 |
| 0.133013  | 0.132867  | 0.131556 | 0.224796 | 0.126311 | 0.212121 | 0.130973  |
| 0.10067   | 0.125583  | 0.116113 | 0.22567  | 0.113782 | 0.196387 | 0.095134  |
| 0.121795  | 0.149913  | 0.1419   | 0.238928 | 0.140734 | 0.210519 | 0.120047  |
| 0.0971737 | 0.130245  | 0.12398  | 0.227127 | 0.112034 | 0.199592 | 0.0930944 |
| 0.112325  | 0.134907  | 0.128059 | 0.235868 | 0.123106 | 0.203089 | 0.107955  |
| 0.113345  | 0.141171  | 0.124126 | 0.225524 | 0.128205 | 0.194202 | 0.116259  |
| 0.118298  | 0.13884   | 0.122378 | 0.23514  | 0.128205 | 0.2044   | 0.115967  |
| 0.126166  | 0.144376  | 0.141608 | 0.236888 | 0.13345  | 0.209353 | 0.124126  |
| 0.104021  | 0.125437  | 0.129371 | 0.227855 | 0.113636 | 0.204108 | 0.0984848 |
| 0.0949883 | 0.121649  | 0.122669 | 0.224068 | 0.106061 | 0.194202 | 0.0973193 |
| 0.10271   | 0.130245  | 0.115239 | 0.225087 | 0.11116  | 0.203089 | 0.099796  |
| 0.100087  | 0.121503  | 0.115822 | 0.217803 | 0.10912  | 0.190268 | 0.0962995 |
| 0.0936772 | 0.123252  | 0.119027 | 0.220134 | 0.108537 | 0.194347 | 0.0939685 |
| 0.100233  | 0.126311  | 0.123252 | 0.224359 | 0.107226 | 0.197115 | 0.0984848 |
| 0.111451  | 0.137821  | 0.118153 | 0.230041 | 0.12398  | 0.201632 | 0.114365  |

|           |          |          |          |          |          |           |
|-----------|----------|----------|----------|----------|----------|-----------|
| 0.114365  | 0.143065 | 0.123689 | 0.238199 | 0.130099 | 0.208042 | 0.12602   |
| 0.0981935 | 0.126603 | 0.126748 | 0.226981 | 0.111888 | 0.198864 | 0.0976107 |
| 0.0962995 | 0.126748 | 0.118735 | 0.221882 | 0.109703 | 0.192016 | 0.095134  |
| 0.111742  | 0.139277 | 0.128059 | 0.236742 | 0.123106 | 0.204837 | 0.114073  |
| 0.0962995 | 0.119755 | 0.118444 | 0.218677 | 0.103001 | 0.198135 | 0.0939685 |
| 0.120338  | 0.153409 | 0.136655 | 0.238054 | 0.13549  | 0.209062 | 0.127914  |
| 0.131993  | 0.144085 | 0.137238 | 0.225816 | 0.131993 | 0.211684 | 0.130245  |
| 0.127477  | 0.143648 | 0.118153 | 0.228001 | 0.129808 | 0.193765 | 0.124563  |
| 0.0954254 | 0.122086 | 0.121066 | 0.222465 | 0.103584 | 0.194347 | 0.0936772 |
| 0.0920746 | 0.119027 | 0.116841 | 0.222028 | 0.102273 | 0.19391  | 0.0926573 |
| 0.107663  | 0.13549  | 0.127185 | 0.233829 | 0.118735 | 0.206294 | 0.104167  |
| 0.104312  | 0.130099 | 0.119464 | 0.229312 | 0.119755 | 0.200321 | 0.104895  |
| 0.105186  | 0.137675 | 0.124709 | 0.226399 | 0.123252 | 0.200321 | 0.11014   |
| 0.0995047 | 0.127331 | 0.11961  | 0.225962 | 0.111742 | 0.197261 | 0.100087  |
| 0.0952797 | 0.13039  | 0.124709 | 0.225233 | 0.107809 | 0.200612 | 0.0996503 |
| 0.104604  | 0.130099 | 0.115385 | 0.226107 | 0.119172 | 0.199155 | 0.104895  |
| 0.114219  | 0.138549 | 0.130245 | 0.238636 | 0.128205 | 0.209936 | 0.115676  |
| 0.111014  | 0.141171 | 0.127622 | 0.233392 | 0.127622 | 0.200321 | 0.111014  |
| 0.105041  | 0.141317 | 0.133596 | 0.237034 | 0.125728 | 0.207168 | 0.110868  |
| 0.113928  | 0.130973 | 0.136655 | 0.231352 | 0.132867 | 0.201195 | 0.116259  |
| 0.0955711 | 0.123689 | 0.123834 | 0.224942 | 0.111888 | 0.202069 | 0.0917832 |
| 0.117716  | 0.144376 | 0.118007 | 0.231643 | 0.122378 | 0.205857 | 0.114219  |
| 0.090472  | 0.121795 | 0.11757  | 0.224505 | 0.103001 | 0.199301 | 0.0919289 |
| 0.106352  | 0.127477 | 0.127914 | 0.215909 | 0.111014 | 0.200029 | 0.104895  |
| 0.102855  | 0.128059 | 0.119464 | 0.225233 | 0.108683 | 0.197115 | 0.0979021 |
| 0.102418  | 0.125874 | 0.116113 | 0.223339 | 0.107663 | 0.20134  | 0.102127  |
| 0.0962995 | 0.123543 | 0.114948 | 0.223631 | 0.106789 | 0.195513 | 0.0939685 |
| 0.113928  | 0.141754 | 0.128205 | 0.235723 | 0.130536 | 0.2044   | 0.111597  |
| 0.106498  | 0.115385 | 0.125437 | 0.224505 | 0.11553  | 0.199592 | 0.10271   |
| 0.116696  | 0.138695 | 0.128351 | 0.234703 | 0.126603 | 0.208042 | 0.113491  |
| 0.0986305 | 0.123543 | 0.119027 | 0.221591 | 0.106498 | 0.192599 | 0.095134  |
| 0.103438  | 0.130099 | 0.122378 | 0.234557 | 0.127914 | 0.207896 | 0.0999417 |
| 0.106789  | 0.131993 | 0.128934 | 0.224796 | 0.121358 | 0.199883 | 0.111742  |
| 0.116987  | 0.129662 | 0.128059 | 0.220425 | 0.112617 | 0.205128 | 0.113782  |
| 0.100524  | 0.120484 | 0.129371 | 0.229895 | 0.117133 | 0.208188 | 0.0812937 |
| 0.114365  | 0.136946 | 0.129808 | 0.218386 | 0.117279 | 0.206585 | 0.118444  |
| 0.106935  | 0.133013 | 0.132867 | 0.229312 | 0.118007 | 0.211684 | 0.105186  |
| 0.106352  | 0.118444 | 0.13345  | 0.224942 | 0.110431 | 0.205565 | 0.0964452 |
| 0.136072  | 0.137383 | 0.141026 | 0.236014 | 0.132576 | 0.225087 | 0.13141   |
| 0.127768  | 0.138112 | 0.144085 | 0.239073 | 0.137966 | 0.219697 | 0.10912   |
| 0.110577  | 0.116259 | 0.117861 | 0.220425 | 0.106789 | 0.210373 | 0.103584  |
| 0.137529  | 0.133304 | 0.125291 | 0.238054 | 0.129371 | 0.220425 | 0.132576  |
| 0.129808  | 0.128205 | 0.134761 | 0.232955 | 0.128059 | 0.217657 | 0.121649  |
| 0.133596  | 0.137821 | 0.127185 | 0.227127 | 0.124272 | 0.213869 | 0.127477  |

|          |          |          |          |          |          |           |
|----------|----------|----------|----------|----------|----------|-----------|
| 0.12602  | 0.124417 | 0.116113 | 0.222756 | 0.11757  | 0.203671 | 0.11961   |
| 0.123397 | 0.129371 | 0.130099 | 0.232955 | 0.116113 | 0.217949 | 0.118444  |
| 0.127622 | 0.129808 | 0.132576 | 0.229604 | 0.121795 | 0.214889 | 0.117716  |
| 0.129808 | 0.140443 | 0.123397 | 0.236742 | 0.121649 | 0.215909 | 0.126311  |
| 0.139714 | 0.138112 | 0.129808 | 0.234994 | 0.131556 | 0.223193 | 0.133887  |
| 0.128642 | 0.13141  | 0.133596 | 0.232663 | 0.122815 | 0.220571 | 0.124272  |
| 0.124272 | 0.122669 | 0.114656 | 0.220425 | 0.115239 | 0.200466 | 0.112617  |
| 0.111305 | 0.139132 | 0.138695 | 0.231643 | 0.129953 | 0.20877  | 0.111014  |
| 0.133304 | 0.136072 | 0.134761 | 0.234703 | 0.126311 | 0.223193 | 0.123689  |
| 0.117279 | 0.120921 | 0.123106 | 0.220717 | 0.10912  | 0.200758 | 0.107955  |
| 0.21824  | 0.218677 | 0.217949 | 0.117424 | 0.22028  | 0.143794 | 0.222611  |
| 0.126748 | 0.130973 | 0.126166 | 0.229021 | 0.121503 | 0.211684 | 0.122669  |
| 0.116259 | 0.125437 | 0.127331 | 0.225233 | 0.119172 | 0.215763 | 0.113054  |
| 0.135927 | 0.141026 | 0.128059 | 0.234994 | 0.124854 | 0.215909 | 0.132721  |
| 0.120192 | 0.126748 | 0.131556 | 0.225962 | 0.114365 | 0.210664 | 0.113491  |
| 0.137092 | 0.13549  | 0.140297 | 0.235868 | 0.132139 | 0.225816 | 0.130973  |
| 0.125437 | 0.137821 | 0.117861 | 0.225962 | 0.116987 | 0.214452 | 0.121649  |
| 0.125    | 0.130682 | 0.126457 | 0.225816 | 0.118881 | 0.211101 | 0.117133  |
| 0.128205 | 0.131265 | 0.136072 | 0.226981 | 0.126166 | 0.216346 | 0.12704   |
| 0.131556 | 0.138403 | 0.128351 | 0.219551 | 0.12602  | 0.20338  | 0.122815  |
| 0.131119 | 0.134761 | 0.126457 | 0.231352 | 0.125874 | 0.21722  | 0.126457  |
| 0.137383 | 0.131702 | 0.116113 | 0.234703 | 0.123106 | 0.214452 | 0.129808  |
| 0.133887 | 0.132867 | 0.12398  | 0.232663 | 0.124563 | 0.217075 | 0.12602   |
| 0.110868 | 0.12296  | 0.129516 | 0.230041 | 0.116113 | 0.214744 | 0.105041  |
| 0.124854 | 0.130828 | 0.120484 | 0.232372 | 0.116404 | 0.215909 | 0.11553   |
| 0.139277 | 0.143794 | 0.129371 | 0.233683 | 0.134324 | 0.218386 | 0.134907  |
| 0.122523 | 0.125874 | 0.115822 | 0.215763 | 0.116987 | 0.199883 | 0.121649  |
| 0.117861 | 0.146853 | 0.135344 | 0.235577 | 0.131847 | 0.216492 | 0.122815  |
| 0.13986  | 0.131556 | 0.144522 | 0.218531 | 0.13141  | 0.203817 | 0.134615  |
| 0.111597 | 0.125146 | 0.13345  | 0.224359 | 0.127622 | 0.200612 | 0.108974  |
| 0.130245 | 0.12602  | 0.130536 | 0.231061 | 0.127331 | 0.21926  | 0.125583  |
| 0.12602  | 0.125874 | 0.133596 | 0.217512 | 0.127185 | 0.199301 | 0.116696  |
| 0.128205 | 0.124563 | 0.134615 | 0.229021 | 0.121795 | 0.211393 | 0.116841  |
| 0.132284 | 0.125728 | 0.135198 | 0.217366 | 0.128788 | 0.200903 | 0.121212  |
| 0.139277 | 0.130099 | 0.144522 | 0.224068 | 0.135198 | 0.211684 | 0.13986   |
| 0.102127 | 0.125291 | 0.126603 | 0.217512 | 0.110868 | 0.204837 | 0.105041  |
| 0.124709 | 0.143502 | 0.138112 | 0.2331   | 0.134907 | 0.212558 | 0.127622  |
| 0.14088  | 0.127914 | 0.144959 | 0.212558 | 0.139714 | 0.197261 | 0.139714  |
| 0.108246 | 0.121503 | 0.13447  | 0.231789 | 0.120775 | 0.212413 | 0.0989219 |
| 0.113199 | 0.134033 | 0.128934 | 0.222465 | 0.119027 | 0.200466 | 0.116113  |
| 0.123252 | 0.139714 | 0.145979 | 0.234557 | 0.1419   | 0.212558 | 0.117133  |
| 0.104604 | 0.142045 | 0.131702 | 0.230186 | 0.123252 | 0.209062 | 0.115385  |
| 0.129225 | 0.141317 | 0.144668 | 0.241113 | 0.143211 | 0.217366 | 0.133887  |
| 0.11655  | 0.13884  | 0.141026 | 0.234266 | 0.129079 | 0.211101 | 0.121503  |

|           |           |          |          |          |          |           |
|-----------|-----------|----------|----------|----------|----------|-----------|
| 0.118735  | 0.135781  | 0.11757  | 0.232955 | 0.121649 | 0.214744 | 0.113782  |
| 0.118881  | 0.136218  | 0.140152 | 0.226107 | 0.134907 | 0.20236  | 0.119172  |
| 0.11116   | 0.134033  | 0.135052 | 0.224505 | 0.12602  | 0.204545 | 0.110868  |
| 0.117424  | 0.139714  | 0.127331 | 0.235723 | 0.12704  | 0.216346 | 0.110431  |
| 0.130245  | 0.137966  | 0.127331 | 0.235431 | 0.127914 | 0.216346 | 0.122378  |
| 0.124417  | 0.135052  | 0.120921 | 0.236888 | 0.12704  | 0.214307 | 0.117133  |
| 0.130536  | 0.134761  | 0.132867 | 0.238636 | 0.133159 | 0.217512 | 0.121503  |
| 0.120629  | 0.128642  | 0.133741 | 0.230186 | 0.134324 | 0.202943 | 0.110431  |
| 0.139569  | 0.145251  | 0.134033 | 0.230186 | 0.147145 | 0.203817 | 0.13345   |
| 0.11655   | 0.126894  | 0.136655 | 0.228438 | 0.114802 | 0.212267 | 0.119172  |
| 0.107517  | 0.133596  | 0.131119 | 0.231061 | 0.120338 | 0.209353 | 0.101981  |
| 0.129371  | 0.130682  | 0.130828 | 0.229604 | 0.129662 | 0.214598 | 0.112179  |
| 0.11451   | 0.121066  | 0.135781 | 0.225524 | 0.11655  | 0.20877  | 0.101399  |
| 0.142045  | 0.132867  | 0.154283 | 0.230041 | 0.143211 | 0.212704 | 0.131556  |
| 0.14933   | 0.142191  | 0.161568 | 0.238491 | 0.151952 | 0.219988 | 0.141754  |
| 0.114656  | 0.133741  | 0.125728 | 0.234994 | 0.124563 | 0.206002 | 0.113782  |
| 0.100524  | 0.129516  | 0.124709 | 0.229604 | 0.118881 | 0.204108 | 0.102855  |
| 0.129225  | 0.136946  | 0.125437 | 0.237034 | 0.125728 | 0.218531 | 0.122232  |
| 0.134907  | 0.141171  | 0.132284 | 0.236888 | 0.125583 | 0.215763 | 0.133159  |
| 0.108392  | 0.135927  | 0.128205 | 0.234557 | 0.120921 | 0.208188 | 0.107809  |
| 0.136655  | 0.141463  | 0.124417 | 0.238928 | 0.129079 | 0.220134 | 0.131119  |
| 0.138112  | 0.133304  | 0.144522 | 0.225816 | 0.139569 | 0.200903 | 0.132867  |
| 0.113199  | 0.128205  | 0.133013 | 0.233537 | 0.127477 | 0.209207 | 0.112908  |
| 0.158362  | 0.153555  | 0.153118 | 0.241113 | 0.15778  | 0.218823 | 0.150204  |
| 0.110577  | 0.132284  | 0.133596 | 0.23412  | 0.125437 | 0.208042 | 0.115822  |
| 0.130099  | 0.138695  | 0.148747 | 0.231789 | 0.137092 | 0.215035 | 0.129808  |
| 0.105769  | 0.135927  | 0.130245 | 0.23514  | 0.121503 | 0.208479 | 0.101107  |
| 0.129371  | 0.133596  | 0.130828 | 0.238636 | 0.126457 | 0.219551 | 0.11859   |
| 0.128788  | 0.131847  | 0.114802 | 0.224359 | 0.123834 | 0.207896 | 0.122669  |
| 0.13447   | 0.0909091 | 0.148164 | 0.197698 | 0.132721 | 0.182984 | 0.129225  |
| 0.152098  | 0.149621  | 0.129079 | 0.232517 | 0.134907 | 0.215763 | 0.146562  |
| 0.124272  | 0.130536  | 0.124272 | 0.218677 | 0.116404 | 0.201923 | 0.119901  |
| 0.134615  | 0.140589  | 0.131702 | 0.19697  | 0.129953 | 0.181672 | 0.132284  |
| 0.107663  | 0.155303  | 0.1537   | 0.175554 | 0.144959 | 0.1588   | 0.128642  |
| 0.142045  | 0.144231  | 0.147582 | 0.178467 | 0.139714 | 0.168706 | 0.141463  |
| 0.0926573 | 0.114365  | 0.126166 | 0.234266 | 0.122378 | 0.209936 | 0.0571096 |
| 0.136801  | 0.137238  | 0.135927 | 0.224213 | 0.130099 | 0.217657 | 0.132721  |
| 0.117279  | 0.120338  | 0.125728 | 0.215763 | 0.110286 | 0.20338  | 0.108829  |
| 0.1081    | 0.124272  | 0.132284 | 0.215035 | 0.113928 | 0.191288 | 0.106643  |
| 0.123689  | 0.124709  | 0.128351 | 0.219551 | 0.123689 | 0.207751 | 0.122523  |
| 0.116696  | 0.126166  | 0.122523 | 0.219551 | 0.110868 | 0.198427 | 0.116113  |
| 0.109557  | 0.129225  | 0.124709 | 0.222028 | 0.11451  | 0.206731 | 0.113345  |
| 0.116259  | 0.118444  | 0.125    | 0.208625 | 0.110723 | 0.190122 | 0.112179  |
| 0.120629  | 0.128351  | 0.124709 | 0.221154 | 0.116841 | 0.210227 | 0.112471  |



|           |           |          |          |           |          |           |
|-----------|-----------|----------|----------|-----------|----------|-----------|
| 0.128642  | 0.131702  | 0.128934 | 0.208188 | 0.120775  | 0.195513 | 0.123106  |
| 0.110286  | 0.117133  | 0.126894 | 0.216638 | 0.102127  | 0.201049 | 0.106789  |
| 0.119027  | 0.132576  | 0.125437 | 0.216929 | 0.115239  | 0.20134  | 0.118444  |
| 0.118881  | 0.125146  | 0.121503 | 0.219988 | 0.110723  | 0.201777 | 0.117133  |
| 0.0483683 | 0.131847  | 0.133741 | 0.228438 | 0.119464  | 0.2044   | 0.087704  |
| 0.216783  | 0.218094  | 0.215326 | 0.116841 | 0.217366  | 0.132721 | 0.217075  |
| 0.142774  | 0.145251  | 0.134033 | 0.228438 | 0.135198  | 0.207896 | 0.138112  |
| 0.125146  | 0.134324  | 0.134761 | 0.229167 | 0.0692016 | 0.208333 | 0.122523  |
| 0.121212  | 0.13039   | 0.131119 | 0.213869 | 0.120629  | 0.207605 | 0.120338  |
| 0.208625  | 0.216055  | 0.210373 | 0.101107 | 0.20979   | 0.132721 | 0.215326  |
| 0.0743007 | 0.103875  | 0.135781 | 0.215618 | 0.118007  | 0.190997 | 0.0979021 |
| 0.109411  | 0.126457  | 0.134178 | 0.226544 | 0.116404  | 0.208916 | 0.103875  |
| 0.118444  | 0.135781  | 0.122815 | 0.221882 | 0.119318  | 0.205128 | 0.118153  |
| 0.124417  | 0.125146  | 0.131702 | 0.214744 | 0.118007  | 0.206148 | 0.123834  |
| 0.249126  | 0.249563  | 0.245047 | 0.118881 | 0.249417  | 0.142337 | 0.255828  |
| 0.124854  | 0.0477855 | 0.135052 | 0.223631 | 0.120192  | 0.212121 | 0.110286  |
| 0.048514  | 0.129079  | 0.132139 | 0.224796 | 0.108829  | 0.201923 | 0.0826049 |
| 0.122523  | 0.133159  | 0.10912  | 0.228875 | 0.116987  | 0.21183  | 0.119318  |
| 0.119901  | 0.133741  | 0.108829 | 0.224213 | 0.113782  | 0.208333 | 0.116696  |
| 0.124854  | 0.0693473 | 0.134761 | 0.216638 | 0.127477  | 0.201632 | 0.116696  |
| 0.130973  | 0.128497  | 0.137675 | 0.204108 | 0.126311  | 0.180653 | 0.128059  |
| 0.0514277 | 0.131119  | 0.132721 | 0.223631 | 0.116404  | 0.204545 | 0.0855186 |
| 0.119755  | 0.12602   | 0.121795 | 0.217366 | 0.106935  | 0.201195 | 0.113054  |
| 0.128059  | 0.128788  | 0.131265 | 0.220717 | 0.118735  | 0.214452 | 0.120775  |
| 0.122232  | 0.123252  | 0.125728 | 0.216638 | 0.114073  | 0.207751 | 0.116696  |
| 0.113928  | 0.125146  | 0.122669 | 0.214161 | 0.106935  | 0.197115 | 0.112471  |
| 0.124854  | 0.117133  | 0.127768 | 0.220134 | 0.117279  | 0.208333 | 0.119318  |
| 0.150058  | 0.150495  | 0.129662 | 0.232226 | 0.137529  | 0.214889 | 0.144522  |
| 0.129662  | 0.0476399 | 0.134615 | 0.222902 | 0.123543  | 0.214598 | 0.108683  |
| 0.112179  | 0.127477  | 0.136946 | 0.226399 | 0.122086  | 0.209936 | 0.109557  |
| 0.187646  | 0.190705  | 0.192308 | 0.11014  | 0.187646  | 0.139714 | 0.190851  |
| 0.20338   | 0.204691  | 0.203963 | 0.109266 | 0.202506  | 0.139714 | 0.206876  |
| 0.125583  | 0.127185  | 0.132867 | 0.210664 | 0.11859   | 0.204691 | 0.124709  |
| 0.121212  | 0.122232  | 0.125    | 0.217075 | 0.112762  | 0.2044   | 0.115093  |
| 0.138403  | 0.135344  | 0.135781 | 0.216783 | 0.132867  | 0.203234 | 0.134033  |
| 0         | 0.130099  | 0.13141  | 0.22669  | 0.110431  | 0.200029 | 0.0844988 |
| 0.130099  | 0         | 0.135927 | 0.226253 | 0.122523  | 0.214161 | 0.108829  |
| 0.13141   | 0.135927  | 0        | 0.222028 | 0.129953  | 0.206148 | 0.122086  |
| 0.22669   | 0.226253  | 0.222028 | 0        | 0.22465   | 0.139714 | 0.227564  |
| 0.110431  | 0.122523  | 0.129953 | 0.22465  | 0         | 0.206439 | 0.106061  |
| 0.200029  | 0.214161  | 0.206148 | 0.139714 | 0.206439  | 0        | 0.204691  |
| 0.0844988 | 0.108829  | 0.122086 | 0.227564 | 0.106061  | 0.204691 | 0         |
| 0.111742  | 0.122378  | 0.119318 | 0.222174 | 0.112908  | 0.204545 | 0.0980478 |
| 0.105769  | 0.123397  | 0.125874 | 0.212995 | 0.113928  | 0.191579 | 0.111014  |

|           |           |           |          |           |          |           |
|-----------|-----------|-----------|----------|-----------|----------|-----------|
| 0.117424  | 0.121358  | 0.124126  | 0.211538 | 0.113054  | 0.195659 | 0.114219  |
| 0.205565  | 0.209207  | 0.204983  | 0.111116 | 0.206731  | 0.136946 | 0.209936  |
| 0.130973  | 0.139277  | 0.134761  | 0.212267 | 0.121941  | 0.19697  | 0.128059  |
| 0.10708   | 0.122086  | 0.120775  | 0.231789 | 0.115239  | 0.211538 | 0.088141  |
| 0.124563  | 0.129662  | 0.126311  | 0.220134 | 0.117861  | 0.20338  | 0.123106  |
| 0.11961   | 0.133741  | 0.129225  | 0.222174 | 0.119318  | 0.207751 | 0.119901  |
| 0.118444  | 0.125874  | 0.13039   | 0.215472 | 0.114073  | 0.208333 | 0.114073  |
| 0.0868298 | 0.111742  | 0.128205  | 0.228438 | 0.110431  | 0.205274 | 0.0434149 |
| 0.0670163 | 0.13447   | 0.131993  | 0.214161 | 0.120047  | 0.188083 | 0.0926573 |
| 0.112762  | 0.12602   | 0.13549   | 0.224942 | 0.120921  | 0.21081  | 0.1081    |
| 0.115676  | 0.124272  | 0.122086  | 0.212995 | 0.104895  | 0.192162 | 0.111305  |
| 0.107955  | 0.122669  | 0.121649  | 0.225962 | 0.117279  | 0.208333 | 0.090472  |
| 0.18648   | 0.194202  | 0.193765  | 0.111888 | 0.18648   | 0.141754 | 0.192016  |
| 0.124563  | 0.135198  | 0.10708   | 0.228875 | 0.116113  | 0.210664 | 0.119027  |
| 0.132576  | 0.135052  | 0.122086  | 0.223776 | 0.120338  | 0.209353 | 0.12704   |
| 0.121649  | 0.131702  | 0.113199  | 0.218677 | 0.120192  | 0.202797 | 0.119027  |
| 0.122378  | 0.0598776 | 0.138112  | 0.218823 | 0.119755  | 0.205565 | 0.10373   |
| 0.121795  | 0.130099  | 0.122086  | 0.219114 | 0.113054  | 0.200612 | 0.115676  |
| 0.0903263 | 0.114073  | 0.12704   | 0.232517 | 0.114219  | 0.209645 | 0.0498252 |
| 0.118444  | 0.106061  | 0.12602   | 0.216929 | 0.110286  | 0.199301 | 0.105332  |
| 0.0528846 | 0.132867  | 0.131847  | 0.228001 | 0.118735  | 0.205128 | 0.0878497 |
| 0.127331  | 0.128059  | 0.120921  | 0.22028  | 0.116259  | 0.209062 | 0.120921  |
| 0.117716  | 0.131265  | 0.109848  | 0.225816 | 0.111014  | 0.206731 | 0.112471  |
| 0.122232  | 0.129953  | 0.131265  | 0.216929 | 0.116113  | 0.202797 | 0.118153  |
| 0.118007  | 0.133013  | 0.130828  | 0.226981 | 0.116841  | 0.212558 | 0.11655   |
| 0.134761  | 0.144522  | 0.128934  | 0.228293 | 0.13039   | 0.212704 | 0.133013  |
| 0.114948  | 0.0585664 | 0.13447   | 0.220717 | 0.113491  | 0.206876 | 0.101253  |
| 0.135781  | 0.144376  | 0.132284  | 0.225524 | 0.130828  | 0.205857 | 0.134324  |
| 0.120629  | 0.121649  | 0.127331  | 0.217366 | 0.112762  | 0.203817 | 0.116259  |
| 0.121212  | 0.125728  | 0.0521562 | 0.217949 | 0.116259  | 0.202943 | 0.111888  |
| 0.11757   | 0.13141   | 0.12398   | 0.202652 | 0.11553   | 0.181235 | 0.117861  |
| 0.0502622 | 0.135198  | 0.136509  | 0.223922 | 0.118735  | 0.201923 | 0.0910548 |
| 0.175262  | 0.191434  | 0.193619  | 0.121649 | 0.186917  | 0.134907 | 0.185752  |
| 0.10169   | 0.117861  | 0.117716  | 0.221737 | 0.109266  | 0.2044   | 0.0865385 |
| 0.108974  | 0.114948  | 0.118007  | 0.212995 | 0.0964452 | 0.196824 | 0.100233  |
| 0.110723  | 0.124854  | 0.135781  | 0.22873  | 0.118881  | 0.208479 | 0.1081    |
| 0.179779  | 0.187791  | 0.184149  | 0.133159 | 0.18007   | 0.140297 | 0.18211   |
| 0.137675  | 0.0591492 | 0.147873  | 0.228875 | 0.13039   | 0.216783 | 0.116987  |
| 0.147582  | 0.0597319 | 0.146707  | 0.236451 | 0.144959  | 0.223776 | 0.128934  |
| 0.149767  | 0.151661  | 0.132576  | 0.234557 | 0.138695  | 0.216638 | 0.146853  |
| 0.115967  | 0.0604604 | 0.132576  | 0.214452 | 0.112762  | 0.201486 | 0.0996503 |
| 0.124563  | 0.127914  | 0.124272  | 0.215472 | 0.113491  | 0.199883 | 0.121941  |
| 0.21183   | 0.211393  | 0.210664  | 0.105186 | 0.208333  | 0.142337 | 0.215618  |
| 0.127331  | 0.12602   | 0.129953  | 0.214744 | 0.116841  | 0.2044   | 0.121503  |

|           |           |           |          |          |          |           |
|-----------|-----------|-----------|----------|----------|----------|-----------|
| 0.129225  | 0.132867  | 0.125146  | 0.217512 | 0.120484 | 0.199592 | 0.122815  |
| 0.107955  | 0.119755  | 0.120775  | 0.223922 | 0.115239 | 0.205711 | 0.0869755 |
| 0.169143  | 0.174242  | 0.174971  | 0.155449 | 0.167104 | 0.151515 | 0.17264   |
| 0.113199  | 0.122378  | 0.122523  | 0.21285  | 0.108537 | 0.202214 | 0.10912   |
| 0.153263  | 0.150495  | 0.138695  | 0.229895 | 0.144522 | 0.218094 | 0.146853  |
| 0.120047  | 0.123689  | 0.131119  | 0.215909 | 0.112179 | 0.199155 | 0.116841  |
| 0.187646  | 0.19391   | 0.193182  | 0.11655  | 0.187646 | 0.141463 | 0.192599  |
| 0.123543  | 0.0566725 | 0.136072  | 0.226107 | 0.113636 | 0.21081  | 0.101981  |
| 0.111597  | 0.120775  | 0.119172  | 0.220571 | 0.104604 | 0.203817 | 0.103147  |
| 0.121649  | 0.126166  | 0.0703671 | 0.222174 | 0.110577 | 0.204254 | 0.110286  |
| 0.106352  | 0.118444  | 0.125583  | 0.222902 | 0.107517 | 0.212558 | 0.103438  |
| 0.105478  | 0.120775  | 0.134033  | 0.228147 | 0.116841 | 0.207314 | 0.101981  |
| 0.122669  | 0.128934  | 0.121795  | 0.212995 | 0.11655  | 0.206148 | 0.11451   |
| 0.118444  | 0.123252  | 0.128642  | 0.215181 | 0.111742 | 0.203963 | 0.114365  |
| 0.187354  | 0.19391   | 0.191434  | 0.112471 | 0.186189 | 0.141171 | 0.190268  |
| 0.121941  | 0.132284  | 0.126311  | 0.220425 | 0.113199 | 0.208042 | 0.114656  |
| 0.115676  | 0.129516  | 0.119172  | 0.20979  | 0.112471 | 0.194784 | 0.1081    |
| 0.209353  | 0.212121  | 0.212267  | 0.107955 | 0.209062 | 0.135781 | 0.216346  |
| 0.121066  | 0.133159  | 0.108829  | 0.230624 | 0.117279 | 0.212995 | 0.117861  |
| 0.122378  | 0.124854  | 0.128497  | 0.217075 | 0.114219 | 0.205274 | 0.115385  |
| 0.115967  | 0.122523  | 0.125583  | 0.213869 | 0.110431 | 0.203234 | 0.112179  |
| 0.135052  | 0.141317  | 0.129808  | 0.223048 | 0.131847 | 0.199009 | 0.133304  |
| 0.189248  | 0.192308  | 0.192162  | 0.110286 | 0.1875   | 0.143065 | 0.192745  |
| 0.0469114 | 0.130099  | 0.133159  | 0.231352 | 0.114802 | 0.20877  | 0.0856643 |
| 0.126748  | 0.14088   | 0.125     | 0.226981 | 0.124709 | 0.210227 | 0.128205  |
| 0.117716  | 0.121649  | 0.128788  | 0.214744 | 0.111014 | 0.206148 | 0.113928  |
| 0.115093  | 0.123689  | 0.127914  | 0.215909 | 0.111597 | 0.206439 | 0.110431  |
| 0.11961   | 0.121795  | 0.128642  | 0.213432 | 0.113199 | 0.200758 | 0.113782  |
| 0.118298  | 0.127477  | 0.125291  | 0.221445 | 0.108974 | 0.202069 | 0.113636  |
| 0.106498  | 0.113054  | 0.122815  | 0.219551 | 0.102127 | 0.20542  | 0.10271   |
| 0.123689  | 0.0469114 | 0.137675  | 0.224796 | 0.119318 | 0.213287 | 0.105041  |
| 0.13243   | 0.144814  | 0.112325  | 0.231789 | 0.127185 | 0.211538 | 0.128351  |
| 0.122815  | 0.0565268 | 0.137383  | 0.224505 | 0.116696 | 0.210956 | 0.103584  |
| 0.126457  | 0.139714  | 0.133741  | 0.229021 | 0.127331 | 0.212267 | 0.125291  |
| 0.192453  | 0.19697   | 0.196241  | 0.11757  | 0.192162 | 0.148601 | 0.19595   |
| 0.11859   | 0.128934  | 0.125     | 0.224942 | 0.114802 | 0.209645 | 0.112179  |
| 0.129516  | 0.137238  | 0.124854  | 0.218677 | 0.120192 | 0.20134  | 0.125146  |
| 0.120921  | 0.120484  | 0.127622  | 0.215035 | 0.111597 | 0.207605 | 0.111597  |
| 0.10912   | 0.113636  | 0.123689  | 0.217512 | 0.101253 | 0.199883 | 0.103001  |
| 0.118735  | 0.119172  | 0.127768  | 0.213724 | 0.114073 | 0.193765 | 0.110868  |
| 0.0451632 | 0.131556  | 0.132867  | 0.226399 | 0.113054 | 0.202652 | 0.085373  |
| 0.131993  | 0.13447   | 0.133741  | 0.221737 | 0.125583 | 0.211976 | 0.122669  |
| 0.122815  | 0.129662  | 0.126311  | 0.223048 | 0.109994 | 0.208625 | 0.11757   |
| 0.069493  | 0.120921  | 0.129808  | 0.218386 | 0.103001 | 0.195513 | 0.0936772 |

|           |           |           |          |          |          |           |
|-----------|-----------|-----------|----------|----------|----------|-----------|
| 0.0795455 | 0.116404  | 0.123543  | 0.2162   | 0.103438 | 0.192745 | 0.0935315 |
| 0.112617  | 0.119464  | 0.122523  | 0.219551 | 0.105332 | 0.198718 | 0.105624  |
| 0.083042  | 0.107663  | 0.125874  | 0.229604 | 0.108683 | 0.2044   | 0.0457459 |
| 0.131265  | 0.0553613 | 0.141171  | 0.231789 | 0.127477 | 0.217075 | 0.114073  |
| 0.0544872 | 0.128934  | 0.133159  | 0.22669  | 0.112179 | 0.207314 | 0.0865385 |
| 0.116404  | 0.122086  | 0.120484  | 0.213432 | 0.106498 | 0.197552 | 0.111742  |
| 0.0537587 | 0.126166  | 0.130682  | 0.224796 | 0.105332 | 0.20542  | 0.0814394 |
| 0.119172  | 0.122523  | 0.129662  | 0.215618 | 0.113054 | 0.20236  | 0.113928  |
| 0.105332  | 0.115967  | 0.116113  | 0.225087 | 0.107663 | 0.208333 | 0.0863928 |
| 0.122232  | 0.124709  | 0.129225  | 0.218094 | 0.114365 | 0.203963 | 0.117279  |
| 0.110868  | 0.127622  | 0.12398   | 0.222174 | 0.107372 | 0.203671 | 0.110286  |
| 0.12398   | 0.133159  | 0.120192  | 0.223922 | 0.112908 | 0.208333 | 0.11961   |
| 0.104458  | 0.12296   | 0.128934  | 0.228001 | 0.112617 | 0.207751 | 0.100379  |
| 0.108392  | 0.115239  | 0.125874  | 0.218823 | 0.102273 | 0.204108 | 0.105478  |
| 0.118735  | 0.121795  | 0.128642  | 0.215181 | 0.112325 | 0.206876 | 0.114656  |
| 0.119027  | 0.132576  | 0.0703671 | 0.20877  | 0.118735 | 0.191434 | 0.11553   |
| 0.121503  | 0.128934  | 0.126166  | 0.220862 | 0.11655  | 0.206439 | 0.110723  |
| 0.10708   | 0.124126  | 0.12398   | 0.222756 | 0.109703 | 0.204545 | 0.103293  |
| 0.118444  | 0.122669  | 0.126603  | 0.218969 | 0.10912  | 0.204545 | 0.112908  |
| 0.12296   | 0.125728  | 0.122669  | 0.213578 | 0.113636 | 0.194493 | 0.118298  |
| 0.0862471 | 0.11116   | 0.128788  | 0.227564 | 0.109848 | 0.204108 | 0.0483683 |
| 0.120921  | 0.126603  | 0.125874  | 0.222028 | 0.111014 | 0.201195 | 0.114219  |
| 0.105186  | 0.127477  | 0.129953  | 0.224068 | 0.115967 | 0.207896 | 0.0979021 |
| 0.113636  | 0.11553   | 0.127622  | 0.222902 | 0.104021 | 0.206148 | 0.109848  |
| 0.114219  | 0.119318  | 0.115676  | 0.215035 | 0.107226 | 0.206439 | 0.109848  |
| 0.106206  | 0.114802  | 0.11961   | 0.226253 | 0.109411 | 0.208916 | 0.0823135 |
| 0.123543  | 0.129516  | 0.123543  | 0.214452 | 0.114219 | 0.200903 | 0.119755  |
| 0.119464  | 0.131556  | 0.132284  | 0.225816 | 0.118881 | 0.210227 | 0.111305  |
| 0.116113  | 0.124417  | 0.12398   | 0.217512 | 0.113782 | 0.20134  | 0.105332  |
| 0.192162  | 0.19493   | 0.196533  | 0.113782 | 0.191871 | 0.135781 | 0.196241  |
| 0.163899  | 0.170163  | 0.167686  | 0.146125 | 0.160985 | 0.14627  | 0.162442  |
| 0.119027  | 0.0536131 | 0.137092  | 0.225087 | 0.115822 | 0.208625 | 0.103293  |
| 0.0810023 | 0.128642  | 0.126457  | 0.214161 | 0.117424 | 0.194784 | 0.102855  |
| 0.150641  | 0.0662879 | 0.150932  | 0.240967 | 0.147436 | 0.229167 | 0.130245  |
| 0.13243   | 0.132867  | 0.131265  | 0.223922 | 0.120192 | 0.215326 | 0.121066  |
| 0.126457  | 0.129516  | 0.129662  | 0.212413 | 0.114802 | 0.19391  | 0.120629  |
| 0.120484  | 0.126166  | 0.125437  | 0.215181 | 0.113782 | 0.196096 | 0.113491  |
| 0.119318  | 0.11655   | 0.131265  | 0.219843 | 0.111451 | 0.205711 | 0.11757   |
| 0.125146  | 0.129662  | 0.123397  | 0.219843 | 0.11961  | 0.206002 | 0.112325  |
| 0.199883  | 0.204983  | 0.205128  | 0.106352 | 0.199009 | 0.141463 | 0.203089  |
| 0.0511364 | 0.132867  | 0.133596  | 0.228293 | 0.116404 | 0.210082 | 0.0887238 |
| 0.0885781 | 0.126311  | 0.122086  | 0.211247 | 0.112471 | 0.186626 | 0.104895  |
| 0.113928  | 0.120484  | 0.125583  | 0.213287 | 0.108974 | 0.196824 | 0.11014   |
| 0.116404  | 0.130245  | 0.131847  | 0.226836 | 0.115822 | 0.211538 | 0.110286  |

|           |           |           |          |          |          |           |
|-----------|-----------|-----------|----------|----------|----------|-----------|
| 0.179779  | 0.191871  | 0.187646  | 0.138986 | 0.178904 | 0.144376 | 0.186189  |
| 0.245047  | 0.243735  | 0.24155   | 0.115093 | 0.244172 | 0.141463 | 0.251457  |
| 0.126166  | 0.129516  | 0.121503  | 0.225233 | 0.114802 | 0.211393 | 0.118298  |
| 0.123252  | 0.131556  | 0.123543  | 0.223193 | 0.11859  | 0.207896 | 0.111888  |
| 0.124126  | 0.0517191 | 0.132867  | 0.223776 | 0.117716 | 0.206731 | 0.106935  |
| 0.104749  | 0.119755  | 0.13039   | 0.224505 | 0.113199 | 0.206002 | 0.0962995 |
| 0.0492424 | 0.130099  | 0.127622  | 0.227273 | 0.109266 | 0.206439 | 0.0810023 |
| 0.116404  | 0.126166  | 0.118735  | 0.215472 | 0.106206 | 0.207168 | 0.109703  |
| 0.11655   | 0.122523  | 0.126748  | 0.207751 | 0.112762 | 0.192162 | 0.115967  |
| 0.0448718 | 0.128642  | 0.129079  | 0.225524 | 0.106643 | 0.202069 | 0.0815851 |
| 0.11961   | 0.12296   | 0.123106  | 0.209936 | 0.110868 | 0.186189 | 0.114948  |
| 0.11655   | 0.126311  | 0.129662  | 0.225524 | 0.118298 | 0.210227 | 0.107809  |
| 0.114073  | 0.114802  | 0.127477  | 0.219843 | 0.104458 | 0.204545 | 0.109703  |
| 0.124126  | 0.130973  | 0.118881  | 0.223485 | 0.112471 | 0.204691 | 0.122378  |
| 0.121358  | 0.13141   | 0.126894  | 0.21722  | 0.112908 | 0.201923 | 0.113782  |
| 0.111451  | 0.12296   | 0.0724068 | 0.214015 | 0.106498 | 0.196387 | 0.101253  |
| 0.120192  | 0.135781  | 0.116987  | 0.233829 | 0.122815 | 0.212995 | 0.114656  |
| 0.11757   | 0.13345   | 0.135927  | 0.237034 | 0.128059 | 0.212995 | 0.113199  |
| 0.117133  | 0.123397  | 0.126166  | 0.216783 | 0.113345 | 0.207022 | 0.110723  |
| 0.116696  | 0.107809  | 0.126894  | 0.211101 | 0.120484 | 0.185606 | 0.11116   |
| 0.133887  | 0.136655  | 0.130099  | 0.223922 | 0.128351 | 0.209499 | 0.132139  |
| 0.208916  | 0.207896  | 0.208625  | 0.121212 | 0.206876 | 0.142337 | 0.211247  |
| 0.115822  | 0.119464  | 0.117861  | 0.214598 | 0.103293 | 0.202214 | 0.110286  |
| 0.113928  | 0.113782  | 0.127622  | 0.224068 | 0.104021 | 0.204691 | 0.105769  |
| 0.117716  | 0.131556  | 0.127914  | 0.224068 | 0.116259 | 0.211393 | 0.11655   |
| 0.117861  | 0.137529  | 0.112325  | 0.229458 | 0.117279 | 0.209207 | 0.117279  |
| 0.116404  | 0.127914  | 0.124854  | 0.223339 | 0.113199 | 0.208042 | 0.107955  |
| 0.198572  | 0.201049  | 0.203234  | 0.106789 | 0.197698 | 0.144231 | 0.202652  |
| 0.120338  | 0.13243   | 0.128497  | 0.220862 | 0.115385 | 0.203526 | 0.118298  |
| 0.117861  | 0.120629  | 0.126311  | 0.21722  | 0.109411 | 0.206002 | 0.111451  |
| 0.115676  | 0.118735  | 0.127622  | 0.223485 | 0.120921 | 0.210227 | 0.112179  |
| 0.103438  | 0.120192  | 0.127914  | 0.225233 | 0.11014  | 0.207022 | 0.0958625 |
| 0.119755  | 0.13243   | 0.125583  | 0.215909 | 0.113345 | 0.198281 | 0.118007  |
| 0.114219  | 0.120484  | 0.117133  | 0.210373 | 0.105478 | 0.196241 | 0.111888  |
| 0.118007  | 0.128351  | 0.125583  | 0.225816 | 0.118007 | 0.209645 | 0.108683  |
| 0.122086  | 0.131265  | 0.112471  | 0.228438 | 0.113636 | 0.210519 | 0.111014  |
| 0.195367  | 0.204254  | 0.200903  | 0.114656 | 0.195659 | 0.13986  | 0.199738  |
| 0.113928  | 0.123397  | 0.119172  | 0.210956 | 0.102855 | 0.19595  | 0.109266  |
| 0.19391   | 0.199301  | 0.197698  | 0.11116  | 0.19391  | 0.142483 | 0.196241  |
| 0.192016  | 0.19595   | 0.194347  | 0.111305 | 0.192599 | 0.139714 | 0.194639  |
| 0.114219  | 0.129516  | 0.134324  | 0.227564 | 0.125291 | 0.210519 | 0.110723  |
| 0.126748  | 0.135927  | 0.107809  | 0.234848 | 0.125583 | 0.216929 | 0.126748  |
| 0.109557  | 0.122523  | 0.118881  | 0.219988 | 0.107517 | 0.201777 | 0.101399  |
| 0.111742  | 0.121795  | 0.117279  | 0.21285  | 0.105915 | 0.200466 | 0.110286  |

|           |           |           |          |          |          |           |
|-----------|-----------|-----------|----------|----------|----------|-----------|
| 0.11655   | 0.127185  | 0.125583  | 0.216783 | 0.108974 | 0.20236  | 0.114219  |
| 0.119755  | 0.124854  | 0.129371  | 0.216492 | 0.115093 | 0.205857 | 0.117133  |
| 0.0518648 | 0.122815  | 0.125874  | 0.224359 | 0.107226 | 0.203817 | 0.0795455 |
| 0.0454545 | 0.126603  | 0.128788  | 0.229895 | 0.106352 | 0.206731 | 0.0798368 |
| 0.128642  | 0.132576  | 0.122523  | 0.223048 | 0.115822 | 0.205711 | 0.123689  |
| 0.11014   | 0.121649  | 0.134615  | 0.225816 | 0.115967 | 0.209645 | 0.10373   |
| 0.114948  | 0.117716  | 0.123689  | 0.213141 | 0.107955 | 0.202214 | 0.10912   |
| 0.121503  | 0.129225  | 0.12704   | 0.217366 | 0.111597 | 0.201777 | 0.117716  |
| 0.10708   | 0.114802  | 0.118153  | 0.216055 | 0.103875 | 0.20338  | 0.0995047 |
| 0.129953  | 0.135927  | 0.125     | 0.222028 | 0.122669 | 0.198864 | 0.125     |
| 0.121503  | 0.0549242 | 0.132867  | 0.225233 | 0.115967 | 0.209062 | 0.102564  |
| 0.134178  | 0.137238  | 0.127768  | 0.221008 | 0.126603 | 0.203963 | 0.128059  |
| 0.260927  | 0.259033  | 0.256847  | 0.115239 | 0.259178 | 0.142483 | 0.263549  |
| 0.118153  | 0.127622  | 0.119901  | 0.234411 | 0.128934 | 0.216492 | 0.10067   |
| 0.125874  | 0.129225  | 0.121212  | 0.227564 | 0.128497 | 0.210227 | 0.111597  |
| 0.219551  | 0.218531  | 0.214598  | 0.111742 | 0.220425 | 0.137821 | 0.223922  |
| 0.127914  | 0.129808  | 0.12296   | 0.226981 | 0.123252 | 0.212267 | 0.120629  |
| 0.232809  | 0.231789  | 0.227564  | 0.117133 | 0.228438 | 0.136218 | 0.234266  |
| 0.108246  | 0.123834  | 0.116696  | 0.228875 | 0.116113 | 0.207751 | 0.0895979 |
| 0.132284  | 0.13243   | 0.132284  | 0.222902 | 0.125874 | 0.209062 | 0.129079  |
| 0.11451   | 0.131847  | 0.110723  | 0.225816 | 0.1081   | 0.207022 | 0.108974  |
| 0.115967  | 0.127768  | 0.137529  | 0.227855 | 0.121795 | 0.212558 | 0.106352  |
| 0.199009  | 0.206439  | 0.206002  | 0.118007 | 0.202506 | 0.140589 | 0.203963  |
| 0.13141   | 0.137966  | 0.128205  | 0.225524 | 0.122378 | 0.2044   | 0.126166  |
| 0.121503  | 0.129225  | 0.125291  | 0.218531 | 0.113054 | 0.200321 | 0.116259  |
| 0.225379  | 0.22873   | 0.224505  | 0.110286 | 0.223922 | 0.138112 | 0.229749  |
| 0.0501166 | 0.133596  | 0.129953  | 0.223776 | 0.111014 | 0.2044   | 0.0842075 |
| 0.197698  | 0.202214  | 0.200321  | 0.108246 | 0.195367 | 0.140152 | 0.200612  |
| 0.0517191 | 0.133159  | 0.135052  | 0.228293 | 0.109411 | 0.20542  | 0.0855186 |
| 0.121358  | 0.124126  | 0.130099  | 0.218677 | 0.112034 | 0.208333 | 0.114073  |
| 0.123834  | 0.121066  | 0.129079  | 0.228147 | 0.11451  | 0.211393 | 0.115676  |
| 0.118007  | 0.128934  | 0.132284  | 0.234266 | 0.128205 | 0.211684 | 0.111597  |
| 0.11553   | 0.120921  | 0.127185  | 0.216929 | 0.115239 | 0.20338  | 0.10912   |
| 0.161276  | 0.164044  | 0.168852  | 0.151952 | 0.158654 | 0.147145 | 0.159237  |
| 0.115822  | 0.124709  | 0.11961   | 0.214889 | 0.106498 | 0.195513 | 0.113491  |
| 0.11961   | 0.130828  | 0.112325  | 0.227127 | 0.11553  | 0.211538 | 0.114948  |
| 0.113491  | 0.134033  | 0.128351  | 0.222465 | 0.120192 | 0.207459 | 0.118735  |
| 0.127768  | 0.134324  | 0.0473485 | 0.21926  | 0.125437 | 0.204837 | 0.119318  |
| 0.193765  | 0.198281  | 0.195804  | 0.111888 | 0.193473 | 0.141463 | 0.197261  |
| 0.115239  | 0.124126  | 0.12602   | 0.215472 | 0.108537 | 0.203671 | 0.110286  |
| 0.110723  | 0.128351  | 0.140152  | 0.215326 | 0.119464 | 0.199446 | 0.106061  |
| 0.0893065 | 0.108974  | 0.125728  | 0.227127 | 0.11116  | 0.206294 | 0.0470571 |
| 0.0463287 | 0.133304  | 0.129662  | 0.229604 | 0.112179 | 0.205274 | 0.0836247 |
| 0.127185  | 0.126457  | 0.128059  | 0.217512 | 0.11961  | 0.206876 | 0.121358  |

|           |           |           |          |          |          |           |
|-----------|-----------|-----------|----------|----------|----------|-----------|
| 0.255828  | 0.259178  | 0.251166  | 0.124126 | 0.254079 | 0.144085 | 0.261364  |
| 0.119901  | 0.119172  | 0.12398   | 0.222756 | 0.108537 | 0.207168 | 0.113199  |
| 0.11961   | 0.131993  | 0.127185  | 0.216638 | 0.112325 | 0.198135 | 0.117861  |
| 0.175554  | 0.185315  | 0.180798  | 0.157488 | 0.178467 | 0.145396 | 0.179924  |
| 0.184003  | 0.190559  | 0.191288  | 0.124272 | 0.182838 | 0.1419   | 0.189248  |
| 0.126311  | 0.131993  | 0.124563  | 0.222174 | 0.114073 | 0.205711 | 0.121941  |
| 0.122669  | 0.128351  | 0.123543  | 0.219988 | 0.112762 | 0.201486 | 0.11655   |
| 0.106061  | 0.122232  | 0.129953  | 0.224359 | 0.11451  | 0.207314 | 0.0981935 |
| 0.144085  | 0.147145  | 0.13447   | 0.22771  | 0.137383 | 0.208625 | 0.141463  |
| 0.118735  | 0.129662  | 0.120775  | 0.222465 | 0.114073 | 0.205128 | 0.116113  |
| 0.127622  | 0.135052  | 0.126457  | 0.222611 | 0.113345 | 0.210519 | 0.119755  |
| 0.0540501 | 0.133159  | 0.133887  | 0.228875 | 0.117861 | 0.204545 | 0.0913462 |
| 0.118735  | 0.12296   | 0.122232  | 0.212558 | 0.11553  | 0.193182 | 0.114365  |
| 0.129662  | 0.136218  | 0.122086  | 0.219406 | 0.120629 | 0.200321 | 0.125874  |
| 0.0677448 | 0.129953  | 0.133013  | 0.21081  | 0.119901 | 0.187937 | 0.0942599 |
| 0.11451   | 0.128059  | 0.134033  | 0.230186 | 0.124417 | 0.21081  | 0.107226  |
| 0.126603  | 0.138112  | 0.143502  | 0.239948 | 0.134761 | 0.222611 | 0.122815  |
| 0.122669  | 0.122523  | 0.129662  | 0.223776 | 0.113345 | 0.209062 | 0.117424  |
| 0.116987  | 0.130245  | 0.137383  | 0.236451 | 0.132139 | 0.215618 | 0.113491  |
| 0.050845  | 0.136364  | 0.13243   | 0.234994 | 0.122815 | 0.207459 | 0.0895979 |
| 0.206876  | 0.211684  | 0.209499  | 0.115385 | 0.204545 | 0.144376 | 0.210373  |
| 0.113491  | 0.124417  | 0.137092  | 0.230624 | 0.120192 | 0.213287 | 0.108537  |
| 0.193619  | 0.196096  | 0.194784  | 0.116987 | 0.191871 | 0.141608 | 0.193036  |
| 0.114948  | 0.131119  | 0.0986305 | 0.221008 | 0.110577 | 0.206002 | 0.109994  |
| 0.128351  | 0.130828  | 0.133013  | 0.216929 | 0.121358 | 0.203089 | 0.125146  |
| 0.123106  | 0.04662   | 0.134761  | 0.221008 | 0.11961  | 0.208333 | 0.108246  |
| 0.115093  | 0.0610431 | 0.132576  | 0.217949 | 0.110431 | 0.207022 | 0.100233  |
| 0.12602   | 0.130536  | 0.124563  | 0.214598 | 0.116113 | 0.196096 | 0.122523  |
| 0.121066  | 0.128788  | 0.123106  | 0.217803 | 0.116696 | 0.199301 | 0.116987  |
| 0.121358  | 0.127331  | 0.131556  | 0.214015 | 0.111742 | 0.201923 | 0.116113  |
| 0.118007  | 0.133013  | 0.110431  | 0.225524 | 0.112762 | 0.208479 | 0.114802  |
| 0.126457  | 0.0505536 | 0.136946  | 0.224359 | 0.122086 | 0.209645 | 0.1081    |
| 0.0543415 | 0.13986   | 0.137383  | 0.222756 | 0.129225 | 0.198135 | 0.0960082 |
| 0.25102   | 0.249709  | 0.248397  | 0.11757  | 0.248689 | 0.142774 | 0.256556  |
| 0.122232  | 0.12704   | 0.133013  | 0.218677 | 0.115239 | 0.206585 | 0.115822  |
| 0.183275  | 0.186917  | 0.187354  | 0.117133 | 0.182984 | 0.140297 | 0.184732  |
| 0.186334  | 0.194347  | 0.192745  | 0.110286 | 0.187791 | 0.139569 | 0.193036  |
| 0.120629  | 0.133013  | 0.129662  | 0.217657 | 0.111014 | 0.203817 | 0.115676  |
| 0.116259  | 0.114948  | 0.126166  | 0.223485 | 0.109266 | 0.206148 | 0.109848  |
| 0.130245  | 0.131556  | 0.130245  | 0.218823 | 0.123543 | 0.20877  | 0.124709  |
| 0.119755  | 0.125437  | 0.120047  | 0.216783 | 0.106352 | 0.196824 | 0.114219  |
| 0.114073  | 0.120047  | 0.124272  | 0.209353 | 0.112617 | 0.196678 | 0.118153  |
| 0.0496795 | 0.128497  | 0.132721  | 0.228001 | 0.106206 | 0.205128 | 0.0846445 |
| 0.123252  | 0.128934  | 0.120338  | 0.213578 | 0.119755 | 0.190705 | 0.121212  |

|           |           |          |          |          |          |           |
|-----------|-----------|----------|----------|----------|----------|-----------|
| 0.13345   | 0.135635  | 0.126457 | 0.227273 | 0.124417 | 0.207605 | 0.129079  |
| 0.119901  | 0.124417  | 0.130099 | 0.213432 | 0.112325 | 0.203671 | 0.116987  |
| 0.127768  | 0.134907  | 0.126894 | 0.223048 | 0.119901 | 0.203963 | 0.125437  |
| 0.115967  | 0.123397  | 0.120921 | 0.222902 | 0.11655  | 0.207022 | 0.0990676 |
| 0.127914  | 0.050845  | 0.136655 | 0.22873  | 0.124417 | 0.213432 | 0.107226  |
| 0.107372  | 0.125     | 0.13447  | 0.227127 | 0.117279 | 0.208042 | 0.100379  |
| 0.0559441 | 0.14088   | 0.137821 | 0.23514  | 0.126166 | 0.209062 | 0.094697  |
| 0.121358  | 0.131993  | 0.129808 | 0.224213 | 0.122232 | 0.211538 | 0.116696  |
| 0.116696  | 0.11655   | 0.128351 | 0.210519 | 0.113491 | 0.196096 | 0.113782  |
| 0.129808  | 0.143648  | 0.13039  | 0.226253 | 0.12602  | 0.210373 | 0.128642  |
| 0.18211   | 0.191288  | 0.189103 | 0.116841 | 0.184732 | 0.139423 | 0.187354  |
| 0.138258  | 0.141317  | 0.128934 | 0.226253 | 0.125146 | 0.204545 | 0.13243   |
| 0.122232  | 0.128205  | 0.125146 | 0.216929 | 0.112617 | 0.197261 | 0.119318  |
| 0.123834  | 0.046183  | 0.130536 | 0.222902 | 0.116841 | 0.21285  | 0.100524  |
| 0.111451  | 0.0603147 | 0.126894 | 0.218094 | 0.10912  | 0.205711 | 0.0989219 |
| 0.106935  | 0.123397  | 0.132576 | 0.224068 | 0.117716 | 0.208188 | 0.102564  |
| 0.111742  | 0.126166  | 0.138549 | 0.229458 | 0.121358 | 0.209207 | 0.105041  |
| 0.189103  | 0.196533  | 0.195804 | 0.114802 | 0.189685 | 0.141463 | 0.194056  |
| 0.118881  | 0.127477  | 0.124417 | 0.209499 | 0.117424 | 0.186334 | 0.115967  |
| 0.109411  | 0.124126  | 0.124272 | 0.195367 | 0.108246 | 0.177739 | 0.108537  |
| 0.124272  | 0.130536  | 0.124272 | 0.220717 | 0.116113 | 0.201923 | 0.122523  |
| 0.191725  | 0.199155  | 0.192308 | 0.114802 | 0.189977 | 0.139714 | 0.193765  |
| 0.112908  | 0.113928  | 0.126894 | 0.214015 | 0.104749 | 0.202797 | 0.104749  |
| 0.0547786 | 0.131556  | 0.13345  | 0.232517 | 0.117424 | 0.209353 | 0.0891608 |
| 0.125874  | 0.128351  | 0.125291 | 0.220862 | 0.117133 | 0.204108 | 0.120338  |
| 0.120192  | 0.130245  | 0.118153 | 0.222756 | 0.104749 | 0.206876 | 0.112034  |
| 0.188083  | 0.192308  | 0.188666 | 0.112908 | 0.184878 | 0.141317 | 0.189248  |
| 0.0502622 | 0.13141   | 0.13243  | 0.22567  | 0.113491 | 0.20134  | 0.0890152 |
| 0.109994  | 0.130536  | 0.122232 | 0.212558 | 0.108829 | 0.199009 | 0.109411  |
| 0.111742  | 0.118007  | 0.128642 | 0.212558 | 0.106789 | 0.199009 | 0.110577  |
| 0.117279  | 0.122086  | 0.13447  | 0.196533 | 0.119027 | 0.187646 | 0.111742  |
| 0.120921  | 0.134761  | 0.112471 | 0.229312 | 0.116841 | 0.211101 | 0.113928  |
| 0.0553613 | 0.136801  | 0.138986 | 0.233974 | 0.120629 | 0.209062 | 0.090035  |
| 0.11859   | 0.124272  | 0.12704  | 0.217366 | 0.111888 | 0.204691 | 0.115385  |
| 0.118007  | 0.131847  | 0.124417 | 0.229021 | 0.114219 | 0.207896 | 0.112471  |
| 0.14933   | 0.15035   | 0.131265 | 0.232663 | 0.137092 | 0.213578 | 0.146707  |
| 0.23616   | 0.240093  | 0.23412  | 0.112908 | 0.235286 | 0.1419   | 0.241987  |
| 0.122232  | 0.136364  | 0.133304 | 0.230624 | 0.125728 | 0.21183  | 0.120775  |
| 0.118444  | 0.132867  | 0.114073 | 0.230624 | 0.115239 | 0.212121 | 0.116113  |
| 0.113054  | 0.127185  | 0.120338 | 0.210082 | 0.111597 | 0.190122 | 0.113636  |
| 0.125146  | 0.131702  | 0.126603 | 0.214598 | 0.116987 | 0.203089 | 0.119318  |
| 0.101107  | 0.121358  | 0.107517 | 0.218823 | 0.111888 | 0.194202 | 0.106061  |
| 0.118298  | 0.128059  | 0.123834 | 0.221154 | 0.116259 | 0.206148 | 0.112471  |
| 0.121066  | 0.128788  | 0.122815 | 0.216055 | 0.119901 | 0.19697  | 0.119318  |



|           |           |           |          |          |          |           |
|-----------|-----------|-----------|----------|----------|----------|-----------|
| 0.048951  | 0.137092  | 0.136364  | 0.229895 | 0.120338 | 0.203234 | 0.0894522 |
| 0.120629  | 0.132721  | 0.120047  | 0.217657 | 0.115676 | 0.199738 | 0.118298  |
| 0.23616   | 0.238928  | 0.232663  | 0.121358 | 0.235868 | 0.138403 | 0.242861  |
| 0.112471  | 0.113199  | 0.123543  | 0.215035 | 0.106643 | 0.20236  | 0.106643  |
| 0.100816  | 0.11553   | 0.117716  | 0.222902 | 0.107809 | 0.202943 | 0.0833333 |
| 0.118153  | 0.121503  | 0.125437  | 0.213141 | 0.113491 | 0.202797 | 0.114073  |
| 0.137238  | 0.136218  | 0.122378  | 0.225816 | 0.124709 | 0.209936 | 0.129953  |
| 0.130245  | 0.141754  | 0.136655  | 0.233683 | 0.130245 | 0.217512 | 0.12704   |
| 0.12296   | 0.120484  | 0.126748  | 0.208625 | 0.115385 | 0.200903 | 0.119464  |
| 0.123543  | 0.127477  | 0.123543  | 0.213869 | 0.11451  | 0.196533 | 0.118881  |
| 0.115239  | 0.123252  | 0.116987  | 0.218677 | 0.109703 | 0.203671 | 0.109994  |
| 0.229167  | 0.234557  | 0.23208   | 0.114365 | 0.229458 | 0.134324 | 0.233829  |
| 0.124563  | 0.128788  | 0.12398   | 0.21926  | 0.117279 | 0.199592 | 0.121941  |
| 0.0492424 | 0.130682  | 0.131702  | 0.230186 | 0.119172 | 0.205274 | 0.0888695 |
| 0.113345  | 0.126603  | 0.122086  | 0.219697 | 0.112179 | 0.200903 | 0.11014   |
| 0.121066  | 0.132867  | 0.0957168 | 0.224213 | 0.121066 | 0.204837 | 0.117279  |
| 0.112325  | 0.126748  | 0.121066  | 0.230332 | 0.123397 | 0.211538 | 0.0945513 |
| 0.121649  | 0.122378  | 0.128934  | 0.216929 | 0.111742 | 0.206585 | 0.116987  |
| 0.0560897 | 0.13141   | 0.135052  | 0.228584 | 0.120484 | 0.203671 | 0.0875583 |
| 0.0576923 | 0.137383  | 0.134907  | 0.236014 | 0.125291 | 0.209062 | 0.0917832 |
| 0.0474942 | 0.129808  | 0.13141   | 0.227564 | 0.109848 | 0.207022 | 0.0842075 |
| 0.121358  | 0.120921  | 0.126603  | 0.217803 | 0.112617 | 0.20542  | 0.116113  |
| 0.126311  | 0.138112  | 0.105624  | 0.229167 | 0.123106 | 0.213578 | 0.123689  |
| 0.130828  | 0.142337  | 0.108974  | 0.237179 | 0.125583 | 0.21926  | 0.128497  |
| 0.132284  | 0.053176  | 0.136655  | 0.229021 | 0.125291 | 0.216929 | 0.111597  |
| 0.130536  | 0.0552156 | 0.13986   | 0.232809 | 0.125583 | 0.214015 | 0.114802  |
| 0.126603  | 0.139569  | 0.109703  | 0.234703 | 0.125146 | 0.216492 | 0.123397  |
| 0.114656  | 0.11451   | 0.125437  | 0.220134 | 0.110577 | 0.206294 | 0.109994  |
| 0.0967366 | 0.123689  | 0.133741  | 0.238636 | 0.125291 | 0.215763 | 0.0620629 |
| 0.121649  | 0.141608  | 0.13884   | 0.234703 | 0.133304 | 0.212121 | 0.124563  |
| 0.206148  | 0.210664  | 0.205565  | 0.10271  | 0.205857 | 0.134324 | 0.21081   |
| 0.124563  | 0.137238  | 0.126603  | 0.220134 | 0.12398  | 0.202797 | 0.116987  |
| 0.102127  | 0.122669  | 0.119901  | 0.224505 | 0.109994 | 0.209207 | 0.0852273 |
| 0.124709  | 0.130682  | 0.130828  | 0.212121 | 0.11859  | 0.201195 | 0.123834  |
| 0.223922  | 0.22465   | 0.2213    | 0.115239 | 0.223048 | 0.141026 | 0.226836  |
| 0.210519  | 0.217949  | 0.211684  | 0.118444 | 0.210519 | 0.146562 | 0.213724  |
| 0.0559441 | 0.136801  | 0.136364  | 0.231352 | 0.124126 | 0.209062 | 0.0897436 |
| 0.249854  | 0.25      | 0.244318  | 0.116987 | 0.250146 | 0.145396 | 0.255682  |
| 0.116113  | 0.111305  | 0.126894  | 0.2213   | 0.109411 | 0.206294 | 0.112325  |
| 0.133887  | 0.140443  | 0.143502  | 0.231206 | 0.135635 | 0.219114 | 0.135635  |
| 0.116404  | 0.113928  | 0.127185  | 0.222756 | 0.107663 | 0.206585 | 0.108829  |
| 0.124709  | 0.13884   | 0.106935  | 0.2331   | 0.120047 | 0.214015 | 0.119172  |
| 0.189248  | 0.196678  | 0.186043  | 0.11116  | 0.187209 | 0.134615 | 0.192162  |
| 0.118881  | 0.137966  | 0.124417  | 0.22028  | 0.119172 | 0.204691 | 0.117424  |

|           |           |           |          |           |          |           |
|-----------|-----------|-----------|----------|-----------|----------|-----------|
| 0.193765  | 0.197115  | 0.200175  | 0.108392 | 0.190559  | 0.13884  | 0.19697   |
| 0.118298  | 0.129225  | 0.125874  | 0.223776 | 0.107226  | 0.212267 | 0.113345  |
| 0.0743007 | 0.127185  | 0.128788  | 0.207751 | 0.116259  | 0.179633 | 0.0961538 |
| 0.12296   | 0.125437  | 0.124417  | 0.219988 | 0.125     | 0.205857 | 0.120338  |
| 0.111597  | 0.116987  | 0.124709  | 0.204837 | 0.109557  | 0.194202 | 0.111888  |
| 0.115239  | 0.119464  | 0.123397  | 0.211976 | 0.105915  | 0.198427 | 0.107663  |
| 0.119901  | 0.126166  | 0.121066  | 0.217512 | 0.109703  | 0.202506 | 0.105915  |
| 0.109703  | 0.114219  | 0.124272  | 0.213432 | 0.103584  | 0.202214 | 0.105041  |
| 0.11655   | 0.124272  | 0.11859   | 0.217366 | 0.104895  | 0.19799  | 0.113054  |
| 0.0866841 | 0.112762  | 0.129808  | 0.228875 | 0.114948  | 0.206294 | 0.0528846 |
| 0.112908  | 0.126457  | 0.123689  | 0.222174 | 0.114948  | 0.204545 | 0.106498  |
| 0.114219  | 0.114656  | 0.125874  | 0.219988 | 0.105478  | 0.205857 | 0.107226  |
| 0.121358  | 0.0719697 | 0.131847  | 0.217803 | 0.11961   | 0.201923 | 0.106498  |
| 0.13039   | 0.136946  | 0.126311  | 0.222465 | 0.120192  | 0.201632 | 0.12602   |
| 0.11451   | 0.0569639 | 0.129371  | 0.219697 | 0.11014   | 0.207022 | 0.100524  |
| 0.111742  | 0.127622  | 0.122232  | 0.217512 | 0.113491  | 0.202797 | 0.107663  |
| 0.116259  | 0.119027  | 0.125     | 0.212413 | 0.108392  | 0.202943 | 0.110431  |
| 0.0588578 | 0.127185  | 0.130245  | 0.219114 | 0.119464  | 0.19595  | 0.0897436 |
| 0.120338  | 0.132721  | 0.110431  | 0.226981 | 0.113636  | 0.210227 | 0.111597  |
| 0.108537  | 0.12296   | 0.134178  | 0.228584 | 0.118444  | 0.211538 | 0.103584  |
| 0.118153  | 0.0571096 | 0.133887  | 0.224505 | 0.115239  | 0.209499 | 0.0995047 |
| 0.121503  | 0.127477  | 0.125291  | 0.216783 | 0.112471  | 0.198864 | 0.117424  |
| 0.129516  | 0.137238  | 0.128934  | 0.221008 | 0.122815  | 0.204837 | 0.125146  |
| 0.137092  | 0.142774  | 0.132139  | 0.226253 | 0.129516  | 0.208625 | 0.136801  |
| 0.0588578 | 0.121649  | 0.123543  | 0.219406 | 0.0999417 | 0.195659 | 0.0844988 |
| 0.119172  | 0.122232  | 0.128497  | 0.215035 | 0.115676  | 0.204983 | 0.115093  |
| 0.108829  | 0.123543  | 0.122523  | 0.218094 | 0.105624  | 0.201632 | 0.103875  |
| 0.130973  | 0.139277  | 0.109994  | 0.234703 | 0.128351  | 0.216492 | 0.126894  |
| 0.116841  | 0.116696  | 0.125583  | 0.227564 | 0.106935  | 0.207314 | 0.111888  |
| 0.126748  | 0.138549  | 0.138986  | 0.23951  | 0.136655  | 0.216346 | 0.122669  |
| 0.138695  | 0.141463  | 0.135198  | 0.227273 | 0.133159  | 0.211976 | 0.137529  |
| 0.133304  | 0.135781  | 0.124563  | 0.223631 | 0.118735  | 0.208625 | 0.123689  |
| 0.113928  | 0.120484  | 0.128205  | 0.217949 | 0.113636  | 0.2044   | 0.108392  |
| 0.115822  | 0.125874  | 0.0677448 | 0.218677 | 0.11116   | 0.202506 | 0.107955  |
| 0.130682  | 0.0498252 | 0.13884   | 0.228001 | 0.123106  | 0.218823 | 0.111451  |
| 0.203963  | 0.212267  | 0.208042  | 0.123543 | 0.206294  | 0.144668 | 0.205711  |
| 0.109557  | 0.129225  | 0.122378  | 0.217366 | 0.111305  | 0.200321 | 0.107517  |
| 0.121066  | 0.121795  | 0.128351  | 0.223922 | 0.121066  | 0.211247 | 0.118444  |
| 0.11859   | 0.130682  | 0.106643  | 0.228438 | 0.11451   | 0.209936 | 0.114219  |
| 0.11961   | 0.0559441 | 0.131265  | 0.223339 | 0.112034  | 0.206585 | 0.101836  |
| 0.12296   | 0.132139  | 0.129953  | 0.225233 | 0.113636  | 0.213724 | 0.116259  |
| 0.115967  | 0.129225  | 0.129953  | 0.222028 | 0.121795  | 0.211684 | 0.111014  |
| 0.121941  | 0.134907  | 0.129808  | 0.224505 | 0.123397  | 0.212121 | 0.111742  |
| 0.126166  | 0.133304  | 0.121503  | 0.222902 | 0.115676  | 0.206148 | 0.120047  |

|           |          |          |          |          |          |           |
|-----------|----------|----------|----------|----------|----------|-----------|
| 0.0859557 | 0.111451 | 0.125583 | 0.22669  | 0.107517 | 0.204108 | 0.0448718 |
| 0.123543  | 0.136509 | 0.108974 | 0.230186 | 0.123252 | 0.212267 | 0.121503  |
| 0.116841  | 0.122815 | 0.12296  | 0.222611 | 0.118881 | 0.206439 | 0.114802  |
| 0.120484  | 0.131119 | 0.128934 | 0.226253 | 0.121358 | 0.210373 | 0.109994  |
| 0.169289  | 0.175554 | 0.179779 | 0.188228 | 0.176282 | 0.192745 | 0.172786  |
| 0.120338  | 0.124854 | 0.123252 | 0.218531 | 0.109557 | 0.200612 | 0.114219  |
| 0.125728  | 0.13986  | 0.11116  | 0.218677 | 0.125146 | 0.204837 | 0.122523  |
| 0.1081    | 0.12602  | 0.127331 | 0.233392 | 0.122669 | 0.21285  | 0.100816  |
| 0.114073  | 0.131119 | 0.12398  | 0.221882 | 0.123397 | 0.191142 | 0.103875  |
| 0.109411  | 0.120338 | 0.119027 | 0.222465 | 0.106206 | 0.204837 | 0.0992133 |
| 0.107955  | 0.11859  | 0.119318 | 0.21926  | 0.107372 | 0.202797 | 0.0968823 |
| 0.114073  | 0.125291 | 0.12398  | 0.228001 | 0.109703 | 0.208625 | 0.106789  |
| 0.105332  | 0.13345  | 0.118735 | 0.227418 | 0.124272 | 0.196678 | 0.10708   |
| 0.11757   | 0.123252 | 0.129516 | 0.211393 | 0.116113 | 0.19289  | 0.116404  |
| 0.121795  | 0.126311 | 0.13549  | 0.233974 | 0.125291 | 0.217803 | 0.1081    |
| 0.105332  | 0.120921 | 0.122232 | 0.216055 | 0.108829 | 0.19697  | 0.0919289 |
| 0.104312  | 0.123689 | 0.129079 | 0.223776 | 0.11451  | 0.204691 | 0.0958625 |
| 0.101253  | 0.143065 | 0.129808 | 0.237908 | 0.127185 | 0.206002 | 0.112617  |
| 0.104458  | 0.122086 | 0.125728 | 0.228001 | 0.119901 | 0.206585 | 0.0872669 |
| 0.115822  | 0.115967 | 0.130099 | 0.22567  | 0.120775 | 0.210664 | 0.112034  |
| 0.104167  | 0.118007 | 0.128934 | 0.226253 | 0.111451 | 0.205711 | 0.0802739 |
| 0.107955  | 0.120629 | 0.126894 | 0.225087 | 0.116987 | 0.206585 | 0.088141  |
| 0.108829  | 0.115385 | 0.12398  | 0.218677 | 0.108829 | 0.207751 | 0.105041  |
| 0.115385  | 0.126603 | 0.132284 | 0.233392 | 0.123252 | 0.212267 | 0.110431  |
| 0.106352  | 0.11961  | 0.128788 | 0.22465  | 0.111014 | 0.204983 | 0.0952797 |
| 0.108974  | 0.143211 | 0.145979 | 0.23514  | 0.139569 | 0.210227 | 0.118298  |
| 0.0996503 | 0.137092 | 0.142191 | 0.222028 | 0.126166 | 0.201195 | 0.110723  |
| 0.101107  | 0.110868 | 0.123834 | 0.223776 | 0.111888 | 0.206731 | 0.0824592 |
| 0.106498  | 0.140443 | 0.132721 | 0.238491 | 0.130973 | 0.2162   | 0.116696  |
| 0.12602   | 0.102564 | 0.131847 | 0.219843 | 0.120192 | 0.206585 | 0.115239  |
| 0.122815  | 0.142774 | 0.142045 | 0.233246 | 0.132139 | 0.202214 | 0.132721  |
| 0.113199  | 0.113928 | 0.11961  | 0.223339 | 0.11116  | 0.207168 | 0.104167  |
| 0.137238  | 0.150495 | 0.137529 | 0.233683 | 0.141317 | 0.219551 | 0.138403  |
| 0.122669  | 0.139132 | 0.128497 | 0.223485 | 0.126748 | 0.21081  | 0.114219  |
| 0.120921  | 0.139132 | 0.135198 | 0.234557 | 0.136946 | 0.201195 | 0.124126  |
| 0.117424  | 0.10708  | 0.133159 | 0.231061 | 0.123543 | 0.211976 | 0.102855  |
| 0.0948427 | 0.11655  | 0.128351 | 0.225379 | 0.112908 | 0.200466 | 0.0831876 |
| 0.102273  | 0.120775 | 0.127622 | 0.22028  | 0.1081   | 0.206439 | 0.0987762 |
| 0.0968823 | 0.129662 | 0.119027 | 0.226544 | 0.11553  | 0.19697  | 0.099796  |
| 0.114948  | 0.122086 | 0.128642 | 0.23412  | 0.118153 | 0.212413 | 0.0922203 |
| 0.124709  | 0.128934 | 0.130828 | 0.235723 | 0.125583 | 0.218677 | 0.117424  |
| 0.102564  | 0.128059 | 0.135781 | 0.219988 | 0.125    | 0.196241 | 0.111597  |
| 0.106643  | 0.099796 | 0.121795 | 0.224068 | 0.104895 | 0.204108 | 0.0917832 |
| 0.102418  | 0.123834 | 0.126894 | 0.221008 | 0.107663 | 0.204545 | 0.100379  |

|           |          |          |          |          |          |           |
|-----------|----------|----------|----------|----------|----------|-----------|
| 0.111597  | 0.127768 | 0.128497 | 0.222611 | 0.119755 | 0.210227 | 0.111888  |
| 0.0984848 | 0.121649 | 0.133159 | 0.223193 | 0.111014 | 0.205857 | 0.0996503 |
| 0.107955  | 0.13141  | 0.13243  | 0.227418 | 0.118444 | 0.211247 | 0.110286  |
| 0.116987  | 0.115676 | 0.130099 | 0.221008 | 0.113491 | 0.202797 | 0.106789  |
| 0.119172  | 0.117861 | 0.125583 | 0.205711 | 0.112179 | 0.200029 | 0.117133  |
| 0.119464  | 0.128934 | 0.126748 | 0.224068 | 0.118007 | 0.205565 | 0.113054  |
| 0.113345  | 0.109703 | 0.124417 | 0.217075 | 0.1081   | 0.207896 | 0.110431  |
| 0.104312  | 0.11961  | 0.126457 | 0.221445 | 0.112762 | 0.207022 | 0.10373   |
| 0.11553   | 0.118007 | 0.123397 | 0.209936 | 0.113782 | 0.199009 | 0.113199  |
| 0.118007  | 0.125146 | 0.12704  | 0.222611 | 0.118881 | 0.205274 | 0.106352  |
| 0.127914  | 0.130099 | 0.129662 | 0.215618 | 0.124709 | 0.203234 | 0.117716  |
| 0.107809  | 0.11757  | 0.119172 | 0.206585 | 0.103147 | 0.19595  | 0.106352  |
| 0.121941  | 0.129371 | 0.135927 | 0.231789 | 0.130099 | 0.215326 | 0.118735  |

| TDr_1798 | TDr_1799  | TDr_1804  | TDr_1807 | TDr_1809 | TDr_1813 | TDr_1817  |
|----------|-----------|-----------|----------|----------|----------|-----------|
| 0.117861 | 0.1081    | 0.11451   | 0.186917 | 0.125728 | 0.112034 | 0.122815  |
| 0.115093 | 0.107372  | 0.107372  | 0.194347 | 0.117133 | 0.122378 | 0.11014   |
| 0.112762 | 0.105332  | 0.101253  | 0.19493  | 0.111597 | 0.115676 | 0.106643  |
| 0.112762 | 0.0744464 | 0.10708   | 0.199301 | 0.100233 | 0.116259 | 0.0917832 |
| 0.127914 | 0.131265  | 0.132721  | 0.217366 | 0.137238 | 0.12704  | 0.136946  |
| 0.126457 | 0.115239  | 0.116987  | 0.206876 | 0.137529 | 0.130245 | 0.128497  |
| 0.118735 | 0.120047  | 0.116259  | 0.210227 | 0.137966 | 0.110577 | 0.13039   |
| 0.110286 | 0.105478  | 0.103147  | 0.195659 | 0.115239 | 0.117861 | 0.109703  |
| 0.103147 | 0.10912   | 0.100087  | 0.202214 | 0.115676 | 0.106061 | 0.109266  |
| 0.108829 | 0.109848  | 0.0909091 | 0.200029 | 0.127185 | 0.116987 | 0.122523  |
| 0.110723 | 0.11553   | 0.103001  | 0.191142 | 0.132576 | 0.112762 | 0.131993  |
| 0.108537 | 0.111888  | 0.11014   | 0.196533 | 0.119318 | 0.107663 | 0.111451  |
| 0.112908 | 0.111014  | 0.10169   | 0.203526 | 0.122232 | 0.111451 | 0.118153  |
| 0.137238 | 0.12602   | 0.11757   | 0.157343 | 0.13141  | 0.138986 | 0.13549   |
| 0.124563 | 0.125     | 0.0606061 | 0.207022 | 0.138549 | 0.133013 | 0.13039   |
| 0.11655  | 0.110286  | 0.104749  | 0.208042 | 0.127914 | 0.120047 | 0.124126  |
| 0.103001 | 0.107517  | 0.108974  | 0.201777 | 0.127768 | 0.100379 | 0.121066  |
| 0.138695 | 0.138258  | 0.139714  | 0.221737 | 0.149476 | 0.141608 | 0.143065  |
| 0.11014  | 0.105624  | 0.102127  | 0.193182 | 0.112471 | 0.118881 | 0.107517  |
| 0.199592 | 0.18954   | 0.1706    | 0.137821 | 0.19697  | 0.208625 | 0.203963  |
| 0.122815 | 0.120629  | 0.117133  | 0.207605 | 0.138549 | 0.124272 | 0.13447   |
| 0.121795 | 0.118444  | 0.111742  | 0.208916 | 0.129079 | 0.119172 | 0.126457  |
| 0.105915 | 0.0935315 | 0.102564  | 0.198281 | 0.122523 | 0.112034 | 0.112325  |
| 0.119464 | 0.122232  | 0.12398   | 0.215326 | 0.137821 | 0.11655  | 0.128205  |
| 0.105915 | 0.102273  | 0.0979021 | 0.193036 | 0.120192 | 0.105332 | 0.114948  |
| 0.128934 | 0.124417  | 0.122378  | 0.214598 | 0.139423 | 0.13243  | 0.136218  |
| 0.117861 | 0.122086  | 0.118007  | 0.211101 | 0.139714 | 0.114948 | 0.133304  |
| 0.118153 | 0.117133  | 0.11655   | 0.213432 | 0.128934 | 0.118444 | 0.124563  |
| 0.125728 | 0.125874  | 0.129079  | 0.214307 | 0.140006 | 0.121358 | 0.135344  |
| 0.114073 | 0.123543  | 0.116841  | 0.216638 | 0.13447  | 0.112617 | 0.127477  |
| 0.119172 | 0.116113  | 0.110286  | 0.203963 | 0.139277 | 0.120047 | 0.135198  |
| 0.121358 | 0.119755  | 0.113345  | 0.212558 | 0.133304 | 0.112617 | 0.12602   |
| 0.110286 | 0.10373   | 0.0952797 | 0.195367 | 0.120775 | 0.109411 | 0.118153  |
| 0.110286 | 0.11859   | 0.114219  | 0.205565 | 0.130682 | 0.10912  | 0.121358  |
| 0.120047 | 0.123397  | 0.116987  | 0.214452 | 0.137821 | 0.115093 | 0.131119  |
| 0.11961  | 0.126748  | 0.122378  | 0.214598 | 0.139423 | 0.122232 | 0.130973  |
| 0.127622 | 0.125146  | 0.129225  | 0.222902 | 0.145688 | 0.125    | 0.138112  |
| 0.118444 | 0.118007  | 0.117133  | 0.211976 | 0.137383 | 0.112034 | 0.130099  |
| 0.111451 | 0.104895  | 0.105769  | 0.202069 | 0.122815 | 0.108537 | 0.116987  |
| 0.11757  | 0.118298  | 0.115676  | 0.21285  | 0.128642 | 0.121066 | 0.123106  |
| 0.105332 | 0.103147  | 0.1081    | 0.202069 | 0.121358 | 0.10912  | 0.115822  |
| 0.136509 | 0.134907  | 0.127622  | 0.225379 | 0.150495 | 0.14088  | 0.145542  |

|           |           |          |          |           |           |           |
|-----------|-----------|----------|----------|-----------|-----------|-----------|
| 0.13447   | 0.13986   | 0.138986 | 0.221882 | 0.154866  | 0.139423  | 0.148456  |
| 0.112762  | 0.112034  | 0.112034 | 0.203963 | 0.12704   | 0.112471  | 0.119755  |
| 0.0958625 | 0.103875  | 0.106206 | 0.203671 | 0.127331  | 0.0996503 | 0.120629  |
| 0.113491  | 0.117716  | 0.108974 | 0.214598 | 0.137675  | 0.109703  | 0.128934  |
| 0.106789  | 0.122086  | 0.110723 | 0.208479 | 0.134178  | 0.110577  | 0.125728  |
| 0.131993  | 0.137092  | 0.128934 | 0.222028 | 0.147436  | 0.134907  | 0.142483  |
| 0.111597  | 0.105624  | 0.109703 | 0.209207 | 0.125874  | 0.110431  | 0.120047  |
| 0.115239  | 0.114802  | 0.107226 | 0.203234 | 0.130682  | 0.116113  | 0.123689  |
| 0.140734  | 0.140006  | 0.139423 | 0.222319 | 0.156469  | 0.138986  | 0.151515  |
| 0.121212  | 0.121941  | 0.120775 | 0.210373 | 0.142774  | 0.127331  | 0.135781  |
| 0.112034  | 0.108392  | 0.113928 | 0.203234 | 0.127185  | 0.112908  | 0.121066  |
| 0.128351  | 0.122378  | 0.112179 | 0.21285  | 0.130682  | 0.124854  | 0.126894  |
| 0.111451  | 0.0935315 | 0.108974 | 0.192162 | 0.0960082 | 0.118735  | 0.0919289 |
| 0.133596  | 0.136946  | 0.138695 | 0.230624 | 0.147582  | 0.133304  | 0.141171  |
| 0.122378  | 0.121066  | 0.122815 | 0.215909 | 0.137238  | 0.124417  | 0.132576  |
| 0.109557  | 0.112325  | 0.109703 | 0.205711 | 0.127331  | 0.109266  | 0.119172  |
| 0.11451   | 0.114073  | 0.110868 | 0.201632 | 0.132867  | 0.114219  | 0.129371  |
| 0.115822  | 0.122086  | 0.112179 | 0.214307 | 0.136801  | 0.115822  | 0.131265  |
| 0.129808  | 0.126748  | 0.129662 | 0.224505 | 0.147582  | 0.128642  | 0.138549  |
| 0.138258  | 0.13345   | 0.130828 | 0.228875 | 0.141171  | 0.139714  | 0.135635  |
| 0.162005  | 0.144668  | 0.149621 | 0.171911 | 0.158508  | 0.163753  | 0.164627  |
| 0.110723  | 0.109994  | 0.110577 | 0.203671 | 0.126166  | 0.111888  | 0.120629  |
| 0.110723  | 0.109411  | 0.112034 | 0.206002 | 0.128788  | 0.111305  | 0.123543  |
| 0.104312  | 0.107372  | 0.111742 | 0.205711 | 0.125291  | 0.106935  | 0.117716  |
| 0.137092  | 0.13345   | 0.132576 | 0.213141 | 0.151661  | 0.133304  | 0.145833  |
| 0.106789  | 0.111597  | 0.104895 | 0.202652 | 0.123106  | 0.106789  | 0.116404  |
| 0.127331  | 0.12602   | 0.122815 | 0.213287 | 0.143648  | 0.129953  | 0.138112  |
| 0.114219  | 0.123689  | 0.109703 | 0.214161 | 0.136655  | 0.11655   | 0.134324  |
| 0.108829  | 0.113345  | 0.111888 | 0.202069 | 0.132139  | 0.112325  | 0.125146  |
| 0.145833  | 0.135781  | 0.138403 | 0.212558 | 0.153409  | 0.140006  | 0.149913  |
| 0.114656  | 0.111597  | 0.11859  | 0.21285  | 0.137092  | 0.115239  | 0.126311  |
| 0.134907  | 0.133887  | 0.131847 | 0.222611 | 0.146562  | 0.132284  | 0.139569  |
| 0.124272  | 0.125583  | 0.123834 | 0.209645 | 0.140006  | 0.128351  | 0.133596  |
| 0.11014   | 0.105041  | 0.108246 | 0.197552 | 0.116259  | 0.109848  | 0.115967  |
| 0.110723  | 0.107663  | 0.112908 | 0.20134  | 0.124126  | 0.112762  | 0.120921  |
| 0.111888  | 0.10912   | 0.106789 | 0.207751 | 0.13141   | 0.108392  | 0.121795  |
| 0.129371  | 0.126311  | 0.129225 | 0.22028  | 0.136946  | 0.128205  | 0.13141   |
| 0.106206  | 0.111305  | 0.109266 | 0.2044   | 0.127185  | 0.10912   | 0.121649  |
| 0.132284  | 0.128934  | 0.131265 | 0.22465  | 0.146562  | 0.139277  | 0.136072  |
| 0.116841  | 0.121358  | 0.118735 | 0.206002 | 0.136655  | 0.122669  | 0.131119  |
| 0.113928  | 0.112034  | 0.114365 | 0.208625 | 0.128788  | 0.113345  | 0.120047  |
| 0.110431  | 0.11553   | 0.111451 | 0.204254 | 0.132576  | 0.111305  | 0.12704   |
| 0.115967  | 0.110286  | 0.115239 | 0.210373 | 0.130245  | 0.120338  | 0.127331  |
| 0.109266  | 0.110868  | 0.112034 | 0.206002 | 0.129662  | 0.113054  | 0.125583  |

|           |          |           |          |          |           |          |
|-----------|----------|-----------|----------|----------|-----------|----------|
| 0.103438  | 0.113782 | 0.110868  | 0.203671 | 0.125583 | 0.107809  | 0.119755 |
| 0.128059  | 0.13345  | 0.130245  | 0.221591 | 0.146707 | 0.135635  | 0.136801 |
| 0.103584  | 0.109848 | 0.102273  | 0.204108 | 0.132139 | 0.109703  | 0.123397 |
| 0.104604  | 0.116696 | 0.106498  | 0.205711 | 0.127914 | 0.108683  | 0.122669 |
| 0.119755  | 0.123397 | 0.118153  | 0.218531 | 0.134615 | 0.11655   | 0.132867 |
| 0.119464  | 0.123689 | 0.123106  | 0.212121 | 0.141026 | 0.11451   | 0.13549  |
| 0.124126  | 0.13039  | 0.124563  | 0.217657 | 0.147145 | 0.125583  | 0.140152 |
| 0.131847  | 0.129953 | 0.131993  | 0.224796 | 0.146416 | 0.13243   | 0.141463 |
| 0.111014  | 0.108537 | 0.110868  | 0.201049 | 0.134615 | 0.109848  | 0.129079 |
| 0.179779  | 0.169726 | 0.172057  | 0.157343 | 0.180653 | 0.182401  | 0.184732 |
| 0.102127  | 0.108392 | 0.106061  | 0.207896 | 0.124563 | 0.102127  | 0.114365 |
| 0.134324  | 0.135635 | 0.124854  | 0.219988 | 0.143357 | 0.126166  | 0.13986  |
| 0.122086  | 0.127768 | 0.116404  | 0.215909 | 0.138986 | 0.116841  | 0.131702 |
| 0.130973  | 0.132867 | 0.131993  | 0.224505 | 0.151078 | 0.121941  | 0.145251 |
| 0.105769  | 0.107955 | 0.107663  | 0.208625 | 0.127914 | 0.104895  | 0.12296  |
| 0.127914  | 0.126603 | 0.128059  | 0.219697 | 0.139277 | 0.122669  | 0.134324 |
| 0.102273  | 0.117279 | 0.112325  | 0.20542  | 0.13141  | 0.10373   | 0.123252 |
| 0.114656  | 0.119464 | 0.117716  | 0.209062 | 0.136218 | 0.116113  | 0.132721 |
| 0.109411  | 0.104604 | 0.109266  | 0.205274 | 0.128351 | 0.110286  | 0.123106 |
| 0.129516  | 0.134615 | 0.133159  | 0.221008 | 0.149913 | 0.121358  | 0.146999 |
| 0.101544  | 0.108683 | 0.105186  | 0.2044   | 0.128351 | 0.0992133 | 0.123397 |
| 0.129079  | 0.127477 | 0.126894  | 0.215326 | 0.144231 | 0.125     | 0.137238 |
| 0.109994  | 0.11451  | 0.116841  | 0.208188 | 0.135927 | 0.104458  | 0.127768 |
| 0.125291  | 0.123106 | 0.126603  | 0.218531 | 0.138403 | 0.127622  | 0.13141  |
| 0.126894  | 0.125583 | 0.119755  | 0.216055 | 0.146125 | 0.116987  | 0.139423 |
| 0.108246  | 0.113636 | 0.105769  | 0.206731 | 0.129808 | 0.102127  | 0.126311 |
| 0.146125  | 0.135198 | 0.136655  | 0.211684 | 0.156906 | 0.139714  | 0.149038 |
| 0.110723  | 0.114948 | 0.108829  | 0.208333 | 0.136655 | 0.101981  | 0.130536 |
| 0.1081    | 0.114073 | 0.10912   | 0.20979  | 0.132284 | 0.109266  | 0.124417 |
| 0.113782  | 0.118881 | 0.113636  | 0.211393 | 0.135635 | 0.10912   | 0.125728 |
| 0.134178  | 0.13549  | 0.131993  | 0.222756 | 0.148747 | 0.134761  | 0.143794 |
| 0.120775  | 0.109848 | 0.11014   | 0.190997 | 0.132139 | 0.119901  | 0.132721 |
| 0.107955  | 0.112179 | 0.10373   | 0.208479 | 0.126603 | 0.104167  | 0.118153 |
| 0.10912   | 0.11014  | 0.10373   | 0.202943 | 0.130099 | 0.112034  | 0.123397 |
| 0.106061  | 0.114656 | 0.114656  | 0.208916 | 0.134615 | 0.108974  | 0.126748 |
| 0.125437  | 0.123543 | 0.114219  | 0.219551 | 0.139132 | 0.124272  | 0.135052 |
| 0.11014   | 0.116987 | 0.112908  | 0.210373 | 0.136072 | 0.101107  | 0.127914 |
| 0.0977564 | 0.108683 | 0.099359  | 0.197698 | 0.120775 | 0.101253  | 0.116987 |
| 0.105915  | 0.105769 | 0.101399  | 0.201486 | 0.123689 | 0.101836  | 0.116404 |
| 0.104604  | 0.116696 | 0.102127  | 0.205711 | 0.126166 | 0.104312  | 0.120921 |
| 0.115093  | 0.107663 | 0.116696  | 0.202797 | 0.133159 | 0.109848  | 0.126748 |
| 0.123689  | 0.130828 | 0.11859   | 0.216638 | 0.144085 | 0.121066  | 0.137966 |
| 0.105186  | 0.112325 | 0.0980478 | 0.207168 | 0.125    | 0.104021  | 0.122086 |
| 0.106789  | 0.106643 | 0.0949883 | 0.202069 | 0.12398  | 0.103293  | 0.11757  |

|          |           |           |          |           |           |           |
|----------|-----------|-----------|----------|-----------|-----------|-----------|
| 0.118153 | 0.120338  | 0.115093  | 0.21722  | 0.143502  | 0.113491  | 0.138549  |
| 0.105186 | 0.106789  | 0.103293  | 0.203963 | 0.125291  | 0.0952797 | 0.118881  |
| 0.121503 | 0.115822  | 0.116696  | 0.199592 | 0.136364  | 0.119172  | 0.131702  |
| 0.129662 | 0.128642  | 0.125437  | 0.213287 | 0.143939  | 0.127914  | 0.13986   |
| 0.113636 | 0.110286  | 0.10708   | 0.210664 | 0.132576  | 0.104895  | 0.126166  |
| 0.105041 | 0.113636  | 0.0990676 | 0.207896 | 0.126894  | 0.104458  | 0.12398   |
| 0.105332 | 0.112179  | 0.101399  | 0.205565 | 0.127185  | 0.106206  | 0.122815  |
| 0.099796 | 0.106643  | 0.100233  | 0.198281 | 0.127768  | 0.103001  | 0.11961   |
| 0.120192 | 0.125583  | 0.117133  | 0.215181 | 0.135927  | 0.117279  | 0.13243   |
| 0.101544 | 0.107226  | 0.0952797 | 0.202652 | 0.122523  | 0.0995047 | 0.115239  |
| 0.130536 | 0.131265  | 0.129808  | 0.219406 | 0.15035   | 0.133159  | 0.143648  |
| 0.125146 | 0.129079  | 0.125583  | 0.214889 | 0.14933   | 0.129225  | 0.141171  |
| 0.118735 | 0.120921  | 0.11655   | 0.214889 | 0.138549  | 0.120484  | 0.129225  |
| 0.109848 | 0.110577  | 0.107955  | 0.20542  | 0.136364  | 0.11451   | 0.128788  |
| 0.107809 | 0.113782  | 0.111742  | 0.202214 | 0.133741  | 0.106643  | 0.129371  |
| 0.101253 | 0.109848  | 0.104021  | 0.204983 | 0.130973  | 0.101253  | 0.124563  |
| 0.10373  | 0.108537  | 0.112617  | 0.208333 | 0.127331  | 0.100524  | 0.122378  |
| 0.104604 | 0.112325  | 0.104167  | 0.207751 | 0.124709  | 0.103438  | 0.117424  |
| 0.107517 | 0.0977564 | 0.105915  | 0.193473 | 0.107226  | 0.113345  | 0.100233  |
| 0.124126 | 0.127185  | 0.121358  | 0.22028  | 0.143939  | 0.121503  | 0.136946  |
| 0.107663 | 0.109266  | 0.113054  | 0.214598 | 0.132721  | 0.106498  | 0.124563  |
| 0.13141  | 0.123689  | 0.117279  | 0.212995 | 0.140152  | 0.131702  | 0.136072  |
| 0.129225 | 0.131119  | 0.129371  | 0.223922 | 0.144959  | 0.123397  | 0.142628  |
| 0.190997 | 0.184149  | 0.176573  | 0.106789 | 0.186917  | 0.201777  | 0.191579  |
| 0.232226 | 0.225087  | 0.222465  | 0.124709 | 0.223485  | 0.244464  | 0.229604  |
| 0.109411 | 0.0912005 | 0.107809  | 0.191871 | 0.0793998 | 0.11116   | 0.0770688 |
| 0.109557 | 0.112325  | 0.105041  | 0.200466 | 0.12704   | 0.104895  | 0.120921  |
| 0.102273 | 0.103001  | 0.101253  | 0.198427 | 0.123543  | 0.102564  | 0.121212  |
| 0.110431 | 0.114073  | 0.107955  | 0.20338  | 0.125874  | 0.109848  | 0.120629  |
| 0.127622 | 0.124272  | 0.0630828 | 0.208625 | 0.138986  | 0.132284  | 0.131702  |
| 0.103147 | 0.117861  | 0.108829  | 0.207751 | 0.125874  | 0.102564  | 0.120921  |
| 0.136218 | 0.143357  | 0.140152  | 0.225379 | 0.156614  | 0.13447   | 0.153118  |
| 0.108974 | 0.116987  | 0.115239  | 0.206876 | 0.130245  | 0.104895  | 0.124709  |
| 0.125    | 0.127185  | 0.129225  | 0.221154 | 0.1419    | 0.118007  | 0.134615  |
| 0.126311 | 0.122086  | 0.124417  | 0.209353 | 0.140006  | 0.125146  | 0.133013  |
| 0.125437 | 0.131119  | 0.122669  | 0.21722  | 0.145542  | 0.127768  | 0.14088   |
| 0.129225 | 0.132576  | 0.129371  | 0.218969 | 0.148456  | 0.135635  | 0.140006  |
| 0.109703 | 0.118007  | 0.113636  | 0.211684 | 0.133887  | 0.10708   | 0.127768  |
| 0.108829 | 0.113928  | 0.109266  | 0.205857 | 0.129808  | 0.100379  | 0.123106  |
| 0.110431 | 0.118153  | 0.110577  | 0.208333 | 0.135781  | 0.108392  | 0.129662  |
| 0.106061 | 0.108537  | 0.107955  | 0.201923 | 0.125     | 0.102273  | 0.119755  |
| 0.106935 | 0.113491  | 0.109411  | 0.203671 | 0.126457  | 0.0990676 | 0.120047  |
| 0.109411 | 0.111305  | 0.112471  | 0.208188 | 0.13039   | 0.104749  | 0.12398   |
| 0.121503 | 0.126311  | 0.119318  | 0.20979  | 0.140734  | 0.122086  | 0.134615  |



|          |          |          |          |          |           |          |
|----------|----------|----------|----------|----------|-----------|----------|
| 0.129079 | 0.133304 | 0.13243  | 0.221154 | 0.146853 | 0.131702  | 0.1419   |
| 0.107955 | 0.119464 | 0.113636 | 0.210227 | 0.128934 | 0.10708   | 0.125146 |
| 0.108683 | 0.110286 | 0.108537 | 0.200758 | 0.129371 | 0.107517  | 0.125874 |
| 0.126166 | 0.128934 | 0.13039  | 0.219406 | 0.147436 | 0.119172  | 0.141608 |
| 0.107226 | 0.109411 | 0.109703 | 0.202797 | 0.127622 | 0.102273  | 0.121503 |
| 0.133596 | 0.141026 | 0.131702 | 0.221882 | 0.155157 | 0.130682  | 0.150787 |
| 0.132721 | 0.119755 | 0.123252 | 0.21081  | 0.149038 | 0.133013  | 0.144085 |
| 0.124126 | 0.122523 | 0.127477 | 0.209499 | 0.145979 | 0.121212  | 0.140152 |
| 0.106352 | 0.108829 | 0.107372 | 0.20542  | 0.122086 | 0.101981  | 0.11655  |
| 0.101836 | 0.109557 | 0.106352 | 0.204983 | 0.124563 | 0.100379  | 0.120192 |
| 0.119464 | 0.121649 | 0.11961  | 0.216492 | 0.136946 | 0.111305  | 0.128788 |
| 0.116987 | 0.118881 | 0.120629 | 0.215763 | 0.133596 | 0.11553   | 0.131847 |
| 0.121358 | 0.128205 | 0.128497 | 0.212267 | 0.143211 | 0.118444  | 0.137966 |
| 0.108974 | 0.119027 | 0.112617 | 0.208333 | 0.133159 | 0.105769  | 0.126166 |
| 0.10912  | 0.115676 | 0.115093 | 0.207605 | 0.133304 | 0.108537  | 0.12398  |
| 0.113782 | 0.119755 | 0.11859  | 0.211684 | 0.13243  | 0.118153  | 0.128642 |
| 0.120775 | 0.134033 | 0.127914 | 0.220717 | 0.149621 | 0.118444  | 0.145251 |
| 0.122523 | 0.131993 | 0.127622 | 0.216638 | 0.144376 | 0.121941  | 0.137383 |
| 0.130245 | 0.132721 | 0.128934 | 0.219988 | 0.144814 | 0.12296   | 0.140152 |
| 0.130099 | 0.124709 | 0.125291 | 0.215763 | 0.143211 | 0.126311  | 0.137966 |
| 0.103875 | 0.117424 | 0.114802 | 0.209062 | 0.126603 | 0.101544  | 0.119318 |
| 0.119901 | 0.129079 | 0.124709 | 0.216638 | 0.142045 | 0.121066  | 0.135344 |
| 0.104604 | 0.10912  | 0.108537 | 0.205128 | 0.125583 | 0.107517  | 0.116259 |
| 0.113491 | 0.106352 | 0.111888 | 0.200029 | 0.13039  | 0.112034  | 0.125146 |
| 0.108537 | 0.118007 | 0.109266 | 0.20877  | 0.130682 | 0.106498  | 0.12398  |
| 0.104021 | 0.113199 | 0.10912  | 0.204254 | 0.132867 | 0.105186  | 0.125874 |
| 0.105186 | 0.109994 | 0.10708  | 0.203963 | 0.126166 | 0.0984848 | 0.117424 |
| 0.129516 | 0.133741 | 0.129371 | 0.220134 | 0.146707 | 0.125437  | 0.141754 |
| 0.113345 | 0.115822 | 0.114948 | 0.204837 | 0.133159 | 0.111597  | 0.125    |
| 0.121503 | 0.132139 | 0.128059 | 0.219114 | 0.142483 | 0.124709  | 0.136072 |
| 0.107517 | 0.108246 | 0.110577 | 0.202797 | 0.126748 | 0.101981  | 0.120629 |
| 0.11757  | 0.126748 | 0.123834 | 0.220717 | 0.141171 | 0.11116   | 0.134761 |
| 0.113636 | 0.113782 | 0.117279 | 0.212121 | 0.138403 | 0.118007  | 0.131119 |
| 0.119464 | 0.104749 | 0.103875 | 0.20134  | 0.135781 | 0.116841  | 0.128497 |
| 0.110286 | 0.118881 | 0.109557 | 0.211393 | 0.135052 | 0.104458  | 0.128642 |
| 0.123252 | 0.121358 | 0.115822 | 0.201632 | 0.131993 | 0.121212  | 0.126457 |
| 0.121649 | 0.114802 | 0.115676 | 0.211684 | 0.133013 | 0.104167  | 0.129225 |
| 0.107663 | 0.116841 | 0.111014 | 0.207022 | 0.133013 | 0.104458  | 0.125146 |
| 0.131556 | 0.13549  | 0.12296  | 0.220425 | 0.148456 | 0.132139  | 0.139423 |
| 0.131702 | 0.135927 | 0.130973 | 0.225816 | 0.147436 | 0.13549   | 0.141317 |
| 0.10373  | 0.113491 | 0.100962 | 0.202797 | 0.120047 | 0.104604  | 0.112762 |
| 0.128059 | 0.129953 | 0.116841 | 0.220717 | 0.144376 | 0.131265  | 0.140006 |
| 0.122669 | 0.128351 | 0.110868 | 0.2162   | 0.143357 | 0.125291  | 0.136364 |
| 0.130536 | 0.13039  | 0.117279 | 0.211247 | 0.141608 | 0.126457  | 0.136364 |

|          |          |          |          |          |          |          |
|----------|----------|----------|----------|----------|----------|----------|
| 0.121503 | 0.116404 | 0.107663 | 0.205711 | 0.13141  | 0.119755 | 0.12704  |
| 0.120338 | 0.124563 | 0.110868 | 0.2162   | 0.137821 | 0.121795 | 0.131993 |
| 0.121066 | 0.124417 | 0.109848 | 0.211684 | 0.137092 | 0.121358 | 0.132139 |
| 0.127331 | 0.124854 | 0.121066 | 0.216492 | 0.13549  | 0.125583 | 0.130828 |
| 0.130828 | 0.126311 | 0.122232 | 0.219114 | 0.146562 | 0.135198 | 0.141026 |
| 0.126166 | 0.123689 | 0.112325 | 0.212121 | 0.131702 | 0.126457 | 0.128205 |
| 0.113054 | 0.114656 | 0.104749 | 0.20338  | 0.129079 | 0.115676 | 0.126457 |
| 0.130099 | 0.115385 | 0.132867 | 0.213432 | 0.142337 | 0.127477 | 0.134178 |
| 0.128205 | 0.130682 | 0.122232 | 0.21824  | 0.14627  | 0.129662 | 0.138695 |
| 0.107809 | 0.11116  | 0.102418 | 0.198427 | 0.125291 | 0.111888 | 0.120629 |
| 0.214598 | 0.206585 | 0.20979  | 0.116987 | 0.209353 | 0.226253 | 0.213141 |
| 0.123106 | 0.119464 | 0.111597 | 0.210227 | 0.137383 | 0.125146 | 0.13039  |
| 0.116404 | 0.120629 | 0.110431 | 0.206148 | 0.130973 | 0.115239 | 0.126894 |
| 0.131119 | 0.128934 | 0.125728 | 0.219697 | 0.1419   | 0.13549  | 0.138403 |
| 0.113054 | 0.116113 | 0.110286 | 0.206585 | 0.127622 | 0.11859  | 0.124709 |
| 0.130245 | 0.13243  | 0.11757  | 0.217949 | 0.143065 | 0.133741 | 0.13549  |
| 0.119464 | 0.120192 | 0.112034 | 0.208042 | 0.132576 | 0.118881 | 0.125    |
| 0.120192 | 0.112471 | 0.104895 | 0.206439 | 0.131265 | 0.119901 | 0.128351 |
| 0.119901 | 0.127914 | 0.112471 | 0.209936 | 0.137966 | 0.127477 | 0.132139 |
| 0.128788 | 0.125728 | 0.116404 | 0.20134  | 0.134907 | 0.126748 | 0.137238 |
| 0.128351 | 0.129371 | 0.121503 | 0.216346 | 0.14088  | 0.131265 | 0.137383 |
| 0.12704  | 0.125437 | 0.11961  | 0.2162   | 0.142774 | 0.124709 | 0.133741 |
| 0.125874 | 0.125728 | 0.119318 | 0.215035 | 0.136072 | 0.124417 | 0.132867 |
| 0.111888 | 0.11553  | 0.103584 | 0.212413 | 0.132284 | 0.113636 | 0.12296  |
| 0.117424 | 0.118153 | 0.116696 | 0.211247 | 0.129371 | 0.120338 | 0.124709 |
| 0.132721 | 0.129371 | 0.122378 | 0.21722  | 0.144376 | 0.135635 | 0.140006 |
| 0.117424 | 0.112908 | 0.10708  | 0.201923 | 0.131119 | 0.120338 | 0.122669 |
| 0.129953 | 0.131265 | 0.133304 | 0.218531 | 0.142774 | 0.132576 | 0.139277 |
| 0.131556 | 0.13345  | 0.125874 | 0.200612 | 0.146125 | 0.139423 | 0.14292  |
| 0.120192 | 0.111597 | 0.111014 | 0.207896 | 0.136509 | 0.120484 | 0.13039  |
| 0.124854 | 0.133159 | 0.116841 | 0.216055 | 0.141463 | 0.128934 | 0.135635 |
| 0.126457 | 0.121358 | 0.121358 | 0.200466 | 0.133159 | 0.128788 | 0.134324 |
| 0.118735 | 0.130828 | 0.124126 | 0.208479 | 0.135052 | 0.114073 | 0.128934 |
| 0.128059 | 0.123834 | 0.119755 | 0.198864 | 0.13447  | 0.126311 | 0.126311 |
| 0.13039  | 0.13549  | 0.126748 | 0.209062 | 0.151078 | 0.137966 | 0.143794 |
| 0.108974 | 0.111451 | 0.103584 | 0.201049 | 0.13141  | 0.108974 | 0.124709 |
| 0.130973 | 0.128788 | 0.120629 | 0.216346 | 0.14729  | 0.133596 | 0.137675 |
| 0.138986 | 0.133596 | 0.126894 | 0.197261 | 0.143357 | 0.144522 | 0.145979 |
| 0.113345 | 0.124272 | 0.112617 | 0.215326 | 0.136655 | 0.113928 | 0.131993 |
| 0.115676 | 0.122523 | 0.118444 | 0.20542  | 0.137238 | 0.120921 | 0.132576 |
| 0.135344 | 0.128788 | 0.137821 | 0.220425 | 0.14729  | 0.137383 | 0.144959 |
| 0.122523 | 0.114219 | 0.119755 | 0.210519 | 0.133596 | 0.123689 | 0.12602  |
| 0.1419   | 0.116404 | 0.128351 | 0.223485 | 0.148601 | 0.138403 | 0.139277 |
| 0.129516 | 0.11451  | 0.120047 | 0.216346 | 0.145833 | 0.126311 | 0.138549 |

|          |           |           |          |           |           |           |
|----------|-----------|-----------|----------|-----------|-----------|-----------|
| 0.121212 | 0.121649  | 0.122815  | 0.214452 | 0.141026  | 0.120921  | 0.134324  |
| 0.128059 | 0.106352  | 0.121795  | 0.213432 | 0.137966  | 0.129808  | 0.136801  |
| 0.122669 | 0.111451  | 0.112034  | 0.207751 | 0.139277  | 0.115967  | 0.135781  |
| 0.130682 | 0.129079  | 0.123834  | 0.218969 | 0.149038  | 0.124272  | 0.13884   |
| 0.124272 | 0.127622  | 0.121795  | 0.214307 | 0.138549  | 0.126311  | 0.135052  |
| 0.130682 | 0.132576  | 0.133159  | 0.218094 | 0.144668  | 0.125146  | 0.137383  |
| 0.130099 | 0.130245  | 0.125     | 0.220425 | 0.144668  | 0.127768  | 0.137383  |
| 0.124854 | 0.126166  | 0.125583  | 0.210227 | 0.146125  | 0.121066  | 0.140006  |
| 0.141171 | 0.132576  | 0.135198  | 0.213432 | 0.151369  | 0.137966  | 0.14933   |
| 0.118153 | 0.124417  | 0.1081    | 0.212558 | 0.142628  | 0.124272  | 0.136509  |
| 0.114073 | 0.120921  | 0.113636  | 0.214307 | 0.138549  | 0.110286  | 0.131265  |
| 0.124563 | 0.127622  | 0.122669  | 0.218969 | 0.146125  | 0.118444  | 0.141171  |
| 0.114073 | 0.114802  | 0.109266  | 0.209353 | 0.136509  | 0.116987  | 0.130682  |
| 0.142483 | 0.135052  | 0.13447   | 0.212704 | 0.152681  | 0.137821  | 0.15035   |
| 0.151807 | 0.149913  | 0.147873  | 0.220862 | 0.166375  | 0.149184  | 0.162005  |
| 0.119464 | 0.127477  | 0.122232  | 0.219114 | 0.141608  | 0.12296   | 0.133741  |
| 0.118153 | 0.11859   | 0.121503  | 0.211976 | 0.13243   | 0.114365  | 0.12602   |
| 0.13345  | 0.128351  | 0.125728  | 0.218823 | 0.136655  | 0.125874  | 0.130536  |
| 0.129516 | 0.128788  | 0.120921  | 0.218677 | 0.141171  | 0.133013  | 0.135344  |
| 0.116987 | 0.125583  | 0.124417  | 0.221008 | 0.141463  | 0.115822  | 0.135635  |
| 0.133887 | 0.137238  | 0.129371  | 0.220425 | 0.155157  | 0.129516  | 0.146416  |
| 0.140006 | 0.125     | 0.123543  | 0.211684 | 0.145542  | 0.135927  | 0.14292   |
| 0.12296  | 0.121941  | 0.112908  | 0.213869 | 0.140443  | 0.125583  | 0.131119  |
| 0.158508 | 0.155449  | 0.153118  | 0.226399 | 0.164044  | 0.151807  | 0.156469  |
| 0.125583 | 0.124272  | 0.118735  | 0.214744 | 0.142191  | 0.125     | 0.13986   |
| 0.136655 | 0.117279  | 0.125146  | 0.221154 | 0.155303  | 0.137529  | 0.14831   |
| 0.118153 | 0.120629  | 0.115093  | 0.21722  | 0.136801  | 0.113199  | 0.131556  |
| 0.131847 | 0.130536  | 0.135198  | 0.223339 | 0.144085  | 0.124563  | 0.13884   |
| 0.120775 | 0.121795  | 0.114219  | 0.208188 | 0.137383  | 0.12398   | 0.133013  |
| 0.137821 | 0.121066  | 0.125728  | 0.178322 | 0.111888  | 0.138695  | 0.118007  |
| 0.142628 | 0.139569  | 0.136946  | 0.218677 | 0.148456  | 0.141754  | 0.143502  |
| 0.120629 | 0.103293  | 0.115239  | 0.197552 | 0.0524476 | 0.124417  | 0.0483683 |
| 0.133304 | 0.113928  | 0.121503  | 0.17701  | 0.064831  | 0.137966  | 0.0645396 |
| 0.146562 | 0.12602   | 0.139423  | 0.157343 | 0.1419    | 0.1419    | 0.145979  |
| 0.138403 | 0.107372  | 0.128934  | 0.158217 | 0.118007  | 0.141026  | 0.120338  |
| 0.113782 | 0.122669  | 0.12296   | 0.216055 | 0.139714  | 0.0977564 | 0.130973  |
| 0.129953 | 0.135052  | 0.132721  | 0.208625 | 0.137238  | 0.129662  | 0.132867  |
| 0.111597 | 0.112034  | 0.0855186 | 0.197844 | 0.119464  | 0.112471  | 0.113636  |
| 0.109703 | 0.100524  | 0.0751748 | 0.201195 | 0.12602   | 0.114948  | 0.120192  |
| 0.118007 | 0.121649  | 0.112617  | 0.203963 | 0.129953  | 0.121503  | 0.129371  |
| 0.116841 | 0.101836  | 0.115239  | 0.200466 | 0.0527389 | 0.122086  | 0.0463287 |
| 0.104458 | 0.112179  | 0.108392  | 0.204691 | 0.132139  | 0.113782  | 0.129808  |
| 0.112617 | 0.0938228 | 0.0725524 | 0.189831 | 0.0977564 | 0.116113  | 0.0910548 |
| 0.116696 | 0.116259  | 0.114802  | 0.201777 | 0.115239  | 0.11757   | 0.107955  |

|           |          |           |           |           |           |           |
|-----------|----------|-----------|-----------|-----------|-----------|-----------|
| 0.120629  | 0.116987 | 0.0622086 | 0.193473  | 0.125583  | 0.126748  | 0.125874  |
| 0.101107  | 0.108829 | 0.0980478 | 0.199009  | 0.124417  | 0.106643  | 0.118881  |
| 0.121212  | 0.102127 | 0.115822  | 0.199301  | 0.0588578 | 0.12296   | 0.0597319 |
| 0.115822  | 0.101981 | 0.112762  | 0.199155  | 0.0560897 | 0.119318  | 0.0499709 |
| 0.116987  | 0.108683 | 0.12296   | 0.208188  | 0.132139  | 0.10708   | 0.125437  |
| 0.213724  | 0.204837 | 0.203089  | 0.117279  | 0.205565  | 0.222465  | 0.211684  |
| 0.140297  | 0.123543 | 0.133741  | 0.211976  | 0.0639569 | 0.143794  | 0.0575466 |
| 0.127331  | 0.127185 | 0.127768  | 0.212413  | 0.133159  | 0.127622  | 0.128205  |
| 0.124854  | 0.11451  | 0.112762  | 0.200321  | 0.119318  | 0.127185  | 0.116696  |
| 0.205857  | 0.199301 | 0.198135  | 0.10067   | 0.199446  | 0.218094  | 0.2044    |
| 0.11553   | 0.101107 | 0.114219  | 0.196241  | 0.132139  | 0.11553   | 0.128934  |
| 0.108392  | 0.119318 | 0.113491  | 0.212995  | 0.136946  | 0.111014  | 0.132867  |
| 0.119755  | 0.122523 | 0.117279  | 0.20542   | 0.132284  | 0.120921  | 0.126457  |
| 0.11961   | 0.117133 | 0.0565268 | 0.200321  | 0.132139  | 0.128059  | 0.123106  |
| 0.244901  | 0.237471 | 0.236014  | 0.132139  | 0.238782  | 0.254808  | 0.241987  |
| 0.123834  | 0.122232 | 0.11757   | 0.207751  | 0.13549   | 0.118298  | 0.130245  |
| 0.112179  | 0.104167 | 0.115239  | 0.206585  | 0.127331  | 0.104895  | 0.122669  |
| 0.114219  | 0.119901 | 0.116696  | 0.208042  | 0.130828  | 0.111014  | 0.122378  |
| 0.113928  | 0.118735 | 0.113491  | 0.207751  | 0.128497  | 0.11014   | 0.125291  |
| 0.127622  | 0.119318 | 0.105041  | 0.199883  | 0.136072  | 0.124417  | 0.130536  |
| 0.126166  | 0.109994 | 0.0977564 | 0.183275  | 0.111305  | 0.129371  | 0.112471  |
| 0.116841  | 0.104749 | 0.118153  | 0.206294  | 0.131702  | 0.107809  | 0.127331  |
| 0.11553   | 0.101399 | 0.111014  | 0.199738  | 0.0546329 | 0.118444  | 0.0514277 |
| 0.116841  | 0.125437 | 0.121066  | 0.201632  | 0.128205  | 0.118007  | 0.12296   |
| 0.113345  | 0.112617 | 0.0505536 | 0.199301  | 0.126748  | 0.119464  | 0.119755  |
| 0.114948  | 0.103438 | 0.109557  | 0.195076  | 0.0639569 | 0.119318  | 0.0557984 |
| 0.117716  | 0.115239 | 0.0971737 | 0.202797  | 0.130245  | 0.119172  | 0.126457  |
| 0.140297  | 0.142483 | 0.138403  | 0.218677  | 0.146707  | 0.14088   | 0.142628  |
| 0.124272  | 0.124126 | 0.122378  | 0.209936  | 0.137675  | 0.12398   | 0.132139  |
| 0.111742  | 0.120629 | 0.114802  | 0.20877   | 0.133304  | 0.116987  | 0.129808  |
| 0.188666  | 0.178613 | 0.180361  | 0.105624  | 0.178176  | 0.19595   | 0.186043  |
| 0.201195  | 0.189685 | 0.191434  | 0.0971737 | 0.193619  | 0.209645  | 0.201486  |
| 0.11961   | 0.120921 | 0.0544872 | 0.194202  | 0.128934  | 0.124563  | 0.127185  |
| 0.113782  | 0.110431 | 0.0501166 | 0.200321  | 0.123397  | 0.119027  | 0.116696  |
| 0.135052  | 0.129079 | 0.125     | 0.200903  | 0.129516  | 0.143794  | 0.128059  |
| 0.111742  | 0.105769 | 0.117424  | 0.205565  | 0.130973  | 0.10708   | 0.124563  |
| 0.122378  | 0.123397 | 0.121358  | 0.209207  | 0.139277  | 0.122086  | 0.129662  |
| 0.119318  | 0.125874 | 0.124126  | 0.204983  | 0.134761  | 0.120775  | 0.126311  |
| 0.222174  | 0.212995 | 0.211538  | 0.11116   | 0.212267  | 0.231789  | 0.220134  |
| 0.112908  | 0.113928 | 0.113054  | 0.206731  | 0.121941  | 0.115239  | 0.117861  |
| 0.204545  | 0.191579 | 0.195659  | 0.136946  | 0.19697   | 0.211538  | 0.20338   |
| 0.0980478 | 0.111014 | 0.114219  | 0.209936  | 0.128059  | 0.088141  | 0.123106  |
| 0         | 0.11757  | 0.108246  | 0.203089  | 0.130245  | 0.0909091 | 0.120629  |
| 0.11757   | 0        | 0.108392  | 0.193619  | 0.110868  | 0.117279  | 0.106498  |

|           |           |           |          |           |           |           |
|-----------|-----------|-----------|----------|-----------|-----------|-----------|
| 0.108246  | 0.108392  | 0         | 0.194202 | 0.122232  | 0.114948  | 0.117279  |
| 0.203089  | 0.193619  | 0.194202  | 0        | 0.192599  | 0.211538  | 0.200175  |
| 0.130245  | 0.110868  | 0.122232  | 0.192599 | 0         | 0.132867  | 0.0504079 |
| 0.0909091 | 0.117279  | 0.114948  | 0.211538 | 0.132867  | 0         | 0.125     |
| 0.120629  | 0.106498  | 0.117279  | 0.200175 | 0.0504079 | 0.125     | 0         |
| 0.11451   | 0.118735  | 0.122523  | 0.205711 | 0.129079  | 0.121212  | 0.120921  |
| 0.113054  | 0.112908  | 0.0575466 | 0.199592 | 0.128788  | 0.118298  | 0.122086  |
| 0.103293  | 0.112471  | 0.116259  | 0.210227 | 0.129516  | 0.0913462 | 0.123689  |
| 0.112908  | 0.105478  | 0.113636  | 0.193036 | 0.123106  | 0.113199  | 0.125146  |
| 0.110577  | 0.122669  | 0.117133  | 0.209353 | 0.137092  | 0.116696  | 0.130682  |
| 0.115239  | 0.099359  | 0.1081    | 0.191871 | 0.057838  | 0.116987  | 0.0587121 |
| 0.0984848 | 0.116696  | 0.120484  | 0.206002 | 0.129662  | 0.0521562 | 0.12704   |
| 0.186043  | 0.175991  | 0.176282  | 0.105332 | 0.178759  | 0.195076  | 0.184878  |
| 0.117424  | 0.121358  | 0.120484  | 0.211247 | 0.132576  | 0.113928  | 0.125583  |
| 0.125437  | 0.125583  | 0.12296   | 0.208188 | 0.134761  | 0.125728  | 0.126311  |
| 0.11655   | 0.116696  | 0.112617  | 0.200758 | 0.121795  | 0.115676  | 0.116841  |
| 0.118735  | 0.121212  | 0.120338  | 0.198864 | 0.133013  | 0.117279  | 0.130973  |
| 0.116696  | 0.106643  | 0.116841  | 0.201777 | 0.0511364 | 0.123397  | 0.0421037 |
| 0.104749  | 0.118007  | 0.120629  | 0.215763 | 0.135344  | 0.0962995 | 0.127185  |
| 0.107517  | 0.111451  | 0.114656  | 0.200466 | 0.125583  | 0.111305  | 0.116841  |
| 0.120921  | 0.112034  | 0.124272  | 0.210373 | 0.135781  | 0.109266  | 0.127914  |
| 0.119027  | 0.118007  | 0.114219  | 0.205857 | 0.126603  | 0.122523  | 0.121941  |
| 0.109411  | 0.117133  | 0.112762  | 0.204983 | 0.126603  | 0.105915  | 0.121941  |
| 0.11859   | 0.114073  | 0.0607517 | 0.199592 | 0.127914  | 0.120629  | 0.123543  |
| 0.118444  | 0.120921  | 0.113928  | 0.210519 | 0.132721  | 0.118735  | 0.128059  |
| 0.129953  | 0.133304  | 0.127477  | 0.214744 | 0.141608  | 0.134907  | 0.138112  |
| 0.112471  | 0.114656  | 0.113199  | 0.201049 | 0.132284  | 0.112179  | 0.124417  |
| 0.135635  | 0.119172  | 0.131119  | 0.211684 | 0.0642483 | 0.137966  | 0.0543415 |
| 0.112908  | 0.112762  | 0.0524476 | 0.200612 | 0.127477  | 0.117279  | 0.121649  |
| 0.105915  | 0.111597  | 0.113636  | 0.199446 | 0.119901  | 0.108537  | 0.113491  |
| 0.118881  | 0.0992133 | 0.107372  | 0.184732 | 0.0649767 | 0.119464  | 0.0690559 |
| 0.120921  | 0.111451  | 0.123397  | 0.207168 | 0.136946  | 0.113054  | 0.131702  |
| 0.186189  | 0.171766  | 0.178759  | 0.111888 | 0.18211   | 0.194056  | 0.185897  |
| 0.0913462 | 0.111597  | 0.113636  | 0.206148 | 0.128059  | 0.0456002 | 0.125146  |
| 0.0992133 | 0.105478  | 0.105769  | 0.195367 | 0.11116   | 0.103875  | 0.10708   |
| 0.112034  | 0.120338  | 0.11451   | 0.212558 | 0.13447   | 0.116113  | 0.129808  |
| 0.182255  | 0.163462  | 0.166375  | 0.121358 | 0.171474  | 0.186334  | 0.175262  |
| 0.129662  | 0.130682  | 0.129516  | 0.20979  | 0.14627   | 0.129079  | 0.143065  |
| 0.140734  | 0.140589  | 0.140006  | 0.220862 | 0.157925  | 0.136946  | 0.152681  |
| 0.14292   | 0.145105  | 0.138695  | 0.218969 | 0.14933   | 0.143211  | 0.14088   |
| 0.111451  | 0.116841  | 0.112179  | 0.199155 | 0.128642  | 0.112034  | 0.126603  |
| 0.119464  | 0.105332  | 0.114365  | 0.196387 | 0.0515734 | 0.122669  | 0.0448718 |
| 0.209936  | 0.196387  | 0.199592  | 0.106789 | 0.197698  | 0.217512  | 0.204108  |
| 0.119901  | 0.118881  | 0.113054  | 0.195076 | 0.125728  | 0.124854  | 0.11961   |

|           |           |           |           |           |           |           |
|-----------|-----------|-----------|-----------|-----------|-----------|-----------|
| 0.123834  | 0.106206  | 0.11961   | 0.200175  | 0.0486597 | 0.126748  | 0.0454545 |
| 0.0944056 | 0.116113  | 0.118735  | 0.204254  | 0.126748  | 0.0498252 | 0.124709  |
| 0.164044  | 0.152244  | 0.155449  | 0.137238  | 0.148019  | 0.171329  | 0.152389  |
| 0.111888  | 0.105915  | 0.102418  | 0.195804  | 0.117716  | 0.115093  | 0.111888  |
| 0.142337  | 0.148893  | 0.145688  | 0.215763  | 0.150787  | 0.140006  | 0.147873  |
| 0.111116  | 0.119755  | 0.105478  | 0.200612  | 0.129516  | 0.11757   | 0.129225  |
| 0.186334  | 0.17803   | 0.178904  | 0.0995047 | 0.182838  | 0.19391   | 0.184878  |
| 0.119027  | 0.122378  | 0.117424  | 0.208188  | 0.138549  | 0.115239  | 0.131265  |
| 0.10912   | 0.110431  | 0.101107  | 0.201777  | 0.118153  | 0.107372  | 0.112617  |
| 0.106352  | 0.114365  | 0.115239  | 0.203089  | 0.12296   | 0.106352  | 0.118298  |
| 0.106498  | 0.118881  | 0.11655   | 0.205274  | 0.126603  | 0.114365  | 0.120192  |
| 0.106498  | 0.120921  | 0.115676  | 0.210519  | 0.135635  | 0.112325  | 0.129225  |
| 0.110286  | 0.122669  | 0.114219  | 0.196824  | 0.130973  | 0.116987  | 0.128059  |
| 0.112179  | 0.109703  | 0.0549242 | 0.197552  | 0.124709  | 0.11859   | 0.121212  |
| 0.186626  | 0.176282  | 0.178904  | 0.099796  | 0.180798  | 0.192745  | 0.186626  |
| 0.121212  | 0.119318  | 0.119027  | 0.204545  | 0.129662  | 0.118298  | 0.127331  |
| 0.109411  | 0.119172  | 0.106643  | 0.19391   | 0.116696  | 0.113782  | 0.112908  |
| 0.205711  | 0.199738  | 0.199738  | 0.103438  | 0.198135  | 0.217366  | 0.208333  |
| 0.115385  | 0.118153  | 0.118735  | 0.21183   | 0.132284  | 0.110723  | 0.127331  |
| 0.114656  | 0.113928  | 0.0553613 | 0.199155  | 0.128059  | 0.118153  | 0.124854  |
| 0.108829  | 0.109266  | 0.0544872 | 0.195076  | 0.122232  | 0.112617  | 0.116987  |
| 0.132576  | 0.116987  | 0.127768  | 0.208333  | 0.0737179 | 0.136072  | 0.0684732 |
| 0.181527  | 0.178467  | 0.177593  | 0.10169   | 0.180944  | 0.192599  | 0.185315  |
| 0.115239  | 0.106061  | 0.119464  | 0.211684  | 0.131847  | 0.107955  | 0.125146  |
| 0.122815  | 0.128205  | 0.125291  | 0.213141  | 0.136218  | 0.129225  | 0.134178  |
| 0.113199  | 0.111597  | 0.0524476 | 0.196824  | 0.126894  | 0.115822  | 0.121941  |
| 0.10912   | 0.109848  | 0.0579837 | 0.199738  | 0.125728  | 0.114948  | 0.120192  |
| 0.111014  | 0.111742  | 0.0525932 | 0.194056  | 0.125291  | 0.11859   | 0.123834  |
| 0.116696  | 0.100233  | 0.112471  | 0.201195  | 0.0590035 | 0.118735  | 0.0546329 |
| 0.0964452 | 0.10912   | 0.0945513 | 0.20338   | 0.124417  | 0.102273  | 0.113636  |
| 0.119172  | 0.121066  | 0.120775  | 0.208042  | 0.137821  | 0.118298  | 0.13345   |
| 0.130245  | 0.132721  | 0.127477  | 0.214161  | 0.126748  | 0.127622  | 0.12296   |
| 0.115967  | 0.119901  | 0.11961   | 0.207459  | 0.137529  | 0.113054  | 0.132284  |
| 0.119027  | 0.12704   | 0.12704   | 0.210227  | 0.136218  | 0.126894  | 0.126894  |
| 0.191725  | 0.182255  | 0.180216  | 0.103438  | 0.181818  | 0.196678  | 0.189103  |
| 0.114365  | 0.121212  | 0.113345  | 0.207314  | 0.130682  | 0.117861  | 0.125728  |
| 0.127622  | 0.110577  | 0.12398   | 0.201049  | 0.0582751 | 0.129079  | 0.0509907 |
| 0.107663  | 0.111305  | 0.0591492 | 0.199155  | 0.127185  | 0.116404  | 0.117861  |
| 0.100233  | 0.105915  | 0.097465  | 0.200175  | 0.125     | 0.104604  | 0.120338  |
| 0.109848  | 0.108829  | 0.10912   | 0.197552  | 0.123834  | 0.111888  | 0.119464  |
| 0.115822  | 0.106643  | 0.118881  | 0.205565  | 0.130973  | 0.107663  | 0.124563  |
| 0.120484  | 0.127914  | 0.12704   | 0.206439  | 0.133013  | 0.128642  | 0.128059  |
| 0.118298  | 0.119027  | 0.113199  | 0.204545  | 0.128497  | 0.118881  | 0.119755  |
| 0.102855  | 0.0980478 | 0.103875  | 0.198135  | 0.128497  | 0.105478  | 0.123834  |

|           |           |           |          |           |           |           |
|-----------|-----------|-----------|----------|-----------|-----------|-----------|
| 0.104458  | 0.094697  | 0.100233  | 0.196824 | 0.122523  | 0.101544  | 0.114656  |
| 0.105769  | 0.106789  | 0.102127  | 0.20134  | 0.116259  | 0.109266  | 0.112762  |
| 0.0995047 | 0.112762  | 0.114802  | 0.21081  | 0.129808  | 0.0872669 | 0.121941  |
| 0.128205  | 0.126894  | 0.123689  | 0.213869 | 0.143648  | 0.127331  | 0.13986   |
| 0.110577  | 0.105769  | 0.11655   | 0.207314 | 0.133013  | 0.106206  | 0.126894  |
| 0.111305  | 0.0989219 | 0.109411  | 0.195513 | 0.0603147 | 0.115676  | 0.0556527 |
| 0.109266  | 0.103875  | 0.114365  | 0.208625 | 0.129079  | 0.102273  | 0.121212  |
| 0.108246  | 0.113054  | 0.0550699 | 0.195367 | 0.126603  | 0.112325  | 0.117279  |
| 0.0885781 | 0.110577  | 0.111451  | 0.206876 | 0.126457  | 0.0474942 | 0.120629  |
| 0.112762  | 0.11553   | 0.0540501 | 0.199301 | 0.129662  | 0.119464  | 0.125     |
| 0.112471  | 0.116987  | 0.109411  | 0.206002 | 0.127622  | 0.112762  | 0.121503  |
| 0.11655   | 0.116404  | 0.113491  | 0.203963 | 0.129079  | 0.119172  | 0.124126  |
| 0.107809  | 0.118153  | 0.109703  | 0.213287 | 0.133159  | 0.112762  | 0.125291  |
| 0.100087  | 0.108683  | 0.099359  | 0.203526 | 0.125437  | 0.106206  | 0.118735  |
| 0.111888  | 0.110286  | 0.0569639 | 0.199883 | 0.125874  | 0.11451   | 0.120338  |
| 0.112179  | 0.117861  | 0.110577  | 0.19289  | 0.120629  | 0.112762  | 0.123543  |
| 0.113199  | 0.11859   | 0.109848  | 0.202069 | 0.122523  | 0.119027  | 0.116696  |
| 0.106935  | 0.114073  | 0.10271   | 0.203671 | 0.124709  | 0.110431  | 0.11655   |
| 0.112179  | 0.112617  | 0.0569639 | 0.20134  | 0.125291  | 0.117133  | 0.119172  |
| 0.116987  | 0.101107  | 0.115967  | 0.196241 | 0.050845  | 0.119901  | 0.0464744 |
| 0.101544  | 0.113636  | 0.113636  | 0.209645 | 0.131847  | 0.0907634 | 0.125728  |
| 0.115239  | 0.10169   | 0.114802  | 0.201777 | 0.0566725 | 0.117861  | 0.0476399 |
| 0.103293  | 0.117424  | 0.110723  | 0.207896 | 0.133887  | 0.11116   | 0.128934  |
| 0.102127  | 0.111305  | 0.102273  | 0.203817 | 0.126311  | 0.107372  | 0.121941  |
| 0.107663  | 0.109266  | 0.101981  | 0.197115 | 0.123106  | 0.109411  | 0.113491  |
| 0.0912005 | 0.112034  | 0.115239  | 0.208625 | 0.128205  | 0.04662   | 0.122669  |
| 0.119318  | 0.106935  | 0.116841  | 0.198281 | 0.0575466 | 0.122815  | 0.0517191 |
| 0.120775  | 0.118007  | 0.122378  | 0.208188 | 0.121066  | 0.112034  | 0.118153  |
| 0.113928  | 0.114365  | 0.110577  | 0.198135 | 0.117716  | 0.114802  | 0.110431  |
| 0.189977  | 0.183129  | 0.181964  | 0.106061 | 0.183275  | 0.199592  | 0.189977  |
| 0.159674  | 0.14933   | 0.151078  | 0.131702 | 0.150932  | 0.164918  | 0.152972  |
| 0.117133  | 0.121066  | 0.121358  | 0.203963 | 0.136655  | 0.111597  | 0.131119  |
| 0.112617  | 0.100233  | 0.112179  | 0.197698 | 0.125437  | 0.113782  | 0.116404  |
| 0.145251  | 0.145105  | 0.143648  | 0.225962 | 0.159819  | 0.142337  | 0.154283  |
| 0.118007  | 0.125437  | 0.119901  | 0.206002 | 0.132576  | 0.119464  | 0.125291  |
| 0.113199  | 0.113345  | 0.0804196 | 0.197115 | 0.132721  | 0.118153  | 0.12602   |
| 0.112471  | 0.10708   | 0.0820221 | 0.195221 | 0.122669  | 0.114802  | 0.116841  |
| 0.113928  | 0.114365  | 0.0936772 | 0.200758 | 0.126166  | 0.117133  | 0.124709  |
| 0.113636  | 0.121066  | 0.110286  | 0.203671 | 0.121503  | 0.117716  | 0.114802  |
| 0.198281  | 0.190268  | 0.18648   | 0.102418 | 0.190997  | 0.207022  | 0.196824  |
| 0.117133  | 0.110868  | 0.122815  | 0.20979  | 0.13549   | 0.110723  | 0.12704   |
| 0.119318  | 0.0891608 | 0.108683  | 0.192453 | 0.0828963 | 0.11757   | 0.0761946 |
| 0.108537  | 0.102273  | 0.0632284 | 0.195659 | 0.121358  | 0.114656  | 0.117861  |
| 0.106935  | 0.117279  | 0.117861  | 0.206585 | 0.131119  | 0.111014  | 0.120629  |

|           |           |           |           |           |          |           |
|-----------|-----------|-----------|-----------|-----------|----------|-----------|
| 0.180798  | 0.166375  | 0.170455  | 0.121358  | 0.174679  | 0.189831 | 0.181672  |
| 0.241987  | 0.232517  | 0.237179  | 0.119901  | 0.233537  | 0.253351 | 0.239948  |
| 0.118444  | 0.118881  | 0.11451   | 0.208188  | 0.131847  | 0.118153 | 0.121941  |
| 0.112617  | 0.122378  | 0.108683  | 0.204691  | 0.121358  | 0.117861 | 0.116987  |
| 0.111451  | 0.120921  | 0.116841  | 0.2044    | 0.135927  | 0.115822 | 0.132139  |
| 0.105769  | 0.117861  | 0.109703  | 0.209207  | 0.131993  | 0.108392 | 0.125291  |
| 0.109994  | 0.104895  | 0.114219  | 0.207896  | 0.129516  | 0.103875 | 0.121358  |
| 0.109557  | 0.115239  | 0.110868  | 0.200758  | 0.124709  | 0.110431 | 0.117133  |
| 0.114073  | 0.0964452 | 0.0725524 | 0.191288  | 0.0898893 | 0.117279 | 0.0893065 |
| 0.109994  | 0.103438  | 0.115676  | 0.206439  | 0.129225  | 0.104749 | 0.121649  |
| 0.11014   | 0.092803  | 0.0814394 | 0.190559  | 0.0821678 | 0.117424 | 0.0769231 |
| 0.11553   | 0.117133  | 0.109266  | 0.207314  | 0.129516  | 0.113782 | 0.121358  |
| 0.100233  | 0.110577  | 0.0983392 | 0.200175  | 0.123252  | 0.107809 | 0.120629  |
| 0.120484  | 0.117716  | 0.113636  | 0.206439  | 0.129808  | 0.119027 | 0.12398   |
| 0.119464  | 0.103875  | 0.11553   | 0.198135  | 0.0588578 | 0.120338 | 0.0539044 |
| 0.0984848 | 0.105041  | 0.104749  | 0.195221  | 0.11859   | 0.10169  | 0.11014   |
| 0.125291  | 0.125146  | 0.11553   | 0.215909  | 0.138403  | 0.123543 | 0.133741  |
| 0.119172  | 0.128642  | 0.123689  | 0.219114  | 0.144522  | 0.123252 | 0.139277  |
| 0.109411  | 0.111597  | 0.0565268 | 0.198572  | 0.126894  | 0.112908 | 0.118153  |
| 0.118007  | 0.103001  | 0.0826049 | 0.192308  | 0.133159  | 0.120921 | 0.126166  |
| 0.129371  | 0.124854  | 0.0622086 | 0.20979   | 0.138112  | 0.134324 | 0.134907  |
| 0.206731  | 0.198718  | 0.193765  | 0.121066  | 0.197698  | 0.216929 | 0.202943  |
| 0.110723  | 0.107955  | 0.10708   | 0.196678  | 0.12296   | 0.112179 | 0.115967  |
| 0.0980478 | 0.109848  | 0.101107  | 0.204983  | 0.125728  | 0.102127 | 0.118153  |
| 0.112617  | 0.120338  | 0.114802  | 0.208188  | 0.131265  | 0.116404 | 0.128351  |
| 0.113636  | 0.120192  | 0.117279  | 0.207751  | 0.132576  | 0.11014  | 0.127622  |
| 0.107517  | 0.113491  | 0.11757   | 0.206002  | 0.127622  | 0.110723 | 0.117424  |
| 0.193182  | 0.1875    | 0.18954   | 0.102564  | 0.191142  | 0.202506 | 0.195221  |
| 0.119318  | 0.101981  | 0.118007  | 0.200321  | 0.0543415 | 0.121649 | 0.050845  |
| 0.111014  | 0.107955  | 0.0546329 | 0.196387  | 0.125     | 0.118007 | 0.118298  |
| 0.119901  | 0.121503  | 0.120629  | 0.207314  | 0.131847  | 0.115822 | 0.125728  |
| 0.100379  | 0.115967  | 0.107226  | 0.209645  | 0.130099  | 0.106498 | 0.120775  |
| 0.11961   | 0.105186  | 0.11451   | 0.197407  | 0.0540501 | 0.122815 | 0.0534674 |
| 0.116404  | 0.10373   | 0.101981  | 0.192453  | 0.0863928 | 0.113199 | 0.0799825 |
| 0.11116   | 0.118007  | 0.109848  | 0.204108  | 0.124272  | 0.112617 | 0.122523  |
| 0.11116   | 0.115967  | 0.116841  | 0.206731  | 0.130099  | 0.106498 | 0.124563  |
| 0.19493   | 0.184878  | 0.186626  | 0.101981  | 0.188228  | 0.205128 | 0.191725  |
| 0.113199  | 0.0952797 | 0.109266  | 0.195659  | 0.0630828 | 0.113782 | 0.0592949 |
| 0.189103  | 0.182255  | 0.183712  | 0.103147  | 0.183858  | 0.197844 | 0.19289   |
| 0.187209  | 0.184149  | 0.179487  | 0.0962995 | 0.182255  | 0.19595  | 0.187209  |
| 0.118735  | 0.125291  | 0.120629  | 0.214889  | 0.14088   | 0.11961  | 0.133596  |
| 0.124854  | 0.127914  | 0.127331  | 0.216638  | 0.142628  | 0.118735 | 0.136801  |
| 0.103875  | 0.109557  | 0.102273  | 0.201195  | 0.119027  | 0.106498 | 0.113199  |
| 0.109848  | 0.100379  | 0.105041  | 0.196678  | 0.0681818 | 0.113928 | 0.0643939 |



|           |           |           |          |           |           |           |
|-----------|-----------|-----------|----------|-----------|-----------|-----------|
| 0.11553   | 0.100233  | 0.113636  | 0.199155 | 0.0630828 | 0.116987  | 0.0572552 |
| 0.113491  | 0.113636  | 0.0585664 | 0.198864 | 0.128059  | 0.118153  | 0.12398   |
| 0.105332  | 0.102855  | 0.111014  | 0.205274 | 0.124272  | 0.103293  | 0.116987  |
| 0.110286  | 0.104895  | 0.113636  | 0.208188 | 0.128642  | 0.103875  | 0.122523  |
| 0.120629  | 0.120192  | 0.114365  | 0.204254 | 0.126457  | 0.122378  | 0.125874  |
| 0.106498  | 0.120338  | 0.110723  | 0.211976 | 0.136801  | 0.112034  | 0.128642  |
| 0.109266  | 0.10912   | 0.0575466 | 0.19697  | 0.122669  | 0.114219  | 0.115093  |
| 0.11961   | 0.10373   | 0.114219  | 0.200321 | 0.0587121 | 0.119901  | 0.0525932 |
| 0.105769  | 0.107372  | 0.0989219 | 0.200466 | 0.114219  | 0.106061  | 0.108974  |
| 0.126894  | 0.111597  | 0.122669  | 0.202652 | 0.0592949 | 0.130099  | 0.0496795 |
| 0.114948  | 0.117716  | 0.115385  | 0.205274 | 0.135052  | 0.11116   | 0.128059  |
| 0.130536  | 0.116987  | 0.128351  | 0.20542  | 0.0576923 | 0.133741  | 0.0486597 |
| 0.254079  | 0.244901  | 0.246358  | 0.125583 | 0.246212  | 0.264569  | 0.251457  |
| 0.105769  | 0.126311  | 0.126311  | 0.220862 | 0.141608  | 0.0556527 | 0.13345   |
| 0.0627914 | 0.130536  | 0.121212  | 0.211101 | 0.14292   | 0.103875  | 0.131265  |
| 0.214744  | 0.206148  | 0.203234  | 0.104021 | 0.205711  | 0.226399  | 0.211247  |
| 0.117279  | 0.125874  | 0.120047  | 0.208188 | 0.140589  | 0.116987  | 0.135927  |
| 0.225379  | 0.217366  | 0.219697  | 0.112908 | 0.217803  | 0.237325  | 0.225087  |
| 0.0996503 | 0.117861  | 0.122815  | 0.211247 | 0.13345   | 0.0527389 | 0.126166  |
| 0.123689  | 0.123834  | 0.0576923 | 0.209062 | 0.138258  | 0.130682  | 0.13039   |
| 0.10708   | 0.116841  | 0.111888  | 0.203234 | 0.125728  | 0.106498  | 0.118735  |
| 0.113199  | 0.124126  | 0.113345  | 0.212267 | 0.135635  | 0.116113  | 0.128351  |
| 0.199155  | 0.191725  | 0.190559  | 0.104167 | 0.193036  | 0.20877   | 0.200029  |
| 0.129225  | 0.111014  | 0.12296   | 0.207896 | 0.0563811 | 0.130973  | 0.048514  |
| 0.116696  | 0.102273  | 0.115093  | 0.198864 | 0.0607517 | 0.117861  | 0.0552156 |
| 0.222902  | 0.212558  | 0.214598  | 0.114802 | 0.213578  | 0.231935  | 0.222611  |
| 0.113199  | 0.107517  | 0.114802  | 0.205274 | 0.130099  | 0.105624  | 0.125146  |
| 0.196096  | 0.185752  | 0.187791  | 0.103147 | 0.187937  | 0.202797  | 0.19493   |
| 0.113345  | 0.105915  | 0.11961   | 0.207168 | 0.129953  | 0.110723  | 0.127914  |
| 0.113928  | 0.114948  | 0.0572552 | 0.199883 | 0.126748  | 0.117716  | 0.12296   |
| 0.109703  | 0.117133  | 0.108392  | 0.210519 | 0.131556  | 0.116404  | 0.124563  |
| 0.119027  | 0.124126  | 0.122378  | 0.216346 | 0.144668  | 0.121649  | 0.135927  |
| 0.115093  | 0.109703  | 0.107372  | 0.199009 | 0.119464  | 0.115967  | 0.119172  |
| 0.152681  | 0.146125  | 0.144959  | 0.137238 | 0.156469  | 0.160256  | 0.162005  |
| 0.113054  | 0.0980478 | 0.109411  | 0.193473 | 0.0539044 | 0.118298  | 0.0501166 |
| 0.115676  | 0.11757   | 0.116404  | 0.208042 | 0.132867  | 0.108392  | 0.125874  |
| 0.11014   | 0.116696  | 0.114948  | 0.201923 | 0.131119  | 0.114802  | 0.129371  |
| 0.116841  | 0.126603  | 0.121941  | 0.205128 | 0.128205  | 0.118881  | 0.121795  |
| 0.191288  | 0.185606  | 0.18211   | 0.099796 | 0.185752  | 0.201777  | 0.190705  |
| 0.107226  | 0.108829  | 0.0525932 | 0.199009 | 0.12704   | 0.115967  | 0.119755  |
| 0.109994  | 0.121795  | 0.110431  | 0.199446 | 0.132139  | 0.115822  | 0.133013  |
| 0.0999417 | 0.112617  | 0.111742  | 0.210664 | 0.128205  | 0.0891608 | 0.124417  |
| 0.115822  | 0.106061  | 0.120629  | 0.209062 | 0.130973  | 0.107955  | 0.124563  |
| 0.119172  | 0.118444  | 0.057838  | 0.202506 | 0.129953  | 0.124417  | 0.125583  |

|          |           |           |          |           |          |           |
|----------|-----------|-----------|----------|-----------|----------|-----------|
| 0.249563 | 0.24155   | 0.242133  | 0.131265 | 0.24257   | 0.263258 | 0.248689  |
| 0.105478 | 0.113782  | 0.103293  | 0.207459 | 0.129079  | 0.109557 | 0.123252  |
| 0.113636 | 0.110286  | 0.0887238 | 0.199301 | 0.127331  | 0.11655  | 0.123543  |
| 0.176282 | 0.164773  | 0.171766  | 0.143357 | 0.17366   | 0.180653 | 0.174534  |
| 0.184732 | 0.175554  | 0.175262  | 0.109266 | 0.178322  | 0.192308 | 0.184441  |
| 0.119172 | 0.116987  | 0.112034  | 0.205711 | 0.128497  | 0.119755 | 0.126166  |
| 0.11553  | 0.0996503 | 0.114219  | 0.200612 | 0.0592949 | 0.120775 | 0.0537587 |
| 0.104458 | 0.112762  | 0.109848  | 0.206439 | 0.131847  | 0.10912  | 0.121649  |
| 0.143357 | 0.124272  | 0.137092  | 0.212121 | 0.0678904 | 0.147727 | 0.0594406 |
| 0.115676 | 0.114948  | 0.113491  | 0.203089 | 0.128205  | 0.119464 | 0.122378  |
| 0.119318 | 0.118007  | 0.115385  | 0.207314 | 0.130682  | 0.117861 | 0.125146  |
| 0.120629 | 0.110868  | 0.123689  | 0.212704 | 0.137238  | 0.111597 | 0.129953  |
| 0.117716 | 0.0989219 | 0.114948  | 0.195221 | 0.0547786 | 0.11859  | 0.0477855 |
| 0.127185 | 0.109557  | 0.122669  | 0.201777 | 0.0566725 | 0.128059 | 0.0470571 |
| 0.112762 | 0.106498  | 0.107663  | 0.192599 | 0.123252  | 0.1081   | 0.122669  |
| 0.114073 | 0.122669  | 0.117424  | 0.214015 | 0.139132  | 0.11757  | 0.135344  |
| 0.12704  | 0.134178  | 0.128934  | 0.222028 | 0.15035   | 0.130245 | 0.145105  |
| 0.109703 | 0.119464  | 0.1081    | 0.207896 | 0.13039   | 0.115822 | 0.126894  |
| 0.121212 | 0.128934  | 0.122815  | 0.220862 | 0.14627   | 0.123543 | 0.136946  |
| 0.121212 | 0.114656  | 0.126894  | 0.2162   | 0.138695  | 0.114219 | 0.131119  |
| 0.203817 | 0.195513  | 0.196096  | 0.108829 | 0.195659  | 0.212267 | 0.200903  |
| 0.120047 | 0.119901  | 0.105624  | 0.212995 | 0.138403  | 0.121212 | 0.136655  |
| 0.188811 | 0.178759  | 0.179924  | 0.102273 | 0.181235  | 0.196678 | 0.188228  |
| 0.103438 | 0.116987  | 0.112617  | 0.205128 | 0.125     | 0.102564 | 0.120629  |
| 0.121795 | 0.119901  | 0.0566725 | 0.202214 | 0.130828  | 0.128497 | 0.128497  |
| 0.120338 | 0.120484  | 0.116404  | 0.203963 | 0.13345   | 0.122669 | 0.129371  |
| 0.11116  | 0.115093  | 0.111888  | 0.200321 | 0.132139  | 0.116113 | 0.126311  |
| 0.120338 | 0.103875  | 0.11757   | 0.196096 | 0.0504079 | 0.125291 | 0.0437063 |
| 0.121795 | 0.104458  | 0.11553   | 0.201049 | 0.0498252 | 0.120338 | 0.0422494 |
| 0.115385 | 0.114365  | 0.0546329 | 0.195804 | 0.126457  | 0.11859  | 0.127331  |
| 0.11553  | 0.118298  | 0.113636  | 0.206731 | 0.128642  | 0.110868 | 0.122523  |
| 0.122523 | 0.122086  | 0.119464  | 0.208188 | 0.131265  | 0.121066 | 0.128351  |
| 0.127622 | 0.119318  | 0.128934  | 0.206002 | 0.142483  | 0.118298 | 0.140152  |
| 0.24796  | 0.236742  | 0.237617  | 0.125583 | 0.238636  | 0.258741 | 0.243298  |
| 0.117424 | 0.113199  | 0.0537587 | 0.199301 | 0.128788  | 0.119172 | 0.124417  |
| 0.18109  | 0.173368  | 0.169872  | 0.100962 | 0.17701   | 0.189248 | 0.18109   |
| 0.187937 | 0.174971  | 0.178759  | 0.104312 | 0.18007   | 0.194347 | 0.185897  |
| 0.114948 | 0.11655   | 0.111014  | 0.19799  | 0.131847  | 0.118153 | 0.130973  |
| 0.104167 | 0.108392  | 0.0976107 | 0.204691 | 0.125728  | 0.106206 | 0.118153  |
| 0.120192 | 0.119464  | 0.0550699 | 0.205857 | 0.133304  | 0.128934 | 0.12602   |
| 0.113199 | 0.0999417 | 0.111014  | 0.196533 | 0.0616259 | 0.11757  | 0.0552156 |
| 0.11451  | 0.10912   | 0.0913462 | 0.19289  | 0.123543  | 0.118007 | 0.125583  |
| 0.110431 | 0.106789  | 0.118444  | 0.207751 | 0.131993  | 0.106061 | 0.125583  |
| 0.119318 | 0.10169   | 0.112762  | 0.195367 | 0.0837704 | 0.122232 | 0.0744464 |

|           |           |           |          |           |           |           |
|-----------|-----------|-----------|----------|-----------|-----------|-----------|
| 0.132139  | 0.113636  | 0.125     | 0.209936 | 0.0592949 | 0.133013  | 0.050845  |
| 0.112179  | 0.112908  | 0.0525932 | 0.199592 | 0.124417  | 0.117424  | 0.124126  |
| 0.125     | 0.111451  | 0.122232  | 0.205128 | 0.0576923 | 0.127331  | 0.0480769 |
| 0.0520105 | 0.119755  | 0.115385  | 0.206731 | 0.133013  | 0.0942599 | 0.125437  |
| 0.125437  | 0.123834  | 0.121795  | 0.211684 | 0.137966  | 0.122232  | 0.13243   |
| 0.106643  | 0.123689  | 0.114073  | 0.210082 | 0.134615  | 0.113345  | 0.124709  |
| 0.126603  | 0.118298  | 0.129662  | 0.21926  | 0.141754  | 0.119901  | 0.137092  |
| 0.11859   | 0.124272  | 0.110868  | 0.206585 | 0.132576  | 0.118298  | 0.124417  |
| 0.114802  | 0.109703  | 0.055507  | 0.195513 | 0.126457  | 0.118298  | 0.121795  |
| 0.127622  | 0.13243   | 0.127477  | 0.212704 | 0.138403  | 0.13141   | 0.134033  |
| 0.181381  | 0.175117  | 0.173368  | 0.105915 | 0.176428  | 0.1875    | 0.182838  |
| 0.131993  | 0.117279  | 0.129808  | 0.207168 | 0.0608974 | 0.13549   | 0.0521562 |
| 0.119755  | 0.10271   | 0.116113  | 0.197261 | 0.0501166 | 0.125583  | 0.0463287 |
| 0.116113  | 0.11859   | 0.119172  | 0.207022 | 0.137966  | 0.116696  | 0.132139  |
| 0.108974  | 0.114073  | 0.108829  | 0.20134  | 0.127622  | 0.109557  | 0.122669  |
| 0.109411  | 0.119172  | 0.111014  | 0.207605 | 0.132139  | 0.113491  | 0.126894  |
| 0.109557  | 0.122232  | 0.118153  | 0.213578 | 0.138112  | 0.117716  | 0.134615  |
| 0.190705  | 0.180944  | 0.179779  | 0.101544 | 0.183129  | 0.199155  | 0.189248  |
| 0.120484  | 0.0973193 | 0.111888  | 0.188666 | 0.0756119 | 0.121066  | 0.0729895 |
| 0.112762  | 0.104167  | 0.103584  | 0.17803  | 0.109848  | 0.109848  | 0.11014   |
| 0.122378  | 0.106498  | 0.119027  | 0.202214 | 0.0504079 | 0.124417  | 0.0437063 |
| 0.190705  | 0.184732  | 0.18211   | 0.102418 | 0.182547  | 0.198864  | 0.186043  |
| 0.099359  | 0.107663  | 0.0980478 | 0.198135 | 0.120047  | 0.106061  | 0.120338  |
| 0.119318  | 0.110431  | 0.123834  | 0.214598 | 0.13884   | 0.110286  | 0.128642  |
| 0.123106  | 0.102564  | 0.115967  | 0.201777 | 0.0523019 | 0.12602   | 0.0467657 |
| 0.115093  | 0.114365  | 0.109411  | 0.205711 | 0.127331  | 0.115676  | 0.120921  |
| 0.185023  | 0.176428  | 0.176719  | 0.102564 | 0.178613  | 0.192599  | 0.179779  |
| 0.114219  | 0.107372  | 0.120192  | 0.206585 | 0.129371  | 0.1081    | 0.122086  |
| 0.11014   | 0.112325  | 0.10912   | 0.199009 | 0.118298  | 0.113636  | 0.115385  |
| 0.106352  | 0.110577  | 0.0965909 | 0.192308 | 0.120629  | 0.111014  | 0.120338  |
| 0.120629  | 0.113782  | 0.107663  | 0.179487 | 0.11451   | 0.122086  | 0.120047  |
| 0.112325  | 0.120047  | 0.116841  | 0.209353 | 0.132721  | 0.10912   | 0.127185  |
| 0.122232  | 0.113345  | 0.128497  | 0.214307 | 0.139132  | 0.11553   | 0.132721  |
| 0.112908  | 0.109266  | 0.0559441 | 0.200029 | 0.12602   | 0.117861  | 0.118735  |
| 0.116696  | 0.119464  | 0.122086  | 0.211101 | 0.123397  | 0.11116   | 0.118735  |
| 0.143357  | 0.142628  | 0.138258  | 0.216783 | 0.148019  | 0.145105  | 0.144231  |
| 0.233683  | 0.224796  | 0.225087  | 0.116259 | 0.224942  | 0.243881  | 0.231643  |
| 0.122378  | 0.129225  | 0.11553   | 0.208916 | 0.134615  | 0.124126  | 0.129953  |
| 0.113928  | 0.122523  | 0.116987  | 0.207751 | 0.132867  | 0.109848  | 0.128205  |
| 0.120775  | 0.099359  | 0.110723  | 0.191871 | 0.0572552 | 0.119318  | 0.0523019 |
| 0.114219  | 0.121941  | 0.118735  | 0.196387 | 0.132867  | 0.121795  | 0.129662  |
| 0.109703  | 0.100524  | 0.111597  | 0.201486 | 0.121649  | 0.110868  | 0.11553   |
| 0.110286  | 0.116259  | 0.116841  | 0.203526 | 0.127768  | 0.112034  | 0.118735  |
| 0.122378  | 0.103001  | 0.113782  | 0.198718 | 0.0568182 | 0.123543  | 0.0530303 |

|           |          |           |          |           |           |           |
|-----------|----------|-----------|----------|-----------|-----------|-----------|
| 0.120775  | 0.110723 | 0.123543  | 0.209645 | 0.135052  | 0.111742  | 0.129225  |
| 0.109994  | 0.111597 | 0.113636  | 0.201486 | 0.129516  | 0.112325  | 0.121358  |
| 0.234848  | 0.223631 | 0.227127  | 0.117716 | 0.227273  | 0.243881  | 0.233392  |
| 0.101544  | 0.106061 | 0.0981935 | 0.198864 | 0.119901  | 0.104458  | 0.114073  |
| 0.0898893 | 0.105186 | 0.107517  | 0.201486 | 0.122523  | 0.0473485 | 0.114948  |
| 0.111305  | 0.107955 | 0.050845  | 0.197552 | 0.123252  | 0.11859   | 0.117133  |
| 0.127768  | 0.129079 | 0.122086  | 0.21285  | 0.135052  | 0.128934  | 0.129225  |
| 0.124272  | 0.134324 | 0.11859   | 0.214598 | 0.146707  | 0.131265  | 0.137383  |
| 0.11961   | 0.111014 | 0.108974  | 0.194784 | 0.119318  | 0.124854  | 0.114656  |
| 0.119318  | 0.104312 | 0.115385  | 0.19391  | 0.0496795 | 0.121649  | 0.0447261 |
| 0.116259  | 0.112908 | 0.106789  | 0.200466 | 0.122378  | 0.11451   | 0.117424  |
| 0.225524  | 0.218386 | 0.216638  | 0.117133 | 0.219114  | 0.239219  | 0.22465   |
| 0.123252  | 0.107663 | 0.118444  | 0.202506 | 0.0472028 | 0.123834  | 0.0413753 |
| 0.114948  | 0.107517 | 0.122378  | 0.210519 | 0.13447   | 0.107663  | 0.125146  |
| 0.106206  | 0.109848 | 0.109266  | 0.200029 | 0.127477  | 0.113491  | 0.122232  |
| 0.11859   | 0.125437 | 0.118153  | 0.208333 | 0.130828  | 0.121503  | 0.122378  |
| 0.0984848 | 0.12398  | 0.126603  | 0.214452 | 0.138986  | 0.0562354 | 0.128788  |
| 0.115385  | 0.113491 | 0.0563811 | 0.203089 | 0.127331  | 0.119755  | 0.121212  |
| 0.11859   | 0.112034 | 0.125728  | 0.20979  | 0.136364  | 0.110723  | 0.130245  |
| 0.12398   | 0.115967 | 0.129079  | 0.218094 | 0.13884   | 0.115239  | 0.13243   |
| 0.112325  | 0.106643 | 0.120338  | 0.208188 | 0.131265  | 0.105332  | 0.125728  |
| 0.113928  | 0.112034 | 0.0540501 | 0.199883 | 0.127622  | 0.117716  | 0.121503  |
| 0.121795  | 0.122815 | 0.122523  | 0.211247 | 0.135198  | 0.117716  | 0.129662  |
| 0.123397  | 0.127331 | 0.12704   | 0.219843 | 0.139714  | 0.121649  | 0.131847  |
| 0.122815  | 0.124417 | 0.123834  | 0.214598 | 0.140589  | 0.124563  | 0.135344  |
| 0.127477  | 0.128788 | 0.126457  | 0.214307 | 0.144376  | 0.122232  | 0.139714  |
| 0.122086  | 0.127185 | 0.125437  | 0.2162   | 0.139277  | 0.116259  | 0.131119  |
| 0.107517  | 0.108246 | 0.092803  | 0.201632 | 0.126748  | 0.110723  | 0.121795  |
| 0.119318  | 0.129079 | 0.131702  | 0.223048 | 0.144668  | 0.106498  | 0.136801  |
| 0.135198  | 0.128351 | 0.120484  | 0.219988 | 0.142191  | 0.134907  | 0.134324  |
| 0.203671  | 0.190705 | 0.19391   | 0.102564 | 0.194056  | 0.212413  | 0.199301  |
| 0.122378  | 0.124272 | 0.112908  | 0.202506 | 0.128788  | 0.125874  | 0.123543  |
| 0.0932401 | 0.110577 | 0.114656  | 0.210373 | 0.131993  | 0.0506993 | 0.121795  |
| 0.120484  | 0.116841 | 0.0539044 | 0.19391  | 0.129225  | 0.124272  | 0.127477  |
| 0.219697  | 0.210227 | 0.209062  | 0.118298 | 0.214452  | 0.229604  | 0.217657  |
| 0.208625  | 0.19799  | 0.200321  | 0.109557 | 0.203671  | 0.216492  | 0.208916  |
| 0.121941  | 0.116259 | 0.126748  | 0.213432 | 0.138549  | 0.116696  | 0.133596  |
| 0.246795  | 0.237617 | 0.238491  | 0.123834 | 0.236888  | 0.255536  | 0.241259  |
| 0.109557  | 0.107663 | 0.0884324 | 0.202797 | 0.127622  | 0.111597  | 0.125     |
| 0.135198  | 0.13039  | 0.124563  | 0.217366 | 0.147727  | 0.136946  | 0.141608  |
| 0.105186  | 0.111451 | 0.100379  | 0.203089 | 0.127331  | 0.107809  | 0.120921  |
| 0.119901  | 0.122669 | 0.121503  | 0.21285  | 0.133596  | 0.115822  | 0.128351  |
| 0.186772  | 0.177885 | 0.177885  | 0.10169  | 0.179196  | 0.195513  | 0.184732  |
| 0.112034  | 0.124417 | 0.119464  | 0.202652 | 0.135052  | 0.121066  | 0.127768  |

|           |           |           |           |           |           |           |
|-----------|-----------|-----------|-----------|-----------|-----------|-----------|
| 0.191288  | 0.181527  | 0.180944  | 0.0995047 | 0.184586  | 0.20236   | 0.190414  |
| 0.109411  | 0.112471  | 0.108974  | 0.206439  | 0.128351  | 0.118153  | 0.123397  |
| 0.115239  | 0.0926573 | 0.110723  | 0.18546   | 0.106206  | 0.110868  | 0.105332  |
| 0.120192  | 0.122086  | 0.111597  | 0.204983  | 0.131556  | 0.120484  | 0.128642  |
| 0.116987  | 0.101107  | 0.101107  | 0.186043  | 0.110868  | 0.113199  | 0.105332  |
| 0.107226  | 0.105332  | 0.0540501 | 0.194639  | 0.119755  | 0.115385  | 0.11451   |
| 0.106352  | 0.116987  | 0.105041  | 0.200175  | 0.119755  | 0.113928  | 0.111597  |
| 0.0981935 | 0.109411  | 0.0962995 | 0.19493   | 0.122669  | 0.105186  | 0.118007  |
| 0.116404  | 0.0987762 | 0.112471  | 0.198572  | 0.0543415 | 0.118735  | 0.0514277 |
| 0.108392  | 0.117861  | 0.115822  | 0.208916  | 0.13141   | 0.0952797 | 0.12296   |
| 0.108683  | 0.112617  | 0.105624  | 0.203963  | 0.123252  | 0.11014   | 0.119172  |
| 0.103584  | 0.111597  | 0.099359  | 0.198864  | 0.127185  | 0.106498  | 0.120192  |
| 0.11655   | 0.114656  | 0.102127  | 0.199592  | 0.132576  | 0.120629  | 0.126457  |
| 0.127914  | 0.112325  | 0.123689  | 0.203671  | 0.0585664 | 0.130828  | 0.0518648 |
| 0.113199  | 0.116259  | 0.112179  | 0.200321  | 0.130682  | 0.112617  | 0.125146  |
| 0.115385  | 0.116696  | 0.107372  | 0.20338   | 0.125291  | 0.113054  | 0.120921  |
| 0.111451  | 0.10373   | 0.0530303 | 0.19595   | 0.121358  | 0.111742  | 0.116696  |
| 0.113491  | 0.105478  | 0.11859   | 0.201486  | 0.123397  | 0.111742  | 0.119318  |
| 0.114073  | 0.115967  | 0.115967  | 0.207314  | 0.130973  | 0.107372  | 0.126894  |
| 0.109848  | 0.121941  | 0.116696  | 0.210373  | 0.135198  | 0.116841  | 0.131119  |
| 0.115676  | 0.11961   | 0.114073  | 0.20338   | 0.132867  | 0.111014  | 0.129079  |
| 0.119901  | 0.100233  | 0.116259  | 0.19799   | 0.0546329 | 0.123397  | 0.053176  |
| 0.128497  | 0.112034  | 0.123106  | 0.207751  | 0.0591492 | 0.131993  | 0.0506993 |
| 0.136072  | 0.11757   | 0.13039   | 0.211538  | 0.0597319 | 0.140152  | 0.0530303 |
| 0.103875  | 0.0996503 | 0.105186  | 0.200903  | 0.120775  | 0.103001  | 0.114948  |
| 0.11757   | 0.112471  | 0.0574009 | 0.200903  | 0.126311  | 0.11757   | 0.121066  |
| 0.100816  | 0.110577  | 0.112617  | 0.198718  | 0.121503  | 0.107809  | 0.112179  |
| 0.124126  | 0.129808  | 0.128351  | 0.215909  | 0.141317  | 0.121503  | 0.134033  |
| 0.105915  | 0.113054  | 0.105186  | 0.207605  | 0.128059  | 0.109994  | 0.121358  |
| 0.127185  | 0.131702  | 0.133159  | 0.225087  | 0.153118  | 0.130099  | 0.143794  |
| 0.13039   | 0.128497  | 0.0658508 | 0.211101  | 0.143211  | 0.13884   | 0.137675  |
| 0.123834  | 0.12398   | 0.118153  | 0.206876  | 0.127622  | 0.123543  | 0.122669  |
| 0.114073  | 0.111597  | 0.100524  | 0.200903  | 0.120484  | 0.110577  | 0.113199  |
| 0.103147  | 0.111742  | 0.109411  | 0.199301  | 0.120921  | 0.10373   | 0.11451   |
| 0.122669  | 0.12602   | 0.122232  | 0.210664  | 0.141026  | 0.122086  | 0.136364  |
| 0.205857  | 0.195513  | 0.197261  | 0.112034  | 0.196241  | 0.214015  | 0.202943  |
| 0.10912   | 0.114802  | 0.110723  | 0.202069  | 0.12602   | 0.111742  | 0.123106  |
| 0.113345  | 0.11961   | 0.110286  | 0.205128  | 0.129079  | 0.115385  | 0.126166  |
| 0.112617  | 0.118298  | 0.117133  | 0.211101  | 0.13039   | 0.10912   | 0.124854  |
| 0.116841  | 0.11553   | 0.117861  | 0.205711  | 0.134324  | 0.115385  | 0.125874  |
| 0.116113  | 0.119755  | 0.117133  | 0.205857  | 0.137092  | 0.118735  | 0.133596  |
| 0.122232  | 0.118881  | 0.123543  | 0.208479  | 0.122815  | 0.113782  | 0.116987  |
| 0.127622  | 0.121066  | 0.123397  | 0.210082  | 0.120629  | 0.114219  | 0.115093  |
| 0.119027  | 0.117716  | 0.114802  | 0.205565  | 0.130682  | 0.11757   | 0.124854  |

|          |           |           |          |           |           |           |
|----------|-----------|-----------|----------|-----------|-----------|-----------|
| 0.100379 | 0.112179  | 0.112471  | 0.210227 | 0.12602   | 0.0925117 | 0.123397  |
| 0.122232 | 0.123834  | 0.124126  | 0.21285  | 0.136801  | 0.113491  | 0.130099  |
| 0.111451 | 0.11655   | 0.108392  | 0.207314 | 0.13039   | 0.109703  | 0.125437  |
| 0.111305 | 0.123106  | 0.111742  | 0.206876 | 0.13141   | 0.113636  | 0.125583  |
| 0.170892 | 0.169289  | 0.167832  | 0.176428 | 0.172057  | 0.172931  | 0.172348  |
| 0.118735 | 0.102855  | 0.111305  | 0.197115 | 0.0613345 | 0.120775  | 0.053176  |
| 0.119464 | 0.127185  | 0.121649  | 0.200466 | 0.135198  | 0.116259  | 0.133159  |
| 0.112617 | 0.124709  | 0.111597  | 0.216346 | 0.142628  | 0.113199  | 0.136801  |
| 0.116841 | 0.104749  | 0.116404  | 0.202214 | 0.122086  | 0.115093  | 0.115676  |
| 0.112179 | 0.109994  | 0.103001  | 0.200175 | 0.116841  | 0.105769  | 0.112471  |
| 0.102273 | 0.11116   | 0.10271   | 0.201923 | 0.122669  | 0.105186  | 0.113636  |
| 0.113636 | 0.113199  | 0.105915  | 0.207459 | 0.122669  | 0.11014   | 0.117716  |
| 0.118298 | 0.122523  | 0.118735  | 0.210664 | 0.139277  | 0.111888  | 0.130828  |
| 0.113054 | 0.099796  | 0.105915  | 0.193765 | 0.0958625 | 0.116841  | 0.0891608 |
| 0.119318 | 0.123252  | 0.120047  | 0.216055 | 0.141463  | 0.124272  | 0.135052  |
| 0.106935 | 0.100379  | 0.108537  | 0.199592 | 0.122086  | 0.102855  | 0.115385  |
| 0.109411 | 0.117424  | 0.113345  | 0.203526 | 0.132721  | 0.110868  | 0.129225  |
| 0.124709 | 0.13039   | 0.122523  | 0.222028 | 0.143939  | 0.122086  | 0.137238  |
| 0.113636 | 0.118735  | 0.10912   | 0.211538 | 0.135781  | 0.107809  | 0.130536  |
| 0.118007 | 0.123397  | 0.117861  | 0.209499 | 0.130828  | 0.11655   | 0.125583  |
| 0.10373  | 0.111742  | 0.103001  | 0.208042 | 0.133159  | 0.100524  | 0.128497  |
| 0.111305 | 0.116987  | 0.10708   | 0.206876 | 0.132867  | 0.10373   | 0.127622  |
| 0.104895 | 0.112617  | 0.0983392 | 0.200758 | 0.126748  | 0.106643  | 0.120047  |
| 0.11757  | 0.122086  | 0.110723  | 0.213432 | 0.133013  | 0.119318  | 0.13039   |
| 0.104749 | 0.113054  | 0.101981  | 0.206148 | 0.132139  | 0.0977564 | 0.123397  |
| 0.141171 | 0.099359  | 0.13986   | 0.218094 | 0.148747  | 0.135344  | 0.139423  |
| 0.129516 | 0.0882867 | 0.126457  | 0.207314 | 0.131847  | 0.125437  | 0.129516  |
| 0.109411 | 0.111014  | 0.104312  | 0.204108 | 0.126311  | 0.103293  | 0.120192  |
| 0.13549  | 0.131265  | 0.134178  | 0.221737 | 0.144814  | 0.127914  | 0.13549   |
| 0.117133 | 0.123106  | 0.116696  | 0.202214 | 0.13141   | 0.120338  | 0.126457  |
| 0.130245 | 0.123106  | 0.127185  | 0.215909 | 0.145105  | 0.130828  | 0.141026  |
| 0.109848 | 0.116987  | 0.105624  | 0.208333 | 0.128205  | 0.111305  | 0.120921  |
| 0.14088  | 0.126457  | 0.139277  | 0.215472 | 0.150204  | 0.133013  | 0.140589  |
| 0.12398  | 0.127331  | 0.126457  | 0.209353 | 0.143211  | 0.119318  | 0.137675  |
| 0.127768 | 0.124709  | 0.130828  | 0.214015 | 0.152535  | 0.128351  | 0.147582  |
| 0.115822 | 0.117133  | 0.11655   | 0.216638 | 0.137966  | 0.116113  | 0.131265  |
| 0.109557 | 0.11116   | 0.10271   | 0.208042 | 0.128497  | 0.102855  | 0.126457  |
| 0.107955 | 0.110723  | 0.100816  | 0.204691 | 0.130973  | 0.106789  | 0.124272  |
| 0.112179 | 0.118153  | 0.11553   | 0.209207 | 0.13141   | 0.106352  | 0.123834  |
| 0.112762 | 0.116696  | 0.112325  | 0.2162   | 0.135198  | 0.0990676 | 0.126166  |
| 0.120775 | 0.129662  | 0.118007  | 0.222756 | 0.140589  | 0.123397  | 0.134761  |
| 0.120484 | 0.0847902 | 0.115093  | 0.200903 | 0.13447   | 0.122523  | 0.130973  |
| 0.106789 | 0.108683  | 0.107517  | 0.205857 | 0.129225  | 0.100087  | 0.122815  |
| 0.109557 | 0.110577  | 0.10271   | 0.203963 | 0.132284  | 0.108392  | 0.123252  |

|          |          |           |          |          |          |          |
|----------|----------|-----------|----------|----------|----------|----------|
| 0.116987 | 0.11859  | 0.109557  | 0.207605 | 0.135344 | 0.120192 | 0.130682 |
| 0.110286 | 0.1081   | 0.10373   | 0.203526 | 0.124272 | 0.110286 | 0.119901 |
| 0.118007 | 0.119027 | 0.109703  | 0.212121 | 0.140443 | 0.113928 | 0.130536 |
| 0.102564 | 0.113199 | 0.103875  | 0.203671 | 0.12704  | 0.108392 | 0.117424 |
| 0.119318 | 0.110431 | 0.111305  | 0.19391  | 0.114365 | 0.124563 | 0.111451 |
| 0.11553  | 0.109557 | 0.104021  | 0.204983 | 0.123106 | 0.109703 | 0.114948 |
| 0.109411 | 0.108392 | 0.0903263 | 0.199446 | 0.124563 | 0.110286 | 0.116987 |
| 0.110286 | 0.111597 | 0.102273  | 0.202943 | 0.128934 | 0.111451 | 0.123106 |
| 0.115385 | 0.107372 | 0.107663  | 0.194056 | 0.117716 | 0.11859  | 0.112762 |
| 0.113199 | 0.11014  | 0.105478  | 0.204108 | 0.11961  | 0.112325 | 0.114656 |
| 0.122815 | 0.113345 | 0.121795  | 0.200612 | 0.108246 | 0.122523 | 0.107955 |
| 0.11116  | 0.103147 | 0.101981  | 0.191871 | 0.111451 | 0.115822 | 0.105041 |
| 0.127914 | 0.120484 | 0.123397  | 0.216492 | 0.132576 | 0.123252 | 0.124709 |

| TDr_1818 | TDr_1825  | TDr_1826  | TDr_1827  | TDr_1828 | TDr_1829  | TDr_1832 |
|----------|-----------|-----------|-----------|----------|-----------|----------|
| 0.117861 | 0.115822  | 0.110723  | 0.11655   | 0.125291 | 0.112179  | 0.114073 |
| 0.118007 | 0.104895  | 0.115239  | 0.122523  | 0.129516 | 0.104167  | 0.123543 |
| 0.111888 | 0.100816  | 0.113491  | 0.119027  | 0.125728 | 0.0971737 | 0.120338 |
| 0.119755 | 0.105769  | 0.116113  | 0.116404  | 0.124563 | 0.0878497 | 0.119172 |
| 0.132576 | 0.13549   | 0.128642  | 0.129225  | 0.129225 | 0.131265  | 0.127914 |
| 0.125    | 0.124709  | 0.126311  | 0.129516  | 0.134178 | 0.124272  | 0.129371 |
| 0.126311 | 0.123397  | 0.106061  | 0.118881  | 0.126748 | 0.121503  | 0.111742 |
| 0.121358 | 0.105041  | 0.115093  | 0.115385  | 0.117716 | 0.100233  | 0.117861 |
| 0.109266 | 0.105478  | 0.104749  | 0.110868  | 0.11757  | 0.0971737 | 0.108392 |
| 0.116404 | 0.0942599 | 0.120047  | 0.121212  | 0.121503 | 0.112762  | 0.118153 |
| 0.119755 | 0.107226  | 0.105041  | 0.10912   | 0.128351 | 0.115239  | 0.112762 |
| 0.112034 | 0.111742  | 0.105478  | 0.112471  | 0.115385 | 0.0996503 | 0.109703 |
| 0.111742 | 0.104167  | 0.108974  | 0.112471  | 0.115967 | 0.105478  | 0.112908 |
| 0.136946 | 0.126748  | 0.143211  | 0.127477  | 0.146125 | 0.120192  | 0.137821 |
| 0.13243  | 0.0581294 | 0.130828  | 0.131702  | 0.127331 | 0.124417  | 0.133887 |
| 0.112762 | 0.111305  | 0.0995047 | 0.10708   | 0.118153 | 0.116404  | 0.117133 |
| 0.11553  | 0.106789  | 0.102273  | 0.106061  | 0.112471 | 0.108392  | 0.105624 |
| 0.149184 | 0.142191  | 0.144959  | 0.148164  | 0.157488 | 0.135635  | 0.13986  |
| 0.112471 | 0.104895  | 0.109411  | 0.115239  | 0.119901 | 0.0989219 | 0.119755 |
| 0.205711 | 0.18007   | 0.209645  | 0.196533  | 0.206439 | 0.191579  | 0.207459 |
| 0.128059 | 0.116696  | 0.113928  | 0.128788  | 0.134324 | 0.121795  | 0.125437 |
| 0.129953 | 0.114802  | 0.114656  | 0.129516  | 0.129516 | 0.112325  | 0.121503 |
| 0.116113 | 0.108537  | 0.101107  | 0.0917832 | 0.118007 | 0.102273  | 0.114073 |
| 0.121212 | 0.129079  | 0.0977564 | 0.109703  | 0.12398  | 0.123397  | 0.113636 |
| 0.11553  | 0.0995047 | 0.101107  | 0.100233  | 0.112471 | 0.100524  | 0.109703 |
| 0.127185 | 0.124854  | 0.120629  | 0.133159  | 0.137529 | 0.126166  | 0.13039  |
| 0.12602  | 0.120192  | 0.108392  | 0.121795  | 0.115967 | 0.12296   | 0.113782 |
| 0.115239 | 0.11961   | 0.111597  | 0.109557  | 0.123834 | 0.114802  | 0.11757  |
| 0.13039  | 0.131847  | 0.118881  | 0.127914  | 0.129371 | 0.124126  | 0.119901 |
| 0.119318 | 0.116113  | 0.11655   | 0.123834  | 0.116259 | 0.117716  | 0.114365 |
| 0.129953 | 0.115093  | 0.113782  | 0.120775  | 0.125728 | 0.125728  | 0.120629 |
| 0.117279 | 0.115822  | 0.108392  | 0.11859   | 0.120338 | 0.11859   | 0.110286 |
| 0.114656 | 0.0989219 | 0.106352  | 0.109557  | 0.111014 | 0.102273  | 0.111742 |
| 0.120192 | 0.112034  | 0.108392  | 0.121795  | 0.109557 | 0.113928  | 0.109411 |
| 0.115967 | 0.117424  | 0.095134  | 0.11553   | 0.119901 | 0.121066  | 0.114802 |
| 0.112908 | 0.127477  | 0.105478  | 0.122669  | 0.12296  | 0.126457  | 0.118153 |
| 0.137529 | 0.129662  | 0.116987  | 0.133304  | 0.141171 | 0.130973  | 0.125    |
| 0.123397 | 0.119027  | 0.111888  | 0.115093  | 0.122378 | 0.119172  | 0.116696 |
| 0.113199 | 0.10708   | 0.0976107 | 0.0987762 | 0.115093 | 0.106643  | 0.107663 |
| 0.125146 | 0.11961   | 0.111597  | 0.112471  | 0.128788 | 0.116259  | 0.119901 |
| 0.117279 | 0.105915  | 0.102564  | 0.102564  | 0.123252 | 0.105769  | 0.110577 |
| 0.137092 | 0.135052  | 0.132576  | 0.129662  | 0.14831  | 0.136655  | 0.140297 |



|          |          |           |           |          |           |          |
|----------|----------|-----------|-----------|----------|-----------|----------|
| 0.139714 | 0.143794 | 0.129953  | 0.133741  | 0.147727 | 0.142483  | 0.14088  |
| 0.123543 | 0.113345 | 0.104458  | 0.109703  | 0.122232 | 0.109703  | 0.115385 |
| 0.112179 | 0.106352 | 0.0942599 | 0.104749  | 0.108829 | 0.10708   | 0.102564 |
| 0.122523 | 0.109411 | 0.105186  | 0.112471  | 0.119464 | 0.118007  | 0.111742 |
| 0.120192 | 0.116113 | 0.104021  | 0.11014   | 0.120047 | 0.115967  | 0.112617 |
| 0.136072 | 0.133159 | 0.123397  | 0.126894  | 0.14088  | 0.135344  | 0.133741 |
| 0.113345 | 0.112471 | 0.107372  | 0.112617  | 0.119901 | 0.110868  | 0.111597 |
| 0.116404 | 0.109994 | 0.104312  | 0.105186  | 0.122086 | 0.114219  | 0.117861 |
| 0.14831  | 0.146853 | 0.125437  | 0.151952  | 0.142337 | 0.143794  | 0.137821 |
| 0.127622 | 0.125    | 0.123106  | 0.117861  | 0.128934 | 0.128351  | 0.119755 |
| 0.116113 | 0.114656 | 0.100233  | 0.101981  | 0.117424 | 0.107809  | 0.113199 |
| 0.125728 | 0.119901 | 0.128788  | 0.130536  | 0.134033 | 0.119464  | 0.128351 |
| 0.121066 | 0.114073 | 0.112179  | 0.1081    | 0.127914 | 0.0810023 | 0.114365 |
| 0.133887 | 0.142337 | 0.121503  | 0.128205  | 0.132867 | 0.13141   | 0.131847 |
| 0.129079 | 0.127914 | 0.112908  | 0.118735  | 0.130099 | 0.123397  | 0.124709 |
| 0.120338 | 0.114802 | 0.104458  | 0.10708   | 0.123689 | 0.108537  | 0.114802 |
| 0.12296  | 0.114219 | 0.113199  | 0.114948  | 0.122815 | 0.116404  | 0.115093 |
| 0.121358 | 0.114948 | 0.102855  | 0.113636  | 0.124126 | 0.121795  | 0.117861 |
| 0.132139 | 0.135635 | 0.122086  | 0.123252  | 0.144522 | 0.131993  | 0.129225 |
| 0.134178 | 0.13447  | 0.129371  | 0.125874  | 0.146853 | 0.130245  | 0.140589 |
| 0.162005 | 0.155594 | 0.157197  | 0.144959  | 0.164773 | 0.153118  | 0.161713 |
| 0.116841 | 0.111305 | 0.105332  | 0.10912   | 0.124854 | 0.110868  | 0.115967 |
| 0.11014  | 0.112179 | 0.105332  | 0.106206  | 0.122815 | 0.109994  | 0.114219 |
| 0.115967 | 0.113345 | 0.103001  | 0.108537  | 0.116404 | 0.10708   | 0.11014  |
| 0.141171 | 0.136218 | 0.128788  | 0.134615  | 0.138986 | 0.138695  | 0.135635 |
| 0.118444 | 0.108246 | 0.102273  | 0.1081    | 0.11859  | 0.108683  | 0.110577 |
| 0.132576 | 0.134615 | 0.117861  | 0.121066  | 0.138258 | 0.12602   | 0.129371 |
| 0.125    | 0.114219 | 0.102127  | 0.109703  | 0.122232 | 0.120192  | 0.116259 |
| 0.121941 | 0.116696 | 0.104895  | 0.11014   | 0.126748 | 0.115967  | 0.11116  |
| 0.149621 | 0.144959 | 0.13345   | 0.141026  | 0.144522 | 0.142483  | 0.14088  |
| 0.11961  | 0.118444 | 0.111305  | 0.11014   | 0.126166 | 0.116841  | 0.118735 |
| 0.132284 | 0.135781 | 0.128351  | 0.129808  | 0.14088  | 0.136801  | 0.132867 |
| 0.128059 | 0.130682 | 0.125     | 0.121795  | 0.129079 | 0.130245  | 0.121066 |
| 0.116259 | 0.112471 | 0.104749  | 0.110868  | 0.119318 | 0.103001  | 0.112762 |
| 0.116841 | 0.111888 | 0.099796  | 0.0995047 | 0.116696 | 0.108537  | 0.11014  |
| 0.113636 | 0.109557 | 0.105624  | 0.108537  | 0.125437 | 0.112034  | 0.111597 |
| 0.133741 | 0.13345  | 0.116696  | 0.119318  | 0.139714 | 0.123689  | 0.125874 |
| 0.114656 | 0.112034 | 0.101399  | 0.108974  | 0.120047 | 0.108392  | 0.108537 |
| 0.130245 | 0.138403 | 0.13243   | 0.13039   | 0.146999 | 0.132721  | 0.141026 |
| 0.125874 | 0.117133 | 0.106498  | 0.112617  | 0.127768 | 0.118735  | 0.124417 |
| 0.112471 | 0.117424 | 0.106206  | 0.105332  | 0.11757  | 0.113199  | 0.111888 |
| 0.119172 | 0.113928 | 0.106206  | 0.110286  | 0.121649 | 0.118444  | 0.115093 |
| 0.120338 | 0.118007 | 0.114073  | 0.10912   | 0.129516 | 0.111742  | 0.123834 |
| 0.118007 | 0.111305 | 0.109411  | 0.106789  | 0.123689 | 0.113491  | 0.116259 |

|          |           |           |          |          |          |           |
|----------|-----------|-----------|----------|----------|----------|-----------|
| 0.116841 | 0.113054  | 0.103001  | 0.104167 | 0.118735 | 0.109411 | 0.110431  |
| 0.133013 | 0.132139  | 0.125874  | 0.125874 | 0.140734 | 0.133741 | 0.13447   |
| 0.118444 | 0.105624  | 0.0955711 | 0.106061 | 0.110431 | 0.110723 | 0.114365  |
| 0.105478 | 0.105478  | 0.100962  | 0.112617 | 0.115239 | 0.109994 | 0.108974  |
| 0.134324 | 0.119172  | 0.112034  | 0.13039  | 0.131265 | 0.120775 | 0.120338  |
| 0.129953 | 0.125583  | 0.108537  | 0.126311 | 0.127768 | 0.128934 | 0.115093  |
| 0.126748 | 0.131119  | 0.116404  | 0.126603 | 0.135052 | 0.133013 | 0.125291  |
| 0.136218 | 0.135344  | 0.112762  | 0.129371 | 0.138986 | 0.133741 | 0.129808  |
| 0.127622 | 0.116841  | 0.108246  | 0.113491 | 0.12398  | 0.114656 | 0.109266  |
| 0.18648  | 0.180361  | 0.178759  | 0.170309 | 0.186043 | 0.177302 | 0.180653  |
| 0.120484 | 0.106206  | 0.0996503 | 0.112471 | 0.118881 | 0.104312 | 0.107663  |
| 0.14627  | 0.135198  | 0.118153  | 0.134178 | 0.135635 | 0.133887 | 0.125291  |
| 0.137529 | 0.124709  | 0.109411  | 0.128351 | 0.125437 | 0.125146 | 0.115093  |
| 0.142045 | 0.133304  | 0.117424  | 0.132284 | 0.13986  | 0.134907 | 0.123689  |
| 0.116259 | 0.107809  | 0.0954254 | 0.108829 | 0.11553  | 0.109994 | 0.106352  |
| 0.12704  | 0.128497  | 0.109994  | 0.122232 | 0.132721 | 0.126603 | 0.126166  |
| 0.11859  | 0.113928  | 0.10067   | 0.115822 | 0.116696 | 0.112617 | 0.108683  |
| 0.127185 | 0.120775  | 0.107226  | 0.120921 | 0.123252 | 0.123834 | 0.114656  |
| 0.127185 | 0.110577  | 0.102855  | 0.112471 | 0.120921 | 0.113345 | 0.110868  |
| 0.134178 | 0.139423  | 0.112179  | 0.127622 | 0.13141  | 0.13549  | 0.118153  |
| 0.118735 | 0.106206  | 0.0958625 | 0.10373  | 0.112762 | 0.11014  | 0.0986305 |
| 0.138403 | 0.135198  | 0.119901  | 0.129516 | 0.142628 | 0.133596 | 0.125291  |
| 0.127477 | 0.116987  | 0.0990676 | 0.115676 | 0.123252 | 0.117133 | 0.108246  |
| 0.124709 | 0.128205  | 0.120484  | 0.118735 | 0.133013 | 0.124854 | 0.125874  |
| 0.135052 | 0.121066  | 0.111014  | 0.127914 | 0.129953 | 0.131702 | 0.11553   |
| 0.120775 | 0.107663  | 0.101107  | 0.115093 | 0.120338 | 0.105769 | 0.10708   |
| 0.147582 | 0.14088   | 0.13141   | 0.139569 | 0.145979 | 0.140443 | 0.138549  |
| 0.123834 | 0.113054  | 0.10067   | 0.115822 | 0.119901 | 0.116113 | 0.111888  |
| 0.118881 | 0.112179  | 0.103875  | 0.112325 | 0.116113 | 0.112908 | 0.108974  |
| 0.122232 | 0.123689  | 0.104895  | 0.11655  | 0.120338 | 0.11859  | 0.107663  |
| 0.14729  | 0.138258  | 0.132576  | 0.142774 | 0.145979 | 0.140443 | 0.135635  |
| 0.123397 | 0.119027  | 0.112762  | 0.108974 | 0.127331 | 0.118881 | 0.116987  |
| 0.115822 | 0.105332  | 0.0984848 | 0.108683 | 0.115093 | 0.105478 | 0.106206  |
| 0.120484 | 0.107372  | 0.0984848 | 0.110723 | 0.11451  | 0.110431 | 0.112908  |
| 0.126166 | 0.115093  | 0.103001  | 0.121066 | 0.122523 | 0.116113 | 0.112179  |
| 0.128059 | 0.116696  | 0.113345  | 0.122086 | 0.130245 | 0.126748 | 0.12602   |
| 0.124417 | 0.118007  | 0.10067   | 0.117279 | 0.122232 | 0.118153 | 0.106352  |
| 0.113199 | 0.100379  | 0.0906177 | 0.102564 | 0.108683 | 0.103147 | 0.103001  |
| 0.116113 | 0.103293  | 0.0941142 | 0.10373  | 0.115385 | 0.102564 | 0.105624  |
| 0.118007 | 0.105186  | 0.0971737 | 0.107955 | 0.113199 | 0.10912  | 0.105478  |
| 0.123252 | 0.119172  | 0.112325  | 0.114365 | 0.118735 | 0.11116  | 0.112471  |
| 0.128351 | 0.122523  | 0.106643  | 0.120629 | 0.125874 | 0.124709 | 0.12398   |
| 0.117424 | 0.0999417 | 0.0986305 | 0.105624 | 0.108537 | 0.109411 | 0.1081    |
| 0.112908 | 0.0933858 | 0.0964452 | 0.101107 | 0.111305 | 0.103438 | 0.105332  |

|          |           |           |           |          |           |           |
|----------|-----------|-----------|-----------|----------|-----------|-----------|
| 0.123689 | 0.114656  | 0.101107  | 0.111305  | 0.126457 | 0.125583  | 0.112908  |
| 0.11655  | 0.102273  | 0.0893065 | 0.100087  | 0.114948 | 0.110577  | 0.100233  |
| 0.126457 | 0.117424  | 0.112034  | 0.120484  | 0.12398  | 0.118444  | 0.122669  |
| 0.137821 | 0.130536  | 0.112325  | 0.138549  | 0.130682 | 0.130973  | 0.12704   |
| 0.120047 | 0.11014   | 0.100962  | 0.108537  | 0.118735 | 0.114365  | 0.11014   |
| 0.118735 | 0.0995047 | 0.0973193 | 0.107517  | 0.114219 | 0.107809  | 0.110286  |
| 0.115822 | 0.104749  | 0.0999417 | 0.106643  | 0.114219 | 0.109266  | 0.105332  |
| 0.112325 | 0.101544  | 0.0958625 | 0.103147  | 0.112471 | 0.107517  | 0.106789  |
| 0.130682 | 0.120775  | 0.115676  | 0.124709  | 0.127914 | 0.122378  | 0.120775  |
| 0.116404 | 0.0971737 | 0.0914918 | 0.10169   | 0.112762 | 0.0999417 | 0.108246  |
| 0.138403 | 0.132284  | 0.121358  | 0.13447   | 0.135052 | 0.133013  | 0.134324  |
| 0.136218 | 0.128059  | 0.125583  | 0.127622  | 0.132284 | 0.13549   | 0.128059  |
| 0.125146 | 0.119027  | 0.119755  | 0.119464  | 0.126748 | 0.121212  | 0.123106  |
| 0.122086 | 0.107809  | 0.108829  | 0.112617  | 0.119318 | 0.11757   | 0.118881  |
| 0.119755 | 0.109557  | 0.104167  | 0.11553   | 0.118444 | 0.11553   | 0.112179  |
| 0.114073 | 0.104167  | 0.0862471 | 0.103147  | 0.114219 | 0.110431  | 0.101253  |
| 0.116259 | 0.113054  | 0.0872669 | 0.0983392 | 0.114365 | 0.110286  | 0.0981935 |
| 0.114802 | 0.106061  | 0.0960082 | 0.110286  | 0.114073 | 0.107663  | 0.104312  |
| 0.118007 | 0.111888  | 0.106789  | 0.103875  | 0.119901 | 0.090472  | 0.111305  |
| 0.125874 | 0.125874  | 0.109411  | 0.109411  | 0.130682 | 0.129808  | 0.118298  |
| 0.116987 | 0.109703  | 0.0984848 | 0.113928  | 0.122669 | 0.111888  | 0.109411  |
| 0.131993 | 0.123252  | 0.133887  | 0.131556  | 0.135927 | 0.124563  | 0.132867  |
| 0.141463 | 0.129808  | 0.118298  | 0.136072  | 0.138403 | 0.132867  | 0.125146  |
| 0.198281 | 0.182547  | 0.197552  | 0.183858  | 0.199301 | 0.178322  | 0.199446  |
| 0.238928 | 0.232809  | 0.241987  | 0.22567   | 0.239948 | 0.223631  | 0.237179  |
| 0.117861 | 0.111451  | 0.106352  | 0.104895  | 0.119172 | 0.0664336 | 0.113199  |
| 0.111597 | 0.109848  | 0.095134  | 0.103875  | 0.114073 | 0.108246  | 0.104312  |
| 0.109266 | 0.104312  | 0.0939685 | 0.099796  | 0.112617 | 0.104167  | 0.103147  |
| 0.113636 | 0.112471  | 0.101253  | 0.108537  | 0.120775 | 0.10708   | 0.110723  |
| 0.133159 | 0.0597319 | 0.135052  | 0.132721  | 0.128642 | 0.124272  | 0.134907  |
| 0.11655  | 0.116259  | 0.0992133 | 0.108246  | 0.121358 | 0.10912   | 0.104312  |
| 0.138549 | 0.144959  | 0.118298  | 0.133741  | 0.137238 | 0.1419    | 0.12602   |
| 0.120047 | 0.117424  | 0.0992133 | 0.105332  | 0.117279 | 0.109411  | 0.107809  |
| 0.122378 | 0.13345   | 0.108246  | 0.120484  | 0.127185 | 0.126894  | 0.112762  |
| 0.130099 | 0.131556  | 0.115676  | 0.114219  | 0.134324 | 0.125     | 0.126894  |
| 0.132721 | 0.128059  | 0.115385  | 0.12296   | 0.129953 | 0.129079  | 0.123397  |
| 0.135052 | 0.134178  | 0.126748  | 0.129662  | 0.138986 | 0.134033  | 0.137966  |
| 0.123397 | 0.114365  | 0.100816  | 0.111888  | 0.120921 | 0.11451   | 0.108829  |
| 0.117861 | 0.113199  | 0.092366  | 0.104895  | 0.115385 | 0.108392  | 0.103001  |
| 0.117424 | 0.11655   | 0.100087  | 0.107372  | 0.123689 | 0.117861  | 0.110431  |
| 0.111597 | 0.108974  | 0.0992133 | 0.105332  | 0.109994 | 0.106498  | 0.104604  |
| 0.113928 | 0.113345  | 0.0954254 | 0.105041  | 0.113782 | 0.108246  | 0.0996503 |
| 0.119901 | 0.11553   | 0.101399  | 0.106352  | 0.117133 | 0.110723  | 0.106206  |
| 0.123252 | 0.125583  | 0.114365  | 0.116696  | 0.13039  | 0.12398   | 0.120629  |

|          |          |           |           |          |          |          |
|----------|----------|-----------|-----------|----------|----------|----------|
| 0.130536 | 0.137821 | 0.123106  | 0.121358  | 0.132139 | 0.130099 | 0.127914 |
| 0.11757  | 0.118444 | 0.0987762 | 0.10373   | 0.116259 | 0.111597 | 0.106498 |
| 0.119172 | 0.115676 | 0.0957168 | 0.0995047 | 0.119318 | 0.114948 | 0.109557 |
| 0.127331 | 0.136364 | 0.116696  | 0.122815  | 0.127768 | 0.129516 | 0.118007 |
| 0.113636 | 0.111888 | 0.0948427 | 0.101836  | 0.112617 | 0.109703 | 0.103147 |
| 0.14088  | 0.137092 | 0.127331  | 0.13141   | 0.142483 | 0.138986 | 0.127477 |
| 0.134761 | 0.128642 | 0.134033  | 0.131993  | 0.138986 | 0.131993 | 0.134178 |
| 0.130245 | 0.133741 | 0.121649  | 0.125437  | 0.130682 | 0.131265 | 0.120047 |
| 0.111305 | 0.108392 | 0.0980478 | 0.101544  | 0.114073 | 0.101836 | 0.099359 |
| 0.108537 | 0.111742 | 0.0964452 | 0.100524  | 0.109266 | 0.104895 | 0.103584 |
| 0.123252 | 0.124709 | 0.103293  | 0.114073  | 0.124854 | 0.119901 | 0.109848 |
| 0.117861 | 0.125437 | 0.107517  | 0.110431  | 0.116841 | 0.120338 | 0.119027 |
| 0.127185 | 0.135344 | 0.109848  | 0.11451   | 0.128497 | 0.127331 | 0.114656 |
| 0.119755 | 0.118881 | 0.10067   | 0.105915  | 0.121649 | 0.113491 | 0.106643 |
| 0.120484 | 0.118735 | 0.101981  | 0.103438  | 0.117424 | 0.115093 | 0.107372 |
| 0.128351 | 0.122232 | 0.106935  | 0.111597  | 0.125    | 0.121212 | 0.113782 |
| 0.132721 | 0.133304 | 0.113928  | 0.121212  | 0.13345  | 0.132867 | 0.119901 |
| 0.126311 | 0.131265 | 0.111597  | 0.116259  | 0.127331 | 0.126457 | 0.120484 |
| 0.134324 | 0.134324 | 0.109411  | 0.114656  | 0.128351 | 0.13039  | 0.12296  |
| 0.129808 | 0.13243  | 0.122669  | 0.114219  | 0.137238 | 0.129371 | 0.128059 |
| 0.119027 | 0.116113 | 0.0961538 | 0.103147  | 0.119464 | 0.107226 | 0.10271  |
| 0.126311 | 0.133013 | 0.119755  | 0.119755  | 0.132284 | 0.127331 | 0.120775 |
| 0.11014  | 0.113054 | 0.0922203 | 0.100379  | 0.114948 | 0.108537 | 0.104895 |
| 0.11757  | 0.112908 | 0.105478  | 0.112179  | 0.129953 | 0.109557 | 0.112034 |
| 0.123106 | 0.112034 | 0.10169   | 0.107809  | 0.122086 | 0.111888 | 0.10912  |
| 0.117133 | 0.114219 | 0.102418  | 0.107372  | 0.119318 | 0.115822 | 0.104895 |
| 0.109848 | 0.111888 | 0.0939685 | 0.105332  | 0.112617 | 0.108246 | 0.104312 |
| 0.133596 | 0.136218 | 0.111305  | 0.11655   | 0.132576 | 0.130245 | 0.119901 |
| 0.120629 | 0.117133 | 0.105915  | 0.111451  | 0.124563 | 0.118153 | 0.110723 |
| 0.131702 | 0.136655 | 0.114656  | 0.122523  | 0.133596 | 0.128059 | 0.123543 |
| 0.111305 | 0.11014  | 0.0986305 | 0.105332  | 0.109703 | 0.107663 | 0.104021 |
| 0.121649 | 0.128642 | 0.100233  | 0.110431  | 0.120047 | 0.123834 | 0.105915 |
| 0.110431 | 0.122669 | 0.111742  | 0.107663  | 0.126311 | 0.123106 | 0.115676 |
| 0.121795 | 0.110723 | 0.118153  | 0.114365  | 0.126311 | 0.114073 | 0.12296  |
| 0.123106 | 0.112617 | 0.0810023 | 0.107226  | 0.113054 | 0.114219 | 0.106206 |
| 0.121503 | 0.118298 | 0.122523  | 0.118153  | 0.128351 | 0.11961  | 0.124709 |
| 0.132721 | 0.110577 | 0.108683  | 0.112762  | 0.122378 | 0.111597 | 0.114365 |
| 0.120192 | 0.11116  | 0.100524  | 0.115385  | 0.112179 | 0.112762 | 0.107372 |
| 0.130682 | 0.124563 | 0.133159  | 0.136364  | 0.137821 | 0.130536 | 0.132139 |
| 0.140152 | 0.138112 | 0.106206  | 0.128642  | 0.13447  | 0.133304 | 0.13549  |
| 0.110723 | 0.100816 | 0.107955  | 0.116113  | 0.113199 | 0.103293 | 0.105478 |
| 0.134178 | 0.119027 | 0.134615  | 0.141608  | 0.137821 | 0.130828 | 0.13447  |
| 0.127331 | 0.115093 | 0.124272  | 0.130973  | 0.128934 | 0.127768 | 0.129371 |
| 0.131993 | 0.122669 | 0.129225  | 0.13447   | 0.133304 | 0.127185 | 0.127331 |

|          |          |          |          |          |          |          |
|----------|----------|----------|----------|----------|----------|----------|
| 0.120921 | 0.110723 | 0.123106 | 0.127768 | 0.126603 | 0.117861 | 0.122086 |
| 0.123252 | 0.115676 | 0.120192 | 0.129225 | 0.127477 | 0.119901 | 0.120047 |
| 0.127185 | 0.113491 | 0.124709 | 0.131702 | 0.129953 | 0.121503 | 0.126311 |
| 0.128205 | 0.121795 | 0.128642 | 0.13243  | 0.127477 | 0.124563 | 0.125583 |
| 0.136072 | 0.128497 | 0.135927 | 0.141171 | 0.138549 | 0.136801 | 0.137238 |
| 0.129662 | 0.115093 | 0.127185 | 0.130973 | 0.135635 | 0.11757  | 0.127914 |
| 0.11859  | 0.109848 | 0.11757  | 0.12398  | 0.123106 | 0.116987 | 0.119464 |
| 0.125146 | 0.135635 | 0.112179 | 0.121503 | 0.13141  | 0.125583 | 0.129808 |
| 0.133159 | 0.122086 | 0.129808 | 0.135635 | 0.136801 | 0.129808 | 0.130245 |
| 0.117133 | 0.107226 | 0.107955 | 0.120484 | 0.119901 | 0.10708  | 0.111888 |
| 0.215472 | 0.214598 | 0.223193 | 0.20979  | 0.219406 | 0.204254 | 0.219843 |
| 0.126311 | 0.11553  | 0.125291 | 0.129953 | 0.123834 | 0.120629 | 0.124272 |
| 0.125728 | 0.107955 | 0.117424 | 0.121212 | 0.125291 | 0.112179 | 0.119901 |
| 0.134033 | 0.130245 | 0.131847 | 0.138258 | 0.139714 | 0.130682 | 0.138986 |
| 0.120047 | 0.111597 | 0.114656 | 0.123106 | 0.127768 | 0.110868 | 0.11859  |
| 0.136946 | 0.120338 | 0.135052 | 0.140589 | 0.139423 | 0.130099 | 0.141026 |
| 0.121795 | 0.113928 | 0.123397 | 0.125146 | 0.126603 | 0.116987 | 0.120047 |
| 0.120484 | 0.108537 | 0.120921 | 0.126166 | 0.123834 | 0.11655  | 0.122523 |
| 0.127477 | 0.114073 | 0.131119 | 0.131702 | 0.134907 | 0.122378 | 0.130973 |
| 0.125583 | 0.122086 | 0.125728 | 0.124563 | 0.136509 | 0.122523 | 0.12704  |
| 0.134761 | 0.126603 | 0.125874 | 0.136946 | 0.134033 | 0.125583 | 0.127477 |
| 0.130245 | 0.12704  | 0.13039  | 0.142337 | 0.136218 | 0.127768 | 0.124709 |
| 0.127914 | 0.120338 | 0.128642 | 0.134761 | 0.13447  | 0.120775 | 0.124417 |
| 0.123252 | 0.108974 | 0.11116  | 0.112617 | 0.112617 | 0.113491 | 0.116841 |
| 0.120629 | 0.115967 | 0.120484 | 0.128934 | 0.121941 | 0.11116  | 0.118007 |
| 0.131265 | 0.127768 | 0.134907 | 0.140734 | 0.137821 | 0.131119 | 0.13884  |
| 0.123834 | 0.113345 | 0.119318 | 0.124272 | 0.12602  | 0.117279 | 0.119172 |
| 0.13549  | 0.135781 | 0.124563 | 0.12398  | 0.13884  | 0.132139 | 0.135198 |
| 0.139132 | 0.13243  | 0.137821 | 0.138112 | 0.146853 | 0.132867 | 0.139132 |
| 0.129516 | 0.116696 | 0.113636 | 0.113928 | 0.123252 | 0.121212 | 0.120775 |
| 0.131265 | 0.118444 | 0.127622 | 0.138112 | 0.133159 | 0.124709 | 0.130973 |
| 0.13345  | 0.124417 | 0.118444 | 0.124272 | 0.129225 | 0.120192 | 0.129662 |
| 0.126894 | 0.127185 | 0.118007 | 0.131993 | 0.120921 | 0.12296  | 0.116987 |
| 0.125728 | 0.122815 | 0.121795 | 0.127622 | 0.129079 | 0.120338 | 0.126603 |
| 0.140006 | 0.128934 | 0.140734 | 0.140443 | 0.145105 | 0.136364 | 0.13884  |
| 0.119172 | 0.105186 | 0.105332 | 0.106206 | 0.116987 | 0.113782 | 0.110723 |
| 0.13447  | 0.123397 | 0.131119 | 0.12704  | 0.137238 | 0.131993 | 0.131556 |
| 0.141026 | 0.135781 | 0.142337 | 0.134761 | 0.149038 | 0.134178 | 0.143357 |
| 0.120921 | 0.115676 | 0.100087 | 0.114365 | 0.124563 | 0.121941 | 0.115676 |
| 0.125874 | 0.121503 | 0.117861 | 0.117279 | 0.131847 | 0.121941 | 0.117424 |
| 0.140589 | 0.143211 | 0.119172 | 0.127622 | 0.140443 | 0.137238 | 0.135052 |
| 0.121941 | 0.121649 | 0.115676 | 0.110431 | 0.13345  | 0.119755 | 0.123106 |
| 0.133159 | 0.128205 | 0.134178 | 0.135344 | 0.136509 | 0.135635 | 0.139277 |
| 0.130973 | 0.122232 | 0.123543 | 0.120338 | 0.13345  | 0.129662 | 0.12398  |

|          |           |           |          |          |           |           |
|----------|-----------|-----------|----------|----------|-----------|-----------|
| 0.129371 | 0.123543  | 0.113491  | 0.120775 | 0.12602  | 0.125437  | 0.118298  |
| 0.137383 | 0.123689  | 0.120921  | 0.120629 | 0.132867 | 0.125291  | 0.126894  |
| 0.131702 | 0.11655   | 0.111742  | 0.109703 | 0.124854 | 0.122232  | 0.117716  |
| 0.134178 | 0.131265  | 0.107809  | 0.123543 | 0.131702 | 0.130245  | 0.124563  |
| 0.124563 | 0.130099  | 0.123252  | 0.132284 | 0.134324 | 0.12704   | 0.125437  |
| 0.135344 | 0.136218  | 0.115967  | 0.13141  | 0.13549  | 0.128788  | 0.123397  |
| 0.133013 | 0.131265  | 0.121503  | 0.132576 | 0.133741 | 0.13141   | 0.12398   |
| 0.133013 | 0.129808  | 0.110431  | 0.120047 | 0.134033 | 0.129662  | 0.119901  |
| 0.144085 | 0.142337  | 0.130828  | 0.136655 | 0.143648 | 0.141026  | 0.13884   |
| 0.128059 | 0.113491  | 0.121212  | 0.121212 | 0.126748 | 0.126457  | 0.124272  |
| 0.125146 | 0.115822  | 0.0973193 | 0.110431 | 0.126748 | 0.119755  | 0.10912   |
| 0.135635 | 0.124272  | 0.112179  | 0.125291 | 0.136655 | 0.127914  | 0.121066  |
| 0.126311 | 0.114073  | 0.104312  | 0.119172 | 0.117716 | 0.118298  | 0.112908  |
| 0.144231 | 0.134324  | 0.135344  | 0.140006 | 0.144376 | 0.135927  | 0.140734  |
| 0.152681 | 0.148601  | 0.142628  | 0.148747 | 0.156906 | 0.154866  | 0.145979  |
| 0.128788 | 0.132576  | 0.110868  | 0.117861 | 0.124563 | 0.127477  | 0.11859   |
| 0.121941 | 0.121358  | 0.101107  | 0.1081   | 0.117424 | 0.115093  | 0.112325  |
| 0.134324 | 0.129371  | 0.121358  | 0.135927 | 0.129225 | 0.123397  | 0.127331  |
| 0.129808 | 0.123689  | 0.136072  | 0.140734 | 0.134615 | 0.127331  | 0.135052  |
| 0.129516 | 0.125437  | 0.109848  | 0.119172 | 0.128788 | 0.127331  | 0.112325  |
| 0.131265 | 0.128934  | 0.13345   | 0.142191 | 0.137821 | 0.136364  | 0.133596  |
| 0.138258 | 0.130973  | 0.132284  | 0.134615 | 0.143357 | 0.133741  | 0.136801  |
| 0.124709 | 0.119464  | 0.119318  | 0.11961  | 0.125728 | 0.120775  | 0.12296   |
| 0.153555 | 0.157051  | 0.149621  | 0.158654 | 0.161276 | 0.152535  | 0.151807  |
| 0.12704  | 0.117716  | 0.11961   | 0.116987 | 0.129225 | 0.128642  | 0.125     |
| 0.142483 | 0.127914  | 0.129516  | 0.130973 | 0.140589 | 0.14088   | 0.13549   |
| 0.128642 | 0.118735  | 0.10373   | 0.11014  | 0.129079 | 0.122669  | 0.114073  |
| 0.128642 | 0.137966  | 0.119464  | 0.131702 | 0.129371 | 0.127622  | 0.125437  |
| 0.125728 | 0.116696  | 0.125583  | 0.131119 | 0.132867 | 0.122669  | 0.122815  |
| 0.140152 | 0.131993  | 0.126894  | 0.130099 | 0.141171 | 0.107955  | 0.134615  |
| 0.145833 | 0.144959  | 0.142774  | 0.150641 | 0.153263 | 0.133159  | 0.143211  |
| 0.121503 | 0.121212  | 0.120484  | 0.121066 | 0.128934 | 0.055507  | 0.12296   |
| 0.133013 | 0.129225  | 0.133741  | 0.124709 | 0.139277 | 0.0734266 | 0.132139  |
| 0.152389 | 0.145979  | 0.129808  | 0.103584 | 0.145833 | 0.136218  | 0.140152  |
| 0.142483 | 0.132284  | 0.144959  | 0.132721 | 0.151078 | 0.110577  | 0.141026  |
| 0.126311 | 0.126894  | 0.0524476 | 0.101107 | 0.115093 | 0.125     | 0.0989219 |
| 0.139569 | 0.134907  | 0.133304  | 0.137966 | 0.136509 | 0.125728  | 0.129953  |
| 0.125583 | 0.0844988 | 0.113199  | 0.116404 | 0.120484 | 0.104458  | 0.119172  |
| 0.11961  | 0.0828963 | 0.105186  | 0.109266 | 0.11451  | 0.11014   | 0.114656  |
| 0.123543 | 0.117716  | 0.124272  | 0.122523 | 0.126603 | 0.116113  | 0.120047  |
| 0.121212 | 0.115093  | 0.116404  | 0.116987 | 0.123397 | 0.0482226 | 0.120338  |
| 0.114365 | 0.112908  | 0.113636  | 0.109848 | 0.112762 | 0.114219  | 0.116987  |
| 0.121941 | 0.0738636 | 0.115385  | 0.111305 | 0.117424 | 0.0812937 | 0.120192  |
| 0.122523 | 0.114948  | 0.113928  | 0.124126 | 0.128205 | 0.100233  | 0.11961   |

|          |           |           |           |           |           |           |
|----------|-----------|-----------|-----------|-----------|-----------|-----------|
| 0.128788 | 0.0635198 | 0.126603  | 0.121066  | 0.128059  | 0.112325  | 0.129079  |
| 0.103438 | 0.097028  | 0.10912   | 0.114073  | 0.109703  | 0.10708   | 0.108392  |
| 0.126457 | 0.116841  | 0.123106  | 0.118444  | 0.129808  | 0.0525932 | 0.125291  |
| 0.119901 | 0.116404  | 0.11859   | 0.117424  | 0.125291  | 0.0486597 | 0.121941  |
| 0.125146 | 0.126894  | 0.0874126 | 0.0620629 | 0.114802  | 0.121503  | 0.110868  |
| 0.213724 | 0.208188  | 0.219406  | 0.20542   | 0.21824   | 0.20134   | 0.217512  |
| 0.138549 | 0.142045  | 0.139569  | 0.138112  | 0.145396  | 0.0748834 | 0.140589  |
| 0.128788 | 0.127331  | 0.121649  | 0.133304  | 0.130099  | 0.123106  | 0.128497  |
| 0.121358 | 0.11757   | 0.120047  | 0.119755  | 0.128497  | 0.113345  | 0.128934  |
| 0.209936 | 0.205565  | 0.216492  | 0.198718  | 0.20979   | 0.195804  | 0.211101  |
| 0.126603 | 0.120484  | 0.101981  | 0.0786713 | 0.12296   | 0.118881  | 0.116696  |
| 0.121795 | 0.113928  | 0.106498  | 0.116987  | 0.0488054 | 0.121649  | 0.114802  |
| 0.120047 | 0.121212  | 0.120192  | 0.112034  | 0.121358  | 0.117279  | 0.123543  |
| 0.127185 | 0.0517191 | 0.127622  | 0.125874  | 0.121503  | 0.115676  | 0.127185  |
| 0.247232 | 0.24461   | 0.255245  | 0.242424  | 0.251748  | 0.236597  | 0.252185  |
| 0.13141  | 0.121503  | 0.107372  | 0.129516  | 0.126603  | 0.122815  | 0.122669  |
| 0.119755 | 0.121212  | 0.088141  | 0.0639569 | 0.110577  | 0.110286  | 0.106061  |
| 0.118007 | 0.128497  | 0.121066  | 0.122815  | 0.128642  | 0.116987  | 0.113928  |
| 0.115676 | 0.120047  | 0.118153  | 0.120484  | 0.126311  | 0.11553   | 0.113054  |
| 0.133159 | 0.109848  | 0.116404  | 0.128934  | 0.126894  | 0.124563  | 0.128205  |
| 0.109557 | 0.107226  | 0.12602   | 0.119901  | 0.130973  | 0.0992133 | 0.129662  |
| 0.122378 | 0.121212  | 0.08581   | 0.0645396 | 0.11116   | 0.116696  | 0.106643  |
| 0.122523 | 0.115822  | 0.114802  | 0.119755  | 0.125874  | 0.0454545 | 0.123397  |
| 0.13141  | 0.122378  | 0.122232  | 0.124563  | 0.125728  | 0.116113  | 0.119172  |
| 0.125583 | 0.0448718 | 0.118444  | 0.119318  | 0.116696  | 0.112908  | 0.122086  |
| 0.11757  | 0.109994  | 0.113928  | 0.111305  | 0.125291  | 0.0536131 | 0.120192  |
| 0.121795 | 0.100524  | 0.123689  | 0.124272  | 0.129516  | 0.113199  | 0.12296   |
| 0.146125 | 0.143794  | 0.144522  | 0.14831   | 0.151807  | 0.131702  | 0.141463  |
| 0.13447  | 0.125146  | 0.107809  | 0.13141   | 0.126457  | 0.124126  | 0.123689  |
| 0.122232 | 0.121066  | 0.108683  | 0.113636  | 0.0492424 | 0.124126  | 0.118444  |
| 0.192162 | 0.181672  | 0.192016  | 0.178904  | 0.190851  | 0.17162   | 0.191871  |
| 0.205565 | 0.196824  | 0.208916  | 0.191434  | 0.204254  | 0.18648   | 0.204691  |
| 0.128642 | 0.0502622 | 0.127914  | 0.123252  | 0.123252  | 0.115967  | 0.126603  |
| 0.123689 | 0.0473485 | 0.118298  | 0.11859   | 0.11859   | 0.110723  | 0.121941  |
| 0.13039  | 0.128351  | 0.138403  | 0.138403  | 0.147727  | 0.12296   | 0.142337  |
| 0.11961  | 0.118444  | 0.0868298 | 0.0670163 | 0.112762  | 0.115676  | 0.107955  |
| 0.133741 | 0.125874  | 0.111742  | 0.13447   | 0.12602   | 0.124272  | 0.122669  |
| 0.129225 | 0.13039   | 0.128205  | 0.131993  | 0.13549   | 0.122086  | 0.121649  |
| 0.222174 | 0.215472  | 0.228438  | 0.214161  | 0.224942  | 0.212995  | 0.225962  |
| 0.119318 | 0.114073  | 0.110431  | 0.120047  | 0.120921  | 0.104895  | 0.117279  |
| 0.207751 | 0.208333  | 0.205274  | 0.188083  | 0.21081   | 0.192162  | 0.208333  |
| 0.119901 | 0.114073  | 0.0434149 | 0.0926573 | 0.1081    | 0.111305  | 0.090472  |
| 0.11451  | 0.113054  | 0.103293  | 0.112908  | 0.110577  | 0.115239  | 0.0984848 |
| 0.118735 | 0.112908  | 0.112471  | 0.105478  | 0.122669  | 0.099359  | 0.116696  |

|           |           |           |           |           |           |           |
|-----------|-----------|-----------|-----------|-----------|-----------|-----------|
| 0.122523  | 0.0575466 | 0.116259  | 0.113636  | 0.117133  | 0.1081    | 0.120484  |
| 0.205711  | 0.199592  | 0.210227  | 0.193036  | 0.209353  | 0.191871  | 0.206002  |
| 0.129079  | 0.128788  | 0.129516  | 0.123106  | 0.137092  | 0.057838  | 0.129662  |
| 0.121212  | 0.118298  | 0.0913462 | 0.113199  | 0.116696  | 0.116987  | 0.0521562 |
| 0.120921  | 0.122086  | 0.123689  | 0.125146  | 0.130682  | 0.0587121 | 0.12704   |
| 0         | 0.126166  | 0.120775  | 0.122815  | 0.120192  | 0.114656  | 0.120338  |
| 0.126166  | 0         | 0.119318  | 0.119318  | 0.119027  | 0.10912   | 0.121795  |
| 0.120775  | 0.119318  | 0         | 0.0914918 | 0.107517  | 0.114802  | 0.090472  |
| 0.122815  | 0.119318  | 0.0914918 | 0         | 0.11655   | 0.113636  | 0.115822  |
| 0.120192  | 0.119027  | 0.107517  | 0.11655   | 0         | 0.125     | 0.114656  |
| 0.114656  | 0.10912   | 0.114802  | 0.113636  | 0.125     | 0         | 0.119027  |
| 0.120338  | 0.121795  | 0.090472  | 0.115822  | 0.114656  | 0.119027  | 0         |
| 0.190705  | 0.180507  | 0.19289   | 0.179196  | 0.192308  | 0.174825  | 0.189831  |
| 0.116841  | 0.128205  | 0.120775  | 0.122523  | 0.128934  | 0.115822  | 0.115385  |
| 0.13039   | 0.125437  | 0.125583  | 0.134615  | 0.134907  | 0.11859   | 0.124563  |
| 0.127622  | 0.118298  | 0.116696  | 0.123689  | 0.124563  | 0.10912   | 0.118298  |
| 0.131265  | 0.124272  | 0.106061  | 0.123252  | 0.127914  | 0.11859   | 0.120192  |
| 0.121066  | 0.118444  | 0.117424  | 0.120047  | 0.125874  | 0.0544872 | 0.122523  |
| 0.120192  | 0.123106  | 0.0492424 | 0.0961538 | 0.108683  | 0.11655   | 0.0965909 |
| 0.0716783 | 0.120921  | 0.104458  | 0.116404  | 0.119318  | 0.106498  | 0.11014   |
| 0.125583  | 0.12704   | 0.0930944 | 0.069493  | 0.115822  | 0.122815  | 0.110431  |
| 0.126894  | 0.11961   | 0.123252  | 0.126748  | 0.130828  | 0.109848  | 0.121358  |
| 0.118444  | 0.115822  | 0.114802  | 0.118298  | 0.12296   | 0.109266  | 0.112034  |
| 0.129371  | 0.0568182 | 0.121066  | 0.118444  | 0.12398   | 0.106789  | 0.125874  |
| 0.121066  | 0.117861  | 0.11859   | 0.113928  | 0.123252  | 0.116841  | 0.124563  |
| 0.129953  | 0.133159  | 0.133304  | 0.124563  | 0.134178  | 0.13039   | 0.135781  |
| 0.127622  | 0.111888  | 0.099796  | 0.120775  | 0.121066  | 0.116987  | 0.115385  |
| 0.131265  | 0.136801  | 0.134615  | 0.136946  | 0.140734  | 0.0702214 | 0.13884   |
| 0.125728  | 0.0435606 | 0.11859   | 0.118007  | 0.118007  | 0.109848  | 0.121649  |
| 0.118444  | 0.121941  | 0.111597  | 0.117424  | 0.12296   | 0.106935  | 0.108537  |
| 0.120921  | 0.115676  | 0.120775  | 0.108829  | 0.127477  | 0.0633741 | 0.122669  |
| 0.125874  | 0.127914  | 0.0913462 | 0.0645396 | 0.116404  | 0.121358  | 0.113345  |
| 0.189103  | 0.187063  | 0.186917  | 0.165938  | 0.193328  | 0.175554  | 0.186189  |
| 0.117861  | 0.117861  | 0.0874126 | 0.111597  | 0.111305  | 0.112471  | 0.0464744 |
| 0.115239  | 0.107663  | 0.101399  | 0.111597  | 0.111305  | 0.0949883 | 0.103293  |
| 0.120192  | 0.116987  | 0.107809  | 0.113345  | 0.0445804 | 0.122669  | 0.112617  |
| 0.176136  | 0.172348  | 0.183858  | 0.16958   | 0.182692  | 0.159965  | 0.181964  |
| 0.140443  | 0.135198  | 0.119027  | 0.137383  | 0.133596  | 0.131265  | 0.131119  |
| 0.148601  | 0.145688  | 0.125728  | 0.150495  | 0.14292   | 0.146416  | 0.137238  |
| 0.14292   | 0.146125  | 0.145688  | 0.15035   | 0.152972  | 0.134907  | 0.146125  |
| 0.122815  | 0.116113  | 0.10169   | 0.116841  | 0.120921  | 0.11451   | 0.114656  |
| 0.120921  | 0.11859   | 0.11961   | 0.121649  | 0.126311  | 0.0537587 | 0.120921  |
| 0.211101  | 0.203234  | 0.215326  | 0.199883  | 0.210373  | 0.194056  | 0.211976  |
| 0.125728  | 0.114948  | 0.12296   | 0.12704   | 0.124417  | 0.113928  | 0.121649  |



|           |           |           |           |           |           |           |
|-----------|-----------|-----------|-----------|-----------|-----------|-----------|
| 0.125291  | 0.125291  | 0.124854  | 0.125437  | 0.130682  | 0.0569639 | 0.126457  |
| 0.120338  | 0.120338  | 0.0910548 | 0.111451  | 0.114656  | 0.114656  | 0.0463287 |
| 0.170746  | 0.160256  | 0.172057  | 0.1537    | 0.174097  | 0.144668  | 0.167541  |
| 0.117716  | 0.109266  | 0.112034  | 0.117279  | 0.120192  | 0.104458  | 0.119755  |
| 0.149913  | 0.145833  | 0.144814  | 0.14831   | 0.148019  | 0.141317  | 0.138258  |
| 0.109994  | 0.110577  | 0.120629  | 0.123252  | 0.120338  | 0.115385  | 0.120192  |
| 0.191871  | 0.18109   | 0.19289   | 0.179196  | 0.193182  | 0.174825  | 0.189831  |
| 0.134178  | 0.117279  | 0.106643  | 0.126748  | 0.125583  | 0.120047  | 0.120192  |
| 0.113491  | 0.10067   | 0.107226  | 0.113928  | 0.11451   | 0.0967366 | 0.112034  |
| 0.118881  | 0.120047  | 0.114365  | 0.118444  | 0.125146  | 0.103293  | 0.107517  |
| 0.116987  | 0.117279  | 0.108974  | 0.11451   | 0.111888  | 0.112762  | 0.11553   |
| 0.123397  | 0.116113  | 0.104895  | 0.113345  | 0.0483683 | 0.118007  | 0.115239  |
| 0.130099  | 0.118735  | 0.118007  | 0.121795  | 0.129662  | 0.115385  | 0.119027  |
| 0.124417  | 0.0463287 | 0.116987  | 0.118735  | 0.118444  | 0.10912   | 0.122378  |
| 0.193619  | 0.182255  | 0.192016  | 0.176865  | 0.193182  | 0.173368  | 0.188374  |
| 0.126166  | 0.121212  | 0.118444  | 0.119901  | 0.123689  | 0.114948  | 0.119172  |
| 0.118444  | 0.108246  | 0.113928  | 0.117716  | 0.117716  | 0.101981  | 0.115822  |
| 0.210664  | 0.201923  | 0.215472  | 0.200612  | 0.211684  | 0.19595   | 0.211538  |
| 0.120629  | 0.127622  | 0.118153  | 0.123397  | 0.125728  | 0.117279  | 0.11014   |
| 0.127185  | 0.0479312 | 0.119464  | 0.121212  | 0.118298  | 0.111014  | 0.123689  |
| 0.12398   | 0.0467657 | 0.116841  | 0.115676  | 0.117424  | 0.105478  | 0.118153  |
| 0.130536  | 0.134907  | 0.13447   | 0.131556  | 0.142628  | 0.0802739 | 0.135781  |
| 0.189394  | 0.181235  | 0.193619  | 0.179633  | 0.193328  | 0.173805  | 0.188811  |
| 0.123106  | 0.123397  | 0.0874126 | 0.0690559 | 0.112762  | 0.11859   | 0.109994  |
| 0.126603  | 0.128059  | 0.128788  | 0.119172  | 0.13141   | 0.125     | 0.127768  |
| 0.124272  | 0.048514  | 0.11859   | 0.118881  | 0.117716  | 0.110431  | 0.123106  |
| 0.122815  | 0.0488054 | 0.114802  | 0.116259  | 0.117133  | 0.106061  | 0.11961   |
| 0.12296   | 0.048951  | 0.118444  | 0.116987  | 0.121066  | 0.107372  | 0.118881  |
| 0.118444  | 0.111451  | 0.11451   | 0.117424  | 0.127331  | 0.0492424 | 0.118444  |
| 0.10373   | 0.0935315 | 0.107372  | 0.112617  | 0.109703  | 0.104167  | 0.106643  |
| 0.131702  | 0.122086  | 0.106498  | 0.129516  | 0.125728  | 0.123689  | 0.119755  |
| 0.125583  | 0.137238  | 0.128059  | 0.132721  | 0.138258  | 0.113782  | 0.128497  |
| 0.133741  | 0.117716  | 0.104749  | 0.125146  | 0.130099  | 0.120192  | 0.118298  |
| 0.0517191 | 0.130973  | 0.123543  | 0.12704   | 0.127622  | 0.124126  | 0.12398   |
| 0.198135  | 0.187646  | 0.19595   | 0.184003  | 0.198864  | 0.17905   | 0.193765  |
| 0.122815  | 0.116404  | 0.11655   | 0.110431  | 0.121212  | 0.11451   | 0.120192  |
| 0.127914  | 0.127331  | 0.127477  | 0.128351  | 0.136218  | 0.0613345 | 0.129953  |
| 0.123106  | 0.0482226 | 0.117133  | 0.11859   | 0.114802  | 0.106352  | 0.121358  |
| 0.103438  | 0.0949883 | 0.109411  | 0.115822  | 0.109411  | 0.105041  | 0.111014  |
| 0.128497  | 0.113345  | 0.111451  | 0.113491  | 0.124854  | 0.10708   | 0.114219  |
| 0.122232  | 0.125146  | 0.0865385 | 0.0641026 | 0.111305  | 0.116841  | 0.109411  |
| 0.128059  | 0.128059  | 0.125291  | 0.132867  | 0.134615  | 0.122086  | 0.127477  |
| 0.128205  | 0.116841  | 0.118153  | 0.124272  | 0.130682  | 0.105624  | 0.121212  |
| 0.115093  | 0.1081    | 0.0942599 | 0.0756119 | 0.110286  | 0.109411  | 0.107226  |

|           |           |           |           |           |           |           |
|-----------|-----------|-----------|-----------|-----------|-----------|-----------|
| 0.10708   | 0.105332  | 0.0973193 | 0.0850816 | 0.108392  | 0.101981  | 0.105915  |
| 0.107517  | 0.100816  | 0.108246  | 0.113782  | 0.116987  | 0.0995047 | 0.110723  |
| 0.118153  | 0.116113  | 0.0483683 | 0.0903263 | 0.107226  | 0.113345  | 0.090472  |
| 0.138112  | 0.128788  | 0.114656  | 0.137092  | 0.13243   | 0.128059  | 0.126457  |
| 0.120484  | 0.118444  | 0.0891608 | 0.0675991 | 0.112762  | 0.116841  | 0.10912   |
| 0.116841  | 0.111014  | 0.114948  | 0.116404  | 0.122523  | 0.0523019 | 0.115676  |
| 0.11655   | 0.115385  | 0.0855186 | 0.0703671 | 0.107955  | 0.109411  | 0.104021  |
| 0.121649  | 0.0505536 | 0.116259  | 0.116259  | 0.118298  | 0.107226  | 0.118153  |
| 0.11655   | 0.115676  | 0.0872669 | 0.108537  | 0.109411  | 0.108829  | 0.0509907 |
| 0.128788  | 0.04662   | 0.122815  | 0.123106  | 0.120192  | 0.110286  | 0.124126  |
| 0.118298  | 0.112762  | 0.112325  | 0.103875  | 0.114073  | 0.106498  | 0.115967  |
| 0.126166  | 0.116259  | 0.121066  | 0.12602   | 0.127185  | 0.108537  | 0.122669  |
| 0.119464  | 0.111305  | 0.103293  | 0.109994  | 0.0581294 | 0.111742  | 0.111888  |
| 0.107372  | 0.0957168 | 0.111014  | 0.115676  | 0.113345  | 0.104604  | 0.112034  |
| 0.120338  | 0.0518648 | 0.118153  | 0.119318  | 0.118444  | 0.108829  | 0.119464  |
| 0.123834  | 0.117716  | 0.11961   | 0.114948  | 0.129516  | 0.108537  | 0.112471  |
| 0.12398   | 0.112325  | 0.118298  | 0.122669  | 0.126457  | 0.108974  | 0.12602   |
| 0.117133  | 0.107809  | 0.110577  | 0.117861  | 0.121358  | 0.105915  | 0.110431  |
| 0.124417  | 0.0515734 | 0.113782  | 0.118444  | 0.118153  | 0.107663  | 0.123834  |
| 0.11961   | 0.11757   | 0.119755  | 0.121212  | 0.125291  | 0.0512821 | 0.118735  |
| 0.122523  | 0.113782  | 0.04662   | 0.0929487 | 0.11014   | 0.115093  | 0.092803  |
| 0.12398   | 0.114948  | 0.113636  | 0.119464  | 0.127622  | 0.0498252 | 0.123397  |
| 0.120775  | 0.111451  | 0.103147  | 0.112179  | 0.0541958 | 0.114802  | 0.112617  |
| 0.10708   | 0.101253  | 0.113928  | 0.116841  | 0.11014   | 0.111014  | 0.111451  |
| 0.116987  | 0.103001  | 0.112179  | 0.11451   | 0.117716  | 0.103147  | 0.111451  |
| 0.116841  | 0.117133  | 0.0866841 | 0.111451  | 0.113491  | 0.109994  | 0.0515734 |
| 0.123689  | 0.11757   | 0.121503  | 0.126748  | 0.126748  | 0.0515734 | 0.12398   |
| 0.114948  | 0.126311  | 0.11014   | 0.121212  | 0.126457  | 0.111597  | 0.115239  |
| 0.115093  | 0.110723  | 0.111742  | 0.118735  | 0.12398   | 0.0977564 | 0.119464  |
| 0.196678  | 0.187063  | 0.197407  | 0.183421  | 0.197115  | 0.178467  | 0.194056  |
| 0.161131  | 0.160256  | 0.165064  | 0.151369  | 0.171474  | 0.146707  | 0.163462  |
| 0.131993  | 0.120338  | 0.105041  | 0.128642  | 0.124272  | 0.119318  | 0.118881  |
| 0.120192  | 0.117861  | 0.103147  | 0.0859557 | 0.123834  | 0.110431  | 0.113199  |
| 0.151078  | 0.149913  | 0.128497  | 0.15472   | 0.146853  | 0.147727  | 0.142628  |
| 0.135781  | 0.120921  | 0.122815  | 0.124563  | 0.128351  | 0.119318  | 0.12296   |
| 0.130099  | 0.0828963 | 0.125     | 0.119464  | 0.128788  | 0.114802  | 0.124272  |
| 0.123252  | 0.0810023 | 0.119318  | 0.117861  | 0.12602   | 0.104167  | 0.121795  |
| 0.120921  | 0.097028  | 0.121649  | 0.119901  | 0.123106  | 0.109411  | 0.122669  |
| 0.122669  | 0.111014  | 0.117861  | 0.126894  | 0.12602   | 0.107663  | 0.122378  |
| 0.204691  | 0.190414  | 0.204254  | 0.190851  | 0.205128  | 0.185606  | 0.203817  |
| 0.12296   | 0.123252  | 0.0872669 | 0.0686189 | 0.116696  | 0.121649  | 0.107517  |
| 0.121066  | 0.116113  | 0.108392  | 0.0844988 | 0.121503  | 0.0725524 | 0.118735  |
| 0.121649  | 0.0613345 | 0.115093  | 0.111597  | 0.117133  | 0.104895  | 0.117861  |
| 0.0638112 | 0.11859   | 0.114656  | 0.117861  | 0.122232  | 0.113199  | 0.11451   |

|           |           |           |           |           |           |          |
|-----------|-----------|-----------|-----------|-----------|-----------|----------|
| 0.183129  | 0.175845  | 0.189394  | 0.174534  | 0.189977  | 0.167249  | 0.186043 |
| 0.247232  | 0.243735  | 0.248834  | 0.23514   | 0.245047  | 0.233683  | 0.24461  |
| 0.128642  | 0.116404  | 0.122378  | 0.129371  | 0.134324  | 0.110431  | 0.121358 |
| 0.117861  | 0.111451  | 0.11859   | 0.125583  | 0.125874  | 0.1081    | 0.12398  |
| 0.129225  | 0.118153  | 0.108683  | 0.125291  | 0.125583  | 0.115093  | 0.121358 |
| 0.117424  | 0.108392  | 0.101253  | 0.11116   | 0.053176  | 0.114656  | 0.110723 |
| 0.117861  | 0.119318  | 0.083042  | 0.0658508 | 0.106352  | 0.111888  | 0.105915 |
| 0.122669  | 0.114219  | 0.112034  | 0.115239  | 0.11961   | 0.106498  | 0.114802 |
| 0.119318  | 0.0761946 | 0.117133  | 0.112179  | 0.120047  | 0.080711  | 0.123689 |
| 0.119027  | 0.117279  | 0.0839161 | 0.0632284 | 0.110431  | 0.112471  | 0.106206 |
| 0.122086  | 0.0842075 | 0.114948  | 0.11553   | 0.123397  | 0.0703671 | 0.121212 |
| 0.122232  | 0.109703  | 0.112471  | 0.121212  | 0.125291  | 0.113636  | 0.118153 |
| 0.10373   | 0.0976107 | 0.11116   | 0.114948  | 0.112325  | 0.10708   | 0.108974 |
| 0.128934  | 0.118153  | 0.119464  | 0.125583  | 0.131702  | 0.108974  | 0.122523 |
| 0.120629  | 0.113928  | 0.11553   | 0.11961   | 0.12602   | 0.0496795 | 0.123543 |
| 0.111888  | 0.109848  | 0.101544  | 0.108246  | 0.114365  | 0.0957168 | 0.105186 |
| 0.132867  | 0.121795  | 0.115239  | 0.123397  | 0.126603  | 0.124854  | 0.123252 |
| 0.126457  | 0.126748  | 0.112034  | 0.123689  | 0.0517191 | 0.131847  | 0.122086 |
| 0.12602   | 0.0499709 | 0.114802  | 0.11655   | 0.118881  | 0.108392  | 0.11757  |
| 0.123252  | 0.0888695 | 0.114656  | 0.116696  | 0.119901  | 0.117861  | 0.119464 |
| 0.134324  | 0.0617716 | 0.135052  | 0.132139  | 0.128059  | 0.124563  | 0.138112 |
| 0.208479  | 0.200903  | 0.21183   | 0.198427  | 0.209207  | 0.194347  | 0.207022 |
| 0.119464  | 0.110723  | 0.111742  | 0.116404  | 0.122815  | 0.100379  | 0.112179 |
| 0.105915  | 0.0986305 | 0.109848  | 0.116259  | 0.108974  | 0.109848  | 0.107372 |
| 0.120484  | 0.116113  | 0.118298  | 0.107809  | 0.119464  | 0.113928  | 0.121358 |
| 0.122086  | 0.121795  | 0.120192  | 0.121941  | 0.128642  | 0.114948  | 0.11451  |
| 0.0620629 | 0.118007  | 0.112908  | 0.116113  | 0.116696  | 0.108829  | 0.113928 |
| 0.197844  | 0.189685  | 0.201195  | 0.189248  | 0.200321  | 0.18546   | 0.202214 |
| 0.125146  | 0.120775  | 0.120047  | 0.12296   | 0.131702  | 0.0539044 | 0.124854 |
| 0.121795  | 0.0477855 | 0.114656  | 0.113782  | 0.113782  | 0.105915  | 0.120629 |
| 0.118735  | 0.122815  | 0.114802  | 0.120338  | 0.120921  | 0.118007  | 0.116404 |
| 0.116696  | 0.106789  | 0.100524  | 0.108392  | 0.0518648 | 0.109266  | 0.10912  |
| 0.12398   | 0.114656  | 0.120338  | 0.11859   | 0.129079  | 0.0501166 | 0.124854 |
| 0.116696  | 0.107955  | 0.109848  | 0.113345  | 0.119755  | 0.0690559 | 0.113199 |
| 0.122523  | 0.110286  | 0.111888  | 0.119755  | 0.124126  | 0.11014   | 0.11961  |
| 0.119027  | 0.121941  | 0.115676  | 0.121212  | 0.123834  | 0.115093  | 0.110286 |
| 0.198135  | 0.189685  | 0.201486  | 0.188666  | 0.198864  | 0.179633  | 0.200175 |
| 0.11757   | 0.109994  | 0.111888  | 0.112179  | 0.123252  | 0.0521562 | 0.112325 |
| 0.196096  | 0.181818  | 0.198864  | 0.184295  | 0.200029  | 0.178467  | 0.195221 |
| 0.196241  | 0.182838  | 0.19493   | 0.181527  | 0.195513  | 0.175991  | 0.193036 |
| 0.121066  | 0.121358  | 0.111305  | 0.121503  | 0.0512821 | 0.128205  | 0.115822 |
| 0.12398   | 0.13243   | 0.126166  | 0.131702  | 0.134615  | 0.127331  | 0.118444 |
| 0.113199  | 0.105332  | 0.104895  | 0.110723  | 0.118007  | 0.100816  | 0.111742 |
| 0.117716  | 0.107809  | 0.10708   | 0.110286  | 0.117861  | 0.0549242 | 0.112179 |

|          |           |           |           |           |           |           |
|----------|-----------|-----------|-----------|-----------|-----------|-----------|
| 0.121358 | 0.113199  | 0.115093  | 0.116841  | 0.12704   | 0.0480769 | 0.119318  |
| 0.128351 | 0.050845  | 0.120921  | 0.120047  | 0.121795  | 0.111014  | 0.120484  |
| 0.11553  | 0.113491  | 0.0812937 | 0.0716783 | 0.107226  | 0.107226  | 0.104167  |
| 0.115239 | 0.116987  | 0.0821678 | 0.0655594 | 0.106935  | 0.112179  | 0.104458  |
| 0.130536 | 0.120921  | 0.122523  | 0.128059  | 0.133013  | 0.111451  | 0.125583  |
| 0.121358 | 0.116404  | 0.105186  | 0.115967  | 0.0512821 | 0.119172  | 0.113199  |
| 0.119755 | 0.0474942 | 0.115239  | 0.114656  | 0.117861  | 0.102418  | 0.118298  |
| 0.121649 | 0.115239  | 0.118298  | 0.120338  | 0.128788  | 0.0495338 | 0.119318  |
| 0.105769 | 0.102564  | 0.105332  | 0.111742  | 0.113782  | 0.0960082 | 0.106643  |
| 0.123689 | 0.127477  | 0.126166  | 0.128205  | 0.135198  | 0.0600233 | 0.130682  |
| 0.128642 | 0.116987  | 0.104312  | 0.125     | 0.124126  | 0.117716  | 0.118735  |
| 0.131119 | 0.131993  | 0.130682  | 0.133887  | 0.135927  | 0.067162  | 0.134615  |
| 0.258741 | 0.255536  | 0.263549  | 0.247815  | 0.262675  | 0.245775  | 0.258159  |
| 0.126166 | 0.134615  | 0.0986305 | 0.122815  | 0.122523  | 0.127185  | 0.0550699 |
| 0.121358 | 0.129808  | 0.11014   | 0.12704   | 0.119172  | 0.128788  | 0.101544  |
| 0.221737 | 0.211247  | 0.223339  | 0.207896  | 0.2213    | 0.202652  | 0.220571  |
| 0.124272 | 0.124272  | 0.121212  | 0.132867  | 0.119172  | 0.128788  | 0.117279  |
| 0.228875 | 0.226253  | 0.233392  | 0.221737  | 0.234557  | 0.215035  | 0.228001  |
| 0.11859  | 0.125     | 0.0893065 | 0.114365  | 0.115239  | 0.11961   | 0.0518648 |
| 0.133304 | 0.057838  | 0.132867  | 0.131993  | 0.126457  | 0.121212  | 0.133013  |
| 0.113199 | 0.117279  | 0.112471  | 0.115967  | 0.122378  | 0.106643  | 0.107955  |
| 0.11961  | 0.119901  | 0.109557  | 0.120047  | 0.048951  | 0.12296   | 0.114948  |
| 0.205565 | 0.191579  | 0.20542   | 0.189977  | 0.206002  | 0.187937  | 0.203234  |
| 0.125146 | 0.128351  | 0.128205  | 0.129371  | 0.134033  | 0.0629371 | 0.131847  |
| 0.119318 | 0.117279  | 0.118007  | 0.116841  | 0.129371  | 0.048951  | 0.11961   |
| 0.227855 | 0.222902  | 0.229749  | 0.214015  | 0.228001  | 0.212267  | 0.223485  |
| 0.11961  | 0.11757   | 0.0885781 | 0.0678904 | 0.115093  | 0.115093  | 0.107372  |
| 0.200466 | 0.191142  | 0.201777  | 0.188083  | 0.202652  | 0.183712  | 0.202214  |
| 0.124126 | 0.122378  | 0.0866841 | 0.0683275 | 0.112034  | 0.114365  | 0.111888  |
| 0.126748 | 0.0486597 | 0.121649  | 0.121066  | 0.119318  | 0.107955  | 0.121212  |
| 0.111742 | 0.107372  | 0.118298  | 0.124126  | 0.121795  | 0.116259  | 0.11961   |
| 0.119318 | 0.125437  | 0.110431  | 0.12296   | 0.0512821 | 0.126748  | 0.120484  |
| 0.119172 | 0.113054  | 0.116987  | 0.117279  | 0.125146  | 0.104458  | 0.121503  |
| 0.162005 | 0.151224  | 0.16215   | 0.14933   | 0.167395  | 0.149913  | 0.161422  |
| 0.118007 | 0.113636  | 0.112617  | 0.11553   | 0.122523  | 0.0447261 | 0.119755  |
| 0.119172 | 0.122378  | 0.116987  | 0.123397  | 0.127477  | 0.11553   | 0.113928  |
| 0.119755 | 0.11655   | 0.120775  | 0.114656  | 0.121358  | 0.116987  | 0.115676  |
| 0.12296  | 0.131702  | 0.123106  | 0.128059  | 0.133013  | 0.117279  | 0.114802  |
| 0.198864 | 0.18546   | 0.198427  | 0.185897  | 0.19493   | 0.179779  | 0.196824  |
| 0.121795 | 0.0425408 | 0.118153  | 0.118444  | 0.116696  | 0.107663  | 0.119755  |
| 0.123397 | 0.112617  | 0.11014   | 0.112471  | 0.0643939 | 0.116259  | 0.116404  |
| 0.120921 | 0.114802  | 0.0488054 | 0.095134  | 0.10708   | 0.113491  | 0.0920746 |
| 0.117861 | 0.121649  | 0.0865385 | 0.0661422 | 0.112762  | 0.117716  | 0.108246  |
| 0.124417 | 0.0536131 | 0.125728  | 0.124854  | 0.122815  | 0.113199  | 0.129079  |

|          |           |           |           |           |           |          |
|----------|-----------|-----------|-----------|-----------|-----------|----------|
| 0.254516 | 0.25102   | 0.260781  | 0.243298  | 0.257284  | 0.241841  | 0.254808 |
| 0.104021 | 0.105769  | 0.114656  | 0.120775  | 0.112908  | 0.114073  | 0.110723 |
| 0.124126 | 0.090035  | 0.121649  | 0.110868  | 0.12398   | 0.111742  | 0.120921 |
| 0.139277 | 0.181818  | 0.178759  | 0.164773  | 0.182547  | 0.169726  | 0.176865 |
| 0.187646 | 0.177448  | 0.189248  | 0.172348  | 0.188374  | 0.170017  | 0.18852  |
| 0.130536 | 0.11655   | 0.123106  | 0.12398   | 0.131556  | 0.108246  | 0.12296  |
| 0.120775 | 0.115822  | 0.11859   | 0.120338  | 0.125583  | 0.0512821 | 0.123106 |
| 0.11757  | 0.106206  | 0.101107  | 0.107517  | 0.0556527 | 0.110723  | 0.11116  |
| 0.136655 | 0.144522  | 0.144085  | 0.143794  | 0.14729   | 0.0753205 | 0.143648 |
| 0.126457 | 0.114802  | 0.118153  | 0.123689  | 0.129225  | 0.106789  | 0.119172 |
| 0.129516 | 0.117279  | 0.120047  | 0.126457  | 0.132867  | 0.112762  | 0.12398  |
| 0.124417 | 0.128205  | 0.0910548 | 0.0662879 | 0.118153  | 0.122232  | 0.110431 |
| 0.119464 | 0.11451   | 0.113782  | 0.116113  | 0.121649  | 0.0557984 | 0.119172 |
| 0.125728 | 0.128351  | 0.125583  | 0.129953  | 0.131702  | 0.0603147 | 0.126603 |
| 0.122086 | 0.115676  | 0.097465  | 0.0659965 | 0.117279  | 0.110577  | 0.111888 |
| 0.121649 | 0.121066  | 0.105478  | 0.11859   | 0.0477855 | 0.126166  | 0.115239 |
| 0.131119 | 0.133741  | 0.121066  | 0.128059  | 0.060169  | 0.138549  | 0.130245 |
| 0.109703 | 0.110577  | 0.120921  | 0.123252  | 0.121212  | 0.117133  | 0.116987 |
| 0.125291 | 0.126748  | 0.112617  | 0.12398   | 0.0511364 | 0.133013  | 0.122086 |
| 0.126166 | 0.132867  | 0.0913462 | 0.067162  | 0.11757   | 0.127768  | 0.114802 |
| 0.21081  | 0.199738  | 0.210664  | 0.19697   | 0.210373  | 0.189103  | 0.207605 |
| 0.127331 | 0.111305  | 0.11116   | 0.11757   | 0.126311  | 0.125437  | 0.123543 |
| 0.193182 | 0.181235  | 0.194493  | 0.183712  | 0.194202  | 0.176136  | 0.191142 |
| 0.118881 | 0.114219  | 0.111451  | 0.116696  | 0.121066  | 0.108246  | 0.106935 |
| 0.129662 | 0.0574009 | 0.128934  | 0.127185  | 0.12398   | 0.117279  | 0.128497 |
| 0.129953 | 0.121212  | 0.10708   | 0.124563  | 0.125728  | 0.117279  | 0.121503 |
| 0.127185 | 0.113782  | 0.10169   | 0.11859   | 0.122378  | 0.113054  | 0.119318 |
| 0.123543 | 0.120629  | 0.121649  | 0.120484  | 0.128059  | 0.0543415 | 0.123834 |
| 0.121212 | 0.120338  | 0.11961   | 0.119901  | 0.128642  | 0.053176  | 0.12296  |
| 0.129371 | 0.0495338 | 0.117279  | 0.120192  | 0.119318  | 0.11116   | 0.122378 |
| 0.11757  | 0.119901  | 0.119464  | 0.120338  | 0.125291  | 0.112762  | 0.113199 |
| 0.132139 | 0.12398   | 0.107226  | 0.127622  | 0.126457  | 0.119172  | 0.123397 |
| 0.127914 | 0.135198  | 0.0980478 | 0.0706585 | 0.122232  | 0.130099  | 0.118298 |
| 0.248834 | 0.248543  | 0.255682  | 0.240239  | 0.251603  | 0.235868  | 0.251457 |
| 0.129371 | 0.04662   | 0.120192  | 0.120775  | 0.120192  | 0.108829  | 0.125291 |
| 0.184003 | 0.174388  | 0.187063  | 0.173077  | 0.185023  | 0.167832  | 0.187209 |
| 0.189977 | 0.180653  | 0.194493  | 0.179633  | 0.190705  | 0.172348  | 0.187937 |
| 0.123106 | 0.110286  | 0.119172  | 0.121795  | 0.13141   | 0.115676  | 0.123106 |
| 0.105041 | 0.102127  | 0.113345  | 0.118881  | 0.113345  | 0.111305  | 0.11116  |
| 0.130973 | 0.0557984 | 0.129953  | 0.124709  | 0.124126  | 0.118881  | 0.131847 |
| 0.116113 | 0.113199  | 0.113928  | 0.117133  | 0.122378  | 0.0501166 | 0.117279 |
| 0.117424 | 0.094697  | 0.11961   | 0.114656  | 0.121649  | 0.10912   | 0.115967 |
| 0.122378 | 0.118881  | 0.0872669 | 0.0692016 | 0.114073  | 0.114948  | 0.108974 |
| 0.118735 | 0.117279  | 0.120629  | 0.120629  | 0.129662  | 0.0795455 | 0.122523 |

|           |           |           |           |           |           |           |
|-----------|-----------|-----------|-----------|-----------|-----------|-----------|
| 0.128642  | 0.130099  | 0.130536  | 0.130245  | 0.133741  | 0.0649767 | 0.131265  |
| 0.127622  | 0.0495338 | 0.123106  | 0.120484  | 0.119027  | 0.109994  | 0.121503  |
| 0.125874  | 0.128497  | 0.124563  | 0.124272  | 0.133887  | 0.0639569 | 0.128497  |
| 0.116113  | 0.115822  | 0.104895  | 0.118298  | 0.113345  | 0.117424  | 0.0977564 |
| 0.133887  | 0.121941  | 0.111014  | 0.134615  | 0.128788  | 0.125     | 0.124854  |
| 0.125874  | 0.114219  | 0.105624  | 0.11116   | 0.0537587 | 0.118444  | 0.118298  |
| 0.127768  | 0.13447   | 0.0958625 | 0.0728438 | 0.119464  | 0.128205  | 0.120192  |
| 0.124126  | 0.115093  | 0.118153  | 0.124563  | 0.128059  | 0.119027  | 0.120629  |
| 0.121503  | 0.0559441 | 0.117861  | 0.115822  | 0.11553   | 0.110577  | 0.123252  |
| 0.125     | 0.129953  | 0.132139  | 0.121649  | 0.131556  | 0.126311  | 0.13141   |
| 0.186334  | 0.17701   | 0.189394  | 0.171911  | 0.189977  | 0.169289  | 0.18546   |
| 0.130828  | 0.132576  | 0.132139  | 0.133596  | 0.138549  | 0.0709499 | 0.131702  |
| 0.120629  | 0.120338  | 0.120484  | 0.119901  | 0.126894  | 0.0523019 | 0.124417  |
| 0.131556  | 0.120192  | 0.102855  | 0.127331  | 0.124126  | 0.121503  | 0.118153  |
| 0.122086  | 0.109557  | 0.099796  | 0.119901  | 0.119027  | 0.108829  | 0.112179  |
| 0.118735  | 0.113199  | 0.101981  | 0.113636  | 0.0425408 | 0.119172  | 0.11116   |
| 0.123543  | 0.118881  | 0.106498  | 0.116987  | 0.0493881 | 0.121941  | 0.115385  |
| 0.192453  | 0.185752  | 0.192308  | 0.18007   | 0.19289   | 0.177448  | 0.193036  |
| 0.115822  | 0.11553   | 0.114802  | 0.11451   | 0.125874  | 0.0748834 | 0.120192  |
| 0.11451   | 0.11014   | 0.10912   | 0.106789  | 0.118735  | 0.095134  | 0.107226  |
| 0.12296   | 0.122086  | 0.121358  | 0.123689  | 0.127768  | 0.0575466 | 0.124709  |
| 0.192162  | 0.183421  | 0.195804  | 0.18211   | 0.194347  | 0.176282  | 0.194784  |
| 0.105186  | 0.097028  | 0.108829  | 0.112325  | 0.112908  | 0.105332  | 0.106935  |
| 0.123397  | 0.128934  | 0.0879953 | 0.0667249 | 0.112762  | 0.122086  | 0.110286  |
| 0.125437  | 0.119027  | 0.123543  | 0.124709  | 0.129371  | 0.0562354 | 0.125146  |
| 0.122378  | 0.111597  | 0.115239  | 0.121358  | 0.123689  | 0.106206  | 0.11859   |
| 0.187937  | 0.178904  | 0.19391   | 0.175845  | 0.192453  | 0.171474  | 0.190268  |
| 0.119172  | 0.123834  | 0.08581   | 0.0625    | 0.111451  | 0.109994  | 0.107809  |
| 0.117424  | 0.114219  | 0.113782  | 0.103584  | 0.116696  | 0.104749  | 0.113636  |
| 0.109266  | 0.100816  | 0.11116   | 0.113199  | 0.114948  | 0.105915  | 0.111888  |
| 0.122378  | 0.117133  | 0.115239  | 0.112325  | 0.132139  | 0.100087  | 0.124126  |
| 0.118735  | 0.12398   | 0.11655   | 0.123834  | 0.129662  | 0.115385  | 0.112034  |
| 0.126311  | 0.131847  | 0.0903263 | 0.0702214 | 0.115967  | 0.123834  | 0.116113  |
| 0.126894  | 0.0453089 | 0.120338  | 0.119755  | 0.118298  | 0.108683  | 0.121941  |
| 0.129516  | 0.124563  | 0.112471  | 0.12296   | 0.128788  | 0.1081    | 0.113199  |
| 0.145105  | 0.145105  | 0.144668  | 0.150787  | 0.152826  | 0.13447   | 0.144522  |
| 0.236014  | 0.231061  | 0.239948  | 0.224213  | 0.238199  | 0.223922  | 0.236888  |
| 0.130536  | 0.124417  | 0.122523  | 0.127185  | 0.133596  | 0.122232  | 0.125291  |
| 0.122086  | 0.120338  | 0.116696  | 0.121358  | 0.129225  | 0.114073  | 0.113054  |
| 0.119318  | 0.114365  | 0.115385  | 0.111014  | 0.125583  | 0.0571096 | 0.121358  |
| 0.129371  | 0.120047  | 0.123689  | 0.125728  | 0.131265  | 0.11553   | 0.122378  |
| 0.116113  | 0.118735  | 0.104604  | 0.0984848 | 0.120338  | 0.106061  | 0.107955  |
| 0.0525932 | 0.118735  | 0.115676  | 0.118298  | 0.119755  | 0.112471  | 0.113199  |
| 0.121795  | 0.119755  | 0.11961   | 0.11757   | 0.128059  | 0.0642483 | 0.125     |

|          |           |           |           |          |           |           |
|----------|-----------|-----------|-----------|----------|-----------|-----------|
| 0.125728 | 0.129808  | 0.0882867 | 0.0658508 | 0.117133 | 0.123834  | 0.110577  |
| 0.123106 | 0.114365  | 0.116259  | 0.117716  | 0.125    | 0.110431  | 0.119318  |
| 0.238345 | 0.232226  | 0.243444  | 0.228584  | 0.239656 | 0.225087  | 0.237762  |
| 0.103001 | 0.0977564 | 0.109557  | 0.111305  | 0.108974 | 0.104604  | 0.107663  |
| 0.111742 | 0.113491  | 0.0862471 | 0.106935  | 0.111597 | 0.103438  | 0.0557984 |
| 0.12296  | 0.0474942 | 0.118735  | 0.117861  | 0.113782 | 0.107372  | 0.120629  |
| 0.134178 | 0.128059  | 0.130536  | 0.135198  | 0.140152 | 0.120047  | 0.131847  |
| 0.132139 | 0.126603  | 0.127914  | 0.134615  | 0.137821 | 0.131119  | 0.133596  |
| 0.116113 | 0.106206  | 0.121212  | 0.127331  | 0.133741 | 0.104604  | 0.128351  |
| 0.120484 | 0.114656  | 0.118881  | 0.118298  | 0.124709 | 0.0501166 | 0.122232  |
| 0.121795 | 0.108683  | 0.113782  | 0.115239  | 0.123689 | 0.100379  | 0.116259  |
| 0.229604 | 0.226981  | 0.235286  | 0.2213    | 0.232955 | 0.21722   | 0.230478  |
| 0.124126 | 0.125583  | 0.123397  | 0.123689  | 0.128934 | 0.0569639 | 0.126166  |
| 0.122523 | 0.124272  | 0.0868298 | 0.0643939 | 0.113345 | 0.120629  | 0.10912   |
| 0.118735 | 0.109411  | 0.111014  | 0.11655   | 0.117133 | 0.110723  | 0.115239  |
| 0.124709 | 0.123543  | 0.11961   | 0.124563  | 0.128642 | 0.118153  | 0.116841  |
| 0.124417 | 0.129662  | 0.0922203 | 0.119318  | 0.118735 | 0.124563  | 0.0524476 |
| 0.122669 | 0.0512821 | 0.122815  | 0.122232  | 0.118444 | 0.109994  | 0.122669  |
| 0.122378 | 0.126166  | 0.0887238 | 0.0689103 | 0.114073 | 0.120484  | 0.109557  |
| 0.124563 | 0.135635  | 0.0932401 | 0.0699301 | 0.119755 | 0.124709  | 0.11553   |
| 0.119318 | 0.120484  | 0.0891608 | 0.0687646 | 0.111597 | 0.11451   | 0.110868  |
| 0.124417 | 0.0457459 | 0.120484  | 0.119027  | 0.11757  | 0.108537  | 0.122378  |
| 0.119464 | 0.127622  | 0.122815  | 0.129516  | 0.132139 | 0.120775  | 0.117133  |
| 0.12398  | 0.133596  | 0.129662  | 0.131702  | 0.137529 | 0.125583  | 0.121066  |
| 0.136218 | 0.126894  | 0.112179  | 0.133741  | 0.127914 | 0.127622  | 0.122232  |
| 0.14088  | 0.13039   | 0.115676  | 0.137821  | 0.133159 | 0.13345   | 0.123397  |
| 0.124709 | 0.132867  | 0.126311  | 0.131556  | 0.134761 | 0.125437  | 0.120338  |
| 0.115676 | 0.0914918 | 0.114656  | 0.11553   | 0.117861 | 0.106789  | 0.114219  |
| 0.127768 | 0.138258  | 0.0594406 | 0.110723  | 0.117716 | 0.130828  | 0.106206  |
| 0.13549  | 0.122378  | 0.125146  | 0.123106  | 0.134178 | 0.127477  | 0.132867  |
| 0.204545 | 0.19697   | 0.212558  | 0.198281  | 0.209353 | 0.190705  | 0.206002  |
| 0.128788 | 0.115967  | 0.120484  | 0.126894  | 0.128642 | 0.116404  | 0.124126  |
| 0.121503 | 0.117133  | 0.0875583 | 0.111742  | 0.114365 | 0.11553   | 0.0565268 |
| 0.13243  | 0.0514277 | 0.126166  | 0.121795  | 0.125874 | 0.115093  | 0.125146  |
| 0.22465  | 0.219114  | 0.227418  | 0.211976  | 0.227418 | 0.209353  | 0.222902  |
| 0.211247 | 0.203963  | 0.213724  | 0.200029  | 0.214307 | 0.199446  | 0.212121  |
| 0.128059 | 0.131265  | 0.0926573 | 0.0710956 | 0.118881 | 0.125583  | 0.11553   |
| 0.250583 | 0.243007  | 0.255682  | 0.238782  | 0.252477 | 0.237908  | 0.250291  |
| 0.117424 | 0.0920746 | 0.118735  | 0.119027  | 0.119027 | 0.106498  | 0.116259  |
| 0.138403 | 0.131702  | 0.136801  | 0.139714  | 0.14292  | 0.136218  | 0.13549   |
| 0.106061 | 0.101981  | 0.114656  | 0.118735  | 0.113491 | 0.111742  | 0.111597  |
| 0.122232 | 0.128642  | 0.123543  | 0.127331  | 0.130536 | 0.11859   | 0.11553   |
| 0.189977 | 0.181527  | 0.194784  | 0.18109   | 0.193619 | 0.173805  | 0.191434  |
| 0.123689 | 0.122523  | 0.120047  | 0.123834  | 0.12296  | 0.122378  | 0.119901  |

|           |           |           |           |           |           |           |
|-----------|-----------|-----------|-----------|-----------|-----------|-----------|
| 0.197115  | 0.184295  | 0.199883  | 0.184149  | 0.198427  | 0.179196  | 0.197407  |
| 0.119318  | 0.10708   | 0.114802  | 0.122378  | 0.125874  | 0.1081    | 0.11961   |
| 0.123397  | 0.116696  | 0.0938228 | 0.0708042 | 0.117133  | 0.097028  | 0.110868  |
| 0.122232  | 0.118735  | 0.124417  | 0.123834  | 0.129079  | 0.117716  | 0.121358  |
| 0.113782  | 0.108829  | 0.112471  | 0.108392  | 0.122378  | 0.100524  | 0.114073  |
| 0.11859   | 0.048951  | 0.112617  | 0.113199  | 0.114073  | 0.101836  | 0.117133  |
| 0.117133  | 0.107809  | 0.11116   | 0.120192  | 0.120192  | 0.102418  | 0.117716  |
| 0.101981  | 0.0955711 | 0.107663  | 0.11116   | 0.110286  | 0.106789  | 0.1081    |
| 0.119318  | 0.111742  | 0.11655   | 0.116841  | 0.124417  | 0.0457459 | 0.118444  |
| 0.122669  | 0.121212  | 0.0464744 | 0.0942599 | 0.108246  | 0.11553   | 0.0949883 |
| 0.116841  | 0.110431  | 0.110577  | 0.118153  | 0.12398   | 0.103875  | 0.113054  |
| 0.105332  | 0.100087  | 0.111305  | 0.116841  | 0.112471  | 0.106643  | 0.109411  |
| 0.122669  | 0.108683  | 0.105915  | 0.121358  | 0.124854  | 0.120192  | 0.123252  |
| 0.126748  | 0.128497  | 0.126603  | 0.128351  | 0.131556  | 0.0619172 | 0.131702  |
| 0.125437  | 0.11553   | 0.10169   | 0.119755  | 0.121212  | 0.113928  | 0.116113  |
| 0.116841  | 0.111597  | 0.112325  | 0.106206  | 0.117861  | 0.106498  | 0.115967  |
| 0.119901  | 0.0444347 | 0.113345  | 0.115385  | 0.11655   | 0.101107  | 0.115822  |
| 0.120484  | 0.120775  | 0.0914918 | 0.0649767 | 0.110723  | 0.11014   | 0.112325  |
| 0.119027  | 0.120192  | 0.116259  | 0.120047  | 0.126166  | 0.112471  | 0.11116   |
| 0.119464  | 0.115967  | 0.105915  | 0.116696  | 0.0482226 | 0.119318  | 0.113345  |
| 0.126748  | 0.115967  | 0.10271   | 0.121649  | 0.120192  | 0.117861  | 0.112471  |
| 0.122232  | 0.118735  | 0.114802  | 0.118298  | 0.125583  | 0.0527389 | 0.123689  |
| 0.127914  | 0.128205  | 0.128351  | 0.127477  | 0.131556  | 0.0627914 | 0.130536  |
| 0.132867  | 0.135781  | 0.136509  | 0.137092  | 0.141171  | 0.071824  | 0.139569  |
| 0.109411  | 0.108829  | 0.0839161 | 0.0687646 | 0.105769  | 0.101981  | 0.104167  |
| 0.128642  | 0.0467657 | 0.120629  | 0.118298  | 0.119172  | 0.109848  | 0.120775  |
| 0.0579837 | 0.112179  | 0.106789  | 0.114365  | 0.116987  | 0.100962  | 0.108392  |
| 0.125291  | 0.137238  | 0.127185  | 0.13039   | 0.135344  | 0.127768  | 0.121212  |
| 0.105624  | 0.106789  | 0.114802  | 0.121503  | 0.113636  | 0.112179  | 0.114365  |
| 0.132139  | 0.135344  | 0.119464  | 0.130245  | 0.0600233 | 0.138112  | 0.128059  |
| 0.137966  | 0.0654138 | 0.141317  | 0.137529  | 0.132867  | 0.127331  | 0.142045  |
| 0.131993  | 0.123543  | 0.12398   | 0.131847  | 0.136218  | 0.113782  | 0.125     |
| 0.116113  | 0.100962  | 0.112179  | 0.11451   | 0.124126  | 0.10373   | 0.117279  |
| 0.119755  | 0.113345  | 0.111742  | 0.116987  | 0.122523  | 0.106789  | 0.105769  |
| 0.136072  | 0.123834  | 0.11116   | 0.13243   | 0.128934  | 0.12602   | 0.125583  |
| 0.209936  | 0.201777  | 0.209207  | 0.191142  | 0.212121  | 0.19289   | 0.206731  |
| 0.116113  | 0.114073  | 0.110723  | 0.103147  | 0.116259  | 0.107517  | 0.116404  |
| 0.122086  | 0.111014  | 0.120775  | 0.122232  | 0.126603  | 0.10912   | 0.119464  |
| 0.117279  | 0.124563  | 0.115676  | 0.120921  | 0.127331  | 0.115093  | 0.109411  |
| 0.128497  | 0.11655   | 0.105332  | 0.122815  | 0.126603  | 0.114365  | 0.118298  |
| 0.127768  | 0.111451  | 0.120629  | 0.125874  | 0.128497  | 0.117716  | 0.124563  |
| 0.109703  | 0.129225  | 0.111305  | 0.123543  | 0.124417  | 0.109848  | 0.114656  |
| 0.108683  | 0.13141   | 0.112908  | 0.125146  | 0.126603  | 0.114656  | 0.113928  |
| 0.127768  | 0.120484  | 0.120629  | 0.127331  | 0.132576  | 0.111888  | 0.122232  |



|          |           |           |           |          |           |          |
|----------|-----------|-----------|-----------|----------|-----------|----------|
| 0.11757  | 0.117279  | 0.0515734 | 0.0949883 | 0.107517 | 0.112179  | 0.097465 |
| 0.117861 | 0.130099  | 0.121795  | 0.128497  | 0.13141  | 0.119464  | 0.118153 |
| 0.118735 | 0.111742  | 0.117716  | 0.116841  | 0.123834 | 0.111305  | 0.109411 |
| 0.124709 | 0.110431  | 0.118153  | 0.12602   | 0.125437 | 0.115822  | 0.118881 |
| 0.177593 | 0.171766  | 0.177448  | 0.164627  | 0.180944 | 0.166084  | 0.17264  |
| 0.123397 | 0.115822  | 0.115676  | 0.116259  | 0.128205 | 0.0515734 | 0.122815 |
| 0.122669 | 0.129953  | 0.123689  | 0.12398   | 0.133013 | 0.120484  | 0.117133 |
| 0.125728 | 0.114073  | 0.101399  | 0.113636  | 0.123252 | 0.120338  | 0.114365 |
| 0.124126 | 0.120338  | 0.106206  | 0.112908  | 0.132721 | 0.107955  | 0.116259 |
| 0.110723 | 0.10373   | 0.103584  | 0.11553   | 0.114656 | 0.0989219 | 0.111014 |
| 0.115093 | 0.102855  | 0.103584  | 0.109411  | 0.11961  | 0.105041  | 0.1081   |
| 0.109266 | 0.110431  | 0.108829  | 0.118444  | 0.118153 | 0.105915  | 0.113928 |
| 0.120629 | 0.125874  | 0.108246  | 0.11116   | 0.128642 | 0.119318  | 0.112471 |
| 0.120338 | 0.110723  | 0.119318  | 0.116987  | 0.125728 | 0.08581   | 0.120047 |
| 0.127185 | 0.122815  | 0.115093  | 0.125583  | 0.125874 | 0.125291  | 0.126311 |
| 0.116259 | 0.111597  | 0.0957168 | 0.103875  | 0.115239 | 0.103584  | 0.107809 |
| 0.113199 | 0.118444  | 0.0976107 | 0.110723  | 0.117424 | 0.115093  | 0.112617 |
| 0.125874 | 0.125291  | 0.116113  | 0.111451  | 0.130973 | 0.13039   | 0.119464 |
| 0.120047 | 0.113345  | 0.0875583 | 0.110868  | 0.11961  | 0.118444  | 0.107809 |
| 0.120921 | 0.120921  | 0.110868  | 0.119027  | 0.119027 | 0.117861  | 0.114219 |
| 0.118881 | 0.106061  | 0.0831876 | 0.106789  | 0.113491 | 0.112908  | 0.101981 |
| 0.118298 | 0.111014  | 0.0869755 | 0.108829  | 0.116404 | 0.115239  | 0.107226 |
| 0.112471 | 0.0999417 | 0.107663  | 0.113782  | 0.111742 | 0.107372  | 0.107809 |
| 0.127768 | 0.113782  | 0.115967  | 0.120921  | 0.118007 | 0.11859   | 0.11961  |
| 0.117279 | 0.101836  | 0.0990676 | 0.108683  | 0.107226 | 0.110723  | 0.103293 |
| 0.136509 | 0.141463  | 0.117133  | 0.115967  | 0.137238 | 0.134324  | 0.131556 |
| 0.133596 | 0.128351  | 0.111888  | 0.102855  | 0.129079 | 0.123252  | 0.128351 |
| 0.11961  | 0.105332  | 0.0856643 | 0.105769  | 0.108683 | 0.111597  | 0.108246 |
| 0.134324 | 0.142191  | 0.117861  | 0.112908  | 0.127768 | 0.133887  | 0.128497 |
| 0.130828 | 0.118881  | 0.116696  | 0.127185  | 0.130973 | 0.110868  | 0.123252 |
| 0.130828 | 0.132867  | 0.133013  | 0.125728  | 0.142337 | 0.133887  | 0.132867 |
| 0.120338 | 0.105478  | 0.106789  | 0.120484  | 0.104167 | 0.112325  | 0.113928 |
| 0.141754 | 0.143794  | 0.138403  | 0.143648  | 0.143939 | 0.13345   | 0.135344 |
| 0.129225 | 0.13039   | 0.119172  | 0.125291  | 0.126457 | 0.128205  | 0.116987 |
| 0.133596 | 0.135635  | 0.125583  | 0.123252  | 0.133159 | 0.13549   | 0.126894 |
| 0.12398  | 0.119901  | 0.103438  | 0.121503  | 0.125874 | 0.114802  | 0.115822 |
| 0.122378 | 0.10373   | 0.088141  | 0.10271   | 0.118444 | 0.11116   | 0.102855 |
| 0.121066 | 0.104167  | 0.104312  | 0.105186  | 0.117424 | 0.112179  | 0.109703 |
| 0.120338 | 0.119172  | 0.097465  | 0.109411  | 0.120484 | 0.113782  | 0.104312 |
| 0.117716 | 0.116841  | 0.0945513 | 0.115822  | 0.115822 | 0.120775  | 0.102855 |
| 0.127185 | 0.123106  | 0.120629  | 0.130245  | 0.122669 | 0.127622  | 0.122815 |
| 0.12602  | 0.116696  | 0.111888  | 0.106352  | 0.124709 | 0.116259  | 0.122523 |
| 0.118153 | 0.108246  | 0.0961538 | 0.108683  | 0.117424 | 0.1081    | 0.104458 |
| 0.119464 | 0.104312  | 0.104458  | 0.105624  | 0.11553  | 0.112617  | 0.109848 |

|          |           |          |          |          |           |          |
|----------|-----------|----------|----------|----------|-----------|----------|
| 0.117861 | 0.112617  | 0.114802 | 0.115676 | 0.128205 | 0.120338  | 0.119318 |
| 0.114948 | 0.103584  | 0.105478 | 0.104604 | 0.115385 | 0.1081    | 0.113199 |
| 0.128788 | 0.113345  | 0.112908 | 0.110286 | 0.122815 | 0.121066  | 0.119464 |
| 0.118881 | 0.106643  | 0.110577 | 0.116696 | 0.111742 | 0.106206  | 0.113636 |
| 0.115822 | 0.10708   | 0.118298 | 0.125    | 0.129953 | 0.10373   | 0.12398  |
| 0.120192 | 0.107372  | 0.118007 | 0.119464 | 0.126166 | 0.106935  | 0.116113 |
| 0.114365 | 0.0913462 | 0.114219 | 0.114802 | 0.117716 | 0.106643  | 0.113782 |
| 0.112617 | 0.105041  | 0.108683 | 0.112471 | 0.123252 | 0.115093  | 0.113782 |
| 0.114802 | 0.107226  | 0.118444 | 0.121358 | 0.130099 | 0.103001  | 0.123252 |
| 0.115822 | 0.113491  | 0.109557 | 0.118007 | 0.121503 | 0.104021  | 0.114365 |
| 0.118735 | 0.121066  | 0.123543 | 0.123543 | 0.12704  | 0.104021  | 0.121358 |
| 0.110868 | 0.0992133 | 0.111305 | 0.113054 | 0.122669 | 0.0932401 | 0.121358 |
| 0.123252 | 0.125874  | 0.119901 | 0.127477 | 0.130973 | 0.119901  | 0.123834 |

| TDr_1839 | TDr_1850 | TDr_1851 | TDr_1856 | TDr_1858  | TDr_1876  | TDr_1881 |
|----------|----------|----------|----------|-----------|-----------|----------|
| 0.17162  | 0.133596 | 0.129079 | 0.12602  | 0.085373  | 0.119464  | 0.119755 |
| 0.174388 | 0.121212 | 0.116404 | 0.112471 | 0.11757   | 0.108829  | 0.120775 |
| 0.171474 | 0.118007 | 0.119027 | 0.111014 | 0.113199  | 0.103875  | 0.121066 |
| 0.18109  | 0.120047 | 0.126603 | 0.120629 | 0.12398   | 0.0913462 | 0.122815 |
| 0.201486 | 0.132284 | 0.126894 | 0.133159 | 0.140589  | 0.133013  | 0.13243  |
| 0.191871 | 0.13549  | 0.122815 | 0.128205 | 0.118735  | 0.128642  | 0.129808 |
| 0.196387 | 0.13039  | 0.134033 | 0.125437 | 0.107809  | 0.125     | 0.104604 |
| 0.175991 | 0.120775 | 0.121795 | 0.11116  | 0.117716  | 0.107226  | 0.115093 |
| 0.17905  | 0.119172 | 0.120484 | 0.111014 | 0.111451  | 0.108246  | 0.106206 |
| 0.184732 | 0.12602  | 0.124417 | 0.116113 | 0.115093  | 0.120338  | 0.120921 |
| 0.171766 | 0.132284 | 0.129808 | 0.123252 | 0.107372  | 0.130973  | 0.112034 |
| 0.178322 | 0.11116  | 0.123543 | 0.109703 | 0.120921  | 0.107809  | 0.108683 |
| 0.184149 | 0.12602  | 0.126166 | 0.116696 | 0.121503  | 0.115093  | 0.116259 |
| 0.144376 | 0.146853 | 0.14292  | 0.136072 | 0.13447   | 0.133304  | 0.146125 |
| 0.190559 | 0.135052 | 0.129953 | 0.127768 | 0.135781  | 0.127914  | 0.134033 |
| 0.192745 | 0.131993 | 0.129808 | 0.125874 | 0.119318  | 0.120192  | 0.10271  |
| 0.187063 | 0.102127 | 0.122086 | 0.109703 | 0.121212  | 0.118298  | 0.104895 |
| 0.206439 | 0.138403 | 0.135344 | 0.145688 | 0.154283  | 0.137675  | 0.144959 |
| 0.1706   | 0.118298 | 0.116696 | 0.106061 | 0.110577  | 0.103875  | 0.114365 |
| 0.139132 | 0.208042 | 0.205274 | 0.199592 | 0.19799   | 0.200612  | 0.212267 |
| 0.18852  | 0.125437 | 0.12296  | 0.117279 | 0.107517  | 0.130536  | 0.121795 |
| 0.192453 | 0.119755 | 0.11961  | 0.110431 | 0.103293  | 0.124563  | 0.123689 |
| 0.181527 | 0.118444 | 0.122669 | 0.110868 | 0.120047  | 0.109557  | 0.110431 |
| 0.197407 | 0.124709 | 0.130682 | 0.12704  | 0.129225  | 0.127768  | 0.10271  |
| 0.177739 | 0.116404 | 0.111888 | 0.11553  | 0.111014  | 0.109266  | 0.106643 |
| 0.19697  | 0.131847 | 0.125291 | 0.11961  | 0.113345  | 0.13345   | 0.123543 |
| 0.193182 | 0.126603 | 0.127622 | 0.12602  | 0.119755  | 0.131119  | 0.110431 |
| 0.19697  | 0.11961  | 0.126166 | 0.119318 | 0.129079  | 0.120921  | 0.111305 |
| 0.198718 | 0.13243  | 0.134907 | 0.130973 | 0.130245  | 0.133741  | 0.115967 |
| 0.196678 | 0.123397 | 0.134324 | 0.123106 | 0.124126  | 0.124417  | 0.117716 |
| 0.191579 | 0.130828 | 0.129225 | 0.128497 | 0.0989219 | 0.13243   | 0.116113 |
| 0.192599 | 0.121358 | 0.130828 | 0.124563 | 0.122669  | 0.124709  | 0.109848 |
| 0.176865 | 0.113782 | 0.117716 | 0.108829 | 0.106061  | 0.113054  | 0.106935 |
| 0.187646 | 0.128351 | 0.122086 | 0.116696 | 0.120047  | 0.118007  | 0.113928 |
| 0.194493 | 0.129079 | 0.13039  | 0.125    | 0.121358  | 0.13039   | 0.100962 |
| 0.201632 | 0.133887 | 0.136364 | 0.131265 | 0.127622  | 0.131993  | 0.11014  |
| 0.207605 | 0.136655 | 0.137675 | 0.138403 | 0.118153  | 0.136509  | 0.116987 |
| 0.190559 | 0.124563 | 0.133741 | 0.121941 | 0.117133  | 0.127914  | 0.11451  |
| 0.184149 | 0.116404 | 0.122669 | 0.112325 | 0.112471  | 0.111597  | 0.10373  |
| 0.192599 | 0.127477 | 0.130828 | 0.12398  | 0.133159  | 0.120629  | 0.117133 |
| 0.180653 | 0.118735 | 0.121503 | 0.108537 | 0.118298  | 0.112762  | 0.106061 |
| 0.204254 | 0.146125 | 0.150932 | 0.146416 | 0.148893  | 0.143939  | 0.133741 |

|          |          |          |          |           |           |           |
|----------|----------|----------|----------|-----------|-----------|-----------|
| 0.203671 | 0.150204 | 0.153846 | 0.139714 | 0.148601  | 0.147145  | 0.132284  |
| 0.182255 | 0.123543 | 0.126603 | 0.118007 | 0.121649  | 0.11961   | 0.112325  |
| 0.184295 | 0.111305 | 0.116113 | 0.110431 | 0.111451  | 0.116404  | 0.0980478 |
| 0.199009 | 0.127185 | 0.13345  | 0.127185 | 0.124709  | 0.125583  | 0.106935  |
| 0.187063 | 0.113491 | 0.123834 | 0.113199 | 0.126748  | 0.121212  | 0.104312  |
| 0.202652 | 0.140443 | 0.149038 | 0.137821 | 0.139714  | 0.141171  | 0.127185  |
| 0.188666 | 0.120921 | 0.12398  | 0.107809 | 0.126603  | 0.118153  | 0.112617  |
| 0.182692 | 0.122523 | 0.130536 | 0.116696 | 0.124126  | 0.120921  | 0.11014   |
| 0.207605 | 0.149767 | 0.152244 | 0.151515 | 0.0759033 | 0.147873  | 0.128642  |
| 0.193619 | 0.118007 | 0.134178 | 0.121795 | 0.138258  | 0.135052  | 0.120775  |
| 0.183275 | 0.122523 | 0.125    | 0.114948 | 0.121503  | 0.11859   | 0.106643  |
| 0.197552 | 0.135635 | 0.133159 | 0.12602  | 0.135781  | 0.12296   | 0.129371  |
| 0.173951 | 0.127768 | 0.123543 | 0.114948 | 0.119464  | 0.0894522 | 0.117716  |
| 0.210082 | 0.133013 | 0.142483 | 0.129516 | 0.147145  | 0.136072  | 0.116259  |
| 0.19799  | 0.140152 | 0.134761 | 0.125874 | 0.134761  | 0.129808  | 0.113199  |
| 0.186917 | 0.119172 | 0.125437 | 0.111888 | 0.123397  | 0.11757   | 0.109411  |
| 0.18546  | 0.124709 | 0.129225 | 0.118298 | 0.126311  | 0.125146  | 0.119901  |
| 0.198718 | 0.129516 | 0.130245 | 0.121649 | 0.124709  | 0.128497  | 0.104312  |
| 0.209207 | 0.142628 | 0.145979 | 0.135344 | 0.142483  | 0.138112  | 0.121503  |
| 0.207168 | 0.146707 | 0.14627  | 0.140589 | 0.148893  | 0.132867  | 0.127914  |
| 0.160693 | 0.170746 | 0.17264  | 0.167249 | 0.157197  | 0.160693  | 0.160693  |
| 0.186334 | 0.119464 | 0.127185 | 0.117424 | 0.120775  | 0.115822  | 0.111451  |
| 0.186334 | 0.119755 | 0.122815 | 0.113054 | 0.123689  | 0.119901  | 0.110286  |
| 0.185169 | 0.117133 | 0.126894 | 0.113054 | 0.117861  | 0.116113  | 0.10708   |
| 0.198427 | 0.143211 | 0.148601 | 0.143211 | 0.127331  | 0.144231  | 0.126748  |
| 0.183275 | 0.121358 | 0.124709 | 0.112617 | 0.121795  | 0.114219  | 0.107809  |
| 0.195367 | 0.13141  | 0.136509 | 0.126748 | 0.14088   | 0.13447   | 0.122815  |
| 0.197698 | 0.126457 | 0.132721 | 0.127622 | 0.121358  | 0.128642  | 0.100087  |
| 0.183858 | 0.119318 | 0.130245 | 0.11757  | 0.124709  | 0.125583  | 0.11655   |
| 0.199009 | 0.146707 | 0.155886 | 0.148164 | 0.130245  | 0.145979  | 0.135781  |
| 0.19493  | 0.130682 | 0.134615 | 0.126311 | 0.129079  | 0.125874  | 0.11655   |
| 0.205274 | 0.145105 | 0.148164 | 0.129953 | 0.143794  | 0.13884   | 0.128642  |
| 0.196678 | 0.120775 | 0.132867 | 0.122232 | 0.141026  | 0.133159  | 0.125583  |
| 0.17905  | 0.10169  | 0.115239 | 0.109557 | 0.117861  | 0.114073  | 0.114656  |
| 0.183129 | 0.123834 | 0.124854 | 0.11655  | 0.125437  | 0.115822  | 0.10708   |
| 0.187791 | 0.121212 | 0.125146 | 0.11655  | 0.125146  | 0.119901  | 0.109411  |
| 0.200903 | 0.134033 | 0.139423 | 0.129953 | 0.139132  | 0.129808  | 0.116696  |
| 0.183566 | 0.125728 | 0.124709 | 0.118153 | 0.119172  | 0.119755  | 0.102855  |
| 0.2044   | 0.141608 | 0.148456 | 0.135198 | 0.146416  | 0.134178  | 0.133887  |
| 0.1875   | 0.131993 | 0.137383 | 0.126457 | 0.127185  | 0.127768  | 0.111742  |
| 0.19391  | 0.11859  | 0.126603 | 0.117424 | 0.127185  | 0.119318  | 0.106206  |
| 0.186043 | 0.125    | 0.133887 | 0.114219 | 0.126311  | 0.124854  | 0.110577  |
| 0.192162 | 0.127914 | 0.131847 | 0.125    | 0.133596  | 0.120775  | 0.118444  |
| 0.184878 | 0.120629 | 0.126603 | 0.117424 | 0.123106  | 0.12398   | 0.111742  |

|          |          |          |          |          |          |           |
|----------|----------|----------|----------|----------|----------|-----------|
| 0.185169 | 0.119464 | 0.125437 | 0.110431 | 0.123689 | 0.117279 | 0.10708   |
| 0.208042 | 0.140297 | 0.145105 | 0.14088  | 0.146562 | 0.137821 | 0.125874  |
| 0.187354 | 0.119901 | 0.125583 | 0.11961  | 0.116841 | 0.121795 | 0.0990676 |
| 0.188083 | 0.121795 | 0.12398  | 0.11859  | 0.121941 | 0.118444 | 0.101544  |
| 0.197115 | 0.127331 | 0.133887 | 0.123834 | 0.122523 | 0.128934 | 0.114365  |
| 0.197407 | 0.132867 | 0.137092 | 0.129371 | 0.10912  | 0.13243  | 0.108537  |
| 0.203234 | 0.125291 | 0.123397 | 0.125    | 0.135344 | 0.140297 | 0.115822  |
| 0.214452 | 0.136509 | 0.131702 | 0.136509 | 0.142483 | 0.138695 | 0.117716  |
| 0.184586 | 0.122086 | 0.125146 | 0.120629 | 0.104749 | 0.126311 | 0.111451  |
| 0.150495 | 0.185023 | 0.190997 | 0.185315 | 0.167978 | 0.185169 | 0.180798  |
| 0.185606 | 0.114073 | 0.119755 | 0.113199 | 0.107809 | 0.112179 | 0.103147  |
| 0.204108 | 0.139277 | 0.134761 | 0.128497 | 0.142045 | 0.139132 | 0.119901  |
| 0.199738 | 0.130245 | 0.126603 | 0.122378 | 0.134178 | 0.130973 | 0.112034  |
| 0.20979  | 0.133304 | 0.141608 | 0.137675 | 0.119755 | 0.143939 | 0.118007  |
| 0.189831 | 0.119172 | 0.114656 | 0.113345 | 0.121941 | 0.116696 | 0.0948427 |
| 0.203817 | 0.127914 | 0.128059 | 0.130245 | 0.137966 | 0.131265 | 0.108829  |
| 0.18954  | 0.11451  | 0.116113 | 0.112179 | 0.115239 | 0.11961  | 0.103875  |
| 0.193182 | 0.125437 | 0.125583 | 0.123689 | 0.127914 | 0.127622 | 0.111888  |
| 0.190268 | 0.127768 | 0.125583 | 0.122523 | 0.104895 | 0.120629 | 0.107226  |
| 0.207459 | 0.134178 | 0.130536 | 0.131556 | 0.143357 | 0.1419   | 0.115676  |
| 0.185315 | 0.116987 | 0.124709 | 0.114656 | 0.114219 | 0.119172 | 0.101107  |
| 0.200612 | 0.133741 | 0.137966 | 0.135781 | 0.121358 | 0.135927 | 0.116404  |
| 0.187937 | 0.118153 | 0.127331 | 0.117861 | 0.103438 | 0.124417 | 0.104604  |
| 0.199155 | 0.137529 | 0.138549 | 0.131119 | 0.141754 | 0.13243  | 0.123689  |
| 0.197844 | 0.134761 | 0.13986  | 0.131265 | 0.115967 | 0.137821 | 0.115385  |
| 0.189394 | 0.114365 | 0.116841 | 0.117279 | 0.104604 | 0.121795 | 0.102855  |
| 0.19697  | 0.144959 | 0.153555 | 0.146125 | 0.134907 | 0.145396 | 0.130828  |
| 0.192453 | 0.115967 | 0.120484 | 0.120047 | 0.104167 | 0.125146 | 0.103584  |
| 0.192745 | 0.122086 | 0.121066 | 0.115676 | 0.121941 | 0.120192 | 0.106498  |
| 0.192308 | 0.11553  | 0.124417 | 0.112325 | 0.121212 | 0.121212 | 0.109557  |
| 0.204545 | 0.141754 | 0.143648 | 0.138549 | 0.125    | 0.142774 | 0.134907  |
| 0.174242 | 0.129225 | 0.131702 | 0.123397 | 0.112179 | 0.128497 | 0.11655   |
| 0.187063 | 0.117861 | 0.11859  | 0.109411 | 0.115676 | 0.113928 | 0.100233  |
| 0.183566 | 0.116404 | 0.110431 | 0.109703 | 0.118298 | 0.11859  | 0.10373   |
| 0.187209 | 0.124417 | 0.126603 | 0.117424 | 0.104167 | 0.122815 | 0.10912   |
| 0.202506 | 0.133596 | 0.134907 | 0.132139 | 0.130536 | 0.131993 | 0.113054  |
| 0.193328 | 0.127331 | 0.129516 | 0.120921 | 0.104167 | 0.126603 | 0.101836  |
| 0.178613 | 0.110868 | 0.118881 | 0.109411 | 0.111305 | 0.111014 | 0.0926573 |
| 0.184732 | 0.118153 | 0.118881 | 0.114073 | 0.1081   | 0.111888 | 0.0979021 |
| 0.189248 | 0.113054 | 0.122523 | 0.116841 | 0.119318 | 0.116987 | 0.10067   |
| 0.186043 | 0.123543 | 0.129808 | 0.120629 | 0.12602  | 0.122523 | 0.116404  |
| 0.200758 | 0.131847 | 0.136655 | 0.131556 | 0.132867 | 0.134324 | 0.108392  |
| 0.192162 | 0.112179 | 0.11961  | 0.110431 | 0.119027 | 0.118153 | 0.0989219 |
| 0.182984 | 0.114073 | 0.115093 | 0.10912  | 0.113054 | 0.114802 | 0.100233  |

|           |          |          |          |          |           |           |
|-----------|----------|----------|----------|----------|-----------|-----------|
| 0.197261  | 0.12398  | 0.136364 | 0.129808 | 0.127914 | 0.133741  | 0.104021  |
| 0.186043  | 0.116841 | 0.127768 | 0.113345 | 0.112034 | 0.116696  | 0.0965909 |
| 0.183421  | 0.134033 | 0.13243  | 0.124709 | 0.114656 | 0.128351  | 0.11553   |
| 0.197407  | 0.137821 | 0.141171 | 0.136946 | 0.0625   | 0.135927  | 0.117861  |
| 0.194784  | 0.120047 | 0.126603 | 0.119464 | 0.120192 | 0.121941  | 0.102418  |
| 0.190559  | 0.116696 | 0.125    | 0.113491 | 0.120629 | 0.120047  | 0.101981  |
| 0.185315  | 0.11553  | 0.124709 | 0.111451 | 0.120921 | 0.11655   | 0.105478  |
| 0.182692  | 0.118735 | 0.115676 | 0.114656 | 0.112471 | 0.117716  | 0.101107  |
| 0.197261  | 0.125437 | 0.129662 | 0.128642 | 0.132284 | 0.127622  | 0.116259  |
| 0.185023  | 0.116404 | 0.120629 | 0.112325 | 0.111597 | 0.114219  | 0.0979021 |
| 0.206439  | 0.138695 | 0.148164 | 0.136364 | 0.136509 | 0.14088   | 0.118735  |
| 0.196678  | 0.141463 | 0.141608 | 0.133304 | 0.137821 | 0.136946  | 0.129953  |
| 0.193473  | 0.133013 | 0.137529 | 0.126603 | 0.127331 | 0.125874  | 0.121212  |
| 0.188957  | 0.123543 | 0.126311 | 0.119172 | 0.122232 | 0.126311  | 0.113782  |
| 0.186334  | 0.118007 | 0.119901 | 0.11655  | 0.10271  | 0.126894  | 0.109411  |
| 0.190268  | 0.115239 | 0.124417 | 0.114073 | 0.115967 | 0.121795  | 0.0932401 |
| 0.188083  | 0.115676 | 0.127477 | 0.115967 | 0.114948 | 0.116987  | 0.0913462 |
| 0.186043  | 0.120921 | 0.118444 | 0.11014  | 0.117279 | 0.112617  | 0.101544  |
| 0.176428  | 0.123252 | 0.121066 | 0.115967 | 0.11961  | 0.0971737 | 0.113782  |
| 0.201777  | 0.128205 | 0.135635 | 0.126166 | 0.140589 | 0.133596  | 0.109994  |
| 0.197844  | 0.121066 | 0.117424 | 0.118153 | 0.120338 | 0.12296   | 0.100233  |
| 0.19595   | 0.132284 | 0.133013 | 0.125583 | 0.134761 | 0.130973  | 0.133887  |
| 0.204545  | 0.13243  | 0.138695 | 0.132721 | 0.126748 | 0.138403  | 0.118881  |
| 0.0938228 | 0.196533 | 0.198718 | 0.188374 | 0.189685 | 0.190851  | 0.201923  |
| 0.131265  | 0.242716 | 0.23412  | 0.231643 | 0.233537 | 0.229749  | 0.243444  |
| 0.175991  | 0.118735 | 0.119755 | 0.11116  | 0.116259 | 0.0710956 | 0.111597  |
| 0.181672  | 0.113928 | 0.121649 | 0.109557 | 0.119901 | 0.117861  | 0.099796  |
| 0.179341  | 0.111888 | 0.117861 | 0.109848 | 0.111451 | 0.114365  | 0.0986305 |
| 0.184878  | 0.106643 | 0.116113 | 0.105186 | 0.119901 | 0.116404  | 0.103293  |
| 0.190997  | 0.13986  | 0.134178 | 0.130245 | 0.137966 | 0.128351  | 0.135927  |
| 0.186917  | 0.111888 | 0.122815 | 0.108974 | 0.120484 | 0.113199  | 0.0942599 |
| 0.208333  | 0.139423 | 0.151515 | 0.14088  | 0.14831  | 0.146562  | 0.11451   |
| 0.187209  | 0.110431 | 0.120192 | 0.111014 | 0.126311 | 0.121649  | 0.10067   |
| 0.203234  | 0.124709 | 0.131847 | 0.124709 | 0.136509 | 0.129516  | 0.112325  |
| 0.192599  | 0.129808 | 0.13345  | 0.12602  | 0.136364 | 0.131993  | 0.11859   |
| 0.203671  | 0.119901 | 0.133741 | 0.125437 | 0.142191 | 0.133741  | 0.114219  |
| 0.201632  | 0.144376 | 0.147145 | 0.137383 | 0.143939 | 0.137238  | 0.128788  |
| 0.19289   | 0.107663 | 0.126166 | 0.112325 | 0.12296  | 0.123252  | 0.105769  |
| 0.188228  | 0.109411 | 0.118881 | 0.106789 | 0.120629 | 0.118007  | 0.0990676 |
| 0.190122  | 0.109266 | 0.123397 | 0.113345 | 0.125728 | 0.124563  | 0.103001  |
| 0.182838  | 0.104604 | 0.117861 | 0.105186 | 0.118444 | 0.113491  | 0.10271   |
| 0.18546   | 0.105186 | 0.117861 | 0.109557 | 0.120484 | 0.114948  | 0.0995047 |
| 0.187937  | 0.106206 | 0.125583 | 0.113491 | 0.124126 | 0.11655   | 0.101399  |
| 0.196533  | 0.114219 | 0.131847 | 0.118007 | 0.13447  | 0.130099  | 0.113199  |

|          |          |          |          |          |          |           |
|----------|----------|----------|----------|----------|----------|-----------|
| 0.204983 | 0.125291 | 0.131556 | 0.126166 | 0.145251 | 0.138549 | 0.125437  |
| 0.18852  | 0.116696 | 0.127914 | 0.109703 | 0.124126 | 0.119755 | 0.102273  |
| 0.18546  | 0.118007 | 0.121941 | 0.113928 | 0.120484 | 0.119027 | 0.103875  |
| 0.204691 | 0.123834 | 0.135344 | 0.130536 | 0.136801 | 0.136509 | 0.119027  |
| 0.182838 | 0.110431 | 0.120775 | 0.103147 | 0.119027 | 0.115239 | 0.0995047 |
| 0.201923 | 0.128351 | 0.142191 | 0.125146 | 0.150058 | 0.147436 | 0.126457  |
| 0.190559 | 0.133596 | 0.1419   | 0.13243  | 0.143648 | 0.139569 | 0.137529  |
| 0.192745 | 0.124417 | 0.127768 | 0.120047 | 0.141463 | 0.134761 | 0.12602   |
| 0.184295 | 0.107517 | 0.121358 | 0.108683 | 0.120192 | 0.112034 | 0.10067   |
| 0.185023 | 0.106789 | 0.117133 | 0.100087 | 0.117133 | 0.113345 | 0.0973193 |
| 0.19799  | 0.114219 | 0.128642 | 0.115676 | 0.134761 | 0.126603 | 0.10271   |
| 0.196387 | 0.115239 | 0.125    | 0.112908 | 0.129953 | 0.125    | 0.104312  |
| 0.195513 | 0.118153 | 0.137529 | 0.124272 | 0.133159 | 0.134907 | 0.110431  |
| 0.192162 | 0.108392 | 0.125437 | 0.116259 | 0.122232 | 0.118444 | 0.105624  |
| 0.189103 | 0.111451 | 0.123543 | 0.112908 | 0.127331 | 0.122669 | 0.105478  |
| 0.193182 | 0.11553  | 0.124417 | 0.116987 | 0.130828 | 0.124417 | 0.107226  |
| 0.204254 | 0.128642 | 0.136655 | 0.127768 | 0.137238 | 0.141608 | 0.115676  |
| 0.198427 | 0.128059 | 0.130828 | 0.121649 | 0.13549  | 0.133741 | 0.112179  |
| 0.202943 | 0.129079 | 0.132721 | 0.132284 | 0.13884  | 0.135927 | 0.108829  |
| 0.197261 | 0.137092 | 0.139569 | 0.137675 | 0.133741 | 0.134615 | 0.126457  |
| 0.190268 | 0.113199 | 0.124126 | 0.114656 | 0.120921 | 0.113928 | 0.0984848 |
| 0.199009 | 0.11961  | 0.13345  | 0.116987 | 0.138695 | 0.131993 | 0.122378  |
| 0.187209 | 0.105186 | 0.116987 | 0.110431 | 0.119318 | 0.114948 | 0.100962  |
| 0.180653 | 0.122815 | 0.123834 | 0.115822 | 0.122669 | 0.122669 | 0.114219  |
| 0.187646 | 0.103875 | 0.117716 | 0.106789 | 0.122378 | 0.120047 | 0.104021  |
| 0.184003 | 0.108974 | 0.116696 | 0.103438 | 0.122523 | 0.119318 | 0.103875  |
| 0.185752 | 0.101981 | 0.119027 | 0.104604 | 0.120484 | 0.113491 | 0.0971737 |
| 0.202797 | 0.124563 | 0.137238 | 0.124272 | 0.1419   | 0.138112 | 0.113345  |
| 0.1875   | 0.123543 | 0.126894 | 0.117133 | 0.118153 | 0.123397 | 0.112617  |
| 0.200612 | 0.12296  | 0.13447  | 0.116841 | 0.14088  | 0.129225 | 0.114365  |
| 0.183129 | 0.104604 | 0.117861 | 0.103438 | 0.123689 | 0.116404 | 0.101544  |
| 0.200758 | 0.11757  | 0.132867 | 0.123397 | 0.132576 | 0.130536 | 0.0999417 |
| 0.19391  | 0.129953 | 0.128934 | 0.130828 | 0.131556 | 0.126311 | 0.112908  |
| 0.179633 | 0.124417 | 0.127477 | 0.119464 | 0.129808 | 0.125146 | 0.121941  |
| 0.194056 | 0.119901 | 0.125291 | 0.119318 | 0.119755 | 0.123834 | 0.0827506 |
| 0.186917 | 0.111888 | 0.123397 | 0.112471 | 0.132721 | 0.123397 | 0.124854  |
| 0.19493  | 0.125437 | 0.129371 | 0.118735 | 0.129371 | 0.126457 | 0.113054  |
| 0.187937 | 0.120484 | 0.124126 | 0.119901 | 0.110723 | 0.122378 | 0.106352  |
| 0.206002 | 0.143502 | 0.147145 | 0.140006 | 0.138403 | 0.139569 | 0.132867  |
| 0.209062 | 0.139569 | 0.149621 | 0.143939 | 0.140006 | 0.133596 | 0.107372  |
| 0.181672 | 0.118881 | 0.119027 | 0.109848 | 0.112617 | 0.111742 | 0.112617  |
| 0.20134  | 0.129808 | 0.129371 | 0.122523 | 0.136946 | 0.136946 | 0.13986   |
| 0.198572 | 0.138695 | 0.140297 | 0.130828 | 0.129516 | 0.132721 | 0.127768  |
| 0.19391  | 0.134033 | 0.124854 | 0.125874 | 0.136218 | 0.133887 | 0.133304  |

|          |          |          |          |          |          |          |
|----------|----------|----------|----------|----------|----------|----------|
| 0.18954  | 0.12296  | 0.115822 | 0.122086 | 0.123397 | 0.123397 | 0.127768 |
| 0.197115 | 0.132284 | 0.130099 | 0.124126 | 0.13039  | 0.129808 | 0.120192 |
| 0.19697  | 0.136509 | 0.131993 | 0.130099 | 0.129662 | 0.130828 | 0.121212 |
| 0.202943 | 0.127622 | 0.126894 | 0.122086 | 0.140297 | 0.128351 | 0.130682 |
| 0.202943 | 0.136072 | 0.136801 | 0.127331 | 0.13884  | 0.139132 | 0.139423 |
| 0.196533 | 0.13986  | 0.129516 | 0.121503 | 0.132139 | 0.126603 | 0.125146 |
| 0.187209 | 0.117133 | 0.114073 | 0.11655  | 0.11757  | 0.123397 | 0.121941 |
| 0.199009 | 0.13243  | 0.142191 | 0.13447  | 0.136655 | 0.134033 | 0.111014 |
| 0.201486 | 0.140443 | 0.137383 | 0.133741 | 0.137383 | 0.140006 | 0.130973 |
| 0.183129 | 0.119172 | 0.117279 | 0.112179 | 0.113491 | 0.119027 | 0.114073 |
| 0.116841 | 0.218969 | 0.221445 | 0.214015 | 0.212995 | 0.214744 | 0.224359 |
| 0.192308 | 0.12602  | 0.123834 | 0.120192 | 0.131993 | 0.12704  | 0.126457 |
| 0.18852  | 0.128642 | 0.128205 | 0.11757  | 0.122378 | 0.125874 | 0.12296  |
| 0.20236  | 0.134615 | 0.129516 | 0.127914 | 0.14088  | 0.134761 | 0.136801 |
| 0.194493 | 0.132284 | 0.126603 | 0.121795 | 0.12398  | 0.124854 | 0.117279 |
| 0.204691 | 0.143065 | 0.137675 | 0.135198 | 0.139714 | 0.13447  | 0.134178 |
| 0.188666 | 0.127331 | 0.121358 | 0.114219 | 0.135052 | 0.122523 | 0.125437 |
| 0.189394 | 0.127185 | 0.125    | 0.115239 | 0.129079 | 0.122669 | 0.125583 |
| 0.195804 | 0.131847 | 0.132867 | 0.123689 | 0.132867 | 0.129371 | 0.131702 |
| 0.184586 | 0.134033 | 0.125146 | 0.12704  | 0.131265 | 0.133596 | 0.128642 |
| 0.199301 | 0.136509 | 0.129079 | 0.128351 | 0.132576 | 0.133159 | 0.129953 |
| 0.197115 | 0.126457 | 0.122523 | 0.123252 | 0.130973 | 0.132139 | 0.133304 |
| 0.199738 | 0.125874 | 0.121649 | 0.121795 | 0.133013 | 0.128934 | 0.135052 |
| 0.191871 | 0.129079 | 0.133596 | 0.124417 | 0.121649 | 0.123689 | 0.114948 |
| 0.194784 | 0.11655  | 0.11961  | 0.118298 | 0.12602  | 0.116987 | 0.126311 |
| 0.200175 | 0.135927 | 0.126748 | 0.126603 | 0.145396 | 0.138986 | 0.137821 |
| 0.184003 | 0.125291 | 0.116987 | 0.109848 | 0.128642 | 0.122523 | 0.123689 |
| 0.201486 | 0.139277 | 0.144085 | 0.134907 | 0.146416 | 0.137675 | 0.127768 |
| 0.184441 | 0.144376 | 0.145396 | 0.145251 | 0.126457 | 0.143939 | 0.139569 |
| 0.187937 | 0.13243  | 0.134615 | 0.130682 | 0.120921 | 0.130536 | 0.114219 |
| 0.198427 | 0.136218 | 0.139569 | 0.129225 | 0.127331 | 0.135198 | 0.128205 |
| 0.184586 | 0.138403 | 0.133887 | 0.132576 | 0.121066 | 0.129808 | 0.125437 |
| 0.194056 | 0.134178 | 0.134615 | 0.129516 | 0.128205 | 0.127331 | 0.123834 |
| 0.183275 | 0.132721 | 0.133741 | 0.13243  | 0.126457 | 0.126166 | 0.126457 |
| 0.191434 | 0.144668 | 0.144522 | 0.140006 | 0.13141  | 0.142483 | 0.144522 |
| 0.184586 | 0.123252 | 0.125437 | 0.116259 | 0.119901 | 0.119318 | 0.109994 |
| 0.200175 | 0.143211 | 0.142483 | 0.134761 | 0.143648 | 0.132867 | 0.128205 |
| 0.184003 | 0.145688 | 0.149913 | 0.143357 | 0.125437 | 0.144668 | 0.146707 |
| 0.198864 | 0.130536 | 0.128642 | 0.120921 | 0.124272 | 0.127477 | 0.103293 |
| 0.189248 | 0.134907 | 0.137966 | 0.120629 | 0.128351 | 0.12602  | 0.122232 |
| 0.205711 | 0.144668 | 0.152681 | 0.14729  | 0.141317 | 0.143357 | 0.116841 |
| 0.193182 | 0.127477 | 0.130828 | 0.128351 | 0.138986 | 0.124709 | 0.118881 |
| 0.207605 | 0.138403 | 0.149621 | 0.142483 | 0.145251 | 0.136218 | 0.136509 |
| 0.200175 | 0.135344 | 0.136072 | 0.130099 | 0.138403 | 0.136655 | 0.123834 |



|          |          |           |          |           |           |          |
|----------|----------|-----------|----------|-----------|-----------|----------|
| 0.198572 | 0.125    | 0.118153  | 0.118298 | 0.135635  | 0.130682  | 0.114365 |
| 0.197261 | 0.133304 | 0.138112  | 0.130099 | 0.134907  | 0.13345   | 0.122378 |
| 0.190122 | 0.127622 | 0.137383  | 0.12704  | 0.130682  | 0.132139  | 0.115239 |
| 0.202214 | 0.129808 | 0.129953  | 0.121649 | 0.134615  | 0.135198  | 0.112471 |
| 0.19697  | 0.132139 | 0.128788  | 0.125437 | 0.136072  | 0.132284  | 0.130828 |
| 0.203963 | 0.130973 | 0.126748  | 0.123689 | 0.134324  | 0.136364  | 0.119172 |
| 0.207751 | 0.13039  | 0.13345   | 0.136509 | 0.134907  | 0.13986   | 0.123543 |
| 0.195804 | 0.137092 | 0.13549   | 0.128642 | 0.123834  | 0.138112  | 0.116841 |
| 0.196678 | 0.14088  | 0.143065  | 0.137966 | 0.145105  | 0.144231  | 0.134033 |
| 0.192308 | 0.132721 | 0.133741  | 0.127768 | 0.128205  | 0.131993  | 0.125    |
| 0.196387 | 0.124563 | 0.123252  | 0.118153 | 0.127914  | 0.129953  | 0.101399 |
| 0.201049 | 0.124854 | 0.138695  | 0.137092 | 0.127914  | 0.135781  | 0.111014 |
| 0.192016 | 0.12602  | 0.135781  | 0.124854 | 0.11655   | 0.126457  | 0.104021 |
| 0.196241 | 0.14831  | 0.154575  | 0.147145 | 0.127768  | 0.146416  | 0.134761 |
| 0.209353 | 0.153555 | 0.157488  | 0.15676  | 0.145542  | 0.160111  | 0.144085 |
| 0.200029 | 0.126166 | 0.128059  | 0.118007 | 0.13884   | 0.129516  | 0.110868 |
| 0.19289  | 0.118735 | 0.12704   | 0.11961  | 0.126748  | 0.122086  | 0.103438 |
| 0.200903 | 0.128205 | 0.12398   | 0.122086 | 0.135635  | 0.126894  | 0.127477 |
| 0.199883 | 0.133013 | 0.134615  | 0.127477 | 0.141608  | 0.132284  | 0.13986  |
| 0.199301 | 0.120484 | 0.132284  | 0.121358 | 0.134324  | 0.132576  | 0.109557 |
| 0.205711 | 0.136801 | 0.128788  | 0.129516 | 0.139569  | 0.143357  | 0.13549  |
| 0.197552 | 0.142337 | 0.144522  | 0.137966 | 0.132576  | 0.141317  | 0.137821 |
| 0.197407 | 0.133741 | 0.140297  | 0.135198 | 0.128351  | 0.132139  | 0.121066 |
| 0.210227 | 0.142774 | 0.160693  | 0.153555 | 0.149913  | 0.156031  | 0.150787 |
| 0.196824 | 0.134324 | 0.141171  | 0.132284 | 0.133887  | 0.136801  | 0.122815 |
| 0.198572 | 0.150641 | 0.149621  | 0.140152 | 0.140297  | 0.147873  | 0.128642 |
| 0.199301 | 0.12602  | 0.130828  | 0.11757  | 0.131993  | 0.127914  | 0.104604 |
| 0.208625 | 0.133013 | 0.134033  | 0.13243  | 0.136072  | 0.133159  | 0.11859  |
| 0.191434 | 0.125437 | 0.11655   | 0.118735 | 0.131119  | 0.130245  | 0.127914 |
| 0.16419  | 0.146562 | 0.147582  | 0.139277 | 0.0852273 | 0.115822  | 0.135635 |
| 0.206002 | 0.132721 | 0.0597319 | 0.131556 | 0.151515  | 0.140152  | 0.145105 |
| 0.18109  | 0.120629 | 0.123106  | 0.114802 | 0.129516  | 0.0476399 | 0.127477 |
| 0.164044 | 0.137383 | 0.138695  | 0.128934 | 0.13141   | 0.0675991 | 0.139277 |
| 0.140297 | 0.149476 | 0.15778   | 0.144522 | 0.142337  | 0.146707  | 0.137383 |
| 0.142337 | 0.152098 | 0.152535  | 0.143357 | 0.138549  | 0.120775  | 0.151078 |
| 0.199883 | 0.127477 | 0.137821  | 0.127477 | 0.115385  | 0.126457  | 0.04662  |
| 0.195367 | 0.135781 | 0.128351  | 0.130245 | 0.137383  | 0.131265  | 0.135927 |
| 0.176136 | 0.120921 | 0.118735  | 0.117424 | 0.11757   | 0.114948  | 0.115822 |
| 0.179487 | 0.124854 | 0.123834  | 0.121066 | 0.122669  | 0.117716  | 0.111597 |
| 0.186917 | 0.125583 | 0.125437  | 0.110431 | 0.120192  | 0.128059  | 0.124563 |
| 0.180798 | 0.121503 | 0.12398   | 0.109557 | 0.124854  | 0.0435606 | 0.118735 |
| 0.18648  | 0.11757  | 0.124417  | 0.118444 | 0.126748  | 0.125     | 0.120338 |
| 0.169872 | 0.125728 | 0.119464  | 0.114073 | 0.119172  | 0.0882867 | 0.120047 |
| 0.185606 | 0.121066 | 0.120047  | 0.114365 | 0.129371  | 0.106061  | 0.120338 |

|           |           |           |          |           |           |           |
|-----------|-----------|-----------|----------|-----------|-----------|-----------|
| 0.173223  | 0.129371  | 0.125728  | 0.122669 | 0.127768  | 0.120775  | 0.130682  |
| 0.177885  | 0.119755  | 0.123106  | 0.114802 | 0.111742  | 0.115239  | 0.113782  |
| 0.17905   | 0.126748  | 0.126894  | 0.116841 | 0.122815  | 0.0546329 | 0.124272  |
| 0.182401  | 0.121358  | 0.123252  | 0.109411 | 0.124709  | 0.0486597 | 0.122669  |
| 0.194056  | 0.121649  | 0.13549   | 0.121066 | 0.127331  | 0.123543  | 0.0932401 |
| 0.121212  | 0.220717  | 0.219114  | 0.21081  | 0.210664  | 0.209499  | 0.221737  |
| 0.197552  | 0.14088   | 0.143357  | 0.137966 | 0.148893  | 0.0620629 | 0.1419    |
| 0.199446  | 0.12704   | 0.129225  | 0.125583 | 0.135635  | 0.122523  | 0.125728  |
| 0.182984  | 0.122232  | 0.123543  | 0.116696 | 0.129662  | 0.116841  | 0.126166  |
| 0.106643  | 0.213141  | 0.211247  | 0.203526 | 0.205711  | 0.202797  | 0.219114  |
| 0.178322  | 0.128934  | 0.13549   | 0.126894 | 0.0941142 | 0.126166  | 0.107517  |
| 0.192162  | 0.128788  | 0.13447   | 0.126457 | 0.12398   | 0.127768  | 0.10708   |
| 0.187791  | 0.119755  | 0.123106  | 0.122669 | 0.133013  | 0.12398   | 0.120775  |
| 0.185023  | 0.131265  | 0.124126  | 0.121941 | 0.128205  | 0.124709  | 0.129662  |
| 0.133741  | 0.253351  | 0.249709  | 0.243735 | 0.245629  | 0.242133  | 0.256993  |
| 0.191288  | 0.129662  | 0.133013  | 0.129662 | 0.0604604 | 0.126311  | 0.114073  |
| 0.188666  | 0.119464  | 0.131847  | 0.115093 | 0.124272  | 0.118153  | 0.0942599 |
| 0.193619  | 0.0402098 | 0.116113  | 0.103438 | 0.133304  | 0.121941  | 0.121941  |
| 0.188957  | 0.044289  | 0.111451  | 0.100233 | 0.125146  | 0.119901  | 0.117861  |
| 0.186626  | 0.134324  | 0.137966  | 0.138112 | 0.0761946 | 0.127768  | 0.121066  |
| 0.168269  | 0.126457  | 0.133304  | 0.125291 | 0.117279  | 0.109994  | 0.13039   |
| 0.190705  | 0.121212  | 0.129516  | 0.120629 | 0.127477  | 0.121941  | 0.088141  |
| 0.18211   | 0.121066  | 0.123543  | 0.113199 | 0.122086  | 0.0486597 | 0.119755  |
| 0.1875    | 0.12296   | 0.122523  | 0.121503 | 0.127768  | 0.120775  | 0.125146  |
| 0.182838  | 0.122086  | 0.122815  | 0.116841 | 0.123689  | 0.11757   | 0.122815  |
| 0.177448  | 0.119027  | 0.122378  | 0.111451 | 0.119172  | 0.0518648 | 0.11859   |
| 0.186917  | 0.130536  | 0.128059  | 0.120338 | 0.11961   | 0.124272  | 0.12398   |
| 0.20542   | 0.130682  | 0.0556527 | 0.131265 | 0.151515  | 0.141026  | 0.145105  |
| 0.191434  | 0.128059  | 0.137529  | 0.134178 | 0.0582751 | 0.128205  | 0.113636  |
| 0.191142  | 0.129225  | 0.135781  | 0.126311 | 0.123834  | 0.127622  | 0.111014  |
| 0.0871212 | 0.192453  | 0.195804  | 0.181381 | 0.179779  | 0.18211   | 0.197552  |
| 0.0990676 | 0.206148  | 0.20542   | 0.198281 | 0.198427  | 0.197552  | 0.210373  |
| 0.178904  | 0.130973  | 0.130245  | 0.121941 | 0.126166  | 0.12296   | 0.132284  |
| 0.181235  | 0.119318  | 0.120338  | 0.11553  | 0.122378  | 0.115967  | 0.119755  |
| 0.187354  | 0.136509  | 0.136364  | 0.134761 | 0.13549   | 0.124417  | 0.141026  |
| 0.18648   | 0.124563  | 0.132576  | 0.121649 | 0.122378  | 0.121795  | 0.0903263 |
| 0.194202  | 0.135198  | 0.135052  | 0.131702 | 0.0598776 | 0.130099  | 0.114073  |
| 0.193765  | 0.10708   | 0.122086  | 0.113199 | 0.138112  | 0.122086  | 0.12704   |
| 0.111888  | 0.228875  | 0.223776  | 0.218677 | 0.218823  | 0.219114  | 0.232517  |
| 0.18648   | 0.116113  | 0.120338  | 0.120192 | 0.119755  | 0.113054  | 0.114219  |
| 0.141754  | 0.210664  | 0.209353  | 0.202797 | 0.205565  | 0.200612  | 0.209645  |
| 0.192016  | 0.119027  | 0.12704   | 0.119027 | 0.10373   | 0.115676  | 0.0498252 |
| 0.186043  | 0.117424  | 0.125437  | 0.11655  | 0.118735  | 0.116696  | 0.104749  |
| 0.175991  | 0.121358  | 0.125583  | 0.116696 | 0.121212  | 0.106643  | 0.118007  |

|          |           |           |           |           |           |           |
|----------|-----------|-----------|-----------|-----------|-----------|-----------|
| 0.176282 | 0.120484  | 0.12296   | 0.112617  | 0.120338  | 0.116841  | 0.120629  |
| 0.105332 | 0.211247  | 0.208188  | 0.200758  | 0.198864  | 0.201777  | 0.215763  |
| 0.178759 | 0.132576  | 0.134761  | 0.121795  | 0.133013  | 0.0511364 | 0.135344  |
| 0.195076 | 0.113928  | 0.125728  | 0.115676  | 0.117279  | 0.123397  | 0.0962995 |
| 0.184878 | 0.125583  | 0.126311  | 0.116841  | 0.130973  | 0.0421037 | 0.127185  |
| 0.190705 | 0.116841  | 0.13039   | 0.127622  | 0.131265  | 0.121066  | 0.120192  |
| 0.180507 | 0.128205  | 0.125437  | 0.118298  | 0.124272  | 0.118444  | 0.123106  |
| 0.19289  | 0.120775  | 0.125583  | 0.116696  | 0.106061  | 0.117424  | 0.0492424 |
| 0.179196 | 0.122523  | 0.134615  | 0.123689  | 0.123252  | 0.120047  | 0.0961538 |
| 0.192308 | 0.128934  | 0.134907  | 0.124563  | 0.127914  | 0.125874  | 0.108683  |
| 0.174825 | 0.115822  | 0.11859   | 0.10912   | 0.11859   | 0.0544872 | 0.11655   |
| 0.189831 | 0.115385  | 0.124563  | 0.118298  | 0.120192  | 0.122523  | 0.0965909 |
| 0        | 0.193619  | 0.195513  | 0.180216  | 0.182401  | 0.183566  | 0.198135  |
| 0.193619 | 0         | 0.115822  | 0.103438  | 0.133304  | 0.121358  | 0.122815  |
| 0.195513 | 0.115822  | 0         | 0.11116   | 0.134907  | 0.125583  | 0.128788  |
| 0.180216 | 0.103438  | 0.11116   | 0         | 0.131265  | 0.111742  | 0.123397  |
| 0.182401 | 0.133304  | 0.134907  | 0.131265  | 0         | 0.128788  | 0.115385  |
| 0.183566 | 0.121358  | 0.125583  | 0.111742  | 0.128788  | 0         | 0.120921  |
| 0.198135 | 0.122815  | 0.128788  | 0.123397  | 0.115385  | 0.120921  | 0         |
| 0.18546  | 0.113054  | 0.123106  | 0.119172  | 0.104749  | 0.11553   | 0.108537  |
| 0.195076 | 0.124709  | 0.135344  | 0.12704   | 0.131556  | 0.125437  | 0.0939685 |
| 0.191434 | 0.112617  | 0.0524476 | 0.109703  | 0.129371  | 0.11859   | 0.125874  |
| 0.186189 | 0.0496795 | 0.115676  | 0.0992133 | 0.127622  | 0.117424  | 0.11859   |
| 0.179924 | 0.129079  | 0.127185  | 0.121503  | 0.127185  | 0.121358  | 0.12602   |
| 0.19493  | 0.123689  | 0.123252  | 0.122232  | 0.133741  | 0.126166  | 0.122086  |
| 0.199155 | 0.13345   | 0.130973  | 0.135781  | 0.145251  | 0.13243   | 0.130973  |
| 0.183421 | 0.12704   | 0.126603  | 0.125583  | 0.060169  | 0.123106  | 0.108537  |
| 0.194639 | 0.135635  | 0.140734  | 0.130973  | 0.146853  | 0.0579837 | 0.135781  |
| 0.180361 | 0.127477  | 0.125     | 0.116987  | 0.122086  | 0.119172  | 0.12296   |
| 0.185023 | 0.0995047 | 0.113928  | 0.0983392 | 0.122669  | 0.111305  | 0.114802  |
| 0.166812 | 0.12704   | 0.128059  | 0.119464  | 0.119901  | 0.0657051 | 0.124854  |
| 0.186626 | 0.126748  | 0.138549  | 0.128497  | 0.13039   | 0.128642  | 0.0954254 |
| 0.114073 | 0.194639  | 0.193328  | 0.184149  | 0.179924  | 0.184878  | 0.193036  |
| 0.189977 | 0.109994  | 0.120338  | 0.114656  | 0.115385  | 0.120047  | 0.0941142 |
| 0.176573 | 0.110577  | 0.110723  | 0.107663  | 0.113345  | 0.10373   | 0.104895  |
| 0.194639 | 0.12602   | 0.134907  | 0.127185  | 0.12296   | 0.127914  | 0.111597  |
| 0.108683 | 0.1875    | 0.184149  | 0.178759  | 0.175699  | 0.175408  | 0.189103  |
| 0.194784 | 0.140734  | 0.144668  | 0.139569  | 0.0683275 | 0.141171  | 0.121941  |
| 0.206439 | 0.150058  | 0.153992  | 0.149184  | 0.0785256 | 0.148456  | 0.129225  |
| 0.204837 | 0.13447   | 0.0620629 | 0.132721  | 0.153263  | 0.1419    | 0.147436  |
| 0.18211  | 0.123106  | 0.12704   | 0.125146  | 0.0594406 | 0.123834  | 0.107517  |
| 0.181964 | 0.123834  | 0.123397  | 0.11451   | 0.129516  | 0.0450175 | 0.12398   |
| 0.10373  | 0.212558  | 0.21183   | 0.204691  | 0.203963  | 0.201632  | 0.218823  |
| 0.181235 | 0.121941  | 0.126748  | 0.121066  | 0.131702  | 0.117133  | 0.124126  |

|           |           |           |           |           |           |           |
|-----------|-----------|-----------|-----------|-----------|-----------|-----------|
| 0.183129  | 0.126166  | 0.128351  | 0.119464  | 0.128351  | 0.0432692 | 0.129808  |
| 0.188374  | 0.113928  | 0.123106  | 0.115967  | 0.116696  | 0.119027  | 0.095134  |
| 0.128642  | 0.173368  | 0.170309  | 0.170455  | 0.166521  | 0.149913  | 0.175845  |
| 0.175845  | 0.121503  | 0.117279  | 0.111014  | 0.120484  | 0.108537  | 0.116696  |
| 0.20338   | 0.145251  | 0.140443  | 0.145251  | 0.152098  | 0.145396  | 0.146562  |
| 0.180944  | 0.128642  | 0.134324  | 0.125146  | 0.118007  | 0.124417  | 0.123252  |
| 0.0949883 | 0.19391   | 0.19493   | 0.184878  | 0.185606  | 0.183566  | 0.195804  |
| 0.190268  | 0.126894  | 0.134324  | 0.130099  | 0.0620629 | 0.129371  | 0.11014   |
| 0.184441  | 0.119318  | 0.11655   | 0.113491  | 0.117424  | 0.108683  | 0.113054  |
| 0.184586  | 0.103147  | 0.118735  | 0.10373   | 0.123689  | 0.114365  | 0.11757   |
| 0.185897  | 0.11757   | 0.129079  | 0.119318  | 0.118298  | 0.115385  | 0.109557  |
| 0.190559  | 0.126894  | 0.135781  | 0.126603  | 0.122669  | 0.126166  | 0.1081    |
| 0.181235  | 0.129808  | 0.119172  | 0.125146  | 0.127622  | 0.121503  | 0.120629  |
| 0.177593  | 0.126748  | 0.123689  | 0.114219  | 0.119901  | 0.11961   | 0.121941  |
| 0.087704  | 0.192162  | 0.193765  | 0.185169  | 0.184441  | 0.184441  | 0.194639  |
| 0.188374  | 0.126166  | 0.120775  | 0.122086  | 0.13039   | 0.122523  | 0.121066  |
| 0.180361  | 0.121649  | 0.126748  | 0.119318  | 0.123834  | 0.108683  | 0.11655   |
| 0.107955  | 0.214161  | 0.213141  | 0.204837  | 0.206148  | 0.204691  | 0.218969  |
| 0.193619  | 0.0390443 | 0.114656  | 0.0984848 | 0.13039   | 0.125146  | 0.121649  |
| 0.183566  | 0.127477  | 0.12296   | 0.114656  | 0.126457  | 0.119464  | 0.12296   |
| 0.176865  | 0.121649  | 0.121795  | 0.113491  | 0.122086  | 0.115676  | 0.119172  |
| 0.193619  | 0.130828  | 0.134761  | 0.132576  | 0.144668  | 0.0703671 | 0.134761  |
| 0.0890152 | 0.195221  | 0.192162  | 0.184441  | 0.179633  | 0.184586  | 0.19799   |
| 0.192308  | 0.125146  | 0.134615  | 0.119027  | 0.125874  | 0.121503  | 0.092366  |
| 0.19697   | 0.124272  | 0.126457  | 0.129808  | 0.139569  | 0.130245  | 0.125874  |
| 0.179487  | 0.125728  | 0.123252  | 0.118153  | 0.122669  | 0.118007  | 0.120047  |
| 0.17803   | 0.125146  | 0.122378  | 0.114948  | 0.120921  | 0.11859   | 0.120629  |
| 0.176719  | 0.122669  | 0.122232  | 0.114802  | 0.118735  | 0.119027  | 0.121066  |
| 0.181235  | 0.123106  | 0.124709  | 0.111451  | 0.124709  | 0.0515734 | 0.118881  |
| 0.182255  | 0.113636  | 0.122815  | 0.111597  | 0.109994  | 0.113199  | 0.111742  |
| 0.190705  | 0.131119  | 0.135344  | 0.133159  | 0.0543415 | 0.129808  | 0.112908  |
| 0.20236   | 0.120629  | 0.113491  | 0.122086  | 0.142045  | 0.121066  | 0.131265  |
| 0.190122  | 0.129371  | 0.135927  | 0.129079  | 0.0604604 | 0.128351  | 0.114365  |
| 0.197844  | 0.121649  | 0.134615  | 0.131556  | 0.138695  | 0.127914  | 0.124126  |
| 0.0948427 | 0.200466  | 0.201195  | 0.189103  | 0.185752  | 0.186626  | 0.202943  |
| 0.190268  | 0.11961   | 0.120047  | 0.118153  | 0.128497  | 0.123252  | 0.121212  |
| 0.186626  | 0.128788  | 0.13243   | 0.124126  | 0.135344  | 0.0490967 | 0.129808  |
| 0.182401  | 0.123397  | 0.120047  | 0.114073  | 0.119172  | 0.117424  | 0.118298  |
| 0.177593  | 0.115093  | 0.118735  | 0.11014   | 0.110577  | 0.116696  | 0.111451  |
| 0.179924  | 0.120338  | 0.121358  | 0.115676  | 0.116113  | 0.119027  | 0.11961   |
| 0.190268  | 0.122523  | 0.137529  | 0.121941  | 0.127622  | 0.120047  | 0.0885781 |
| 0.193182  | 0.128642  | 0.128205  | 0.127185  | 0.134615  | 0.123543  | 0.123834  |
| 0.186917  | 0.119464  | 0.0665793 | 0.111888  | 0.125146  | 0.121066  | 0.122815  |
| 0.179341  | 0.121212  | 0.129516  | 0.116841  | 0.11757   | 0.118444  | 0.100087  |

|           |          |           |          |           |           |           |
|-----------|----------|-----------|----------|-----------|-----------|-----------|
| 0.181235  | 0.11553  | 0.124417  | 0.113782 | 0.111014  | 0.115676  | 0.105186  |
| 0.18109   | 0.120629 | 0.11757   | 0.110723 | 0.113199  | 0.108246  | 0.112908  |
| 0.190851  | 0.120775 | 0.130536  | 0.119901 | 0.105186  | 0.118007  | 0.0515734 |
| 0.197115  | 0.137529 | 0.141171  | 0.136072 | 0.0645396 | 0.134761  | 0.121358  |
| 0.190559  | 0.12398  | 0.134907  | 0.116987 | 0.125583  | 0.123834  | 0.0935315 |
| 0.17701   | 0.119755 | 0.120775  | 0.109848 | 0.118153  | 0.0552156 | 0.114656  |
| 0.188957  | 0.119172 | 0.128934  | 0.11451  | 0.122523  | 0.11961   | 0.0893065 |
| 0.179779  | 0.121649 | 0.121212  | 0.114656 | 0.121503  | 0.11655   | 0.121795  |
| 0.189831  | 0.108392 | 0.120484  | 0.111888 | 0.113782  | 0.117279  | 0.092803  |
| 0.180507  | 0.126748 | 0.124563  | 0.118007 | 0.12602   | 0.120484  | 0.127185  |
| 0.184586  | 0.114802 | 0.116696  | 0.113928 | 0.128642  | 0.116696  | 0.113199  |
| 0.186626  | 0.115093 | 0.0560897 | 0.107517 | 0.129516  | 0.11961   | 0.126311  |
| 0.1875    | 0.124709 | 0.129808  | 0.125    | 0.119901  | 0.120192  | 0.107372  |
| 0.180361  | 0.120192 | 0.125     | 0.112325 | 0.113054  | 0.116841  | 0.115676  |
| 0.179633  | 0.124126 | 0.120775  | 0.115093 | 0.122815  | 0.11553   | 0.120192  |
| 0.175554  | 0.109266 | 0.123106  | 0.109266 | 0.11757   | 0.119027  | 0.123106  |
| 0.184441  | 0.127768 | 0.129953  | 0.122523 | 0.129079  | 0.113636  | 0.11859   |
| 0.184878  | 0.124709 | 0.116404  | 0.111888 | 0.120484  | 0.115822  | 0.111742  |
| 0.182838  | 0.122669 | 0.121358  | 0.115385 | 0.123106  | 0.11553   | 0.120192  |
| 0.179196  | 0.121941 | 0.122669  | 0.113491 | 0.123543  | 0.0480769 | 0.123834  |
| 0.189977  | 0.121649 | 0.129953  | 0.121941 | 0.107809  | 0.120921  | 0.0527389 |
| 0.184149  | 0.124272 | 0.126748  | 0.110577 | 0.126166  | 0.0501166 | 0.120921  |
| 0.18852   | 0.12602  | 0.131119  | 0.123106 | 0.121503  | 0.121795  | 0.106352  |
| 0.185315  | 0.120484 | 0.126748  | 0.116404 | 0.115385  | 0.120047  | 0.117716  |
| 0.180361  | 0.118444 | 0.110431  | 0.118735 | 0.118298  | 0.11014   | 0.113636  |
| 0.188957  | 0.11014  | 0.123106  | 0.111888 | 0.113491  | 0.119318  | 0.095134  |
| 0.180361  | 0.127185 | 0.128788  | 0.118735 | 0.129079  | 0.0509907 | 0.127914  |
| 0.185023  | 0.129225 | 0.126748  | 0.118735 | 0.127914  | 0.11451   | 0.113345  |
| 0.179341  | 0.123834 | 0.12398   | 0.120338 | 0.121649  | 0.107663  | 0.115822  |
| 0.0893065 | 0.199592 | 0.19595   | 0.189394 | 0.188374  | 0.189248  | 0.200903  |
| 0.120775  | 0.167249 | 0.165938  | 0.162296 | 0.16215   | 0.153409  | 0.168269  |
| 0.186043  | 0.128205 | 0.133013  | 0.129079 | 0.0569639 | 0.128059  | 0.113199  |
| 0.179487  | 0.125146 | 0.122086  | 0.116696 | 0.121503  | 0.11655   | 0.109557  |
| 0.210664  | 0.149913 | 0.156469  | 0.153118 | 0.0804196 | 0.151515  | 0.13141   |
| 0.190122  | 0.125874 | 0.12602   | 0.125    | 0.131265  | 0.123106  | 0.125728  |
| 0.18007   | 0.126894 | 0.125874  | 0.122815 | 0.126166  | 0.122669  | 0.127331  |
| 0.178176  | 0.129662 | 0.125146  | 0.120338 | 0.121066  | 0.113491  | 0.122523  |
| 0.183421  | 0.127331 | 0.128351  | 0.117716 | 0.114948  | 0.121066  | 0.12398   |
| 0.188957  | 0.128205 | 0.131556  | 0.122669 | 0.130682  | 0.116987  | 0.119318  |
| 0.0920746 | 0.207605 | 0.203671  | 0.195076 | 0.195221  | 0.195804  | 0.209499  |
| 0.19595   | 0.124126 | 0.136509  | 0.123543 | 0.128934  | 0.124272  | 0.0957168 |
| 0.173368  | 0.120484 | 0.129953  | 0.115239 | 0.121795  | 0.076049  | 0.113054  |
| 0.17803   | 0.125146 | 0.121503  | 0.113199 | 0.124417  | 0.11451   | 0.118881  |
| 0.190414  | 0.118007 | 0.126603  | 0.121503 | 0.127185  | 0.118735  | 0.118735  |

|           |           |           |           |           |           |           |
|-----------|-----------|-----------|-----------|-----------|-----------|-----------|
| 0.119172  | 0.189831  | 0.186772  | 0.18109   | 0.176865  | 0.180944  | 0.19493   |
| 0.13141   | 0.249563  | 0.245338  | 0.240822  | 0.242716  | 0.238345  | 0.250874  |
| 0.189685  | 0.120484  | 0.0597319 | 0.111451  | 0.129953  | 0.118881  | 0.12704   |
| 0.187937  | 0.12398   | 0.129371  | 0.120775  | 0.128205  | 0.113928  | 0.119172  |
| 0.189103  | 0.127185  | 0.133159  | 0.130099  | 0.0562354 | 0.128205  | 0.112179  |
| 0.186917  | 0.125874  | 0.128934  | 0.124417  | 0.117279  | 0.121358  | 0.103875  |
| 0.189977  | 0.120192  | 0.129079  | 0.115822  | 0.126166  | 0.115967  | 0.087704  |
| 0.186334  | 0.119755  | 0.114948  | 0.113345  | 0.121358  | 0.113782  | 0.11757   |
| 0.173368  | 0.127768  | 0.124709  | 0.118735  | 0.119464  | 0.0874126 | 0.119172  |
| 0.190851  | 0.118153  | 0.130536  | 0.11553   | 0.122669  | 0.118298  | 0.0882867 |
| 0.174097  | 0.125     | 0.123397  | 0.115093  | 0.118153  | 0.0761946 | 0.11961   |
| 0.192599  | 0.129808  | 0.122378  | 0.119318  | 0.126748  | 0.119172  | 0.117716  |
| 0.18109   | 0.119464  | 0.124563  | 0.115093  | 0.112325  | 0.113782  | 0.115239  |
| 0.189977  | 0.114656  | 0.0472028 | 0.109411  | 0.130245  | 0.119464  | 0.124417  |
| 0.180216  | 0.122086  | 0.122232  | 0.117424  | 0.125728  | 0.0488054 | 0.120484  |
| 0.178759  | 0.0979021 | 0.110286  | 0.101981  | 0.118735  | 0.105915  | 0.105915  |
| 0.196533  | 0.125     | 0.120775  | 0.119464  | 0.136218  | 0.128934  | 0.118444  |
| 0.202652  | 0.136072  | 0.142628  | 0.135781  | 0.131847  | 0.135052  | 0.112908  |
| 0.18007   | 0.122523  | 0.122669  | 0.112617  | 0.122086  | 0.116841  | 0.117716  |
| 0.180216  | 0.131119  | 0.124854  | 0.120921  | 0.111451  | 0.122815  | 0.117861  |
| 0.192453  | 0.137529  | 0.135635  | 0.131702  | 0.141171  | 0.130682  | 0.137383  |
| 0.122378  | 0.215472  | 0.210082  | 0.207314  | 0.202214  | 0.201923  | 0.214744  |
| 0.181381  | 0.106935  | 0.0651224 | 0.104021  | 0.120775  | 0.113782  | 0.116113  |
| 0.183275  | 0.117861  | 0.128497  | 0.114948  | 0.112471  | 0.118007  | 0.114219  |
| 0.187646  | 0.121941  | 0.124126  | 0.120775  | 0.127622  | 0.124709  | 0.120629  |
| 0.190414  | 0.048951  | 0.114365  | 0.101107  | 0.13039   | 0.121649  | 0.122523  |
| 0.184878  | 0.11655   | 0.124854  | 0.120047  | 0.126603  | 0.11757   | 0.114656  |
| 0.0945513 | 0.202797  | 0.204108  | 0.192599  | 0.190997  | 0.19391   | 0.208479  |
| 0.183858  | 0.129808  | 0.129371  | 0.116696  | 0.129662  | 0.0492424 | 0.125     |
| 0.180507  | 0.123252  | 0.121066  | 0.114219  | 0.120775  | 0.11553   | 0.118735  |
| 0.189103  | 0.129225  | 0.127622  | 0.124563  | 0.120629  | 0.122086  | 0.111888  |
| 0.185897  | 0.120775  | 0.129371  | 0.118444  | 0.118298  | 0.117716  | 0.101399  |
| 0.178322  | 0.127185  | 0.124126  | 0.116113  | 0.125874  | 0.0498252 | 0.123252  |
| 0.176865  | 0.113491  | 0.116259  | 0.10708   | 0.116841  | 0.0789627 | 0.115676  |
| 0.189977  | 0.127768  | 0.125874  | 0.116404  | 0.123543  | 0.117424  | 0.116259  |
| 0.189977  | 0.050845  | 0.111597  | 0.0962995 | 0.128497  | 0.119172  | 0.119755  |
| 0.092803  | 0.200758  | 0.201486  | 0.192016  | 0.19391   | 0.191871  | 0.206731  |
| 0.17366   | 0.115822  | 0.117424  | 0.110577  | 0.117716  | 0.0556527 | 0.115093  |
| 0.0954254 | 0.198427  | 0.200612  | 0.188811  | 0.188957  | 0.187209  | 0.202943  |
| 0.0894522 | 0.196241  | 0.197552  | 0.186626  | 0.185315  | 0.189103  | 0.201923  |
| 0.19697   | 0.13039   | 0.140152  | 0.13243   | 0.130536  | 0.130536  | 0.111888  |
| 0.200175  | 0.0517191 | 0.120921  | 0.112034  | 0.13549   | 0.133159  | 0.128205  |
| 0.183858  | 0.11961   | 0.115093  | 0.112034  | 0.117133  | 0.112471  | 0.111305  |
| 0.177885  | 0.114802  | 0.118735  | 0.108683  | 0.118735  | 0.0613345 | 0.113491  |

|           |           |           |          |           |           |           |
|-----------|-----------|-----------|----------|-----------|-----------|-----------|
| 0.177448  | 0.123106  | 0.124126  | 0.112908 | 0.122669  | 0.0550699 | 0.11859   |
| 0.179196  | 0.127477  | 0.126457  | 0.118444 | 0.125291  | 0.119464  | 0.124417  |
| 0.18648   | 0.114365  | 0.128788  | 0.116696 | 0.119755  | 0.111014  | 0.0874126 |
| 0.190851  | 0.119318  | 0.130828  | 0.116987 | 0.123543  | 0.117133  | 0.0856643 |
| 0.186917  | 0.114219  | 0.0528846 | 0.109557 | 0.133304  | 0.119901  | 0.128642  |
| 0.189685  | 0.125728  | 0.130828  | 0.124272 | 0.12296   | 0.126457  | 0.106935  |
| 0.177593  | 0.120047  | 0.118444  | 0.112762 | 0.119027  | 0.114073  | 0.117279  |
| 0.182692  | 0.121358  | 0.125     | 0.116113 | 0.127331  | 0.0512821 | 0.123543  |
| 0.180216  | 0.117424  | 0.113491  | 0.107809 | 0.114365  | 0.105915  | 0.109994  |
| 0.185897  | 0.128934  | 0.131993  | 0.124272 | 0.134615  | 0.0539044 | 0.127914  |
| 0.188811  | 0.128934  | 0.129079  | 0.128351 | 0.0582751 | 0.125291  | 0.109848  |
| 0.193619  | 0.132576  | 0.13243   | 0.123543 | 0.139423  | 0.0525932 | 0.133304  |
| 0.135927  | 0.261072  | 0.256847  | 0.252914 | 0.253351  | 0.251894  | 0.265297  |
| 0.203526  | 0.119755  | 0.132139  | 0.127331 | 0.13039   | 0.130099  | 0.0992133 |
| 0.196678  | 0.127185  | 0.132284  | 0.129808 | 0.131993  | 0.127914  | 0.111014  |
| 0.114656  | 0.223485  | 0.218969  | 0.212995 | 0.21285   | 0.209353  | 0.224505  |
| 0.196387  | 0.118444  | 0.131119  | 0.123106 | 0.133159  | 0.132576  | 0.12296   |
| 0.11859   | 0.229749  | 0.228438  | 0.222756 | 0.225233  | 0.223776  | 0.238054  |
| 0.196824  | 0.114219  | 0.122815  | 0.119172 | 0.123689  | 0.121941  | 0.0948427 |
| 0.190851  | 0.137092  | 0.131993  | 0.127477 | 0.136655  | 0.129371  | 0.134615  |
| 0.185606  | 0.0549242 | 0.115967  | 0.100087 | 0.126748  | 0.115967  | 0.115093  |
| 0.194056  | 0.131556  | 0.136072  | 0.126894 | 0.127331  | 0.125291  | 0.11014   |
| 0.094697  | 0.207605  | 0.206585  | 0.196824 | 0.196096  | 0.198135  | 0.208625  |
| 0.191142  | 0.133596  | 0.132576  | 0.123397 | 0.137238  | 0.0547786 | 0.129662  |
| 0.181235  | 0.12398   | 0.124709  | 0.114365 | 0.125583  | 0.0509907 | 0.120338  |
| 0.115822  | 0.230769  | 0.227127  | 0.222319 | 0.221008  | 0.219551  | 0.232372  |
| 0.187354  | 0.121358  | 0.132284  | 0.118444 | 0.127622  | 0.123252  | 0.0909091 |
| 0.0925117 | 0.201632  | 0.201195  | 0.19493  | 0.192745  | 0.195367  | 0.206439  |
| 0.189831  | 0.125583  | 0.13447   | 0.120921 | 0.127185  | 0.121941  | 0.0913462 |
| 0.184295  | 0.125     | 0.121941  | 0.116841 | 0.122815  | 0.120775  | 0.121358  |
| 0.189977  | 0.125146  | 0.133159  | 0.121649 | 0.123834  | 0.124126  | 0.12296   |
| 0.199592  | 0.131847  | 0.140152  | 0.13243  | 0.130828  | 0.133741  | 0.112179  |
| 0.18109   | 0.125     | 0.119318  | 0.115676 | 0.119901  | 0.11553   | 0.11553   |
| 0.121066  | 0.169289  | 0.168561  | 0.160256 | 0.149621  | 0.160111  | 0.1706    |
| 0.17701   | 0.11655   | 0.119027  | 0.109848 | 0.122523  | 0.0453089 | 0.117861  |
| 0.190122  | 0.0495338 | 0.114073  | 0.105478 | 0.127185  | 0.120775  | 0.121358  |
| 0.186334  | 0.120629  | 0.128934  | 0.122086 | 0.129516  | 0.128934  | 0.125146  |
| 0.192745  | 0.106935  | 0.120775  | 0.109848 | 0.137383  | 0.118444  | 0.121358  |
| 0.0935315 | 0.202652  | 0.197844  | 0.190997 | 0.187646  | 0.190559  | 0.203089  |
| 0.179341  | 0.124417  | 0.123397  | 0.115676 | 0.123397  | 0.115822  | 0.121358  |
| 0.177739  | 0.135344  | 0.136655  | 0.128934 | 0.119172  | 0.128788  | 0.115967  |
| 0.191288  | 0.123252  | 0.128059  | 0.120047 | 0.109411  | 0.118444  | 0.055507  |
| 0.194056  | 0.121066  | 0.132867  | 0.119027 | 0.129079  | 0.120047  | 0.0879953 |
| 0.18546   | 0.128205  | 0.126894  | 0.121503 | 0.130973  | 0.123106  | 0.126894  |

|           |           |           |          |           |           |           |
|-----------|-----------|-----------|----------|-----------|-----------|-----------|
| 0.134615  | 0.256556  | 0.251748  | 0.246941 | 0.251457  | 0.247378  | 0.262529  |
| 0.189248  | 0.120338  | 0.127768  | 0.11859  | 0.118153  | 0.118153  | 0.116696  |
| 0.182838  | 0.122378  | 0.120192  | 0.117716 | 0.127768  | 0.119901  | 0.124272  |
| 0.138258  | 0.177739  | 0.18109   | 0.182984 | 0.172931  | 0.177302  | 0.184878  |
| 0.0922203 | 0.192308  | 0.192745  | 0.182401 | 0.17905   | 0.18109   | 0.192162  |
| 0.186043  | 0.116841  | 0.0592949 | 0.110723 | 0.127768  | 0.120775  | 0.129808  |
| 0.182401  | 0.124272  | 0.124126  | 0.112617 | 0.128497  | 0.0515734 | 0.12296   |
| 0.187646  | 0.124272  | 0.132576  | 0.121358 | 0.118881  | 0.11859   | 0.107809  |
| 0.197407  | 0.142483  | 0.144376  | 0.138695 | 0.150787  | 0.0654138 | 0.144668  |
| 0.18546   | 0.117133  | 0.0616259 | 0.108974 | 0.12602   | 0.117861  | 0.123689  |
| 0.189103  | 0.116404  | 0.0576923 | 0.112617 | 0.127622  | 0.126457  | 0.125583  |
| 0.19391   | 0.125874  | 0.133304  | 0.124126 | 0.130099  | 0.126603  | 0.0948427 |
| 0.177302  | 0.121212  | 0.122523  | 0.111014 | 0.121358  | 0.0493881 | 0.11961   |
| 0.187063  | 0.129808  | 0.132867  | 0.120192 | 0.138112  | 0.0512821 | 0.127622  |
| 0.174388  | 0.127331  | 0.137092  | 0.125    | 0.116696  | 0.121941  | 0.102418  |
| 0.196096  | 0.131265  | 0.13549   | 0.127768 | 0.129662  | 0.128788  | 0.110431  |
| 0.206439  | 0.13986   | 0.146999  | 0.143648 | 0.139714  | 0.142045  | 0.121941  |
| 0.190851  | 0.124563  | 0.134033  | 0.121066 | 0.122086  | 0.124126  | 0.122669  |
| 0.204691  | 0.139277  | 0.142337  | 0.136946 | 0.130973  | 0.133596  | 0.112617  |
| 0.200029  | 0.127622  | 0.140589  | 0.127622 | 0.13243   | 0.129225  | 0.0965909 |
| 0.104021  | 0.211684  | 0.208916  | 0.203817 | 0.201923  | 0.200466  | 0.2162    |
| 0.196241  | 0.127331  | 0.133013  | 0.127622 | 0.12602   | 0.133887  | 0.112034  |
| 0.0933858 | 0.197844  | 0.196533  | 0.187937 | 0.188374  | 0.186917  | 0.198864  |
| 0.184878  | 0.092366  | 0.117861  | 0.102273 | 0.123106  | 0.117861  | 0.118153  |
| 0.18546   | 0.132867  | 0.127768  | 0.125583 | 0.133013  | 0.124272  | 0.130099  |
| 0.1875    | 0.12704   | 0.133887  | 0.129662 | 0.0604604 | 0.124563  | 0.116696  |
| 0.185315  | 0.125437  | 0.124417  | 0.12398  | 0.0614802 | 0.124126  | 0.108683  |
| 0.179341  | 0.124126  | 0.124563  | 0.115093 | 0.130682  | 0.0447261 | 0.128934  |
| 0.18546   | 0.121795  | 0.127768  | 0.116259 | 0.127768  | 0.0444347 | 0.121649  |
| 0.17701   | 0.125874  | 0.126311  | 0.116259 | 0.122232  | 0.121066  | 0.126311  |
| 0.186772  | 0.0490967 | 0.113636  | 0.100379 | 0.129953  | 0.120629  | 0.121212  |
| 0.192308  | 0.130973  | 0.132576  | 0.132721 | 0.0603147 | 0.124417  | 0.113928  |
| 0.188083  | 0.133159  | 0.144085  | 0.134907 | 0.132721  | 0.136218  | 0.0992133 |
| 0.135344  | 0.253788  | 0.249854  | 0.245338 | 0.246649  | 0.241987  | 0.254808  |
| 0.179633  | 0.129662  | 0.128351  | 0.122086 | 0.124854  | 0.121066  | 0.125437  |
| 0.0897436 | 0.188083  | 0.191725  | 0.177593 | 0.176573  | 0.181527  | 0.190851  |
| 0.0855186 | 0.194639  | 0.190997  | 0.181818 | 0.186917  | 0.183421  | 0.196241  |
| 0.179779  | 0.128642  | 0.125     | 0.114656 | 0.126166  | 0.12704   | 0.122086  |
| 0.184732  | 0.119027  | 0.126748  | 0.117279 | 0.113345  | 0.116841  | 0.115385  |
| 0.188228  | 0.129808  | 0.127914  | 0.122815 | 0.135781  | 0.122086  | 0.128205  |
| 0.177448  | 0.118735  | 0.120338  | 0.11116  | 0.121503  | 0.0509907 | 0.121212  |
| 0.176136  | 0.125583  | 0.128059  | 0.119464 | 0.107955  | 0.119318  | 0.12398   |
| 0.187791  | 0.120921  | 0.129808  | 0.117133 | 0.125146  | 0.123397  | 0.0942599 |
| 0.179487  | 0.121649  | 0.12704   | 0.113491 | 0.126748  | 0.0737179 | 0.123834  |



|           |           |           |           |           |           |           |
|-----------|-----------|-----------|-----------|-----------|-----------|-----------|
| 0.193182  | 0.131556  | 0.136072  | 0.125728  | 0.13986   | 0.0518648 | 0.129079  |
| 0.179924  | 0.12704   | 0.124272  | 0.11859   | 0.122523  | 0.119318  | 0.124272  |
| 0.190414  | 0.129371  | 0.127768  | 0.121503  | 0.134761  | 0.0540501 | 0.129225  |
| 0.187063  | 0.116113  | 0.123834  | 0.118444  | 0.119755  | 0.121212  | 0.111014  |
| 0.193765  | 0.135052  | 0.136364  | 0.135052  | 0.0614802 | 0.129662  | 0.113345  |
| 0.187791  | 0.131993  | 0.133887  | 0.126457  | 0.122232  | 0.123106  | 0.108829  |
| 0.202797  | 0.131847  | 0.142191  | 0.129225  | 0.139569  | 0.130536  | 0.0961538 |
| 0.193328  | 0.133159  | 0.124854  | 0.122669  | 0.132139  | 0.124563  | 0.11961   |
| 0.178759  | 0.125583  | 0.121941  | 0.118298  | 0.116113  | 0.119027  | 0.120484  |
| 0.19799   | 0.126166  | 0.129808  | 0.134033  | 0.142628  | 0.129516  | 0.128059  |
| 0.0917832 | 0.187209  | 0.190559  | 0.179924  | 0.179487  | 0.181818  | 0.190559  |
| 0.193328  | 0.135781  | 0.133887  | 0.129371  | 0.141463  | 0.0552156 | 0.132721  |
| 0.18109   | 0.122669  | 0.124854  | 0.114802  | 0.12602   | 0.0479312 | 0.125437  |
| 0.189977  | 0.126894  | 0.129662  | 0.128934  | 0.0562354 | 0.12704   | 0.110431  |
| 0.182547  | 0.120338  | 0.121941  | 0.122378  | 0.0625    | 0.11757   | 0.105332  |
| 0.188811  | 0.125728  | 0.13141   | 0.123689  | 0.123252  | 0.121795  | 0.107809  |
| 0.194493  | 0.130536  | 0.134761  | 0.126748  | 0.126311  | 0.127185  | 0.110577  |
| 0.0917832 | 0.196241  | 0.195804  | 0.187791  | 0.183858  | 0.187354  | 0.201049  |
| 0.171911  | 0.125728  | 0.125291  | 0.116404  | 0.124417  | 0.0699301 | 0.119464  |
| 0.159237  | 0.121503  | 0.11553   | 0.117133  | 0.112325  | 0.106206  | 0.116113  |
| 0.184586  | 0.122669  | 0.126603  | 0.117133  | 0.133304  | 0.0423951 | 0.125728  |
| 0.0961538 | 0.195367  | 0.194347  | 0.189831  | 0.189394  | 0.185023  | 0.199592  |
| 0.176136  | 0.120629  | 0.125146  | 0.115676  | 0.10708   | 0.116113  | 0.115239  |
| 0.197552  | 0.123106  | 0.137238  | 0.126603  | 0.13345   | 0.124709  | 0.0914918 |
| 0.183858  | 0.126311  | 0.125291  | 0.117861  | 0.127914  | 0.04662   | 0.124709  |
| 0.188666  | 0.110431  | 0.0575466 | 0.1081    | 0.128642  | 0.116987  | 0.11757   |
| 0.0875583 | 0.193765  | 0.193036  | 0.181818  | 0.17905   | 0.182547  | 0.195367  |
| 0.191288  | 0.120338  | 0.133887  | 0.120629  | 0.123689  | 0.119027  | 0.0919289 |
| 0.178176  | 0.115967  | 0.116696  | 0.11655   | 0.12398   | 0.110286  | 0.118735  |
| 0.1706    | 0.118007  | 0.125437  | 0.115967  | 0.107955  | 0.116987  | 0.119901  |
| 0.163899  | 0.127914  | 0.130973  | 0.123543  | 0.107372  | 0.116987  | 0.121358  |
| 0.191142  | 0.0464744 | 0.11451   | 0.0962995 | 0.128497  | 0.124709  | 0.122378  |
| 0.199883  | 0.125146  | 0.138695  | 0.12602   | 0.134324  | 0.129953  | 0.0938228 |
| 0.180944  | 0.123689  | 0.124126  | 0.116696  | 0.125291  | 0.114802  | 0.12296   |
| 0.191434  | 0.126894  | 0.126166  | 0.12398   | 0.129662  | 0.115385  | 0.118298  |
| 0.201486  | 0.13345   | 0.0587121 | 0.130245  | 0.150787  | 0.143794  | 0.148747  |
| 0.124854  | 0.237471  | 0.237034  | 0.228147  | 0.232663  | 0.229458  | 0.241987  |
| 0.199155  | 0.136364  | 0.130682  | 0.126748  | 0.136218  | 0.126311  | 0.120484  |
| 0.190997  | 0.0504079 | 0.114656  | 0.101107  | 0.127768  | 0.12398   | 0.121066  |
| 0.178904  | 0.121941  | 0.123834  | 0.113782  | 0.123543  | 0.0559441 | 0.120921  |
| 0.179924  | 0.128497  | 0.121649  | 0.127622  | 0.131265  | 0.129225  | 0.125437  |
| 0.183275  | 0.0657051 | 0.113928  | 0.10271   | 0.118298  | 0.112471  | 0.108392  |
| 0.186189  | 0.113782  | 0.124126  | 0.123397  | 0.125291  | 0.119755  | 0.115385  |
| 0.18109   | 0.11859   | 0.126311  | 0.115967  | 0.128059  | 0.0552156 | 0.12398   |

|           |           |           |           |           |           |           |
|-----------|-----------|-----------|-----------|-----------|-----------|-----------|
| 0.195513  | 0.12398   | 0.136946  | 0.125437  | 0.132576  | 0.127331  | 0.094697  |
| 0.183275  | 0.114365  | 0.0981935 | 0.114656  | 0.127622  | 0.121795  | 0.121795  |
| 0.128934  | 0.237179  | 0.238199  | 0.233392  | 0.231206  | 0.231498  | 0.243735  |
| 0.17803   | 0.11553   | 0.123834  | 0.111742  | 0.113928  | 0.112762  | 0.112179  |
| 0.184441  | 0.10708   | 0.117133  | 0.10912   | 0.110723  | 0.112762  | 0.0914918 |
| 0.179924  | 0.120921  | 0.117861  | 0.114219  | 0.121358  | 0.114948  | 0.120775  |
| 0.196096  | 0.119318  | 0.0515734 | 0.11757   | 0.137238  | 0.128205  | 0.132284  |
| 0.204254  | 0.142045  | 0.133741  | 0.133596  | 0.140443  | 0.136655  | 0.129371  |
| 0.175991  | 0.12398   | 0.12296   | 0.116404  | 0.119755  | 0.111014  | 0.124709  |
| 0.18007   | 0.121358  | 0.125291  | 0.114365  | 0.129079  | 0.0463287 | 0.123543  |
| 0.181381  | 0.113928  | 0.0831876 | 0.111305  | 0.121358  | 0.114948  | 0.11757   |
| 0.122232  | 0.233392  | 0.233246  | 0.227273  | 0.227418  | 0.224213  | 0.237617  |
| 0.186043  | 0.124709  | 0.125146  | 0.118007  | 0.129808  | 0.0473485 | 0.126311  |
| 0.195513  | 0.123689  | 0.135781  | 0.124563  | 0.130245  | 0.123252  | 0.0912005 |
| 0.184441  | 0.112908  | 0.105478  | 0.111451  | 0.124126  | 0.118298  | 0.118881  |
| 0.190705  | 0.100816  | 0.119318  | 0.0958625 | 0.131265  | 0.11961   | 0.120775  |
| 0.199738  | 0.120629  | 0.128059  | 0.122378  | 0.124854  | 0.127477  | 0.0965909 |
| 0.184586  | 0.122378  | 0.121941  | 0.118007  | 0.125437  | 0.119027  | 0.123689  |
| 0.19595   | 0.125874  | 0.133013  | 0.124126  | 0.127477  | 0.126311  | 0.0945513 |
| 0.201632  | 0.127768  | 0.141608  | 0.130099  | 0.137529  | 0.12704   | 0.0914918 |
| 0.192308  | 0.120192  | 0.130828  | 0.118153  | 0.126166  | 0.123543  | 0.0885781 |
| 0.183421  | 0.124709  | 0.123397  | 0.116259  | 0.124272  | 0.119027  | 0.121941  |
| 0.195076  | 0.0463287 | 0.114656  | 0.104021  | 0.133887  | 0.127768  | 0.127185  |
| 0.200466  | 0.0456002 | 0.121503  | 0.109994  | 0.139569  | 0.129953  | 0.129662  |
| 0.197261  | 0.128642  | 0.136072  | 0.133304  | 0.0667249 | 0.133159  | 0.118007  |
| 0.196678  | 0.137966  | 0.141026  | 0.135052  | 0.0667249 | 0.137821  | 0.120338  |
| 0.200029  | 0.0457459 | 0.121066  | 0.107226  | 0.139714  | 0.131265  | 0.125146  |
| 0.183129  | 0.121795  | 0.126311  | 0.112471  | 0.113199  | 0.11757   | 0.118444  |
| 0.208625  | 0.132721  | 0.141026  | 0.138258  | 0.125874  | 0.131993  | 0.0515734 |
| 0.201486  | 0.138986  | 0.13884   | 0.13345   | 0.142045  | 0.133304  | 0.128642  |
| 0.10271   | 0.206294  | 0.207022  | 0.198427  | 0.202652  | 0.198864  | 0.213432  |
| 0.190414  | 0.132576  | 0.13039   | 0.126748  | 0.135927  | 0.123689  | 0.121358  |
| 0.187209  | 0.113345  | 0.121358  | 0.112762  | 0.117861  | 0.11961   | 0.0948427 |
| 0.177739  | 0.129516  | 0.125291  | 0.121358  | 0.127622  | 0.123252  | 0.127914  |
| 0.116404  | 0.229021  | 0.22771   | 0.216492  | 0.217803  | 0.21722   | 0.229167  |
| 0.113491  | 0.215909  | 0.215181  | 0.206876  | 0.208479  | 0.207022  | 0.216346  |
| 0.197552  | 0.127477  | 0.140443  | 0.128351  | 0.131119  | 0.129662  | 0.094697  |
| 0.134761  | 0.251166  | 0.247523  | 0.24359   | 0.243153  | 0.241987  | 0.25947   |
| 0.185752  | 0.123834  | 0.124272  | 0.115676  | 0.109411  | 0.121358  | 0.118444  |
| 0.203526  | 0.138403  | 0.13884   | 0.134324  | 0.143211  | 0.139714  | 0.140589  |
| 0.183421  | 0.119755  | 0.129808  | 0.116259  | 0.113199  | 0.119318  | 0.116404  |
| 0.196387  | 0.043852  | 0.113928  | 0.100962  | 0.131119  | 0.126166  | 0.124417  |
| 0.0919289 | 0.193473  | 0.191871  | 0.183275  | 0.184003  | 0.183421  | 0.196824  |
| 0.187354  | 0.123689  | 0.127914  | 0.125437  | 0.134324  | 0.126166  | 0.123252  |

|           |           |           |          |           |           |           |
|-----------|-----------|-----------|----------|-----------|-----------|-----------|
| 0.0976107 | 0.200903  | 0.19697   | 0.191288 | 0.186772  | 0.188228  | 0.201632  |
| 0.187063  | 0.12398   | 0.117716  | 0.113491 | 0.126748  | 0.123252  | 0.121212  |
| 0.17162   | 0.123689  | 0.133741  | 0.124563 | 0.118881  | 0.100524  | 0.104604  |
| 0.188228  | 0.122232  | 0.123252  | 0.111116 | 0.121503  | 0.126748  | 0.123252  |
| 0.17162   | 0.116987  | 0.119172  | 0.114656 | 0.115093  | 0.108392  | 0.117133  |
| 0.176719  | 0.117716  | 0.117279  | 0.112471 | 0.116696  | 0.112034  | 0.116404  |
| 0.182547  | 0.122378  | 0.127185  | 0.117716 | 0.125728  | 0.108537  | 0.114656  |
| 0.176136  | 0.116259  | 0.123689  | 0.114802 | 0.109703  | 0.114656  | 0.115239  |
| 0.179487  | 0.120484  | 0.119755  | 0.111742 | 0.124126  | 0.0469114 | 0.11859   |
| 0.194202  | 0.125291  | 0.132721  | 0.121212 | 0.109411  | 0.123397  | 0.0511364 |
| 0.188083  | 0.121795  | 0.118153  | 0.115676 | 0.123397  | 0.117861  | 0.111742  |
| 0.18007   | 0.116987  | 0.125874  | 0.113782 | 0.113345  | 0.117716  | 0.115967  |
| 0.186043  | 0.131702  | 0.131847  | 0.127914 | 0.0738636 | 0.124272  | 0.112908  |
| 0.189248  | 0.130828  | 0.129808  | 0.122669 | 0.136218  | 0.0523019 | 0.128351  |
| 0.180361  | 0.123689  | 0.125     | 0.126603 | 0.0603147 | 0.120338  | 0.1081    |
| 0.184878  | 0.118881  | 0.118735  | 0.116259 | 0.12602   | 0.115239  | 0.114073  |
| 0.175991  | 0.119901  | 0.115093  | 0.113199 | 0.117716  | 0.113054  | 0.115967  |
| 0.186189  | 0.120192  | 0.131119  | 0.122815 | 0.122378  | 0.115093  | 0.094697  |
| 0.188811  | 0.0511364 | 0.115385  | 0.101253 | 0.126457  | 0.120629  | 0.118881  |
| 0.192162  | 0.125874  | 0.133596  | 0.126457 | 0.123397  | 0.12398   | 0.107372  |
| 0.187791  | 0.125874  | 0.129808  | 0.129371 | 0.0575466 | 0.12398   | 0.105332  |
| 0.178904  | 0.125728  | 0.126748  | 0.113782 | 0.124417  | 0.0486597 | 0.121503  |
| 0.188666  | 0.128497  | 0.130973  | 0.122378 | 0.137383  | 0.0511364 | 0.129225  |
| 0.19595   | 0.138986  | 0.136801  | 0.13141  | 0.145542  | 0.060169  | 0.137383  |
| 0.183566  | 0.11553   | 0.123834  | 0.110868 | 0.116259  | 0.109266  | 0.0903263 |
| 0.178322  | 0.124272  | 0.121212  | 0.116696 | 0.124709  | 0.117716  | 0.123834  |
| 0.178759  | 0.108974  | 0.119901  | 0.113054 | 0.119318  | 0.11116   | 0.107955  |
| 0.200612  | 0.0498252 | 0.118444  | 0.110431 | 0.140297  | 0.13039   | 0.129516  |
| 0.190268  | 0.124563  | 0.129079  | 0.119027 | 0.119172  | 0.118881  | 0.118298  |
| 0.209499  | 0.142045  | 0.149767  | 0.14292  | 0.142483  | 0.140734  | 0.121795  |
| 0.196096  | 0.144668  | 0.136655  | 0.136509 | 0.144522  | 0.136946  | 0.13986   |
| 0.190705  | 0.117133  | 0.0517191 | 0.11451  | 0.134178  | 0.12398   | 0.132139  |
| 0.183858  | 0.121941  | 0.120047  | 0.117861 | 0.120338  | 0.112762  | 0.116841  |
| 0.181672  | 0.102564  | 0.115239  | 0.104895 | 0.124272  | 0.11116   | 0.112617  |
| 0.195659  | 0.13549   | 0.137675  | 0.136364 | 0.0622086 | 0.132139  | 0.114948  |
| 0.116841  | 0.21285   | 0.215035  | 0.205857 | 0.203089  | 0.200758  | 0.212121  |
| 0.183275  | 0.115822  | 0.119464  | 0.114656 | 0.124126  | 0.115385  | 0.113636  |
| 0.187791  | 0.125874  | 0.128351  | 0.105478 | 0.119027  | 0.123397  | 0.12398   |
| 0.191434  | 0.0473485 | 0.113928  | 0.10271  | 0.127622  | 0.123252  | 0.115385  |
| 0.185752  | 0.126166  | 0.128059  | 0.12704  | 0.0587121 | 0.124854  | 0.109703  |
| 0.189394  | 0.125728  | 0.121212  | 0.116696 | 0.13141   | 0.131119  | 0.121795  |
| 0.188228  | 0.127185  | 0.126748  | 0.119901 | 0.126166  | 0.116259  | 0.113054  |
| 0.191579  | 0.129079  | 0.127768  | 0.123252 | 0.132139  | 0.114948  | 0.114073  |
| 0.189685  | 0.111451  | 0.0553613 | 0.110286 | 0.130828  | 0.12296   | 0.12296   |

|          |           |          |          |           |           |           |
|----------|-----------|----------|----------|-----------|-----------|-----------|
| 0.191434 | 0.121066  | 0.128788 | 0.118735 | 0.1081    | 0.116259  | 0.0492424 |
| 0.196096 | 0.048514  | 0.118007 | 0.105332 | 0.137238  | 0.126166  | 0.122669  |
| 0.185897 | 0.119318  | 0.123543 | 0.106498 | 0.116841  | 0.121795  | 0.119172  |
| 0.192745 | 0.13141   | 0.124563 | 0.120047 | 0.127477  | 0.123397  | 0.117861  |
| 0.162587 | 0.180798  | 0.180944 | 0.173805 | 0.17162   | 0.172203  | 0.178613  |
| 0.18007  | 0.12398   | 0.123543 | 0.115239 | 0.12296   | 0.0498252 | 0.120047  |
| 0.183712 | 0.0582751 | 0.119318 | 0.106643 | 0.127768  | 0.130099  | 0.12602   |
| 0.198427 | 0.123397  | 0.132284 | 0.121941 | 0.125291  | 0.13345   | 0.106061  |
| 0.184586 | 0.126457  | 0.12602  | 0.122378 | 0.124854  | 0.114365  | 0.110868  |
| 0.183421 | 0.119464  | 0.113491 | 0.112179 | 0.113199  | 0.106498  | 0.108829  |
| 0.183129 | 0.121212  | 0.114948 | 0.115967 | 0.11757   | 0.112325  | 0.107955  |
| 0.188666 | 0.121795  | 0.122815 | 0.116259 | 0.117279  | 0.113199  | 0.114365  |
| 0.194493 | 0.120338  | 0.129808 | 0.117424 | 0.128934  | 0.127185  | 0.108246  |
| 0.177885 | 0.129662  | 0.120192 | 0.115676 | 0.120775  | 0.0849359 | 0.121358  |
| 0.203089 | 0.133596  | 0.136072 | 0.127768 | 0.127331  | 0.131119  | 0.115676  |
| 0.18109  | 0.116841  | 0.126603 | 0.118298 | 0.121649  | 0.10912   | 0.10067   |
| 0.187646 | 0.129225  | 0.132576 | 0.124854 | 0.115676  | 0.125291  | 0.100524  |
| 0.199738 | 0.130245  | 0.138549 | 0.127914 | 0.143211  | 0.135344  | 0.114656  |
| 0.195367 | 0.123252  | 0.128642 | 0.125874 | 0.119027  | 0.124854  | 0.0866841 |
| 0.191579 | 0.126166  | 0.128351 | 0.122086 | 0.121358  | 0.119027  | 0.112034  |
| 0.189831 | 0.124417  | 0.127185 | 0.120921 | 0.113491  | 0.121941  | 0.08581   |
| 0.192453 | 0.128497  | 0.129225 | 0.122669 | 0.118444  | 0.121941  | 0.0887238 |
| 0.182255 | 0.119464  | 0.118735 | 0.114802 | 0.113491  | 0.116113  | 0.109994  |
| 0.197552 | 0.131265  | 0.134033 | 0.129516 | 0.127914  | 0.128205  | 0.120921  |
| 0.188228 | 0.120484  | 0.117716 | 0.114073 | 0.116841  | 0.120047  | 0.102564  |
| 0.203089 | 0.142337  | 0.146562 | 0.139714 | 0.146853  | 0.139277  | 0.119464  |
| 0.189977 | 0.134178  | 0.134033 | 0.130099 | 0.13549   | 0.130245  | 0.115093  |
| 0.191434 | 0.120775  | 0.124126 | 0.114365 | 0.111014  | 0.118007  | 0.0862471 |
| 0.206148 | 0.13345   | 0.143211 | 0.132284 | 0.142045  | 0.133596  | 0.119901  |
| 0.190705 | 0.122669  | 0.120192 | 0.122086 | 0.10067   | 0.122815  | 0.121358  |
| 0.201486 | 0.145688  | 0.139132 | 0.133159 | 0.139714  | 0.138549  | 0.135052  |
| 0.18954  | 0.121212  | 0.12602  | 0.11655  | 0.110868  | 0.117861  | 0.10912   |
| 0.201923 | 0.127477  | 0.146853 | 0.135344 | 0.150641  | 0.140152  | 0.138986  |
| 0.189685 | 0.121066  | 0.131702 | 0.130973 | 0.13549   | 0.134033  | 0.118881  |
| 0.197261 | 0.130099  | 0.137529 | 0.131847 | 0.137238  | 0.142191  | 0.123252  |
| 0.20134  | 0.129808  | 0.128205 | 0.130973 | 0.107226  | 0.125     | 0.107517  |
| 0.188083 | 0.125874  | 0.124272 | 0.117716 | 0.112034  | 0.121649  | 0.092803  |
| 0.183858 | 0.12398   | 0.123834 | 0.118153 | 0.11655   | 0.120047  | 0.11014   |
| 0.191579 | 0.109848  | 0.11553  | 0.107809 | 0.126894  | 0.121358  | 0.102127  |
| 0.198281 | 0.126748  | 0.135052 | 0.125874 | 0.123106  | 0.124563  | 0.0942599 |
| 0.205711 | 0.130973  | 0.137238 | 0.131265 | 0.130828  | 0.128205  | 0.121503  |
| 0.187646 | 0.131847  | 0.134615 | 0.12602  | 0.125874  | 0.129079  | 0.115385  |
| 0.186772 | 0.118444  | 0.120629 | 0.115239 | 0.0990676 | 0.118881  | 0.102273  |
| 0.184003 | 0.125     | 0.127768 | 0.117716 | 0.121358  | 0.118735  | 0.109994  |

|          |          |          |          |          |          |          |
|----------|----------|----------|----------|----------|----------|----------|
| 0.191142 | 0.121941 | 0.126748 | 0.121358 | 0.127622 | 0.129662 | 0.119755 |
| 0.186189 | 0.119027 | 0.125    | 0.123106 | 0.117424 | 0.118881 | 0.11014  |
| 0.193328 | 0.132284 | 0.130682 | 0.122086 | 0.128934 | 0.126894 | 0.11961  |
| 0.184295 | 0.124126 | 0.128351 | 0.117424 | 0.114656 | 0.115822 | 0.114365 |
| 0.175408 | 0.122523 | 0.120629 | 0.113199 | 0.120338 | 0.105769 | 0.124417 |
| 0.190851 | 0.125437 | 0.12296  | 0.114656 | 0.125    | 0.115385 | 0.122086 |
| 0.183275 | 0.123689 | 0.119172 | 0.112325 | 0.108392 | 0.116259 | 0.117716 |
| 0.187063 | 0.120775 | 0.122378 | 0.119027 | 0.121795 | 0.120921 | 0.11451  |
| 0.174388 | 0.122378 | 0.123397 | 0.114802 | 0.115239 | 0.110577 | 0.125728 |
| 0.186189 | 0.122815 | 0.126748 | 0.112325 | 0.12296  | 0.108392 | 0.116841 |
| 0.184149 | 0.126894 | 0.131702 | 0.126603 | 0.124126 | 0.100816 | 0.123834 |
| 0.17162  | 0.11553  | 0.113928 | 0.107955 | 0.111597 | 0.101981 | 0.113636 |
| 0.19799  | 0.134615 | 0.140589 | 0.134615 | 0.130973 | 0.127185 | 0.120484 |

| TDr_1888  | TDr_1895  | TDr_1899 | TDr_1905  | TDr_1907  | TDr_1913 | TDr_1922 |
|-----------|-----------|----------|-----------|-----------|----------|----------|
| 0.0983392 | 0.125146  | 0.124709 | 0.124417  | 0.116987  | 0.131119 | 0.143794 |
| 0.109848  | 0.125291  | 0.112617 | 0.114365  | 0.106352  | 0.121649 | 0.132284 |
| 0.103438  | 0.123834  | 0.109703 | 0.110868  | 0.104312  | 0.118444 | 0.129662 |
| 0.113928  | 0.121795  | 0.117279 | 0.114365  | 0.104895  | 0.119901 | 0.135781 |
| 0.132867  | 0.13345   | 0.123106 | 0.13243   | 0.133741  | 0.10708  | 0.101107 |
| 0.118007  | 0.133741  | 0.118153 | 0.129808  | 0.126748  | 0.118444 | 0.127331 |
| 0.108246  | 0.11961   | 0.131702 | 0.126748  | 0.124854  | 0.125    | 0.133304 |
| 0.109703  | 0.123397  | 0.115676 | 0.111888  | 0.107955  | 0.115385 | 0.126894 |
| 0.0981935 | 0.116259  | 0.114073 | 0.10912   | 0.107517  | 0.109994 | 0.123543 |
| 0.110577  | 0.123689  | 0.118298 | 0.118007  | 0.099796  | 0.118007 | 0.128642 |
| 0.106935  | 0.121503  | 0.12398  | 0.120192  | 0.112762  | 0.124854 | 0.137821 |
| 0.102418  | 0.112617  | 0.115385 | 0.103147  | 0.112034  | 0.108974 | 0.12398  |
| 0.10271   | 0.11961   | 0.11859  | 0.114802  | 0.103875  | 0.118881 | 0.130973 |
| 0.130828  | 0.147436  | 0.135635 | 0.136218  | 0.124709  | 0.136801 | 0.145688 |
| 0.126894  | 0.135927  | 0.12704  | 0.131119  | 0.0639569 | 0.132576 | 0.14088  |
| 0.108392  | 0.111597  | 0.124272 | 0.126894  | 0.114219  | 0.129516 | 0.132576 |
| 0.10912   | 0.107663  | 0.118007 | 0.0952797 | 0.114656  | 0.111597 | 0.125437 |
| 0.143065  | 0.151807  | 0.131265 | 0.133596  | 0.145688  | 0.127477 | 0.124126 |
| 0.106061  | 0.119755  | 0.10912  | 0.108537  | 0.106643  | 0.116696 | 0.128788 |
| 0.199883  | 0.212413  | 0.201777 | 0.204108  | 0.174534  | 0.209645 | 0.208916 |
| 0.113199  | 0.13447   | 0.117424 | 0.119172  | 0.118735  | 0.126457 | 0.13884  |
| 0.113928  | 0.129371  | 0.114365 | 0.112908  | 0.120921  | 0.119027 | 0.136655 |
| 0.107372  | 0.0965909 | 0.116259 | 0.109557  | 0.10912   | 0.117716 | 0.128351 |
| 0.112762  | 0.106352  | 0.126311 | 0.12602   | 0.130828  | 0.123689 | 0.132867 |
| 0.0989219 | 0.108537  | 0.108392 | 0.108392  | 0.103001  | 0.11014  | 0.123397 |
| 0.116113  | 0.134178  | 0.122378 | 0.128497  | 0.124563  | 0.132284 | 0.140006 |
| 0.116404  | 0.119901  | 0.128497 | 0.123252  | 0.124272  | 0.121212 | 0.128934 |
| 0.113491  | 0.104749  | 0.121795 | 0.119172  | 0.120192  | 0.128497 | 0.135344 |
| 0.125146  | 0.12398   | 0.133159 | 0.133741  | 0.131556  | 0.13345  | 0.141171 |
| 0.110286  | 0.12398   | 0.129953 | 0.120921  | 0.11961   | 0.127331 | 0.135344 |
| 0.111888  | 0.121795  | 0.127768 | 0.126311  | 0.119464  | 0.131556 | 0.138986 |
| 0.114073  | 0.116696  | 0.123252 | 0.119755  | 0.118444  | 0.126166 | 0.135052 |
| 0.102127  | 0.113199  | 0.110431 | 0.108392  | 0.10067   | 0.119464 | 0.126894 |
| 0.110868  | 0.120484  | 0.122378 | 0.122669  | 0.117279  | 0.123834 | 0.135635 |
| 0.106643  | 0.113345  | 0.129808 | 0.125146  | 0.124417  | 0.127768 | 0.136946 |
| 0.11116   | 0.121066  | 0.13345  | 0.130536  | 0.130099  | 0.130828 | 0.136218 |
| 0.122669  | 0.133741  | 0.137383 | 0.134178  | 0.136655  | 0.141754 | 0.143648 |
| 0.110868  | 0.116404  | 0.129662 | 0.117133  | 0.121941  | 0.124126 | 0.140006 |
| 0.10271   | 0.092803  | 0.114219 | 0.112179  | 0.109703  | 0.116259 | 0.129808 |
| 0.118153  | 0.109994  | 0.128205 | 0.125291  | 0.120484  | 0.126166 | 0.137383 |
| 0.107955  | 0.101836  | 0.115093 | 0.11014   | 0.112617  | 0.11014  | 0.124854 |
| 0.135052  | 0.130682  | 0.147145 | 0.144231  | 0.13447   | 0.141608 | 0.145542 |

|          |           |          |           |          |          |          |
|----------|-----------|----------|-----------|----------|----------|----------|
| 0.137092 | 0.127768  | 0.150058 | 0.143357  | 0.146125 | 0.148019 | 0.151661 |
| 0.115676 | 0.11014   | 0.119027 | 0.115239  | 0.118298 | 0.116696 | 0.131702 |
| 0.103147 | 0.107226  | 0.111451 | 0.100962  | 0.112762 | 0.112034 | 0.123834 |
| 0.112617 | 0.114073  | 0.129662 | 0.120629  | 0.112908 | 0.126748 | 0.13884  |
| 0.114073 | 0.112034  | 0.120047 | 0.111597  | 0.118735 | 0.118881 | 0.134178 |
| 0.131702 | 0.129953  | 0.143794 | 0.139132  | 0.13549  | 0.138549 | 0.144814 |
| 0.107226 | 0.110723  | 0.121358 | 0.116987  | 0.11859  | 0.11961  | 0.131702 |
| 0.112034 | 0.106498  | 0.123834 | 0.117133  | 0.112617 | 0.123252 | 0.133013 |
| 0.124126 | 0.148019  | 0.148456 | 0.151078  | 0.147727 | 0.149913 | 0.156177 |
| 0.121212 | 0.119172  | 0.129808 | 0.122815  | 0.130828 | 0.125437 | 0.128788 |
| 0.10912  | 0.0971737 | 0.120629 | 0.116841  | 0.11757  | 0.121795 | 0.134178 |
| 0.122232 | 0.132721  | 0.129953 | 0.128497  | 0.117279 | 0.13141  | 0.137966 |
| 0.109994 | 0.114365  | 0.115676 | 0.117424  | 0.116987 | 0.122378 | 0.133304 |
| 0.129516 | 0.121066  | 0.141317 | 0.134615  | 0.143794 | 0.137821 | 0.146707 |
| 0.120921 | 0.114219  | 0.135344 | 0.131265  | 0.13141  | 0.128934 | 0.135781 |
| 0.113054 | 0.105478  | 0.11961  | 0.112908  | 0.113928 | 0.116113 | 0.129953 |
| 0.115093 | 0.116259  | 0.123689 | 0.118153  | 0.120338 | 0.121358 | 0.135198 |
| 0.114948 | 0.112034  | 0.126166 | 0.127622  | 0.119027 | 0.124709 | 0.129808 |
| 0.129808 | 0.114073  | 0.142483 | 0.139569  | 0.135927 | 0.134907 | 0.136509 |
| 0.133596 | 0.123106  | 0.143357 | 0.147145  | 0.137675 | 0.141317 | 0.143211 |
| 0.156177 | 0.158217  | 0.167978 | 0.167978  | 0.154138 | 0.171474 | 0.17162  |
| 0.108683 | 0.106643  | 0.121066 | 0.114948  | 0.11451  | 0.119318 | 0.132867 |
| 0.1081   | 0.10169   | 0.11757  | 0.113491  | 0.116259 | 0.119318 | 0.132284 |
| 0.104312 | 0.105478  | 0.120775 | 0.111742  | 0.11859  | 0.117861 | 0.135198 |
| 0.131556 | 0.138549  | 0.148019 | 0.13986   | 0.140006 | 0.144522 | 0.150787 |
| 0.108829 | 0.106498  | 0.117716 | 0.112179  | 0.111742 | 0.113928 | 0.126603 |
| 0.126457 | 0.120629  | 0.133887 | 0.125437  | 0.133741 | 0.135927 | 0.143357 |
| 0.115385 | 0.108683  | 0.128934 | 0.122232  | 0.117716 | 0.124272 | 0.131993 |
| 0.112617 | 0.105915  | 0.122086 | 0.115093  | 0.117861 | 0.11859  | 0.132721 |
| 0.133304 | 0.146125  | 0.152389 | 0.145688  | 0.145833 | 0.150932 | 0.153409 |
| 0.114365 | 0.107372  | 0.130828 | 0.122378  | 0.122815 | 0.122086 | 0.138549 |
| 0.136655 | 0.122378  | 0.143502 | 0.142045  | 0.136364 | 0.134178 | 0.1419   |
| 0.120192 | 0.120192  | 0.129079 | 0.122669  | 0.133013 | 0.124709 | 0.128934 |
| 0.104895 | 0.122086  | 0.110286 | 0.0945513 | 0.115676 | 0.117279 | 0.13345  |
| 0.111305 | 0.0999417 | 0.116696 | 0.113782  | 0.114802 | 0.116696 | 0.132867 |
| 0.109557 | 0.108683  | 0.11961  | 0.114073  | 0.11655  | 0.112034 | 0.128205 |
| 0.127622 | 0.113636  | 0.135052 | 0.130682  | 0.13549  | 0.133887 | 0.141026 |
| 0.104749 | 0.110577  | 0.11859  | 0.116841  | 0.116696 | 0.119755 | 0.133596 |
| 0.13141  | 0.126457  | 0.144376 | 0.142337  | 0.137821 | 0.14088  | 0.143939 |
| 0.117133 | 0.11451   | 0.128351 | 0.123397  | 0.121795 | 0.124272 | 0.138986 |
| 0.107226 | 0.097028  | 0.12602  | 0.119318  | 0.121795 | 0.118153 | 0.128205 |
| 0.112762 | 0.107809  | 0.12602  | 0.11757   | 0.120921 | 0.121066 | 0.131993 |
| 0.115967 | 0.111014  | 0.126311 | 0.120775  | 0.119755 | 0.124563 | 0.137821 |
| 0.109848 | 0.107226  | 0.121066 | 0.112617  | 0.114802 | 0.11757  | 0.130536 |

|          |          |          |          |           |          |          |
|----------|----------|----------|----------|-----------|----------|----------|
| 0.11014  | 0.104604 | 0.119318 | 0.114073 | 0.118881  | 0.119901 | 0.132576 |
| 0.129225 | 0.121066 | 0.141608 | 0.140152 | 0.136218  | 0.137821 | 0.139132 |
| 0.10708  | 0.107663 | 0.120629 | 0.112762 | 0.106206  | 0.113928 | 0.131265 |
| 0.102273 | 0.117424 | 0.117279 | 0.113782 | 0.113345  | 0.114948 | 0.126166 |
| 0.122669 | 0.130245 | 0.127477 | 0.124563 | 0.122378  | 0.128934 | 0.138986 |
| 0.114219 | 0.125583 | 0.137092 | 0.128934 | 0.128788  | 0.126311 | 0.132576 |
| 0.123252 | 0.128497 | 0.127185 | 0.125728 | 0.131119  | 0.134178 | 0.138986 |
| 0.130099 | 0.131265 | 0.134033 | 0.136946 | 0.136509  | 0.141026 | 0.147582 |
| 0.111014 | 0.124126 | 0.118153 | 0.115239 | 0.116841  | 0.112034 | 0.123543 |
| 0.172203 | 0.185897 | 0.186626 | 0.183129 | 0.180361  | 0.185752 | 0.189685 |
| 0.104749 | 0.118735 | 0.111305 | 0.108974 | 0.10912   | 0.111014 | 0.127477 |
| 0.138403 | 0.130828 | 0.135635 | 0.13447  | 0.130536  | 0.14933  | 0.155886 |
| 0.127914 | 0.125    | 0.127185 | 0.128059 | 0.124126  | 0.139132 | 0.147727 |
| 0.125146 | 0.13243  | 0.137238 | 0.130828 | 0.134761  | 0.134615 | 0.141171 |
| 0.106352 | 0.113054 | 0.112908 | 0.113199 | 0.112762  | 0.122815 | 0.131119 |
| 0.12296  | 0.125874 | 0.130099 | 0.128059 | 0.131119  | 0.140589 | 0.144814 |
| 0.109266 | 0.120338 | 0.112325 | 0.111742 | 0.117133  | 0.120192 | 0.133159 |
| 0.120484 | 0.119901 | 0.121503 | 0.123252 | 0.127185  | 0.128205 | 0.130973 |
| 0.10912  | 0.115239 | 0.121795 | 0.120629 | 0.116696  | 0.125874 | 0.13447  |
| 0.128934 | 0.125437 | 0.125291 | 0.132284 | 0.139714  | 0.142483 | 0.143794 |
| 0.105915 | 0.106789 | 0.120338 | 0.111014 | 0.110286  | 0.117424 | 0.13243  |
| 0.124126 | 0.131993 | 0.136218 | 0.130973 | 0.13549   | 0.140006 | 0.144522 |
| 0.109994 | 0.120484 | 0.123543 | 0.112471 | 0.121358  | 0.119755 | 0.130682 |
| 0.124126 | 0.116259 | 0.135052 | 0.135052 | 0.131993  | 0.132139 | 0.139277 |
| 0.121941 | 0.125728 | 0.138403 | 0.131702 | 0.126603  | 0.135198 | 0.14088  |
| 0.103584 | 0.116113 | 0.110431 | 0.106061 | 0.113491  | 0.11451  | 0.128351 |
| 0.133887 | 0.142337 | 0.153263 | 0.145396 | 0.142337  | 0.150932 | 0.156614 |
| 0.109266 | 0.118007 | 0.116113 | 0.112034 | 0.116259  | 0.11961  | 0.129371 |
| 0.110431 | 0.115093 | 0.118444 | 0.114073 | 0.113345  | 0.11961  | 0.130536 |
| 0.114365 | 0.108829 | 0.117716 | 0.114219 | 0.121649  | 0.123834 | 0.134761 |
| 0.134178 | 0.143502 | 0.142191 | 0.13345  | 0.142628  | 0.145105 | 0.149913 |
| 0.10912  | 0.114656 | 0.129079 | 0.122378 | 0.120484  | 0.134324 | 0.138258 |
| 0.104749 | 0.113782 | 0.113636 | 0.107226 | 0.112617  | 0.120629 | 0.130973 |
| 0.11116  | 0.114656 | 0.106643 | 0.106643 | 0.111451  | 0.120629 | 0.135344 |
| 0.109848 | 0.119172 | 0.122815 | 0.116696 | 0.116259  | 0.124563 | 0.137529 |
| 0.121358 | 0.117861 | 0.131702 | 0.129953 | 0.121066  | 0.132867 | 0.136218 |
| 0.105186 | 0.117424 | 0.12398  | 0.121066 | 0.120338  | 0.116987 | 0.13141  |
| 0.101253 | 0.103001 | 0.11655  | 0.105769 | 0.103001  | 0.109557 | 0.123689 |
| 0.10271  | 0.108246 | 0.115967 | 0.106643 | 0.10708   | 0.113345 | 0.127477 |
| 0.105769 | 0.111305 | 0.118153 | 0.10912  | 0.108392  | 0.116987 | 0.128497 |
| 0.117424 | 0.11451  | 0.120192 | 0.116696 | 0.121212  | 0.123397 | 0.137821 |
| 0.122232 | 0.11961  | 0.136072 | 0.130245 | 0.127768  | 0.13345  | 0.137966 |
| 0.109848 | 0.108392 | 0.116987 | 0.106498 | 0.105478  | 0.114365 | 0.126457 |
| 0.104749 | 0.102127 | 0.11014  | 0.108683 | 0.0995047 | 0.112471 | 0.126311 |



|           |           |          |           |           |          |          |
|-----------|-----------|----------|-----------|-----------|----------|----------|
| 0.11553   | 0.106206  | 0.13345  | 0.126166  | 0.119318  | 0.125583 | 0.130099 |
| 0.105478  | 0.0999417 | 0.122523 | 0.107372  | 0.107809  | 0.112034 | 0.128205 |
| 0.115676  | 0.127914  | 0.126894 | 0.122523  | 0.120047  | 0.131265 | 0.1419   |
| 0.107809  | 0.138403  | 0.136509 | 0.133887  | 0.134033  | 0.137675 | 0.148019 |
| 0.112471  | 0.109557  | 0.123689 | 0.116696  | 0.114219  | 0.116696 | 0.123543 |
| 0.110286  | 0.108246  | 0.121212 | 0.110723  | 0.108829  | 0.112762 | 0.129225 |
| 0.109411  | 0.105041  | 0.117716 | 0.111014  | 0.106498  | 0.120629 | 0.13243  |
| 0.103875  | 0.10708   | 0.112179 | 0.109557  | 0.108829  | 0.114802 | 0.131265 |
| 0.122523  | 0.120484  | 0.129371 | 0.125291  | 0.124854  | 0.130828 | 0.133304 |
| 0.106206  | 0.0995047 | 0.113636 | 0.109266  | 0.103584  | 0.112471 | 0.123397 |
| 0.130536  | 0.131119  | 0.144959 | 0.133304  | 0.137821  | 0.140589 | 0.144814 |
| 0.130682  | 0.125146  | 0.13986  | 0.136072  | 0.133013  | 0.133159 | 0.13884  |
| 0.121358  | 0.116987  | 0.131702 | 0.126457  | 0.121649  | 0.129953 | 0.134761 |
| 0.112471  | 0.113928  | 0.122232 | 0.115822  | 0.113636  | 0.117861 | 0.13345  |
| 0.105478  | 0.118881  | 0.115239 | 0.111742  | 0.115967  | 0.116987 | 0.130245 |
| 0.100087  | 0.100087  | 0.119464 | 0.105478  | 0.109703  | 0.113928 | 0.128642 |
| 0.107517  | 0.0976107 | 0.120775 | 0.109994  | 0.117716  | 0.117279 | 0.131702 |
| 0.101107  | 0.1081    | 0.113782 | 0.112908  | 0.111305  | 0.112908 | 0.125583 |
| 0.107226  | 0.11014   | 0.114073 | 0.110868  | 0.115676  | 0.118735 | 0.13549  |
| 0.124709  | 0.0996503 | 0.133013 | 0.126894  | 0.129662  | 0.128642 | 0.135781 |
| 0.110577  | 0.119027  | 0.113928 | 0.114802  | 0.116113  | 0.123834 | 0.137675 |
| 0.125     | 0.13345   | 0.133887 | 0.127185  | 0.122086  | 0.131847 | 0.13986  |
| 0.128934  | 0.139423  | 0.137529 | 0.131993  | 0.135344  | 0.136364 | 0.142628 |
| 0.18954   | 0.198572  | 0.194056 | 0.188228  | 0.182255  | 0.194639 | 0.203234 |
| 0.232809  | 0.239219  | 0.235286 | 0.238782  | 0.228438  | 0.240239 | 0.238928 |
| 0.105624  | 0.112325  | 0.115385 | 0.111888  | 0.112034  | 0.115967 | 0.129516 |
| 0.1081    | 0.103147  | 0.116113 | 0.107955  | 0.113345  | 0.111742 | 0.122669 |
| 0.0961538 | 0.105186  | 0.114948 | 0.103875  | 0.112471  | 0.113782 | 0.130245 |
| 0.101399  | 0.107226  | 0.112908 | 0.10067   | 0.113345  | 0.114365 | 0.130245 |
| 0.129953  | 0.136364  | 0.129808 | 0.131556  | 0.0652681 | 0.134761 | 0.139569 |
| 0.104604  | 0.108974  | 0.117861 | 0.107955  | 0.117133  | 0.121941 | 0.129953 |
| 0.136509  | 0.121941  | 0.148019 | 0.137529  | 0.146999  | 0.13986  | 0.14729  |
| 0.112179  | 0.104312  | 0.118153 | 0.105041  | 0.120047  | 0.115822 | 0.131993 |
| 0.118007  | 0.114802  | 0.129516 | 0.121941  | 0.134324  | 0.130973 | 0.138112 |
| 0.127185  | 0.119318  | 0.13141  | 0.124126  | 0.133304  | 0.131702 | 0.141171 |
| 0.124854  | 0.117279  | 0.133159 | 0.122669  | 0.128351  | 0.138112 | 0.146999 |
| 0.130099  | 0.12602   | 0.142191 | 0.138695  | 0.136218  | 0.140443 | 0.146416 |
| 0.113199  | 0.108829  | 0.119172 | 0.104895  | 0.120484  | 0.120921 | 0.135635 |
| 0.107955  | 0.102418  | 0.113928 | 0.101107  | 0.11553   | 0.112471 | 0.127768 |
| 0.109266  | 0.104895  | 0.119901 | 0.105332  | 0.119464  | 0.116113 | 0.130245 |
| 0.102273  | 0.102855  | 0.111742 | 0.0989219 | 0.114219  | 0.110577 | 0.12296  |
| 0.105478  | 0.0999417 | 0.113491 | 0.0992133 | 0.11451   | 0.115239 | 0.128205 |
| 0.106789  | 0.101836  | 0.115967 | 0.100816  | 0.122523  | 0.113636 | 0.125728 |
| 0.120629  | 0.111888  | 0.125146 | 0.114365  | 0.128788  | 0.132139 | 0.140734 |

|          |           |          |           |          |          |          |
|----------|-----------|----------|-----------|----------|----------|----------|
| 0.127914 | 0.114802  | 0.13039  | 0.127477  | 0.137821 | 0.14088  | 0.149184 |
| 0.109994 | 0.104749  | 0.122669 | 0.111014  | 0.120775 | 0.120629 | 0.130682 |
| 0.109557 | 0.0999417 | 0.119027 | 0.107955  | 0.116841 | 0.120775 | 0.131993 |
| 0.123834 | 0.111597  | 0.133013 | 0.121066  | 0.136655 | 0.135344 | 0.141026 |
| 0.107226 | 0.0979021 | 0.113199 | 0.103875  | 0.118007 | 0.115822 | 0.127914 |
| 0.13447  | 0.123397  | 0.140152 | 0.128788  | 0.136801 | 0.142774 | 0.151661 |
| 0.129225 | 0.135635  | 0.139277 | 0.134033  | 0.124563 | 0.145105 | 0.150787 |
| 0.123252 | 0.12296   | 0.126311 | 0.12398   | 0.134615 | 0.133596 | 0.142191 |
| 0.101107 | 0.100816  | 0.116696 | 0.0986305 | 0.11451  | 0.108829 | 0.120629 |
| 0.103584 | 0.0983392 | 0.110723 | 0.100816  | 0.116113 | 0.112471 | 0.127477 |
| 0.116259 | 0.109848  | 0.123397 | 0.114073  | 0.125583 | 0.12398  | 0.129371 |
| 0.114948 | 0.105624  | 0.121503 | 0.113928  | 0.130099 | 0.129953 | 0.138258 |
| 0.121358 | 0.10912   | 0.130245 | 0.11655   | 0.136509 | 0.129371 | 0.138549 |
| 0.109266 | 0.10169   | 0.118444 | 0.102418  | 0.122378 | 0.11757  | 0.130245 |
| 0.111742 | 0.101836  | 0.118881 | 0.107226  | 0.118735 | 0.113054 | 0.129516 |
| 0.121066 | 0.105915  | 0.124126 | 0.117424  | 0.124854 | 0.130245 | 0.141463 |
| 0.131847 | 0.112325  | 0.134615 | 0.127622  | 0.134761 | 0.137529 | 0.143502 |
| 0.123106 | 0.114948  | 0.129371 | 0.122086  | 0.133887 | 0.133159 | 0.14088  |
| 0.129953 | 0.105186  | 0.131556 | 0.129516  | 0.13549  | 0.139714 | 0.149767 |
| 0.123106 | 0.114656  | 0.134033 | 0.138986  | 0.131847 | 0.137821 | 0.148456 |
| 0.108537 | 0.100962  | 0.120921 | 0.107226  | 0.121066 | 0.118298 | 0.132139 |
| 0.125146 | 0.119318  | 0.129953 | 0.115385  | 0.133596 | 0.129953 | 0.138258 |
| 0.105478 | 0.0944056 | 0.109411 | 0.101544  | 0.11655  | 0.116404 | 0.131702 |
| 0.108829 | 0.112617  | 0.117424 | 0.112471  | 0.116404 | 0.113345 | 0.128059 |
| 0.11116  | 0.108537  | 0.112471 | 0.0979021 | 0.114365 | 0.115385 | 0.127477 |
| 0.106643 | 0.107226  | 0.11553  | 0.105915  | 0.11859  | 0.112908 | 0.125874 |
| 0.101399 | 0.102855  | 0.114365 | 0.0957168 | 0.112471 | 0.110868 | 0.125583 |
| 0.126311 | 0.110577  | 0.135198 | 0.125291  | 0.135927 | 0.13986  | 0.148456 |
| 0.108683 | 0.109266  | 0.11757  | 0.114365  | 0.120921 | 0.120484 | 0.13141  |
| 0.125583 | 0.116841  | 0.133596 | 0.123106  | 0.136946 | 0.137092 | 0.146562 |
| 0.107226 | 0.10373   | 0.112908 | 0.10271   | 0.11451  | 0.11116  | 0.122669 |
| 0.116696 | 0.103875  | 0.125291 | 0.117424  | 0.132139 | 0.129662 | 0.137092 |
| 0.109848 | 0.108392  | 0.125728 | 0.126311  | 0.125874 | 0.130973 | 0.134324 |
| 0.11451  | 0.121503  | 0.125146 | 0.116404  | 0.111597 | 0.127768 | 0.1419   |
| 0.114073 | 0.105624  | 0.121503 | 0.116259  | 0.11553  | 0.120338 | 0.130973 |
| 0.118007 | 0.118007  | 0.120484 | 0.107372  | 0.123543 | 0.123397 | 0.129371 |
| 0.125146 | 0.114073  | 0.123834 | 0.114802  | 0.119027 | 0.126166 | 0.144085 |
| 0.106789 | 0.113491  | 0.120629 | 0.113345  | 0.115239 | 0.111888 | 0.127477 |
| 0.127185 | 0.141171  | 0.139277 | 0.141026  | 0.129225 | 0.134907 | 0.140297 |
| 0.13345  | 0.128788  | 0.143794 | 0.14088   | 0.137238 | 0.145833 | 0.151807 |
| 0.103438 | 0.11859   | 0.113491 | 0.111742  | 0.103147 | 0.116987 | 0.12704  |
| 0.129225 | 0.137966  | 0.126748 | 0.128497  | 0.121358 | 0.140152 | 0.14729  |
| 0.120338 | 0.131993  | 0.134178 | 0.133013  | 0.119464 | 0.133013 | 0.136946 |
| 0.125    | 0.133741  | 0.119901 | 0.13243   | 0.122669 | 0.136509 | 0.138403 |

|          |          |          |          |          |          |          |
|----------|----------|----------|----------|----------|----------|----------|
| 0.111888 | 0.130245 | 0.118735 | 0.120775 | 0.115385 | 0.126311 | 0.134324 |
| 0.120338 | 0.129079 | 0.125437 | 0.126603 | 0.116841 | 0.125437 | 0.135198 |
| 0.122523 | 0.131847 | 0.126748 | 0.132284 | 0.118153 | 0.132576 | 0.136509 |
| 0.123543 | 0.131702 | 0.12602  | 0.124563 | 0.12296  | 0.129808 | 0.139569 |
| 0.130245 | 0.142774 | 0.130099 | 0.134761 | 0.129079 | 0.140006 | 0.147145 |
| 0.121503 | 0.134324 | 0.12398  | 0.133304 | 0.119755 | 0.131556 | 0.138986 |
| 0.111305 | 0.126166 | 0.11116  | 0.113782 | 0.111888 | 0.121358 | 0.131119 |
| 0.121358 | 0.116113 | 0.136946 | 0.130245 | 0.13884  | 0.134324 | 0.141171 |
| 0.131702 | 0.136946 | 0.133304 | 0.13447  | 0.128497 | 0.137966 | 0.142483 |
| 0.104895 | 0.127914 | 0.113782 | 0.11116  | 0.107517 | 0.119027 | 0.130536 |
| 0.211684 | 0.224213 | 0.219988 | 0.216492 | 0.211393 | 0.222611 | 0.224505 |
| 0.118735 | 0.128934 | 0.122378 | 0.119755 | 0.117279 | 0.129953 | 0.142628 |
| 0.116404 | 0.122815 | 0.121212 | 0.116841 | 0.112325 | 0.120047 | 0.131847 |
| 0.127622 | 0.137821 | 0.127185 | 0.132721 | 0.128205 | 0.138258 | 0.147436 |
| 0.109848 | 0.127622 | 0.123397 | 0.12398  | 0.116259 | 0.122815 | 0.131119 |
| 0.131119 | 0.139569 | 0.134761 | 0.14088  | 0.126166 | 0.134761 | 0.140152 |
| 0.115676 | 0.125874 | 0.11757  | 0.121358 | 0.117133 | 0.125146 | 0.133159 |
| 0.114656 | 0.128642 | 0.116259 | 0.124126 | 0.112325 | 0.126457 | 0.135927 |
| 0.123397 | 0.132721 | 0.128205 | 0.127331 | 0.117861 | 0.130536 | 0.133887 |
| 0.120629 | 0.134033 | 0.120484 | 0.13039  | 0.121503 | 0.136218 | 0.143648 |
| 0.126311 | 0.135344 | 0.126748 | 0.129371 | 0.12602  | 0.136072 | 0.138258 |
| 0.122669 | 0.140734 | 0.123397 | 0.124563 | 0.129371 | 0.135927 | 0.140734 |
| 0.123543 | 0.136946 | 0.122232 | 0.123106 | 0.12296  | 0.133596 | 0.140734 |
| 0.11451  | 0.114802 | 0.126311 | 0.123397 | 0.111014 | 0.123689 | 0.134324 |
| 0.111597 | 0.129953 | 0.117861 | 0.113782 | 0.116259 | 0.123106 | 0.134033 |
| 0.128059 | 0.141171 | 0.125    | 0.134033 | 0.129808 | 0.139569 | 0.145833 |
| 0.112471 | 0.126748 | 0.114948 | 0.121358 | 0.113636 | 0.126311 | 0.13141  |
| 0.129662 | 0.117716 | 0.141754 | 0.135927 | 0.138112 | 0.136801 | 0.140734 |
| 0.128059 | 0.145251 | 0.13986  | 0.138986 | 0.133596 | 0.145979 | 0.151952 |
| 0.11757  | 0.116404 | 0.130828 | 0.126457 | 0.117861 | 0.131993 | 0.140589 |
| 0.120775 | 0.134761 | 0.134615 | 0.131119 | 0.122815 | 0.132576 | 0.14088  |
| 0.120338 | 0.128497 | 0.133013 | 0.128351 | 0.124709 | 0.138549 | 0.145105 |
| 0.119318 | 0.129808 | 0.130536 | 0.131702 | 0.128934 | 0.134615 | 0.140297 |
| 0.116987 | 0.134178 | 0.130245 | 0.129079 | 0.127477 | 0.132284 | 0.140589 |
| 0.12398  | 0.141171 | 0.141317 | 0.139569 | 0.131847 | 0.143939 | 0.151952 |
| 0.109848 | 0.104312 | 0.120775 | 0.117279 | 0.107809 | 0.119027 | 0.128788 |
| 0.126311 | 0.125146 | 0.141026 | 0.13549  | 0.127477 | 0.130536 | 0.134178 |
| 0.132867 | 0.145688 | 0.144959 | 0.142337 | 0.134615 | 0.147873 | 0.15472  |
| 0.112179 | 0.110431 | 0.125437 | 0.126894 | 0.118007 | 0.126311 | 0.129079 |
| 0.11859  | 0.118007 | 0.133013 | 0.126894 | 0.126166 | 0.128934 | 0.135198 |
| 0.135635 | 0.123689 | 0.14831  | 0.143648 | 0.146125 | 0.141608 | 0.149913 |
| 0.119027 | 0.108829 | 0.128788 | 0.123834 | 0.126894 | 0.127914 | 0.137675 |
| 0.131119 | 0.129079 | 0.142045 | 0.138549 | 0.132867 | 0.143794 | 0.151515 |
| 0.124563 | 0.120484 | 0.132867 | 0.13345  | 0.128351 | 0.135781 | 0.143502 |

|          |          |           |          |           |          |          |
|----------|----------|-----------|----------|-----------|----------|----------|
| 0.121795 | 0.120047 | 0.121066  | 0.121649 | 0.12296   | 0.131847 | 0.137529 |
| 0.128934 | 0.12398  | 0.133159  | 0.131119 | 0.125437  | 0.136655 | 0.141754 |
| 0.119172 | 0.113928 | 0.133887  | 0.122815 | 0.120629  | 0.133013 | 0.138695 |
| 0.126603 | 0.117861 | 0.130536  | 0.127914 | 0.129808  | 0.136946 | 0.14088  |
| 0.116404 | 0.133887 | 0.125874  | 0.125583 | 0.132139  | 0.132284 | 0.136509 |
| 0.125146 | 0.124272 | 0.125291  | 0.13141  | 0.135927  | 0.140734 | 0.143502 |
| 0.12398  | 0.130973 | 0.130828  | 0.129079 | 0.133596  | 0.137238 | 0.143794 |
| 0.117279 | 0.125437 | 0.134907  | 0.131702 | 0.130973  | 0.140734 | 0.146999 |
| 0.137383 | 0.141171 | 0.142483  | 0.140443 | 0.140297  | 0.150932 | 0.156031 |
| 0.123397 | 0.120192 | 0.128788  | 0.13141  | 0.114948  | 0.126457 | 0.130682 |
| 0.114948 | 0.111451 | 0.119755  | 0.116841 | 0.116404  | 0.120629 | 0.131556 |
| 0.125728 | 0.129225 | 0.136364  | 0.123252 | 0.127185  | 0.124126 | 0.127768 |
| 0.114656 | 0.11961  | 0.128205  | 0.12296  | 0.117279  | 0.120047 | 0.126603 |
| 0.132576 | 0.145105 | 0.150787  | 0.143211 | 0.137529  | 0.150204 | 0.155012 |
| 0.147436 | 0.15035  | 0.155449  | 0.1537   | 0.152972  | 0.155449 | 0.161713 |
| 0.123252 | 0.113345 | 0.125437  | 0.125437 | 0.134033  | 0.130682 | 0.138112 |
| 0.114948 | 0.10271  | 0.122378  | 0.11859  | 0.12602   | 0.125291 | 0.13447  |
| 0.125874 | 0.130245 | 0.123106  | 0.126603 | 0.129662  | 0.139714 | 0.145688 |
| 0.126894 | 0.139132 | 0.128497  | 0.129953 | 0.128351  | 0.137821 | 0.143794 |
| 0.123397 | 0.109411 | 0.131119  | 0.117133 | 0.131265  | 0.125583 | 0.133596 |
| 0.130099 | 0.141754 | 0.123252  | 0.133741 | 0.130973  | 0.137821 | 0.145251 |
| 0.124854 | 0.139423 | 0.13986   | 0.140443 | 0.133304  | 0.145396 | 0.149621 |
| 0.118298 | 0.114802 | 0.133304  | 0.131556 | 0.12296   | 0.134178 | 0.142191 |
| 0.144522 | 0.159674 | 0.15574   | 0.139714 | 0.15676   | 0.159528 | 0.165501 |
| 0.121795 | 0.112762 | 0.135927  | 0.129516 | 0.122669  | 0.129225 | 0.136364 |
| 0.13345  | 0.130828 | 0.143211  | 0.146416 | 0.132284  | 0.144668 | 0.150058 |
| 0.119901 | 0.108246 | 0.126457  | 0.120629 | 0.11961   | 0.122378 | 0.131556 |
| 0.118735 | 0.127185 | 0.131702  | 0.130536 | 0.140589  | 0.138112 | 0.141463 |
| 0.11757  | 0.132139 | 0.118007  | 0.124126 | 0.118735  | 0.131119 | 0.139714 |
| 0.116841 | 0.145688 | 0.138549  | 0.139132 | 0.134615  | 0.145833 | 0.155594 |
| 0.139714 | 0.152244 | 0.0670163 | 0.132867 | 0.143211  | 0.136946 | 0.13884  |
| 0.116841 | 0.127914 | 0.118735  | 0.11757  | 0.122086  | 0.125437 | 0.134324 |
| 0.128642 | 0.14088  | 0.131702  | 0.136655 | 0.128642  | 0.139569 | 0.145833 |
| 0.141317 | 0.114219 | 0.1537    | 0.143211 | 0.144814  | 0.150495 | 0.160839 |
| 0.133159 | 0.149767 | 0.143794  | 0.142337 | 0.133159  | 0.143794 | 0.157634 |
| 0.114073 | 0.095134 | 0.131702  | 0.122378 | 0.133013  | 0.128497 | 0.135344 |
| 0.137821 | 0.144231 | 0.129516  | 0.129225 | 0.134615  | 0.108829 | 0.105186 |
| 0.118007 | 0.122086 | 0.110286  | 0.111742 | 0.0865385 | 0.122232 | 0.134033 |
| 0.114073 | 0.119318 | 0.118298  | 0.114219 | 0.0855186 | 0.121503 | 0.135927 |
| 0.11655  | 0.128788 | 0.123397  | 0.122232 | 0.118007  | 0.122523 | 0.129371 |
| 0.112471 | 0.124126 | 0.117279  | 0.111451 | 0.118881  | 0.122232 | 0.133741 |
| 0.111451 | 0.117279 | 0.120338  | 0.11014  | 0.11553   | 0.121212 | 0.136218 |
| 0.107372 | 0.121649 | 0.112179  | 0.113054 | 0.0756119 | 0.114802 | 0.129808 |
| 0.117279 | 0.129808 | 0.115967  | 0.114219 | 0.117279  | 0.112471 | 0.128059 |

|           |           |           |           |           |           |           |
|-----------|-----------|-----------|-----------|-----------|-----------|-----------|
| 0.120921  | 0.135198  | 0.123106  | 0.123106  | 0.0699301 | 0.129516  | 0.141026  |
| 0.0981935 | 0.11655   | 0.117861  | 0.109411  | 0.10169   | 0.112034  | 0.126748  |
| 0.115385  | 0.126748  | 0.118735  | 0.11757   | 0.118881  | 0.128642  | 0.141317  |
| 0.112325  | 0.124854  | 0.115093  | 0.112762  | 0.11553   | 0.120921  | 0.132139  |
| 0.11961   | 0.0444347 | 0.13345   | 0.122086  | 0.12602   | 0.126748  | 0.137383  |
| 0.205565  | 0.218094  | 0.214452  | 0.214452  | 0.207605  | 0.219697  | 0.223048  |
| 0.135635  | 0.143502  | 0.136946  | 0.140152  | 0.139423  | 0.142774  | 0.143794  |
| 0.123834  | 0.128788  | 0.125146  | 0.124272  | 0.127622  | 0.132139  | 0.137529  |
| 0.118444  | 0.125146  | 0.118881  | 0.121212  | 0.118153  | 0.11859   | 0.131556  |
| 0.204691  | 0.215472  | 0.206876  | 0.208916  | 0.201195  | 0.215326  | 0.216638  |
| 0.108829  | 0.0785256 | 0.128788  | 0.122378  | 0.120775  | 0.127331  | 0.137966  |
| 0.11655   | 0.114802  | 0.128642  | 0.120484  | 0.120921  | 0.11757   | 0.131119  |
| 0.11859   | 0.123834  | 0.118735  | 0.115239  | 0.122669  | 0.0546329 | 0.0530303 |
| 0.122523  | 0.133596  | 0.120338  | 0.123834  | 0.0595862 | 0.126457  | 0.139132  |
| 0.246066  | 0.253059  | 0.249417  | 0.247378  | 0.242861  | 0.25204   | 0.249854  |
| 0.104604  | 0.132284  | 0.128351  | 0.12602   | 0.123834  | 0.130973  | 0.141608  |
| 0.111888  | 0.0518648 | 0.126603  | 0.11553   | 0.119464  | 0.119027  | 0.132576  |
| 0.110723  | 0.126457  | 0.112908  | 0.0528846 | 0.129079  | 0.120775  | 0.132284  |
| 0.111014  | 0.125291  | 0.108537  | 0.0517191 | 0.123834  | 0.116696  | 0.129371  |
| 0.111888  | 0.130828  | 0.133304  | 0.133596  | 0.109848  | 0.134761  | 0.144814  |
| 0.102564  | 0.136364  | 0.128059  | 0.121066  | 0.108974  | 0.131847  | 0.145396  |
| 0.114802  | 0.0544872 | 0.127185  | 0.116696  | 0.121795  | 0.117861  | 0.131702  |
| 0.111451  | 0.123106  | 0.11655   | 0.11014   | 0.116987  | 0.121503  | 0.133887  |
| 0.124126  | 0.13141   | 0.119901  | 0.11961   | 0.125583  | 0.099796  | 0.103438  |
| 0.117716  | 0.125     | 0.117279  | 0.114656  | 0.0530303 | 0.120192  | 0.132576  |
| 0.10912   | 0.121066  | 0.11655   | 0.111014  | 0.113782  | 0.117133  | 0.128934  |
| 0.112471  | 0.129079  | 0.122815  | 0.124563  | 0.101399  | 0.121066  | 0.129662  |
| 0.14088   | 0.151078  | 0.0641026 | 0.132576  | 0.14292   | 0.136364  | 0.13884   |
| 0.107955  | 0.129808  | 0.129953  | 0.127622  | 0.130099  | 0.13141   | 0.139714  |
| 0.124272  | 0.118735  | 0.133741  | 0.124417  | 0.124854  | 0.121795  | 0.134761  |
| 0.182838  | 0.19391   | 0.188228  | 0.18852   | 0.180798  | 0.19289   | 0.201195  |
| 0.197407  | 0.206439  | 0.202797  | 0.198718  | 0.193328  | 0.205128  | 0.213432  |
| 0.122232  | 0.133887  | 0.121212  | 0.123834  | 0.060169  | 0.124417  | 0.137966  |
| 0.118735  | 0.125728  | 0.11451   | 0.115676  | 0.0517191 | 0.119172  | 0.131556  |
| 0.130973  | 0.142337  | 0.132576  | 0.133159  | 0.127477  | 0.139277  | 0.144085  |
| 0.118444  | 0.0528846 | 0.127331  | 0.117716  | 0.122232  | 0.118007  | 0.134761  |
| 0.106061  | 0.132867  | 0.128059  | 0.131265  | 0.129953  | 0.133013  | 0.144522  |
| 0.12602   | 0.131847  | 0.120921  | 0.109848  | 0.131265  | 0.130828  | 0.128934  |
| 0.216929  | 0.228001  | 0.22028   | 0.225816  | 0.216929  | 0.226981  | 0.228293  |
| 0.110286  | 0.118735  | 0.116259  | 0.111014  | 0.116113  | 0.116841  | 0.13039   |
| 0.199301  | 0.205128  | 0.209062  | 0.206731  | 0.202797  | 0.212558  | 0.212704  |
| 0.105332  | 0.0878497 | 0.120921  | 0.112471  | 0.118153  | 0.11655   | 0.133013  |
| 0.107517  | 0.120921  | 0.119027  | 0.109411  | 0.11859   | 0.118444  | 0.129953  |
| 0.111451  | 0.112034  | 0.118007  | 0.117133  | 0.114073  | 0.120921  | 0.133304  |

|           |           |           |           |           |          |          |
|-----------|-----------|-----------|-----------|-----------|----------|----------|
| 0.114656  | 0.124272  | 0.114219  | 0.112762  | 0.0607517 | 0.113928 | 0.127477 |
| 0.200466  | 0.210373  | 0.205857  | 0.204983  | 0.199592  | 0.210519 | 0.214744 |
| 0.125583  | 0.135781  | 0.126603  | 0.126603  | 0.127914  | 0.132721 | 0.141608 |
| 0.111305  | 0.109266  | 0.122523  | 0.105915  | 0.120629  | 0.118735 | 0.134907 |
| 0.116841  | 0.127914  | 0.121941  | 0.121941  | 0.123543  | 0.128059 | 0.138112 |
| 0.0716783 | 0.125583  | 0.126894  | 0.118444  | 0.129371  | 0.121066 | 0.129953 |
| 0.120921  | 0.12704   | 0.11961   | 0.115822  | 0.0568182 | 0.117861 | 0.133159 |
| 0.104458  | 0.0930944 | 0.123252  | 0.114802  | 0.121066  | 0.11859  | 0.133304 |
| 0.116404  | 0.069493  | 0.126748  | 0.118298  | 0.118444  | 0.113928 | 0.124563 |
| 0.119318  | 0.115822  | 0.130828  | 0.12296   | 0.12398   | 0.123252 | 0.134178 |
| 0.106498  | 0.122815  | 0.109848  | 0.109266  | 0.106789  | 0.116841 | 0.13039  |
| 0.11014   | 0.110431  | 0.121358  | 0.112034  | 0.125874  | 0.124563 | 0.135781 |
| 0.18546   | 0.195076  | 0.191434  | 0.186189  | 0.179924  | 0.19493  | 0.199155 |
| 0.113054  | 0.124709  | 0.112617  | 0.0496795 | 0.129079  | 0.123689 | 0.13345  |
| 0.123106  | 0.135344  | 0.0524476 | 0.115676  | 0.127185  | 0.123252 | 0.130973 |
| 0.119172  | 0.12704   | 0.109703  | 0.0992133 | 0.121503  | 0.122232 | 0.135781 |
| 0.104749  | 0.131556  | 0.129371  | 0.127622  | 0.127185  | 0.133741 | 0.145251 |
| 0.11553   | 0.125437  | 0.11859   | 0.117424  | 0.121358  | 0.126166 | 0.13243  |
| 0.108537  | 0.0939685 | 0.125874  | 0.11859   | 0.12602   | 0.122086 | 0.130973 |
| 0         | 0.122086  | 0.121066  | 0.110577  | 0.121212  | 0.117279 | 0.130245 |
| 0.122086  | 0         | 0.13243   | 0.124272  | 0.129079  | 0.128934 | 0.133159 |
| 0.121066  | 0.13243   | 0         | 0.110723  | 0.118444  | 0.120338 | 0.128934 |
| 0.110577  | 0.124272  | 0.110723  | 0         | 0.123397  | 0.115385 | 0.128059 |
| 0.121212  | 0.129079  | 0.118444  | 0.123397  | 0         | 0.121358 | 0.134324 |
| 0.117279  | 0.128934  | 0.120338  | 0.115385  | 0.121358  | 0        | 0.0625   |
| 0.130245  | 0.133159  | 0.128934  | 0.128059  | 0.134324  | 0.0625   | 0        |
| 0.101107  | 0.122086  | 0.119901  | 0.117861  | 0.116841  | 0.122232 | 0.138695 |
| 0.131265  | 0.13884   | 0.131993  | 0.133741  | 0.134761  | 0.13986  | 0.142628 |
| 0.117861  | 0.128934  | 0.11859   | 0.116841  | 0.0584207 | 0.117424 | 0.132139 |
| 0.112034  | 0.122523  | 0.108683  | 0.0984848 | 0.120192  | 0.119172 | 0.125437 |
| 0.11655   | 0.125291  | 0.120484  | 0.118153  | 0.114802  | 0.120775 | 0.133159 |
| 0.121212  | 0.0547786 | 0.133304  | 0.12398   | 0.129953  | 0.128351 | 0.136364 |
| 0.180653  | 0.179779  | 0.192162  | 0.18954   | 0.185023  | 0.194493 | 0.200758 |
| 0.105041  | 0.105915  | 0.11655   | 0.105478  | 0.119901  | 0.11859  | 0.130099 |
| 0.10912   | 0.111742  | 0.106643  | 0.107226  | 0.105915  | 0.11655  | 0.130682 |
| 0.118153  | 0.118735  | 0.129662  | 0.124709  | 0.123106  | 0.121212 | 0.135052 |
| 0.169726  | 0.187209  | 0.179196  | 0.182984  | 0.171474  | 0.182692 | 0.189248 |
| 0.11451   | 0.141317  | 0.139714  | 0.13884   | 0.131702  | 0.142337 | 0.151515 |
| 0.122086  | 0.149184  | 0.152244  | 0.14729   | 0.148019  | 0.152535 | 0.158508 |
| 0.140589  | 0.153118  | 0.0687646 | 0.135781  | 0.144085  | 0.141026 | 0.140589 |
| 0.0983392 | 0.120775  | 0.118298  | 0.116841  | 0.11961   | 0.125291 | 0.135927 |
| 0.115093  | 0.127331  | 0.117861  | 0.11757   | 0.120338  | 0.124854 | 0.135198 |
| 0.204691  | 0.217512  | 0.209499  | 0.208916  | 0.202652  | 0.215035 | 0.218386 |
| 0.123106  | 0.128934  | 0.120629  | 0.120047  | 0.119318  | 0.114219 | 0.124272 |

|           |           |          |           |           |           |           |
|-----------|-----------|----------|-----------|-----------|-----------|-----------|
| 0.11859   | 0.132576  | 0.121941 | 0.122815  | 0.127331  | 0.131265  | 0.136072  |
| 0.110431  | 0.107809  | 0.11553  | 0.107955  | 0.121503  | 0.125437  | 0.13549   |
| 0.162879  | 0.175991  | 0.162442 | 0.168561  | 0.156469  | 0.164773  | 0.173368  |
| 0.108392  | 0.119755  | 0.115239 | 0.113199  | 0.108974  | 0.111451  | 0.124709  |
| 0.149038  | 0.153118  | 0.144231 | 0.1419    | 0.146416  | 0.122669  | 0.110577  |
| 0.109411  | 0.126603  | 0.130536 | 0.125291  | 0.112617  | 0.125874  | 0.133887  |
| 0.182547  | 0.192453  | 0.190851 | 0.186772  | 0.177593  | 0.193182  | 0.197698  |
| 0.104458  | 0.126311  | 0.128497 | 0.121503  | 0.121066  | 0.12704   | 0.141171  |
| 0.103001  | 0.117861  | 0.1081   | 0.110723  | 0.106789  | 0.112179  | 0.129225  |
| 0.111014  | 0.125291  | 0.114656 | 0.0948427 | 0.120629  | 0.112325  | 0.12704   |
| 0.110577  | 0.113782  | 0.122086 | 0.111014  | 0.122815  | 0.119172  | 0.128934  |
| 0.117861  | 0.11553   | 0.127914 | 0.122669  | 0.121358  | 0.122086  | 0.136218  |
| 0.122815  | 0.128059  | 0.117424 | 0.121503  | 0.123106  | 0.121212  | 0.136509  |
| 0.119172  | 0.12704   | 0.117279 | 0.115822  | 0.0559441 | 0.11757   | 0.129079  |
| 0.181672  | 0.192745  | 0.190268 | 0.186772  | 0.17905   | 0.191725  | 0.198572  |
| 0.122086  | 0.127914  | 0.112325 | 0.118444  | 0.126457  | 0.092803  | 0.103438  |
| 0.108246  | 0.121358  | 0.121503 | 0.113054  | 0.105041  | 0.123543  | 0.133304  |
| 0.203963  | 0.214744  | 0.206148 | 0.20877   | 0.200758  | 0.21285   | 0.215035  |
| 0.113345  | 0.12704   | 0.113782 | 0.0523019 | 0.129953  | 0.121066  | 0.133741  |
| 0.118153  | 0.128934  | 0.11655  | 0.115676  | 0.0546329 | 0.121212  | 0.13039   |
| 0.116987  | 0.124272  | 0.114219 | 0.111888  | 0.053176  | 0.115676  | 0.130973  |
| 0.12704   | 0.138403  | 0.128934 | 0.132721  | 0.131993  | 0.12602   | 0.125874  |
| 0.182692  | 0.194347  | 0.188374 | 0.186917  | 0.178904  | 0.194784  | 0.198427  |
| 0.118153  | 0.0546329 | 0.129371 | 0.116841  | 0.126311  | 0.122086  | 0.136801  |
| 0.127768  | 0.129516  | 0.123834 | 0.123543  | 0.128642  | 0.0591492 | 0.0470571 |
| 0.115822  | 0.124563  | 0.113636 | 0.11655   | 0.0569639 | 0.118007  | 0.131847  |
| 0.114073  | 0.12398   | 0.114219 | 0.115385  | 0.055507  | 0.112179  | 0.130099  |
| 0.113928  | 0.126166  | 0.116113 | 0.114948  | 0.0576923 | 0.11757   | 0.130536  |
| 0.111451  | 0.123397  | 0.117716 | 0.11451   | 0.114073  | 0.118298  | 0.133013  |
| 0.0981935 | 0.114219  | 0.112034 | 0.107955  | 0.0979021 | 0.109994  | 0.125     |
| 0.106935  | 0.130828  | 0.12602  | 0.127768  | 0.126166  | 0.128059  | 0.140734  |
| 0.123834  | 0.138112  | 0.112325 | 0.119901  | 0.13345   | 0.109994  | 0.113636  |
| 0.102564  | 0.127914  | 0.128642 | 0.121941  | 0.12296   | 0.128059  | 0.140443  |
| 0.0759033 | 0.127185  | 0.133741 | 0.125583  | 0.13243   | 0.12704   | 0.135344  |
| 0.190559  | 0.197844  | 0.19391  | 0.192745  | 0.183275  | 0.196824  | 0.203671  |
| 0.113782  | 0.125437  | 0.115385 | 0.111597  | 0.116987  | 0.0492424 | 0.0642483 |
| 0.125     | 0.134907  | 0.127185 | 0.125728  | 0.127331  | 0.135344  | 0.140152  |
| 0.112325  | 0.124854  | 0.114219 | 0.114219  | 0.057838  | 0.115676  | 0.13039   |
| 0.0976107 | 0.114219  | 0.114073 | 0.107955  | 0.0996503 | 0.112034  | 0.126457  |
| 0.113054  | 0.126166  | 0.115239 | 0.111451  | 0.115967  | 0.104749  | 0.119755  |
| 0.116404  | 0.0499709 | 0.132867 | 0.117133  | 0.12602   | 0.122669  | 0.134178  |
| 0.123689  | 0.133013  | 0.126748 | 0.129953  | 0.128934  | 0.13549   | 0.140297  |
| 0.119755  | 0.130536  | 0.055507 | 0.111742  | 0.118007  | 0.113782  | 0.130828  |
| 0.102273  | 0.0798368 | 0.123689 | 0.114073  | 0.110723  | 0.11553   | 0.130536  |

|           |           |           |           |           |           |           |
|-----------|-----------|-----------|-----------|-----------|-----------|-----------|
| 0.099796  | 0.08581   | 0.119755  | 0.107809  | 0.106498  | 0.113345  | 0.129225  |
| 0.0973193 | 0.121503  | 0.10912   | 0.110868  | 0.106643  | 0.113491  | 0.129953  |
| 0.103584  | 0.092803  | 0.125291  | 0.110431  | 0.121066  | 0.117424  | 0.130682  |
| 0.110723  | 0.136655  | 0.137092  | 0.135344  | 0.131119  | 0.139714  | 0.149767  |
| 0.115239  | 0.0587121 | 0.125874  | 0.115676  | 0.123689  | 0.11859   | 0.132721  |
| 0.108974  | 0.121795  | 0.112908  | 0.109703  | 0.110431  | 0.115822  | 0.130536  |
| 0.111014  | 0.0582751 | 0.121941  | 0.113199  | 0.118298  | 0.116404  | 0.132284  |
| 0.11757   | 0.122815  | 0.115093  | 0.109557  | 0.057838  | 0.117424  | 0.131265  |
| 0.104604  | 0.108683  | 0.114948  | 0.100962  | 0.116841  | 0.120192  | 0.132576  |
| 0.117424  | 0.125291  | 0.120775  | 0.115822  | 0.0571096 | 0.118444  | 0.132284  |
| 0.109266  | 0.119464  | 0.111742  | 0.104749  | 0.117716  | 0.0496795 | 0.0652681 |
| 0.11859   | 0.130828  | 0.0514277 | 0.107955  | 0.117424  | 0.11553   | 0.130536  |
| 0.114219  | 0.112179  | 0.125437  | 0.116696  | 0.115385  | 0.11757   | 0.131119  |
| 0.100379  | 0.117279  | 0.117716  | 0.109266  | 0.100087  | 0.112179  | 0.128059  |
| 0.113345  | 0.124126  | 0.11553   | 0.115239  | 0.0574009 | 0.11757   | 0.129079  |
| 0.119172  | 0.129662  | 0.116404  | 0.103293  | 0.117716  | 0.121358  | 0.133159  |
| 0.115822  | 0.126311  | 0.123543  | 0.119172  | 0.108829  | 0.122669  | 0.135635  |
| 0.109848  | 0.11859   | 0.110868  | 0.116113  | 0.110431  | 0.116404  | 0.130245  |
| 0.11451   | 0.123543  | 0.11553   | 0.111742  | 0.0579837 | 0.119318  | 0.131702  |
| 0.113782  | 0.126603  | 0.116841  | 0.117716  | 0.11757   | 0.123543  | 0.133304  |
| 0.107372  | 0.0936772 | 0.124126  | 0.112471  | 0.117861  | 0.117424  | 0.131847  |
| 0.115239  | 0.12398   | 0.118881  | 0.115967  | 0.11553   | 0.121503  | 0.136801  |
| 0.116113  | 0.111742  | 0.123834  | 0.117424  | 0.117279  | 0.11655   | 0.131556  |
| 0.102418  | 0.118735  | 0.12296   | 0.111305  | 0.104167  | 0.115093  | 0.131847  |
| 0.105915  | 0.120775  | 0.106352  | 0.109557  | 0.106206  | 0.101399  | 0.11553   |
| 0.104312  | 0.109557  | 0.116987  | 0.0986305 | 0.11859   | 0.117279  | 0.132576  |
| 0.116987  | 0.128351  | 0.118881  | 0.119755  | 0.121066  | 0.124417  | 0.135344  |
| 0.109703  | 0.124854  | 0.123834  | 0.121795  | 0.128351  | 0.122669  | 0.13447   |
| 0.108974  | 0.122086  | 0.118153  | 0.112908  | 0.113345  | 0.120192  | 0.134324  |
| 0.186772  | 0.199883  | 0.193036  | 0.192453  | 0.185606  | 0.19595   | 0.201632  |
| 0.155303  | 0.16958   | 0.158654  | 0.162442  | 0.15676   | 0.161568  | 0.168124  |
| 0.100233  | 0.125874  | 0.129225  | 0.121649  | 0.125291  | 0.126894  | 0.1419    |
| 0.115822  | 0.0884324 | 0.122086  | 0.117133  | 0.118735  | 0.115093  | 0.132139  |
| 0.128351  | 0.1537    | 0.154429  | 0.149476  | 0.150204  | 0.152389  | 0.160693  |
| 0.127331  | 0.134615  | 0.121066  | 0.117861  | 0.125874  | 0.0983392 | 0.104021  |
| 0.122232  | 0.131847  | 0.118298  | 0.115967  | 0.0878497 | 0.108392  | 0.119027  |
| 0.114802  | 0.127914  | 0.118444  | 0.120775  | 0.0842075 | 0.121066  | 0.138403  |
| 0.111305  | 0.126457  | 0.122523  | 0.121358  | 0.0990676 | 0.118153  | 0.132576  |
| 0.118007  | 0.129953  | 0.126894  | 0.120484  | 0.112471  | 0.124854  | 0.135198  |
| 0.19595   | 0.208479  | 0.199301  | 0.200466  | 0.190122  | 0.205128  | 0.207022  |
| 0.11655   | 0.0533217 | 0.133013  | 0.119901  | 0.126166  | 0.125146  | 0.138403  |
| 0.111451  | 0.0962995 | 0.120921  | 0.113054  | 0.118153  | 0.122378  | 0.135052  |
| 0.112325  | 0.121066  | 0.11014   | 0.113054  | 0.0662879 | 0.114802  | 0.129225  |
| 0.0748834 | 0.122669  | 0.121941  | 0.107372  | 0.122378  | 0.113782  | 0.130828  |



|           |           |           |           |           |           |           |
|-----------|-----------|-----------|-----------|-----------|-----------|-----------|
| 0.176428  | 0.190997  | 0.179487  | 0.183275  | 0.172931  | 0.188811  | 0.197407  |
| 0.241696  | 0.248397  | 0.244172  | 0.246503  | 0.241113  | 0.247086  | 0.246066  |
| 0.120192  | 0.133596  | 0.0544872 | 0.111597  | 0.11757   | 0.117424  | 0.132139  |
| 0.114656  | 0.131265  | 0.12296   | 0.116259  | 0.110286  | 0.12296   | 0.135344  |
| 0.101544  | 0.130973  | 0.12704   | 0.120047  | 0.120484  | 0.124709  | 0.137966  |
| 0.114219  | 0.112179  | 0.126311  | 0.116696  | 0.114219  | 0.114656  | 0.129371  |
| 0.11116   | 0.0537587 | 0.123543  | 0.113054  | 0.121066  | 0.115385  | 0.130099  |
| 0.113054  | 0.122669  | 0.109994  | 0.109994  | 0.116841  | 0.0872669 | 0.10169   |
| 0.113199  | 0.121941  | 0.11655   | 0.119172  | 0.0817308 | 0.116841  | 0.130682  |
| 0.114656  | 0.0488054 | 0.123252  | 0.111888  | 0.121358  | 0.11655   | 0.129516  |
| 0.109266  | 0.124126  | 0.116404  | 0.116696  | 0.0836247 | 0.118444  | 0.13141   |
| 0.114073  | 0.124563  | 0.11451   | 0.123252  | 0.112617  | 0.121795  | 0.137675  |
| 0.100816  | 0.119755  | 0.119027  | 0.109994  | 0.099359  | 0.111742  | 0.127914  |
| 0.120484  | 0.133013  | 0.0472028 | 0.111305  | 0.119318  | 0.115385  | 0.129516  |
| 0.113928  | 0.125874  | 0.118153  | 0.114365  | 0.115385  | 0.121649  | 0.135198  |
| 0.105769  | 0.114802  | 0.10708   | 0.0878497 | 0.111888  | 0.106789  | 0.116259  |
| 0.124709  | 0.11859   | 0.120775  | 0.121066  | 0.122669  | 0.13447   | 0.142191  |
| 0.125291  | 0.121503  | 0.139423  | 0.133013  | 0.131993  | 0.129516  | 0.137238  |
| 0.115822  | 0.121649  | 0.11655   | 0.113054  | 0.0581294 | 0.11451   | 0.130973  |
| 0.113054  | 0.120047  | 0.122815  | 0.124272  | 0.0874126 | 0.124272  | 0.13345   |
| 0.129662  | 0.137821  | 0.130973  | 0.128642  | 0.0667249 | 0.131556  | 0.139277  |
| 0.199446  | 0.215181  | 0.206585  | 0.208042  | 0.201195  | 0.212995  | 0.215763  |
| 0.109266  | 0.122378  | 0.0595862 | 0.100962  | 0.112179  | 0.112325  | 0.124417  |
| 0.100962  | 0.120775  | 0.122086  | 0.11014   | 0.103293  | 0.113636  | 0.129808  |
| 0.114656  | 0.123106  | 0.117424  | 0.111014  | 0.119901  | 0.0498252 | 0.0657051 |
| 0.115093  | 0.125874  | 0.114365  | 0.0505536 | 0.129079  | 0.120192  | 0.133741  |
| 0.0710956 | 0.119464  | 0.124854  | 0.107663  | 0.119172  | 0.114365  | 0.130536  |
| 0.19289   | 0.206585  | 0.198572  | 0.194202  | 0.191725  | 0.2044    | 0.206876  |
| 0.116113  | 0.127185  | 0.121503  | 0.11655   | 0.121941  | 0.119755  | 0.133596  |
| 0.111597  | 0.121795  | 0.116404  | 0.114365  | 0.0579837 | 0.114365  | 0.128788  |
| 0.113491  | 0.11757   | 0.125     | 0.127914  | 0.123689  | 0.127331  | 0.134761  |
| 0.11116   | 0.108829  | 0.12296   | 0.115093  | 0.113199  | 0.112762  | 0.128351  |
| 0.116696  | 0.126311  | 0.113928  | 0.115385  | 0.117279  | 0.122669  | 0.136218  |
| 0.106206  | 0.118735  | 0.108974  | 0.111014  | 0.106789  | 0.118007  | 0.131847  |
| 0.114073  | 0.125437  | 0.117424  | 0.120338  | 0.116113  | 0.121212  | 0.135052  |
| 0.109411  | 0.124563  | 0.111305  | 0.0457459 | 0.124563  | 0.117424  | 0.127768  |
| 0.192308  | 0.202797  | 0.196533  | 0.196533  | 0.188228  | 0.202652  | 0.208042  |
| 0.109994  | 0.118153  | 0.108974  | 0.108974  | 0.112617  | 0.113636  | 0.125728  |
| 0.188228  | 0.199883  | 0.196241  | 0.193036  | 0.185897  | 0.198864  | 0.205128  |
| 0.187209  | 0.199155  | 0.193765  | 0.191434  | 0.184295  | 0.196096  | 0.200612  |
| 0.121358  | 0.118444  | 0.136655  | 0.128497  | 0.128642  | 0.127914  | 0.135344  |
| 0.115822  | 0.128642  | 0.121212  | 0.0649767 | 0.13447   | 0.128788  | 0.131556  |
| 0.103584  | 0.114948  | 0.108974  | 0.11014   | 0.106498  | 0.113054  | 0.12398   |
| 0.109848  | 0.115385  | 0.111742  | 0.107372  | 0.108683  | 0.114656  | 0.129079  |

|          |           |           |           |           |          |          |
|----------|-----------|-----------|-----------|-----------|----------|----------|
| 0.112034 | 0.121358  | 0.115093  | 0.112762  | 0.116987  | 0.11655  | 0.13039  |
| 0.119027 | 0.127768  | 0.122086  | 0.116841  | 0.0584207 | 0.11859  | 0.133304 |
| 0.108537 | 0.0592949 | 0.123252  | 0.107517  | 0.120192  | 0.116259 | 0.127185 |
| 0.11116  | 0.0537587 | 0.125291  | 0.11451   | 0.119318  | 0.114802 | 0.129225 |
| 0.123834 | 0.136364  | 0.0511364 | 0.112908  | 0.12296   | 0.117861 | 0.131119 |
| 0.114073 | 0.119901  | 0.129371  | 0.118298  | 0.121649  | 0.120047 | 0.133013 |
| 0.112179 | 0.121503  | 0.109703  | 0.111451  | 0.0559441 | 0.113199 | 0.125    |
| 0.11116  | 0.125728  | 0.116841  | 0.111305  | 0.118444  | 0.12296  | 0.133887 |
| 0.099359 | 0.113928  | 0.104167  | 0.110577  | 0.105478  | 0.109411 | 0.125    |
| 0.120775 | 0.132721  | 0.128497  | 0.124126  | 0.126311  | 0.132284 | 0.136218 |
| 0.101544 | 0.126894  | 0.126457  | 0.120629  | 0.118444  | 0.126457 | 0.138549 |
| 0.125    | 0.136072  | 0.129808  | 0.130099  | 0.132867  | 0.135927 | 0.140152 |
| 0.252331 | 0.261946  | 0.256265  | 0.258013  | 0.253205  | 0.260927 | 0.259324 |
| 0.121503 | 0.113345  | 0.128934  | 0.119318  | 0.134033  | 0.133304 | 0.137238 |
| 0.118735 | 0.127185  | 0.127914  | 0.124709  | 0.13039   | 0.128788 | 0.13039  |
| 0.214744 | 0.223485  | 0.216929  | 0.216929  | 0.208333  | 0.2213   | 0.222902 |
| 0.123689 | 0.128059  | 0.130536  | 0.118007  | 0.127185  | 0.130245 | 0.135927 |
| 0.222756 | 0.235286  | 0.226399  | 0.228147  | 0.221591  | 0.232809 | 0.235577 |
| 0.111597 | 0.105478  | 0.121941  | 0.111451  | 0.125583  | 0.127768 | 0.132284 |
| 0.127768 | 0.136801  | 0.127331  | 0.128788  | 0.0627914 | 0.131702 | 0.140006 |
| 0.106498 | 0.118444  | 0.113345  | 0.0474942 | 0.120775  | 0.113345 | 0.126311 |
| 0.116696 | 0.118444  | 0.13345   | 0.126166  | 0.121941  | 0.125    | 0.135344 |
| 0.197698 | 0.208479  | 0.203089  | 0.198135  | 0.193328  | 0.204254 | 0.209936 |
| 0.124272 | 0.135927  | 0.128205  | 0.126748  | 0.127768  | 0.133741 | 0.139132 |
| 0.115239 | 0.124272  | 0.117133  | 0.116841  | 0.118153  | 0.122086 | 0.136801 |
| 0.219114 | 0.229895  | 0.225379  | 0.224796  | 0.218531  | 0.230332 | 0.231352 |
| 0.114948 | 0.0619172 | 0.127914  | 0.11451   | 0.120775  | 0.117133 | 0.135052 |
| 0.192599 | 0.203963  | 0.197115  | 0.19595   | 0.188228  | 0.200321 | 0.209499 |
| 0.116259 | 0.0603147 | 0.127768  | 0.117861  | 0.123252  | 0.120484 | 0.135198 |
| 0.117424 | 0.127622  | 0.114948  | 0.113491  | 0.0594406 | 0.120484 | 0.13345  |
| 0.108829 | 0.12602   | 0.127331  | 0.122378  | 0.110286  | 0.124709 | 0.134761 |
| 0.121066 | 0.120192  | 0.138695  | 0.129662  | 0.127768  | 0.128497 | 0.133596 |
| 0.113928 | 0.122086  | 0.11553   | 0.114948  | 0.11451   | 0.109411 | 0.126748 |
| 0.147436 | 0.171037  | 0.162442  | 0.15778   | 0.149476  | 0.164481 | 0.175408 |
| 0.108683 | 0.121503  | 0.114073  | 0.108246  | 0.113054  | 0.117861 | 0.128497 |
| 0.112179 | 0.124417  | 0.110868  | 0.0528846 | 0.127331  | 0.121066 | 0.131702 |
| 0.11655  | 0.118007  | 0.124854  | 0.114948  | 0.119464  | 0.124854 | 0.136072 |
| 0.119755 | 0.125874  | 0.118735  | 0.108246  | 0.129953  | 0.127477 | 0.129079 |
| 0.190414 | 0.201486  | 0.193473  | 0.193182  | 0.184878  | 0.198718 | 0.204691 |
| 0.115385 | 0.124709  | 0.115239  | 0.114656  | 0.0544872 | 0.11553  | 0.130828 |
| 0.122523 | 0.122523  | 0.132576  | 0.122669  | 0.116987  | 0.120047 | 0.139132 |
| 0.106643 | 0.0952797 | 0.11961   | 0.112617  | 0.122669  | 0.116404 | 0.132867 |
| 0.114948 | 0.0505536 | 0.129662  | 0.118881  | 0.121358  | 0.123543 | 0.131556 |
| 0.121503 | 0.129953  | 0.121649  | 0.122523  | 0.0585664 | 0.122523 | 0.132284 |

|          |           |           |           |           |          |           |
|----------|-----------|-----------|-----------|-----------|----------|-----------|
| 0.24898  | 0.258887  | 0.253788  | 0.254662  | 0.249272  | 0.259324 | 0.255682  |
| 0.100233 | 0.121795  | 0.123106  | 0.11553   | 0.1081    | 0.118735 | 0.127914  |
| 0.115967 | 0.12704   | 0.114073  | 0.113199  | 0.094697  | 0.074155 | 0.0909091 |
| 0.14627  | 0.183275  | 0.18109   | 0.178176  | 0.177448  | 0.180507 | 0.185315  |
| 0.177448 | 0.19289   | 0.186917  | 0.181381  | 0.17803   | 0.188374 | 0.193765  |
| 0.11859  | 0.134033  | 0.0528846 | 0.113782  | 0.117424  | 0.113491 | 0.129662  |
| 0.111451 | 0.128934  | 0.118298  | 0.113345  | 0.11553   | 0.120921 | 0.133887  |
| 0.115239 | 0.112908  | 0.124417  | 0.117424  | 0.115822  | 0.116841 | 0.131556  |
| 0.136946 | 0.147436  | 0.13884   | 0.141463  | 0.139277  | 0.146707 | 0.148601  |
| 0.11655  | 0.129953  | 0.0560897 | 0.107372  | 0.118298  | 0.114365 | 0.131119  |
| 0.121358 | 0.13243   | 0.0527389 | 0.112471  | 0.118444  | 0.120629 | 0.131556  |
| 0.121503 | 0.0521562 | 0.126603  | 0.121066  | 0.126457  | 0.124854 | 0.134324  |
| 0.111888 | 0.122086  | 0.119901  | 0.113199  | 0.116841  | 0.121941 | 0.128497  |
| 0.121941 | 0.132721  | 0.123834  | 0.126166  | 0.12602   | 0.133159 | 0.137383  |
| 0.114219 | 0.0766317 | 0.127477  | 0.118444  | 0.118007  | 0.122523 | 0.137529  |
| 0.120775 | 0.116987  | 0.13345   | 0.126166  | 0.122815  | 0.122086 | 0.135927  |
| 0.134033 | 0.12704   | 0.144668  | 0.141171  | 0.137821  | 0.135344 | 0.14627   |
| 0.106789 | 0.124563  | 0.130536  | 0.122669  | 0.112325  | 0.124417 | 0.133887  |
| 0.122378 | 0.119464  | 0.140589  | 0.133013  | 0.13141   | 0.129516 | 0.137821  |
| 0.123252 | 0.0477855 | 0.135344  | 0.125146  | 0.132867  | 0.131265 | 0.138695  |
| 0.198572 | 0.213141  | 0.204254  | 0.20542   | 0.195659  | 0.21183  | 0.216055  |
| 0.118298 | 0.115093  | 0.127185  | 0.121941  | 0.115385  | 0.130099 | 0.137529  |
| 0.18648  | 0.197261  | 0.190414  | 0.1875    | 0.18211   | 0.19595  | 0.200466  |
| 0.108974 | 0.120629  | 0.114948  | 0.0831876 | 0.118007  | 0.113491 | 0.123834  |
| 0.127331 | 0.135198  | 0.123689  | 0.123106  | 0.0638112 | 0.129225 | 0.140443  |
| 0.104895 | 0.12704   | 0.126603  | 0.12398   | 0.123543  | 0.128642 | 0.139569  |
| 0.101253 | 0.123106  | 0.120338  | 0.118298  | 0.116404  | 0.124126 | 0.13884   |
| 0.118007 | 0.129371  | 0.119027  | 0.11961   | 0.120921  | 0.124272 | 0.13141   |
| 0.11655  | 0.125     | 0.122232  | 0.123397  | 0.121503  | 0.124563 | 0.136364  |
| 0.121795 | 0.129953  | 0.121066  | 0.115239  | 0.0574009 | 0.120775 | 0.135198  |
| 0.111451 | 0.125146  | 0.113054  | 0.0480769 | 0.122815  | 0.118298 | 0.132721  |
| 0.106206 | 0.129808  | 0.124126  | 0.129079  | 0.129225  | 0.131119 | 0.142628  |
| 0.129662 | 0.0571096 | 0.14088   | 0.130099  | 0.134615  | 0.133596 | 0.139569  |
| 0.245921 | 0.256119  | 0.246941  | 0.249563  | 0.243007  | 0.252768 | 0.248834  |
| 0.121212 | 0.129371  | 0.119318  | 0.118735  | 0.0565268 | 0.118735 | 0.135198  |
| 0.175845 | 0.189831  | 0.18648   | 0.180653  | 0.175554  | 0.183275 | 0.190122  |
| 0.182401 | 0.19493   | 0.188957  | 0.186626  | 0.179779  | 0.190705 | 0.197261  |
| 0.115239 | 0.129225  | 0.115967  | 0.119172  | 0.114365  | 0.124417 | 0.13884   |
| 0.100962 | 0.117861  | 0.120921  | 0.113636  | 0.104749  | 0.117133 | 0.128059  |
| 0.127185 | 0.131556  | 0.123834  | 0.126748  | 0.0587121 | 0.127914 | 0.138549  |
| 0.11116  | 0.124854  | 0.111888  | 0.109266  | 0.113782  | 0.118007 | 0.128642  |
| 0.108974 | 0.122669  | 0.117279  | 0.119318  | 0.0996503 | 0.11757  | 0.130536  |
| 0.113928 | 0.0571096 | 0.124272  | 0.114365  | 0.121795  | 0.118153 | 0.133741  |
| 0.112617 | 0.12602   | 0.124126  | 0.120921  | 0.118153  | 0.12296  | 0.129516  |

|           |           |           |           |           |           |           |
|-----------|-----------|-----------|-----------|-----------|-----------|-----------|
| 0.123397  | 0.135052  | 0.129662  | 0.13141   | 0.128642  | 0.137529  | 0.138258  |
| 0.120921  | 0.127622  | 0.116987  | 0.117861  | 0.0553613 | 0.119318  | 0.132867  |
| 0.120338  | 0.13141   | 0.123689  | 0.126894  | 0.125291  | 0.132139  | 0.140443  |
| 0.105915  | 0.123397  | 0.118298  | 0.112179  | 0.121649  | 0.117716  | 0.128642  |
| 0.105624  | 0.133596  | 0.129953  | 0.129662  | 0.127477  | 0.132867  | 0.141171  |
| 0.121503  | 0.115093  | 0.129516  | 0.122523  | 0.120921  | 0.119318  | 0.13345   |
| 0.127768  | 0.0511364 | 0.137821  | 0.129371  | 0.133304  | 0.130245  | 0.139714  |
| 0.120047  | 0.123252  | 0.120192  | 0.126603  | 0.118007  | 0.127768  | 0.137529  |
| 0.114219  | 0.122669  | 0.115239  | 0.116987  | 0.0594406 | 0.119027  | 0.13141   |
| 0.126457  | 0.131993  | 0.125728  | 0.122815  | 0.131993  | 0.060169  | 0.0457459 |
| 0.178467  | 0.190414  | 0.187937  | 0.180361  | 0.177593  | 0.189103  | 0.195076  |
| 0.128205  | 0.139569  | 0.132139  | 0.131556  | 0.130245  | 0.137966  | 0.142774  |
| 0.115385  | 0.124417  | 0.118153  | 0.118735  | 0.12296   | 0.122523  | 0.132284  |
| 0.102127  | 0.127477  | 0.125583  | 0.122669  | 0.124854  | 0.127622  | 0.140006  |
| 0.0955711 | 0.119755  | 0.117861  | 0.113199  | 0.114219  | 0.124272  | 0.134033  |
| 0.118444  | 0.114365  | 0.127331  | 0.119464  | 0.115822  | 0.120047  | 0.131556  |
| 0.119755  | 0.115385  | 0.13243   | 0.124563  | 0.123252  | 0.123106  | 0.134033  |
| 0.184586  | 0.195659  | 0.191725  | 0.190559  | 0.182547  | 0.195221  | 0.201195  |
| 0.106789  | 0.122815  | 0.116259  | 0.121795  | 0.114365  | 0.123252  | 0.133304  |
| 0.106061  | 0.114219  | 0.111742  | 0.114073  | 0.108392  | 0.110286  | 0.120629  |
| 0.118881  | 0.131119  | 0.11961   | 0.120484  | 0.121212  | 0.129808  | 0.136072  |
| 0.185169  | 0.197407  | 0.192016  | 0.189977  | 0.186334  | 0.198135  | 0.202652  |
| 0.100233  | 0.119172  | 0.120484  | 0.112617  | 0.100524  | 0.112908  | 0.128788  |
| 0.118153  | 0.0467657 | 0.132284  | 0.119172  | 0.129225  | 0.124709  | 0.133596  |
| 0.118153  | 0.128934  | 0.121503  | 0.123543  | 0.119318  | 0.124126  | 0.13447   |
| 0.113928  | 0.125     | 0.0534674 | 0.107955  | 0.116841  | 0.110286  | 0.124417  |
| 0.182401  | 0.194347  | 0.187209  | 0.186626  | 0.175991  | 0.190997  | 0.196678  |
| 0.114802  | 0.0518648 | 0.126894  | 0.11757   | 0.12296   | 0.118444  | 0.130536  |
| 0.112179  | 0.115093  | 0.112908  | 0.109994  | 0.113636  | 0.0590035 | 0.0690559 |
| 0.10373   | 0.122378  | 0.117861  | 0.110286  | 0.104021  | 0.11553   | 0.128788  |
| 0.113636  | 0.125291  | 0.123689  | 0.11961   | 0.117716  | 0.122232  | 0.133159  |
| 0.109703  | 0.123689  | 0.111888  | 0.0498252 | 0.126894  | 0.117716  | 0.129516  |
| 0.123106  | 0.0496795 | 0.135781  | 0.127331  | 0.131847  | 0.128788  | 0.137092  |
| 0.118444  | 0.12602   | 0.118007  | 0.114802  | 0.0563811 | 0.120629  | 0.132721  |
| 0.122815  | 0.124272  | 0.120629  | 0.122086  | 0.128059  | 0.130536  | 0.138258  |
| 0.142483  | 0.153555  | 0.0668706 | 0.135635  | 0.141026  | 0.13884   | 0.139277  |
| 0.232809  | 0.240967  | 0.234703  | 0.232372  | 0.227855  | 0.238782  | 0.238928  |
| 0.125874  | 0.128788  | 0.125437  | 0.135052  | 0.122669  | 0.132139  | 0.142191  |
| 0.110431  | 0.125     | 0.111742  | 0.0479312 | 0.126166  | 0.112617  | 0.129079  |
| 0.112325  | 0.117861  | 0.119464  | 0.11859   | 0.113782  | 0.118007  | 0.128059  |
| 0.125     | 0.131993  | 0.115239  | 0.121649  | 0.122086  | 0.124563  | 0.138403  |
| 0.103001  | 0.102418  | 0.109848  | 0.0743007 | 0.120775  | 0.119755  | 0.128351  |
| 0.0692016 | 0.121066  | 0.121212  | 0.113054  | 0.122232  | 0.120921  | 0.129225  |
| 0.115676  | 0.123834  | 0.121358  | 0.119318  | 0.120921  | 0.125437  | 0.135198  |

|           |           |           |           |           |          |          |
|-----------|-----------|-----------|-----------|-----------|----------|----------|
| 0.121649  | 0.0470571 | 0.132284  | 0.122378  | 0.128642  | 0.128788 | 0.13884  |
| 0.11553   | 0.125437  | 0.0903263 | 0.107517  | 0.114656  | 0.113636 | 0.132139 |
| 0.232517  | 0.241259  | 0.237908  | 0.235286  | 0.229895  | 0.243735 | 0.242133 |
| 0.0989219 | 0.114365  | 0.117716  | 0.1081    | 0.101544  | 0.1081   | 0.125437 |
| 0.101544  | 0.103584  | 0.113054  | 0.0990676 | 0.114073  | 0.113054 | 0.127477 |
| 0.117424  | 0.121795  | 0.113199  | 0.114948  | 0.0568182 | 0.121358 | 0.13345  |
| 0.128934  | 0.138258  | 0.0530303 | 0.121212  | 0.129516  | 0.125291 | 0.134178 |
| 0.128934  | 0.13447   | 0.131119  | 0.136364  | 0.128351  | 0.134615 | 0.144085 |
| 0.112617  | 0.129808  | 0.116259  | 0.118881  | 0.109411  | 0.124417 | 0.133887 |
| 0.116113  | 0.12602   | 0.116841  | 0.118298  | 0.118735  | 0.123834 | 0.133304 |
| 0.108683  | 0.122086  | 0.0761946 | 0.108537  | 0.105769  | 0.109994 | 0.125291 |
| 0.22465   | 0.234266  | 0.228875  | 0.228875  | 0.222611  | 0.237617 | 0.234557 |
| 0.120047  | 0.128788  | 0.120192  | 0.121358  | 0.124709  | 0.130099 | 0.136655 |
| 0.116696  | 0.0473485 | 0.130828  | 0.121795  | 0.128642  | 0.125    | 0.135927 |
| 0.111742  | 0.121066  | 0.101107  | 0.10169   | 0.113491  | 0.11014  | 0.129225 |
| 0.120338  | 0.124126  | 0.124272  | 0.104167  | 0.124709  | 0.125728 | 0.13141  |
| 0.117133  | 0.112762  | 0.126603  | 0.117861  | 0.130828  | 0.131265 | 0.131702 |
| 0.116259  | 0.128497  | 0.116987  | 0.115822  | 0.0574009 | 0.121066 | 0.132284 |
| 0.118007  | 0.0486597 | 0.13447   | 0.124272  | 0.126457  | 0.129516 | 0.136655 |
| 0.123689  | 0.048514  | 0.138695  | 0.127914  | 0.133013  | 0.130245 | 0.14088  |
| 0.116113  | 0.0502622 | 0.125583  | 0.113636  | 0.122232  | 0.118881 | 0.135344 |
| 0.117716  | 0.128205  | 0.116113  | 0.117279  | 0.0541958 | 0.112908 | 0.130828 |
| 0.114219  | 0.125583  | 0.114365  | 0.0604604 | 0.132576  | 0.12398  | 0.129953 |
| 0.119027  | 0.133596  | 0.118881  | 0.0623543 | 0.135927  | 0.129371 | 0.137092 |
| 0.111742  | 0.134178  | 0.132284  | 0.129371  | 0.131847  | 0.134907 | 0.144668 |
| 0.109411  | 0.135344  | 0.134907  | 0.132284  | 0.135344  | 0.138112 | 0.148747 |
| 0.116841  | 0.129079  | 0.120775  | 0.0595862 | 0.136072  | 0.127185 | 0.137821 |
| 0.105478  | 0.11859   | 0.116113  | 0.112617  | 0.0967366 | 0.114365 | 0.128205 |
| 0.121066  | 0.0992133 | 0.1419    | 0.130536  | 0.140589  | 0.136946 | 0.137675 |
| 0.129953  | 0.123543  | 0.134761  | 0.134761  | 0.127331  | 0.133887 | 0.138112 |
| 0.198427  | 0.211538  | 0.205565  | 0.201777  | 0.193765  | 0.20877  | 0.213578 |
| 0.125583  | 0.129953  | 0.128351  | 0.129808  | 0.11451   | 0.13243  | 0.141608 |
| 0.1081    | 0.109266  | 0.11553   | 0.107372  | 0.118007  | 0.120775 | 0.136072 |
| 0.123397  | 0.130973  | 0.120921  | 0.121795  | 0.0552156 | 0.12704  | 0.13884  |
| 0.215326  | 0.229604  | 0.224796  | 0.221882  | 0.215618  | 0.228875 | 0.228438 |
| 0.205128  | 0.214744  | 0.212267  | 0.21285   | 0.203671  | 0.21722  | 0.220571 |
| 0.124272  | 0.0511364 | 0.137529  | 0.125291  | 0.131556  | 0.129662 | 0.136509 |
| 0.244172  | 0.253788  | 0.249563  | 0.247523  | 0.243007  | 0.251894 | 0.254953 |
| 0.104604  | 0.124417  | 0.118153  | 0.11553   | 0.0938228 | 0.114948 | 0.128205 |
| 0.129662  | 0.138986  | 0.137966  | 0.130973  | 0.127331  | 0.137383 | 0.144814 |
| 0.101399  | 0.117424  | 0.12398   | 0.112617  | 0.106935  | 0.116696 | 0.130828 |
| 0.111451  | 0.130099  | 0.114802  | 0.0576923 | 0.129225  | 0.122669 | 0.133596 |
| 0.185897  | 0.193473  | 0.186334  | 0.186043  | 0.178322  | 0.190997 | 0.194639 |
| 0.119901  | 0.123397  | 0.127331  | 0.116841  | 0.121649  | 0.122669 | 0.130099 |

|           |           |           |           |           |           |           |
|-----------|-----------|-----------|-----------|-----------|-----------|-----------|
| 0.190414  | 0.198572  | 0.194639  | 0.19493   | 0.181672  | 0.197552  | 0.203817  |
| 0.112325  | 0.124854  | 0.111305  | 0.11451   | 0.110286  | 0.120338  | 0.132721  |
| 0.114365  | 0.0770688 | 0.124126  | 0.11655   | 0.117861  | 0.122378  | 0.134761  |
| 0.11757   | 0.126603  | 0.122378  | 0.122086  | 0.121358  | 0.125291  | 0.132139  |
| 0.105624  | 0.116113  | 0.113636  | 0.11451   | 0.10912   | 0.11014   | 0.12398   |
| 0.109557  | 0.118881  | 0.112617  | 0.109703  | 0.0544872 | 0.116113  | 0.127914  |
| 0.110723  | 0.124417  | 0.123106  | 0.114073  | 0.108392  | 0.119901  | 0.130828  |
| 0.0958625 | 0.115967  | 0.118735  | 0.112034  | 0.0999417 | 0.112034  | 0.125874  |
| 0.108537  | 0.120775  | 0.11451   | 0.112762  | 0.114948  | 0.120629  | 0.133596  |
| 0.106352  | 0.0938228 | 0.128642  | 0.116696  | 0.122669  | 0.120484  | 0.131702  |
| 0.111014  | 0.121503  | 0.112908  | 0.116696  | 0.111888  | 0.11757   | 0.131119  |
| 0.0992133 | 0.117279  | 0.121795  | 0.111597  | 0.103293  | 0.115093  | 0.13039   |
| 0.104895  | 0.125583  | 0.126894  | 0.127477  | 0.111888  | 0.124854  | 0.13549   |
| 0.12296   | 0.132576  | 0.127768  | 0.12602   | 0.127622  | 0.130973  | 0.136364  |
| 0.0980478 | 0.121941  | 0.120629  | 0.116841  | 0.117279  | 0.126457  | 0.138258  |
| 0.113345  | 0.119172  | 0.114948  | 0.109994  | 0.114802  | 0.0517191 | 0.0652681 |
| 0.113199  | 0.122815  | 0.111597  | 0.111888  | 0.0511364 | 0.113345  | 0.124272  |
| 0.118444  | 0.0575466 | 0.128788  | 0.117133  | 0.122815  | 0.121212  | 0.13039   |
| 0.10912   | 0.123106  | 0.113054  | 0.0498252 | 0.124272  | 0.114802  | 0.127768  |
| 0.118881  | 0.113928  | 0.131265  | 0.12398   | 0.118298  | 0.124272  | 0.13549   |
| 0.097028  | 0.125     | 0.124854  | 0.121358  | 0.119172  | 0.12398   | 0.136364  |
| 0.114073  | 0.12398   | 0.117133  | 0.115967  | 0.116113  | 0.126457  | 0.13447   |
| 0.124126  | 0.134615  | 0.126894  | 0.128642  | 0.127914  | 0.134178  | 0.137821  |
| 0.13141   | 0.141608  | 0.13447   | 0.136509  | 0.133741  | 0.139132  | 0.1419    |
| 0.102418  | 0.0668706 | 0.118881  | 0.107226  | 0.110286  | 0.113345  | 0.124854  |
| 0.120192  | 0.126603  | 0.11655   | 0.11655   | 0.0592949 | 0.11859   | 0.133013  |
| 0.0652681 | 0.115676  | 0.115822  | 0.103584  | 0.117716  | 0.111742  | 0.125874  |
| 0.118881  | 0.130536  | 0.122232  | 0.0668706 | 0.139277  | 0.126894  | 0.134324  |
| 0.10067   | 0.120775  | 0.128497  | 0.117133  | 0.108537  | 0.12296   | 0.13243   |
| 0.135052  | 0.126603  | 0.145979  | 0.142191  | 0.138258  | 0.138403  | 0.143794  |
| 0.135635  | 0.14292   | 0.132576  | 0.135198  | 0.067162  | 0.136946  | 0.14292   |
| 0.122378  | 0.134033  | 0.0517191 | 0.114073  | 0.123543  | 0.124563  | 0.132284  |
| 0.108829  | 0.121066  | 0.117716  | 0.115385  | 0.10708   | 0.115967  | 0.128351  |
| 0.112471  | 0.122378  | 0.111451  | 0.0954254 | 0.116259  | 0.112034  | 0.121212  |
| 0.108974  | 0.133159  | 0.133887  | 0.129808  | 0.127914  | 0.133887  | 0.143939  |
| 0.200612  | 0.207605  | 0.208625  | 0.206585  | 0.198864  | 0.213578  | 0.21926   |
| 0.109994  | 0.118444  | 0.114802  | 0.106935  | 0.113782  | 0.0536131 | 0.0659965 |
| 0.11451   | 0.125     | 0.120775  | 0.119027  | 0.118881  | 0.116987  | 0.132867  |
| 0.105041  | 0.121066  | 0.109266  | 0.0541958 | 0.123397  | 0.118298  | 0.129516  |
| 0.0987762 | 0.123543  | 0.123689  | 0.120192  | 0.119172  | 0.125437  | 0.13986   |
| 0.115239  | 0.129516  | 0.117716  | 0.120338  | 0.115239  | 0.126748  | 0.137383  |
| 0.108246  | 0.123397  | 0.123252  | 0.124126  | 0.12398   | 0.123543  | 0.135052  |
| 0.110431  | 0.125291  | 0.125437  | 0.124563  | 0.129662  | 0.125146  | 0.132576  |
| 0.118444  | 0.130682  | 0.0556527 | 0.111888  | 0.116696  | 0.116841  | 0.128059  |

|           |           |          |           |          |          |          |
|-----------|-----------|----------|-----------|----------|----------|----------|
| 0.103001  | 0.0945513 | 0.12296  | 0.110431  | 0.119318 | 0.117424 | 0.127185 |
| 0.114073  | 0.125728  | 0.11859  | 0.0600233 | 0.130682 | 0.126748 | 0.135635 |
| 0.112617  | 0.120192  | 0.117424 | 0.116841  | 0.11553  | 0.120338 | 0.128642 |
| 0.118007  | 0.126457  | 0.121649 | 0.121358  | 0.117716 | 0.124563 | 0.138403 |
| 0.174388  | 0.176136  | 0.177156 | 0.173368  | 0.167978 | 0.18007  | 0.188374 |
| 0.11553   | 0.12398   | 0.117716 | 0.115967  | 0.117861 | 0.121503 | 0.133013 |
| 0.115385  | 0.128788  | 0.116696 | 0.0703671 | 0.131119 | 0.127768 | 0.135198 |
| 0.114073  | 0.112908  | 0.126748 | 0.118007  | 0.118444 | 0.124709 | 0.13243  |
| 0.11451   | 0.11859   | 0.122815 | 0.120192  | 0.120629 | 0.129808 | 0.138403 |
| 0.100524  | 0.118298  | 0.107955 | 0.11116   | 0.1081   | 0.112325 | 0.126457 |
| 0.108392  | 0.113928  | 0.107663 | 0.112034  | 0.103147 | 0.113782 | 0.130245 |
| 0.104312  | 0.121212  | 0.114656 | 0.11553   | 0.113636 | 0.115239 | 0.126457 |
| 0.116841  | 0.104312  | 0.12602  | 0.116696  | 0.124126 | 0.128934 | 0.138986 |
| 0.110431  | 0.124126  | 0.113491 | 0.120775  | 0.11451  | 0.121066 | 0.132576 |
| 0.121358  | 0.125437  | 0.136364 | 0.125874  | 0.127185 | 0.133741 | 0.140006 |
| 0.100524  | 0.113636  | 0.119318 | 0.107955  | 0.112471 | 0.116987 | 0.132867 |
| 0.105332  | 0.114365  | 0.126457 | 0.122086  | 0.121649 | 0.12296  | 0.136509 |
| 0.124709  | 0.102273  | 0.132721 | 0.128059  | 0.129662 | 0.13039  | 0.138986 |
| 0.112762  | 0.1081    | 0.126894 | 0.11961   | 0.116259 | 0.124272 | 0.130828 |
| 0.113636  | 0.11859   | 0.122815 | 0.12602   | 0.122086 | 0.126894 | 0.138986 |
| 0.106935  | 0.107226  | 0.123397 | 0.116987  | 0.112179 | 0.117279 | 0.132576 |
| 0.11014   | 0.109848  | 0.126894 | 0.11961   | 0.113636 | 0.118735 | 0.130245 |
| 0.0976107 | 0.114802  | 0.111742 | 0.110286  | 0.105769 | 0.112325 | 0.125    |
| 0.119027  | 0.116696  | 0.129953 | 0.125291  | 0.115239 | 0.130828 | 0.138258 |
| 0.106498  | 0.114656  | 0.114802 | 0.110431  | 0.107663 | 0.115676 | 0.131265 |
| 0.130973  | 0.110286  | 0.1419   | 0.138986  | 0.144668 | 0.140443 | 0.147582 |
| 0.124563  | 0.107663  | 0.128788 | 0.12704   | 0.129808 | 0.129371 | 0.144085 |
| 0.105915  | 0.105915  | 0.119464 | 0.114219  | 0.113199 | 0.118298 | 0.126603 |
| 0.130536  | 0.104021  | 0.14292  | 0.134178  | 0.142483 | 0.133596 | 0.1419   |
| 0.113928  | 0.129662  | 0.119027 | 0.11757   | 0.122086 | 0.127185 | 0.137529 |
| 0.126457  | 0.127914  | 0.138258 | 0.136801  | 0.135198 | 0.134761 | 0.1419   |
| 0.1081    | 0.119755  | 0.122232 | 0.116113  | 0.110431 | 0.121941 | 0.134615 |
| 0.138549  | 0.140006  | 0.147145 | 0.129371  | 0.141171 | 0.145688 | 0.156031 |
| 0.125728  | 0.122232  | 0.130245 | 0.120921  | 0.13447  | 0.126748 | 0.135635 |
| 0.125728  | 0.120775  | 0.135781 | 0.129662  | 0.137092 | 0.134324 | 0.144376 |
| 0.108537  | 0.12398   | 0.127622 | 0.124417  | 0.122523 | 0.126457 | 0.136801 |
| 0.113054  | 0.104312  | 0.117861 | 0.119318  | 0.107226 | 0.119318 | 0.132284 |
| 0.107663  | 0.108829  | 0.120338 | 0.118298  | 0.108829 | 0.112471 | 0.130099 |
| 0.111888  | 0.102273  | 0.115239 | 0.104749  | 0.120338 | 0.118735 | 0.13141  |
| 0.115385  | 0.117133  | 0.131847 | 0.123397  | 0.121795 | 0.125437 | 0.132867 |
| 0.120192  | 0.128059  | 0.134615 | 0.130828  | 0.127477 | 0.129662 | 0.134761 |
| 0.113199  | 0.110577  | 0.12704  | 0.126748  | 0.121358 | 0.124417 | 0.144376 |
| 0.0995047 | 0.108537  | 0.119464 | 0.111014  | 0.112908 | 0.113345 | 0.126311 |
| 0.1081    | 0.110431  | 0.123106 | 0.114656  | 0.109848 | 0.118153 | 0.129662 |

|          |          |          |          |           |          |          |
|----------|----------|----------|----------|-----------|----------|----------|
| 0.112617 | 0.114948 | 0.124126 | 0.121503 | 0.11961   | 0.122378 | 0.129808 |
| 0.107663 | 0.104458 | 0.12296  | 0.113636 | 0.109994  | 0.118881 | 0.130682 |
| 0.119172 | 0.110431 | 0.128934 | 0.124272 | 0.115967  | 0.126603 | 0.136072 |
| 0.111597 | 0.123834 | 0.122232 | 0.116404 | 0.109848  | 0.123106 | 0.13549  |
| 0.112908 | 0.127477 | 0.114219 | 0.117424 | 0.107372  | 0.125874 | 0.135927 |
| 0.112325 | 0.124272 | 0.116841 | 0.117716 | 0.109703  | 0.11859  | 0.132139 |
| 0.106206 | 0.121358 | 0.114219 | 0.115676 | 0.0962995 | 0.112762 | 0.126894 |
| 0.108246 | 0.112034 | 0.115385 | 0.115676 | 0.108537  | 0.11859  | 0.129225 |
| 0.111597 | 0.125291 | 0.112617 | 0.114656 | 0.106935  | 0.11961  | 0.13141  |
| 0.107372 | 0.120484 | 0.116841 | 0.112471 | 0.114656  | 0.123252 | 0.13447  |
| 0.113199 | 0.125146 | 0.123252 | 0.122086 | 0.124272  | 0.121795 | 0.129516 |
| 0.103584 | 0.11757  | 0.1081   | 0.108683 | 0.0980478 | 0.114802 | 0.128642 |
| 0.117716 | 0.125291 | 0.134761 | 0.131265 | 0.127914  | 0.132721 | 0.141026 |



| TDr_1925  | TDr_1928 | TDr_1932  | TDr_1935 | TDr_1937  | TDr_1939  | TDr_1940 |
|-----------|----------|-----------|----------|-----------|-----------|----------|
| 0.0817308 | 0.135781 | 0.115967  | 0.123252 | 0.105624  | 0.124854  | 0.167686 |
| 0.113928  | 0.12398  | 0.102418  | 0.114365 | 0.106643  | 0.124417  | 0.176865 |
| 0.108683  | 0.119318 | 0.0962995 | 0.110868 | 0.10373   | 0.122669  | 0.176865 |
| 0.117133  | 0.108246 | 0.105041  | 0.10912  | 0.0979021 | 0.125     | 0.185023 |
| 0.135781  | 0.141463 | 0.132721  | 0.124272 | 0.130828  | 0.13549   | 0.202214 |
| 0.115385  | 0.142628 | 0.122232  | 0.120775 | 0.127914  | 0.136655  | 0.186772 |
| 0.104458  | 0.141026 | 0.122669  | 0.12296  | 0.124563  | 0.11961   | 0.192453 |
| 0.113199  | 0.122378 | 0.104604  | 0.1081   | 0.105915  | 0.123689  | 0.179633 |
| 0.107517  | 0.124854 | 0.104458  | 0.107955 | 0.105186  | 0.11655   | 0.182401 |
| 0.104749  | 0.134033 | 0.0938228 | 0.11451  | 0.11757   | 0.127477  | 0.18954  |
| 0.106352  | 0.144376 | 0.10912   | 0.121649 | 0.110431  | 0.121212  | 0.172203 |
| 0.112034  | 0.123543 | 0.111305  | 0.105478 | 0.107372  | 0.116404  | 0.180798 |
| 0.114073  | 0.130828 | 0.100816  | 0.116259 | 0.113199  | 0.11961   | 0.186917 |
| 0.134615  | 0.149038 | 0.124854  | 0.136509 | 0.112179  | 0.143357  | 0.145396 |
| 0.125437  | 0.1419   | 0.0556527 | 0.129953 | 0.128059  | 0.139423  | 0.195659 |
| 0.118007  | 0.130973 | 0.109703  | 0.119027 | 0.119755  | 0.112762  | 0.187937 |
| 0.114656  | 0.135781 | 0.106935  | 0.104312 | 0.115822  | 0.10912   | 0.184586 |
| 0.143939  | 0.146416 | 0.142628  | 0.127768 | 0.140443  | 0.154429  | 0.204254 |
| 0.104021  | 0.120775 | 0.103584  | 0.108829 | 0.105186  | 0.119755  | 0.179487 |
| 0.200175  | 0.207314 | 0.177302  | 0.198572 | 0.182401  | 0.208916  | 0.134324 |
| 0.099796  | 0.147436 | 0.117133  | 0.113636 | 0.126311  | 0.133887  | 0.191288 |
| 0.0935315 | 0.141754 | 0.113491  | 0.11553  | 0.122378  | 0.136072  | 0.195221 |
| 0.114948  | 0.127622 | 0.110723  | 0.105769 | 0.105041  | 0.0986305 | 0.169726 |
| 0.121503  | 0.140589 | 0.128642  | 0.119027 | 0.126748  | 0.107226  | 0.195804 |
| 0.100379  | 0.125    | 0.0996503 | 0.11014  | 0.106206  | 0.110577  | 0.173514 |
| 0.105041  | 0.145688 | 0.125291  | 0.117716 | 0.131265  | 0.13884   | 0.195367 |
| 0.116404  | 0.142483 | 0.116841  | 0.123252 | 0.128059  | 0.125146  | 0.197407 |
| 0.124272  | 0.134033 | 0.118298  | 0.114802 | 0.122232  | 0.109994  | 0.194493 |
| 0.120192  | 0.141317 | 0.130828  | 0.124709 | 0.132721  | 0.126603  | 0.198864 |
| 0.11961   | 0.138112 | 0.117133  | 0.126166 | 0.125437  | 0.126603  | 0.200903 |
| 0.0964452 | 0.144668 | 0.114073  | 0.126894 | 0.125291  | 0.123543  | 0.186772 |
| 0.114073  | 0.13549  | 0.117424  | 0.121503 | 0.12602   | 0.120192  | 0.195076 |
| 0.101544  | 0.126166 | 0.0967366 | 0.106352 | 0.108537  | 0.116987  | 0.177302 |
| 0.109411  | 0.131993 | 0.115967  | 0.119172 | 0.120775  | 0.121066  | 0.187209 |
| 0.113928  | 0.141754 | 0.118153  | 0.121066 | 0.128497  | 0.119464  | 0.195513 |
| 0.120192  | 0.136655 | 0.12704   | 0.122669 | 0.130099  | 0.123106  | 0.199155 |
| 0.114802  | 0.146707 | 0.129808  | 0.137383 | 0.138403  | 0.138695  | 0.203963 |
| 0.112325  | 0.142483 | 0.118881  | 0.121503 | 0.122815  | 0.116987  | 0.194202 |
| 0.103293  | 0.129953 | 0.106643  | 0.111888 | 0.113491  | 0.0992133 | 0.182838 |
| 0.123397  | 0.136655 | 0.117424  | 0.117133 | 0.11553   | 0.112325  | 0.192745 |
| 0.109703  | 0.131119 | 0.104895  | 0.109848 | 0.105915  | 0.104167  | 0.180798 |
| 0.144085  | 0.151515 | 0.130245  | 0.136655 | 0.13884   | 0.130973  | 0.206731 |

|           |          |          |          |           |          |          |
|-----------|----------|----------|----------|-----------|----------|----------|
| 0.142628  | 0.155303 | 0.140734 | 0.139569 | 0.140589  | 0.128642 | 0.203234 |
| 0.113345  | 0.133596 | 0.112908 | 0.118153 | 0.11655   | 0.11014  | 0.186189 |
| 0.100816  | 0.130682 | 0.107955 | 0.105915 | 0.115093  | 0.108392 | 0.185023 |
| 0.117279  | 0.141026 | 0.107226 | 0.119755 | 0.125146  | 0.114365 | 0.197115 |
| 0.119901  | 0.136364 | 0.113345 | 0.104895 | 0.121358  | 0.112034 | 0.190122 |
| 0.134907  | 0.149913 | 0.129516 | 0.135635 | 0.132867  | 0.128497 | 0.204254 |
| 0.115385  | 0.133887 | 0.110868 | 0.113491 | 0.113054  | 0.115093 | 0.187354 |
| 0.112325  | 0.136655 | 0.108392 | 0.113928 | 0.116113  | 0.11116  | 0.183421 |
| 0.0757576 | 0.156031 | 0.141754 | 0.143502 | 0.147145  | 0.151807 | 0.208916 |
| 0.132576  | 0.14088  | 0.122523 | 0.11961  | 0.127622  | 0.121212 | 0.18852  |
| 0.113491  | 0.131993 | 0.111305 | 0.11655  | 0.114073  | 0.100962 | 0.181672 |
| 0.128642  | 0.134907 | 0.11655  | 0.128497 | 0.125437  | 0.13884  | 0.200612 |
| 0.11757   | 0.104604 | 0.111014 | 0.106352 | 0.0802739 | 0.112908 | 0.169726 |
| 0.140297  | 0.143939 | 0.140734 | 0.12704  | 0.136509  | 0.128059 | 0.212558 |
| 0.126748  | 0.143211 | 0.125728 | 0.125437 | 0.121503  | 0.11451  | 0.194347 |
| 0.117424  | 0.132721 | 0.110286 | 0.115822 | 0.115967  | 0.106352 | 0.187354 |
| 0.118298  | 0.141171 | 0.110577 | 0.118153 | 0.115093  | 0.11451  | 0.18648  |
| 0.115822  | 0.137821 | 0.113928 | 0.125291 | 0.124272  | 0.113782 | 0.194784 |
| 0.137675  | 0.143939 | 0.13345  | 0.135781 | 0.135344  | 0.119027 | 0.202652 |
| 0.141754  | 0.140443 | 0.132867 | 0.136364 | 0.129516  | 0.124854 | 0.205274 |
| 0.160839  | 0.167978 | 0.154866 | 0.161568 | 0.1419    | 0.150641 | 0.15676  |
| 0.111888  | 0.132721 | 0.107372 | 0.117861 | 0.115676  | 0.108392 | 0.185897 |
| 0.113928  | 0.135635 | 0.109411 | 0.113199 | 0.116259  | 0.100524 | 0.183566 |
| 0.111014  | 0.133013 | 0.113199 | 0.110577 | 0.110431  | 0.104604 | 0.182984 |
| 0.123106  | 0.153263 | 0.135781 | 0.135781 | 0.139423  | 0.140297 | 0.196824 |
| 0.112325  | 0.129371 | 0.106935 | 0.114802 | 0.109703  | 0.110577 | 0.181964 |
| 0.133159  | 0.14292  | 0.131847 | 0.119901 | 0.130828  | 0.118007 | 0.195221 |
| 0.113928  | 0.141463 | 0.114656 | 0.122232 | 0.124417  | 0.110723 | 0.194056 |
| 0.116113  | 0.139277 | 0.113928 | 0.11655  | 0.118444  | 0.107955 | 0.180507 |
| 0.126311  | 0.154138 | 0.142191 | 0.143939 | 0.142045  | 0.151661 | 0.19391  |
| 0.123397  | 0.141026 | 0.117716 | 0.120921 | 0.119901  | 0.10708  | 0.192162 |
| 0.136946  | 0.146125 | 0.131556 | 0.133013 | 0.129953  | 0.129953 | 0.206585 |
| 0.131556  | 0.142483 | 0.130245 | 0.122086 | 0.132139  | 0.121066 | 0.192745 |
| 0.115385  | 0.126311 | 0.111742 | 0.101836 | 0.104895  | 0.119755 | 0.178322 |
| 0.111888  | 0.133304 | 0.112325 | 0.114656 | 0.111597  | 0.100233 | 0.180944 |
| 0.119172  | 0.134761 | 0.108246 | 0.112325 | 0.115093  | 0.107809 | 0.184732 |
| 0.136655  | 0.140297 | 0.131847 | 0.128934 | 0.127622  | 0.119464 | 0.198718 |
| 0.10912   | 0.137238 | 0.113054 | 0.113928 | 0.112908  | 0.105915 | 0.181381 |
| 0.141026  | 0.145833 | 0.13447  | 0.134761 | 0.131993  | 0.129371 | 0.203089 |
| 0.113345  | 0.143794 | 0.113782 | 0.12398  | 0.121795  | 0.112471 | 0.189394 |
| 0.118298  | 0.128351 | 0.116113 | 0.109411 | 0.116841  | 0.100233 | 0.190268 |
| 0.11655   | 0.142337 | 0.11116  | 0.114948 | 0.119172  | 0.107226 | 0.184149 |
| 0.126748  | 0.135927 | 0.114948 | 0.118735 | 0.11859   | 0.106643 | 0.191725 |
| 0.118007  | 0.137383 | 0.109411 | 0.113782 | 0.117424  | 0.108974 | 0.188228 |

|           |          |           |          |          |          |          |
|-----------|----------|-----------|----------|----------|----------|----------|
| 0.116841  | 0.133887 | 0.114365  | 0.114073 | 0.111305 | 0.104021 | 0.182692 |
| 0.137092  | 0.14831  | 0.132867  | 0.132576 | 0.135344 | 0.124272 | 0.204108 |
| 0.107955  | 0.136946 | 0.103438  | 0.111597 | 0.118153 | 0.107955 | 0.182547 |
| 0.111305  | 0.137092 | 0.107663  | 0.110286 | 0.117424 | 0.11655  | 0.191434 |
| 0.120047  | 0.142337 | 0.121066  | 0.119027 | 0.127331 | 0.130828 | 0.201632 |
| 0.106061  | 0.14729  | 0.127477  | 0.121649 | 0.131993 | 0.125291 | 0.194639 |
| 0.128497  | 0.143502 | 0.13039   | 0.120484 | 0.138112 | 0.132867 | 0.201632 |
| 0.13447   | 0.145979 | 0.133159  | 0.120047 | 0.139714 | 0.136801 | 0.209936 |
| 0.101981  | 0.14292  | 0.115822  | 0.117861 | 0.120047 | 0.12704  | 0.187354 |
| 0.175117  | 0.190705 | 0.17701   | 0.178176 | 0.163753 | 0.183858 | 0.148601 |
| 0.103584  | 0.131119 | 0.107809  | 0.107517 | 0.111742 | 0.116404 | 0.192453 |
| 0.134907  | 0.144376 | 0.133887  | 0.121649 | 0.134907 | 0.136072 | 0.205128 |
| 0.126166  | 0.140297 | 0.12398   | 0.114948 | 0.129662 | 0.127331 | 0.200175 |
| 0.110577  | 0.154429 | 0.132284  | 0.135198 | 0.138549 | 0.135927 | 0.205857 |
| 0.112179  | 0.132721 | 0.106206  | 0.103001 | 0.11655  | 0.114219 | 0.190268 |
| 0.131119  | 0.141754 | 0.130099  | 0.11757  | 0.134033 | 0.128205 | 0.203671 |
| 0.111597  | 0.133596 | 0.109994  | 0.099796 | 0.118881 | 0.120338 | 0.192016 |
| 0.122815  | 0.137529 | 0.123252  | 0.112179 | 0.129225 | 0.124272 | 0.191871 |
| 0.0983392 | 0.134033 | 0.110431  | 0.120047 | 0.117279 | 0.118735 | 0.188666 |
| 0.131556  | 0.146853 | 0.139277  | 0.120047 | 0.141754 | 0.130973 | 0.204983 |
| 0.106789  | 0.133741 | 0.105186  | 0.11451  | 0.11553  | 0.108537 | 0.181672 |
| 0.117716  | 0.144959 | 0.133887  | 0.129516 | 0.132867 | 0.135781 | 0.198135 |
| 0.100379  | 0.139569 | 0.115967  | 0.115676 | 0.122815 | 0.123106 | 0.187791 |
| 0.130245  | 0.140006 | 0.128934  | 0.125437 | 0.12704  | 0.119464 | 0.199883 |
| 0.110868  | 0.15035  | 0.119464  | 0.132576 | 0.133596 | 0.128059 | 0.196824 |
| 0.095134  | 0.136946 | 0.106935  | 0.109848 | 0.118444 | 0.117279 | 0.190997 |
| 0.129516  | 0.154138 | 0.138403  | 0.139277 | 0.139714 | 0.145251 | 0.195367 |
| 0.0984848 | 0.141463 | 0.113199  | 0.112908 | 0.120921 | 0.123543 | 0.195221 |
| 0.112471  | 0.13884  | 0.11116   | 0.105332 | 0.117424 | 0.117424 | 0.192308 |
| 0.112325  | 0.136655 | 0.118298  | 0.113928 | 0.123106 | 0.113782 | 0.188374 |
| 0.125146  | 0.155303 | 0.136946  | 0.133159 | 0.139423 | 0.147873 | 0.208479 |
| 0.115239  | 0.142191 | 0.118007  | 0.11859  | 0.114948 | 0.114948 | 0.168852 |
| 0.110286  | 0.131119 | 0.106643  | 0.100233 | 0.113199 | 0.114073 | 0.1875   |
| 0.110577  | 0.136072 | 0.108392  | 0.104021 | 0.118444 | 0.11116  | 0.18546  |
| 0.0990676 | 0.141171 | 0.114365  | 0.11961  | 0.124709 | 0.122669 | 0.186772 |
| 0.122523  | 0.1419   | 0.113345  | 0.128788 | 0.130099 | 0.125728 | 0.201486 |
| 0.0955711 | 0.14292  | 0.119318  | 0.11553  | 0.123543 | 0.121795 | 0.192308 |
| 0.101544  | 0.126748 | 0.0999417 | 0.105769 | 0.110868 | 0.106789 | 0.179341 |
| 0.100379  | 0.127914 | 0.101107  | 0.11014  | 0.108537 | 0.106789 | 0.184295 |
| 0.109848  | 0.130099 | 0.101836  | 0.111742 | 0.117133 | 0.110723 | 0.190559 |
| 0.120047  | 0.137383 | 0.118735  | 0.121941 | 0.119755 | 0.114802 | 0.184732 |
| 0.12602   | 0.143357 | 0.122086  | 0.128788 | 0.131556 | 0.121649 | 0.201486 |
| 0.107226  | 0.13243  | 0.100087  | 0.11757  | 0.115967 | 0.109557 | 0.192016 |
| 0.104749  | 0.129371 | 0.0938228 | 0.11655  | 0.113199 | 0.102127 | 0.184295 |

|           |           |           |          |           |           |          |
|-----------|-----------|-----------|----------|-----------|-----------|----------|
| 0.119027  | 0.145688  | 0.114219  | 0.127622 | 0.133013  | 0.112908  | 0.19391  |
| 0.10373   | 0.133013  | 0.101544  | 0.112617 | 0.112471  | 0.0999417 | 0.182692 |
| 0.104895  | 0.143794  | 0.119027  | 0.118153 | 0.123252  | 0.129079  | 0.185606 |
| 0.0603147 | 0.147582  | 0.127185  | 0.129225 | 0.13549   | 0.1419    | 0.195804 |
| 0.11655   | 0.135635  | 0.108537  | 0.114365 | 0.116841  | 0.109557  | 0.190268 |
| 0.110868  | 0.132867  | 0.101981  | 0.121795 | 0.116404  | 0.106789  | 0.192162 |
| 0.112617  | 0.132284  | 0.105478  | 0.116259 | 0.11553   | 0.107955  | 0.188083 |
| 0.104167  | 0.131119  | 0.100816  | 0.107226 | 0.11116   | 0.10708   | 0.180798 |
| 0.125437  | 0.137821  | 0.118881  | 0.124417 | 0.127477  | 0.126311  | 0.200321 |
| 0.101836  | 0.127331  | 0.0990676 | 0.113054 | 0.109703  | 0.101253  | 0.184878 |
| 0.127622  | 0.150787  | 0.13243   | 0.137092 | 0.137821  | 0.135781  | 0.203671 |
| 0.134178  | 0.152972  | 0.125291  | 0.135781 | 0.135052  | 0.125146  | 0.195367 |
| 0.124563  | 0.137529  | 0.118007  | 0.123834 | 0.122523  | 0.118735  | 0.197115 |
| 0.115676  | 0.14292   | 0.107372  | 0.121066 | 0.124417  | 0.114219  | 0.18648  |
| 0.0961538 | 0.140589  | 0.11116   | 0.113782 | 0.122669  | 0.120921  | 0.186189 |
| 0.104749  | 0.136655  | 0.103438  | 0.111888 | 0.121649  | 0.103001  | 0.1875   |
| 0.1081    | 0.136509  | 0.113782  | 0.110868 | 0.116841  | 0.101981  | 0.186772 |
| 0.108392  | 0.130099  | 0.106498  | 0.114948 | 0.113928  | 0.108392  | 0.188228 |
| 0.117716  | 0.11116   | 0.111742  | 0.110286 | 0.0894522 | 0.109557  | 0.170455 |
| 0.132576  | 0.145251  | 0.125146  | 0.124854 | 0.13141   | 0.101107  | 0.198135 |
| 0.114365  | 0.137529  | 0.109266  | 0.104021 | 0.120192  | 0.119901  | 0.19595  |
| 0.127914  | 0.139714  | 0.121358  | 0.128934 | 0.130828  | 0.134615  | 0.197261 |
| 0.125146  | 0.143648  | 0.129371  | 0.129371 | 0.138549  | 0.139423  | 0.20877  |
| 0.192453  | 0.200466  | 0.182692  | 0.187354 | 0.17264   | 0.193328  | 0.113782 |
| 0.231643  | 0.234411  | 0.233246  | 0.233246 | 0.215035  | 0.237762  | 0.138403 |
| 0.111451  | 0.0903263 | 0.11014   | 0.105769 | 0.0735723 | 0.113491  | 0.170309 |
| 0.115385  | 0.128934  | 0.111742  | 0.103875 | 0.112179  | 0.104021  | 0.184149 |
| 0.111888  | 0.130973  | 0.108829  | 0.103293 | 0.102564  | 0.105186  | 0.176573 |
| 0.108974  | 0.129516  | 0.111742  | 0.102418 | 0.113054  | 0.111305  | 0.182984 |
| 0.12704   | 0.137966  | 0.0584207 | 0.128934 | 0.128205  | 0.139569  | 0.197552 |
| 0.115385  | 0.130682  | 0.112034  | 0.104458 | 0.116841  | 0.108683  | 0.187646 |
| 0.144668  | 0.149476  | 0.145105  | 0.136946 | 0.145251  | 0.124854  | 0.208188 |
| 0.115967  | 0.136218  | 0.116113  | 0.111742 | 0.119464  | 0.105769  | 0.190559 |
| 0.128205  | 0.13884   | 0.133304  | 0.120775 | 0.131119  | 0.117424  | 0.20134  |
| 0.130682  | 0.140152  | 0.128788  | 0.117716 | 0.125146  | 0.118153  | 0.188083 |
| 0.132139  | 0.144522  | 0.126748  | 0.118007 | 0.136509  | 0.121649  | 0.20236  |
| 0.13447   | 0.15035   | 0.13141   | 0.134033 | 0.135927  | 0.128059  | 0.198864 |
| 0.11553   | 0.137529  | 0.113636  | 0.114802 | 0.120484  | 0.108246  | 0.191288 |
| 0.112325  | 0.133741  | 0.111597  | 0.1081   | 0.116696  | 0.101253  | 0.184878 |
| 0.119755  | 0.142337  | 0.114073  | 0.100962 | 0.126457  | 0.107809  | 0.187063 |
| 0.11014   | 0.130099  | 0.11116   | 0.102418 | 0.11014   | 0.108974  | 0.180361 |
| 0.114219  | 0.130099  | 0.112617  | 0.106498 | 0.115093  | 0.102564  | 0.18211  |
| 0.116696  | 0.134324  | 0.114219  | 0.109848 | 0.115239  | 0.106498  | 0.187791 |
| 0.13141   | 0.14088   | 0.12398   | 0.112325 | 0.131119  | 0.113636  | 0.195513 |

|          |          |          |          |          |           |          |
|----------|----------|----------|----------|----------|-----------|----------|
| 0.139277 | 0.14729  | 0.13447  | 0.119027 | 0.135781 | 0.118007  | 0.204254 |
| 0.11757  | 0.135781 | 0.115967 | 0.113054 | 0.114073 | 0.103584  | 0.188957 |
| 0.113636 | 0.135927 | 0.11553  | 0.106498 | 0.117424 | 0.0996503 | 0.180944 |
| 0.13345  | 0.142337 | 0.134761 | 0.120484 | 0.13345  | 0.111888  | 0.199301 |
| 0.110431 | 0.13039  | 0.113491 | 0.104167 | 0.113636 | 0.101107  | 0.183275 |
| 0.144376 | 0.158217 | 0.136655 | 0.134033 | 0.144668 | 0.123106  | 0.201195 |
| 0.132721 | 0.151515 | 0.125874 | 0.130828 | 0.136509 | 0.137966  | 0.192453 |
| 0.136946 | 0.14292  | 0.134761 | 0.11116  | 0.133741 | 0.129662  | 0.191725 |
| 0.113054 | 0.128934 | 0.11116  | 0.107663 | 0.112179 | 0.101107  | 0.185023 |
| 0.108246 | 0.129953 | 0.110431 | 0.103147 | 0.113782 | 0.102127  | 0.181672 |
| 0.128788 | 0.13884  | 0.122815 | 0.114073 | 0.128497 | 0.1081    | 0.196387 |
| 0.124272 | 0.138112 | 0.126457 | 0.112762 | 0.125146 | 0.108537  | 0.195076 |
| 0.128059 | 0.144231 | 0.13345  | 0.117424 | 0.129225 | 0.107372  | 0.190414 |
| 0.11859  | 0.135927 | 0.118735 | 0.10708  | 0.116841 | 0.105478  | 0.187937 |
| 0.120775 | 0.13549  | 0.116841 | 0.111305 | 0.120192 | 0.103293  | 0.188666 |
| 0.123689 | 0.136072 | 0.119755 | 0.106643 | 0.121941 | 0.110868  | 0.190997 |
| 0.130973 | 0.149767 | 0.131993 | 0.121212 | 0.135052 | 0.11961   | 0.203817 |
| 0.134178 | 0.144522 | 0.131119 | 0.119172 | 0.128934 | 0.112617  | 0.197407 |
| 0.13345  | 0.14729  | 0.13447  | 0.127768 | 0.130828 | 0.1081    | 0.202506 |
| 0.125146 | 0.144522 | 0.129371 | 0.129079 | 0.128642 | 0.118444  | 0.1875   |
| 0.112325 | 0.13141  | 0.118007 | 0.113928 | 0.114365 | 0.10271   | 0.185752 |
| 0.136218 | 0.140443 | 0.129662 | 0.112471 | 0.133304 | 0.120192  | 0.198281 |
| 0.106643 | 0.128934 | 0.111742 | 0.104749 | 0.116259 | 0.100816  | 0.185606 |
| 0.113782 | 0.134033 | 0.111888 | 0.118007 | 0.114948 | 0.110868  | 0.184295 |
| 0.116404 | 0.136072 | 0.111888 | 0.109266 | 0.118153 | 0.110868  | 0.188374 |
| 0.11451  | 0.136801 | 0.112908 | 0.103001 | 0.118298 | 0.110431  | 0.182984 |
| 0.111888 | 0.13039  | 0.112325 | 0.102418 | 0.111597 | 0.107226  | 0.183275 |
| 0.133596 | 0.149476 | 0.135198 | 0.123543 | 0.134761 | 0.117861  | 0.203234 |
| 0.111305 | 0.139714 | 0.11553  | 0.115822 | 0.120629 | 0.113345  | 0.185023 |
| 0.131702 | 0.140297 | 0.135635 | 0.120775 | 0.13345  | 0.11859   | 0.200466 |
| 0.113636 | 0.130099 | 0.111451 | 0.105624 | 0.113636 | 0.107809  | 0.185315 |
| 0.12398  | 0.143357 | 0.127622 | 0.114802 | 0.126603 | 0.107663  | 0.196824 |
| 0.128788 | 0.137092 | 0.122232 | 0.121941 | 0.122086 | 0.112179  | 0.185897 |
| 0.122086 | 0.142337 | 0.107663 | 0.118153 | 0.122378 | 0.122378  | 0.182692 |
| 0.113782 | 0.13986  | 0.114219 | 0.118007 | 0.124854 | 0.111742  | 0.191288 |
| 0.125874 | 0.140006 | 0.11961  | 0.119027 | 0.123543 | 0.123543  | 0.18648  |
| 0.120484 | 0.141608 | 0.1081   | 0.117716 | 0.119318 | 0.114073  | 0.191288 |
| 0.104749 | 0.140152 | 0.111305 | 0.119464 | 0.119901 | 0.115822  | 0.192453 |
| 0.131265 | 0.147727 | 0.123252 | 0.134907 | 0.133887 | 0.142045  | 0.207605 |
| 0.134033 | 0.147873 | 0.137092 | 0.137383 | 0.137821 | 0.13345   | 0.207168 |
| 0.100816 | 0.127185 | 0.100962 | 0.106206 | 0.109557 | 0.117133  | 0.188811 |
| 0.129808 | 0.145979 | 0.118298 | 0.120338 | 0.135052 | 0.141754  | 0.203526 |
| 0.121503 | 0.148456 | 0.11553  | 0.129808 | 0.134324 | 0.137821  | 0.202506 |
| 0.129953 | 0.141754 | 0.123397 | 0.120775 | 0.133741 | 0.137238  | 0.201049 |

|          |          |          |          |          |          |          |
|----------|----------|----------|----------|----------|----------|----------|
| 0.115093 | 0.134178 | 0.112034 | 0.111742 | 0.122669 | 0.132576 | 0.193765 |
| 0.121795 | 0.144959 | 0.11553  | 0.121066 | 0.129079 | 0.132576 | 0.20134  |
| 0.123689 | 0.143065 | 0.115385 | 0.124126 | 0.129516 | 0.136801 | 0.20236  |
| 0.130245 | 0.138549 | 0.121358 | 0.118735 | 0.126166 | 0.137821 | 0.203671 |
| 0.130828 | 0.141171 | 0.12602  | 0.127477 | 0.1419   | 0.14627  | 0.206294 |
| 0.124126 | 0.141754 | 0.114365 | 0.125146 | 0.125583 | 0.138695 | 0.201049 |
| 0.113928 | 0.135344 | 0.11116  | 0.106789 | 0.120629 | 0.129953 | 0.190268 |
| 0.129225 | 0.145105 | 0.132576 | 0.128205 | 0.129516 | 0.118153 | 0.192162 |
| 0.129079 | 0.148747 | 0.124854 | 0.13039  | 0.139277 | 0.140152 | 0.206294 |
| 0.106935 | 0.131847 | 0.106206 | 0.109994 | 0.11655  | 0.124417 | 0.186189 |
| 0.214015 | 0.220571 | 0.216492 | 0.214744 | 0.197115 | 0.218386 | 0.128934 |
| 0.123689 | 0.138986 | 0.113345 | 0.115385 | 0.123397 | 0.133304 | 0.191871 |
| 0.114656 | 0.136655 | 0.109266 | 0.115676 | 0.120192 | 0.121649 | 0.19595  |
| 0.135198 | 0.144668 | 0.13039  | 0.123689 | 0.138112 | 0.140734 | 0.204254 |
| 0.115676 | 0.139714 | 0.113199 | 0.118444 | 0.121795 | 0.130828 | 0.195513 |
| 0.129079 | 0.147582 | 0.121649 | 0.133013 | 0.134615 | 0.147436 | 0.207168 |
| 0.126457 | 0.131847 | 0.113782 | 0.102418 | 0.123834 | 0.128788 | 0.19289  |
| 0.120775 | 0.134033 | 0.109557 | 0.113636 | 0.116404 | 0.131556 | 0.190705 |
| 0.124272 | 0.141317 | 0.113636 | 0.126748 | 0.126894 | 0.135344 | 0.199446 |
| 0.128788 | 0.144668 | 0.119901 | 0.117861 | 0.121795 | 0.132576 | 0.189977 |
| 0.126894 | 0.140152 | 0.124417 | 0.121212 | 0.133013 | 0.14088  | 0.203234 |
| 0.124126 | 0.143211 | 0.125437 | 0.109994 | 0.133741 | 0.144522 | 0.204254 |
| 0.12704  | 0.136218 | 0.121066 | 0.120484 | 0.124126 | 0.142483 | 0.203671 |
| 0.11451  | 0.137675 | 0.106498 | 0.118735 | 0.118881 | 0.114219 | 0.193182 |
| 0.120629 | 0.134761 | 0.118153 | 0.109411 | 0.119755 | 0.13345  | 0.197844 |
| 0.137383 | 0.144231 | 0.128497 | 0.125874 | 0.137675 | 0.144085 | 0.203526 |
| 0.120338 | 0.130973 | 0.113199 | 0.108829 | 0.122086 | 0.129371 | 0.185023 |
| 0.140734 | 0.147873 | 0.134178 | 0.131847 | 0.132284 | 0.122669 | 0.19697  |
| 0.124854 | 0.155303 | 0.131119 | 0.13549  | 0.13243  | 0.142628 | 0.188957 |
| 0.116696 | 0.143065 | 0.111888 | 0.123543 | 0.11961  | 0.117279 | 0.189248 |
| 0.121649 | 0.144522 | 0.117133 | 0.125    | 0.133304 | 0.135052 | 0.202652 |
| 0.118298 | 0.142045 | 0.124854 | 0.121358 | 0.126748 | 0.132284 | 0.181818 |
| 0.120192 | 0.135781 | 0.127914 | 0.127914 | 0.127768 | 0.131265 | 0.194784 |
| 0.118153 | 0.141608 | 0.123834 | 0.125583 | 0.122815 | 0.136218 | 0.183712 |
| 0.127477 | 0.154429 | 0.129079 | 0.138403 | 0.13884  | 0.146125 | 0.195076 |
| 0.110431 | 0.137383 | 0.104749 | 0.112617 | 0.119755 | 0.109848 | 0.182401 |
| 0.137092 | 0.147436 | 0.120338 | 0.13345  | 0.133887 | 0.128351 | 0.200321 |
| 0.126748 | 0.153409 | 0.133596 | 0.137966 | 0.128497 | 0.142191 | 0.180361 |
| 0.115676 | 0.139714 | 0.113199 | 0.125146 | 0.125    | 0.11451  | 0.19697  |
| 0.124126 | 0.142628 | 0.11757  | 0.120192 | 0.120338 | 0.121212 | 0.184732 |
| 0.133887 | 0.150641 | 0.139569 | 0.138112 | 0.140589 | 0.127768 | 0.201195 |
| 0.13039  | 0.138112 | 0.121795 | 0.124126 | 0.122232 | 0.109411 | 0.192745 |
| 0.133159 | 0.143794 | 0.128059 | 0.138258 | 0.139277 | 0.134907 | 0.207459 |
| 0.128934 | 0.145396 | 0.12296  | 0.13141  | 0.136801 | 0.122815 | 0.194202 |

|           |           |           |          |           |           |          |
|-----------|-----------|-----------|----------|-----------|-----------|----------|
| 0.124126  | 0.140589  | 0.125437  | 0.111742 | 0.12704   | 0.123543  | 0.200175 |
| 0.130973  | 0.1419    | 0.123543  | 0.129662 | 0.127185  | 0.12602   | 0.191288 |
| 0.123252  | 0.146416  | 0.114073  | 0.124563 | 0.125291  | 0.11655   | 0.188811 |
| 0.129516  | 0.144522  | 0.130828  | 0.122378 | 0.133304  | 0.120775  | 0.19799  |
| 0.127768  | 0.140734  | 0.130536  | 0.121795 | 0.132721  | 0.137092  | 0.200903 |
| 0.127185  | 0.140152  | 0.136364  | 0.116259 | 0.136801  | 0.131847  | 0.203526 |
| 0.125728  | 0.142483  | 0.132284  | 0.127914 | 0.136218  | 0.135927  | 0.207605 |
| 0.120484  | 0.145979  | 0.129953  | 0.125    | 0.132721  | 0.129225  | 0.191288 |
| 0.139423  | 0.150641  | 0.141317  | 0.131702 | 0.143794  | 0.145833  | 0.197698 |
| 0.119318  | 0.145979  | 0.113345  | 0.12704  | 0.13039   | 0.124272  | 0.195367 |
| 0.119318  | 0.140443  | 0.115967  | 0.118298 | 0.125146  | 0.111742  | 0.196241 |
| 0.127477  | 0.143065  | 0.120629  | 0.124417 | 0.132721  | 0.131556  | 0.19799  |
| 0.112617  | 0.138695  | 0.112762  | 0.124126 | 0.125437  | 0.120484  | 0.191871 |
| 0.127914  | 0.154283  | 0.138258  | 0.146125 | 0.13986   | 0.147145  | 0.19697  |
| 0.139277  | 0.166812  | 0.148747  | 0.154866 | 0.153555  | 0.154429  | 0.206585 |
| 0.129079  | 0.141754  | 0.131556  | 0.11961  | 0.130828  | 0.115385  | 0.202506 |
| 0.120192  | 0.138112  | 0.122086  | 0.112762 | 0.12398   | 0.103875  | 0.191579 |
| 0.128497  | 0.137383  | 0.130099  | 0.117279 | 0.129953  | 0.134033  | 0.201923 |
| 0.132721  | 0.141026  | 0.122086  | 0.127914 | 0.134178  | 0.140589  | 0.20236  |
| 0.129516  | 0.144522  | 0.125874  | 0.121795 | 0.129516  | 0.11553   | 0.200029 |
| 0.13447   | 0.149476  | 0.126166  | 0.118007 | 0.143502  | 0.144085  | 0.209062 |
| 0.127477  | 0.146853  | 0.127914  | 0.137821 | 0.135927  | 0.137966  | 0.198281 |
| 0.124417  | 0.14088   | 0.117279  | 0.124854 | 0.125874  | 0.119464  | 0.195221 |
| 0.147727  | 0.163024  | 0.156614  | 0.150787 | 0.153846  | 0.164627  | 0.207751 |
| 0.122669  | 0.149621  | 0.114948  | 0.127768 | 0.132867  | 0.11451   | 0.194347 |
| 0.131119  | 0.154575  | 0.128934  | 0.136801 | 0.144231  | 0.134324  | 0.197552 |
| 0.12398   | 0.138695  | 0.118881  | 0.122086 | 0.128351  | 0.112908  | 0.201777 |
| 0.125728  | 0.142483  | 0.13549   | 0.124126 | 0.137675  | 0.132721  | 0.209936 |
| 0.124272  | 0.140152  | 0.116841  | 0.109848 | 0.124563  | 0.135344  | 0.196241 |
| 0.0944056 | 0.133596  | 0.130973  | 0.133304 | 0.101107  | 0.139569  | 0.160839 |
| 0.139132  | 0.144814  | 0.143357  | 0.127622 | 0.142337  | 0.15778   | 0.206731 |
| 0.122378  | 0.0627914 | 0.11757   | 0.110286 | 0.0699301 | 0.127914  | 0.182692 |
| 0.13447   | 0.0722611 | 0.129662  | 0.125    | 0.067162  | 0.137383  | 0.16215  |
| 0.14627   | 0.157197  | 0.14088   | 0.141171 | 0.125583  | 0.111014  | 0.130245 |
| 0.137238  | 0.133304  | 0.13039   | 0.136801 | 0.1081    | 0.143939  | 0.147436 |
| 0.112325  | 0.140734  | 0.12704   | 0.120338 | 0.126311  | 0.0965909 | 0.193328 |
| 0.128788  | 0.144376  | 0.13243   | 0.128059 | 0.131702  | 0.145688  | 0.20134  |
| 0.111888  | 0.129225  | 0.0843531 | 0.113782 | 0.109266  | 0.123252  | 0.184441 |
| 0.114073  | 0.135198  | 0.0810023 | 0.118881 | 0.113199  | 0.118735  | 0.177885 |
| 0.120338  | 0.140589  | 0.116404  | 0.120775 | 0.118881  | 0.130536  | 0.192016 |
| 0.119172  | 0.0607517 | 0.113199  | 0.10912  | 0.0623543 | 0.125874  | 0.181527 |
| 0.119318  | 0.140734  | 0.109557  | 0.111888 | 0.119027  | 0.118153  | 0.186334 |
| 0.111451  | 0.104312  | 0.0708042 | 0.113928 | 0.0855186 | 0.122523  | 0.172057 |
| 0.118444  | 0.123543  | 0.115967  | 0.115093 | 0.11116   | 0.129516  | 0.190414 |

|           |           |           |           |           |           |          |
|-----------|-----------|-----------|-----------|-----------|-----------|----------|
| 0.123252  | 0.135635  | 0.0595862 | 0.121066  | 0.113345  | 0.134324  | 0.179196 |
| 0.102273  | 0.131847  | 0.0936772 | 0.112325  | 0.110723  | 0.119172  | 0.183275 |
| 0.122669  | 0.0735723 | 0.118735  | 0.114656  | 0.0670163 | 0.126457  | 0.184441 |
| 0.118444  | 0.0670163 | 0.113345  | 0.107226  | 0.0659965 | 0.127477  | 0.186043 |
| 0.120484  | 0.138112  | 0.12704   | 0.123252  | 0.122815  | 0.043852  | 0.177593 |
| 0.211101  | 0.217949  | 0.209207  | 0.212121  | 0.19391   | 0.213432  | 0.125728 |
| 0.145251  | 0.0431235 | 0.137529  | 0.130536  | 0.0817308 | 0.14729   | 0.198864 |
| 0.12704   | 0.135927  | 0.128351  | 0.126311  | 0.129371  | 0.132284  | 0.19697  |
| 0.122232  | 0.13141   | 0.118881  | 0.122378  | 0.11553   | 0.127477  | 0.186917 |
| 0.207896  | 0.212704  | 0.205711  | 0.205711  | 0.186626  | 0.20877   | 0.116404 |
| 0.0960082 | 0.141608  | 0.120921  | 0.122086  | 0.112034  | 0.0759033 | 0.163899 |
| 0.117716  | 0.142045  | 0.118444  | 0.122523  | 0.123543  | 0.114802  | 0.19493  |
| 0.127331  | 0.137675  | 0.120484  | 0.113782  | 0.121212  | 0.123834  | 0.185023 |
| 0.118153  | 0.138112  | 0.0512821 | 0.121212  | 0.123106  | 0.131556  | 0.18546  |
| 0.24461   | 0.245629  | 0.243881  | 0.245338  | 0.228293  | 0.250146  | 0.143211 |
| 0.0533217 | 0.143502  | 0.118444  | 0.121941  | 0.129662  | 0.130536  | 0.190851 |
| 0.117716  | 0.132139  | 0.119901  | 0.118153  | 0.115967  | 0.0533217 | 0.17803  |
| 0.125     | 0.137966  | 0.125146  | 0.0989219 | 0.126166  | 0.126166  | 0.19697  |
| 0.121503  | 0.137383  | 0.119027  | 0.0980478 | 0.124709  | 0.126748  | 0.190268 |
| 0.0754662 | 0.143794  | 0.106498  | 0.126603  | 0.123834  | 0.132576  | 0.182692 |
| 0.120338  | 0.124272  | 0.105624  | 0.125146  | 0.0935315 | 0.13549   | 0.16521  |
| 0.118881  | 0.136509  | 0.118735  | 0.120775  | 0.117716  | 0.0530303 | 0.173951 |
| 0.116987  | 0.0652681 | 0.115967  | 0.110723  | 0.0645396 | 0.124563  | 0.183129 |
| 0.121212  | 0.139132  | 0.121358  | 0.116987  | 0.12296   | 0.13141   | 0.194639 |
| 0.112762  | 0.134178  | 0.0429779 | 0.113491  | 0.118298  | 0.127331  | 0.185606 |
| 0.115822  | 0.0705128 | 0.109848  | 0.108683  | 0.0659965 | 0.120484  | 0.175845 |
| 0.112179  | 0.137675  | 0.097465  | 0.11961   | 0.118007  | 0.133159  | 0.192308 |
| 0.140589  | 0.140443  | 0.142191  | 0.127914  | 0.142628  | 0.154575  | 0.204983 |
| 0.0557984 | 0.143065  | 0.125874  | 0.125583  | 0.131847  | 0.13447   | 0.191579 |
| 0.120484  | 0.141608  | 0.119172  | 0.124417  | 0.124563  | 0.118735  | 0.194202 |
| 0.182255  | 0.193182  | 0.181235  | 0.187063  | 0.164773  | 0.190122  | 0.111742 |
| 0.199738  | 0.207751  | 0.197261  | 0.200175  | 0.179924  | 0.204691  | 0.108829 |
| 0.11757   | 0.141317  | 0.0498252 | 0.123543  | 0.118444  | 0.132139  | 0.183129 |
| 0.110868  | 0.132284  | 0.04662   | 0.117424  | 0.116987  | 0.128351  | 0.186334 |
| 0.132721  | 0.128497  | 0.125583  | 0.131702  | 0.120775  | 0.142337  | 0.184586 |
| 0.114948  | 0.135781  | 0.120629  | 0.121212  | 0.11757   | 0.0502622 | 0.175262 |
| 0.0585664 | 0.144376  | 0.121649  | 0.125728  | 0.13141   | 0.135198  | 0.191434 |
| 0.13447   | 0.132284  | 0.127331  | 0.0521562 | 0.12398   | 0.136509  | 0.193619 |
| 0.220717  | 0.225524  | 0.217366  | 0.217949  | 0.202652  | 0.223922  | 0.121649 |
| 0.113491  | 0.130828  | 0.112762  | 0.116259  | 0.11553   | 0.118735  | 0.186917 |
| 0.206876  | 0.205857  | 0.203817  | 0.202943  | 0.181235  | 0.201923  | 0.134907 |
| 0.101253  | 0.134324  | 0.116259  | 0.111888  | 0.117861  | 0.0910548 | 0.185752 |
| 0.112471  | 0.135635  | 0.112908  | 0.105915  | 0.118881  | 0.120921  | 0.186189 |
| 0.114656  | 0.119172  | 0.112762  | 0.111597  | 0.0992133 | 0.111451  | 0.171766 |



|           |           |           |           |           |           |          |
|-----------|-----------|-----------|-----------|-----------|-----------|----------|
| 0.113199  | 0.131119  | 0.0524476 | 0.113636  | 0.107372  | 0.123397  | 0.178759 |
| 0.201049  | 0.211684  | 0.200612  | 0.199446  | 0.184732  | 0.207168  | 0.111888 |
| 0.132284  | 0.0642483 | 0.127477  | 0.119901  | 0.0649767 | 0.136946  | 0.18211  |
| 0.112179  | 0.137966  | 0.117279  | 0.108537  | 0.119464  | 0.113054  | 0.194056 |
| 0.124417  | 0.0543415 | 0.121649  | 0.113491  | 0.0690559 | 0.131702  | 0.185897 |
| 0.127622  | 0.131265  | 0.125728  | 0.118444  | 0.120921  | 0.125874  | 0.189103 |
| 0.111888  | 0.136801  | 0.0435606 | 0.121941  | 0.115676  | 0.127914  | 0.187063 |
| 0.099796  | 0.134615  | 0.11859   | 0.111597  | 0.120775  | 0.0913462 | 0.186917 |
| 0.120775  | 0.136946  | 0.118007  | 0.117424  | 0.108829  | 0.0645396 | 0.165938 |
| 0.121066  | 0.140734  | 0.118007  | 0.12296   | 0.127477  | 0.116404  | 0.193328 |
| 0.116987  | 0.0702214 | 0.109848  | 0.106935  | 0.0633741 | 0.121358  | 0.175554 |
| 0.115385  | 0.13884   | 0.121649  | 0.108537  | 0.122669  | 0.113345  | 0.186189 |
| 0.183421  | 0.194639  | 0.180361  | 0.185023  | 0.166812  | 0.186626  | 0.114073 |
| 0.12704   | 0.135635  | 0.127477  | 0.0995047 | 0.12704   | 0.126748  | 0.194639 |
| 0.126603  | 0.140734  | 0.125     | 0.113928  | 0.128059  | 0.138549  | 0.193328 |
| 0.125583  | 0.130973  | 0.116987  | 0.0983392 | 0.119464  | 0.128497  | 0.184149 |
| 0.060169  | 0.146853  | 0.122086  | 0.122669  | 0.119901  | 0.13039   | 0.179924 |
| 0.123106  | 0.0579837 | 0.119172  | 0.111305  | 0.0657051 | 0.128642  | 0.184878 |
| 0.108537  | 0.135781  | 0.12296   | 0.114802  | 0.124854  | 0.0954254 | 0.193036 |
| 0.101107  | 0.131265  | 0.117861  | 0.112034  | 0.11655   | 0.121212  | 0.180653 |
| 0.122086  | 0.13884   | 0.128934  | 0.122523  | 0.125291  | 0.0547786 | 0.179779 |
| 0.119901  | 0.131993  | 0.11859   | 0.108683  | 0.120484  | 0.133304  | 0.192162 |
| 0.117861  | 0.133741  | 0.116841  | 0.0984848 | 0.118153  | 0.12398   | 0.18954  |
| 0.116841  | 0.134761  | 0.0584207 | 0.120192  | 0.114802  | 0.129953  | 0.185023 |
| 0.122232  | 0.13986   | 0.117424  | 0.119172  | 0.120775  | 0.128351  | 0.194493 |
| 0.138695  | 0.142628  | 0.132139  | 0.125437  | 0.133159  | 0.136364  | 0.200758 |
| 0         | 0.14088   | 0.111451  | 0.11757   | 0.123834  | 0.126748  | 0.186772 |
| 0.14088   | 0         | 0.133741  | 0.128788  | 0.0805653 | 0.14292   | 0.196241 |
| 0.111451  | 0.133741  | 0         | 0.11655   | 0.115239  | 0.128351  | 0.184878 |
| 0.11757   | 0.128788  | 0.11655   | 0         | 0.110577  | 0.124854  | 0.18546  |
| 0.123834  | 0.0805653 | 0.115239  | 0.110577  | 0         | 0.122378  | 0.165501 |
| 0.126748  | 0.14292   | 0.128351  | 0.124854  | 0.122378  | 0         | 0.173077 |
| 0.186772  | 0.196241  | 0.184878  | 0.18546   | 0.165501  | 0.173077  | 0        |
| 0.10708   | 0.136364  | 0.112762  | 0.106935  | 0.120484  | 0.107955  | 0.184878 |
| 0.103875  | 0.118298  | 0.106061  | 0.101107  | 0.100962  | 0.119318  | 0.176428 |
| 0.118444  | 0.139277  | 0.119755  | 0.122378  | 0.125146  | 0.11961   | 0.197407 |
| 0.177302  | 0.186189  | 0.172203  | 0.177739  | 0.153118  | 0.182547  | 0.113782 |
| 0.0667249 | 0.153409  | 0.132139  | 0.133887  | 0.137529  | 0.141026  | 0.195221 |
| 0.0757576 | 0.158071  | 0.142628  | 0.143794  | 0.149476  | 0.152681  | 0.205128 |
| 0.144085  | 0.144522  | 0.145396  | 0.126748  | 0.145251  | 0.158071  | 0.207896 |
| 0.0514277 | 0.138986  | 0.113054  | 0.117424  | 0.11961   | 0.123106  | 0.184586 |
| 0.122669  | 0.0557984 | 0.119027  | 0.112617  | 0.0649767 | 0.128497  | 0.182401 |
| 0.204691  | 0.214161  | 0.202506  | 0.20542   | 0.188374  | 0.21081   | 0.119901 |
| 0.121941  | 0.133159  | 0.11655   | 0.119172  | 0.116987  | 0.133013  | 0.181964 |

|           |           |           |           |           |           |          |
|-----------|-----------|-----------|-----------|-----------|-----------|----------|
| 0.127914  | 0.0557984 | 0.122815  | 0.114656  | 0.0675991 | 0.132284  | 0.184149 |
| 0.110431  | 0.134761  | 0.120775  | 0.108829  | 0.120047  | 0.112762  | 0.187354 |
| 0.167249  | 0.163316  | 0.158654  | 0.164773  | 0.133741  | 0.170163  | 0.123834 |
| 0.115093  | 0.126894  | 0.106206  | 0.111742  | 0.11014   | 0.121503  | 0.180653 |
| 0.145251  | 0.150641  | 0.144814  | 0.138403  | 0.144668  | 0.156031  | 0.209062 |
| 0.117279  | 0.138986  | 0.106352  | 0.125874  | 0.116113  | 0.128351  | 0.184878 |
| 0.185752  | 0.19493   | 0.183858  | 0.18648   | 0.168269  | 0.187791  | 0.115239 |
| 0.0528846 | 0.143357  | 0.115385  | 0.125     | 0.127185  | 0.133887  | 0.191871 |
| 0.109703  | 0.124417  | 0.10169   | 0.106935  | 0.106498  | 0.119027  | 0.184878 |
| 0.118007  | 0.128934  | 0.112617  | 0.0534674 | 0.113345  | 0.127331  | 0.183858 |
| 0.110286  | 0.132867  | 0.11655   | 0.114802  | 0.121941  | 0.116113  | 0.188666 |
| 0.11553   | 0.13986   | 0.115676  | 0.121795  | 0.123106  | 0.114656  | 0.191579 |
| 0.121066  | 0.138112  | 0.11655   | 0.110431  | 0.122815  | 0.129808  | 0.187209 |
| 0.111014  | 0.133304  | 0.0470571 | 0.116404  | 0.117133  | 0.125291  | 0.185897 |
| 0.185169  | 0.197552  | 0.182984  | 0.185606  | 0.166812  | 0.189248  | 0.110286 |
| 0.127622  | 0.136509  | 0.120775  | 0.114656  | 0.117424  | 0.124417  | 0.191142 |
| 0.11757   | 0.125874  | 0.107809  | 0.108683  | 0.108829  | 0.121649  | 0.177885 |
| 0.20542   | 0.214307  | 0.203234  | 0.206439  | 0.192016  | 0.210082  | 0.116259 |
| 0.125874  | 0.137675  | 0.121358  | 0.099796  | 0.124709  | 0.128205  | 0.196096 |
| 0.112617  | 0.138403  | 0.0480769 | 0.118298  | 0.118153  | 0.129225  | 0.189248 |
| 0.109411  | 0.130828  | 0.0428322 | 0.113636  | 0.112617  | 0.123689  | 0.184003 |
| 0.136364  | 0.0581294 | 0.130682  | 0.125146  | 0.0865385 | 0.143357  | 0.192016 |
| 0.181527  | 0.195076  | 0.179924  | 0.184295  | 0.167249  | 0.191434  | 0.111305 |
| 0.118153  | 0.138112  | 0.12296   | 0.120629  | 0.121649  | 0.0552156 | 0.178467 |
| 0.133887  | 0.138986  | 0.127914  | 0.120629  | 0.128351  | 0.13243   | 0.197698 |
| 0.111742  | 0.134324  | 0.0460373 | 0.115967  | 0.116113  | 0.127768  | 0.186917 |
| 0.11116   | 0.131993  | 0.0445804 | 0.117133  | 0.113491  | 0.123689  | 0.183129 |
| 0.112179  | 0.135927  | 0.0444347 | 0.114073  | 0.113054  | 0.126748  | 0.18007  |
| 0.117279  | 0.0670163 | 0.111888  | 0.111014  | 0.0659965 | 0.127477  | 0.184878 |
| 0.101399  | 0.129808  | 0.0907634 | 0.109994  | 0.108974  | 0.117716  | 0.183275 |
| 0.0501166 | 0.146999  | 0.120192  | 0.125728  | 0.130536  | 0.131993  | 0.192308 |
| 0.137238  | 0.126894  | 0.133013  | 0.106789  | 0.121503  | 0.139569  | 0.203089 |
| 0.0533217 | 0.145542  | 0.118444  | 0.122523  | 0.127622  | 0.129371  | 0.191142 |
| 0.130973  | 0.134907  | 0.129371  | 0.126457  | 0.13039   | 0.133013  | 0.19595  |
| 0.18648   | 0.199738  | 0.185169  | 0.188374  | 0.170746  | 0.191142  | 0.114802 |
| 0.120775  | 0.138986  | 0.113345  | 0.113054  | 0.119027  | 0.123689  | 0.191288 |
| 0.132576  | 0.0514277 | 0.127768  | 0.116113  | 0.0725524 | 0.136655  | 0.189103 |
| 0.107663  | 0.131119  | 0.04662   | 0.116841  | 0.11553   | 0.128351  | 0.186334 |
| 0.102564  | 0.132139  | 0.092803  | 0.111451  | 0.111597  | 0.115676  | 0.18648  |
| 0.104604  | 0.133013  | 0.114365  | 0.112034  | 0.111014  | 0.125291  | 0.179779 |
| 0.11961   | 0.136072  | 0.12296   | 0.120629  | 0.119318  | 0.046183  | 0.17264  |
| 0.127185  | 0.13345   | 0.125583  | 0.122669  | 0.129808  | 0.138258  | 0.190705 |
| 0.117133  | 0.135344  | 0.11553   | 0.111742  | 0.117133  | 0.132576  | 0.189103 |
| 0.111305  | 0.135344  | 0.105041  | 0.115239  | 0.111597  | 0.076049  | 0.170746 |

|           |           |           |           |           |           |          |
|-----------|-----------|-----------|-----------|-----------|-----------|----------|
| 0.106498  | 0.126166  | 0.102273  | 0.112471  | 0.105624  | 0.08581   | 0.167686 |
| 0.106935  | 0.127768  | 0.10271   | 0.110577  | 0.107226  | 0.120338  | 0.181235 |
| 0.103875  | 0.135781  | 0.115385  | 0.113054  | 0.117861  | 0.0933858 | 0.186043 |
| 0.0646853 | 0.148747  | 0.126603  | 0.133013  | 0.13345   | 0.138403  | 0.197844 |
| 0.118444  | 0.138403  | 0.122669  | 0.120629  | 0.118153  | 0.060169  | 0.176719 |
| 0.113054  | 0.0686189 | 0.108829  | 0.10708   | 0.0693473 | 0.121503  | 0.17803  |
| 0.112179  | 0.133887  | 0.116404  | 0.117279  | 0.118298  | 0.0562354 | 0.175991 |
| 0.110577  | 0.133741  | 0.0480769 | 0.114802  | 0.112908  | 0.123689  | 0.182547 |
| 0.106061  | 0.132721  | 0.113199  | 0.0989219 | 0.117716  | 0.107517  | 0.18648  |
| 0.114219  | 0.136801  | 0.0467657 | 0.122232  | 0.118298  | 0.129371  | 0.183858 |
| 0.118298  | 0.135344  | 0.111451  | 0.109703  | 0.113054  | 0.118881  | 0.187937 |
| 0.11859   | 0.136509  | 0.115239  | 0.107955  | 0.121795  | 0.133159  | 0.190268 |
| 0.111305  | 0.135927  | 0.113199  | 0.122232  | 0.119464  | 0.113054  | 0.192308 |
| 0.103293  | 0.131993  | 0.0967366 | 0.11655   | 0.110868  | 0.119318  | 0.1875   |
| 0.113054  | 0.131847  | 0.0464744 | 0.114948  | 0.114219  | 0.124709  | 0.183858 |
| 0.122378  | 0.132139  | 0.116113  | 0.0572552 | 0.102564  | 0.127622  | 0.176282 |
| 0.120192  | 0.131702  | 0.111014  | 0.113054  | 0.116404  | 0.12602   | 0.188666 |
| 0.108974  | 0.13243   | 0.106789  | 0.111742  | 0.113636  | 0.120629  | 0.187937 |
| 0.110723  | 0.131265  | 0.0493881 | 0.11553   | 0.113636  | 0.126166  | 0.189103 |
| 0.120775  | 0.0588578 | 0.117424  | 0.109848  | 0.0619172 | 0.129516  | 0.181672 |
| 0.101836  | 0.137529  | 0.113054  | 0.11451   | 0.121941  | 0.0945513 | 0.18546  |
| 0.118735  | 0.0652681 | 0.11451   | 0.111014  | 0.0686189 | 0.125437  | 0.184878 |
| 0.114365  | 0.139277  | 0.112471  | 0.120047  | 0.122523  | 0.114948  | 0.188374 |
| 0.107955  | 0.135198  | 0.101107  | 0.116259  | 0.112617  | 0.122232  | 0.186917 |
| 0.106498  | 0.127331  | 0.102855  | 0.104895  | 0.113491  | 0.119901  | 0.182255 |
| 0.106935  | 0.133887  | 0.116113  | 0.104458  | 0.115967  | 0.110723  | 0.187937 |
| 0.121941  | 0.0675991 | 0.118007  | 0.113054  | 0.0680361 | 0.13039   | 0.183129 |
| 0.125437  | 0.131119  | 0.123834  | 0.117716  | 0.11961   | 0.123106  | 0.188957 |
| 0.11655   | 0.124563  | 0.106498  | 0.111451  | 0.108974  | 0.123252  | 0.184732 |
| 0.186772  | 0.199738  | 0.186917  | 0.191288  | 0.175117  | 0.193473  | 0.11655  |
| 0.166084  | 0.165355  | 0.158654  | 0.158362  | 0.133159  | 0.165793  | 0.122086 |
| 0.0524476 | 0.144376  | 0.11757   | 0.121941  | 0.128497  | 0.129079  | 0.191142 |
| 0.118735  | 0.130536  | 0.117133  | 0.110723  | 0.10912   | 0.0872669 | 0.165064 |
| 0.0808566 | 0.157343  | 0.146562  | 0.144522  | 0.151661  | 0.156906  | 0.209936 |
| 0.125874  | 0.138549  | 0.119027  | 0.119027  | 0.121503  | 0.135781  | 0.197844 |
| 0.118735  | 0.138695  | 0.0812937 | 0.115967  | 0.117279  | 0.132139  | 0.17905  |
| 0.116841  | 0.130682  | 0.0805653 | 0.115239  | 0.109557  | 0.127331  | 0.180653 |
| 0.111305  | 0.135052  | 0.0977564 | 0.121941  | 0.11451   | 0.126457  | 0.188228 |
| 0.124126  | 0.128059  | 0.10912   | 0.114948  | 0.115385  | 0.129662  | 0.189394 |
| 0.195659  | 0.206002  | 0.186772  | 0.197261  | 0.177593  | 0.199155  | 0.114948 |
| 0.118298  | 0.14088   | 0.121358  | 0.121066  | 0.122378  | 0.0524476 | 0.178322 |
| 0.120775  | 0.0909091 | 0.114802  | 0.113054  | 0.0747378 | 0.0925117 | 0.161859 |
| 0.110286  | 0.131702  | 0.0594406 | 0.112179  | 0.109703  | 0.122815  | 0.180507 |
| 0.117133  | 0.138549  | 0.115239  | 0.120192  | 0.118298  | 0.126457  | 0.191142 |

|           |           |           |           |           |           |          |
|-----------|-----------|-----------|-----------|-----------|-----------|----------|
| 0.180216  | 0.192016  | 0.173951  | 0.179487  | 0.157197  | 0.18546   | 0.116696 |
| 0.242279  | 0.242716  | 0.24155   | 0.23951   | 0.224505  | 0.245192  | 0.137966 |
| 0.121066  | 0.13549   | 0.118007  | 0.112471  | 0.120775  | 0.134178  | 0.192745 |
| 0.120775  | 0.131119  | 0.109848  | 0.110431  | 0.116987  | 0.13039   | 0.188083 |
| 0.0517191 | 0.145688  | 0.115676  | 0.121212  | 0.123397  | 0.131847  | 0.189831 |
| 0.113345  | 0.138549  | 0.110286  | 0.119027  | 0.119464  | 0.115676  | 0.188228 |
| 0.116113  | 0.132867  | 0.118881  | 0.116259  | 0.116696  | 0.0572552 | 0.179341 |
| 0.112471  | 0.129225  | 0.112325  | 0.105624  | 0.114802  | 0.122086  | 0.185897 |
| 0.115239  | 0.101981  | 0.0737179 | 0.111888  | 0.0837704 | 0.121941  | 0.169435 |
| 0.112617  | 0.134324  | 0.118298  | 0.118298  | 0.117279  | 0.0488054 | 0.174679 |
| 0.112179  | 0.0893065 | 0.0808566 | 0.111116  | 0.0772145 | 0.125583  | 0.173077 |
| 0.116696  | 0.136364  | 0.111597  | 0.117716  | 0.118444  | 0.125728  | 0.192453 |
| 0.106061  | 0.133013  | 0.0968823 | 0.113199  | 0.110723  | 0.119464  | 0.184441 |
| 0.11961   | 0.135198  | 0.117424  | 0.109848  | 0.120484  | 0.13447   | 0.191871 |
| 0.118881  | 0.0689103 | 0.116404  | 0.114656  | 0.0673077 | 0.125874  | 0.182984 |
| 0.106935  | 0.120484  | 0.105915  | 0.0563811 | 0.10373   | 0.113054  | 0.178904 |
| 0.126457  | 0.138549  | 0.122815  | 0.114948  | 0.131119  | 0.128205  | 0.200758 |
| 0.126166  | 0.144668  | 0.128642  | 0.129808  | 0.13549   | 0.124417  | 0.200466 |
| 0.11116   | 0.134907  | 0.0469114 | 0.115676  | 0.114365  | 0.124854  | 0.184295 |
| 0.105186  | 0.136509  | 0.0872669 | 0.116987  | 0.114802  | 0.123543  | 0.171037 |
| 0.130536  | 0.140589  | 0.0619172 | 0.130099  | 0.129371  | 0.141317  | 0.195804 |
| 0.202069  | 0.211247  | 0.199301  | 0.202797  | 0.1875    | 0.209353  | 0.124272 |
| 0.11014   | 0.129225  | 0.111451  | 0.102418  | 0.113054  | 0.122669  | 0.18211  |
| 0.105041  | 0.133741  | 0.0955711 | 0.113928  | 0.112617  | 0.121066  | 0.186917 |
| 0.120192  | 0.138695  | 0.112179  | 0.113054  | 0.119318  | 0.12398   | 0.189831 |
| 0.125     | 0.137966  | 0.121941  | 0.104458  | 0.122669  | 0.12704   | 0.193473 |
| 0.116259  | 0.131847  | 0.117279  | 0.114073  | 0.115093  | 0.121212  | 0.189685 |
| 0.192308  | 0.204691  | 0.189831  | 0.195076  | 0.179487  | 0.201049  | 0.113054 |
| 0.120484  | 0.0670163 | 0.119172  | 0.114219  | 0.0677448 | 0.129808  | 0.185169 |
| 0.109557  | 0.132721  | 0.0458916 | 0.113782  | 0.111597  | 0.126457  | 0.184441 |
| 0.113199  | 0.13345   | 0.122378  | 0.119464  | 0.123397  | 0.122232  | 0.194493 |
| 0.109994  | 0.135198  | 0.11014   | 0.11655   | 0.119901  | 0.112325  | 0.186043 |
| 0.123106  | 0.0684732 | 0.114802  | 0.113054  | 0.0622086 | 0.126894  | 0.182547 |
| 0.11116   | 0.0967366 | 0.104604  | 0.104312  | 0.08581   | 0.120484  | 0.179341 |
| 0.116696  | 0.134033  | 0.11014   | 0.11655   | 0.113782  | 0.128934  | 0.194493 |
| 0.118735  | 0.137821  | 0.118007  | 0.0984848 | 0.123397  | 0.128642  | 0.191288 |
| 0.191434  | 0.203526  | 0.188957  | 0.192745  | 0.176865  | 0.196387  | 0.117716 |
| 0.111742  | 0.0728438 | 0.110723  | 0.105478  | 0.067162  | 0.119027  | 0.180798 |
| 0.192016  | 0.199738  | 0.183712  | 0.190122  | 0.170455  | 0.194639  | 0.110431 |
| 0.1875    | 0.199883  | 0.184732  | 0.186189  | 0.170892  | 0.192453  | 0.110868 |
| 0.124272  | 0.142774  | 0.125     | 0.126166  | 0.131556  | 0.121941  | 0.199155 |
| 0.13039   | 0.145105  | 0.131702  | 0.106352  | 0.134761  | 0.134178  | 0.202943 |
| 0.107372  | 0.126748  | 0.104895  | 0.105769  | 0.107955  | 0.116113  | 0.184586 |
| 0.113054  | 0.078817  | 0.107663  | 0.104749  | 0.0734266 | 0.120047  | 0.18211  |

|           |           |           |           |           |           |          |
|-----------|-----------|-----------|-----------|-----------|-----------|----------|
| 0.117861  | 0.0710956 | 0.114802  | 0.109848  | 0.0692016 | 0.121649  | 0.184878 |
| 0.112617  | 0.136655  | 0.0495338 | 0.118881  | 0.115239  | 0.130973  | 0.186043 |
| 0.10912   | 0.130245  | 0.113928  | 0.113928  | 0.113491  | 0.0595862 | 0.174097 |
| 0.116696  | 0.13345   | 0.116841  | 0.11451   | 0.116696  | 0.0528846 | 0.175845 |
| 0.119755  | 0.134178  | 0.118153  | 0.110577  | 0.121503  | 0.135198  | 0.191725 |
| 0.115822  | 0.141317  | 0.113928  | 0.121795  | 0.123106  | 0.120192  | 0.193328 |
| 0.106935  | 0.128642  | 0.043852  | 0.111451  | 0.112179  | 0.122086  | 0.183858 |
| 0.12398   | 0.0673077 | 0.11451   | 0.111014  | 0.0662879 | 0.125146  | 0.184003 |
| 0.108392  | 0.122815  | 0.101544  | 0.107955  | 0.10373   | 0.115967  | 0.182984 |
| 0.131556  | 0.0512821 | 0.127331  | 0.118298  | 0.0721154 | 0.136509  | 0.188083 |
| 0.050845  | 0.141317  | 0.114802  | 0.120921  | 0.122815  | 0.129808  | 0.189248 |
| 0.13345   | 0.0456002 | 0.129516  | 0.119318  | 0.07838   | 0.139569  | 0.19289  |
| 0.254662  | 0.257721  | 0.252768  | 0.253059  | 0.236597  | 0.257284  | 0.146562 |
| 0.125291  | 0.140297  | 0.129808  | 0.112617  | 0.134615  | 0.121795  | 0.199592 |
| 0.123689  | 0.138695  | 0.127622  | 0.115385  | 0.128059  | 0.13039   | 0.194202 |
| 0.211538  | 0.217512  | 0.209936  | 0.211976  | 0.196096  | 0.219697  | 0.127331 |
| 0.126894  | 0.142483  | 0.120921  | 0.121503  | 0.136218  | 0.130682  | 0.19595  |
| 0.225379  | 0.230478  | 0.224359  | 0.223776  | 0.20877   | 0.231789  | 0.123397 |
| 0.117716  | 0.13243   | 0.122232  | 0.108537  | 0.124126  | 0.112179  | 0.192599 |
| 0.125437  | 0.138695  | 0.0574009 | 0.126748  | 0.12602   | 0.139423  | 0.194784 |
| 0.118735  | 0.133741  | 0.115967  | 0.0984848 | 0.119318  | 0.119901  | 0.1875   |
| 0.121066  | 0.142483  | 0.119755  | 0.122378  | 0.126894  | 0.120775  | 0.197698 |
| 0.197115  | 0.207168  | 0.19493   | 0.199301  | 0.180216  | 0.202069  | 0.116696 |
| 0.131265  | 0.0512821 | 0.125291  | 0.118298  | 0.076486  | 0.139423  | 0.195076 |
| 0.120775  | 0.0699301 | 0.115385  | 0.111305  | 0.0677448 | 0.125437  | 0.18109  |
| 0.222319  | 0.22771   | 0.219551  | 0.223339  | 0.204545  | 0.225233  | 0.131119 |
| 0.116696  | 0.139569  | 0.117424  | 0.119755  | 0.116404  | 0.0572552 | 0.175845 |
| 0.194056  | 0.2044    | 0.190414  | 0.193328  | 0.176865  | 0.197261  | 0.115676 |
| 0.11859   | 0.136509  | 0.120775  | 0.121358  | 0.121503  | 0.0533217 | 0.177739 |
| 0.113636  | 0.135344  | 0.0490967 | 0.118735  | 0.114219  | 0.12704   | 0.187063 |
| 0.114656  | 0.136364  | 0.105478  | 0.120338  | 0.119901  | 0.129225  | 0.196533 |
| 0.125728  | 0.1419    | 0.125     | 0.12704   | 0.13039   | 0.122523  | 0.200612 |
| 0.11451   | 0.134761  | 0.111451  | 0.118444  | 0.109848  | 0.123252  | 0.182692 |
| 0.152681  | 0.17264   | 0.147873  | 0.15778   | 0.140152  | 0.162005  | 0.127331 |
| 0.117424  | 0.0639569 | 0.112034  | 0.104458  | 0.0623543 | 0.124417  | 0.178322 |
| 0.123834  | 0.140589  | 0.11961   | 0.100087  | 0.124709  | 0.128788  | 0.190559 |
| 0.124126  | 0.14292   | 0.114656  | 0.115239  | 0.124126  | 0.123834  | 0.186772 |
| 0.130536  | 0.130973  | 0.128351  | 0.0499709 | 0.121212  | 0.134324  | 0.192016 |
| 0.188083  | 0.203089  | 0.18648   | 0.190851  | 0.17264   | 0.19799   | 0.113782 |
| 0.110431  | 0.130973  | 0.0423951 | 0.116404  | 0.113345  | 0.124417  | 0.185023 |
| 0.119318  | 0.142774  | 0.113054  | 0.128205  | 0.114073  | 0.120484  | 0.18109  |
| 0.0990676 | 0.135635  | 0.116113  | 0.112034  | 0.119755  | 0.0938228 | 0.18852  |
| 0.120192  | 0.13345   | 0.123252  | 0.119172  | 0.120484  | 0.0479312 | 0.17905  |
| 0.121212  | 0.13447   | 0.0549242 | 0.120775  | 0.120338  | 0.13345   | 0.189394 |

|           |           |           |           |           |           |          |
|-----------|-----------|-----------|-----------|-----------|-----------|----------|
| 0.253059  | 0.253205  | 0.250291  | 0.249417  | 0.232663  | 0.254516  | 0.146999 |
| 0.111014  | 0.133887  | 0.102418  | 0.11757   | 0.116259  | 0.124709  | 0.191725 |
| 0.120921  | 0.137966  | 0.0910548 | 0.113782  | 0.115967  | 0.128497  | 0.182692 |
| 0.179779  | 0.181672  | 0.180798  | 0.174097  | 0.158508  | 0.177448  | 0.13345  |
| 0.179779  | 0.195367  | 0.176719  | 0.180507  | 0.163462  | 0.185606  | 0.111305 |
| 0.121795  | 0.137966  | 0.113199  | 0.11116   | 0.115967  | 0.129953  | 0.191434 |
| 0.120192  | 0.0678904 | 0.114802  | 0.110431  | 0.069493  | 0.131265  | 0.186626 |
| 0.114365  | 0.133741  | 0.108392  | 0.118298  | 0.118735  | 0.114948  | 0.188374 |
| 0.145979  | 0.0406469 | 0.143794  | 0.134178  | 0.0882867 | 0.150058  | 0.195804 |
| 0.114802  | 0.137092  | 0.115822  | 0.109411  | 0.117716  | 0.129079  | 0.184732 |
| 0.11961   | 0.139277  | 0.116259  | 0.113636  | 0.123397  | 0.134761  | 0.191288 |
| 0.124709  | 0.142337  | 0.127185  | 0.121358  | 0.124126  | 0.0509907 | 0.175117 |
| 0.116259  | 0.0584207 | 0.114365  | 0.107955  | 0.0623543 | 0.123543  | 0.178322 |
| 0.132139  | 0.0501166 | 0.126166  | 0.115967  | 0.0703671 | 0.13447   | 0.188666 |
| 0.121212  | 0.135052  | 0.113491  | 0.120192  | 0.101107  | 0.0670163 | 0.160839 |
| 0.119318  | 0.142483  | 0.120921  | 0.123834  | 0.129516  | 0.120484  | 0.196241 |
| 0.134033  | 0.151952  | 0.133013  | 0.133596  | 0.140152  | 0.129371  | 0.206585 |
| 0.116113  | 0.135198  | 0.104312  | 0.12296   | 0.120775  | 0.127768  | 0.192453 |
| 0.126166  | 0.145251  | 0.128351  | 0.13039   | 0.136655  | 0.124126  | 0.203671 |
| 0.126457  | 0.141754  | 0.132721  | 0.127477  | 0.125874  | 0.0495338 | 0.184149 |
| 0.202943  | 0.212413  | 0.200175  | 0.199592  | 0.18546   | 0.208188  | 0.117279 |
| 0.11655   | 0.146707  | 0.112325  | 0.12602   | 0.124709  | 0.120338  | 0.195221 |
| 0.186772  | 0.197115  | 0.183129  | 0.18954   | 0.168998  | 0.191725  | 0.113345 |
| 0.11655   | 0.133013  | 0.112034  | 0.0861014 | 0.116841  | 0.123252  | 0.185023 |
| 0.125     | 0.136509  | 0.0560897 | 0.12602   | 0.121212  | 0.137238  | 0.186772 |
| 0.0547786 | 0.140589  | 0.119318  | 0.123689  | 0.125291  | 0.129953  | 0.18648  |
| 0.0488054 | 0.138403  | 0.113345  | 0.119172  | 0.122815  | 0.127185  | 0.1875   |
| 0.124126  | 0.0592949 | 0.118444  | 0.110577  | 0.0673077 | 0.132284  | 0.180944 |
| 0.126166  | 0.0552156 | 0.120484  | 0.106789  | 0.0675991 | 0.128205  | 0.183566 |
| 0.11451   | 0.136218  | 0.050845  | 0.118153  | 0.112471  | 0.128497  | 0.181527 |
| 0.122815  | 0.136946  | 0.115967  | 0.0996503 | 0.121649  | 0.124272  | 0.189831 |
| 0.0595862 | 0.142774  | 0.12296   | 0.124417  | 0.125437  | 0.130973  | 0.190705 |
| 0.130245  | 0.145542  | 0.134178  | 0.130682  | 0.125291  | 0.0515734 | 0.174534 |
| 0.245629  | 0.246358  | 0.245192  | 0.244901  | 0.22873   | 0.249417  | 0.1419   |
| 0.114219  | 0.137092  | 0.0429779 | 0.120192  | 0.115676  | 0.129371  | 0.187937 |
| 0.175554  | 0.194056  | 0.175699  | 0.178904  | 0.163316  | 0.184586  | 0.109411 |
| 0.184732  | 0.19391   | 0.180798  | 0.186043  | 0.166375  | 0.189103  | 0.109557 |
| 0.123106  | 0.141608  | 0.108683  | 0.115967  | 0.116404  | 0.124563  | 0.182255 |
| 0.106498  | 0.130245  | 0.100816  | 0.114219  | 0.112617  | 0.121358  | 0.188666 |
| 0.123397  | 0.135781  | 0.0576923 | 0.124126  | 0.122815  | 0.133887  | 0.190414 |
| 0.114365  | 0.0702214 | 0.109266  | 0.105186  | 0.0692016 | 0.124854  | 0.181964 |
| 0.106643  | 0.136218  | 0.0948427 | 0.11553   | 0.107809  | 0.120921  | 0.179196 |
| 0.11859   | 0.137675  | 0.119027  | 0.120484  | 0.119172  | 0.0530303 | 0.173368 |
| 0.123397  | 0.0780886 | 0.115385  | 0.11014   | 0.0799825 | 0.129516  | 0.17905  |

|           |           |           |           |           |           |          |
|-----------|-----------|-----------|-----------|-----------|-----------|----------|
| 0.135635  | 0.0469114 | 0.127331  | 0.122669  | 0.0767774 | 0.138258  | 0.19595  |
| 0.113345  | 0.134178  | 0.0458916 | 0.118735  | 0.115093  | 0.127622  | 0.182984 |
| 0.130245  | 0.0584207 | 0.126311  | 0.117861  | 0.0763403 | 0.133741  | 0.190559 |
| 0.114365  | 0.137238  | 0.114802  | 0.108974  | 0.122523  | 0.123397  | 0.1875   |
| 0.0595862 | 0.1419    | 0.122086  | 0.127622  | 0.131847  | 0.135344  | 0.193036 |
| 0.116259  | 0.140297  | 0.114656  | 0.122523  | 0.124709  | 0.11859   | 0.190559 |
| 0.130973  | 0.1419    | 0.13345   | 0.131702  | 0.129516  | 0.0534674 | 0.186334 |
| 0.123834  | 0.137092  | 0.116696  | 0.117861  | 0.122086  | 0.128788  | 0.193473 |
| 0.108683  | 0.132721  | 0.0566725 | 0.116696  | 0.113928  | 0.12296   | 0.177156 |
| 0.138112  | 0.138549  | 0.13039   | 0.121358  | 0.130536  | 0.132867  | 0.198427 |
| 0.180798  | 0.19289   | 0.175991  | 0.183275  | 0.162442  | 0.183712  | 0.115239 |
| 0.137529  | 0.0499709 | 0.132721  | 0.123106  | 0.0804196 | 0.142483  | 0.193182 |
| 0.119172  | 0.0613345 | 0.119901  | 0.107663  | 0.0611888 | 0.128205  | 0.182692 |
| 0.0499709 | 0.145396  | 0.118007  | 0.119755  | 0.128351  | 0.129516  | 0.189831 |
| 0.0504079 | 0.135052  | 0.10708   | 0.112325  | 0.117133  | 0.124126  | 0.185897 |
| 0.114656  | 0.141026  | 0.115093  | 0.117716  | 0.123689  | 0.11553   | 0.188957 |
| 0.116841  | 0.144668  | 0.120484  | 0.125728  | 0.129079  | 0.116841  | 0.195513 |
| 0.1875    | 0.199301  | 0.183858  | 0.187646  | 0.171474  | 0.190414  | 0.111742 |
| 0.123397  | 0.083042  | 0.118007  | 0.108683  | 0.0756119 | 0.123106  | 0.170892 |
| 0.110431  | 0.122232  | 0.108246  | 0.106789  | 0.0917832 | 0.113636  | 0.162296 |
| 0.126457  | 0.0563811 | 0.121649  | 0.112908  | 0.0710956 | 0.13141   | 0.185897 |
| 0.190122  | 0.197261  | 0.185023  | 0.185606  | 0.169726  | 0.192745  | 0.112325 |
| 0.104895  | 0.13243   | 0.0960082 | 0.114073  | 0.104604  | 0.118881  | 0.181818 |
| 0.121941  | 0.141026  | 0.127622  | 0.122378  | 0.124272  | 0.0493881 | 0.179341 |
| 0.125728  | 0.0576923 | 0.118298  | 0.114802  | 0.0665793 | 0.133596  | 0.1875   |
| 0.115676  | 0.130973  | 0.111451  | 0.105624  | 0.117424  | 0.129371  | 0.192016 |
| 0.182984  | 0.193036  | 0.17905   | 0.183129  | 0.164044  | 0.188811  | 0.112762 |
| 0.120047  | 0.131847  | 0.124854  | 0.118153  | 0.115093  | 0.0480769 | 0.173951 |
| 0.120921  | 0.127185  | 0.111742  | 0.111451  | 0.108683  | 0.116259  | 0.177448 |
| 0.105769  | 0.13243   | 0.0962995 | 0.116404  | 0.106643  | 0.115676  | 0.175991 |
| 0.112762  | 0.135052  | 0.119901  | 0.123689  | 0.0987762 | 0.123252  | 0.164627 |
| 0.121358  | 0.143065  | 0.120629  | 0.0987762 | 0.126311  | 0.127185  | 0.194493 |
| 0.128934  | 0.140152  | 0.132576  | 0.126166  | 0.128059  | 0.050845  | 0.182838 |
| 0.111451  | 0.132576  | 0.0460373 | 0.116841  | 0.114948  | 0.127768  | 0.186334 |
| 0.125146  | 0.126166  | 0.122086  | 0.114219  | 0.114656  | 0.125728  | 0.192162 |
| 0.142191  | 0.146125  | 0.14292   | 0.129516  | 0.142774  | 0.156469  | 0.204545 |
| 0.232226  | 0.235868  | 0.231789  | 0.23208   | 0.215326  | 0.234557  | 0.137238 |
| 0.129662  | 0.139423  | 0.122523  | 0.125437  | 0.125     | 0.13345   | 0.199301 |
| 0.122378  | 0.143211  | 0.120775  | 0.0986305 | 0.123834  | 0.127622  | 0.193182 |
| 0.121358  | 0.0611888 | 0.113636  | 0.108683  | 0.0595862 | 0.120192  | 0.174388 |
| 0.122086  | 0.138549  | 0.11961   | 0.116696  | 0.124417  | 0.131993  | 0.18648  |
| 0.113199  | 0.129079  | 0.116259  | 0.0961538 | 0.112617  | 0.103001  | 0.175845 |
| 0.119027  | 0.132284  | 0.118881  | 0.115093  | 0.119027  | 0.123106  | 0.18954  |
| 0.124417  | 0.064831  | 0.119027  | 0.110577  | 0.0702214 | 0.127331  | 0.18211  |

|           |           |           |           |           |           |          |
|-----------|-----------|-----------|-----------|-----------|-----------|----------|
| 0.125437  | 0.138403  | 0.129662  | 0.126457  | 0.125728  | 0.0473485 | 0.178176 |
| 0.119027  | 0.135198  | 0.115385  | 0.107226  | 0.117279  | 0.126311  | 0.184295 |
| 0.2331    | 0.237325  | 0.232663  | 0.23208   | 0.215618  | 0.235723  | 0.134033 |
| 0.104167  | 0.129662  | 0.0973193 | 0.109848  | 0.105915  | 0.11757   | 0.180798 |
| 0.103875  | 0.129662  | 0.11014   | 0.103438  | 0.114073  | 0.108829  | 0.184295 |
| 0.112179  | 0.13039   | 0.0458916 | 0.114073  | 0.114219  | 0.125583  | 0.182692 |
| 0.127185  | 0.136655  | 0.125291  | 0.113636  | 0.13039   | 0.143211  | 0.19595  |
| 0.135052  | 0.145688  | 0.126748  | 0.130245  | 0.135052  | 0.13884   | 0.20236  |
| 0.115239  | 0.124709  | 0.104312  | 0.115676  | 0.109994  | 0.128642  | 0.176136 |
| 0.123397  | 0.0597319 | 0.115385  | 0.109557  | 0.0659965 | 0.128934  | 0.180798 |
| 0.111597  | 0.125437  | 0.10912   | 0.108246  | 0.114219  | 0.123834  | 0.185315 |
| 0.228147  | 0.231206  | 0.225379  | 0.226836  | 0.208916  | 0.229021  | 0.128788 |
| 0.124709  | 0.0517191 | 0.122232  | 0.110868  | 0.0684732 | 0.131702  | 0.184732 |
| 0.121941  | 0.138695  | 0.126166  | 0.121503  | 0.121649  | 0.0464744 | 0.17905  |
| 0.116987  | 0.134615  | 0.110431  | 0.106352  | 0.116404  | 0.123397  | 0.186917 |
| 0.128497  | 0.130099  | 0.119027  | 0.0925117 | 0.123252  | 0.128497  | 0.190268 |
| 0.121212  | 0.135635  | 0.127185  | 0.112034  | 0.13141   | 0.114802  | 0.194639 |
| 0.115676  | 0.131265  | 0.0511364 | 0.11961   | 0.115385  | 0.127331  | 0.18648  |
| 0.124126  | 0.140589  | 0.127768  | 0.122523  | 0.124417  | 0.0501166 | 0.177739 |
| 0.129516  | 0.136946  | 0.132867  | 0.125291  | 0.126603  | 0.0520105 | 0.183129 |
| 0.116404  | 0.136655  | 0.122086  | 0.118881  | 0.122232  | 0.053176  | 0.176136 |
| 0.111597  | 0.135635  | 0.046183  | 0.120192  | 0.11655   | 0.127914  | 0.188228 |
| 0.127331  | 0.137966  | 0.125437  | 0.103001  | 0.130536  | 0.131993  | 0.197844 |
| 0.133304  | 0.141026  | 0.132867  | 0.105769  | 0.134178  | 0.135635  | 0.204108 |
| 0.0627914 | 0.147436  | 0.123834  | 0.129079  | 0.13447   | 0.136509  | 0.196824 |
| 0.0659965 | 0.15035   | 0.127622  | 0.127914  | 0.136509  | 0.13884   | 0.198281 |
| 0.132284  | 0.142045  | 0.129516  | 0.103875  | 0.133159  | 0.130828  | 0.200175 |
| 0.102273  | 0.134178  | 0.0901807 | 0.113491  | 0.114219  | 0.12296   | 0.18852  |
| 0.122815  | 0.13986   | 0.138112  | 0.128497  | 0.133304  | 0.103293  | 0.199738 |
| 0.134324  | 0.143794  | 0.119318  | 0.133304  | 0.128497  | 0.124126  | 0.201049 |
| 0.20134   | 0.207896  | 0.198572  | 0.200321  | 0.181818  | 0.204837  | 0.117716 |
| 0.130245  | 0.132139  | 0.11553   | 0.119318  | 0.120921  | 0.131993  | 0.187354 |
| 0.108974  | 0.136509  | 0.116404  | 0.10708   | 0.119755  | 0.107517  | 0.187646 |
| 0.120775  | 0.137821  | 0.0512821 | 0.122378  | 0.115239  | 0.131265  | 0.182838 |
| 0.221737  | 0.225379  | 0.218094  | 0.218094  | 0.200175  | 0.222319  | 0.130828 |
| 0.209499  | 0.214015  | 0.203817  | 0.207605  | 0.191725  | 0.210373  | 0.122378 |
| 0.12602   | 0.139569  | 0.131119  | 0.126457  | 0.126311  | 0.0520105 | 0.182547 |
| 0.243007  | 0.24898   | 0.246066  | 0.244901  | 0.229895  | 0.249417  | 0.138986 |
| 0.101399  | 0.135052  | 0.0890152 | 0.112034  | 0.112762  | 0.124709  | 0.187937 |
| 0.134324  | 0.145542  | 0.128934  | 0.136801  | 0.13986   | 0.141026  | 0.20338  |
| 0.106352  | 0.135344  | 0.0986305 | 0.116696  | 0.113636  | 0.122378  | 0.185606 |
| 0.126894  | 0.141608  | 0.127622  | 0.0996503 | 0.130682  | 0.131556  | 0.197115 |
| 0.184732  | 0.196241  | 0.182255  | 0.181381  | 0.165501  | 0.192016  | 0.109848 |
| 0.127185  | 0.139569  | 0.120338  | 0.112471  | 0.122232  | 0.125146  | 0.18954  |



|           |           |           |           |           |           |          |
|-----------|-----------|-----------|-----------|-----------|-----------|----------|
| 0.18954   | 0.201923  | 0.184441  | 0.191142  | 0.172057  | 0.19595   | 0.111742 |
| 0.119901  | 0.13549   | 0.105186  | 0.113636  | 0.11961   | 0.12602   | 0.188083 |
| 0.117279  | 0.116259  | 0.116841  | 0.117424  | 0.0907634 | 0.0735723 | 0.159237 |
| 0.120775  | 0.138403  | 0.116841  | 0.116259  | 0.121358  | 0.132139  | 0.190705 |
| 0.109411  | 0.120047  | 0.107517  | 0.115967  | 0.103875  | 0.118735  | 0.169435 |
| 0.104604  | 0.129225  | 0.0450175 | 0.11116   | 0.108974  | 0.122378  | 0.181818 |
| 0.116259  | 0.124272  | 0.10708   | 0.106206  | 0.108392  | 0.122669  | 0.184149 |
| 0.102564  | 0.133013  | 0.0948427 | 0.109703  | 0.111305  | 0.115967  | 0.178613 |
| 0.118444  | 0.0664336 | 0.113345  | 0.1081    | 0.0636655 | 0.123397  | 0.182547 |
| 0.104895  | 0.135635  | 0.118735  | 0.11757   | 0.119755  | 0.092366  | 0.187354 |
| 0.115385  | 0.131847  | 0.107955  | 0.112617  | 0.113345  | 0.122378  | 0.187354 |
| 0.106206  | 0.134033  | 0.0984848 | 0.112471  | 0.113491  | 0.120775  | 0.184003 |
| 0.0740093 | 0.141754  | 0.105041  | 0.116404  | 0.120921  | 0.128497  | 0.179196 |
| 0.130828  | 0.0514277 | 0.128351  | 0.119901  | 0.0734266 | 0.137821  | 0.191725 |
| 0.0514277 | 0.137238  | 0.110723  | 0.116259  | 0.121649  | 0.122815  | 0.185752 |
| 0.122378  | 0.131556  | 0.110577  | 0.110577  | 0.11014   | 0.118007  | 0.188811 |
| 0.108537  | 0.127914  | 0.0448718 | 0.113636  | 0.10912   | 0.122815  | 0.182547 |
| 0.118735  | 0.126457  | 0.123543  | 0.115385  | 0.110286  | 0.0569639 | 0.167686 |
| 0.121649  | 0.140443  | 0.117716  | 0.0987762 | 0.122815  | 0.124854  | 0.189831 |
| 0.116259  | 0.140006  | 0.117279  | 0.121358  | 0.125291  | 0.115676  | 0.19493  |
| 0.0518648 | 0.142337  | 0.114948  | 0.121358  | 0.125874  | 0.127914  | 0.187937 |
| 0.11961   | 0.0614802 | 0.116259  | 0.111014  | 0.0686189 | 0.124854  | 0.182838 |
| 0.131993  | 0.0523019 | 0.125437  | 0.121358  | 0.0751748 | 0.134615  | 0.191142 |
| 0.138695  | 0.0400641 | 0.132139  | 0.126311  | 0.0798368 | 0.145105  | 0.197844 |
| 0.107372  | 0.127331  | 0.106935  | 0.110723  | 0.108246  | 0.0630828 | 0.172057 |
| 0.110868  | 0.13345   | 0.0460373 | 0.117716  | 0.117279  | 0.126311  | 0.187209 |
| 0.109557  | 0.126603  | 0.112908  | 0.108537  | 0.11014   | 0.118298  | 0.182692 |
| 0.131119  | 0.144376  | 0.134178  | 0.107663  | 0.135198  | 0.136072  | 0.202506 |
| 0.11116   | 0.134907  | 0.104312  | 0.119172  | 0.116987  | 0.122232  | 0.189831 |
| 0.133887  | 0.149767  | 0.134615  | 0.134907  | 0.142045  | 0.131556  | 0.207896 |
| 0.132139  | 0.141317  | 0.0632284 | 0.132284  | 0.134178  | 0.144376  | 0.199738 |
| 0.125291  | 0.137383  | 0.123106  | 0.112034  | 0.126166  | 0.137529  | 0.193473 |
| 0.108246  | 0.128205  | 0.101981  | 0.118298  | 0.110286  | 0.124563  | 0.187791 |
| 0.115676  | 0.128642  | 0.111742  | 0.0514277 | 0.109848  | 0.121212  | 0.185315 |
| 0.0571096 | 0.148164  | 0.12398   | 0.126894  | 0.13141   | 0.136072  | 0.19493  |
| 0.201486  | 0.211247  | 0.202214  | 0.202506  | 0.185169  | 0.205274  | 0.12602  |
| 0.11961   | 0.134907  | 0.111014  | 0.109848  | 0.112034  | 0.116404  | 0.184003 |
| 0.118007  | 0.140589  | 0.112908  | 0.11553   | 0.119464  | 0.129953  | 0.191725 |
| 0.120484  | 0.138695  | 0.121212  | 0.0999417 | 0.123106  | 0.123689  | 0.195367 |
| 0.0501166 | 0.140006  | 0.11553   | 0.120192  | 0.124417  | 0.127914  | 0.187646 |
| 0.124563  | 0.144231  | 0.111305  | 0.118298  | 0.125728  | 0.128351  | 0.190414 |
| 0.124272  | 0.126166  | 0.125874  | 0.116841  | 0.118735  | 0.12398   | 0.188666 |
| 0.129079  | 0.12398   | 0.130099  | 0.118735  | 0.118881  | 0.127622  | 0.192308 |
| 0.120192  | 0.136946  | 0.119755  | 0.111305  | 0.121066  | 0.133304  | 0.192453 |

|           |           |           |          |           |           |          |
|-----------|-----------|-----------|----------|-----------|-----------|----------|
| 0.102418  | 0.131702  | 0.114219  | 0.113345 | 0.11553   | 0.0898893 | 0.185752 |
| 0.13039   | 0.138403  | 0.12704   | 0.10373  | 0.13243   | 0.13039   | 0.19799  |
| 0.11553   | 0.135781  | 0.11014   | 0.115385 | 0.119901  | 0.122523  | 0.188083 |
| 0.119755  | 0.141463  | 0.114365  | 0.117279 | 0.119755  | 0.131993  | 0.193765 |
| 0.167395  | 0.182692  | 0.172494  | 0.171037 | 0.164481  | 0.176719  | 0.165647 |
| 0.120775  | 0.0702214 | 0.111888  | 0.109266 | 0.0665793 | 0.12398   | 0.183129 |
| 0.129079  | 0.142337  | 0.126603  | 0.105332 | 0.123834  | 0.132867  | 0.18648  |
| 0.117861  | 0.143939  | 0.115093  | 0.121212 | 0.128934  | 0.118153  | 0.195659 |
| 0.125291  | 0.122815  | 0.119901  | 0.112908 | 0.1081    | 0.121503  | 0.182401 |
| 0.109557  | 0.125146  | 0.105332  | 0.105041 | 0.1081    | 0.119172  | 0.186189 |
| 0.111305  | 0.127477  | 0.102127  | 0.108537 | 0.11014   | 0.117133  | 0.185606 |
| 0.114802  | 0.130099  | 0.112325  | 0.109994 | 0.113636  | 0.120047  | 0.188811 |
| 0.122378  | 0.137383  | 0.125146  | 0.112617 | 0.125291  | 0.107517  | 0.192016 |
| 0.117716  | 0.104749  | 0.109411  | 0.113199 | 0.0879953 | 0.125583  | 0.172786 |
| 0.11961   | 0.146853  | 0.12296   | 0.130828 | 0.129808  | 0.129516  | 0.197698 |
| 0.111014  | 0.127477  | 0.110286  | 0.10708  | 0.108974  | 0.113636  | 0.178322 |
| 0.112617  | 0.140734  | 0.118298  | 0.115676 | 0.119027  | 0.115822  | 0.18954  |
| 0.136364  | 0.143794  | 0.128059  | 0.125437 | 0.132576  | 0.101981  | 0.199592 |
| 0.112762  | 0.136509  | 0.113199  | 0.118153 | 0.12296   | 0.111305  | 0.195513 |
| 0.113928  | 0.134178  | 0.119027  | 0.121358 | 0.125     | 0.119755  | 0.192599 |
| 0.11014   | 0.140297  | 0.105041  | 0.114948 | 0.120338  | 0.109557  | 0.188228 |
| 0.110723  | 0.137092  | 0.111451  | 0.117861 | 0.120338  | 0.113636  | 0.193182 |
| 0.105186  | 0.131847  | 0.0965909 | 0.110868 | 0.116259  | 0.11859   | 0.186189 |
| 0.120484  | 0.141608  | 0.1081    | 0.122669 | 0.124563  | 0.121066  | 0.198281 |
| 0.107663  | 0.137821  | 0.102564  | 0.115676 | 0.11757   | 0.115239  | 0.1875   |
| 0.13884   | 0.149767  | 0.141026  | 0.134907 | 0.135635  | 0.113491  | 0.192745 |
| 0.128351  | 0.144231  | 0.128497  | 0.12704  | 0.123689  | 0.106789  | 0.183129 |
| 0.103293  | 0.134033  | 0.106935  | 0.112471 | 0.116404  | 0.112325  | 0.18954  |
| 0.134615  | 0.146125  | 0.140297  | 0.124563 | 0.136364  | 0.112762  | 0.198427 |
| 0.0952797 | 0.141754  | 0.116696  | 0.119027 | 0.11859   | 0.133741  | 0.188228 |
| 0.134324  | 0.148164  | 0.130099  | 0.134178 | 0.129079  | 0.127914  | 0.195513 |
| 0.108392  | 0.134178  | 0.10708   | 0.109994 | 0.116841  | 0.121212  | 0.189103 |
| 0.141754  | 0.148019  | 0.1419    | 0.130245 | 0.139714  | 0.143502  | 0.202943 |
| 0.13243   | 0.145688  | 0.127331  | 0.119755 | 0.132721  | 0.127185  | 0.190705 |
| 0.133304  | 0.151515  | 0.135198  | 0.128497 | 0.13884   | 0.123397  | 0.193036 |
| 0.103293  | 0.139569  | 0.119464  | 0.124709 | 0.125728  | 0.124854  | 0.19799  |
| 0.106061  | 0.135927  | 0.103001  | 0.120484 | 0.117716  | 0.106061  | 0.187063 |
| 0.109703  | 0.138403  | 0.102855  | 0.115967 | 0.119318  | 0.109411  | 0.183129 |
| 0.119755  | 0.137383  | 0.121066  | 0.110868 | 0.120047  | 0.10373   | 0.187354 |
| 0.118007  | 0.138258  | 0.115822  | 0.121649 | 0.125583  | 0.116841  | 0.195513 |
| 0.122815  | 0.142191  | 0.120921  | 0.121503 | 0.130973  | 0.129516  | 0.204108 |
| 0.119318  | 0.141026  | 0.112471  | 0.122669 | 0.121066  | 0.111451  | 0.178759 |
| 0.0872669 | 0.13549   | 0.107226  | 0.110723 | 0.116113  | 0.114073  | 0.189248 |
| 0.112471  | 0.136218  | 0.103293  | 0.114948 | 0.116841  | 0.111888  | 0.184441 |

|          |          |           |          |          |          |          |
|----------|----------|-----------|----------|----------|----------|----------|
| 0.116987 | 0.140734 | 0.11014   | 0.118007 | 0.122523 | 0.119901 | 0.188083 |
| 0.110286 | 0.134324 | 0.10373   | 0.119464 | 0.116404 | 0.105624 | 0.181964 |
| 0.120921 | 0.14292  | 0.111451  | 0.123689 | 0.126748 | 0.113054 | 0.192016 |
| 0.108392 | 0.131556 | 0.103584  | 0.118444 | 0.113636 | 0.123543 | 0.192016 |
| 0.117279 | 0.121212 | 0.1081    | 0.113928 | 0.106789 | 0.127185 | 0.174679 |
| 0.118153 | 0.131119 | 0.105186  | 0.116841 | 0.112908 | 0.126603 | 0.188957 |
| 0.10271  | 0.132576 | 0.0903263 | 0.113054 | 0.113782 | 0.122232 | 0.186334 |
| 0.110577 | 0.134324 | 0.103438  | 0.114802 | 0.116404 | 0.114948 | 0.184878 |
| 0.113928 | 0.12398  | 0.103293  | 0.114948 | 0.106352 | 0.126166 | 0.17803  |
| 0.11757  | 0.128788 | 0.111888  | 0.11451  | 0.113491 | 0.124854 | 0.190997 |
| 0.122523 | 0.118007 | 0.122378  | 0.118298 | 0.104167 | 0.126894 | 0.184003 |
| 0.104749 | 0.117133 | 0.0984848 | 0.111305 | 0.103293 | 0.117279 | 0.177302 |
| 0.122669 | 0.130682 | 0.123689  | 0.130682 | 0.123543 | 0.131702 | 0.196387 |

| TDr_1943  | TDr_1953  | TDr_1956 | TDr_1958 | TDr_1966  | TDr_1977 | TDr_2000 |
|-----------|-----------|----------|----------|-----------|----------|----------|
| 0.108392  | 0.108683  | 0.126166 | 0.1588   | 0.0992133 | 0.109411 | 0.147727 |
| 0.11757   | 0.104749  | 0.126603 | 0.167686 | 0.127331  | 0.136364 | 0.13447  |
| 0.115239  | 0.10067   | 0.122232 | 0.165647 | 0.124709  | 0.134324 | 0.133887 |
| 0.114365  | 0.10271   | 0.124854 | 0.172057 | 0.131702  | 0.145396 | 0.144085 |
| 0.125437  | 0.123106  | 0.129225 | 0.190705 | 0.153846  | 0.157051 | 0.136218 |
| 0.124272  | 0.119318  | 0.13447  | 0.180798 | 0.125291  | 0.136655 | 0.136509 |
| 0.109848  | 0.115967  | 0.125583 | 0.187937 | 0.113199  | 0.120484 | 0.148893 |
| 0.112179  | 0.102564  | 0.118298 | 0.166084 | 0.128059  | 0.137675 | 0.136364 |
| 0.101253  | 0.0939685 | 0.116696 | 0.164481 | 0.126748  | 0.13549  | 0.135344 |
| 0.113054  | 0.105478  | 0.120047 | 0.172786 | 0.121941  | 0.128934 | 0.140152 |
| 0.106498  | 0.109411  | 0.125437 | 0.158362 | 0.124709  | 0.137821 | 0.150495 |
| 0.105478  | 0.0976107 | 0.111597 | 0.170455 | 0.130973  | 0.14292  | 0.138695 |
| 0.110431  | 0.100816  | 0.115385 | 0.171037 | 0.134178  | 0.143211 | 0.143939 |
| 0.131847  | 0.128059  | 0.149038 | 0.128934 | 0.14831   | 0.16317  | 0.157197 |
| 0.125874  | 0.118007  | 0.125874 | 0.182984 | 0.142628  | 0.148456 | 0.142483 |
| 0.112325  | 0.106498  | 0.117861 | 0.181381 | 0.131119  | 0.132867 | 0.141463 |
| 0.0961538 | 0.104021  | 0.109848 | 0.172203 | 0.13447   | 0.146999 | 0.142774 |
| 0.135927  | 0.132721  | 0.157197 | 0.198281 | 0.162587  | 0.164336 | 0.141463 |
| 0.114365  | 0.0939685 | 0.120775 | 0.165647 | 0.122378  | 0.133741 | 0.133887 |
| 0.20236   | 0.195367  | 0.204983 | 0.137092 | 0.210082  | 0.216492 | 0.210519 |
| 0.120047  | 0.115093  | 0.13345  | 0.180653 | 0.114073  | 0.128642 | 0.13986  |
| 0.11757   | 0.104458  | 0.128059 | 0.183712 | 0.107809  | 0.118007 | 0.140297 |
| 0.107517  | 0.0990676 | 0.115676 | 0.164044 | 0.131556  | 0.13884  | 0.139569 |
| 0.112617  | 0.113782  | 0.122523 | 0.188957 | 0.131993  | 0.13986  | 0.144668 |
| 0.102564  | 0.0981935 | 0.109848 | 0.162296 | 0.120192  | 0.127768 | 0.131702 |
| 0.126166  | 0.117424  | 0.135781 | 0.184732 | 0.115822  | 0.118735 | 0.133159 |
| 0.111888  | 0.110431  | 0.116841 | 0.183858 | 0.133013  | 0.136801 | 0.145688 |
| 0.115676  | 0.11014   | 0.126748 | 0.185897 | 0.136509  | 0.146999 | 0.140734 |
| 0.115676  | 0.115093  | 0.131119 | 0.185897 | 0.134178  | 0.137675 | 0.147727 |
| 0.11014   | 0.11451   | 0.119755 | 0.184149 | 0.133013  | 0.135635 | 0.153263 |
| 0.114948  | 0.113782  | 0.12602  | 0.179924 | 0.109557  | 0.111305 | 0.151661 |
| 0.107226  | 0.110431  | 0.120921 | 0.182692 | 0.127768  | 0.130682 | 0.143648 |
| 0.107226  | 0.0952797 | 0.112179 | 0.164918 | 0.11553   | 0.122815 | 0.134615 |
| 0.107809  | 0.107226  | 0.113054 | 0.177448 | 0.128351  | 0.134761 | 0.145979 |
| 0.111742  | 0.11116   | 0.120192 | 0.184003 | 0.133741  | 0.135198 | 0.145833 |
| 0.117133  | 0.115385  | 0.119464 | 0.187063 | 0.137092  | 0.141171 | 0.149767 |
| 0.122232  | 0.123689  | 0.136801 | 0.194493 | 0.125     | 0.127331 | 0.148456 |
| 0.11014   | 0.113636  | 0.119464 | 0.180944 | 0.128059  | 0.138549 | 0.150932 |
| 0.103147  | 0.0999417 | 0.115967 | 0.173077 | 0.120192  | 0.131556 | 0.141026 |
| 0.116259  | 0.106643  | 0.128205 | 0.183858 | 0.138549  | 0.147582 | 0.147145 |
| 0.103438  | 0.0952797 | 0.123543 | 0.171911 | 0.127477  | 0.140589 | 0.1419   |
| 0.136946  | 0.129662  | 0.147436 | 0.196096 | 0.157488  | 0.163024 | 0.15676  |

|           |           |          |          |           |          |          |
|-----------|-----------|----------|----------|-----------|----------|----------|
| 0.136072  | 0.130828  | 0.148601 | 0.197552 | 0.160693  | 0.160402 | 0.157051 |
| 0.109411  | 0.10271   | 0.122523 | 0.176136 | 0.133741  | 0.145688 | 0.146125 |
| 0.0948427 | 0.0916375 | 0.10708  | 0.173805 | 0.12296   | 0.13141  | 0.136218 |
| 0.105186  | 0.112471  | 0.120047 | 0.186772 | 0.132139  | 0.140006 | 0.150932 |
| 0.111305  | 0.107517  | 0.120921 | 0.181235 | 0.137092  | 0.148456 | 0.1419   |
| 0.128642  | 0.125146  | 0.141754 | 0.194784 | 0.149767  | 0.156469 | 0.157488 |
| 0.108829  | 0.103001  | 0.123106 | 0.177302 | 0.135198  | 0.144814 | 0.145542 |
| 0.113345  | 0.104021  | 0.122086 | 0.175408 | 0.133596  | 0.140297 | 0.144231 |
| 0.135635  | 0.132139  | 0.142337 | 0.201195 | 0.0661422 | 0.044289 | 0.163899 |
| 0.120192  | 0.119027  | 0.126894 | 0.182255 | 0.147145  | 0.152389 | 0.141463 |
| 0.108974  | 0.101107  | 0.117716 | 0.175408 | 0.13447   | 0.14292  | 0.143648 |
| 0.119755  | 0.117716  | 0.136364 | 0.18211  | 0.143502  | 0.145833 | 0.143648 |
| 0.112762  | 0.104312  | 0.127914 | 0.160839 | 0.133013  | 0.145542 | 0.140443 |
| 0.130536  | 0.126748  | 0.134033 | 0.205711 | 0.153409  | 0.153409 | 0.150932 |
| 0.121358  | 0.11553   | 0.129516 | 0.188957 | 0.139277  | 0.148601 | 0.153118 |
| 0.10708   | 0.0986305 | 0.121358 | 0.177593 | 0.13141   | 0.143648 | 0.143211 |
| 0.107372  | 0.105332  | 0.12398  | 0.173805 | 0.136072  | 0.143357 | 0.145542 |
| 0.109848  | 0.111888  | 0.125    | 0.185606 | 0.131847  | 0.133304 | 0.145979 |
| 0.125583  | 0.123543  | 0.144522 | 0.19697  | 0.14933   | 0.1537   | 0.157343 |
| 0.136946  | 0.124709  | 0.144814 | 0.197261 | 0.153409  | 0.161568 | 0.157051 |
| 0.15574   | 0.151661  | 0.164773 | 0.154283 | 0.169289  | 0.172494 | 0.180798 |
| 0.109703  | 0.10271   | 0.124272 | 0.176428 | 0.129662  | 0.143648 | 0.148164 |
| 0.109703  | 0.103293  | 0.120192 | 0.177302 | 0.132867  | 0.142774 | 0.141463 |
| 0.101544  | 0.0983392 | 0.116113 | 0.176136 | 0.130828  | 0.140152 | 0.14729  |
| 0.133741  | 0.130536  | 0.138112 | 0.187646 | 0.131847  | 0.136509 | 0.161713 |
| 0.105769  | 0.0996503 | 0.117716 | 0.175991 | 0.128351  | 0.14292  | 0.145688 |
| 0.128642  | 0.122232  | 0.137383 | 0.183712 | 0.147145  | 0.151224 | 0.146416 |
| 0.112908  | 0.111742  | 0.123689 | 0.192162 | 0.129953  | 0.136946 | 0.146416 |
| 0.106061  | 0.104895  | 0.123543 | 0.175699 | 0.132721  | 0.144959 | 0.148893 |
| 0.136072  | 0.137529  | 0.143357 | 0.189103 | 0.128642  | 0.132721 | 0.162005 |
| 0.111014  | 0.111888  | 0.127914 | 0.187354 | 0.139423  | 0.148456 | 0.154138 |
| 0.130099  | 0.123397  | 0.140589 | 0.197115 | 0.15472   | 0.155594 | 0.155449 |
| 0.119172  | 0.116841  | 0.128205 | 0.186772 | 0.147873  | 0.15574  | 0.143065 |
| 0.109411  | 0.100962  | 0.116404 | 0.170892 | 0.130536  | 0.139277 | 0.133887 |
| 0.106498  | 0.104167  | 0.118735 | 0.174388 | 0.134907  | 0.144814 | 0.145542 |
| 0.106206  | 0.105624  | 0.126311 | 0.176136 | 0.136946  | 0.145396 | 0.143794 |
| 0.123106  | 0.114656  | 0.139132 | 0.193036 | 0.145979  | 0.15676  | 0.154575 |
| 0.106643  | 0.0979021 | 0.11859  | 0.175699 | 0.128642  | 0.13884  | 0.142191 |
| 0.135635  | 0.125437  | 0.146125 | 0.196824 | 0.153846  | 0.160256 | 0.161276 |
| 0.11757   | 0.11116   | 0.128351 | 0.178759 | 0.134033  | 0.146562 | 0.1537   |
| 0.108829  | 0.109703  | 0.119318 | 0.187209 | 0.132867  | 0.143357 | 0.144959 |
| 0.11116   | 0.106206  | 0.124563 | 0.176136 | 0.133159  | 0.142774 | 0.150787 |
| 0.11757   | 0.109994  | 0.128059 | 0.180798 | 0.1419    | 0.151224 | 0.148164 |
| 0.108829  | 0.100379  | 0.124272 | 0.177885 | 0.132576  | 0.144231 | 0.145542 |

|           |           |          |          |          |          |          |
|-----------|-----------|----------|----------|----------|----------|----------|
| 0.106498  | 0.103001  | 0.119027 | 0.175845 | 0.13345  | 0.144814 | 0.144668 |
| 0.130828  | 0.125583  | 0.140152 | 0.195221 | 0.156031 | 0.157197 | 0.154138 |
| 0.106643  | 0.104895  | 0.108392 | 0.175408 | 0.127768 | 0.137966 | 0.144231 |
| 0.101836  | 0.103001  | 0.114073 | 0.174971 | 0.130245 | 0.138695 | 0.140006 |
| 0.112034  | 0.11116   | 0.128059 | 0.194493 | 0.131119 | 0.136946 | 0.149038 |
| 0.113491  | 0.118444  | 0.126311 | 0.191288 | 0.11655  | 0.120921 | 0.152535 |
| 0.120484  | 0.120775  | 0.131265 | 0.194202 | 0.144522 | 0.143939 | 0.135344 |
| 0.12704   | 0.13141   | 0.141317 | 0.198718 | 0.151078 | 0.15574  | 0.141608 |
| 0.104458  | 0.107372  | 0.120484 | 0.173514 | 0.120338 | 0.131119 | 0.142628 |
| 0.176719  | 0.174971  | 0.183129 | 0.144668 | 0.17803  | 0.182984 | 0.196533 |
| 0.100524  | 0.097028  | 0.113636 | 0.179487 | 0.122523 | 0.131265 | 0.139569 |
| 0.12398   | 0.125437  | 0.133596 | 0.197698 | 0.149476 | 0.152098 | 0.143794 |
| 0.114656  | 0.11757   | 0.125437 | 0.191579 | 0.143939 | 0.149767 | 0.137092 |
| 0.121503  | 0.125874  | 0.139277 | 0.198135 | 0.11961  | 0.122815 | 0.155012 |
| 0.101544  | 0.10708   | 0.11757  | 0.181964 | 0.130245 | 0.141026 | 0.131556 |
| 0.120775  | 0.125146  | 0.133013 | 0.195367 | 0.145688 | 0.152972 | 0.14292  |
| 0.101544  | 0.101836  | 0.11961  | 0.184586 | 0.126748 | 0.136364 | 0.133887 |
| 0.111305  | 0.113054  | 0.122378 | 0.183275 | 0.137383 | 0.143502 | 0.134324 |
| 0.105769  | 0.105478  | 0.122086 | 0.171911 | 0.112908 | 0.121941 | 0.145105 |
| 0.115676  | 0.125874  | 0.135198 | 0.20134  | 0.149038 | 0.152244 | 0.139277 |
| 0.0929487 | 0.100233  | 0.111597 | 0.177448 | 0.128642 | 0.134761 | 0.145688 |
| 0.121941  | 0.121649  | 0.138258 | 0.18954  | 0.125    | 0.123834 | 0.14729  |
| 0.101981  | 0.105769  | 0.121212 | 0.181818 | 0.112325 | 0.120775 | 0.145979 |
| 0.123106  | 0.116113  | 0.130973 | 0.191288 | 0.147727 | 0.15472  | 0.148456 |
| 0.112762  | 0.11859   | 0.128205 | 0.191725 | 0.122815 | 0.123689 | 0.154429 |
| 0.0996503 | 0.0979021 | 0.116841 | 0.179779 | 0.114365 | 0.123106 | 0.13549  |
| 0.136946  | 0.136946  | 0.144522 | 0.189103 | 0.140297 | 0.143211 | 0.164336 |
| 0.105041  | 0.105041  | 0.121358 | 0.182547 | 0.11451  | 0.123834 | 0.138549 |
| 0.104167  | 0.103001  | 0.116696 | 0.180507 | 0.130245 | 0.140734 | 0.140006 |
| 0.107226  | 0.106643  | 0.118881 | 0.183566 | 0.134761 | 0.137966 | 0.138986 |
| 0.132576  | 0.127331  | 0.144814 | 0.199592 | 0.129808 | 0.128059 | 0.154429 |
| 0.114802  | 0.11014   | 0.122086 | 0.162296 | 0.13039  | 0.137383 | 0.148019 |
| 0.100233  | 0.0987762 | 0.117716 | 0.176573 | 0.129225 | 0.135927 | 0.134324 |
| 0.109266  | 0.10169   | 0.117716 | 0.176573 | 0.13243  | 0.140006 | 0.131702 |
| 0.108246  | 0.104458  | 0.120484 | 0.182838 | 0.117424 | 0.122378 | 0.144959 |
| 0.121503  | 0.120629  | 0.128205 | 0.192308 | 0.137675 | 0.142628 | 0.146853 |
| 0.100379  | 0.10912   | 0.119318 | 0.183129 | 0.113928 | 0.120921 | 0.144376 |
| 0.0949883 | 0.0952797 | 0.11014  | 0.17162  | 0.120484 | 0.126894 | 0.13986  |
| 0.0987762 | 0.0944056 | 0.115385 | 0.170455 | 0.122815 | 0.129225 | 0.136946 |
| 0.0983392 | 0.101253  | 0.113199 | 0.175845 | 0.130245 | 0.137821 | 0.13884  |
| 0.107955  | 0.106498  | 0.116404 | 0.178467 | 0.13986  | 0.150932 | 0.146125 |
| 0.118298  | 0.118298  | 0.127331 | 0.191142 | 0.138258 | 0.140006 | 0.148893 |
| 0.10067   | 0.101253  | 0.108829 | 0.180798 | 0.127331 | 0.137529 | 0.139714 |
| 0.0979021 | 0.0949883 | 0.112179 | 0.172203 | 0.124272 | 0.135052 | 0.134907 |

|           |           |          |          |           |           |          |
|-----------|-----------|----------|----------|-----------|-----------|----------|
| 0.108392  | 0.111014  | 0.124417 | 0.186772 | 0.133304  | 0.139714  | 0.152389 |
| 0.0930944 | 0.100962  | 0.113491 | 0.174971 | 0.125874  | 0.134615  | 0.149621 |
| 0.118153  | 0.114948  | 0.12398  | 0.173514 | 0.121795  | 0.129079  | 0.150787 |
| 0.121358  | 0.120192  | 0.130973 | 0.191288 | 0.0611888 | 0.0501166 | 0.156031 |
| 0.101836  | 0.108246  | 0.117279 | 0.181672 | 0.130245  | 0.138403  | 0.139132 |
| 0.099359  | 0.103438  | 0.115676 | 0.18211  | 0.129808  | 0.13884   | 0.141608 |
| 0.100816  | 0.101107  | 0.112762 | 0.17803  | 0.131265  | 0.136218  | 0.143065 |
| 0.0999417 | 0.0944056 | 0.112471 | 0.165793 | 0.123689  | 0.135344  | 0.137238 |
| 0.118881  | 0.111597  | 0.132284 | 0.191725 | 0.136509  | 0.141171  | 0.144814 |
| 0.097028  | 0.094697  | 0.111014 | 0.169289 | 0.120775  | 0.132139  | 0.135198 |
| 0.128351  | 0.122815  | 0.135052 | 0.198572 | 0.138112  | 0.142774  | 0.160985 |
| 0.126457  | 0.123543  | 0.134033 | 0.189685 | 0.147873  | 0.147873  | 0.156177 |
| 0.11859   | 0.11014   | 0.125    | 0.189685 | 0.140589  | 0.142628  | 0.152389 |
| 0.109994  | 0.104458  | 0.120484 | 0.182255 | 0.137238  | 0.147145  | 0.14729  |
| 0.10708   | 0.102418  | 0.118735 | 0.177302 | 0.112762  | 0.12296   | 0.137675 |
| 0.0952797 | 0.106352  | 0.114802 | 0.178904 | 0.126603  | 0.133887  | 0.143939 |
| 0.0936772 | 0.0954254 | 0.112908 | 0.178176 | 0.12704   | 0.136072  | 0.146416 |
| 0.0989219 | 0.100087  | 0.113491 | 0.17264  | 0.129953  | 0.137821  | 0.140006 |
| 0.109703  | 0.101544  | 0.122232 | 0.160402 | 0.133159  | 0.145688  | 0.138258 |
| 0.115239  | 0.116113  | 0.130682 | 0.191288 | 0.14627   | 0.155594  | 0.148456 |
| 0.104604  | 0.111014  | 0.122086 | 0.183858 | 0.135927  | 0.146707  | 0.136364 |
| 0.126311  | 0.122523  | 0.135052 | 0.184878 | 0.141608  | 0.147436  | 0.152244 |
| 0.116841  | 0.120921  | 0.135198 | 0.201049 | 0.133596  | 0.132139  | 0.148019 |
| 0.196387  | 0.179779  | 0.20134  | 0.109266 | 0.201195  | 0.213432  | 0.210664 |
| 0.237034  | 0.225379  | 0.239948 | 0.144085 | 0.243007  | 0.248252  | 0.243444 |
| 0.1081    | 0.0917832 | 0.117716 | 0.160256 | 0.128934  | 0.141171  | 0.141026 |
| 0.103875  | 0.104167  | 0.117279 | 0.176719 | 0.131993  | 0.142774  | 0.139714 |
| 0.0983392 | 0.0945513 | 0.114073 | 0.16623  | 0.125291  | 0.135198  | 0.139423 |
| 0.105332  | 0.0983392 | 0.119027 | 0.177593 | 0.129371  | 0.141026  | 0.135927 |
| 0.128642  | 0.11961   | 0.129225 | 0.184295 | 0.143939  | 0.148019  | 0.144668 |
| 0.102418  | 0.103001  | 0.120775 | 0.179924 | 0.133159  | 0.144231  | 0.137966 |
| 0.131119  | 0.13345   | 0.136655 | 0.20134  | 0.15778   | 0.15574   | 0.1588   |
| 0.105915  | 0.103293  | 0.11961  | 0.181381 | 0.136655  | 0.146562  | 0.138258 |
| 0.114948  | 0.118735  | 0.13243  | 0.195659 | 0.1419    | 0.144522  | 0.145542 |
| 0.122086  | 0.115676  | 0.133159 | 0.180653 | 0.145542  | 0.151369  | 0.146562 |
| 0.124417  | 0.118298  | 0.130828 | 0.194056 | 0.14729   | 0.152244  | 0.145688 |
| 0.131702  | 0.120629  | 0.138695 | 0.195513 | 0.152826  | 0.156323  | 0.153555 |
| 0.101107  | 0.102855  | 0.119464 | 0.185897 | 0.131847  | 0.145251  | 0.143648 |
| 0.097028  | 0.0999417 | 0.114802 | 0.177448 | 0.130099  | 0.140589  | 0.136072 |
| 0.105041  | 0.10708   | 0.128642 | 0.181672 | 0.134615  | 0.14627   | 0.137966 |
| 0.0986305 | 0.0948427 | 0.111451 | 0.171474 | 0.129079  | 0.138695  | 0.13447  |
| 0.0960082 | 0.100379  | 0.114948 | 0.175845 | 0.130828  | 0.140734  | 0.137966 |
| 0.101981  | 0.103147  | 0.121795 | 0.183566 | 0.136218  | 0.144376  | 0.141317 |
| 0.116987  | 0.113491  | 0.130682 | 0.187209 | 0.144814  | 0.154429  | 0.142337 |

|           |           |          |          |          |          |          |
|-----------|-----------|----------|----------|----------|----------|----------|
| 0.128059  | 0.119901  | 0.131265 | 0.197115 | 0.151224 | 0.155594 | 0.143794 |
| 0.104021  | 0.105769  | 0.115967 | 0.18211  | 0.136218 | 0.145251 | 0.145688 |
| 0.101544  | 0.103293  | 0.118153 | 0.174679 | 0.13345  | 0.14627  | 0.14088  |
| 0.119027  | 0.116113  | 0.126603 | 0.194493 | 0.145396 | 0.149184 | 0.149038 |
| 0.097465  | 0.0939685 | 0.110286 | 0.176136 | 0.129079 | 0.141317 | 0.140589 |
| 0.124709  | 0.130245  | 0.143357 | 0.194639 | 0.160693 | 0.162442 | 0.149476 |
| 0.128205  | 0.127331  | 0.13986  | 0.183275 | 0.151661 | 0.151369 | 0.153263 |
| 0.121066  | 0.11961   | 0.130973 | 0.185752 | 0.149476 | 0.153846 | 0.135344 |
| 0.0957168 | 0.101836  | 0.113491 | 0.177302 | 0.131702 | 0.138986 | 0.13884  |
| 0.0979021 | 0.0941142 | 0.11014  | 0.17803  | 0.126311 | 0.135635 | 0.133159 |
| 0.109703  | 0.114948  | 0.127477 | 0.190997 | 0.13986  | 0.147727 | 0.146125 |
| 0.113054  | 0.109266  | 0.11859  | 0.187063 | 0.13884  | 0.144085 | 0.140443 |
| 0.112762  | 0.113928  | 0.127914 | 0.187354 | 0.144376 | 0.151369 | 0.147145 |
| 0.10067   | 0.103293  | 0.120775 | 0.183712 | 0.135198 | 0.14627  | 0.146416 |
| 0.105478  | 0.106352  | 0.118298 | 0.180653 | 0.137966 | 0.145833 | 0.141608 |
| 0.111888  | 0.105478  | 0.125583 | 0.189394 | 0.142337 | 0.145542 | 0.142483 |
| 0.116259  | 0.118007  | 0.134033 | 0.198718 | 0.146416 | 0.151369 | 0.14831  |
| 0.117424  | 0.121212  | 0.127914 | 0.189977 | 0.14933  | 0.156031 | 0.149184 |
| 0.119901  | 0.121066  | 0.128642 | 0.195076 | 0.149184 | 0.150641 | 0.144376 |
| 0.122669  | 0.117716  | 0.132576 | 0.187354 | 0.137092 | 0.144085 | 0.150641 |
| 0.0976107 | 0.0996503 | 0.117424 | 0.179487 | 0.130682 | 0.14088  | 0.143939 |
| 0.119172  | 0.115967  | 0.132867 | 0.193473 | 0.146707 | 0.156614 | 0.146853 |
| 0.100962  | 0.0965909 | 0.113782 | 0.178176 | 0.129953 | 0.138986 | 0.137092 |
| 0.109557  | 0.0999417 | 0.128497 | 0.172203 | 0.133596 | 0.144668 | 0.143065 |
| 0.102564  | 0.10169   | 0.12296  | 0.179487 | 0.135052 | 0.145542 | 0.136946 |
| 0.104167  | 0.101836  | 0.119901 | 0.17701  | 0.135198 | 0.141608 | 0.134178 |
| 0.0977564 | 0.0939685 | 0.114948 | 0.177885 | 0.130245 | 0.140443 | 0.13884  |
| 0.120921  | 0.118298  | 0.131702 | 0.194347 | 0.150495 | 0.151661 | 0.152681 |
| 0.108829  | 0.104749  | 0.123689 | 0.177302 | 0.125    | 0.133741 | 0.146125 |
| 0.119318  | 0.117861  | 0.135052 | 0.192453 | 0.146853 | 0.150058 | 0.146416 |
| 0.0989219 | 0.0957168 | 0.109703 | 0.175262 | 0.129953 | 0.139569 | 0.139714 |
| 0.109266  | 0.11014   | 0.121795 | 0.191434 | 0.139423 | 0.144376 | 0.147145 |
| 0.11553   | 0.112325  | 0.124854 | 0.170892 | 0.1419   | 0.1419   | 0.143211 |
| 0.112325  | 0.112034  | 0.127768 | 0.172057 | 0.140734 | 0.148019 | 0.146416 |
| 0.102855  | 0.111305  | 0.113636 | 0.184441 | 0.132721 | 0.137675 | 0.143648 |
| 0.119318  | 0.112034  | 0.126311 | 0.178759 | 0.145979 | 0.154429 | 0.139132 |
| 0.105186  | 0.108392  | 0.120047 | 0.175699 | 0.142337 | 0.153409 | 0.148019 |
| 0.102564  | 0.101399  | 0.108683 | 0.17803  | 0.12602  | 0.133887 | 0.142191 |
| 0.129371  | 0.123834  | 0.135781 | 0.193473 | 0.14729  | 0.147582 | 0.15676  |
| 0.133304  | 0.123397  | 0.13447  | 0.199738 | 0.141608 | 0.142191 | 0.158945 |
| 0.10271   | 0.0925117 | 0.110577 | 0.172057 | 0.121795 | 0.130536 | 0.139423 |
| 0.13141   | 0.120629  | 0.134907 | 0.191725 | 0.142337 | 0.144959 | 0.13549  |
| 0.122232  | 0.119901  | 0.127477 | 0.1875   | 0.135198 | 0.137238 | 0.152244 |
| 0.123689  | 0.11961   | 0.130973 | 0.189831 | 0.143357 | 0.145688 | 0.131847 |



|          |          |          |          |          |          |          |
|----------|----------|----------|----------|----------|----------|----------|
| 0.114656 | 0.110868 | 0.125437 | 0.177593 | 0.133741 | 0.137529 | 0.129516 |
| 0.115239 | 0.107955 | 0.126311 | 0.186334 | 0.139569 | 0.143357 | 0.144085 |
| 0.11859  | 0.115967 | 0.125583 | 0.183275 | 0.137966 | 0.141171 | 0.143939 |
| 0.122815 | 0.116404 | 0.125437 | 0.191579 | 0.145396 | 0.149476 | 0.141463 |
| 0.132139 | 0.128059 | 0.137092 | 0.195076 | 0.148601 | 0.144231 | 0.14088  |
| 0.123689 | 0.116404 | 0.135635 | 0.183712 | 0.141026 | 0.146853 | 0.148164 |
| 0.113199 | 0.10708  | 0.121066 | 0.175845 | 0.130245 | 0.136364 | 0.128351 |
| 0.12296  | 0.124126 | 0.126748 | 0.191725 | 0.146707 | 0.153409 | 0.157634 |
| 0.123106 | 0.122815 | 0.134178 | 0.18954  | 0.143065 | 0.143939 | 0.148747 |
| 0.106498 | 0.100087 | 0.118444 | 0.17264  | 0.126166 | 0.13549  | 0.135635 |
| 0.217366 | 0.209207 | 0.221154 | 0.133159 | 0.221591 | 0.232663 | 0.232517 |
| 0.122669 | 0.117424 | 0.127622 | 0.179487 | 0.140589 | 0.147582 | 0.141317 |
| 0.110723 | 0.100233 | 0.123543 | 0.175991 | 0.132721 | 0.137966 | 0.147145 |
| 0.133596 | 0.12398  | 0.137675 | 0.194493 | 0.150058 | 0.14831  | 0.138258 |
| 0.112034 | 0.106498 | 0.124854 | 0.175845 | 0.133159 | 0.140443 | 0.144376 |
| 0.133596 | 0.122232 | 0.136509 | 0.192162 | 0.144522 | 0.143939 | 0.14933  |
| 0.118153 | 0.10912  | 0.123106 | 0.183129 | 0.145396 | 0.153263 | 0.134178 |
| 0.118298 | 0.110723 | 0.120629 | 0.178322 | 0.137966 | 0.145251 | 0.13986  |
| 0.125583 | 0.118007 | 0.136946 | 0.183275 | 0.14088  | 0.142337 | 0.147436 |
| 0.121649 | 0.121941 | 0.137675 | 0.175554 | 0.143939 | 0.152098 | 0.137383 |
| 0.121795 | 0.120047 | 0.134033 | 0.189977 | 0.136801 | 0.140297 | 0.138695 |
| 0.124854 | 0.121649 | 0.133013 | 0.194784 | 0.137821 | 0.141317 | 0.129808 |
| 0.121649 | 0.118444 | 0.130682 | 0.189831 | 0.142191 | 0.143939 | 0.131847 |
| 0.111451 | 0.108246 | 0.109994 | 0.178759 | 0.134907 | 0.140443 | 0.148456 |
| 0.114656 | 0.109703 | 0.121066 | 0.182255 | 0.135781 | 0.143648 | 0.140297 |
| 0.13141  | 0.125    | 0.137821 | 0.189685 | 0.147582 | 0.151661 | 0.133741 |
| 0.116696 | 0.107372 | 0.124563 | 0.175262 | 0.136946 | 0.137238 | 0.126311 |
| 0.124563 | 0.12602  | 0.137675 | 0.19595  | 0.152681 | 0.160256 | 0.156614 |
| 0.133741 | 0.131119 | 0.143648 | 0.175991 | 0.135635 | 0.144376 | 0.159965 |
| 0.114219 | 0.11655  | 0.119172 | 0.175699 | 0.135344 | 0.137383 | 0.155886 |
| 0.127331 | 0.116841 | 0.130245 | 0.188228 | 0.133596 | 0.136218 | 0.150932 |
| 0.124563 | 0.120775 | 0.130682 | 0.173514 | 0.131702 | 0.134615 | 0.151078 |
| 0.115385 | 0.115967 | 0.121503 | 0.183566 | 0.135344 | 0.13884  | 0.1419   |
| 0.124709 | 0.121503 | 0.129371 | 0.176865 | 0.135052 | 0.14088  | 0.151224 |
| 0.132867 | 0.12704  | 0.145396 | 0.184441 | 0.137675 | 0.149038 | 0.159965 |
| 0.103875 | 0.10271  | 0.116696 | 0.175845 | 0.132284 | 0.140734 | 0.144376 |
| 0.125583 | 0.12296  | 0.13549  | 0.191434 | 0.152535 | 0.154283 | 0.152681 |
| 0.139714 | 0.133596 | 0.149038 | 0.171766 | 0.136655 | 0.142483 | 0.160985 |
| 0.107955 | 0.110868 | 0.12602  | 0.186043 | 0.130536 | 0.136364 | 0.14729  |
| 0.115822 | 0.114365 | 0.132139 | 0.182255 | 0.141608 | 0.148601 | 0.153992 |
| 0.128205 | 0.130536 | 0.135198 | 0.198135 | 0.148456 | 0.147582 | 0.165793 |
| 0.121503 | 0.116259 | 0.13345  | 0.184149 | 0.144959 | 0.157488 | 0.150641 |
| 0.136509 | 0.133596 | 0.133887 | 0.195076 | 0.14831  | 0.150058 | 0.158071 |
| 0.122086 | 0.120629 | 0.131993 | 0.189977 | 0.151078 | 0.153409 | 0.150641 |

|           |          |          |          |           |          |           |
|-----------|----------|----------|----------|-----------|----------|-----------|
| 0.118444  | 0.112034 | 0.125437 | 0.187791 | 0.138403  | 0.145396 | 0.131847  |
| 0.123543  | 0.118881 | 0.131702 | 0.185897 | 0.143502  | 0.146999 | 0.150058  |
| 0.113782  | 0.119901 | 0.123106 | 0.179924 | 0.141317  | 0.148019 | 0.151078  |
| 0.120921  | 0.116841 | 0.13549  | 0.194347 | 0.144959  | 0.150204 | 0.143357  |
| 0.123834  | 0.122086 | 0.131993 | 0.190559 | 0.143794  | 0.146125 | 0.138695  |
| 0.121795  | 0.119755 | 0.133741 | 0.195513 | 0.141171  | 0.143502 | 0.132576  |
| 0.121795  | 0.120338 | 0.129662 | 0.194056 | 0.142628  | 0.146707 | 0.143648  |
| 0.116841  | 0.118881 | 0.131702 | 0.185023 | 0.132721  | 0.141754 | 0.149184  |
| 0.136072  | 0.137821 | 0.144814 | 0.189394 | 0.15574   | 0.155449 | 0.149476  |
| 0.119755  | 0.113345 | 0.124709 | 0.187063 | 0.13447   | 0.137966 | 0.147145  |
| 0.104604  | 0.106935 | 0.128788 | 0.185023 | 0.140297  | 0.149621 | 0.138403  |
| 0.112762  | 0.117133 | 0.135781 | 0.190851 | 0.13447   | 0.143794 | 0.153555  |
| 0.107517  | 0.110431 | 0.118007 | 0.18211  | 0.128059  | 0.13243  | 0.150932  |
| 0.136509  | 0.131847 | 0.145251 | 0.190122 | 0.137821  | 0.143065 | 0.167395  |
| 0.144668  | 0.146125 | 0.156031 | 0.199155 | 0.146853  | 0.14831  | 0.168852  |
| 0.119901  | 0.114656 | 0.126603 | 0.193619 | 0.144522  | 0.145396 | 0.140589  |
| 0.106935  | 0.108974 | 0.118881 | 0.187063 | 0.13447   | 0.142337 | 0.141608  |
| 0.124563  | 0.122232 | 0.130973 | 0.193619 | 0.142483  | 0.149767 | 0.139132  |
| 0.127622  | 0.121212 | 0.133159 | 0.191142 | 0.147582  | 0.151952 | 0.13549   |
| 0.111888  | 0.110723 | 0.129079 | 0.194056 | 0.146416  | 0.150495 | 0.14831   |
| 0.127331  | 0.128205 | 0.135781 | 0.19493  | 0.145833  | 0.150204 | 0.136655  |
| 0.132576  | 0.128788 | 0.141317 | 0.188228 | 0.140297  | 0.137383 | 0.150641  |
| 0.123106  | 0.11961  | 0.124563 | 0.186334 | 0.135781  | 0.140734 | 0.151369  |
| 0.148456  | 0.148747 | 0.159237 | 0.200903 | 0.152389  | 0.15472  | 0.168852  |
| 0.11553   | 0.120775 | 0.130682 | 0.188666 | 0.140152  | 0.148019 | 0.15574   |
| 0.135927  | 0.134761 | 0.137675 | 0.189831 | 0.148893  | 0.147727 | 0.158654  |
| 0.113636  | 0.109266 | 0.129371 | 0.189977 | 0.142045  | 0.149038 | 0.142191  |
| 0.122669  | 0.125583 | 0.129079 | 0.200466 | 0.143502  | 0.142628 | 0.148019  |
| 0.122086  | 0.113928 | 0.128788 | 0.18211  | 0.142045  | 0.145251 | 0.129953  |
| 0.13243   | 0.123397 | 0.140589 | 0.151952 | 0.0990676 | 0.105186 | 0.16215   |
| 0.137238  | 0.128497 | 0.150641 | 0.19493  | 0.160402  | 0.160402 | 0.0460373 |
| 0.119901  | 0.107372 | 0.128059 | 0.174097 | 0.137529  | 0.150932 | 0.142337  |
| 0.129662  | 0.11655  | 0.136072 | 0.154138 | 0.145833  | 0.153409 | 0.150932  |
| 0.134761  | 0.134761 | 0.145251 | 0.135927 | 0.159091  | 0.170163 | 0.173514  |
| 0.138258  | 0.128351 | 0.152826 | 0.133596 | 0.15035   | 0.162005 | 0.168269  |
| 0.0999417 | 0.112762 | 0.116259 | 0.191725 | 0.122815  | 0.128351 | 0.150058  |
| 0.124854  | 0.122232 | 0.137383 | 0.188957 | 0.146562  | 0.153846 | 0.144085  |
| 0.112617  | 0.102127 | 0.120192 | 0.170017 | 0.128205  | 0.139569 | 0.136218  |
| 0.109266  | 0.104895 | 0.112471 | 0.167832 | 0.129808  | 0.143794 | 0.140443  |
| 0.117861  | 0.110286 | 0.123689 | 0.179341 | 0.132867  | 0.137821 | 0.146416  |
| 0.116987  | 0.101253 | 0.124563 | 0.171183 | 0.136655  | 0.144814 | 0.139714  |
| 0.110723  | 0.107517 | 0.111305 | 0.177156 | 0.136801  | 0.145833 | 0.144814  |
| 0.11451   | 0.100524 | 0.11859  | 0.157925 | 0.128934  | 0.139423 | 0.13549   |
| 0.113054  | 0.102855 | 0.126457 | 0.172203 | 0.138258  | 0.147873 | 0.138986  |

|           |           |           |          |           |           |           |
|-----------|-----------|-----------|----------|-----------|-----------|-----------|
| 0.120484  | 0.115239  | 0.125146  | 0.170017 | 0.139277  | 0.147436  | 0.146416  |
| 0.103001  | 0.0968823 | 0.107372  | 0.169143 | 0.125583  | 0.131702  | 0.141754  |
| 0.121358  | 0.105332  | 0.128351  | 0.167686 | 0.141608  | 0.152098  | 0.144959  |
| 0.11655   | 0.0973193 | 0.124709  | 0.171911 | 0.135635  | 0.147582  | 0.141026  |
| 0.106352  | 0.112179  | 0.114219  | 0.187646 | 0.140006  | 0.14933   | 0.153846  |
| 0.214161  | 0.204837  | 0.221737  | 0.13141  | 0.220425  | 0.227127  | 0.226399  |
| 0.142191  | 0.124126  | 0.144231  | 0.187063 | 0.15778   | 0.162733  | 0.148601  |
| 0.123106  | 0.113199  | 0.131847  | 0.190122 | 0.142483  | 0.148601  | 0.141463  |
| 0.122669  | 0.110431  | 0.127622  | 0.173368 | 0.13884   | 0.147873  | 0.143065  |
| 0.210664  | 0.198718  | 0.213869  | 0.120921 | 0.214598  | 0.225087  | 0.218823  |
| 0.113636  | 0.113928  | 0.121795  | 0.169289 | 0.111451  | 0.124272  | 0.15676   |
| 0.110577  | 0.11116   | 0.048514  | 0.180507 | 0.134615  | 0.141608  | 0.152826  |
| 0.120192  | 0.116987  | 0.120484  | 0.180216 | 0.142191  | 0.151515  | 0.140006  |
| 0.120047  | 0.111888  | 0.121503  | 0.175699 | 0.134761  | 0.147582  | 0.140443  |
| 0.248543  | 0.240093  | 0.253205  | 0.157051 | 0.255973  | 0.257139  | 0.257576  |
| 0.11757   | 0.113491  | 0.125728  | 0.184003 | 0.0571096 | 0.0623543 | 0.151078  |
| 0.101253  | 0.103875  | 0.112617  | 0.180216 | 0.135198  | 0.147145  | 0.14933   |
| 0.109994  | 0.113491  | 0.12398   | 0.186626 | 0.144231  | 0.152098  | 0.137966  |
| 0.106206  | 0.109994  | 0.123689  | 0.182547 | 0.136072  | 0.14831   | 0.133304  |
| 0.123106  | 0.11757   | 0.127768  | 0.17701  | 0.0751748 | 0.0775058 | 0.153409  |
| 0.123397  | 0.111451  | 0.128642  | 0.150204 | 0.131119  | 0.144231  | 0.152826  |
| 0.105915  | 0.108829  | 0.113782  | 0.182255 | 0.140152  | 0.147727  | 0.150204  |
| 0.115967  | 0.0976107 | 0.126166  | 0.169872 | 0.135344  | 0.144085  | 0.13986   |
| 0.116987  | 0.108537  | 0.12398   | 0.180507 | 0.136072  | 0.149184  | 0.141463  |
| 0.11553   | 0.107663  | 0.115239  | 0.174097 | 0.131119  | 0.1419    | 0.139423  |
| 0.113345  | 0.0976107 | 0.125     | 0.166667 | 0.133304  | 0.142337  | 0.140443  |
| 0.116696  | 0.111451  | 0.127477  | 0.174097 | 0.126748  | 0.129079  | 0.142045  |
| 0.13549   | 0.126457  | 0.151224  | 0.195221 | 0.161568  | 0.160985  | 0.0437063 |
| 0.119464  | 0.115385  | 0.12704   | 0.18648  | 0.0552156 | 0.057838  | 0.151807  |
| 0.115676  | 0.111888  | 0.0451632 | 0.182692 | 0.134178  | 0.143502  | 0.155012  |
| 0.185606  | 0.177739  | 0.194056  | 0.106061 | 0.193619  | 0.202943  | 0.205128  |
| 0.20338   | 0.189977  | 0.205128  | 0.120047 | 0.20877   | 0.217803  | 0.218823  |
| 0.121212  | 0.112762  | 0.124126  | 0.171911 | 0.134761  | 0.145542  | 0.145105  |
| 0.117424  | 0.102273  | 0.116259  | 0.17366  | 0.130973  | 0.139423  | 0.136655  |
| 0.13986   | 0.124417  | 0.147145  | 0.179196 | 0.144668  | 0.144959  | 0.139569  |
| 0.10169   | 0.108974  | 0.110723  | 0.179779 | 0.137675  | 0.147582  | 0.149767  |
| 0.117861  | 0.114948  | 0.124854  | 0.187791 | 0.0591492 | 0.0597319 | 0.151661  |
| 0.117716  | 0.118007  | 0.135781  | 0.184149 | 0.147873  | 0.146707  | 0.132576  |
| 0.221737  | 0.212995  | 0.22873   | 0.133159 | 0.228875  | 0.236451  | 0.234557  |
| 0.109266  | 0.0964452 | 0.118881  | 0.18007  | 0.13039   | 0.144959  | 0.138695  |
| 0.2044    | 0.196824  | 0.208479  | 0.140297 | 0.216783  | 0.223776  | 0.216638  |
| 0.0865385 | 0.100233  | 0.1081    | 0.18211  | 0.116987  | 0.128934  | 0.146853  |
| 0.0913462 | 0.0992133 | 0.112034  | 0.182255 | 0.129662  | 0.140734  | 0.14292   |
| 0.111597  | 0.105478  | 0.120338  | 0.163462 | 0.130682  | 0.140589  | 0.145105  |

|           |           |           |          |           |           |           |
|-----------|-----------|-----------|----------|-----------|-----------|-----------|
| 0.113636  | 0.105769  | 0.11451   | 0.166375 | 0.129516  | 0.140006  | 0.138695  |
| 0.206148  | 0.195367  | 0.212558  | 0.121358 | 0.20979   | 0.220862  | 0.218969  |
| 0.128059  | 0.11116   | 0.13447   | 0.171474 | 0.14627   | 0.157925  | 0.14933   |
| 0.0456002 | 0.103875  | 0.116113  | 0.186334 | 0.129079  | 0.136946  | 0.143211  |
| 0.125146  | 0.10708   | 0.129808  | 0.175262 | 0.143065  | 0.152681  | 0.14088   |
| 0.117861  | 0.115239  | 0.120192  | 0.176136 | 0.140443  | 0.148601  | 0.14292   |
| 0.117861  | 0.107663  | 0.116987  | 0.172348 | 0.135198  | 0.145688  | 0.146125  |
| 0.0874126 | 0.101399  | 0.107809  | 0.183858 | 0.119027  | 0.125728  | 0.145688  |
| 0.111597  | 0.111597  | 0.113345  | 0.16958  | 0.137383  | 0.150495  | 0.15035   |
| 0.111305  | 0.111305  | 0.0445804 | 0.182692 | 0.133596  | 0.14292   | 0.152972  |
| 0.112471  | 0.0949883 | 0.122669  | 0.159965 | 0.131265  | 0.146416  | 0.134907  |
| 0.0464744 | 0.103293  | 0.112617  | 0.181964 | 0.131119  | 0.137238  | 0.146125  |
| 0.189977  | 0.176573  | 0.194639  | 0.108683 | 0.194784  | 0.206439  | 0.204837  |
| 0.109994  | 0.110577  | 0.12602   | 0.1875   | 0.140734  | 0.150058  | 0.13447   |
| 0.120338  | 0.110723  | 0.134907  | 0.184149 | 0.144668  | 0.153992  | 0.0620629 |
| 0.114656  | 0.107663  | 0.127185  | 0.178759 | 0.139569  | 0.149184  | 0.132721  |
| 0.115385  | 0.113345  | 0.12296   | 0.175699 | 0.0683275 | 0.0785256 | 0.153263  |
| 0.120047  | 0.10373   | 0.127914  | 0.175408 | 0.141171  | 0.148456  | 0.1419    |
| 0.0941142 | 0.104895  | 0.111597  | 0.189103 | 0.121941  | 0.129225  | 0.147436  |
| 0.105041  | 0.10912   | 0.118153  | 0.169726 | 0.11451   | 0.122086  | 0.140589  |
| 0.105915  | 0.111742  | 0.118735  | 0.187209 | 0.141317  | 0.149184  | 0.153118  |
| 0.11655   | 0.106643  | 0.129662  | 0.179196 | 0.139714  | 0.152244  | 0.0687646 |
| 0.105478  | 0.107226  | 0.124709  | 0.182984 | 0.13884   | 0.14729   | 0.135781  |
| 0.119901  | 0.105915  | 0.123106  | 0.171474 | 0.131702  | 0.148019  | 0.144085  |
| 0.11859   | 0.11655   | 0.121212  | 0.182692 | 0.142337  | 0.152535  | 0.141026  |
| 0.130099  | 0.130682  | 0.135052  | 0.189248 | 0.151515  | 0.158508  | 0.140589  |
| 0.10708   | 0.103875  | 0.118444  | 0.177302 | 0.0667249 | 0.0757576 | 0.144085  |
| 0.136364  | 0.118298  | 0.139277  | 0.186189 | 0.153409  | 0.158071  | 0.144522  |
| 0.112762  | 0.106061  | 0.119755  | 0.172203 | 0.132139  | 0.142628  | 0.145396  |
| 0.106935  | 0.101107  | 0.122378  | 0.177739 | 0.133887  | 0.143794  | 0.126748  |
| 0.120484  | 0.100962  | 0.125146  | 0.153118 | 0.137529  | 0.149476  | 0.145251  |
| 0.107955  | 0.119318  | 0.11961   | 0.182547 | 0.141026  | 0.152681  | 0.158071  |
| 0.184878  | 0.176428  | 0.197407  | 0.113782 | 0.195221  | 0.205128  | 0.207896  |
| 0         | 0.0958625 | 0.111597  | 0.178613 | 0.127185  | 0.134178  | 0.137821  |
| 0.0958625 | 0         | 0.110723  | 0.167541 | 0.121941  | 0.133013  | 0.129953  |
| 0.111597  | 0.110723  | 0         | 0.185023 | 0.13447   | 0.143502  | 0.151224  |
| 0.178613  | 0.167541  | 0.185023  | 0        | 0.190705  | 0.201486  | 0.195221  |
| 0.127185  | 0.121941  | 0.13447   | 0.190705 | 0         | 0.0675991 | 0.160693  |
| 0.134178  | 0.133013  | 0.143502  | 0.201486 | 0.0675991 | 0         | 0.16419   |
| 0.137821  | 0.129953  | 0.151224  | 0.195221 | 0.160693  | 0.16419   | 0         |
| 0.106352  | 0.105186  | 0.118881  | 0.176573 | 0.0665793 | 0.0776515 | 0.144522  |
| 0.118735  | 0.101253  | 0.125437  | 0.1706   | 0.140443  | 0.148019  | 0.142337  |
| 0.209207  | 0.198135  | 0.215035  | 0.124417 | 0.215472  | 0.225962  | 0.223193  |
| 0.118298  | 0.111597  | 0.125291  | 0.174825 | 0.135927  | 0.145251  | 0.144231  |

|           |           |           |          |           |           |          |
|-----------|-----------|-----------|----------|-----------|-----------|----------|
| 0.123397  | 0.108246  | 0.131556  | 0.175262 | 0.142774  | 0.155012  | 0.143502 |
| 0.0450175 | 0.101544  | 0.115822  | 0.179924 | 0.125583  | 0.133741  | 0.14088  |
| 0.16419   | 0.156031  | 0.174388  | 0.122523 | 0.179196  | 0.18852   | 0.182838 |
| 0.112034  | 0.0995047 | 0.121649  | 0.168561 | 0.130245  | 0.142191  | 0.141171 |
| 0.135198  | 0.131993  | 0.150932  | 0.197844 | 0.159237  | 0.160111  | 0.14627  |
| 0.111597  | 0.11451   | 0.119464  | 0.174825 | 0.13039   | 0.136509  | 0.15035  |
| 0.188811  | 0.177156  | 0.196096  | 0.108974 | 0.197698  | 0.205857  | 0.201632 |
| 0.112471  | 0.111014  | 0.120921  | 0.182692 | 0.0692016 | 0.0782343 | 0.150058 |
| 0.107809  | 0.094697  | 0.113928  | 0.157925 | 0.130099  | 0.137966  | 0.133159 |
| 0.105041  | 0.101544  | 0.122523  | 0.177885 | 0.13549   | 0.146562  | 0.137675 |
| 0.109266  | 0.111597  | 0.113054  | 0.178322 | 0.126311  | 0.137383  | 0.14831  |
| 0.110723  | 0.108974  | 0.0451632 | 0.181818 | 0.13243   | 0.140297  | 0.154429 |
| 0.114219  | 0.109557  | 0.128788  | 0.172203 | 0.136801  | 0.144959  | 0.134324 |
| 0.114365  | 0.105915  | 0.118153  | 0.171183 | 0.129662  | 0.142191  | 0.142045 |
| 0.18648   | 0.178322  | 0.196096  | 0.107517 | 0.197115  | 0.206148  | 0.204837 |
| 0.115239  | 0.111742  | 0.121941  | 0.179341 | 0.13986   | 0.152972  | 0.135927 |
| 0.109266  | 0.100816  | 0.118007  | 0.164336 | 0.137966  | 0.142337  | 0.145396 |
| 0.208188  | 0.200903  | 0.213724  | 0.118735 | 0.21183   | 0.225233  | 0.220717 |
| 0.107372  | 0.111742  | 0.12602   | 0.186626 | 0.139277  | 0.150641  | 0.135344 |
| 0.116841  | 0.108392  | 0.117716  | 0.173368 | 0.13039   | 0.145251  | 0.142191 |
| 0.110431  | 0.102273  | 0.11451   | 0.168415 | 0.129808  | 0.140297  | 0.136364 |
| 0.133013  | 0.118735  | 0.144085  | 0.182838 | 0.152972  | 0.155012  | 0.138549 |
| 0.188083  | 0.174971  | 0.194202  | 0.110577 | 0.194056  | 0.201632  | 0.203526 |
| 0.106352  | 0.108392  | 0.113054  | 0.187063 | 0.141463  | 0.147582  | 0.151807 |
| 0.12704   | 0.123252  | 0.130245  | 0.18852  | 0.146707  | 0.155449  | 0.13986  |
| 0.113636  | 0.104021  | 0.115385  | 0.171037 | 0.129516  | 0.142045  | 0.137821 |
| 0.113345  | 0.103147  | 0.11451   | 0.171911 | 0.131556  | 0.143502  | 0.1419   |
| 0.111451  | 0.103293  | 0.116696  | 0.170892 | 0.132867  | 0.140152  | 0.14088  |
| 0.117424  | 0.0987762 | 0.123834  | 0.16958  | 0.13884   | 0.14729   | 0.142191 |
| 0.0992133 | 0.0980478 | 0.108246  | 0.173223 | 0.121503  | 0.130536  | 0.140589 |
| 0.114656  | 0.114073  | 0.125146  | 0.184295 | 0.0576923 | 0.0635198 | 0.150204 |
| 0.126894  | 0.117861  | 0.135927  | 0.188374 | 0.152098  | 0.1588    | 0.118735 |
| 0.109411  | 0.110577  | 0.125437  | 0.184003 | 0.0629371 | 0.0708042 | 0.151078 |
| 0.124126  | 0.115967  | 0.127914  | 0.183858 | 0.142337  | 0.147582  | 0.146853 |
| 0.190997  | 0.182547  | 0.201195  | 0.109994 | 0.199592  | 0.210373  | 0.211684 |
| 0.113345  | 0.113054  | 0.121212  | 0.177448 | 0.137092  | 0.148456  | 0.140443 |
| 0.128642  | 0.107955  | 0.133887  | 0.178176 | 0.146853  | 0.155012  | 0.146416 |
| 0.115093  | 0.104895  | 0.115967  | 0.173368 | 0.129225  | 0.137966  | 0.139569 |
| 0.100962  | 0.0983392 | 0.109411  | 0.172931 | 0.120047  | 0.127331  | 0.13884  |
| 0.109994  | 0.103293  | 0.125146  | 0.165938 | 0.125     | 0.135198  | 0.141463 |
| 0.105769  | 0.111888  | 0.111014  | 0.183275 | 0.140297  | 0.14933   | 0.15472  |
| 0.122378  | 0.111014  | 0.133741  | 0.183566 | 0.14088   | 0.146999  | 0.144522 |
| 0.116404  | 0.101253  | 0.127477  | 0.177302 | 0.140443  | 0.152098  | 0.083479 |
| 0.10271   | 0.103293  | 0.10912   | 0.167104 | 0.130245  | 0.140152  | 0.150204 |

|           |           |           |          |           |           |           |
|-----------|-----------|-----------|----------|-----------|-----------|-----------|
| 0.0984848 | 0.0973193 | 0.105186  | 0.164918 | 0.126311  | 0.137092  | 0.144231  |
| 0.104458  | 0.0965909 | 0.116987  | 0.153118 | 0.127622  | 0.136655  | 0.138258  |
| 0.0885781 | 0.104312  | 0.106061  | 0.185023 | 0.118735  | 0.125437  | 0.147145  |
| 0.121358  | 0.121941  | 0.128351  | 0.191871 | 0.0620629 | 0.0571096 | 0.158654  |
| 0.105186  | 0.108392  | 0.113054  | 0.179779 | 0.137092  | 0.14933   | 0.153555  |
| 0.110577  | 0.095134  | 0.121358  | 0.170017 | 0.131702  | 0.141317  | 0.139132  |
| 0.0962995 | 0.105332  | 0.10912   | 0.17905  | 0.137238  | 0.146853  | 0.148747  |
| 0.112762  | 0.104021  | 0.11859   | 0.16958  | 0.131265  | 0.14088   | 0.141317  |
| 0.0467657 | 0.0948427 | 0.112325  | 0.179341 | 0.123543  | 0.134033  | 0.137383  |
| 0.116696  | 0.108537  | 0.121649  | 0.173805 | 0.133741  | 0.144814  | 0.143502  |
| 0.112034  | 0.107663  | 0.114656  | 0.174097 | 0.135781  | 0.147436  | 0.135635  |
| 0.115822  | 0.099796  | 0.128059  | 0.178467 | 0.141026  | 0.152098  | 0.0756119 |
| 0.106206  | 0.105332  | 0.0549242 | 0.180507 | 0.130245  | 0.136072  | 0.151952  |
| 0.104021  | 0.100816  | 0.113636  | 0.172786 | 0.125146  | 0.135927  | 0.143357  |
| 0.11553   | 0.103293  | 0.118444  | 0.17264  | 0.130245  | 0.143065  | 0.138258  |
| 0.108246  | 0.106206  | 0.123689  | 0.165938 | 0.138112  | 0.148601  | 0.137675  |
| 0.117716  | 0.103147  | 0.127331  | 0.170746 | 0.137675  | 0.148456  | 0.146562  |
| 0.103875  | 0.0989219 | 0.119901  | 0.167686 | 0.134615  | 0.139569  | 0.134761  |
| 0.114948  | 0.104167  | 0.118444  | 0.171474 | 0.133159  | 0.142483  | 0.137675  |
| 0.115676  | 0.101399  | 0.123834  | 0.168415 | 0.135052  | 0.144085  | 0.140443  |
| 0.0882867 | 0.102273  | 0.107809  | 0.182692 | 0.120484  | 0.128351  | 0.148601  |
| 0.116841  | 0.0999417 | 0.127331  | 0.171911 | 0.138258  | 0.147582  | 0.143357  |
| 0.106643  | 0.107226  | 0.0512821 | 0.18007  | 0.133596  | 0.141754  | 0.149767  |
| 0.108392  | 0.104604  | 0.112762  | 0.173368 | 0.124563  | 0.133013  | 0.144231  |
| 0.107517  | 0.099359  | 0.11859   | 0.173368 | 0.132139  | 0.137966  | 0.128788  |
| 0.0482226 | 0.0968823 | 0.113782  | 0.179924 | 0.122669  | 0.133741  | 0.144085  |
| 0.120629  | 0.104604  | 0.125291  | 0.170455 | 0.143502  | 0.153409  | 0.145105  |
| 0.113345  | 0.108392  | 0.122086  | 0.175117 | 0.143794  | 0.150787  | 0.143357  |
| 0.114073  | 0.10067   | 0.124854  | 0.168561 | 0.13549   | 0.141317  | 0.139132  |
| 0.192453  | 0.179633  | 0.198864  | 0.112908 | 0.197552  | 0.207459  | 0.207314  |
| 0.160985  | 0.153118  | 0.172348  | 0.115239 | 0.172203  | 0.187063  | 0.177593  |
| 0.112034  | 0.109994  | 0.123397  | 0.181964 | 0.0673077 | 0.0754662 | 0.150204  |
| 0.11014   | 0.104021  | 0.121503  | 0.164627 | 0.136509  | 0.146416  | 0.143939  |
| 0.139569  | 0.136655  | 0.144814  | 0.206585 | 0.0697844 | 0.0435606 | 0.166084  |
| 0.118153  | 0.109703  | 0.129225  | 0.182838 | 0.143648  | 0.150058  | 0.140297  |
| 0.114802  | 0.112179  | 0.124709  | 0.166667 | 0.135052  | 0.146125  | 0.140734  |
| 0.114656  | 0.101544  | 0.125146  | 0.160693 | 0.135781  | 0.142483  | 0.140297  |
| 0.118444  | 0.108246  | 0.120775  | 0.169143 | 0.125874  | 0.134324  | 0.142337  |
| 0.120192  | 0.104749  | 0.128059  | 0.172931 | 0.138403  | 0.147727  | 0.147582  |
| 0.199592  | 0.188228  | 0.210664  | 0.115676 | 0.208188  | 0.218386  | 0.213578  |
| 0.106498  | 0.114365  | 0.116987  | 0.185169 | 0.140152  | 0.147727  | 0.156031  |
| 0.11451   | 0.103147  | 0.124417  | 0.162005 | 0.13447   | 0.146999  | 0.148019  |
| 0.1081    | 0.101107  | 0.11655   | 0.164918 | 0.131265  | 0.142337  | 0.138112  |
| 0.10912   | 0.110286  | 0.120775  | 0.174971 | 0.136655  | 0.14831   | 0.146999  |

|           |           |           |          |           |           |           |
|-----------|-----------|-----------|----------|-----------|-----------|-----------|
| 0.182692  | 0.167832  | 0.191434  | 0.105769 | 0.193328  | 0.204691  | 0.197844  |
| 0.24359   | 0.235431  | 0.249709  | 0.155594 | 0.249563  | 0.253642  | 0.25204   |
| 0.115385  | 0.102855  | 0.132867  | 0.181527 | 0.139423  | 0.151661  | 0.0772145 |
| 0.117133  | 0.106061  | 0.124126  | 0.173368 | 0.138549  | 0.149621  | 0.145396  |
| 0.11451   | 0.111597  | 0.123252  | 0.180361 | 0.0575466 | 0.0677448 | 0.152098  |
| 0.105915  | 0.105624  | 0.0528846 | 0.17905  | 0.130828  | 0.140734  | 0.147873  |
| 0.100524  | 0.107517  | 0.108974  | 0.182401 | 0.138258  | 0.146707  | 0.148019  |
| 0.107663  | 0.0992133 | 0.119318  | 0.173223 | 0.132576  | 0.145105  | 0.133013  |
| 0.115676  | 0.10373   | 0.120047  | 0.160548 | 0.130682  | 0.143502  | 0.139277  |
| 0.0999417 | 0.106935  | 0.111305  | 0.183566 | 0.134178  | 0.144376  | 0.150932  |
| 0.114073  | 0.099796  | 0.120775  | 0.159819 | 0.127331  | 0.139277  | 0.139423  |
| 0.112762  | 0.101981  | 0.124126  | 0.175699 | 0.137966  | 0.143794  | 0.141317  |
| 0.106789  | 0.10067   | 0.111451  | 0.172348 | 0.121795  | 0.133159  | 0.145542  |
| 0.117133  | 0.104895  | 0.13141   | 0.180361 | 0.13884   | 0.151661  | 0.0635198 |
| 0.11757   | 0.103293  | 0.126894  | 0.169435 | 0.138986  | 0.147436  | 0.143502  |
| 0.0980478 | 0.088141  | 0.114365  | 0.168561 | 0.127622  | 0.137238  | 0.131265  |
| 0.121066  | 0.114948  | 0.127185  | 0.188083 | 0.144231  | 0.147436  | 0.128934  |
| 0.119027  | 0.119318  | 0.0499709 | 0.191288 | 0.1419    | 0.141026  | 0.153992  |
| 0.111597  | 0.105186  | 0.119172  | 0.172494 | 0.130682  | 0.142045  | 0.143065  |
| 0.116404  | 0.111451  | 0.121941  | 0.163024 | 0.119755  | 0.126748  | 0.142337  |
| 0.128351  | 0.119027  | 0.129516  | 0.183712 | 0.144814  | 0.147145  | 0.143502  |
| 0.210082  | 0.196096  | 0.212995  | 0.12704  | 0.212558  | 0.220717  | 0.220571  |
| 0.109994  | 0.0898893 | 0.120484  | 0.171766 | 0.128788  | 0.142483  | 0.0872669 |
| 0.104312  | 0.0987762 | 0.1081    | 0.176865 | 0.122232  | 0.130099  | 0.147145  |
| 0.116259  | 0.109848  | 0.119464  | 0.17803  | 0.137092  | 0.151952  | 0.144231  |
| 0.109994  | 0.115822  | 0.127768  | 0.184878 | 0.142191  | 0.153263  | 0.140006  |
| 0.108829  | 0.105332  | 0.11553   | 0.176136 | 0.136072  | 0.147436  | 0.145542  |
| 0.19595   | 0.187791  | 0.202943  | 0.114365 | 0.203963  | 0.212995  | 0.214598  |
| 0.120047  | 0.105186  | 0.131993  | 0.173368 | 0.141171  | 0.152244  | 0.145105  |
| 0.112325  | 0.102127  | 0.116696  | 0.168852 | 0.129662  | 0.140443  | 0.139423  |
| 0.114219  | 0.112762  | 0.124417  | 0.181527 | 0.126311  | 0.132721  | 0.143648  |
| 0.102855  | 0.101399  | 0.0495338 | 0.177156 | 0.13039   | 0.135927  | 0.146562  |
| 0.120338  | 0.104021  | 0.13141   | 0.168415 | 0.140297  | 0.149913  | 0.141317  |
| 0.107226  | 0.0897436 | 0.120629  | 0.163462 | 0.128351  | 0.139132  | 0.131119  |
| 0.111888  | 0.103147  | 0.123543  | 0.175408 | 0.138549  | 0.14292   | 0.143065  |
| 0.10373   | 0.106935  | 0.124709  | 0.183858 | 0.13884   | 0.14933   | 0.136072  |
| 0.19595   | 0.186334  | 0.203234  | 0.110286 | 0.202797  | 0.214744  | 0.214015  |
| 0.108683  | 0.090035  | 0.119172  | 0.166667 | 0.129808  | 0.138258  | 0.135781  |
| 0.194493  | 0.183421  | 0.200321  | 0.106789 | 0.199883  | 0.210373  | 0.211684  |
| 0.191434  | 0.178904  | 0.198427  | 0.107226 | 0.196241  | 0.208188  | 0.208042  |
| 0.115093  | 0.116841  | 0.0477855 | 0.189685 | 0.13884   | 0.143502  | 0.151807  |
| 0.112762  | 0.120629  | 0.132867  | 0.194347 | 0.145542  | 0.150204  | 0.135781  |
| 0.101399  | 0.0897436 | 0.118007  | 0.168706 | 0.13039   | 0.137092  | 0.131702  |
| 0.109703  | 0.0913462 | 0.116987  | 0.167978 | 0.131119  | 0.138986  | 0.137092  |

|           |           |           |          |           |           |           |
|-----------|-----------|-----------|----------|-----------|-----------|-----------|
| 0.116259  | 0.0996503 | 0.128205  | 0.168998 | 0.137092  | 0.146707  | 0.140152  |
| 0.115385  | 0.104604  | 0.121503  | 0.170455 | 0.135344  | 0.145833  | 0.144814  |
| 0.0979021 | 0.101399  | 0.107809  | 0.178322 | 0.132139  | 0.140297  | 0.149767  |
| 0.102273  | 0.105478  | 0.106352  | 0.181818 | 0.137092  | 0.145833  | 0.149767  |
| 0.116113  | 0.104167  | 0.13039   | 0.17905  | 0.140734  | 0.153846  | 0.0657051 |
| 0.112179  | 0.11014   | 0.0463287 | 0.179779 | 0.129808  | 0.137966  | 0.151224  |
| 0.109994  | 0.103293  | 0.117861  | 0.1706   | 0.127622  | 0.138112  | 0.134761  |
| 0.114802  | 0.102855  | 0.126457  | 0.170455 | 0.139423  | 0.150204  | 0.140152  |
| 0.101544  | 0.0910548 | 0.112908  | 0.156614 | 0.129371  | 0.133741  | 0.129225  |
| 0.128788  | 0.108392  | 0.134033  | 0.176573 | 0.144668  | 0.153992  | 0.143357  |
| 0.111014  | 0.108392  | 0.122669  | 0.180944 | 0.0662879 | 0.0729895 | 0.146562  |
| 0.131847  | 0.114365  | 0.135927  | 0.181672 | 0.148601  | 0.155886  | 0.145833  |
| 0.255682  | 0.248397  | 0.263549  | 0.161568 | 0.261655  | 0.263403  | 0.260635  |
| 0.0557984 | 0.116404  | 0.121358  | 0.194493 | 0.136946  | 0.138112  | 0.143211  |
| 0.0984848 | 0.112762  | 0.123834  | 0.187937 | 0.136801  | 0.139423  | 0.140734  |
| 0.218677  | 0.205274  | 0.223339  | 0.133596 | 0.223193  | 0.229604  | 0.228584  |
| 0.11451   | 0.118007  | 0.116259  | 0.188228 | 0.140589  | 0.144668  | 0.146853  |
| 0.22669   | 0.218531  | 0.234557  | 0.140443 | 0.230915  | 0.24053   | 0.237471  |
| 0.0511364 | 0.106498  | 0.116404  | 0.188957 | 0.136364  | 0.138986  | 0.139714  |
| 0.125874  | 0.117716  | 0.125291  | 0.181818 | 0.141463  | 0.147582  | 0.144522  |
| 0.10373   | 0.104021  | 0.124126  | 0.18007  | 0.138258  | 0.150204  | 0.139277  |
| 0.113636  | 0.113345  | 0.0477855 | 0.183858 | 0.136218  | 0.14292   | 0.153846  |
| 0.202797  | 0.191142  | 0.210082  | 0.114802 | 0.207896  | 0.220425  | 0.216783  |
| 0.127622  | 0.109848  | 0.133159  | 0.18007  | 0.148456  | 0.153409  | 0.145105  |
| 0.11859   | 0.100233  | 0.127914  | 0.168124 | 0.139423  | 0.150495  | 0.143357  |
| 0.2213    | 0.216055  | 0.231206  | 0.14088  | 0.231352  | 0.240967  | 0.235286  |
| 0.102273  | 0.108392  | 0.114219  | 0.179196 | 0.139423  | 0.151369  | 0.154138  |
| 0.197115  | 0.188083  | 0.2044    | 0.112908 | 0.20338   | 0.213869  | 0.211101  |
| 0.107955  | 0.112325  | 0.113199  | 0.180798 | 0.136364  | 0.150932  | 0.153409  |
| 0.114656  | 0.105915  | 0.120192  | 0.173805 | 0.131702  | 0.142191  | 0.140297  |
| 0.112471  | 0.110723  | 0.119172  | 0.184441 | 0.127768  | 0.134761  | 0.147145  |
| 0.117133  | 0.118298  | 0.0512821 | 0.191434 | 0.137383  | 0.140297  | 0.155594  |
| 0.117279  | 0.103875  | 0.122815  | 0.171183 | 0.131119  | 0.140443  | 0.139714  |
| 0.157488  | 0.149038  | 0.1706    | 0.111742 | 0.165793  | 0.177739  | 0.182838  |
| 0.114073  | 0.0968823 | 0.122815  | 0.165647 | 0.13549   | 0.143939  | 0.13884   |
| 0.10271   | 0.107372  | 0.126311  | 0.182255 | 0.140734  | 0.153846  | 0.137966  |
| 0.113199  | 0.110286  | 0.116987  | 0.178759 | 0.141608  | 0.150641  | 0.150495  |
| 0.111451  | 0.111451  | 0.13039   | 0.184878 | 0.144231  | 0.144814  | 0.134178  |
| 0.196387  | 0.182401  | 0.20134   | 0.106352 | 0.20236   | 0.211684  | 0.208042  |
| 0.113199  | 0.104749  | 0.11553   | 0.170017 | 0.129079  | 0.141608  | 0.141754  |
| 0.113636  | 0.112179  | 0.0571096 | 0.170163 | 0.136218  | 0.146999  | 0.158217  |
| 0.0893065 | 0.102418  | 0.108246  | 0.185169 | 0.116841  | 0.127622  | 0.145251  |
| 0.105478  | 0.109266  | 0.111305  | 0.185897 | 0.139423  | 0.150495  | 0.151515  |
| 0.120192  | 0.11116   | 0.120192  | 0.177885 | 0.136364  | 0.145105  | 0.137966  |



|          |           |           |          |           |           |           |
|----------|-----------|-----------|----------|-----------|-----------|-----------|
| 0.255828 | 0.246212  | 0.261072  | 0.160548 | 0.25947   | 0.265589  | 0.257867  |
| 0.10708  | 0.105915  | 0.112325  | 0.181381 | 0.126748  | 0.129079  | 0.145542  |
| 0.116113 | 0.113491  | 0.119318  | 0.166521 | 0.13986   | 0.152098  | 0.140297  |
| 0.17264  | 0.169726  | 0.180216  | 0.133304 | 0.187063  | 0.194347  | 0.191871  |
| 0.184295 | 0.173514  | 0.194202  | 0.105624 | 0.193473  | 0.204545  | 0.20236   |
| 0.116404 | 0.103875  | 0.128642  | 0.175262 | 0.139277  | 0.153555  | 0.0808566 |
| 0.118298 | 0.101107  | 0.127914  | 0.170163 | 0.135635  | 0.148164  | 0.141317  |
| 0.108683 | 0.107226  | 0.0562354 | 0.174534 | 0.130682  | 0.141463  | 0.150058  |
| 0.143211 | 0.126603  | 0.146999  | 0.186626 | 0.159674  | 0.163462  | 0.146707  |
| 0.113199 | 0.0986305 | 0.127768  | 0.175554 | 0.137529  | 0.147727  | 0.0796911 |
| 0.115967 | 0.104021  | 0.130536  | 0.177739 | 0.141171  | 0.157197  | 0.0745921 |
| 0.108246 | 0.112908  | 0.11553   | 0.187209 | 0.144231  | 0.151807  | 0.152535  |
| 0.113199 | 0.0980478 | 0.12398   | 0.169143 | 0.133741  | 0.140152  | 0.13884   |
| 0.126166 | 0.110723  | 0.131993  | 0.174242 | 0.145542  | 0.152244  | 0.143648  |
| 0.105332 | 0.112325  | 0.11757   | 0.164773 | 0.134033  | 0.146853  | 0.154283  |
| 0.113636 | 0.11451   | 0.0495338 | 0.187063 | 0.134761  | 0.140006  | 0.150932  |
| 0.128059 | 0.126311  | 0.0560897 | 0.197698 | 0.145396  | 0.146853  | 0.157197  |
| 0.112762 | 0.109266  | 0.117133  | 0.182984 | 0.129808  | 0.133013  | 0.152389  |
| 0.121066 | 0.121358  | 0.0502622 | 0.18954  | 0.139569  | 0.140734  | 0.156323  |
| 0.111742 | 0.117279  | 0.118153  | 0.19391  | 0.143357  | 0.153555  | 0.156614  |
| 0.204545 | 0.196678  | 0.213578  | 0.120921 | 0.211976  | 0.223048  | 0.21824   |
| 0.116696 | 0.115822  | 0.125728  | 0.184586 | 0.130828  | 0.13549   | 0.145251  |
| 0.189248 | 0.175554  | 0.19595   | 0.112908 | 0.197261  | 0.207459  | 0.2044    |
| 0.103001 | 0.102418  | 0.11961   | 0.177302 | 0.137529  | 0.148019  | 0.135927  |
| 0.121649 | 0.114073  | 0.121941  | 0.176719 | 0.139277  | 0.148601  | 0.145251  |
| 0.116113 | 0.113491  | 0.124272  | 0.179924 | 0.0600233 | 0.0649767 | 0.152826  |
| 0.109266 | 0.10373   | 0.120047  | 0.173951 | 0.0700758 | 0.0828963 | 0.140734  |
| 0.123397 | 0.103584  | 0.126311  | 0.170309 | 0.140443  | 0.149184  | 0.141463  |
| 0.120775 | 0.102418  | 0.12602   | 0.175845 | 0.138986  | 0.149476  | 0.141171  |
| 0.117279 | 0.10708   | 0.118444  | 0.1706   | 0.131993  | 0.148019  | 0.145251  |
| 0.109848 | 0.106352  | 0.12704   | 0.182692 | 0.142337  | 0.149913  | 0.135781  |
| 0.120338 | 0.113636  | 0.125291  | 0.185897 | 0.0619172 | 0.0657051 | 0.152972  |
| 0.114656 | 0.122523  | 0.121066  | 0.183129 | 0.147145  | 0.155012  | 0.159819  |
| 0.248397 | 0.239656  | 0.254516  | 0.154283 | 0.251457  | 0.257867  | 0.253642  |
| 0.119027 | 0.107372  | 0.119318  | 0.173223 | 0.132576  | 0.145688  | 0.146416  |
| 0.182401 | 0.169289  | 0.189685  | 0.10373  | 0.190997  | 0.200903  | 0.200466  |
| 0.188374 | 0.178467  | 0.195659  | 0.107955 | 0.198427  | 0.207168  | 0.205565  |
| 0.120047 | 0.106643  | 0.124417  | 0.173368 | 0.140589  | 0.151952  | 0.145105  |
| 0.105186 | 0.102564  | 0.111888  | 0.177739 | 0.123397  | 0.13243   | 0.14627   |
| 0.124126 | 0.115676  | 0.125     | 0.179487 | 0.142045  | 0.148747  | 0.143065  |
| 0.115385 | 0.0949883 | 0.123252  | 0.166958 | 0.133304  | 0.144376  | 0.136364  |
| 0.111451 | 0.107372  | 0.118735  | 0.16215  | 0.126457  | 0.132576  | 0.14292   |
| 0.105041 | 0.107372  | 0.113199  | 0.180507 | 0.137821  | 0.148893  | 0.152244  |
| 0.120047 | 0.105186  | 0.12704   | 0.165501 | 0.139132  | 0.144959  | 0.143357  |

|           |           |           |          |           |           |           |
|-----------|-----------|-----------|----------|-----------|-----------|-----------|
| 0.130245  | 0.114219  | 0.13549   | 0.181818 | 0.146125  | 0.152826  | 0.144522  |
| 0.113782  | 0.105332  | 0.119027  | 0.171183 | 0.132284  | 0.143357  | 0.141463  |
| 0.124563  | 0.111451  | 0.131265  | 0.178467 | 0.143357  | 0.152098  | 0.142628  |
| 0.0885781 | 0.102855  | 0.114802  | 0.180944 | 0.130682  | 0.139714  | 0.145979  |
| 0.119755  | 0.11655   | 0.125583  | 0.189685 | 0.0607517 | 0.0639569 | 0.151807  |
| 0.111451  | 0.108537  | 0.0546329 | 0.179633 | 0.136072  | 0.144522  | 0.152535  |
| 0.116259  | 0.120921  | 0.122669  | 0.193765 | 0.148164  | 0.151661  | 0.15676   |
| 0.117279  | 0.106789  | 0.12602   | 0.176719 | 0.1419    | 0.14627   | 0.140589  |
| 0.113782  | 0.105915  | 0.11757   | 0.16623  | 0.123252  | 0.135781  | 0.140006  |
| 0.131265  | 0.127768  | 0.128642  | 0.189831 | 0.15035   | 0.158217  | 0.139423  |
| 0.183858  | 0.174242  | 0.192016  | 0.105769 | 0.191288  | 0.201777  | 0.20338   |
| 0.134178  | 0.116113  | 0.13884   | 0.186043 | 0.15035   | 0.154429  | 0.146416  |
| 0.120775  | 0.103001  | 0.128059  | 0.172057 | 0.136364  | 0.14831   | 0.144085  |
| 0.111014  | 0.111014  | 0.121795  | 0.183566 | 0.060169  | 0.0604604 | 0.149767  |
| 0.103875  | 0.101253  | 0.116696  | 0.177885 | 0.0728438 | 0.0810023 | 0.139714  |
| 0.107517  | 0.107226  | 0.0422494 | 0.18007  | 0.135052  | 0.142337  | 0.148601  |
| 0.112325  | 0.112617  | 0.0444347 | 0.183129 | 0.136072  | 0.142191  | 0.15574   |
| 0.189685  | 0.17803   | 0.196678  | 0.108974 | 0.197115  | 0.206439  | 0.208333  |
| 0.11859   | 0.104021  | 0.125     | 0.153555 | 0.14088   | 0.146707  | 0.140443  |
| 0.104458  | 0.0948427 | 0.115822  | 0.143794 | 0.131702  | 0.1419    | 0.136801  |
| 0.120775  | 0.103584  | 0.127185  | 0.177302 | 0.138695  | 0.152098  | 0.143211  |
| 0.191434  | 0.177156  | 0.199592  | 0.11014  | 0.198281  | 0.210227  | 0.207168  |
| 0.105041  | 0.101253  | 0.109703  | 0.169435 | 0.12296   | 0.131119  | 0.145542  |
| 0.108392  | 0.113928  | 0.115385  | 0.187937 | 0.141171  | 0.146999  | 0.156177  |
| 0.124417  | 0.107517  | 0.128205  | 0.173951 | 0.141171  | 0.149913  | 0.145105  |
| 0.11116   | 0.0977564 | 0.12398   | 0.176719 | 0.136072  | 0.149184  | 0.074155  |
| 0.186043  | 0.174097  | 0.193328  | 0.105332 | 0.193182  | 0.20542   | 0.204108  |
| 0.104458  | 0.109411  | 0.111742  | 0.184586 | 0.136072  | 0.146562  | 0.151952  |
| 0.108246  | 0.105624  | 0.118735  | 0.170017 | 0.138112  | 0.148601  | 0.136218  |
| 0.106206  | 0.10067   | 0.114948  | 0.165355 | 0.123543  | 0.13141   | 0.143211  |
| 0.116696  | 0.113491  | 0.128934  | 0.154575 | 0.127622  | 0.140734  | 0.14729   |
| 0.108392  | 0.109557  | 0.129079  | 0.183566 | 0.139714  | 0.150204  | 0.136655  |
| 0.111014  | 0.117424  | 0.11859   | 0.190559 | 0.142045  | 0.149038  | 0.15676   |
| 0.11655   | 0.1081    | 0.115676  | 0.172203 | 0.134761  | 0.143211  | 0.141026  |
| 0.106061  | 0.0856643 | 0.125583  | 0.184732 | 0.143794  | 0.148456  | 0.141608  |
| 0.137383  | 0.128642  | 0.150204  | 0.194493 | 0.159382  | 0.16317   | 0.0406469 |
| 0.234703  | 0.225087  | 0.239948  | 0.145542 | 0.242424  | 0.245338  | 0.247815  |
| 0.121358  | 0.110868  | 0.128351  | 0.18109  | 0.146853  | 0.149767  | 0.142337  |
| 0.105915  | 0.109994  | 0.127185  | 0.183421 | 0.138112  | 0.149767  | 0.137092  |
| 0.11859   | 0.100816  | 0.125874  | 0.163462 | 0.135635  | 0.145833  | 0.143648  |
| 0.117861  | 0.111451  | 0.133013  | 0.173514 | 0.135198  | 0.147145  | 0.137675  |
| 0.105769  | 0.101399  | 0.119172  | 0.172494 | 0.129808  | 0.137966  | 0.136364  |
| 0.108392  | 0.109266  | 0.11655   | 0.173951 | 0.135344  | 0.141754  | 0.143357  |
| 0.123689  | 0.107372  | 0.13039   | 0.171474 | 0.13986   | 0.14831   | 0.144959  |

|           |           |          |          |           |           |           |
|-----------|-----------|----------|----------|-----------|-----------|-----------|
| 0.108683  | 0.114802  | 0.115967 | 0.188228 | 0.144376  | 0.152244  | 0.155303  |
| 0.112179  | 0.104895  | 0.124126 | 0.166958 | 0.141754  | 0.150204  | 0.115967  |
| 0.235577  | 0.225962  | 0.239365 | 0.148456 | 0.23951   | 0.248834  | 0.244901  |
| 0.103147  | 0.100233  | 0.109266 | 0.170746 | 0.124272  | 0.13447   | 0.144231  |
| 0.04662   | 0.0932401 | 0.109557 | 0.171037 | 0.124854  | 0.131556  | 0.135781  |
| 0.114365  | 0.103584  | 0.113491 | 0.172348 | 0.130245  | 0.139277  | 0.139423  |
| 0.125291  | 0.113928  | 0.137529 | 0.186189 | 0.145251  | 0.156031  | 0.0594406 |
| 0.126748  | 0.120629  | 0.134615 | 0.187646 | 0.151952  | 0.154283  | 0.145688  |
| 0.125     | 0.109557  | 0.13141  | 0.167249 | 0.129516  | 0.140297  | 0.138986  |
| 0.121212  | 0.101399  | 0.124417 | 0.171329 | 0.140297  | 0.149621  | 0.138112  |
| 0.111451  | 0.0895979 | 0.121066 | 0.174679 | 0.13345   | 0.143939  | 0.099796  |
| 0.227418  | 0.220717  | 0.237908 | 0.143502 | 0.237762  | 0.242424  | 0.238491  |
| 0.123106  | 0.107663  | 0.129516 | 0.175554 | 0.143065  | 0.15035   | 0.139423  |
| 0.106643  | 0.110431  | 0.113928 | 0.185315 | 0.139132  | 0.149621  | 0.153555  |
| 0.108974  | 0.0984848 | 0.114802 | 0.17162  | 0.135927  | 0.144668  | 0.125874  |
| 0.117861  | 0.112617  | 0.128934 | 0.18546  | 0.139569  | 0.145396  | 0.13447   |
| 0.0537587 | 0.112034  | 0.119901 | 0.191288 | 0.135198  | 0.138112  | 0.143502  |
| 0.116404  | 0.106498  | 0.116696 | 0.173223 | 0.13345   | 0.141608  | 0.138549  |
| 0.105041  | 0.114365  | 0.116113 | 0.187209 | 0.138403  | 0.150641  | 0.151661  |
| 0.113928  | 0.11655   | 0.122669 | 0.193182 | 0.144959  | 0.151369  | 0.157051  |
| 0.102855  | 0.106935  | 0.113345 | 0.183275 | 0.138258  | 0.143794  | 0.151224  |
| 0.116696  | 0.107372  | 0.114948 | 0.174388 | 0.130245  | 0.142191  | 0.14088   |
| 0.112034  | 0.116404  | 0.130099 | 0.188957 | 0.143939  | 0.149184  | 0.134178  |
| 0.11859   | 0.120338  | 0.133159 | 0.194056 | 0.148164  | 0.153992  | 0.136946  |
| 0.118007  | 0.115385  | 0.126748 | 0.191434 | 0.0619172 | 0.0595862 | 0.152389  |
| 0.119755  | 0.119464  | 0.129662 | 0.192599 | 0.0619172 | 0.060169  | 0.159674  |
| 0.114656  | 0.117861  | 0.133887 | 0.19391  | 0.143648  | 0.151224  | 0.137092  |
| 0.107955  | 0.101253  | 0.119027 | 0.167686 | 0.122669  | 0.129953  | 0.141754  |
| 0.10373   | 0.120047  | 0.118881 | 0.201049 | 0.131847  | 0.135344  | 0.150932  |
| 0.127768  | 0.11757   | 0.134178 | 0.18954  | 0.152389  | 0.15676   | 0.151661  |
| 0.204983  | 0.195076  | 0.214307 | 0.121941 | 0.211538  | 0.222028  | 0.21926   |
| 0.123397  | 0.107955  | 0.127185 | 0.174097 | 0.142774  | 0.15035   | 0.144668  |
| 0.0470571 | 0.103584  | 0.113491 | 0.182255 | 0.127914  | 0.143357  | 0.141171  |
| 0.120921  | 0.112762  | 0.123543 | 0.170746 | 0.138258  | 0.147873  | 0.144522  |
| 0.221882  | 0.212267  | 0.228875 | 0.138258 | 0.225524  | 0.237179  | 0.233246  |
| 0.209645  | 0.200029  | 0.215763 | 0.13243  | 0.22028   | 0.226981  | 0.223631  |
| 0.112471  | 0.116841  | 0.120047 | 0.189685 | 0.145251  | 0.154575  | 0.157634  |
| 0.250437  | 0.240239  | 0.255682 | 0.158071 | 0.253205  | 0.254953  | 0.256556  |
| 0.108537  | 0.103001  | 0.118735 | 0.171766 | 0.120047  | 0.129662  | 0.137966  |
| 0.132139  | 0.128059  | 0.142628 | 0.189831 | 0.150058  | 0.150058  | 0.15574   |
| 0.10708   | 0.105332  | 0.113199 | 0.176428 | 0.124417  | 0.130245  | 0.14729   |
| 0.109848  | 0.115093  | 0.126457 | 0.188228 | 0.142045  | 0.151661  | 0.135198  |
| 0.188083  | 0.174971  | 0.195659 | 0.104458 | 0.194347  | 0.20542   | 0.202943  |
| 0.113345  | 0.115967  | 0.122378 | 0.17803  | 0.142337  | 0.152244  | 0.144231  |

|           |           |           |          |           |           |           |
|-----------|-----------|-----------|----------|-----------|-----------|-----------|
| 0.194347  | 0.18211   | 0.202214  | 0.118007 | 0.200612  | 0.211101  | 0.210664  |
| 0.112179  | 0.0999417 | 0.125     | 0.18007  | 0.135927  | 0.148164  | 0.136655  |
| 0.104021  | 0.106643  | 0.116259  | 0.155886 | 0.135052  | 0.146416  | 0.149767  |
| 0.119464  | 0.112762  | 0.127622  | 0.181235 | 0.132721  | 0.140297  | 0.143065  |
| 0.108683  | 0.0990676 | 0.120921  | 0.160256 | 0.128059  | 0.136218  | 0.138403  |
| 0.107372  | 0.0992133 | 0.113782  | 0.167395 | 0.126166  | 0.136655  | 0.134178  |
| 0.111451  | 0.0983392 | 0.121649  | 0.169435 | 0.136364  | 0.142483  | 0.14088   |
| 0.103001  | 0.100087  | 0.109703  | 0.168561 | 0.121795  | 0.129662  | 0.142337  |
| 0.114219  | 0.0952797 | 0.124709  | 0.168415 | 0.135344  | 0.146125  | 0.136946  |
| 0.092803  | 0.10708   | 0.110577  | 0.185169 | 0.116841  | 0.128788  | 0.149621  |
| 0.108537  | 0.100379  | 0.123106  | 0.170017 | 0.138403  | 0.142774  | 0.134761  |
| 0.104312  | 0.101399  | 0.112179  | 0.172494 | 0.124563  | 0.131265  | 0.142483  |
| 0.116113  | 0.108537  | 0.124854  | 0.171183 | 0.0839161 | 0.0871212 | 0.150204  |
| 0.130099  | 0.109994  | 0.131265  | 0.179924 | 0.148019  | 0.151224  | 0.143211  |
| 0.108392  | 0.104604  | 0.118298  | 0.175117 | 0.0659965 | 0.0732809 | 0.142774  |
| 0.114365  | 0.108537  | 0.116404  | 0.174097 | 0.137529  | 0.14627   | 0.139132  |
| 0.108974  | 0.0996503 | 0.114802  | 0.168415 | 0.129808  | 0.136801  | 0.134033  |
| 0.107226  | 0.109848  | 0.112471  | 0.178613 | 0.135344  | 0.144376  | 0.151515  |
| 0.105186  | 0.108392  | 0.125291  | 0.181527 | 0.138258  | 0.148164  | 0.136364  |
| 0.111742  | 0.107955  | 0.0470571 | 0.180507 | 0.13141   | 0.13986   | 0.154283  |
| 0.108246  | 0.10708   | 0.118153  | 0.18109  | 0.0632284 | 0.0710956 | 0.147582  |
| 0.11859   | 0.0979021 | 0.125291  | 0.170163 | 0.135344  | 0.145833  | 0.142191  |
| 0.129516  | 0.112325  | 0.132721  | 0.181381 | 0.145688  | 0.15472   | 0.146416  |
| 0.136801  | 0.120192  | 0.137675  | 0.184878 | 0.150932  | 0.155303  | 0.143794  |
| 0.0981935 | 0.0976107 | 0.106643  | 0.171329 | 0.130099  | 0.140297  | 0.143939  |
| 0.113928  | 0.104895  | 0.121212  | 0.172203 | 0.130973  | 0.142628  | 0.13986   |
| 0.104167  | 0.0980478 | 0.116404  | 0.168852 | 0.130828  | 0.13986   | 0.138549  |
| 0.117861  | 0.120775  | 0.13243   | 0.195076 | 0.149767  | 0.15035   | 0.135344  |
| 0.106935  | 0.105186  | 0.116841  | 0.18211  | 0.12602   | 0.131265  | 0.147145  |
| 0.126748  | 0.12704   | 0.0603147 | 0.198427 | 0.146707  | 0.147873  | 0.157051  |
| 0.134324  | 0.124709  | 0.133159  | 0.187354 | 0.151369  | 0.155157  | 0.144231  |
| 0.118444  | 0.107372  | 0.136509  | 0.18109  | 0.145105  | 0.156469  | 0.0622086 |
| 0.112762  | 0.101981  | 0.124126  | 0.172203 | 0.130099  | 0.137092  | 0.136072  |
| 0.101836  | 0.0980478 | 0.122232  | 0.177593 | 0.134615  | 0.144522  | 0.131847  |
| 0.120775  | 0.114948  | 0.128351  | 0.18546  | 0.0608974 | 0.0614802 | 0.154866  |
| 0.206002  | 0.193765  | 0.212413  | 0.129953 | 0.208188  | 0.221008  | 0.223776  |
| 0.109557  | 0.106352  | 0.11655   | 0.172494 | 0.137966  | 0.147873  | 0.137529  |
| 0.114656  | 0.10912   | 0.125728  | 0.175845 | 0.131993  | 0.141026  | 0.148456  |
| 0.102855  | 0.107226  | 0.125583  | 0.18648  | 0.138258  | 0.150495  | 0.132867  |
| 0.112325  | 0.108537  | 0.122232  | 0.180798 | 0.0675991 | 0.0731352 | 0.150495  |
| 0.11655   | 0.105186  | 0.125874  | 0.18007  | 0.13884   | 0.148456  | 0.142483  |
| 0.111888  | 0.104312  | 0.122378  | 0.17366  | 0.137383  | 0.144668  | 0.143065  |
| 0.112617  | 0.109411  | 0.124563  | 0.178176 | 0.143065  | 0.148601  | 0.140006  |
| 0.115385  | 0.104895  | 0.131119  | 0.180361 | 0.139423  | 0.151952  | 0.0708042 |

|           |           |          |          |          |          |          |
|-----------|-----------|----------|----------|----------|----------|----------|
| 0.0894522 | 0.103147  | 0.108974 | 0.18211  | 0.120192 | 0.130682 | 0.145105 |
| 0.111888  | 0.115093  | 0.129371 | 0.192308 | 0.145542 | 0.152535 | 0.134033 |
| 0.105478  | 0.103147  | 0.123252 | 0.176282 | 0.13039  | 0.141754 | 0.143939 |
| 0.116696  | 0.105915  | 0.124854 | 0.174971 | 0.140734 | 0.147727 | 0.140297 |
| 0.166667  | 0.162879  | 0.182984 | 0.160548 | 0.169435 | 0.186917 | 0.195804 |
| 0.118881  | 0.100524  | 0.125874 | 0.167832 | 0.138549 | 0.145833 | 0.142483 |
| 0.112908  | 0.116696  | 0.131847 | 0.179633 | 0.143648 | 0.151224 | 0.137966 |
| 0.106643  | 0.111305  | 0.121503 | 0.187937 | 0.13447  | 0.137966 | 0.146562 |
| 0.112325  | 0.109703  | 0.131265 | 0.175554 | 0.134615 | 0.147436 | 0.141754 |
| 0.105624  | 0.0960082 | 0.115239 | 0.158945 | 0.130828 | 0.137821 | 0.133013 |
| 0.103001  | 0.092803  | 0.115822 | 0.166812 | 0.131119 | 0.136072 | 0.129808 |
| 0.109994  | 0.101544  | 0.119027 | 0.162442 | 0.132867 | 0.140152 | 0.137092 |
| 0.109411  | 0.108246  | 0.130682 | 0.18109  | 0.138112 | 0.14627  | 0.144668 |
| 0.113782  | 0.101836  | 0.126894 | 0.160693 | 0.135781 | 0.143065 | 0.139714 |
| 0.120047  | 0.113928  | 0.126166 | 0.193765 | 0.135052 | 0.139423 | 0.152681 |
| 0.101253  | 0.101253  | 0.114365 | 0.166521 | 0.134033 | 0.140152 | 0.14088  |
| 0.105769  | 0.109266  | 0.113928 | 0.173368 | 0.129516 | 0.140297 | 0.151515 |
| 0.11961   | 0.117279  | 0.129225 | 0.191871 | 0.149476 | 0.15676  | 0.14933  |
| 0.102418  | 0.107663  | 0.117861 | 0.184003 | 0.129662 | 0.131119 | 0.145542 |
| 0.112325  | 0.112034  | 0.123689 | 0.179341 | 0.12704  | 0.130245 | 0.144376 |
| 0.0957168 | 0.101836  | 0.111451 | 0.17701  | 0.124126 | 0.134615 | 0.146999 |
| 0.101253  | 0.103875  | 0.115822 | 0.180798 | 0.126457 | 0.130828 | 0.148456 |
| 0.104458  | 0.097465  | 0.111451 | 0.170309 | 0.128205 | 0.132867 | 0.137383 |
| 0.11655   | 0.111888  | 0.11655  | 0.185897 | 0.13884  | 0.142045 | 0.152681 |
| 0.0984848 | 0.104312  | 0.110431 | 0.173368 | 0.128642 | 0.136801 | 0.140443 |
| 0.130245  | 0.131119  | 0.136655 | 0.195804 | 0.154283 | 0.158071 | 0.159382 |
| 0.121212  | 0.120338  | 0.131993 | 0.183275 | 0.144085 | 0.157197 | 0.152972 |
| 0.103438  | 0.102564  | 0.109557 | 0.179196 | 0.119901 | 0.126603 | 0.143357 |
| 0.122815  | 0.129225  | 0.130099 | 0.200903 | 0.149184 | 0.150058 | 0.155157 |
| 0.119901  | 0.111451  | 0.132139 | 0.178467 | 0.111014 | 0.121212 | 0.14088  |
| 0.128642  | 0.120775  | 0.139714 | 0.185752 | 0.152972 | 0.146562 | 0.151078 |
| 0.109411  | 0.0995047 | 0.105041 | 0.17701  | 0.122669 | 0.129953 | 0.145542 |
| 0.133741  | 0.132576  | 0.143357 | 0.196096 | 0.154575 | 0.164481 | 0.159382 |
| 0.114219  | 0.118298  | 0.125    | 0.183275 | 0.145833 | 0.152826 | 0.147436 |
| 0.124417  | 0.123834  | 0.136364 | 0.18648  | 0.142628 | 0.149913 | 0.151515 |
| 0.11014   | 0.111305  | 0.125291 | 0.186772 | 0.11553  | 0.11961  | 0.145396 |
| 0.10271   | 0.101544  | 0.116696 | 0.177885 | 0.127622 | 0.13345  | 0.144085 |
| 0.102273  | 0.103438  | 0.118007 | 0.174242 | 0.132139 | 0.138549 | 0.143065 |
| 0.101253  | 0.105624  | 0.119318 | 0.180216 | 0.137529 | 0.143939 | 0.135344 |
| 0.0965909 | 0.112325  | 0.114365 | 0.189248 | 0.129953 | 0.13345  | 0.146999 |
| 0.122086  | 0.11451   | 0.120629 | 0.193182 | 0.137383 | 0.142337 | 0.150932 |
| 0.117133  | 0.112762  | 0.125583 | 0.173368 | 0.139423 | 0.149913 | 0.152389 |
| 0.0961538 | 0.0999417 | 0.115967 | 0.178613 | 0.110286 | 0.117279 | 0.141608 |
| 0.105332  | 0.105332  | 0.115822 | 0.174388 | 0.134324 | 0.142483 | 0.145251 |

|          |           |          |          |          |          |          |
|----------|-----------|----------|----------|----------|----------|----------|
| 0.11451  | 0.115093  | 0.123543 | 0.179196 | 0.136509 | 0.140006 | 0.140152 |
| 0.107226 | 0.107809  | 0.115676 | 0.175699 | 0.12602  | 0.137092 | 0.142774 |
| 0.111451 | 0.112617  | 0.122815 | 0.183712 | 0.140152 | 0.144522 | 0.14933  |
| 0.109703 | 0.105332  | 0.108829 | 0.174679 | 0.125874 | 0.134615 | 0.148164 |
| 0.120047 | 0.106643  | 0.130536 | 0.166958 | 0.126311 | 0.13447  | 0.136072 |
| 0.1081   | 0.106352  | 0.129079 | 0.173368 | 0.13447  | 0.145833 | 0.138986 |
| 0.107517 | 0.102273  | 0.115385 | 0.168124 | 0.119901 | 0.125728 | 0.136364 |
| 0.111014 | 0.105769  | 0.120047 | 0.174242 | 0.129516 | 0.135927 | 0.138403 |
| 0.11553  | 0.103584  | 0.127185 | 0.167395 | 0.126748 | 0.140443 | 0.141171 |
| 0.108683 | 0.102273  | 0.121795 | 0.171329 | 0.136218 | 0.141171 | 0.142774 |
| 0.11859  | 0.110723  | 0.125874 | 0.168998 | 0.135344 | 0.143211 | 0.145979 |
| 0.11451  | 0.0958625 | 0.122378 | 0.162005 | 0.123689 | 0.13447  | 0.133159 |
| 0.11961  | 0.117279  | 0.13243  | 0.184586 | 0.139277 | 0.136655 | 0.149621 |

| TDr_2007  | TDr_2009  | TDr_2015 | TDr_2017 | TDr_2018  | TDr_2022 | TDr_2028 |
|-----------|-----------|----------|----------|-----------|----------|----------|
| 0.0821678 | 0.120484  | 0.192308 | 0.122378 | 0.126311  | 0.112325 | 0.143794 |
| 0.109411  | 0.1081    | 0.195367 | 0.109994 | 0.111305  | 0.119464 | 0.152098 |
| 0.104167  | 0.106935  | 0.191871 | 0.10912  | 0.108974  | 0.116841 | 0.149767 |
| 0.116113  | 0.0938228 | 0.202943 | 0.121358 | 0.0958625 | 0.118007 | 0.159674 |
| 0.133887  | 0.131702  | 0.218386 | 0.134178 | 0.134324  | 0.129079 | 0.179779 |
| 0.117861  | 0.129662  | 0.210227 | 0.127477 | 0.131702  | 0.126457 | 0.166084 |
| 0.107226  | 0.128642  | 0.213287 | 0.129953 | 0.133013  | 0.113491 | 0.174388 |
| 0.108974  | 0.106206  | 0.196387 | 0.112179 | 0.111742  | 0.115239 | 0.154283 |
| 0.105624  | 0.109557  | 0.2044   | 0.118735 | 0.115093  | 0.106352 | 0.159674 |
| 0.10373   | 0.119901  | 0.208333 | 0.118007 | 0.124854  | 0.117279 | 0.164481 |
| 0.101836  | 0.127331  | 0.193328 | 0.128642 | 0.129371  | 0.11014  | 0.151807 |
| 0.108974  | 0.10912   | 0.203671 | 0.109557 | 0.112325  | 0.107955 | 0.154283 |
| 0.115093  | 0.116404  | 0.206876 | 0.122669 | 0.122815  | 0.113199 | 0.164481 |
| 0.131847  | 0.132284  | 0.16215  | 0.131847 | 0.134907  | 0.134324 | 0.122378 |
| 0.126748  | 0.129225  | 0.210664 | 0.126457 | 0.133013  | 0.130099 | 0.170892 |
| 0.11757   | 0.121795  | 0.212558 | 0.119901 | 0.12704   | 0.115093 | 0.164336 |
| 0.113345  | 0.118735  | 0.207751 | 0.116259 | 0.123397  | 0.107663 | 0.164773 |
| 0.142045  | 0.134615  | 0.226253 | 0.138549 | 0.143939  | 0.13986  | 0.182401 |
| 0.0992133 | 0.105478  | 0.193328 | 0.108829 | 0.107517  | 0.118007 | 0.15472  |
| 0.199446  | 0.198135  | 0.137675 | 0.194493 | 0.199883  | 0.201923 | 0.145688 |
| 0.0987762 | 0.132721  | 0.210082 | 0.133741 | 0.136509  | 0.120484 | 0.177302 |
| 0.0936772 | 0.123834  | 0.213432 | 0.126311 | 0.129079  | 0.117716 | 0.17366  |
| 0.111597  | 0.114365  | 0.202214 | 0.115676 | 0.116696  | 0.109703 | 0.149038 |
| 0.11961   | 0.130536  | 0.218094 | 0.125146 | 0.128205  | 0.117133 | 0.175699 |
| 0.0996503 | 0.110868  | 0.199883 | 0.111014 | 0.114656  | 0.106789 | 0.14933  |
| 0.10169   | 0.133013  | 0.214161 | 0.137238 | 0.137966  | 0.129516 | 0.180216 |
| 0.112471  | 0.131847  | 0.212995 | 0.126748 | 0.133304  | 0.114948 | 0.176136 |
| 0.119755  | 0.120192  | 0.221445 | 0.125583 | 0.120775  | 0.115239 | 0.172057 |
| 0.120338  | 0.129808  | 0.213869 | 0.125583 | 0.132721  | 0.117861 | 0.178176 |
| 0.120047  | 0.123397  | 0.220862 | 0.124709 | 0.129808  | 0.111742 | 0.171474 |
| 0.0939685 | 0.129079  | 0.209062 | 0.130099 | 0.13549   | 0.117133 | 0.167249 |
| 0.113636  | 0.123397  | 0.215035 | 0.121795 | 0.126894  | 0.110577 | 0.174971 |
| 0.101107  | 0.113782  | 0.19697  | 0.113928 | 0.114656  | 0.109411 | 0.150495 |
| 0.113928  | 0.121066  | 0.208042 | 0.11859  | 0.125146  | 0.110286 | 0.169435 |
| 0.114656  | 0.129079  | 0.215763 | 0.129808 | 0.131119  | 0.115385 | 0.175699 |
| 0.120921  | 0.131556  | 0.220862 | 0.125291 | 0.133013  | 0.118735 | 0.175845 |
| 0.111451  | 0.137238  | 0.227418 | 0.14088  | 0.136655  | 0.125291 | 0.182984 |
| 0.114802  | 0.129225  | 0.2162   | 0.12704  | 0.13243   | 0.117861 | 0.173514 |
| 0.102564  | 0.114365  | 0.204545 | 0.11451  | 0.116113  | 0.105624 | 0.162442 |
| 0.120338  | 0.121649  | 0.219114 | 0.129662 | 0.124563  | 0.117279 | 0.172931 |
| 0.106935  | 0.113199  | 0.205128 | 0.110431 | 0.116113  | 0.107372 | 0.160402 |
| 0.140152  | 0.14292   | 0.226399 | 0.140734 | 0.143211  | 0.139714 | 0.184586 |

|           |           |          |          |           |           |          |
|-----------|-----------|----------|----------|-----------|-----------|----------|
| 0.140443  | 0.146125  | 0.22669  | 0.141608 | 0.150787  | 0.137675  | 0.186626 |
| 0.115822  | 0.119464  | 0.207605 | 0.12602  | 0.125291  | 0.113636  | 0.167249 |
| 0.104167  | 0.11859   | 0.209062 | 0.121066 | 0.124126  | 0.0981935 | 0.166084 |
| 0.114802  | 0.128934  | 0.220862 | 0.132284 | 0.131265  | 0.110286  | 0.176428 |
| 0.117424  | 0.121649  | 0.210082 | 0.120047 | 0.126603  | 0.109994  | 0.167978 |
| 0.133887  | 0.137529  | 0.226253 | 0.137092 | 0.142191  | 0.130828  | 0.181235 |
| 0.114365  | 0.117716  | 0.210227 | 0.119318 | 0.12296   | 0.114219  | 0.165501 |
| 0.109848  | 0.12398   | 0.208333 | 0.119464 | 0.125146  | 0.112908  | 0.165938 |
| 0.0808566 | 0.147727  | 0.226253 | 0.142337 | 0.152098  | 0.136655  | 0.189977 |
| 0.132139  | 0.132284  | 0.215472 | 0.126311 | 0.136946  | 0.125874  | 0.167249 |
| 0.112471  | 0.119318  | 0.207168 | 0.117424 | 0.122232  | 0.11116   | 0.162733 |
| 0.126457  | 0.126603  | 0.220571 | 0.12704  | 0.130099  | 0.125146  | 0.174679 |
| 0.112471  | 0.0866841 | 0.196387 | 0.117133 | 0.0910548 | 0.113782  | 0.146125 |
| 0.136364  | 0.136801  | 0.230769 | 0.142483 | 0.138549  | 0.13243   | 0.190997 |
| 0.125728  | 0.131993  | 0.219843 | 0.130973 | 0.135198  | 0.122669  | 0.175699 |
| 0.113491  | 0.119464  | 0.210519 | 0.120775 | 0.122669  | 0.113928  | 0.165793 |
| 0.110577  | 0.124417  | 0.208188 | 0.120192 | 0.129371  | 0.113054  | 0.166667 |
| 0.115676  | 0.129808  | 0.22028  | 0.128497 | 0.134761  | 0.114948  | 0.176428 |
| 0.134033  | 0.137092  | 0.229312 | 0.136364 | 0.142045  | 0.13039   | 0.183421 |
| 0.141317  | 0.133304  | 0.231352 | 0.141608 | 0.136218  | 0.138549  | 0.184003 |
| 0.158071  | 0.157343  | 0.171183 | 0.159237 | 0.1588    | 0.153263  | 0.151807 |
| 0.112034  | 0.117716  | 0.208188 | 0.122815 | 0.119464  | 0.111597  | 0.164044 |
| 0.109411  | 0.121795  | 0.208479 | 0.118444 | 0.126166  | 0.113345  | 0.166958 |
| 0.107955  | 0.118298  | 0.208479 | 0.120192 | 0.120921  | 0.105769  | 0.166084 |
| 0.123543  | 0.144085  | 0.219697 | 0.13986  | 0.149038  | 0.132721  | 0.178467 |
| 0.11014   | 0.113782  | 0.206002 | 0.115967 | 0.116987  | 0.107663  | 0.162733 |
| 0.132139  | 0.135781  | 0.216346 | 0.136801 | 0.137238  | 0.131119  | 0.175699 |
| 0.112034  | 0.129953  | 0.218094 | 0.131847 | 0.134615  | 0.114219  | 0.180361 |
| 0.115967  | 0.123106  | 0.210373 | 0.119464 | 0.128351  | 0.110868  | 0.165064 |
| 0.124709  | 0.148456  | 0.21824  | 0.150641 | 0.148747  | 0.139132  | 0.174388 |
| 0.122378  | 0.124854  | 0.215909 | 0.125874 | 0.127185  | 0.114365  | 0.171766 |
| 0.139423  | 0.137238  | 0.228293 | 0.137675 | 0.140443  | 0.129079  | 0.183858 |
| 0.132576  | 0.131556  | 0.21824  | 0.126457 | 0.136509  | 0.125146  | 0.171183 |
| 0.111742  | 0.110431  | 0.199738 | 0.117861 | 0.113928  | 0.112762  | 0.159091 |
| 0.111742  | 0.117424  | 0.204691 | 0.121941 | 0.121795  | 0.105769  | 0.163753 |
| 0.116404  | 0.120047  | 0.210519 | 0.115822 | 0.125291  | 0.108683  | 0.163462 |
| 0.130099  | 0.127622  | 0.223922 | 0.13243  | 0.130828  | 0.125583  | 0.180944 |
| 0.106643  | 0.122232  | 0.207168 | 0.121795 | 0.124563  | 0.109994  | 0.16623  |
| 0.139132  | 0.135198  | 0.229749 | 0.136509 | 0.136946  | 0.137821  | 0.180653 |
| 0.116696  | 0.129662  | 0.210227 | 0.123689 | 0.13345   | 0.119172  | 0.170455 |
| 0.119318  | 0.115967  | 0.216055 | 0.124563 | 0.121503  | 0.11014   | 0.173077 |
| 0.114073  | 0.125583  | 0.207605 | 0.116987 | 0.128205  | 0.113928  | 0.165793 |
| 0.124563  | 0.121503  | 0.214307 | 0.124272 | 0.126166  | 0.118298  | 0.168998 |
| 0.112908  | 0.123252  | 0.212267 | 0.117861 | 0.128497  | 0.111014  | 0.165793 |



|           |          |          |          |          |           |          |
|-----------|----------|----------|----------|----------|-----------|----------|
| 0.111451  | 0.117716 | 0.209936 | 0.11553  | 0.122669 | 0.108392  | 0.16317  |
| 0.134907  | 0.137675 | 0.228147 | 0.139569 | 0.14292  | 0.133013  | 0.184586 |
| 0.106061  | 0.12398  | 0.208916 | 0.123543 | 0.125728 | 0.109994  | 0.165355 |
| 0.109411  | 0.120921 | 0.211393 | 0.117861 | 0.124709 | 0.109557  | 0.164627 |
| 0.114073  | 0.130536 | 0.217803 | 0.13447  | 0.13345  | 0.118298  | 0.182401 |
| 0.107663  | 0.132576 | 0.216346 | 0.134761 | 0.137529 | 0.11655   | 0.177448 |
| 0.126603  | 0.141026 | 0.225962 | 0.13884  | 0.1419   | 0.123252  | 0.181527 |
| 0.134324  | 0.140589 | 0.232517 | 0.146562 | 0.142337 | 0.129516  | 0.1875   |
| 0.101836  | 0.12704  | 0.207022 | 0.123106 | 0.131119 | 0.110431  | 0.161131 |
| 0.1706    | 0.181818 | 0.157488 | 0.179924 | 0.185606 | 0.177156  | 0.148601 |
| 0.0990676 | 0.113199 | 0.208333 | 0.124126 | 0.118153 | 0.104167  | 0.168269 |
| 0.132721  | 0.139569 | 0.228293 | 0.143502 | 0.142483 | 0.123252  | 0.185606 |
| 0.12602   | 0.130536 | 0.223048 | 0.135344 | 0.134615 | 0.116841  | 0.178322 |
| 0.117716  | 0.143502 | 0.228147 | 0.148601 | 0.145251 | 0.125437  | 0.188374 |
| 0.110577  | 0.120047 | 0.213141 | 0.121358 | 0.123834 | 0.10373   | 0.167541 |
| 0.130973  | 0.134907 | 0.226544 | 0.140589 | 0.13549  | 0.123252  | 0.185023 |
| 0.108246  | 0.124417 | 0.214598 | 0.124563 | 0.123543 | 0.103438  | 0.170746 |
| 0.120921  | 0.129808 | 0.215618 | 0.133159 | 0.135052 | 0.114073  | 0.171474 |
| 0.100816  | 0.119901 | 0.21183  | 0.124126 | 0.122523 | 0.105915  | 0.163899 |
| 0.129662  | 0.142045 | 0.230478 | 0.142191 | 0.146999 | 0.119027  | 0.189248 |
| 0.105186  | 0.121066 | 0.211538 | 0.123834 | 0.125146 | 0.0971737 | 0.169143 |
| 0.118153  | 0.135198 | 0.221591 | 0.143211 | 0.140152 | 0.126457  | 0.172494 |
| 0.0987762 | 0.126311 | 0.212995 | 0.122086 | 0.129225 | 0.106206  | 0.171183 |
| 0.127768  | 0.130245 | 0.222756 | 0.13243  | 0.134907 | 0.125583  | 0.177448 |
| 0.112471  | 0.135927 | 0.21824  | 0.137821 | 0.143794 | 0.118444  | 0.181672 |
| 0.0955711 | 0.120775 | 0.208916 | 0.122378 | 0.12602  | 0.105332  | 0.172057 |
| 0.127914  | 0.146707 | 0.215618 | 0.143648 | 0.14933  | 0.14088   | 0.170892 |
| 0.0980478 | 0.125291 | 0.211393 | 0.128642 | 0.13141  | 0.106352  | 0.173077 |
| 0.108829  | 0.122086 | 0.215763 | 0.130682 | 0.126166 | 0.109266  | 0.17162  |
| 0.109557  | 0.123397 | 0.212995 | 0.121795 | 0.12602  | 0.109994  | 0.169726 |
| 0.121795  | 0.144959 | 0.225233 | 0.144231 | 0.149038 | 0.135052  | 0.187791 |
| 0.112179  | 0.130682 | 0.197261 | 0.125583 | 0.128642 | 0.11757   | 0.146999 |
| 0.106061  | 0.117279 | 0.211538 | 0.120338 | 0.120484 | 0.104167  | 0.165938 |
| 0.111014  | 0.121941 | 0.207168 | 0.125291 | 0.123397 | 0.112325  | 0.168561 |
| 0.0986305 | 0.123834 | 0.210519 | 0.126603 | 0.128205 | 0.111305  | 0.172203 |
| 0.118007  | 0.133887 | 0.223193 | 0.135198 | 0.134761 | 0.12398   | 0.179924 |
| 0.0960082 | 0.125583 | 0.212267 | 0.12602  | 0.130245 | 0.106061  | 0.173368 |
| 0.101107  | 0.110577 | 0.206294 | 0.112471 | 0.116404 | 0.0983392 | 0.163607 |
| 0.101107  | 0.114656 | 0.206294 | 0.120338 | 0.115822 | 0.103875  | 0.16215  |
| 0.106206  | 0.120047 | 0.213432 | 0.119901 | 0.123543 | 0.101107  | 0.166667 |
| 0.118444  | 0.120629 | 0.206439 | 0.125728 | 0.126457 | 0.113345  | 0.161713 |
| 0.125583  | 0.135052 | 0.222319 | 0.142774 | 0.138549 | 0.120484  | 0.182255 |
| 0.109411  | 0.115676 | 0.21285  | 0.120192 | 0.123543 | 0.101981  | 0.170455 |
| 0.10373   | 0.116696 | 0.205711 | 0.118298 | 0.118444 | 0.104458  | 0.161859 |

|           |           |          |          |           |           |          |
|-----------|-----------|----------|----------|-----------|-----------|----------|
| 0.116841  | 0.137092  | 0.218823 | 0.132867 | 0.140589  | 0.111742  | 0.17905  |
| 0.105332  | 0.118007  | 0.207896 | 0.121941 | 0.121503  | 0.099359  | 0.164044 |
| 0.106789  | 0.129079  | 0.205857 | 0.130099 | 0.131702  | 0.118007  | 0.166084 |
| 0.0642483 | 0.134907  | 0.215472 | 0.132139 | 0.140152  | 0.126166  | 0.180361 |
| 0.113199  | 0.121795  | 0.216055 | 0.125728 | 0.126166  | 0.107226  | 0.17162  |
| 0.108683  | 0.118735  | 0.214452 | 0.122086 | 0.124563  | 0.104458  | 0.169726 |
| 0.109266  | 0.116404  | 0.209207 | 0.118007 | 0.121941  | 0.104458  | 0.165647 |
| 0.101107  | 0.11553   | 0.204254 | 0.121795 | 0.120484  | 0.104749  | 0.159528 |
| 0.118007  | 0.128934  | 0.219114 | 0.129079 | 0.132139  | 0.117861  | 0.180798 |
| 0.102855  | 0.114656  | 0.206585 | 0.119755 | 0.118735  | 0.100962  | 0.165647 |
| 0.128059  | 0.141608  | 0.224796 | 0.147582 | 0.143939  | 0.130536  | 0.189394 |
| 0.128497  | 0.138549  | 0.216492 | 0.140734 | 0.14292   | 0.126311  | 0.180216 |
| 0.118007  | 0.12602   | 0.219988 | 0.126748 | 0.128934  | 0.117861  | 0.172348 |
| 0.113199  | 0.12704   | 0.209936 | 0.122815 | 0.131119  | 0.112179  | 0.170455 |
| 0.0945513 | 0.125     | 0.206439 | 0.11757  | 0.128788  | 0.109266  | 0.168706 |
| 0.104604  | 0.121941  | 0.210956 | 0.123252 | 0.124854  | 0.100379  | 0.172057 |
| 0.104749  | 0.119172  | 0.213141 | 0.122232 | 0.124417  | 0.0999417 | 0.169289 |
| 0.106789  | 0.115967  | 0.211684 | 0.109703 | 0.119172  | 0.104312  | 0.162879 |
| 0.11116   | 0.0999417 | 0.200029 | 0.115239 | 0.100233  | 0.108392  | 0.143065 |
| 0.13447   | 0.134907  | 0.224796 | 0.130973 | 0.139277  | 0.118881  | 0.18007  |
| 0.115385  | 0.12398   | 0.219988 | 0.129079 | 0.125437  | 0.106206  | 0.172931 |
| 0.128642  | 0.13345   | 0.214598 | 0.129516 | 0.137821  | 0.128497  | 0.172203 |
| 0.122086  | 0.139423  | 0.226981 | 0.142191 | 0.142045  | 0.123106  | 0.1875   |
| 0.189977  | 0.186626  | 0.108683 | 0.185897 | 0.187791  | 0.197115  | 0.13243  |
| 0.231789  | 0.226399  | 0.111742 | 0.22771  | 0.22873   | 0.236014  | 0.173951 |
| 0.109266  | 0.0735723 | 0.194639 | 0.113345 | 0.0750291 | 0.113782  | 0.139423 |
| 0.112617  | 0.116841  | 0.204108 | 0.117279 | 0.119755  | 0.104895  | 0.164918 |
| 0.105915  | 0.116259  | 0.202943 | 0.11553  | 0.120047  | 0.101107  | 0.157925 |
| 0.107955  | 0.11655   | 0.207605 | 0.117861 | 0.120629  | 0.105769  | 0.165793 |
| 0.128351  | 0.129371  | 0.213432 | 0.125437 | 0.132576  | 0.131119  | 0.170746 |
| 0.113782  | 0.115967  | 0.21285  | 0.11961  | 0.118007  | 0.10373   | 0.164627 |
| 0.141317  | 0.146707  | 0.231935 | 0.146562 | 0.151078  | 0.129516  | 0.191288 |
| 0.116404  | 0.122669  | 0.212267 | 0.120775 | 0.12704   | 0.105769  | 0.167249 |
| 0.127768  | 0.129371  | 0.223922 | 0.134761 | 0.131702  | 0.114219  | 0.182401 |
| 0.129371  | 0.133304  | 0.215618 | 0.136655 | 0.136509  | 0.12602   | 0.171183 |
| 0.130536  | 0.135927  | 0.226107 | 0.134324 | 0.142337  | 0.125146  | 0.179924 |
| 0.131993  | 0.139132  | 0.224359 | 0.142191 | 0.139132  | 0.13243   | 0.180507 |
| 0.112762  | 0.123397  | 0.2162   | 0.121795 | 0.128351  | 0.106206  | 0.172931 |
| 0.109848  | 0.119027  | 0.212121 | 0.120338 | 0.124563  | 0.100087  | 0.164481 |
| 0.11553   | 0.12704   | 0.215472 | 0.120775 | 0.130828  | 0.106352  | 0.167249 |
| 0.109411  | 0.116259  | 0.204108 | 0.114656 | 0.119464  | 0.102855  | 0.159965 |
| 0.110286  | 0.115967  | 0.210519 | 0.116113 | 0.122378  | 0.0984848 | 0.161713 |
| 0.113345  | 0.117861  | 0.212995 | 0.121795 | 0.121941  | 0.102127  | 0.169435 |
| 0.128351  | 0.132284  | 0.219551 | 0.128059 | 0.134907  | 0.123543  | 0.178322 |

|          |          |          |          |          |           |          |
|----------|----------|----------|----------|----------|-----------|----------|
| 0.134761 | 0.137821 | 0.22567  | 0.138258 | 0.142774 | 0.129079  | 0.18648  |
| 0.115676 | 0.119901 | 0.210664 | 0.12296  | 0.124854 | 0.107372  | 0.168852 |
| 0.109994 | 0.122086 | 0.207022 | 0.121941 | 0.124126 | 0.108392  | 0.164336 |
| 0.129516 | 0.136946 | 0.223922 | 0.13447  | 0.139277 | 0.118881  | 0.18211  |
| 0.10708  | 0.117716 | 0.207896 | 0.113199 | 0.120629 | 0.101981  | 0.164336 |
| 0.1419   | 0.147582 | 0.222902 | 0.140734 | 0.151078 | 0.128059  | 0.188374 |
| 0.131119 | 0.142628 | 0.213287 | 0.139277 | 0.146707 | 0.133304  | 0.177593 |
| 0.133304 | 0.135198 | 0.214307 | 0.134178 | 0.138986 | 0.121503  | 0.175408 |
| 0.108246 | 0.11451  | 0.209353 | 0.116113 | 0.118298 | 0.0999417 | 0.166958 |
| 0.106643 | 0.11757  | 0.208916 | 0.113928 | 0.123397 | 0.100379  | 0.162733 |
| 0.122232 | 0.12704  | 0.220134 | 0.125728 | 0.129953 | 0.110723  | 0.178322 |
| 0.121795 | 0.129225 | 0.217075 | 0.126748 | 0.129808 | 0.114656  | 0.177302 |
| 0.125583 | 0.136218 | 0.215909 | 0.128497 | 0.138258 | 0.119901  | 0.177593 |
| 0.117279 | 0.122086 | 0.213432 | 0.127477 | 0.127622 | 0.104895  | 0.171911 |
| 0.118007 | 0.123397 | 0.214161 | 0.125874 | 0.127477 | 0.107663  | 0.170892 |
| 0.123252 | 0.12398  | 0.213869 | 0.125291 | 0.125437 | 0.113491  | 0.174097 |
| 0.127914 | 0.141463 | 0.225816 | 0.136946 | 0.144668 | 0.11961   | 0.183129 |
| 0.129662 | 0.135635 | 0.219406 | 0.130828 | 0.135927 | 0.121941  | 0.174679 |
| 0.129516 | 0.138403 | 0.223339 | 0.138549 | 0.139277 | 0.124417  | 0.183275 |
| 0.121212 | 0.135927 | 0.217657 | 0.138695 | 0.140589 | 0.123397  | 0.174097 |
| 0.1081   | 0.116404 | 0.212704 | 0.121212 | 0.11757  | 0.102127  | 0.168269 |
| 0.129662 | 0.13243  | 0.219114 | 0.128497 | 0.136218 | 0.122523  | 0.180507 |
| 0.108537 | 0.11655  | 0.213141 | 0.120484 | 0.120921 | 0.104895  | 0.164918 |
| 0.111014 | 0.121941 | 0.206585 | 0.123834 | 0.120775 | 0.113782  | 0.166812 |
| 0.113345 | 0.121941 | 0.213578 | 0.117716 | 0.125437 | 0.105624  | 0.168852 |
| 0.114948 | 0.123543 | 0.209936 | 0.119027 | 0.125874 | 0.106061  | 0.163753 |
| 0.111451 | 0.115967 | 0.209936 | 0.115239 | 0.118007 | 0.101981  | 0.167541 |
| 0.131119 | 0.140589 | 0.222902 | 0.1419   | 0.141171 | 0.119901  | 0.186334 |
| 0.10708  | 0.123834 | 0.207896 | 0.114365 | 0.128497 | 0.109266  | 0.164918 |
| 0.129225 | 0.136364 | 0.221008 | 0.136509 | 0.136364 | 0.119464  | 0.182692 |
| 0.113199 | 0.115093 | 0.204983 | 0.11553  | 0.122669 | 0.105186  | 0.164627 |
| 0.120047 | 0.133013 | 0.220571 | 0.130536 | 0.134178 | 0.108829  | 0.180216 |
| 0.127477 | 0.124417 | 0.214889 | 0.13039  | 0.131119 | 0.114219  | 0.162879 |
| 0.115239 | 0.124709 | 0.204983 | 0.126603 | 0.130536 | 0.120047  | 0.161713 |
| 0.111888 | 0.125728 | 0.216492 | 0.122669 | 0.129808 | 0.105624  | 0.17264  |
| 0.125728 | 0.127622 | 0.208188 | 0.126603 | 0.13141  | 0.120047  | 0.168706 |
| 0.120921 | 0.124563 | 0.214744 | 0.131119 | 0.13039  | 0.109994  | 0.170309 |
| 0.103438 | 0.12398  | 0.210956 | 0.119464 | 0.128934 | 0.105624  | 0.169726 |
| 0.130245 | 0.13884  | 0.22669  | 0.13345  | 0.145833 | 0.135927  | 0.180798 |
| 0.130682 | 0.138403 | 0.227127 | 0.143794 | 0.142191 | 0.134324  | 0.190559 |
| 0.102418 | 0.111888 | 0.206731 | 0.11553  | 0.115676 | 0.104604  | 0.165501 |
| 0.126166 | 0.138549 | 0.225816 | 0.132284 | 0.141754 | 0.133304  | 0.180216 |
| 0.120192 | 0.136655 | 0.223048 | 0.129225 | 0.138403 | 0.126166  | 0.177448 |
| 0.124854 | 0.135198 | 0.220717 | 0.137383 | 0.138112 | 0.12704   | 0.180653 |

|          |          |          |          |          |          |          |
|----------|----------|----------|----------|----------|----------|----------|
| 0.111742 | 0.125291 | 0.213141 | 0.12398  | 0.129371 | 0.121503 | 0.16958  |
| 0.120775 | 0.130828 | 0.221008 | 0.123689 | 0.136655 | 0.120047 | 0.174534 |
| 0.121212 | 0.132139 | 0.217366 | 0.129079 | 0.133887 | 0.122523 | 0.176719 |
| 0.126894 | 0.129371 | 0.224796 | 0.132139 | 0.130828 | 0.123834 | 0.176573 |
| 0.13039  | 0.139569 | 0.228875 | 0.14088  | 0.143065 | 0.134324 | 0.182401 |
| 0.120192 | 0.126166 | 0.218969 | 0.127768 | 0.130245 | 0.128497 | 0.172203 |
| 0.10912  | 0.123834 | 0.210227 | 0.123689 | 0.128788 | 0.117424 | 0.168124 |
| 0.129371 | 0.134761 | 0.218531 | 0.143939 | 0.140006 | 0.129225 | 0.184003 |
| 0.128059 | 0.139569 | 0.223048 | 0.135344 | 0.143065 | 0.129079 | 0.185023 |
| 0.106498 | 0.118298 | 0.206731 | 0.119318 | 0.12296  | 0.111888 | 0.164627 |
| 0.20979  | 0.211393 | 0.107809 | 0.210956 | 0.213141 | 0.217512 | 0.157488 |
| 0.120047 | 0.127185 | 0.215909 | 0.128205 | 0.132139 | 0.123106 | 0.171183 |
| 0.114219 | 0.121941 | 0.213287 | 0.124417 | 0.129516 | 0.113199 | 0.170892 |
| 0.132139 | 0.137529 | 0.226253 | 0.139714 | 0.139569 | 0.136946 | 0.184149 |
| 0.114656 | 0.123252 | 0.211976 | 0.126603 | 0.128205 | 0.116841 | 0.171329 |
| 0.130099 | 0.136364 | 0.227418 | 0.13447  | 0.140443 | 0.138112 | 0.181527 |
| 0.126311 | 0.123834 | 0.213141 | 0.123689 | 0.126748 | 0.121212 | 0.174825 |
| 0.118298 | 0.12398  | 0.21183  | 0.12704  | 0.125728 | 0.121941 | 0.167978 |
| 0.120921 | 0.128934 | 0.22028  | 0.13141  | 0.134178 | 0.128642 | 0.176136 |
| 0.124272 | 0.132576 | 0.207605 | 0.134178 | 0.136072 | 0.121503 | 0.164627 |
| 0.125291 | 0.13243  | 0.222902 | 0.136364 | 0.137092 | 0.126311 | 0.181381 |
| 0.122523 | 0.13345  | 0.224505 | 0.134761 | 0.136655 | 0.128788 | 0.181235 |
| 0.12398  | 0.128205 | 0.224505 | 0.131265 | 0.133741 | 0.124709 | 0.177448 |
| 0.11553  | 0.124709 | 0.214307 | 0.126311 | 0.124709 | 0.114219 | 0.171329 |
| 0.118735 | 0.119172 | 0.219843 | 0.130682 | 0.124126 | 0.119172 | 0.170163 |
| 0.132867 | 0.13884  | 0.225233 | 0.143065 | 0.14292  | 0.136509 | 0.184003 |
| 0.11553  | 0.123543 | 0.207605 | 0.12602  | 0.125291 | 0.118881 | 0.164044 |
| 0.133596 | 0.135198 | 0.224505 | 0.13447  | 0.138112 | 0.132867 | 0.179487 |
| 0.117716 | 0.14292  | 0.20979  | 0.139569 | 0.147582 | 0.136509 | 0.168561 |
| 0.115093 | 0.13243  | 0.210956 | 0.132576 | 0.131556 | 0.118153 | 0.162442 |
| 0.116841 | 0.137092 | 0.223776 | 0.13345  | 0.14088  | 0.133304 | 0.180216 |
| 0.113199 | 0.129953 | 0.206439 | 0.133013 | 0.133741 | 0.125291 | 0.160256 |
| 0.12296  | 0.129516 | 0.213869 | 0.12704  | 0.131265 | 0.118153 | 0.175262 |
| 0.114802 | 0.125728 | 0.201632 | 0.127622 | 0.129225 | 0.12398  | 0.161568 |
| 0.126748 | 0.144668 | 0.211247 | 0.138986 | 0.145833 | 0.137092 | 0.174388 |
| 0.110577 | 0.121503 | 0.211101 | 0.120192 | 0.128497 | 0.110431 | 0.162296 |
| 0.134907 | 0.137383 | 0.220862 | 0.134033 | 0.14088  | 0.129225 | 0.17701  |
| 0.121941 | 0.143648 | 0.199738 | 0.141171 | 0.145105 | 0.138112 | 0.161713 |
| 0.114073 | 0.128497 | 0.219843 | 0.131265 | 0.132867 | 0.109848 | 0.17803  |
| 0.121066 | 0.128497 | 0.211101 | 0.125728 | 0.131993 | 0.118298 | 0.167249 |
| 0.135198 | 0.142337 | 0.222902 | 0.145396 | 0.144085 | 0.133596 | 0.184003 |
| 0.127331 | 0.126894 | 0.216783 | 0.129371 | 0.129808 | 0.122815 | 0.177302 |
| 0.131847 | 0.139569 | 0.226544 | 0.145251 | 0.142191 | 0.13549  | 0.184732 |
| 0.131702 | 0.137383 | 0.220862 | 0.140152 | 0.142337 | 0.123689 | 0.180507 |

|           |           |          |          |           |          |          |
|-----------|-----------|----------|----------|-----------|----------|----------|
| 0.124854  | 0.129371  | 0.221591 | 0.136801 | 0.134324  | 0.119172 | 0.179196 |
| 0.127914  | 0.133887  | 0.215035 | 0.135781 | 0.134761  | 0.125146 | 0.171766 |
| 0.122815  | 0.134907  | 0.211393 | 0.131556 | 0.138403  | 0.116259 | 0.170163 |
| 0.129371  | 0.138258  | 0.225816 | 0.138112 | 0.141463  | 0.124272 | 0.186334 |
| 0.124417  | 0.133887  | 0.224359 | 0.13345  | 0.137966  | 0.123106 | 0.183129 |
| 0.127331  | 0.137383  | 0.225816 | 0.137821 | 0.138258  | 0.122815 | 0.188374 |
| 0.125     | 0.133304  | 0.230186 | 0.143939 | 0.140006  | 0.125437 | 0.186043 |
| 0.11655   | 0.136801  | 0.218531 | 0.138986 | 0.140589  | 0.119901 | 0.173514 |
| 0.137238  | 0.14729   | 0.219114 | 0.14831  | 0.151369  | 0.138549 | 0.178467 |
| 0.117424  | 0.135927  | 0.215909 | 0.126748 | 0.139423  | 0.122232 | 0.174679 |
| 0.12296   | 0.127768  | 0.219114 | 0.128497 | 0.133596  | 0.108537 | 0.177593 |
| 0.123834  | 0.136218  | 0.219406 | 0.137238 | 0.140006  | 0.116987 | 0.177302 |
| 0.111305  | 0.12602   | 0.216783 | 0.127331 | 0.133013  | 0.10912  | 0.174097 |
| 0.124854  | 0.144231  | 0.21926  | 0.139714 | 0.147145  | 0.137529 | 0.179779 |
| 0.134761  | 0.155303  | 0.230915 | 0.153992 | 0.162005  | 0.144231 | 0.18852  |
| 0.124563  | 0.132284  | 0.222756 | 0.135635 | 0.135781  | 0.11859  | 0.181818 |
| 0.117133  | 0.123397  | 0.214452 | 0.125    | 0.126603  | 0.112325 | 0.17264  |
| 0.128059  | 0.130536  | 0.224796 | 0.132721 | 0.130245  | 0.125291 | 0.187937 |
| 0.129662  | 0.131847  | 0.220862 | 0.134907 | 0.137092  | 0.133013 | 0.181964 |
| 0.123834  | 0.128642  | 0.224942 | 0.127331 | 0.137383  | 0.116696 | 0.181672 |
| 0.131993  | 0.14729   | 0.230186 | 0.145396 | 0.147873  | 0.130973 | 0.190414 |
| 0.124709  | 0.140589  | 0.220571 | 0.139277 | 0.142337  | 0.135635 | 0.172348 |
| 0.120192  | 0.130245  | 0.222756 | 0.129225 | 0.131993  | 0.125874 | 0.176282 |
| 0.141754  | 0.155303  | 0.227127 | 0.158654 | 0.157051  | 0.149476 | 0.191434 |
| 0.127768  | 0.135198  | 0.223048 | 0.127768 | 0.140734  | 0.125291 | 0.176865 |
| 0.133013  | 0.147145  | 0.2213   | 0.144085 | 0.153846  | 0.137238 | 0.180944 |
| 0.12296   | 0.129516  | 0.222902 | 0.131993 | 0.13447   | 0.112034 | 0.180216 |
| 0.124417  | 0.135344  | 0.227855 | 0.138986 | 0.136218  | 0.124272 | 0.191288 |
| 0.122669  | 0.129225  | 0.213869 | 0.131119 | 0.133887  | 0.125728 | 0.175845 |
| 0.0948427 | 0.112762  | 0.184003 | 0.135344 | 0.119172  | 0.131119 | 0.134907 |
| 0.1419    | 0.141754  | 0.220862 | 0.141317 | 0.142628  | 0.137675 | 0.182547 |
| 0.125146  | 0.048951  | 0.200321 | 0.118444 | 0.0477855 | 0.121503 | 0.148601 |
| 0.129953  | 0.0627914 | 0.181235 | 0.129953 | 0.064831  | 0.129516 | 0.129225 |
| 0.140297  | 0.143939  | 0.16419  | 0.14729  | 0.147145  | 0.136946 | 0.13345  |
| 0.134178  | 0.120338  | 0.160402 | 0.137383 | 0.121795  | 0.138986 | 0.123834 |
| 0.111597  | 0.127185  | 0.220571 | 0.126457 | 0.133013  | 0.099796 | 0.178467 |
| 0.132721  | 0.130536  | 0.216055 | 0.131556 | 0.13549   | 0.132284 | 0.175991 |
| 0.10708   | 0.113928  | 0.201777 | 0.11757  | 0.118298  | 0.114802 | 0.160256 |
| 0.112471  | 0.121649  | 0.204254 | 0.118881 | 0.12398   | 0.113199 | 0.152244 |
| 0.113491  | 0.124709  | 0.206439 | 0.124272 | 0.129371  | 0.121795 | 0.169872 |
| 0.119901  | 0.0460373 | 0.200321 | 0.114948 | 0.0474942 | 0.11859  | 0.145979 |
| 0.115967  | 0.125146  | 0.210956 | 0.118007 | 0.131556  | 0.109411 | 0.167104 |
| 0.11014   | 0.0887238 | 0.191434 | 0.11451  | 0.0916375 | 0.116696 | 0.137383 |
| 0.117133  | 0.106206  | 0.207168 | 0.118881 | 0.111742  | 0.116696 | 0.156323 |

|           |           |           |          |           |           |          |
|-----------|-----------|-----------|----------|-----------|-----------|----------|
| 0.120192  | 0.122378  | 0.194784  | 0.121941 | 0.125583  | 0.124709  | 0.15472  |
| 0.107663  | 0.11655   | 0.20236   | 0.11553  | 0.121212  | 0.106061  | 0.159382 |
| 0.121941  | 0.0565268 | 0.200321  | 0.12398  | 0.0547786 | 0.120629  | 0.153263 |
| 0.116841  | 0.0488054 | 0.200466  | 0.117716 | 0.053176  | 0.120192  | 0.151369 |
| 0.120921  | 0.125146  | 0.215909  | 0.129953 | 0.128351  | 0.107955  | 0.173223 |
| 0.208916  | 0.207022  | 0.111888  | 0.20542  | 0.211393  | 0.214598  | 0.154575 |
| 0.143065  | 0.0592949 | 0.2162    | 0.134324 | 0.057838  | 0.140589  | 0.165355 |
| 0.122815  | 0.123252  | 0.214889  | 0.128642 | 0.130245  | 0.125     | 0.176865 |
| 0.118881  | 0.114656  | 0.202797  | 0.117133 | 0.118735  | 0.128351  | 0.156323 |
| 0.202506  | 0.202652  | 0.094697  | 0.203671 | 0.203234  | 0.209062  | 0.146999 |
| 0.0929487 | 0.128059  | 0.202214  | 0.126166 | 0.130099  | 0.115239  | 0.156031 |
| 0.120484  | 0.129371  | 0.214598  | 0.128059 | 0.13141   | 0.113928  | 0.174534 |
| 0.125146  | 0.122378  | 0.206731  | 0.114948 | 0.126748  | 0.121503  | 0.161422 |
| 0.118881  | 0.124272  | 0.20542   | 0.11859  | 0.127768  | 0.127185  | 0.16419  |
| 0.244172  | 0.241696  | 0.118007  | 0.239219 | 0.241696  | 0.248397  | 0.181964 |
| 0.057838  | 0.126748  | 0.211393  | 0.126894 | 0.130828  | 0.119464  | 0.171911 |
| 0.115239  | 0.121503  | 0.210519  | 0.12602  | 0.126166  | 0.103438  | 0.168998 |
| 0.122815  | 0.120629  | 0.214307  | 0.123106 | 0.125583  | 0.113054  | 0.176282 |
| 0.122523  | 0.120629  | 0.210227  | 0.119318 | 0.125291  | 0.111305  | 0.171037 |
| 0.0770688 | 0.126166  | 0.204691  | 0.125146 | 0.130828  | 0.12704   | 0.158217 |
| 0.116404  | 0.108683  | 0.186917  | 0.129808 | 0.111014  | 0.125583  | 0.135198 |
| 0.116987  | 0.123543  | 0.210519  | 0.127185 | 0.127622  | 0.106643  | 0.166667 |
| 0.116841  | 0.0421037 | 0.197844  | 0.115676 | 0.0511364 | 0.119027  | 0.151078 |
| 0.120484  | 0.121212  | 0.20877   | 0.124854 | 0.125291  | 0.11859   | 0.163753 |
| 0.114656  | 0.119172  | 0.205565  | 0.114365 | 0.123543  | 0.119172  | 0.162296 |
| 0.115967  | 0.0549242 | 0.197552  | 0.115676 | 0.0584207 | 0.116696  | 0.144959 |
| 0.109703  | 0.126748  | 0.211101  | 0.121941 | 0.129079  | 0.119755  | 0.164918 |
| 0.142774  | 0.140589  | 0.223193  | 0.141317 | 0.143502  | 0.139132  | 0.183712 |
| 0.0597319 | 0.128934  | 0.210664  | 0.125291 | 0.131556  | 0.122232  | 0.17264  |
| 0.119172  | 0.129225  | 0.212704  | 0.127331 | 0.132139  | 0.117861  | 0.171474 |
| 0.180361  | 0.182547  | 0.101981  | 0.18211  | 0.181381  | 0.186626  | 0.129808 |
| 0.196678  | 0.195659  | 0.0981935 | 0.192599 | 0.197407  | 0.206731  | 0.138549 |
| 0.117424  | 0.12398   | 0.198718  | 0.119172 | 0.127768  | 0.126311  | 0.157488 |
| 0.115093  | 0.116113  | 0.204545  | 0.115093 | 0.120484  | 0.11961   | 0.160693 |
| 0.12704   | 0.124854  | 0.20542   | 0.13141  | 0.12398   | 0.140297  | 0.161276 |
| 0.115967  | 0.124563  | 0.21183   | 0.127331 | 0.129225  | 0.107955  | 0.169143 |
| 0.0604604 | 0.127914  | 0.211393  | 0.12602  | 0.132867  | 0.119755  | 0.174242 |
| 0.132576  | 0.124272  | 0.210664  | 0.129953 | 0.125146  | 0.120775  | 0.174971 |
| 0.214452  | 0.215472  | 0.105186  | 0.214744 | 0.217512  | 0.223922  | 0.155449 |
| 0.112762  | 0.113491  | 0.208333  | 0.116841 | 0.120484  | 0.115239  | 0.167104 |
| 0.201486  | 0.199883  | 0.142337  | 0.2044   | 0.199592  | 0.205711  | 0.151515 |
| 0.0996503 | 0.121941  | 0.215618  | 0.121503 | 0.122815  | 0.0869755 | 0.17264  |
| 0.111451  | 0.119464  | 0.209936  | 0.119901 | 0.123834  | 0.0944056 | 0.164044 |
| 0.116841  | 0.105332  | 0.196387  | 0.118881 | 0.106206  | 0.116113  | 0.152244 |

|           |           |          |          |           |           |          |
|-----------|-----------|----------|----------|-----------|-----------|----------|
| 0.112179  | 0.114365  | 0.199592 | 0.113054 | 0.11961   | 0.118735  | 0.155449 |
| 0.199155  | 0.196387  | 0.106789 | 0.195076 | 0.200175  | 0.204254  | 0.137238 |
| 0.128642  | 0.0515734 | 0.197698 | 0.125728 | 0.0486597 | 0.126748  | 0.148019 |
| 0.112034  | 0.122669  | 0.217512 | 0.124854 | 0.126748  | 0.0498252 | 0.171329 |
| 0.126603  | 0.0448718 | 0.204108 | 0.11961  | 0.0454545 | 0.124709  | 0.152389 |
| 0.122815  | 0.120921  | 0.211101 | 0.125728 | 0.125291  | 0.120338  | 0.170746 |
| 0.116113  | 0.11859   | 0.203234 | 0.114948 | 0.125291  | 0.120338  | 0.160256 |
| 0.10169   | 0.11961   | 0.215326 | 0.12296  | 0.124854  | 0.0910548 | 0.172057 |
| 0.116841  | 0.121649  | 0.199883 | 0.12704  | 0.125437  | 0.111451  | 0.1537   |
| 0.120921  | 0.126311  | 0.210373 | 0.124417 | 0.130682  | 0.114656  | 0.174097 |
| 0.11451   | 0.0537587 | 0.194056 | 0.113928 | 0.0569639 | 0.114656  | 0.144668 |
| 0.114656  | 0.120921  | 0.211976 | 0.121649 | 0.126457  | 0.0463287 | 0.167541 |
| 0.18211   | 0.181964  | 0.10373  | 0.181235 | 0.183129  | 0.188374  | 0.128642 |
| 0.123106  | 0.123834  | 0.212558 | 0.121941 | 0.126166  | 0.113928  | 0.173368 |
| 0.12704   | 0.123397  | 0.21183  | 0.126748 | 0.128351  | 0.123106  | 0.170309 |
| 0.125146  | 0.11451   | 0.204691 | 0.121066 | 0.119464  | 0.115967  | 0.170455 |
| 0.0594406 | 0.129516  | 0.203963 | 0.131702 | 0.128351  | 0.116696  | 0.166521 |
| 0.123834  | 0.0450175 | 0.201632 | 0.117133 | 0.0432692 | 0.119027  | 0.149913 |
| 0.107517  | 0.12398   | 0.218823 | 0.124126 | 0.129808  | 0.095134  | 0.175845 |
| 0.0983392 | 0.115093  | 0.204691 | 0.123106 | 0.11859   | 0.110431  | 0.162879 |
| 0.120775  | 0.127331  | 0.217512 | 0.128934 | 0.132576  | 0.107809  | 0.175991 |
| 0.118298  | 0.117861  | 0.209499 | 0.120629 | 0.121941  | 0.11553   | 0.162442 |
| 0.116841  | 0.11757   | 0.208916 | 0.120047 | 0.122815  | 0.107955  | 0.168561 |
| 0.11961   | 0.120338  | 0.202652 | 0.119318 | 0.127331  | 0.121503  | 0.156469 |
| 0.125291  | 0.124854  | 0.215035 | 0.114219 | 0.131265  | 0.125437  | 0.164773 |
| 0.135927  | 0.135198  | 0.218386 | 0.124272 | 0.136072  | 0.13549   | 0.173368 |
| 0.0514277 | 0.122669  | 0.204691 | 0.121941 | 0.127914  | 0.110431  | 0.167249 |
| 0.138986  | 0.0557984 | 0.214161 | 0.133159 | 0.0557984 | 0.134761  | 0.163316 |
| 0.113054  | 0.119027  | 0.202506 | 0.11655  | 0.122815  | 0.120775  | 0.158654 |
| 0.117424  | 0.112617  | 0.20542  | 0.119172 | 0.114656  | 0.108829  | 0.164773 |
| 0.11961   | 0.0649767 | 0.188374 | 0.116987 | 0.0675991 | 0.120047  | 0.133741 |
| 0.123106  | 0.128497  | 0.21081  | 0.133013 | 0.132284  | 0.112762  | 0.170163 |
| 0.184586  | 0.182401  | 0.119901 | 0.181964 | 0.184149  | 0.187354  | 0.123834 |
| 0.106352  | 0.118735  | 0.209207 | 0.118298 | 0.123397  | 0.0450175 | 0.16419  |
| 0.105186  | 0.101253  | 0.198135 | 0.111597 | 0.108246  | 0.101544  | 0.156031 |
| 0.118881  | 0.125437  | 0.215035 | 0.125291 | 0.131556  | 0.115822  | 0.174388 |
| 0.176573  | 0.1706    | 0.124417 | 0.174825 | 0.175262  | 0.179924  | 0.122523 |
| 0.0665793 | 0.140443  | 0.215472 | 0.135927 | 0.142774  | 0.125583  | 0.179196 |
| 0.0776515 | 0.148019  | 0.225962 | 0.145251 | 0.155012  | 0.133741  | 0.18852  |
| 0.144522  | 0.142337  | 0.223193 | 0.144231 | 0.143502  | 0.14088   | 0.182838 |
| 0         | 0.120775  | 0.20134  | 0.122378 | 0.125437  | 0.113782  | 0.165938 |
| 0.120775  | 0         | 0.199446 | 0.115239 | 0.0448718 | 0.119172  | 0.148601 |
| 0.20134   | 0.199446  | 0        | 0.199301 | 0.201486  | 0.208479  | 0.146125 |
| 0.122378  | 0.115239  | 0.199301 | 0        | 0.121941  | 0.121649  | 0.136509 |

|           |           |           |          |           |          |          |
|-----------|-----------|-----------|----------|-----------|----------|----------|
| 0.125437  | 0.0448718 | 0.201486  | 0.121941 | 0         | 0.125    | 0.150641 |
| 0.113782  | 0.119172  | 0.208479  | 0.121649 | 0.125     | 0        | 0.164918 |
| 0.165938  | 0.148601  | 0.146125  | 0.136509 | 0.150641  | 0.164918 | 0        |
| 0.108537  | 0.111014  | 0.198281  | 0.113199 | 0.114802  | 0.114802 | 0.15676  |
| 0.145105  | 0.143502  | 0.221154  | 0.143065 | 0.14729   | 0.137966 | 0.183129 |
| 0.116259  | 0.126311  | 0.203963  | 0.124126 | 0.130682  | 0.115239 | 0.160693 |
| 0.181818  | 0.180216  | 0.107809  | 0.18211  | 0.183421  | 0.185752 | 0.127477 |
| 0.0515734 | 0.128351  | 0.210373  | 0.125    | 0.130973  | 0.115239 | 0.171183 |
| 0.106352  | 0.10708   | 0.206876  | 0.115093 | 0.113199  | 0.108246 | 0.158362 |
| 0.119901  | 0.112762  | 0.206731  | 0.123397 | 0.118881  | 0.107517 | 0.166958 |
| 0.111888  | 0.119901  | 0.210956  | 0.121795 | 0.124563  | 0.11553  | 0.167395 |
| 0.118881  | 0.126311  | 0.211247  | 0.124126 | 0.13039   | 0.115239 | 0.171766 |
| 0.118298  | 0.123106  | 0.200466  | 0.123834 | 0.128642  | 0.118153 | 0.16419  |
| 0.113199  | 0.119172  | 0.201777  | 0.116404 | 0.125     | 0.117716 | 0.159091 |
| 0.181818  | 0.183129  | 0.103147  | 0.183858 | 0.18546   | 0.186626 | 0.130682 |
| 0.124272  | 0.122669  | 0.211393  | 0.124563 | 0.127622  | 0.120629 | 0.165501 |
| 0.115385  | 0.110868  | 0.199592  | 0.119172 | 0.113782  | 0.112908 | 0.153409 |
| 0.202652  | 0.202506  | 0.0960082 | 0.200903 | 0.207168  | 0.207751 | 0.147145 |
| 0.122815  | 0.124709  | 0.214015  | 0.127185 | 0.126166  | 0.111014 | 0.174242 |
| 0.111888  | 0.119318  | 0.203963  | 0.113636 | 0.126603  | 0.120484 | 0.159819 |
| 0.11014   | 0.114656  | 0.200758  | 0.112762 | 0.120775  | 0.113782 | 0.15778  |
| 0.137675  | 0.0713869 | 0.210227  | 0.126603 | 0.0667249 | 0.13549  | 0.155012 |
| 0.179341  | 0.181235  | 0.106498  | 0.183421 | 0.183275  | 0.187063 | 0.126748 |
| 0.120338  | 0.125146  | 0.215909  | 0.129953 | 0.127477  | 0.108537 | 0.17701  |
| 0.131702  | 0.129225  | 0.212413  | 0.117424 | 0.133013  | 0.128351 | 0.171766 |
| 0.109848  | 0.116987  | 0.204254  | 0.115676 | 0.125728  | 0.118153 | 0.15778  |
| 0.111014  | 0.116113  | 0.202506  | 0.116841 | 0.122523  | 0.116987 | 0.158654 |
| 0.113199  | 0.118007  | 0.200903  | 0.113782 | 0.125874  | 0.116259 | 0.159091 |
| 0.119755  | 0.0511364 | 0.202506  | 0.114802 | 0.057838  | 0.117861 | 0.150787 |
| 0.102127  | 0.113636  | 0.205274  | 0.113782 | 0.118881  | 0.105186 | 0.160548 |
| 0.0528846 | 0.131702  | 0.211393  | 0.127768 | 0.130536  | 0.115385 | 0.175408 |
| 0.137092  | 0.121503  | 0.220425  | 0.133887 | 0.122086  | 0.129371 | 0.174825 |
| 0.053176  | 0.128497  | 0.209353  | 0.127477 | 0.134324  | 0.115385 | 0.172786 |
| 0.128205  | 0.127185  | 0.218531  | 0.131993 | 0.128934  | 0.124272 | 0.178467 |
| 0.185752  | 0.18648   | 0.104749  | 0.183129 | 0.186772  | 0.189977 | 0.129953 |
| 0.120921  | 0.121941  | 0.210373  | 0.11451  | 0.128059  | 0.118735 | 0.161568 |
| 0.131847  | 0.048951  | 0.204691  | 0.126603 | 0.0504079 | 0.128205 | 0.154138 |
| 0.109848  | 0.116987  | 0.204254  | 0.113636 | 0.122232  | 0.116404 | 0.160402 |
| 0.101544  | 0.117133  | 0.201486  | 0.112908 | 0.120921  | 0.106061 | 0.159382 |
| 0.107955  | 0.119172  | 0.199738  | 0.114948 | 0.120338  | 0.11451  | 0.150641 |
| 0.121212  | 0.124272  | 0.210956  | 0.129662 | 0.128642  | 0.10912  | 0.172057 |
| 0.127331  | 0.121941  | 0.208625  | 0.126748 | 0.13039   | 0.126311 | 0.170892 |
| 0.111742  | 0.11655   | 0.207022  | 0.121358 | 0.121212  | 0.119172 | 0.163462 |
| 0.109703  | 0.120921  | 0.204108  | 0.122523 | 0.126457  | 0.102564 | 0.158508 |



|           |           |           |          |           |           |          |
|-----------|-----------|-----------|----------|-----------|-----------|----------|
| 0.10373   | 0.114073  | 0.199301  | 0.116841 | 0.119318  | 0.101836  | 0.157197 |
| 0.10708   | 0.111888  | 0.20236   | 0.113782 | 0.117716  | 0.109266  | 0.15472  |
| 0.101399  | 0.119318  | 0.215035  | 0.120047 | 0.126311  | 0.0898893 | 0.171766 |
| 0.0654138 | 0.134033  | 0.218094  | 0.13243  | 0.137821  | 0.124126  | 0.179779 |
| 0.118881  | 0.124563  | 0.213869  | 0.126457 | 0.130099  | 0.104458  | 0.17264  |
| 0.113491  | 0.0506993 | 0.197407  | 0.115822 | 0.0574009 | 0.112762  | 0.144522 |
| 0.112617  | 0.120338  | 0.209645  | 0.123106 | 0.125     | 0.102273  | 0.16958  |
| 0.109848  | 0.116113  | 0.201632  | 0.113928 | 0.120484  | 0.114656  | 0.156614 |
| 0.106498  | 0.116841  | 0.210227  | 0.11757  | 0.121503  | 0.0457459 | 0.167541 |
| 0.114948  | 0.121212  | 0.204983  | 0.116987 | 0.125583  | 0.121212  | 0.161422 |
| 0.114365  | 0.116841  | 0.206439  | 0.10912  | 0.123543  | 0.113928  | 0.157634 |
| 0.119318  | 0.122378  | 0.20877   | 0.122523 | 0.125291  | 0.119464  | 0.166375 |
| 0.109411  | 0.12296   | 0.213141  | 0.122232 | 0.126166  | 0.108974  | 0.169289 |
| 0.106643  | 0.114656  | 0.202797  | 0.115385 | 0.120775  | 0.105624  | 0.161276 |
| 0.113491  | 0.11859   | 0.20236   | 0.120192 | 0.119755  | 0.115967  | 0.160548 |
| 0.118444  | 0.119755  | 0.196824  | 0.126603 | 0.123252  | 0.11014   | 0.156469 |
| 0.120921  | 0.114948  | 0.205711  | 0.122086 | 0.118153  | 0.119318  | 0.162442 |
| 0.112325  | 0.116841  | 0.209645  | 0.119901 | 0.122086  | 0.107226  | 0.161713 |
| 0.109703  | 0.116841  | 0.206148  | 0.114948 | 0.119464  | 0.121503  | 0.162005 |
| 0.120921  | 0.0447261 | 0.199009  | 0.121212 | 0.0456002 | 0.117279  | 0.147582 |
| 0.101981  | 0.124563  | 0.213578  | 0.122669 | 0.128934  | 0.0939685 | 0.170892 |
| 0.120338  | 0.0479312 | 0.204254  | 0.115385 | 0.0543415 | 0.120192  | 0.149913 |
| 0.114802  | 0.128934  | 0.210664  | 0.124709 | 0.130099  | 0.110868  | 0.169435 |
| 0.108683  | 0.119901  | 0.209207  | 0.116259 | 0.124272  | 0.111451  | 0.165064 |
| 0.1081    | 0.109703  | 0.201049  | 0.111888 | 0.115239  | 0.109703  | 0.155157 |
| 0.105332  | 0.119755  | 0.211684  | 0.118735 | 0.122378  | 0.0480769 | 0.165501 |
| 0.123543  | 0.0499709 | 0.198135  | 0.118881 | 0.0514277 | 0.124563  | 0.151661 |
| 0.121795  | 0.114656  | 0.209207  | 0.124709 | 0.120192  | 0.115822  | 0.163607 |
| 0.112908  | 0.107517  | 0.203526  | 0.111742 | 0.112762  | 0.117133  | 0.157051 |
| 0.184878  | 0.185606  | 0.0977564 | 0.185169 | 0.187646  | 0.189394  | 0.131702 |
| 0.158071  | 0.150932  | 0.143502  | 0.156614 | 0.152681  | 0.161422  | 0.112179 |
| 0.055507  | 0.126457  | 0.209353  | 0.128351 | 0.13141   | 0.113928  | 0.170746 |
| 0.118881  | 0.114656  | 0.202797  | 0.122086 | 0.120484  | 0.112325  | 0.149621 |
| 0.0824592 | 0.150495  | 0.229895  | 0.145396 | 0.156031  | 0.138549  | 0.192162 |
| 0.123106  | 0.12296   | 0.212558  | 0.124272 | 0.130536  | 0.120047  | 0.166667 |
| 0.11655   | 0.123106  | 0.200466  | 0.121503 | 0.126894  | 0.121066  | 0.150204 |
| 0.116404  | 0.113928  | 0.201195  | 0.121358 | 0.121503  | 0.117424  | 0.153263 |
| 0.105041  | 0.122669  | 0.206731  | 0.118735 | 0.12296   | 0.120629  | 0.162587 |
| 0.124272  | 0.118007  | 0.207896  | 0.123689 | 0.116841  | 0.121212  | 0.164627 |
| 0.195221  | 0.193036  | 0.104021  | 0.192016 | 0.193328  | 0.201195  | 0.136801 |
| 0.120192  | 0.125291  | 0.216638  | 0.129516 | 0.13345   | 0.106935  | 0.173077 |
| 0.116259  | 0.0759033 | 0.194347  | 0.120338 | 0.0779429 | 0.117861  | 0.141754 |
| 0.110723  | 0.11553   | 0.199883  | 0.113345 | 0.119027  | 0.113782  | 0.149913 |
| 0.119027  | 0.123252  | 0.211101  | 0.125728 | 0.127331  | 0.113054  | 0.167249 |

|           |           |           |          |           |          |          |
|-----------|-----------|-----------|----------|-----------|----------|----------|
| 0.181818  | 0.176136  | 0.134907  | 0.175117 | 0.177593  | 0.181381 | 0.11553  |
| 0.237762  | 0.237617  | 0.11655   | 0.238345 | 0.238491  | 0.242279 | 0.174971 |
| 0.119464  | 0.120484  | 0.210956  | 0.122378 | 0.12398   | 0.117279 | 0.167686 |
| 0.121795  | 0.114073  | 0.208333  | 0.125291 | 0.119318  | 0.121649 | 0.165064 |
| 0.0556527 | 0.127477  | 0.208916  | 0.125583 | 0.131265  | 0.116987 | 0.167104 |
| 0.113199  | 0.125291  | 0.210519  | 0.124272 | 0.130536  | 0.108392 | 0.166375 |
| 0.113928  | 0.118444  | 0.212413  | 0.124417 | 0.123397  | 0.103584 | 0.169726 |
| 0.113199  | 0.114802  | 0.204983  | 0.112908 | 0.119755  | 0.112471 | 0.161713 |
| 0.115967  | 0.0875583 | 0.194347  | 0.111597 | 0.0893065 | 0.116404 | 0.138549 |
| 0.115385  | 0.118735  | 0.210664  | 0.120629 | 0.12602   | 0.101544 | 0.168852 |
| 0.112908  | 0.0772145 | 0.195367  | 0.111451 | 0.07838   | 0.119755 | 0.13986  |
| 0.119172  | 0.124272  | 0.212704  | 0.123543 | 0.125728  | 0.115822 | 0.165064 |
| 0.105915  | 0.117133  | 0.204691  | 0.118153 | 0.120921  | 0.11014  | 0.160839 |
| 0.121795  | 0.122523  | 0.206585  | 0.12296  | 0.126311  | 0.119318 | 0.165355 |
| 0.120484  | 0.0498252 | 0.201777  | 0.117279 | 0.0541958 | 0.121503 | 0.147145 |
| 0.106789  | 0.107517  | 0.200903  | 0.11553  | 0.113054  | 0.103438 | 0.1588   |
| 0.12398   | 0.130828  | 0.223048  | 0.135927 | 0.133741  | 0.121503 | 0.183566 |
| 0.128351  | 0.136364  | 0.222756  | 0.135344 | 0.140443  | 0.123543 | 0.183566 |
| 0.110431  | 0.114948  | 0.203963  | 0.11655  | 0.123397  | 0.114948 | 0.163024 |
| 0.103293  | 0.123834  | 0.200029  | 0.116113 | 0.128497  | 0.122378 | 0.150641 |
| 0.130682  | 0.129953  | 0.211393  | 0.126894 | 0.134324  | 0.132867 | 0.170746 |
| 0.200466  | 0.200321  | 0.115093  | 0.197552 | 0.202069  | 0.207605 | 0.144959 |
| 0.10912   | 0.113054  | 0.202652  | 0.11553  | 0.11859   | 0.111597 | 0.159674 |
| 0.107226  | 0.116987  | 0.207751  | 0.115967 | 0.123397  | 0.105041 | 0.160402 |
| 0.121212  | 0.122523  | 0.210373  | 0.11655  | 0.127768  | 0.11961  | 0.161276 |
| 0.125437  | 0.12296   | 0.212558  | 0.126603 | 0.121795  | 0.113928 | 0.17366  |
| 0.11757   | 0.117133  | 0.210227  | 0.125728 | 0.122086  | 0.110431 | 0.168706 |
| 0.189248  | 0.191142  | 0.103001  | 0.190997 | 0.193473  | 0.195513 | 0.13549  |
| 0.124126  | 0.0493881 | 0.202506  | 0.119755 | 0.053176  | 0.12398  | 0.151952 |
| 0.109703  | 0.11655   | 0.203234  | 0.117279 | 0.120921  | 0.117716 | 0.160256 |
| 0.112471  | 0.123689  | 0.212121  | 0.120338 | 0.124563  | 0.11553  | 0.171474 |
| 0.110431  | 0.121066  | 0.210956  | 0.120047 | 0.125437  | 0.108246 | 0.169726 |
| 0.120629  | 0.0505536 | 0.199009  | 0.120338 | 0.0546329 | 0.122523 | 0.144376 |
| 0.108974  | 0.0805653 | 0.192599  | 0.112762 | 0.0843531 | 0.111742 | 0.150787 |
| 0.118007  | 0.119901  | 0.210664  | 0.124417 | 0.121649  | 0.112617 | 0.167104 |
| 0.119172  | 0.11961   | 0.213578  | 0.120047 | 0.124272  | 0.108829 | 0.172931 |
| 0.18954   | 0.190268  | 0.0983392 | 0.18954  | 0.191434  | 0.197552 | 0.136946 |
| 0.112762  | 0.055507  | 0.198135  | 0.112762 | 0.0598776 | 0.113491 | 0.144959 |
| 0.188957  | 0.18648   | 0.104749  | 0.186334 | 0.187937  | 0.194347 | 0.128205 |
| 0.182692  | 0.185169  | 0.104312  | 0.185606 | 0.186917  | 0.190122 | 0.128642 |
| 0.124709  | 0.13243   | 0.217075  | 0.131702 | 0.13243   | 0.116113 | 0.177302 |
| 0.128205  | 0.130973  | 0.220571  | 0.129079 | 0.135052  | 0.116696 | 0.183421 |
| 0.108683  | 0.111451  | 0.204837  | 0.116259 | 0.11553   | 0.106498 | 0.158071 |
| 0.107663  | 0.0594406 | 0.198281  | 0.115822 | 0.0643939 | 0.11014  | 0.149476 |

|          |           |           |          |           |           |          |
|----------|-----------|-----------|----------|-----------|-----------|----------|
| 0.115676 | 0.0552156 | 0.197844  | 0.117716 | 0.0584207 | 0.117861  | 0.150204 |
| 0.113345 | 0.119027  | 0.203963  | 0.116259 | 0.122815  | 0.119318  | 0.160693 |
| 0.108392 | 0.115822  | 0.209207  | 0.122378 | 0.119318  | 0.102418  | 0.167395 |
| 0.115967 | 0.120192  | 0.214161  | 0.123834 | 0.124563  | 0.104458  | 0.169143 |
| 0.121649 | 0.122086  | 0.209353  | 0.124563 | 0.12296   | 0.120338  | 0.166958 |
| 0.114219 | 0.126894  | 0.213287  | 0.127331 | 0.130973  | 0.114365  | 0.174679 |
| 0.106789 | 0.113054  | 0.200903  | 0.110577 | 0.119464  | 0.11451   | 0.156177 |
| 0.118007 | 0.0490967 | 0.203089  | 0.119172 | 0.0540501 | 0.117279  | 0.147582 |
| 0.104167 | 0.107226  | 0.201777  | 0.111742 | 0.113345  | 0.104021  | 0.155886 |
| 0.129079 | 0.0534674 | 0.206585  | 0.123252 | 0.0525932 | 0.130099  | 0.15574  |
| 0.048951 | 0.124563  | 0.206294  | 0.121212 | 0.129225  | 0.112617  | 0.171766 |
| 0.133887 | 0.0524476 | 0.206439  | 0.123689 | 0.048951  | 0.134324  | 0.159091 |
| 0.252477 | 0.249709  | 0.119901  | 0.247523 | 0.250583  | 0.257284  | 0.189394 |
| 0.123397 | 0.128497  | 0.222756  | 0.132721 | 0.133741  | 0.0541958 | 0.180653 |
| 0.123543 | 0.129225  | 0.217075  | 0.125583 | 0.133013  | 0.100087  | 0.173223 |
| 0.211684 | 0.206002  | 0.104458  | 0.207314 | 0.209207  | 0.217075  | 0.153846 |
| 0.12296  | 0.131556  | 0.215035  | 0.128205 | 0.13447   | 0.11757   | 0.175554 |
| 0.220862 | 0.219551  | 0.116259  | 0.219697 | 0.224213  | 0.228584  | 0.163899 |
| 0.115239 | 0.121503  | 0.216929  | 0.126894 | 0.127331  | 0.0527389 | 0.175699 |
| 0.125874 | 0.129225  | 0.213869  | 0.124417 | 0.131556  | 0.130682  | 0.170892 |
| 0.11655  | 0.116987  | 0.209207  | 0.118007 | 0.120192  | 0.106498  | 0.169726 |
| 0.123834 | 0.13039   | 0.216492  | 0.130245 | 0.131556  | 0.114656  | 0.175262 |
| 0.195804 | 0.195659  | 0.106643  | 0.193473 | 0.198864  | 0.200612  | 0.137383 |
| 0.132576 | 0.0528846 | 0.208916  | 0.129079 | 0.0560897 | 0.130973  | 0.158945 |
| 0.121503 | 0.0493881 | 0.20134   | 0.121795 | 0.0563811 | 0.121941  | 0.148456 |
| 0.217512 | 0.21824   | 0.115822  | 0.216346 | 0.219988  | 0.221154  | 0.161422 |
| 0.118881 | 0.124854  | 0.210664  | 0.12704  | 0.129516  | 0.10708   | 0.167395 |
| 0.190705 | 0.191725  | 0.105624  | 0.188374 | 0.193473  | 0.197552  | 0.134907 |
| 0.120192 | 0.124126  | 0.211976  | 0.128934 | 0.129953  | 0.107809  | 0.171911 |
| 0.111742 | 0.119755  | 0.206731  | 0.116113 | 0.123834  | 0.120629  | 0.161713 |
| 0.115385 | 0.124854  | 0.212121  | 0.122086 | 0.127185  | 0.118153  | 0.17264  |
| 0.124709 | 0.135635  | 0.220571  | 0.13141  | 0.13447   | 0.120484  | 0.181672 |
| 0.109703 | 0.115676  | 0.203526  | 0.112325 | 0.119172  | 0.117424  | 0.155303 |
| 0.151661 | 0.157634  | 0.140006  | 0.158071 | 0.16317   | 0.152972  | 0.112762 |
| 0.118444 | 0.0451632 | 0.198281  | 0.11553  | 0.0509907 | 0.115967  | 0.144522 |
| 0.120484 | 0.123834  | 0.209936  | 0.122232 | 0.127331  | 0.108974  | 0.169872 |
| 0.121358 | 0.126166  | 0.209353  | 0.121358 | 0.132284  | 0.115385  | 0.168998 |
| 0.130682 | 0.120338  | 0.211101  | 0.126894 | 0.122669  | 0.11859   | 0.173077 |
| 0.187354 | 0.186626  | 0.0999417 | 0.186772 | 0.189831  | 0.19391   | 0.129516 |
| 0.111451 | 0.116841  | 0.20236   | 0.116987 | 0.121503  | 0.114802  | 0.1588   |
| 0.117133 | 0.129516  | 0.202506  | 0.131993 | 0.133887  | 0.111451  | 0.159237 |
| 0.101253 | 0.121503  | 0.213141  | 0.120192 | 0.126748  | 0.092366  | 0.17162  |
| 0.121212 | 0.123106  | 0.217657  | 0.129371 | 0.127477  | 0.106206  | 0.175554 |
| 0.118444 | 0.122378  | 0.206439  | 0.120192 | 0.128205  | 0.126166  | 0.166375 |

|           |           |          |          |           |          |          |
|-----------|-----------|----------|----------|-----------|----------|----------|
| 0.250583  | 0.245775  | 0.118007 | 0.245629 | 0.246941  | 0.254225 | 0.184878 |
| 0.112325  | 0.120629  | 0.210519 | 0.118444 | 0.124126  | 0.109266 | 0.166958 |
| 0.120484  | 0.120921  | 0.202943 | 0.115239 | 0.125583  | 0.117716 | 0.149767 |
| 0.175554  | 0.175699  | 0.151369 | 0.174097 | 0.175699  | 0.172494 | 0.135198 |
| 0.176428  | 0.181818  | 0.112325 | 0.18109  | 0.182401  | 0.183858 | 0.127914 |
| 0.121358  | 0.120921  | 0.20877  | 0.124272 | 0.125     | 0.119464 | 0.163462 |
| 0.120047  | 0.0479312 | 0.203089 | 0.116259 | 0.0549242 | 0.123106 | 0.151952 |
| 0.111888  | 0.121649  | 0.209499 | 0.120921 | 0.125146  | 0.106498 | 0.168852 |
| 0.146999  | 0.0641026 | 0.213432 | 0.139423 | 0.0585664 | 0.142191 | 0.16521  |
| 0.114656  | 0.117716  | 0.207022 | 0.12398  | 0.122086  | 0.118881 | 0.164918 |
| 0.122378  | 0.123397  | 0.209207 | 0.127331 | 0.126603  | 0.119318 | 0.168561 |
| 0.125437  | 0.129662  | 0.216346 | 0.128642 | 0.129953  | 0.110431 | 0.175699 |
| 0.116113  | 0.0428322 | 0.195659 | 0.116113 | 0.048951  | 0.117716 | 0.142191 |
| 0.130828  | 0.0488054 | 0.205128 | 0.120629 | 0.050845  | 0.128934 | 0.1537   |
| 0.115239  | 0.119464  | 0.197698 | 0.127477 | 0.124126  | 0.1081   | 0.152098 |
| 0.122669  | 0.130099  | 0.218823 | 0.129953 | 0.13447   | 0.116696 | 0.175554 |
| 0.136509  | 0.142774  | 0.22567  | 0.138258 | 0.145105  | 0.130245 | 0.189394 |
| 0.114802  | 0.125437  | 0.213287 | 0.121212 | 0.127185  | 0.116113 | 0.167686 |
| 0.128934  | 0.136655  | 0.222174 | 0.132139 | 0.137529  | 0.120629 | 0.182692 |
| 0.125146  | 0.128205  | 0.219843 | 0.13243  | 0.132576  | 0.114219 | 0.181235 |
| 0.199301  | 0.196241  | 0.105478 | 0.201049 | 0.198572  | 0.204108 | 0.142337 |
| 0.113782  | 0.134033  | 0.216638 | 0.133887 | 0.136655  | 0.117716 | 0.176573 |
| 0.184003  | 0.183566  | 0.112617 | 0.181964 | 0.187354  | 0.18852  | 0.129662 |
| 0.117861  | 0.116259  | 0.205857 | 0.119901 | 0.120629  | 0.108974 | 0.166084 |
| 0.124854  | 0.124126  | 0.204983 | 0.12398  | 0.127914  | 0.126166 | 0.162879 |
| 0.0604604 | 0.124709  | 0.206148 | 0.122815 | 0.129662  | 0.11859  | 0.166375 |
| 0.0492424 | 0.120484  | 0.20542  | 0.120338 | 0.128059  | 0.114073 | 0.168269 |
| 0.124563  | 0.0445804 | 0.198281 | 0.11757  | 0.0448718 | 0.123543 | 0.150058 |
| 0.122523  | 0.0472028 | 0.203817 | 0.119027 | 0.0454545 | 0.122669 | 0.150641 |
| 0.112908  | 0.118881  | 0.200321 | 0.119027 | 0.124126  | 0.119172 | 0.15676  |
| 0.118298  | 0.120192  | 0.20979  | 0.123252 | 0.125146  | 0.110868 | 0.169726 |
| 0.0606061 | 0.124854  | 0.210956 | 0.124417 | 0.128351  | 0.121066 | 0.17264  |
| 0.128934  | 0.137821  | 0.211101 | 0.137675 | 0.139569  | 0.116841 | 0.171329 |
| 0.244901  | 0.243007  | 0.117279 | 0.237617 | 0.241841  | 0.249126 | 0.18007  |
| 0.112908  | 0.120629  | 0.204691 | 0.11757  | 0.125874  | 0.121795 | 0.160256 |
| 0.175991  | 0.178467  | 0.105478 | 0.177739 | 0.183129  | 0.182547 | 0.132139 |
| 0.18546   | 0.180653  | 0.103875 | 0.181672 | 0.183275  | 0.186189 | 0.131119 |
| 0.11859   | 0.12602   | 0.203089 | 0.124126 | 0.129516  | 0.118735 | 0.156323 |
| 0.108683  | 0.115822  | 0.208916 | 0.115676 | 0.119027  | 0.107372 | 0.16215  |
| 0.124417  | 0.122815  | 0.208916 | 0.123834 | 0.127477  | 0.126894 | 0.167104 |
| 0.116259  | 0.0537587 | 0.199592 | 0.113928 | 0.0563811 | 0.118153 | 0.14729  |
| 0.101253  | 0.122378  | 0.200612 | 0.120484 | 0.124417  | 0.115385 | 0.152681 |
| 0.11961   | 0.124126  | 0.211684 | 0.129808 | 0.129371  | 0.107809 | 0.17162  |
| 0.120629  | 0.0732809 | 0.199883 | 0.118881 | 0.0721154 | 0.123397 | 0.145542 |

|           |           |          |          |           |           |          |
|-----------|-----------|----------|----------|-----------|-----------|----------|
| 0.131993  | 0.0537587 | 0.211247 | 0.126166 | 0.0520105 | 0.129808  | 0.159819 |
| 0.116113  | 0.117133  | 0.203234 | 0.115239 | 0.123543  | 0.116259  | 0.160839 |
| 0.128351  | 0.0474942 | 0.209062 | 0.124854 | 0.0492424 | 0.125291  | 0.15676  |
| 0.116841  | 0.121941  | 0.20979  | 0.118298 | 0.126311  | 0.0910548 | 0.163607 |
| 0.0626457 | 0.128642  | 0.214452 | 0.124126 | 0.133596  | 0.121358  | 0.17264  |
| 0.116987  | 0.126457  | 0.211393 | 0.126603 | 0.13141   | 0.114802  | 0.170455 |
| 0.130828  | 0.13243   | 0.220571 | 0.137529 | 0.139423  | 0.119027  | 0.184003 |
| 0.122232  | 0.124709  | 0.213432 | 0.128934 | 0.129953  | 0.121212  | 0.167832 |
| 0.110577  | 0.115967  | 0.199446 | 0.114365 | 0.123543  | 0.117424  | 0.155303 |
| 0.135344  | 0.128788  | 0.216346 | 0.119027 | 0.133741  | 0.131702  | 0.170455 |
| 0.176865  | 0.179341  | 0.106352 | 0.179196 | 0.181381  | 0.181964  | 0.12602  |
| 0.136218  | 0.0530303 | 0.211976 | 0.130973 | 0.0539044 | 0.133159  | 0.161422 |
| 0.118735  | 0.0451632 | 0.199446 | 0.11553  | 0.048951  | 0.121212  | 0.145396 |
| 0.0544872 | 0.126311  | 0.210082 | 0.12296  | 0.131265  | 0.112325  | 0.172057 |
| 0.0488054 | 0.118881  | 0.20236  | 0.119027 | 0.122378  | 0.108683  | 0.166375 |
| 0.118298  | 0.124272  | 0.210373 | 0.123834 | 0.127185  | 0.110577  | 0.170892 |
| 0.121358  | 0.130245  | 0.215763 | 0.128934 | 0.13549   | 0.114219  | 0.174242 |
| 0.184149  | 0.18546   | 0.106935 | 0.184732 | 0.188374  | 0.192162  | 0.131556 |
| 0.122669  | 0.0697844 | 0.192016 | 0.118298 | 0.0738636 | 0.117279  | 0.137092 |
| 0.104749  | 0.106061  | 0.184295 | 0.120775 | 0.110431  | 0.106935  | 0.138403 |
| 0.126311  | 0.0425408 | 0.203526 | 0.119318 | 0.0431235 | 0.123834  | 0.150932 |
| 0.185023  | 0.182547  | 0.105186 | 0.182401 | 0.186626  | 0.191288  | 0.126894 |
| 0.103293  | 0.115385  | 0.200612 | 0.116404 | 0.120629  | 0.102273  | 0.155886 |
| 0.122086  | 0.128934  | 0.217075 | 0.128788 | 0.132139  | 0.109411  | 0.177302 |
| 0.122669  | 0.0450175 | 0.204254 | 0.116259 | 0.0470571 | 0.122815  | 0.14729  |
| 0.11553   | 0.116259  | 0.211101 | 0.11757  | 0.121503  | 0.115676  | 0.164336 |
| 0.180216  | 0.178613  | 0.103293 | 0.17905  | 0.180653  | 0.186772  | 0.126166 |
| 0.117279  | 0.119464  | 0.21081  | 0.125437 | 0.124709  | 0.107517  | 0.167541 |
| 0.115239  | 0.109266  | 0.198281 | 0.109703 | 0.113928  | 0.112471  | 0.153846 |
| 0.104167  | 0.116841  | 0.19595  | 0.116113 | 0.121212  | 0.109557  | 0.152389 |
| 0.105332  | 0.116259  | 0.18546  | 0.119027 | 0.117716  | 0.11859   | 0.136946 |
| 0.120921  | 0.124272  | 0.213578 | 0.124126 | 0.127185  | 0.111451  | 0.176136 |
| 0.124709  | 0.128351  | 0.221737 | 0.133159 | 0.135635  | 0.114365  | 0.181672 |
| 0.114219  | 0.11757   | 0.204837 | 0.115967 | 0.121358  | 0.117861  | 0.16215  |
| 0.12704   | 0.118735  | 0.216783 | 0.127622 | 0.122523  | 0.110868  | 0.167395 |
| 0.142045  | 0.143357  | 0.221591 | 0.142045 | 0.144814  | 0.140152  | 0.181235 |
| 0.229458  | 0.225524  | 0.11116  | 0.224505 | 0.229604  | 0.233974  | 0.169289 |
| 0.13039   | 0.129953  | 0.221591 | 0.131847 | 0.134033  | 0.123543  | 0.17366  |
| 0.120192  | 0.125291  | 0.211101 | 0.121358 | 0.127914  | 0.1081    | 0.175117 |
| 0.120047  | 0.0534674 | 0.19697  | 0.116841 | 0.0537587 | 0.11961   | 0.142628 |
| 0.11757   | 0.125     | 0.201486 | 0.127768 | 0.132867  | 0.120338  | 0.162296 |
| 0.111597  | 0.110577  | 0.203963 | 0.116259 | 0.114948  | 0.107372  | 0.158945 |
| 0.11859   | 0.117861  | 0.207751 | 0.12704  | 0.122523  | 0.111451  | 0.169435 |
| 0.122232  | 0.0539044 | 0.201777 | 0.119318 | 0.0536131 | 0.12296   | 0.14627  |

|           |           |           |          |           |           |          |
|-----------|-----------|-----------|----------|-----------|-----------|----------|
| 0.126748  | 0.128059  | 0.217657  | 0.134033 | 0.134761  | 0.11116   | 0.173223 |
| 0.123252  | 0.119027  | 0.200758  | 0.121795 | 0.126894  | 0.11757   | 0.156906 |
| 0.230624  | 0.22873   | 0.108829  | 0.22567  | 0.229604  | 0.233974  | 0.173077 |
| 0.108974  | 0.11116   | 0.200175  | 0.111597 | 0.116696  | 0.106498  | 0.158654 |
| 0.104021  | 0.115239  | 0.208042  | 0.115676 | 0.118444  | 0.0505536 | 0.164773 |
| 0.112908  | 0.114219  | 0.203234  | 0.113491 | 0.120338  | 0.116841  | 0.1588   |
| 0.12704   | 0.126311  | 0.214744  | 0.129079 | 0.131847  | 0.127185  | 0.174097 |
| 0.134324  | 0.137675  | 0.226107  | 0.137821 | 0.140297  | 0.131847  | 0.181672 |
| 0.113345  | 0.113782  | 0.194639  | 0.113345 | 0.114948  | 0.126894  | 0.151369 |
| 0.121503  | 0.0458916 | 0.197261  | 0.117424 | 0.0432692 | 0.120775  | 0.145251 |
| 0.111451  | 0.112471  | 0.20236   | 0.118444 | 0.115967  | 0.115385  | 0.159382 |
| 0.223631  | 0.222028  | 0.11116   | 0.221591 | 0.222902  | 0.231352  | 0.162879 |
| 0.125146  | 0.0439977 | 0.201195  | 0.120775 | 0.0428322 | 0.124417  | 0.150058 |
| 0.122378  | 0.12398   | 0.215909  | 0.127331 | 0.128642  | 0.107955  | 0.174097 |
| 0.115385  | 0.119318  | 0.207168  | 0.118881 | 0.124272  | 0.11116   | 0.161859 |
| 0.128059  | 0.122378  | 0.211393  | 0.127768 | 0.12704   | 0.119464  | 0.171037 |
| 0.11961   | 0.126748  | 0.220134  | 0.126894 | 0.132284  | 0.0565268 | 0.176573 |
| 0.114073  | 0.11859   | 0.205857  | 0.112325 | 0.123543  | 0.120629  | 0.16317  |
| 0.121358  | 0.12704   | 0.216346  | 0.131556 | 0.131702  | 0.104895  | 0.176282 |
| 0.127622  | 0.130973  | 0.221737  | 0.134324 | 0.133887  | 0.112034  | 0.183129 |
| 0.117716  | 0.122523  | 0.210082  | 0.126166 | 0.129225  | 0.105624  | 0.17264  |
| 0.113491  | 0.119755  | 0.204691  | 0.115822 | 0.124417  | 0.120047  | 0.160839 |
| 0.128642  | 0.127331  | 0.215181  | 0.125437 | 0.131119  | 0.118298  | 0.179487 |
| 0.132284  | 0.131556  | 0.221154  | 0.130245 | 0.131847  | 0.122232  | 0.181672 |
| 0.0667249 | 0.132139  | 0.2162    | 0.130245 | 0.135052  | 0.121358  | 0.175554 |
| 0.0673077 | 0.136218  | 0.217366  | 0.134907 | 0.139714  | 0.123689  | 0.181964 |
| 0.131847  | 0.130536  | 0.222174  | 0.129225 | 0.133159  | 0.120338  | 0.183858 |
| 0.0986305 | 0.121212  | 0.20877   | 0.116404 | 0.12296   | 0.111597  | 0.164336 |
| 0.120047  | 0.13243   | 0.227564  | 0.132867 | 0.137675  | 0.10708   | 0.186043 |
| 0.13243   | 0.134324  | 0.223048  | 0.13447  | 0.138695  | 0.134615  | 0.177156 |
| 0.201486  | 0.19697   | 0.0965909 | 0.19595  | 0.199301  | 0.204254  | 0.144231 |
| 0.128351  | 0.121795  | 0.207605  | 0.126603 | 0.126457  | 0.121503  | 0.16317  |
| 0.108829  | 0.122378  | 0.212558  | 0.122815 | 0.125291  | 0.0524476 | 0.170746 |
| 0.117716  | 0.123397  | 0.20134   | 0.120047 | 0.125437  | 0.124272  | 0.159819 |
| 0.216346  | 0.214161  | 0.106789  | 0.215763 | 0.215035  | 0.221154  | 0.157051 |
| 0.204691  | 0.205128  | 0.117279  | 0.205565 | 0.208333  | 0.211247  | 0.15035  |
| 0.125874  | 0.131556  | 0.217075  | 0.13549  | 0.134761  | 0.111451  | 0.17905  |
| 0.243153  | 0.240967  | 0.121649  | 0.239365 | 0.242133  | 0.25      | 0.178613 |
| 0.0977564 | 0.120047  | 0.207605  | 0.116696 | 0.124126  | 0.113636  | 0.161131 |
| 0.13447   | 0.140734  | 0.220134  | 0.136509 | 0.144522  | 0.135198  | 0.182984 |
| 0.107955  | 0.11859   | 0.208479  | 0.116404 | 0.12296   | 0.110431  | 0.164627 |
| 0.126748  | 0.12602   | 0.218531  | 0.128497 | 0.128934  | 0.114365  | 0.179341 |
| 0.181964  | 0.18211   | 0.100087  | 0.180216 | 0.185023  | 0.187937  | 0.130536 |
| 0.129079  | 0.128351  | 0.21183   | 0.125583 | 0.13243   | 0.119901  | 0.172348 |

|           |           |          |          |           |           |          |
|-----------|-----------|----------|----------|-----------|-----------|----------|
| 0.188228  | 0.186334  | 0.104604 | 0.185897 | 0.190705  | 0.194202  | 0.128934 |
| 0.122378  | 0.121358  | 0.208625 | 0.122378 | 0.12398   | 0.116404  | 0.166812 |
| 0.114219  | 0.10271   | 0.192308 | 0.119755 | 0.106498  | 0.10708   | 0.139714 |
| 0.11451   | 0.124563  | 0.208625 | 0.127622 | 0.128934  | 0.121941  | 0.172348 |
| 0.111014  | 0.104167  | 0.190851 | 0.107517 | 0.10912   | 0.112325  | 0.137675 |
| 0.105332  | 0.112179  | 0.200029 | 0.112908 | 0.11859   | 0.111597  | 0.157051 |
| 0.116113  | 0.107517  | 0.204691 | 0.118444 | 0.113054  | 0.116259  | 0.159091 |
| 0.106498  | 0.117424  | 0.200321 | 0.11553  | 0.121503  | 0.104604  | 0.15676  |
| 0.11451   | 0.0476399 | 0.201923 | 0.11451  | 0.0520105 | 0.117861  | 0.147873 |
| 0.103584  | 0.122669  | 0.216055 | 0.121941 | 0.124417  | 0.094697  | 0.16958  |
| 0.116696  | 0.116841  | 0.20877  | 0.120775 | 0.120921  | 0.110431  | 0.16317  |
| 0.107809  | 0.119027  | 0.204545 | 0.11451  | 0.123689  | 0.105915  | 0.162733 |
| 0.0744464 | 0.126748  | 0.203526 | 0.121358 | 0.130536  | 0.11859   | 0.157051 |
| 0.130973  | 0.0512821 | 0.209062 | 0.126603 | 0.0515734 | 0.128205  | 0.157051 |
| 0.0509907 | 0.120192  | 0.203089 | 0.121795 | 0.124272  | 0.11116   | 0.167395 |
| 0.116696  | 0.11655   | 0.206731 | 0.109994 | 0.123834  | 0.114802  | 0.158217 |
| 0.107517  | 0.11116   | 0.198718 | 0.110431 | 0.118735  | 0.11116   | 0.157488 |
| 0.117424  | 0.11757   | 0.206585 | 0.125291 | 0.122523  | 0.108246  | 0.165064 |
| 0.116841  | 0.121941  | 0.209499 | 0.122378 | 0.124563  | 0.110577  | 0.171183 |
| 0.119901  | 0.125874  | 0.215181 | 0.126603 | 0.130245  | 0.113928  | 0.173368 |
| 0.0520105 | 0.123252  | 0.208479 | 0.122815 | 0.130536  | 0.109848  | 0.16958  |
| 0.120629  | 0.048514  | 0.200466 | 0.122086 | 0.0520105 | 0.121066  | 0.148747 |
| 0.13039   | 0.0504079 | 0.206439 | 0.123689 | 0.0518648 | 0.131702  | 0.157051 |
| 0.138549  | 0.0568182 | 0.213141 | 0.129808 | 0.0541958 | 0.138112  | 0.164627 |
| 0.105769  | 0.114073  | 0.20338  | 0.120047 | 0.116987  | 0.0995047 | 0.164481 |
| 0.112179  | 0.118735  | 0.200466 | 0.115385 | 0.123106  | 0.118153  | 0.160985 |
| 0.108246  | 0.111888  | 0.203526 | 0.11961  | 0.11655   | 0.106643  | 0.162296 |
| 0.131265  | 0.130245  | 0.221008 | 0.13039  | 0.134033  | 0.120629  | 0.180944 |
| 0.112471  | 0.121941  | 0.210082 | 0.120047 | 0.123397  | 0.111451  | 0.16623  |
| 0.135781  | 0.143502  | 0.226399 | 0.138403 | 0.145833  | 0.129516  | 0.190122 |
| 0.133741  | 0.13447   | 0.217075 | 0.131702 | 0.139423  | 0.138549  | 0.174679 |
| 0.12398   | 0.124709  | 0.211976 | 0.126894 | 0.124709  | 0.12296   | 0.170163 |
| 0.109848  | 0.111451  | 0.204837 | 0.116259 | 0.115822  | 0.116696  | 0.159237 |
| 0.116696  | 0.109557  | 0.205857 | 0.118735 | 0.11655   | 0.108392  | 0.162879 |
| 0.0622086 | 0.133741  | 0.21285  | 0.127768 | 0.13549   | 0.120047  | 0.176865 |
| 0.196678  | 0.197698  | 0.122669 | 0.201923 | 0.200612  | 0.204983  | 0.146416 |
| 0.115676  | 0.116987  | 0.203089 | 0.11014  | 0.120484  | 0.114656  | 0.153992 |
| 0.111742  | 0.12296   | 0.209936 | 0.122523 | 0.127622  | 0.118298  | 0.171162 |
| 0.118881  | 0.122232  | 0.212704 | 0.121795 | 0.125146  | 0.108246  | 0.173805 |
| 0.0476399 | 0.125874  | 0.205565 | 0.126311 | 0.129662  | 0.114802  | 0.170746 |
| 0.124126  | 0.127477  | 0.211538 | 0.124709 | 0.133013  | 0.121649  | 0.167104 |
| 0.12296   | 0.11553   | 0.208625 | 0.123252 | 0.118444  | 0.113782  | 0.16419  |
| 0.124563  | 0.113345  | 0.211684 | 0.12398  | 0.118298  | 0.115967  | 0.166958 |
| 0.120338  | 0.122523  | 0.209207 | 0.123252 | 0.125437  | 0.117279  | 0.167395 |

|           |           |          |          |           |           |          |
|-----------|-----------|----------|----------|-----------|-----------|----------|
| 0.0996503 | 0.120192  | 0.212121 | 0.121212 | 0.123689  | 0.0916375 | 0.172057 |
| 0.127914  | 0.126894  | 0.216783 | 0.125291 | 0.129808  | 0.118153  | 0.179924 |
| 0.11451   | 0.121066  | 0.208916 | 0.12296  | 0.125728  | 0.109411  | 0.166812 |
| 0.119318  | 0.12296   | 0.215472 | 0.129516 | 0.128205  | 0.11655   | 0.168706 |
| 0.166667  | 0.17264   | 0.183858 | 0.170455 | 0.173805  | 0.167978  | 0.163316 |
| 0.120338  | 0.0511364 | 0.201923 | 0.117424 | 0.0540501 | 0.119901  | 0.147582 |
| 0.126311  | 0.130536  | 0.202943 | 0.126311 | 0.132867  | 0.116259  | 0.167832 |
| 0.117716  | 0.135344  | 0.22028  | 0.130828 | 0.139714  | 0.111451  | 0.177885 |
| 0.124563  | 0.116259  | 0.207896 | 0.128351 | 0.11859   | 0.11655   | 0.156177 |
| 0.108246  | 0.107809  | 0.207314 | 0.115822 | 0.115093  | 0.1081    | 0.160839 |
| 0.109703  | 0.113345  | 0.203817 | 0.119027 | 0.118298  | 0.105186  | 0.162587 |
| 0.112325  | 0.110723  | 0.210227 | 0.116113 | 0.120629  | 0.112471  | 0.164918 |
| 0.120484  | 0.130245  | 0.217512 | 0.131847 | 0.132576  | 0.115385  | 0.174534 |
| 0.119901  | 0.0885781 | 0.197698 | 0.118735 | 0.0912005 | 0.119172  | 0.140443 |
| 0.121503  | 0.131847  | 0.219697 | 0.140734 | 0.135344  | 0.122232  | 0.183129 |
| 0.111742  | 0.112179  | 0.204108 | 0.11961  | 0.115385  | 0.104021  | 0.153846 |
| 0.109266  | 0.127477  | 0.210082 | 0.120338 | 0.129808  | 0.10912   | 0.163607 |
| 0.13447   | 0.13345   | 0.225379 | 0.131265 | 0.138403  | 0.121795  | 0.180944 |
| 0.11116   | 0.128788  | 0.215763 | 0.124272 | 0.131119  | 0.104895  | 0.170455 |
| 0.112908  | 0.120338  | 0.212558 | 0.121358 | 0.123543  | 0.116841  | 0.172203 |
| 0.106206  | 0.124126  | 0.21285  | 0.122232 | 0.129662  | 0.101981  | 0.168124 |
| 0.109994  | 0.124417  | 0.214015 | 0.124563 | 0.129079  | 0.105478  | 0.168998 |
| 0.10067   | 0.115967  | 0.205857 | 0.113782 | 0.120629  | 0.106643  | 0.165501 |
| 0.117424  | 0.129516  | 0.219114 | 0.128497 | 0.133013  | 0.118735  | 0.173223 |
| 0.107226  | 0.121649  | 0.210956 | 0.117716 | 0.128059  | 0.10067   | 0.162442 |
| 0.138695  | 0.139132  | 0.220862 | 0.142483 | 0.143502  | 0.131556  | 0.182838 |
| 0.125583  | 0.128642  | 0.208625 | 0.134615 | 0.132721  | 0.125728  | 0.171766 |
| 0.102855  | 0.120775  | 0.210373 | 0.123252 | 0.124272  | 0.104749  | 0.171766 |
| 0.134761  | 0.137238  | 0.226253 | 0.136801 | 0.142483  | 0.12704   | 0.188811 |
| 0.0942599 | 0.122669  | 0.207022 | 0.123106 | 0.128205  | 0.123543  | 0.167832 |
| 0.13243   | 0.137821  | 0.220134 | 0.137966 | 0.142191  | 0.131702  | 0.171911 |
| 0.107372  | 0.119755  | 0.210227 | 0.124854 | 0.125291  | 0.112471  | 0.16958  |
| 0.1419    | 0.13884   | 0.219406 | 0.141317 | 0.142337  | 0.13243   | 0.185752 |
| 0.130536  | 0.133887  | 0.212121 | 0.129079 | 0.137383  | 0.117279  | 0.178176 |
| 0.129079  | 0.143794  | 0.221154 | 0.130245 | 0.146707  | 0.124563  | 0.174388 |
| 0.100233  | 0.125728  | 0.217075 | 0.128205 | 0.131556  | 0.113491  | 0.174388 |
| 0.106789  | 0.122086  | 0.211976 | 0.122523 | 0.126166  | 0.102564  | 0.168998 |
| 0.1081    | 0.121649  | 0.209499 | 0.122378 | 0.124563  | 0.107955  | 0.163316 |
| 0.116696  | 0.123252  | 0.216055 | 0.125146 | 0.127622  | 0.103147  | 0.170455 |
| 0.117861  | 0.125     | 0.219843 | 0.126311 | 0.127622  | 0.101399  | 0.174825 |
| 0.121212  | 0.131265  | 0.226981 | 0.13141  | 0.13447   | 0.122232  | 0.181672 |
| 0.120629  | 0.127185  | 0.206876 | 0.12704  | 0.130682  | 0.122232  | 0.160693 |
| 0.0894522 | 0.119027  | 0.210373 | 0.120338 | 0.123397  | 0.0995047 | 0.167978 |
| 0.110868  | 0.121503  | 0.210519 | 0.123106 | 0.125583  | 0.108683  | 0.167249 |



|           |          |          |          |          |          |          |
|-----------|----------|----------|----------|----------|----------|----------|
| 0.114802  | 0.127185 | 0.211538 | 0.127622 | 0.132139 | 0.118153 | 0.170892 |
| 0.106643  | 0.118153 | 0.208042 | 0.124417 | 0.123689 | 0.109703 | 0.165064 |
| 0.118444  | 0.132867 | 0.218094 | 0.127768 | 0.134324 | 0.115385 | 0.172494 |
| 0.105041  | 0.115967 | 0.207314 | 0.121941 | 0.120921 | 0.111888 | 0.165501 |
| 0.111305  | 0.106789 | 0.193765 | 0.111597 | 0.109703 | 0.122232 | 0.151952 |
| 0.117716  | 0.116113 | 0.208916 | 0.115385 | 0.117279 | 0.114073 | 0.164773 |
| 0.0990676 | 0.115822 | 0.204837 | 0.112762 | 0.11961  | 0.109994 | 0.161859 |
| 0.108974  | 0.121358 | 0.209207 | 0.122378 | 0.127768 | 0.111451 | 0.167104 |
| 0.10708   | 0.110431 | 0.194493 | 0.112617 | 0.113636 | 0.120629 | 0.152098 |
| 0.113345  | 0.112034 | 0.208042 | 0.119464 | 0.116404 | 0.114073 | 0.163316 |
| 0.121212  | 0.103584 | 0.201923 | 0.117424 | 0.105915 | 0.11757  | 0.147873 |
| 0.10169   | 0.103293 | 0.193473 | 0.109848 | 0.105041 | 0.117861 | 0.149621 |
| 0.121649  | 0.12296  | 0.219551 | 0.126603 | 0.129371 | 0.123543 | 0.173077 |

| TDr_2029  | TDr_2032 | TDr_2033  | TDr_2034 | TDr_2035  | TDr_2038  | TDr_2041  |
|-----------|----------|-----------|----------|-----------|-----------|-----------|
| 0.107955  | 0.148601 | 0.112762  | 0.171911 | 0.0865385 | 0.0996503 | 0.122815  |
| 0.0955711 | 0.137383 | 0.112325  | 0.176719 | 0.113782  | 0.104458  | 0.115385  |
| 0.0941142 | 0.140297 | 0.110868  | 0.175845 | 0.109994  | 0.0968823 | 0.107226  |
| 0.104604  | 0.142337 | 0.112908  | 0.183129 | 0.121358  | 0.106789  | 0.110431  |
| 0.126457  | 0.101836 | 0.131556  | 0.200029 | 0.138549  | 0.120484  | 0.125     |
| 0.116259  | 0.144085 | 0.129225  | 0.190414 | 0.120484  | 0.122815  | 0.124417  |
| 0.119027  | 0.146853 | 0.115093  | 0.193765 | 0.107517  | 0.112762  | 0.123397  |
| 0.106498  | 0.138695 | 0.115676  | 0.174534 | 0.113928  | 0.101399  | 0.105915  |
| 0.0952797 | 0.137383 | 0.101253  | 0.179341 | 0.112908  | 0.0750291 | 0.106061  |
| 0.104458  | 0.134615 | 0.0874126 | 0.18648  | 0.109848  | 0.087704  | 0.112617  |
| 0.112471  | 0.149913 | 0.107663  | 0.17264  | 0.112617  | 0.104749  | 0.117716  |
| 0.104167  | 0.138986 | 0.111014  | 0.177739 | 0.115385  | 0.0981935 | 0.105624  |
| 0.0980478 | 0.138695 | 0.11014   | 0.186772 | 0.118881  | 0.0865385 | 0.115239  |
| 0.125     | 0.1537   | 0.121066  | 0.141754 | 0.140297  | 0.118735  | 0.135781  |
| 0.118735  | 0.142774 | 0.11655   | 0.192016 | 0.130828  | 0.114802  | 0.129808  |
| 0.11859   | 0.145251 | 0.115239  | 0.192745 | 0.119901  | 0.10708   | 0.122086  |
| 0.106498  | 0.13986  | 0.113054  | 0.183275 | 0.120047  | 0.10169   | 0.0995047 |
| 0.138986  | 0.130973 | 0.146125  | 0.204108 | 0.149038  | 0.133304  | 0.133741  |
| 0.0879953 | 0.138258 | 0.108246  | 0.17264  | 0.107372  | 0.0977564 | 0.105769  |
| 0.192599  | 0.214307 | 0.190414  | 0.142045 | 0.205565  | 0.195367  | 0.203671  |
| 0.11553   | 0.150058 | 0.12704   | 0.191434 | 0.10169   | 0.115967  | 0.118153  |
| 0.109848  | 0.146125 | 0.123689  | 0.194202 | 0.0962995 | 0.11116   | 0.11655   |
| 0.103584  | 0.142191 | 0.111305  | 0.18211  | 0.117133  | 0.100233  | 0.103875  |
| 0.121503  | 0.151369 | 0.122523  | 0.193036 | 0.124272  | 0.114656  | 0.120047  |
| 0.103001  | 0.136364 | 0.105478  | 0.175991 | 0.107226  | 0.0938228 | 0.106206  |
| 0.121649  | 0.148019 | 0.125874  | 0.194347 | 0.112471  | 0.122378  | 0.12398   |
| 0.11961   | 0.142191 | 0.120338  | 0.19289  | 0.116259  | 0.114219  | 0.125437  |
| 0.112617  | 0.152389 | 0.115967  | 0.199009 | 0.126748  | 0.106935  | 0.119901  |
| 0.125728  | 0.152681 | 0.128497  | 0.197844 | 0.126166  | 0.113928  | 0.127185  |
| 0.116404  | 0.146562 | 0.107809  | 0.19697  | 0.121212  | 0.105478  | 0.125437  |
| 0.121503  | 0.143502 | 0.118444  | 0.188957 | 0.0957168 | 0.120484  | 0.129079  |
| 0.116404  | 0.147727 | 0.119172  | 0.19289  | 0.118881  | 0.104604  | 0.123689  |
| 0.103293  | 0.138403 | 0.103438  | 0.177739 | 0.100816  | 0.0979021 | 0.107955  |
| 0.112617  | 0.147145 | 0.111305  | 0.18852  | 0.114802  | 0.102273  | 0.119901  |
| 0.12296   | 0.137675 | 0.118735  | 0.191871 | 0.11961   | 0.10708   | 0.123834  |
| 0.120775  | 0.141608 | 0.113928  | 0.198135 | 0.126748  | 0.113345  | 0.123689  |
| 0.128788  | 0.146707 | 0.127185  | 0.206148 | 0.116404  | 0.119027  | 0.13345   |
| 0.118735  | 0.152098 | 0.121503  | 0.194056 | 0.115093  | 0.109848  | 0.120192  |
| 0.105041  | 0.148601 | 0.111888  | 0.18211  | 0.108683  | 0.099359  | 0.115239  |
| 0.122523  | 0.152681 | 0.117133  | 0.194347 | 0.128788  | 0.110431  | 0.121649  |
| 0.103875  | 0.138695 | 0.109848  | 0.183275 | 0.115967  | 0.0984848 | 0.109994  |
| 0.140297  | 0.157343 | 0.129662  | 0.205711 | 0.145396  | 0.129662  | 0.139714  |

|          |          |          |          |           |           |          |
|----------|----------|----------|----------|-----------|-----------|----------|
| 0.13884  | 0.164627 | 0.134033 | 0.206876 | 0.148893  | 0.129079  | 0.143502 |
| 0.110431 | 0.146416 | 0.115822 | 0.18546  | 0.120775  | 0.104167  | 0.115385 |
| 0.102564 | 0.135927 | 0.10912  | 0.184586 | 0.107663  | 0.0945513 | 0.104312 |
| 0.118444 | 0.147727 | 0.108392 | 0.19697  | 0.119172  | 0.105186  | 0.116113 |
| 0.109994 | 0.148601 | 0.117133 | 0.18852  | 0.121795  | 0.1081    | 0.105332 |
| 0.137238 | 0.160985 | 0.127768 | 0.207896 | 0.139132  | 0.121649  | 0.135198 |
| 0.107517 | 0.146999 | 0.110577 | 0.189248 | 0.121649  | 0.101836  | 0.111014 |
| 0.114948 | 0.147145 | 0.113928 | 0.182984 | 0.118298  | 0.101107  | 0.114073 |
| 0.141317 | 0.155157 | 0.135344 | 0.206731 | 0.0756119 | 0.13884   | 0.144231 |
| 0.125    | 0.144376 | 0.12398  | 0.192453 | 0.134761  | 0.116404  | 0.124417 |
| 0.105915 | 0.147145 | 0.116259 | 0.183275 | 0.117424  | 0.10373   | 0.115239 |
| 0.119027 | 0.138986 | 0.110723 | 0.199009 | 0.134615  | 0.106352  | 0.129225 |
| 0.107372 | 0.140152 | 0.119755 | 0.172786 | 0.117424  | 0.108974  | 0.106789 |
| 0.140297 | 0.157051 | 0.133159 | 0.208625 | 0.141608  | 0.125874  | 0.131847 |
| 0.122086 | 0.146999 | 0.11961  | 0.199446 | 0.131556  | 0.116987  | 0.129662 |
| 0.115967 | 0.145833 | 0.115239 | 0.186334 | 0.116696  | 0.100087  | 0.115385 |
| 0.111597 | 0.14729  | 0.113782 | 0.1875   | 0.11961   | 0.101253  | 0.118298 |
| 0.119027 | 0.143357 | 0.106643 | 0.199301 | 0.118007  | 0.109848  | 0.122523 |
| 0.134761 | 0.158508 | 0.132284 | 0.208333 | 0.142483  | 0.12704   | 0.13447  |
| 0.135635 | 0.161422 | 0.127331 | 0.210082 | 0.147436  | 0.12704   | 0.139132 |
| 0.161713 | 0.179633 | 0.14292  | 0.161568 | 0.163316  | 0.154866  | 0.163462 |
| 0.108974 | 0.150204 | 0.11116  | 0.185752 | 0.116696  | 0.102127  | 0.114802 |
| 0.110723 | 0.149621 | 0.10912  | 0.185752 | 0.116987  | 0.101836  | 0.109557 |
| 0.108974 | 0.142045 | 0.10708  | 0.18546  | 0.114656  | 0.100087  | 0.1081   |
| 0.135052 | 0.159674 | 0.141026 | 0.196387 | 0.126166  | 0.131702  | 0.133304 |
| 0.10912  | 0.145396 | 0.108974 | 0.183566 | 0.116259  | 0.0955711 | 0.114073 |
| 0.129371 | 0.151661 | 0.127477 | 0.197407 | 0.137092  | 0.124272  | 0.128788 |
| 0.117424 | 0.143211 | 0.108829 | 0.196241 | 0.11757   | 0.108246  | 0.120921 |
| 0.114073 | 0.147436 | 0.116259 | 0.184441 | 0.122086  | 0.107517  | 0.112325 |
| 0.142628 | 0.16317  | 0.145688 | 0.200175 | 0.125874  | 0.138986  | 0.146416 |
| 0.116696 | 0.153846 | 0.119464 | 0.195804 | 0.127622  | 0.107809  | 0.116987 |
| 0.131993 | 0.153992 | 0.124272 | 0.206148 | 0.141171  | 0.128351  | 0.136364 |
| 0.126894 | 0.145688 | 0.127331 | 0.194056 | 0.136946  | 0.121503  | 0.12398  |
| 0.111888 | 0.139423 | 0.117861 | 0.182838 | 0.118444  | 0.105915  | 0.101981 |
| 0.108974 | 0.144668 | 0.110286 | 0.184878 | 0.118444  | 0.0989219 | 0.112471 |
| 0.111597 | 0.14292  | 0.113782 | 0.1875   | 0.122523  | 0.0971737 | 0.113054 |
| 0.132576 | 0.154575 | 0.130973 | 0.202943 | 0.134178  | 0.117861  | 0.129662 |
| 0.106498 | 0.144522 | 0.112762 | 0.18648  | 0.114219  | 0.0990676 | 0.113782 |
| 0.134033 | 0.159819 | 0.125146 | 0.208188 | 0.143794  | 0.130682  | 0.136072 |
| 0.116259 | 0.153992 | 0.11553  | 0.190997 | 0.124854  | 0.109703  | 0.121795 |
| 0.111597 | 0.146416 | 0.117861 | 0.190414 | 0.123106  | 0.107372  | 0.111597 |
| 0.110431 | 0.150495 | 0.117279 | 0.188083 | 0.122232  | 0.101253  | 0.118007 |
| 0.117716 | 0.156614 | 0.121066 | 0.194202 | 0.132139  | 0.106789  | 0.117424 |
| 0.111888 | 0.146416 | 0.113199 | 0.186626 | 0.119027  | 0.103293  | 0.11655  |

|          |          |           |          |           |           |          |
|----------|----------|-----------|----------|-----------|-----------|----------|
| 0.108683 | 0.149913 | 0.112908  | 0.184878 | 0.119901  | 0.0968823 | 0.113636 |
| 0.137092 | 0.157051 | 0.129662  | 0.204254 | 0.14627   | 0.12296   | 0.136218 |
| 0.107663 | 0.1419   | 0.111014  | 0.185606 | 0.111305  | 0.0990676 | 0.109703 |
| 0.108392 | 0.140297 | 0.111742  | 0.188957 | 0.116696  | 0.0901807 | 0.114802 |
| 0.122086 | 0.151661 | 0.118735  | 0.201486 | 0.118153  | 0.114656  | 0.123543 |
| 0.123543 | 0.150204 | 0.119318  | 0.196533 | 0.107955  | 0.118153  | 0.124417 |
| 0.127622 | 0.144959 | 0.121358  | 0.201777 | 0.131847  | 0.12398   | 0.127914 |
| 0.13243  | 0.153263 | 0.13345   | 0.208042 | 0.138695  | 0.129662  | 0.126311 |
| 0.112762 | 0.125728 | 0.119318  | 0.185752 | 0.105041  | 0.107372  | 0.118007 |
| 0.17366  | 0.190705 | 0.168269  | 0.154283 | 0.174971  | 0.181672  | 0.183566 |
| 0.106789 | 0.139569 | 0.111597  | 0.188228 | 0.106643  | 0.101981  | 0.107372 |
| 0.132576 | 0.149621 | 0.136218  | 0.204691 | 0.136801  | 0.127477  | 0.127622 |
| 0.124709 | 0.145542 | 0.128059  | 0.199738 | 0.130682  | 0.116113  | 0.120338 |
| 0.134761 | 0.152098 | 0.132576  | 0.206002 | 0.114219  | 0.128788  | 0.137092 |
| 0.108683 | 0.14088  | 0.112325  | 0.1875   | 0.118735  | 0.105915  | 0.103147 |
| 0.128497 | 0.150495 | 0.129808  | 0.204108 | 0.135635  | 0.125146  | 0.120338 |
| 0.111014 | 0.146999 | 0.118153  | 0.190705 | 0.114948  | 0.10708   | 0.104021 |
| 0.124563 | 0.143357 | 0.122378  | 0.194639 | 0.124709  | 0.115676  | 0.116113 |
| 0.112908 | 0.144522 | 0.113054  | 0.189685 | 0.104895  | 0.104312  | 0.120484 |
| 0.131847 | 0.150641 | 0.132867  | 0.207168 | 0.137238  | 0.127914  | 0.12398  |
| 0.110286 | 0.149476 | 0.104604  | 0.18648  | 0.112179  | 0.0990676 | 0.105624 |
| 0.131119 | 0.149621 | 0.128351  | 0.199738 | 0.11757   | 0.125437  | 0.134033 |
| 0.114365 | 0.143648 | 0.115093  | 0.189394 | 0.101107  | 0.108683  | 0.110868 |
| 0.129079 | 0.152535 | 0.122523  | 0.201777 | 0.137383  | 0.116987  | 0.128497 |
| 0.128642 | 0.15035  | 0.120629  | 0.199009 | 0.115676  | 0.119464  | 0.13243  |
| 0.10708  | 0.141317 | 0.111014  | 0.188811 | 0.0996503 | 0.0996503 | 0.108537 |
| 0.13884  | 0.165501 | 0.143357  | 0.198427 | 0.129953  | 0.136946  | 0.143502 |
| 0.109266 | 0.142337 | 0.110286  | 0.192453 | 0.101253  | 0.103875  | 0.113636 |
| 0.1081   | 0.138549 | 0.116113  | 0.191288 | 0.119901  | 0.103001  | 0.100233 |
| 0.112034 | 0.147436 | 0.118298  | 0.191725 | 0.116841  | 0.101107  | 0.114073 |
| 0.133013 | 0.155012 | 0.13141   | 0.206294 | 0.124417  | 0.127914  | 0.13243  |
| 0.118153 | 0.148601 | 0.115385  | 0.178613 | 0.119464  | 0.113345  | 0.120484 |
| 0.107955 | 0.142191 | 0.114219  | 0.190268 | 0.115385  | 0.0981935 | 0.100379 |
| 0.104749 | 0.144231 | 0.113345  | 0.185897 | 0.117716  | 0.0996503 | 0.101836 |
| 0.113345 | 0.148164 | 0.112617  | 0.187209 | 0.10067   | 0.10271   | 0.115676 |
| 0.125146 | 0.147436 | 0.111305  | 0.199883 | 0.120921  | 0.114802  | 0.129808 |
| 0.111888 | 0.146707 | 0.113491  | 0.192162 | 0.0962995 | 0.108537  | 0.113928 |
| 0.099796 | 0.142191 | 0.0999417 | 0.176282 | 0.107809  | 0.087704  | 0.102418 |
| 0.104458 | 0.141026 | 0.102564  | 0.181818 | 0.105478  | 0.0926573 | 0.104167 |
| 0.108683 | 0.145833 | 0.106206  | 0.1875   | 0.113491  | 0.0910548 | 0.108392 |
| 0.112762 | 0.144668 | 0.118153  | 0.184586 | 0.122523  | 0.10271   | 0.119464 |
| 0.128059 | 0.151515 | 0.119755  | 0.199009 | 0.127914  | 0.113928  | 0.125728 |
| 0.106352 | 0.141754 | 0.103875  | 0.190997 | 0.110577  | 0.0945513 | 0.11014  |
| 0.103875 | 0.142191 | 0.105478  | 0.183566 | 0.109557  | 0.0894522 | 0.110868 |

|          |          |          |           |           |           |          |
|----------|----------|----------|-----------|-----------|-----------|----------|
| 0.123397 | 0.149476 | 0.116841 | 0.196387  | 0.120921  | 0.11451   | 0.125146 |
| 0.108683 | 0.142337 | 0.104167 | 0.185752  | 0.110868  | 0.0962995 | 0.108683 |
| 0.115676 | 0.148456 | 0.126894 | 0.183421  | 0.114073  | 0.111742  | 0.118298 |
| 0.127914 | 0.150204 | 0.122523 | 0.198281  | 0.0633741 | 0.122523  | 0.131702 |
| 0.114219 | 0.145833 | 0.107372 | 0.191288  | 0.118735  | 0.10271   | 0.111014 |
| 0.105915 | 0.1419   | 0.104604 | 0.188811  | 0.113928  | 0.0938228 | 0.112908 |
| 0.11116  | 0.145396 | 0.106061 | 0.184441  | 0.114802  | 0.0984848 | 0.109703 |
| 0.100379 | 0.140152 | 0.105769 | 0.178904  | 0.108392  | 0.0906177 | 0.10271  |
| 0.120192 | 0.149184 | 0.111305 | 0.199592  | 0.126457  | 0.11014   | 0.12398  |
| 0.103293 | 0.143357 | 0.102564 | 0.185606  | 0.105769  | 0.0868298 | 0.107955 |
| 0.132576 | 0.151369 | 0.132721 | 0.20236   | 0.128351  | 0.13039   | 0.136946 |
| 0.130099 | 0.153846 | 0.127622 | 0.195804  | 0.132867  | 0.116841  | 0.136801 |
| 0.119901 | 0.149184 | 0.119755 | 0.19493   | 0.126748  | 0.109266  | 0.125146 |
| 0.108683 | 0.146125 | 0.112034 | 0.187209  | 0.121649  | 0.100962  | 0.115676 |
| 0.111305 | 0.145542 | 0.109994 | 0.188957  | 0.0971737 | 0.105041  | 0.112762 |
| 0.107663 | 0.148893 | 0.107517 | 0.187937  | 0.111014  | 0.0990676 | 0.108246 |
| 0.1081   | 0.145833 | 0.11116  | 0.189248  | 0.110286  | 0.0980478 | 0.107809 |
| 0.100524 | 0.144959 | 0.11116  | 0.186043  | 0.110577  | 0.0846445 | 0.116259 |
| 0.102564 | 0.145542 | 0.115239 | 0.177593  | 0.119318  | 0.103584  | 0.104604 |
| 0.128497 | 0.158362 | 0.119901 | 0.201486  | 0.135927  | 0.120192  | 0.126748 |
| 0.114656 | 0.145979 | 0.115676 | 0.19493   | 0.120629  | 0.105769  | 0.102418 |
| 0.123252 | 0.148747 | 0.118444 | 0.19799   | 0.132721  | 0.114948  | 0.129079 |
| 0.134178 | 0.155303 | 0.125874 | 0.206585  | 0.125     | 0.127914  | 0.131847 |
| 0.179341 | 0.209207 | 0.188811 | 0.0964452 | 0.195513  | 0.186772  | 0.186334 |
| 0.226399 | 0.242861 | 0.229458 | 0.131556  | 0.238491  | 0.233246  | 0.23514  |
| 0.097465 | 0.141317 | 0.11655  | 0.176865  | 0.116259  | 0.102855  | 0.105332 |
| 0.106061 | 0.145251 | 0.112325 | 0.184295  | 0.116404  | 0.102127  | 0.104312 |
| 0.103438 | 0.139714 | 0.112034 | 0.182547  | 0.109994  | 0.0980478 | 0.102273 |
| 0.106352 | 0.145251 | 0.109411 | 0.1875    | 0.113491  | 0.103875  | 0.10169  |
| 0.119172 | 0.143794 | 0.118444 | 0.192162  | 0.13039   | 0.117279  | 0.130828 |
| 0.11014  | 0.146125 | 0.115822 | 0.190414  | 0.11757   | 0.107663  | 0.105186 |
| 0.144959 | 0.159674 | 0.141317 | 0.207459  | 0.147727  | 0.136946  | 0.141754 |
| 0.113345 | 0.149913 | 0.119318 | 0.191288  | 0.120484  | 0.103001  | 0.109266 |
| 0.128205 | 0.153992 | 0.121941 | 0.2044    | 0.133887  | 0.121358  | 0.125291 |
| 0.12602  | 0.148019 | 0.129953 | 0.194347  | 0.133741  | 0.125     | 0.123689 |
| 0.128934 | 0.156469 | 0.128497 | 0.201632  | 0.135781  | 0.122378  | 0.123106 |
| 0.13243  | 0.151515 | 0.124126 | 0.203089  | 0.138695  | 0.124126  | 0.13884  |
| 0.114365 | 0.148893 | 0.115967 | 0.192016  | 0.119464  | 0.10373   | 0.111742 |
| 0.108829 | 0.142191 | 0.120338 | 0.189977  | 0.114219  | 0.104312  | 0.10708  |
| 0.109266 | 0.143211 | 0.11961  | 0.189831  | 0.120484  | 0.112908  | 0.103147 |
| 0.107809 | 0.139714 | 0.108829 | 0.18109   | 0.115239  | 0.097465  | 0.10169  |
| 0.106643 | 0.138549 | 0.114948 | 0.183129  | 0.114656  | 0.101253  | 0.106352 |
| 0.112325 | 0.143357 | 0.11451  | 0.18648   | 0.120338  | 0.106352  | 0.108537 |
| 0.120338 | 0.150787 | 0.127768 | 0.196824  | 0.136509  | 0.123397  | 0.116841 |

|           |          |           |          |          |           |           |
|-----------|----------|-----------|----------|----------|-----------|-----------|
| 0.127914  | 0.160693 | 0.131556  | 0.206731 | 0.144376 | 0.126311  | 0.126748  |
| 0.114948  | 0.149767 | 0.118007  | 0.189685 | 0.118881 | 0.104604  | 0.109703  |
| 0.107517  | 0.147582 | 0.115822  | 0.184878 | 0.119901 | 0.107663  | 0.103147  |
| 0.127331  | 0.158654 | 0.124854  | 0.20236  | 0.134178 | 0.124854  | 0.119464  |
| 0.107809  | 0.14292  | 0.10708   | 0.181964 | 0.112325 | 0.101253  | 0.0999417 |
| 0.141463  | 0.154138 | 0.135781  | 0.201632 | 0.144814 | 0.135781  | 0.139132  |
| 0.129808  | 0.162587 | 0.127914  | 0.190559 | 0.13986  | 0.122086  | 0.13039   |
| 0.133741  | 0.148164 | 0.134761  | 0.19391  | 0.138258 | 0.125437  | 0.119755  |
| 0.107809  | 0.138258 | 0.110868  | 0.18546  | 0.114656 | 0.102418  | 0.10373   |
| 0.0995047 | 0.1419   | 0.109848  | 0.184732 | 0.111597 | 0.102855  | 0.103001  |
| 0.12296   | 0.146416 | 0.123689  | 0.200321 | 0.130099 | 0.116404  | 0.117133  |
| 0.11553   | 0.155594 | 0.120629  | 0.197261 | 0.125583 | 0.117133  | 0.114073  |
| 0.128351  | 0.151224 | 0.12704   | 0.19289  | 0.131993 | 0.122669  | 0.121066  |
| 0.114219  | 0.144668 | 0.119901  | 0.191579 | 0.121941 | 0.109411  | 0.105769  |
| 0.113782  | 0.144231 | 0.116841  | 0.187937 | 0.125291 | 0.106352  | 0.109411  |
| 0.120484  | 0.150932 | 0.124709  | 0.194056 | 0.127331 | 0.113928  | 0.112325  |
| 0.130682  | 0.156469 | 0.125     | 0.20542  | 0.132576 | 0.125874  | 0.12398   |
| 0.124272  | 0.154138 | 0.128497  | 0.199592 | 0.139277 | 0.121503  | 0.121649  |
| 0.126166  | 0.154575 | 0.13039   | 0.203526 | 0.135635 | 0.129225  | 0.134615  |
| 0.127477  | 0.154138 | 0.129662  | 0.196096 | 0.131993 | 0.118881  | 0.131556  |
| 0.107663  | 0.14627  | 0.11859   | 0.188811 | 0.115385 | 0.106643  | 0.108829  |
| 0.118153  | 0.153846 | 0.126748  | 0.200175 | 0.135781 | 0.123543  | 0.116113  |
| 0.104895  | 0.143794 | 0.115239  | 0.188666 | 0.113491 | 0.100087  | 0.104895  |
| 0.113782  | 0.144231 | 0.113054  | 0.18211  | 0.120338 | 0.10373   | 0.11553   |
| 0.10912   | 0.144231 | 0.114219  | 0.187354 | 0.115093 | 0.101981  | 0.109411  |
| 0.109557  | 0.146416 | 0.107372  | 0.182838 | 0.118735 | 0.10708   | 0.104312  |
| 0.107226  | 0.142628 | 0.113199  | 0.186626 | 0.118153 | 0.100379  | 0.100816  |
| 0.126894  | 0.152972 | 0.135781  | 0.202797 | 0.139277 | 0.12704   | 0.124854  |
| 0.113345  | 0.150204 | 0.119318  | 0.188957 | 0.112325 | 0.107372  | 0.112471  |
| 0.125874  | 0.151952 | 0.130973  | 0.198281 | 0.134178 | 0.128059  | 0.126748  |
| 0.106061  | 0.142045 | 0.108246  | 0.184003 | 0.118444 | 0.10271   | 0.104021  |
| 0.126603  | 0.151515 | 0.124417  | 0.200175 | 0.128497 | 0.114219  | 0.118735  |
| 0.119755  | 0.150787 | 0.116987  | 0.193619 | 0.13243  | 0.0898893 | 0.124417  |
| 0.111597  | 0.156906 | 0.115822  | 0.18109  | 0.123397 | 0.104749  | 0.113636  |
| 0.115822  | 0.146853 | 0.112762  | 0.189977 | 0.114219 | 0.0996503 | 0.113199  |
| 0.121212  | 0.145542 | 0.121066  | 0.186043 | 0.127768 | 0.104749  | 0.118007  |
| 0.117861  | 0.150058 | 0.123543  | 0.191725 | 0.124417 | 0.100816  | 0.11757   |
| 0.110577  | 0.142191 | 0.113928  | 0.184732 | 0.1081   | 0.0999417 | 0.116696  |
| 0.129225  | 0.146853 | 0.112179  | 0.204545 | 0.132576 | 0.112762  | 0.13039   |
| 0.136655  | 0.164773 | 0.133304  | 0.202943 | 0.13243  | 0.127477  | 0.1419    |
| 0.0984848 | 0.137966 | 0.0992133 | 0.182838 | 0.108829 | 0.081148  | 0.102855  |
| 0.123106  | 0.154138 | 0.120047  | 0.203089 | 0.131702 | 0.113054  | 0.124854  |
| 0.122378  | 0.149038 | 0.100962  | 0.198864 | 0.12398  | 0.101253  | 0.127331  |
| 0.124417  | 0.145833 | 0.119318  | 0.197407 | 0.130973 | 0.116113  | 0.122086  |

|          |          |          |          |          |           |          |
|----------|----------|----------|----------|----------|-----------|----------|
| 0.118007 | 0.142628 | 0.108829 | 0.190705 | 0.117279 | 0.107663  | 0.115967 |
| 0.115093 | 0.144959 | 0.110868 | 0.19799  | 0.124563 | 0.101544  | 0.11655  |
| 0.119901 | 0.143939 | 0.105478 | 0.198427 | 0.125874 | 0.0967366 | 0.121941 |
| 0.120629 | 0.144376 | 0.121066 | 0.201486 | 0.131847 | 0.114656  | 0.120629 |
| 0.130245 | 0.149913 | 0.124854 | 0.202652 | 0.132721 | 0.123106  | 0.131119 |
| 0.11859  | 0.147873 | 0.112034 | 0.199446 | 0.12602  | 0.0936772 | 0.120921 |
| 0.112471 | 0.140297 | 0.108829 | 0.187209 | 0.115822 | 0.10067   | 0.110431 |
| 0.13243  | 0.165793 | 0.134907 | 0.198135 | 0.132284 | 0.127331  | 0.135635 |
| 0.129662 | 0.146999 | 0.114365 | 0.202943 | 0.131847 | 0.10708   | 0.128205 |
| 0.105769 | 0.140589 | 0.106498 | 0.184295 | 0.113782 | 0.100962  | 0.105769 |
| 0.207022 | 0.227273 | 0.209499 | 0.113054 | 0.217949 | 0.213578  | 0.215472 |
| 0.117279 | 0.148019 | 0.113054 | 0.192308 | 0.122669 | 0.108392  | 0.118735 |
| 0.112325 | 0.145688 | 0.101981 | 0.187063 | 0.117424 | 0.0859557 | 0.109703 |
| 0.126748 | 0.143794 | 0.123106 | 0.203526 | 0.138549 | 0.117279  | 0.130536 |
| 0.115676 | 0.148164 | 0.112325 | 0.193619 | 0.121941 | 0.0893065 | 0.117424 |
| 0.127914 | 0.147582 | 0.112325 | 0.20236  | 0.131556 | 0.105332  | 0.131702 |
| 0.111305 | 0.14933  | 0.112034 | 0.190414 | 0.13243  | 0.108829  | 0.109266 |
| 0.11553  | 0.137238 | 0.111305 | 0.192016 | 0.12296  | 0.100816  | 0.120775 |
| 0.121941 | 0.140152 | 0.108392 | 0.198718 | 0.125    | 0.104604  | 0.123397 |
| 0.121795 | 0.14729  | 0.10912  | 0.187791 | 0.134761 | 0.116987  | 0.122086 |
| 0.121941 | 0.144814 | 0.118007 | 0.198135 | 0.13141  | 0.117424  | 0.122815 |
| 0.121795 | 0.145251 | 0.116404 | 0.200903 | 0.128059 | 0.117279  | 0.117424 |
| 0.127622 | 0.144376 | 0.116113 | 0.201195 | 0.129516 | 0.109994  | 0.123834 |
| 0.113345 | 0.152244 | 0.110868 | 0.192745 | 0.119027 | 0.102127  | 0.116841 |
| 0.113636 | 0.146416 | 0.112325 | 0.194493 | 0.124563 | 0.0986305 | 0.111014 |
| 0.12602  | 0.153555 | 0.128788 | 0.198718 | 0.141608 | 0.119172  | 0.127185 |
| 0.111305 | 0.141754 | 0.114365 | 0.18546  | 0.126311 | 0.106498  | 0.115385 |
| 0.136072 | 0.159528 | 0.128642 | 0.205274 | 0.140297 | 0.12602   | 0.13549  |
| 0.133596 | 0.164627 | 0.137529 | 0.185606 | 0.128497 | 0.123834  | 0.135052 |
| 0.120192 | 0.146853 | 0.116841 | 0.190559 | 0.121795 | 0.115676  | 0.126894 |
| 0.121358 | 0.147436 | 0.117716 | 0.198718 | 0.125583 | 0.101981  | 0.125146 |
| 0.118298 | 0.151952 | 0.128059 | 0.184003 | 0.119901 | 0.116987  | 0.121795 |
| 0.119901 | 0.149184 | 0.117716 | 0.19289  | 0.122086 | 0.111597  | 0.126311 |
| 0.122232 | 0.160548 | 0.130828 | 0.178613 | 0.121503 | 0.111888  | 0.123106 |
| 0.134761 | 0.155886 | 0.138112 | 0.191434 | 0.129079 | 0.126748  | 0.135927 |
| 0.113345 | 0.145251 | 0.108829 | 0.182255 | 0.119318 | 0.092803  | 0.110431 |
| 0.128351 | 0.143939 | 0.129079 | 0.201632 | 0.139569 | 0.117424  | 0.135635 |
| 0.136946 | 0.163316 | 0.138549 | 0.183712 | 0.129516 | 0.132721  | 0.1419   |
| 0.121212 | 0.142628 | 0.107663 | 0.19799  | 0.117861 | 0.110577  | 0.122669 |
| 0.120921 | 0.149621 | 0.115239 | 0.189831 | 0.128642 | 0.116113  | 0.118881 |
| 0.143502 | 0.160256 | 0.137529 | 0.205128 | 0.137238 | 0.138403  | 0.143211 |
| 0.121066 | 0.157634 | 0.122378 | 0.193182 | 0.134324 | 0.111014  | 0.123397 |
| 0.13345  | 0.161568 | 0.131265 | 0.205857 | 0.13447  | 0.126603  | 0.13986  |
| 0.127477 | 0.157925 | 0.126166 | 0.198718 | 0.136364 | 0.114219  | 0.13243  |

|          |          |          |          |          |           |          |
|----------|----------|----------|----------|----------|-----------|----------|
| 0.11655  | 0.144959 | 0.128642 | 0.196533 | 0.126311 | 0.117861  | 0.113345 |
| 0.133013 | 0.151807 | 0.126457 | 0.195804 | 0.132576 | 0.115676  | 0.129225 |
| 0.121503 | 0.1537   | 0.10912  | 0.188666 | 0.126603 | 0.109411  | 0.122378 |
| 0.128351 | 0.151224 | 0.135781 | 0.200175 | 0.129662 | 0.120921  | 0.128059 |
| 0.12602  | 0.150641 | 0.117133 | 0.200466 | 0.131702 | 0.11014   | 0.125437 |
| 0.123397 | 0.154138 | 0.132284 | 0.201632 | 0.132284 | 0.125583  | 0.121358 |
| 0.13039  | 0.152098 | 0.126166 | 0.206002 | 0.129662 | 0.123252  | 0.127477 |
| 0.125146 | 0.158217 | 0.130245 | 0.19493  | 0.121795 | 0.120338  | 0.127477 |
| 0.140006 | 0.157343 | 0.13986  | 0.199009 | 0.141317 | 0.13549   | 0.137383 |
| 0.117861 | 0.145688 | 0.104312 | 0.192308 | 0.124709 | 0.102564  | 0.124563 |
| 0.119318 | 0.143357 | 0.116841 | 0.195513 | 0.124417 | 0.1081    | 0.118735 |
| 0.128642 | 0.141026 | 0.126457 | 0.199301 | 0.126166 | 0.122086  | 0.122815 |
| 0.117861 | 0.145105 | 0.105186 | 0.193473 | 0.116841 | 0.104895  | 0.122523 |
| 0.138695 | 0.163607 | 0.142337 | 0.197407 | 0.127477 | 0.126894  | 0.145105 |
| 0.147436 | 0.171183 | 0.144085 | 0.205565 | 0.140589 | 0.145542  | 0.153263 |
| 0.121212 | 0.154575 | 0.13039  | 0.202069 | 0.132139 | 0.122232  | 0.123834 |
| 0.118153 | 0.152389 | 0.121795 | 0.196387 | 0.124126 | 0.11014   | 0.11757  |
| 0.123252 | 0.153409 | 0.135635 | 0.203234 | 0.131847 | 0.11961   | 0.127622 |
| 0.125437 | 0.152972 | 0.125291 | 0.201049 | 0.133159 | 0.109848  | 0.128642 |
| 0.124563 | 0.151224 | 0.126457 | 0.198427 | 0.133741 | 0.116841  | 0.123689 |
| 0.127768 | 0.15035  | 0.122669 | 0.208333 | 0.138986 | 0.123252  | 0.124272 |
| 0.130973 | 0.158508 | 0.123834 | 0.199301 | 0.130828 | 0.122086  | 0.142045 |
| 0.124126 | 0.155449 | 0.113782 | 0.199155 | 0.126603 | 0.104167  | 0.123543 |
| 0.150058 | 0.168852 | 0.161859 | 0.209936 | 0.146707 | 0.152244  | 0.150641 |
| 0.123252 | 0.151952 | 0.111451 | 0.198572 | 0.127768 | 0.112325  | 0.131119 |
| 0.136946 | 0.159819 | 0.124272 | 0.200029 | 0.136218 | 0.124854  | 0.140152 |
| 0.121941 | 0.144522 | 0.118881 | 0.199301 | 0.129079 | 0.11014   | 0.119027 |
| 0.128059 | 0.156177 | 0.132867 | 0.207459 | 0.132284 | 0.121503  | 0.128642 |
| 0.122523 | 0.143648 | 0.118298 | 0.192599 | 0.129371 | 0.109266  | 0.116404 |
| 0.131702 | 0.160693 | 0.129516 | 0.165064 | 0.099796 | 0.126603  | 0.136072 |
| 0.138549 | 0.149184 | 0.147727 | 0.201049 | 0.147727 | 0.130828  | 0.133887 |
| 0.11014  | 0.146416 | 0.128059 | 0.182255 | 0.128059 | 0.110868  | 0.112179 |
| 0.121649 | 0.15472  | 0.128205 | 0.163462 | 0.140152 | 0.119464  | 0.128934 |
| 0.139277 | 0.174971 | 0.140006 | 0.142628 | 0.149621 | 0.137966  | 0.140734 |
| 0.125    | 0.164773 | 0.135344 | 0.141171 | 0.140589 | 0.133304  | 0.134033 |
| 0.120484 | 0.149184 | 0.127331 | 0.199592 | 0.114219 | 0.115967  | 0.125146 |
| 0.129371 | 0.055507 | 0.134761 | 0.195367 | 0.139132 | 0.130099  | 0.131993 |
| 0.103147 | 0.141463 | 0.110577 | 0.176719 | 0.113782 | 0.100379  | 0.111305 |
| 0.107372 | 0.144522 | 0.113636 | 0.180944 | 0.118007 | 0.108683  | 0.118153 |
| 0.115676 | 0.146999 | 0.105332 | 0.187209 | 0.122232 | 0.103584  | 0.118881 |
| 0.108683 | 0.142337 | 0.122815 | 0.179633 | 0.122815 | 0.103293  | 0.106643 |
| 0.110286 | 0.145688 | 0.11655  | 0.186189 | 0.12296  | 0.107517  | 0.108537 |
| 0.10067  | 0.140152 | 0.110723 | 0.172203 | 0.113636 | 0.0961538 | 0.111742 |
| 0.101253 | 0.145688 | 0.127914 | 0.185315 | 0.122086 | 0.0938228 | 0.114656 |



|           |           |           |           |           |           |           |
|-----------|-----------|-----------|-----------|-----------|-----------|-----------|
| 0.113054  | 0.146707  | 0.107663  | 0.178759  | 0.126311  | 0.111451  | 0.121795  |
| 0.100816  | 0.13884   | 0.0592949 | 0.180507  | 0.10912   | 0.0936772 | 0.106352  |
| 0.106061  | 0.149038  | 0.124563  | 0.18109   | 0.126894  | 0.105624  | 0.113054  |
| 0.106789  | 0.1419    | 0.123252  | 0.185023  | 0.120629  | 0.102564  | 0.105624  |
| 0.121649  | 0.154429  | 0.125874  | 0.189103  | 0.126457  | 0.117424  | 0.123397  |
| 0.203526  | 0.223193  | 0.208333  | 0.119755  | 0.217366  | 0.210956  | 0.211976  |
| 0.130099  | 0.153846  | 0.141608  | 0.197552  | 0.146562  | 0.12704   | 0.131847  |
| 0.127622  | 0.144085  | 0.119318  | 0.195076  | 0.127768  | 0.118735  | 0.126457  |
| 0.0610431 | 0.144814  | 0.124126  | 0.185023  | 0.126457  | 0.111014  | 0.126311  |
| 0.198281  | 0.219988  | 0.203089  | 0.101399  | 0.21183   | 0.207168  | 0.207605  |
| 0.113491  | 0.155594  | 0.119755  | 0.176573  | 0.102564  | 0.115967  | 0.123106  |
| 0.120629  | 0.150204  | 0.118735  | 0.191871  | 0.120484  | 0.108829  | 0.122086  |
| 0.113636  | 0.112617  | 0.12398   | 0.186043  | 0.130682  | 0.114073  | 0.11859   |
| 0.114656  | 0.145688  | 0.115093  | 0.183858  | 0.124126  | 0.111014  | 0.125437  |
| 0.238491  | 0.253788  | 0.238636  | 0.139277  | 0.251457  | 0.245921  | 0.247232  |
| 0.119755  | 0.149038  | 0.123397  | 0.192453  | 0.0534674 | 0.116113  | 0.124709  |
| 0.108392  | 0.152244  | 0.122232  | 0.186334  | 0.122815  | 0.110577  | 0.116841  |
| 0.118881  | 0.146999  | 0.129225  | 0.194202  | 0.12602   | 0.117861  | 0.104312  |
| 0.118298  | 0.144085  | 0.12602   | 0.191579  | 0.126603  | 0.116113  | 0.0987762 |
| 0.121503  | 0.149913  | 0.122815  | 0.186043  | 0.0773601 | 0.121649  | 0.131702  |
| 0.113054  | 0.1537    | 0.113199  | 0.170309  | 0.126603  | 0.114365  | 0.126166  |
| 0.11451   | 0.150787  | 0.125437  | 0.1875    | 0.127477  | 0.11116   | 0.118881  |
| 0.10708   | 0.144231  | 0.121503  | 0.179196  | 0.122086  | 0.101981  | 0.10912   |
| 0.117424  | 0.0686189 | 0.130099  | 0.187791  | 0.127768  | 0.115239  | 0.121503  |
| 0.106935  | 0.144959  | 0.109411  | 0.182547  | 0.118444  | 0.101836  | 0.115967  |
| 0.105332  | 0.142191  | 0.118007  | 0.177448  | 0.118881  | 0.100816  | 0.105915  |
| 0.108392  | 0.135052  | 0.0907634 | 0.190705  | 0.113199  | 0.0925117 | 0.117716  |
| 0.138549  | 0.145979  | 0.147145  | 0.202506  | 0.147436  | 0.131702  | 0.133304  |
| 0.124854  | 0.147145  | 0.121212  | 0.193473  | 0.0576923 | 0.122378  | 0.128351  |
| 0.124854  | 0.152389  | 0.119172  | 0.192016  | 0.125291  | 0.118298  | 0.126311  |
| 0.176136  | 0.202506  | 0.18211   | 0.0888695 | 0.187354  | 0.183566  | 0.181964  |
| 0.194202  | 0.216492  | 0.195804  | 0.0990676 | 0.20542   | 0.200175  | 0.200321  |
| 0.113491  | 0.14831   | 0.110431  | 0.178322  | 0.124126  | 0.111888  | 0.126603  |
| 0.106206  | 0.140443  | 0.109266  | 0.182401  | 0.11859   | 0.104021  | 0.115822  |
| 0.11961   | 0.148601  | 0.125874  | 0.185315  | 0.134907  | 0.124126  | 0.133013  |
| 0.113199  | 0.153263  | 0.120047  | 0.187646  | 0.123543  | 0.111597  | 0.121649  |
| 0.122378  | 0.150495  | 0.123689  | 0.19391   | 0.0566725 | 0.120775  | 0.126166  |
| 0.122523  | 0.138695  | 0.131119  | 0.193182  | 0.136072  | 0.119172  | 0.0703671 |
| 0.21285   | 0.229895  | 0.215909  | 0.11655   | 0.226107  | 0.220571  | 0.222174  |
| 0.108537  | 0.144522  | 0.112179  | 0.187646  | 0.113636  | 0.104604  | 0.110577  |
| 0.202214  | 0.218094  | 0.199155  | 0.141463  | 0.21081   | 0.203817  | 0.204254  |
| 0.10912   | 0.146853  | 0.116841  | 0.192599  | 0.101981  | 0.103147  | 0.110286  |
| 0.111888  | 0.142337  | 0.11116   | 0.186334  | 0.119027  | 0.10912   | 0.106352  |
| 0.105915  | 0.148893  | 0.119755  | 0.17803   | 0.122378  | 0.110431  | 0.114365  |

|           |          |          |           |           |           |           |
|-----------|----------|----------|-----------|-----------|-----------|-----------|
| 0.102418  | 0.145688 | 0.105478 | 0.178904  | 0.117424  | 0.101107  | 0.115239  |
| 0.195804  | 0.215763 | 0.200612 | 0.0995047 | 0.208188  | 0.201777  | 0.203089  |
| 0.117716  | 0.150787 | 0.129516 | 0.182838  | 0.138549  | 0.118153  | 0.12296   |
| 0.115093  | 0.140006 | 0.11757  | 0.19391   | 0.115239  | 0.107372  | 0.106352  |
| 0.111888  | 0.147873 | 0.129225 | 0.184878  | 0.131265  | 0.112617  | 0.118298  |
| 0.117716  | 0.149913 | 0.109994 | 0.191871  | 0.134178  | 0.113491  | 0.118881  |
| 0.109266  | 0.145833 | 0.110577 | 0.18109   | 0.117279  | 0.10067   | 0.120047  |
| 0.112034  | 0.144814 | 0.120629 | 0.19289   | 0.106643  | 0.107226  | 0.114365  |
| 0.117279  | 0.14831  | 0.123252 | 0.179196  | 0.126748  | 0.113928  | 0.118444  |
| 0.120192  | 0.148019 | 0.120338 | 0.193182  | 0.125583  | 0.11451   | 0.125146  |
| 0.104458  | 0.141317 | 0.115385 | 0.174825  | 0.120047  | 0.0967366 | 0.103293  |
| 0.119755  | 0.138258 | 0.120192 | 0.189831  | 0.120192  | 0.112034  | 0.107517  |
| 0.175845  | 0.20338  | 0.180944 | 0.0949883 | 0.190268  | 0.184441  | 0.184586  |
| 0.121503  | 0.145251 | 0.128642 | 0.19391   | 0.126894  | 0.119318  | 0.103147  |
| 0.117279  | 0.140443 | 0.134324 | 0.19493   | 0.134324  | 0.11655   | 0.118735  |
| 0.111014  | 0.145251 | 0.125146 | 0.184878  | 0.130099  | 0.113491  | 0.10373   |
| 0.120484  | 0.152098 | 0.118007 | 0.185606  | 0.0620629 | 0.117424  | 0.123689  |
| 0.108537  | 0.145396 | 0.124417 | 0.183566  | 0.129371  | 0.108683  | 0.114365  |
| 0.116696  | 0.146562 | 0.123252 | 0.195804  | 0.11014   | 0.113054  | 0.11757   |
| 0.108392  | 0.149038 | 0.109411 | 0.182547  | 0.104458  | 0.103001  | 0.111014  |
| 0.119755  | 0.153118 | 0.126603 | 0.192453  | 0.126311  | 0.117861  | 0.125291  |
| 0.115239  | 0.144231 | 0.130536 | 0.190851  | 0.128497  | 0.1081    | 0.114656  |
| 0.113199  | 0.1419   | 0.125291 | 0.186772  | 0.121503  | 0.110723  | 0.0948427 |
| 0.108974  | 0.146416 | 0.112617 | 0.177593  | 0.121066  | 0.106789  | 0.120629  |
| 0.111451  | 0.122669 | 0.125874 | 0.193182  | 0.12704   | 0.112179  | 0.112325  |
| 0.124709  | 0.110577 | 0.133887 | 0.197698  | 0.141171  | 0.129225  | 0.12704   |
| 0.115093  | 0.145251 | 0.117279 | 0.185752  | 0.0528846 | 0.109703  | 0.118007  |
| 0.126894  | 0.150641 | 0.138986 | 0.19493   | 0.143357  | 0.124417  | 0.128934  |
| 0.106206  | 0.144814 | 0.106352 | 0.183858  | 0.115385  | 0.10169   | 0.112617  |
| 0.111742  | 0.138403 | 0.125874 | 0.18648   | 0.125     | 0.106935  | 0.0534674 |
| 0.11014   | 0.144668 | 0.116113 | 0.168269  | 0.127185  | 0.106498  | 0.113345  |
| 0.121503  | 0.156031 | 0.128351 | 0.187791  | 0.133887  | 0.119027  | 0.127331  |
| 0.180653  | 0.209062 | 0.184878 | 0.115239  | 0.191871  | 0.184878  | 0.183858  |
| 0.112034  | 0.135198 | 0.111597 | 0.188811  | 0.112471  | 0.107809  | 0.105041  |
| 0.0995047 | 0.131993 | 0.11451  | 0.177156  | 0.111014  | 0.094697  | 0.101544  |
| 0.121649  | 0.150932 | 0.119464 | 0.196096  | 0.120921  | 0.113928  | 0.122523  |
| 0.168561  | 0.197844 | 0.174825 | 0.108974  | 0.182692  | 0.157925  | 0.177885  |
| 0.130245  | 0.159237 | 0.13039  | 0.197698  | 0.0692016 | 0.130099  | 0.13549   |
| 0.142191  | 0.160111 | 0.136509 | 0.205857  | 0.0782343 | 0.137966  | 0.146562  |
| 0.141171  | 0.14627  | 0.15035  | 0.201632  | 0.150058  | 0.133159  | 0.137675  |
| 0.108537  | 0.145105 | 0.116259 | 0.181818  | 0.0515734 | 0.106352  | 0.119901  |
| 0.111014  | 0.143502 | 0.126311 | 0.180216  | 0.128351  | 0.10708   | 0.112762  |
| 0.198281  | 0.221154 | 0.203963 | 0.107809  | 0.210373  | 0.206876  | 0.206731  |
| 0.113199  | 0.143065 | 0.124126 | 0.18211   | 0.125     | 0.115093  | 0.123397  |

|           |          |           |           |           |           |          |
|-----------|----------|-----------|-----------|-----------|-----------|----------|
| 0.114802  | 0.14729  | 0.130682  | 0.183421  | 0.130973  | 0.113199  | 0.118881 |
| 0.114802  | 0.137966 | 0.115239  | 0.185752  | 0.115239  | 0.108246  | 0.107517 |
| 0.15676   | 0.183129 | 0.160693  | 0.127477  | 0.171183  | 0.158362  | 0.166958 |
| 0         | 0.143211 | 0.112908  | 0.178176  | 0.116404  | 0.0983392 | 0.110723 |
| 0.143211  | 0        | 0.145979  | 0.200466  | 0.148601  | 0.143065  | 0.140297 |
| 0.112908  | 0.145979 | 0         | 0.182692  | 0.11859   | 0.105769  | 0.121066 |
| 0.178176  | 0.200466 | 0.182692  | 0         | 0.18852   | 0.18211   | 0.184295 |
| 0.116404  | 0.148601 | 0.11859   | 0.18852   | 0         | 0.11451   | 0.124563 |
| 0.0983392 | 0.143065 | 0.105769  | 0.18211   | 0.11451   | 0         | 0.10708  |
| 0.110723  | 0.140297 | 0.121066  | 0.184295  | 0.124563  | 0.10708   | 0        |
| 0.115239  | 0.142483 | 0.115967  | 0.184732  | 0.116841  | 0.11014   | 0.114073 |
| 0.120775  | 0.152681 | 0.115676  | 0.191142  | 0.118298  | 0.111888  | 0.122523 |
| 0.114948  | 0.130245 | 0.126457  | 0.181818  | 0.12296   | 0.112762  | 0.110577 |
| 0.103147  | 0.141171 | 0.109994  | 0.183712  | 0.11553   | 0.103293  | 0.11859  |
| 0.17701   | 0.206876 | 0.182984  | 0.0868298 | 0.191142  | 0.181527  | 0.185169 |
| 0.113928  | 0.110286 | 0.12602   | 0.191288  | 0.130099  | 0.109411  | 0.113928 |
| 0.110286  | 0.139569 | 0.118881  | 0.17803   | 0.123834  | 0.0909091 | 0.109703 |
| 0.19697   | 0.21926  | 0.20236   | 0.108829  | 0.210519  | 0.207896  | 0.206585 |
| 0.118298  | 0.145251 | 0.127185  | 0.193619  | 0.127185  | 0.121941  | 0.100524 |
| 0.106789  | 0.143939 | 0.111305  | 0.182692  | 0.115967  | 0.102564  | 0.121066 |
| 0.101544  | 0.141608 | 0.106935  | 0.178322  | 0.115967  | 0.100233  | 0.114365 |
| 0.123252  | 0.142337 | 0.138549  | 0.193328  | 0.142045  | 0.122232  | 0.128205 |
| 0.17803   | 0.203526 | 0.179633  | 0.0919289 | 0.188083  | 0.180216  | 0.183275 |
| 0.116987  | 0.157051 | 0.12704   | 0.191142  | 0.127331  | 0.112762  | 0.11961  |
| 0.118735  | 0.110723 | 0.131119  | 0.195804  | 0.136655  | 0.122669  | 0.123689 |
| 0.105332  | 0.141026 | 0.109557  | 0.181527  | 0.113928  | 0.101399  | 0.115239 |
| 0.104167  | 0.144522 | 0.108974  | 0.181235  | 0.112471  | 0.0961538 | 0.115239 |
| 0.104021  | 0.137966 | 0.108829  | 0.17701   | 0.116404  | 0.0992133 | 0.114219 |
| 0.103293  | 0.143939 | 0.120921  | 0.181818  | 0.124126  | 0.100524  | 0.108246 |
| 0.100233  | 0.137383 | 0.0581294 | 0.183421  | 0.106789  | 0.0922203 | 0.106935 |
| 0.120921  | 0.149621 | 0.121066  | 0.195076  | 0.0534674 | 0.117861  | 0.125583 |
| 0.119172  | 0.129516 | 0.135635  | 0.202943  | 0.142628  | 0.117861  | 0.112179 |
| 0.117716  | 0.149621 | 0.120775  | 0.189831  | 0.0525932 | 0.11553   | 0.11859  |
| 0.124272  | 0.149476 | 0.113636  | 0.197552  | 0.13549   | 0.115967  | 0.126603 |
| 0.18007   | 0.207896 | 0.185169  | 0.0878497 | 0.19391   | 0.186626  | 0.18852  |
| 0.109411  | 0.120921 | 0.124709  | 0.191142  | 0.12296   | 0.112762  | 0.112325 |
| 0.118007  | 0.149913 | 0.133304  | 0.188666  | 0.137092  | 0.116987  | 0.121795 |
| 0.104458  | 0.138986 | 0.103438  | 0.18007   | 0.113636  | 0.0990676 | 0.116987 |
| 0.101399  | 0.134761 | 0.0560897 | 0.180507  | 0.10271   | 0.0913462 | 0.110431 |
| 0.113636  | 0.101544 | 0.122523  | 0.180507  | 0.112617  | 0.110286  | 0.115385 |
| 0.11757   | 0.15676  | 0.124709  | 0.189394  | 0.12704   | 0.113636  | 0.119027 |
| 0.124563  | 0.14627  | 0.13141   | 0.189977  | 0.129662  | 0.122086  | 0.124854 |
| 0.11014   | 0.145251 | 0.128642  | 0.186626  | 0.121066  | 0.102418  | 0.112471 |
| 0.101981  | 0.144959 | 0.0989219 | 0.179341  | 0.115239  | 0.101253  | 0.111014 |

|           |           |           |           |           |           |           |
|-----------|-----------|-----------|-----------|-----------|-----------|-----------|
| 0.100379  | 0.143357  | 0.0862471 | 0.178613  | 0.110723  | 0.097028  | 0.106498  |
| 0.097028  | 0.141171  | 0.0942599 | 0.18109   | 0.10912   | 0.0689103 | 0.106352  |
| 0.112617  | 0.146853  | 0.117133  | 0.19289   | 0.106352  | 0.10373   | 0.108246  |
| 0.126748  | 0.1537    | 0.121941  | 0.19799   | 0.0645396 | 0.121649  | 0.13345   |
| 0.114656  | 0.156469  | 0.125     | 0.188228  | 0.123834  | 0.110723  | 0.11757   |
| 0.106061  | 0.138258  | 0.11961   | 0.17701   | 0.118735  | 0.0992133 | 0.102273  |
| 0.106352  | 0.151661  | 0.119318  | 0.186917  | 0.120775  | 0.107372  | 0.114802  |
| 0.102418  | 0.142774  | 0.109557  | 0.177448  | 0.115967  | 0.0999417 | 0.114948  |
| 0.107226  | 0.133304  | 0.113491  | 0.188957  | 0.109703  | 0.0989219 | 0.101981  |
| 0.107809  | 0.142337  | 0.109994  | 0.180798  | 0.116696  | 0.103875  | 0.119172  |
| 0.10373   | 0.120484  | 0.11961   | 0.186043  | 0.120192  | 0.102127  | 0.106352  |
| 0.106352  | 0.143794  | 0.127477  | 0.188083  | 0.125437  | 0.103875  | 0.108974  |
| 0.115385  | 0.14729   | 0.115239  | 0.191871  | 0.114656  | 0.106206  | 0.119464  |
| 0.100087  | 0.13986   | 0.0576923 | 0.182692  | 0.108683  | 0.0932401 | 0.108829  |
| 0.101107  | 0.14088   | 0.108829  | 0.179924  | 0.11757   | 0.10271   | 0.115676  |
| 0.113636  | 0.145542  | 0.121066  | 0.176136  | 0.126311  | 0.108829  | 0.0617716 |
| 0.110577  | 0.146562  | 0.125291  | 0.187354  | 0.128788  | 0.0955711 | 0.110577  |
| 0.107809  | 0.137966  | 0.109994  | 0.187791  | 0.119901  | 0.0846445 | 0.109848  |
| 0.103147  | 0.141171  | 0.109411  | 0.182547  | 0.114656  | 0.0992133 | 0.114219  |
| 0.110286  | 0.143065  | 0.121503  | 0.178904  | 0.124126  | 0.107809  | 0.110286  |
| 0.109703  | 0.146853  | 0.120921  | 0.190559  | 0.104895  | 0.107226  | 0.111742  |
| 0.105332  | 0.145688  | 0.128205  | 0.185023  | 0.12296   | 0.107517  | 0.109703  |
| 0.112325  | 0.150058  | 0.119464  | 0.188228  | 0.118881  | 0.1081    | 0.114656  |
| 0.103584  | 0.136946  | 0.0515734 | 0.185606  | 0.11014   | 0.0958625 | 0.11116   |
| 0.0971737 | 0.132867  | 0.108683  | 0.177156  | 0.112471  | 0.100233  | 0.100379  |
| 0.107809  | 0.136218  | 0.114073  | 0.188666  | 0.108537  | 0.0992133 | 0.104021  |
| 0.110286  | 0.144522  | 0.126166  | 0.182984  | 0.12704   | 0.106352  | 0.11116   |
| 0.103001  | 0.151807  | 0.127622  | 0.190268  | 0.129662  | 0.0882867 | 0.121941  |
| 0.104312  | 0.143794  | 0.11757   | 0.179924  | 0.119901  | 0.095134  | 0.106352  |
| 0.180361  | 0.203234  | 0.183712  | 0.0907634 | 0.192162  | 0.187791  | 0.190559  |
| 0.148601  | 0.178467  | 0.158654  | 0.120192  | 0.165938  | 0.148456  | 0.159382  |
| 0.11655   | 0.148164  | 0.124563  | 0.188083  | 0.0520105 | 0.11553   | 0.123252  |
| 0.109411  | 0.148019  | 0.128788  | 0.180361  | 0.124709  | 0.102273  | 0.112617  |
| 0.147582  | 0.159091  | 0.140443  | 0.208916  | 0.0798368 | 0.141317  | 0.148456  |
| 0.115676  | 0.0721154 | 0.129808  | 0.189831  | 0.127768  | 0.119901  | 0.121212  |
| 0.108246  | 0.110723  | 0.119464  | 0.180653  | 0.124126  | 0.110723  | 0.118153  |
| 0.109848  | 0.145542  | 0.120775  | 0.181964  | 0.118153  | 0.0954254 | 0.112179  |
| 0.107517  | 0.142628  | 0.0898893 | 0.187791  | 0.110286  | 0.0890152 | 0.115967  |
| 0.114802  | 0.144376  | 0.124563  | 0.189831  | 0.131265  | 0.0968823 | 0.11451   |
| 0.188666  | 0.211247  | 0.193765  | 0.100524  | 0.201632  | 0.194347  | 0.195367  |
| 0.119464  | 0.156323  | 0.128642  | 0.193619  | 0.127477  | 0.11553   | 0.121212  |
| 0.107372  | 0.149476  | 0.125     | 0.174825  | 0.124126  | 0.106061  | 0.110577  |
| 0.104749  | 0.143065  | 0.108683  | 0.177448  | 0.115385  | 0.0929487 | 0.107955  |
| 0.108683  | 0.151952  | 0.112617  | 0.190414  | 0.124854  | 0.106789  | 0.113345  |

|           |          |           |           |           |           |           |
|-----------|----------|-----------|-----------|-----------|-----------|-----------|
| 0.173514  | 0.20134  | 0.179196  | 0.113636  | 0.187063  | 0.171911  | 0.17701   |
| 0.236451  | 0.251748 | 0.238636  | 0.134615  | 0.245047  | 0.245629  | 0.24053   |
| 0.108537  | 0.144814 | 0.129662  | 0.189685  | 0.12704   | 0.105478  | 0.114073  |
| 0.112325  | 0.145688 | 0.126457  | 0.189977  | 0.127914  | 0.0938228 | 0.111451  |
| 0.114073  | 0.146853 | 0.118298  | 0.18852   | 0.0541958 | 0.115385  | 0.119901  |
| 0.112762  | 0.148747 | 0.112034  | 0.186626  | 0.114656  | 0.105041  | 0.116259  |
| 0.109703  | 0.151807 | 0.120921  | 0.188228  | 0.120921  | 0.105186  | 0.113199  |
| 0.108392  | 0.113199 | 0.117279  | 0.183129  | 0.120192  | 0.10271   | 0.102273  |
| 0.102418  | 0.141026 | 0.114802  | 0.17366   | 0.120047  | 0.103147  | 0.114073  |
| 0.110868  | 0.150058 | 0.120921  | 0.190268  | 0.120338  | 0.109557  | 0.115822  |
| 0.0979021 | 0.140589 | 0.112617  | 0.174971  | 0.114948  | 0.10271   | 0.110723  |
| 0.112325  | 0.143939 | 0.109557  | 0.191725  | 0.120921  | 0.0871212 | 0.111742  |
| 0.102564  | 0.138258 | 0.0557984 | 0.181964  | 0.108829  | 0.0977564 | 0.110431  |
| 0.111451  | 0.141608 | 0.127914  | 0.191142  | 0.124417  | 0.108683  | 0.114073  |
| 0.109557  | 0.145251 | 0.122815  | 0.180216  | 0.123397  | 0.103584  | 0.111014  |
| 0.0996503 | 0.13447  | 0.116113  | 0.176719  | 0.114656  | 0.0945513 | 0.0568182 |
| 0.120338  | 0.14729  | 0.126311  | 0.19595   | 0.13039   | 0.114948  | 0.115967  |
| 0.132576  | 0.155449 | 0.124563  | 0.201195  | 0.129516  | 0.122815  | 0.13549   |
| 0.101253  | 0.1419   | 0.108974  | 0.179779  | 0.115093  | 0.103147  | 0.112617  |
| 0.108974  | 0.14292  | 0.109703  | 0.176136  | 0.107955  | 0.10912   | 0.122378  |
| 0.122086  | 0.142337 | 0.117279  | 0.191579  | 0.133013  | 0.114365  | 0.133159  |
| 0.196533  | 0.222611 | 0.195804  | 0.116259  | 0.207459  | 0.201923  | 0.207022  |
| 0.100233  | 0.136801 | 0.121649  | 0.17905   | 0.116696  | 0.0968823 | 0.105186  |
| 0.103001  | 0.141026 | 0.0576923 | 0.184732  | 0.106935  | 0.0981935 | 0.110577  |
| 0.104749  | 0.123252 | 0.122086  | 0.18852   | 0.123543  | 0.109557  | 0.109994  |
| 0.11859   | 0.146125 | 0.128059  | 0.194493  | 0.127477  | 0.116696  | 0.103147  |
| 0.107226  | 0.149621 | 0.110868  | 0.189831  | 0.124272  | 0.101253  | 0.112471  |
| 0.18648   | 0.211976 | 0.190414  | 0.0992133 | 0.197115  | 0.192745  | 0.19493   |
| 0.10912   | 0.147436 | 0.127331  | 0.184441  | 0.128205  | 0.106352  | 0.111451  |
| 0.101399  | 0.142337 | 0.10912   | 0.182547  | 0.113199  | 0.099796  | 0.112762  |
| 0.113782  | 0.15035  | 0.120338  | 0.189977  | 0.116841  | 0.105186  | 0.121358  |
| 0.11116   | 0.147436 | 0.112762  | 0.186189  | 0.113054  | 0.105478  | 0.112908  |
| 0.109411  | 0.145396 | 0.12704   | 0.179487  | 0.125583  | 0.106061  | 0.10912   |
| 0.101836  | 0.138403 | 0.1081    | 0.175117  | 0.115093  | 0.0958625 | 0.102418  |
| 0.112908  | 0.143065 | 0.110431  | 0.190268  | 0.120047  | 0.0842075 | 0.109994  |
| 0.114365  | 0.142774 | 0.126748  | 0.190851  | 0.120921  | 0.115093  | 0.095134  |
| 0.184441  | 0.213141 | 0.190122  | 0.0936772 | 0.197407  | 0.193619  | 0.193473  |
| 0.103293  | 0.137529 | 0.116259  | 0.175699  | 0.117424  | 0.0932401 | 0.104749  |
| 0.183858  | 0.210227 | 0.186334  | 0.0960082 | 0.197115  | 0.186334  | 0.189103  |
| 0.178759  | 0.206002 | 0.187063  | 0.0912005 | 0.19289   | 0.186189  | 0.184878  |
| 0.126894  | 0.152972 | 0.121503  | 0.196678  | 0.125291  | 0.118298  | 0.129225  |
| 0.127477  | 0.144814 | 0.130536  | 0.199301  | 0.133741  | 0.124126  | 0.108537  |
| 0.105332  | 0.134907 | 0.104895  | 0.182401  | 0.115676  | 0.0812937 | 0.104458  |
| 0.101981  | 0.141463 | 0.114948  | 0.175554  | 0.114073  | 0.0960082 | 0.104021  |

|           |          |           |           |           |           |           |
|-----------|----------|-----------|-----------|-----------|-----------|-----------|
| 0.105332  | 0.1419   | 0.121795  | 0.179196  | 0.120629  | 0.0999417 | 0.106498  |
| 0.107372  | 0.143648 | 0.111305  | 0.18007   | 0.115967  | 0.101981  | 0.116696  |
| 0.108246  | 0.149184 | 0.117716  | 0.184732  | 0.115676  | 0.104895  | 0.109703  |
| 0.111742  | 0.151807 | 0.118298  | 0.187646  | 0.123252  | 0.108392  | 0.114365  |
| 0.116259  | 0.140006 | 0.132139  | 0.189831  | 0.128351  | 0.112034  | 0.111888  |
| 0.117861  | 0.151515 | 0.115967  | 0.190851  | 0.116841  | 0.111597  | 0.119027  |
| 0.102273  | 0.135344 | 0.102127  | 0.176719  | 0.111451  | 0.0983392 | 0.113636  |
| 0.105041  | 0.143357 | 0.123543  | 0.183275  | 0.123834  | 0.10373   | 0.110577  |
| 0.0929487 | 0.138549 | 0.105624  | 0.18109   | 0.110577  | 0.0412296 | 0.10169   |
| 0.118153  | 0.147145 | 0.131702  | 0.18648   | 0.133159  | 0.114219  | 0.121941  |
| 0.113782  | 0.146562 | 0.119755  | 0.187937  | 0.0539044 | 0.111014  | 0.11961   |
| 0.122669  | 0.148456 | 0.138258  | 0.190414  | 0.139423  | 0.118444  | 0.122669  |
| 0.249126  | 0.262092 | 0.248106  | 0.142337  | 0.259178  | 0.255682  | 0.254371  |
| 0.125874  | 0.13884  | 0.125437  | 0.201777  | 0.12602   | 0.120484  | 0.11859   |
| 0.127477  | 0.138695 | 0.119172  | 0.193182  | 0.127622  | 0.121795  | 0.11757   |
| 0.205711  | 0.22771  | 0.209353  | 0.117279  | 0.216929  | 0.213724  | 0.214161  |
| 0.11961   | 0.139277 | 0.121795  | 0.195221  | 0.128497  | 0.119464  | 0.124272  |
| 0.218094  | 0.236014 | 0.218823  | 0.126166  | 0.231061  | 0.223193  | 0.224213  |
| 0.118007  | 0.134178 | 0.120192  | 0.194493  | 0.121358  | 0.110868  | 0.108683  |
| 0.120775  | 0.145688 | 0.117424  | 0.190559  | 0.128497  | 0.11451   | 0.129808  |
| 0.112325  | 0.1419   | 0.121795  | 0.185897  | 0.123543  | 0.107809  | 0.0930944 |
| 0.126603  | 0.14831  | 0.117716  | 0.194056  | 0.123543  | 0.114219  | 0.123106  |
| 0.190705  | 0.213578 | 0.196678  | 0.0929487 | 0.202797  | 0.194639  | 0.197115  |
| 0.122523  | 0.146562 | 0.13141   | 0.190559  | 0.13549   | 0.117424  | 0.119901  |
| 0.107372  | 0.145396 | 0.125291  | 0.183566  | 0.126166  | 0.106935  | 0.106498  |
| 0.214161  | 0.231789 | 0.216929  | 0.118444  | 0.225379  | 0.221591  | 0.224068  |
| 0.115239  | 0.15472  | 0.125874  | 0.18648   | 0.126748  | 0.112179  | 0.11553   |
| 0.18648   | 0.21081  | 0.190414  | 0.0936772 | 0.199446  | 0.190705  | 0.194056  |
| 0.113928  | 0.156323 | 0.125728  | 0.190122  | 0.12602   | 0.113199  | 0.118298  |
| 0.104604  | 0.14292  | 0.110868  | 0.182255  | 0.116404  | 0.103293  | 0.116259  |
| 0.110577  | 0.1419   | 0.0504079 | 0.192599  | 0.120338  | 0.105769  | 0.121066  |
| 0.128934  | 0.150932 | 0.122378  | 0.200466  | 0.127331  | 0.119464  | 0.129516  |
| 0.0533217 | 0.142337 | 0.113199  | 0.181672  | 0.116987  | 0.0942599 | 0.113636  |
| 0.145688  | 0.179633 | 0.131556  | 0.120484  | 0.158362  | 0.151369  | 0.15676   |
| 0.104895  | 0.137966 | 0.117279  | 0.178176  | 0.120775  | 0.101836  | 0.104021  |
| 0.115967  | 0.145251 | 0.12602   | 0.192162  | 0.124272  | 0.114948  | 0.0990676 |
| 0.114219  | 0.14729  | 0.11757   | 0.184878  | 0.12602   | 0.110868  | 0.111305  |
| 0.122378  | 0.141463 | 0.132721  | 0.190705  | 0.133596  | 0.120484  | 0.0641026 |
| 0.180216  | 0.208042 | 0.189394  | 0.094697  | 0.194056  | 0.187063  | 0.190997  |
| 0.104021  | 0.143211 | 0.10708   | 0.181381  | 0.116113  | 0.102127  | 0.11451   |
| 0.11961   | 0.156177 | 0.115676  | 0.179487  | 0.121503  | 0.113345  | 0.122523  |
| 0.107809  | 0.143794 | 0.119027  | 0.192745  | 0.104458  | 0.103875  | 0.113345  |
| 0.116113  | 0.152681 | 0.122086  | 0.189977  | 0.128205  | 0.112762  | 0.121941  |
| 0.114219  | 0.137675 | 0.112617  | 0.183129  | 0.123397  | 0.107955  | 0.122378  |

|          |          |           |           |           |           |           |
|----------|----------|-----------|-----------|-----------|-----------|-----------|
| 0.246066 | 0.259324 | 0.244464  | 0.1419    | 0.259907  | 0.25204   | 0.252477  |
| 0.109848 | 0.137966 | 0.0464744 | 0.189248  | 0.113782  | 0.101253  | 0.115385  |
| 0.104021 | 0.13243  | 0.118444  | 0.183421  | 0.126603  | 0.108537  | 0.109557  |
| 0.171911 | 0.195076 | 0.165064  | 0.137383  | 0.18546   | 0.172931  | 0.175991  |
| 0.173951 | 0.200321 | 0.177593  | 0.0948427 | 0.182838  | 0.17701   | 0.180361  |
| 0.113636 | 0.144085 | 0.12602   | 0.190414  | 0.127185  | 0.107955  | 0.113636  |
| 0.10708  | 0.143357 | 0.124417  | 0.184149  | 0.125874  | 0.104021  | 0.109703  |
| 0.116113 | 0.147727 | 0.117133  | 0.18648   | 0.115093  | 0.107517  | 0.115822  |
| 0.132867 | 0.156323 | 0.144959  | 0.195367  | 0.149621  | 0.130973  | 0.136364  |
| 0.108392 | 0.140297 | 0.127477  | 0.187209  | 0.121358  | 0.103875  | 0.112762  |
| 0.116113 | 0.143065 | 0.13141   | 0.190268  | 0.125583  | 0.107517  | 0.115239  |
| 0.120921 | 0.154866 | 0.130682  | 0.192162  | 0.130099  | 0.119027  | 0.121212  |
| 0.108974 | 0.137966 | 0.11961   | 0.177302  | 0.122232  | 0.107372  | 0.109557  |
| 0.115822 | 0.144814 | 0.131119  | 0.185606  | 0.136655  | 0.114802  | 0.120775  |
| 0.117716 | 0.15574  | 0.115822  | 0.174388  | 0.126603  | 0.109703  | 0.117133  |
| 0.125437 | 0.149767 | 0.11859   | 0.195804  | 0.124709  | 0.115093  | 0.128351  |
| 0.138986 | 0.157488 | 0.132721  | 0.205274  | 0.135927  | 0.129808  | 0.138112  |
| 0.112034 | 0.141026 | 0.0504079 | 0.191142  | 0.117424  | 0.105186  | 0.121358  |
| 0.13141  | 0.152826 | 0.124272  | 0.200903  | 0.129225  | 0.123106  | 0.133159  |
| 0.125291 | 0.156323 | 0.131556  | 0.19799   | 0.131847  | 0.118444  | 0.129371  |
| 0.193036 | 0.217657 | 0.199009  | 0.105186  | 0.208625  | 0.201923  | 0.201195  |
| 0.119172 | 0.146416 | 0.107663  | 0.193328  | 0.11961   | 0.106498  | 0.12296   |
| 0.180361 | 0.206148 | 0.185169  | 0.0933858 | 0.193328  | 0.186043  | 0.18648   |
| 0.109557 | 0.140297 | 0.119027  | 0.184878  | 0.121649  | 0.106498  | 0.0842075 |
| 0.116259 | 0.143502 | 0.113782  | 0.18546   | 0.128642  | 0.112908  | 0.126748  |
| 0.118007 | 0.146707 | 0.119027  | 0.188083  | 0.0587121 | 0.116987  | 0.122378  |
| 0.110577 | 0.14627  | 0.115385  | 0.184149  | 0.0556527 | 0.105186  | 0.116404  |
| 0.110723 | 0.142337 | 0.128642  | 0.181381  | 0.130682  | 0.10912   | 0.114219  |
| 0.112471 | 0.148456 | 0.127185  | 0.183712  | 0.129516  | 0.109411  | 0.115385  |
| 0.1081   | 0.143794 | 0.110577  | 0.177593  | 0.116404  | 0.104749  | 0.120921  |
| 0.113782 | 0.143065 | 0.124126  | 0.190559  | 0.124417  | 0.114802  | 0.0980478 |
| 0.122232 | 0.15035  | 0.122086  | 0.193473  | 0.0594406 | 0.119464  | 0.127477  |
| 0.127331 | 0.159528 | 0.130099  | 0.186917  | 0.137092  | 0.126894  | 0.133159  |
| 0.23951  | 0.255973 | 0.241404  | 0.139132  | 0.251894  | 0.246649  | 0.246795  |
| 0.106352 | 0.146999 | 0.111451  | 0.183712  | 0.119901  | 0.100962  | 0.117133  |
| 0.173805 | 0.195513 | 0.176865  | 0.0868298 | 0.182692  | 0.177156  | 0.177593  |
| 0.17803  | 0.203817 | 0.182838  | 0.0895979 | 0.190414  | 0.183712  | 0.184441  |
| 0.113199 | 0.148893 | 0.116259  | 0.179779  | 0.126457  | 0.107517  | 0.116696  |
| 0.102418 | 0.138112 | 0.0518648 | 0.184441  | 0.109266  | 0.0984848 | 0.114073  |
| 0.114073 | 0.145396 | 0.113345  | 0.187937  | 0.129371  | 0.110431  | 0.12602   |
| 0.102418 | 0.138986 | 0.119755  | 0.176573  | 0.119172  | 0.0987762 | 0.102418  |
| 0.104312 | 0.14292  | 0.0872669 | 0.178176  | 0.112034  | 0.0884324 | 0.113054  |
| 0.114219 | 0.154283 | 0.125146  | 0.187209  | 0.123397  | 0.110868  | 0.11451   |
| 0.114948 | 0.143648 | 0.123252  | 0.177739  | 0.126166  | 0.105478  | 0.114073  |

|           |          |           |           |           |           |           |
|-----------|----------|-----------|-----------|-----------|-----------|-----------|
| 0.119318  | 0.147145 | 0.13345   | 0.192016  | 0.135781  | 0.116259  | 0.121941  |
| 0.1081    | 0.140297 | 0.109703  | 0.181381  | 0.120775  | 0.102127  | 0.11655   |
| 0.11859   | 0.148747 | 0.130099  | 0.189248  | 0.13243   | 0.114656  | 0.121503  |
| 0.113491  | 0.13986  | 0.111888  | 0.188811  | 0.118298  | 0.105769  | 0.103875  |
| 0.123689  | 0.153555 | 0.119755  | 0.193765  | 0.0579837 | 0.11859   | 0.128934  |
| 0.122378  | 0.151078 | 0.118735  | 0.188666  | 0.11961   | 0.111451  | 0.121503  |
| 0.128642  | 0.157634 | 0.130536  | 0.198718  | 0.13549   | 0.124126  | 0.131847  |
| 0.117133  | 0.140006 | 0.11116   | 0.190997  | 0.126603  | 0.0957168 | 0.120338  |
| 0.110431  | 0.140297 | 0.108829  | 0.178467  | 0.111742  | 0.100962  | 0.119755  |
| 0.121212  | 0.114948 | 0.131847  | 0.196824  | 0.140297  | 0.124272  | 0.125583  |
| 0.172931  | 0.199009 | 0.175991  | 0.0929487 | 0.185023  | 0.174242  | 0.17905   |
| 0.126748  | 0.149913 | 0.135927  | 0.194202  | 0.141171  | 0.122815  | 0.126166  |
| 0.108683  | 0.143502 | 0.124854  | 0.182838  | 0.123689  | 0.107955  | 0.113636  |
| 0.115239  | 0.144231 | 0.121212  | 0.189977  | 0.0501166 | 0.113054  | 0.120484  |
| 0.106352  | 0.13884  | 0.110577  | 0.183712  | 0.0523019 | 0.102127  | 0.115676  |
| 0.122523  | 0.146853 | 0.117424  | 0.190559  | 0.120338  | 0.109848  | 0.12398   |
| 0.123834  | 0.151078 | 0.11961   | 0.194202  | 0.123689  | 0.114656  | 0.126457  |
| 0.178759  | 0.20338  | 0.183275  | 0.0903263 | 0.193182  | 0.182984  | 0.18954   |
| 0.109703  | 0.145688 | 0.122086  | 0.17366   | 0.129371  | 0.0917832 | 0.116113  |
| 0.103147  | 0.133596 | 0.109994  | 0.161859  | 0.115822  | 0.0840618 | 0.110723  |
| 0.113636  | 0.148164 | 0.129225  | 0.184003  | 0.129225  | 0.112617  | 0.116841  |
| 0.179341  | 0.206876 | 0.185606  | 0.0926573 | 0.194347  | 0.186189  | 0.18546   |
| 0.0999417 | 0.140006 | 0.055507  | 0.178176  | 0.108537  | 0.0942599 | 0.108683  |
| 0.120192  | 0.156177 | 0.127914  | 0.193473  | 0.126748  | 0.118881  | 0.123106  |
| 0.112034  | 0.143065 | 0.12704   | 0.183858  | 0.127914  | 0.110431  | 0.114948  |
| 0.1081    | 0.13884  | 0.12398   | 0.1875    | 0.119318  | 0.10067   | 0.109266  |
| 0.174242  | 0.201486 | 0.177885  | 0.0869755 | 0.1875    | 0.180216  | 0.182984  |
| 0.116259  | 0.151952 | 0.122815  | 0.1875    | 0.127477  | 0.113491  | 0.121795  |
| 0.101981  | 0.118444 | 0.119027  | 0.179924  | 0.123689  | 0.106498  | 0.109557  |
| 0.101107  | 0.140589 | 0.0657051 | 0.173805  | 0.112325  | 0.0948427 | 0.113928  |
| 0.0751748 | 0.146707 | 0.116696  | 0.160402  | 0.113782  | 0.106498  | 0.122086  |
| 0.115822  | 0.147727 | 0.125874  | 0.19289   | 0.125291  | 0.113636  | 0.0968823 |
| 0.125437  | 0.158217 | 0.130245  | 0.19697   | 0.13345   | 0.122086  | 0.129808  |
| 0.105624  | 0.141608 | 0.112179  | 0.181235  | 0.116259  | 0.100524  | 0.116696  |
| 0.119027  | 0.138112 | 0.115967  | 0.191434  | 0.129953  | 0.109557  | 0.114365  |
| 0.138695  | 0.146416 | 0.147582  | 0.201777  | 0.149621  | 0.133304  | 0.136072  |
| 0.223776  | 0.241696 | 0.228293  | 0.124563  | 0.237325  | 0.231789  | 0.233683  |
| 0.12296   | 0.146416 | 0.114948  | 0.200321  | 0.133013  | 0.0995047 | 0.123252  |
| 0.115967  | 0.144959 | 0.127477  | 0.192453  | 0.124272  | 0.116404  | 0.0987762 |
| 0.106789  | 0.144814 | 0.120921  | 0.178613  | 0.123252  | 0.104312  | 0.111451  |
| 0.121795  | 0.135052 | 0.129225  | 0.179341  | 0.12602   | 0.116404  | 0.111014  |
| 0.110286  | 0.140734 | 0.118881  | 0.184441  | 0.118298  | 0.109266  | 0.099796  |
| 0.113782  | 0.150641 | 0.108683  | 0.188228  | 0.126748  | 0.108974  | 0.118153  |
| 0.111305  | 0.146416 | 0.126603  | 0.18109   | 0.128934  | 0.109703  | 0.116841  |



|          |          |           |           |           |           |           |
|----------|----------|-----------|-----------|-----------|-----------|-----------|
| 0.125437 | 0.157925 | 0.128205  | 0.194639  | 0.130828  | 0.119755  | 0.127768  |
| 0.115239 | 0.138112 | 0.130828  | 0.184149  | 0.12296   | 0.105478  | 0.105915  |
| 0.225233 | 0.245192 | 0.225379  | 0.128642  | 0.238199  | 0.233246  | 0.233974  |
| 0.103875 | 0.13549  | 0.0524476 | 0.179196  | 0.108974  | 0.0952797 | 0.108829  |
| 0.103875 | 0.132867 | 0.109557  | 0.184441  | 0.110723  | 0.0973193 | 0.100962  |
| 0.106061 | 0.13884  | 0.108246  | 0.182547  | 0.118444  | 0.0992133 | 0.116259  |
| 0.122523 | 0.140443 | 0.138112  | 0.196096  | 0.136072  | 0.115676  | 0.11961   |
| 0.128642 | 0.143065 | 0.118881  | 0.20338   | 0.137238  | 0.104895  | 0.129516  |
| 0.100087 | 0.144522 | 0.112762  | 0.178322  | 0.116841  | 0.106935  | 0.116113  |
| 0.110577 | 0.146853 | 0.125874  | 0.181818  | 0.125583  | 0.106643  | 0.110577  |
| 0.106935 | 0.14088  | 0.118735  | 0.18109   | 0.118153  | 0.101253  | 0.110723  |
| 0.218823 | 0.237325 | 0.221008  | 0.126894  | 0.23208   | 0.228293  | 0.22873   |
| 0.113928 | 0.146707 | 0.13039   | 0.18546   | 0.129808  | 0.114656  | 0.118007  |
| 0.119027 | 0.153846 | 0.127331  | 0.19289   | 0.129662  | 0.115093  | 0.122523  |
| 0.112908 | 0.135198 | 0.124709  | 0.184441  | 0.120921  | 0.0976107 | 0.104167  |
| 0.116259 | 0.146999 | 0.122523  | 0.190997  | 0.128642  | 0.114365  | 0.0984848 |
| 0.122669 | 0.137675 | 0.121066  | 0.198281  | 0.12398   | 0.116696  | 0.113928  |
| 0.107226 | 0.140589 | 0.109994  | 0.183129  | 0.118735  | 0.103001  | 0.119172  |
| 0.121795 | 0.154866 | 0.12398   | 0.191871  | 0.129808  | 0.118444  | 0.125583  |
| 0.126894 | 0.15676  | 0.131702  | 0.195513  | 0.133159  | 0.120047  | 0.126603  |
| 0.115822 | 0.153263 | 0.123834  | 0.191434  | 0.123252  | 0.111305  | 0.117861  |
| 0.105478 | 0.142628 | 0.109703  | 0.184586  | 0.116113  | 0.101253  | 0.11655   |
| 0.124126 | 0.143794 | 0.128642  | 0.196533  | 0.131847  | 0.123689  | 0.105478  |
| 0.128059 | 0.152389 | 0.132576  | 0.202797  | 0.134033  | 0.126457  | 0.110577  |
| 0.125437 | 0.147727 | 0.124126  | 0.197261  | 0.0655594 | 0.121212  | 0.129808  |
| 0.128934 | 0.154138 | 0.125     | 0.197261  | 0.0646853 | 0.125291  | 0.133887  |
| 0.125    | 0.149621 | 0.133596  | 0.201195  | 0.133304  | 0.125437  | 0.107517  |
| 0.102855 | 0.137675 | 0.0910548 | 0.186334  | 0.108537  | 0.0846445 | 0.109848  |
| 0.128351 | 0.150058 | 0.135198  | 0.205711  | 0.122086  | 0.125291  | 0.130682  |
| 0.127914 | 0.150495 | 0.125437  | 0.201777  | 0.139132  | 0.118735  | 0.138986  |
| 0.193473 | 0.21926  | 0.197407  | 0.101253  | 0.207896  | 0.200029  | 0.202797  |
| 0.119755 | 0.143502 | 0.127477  | 0.190997  | 0.135052  | 0.103584  | 0.122669  |
| 0.109557 | 0.140297 | 0.117279  | 0.190414  | 0.116696  | 0.107663  | 0.107517  |
| 0.112617 | 0.145396 | 0.110431  | 0.177156  | 0.125583  | 0.107517  | 0.126311  |
| 0.211247 | 0.232372 | 0.211684  | 0.116696  | 0.224505  | 0.217803  | 0.220862  |
| 0.20134  | 0.226836 | 0.207896  | 0.110286  | 0.215763  | 0.206439  | 0.206294  |
| 0.123689 | 0.157343 | 0.130828  | 0.19493   | 0.133741  | 0.119755  | 0.127477  |
| 0.238345 | 0.256556 | 0.239365  | 0.136509  | 0.249563  | 0.248397  | 0.245629  |
| 0.101399 | 0.139132 | 0.0960082 | 0.186043  | 0.105915  | 0.0817308 | 0.110723  |
| 0.131993 | 0.155157 | 0.124854  | 0.20236   | 0.138549  | 0.120192  | 0.137238  |
| 0.104895 | 0.139714 | 0.0488054 | 0.185169  | 0.109411  | 0.0989219 | 0.11451   |
| 0.119901 | 0.147436 | 0.130828  | 0.19493   | 0.129079  | 0.122086  | 0.103293  |
| 0.176865 | 0.200321 | 0.18109   | 0.0861014 | 0.188374  | 0.181381  | 0.185023  |
| 0.127768 | 0.135198 | 0.120921  | 0.189103  | 0.130828  | 0.11014   | 0.115239  |

|           |          |           |           |           |           |           |
|-----------|----------|-----------|-----------|-----------|-----------|-----------|
| 0.180216  | 0.210373 | 0.18648   | 0.0941142 | 0.195513  | 0.188228  | 0.190997  |
| 0.108246  | 0.1419   | 0.117424  | 0.187646  | 0.124126  | 0.102564  | 0.109411  |
| 0.109411  | 0.15035  | 0.121212  | 0.170163  | 0.125     | 0.106061  | 0.118153  |
| 0.115239  | 0.150932 | 0.107517  | 0.189103  | 0.121795  | 0.101107  | 0.116987  |
| 0.0659965 | 0.13986  | 0.112762  | 0.171911  | 0.114802  | 0.104021  | 0.114073  |
| 0.101399  | 0.139714 | 0.105041  | 0.177302  | 0.111451  | 0.0960082 | 0.113345  |
| 0.109266  | 0.140589 | 0.11961   | 0.182255  | 0.123397  | 0.0898893 | 0.107517  |
| 0.0996503 | 0.136509 | 0.0534674 | 0.178759  | 0.106789  | 0.0939685 | 0.111014  |
| 0.105332  | 0.140443 | 0.120629  | 0.178904  | 0.122669  | 0.100816  | 0.107663  |
| 0.115967  | 0.146707 | 0.122815  | 0.191871  | 0.105915  | 0.11116   | 0.115967  |
| 0.106935  | 0.142045 | 0.108829  | 0.188083  | 0.122232  | 0.0863928 | 0.107517  |
| 0.104458  | 0.138112 | 0.0498252 | 0.181235  | 0.111305  | 0.0961538 | 0.112034  |
| 0.108683  | 0.14729  | 0.119318  | 0.184586  | 0.0750291 | 0.114365  | 0.120629  |
| 0.118881  | 0.147582 | 0.131556  | 0.189248  | 0.133887  | 0.114656  | 0.119172  |
| 0.107955  | 0.145979 | 0.115093  | 0.183566  | 0.0477855 | 0.108974  | 0.114948  |
| 0.102273  | 0.119318 | 0.119027  | 0.183712  | 0.122815  | 0.103875  | 0.109266  |
| 0.100379  | 0.13549  | 0.105186  | 0.177156  | 0.112762  | 0.0984848 | 0.11116   |
| 0.11961   | 0.150641 | 0.122669  | 0.182692  | 0.125874  | 0.112762  | 0.119027  |
| 0.115822  | 0.144522 | 0.125     | 0.189685  | 0.12296   | 0.113928  | 0.097465  |
| 0.121503  | 0.151369 | 0.120775  | 0.195076  | 0.119318  | 0.112325  | 0.121212  |
| 0.113345  | 0.147582 | 0.115822  | 0.187791  | 0.0523019 | 0.113782  | 0.121212  |
| 0.108246  | 0.144814 | 0.123252  | 0.18007   | 0.123834  | 0.105186  | 0.110577  |
| 0.118881  | 0.151078 | 0.130973  | 0.191871  | 0.13447   | 0.116113  | 0.125     |
| 0.129371  | 0.150787 | 0.139132  | 0.195076  | 0.142045  | 0.123689  | 0.129662  |
| 0.106206  | 0.146853 | 0.110431  | 0.18007   | 0.114802  | 0.0979021 | 0.106206  |
| 0.104749  | 0.142191 | 0.112762  | 0.18211   | 0.11451   | 0.102564  | 0.113491  |
| 0.101981  | 0.146416 | 0.102127  | 0.18109   | 0.116696  | 0.0992133 | 0.105478  |
| 0.129371  | 0.144959 | 0.132139  | 0.200612  | 0.13447   | 0.12602   | 0.111014  |
| 0.104458  | 0.137821 | 0.048951  | 0.189977  | 0.115385  | 0.0999417 | 0.116404  |
| 0.140297  | 0.154429 | 0.131702  | 0.206002  | 0.136364  | 0.131702  | 0.137092  |
| 0.127185  | 0.145396 | 0.119172  | 0.193765  | 0.136655  | 0.121503  | 0.135344  |
| 0.118298  | 0.144376 | 0.134761  | 0.190705  | 0.132139  | 0.112908  | 0.117424  |
| 0.103293  | 0.145979 | 0.104895  | 0.182401  | 0.112762  | 0.0949883 | 0.112617  |
| 0.107226  | 0.133596 | 0.121649  | 0.182838  | 0.120775  | 0.105915  | 0.0504079 |
| 0.124417  | 0.14933  | 0.121358  | 0.194202  | 0.057838  | 0.120484  | 0.128205  |
| 0.198281  | 0.221154 | 0.200758  | 0.112762  | 0.205711  | 0.20134   | 0.2044    |
| 0.102418  | 0.121212 | 0.118298  | 0.181527  | 0.122086  | 0.104604  | 0.10912   |
| 0.11014   | 0.151369 | 0.113782  | 0.187209  | 0.118735  | 0.100087  | 0.112471  |
| 0.11553   | 0.1419   | 0.123834  | 0.190851  | 0.124709  | 0.116841  | 0.100087  |
| 0.111888  | 0.148456 | 0.116404  | 0.186626  | 0.0493881 | 0.111451  | 0.117716  |
| 0.116696  | 0.142483 | 0.125     | 0.187646  | 0.123252  | 0.1081    | 0.116987  |
| 0.104749  | 0.146853 | 0.131119  | 0.189977  | 0.131702  | 0.0882867 | 0.11961   |
| 0.109266  | 0.145251 | 0.13039   | 0.193328  | 0.135052  | 0.0925117 | 0.125     |
| 0.11116   | 0.139277 | 0.127914  | 0.18648   | 0.126457  | 0.108392  | 0.112617  |

|           |          |           |          |           |           |          |
|-----------|----------|-----------|----------|-----------|-----------|----------|
| 0.106498  | 0.145979 | 0.115385  | 0.187063 | 0.105478  | 0.104312  | 0.111451 |
| 0.123397  | 0.149476 | 0.128205  | 0.196387 | 0.131993  | 0.124417  | 0.10708  |
| 0.109703  | 0.145688 | 0.1081    | 0.189394 | 0.119464  | 0.0987762 | 0.113491 |
| 0.117424  | 0.143502 | 0.113491  | 0.190997 | 0.124563  | 0.0884324 | 0.114219 |
| 0.169435  | 0.196678 | 0.173951  | 0.167832 | 0.171037  | 0.167541  | 0.17264  |
| 0.105915  | 0.145688 | 0.123834  | 0.180361 | 0.121212  | 0.101107  | 0.107955 |
| 0.122669  | 0.147582 | 0.124563  | 0.184586 | 0.132139  | 0.127185  | 0.109848 |
| 0.121066  | 0.147436 | 0.107809  | 0.200175 | 0.122086  | 0.104604  | 0.118444 |
| 0.119464  | 0.146416 | 0.125146  | 0.186626 | 0.127477  | 0.119901  | 0.117133 |
| 0.0973193 | 0.139423 | 0.110286  | 0.184295 | 0.111742  | 0.043852  | 0.107809 |
| 0.101981  | 0.139714 | 0.104458  | 0.184586 | 0.113199  | 0.0785256 | 0.101399 |
| 0.101981  | 0.140297 | 0.112908  | 0.190122 | 0.119901  | 0.0514277 | 0.114219 |
| 0.11859   | 0.146125 | 0.120775  | 0.19391  | 0.128351  | 0.119318  | 0.117424 |
| 0.109557  | 0.140297 | 0.116404  | 0.177885 | 0.125146  | 0.0919289 | 0.111014 |
| 0.122815  | 0.151515 | 0.121503  | 0.199301 | 0.121503  | 0.122378  | 0.128642 |
| 0.10169   | 0.146707 | 0.114948  | 0.181381 | 0.115822  | 0.0992133 | 0.106935 |
| 0.109994  | 0.145105 | 0.11014   | 0.186772 | 0.117133  | 0.101981  | 0.112617 |
| 0.130536  | 0.157197 | 0.122232  | 0.202943 | 0.139714  | 0.118735  | 0.127331 |
| 0.114802  | 0.14088  | 0.107955  | 0.196533 | 0.116696  | 0.0980478 | 0.120047 |
| 0.114802  | 0.150787 | 0.12398   | 0.191579 | 0.118444  | 0.104458  | 0.122086 |
| 0.111305  | 0.143502 | 0.107955  | 0.191871 | 0.110286  | 0.0910548 | 0.113928 |
| 0.116259  | 0.138258 | 0.108829  | 0.19391  | 0.114656  | 0.092803  | 0.117424 |
| 0.104895  | 0.139423 | 0.100379  | 0.181381 | 0.108246  | 0.0893065 | 0.109557 |
| 0.119901  | 0.152098 | 0.111888  | 0.197844 | 0.121212  | 0.106061  | 0.123106 |
| 0.105624  | 0.143939 | 0.0990676 | 0.184441 | 0.110431  | 0.0882867 | 0.107663 |
| 0.138258  | 0.168706 | 0.145396  | 0.200466 | 0.142774  | 0.131993  | 0.142337 |
| 0.122523  | 0.162296 | 0.136364  | 0.190851 | 0.133159  | 0.122086  | 0.128351 |
| 0.107955  | 0.143648 | 0.108683  | 0.18852  | 0.109557  | 0.0949883 | 0.113782 |
| 0.13549   | 0.159819 | 0.13884   | 0.203234 | 0.139423  | 0.130682  | 0.128205 |
| 0.112471  | 0.144085 | 0.126603  | 0.190122 | 0.0971737 | 0.111451  | 0.118298 |
| 0.132576  | 0.147873 | 0.116113  | 0.200903 | 0.140297  | 0.120484  | 0.138112 |
| 0.110431  | 0.141754 | 0.106206  | 0.188374 | 0.109994  | 0.0954254 | 0.111014 |
| 0.139423  | 0.163462 | 0.146853  | 0.198135 | 0.147727  | 0.138695  | 0.137383 |
| 0.12602   | 0.145396 | 0.129953  | 0.187646 | 0.133159  | 0.11859   | 0.120484 |
| 0.132139  | 0.156177 | 0.132867  | 0.196678 | 0.13345   | 0.128788  | 0.132139 |
| 0.116404  | 0.144231 | 0.116841  | 0.197844 | 0.104604  | 0.106643  | 0.120192 |
| 0.110723  | 0.144376 | 0.106498  | 0.190122 | 0.113782  | 0.0965909 | 0.11451  |
| 0.109703  | 0.146562 | 0.108392  | 0.185897 | 0.114802  | 0.0920746 | 0.112325 |
| 0.113345  | 0.14088  | 0.118735  | 0.190705 | 0.123397  | 0.10912   | 0.115093 |
| 0.116841  | 0.143502 | 0.10271   | 0.197698 | 0.122232  | 0.107955  | 0.123543 |
| 0.120192  | 0.146853 | 0.113928  | 0.202214 | 0.128497  | 0.108683  | 0.122523 |
| 0.117279  | 0.152389 | 0.124417  | 0.187937 | 0.122378  | 0.111305  | 0.12398  |
| 0.101253  | 0.1419   | 0.104312  | 0.187646 | 0.0906177 | 0.100524  | 0.105915 |
| 0.110723  | 0.143794 | 0.108246  | 0.184003 | 0.116113  | 0.0913462 | 0.109848 |

|           |          |           |          |          |           |          |
|-----------|----------|-----------|----------|----------|-----------|----------|
| 0.113782  | 0.138403 | 0.100233  | 0.189977 | 0.119464 | 0.103147  | 0.119901 |
| 0.109703  | 0.150641 | 0.104604  | 0.184149 | 0.113054 | 0.0944056 | 0.119027 |
| 0.119172  | 0.145542 | 0.114948  | 0.194493 | 0.125437 | 0.101253  | 0.121795 |
| 0.109557  | 0.142045 | 0.102127  | 0.186334 | 0.107372 | 0.0980478 | 0.117424 |
| 0.10067   | 0.140734 | 0.111014  | 0.17803  | 0.116841 | 0.107517  | 0.118153 |
| 0.108537  | 0.137238 | 0.106352  | 0.190268 | 0.119464 | 0.0932401 | 0.114948 |
| 0.0989219 | 0.139569 | 0.0894522 | 0.183858 | 0.104312 | 0.0833333 | 0.108537 |
| 0.106498  | 0.142483 | 0.100233  | 0.187063 | 0.113345 | 0.0944056 | 0.113199 |
| 0.0967366 | 0.139423 | 0.112617  | 0.176428 | 0.110868 | 0.105041  | 0.111305 |
| 0.100962  | 0.145979 | 0.108974  | 0.186772 | 0.120921 | 0.0824592 | 0.114948 |
| 0.112908  | 0.144522 | 0.118298  | 0.181527 | 0.125291 | 0.100233  | 0.122232 |
| 0.0930944 | 0.138403 | 0.108392  | 0.17162  | 0.107517 | 0.0976107 | 0.10912  |
| 0.119464  | 0.149913 | 0.11757   | 0.196824 | 0.127768 | 0.099796  | 0.132284 |

| TDr_2042 | TDr_2048 | TDr_2050 | TDr_2059  | TDr_2071 | TDr_2078  | TDr_2083  |
|----------|----------|----------|-----------|----------|-----------|-----------|
| 0.120921 | 0.124126 | 0.12296  | 0.116404  | 0.170163 | 0.124272  | 0.1081    |
| 0.11553  | 0.124563 | 0.116113 | 0.100233  | 0.177302 | 0.120338  | 0.107955  |
| 0.116696 | 0.119318 | 0.114073 | 0.0949883 | 0.174679 | 0.117424  | 0.103293  |
| 0.119901 | 0.118735 | 0.120192 | 0.104604  | 0.182838 | 0.115967  | 0.115822  |
| 0.133887 | 0.131556 | 0.123397 | 0.132284  | 0.200029 | 0.0629371 | 0.128934  |
| 0.123106 | 0.135052 | 0.131265 | 0.120629  | 0.189831 | 0.125     | 0.124563  |
| 0.124417 | 0.12296  | 0.129371 | 0.119901  | 0.192308 | 0.118444  | 0.124126  |
| 0.115385 | 0.117133 | 0.110723 | 0.107663  | 0.175991 | 0.118444  | 0.104021  |
| 0.112034 | 0.114073 | 0.11553  | 0.102855  | 0.17905  | 0.112762  | 0.0925117 |
| 0.117424 | 0.11859  | 0.115093 | 0.088141  | 0.186772 | 0.118444  | 0.110431  |
| 0.11961  | 0.118153 | 0.123689 | 0.107226  | 0.171183 | 0.122669  | 0.109411  |
| 0.104895 | 0.110723 | 0.116259 | 0.111451  | 0.176282 | 0.110868  | 0.0999417 |
| 0.114802 | 0.111888 | 0.122378 | 0.0980478 | 0.184441 | 0.114948  | 0.104895  |
| 0.140589 | 0.144085 | 0.133013 | 0.124709  | 0.141463 | 0.134615  | 0.122815  |
| 0.127914 | 0.123834 | 0.12704  | 0.0569639 | 0.191434 | 0.13243   | 0.11859   |
| 0.119027 | 0.11553  | 0.125437 | 0.106643  | 0.192453 | 0.128788  | 0.115239  |
| 0.106935 | 0.1081   | 0.118007 | 0.109703  | 0.181235 | 0.112908  | 0.112471  |
| 0.146707 | 0.155449 | 0.131556 | 0.140443  | 0.2044   | 0.129079  | 0.142337  |
| 0.116696 | 0.11757  | 0.109411 | 0.101399  | 0.176136 | 0.120047  | 0.103584  |
| 0.207605 | 0.207022 | 0.199738 | 0.175699  | 0.133013 | 0.207168  | 0.195367  |
| 0.125291 | 0.129953 | 0.12296  | 0.11553   | 0.189103 | 0.122232  | 0.124126  |
| 0.120484 | 0.124563 | 0.115822 | 0.112762  | 0.18954  | 0.11859   | 0.11961   |
| 0.115093 | 0.111888 | 0.113054 | 0.108537  | 0.180944 | 0.115822  | 0.106643  |
| 0.114656 | 0.119318 | 0.130682 | 0.125583  | 0.196241 | 0.124126  | 0.120775  |
| 0.10373  | 0.107226 | 0.106643 | 0.097465  | 0.175117 | 0.114365  | 0.104021  |
| 0.132284 | 0.137821 | 0.122086 | 0.124272  | 0.194639 | 0.13039   | 0.126748  |
| 0.122669 | 0.113928 | 0.124709 | 0.119027  | 0.190268 | 0.124563  | 0.122669  |
| 0.117424 | 0.122086 | 0.12704  | 0.115822  | 0.197261 | 0.128934  | 0.115676  |
| 0.116841 | 0.12704  | 0.135781 | 0.128642  | 0.19697  | 0.131265  | 0.127622  |
| 0.113928 | 0.118298 | 0.134907 | 0.114948  | 0.197844 | 0.12602   | 0.120629  |
| 0.125437 | 0.122815 | 0.130973 | 0.113636  | 0.187209 | 0.128497  | 0.121649  |
| 0.115385 | 0.120047 | 0.13141  | 0.115239  | 0.193182 | 0.124854  | 0.117716  |
| 0.10373  | 0.105478 | 0.116259 | 0.0954254 | 0.179487 | 0.114656  | 0.103438  |
| 0.1081   | 0.105478 | 0.124126 | 0.111742  | 0.187646 | 0.123397  | 0.113345  |
| 0.118444 | 0.118735 | 0.124854 | 0.119172  | 0.19391  | 0.124126  | 0.115822  |
| 0.119172 | 0.120338 | 0.130245 | 0.124563  | 0.199301 | 0.13243   | 0.119464  |
| 0.136509 | 0.135344 | 0.13039  | 0.128205  | 0.204691 | 0.138695  | 0.131847  |
| 0.115676 | 0.120921 | 0.125874 | 0.117279  | 0.195804 | 0.126894  | 0.114802  |
| 0.104021 | 0.112179 | 0.115967 | 0.105624  | 0.183275 | 0.119901  | 0.109848  |
| 0.125291 | 0.126166 | 0.128788 | 0.118444  | 0.194347 | 0.12602   | 0.11451   |
| 0.111888 | 0.119464 | 0.113636 | 0.10708   | 0.182692 | 0.115239  | 0.107517  |
| 0.140152 | 0.148601 | 0.136946 | 0.135344  | 0.207751 | 0.143794  | 0.136072  |

|          |          |          |          |          |          |          |
|----------|----------|----------|----------|----------|----------|----------|
| 0.1419   | 0.14831  | 0.143357 | 0.145833 | 0.206002 | 0.147873 | 0.13986  |
| 0.119901 | 0.118444 | 0.116404 | 0.110431 | 0.184003 | 0.117424 | 0.112617 |
| 0.108829 | 0.103293 | 0.110286 | 0.104895 | 0.185169 | 0.107809 | 0.102418 |
| 0.125    | 0.115967 | 0.122086 | 0.105041 | 0.193765 | 0.12602  | 0.115093 |
| 0.115967 | 0.119755 | 0.11451  | 0.112325 | 0.187937 | 0.122523 | 0.112471 |
| 0.132139 | 0.141463 | 0.137966 | 0.134033 | 0.206439 | 0.143648 | 0.131265 |
| 0.114656 | 0.11961  | 0.121066 | 0.112471 | 0.188957 | 0.11451  | 0.116696 |
| 0.115385 | 0.119172 | 0.113636 | 0.111451 | 0.185023 | 0.125146 | 0.107226 |
| 0.137383 | 0.141463 | 0.145251 | 0.143065 | 0.211101 | 0.151224 | 0.146416 |
| 0.122232 | 0.129516 | 0.129225 | 0.126457 | 0.197115 | 0.12704  | 0.129808 |
| 0.11451  | 0.11451  | 0.120047 | 0.116113 | 0.182984 | 0.116696 | 0.11014  |
| 0.132284 | 0.133741 | 0.129953 | 0.113491 | 0.199009 | 0.122815 | 0.11451  |
| 0.118007 | 0.125    | 0.115967 | 0.114365 | 0.175117 | 0.116696 | 0.110431 |
| 0.132867 | 0.135781 | 0.146562 | 0.141754 | 0.211247 | 0.141463 | 0.132867 |
| 0.12602  | 0.125437 | 0.126894 | 0.126166 | 0.198864 | 0.125874 | 0.125728 |
| 0.112325 | 0.116987 | 0.119318 | 0.111305 | 0.187791 | 0.115967 | 0.114073 |
| 0.11961  | 0.119901 | 0.118444 | 0.111305 | 0.18546  | 0.123252 | 0.116404 |
| 0.122378 | 0.122086 | 0.126748 | 0.11116  | 0.199009 | 0.126311 | 0.119755 |
| 0.141317 | 0.142191 | 0.134033 | 0.133304 | 0.20979  | 0.134178 | 0.133159 |
| 0.137529 | 0.143939 | 0.140152 | 0.134761 | 0.210082 | 0.143211 | 0.13345  |
| 0.165064 | 0.163899 | 0.165064 | 0.15472  | 0.157197 | 0.168706 | 0.150787 |
| 0.108829 | 0.120192 | 0.119318 | 0.107517 | 0.18546  | 0.117133 | 0.112617 |
| 0.111742 | 0.116987 | 0.116404 | 0.109848 | 0.186334 | 0.117424 | 0.113491 |
| 0.109994 | 0.110286 | 0.113491 | 0.112762 | 0.185169 | 0.115385 | 0.112325 |
| 0.138112 | 0.136364 | 0.137529 | 0.134761 | 0.195804 | 0.138258 | 0.136946 |
| 0.110431 | 0.115385 | 0.111597 | 0.106789 | 0.185023 | 0.118735 | 0.1081   |
| 0.135635 | 0.136801 | 0.131556 | 0.130245 | 0.192745 | 0.13549  | 0.128934 |
| 0.122815 | 0.11553  | 0.124272 | 0.109557 | 0.193328 | 0.12296  | 0.119027 |
| 0.112762 | 0.118881 | 0.117716 | 0.114073 | 0.184441 | 0.120192 | 0.112762 |
| 0.146853 | 0.143648 | 0.148019 | 0.141754 | 0.196678 | 0.149913 | 0.143648 |
| 0.11859  | 0.120921 | 0.124709 | 0.118735 | 0.195221 | 0.12398  | 0.119172 |
| 0.135052 | 0.137092 | 0.142337 | 0.132576 | 0.207314 | 0.136946 | 0.135927 |
| 0.121212 | 0.128497 | 0.132576 | 0.127185 | 0.195513 | 0.131556 | 0.128497 |
| 0.117861 | 0.113491 | 0.113491 | 0.110723 | 0.17905  | 0.111305 | 0.110286 |
| 0.116404 | 0.116987 | 0.119027 | 0.113928 | 0.184003 | 0.115967 | 0.10912  |
| 0.116113 | 0.124854 | 0.114948 | 0.111888 | 0.184586 | 0.117133 | 0.114073 |
| 0.134178 | 0.137383 | 0.132721 | 0.131119 | 0.202069 | 0.134907 | 0.130099 |
| 0.110431 | 0.11451  | 0.113054 | 0.113782 | 0.182984 | 0.116113 | 0.111888 |
| 0.136801 | 0.14729  | 0.143502 | 0.135198 | 0.209062 | 0.143648 | 0.135052 |
| 0.115239 | 0.12602  | 0.11961  | 0.117424 | 0.188666 | 0.124126 | 0.11757  |
| 0.115822 | 0.118153 | 0.12398  | 0.117133 | 0.192453 | 0.119464 | 0.11553  |
| 0.114365 | 0.119318 | 0.118735 | 0.112762 | 0.1875   | 0.119464 | 0.113491 |
| 0.122232 | 0.125437 | 0.126311 | 0.115676 | 0.192453 | 0.125583 | 0.117861 |
| 0.111451 | 0.118444 | 0.116113 | 0.111014 | 0.188957 | 0.115967 | 0.112325 |

|          |          |          |           |          |          |           |
|----------|----------|----------|-----------|----------|----------|-----------|
| 0.113491 | 0.115239 | 0.119901 | 0.11655   | 0.1875   | 0.118007 | 0.10912   |
| 0.135198 | 0.140443 | 0.138986 | 0.135927  | 0.203963 | 0.139714 | 0.129953  |
| 0.107226 | 0.107517 | 0.114219 | 0.10067   | 0.182692 | 0.116987 | 0.109266  |
| 0.110577 | 0.110868 | 0.119027 | 0.106061  | 0.190414 | 0.115676 | 0.101836  |
| 0.131265 | 0.125728 | 0.130099 | 0.119172  | 0.195659 | 0.129079 | 0.124272  |
| 0.124272 | 0.126311 | 0.131556 | 0.123252  | 0.195367 | 0.123252 | 0.127477  |
| 0.129225 | 0.131556 | 0.128351 | 0.127622  | 0.201486 | 0.129662 | 0.129516  |
| 0.139277 | 0.138403 | 0.136364 | 0.134178  | 0.212121 | 0.13884  | 0.134033  |
| 0.117279 | 0.118153 | 0.114656 | 0.113928  | 0.184003 | 0.110431 | 0.122523  |
| 0.186043 | 0.182838 | 0.18109  | 0.18007   | 0.149913 | 0.184441 | 0.17701   |
| 0.110723 | 0.111014 | 0.114802 | 0.104167  | 0.186772 | 0.111451 | 0.109557  |
| 0.135635 | 0.135344 | 0.137383 | 0.128497  | 0.204983 | 0.138112 | 0.135052  |
| 0.129808 | 0.12602  | 0.128059 | 0.120921  | 0.198864 | 0.130536 | 0.125728  |
| 0.13345  | 0.139277 | 0.141026 | 0.131265  | 0.206585 | 0.13884  | 0.138986  |
| 0.116987 | 0.115239 | 0.109994 | 0.109557  | 0.18954  | 0.117133 | 0.109411  |
| 0.13447  | 0.130973 | 0.129808 | 0.129662  | 0.202943 | 0.134324 | 0.12602   |
| 0.11757  | 0.111742 | 0.113199 | 0.111305  | 0.188374 | 0.121503 | 0.111742  |
| 0.127622 | 0.12296  | 0.12296  | 0.118444  | 0.193182 | 0.128059 | 0.119755  |
| 0.11859  | 0.118298 | 0.117424 | 0.109703  | 0.190268 | 0.124854 | 0.113054  |
| 0.13549  | 0.135781 | 0.132576 | 0.135344  | 0.206294 | 0.137675 | 0.135198  |
| 0.111305 | 0.1081   | 0.116841 | 0.103584  | 0.185606 | 0.118735 | 0.108683  |
| 0.135927 | 0.137092 | 0.133013 | 0.131119  | 0.19799  | 0.138695 | 0.136218  |
| 0.118298 | 0.118881 | 0.124709 | 0.116696  | 0.186772 | 0.121358 | 0.11859   |
| 0.131265 | 0.129516 | 0.131556 | 0.12704   | 0.200903 | 0.132576 | 0.12398   |
| 0.131702 | 0.127914 | 0.131702 | 0.120484  | 0.197261 | 0.131265 | 0.129662  |
| 0.109557 | 0.113636 | 0.114219 | 0.106498  | 0.186772 | 0.115239 | 0.111597  |
| 0.149184 | 0.144814 | 0.147145 | 0.140297  | 0.197552 | 0.149913 | 0.136946  |
| 0.118153 | 0.119027 | 0.117279 | 0.108392  | 0.190705 | 0.120047 | 0.116113  |
| 0.116696 | 0.113199 | 0.10912  | 0.111305  | 0.191288 | 0.11451  | 0.105041  |
| 0.121212 | 0.119172 | 0.125874 | 0.116696  | 0.194056 | 0.119318 | 0.115093  |
| 0.139277 | 0.145688 | 0.141317 | 0.135927  | 0.204545 | 0.14292  | 0.136364  |
| 0.129953 | 0.123543 | 0.128205 | 0.11757   | 0.177448 | 0.124854 | 0.116841  |
| 0.113636 | 0.115093 | 0.109848 | 0.104458  | 0.187354 | 0.119027 | 0.106643  |
| 0.112179 | 0.111888 | 0.108683 | 0.103875  | 0.182692 | 0.11553  | 0.108683  |
| 0.118153 | 0.112325 | 0.123106 | 0.112762  | 0.185169 | 0.124126 | 0.116987  |
| 0.129662 | 0.123834 | 0.126748 | 0.114656  | 0.201049 | 0.131556 | 0.123543  |
| 0.118153 | 0.113782 | 0.121649 | 0.115093  | 0.18954  | 0.117424 | 0.11757   |
| 0.107809 | 0.105186 | 0.105769 | 0.0983392 | 0.18007  | 0.112325 | 0.0999417 |
| 0.106061 | 0.110431 | 0.114219 | 0.100379  | 0.183858 | 0.112325 | 0.102273  |
| 0.114948 | 0.109411 | 0.116696 | 0.102564  | 0.187791 | 0.119755 | 0.107955  |
| 0.119318 | 0.113199 | 0.116987 | 0.120921  | 0.187209 | 0.121212 | 0.118153  |
| 0.127622 | 0.125    | 0.134033 | 0.120775  | 0.201049 | 0.133887 | 0.123543  |
| 0.109994 | 0.107663 | 0.113782 | 0.100524  | 0.189831 | 0.117716 | 0.103584  |
| 0.106935 | 0.108974 | 0.113636 | 0.0942599 | 0.183858 | 0.113782 | 0.104604  |

|          |          |          |           |           |          |          |
|----------|----------|----------|-----------|-----------|----------|----------|
| 0.122086 | 0.120338 | 0.125583 | 0.116696  | 0.196096  | 0.126894 | 0.122378 |
| 0.106789 | 0.108537 | 0.116113 | 0.102273  | 0.184003  | 0.111305 | 0.108537 |
| 0.121649 | 0.121066 | 0.120192 | 0.115093  | 0.184586  | 0.12704  | 0.118444 |
| 0.123689 | 0.128351 | 0.133304 | 0.124709  | 0.198281  | 0.136072 | 0.129225 |
| 0.119027 | 0.117279 | 0.120192 | 0.108683  | 0.192745  | 0.11859  | 0.114948 |
| 0.108683 | 0.111305 | 0.115093 | 0.0968823 | 0.189977  | 0.117279 | 0.106643 |
| 0.112179 | 0.109557 | 0.118298 | 0.102418  | 0.187937  | 0.118153 | 0.106643 |
| 0.111014 | 0.106061 | 0.108683 | 0.103001  | 0.180361  | 0.115239 | 0.101107 |
| 0.129371 | 0.125874 | 0.130245 | 0.118444  | 0.195513  | 0.129808 | 0.120338 |
| 0.104604 | 0.106061 | 0.11451  | 0.0962995 | 0.184441  | 0.112617 | 0.100233 |
| 0.130099 | 0.133304 | 0.146707 | 0.131702  | 0.204108  | 0.137238 | 0.133304 |
| 0.131119 | 0.132867 | 0.137821 | 0.129225  | 0.195513  | 0.135052 | 0.130536 |
| 0.129662 | 0.122378 | 0.134033 | 0.117279  | 0.19697   | 0.126603 | 0.122669 |
| 0.117279 | 0.118153 | 0.121649 | 0.1081    | 0.186917  | 0.122669 | 0.115239 |
| 0.11553  | 0.116987 | 0.107663 | 0.106352  | 0.181964  | 0.122086 | 0.114656 |
| 0.106061 | 0.109557 | 0.113636 | 0.10271   | 0.185606  | 0.118735 | 0.106061 |
| 0.104749 | 0.110286 | 0.116696 | 0.111014  | 0.18954   | 0.119755 | 0.107955 |
| 0.104458 | 0.110577 | 0.115239 | 0.105478  | 0.186334  | 0.115385 | 0.102418 |
| 0.113782 | 0.120192 | 0.111742 | 0.111597  | 0.17905   | 0.120629 | 0.105915 |
| 0.121941 | 0.130099 | 0.134761 | 0.127331  | 0.20236   | 0.131119 | 0.12602  |
| 0.120629 | 0.119755 | 0.113345 | 0.112617  | 0.195513  | 0.118735 | 0.113928 |
| 0.124854 | 0.13447  | 0.131556 | 0.115967  | 0.197698  | 0.130536 | 0.128059 |
| 0.138986 | 0.134033 | 0.138986 | 0.127185  | 0.204254  | 0.137383 | 0.134615 |
| 0.190268 | 0.19493  | 0.185897 | 0.183129  | 0.0944056 | 0.191871 | 0.185315 |
| 0.235868 | 0.237617 | 0.226836 | 0.230478  | 0.124563  | 0.237471 | 0.227418 |
| 0.115967 | 0.115676 | 0.116841 | 0.110577  | 0.173368  | 0.11757  | 0.102564 |
| 0.112908 | 0.114656 | 0.117861 | 0.107809  | 0.183421  | 0.109557 | 0.111742 |
| 0.110868 | 0.108829 | 0.109411 | 0.106352  | 0.179633  | 0.112762 | 0.101836 |
| 0.114365 | 0.116113 | 0.112617 | 0.111888  | 0.185169  | 0.121212 | 0.111742 |
| 0.128934 | 0.128934 | 0.128934 | 0.0576923 | 0.195367  | 0.13549  | 0.119318 |
| 0.114365 | 0.117861 | 0.118735 | 0.112762  | 0.190122  | 0.118881 | 0.110577 |
| 0.141608 | 0.13986  | 0.148601 | 0.14292   | 0.210082  | 0.140297 | 0.143939 |
| 0.114656 | 0.113199 | 0.116696 | 0.114219  | 0.190997  | 0.121503 | 0.112034 |
| 0.128642 | 0.129808 | 0.13447  | 0.130828  | 0.204691  | 0.130536 | 0.126603 |
| 0.132576 | 0.132576 | 0.130536 | 0.130682  | 0.191434  | 0.133013 | 0.128788 |
| 0.134033 | 0.133159 | 0.133741 | 0.126311  | 0.202506  | 0.136801 | 0.129079 |
| 0.137821 | 0.140152 | 0.139569 | 0.134178  | 0.202214  | 0.141171 | 0.130828 |
| 0.117424 | 0.117716 | 0.11859  | 0.113491  | 0.192016  | 0.123106 | 0.11451  |
| 0.115967 | 0.11451  | 0.115093 | 0.110868  | 0.188811  | 0.112325 | 0.113054 |
| 0.118735 | 0.125437 | 0.115822 | 0.113054  | 0.191871  | 0.117716 | 0.117861 |
| 0.103584 | 0.10912  | 0.11116  | 0.111014  | 0.183712  | 0.110723 | 0.106498 |
| 0.111742 | 0.112908 | 0.113491 | 0.111014  | 0.18546   | 0.111014 | 0.108246 |
| 0.112762 | 0.114802 | 0.113636 | 0.115239  | 0.187937  | 0.114365 | 0.111597 |
| 0.130099 | 0.13243  | 0.13039  | 0.123543  | 0.196533  | 0.130828 | 0.127768 |



|          |          |          |           |          |          |           |
|----------|----------|----------|-----------|----------|----------|-----------|
| 0.13447  | 0.131556 | 0.136801 | 0.133741  | 0.206148 | 0.134615 | 0.133013  |
| 0.11655  | 0.113636 | 0.119172 | 0.116404  | 0.190559 | 0.116113 | 0.116259  |
| 0.114656 | 0.118153 | 0.112034 | 0.113345  | 0.185752 | 0.120338 | 0.111742  |
| 0.126311 | 0.126311 | 0.135635 | 0.133159  | 0.20236  | 0.134615 | 0.131847  |
| 0.106498 | 0.110286 | 0.116404 | 0.112179  | 0.182547 | 0.11655  | 0.10912   |
| 0.138403 | 0.141026 | 0.1419   | 0.135344  | 0.20338  | 0.146707 | 0.138403  |
| 0.140443 | 0.138403 | 0.139569 | 0.13039   | 0.191725 | 0.143211 | 0.131119  |
| 0.133304 | 0.133304 | 0.128059 | 0.132284  | 0.193328 | 0.134907 | 0.131265  |
| 0.109411 | 0.112325 | 0.113199 | 0.111597  | 0.184878 | 0.108392 | 0.110286  |
| 0.111888 | 0.106352 | 0.112179 | 0.10708   | 0.185897 | 0.115822 | 0.108683  |
| 0.121649 | 0.127477 | 0.125728 | 0.122669  | 0.199446 | 0.122086 | 0.119318  |
| 0.126457 | 0.121795 | 0.124709 | 0.125728  | 0.196387 | 0.129808 | 0.120338  |
| 0.126457 | 0.127331 | 0.13549  | 0.133013  | 0.194639 | 0.129225 | 0.129079  |
| 0.107955 | 0.118735 | 0.11961  | 0.118298  | 0.189831 | 0.11859  | 0.115239  |
| 0.111014 | 0.117424 | 0.113928 | 0.11553   | 0.189103 | 0.113782 | 0.114802  |
| 0.124126 | 0.123543 | 0.12704  | 0.120192  | 0.195513 | 0.127768 | 0.120338  |
| 0.134033 | 0.133741 | 0.132867 | 0.133887  | 0.203089 | 0.133596 | 0.133159  |
| 0.131993 | 0.129079 | 0.134324 | 0.133596  | 0.200758 | 0.130099 | 0.121795  |
| 0.133596 | 0.128934 | 0.138258 | 0.129953  | 0.202652 | 0.137821 | 0.13447   |
| 0.128497 | 0.133159 | 0.136072 | 0.130682  | 0.197844 | 0.135052 | 0.127622  |
| 0.107517 | 0.115385 | 0.121503 | 0.11757   | 0.191725 | 0.116987 | 0.113928  |
| 0.129371 | 0.134907 | 0.131702 | 0.129225  | 0.198427 | 0.135927 | 0.127914  |
| 0.10912  | 0.111742 | 0.112617 | 0.108974  | 0.187209 | 0.117716 | 0.112617  |
| 0.115093 | 0.123252 | 0.115967 | 0.112034  | 0.18211  | 0.11553  | 0.113636  |
| 0.118007 | 0.120047 | 0.112762 | 0.113199  | 0.188811 | 0.121066 | 0.112179  |
| 0.112617 | 0.115822 | 0.109411 | 0.111597  | 0.184586 | 0.114802 | 0.112325  |
| 0.112617 | 0.111742 | 0.115239 | 0.111014  | 0.184586 | 0.111014 | 0.10708   |
| 0.137821 | 0.132867 | 0.137529 | 0.136801  | 0.201923 | 0.139132 | 0.129953  |
| 0.116113 | 0.11961  | 0.119027 | 0.114802  | 0.186334 | 0.119755 | 0.113199  |
| 0.132139 | 0.131847 | 0.132721 | 0.134324  | 0.200612 | 0.138695 | 0.127185  |
| 0.105332 | 0.11116  | 0.116404 | 0.109848  | 0.185752 | 0.112471 | 0.113199  |
| 0.122086 | 0.123252 | 0.133159 | 0.127768  | 0.199883 | 0.129516 | 0.122669  |
| 0.124563 | 0.122523 | 0.126603 | 0.123543  | 0.195076 | 0.129371 | 0.114948  |
| 0.125146 | 0.124563 | 0.121066 | 0.107809  | 0.181964 | 0.130536 | 0.118153  |
| 0.115676 | 0.1081   | 0.120629 | 0.110577  | 0.194347 | 0.121358 | 0.11451   |
| 0.126311 | 0.125728 | 0.127185 | 0.11859   | 0.186917 | 0.127914 | 0.118444  |
| 0.118298 | 0.11451  | 0.125291 | 0.112617  | 0.190851 | 0.125437 | 0.119464  |
| 0.111888 | 0.107517 | 0.114802 | 0.106789  | 0.185315 | 0.118153 | 0.112471  |
| 0.131993 | 0.135198 | 0.134907 | 0.120484  | 0.208916 | 0.136801 | 0.120047  |
| 0.136801 | 0.129516 | 0.140589 | 0.131993  | 0.206439 | 0.143065 | 0.13243   |
| 0.106498 | 0.107663 | 0.110868 | 0.0990676 | 0.182255 | 0.115676 | 0.0968823 |
| 0.133741 | 0.132284 | 0.129079 | 0.116404  | 0.203963 | 0.135927 | 0.129371  |
| 0.128059 | 0.124563 | 0.126603 | 0.113345  | 0.199738 | 0.13549  | 0.118735  |
| 0.133596 | 0.132139 | 0.128642 | 0.119755  | 0.197407 | 0.136072 | 0.123106  |

|          |          |          |          |          |          |          |
|----------|----------|----------|----------|----------|----------|----------|
| 0.123689 | 0.125728 | 0.124272 | 0.11014  | 0.189248 | 0.128205 | 0.119318 |
| 0.122523 | 0.121649 | 0.124854 | 0.109848 | 0.19799  | 0.124417 | 0.114365 |
| 0.129953 | 0.128788 | 0.125874 | 0.108246 | 0.198427 | 0.129225 | 0.111305 |
| 0.129808 | 0.128059 | 0.128934 | 0.124417 | 0.202943 | 0.128497 | 0.125728 |
| 0.135635 | 0.137383 | 0.134178 | 0.124709 | 0.204983 | 0.138986 | 0.133013 |
| 0.13243  | 0.133013 | 0.126894 | 0.111014 | 0.196241 | 0.128497 | 0.113491 |
| 0.118735 | 0.121649 | 0.118444 | 0.107226 | 0.1875   | 0.122378 | 0.115822 |
| 0.126457 | 0.125874 | 0.141608 | 0.134178 | 0.198427 | 0.137675 | 0.128788 |
| 0.139423 | 0.133596 | 0.137675 | 0.118881 | 0.202943 | 0.134324 | 0.121941 |
| 0.116404 | 0.11961  | 0.118735 | 0.10373  | 0.186043 | 0.114219 | 0.107955 |
| 0.216492 | 0.219697 | 0.210082 | 0.211976 | 0.11655  | 0.220134 | 0.208333 |
| 0.128497 | 0.126748 | 0.123543 | 0.112617 | 0.195221 | 0.128351 | 0.123834 |
| 0.122669 | 0.125291 | 0.124417 | 0.107372 | 0.187354 | 0.120775 | 0.105186 |
| 0.139423 | 0.13447  | 0.13039  | 0.125    | 0.202069 | 0.13345  | 0.125437 |
| 0.122815 | 0.123397 | 0.120192 | 0.106643 | 0.190414 | 0.125    | 0.106789 |
| 0.131556 | 0.136218 | 0.131847 | 0.117716 | 0.206148 | 0.134615 | 0.122232 |
| 0.124563 | 0.125437 | 0.122815 | 0.111597 | 0.190997 | 0.125291 | 0.119318 |
| 0.125583 | 0.122086 | 0.118298 | 0.108246 | 0.191142 | 0.122815 | 0.116259 |
| 0.129079 | 0.131993 | 0.127914 | 0.108537 | 0.195513 | 0.129225 | 0.118881 |
| 0.135635 | 0.133887 | 0.131847 | 0.116841 | 0.187209 | 0.131993 | 0.13039  |
| 0.130245 | 0.133741 | 0.126457 | 0.120192 | 0.201632 | 0.133013 | 0.130245 |
| 0.135927 | 0.137675 | 0.130973 | 0.121212 | 0.198864 | 0.131993 | 0.132139 |
| 0.132139 | 0.132139 | 0.130973 | 0.117424 | 0.200321 | 0.127914 | 0.124272 |
| 0.11553  | 0.108829 | 0.12398  | 0.108974 | 0.190122 | 0.122086 | 0.107372 |
| 0.123689 | 0.120775 | 0.126603 | 0.113928 | 0.19595  | 0.128788 | 0.113491 |
| 0.13986  | 0.138112 | 0.130536 | 0.126311 | 0.199009 | 0.141171 | 0.126166 |
| 0.125728 | 0.12602  | 0.120775 | 0.108392 | 0.185169 | 0.124709 | 0.114656 |
| 0.131556 | 0.13884  | 0.135635 | 0.134907 | 0.202069 | 0.135198 | 0.134178 |
| 0.142774 | 0.141317 | 0.141608 | 0.129808 | 0.184732 | 0.143211 | 0.128788 |
| 0.122669 | 0.120629 | 0.128205 | 0.110868 | 0.187646 | 0.129225 | 0.11451  |
| 0.130828 | 0.129371 | 0.129371 | 0.112908 | 0.199009 | 0.133013 | 0.11451  |
| 0.130682 | 0.130099 | 0.123106 | 0.122669 | 0.185752 | 0.134324 | 0.119027 |
| 0.117716 | 0.119464 | 0.134033 | 0.124563 | 0.194056 | 0.13243  | 0.124709 |
| 0.132284 | 0.125874 | 0.126457 | 0.124563 | 0.183858 | 0.13243  | 0.123252 |
| 0.142191 | 0.143065 | 0.139569 | 0.127477 | 0.192308 | 0.139714 | 0.134324 |
| 0.112908 | 0.115822 | 0.11757  | 0.104312 | 0.184878 | 0.119172 | 0.110868 |
| 0.134615 | 0.136655 | 0.136655 | 0.122815 | 0.200175 | 0.131556 | 0.130536 |
| 0.144959 | 0.144959 | 0.145542 | 0.134033 | 0.180798 | 0.141026 | 0.137966 |
| 0.121649 | 0.122815 | 0.128351 | 0.111888 | 0.197407 | 0.123834 | 0.118444 |
| 0.125146 | 0.127768 | 0.123106 | 0.120921 | 0.190122 | 0.125583 | 0.119901 |
| 0.13549  | 0.132284 | 0.145688 | 0.14292  | 0.205128 | 0.145833 | 0.136946 |
| 0.124417 | 0.132284 | 0.130828 | 0.122232 | 0.191142 | 0.129808 | 0.125583 |
| 0.137383 | 0.137383 | 0.143502 | 0.128497 | 0.207896 | 0.146853 | 0.137092 |
| 0.129079 | 0.132284 | 0.134907 | 0.120192 | 0.198718 | 0.135052 | 0.123834 |

|          |          |          |           |          |          |          |
|----------|----------|----------|-----------|----------|----------|----------|
| 0.125146 | 0.121358 | 0.118735 | 0.120047  | 0.197407 | 0.129079 | 0.118735 |
| 0.129662 | 0.133741 | 0.136072 | 0.122523  | 0.199592 | 0.135635 | 0.13141  |
| 0.128934 | 0.123106 | 0.13039  | 0.115967  | 0.189831 | 0.129662 | 0.114948 |
| 0.134615 | 0.129079 | 0.131993 | 0.12602   | 0.202214 | 0.131847 | 0.127622 |
| 0.133741 | 0.13345  | 0.130536 | 0.123689  | 0.198135 | 0.133304 | 0.127331 |
| 0.130828 | 0.137238 | 0.137238 | 0.131556  | 0.203089 | 0.137383 | 0.133741 |
| 0.13549  | 0.134033 | 0.132867 | 0.129808  | 0.205711 | 0.136509 | 0.132576 |
| 0.131702 | 0.13141  | 0.129662 | 0.126603  | 0.192599 | 0.136509 | 0.126748 |
| 0.143648 | 0.144231 | 0.13986  | 0.138549  | 0.20134  | 0.146999 | 0.138986 |
| 0.125874 | 0.12296  | 0.128205 | 0.108829  | 0.194639 | 0.127768 | 0.119464 |
| 0.121503 | 0.125874 | 0.120338 | 0.112908  | 0.196387 | 0.122815 | 0.120629 |
| 0.133741 | 0.135198 | 0.128497 | 0.124854  | 0.199301 | 0.127768 | 0.128497 |
| 0.122669 | 0.115093 | 0.122378 | 0.109703  | 0.191725 | 0.123106 | 0.11655  |
| 0.145833 | 0.144959 | 0.137966 | 0.134907  | 0.195367 | 0.151515 | 0.135927 |
| 0.154283 | 0.155157 | 0.151661 | 0.147436  | 0.207022 | 0.159382 | 0.153118 |
| 0.128059 | 0.131556 | 0.131556 | 0.125583  | 0.202069 | 0.129953 | 0.125146 |
| 0.11655  | 0.120338 | 0.124417 | 0.120775  | 0.195513 | 0.121649 | 0.117716 |
| 0.128934 | 0.127185 | 0.137092 | 0.124417  | 0.203526 | 0.138112 | 0.126311 |
| 0.13345  | 0.136655 | 0.13141  | 0.122523  | 0.202797 | 0.135927 | 0.130245 |
| 0.121795 | 0.131119 | 0.129371 | 0.127185  | 0.201049 | 0.125437 | 0.124417 |
| 0.137821 | 0.138403 | 0.136655 | 0.125437  | 0.211538 | 0.136801 | 0.134033 |
| 0.143065 | 0.141026 | 0.137238 | 0.128059  | 0.196387 | 0.147873 | 0.12704  |
| 0.127477 | 0.124563 | 0.13243  | 0.118007  | 0.199738 | 0.13549  | 0.121649 |
| 0.15778  | 0.160985 | 0.157197 | 0.157634  | 0.208188 | 0.1588   | 0.155449 |
| 0.122815 | 0.126603 | 0.132139 | 0.11859   | 0.199738 | 0.131119 | 0.125437 |
| 0.137675 | 0.135635 | 0.142337 | 0.121212  | 0.200029 | 0.146853 | 0.13884  |
| 0.124126 | 0.126457 | 0.123252 | 0.116113  | 0.197261 | 0.126894 | 0.119172 |
| 0.130536 | 0.132867 | 0.13986  | 0.134178  | 0.207459 | 0.136509 | 0.134615 |
| 0.129371 | 0.128497 | 0.121503 | 0.113491  | 0.191725 | 0.129225 | 0.122669 |
| 0.133304 | 0.138258 | 0.135052 | 0.133741  | 0.16419  | 0.144522 | 0.128351 |
| 0.146853 | 0.151807 | 0.135781 | 0.141171  | 0.203963 | 0.133887 | 0.143939 |
| 0.118153 | 0.12602  | 0.123397 | 0.118007  | 0.184295 | 0.125291 | 0.109411 |
| 0.134907 | 0.138112 | 0.13549  | 0.130099  | 0.164336 | 0.132721 | 0.121795 |
| 0.14088  | 0.142337 | 0.146999 | 0.143065  | 0.142628 | 0.148601 | 0.139132 |
| 0.145833 | 0.146707 | 0.142045 | 0.133159  | 0.141463 | 0.144814 | 0.136509 |
| 0.119464 | 0.111305 | 0.128205 | 0.12602   | 0.200175 | 0.124854 | 0.120338 |
| 0.13039  | 0.136509 | 0.120484 | 0.129079  | 0.197407 | 0.100524 | 0.13039  |
| 0.110868 | 0.118153 | 0.107955 | 0.0827506 | 0.178467 | 0.115093 | 0.105624 |
| 0.11655  | 0.11014  | 0.116259 | 0.0761946 | 0.182692 | 0.121358 | 0.107226 |
| 0.126603 | 0.124272 | 0.12602  | 0.115385  | 0.1875   | 0.127331 | 0.118444 |
| 0.112908 | 0.123106 | 0.120192 | 0.116259  | 0.182255 | 0.123543 | 0.104167 |
| 0.113928 | 0.11014  | 0.112179 | 0.110286  | 0.186772 | 0.119027 | 0.11451  |
| 0.113928 | 0.113636 | 0.113928 | 0.0729895 | 0.17162  | 0.114073 | 0.097028 |
| 0.120921 | 0.121212 | 0.122378 | 0.113491  | 0.185315 | 0.116404 | 0.104604 |

|          |           |          |           |           |           |          |
|----------|-----------|----------|-----------|-----------|-----------|----------|
| 0.124563 | 0.121066  | 0.123689 | 0.0620629 | 0.178759  | 0.127331  | 0.113199 |
| 0.10271  | 0.104167  | 0.113491 | 0.0955711 | 0.178759  | 0.113054  | 0.103875 |
| 0.116987 | 0.124854  | 0.121649 | 0.11655   | 0.178467  | 0.124126  | 0.107663 |
| 0.11451  | 0.122086  | 0.118298 | 0.112034  | 0.184149  | 0.119027  | 0.105478 |
| 0.115385 | 0.111597  | 0.127331 | 0.125146  | 0.191725  | 0.126894  | 0.120338 |
| 0.215618 | 0.214744  | 0.206294 | 0.207896  | 0.115676  | 0.214307  | 0.205128 |
| 0.137821 | 0.145396  | 0.13986  | 0.139714  | 0.200175  | 0.141463  | 0.130828 |
| 0.118444 | 0.131556  | 0.128642 | 0.126748  | 0.195659  | 0.125583  | 0.123397 |
| 0.12296  | 0.128205  | 0.123834 | 0.113491  | 0.182401  | 0.121941  | 0.120921 |
| 0.211538 | 0.212413  | 0.201632 | 0.203234  | 0.102273  | 0.207896  | 0.200175 |
| 0.114802 | 0.118298  | 0.125874 | 0.120484  | 0.178613  | 0.126603  | 0.11859  |
| 0.108537 | 0.0496795 | 0.125437 | 0.116259  | 0.193619  | 0.120629  | 0.114948 |
| 0.119901 | 0.121941  | 0.124272 | 0.120338  | 0.187791  | 0.0961538 | 0.120775 |
| 0.121212 | 0.118298  | 0.124709 | 0.0520105 | 0.184732  | 0.129225  | 0.113928 |
| 0.249417 | 0.251457  | 0.23951  | 0.241404  | 0.132576  | 0.248106  | 0.237179 |
| 0.117279 | 0.123397  | 0.124854 | 0.115676  | 0.192162  | 0.129953  | 0.126311 |
| 0.112908 | 0.107955  | 0.120775 | 0.117716  | 0.18546   | 0.121212  | 0.112617 |
| 0.117861 | 0.127477  | 0.127477 | 0.125874  | 0.192453  | 0.125     | 0.122232 |
| 0.117279 | 0.12398   | 0.121066 | 0.120921  | 0.190122  | 0.121795  | 0.118735 |
| 0.125728 | 0.124563  | 0.128642 | 0.105186  | 0.188374  | 0.136655  | 0.125728 |
| 0.128642 | 0.128642  | 0.128059 | 0.1081    | 0.168852  | 0.130536  | 0.111451 |
| 0.112034 | 0.109703  | 0.12398  | 0.119755  | 0.188083  | 0.117716  | 0.118444 |
| 0.114802 | 0.123543  | 0.120629 | 0.113782  | 0.181235  | 0.119901  | 0.104604 |
| 0.120484 | 0.125437  | 0.108537 | 0.121503  | 0.187791  | 0.0906177 | 0.120192 |
| 0.115239 | 0.115239  | 0.116696 | 0.0463287 | 0.182838  | 0.120629  | 0.107663 |
| 0.112762 | 0.122086  | 0.116259 | 0.114365  | 0.178613  | 0.117279  | 0.104604 |
| 0.121941 | 0.123689  | 0.119318 | 0.0929487 | 0.189248  | 0.122669  | 0.112617 |
| 0.146562 | 0.152098  | 0.136072 | 0.14088   | 0.204254  | 0.133013  | 0.142774 |
| 0.120921 | 0.122669  | 0.129079 | 0.122815  | 0.192599  | 0.134178  | 0.129953 |
| 0.111305 | 0.048951  | 0.129662 | 0.119318  | 0.193473  | 0.124563  | 0.122378 |
| 0.18648  | 0.188811  | 0.182692 | 0.180798  | 0.0885781 | 0.188666  | 0.177739 |
| 0.203671 | 0.205128  | 0.19493  | 0.196533  | 0.101107  | 0.202943  | 0.190559 |
| 0.123252 | 0.11859   | 0.123834 | 0.0496795 | 0.18007   | 0.12398   | 0.113054 |
| 0.114219 | 0.113636  | 0.117424 | 0.0447261 | 0.183566  | 0.121066  | 0.107517 |
| 0.137821 | 0.148893  | 0.137238 | 0.125728  | 0.187646  | 0.139423  | 0.126748 |
| 0.106352 | 0.105478  | 0.122669 | 0.118444  | 0.187354  | 0.121941  | 0.115676 |
| 0.118444 | 0.120775  | 0.128934 | 0.123252  | 0.19391   | 0.132284  | 0.129516 |
| 0.125583 | 0.134033  | 0.121795 | 0.128642  | 0.191434  | 0.126311  | 0.119172 |
| 0.222902 | 0.228147  | 0.212995 | 0.215181  | 0.112471  | 0.220425  | 0.20979  |
| 0.107517 | 0.116841  | 0.11655  | 0.111742  | 0.186189  | 0.113199  | 0.112471 |
| 0.212558 | 0.207314  | 0.206148 | 0.203963  | 0.141171  | 0.208042  | 0.194784 |
| 0.103438 | 0.101981  | 0.11451  | 0.114365  | 0.190268  | 0.114656  | 0.1081   |
| 0.106498 | 0.106498  | 0.110286 | 0.112179  | 0.186626  | 0.121212  | 0.109411 |
| 0.118881 | 0.120921  | 0.122669 | 0.109703  | 0.176282  | 0.119318  | 0.119172 |

|          |           |          |           |          |          |          |
|----------|-----------|----------|-----------|----------|----------|----------|
| 0.11655  | 0.115676  | 0.114219 | 0.0549242 | 0.178904 | 0.119027 | 0.106643 |
| 0.205274 | 0.210519  | 0.196824 | 0.197552  | 0.099796 | 0.204545 | 0.19391  |
| 0.126603 | 0.135635  | 0.130973 | 0.124709  | 0.180798 | 0.129662 | 0.116696 |
| 0.114365 | 0.112325  | 0.116987 | 0.11859   | 0.192745 | 0.118298 | 0.113782 |
| 0.120192 | 0.129225  | 0.128059 | 0.121212  | 0.186626 | 0.127331 | 0.112908 |
| 0.116987 | 0.123397  | 0.130099 | 0.124417  | 0.193619 | 0.126166 | 0.118444 |
| 0.117279 | 0.116113  | 0.118735 | 0.0463287 | 0.182255 | 0.121212 | 0.108246 |
| 0.108974 | 0.104895  | 0.118007 | 0.116987  | 0.192016 | 0.118444 | 0.113928 |
| 0.11451  | 0.113345  | 0.121795 | 0.118735  | 0.176865 | 0.119901 | 0.117716 |
| 0.111888 | 0.0483683 | 0.129662 | 0.118444  | 0.193182 | 0.123689 | 0.117716 |
| 0.112762 | 0.118007  | 0.115385 | 0.10912   | 0.173368 | 0.114948 | 0.101981 |
| 0.11553  | 0.115239  | 0.119027 | 0.122378  | 0.188374 | 0.119172 | 0.115822 |
| 0.185897 | 0.190559  | 0.181235 | 0.177593  | 0.087704 | 0.188374 | 0.180361 |
| 0.11757  | 0.126894  | 0.129808 | 0.126748  | 0.192162 | 0.126166 | 0.121649 |
| 0.129079 | 0.135781  | 0.119172 | 0.123689  | 0.193765 | 0.120775 | 0.126748 |
| 0.119318 | 0.126603  | 0.125146 | 0.114219  | 0.185169 | 0.122086 | 0.119318 |
| 0.118298 | 0.122669  | 0.127622 | 0.119901  | 0.184441 | 0.13039  | 0.123834 |
| 0.115385 | 0.126166  | 0.121503 | 0.11961   | 0.184441 | 0.122523 | 0.108683 |
| 0.109557 | 0.1081    | 0.120629 | 0.121941  | 0.194639 | 0.121066 | 0.11655  |
| 0.110577 | 0.117861  | 0.122815 | 0.119172  | 0.181672 | 0.122086 | 0.108246 |
| 0.113782 | 0.11553   | 0.128059 | 0.12704   | 0.192745 | 0.127914 | 0.121358 |
| 0.122086 | 0.127914  | 0.117424 | 0.117279  | 0.190268 | 0.112325 | 0.121503 |
| 0.111014 | 0.122669  | 0.121503 | 0.115822  | 0.186772 | 0.118444 | 0.113054 |
| 0.122815 | 0.121358  | 0.123106 | 0.0559441 | 0.17905  | 0.126457 | 0.105041 |
| 0.119172 | 0.122086  | 0.121212 | 0.11757   | 0.191725 | 0.092803 | 0.123543 |
| 0.128934 | 0.136218  | 0.136509 | 0.129079  | 0.198572 | 0.103438 | 0.133304 |
| 0.110286 | 0.11553   | 0.121066 | 0.111014  | 0.185169 | 0.127622 | 0.11757  |
| 0.132867 | 0.13986   | 0.138112 | 0.133304  | 0.197552 | 0.136509 | 0.125874 |
| 0.11655  | 0.115676  | 0.11655  | 0.0470571 | 0.182984 | 0.120775 | 0.107809 |
| 0.114802 | 0.121795  | 0.110431 | 0.116404  | 0.185606 | 0.114656 | 0.108683 |
| 0.121941 | 0.123106  | 0.122815 | 0.117133  | 0.166812 | 0.117424 | 0.108829 |
| 0.116113 | 0.114656  | 0.129808 | 0.125291  | 0.189248 | 0.124417 | 0.121649 |
| 0.188666 | 0.191579  | 0.187209 | 0.185897  | 0.110286 | 0.191142 | 0.177885 |
| 0.109266 | 0.110723  | 0.114219 | 0.114365  | 0.18648  | 0.115239 | 0.109266 |
| 0.111597 | 0.108974  | 0.109557 | 0.105915  | 0.178322 | 0.111742 | 0.100816 |
| 0.113054 | 0.0451632 | 0.128788 | 0.118153  | 0.196096 | 0.121941 | 0.118007 |
| 0.178322 | 0.181818  | 0.172203 | 0.171183  | 0.107517 | 0.179341 | 0.164336 |
| 0.126311 | 0.13243   | 0.136801 | 0.129662  | 0.197115 | 0.13986  | 0.137966 |
| 0.137383 | 0.140297  | 0.144959 | 0.142191  | 0.206148 | 0.152972 | 0.142337 |
| 0.14831  | 0.154429  | 0.134324 | 0.142045  | 0.204837 | 0.135927 | 0.145396 |
| 0.111888 | 0.118881  | 0.118298 | 0.113199  | 0.181818 | 0.124272 | 0.115385 |
| 0.119901 | 0.126311  | 0.123106 | 0.119172  | 0.183129 | 0.122669 | 0.110868 |
| 0.210956 | 0.211247  | 0.200466 | 0.201777  | 0.103147 | 0.211393 | 0.199592 |
| 0.121795 | 0.124126  | 0.123834 | 0.116404  | 0.183858 | 0.124563 | 0.119172 |

|          |          |          |           |           |           |           |
|----------|----------|----------|-----------|-----------|-----------|-----------|
| 0.124563 | 0.13039  | 0.128642 | 0.125     | 0.18546   | 0.127622  | 0.113782  |
| 0.11553  | 0.115239 | 0.118153 | 0.117716  | 0.186626  | 0.120629  | 0.112908  |
| 0.167395 | 0.171766 | 0.16419  | 0.159091  | 0.130682  | 0.165501  | 0.153409  |
| 0.115239 | 0.120775 | 0.114948 | 0.103147  | 0.17701   | 0.113928  | 0.110286  |
| 0.142483 | 0.152681 | 0.130245 | 0.141171  | 0.206876  | 0.110286  | 0.139569  |
| 0.115967 | 0.115676 | 0.126457 | 0.109994  | 0.182984  | 0.12602   | 0.118881  |
| 0.184732 | 0.191142 | 0.181818 | 0.183712  | 0.0868298 | 0.191288  | 0.17803   |
| 0.116841 | 0.118298 | 0.12296  | 0.11553   | 0.191142  | 0.130099  | 0.123834  |
| 0.11014  | 0.111888 | 0.112762 | 0.103293  | 0.181527  | 0.109411  | 0.0909091 |
| 0.114073 | 0.122523 | 0.110577 | 0.11859   | 0.185169  | 0.113928  | 0.109703  |
| 0        | 0.108974 | 0.122669 | 0.114073  | 0.185606  | 0.122232  | 0.112179  |
| 0.108974 | 0        | 0.125874 | 0.112908  | 0.191142  | 0.120775  | 0.116259  |
| 0.122669 | 0.125874 | 0        | 0.116113  | 0.180653  | 0.116696  | 0.11014   |
| 0.114073 | 0.112908 | 0.116113 | 0         | 0.181964  | 0.118881  | 0.105332  |
| 0.185606 | 0.191142 | 0.180653 | 0.181964  | 0         | 0.191871  | 0.177156  |
| 0.122232 | 0.120775 | 0.116696 | 0.118881  | 0.191871  | 0         | 0.123106  |
| 0.112179 | 0.116259 | 0.11014  | 0.105332  | 0.177156  | 0.123106  | 0         |
| 0.209936 | 0.211101 | 0.201777 | 0.201632  | 0.103584  | 0.206876  | 0.200029  |
| 0.118444 | 0.126311 | 0.127185 | 0.121212  | 0.191871  | 0.124126  | 0.121941  |
| 0.117716 | 0.115967 | 0.118881 | 0.0441434 | 0.183566  | 0.122232  | 0.108683  |
| 0.113345 | 0.114219 | 0.113345 | 0.0444347 | 0.178322  | 0.120775  | 0.101399  |
| 0.132721 | 0.14292  | 0.138258 | 0.133741  | 0.197115  | 0.132576  | 0.124272  |
| 0.185752 | 0.18954  | 0.179924 | 0.178322  | 0.0913462 | 0.18852   | 0.175845  |
| 0.1081   | 0.109266 | 0.125583 | 0.120484  | 0.192599  | 0.121358  | 0.119464  |
| 0.124126 | 0.131119 | 0.132867 | 0.125728  | 0.196096  | 0.0960082 | 0.128788  |
| 0.112762 | 0.113054 | 0.115385 | 0.0432692 | 0.181527  | 0.120775  | 0.107809  |
| 0.111888 | 0.112179 | 0.115676 | 0.0473485 | 0.179779  | 0.118735  | 0.105769  |
| 0.111742 | 0.116987 | 0.115822 | 0.0472028 | 0.178467  | 0.118298  | 0.105041  |
| 0.113928 | 0.120338 | 0.120047 | 0.112617  | 0.182401  | 0.115822  | 0.105186  |
| 0.101544 | 0.106206 | 0.112908 | 0.0952797 | 0.183129  | 0.112762  | 0.103584  |
| 0.118153 | 0.123689 | 0.122523 | 0.115967  | 0.191871  | 0.131119  | 0.126603  |
| 0.137966 | 0.13884  | 0.125437 | 0.134907  | 0.202069  | 0.101981  | 0.122523  |
| 0.119901 | 0.122523 | 0.121649 | 0.114802  | 0.188957  | 0.128788  | 0.125437  |
| 0.124709 | 0.12704  | 0.13549  | 0.128059  | 0.199009  | 0.131556  | 0.120047  |
| 0.188957 | 0.197407 | 0.184878 | 0.181527  | 0.0901807 | 0.19289   | 0.183129  |
| 0.115676 | 0.120047 | 0.121503 | 0.113491  | 0.190559  | 0.0898893 | 0.118298  |
| 0.12398  | 0.133596 | 0.13039  | 0.125583  | 0.188083  | 0.13141   | 0.115822  |
| 0.113345 | 0.111888 | 0.117424 | 0.0444347 | 0.182984  | 0.11961   | 0.102855  |
| 0.102418 | 0.100379 | 0.112325 | 0.0944056 | 0.179633  | 0.111597  | 0.103875  |
| 0.118735 | 0.121649 | 0.107663 | 0.111305  | 0.180216  | 0.101399  | 0.113491  |
| 0.109557 | 0.108392 | 0.126166 | 0.122815  | 0.189103  | 0.123689  | 0.116841  |
| 0.126748 | 0.134907 | 0.122086 | 0.127185  | 0.191142  | 0.129808  | 0.118881  |
| 0.121066 | 0.128059 | 0.111742 | 0.115385  | 0.188083  | 0.115967  | 0.118153  |
| 0.108246 | 0.103584 | 0.114656 | 0.105769  | 0.179633  | 0.116259  | 0.105332  |

|          |           |          |           |           |           |           |
|----------|-----------|----------|-----------|-----------|-----------|-----------|
| 0.100816 | 0.102855  | 0.114219 | 0.104167  | 0.180653  | 0.114365  | 0.105478  |
| 0.108537 | 0.114073  | 0.112908 | 0.102855  | 0.180798  | 0.115676  | 0.0948427 |
| 0.111305 | 0.10169   | 0.118298 | 0.114948  | 0.191142  | 0.11757   | 0.111014  |
| 0.12398  | 0.126894  | 0.13039  | 0.126166  | 0.199155  | 0.136364  | 0.131556  |
| 0.108683 | 0.1081    | 0.123543 | 0.11757   | 0.187937  | 0.122815  | 0.115967  |
| 0.10912  | 0.119027  | 0.116987 | 0.11014   | 0.178759  | 0.11655   | 0.103875  |
| 0.105624 | 0.105041  | 0.121941 | 0.115093  | 0.1875    | 0.118881  | 0.113199  |
| 0.115676 | 0.113928  | 0.11451  | 0.0505536 | 0.179196  | 0.121358  | 0.106061  |
| 0.109411 | 0.112034  | 0.112034 | 0.113928  | 0.186917  | 0.117424  | 0.108537  |
| 0.114365 | 0.117861  | 0.121941 | 0.0451632 | 0.183712  | 0.124709  | 0.105915  |
| 0.112617 | 0.114948  | 0.115822 | 0.109557  | 0.184878  | 0.0891608 | 0.114073  |
| 0.120192 | 0.127477  | 0.10912  | 0.11451   | 0.187209  | 0.113636  | 0.118444  |
| 0.102418 | 0.0520105 | 0.121941 | 0.111888  | 0.190122  | 0.117133  | 0.109703  |
| 0.102855 | 0.108974  | 0.115385 | 0.0968823 | 0.18211   | 0.11757   | 0.108974  |
| 0.114656 | 0.115822  | 0.117279 | 0.0504079 | 0.18109   | 0.122086  | 0.105041  |
| 0.120775 | 0.126603  | 0.113491 | 0.117133  | 0.173805  | 0.117133  | 0.113491  |
| 0.113345 | 0.125874  | 0.116841 | 0.108829  | 0.185897  | 0.126311  | 0.0515734 |
| 0.112908 | 0.11553   | 0.114948 | 0.103147  | 0.184295  | 0.116259  | 0.0942599 |
| 0.113782 | 0.114365  | 0.112908 | 0.0501166 | 0.184295  | 0.123252  | 0.107372  |
| 0.113054 | 0.121212  | 0.11859  | 0.115822  | 0.179779  | 0.123689  | 0.107517  |
| 0.106061 | 0.102564  | 0.115676 | 0.11553   | 0.189103  | 0.116696  | 0.113345  |
| 0.114802 | 0.121212  | 0.119172 | 0.113782  | 0.184732  | 0.122523  | 0.106352  |
| 0.101399 | 0.0477855 | 0.122086 | 0.109703  | 0.188228  | 0.116987  | 0.110723  |
| 0.106352 | 0.107226  | 0.114219 | 0.097465  | 0.185897  | 0.116404  | 0.112762  |
| 0.11014  | 0.114802  | 0.114219 | 0.105041  | 0.178613  | 0.112034  | 0.106643  |
| 0.105041 | 0.110286  | 0.116404 | 0.115093  | 0.1875    | 0.115093  | 0.107663  |
| 0.114802 | 0.124126  | 0.122378 | 0.118444  | 0.182984  | 0.121066  | 0.1081    |
| 0.131119 | 0.123834  | 0.124126 | 0.123106  | 0.18852   | 0.121358  | 0.103438  |
| 0.116987 | 0.11961   | 0.117279 | 0.1081    | 0.181672  | 0.118007  | 0.0957168 |
| 0.192162 | 0.196241  | 0.184003 | 0.184149  | 0.0936772 | 0.193765  | 0.183421  |
| 0.161859 | 0.167104  | 0.156906 | 0.159382  | 0.120775  | 0.15472   | 0.149038  |
| 0.115822 | 0.118444  | 0.120192 | 0.117716  | 0.187209  | 0.128497  | 0.121941  |
| 0.118881 | 0.119464  | 0.120629 | 0.118153  | 0.185315  | 0.114365  | 0.108683  |
| 0.140152 | 0.143357  | 0.149184 | 0.144959  | 0.21183   | 0.153409  | 0.145979  |
| 0.120484 | 0.128642  | 0.107955 | 0.118881  | 0.190997  | 0.0917832 | 0.122815  |
| 0.124417 | 0.12296   | 0.110723 | 0.0808566 | 0.181235  | 0.10708   | 0.11655   |
| 0.119901 | 0.120192  | 0.114073 | 0.080711  | 0.180507  | 0.121212  | 0.0808566 |
| 0.11961  | 0.121066  | 0.116696 | 0.0926573 | 0.186334  | 0.122086  | 0.110286  |
| 0.117279 | 0.121941  | 0.11757  | 0.106352  | 0.188957  | 0.126748  | 0.0523019 |
| 0.199883 | 0.204254  | 0.194347 | 0.188374  | 0.0984848 | 0.199155  | 0.188228  |
| 0.112325 | 0.111742  | 0.124563 | 0.122669  | 0.194784  | 0.122669  | 0.118735  |
| 0.115093 | 0.120338  | 0.12296  | 0.117861  | 0.174534  | 0.122523  | 0.108974  |
| 0.111597 | 0.111597  | 0.115676 | 0.0595862 | 0.18007   | 0.118735  | 0.0976107 |
| 0.112034 | 0.116987  | 0.124563 | 0.118007  | 0.186917  | 0.122669  | 0.112325  |

|          |           |          |           |           |           |           |
|----------|-----------|----------|-----------|-----------|-----------|-----------|
| 0.184149 | 0.187354  | 0.176573 | 0.173514  | 0.112762  | 0.186334  | 0.154429  |
| 0.245047 | 0.245629  | 0.234848 | 0.239656  | 0.130245  | 0.245775  | 0.233974  |
| 0.122378 | 0.128497  | 0.115385 | 0.114073  | 0.190851  | 0.113199  | 0.119755  |
| 0.116259 | 0.123252  | 0.117716 | 0.106206  | 0.189685  | 0.126311  | 0.0518648 |
| 0.113345 | 0.118881  | 0.120629 | 0.115822  | 0.187937  | 0.13039   | 0.123543  |
| 0.101836 | 0.0511364 | 0.123397 | 0.107809  | 0.187209  | 0.118007  | 0.110868  |
| 0.106935 | 0.104312  | 0.118881 | 0.116696  | 0.188811  | 0.11757   | 0.111305  |
| 0.114656 | 0.118735  | 0.108829 | 0.109266  | 0.183129  | 0.0600233 | 0.114948  |
| 0.118298 | 0.116841  | 0.114219 | 0.0732809 | 0.175117  | 0.124563  | 0.104895  |
| 0.104604 | 0.106352  | 0.122669 | 0.113199  | 0.190851  | 0.119901  | 0.110431  |
| 0.117861 | 0.118444  | 0.114656 | 0.083042  | 0.174679  | 0.120921  | 0.101253  |
| 0.121795 | 0.120629  | 0.122086 | 0.10708   | 0.192308  | 0.120192  | 0.101399  |
| 0.103875 | 0.103875  | 0.116696 | 0.097028  | 0.180216  | 0.11655   | 0.107372  |
| 0.124417 | 0.127331  | 0.115385 | 0.115822  | 0.189977  | 0.113199  | 0.123252  |
| 0.112908 | 0.123689  | 0.120192 | 0.113054  | 0.184295  | 0.121212  | 0.106498  |
| 0.107955 | 0.10912   | 0.103875 | 0.108392  | 0.177885  | 0.108683  | 0.103584  |
| 0.128642 | 0.126603  | 0.122523 | 0.118007  | 0.196824  | 0.127622  | 0.124563  |
| 0.118735 | 0.055507  | 0.137092 | 0.126166  | 0.203817  | 0.131702  | 0.128351  |
| 0.112179 | 0.11451   | 0.114802 | 0.0493881 | 0.181818  | 0.116987  | 0.106643  |
| 0.121066 | 0.120192  | 0.123397 | 0.0868298 | 0.179924  | 0.125583  | 0.115239  |
| 0.132139 | 0.127477  | 0.131847 | 0.0591492 | 0.194784  | 0.13549   | 0.116404  |
| 0.20979  | 0.209207  | 0.202214 | 0.201486  | 0.11655   | 0.209936  | 0.198135  |
| 0.116404 | 0.118444  | 0.107955 | 0.109557  | 0.18109   | 0.102564  | 0.109703  |
| 0.102564 | 0.10373   | 0.117133 | 0.0965909 | 0.183275  | 0.117861  | 0.108683  |
| 0.114802 | 0.118881  | 0.121795 | 0.114365  | 0.189103  | 0.0922203 | 0.119172  |
| 0.118444 | 0.125146  | 0.124272 | 0.119755  | 0.190997  | 0.120629  | 0.120484  |
| 0.113199 | 0.116987  | 0.123106 | 0.115093  | 0.186626  | 0.123543  | 0.108246  |
| 0.197115 | 0.200612  | 0.189248 | 0.188228  | 0.095134  | 0.19697   | 0.190122  |
| 0.116841 | 0.125583  | 0.11859  | 0.116696  | 0.185606  | 0.124854  | 0.109557  |
| 0.113491 | 0.114948  | 0.11553  | 0.0480769 | 0.178759  | 0.118881  | 0.105041  |
| 0.114802 | 0.124417  | 0.129953 | 0.120192  | 0.190268  | 0.129225  | 0.119755  |
| 0.100524 | 0.0501166 | 0.119464 | 0.106498  | 0.186772  | 0.116404  | 0.108683  |
| 0.118007 | 0.125583  | 0.120047 | 0.114948  | 0.180653  | 0.121066  | 0.106935  |
| 0.1081   | 0.117133  | 0.116259 | 0.102127  | 0.175408  | 0.115822  | 0.103147  |
| 0.119755 | 0.119755  | 0.117716 | 0.106498  | 0.187646  | 0.119027  | 0.0981935 |
| 0.11451  | 0.123252  | 0.122086 | 0.119027  | 0.18852   | 0.119027  | 0.117716  |
| 0.197115 | 0.198864  | 0.18954  | 0.190559  | 0.0962995 | 0.198718  | 0.186626  |
| 0.107809 | 0.118007  | 0.113345 | 0.10912   | 0.177448  | 0.114948  | 0.102273  |
| 0.191871 | 0.196241  | 0.183712 | 0.185606  | 0.092803  | 0.194639  | 0.182547  |
| 0.189977 | 0.194056  | 0.182984 | 0.182547  | 0.0914918 | 0.190997  | 0.18211   |
| 0.115967 | 0.0571096 | 0.135198 | 0.122815  | 0.199592  | 0.128351  | 0.119172  |
| 0.125874 | 0.136946  | 0.133741 | 0.130682  | 0.198718  | 0.131847  | 0.127331  |
| 0.111305 | 0.113928  | 0.112762 | 0.103001  | 0.183275  | 0.112617  | 0.090035  |
| 0.110286 | 0.118153  | 0.113491 | 0.106352  | 0.177593  | 0.114219  | 0.101836  |



|          |           |          |           |           |          |           |
|----------|-----------|----------|-----------|-----------|----------|-----------|
| 0.111597 | 0.123834  | 0.121212 | 0.111742  | 0.178904  | 0.118153 | 0.105478  |
| 0.117716 | 0.115385  | 0.11859  | 0.0490967 | 0.181235  | 0.122232 | 0.106061  |
| 0.102564 | 0.102855  | 0.118007 | 0.115239  | 0.185897  | 0.115239 | 0.108392  |
| 0.10373  | 0.104312  | 0.119755 | 0.116696  | 0.190268  | 0.116113 | 0.111597  |
| 0.125146 | 0.129808  | 0.115239 | 0.116259  | 0.188083  | 0.118007 | 0.124854  |
| 0.107226 | 0.0486597 | 0.122669 | 0.114948  | 0.192308  | 0.121066 | 0.113636  |
| 0.111451 | 0.112325  | 0.109411 | 0.0439977 | 0.179924  | 0.115093 | 0.100379  |
| 0.11655  | 0.122378  | 0.120047 | 0.114948  | 0.183566  | 0.120192 | 0.106061  |
| 0.10708  | 0.110868  | 0.11116  | 0.0981935 | 0.18109   | 0.107809 | 0.0913462 |
| 0.124417 | 0.131993  | 0.129079 | 0.124563  | 0.187354  | 0.130682 | 0.113636  |
| 0.11451  | 0.120338  | 0.119464 | 0.113199  | 0.188228  | 0.128642 | 0.117133  |
| 0.128059 | 0.135635  | 0.131847 | 0.130828  | 0.194493  | 0.132284 | 0.120484  |
| 0.258887 | 0.261801  | 0.249563 | 0.253788  | 0.133304  | 0.25845  | 0.248397  |
| 0.124854 | 0.127477  | 0.129225 | 0.130828  | 0.200903  | 0.129371 | 0.124563  |
| 0.115967 | 0.121503  | 0.127331 | 0.12602   | 0.196387  | 0.129225 | 0.123543  |
| 0.215472 | 0.221591  | 0.210519 | 0.208625  | 0.118153  | 0.215909 | 0.20877   |
| 0.119755 | 0.120047  | 0.12704  | 0.119901  | 0.194639  | 0.130099 | 0.120338  |
| 0.229895 | 0.232226  | 0.219988 | 0.222465  | 0.121503  | 0.226836 | 0.218823  |
| 0.113199 | 0.11961   | 0.120775 | 0.124126  | 0.193036  | 0.11859  | 0.11553   |
| 0.129371 | 0.121212  | 0.12704  | 0.0543415 | 0.193765  | 0.132721 | 0.117424  |
| 0.115676 | 0.120921  | 0.118298 | 0.117861  | 0.185023  | 0.116987 | 0.111597  |
| 0.112471 | 0.0492424 | 0.128788 | 0.118153  | 0.19697   | 0.125728 | 0.120338  |
| 0.201632 | 0.204837  | 0.193182 | 0.193619  | 0.0949883 | 0.201777 | 0.189685  |
| 0.126166 | 0.132284  | 0.130245 | 0.127768  | 0.191434  | 0.13039  | 0.116841  |
| 0.116841 | 0.124709  | 0.117133 | 0.11553   | 0.181235  | 0.120192 | 0.105769  |
| 0.223048 | 0.229167  | 0.216346 | 0.21824   | 0.119901  | 0.223776 | 0.212267  |
| 0.107809 | 0.108392  | 0.120921 | 0.11757   | 0.186772  | 0.121358 | 0.111597  |
| 0.195076 | 0.199446  | 0.188666 | 0.189977  | 0.0948427 | 0.197844 | 0.185752  |
| 0.109994 | 0.107663  | 0.124272 | 0.121212  | 0.189831  | 0.119755 | 0.11757   |
| 0.116987 | 0.116987  | 0.116987 | 0.0474942 | 0.183421  | 0.12296  | 0.105041  |
| 0.112471 | 0.116841  | 0.125874 | 0.105332  | 0.190559  | 0.126603 | 0.119464  |
| 0.116841 | 0.0544872 | 0.136946 | 0.122815  | 0.202506  | 0.130682 | 0.124126  |
| 0.116987 | 0.122232  | 0.112617 | 0.112179  | 0.181381  | 0.115385 | 0.112325  |
| 0.156906 | 0.165647  | 0.156323 | 0.148019  | 0.119318  | 0.157343 | 0.151661  |
| 0.109703 | 0.119027  | 0.116987 | 0.111305  | 0.17701   | 0.11655  | 0.0995047 |
| 0.11961  | 0.126311  | 0.122232 | 0.124709  | 0.188957  | 0.123834 | 0.11961   |
| 0.118735 | 0.112325  | 0.11757  | 0.11655   | 0.184586  | 0.125    | 0.119901  |
| 0.123689 | 0.131847  | 0.122815 | 0.130536  | 0.191579  | 0.125    | 0.11961   |
| 0.19493  | 0.197552  | 0.184732 | 0.185169  | 0.0903263 | 0.193619 | 0.183275  |
| 0.114656 | 0.112325  | 0.116113 | 0.0448718 | 0.17905   | 0.118881 | 0.103293  |
| 0.11014  | 0.0574009 | 0.125291 | 0.113199  | 0.180361  | 0.122232 | 0.111888  |
| 0.105332 | 0.105041  | 0.113199 | 0.11655   | 0.192453  | 0.116259 | 0.112034  |
| 0.108974 | 0.109557  | 0.125    | 0.121066  | 0.192016  | 0.121649 | 0.117716  |
| 0.122815 | 0.119027  | 0.122232 | 0.0533217 | 0.185169  | 0.125291 | 0.114073  |

|          |           |          |           |           |          |          |
|----------|-----------|----------|-----------|-----------|----------|----------|
| 0.256119 | 0.256993  | 0.245921 | 0.248106  | 0.136655  | 0.254225 | 0.248543 |
| 0.109411 | 0.109411  | 0.121066 | 0.107226  | 0.189248  | 0.119172 | 0.114365 |
| 0.118153 | 0.11961   | 0.116987 | 0.0906177 | 0.181381  | 0.104312 | 0.114656 |
| 0.178467 | 0.18109   | 0.18109  | 0.179196  | 0.137966  | 0.17803  | 0.170309 |
| 0.183129 | 0.189248  | 0.17905  | 0.178613  | 0.0919289 | 0.185606 | 0.173805 |
| 0.124272 | 0.128934  | 0.113491 | 0.111888  | 0.187209  | 0.111014 | 0.122232 |
| 0.118298 | 0.122086  | 0.123252 | 0.114073  | 0.184441  | 0.121649 | 0.107809 |
| 0.104021 | 0.0512821 | 0.120047 | 0.10912   | 0.189394  | 0.120192 | 0.108974 |
| 0.140297 | 0.148456  | 0.146125 | 0.140734  | 0.198572  | 0.144522 | 0.128934 |
| 0.119318 | 0.12398   | 0.110286 | 0.115385  | 0.183421  | 0.11014  | 0.114948 |
| 0.124417 | 0.129953  | 0.115967 | 0.114365  | 0.189685  | 0.114948 | 0.122378 |
| 0.116113 | 0.11553   | 0.128059 | 0.126748  | 0.193619  | 0.123834 | 0.123397 |
| 0.114948 | 0.121941  | 0.120484 | 0.11451   | 0.179341  | 0.121795 | 0.108537 |
| 0.12296  | 0.131993  | 0.129371 | 0.126603  | 0.187646  | 0.128059 | 0.115093 |
| 0.112325 | 0.115239  | 0.121649 | 0.117133  | 0.171474  | 0.123543 | 0.113491 |
| 0.111305 | 0.0521562 | 0.131119 | 0.118444  | 0.196387  | 0.125437 | 0.119464 |
| 0.123397 | 0.0639569 | 0.14292  | 0.13141   | 0.209062  | 0.138403 | 0.134178 |
| 0.115676 | 0.113636  | 0.125291 | 0.106789  | 0.190559  | 0.124854 | 0.118298 |
| 0.116113 | 0.0543415 | 0.135344 | 0.125583  | 0.2044    | 0.134615 | 0.125437 |
| 0.118735 | 0.116113  | 0.130973 | 0.131119  | 0.198572  | 0.132284 | 0.124563 |
| 0.203963 | 0.208042  | 0.199301 | 0.199446  | 0.0973193 | 0.206731 | 0.192016 |
| 0.121941 | 0.120775  | 0.121941 | 0.107809  | 0.194784  | 0.131702 | 0.117279 |
| 0.191288 | 0.194202  | 0.182255 | 0.181527  | 0.0895979 | 0.189977 | 0.180507 |
| 0.114073 | 0.11961   | 0.114365 | 0.11451   | 0.186043  | 0.11451  | 0.107663 |
| 0.124272 | 0.12398   | 0.126894 | 0.0539044 | 0.188666  | 0.130536 | 0.114073 |
| 0.118735 | 0.121066  | 0.125437 | 0.119755  | 0.18954   | 0.131119 | 0.124854 |
| 0.112471 | 0.119172  | 0.117424 | 0.11116   | 0.182692  | 0.124563 | 0.115093 |
| 0.119901 | 0.12602   | 0.121066 | 0.120921  | 0.179341  | 0.123834 | 0.110286 |
| 0.122232 | 0.12602   | 0.123106 | 0.119755  | 0.184586  | 0.125    | 0.111451 |
| 0.116696 | 0.11757   | 0.12398  | 0.0469114 | 0.177593  | 0.121795 | 0.106498 |
| 0.117133 | 0.126166  | 0.119464 | 0.118153  | 0.187646  | 0.120775 | 0.114219 |
| 0.119755 | 0.121795  | 0.125874 | 0.121066  | 0.192016  | 0.129225 | 0.125583 |
| 0.125146 | 0.116696  | 0.136801 | 0.133159  | 0.188957  | 0.131702 | 0.125728 |
| 0.250728 | 0.252477  | 0.241404 | 0.245338  | 0.136801  | 0.249417 | 0.240822 |
| 0.120484 | 0.118444  | 0.120775 | 0.0448718 | 0.183421  | 0.121795 | 0.108246 |
| 0.183275 | 0.185023  | 0.176573 | 0.175554  | 0.0844988 | 0.182838 | 0.171329 |
| 0.188374 | 0.189831  | 0.180507 | 0.180944  | 0.0887238 | 0.186189 | 0.178759 |
| 0.121503 | 0.126748  | 0.120338 | 0.108829  | 0.17803   | 0.118444 | 0.113054 |
| 0.109266 | 0.109557  | 0.117133 | 0.10067   | 0.185315  | 0.118735 | 0.111014 |
| 0.125874 | 0.121503  | 0.122086 | 0.0546329 | 0.189394  | 0.129808 | 0.115676 |
| 0.111597 | 0.121503  | 0.115385 | 0.110577  | 0.179487  | 0.115822 | 0.100816 |
| 0.11757  | 0.120775  | 0.116987 | 0.0944056 | 0.176719  | 0.120338 | 0.107955 |
| 0.109703 | 0.10708   | 0.120775 | 0.119464  | 0.186626  | 0.121212 | 0.116696 |
| 0.121795 | 0.125583  | 0.12296  | 0.118735  | 0.18211   | 0.125146 | 0.112179 |

|          |           |          |           |           |           |           |
|----------|-----------|----------|-----------|-----------|-----------|-----------|
| 0.126457 | 0.135198  | 0.131993 | 0.128351  | 0.194056  | 0.132139  | 0.117716  |
| 0.117279 | 0.115239  | 0.118735 | 0.0463287 | 0.181964  | 0.121503  | 0.106789  |
| 0.12602  | 0.131847  | 0.13039  | 0.127622  | 0.191579  | 0.130828  | 0.116404  |
| 0.108683 | 0.111888  | 0.11655  | 0.11757   | 0.189103  | 0.121066  | 0.109848  |
| 0.121503 | 0.124126  | 0.128205 | 0.121941  | 0.194347  | 0.133596  | 0.127914  |
| 0.109411 | 0.050845  | 0.125146 | 0.11655   | 0.189248  | 0.124126  | 0.111451  |
| 0.119755 | 0.118881  | 0.135198 | 0.132139  | 0.20134   | 0.13243   | 0.12704   |
| 0.127185 | 0.12602   | 0.124563 | 0.112762  | 0.190414  | 0.124417  | 0.107663  |
| 0.11757  | 0.113782  | 0.118735 | 0.0594406 | 0.17905   | 0.121212  | 0.105041  |
| 0.125437 | 0.130973  | 0.132721 | 0.129662  | 0.198281  | 0.100524  | 0.128642  |
| 0.182692 | 0.187937  | 0.176573 | 0.176719  | 0.0906177 | 0.186334  | 0.172203  |
| 0.131556 | 0.139132  | 0.133887 | 0.131119  | 0.197698  | 0.136364  | 0.124563  |
| 0.116113 | 0.125437  | 0.120484 | 0.119172  | 0.183129  | 0.12296   | 0.110577  |
| 0.115093 | 0.120629  | 0.122669 | 0.115822  | 0.190268  | 0.126894  | 0.12296   |
| 0.107955 | 0.114656  | 0.112325 | 0.1081    | 0.184295  | 0.122086  | 0.109703  |
| 0.107809 | 0.0463287 | 0.12704  | 0.113199  | 0.188811  | 0.118153  | 0.113928  |
| 0.110577 | 0.0467657 | 0.130682 | 0.119755  | 0.195659  | 0.125583  | 0.120192  |
| 0.189685 | 0.191142  | 0.183275 | 0.181672  | 0.0920746 | 0.18954   | 0.179487  |
| 0.122086 | 0.122378  | 0.122669 | 0.116696  | 0.174825  | 0.119901  | 0.100524  |
| 0.117279 | 0.114656  | 0.113491 | 0.107517  | 0.160693  | 0.112179  | 0.0965909 |
| 0.121066 | 0.127768  | 0.12398  | 0.121795  | 0.186043  | 0.127331  | 0.113199  |
| 0.189977 | 0.196096  | 0.183858 | 0.183129  | 0.092366  | 0.191579  | 0.179196  |
| 0.106498 | 0.10708   | 0.116113 | 0.0976107 | 0.176428  | 0.11451   | 0.106206  |
| 0.11655  | 0.111888  | 0.130245 | 0.127185  | 0.196387  | 0.12602   | 0.123252  |
| 0.119172 | 0.126166  | 0.124126 | 0.120484  | 0.187937  | 0.124563  | 0.113054  |
| 0.119027 | 0.122815  | 0.108829 | 0.11014   | 0.188083  | 0.11014   | 0.114365  |
| 0.186043 | 0.188666  | 0.179633 | 0.179779  | 0.0866841 | 0.188228  | 0.176136  |
| 0.110286 | 0.10912   | 0.126603 | 0.121795  | 0.187209  | 0.120629  | 0.117279  |
| 0.112034 | 0.114948  | 0.116696 | 0.11014   | 0.177302  | 0.0944056 | 0.111742  |
| 0.103875 | 0.110286  | 0.117279 | 0.102273  | 0.17264   | 0.113054  | 0.10708   |
| 0.118735 | 0.127477  | 0.124563 | 0.119755  | 0.162733  | 0.123543  | 0.114073  |
| 0.115676 | 0.125874  | 0.125    | 0.123106  | 0.192016  | 0.123397  | 0.119172  |
| 0.115093 | 0.114802  | 0.133159 | 0.128934  | 0.198718  | 0.130973  | 0.126748  |
| 0.115093 | 0.113054  | 0.117424 | 0.0467657 | 0.182692  | 0.121941  | 0.104021  |
| 0.124709 | 0.123543  | 0.128788 | 0.122815  | 0.191434  | 0.122815  | 0.111305  |
| 0.14729  | 0.153409  | 0.137966 | 0.140443  | 0.20236   | 0.136655  | 0.143211  |
| 0.234703 | 0.237617  | 0.226836 | 0.229895  | 0.121066  | 0.236597  | 0.22567   |
| 0.131847 | 0.125437  | 0.128934 | 0.117424  | 0.199155  | 0.129079  | 0.109994  |
| 0.117279 | 0.124854  | 0.123397 | 0.123543  | 0.188083  | 0.123543  | 0.121358  |
| 0.114802 | 0.119755  | 0.123834 | 0.115239  | 0.178322  | 0.121066  | 0.105186  |
| 0.123397 | 0.129516  | 0.050845 | 0.120338  | 0.179633  | 0.119172  | 0.116404  |
| 0.108974 | 0.118007  | 0.118881 | 0.119027  | 0.184149  | 0.118444  | 0.113928  |
| 0.114219 | 0.116841  | 0.126748 | 0.119318  | 0.18648   | 0.125728  | 0.111014  |
| 0.120484 | 0.129225  | 0.12398  | 0.11859   | 0.183712  | 0.128205  | 0.112325  |

|          |          |          |           |           |          |           |
|----------|----------|----------|-----------|-----------|----------|-----------|
| 0.118007 | 0.115093 | 0.131993 | 0.127477  | 0.193182  | 0.128934 | 0.124126  |
| 0.119172 | 0.12296  | 0.111305 | 0.112034  | 0.182984  | 0.114073 | 0.113345  |
| 0.238782 | 0.238491 | 0.228584 | 0.230478  | 0.12398   | 0.237179 | 0.227127  |
| 0.104312 | 0.105769 | 0.115676 | 0.0962995 | 0.177448  | 0.114948 | 0.110431  |
| 0.104021 | 0.108683 | 0.111597 | 0.111742  | 0.181527  | 0.110577 | 0.108392  |
| 0.112908 | 0.110868 | 0.118444 | 0.04662   | 0.181964  | 0.119755 | 0.10271   |
| 0.134033 | 0.140152 | 0.120629 | 0.125146  | 0.19697   | 0.120775 | 0.128497  |
| 0.136655 | 0.13549  | 0.132576 | 0.121941  | 0.202506  | 0.133304 | 0.113928  |
| 0.122086 | 0.127914 | 0.120629 | 0.103875  | 0.178322  | 0.124563 | 0.112471  |
| 0.119464 | 0.124126 | 0.123252 | 0.114656  | 0.178904  | 0.122523 | 0.107226  |
| 0.115822 | 0.120484 | 0.10912  | 0.106643  | 0.181381  | 0.110431 | 0.108246  |
| 0.230332 | 0.234994 | 0.221882 | 0.22465   | 0.121941  | 0.232226 | 0.21926   |
| 0.122523 | 0.129516 | 0.125437 | 0.123252  | 0.188666  | 0.128788 | 0.113491  |
| 0.115385 | 0.111014 | 0.128205 | 0.124563  | 0.194056  | 0.124563 | 0.120047  |
| 0.110431 | 0.113636 | 0.109557 | 0.107663  | 0.18211   | 0.109411 | 0.107226  |
| 0.123689 | 0.12602  | 0.129225 | 0.120629  | 0.194202  | 0.130536 | 0.11757   |
| 0.117861 | 0.122523 | 0.123106 | 0.127331  | 0.196824  | 0.125291 | 0.122815  |
| 0.117279 | 0.113491 | 0.119027 | 0.0492424 | 0.183712  | 0.120921 | 0.107955  |
| 0.116987 | 0.112908 | 0.129516 | 0.125     | 0.193036  | 0.126166 | 0.120484  |
| 0.120047 | 0.118298 | 0.132576 | 0.134178  | 0.200758  | 0.128642 | 0.126457  |
| 0.108392 | 0.107517 | 0.12296  | 0.116696  | 0.19289   | 0.121358 | 0.115093  |
| 0.115822 | 0.11553  | 0.11757  | 0.0454545 | 0.182838  | 0.120629 | 0.10708   |
| 0.122232 | 0.129225 | 0.130099 | 0.12704   | 0.195076  | 0.126166 | 0.128934  |
| 0.125583 | 0.134324 | 0.134324 | 0.133596  | 0.199009  | 0.133596 | 0.130245  |
| 0.120921 | 0.126166 | 0.129079 | 0.125437  | 0.196678  | 0.133596 | 0.129953  |
| 0.127331 | 0.127914 | 0.133159 | 0.12602   | 0.196387  | 0.13884  | 0.132576  |
| 0.126894 | 0.133887 | 0.132139 | 0.131993  | 0.201486  | 0.130536 | 0.128059  |
| 0.113782 | 0.112908 | 0.114656 | 0.0862471 | 0.184295  | 0.117424 | 0.103293  |
| 0.124417 | 0.117716 | 0.135781 | 0.136509  | 0.206002  | 0.130682 | 0.126166  |
| 0.135052 | 0.13447  | 0.134178 | 0.123543  | 0.200903  | 0.134615 | 0.128351  |
| 0.204691 | 0.210227 | 0.198572 | 0.197844  | 0.100962  | 0.205128 | 0.196824  |
| 0.12398  | 0.126311 | 0.12398  | 0.112179  | 0.189248  | 0.131993 | 0.0607517 |
| 0.109994 | 0.114656 | 0.113782 | 0.116259  | 0.188666  | 0.113928 | 0.112034  |
| 0.122378 | 0.120629 | 0.121503 | 0.0493881 | 0.179196  | 0.126311 | 0.110723  |
| 0.225962 | 0.224796 | 0.214015 | 0.217075  | 0.114656  | 0.221445 | 0.214015  |
| 0.211976 | 0.214889 | 0.202652 | 0.203089  | 0.105624  | 0.212704 | 0.201195  |
| 0.11859  | 0.118298 | 0.130536 | 0.129808  | 0.195513  | 0.129808 | 0.125     |
| 0.249272 | 0.251894 | 0.239656 | 0.242133  | 0.130682  | 0.248252 | 0.240239  |
| 0.117279 | 0.115822 | 0.110577 | 0.0879953 | 0.18546   | 0.11451  | 0.106498  |
| 0.129808 | 0.14088  | 0.139423 | 0.12704   | 0.203526  | 0.135781 | 0.135052  |
| 0.108537 | 0.107663 | 0.117861 | 0.0996503 | 0.183712  | 0.117716 | 0.114073  |
| 0.122378 | 0.130536 | 0.130536 | 0.127768  | 0.196387  | 0.129516 | 0.122669  |
| 0.186043 | 0.193328 | 0.180216 | 0.180653  | 0.0852273 | 0.189685 | 0.174679  |
| 0.118298 | 0.119172 | 0.119755 | 0.116113  | 0.187937  | 0.122523 | 0.11859   |

|          |           |          |           |           |           |           |
|----------|-----------|----------|-----------|-----------|-----------|-----------|
| 0.193182 | 0.19697   | 0.187354 | 0.184003  | 0.0935315 | 0.192745  | 0.182984  |
| 0.120921 | 0.123543  | 0.115093 | 0.104458  | 0.189394  | 0.114073  | 0.107517  |
| 0.115093 | 0.114802  | 0.123834 | 0.116987  | 0.17162   | 0.123397  | 0.11014   |
| 0.126457 | 0.129371  | 0.125583 | 0.116113  | 0.187063  | 0.128059  | 0.119464  |
| 0.115093 | 0.120338  | 0.121503 | 0.106498  | 0.171037  | 0.114073  | 0.113345  |
| 0.109994 | 0.110868  | 0.111451 | 0.0425408 | 0.179341  | 0.115967  | 0.099796  |
| 0.112617 | 0.117861  | 0.114365 | 0.10373   | 0.183129  | 0.123252  | 0.0453089 |
| 0.104167 | 0.103875  | 0.114656 | 0.0952797 | 0.176136  | 0.112471  | 0.106498  |
| 0.112471 | 0.121212  | 0.11655  | 0.110868  | 0.178904  | 0.118735  | 0.102855  |
| 0.110868 | 0.108537  | 0.119318 | 0.11655   | 0.194784  | 0.119755  | 0.113199  |
| 0.121358 | 0.117861  | 0.114656 | 0.105478  | 0.186626  | 0.118007  | 0.0957168 |
| 0.105478 | 0.108392  | 0.118007 | 0.099796  | 0.179779  | 0.116404  | 0.109266  |
| 0.11961  | 0.121066  | 0.121649 | 0.10169   | 0.184878  | 0.128497  | 0.11757   |
| 0.128642 | 0.132721  | 0.130973 | 0.125583  | 0.192453  | 0.130245  | 0.116696  |
| 0.1081   | 0.11655   | 0.114802 | 0.112617  | 0.183566  | 0.126894  | 0.113345  |
| 0.112908 | 0.11757   | 0.117861 | 0.112471  | 0.184878  | 0.087704  | 0.108537  |
| 0.110431 | 0.112762  | 0.113054 | 0.03919   | 0.176573  | 0.113199  | 0.103438  |
| 0.112471 | 0.109848  | 0.122086 | 0.122523  | 0.184732  | 0.120484  | 0.114219  |
| 0.115676 | 0.124417  | 0.122378 | 0.118735  | 0.18852   | 0.119027  | 0.119464  |
| 0.109411 | 0.0473485 | 0.126894 | 0.114802  | 0.193619  | 0.124417  | 0.114948  |
| 0.114656 | 0.118153  | 0.123106 | 0.115676  | 0.188666  | 0.127331  | 0.117861  |
| 0.115676 | 0.122378  | 0.120047 | 0.116113  | 0.181818  | 0.119901  | 0.109266  |
| 0.124854 | 0.131847  | 0.131265 | 0.126457  | 0.193036  | 0.130245  | 0.118735  |
| 0.13447  | 0.140589  | 0.135635 | 0.133159  | 0.200029  | 0.137529  | 0.125728  |
| 0.103147 | 0.102855  | 0.118007 | 0.107372  | 0.182692  | 0.116696  | 0.104021  |
| 0.115385 | 0.11859   | 0.114802 | 0.0467657 | 0.181527  | 0.121066  | 0.107809  |
| 0.105915 | 0.114948  | 0.114656 | 0.111014  | 0.179633  | 0.118007  | 0.103293  |
| 0.126603 | 0.135635  | 0.133596 | 0.137238  | 0.199738  | 0.132576  | 0.129225  |
| 0.112179 | 0.110431  | 0.118298 | 0.103293  | 0.189103  | 0.121358  | 0.115676  |
| 0.124417 | 0.0611888 | 0.148019 | 0.132721  | 0.208333  | 0.136801  | 0.134324  |
| 0.134907 | 0.131993  | 0.13345  | 0.0627914 | 0.197261  | 0.139132  | 0.124417  |
| 0.13039  | 0.136218  | 0.117861 | 0.120047  | 0.18954   | 0.118007  | 0.12398   |
| 0.115093 | 0.118298  | 0.114219 | 0.101253  | 0.18648   | 0.118153  | 0.103147  |
| 0.110868 | 0.118153  | 0.106498 | 0.115385  | 0.182547  | 0.114219  | 0.103584  |
| 0.120192 | 0.12602   | 0.128934 | 0.121212  | 0.19391   | 0.134907  | 0.126603  |
| 0.205711 | 0.210082  | 0.198718 | 0.201486  | 0.110431  | 0.209353  | 0.19697   |
| 0.108974 | 0.115676  | 0.118298 | 0.112325  | 0.180361  | 0.0910548 | 0.109266  |
| 0.124272 | 0.120775  | 0.121066 | 0.110723  | 0.187791  | 0.125874  | 0.116987  |
| 0.115676 | 0.126748  | 0.12296  | 0.121941  | 0.189977  | 0.12398   | 0.117716  |
| 0.112325 | 0.120775  | 0.117861 | 0.115967  | 0.185752  | 0.128497  | 0.118444  |
| 0.121795 | 0.124709  | 0.118298 | 0.109703  | 0.190559  | 0.11961   | 0.112471  |
| 0.126166 | 0.122378  | 0.126748 | 0.123689  | 0.188228  | 0.124563  | 0.103438  |
| 0.130099 | 0.12602   | 0.128351 | 0.12704   | 0.191288  | 0.121795  | 0.104458  |
| 0.123543 | 0.127331  | 0.111888 | 0.118153  | 0.187937  | 0.112908  | 0.121503  |

|           |          |          |           |          |          |           |
|-----------|----------|----------|-----------|----------|----------|-----------|
| 0.0990676 | 0.10373  | 0.11655  | 0.114365  | 0.188811 | 0.114365 | 0.111305  |
| 0.122669  | 0.130245 | 0.129953 | 0.128642  | 0.196096 | 0.128351 | 0.124417  |
| 0.122378  | 0.122378 | 0.122669 | 0.111116  | 0.189685 | 0.12398  | 0.113928  |
| 0.122232  | 0.124272 | 0.119027 | 0.109848  | 0.192162 | 0.122669 | 0.101544  |
| 0.180653  | 0.179779 | 0.173368 | 0.171766  | 0.164627 | 0.175845 | 0.173368  |
| 0.115093  | 0.124417 | 0.117716 | 0.114948  | 0.183566 | 0.121649 | 0.105769  |
| 0.124563  | 0.129808 | 0.131556 | 0.131702  | 0.184003 | 0.130245 | 0.126894  |
| 0.123834  | 0.11859  | 0.129953 | 0.113199  | 0.199009 | 0.13039  | 0.118881  |
| 0.126603  | 0.126603 | 0.124854 | 0.121503  | 0.188083 | 0.12704  | 0.117279  |
| 0.110868  | 0.111742 | 0.116113 | 0.103438  | 0.184295 | 0.110431 | 0.092803  |
| 0.109411  | 0.113491 | 0.111451 | 0.100524  | 0.182255 | 0.110723 | 0.0910548 |
| 0.116696  | 0.114948 | 0.120192 | 0.106935  | 0.187791 | 0.113345 | 0.0971737 |
| 0.126311  | 0.125728 | 0.12602  | 0.122669  | 0.192453 | 0.125874 | 0.120775  |
| 0.11757   | 0.122232 | 0.116987 | 0.109848  | 0.178759 | 0.118298 | 0.101253  |
| 0.122086  | 0.125583 | 0.136364 | 0.121358  | 0.200758 | 0.130973 | 0.126457  |
| 0.110286  | 0.111451 | 0.112325 | 0.108683  | 0.178759 | 0.121503 | 0.105624  |
| 0.11014   | 0.112179 | 0.122086 | 0.115239  | 0.183275 | 0.124272 | 0.112471  |
| 0.127185  | 0.130973 | 0.132721 | 0.127331  | 0.201486 | 0.133741 | 0.126894  |
| 0.121066  | 0.115239 | 0.122232 | 0.111888  | 0.194784 | 0.122086 | 0.110868  |
| 0.113782  | 0.120484 | 0.13039  | 0.120338  | 0.193036 | 0.129662 | 0.119318  |
| 0.116696  | 0.107955 | 0.114365 | 0.103147  | 0.189248 | 0.115967 | 0.107663  |
| 0.120775  | 0.114365 | 0.121358 | 0.108974  | 0.193328 | 0.117424 | 0.108537  |
| 0.11116   | 0.11116  | 0.112034 | 0.0987762 | 0.182255 | 0.115967 | 0.103001  |
| 0.125     | 0.115093 | 0.127914 | 0.111451  | 0.195804 | 0.128059 | 0.113054  |
| 0.111597  | 0.104312 | 0.11655  | 0.102418  | 0.187354 | 0.11757  | 0.1081    |
| 0.129953  | 0.134033 | 0.146853 | 0.141463  | 0.200758 | 0.143794 | 0.139277  |
| 0.122669  | 0.129371 | 0.128788 | 0.12602   | 0.188811 | 0.131847 | 0.127622  |
| 0.106061  | 0.106643 | 0.120629 | 0.104167  | 0.187354 | 0.120484 | 0.105186  |
| 0.116113  | 0.126603 | 0.139132 | 0.139569  | 0.205565 | 0.136364 | 0.128934  |
| 0.120775  | 0.125728 | 0.110868 | 0.117133  | 0.1875   | 0.12296  | 0.11961   |
| 0.137966  | 0.13884  | 0.134178 | 0.133159  | 0.200029 | 0.133741 | 0.130973  |
| 0.116696  | 0.103293 | 0.120775 | 0.104604  | 0.189248 | 0.117133 | 0.112325  |
| 0.145396  | 0.142774 | 0.143357 | 0.14088   | 0.199883 | 0.150204 | 0.142191  |
| 0.12296   | 0.127622 | 0.122378 | 0.128351  | 0.187063 | 0.127768 | 0.127914  |
| 0.130828  | 0.135781 | 0.138695 | 0.135052  | 0.195804 | 0.137092 | 0.137821  |
| 0.124709  | 0.121795 | 0.115676 | 0.119027  | 0.199009 | 0.125728 | 0.119755  |
| 0.114656  | 0.113199 | 0.116696 | 0.101981  | 0.18954  | 0.117133 | 0.10912   |
| 0.113636  | 0.114802 | 0.120047 | 0.103584  | 0.183858 | 0.116987 | 0.109557  |
| 0.118153  | 0.119027 | 0.122232 | 0.119172  | 0.192745 | 0.116259 | 0.11757   |
| 0.120192  | 0.115239 | 0.127185 | 0.117133  | 0.198572 | 0.124126 | 0.119318  |
| 0.121503  | 0.120629 | 0.129662 | 0.119027  | 0.204254 | 0.132139 | 0.122086  |
| 0.117133  | 0.122669 | 0.124709 | 0.116404  | 0.18648  | 0.125437 | 0.120921  |
| 0.113928  | 0.112762 | 0.11451  | 0.10708   | 0.185897 | 0.11116  | 0.108392  |
| 0.115822  | 0.111451 | 0.117279 | 0.102855  | 0.18546  | 0.117424 | 0.108829  |

|          |          |          |           |          |          |           |
|----------|----------|----------|-----------|----------|----------|-----------|
| 0.12296  | 0.121503 | 0.123252 | 0.109994  | 0.191434 | 0.122815 | 0.113636  |
| 0.116841 | 0.113345 | 0.119172 | 0.10067   | 0.183566 | 0.121358 | 0.110723  |
| 0.122815 | 0.120775 | 0.125146 | 0.111305  | 0.192745 | 0.121795 | 0.114656  |
| 0.116696 | 0.105332 | 0.11757  | 0.104312  | 0.186043 | 0.118298 | 0.106498  |
| 0.119755 | 0.127331 | 0.119755 | 0.106206  | 0.17803  | 0.123689 | 0.111305  |
| 0.124417 | 0.122669 | 0.117133 | 0.103001  | 0.187937 | 0.114656 | 0.101981  |
| 0.113636 | 0.112471 | 0.111305 | 0.0863928 | 0.182692 | 0.117279 | 0.102273  |
| 0.117424 | 0.118007 | 0.115385 | 0.102127  | 0.185897 | 0.119318 | 0.106935  |
| 0.120192 | 0.124563 | 0.116404 | 0.102564  | 0.177302 | 0.119172 | 0.110286  |
| 0.122669 | 0.117424 | 0.12296  | 0.106789  | 0.185897 | 0.119901 | 0.0990676 |
| 0.126748 | 0.121503 | 0.123252 | 0.122232  | 0.18211  | 0.116696 | 0.107517  |
| 0.111014 | 0.117133 | 0.109848 | 0.0968823 | 0.172203 | 0.117861 | 0.099359  |
| 0.130973 | 0.129225 | 0.132139 | 0.124709  | 0.200029 | 0.13345  | 0.115822  |

| TDr_2084 | TDr_2090  | TDr_2094  | TDr_2104  | TDr_2106 | TDr_2110 | TDr_2119  |
|----------|-----------|-----------|-----------|----------|----------|-----------|
| 0.192453 | 0.134178  | 0.117424  | 0.11451   | 0.133304 | 0.171183 | 0.124709  |
| 0.198427 | 0.120338  | 0.10271   | 0.0980478 | 0.128788 | 0.176573 | 0.121358  |
| 0.19493  | 0.117133  | 0.097465  | 0.0942599 | 0.120629 | 0.174825 | 0.116987  |
| 0.206294 | 0.119464  | 0.106206  | 0.102127  | 0.111014 | 0.182692 | 0.11961   |
| 0.216783 | 0.130828  | 0.133013  | 0.132139  | 0.133741 | 0.202797 | 0.131556  |
| 0.209207 | 0.134615  | 0.122815  | 0.120484  | 0.13549  | 0.189394 | 0.135927  |
| 0.215181 | 0.13039   | 0.118298  | 0.119172  | 0.133887 | 0.195076 | 0.115967  |
| 0.198572 | 0.119027  | 0.107809  | 0.099359  | 0.121649 | 0.174679 | 0.119172  |
| 0.204254 | 0.115967  | 0.106206  | 0.0986305 | 0.124709 | 0.17803  | 0.110868  |
| 0.204108 | 0.123689  | 0.0909091 | 0.0862471 | 0.130682 | 0.184003 | 0.121212  |
| 0.193473 | 0.129371  | 0.110286  | 0.107955  | 0.140443 | 0.171037 | 0.118735  |
| 0.202943 | 0.11116   | 0.113636  | 0.107517  | 0.121649 | 0.177302 | 0.106352  |
| 0.207022 | 0.124272  | 0.103147  | 0.0984848 | 0.129225 | 0.187791 | 0.111597  |
| 0.163753 | 0.144814  | 0.123689  | 0.123106  | 0.142774 | 0.142774 | 0.144668  |
| 0.211684 | 0.135927  | 0.0518648 | 0.0550699 | 0.139132 | 0.190414 | 0.134615  |
| 0.21183  | 0.130828  | 0.10912   | 0.105332  | 0.129079 | 0.189977 | 0.10912   |
| 0.205565 | 0.0962995 | 0.11014   | 0.105478  | 0.133887 | 0.18546  | 0.102855  |
| 0.222319 | 0.139569  | 0.140006  | 0.13884   | 0.139277 | 0.205711 | 0.152535  |
| 0.194056 | 0.117133  | 0.100962  | 0.0980478 | 0.124417 | 0.173368 | 0.114073  |
| 0.132576 | 0.207168  | 0.173223  | 0.171474  | 0.200175 | 0.139277 | 0.211684  |
| 0.213141 | 0.121941  | 0.113345  | 0.113928  | 0.145542 | 0.188083 | 0.129371  |
| 0.214452 | 0.117424  | 0.114656  | 0.113199  | 0.138112 | 0.190268 | 0.129225  |
| 0.201195 | 0.120775  | 0.108974  | 0.105186  | 0.126311 | 0.178759 | 0.0935315 |
| 0.219406 | 0.127331  | 0.129516  | 0.12398   | 0.138403 | 0.199009 | 0.105624  |
| 0.199155 | 0.115239  | 0.100816  | 0.0955711 | 0.124854 | 0.174971 | 0.102273  |
| 0.214598 | 0.129516  | 0.125     | 0.120921  | 0.140297 | 0.19391  | 0.13345   |
| 0.214889 | 0.126311  | 0.119755  | 0.118007  | 0.137675 | 0.193036 | 0.120921  |
| 0.221008 | 0.119318  | 0.11859   | 0.112179  | 0.131556 | 0.198281 | 0.107517  |
| 0.216929 | 0.132721  | 0.132284  | 0.127914  | 0.14088  | 0.192745 | 0.125583  |
| 0.21722  | 0.124272  | 0.11655   | 0.112762  | 0.137675 | 0.194784 | 0.12296   |
| 0.210082 | 0.128788  | 0.112034  | 0.112034  | 0.135781 | 0.189977 | 0.123689  |
| 0.213724 | 0.120775  | 0.117716  | 0.109557  | 0.13447  | 0.192745 | 0.116841  |
| 0.196824 | 0.116404  | 0.0984848 | 0.0949883 | 0.121941 | 0.177302 | 0.11451   |
| 0.209353 | 0.129516  | 0.114802  | 0.111597  | 0.135344 | 0.1875   | 0.117716  |
| 0.217949 | 0.129079  | 0.123106  | 0.115239  | 0.136946 | 0.194347 | 0.113782  |
| 0.219551 | 0.133596  | 0.126166  | 0.125583  | 0.140589 | 0.19799  | 0.122669  |
| 0.228147 | 0.13549   | 0.128351  | 0.125728  | 0.144231 | 0.202797 | 0.130682  |
| 0.215472 | 0.120484  | 0.119172  | 0.117716  | 0.142337 | 0.194493 | 0.115385  |
| 0.206439 | 0.114948  | 0.106935  | 0.102564  | 0.130682 | 0.182255 | 0.0938228 |
| 0.217512 | 0.128642  | 0.119755  | 0.113636  | 0.13243  | 0.192162 | 0.1081    |
| 0.207314 | 0.120484  | 0.111014  | 0.104021  | 0.126603 | 0.181964 | 0.100816  |
| 0.227127 | 0.144668  | 0.133741  | 0.129662  | 0.147582 | 0.205274 | 0.128205  |



|          |          |          |          |          |          |           |
|----------|----------|----------|----------|----------|----------|-----------|
| 0.22567  | 0.148747 | 0.141608 | 0.139569 | 0.153118 | 0.203817 | 0.127914  |
| 0.208042 | 0.124709 | 0.11553  | 0.109411 | 0.132576 | 0.184149 | 0.105332  |
| 0.206876 | 0.108392 | 0.110286 | 0.101544 | 0.132576 | 0.183858 | 0.101836  |
| 0.218677 | 0.125437 | 0.111597 | 0.105769 | 0.14088  | 0.198864 | 0.112471  |
| 0.210227 | 0.115239 | 0.113345 | 0.108974 | 0.136509 | 0.189831 | 0.106352  |
| 0.225524 | 0.140734 | 0.133304 | 0.128351 | 0.148601 | 0.203963 | 0.123689  |
| 0.212704 | 0.120921 | 0.112908 | 0.107372 | 0.131119 | 0.191434 | 0.107663  |
| 0.20877  | 0.123397 | 0.11014  | 0.104312 | 0.133887 | 0.184586 | 0.104895  |
| 0.225524 | 0.149184 | 0.145251 | 0.141754 | 0.153846 | 0.206294 | 0.148164  |
| 0.212413 | 0.121503 | 0.124854 | 0.123397 | 0.138986 | 0.196096 | 0.116404  |
| 0.209062 | 0.123397 | 0.115967 | 0.111597 | 0.132721 | 0.184878 | 0.0941142 |
| 0.216929 | 0.133887 | 0.115385 | 0.111014 | 0.132139 | 0.196824 | 0.130828  |
| 0.196533 | 0.126311 | 0.116259 | 0.108683 | 0.105041 | 0.173223 | 0.111014  |
| 0.232372 | 0.135927 | 0.140443 | 0.13986  | 0.142045 | 0.211976 | 0.120047  |
| 0.222028 | 0.138986 | 0.125146 | 0.123106 | 0.140443 | 0.199009 | 0.111116  |
| 0.212995 | 0.118007 | 0.114365 | 0.107955 | 0.133159 | 0.186189 | 0.0986305 |
| 0.206585 | 0.124126 | 0.112034 | 0.108829 | 0.139277 | 0.184149 | 0.109703  |
| 0.218386 | 0.129808 | 0.113636 | 0.11014  | 0.136509 | 0.198864 | 0.111597  |
| 0.227418 | 0.145251 | 0.13549  | 0.132284 | 0.142337 | 0.206731 | 0.117133  |
| 0.231498 | 0.150204 | 0.134615 | 0.131702 | 0.140589 | 0.209936 | 0.125874  |
| 0.174242 | 0.174242 | 0.156906 | 0.150787 | 0.166084 | 0.158508 | 0.15778   |
| 0.208625 | 0.121795 | 0.110868 | 0.107663 | 0.132576 | 0.184441 | 0.101836  |
| 0.209499 | 0.120629 | 0.111451 | 0.107663 | 0.132576 | 0.185606 | 0.095134  |
| 0.211538 | 0.115967 | 0.11553  | 0.111116 | 0.131119 | 0.186772 | 0.0977564 |
| 0.214889 | 0.143794 | 0.136364 | 0.131993 | 0.151661 | 0.197115 | 0.135781  |
| 0.20877  | 0.122232 | 0.108392 | 0.104604 | 0.129516 | 0.183712 | 0.101107  |
| 0.21824  | 0.130828 | 0.13039  | 0.128351 | 0.13986  | 0.197261 | 0.119318  |
| 0.216492 | 0.126457 | 0.111451 | 0.107372 | 0.138695 | 0.199301 | 0.105332  |
| 0.206439 | 0.120484 | 0.113345 | 0.109557 | 0.13884  | 0.182547 | 0.099359  |
| 0.218677 | 0.148456 | 0.143065 | 0.138986 | 0.149621 | 0.197407 | 0.147727  |
| 0.217512 | 0.13243  | 0.120338 | 0.117424 | 0.137966 | 0.193036 | 0.10169   |
| 0.226981 | 0.145688 | 0.131847 | 0.129225 | 0.14627  | 0.206585 | 0.123689  |
| 0.214889 | 0.122815 | 0.126748 | 0.126457 | 0.142628 | 0.196241 | 0.119464  |
| 0.202214 | 0.101399 | 0.111451 | 0.10912  | 0.125    | 0.179487 | 0.115239  |
| 0.205711 | 0.123252 | 0.113491 | 0.108829 | 0.132867 | 0.183275 | 0.0948427 |
| 0.212121 | 0.121795 | 0.111451 | 0.108829 | 0.134324 | 0.189103 | 0.103875  |
| 0.22465  | 0.134033 | 0.130682 | 0.131847 | 0.138695 | 0.201923 | 0.113782  |
| 0.209062 | 0.12398  | 0.113636 | 0.110431 | 0.134761 | 0.186334 | 0.100816  |
| 0.226981 | 0.142483 | 0.136509 | 0.133596 | 0.143357 | 0.202797 | 0.126894  |
| 0.210082 | 0.130828 | 0.118735 | 0.112325 | 0.142774 | 0.189103 | 0.111742  |
| 0.215618 | 0.121795 | 0.118444 | 0.112908 | 0.127914 | 0.194056 | 0.0983392 |
| 0.211247 | 0.123834 | 0.113782 | 0.10912  | 0.137238 | 0.186189 | 0.102127  |
| 0.2162   | 0.130245 | 0.116113 | 0.114073 | 0.134907 | 0.191434 | 0.103584  |
| 0.210664 | 0.11859  | 0.113491 | 0.108537 | 0.134324 | 0.186189 | 0.10271   |

|          |          |           |           |          |          |           |
|----------|----------|-----------|-----------|----------|----------|-----------|
| 0.210664 | 0.123252 | 0.11553   | 0.112325  | 0.130828 | 0.185897 | 0.097465  |
| 0.225379 | 0.144959 | 0.135198  | 0.13345   | 0.142045 | 0.203817 | 0.120338  |
| 0.208188 | 0.116987 | 0.105769  | 0.099359  | 0.137966 | 0.185169 | 0.103147  |
| 0.211247 | 0.12296  | 0.107372  | 0.104749  | 0.13345  | 0.187646 | 0.111116  |
| 0.220571 | 0.127914 | 0.119901  | 0.113782  | 0.138986 | 0.197261 | 0.128351  |
| 0.217657 | 0.131119 | 0.124563  | 0.12398   | 0.143939 | 0.194056 | 0.123106  |
| 0.224068 | 0.12704  | 0.126894  | 0.121941  | 0.143648 | 0.203963 | 0.125146  |
| 0.229458 | 0.137383 | 0.134033  | 0.128788  | 0.147873 | 0.212558 | 0.134324  |
| 0.204545 | 0.122669 | 0.114656  | 0.11553   | 0.135781 | 0.185023 | 0.120775  |
| 0.154429 | 0.183858 | 0.18109   | 0.174971  | 0.185897 | 0.155303 | 0.187791  |
| 0.210519 | 0.111451 | 0.1081    | 0.101399  | 0.130099 | 0.187209 | 0.111014  |
| 0.225233 | 0.137238 | 0.128351  | 0.124563  | 0.147436 | 0.204545 | 0.129225  |
| 0.22028  | 0.130536 | 0.121649  | 0.114948  | 0.1419   | 0.199009 | 0.122232  |
| 0.227418 | 0.133304 | 0.131993  | 0.128497  | 0.149913 | 0.204983 | 0.13141   |
| 0.212995 | 0.118881 | 0.10912   | 0.101836  | 0.13549  | 0.188228 | 0.110286  |
| 0.225816 | 0.129953 | 0.13039   | 0.123397  | 0.143939 | 0.206585 | 0.124272  |
| 0.214161 | 0.111014 | 0.111742  | 0.108246  | 0.136364 | 0.190559 | 0.116113  |
| 0.213141 | 0.126894 | 0.118881  | 0.11655   | 0.137383 | 0.193328 | 0.121503  |
| 0.212558 | 0.126603 | 0.113636  | 0.107809  | 0.130682 | 0.188957 | 0.111888  |
| 0.224796 | 0.133887 | 0.134907  | 0.130536  | 0.148164 | 0.207896 | 0.127622  |
| 0.208188 | 0.119027 | 0.1081    | 0.102564  | 0.135344 | 0.186626 | 0.0987762 |
| 0.219406 | 0.134907 | 0.133596  | 0.126311  | 0.138695 | 0.198427 | 0.133013  |
| 0.212267 | 0.114365 | 0.115676  | 0.113636  | 0.13243  | 0.188666 | 0.117716  |
| 0.221737 | 0.139277 | 0.129225  | 0.126311  | 0.138986 | 0.202506 | 0.117279  |
| 0.218677 | 0.134178 | 0.122378  | 0.115967  | 0.146125 | 0.198572 | 0.125291  |
| 0.209936 | 0.11116  | 0.105478  | 0.106061  | 0.13243  | 0.186917 | 0.112471  |
| 0.217803 | 0.146416 | 0.140734  | 0.135198  | 0.150495 | 0.195076 | 0.145105  |
| 0.210956 | 0.113636 | 0.109703  | 0.109994  | 0.137821 | 0.190268 | 0.116404  |
| 0.213287 | 0.120629 | 0.110577  | 0.107372  | 0.137238 | 0.191725 | 0.108537  |
| 0.21285  | 0.114365 | 0.116259  | 0.113636  | 0.131265 | 0.190705 | 0.1081    |
| 0.225379 | 0.139423 | 0.138403  | 0.132284  | 0.151369 | 0.200903 | 0.13986   |
| 0.198572 | 0.126311 | 0.117424  | 0.115676  | 0.134761 | 0.176719 | 0.116841  |
| 0.213432 | 0.11553  | 0.107226  | 0.10373   | 0.131265 | 0.188083 | 0.110431  |
| 0.207896 | 0.113491 | 0.107809  | 0.101107  | 0.135635 | 0.184295 | 0.107226  |
| 0.21183  | 0.121795 | 0.113782  | 0.110577  | 0.138695 | 0.18648  | 0.114365  |
| 0.221008 | 0.132721 | 0.115385  | 0.111888  | 0.137383 | 0.204108 | 0.118298  |
| 0.210664 | 0.12296  | 0.116113  | 0.113782  | 0.138112 | 0.190559 | 0.114073  |
| 0.203234 | 0.112325 | 0.100816  | 0.0935315 | 0.128059 | 0.180798 | 0.0981935 |
| 0.206148 | 0.110577 | 0.104895  | 0.097028  | 0.127185 | 0.181381 | 0.102564  |
| 0.208916 | 0.113345 | 0.103875  | 0.0992133 | 0.129371 | 0.189977 | 0.104167  |
| 0.209207 | 0.123834 | 0.11961   | 0.114365  | 0.136655 | 0.187063 | 0.113491  |
| 0.218094 | 0.133887 | 0.122378  | 0.11451   | 0.141754 | 0.200029 | 0.115967  |
| 0.211247 | 0.112179 | 0.10067   | 0.095134  | 0.128205 | 0.192599 | 0.101544  |
| 0.20877  | 0.111742 | 0.0949883 | 0.0871212 | 0.13039  | 0.18109  | 0.0976107 |

|          |          |           |           |           |          |           |
|----------|----------|-----------|-----------|-----------|----------|-----------|
| 0.216929 | 0.126311 | 0.118298  | 0.112762  | 0.142337  | 0.197115 | 0.107809  |
| 0.209207 | 0.11451  | 0.103293  | 0.0977564 | 0.13345   | 0.184149 | 0.0930944 |
| 0.207459 | 0.131702 | 0.116404  | 0.113491  | 0.142191  | 0.182401 | 0.121941  |
| 0.216783 | 0.136946 | 0.128351  | 0.12602   | 0.143065  | 0.196387 | 0.134761  |
| 0.212995 | 0.11655  | 0.110868  | 0.107955  | 0.134615  | 0.191725 | 0.105915  |
| 0.212267 | 0.115822 | 0.102273  | 0.0976107 | 0.132721  | 0.191288 | 0.100816  |
| 0.207605 | 0.113199 | 0.104312  | 0.101399  | 0.13243   | 0.186626 | 0.0990676 |
| 0.204691 | 0.11757  | 0.102564  | 0.0987762 | 0.133304  | 0.180216 | 0.102564  |
| 0.21722  | 0.12602  | 0.11859   | 0.111597  | 0.135344  | 0.198572 | 0.121212  |
| 0.207896 | 0.115822 | 0.0987762 | 0.0941142 | 0.128351  | 0.182838 | 0.0981935 |
| 0.22873  | 0.137238 | 0.13039   | 0.130099  | 0.147436  | 0.204545 | 0.129808  |
| 0.217803 | 0.144085 | 0.129371  | 0.12704   | 0.148456  | 0.19391  | 0.123252  |
| 0.216055 | 0.13447  | 0.118298  | 0.115093  | 0.135635  | 0.195659 | 0.115967  |
| 0.21183  | 0.12296  | 0.106789  | 0.106206  | 0.139569  | 0.188228 | 0.107955  |
| 0.208042 | 0.11655  | 0.110577  | 0.105624  | 0.138695  | 0.183858 | 0.112908  |
| 0.210519 | 0.112908 | 0.104895  | 0.100233  | 0.135927  | 0.186334 | 0.0958625 |
| 0.210373 | 0.117424 | 0.11553   | 0.109411  | 0.134907  | 0.187354 | 0.0930944 |
| 0.211538 | 0.121795 | 0.104167  | 0.103584  | 0.128788  | 0.187354 | 0.105041  |
| 0.199301 | 0.121503 | 0.111742  | 0.108829  | 0.111597  | 0.176865 | 0.108537  |
| 0.222611 | 0.128788 | 0.123689  | 0.120775  | 0.145105  | 0.204837 | 0.100962  |
| 0.216929 | 0.119318 | 0.113636  | 0.106061  | 0.139132  | 0.192453 | 0.112179  |
| 0.217949 | 0.131119 | 0.118735  | 0.118444  | 0.141608  | 0.195513 | 0.132721  |
| 0.225087 | 0.13243  | 0.130828  | 0.12296   | 0.141171  | 0.206731 | 0.136072  |
| 0.107372 | 0.19595  | 0.184441  | 0.177448  | 0.198281  | 0.103293 | 0.198427  |
| 0.108974 | 0.245921 | 0.230041  | 0.229167  | 0.232517  | 0.132284 | 0.24257   |
| 0.19799  | 0.117861 | 0.110723  | 0.106935  | 0.0919289 | 0.174971 | 0.106935  |
| 0.206876 | 0.110723 | 0.109703  | 0.105624  | 0.128788  | 0.183275 | 0.0954254 |
| 0.20338  | 0.111597 | 0.107955  | 0.105332  | 0.126457  | 0.180653 | 0.100087  |
| 0.208916 | 0.11014  | 0.109703  | 0.108537  | 0.128497  | 0.182984 | 0.103875  |
| 0.213287 | 0.137238 | 0.0546329 | 0.0546329 | 0.136946  | 0.191142 | 0.135927  |
| 0.212121 | 0.109557 | 0.112908  | 0.108246  | 0.129662  | 0.188228 | 0.102418  |
| 0.230041 | 0.141171 | 0.144231  | 0.140443  | 0.151661  | 0.209062 | 0.119755  |
| 0.214452 | 0.110723 | 0.119318  | 0.112325  | 0.134615  | 0.188811 | 0.0989219 |
| 0.221154 | 0.127622 | 0.133596  | 0.127768  | 0.13986   | 0.203963 | 0.112325  |
| 0.216638 | 0.129225 | 0.131702  | 0.126166  | 0.136801  | 0.192453 | 0.115967  |
| 0.223048 | 0.121066 | 0.12704   | 0.121795  | 0.141754  | 0.205274 | 0.117424  |
| 0.223922 | 0.144668 | 0.132867  | 0.129662  | 0.147873  | 0.198572 | 0.126166  |
| 0.217512 | 0.108537 | 0.112471  | 0.111305  | 0.136801  | 0.193619 | 0.105478  |
| 0.21081  | 0.107663 | 0.113054  | 0.106352  | 0.132139  | 0.187209 | 0.0944056 |
| 0.21183  | 0.111014 | 0.114656  | 0.109994  | 0.137821  | 0.190559 | 0.102127  |
| 0.204837 | 0.105478 | 0.110577  | 0.108246  | 0.127914  | 0.18007  | 0.101544  |
| 0.207751 | 0.104021 | 0.114365  | 0.107955  | 0.129079  | 0.185606 | 0.0960082 |
| 0.212558 | 0.106498 | 0.117133  | 0.112762  | 0.132721  | 0.187209 | 0.10169   |
| 0.217657 | 0.113345 | 0.122232  | 0.119318  | 0.137821  | 0.198135 | 0.111451  |

|          |          |          |           |          |          |           |
|----------|----------|----------|-----------|----------|----------|-----------|
| 0.226399 | 0.128497 | 0.133304 | 0.13039   | 0.145688 | 0.206876 | 0.117279  |
| 0.212267 | 0.114948 | 0.117424 | 0.119464  | 0.130682 | 0.191871 | 0.097028  |
| 0.206585 | 0.11859  | 0.114948 | 0.113491  | 0.13549  | 0.187646 | 0.0954254 |
| 0.221445 | 0.124417 | 0.133596 | 0.131265  | 0.144522 | 0.203963 | 0.109703  |
| 0.207168 | 0.108683 | 0.111742 | 0.110577  | 0.131702 | 0.183566 | 0.0948427 |
| 0.224505 | 0.133304 | 0.13345  | 0.131993  | 0.151661 | 0.20236  | 0.11859   |
| 0.210227 | 0.136509 | 0.128205 | 0.125291  | 0.14933  | 0.195076 | 0.134907  |
| 0.212121 | 0.125    | 0.130973 | 0.127185  | 0.141608 | 0.195221 | 0.125437  |
| 0.20979  | 0.104604 | 0.110286 | 0.106498  | 0.126457 | 0.183566 | 0.0977564 |
| 0.208188 | 0.105332 | 0.109848 | 0.105769  | 0.13039  | 0.186334 | 0.0944056 |
| 0.219988 | 0.115676 | 0.121941 | 0.119318  | 0.136072 | 0.19697  | 0.108829  |
| 0.216346 | 0.116696 | 0.122086 | 0.121503  | 0.138549 | 0.196824 | 0.103147  |
| 0.21722  | 0.118444 | 0.13345  | 0.129079  | 0.140589 | 0.194784 | 0.105769  |
| 0.214161 | 0.109848 | 0.11757  | 0.116696  | 0.136655 | 0.189977 | 0.0962995 |
| 0.21081  | 0.111451 | 0.120047 | 0.114219  | 0.136218 | 0.190414 | 0.0955711 |
| 0.214889 | 0.116987 | 0.120338 | 0.119172  | 0.129808 | 0.194493 | 0.103438  |
| 0.226836 | 0.128351 | 0.13141  | 0.13141   | 0.149621 | 0.206439 | 0.11655   |
| 0.218969 | 0.127477 | 0.132284 | 0.130828  | 0.13884  | 0.201195 | 0.114219  |
| 0.225816 | 0.129953 | 0.131265 | 0.129225  | 0.143357 | 0.203671 | 0.107663  |
| 0.216055 | 0.141463 | 0.128205 | 0.126457  | 0.141463 | 0.195367 | 0.117133  |
| 0.212267 | 0.114656 | 0.118298 | 0.115093  | 0.129808 | 0.186917 | 0.0944056 |
| 0.222174 | 0.117279 | 0.130828 | 0.123834  | 0.14088  | 0.198572 | 0.118007  |
| 0.20979  | 0.106935 | 0.112908 | 0.109411  | 0.131993 | 0.18852  | 0.0913462 |
| 0.206731 | 0.120192 | 0.113928 | 0.108683  | 0.13243  | 0.181672 | 0.109266  |
| 0.213141 | 0.105332 | 0.108974 | 0.106352  | 0.132721 | 0.190705 | 0.104895  |
| 0.206585 | 0.1081   | 0.115239 | 0.107955  | 0.135198 | 0.186189 | 0.101544  |
| 0.20979  | 0.10169  | 0.112617 | 0.11116   | 0.129953 | 0.186772 | 0.0992133 |
| 0.222465 | 0.124854 | 0.134907 | 0.131702  | 0.148164 | 0.203817 | 0.112471  |
| 0.210956 | 0.121795 | 0.116404 | 0.112034  | 0.140443 | 0.186189 | 0.105624  |
| 0.220862 | 0.126457 | 0.133013 | 0.131265  | 0.140443 | 0.201049 | 0.113199  |
| 0.208333 | 0.105478 | 0.111451 | 0.107955  | 0.131119 | 0.183566 | 0.101836  |
| 0.223048 | 0.116987 | 0.127331 | 0.125583  | 0.139423 | 0.201777 | 0.104312  |
| 0.215618 | 0.132576 | 0.124854 | 0.121941  | 0.133741 | 0.19289  | 0.108829  |
| 0.203963 | 0.125874 | 0.108537 | 0.106789  | 0.141317 | 0.181818 | 0.117861  |
| 0.215181 | 0.122523 | 0.112179 | 0.1081    | 0.136509 | 0.193619 | 0.106935  |
| 0.209207 | 0.115967 | 0.118153 | 0.116113  | 0.13549  | 0.185606 | 0.118153  |
| 0.215763 | 0.123397 | 0.112179 | 0.108974  | 0.138549 | 0.191579 | 0.108974  |
| 0.211684 | 0.121358 | 0.108974 | 0.107809  | 0.137675 | 0.186043 | 0.113345  |
| 0.221008 | 0.145833 | 0.122378 | 0.121212  | 0.142337 | 0.204983 | 0.140734  |
| 0.226981 | 0.145396 | 0.135344 | 0.133013  | 0.14627  | 0.206294 | 0.125437  |
| 0.205128 | 0.118007 | 0.101253 | 0.0945513 | 0.127622 | 0.181818 | 0.111451  |
| 0.223339 | 0.129808 | 0.11451  | 0.113345  | 0.144376 | 0.201777 | 0.136946  |
| 0.217366 | 0.137529 | 0.114656 | 0.110868  | 0.142191 | 0.199301 | 0.132721  |
| 0.2162   | 0.133159 | 0.120484 | 0.115822  | 0.140152 | 0.194639 | 0.136218  |

|          |          |          |          |          |          |          |
|----------|----------|----------|----------|----------|----------|----------|
| 0.208916 | 0.125    | 0.109703 | 0.107955 | 0.131993 | 0.192016 | 0.130099 |
| 0.215618 | 0.131119 | 0.110868 | 0.107955 | 0.138986 | 0.198718 | 0.125146 |
| 0.213432 | 0.137966 | 0.111597 | 0.109557 | 0.137966 | 0.194202 | 0.132576 |
| 0.219697 | 0.126166 | 0.124272 | 0.118735 | 0.136072 | 0.202214 | 0.135052 |
| 0.221445 | 0.134615 | 0.12398  | 0.120484 | 0.145979 | 0.201923 | 0.144376 |
| 0.217075 | 0.135781 | 0.111116 | 0.110868 | 0.138695 | 0.196387 | 0.133013 |
| 0.208625 | 0.115676 | 0.106498 | 0.103875 | 0.134033 | 0.186772 | 0.125146 |
| 0.21926  | 0.132721 | 0.136364 | 0.131993 | 0.144085 | 0.19799  | 0.11655  |
| 0.219114 | 0.138695 | 0.119027 | 0.118444 | 0.146853 | 0.197844 | 0.137092 |
| 0.202797 | 0.119172 | 0.105624 | 0.10067  | 0.129953 | 0.185023 | 0.118735 |
| 0.109411 | 0.2213   | 0.216492 | 0.212995 | 0.220134 | 0.120192 | 0.222902 |
| 0.213141 | 0.125437 | 0.115093 | 0.1081   | 0.137675 | 0.194202 | 0.132284 |
| 0.209353 | 0.126311 | 0.110723 | 0.102855 | 0.138258 | 0.185752 | 0.118007 |
| 0.221154 | 0.132867 | 0.124563 | 0.120775 | 0.141026 | 0.203963 | 0.137383 |
| 0.210373 | 0.128788 | 0.107372 | 0.105915 | 0.135781 | 0.189394 | 0.122232 |
| 0.220862 | 0.144231 | 0.115822 | 0.117279 | 0.142774 | 0.201923 | 0.138549 |
| 0.212995 | 0.127331 | 0.114365 | 0.10912  | 0.13549  | 0.191142 | 0.123689 |
| 0.21081  | 0.123397 | 0.107226 | 0.104021 | 0.134761 | 0.192162 | 0.128205 |
| 0.214889 | 0.131847 | 0.111597 | 0.108974 | 0.135344 | 0.195659 | 0.130536 |
| 0.208042 | 0.134907 | 0.118444 | 0.119027 | 0.144522 | 0.187937 | 0.135344 |
| 0.21722  | 0.131556 | 0.123252 | 0.117133 | 0.141463 | 0.198281 | 0.135781 |
| 0.219697 | 0.124126 | 0.12398  | 0.118444 | 0.143065 | 0.200466 | 0.139714 |
| 0.219988 | 0.124709 | 0.119027 | 0.11553  | 0.134615 | 0.198718 | 0.135927 |
| 0.214744 | 0.124709 | 0.10708  | 0.103584 | 0.134907 | 0.190268 | 0.110577 |
| 0.216783 | 0.115967 | 0.116113 | 0.113199 | 0.133159 | 0.193765 | 0.128642 |
| 0.220717 | 0.135927 | 0.125583 | 0.119172 | 0.143211 | 0.19799  | 0.140443 |
| 0.203963 | 0.12296  | 0.111451 | 0.105041 | 0.130536 | 0.181818 | 0.125146 |
| 0.223193 | 0.138695 | 0.13447  | 0.131556 | 0.146562 | 0.201632 | 0.119027 |
| 0.205857 | 0.144959 | 0.129079 | 0.129079 | 0.152535 | 0.186626 | 0.143065 |
| 0.213724 | 0.129516 | 0.112471 | 0.11014  | 0.138258 | 0.18954  | 0.117424 |
| 0.218386 | 0.136801 | 0.116841 | 0.112762 | 0.143211 | 0.19799  | 0.132576 |
| 0.205711 | 0.138986 | 0.122815 | 0.117279 | 0.13986  | 0.185023 | 0.130973 |
| 0.213432 | 0.135927 | 0.125    | 0.120338 | 0.136218 | 0.190705 | 0.126457 |
| 0.206148 | 0.133013 | 0.122378 | 0.119172 | 0.140006 | 0.179633 | 0.131702 |
| 0.211393 | 0.143502 | 0.129371 | 0.129079 | 0.149621 | 0.190705 | 0.140734 |
| 0.207459 | 0.122378 | 0.105915 | 0.101836 | 0.136364 | 0.180653 | 0.102418 |
| 0.221008 | 0.142337 | 0.124417 | 0.119172 | 0.143502 | 0.200903 | 0.125583 |
| 0.198718 | 0.143065 | 0.133887 | 0.131847 | 0.145979 | 0.180944 | 0.143211 |
| 0.217075 | 0.131119 | 0.114073 | 0.110286 | 0.136946 | 0.197261 | 0.110577 |
| 0.212704 | 0.131702 | 0.119901 | 0.117279 | 0.142483 | 0.18648  | 0.11553  |
| 0.223631 | 0.144085 | 0.138112 | 0.136364 | 0.147873 | 0.202652 | 0.125583 |
| 0.217512 | 0.129225 | 0.12296  | 0.117424 | 0.139132 | 0.195367 | 0.106061 |
| 0.228147 | 0.1419   | 0.129808 | 0.126894 | 0.145396 | 0.208042 | 0.133887 |
| 0.217512 | 0.136218 | 0.124417 | 0.118881 | 0.142337 | 0.200321 | 0.120338 |

|          |          |           |           |           |          |          |
|----------|----------|-----------|-----------|-----------|----------|----------|
| 0.218823 | 0.120629 | 0.121066  | 0.119901  | 0.141608  | 0.198135 | 0.121649 |
| 0.218386 | 0.137092 | 0.125     | 0.121212  | 0.138549  | 0.197698 | 0.121503 |
| 0.212121 | 0.128205 | 0.117279  | 0.111451  | 0.144522  | 0.19289  | 0.114365 |
| 0.224213 | 0.131556 | 0.126166  | 0.124126  | 0.148164  | 0.203817 | 0.118298 |
| 0.220134 | 0.130973 | 0.126166  | 0.124709  | 0.140589  | 0.198281 | 0.133159 |
| 0.224213 | 0.130682 | 0.130828  | 0.129953  | 0.144085  | 0.204108 | 0.126748 |
| 0.223922 | 0.130973 | 0.129662  | 0.126457  | 0.145542  | 0.205565 | 0.134615 |
| 0.218094 | 0.136801 | 0.126748  | 0.12296   | 0.146707  | 0.195076 | 0.122669 |
| 0.216638 | 0.143211 | 0.140443  | 0.134324  | 0.151369  | 0.202943 | 0.141317 |
| 0.210519 | 0.133887 | 0.110723  | 0.110431  | 0.140006  | 0.192162 | 0.120921 |
| 0.21722  | 0.123689 | 0.11451   | 0.111888  | 0.141171  | 0.195659 | 0.107226 |
| 0.219551 | 0.128351 | 0.123834  | 0.118007  | 0.141463  | 0.199738 | 0.127914 |
| 0.212558 | 0.12602  | 0.113928  | 0.111014  | 0.135344  | 0.191288 | 0.118298 |
| 0.217366 | 0.15035  | 0.133887  | 0.13039   | 0.153263  | 0.196096 | 0.143502 |
| 0.22465  | 0.15676  | 0.148456  | 0.145542  | 0.163462  | 0.205711 | 0.153409 |
| 0.223776 | 0.125874 | 0.129516  | 0.125728  | 0.137238  | 0.202506 | 0.110868 |
| 0.214307 | 0.120484 | 0.125     | 0.12296   | 0.136509  | 0.19391  | 0.102855 |
| 0.223193 | 0.129079 | 0.129516  | 0.122523  | 0.140734  | 0.201923 | 0.13039  |
| 0.218969 | 0.13447  | 0.122086  | 0.119464  | 0.140589  | 0.200903 | 0.138695 |
| 0.225379 | 0.118153 | 0.125291  | 0.123834  | 0.13884   | 0.20236  | 0.1081   |
| 0.224505 | 0.135635 | 0.127914  | 0.122086  | 0.150495  | 0.206148 | 0.139569 |
| 0.216929 | 0.14729  | 0.126748  | 0.123543  | 0.144085  | 0.198572 | 0.136655 |
| 0.219114 | 0.13549  | 0.117861  | 0.112908  | 0.136946  | 0.199592 | 0.114948 |
| 0.228438 | 0.147145 | 0.157197  | 0.151078  | 0.160256  | 0.208042 | 0.161276 |
| 0.22028  | 0.132284 | 0.11961   | 0.116987  | 0.142191  | 0.200466 | 0.116113 |
| 0.220571 | 0.152389 | 0.124563  | 0.123689  | 0.149476  | 0.199009 | 0.130099 |
| 0.221008 | 0.124854 | 0.11655   | 0.112471  | 0.138258  | 0.200612 | 0.108392 |
| 0.228875 | 0.130973 | 0.134907  | 0.130245  | 0.143794  | 0.204108 | 0.130828 |
| 0.212267 | 0.126311 | 0.11014   | 0.110723  | 0.133596  | 0.192162 | 0.130245 |
| 0.184149 | 0.145688 | 0.132721  | 0.130682  | 0.129371  | 0.164336 | 0.142337 |
| 0.2213   | 0.132721 | 0.141026  | 0.135781  | 0.136801  | 0.201777 | 0.151807 |
| 0.206002 | 0.120047 | 0.121941  | 0.116696  | 0.0743007 | 0.181235 | 0.123689 |
| 0.184003 | 0.137092 | 0.130245  | 0.125583  | 0.0814394 | 0.16419  | 0.139277 |
| 0.16317  | 0.151807 | 0.145251  | 0.140006  | 0.155012  | 0.13986  | 0.112617 |
| 0.16521  | 0.150058 | 0.133013  | 0.130973  | 0.132576  | 0.143357 | 0.145251 |
| 0.221008 | 0.123689 | 0.128205  | 0.126166  | 0.137675  | 0.201777 | 0.094697 |
| 0.213578 | 0.134907 | 0.133596  | 0.128642  | 0.139277  | 0.195804 | 0.141463 |
| 0.201049 | 0.119755 | 0.0840618 | 0.0791084 | 0.132867  | 0.17803  | 0.119901 |
| 0.201195 | 0.121066 | 0.0786713 | 0.0763403 | 0.135344  | 0.180798 | 0.111305 |
| 0.207459 | 0.124417 | 0.116113  | 0.111742  | 0.136946  | 0.186772 | 0.126603 |
| 0.204837 | 0.119755 | 0.118735  | 0.112908  | 0.0719697 | 0.179779 | 0.118735 |
| 0.209936 | 0.115822 | 0.112762  | 0.10373   | 0.14292   | 0.187209 | 0.107226 |
| 0.196241 | 0.123106 | 0.0743007 | 0.0684732 | 0.107372  | 0.171474 | 0.117424 |
| 0.208479 | 0.125437 | 0.114802  | 0.112762  | 0.121358  | 0.183421 | 0.126166 |

|           |           |           |           |           |           |           |
|-----------|-----------|-----------|-----------|-----------|-----------|-----------|
| 0.195513  | 0.128205  | 0.0592949 | 0.0630828 | 0.134033  | 0.176573  | 0.13243   |
| 0.202797  | 0.114802  | 0.0977564 | 0.092803  | 0.129953  | 0.178613  | 0.112034  |
| 0.203671  | 0.128497  | 0.120192  | 0.113491  | 0.0844988 | 0.17803   | 0.122232  |
| 0.204108  | 0.121066  | 0.11655   | 0.112471  | 0.0802739 | 0.182547  | 0.117716  |
| 0.214598  | 0.12398   | 0.127914  | 0.123252  | 0.137675  | 0.194493  | 0.0506993 |
| 0.109994  | 0.222756  | 0.208042  | 0.206585  | 0.212267  | 0.121066  | 0.220571  |
| 0.216346  | 0.142628  | 0.141026  | 0.13345   | 0.0630828 | 0.196533  | 0.142483  |
| 0.212995  | 0.127622  | 0.125728  | 0.125146  | 0.13141   | 0.195221  | 0.128351  |
| 0.202652  | 0.123106  | 0.117424  | 0.112179  | 0.128934  | 0.18546   | 0.124417  |
| 0.0939685 | 0.213724  | 0.201632  | 0.201049  | 0.20877   | 0.106206  | 0.215035  |
| 0.200903  | 0.129225  | 0.121212  | 0.11655   | 0.139132  | 0.180216  | 0.07838   |
| 0.212413  | 0.126748  | 0.116404  | 0.112034  | 0.143357  | 0.193182  | 0.10912   |
| 0.207459  | 0.121212  | 0.121941  | 0.120775  | 0.122086  | 0.18852   | 0.123689  |
| 0.205565  | 0.129808  | 0.0506993 | 0.0474942 | 0.138258  | 0.18546   | 0.129953  |
| 0.11553   | 0.257139  | 0.244172  | 0.240676  | 0.243153  | 0.139132  | 0.25641   |
| 0.210956  | 0.129371  | 0.119027  | 0.119901  | 0.13986   | 0.187646  | 0.12602   |
| 0.210373  | 0.121503  | 0.122232  | 0.113199  | 0.13345   | 0.188811  | 0.0499709 |
| 0.212995  | 0.044289  | 0.126311  | 0.118153  | 0.13549   | 0.194639  | 0.123397  |
| 0.210664  | 0.0457459 | 0.122815  | 0.117279  | 0.131993  | 0.193473  | 0.120775  |
| 0.202214  | 0.134033  | 0.107372  | 0.105332  | 0.137238  | 0.185315  | 0.130099  |
| 0.189394  | 0.126457  | 0.109703  | 0.106498  | 0.118881  | 0.16521   | 0.135344  |
| 0.20979   | 0.123834  | 0.125146  | 0.115822  | 0.134324  | 0.189685  | 0.0511364 |
| 0.201486  | 0.118735  | 0.116259  | 0.112762  | 0.0767774 | 0.178759  | 0.120338  |
| 0.206876  | 0.122669  | 0.122523  | 0.117861  | 0.132867  | 0.187937  | 0.131265  |
| 0.203089  | 0.121212  | 0.0453089 | 0.0423951 | 0.129079  | 0.183275  | 0.123106  |
| 0.19799   | 0.119027  | 0.11451   | 0.106352  | 0.0820221 | 0.177302  | 0.116841  |
| 0.206876  | 0.127914  | 0.0983392 | 0.0945513 | 0.131702  | 0.187646  | 0.127477  |
| 0.219551  | 0.132139  | 0.142483  | 0.134907  | 0.137383  | 0.201195  | 0.149767  |
| 0.211976  | 0.131556  | 0.125583  | 0.120921  | 0.139714  | 0.191579  | 0.130828  |
| 0.211976  | 0.128351  | 0.116259  | 0.115385  | 0.144376  | 0.194202  | 0.115385  |
| 0.100379  | 0.19391   | 0.185606  | 0.181818  | 0.192162  | 0.0898893 | 0.19289   |
| 0.0977564 | 0.206148  | 0.197552  | 0.194056  | 0.2044    | 0.099796  | 0.207751  |
| 0.196241  | 0.130973  | 0.048951  | 0.0480769 | 0.137966  | 0.178176  | 0.129371  |
| 0.203817  | 0.11961   | 0.0448718 | 0.0425408 | 0.128059  | 0.180216  | 0.122669  |
| 0.205857  | 0.136509  | 0.125583  | 0.120047  | 0.13243   | 0.186043  | 0.140152  |
| 0.209353  | 0.121066  | 0.122378  | 0.115967  | 0.135052  | 0.189248  | 0.0469114 |
| 0.212121  | 0.133159  | 0.124854  | 0.122523  | 0.141317  | 0.192308  | 0.130099  |
| 0.212267  | 0.108829  | 0.128497  | 0.125583  | 0.129808  | 0.192162  | 0.133159  |
| 0.107955  | 0.230624  | 0.217075  | 0.213869  | 0.223048  | 0.110286  | 0.231352  |
| 0.209062  | 0.117279  | 0.114219  | 0.110431  | 0.131847  | 0.1875    | 0.114802  |
| 0.135781  | 0.212995  | 0.205274  | 0.203234  | 0.199009  | 0.143065  | 0.20877   |
| 0.216346  | 0.117861  | 0.115385  | 0.112179  | 0.133304  | 0.192745  | 0.0856643 |
| 0.205711  | 0.115385  | 0.114656  | 0.108829  | 0.132576  | 0.181527  | 0.115239  |
| 0.199738  | 0.118153  | 0.113928  | 0.109266  | 0.116987  | 0.178467  | 0.106061  |

|           |           |           |           |           |           |           |
|-----------|-----------|-----------|-----------|-----------|-----------|-----------|
| 0.199738  | 0.118735  | 0.0553613 | 0.0544872 | 0.127768  | 0.177593  | 0.119464  |
| 0.103438  | 0.21183   | 0.199155  | 0.195076  | 0.208333  | 0.10169   | 0.211684  |
| 0.198135  | 0.132284  | 0.128059  | 0.122232  | 0.0737179 | 0.180944  | 0.131847  |
| 0.217366  | 0.110723  | 0.118153  | 0.112617  | 0.136072  | 0.192599  | 0.107955  |
| 0.208333  | 0.127331  | 0.124854  | 0.116987  | 0.0684732 | 0.185315  | 0.125146  |
| 0.210664  | 0.120629  | 0.127185  | 0.12398   | 0.130536  | 0.189394  | 0.123106  |
| 0.201923  | 0.127622  | 0.0479312 | 0.0467657 | 0.134907  | 0.181235  | 0.123397  |
| 0.215472  | 0.118153  | 0.119464  | 0.116841  | 0.13447   | 0.193619  | 0.0874126 |
| 0.200612  | 0.123397  | 0.121212  | 0.115676  | 0.131556  | 0.179633  | 0.0690559 |
| 0.211684  | 0.125728  | 0.118298  | 0.117424  | 0.142628  | 0.193328  | 0.112762  |
| 0.19595   | 0.117279  | 0.111014  | 0.105478  | 0.0802739 | 0.173805  | 0.11859   |
| 0.211538  | 0.11014   | 0.123689  | 0.118153  | 0.135781  | 0.188811  | 0.109994  |
| 0.107955  | 0.193619  | 0.183566  | 0.176865  | 0.193619  | 0.0890152 | 0.192308  |
| 0.214161  | 0.0390443 | 0.127477  | 0.121649  | 0.130828  | 0.195221  | 0.125146  |
| 0.213141  | 0.114656  | 0.12296   | 0.121795  | 0.134761  | 0.192162  | 0.134615  |
| 0.204837  | 0.0984848 | 0.114656  | 0.113491  | 0.132576  | 0.184441  | 0.119027  |
| 0.206148  | 0.13039   | 0.126457  | 0.122086  | 0.144668  | 0.179633  | 0.125874  |
| 0.204691  | 0.125146  | 0.119464  | 0.115676  | 0.0703671 | 0.184586  | 0.121503  |
| 0.218969  | 0.121649  | 0.12296   | 0.119172  | 0.134761  | 0.19799   | 0.092366  |
| 0.203963  | 0.113345  | 0.118153  | 0.116987  | 0.12704   | 0.182692  | 0.118153  |
| 0.214744  | 0.12704   | 0.128934  | 0.124272  | 0.138403  | 0.194347  | 0.0546329 |
| 0.206148  | 0.113782  | 0.11655   | 0.114219  | 0.128934  | 0.188374  | 0.129371  |
| 0.20877   | 0.0523019 | 0.115676  | 0.111888  | 0.132721  | 0.186917  | 0.116841  |
| 0.200758  | 0.129953  | 0.0546329 | 0.053176  | 0.131993  | 0.178904  | 0.126311  |
| 0.21285   | 0.121066  | 0.121212  | 0.115676  | 0.12602   | 0.194784  | 0.122086  |
| 0.215035  | 0.133741  | 0.13039   | 0.130973  | 0.125874  | 0.198427  | 0.136801  |
| 0.20542   | 0.125874  | 0.112617  | 0.109411  | 0.136364  | 0.181527  | 0.118153  |
| 0.214307  | 0.137675  | 0.138403  | 0.130828  | 0.0581294 | 0.195076  | 0.138112  |
| 0.203234  | 0.121358  | 0.0480769 | 0.0428322 | 0.130682  | 0.179924  | 0.12296   |
| 0.206439  | 0.099796  | 0.118298  | 0.113636  | 0.125146  | 0.184295  | 0.120629  |
| 0.192016  | 0.124709  | 0.118153  | 0.112617  | 0.0865385 | 0.167249  | 0.121649  |
| 0.210082  | 0.128205  | 0.129225  | 0.123689  | 0.143357  | 0.191434  | 0.0552156 |
| 0.116259  | 0.196096  | 0.189248  | 0.184003  | 0.192016  | 0.111305  | 0.178467  |
| 0.208188  | 0.107372  | 0.116841  | 0.110431  | 0.133013  | 0.188083  | 0.106352  |
| 0.200903  | 0.111742  | 0.108392  | 0.102273  | 0.118735  | 0.174971  | 0.108392  |
| 0.213724  | 0.12602   | 0.117716  | 0.11451   | 0.144085  | 0.194202  | 0.113054  |
| 0.118735  | 0.186626  | 0.173368  | 0.168415  | 0.182838  | 0.110577  | 0.187063  |
| 0.21183   | 0.139277  | 0.13039   | 0.129808  | 0.152972  | 0.194056  | 0.141463  |
| 0.225233  | 0.150641  | 0.145251  | 0.140297  | 0.155012  | 0.201632  | 0.147582  |
| 0.220717  | 0.135344  | 0.142191  | 0.136364  | 0.138549  | 0.203526  | 0.151807  |
| 0.202652  | 0.122815  | 0.111888  | 0.11014   | 0.137675  | 0.179341  | 0.120338  |
| 0.202506  | 0.124709  | 0.119318  | 0.114656  | 0.0713869 | 0.181235  | 0.125146  |
| 0.0960082 | 0.214015  | 0.203963  | 0.200758  | 0.210227  | 0.106498  | 0.215909  |
| 0.200903  | 0.127185  | 0.113636  | 0.112762  | 0.126603  | 0.183421  | 0.129953  |



|          |          |           |           |           |           |           |
|----------|----------|-----------|-----------|-----------|-----------|-----------|
| 0.207168 | 0.126166 | 0.126603  | 0.120775  | 0.0667249 | 0.183275  | 0.127477  |
| 0.207751 | 0.111014 | 0.120484  | 0.113782  | 0.13549   | 0.187063  | 0.108537  |
| 0.147145 | 0.174242 | 0.159819  | 0.15778   | 0.155012  | 0.126748  | 0.17701   |
| 0.19697  | 0.118298 | 0.106789  | 0.101544  | 0.123252  | 0.17803   | 0.116987  |
| 0.21926  | 0.145251 | 0.143939  | 0.141608  | 0.142337  | 0.203526  | 0.157051  |
| 0.20236  | 0.127185 | 0.111305  | 0.106935  | 0.138549  | 0.179633  | 0.12704   |
| 0.108829 | 0.193619 | 0.182692  | 0.178322  | 0.193328  | 0.0919289 | 0.191142  |
| 0.210519 | 0.127185 | 0.115967  | 0.115967  | 0.142045  | 0.188083  | 0.127331  |
| 0.207896 | 0.121941 | 0.102564  | 0.100233  | 0.122232  | 0.180216  | 0.112762  |
| 0.206585 | 0.100524 | 0.121066  | 0.114365  | 0.128205  | 0.183275  | 0.11961   |
| 0.209936 | 0.118444 | 0.117716  | 0.113345  | 0.132721  | 0.185752  | 0.1081    |
| 0.211101 | 0.126311 | 0.115967  | 0.114219  | 0.14292   | 0.18954   | 0.109266  |
| 0.201777 | 0.127185 | 0.118881  | 0.113345  | 0.138258  | 0.179924  | 0.125583  |
| 0.201632 | 0.121212 | 0.0441434 | 0.0444347 | 0.133741  | 0.178322  | 0.120484  |
| 0.103584 | 0.191871 | 0.183566  | 0.178322  | 0.197115  | 0.0913462 | 0.192599  |
| 0.206876 | 0.124126 | 0.122232  | 0.120775  | 0.132576  | 0.18852   | 0.121358  |
| 0.200029 | 0.121941 | 0.108683  | 0.101399  | 0.124272  | 0.175845  | 0.119464  |
| 0        | 0.214744 | 0.201777  | 0.200029  | 0.208042  | 0.111597  | 0.214015  |
| 0.214744 | 0        | 0.122815  | 0.117861  | 0.133159  | 0.194347  | 0.121358  |
| 0.201777 | 0.122815 | 0         | 0.044289  | 0.133304  | 0.18109   | 0.124126  |
| 0.200029 | 0.117861 | 0.044289  | 0         | 0.131556  | 0.178759  | 0.118298  |
| 0.208042 | 0.133159 | 0.133304  | 0.131556  | 0         | 0.191142  | 0.139132  |
| 0.111597 | 0.194347 | 0.18109   | 0.178759  | 0.191142  | 0         | 0.19391   |
| 0.214015 | 0.121358 | 0.124126  | 0.118298  | 0.139132  | 0.19391   | 0         |
| 0.215472 | 0.125437 | 0.128497  | 0.127914  | 0.123397  | 0.197698  | 0.131702  |
| 0.200903 | 0.122815 | 0.0451632 | 0.0448718 | 0.13243   | 0.180216  | 0.12296   |
| 0.201195 | 0.120484 | 0.0463287 | 0.0425408 | 0.132139  | 0.181672  | 0.118881  |
| 0.199009 | 0.119172 | 0.0444347 | 0.0418124 | 0.134033  | 0.17803   | 0.121649  |
| 0.206731 | 0.122523 | 0.115967  | 0.108392  | 0.0823135 | 0.18109   | 0.11655   |
| 0.204545 | 0.113345 | 0.0948427 | 0.0916375 | 0.126457  | 0.179779  | 0.110286  |
| 0.211247 | 0.130245 | 0.121941  | 0.116987  | 0.142191  | 0.189977  | 0.125728  |
| 0.218531 | 0.120338 | 0.132139  | 0.131265  | 0.12296   | 0.201632  | 0.134178  |
| 0.210082 | 0.126166 | 0.11757   | 0.114365  | 0.143357  | 0.189103  | 0.125146  |
| 0.21722  | 0.123106 | 0.128205  | 0.124709  | 0.13447   | 0.196533  | 0.125291  |
| 0.112471 | 0.200758 | 0.187791  | 0.181672  | 0.196678  | 0.0944056 | 0.196241  |
| 0.207605 | 0.116696 | 0.115676  | 0.112762  | 0.125437  | 0.189248  | 0.11655   |
| 0.209499 | 0.131702 | 0.129225  | 0.124272  | 0.0664336 | 0.185606  | 0.130682  |
| 0.204691 | 0.120192 | 0.0445804 | 0.0431235 | 0.130099  | 0.180216  | 0.122378  |
| 0.200758 | 0.112179 | 0.0945513 | 0.0930944 | 0.130828  | 0.179487  | 0.114073  |
| 0.200466 | 0.118881 | 0.114365  | 0.110868  | 0.128205  | 0.181235  | 0.122815  |
| 0.211393 | 0.121941 | 0.124126  | 0.119172  | 0.137383  | 0.192745  | 0.048951  |
| 0.210227 | 0.13243  | 0.128497  | 0.12296   | 0.13243   | 0.190997  | 0.134033  |
| 0.21183  | 0.117716 | 0.116113  | 0.112034  | 0.130245  | 0.18648   | 0.127477  |
| 0.201923 | 0.11859  | 0.110286  | 0.102418  | 0.134033  | 0.18211   | 0.0724068 |

|          |          |           |           |           |           |           |
|----------|----------|-----------|-----------|-----------|-----------|-----------|
| 0.201195 | 0.116987 | 0.1081    | 0.100233  | 0.125437  | 0.178759  | 0.0775058 |
| 0.201923 | 0.118298 | 0.103293  | 0.0983392 | 0.125874  | 0.177739  | 0.114656  |
| 0.215181 | 0.119027 | 0.118881  | 0.115093  | 0.136218  | 0.192453  | 0.0856643 |
| 0.215909 | 0.140734 | 0.125437  | 0.123689  | 0.145688  | 0.195513  | 0.135052  |
| 0.212267 | 0.122815 | 0.119464  | 0.11655   | 0.139423  | 0.192453  | 0.0506993 |
| 0.199883 | 0.117424 | 0.114073  | 0.106789  | 0.0792541 | 0.176282  | 0.115822  |
| 0.208916 | 0.120629 | 0.117279  | 0.11116   | 0.13549   | 0.189394  | 0.0517191 |
| 0.200321 | 0.11961  | 0.0483683 | 0.0445804 | 0.132721  | 0.177885  | 0.120921  |
| 0.210664 | 0.104895 | 0.114656  | 0.108246  | 0.134907  | 0.189103  | 0.107955  |
| 0.203089 | 0.123252 | 0.0447261 | 0.0421037 | 0.131993  | 0.180653  | 0.127185  |
| 0.20542  | 0.11451  | 0.110286  | 0.108829  | 0.122669  | 0.185315  | 0.112325  |
| 0.209499 | 0.113636 | 0.117279  | 0.112325  | 0.132867  | 0.187646  | 0.126603  |
| 0.213287 | 0.126166 | 0.113491  | 0.107372  | 0.141317  | 0.190559  | 0.108246  |
| 0.2044   | 0.117279 | 0.0996503 | 0.0961538 | 0.129808  | 0.181964  | 0.111888  |
| 0.20338  | 0.12296  | 0.0511364 | 0.0453089 | 0.133741  | 0.179196  | 0.119318  |
| 0.196678 | 0.105478 | 0.118444  | 0.114656  | 0.132576  | 0.175699  | 0.125728  |
| 0.206731 | 0.126311 | 0.111014  | 0.109848  | 0.129225  | 0.182255  | 0.123834  |
| 0.207751 | 0.123252 | 0.105915  | 0.10067   | 0.129371  | 0.185023  | 0.113491  |
| 0.206002 | 0.119464 | 0.050845  | 0.046183  | 0.129371  | 0.182692  | 0.118444  |
| 0.200029 | 0.119901 | 0.121795  | 0.111597  | 0.0700758 | 0.179924  | 0.124417  |
| 0.213141 | 0.120484 | 0.117424  | 0.113345  | 0.138549  | 0.189831  | 0.085373  |
| 0.205274 | 0.125437 | 0.119172  | 0.111305  | 0.0779429 | 0.182838  | 0.119755  |
| 0.209353 | 0.124854 | 0.111597  | 0.108683  | 0.142045  | 0.188666  | 0.104021  |
| 0.2044   | 0.11757  | 0.10169   | 0.0967366 | 0.133887  | 0.181672  | 0.114802  |
| 0.200029 | 0.117861 | 0.104312  | 0.0990676 | 0.126603  | 0.178176  | 0.118881  |
| 0.213578 | 0.106935 | 0.113782  | 0.110286  | 0.135781  | 0.188811  | 0.105041  |
| 0.203234 | 0.130682 | 0.120338  | 0.116259  | 0.0791084 | 0.17905   | 0.124126  |
| 0.211101 | 0.126603 | 0.125874  | 0.12296   | 0.128642  | 0.187791  | 0.11859   |
| 0.20542  | 0.124126 | 0.106498  | 0.106498  | 0.12704   | 0.180944  | 0.117279  |
| 0.101399 | 0.199009 | 0.186334  | 0.184295  | 0.199301  | 0.0952797 | 0.198864  |
| 0.141317 | 0.169289 | 0.158945  | 0.156031  | 0.158508  | 0.11859   | 0.168561  |
| 0.210956 | 0.128497 | 0.118444  | 0.118735  | 0.1419    | 0.186189  | 0.121066  |
| 0.202652 | 0.124563 | 0.121503  | 0.114219  | 0.127477  | 0.177593  | 0.0833333 |
| 0.231206 | 0.151078 | 0.148601  | 0.144231  | 0.157197  | 0.20877   | 0.151807  |
| 0.207751 | 0.125    | 0.121358  | 0.119318  | 0.132284  | 0.189394  | 0.13039   |
| 0.197115 | 0.125437 | 0.0827506 | 0.0804196 | 0.131847  | 0.180216  | 0.129079  |
| 0.199009 | 0.126457 | 0.0820221 | 0.0782343 | 0.127622  | 0.178322  | 0.121649  |
| 0.205128 | 0.125874 | 0.0939685 | 0.0933858 | 0.131993  | 0.185315  | 0.123106  |
| 0.206876 | 0.128497 | 0.113782  | 0.108829  | 0.12704   | 0.184732  | 0.124563  |
| 0.102127 | 0.205857 | 0.192599  | 0.189394  | 0.203817  | 0.100962  | 0.207168  |
| 0.215618 | 0.124709 | 0.122815  | 0.118153  | 0.1419    | 0.195221  | 0.0499709 |
| 0.197115 | 0.122523 | 0.119464  | 0.112471  | 0.0922203 | 0.174971  | 0.0906177 |
| 0.199446 | 0.122523 | 0.0623543 | 0.0614802 | 0.127768  | 0.180216  | 0.117716  |
| 0.211538 | 0.116259 | 0.119901  | 0.116696  | 0.137238  | 0.187354  | 0.116113  |

|          |           |           |           |           |           |           |
|----------|-----------|-----------|-----------|-----------|-----------|-----------|
| 0.13039  | 0.188374  | 0.174534  | 0.172494  | 0.18546   | 0.113199  | 0.189103  |
| 0.116113 | 0.250728  | 0.242424  | 0.236305  | 0.239365  | 0.133013  | 0.250291  |
| 0.212558 | 0.119901  | 0.115385  | 0.113928  | 0.129225  | 0.190122  | 0.128205  |
| 0.209936 | 0.124272  | 0.108392  | 0.108683  | 0.127768  | 0.187791  | 0.125874  |
| 0.20877  | 0.126603  | 0.119755  | 0.114219  | 0.14292   | 0.187791  | 0.125874  |
| 0.211538 | 0.123543  | 0.111742  | 0.106206  | 0.140734  | 0.185897  | 0.108829  |
| 0.212558 | 0.117279  | 0.117133  | 0.113636  | 0.13243   | 0.191288  | 0.0512821 |
| 0.202797 | 0.118007  | 0.116113  | 0.112617  | 0.125583  | 0.183858  | 0.116404  |
| 0.195659 | 0.126603  | 0.0769231 | 0.0728438 | 0.10067   | 0.174388  | 0.118881  |
| 0.213141 | 0.120192  | 0.118007  | 0.113928  | 0.134761  | 0.190705  | 0.0480769 |
| 0.195804 | 0.124709  | 0.0849359 | 0.078817  | 0.0897436 | 0.175408  | 0.122523  |
| 0.209645 | 0.128059  | 0.107809  | 0.106352  | 0.134178  | 0.189831  | 0.120047  |
| 0.204545 | 0.118007  | 0.100087  | 0.0957168 | 0.130245  | 0.178613  | 0.115239  |
| 0.20877  | 0.111451  | 0.117133  | 0.112762  | 0.131847  | 0.191288  | 0.127331  |
| 0.203089 | 0.123252  | 0.117279  | 0.113782  | 0.0795455 | 0.181818  | 0.123689  |
| 0.201049 | 0.0987762 | 0.108246  | 0.105624  | 0.121503  | 0.177448  | 0.113782  |
| 0.220862 | 0.12296   | 0.118153  | 0.116696  | 0.140443  | 0.199883  | 0.119318  |
| 0.223193 | 0.136946  | 0.12602   | 0.126603  | 0.147145  | 0.203671  | 0.118153  |
| 0.203817 | 0.121941  | 0.0495338 | 0.0451632 | 0.129516  | 0.179633  | 0.118298  |
| 0.197261 | 0.128788  | 0.0855186 | 0.0817308 | 0.131119  | 0.177156  | 0.120775  |
| 0.211247 | 0.137238  | 0.0552156 | 0.0587121 | 0.138112  | 0.193182  | 0.137092  |
| 0.116113 | 0.215763  | 0.20134   | 0.199883  | 0.208479  | 0.118153  | 0.214744  |
| 0.201632 | 0.108974  | 0.112034  | 0.10708   | 0.127622  | 0.180361  | 0.118444  |
| 0.206148 | 0.115822  | 0.10169   | 0.0938228 | 0.133304  | 0.184586  | 0.113928  |
| 0.209062 | 0.119027  | 0.11859   | 0.11655   | 0.126603  | 0.188666  | 0.119755  |
| 0.212704 | 0.0472028 | 0.121066  | 0.118444  | 0.134907  | 0.190851  | 0.118444  |
| 0.212413 | 0.115093  | 0.118153  | 0.113199  | 0.132867  | 0.185897  | 0.112325  |
| 0.108392 | 0.203963  | 0.193328  | 0.186917  | 0.20134   | 0.0949883 | 0.204983  |
| 0.206731 | 0.129516  | 0.120629  | 0.115967  | 0.0782343 | 0.183712  | 0.121212  |
| 0.202506 | 0.120047  | 0.0476399 | 0.0479312 | 0.131119  | 0.180653  | 0.118444  |
| 0.211684 | 0.127185  | 0.123543  | 0.119172  | 0.133013  | 0.188957  | 0.118881  |
| 0.211101 | 0.119901  | 0.111305  | 0.104021  | 0.138258  | 0.1875    | 0.105478  |
| 0.202943 | 0.123689  | 0.118298  | 0.113636  | 0.0793998 | 0.177885  | 0.122086  |
| 0.197407 | 0.115239  | 0.105769  | 0.0979021 | 0.101544  | 0.176136  | 0.115093  |
| 0.210519 | 0.128642  | 0.107517  | 0.104021  | 0.131847  | 0.18954   | 0.119172  |
| 0.210227 | 0.0467657 | 0.11859   | 0.115093  | 0.134178  | 0.190122  | 0.11655   |
| 0.102273 | 0.202214  | 0.190414  | 0.187791  | 0.199301  | 0.10373   | 0.203526  |
| 0.199738 | 0.116987  | 0.113928  | 0.106643  | 0.0799825 | 0.17701   | 0.116259  |
| 0.107517 | 0.200466  | 0.185169  | 0.182547  | 0.199301  | 0.0949883 | 0.200321  |
| 0.107955 | 0.19799   | 0.185315  | 0.178904  | 0.198572  | 0.0930944 | 0.196678  |
| 0.21926  | 0.132139  | 0.121795  | 0.119172  | 0.145251  | 0.197407  | 0.115676  |
| 0.218677 | 0.0528846 | 0.13141   | 0.128497  | 0.139423  | 0.200321  | 0.131702  |
| 0.204691 | 0.117279  | 0.106061  | 0.102273  | 0.12602   | 0.181672  | 0.109848  |
| 0.201049 | 0.115967  | 0.107372  | 0.104167  | 0.0894522 | 0.175991  | 0.111742  |

|          |           |           |           |           |           |           |
|----------|-----------|-----------|-----------|-----------|-----------|-----------|
| 0.201195 | 0.120192  | 0.115967  | 0.111305  | 0.0846445 | 0.178759  | 0.116841  |
| 0.204983 | 0.124854  | 0.0492424 | 0.0469114 | 0.135344  | 0.179924  | 0.123834  |
| 0.210227 | 0.114948  | 0.114802  | 0.111305  | 0.128642  | 0.18954   | 0.0533217 |
| 0.214015 | 0.121358  | 0.11655   | 0.112762  | 0.13447   | 0.190997  | 0.0474942 |
| 0.208625 | 0.113345  | 0.116696  | 0.112617  | 0.131119  | 0.185897  | 0.130973  |
| 0.210519 | 0.124854  | 0.113345  | 0.110723  | 0.144668  | 0.191871  | 0.110431  |
| 0.200466 | 0.117424  | 0.0473485 | 0.0412296 | 0.125874  | 0.176573  | 0.118153  |
| 0.203817 | 0.120484  | 0.117424  | 0.111888  | 0.0817308 | 0.182838  | 0.121503  |
| 0.202506 | 0.115676  | 0.10067   | 0.0977564 | 0.123834  | 0.178904  | 0.109703  |
| 0.210519 | 0.129808  | 0.127914  | 0.123252  | 0.0657051 | 0.1875    | 0.131119  |
| 0.209645 | 0.128059  | 0.113345  | 0.114219  | 0.139423  | 0.188957  | 0.123252  |
| 0.212121 | 0.133159  | 0.130973  | 0.126603  | 0.0614802 | 0.191725  | 0.133013  |
| 0.118298 | 0.263695  | 0.254516  | 0.251894  | 0.253788  | 0.133741  | 0.263258  |
| 0.222028 | 0.113928  | 0.131265  | 0.124563  | 0.139569  | 0.201632  | 0.120484  |
| 0.214307 | 0.126311  | 0.125     | 0.124126  | 0.134761  | 0.194202  | 0.129662  |
| 0.108392 | 0.224942  | 0.209353  | 0.208479  | 0.213869  | 0.115967  | 0.223339  |
| 0.213432 | 0.118444  | 0.118007  | 0.117424  | 0.14088   | 0.195659  | 0.127914  |
| 0.105041 | 0.233537  | 0.224942  | 0.222028  | 0.227418  | 0.12398   | 0.237471  |
| 0.215909 | 0.112179  | 0.121941  | 0.118444  | 0.132284  | 0.197261  | 0.110868  |
| 0.211101 | 0.134761  | 0.0533217 | 0.0559441 | 0.139132  | 0.190997  | 0.133741  |
| 0.207896 | 0.0552156 | 0.118881  | 0.113054  | 0.131556  | 0.189831  | 0.112471  |
| 0.215763 | 0.129808  | 0.118298  | 0.115967  | 0.145542  | 0.19595   | 0.113345  |
| 0.105332 | 0.207314  | 0.197552  | 0.19289   | 0.204691  | 0.097465  | 0.204545  |
| 0.21285  | 0.132721  | 0.127914  | 0.121503  | 0.0680361 | 0.19391   | 0.132867  |
| 0.204691 | 0.124563  | 0.117133  | 0.111305  | 0.0826049 | 0.181381  | 0.120338  |
| 0.114802 | 0.231935  | 0.220134  | 0.218386  | 0.22465   | 0.12296   | 0.232372  |
| 0.211393 | 0.121358  | 0.120338  | 0.115093  | 0.140297  | 0.188666  | 0.0547786 |
| 0.100816 | 0.202506  | 0.191288  | 0.1875    | 0.202797  | 0.0949883 | 0.201777  |
| 0.212121 | 0.122378  | 0.123106  | 0.11757   | 0.138986  | 0.191434  | 0.053176  |
| 0.206002 | 0.122086  | 0.0499709 | 0.0470571 | 0.134615  | 0.181235  | 0.12398   |
| 0.21081  | 0.126894  | 0.109266  | 0.104312  | 0.132721  | 0.189831  | 0.12704   |
| 0.222465 | 0.133013  | 0.122378  | 0.122669  | 0.144085  | 0.201195  | 0.120338  |
| 0.201923 | 0.125     | 0.11116   | 0.107663  | 0.129371  | 0.180653  | 0.11757   |
| 0.1419   | 0.166084  | 0.152826  | 0.149038  | 0.169289  | 0.117424  | 0.163024  |
| 0.200175 | 0.115967  | 0.114948  | 0.10708   | 0.0754662 | 0.177448  | 0.116696  |
| 0.212413 | 0.0512821 | 0.123397  | 0.120775  | 0.137821  | 0.18852   | 0.121649  |
| 0.209207 | 0.119464  | 0.118153  | 0.109411  | 0.144814  | 0.185606  | 0.113199  |
| 0.208916 | 0.107517  | 0.130099  | 0.12398   | 0.125874  | 0.190559  | 0.129225  |
| 0.104167 | 0.201486  | 0.18852   | 0.185023  | 0.198572  | 0.0983392 | 0.200466  |
| 0.200466 | 0.121795  | 0.0473485 | 0.0418124 | 0.132284  | 0.180944  | 0.117861  |
| 0.200321 | 0.128934  | 0.115385  | 0.112471  | 0.14729   | 0.177302  | 0.115093  |
| 0.2162   | 0.122086  | 0.117861  | 0.113782  | 0.135198  | 0.192016  | 0.0884324 |
| 0.216055 | 0.122815  | 0.123252  | 0.117424  | 0.134761  | 0.192453  | 0.0509907 |
| 0.205128 | 0.128788  | 0.0473485 | 0.0502622 | 0.132576  | 0.184732  | 0.128059  |

|          |           |           |           |           |           |           |
|----------|-----------|-----------|-----------|-----------|-----------|-----------|
| 0.114948 | 0.259761  | 0.25      | 0.246795  | 0.249272  | 0.13884   | 0.259615  |
| 0.208916 | 0.11859   | 0.107372  | 0.102127  | 0.133741  | 0.18852   | 0.120192  |
| 0.20134  | 0.122378  | 0.092803  | 0.0875583 | 0.125583  | 0.18211   | 0.119318  |
| 0.148893 | 0.179779  | 0.181672  | 0.177302  | 0.178322  | 0.140152  | 0.183712  |
| 0.113054 | 0.192599  | 0.17905   | 0.175554  | 0.191434  | 0.0906177 | 0.189248  |
| 0.207459 | 0.115676  | 0.119318  | 0.11116   | 0.13345   | 0.185897  | 0.128642  |
| 0.205565 | 0.123689  | 0.116259  | 0.110431  | 0.0782343 | 0.184878  | 0.123252  |
| 0.212558 | 0.123106  | 0.112471  | 0.107226  | 0.137966  | 0.188374  | 0.106643  |
| 0.215326 | 0.143648  | 0.142628  | 0.137966  | 0.0603147 | 0.196387  | 0.143794  |
| 0.208333 | 0.115385  | 0.114365  | 0.109994  | 0.130828  | 0.184441  | 0.123397  |
| 0.209645 | 0.116404  | 0.116841  | 0.113345  | 0.132721  | 0.1875    | 0.129079  |
| 0.214161 | 0.125583  | 0.129225  | 0.123106  | 0.141317  | 0.195221  | 0.0528846 |
| 0.199301 | 0.117716  | 0.11553   | 0.112325  | 0.0670163 | 0.17803   | 0.122232  |
| 0.207314 | 0.129808  | 0.128788  | 0.123543  | 0.0636655 | 0.186043  | 0.129371  |
| 0.197844 | 0.125     | 0.118735  | 0.112908  | 0.134033  | 0.176282  | 0.0759033 |
| 0.217512 | 0.130682  | 0.121503  | 0.118007  | 0.142628  | 0.197698  | 0.115385  |
| 0.227564 | 0.142774  | 0.134761  | 0.131265  | 0.15472   | 0.208042  | 0.127768  |
| 0.212267 | 0.124563  | 0.108392  | 0.10373   | 0.136218  | 0.18954   | 0.124126  |
| 0.223776 | 0.136946  | 0.124563  | 0.125728  | 0.147436  | 0.203963  | 0.117279  |
| 0.220571 | 0.130245  | 0.131556  | 0.128351  | 0.140443  | 0.200758  | 0.055507  |
| 0.111742 | 0.212558  | 0.200175  | 0.198135  | 0.211393  | 0.0980478 | 0.212121  |
| 0.214161 | 0.126457  | 0.112908  | 0.104458  | 0.141608  | 0.194347  | 0.11553   |
| 0.109266 | 0.19697   | 0.184295  | 0.181381  | 0.195513  | 0.0888695 | 0.195659  |
| 0.207459 | 0.0885781 | 0.118735  | 0.112908  | 0.129953  | 0.185023  | 0.114656  |
| 0.204254 | 0.129953  | 0.055507  | 0.0549242 | 0.136655  | 0.185023  | 0.133887  |
| 0.204545 | 0.129662  | 0.120192  | 0.118735  | 0.138403  | 0.188228  | 0.126311  |
| 0.205274 | 0.12398   | 0.110431  | 0.108974  | 0.135052  | 0.179924  | 0.119464  |
| 0.203671 | 0.122378  | 0.122232  | 0.115239  | 0.0699301 | 0.180944  | 0.12602   |
| 0.207459 | 0.125291  | 0.125146  | 0.114948  | 0.0641026 | 0.184149  | 0.123397  |
| 0.200175 | 0.121503  | 0.0482226 | 0.0490967 | 0.136072  | 0.177156  | 0.124563  |
| 0.212267 | 0.0499709 | 0.119755  | 0.113054  | 0.133596  | 0.187791  | 0.119755  |
| 0.210519 | 0.130682  | 0.121503  | 0.121503  | 0.137966  | 0.190997  | 0.130245  |
| 0.20979  | 0.133741  | 0.136509  | 0.13243   | 0.144814  | 0.190268  | 0.0630828 |
| 0.110431 | 0.255245  | 0.246941  | 0.244027  | 0.241259  | 0.141608  | 0.25539   |
| 0.203963 | 0.12704   | 0.048514  | 0.0432692 | 0.137238  | 0.180944  | 0.126603  |
| 0.11116  | 0.187209  | 0.179487  | 0.175117  | 0.192162  | 0.0930944 | 0.187354  |
| 0.10373  | 0.194347  | 0.183712  | 0.179924  | 0.193765  | 0.0891608 | 0.191288  |
| 0.201486 | 0.126311  | 0.109848  | 0.106935  | 0.142628  | 0.179341  | 0.122669  |
| 0.207314 | 0.120192  | 0.102564  | 0.0981935 | 0.131847  | 0.182838  | 0.118881  |
| 0.207896 | 0.13039   | 0.0518648 | 0.0518648 | 0.134761  | 0.188957  | 0.129953  |
| 0.202069 | 0.116404  | 0.114802  | 0.108974  | 0.0814394 | 0.177593  | 0.11859   |
| 0.198427 | 0.12296   | 0.0965909 | 0.0948427 | 0.131119  | 0.174534  | 0.122232  |
| 0.210373 | 0.118881  | 0.120192  | 0.116987  | 0.138986  | 0.189103  | 0.0496795 |
| 0.200612 | 0.122232  | 0.11655   | 0.111014  | 0.0820221 | 0.179633  | 0.124126  |

|          |           |           |           |           |           |           |
|----------|-----------|-----------|-----------|-----------|-----------|-----------|
| 0.214598 | 0.13447   | 0.131119  | 0.125291  | 0.0659965 | 0.194493  | 0.133159  |
| 0.202506 | 0.121795  | 0.0473485 | 0.0435606 | 0.132284  | 0.179196  | 0.123397  |
| 0.212121 | 0.129662  | 0.12602   | 0.121941  | 0.0690559 | 0.190268  | 0.13039   |
| 0.208479 | 0.114365  | 0.11859   | 0.113054  | 0.132139  | 0.184295  | 0.120921  |
| 0.212558 | 0.134761  | 0.122669  | 0.121795  | 0.14088   | 0.194784  | 0.130828  |
| 0.212121 | 0.129662  | 0.116404  | 0.114948  | 0.142191  | 0.189394  | 0.111451  |
| 0.221008 | 0.133887  | 0.132867  | 0.130828  | 0.141463  | 0.202943  | 0.0559441 |
| 0.211247 | 0.131702  | 0.111451  | 0.110577  | 0.137238  | 0.191434  | 0.12398   |
| 0.198718 | 0.125291  | 0.0540501 | 0.0552156 | 0.127331  | 0.178322  | 0.119901  |
| 0.213869 | 0.128788  | 0.128642  | 0.128351  | 0.125583  | 0.197552  | 0.133887  |
| 0.108246 | 0.188083  | 0.18007   | 0.175408  | 0.18954   | 0.0922203 | 0.188228  |
| 0.213578 | 0.136655  | 0.133887  | 0.127185  | 0.0658508 | 0.192599  | 0.136218  |
| 0.20338  | 0.123543  | 0.121941  | 0.116987  | 0.0702214 | 0.182984  | 0.122523  |
| 0.211684 | 0.125728  | 0.11859   | 0.117424  | 0.140297  | 0.190122  | 0.125291  |
| 0.206294 | 0.121212  | 0.107372  | 0.103875  | 0.134907  | 0.18007   | 0.117861  |
| 0.211684 | 0.126311  | 0.114219  | 0.109848  | 0.142045  | 0.189831  | 0.108974  |
| 0.214744 | 0.129371  | 0.120484  | 0.11757   | 0.147436  | 0.197261  | 0.111451  |
| 0.110868 | 0.198281  | 0.182984  | 0.181527  | 0.197407  | 0.0884324 | 0.195804  |
| 0.194784 | 0.12602   | 0.11859   | 0.111305  | 0.0826049 | 0.172931  | 0.121212  |
| 0.184441 | 0.119172  | 0.109411  | 0.103293  | 0.119464  | 0.161131  | 0.112034  |
| 0.206294 | 0.124417  | 0.121941  | 0.116113  | 0.0699301 | 0.18648   | 0.127477  |
| 0.106789 | 0.195076  | 0.183566  | 0.183275  | 0.195367  | 0.090472  | 0.197261  |
| 0.201632 | 0.118007  | 0.102418  | 0.095134  | 0.132867  | 0.175991  | 0.116113  |
| 0.218969 | 0.125146  | 0.128205  | 0.123252  | 0.140297  | 0.19799   | 0.0530303 |
| 0.207022 | 0.126311  | 0.121503  | 0.116841  | 0.067162  | 0.184586  | 0.128497  |
| 0.209207 | 0.111597  | 0.113199  | 0.108537  | 0.129079  | 0.18852   | 0.122815  |
| 0.106061 | 0.19289   | 0.183421  | 0.178176  | 0.190268  | 0.0917832 | 0.194493  |
| 0.210082 | 0.120921  | 0.12398   | 0.119027  | 0.132576  | 0.192016  | 0.0517191 |
| 0.198718 | 0.11655   | 0.112617  | 0.109703  | 0.115385  | 0.179779  | 0.111451  |
| 0.196096 | 0.115385  | 0.104458  | 0.0983392 | 0.132867  | 0.172494  | 0.115239  |
| 0.187063 | 0.129662  | 0.118444  | 0.11757   | 0.128497  | 0.161422  | 0.124563  |
| 0.215181 | 0.0464744 | 0.121503  | 0.118881  | 0.137383  | 0.192162  | 0.119755  |
| 0.220425 | 0.128351  | 0.131119  | 0.126748  | 0.144085  | 0.201486  | 0.0550699 |
| 0.201777 | 0.122815  | 0.0463287 | 0.0405012 | 0.129516  | 0.181672  | 0.120629  |
| 0.213724 | 0.124272  | 0.126166  | 0.120338  | 0.124272  | 0.192453  | 0.120921  |
| 0.21824  | 0.134324  | 0.142628  | 0.134178  | 0.141026  | 0.200175  | 0.151369  |
| 0.11451  | 0.240093  | 0.230332  | 0.227127  | 0.232517  | 0.123834  | 0.24257   |
| 0.215326 | 0.136655  | 0.116696  | 0.112034  | 0.136072  | 0.198135  | 0.128351  |
| 0.214452 | 0.0492424 | 0.121358  | 0.117279  | 0.138403  | 0.192016  | 0.118444  |
| 0.19799  | 0.122815  | 0.116841  | 0.111305  | 0.0680361 | 0.178176  | 0.11451   |
| 0.201049 | 0.127914  | 0.120484  | 0.117279  | 0.140152  | 0.179779  | 0.127768  |
| 0.205565 | 0.0674534 | 0.118298  | 0.111888  | 0.12398   | 0.184586  | 0.0999417 |
| 0.207022 | 0.114365  | 0.120629  | 0.11655   | 0.13039   | 0.184003  | 0.117424  |
| 0.204837 | 0.124417  | 0.121358  | 0.115822  | 0.0705128 | 0.182984  | 0.123106  |

|          |           |           |           |           |           |           |
|----------|-----------|-----------|-----------|-----------|-----------|-----------|
| 0.215472 | 0.12602   | 0.127914  | 0.123543  | 0.141463  | 0.195367  | 0.0512821 |
| 0.203817 | 0.114656  | 0.114219  | 0.108683  | 0.129808  | 0.181381  | 0.120047  |
| 0.111014 | 0.23951   | 0.230332  | 0.228001  | 0.2331    | 0.128788  | 0.243444  |
| 0.201777 | 0.115239  | 0.100524  | 0.0941142 | 0.127477  | 0.179633  | 0.112762  |
| 0.206439 | 0.103875  | 0.111305  | 0.107226  | 0.12602   | 0.181964  | 0.102564  |
| 0.202506 | 0.119464  | 0.0456002 | 0.0441434 | 0.129371  | 0.18007   | 0.121649  |
| 0.212558 | 0.122815  | 0.127622  | 0.123252  | 0.131265  | 0.195659  | 0.138986  |
| 0.219843 | 0.140006  | 0.121503  | 0.120921  | 0.145251  | 0.200029  | 0.134615  |
| 0.195659 | 0.12398   | 0.106643  | 0.10169   | 0.127768  | 0.176719  | 0.12704   |
| 0.203234 | 0.124563  | 0.119172  | 0.113928  | 0.0706585 | 0.179341  | 0.122378  |
| 0.203963 | 0.111305  | 0.109411  | 0.103584  | 0.12704   | 0.183566  | 0.11757   |
| 0.107809 | 0.234557  | 0.225087  | 0.220717  | 0.226399  | 0.125     | 0.237325  |
| 0.204545 | 0.123543  | 0.12398   | 0.118153  | 0.0641026 | 0.186772  | 0.127185  |
| 0.216346 | 0.125728  | 0.125291  | 0.12296   | 0.139132  | 0.196241  | 0.0498252 |
| 0.207896 | 0.110577  | 0.11014   | 0.105186  | 0.133013  | 0.183421  | 0.115676  |
| 0.210082 | 0.103438  | 0.123397  | 0.118444  | 0.129662  | 0.192016  | 0.121358  |
| 0.2162   | 0.11655   | 0.125728  | 0.122232  | 0.134615  | 0.198135  | 0.116404  |
| 0.20542  | 0.122378  | 0.048514  | 0.0476399 | 0.130245  | 0.182692  | 0.123689  |
| 0.2162   | 0.125874  | 0.127768  | 0.12398   | 0.138403  | 0.194056  | 0.0587121 |
| 0.221882 | 0.130682  | 0.133741  | 0.130245  | 0.140297  | 0.201195  | 0.0571096 |
| 0.213724 | 0.121941  | 0.122669  | 0.113636  | 0.137675  | 0.193036  | 0.0501166 |
| 0.202797 | 0.123252  | 0.0464744 | 0.0406469 | 0.13345   | 0.182401  | 0.121941  |
| 0.215326 | 0.0474942 | 0.128351  | 0.12398   | 0.134907  | 0.195221  | 0.128351  |
| 0.223339 | 0.0473485 | 0.132576  | 0.129953  | 0.135635  | 0.202943  | 0.133741  |
| 0.217803 | 0.131847  | 0.126748  | 0.122669  | 0.141171  | 0.195076  | 0.133159  |
| 0.216929 | 0.133596  | 0.130536  | 0.126457  | 0.148456  | 0.194784  | 0.134615  |
| 0.22028  | 0.0439977 | 0.132721  | 0.127185  | 0.134907  | 0.201632  | 0.129516  |
| 0.208042 | 0.120338  | 0.0895979 | 0.0887238 | 0.130828  | 0.183566  | 0.116113  |
| 0.228001 | 0.134761  | 0.13549   | 0.13549   | 0.139423  | 0.207605  | 0.0981935 |
| 0.224942 | 0.137529  | 0.123106  | 0.119318  | 0.141026  | 0.201923  | 0.122815  |
| 0.102564 | 0.20979   | 0.199155  | 0.194784  | 0.206002  | 0.105186  | 0.211976  |
| 0.205711 | 0.130828  | 0.114365  | 0.112617  | 0.131119  | 0.187646  | 0.12602   |
| 0.212995 | 0.110431  | 0.11553   | 0.110868  | 0.136655  | 0.18852   | 0.107955  |
| 0.200612 | 0.129808  | 0.0486597 | 0.0472028 | 0.137966  | 0.179633  | 0.130245  |
| 0.105769 | 0.227855  | 0.21722   | 0.214015  | 0.22028   | 0.125     | 0.229167  |
| 0.113345 | 0.217366  | 0.206439  | 0.202069  | 0.215326  | 0.110431  | 0.215181  |
| 0.216638 | 0.130973  | 0.131702  | 0.127622  | 0.14088   | 0.19799   | 0.0553613 |
| 0.114802 | 0.254953  | 0.245192  | 0.243153  | 0.244755  | 0.134615  | 0.253351  |
| 0.205128 | 0.120047  | 0.0869755 | 0.0875583 | 0.131119  | 0.183566  | 0.118444  |
| 0.221154 | 0.137529  | 0.127477  | 0.126894  | 0.144814  | 0.20134   | 0.137675  |
| 0.205711 | 0.118881  | 0.100087  | 0.0977564 | 0.133741  | 0.183858  | 0.116696  |
| 0.21926  | 0.0453089 | 0.127622  | 0.124709  | 0.137675  | 0.198864  | 0.126166  |
| 0.10373  | 0.194639  | 0.181964  | 0.177885  | 0.191725  | 0.0894522 | 0.193619  |
| 0.208188 | 0.121358  | 0.117133  | 0.117716  | 0.13447   | 0.184878  | 0.122086  |

|          |           |           |           |           |           |           |
|----------|-----------|-----------|-----------|-----------|-----------|-----------|
| 0.105915 | 0.201486  | 0.18648   | 0.18211   | 0.200903  | 0.0933858 | 0.198427  |
| 0.210519 | 0.119901  | 0.105478  | 0.104021  | 0.133013  | 0.187209  | 0.118881  |
| 0.192745 | 0.122815  | 0.118007  | 0.113345  | 0.115822  | 0.17264   | 0.0780886 |
| 0.210227 | 0.120484  | 0.117424  | 0.111597  | 0.132721  | 0.188374  | 0.127914  |
| 0.188666 | 0.118153  | 0.106935  | 0.106935  | 0.115239  | 0.171474  | 0.112179  |
| 0.200758 | 0.115093  | 0.0456002 | 0.0421037 | 0.125583  | 0.176282  | 0.116404  |
| 0.205128 | 0.121212  | 0.109703  | 0.105915  | 0.125583  | 0.180361  | 0.120775  |
| 0.197261 | 0.112762  | 0.0986305 | 0.0945513 | 0.130828  | 0.175117  | 0.112617  |
| 0.20236  | 0.120192  | 0.115385  | 0.1081    | 0.0738636 | 0.178176  | 0.117133  |
| 0.214161 | 0.122086  | 0.117861  | 0.117861  | 0.134907  | 0.195221  | 0.0901807 |
| 0.207459 | 0.122669  | 0.107955  | 0.103293  | 0.130828  | 0.185315  | 0.118153  |
| 0.205857 | 0.11553   | 0.101107  | 0.0961538 | 0.131847  | 0.180798  | 0.118298  |
| 0.205128 | 0.128497  | 0.106206  | 0.102127  | 0.136072  | 0.183566  | 0.124563  |
| 0.212121 | 0.128205  | 0.128351  | 0.123689  | 0.0690559 | 0.187937  | 0.129808  |
| 0.208188 | 0.121358  | 0.111888  | 0.108683  | 0.136509  | 0.18109   | 0.117716  |
| 0.206876 | 0.11859   | 0.110286  | 0.108829  | 0.120629  | 0.187063  | 0.114656  |
| 0.200903 | 0.116404  | 0.0434149 | 0.0381702 | 0.127477  | 0.175845  | 0.115967  |
| 0.206148 | 0.12398   | 0.123252  | 0.120047  | 0.128059  | 0.184295  | 0.0603147 |
| 0.21285  | 0.0566725 | 0.120338  | 0.115093  | 0.137966  | 0.190414  | 0.118298  |
| 0.212995 | 0.125     | 0.116404  | 0.112325  | 0.143648  | 0.192016  | 0.112325  |
| 0.211247 | 0.125583  | 0.116404  | 0.112034  | 0.141026  | 0.189685  | 0.121358  |
| 0.202069 | 0.124272  | 0.120047  | 0.113636  | 0.0744464 | 0.179924  | 0.118881  |
| 0.21183  | 0.129953  | 0.130973  | 0.123106  | 0.0684732 | 0.188811  | 0.130682  |
| 0.215909 | 0.13986   | 0.13447   | 0.130682  | 0.0603147 | 0.19289   | 0.139714  |
| 0.205565 | 0.115239  | 0.107226  | 0.101981  | 0.127477  | 0.182255  | 0.0588578 |
| 0.202943 | 0.122523  | 0.0480769 | 0.04662   | 0.130099  | 0.179341  | 0.121212  |
| 0.202506 | 0.1081    | 0.113491  | 0.106498  | 0.125     | 0.179196  | 0.109411  |
| 0.220571 | 0.0530303 | 0.138549  | 0.131556  | 0.138986  | 0.202214  | 0.132721  |
| 0.21081  | 0.121066  | 0.105769  | 0.102564  | 0.133013  | 0.188666  | 0.120338  |
| 0.227127 | 0.140589  | 0.13345   | 0.131702  | 0.153409  | 0.207896  | 0.127331  |
| 0.214307 | 0.14292   | 0.0579837 | 0.0641026 | 0.139132  | 0.194202  | 0.143648  |
| 0.210664 | 0.116259  | 0.120192  | 0.11553   | 0.131119  | 0.190851  | 0.13243   |
| 0.202943 | 0.118153  | 0.102564  | 0.0999417 | 0.126311  | 0.181381  | 0.115676  |
| 0.206002 | 0.103147  | 0.114948  | 0.109411  | 0.125291  | 0.185023  | 0.118444  |
| 0.213869 | 0.13345   | 0.123397  | 0.121358  | 0.144814  | 0.194056  | 0.132139  |
| 0.117279 | 0.213141  | 0.203671  | 0.199009  | 0.207896  | 0.112325  | 0.209207  |
| 0.201486 | 0.116113  | 0.115093  | 0.11014   | 0.122232  | 0.181381  | 0.111597  |
| 0.209207 | 0.12296   | 0.110868  | 0.108829  | 0.136655  | 0.186772  | 0.122815  |
| 0.215472 | 0.0488054 | 0.122086  | 0.119464  | 0.131556  | 0.193036  | 0.118881  |
| 0.20979  | 0.126748  | 0.11961   | 0.112325  | 0.13986   | 0.184149  | 0.120484  |
| 0.209936 | 0.125728  | 0.111888  | 0.107809  | 0.140297  | 0.189248  | 0.124417  |
| 0.211684 | 0.128059  | 0.124126  | 0.123543  | 0.127185  | 0.186334  | 0.116841  |
| 0.211538 | 0.129371  | 0.128351  | 0.123689  | 0.120047  | 0.19289   | 0.121649  |
| 0.207314 | 0.113491  | 0.11655   | 0.11451   | 0.130099  | 0.186626  | 0.130536  |



|          |           |           |           |           |          |           |
|----------|-----------|-----------|-----------|-----------|----------|-----------|
| 0.21285  | 0.118735  | 0.115093  | 0.113345  | 0.130973  | 0.190705 | 0.0865385 |
| 0.217512 | 0.0493881 | 0.126748  | 0.122086  | 0.133596  | 0.199446 | 0.127622  |
| 0.21081  | 0.117279  | 0.111305  | 0.106352  | 0.133013  | 0.189248 | 0.120047  |
| 0.212121 | 0.129371  | 0.110868  | 0.109703  | 0.137821  | 0.191142 | 0.120775  |
| 0.177885 | 0.181672  | 0.173077  | 0.167541  | 0.183421  | 0.163316 | 0.175991  |
| 0.204691 | 0.124563  | 0.117716  | 0.111014  | 0.0796911 | 0.179924 | 0.118007  |
| 0.205711 | 0.0571096 | 0.13039   | 0.123106  | 0.138112  | 0.185606 | 0.13039   |
| 0.217803 | 0.121358  | 0.113345  | 0.109557  | 0.139714  | 0.198864 | 0.112179  |
| 0.207168 | 0.125874  | 0.124563  | 0.116696  | 0.124126  | 0.186772 | 0.116113  |
| 0.206002 | 0.119172  | 0.103875  | 0.0995047 | 0.123252  | 0.182984 | 0.11116   |
| 0.20338  | 0.120921  | 0.102418  | 0.0986305 | 0.123543  | 0.180944 | 0.10912   |
| 0.211247 | 0.119172  | 0.110286  | 0.106789  | 0.127914  | 0.189103 | 0.116113  |
| 0.215326 | 0.119755  | 0.12398   | 0.119027  | 0.13345   | 0.193765 | 0.101836  |
| 0.195804 | 0.128205  | 0.109411  | 0.10912   | 0.100233  | 0.176282 | 0.122523  |
| 0.223922 | 0.130682  | 0.122378  | 0.11859   | 0.141463  | 0.199155 | 0.119755  |
| 0.205128 | 0.118007  | 0.110286  | 0.106206  | 0.128788  | 0.17803  | 0.108829  |
| 0.207605 | 0.126603  | 0.117716  | 0.115093  | 0.140297  | 0.186043 | 0.111305  |
| 0.225524 | 0.132576  | 0.126894  | 0.122815  | 0.142191  | 0.204545 | 0.103293  |
| 0.214744 | 0.126457  | 0.111742  | 0.107372  | 0.135781  | 0.196678 | 0.10912   |
| 0.211538 | 0.12704   | 0.121066  | 0.116696  | 0.133741  | 0.190851 | 0.120484  |
| 0.211538 | 0.122378  | 0.105915  | 0.10271   | 0.138112  | 0.192308 | 0.104167  |
| 0.21183  | 0.127622  | 0.109703  | 0.107955  | 0.136072  | 0.191434 | 0.107663  |
| 0.204837 | 0.117424  | 0.0986305 | 0.0945513 | 0.133159  | 0.182401 | 0.112325  |
| 0.218677 | 0.127768  | 0.108683  | 0.106061  | 0.135927  | 0.195367 | 0.115093  |
| 0.21285  | 0.119027  | 0.106061  | 0.103147  | 0.137966  | 0.185169 | 0.109557  |
| 0.223339 | 0.142337  | 0.141608  | 0.138986  | 0.146416  | 0.203526 | 0.110723  |
| 0.211393 | 0.131556  | 0.131119  | 0.123834  | 0.141754  | 0.190997 | 0.102564  |
| 0.210227 | 0.119027  | 0.104021  | 0.104604  | 0.128642  | 0.188957 | 0.104312  |
| 0.227273 | 0.132576  | 0.14088   | 0.136801  | 0.143357  | 0.208333 | 0.106789  |
| 0.210956 | 0.12296   | 0.115822  | 0.112908  | 0.138986  | 0.184441 | 0.128934  |
| 0.216492 | 0.143648  | 0.131265  | 0.128351  | 0.141317  | 0.198718 | 0.124563  |
| 0.20979  | 0.120921  | 0.106206  | 0.101253  | 0.132576  | 0.191725 | 0.114365  |
| 0.220717 | 0.127185  | 0.141026  | 0.137821  | 0.144668  | 0.200903 | 0.141026  |
| 0.210519 | 0.120775  | 0.129662  | 0.125291  | 0.144376  | 0.189831 | 0.122378  |
| 0.217512 | 0.131556  | 0.132867  | 0.129662  | 0.150495  | 0.19799  | 0.121212  |
| 0.220425 | 0.131556  | 0.118881  | 0.115385  | 0.13884   | 0.198864 | 0.120047  |
| 0.211247 | 0.125     | 0.101544  | 0.100379  | 0.134033  | 0.189685 | 0.0992133 |
| 0.207314 | 0.121358  | 0.108392  | 0.101399  | 0.135052  | 0.182255 | 0.102564  |
| 0.214744 | 0.1081    | 0.118153  | 0.115239  | 0.133741  | 0.190559 | 0.100379  |
| 0.219114 | 0.127331  | 0.114948  | 0.11116   | 0.134907  | 0.199592 | 0.118153  |
| 0.223922 | 0.131847  | 0.120047  | 0.116841  | 0.140589  | 0.202069 | 0.128205  |
| 0.207896 | 0.130099  | 0.119172  | 0.117133  | 0.137675  | 0.185752 | 0.104312  |
| 0.207605 | 0.116404  | 0.107809  | 0.104604  | 0.133887  | 0.185169 | 0.1081    |
| 0.209499 | 0.122669  | 0.104458  | 0.105041  | 0.13549   | 0.185606 | 0.101836  |

|          |          |           |           |          |          |           |
|----------|----------|-----------|-----------|----------|----------|-----------|
| 0.210227 | 0.120192 | 0.109848  | 0.104312  | 0.133887 | 0.190414 | 0.114219  |
| 0.206439 | 0.121941 | 0.102855  | 0.102564  | 0.133013 | 0.185169 | 0.0990676 |
| 0.2162   | 0.131993 | 0.112908  | 0.110577  | 0.140152 | 0.193182 | 0.109703  |
| 0.207459 | 0.122378 | 0.107663  | 0.100087  | 0.131119 | 0.185023 | 0.119027  |
| 0.196241 | 0.123397 | 0.107226  | 0.103147  | 0.122815 | 0.174971 | 0.126457  |
| 0.210519 | 0.122523 | 0.103438  | 0.100816  | 0.128934 | 0.188957 | 0.121212  |
| 0.204108 | 0.122523 | 0.0879953 | 0.085373  | 0.13039  | 0.182255 | 0.117716  |
| 0.205857 | 0.116696 | 0.102855  | 0.0964452 | 0.131847 | 0.184878 | 0.109266  |
| 0.198427 | 0.119755 | 0.103875  | 0.0995047 | 0.128205 | 0.175991 | 0.120192  |
| 0.209353 | 0.122815 | 0.109557  | 0.1081    | 0.12602  | 0.186043 | 0.117133  |
| 0.204108 | 0.125728 | 0.120921  | 0.122669  | 0.115822 | 0.183421 | 0.128497  |
| 0.194493 | 0.116696 | 0.0984848 | 0.0932401 | 0.119318 | 0.174097 | 0.112471  |
| 0.221737 | 0.133741 | 0.124272  | 0.122523  | 0.131702 | 0.200758 | 0.123689  |

| TDr_2121 | TDr_2126  | TDr_2128  | TDr_2131  | TDr_2136  | TDr_2148  | TDr_2149  |
|----------|-----------|-----------|-----------|-----------|-----------|-----------|
| 0.138403 | 0.115385  | 0.111597  | 0.114365  | 0.114802  | 0.105332  | 0.0872669 |
| 0.129225 | 0.103875  | 0.100962  | 0.101107  | 0.104749  | 0.0990676 | 0.115093  |
| 0.125728 | 0.0971737 | 0.0945513 | 0.0976107 | 0.0989219 | 0.097028  | 0.112471  |
| 0.128934 | 0.107663  | 0.100962  | 0.104021  | 0.0872669 | 0.0990676 | 0.124417  |
| 0.100962 | 0.133596  | 0.131847  | 0.133159  | 0.128642  | 0.122378  | 0.138695  |
| 0.124854 | 0.124272  | 0.119901  | 0.119172  | 0.127185  | 0.114802  | 0.118007  |
| 0.128497 | 0.121212  | 0.121795  | 0.119027  | 0.123543  | 0.108537  | 0.107663  |
| 0.120047 | 0.102564  | 0.102855  | 0.103293  | 0.103147  | 0.10271   | 0.119027  |
| 0.119318 | 0.103001  | 0.0986305 | 0.100233  | 0.10271   | 0.0891608 | 0.115385  |
| 0.123834 | 0.0871212 | 0.0897436 | 0.0878497 | 0.113928  | 0.0782343 | 0.107955  |
| 0.133596 | 0.108537  | 0.107955  | 0.10373   | 0.122523  | 0.105186  | 0.115967  |
| 0.117424 | 0.109266  | 0.107517  | 0.111742  | 0.10373   | 0.097465  | 0.124563  |
| 0.124417 | 0.0976107 | 0.0967366 | 0.10067   | 0.108392  | 0.097465  | 0.120192  |
| 0.142628 | 0.125146  | 0.12398   | 0.120047  | 0.126894  | 0.118007  | 0.13986   |
| 0.137238 | 0.0530303 | 0.0597319 | 0.0540501 | 0.125583  | 0.105624  | 0.135344  |
| 0.133596 | 0.106789  | 0.107663  | 0.107517  | 0.117861  | 0.105186  | 0.120921  |
| 0.120921 | 0.107809  | 0.105478  | 0.10708   | 0.112762  | 0.101253  | 0.125728  |
| 0.122523 | 0.140589  | 0.141171  | 0.138403  | 0.137092  | 0.136072  | 0.151224  |
| 0.12398  | 0.10271   | 0.102418  | 0.104021  | 0.0995047 | 0.0967366 | 0.111597  |
| 0.20877  | 0.17701   | 0.176136  | 0.171329  | 0.200029  | 0.19289   | 0.206002  |
| 0.135198 | 0.110723  | 0.114802  | 0.116404  | 0.125     | 0.111451  | 0.105915  |
| 0.129225 | 0.114365  | 0.112034  | 0.112471  | 0.118153  | 0.11014   | 0.0949883 |
| 0.121503 | 0.106935  | 0.105769  | 0.107372  | 0.1081    | 0.097465  | 0.121066  |
| 0.128059 | 0.128059  | 0.124854  | 0.128205  | 0.127477  | 0.111014  | 0.126166  |
| 0.120047 | 0.0981935 | 0.0944056 | 0.0986305 | 0.106352  | 0.0890152 | 0.108246  |
| 0.136364 | 0.12296   | 0.125291  | 0.122815  | 0.132284  | 0.119901  | 0.10708   |
| 0.122669 | 0.116259  | 0.118007  | 0.116113  | 0.126166  | 0.110577  | 0.122232  |
| 0.127622 | 0.114802  | 0.11655   | 0.116696  | 0.118881  | 0.10271   | 0.127768  |
| 0.138403 | 0.127914  | 0.127914  | 0.128934  | 0.127622  | 0.11961   | 0.12602   |
| 0.133741 | 0.113345  | 0.115967  | 0.111742  | 0.121212  | 0.0971737 | 0.120484  |
| 0.13447  | 0.109703  | 0.110577  | 0.109557  | 0.13039   | 0.107517  | 0.0979021 |
| 0.129371 | 0.11451   | 0.113636  | 0.113782  | 0.120338  | 0.105624  | 0.116113  |
| 0.12296  | 0.0941142 | 0.0932401 | 0.0936772 | 0.106352  | 0.0945513 | 0.105041  |
| 0.130536 | 0.114802  | 0.113636  | 0.114365  | 0.117424  | 0.10067   | 0.11757   |
| 0.133596 | 0.116987  | 0.116696  | 0.114219  | 0.122232  | 0.109266  | 0.120921  |
| 0.135781 | 0.125874  | 0.125874  | 0.124854  | 0.126166  | 0.107372  | 0.129225  |
| 0.141463 | 0.131556  | 0.130099  | 0.127914  | 0.132721  | 0.120921  | 0.114802  |
| 0.137238 | 0.115967  | 0.113928  | 0.116696  | 0.12296   | 0.109994  | 0.116987  |
| 0.123252 | 0.105186  | 0.102564  | 0.105041  | 0.110431  | 0.0983392 | 0.110286  |
| 0.130828 | 0.116841  | 0.11655   | 0.117279  | 0.122378  | 0.107372  | 0.129225  |
| 0.120047 | 0.105769  | 0.101399  | 0.106206  | 0.106352  | 0.095134  | 0.120484  |
| 0.143648 | 0.131702  | 0.131702  | 0.13039   | 0.1419    | 0.123397  | 0.145251  |

|          |          |          |          |           |           |           |
|----------|----------|----------|----------|-----------|-----------|-----------|
| 0.146853 | 0.1419   | 0.142774 | 0.140006 | 0.148601  | 0.125728  | 0.150204  |
| 0.126311 | 0.114365 | 0.10912  | 0.108974 | 0.114073  | 0.100524  | 0.12296   |
| 0.116696 | 0.104749 | 0.103584 | 0.104604 | 0.110868  | 0.0932401 | 0.111597  |
| 0.132867 | 0.105478 | 0.109266 | 0.107955 | 0.123834  | 0.0995047 | 0.121358  |
| 0.128205 | 0.114219 | 0.110723 | 0.113782 | 0.118298  | 0.103875  | 0.126603  |
| 0.142628 | 0.131847 | 0.130682 | 0.130536 | 0.137675  | 0.122086  | 0.139277  |
| 0.127768 | 0.114365 | 0.109994 | 0.111888 | 0.109994  | 0.0996503 | 0.125583  |
| 0.127622 | 0.111014 | 0.107226 | 0.108246 | 0.118881  | 0.10067   | 0.121066  |
| 0.152826 | 0.14292  | 0.142628 | 0.1419   | 0.143794  | 0.131993  | 0.0623543 |
| 0.128059 | 0.123106 | 0.124854 | 0.124126 | 0.128059  | 0.115093  | 0.13986   |
| 0.126166 | 0.114219 | 0.111305 | 0.112034 | 0.113928  | 0.099796  | 0.120775  |
| 0.135781 | 0.112762 | 0.115093 | 0.109411 | 0.118298  | 0.106498  | 0.13447   |
| 0.128205 | 0.111888 | 0.11014  | 0.108829 | 0.0856643 | 0.108829  | 0.120775  |
| 0.1419   | 0.13986  | 0.142483 | 0.143794 | 0.134615  | 0.128642  | 0.144668  |
| 0.130973 | 0.124854 | 0.124563 | 0.124126 | 0.128934  | 0.113054  | 0.134324  |
| 0.126311 | 0.110286 | 0.108537 | 0.107517 | 0.112034  | 0.103438  | 0.120921  |
| 0.131265 | 0.112617 | 0.111451 | 0.107226 | 0.120775  | 0.103147  | 0.125583  |
| 0.129953 | 0.113636 | 0.111305 | 0.109994 | 0.122086  | 0.0992133 | 0.121066  |
| 0.136655 | 0.13549  | 0.13549  | 0.136801 | 0.135781  | 0.125437  | 0.141754  |
| 0.142191 | 0.134324 | 0.13345  | 0.134178 | 0.131993  | 0.121649  | 0.148164  |
| 0.169726 | 0.156323 | 0.155449 | 0.151807 | 0.15778   | 0.150932  | 0.161422  |
| 0.125146 | 0.106789 | 0.106498 | 0.106935 | 0.110286  | 0.0952797 | 0.121795  |
| 0.126894 | 0.111451 | 0.110286 | 0.109557 | 0.114656  | 0.0949883 | 0.123252  |
| 0.128059 | 0.111451 | 0.108246 | 0.111888 | 0.114073  | 0.092366  | 0.115967  |
| 0.147145 | 0.137529 | 0.137238 | 0.132139 | 0.13986   | 0.129808  | 0.125728  |
| 0.12296  | 0.106935 | 0.10169  | 0.107663 | 0.11014   | 0.0930944 | 0.121941  |
| 0.140006 | 0.131556 | 0.128642 | 0.129662 | 0.133304  | 0.122378  | 0.141026  |
| 0.126894 | 0.110868 | 0.10708  | 0.108392 | 0.123397  | 0.0990676 | 0.118881  |
| 0.125874 | 0.113345 | 0.111597 | 0.111451 | 0.118881  | 0.100962  | 0.12602   |
| 0.153846 | 0.141317 | 0.143065 | 0.141171 | 0.143357  | 0.13884   | 0.12398   |
| 0.13141  | 0.120047 | 0.117716 | 0.116987 | 0.117424  | 0.107955  | 0.126311  |
| 0.136801 | 0.133013 | 0.128642 | 0.13141  | 0.135927  | 0.123543  | 0.1419    |
| 0.126748 | 0.126748 | 0.125291 | 0.124272 | 0.13141   | 0.117279  | 0.142045  |
| 0.124854 | 0.11116  | 0.109703 | 0.109266 | 0.10912   | 0.105769  | 0.119464  |
| 0.125146 | 0.113199 | 0.111451 | 0.113636 | 0.112617  | 0.0984848 | 0.124126  |
| 0.123106 | 0.110577 | 0.109411 | 0.108683 | 0.11553   | 0.101107  | 0.12704   |
| 0.137383 | 0.128934 | 0.130973 | 0.128788 | 0.13039   | 0.121503  | 0.136072  |
| 0.127914 | 0.113054 | 0.106935 | 0.10912  | 0.113928  | 0.0968823 | 0.119318  |
| 0.140297 | 0.133596 | 0.133596 | 0.135198 | 0.135344  | 0.119172  | 0.144814  |
| 0.135635 | 0.116113 | 0.116113 | 0.113928 | 0.124272  | 0.104604  | 0.125874  |
| 0.123106 | 0.115822 | 0.114073 | 0.11655  | 0.116987  | 0.106935  | 0.127331  |
| 0.127768 | 0.111742 | 0.110868 | 0.114219 | 0.120775  | 0.104021  | 0.123543  |
| 0.13447  | 0.118444 | 0.113782 | 0.114802 | 0.11961   | 0.107809  | 0.133741  |
| 0.124563 | 0.113491 | 0.106789 | 0.109266 | 0.118444  | 0.101981  | 0.125     |

|          |           |           |           |          |           |           |
|----------|-----------|-----------|-----------|----------|-----------|-----------|
| 0.126603 | 0.116404  | 0.111742  | 0.112179  | 0.114073 | 0.10169   | 0.123252  |
| 0.137529 | 0.134033  | 0.13549   | 0.130682  | 0.137821 | 0.122815  | 0.144085  |
| 0.125583 | 0.102564  | 0.101399  | 0.101253  | 0.115676 | 0.0916375 | 0.114656  |
| 0.122232 | 0.10708   | 0.108246  | 0.106643  | 0.113491 | 0.097028  | 0.122669  |
| 0.133887 | 0.120484  | 0.118735  | 0.117133  | 0.124272 | 0.111305  | 0.116841  |
| 0.128642 | 0.125146  | 0.124272  | 0.122378  | 0.128059 | 0.11014   | 0.110431  |
| 0.136801 | 0.125728  | 0.127185  | 0.125291  | 0.135635 | 0.118007  | 0.133741  |
| 0.145105 | 0.134324  | 0.133741  | 0.132139  | 0.13345  | 0.126311  | 0.143211  |
| 0.11757  | 0.110577  | 0.113199  | 0.11014   | 0.11961  | 0.105769  | 0.108974  |
| 0.187209 | 0.179341  | 0.178759  | 0.17366   | 0.183712 | 0.172494  | 0.177739  |
| 0.120921 | 0.105478  | 0.101399  | 0.103875  | 0.107809 | 0.0954254 | 0.109411  |
| 0.152826 | 0.128351  | 0.129225  | 0.127622  | 0.133887 | 0.12704   | 0.142483  |
| 0.143502 | 0.120484  | 0.119901  | 0.119755  | 0.128934 | 0.118007  | 0.132576  |
| 0.136655 | 0.131119  | 0.130245  | 0.131265  | 0.138986 | 0.11961   | 0.113491  |
| 0.129225 | 0.10912   | 0.105041  | 0.105186  | 0.112617 | 0.099359  | 0.12296   |
| 0.143502 | 0.129808  | 0.127768  | 0.125583  | 0.128642 | 0.122086  | 0.138403  |
| 0.127185 | 0.109703  | 0.105915  | 0.108392  | 0.116696 | 0.105186  | 0.118007  |
| 0.129662 | 0.120338  | 0.118007  | 0.11553   | 0.127914 | 0.113491  | 0.127768  |
| 0.129079 | 0.111888  | 0.108683  | 0.10912   | 0.113636 | 0.103584  | 0.101544  |
| 0.143065 | 0.134615  | 0.135198  | 0.13243   | 0.13986  | 0.125437  | 0.141171  |
| 0.125    | 0.104604  | 0.100233  | 0.101544  | 0.112179 | 0.0907634 | 0.114656  |
| 0.143502 | 0.127477  | 0.129808  | 0.128205  | 0.13243  | 0.122669  | 0.118881  |
| 0.124709 | 0.115385  | 0.110723  | 0.113782  | 0.120629 | 0.102418  | 0.0992133 |
| 0.133596 | 0.126311  | 0.12602   | 0.128497  | 0.133013 | 0.113928  | 0.138695  |
| 0.138403 | 0.120629  | 0.119755  | 0.117279  | 0.130828 | 0.112325  | 0.113199  |
| 0.120921 | 0.10373   | 0.103438  | 0.103293  | 0.112179 | 0.0980478 | 0.102418  |
| 0.154138 | 0.140443  | 0.141026  | 0.136218  | 0.140734 | 0.137966  | 0.134178  |
| 0.124854 | 0.110286  | 0.109703  | 0.114802  | 0.123106 | 0.099359  | 0.102564  |
| 0.126311 | 0.108246  | 0.108246  | 0.106643  | 0.113199 | 0.101399  | 0.121795  |
| 0.127331 | 0.113345  | 0.113636  | 0.114948  | 0.11859  | 0.104749  | 0.11961   |
| 0.144231 | 0.137238  | 0.137821  | 0.135927  | 0.137238 | 0.11961   | 0.123106  |
| 0.136655 | 0.117424  | 0.118298  | 0.114365  | 0.126457 | 0.11116   | 0.120775  |
| 0.129371 | 0.103147  | 0.10373   | 0.101836  | 0.109848 | 0.10271   | 0.119318  |
| 0.129953 | 0.104895  | 0.102273  | 0.103584  | 0.113928 | 0.104749  | 0.118153  |
| 0.131265 | 0.111742  | 0.106789  | 0.111014  | 0.117279 | 0.0979021 | 0.101107  |
| 0.134324 | 0.111305  | 0.113345  | 0.114365  | 0.12704  | 0.10708   | 0.128351  |
| 0.126311 | 0.114073  | 0.113491  | 0.114219  | 0.119318 | 0.100233  | 0.100233  |
| 0.118881 | 0.0973193 | 0.094697  | 0.0942599 | 0.108683 | 0.0843531 | 0.110577  |
| 0.12296  | 0.101399  | 0.0976107 | 0.100087  | 0.106352 | 0.0895979 | 0.10912   |
| 0.125728 | 0.101836  | 0.0977564 | 0.0996503 | 0.112908 | 0.0917832 | 0.118881  |
| 0.133887 | 0.114365  | 0.114948  | 0.118007  | 0.117861 | 0.105769  | 0.129662  |
| 0.140152 | 0.119755  | 0.118298  | 0.117279  | 0.127914 | 0.114365  | 0.128351  |
| 0.121941 | 0.099796  | 0.097465  | 0.0964452 | 0.112617 | 0.0871212 | 0.116841  |
| 0.121795 | 0.0938228 | 0.0891608 | 0.0919289 | 0.106061 | 0.0907634 | 0.111742  |

|          |           |           |           |           |           |           |
|----------|-----------|-----------|-----------|-----------|-----------|-----------|
| 0.130245 | 0.11451   | 0.11451   | 0.111451  | 0.130536  | 0.109411  | 0.126311  |
| 0.122232 | 0.103001  | 0.0989219 | 0.101107  | 0.108829  | 0.0871212 | 0.111305  |
| 0.135635 | 0.116404  | 0.114656  | 0.11451   | 0.119318  | 0.109848  | 0.114219  |
| 0.144376 | 0.128059  | 0.129516  | 0.125     | 0.131556  | 0.118007  | 0.0495338 |
| 0.118444 | 0.10912   | 0.105915  | 0.107809  | 0.116113  | 0.0976107 | 0.121212  |
| 0.125583 | 0.100524  | 0.0976107 | 0.0965909 | 0.113054  | 0.0922203 | 0.119027  |
| 0.128205 | 0.102273  | 0.101399  | 0.101544  | 0.108683  | 0.0925117 | 0.119027  |
| 0.122669 | 0.102855  | 0.0979021 | 0.102418  | 0.113054  | 0.0898893 | 0.112908  |
| 0.13141  | 0.11859   | 0.115967  | 0.11553   | 0.124126  | 0.100962  | 0.127768  |
| 0.116259 | 0.0967366 | 0.0952797 | 0.0945513 | 0.107809  | 0.0869755 | 0.110868  |
| 0.144085 | 0.126894  | 0.128934  | 0.130536  | 0.139132  | 0.121795  | 0.13345   |
| 0.136364 | 0.128788  | 0.125874  | 0.124272  | 0.138112  | 0.11961   | 0.135052  |
| 0.131702 | 0.118881  | 0.11655   | 0.116404  | 0.125291  | 0.107663  | 0.125437  |
| 0.124854 | 0.107372  | 0.104749  | 0.105478  | 0.120484  | 0.0976107 | 0.123543  |
| 0.123689 | 0.108246  | 0.107955  | 0.107226  | 0.120775  | 0.0987762 | 0.101399  |
| 0.123252 | 0.104312  | 0.0981935 | 0.103584  | 0.115967  | 0.0930944 | 0.113199  |
| 0.126894 | 0.112034  | 0.109411  | 0.111597  | 0.114365  | 0.0964452 | 0.114802  |
| 0.118153 | 0.105624  | 0.10271   | 0.105186  | 0.108829  | 0.0958625 | 0.115676  |
| 0.130682 | 0.107955  | 0.110286  | 0.108974  | 0.0939685 | 0.101107  | 0.123252  |
| 0.132721 | 0.125146  | 0.122815  | 0.122378  | 0.132721  | 0.110723  | 0.139277  |
| 0.133159 | 0.112471  | 0.106935  | 0.110577  | 0.111888  | 0.103875  | 0.124854  |
| 0.135635 | 0.11757   | 0.11961   | 0.119755  | 0.130682  | 0.113054  | 0.136946  |
| 0.140443 | 0.129079  | 0.129371  | 0.126603  | 0.134615  | 0.120775  | 0.123689  |
| 0.201923 | 0.182401  | 0.181818  | 0.179341  | 0.186772  | 0.188957  | 0.198572  |
| 0.239073 | 0.230041  | 0.231789  | 0.22669   | 0.229749  | 0.233683  | 0.240676  |
| 0.124417 | 0.108683  | 0.1081    | 0.111451  | 0.0690559 | 0.103875  | 0.118444  |
| 0.115239 | 0.110577  | 0.10708   | 0.108683  | 0.111451  | 0.100524  | 0.120629  |
| 0.121358 | 0.107372  | 0.104167  | 0.103438  | 0.10708   | 0.0952797 | 0.11451   |
| 0.122523 | 0.110577  | 0.11116   | 0.110723  | 0.110286  | 0.0984848 | 0.120629  |
| 0.137092 | 0.0546329 | 0.0645396 | 0.0553613 | 0.125146  | 0.106061  | 0.13549   |
| 0.128934 | 0.111451  | 0.110577  | 0.111014  | 0.111451  | 0.104021  | 0.125291  |
| 0.143065 | 0.143939  | 0.143065  | 0.143211  | 0.143648  | 0.135344  | 0.149621  |
| 0.126311 | 0.117861  | 0.113199  | 0.116259  | 0.116113  | 0.106935  | 0.125583  |
| 0.133596 | 0.13243   | 0.129516  | 0.132867  | 0.127477  | 0.114802  | 0.132867  |
| 0.138986 | 0.131702  | 0.128205  | 0.128934  | 0.130245  | 0.120192  | 0.137092  |
| 0.141317 | 0.125874  | 0.12704   | 0.126311  | 0.134033  | 0.118444  | 0.139714  |
| 0.143357 | 0.130245  | 0.132867  | 0.131556  | 0.134615  | 0.118444  | 0.142628  |
| 0.128497 | 0.112471  | 0.113054  | 0.110286  | 0.117716  | 0.103584  | 0.124854  |
| 0.121795 | 0.113054  | 0.111888  | 0.110868  | 0.112179  | 0.106206  | 0.119901  |
| 0.125728 | 0.114948  | 0.11116   | 0.112471  | 0.121066  | 0.104312  | 0.127914  |
| 0.116987 | 0.111742  | 0.108829  | 0.111014  | 0.110286  | 0.0935315 | 0.119464  |
| 0.121358 | 0.111742  | 0.110868  | 0.111888  | 0.113199  | 0.103438  | 0.122086  |
| 0.120338 | 0.115967  | 0.113928  | 0.116987  | 0.113636  | 0.103293  | 0.123106  |
| 0.133887 | 0.123397  | 0.123397  | 0.123834  | 0.128934  | 0.117716  | 0.138403  |

|          |           |           |           |          |           |          |
|----------|-----------|-----------|-----------|----------|-----------|----------|
| 0.144085 | 0.13447   | 0.133304  | 0.134907  | 0.135927 | 0.125     | 0.145979 |
| 0.124417 | 0.118298  | 0.117424  | 0.116987  | 0.113928 | 0.105624  | 0.124272 |
| 0.128059 | 0.114656  | 0.111451  | 0.111888  | 0.117279 | 0.102273  | 0.121795 |
| 0.135344 | 0.133304  | 0.133304  | 0.132576  | 0.133013 | 0.11655   | 0.138112 |
| 0.122232 | 0.11116   | 0.110577  | 0.112471  | 0.110868 | 0.0955711 | 0.120921 |
| 0.145396 | 0.138403  | 0.136072  | 0.131847  | 0.143939 | 0.131265  | 0.150204 |
| 0.144814 | 0.123834  | 0.126748  | 0.124563  | 0.13549  | 0.11961   | 0.140297 |
| 0.140297 | 0.13039   | 0.131556  | 0.131119  | 0.134761 | 0.12704   | 0.142483 |
| 0.114948 | 0.111742  | 0.106789  | 0.1081    | 0.106498 | 0.097028  | 0.117424 |
| 0.123543 | 0.108683  | 0.103438  | 0.108246  | 0.108392 | 0.099796  | 0.116113 |
| 0.123689 | 0.122815  | 0.123397  | 0.123252  | 0.12602  | 0.109266  | 0.131119 |
| 0.137821 | 0.125583  | 0.122669  | 0.125146  | 0.122378 | 0.115822  | 0.128642 |
| 0.131702 | 0.133741  | 0.13141   | 0.131847  | 0.130536 | 0.118153  | 0.133596 |
| 0.124854 | 0.117279  | 0.114073  | 0.116841  | 0.116696 | 0.107517  | 0.125583 |
| 0.12296  | 0.116259  | 0.112762  | 0.116404  | 0.120338 | 0.102418  | 0.127768 |
| 0.133159 | 0.11859   | 0.119172  | 0.117861  | 0.121503 | 0.109994  | 0.128934 |
| 0.13986  | 0.132867  | 0.13345   | 0.132139  | 0.138403 | 0.118153  | 0.139132 |
| 0.135198 | 0.133741  | 0.13141   | 0.132139  | 0.129662 | 0.120192  | 0.143794 |
| 0.143794 | 0.13039   | 0.133013  | 0.129953  | 0.135052 | 0.123834  | 0.138112 |
| 0.140443 | 0.128788  | 0.127331  | 0.126894  | 0.13345  | 0.11961   | 0.130682 |
| 0.124126 | 0.118881  | 0.115093  | 0.119318  | 0.112471 | 0.104458  | 0.120775 |
| 0.133741 | 0.131119  | 0.128788  | 0.130099  | 0.130536 | 0.114656  | 0.141463 |
| 0.125437 | 0.112325  | 0.112034  | 0.111597  | 0.110286 | 0.0981935 | 0.116259 |
| 0.123543 | 0.113928  | 0.112179  | 0.109994  | 0.116841 | 0.100379  | 0.120484 |
| 0.122378 | 0.11014   | 0.109557  | 0.109703  | 0.116259 | 0.101544  | 0.124272 |
| 0.121358 | 0.114365  | 0.112908  | 0.111597  | 0.119318 | 0.099359  | 0.122669 |
| 0.120484 | 0.114948  | 0.109703  | 0.112762  | 0.108829 | 0.100233  | 0.120338 |
| 0.141608 | 0.133741  | 0.134033  | 0.13447   | 0.137529 | 0.128059  | 0.138549 |
| 0.125437 | 0.114365  | 0.111742  | 0.113928  | 0.120775 | 0.100524  | 0.118881 |
| 0.143502 | 0.13447   | 0.133596  | 0.13345   | 0.130973 | 0.124709  | 0.141026 |
| 0.119318 | 0.11116   | 0.110577  | 0.112762  | 0.108829 | 0.0981935 | 0.122086 |
| 0.13345  | 0.127331  | 0.125291  | 0.128059  | 0.127914 | 0.113199  | 0.132139 |
| 0.132139 | 0.121649  | 0.118153  | 0.120921  | 0.12602  | 0.1081    | 0.132576 |
| 0.135344 | 0.107663  | 0.106789  | 0.106643  | 0.120484 | 0.104604  | 0.128205 |
| 0.128205 | 0.112179  | 0.1081    | 0.110577  | 0.11859  | 0.10067   | 0.117279 |
| 0.12602  | 0.118444  | 0.117861  | 0.114802  | 0.12398  | 0.111014  | 0.136072 |
| 0.137529 | 0.112179  | 0.107809  | 0.112617  | 0.11859  | 0.109703  | 0.131265 |
| 0.121503 | 0.108392  | 0.106352  | 0.107372  | 0.117424 | 0.0992133 | 0.111742 |
| 0.136364 | 0.119464  | 0.121212  | 0.120484  | 0.130828 | 0.105624  | 0.137383 |
| 0.146125 | 0.134761  | 0.133887  | 0.13345   | 0.133013 | 0.12704   | 0.132867 |
| 0.122232 | 0.0992133 | 0.0957168 | 0.0984848 | 0.104458 | 0.0836247 | 0.111305 |
| 0.145105 | 0.118298  | 0.115676  | 0.116113  | 0.133741 | 0.111451  | 0.13447  |
| 0.136218 | 0.110286  | 0.10912   | 0.110723  | 0.129808 | 0.0987762 | 0.123834 |
| 0.137092 | 0.119901  | 0.116696  | 0.11859   | 0.132139 | 0.110431  | 0.134033 |

|          |          |          |          |          |           |          |
|----------|----------|----------|----------|----------|-----------|----------|
| 0.133887 | 0.106789 | 0.108246 | 0.11014  | 0.123106 | 0.103147  | 0.120047 |
| 0.131265 | 0.110577 | 0.107955 | 0.108392 | 0.12398  | 0.10169   | 0.127622 |
| 0.131993 | 0.107226 | 0.106935 | 0.109411 | 0.125583 | 0.10067   | 0.126603 |
| 0.13447  | 0.122815 | 0.120775 | 0.121503 | 0.125728 | 0.112471  | 0.137238 |
| 0.144376 | 0.120775 | 0.121649 | 0.125583 | 0.139132 | 0.117133  | 0.134907 |
| 0.135927 | 0.108829 | 0.112617 | 0.111305 | 0.117861 | 0.103147  | 0.12704  |
| 0.128059 | 0.106498 | 0.102418 | 0.105769 | 0.11757  | 0.0967366 | 0.118881 |
| 0.140443 | 0.133741 | 0.134033 | 0.133304 | 0.130245 | 0.124272  | 0.133596 |
| 0.137966 | 0.118153 | 0.120484 | 0.120047 | 0.133596 | 0.107809  | 0.133159 |
| 0.124272 | 0.102418 | 0.106206 | 0.102273 | 0.112034 | 0.0967366 | 0.114802 |
| 0.222028 | 0.216492 | 0.212995 | 0.212267 | 0.213287 | 0.214015  | 0.220134 |
| 0.134033 | 0.112762 | 0.111014 | 0.112325 | 0.121212 | 0.106206  | 0.128934 |
| 0.127331 | 0.106643 | 0.104604 | 0.104167 | 0.114802 | 0.0884324 | 0.119901 |
| 0.142045 | 0.123397 | 0.122232 | 0.123543 | 0.13447  | 0.11859   | 0.138695 |
| 0.127477 | 0.109994 | 0.104458 | 0.107809 | 0.116696 | 0.102564  | 0.122378 |
| 0.138549 | 0.113199 | 0.116404 | 0.11655  | 0.128642 | 0.106935  | 0.134907 |
| 0.127768 | 0.110286 | 0.110868 | 0.109848 | 0.116696 | 0.100816  | 0.13549  |
| 0.132867 | 0.106061 | 0.104312 | 0.105624 | 0.11859  | 0.100379  | 0.127768 |
| 0.132284 | 0.108974 | 0.111888 | 0.109994 | 0.126166 | 0.101544  | 0.129516 |
| 0.14088  | 0.116113 | 0.118153 | 0.11655  | 0.129808 | 0.112762  | 0.136364 |
| 0.136655 | 0.123543 | 0.120921 | 0.122815 | 0.131993 | 0.10912   | 0.130682 |
| 0.136801 | 0.120484 | 0.123397 | 0.126457 | 0.129808 | 0.112471  | 0.129079 |
| 0.137092 | 0.117279 | 0.117861 | 0.117716 | 0.122232 | 0.108392  | 0.131702 |
| 0.128642 | 0.106498 | 0.103584 | 0.10373  | 0.118735 | 0.0941142 | 0.122378 |
| 0.127477 | 0.111451 | 0.109994 | 0.112762 | 0.114073 | 0.10169   | 0.12704  |
| 0.143648 | 0.120338 | 0.122669 | 0.122232 | 0.136364 | 0.120775  | 0.142045 |
| 0.128934 | 0.110286 | 0.107955 | 0.107809 | 0.120484 | 0.100233  | 0.127331 |
| 0.139714 | 0.134761 | 0.131265 | 0.13345  | 0.139423 | 0.120921  | 0.143939 |
| 0.149184 | 0.126748 | 0.128497 | 0.125728 | 0.141026 | 0.129225  | 0.130973 |
| 0.138112 | 0.111597 | 0.109557 | 0.111742 | 0.126748 | 0.103875  | 0.125146 |
| 0.137821 | 0.112762 | 0.112179 | 0.111742 | 0.128788 | 0.10708   | 0.125728 |
| 0.140006 | 0.122523 | 0.120484 | 0.121212 | 0.127768 | 0.118881  | 0.123252 |
| 0.136946 | 0.122086 | 0.125583 | 0.121941 | 0.129079 | 0.109994  | 0.124854 |
| 0.137238 | 0.122669 | 0.121503 | 0.122815 | 0.119464 | 0.116404  | 0.124272 |
| 0.145105 | 0.126748 | 0.127331 | 0.125437 | 0.138986 | 0.128934  | 0.130973 |
| 0.122232 | 0.103584 | 0.103584 | 0.101399 | 0.115822 | 0.0958625 | 0.121795 |
| 0.129953 | 0.120629 | 0.120338 | 0.120192 | 0.131993 | 0.118735  | 0.140589 |
| 0.14933  | 0.133887 | 0.130099 | 0.129371 | 0.141754 | 0.135198  | 0.133159 |
| 0.126603 | 0.11116  | 0.112325 | 0.11014  | 0.121941 | 0.102564  | 0.121795 |
| 0.129225 | 0.120775 | 0.119027 | 0.117424 | 0.125437 | 0.107809  | 0.130245 |
| 0.145979 | 0.13986  | 0.139569 | 0.138258 | 0.140443 | 0.136509  | 0.140297 |
| 0.134324 | 0.123543 | 0.120338 | 0.121066 | 0.122086 | 0.113491  | 0.135344 |
| 0.146999 | 0.125728 | 0.128059 | 0.132284 | 0.13884  | 0.122086  | 0.138403 |
| 0.142774 | 0.119464 | 0.121503 | 0.122232 | 0.129079 | 0.115239  | 0.137383 |



|          |           |           |           |           |           |           |
|----------|-----------|-----------|-----------|-----------|-----------|-----------|
| 0.135344 | 0.120484  | 0.120484  | 0.120921  | 0.12602   | 0.118881  | 0.132284  |
| 0.139569 | 0.120921  | 0.120338  | 0.121649  | 0.129662  | 0.118444  | 0.130099  |
| 0.135344 | 0.11553   | 0.113491  | 0.111888  | 0.126311  | 0.107517  | 0.131702  |
| 0.138986 | 0.127622  | 0.125874  | 0.123397  | 0.133741  | 0.123397  | 0.137092  |
| 0.136072 | 0.123834  | 0.125583  | 0.124272  | 0.129079  | 0.112034  | 0.131556  |
| 0.144231 | 0.134907  | 0.132576  | 0.13243   | 0.132576  | 0.125728  | 0.133887  |
| 0.140734 | 0.128205  | 0.128497  | 0.128351  | 0.133159  | 0.117861  | 0.130682  |
| 0.142191 | 0.128788  | 0.126166  | 0.123397  | 0.134324  | 0.120484  | 0.12602   |
| 0.15472  | 0.134907  | 0.139569  | 0.137966  | 0.144522  | 0.135344  | 0.144376  |
| 0.127331 | 0.110723  | 0.11014   | 0.110577  | 0.128788  | 0.0954254 | 0.124563  |
| 0.127331 | 0.113054  | 0.113345  | 0.110286  | 0.121212  | 0.107663  | 0.128934  |
| 0.128497 | 0.123543  | 0.119755  | 0.120192  | 0.131702  | 0.116987  | 0.128934  |
| 0.123834 | 0.109848  | 0.111014  | 0.109411  | 0.123543  | 0.0992133 | 0.114656  |
| 0.151952 | 0.133304  | 0.135927  | 0.131702  | 0.138258  | 0.131702  | 0.127331  |
| 0.160111 | 0.14933   | 0.148747  | 0.147727  | 0.155449  | 0.136364  | 0.139277  |
| 0.13447  | 0.131556  | 0.128642  | 0.128205  | 0.127768  | 0.12296   | 0.134324  |
| 0.128497 | 0.124709  | 0.122378  | 0.122232  | 0.119755  | 0.110577  | 0.125437  |
| 0.139714 | 0.125146  | 0.125728  | 0.125     | 0.124272  | 0.12296   | 0.134033  |
| 0.140734 | 0.119172  | 0.118298  | 0.120192  | 0.128497  | 0.114948  | 0.137675  |
| 0.127914 | 0.12704   | 0.124709  | 0.125146  | 0.128205  | 0.112908  | 0.136801  |
| 0.141317 | 0.128788  | 0.129371  | 0.12602   | 0.140152  | 0.11757   | 0.137383  |
| 0.146562 | 0.127331  | 0.124709  | 0.125728  | 0.138403  | 0.119318  | 0.129516  |
| 0.139132 | 0.114656  | 0.114365  | 0.11451   | 0.126894  | 0.1081    | 0.127331  |
| 0.162733 | 0.159237  | 0.157488  | 0.154138  | 0.151078  | 0.152972  | 0.148019  |
| 0.133596 | 0.119318  | 0.115822  | 0.117133  | 0.133013  | 0.10169   | 0.131993  |
| 0.149038 | 0.121649  | 0.125146  | 0.125     | 0.141171  | 0.118298  | 0.136946  |
| 0.126748 | 0.115385  | 0.116259  | 0.116113  | 0.124126  | 0.107372  | 0.13039   |
| 0.139277 | 0.131702  | 0.134615  | 0.135927  | 0.131702  | 0.122523  | 0.130682  |
| 0.134615 | 0.112179  | 0.111888  | 0.10912   | 0.12704   | 0.109703  | 0.128642  |
| 0.153409 | 0.132721  | 0.131556  | 0.129371  | 0.116404  | 0.128497  | 0.0932401 |
| 0.136072 | 0.136072  | 0.13986   | 0.140589  | 0.140443  | 0.139132  | 0.149621  |
| 0.128934 | 0.121358  | 0.11757   | 0.119172  | 0.0549242 | 0.113928  | 0.129953  |
| 0.143065 | 0.13141   | 0.129079  | 0.130099  | 0.0754662 | 0.128351  | 0.14088   |
| 0.154866 | 0.142628  | 0.139714  | 0.138986  | 0.142045  | 0.136072  | 0.153846  |
| 0.151369 | 0.13447   | 0.128934  | 0.131702  | 0.117861  | 0.128497  | 0.145105  |
| 0.132284 | 0.128205  | 0.124709  | 0.128351  | 0.123834  | 0.116987  | 0.117279  |
| 0.105624 | 0.130099  | 0.133887  | 0.127331  | 0.128642  | 0.123834  | 0.134324  |
| 0.13039  | 0.0802739 | 0.0791084 | 0.0789627 | 0.10708   | 0.0958625 | 0.119172  |
| 0.132576 | 0.0780886 | 0.0798368 | 0.0776515 | 0.115676  | 0.103001  | 0.121358  |
| 0.12602  | 0.11757   | 0.112617  | 0.114219  | 0.123397  | 0.100816  | 0.117716  |
| 0.127477 | 0.116113  | 0.113199  | 0.114802  | 0.0499709 | 0.111888  | 0.125583  |
| 0.127914 | 0.11014   | 0.107226  | 0.107955  | 0.118007  | 0.102127  | 0.128351  |
| 0.122669 | 0.0725524 | 0.0687646 | 0.0709499 | 0.0824592 | 0.0968823 | 0.121066  |
| 0.12296  | 0.11451   | 0.11014   | 0.114365  | 0.104021  | 0.113782  | 0.127185  |

|           |           |           |           |           |           |           |
|-----------|-----------|-----------|-----------|-----------|-----------|-----------|
| 0.138549  | 0.0587121 | 0.0645396 | 0.0576923 | 0.116404  | 0.102855  | 0.131119  |
| 0.121066  | 0.0971737 | 0.0948427 | 0.0955711 | 0.105624  | 0.0451632 | 0.110431  |
| 0.135344  | 0.11757   | 0.115239  | 0.115967  | 0.0496795 | 0.112762  | 0.131702  |
| 0.127331  | 0.113345  | 0.111014  | 0.11553   | 0.0463287 | 0.108537  | 0.125146  |
| 0.132867  | 0.124417  | 0.123252  | 0.12602   | 0.122378  | 0.115239  | 0.128059  |
| 0.219697  | 0.208333  | 0.207459  | 0.207022  | 0.209207  | 0.21081   | 0.216055  |
| 0.144231  | 0.138695  | 0.138112  | 0.140006  | 0.0731352 | 0.135052  | 0.149913  |
| 0.133887  | 0.126603  | 0.125146  | 0.127914  | 0.12398   | 0.115676  | 0.13141   |
| 0.124417  | 0.118007  | 0.113928  | 0.11553   | 0.115093  | 0.111451  | 0.126894  |
| 0.213578  | 0.202797  | 0.203963  | 0.200903  | 0.203963  | 0.206148  | 0.214598  |
| 0.13345   | 0.120629  | 0.11859   | 0.11757   | 0.119464  | 0.112034  | 0.10067   |
| 0.127477  | 0.114073  | 0.114948  | 0.115967  | 0.122232  | 0.106643  | 0.125291  |
| 0.0496795 | 0.118153  | 0.117279  | 0.119755  | 0.121941  | 0.11014   | 0.134324  |
| 0.134907  | 0.0454545 | 0.0553613 | 0.046183  | 0.120047  | 0.10067   | 0.126894  |
| 0.25      | 0.24359   | 0.24359   | 0.241113  | 0.244464  | 0.244318  | 0.250146  |
| 0.136801  | 0.119027  | 0.123106  | 0.120921  | 0.124563  | 0.110431  | 0.0434149 |
| 0.127477  | 0.11961   | 0.113491  | 0.117716  | 0.115239  | 0.105769  | 0.125     |
| 0.12602   | 0.122232  | 0.12398   | 0.123252  | 0.122232  | 0.111305  | 0.130828  |
| 0.121066  | 0.121649  | 0.122232  | 0.120047  | 0.118153  | 0.110723  | 0.125874  |
| 0.140589  | 0.105624  | 0.105332  | 0.107809  | 0.130099  | 0.113345  | 0.0681818 |
| 0.138258  | 0.108246  | 0.107955  | 0.104604  | 0.107955  | 0.107809  | 0.12704   |
| 0.125437  | 0.119318  | 0.115239  | 0.11859   | 0.116113  | 0.109848  | 0.127331  |
| 0.129079  | 0.116259  | 0.113054  | 0.116696  | 0.0495338 | 0.110577  | 0.126603  |
| 0.101544  | 0.119318  | 0.121066  | 0.11859   | 0.120192  | 0.112762  | 0.125874  |
| 0.129516  | 0.0467657 | 0.0493881 | 0.0434149 | 0.113491  | 0.0958625 | 0.120921  |
| 0.125291  | 0.112471  | 0.107517  | 0.109411  | 0.0518648 | 0.104167  | 0.123106  |
| 0.126311  | 0.0919289 | 0.0942599 | 0.0938228 | 0.118153  | 0.0844988 | 0.115385  |
| 0.136364  | 0.137238  | 0.140734  | 0.138549  | 0.140443  | 0.138549  | 0.14933   |
| 0.133741  | 0.12296   | 0.126166  | 0.124272  | 0.129371  | 0.113491  | 0.0458916 |
| 0.132284  | 0.11655   | 0.118881  | 0.117279  | 0.126457  | 0.112034  | 0.128934  |
| 0.197844  | 0.18007   | 0.181235  | 0.177885  | 0.179779  | 0.182838  | 0.188666  |
| 0.208042  | 0.198427  | 0.194639  | 0.193036  | 0.197844  | 0.198864  | 0.205857  |
| 0.13141   | 0.0521562 | 0.0533217 | 0.0514277 | 0.120338  | 0.100379  | 0.125728  |
| 0.127622  | 0.0431235 | 0.0463287 | 0.043852  | 0.111305  | 0.095134  | 0.120484  |
| 0.141608  | 0.126748  | 0.125583  | 0.124563  | 0.124709  | 0.118735  | 0.134761  |
| 0.126748  | 0.117716  | 0.115093  | 0.11961   | 0.118298  | 0.106498  | 0.123689  |
| 0.14088   | 0.121649  | 0.123689  | 0.121795  | 0.127477  | 0.113054  | 0.0469114 |
| 0.125     | 0.128788  | 0.127914  | 0.128642  | 0.125291  | 0.122815  | 0.137675  |
| 0.226981  | 0.214744  | 0.215909  | 0.213432  | 0.221445  | 0.219551  | 0.224796  |
| 0.124709  | 0.111014  | 0.111597  | 0.113199  | 0.108974  | 0.102127  | 0.119318  |
| 0.210227  | 0.206148  | 0.206439  | 0.200758  | 0.202069  | 0.20542   | 0.213287  |
| 0.128205  | 0.113928  | 0.110431  | 0.113782  | 0.113636  | 0.10271   | 0.105041  |
| 0.122815  | 0.113199  | 0.10912   | 0.111014  | 0.116696  | 0.0964452 | 0.119172  |
| 0.128205  | 0.111597  | 0.109848  | 0.111742  | 0.100233  | 0.10912   | 0.121066  |

|           |           |           |           |           |           |           |
|-----------|-----------|-----------|-----------|-----------|-----------|-----------|
| 0.125291  | 0.0524476 | 0.0579837 | 0.0525932 | 0.112471  | 0.0945513 | 0.120775  |
| 0.213141  | 0.196824  | 0.199738  | 0.194056  | 0.201195  | 0.20338   | 0.208042  |
| 0.136218  | 0.126894  | 0.125728  | 0.125291  | 0.0590035 | 0.124417  | 0.137821  |
| 0.129225  | 0.115822  | 0.114948  | 0.11859   | 0.118735  | 0.102273  | 0.118298  |
| 0.134178  | 0.121941  | 0.120192  | 0.123834  | 0.0546329 | 0.113636  | 0.13345   |
| 0.126603  | 0.124272  | 0.122815  | 0.12296   | 0.118444  | 0.10373   | 0.131702  |
| 0.128059  | 0.048514  | 0.0488054 | 0.048951  | 0.111451  | 0.0935315 | 0.122086  |
| 0.128788  | 0.11859   | 0.114802  | 0.118444  | 0.11451   | 0.107372  | 0.106498  |
| 0.119172  | 0.118881  | 0.116259  | 0.116987  | 0.117424  | 0.112617  | 0.129516  |
| 0.13141   | 0.117716  | 0.117133  | 0.121066  | 0.127331  | 0.109703  | 0.125728  |
| 0.125     | 0.110431  | 0.106061  | 0.107372  | 0.0492424 | 0.104167  | 0.123689  |
| 0.127768  | 0.123106  | 0.11961   | 0.118881  | 0.118444  | 0.106643  | 0.119755  |
| 0.19697   | 0.179487  | 0.17803   | 0.176719  | 0.181235  | 0.182255  | 0.190705  |
| 0.124272  | 0.125728  | 0.125146  | 0.122669  | 0.123106  | 0.113636  | 0.131119  |
| 0.126457  | 0.123252  | 0.122378  | 0.122232  | 0.124709  | 0.122815  | 0.135344  |
| 0.129808  | 0.118153  | 0.114948  | 0.114802  | 0.111451  | 0.111597  | 0.133159  |
| 0.139569  | 0.122669  | 0.120921  | 0.118735  | 0.124709  | 0.109994  | 0.0543415 |
| 0.130245  | 0.118007  | 0.11859   | 0.119027  | 0.0515734 | 0.113199  | 0.129808  |
| 0.125874  | 0.120047  | 0.120629  | 0.121066  | 0.118881  | 0.111742  | 0.112908  |
| 0.127768  | 0.115822  | 0.114073  | 0.113928  | 0.111451  | 0.0981935 | 0.106935  |
| 0.129516  | 0.124563  | 0.12398   | 0.126166  | 0.123397  | 0.114219  | 0.130828  |
| 0.123834  | 0.113636  | 0.114219  | 0.116113  | 0.117716  | 0.112034  | 0.12602   |
| 0.123543  | 0.11655   | 0.115385  | 0.114948  | 0.11451   | 0.107955  | 0.127768  |
| 0.128642  | 0.0569639 | 0.055507  | 0.0576923 | 0.114073  | 0.0979021 | 0.126166  |
| 0.0591492 | 0.118007  | 0.112179  | 0.11757   | 0.118298  | 0.109994  | 0.128059  |
| 0.0470571 | 0.131847  | 0.130099  | 0.130536  | 0.133013  | 0.125     | 0.140734  |
| 0.133887  | 0.111742  | 0.11116   | 0.112179  | 0.117279  | 0.101399  | 0.0501166 |
| 0.138986  | 0.134324  | 0.131993  | 0.135927  | 0.0670163 | 0.129808  | 0.146999  |
| 0.127914  | 0.0460373 | 0.0445804 | 0.0444347 | 0.111888  | 0.0907634 | 0.120192  |
| 0.120629  | 0.115967  | 0.117133  | 0.114073  | 0.111014  | 0.109994  | 0.125728  |
| 0.128351  | 0.116113  | 0.113491  | 0.113054  | 0.0659965 | 0.108974  | 0.130536  |
| 0.13243   | 0.127768  | 0.123689  | 0.126748  | 0.127477  | 0.117716  | 0.131993  |
| 0.197698  | 0.186917  | 0.183129  | 0.18007   | 0.184878  | 0.183275  | 0.192308  |
| 0.12704   | 0.113636  | 0.113345  | 0.111451  | 0.117424  | 0.0992133 | 0.114656  |
| 0.123252  | 0.104021  | 0.103147  | 0.103293  | 0.0987762 | 0.0980478 | 0.114073  |
| 0.130245  | 0.115385  | 0.11451   | 0.116696  | 0.123834  | 0.108246  | 0.125146  |
| 0.18852   | 0.171037  | 0.171911  | 0.170892  | 0.16958   | 0.173223  | 0.184295  |
| 0.146707  | 0.129516  | 0.131556  | 0.132867  | 0.13884   | 0.121503  | 0.0576923 |
| 0.155449  | 0.142045  | 0.143502  | 0.140152  | 0.14729   | 0.130536  | 0.0635198 |
| 0.13986   | 0.137821  | 0.1419    | 0.14088   | 0.142191  | 0.140589  | 0.150204  |
| 0.131702  | 0.109848  | 0.111014  | 0.113199  | 0.119755  | 0.102127  | 0.0528846 |
| 0.129225  | 0.116987  | 0.116113  | 0.118007  | 0.0511364 | 0.113636  | 0.131702  |
| 0.212413  | 0.204254  | 0.202506  | 0.200903  | 0.202506  | 0.205274  | 0.211393  |
| 0.117424  | 0.115676  | 0.116841  | 0.113782  | 0.114802  | 0.113782  | 0.127768  |

|           |           |           |           |           |           |           |
|-----------|-----------|-----------|-----------|-----------|-----------|-----------|
| 0.133013  | 0.125728  | 0.122523  | 0.125874  | 0.057838  | 0.118881  | 0.130536  |
| 0.128351  | 0.118153  | 0.116987  | 0.116259  | 0.117861  | 0.105186  | 0.115385  |
| 0.171766  | 0.15778   | 0.158654  | 0.159091  | 0.150787  | 0.160548  | 0.175408  |
| 0.118735  | 0.105332  | 0.104167  | 0.104021  | 0.103293  | 0.100233  | 0.120921  |
| 0.110723  | 0.141026  | 0.144522  | 0.137966  | 0.143939  | 0.137383  | 0.149621  |
| 0.131119  | 0.109557  | 0.108974  | 0.108829  | 0.120921  | 0.0581294 | 0.121066  |
| 0.195804  | 0.181527  | 0.181235  | 0.17701   | 0.181818  | 0.183421  | 0.195076  |
| 0.136655  | 0.113928  | 0.112471  | 0.116404  | 0.124126  | 0.106789  | 0.0534674 |
| 0.122669  | 0.101399  | 0.0961538 | 0.0992133 | 0.100524  | 0.0922203 | 0.117861  |
| 0.123689  | 0.115239  | 0.115239  | 0.114219  | 0.108246  | 0.106935  | 0.125583  |
| 0.124126  | 0.112762  | 0.111888  | 0.111742  | 0.113928  | 0.101544  | 0.118153  |
| 0.131119  | 0.113054  | 0.112179  | 0.116987  | 0.120338  | 0.106206  | 0.123689  |
| 0.132867  | 0.115385  | 0.115676  | 0.115822  | 0.120047  | 0.112908  | 0.122523  |
| 0.125728  | 0.0432692 | 0.0473485 | 0.0472028 | 0.112617  | 0.0952797 | 0.115967  |
| 0.196096  | 0.181527  | 0.179779  | 0.178467  | 0.182401  | 0.183129  | 0.191871  |
| 0.0960082 | 0.120775  | 0.118735  | 0.118298  | 0.115822  | 0.112762  | 0.131119  |
| 0.128788  | 0.107809  | 0.105769  | 0.105041  | 0.105186  | 0.103584  | 0.126603  |
| 0.215472  | 0.200903  | 0.201195  | 0.199009  | 0.206731  | 0.204545  | 0.211247  |
| 0.125437  | 0.122815  | 0.120484  | 0.119172  | 0.122523  | 0.113345  | 0.130245  |
| 0.128497  | 0.0451632 | 0.0463287 | 0.0444347 | 0.115967  | 0.0948427 | 0.121941  |
| 0.127914  | 0.0448718 | 0.0425408 | 0.0418124 | 0.108392  | 0.0916375 | 0.116987  |
| 0.123397  | 0.13243   | 0.132139  | 0.134033  | 0.0823135 | 0.126457  | 0.142191  |
| 0.197698  | 0.180216  | 0.181672  | 0.17803   | 0.18109   | 0.179779  | 0.189977  |
| 0.131702  | 0.12296   | 0.118881  | 0.121649  | 0.11655   | 0.110286  | 0.125728  |
| 0         | 0.127331  | 0.124126  | 0.127185  | 0.128497  | 0.118444  | 0.136801  |
| 0.127331  | 0         | 0.0486597 | 0.0447261 | 0.113928  | 0.0925117 | 0.119318  |
| 0.124126  | 0.0486597 | 0         | 0.0444347 | 0.110431  | 0.0913462 | 0.120775  |
| 0.127185  | 0.0447261 | 0.0444347 | 0         | 0.112034  | 0.0955711 | 0.118881  |
| 0.128497  | 0.113928  | 0.110431  | 0.112034  | 0         | 0.109411  | 0.124563  |
| 0.118444  | 0.0925117 | 0.0913462 | 0.0955711 | 0.109411  | 0         | 0.109266  |
| 0.136801  | 0.119318  | 0.120775  | 0.118881  | 0.124563  | 0.109266  | 0         |
| 0.112034  | 0.134761  | 0.133013  | 0.135198  | 0.122523  | 0.123543  | 0.141026  |
| 0.135927  | 0.114656  | 0.11553   | 0.117424  | 0.126311  | 0.107809  | 0.0483683 |
| 0.132284  | 0.129079  | 0.126748  | 0.129225  | 0.125     | 0.107663  | 0.136509  |
| 0.20236   | 0.18546   | 0.186043  | 0.181235  | 0.184878  | 0.188228  | 0.195513  |
| 0.0606061 | 0.11655   | 0.113928  | 0.115239  | 0.115967  | 0.103001  | 0.124272  |
| 0.138258  | 0.126311  | 0.125146  | 0.12704   | 0.0610431 | 0.122669  | 0.137238  |
| 0.126457  | 0.0434149 | 0.0451632 | 0.0456002 | 0.111597  | 0.0898893 | 0.11757   |
| 0.119901  | 0.0930944 | 0.0922203 | 0.0914918 | 0.110868  | 0.04662   | 0.1081    |
| 0.11116   | 0.114948  | 0.113782  | 0.113345  | 0.114365  | 0.106935  | 0.111888  |
| 0.128205  | 0.120921  | 0.121212  | 0.122815  | 0.11859   | 0.11116   | 0.128059  |
| 0.134033  | 0.125291  | 0.124126  | 0.125146  | 0.125291  | 0.118444  | 0.132721  |
| 0.12398   | 0.110286  | 0.108537  | 0.115385  | 0.110577  | 0.111597  | 0.124417  |
| 0.128642  | 0.106498  | 0.102127  | 0.10373   | 0.111742  | 0.0850816 | 0.115676  |

|           |           |           |           |           |           |           |
|-----------|-----------|-----------|-----------|-----------|-----------|-----------|
| 0.122669  | 0.101399  | 0.100233  | 0.101544  | 0.106061  | 0.0715326 | 0.114656  |
| 0.126311  | 0.102418  | 0.0965909 | 0.100233  | 0.105041  | 0.080711  | 0.115967  |
| 0.126457  | 0.116841  | 0.115385  | 0.11553   | 0.113345  | 0.104458  | 0.107663  |
| 0.143211  | 0.124272  | 0.12602   | 0.125874  | 0.131556  | 0.11655   | 0.0512821 |
| 0.12704   | 0.119755  | 0.116259  | 0.119318  | 0.118881  | 0.109703  | 0.129808  |
| 0.125437  | 0.110577  | 0.107955  | 0.109557  | 0.048514  | 0.104021  | 0.12296   |
| 0.126311  | 0.117279  | 0.109994  | 0.116259  | 0.114073  | 0.101399  | 0.124709  |
| 0.125583  | 0.0498252 | 0.0451632 | 0.0488054 | 0.112179  | 0.092803  | 0.121941  |
| 0.124563  | 0.113782  | 0.11116   | 0.113345  | 0.11553   | 0.0979021 | 0.109848  |
| 0.127768  | 0.0453089 | 0.0493881 | 0.0454545 | 0.115822  | 0.0976107 | 0.124709  |
| 0.0604604 | 0.107663  | 0.109411  | 0.110723  | 0.111742  | 0.101399  | 0.125583  |
| 0.125146  | 0.112034  | 0.107955  | 0.112179  | 0.116404  | 0.111305  | 0.129953  |
| 0.125728  | 0.110577  | 0.10708   | 0.11014   | 0.116987  | 0.103147  | 0.11859   |
| 0.121795  | 0.0976107 | 0.0958625 | 0.0992133 | 0.108392  | 0.0476399 | 0.109703  |
| 0.125728  | 0.0490967 | 0.0499709 | 0.0472028 | 0.113491  | 0.0920746 | 0.120338  |
| 0.128351  | 0.119027  | 0.115239  | 0.113928  | 0.114656  | 0.112179  | 0.129662  |
| 0.129662  | 0.11014   | 0.107226  | 0.109703  | 0.108683  | 0.109703  | 0.127768  |
| 0.122232  | 0.103001  | 0.104167  | 0.104312  | 0.110577  | 0.0958625 | 0.120047  |
| 0.129808  | 0.0496795 | 0.0488054 | 0.0515734 | 0.107372  | 0.0935315 | 0.121795  |
| 0.129371  | 0.119755  | 0.117424  | 0.117279  | 0.0524476 | 0.112034  | 0.125146  |
| 0.125874  | 0.112471  | 0.109848  | 0.112325  | 0.11451   | 0.107663  | 0.108829  |
| 0.13141   | 0.116259  | 0.111305  | 0.117279  | 0.0504079 | 0.112034  | 0.130973  |
| 0.126748  | 0.110431  | 0.106061  | 0.10912   | 0.11859   | 0.101544  | 0.120484  |
| 0.128205  | 0.0987762 | 0.0990676 | 0.0989219 | 0.111014  | 0.0490967 | 0.11116   |
| 0.110723  | 0.101399  | 0.0976107 | 0.0989219 | 0.101399  | 0.0942599 | 0.118444  |
| 0.125728  | 0.112325  | 0.111742  | 0.113054  | 0.112908  | 0.0979021 | 0.111305  |
| 0.132576  | 0.117716  | 0.116841  | 0.120775  | 0.0524476 | 0.113491  | 0.130973  |
| 0.129371  | 0.125291  | 0.122378  | 0.125146  | 0.112179  | 0.119027  | 0.127185  |
| 0.128642  | 0.106789  | 0.107663  | 0.109557  | 0.100087  | 0.10169   | 0.118298  |
| 0.198281  | 0.184878  | 0.18546   | 0.181527  | 0.187209  | 0.185897  | 0.191725  |
| 0.164481  | 0.159528  | 0.15778   | 0.158217  | 0.151369  | 0.155886  | 0.168998  |
| 0.137383  | 0.115822  | 0.115822  | 0.119172  | 0.120775  | 0.109848  | 0.0498252 |
| 0.125     | 0.117133  | 0.11451   | 0.117279  | 0.111597  | 0.11116   | 0.126311  |
| 0.155594  | 0.144814  | 0.147727  | 0.144668  | 0.149767  | 0.13447   | 0.0674534 |
| 0.103293  | 0.118735  | 0.120484  | 0.119172  | 0.118153  | 0.114219  | 0.127331  |
| 0.11451   | 0.0786713 | 0.0792541 | 0.0793998 | 0.117424  | 0.104167  | 0.124854  |
| 0.13243   | 0.0799825 | 0.0750291 | 0.0789627 | 0.106206  | 0.103438  | 0.122086  |
| 0.128059  | 0.0919289 | 0.0922203 | 0.0929487 | 0.112908  | 0.0821678 | 0.113054  |
| 0.131265  | 0.112908  | 0.109411  | 0.110431  | 0.108829  | 0.108974  | 0.128788  |
| 0.206585  | 0.188811  | 0.189977  | 0.186917  | 0.193473  | 0.195367  | 0.201777  |
| 0.13243   | 0.121066  | 0.118444  | 0.121795  | 0.119901  | 0.113054  | 0.126457  |
| 0.128497  | 0.115676  | 0.111888  | 0.116113  | 0.0754662 | 0.111451  | 0.12602   |
| 0.125874  | 0.0565268 | 0.0588578 | 0.0607517 | 0.106352  | 0.0916375 | 0.120192  |
| 0.124854  | 0.116404  | 0.114073  | 0.118007  | 0.115239  | 0.0976107 | 0.127331  |

|           |           |           |           |           |           |           |
|-----------|-----------|-----------|-----------|-----------|-----------|-----------|
| 0.196387  | 0.175408  | 0.172786  | 0.171766  | 0.175117  | 0.175554  | 0.186626  |
| 0.247669  | 0.242133  | 0.240967  | 0.237617  | 0.240093  | 0.241404  | 0.245192  |
| 0.127331  | 0.114802  | 0.111597  | 0.116696  | 0.113928  | 0.112908  | 0.128934  |
| 0.129953  | 0.107809  | 0.104312  | 0.109411  | 0.107809  | 0.103875  | 0.127768  |
| 0.134033  | 0.115385  | 0.116841  | 0.11553   | 0.120338  | 0.105915  | 0.0496795 |
| 0.126894  | 0.107663  | 0.106206  | 0.109266  | 0.118153  | 0.0979021 | 0.120629  |
| 0.124417  | 0.116259  | 0.113345  | 0.117279  | 0.111888  | 0.106789  | 0.124272  |
| 0.0962995 | 0.111451  | 0.11116   | 0.113928  | 0.112325  | 0.102855  | 0.121212  |
| 0.125     | 0.0748834 | 0.0725524 | 0.0732809 | 0.0844988 | 0.100379  | 0.123106  |
| 0.125874  | 0.117424  | 0.113636  | 0.116696  | 0.113636  | 0.105915  | 0.123397  |
| 0.124563  | 0.0863928 | 0.0820221 | 0.0839161 | 0.0750291 | 0.101981  | 0.120629  |
| 0.132867  | 0.104021  | 0.102273  | 0.107663  | 0.114802  | 0.0971737 | 0.124563  |
| 0.121649  | 0.095134  | 0.0957168 | 0.0976107 | 0.107663  | 0.0495338 | 0.109557  |
| 0.120921  | 0.113636  | 0.114802  | 0.114656  | 0.113928  | 0.115822  | 0.129516  |
| 0.130099  | 0.117279  | 0.114948  | 0.114802  | 0.0490967 | 0.112179  | 0.128205  |
| 0.114073  | 0.108246  | 0.10708   | 0.106643  | 0.103001  | 0.100524  | 0.121212  |
| 0.139714  | 0.11757   | 0.118444  | 0.117716  | 0.127477  | 0.118881  | 0.13345   |
| 0.135052  | 0.123689  | 0.125728  | 0.125583  | 0.133304  | 0.117133  | 0.133159  |
| 0.124126  | 0.0457459 | 0.0457459 | 0.0456002 | 0.11014   | 0.0913462 | 0.120192  |
| 0.129808  | 0.0855186 | 0.0861014 | 0.0812937 | 0.121649  | 0.103438  | 0.111597  |
| 0.135344  | 0.060169  | 0.0642483 | 0.0582751 | 0.127768  | 0.107809  | 0.136072  |
| 0.214452  | 0.197844  | 0.199883  | 0.199738  | 0.201632  | 0.199446  | 0.205274  |
| 0.117861  | 0.111742  | 0.106789  | 0.106352  | 0.106498  | 0.106935  | 0.120338  |
| 0.125583  | 0.0979021 | 0.0949883 | 0.0957168 | 0.111014  | 0.046183  | 0.109411  |
| 0.0611888 | 0.11451   | 0.112762  | 0.114948  | 0.117716  | 0.106789  | 0.128351  |
| 0.127185  | 0.121941  | 0.121941  | 0.122378  | 0.120192  | 0.112762  | 0.130536  |
| 0.128059  | 0.114073  | 0.113491  | 0.118881  | 0.110868  | 0.0952797 | 0.127914  |
| 0.205857  | 0.188083  | 0.187791  | 0.187063  | 0.193619  | 0.191725  | 0.198135  |
| 0.130245  | 0.118298  | 0.11451   | 0.119901  | 0.0515734 | 0.113491  | 0.130682  |
| 0.126894  | 0.0444347 | 0.0464744 | 0.0451632 | 0.109411  | 0.0926573 | 0.118007  |
| 0.130245  | 0.117424  | 0.121795  | 0.120484  | 0.119464  | 0.110577  | 0.11757   |
| 0.123543  | 0.108392  | 0.106352  | 0.10708   | 0.117716  | 0.0954254 | 0.116404  |
| 0.131993  | 0.113636  | 0.113928  | 0.116113  | 0.0533217 | 0.114656  | 0.130099  |
| 0.12704   | 0.104604  | 0.103147  | 0.104167  | 0.0748834 | 0.0995047 | 0.120484  |
| 0.129371  | 0.107226  | 0.104604  | 0.107955  | 0.113054  | 0.0977564 | 0.122232  |
| 0.12296   | 0.119172  | 0.11859   | 0.117279  | 0.116259  | 0.108537  | 0.128642  |
| 0.203234  | 0.190414  | 0.188666  | 0.187354  | 0.191579  | 0.190559  | 0.198135  |
| 0.119464  | 0.112762  | 0.107226  | 0.10912   | 0.0524476 | 0.101544  | 0.122232  |
| 0.202943  | 0.184586  | 0.183421  | 0.182692  | 0.187791  | 0.190268  | 0.195804  |
| 0.199883  | 0.18648   | 0.182401  | 0.17905   | 0.185315  | 0.184586  | 0.192745  |
| 0.130828  | 0.119755  | 0.121503  | 0.121649  | 0.129371  | 0.113491  | 0.128642  |
| 0.126748  | 0.128497  | 0.130828  | 0.128059  | 0.131119  | 0.118444  | 0.133304  |
| 0.11859   | 0.104312  | 0.102273  | 0.104458  | 0.104604  | 0.0901807 | 0.117861  |
| 0.122815  | 0.107372  | 0.103875  | 0.106061  | 0.0543415 | 0.102273  | 0.11859   |

|          |           |           |           |           |           |           |
|----------|-----------|-----------|-----------|-----------|-----------|-----------|
| 0.125583 | 0.113345  | 0.1081    | 0.114948  | 0.0504079 | 0.106789  | 0.12398   |
| 0.128788 | 0.0492424 | 0.0512821 | 0.0458916 | 0.112762  | 0.0968823 | 0.121066  |
| 0.120338 | 0.115676  | 0.110723  | 0.114948  | 0.108392  | 0.100087  | 0.119027  |
| 0.121212 | 0.116259  | 0.112762  | 0.11553   | 0.114219  | 0.104167  | 0.12398   |
| 0.126894 | 0.116987  | 0.116987  | 0.117133  | 0.117279  | 0.119172  | 0.129079  |
| 0.129371 | 0.114219  | 0.111305  | 0.113199  | 0.122669  | 0.103875  | 0.121649  |
| 0.119901 | 0.0426865 | 0.046183  | 0.044289  | 0.108246  | 0.087704  | 0.115676  |
| 0.128788 | 0.117716  | 0.111597  | 0.116987  | 0.0498252 | 0.110868  | 0.128642  |
| 0.121358 | 0.0995047 | 0.0948427 | 0.0955711 | 0.099796  | 0.0891608 | 0.114802  |
| 0.13549  | 0.12704   | 0.125291  | 0.126311  | 0.0632284 | 0.121649  | 0.139132  |
| 0.136655 | 0.114219  | 0.115385  | 0.11553   | 0.120338  | 0.10271   | 0.0482226 |
| 0.137383 | 0.132139  | 0.128934  | 0.131119  | 0.0651224 | 0.126457  | 0.141317  |
| 0.258887 | 0.254516  | 0.253351  | 0.248834  | 0.25539   | 0.254953  | 0.260198  |
| 0.133596 | 0.126894  | 0.128934  | 0.127914  | 0.13243   | 0.115093  | 0.124709  |
| 0.129662 | 0.125291  | 0.123252  | 0.124854  | 0.130536  | 0.112034  | 0.13039   |
| 0.221008 | 0.210227  | 0.213141  | 0.209207  | 0.211101  | 0.212704  | 0.219697  |
| 0.129953 | 0.117716  | 0.11859   | 0.120192  | 0.130536  | 0.112908  | 0.131847  |
| 0.230478 | 0.22465   | 0.226107  | 0.220425  | 0.222028  | 0.222756  | 0.231206  |
| 0.126311 | 0.123106  | 0.121649  | 0.119172  | 0.123106  | 0.108683  | 0.120921  |
| 0.136946 | 0.0553613 | 0.0623543 | 0.0560897 | 0.123834  | 0.105915  | 0.133304  |
| 0.11859  | 0.118007  | 0.115385  | 0.114365  | 0.111305  | 0.107372  | 0.129516  |
| 0.129953 | 0.116259  | 0.116259  | 0.11553   | 0.12704   | 0.106206  | 0.128059  |
| 0.207751 | 0.193765  | 0.193182  | 0.190122  | 0.192599  | 0.19595   | 0.2044    |
| 0.136364 | 0.127914  | 0.124709  | 0.127768  | 0.0588578 | 0.124854  | 0.13884   |
| 0.131993 | 0.115093  | 0.111888  | 0.116987  | 0.0501166 | 0.112034  | 0.128351  |
| 0.22771  | 0.218094  | 0.220717  | 0.216492  | 0.218677  | 0.221445  | 0.227855  |
| 0.129371 | 0.118298  | 0.113054  | 0.11961   | 0.118298  | 0.108829  | 0.130973  |
| 0.205565 | 0.191288  | 0.190414  | 0.187937  | 0.192453  | 0.191142  | 0.200175  |
| 0.129516 | 0.120484  | 0.116987  | 0.122086  | 0.11757   | 0.109266  | 0.126748  |
| 0.129225 | 0.050845  | 0.0493881 | 0.0486597 | 0.112325  | 0.0935315 | 0.120047  |
| 0.128788 | 0.105769  | 0.108683  | 0.109703  | 0.11859   | 0.0543415 | 0.117861  |
| 0.130828 | 0.118007  | 0.121795  | 0.11961   | 0.129662  | 0.114365  | 0.131265  |
| 0.118444 | 0.112325  | 0.109703  | 0.111014  | 0.109411  | 0.10169   | 0.117716  |
| 0.170309 | 0.149038  | 0.148164  | 0.148601  | 0.1537    | 0.132867  | 0.160548  |
| 0.12398  | 0.114656  | 0.108537  | 0.115093  | 0.0453089 | 0.107809  | 0.124417  |
| 0.124854 | 0.122815  | 0.122523  | 0.120047  | 0.120192  | 0.111888  | 0.129953  |
| 0.13039  | 0.116113  | 0.110868  | 0.111888  | 0.120192  | 0.105769  | 0.131993  |
| 0.126603 | 0.13039   | 0.129516  | 0.127331  | 0.121358  | 0.11859   | 0.134033  |
| 0.200175 | 0.18648   | 0.184441  | 0.184586  | 0.18852   | 0.187791  | 0.198281  |
| 0.125728 | 0.0456002 | 0.0450175 | 0.0454545 | 0.109703  | 0.0906177 | 0.117424  |
| 0.134033 | 0.111888  | 0.111888  | 0.11116   | 0.121795  | 0.107955  | 0.12602   |
| 0.127185 | 0.114365  | 0.112325  | 0.115967  | 0.114073  | 0.102855  | 0.105186  |
| 0.125874 | 0.118881  | 0.11859   | 0.120192  | 0.117133  | 0.109994  | 0.130099  |
| 0.124563 | 0.0496795 | 0.055507  | 0.0477855 | 0.11757   | 0.0987762 | 0.128788  |

|           |           |           |           |           |           |           |
|-----------|-----------|-----------|-----------|-----------|-----------|-----------|
| 0.257576  | 0.248543  | 0.251457  | 0.247232  | 0.249126  | 0.252185  | 0.260635  |
| 0.123397  | 0.105332  | 0.103293  | 0.102855  | 0.116696  | 0.0539044 | 0.115093  |
| 0.0861014 | 0.0907634 | 0.0875583 | 0.0879953 | 0.114656  | 0.102564  | 0.127331  |
| 0.181381  | 0.175845  | 0.181672  | 0.175117  | 0.177302  | 0.168998  | 0.182984  |
| 0.191871  | 0.177885  | 0.177302  | 0.174534  | 0.181964  | 0.177448  | 0.187937  |
| 0.124563  | 0.115239  | 0.111451  | 0.113928  | 0.116404  | 0.115676  | 0.129662  |
| 0.128788  | 0.115967  | 0.111888  | 0.114948  | 0.0472028 | 0.113491  | 0.128059  |
| 0.124709  | 0.109848  | 0.106643  | 0.109994  | 0.115093  | 0.103293  | 0.119027  |
| 0.148456  | 0.142337  | 0.140297  | 0.140734  | 0.0726981 | 0.138695  | 0.15035   |
| 0.124563  | 0.113491  | 0.109411  | 0.111597  | 0.112617  | 0.11014   | 0.127622  |
| 0.126457  | 0.114802  | 0.114219  | 0.11553   | 0.118298  | 0.114948  | 0.13039   |
| 0.129225  | 0.124563  | 0.124272  | 0.125583  | 0.124854  | 0.113636  | 0.130828  |
| 0.126894  | 0.117279  | 0.113199  | 0.113928  | 0.0546329 | 0.11014   | 0.12296   |
| 0.13345   | 0.126457  | 0.124709  | 0.128351  | 0.0617716 | 0.12398   | 0.139423  |
| 0.134178  | 0.11553   | 0.114365  | 0.113928  | 0.11553   | 0.106061  | 0.129371  |
| 0.130536  | 0.117133  | 0.120338  | 0.119318  | 0.125874  | 0.106789  | 0.128642  |
| 0.139714  | 0.129225  | 0.132721  | 0.130245  | 0.138549  | 0.123834  | 0.138403  |
| 0.128205  | 0.104604  | 0.107809  | 0.106498  | 0.118298  | 0.0572552 | 0.119027  |
| 0.134178  | 0.121358  | 0.12602   | 0.124126  | 0.133013  | 0.115967  | 0.131702  |
| 0.133596  | 0.130682  | 0.127477  | 0.131119  | 0.126894  | 0.119755  | 0.134615  |
| 0.212121  | 0.199301  | 0.198135  | 0.195076  | 0.197844  | 0.198864  | 0.210519  |
| 0.137383  | 0.107372  | 0.109411  | 0.106352  | 0.126311  | 0.0996503 | 0.120921  |
| 0.197698  | 0.183129  | 0.185752  | 0.180944  | 0.182838  | 0.185023  | 0.19493   |
| 0.119318  | 0.114073  | 0.113199  | 0.115676  | 0.109703  | 0.108683  | 0.124126  |
| 0.136509  | 0.0511364 | 0.0592949 | 0.0506993 | 0.120484  | 0.103147  | 0.132284  |
| 0.13447   | 0.11757   | 0.120484  | 0.118007  | 0.123689  | 0.108683  | 0.0483683 |
| 0.132867  | 0.108683  | 0.110431  | 0.111451  | 0.119172  | 0.100087  | 0.0575466 |
| 0.128351  | 0.120775  | 0.118735  | 0.120629  | 0.0520105 | 0.115967  | 0.131119  |
| 0.131556  | 0.121358  | 0.120192  | 0.121212  | 0.0537587 | 0.117716  | 0.129079  |
| 0.127185  | 0.0450175 | 0.0505536 | 0.0445804 | 0.115239  | 0.0967366 | 0.124126  |
| 0.125874  | 0.11655   | 0.118298  | 0.117279  | 0.114802  | 0.112617  | 0.130682  |
| 0.137238  | 0.120921  | 0.119755  | 0.121941  | 0.124417  | 0.109703  | 0.0490967 |
| 0.135052  | 0.135344  | 0.131265  | 0.132867  | 0.133887  | 0.121212  | 0.138695  |
| 0.249854  | 0.244318  | 0.247523  | 0.243007  | 0.245775  | 0.246212  | 0.250874  |
| 0.129225  | 0.0453089 | 0.048514  | 0.0495338 | 0.112617  | 0.0981935 | 0.122086  |
| 0.189103  | 0.175699  | 0.175117  | 0.171766  | 0.177448  | 0.177593  | 0.184878  |
| 0.194493  | 0.183129  | 0.179924  | 0.177739  | 0.181381  | 0.184149  | 0.19289   |
| 0.132576  | 0.109557  | 0.106935  | 0.10912   | 0.120047  | 0.105041  | 0.129225  |
| 0.12296   | 0.0981935 | 0.0990676 | 0.100379  | 0.110723  | 0.0490967 | 0.111742  |
| 0.132284  | 0.0518648 | 0.0597319 | 0.0534674 | 0.120629  | 0.100379  | 0.128351  |
| 0.124709  | 0.113054  | 0.108974  | 0.11116   | 0.0469114 | 0.105041  | 0.121941  |
| 0.127185  | 0.0939685 | 0.0933858 | 0.0914918 | 0.117861  | 0.0821678 | 0.113928  |
| 0.129225  | 0.118153  | 0.114365  | 0.117424  | 0.116404  | 0.106643  | 0.126166  |
| 0.128205  | 0.116841  | 0.111888  | 0.115239  | 0.0775058 | 0.110868  | 0.129516  |



|          |           |           |           |           |           |           |
|----------|-----------|-----------|-----------|-----------|-----------|-----------|
| 0.135781 | 0.129079  | 0.127622  | 0.129808  | 0.0632284 | 0.124272  | 0.140589  |
| 0.127768 | 0.043852  | 0.0482226 | 0.044289  | 0.114656  | 0.0967366 | 0.121795  |
| 0.135635 | 0.125437  | 0.124563  | 0.127331  | 0.0627914 | 0.120338  | 0.13549   |
| 0.126166 | 0.116841  | 0.113636  | 0.11553   | 0.11859   | 0.102127  | 0.121358  |
| 0.13549  | 0.121503  | 0.120338  | 0.122232  | 0.128788  | 0.111742  | 0.0496795 |
| 0.132139 | 0.11553   | 0.11116   | 0.114802  | 0.121941  | 0.105478  | 0.122669  |
| 0.137529 | 0.13141   | 0.129953  | 0.13243   | 0.129662  | 0.122232  | 0.139423  |
| 0.13243  | 0.107663  | 0.110577  | 0.110431  | 0.120775  | 0.101399  | 0.129371  |
| 0.126894 | 0.0563811 | 0.0590035 | 0.0536131 | 0.112908  | 0.0967366 | 0.114219  |
| 0.048514 | 0.130682  | 0.126894  | 0.128788  | 0.130682  | 0.119172  | 0.141026  |
| 0.191434 | 0.177448  | 0.176282  | 0.174679  | 0.177739  | 0.176136  | 0.186626  |
| 0.14088  | 0.130099  | 0.128642  | 0.130536  | 0.0668706 | 0.126166  | 0.143357  |
| 0.128934 | 0.121649  | 0.117279  | 0.119755  | 0.0511364 | 0.111888  | 0.127622  |
| 0.134907 | 0.115967  | 0.118007  | 0.115239  | 0.121503  | 0.107372  | 0.041521  |
| 0.129225 | 0.105624  | 0.104167  | 0.107226  | 0.11553   | 0.0973193 | 0.0588578 |
| 0.126166 | 0.111305  | 0.112179  | 0.113491  | 0.121212  | 0.101544  | 0.121941  |
| 0.130099 | 0.116987  | 0.117861  | 0.117424  | 0.128934  | 0.11014   | 0.126457  |
| 0.197552 | 0.185606  | 0.182692  | 0.179341  | 0.186189  | 0.184586  | 0.193036  |
| 0.127914 | 0.116259  | 0.111597  | 0.114948  | 0.0743007 | 0.108829  | 0.128934  |
| 0.11553  | 0.105624  | 0.105332  | 0.104895  | 0.103584  | 0.0979021 | 0.120047  |
| 0.133887 | 0.121358  | 0.118153  | 0.123252  | 0.0540501 | 0.118007  | 0.13345   |
| 0.202214 | 0.183566  | 0.182401  | 0.179633  | 0.182984  | 0.185752  | 0.196533  |
| 0.124563 | 0.0971737 | 0.0968823 | 0.0958625 | 0.110868  | 0.0492424 | 0.110431  |
| 0.131119 | 0.125583  | 0.12296   | 0.126603  | 0.123834  | 0.113491  | 0.129225  |
| 0.130536 | 0.119172  | 0.11859   | 0.121066  | 0.0524476 | 0.115822  | 0.131556  |
| 0.116696 | 0.110868  | 0.10708   | 0.112762  | 0.11116   | 0.106643  | 0.125583  |
| 0.193619 | 0.17905   | 0.177593  | 0.176282  | 0.179341  | 0.178322  | 0.188811  |
| 0.12602  | 0.122815  | 0.11757   | 0.122669  | 0.116404  | 0.108974  | 0.125874  |
| 0.064831 | 0.112617  | 0.108246  | 0.110723  | 0.107372  | 0.102564  | 0.126748  |
| 0.124854 | 0.100379  | 0.0995047 | 0.0981935 | 0.111742  | 0.0576923 | 0.113054  |
| 0.125146 | 0.118735  | 0.116404  | 0.116259  | 0.109411  | 0.108683  | 0.11859   |
| 0.123543 | 0.122669  | 0.118298  | 0.116987  | 0.120338  | 0.109994  | 0.130682  |
| 0.134907 | 0.130536  | 0.127914  | 0.128934  | 0.128497  | 0.117861  | 0.135927  |
| 0.128205 | 0.0439977 | 0.0460373 | 0.0447261 | 0.111888  | 0.0957168 | 0.120775  |
| 0.133741 | 0.121503  | 0.118007  | 0.121066  | 0.11451   | 0.113199  | 0.131556  |
| 0.136801 | 0.137675  | 0.139423  | 0.139277  | 0.141171  | 0.137821  | 0.148601  |
| 0.236742 | 0.228875  | 0.231206  | 0.226399  | 0.231789  | 0.234848  | 0.239219  |
| 0.138258 | 0.115239  | 0.11553   | 0.115385  | 0.124854  | 0.106935  | 0.134033  |
| 0.120484 | 0.121649  | 0.119318  | 0.120629  | 0.120775  | 0.109266  | 0.127622  |
| 0.124709 | 0.117133  | 0.113928  | 0.116987  | 0.0623543 | 0.110577  | 0.129225  |
| 0.132139 | 0.121941  | 0.119027  | 0.119755  | 0.122815  | 0.115676  | 0.126166  |
| 0.123252 | 0.116259  | 0.118007  | 0.114948  | 0.112179  | 0.105332  | 0.119027  |
| 0.125583 | 0.119464  | 0.117424  | 0.118444  | 0.116841  | 0.0989219 | 0.125437  |
| 0.133596 | 0.119901  | 0.11757   | 0.120047  | 0.0639569 | 0.116259  | 0.128205  |

|          |           |           |           |           |           |           |
|----------|-----------|-----------|-----------|-----------|-----------|-----------|
| 0.134033 | 0.128497  | 0.125874  | 0.127768  | 0.125583  | 0.118153  | 0.134178  |
| 0.124709 | 0.115676  | 0.108974  | 0.112325  | 0.114219  | 0.110868  | 0.130973  |
| 0.238782 | 0.228584  | 0.232372  | 0.227273  | 0.232663  | 0.232226  | 0.238928  |
| 0.120921 | 0.0973193 | 0.0955711 | 0.0962995 | 0.105769  | 0.0490967 | 0.111116  |
| 0.123834 | 0.110723  | 0.108392  | 0.109703  | 0.109557  | 0.0968823 | 0.112034  |
| 0.127477 | 0.0473485 | 0.0479312 | 0.0431235 | 0.110577  | 0.0929487 | 0.121212  |
| 0.127914 | 0.122378  | 0.122378  | 0.123689  | 0.126748  | 0.123397  | 0.135927  |
| 0.139277 | 0.117716  | 0.120921  | 0.120775  | 0.132284  | 0.111451  | 0.138549  |
| 0.129662 | 0.106643  | 0.104312  | 0.108537  | 0.107226  | 0.101253  | 0.121358  |
| 0.129953 | 0.118007  | 0.115967  | 0.118153  | 0.0506993 | 0.115822  | 0.129516  |
| 0.11757  | 0.106789  | 0.103584  | 0.104895  | 0.106206  | 0.106935  | 0.121795  |
| 0.23412  | 0.223922  | 0.226836  | 0.222028  | 0.225962  | 0.225233  | 0.237179  |
| 0.132721 | 0.122523  | 0.11961   | 0.123252  | 0.0566725 | 0.117716  | 0.129371  |
| 0.130245 | 0.124709  | 0.121795  | 0.126311  | 0.121503  | 0.112908  | 0.130973  |
| 0.11859  | 0.11014   | 0.106061  | 0.107663  | 0.113928  | 0.104749  | 0.126894  |
| 0.125437 | 0.123689  | 0.121941  | 0.119464  | 0.119027  | 0.116841  | 0.131119  |
| 0.13243  | 0.126603  | 0.124272  | 0.125291  | 0.126603  | 0.110723  | 0.123252  |
| 0.127185 | 0.0467657 | 0.050845  | 0.0448718 | 0.112325  | 0.097028  | 0.121503  |
| 0.13243  | 0.126603  | 0.123397  | 0.123834  | 0.123689  | 0.113928  | 0.130536  |
| 0.13549  | 0.131119  | 0.128788  | 0.13039   | 0.126166  | 0.120775  | 0.133887  |
| 0.129371 | 0.120629  | 0.116259  | 0.119027  | 0.120047  | 0.106789  | 0.124272  |
| 0.126603 | 0.0441434 | 0.0456002 | 0.0486597 | 0.110868  | 0.0941142 | 0.119172  |
| 0.127477 | 0.125146  | 0.125728  | 0.124417  | 0.125728  | 0.117133  | 0.133741  |
| 0.130245 | 0.131119  | 0.131702  | 0.131265  | 0.129953  | 0.119901  | 0.137966  |
| 0.137821 | 0.125     | 0.124417  | 0.123106  | 0.130245  | 0.116404  | 0.0523019 |
| 0.1419   | 0.126748  | 0.129079  | 0.128934  | 0.135198  | 0.115822  | 0.0557984 |
| 0.13039  | 0.129808  | 0.130973  | 0.127622  | 0.130973  | 0.119464  | 0.136655  |
| 0.121941 | 0.0887238 | 0.0840618 | 0.0856643 | 0.112325  | 0.0786713 | 0.109557  |
| 0.13549  | 0.136364  | 0.13345   | 0.138549  | 0.129953  | 0.124854  | 0.125728  |
| 0.137966 | 0.121649  | 0.120192  | 0.11859   | 0.133304  | 0.118007  | 0.139277  |
| 0.210227 | 0.198572  | 0.19799   | 0.195221  | 0.200612  | 0.201049  | 0.210082  |
| 0.135052 | 0.11757   | 0.112908  | 0.114219  | 0.118444  | 0.111888  | 0.134615  |
| 0.128642 | 0.113491  | 0.113491  | 0.114802  | 0.118735  | 0.0999417 | 0.120338  |
| 0.133741 | 0.0492424 | 0.0524476 | 0.0441434 | 0.119464  | 0.0995047 | 0.128934  |
| 0.229749 | 0.216929  | 0.216346  | 0.215618  | 0.218969  | 0.219114  | 0.22669   |
| 0.220134 | 0.2044    | 0.204691  | 0.201632  | 0.207314  | 0.20542   | 0.217075  |
| 0.134907 | 0.128788  | 0.12704   | 0.129225  | 0.127622  | 0.119027  | 0.134761  |
| 0.252477 | 0.244318  | 0.246066  | 0.241841  | 0.244027  | 0.245921  | 0.250874  |
| 0.122232 | 0.0861014 | 0.083479  | 0.0868298 | 0.111451  | 0.0780886 | 0.1081    |
| 0.140589 | 0.125146  | 0.12398   | 0.127622  | 0.137966  | 0.115967  | 0.140443  |
| 0.126894 | 0.0977564 | 0.099796  | 0.0990676 | 0.113782  | 0.0460373 | 0.109848  |
| 0.125874 | 0.125874  | 0.125874  | 0.125437  | 0.122669  | 0.11553   | 0.131556  |
| 0.192745 | 0.180507  | 0.181381  | 0.177156  | 0.181672  | 0.182984  | 0.193473  |
| 0.125    | 0.117133  | 0.118881  | 0.115822  | 0.123252  | 0.108829  | 0.135927  |

|           |           |           |           |           |           |           |
|-----------|-----------|-----------|-----------|-----------|-----------|-----------|
| 0.202214  | 0.184732  | 0.183566  | 0.181672  | 0.185606  | 0.188083  | 0.197407  |
| 0.130245  | 0.1081    | 0.104895  | 0.108829  | 0.112762  | 0.102418  | 0.126603  |
| 0.130828  | 0.11655   | 0.112471  | 0.115239  | 0.0996503 | 0.111742  | 0.124563  |
| 0.128497  | 0.117133  | 0.112762  | 0.114656  | 0.122086  | 0.101836  | 0.118153  |
| 0.117424  | 0.107226  | 0.106061  | 0.107663  | 0.106061  | 0.101253  | 0.116113  |
| 0.123397  | 0.0450175 | 0.0456002 | 0.0425408 | 0.106789  | 0.0920746 | 0.11451   |
| 0.12602   | 0.108246  | 0.103293  | 0.104021  | 0.103001  | 0.0999417 | 0.126457  |
| 0.122523  | 0.0948427 | 0.0954254 | 0.0941142 | 0.108829  | 0.0463287 | 0.11014   |
| 0.128205  | 0.112762  | 0.108974  | 0.112325  | 0.0477855 | 0.107955  | 0.128642  |
| 0.129225  | 0.120484  | 0.116113  | 0.119172  | 0.116987  | 0.107809  | 0.106935  |
| 0.125146  | 0.105332  | 0.105915  | 0.106061  | 0.110577  | 0.0990676 | 0.123834  |
| 0.126748  | 0.0990676 | 0.0981935 | 0.0983392 | 0.113345  | 0.0476399 | 0.111451  |
| 0.133304  | 0.105041  | 0.104749  | 0.105186  | 0.123689  | 0.107517  | 0.0687646 |
| 0.135635  | 0.129516  | 0.125146  | 0.127331  | 0.0587121 | 0.120338  | 0.137529  |
| 0.13549   | 0.108974  | 0.109848  | 0.112325  | 0.115676  | 0.100962  | 0.0482226 |
| 0.0613345 | 0.109703  | 0.108829  | 0.110431  | 0.110868  | 0.102564  | 0.125874  |
| 0.120047  | 0.0393357 | 0.0445804 | 0.03919   | 0.105478  | 0.0884324 | 0.116987  |
| 0.12704   | 0.12296   | 0.118298  | 0.118444  | 0.115093  | 0.11116   | 0.125728  |
| 0.122378  | 0.119172  | 0.117133  | 0.11757   | 0.117716  | 0.107955  | 0.126603  |
| 0.130682  | 0.114073  | 0.114365  | 0.113345  | 0.120775  | 0.106352  | 0.120338  |
| 0.132721  | 0.116404  | 0.114365  | 0.113928  | 0.119318  | 0.106352  | 0.048951  |
| 0.132867  | 0.118007  | 0.116259  | 0.115239  | 0.0495338 | 0.113491  | 0.127185  |
| 0.134761  | 0.127768  | 0.123397  | 0.127914  | 0.060169  | 0.123834  | 0.13549   |
| 0.13884   | 0.136509  | 0.130682  | 0.134615  | 0.0665793 | 0.131702  | 0.143939  |
| 0.118298  | 0.107517  | 0.105769  | 0.106789  | 0.104604  | 0.0945513 | 0.11757   |
| 0.126748  | 0.04662   | 0.0486597 | 0.0479312 | 0.111597  | 0.095134  | 0.11961   |
| 0.123106  | 0.112034  | 0.108246  | 0.110723  | 0.104167  | 0.0903263 | 0.117716  |
| 0.128642  | 0.13447   | 0.135052  | 0.133159  | 0.129225  | 0.121795  | 0.136364  |
| 0.129079  | 0.106061  | 0.102855  | 0.104458  | 0.113928  | 0.050845  | 0.113782  |
| 0.140443  | 0.131119  | 0.13549   | 0.133013  | 0.13986   | 0.125146  | 0.139714  |
| 0.139277  | 0.0579837 | 0.0690559 | 0.0607517 | 0.132284  | 0.110286  | 0.143794  |
| 0.127185  | 0.117861  | 0.120484  | 0.11859   | 0.119901  | 0.118007  | 0.131119  |
| 0.125874  | 0.102564  | 0.0999417 | 0.10271   | 0.106935  | 0.0919289 | 0.115822  |
| 0.11757   | 0.113199  | 0.110868  | 0.112179  | 0.109994  | 0.10373   | 0.124709  |
| 0.13884   | 0.123106  | 0.122232  | 0.122378  | 0.129808  | 0.111888  | 0.048951  |
| 0.217657  | 0.201923  | 0.201923  | 0.198281  | 0.201923  | 0.201195  | 0.209062  |
| 0.0568182 | 0.113636  | 0.107226  | 0.112034  | 0.112179  | 0.105332  | 0.124563  |
| 0.126894  | 0.112617  | 0.10708   | 0.110723  | 0.114656  | 0.0964452 | 0.120047  |
| 0.121795  | 0.119172  | 0.120629  | 0.119901  | 0.11859   | 0.107372  | 0.127768  |
| 0.135344  | 0.114948  | 0.112617  | 0.114802  | 0.120192  | 0.10373   | 0.0539044 |
| 0.133159  | 0.1081    | 0.105769  | 0.110577  | 0.124417  | 0.107955  | 0.130099  |
| 0.132867  | 0.122669  | 0.12296   | 0.125146  | 0.11014   | 0.117861  | 0.130099  |
| 0.129516  | 0.124272  | 0.126894  | 0.129079  | 0.11553   | 0.122378  | 0.132576  |
| 0.124126  | 0.115967  | 0.11655   | 0.11553   | 0.118007  | 0.115822  | 0.130682  |

|          |           |           |           |           |           |           |
|----------|-----------|-----------|-----------|-----------|-----------|-----------|
| 0.123543 | 0.114802  | 0.110723  | 0.113491  | 0.112762  | 0.101253  | 0.108246  |
| 0.128788 | 0.125583  | 0.129371  | 0.125728  | 0.12704   | 0.119027  | 0.133013  |
| 0.124417 | 0.112471  | 0.105186  | 0.107955  | 0.117716  | 0.0965909 | 0.11757   |
| 0.131847 | 0.110286  | 0.106206  | 0.110431  | 0.116987  | 0.102273  | 0.127914  |
| 0.187937 | 0.171329  | 0.168998  | 0.171766  | 0.17162   | 0.169435  | 0.172931  |
| 0.128205 | 0.11451   | 0.112471  | 0.113782  | 0.0501166 | 0.112325  | 0.12602   |
| 0.131556 | 0.127185  | 0.128351  | 0.124417  | 0.127185  | 0.121212  | 0.134907  |
| 0.128205 | 0.112179  | 0.1081    | 0.111451  | 0.128205  | 0.0957168 | 0.123689  |
| 0.136218 | 0.118444  | 0.11757   | 0.115093  | 0.111742  | 0.113054  | 0.129371  |
| 0.120775 | 0.100087  | 0.0995047 | 0.0990676 | 0.103001  | 0.0935315 | 0.115093  |
| 0.121358 | 0.100962  | 0.0962995 | 0.0999417 | 0.105041  | 0.0891608 | 0.116259  |
| 0.123106 | 0.107955  | 0.104167  | 0.106935  | 0.107372  | 0.0987762 | 0.121503  |
| 0.133013 | 0.123106  | 0.119901  | 0.120629  | 0.127477  | 0.110431  | 0.130245  |
| 0.129225 | 0.106789  | 0.109994  | 0.106643  | 0.0866841 | 0.107226  | 0.124417  |
| 0.136655 | 0.120338  | 0.117716  | 0.119027  | 0.128205  | 0.109994  | 0.123397  |
| 0.127768 | 0.109703  | 0.105915  | 0.107517  | 0.105915  | 0.100816  | 0.122086  |
| 0.132867 | 0.115093  | 0.115967  | 0.114073  | 0.11859   | 0.100379  | 0.121358  |
| 0.132721 | 0.126311  | 0.124272  | 0.126748  | 0.13243   | 0.113345  | 0.142774  |
| 0.125437 | 0.109703  | 0.111451  | 0.105478  | 0.120775  | 0.101107  | 0.119464  |
| 0.13243  | 0.114365  | 0.118735  | 0.117716  | 0.122523  | 0.114219  | 0.11859   |
| 0.127185 | 0.103875  | 0.104458  | 0.101107  | 0.116113  | 0.0964452 | 0.114802  |
| 0.126311 | 0.110577  | 0.109994  | 0.105478  | 0.11553   | 0.0999417 | 0.117424  |
| 0.119901 | 0.0965909 | 0.0945513 | 0.0929487 | 0.111742  | 0.0859557 | 0.115676  |
| 0.134324 | 0.109557  | 0.107226  | 0.10708   | 0.123543  | 0.100087  | 0.126894  |
| 0.124709 | 0.100524  | 0.0996503 | 0.101253  | 0.111597  | 0.0884324 | 0.11553   |
| 0.144231 | 0.138403  | 0.138403  | 0.141171  | 0.136946  | 0.133887  | 0.14292   |
| 0.138986 | 0.129079  | 0.125583  | 0.126311  | 0.125583  | 0.121941  | 0.13447   |
| 0.122669 | 0.104312  | 0.104604  | 0.104458  | 0.112762  | 0.0971737 | 0.10708   |
| 0.140006 | 0.141463  | 0.136218  | 0.138986  | 0.136509  | 0.12704   | 0.1419    |
| 0.131556 | 0.11553   | 0.115822  | 0.113345  | 0.118735  | 0.111305  | 0.0990676 |
| 0.14292  | 0.130099  | 0.13039   | 0.130828  | 0.13447   | 0.116841  | 0.136655  |
| 0.131265 | 0.104458  | 0.101253  | 0.10373   | 0.114365  | 0.0952797 | 0.112762  |
| 0.148019 | 0.137238  | 0.143065  | 0.141171  | 0.138112  | 0.136509  | 0.148747  |
| 0.130536 | 0.125291  | 0.127914  | 0.127768  | 0.132867  | 0.116113  | 0.135635  |
| 0.137529 | 0.132284  | 0.135781  | 0.133304  | 0.138403  | 0.122815  | 0.134178  |
| 0.131119 | 0.11859   | 0.116259  | 0.117861  | 0.120047  | 0.106789  | 0.103001  |
| 0.125437 | 0.100962  | 0.102127  | 0.101981  | 0.113782  | 0.0935315 | 0.113345  |
| 0.123834 | 0.104312  | 0.100524  | 0.101544  | 0.11451   | 0.0930944 | 0.115822  |
| 0.125728 | 0.119027  | 0.11757   | 0.118298  | 0.118735  | 0.109557  | 0.127622  |
| 0.129225 | 0.11553   | 0.111742  | 0.113054  | 0.118735  | 0.0958625 | 0.118007  |
| 0.133159 | 0.119172  | 0.118881  | 0.121941  | 0.131993  | 0.105332  | 0.127477  |
| 0.134907 | 0.113054  | 0.112762  | 0.113199  | 0.120629  | 0.10708   | 0.128059  |
| 0.121503 | 0.105769  | 0.104895  | 0.106206  | 0.112179  | 0.0910548 | 0.0968823 |
| 0.124563 | 0.102127  | 0.102418  | 0.103147  | 0.113782  | 0.0941142 | 0.120629  |

|          |           |           |           |          |           |          |
|----------|-----------|-----------|-----------|----------|-----------|----------|
| 0.127331 | 0.109557  | 0.105769  | 0.108537  | 0.121503 | 0.0968823 | 0.125437 |
| 0.126166 | 0.104312  | 0.103147  | 0.103875  | 0.111888 | 0.0875583 | 0.116696 |
| 0.13039  | 0.11116   | 0.110577  | 0.109557  | 0.12398  | 0.101107  | 0.129079 |
| 0.13243  | 0.104749  | 0.101544  | 0.102855  | 0.110577 | 0.0891608 | 0.113636 |
| 0.129079 | 0.106935  | 0.107517  | 0.107372  | 0.107517 | 0.103584  | 0.119318 |
| 0.125583 | 0.104312  | 0.104895  | 0.102418  | 0.109848 | 0.0939685 | 0.123106 |
| 0.122086 | 0.0859557 | 0.0856643 | 0.0852273 | 0.11014  | 0.0767774 | 0.103584 |
| 0.125291 | 0.100524  | 0.100816  | 0.100379  | 0.116259 | 0.0884324 | 0.115822 |
| 0.125728 | 0.103001  | 0.102127  | 0.102855  | 0.107372 | 0.0987762 | 0.115093 |
| 0.130828 | 0.106061  | 0.105186  | 0.106789  | 0.107517 | 0.0986305 | 0.123106 |
| 0.123252 | 0.12296   | 0.118298  | 0.119901  | 0.103438 | 0.110286  | 0.127185 |
| 0.122086 | 0.0987762 | 0.0949883 | 0.0989219 | 0.100816 | 0.0933858 | 0.112325 |
| 0.136509 | 0.122815  | 0.120775  | 0.122378  | 0.122232 | 0.112471  | 0.128205 |

| TDr_2155 | TDr_2158  | TDr_2159 | TDr_2161 | TDr_2163 | TDr_2167  | TDr_2171  |
|----------|-----------|----------|----------|----------|-----------|-----------|
| 0.137383 | 0.0861014 | 0.126166 | 0.177885 | 0.130536 | 0.128059  | 0.115385  |
| 0.129662 | 0.117133  | 0.121941 | 0.181818 | 0.117279 | 0.11655   | 0.102127  |
| 0.124709 | 0.109848  | 0.115822 | 0.180361 | 0.116113 | 0.115385  | 0.0957168 |
| 0.12704  | 0.122086  | 0.124854 | 0.18648  | 0.117279 | 0.0981935 | 0.103584  |
| 0.101981 | 0.137529  | 0.137383 | 0.206585 | 0.106789 | 0.13986   | 0.131556  |
| 0.129079 | 0.118881  | 0.131556 | 0.19697  | 0.118735 | 0.134615  | 0.118735  |
| 0.131556 | 0.108537  | 0.129953 | 0.198281 | 0.120921 | 0.133887  | 0.118298  |
| 0.124854 | 0.116696  | 0.12704  | 0.179924 | 0.110431 | 0.114073  | 0.101981  |
| 0.121503 | 0.111305  | 0.113199 | 0.184732 | 0.10912  | 0.117133  | 0.099796  |
| 0.127768 | 0.111742  | 0.120047 | 0.191579 | 0.113636 | 0.126311  | 0.0888695 |
| 0.135198 | 0.112179  | 0.129225 | 0.173951 | 0.119027 | 0.137529  | 0.10912   |
| 0.125728 | 0.116696  | 0.117133 | 0.182547 | 0.107809 | 0.115822  | 0.105769  |
| 0.131847 | 0.116404  | 0.116259 | 0.188374 | 0.113636 | 0.123397  | 0.0979021 |
| 0.147436 | 0.139277  | 0.144376 | 0.145396 | 0.135052 | 0.138695  | 0.123106  |
| 0.140006 | 0.13039   | 0.13141  | 0.198281 | 0.128788 | 0.136801  | 0.0568182 |
| 0.130536 | 0.124417  | 0.113491 | 0.200758 | 0.124563 | 0.125583  | 0.106498  |
| 0.125728 | 0.122523  | 0.120047 | 0.186334 | 0.1081   | 0.127477  | 0.107517  |
| 0.135781 | 0.146562  | 0.151661 | 0.21183  | 0.124563 | 0.143065  | 0.143794  |
| 0.126166 | 0.108974  | 0.116113 | 0.17803  | 0.114948 | 0.115093  | 0.100087  |
| 0.211247 | 0.205711  | 0.212267 | 0.138986 | 0.202943 | 0.20134   | 0.175845  |
| 0.127185 | 0.099796  | 0.130245 | 0.197407 | 0.125291 | 0.137383  | 0.111888  |
| 0.124126 | 0.0973193 | 0.13447  | 0.193473 | 0.11961  | 0.130536  | 0.112617  |
| 0.119027 | 0.113199  | 0.124709 | 0.184586 | 0.110723 | 0.121066  | 0.108683  |
| 0.134907 | 0.12704   | 0.125146 | 0.202797 | 0.12398  | 0.134033  | 0.127185  |
| 0.122815 | 0.105332  | 0.119755 | 0.180507 | 0.104895 | 0.120192  | 0.0964452 |
| 0.124854 | 0.104167  | 0.130828 | 0.200903 | 0.127622 | 0.140589  | 0.122086  |
| 0.13243  | 0.122815  | 0.127622 | 0.196241 | 0.118007 | 0.135344  | 0.115967  |
| 0.133304 | 0.125437  | 0.116841 | 0.202943 | 0.122086 | 0.126311  | 0.115967  |
| 0.141463 | 0.128642  | 0.13141  | 0.198864 | 0.132576 | 0.135927  | 0.128205  |
| 0.13884  | 0.123106  | 0.122669 | 0.203234 | 0.124709 | 0.132139  | 0.109266  |
| 0.143065 | 0.0967366 | 0.131556 | 0.196096 | 0.127185 | 0.13549   | 0.113199  |
| 0.133304 | 0.118735  | 0.122086 | 0.197698 | 0.121212 | 0.133596  | 0.113054  |
| 0.123689 | 0.10708   | 0.119172 | 0.184878 | 0.11451  | 0.11757   | 0.0964452 |
| 0.135344 | 0.116404  | 0.123543 | 0.193328 | 0.120921 | 0.126894  | 0.111305  |
| 0.130536 | 0.118007  | 0.118735 | 0.199592 | 0.126603 | 0.136655  | 0.114365  |
| 0.136218 | 0.129516  | 0.113928 | 0.203526 | 0.128205 | 0.13447   | 0.125291  |
| 0.138112 | 0.116841  | 0.14088  | 0.210664 | 0.136509 | 0.141317  | 0.126603  |
| 0.138258 | 0.118153  | 0.129079 | 0.196533 | 0.121795 | 0.135635  | 0.116259  |
| 0.125437 | 0.109994  | 0.117716 | 0.187209 | 0.113928 | 0.121941  | 0.104604  |
| 0.131847 | 0.126603  | 0.127331 | 0.199738 | 0.12296  | 0.127768  | 0.118298  |
| 0.127768 | 0.114948  | 0.120629 | 0.184295 | 0.107226 | 0.121941  | 0.106061  |
| 0.147873 | 0.149038  | 0.143357 | 0.20877  | 0.138112 | 0.14729   | 0.130536  |

|          |           |          |          |          |           |          |
|----------|-----------|----------|----------|----------|-----------|----------|
| 0.150204 | 0.14933   | 0.143065 | 0.210519 | 0.14627  | 0.152535  | 0.140443 |
| 0.134615 | 0.120921  | 0.127768 | 0.189685 | 0.114073 | 0.127622  | 0.111742 |
| 0.122086 | 0.108974  | 0.114073 | 0.188811 | 0.105332 | 0.125     | 0.103001 |
| 0.133304 | 0.120192  | 0.124709 | 0.200612 | 0.124417 | 0.135344  | 0.106061 |
| 0.124854 | 0.125146  | 0.126748 | 0.195076 | 0.11451  | 0.130099  | 0.110723 |
| 0.15035  | 0.1419    | 0.137383 | 0.208333 | 0.135927 | 0.144231  | 0.133887 |
| 0.126166 | 0.122669  | 0.116987 | 0.194639 | 0.116696 | 0.127914  | 0.110577 |
| 0.133013 | 0.120775  | 0.121212 | 0.189831 | 0.11859  | 0.131265  | 0.110431 |
| 0.15676  | 0.0708042 | 0.148747 | 0.210956 | 0.146125 | 0.153555  | 0.13884  |
| 0.134615 | 0.136946  | 0.131847 | 0.201923 | 0.124563 | 0.136072  | 0.12602  |
| 0.127477 | 0.120484  | 0.122669 | 0.190705 | 0.116259 | 0.124272  | 0.111305 |
| 0.131556 | 0.134761  | 0.130536 | 0.203234 | 0.130828 | 0.131847  | 0.110723 |
| 0.121649 | 0.119901  | 0.129662 | 0.176428 | 0.118881 | 0.0977564 | 0.111888 |
| 0.13884  | 0.144668  | 0.131702 | 0.218969 | 0.136072 | 0.139714  | 0.139277 |
| 0.137529 | 0.132576  | 0.132721 | 0.202506 | 0.127768 | 0.137529  | 0.125437 |
| 0.130828 | 0.11655   | 0.125437 | 0.19289  | 0.110868 | 0.125583  | 0.109994 |
| 0.134907 | 0.121503  | 0.127768 | 0.190559 | 0.11961  | 0.132284  | 0.113199 |
| 0.131556 | 0.120484  | 0.125874 | 0.203526 | 0.119464 | 0.135635  | 0.110431 |
| 0.142628 | 0.14088   | 0.136072 | 0.214307 | 0.128497 | 0.143794  | 0.13345  |
| 0.144668 | 0.146125  | 0.136364 | 0.215181 | 0.137238 | 0.13884   | 0.13345  |
| 0.17162  | 0.161713  | 0.163899 | 0.162296 | 0.167686 | 0.161422  | 0.153118 |
| 0.134033 | 0.118007  | 0.123397 | 0.188811 | 0.116113 | 0.124417  | 0.108537 |
| 0.127914 | 0.117424  | 0.11757  | 0.189103 | 0.11553  | 0.131702  | 0.110577 |
| 0.129662 | 0.113345  | 0.122232 | 0.191434 | 0.114656 | 0.125     | 0.109411 |
| 0.150495 | 0.126894  | 0.145688 | 0.203526 | 0.141317 | 0.146999  | 0.132284 |
| 0.128351 | 0.115822  | 0.121795 | 0.186626 | 0.110431 | 0.12398   | 0.104895 |
| 0.13549  | 0.135198  | 0.134761 | 0.202797 | 0.132721 | 0.13986   | 0.128934 |
| 0.132867 | 0.120338  | 0.127477 | 0.202797 | 0.121649 | 0.135781  | 0.108246 |
| 0.134761 | 0.119901  | 0.124709 | 0.188666 | 0.115967 | 0.131556  | 0.111888 |
| 0.1537   | 0.125437  | 0.150641 | 0.203817 | 0.143648 | 0.150787  | 0.144231 |
| 0.135635 | 0.126603  | 0.124126 | 0.198281 | 0.121212 | 0.134178  | 0.119464 |
| 0.145688 | 0.144814  | 0.135927 | 0.210956 | 0.13447  | 0.140443  | 0.133013 |
| 0.137383 | 0.138258  | 0.131993 | 0.203234 | 0.123252 | 0.135344  | 0.129953 |
| 0.119464 | 0.11655   | 0.121066 | 0.184732 | 0.116113 | 0.115676  | 0.112034 |
| 0.126457 | 0.121503  | 0.122815 | 0.185897 | 0.115822 | 0.127622  | 0.110868 |
| 0.128788 | 0.122669  | 0.122523 | 0.19289  | 0.111742 | 0.128205  | 0.108246 |
| 0.140734 | 0.135198  | 0.136509 | 0.20979  | 0.131265 | 0.134615  | 0.130099 |
| 0.13039  | 0.116987  | 0.119172 | 0.18954  | 0.118298 | 0.129516  | 0.110723 |
| 0.145105 | 0.144522  | 0.13243  | 0.21183  | 0.138258 | 0.139569  | 0.134178 |
| 0.143065 | 0.124709  | 0.130682 | 0.190851 | 0.122815 | 0.138695  | 0.116113 |
| 0.124417 | 0.124126  | 0.113199 | 0.197844 | 0.116696 | 0.12296   | 0.116696 |
| 0.132867 | 0.11859   | 0.125437 | 0.189394 | 0.117279 | 0.134907  | 0.113199 |
| 0.130245 | 0.130828  | 0.124563 | 0.196387 | 0.120775 | 0.129371  | 0.116987 |
| 0.129953 | 0.120338  | 0.123397 | 0.191142 | 0.115239 | 0.131119  | 0.110286 |

|          |           |          |          |          |          |           |
|----------|-----------|----------|----------|----------|----------|-----------|
| 0.129371 | 0.121212  | 0.121941 | 0.191434 | 0.115822 | 0.127622 | 0.113782  |
| 0.143502 | 0.145542  | 0.134324 | 0.207896 | 0.134033 | 0.14292  | 0.131993  |
| 0.128642 | 0.111451  | 0.124709 | 0.190122 | 0.111888 | 0.128642 | 0.103438  |
| 0.125    | 0.115676  | 0.111742 | 0.192599 | 0.11116  | 0.12704  | 0.106206  |
| 0.136364 | 0.11859   | 0.137966 | 0.20338  | 0.124272 | 0.13141  | 0.11757   |
| 0.134907 | 0.11014   | 0.132721 | 0.198135 | 0.121066 | 0.140152 | 0.120484  |
| 0.127914 | 0.131119  | 0.128059 | 0.207168 | 0.13039  | 0.141026 | 0.125437  |
| 0.132721 | 0.140006  | 0.135781 | 0.216638 | 0.141026 | 0.144376 | 0.130536  |
| 0.130828 | 0.107226  | 0.13243  | 0.187646 | 0.109994 | 0.134033 | 0.112908  |
| 0.192016 | 0.174534  | 0.188666 | 0.157343 | 0.181964 | 0.186189 | 0.177593  |
| 0.123689 | 0.107372  | 0.125    | 0.188957 | 0.108683 | 0.11961  | 0.101107  |
| 0.134907 | 0.138695  | 0.148456 | 0.210373 | 0.141171 | 0.143065 | 0.127185  |
| 0.123543 | 0.130828  | 0.140589 | 0.203671 | 0.133013 | 0.137821 | 0.118735  |
| 0.140589 | 0.114365  | 0.141026 | 0.21081  | 0.127914 | 0.147873 | 0.128205  |
| 0.118881 | 0.115385  | 0.116404 | 0.195221 | 0.117279 | 0.125583 | 0.104749  |
| 0.130245 | 0.137238  | 0.129516 | 0.209499 | 0.137383 | 0.138695 | 0.126311  |
| 0.122378 | 0.113345  | 0.122523 | 0.19493  | 0.117861 | 0.128205 | 0.108246  |
| 0.127185 | 0.127477  | 0.128497 | 0.201486 | 0.123834 | 0.13447  | 0.118007  |
| 0.130682 | 0.105332  | 0.129079 | 0.191871 | 0.121503 | 0.125437 | 0.108392  |
| 0.135927 | 0.137675  | 0.131119 | 0.211684 | 0.136655 | 0.149038 | 0.133159  |
| 0.131265 | 0.11116   | 0.121212 | 0.188083 | 0.114802 | 0.125437 | 0.102273  |
| 0.137821 | 0.118881  | 0.139714 | 0.203089 | 0.136218 | 0.140734 | 0.130099  |
| 0.133596 | 0.099796  | 0.128788 | 0.194202 | 0.114219 | 0.133304 | 0.113054  |
| 0.134907 | 0.136072  | 0.13039  | 0.20542  | 0.129225 | 0.137529 | 0.128642  |
| 0.140006 | 0.110577  | 0.135781 | 0.206439 | 0.131119 | 0.145251 | 0.117716  |
| 0.121358 | 0.0992133 | 0.125291 | 0.191579 | 0.111014 | 0.12602  | 0.10169   |
| 0.150787 | 0.135344  | 0.150058 | 0.203526 | 0.144522 | 0.150204 | 0.139569  |
| 0.12296  | 0.101399  | 0.127477 | 0.194056 | 0.114365 | 0.132867 | 0.108246  |
| 0.120921 | 0.11655   | 0.121941 | 0.195513 | 0.11116  | 0.130536 | 0.10708   |
| 0.126603 | 0.119027  | 0.122378 | 0.196241 | 0.120921 | 0.130973 | 0.113636  |
| 0.145542 | 0.124563  | 0.150932 | 0.207605 | 0.138986 | 0.14933  | 0.132867  |
| 0.127768 | 0.120484  | 0.128205 | 0.182838 | 0.126457 | 0.133596 | 0.117424  |
| 0.115239 | 0.112325  | 0.121212 | 0.192745 | 0.116841 | 0.123689 | 0.0987762 |
| 0.119027 | 0.114656  | 0.126457 | 0.191871 | 0.118298 | 0.126603 | 0.102855  |
| 0.128788 | 0.101399  | 0.131265 | 0.191142 | 0.121066 | 0.132576 | 0.108829  |
| 0.135052 | 0.126311  | 0.131993 | 0.206148 | 0.127331 | 0.137966 | 0.112762  |
| 0.13141  | 0.097028  | 0.128059 | 0.195804 | 0.112617 | 0.134615 | 0.112617  |
| 0.122523 | 0.105624  | 0.117133 | 0.184878 | 0.108683 | 0.11961  | 0.092366  |
| 0.122232 | 0.106789  | 0.117716 | 0.186334 | 0.108683 | 0.119901 | 0.0984848 |
| 0.123252 | 0.115676  | 0.119027 | 0.19289  | 0.115822 | 0.125291 | 0.103001  |
| 0.129662 | 0.123252  | 0.130682 | 0.189394 | 0.123689 | 0.131993 | 0.112908  |
| 0.137675 | 0.130973  | 0.13141  | 0.204983 | 0.128788 | 0.136801 | 0.119172  |
| 0.127331 | 0.114802  | 0.120775 | 0.195804 | 0.110577 | 0.125583 | 0.0980478 |
| 0.125146 | 0.109994  | 0.116259 | 0.188083 | 0.108974 | 0.120775 | 0.0926573 |



|          |           |          |           |          |           |           |
|----------|-----------|----------|-----------|----------|-----------|-----------|
| 0.137966 | 0.12398   | 0.125583 | 0.2044    | 0.121795 | 0.138258  | 0.113054  |
| 0.127914 | 0.106352  | 0.121358 | 0.188228  | 0.105915 | 0.123834  | 0.101253  |
| 0.138695 | 0.111305  | 0.131265 | 0.18852   | 0.124563 | 0.13345   | 0.112617  |
| 0.145688 | 0.0579837 | 0.136801 | 0.201923  | 0.133596 | 0.142774  | 0.124854  |
| 0.127331 | 0.117716  | 0.123106 | 0.195804  | 0.111451 | 0.127622  | 0.109994  |
| 0.128059 | 0.114073  | 0.123543 | 0.194493  | 0.111597 | 0.12602   | 0.0973193 |
| 0.130973 | 0.118735  | 0.118298 | 0.190414  | 0.113636 | 0.12398   | 0.101981  |
| 0.118735 | 0.10912   | 0.11655  | 0.184295  | 0.111014 | 0.123397  | 0.0990676 |
| 0.135344 | 0.129808  | 0.128205 | 0.204691  | 0.126166 | 0.133596  | 0.115385  |
| 0.121941 | 0.106206  | 0.120921 | 0.190122  | 0.109266 | 0.123689  | 0.0944056 |
| 0.145688 | 0.134324  | 0.135052 | 0.209499  | 0.137966 | 0.144522  | 0.129225  |
| 0.147873 | 0.139423  | 0.139569 | 0.201486  | 0.13141  | 0.146125  | 0.127914  |
| 0.134761 | 0.126894  | 0.129371 | 0.202069  | 0.125    | 0.133304  | 0.11655   |
| 0.132867 | 0.121503  | 0.126603 | 0.192308  | 0.116113 | 0.136072  | 0.105915  |
| 0.13141  | 0.0967366 | 0.125437 | 0.189394  | 0.116113 | 0.132576  | 0.105332  |
| 0.128642 | 0.110868  | 0.11655  | 0.190414  | 0.110723 | 0.129808  | 0.10373   |
| 0.129662 | 0.112179  | 0.120484 | 0.191725  | 0.110577 | 0.126166  | 0.111742  |
| 0.129371 | 0.110723  | 0.118735 | 0.192308  | 0.109994 | 0.124417  | 0.103001  |
| 0.124126 | 0.117424  | 0.124563 | 0.180361  | 0.119318 | 0.105478  | 0.109703  |
| 0.139569 | 0.136946  | 0.127768 | 0.207168  | 0.127768 | 0.137529  | 0.123689  |
| 0.125437 | 0.11961   | 0.122669 | 0.200029  | 0.121503 | 0.13039   | 0.109266  |
| 0.139569 | 0.133159  | 0.13447  | 0.201923  | 0.130682 | 0.137821  | 0.114073  |
| 0.140006 | 0.125437  | 0.142774 | 0.212267  | 0.133159 | 0.140589  | 0.126166  |
| 0.205565 | 0.195076  | 0.204254 | 0.0989219 | 0.191434 | 0.191579  | 0.185606  |
| 0.245921 | 0.240093  | 0.242279 | 0.136072  | 0.23616  | 0.230769  | 0.231206  |
| 0.121941 | 0.114656  | 0.123834 | 0.180798  | 0.114219 | 0.0820221 | 0.1081    |
| 0.119172 | 0.117424  | 0.115822 | 0.189394  | 0.107372 | 0.123543  | 0.107663  |
| 0.11859  | 0.110723  | 0.11553  | 0.18648   | 0.112034 | 0.122378  | 0.105624  |
| 0.120629 | 0.117133  | 0.118153 | 0.190268  | 0.11116  | 0.124709  | 0.10912   |
| 0.143357 | 0.13141   | 0.136509 | 0.197552  | 0.128934 | 0.134907  | 0.060169  |
| 0.124709 | 0.122378  | 0.121358 | 0.19697   | 0.118153 | 0.123543  | 0.108537  |
| 0.14729  | 0.150495  | 0.139277 | 0.215763  | 0.140152 | 0.146707  | 0.141608  |
| 0.121795 | 0.122669  | 0.124854 | 0.190851  | 0.113782 | 0.12704   | 0.113782  |
| 0.13141  | 0.131702  | 0.124563 | 0.208916  | 0.128059 | 0.134033  | 0.130099  |
| 0.137383 | 0.136509  | 0.132576 | 0.200612  | 0.129079 | 0.133596  | 0.129079  |
| 0.13447  | 0.138549  | 0.133741 | 0.207314  | 0.135781 | 0.14088   | 0.124709  |
| 0.143502 | 0.143794  | 0.138695 | 0.207896  | 0.138695 | 0.143502  | 0.131119  |
| 0.128934 | 0.118735  | 0.12704  | 0.197407  | 0.116259 | 0.132139  | 0.11014   |
| 0.118153 | 0.114948  | 0.119464 | 0.191579  | 0.110431 | 0.128351  | 0.113054  |
| 0.123834 | 0.124126  | 0.120775 | 0.194056  | 0.112325 | 0.133741  | 0.11116   |
| 0.118881 | 0.115385  | 0.114948 | 0.185897  | 0.104167 | 0.123834  | 0.108246  |
| 0.11859  | 0.116841  | 0.117279 | 0.189685  | 0.111742 | 0.125874  | 0.10912   |
| 0.123689 | 0.121066  | 0.125583 | 0.194784  | 0.111014 | 0.126894  | 0.113636  |
| 0.128497 | 0.134033  | 0.126894 | 0.200466  | 0.130099 | 0.137238  | 0.121358  |

|          |          |          |          |          |          |           |
|----------|----------|----------|----------|----------|----------|-----------|
| 0.132284 | 0.142191 | 0.132721 | 0.212413 | 0.13884  | 0.143065 | 0.13243   |
| 0.125728 | 0.121941 | 0.124126 | 0.192453 | 0.115676 | 0.129516 | 0.118007  |
| 0.126166 | 0.118298 | 0.124563 | 0.187937 | 0.114365 | 0.130245 | 0.113782  |
| 0.136364 | 0.13549  | 0.129516 | 0.207751 | 0.128642 | 0.139569 | 0.130973  |
| 0.125291 | 0.115093 | 0.119027 | 0.186189 | 0.110577 | 0.12296  | 0.109994  |
| 0.143211 | 0.148164 | 0.142191 | 0.207022 | 0.141317 | 0.152535 | 0.132576  |
| 0.145251 | 0.140297 | 0.139277 | 0.19595  | 0.141317 | 0.149038 | 0.124709  |
| 0.127622 | 0.137529 | 0.130682 | 0.200758 | 0.133013 | 0.138112 | 0.129808  |
| 0.117424 | 0.113054 | 0.113782 | 0.190851 | 0.10271  | 0.121795 | 0.107372  |
| 0.118153 | 0.114073 | 0.113345 | 0.191871 | 0.111597 | 0.122523 | 0.106935  |
| 0.12704  | 0.127914 | 0.125437 | 0.20134  | 0.115822 | 0.130536 | 0.122232  |
| 0.126311 | 0.128642 | 0.121212 | 0.200903 | 0.126166 | 0.131265 | 0.123543  |
| 0.13447  | 0.132721 | 0.129953 | 0.198572 | 0.125291 | 0.137383 | 0.129662  |
| 0.126457 | 0.121212 | 0.123397 | 0.193182 | 0.113199 | 0.127331 | 0.116113  |
| 0.12398  | 0.124272 | 0.121503 | 0.195076 | 0.110723 | 0.129808 | 0.114219  |
| 0.127185 | 0.129516 | 0.130245 | 0.198864 | 0.125583 | 0.127768 | 0.114802  |
| 0.13884  | 0.130973 | 0.136655 | 0.209353 | 0.132576 | 0.144959 | 0.13141   |
| 0.128351 | 0.136801 | 0.13141  | 0.204108 | 0.129079 | 0.138258 | 0.130245  |
| 0.137238 | 0.137529 | 0.137675 | 0.208625 | 0.137675 | 0.142191 | 0.128934  |
| 0.141463 | 0.130099 | 0.132867 | 0.200612 | 0.134615 | 0.139132 | 0.128205  |
| 0.128351 | 0.115239 | 0.121503 | 0.193619 | 0.11451  | 0.123397 | 0.114802  |
| 0.127768 | 0.136801 | 0.129371 | 0.201195 | 0.127914 | 0.137675 | 0.128788  |
| 0.120921 | 0.113054 | 0.115239 | 0.191434 | 0.11116  | 0.122086 | 0.110577  |
| 0.128059 | 0.119027 | 0.121212 | 0.188083 | 0.113928 | 0.130099 | 0.11014   |
| 0.121358 | 0.11961  | 0.125874 | 0.192162 | 0.112762 | 0.129225 | 0.106352  |
| 0.120629 | 0.119755 | 0.122523 | 0.187646 | 0.109703 | 0.13141  | 0.109703  |
| 0.123252 | 0.118298 | 0.114073 | 0.18852  | 0.107372 | 0.123543 | 0.107372  |
| 0.132139 | 0.136218 | 0.136072 | 0.209062 | 0.136072 | 0.143794 | 0.129662  |
| 0.131702 | 0.110723 | 0.125146 | 0.190851 | 0.114656 | 0.129953 | 0.113782  |
| 0.134615 | 0.137529 | 0.13447  | 0.206876 | 0.134178 | 0.137238 | 0.132139  |
| 0.122378 | 0.118007 | 0.116113 | 0.189394 | 0.105915 | 0.124126 | 0.109703  |
| 0.132721 | 0.128059 | 0.127331 | 0.204691 | 0.126166 | 0.135344 | 0.126457  |
| 0.130245 | 0.131993 | 0.114656 | 0.200758 | 0.127477 | 0.132867 | 0.119318  |
| 0.132284 | 0.126166 | 0.128351 | 0.185315 | 0.123689 | 0.134615 | 0.106789  |
| 0.133887 | 0.11757  | 0.129953 | 0.198281 | 0.120338 | 0.132721 | 0.107809  |
| 0.128205 | 0.132284 | 0.126311 | 0.19289  | 0.120484 | 0.131702 | 0.116696  |
| 0.136509 | 0.126894 | 0.136364 | 0.194493 | 0.123543 | 0.131847 | 0.110431  |
| 0.129516 | 0.110868 | 0.120338 | 0.190997 | 0.11014  | 0.133304 | 0.1081    |
| 0.140006 | 0.133013 | 0.131993 | 0.208479 | 0.13141  | 0.144376 | 0.118298  |
| 0.151807 | 0.134033 | 0.141171 | 0.212995 | 0.144376 | 0.142483 | 0.130682  |
| 0.11859  | 0.108392 | 0.116696 | 0.189977 | 0.114656 | 0.119464 | 0.0965909 |
| 0.128934 | 0.129808 | 0.134324 | 0.210519 | 0.134324 | 0.141171 | 0.11451   |
| 0.140734 | 0.12296  | 0.129516 | 0.204837 | 0.129225 | 0.141608 | 0.10912   |
| 0.124417 | 0.133741 | 0.131556 | 0.203963 | 0.130682 | 0.138986 | 0.118735  |

|          |          |          |          |          |          |          |
|----------|----------|----------|----------|----------|----------|----------|
| 0.12296  | 0.122086 | 0.122815 | 0.196387 | 0.125728 | 0.130536 | 0.106789 |
| 0.134615 | 0.126166 | 0.129516 | 0.204545 | 0.122232 | 0.135781 | 0.111116 |
| 0.134178 | 0.126894 | 0.131993 | 0.203526 | 0.128497 | 0.137092 | 0.107517 |
| 0.125    | 0.135198 | 0.13039  | 0.209207 | 0.127477 | 0.132576 | 0.120775 |
| 0.134324 | 0.133741 | 0.137675 | 0.212995 | 0.141463 | 0.145105 | 0.123106 |
| 0.134615 | 0.129079 | 0.133304 | 0.204837 | 0.129225 | 0.133159 | 0.109703 |
| 0.120921 | 0.120047 | 0.122523 | 0.192599 | 0.119027 | 0.128205 | 0.10708  |
| 0.143502 | 0.134761 | 0.132867 | 0.201195 | 0.134033 | 0.137966 | 0.132867 |
| 0.135781 | 0.134324 | 0.135344 | 0.209207 | 0.136509 | 0.145396 | 0.11553  |
| 0.120921 | 0.111014 | 0.117861 | 0.192016 | 0.114948 | 0.125583 | 0.103875 |
| 0.22771  | 0.221008 | 0.224068 | 0.119027 | 0.221445 | 0.211976 | 0.214744 |
| 0.125437 | 0.13039  | 0.130828 | 0.200029 | 0.125583 | 0.131556 | 0.1081   |
| 0.130099 | 0.116987 | 0.125874 | 0.193619 | 0.11655  | 0.129808 | 0.100524 |
| 0.13345  | 0.137529 | 0.133596 | 0.20979  | 0.135344 | 0.141608 | 0.121358 |
| 0.129662 | 0.119172 | 0.125146 | 0.196387 | 0.120484 | 0.129953 | 0.108537 |
| 0.1419   | 0.129662 | 0.138549 | 0.208333 | 0.133013 | 0.139277 | 0.112908 |
| 0.121212 | 0.13141  | 0.126894 | 0.195513 | 0.122232 | 0.130245 | 0.10912  |
| 0.126894 | 0.124563 | 0.125583 | 0.198281 | 0.123834 | 0.128934 | 0.102273 |
| 0.136801 | 0.127768 | 0.130536 | 0.200612 | 0.127914 | 0.135635 | 0.108974 |
| 0.131119 | 0.134324 | 0.127185 | 0.192016 | 0.133304 | 0.136364 | 0.115239 |
| 0.129225 | 0.130099 | 0.136364 | 0.203817 | 0.130828 | 0.139423 | 0.118881 |
| 0.128205 | 0.128497 | 0.131265 | 0.206585 | 0.131265 | 0.136655 | 0.118735 |
| 0.124709 | 0.129371 | 0.128351 | 0.208333 | 0.129225 | 0.134907 | 0.113782 |
| 0.128788 | 0.120047 | 0.127477 | 0.198718 | 0.117861 | 0.131119 | 0.102127 |
| 0.120338 | 0.125583 | 0.122523 | 0.202506 | 0.118735 | 0.127622 | 0.11116  |
| 0.131847 | 0.137966 | 0.132576 | 0.209353 | 0.138112 | 0.139423 | 0.119755 |
| 0.114219 | 0.124709 | 0.124854 | 0.190559 | 0.12398  | 0.126457 | 0.10708  |
| 0.145396 | 0.142483 | 0.136509 | 0.208333 | 0.135635 | 0.143648 | 0.133596 |
| 0.149621 | 0.129225 | 0.144522 | 0.191288 | 0.141608 | 0.148456 | 0.128788 |
| 0.137966 | 0.122815 | 0.130828 | 0.197698 | 0.125874 | 0.135635 | 0.108974 |
| 0.136218 | 0.122815 | 0.132867 | 0.203817 | 0.129662 | 0.140297 | 0.111305 |
| 0.135781 | 0.118298 | 0.139132 | 0.188228 | 0.130682 | 0.134907 | 0.119901 |
| 0.137675 | 0.125437 | 0.129953 | 0.196241 | 0.129662 | 0.135927 | 0.12296  |
| 0.136218 | 0.125437 | 0.132284 | 0.184586 | 0.130536 | 0.136509 | 0.121503 |
| 0.148456 | 0.128351 | 0.142191 | 0.196824 | 0.136946 | 0.148164 | 0.127331 |
| 0.129371 | 0.117133 | 0.123397 | 0.186772 | 0.116113 | 0.129662 | 0.099796 |
| 0.14088  | 0.142628 | 0.137238 | 0.206148 | 0.128205 | 0.142045 | 0.120629 |
| 0.150641 | 0.130536 | 0.14729  | 0.187646 | 0.144085 | 0.147145 | 0.133013 |
| 0.132284 | 0.120338 | 0.127185 | 0.203963 | 0.117861 | 0.134324 | 0.110577 |
| 0.137238 | 0.126748 | 0.131265 | 0.192308 | 0.12398  | 0.13549  | 0.119318 |
| 0.156031 | 0.141463 | 0.140152 | 0.20877  | 0.143939 | 0.145833 | 0.138112 |
| 0.135052 | 0.133887 | 0.125874 | 0.200903 | 0.124126 | 0.134761 | 0.120629 |
| 0.147727 | 0.140734 | 0.137383 | 0.211538 | 0.144085 | 0.143065 | 0.12398  |
| 0.136218 | 0.135052 | 0.132576 | 0.206439 | 0.135781 | 0.141754 | 0.118881 |

|          |           |          |          |          |           |           |
|----------|-----------|----------|----------|----------|-----------|-----------|
| 0.121795 | 0.129371  | 0.133304 | 0.204254 | 0.125146 | 0.134615  | 0.117279  |
| 0.142337 | 0.133596  | 0.139277 | 0.203526 | 0.133741 | 0.140006  | 0.122378  |
| 0.137529 | 0.129371  | 0.13039  | 0.196096 | 0.128934 | 0.142774  | 0.114365  |
| 0.131847 | 0.133304  | 0.134324 | 0.206148 | 0.132576 | 0.14088   | 0.121212  |
| 0.130682 | 0.134178  | 0.124417 | 0.206731 | 0.130828 | 0.136509  | 0.12296   |
| 0.128934 | 0.128351  | 0.136072 | 0.206439 | 0.136364 | 0.139132  | 0.13141   |
| 0.131556 | 0.130973  | 0.135198 | 0.213141 | 0.132576 | 0.140297  | 0.127622  |
| 0.133304 | 0.123397  | 0.134907 | 0.199738 | 0.135781 | 0.145542  | 0.126457  |
| 0.142628 | 0.145251  | 0.145105 | 0.206439 | 0.147145 | 0.151078  | 0.135781  |
| 0.138549 | 0.125437  | 0.130245 | 0.196241 | 0.120629 | 0.140297  | 0.112179  |
| 0.131556 | 0.12602   | 0.126457 | 0.203526 | 0.118007 | 0.134178  | 0.111305  |
| 0.136509 | 0.125437  | 0.136946 | 0.203234 | 0.120629 | 0.141171  | 0.122378  |
| 0.134178 | 0.116696  | 0.129953 | 0.198572 | 0.11451  | 0.134178  | 0.110431  |
| 0.157051 | 0.127914  | 0.150787 | 0.199883 | 0.143502 | 0.14831   | 0.133304  |
| 0.168415 | 0.144522  | 0.155157 | 0.210956 | 0.1537   | 0.162587  | 0.147582  |
| 0.128788 | 0.130536  | 0.13243  | 0.206294 | 0.129808 | 0.134907  | 0.127477  |
| 0.128351 | 0.124272  | 0.124417 | 0.19799  | 0.123543 | 0.129808  | 0.121795  |
| 0.134033 | 0.134907  | 0.136509 | 0.207168 | 0.134178 | 0.133159  | 0.125437  |
| 0.133596 | 0.134178  | 0.132576 | 0.207314 | 0.134324 | 0.139423  | 0.120338  |
| 0.135344 | 0.133304  | 0.131993 | 0.205565 | 0.124417 | 0.136801  | 0.124709  |
| 0.129225 | 0.138258  | 0.134615 | 0.213432 | 0.134324 | 0.146707  | 0.124126  |
| 0.148747 | 0.131847  | 0.135198 | 0.203526 | 0.145396 | 0.146707  | 0.125583  |
| 0.138403 | 0.126457  | 0.130099 | 0.206294 | 0.13039  | 0.13549   | 0.114656  |
| 0.157634 | 0.148019  | 0.156323 | 0.212704 | 0.152535 | 0.15472   | 0.157488  |
| 0.142774 | 0.130828  | 0.131556 | 0.203089 | 0.127185 | 0.13986   | 0.115822  |
| 0.15035  | 0.138986  | 0.144376 | 0.208042 | 0.143502 | 0.151807  | 0.123397  |
| 0.128642 | 0.125728  | 0.130245 | 0.205565 | 0.122378 | 0.133887  | 0.115676  |
| 0.138258 | 0.130099  | 0.12704  | 0.212558 | 0.131993 | 0.137383  | 0.131119  |
| 0.120775 | 0.127477  | 0.130245 | 0.200612 | 0.126457 | 0.13243   | 0.111305  |
| 0.147727 | 0.0955711 | 0.147873 | 0.167249 | 0.14292  | 0.125291  | 0.133013  |
| 0.121066 | 0.149913  | 0.146562 | 0.209062 | 0.137529 | 0.146707  | 0.137821  |
| 0.120629 | 0.129079  | 0.127768 | 0.185023 | 0.121941 | 0.0539044 | 0.117279  |
| 0.129808 | 0.137966  | 0.140734 | 0.167104 | 0.137821 | 0.0657051 | 0.130245  |
| 0.161422 | 0.149184  | 0.156906 | 0.14627  | 0.145833 | 0.149184  | 0.142628  |
| 0.153555 | 0.1419    | 0.151078 | 0.143648 | 0.143794 | 0.12296   | 0.133596  |
| 0.135635 | 0.116987  | 0.128788 | 0.204691 | 0.126166 | 0.13447   | 0.127331  |
| 0.12296  | 0.134033  | 0.142337 | 0.200758 | 0.107955 | 0.138403  | 0.128934  |
| 0.132867 | 0.115676  | 0.131556 | 0.18211  | 0.118444 | 0.121795  | 0.0799825 |
| 0.131265 | 0.117279  | 0.125874 | 0.185752 | 0.115967 | 0.130099  | 0.0792541 |
| 0.127914 | 0.120629  | 0.12602  | 0.192016 | 0.119901 | 0.132867  | 0.114365  |
| 0.121212 | 0.123834  | 0.126894 | 0.186189 | 0.119901 | 0.0541958 | 0.112908  |
| 0.133304 | 0.126894  | 0.121795 | 0.190414 | 0.117716 | 0.133304  | 0.105769  |
| 0.125146 | 0.116696  | 0.124126 | 0.176136 | 0.116841 | 0.097465  | 0.0705128 |
| 0.120484 | 0.126603  | 0.128205 | 0.188374 | 0.111014 | 0.11553   | 0.115093  |

|          |           |          |           |           |           |           |
|----------|-----------|----------|-----------|-----------|-----------|-----------|
| 0.137529 | 0.126748  | 0.134178 | 0.179487  | 0.125437  | 0.127331  | 0.0607517 |
| 0.128205 | 0.110431  | 0.108246 | 0.182401  | 0.108246  | 0.123543  | 0.0919289 |
| 0.126457 | 0.130536  | 0.133596 | 0.182401  | 0.127768  | 0.0635198 | 0.115822  |
| 0.119027 | 0.123689  | 0.127622 | 0.18546   | 0.116259  | 0.0587121 | 0.112179  |
| 0.135344 | 0.126603  | 0.128497 | 0.197115  | 0.124126  | 0.133013  | 0.123252  |
| 0.223339 | 0.217803  | 0.221737 | 0.125146  | 0.216783  | 0.211976  | 0.206294  |
| 0.131556 | 0.148747  | 0.140152 | 0.201486  | 0.144231  | 0.0560897 | 0.136946  |
| 0.128788 | 0.129371  | 0.13447  | 0.20338   | 0.131265  | 0.131119  | 0.126894  |
| 0.13039  | 0.125728  | 0.127914 | 0.186917  | 0.114802  | 0.124272  | 0.114802  |
| 0.220425 | 0.213432  | 0.215326 | 0.10912   | 0.210373  | 0.204983  | 0.204837  |
| 0.140297 | 0.0968823 | 0.131119 | 0.181381  | 0.122669  | 0.134178  | 0.120047  |
| 0.135781 | 0.125     | 0.127768 | 0.196096  | 0.118735  | 0.136364  | 0.112617  |
| 0.112762 | 0.132284  | 0.127185 | 0.193765  | 0.0563811 | 0.131119  | 0.117861  |
| 0.139423 | 0.122523  | 0.132284 | 0.189831  | 0.12296   | 0.130682  | 0.0495338 |
| 0.257721 | 0.252477  | 0.25204  | 0.139132  | 0.25      | 0.241113  | 0.244172  |
| 0.13986  | 0.0527389 | 0.137092 | 0.196096  | 0.125146  | 0.13549   | 0.118153  |
| 0.131993 | 0.119755  | 0.121358 | 0.193182  | 0.117279  | 0.128788  | 0.119901  |
| 0.120921 | 0.129371  | 0.12398  | 0.199301  | 0.118153  | 0.129371  | 0.121649  |
| 0.119755 | 0.126457  | 0.121649 | 0.195513  | 0.111742  | 0.128205  | 0.118735  |
| 0.142191 | 0.0719697 | 0.137092 | 0.191434  | 0.132139  | 0.134615  | 0.105041  |
| 0.136364 | 0.126748  | 0.117861 | 0.171329  | 0.129808  | 0.116841  | 0.105915  |
| 0.134324 | 0.125291  | 0.12398  | 0.192016  | 0.117279  | 0.131993  | 0.117861  |
| 0.116404 | 0.122523  | 0.129953 | 0.184586  | 0.120047  | 0.053176  | 0.114219  |
| 0.116841 | 0.123252  | 0.135052 | 0.190559  | 0.0960082 | 0.130828  | 0.119027  |
| 0.13141  | 0.11859   | 0.128934 | 0.184441  | 0.116404  | 0.127914  | 0.046183  |
| 0.114656 | 0.11961   | 0.126457 | 0.179924  | 0.115676  | 0.0633741 | 0.109848  |
| 0.126457 | 0.116259  | 0.126311 | 0.193182  | 0.118735  | 0.131119  | 0.092803  |
| 0.120192 | 0.149621  | 0.147727 | 0.209353  | 0.137821  | 0.145833  | 0.136655  |
| 0.142337 | 0.0546329 | 0.134907 | 0.197115  | 0.129662  | 0.136801  | 0.121795  |
| 0.141463 | 0.130973  | 0.127331 | 0.196533  | 0.120629  | 0.135927  | 0.115385  |
| 0.201195 | 0.187791  | 0.201049 | 0.0895979 | 0.191725  | 0.184295  | 0.184732  |
| 0.214015 | 0.203234  | 0.210082 | 0.101544  | 0.203089  | 0.198572  | 0.197552  |
| 0.137966 | 0.121941  | 0.132867 | 0.182838  | 0.120629  | 0.132721  | 0.0530303 |
| 0.132721 | 0.118444  | 0.126457 | 0.188666  | 0.115093  | 0.124563  | 0.0454545 |
| 0.141754 | 0.136801  | 0.134615 | 0.190997  | 0.140734  | 0.126311  | 0.123543  |
| 0.13243  | 0.122815  | 0.126457 | 0.192453  | 0.11859   | 0.129516  | 0.120921  |
| 0.144814 | 0.0565268 | 0.139714 | 0.19697   | 0.128934  | 0.137238  | 0.120484  |
| 0.112325 | 0.137383  | 0.133741 | 0.196241  | 0.125     | 0.124854  | 0.127622  |
| 0.231789 | 0.224505  | 0.229021 | 0.11757   | 0.224942  | 0.218677  | 0.215035  |
| 0.127185 | 0.116696  | 0.127331 | 0.192162  | 0.114802  | 0.120192  | 0.111597  |
| 0.211538 | 0.210956  | 0.212267 | 0.148601  | 0.209645  | 0.20134   | 0.207605  |
| 0.128351 | 0.103584  | 0.125291 | 0.19595   | 0.112179  | 0.125146  | 0.111597  |
| 0.130245 | 0.115967  | 0.119027 | 0.191725  | 0.114365  | 0.127622  | 0.107663  |
| 0.132721 | 0.119901  | 0.12704  | 0.182255  | 0.121212  | 0.110577  | 0.111305  |

|          |           |           |           |           |           |           |
|----------|-----------|-----------|-----------|-----------|-----------|-----------|
| 0.127477 | 0.11961   | 0.12704   | 0.180216  | 0.113345  | 0.12398   | 0.0591492 |
| 0.214161 | 0.207459  | 0.210227  | 0.103438  | 0.207314  | 0.201049  | 0.199155  |
| 0.126748 | 0.137529  | 0.136218  | 0.181818  | 0.130682  | 0.0582751 | 0.127185  |
| 0.127622 | 0.113054  | 0.126894  | 0.196678  | 0.117861  | 0.129079  | 0.116404  |
| 0.12296  | 0.132284  | 0.126894  | 0.189103  | 0.125728  | 0.0509907 | 0.117861  |
| 0.125583 | 0.133741  | 0.0517191 | 0.198135  | 0.122815  | 0.127914  | 0.123106  |
| 0.137238 | 0.117716  | 0.130973  | 0.187646  | 0.116404  | 0.127331  | 0.0482226 |
| 0.128059 | 0.104749  | 0.123543  | 0.19595   | 0.11655   | 0.127477  | 0.117133  |
| 0.132721 | 0.125146  | 0.12704   | 0.184003  | 0.110431  | 0.128351  | 0.11859   |
| 0.138258 | 0.130099  | 0.127622  | 0.198864  | 0.121212  | 0.136218  | 0.114802  |
| 0.113782 | 0.120192  | 0.124126  | 0.17905   | 0.11451   | 0.0613345 | 0.106352  |
| 0.128497 | 0.118298  | 0.12398   | 0.193765  | 0.120192  | 0.129953  | 0.121358  |
| 0.20236  | 0.190122  | 0.197844  | 0.0948427 | 0.190268  | 0.186626  | 0.182401  |
| 0.120629 | 0.129371  | 0.121649  | 0.200466  | 0.11961   | 0.128788  | 0.123397  |
| 0.113491 | 0.135927  | 0.134615  | 0.201195  | 0.120047  | 0.13243   | 0.120047  |
| 0.122086 | 0.129079  | 0.131556  | 0.189103  | 0.118153  | 0.124126  | 0.114073  |
| 0.142045 | 0.0604604 | 0.138695  | 0.185752  | 0.128497  | 0.135344  | 0.119172  |
| 0.121066 | 0.128351  | 0.127914  | 0.186626  | 0.123252  | 0.0490967 | 0.117424  |
| 0.131265 | 0.114365  | 0.124126  | 0.202943  | 0.121212  | 0.129808  | 0.118298  |
| 0.123834 | 0.102564  | 0.0759033 | 0.190559  | 0.113782  | 0.125     | 0.112325  |
| 0.138112 | 0.127914  | 0.127185  | 0.197844  | 0.125437  | 0.134907  | 0.124854  |
| 0.112325 | 0.128642  | 0.133741  | 0.19391   | 0.115385  | 0.127185  | 0.114219  |
| 0.119901 | 0.121941  | 0.125583  | 0.192745  | 0.111597  | 0.125728  | 0.114219  |
| 0.13345  | 0.12296   | 0.13243   | 0.183275  | 0.116987  | 0.127331  | 0.057838  |
| 0.109994 | 0.128059  | 0.12704   | 0.196824  | 0.0492424 | 0.135344  | 0.115676  |
| 0.113636 | 0.140443  | 0.135344  | 0.203671  | 0.0642483 | 0.140152  | 0.13039   |
| 0.137238 | 0.0533217 | 0.130973  | 0.18648   | 0.120775  | 0.132576  | 0.107663  |
| 0.126894 | 0.145542  | 0.134907  | 0.199738  | 0.138986  | 0.0514277 | 0.131119  |
| 0.133013 | 0.118444  | 0.129371  | 0.185169  | 0.113345  | 0.127768  | 0.04662   |
| 0.106789 | 0.122523  | 0.126457  | 0.188374  | 0.113054  | 0.116113  | 0.116841  |
| 0.121503 | 0.127622  | 0.13039   | 0.170746  | 0.119027  | 0.0725524 | 0.11553   |
| 0.139569 | 0.129371  | 0.133013  | 0.191142  | 0.123689  | 0.136655  | 0.128351  |
| 0.203089 | 0.191142  | 0.19595   | 0.114802  | 0.191288  | 0.189103  | 0.186334  |
| 0.126894 | 0.109411  | 0.124126  | 0.190997  | 0.113345  | 0.128642  | 0.115093  |
| 0.117861 | 0.110577  | 0.115967  | 0.182547  | 0.113054  | 0.107955  | 0.104895  |
| 0.135927 | 0.125437  | 0.127914  | 0.201195  | 0.121212  | 0.133887  | 0.115967  |
| 0.188374 | 0.184003  | 0.183858  | 0.109994  | 0.177448  | 0.178176  | 0.173368  |
| 0.152098 | 0.0629371 | 0.142337  | 0.199592  | 0.137092  | 0.146853  | 0.129225  |
| 0.1588   | 0.0708042 | 0.147582  | 0.210373  | 0.148456  | 0.155012  | 0.137966  |
| 0.118735 | 0.151078  | 0.146853  | 0.211684  | 0.140443  | 0.146416  | 0.139569  |
| 0.137092 | 0.053176  | 0.128205  | 0.185752  | 0.120921  | 0.131847  | 0.109848  |
| 0.121503 | 0.128497  | 0.127185  | 0.18648   | 0.121941  | 0.048951  | 0.116987  |
| 0.220425 | 0.209353  | 0.218531  | 0.104749  | 0.210373  | 0.204691  | 0.204254  |
| 0.133887 | 0.127477  | 0.131993  | 0.183129  | 0.11451   | 0.126603  | 0.113636  |

|          |           |          |           |           |           |           |
|----------|-----------|----------|-----------|-----------|-----------|-----------|
| 0.122086 | 0.134324  | 0.128934 | 0.186772  | 0.128059  | 0.0504079 | 0.122232  |
| 0.129371 | 0.115385  | 0.124272 | 0.189977  | 0.118735  | 0.128205  | 0.116404  |
| 0.174825 | 0.172786  | 0.178467 | 0.129953  | 0.161568  | 0.154138  | 0.160402  |
| 0.119172 | 0.117716  | 0.124272 | 0.18007   | 0.109411  | 0.118007  | 0.104458  |
| 0.129516 | 0.149621  | 0.149476 | 0.207896  | 0.120921  | 0.149913  | 0.138986  |
| 0.135635 | 0.120775  | 0.113636 | 0.185169  | 0.124709  | 0.133304  | 0.103438  |
| 0.202943 | 0.189831  | 0.197552 | 0.0878497 | 0.191142  | 0.188666  | 0.18007   |
| 0.142628 | 0.0525932 | 0.13549  | 0.19391   | 0.12296   | 0.137092  | 0.113636  |
| 0.117861 | 0.11553   | 0.115967 | 0.186626  | 0.112762  | 0.116987  | 0.0990676 |
| 0.112179 | 0.11859   | 0.126603 | 0.18852   | 0.112325  | 0.121795  | 0.116987  |
| 0.137966 | 0.119901  | 0.124709 | 0.188957  | 0.115676  | 0.12398   | 0.113345  |
| 0.13884  | 0.122523  | 0.12704  | 0.197407  | 0.120047  | 0.133596  | 0.111888  |
| 0.125437 | 0.121649  | 0.13549  | 0.184878  | 0.121503  | 0.13039   | 0.117424  |
| 0.134907 | 0.114802  | 0.128059 | 0.181527  | 0.113491  | 0.125583  | 0.0444347 |
| 0.202069 | 0.188957  | 0.199009 | 0.0901807 | 0.190559  | 0.188083  | 0.182984  |
| 0.101981 | 0.128788  | 0.131556 | 0.19289   | 0.0898893 | 0.13141   | 0.11961   |
| 0.122523 | 0.125437  | 0.120047 | 0.183129  | 0.118298  | 0.115822  | 0.102855  |
| 0.218531 | 0.210082  | 0.21722  | 0.112471  | 0.207605  | 0.209499  | 0.204691  |
| 0.120338 | 0.126166  | 0.123106 | 0.200758  | 0.116696  | 0.131702  | 0.120192  |
| 0.132139 | 0.11757   | 0.128205 | 0.187791  | 0.115676  | 0.129225  | 0.0445804 |
| 0.131265 | 0.114365  | 0.124709 | 0.181672  | 0.112762  | 0.124272  | 0.0431235 |
| 0.12296  | 0.143357  | 0.13447  | 0.196678  | 0.125437  | 0.0664336 | 0.130099  |
| 0.201632 | 0.189103  | 0.196533 | 0.0944056 | 0.189248  | 0.185606  | 0.180216  |
| 0.134178 | 0.125146  | 0.125291 | 0.196241  | 0.11655   | 0.130682  | 0.122378  |
| 0.112034 | 0.135927  | 0.132284 | 0.20236   | 0.0606061 | 0.138258  | 0.126457  |
| 0.134761 | 0.114656  | 0.129079 | 0.18546   | 0.11655   | 0.126311  | 0.0434149 |
| 0.133013 | 0.11553   | 0.126748 | 0.186043  | 0.113928  | 0.125146  | 0.0451632 |
| 0.135198 | 0.117424  | 0.129225 | 0.181235  | 0.115239  | 0.12704   | 0.0456002 |
| 0.122523 | 0.126311  | 0.125    | 0.184878  | 0.115967  | 0.0610431 | 0.111597  |
| 0.123543 | 0.107809  | 0.107663 | 0.188228  | 0.103001  | 0.122669  | 0.0898893 |
| 0.141026 | 0.0483683 | 0.136509 | 0.195513  | 0.124272  | 0.137238  | 0.11757   |
| 0        | 0.141317  | 0.133596 | 0.20338   | 0.110577  | 0.125583  | 0.13243   |
| 0.141317 | 0         | 0.135344 | 0.195221  | 0.124272  | 0.137238  | 0.112034  |
| 0.133596 | 0.135344  | 0        | 0.207022  | 0.126748  | 0.135052  | 0.125583  |
| 0.20338  | 0.195221  | 0.207022 | 0         | 0.193036  | 0.189977  | 0.187209  |
| 0.110577 | 0.124272  | 0.126748 | 0.193036  | 0         | 0.131556  | 0.113054  |
| 0.125583 | 0.137238  | 0.135052 | 0.189977  | 0.131556  | 0         | 0.124563  |
| 0.13243  | 0.112034  | 0.125583 | 0.187209  | 0.113054  | 0.124563  | 0         |
| 0.12704  | 0.106643  | 0.108829 | 0.184149  | 0.109994  | 0.123834  | 0.0901807 |
| 0.116841 | 0.108974  | 0.133013 | 0.182401  | 0.102127  | 0.128788  | 0.111451  |
| 0.136218 | 0.122523  | 0.126166 | 0.192162  | 0.117716  | 0.132139  | 0.123252  |
| 0.130973 | 0.132139  | 0.134615 | 0.195659  | 0.131702  | 0.126894  | 0.124126  |
| 0.115967 | 0.124126  | 0.134761 | 0.190268  | 0.114948  | 0.126166  | 0.113491  |
| 0.130536 | 0.115676  | 0.118735 | 0.183275  | 0.113782  | 0.127914  | 0.107663  |

|          |           |           |           |           |           |           |
|----------|-----------|-----------|-----------|-----------|-----------|-----------|
| 0.126894 | 0.110577  | 0.115093  | 0.183129  | 0.111014  | 0.119901  | 0.102564  |
| 0.123252 | 0.11014   | 0.110577  | 0.184149  | 0.109703  | 0.118007  | 0.0995047 |
| 0.131847 | 0.105915  | 0.121795  | 0.194784  | 0.115385  | 0.13039   | 0.115967  |
| 0.146853 | 0.0603147 | 0.141463  | 0.202506  | 0.135635  | 0.140443  | 0.124272  |
| 0.135927 | 0.121941  | 0.126748  | 0.193619  | 0.115967  | 0.132721  | 0.117716  |
| 0.11655  | 0.120047  | 0.123689  | 0.183275  | 0.115822  | 0.0626457 | 0.107955  |
| 0.130536 | 0.119755  | 0.123689  | 0.192016  | 0.114073  | 0.127914  | 0.114365  |
| 0.135052 | 0.115822  | 0.126457  | 0.182547  | 0.113636  | 0.125728  | 0.04662   |
| 0.124709 | 0.109266  | 0.12398   | 0.19289   | 0.11553   | 0.126748  | 0.111451  |
| 0.136364 | 0.11655   | 0.129516  | 0.187063  | 0.11553   | 0.129371  | 0.0435606 |
| 0.108683 | 0.121795  | 0.123689  | 0.188228  | 0.0476399 | 0.126748  | 0.108829  |
| 0.113345 | 0.124709  | 0.132721  | 0.192016  | 0.115822  | 0.126748  | 0.111742  |
| 0.133741 | 0.11859   | 0.127185  | 0.194347  | 0.114656  | 0.131119  | 0.108246  |
| 0.128351 | 0.111742  | 0.110431  | 0.186917  | 0.111305  | 0.124563  | 0.0961538 |
| 0.13345  | 0.11859   | 0.125728  | 0.183566  | 0.114365  | 0.125     | 0.048514  |
| 0.117133 | 0.123543  | 0.131556  | 0.177156  | 0.120192  | 0.124126  | 0.11961   |
| 0.126894 | 0.125728  | 0.128788  | 0.190122  | 0.122669  | 0.119901  | 0.107809  |
| 0.123834 | 0.117133  | 0.121649  | 0.192016  | 0.111451  | 0.122086  | 0.101836  |
| 0.131993 | 0.115093  | 0.124854  | 0.185315  | 0.114656  | 0.123834  | 0.0499709 |
| 0.119901 | 0.125437  | 0.12704   | 0.182838  | 0.122669  | 0.0523019 | 0.118007  |
| 0.133013 | 0.107955  | 0.127331  | 0.191288  | 0.115967  | 0.129808  | 0.113928  |
| 0.122232 | 0.125146  | 0.128497  | 0.18546   | 0.120338  | 0.0572552 | 0.114802  |
| 0.135344 | 0.118153  | 0.129371  | 0.191579  | 0.114219  | 0.13447   | 0.1081    |
| 0.129516 | 0.112325  | 0.109557  | 0.18954   | 0.112471  | 0.129225  | 0.0941142 |
| 0.121941 | 0.116987  | 0.121795  | 0.184003  | 0.100524  | 0.120484  | 0.0996503 |
| 0.126457 | 0.107809  | 0.119901  | 0.193473  | 0.114365  | 0.128205  | 0.112617  |
| 0.121358 | 0.130099  | 0.130828  | 0.184295  | 0.122086  | 0.0587121 | 0.117133  |
| 0.128059 | 0.130099  | 0.117133  | 0.191288  | 0.120921  | 0.124563  | 0.124126  |
| 0.129953 | 0.119172  | 0.119318  | 0.186189  | 0.119318  | 0.115385  | 0.105915  |
| 0.203671 | 0.190559  | 0.203526  | 0.0929487 | 0.193328  | 0.192599  | 0.187209  |
| 0.164627 | 0.166958  | 0.168269  | 0.125291  | 0.159819  | 0.157051  | 0.158654  |
| 0.139569 | 0.0504079 | 0.135344  | 0.192308  | 0.123397  | 0.13549   | 0.116696  |
| 0.124563 | 0.122523  | 0.126166  | 0.184295  | 0.111305  | 0.125437  | 0.115093  |
| 0.156906 | 0.0756119 | 0.15035   | 0.214307  | 0.150058  | 0.158071  | 0.1419    |
| 0.116259 | 0.128497  | 0.139132  | 0.192599  | 0.0954254 | 0.132867  | 0.119901  |
| 0.126894 | 0.121649  | 0.136655  | 0.18546   | 0.106352  | 0.128934  | 0.0839161 |
| 0.129371 | 0.11859   | 0.129225  | 0.185897  | 0.117861  | 0.123252  | 0.0767774 |
| 0.131119 | 0.114219  | 0.122523  | 0.191434  | 0.116987  | 0.131119  | 0.0893065 |
| 0.125874 | 0.126457  | 0.122232  | 0.191434  | 0.123106  | 0.11859   | 0.107372  |
| 0.21285  | 0.202652  | 0.210956  | 0.10271   | 0.199592  | 0.196241  | 0.192599  |
| 0.136946 | 0.125874  | 0.128059  | 0.198718  | 0.120192  | 0.136946  | 0.123689  |
| 0.127768 | 0.123106  | 0.129371  | 0.178467  | 0.120338  | 0.0831876 | 0.11655   |
| 0.128642 | 0.114365  | 0.124709  | 0.183129  | 0.111888  | 0.124854  | 0.0617716 |
| 0.127622 | 0.122669  | 0.0627914 | 0.195804  | 0.114073  | 0.130245  | 0.116404  |



|          |           |           |           |           |           |           |
|----------|-----------|-----------|-----------|-----------|-----------|-----------|
| 0.192162 | 0.186917  | 0.192308  | 0.114073  | 0.187063  | 0.179924  | 0.177448  |
| 0.254808 | 0.245192  | 0.251748  | 0.13447   | 0.243881  | 0.237325  | 0.241841  |
| 0.114656 | 0.127768  | 0.133159  | 0.191871  | 0.115385  | 0.128351  | 0.114802  |
| 0.125728 | 0.12398   | 0.124126  | 0.194202  | 0.121795  | 0.121358  | 0.106061  |
| 0.136509 | 0.0523019 | 0.133159  | 0.189831  | 0.123834  | 0.134178  | 0.113345  |
| 0.135198 | 0.118298  | 0.12602   | 0.191725  | 0.114656  | 0.132284  | 0.106789  |
| 0.130973 | 0.121066  | 0.123252  | 0.193619  | 0.114219  | 0.127185  | 0.115676  |
| 0.10373  | 0.116259  | 0.126603  | 0.184149  | 0.088141  | 0.124126  | 0.110868  |
| 0.128351 | 0.119027  | 0.125874  | 0.178176  | 0.115967  | 0.0916375 | 0.0745921 |
| 0.130099 | 0.11961   | 0.121795  | 0.192745  | 0.114219  | 0.127768  | 0.117133  |
| 0.127914 | 0.116841  | 0.125437  | 0.180361  | 0.11757   | 0.0847902 | 0.0843531 |
| 0.129516 | 0.123106  | 0.128497  | 0.195367  | 0.120047  | 0.128934  | 0.105186  |
| 0.128788 | 0.110431  | 0.110286  | 0.187354  | 0.110868  | 0.123543  | 0.092803  |
| 0.113199 | 0.12602   | 0.134615  | 0.196533  | 0.115385  | 0.128642  | 0.113054  |
| 0.120921 | 0.127914  | 0.127185  | 0.18648   | 0.120775  | 0.0591492 | 0.114365  |
| 0.105186 | 0.114219  | 0.119901  | 0.180944  | 0.102418  | 0.112471  | 0.105624  |
| 0.124417 | 0.128788  | 0.133887  | 0.205711  | 0.13039   | 0.13549   | 0.115822  |
| 0.143648 | 0.136364  | 0.132139  | 0.209207  | 0.128642  | 0.139277  | 0.125437  |
| 0.131265 | 0.11757   | 0.130536  | 0.183421  | 0.111888  | 0.124854  | 0.0472028 |
| 0.129371 | 0.1081    | 0.127768  | 0.181235  | 0.120192  | 0.129953  | 0.0872669 |
| 0.141317 | 0.131119  | 0.132139  | 0.200175  | 0.128059  | 0.136655  | 0.0630828 |
| 0.218677 | 0.209353  | 0.214452  | 0.121066  | 0.209207  | 0.203526  | 0.199009  |
| 0.108683 | 0.116259  | 0.125728  | 0.186772  | 0.10708   | 0.121795  | 0.106498  |
| 0.130682 | 0.110286  | 0.110431  | 0.188083  | 0.111305  | 0.126894  | 0.0920746 |
| 0.114948 | 0.125728  | 0.128497  | 0.190414  | 0.0518648 | 0.131847  | 0.113345  |
| 0.120629 | 0.128788  | 0.12398   | 0.197552  | 0.114656  | 0.129371  | 0.121358  |
| 0.127622 | 0.123543  | 0.0633741 | 0.19289   | 0.116113  | 0.126166  | 0.115239  |
| 0.21183  | 0.195804  | 0.206439  | 0.0996503 | 0.196241  | 0.198718  | 0.18954   |
| 0.124272 | 0.130682  | 0.130536  | 0.187209  | 0.120047  | 0.0572552 | 0.117133  |
| 0.13141  | 0.113345  | 0.125437  | 0.185023  | 0.113782  | 0.122378  | 0.0429779 |
| 0.131847 | 0.118444  | 0.124417  | 0.194784  | 0.124709  | 0.127185  | 0.117424  |
| 0.132721 | 0.116404  | 0.124126  | 0.190997  | 0.113345  | 0.13039   | 0.104312  |
| 0.120775 | 0.127768  | 0.129079  | 0.182838  | 0.122378  | 0.0595862 | 0.114802  |
| 0.112034 | 0.116987  | 0.120338  | 0.17701   | 0.11451   | 0.0869755 | 0.102564  |
| 0.128934 | 0.121649  | 0.126457  | 0.192453  | 0.120921  | 0.123689  | 0.105478  |
| 0.122232 | 0.123106  | 0.123543  | 0.196241  | 0.111888  | 0.13039   | 0.11859   |
| 0.209499 | 0.199883  | 0.205857  | 0.0981935 | 0.198572  | 0.19493   | 0.189831  |
| 0.112617 | 0.118735  | 0.120629  | 0.180507  | 0.108974  | 0.0639569 | 0.1081    |
| 0.206585 | 0.195804  | 0.202069  | 0.094697  | 0.195659  | 0.192016  | 0.185752  |
| 0.203817 | 0.190997  | 0.202506  | 0.0887238 | 0.190559  | 0.190705  | 0.184732  |
| 0.140006 | 0.130682  | 0.127622  | 0.202069  | 0.125874  | 0.135927  | 0.118298  |
| 0.123397 | 0.13447   | 0.126748  | 0.2044    | 0.124126  | 0.138258  | 0.131119  |
| 0.120484 | 0.114656  | 0.118007  | 0.189831  | 0.110723  | 0.116987  | 0.0999417 |
| 0.113636 | 0.120047  | 0.123106  | 0.181818  | 0.114948  | 0.0693473 | 0.104749  |

|          |           |          |           |          |           |           |
|----------|-----------|----------|-----------|----------|-----------|-----------|
| 0.117279 | 0.121358  | 0.126748 | 0.182838  | 0.117133 | 0.0636655 | 0.111305  |
| 0.133596 | 0.11961   | 0.131119 | 0.182838  | 0.114219 | 0.129808  | 0.0486597 |
| 0.129225 | 0.116987  | 0.120921 | 0.190414  | 0.1081   | 0.122523  | 0.114802  |
| 0.129808 | 0.122523  | 0.121503 | 0.196241  | 0.113928 | 0.13039   | 0.116841  |
| 0.113054 | 0.127331  | 0.136218 | 0.194347  | 0.113782 | 0.127331  | 0.114365  |
| 0.137092 | 0.119318  | 0.130245 | 0.195076  | 0.115385 | 0.133596  | 0.111014  |
| 0.129662 | 0.110723  | 0.123689 | 0.181818  | 0.108246 | 0.120629  | 0.0441434 |
| 0.121649 | 0.127768  | 0.125583 | 0.186043  | 0.119464 | 0.0604604 | 0.115093  |
| 0.117133 | 0.112179  | 0.110868 | 0.187063  | 0.109994 | 0.11655   | 0.0995047 |
| 0.122232 | 0.136801  | 0.129662 | 0.191579  | 0.130828 | 0.048514  | 0.123834  |
| 0.138549 | 0.0540501 | 0.130828 | 0.192453  | 0.123543 | 0.134178  | 0.112471  |
| 0.128788 | 0.13986   | 0.131847 | 0.196678  | 0.135635 | 0.0541958 | 0.127768  |
| 0.265152 | 0.259324  | 0.261218 | 0.13986   | 0.256847 | 0.251457  | 0.253934  |
| 0.13345  | 0.12704   | 0.128934 | 0.203963  | 0.130682 | 0.138112  | 0.129225  |
| 0.131556 | 0.130099  | 0.122086 | 0.200612  | 0.127331 | 0.135344  | 0.120921  |
| 0.22669  | 0.218823  | 0.223048 | 0.116259  | 0.217803 | 0.210664  | 0.210519  |
| 0.132139 | 0.13243   | 0.125583 | 0.201195  | 0.128497 | 0.137383  | 0.117716  |
| 0.238199 | 0.228875  | 0.231643 | 0.129225  | 0.227855 | 0.222465  | 0.225816  |
| 0.126457 | 0.119172  | 0.121941 | 0.200175  | 0.123106 | 0.126748  | 0.120192  |
| 0.141754 | 0.128351  | 0.133741 | 0.199446  | 0.127622 | 0.133887  | 0.0576923 |
| 0.120192 | 0.123689  | 0.120921 | 0.190997  | 0.110723 | 0.126311  | 0.113928  |
| 0.139714 | 0.128351  | 0.127914 | 0.199155  | 0.121212 | 0.137383  | 0.113928  |
| 0.214307 | 0.20236   | 0.210664 | 0.0962995 | 0.200758 | 0.201486  | 0.195804  |
| 0.12602  | 0.136218  | 0.129662 | 0.19391   | 0.13141  | 0.0499709 | 0.123543  |
| 0.120192 | 0.128642  | 0.127331 | 0.186043  | 0.122669 | 0.060169  | 0.112179  |
| 0.236888 | 0.228147  | 0.233829 | 0.121795  | 0.227127 | 0.219988  | 0.21926   |
| 0.135052 | 0.125146  | 0.124709 | 0.190414  | 0.115093 | 0.132721  | 0.118881  |
| 0.210664 | 0.199883  | 0.208479 | 0.101399  | 0.200612 | 0.197261  | 0.189831  |
| 0.136655 | 0.125     | 0.127477 | 0.193473  | 0.115822 | 0.130828  | 0.123106  |
| 0.13549  | 0.116259  | 0.129225 | 0.185023  | 0.11757  | 0.125     | 0.0476399 |
| 0.134761 | 0.11757   | 0.111888 | 0.199446  | 0.119755 | 0.129808  | 0.102855  |
| 0.141171 | 0.133013  | 0.129662 | 0.206439  | 0.127331 | 0.136801  | 0.119755  |
| 0.123543 | 0.11859   | 0.125146 | 0.183566  | 0.109994 | 0.126166  | 0.10912   |
| 0.172203 | 0.155303  | 0.168852 | 0.119464  | 0.158945 | 0.163462  | 0.14729   |
| 0.114219 | 0.123834  | 0.123106 | 0.181235  | 0.114656 | 0.0536131 | 0.110868  |
| 0.124417 | 0.124709  | 0.126603 | 0.194347  | 0.114948 | 0.130536  | 0.122232  |
| 0.135198 | 0.129662  | 0.125728 | 0.191434  | 0.118735 | 0.134615  | 0.10912   |
| 0.113928 | 0.131993  | 0.13039  | 0.196387  | 0.121649 | 0.122378  | 0.127477  |
| 0.205274 | 0.196533  | 0.204545 | 0.0930944 | 0.193473 | 0.193328  | 0.188811  |
| 0.132867 | 0.117133  | 0.126603 | 0.185315  | 0.112617 | 0.123543  | 0.0435606 |
| 0.142628 | 0.124854  | 0.133741 | 0.180798  | 0.121212 | 0.138258  | 0.109848  |
| 0.130245 | 0.103438  | 0.124854 | 0.19493   | 0.114948 | 0.12704   | 0.11553   |
| 0.135052 | 0.127768  | 0.121212 | 0.197115  | 0.118298 | 0.129516  | 0.121212  |
| 0.133159 | 0.122378  | 0.127768 | 0.190268  | 0.119901 | 0.129662  | 0.0540501 |

|          |           |          |           |           |           |           |
|----------|-----------|----------|-----------|-----------|-----------|-----------|
| 0.262966 | 0.260052  | 0.257284 | 0.13884   | 0.252914  | 0.247523  | 0.250874  |
| 0.127622 | 0.114219  | 0.105915 | 0.194639  | 0.116987  | 0.126748  | 0.0995047 |
| 0.113345 | 0.123252  | 0.130973 | 0.186772  | 0.0750291 | 0.13141   | 0.088141  |
| 0.183858 | 0.184732  | 0.139132 | 0.143939  | 0.177302  | 0.179487  | 0.18109   |
| 0.197844 | 0.18648   | 0.19391  | 0.097028  | 0.186626  | 0.185315  | 0.179341  |
| 0.112179 | 0.127622  | 0.137675 | 0.188228  | 0.113199  | 0.129953  | 0.115239  |
| 0.118735 | 0.127185  | 0.126748 | 0.186334  | 0.119755  | 0.060169  | 0.111888  |
| 0.13447  | 0.116987  | 0.126166 | 0.192745  | 0.115676  | 0.128351  | 0.107226  |
| 0.132867 | 0.153263  | 0.137966 | 0.200466  | 0.145542  | 0.0568182 | 0.136509  |
| 0.112471 | 0.123543  | 0.132139 | 0.189685  | 0.113491  | 0.126457  | 0.111742  |
| 0.117861 | 0.128059  | 0.133159 | 0.195367  | 0.115676  | 0.131847  | 0.115093  |
| 0.133741 | 0.128205  | 0.129516 | 0.197844  | 0.121358  | 0.138403  | 0.127185  |
| 0.118881 | 0.122378  | 0.123689 | 0.18211   | 0.120484  | 0.0515734 | 0.113491  |
| 0.11757  | 0.137383  | 0.130536 | 0.190414  | 0.130245  | 0.0502622 | 0.12296   |
| 0.134615 | 0.123252  | 0.131556 | 0.178322  | 0.123397  | 0.129371  | 0.116404  |
| 0.139714 | 0.128934  | 0.127914 | 0.203526  | 0.12296   | 0.135927  | 0.11655   |
| 0.150058 | 0.141026  | 0.137675 | 0.21183   | 0.135635  | 0.144814  | 0.13039   |
| 0.135927 | 0.119318  | 0.107226 | 0.196241  | 0.122378  | 0.128934  | 0.099359  |
| 0.145105 | 0.133159  | 0.129808 | 0.208333  | 0.129516  | 0.140443  | 0.12398   |
| 0.141026 | 0.130245  | 0.128351 | 0.202506  | 0.127768  | 0.137238  | 0.131556  |
| 0.21722  | 0.205565  | 0.215035 | 0.105332  | 0.207168  | 0.202652  | 0.200175  |
| 0.13549  | 0.120047  | 0.129808 | 0.199301  | 0.124854  | 0.13986   | 0.107372  |
| 0.202797 | 0.193182  | 0.197698 | 0.092366  | 0.193036  | 0.190268  | 0.186043  |
| 0.11451  | 0.12296   | 0.127185 | 0.187646  | 0.10912   | 0.125     | 0.113491  |
| 0.1419   | 0.129662  | 0.133013 | 0.192016  | 0.126894  | 0.130536  | 0.0572552 |
| 0.138403 | 0.0509907 | 0.13447  | 0.191434  | 0.12602   | 0.133741  | 0.116113  |
| 0.133887 | 0.0534674 | 0.130828 | 0.1875    | 0.121503  | 0.131556  | 0.106061  |
| 0.118881 | 0.131993  | 0.130973 | 0.182984  | 0.123689  | 0.0524476 | 0.118153  |
| 0.119755 | 0.12704   | 0.128351 | 0.186772  | 0.124272  | 0.0512821 | 0.119027  |
| 0.135781 | 0.118298  | 0.134178 | 0.182984  | 0.116404  | 0.130245  | 0.0496795 |
| 0.120775 | 0.127768  | 0.123252 | 0.194493  | 0.117716  | 0.129225  | 0.11859   |
| 0.143502 | 0.0575466 | 0.136946 | 0.194493  | 0.127914  | 0.133013  | 0.120047  |
| 0.140734 | 0.137821  | 0.133887 | 0.194056  | 0.128934  | 0.141608  | 0.136509  |
| 0.255828 | 0.252914  | 0.253351 | 0.138403  | 0.248689  | 0.243007  | 0.246649  |
| 0.134615 | 0.119464  | 0.133887 | 0.185897  | 0.120775  | 0.131702  | 0.0453089 |
| 0.196533 | 0.183712  | 0.189685 | 0.0936772 | 0.183566  | 0.186917  | 0.176282  |
| 0.202214 | 0.192016  | 0.19799  | 0.0932401 | 0.187209  | 0.184732  | 0.184295  |
| 0.139423 | 0.125146  | 0.129079 | 0.181672  | 0.122086  | 0.134178  | 0.107517  |
| 0.129808 | 0.113199  | 0.110431 | 0.190414  | 0.112179  | 0.123689  | 0.094697  |
| 0.137675 | 0.128059  | 0.130828 | 0.194202  | 0.123834  | 0.130973  | 0.0553613 |
| 0.114948 | 0.121358  | 0.124126 | 0.181381  | 0.116259  | 0.0630828 | 0.110431  |
| 0.127622 | 0.113345  | 0.121941 | 0.175699  | 0.118153  | 0.126748  | 0.0939685 |
| 0.13345  | 0.12296   | 0.127477 | 0.19493   | 0.113782  | 0.129953  | 0.11961   |
| 0.119901 | 0.126603  | 0.125874 | 0.186043  | 0.122086  | 0.0735723 | 0.115967  |

|          |           |           |           |           |           |           |
|----------|-----------|-----------|-----------|-----------|-----------|-----------|
| 0.121649 | 0.139132  | 0.132284  | 0.198572  | 0.135198  | 0.0490967 | 0.127914  |
| 0.131993 | 0.117716  | 0.128934  | 0.185315  | 0.115239  | 0.127331  | 0.0479312 |
| 0.125291 | 0.133741  | 0.131556  | 0.192308  | 0.131556  | 0.0539044 | 0.121649  |
| 0.128642 | 0.11961   | 0.118881  | 0.191579  | 0.113636  | 0.129225  | 0.112762  |
| 0.144959 | 0.0569639 | 0.136946  | 0.197698  | 0.129371  | 0.137383  | 0.118007  |
| 0.137821 | 0.126748  | 0.133596  | 0.192308  | 0.119901  | 0.13345   | 0.110577  |
| 0.140006 | 0.136218  | 0.132284  | 0.206148  | 0.128497  | 0.140589  | 0.133741  |
| 0.130245 | 0.126457  | 0.128934  | 0.197844  | 0.12602   | 0.13141   | 0.110286  |
| 0.13549  | 0.112179  | 0.124563  | 0.184441  | 0.11553   | 0.125583  | 0.0546329 |
| 0.113928 | 0.139277  | 0.128642  | 0.204837  | 0.060169  | 0.135198  | 0.125728  |
| 0.200029 | 0.185752  | 0.193473  | 0.0933858 | 0.185023  | 0.183421  | 0.175699  |
| 0.130828 | 0.143357  | 0.134178  | 0.198427  | 0.137966  | 0.0486597 | 0.128059  |
| 0.120338 | 0.126457  | 0.125728  | 0.186189  | 0.121358  | 0.0536131 | 0.120484  |
| 0.14088  | 0.048514  | 0.134033  | 0.193328  | 0.123252  | 0.135344  | 0.114219  |
| 0.131119 | 0.0527389 | 0.125728  | 0.186772  | 0.119027  | 0.127331  | 0.103584  |
| 0.136218 | 0.124272  | 0.125583  | 0.194784  | 0.115385  | 0.129516  | 0.109557  |
| 0.139569 | 0.125874  | 0.130973  | 0.201049  | 0.121066  | 0.138403  | 0.11553   |
| 0.200321 | 0.193036  | 0.198427  | 0.0945513 | 0.190851  | 0.189831  | 0.183275  |
| 0.123106 | 0.126311  | 0.123252  | 0.179633  | 0.122086  | 0.0773601 | 0.114219  |
| 0.119172 | 0.117716  | 0.122232  | 0.167249  | 0.106498  | 0.113928  | 0.106789  |
| 0.123252 | 0.13141   | 0.128642  | 0.188228  | 0.127768  | 0.048951  | 0.11961   |
| 0.202069 | 0.194202  | 0.199883  | 0.0968823 | 0.192308  | 0.188666  | 0.184441  |
| 0.127914 | 0.107809  | 0.11116   | 0.180944  | 0.112617  | 0.124417  | 0.0930944 |
| 0.138549 | 0.129516  | 0.124709  | 0.200903  | 0.12296   | 0.137092  | 0.127331  |
| 0.120484 | 0.131847  | 0.131702  | 0.189248  | 0.123252  | 0.0523019 | 0.118007  |
| 0.108392 | 0.122669  | 0.125728  | 0.195221  | 0.109994  | 0.124126  | 0.108246  |
| 0.199592 | 0.189977  | 0.197407  | 0.0885781 | 0.186043  | 0.185606  | 0.179633  |
| 0.131993 | 0.121212  | 0.124563  | 0.19289   | 0.117279  | 0.127331  | 0.122815  |
| 0.109557 | 0.124126  | 0.125728  | 0.183566  | 0.0598776 | 0.119464  | 0.111451  |
| 0.130828 | 0.113345  | 0.116404  | 0.175991  | 0.112617  | 0.124709  | 0.0968823 |
| 0.13141  | 0.118007  | 0.133304  | 0.159965  | 0.118153  | 0.124417  | 0.114365  |
| 0.120775 | 0.126311  | 0.124417  | 0.196241  | 0.115385  | 0.134178  | 0.119172  |
| 0.14292  | 0.131265  | 0.12704   | 0.203234  | 0.126166  | 0.137383  | 0.130245  |
| 0.133013 | 0.116987  | 0.132576  | 0.1875    | 0.115676  | 0.122815  | 0.0472028 |
| 0.127185 | 0.127768  | 0.130536  | 0.19799   | 0.129953  | 0.119901  | 0.118007  |
| 0.120629 | 0.15035   | 0.146707  | 0.208333  | 0.13884   | 0.147145  | 0.138258  |
| 0.245047 | 0.237762  | 0.239948  | 0.126748  | 0.23412   | 0.229895  | 0.23208   |
| 0.13141  | 0.132867  | 0.135052  | 0.204837  | 0.130099  | 0.134033  | 0.116113  |
| 0.121795 | 0.126457  | 0.127185  | 0.194639  | 0.111451  | 0.13345   | 0.118444  |
| 0.120192 | 0.128351  | 0.124709  | 0.183712  | 0.116259  | 0.0587121 | 0.114802  |
| 0.131119 | 0.125     | 0.134178  | 0.182692  | 0.121649  | 0.131993  | 0.117861  |
| 0.111742 | 0.116987  | 0.120338  | 0.188374  | 0.114802  | 0.120775  | 0.115676  |
| 0.123689 | 0.125437  | 0.0544872 | 0.191579  | 0.11655   | 0.125728  | 0.116259  |
| 0.124709 | 0.129079  | 0.127185  | 0.184441  | 0.127185  | 0.0568182 | 0.116404  |

|          |           |          |           |          |           |           |
|----------|-----------|----------|-----------|----------|-----------|-----------|
| 0.140006 | 0.130973  | 0.12704  | 0.200321  | 0.125291 | 0.136509  | 0.127914  |
| 0.121066 | 0.126311  | 0.125583 | 0.187791  | 0.115093 | 0.132139  | 0.115676  |
| 0.245338 | 0.236305  | 0.242279 | 0.129371  | 0.240239 | 0.229312  | 0.231498  |
| 0.127185 | 0.111451  | 0.109848 | 0.185169  | 0.107517 | 0.119318  | 0.0932401 |
| 0.124272 | 0.109703  | 0.118007 | 0.188083  | 0.112471 | 0.120775  | 0.108974  |
| 0.130245 | 0.118881  | 0.126311 | 0.185897  | 0.116987 | 0.123252  | 0.0467657 |
| 0.116696 | 0.137675  | 0.137821 | 0.201777  | 0.125    | 0.133596  | 0.121795  |
| 0.137675 | 0.137966  | 0.13345  | 0.20877   | 0.136072 | 0.142337  | 0.119172  |
| 0.132721 | 0.118735  | 0.121212 | 0.183129  | 0.122378 | 0.118444  | 0.104312  |
| 0.119318 | 0.129225  | 0.128788 | 0.184295  | 0.125    | 0.0520105 | 0.114219  |
| 0.112179 | 0.118298  | 0.124563 | 0.187937  | 0.111451 | 0.11859   | 0.105624  |
| 0.239802 | 0.234557  | 0.237034 | 0.123252  | 0.23208  | 0.225233  | 0.22771   |
| 0.117133 | 0.132284  | 0.129516 | 0.190268  | 0.128351 | 0.0474942 | 0.120484  |
| 0.135927 | 0.127768  | 0.125583 | 0.198281  | 0.122669 | 0.133013  | 0.125583  |
| 0.12398  | 0.121358  | 0.12296  | 0.189248  | 0.111014 | 0.129225  | 0.109557  |
| 0.121503 | 0.130828  | 0.125146 | 0.197261  | 0.121941 | 0.128788  | 0.122523  |
| 0.129662 | 0.120629  | 0.124854 | 0.201632  | 0.12602  | 0.133159  | 0.125437  |
| 0.132576 | 0.118881  | 0.127185 | 0.188811  | 0.11757  | 0.125291  | 0.0496795 |
| 0.138112 | 0.126166  | 0.126311 | 0.199592  | 0.12398  | 0.134033  | 0.126603  |
| 0.138549 | 0.133596  | 0.129662 | 0.2044    | 0.129953 | 0.136801  | 0.132284  |
| 0.132139 | 0.121941  | 0.122378 | 0.194493  | 0.117133 | 0.133596  | 0.120629  |
| 0.131119 | 0.11655   | 0.128642 | 0.187354  | 0.113782 | 0.125583  | 0.0450175 |
| 0.120338 | 0.130536  | 0.125146 | 0.200758  | 0.121358 | 0.133741  | 0.126311  |
| 0.12398  | 0.135344  | 0.124709 | 0.209062  | 0.124709 | 0.133887  | 0.131119  |
| 0.140589 | 0.0590035 | 0.138403 | 0.20236   | 0.13345  | 0.138549  | 0.11859   |
| 0.148456 | 0.0607517 | 0.142483 | 0.202652  | 0.134907 | 0.144376  | 0.125583  |
| 0.125    | 0.134615  | 0.126311 | 0.207751  | 0.122232 | 0.136655  | 0.129225  |
| 0.126748 | 0.105478  | 0.117861 | 0.190851  | 0.109994 | 0.127622  | 0.0828963 |
| 0.139132 | 0.12398   | 0.134033 | 0.213432  | 0.131993 | 0.136801  | 0.134907  |
| 0.147727 | 0.140734  | 0.137966 | 0.207459  | 0.13039  | 0.139569  | 0.121941  |
| 0.215909 | 0.207168  | 0.21081  | 0.10169   | 0.204691 | 0.199592  | 0.198572  |
| 0.129079 | 0.13345   | 0.129225 | 0.19493   | 0.128642 | 0.125583  | 0.116113  |
| 0.127331 | 0.114219  | 0.128934 | 0.192016  | 0.118735 | 0.129662  | 0.112908  |
| 0.135927 | 0.123689  | 0.132867 | 0.182547  | 0.120629 | 0.131265  | 0.0509907 |
| 0.232226 | 0.226107  | 0.22771  | 0.128497  | 0.224796 | 0.217366  | 0.218386  |
| 0.222611 | 0.215035  | 0.216055 | 0.112762  | 0.21722  | 0.207751  | 0.203817  |
| 0.137383 | 0.132139  | 0.134033 | 0.199446  | 0.125874 | 0.137383  | 0.129662  |
| 0.257867 | 0.250874  | 0.252768 | 0.138986  | 0.25102  | 0.244464  | 0.246649  |
| 0.125    | 0.105769  | 0.121941 | 0.189394  | 0.112034 | 0.128205  | 0.0907634 |
| 0.145105 | 0.138695  | 0.137675 | 0.206002  | 0.134761 | 0.144522  | 0.121649  |
| 0.131702 | 0.111305  | 0.106789 | 0.189394  | 0.112617 | 0.12704   | 0.092803  |
| 0.122523 | 0.131847  | 0.12704  | 0.202943  | 0.123543 | 0.132721  | 0.124709  |
| 0.201049 | 0.190268  | 0.196241 | 0.0952797 | 0.18954  | 0.185897  | 0.18109   |
| 0.132139 | 0.133887  | 0.12704  | 0.193036  | 0.120338 | 0.13447   | 0.115967  |

|          |           |           |           |           |           |           |
|----------|-----------|-----------|-----------|-----------|-----------|-----------|
| 0.208479 | 0.19391   | 0.204545  | 0.0948427 | 0.19493   | 0.190997  | 0.182984  |
| 0.130682 | 0.122815  | 0.123252  | 0.194493  | 0.11859   | 0.129225  | 0.102855  |
| 0.13039  | 0.120775  | 0.129662  | 0.174971  | 0.119464  | 0.109994  | 0.117716  |
| 0.128351 | 0.118735  | 0.128497  | 0.19391   | 0.123834  | 0.130973  | 0.113928  |
| 0.121649 | 0.116696  | 0.118298  | 0.177593  | 0.108974  | 0.113782  | 0.106935  |
| 0.127622 | 0.112762  | 0.123106  | 0.182984  | 0.112034  | 0.120921  | 0.0432692 |
| 0.123543 | 0.12296   | 0.119901  | 0.18852   | 0.119027  | 0.117133  | 0.10271   |
| 0.127331 | 0.109266  | 0.106206  | 0.180944  | 0.108829  | 0.123834  | 0.0913462 |
| 0.119027 | 0.124563  | 0.124709  | 0.184586  | 0.11859   | 0.0572552 | 0.109557  |
| 0.129662 | 0.107809  | 0.123397  | 0.196096  | 0.116987  | 0.129662  | 0.119901  |
| 0.123834 | 0.120629  | 0.124854  | 0.193765  | 0.117279  | 0.121795  | 0.102127  |
| 0.128642 | 0.113491  | 0.1081    | 0.18546   | 0.114802  | 0.12602   | 0.0949883 |
| 0.137529 | 0.0740093 | 0.129516  | 0.189103  | 0.122523  | 0.134033  | 0.104749  |
| 0.121503 | 0.137529  | 0.131556  | 0.192599  | 0.130099  | 0.0518648 | 0.124563  |
| 0.134761 | 0.0499709 | 0.129079  | 0.186626  | 0.12296   | 0.128351  | 0.109557  |
| 0.1081   | 0.123834  | 0.124272  | 0.187646  | 0.0467657 | 0.12704   | 0.108829  |
| 0.129516 | 0.113199  | 0.124126  | 0.183421  | 0.109557  | 0.121358  | 0.0407925 |
| 0.135344 | 0.12398   | 0.126166  | 0.18954   | 0.119172  | 0.124272  | 0.121795  |
| 0.119318 | 0.122232  | 0.125291  | 0.193328  | 0.111305  | 0.129225  | 0.115093  |
| 0.138112 | 0.125874  | 0.127477  | 0.198427  | 0.118444  | 0.133159  | 0.112617  |
| 0.13986  | 0.0541958 | 0.128642  | 0.192016  | 0.121066  | 0.134033  | 0.112034  |
| 0.121649 | 0.125437  | 0.128205  | 0.184003  | 0.120338  | 0.0549242 | 0.114802  |
| 0.124126 | 0.136655  | 0.134178  | 0.193182  | 0.132721  | 0.0486597 | 0.12398   |
| 0.127622 | 0.145979  | 0.134761  | 0.199592  | 0.140006  | 0.0527389 | 0.13039   |
| 0.123397 | 0.113491  | 0.119172  | 0.18546   | 0.109266  | 0.122232  | 0.105186  |
| 0.135052 | 0.116696  | 0.130536  | 0.186334  | 0.115676  | 0.128934  | 0.0480769 |
| 0.12296  | 0.116259  | 0.0607517 | 0.186772  | 0.110868  | 0.121795  | 0.108246  |
| 0.122378 | 0.136364  | 0.124563  | 0.207168  | 0.125146  | 0.136655  | 0.132139  |
| 0.129516 | 0.113199  | 0.108974  | 0.194784  | 0.119172  | 0.12602   | 0.100816  |
| 0.150204 | 0.142628  | 0.138403  | 0.212558  | 0.136946  | 0.144959  | 0.130828  |
| 0.144959 | 0.137966  | 0.138986  | 0.202069  | 0.134324  | 0.14292   | 0.0661422 |
| 0.113054 | 0.130245  | 0.135927  | 0.197552  | 0.120192  | 0.132284  | 0.11553   |
| 0.128351 | 0.113199  | 0.118881  | 0.186334  | 0.114219  | 0.121941  | 0.102564  |
| 0.1081   | 0.119464  | 0.126603  | 0.18648   | 0.107372  | 0.11859   | 0.113199  |
| 0.1419   | 0.0553613 | 0.138258  | 0.19697   | 0.132139  | 0.139569  | 0.120484  |
| 0.221591 | 0.207896  | 0.213287  | 0.111742  | 0.210082  | 0.204108  | 0.201923  |
| 0.11116  | 0.121649  | 0.12296   | 0.185752  | 0.0498252 | 0.125728  | 0.11014   |
| 0.134033 | 0.118007  | 0.129808  | 0.191725  | 0.113782  | 0.132284  | 0.109703  |
| 0.116404 | 0.124854  | 0.121503  | 0.199738  | 0.11451   | 0.129516  | 0.117424  |
| 0.138403 | 0.0521562 | 0.13039   | 0.190851  | 0.122815  | 0.131119  | 0.112617  |
| 0.13447  | 0.123397  | 0.126748  | 0.193328  | 0.121503  | 0.135927  | 0.112179  |
| 0.128934 | 0.130973  | 0.112471  | 0.19391   | 0.119464  | 0.119318  | 0.122086  |
| 0.125583 | 0.132576  | 0.112034  | 0.198135  | 0.124272  | 0.119172  | 0.127185  |
| 0.110286 | 0.129808  | 0.132867  | 0.192453  | 0.11655   | 0.13039   | 0.115093  |

|          |           |          |          |          |           |           |
|----------|-----------|----------|----------|----------|-----------|-----------|
| 0.127185 | 0.106498  | 0.124126 | 0.191871 | 0.113928 | 0.12602   | 0.111597  |
| 0.118735 | 0.133304  | 0.124417 | 0.201486 | 0.123834 | 0.132139  | 0.124709  |
| 0.128351 | 0.116696  | 0.123543 | 0.19391  | 0.116841 | 0.129516  | 0.108392  |
| 0.130536 | 0.126457  | 0.128934 | 0.196387 | 0.121941 | 0.134033  | 0.106498  |
| 0.185752 | 0.174388  | 0.18648  | 0.168852 | 0.179487 | 0.177593  | 0.173077  |
| 0.121066 | 0.126311  | 0.130245 | 0.182547 | 0.121212 | 0.0604604 | 0.113345  |
| 0.126457 | 0.134615  | 0.129808 | 0.190268 | 0.124854 | 0.135781  | 0.125728  |
| 0.13243  | 0.124272  | 0.129662 | 0.204983 | 0.123543 | 0.139714  | 0.109266  |
| 0.128205 | 0.12704   | 0.127768 | 0.192016 | 0.12602  | 0.11859   | 0.119901  |
| 0.117424 | 0.111888  | 0.113491 | 0.190268 | 0.109703 | 0.118007  | 0.0986305 |
| 0.118881 | 0.112471  | 0.119901 | 0.187937 | 0.111742 | 0.117424  | 0.0971737 |
| 0.121795 | 0.121212  | 0.11553  | 0.194056 | 0.113491 | 0.122669  | 0.107955  |
| 0.125    | 0.126748  | 0.123397 | 0.198427 | 0.127768 | 0.132284  | 0.120192  |
| 0.122378 | 0.122669  | 0.128934 | 0.179487 | 0.120775 | 0.0958625 | 0.104749  |
| 0.144376 | 0.128059  | 0.128788 | 0.203234 | 0.129079 | 0.137092  | 0.117133  |
| 0.124709 | 0.115676  | 0.120775 | 0.183566 | 0.114073 | 0.118881  | 0.107955  |
| 0.134761 | 0.116113  | 0.116841 | 0.188083 | 0.124126 | 0.13243   | 0.114802  |
| 0.136364 | 0.140443  | 0.126603 | 0.208916 | 0.130099 | 0.141317  | 0.12602   |
| 0.132284 | 0.118298  | 0.122815 | 0.200175 | 0.122232 | 0.134615  | 0.107955  |
| 0.136655 | 0.117424  | 0.121941 | 0.196387 | 0.124854 | 0.130245  | 0.114656  |
| 0.129662 | 0.111305  | 0.122232 | 0.19493  | 0.116404 | 0.131993  | 0.103875  |
| 0.128788 | 0.115967  | 0.120484 | 0.198718 | 0.118444 | 0.131993  | 0.106498  |
| 0.121212 | 0.110431  | 0.113782 | 0.18852  | 0.108829 | 0.127331  | 0.0942599 |
| 0.135927 | 0.125146  | 0.126166 | 0.2044   | 0.122669 | 0.13243   | 0.105478  |
| 0.128351 | 0.113782  | 0.121795 | 0.188957 | 0.112179 | 0.131847  | 0.0979021 |
| 0.150787 | 0.146707  | 0.140734 | 0.204983 | 0.1419   | 0.143794  | 0.139277  |
| 0.143502 | 0.135052  | 0.138112 | 0.190122 | 0.130828 | 0.137092  | 0.127622  |
| 0.128934 | 0.10912   | 0.123543 | 0.191871 | 0.113345 | 0.122523  | 0.10373   |
| 0.139569 | 0.138986  | 0.135927 | 0.208333 | 0.135052 | 0.139277  | 0.138549  |
| 0.129371 | 0.0979021 | 0.13447  | 0.190268 | 0.121941 | 0.13345   | 0.113782  |
| 0.143065 | 0.141608  | 0.133304 | 0.208042 | 0.136801 | 0.143065  | 0.13039   |
| 0.122669 | 0.113636  | 0.122523 | 0.19493  | 0.120192 | 0.12704   | 0.103584  |
| 0.143794 | 0.146999  | 0.147436 | 0.203234 | 0.145396 | 0.146999  | 0.137238  |
| 0.136801 | 0.134178  | 0.131993 | 0.194784 | 0.124709 | 0.140006  | 0.127622  |
| 0.141171 | 0.133304  | 0.136072 | 0.20236  | 0.134615 | 0.146999  | 0.130828  |
| 0.129516 | 0.106206  | 0.129953 | 0.2044   | 0.124126 | 0.132721  | 0.115967  |
| 0.130245 | 0.113054  | 0.12602  | 0.193473 | 0.113491 | 0.126748  | 0.0995047 |
| 0.127185 | 0.114656  | 0.124417 | 0.189831 | 0.108683 | 0.133887  | 0.0996503 |
| 0.120629 | 0.125874  | 0.120775 | 0.195513 | 0.118153 | 0.126457  | 0.115239  |
| 0.134033 | 0.121795  | 0.12398  | 0.203963 | 0.122815 | 0.131993  | 0.112908  |
| 0.137092 | 0.128934  | 0.127331 | 0.207896 | 0.126748 | 0.135344  | 0.115385  |
| 0.13884  | 0.12602   | 0.131993 | 0.189248 | 0.126748 | 0.134761  | 0.116841  |
| 0.119901 | 0.0916375 | 0.122086 | 0.190122 | 0.107809 | 0.128059  | 0.102855  |
| 0.127914 | 0.116259  | 0.123689 | 0.191142 | 0.114073 | 0.129662  | 0.101836  |

|          |          |          |          |          |          |           |
|----------|----------|----------|----------|----------|----------|-----------|
| 0.128642 | 0.122232 | 0.117133 | 0.194202 | 0.120921 | 0.133013 | 0.104021  |
| 0.128351 | 0.112908 | 0.119464 | 0.187209 | 0.111888 | 0.126311 | 0.100816  |
| 0.13549  | 0.12704  | 0.130099 | 0.19697  | 0.123689 | 0.136364 | 0.10912   |
| 0.13345  | 0.112471 | 0.126311 | 0.187646 | 0.121066 | 0.125    | 0.100379  |
| 0.131556 | 0.118153 | 0.121212 | 0.184295 | 0.126748 | 0.112908 | 0.104895  |
| 0.124854 | 0.123397 | 0.124417 | 0.195367 | 0.116259 | 0.122523 | 0.0996503 |
| 0.121941 | 0.107663 | 0.115676 | 0.18954  | 0.111305 | 0.124272 | 0.0847902 |
| 0.125728 | 0.117279 | 0.116841 | 0.188666 | 0.11655  | 0.125728 | 0.102855  |
| 0.130245 | 0.114802 | 0.119027 | 0.182401 | 0.116696 | 0.119755 | 0.105332  |
| 0.127768 | 0.120775 | 0.119464 | 0.193036 | 0.121212 | 0.11961  | 0.105769  |
| 0.131847 | 0.126894 | 0.12296  | 0.1875   | 0.119755 | 0.11116  | 0.120629  |
| 0.125146 | 0.110286 | 0.115676 | 0.178176 | 0.113054 | 0.109703 | 0.0955711 |
| 0.138986 | 0.128205 | 0.120775 | 0.204254 | 0.133596 | 0.130536 | 0.121358  |



| TDr_2175  | TDr_2195  | TDr_2197  | TDr_2201 | TDr_2207 | TDr_2210  | TDr_2211  |
|-----------|-----------|-----------|----------|----------|-----------|-----------|
| 0.103293  | 0.105041  | 0.122378  | 0.131119 | 0.119901 | 0.106498  | 0.099359  |
| 0.0990676 | 0.111305  | 0.121649  | 0.124563 | 0.109557 | 0.11014   | 0.10708   |
| 0.0926573 | 0.106643  | 0.118444  | 0.122523 | 0.106935 | 0.106061  | 0.100087  |
| 0.100816  | 0.115676  | 0.118153  | 0.128934 | 0.117716 | 0.1081    | 0.102418  |
| 0.122086  | 0.109266  | 0.132139  | 0.137966 | 0.124417 | 0.127622  | 0.126894  |
| 0.115967  | 0.113054  | 0.131556  | 0.134761 | 0.121795 | 0.120047  | 0.117279  |
| 0.105041  | 0.113199  | 0.116841  | 0.135198 | 0.130099 | 0.113199  | 0.111014  |
| 0.10271   | 0.110868  | 0.11859   | 0.120921 | 0.112908 | 0.110868  | 0.106935  |
| 0.0879953 | 0.107517  | 0.10912   | 0.121941 | 0.110431 | 0.0949883 | 0.0922203 |
| 0.0744464 | 0.106206  | 0.125874  | 0.122378 | 0.116404 | 0.101544  | 0.0932401 |
| 0.101981  | 0.102273  | 0.118444  | 0.135344 | 0.119755 | 0.101981  | 0.0980478 |
| 0.100379  | 0.110577  | 0.107226  | 0.121212 | 0.111742 | 0.102127  | 0.0984848 |
| 0.0965909 | 0.108829  | 0.112179  | 0.122378 | 0.116987 | 0.099796  | 0.0979021 |
| 0.116841  | 0.121795  | 0.14292   | 0.146999 | 0.136946 | 0.122086  | 0.11961   |
| 0.105624  | 0.124272  | 0.133741  | 0.133159 | 0.126603 | 0.120484  | 0.115093  |
| 0.105769  | 0.113636  | 0.109994  | 0.126894 | 0.125291 | 0.10169   | 0.0989219 |
| 0.0995047 | 0.11116   | 0.101981  | 0.125291 | 0.115239 | 0.0960082 | 0.0958625 |
| 0.132867  | 0.131119  | 0.151078  | 0.143794 | 0.132867 | 0.142774  | 0.140297  |
| 0.0935315 | 0.107226  | 0.114656  | 0.121358 | 0.106935 | 0.103147  | 0.101836  |
| 0.194056  | 0.189103  | 0.209645  | 0.207022 | 0.202797 | 0.19493   | 0.192453  |
| 0.114073  | 0.110286  | 0.128497  | 0.134907 | 0.113782 | 0.118153  | 0.117133  |
| 0.108392  | 0.108683  | 0.128351  | 0.136509 | 0.112471 | 0.118881  | 0.116113  |
| 0.095134  | 0.0995047 | 0.092366  | 0.12296  | 0.113491 | 0.0814394 | 0.0792541 |
| 0.108974  | 0.123834  | 0.104167  | 0.138258 | 0.12704  | 0.1081    | 0.103001  |
| 0.0901807 | 0.097465  | 0.107809  | 0.117133 | 0.10271  | 0.0901807 | 0.0891608 |
| 0.120484  | 0.11961   | 0.132576  | 0.136655 | 0.123106 | 0.125728  | 0.121503  |
| 0.109994  | 0.11961   | 0.11859   | 0.129953 | 0.124854 | 0.114365  | 0.109848  |
| 0.104458  | 0.121941  | 0.102564  | 0.133741 | 0.122815 | 0.102418  | 0.101981  |
| 0.116987  | 0.131847  | 0.125874  | 0.131702 | 0.133304 | 0.122815  | 0.117716  |
| 0.097465  | 0.125728  | 0.123252  | 0.130245 | 0.134178 | 0.114656  | 0.106061  |
| 0.106061  | 0.112179  | 0.123106  | 0.13243  | 0.128788 | 0.107809  | 0.101836  |
| 0.105332  | 0.124272  | 0.115967  | 0.134324 | 0.124272 | 0.112034  | 0.105186  |
| 0.0913462 | 0.101836  | 0.112179  | 0.123543 | 0.111451 | 0.0980478 | 0.0909091 |
| 0.0980478 | 0.122815  | 0.116841  | 0.125291 | 0.124272 | 0.115822  | 0.104604  |
| 0.107517  | 0.112762  | 0.112908  | 0.12602  | 0.126166 | 0.109557  | 0.105041  |
| 0.107663  | 0.122523  | 0.119755  | 0.135198 | 0.133304 | 0.116404  | 0.111305  |
| 0.119172  | 0.11859   | 0.133596  | 0.137966 | 0.137529 | 0.125874  | 0.118153  |
| 0.108246  | 0.123689  | 0.116259  | 0.13345  | 0.123689 | 0.110577  | 0.106061  |
| 0.0962995 | 0.113782  | 0.0926573 | 0.123543 | 0.112325 | 0.0898893 | 0.090035  |
| 0.108537  | 0.121941  | 0.107517  | 0.131993 | 0.121358 | 0.109411  | 0.104021  |
| 0.0942599 | 0.105041  | 0.104604  | 0.122378 | 0.112617 | 0.0957168 | 0.0929487 |
| 0.121066  | 0.134761  | 0.128788  | 0.148601 | 0.142337 | 0.126603  | 0.119755  |

|           |          |           |          |          |           |           |
|-----------|----------|-----------|----------|----------|-----------|-----------|
| 0.12602   | 0.140006 | 0.129953  | 0.152389 | 0.148747 | 0.128059  | 0.123834  |
| 0.10169   | 0.108683 | 0.107372  | 0.131265 | 0.116259 | 0.103147  | 0.0983392 |
| 0.0932401 | 0.10373  | 0.103293  | 0.11961  | 0.109266 | 0.0961538 | 0.0936772 |
| 0.0986305 | 0.114948 | 0.11014   | 0.126457 | 0.127185 | 0.103875  | 0.100524  |
| 0.105332  | 0.118444 | 0.107226  | 0.127331 | 0.116113 | 0.104167  | 0.101399  |
| 0.121795  | 0.134907 | 0.126311  | 0.144668 | 0.13986  | 0.125291  | 0.120775  |
| 0.0955711 | 0.111014 | 0.10912   | 0.126894 | 0.11859  | 0.101399  | 0.095134  |
| 0.0992133 | 0.108829 | 0.107226  | 0.129662 | 0.121358 | 0.10067   | 0.0990676 |
| 0.129371  | 0.130828 | 0.148456  | 0.146707 | 0.148601 | 0.138403  | 0.137675  |
| 0.114802  | 0.121795 | 0.114948  | 0.140006 | 0.132867 | 0.111597  | 0.108829  |
| 0.100962  | 0.110868 | 0.0961538 | 0.121795 | 0.116987 | 0.0933858 | 0.0932401 |
| 0.10271   | 0.121066 | 0.134615  | 0.137821 | 0.13243  | 0.120775  | 0.113928  |
| 0.109994  | 0.101253 | 0.112179  | 0.125583 | 0.11553  | 0.10271   | 0.0976107 |
| 0.124854  | 0.13884  | 0.123252  | 0.150058 | 0.142045 | 0.128059  | 0.126166  |
| 0.11014   | 0.120047 | 0.111451  | 0.138549 | 0.134033 | 0.113636  | 0.10912   |
| 0.102564  | 0.112762 | 0.102127  | 0.12602  | 0.115385 | 0.0976107 | 0.0968823 |
| 0.100524  | 0.112471 | 0.112617  | 0.131556 | 0.122086 | 0.104895  | 0.102127  |
| 0.0939685 | 0.114365 | 0.112471  | 0.133741 | 0.127768 | 0.106206  | 0.102564  |
| 0.124272  | 0.133887 | 0.114219  | 0.143357 | 0.142628 | 0.115822  | 0.113636  |
| 0.121941  | 0.13447  | 0.123834  | 0.147436 | 0.140006 | 0.125437  | 0.122378  |
| 0.149476  | 0.153846 | 0.153409  | 0.170892 | 0.164336 | 0.14627   | 0.139423  |
| 0.0944056 | 0.115967 | 0.105332  | 0.127477 | 0.11859  | 0.101981  | 0.0930944 |
| 0.0952797 | 0.11014  | 0.0995047 | 0.131556 | 0.111888 | 0.0984848 | 0.0913462 |
| 0.0912005 | 0.108974 | 0.101544  | 0.122815 | 0.115093 | 0.092366  | 0.0895979 |
| 0.126894  | 0.132721 | 0.138403  | 0.143065 | 0.145251 | 0.132721  | 0.129953  |
| 0.0980478 | 0.114365 | 0.10373   | 0.117716 | 0.116696 | 0.100962  | 0.0944056 |
| 0.119464  | 0.120338 | 0.11961   | 0.142045 | 0.134324 | 0.118298  | 0.114365  |
| 0.0961538 | 0.120629 | 0.10708   | 0.132721 | 0.127914 | 0.105478  | 0.100379  |
| 0.103584  | 0.113199 | 0.10373   | 0.127914 | 0.120484 | 0.101544  | 0.0979021 |
| 0.13447   | 0.131556 | 0.145396  | 0.14831  | 0.151952 | 0.134761  | 0.133741  |
| 0.107955  | 0.117861 | 0.104312  | 0.132576 | 0.128934 | 0.099796  | 0.0979021 |
| 0.117133  | 0.138986 | 0.121649  | 0.14729  | 0.141026 | 0.126457  | 0.11961   |
| 0.114656  | 0.127477 | 0.117424  | 0.138112 | 0.130682 | 0.116404  | 0.111888  |
| 0.104604  | 0.104895 | 0.116404  | 0.128934 | 0.108392 | 0.106935  | 0.101544  |
| 0.0981935 | 0.113054 | 0.0971737 | 0.130099 | 0.115676 | 0.0941142 | 0.0919289 |
| 0.0979021 | 0.112762 | 0.107663  | 0.126603 | 0.116841 | 0.0987762 | 0.0989219 |
| 0.122086  | 0.131993 | 0.11553   | 0.137675 | 0.133741 | 0.116841  | 0.114365  |
| 0.0968823 | 0.106789 | 0.105186  | 0.127622 | 0.111451 | 0.10067   | 0.094697  |
| 0.119755  | 0.138986 | 0.12602   | 0.139423 | 0.145396 | 0.126748  | 0.118735  |
| 0.104312  | 0.117133 | 0.110868  | 0.13039  | 0.125291 | 0.100816  | 0.101836  |
| 0.106061  | 0.117716 | 0.097465  | 0.125146 | 0.123252 | 0.102855  | 0.103293  |
| 0.105186  | 0.115676 | 0.104749  | 0.129225 | 0.120047 | 0.100816  | 0.0962995 |
| 0.104895  | 0.120338 | 0.106498  | 0.133596 | 0.123252 | 0.102564  | 0.100379  |
| 0.0990676 | 0.113054 | 0.104458  | 0.130099 | 0.120921 | 0.100233  | 0.097465  |

|           |           |           |          |          |           |           |
|-----------|-----------|-----------|----------|----------|-----------|-----------|
| 0.104021  | 0.11451   | 0.0992133 | 0.128059 | 0.117133 | 0.0949883 | 0.0933858 |
| 0.121941  | 0.13447   | 0.121795  | 0.144814 | 0.139423 | 0.11961   | 0.115676  |
| 0.0930944 | 0.10708   | 0.10373   | 0.126748 | 0.116696 | 0.0916375 | 0.0903263 |
| 0.0984848 | 0.112179  | 0.111451  | 0.124854 | 0.117716 | 0.108974  | 0.101836  |
| 0.107517  | 0.124709  | 0.127477  | 0.130973 | 0.128788 | 0.121795  | 0.118735  |
| 0.110431  | 0.117716  | 0.123689  | 0.138549 | 0.136072 | 0.120338  | 0.115239  |
| 0.115967  | 0.125583  | 0.124854  | 0.131847 | 0.129662 | 0.120338  | 0.11553   |
| 0.127768  | 0.129225  | 0.132576  | 0.144522 | 0.13447  | 0.128934  | 0.125     |
| 0.10373   | 0.0725524 | 0.122815  | 0.13039  | 0.11655  | 0.111305  | 0.10271   |
| 0.170746  | 0.163462  | 0.184295  | 0.188083 | 0.187937 | 0.169872  | 0.168269  |
| 0.0913462 | 0.103001  | 0.111597  | 0.122669 | 0.112325 | 0.10067   | 0.100233  |
| 0.126748  | 0.129662  | 0.131556  | 0.143794 | 0.13549  | 0.129079  | 0.125437  |
| 0.120338  | 0.122378  | 0.121358  | 0.135635 | 0.125583 | 0.120921  | 0.117279  |
| 0.121941  | 0.120775  | 0.130536  | 0.143939 | 0.140006 | 0.126603  | 0.124709  |
| 0.0996503 | 0.105186  | 0.107955  | 0.12602  | 0.111014 | 0.10169   | 0.101253  |
| 0.119755  | 0.124709  | 0.12398   | 0.136509 | 0.134615 | 0.122086  | 0.11961   |
| 0.101981  | 0.111888  | 0.115822  | 0.11553  | 0.111014 | 0.108683  | 0.106789  |
| 0.110868  | 0.116404  | 0.120629  | 0.128497 | 0.126603 | 0.114073  | 0.112179  |
| 0.0971737 | 0.10271   | 0.115676  | 0.125583 | 0.122815 | 0.0980478 | 0.0938228 |
| 0.12398   | 0.131556  | 0.129079  | 0.139569 | 0.131265 | 0.128059  | 0.124709  |
| 0.0898893 | 0.109703  | 0.103147  | 0.120629 | 0.119318 | 0.092803  | 0.0836247 |
| 0.120629  | 0.118007  | 0.130682  | 0.136801 | 0.138112 | 0.120921  | 0.119318  |
| 0.0989219 | 0.103293  | 0.118007  | 0.12704  | 0.123397 | 0.107372  | 0.104604  |
| 0.113345  | 0.126748  | 0.11553   | 0.139423 | 0.133741 | 0.115967  | 0.108246  |
| 0.112034  | 0.11757   | 0.12296   | 0.136364 | 0.13884  | 0.120775  | 0.118007  |
| 0.0945513 | 0.101544  | 0.113636  | 0.126457 | 0.110577 | 0.104458  | 0.102564  |
| 0.136801  | 0.13884   | 0.143065  | 0.14831  | 0.152826 | 0.13243   | 0.132284  |
| 0.0999417 | 0.105478  | 0.117861  | 0.128059 | 0.115385 | 0.1081    | 0.103875  |
| 0.103438  | 0.108392  | 0.110868  | 0.123689 | 0.11451  | 0.104312  | 0.103001  |
| 0.103875  | 0.117279  | 0.107226  | 0.129371 | 0.119901 | 0.103584  | 0.100816  |
| 0.118735  | 0.124854  | 0.140734  | 0.147436 | 0.146125 | 0.131847  | 0.125874  |
| 0.109994  | 0.105332  | 0.11451   | 0.142191 | 0.128934 | 0.101253  | 0.0949883 |
| 0.101253  | 0.109703  | 0.111305  | 0.118881 | 0.10912  | 0.106498  | 0.103147  |
| 0.10067   | 0.108829  | 0.110431  | 0.124126 | 0.103875 | 0.10067   | 0.10169   |
| 0.0976107 | 0.108392  | 0.116404  | 0.125437 | 0.122086 | 0.103438  | 0.101544  |
| 0.101544  | 0.122815  | 0.119755  | 0.137238 | 0.13243  | 0.107663  | 0.106061  |
| 0.0973193 | 0.1081    | 0.116404  | 0.131265 | 0.125    | 0.107226  | 0.105915  |
| 0.0823135 | 0.105915  | 0.100816  | 0.115385 | 0.112034 | 0.0901807 | 0.0865385 |
| 0.0861014 | 0.104458  | 0.102855  | 0.124126 | 0.108537 | 0.0913462 | 0.0865385 |
| 0.087704  | 0.111888  | 0.10912   | 0.124563 | 0.115093 | 0.0973193 | 0.0919289 |
| 0.106935  | 0.114802  | 0.108829  | 0.133304 | 0.11859  | 0.104895  | 0.104458  |
| 0.108829  | 0.130682  | 0.114802  | 0.134615 | 0.130973 | 0.112617  | 0.111014  |
| 0.0874126 | 0.114802  | 0.101253  | 0.126311 | 0.115385 | 0.0964452 | 0.0925117 |
| 0.0872669 | 0.107955  | 0.0990676 | 0.12296  | 0.10708  | 0.0884324 | 0.0844988 |

|           |           |           |          |          |           |           |
|-----------|-----------|-----------|----------|----------|-----------|-----------|
| 0.105624  | 0.123106  | 0.108974  | 0.130828 | 0.132139 | 0.106498  | 0.102564  |
| 0.0891608 | 0.108392  | 0.0965909 | 0.127768 | 0.119172 | 0.0912005 | 0.0878497 |
| 0.111014  | 0.114219  | 0.123106  | 0.13447  | 0.125874 | 0.111888  | 0.11116   |
| 0.118007  | 0.119464  | 0.134761  | 0.135052 | 0.134324 | 0.125583  | 0.121358  |
| 0.0961538 | 0.11655   | 0.107663  | 0.129516 | 0.120921 | 0.0996503 | 0.0913462 |
| 0.0895979 | 0.112034  | 0.106061  | 0.132284 | 0.117861 | 0.095134  | 0.0938228 |
| 0.088141  | 0.116404  | 0.106352  | 0.128788 | 0.116696 | 0.0968823 | 0.0909091 |
| 0.0901807 | 0.102418  | 0.102855  | 0.124709 | 0.10912  | 0.0895979 | 0.083042  |
| 0.0989219 | 0.125437  | 0.122378  | 0.13345  | 0.129808 | 0.112617  | 0.108974  |
| 0.0872669 | 0.103293  | 0.0967366 | 0.121503 | 0.109994 | 0.0901807 | 0.0874126 |
| 0.121795  | 0.135781  | 0.129808  | 0.140589 | 0.144814 | 0.123543  | 0.120775  |
| 0.114073  | 0.13039   | 0.123543  | 0.144522 | 0.141754 | 0.119318  | 0.117133  |
| 0.105624  | 0.126603  | 0.114219  | 0.13345  | 0.13243  | 0.113491  | 0.107517  |
| 0.0984848 | 0.11655   | 0.109703  | 0.124563 | 0.117716 | 0.101107  | 0.101253  |
| 0.0952797 | 0.11014   | 0.115822  | 0.123689 | 0.113636 | 0.103438  | 0.100962  |
| 0.0910548 | 0.112617  | 0.097028  | 0.128497 | 0.114073 | 0.0913462 | 0.090035  |
| 0.0952797 | 0.108683  | 0.0957168 | 0.126603 | 0.119755 | 0.0906177 | 0.0898893 |
| 0.0949883 | 0.11014   | 0.103584  | 0.127768 | 0.110723 | 0.100233  | 0.0960082 |
| 0.105186  | 0.10373   | 0.107955  | 0.128934 | 0.110723 | 0.0926573 | 0.088141  |
| 0.109848  | 0.13141   | 0.102127  | 0.142045 | 0.129079 | 0.106935  | 0.103875  |
| 0.104458  | 0.108829  | 0.113636  | 0.126166 | 0.111742 | 0.107663  | 0.10169   |
| 0.109557  | 0.129662  | 0.133304  | 0.13884  | 0.135198 | 0.126166  | 0.120484  |
| 0.118735  | 0.131265  | 0.136946  | 0.135198 | 0.140006 | 0.128642  | 0.124417  |
| 0.18546   | 0.183129  | 0.194056  | 0.195804 | 0.191579 | 0.182838  | 0.185897  |
| 0.232226  | 0.227564  | 0.238782  | 0.23412  | 0.235723 | 0.231352  | 0.229167  |
| 0.106206  | 0.103875  | 0.107809  | 0.121503 | 0.111451 | 0.0989219 | 0.0958625 |
| 0.100524  | 0.109848  | 0.0986305 | 0.129516 | 0.112471 | 0.100816  | 0.0954254 |
| 0.097028  | 0.0955711 | 0.100962  | 0.117861 | 0.112471 | 0.0920746 | 0.0884324 |
| 0.097028  | 0.109266  | 0.101836  | 0.127768 | 0.108974 | 0.0996503 | 0.0968823 |
| 0.108974  | 0.127331  | 0.133304  | 0.134178 | 0.129371 | 0.120921  | 0.118735  |
| 0.103438  | 0.113928  | 0.103875  | 0.128642 | 0.114802 | 0.0990676 | 0.101836  |
| 0.133304  | 0.145251  | 0.121503  | 0.151224 | 0.146416 | 0.129808  | 0.128497  |
| 0.105769  | 0.11451   | 0.100087  | 0.133887 | 0.113345 | 0.0999417 | 0.0992133 |
| 0.113345  | 0.129662  | 0.116987  | 0.140297 | 0.129371 | 0.117424  | 0.111451  |
| 0.118444  | 0.116987  | 0.11451   | 0.138695 | 0.134761 | 0.114656  | 0.108974  |
| 0.119027  | 0.13243   | 0.117133  | 0.141608 | 0.133596 | 0.118444  | 0.11655   |
| 0.119027  | 0.130973  | 0.125     | 0.144522 | 0.142628 | 0.125146  | 0.120047  |
| 0.103293  | 0.113491  | 0.104895  | 0.13141  | 0.11757  | 0.106498  | 0.101399  |
| 0.105332  | 0.108829  | 0.0979021 | 0.129371 | 0.10912  | 0.100962  | 0.0981935 |
| 0.106352  | 0.113054  | 0.106206  | 0.130682 | 0.115385 | 0.100816  | 0.0968823 |
| 0.0941142 | 0.109557  | 0.100379  | 0.121649 | 0.111305 | 0.0996503 | 0.0930944 |
| 0.103438  | 0.108683  | 0.0968823 | 0.129225 | 0.111888 | 0.10169   | 0.0968823 |
| 0.100087  | 0.109703  | 0.10169   | 0.129953 | 0.115822 | 0.0971737 | 0.0981935 |
| 0.116259  | 0.126166  | 0.110286  | 0.133887 | 0.125291 | 0.112471  | 0.109994  |

|           |          |           |          |          |           |           |
|-----------|----------|-----------|----------|----------|-----------|-----------|
| 0.123834  | 0.138695 | 0.116113  | 0.147873 | 0.13345  | 0.119755  | 0.117279  |
| 0.106206  | 0.114656 | 0.100524  | 0.134615 | 0.118735 | 0.103293  | 0.10169   |
| 0.100816  | 0.104604 | 0.0960082 | 0.125728 | 0.115676 | 0.0932401 | 0.0893065 |
| 0.119172  | 0.129371 | 0.110286  | 0.144959 | 0.130828 | 0.118007  | 0.110868  |
| 0.0984848 | 0.106643 | 0.097465  | 0.125146 | 0.111888 | 0.0938228 | 0.0913462 |
| 0.128934  | 0.132139 | 0.122378  | 0.150641 | 0.142628 | 0.125728  | 0.125291  |
| 0.119901  | 0.134761 | 0.131119  | 0.136655 | 0.141754 | 0.128059  | 0.119172  |
| 0.125874  | 0.124417 | 0.12602   | 0.141171 | 0.128205 | 0.122378  | 0.117861  |
| 0.0964452 | 0.105186 | 0.0980478 | 0.128059 | 0.112179 | 0.0981935 | 0.0942599 |
| 0.0989219 | 0.108537 | 0.0944056 | 0.123543 | 0.10912  | 0.0948427 | 0.0941142 |
| 0.111014  | 0.124417 | 0.10708   | 0.135344 | 0.126166 | 0.113636  | 0.109703  |
| 0.114656  | 0.127185 | 0.10373   | 0.133741 | 0.12602  | 0.111451  | 0.109266  |
| 0.114656  | 0.125146 | 0.111305  | 0.138112 | 0.131265 | 0.116113  | 0.112762  |
| 0.105769  | 0.114219 | 0.101253  | 0.134761 | 0.119755 | 0.100524  | 0.0965909 |
| 0.105624  | 0.112325 | 0.0964452 | 0.13345  | 0.116696 | 0.0986305 | 0.0976107 |
| 0.111742  | 0.122232 | 0.105186  | 0.133741 | 0.124563 | 0.109411  | 0.106061  |
| 0.115822  | 0.13039  | 0.117424  | 0.141026 | 0.134178 | 0.11961   | 0.115385  |
| 0.118153  | 0.124854 | 0.115093  | 0.143939 | 0.130099 | 0.116113  | 0.111305  |
| 0.121212  | 0.134033 | 0.108829  | 0.143502 | 0.131993 | 0.115967  | 0.115822  |
| 0.121649  | 0.127768 | 0.111888  | 0.145105 | 0.135344 | 0.113491  | 0.106643  |
| 0.102418  | 0.112908 | 0.0999417 | 0.128788 | 0.116113 | 0.103584  | 0.0987762 |
| 0.116113  | 0.126603 | 0.119172  | 0.138112 | 0.130973 | 0.11757   | 0.11451   |
| 0.100233  | 0.108392 | 0.0942599 | 0.128059 | 0.108974 | 0.0949883 | 0.0907634 |
| 0.0989219 | 0.112034 | 0.110723  | 0.127914 | 0.115822 | 0.10067   | 0.0990676 |
| 0.100087  | 0.11116  | 0.105478  | 0.129079 | 0.111742 | 0.105332  | 0.101107  |
| 0.0979021 | 0.104021 | 0.103001  | 0.128351 | 0.109848 | 0.0981935 | 0.0957168 |
| 0.100233  | 0.111014 | 0.0992133 | 0.11961  | 0.11014  | 0.0984848 | 0.0948427 |
| 0.122523  | 0.130099 | 0.111597  | 0.142483 | 0.139132 | 0.117861  | 0.113636  |
| 0.104021  | 0.114802 | 0.106498  | 0.133013 | 0.11655  | 0.105186  | 0.101836  |
| 0.119464  | 0.128205 | 0.116696  | 0.142337 | 0.134907 | 0.119755  | 0.119027  |
| 0.097028  | 0.111597 | 0.103584  | 0.125146 | 0.110431 | 0.0967366 | 0.0936772 |
| 0.114073  | 0.125437 | 0.104021  | 0.136946 | 0.129516 | 0.112034  | 0.107809  |
| 0.11014   | 0.12296  | 0.109411  | 0.135635 | 0.126457 | 0.10169   | 0.0965909 |
| 0.104021  | 0.118007 | 0.117279  | 0.128934 | 0.123252 | 0.110431  | 0.104167  |
| 0.0986305 | 0.116113 | 0.106935  | 0.135781 | 0.122232 | 0.102418  | 0.101107  |
| 0.107226  | 0.118007 | 0.116987  | 0.134178 | 0.119755 | 0.11451   | 0.10912   |
| 0.107372  | 0.118735 | 0.106352  | 0.132576 | 0.120484 | 0.106206  | 0.105186  |
| 0.0995047 | 0.11116  | 0.110431  | 0.123543 | 0.114948 | 0.104458  | 0.102273  |
| 0.10271   | 0.133596 | 0.138695  | 0.141608 | 0.137966 | 0.127185  | 0.11655   |
| 0.124709  | 0.1419   | 0.127185  | 0.144376 | 0.143939 | 0.126457  | 0.122815  |
| 0.085373  | 0.11014  | 0.113199  | 0.115239 | 0.108974 | 0.102273  | 0.0965909 |
| 0.109994  | 0.131556 | 0.138695  | 0.132867 | 0.12602  | 0.125437  | 0.121212  |
| 0.092366  | 0.126166 | 0.133887  | 0.139423 | 0.133159 | 0.116841  | 0.110286  |
| 0.1081    | 0.127622 | 0.135052  | 0.135927 | 0.122378 | 0.120629  | 0.116696  |

|           |          |          |          |          |           |           |
|-----------|----------|----------|----------|----------|-----------|-----------|
| 0.0973193 | 0.113928 | 0.127768 | 0.126894 | 0.115967 | 0.11451   | 0.109411  |
| 0.097028  | 0.125291 | 0.128934 | 0.126311 | 0.120629 | 0.115967  | 0.111742  |
| 0.0971737 | 0.121649 | 0.133159 | 0.137821 | 0.122523 | 0.118735  | 0.108974  |
| 0.108392  | 0.125291 | 0.134178 | 0.136509 | 0.121503 | 0.122669  | 0.119901  |
| 0.113345  | 0.13345  | 0.143794 | 0.139714 | 0.132576 | 0.132284  | 0.126603  |
| 0.101107  | 0.123543 | 0.134178 | 0.134761 | 0.125583 | 0.121503  | 0.114656  |
| 0.0964452 | 0.110431 | 0.126603 | 0.123689 | 0.111597 | 0.108974  | 0.104458  |
| 0.125437  | 0.137092 | 0.108974 | 0.137238 | 0.135927 | 0.118153  | 0.114802  |
| 0.106061  | 0.132284 | 0.138549 | 0.143502 | 0.131993 | 0.129953  | 0.120484  |
| 0.0929487 | 0.106061 | 0.11961  | 0.121649 | 0.11014  | 0.106643  | 0.10067   |
| 0.21081   | 0.209353 | 0.219114 | 0.2162   | 0.218094 | 0.211976  | 0.207751  |
| 0.103001  | 0.119318 | 0.130245 | 0.133741 | 0.119901 | 0.115822  | 0.112471  |
| 0.0875583 | 0.117279 | 0.121212 | 0.125874 | 0.118153 | 0.110577  | 0.10373   |
| 0.111305  | 0.127622 | 0.140297 | 0.136801 | 0.130536 | 0.130828  | 0.127768  |
| 0.0976107 | 0.119172 | 0.124854 | 0.131265 | 0.117716 | 0.111888  | 0.108829  |
| 0.10169   | 0.130245 | 0.142045 | 0.143211 | 0.13345  | 0.127622  | 0.121066  |
| 0.100816  | 0.119172 | 0.123397 | 0.126311 | 0.114219 | 0.115093  | 0.104458  |
| 0.10067   | 0.116696 | 0.12704  | 0.127622 | 0.113782 | 0.11553   | 0.1081    |
| 0.0942599 | 0.120484 | 0.132576 | 0.132284 | 0.126311 | 0.116404  | 0.110723  |
| 0.106935  | 0.128497 | 0.13243  | 0.136509 | 0.125874 | 0.124126  | 0.11553   |
| 0.106206  | 0.127477 | 0.137529 | 0.134907 | 0.126894 | 0.125437  | 0.11859   |
| 0.107226  | 0.127331 | 0.14088  | 0.138549 | 0.121212 | 0.132576  | 0.120775  |
| 0.107517  | 0.125583 | 0.137383 | 0.136509 | 0.120921 | 0.12704   | 0.11757   |
| 0.0941142 | 0.11451  | 0.109411 | 0.131556 | 0.120921 | 0.10169   | 0.0989219 |
| 0.100816  | 0.11859  | 0.129225 | 0.124272 | 0.115676 | 0.114802  | 0.109994  |
| 0.118153  | 0.131847 | 0.142191 | 0.139569 | 0.126894 | 0.131847  | 0.127331  |
| 0.10169   | 0.112179 | 0.127477 | 0.125146 | 0.114802 | 0.111597  | 0.106789  |
| 0.119172  | 0.13141  | 0.119901 | 0.144085 | 0.141026 | 0.119464  | 0.116404  |
| 0.128059  | 0.13243  | 0.1419   | 0.142191 | 0.140006 | 0.132721  | 0.126457  |
| 0.105332  | 0.11553  | 0.115676 | 0.134324 | 0.128059 | 0.107372  | 0.10169   |
| 0.103584  | 0.129225 | 0.134033 | 0.129953 | 0.130682 | 0.119901  | 0.11451   |
| 0.114802  | 0.118298 | 0.128059 | 0.137092 | 0.131119 | 0.113636  | 0.111742  |
| 0.109994  | 0.130973 | 0.126166 | 0.131702 | 0.129225 | 0.126311  | 0.114802  |
| 0.115239  | 0.129516 | 0.131993 | 0.137821 | 0.126603 | 0.121941  | 0.116259  |
| 0.127185  | 0.132721 | 0.145105 | 0.142483 | 0.14292  | 0.131556  | 0.129079  |
| 0.094697  | 0.113054 | 0.105624 | 0.123106 | 0.120921 | 0.0973193 | 0.0945513 |
| 0.114656  | 0.130099 | 0.125583 | 0.136946 | 0.14088  | 0.120192  | 0.120629  |
| 0.133159  | 0.13345  | 0.143502 | 0.1537   | 0.140443 | 0.134324  | 0.128351  |
| 0.0961538 | 0.11655  | 0.111451 | 0.130682 | 0.126748 | 0.105769  | 0.101253  |
| 0.105186  | 0.120047 | 0.115239 | 0.135635 | 0.129371 | 0.111014  | 0.104458  |
| 0.131847  | 0.142628 | 0.123834 | 0.149476 | 0.150204 | 0.130099  | 0.130536  |
| 0.108537  | 0.126311 | 0.103147 | 0.132576 | 0.128642 | 0.109703  | 0.106061  |
| 0.118007  | 0.140152 | 0.129808 | 0.145833 | 0.144231 | 0.128205  | 0.120775  |
| 0.112617  | 0.129225 | 0.118298 | 0.138986 | 0.133596 | 0.109994  | 0.111014  |

|           |          |           |          |           |           |           |
|-----------|----------|-----------|----------|-----------|-----------|-----------|
| 0.11451   | 0.126748 | 0.121066  | 0.129516 | 0.119172  | 0.115385  | 0.115239  |
| 0.114948  | 0.123689 | 0.123252  | 0.142774 | 0.132721  | 0.116987  | 0.112179  |
| 0.101107  | 0.119755 | 0.113199  | 0.133887 | 0.131119  | 0.104312  | 0.0968823 |
| 0.118735  | 0.126894 | 0.118298  | 0.136655 | 0.129808  | 0.11757   | 0.118007  |
| 0.107663  | 0.130099 | 0.136655  | 0.133159 | 0.125728  | 0.122815  | 0.117424  |
| 0.122523  | 0.136509 | 0.126457  | 0.137529 | 0.128934  | 0.125437  | 0.124126  |
| 0.117279  | 0.127768 | 0.13345   | 0.13986  | 0.133887  | 0.128351  | 0.121503  |
| 0.116987  | 0.127185 | 0.121795  | 0.134615 | 0.134761  | 0.114365  | 0.111597  |
| 0.131847  | 0.134761 | 0.141317  | 0.148601 | 0.147873  | 0.127477  | 0.126748  |
| 0.0945513 | 0.123106 | 0.123543  | 0.136072 | 0.12398   | 0.109411  | 0.10373   |
| 0.101836  | 0.117861 | 0.111305  | 0.13549  | 0.118444  | 0.107663  | 0.1081    |
| 0.119027  | 0.121066 | 0.130245  | 0.128788 | 0.133596  | 0.122523  | 0.120047  |
| 0.0965909 | 0.117279 | 0.122378  | 0.131119 | 0.130973  | 0.10708   | 0.102564  |
| 0.129662  | 0.136364 | 0.146416  | 0.144668 | 0.148601  | 0.137821  | 0.13039   |
| 0.136946  | 0.150058 | 0.151661  | 0.15574  | 0.158217  | 0.144814  | 0.141171  |
| 0.120338  | 0.13141  | 0.111742  | 0.139714 | 0.125874  | 0.115967  | 0.114073  |
| 0.110868  | 0.122815 | 0.102273  | 0.135781 | 0.123397  | 0.108829  | 0.105186  |
| 0.122378  | 0.134324 | 0.131556  | 0.140006 | 0.122669  | 0.130536  | 0.126603  |
| 0.115822  | 0.13243  | 0.139277  | 0.138695 | 0.126894  | 0.128642  | 0.124709  |
| 0.114073  | 0.126311 | 0.111014  | 0.133159 | 0.127768  | 0.117861  | 0.111597  |
| 0.113782  | 0.133596 | 0.140734  | 0.143357 | 0.127768  | 0.131265  | 0.124417  |
| 0.116696  | 0.129808 | 0.138112  | 0.152389 | 0.140589  | 0.122232  | 0.11451   |
| 0.105478  | 0.126166 | 0.114656  | 0.140589 | 0.131993  | 0.109557  | 0.105041  |
| 0.152389  | 0.151807 | 0.159237  | 0.160111 | 0.155886  | 0.159674  | 0.153409  |
| 0.0984848 | 0.124417 | 0.114365  | 0.138258 | 0.136364  | 0.109557  | 0.106206  |
| 0.117133  | 0.134033 | 0.133304  | 0.144959 | 0.145105  | 0.116841  | 0.118153  |
| 0.106498  | 0.121649 | 0.107517  | 0.132284 | 0.124272  | 0.108537  | 0.104604  |
| 0.121649  | 0.140297 | 0.126166  | 0.142191 | 0.135052  | 0.127768  | 0.123834  |
| 0.106498  | 0.121649 | 0.130828  | 0.129953 | 0.121358  | 0.120775  | 0.114219  |
| 0.125291  | 0.119464 | 0.140006  | 0.143211 | 0.140443  | 0.124709  | 0.120192  |
| 0.13884   | 0.138549 | 0.152389  | 0.143357 | 0.0828963 | 0.14933   | 0.144814  |
| 0.114802  | 0.115676 | 0.124854  | 0.123106 | 0.118881  | 0.120338  | 0.115239  |
| 0.131265  | 0.126603 | 0.13549   | 0.136364 | 0.130973  | 0.13243   | 0.125291  |
| 0.138112  | 0.138112 | 0.108829  | 0.160985 | 0.147436  | 0.107809  | 0.110286  |
| 0.129371  | 0.13345  | 0.144959  | 0.154575 | 0.1419    | 0.132284  | 0.12398   |
| 0.116987  | 0.123106 | 0.0906177 | 0.131702 | 0.13039   | 0.10271   | 0.105478  |
| 0.126457  | 0.090035 | 0.143211  | 0.139132 | 0.131702  | 0.134907  | 0.130099  |
| 0.0958625 | 0.111597 | 0.121941  | 0.127185 | 0.106935  | 0.106352  | 0.105041  |
| 0.101836  | 0.108537 | 0.111305  | 0.127331 | 0.114948  | 0.0965909 | 0.094697  |
| 0.101399  | 0.118881 | 0.125437  | 0.129516 | 0.123834  | 0.114802  | 0.108246  |
| 0.113345  | 0.11451  | 0.115822  | 0.122232 | 0.113054  | 0.115093  | 0.112617  |
| 0.0995047 | 0.115822 | 0.113345  | 0.123543 | 0.11553   | 0.101544  | 0.0976107 |
| 0.0962995 | 0.104749 | 0.118881  | 0.124709 | 0.10912   | 0.099796  | 0.0964452 |
| 0.115239  | 0.11757  | 0.126166  | 0.125874 | 0.118735  | 0.115239  | 0.115385  |

|           |           |           |          |           |           |           |
|-----------|-----------|-----------|----------|-----------|-----------|-----------|
| 0.0990676 | 0.115967  | 0.13243   | 0.133596 | 0.12296   | 0.11451   | 0.110286  |
| 0.0460373 | 0.107226  | 0.110577  | 0.121066 | 0.116259  | 0.0859557 | 0.0715326 |
| 0.113928  | 0.11859   | 0.120775  | 0.13243  | 0.116259  | 0.117133  | 0.10912   |
| 0.111742  | 0.111451  | 0.118881  | 0.123252 | 0.113782  | 0.113491  | 0.107809  |
| 0.114073  | 0.124854  | 0.0437063 | 0.134324 | 0.128642  | 0.0750291 | 0.0818765 |
| 0.207314  | 0.204108  | 0.216783  | 0.212995 | 0.216055  | 0.206731  | 0.20542   |
| 0.137383  | 0.137383  | 0.140152  | 0.135781 | 0.137966  | 0.138549  | 0.133159  |
| 0.114802  | 0.127622  | 0.130099  | 0.136801 | 0.124417  | 0.120047  | 0.114656  |
| 0.109703  | 0.11553   | 0.124126  | 0.128205 | 0.124272  | 0.112617  | 0.115093  |
| 0.204108  | 0.198864  | 0.210956  | 0.206876 | 0.209062  | 0.204691  | 0.20338   |
| 0.114073  | 0.111742  | 0.0743007 | 0.134324 | 0.128934  | 0.0791084 | 0.0847902 |
| 0.105769  | 0.122086  | 0.10912   | 0.135052 | 0.126748  | 0.105186  | 0.102418  |
| 0.112471  | 0.106352  | 0.11961   | 0.130973 | 0.11859   | 0.120629  | 0.114656  |
| 0.100087  | 0.120775  | 0.127331  | 0.129371 | 0.121941  | 0.11553   | 0.111888  |
| 0.240239  | 0.239365  | 0.251166  | 0.248834 | 0.249854  | 0.244027  | 0.23951   |
| 0.111305  | 0.112471  | 0.128059  | 0.13039  | 0.126457  | 0.119172  | 0.114365  |
| 0.1081    | 0.11859   | 0.0488054 | 0.131556 | 0.122378  | 0.0675991 | 0.0767774 |
| 0.113636  | 0.117133  | 0.120192  | 0.130682 | 0.117716  | 0.118881  | 0.113782  |
| 0.109557  | 0.115676  | 0.122232  | 0.127477 | 0.115093  | 0.118881  | 0.113199  |
| 0.114219  | 0.114802  | 0.129225  | 0.135927 | 0.13345   | 0.117716  | 0.114073  |
| 0.112179  | 0.113928  | 0.131265  | 0.136801 | 0.127622  | 0.111305  | 0.106498  |
| 0.111888  | 0.120338  | 0.048514  | 0.130099 | 0.123543  | 0.0725524 | 0.078817  |
| 0.112908  | 0.113491  | 0.118007  | 0.125291 | 0.113199  | 0.118444  | 0.109557  |
| 0.111597  | 0.0786713 | 0.132721  | 0.131556 | 0.117716  | 0.121212  | 0.119901  |
| 0.0944056 | 0.118881  | 0.120775  | 0.126603 | 0.117716  | 0.107226  | 0.105332  |
| 0.105332  | 0.111451  | 0.115676  | 0.122378 | 0.115239  | 0.10912   | 0.107517  |
| 0.0772145 | 0.110723  | 0.13039   | 0.129516 | 0.12296   | 0.106935  | 0.0983392 |
| 0.136509  | 0.138258  | 0.151807  | 0.1419   | 0.0823135 | 0.146125  | 0.142191  |
| 0.11116   | 0.114656  | 0.129953  | 0.135781 | 0.128642  | 0.122232  | 0.118298  |
| 0.107663  | 0.126603  | 0.113636  | 0.134615 | 0.132139  | 0.111451  | 0.108974  |
| 0.178759  | 0.181964  | 0.192308  | 0.189977 | 0.1875    | 0.179633  | 0.18007   |
| 0.195367  | 0.19391   | 0.203963  | 0.202797 | 0.20236   | 0.195367  | 0.193765  |
| 0.100379  | 0.114948  | 0.133159  | 0.129662 | 0.122232  | 0.114656  | 0.109266  |
| 0.0977564 | 0.112034  | 0.12296   | 0.126457 | 0.117279  | 0.106789  | 0.104895  |
| 0.121649  | 0.133596  | 0.138403  | 0.135198 | 0.133013  | 0.13243   | 0.129371  |
| 0.10912   | 0.118735  | 0.0451632 | 0.131993 | 0.122815  | 0.069493  | 0.0795455 |
| 0.113636  | 0.119172  | 0.131556  | 0.13447  | 0.129662  | 0.120921  | 0.116404  |
| 0.123689  | 0.127768  | 0.132867  | 0.133741 | 0.126311  | 0.129808  | 0.123543  |
| 0.217512  | 0.213724  | 0.226399  | 0.221737 | 0.223048  | 0.218386  | 0.2162    |
| 0.101253  | 0.114073  | 0.113054  | 0.125583 | 0.109994  | 0.103001  | 0.103438  |
| 0.199883  | 0.193765  | 0.202652  | 0.211976 | 0.208625  | 0.195513  | 0.192745  |
| 0.103001  | 0.110868  | 0.085373  | 0.122669 | 0.11757   | 0.0936772 | 0.0935315 |
| 0.100233  | 0.109848  | 0.115822  | 0.120484 | 0.118298  | 0.102855  | 0.104458  |
| 0.105915  | 0.108829  | 0.106643  | 0.127914 | 0.119027  | 0.0980478 | 0.094697  |



|           |          |           |          |           |           |           |
|-----------|----------|-----------|----------|-----------|-----------|-----------|
| 0.097465  | 0.10912  | 0.118881  | 0.12704  | 0.113199  | 0.103875  | 0.100233  |
| 0.200175  | 0.197552 | 0.205565  | 0.206439 | 0.204545  | 0.198135  | 0.196824  |
| 0.125     | 0.123834 | 0.130973  | 0.133013 | 0.128497  | 0.128497  | 0.122523  |
| 0.104604  | 0.111888 | 0.107663  | 0.128642 | 0.118881  | 0.105478  | 0.101544  |
| 0.120338  | 0.119464 | 0.124563  | 0.128059 | 0.119755  | 0.123834  | 0.114656  |
| 0.103438  | 0.128497 | 0.122232  | 0.128059 | 0.128205  | 0.115093  | 0.10708   |
| 0.0949883 | 0.113345 | 0.125146  | 0.128059 | 0.116841  | 0.1081    | 0.105332  |
| 0.109411  | 0.111451 | 0.0865385 | 0.125291 | 0.118153  | 0.0942599 | 0.0973193 |
| 0.115822  | 0.113491 | 0.0641026 | 0.132867 | 0.124272  | 0.0756119 | 0.0850816 |
| 0.109411  | 0.124854 | 0.111305  | 0.134615 | 0.130682  | 0.110286  | 0.108392  |
| 0.105041  | 0.10708  | 0.116841  | 0.122086 | 0.105624  | 0.109411  | 0.101981  |
| 0.111014  | 0.114219 | 0.109411  | 0.127477 | 0.121212  | 0.107226  | 0.105915  |
| 0.177593  | 0.179924 | 0.190268  | 0.193182 | 0.186917  | 0.179341  | 0.181235  |
| 0.115093  | 0.120338 | 0.122523  | 0.128642 | 0.119464  | 0.121212  | 0.11553   |
| 0.118735  | 0.121358 | 0.137529  | 0.128205 | 0.0665793 | 0.129516  | 0.124417  |
| 0.11014   | 0.115676 | 0.121941  | 0.127185 | 0.111888  | 0.116841  | 0.113782  |
| 0.110577  | 0.116113 | 0.127622  | 0.134615 | 0.125146  | 0.11757   | 0.111014  |
| 0.116696  | 0.119027 | 0.120047  | 0.123543 | 0.121066  | 0.118444  | 0.115676  |
| 0.111451  | 0.11961  | 0.0885781 | 0.123834 | 0.122815  | 0.100087  | 0.105186  |
| 0.0976107 | 0.113054 | 0.116404  | 0.123689 | 0.119755  | 0.102273  | 0.099796  |
| 0.114219  | 0.126166 | 0.0499709 | 0.133013 | 0.130536  | 0.0798368 | 0.08581   |
| 0.114073  | 0.115239 | 0.132867  | 0.126748 | 0.055507  | 0.123689  | 0.119755  |
| 0.107955  | 0.111451 | 0.117133  | 0.129953 | 0.111742  | 0.114073  | 0.107809  |
| 0.0996503 | 0.115967 | 0.12602   | 0.128934 | 0.118007  | 0.110723  | 0.106498  |
| 0.112034  | 0.104749 | 0.122669  | 0.13549  | 0.113782  | 0.11553   | 0.113345  |
| 0.126457  | 0.119755 | 0.134178  | 0.140297 | 0.130828  | 0.130536  | 0.129225  |
| 0.102564  | 0.104604 | 0.11961   | 0.127185 | 0.117133  | 0.111305  | 0.106498  |
| 0.132139  | 0.133013 | 0.136072  | 0.13345  | 0.135344  | 0.135344  | 0.126166  |
| 0.092803  | 0.114365 | 0.12296   | 0.125583 | 0.11553   | 0.105041  | 0.102273  |
| 0.111451  | 0.112034 | 0.120629  | 0.122669 | 0.111742  | 0.115239  | 0.112471  |
| 0.111597  | 0.111014 | 0.119318  | 0.129808 | 0.117133  | 0.111597  | 0.105624  |
| 0.115676  | 0.125291 | 0.046183  | 0.138258 | 0.132576  | 0.076049  | 0.08581   |
| 0.18648   | 0.179779 | 0.17264   | 0.190705 | 0.189103  | 0.170746  | 0.167686  |
| 0.100962  | 0.109994 | 0.105769  | 0.122378 | 0.116404  | 0.10271   | 0.0984848 |
| 0.0983392 | 0.103293 | 0.111888  | 0.111014 | 0.101253  | 0.103293  | 0.0973193 |
| 0.109411  | 0.125146 | 0.111014  | 0.133741 | 0.127477  | 0.10912   | 0.105186  |
| 0.172931  | 0.165938 | 0.183275  | 0.183566 | 0.177302  | 0.167104  | 0.164918  |
| 0.120047  | 0.125    | 0.140297  | 0.14088  | 0.140443  | 0.130245  | 0.126311  |
| 0.127331  | 0.135198 | 0.14933   | 0.146999 | 0.152098  | 0.140152  | 0.137092  |
| 0.13884   | 0.141463 | 0.15472   | 0.144522 | 0.083479  | 0.150204  | 0.144231  |
| 0.101544  | 0.107955 | 0.121212  | 0.127331 | 0.111742  | 0.109703  | 0.10373   |
| 0.117133  | 0.119172 | 0.124272  | 0.121941 | 0.11655   | 0.120921  | 0.114073  |
| 0.201486  | 0.199738 | 0.210956  | 0.208625 | 0.207022  | 0.204108  | 0.199301  |
| 0.112908  | 0.114948 | 0.129662  | 0.126748 | 0.121358  | 0.122523  | 0.116841  |

|           |          |           |          |          |           |           |
|-----------|----------|-----------|----------|----------|-----------|-----------|
| 0.120921  | 0.120338 | 0.128642  | 0.13039  | 0.121212 | 0.126457  | 0.119318  |
| 0.106061  | 0.11451  | 0.10912   | 0.126311 | 0.119172 | 0.102564  | 0.101836  |
| 0.159382  | 0.150641 | 0.172057  | 0.170892 | 0.163462 | 0.158508  | 0.157197  |
| 0.101399  | 0.113636 | 0.11757   | 0.124563 | 0.11014  | 0.101981  | 0.100379  |
| 0.134761  | 0.101544 | 0.15676   | 0.14627  | 0.145251 | 0.144959  | 0.143357  |
| 0.0560897 | 0.122523 | 0.124709  | 0.13141  | 0.128642 | 0.0989219 | 0.0862471 |
| 0.180507  | 0.180507 | 0.189394  | 0.189977 | 0.186626 | 0.179341  | 0.178613  |
| 0.10271   | 0.112617 | 0.12704   | 0.129662 | 0.121066 | 0.115239  | 0.110723  |
| 0.0913462 | 0.110286 | 0.113636  | 0.122086 | 0.102418 | 0.101253  | 0.097028  |
| 0.110431  | 0.115385 | 0.119027  | 0.124854 | 0.112471 | 0.111014  | 0.106498  |
| 0.102418  | 0.118735 | 0.109557  | 0.126748 | 0.121066 | 0.108246  | 0.100816  |
| 0.100379  | 0.121649 | 0.108392  | 0.134907 | 0.128059 | 0.103584  | 0.102855  |
| 0.112325  | 0.107663 | 0.126166  | 0.122086 | 0.111742 | 0.114656  | 0.114219  |
| 0.0944056 | 0.111305 | 0.122815  | 0.127185 | 0.115385 | 0.105769  | 0.104167  |
| 0.179633  | 0.180216 | 0.189103  | 0.191142 | 0.188083 | 0.179633  | 0.180653  |
| 0.111597  | 0.101399 | 0.123689  | 0.129808 | 0.115967 | 0.116259  | 0.114365  |
| 0.103875  | 0.113491 | 0.116841  | 0.118881 | 0.118153 | 0.105332  | 0.105478  |
| 0.200758  | 0.200466 | 0.211393  | 0.210227 | 0.21183  | 0.201923  | 0.201195  |
| 0.112179  | 0.118881 | 0.121941  | 0.13243  | 0.117716 | 0.11859   | 0.116987  |
| 0.0945513 | 0.114365 | 0.124126  | 0.128497 | 0.116113 | 0.110286  | 0.1081    |
| 0.0930944 | 0.110868 | 0.119172  | 0.12296  | 0.112034 | 0.102418  | 0.100233  |
| 0.130828  | 0.128205 | 0.137383  | 0.13243  | 0.130245 | 0.134033  | 0.125437  |
| 0.179487  | 0.181235 | 0.192745  | 0.190997 | 0.18648  | 0.18211   | 0.178759  |
| 0.114073  | 0.122815 | 0.048951  | 0.134033 | 0.127477 | 0.0724068 | 0.0775058 |
| 0.119901  | 0.11116  | 0.128205  | 0.134033 | 0.12398  | 0.128642  | 0.122669  |
| 0.0930944 | 0.114948 | 0.120921  | 0.125291 | 0.110286 | 0.106498  | 0.101399  |
| 0.0922203 | 0.113782 | 0.121212  | 0.124126 | 0.108537 | 0.102127  | 0.100233  |
| 0.0914918 | 0.113345 | 0.122815  | 0.125146 | 0.115385 | 0.10373   | 0.101544  |
| 0.110868  | 0.114365 | 0.11859   | 0.125291 | 0.110577 | 0.111742  | 0.106061  |
| 0.04662   | 0.106935 | 0.11116   | 0.118444 | 0.111597 | 0.0850816 | 0.0715326 |
| 0.1081    | 0.111888 | 0.128059  | 0.132721 | 0.124417 | 0.115676  | 0.114656  |
| 0.12704   | 0.116841 | 0.136218  | 0.130973 | 0.115967 | 0.130536  | 0.126894  |
| 0.106643  | 0.108974 | 0.122523  | 0.132139 | 0.124126 | 0.115676  | 0.110577  |
| 0.108829  | 0.133013 | 0.126166  | 0.134615 | 0.134761 | 0.118735  | 0.115093  |
| 0.184149  | 0.182401 | 0.192162  | 0.195659 | 0.190268 | 0.183275  | 0.183129  |
| 0.109994  | 0.102127 | 0.117716  | 0.131702 | 0.114948 | 0.113782  | 0.111014  |
| 0.123834  | 0.128788 | 0.132139  | 0.126894 | 0.126166 | 0.127914  | 0.119901  |
| 0.0901807 | 0.111451 | 0.123252  | 0.124126 | 0.113491 | 0.107663  | 0.102564  |
| 0         | 0.104604 | 0.114365  | 0.120775 | 0.116841 | 0.0868298 | 0.0753205 |
| 0.104604  | 0        | 0.121358  | 0.129808 | 0.117133 | 0.105186  | 0.10067   |
| 0.114365  | 0.121358 | 0         | 0.132576 | 0.126894 | 0.0686189 | 0.0786713 |
| 0.120775  | 0.129808 | 0.132576  | 0        | 0.127477 | 0.125437  | 0.126166  |
| 0.116841  | 0.117133 | 0.126894  | 0.127477 | 0        | 0.119755  | 0.11553   |
| 0.0868298 | 0.105186 | 0.0686189 | 0.125437 | 0.119755 | 0         | 0.0587121 |

|           |           |           |          |           |           |           |
|-----------|-----------|-----------|----------|-----------|-----------|-----------|
| 0.0753205 | 0.10067   | 0.0786713 | 0.126166 | 0.11553   | 0.0587121 | 0         |
| 0.0792541 | 0.104604  | 0.116404  | 0.12602  | 0.11014   | 0.0941142 | 0.0823135 |
| 0.108829  | 0.112325  | 0.0833333 | 0.127331 | 0.120484  | 0.0933858 | 0.0955711 |
| 0.114802  | 0.122086  | 0.135635  | 0.135344 | 0.133159  | 0.128497  | 0.121358  |
| 0.112034  | 0.119318  | 0.0492424 | 0.134324 | 0.122815  | 0.0715326 | 0.07838   |
| 0.104312  | 0.111305  | 0.11757   | 0.11961  | 0.113054  | 0.112179  | 0.106206  |
| 0.105186  | 0.115385  | 0.0534674 | 0.128351 | 0.119755  | 0.0690559 | 0.0744464 |
| 0.0960082 | 0.10912   | 0.11859   | 0.12704  | 0.110286  | 0.104458  | 0.101981  |
| 0.0990676 | 0.107226  | 0.104749  | 0.120775 | 0.111888  | 0.0990676 | 0.0989219 |
| 0.0952797 | 0.115676  | 0.124272  | 0.128351 | 0.116841  | 0.108683  | 0.106789  |
| 0.105186  | 0.0981935 | 0.114656  | 0.130682 | 0.105186  | 0.109557  | 0.104749  |
| 0.11014   | 0.11655   | 0.128351  | 0.123397 | 0.0492424 | 0.117716  | 0.115239  |
| 0.0999417 | 0.115093  | 0.109703  | 0.13243  | 0.122378  | 0.104312  | 0.0968823 |
| 0.0456002 | 0.108246  | 0.115093  | 0.123252 | 0.114073  | 0.0852273 | 0.0731352 |
| 0.0949883 | 0.114219  | 0.11961   | 0.125437 | 0.114802  | 0.102564  | 0.0995047 |
| 0.11451   | 0.115967  | 0.125437  | 0.131265 | 0.114219  | 0.115385  | 0.11553   |
| 0.110577  | 0.118153  | 0.122669  | 0.128205 | 0.116987  | 0.112908  | 0.110431  |
| 0.092366  | 0.107809  | 0.114365  | 0.122815 | 0.106061  | 0.104895  | 0.10067   |
| 0.0941142 | 0.113636  | 0.121358  | 0.125728 | 0.110431  | 0.106643  | 0.102418  |
| 0.114073  | 0.113782  | 0.123543  | 0.12296  | 0.114365  | 0.118735  | 0.111888  |
| 0.108246  | 0.112617  | 0.0862471 | 0.124709 | 0.11961   | 0.0942599 | 0.0961538 |
| 0.113491  | 0.116113  | 0.118298  | 0.125    | 0.112325  | 0.114073  | 0.1081    |
| 0.100379  | 0.118444  | 0.107517  | 0.134324 | 0.121358  | 0.0986305 | 0.0976107 |
| 0.0447261 | 0.109703  | 0.116259  | 0.125291 | 0.119027  | 0.0884324 | 0.0772145 |
| 0.0933858 | 0.11116   | 0.118881  | 0.125    | 0.101544  | 0.103001  | 0.100524  |
| 0.0999417 | 0.105769  | 0.107372  | 0.125437 | 0.113054  | 0.100816  | 0.0960082 |
| 0.115239  | 0.117861  | 0.123252  | 0.129953 | 0.118444  | 0.121941  | 0.113928  |
| 0.119901  | 0.122815  | 0.117133  | 0.132576 | 0.121066  | 0.114365  | 0.116259  |
| 0.10373   | 0.11655   | 0.118153  | 0.121649 | 0.113054  | 0.107809  | 0.106789  |
| 0.18211   | 0.182401  | 0.19391   | 0.194784 | 0.190268  | 0.187063  | 0.184586  |
| 0.157634  | 0.148893  | 0.168561  | 0.166812 | 0.158508  | 0.153555  | 0.152535  |
| 0.109557  | 0.111888  | 0.123397  | 0.131556 | 0.123543  | 0.112762  | 0.107372  |
| 0.11757   | 0.109411  | 0.083042  | 0.129371 | 0.116404  | 0.0840618 | 0.0842075 |
| 0.133013  | 0.136801  | 0.151515  | 0.147727 | 0.151369  | 0.141463  | 0.139277  |
| 0.113054  | 0.0827506 | 0.134761  | 0.136801 | 0.119172  | 0.123252  | 0.120484  |
| 0.103293  | 0.0878497 | 0.130245  | 0.127622 | 0.117861  | 0.108246  | 0.106352  |
| 0.104312  | 0.110723  | 0.121649  | 0.127477 | 0.115093  | 0.103438  | 0.0992133 |
| 0.0766317 | 0.11014   | 0.124272  | 0.128059 | 0.117424  | 0.10169   | 0.0945513 |
| 0.111888  | 0.119172  | 0.122232  | 0.127768 | 0.123252  | 0.114802  | 0.110868  |
| 0.191288  | 0.188957  | 0.20338   | 0.202214 | 0.195076  | 0.192745  | 0.193473  |
| 0.115967  | 0.121503  | 0.0473485 | 0.135052 | 0.128205  | 0.0705128 | 0.0805653 |
| 0.11757   | 0.110868  | 0.087704  | 0.130536 | 0.116987  | 0.092803  | 0.0888695 |
| 0.0919289 | 0.106206  | 0.115385  | 0.122378 | 0.106498  | 0.0983392 | 0.0967366 |
| 0.0987762 | 0.12296   | 0.118444  | 0.13039  | 0.120921  | 0.109848  | 0.102127  |

|           |           |           |          |           |           |           |
|-----------|-----------|-----------|----------|-----------|-----------|-----------|
| 0.174971  | 0.170309  | 0.186189  | 0.187354 | 0.177302  | 0.168852  | 0.167832  |
| 0.239365  | 0.235577  | 0.245047  | 0.244755 | 0.246358  | 0.237908  | 0.237471  |
| 0.116987  | 0.11553   | 0.129953  | 0.129662 | 0.0549242 | 0.119901  | 0.118298  |
| 0.111742  | 0.118735  | 0.123543  | 0.121503 | 0.120192  | 0.112034  | 0.108974  |
| 0.105332  | 0.113491  | 0.129371  | 0.130245 | 0.122523  | 0.11553   | 0.111597  |
| 0.101107  | 0.120047  | 0.107372  | 0.131265 | 0.120629  | 0.101981  | 0.100087  |
| 0.108246  | 0.118444  | 0.0518648 | 0.128788 | 0.120775  | 0.0662879 | 0.0789627 |
| 0.104312  | 0.0917832 | 0.117279  | 0.124854 | 0.104312  | 0.109266  | 0.106789  |
| 0.102418  | 0.105041  | 0.11859   | 0.125    | 0.112908  | 0.105624  | 0.102273  |
| 0.107663  | 0.115239  | 0.0428322 | 0.128497 | 0.11961   | 0.0683275 | 0.076049  |
| 0.102855  | 0.104021  | 0.122232  | 0.125728 | 0.115676  | 0.105478  | 0.100087  |
| 0.0954254 | 0.114073  | 0.120921  | 0.128497 | 0.112617  | 0.108537  | 0.105186  |
| 0.0472028 | 0.111888  | 0.116113  | 0.12602  | 0.117133  | 0.0868298 | 0.0750291 |
| 0.115239  | 0.114656  | 0.127914  | 0.126748 | 0.0560897 | 0.121066  | 0.117424  |
| 0.113636  | 0.115385  | 0.120484  | 0.124563 | 0.114802  | 0.118298  | 0.111451  |
| 0.100524  | 0.104312  | 0.111451  | 0.114365 | 0.104021  | 0.101399  | 0.0992133 |
| 0.11451   | 0.124709  | 0.123689  | 0.13039  | 0.122378  | 0.116259  | 0.114948  |
| 0.115676  | 0.134033  | 0.118444  | 0.14088  | 0.136072  | 0.116841  | 0.112034  |
| 0.092803  | 0.111451  | 0.119172  | 0.124126 | 0.112908  | 0.103584  | 0.100524  |
| 0.104021  | 0.104895  | 0.120192  | 0.129808 | 0.119755  | 0.101981  | 0.0960082 |
| 0.108974  | 0.128205  | 0.134761  | 0.135344 | 0.130245  | 0.122086  | 0.11961   |
| 0.196533  | 0.198572  | 0.210956  | 0.208333 | 0.20877   | 0.199738  | 0.19493   |
| 0.1081    | 0.1081    | 0.11961   | 0.123106 | 0.0547786 | 0.111888  | 0.107663  |
| 0.0435606 | 0.110868  | 0.112762  | 0.123252 | 0.116404  | 0.0863928 | 0.0751748 |
| 0.10708   | 0.103293  | 0.120338  | 0.129953 | 0.114656  | 0.112617  | 0.110723  |
| 0.112471  | 0.11859   | 0.123397  | 0.133013 | 0.116841  | 0.116841  | 0.115822  |
| 0.097028  | 0.122378  | 0.114365  | 0.127768 | 0.118007  | 0.107517  | 0.100379  |
| 0.189103  | 0.190559  | 0.201486  | 0.201777 | 0.196096  | 0.191434  | 0.18954   |
| 0.118153  | 0.11961   | 0.123543  | 0.129371 | 0.115822  | 0.119318  | 0.112762  |
| 0.0912005 | 0.108683  | 0.118444  | 0.121649 | 0.111305  | 0.102564  | 0.10067   |
| 0.111742  | 0.124563  | 0.119464  | 0.136655 | 0.122815  | 0.114948  | 0.109557  |
| 0.0980478 | 0.117279  | 0.107226  | 0.128497 | 0.11961   | 0.100087  | 0.0973193 |
| 0.114948  | 0.114656  | 0.123252  | 0.126457 | 0.112034  | 0.116987  | 0.113054  |
| 0.0995047 | 0.109411  | 0.115967  | 0.115093 | 0.109994  | 0.105332  | 0.0987762 |
| 0.0954254 | 0.112617  | 0.119755  | 0.128788 | 0.114948  | 0.108537  | 0.103438  |
| 0.108537  | 0.113782  | 0.120338  | 0.13141  | 0.115239  | 0.115822  | 0.108683  |
| 0.18648   | 0.18852   | 0.200029  | 0.197698 | 0.19697   | 0.191142  | 0.188374  |
| 0.103293  | 0.108246  | 0.115676  | 0.120338 | 0.109411  | 0.109703  | 0.104021  |
| 0.185023  | 0.182984  | 0.19595   | 0.192745 | 0.194056  | 0.185023  | 0.186334  |
| 0.184295  | 0.181381  | 0.194347  | 0.196678 | 0.188957  | 0.186917  | 0.18211   |
| 0.114365  | 0.13243   | 0.115385  | 0.135781 | 0.135052  | 0.114073  | 0.110723  |
| 0.119027  | 0.125728  | 0.129079  | 0.134615 | 0.127768  | 0.128642  | 0.123834  |
| 0.0884324 | 0.108537  | 0.109266  | 0.121795 | 0.103584  | 0.101544  | 0.0958625 |
| 0.102564  | 0.11014   | 0.114073  | 0.11961  | 0.107809  | 0.108392  | 0.104749  |

|           |          |           |          |           |           |           |
|-----------|----------|-----------|----------|-----------|-----------|-----------|
| 0.108537  | 0.114365 | 0.119755  | 0.122086 | 0.109411  | 0.112034  | 0.1081    |
| 0.0957168 | 0.112617 | 0.123252  | 0.125291 | 0.11553   | 0.106206  | 0.105186  |
| 0.105624  | 0.114948 | 0.0521562 | 0.124709 | 0.118444  | 0.0735723 | 0.076049  |
| 0.106789  | 0.114948 | 0.0445804 | 0.128788 | 0.121358  | 0.067162  | 0.0780886 |
| 0.118298  | 0.119464 | 0.133596  | 0.128934 | 0.0591492 | 0.126166  | 0.121941  |
| 0.103875  | 0.120192 | 0.109557  | 0.135198 | 0.126603  | 0.108246  | 0.103147  |
| 0.0871212 | 0.106643 | 0.115822  | 0.120484 | 0.110431  | 0.101981  | 0.099796  |
| 0.112908  | 0.115239 | 0.11859   | 0.125874 | 0.110286  | 0.112617  | 0.110723  |
| 0.0917832 | 0.109848 | 0.111742  | 0.120775 | 0.101107  | 0.0979021 | 0.0910548 |
| 0.122232  | 0.124854 | 0.130536  | 0.123252 | 0.124272  | 0.127477  | 0.120629  |
| 0.105332  | 0.108829 | 0.121212  | 0.127331 | 0.119901  | 0.11116   | 0.109848  |
| 0.128205  | 0.125291 | 0.132139  | 0.130973 | 0.130245  | 0.13141   | 0.123397  |
| 0.25204   | 0.25     | 0.261218  | 0.25743  | 0.258741  | 0.252914  | 0.251894  |
| 0.117133  | 0.125    | 0.117861  | 0.133887 | 0.129079  | 0.115676  | 0.114948  |
| 0.11116   | 0.124272 | 0.126748  | 0.127331 | 0.128351  | 0.119318  | 0.118881  |
| 0.208625  | 0.207459 | 0.220134  | 0.215763 | 0.217366  | 0.211538  | 0.211393  |
| 0.108829  | 0.128059 | 0.126748  | 0.132576 | 0.129808  | 0.121941  | 0.118007  |
| 0.224505  | 0.218677 | 0.232226  | 0.22465  | 0.228293  | 0.22567   | 0.219697  |
| 0.108392  | 0.116841 | 0.110577  | 0.12602  | 0.122086  | 0.106643  | 0.106789  |
| 0.103875  | 0.123106 | 0.13549   | 0.134615 | 0.127768  | 0.121358  | 0.117133  |
| 0.105332  | 0.114365 | 0.115967  | 0.125583 | 0.107955  | 0.10912   | 0.104604  |
| 0.105624  | 0.12398  | 0.113636  | 0.13549  | 0.131556  | 0.109703  | 0.106935  |
| 0.19595   | 0.192745 | 0.202506  | 0.200758 | 0.200903  | 0.193036  | 0.19289   |
| 0.123397  | 0.126603 | 0.130245  | 0.125583 | 0.127768  | 0.128059  | 0.121795  |
| 0.116696  | 0.116404 | 0.120338  | 0.126748 | 0.113782  | 0.115822  | 0.110431  |
| 0.215909  | 0.214744 | 0.224213  | 0.226253 | 0.225524  | 0.219697  | 0.216929  |
| 0.109994  | 0.114365 | 0.0533217 | 0.131702 | 0.124563  | 0.0709499 | 0.0792541 |
| 0.187063  | 0.188811 | 0.199446  | 0.200321 | 0.195513  | 0.189977  | 0.189248  |
| 0.111888  | 0.120047 | 0.0537587 | 0.134761 | 0.123252  | 0.0728438 | 0.0796911 |
| 0.0941142 | 0.111014 | 0.125728  | 0.129225 | 0.112762  | 0.105478  | 0.10271   |
| 0.053176  | 0.121066 | 0.12704   | 0.131702 | 0.126311  | 0.0995047 | 0.0842075 |
| 0.11116   | 0.131265 | 0.11859   | 0.138112 | 0.135927  | 0.116696  | 0.11014   |
| 0.100233  | 0.109557 | 0.118444  | 0.123397 | 0.113054  | 0.103147  | 0.101544  |
| 0.129953  | 0.145979 | 0.163607  | 0.169143 | 0.159382  | 0.140152  | 0.131265  |
| 0.109848  | 0.109557 | 0.114948  | 0.120484 | 0.111597  | 0.110723  | 0.105041  |
| 0.11451   | 0.120047 | 0.122523  | 0.129516 | 0.112471  | 0.117133  | 0.112908  |
| 0.104312  | 0.118881 | 0.120484  | 0.128934 | 0.124417  | 0.104312  | 0.106498  |
| 0.122669  | 0.125    | 0.126894  | 0.127768 | 0.124709  | 0.124126  | 0.122232  |
| 0.186334  | 0.184295 | 0.19697   | 0.194347 | 0.18954   | 0.1875    | 0.185023  |
| 0.0914918 | 0.110723 | 0.121649  | 0.127477 | 0.111888  | 0.103438  | 0.102127  |
| 0.103875  | 0.125146 | 0.11451   | 0.142774 | 0.128059  | 0.106789  | 0.104312  |
| 0.106643  | 0.108974 | 0.0878497 | 0.122232 | 0.117424  | 0.0935315 | 0.0960082 |
| 0.11116   | 0.121066 | 0.044289  | 0.13141  | 0.125728  | 0.0709499 | 0.0815851 |
| 0.0996503 | 0.118881 | 0.127768  | 0.127768 | 0.121503  | 0.113345  | 0.107955  |

|           |          |           |          |           |           |           |
|-----------|----------|-----------|----------|-----------|-----------|-----------|
| 0.247815  | 0.246941 | 0.257284  | 0.251166 | 0.254808  | 0.24898   | 0.246795  |
| 0.0498252 | 0.115676 | 0.119901  | 0.124854 | 0.122378  | 0.0926573 | 0.0791084 |
| 0.105769  | 0.101107 | 0.121358  | 0.132139 | 0.112762  | 0.104312  | 0.10067   |
| 0.168124  | 0.172494 | 0.177302  | 0.181381 | 0.182692  | 0.166667  | 0.163899  |
| 0.175991  | 0.174242 | 0.186917  | 0.190414 | 0.182984  | 0.175699  | 0.174679  |
| 0.113345  | 0.113345 | 0.128934  | 0.128351 | 0.0588578 | 0.120921  | 0.118735  |
| 0.11553   | 0.114365 | 0.122086  | 0.125    | 0.114365  | 0.11757   | 0.111305  |
| 0.103584  | 0.119318 | 0.106935  | 0.131993 | 0.121649  | 0.0980478 | 0.0979021 |
| 0.138403  | 0.143065 | 0.144668  | 0.139423 | 0.140152  | 0.143065  | 0.135635  |
| 0.112179  | 0.115967 | 0.126603  | 0.125146 | 0.0533217 | 0.115967  | 0.113199  |
| 0.115239  | 0.116113 | 0.131993  | 0.131119 | 0.0572552 | 0.119318  | 0.119464  |
| 0.120047  | 0.125583 | 0.0441434 | 0.135927 | 0.127914  | 0.0748834 | 0.0823135 |
| 0.11014   | 0.113345 | 0.121358  | 0.11961  | 0.118007  | 0.115676  | 0.109703  |
| 0.122232  | 0.124854 | 0.128788  | 0.131702 | 0.125146  | 0.127477  | 0.122378  |
| 0.111888  | 0.112471 | 0.0689103 | 0.130973 | 0.123834  | 0.0745921 | 0.0791084 |
| 0.108246  | 0.126603 | 0.114802  | 0.133159 | 0.130099  | 0.110286  | 0.106643  |
| 0.120921  | 0.141026 | 0.126894  | 0.145542 | 0.143357  | 0.123543  | 0.119318  |
| 0.0502622 | 0.120775 | 0.123834  | 0.128205 | 0.13039   | 0.097465  | 0.0836247 |
| 0.115093  | 0.133741 | 0.118735  | 0.139423 | 0.138112  | 0.11451   | 0.11116   |
| 0.117716  | 0.128497 | 0.048514  | 0.136218 | 0.13549   | 0.0795455 | 0.0884324 |
| 0.197407  | 0.195659 | 0.207168  | 0.209207 | 0.2044    | 0.198864  | 0.197844  |
| 0.0967366 | 0.118007 | 0.116113  | 0.134761 | 0.124417  | 0.104021  | 0.0977564 |
| 0.184149  | 0.183566 | 0.193328  | 0.194202 | 0.191434  | 0.182692  | 0.181672  |
| 0.108683  | 0.107226 | 0.113491  | 0.123689 | 0.109848  | 0.110723  | 0.105332  |
| 0.10373   | 0.121795 | 0.131265  | 0.13039  | 0.124709  | 0.117716  | 0.112325  |
| 0.107226  | 0.111014 | 0.127477  | 0.135052 | 0.126748  | 0.116841  | 0.111742  |
| 0.101253  | 0.110286 | 0.121503  | 0.124126 | 0.116404  | 0.108537  | 0.104895  |
| 0.11655   | 0.117133 | 0.123397  | 0.125146 | 0.119464  | 0.122086  | 0.114948  |
| 0.118298  | 0.118298 | 0.119901  | 0.126311 | 0.118881  | 0.119464  | 0.113199  |
| 0.0973193 | 0.113636 | 0.122232  | 0.127185 | 0.117424  | 0.109266  | 0.106789  |
| 0.110868  | 0.116987 | 0.121212  | 0.131993 | 0.112034  | 0.115822  | 0.110431  |
| 0.108829  | 0.113782 | 0.129662  | 0.134907 | 0.12602   | 0.119318  | 0.118298  |
| 0.121795  | 0.131702 | 0.0552156 | 0.139423 | 0.139277  | 0.0836247 | 0.0922203 |
| 0.242424  | 0.243298 | 0.25102   | 0.251311 | 0.250874  | 0.243007  | 0.241696  |
| 0.0976107 | 0.114802 | 0.125437  | 0.129516 | 0.117716  | 0.109266  | 0.105915  |
| 0.173223  | 0.173223 | 0.185315  | 0.187063 | 0.179633  | 0.174971  | 0.175408  |
| 0.180361  | 0.180361 | 0.189248  | 0.188957 | 0.185897  | 0.178904  | 0.178467  |
| 0.103584  | 0.11757  | 0.121212  | 0.129662 | 0.109994  | 0.113199  | 0.1081    |
| 0.0456002 | 0.113491 | 0.119464  | 0.121212 | 0.121941  | 0.0925117 | 0.0777972 |
| 0.103293  | 0.123106 | 0.131119  | 0.130245 | 0.122232  | 0.116113  | 0.112762  |
| 0.10912   | 0.10708  | 0.120629  | 0.122378 | 0.110868  | 0.112617  | 0.102855  |
| 0.0795455 | 0.108974 | 0.123106  | 0.127477 | 0.113054  | 0.0979021 | 0.0939685 |
| 0.109266  | 0.118881 | 0.0502622 | 0.13447  | 0.122669  | 0.0664336 | 0.0756119 |
| 0.114073  | 0.115822 | 0.123834  | 0.123543 | 0.122523  | 0.114948  | 0.107809  |

|           |           |           |          |           |           |           |
|-----------|-----------|-----------|----------|-----------|-----------|-----------|
| 0.124272  | 0.127768  | 0.130536  | 0.129371 | 0.130099  | 0.129516  | 0.122086  |
| 0.0952797 | 0.112762  | 0.123106  | 0.128059 | 0.11655   | 0.105769  | 0.103875  |
| 0.121795  | 0.125     | 0.129516  | 0.129808 | 0.124417  | 0.125583  | 0.118444  |
| 0.101836  | 0.112325  | 0.119755  | 0.12296  | 0.120192  | 0.108829  | 0.108683  |
| 0.109703  | 0.116696  | 0.131993  | 0.131993 | 0.129225  | 0.123689  | 0.11655   |
| 0.106935  | 0.122086  | 0.110868  | 0.133013 | 0.125291  | 0.104604  | 0.103293  |
| 0.120192  | 0.129225  | 0.0512821 | 0.140734 | 0.139423  | 0.0823135 | 0.0897436 |
| 0.100233  | 0.119464  | 0.124272  | 0.128351 | 0.117424  | 0.115385  | 0.109411  |
| 0.0961538 | 0.109848  | 0.121066  | 0.124854 | 0.118881  | 0.104604  | 0.102127  |
| 0.121503  | 0.116259  | 0.13039   | 0.139132 | 0.128788  | 0.129079  | 0.127768  |
| 0.173805  | 0.173514  | 0.185023  | 0.189685 | 0.183129  | 0.174971  | 0.174242  |
| 0.127914  | 0.134615  | 0.135927  | 0.133304 | 0.133741  | 0.135198  | 0.12602   |
| 0.113054  | 0.11655   | 0.122232  | 0.125437 | 0.117424  | 0.118298  | 0.114948  |
| 0.106498  | 0.111451  | 0.125291  | 0.132576 | 0.121066  | 0.115239  | 0.112762  |
| 0.0973193 | 0.104021  | 0.118153  | 0.125437 | 0.109557  | 0.104895  | 0.10271   |
| 0.104749  | 0.119901  | 0.108974  | 0.13141  | 0.124563  | 0.10708   | 0.104021  |
| 0.107517  | 0.124417  | 0.114365  | 0.135927 | 0.13141   | 0.108974  | 0.106206  |
| 0.181964  | 0.181381  | 0.192599  | 0.189394 | 0.191579  | 0.18109   | 0.180361  |
| 0.109703  | 0.109703  | 0.118007  | 0.126457 | 0.117861  | 0.109703  | 0.104895  |
| 0.0996503 | 0.100233  | 0.11116   | 0.123106 | 0.105769  | 0.0996503 | 0.0939685 |
| 0.120047  | 0.120629  | 0.126311  | 0.125728 | 0.121795  | 0.124417  | 0.116404  |
| 0.182547  | 0.183129  | 0.194056  | 0.191142 | 0.188957  | 0.184003  | 0.183566  |
| 0.0448718 | 0.109848  | 0.114656  | 0.123689 | 0.117716  | 0.085373  | 0.0747378 |
| 0.116404  | 0.125146  | 0.0448718 | 0.135781 | 0.130682  | 0.074155  | 0.0818765 |
| 0.118444  | 0.118735  | 0.124709  | 0.125291 | 0.117861  | 0.121941  | 0.115967  |
| 0.108392  | 0.111888  | 0.12398   | 0.119901 | 0.0544872 | 0.115967  | 0.114656  |
| 0.175408  | 0.177156  | 0.189248  | 0.188083 | 0.185023  | 0.179779  | 0.177885  |
| 0.11451   | 0.119464  | 0.0421037 | 0.13243  | 0.124126  | 0.0710956 | 0.0802739 |
| 0.105478  | 0.0958625 | 0.112034  | 0.124563 | 0.111014  | 0.105478  | 0.10271   |
| 0.0553613 | 0.107809  | 0.11757   | 0.127477 | 0.116259  | 0.0894522 | 0.0802739 |
| 0.112762  | 0.11014   | 0.121358  | 0.13447  | 0.11859   | 0.108392  | 0.106206  |
| 0.110868  | 0.117861  | 0.120338  | 0.131702 | 0.112325  | 0.116987  | 0.11014   |
| 0.119027  | 0.128934  | 0.0498252 | 0.138403 | 0.133304  | 0.0808566 | 0.090035  |
| 0.0939685 | 0.112617  | 0.121795  | 0.126166 | 0.114948  | 0.106206  | 0.105186  |
| 0.110868  | 0.117861  | 0.121503  | 0.129371 | 0.123106  | 0.115239  | 0.110431  |
| 0.136946  | 0.138403  | 0.154866  | 0.143794 | 0.0827506 | 0.147436  | 0.144085  |
| 0.228438  | 0.224942  | 0.238491  | 0.235868 | 0.23514   | 0.230186  | 0.228584  |
| 0.106061  | 0.125     | 0.12602   | 0.13884  | 0.125874  | 0.11655   | 0.112908  |
| 0.11014   | 0.114802  | 0.120775  | 0.132139 | 0.111888  | 0.116841  | 0.112325  |
| 0.112325  | 0.112034  | 0.113345  | 0.123252 | 0.11757   | 0.111742  | 0.105186  |
| 0.11451   | 0.111597  | 0.129516  | 0.124854 | 0.111014  | 0.118298  | 0.116987  |
| 0.106498  | 0.105332  | 0.0990676 | 0.125    | 0.11553   | 0.0948427 | 0.0932401 |
| 0.0983392 | 0.12398   | 0.115676  | 0.128205 | 0.121358  | 0.112617  | 0.104604  |
| 0.11655   | 0.11859   | 0.121649  | 0.126311 | 0.12296   | 0.119172  | 0.113491  |

|           |          |           |          |           |           |           |
|-----------|----------|-----------|----------|-----------|-----------|-----------|
| 0.118444  | 0.128642 | 0.0439977 | 0.138695 | 0.130973  | 0.0782343 | 0.0859557 |
| 0.112325  | 0.107372 | 0.124709  | 0.128788 | 0.0898893 | 0.109703  | 0.107226  |
| 0.230478  | 0.227564 | 0.238199  | 0.236451 | 0.236305  | 0.231061  | 0.228584  |
| 0.0467657 | 0.10708  | 0.113054  | 0.12296  | 0.116113  | 0.0866841 | 0.0705128 |
| 0.0962995 | 0.104167 | 0.102564  | 0.123543 | 0.108246  | 0.0989219 | 0.0935315 |
| 0.0932401 | 0.111305 | 0.119318  | 0.124272 | 0.115385  | 0.106061  | 0.103001  |
| 0.123689  | 0.124563 | 0.140152  | 0.129953 | 0.0639569 | 0.135052  | 0.129079  |
| 0.109703  | 0.127768 | 0.134615  | 0.138112 | 0.128934  | 0.126311  | 0.120921  |
| 0.097465  | 0.116696 | 0.125291  | 0.124417 | 0.114948  | 0.113782  | 0.107517  |
| 0.117279  | 0.117861 | 0.119464  | 0.125583 | 0.113199  | 0.120484  | 0.113636  |
| 0.106935  | 0.114802 | 0.119027  | 0.124272 | 0.0731352 | 0.113345  | 0.111451  |
| 0.22465   | 0.220862 | 0.231206  | 0.231206 | 0.232517  | 0.226107  | 0.21926   |
| 0.119172  | 0.121795 | 0.125728  | 0.124563 | 0.121503  | 0.124126  | 0.116696  |
| 0.118735  | 0.123689 | 0.0431235 | 0.136364 | 0.127768  | 0.0756119 | 0.0815851 |
| 0.107663  | 0.107663 | 0.118881  | 0.125583 | 0.0971737 | 0.104749  | 0.103438  |
| 0.114802  | 0.123834 | 0.121941  | 0.130973 | 0.126457  | 0.121212  | 0.116696  |
| 0.111014  | 0.120047 | 0.114948  | 0.133887 | 0.128205  | 0.112471  | 0.110286  |
| 0.0961538 | 0.114802 | 0.12398   | 0.12398  | 0.113636  | 0.108392  | 0.104458  |
| 0.113345  | 0.125874 | 0.0523019 | 0.134761 | 0.131993  | 0.0780886 | 0.0823135 |
| 0.122232  | 0.128642 | 0.0509907 | 0.138403 | 0.136218  | 0.0802739 | 0.0903263 |
| 0.107372  | 0.118153 | 0.0480769 | 0.129953 | 0.122815  | 0.0712413 | 0.0786713 |
| 0.0941142 | 0.112471 | 0.124563  | 0.126894 | 0.113054  | 0.107226  | 0.104749  |
| 0.11655   | 0.122669 | 0.128059  | 0.13039  | 0.120921  | 0.125291  | 0.120484  |
| 0.11961   | 0.130099 | 0.132867  | 0.134615 | 0.124563  | 0.129225  | 0.125583  |
| 0.11553   | 0.11553  | 0.131993  | 0.134907 | 0.133013  | 0.125146  | 0.121212  |
| 0.114656  | 0.121358 | 0.13141   | 0.137529 | 0.135344  | 0.126603  | 0.126166  |
| 0.117716  | 0.124709 | 0.128059  | 0.13447  | 0.128788  | 0.126457  | 0.121649  |
| 0.0745921 | 0.101107 | 0.120192  | 0.123106 | 0.111597  | 0.0964452 | 0.0875583 |
| 0.124854  | 0.130973 | 0.0938228 | 0.138112 | 0.138549  | 0.10912   | 0.113054  |
| 0.115676  | 0.124709 | 0.123106  | 0.143794 | 0.132576  | 0.11655   | 0.114365  |
| 0.197552  | 0.196678 | 0.207022  | 0.205274 | 0.20542   | 0.198427  | 0.196241  |
| 0.115967  | 0.125291 | 0.12602   | 0.125728 | 0.125583  | 0.120921  | 0.112034  |
| 0.102273  | 0.107809 | 0.10271   | 0.126311 | 0.11655   | 0.100233  | 0.097465  |
| 0.102127  | 0.118153 | 0.12704   | 0.134033 | 0.119027  | 0.110577  | 0.110723  |
| 0.214161  | 0.215326 | 0.226253  | 0.224213 | 0.221737  | 0.213869  | 0.213724  |
| 0.203963  | 0.206002 | 0.211101  | 0.21285  | 0.20979   | 0.204545  | 0.203234  |
| 0.11961   | 0.128642 | 0.0498252 | 0.140152 | 0.133887  | 0.0802739 | 0.0856643 |
| 0.245338  | 0.242133 | 0.249854  | 0.246649 | 0.249126  | 0.244464  | 0.24053   |
| 0.0763403 | 0.104312 | 0.11961   | 0.122523 | 0.110431  | 0.0990676 | 0.090472  |
| 0.116259  | 0.138695 | 0.139423  | 0.140006 | 0.139277  | 0.133159  | 0.127477  |
| 0.0451632 | 0.111305 | 0.117279  | 0.125146 | 0.120047  | 0.090035  | 0.0767774 |
| 0.11553   | 0.121649 | 0.125291  | 0.129662 | 0.119901  | 0.11961   | 0.117133  |
| 0.179196  | 0.180653 | 0.192453  | 0.189831 | 0.185606  | 0.183566  | 0.179341  |
| 0.106206  | 0.118153 | 0.12296   | 0.128497 | 0.126603  | 0.11961   | 0.115676  |



|           |           |           |          |           |           |           |
|-----------|-----------|-----------|----------|-----------|-----------|-----------|
| 0.186917  | 0.182547  | 0.195804  | 0.193473 | 0.191871  | 0.186334  | 0.184149  |
| 0.100087  | 0.115239  | 0.120338  | 0.124126 | 0.109994  | 0.114948  | 0.109848  |
| 0.112908  | 0.10912   | 0.0731352 | 0.132284 | 0.122232  | 0.0779429 | 0.0839161 |
| 0.100962  | 0.122523  | 0.125     | 0.129953 | 0.125146  | 0.114073  | 0.107226  |
| 0.103001  | 0.103584  | 0.111305  | 0.126457 | 0.114073  | 0.103001  | 0.0996503 |
| 0.0882867 | 0.110431  | 0.116987  | 0.122523 | 0.109266  | 0.100816  | 0.0977564 |
| 0.103438  | 0.113054  | 0.119027  | 0.121941 | 0.115385  | 0.106643  | 0.108246  |
| 0.0416667 | 0.106352  | 0.112908  | 0.122523 | 0.117424  | 0.0842075 | 0.0735723 |
| 0.110577  | 0.110286  | 0.118007  | 0.122086 | 0.110286  | 0.112617  | 0.107809  |
| 0.111888  | 0.11451   | 0.0855186 | 0.129808 | 0.123252  | 0.0961538 | 0.0986305 |
| 0.0964452 | 0.109266  | 0.11757   | 0.126311 | 0.1081    | 0.107517  | 0.102127  |
| 0.0423951 | 0.112034  | 0.11859   | 0.124126 | 0.117861  | 0.0875583 | 0.0763403 |
| 0.106352  | 0.107517  | 0.124272  | 0.131265 | 0.124126  | 0.107809  | 0.106789  |
| 0.124709  | 0.127331  | 0.129516  | 0.128642 | 0.125     | 0.128788  | 0.123397  |
| 0.099796  | 0.108829  | 0.118881  | 0.125291 | 0.114365  | 0.108537  | 0.106352  |
| 0.106643  | 0.0987762 | 0.112908  | 0.127185 | 0.108683  | 0.109266  | 0.108246  |
| 0.0907634 | 0.108829  | 0.118298  | 0.122086 | 0.107663  | 0.104167  | 0.0984848 |
| 0.112617  | 0.11961   | 0.0547786 | 0.131119 | 0.12602   | 0.0753205 | 0.0827506 |
| 0.106206  | 0.113782  | 0.119464  | 0.129662 | 0.111742  | 0.115822  | 0.108683  |
| 0.104895  | 0.125583  | 0.109411  | 0.133887 | 0.128205  | 0.105478  | 0.105041  |
| 0.107809  | 0.113345  | 0.119901  | 0.124854 | 0.118881  | 0.111014  | 0.108829  |
| 0.112908  | 0.115822  | 0.11859   | 0.12296  | 0.118735  | 0.114948  | 0.109848  |
| 0.123834  | 0.126166  | 0.129808  | 0.130099 | 0.127331  | 0.129662  | 0.120775  |
| 0.132867  | 0.134324  | 0.137966  | 0.132139 | 0.133159  | 0.138695  | 0.130682  |
| 0.0971737 | 0.110286  | 0.0576923 | 0.125874 | 0.114073  | 0.0689103 | 0.0710956 |
| 0.0942599 | 0.114948  | 0.125583  | 0.126166 | 0.114948  | 0.108246  | 0.105186  |
| 0.0909091 | 0.115967  | 0.11116   | 0.123106 | 0.112471  | 0.101399  | 0.095134  |
| 0.120629  | 0.126748  | 0.130973  | 0.137675 | 0.128497  | 0.129079  | 0.123106  |
| 0.0488054 | 0.116113  | 0.120629  | 0.124709 | 0.125146  | 0.0945513 | 0.0801282 |
| 0.122523  | 0.140297  | 0.125874  | 0.144522 | 0.145833  | 0.124854  | 0.121795  |
| 0.112908  | 0.13039   | 0.13986   | 0.139277 | 0.133304  | 0.126894  | 0.123834  |
| 0.119172  | 0.122086  | 0.133304  | 0.130099 | 0.0643939 | 0.129079  | 0.120775  |
| 0.0930944 | 0.113199  | 0.118298  | 0.124417 | 0.109994  | 0.102127  | 0.0964452 |
| 0.108683  | 0.111305  | 0.11757   | 0.121358 | 0.108683  | 0.11014   | 0.107955  |
| 0.111305  | 0.113928  | 0.132139  | 0.135052 | 0.131119  | 0.122669  | 0.118444  |
| 0.199446  | 0.196241  | 0.20542   | 0.207459 | 0.204983  | 0.197115  | 0.197552  |
| 0.105332  | 0.100962  | 0.111014  | 0.126748 | 0.109411  | 0.108829  | 0.104895  |
| 0.0967366 | 0.117424  | 0.12398   | 0.133013 | 0.11655   | 0.106935  | 0.105332  |
| 0.110286  | 0.11757   | 0.120629  | 0.124709 | 0.114365  | 0.118153  | 0.111597  |
| 0.101981  | 0.110723  | 0.124272  | 0.124272 | 0.120047  | 0.110723  | 0.103293  |
| 0.108537  | 0.118444  | 0.125291  | 0.126748 | 0.114365  | 0.114365  | 0.111888  |
| 0.118735  | 0.124854  | 0.115093  | 0.133159 | 0.122815  | 0.114365  | 0.112762  |
| 0.123252  | 0.123543  | 0.121066  | 0.131847 | 0.126457  | 0.121212  | 0.117279  |
| 0.113782  | 0.116113  | 0.130245  | 0.124126 | 0.0622086 | 0.120192  | 0.116841  |

|           |          |          |          |          |           |           |
|-----------|----------|----------|----------|----------|-----------|-----------|
| 0.103293  | 0.11116  | 0.083042 | 0.126166 | 0.11757  | 0.0933858 | 0.0935315 |
| 0.115822  | 0.127185 | 0.12296  | 0.129953 | 0.123689 | 0.125146  | 0.119755  |
| 0.0971737 | 0.114948 | 0.118007 | 0.128205 | 0.120775 | 0.103584  | 0.100524  |
| 0.099359  | 0.116259 | 0.122232 | 0.129516 | 0.115093 | 0.111597  | 0.109994  |
| 0.16623   | 0.172931 | 0.175699 | 0.18211  | 0.176719 | 0.168561  | 0.164627  |
| 0.112325  | 0.116404 | 0.119464 | 0.124417 | 0.116113 | 0.113199  | 0.108974  |
| 0.114802  | 0.125583 | 0.128642 | 0.133887 | 0.121795 | 0.122669  | 0.120192  |
| 0.0916375 | 0.121358 | 0.113928 | 0.131119 | 0.128059 | 0.103875  | 0.0976107 |
| 0.113636  | 0.107517 | 0.113491 | 0.129516 | 0.123252 | 0.107809  | 0.100962  |
| 0.0914918 | 0.11014  | 0.112908 | 0.125437 | 0.106643 | 0.0999417 | 0.0960082 |
| 0.0894522 | 0.108683 | 0.108829 | 0.119027 | 0.104895 | 0.101981  | 0.0957168 |
| 0.0961538 | 0.116259 | 0.116404 | 0.122815 | 0.111597 | 0.105186  | 0.101544  |
| 0.109557  | 0.116259 | 0.106206 | 0.137966 | 0.12704  | 0.108392  | 0.104167  |
| 0.108392  | 0.105478 | 0.120192 | 0.127185 | 0.112179 | 0.107517  | 0.104749  |
| 0.110577  | 0.125728 | 0.122669 | 0.136364 | 0.135927 | 0.114365  | 0.11014   |
| 0.101107  | 0.1081   | 0.105332 | 0.127185 | 0.112179 | 0.094697  | 0.0919289 |
| 0.099796  | 0.114656 | 0.109848 | 0.126166 | 0.123106 | 0.106789  | 0.101107  |
| 0.115385  | 0.128497 | 0.101544 | 0.141754 | 0.130828 | 0.107517  | 0.104458  |
| 0.0949883 | 0.113636 | 0.105915 | 0.128642 | 0.126166 | 0.10373   | 0.0992133 |
| 0.111888  | 0.125    | 0.115822 | 0.134761 | 0.124709 | 0.116259  | 0.112617  |
| 0.0929487 | 0.108392 | 0.102418 | 0.125146 | 0.117133 | 0.0964452 | 0.0942599 |
| 0.0952797 | 0.111597 | 0.107955 | 0.128351 | 0.124417 | 0.10373   | 0.10067   |
| 0.0856643 | 0.107517 | 0.112908 | 0.117861 | 0.107517 | 0.104021  | 0.0954254 |
| 0.0965909 | 0.121066 | 0.117424 | 0.13549  | 0.130099 | 0.105915  | 0.104604  |
| 0.0872669 | 0.10708  | 0.111597 | 0.131119 | 0.111742 | 0.0980478 | 0.0885781 |
| 0.135635  | 0.142045 | 0.107517 | 0.143065 | 0.142337 | 0.123397  | 0.120047  |
| 0.12602   | 0.126311 | 0.103438 | 0.138695 | 0.128351 | 0.10912   | 0.108974  |
| 0.0957168 | 0.110577 | 0.104021 | 0.127622 | 0.118735 | 0.0945513 | 0.0973193 |
| 0.126457  | 0.137238 | 0.107372 | 0.142628 | 0.142774 | 0.114802  | 0.118444  |
| 0.111597  | 0.109266 | 0.127185 | 0.132139 | 0.118298 | 0.11655   | 0.116696  |
| 0.113636  | 0.121503 | 0.126603 | 0.145251 | 0.137821 | 0.113636  | 0.107955  |
| 0.0894522 | 0.113928 | 0.119901 | 0.128642 | 0.121795 | 0.106352  | 0.100962  |
| 0.136801  | 0.14088  | 0.138403 | 0.140443 | 0.144668 | 0.139714  | 0.132867  |
| 0.114073  | 0.128059 | 0.12296  | 0.133741 | 0.13039  | 0.117279  | 0.115676  |
| 0.122523  | 0.124563 | 0.118881 | 0.147436 | 0.136801 | 0.118735  | 0.111014  |
| 0.106206  | 0.106206 | 0.118298 | 0.127914 | 0.125728 | 0.110868  | 0.106352  |
| 0.0914918 | 0.109266 | 0.100379 | 0.12602  | 0.11655  | 0.0912005 | 0.0895979 |
| 0.0942599 | 0.108829 | 0.105186 | 0.125583 | 0.116113 | 0.0954254 | 0.0935315 |
| 0.109557  | 0.112762 | 0.104167 | 0.131265 | 0.115093 | 0.106935  | 0.103584  |
| 0.0949883 | 0.119172 | 0.112908 | 0.132139 | 0.127914 | 0.107517  | 0.101544  |
| 0.103584  | 0.128934 | 0.129079 | 0.129079 | 0.135052 | 0.118153  | 0.113636  |
| 0.10912   | 0.110868 | 0.106643 | 0.134615 | 0.123106 | 0.0960082 | 0.0964452 |
| 0.0890152 | 0.101836 | 0.108683 | 0.125874 | 0.113199 | 0.099796  | 0.0949883 |
| 0.0909091 | 0.108974 | 0.103293 | 0.126311 | 0.115385 | 0.0912005 | 0.0913462 |

|           |          |           |          |          |           |           |
|-----------|----------|-----------|----------|----------|-----------|-----------|
| 0.0916375 | 0.119027 | 0.116259  | 0.133741 | 0.121941 | 0.101544  | 0.0979021 |
| 0.0887238 | 0.109703 | 0.0999417 | 0.130245 | 0.118153 | 0.0939685 | 0.0868298 |
| 0.0976107 | 0.117424 | 0.108246  | 0.130682 | 0.127914 | 0.102273  | 0.101253  |
| 0.0882867 | 0.111305 | 0.119901  | 0.128351 | 0.119172 | 0.104021  | 0.100379  |
| 0.0980478 | 0.115239 | 0.125583  | 0.122378 | 0.116696 | 0.116987  | 0.109557  |
| 0.0895979 | 0.105915 | 0.122669  | 0.129079 | 0.116113 | 0.10912   | 0.100233  |
| 0.071824  | 0.103875 | 0.119172  | 0.122378 | 0.112908 | 0.0977564 | 0.0888695 |
| 0.088141  | 0.113782 | 0.110723  | 0.131993 | 0.114948 | 0.097465  | 0.0912005 |
| 0.0984848 | 0.109848 | 0.121066  | 0.121649 | 0.111014 | 0.109266  | 0.106206  |
| 0.097465  | 0.116404 | 0.11655   | 0.121795 | 0.116696 | 0.105041  | 0.101399  |
| 0.110577  | 0.118444 | 0.129079  | 0.12704  | 0.126311 | 0.120775  | 0.113345  |
| 0.0930944 | 0.106498 | 0.113345  | 0.118298 | 0.103293 | 0.103001  | 0.0990676 |
| 0.109266  | 0.126166 | 0.124563  | 0.135927 | 0.131119 | 0.118881  | 0.114365  |

| TDr_2212  | TDr_2225  | TDr_2226  | TDr_2229  | TDr_2237  | TDr_2239  | TDr_2242  |
|-----------|-----------|-----------|-----------|-----------|-----------|-----------|
| 0.0913462 | 0.111597  | 0.0936772 | 0.120338  | 0.112617  | 0.117279  | 0.114219  |
| 0.101107  | 0.116696  | 0.120921  | 0.118735  | 0.100816  | 0.113054  | 0.100087  |
| 0.097028  | 0.114073  | 0.120338  | 0.116404  | 0.0964452 | 0.109266  | 0.0992133 |
| 0.104312  | 0.116404  | 0.129662  | 0.118153  | 0.090035  | 0.113345  | 0.105041  |
| 0.128788  | 0.128642  | 0.145688  | 0.133304  | 0.12704   | 0.129662  | 0.135344  |
| 0.118881  | 0.127185  | 0.124126  | 0.133596  | 0.124709  | 0.127914  | 0.122815  |
| 0.11553   | 0.103147  | 0.109994  | 0.117133  | 0.120484  | 0.111451  | 0.12296   |
| 0.101253  | 0.112762  | 0.128351  | 0.118007  | 0.0992133 | 0.110868  | 0.10169   |
| 0.0766317 | 0.102127  | 0.119464  | 0.105915  | 0.099359  | 0.10169   | 0.099796  |
| 0.0843531 | 0.118007  | 0.112908  | 0.122378  | 0.110868  | 0.115239  | 0.0909091 |
| 0.100524  | 0.102127  | 0.123543  | 0.112034  | 0.118298  | 0.110431  | 0.103584  |
| 0.0962995 | 0.106935  | 0.128351  | 0.103147  | 0.101544  | 0.100379  | 0.107809  |
| 0.0861014 | 0.109557  | 0.127185  | 0.1081    | 0.108537  | 0.10708   | 0.0984848 |
| 0.111597  | 0.140589  | 0.147436  | 0.14088   | 0.125874  | 0.135198  | 0.120484  |
| 0.114948  | 0.129079  | 0.135927  | 0.134324  | 0.121941  | 0.130682  | 0.0606061 |
| 0.107226  | 0.101836  | 0.124709  | 0.110286  | 0.116841  | 0.108974  | 0.108829  |
| 0.0995047 | 0.101981  | 0.130973  | 0.100524  | 0.110577  | 0.0968823 | 0.106061  |
| 0.139569  | 0.143502  | 0.151224  | 0.150787  | 0.134615  | 0.148893  | 0.140006  |
| 0.0909091 | 0.112617  | 0.120338  | 0.112325  | 0.0990676 | 0.109848  | 0.0986305 |
| 0.189103  | 0.209353  | 0.20979   | 0.21081   | 0.196678  | 0.206294  | 0.176136  |
| 0.112908  | 0.117133  | 0.113199  | 0.127622  | 0.123689  | 0.121941  | 0.114802  |
| 0.115676  | 0.118735  | 0.106061  | 0.126603  | 0.116259  | 0.122669  | 0.115822  |
| 0.0930944 | 0.104604  | 0.125728  | 0.0888695 | 0.107372  | 0.0840618 | 0.105186  |
| 0.114219  | 0.101253  | 0.129371  | 0.110286  | 0.126457  | 0.103438  | 0.122815  |
| 0.0890152 | 0.10373   | 0.118444  | 0.103438  | 0.102418  | 0.0989219 | 0.0987762 |
| 0.117861  | 0.124417  | 0.109994  | 0.131702  | 0.124854  | 0.129225  | 0.122669  |
| 0.114948  | 0.102855  | 0.124563  | 0.11859   | 0.122815  | 0.113491  | 0.119464  |
| 0.105624  | 0.110431  | 0.132721  | 0.105186  | 0.118153  | 0.103001  | 0.113636  |
| 0.117861  | 0.11859   | 0.12602   | 0.126457  | 0.124563  | 0.120775  | 0.128788  |
| 0.100379  | 0.113054  | 0.127185  | 0.125     | 0.118735  | 0.119318  | 0.116259  |
| 0.112471  | 0.114365  | 0.104604  | 0.122232  | 0.125     | 0.11859   | 0.114948  |
| 0.107372  | 0.108392  | 0.121649  | 0.117716  | 0.119318  | 0.113199  | 0.113345  |
| 0.090472  | 0.105186  | 0.11116   | 0.113345  | 0.106206  | 0.10708   | 0.0964452 |
| 0.102127  | 0.1081    | 0.121941  | 0.113928  | 0.113782  | 0.111451  | 0.112179  |
| 0.11014   | 0.0995047 | 0.127331  | 0.113491  | 0.119464  | 0.108392  | 0.115239  |
| 0.114948  | 0.106061  | 0.131847  | 0.118881  | 0.12398   | 0.116113  | 0.125     |
| 0.119755  | 0.11757   | 0.11655   | 0.134178  | 0.131119  | 0.127622  | 0.128351  |
| 0.111451  | 0.11014   | 0.125146  | 0.115093  | 0.119901  | 0.108537  | 0.119172  |
| 0.0930944 | 0.0987762 | 0.11757   | 0.0929487 | 0.106498  | 0.0875583 | 0.103147  |
| 0.111742  | 0.113928  | 0.133013  | 0.113928  | 0.117279  | 0.10708   | 0.117133  |
| 0.0968823 | 0.101399  | 0.126603  | 0.0984848 | 0.102127  | 0.0925117 | 0.104021  |
| 0.130099  | 0.130245  | 0.148747  | 0.134324  | 0.136801  | 0.128351  | 0.13141   |

|           |           |           |           |           |           |          |
|-----------|-----------|-----------|-----------|-----------|-----------|----------|
| 0.129516  | 0.130245  | 0.154575  | 0.133741  | 0.144959  | 0.12602   | 0.139569 |
| 0.104604  | 0.106206  | 0.130828  | 0.103001  | 0.113054  | 0.101107  | 0.108829 |
| 0.0964452 | 0.0939685 | 0.120338  | 0.101836  | 0.109266  | 0.0949883 | 0.105915 |
| 0.103584  | 0.0996503 | 0.126311  | 0.107809  | 0.11961   | 0.107372  | 0.109848 |
| 0.106789  | 0.102564  | 0.133596  | 0.107226  | 0.116696  | 0.102127  | 0.112179 |
| 0.127331  | 0.123397  | 0.145105  | 0.126894  | 0.134907  | 0.127622  | 0.13243  |
| 0.100233  | 0.107372  | 0.133741  | 0.108537  | 0.11014   | 0.0987762 | 0.108537 |
| 0.104749  | 0.102564  | 0.128059  | 0.107226  | 0.114948  | 0.102127  | 0.106061 |
| 0.134907  | 0.126311  | 0.0579837 | 0.150495  | 0.139277  | 0.14627   | 0.141754 |
| 0.11451   | 0.118153  | 0.140443  | 0.120484  | 0.128205  | 0.115676  | 0.125728 |
| 0.107955  | 0.102855  | 0.127477  | 0.097028  | 0.112325  | 0.0901807 | 0.110723 |
| 0.109411  | 0.124709  | 0.137675  | 0.13141   | 0.120484  | 0.126894  | 0.113636 |
| 0.104167  | 0.113054  | 0.127768  | 0.111888  | 0.0840618 | 0.105041  | 0.109266 |
| 0.134178  | 0.121503  | 0.148747  | 0.124709  | 0.129225  | 0.124854  | 0.141026 |
| 0.118007  | 0.113782  | 0.136655  | 0.113199  | 0.121795  | 0.109266  | 0.124272 |
| 0.10169   | 0.103875  | 0.128497  | 0.100962  | 0.11014   | 0.097028  | 0.108246 |
| 0.106935  | 0.113199  | 0.129953  | 0.110577  | 0.115385  | 0.107517  | 0.109703 |
| 0.108246  | 0.102855  | 0.123397  | 0.109557  | 0.120192  | 0.105332  | 0.113345 |
| 0.128934  | 0.118007  | 0.147582  | 0.120629  | 0.133596  | 0.11553   | 0.133159 |
| 0.127477  | 0.13141   | 0.151661  | 0.131119  | 0.129225  | 0.125146  | 0.134033 |
| 0.150641  | 0.156614  | 0.164336  | 0.156323  | 0.154429  | 0.154138  | 0.155157 |
| 0.104021  | 0.109411  | 0.129079  | 0.10271   | 0.110431  | 0.0999417 | 0.107663 |
| 0.102564  | 0.104749  | 0.126457  | 0.0954254 | 0.1081    | 0.0912005 | 0.106789 |
| 0.100816  | 0.104749  | 0.12704   | 0.099796  | 0.107226  | 0.0914918 | 0.11116  |
| 0.132139  | 0.125583  | 0.127477  | 0.140152  | 0.139714  | 0.133596  | 0.137238 |
| 0.10271   | 0.10169   | 0.126311  | 0.0996503 | 0.106789  | 0.0986305 | 0.102564 |
| 0.124709  | 0.123106  | 0.144231  | 0.12398   | 0.129662  | 0.119755  | 0.128059 |
| 0.110723  | 0.099796  | 0.125583  | 0.103584  | 0.121212  | 0.104604  | 0.108537 |
| 0.106498  | 0.107226  | 0.132721  | 0.0996503 | 0.116113  | 0.0948427 | 0.108683 |
| 0.135927  | 0.134324  | 0.128351  | 0.152389  | 0.143794  | 0.144668  | 0.145396 |
| 0.111742  | 0.107809  | 0.133304  | 0.104895  | 0.119027  | 0.100379  | 0.118007 |
| 0.128788  | 0.129225  | 0.145979  | 0.129808  | 0.134615  | 0.12296   | 0.131556 |
| 0.119027  | 0.121503  | 0.144668  | 0.120629  | 0.128934  | 0.116404  | 0.128788 |
| 0.102273  | 0.106498  | 0.124709  | 0.113199  | 0.106643  | 0.113928  | 0.108829 |
| 0.0984848 | 0.102127  | 0.128205  | 0.0945513 | 0.108683  | 0.0897436 | 0.107372 |
| 0.101981  | 0.106206  | 0.134033  | 0.101836  | 0.111888  | 0.0973193 | 0.107955 |
| 0.121795  | 0.116987  | 0.142191  | 0.117861  | 0.126166  | 0.115093  | 0.130973 |
| 0.101544  | 0.0996503 | 0.128351  | 0.101107  | 0.109411  | 0.0962995 | 0.11014  |
| 0.129371  | 0.131556  | 0.147727  | 0.128934  | 0.131993  | 0.125874  | 0.131847 |
| 0.107809  | 0.106498  | 0.134033  | 0.109411  | 0.122086  | 0.106352  | 0.114365 |
| 0.113928  | 0.105041  | 0.129953  | 0.10271   | 0.109848  | 0.0955711 | 0.115822 |
| 0.105478  | 0.105332  | 0.129079  | 0.103293  | 0.116841  | 0.0996503 | 0.106789 |
| 0.11014   | 0.114365  | 0.142191  | 0.104458  | 0.115676  | 0.0990676 | 0.11553  |
| 0.105186  | 0.106206  | 0.126457  | 0.0992133 | 0.115093  | 0.0952797 | 0.107955 |

|           |           |          |           |          |           |           |
|-----------|-----------|----------|-----------|----------|-----------|-----------|
| 0.0990676 | 0.102127  | 0.130245 | 0.0986305 | 0.112471 | 0.0909091 | 0.109994  |
| 0.124272  | 0.122669  | 0.147582 | 0.125583  | 0.134761 | 0.120484  | 0.132867  |
| 0.0995047 | 0.0952797 | 0.124563 | 0.0984848 | 0.110577 | 0.0922203 | 0.101981  |
| 0.0955711 | 0.100379  | 0.124709 | 0.108829  | 0.111014 | 0.106352  | 0.103293  |
| 0.117424  | 0.114365  | 0.121212 | 0.128642  | 0.125874 | 0.123543  | 0.119318  |
| 0.119172  | 0.105624  | 0.113054 | 0.123106  | 0.126166 | 0.117716  | 0.12398   |
| 0.122086  | 0.11757   | 0.138986 | 0.129808  | 0.132576 | 0.125     | 0.125437  |
| 0.128642  | 0.117716  | 0.147582 | 0.132867  | 0.13447  | 0.128642  | 0.133741  |
| 0.105186  | 0.10708   | 0.115385 | 0.11961   | 0.117716 | 0.113054  | 0.114656  |
| 0.172786  | 0.17905   | 0.180361 | 0.1875    | 0.176865 | 0.18211   | 0.179633  |
| 0.10067   | 0.100524  | 0.118153 | 0.109848  | 0.107955 | 0.107955  | 0.103147  |
| 0.13141   | 0.121066  | 0.145688 | 0.132721  | 0.13141  | 0.129079  | 0.130973  |
| 0.121503  | 0.112034  | 0.141026 | 0.123106  | 0.127331 | 0.118007  | 0.121649  |
| 0.130682  | 0.116841  | 0.117279 | 0.133741  | 0.136509 | 0.128059  | 0.134907  |
| 0.10373   | 0.0933858 | 0.128205 | 0.10708   | 0.109557 | 0.102273  | 0.104167  |
| 0.122378  | 0.108537  | 0.144814 | 0.125728  | 0.12704  | 0.119464  | 0.128351  |
| 0.111014  | 0.0980478 | 0.124709 | 0.11553   | 0.113636 | 0.111305  | 0.107372  |
| 0.115239  | 0.111597  | 0.131847 | 0.12296   | 0.12398  | 0.115822  | 0.120338  |
| 0.100087  | 0.101981  | 0.108246 | 0.111305  | 0.110286 | 0.107663  | 0.111305  |
| 0.128351  | 0.114219  | 0.146707 | 0.127914  | 0.133887 | 0.122523  | 0.136655  |
| 0.0962995 | 0.0926573 | 0.121358 | 0.0984848 | 0.109994 | 0.0930944 | 0.102855  |
| 0.126457  | 0.120775  | 0.121212 | 0.134178  | 0.129953 | 0.130245  | 0.131265  |
| 0.106206  | 0.099359  | 0.107955 | 0.118007  | 0.116404 | 0.113491  | 0.11451   |
| 0.120629  | 0.121358  | 0.138695 | 0.118153  | 0.126166 | 0.112179  | 0.127185  |
| 0.122523  | 0.112179  | 0.112325 | 0.125583  | 0.129516 | 0.123106  | 0.122669  |
| 0.102418  | 0.0990676 | 0.108246 | 0.110431  | 0.111451 | 0.104749  | 0.106061  |
| 0.135344  | 0.130245  | 0.135052 | 0.147145  | 0.143211 | 0.137966  | 0.142483  |
| 0.107517  | 0.101253  | 0.106935 | 0.115239  | 0.119755 | 0.110723  | 0.112908  |
| 0.104312  | 0.103293  | 0.12704  | 0.108537  | 0.113345 | 0.105478  | 0.109703  |
| 0.105332  | 0.107809  | 0.122232 | 0.106643  | 0.118153 | 0.105041  | 0.116841  |
| 0.12602   | 0.132867  | 0.122815 | 0.143648  | 0.139132 | 0.137092  | 0.139277  |
| 0.111451  | 0.110431  | 0.124854 | 0.114802  | 0.122815 | 0.113199  | 0.117424  |
| 0.103293  | 0.0964452 | 0.125437 | 0.106643  | 0.105041 | 0.106789  | 0.103147  |
| 0.100962  | 0.103438  | 0.128351 | 0.110431  | 0.113491 | 0.101544  | 0.104021  |
| 0.104021  | 0.100962  | 0.109557 | 0.115822  | 0.112471 | 0.11014   | 0.110868  |
| 0.110577  | 0.112762  | 0.130973 | 0.118298  | 0.124272 | 0.114656  | 0.114219  |
| 0.108974  | 0.0992133 | 0.1081   | 0.114073  | 0.118881 | 0.109848  | 0.115239  |
| 0.0901807 | 0.0914918 | 0.116696 | 0.0979021 | 0.103293 | 0.0957168 | 0.0938228 |
| 0.0893065 | 0.0944056 | 0.117279 | 0.100233  | 0.103001 | 0.0957168 | 0.0999417 |
| 0.0920746 | 0.0971737 | 0.124126 | 0.105915  | 0.109266 | 0.0981935 | 0.103584  |
| 0.111888  | 0.109703  | 0.131993 | 0.110577  | 0.113636 | 0.102273  | 0.115822  |
| 0.120192  | 0.109557  | 0.133887 | 0.117133  | 0.124854 | 0.117279  | 0.122669  |
| 0.0932401 | 0.0948427 | 0.121795 | 0.100379  | 0.107809 | 0.0961538 | 0.0962995 |
| 0.0890152 | 0.0952797 | 0.119027 | 0.0981935 | 0.105041 | 0.0901807 | 0.0941142 |

|           |           |           |           |           |           |           |
|-----------|-----------|-----------|-----------|-----------|-----------|-----------|
| 0.111742  | 0.103438  | 0.129225  | 0.111597  | 0.125437  | 0.106498  | 0.115385  |
| 0.0967366 | 0.0872669 | 0.120921  | 0.0948427 | 0.106935  | 0.0885781 | 0.100962  |
| 0.111597  | 0.111116  | 0.119172  | 0.121941  | 0.122086  | 0.118298  | 0.11553   |
| 0.124417  | 0.112325  | 0.0469114 | 0.135635  | 0.125874  | 0.130536  | 0.128642  |
| 0.100233  | 0.097465  | 0.123252  | 0.106789  | 0.114219  | 0.101399  | 0.109703  |
| 0.0925117 | 0.0964452 | 0.124563  | 0.099359  | 0.111116  | 0.0960082 | 0.0979021 |
| 0.0936772 | 0.0996503 | 0.123397  | 0.102273  | 0.108537  | 0.099796  | 0.106061  |
| 0.0852273 | 0.0967366 | 0.121649  | 0.0967366 | 0.106789  | 0.0962995 | 0.0987762 |
| 0.108537  | 0.113928  | 0.131265  | 0.121503  | 0.121941  | 0.117279  | 0.118881  |
| 0.0887238 | 0.0917832 | 0.117861  | 0.0932401 | 0.105332  | 0.0919289 | 0.0938228 |
| 0.128788  | 0.118153  | 0.138112  | 0.129516  | 0.135781  | 0.124709  | 0.133887  |
| 0.122815  | 0.126748  | 0.14088   | 0.120921  | 0.133887  | 0.119027  | 0.127331  |
| 0.116113  | 0.113928  | 0.129225  | 0.114219  | 0.124272  | 0.112034  | 0.115967  |
| 0.109557  | 0.107955  | 0.130828  | 0.10708   | 0.116259  | 0.100816  | 0.106498  |
| 0.103147  | 0.104458  | 0.109557  | 0.112617  | 0.114802  | 0.110431  | 0.105624  |
| 0.0980478 | 0.0865385 | 0.11961   | 0.0955711 | 0.114948  | 0.0875583 | 0.101399  |
| 0.092366  | 0.0893065 | 0.12296   | 0.0968823 | 0.109848  | 0.0859557 | 0.111451  |
| 0.0885781 | 0.0980478 | 0.123252  | 0.100962  | 0.109848  | 0.0973193 | 0.105624  |
| 0.0987762 | 0.108537  | 0.129662  | 0.103875  | 0.0903263 | 0.102564  | 0.107663  |
| 0.11655   | 0.111451  | 0.144231  | 0.105332  | 0.127914  | 0.103438  | 0.122815  |
| 0.105332  | 0.0987762 | 0.131847  | 0.110431  | 0.112908  | 0.108829  | 0.108683  |
| 0.113345  | 0.131265  | 0.13345   | 0.129808  | 0.127331  | 0.12704   | 0.121649  |
| 0.12602   | 0.120047  | 0.128059  | 0.137238  | 0.135635  | 0.132721  | 0.130245  |
| 0.184586  | 0.196678  | 0.202943  | 0.194056  | 0.182838  | 0.190705  | 0.178904  |
| 0.231061  | 0.241113  | 0.240967  | 0.24257   | 0.224068  | 0.238054  | 0.229167  |
| 0.10067   | 0.108392  | 0.126603  | 0.107809  | 0.0674534 | 0.101253  | 0.108683  |
| 0.101399  | 0.0962995 | 0.127914  | 0.0995047 | 0.107517  | 0.094697  | 0.108537  |
| 0.0964452 | 0.0901807 | 0.125583  | 0.097465  | 0.104895  | 0.0938228 | 0.106789  |
| 0.104604  | 0.10067   | 0.126166  | 0.103001  | 0.106935  | 0.101107  | 0.105332  |
| 0.117133  | 0.129516  | 0.135781  | 0.135635  | 0.122086  | 0.132284  | 0.0630828 |
| 0.106643  | 0.0960082 | 0.131993  | 0.102418  | 0.107517  | 0.100816  | 0.109994  |
| 0.140589  | 0.11859   | 0.151078  | 0.126166  | 0.142628  | 0.123689  | 0.144814  |
| 0.11014   | 0.0948427 | 0.131993  | 0.100379  | 0.113636  | 0.0961538 | 0.113199  |
| 0.123252  | 0.109703  | 0.136072  | 0.114365  | 0.124709  | 0.108392  | 0.129225  |
| 0.121941  | 0.120047  | 0.141754  | 0.119755  | 0.126603  | 0.114948  | 0.127331  |
| 0.124563  | 0.113636  | 0.144085  | 0.122669  | 0.130682  | 0.118444  | 0.127331  |
| 0.128934  | 0.128788  | 0.145542  | 0.130536  | 0.130973  | 0.128059  | 0.130536  |
| 0.110286  | 0.102855  | 0.128351  | 0.103147  | 0.114365  | 0.101544  | 0.113054  |
| 0.103293  | 0.094697  | 0.125437  | 0.0979021 | 0.108829  | 0.0942599 | 0.110723  |
| 0.1081    | 0.101544  | 0.132867  | 0.102418  | 0.116841  | 0.100816  | 0.110868  |
| 0.0976107 | 0.0992133 | 0.123543  | 0.099796  | 0.106643  | 0.0961538 | 0.107955  |
| 0.100816  | 0.0939685 | 0.126748  | 0.0971737 | 0.108392  | 0.0917832 | 0.106498  |
| 0.108829  | 0.101107  | 0.130099  | 0.0990676 | 0.110868  | 0.0960082 | 0.112471  |
| 0.120629  | 0.116987  | 0.140152  | 0.112908  | 0.128497  | 0.108392  | 0.120484  |

|           |           |          |           |          |           |           |
|-----------|-----------|----------|-----------|----------|-----------|-----------|
| 0.128497  | 0.125437  | 0.147145 | 0.11757   | 0.131993 | 0.11451   | 0.133887  |
| 0.109994  | 0.0973193 | 0.126894 | 0.0987762 | 0.110868 | 0.0960082 | 0.11655   |
| 0.104604  | 0.0980478 | 0.131993 | 0.0968823 | 0.114219 | 0.0906177 | 0.111451  |
| 0.125874  | 0.113782  | 0.140152 | 0.112908  | 0.129079 | 0.110723  | 0.129808  |
| 0.100816  | 0.0962995 | 0.125583 | 0.0948427 | 0.109848 | 0.0917832 | 0.107663  |
| 0.136218  | 0.126748  | 0.154575 | 0.125     | 0.141754 | 0.120775  | 0.13549   |
| 0.122232  | 0.132576  | 0.143794 | 0.136072  | 0.134178 | 0.129808  | 0.127622  |
| 0.127914  | 0.127477  | 0.14627  | 0.126894  | 0.132576 | 0.123252  | 0.130099  |
| 0.101981  | 0.097465  | 0.125    | 0.0948427 | 0.102273 | 0.090035  | 0.106789  |
| 0.0986305 | 0.092366  | 0.123106 | 0.094697  | 0.106498 | 0.0919289 | 0.105478  |
| 0.119172  | 0.103875  | 0.134907 | 0.109411  | 0.122086 | 0.105478  | 0.122523  |
| 0.11553   | 0.105769  | 0.133887 | 0.1081    | 0.121066 | 0.102127  | 0.122086  |
| 0.124563  | 0.110723  | 0.137675 | 0.112762  | 0.128642 | 0.106206  | 0.129953  |
| 0.109266  | 0.101544  | 0.132867 | 0.0962995 | 0.113636 | 0.0967366 | 0.11553   |
| 0.105332  | 0.0996503 | 0.133304 | 0.0952797 | 0.117279 | 0.092803  | 0.113345  |
| 0.120192  | 0.11014   | 0.135344 | 0.105186  | 0.116113 | 0.105915  | 0.120338  |
| 0.123397  | 0.113636  | 0.140297 | 0.117424  | 0.13243  | 0.114948  | 0.131702  |
| 0.121941  | 0.108683  | 0.144376 | 0.113636  | 0.124854 | 0.109411  | 0.130828  |
| 0.132576  | 0.110286  | 0.143065 | 0.111451  | 0.131119 | 0.108683  | 0.129225  |
| 0.119027  | 0.119755  | 0.133013 | 0.119172  | 0.129808 | 0.112617  | 0.129079  |
| 0.104458  | 0.0932401 | 0.125146 | 0.0929487 | 0.10912  | 0.0887238 | 0.113345  |
| 0.123106  | 0.117716  | 0.14088  | 0.120047  | 0.128351 | 0.115239  | 0.128788  |
| 0.102273  | 0.0939685 | 0.123834 | 0.0945513 | 0.106935 | 0.0868298 | 0.109703  |
| 0.103584  | 0.11014   | 0.129808 | 0.107809  | 0.11116  | 0.105041  | 0.108974  |
| 0.104749  | 0.100816  | 0.128351 | 0.103438  | 0.112034 | 0.100087  | 0.109848  |
| 0.104021  | 0.101836  | 0.130245 | 0.100087  | 0.113636 | 0.0961538 | 0.109703  |
| 0.105186  | 0.0948427 | 0.127622 | 0.0989219 | 0.108392 | 0.0944056 | 0.108829  |
| 0.132139  | 0.113928  | 0.143211 | 0.114802  | 0.131847 | 0.110868  | 0.13141   |
| 0.102564  | 0.102418  | 0.122378 | 0.106789  | 0.117716 | 0.104312  | 0.113199  |
| 0.126166  | 0.114073  | 0.143065 | 0.119318  | 0.127914 | 0.113928  | 0.133013  |
| 0.101399  | 0.102418  | 0.12704  | 0.102127  | 0.106061 | 0.0964452 | 0.108246  |
| 0.118153  | 0.103147  | 0.13447  | 0.106061  | 0.124272 | 0.101836  | 0.123252  |
| 0.0888695 | 0.110868  | 0.13549  | 0.110577  | 0.123252 | 0.107517  | 0.121941  |
| 0.107517  | 0.116404  | 0.133741 | 0.116404  | 0.116841 | 0.112762  | 0.106206  |
| 0.101253  | 0.0801282 | 0.121941 | 0.106061  | 0.117279 | 0.0995047 | 0.111597  |
| 0.108392  | 0.120484  | 0.138112 | 0.113491  | 0.118881 | 0.113054  | 0.117861  |
| 0.103293  | 0.105769  | 0.136218 | 0.104312  | 0.114365 | 0.102127  | 0.112179  |
| 0.103584  | 0.0961538 | 0.118153 | 0.109266  | 0.114656 | 0.103001  | 0.106935  |
| 0.109703  | 0.130536  | 0.13884  | 0.136946  | 0.132139 | 0.131847  | 0.123834  |
| 0.129662  | 0.10708   | 0.136072 | 0.129225  | 0.134907 | 0.125291  | 0.135927  |
| 0.0874126 | 0.105915  | 0.115967 | 0.11116   | 0.100524 | 0.104895  | 0.0977564 |
| 0.119027  | 0.138403  | 0.136509 | 0.135781  | 0.131847 | 0.133013  | 0.113928  |
| 0.103147  | 0.123106  | 0.125    | 0.13039   | 0.126457 | 0.126457  | 0.110868  |
| 0.11451   | 0.129516  | 0.140152 | 0.134178  | 0.127331 | 0.131119  | 0.119318  |



|           |          |          |           |          |           |          |
|-----------|----------|----------|-----------|----------|-----------|----------|
| 0.107517  | 0.122232 | 0.12704  | 0.127768  | 0.119464 | 0.12296   | 0.10912  |
| 0.101107  | 0.118153 | 0.130828 | 0.125146  | 0.120921 | 0.118881  | 0.112617 |
| 0.0962995 | 0.120921 | 0.128934 | 0.132284  | 0.12398  | 0.125146  | 0.111014 |
| 0.116259  | 0.13039  | 0.140152 | 0.133013  | 0.122086 | 0.127331  | 0.124272 |
| 0.119464  | 0.137383 | 0.139277 | 0.141171  | 0.133159 | 0.136655  | 0.123689 |
| 0.0979021 | 0.123689 | 0.130536 | 0.131265  | 0.114802 | 0.127914  | 0.11553  |
| 0.100816  | 0.118444 | 0.124709 | 0.122815  | 0.115967 | 0.120338  | 0.106498 |
| 0.129808  | 0.111597 | 0.139423 | 0.118007  | 0.128642 | 0.110868  | 0.137238 |
| 0.107809  | 0.124854 | 0.136364 | 0.137966  | 0.129953 | 0.130245  | 0.123397 |
| 0.0976107 | 0.109703 | 0.121795 | 0.118153  | 0.109848 | 0.11451   | 0.104749 |
| 0.211976  | 0.221737 | 0.223048 | 0.222028  | 0.205565 | 0.216929  | 0.214452 |
| 0.107663  | 0.124126 | 0.131265 | 0.128788  | 0.121066 | 0.123689  | 0.111305 |
| 0.0916375 | 0.11655  | 0.127768 | 0.117133  | 0.11116  | 0.112617  | 0.106061 |
| 0.119172  | 0.132721 | 0.140443 | 0.13884   | 0.130245 | 0.13549   | 0.124563 |
| 0.0987762 | 0.113782 | 0.128205 | 0.120484  | 0.112471 | 0.116841  | 0.109411 |
| 0.104895  | 0.132139 | 0.134907 | 0.139132  | 0.129953 | 0.134324  | 0.121066 |
| 0.102564  | 0.122232 | 0.13986  | 0.121649  | 0.115967 | 0.11655   | 0.108246 |
| 0.102418  | 0.12296  | 0.131556 | 0.126166  | 0.11553  | 0.119901  | 0.107809 |
| 0.103584  | 0.129371 | 0.132721 | 0.128205  | 0.122523 | 0.124272  | 0.113345 |
| 0.112179  | 0.124854 | 0.138112 | 0.129516  | 0.123834 | 0.12704   | 0.117279 |
| 0.11757   | 0.128788 | 0.136218 | 0.137529  | 0.124272 | 0.130973  | 0.120921 |
| 0.118881  | 0.13039  | 0.132284 | 0.139132  | 0.128205 | 0.136655  | 0.121941 |
| 0.111305  | 0.126603 | 0.13141  | 0.135052  | 0.123834 | 0.131119  | 0.118153 |
| 0.0996503 | 0.114073 | 0.127622 | 0.106206  | 0.115967 | 0.10373   | 0.10708  |
| 0.102855  | 0.121941 | 0.131702 | 0.125437  | 0.111014 | 0.122086  | 0.113782 |
| 0.118444  | 0.137821 | 0.143794 | 0.138986  | 0.132139 | 0.134178  | 0.122669 |
| 0.104312  | 0.122232 | 0.129953 | 0.123106  | 0.115967 | 0.120338  | 0.106498 |
| 0.128497  | 0.124272 | 0.148893 | 0.120775  | 0.134033 | 0.118007  | 0.13243  |
| 0.124854  | 0.136072 | 0.133304 | 0.141608  | 0.135052 | 0.137966  | 0.130245 |
| 0.103293  | 0.113636 | 0.128351 | 0.115093  | 0.123106 | 0.111451  | 0.113345 |
| 0.104167  | 0.126748 | 0.126311 | 0.132284  | 0.125728 | 0.127477  | 0.115385 |
| 0.11014   | 0.119318 | 0.123543 | 0.13039   | 0.12296  | 0.122669  | 0.120775 |
| 0.110577  | 0.119755 | 0.129225 | 0.126748  | 0.12398  | 0.122815  | 0.122086 |
| 0.11553   | 0.119172 | 0.125146 | 0.133741  | 0.121066 | 0.128351  | 0.120338 |
| 0.125437  | 0.140734 | 0.135927 | 0.144231  | 0.136218 | 0.13884   | 0.131702 |
| 0.092366  | 0.104749 | 0.126166 | 0.0995047 | 0.109557 | 0.0958625 | 0.102418 |
| 0.123689  | 0.127622 | 0.145833 | 0.128497  | 0.130973 | 0.122523  | 0.125291 |
| 0.128788  | 0.14292  | 0.131119 | 0.141754  | 0.138403 | 0.141317  | 0.130682 |
| 0.106643  | 0.10067  | 0.125874 | 0.108246  | 0.121795 | 0.106061  | 0.112908 |
| 0.115093  | 0.117861 | 0.135781 | 0.115822  | 0.120338 | 0.111888  | 0.118735 |
| 0.137092  | 0.119464 | 0.14292  | 0.130536  | 0.137675 | 0.123689  | 0.141026 |
| 0.11553   | 0.117716 | 0.143502 | 0.109557  | 0.121066 | 0.101544  | 0.119755 |
| 0.123834  | 0.135635 | 0.142191 | 0.133596  | 0.136364 | 0.128205  | 0.128934 |
| 0.114948  | 0.122086 | 0.14292  | 0.119755  | 0.127185 | 0.113782  | 0.124709 |

|           |           |           |           |           |           |           |
|-----------|-----------|-----------|-----------|-----------|-----------|-----------|
| 0.117424  | 0.116404  | 0.137238  | 0.119027  | 0.123834  | 0.114219  | 0.11961   |
| 0.120192  | 0.120921  | 0.137383  | 0.122378  | 0.12602   | 0.120484  | 0.127331  |
| 0.108974  | 0.110286  | 0.135781  | 0.114948  | 0.125     | 0.109848  | 0.11553   |
| 0.124563  | 0.110723  | 0.142045  | 0.117424  | 0.131847  | 0.114656  | 0.124709  |
| 0.112034  | 0.125874  | 0.137675  | 0.131993  | 0.125728  | 0.129808  | 0.125291  |
| 0.125437  | 0.116841  | 0.141171  | 0.130828  | 0.132139  | 0.122523  | 0.133159  |
| 0.124854  | 0.125291  | 0.136801  | 0.136655  | 0.130973  | 0.127477  | 0.129079  |
| 0.118735  | 0.111014  | 0.129808  | 0.122378  | 0.131265  | 0.120192  | 0.125     |
| 0.134178  | 0.13141   | 0.148456  | 0.143648  | 0.143502  | 0.138549  | 0.143065  |
| 0.102127  | 0.120047  | 0.12602   | 0.120047  | 0.124272  | 0.114948  | 0.112762  |
| 0.10708   | 0.103147  | 0.134761  | 0.107809  | 0.11757   | 0.107663  | 0.111305  |
| 0.121941  | 0.115385  | 0.133887  | 0.132867  | 0.128351  | 0.126311  | 0.119755  |
| 0.100379  | 0.104021  | 0.119901  | 0.119755  | 0.118735  | 0.114073  | 0.11451   |
| 0.128788  | 0.135052  | 0.130828  | 0.149038  | 0.140443  | 0.143065  | 0.133304  |
| 0.142774  | 0.142337  | 0.143648  | 0.154575  | 0.153555  | 0.147436  | 0.149621  |
| 0.121503  | 0.112034  | 0.137821  | 0.11553   | 0.125     | 0.110431  | 0.128059  |
| 0.11553   | 0.103438  | 0.131556  | 0.10373   | 0.116987  | 0.100379  | 0.123543  |
| 0.123543  | 0.12398   | 0.137238  | 0.128642  | 0.125583  | 0.125874  | 0.126894  |
| 0.114656  | 0.135198  | 0.139423  | 0.136655  | 0.126894  | 0.130973  | 0.123543  |
| 0.121358  | 0.108974  | 0.137383  | 0.112179  | 0.122815  | 0.106498  | 0.127622  |
| 0.125728  | 0.131702  | 0.145542  | 0.140152  | 0.137092  | 0.135635  | 0.126457  |
| 0.11757   | 0.134324  | 0.133596  | 0.140443  | 0.137092  | 0.135052  | 0.128205  |
| 0.106061  | 0.118153  | 0.127622  | 0.113491  | 0.126457  | 0.11451   | 0.119027  |
| 0.155303  | 0.150495  | 0.147145  | 0.162442  | 0.152681  | 0.15676   | 0.15574   |
| 0.111014  | 0.120192  | 0.13549   | 0.115822  | 0.127914  | 0.113636  | 0.120192  |
| 0.124126  | 0.133596  | 0.137821  | 0.130973  | 0.138403  | 0.125874  | 0.127768  |
| 0.109703  | 0.105186  | 0.135635  | 0.108392  | 0.119901  | 0.10708   | 0.113928  |
| 0.124563  | 0.119755  | 0.13447   | 0.129371  | 0.128642  | 0.123397  | 0.13345   |
| 0.111451  | 0.126748  | 0.133013  | 0.129662  | 0.122815  | 0.125437  | 0.113054  |
| 0.120629  | 0.129225  | 0.0979021 | 0.141463  | 0.112179  | 0.137529  | 0.132139  |
| 0.138549  | 0.145688  | 0.154283  | 0.152681  | 0.136801  | 0.14729   | 0.13986   |
| 0.110431  | 0.119901  | 0.136655  | 0.126894  | 0.0559441 | 0.120047  | 0.11757   |
| 0.123106  | 0.132867  | 0.143211  | 0.137238  | 0.0785256 | 0.13243   | 0.129953  |
| 0.133159  | 0.131265  | 0.161422  | 0.113491  | 0.141026  | 0.111597  | 0.141171  |
| 0.125583  | 0.144376  | 0.150932  | 0.144959  | 0.11451   | 0.137821  | 0.13039   |
| 0.120775  | 0.0492424 | 0.121941  | 0.0967366 | 0.121941  | 0.0933858 | 0.129079  |
| 0.131993  | 0.131265  | 0.143065  | 0.144959  | 0.125874  | 0.137529  | 0.131847  |
| 0.10373   | 0.11116   | 0.124417  | 0.115822  | 0.104895  | 0.109848  | 0.0820221 |
| 0.100962  | 0.104604  | 0.130099  | 0.111888  | 0.114365  | 0.108537  | 0.0798368 |
| 0.0976107 | 0.121066  | 0.123834  | 0.123689  | 0.119464  | 0.121212  | 0.114948  |
| 0.105769  | 0.112908  | 0.129079  | 0.118153  | 0.0480769 | 0.114802  | 0.113199  |
| 0.106206  | 0.113928  | 0.133013  | 0.102564  | 0.114656  | 0.105915  | 0.109848  |
| 0.0965909 | 0.115385  | 0.124272  | 0.113636  | 0.0831876 | 0.111742  | 0.0699301 |
| 0.0962995 | 0.113928  | 0.133304  | 0.123543  | 0.0980478 | 0.121649  | 0.114219  |

|           |           |           |           |           |           |           |
|-----------|-----------|-----------|-----------|-----------|-----------|-----------|
| 0.107809  | 0.120484  | 0.132867  | 0.129516  | 0.115093  | 0.124417  | 0.0654138 |
| 0.07838   | 0.107955  | 0.120047  | 0.111451  | 0.107809  | 0.104312  | 0.0948427 |
| 0.108683  | 0.120192  | 0.135198  | 0.118735  | 0.0553613 | 0.117424  | 0.115239  |
| 0.106206  | 0.116841  | 0.131265  | 0.11859   | 0.0505536 | 0.115239  | 0.111597  |
| 0.120484  | 0.0879953 | 0.136509  | 0.0553613 | 0.120192  | 0.0549242 | 0.12296   |
| 0.209353  | 0.217657  | 0.221008  | 0.219697  | 0.204691  | 0.213432  | 0.206585  |
| 0.133013  | 0.139277  | 0.152826  | 0.145688  | 0.0735723 | 0.139423  | 0.138695  |
| 0.118881  | 0.126311  | 0.132867  | 0.128934  | 0.122086  | 0.123834  | 0.125728  |
| 0.111742  | 0.121212  | 0.133304  | 0.123834  | 0.114073  | 0.11757   | 0.117133  |
| 0.204691  | 0.215618  | 0.21926   | 0.214452  | 0.198572  | 0.210519  | 0.202214  |
| 0.112908  | 0.0996503 | 0.106206  | 0.0810023 | 0.120484  | 0.0826049 | 0.115676  |
| 0.112471  | 0.103584  | 0.129662  | 0.10912   | 0.122086  | 0.106643  | 0.114948  |
| 0.114802  | 0.119027  | 0.140152  | 0.120484  | 0.119464  | 0.117716  | 0.119318  |
| 0.11116   | 0.124126  | 0.133013  | 0.126748  | 0.11553   | 0.123397  | 0.0553613 |
| 0.243444  | 0.252622  | 0.254225  | 0.255245  | 0.236742  | 0.251603  | 0.242424  |
| 0.11451   | 0.109411  | 0.0559441 | 0.126311  | 0.122086  | 0.12296   | 0.118735  |
| 0.111305  | 0.0823135 | 0.13345   | 0.0525932 | 0.113928  | 0.048951  | 0.113782  |
| 0.118881  | 0.119318  | 0.138986  | 0.122815  | 0.117424  | 0.117133  | 0.121358  |
| 0.113345  | 0.116113  | 0.134907  | 0.120484  | 0.11451   | 0.117133  | 0.11961   |
| 0.117133  | 0.115822  | 0.0696387 | 0.129808  | 0.123543  | 0.124126  | 0.107372  |
| 0.10373   | 0.124854  | 0.132867  | 0.13447   | 0.104021  | 0.126166  | 0.107372  |
| 0.117424  | 0.088141  | 0.134324  | 0.0584207 | 0.115385  | 0.0565268 | 0.116404  |
| 0.104458  | 0.117424  | 0.129516  | 0.11859   | 0.0523019 | 0.112908  | 0.113345  |
| 0.117133  | 0.122232  | 0.135198  | 0.128934  | 0.117716  | 0.125874  | 0.119027  |
| 0.105186  | 0.11553   | 0.126457  | 0.119318  | 0.111305  | 0.117133  | 0.0482226 |
| 0.103001  | 0.113636  | 0.129516  | 0.117716  | 0.0523019 | 0.112617  | 0.108974  |
| 0.0914918 | 0.118735  | 0.118298  | 0.128351  | 0.115093  | 0.12296   | 0.0983392 |
| 0.136218  | 0.147436  | 0.155449  | 0.150641  | 0.136801  | 0.147873  | 0.140734  |
| 0.120192  | 0.106935  | 0.0520105 | 0.130536  | 0.122232  | 0.126603  | 0.124709  |
| 0.11961   | 0.106352  | 0.129516  | 0.115093  | 0.123689  | 0.112034  | 0.118298  |
| 0.181672  | 0.192016  | 0.195367  | 0.189103  | 0.175554  | 0.186626  | 0.180653  |
| 0.194202  | 0.208625  | 0.209645  | 0.206294  | 0.193036  | 0.203817  | 0.193182  |
| 0.105332  | 0.125583  | 0.130682  | 0.127914  | 0.119027  | 0.123397  | 0.0544872 |
| 0.101253  | 0.117716  | 0.12398   | 0.120921  | 0.110286  | 0.118735  | 0.0477855 |
| 0.12398   | 0.136655  | 0.140297  | 0.141026  | 0.119901  | 0.135052  | 0.12296   |
| 0.112617  | 0.083042  | 0.131265  | 0.0544872 | 0.116404  | 0.0537587 | 0.119172  |
| 0.119464  | 0.107663  | 0.0553613 | 0.128934  | 0.122086  | 0.126166  | 0.122523  |
| 0.122523  | 0.125874  | 0.141171  | 0.133159  | 0.120484  | 0.130682  | 0.129662  |
| 0.219551  | 0.229604  | 0.231789  | 0.22669   | 0.213432  | 0.224796  | 0.215618  |
| 0.105332  | 0.108683  | 0.127477  | 0.112179  | 0.106498  | 0.105332  | 0.113054  |
| 0.198718  | 0.2044    | 0.217075  | 0.207314  | 0.197552  | 0.20542   | 0.20236   |
| 0.105624  | 0.0457459 | 0.114073  | 0.0865385 | 0.111742  | 0.0814394 | 0.113928  |
| 0.105769  | 0.0995047 | 0.128205  | 0.110577  | 0.111305  | 0.109266  | 0.108246  |
| 0.106789  | 0.112762  | 0.126894  | 0.105769  | 0.0989219 | 0.103875  | 0.113054  |

|           |           |           |           |           |           |           |
|-----------|-----------|-----------|-----------|-----------|-----------|-----------|
| 0.102127  | 0.114802  | 0.123689  | 0.11655   | 0.109411  | 0.114365  | 0.0550699 |
| 0.20134   | 0.21081   | 0.213869  | 0.207314  | 0.195513  | 0.208625  | 0.195367  |
| 0.116259  | 0.129808  | 0.143648  | 0.133013  | 0.0603147 | 0.129079  | 0.126603  |
| 0.109266  | 0.0872669 | 0.127331  | 0.106206  | 0.115676  | 0.102273  | 0.112325  |
| 0.112762  | 0.121941  | 0.13986   | 0.126894  | 0.0556527 | 0.121212  | 0.117279  |
| 0.107517  | 0.118153  | 0.138112  | 0.120484  | 0.116841  | 0.11655   | 0.121649  |
| 0.100816  | 0.116113  | 0.128788  | 0.118444  | 0.111014  | 0.115385  | 0.0505536 |
| 0.108246  | 0.0483683 | 0.114656  | 0.0891608 | 0.114948  | 0.0855186 | 0.116259  |
| 0.113782  | 0.0903263 | 0.137092  | 0.0675991 | 0.116404  | 0.0703671 | 0.116259  |
| 0.116987  | 0.107226  | 0.13243   | 0.112762  | 0.122523  | 0.107955  | 0.118298  |
| 0.0995047 | 0.113345  | 0.128059  | 0.116841  | 0.0523019 | 0.109411  | 0.107226  |
| 0.110723  | 0.090472  | 0.126457  | 0.10912   | 0.115676  | 0.104021  | 0.118153  |
| 0.18109   | 0.190851  | 0.197115  | 0.190559  | 0.17701   | 0.188957  | 0.179779  |
| 0.120629  | 0.120775  | 0.137529  | 0.12398   | 0.119755  | 0.119172  | 0.121649  |
| 0.11757   | 0.130536  | 0.141171  | 0.134907  | 0.120775  | 0.128934  | 0.121212  |
| 0.110723  | 0.119901  | 0.136072  | 0.116987  | 0.109848  | 0.11451   | 0.114656  |
| 0.113199  | 0.105186  | 0.0645396 | 0.125583  | 0.118153  | 0.122523  | 0.121503  |
| 0.108246  | 0.118007  | 0.134761  | 0.123834  | 0.0552156 | 0.11961   | 0.11655   |
| 0.112908  | 0.0515734 | 0.121358  | 0.0935315 | 0.114656  | 0.0893065 | 0.121795  |
| 0.0973193 | 0.103584  | 0.110723  | 0.115239  | 0.108974  | 0.111014  | 0.11757   |
| 0.121503  | 0.092803  | 0.136655  | 0.0587121 | 0.121795  | 0.0582751 | 0.122815  |
| 0.10912   | 0.125291  | 0.137092  | 0.125874  | 0.112908  | 0.121941  | 0.115093  |
| 0.110868  | 0.110431  | 0.135344  | 0.115676  | 0.109703  | 0.113199  | 0.109557  |
| 0.106643  | 0.121066  | 0.131119  | 0.123689  | 0.110431  | 0.118298  | 0.057838  |
| 0.113491  | 0.117424  | 0.139714  | 0.11859   | 0.115822  | 0.116404  | 0.117424  |
| 0.129953  | 0.130682  | 0.149767  | 0.132721  | 0.130536  | 0.132284  | 0.131265  |
| 0.106935  | 0.103875  | 0.0646853 | 0.118444  | 0.113054  | 0.112179  | 0.110577  |
| 0.127768  | 0.135781  | 0.148747  | 0.138403  | 0.0686189 | 0.133887  | 0.133741  |
| 0.10271   | 0.115385  | 0.126603  | 0.122669  | 0.108829  | 0.116404  | 0.0480769 |
| 0.110577  | 0.113054  | 0.133013  | 0.120629  | 0.10708   | 0.117279  | 0.114802  |
| 0.107226  | 0.117861  | 0.13345   | 0.118153  | 0.0693473 | 0.118298  | 0.112908  |
| 0.120338  | 0.0933858 | 0.138403  | 0.060169  | 0.121503  | 0.0562354 | 0.123689  |
| 0.181235  | 0.186043  | 0.197844  | 0.176719  | 0.17803   | 0.175991  | 0.182547  |
| 0.104458  | 0.0885781 | 0.121358  | 0.105186  | 0.110577  | 0.0962995 | 0.112762  |
| 0.0965909 | 0.104312  | 0.121941  | 0.108392  | 0.095134  | 0.105332  | 0.104021  |
| 0.116987  | 0.106061  | 0.128351  | 0.113054  | 0.121358  | 0.10912   | 0.11859   |
| 0.153118  | 0.185023  | 0.191871  | 0.179779  | 0.170017  | 0.17905   | 0.16958   |
| 0.127622  | 0.118735  | 0.0620629 | 0.137092  | 0.131702  | 0.137238  | 0.131265  |
| 0.136655  | 0.125437  | 0.0571096 | 0.14933   | 0.141317  | 0.146853  | 0.14088   |
| 0.138258  | 0.147145  | 0.158654  | 0.153555  | 0.139132  | 0.148747  | 0.141317  |
| 0.10708   | 0.101399  | 0.0654138 | 0.118881  | 0.113491  | 0.112617  | 0.109848  |
| 0.111888  | 0.119318  | 0.134033  | 0.124563  | 0.0506993 | 0.120338  | 0.116113  |
| 0.20236   | 0.215035  | 0.218094  | 0.213869  | 0.197407  | 0.209645  | 0.201632  |
| 0.113782  | 0.120047  | 0.13243   | 0.126457  | 0.115822  | 0.123106  | 0.113928  |

|           |           |           |           |           |           |           |
|-----------|-----------|-----------|-----------|-----------|-----------|-----------|
| 0.117716  | 0.126311  | 0.137821  | 0.130099  | 0.0574009 | 0.125     | 0.120484  |
| 0.109266  | 0.0898893 | 0.124126  | 0.104458  | 0.112762  | 0.102273  | 0.114656  |
| 0.15472   | 0.171766  | 0.179779  | 0.17264   | 0.144522  | 0.16958   | 0.156614  |
| 0.097028  | 0.112617  | 0.126748  | 0.114656  | 0.106061  | 0.106352  | 0.102418  |
| 0.141171  | 0.146853  | 0.1537    | 0.156469  | 0.138258  | 0.151661  | 0.142774  |
| 0.0942599 | 0.117133  | 0.121941  | 0.125     | 0.11961   | 0.119318  | 0.109557  |
| 0.18109   | 0.19289   | 0.19799   | 0.188228  | 0.17701   | 0.186917  | 0.177448  |
| 0.10912   | 0.106352  | 0.0645396 | 0.123834  | 0.118735  | 0.120775  | 0.115967  |
| 0.0689103 | 0.10373   | 0.121649  | 0.110723  | 0.0992133 | 0.107372  | 0.0999417 |
| 0.106352  | 0.108246  | 0.13345   | 0.11757   | 0.102273  | 0.114802  | 0.114948  |
| 0.108537  | 0.111305  | 0.12398   | 0.108683  | 0.10912   | 0.105624  | 0.115676  |
| 0.114073  | 0.10169   | 0.126894  | 0.1081    | 0.119027  | 0.105041  | 0.113928  |
| 0.112908  | 0.118298  | 0.13039   | 0.123543  | 0.116987  | 0.121941  | 0.11451   |
| 0.102855  | 0.114948  | 0.126166  | 0.11757   | 0.11014   | 0.115093  | 0.0505536 |
| 0.180798  | 0.191142  | 0.199155  | 0.187937  | 0.178759  | 0.1875    | 0.179196  |
| 0.115676  | 0.11757   | 0.136364  | 0.122815  | 0.11655   | 0.118881  | 0.121358  |
| 0.0948427 | 0.111014  | 0.131556  | 0.115967  | 0.103875  | 0.113199  | 0.106061  |
| 0.201923  | 0.215181  | 0.215909  | 0.212267  | 0.199883  | 0.208916  | 0.200321  |
| 0.118298  | 0.119027  | 0.140734  | 0.122815  | 0.117424  | 0.120629  | 0.11961   |
| 0.103293  | 0.118881  | 0.125437  | 0.119464  | 0.114073  | 0.117279  | 0.0483683 |
| 0.0983392 | 0.115093  | 0.123689  | 0.11655   | 0.106789  | 0.11116   | 0.0445804 |
| 0.125874  | 0.136218  | 0.145688  | 0.139423  | 0.0792541 | 0.13549   | 0.132721  |
| 0.177739  | 0.192453  | 0.195513  | 0.192453  | 0.176282  | 0.189394  | 0.177885  |
| 0.114656  | 0.0856643 | 0.135052  | 0.0506993 | 0.115822  | 0.0517191 | 0.120921  |
| 0.126311  | 0.126457  | 0.143211  | 0.12704   | 0.125437  | 0.126311  | 0.125583  |
| 0.102418  | 0.116841  | 0.124272  | 0.119755  | 0.110577  | 0.117279  | 0.0498252 |
| 0.0965909 | 0.115385  | 0.12602   | 0.116259  | 0.107955  | 0.109994  | 0.0451632 |
| 0.100233  | 0.11553   | 0.125874  | 0.119318  | 0.109557  | 0.116259  | 0.0488054 |
| 0.105041  | 0.113345  | 0.131556  | 0.118881  | 0.048514  | 0.114073  | 0.112179  |
| 0.080711  | 0.104458  | 0.11655   | 0.109703  | 0.104021  | 0.101399  | 0.092803  |
| 0.115967  | 0.107663  | 0.0512821 | 0.129808  | 0.12296   | 0.124709  | 0.121941  |
| 0.123252  | 0.131847  | 0.146853  | 0.135927  | 0.11655   | 0.130536  | 0.135052  |
| 0.11014   | 0.105915  | 0.0603147 | 0.121941  | 0.120047  | 0.119755  | 0.115822  |
| 0.110577  | 0.121795  | 0.141463  | 0.126748  | 0.123689  | 0.123689  | 0.126457  |
| 0.184149  | 0.194784  | 0.202506  | 0.193619  | 0.183275  | 0.192016  | 0.182547  |
| 0.109703  | 0.115385  | 0.135635  | 0.115967  | 0.115822  | 0.114073  | 0.113636  |
| 0.118007  | 0.13039   | 0.140443  | 0.132721  | 0.0626457 | 0.127914  | 0.125728  |
| 0.0995047 | 0.115967  | 0.124272  | 0.117716  | 0.107955  | 0.114365  | 0.04662   |
| 0.0792541 | 0.108829  | 0.114802  | 0.112034  | 0.104312  | 0.105186  | 0.0960082 |
| 0.104604  | 0.112325  | 0.122086  | 0.119318  | 0.111305  | 0.115385  | 0.10912   |
| 0.116404  | 0.0833333 | 0.135635  | 0.0492424 | 0.11757   | 0.0534674 | 0.11859   |
| 0.12602   | 0.127331  | 0.135344  | 0.134324  | 0.11961   | 0.128351  | 0.12704   |
| 0.11014   | 0.120484  | 0.133159  | 0.122815  | 0.113054  | 0.119755  | 0.110286  |
| 0.0941142 | 0.0933858 | 0.128497  | 0.0715326 | 0.112179  | 0.0690559 | 0.104458  |

|           |           |           |           |           |           |           |
|-----------|-----------|-----------|-----------|-----------|-----------|-----------|
| 0.0823135 | 0.0955711 | 0.121358  | 0.07838   | 0.106206  | 0.0744464 | 0.101981  |
| 0         | 0.108537  | 0.123834  | 0.109994  | 0.106352  | 0.105186  | 0.0995047 |
| 0.108537  | 0         | 0.112908  | 0.0891608 | 0.112617  | 0.0826049 | 0.115385  |
| 0.123834  | 0.112908  | 0         | 0.132139  | 0.126748  | 0.129662  | 0.126603  |
| 0.109994  | 0.0891608 | 0.132139  | 0         | 0.11757   | 0.0502622 | 0.112762  |
| 0.106352  | 0.112617  | 0.126748  | 0.11757   | 0         | 0.110723  | 0.106206  |
| 0.105186  | 0.0826049 | 0.129662  | 0.0502622 | 0.110723  | 0         | 0.112617  |
| 0.0995047 | 0.115385  | 0.126603  | 0.112762  | 0.106206  | 0.112617  | 0         |
| 0.10169   | 0.0878497 | 0.119755  | 0.101544  | 0.107809  | 0.0976107 | 0.110577  |
| 0.10373   | 0.119901  | 0.129371  | 0.119318  | 0.11451   | 0.119755  | 0.0470571 |
| 0.104895  | 0.109411  | 0.13345   | 0.109703  | 0.108392  | 0.106643  | 0.107663  |
| 0.106061  | 0.122523  | 0.13986   | 0.126894  | 0.115385  | 0.120047  | 0.111742  |
| 0.108392  | 0.102127  | 0.122086  | 0.107955  | 0.114802  | 0.0999417 | 0.11116   |
| 0.0808566 | 0.110723  | 0.121358  | 0.108683  | 0.104749  | 0.104749  | 0.0973193 |
| 0.102564  | 0.118153  | 0.126457  | 0.117861  | 0.109557  | 0.112762  | 0.0479312 |
| 0.112179  | 0.114073  | 0.132576  | 0.122523  | 0.11014   | 0.119464  | 0.116987  |
| 0.099796  | 0.114219  | 0.134761  | 0.122378  | 0.107372  | 0.117279  | 0.109557  |
| 0.0850816 | 0.10708   | 0.126166  | 0.107663  | 0.109266  | 0.107517  | 0.103584  |
| 0.100233  | 0.116113  | 0.127331  | 0.116113  | 0.1081    | 0.113054  | 0.0479312 |
| 0.108246  | 0.118881  | 0.130682  | 0.123252  | 0.0525932 | 0.11961   | 0.114802  |
| 0.10912   | 0.0463287 | 0.116696  | 0.087704  | 0.113199  | 0.08581   | 0.111597  |
| 0.106498  | 0.11655   | 0.132139  | 0.11859   | 0.0488054 | 0.113199  | 0.112471  |
| 0.106498  | 0.100816  | 0.127768  | 0.104895  | 0.119027  | 0.101253  | 0.11014   |
| 0.0831876 | 0.113054  | 0.120192  | 0.112762  | 0.112325  | 0.108537  | 0.100816  |
| 0.0992133 | 0.111597  | 0.125437  | 0.118007  | 0.10271   | 0.109994  | 0.0990676 |
| 0.102855  | 0.0861014 | 0.121795  | 0.10271   | 0.107517  | 0.0990676 | 0.110286  |
| 0.107955  | 0.122086  | 0.135635  | 0.124126  | 0.0569639 | 0.119318  | 0.117716  |
| 0.0989219 | 0.107517  | 0.137092  | 0.120047  | 0.115822  | 0.113491  | 0.123834  |
| 0.10169   | 0.108537  | 0.127914  | 0.116696  | 0.102273  | 0.113636  | 0.108829  |
| 0.183566  | 0.196241  | 0.199009  | 0.195076  | 0.181818  | 0.19289   | 0.182255  |
| 0.145688  | 0.162442  | 0.177156  | 0.169143  | 0.14831   | 0.164044  | 0.155449  |
| 0.111014  | 0.102418  | 0.0600233 | 0.122523  | 0.120047  | 0.119464  | 0.11757   |
| 0.103001  | 0.104312  | 0.134178  | 0.0824592 | 0.109994  | 0.0861014 | 0.113345  |
| 0.139714  | 0.129371  | 0.0604604 | 0.152972  | 0.144085  | 0.150787  | 0.147436  |
| 0.118881  | 0.125437  | 0.136364  | 0.130973  | 0.115676  | 0.12704   | 0.115239  |
| 0.107955  | 0.122669  | 0.130682  | 0.126748  | 0.118444  | 0.122523  | 0.0815851 |
| 0.0949883 | 0.11553   | 0.131702  | 0.120775  | 0.107517  | 0.117133  | 0.0805653 |
| 0.0847902 | 0.116987  | 0.118298  | 0.121649  | 0.113928  | 0.118881  | 0.0971737 |
| 0.10169   | 0.11757   | 0.136364  | 0.122232  | 0.110723  | 0.120338  | 0.107955  |
| 0.19391   | 0.205711  | 0.210227  | 0.205128  | 0.188957  | 0.202652  | 0.187937  |
| 0.115093  | 0.0901807 | 0.135198  | 0.0543415 | 0.121503  | 0.0553613 | 0.120775  |
| 0.106206  | 0.104895  | 0.129808  | 0.0912005 | 0.074155  | 0.088141  | 0.112179  |
| 0.092803  | 0.112179  | 0.125146  | 0.111597  | 0.105332  | 0.112034  | 0.0600233 |
| 0.097028  | 0.110868  | 0.135781  | 0.11116   | 0.113054  | 0.109848  | 0.114948  |

|           |           |           |           |           |           |           |
|-----------|-----------|-----------|-----------|-----------|-----------|-----------|
| 0.16419   | 0.187646  | 0.195367  | 0.183566  | 0.169726  | 0.180507  | 0.171329  |
| 0.239073  | 0.251457  | 0.249854  | 0.248834  | 0.234994  | 0.245484  | 0.238636  |
| 0.114365  | 0.12296   | 0.138258  | 0.128205  | 0.114656  | 0.120775  | 0.112179  |
| 0.0977564 | 0.11655   | 0.136801  | 0.123252  | 0.10708   | 0.116404  | 0.108392  |
| 0.109411  | 0.105186  | 0.0575466 | 0.126457  | 0.116696  | 0.119901  | 0.113054  |
| 0.107226  | 0.0995047 | 0.125583  | 0.105332  | 0.115676  | 0.101981  | 0.107955  |
| 0.109411  | 0.0844988 | 0.131847  | 0.0515734 | 0.11116   | 0.0479312 | 0.113928  |
| 0.107226  | 0.112325  | 0.130245  | 0.112034  | 0.1081    | 0.108974  | 0.110868  |
| 0.0971737 | 0.115093  | 0.12398   | 0.120629  | 0.0855186 | 0.116696  | 0.0728438 |
| 0.109703  | 0.0827506 | 0.131265  | 0.0474942 | 0.112325  | 0.0467657 | 0.115967  |
| 0.0935315 | 0.114948  | 0.123252  | 0.121358  | 0.0754662 | 0.117424  | 0.0826049 |
| 0.0872669 | 0.112762  | 0.132139  | 0.118881  | 0.114656  | 0.113491  | 0.105769  |
| 0.0824592 | 0.113199  | 0.116841  | 0.110868  | 0.107809  | 0.11014   | 0.0942599 |
| 0.114948  | 0.124126  | 0.134761  | 0.125291  | 0.114656  | 0.123106  | 0.113345  |
| 0.1081    | 0.115822  | 0.131702  | 0.120192  | 0.0524476 | 0.118881  | 0.112034  |
| 0.0979021 | 0.103584  | 0.128497  | 0.109994  | 0.0981935 | 0.103147  | 0.104749  |
| 0.118298  | 0.118444  | 0.13986   | 0.121941  | 0.125583  | 0.11859   | 0.117279  |
| 0.126748  | 0.111742  | 0.132284  | 0.120192  | 0.131993  | 0.117716  | 0.128642  |
| 0.10067   | 0.115676  | 0.127477  | 0.114219  | 0.105624  | 0.109411  | 0.0416667 |
| 0.102564  | 0.114073  | 0.112471  | 0.121649  | 0.117133  | 0.115385  | 0.0866841 |
| 0.118007  | 0.132721  | 0.13549   | 0.136509  | 0.125     | 0.131702  | 0.0636655 |
| 0.19799   | 0.211538  | 0.210519  | 0.214452  | 0.196533  | 0.209062  | 0.198135  |
| 0.102273  | 0.114948  | 0.128205  | 0.112617  | 0.108392  | 0.111305  | 0.105332  |
| 0.0820221 | 0.109557  | 0.119027  | 0.111014  | 0.10708   | 0.107663  | 0.0952797 |
| 0.108537  | 0.115967  | 0.137383  | 0.115676  | 0.114948  | 0.113782  | 0.115385  |
| 0.117424  | 0.118735  | 0.139277  | 0.122815  | 0.11859   | 0.120047  | 0.119318  |
| 0.0967366 | 0.108537  | 0.132867  | 0.110286  | 0.108974  | 0.107517  | 0.113782  |
| 0.190851  | 0.202943  | 0.205711  | 0.19799   | 0.186772  | 0.197844  | 0.186334  |
| 0.110868  | 0.120338  | 0.13447   | 0.122669  | 0.0502622 | 0.119027  | 0.115676  |
| 0.0990676 | 0.113782  | 0.125874  | 0.114365  | 0.1081    | 0.113345  | 0.048514  |
| 0.107955  | 0.110431  | 0.123397  | 0.117424  | 0.114948  | 0.114073  | 0.118881  |
| 0.106789  | 0.0964452 | 0.124272  | 0.103147  | 0.112325  | 0.0962995 | 0.110431  |
| 0.109703  | 0.118881  | 0.135344  | 0.121795  | 0.0502622 | 0.116404  | 0.113345  |
| 0.0930944 | 0.109557  | 0.123106  | 0.114219  | 0.0732809 | 0.105624  | 0.103438  |
| 0.0910548 | 0.109557  | 0.129808  | 0.113636  | 0.112325  | 0.110868  | 0.109557  |
| 0.113782  | 0.115385  | 0.136218  | 0.118881  | 0.112617  | 0.115239  | 0.113928  |
| 0.189103  | 0.2044    | 0.206876  | 0.199155  | 0.187646  | 0.196387  | 0.187791  |
| 0.0980478 | 0.111014  | 0.124854  | 0.115385  | 0.0514277 | 0.107663  | 0.106352  |
| 0.183275  | 0.19799   | 0.201923  | 0.19391   | 0.183858  | 0.19493   | 0.182547  |
| 0.182255  | 0.194639  | 0.199738  | 0.192308  | 0.181672  | 0.190414  | 0.180944  |
| 0.124854  | 0.109266  | 0.13039   | 0.117716  | 0.128351  | 0.116696  | 0.123252  |
| 0.128059  | 0.123834  | 0.138258  | 0.13141   | 0.124563  | 0.128059  | 0.130536  |
| 0.0820221 | 0.1081    | 0.124854  | 0.107226  | 0.101836  | 0.104749  | 0.10373   |
| 0.101107  | 0.110577  | 0.126457  | 0.111451  | 0.0521562 | 0.105186  | 0.104167  |

|           |           |           |           |           |           |           |
|-----------|-----------|-----------|-----------|-----------|-----------|-----------|
| 0.104458  | 0.113054  | 0.129516  | 0.118007  | 0.0499709 | 0.110577  | 0.111305  |
| 0.103584  | 0.118298  | 0.129225  | 0.120338  | 0.111451  | 0.117279  | 0.0483683 |
| 0.105041  | 0.083042  | 0.124563  | 0.0527389 | 0.107955  | 0.0502622 | 0.111305  |
| 0.11116   | 0.0815851 | 0.133013  | 0.04662   | 0.111742  | 0.0453089 | 0.113054  |
| 0.117133  | 0.129516  | 0.138695  | 0.128934  | 0.118298  | 0.125874  | 0.114073  |
| 0.10912   | 0.103147  | 0.125437  | 0.109557  | 0.11961   | 0.105041  | 0.111305  |
| 0.0964452 | 0.112034  | 0.123834  | 0.114656  | 0.106061  | 0.111888  | 0.0473485 |
| 0.107955  | 0.118298  | 0.13447   | 0.121212  | 0.0520105 | 0.113782  | 0.111014  |
| 0.0603147 | 0.100087  | 0.118881  | 0.106789  | 0.0999417 | 0.104604  | 0.0965909 |
| 0.118153  | 0.125874  | 0.137675  | 0.13141   | 0.0610431 | 0.127477  | 0.125     |
| 0.11116   | 0.101981  | 0.0595862 | 0.122086  | 0.117279  | 0.11553   | 0.113928  |
| 0.123252  | 0.132721  | 0.143357  | 0.133887  | 0.0664336 | 0.129371  | 0.128934  |
| 0.251748  | 0.262383  | 0.263403  | 0.262675  | 0.248834  | 0.260198  | 0.25102   |
| 0.122086  | 0.100087  | 0.130245  | 0.118735  | 0.125291  | 0.113054  | 0.129808  |
| 0.122232  | 0.109266  | 0.132721  | 0.127622  | 0.121941  | 0.123397  | 0.122086  |
| 0.210082  | 0.224505  | 0.224068  | 0.220134  | 0.204837  | 0.219114  | 0.209353  |
| 0.118444  | 0.126166  | 0.134178  | 0.126748  | 0.125728  | 0.125146  | 0.11859   |
| 0.223339  | 0.231935  | 0.23208   | 0.23514   | 0.218386  | 0.232955  | 0.222611  |
| 0.116259  | 0.0939685 | 0.126166  | 0.107663  | 0.114802  | 0.103147  | 0.11961   |
| 0.11553   | 0.129371  | 0.13447   | 0.132867  | 0.120775  | 0.130973  | 0.0617716 |
| 0.109703  | 0.112179  | 0.136801  | 0.113636  | 0.109411  | 0.108246  | 0.111014  |
| 0.116404  | 0.106643  | 0.129516  | 0.11451   | 0.12398   | 0.110577  | 0.119755  |
| 0.192745  | 0.203671  | 0.211101  | 0.202506  | 0.18954   | 0.199738  | 0.19289   |
| 0.116404  | 0.127331  | 0.141171  | 0.132576  | 0.0616259 | 0.127477  | 0.124709  |
| 0.109703  | 0.117133  | 0.13243   | 0.118881  | 0.0479312 | 0.113199  | 0.111014  |
| 0.218823  | 0.228001  | 0.231061  | 0.228584  | 0.215035  | 0.225816  | 0.220134  |
| 0.111742  | 0.0859557 | 0.137675  | 0.0547786 | 0.11553   | 0.0528846 | 0.11451   |
| 0.18852   | 0.202069  | 0.205711  | 0.200612  | 0.185315  | 0.199009  | 0.185752  |
| 0.112471  | 0.0884324 | 0.136946  | 0.0517191 | 0.114802  | 0.0541958 | 0.120775  |
| 0.101981  | 0.116987  | 0.12704   | 0.117861  | 0.109266  | 0.115385  | 0.0482226 |
| 0.092803  | 0.118881  | 0.119901  | 0.125874  | 0.118444  | 0.119027  | 0.1081    |
| 0.125146  | 0.111888  | 0.130973  | 0.119464  | 0.128059  | 0.11553   | 0.122086  |
| 0.100524  | 0.110577  | 0.125874  | 0.116113  | 0.108683  | 0.108974  | 0.105624  |
| 0.132576  | 0.163024  | 0.169289  | 0.160402  | 0.152681  | 0.1588    | 0.149038  |
| 0.102564  | 0.112325  | 0.126457  | 0.114948  | 0.0472028 | 0.112762  | 0.107663  |
| 0.116259  | 0.117861  | 0.139569  | 0.120192  | 0.117716  | 0.115676  | 0.116696  |
| 0.109557  | 0.118153  | 0.135781  | 0.110286  | 0.11655   | 0.108392  | 0.114656  |
| 0.121795  | 0.122232  | 0.13986   | 0.132139  | 0.115093  | 0.124709  | 0.127477  |
| 0.182838  | 0.198718  | 0.202652  | 0.196096  | 0.182547  | 0.193619  | 0.182692  |
| 0.101107  | 0.116404  | 0.126457  | 0.117279  | 0.108392  | 0.113928  | 0.0464744 |
| 0.111451  | 0.1081    | 0.133304  | 0.112179  | 0.123397  | 0.108829  | 0.113636  |
| 0.102855  | 0.0502622 | 0.115676  | 0.0863928 | 0.113636  | 0.083042  | 0.11116   |
| 0.115822  | 0.0865385 | 0.134178  | 0.0518648 | 0.118153  | 0.0499709 | 0.120047  |
| 0.110723  | 0.123689  | 0.130245  | 0.124854  | 0.11655   | 0.123252  | 0.0540501 |



|           |           |           |           |           |           |           |
|-----------|-----------|-----------|-----------|-----------|-----------|-----------|
| 0.24898   | 0.258741  | 0.263258  | 0.25845   | 0.24461   | 0.255682  | 0.246503  |
| 0.0879953 | 0.113199  | 0.118881  | 0.120192  | 0.113928  | 0.113928  | 0.106206  |
| 0.101981  | 0.117279  | 0.13549   | 0.116987  | 0.112762  | 0.119172  | 0.0895979 |
| 0.168124  | 0.178467  | 0.187354  | 0.18109   | 0.173077  | 0.179779  | 0.178176  |
| 0.174825  | 0.188374  | 0.193765  | 0.185752  | 0.176865  | 0.184732  | 0.176428  |
| 0.111888  | 0.126894  | 0.137529  | 0.124854  | 0.113636  | 0.120921  | 0.110286  |
| 0.105915  | 0.116841  | 0.131847  | 0.123252  | 0.0502622 | 0.118735  | 0.111014  |
| 0.105041  | 0.10169   | 0.12602   | 0.102273  | 0.11553   | 0.101544  | 0.108683  |
| 0.133159  | 0.142045  | 0.153846  | 0.146416  | 0.0757576 | 0.142774  | 0.14088   |
| 0.107809  | 0.11961   | 0.132576  | 0.121358  | 0.110431  | 0.11859   | 0.108537  |
| 0.112908  | 0.125     | 0.139714  | 0.123834  | 0.116113  | 0.123689  | 0.11451   |
| 0.120047  | 0.0898893 | 0.137821  | 0.057838  | 0.121212  | 0.0588578 | 0.121358  |
| 0.1081    | 0.113782  | 0.127622  | 0.122523  | 0.0544872 | 0.117133  | 0.112617  |
| 0.116987  | 0.125874  | 0.137966  | 0.131702  | 0.0598776 | 0.127185  | 0.122669  |
| 0.107809  | 0.0922203 | 0.133741  | 0.071824  | 0.112471  | 0.0716783 | 0.112617  |
| 0.119318  | 0.1081    | 0.128642  | 0.115967  | 0.127185  | 0.109994  | 0.120629  |
| 0.136072  | 0.120484  | 0.137529  | 0.126603  | 0.137238  | 0.125     | 0.135344  |
| 0.0898893 | 0.118298  | 0.123689  | 0.123543  | 0.115822  | 0.116987  | 0.110431  |
| 0.125     | 0.111451  | 0.131702  | 0.11961   | 0.133159  | 0.115967  | 0.127477  |
| 0.124709  | 0.0942599 | 0.140443  | 0.0592949 | 0.123543  | 0.0600233 | 0.128351  |
| 0.19595   | 0.210082  | 0.214889  | 0.210373  | 0.193328  | 0.205565  | 0.196387  |
| 0.104021  | 0.112325  | 0.127622  | 0.114948  | 0.124126  | 0.109848  | 0.108537  |
| 0.18007   | 0.19391   | 0.199592  | 0.192745  | 0.180944  | 0.190851  | 0.183129  |
| 0.108392  | 0.10912   | 0.137238  | 0.115822  | 0.109266  | 0.111888  | 0.111451  |
| 0.112471  | 0.125437  | 0.134615  | 0.129808  | 0.11859   | 0.127914  | 0.057838  |
| 0.112471  | 0.108537  | 0.0562354 | 0.124272  | 0.11859   | 0.121503  | 0.11961   |
| 0.104749  | 0.104312  | 0.0680361 | 0.119755  | 0.112034  | 0.113782  | 0.110723  |
| 0.113345  | 0.122232  | 0.137238  | 0.125728  | 0.0533217 | 0.122669  | 0.119027  |
| 0.113345  | 0.11757   | 0.132284  | 0.122815  | 0.0559441 | 0.118298  | 0.11961   |
| 0.102564  | 0.120775  | 0.129953  | 0.120192  | 0.113054  | 0.118007  | 0.0520105 |
| 0.113782  | 0.120047  | 0.137966  | 0.11859   | 0.112908  | 0.116404  | 0.113928  |
| 0.116113  | 0.108683  | 0.0549242 | 0.129662  | 0.118735  | 0.124563  | 0.120921  |
| 0.129079  | 0.0962995 | 0.13986   | 0.067162  | 0.131119  | 0.0678904 | 0.131556  |
| 0.246503  | 0.254808  | 0.253497  | 0.255973  | 0.239802  | 0.25204   | 0.24461   |
| 0.1081    | 0.121358  | 0.130828  | 0.122523  | 0.111888  | 0.118007  | 0.0476399 |
| 0.174388  | 0.184732  | 0.194202  | 0.184732  | 0.174679  | 0.183712  | 0.174242  |
| 0.178322  | 0.191579  | 0.196096  | 0.188083  | 0.175699  | 0.185606  | 0.179341  |
| 0.10708   | 0.117424  | 0.137966  | 0.113636  | 0.11961   | 0.114948  | 0.1081    |
| 0.0855186 | 0.111597  | 0.117861  | 0.115385  | 0.109411  | 0.10912   | 0.100233  |
| 0.114073  | 0.123834  | 0.133013  | 0.128788  | 0.119027  | 0.123689  | 0.0588578 |
| 0.100379  | 0.113636  | 0.13039   | 0.120338  | 0.0488054 | 0.113199  | 0.109266  |
| 0.085373  | 0.116987  | 0.120047  | 0.11961   | 0.11451   | 0.116841  | 0.0954254 |
| 0.112762  | 0.0861014 | 0.131993  | 0.0493881 | 0.115093  | 0.0501166 | 0.113491  |
| 0.103293  | 0.12296   | 0.130682  | 0.126166  | 0.0750291 | 0.122815  | 0.115093  |

|           |           |           |           |           |           |           |
|-----------|-----------|-----------|-----------|-----------|-----------|-----------|
| 0.121358  | 0.128788  | 0.141754  | 0.13345   | 0.0633741 | 0.128351  | 0.128205  |
| 0.10373   | 0.119318  | 0.129079  | 0.121066  | 0.11014   | 0.119172  | 0.048514  |
| 0.119755  | 0.123689  | 0.138695  | 0.131556  | 0.0606061 | 0.125291  | 0.124854  |
| 0.108537  | 0.101399  | 0.129225  | 0.117424  | 0.112325  | 0.109994  | 0.113928  |
| 0.116987  | 0.108974  | 0.0549242 | 0.132284  | 0.122815  | 0.126894  | 0.120629  |
| 0.112762  | 0.105041  | 0.132576  | 0.108537  | 0.120338  | 0.103438  | 0.113782  |
| 0.126894  | 0.0973193 | 0.141171  | 0.0620629 | 0.126894  | 0.0622086 | 0.130536  |
| 0.097028  | 0.118735  | 0.135781  | 0.125146  | 0.118298  | 0.120629  | 0.113199  |
| 0.100816  | 0.114948  | 0.12296   | 0.11553   | 0.111014  | 0.113345  | 0.0598776 |
| 0.12704   | 0.12602   | 0.145979  | 0.130973  | 0.127331  | 0.125874  | 0.129516  |
| 0.174097  | 0.186772  | 0.192745  | 0.184441  | 0.173514  | 0.181964  | 0.173368  |
| 0.124417  | 0.133887  | 0.144231  | 0.138258  | 0.0664336 | 0.134324  | 0.13039   |
| 0.107517  | 0.11961   | 0.134033  | 0.121941  | 0.0530303 | 0.120629  | 0.115822  |
| 0.110286  | 0.103438  | 0.0520105 | 0.124417  | 0.119901  | 0.120484  | 0.117133  |
| 0.100233  | 0.0995047 | 0.0655594 | 0.11757   | 0.111305  | 0.11014   | 0.10708   |
| 0.113491  | 0.101981  | 0.128642  | 0.111305  | 0.119901  | 0.107372  | 0.113345  |
| 0.113928  | 0.107955  | 0.128497  | 0.112325  | 0.125     | 0.107226  | 0.121649  |
| 0.180216  | 0.194347  | 0.199155  | 0.191434  | 0.178467  | 0.189831  | 0.180653  |
| 0.0890152 | 0.114219  | 0.13243   | 0.119755  | 0.0793998 | 0.116696  | 0.113054  |
| 0.0871212 | 0.112325  | 0.125874  | 0.110868  | 0.102273  | 0.107517  | 0.103875  |
| 0.113345  | 0.122232  | 0.136946  | 0.129516  | 0.0571096 | 0.123834  | 0.120484  |
| 0.182838  | 0.197261  | 0.204108  | 0.193182  | 0.178759  | 0.190997  | 0.18211   |
| 0.080711  | 0.106789  | 0.118881  | 0.110286  | 0.1081    | 0.108392  | 0.0965909 |
| 0.121941  | 0.0882867 | 0.13447   | 0.0550699 | 0.121649  | 0.0537587 | 0.121212  |
| 0.114365  | 0.121795  | 0.135635  | 0.127622  | 0.0520105 | 0.121066  | 0.117133  |
| 0.108392  | 0.118153  | 0.135781  | 0.120484  | 0.109848  | 0.11451   | 0.109994  |
| 0.179196  | 0.190997  | 0.195513  | 0.18954   | 0.173951  | 0.189394  | 0.174679  |
| 0.114802  | 0.0878497 | 0.133159  | 0.0560897 | 0.113054  | 0.0521562 | 0.117861  |
| 0.105769  | 0.113782  | 0.132576  | 0.107372  | 0.105186  | 0.104021  | 0.109703  |
| 0.0818765 | 0.111451  | 0.120921  | 0.113199  | 0.105769  | 0.108974  | 0.0954254 |
| 0.103147  | 0.112617  | 0.124417  | 0.122815  | 0.110431  | 0.115967  | 0.114365  |
| 0.11553   | 0.114219  | 0.137675  | 0.118881  | 0.11757   | 0.114365  | 0.115967  |
| 0.121941  | 0.092366  | 0.137383  | 0.0571096 | 0.125728  | 0.0584207 | 0.128497  |
| 0.101836  | 0.116841  | 0.128642  | 0.118881  | 0.108246  | 0.115239  | 0.0492424 |
| 0.107955  | 0.116841  | 0.136218  | 0.120921  | 0.110577  | 0.116696  | 0.125583  |
| 0.136655  | 0.149038  | 0.153846  | 0.155157  | 0.138403  | 0.149476  | 0.140297  |
| 0.229312  | 0.24053   | 0.240093  | 0.239073  | 0.223776  | 0.237179  | 0.228293  |
| 0.101981  | 0.120775  | 0.136946  | 0.12602   | 0.122378  | 0.124126  | 0.118153  |
| 0.117133  | 0.118735  | 0.137529  | 0.117861  | 0.11859   | 0.115967  | 0.11757   |
| 0.107955  | 0.116259  | 0.130682  | 0.115093  | 0.0613345 | 0.111451  | 0.113345  |
| 0.116259  | 0.122232  | 0.134324  | 0.12398   | 0.117424  | 0.122086  | 0.117279  |
| 0.108246  | 0.104312  | 0.125728  | 0.100233  | 0.106206  | 0.0977564 | 0.115967  |
| 0.101544  | 0.113054  | 0.133013  | 0.115676  | 0.114073  | 0.111742  | 0.116841  |
| 0.113345  | 0.118153  | 0.135198  | 0.122815  | 0.0646853 | 0.118881  | 0.118444  |

|           |           |           |           |           |           |           |
|-----------|-----------|-----------|-----------|-----------|-----------|-----------|
| 0.123106  | 0.0906177 | 0.137092  | 0.0571096 | 0.12398   | 0.0566725 | 0.124709  |
| 0.101253  | 0.118881  | 0.13884   | 0.119755  | 0.113782  | 0.116404  | 0.110723  |
| 0.230186  | 0.24053   | 0.240676  | 0.241404  | 0.226399  | 0.237179  | 0.228293  |
| 0.0808566 | 0.108974  | 0.117861  | 0.109557  | 0.103293  | 0.104749  | 0.0987762 |
| 0.0960082 | 0.0882867 | 0.119318  | 0.0996503 | 0.104749  | 0.0930944 | 0.106643  |
| 0.102564  | 0.116987  | 0.125583  | 0.11757   | 0.107226  | 0.113636  | 0.0493881 |
| 0.123106  | 0.133159  | 0.142628  | 0.136946  | 0.121358  | 0.131556  | 0.124417  |
| 0.107663  | 0.125583  | 0.140297  | 0.134324  | 0.130099  | 0.128351  | 0.123252  |
| 0.103584  | 0.121795  | 0.126603  | 0.124417  | 0.105624  | 0.118735  | 0.104312  |
| 0.113491  | 0.119464  | 0.137092  | 0.123543  | 0.0517191 | 0.120484  | 0.112471  |
| 0.105478  | 0.113782  | 0.127914  | 0.116696  | 0.106061  | 0.114802  | 0.107663  |
| 0.226399  | 0.234411  | 0.236597  | 0.235577  | 0.219114  | 0.231643  | 0.223631  |
| 0.114219  | 0.123689  | 0.137238  | 0.127477  | 0.0559441 | 0.122086  | 0.121941  |
| 0.119027  | 0.0874126 | 0.137092  | 0.0556527 | 0.11961   | 0.055507  | 0.120629  |
| 0.0962995 | 0.115967  | 0.134178  | 0.111305  | 0.110868  | 0.108537  | 0.108683  |
| 0.118007  | 0.118444  | 0.137238  | 0.125437  | 0.116841  | 0.119755  | 0.122232  |
| 0.115967  | 0.0971737 | 0.127622  | 0.114073  | 0.119755  | 0.107517  | 0.125437  |
| 0.103438  | 0.120192  | 0.125     | 0.122815  | 0.111888  | 0.115967  | 0.0540501 |
| 0.120047  | 0.0878497 | 0.136364  | 0.0616259 | 0.119464  | 0.0597319 | 0.123106  |
| 0.128059  | 0.0909091 | 0.137966  | 0.0623543 | 0.124272  | 0.0622086 | 0.129953  |
| 0.114365  | 0.0850816 | 0.133596  | 0.0527389 | 0.116404  | 0.0488054 | 0.115093  |
| 0.101107  | 0.116113  | 0.125874  | 0.121649  | 0.11014   | 0.115385  | 0.0473485 |
| 0.123834  | 0.124563  | 0.137238  | 0.129808  | 0.121212  | 0.125     | 0.123106  |
| 0.126894  | 0.129079  | 0.14292   | 0.134324  | 0.125437  | 0.129808  | 0.130245  |
| 0.119901  | 0.112179  | 0.053176  | 0.13345   | 0.124854  | 0.127768  | 0.125     |
| 0.123106  | 0.111888  | 0.0543415 | 0.134907  | 0.126311  | 0.128642  | 0.12704   |
| 0.126748  | 0.126603  | 0.142774  | 0.130682  | 0.124126  | 0.123834  | 0.126894  |
| 0.0810023 | 0.111742  | 0.117133  | 0.113491  | 0.109557  | 0.111305  | 0.0872669 |
| 0.128934  | 0.0611888 | 0.128934  | 0.10373   | 0.128351  | 0.102127  | 0.136072  |
| 0.121503  | 0.126603  | 0.141026  | 0.125728  | 0.128788  | 0.121795  | 0.121358  |
| 0.19697   | 0.212267  | 0.213287  | 0.208479  | 0.19289   | 0.205128  | 0.19799   |
| 0.105478  | 0.11961   | 0.140443  | 0.124854  | 0.119172  | 0.120047  | 0.118153  |
| 0.102855  | 0.0898893 | 0.125874  | 0.102127  | 0.113345  | 0.0952797 | 0.112908  |
| 0.108246  | 0.125     | 0.130973  | 0.123834  | 0.118735  | 0.122815  | 0.0512821 |
| 0.2162    | 0.225087  | 0.227564  | 0.228293  | 0.210664  | 0.224359  | 0.216638  |
| 0.204837  | 0.214598  | 0.219114  | 0.215181  | 0.20134   | 0.211247  | 0.201486  |
| 0.125728  | 0.0914918 | 0.138549  | 0.0603147 | 0.125437  | 0.0587121 | 0.12704   |
| 0.245921  | 0.252477  | 0.251166  | 0.252477  | 0.238345  | 0.250291  | 0.244318  |
| 0.0824592 | 0.112034  | 0.11451   | 0.116987  | 0.107226  | 0.110431  | 0.0890152 |
| 0.120047  | 0.135344  | 0.1419    | 0.136509  | 0.134907  | 0.132284  | 0.126311  |
| 0.0847902 | 0.112617  | 0.115385  | 0.114948  | 0.111888  | 0.111597  | 0.0992133 |
| 0.120484  | 0.122086  | 0.140589  | 0.127331  | 0.120775  | 0.122232  | 0.124417  |
| 0.179779  | 0.194202  | 0.195804  | 0.189831  | 0.176573  | 0.190268  | 0.17905   |
| 0.110868  | 0.119755  | 0.138258  | 0.122669  | 0.121066  | 0.123106  | 0.118881  |

|           |           |           |           |           |           |           |
|-----------|-----------|-----------|-----------|-----------|-----------|-----------|
| 0.188374  | 0.19697   | 0.204691  | 0.196678  | 0.180507  | 0.195367  | 0.184149  |
| 0.105915  | 0.115385  | 0.133013  | 0.115385  | 0.11116   | 0.112325  | 0.106061  |
| 0.105332  | 0.0981935 | 0.132721  | 0.0818765 | 0.0983392 | 0.0782343 | 0.110431  |
| 0.0986305 | 0.121212  | 0.125146  | 0.12704   | 0.116987  | 0.120484  | 0.116259  |
| 0.102418  | 0.111014  | 0.12398   | 0.11014   | 0.102418  | 0.105624  | 0.10373   |
| 0.0990676 | 0.111742  | 0.120338  | 0.114656  | 0.104312  | 0.111305  | 0.0470571 |
| 0.0976107 | 0.110868  | 0.129953  | 0.11757   | 0.103147  | 0.114219  | 0.103293  |
| 0.0815851 | 0.107955  | 0.116841  | 0.108829  | 0.106061  | 0.102564  | 0.0968823 |
| 0.104167  | 0.114802  | 0.128059  | 0.115676  | 0.0467657 | 0.112617  | 0.108974  |
| 0.112762  | 0.048514  | 0.114802  | 0.090472  | 0.116259  | 0.0888695 | 0.117861  |
| 0.0842075 | 0.109411  | 0.130245  | 0.114365  | 0.106061  | 0.11014   | 0.105041  |
| 0.0823135 | 0.111305  | 0.118153  | 0.113928  | 0.109703  | 0.109994  | 0.0996503 |
| 0.106935  | 0.107663  | 0.0798368 | 0.123106  | 0.118007  | 0.120338  | 0.103875  |
| 0.118007  | 0.126603  | 0.141608  | 0.130682  | 0.0611888 | 0.128497  | 0.123397  |
| 0.105041  | 0.102855  | 0.0642483 | 0.117424  | 0.112325  | 0.113199  | 0.111597  |
| 0.104604  | 0.10912   | 0.132284  | 0.111451  | 0.109557  | 0.108974  | 0.105915  |
| 0.097465  | 0.112179  | 0.121941  | 0.115093  | 0.10271   | 0.113782  | 0.0457459 |
| 0.114948  | 0.0912005 | 0.132139  | 0.0646853 | 0.111742  | 0.0636655 | 0.116841  |
| 0.114073  | 0.115093  | 0.138549  | 0.118298  | 0.114656  | 0.115239  | 0.114802  |
| 0.115093  | 0.105041  | 0.128788  | 0.110868  | 0.124126  | 0.107809  | 0.116113  |
| 0.1081    | 0.0995047 | 0.0600233 | 0.121066  | 0.117716  | 0.115676  | 0.114948  |
| 0.108246  | 0.115967  | 0.132139  | 0.119755  | 0.0488054 | 0.116404  | 0.11451   |
| 0.119755  | 0.127768  | 0.140443  | 0.134178  | 0.0620629 | 0.127914  | 0.127477  |
| 0.127914  | 0.136218  | 0.145688  | 0.14088   | 0.0675991 | 0.136072  | 0.133013  |
| 0.101544  | 0.0839161 | 0.123106  | 0.0533217 | 0.104458  | 0.0511364 | 0.10373   |
| 0.100379  | 0.119755  | 0.127768  | 0.120047  | 0.109703  | 0.115822  | 0.048951  |
| 0.0894522 | 0.102127  | 0.128497  | 0.108537  | 0.104895  | 0.103147  | 0.109994  |
| 0.129953  | 0.129225  | 0.142774  | 0.134178  | 0.127331  | 0.129371  | 0.132721  |
| 0.0878497 | 0.115385  | 0.119027  | 0.118007  | 0.110868  | 0.110868  | 0.105478  |
| 0.134761  | 0.119172  | 0.141463  | 0.127914  | 0.140297  | 0.12602   | 0.136655  |
| 0.121066  | 0.136072  | 0.142628  | 0.141317  | 0.128059  | 0.135927  | 0.0684732 |
| 0.11859   | 0.128351  | 0.139569  | 0.13039   | 0.118298  | 0.125583  | 0.121358  |
| 0.0936772 | 0.110723  | 0.123106  | 0.115385  | 0.105915  | 0.109411  | 0.102564  |
| 0.103147  | 0.109703  | 0.13345   | 0.112617  | 0.105186  | 0.109557  | 0.111451  |
| 0.117424  | 0.110868  | 0.0550699 | 0.13243   | 0.12296   | 0.12704   | 0.121066  |
| 0.200321  | 0.208625  | 0.212267  | 0.206876  | 0.193619  | 0.201777  | 0.199301  |
| 0.106206  | 0.110431  | 0.132139  | 0.109266  | 0.109703  | 0.10708   | 0.110723  |
| 0.0949883 | 0.118444  | 0.125874  | 0.119027  | 0.113345  | 0.11655   | 0.10912   |
| 0.117279  | 0.115385  | 0.136218  | 0.120921  | 0.113782  | 0.114948  | 0.119464  |
| 0.105769  | 0.104458  | 0.0623543 | 0.120775  | 0.115676  | 0.116841  | 0.11553   |
| 0.109994  | 0.115676  | 0.136509  | 0.120629  | 0.118735  | 0.117861  | 0.113345  |
| 0.100379  | 0.109848  | 0.13447   | 0.117133  | 0.111742  | 0.112325  | 0.124417  |
| 0.105186  | 0.112617  | 0.13549   | 0.121941  | 0.113054  | 0.116841  | 0.126603  |
| 0.114365  | 0.124126  | 0.135052  | 0.125     | 0.114656  | 0.121649  | 0.115385  |

|           |           |          |           |           |           |           |
|-----------|-----------|----------|-----------|-----------|-----------|-----------|
| 0.104167  | 0.0501166 | 0.116113 | 0.0856643 | 0.111451  | 0.0796911 | 0.113054  |
| 0.123106  | 0.122378  | 0.140006 | 0.129079  | 0.121941  | 0.124563  | 0.123543  |
| 0.0939685 | 0.116841  | 0.12602  | 0.120047  | 0.111451  | 0.115239  | 0.111014  |
| 0.0944056 | 0.114073  | 0.134907 | 0.119318  | 0.114802  | 0.119755  | 0.10912   |
| 0.16623   | 0.174825  | 0.17905  | 0.176573  | 0.168561  | 0.170017  | 0.169289  |
| 0.107663  | 0.115385  | 0.135344 | 0.119755  | 0.0517191 | 0.113782  | 0.112762  |
| 0.125     | 0.124854  | 0.13986  | 0.13039   | 0.12296   | 0.124417  | 0.124854  |
| 0.101836  | 0.10169   | 0.124563 | 0.113345  | 0.126603  | 0.107372  | 0.11655   |
| 0.110723  | 0.103875  | 0.133159 | 0.116113  | 0.11014   | 0.111597  | 0.117861  |
| 0.0603147 | 0.103875  | 0.121503 | 0.11116   | 0.102855  | 0.106643  | 0.104458  |
| 0.0815851 | 0.103584  | 0.123252 | 0.105332  | 0.10373   | 0.104312  | 0.100379  |
| 0.0635198 | 0.10708   | 0.126748 | 0.115822  | 0.109848  | 0.110723  | 0.107663  |
| 0.11859   | 0.108829  | 0.133159 | 0.105624  | 0.121503  | 0.104021  | 0.119318  |
| 0.0920746 | 0.11553   | 0.129079 | 0.118153  | 0.0827506 | 0.116259  | 0.107955  |
| 0.119027  | 0.111014  | 0.133887 | 0.119755  | 0.126603  | 0.114948  | 0.124126  |
| 0.0955711 | 0.0942599 | 0.129662 | 0.104749  | 0.106061  | 0.097028  | 0.107955  |
| 0.105332  | 0.0935315 | 0.129516 | 0.108683  | 0.117279  | 0.103001  | 0.113345  |
| 0.116259  | 0.113491  | 0.144522 | 0.106206  | 0.129371  | 0.10373   | 0.125728  |
| 0.0987762 | 0.0887238 | 0.121503 | 0.108537  | 0.115676  | 0.10373   | 0.109411  |
| 0.104312  | 0.110577  | 0.122378 | 0.117861  | 0.118881  | 0.114802  | 0.11553   |
| 0.0929487 | 0.0861014 | 0.120921 | 0.101544  | 0.113928  | 0.0987762 | 0.103001  |
| 0.0979021 | 0.0913462 | 0.11859  | 0.107663  | 0.114802  | 0.104604  | 0.107663  |
| 0.0894522 | 0.103875  | 0.120338 | 0.10708   | 0.108392  | 0.106061  | 0.0954254 |
| 0.10271   | 0.113928  | 0.129225 | 0.114219  | 0.121649  | 0.111451  | 0.11014   |
| 0.0893065 | 0.097028  | 0.122523 | 0.107517  | 0.109994  | 0.101836  | 0.102855  |
| 0.137675  | 0.120338  | 0.148164 | 0.115093  | 0.135052  | 0.110868  | 0.141317  |
| 0.122523  | 0.111305  | 0.144085 | 0.105186  | 0.123397  | 0.101253  | 0.125583  |
| 0.0954254 | 0.0844988 | 0.113491 | 0.104895  | 0.109994  | 0.0995047 | 0.107226  |
| 0.130828  | 0.118735  | 0.141608 | 0.109411  | 0.131702  | 0.106352  | 0.14088   |
| 0.115093  | 0.115239  | 0.107809 | 0.12602   | 0.115093  | 0.123834  | 0.113782  |
| 0.114219  | 0.133596  | 0.143939 | 0.131556  | 0.133159  | 0.126166  | 0.13039   |
| 0.0944056 | 0.106498  | 0.118881 | 0.11553   | 0.113636  | 0.111888  | 0.10708   |
| 0.140589  | 0.138986  | 0.152826 | 0.138695  | 0.136801  | 0.137675  | 0.140734  |
| 0.119027  | 0.118298  | 0.137966 | 0.124126  | 0.130682  | 0.119318  | 0.127914  |
| 0.125437  | 0.126166  | 0.13447  | 0.121212  | 0.136218  | 0.118735  | 0.13345   |
| 0.11116   | 0.104021  | 0.10708  | 0.115967  | 0.119027  | 0.111742  | 0.117133  |
| 0.097028  | 0.0866841 | 0.120047 | 0.101544  | 0.113928  | 0.0967366 | 0.102127  |
| 0.0913462 | 0.104895  | 0.124272 | 0.102855  | 0.112908  | 0.0971737 | 0.101107  |
| 0.108392  | 0.102127  | 0.129953 | 0.103584  | 0.113636  | 0.0979021 | 0.113782  |
| 0.104895  | 0.095134  | 0.123543 | 0.11757   | 0.118298  | 0.111014  | 0.113199  |
| 0.114365  | 0.118881  | 0.13039  | 0.129079  | 0.125146  | 0.120192  | 0.121795  |
| 0.110286  | 0.11451   | 0.137966 | 0.106643  | 0.11757   | 0.103875  | 0.115967  |
| 0.101253  | 0.0944056 | 0.10271  | 0.1081    | 0.110577  | 0.100962  | 0.106352  |
| 0.0917832 | 0.101544  | 0.126748 | 0.100962  | 0.111888  | 0.0964452 | 0.104458  |

|           |          |          |           |           |           |           |
|-----------|----------|----------|-----------|-----------|-----------|-----------|
| 0.103875  | 0.113636 | 0.125437 | 0.113636  | 0.119901  | 0.11116   | 0.108974  |
| 0.0962995 | 0.103147 | 0.123689 | 0.0990676 | 0.108829  | 0.0936772 | 0.100233  |
| 0.0984848 | 0.111742 | 0.132867 | 0.108537  | 0.120921  | 0.104312  | 0.112908  |
| 0.0967366 | 0.10912  | 0.119464 | 0.116113  | 0.11014   | 0.110431  | 0.101544  |
| 0.102127  | 0.119755 | 0.121649 | 0.121503  | 0.103293  | 0.11757   | 0.11014   |
| 0.0954254 | 0.117133 | 0.13039  | 0.119755  | 0.107955  | 0.116113  | 0.10169   |
| 0.0814394 | 0.111888 | 0.112617 | 0.11451   | 0.107372  | 0.11116   | 0.0879953 |
| 0.0986305 | 0.106935 | 0.119027 | 0.1081    | 0.113491  | 0.104458  | 0.10169   |
| 0.102855  | 0.11553  | 0.124126 | 0.118153  | 0.101399  | 0.113054  | 0.105332  |
| 0.083479  | 0.108683 | 0.128059 | 0.114802  | 0.107372  | 0.112034  | 0.107517  |
| 0.099796  | 0.122086 | 0.133596 | 0.129662  | 0.103001  | 0.123397  | 0.12296   |
| 0.0942599 | 0.112471 | 0.117861 | 0.107517  | 0.0939685 | 0.103584  | 0.097028  |
| 0.105769  | 0.11757  | 0.130828 | 0.128059  | 0.12296   | 0.121795  | 0.12602   |

| TDr_2247  | TDr_2248  | TDr_2249 | TDr_2257 | TDr_2262  | TDr_2266  | TDr_2273  |
|-----------|-----------|----------|----------|-----------|-----------|-----------|
| 0.107372  | 0.119027  | 0.120775 | 0.12398  | 0.117861  | 0.104895  | 0.116113  |
| 0.114219  | 0.106061  | 0.111888 | 0.108683 | 0.12296   | 0.100087  | 0.10169   |
| 0.109848  | 0.101981  | 0.11014  | 0.106352 | 0.117133  | 0.0957168 | 0.0961538 |
| 0.11014   | 0.104312  | 0.116259 | 0.115385 | 0.119464  | 0.101836  | 0.103147  |
| 0.122669  | 0.134907  | 0.104895 | 0.125    | 0.129079  | 0.125437  | 0.135198  |
| 0.120047  | 0.122086  | 0.115385 | 0.120921 | 0.130536  | 0.118153  | 0.120921  |
| 0.109703  | 0.122523  | 0.116404 | 0.131847 | 0.119901  | 0.1081    | 0.123689  |
| 0.109703  | 0.106789  | 0.103293 | 0.110868 | 0.112034  | 0.102564  | 0.100087  |
| 0.0984848 | 0.104021  | 0.106061 | 0.109266 | 0.107809  | 0.0898893 | 0.102273  |
| 0.108829  | 0.095134  | 0.110577 | 0.113491 | 0.11553   | 0.0804196 | 0.0954254 |
| 0.1081    | 0.108974  | 0.116259 | 0.122086 | 0.117424  | 0.10708   | 0.108974  |
| 0.100962  | 0.109703  | 0.100962 | 0.112325 | 0.106789  | 0.0984848 | 0.107955  |
| 0.105041  | 0.10067   | 0.110577 | 0.111451 | 0.109994  | 0.0941142 | 0.0977564 |
| 0.132867  | 0.125291  | 0.129079 | 0.135781 | 0.142191  | 0.116987  | 0.126457  |
| 0.128351  | 0.0511364 | 0.124854 | 0.124272 | 0.122232  | 0.1081    | 0.0598776 |
| 0.114219  | 0.111597  | 0.120629 | 0.122086 | 0.113928  | 0.109411  | 0.110723  |
| 0.0971737 | 0.109411  | 0.104458 | 0.114656 | 0.104458  | 0.102855  | 0.108246  |
| 0.131993  | 0.140152  | 0.120921 | 0.132284 | 0.15035   | 0.138549  | 0.142191  |
| 0.11014   | 0.102564  | 0.108683 | 0.105478 | 0.117133  | 0.0980478 | 0.102273  |
| 0.205128  | 0.175117  | 0.199592 | 0.20134  | 0.207168  | 0.194784  | 0.179487  |
| 0.117279  | 0.116696  | 0.119901 | 0.113782 | 0.129225  | 0.11655   | 0.113491  |
| 0.114219  | 0.116841  | 0.11451  | 0.11014  | 0.120338  | 0.113199  | 0.11451   |
| 0.104458  | 0.109703  | 0.106498 | 0.111742 | 0.105332  | 0.0979021 | 0.10912   |
| 0.113928  | 0.129079  | 0.118007 | 0.125291 | 0.117133  | 0.112908  | 0.124417  |
| 0.100962  | 0.100087  | 0.10067  | 0.101253 | 0.0995047 | 0.0917832 | 0.0995047 |
| 0.124272  | 0.124854  | 0.124854 | 0.120484 | 0.133013  | 0.119755  | 0.121358  |
| 0.107372  | 0.121941  | 0.112034 | 0.122523 | 0.111451  | 0.112471  | 0.118444  |
| 0.111742  | 0.114948  | 0.119901 | 0.120192 | 0.121066  | 0.105769  | 0.112617  |
| 0.114365  | 0.134178  | 0.128642 | 0.128351 | 0.128351  | 0.120338  | 0.130973  |
| 0.108829  | 0.115822  | 0.121649 | 0.129225 | 0.116113  | 0.0987762 | 0.112908  |
| 0.11451   | 0.112762  | 0.123252 | 0.127914 | 0.12296   | 0.110286  | 0.11451   |
| 0.104167  | 0.118444  | 0.116404 | 0.122815 | 0.117861  | 0.107517  | 0.11553   |
| 0.102127  | 0.0980478 | 0.105624 | 0.107372 | 0.105041  | 0.0967366 | 0.0968823 |
| 0.102418  | 0.112908  | 0.119318 | 0.121649 | 0.104458  | 0.101399  | 0.112034  |
| 0.110723  | 0.119172  | 0.117133 | 0.125583 | 0.114219  | 0.112617  | 0.118298  |
| 0.116696  | 0.129225  | 0.126603 | 0.133013 | 0.119901  | 0.111597  | 0.128642  |
| 0.121503  | 0.131119  | 0.132867 | 0.136364 | 0.130245  | 0.121066  | 0.128788  |
| 0.109411  | 0.120484  | 0.118735 | 0.124563 | 0.119901  | 0.112762  | 0.11757   |
| 0.102418  | 0.105332  | 0.107372 | 0.112908 | 0.10912   | 0.0987762 | 0.103001  |
| 0.112617  | 0.119901  | 0.122815 | 0.122815 | 0.121358  | 0.110431  | 0.116987  |
| 0.099796  | 0.106789  | 0.101544 | 0.110868 | 0.112325  | 0.0964452 | 0.105624  |
| 0.130973  | 0.135635  | 0.135635 | 0.145251 | 0.138258  | 0.127331  | 0.131556  |

|           |          |           |          |           |           |          |
|-----------|----------|-----------|----------|-----------|-----------|----------|
| 0.135052  | 0.145833 | 0.141754  | 0.147582 | 0.142045  | 0.129662  | 0.141754 |
| 0.106643  | 0.113345 | 0.111305  | 0.116841 | 0.112471  | 0.107663  | 0.111014 |
| 0.0935315 | 0.108392 | 0.0990676 | 0.1081   | 0.0987762 | 0.0960082 | 0.105769 |
| 0.104749  | 0.110286 | 0.121941  | 0.130099 | 0.112617  | 0.10169   | 0.10912  |
| 0.107663  | 0.114948 | 0.111116  | 0.113199 | 0.117861  | 0.107517  | 0.111116 |
| 0.128497  | 0.136072 | 0.131702  | 0.143357 | 0.133741  | 0.123397  | 0.13345  |
| 0.104895  | 0.113928 | 0.111014  | 0.115385 | 0.113636  | 0.0995047 | 0.109557 |
| 0.108246  | 0.110868 | 0.114365  | 0.120192 | 0.114365  | 0.105186  | 0.109411 |
| 0.132284  | 0.145105 | 0.145979  | 0.14831  | 0.138403  | 0.134178  | 0.142483 |
| 0.121795  | 0.124709 | 0.121212  | 0.12704  | 0.127914  | 0.116404  | 0.127622 |
| 0.107955  | 0.11553  | 0.115239  | 0.11553  | 0.10708   | 0.10373   | 0.113199 |
| 0.118735  | 0.116987 | 0.123106  | 0.124563 | 0.129516  | 0.10373   | 0.114656 |
| 0.11116   | 0.116404 | 0.110868  | 0.116404 | 0.121066  | 0.110431  | 0.111742 |
| 0.130682  | 0.141171 | 0.135344  | 0.144959 | 0.131847  | 0.128497  | 0.141171 |
| 0.121212  | 0.12704  | 0.121503  | 0.131702 | 0.122378  | 0.112617  | 0.125291 |
| 0.102855  | 0.111305 | 0.11014   | 0.113345 | 0.11451   | 0.105332  | 0.111305 |
| 0.107809  | 0.115385 | 0.115676  | 0.121795 | 0.116841  | 0.10708   | 0.113345 |
| 0.109703  | 0.115822 | 0.119027  | 0.124563 | 0.119318  | 0.101107  | 0.112325 |
| 0.123397  | 0.136509 | 0.128351  | 0.140297 | 0.139132  | 0.125874  | 0.13243  |
| 0.133887  | 0.137675 | 0.133596  | 0.141463 | 0.136509  | 0.122669  | 0.132721 |
| 0.159091  | 0.157343 | 0.163462  | 0.165501 | 0.161131  | 0.150787  | 0.155012 |
| 0.107809  | 0.112471 | 0.111597  | 0.11859  | 0.113345  | 0.0983392 | 0.107517 |
| 0.106061  | 0.113928 | 0.111305  | 0.111014 | 0.112179  | 0.097465  | 0.11014  |
| 0.0987762 | 0.116259 | 0.109557  | 0.116841 | 0.1081    | 0.0954254 | 0.113054 |
| 0.130973  | 0.136509 | 0.14088   | 0.145542 | 0.137675  | 0.132576  | 0.137092 |
| 0.101544  | 0.10708  | 0.106789  | 0.115822 | 0.109703  | 0.0987762 | 0.105041 |
| 0.12704   | 0.131993 | 0.128788  | 0.132867 | 0.130245  | 0.124563  | 0.131702 |
| 0.110723  | 0.111014 | 0.117133  | 0.126166 | 0.115385  | 0.101836  | 0.111305 |
| 0.105041  | 0.112908 | 0.113782  | 0.118153 | 0.116113  | 0.105478  | 0.114948 |
| 0.135927  | 0.144668 | 0.144959  | 0.148164 | 0.144376  | 0.142191  | 0.143794 |
| 0.111451  | 0.118735 | 0.116404  | 0.126311 | 0.116404  | 0.108392  | 0.11961  |
| 0.126166  | 0.134615 | 0.130828  | 0.140734 | 0.137821  | 0.11961   | 0.131702 |
| 0.118735  | 0.127185 | 0.120484  | 0.126603 | 0.127477  | 0.11859   | 0.131265 |
| 0.105478  | 0.112471 | 0.108392  | 0.108974 | 0.116259  | 0.109703  | 0.113636 |
| 0.102273  | 0.115385 | 0.107809  | 0.118007 | 0.111014  | 0.100087  | 0.113928 |
| 0.102273  | 0.111888 | 0.107517  | 0.11655  | 0.118007  | 0.104749  | 0.109848 |
| 0.120047  | 0.134615 | 0.131702  | 0.132284 | 0.130536  | 0.124854  | 0.132576 |
| 0.103001  | 0.114365 | 0.109994  | 0.114656 | 0.108829  | 0.099359  | 0.111742 |
| 0.13549   | 0.137238 | 0.136364  | 0.142483 | 0.143065  | 0.122815  | 0.13549  |
| 0.114802  | 0.118298 | 0.119172  | 0.125    | 0.121795  | 0.104458  | 0.115967 |
| 0.106061  | 0.118881 | 0.111888  | 0.121212 | 0.111888  | 0.109703  | 0.113345 |
| 0.109557  | 0.115967 | 0.111305  | 0.121503 | 0.115093  | 0.105332  | 0.112179 |
| 0.114219  | 0.118881 | 0.117424  | 0.122086 | 0.119172  | 0.108246  | 0.114219 |
| 0.1081    | 0.114219 | 0.107517  | 0.117424 | 0.116259  | 0.100379  | 0.11014  |



|           |           |          |          |          |           |           |
|-----------|-----------|----------|----------|----------|-----------|-----------|
| 0.100816  | 0.118007  | 0.111597 | 0.11655  | 0.112471 | 0.103293  | 0.113636  |
| 0.128642  | 0.135635  | 0.133013 | 0.138549 | 0.133304 | 0.123834  | 0.133013  |
| 0.101544  | 0.105332  | 0.104749 | 0.113782 | 0.104458 | 0.097028  | 0.101836  |
| 0.104021  | 0.106935  | 0.107517 | 0.117133 | 0.109848 | 0.103293  | 0.106352  |
| 0.109848  | 0.119755  | 0.122086 | 0.126166 | 0.122378 | 0.113199  | 0.119172  |
| 0.109848  | 0.126166  | 0.120047 | 0.132284 | 0.124709 | 0.114948  | 0.127914  |
| 0.121503  | 0.127914  | 0.129662 | 0.123834 | 0.13345  | 0.119318  | 0.125583  |
| 0.128059  | 0.136218  | 0.13884  | 0.129516 | 0.13884  | 0.127331  | 0.135052  |
| 0.104604  | 0.116259  | 0.103438 | 0.116259 | 0.112762 | 0.108246  | 0.11655   |
| 0.177156  | 0.180653  | 0.18007  | 0.188811 | 0.181527 | 0.174097  | 0.179487  |
| 0.099796  | 0.105041  | 0.104749 | 0.11116  | 0.107663 | 0.097028  | 0.105915  |
| 0.12296   | 0.130536  | 0.139569 | 0.131993 | 0.13141  | 0.131265  | 0.129953  |
| 0.112471  | 0.121795  | 0.130245 | 0.123252 | 0.122086 | 0.120775  | 0.120921  |
| 0.119027  | 0.134178  | 0.128351 | 0.137092 | 0.134761 | 0.126166  | 0.133887  |
| 0.101981  | 0.108974  | 0.114219 | 0.109266 | 0.112179 | 0.102127  | 0.109266  |
| 0.120921  | 0.128497  | 0.136946 | 0.127914 | 0.133159 | 0.122232  | 0.127914  |
| 0.101107  | 0.112762  | 0.113928 | 0.109848 | 0.113054 | 0.10912   | 0.112471  |
| 0.109703  | 0.120192  | 0.124272 | 0.122523 | 0.123106 | 0.118007  | 0.119901  |
| 0.104458  | 0.11116   | 0.117279 | 0.121066 | 0.115239 | 0.102855  | 0.112908  |
| 0.11961   | 0.133596  | 0.13447  | 0.126311 | 0.133304 | 0.130245  | 0.136801  |
| 0.0930944 | 0.105915  | 0.11116  | 0.115822 | 0.105624 | 0.0920746 | 0.103293  |
| 0.123252  | 0.131702  | 0.134907 | 0.133741 | 0.138986 | 0.127185  | 0.132867  |
| 0.0989219 | 0.115822  | 0.112034 | 0.11961  | 0.116404 | 0.105769  | 0.117279  |
| 0.120047  | 0.130828  | 0.128497 | 0.134033 | 0.122669 | 0.116696  | 0.129371  |
| 0.109411  | 0.12398   | 0.129225 | 0.137966 | 0.122815 | 0.114802  | 0.120775  |
| 0.0977564 | 0.106498  | 0.103001 | 0.106498 | 0.112908 | 0.102273  | 0.108829  |
| 0.13884   | 0.139423  | 0.143211 | 0.149621 | 0.144085 | 0.142483  | 0.139714  |
| 0.101107  | 0.114802  | 0.109557 | 0.115385 | 0.118007 | 0.10067   | 0.112179  |
| 0.105478  | 0.110723  | 0.109266 | 0.111014 | 0.108392 | 0.106206  | 0.108974  |
| 0.106789  | 0.119318  | 0.112617 | 0.118153 | 0.115822 | 0.109848  | 0.119318  |
| 0.12602   | 0.137092  | 0.138258 | 0.140006 | 0.137966 | 0.124709  | 0.137092  |
| 0.11553   | 0.117861  | 0.123689 | 0.128059 | 0.120775 | 0.112471  | 0.115822  |
| 0.100379  | 0.105332  | 0.110868 | 0.109411 | 0.109411 | 0.106061  | 0.104458  |
| 0.107663  | 0.104458  | 0.112325 | 0.103875 | 0.109703 | 0.104604  | 0.105041  |
| 0.108392  | 0.114802  | 0.11655  | 0.116259 | 0.114219 | 0.100379  | 0.112179  |
| 0.121649  | 0.116404  | 0.122232 | 0.127768 | 0.124272 | 0.107226  | 0.114948  |
| 0.100816  | 0.116259  | 0.108392 | 0.121212 | 0.11451  | 0.105624  | 0.118298  |
| 0.0933858 | 0.10067   | 0.101253 | 0.109411 | 0.101836 | 0.087704  | 0.0962995 |
| 0.0962995 | 0.103584  | 0.104167 | 0.108829 | 0.104167 | 0.090035  | 0.100962  |
| 0.0955711 | 0.10373   | 0.11014  | 0.114219 | 0.106643 | 0.0945513 | 0.101981  |
| 0.107517  | 0.120629  | 0.11451  | 0.119464 | 0.110723 | 0.109703  | 0.115093  |
| 0.11553   | 0.124854  | 0.126894 | 0.129225 | 0.124563 | 0.115385  | 0.121941  |
| 0.0987762 | 0.100524  | 0.107809 | 0.112762 | 0.104604 | 0.090472  | 0.099359  |
| 0.0971737 | 0.0960082 | 0.101544 | 0.10708  | 0.103875 | 0.0914918 | 0.0933858 |

|           |           |           |          |          |           |           |
|-----------|-----------|-----------|----------|----------|-----------|-----------|
| 0.110868  | 0.115822  | 0.121358  | 0.129225 | 0.11757  | 0.110723  | 0.113199  |
| 0.0926573 | 0.10373   | 0.101981  | 0.11859  | 0.108683 | 0.0895979 | 0.101981  |
| 0.115676  | 0.118007  | 0.122378  | 0.123834 | 0.120921 | 0.114656  | 0.11655   |
| 0.121795  | 0.128497  | 0.134324  | 0.138986 | 0.124709 | 0.121649  | 0.12704   |
| 0.101399  | 0.111014  | 0.11014   | 0.11859  | 0.115676 | 0.100379  | 0.109266  |
| 0.101544  | 0.10067   | 0.107955  | 0.115822 | 0.109411 | 0.0891608 | 0.100379  |
| 0.0992133 | 0.105624  | 0.112325  | 0.116404 | 0.107955 | 0.0926573 | 0.103584  |
| 0.0968823 | 0.105915  | 0.107955  | 0.110286 | 0.104458 | 0.0906177 | 0.10067   |
| 0.113199  | 0.119901  | 0.121358  | 0.126603 | 0.124272 | 0.104021  | 0.116987  |
| 0.0960082 | 0.099796  | 0.101836  | 0.108246 | 0.103001 | 0.0871212 | 0.0977564 |
| 0.128205  | 0.134324  | 0.134033  | 0.143065 | 0.133159 | 0.122232  | 0.131993  |
| 0.122232  | 0.128351  | 0.13039   | 0.138549 | 0.126603 | 0.121795  | 0.127185  |
| 0.116404  | 0.120484  | 0.120192  | 0.130973 | 0.11961  | 0.111014  | 0.116404  |
| 0.106643  | 0.109266  | 0.11451   | 0.115385 | 0.113345 | 0.100379  | 0.108392  |
| 0.105478  | 0.109557  | 0.112762  | 0.115093 | 0.113054 | 0.0980478 | 0.109557  |
| 0.0948427 | 0.103584  | 0.107372  | 0.115822 | 0.105041 | 0.0938228 | 0.104749  |
| 0.0944056 | 0.115967  | 0.1081    | 0.118298 | 0.108974 | 0.100087  | 0.112471  |
| 0.0984848 | 0.105769  | 0.103438  | 0.106935 | 0.105186 | 0.0957168 | 0.105478  |
| 0.106352  | 0.111888  | 0.111305  | 0.109557 | 0.113054 | 0.101544  | 0.110431  |
| 0.116841  | 0.125583  | 0.123252  | 0.128205 | 0.127331 | 0.114656  | 0.124126  |
| 0.107372  | 0.112908  | 0.116696  | 0.110577 | 0.119027 | 0.104312  | 0.108829  |
| 0.124417  | 0.120629  | 0.124709  | 0.130245 | 0.134033 | 0.114656  | 0.120629  |
| 0.117861  | 0.13039   | 0.132139  | 0.135635 | 0.132139 | 0.120921  | 0.128642  |
| 0.193328  | 0.181672  | 0.186043  | 0.190705 | 0.195367 | 0.188811  | 0.182255  |
| 0.238345  | 0.231935  | 0.233392  | 0.236305 | 0.238928 | 0.233246  | 0.231352  |
| 0.105332  | 0.112908  | 0.106498  | 0.110577 | 0.114365 | 0.107226  | 0.108829  |
| 0.0987762 | 0.111014  | 0.104312  | 0.113636 | 0.109848 | 0.103293  | 0.107517  |
| 0.0979021 | 0.1081    | 0.102855  | 0.109848 | 0.106061 | 0.0983392 | 0.107517  |
| 0.103438  | 0.111305  | 0.104895  | 0.106643 | 0.113636 | 0.0977564 | 0.107226  |
| 0.128788  | 0.0533217 | 0.12704   | 0.128497 | 0.123252 | 0.111451  | 0.0643939 |
| 0.100816  | 0.114219  | 0.111305  | 0.113928 | 0.118298 | 0.109411  | 0.110723  |
| 0.130099  | 0.144376  | 0.135927  | 0.146707 | 0.140589 | 0.139277  | 0.142628  |
| 0.101399  | 0.117716  | 0.104604  | 0.110431 | 0.111597 | 0.108246  | 0.113054  |
| 0.114219  | 0.132576  | 0.123834  | 0.128497 | 0.125291 | 0.116113  | 0.127914  |
| 0.122815  | 0.13039   | 0.127185  | 0.131265 | 0.129225 | 0.123543  | 0.129225  |
| 0.122232  | 0.127477  | 0.128351  | 0.128059 | 0.130973 | 0.12296   | 0.12398   |
| 0.129225  | 0.132721  | 0.13447   | 0.141171 | 0.133304 | 0.124126  | 0.128934  |
| 0.100379  | 0.112908  | 0.111451  | 0.116113 | 0.114365 | 0.106352  | 0.112908  |
| 0.0936772 | 0.115239  | 0.103875  | 0.110286 | 0.10912  | 0.109266  | 0.11116   |
| 0.104021  | 0.116841  | 0.106935  | 0.115093 | 0.119755 | 0.110286  | 0.111014  |
| 0.0981935 | 0.113345  | 0.0987762 | 0.107517 | 0.106061 | 0.097465  | 0.108392  |
| 0.094697  | 0.111305  | 0.106935  | 0.108683 | 0.109557 | 0.107955  | 0.111305  |
| 0.099796  | 0.119027  | 0.103584  | 0.116113 | 0.109703 | 0.104895  | 0.114365  |
| 0.115967  | 0.126457  | 0.126166  | 0.123252 | 0.131119 | 0.121358  | 0.120047  |

|           |          |           |          |          |           |          |
|-----------|----------|-----------|----------|----------|-----------|----------|
| 0.126748  | 0.138112 | 0.133159  | 0.130245 | 0.132576 | 0.127185  | 0.134615 |
| 0.104167  | 0.120484 | 0.107372  | 0.119318 | 0.108246 | 0.105769  | 0.117861 |
| 0.10169   | 0.116841 | 0.112471  | 0.11014  | 0.113928 | 0.101836  | 0.113345 |
| 0.118298  | 0.132576 | 0.125291  | 0.132284 | 0.125583 | 0.122815  | 0.131993 |
| 0.097028  | 0.113636 | 0.10373   | 0.110723 | 0.106643 | 0.0983392 | 0.107809 |
| 0.12602   | 0.136801 | 0.135052  | 0.137092 | 0.139423 | 0.133159  | 0.134761 |
| 0.131265  | 0.126311 | 0.138258  | 0.137966 | 0.135635 | 0.123543  | 0.127185 |
| 0.123543  | 0.129371 | 0.127914  | 0.125583 | 0.13345  | 0.129808  | 0.130245 |
| 0.0941142 | 0.109848 | 0.0955711 | 0.113345 | 0.105769 | 0.100087  | 0.108974 |
| 0.0965909 | 0.108537 | 0.104167  | 0.106206 | 0.10708  | 0.10373   | 0.106498 |
| 0.1081    | 0.124126 | 0.115093  | 0.123252 | 0.120921 | 0.116113  | 0.122669 |
| 0.113782  | 0.124854 | 0.120775  | 0.119027 | 0.121066 | 0.118881  | 0.120775 |
| 0.115239  | 0.134178 | 0.120192  | 0.130973 | 0.12602  | 0.123834  | 0.132721 |
| 0.0996503 | 0.117716 | 0.108683  | 0.11859  | 0.112762 | 0.108829  | 0.117424 |
| 0.107663  | 0.118153 | 0.105915  | 0.117279 | 0.113782 | 0.105478  | 0.114656 |
| 0.111451  | 0.120192 | 0.121649  | 0.123397 | 0.121941 | 0.117424  | 0.118444 |
| 0.115822  | 0.132139 | 0.128642  | 0.131847 | 0.132139 | 0.122378  | 0.131847 |
| 0.11961   | 0.131556 | 0.124563  | 0.129516 | 0.122232 | 0.122378  | 0.130099 |
| 0.121795  | 0.132576 | 0.13345   | 0.131993 | 0.125874 | 0.128934  | 0.131119 |
| 0.121066  | 0.129808 | 0.131847  | 0.134178 | 0.130682 | 0.124709  | 0.127477 |
| 0.0977564 | 0.120775 | 0.106789  | 0.114656 | 0.109994 | 0.106061  | 0.117861 |
| 0.115822  | 0.13039  | 0.12398   | 0.127185 | 0.129516 | 0.121795  | 0.131265 |
| 0.0996503 | 0.114219 | 0.105478  | 0.107809 | 0.107517 | 0.101836  | 0.112471 |
| 0.104458  | 0.114656 | 0.107955  | 0.114656 | 0.119901 | 0.104312  | 0.109703 |
| 0.0971737 | 0.109994 | 0.104167  | 0.108246 | 0.112034 | 0.105186  | 0.108246 |
| 0.099359  | 0.115093 | 0.104895  | 0.111014 | 0.113928 | 0.100087  | 0.11014  |
| 0.0955711 | 0.112762 | 0.10373   | 0.109848 | 0.106643 | 0.103293  | 0.109848 |
| 0.11961   | 0.135927 | 0.131847  | 0.135052 | 0.127477 | 0.129371  | 0.134178 |
| 0.105478  | 0.113345 | 0.108974  | 0.116841 | 0.115676 | 0.108246  | 0.117133 |
| 0.120047  | 0.134033 | 0.128788  | 0.129953 | 0.132284 | 0.126603  | 0.129371 |
| 0.097028  | 0.113636 | 0.101399  | 0.11014  | 0.105478 | 0.0983392 | 0.1081   |
| 0.107372  | 0.129225 | 0.119318  | 0.127768 | 0.116113 | 0.116841  | 0.124854 |
| 0.112762  | 0.123834 | 0.122378  | 0.124126 | 0.117716 | 0.111451  | 0.119464 |
| 0.11451   | 0.108392 | 0.117716  | 0.120047 | 0.121503 | 0.106789  | 0.109557 |
| 0.101544  | 0.112034 | 0.112325  | 0.119027 | 0.108537 | 0.103147  | 0.114365 |
| 0.115385  | 0.116841 | 0.114802  | 0.119464 | 0.125874 | 0.111742  | 0.118298 |
| 0.100962  | 0.114365 | 0.119027  | 0.120775 | 0.115822 | 0.110431  | 0.114656 |
| 0.0995047 | 0.11116  | 0.102418  | 0.114073 | 0.101544 | 0.10169   | 0.110286 |
| 0.127185  | 0.123397 | 0.127768  | 0.137675 | 0.133304 | 0.110723  | 0.124854 |
| 0.131702  | 0.136655 | 0.138403  | 0.145396 | 0.131119 | 0.128642  | 0.133159 |
| 0.0964452 | 0.100816 | 0.107809  | 0.109266 | 0.105769 | 0.0869755 | 0.100233 |
| 0.128059  | 0.11757  | 0.132721  | 0.122815 | 0.13039  | 0.114219  | 0.115822 |
| 0.119172  | 0.113345 | 0.125291  | 0.130536 | 0.122086 | 0.0977564 | 0.115093 |
| 0.126166  | 0.117716 | 0.128205  | 0.117716 | 0.129079 | 0.114365  | 0.117716 |

|          |          |          |          |          |           |          |
|----------|----------|----------|----------|----------|-----------|----------|
| 0.111597 | 0.109266 | 0.12296  | 0.112471 | 0.120629 | 0.104167  | 0.110431 |
| 0.111597 | 0.114802 | 0.118007 | 0.120921 | 0.119172 | 0.103293  | 0.113345 |
| 0.118153 | 0.114948 | 0.122523 | 0.123397 | 0.123689 | 0.102273  | 0.113491 |
| 0.116841 | 0.121795 | 0.127331 | 0.12296  | 0.123252 | 0.113491  | 0.124126 |
| 0.130536 | 0.124417 | 0.138695 | 0.127914 | 0.135198 | 0.118444  | 0.127331 |
| 0.122378 | 0.115385 | 0.122086 | 0.123252 | 0.130828 | 0.106789  | 0.115967 |
| 0.108683 | 0.107517 | 0.117133 | 0.109266 | 0.117716 | 0.101836  | 0.107226 |
| 0.125146 | 0.140006 | 0.129808 | 0.136801 | 0.124563 | 0.129079  | 0.135635 |
| 0.120047 | 0.123543 | 0.129953 | 0.132284 | 0.130536 | 0.113782  | 0.125291 |
| 0.104604 | 0.103438 | 0.109266 | 0.106643 | 0.111014 | 0.0983392 | 0.104021 |
| 0.220425 | 0.216346 | 0.214889 | 0.217803 | 0.2213   | 0.213578  | 0.213141 |
| 0.118735 | 0.110868 | 0.122232 | 0.121649 | 0.124854 | 0.109848  | 0.114656 |
| 0.109703 | 0.109411 | 0.112325 | 0.117861 | 0.119318 | 0.0917832 | 0.108829 |
| 0.129662 | 0.124417 | 0.134615 | 0.126748 | 0.133159 | 0.120484  | 0.129953 |
| 0.111305 | 0.110723 | 0.114219 | 0.117716 | 0.120921 | 0.105041  | 0.112179 |
| 0.130828 | 0.118298 | 0.127622 | 0.131119 | 0.133159 | 0.10912   | 0.12296  |
| 0.115676 | 0.113345 | 0.11655  | 0.113345 | 0.121503 | 0.101544  | 0.109557 |
| 0.11553  | 0.108537 | 0.119318 | 0.116113 | 0.116696 | 0.105186  | 0.109411 |
| 0.120192 | 0.113199 | 0.122232 | 0.128351 | 0.129516 | 0.0984848 | 0.116404 |
| 0.12296  | 0.11859  | 0.126166 | 0.121503 | 0.136072 | 0.114656  | 0.116841 |
| 0.121358 | 0.124563 | 0.127768 | 0.122815 | 0.129808 | 0.112471  | 0.121358 |
| 0.120629 | 0.126166 | 0.126457 | 0.118881 | 0.130245 | 0.112908  | 0.122669 |
| 0.120629 | 0.119755 | 0.127331 | 0.117133 | 0.12704  | 0.112034  | 0.119464 |
| 0.109266 | 0.108683 | 0.115676 | 0.121212 | 0.104895 | 0.0977564 | 0.102855 |
| 0.111888 | 0.115385 | 0.115385 | 0.112179 | 0.119172 | 0.10708   | 0.110431 |
| 0.13039  | 0.12398  | 0.135344 | 0.121649 | 0.136509 | 0.125291  | 0.124854 |
| 0.117424 | 0.108683 | 0.118881 | 0.111014 | 0.120047 | 0.106498  | 0.11014  |
| 0.126457 | 0.135781 | 0.132576 | 0.138112 | 0.131119 | 0.121941  | 0.134615 |
| 0.132721 | 0.130973 | 0.139132 | 0.141171 | 0.139423 | 0.131993  | 0.131847 |
| 0.11553  | 0.114365 | 0.124563 | 0.129225 | 0.11553  | 0.108392  | 0.115239 |
| 0.120775 | 0.117279 | 0.127185 | 0.128642 | 0.126894 | 0.108683  | 0.11553  |
| 0.123543 | 0.122378 | 0.126166 | 0.129662 | 0.12296  | 0.121941  | 0.123543 |
| 0.110868 | 0.12602  | 0.125728 | 0.127477 | 0.116696 | 0.109848  | 0.121358 |
| 0.121941 | 0.126603 | 0.124272 | 0.12602  | 0.122523 | 0.11859   | 0.121358 |
| 0.133304 | 0.124854 | 0.135927 | 0.138549 | 0.140589 | 0.130245  | 0.128934 |
| 0.10169  | 0.105478 | 0.110431 | 0.118007 | 0.109848 | 0.101836  | 0.104021 |
| 0.12398  | 0.125437 | 0.125728 | 0.136801 | 0.129225 | 0.121795  | 0.125437 |
| 0.137821 | 0.134615 | 0.140443 | 0.14627  | 0.145396 | 0.136218  | 0.134033 |
| 0.11014  | 0.113345 | 0.118298 | 0.126166 | 0.119755 | 0.10271   | 0.111888 |
| 0.115676 | 0.121212 | 0.120921 | 0.131119 | 0.124417 | 0.106206  | 0.122086 |
| 0.13447  | 0.144376 | 0.138549 | 0.148747 | 0.131847 | 0.13986   | 0.14088  |
| 0.118735 | 0.123689 | 0.121066 | 0.127477 | 0.126311 | 0.11655   | 0.119318 |
| 0.13345  | 0.127914 | 0.141317 | 0.141608 | 0.13345  | 0.12602   | 0.124126 |
| 0.123106 | 0.123689 | 0.129225 | 0.129808 | 0.128642 | 0.117716  | 0.125146 |

|           |           |          |           |          |           |           |
|-----------|-----------|----------|-----------|----------|-----------|-----------|
| 0.11451   | 0.121795  | 0.124417 | 0.117133  | 0.119755 | 0.121066  | 0.122378  |
| 0.123106  | 0.122523  | 0.131556 | 0.131265  | 0.130099 | 0.120921  | 0.123689  |
| 0.115093  | 0.115093  | 0.124126 | 0.129371  | 0.119464 | 0.106206  | 0.115967  |
| 0.122232  | 0.124563  | 0.127768 | 0.126894  | 0.129516 | 0.127914  | 0.125437  |
| 0.118153  | 0.125437  | 0.126894 | 0.126603  | 0.131556 | 0.114219  | 0.127477  |
| 0.123397  | 0.133013  | 0.133596 | 0.126603  | 0.134178 | 0.126166  | 0.13039   |
| 0.121649  | 0.132721  | 0.131556 | 0.131556  | 0.128642 | 0.122378  | 0.131265  |
| 0.119901  | 0.125437  | 0.132721 | 0.131556  | 0.128934 | 0.122378  | 0.125146  |
| 0.136218  | 0.138549  | 0.144085 | 0.139132  | 0.143211 | 0.139569  | 0.14088   |
| 0.114656  | 0.113491  | 0.11961  | 0.124272  | 0.119901 | 0.0999417 | 0.114073  |
| 0.107372  | 0.114656  | 0.112034 | 0.118153  | 0.122815 | 0.105186  | 0.112908  |
| 0.115822  | 0.124563  | 0.120192 | 0.135344  | 0.128642 | 0.121795  | 0.120775  |
| 0.105041  | 0.114656  | 0.11553  | 0.128351  | 0.114656 | 0.100233  | 0.110868  |
| 0.136364  | 0.13345   | 0.138986 | 0.149476  | 0.139277 | 0.134761  | 0.132576  |
| 0.145396  | 0.151224  | 0.151515 | 0.15472   | 0.154429 | 0.140006  | 0.149184  |
| 0.117133  | 0.131993  | 0.122378 | 0.125874  | 0.128205 | 0.124563  | 0.128205  |
| 0.107372  | 0.126603  | 0.114656 | 0.120192  | 0.114073 | 0.113054  | 0.122523  |
| 0.124417  | 0.126166  | 0.13141  | 0.12296   | 0.127622 | 0.128642  | 0.126457  |
| 0.121066  | 0.122815  | 0.129225 | 0.126311  | 0.132721 | 0.122086  | 0.123397  |
| 0.114073  | 0.12602   | 0.119901 | 0.127185  | 0.123397 | 0.118298  | 0.125146  |
| 0.12398   | 0.126311  | 0.131265 | 0.124563  | 0.137383 | 0.121795  | 0.123397  |
| 0.132139  | 0.127477  | 0.138549 | 0.136801  | 0.137383 | 0.122669  | 0.130682  |
| 0.118298  | 0.115676  | 0.127622 | 0.133159  | 0.122086 | 0.106206  | 0.118007  |
| 0.150058  | 0.15676   | 0.153846 | 0.155886  | 0.155886 | 0.158945  | 0.156177  |
| 0.112471  | 0.120047  | 0.124709 | 0.131119  | 0.124709 | 0.105624  | 0.117716  |
| 0.133159  | 0.128205  | 0.136946 | 0.142774  | 0.133159 | 0.118444  | 0.12704   |
| 0.109703  | 0.119027  | 0.114948 | 0.123397  | 0.124563 | 0.110723  | 0.115822  |
| 0.121941  | 0.132721  | 0.128059 | 0.132139  | 0.131847 | 0.126457  | 0.13447   |
| 0.117861  | 0.113782  | 0.122232 | 0.113199  | 0.125437 | 0.11451   | 0.112617  |
| 0.135198  | 0.133741  | 0.136946 | 0.141317  | 0.136946 | 0.128642  | 0.134615  |
| 0.13447   | 0.140589  | 0.133013 | 0.0770688 | 0.149621 | 0.141608  | 0.137383  |
| 0.119464  | 0.119464  | 0.119464 | 0.119755  | 0.124126 | 0.116696  | 0.119172  |
| 0.128934  | 0.133013  | 0.133596 | 0.136218  | 0.132139 | 0.129079  | 0.13039   |
| 0.138986  | 0.144231  | 0.138403 | 0.149184  | 0.138695 | 0.144085  | 0.144231  |
| 0.137821  | 0.136072  | 0.138695 | 0.141608  | 0.145688 | 0.129808  | 0.131119  |
| 0.0971737 | 0.13243   | 0.118153 | 0.133596  | 0.112908 | 0.120921  | 0.128059  |
| 0.124417  | 0.129371  | 0.104895 | 0.13141   | 0.133159 | 0.128934  | 0.129079  |
| 0.109266  | 0.0859557 | 0.111305 | 0.106643  | 0.111597 | 0.0995047 | 0.0804196 |
| 0.109411  | 0.0796911 | 0.112617 | 0.113491  | 0.104749 | 0.105478  | 0.0782343 |
| 0.116259  | 0.118007  | 0.117133 | 0.120338  | 0.122086 | 0.101836  | 0.115385  |
| 0.112762  | 0.115967  | 0.111305 | 0.116841  | 0.117424 | 0.111742  | 0.113345  |
| 0.11116   | 0.11116   | 0.112908 | 0.114073  | 0.105332 | 0.0987762 | 0.107372  |
| 0.112617  | 0.074155  | 0.107372 | 0.107663  | 0.108246 | 0.0961538 | 0.0712413 |
| 0.115822  | 0.114656  | 0.107955 | 0.111742  | 0.120192 | 0.116841  | 0.11553   |

|           |           |           |           |           |           |           |
|-----------|-----------|-----------|-----------|-----------|-----------|-----------|
| 0.122086  | 0.0597319 | 0.122378  | 0.122669  | 0.11859   | 0.10708   | 0.0661422 |
| 0.101107  | 0.0976107 | 0.105186  | 0.112762  | 0.100233  | 0.0488054 | 0.092366  |
| 0.119755  | 0.11859   | 0.118007  | 0.122086  | 0.120921  | 0.11553   | 0.117424  |
| 0.114656  | 0.11757   | 0.110868  | 0.114073  | 0.118735  | 0.108683  | 0.112908  |
| 0.106789  | 0.126894  | 0.118735  | 0.129516  | 0.110868  | 0.117424  | 0.121941  |
| 0.216638  | 0.20877   | 0.212267  | 0.214307  | 0.217803  | 0.212121  | 0.209062  |
| 0.138549  | 0.141171  | 0.139423  | 0.139714  | 0.14088   | 0.136364  | 0.137966  |
| 0.123252  | 0.127622  | 0.124709  | 0.126166  | 0.129953  | 0.117279  | 0.12704   |
| 0.120775  | 0.118444  | 0.112908  | 0.117861  | 0.126894  | 0.114802  | 0.114948  |
| 0.209645  | 0.204983  | 0.206731  | 0.207605  | 0.213724  | 0.204254  | 0.202652  |
| 0.111451  | 0.118444  | 0.11757   | 0.130973  | 0.118444  | 0.113636  | 0.117279  |
| 0.111597  | 0.116259  | 0.110431  | 0.126748  | 0.0533217 | 0.109994  | 0.113054  |
| 0.118007  | 0.120629  | 0.0515734 | 0.117424  | 0.115385  | 0.114656  | 0.117424  |
| 0.120192  | 0.0456002 | 0.119027  | 0.117279  | 0.115822  | 0.107517  | 0.0557984 |
| 0.251894  | 0.24461   | 0.244318  | 0.249563  | 0.25102   | 0.24359   | 0.244318  |
| 0.113636  | 0.121503  | 0.125583  | 0.129662  | 0.119755  | 0.112325  | 0.120338  |
| 0.101107  | 0.122086  | 0.109848  | 0.120921  | 0.104312  | 0.108829  | 0.115676  |
| 0.107517  | 0.124126  | 0.113345  | 0.116259  | 0.124126  | 0.118153  | 0.122086  |
| 0.105186  | 0.12296   | 0.110723  | 0.108974  | 0.12296   | 0.113782  | 0.120338  |
| 0.125     | 0.107517  | 0.128788  | 0.13345   | 0.12296   | 0.11757   | 0.107226  |
| 0.124126  | 0.1081    | 0.119755  | 0.130828  | 0.126457  | 0.113491  | 0.107809  |
| 0.106061  | 0.124709  | 0.113054  | 0.122378  | 0.107226  | 0.111742  | 0.11451   |
| 0.114656  | 0.11553   | 0.113199  | 0.116113  | 0.11757   | 0.11014   | 0.112908  |
| 0.111888  | 0.124417  | 0.0941142 | 0.116841  | 0.120921  | 0.116113  | 0.118881  |
| 0.115385  | 0.0425408 | 0.114802  | 0.113928  | 0.111597  | 0.100962  | 0.0469114 |
| 0.112617  | 0.11553   | 0.107663  | 0.113491  | 0.116987  | 0.104895  | 0.110286  |
| 0.111888  | 0.099359  | 0.113345  | 0.119172  | 0.118007  | 0.0849359 | 0.0990676 |
| 0.13447   | 0.141754  | 0.133013  | 0.0732809 | 0.148747  | 0.143357  | 0.137966  |
| 0.118153  | 0.12398   | 0.12602   | 0.135052  | 0.120192  | 0.115385  | 0.125728  |
| 0.114948  | 0.120484  | 0.11553   | 0.13243   | 0.0563811 | 0.118298  | 0.118444  |
| 0.190414  | 0.181672  | 0.186043  | 0.188083  | 0.18954   | 0.181818  | 0.181672  |
| 0.204691  | 0.196824  | 0.200029  | 0.202069  | 0.205857  | 0.198718  | 0.19595   |
| 0.122523  | 0.0456002 | 0.118735  | 0.121066  | 0.114948  | 0.104604  | 0.0537587 |
| 0.11757   | 0.0406469 | 0.111742  | 0.114948  | 0.109994  | 0.10169   | 0.0490967 |
| 0.136218  | 0.12602   | 0.134178  | 0.131847  | 0.144959  | 0.121503  | 0.123397  |
| 0.105332  | 0.122232  | 0.110868  | 0.12398   | 0.104458  | 0.108392  | 0.118735  |
| 0.115967  | 0.124709  | 0.127622  | 0.133159  | 0.12296   | 0.115239  | 0.121795  |
| 0.116113  | 0.129225  | 0.12398   | 0.120192  | 0.128934  | 0.125874  | 0.128642  |
| 0.225087  | 0.218094  | 0.222174  | 0.223922  | 0.228001  | 0.218823  | 0.215181  |
| 0.107663  | 0.114365  | 0.107372  | 0.112908  | 0.112617  | 0.102273  | 0.112325  |
| 0.208333  | 0.203963  | 0.203671  | 0.208333  | 0.207751  | 0.204108  | 0.206876  |
| 0.0863928 | 0.117279  | 0.110286  | 0.11961   | 0.100379  | 0.105478  | 0.114656  |
| 0.0885781 | 0.112762  | 0.112471  | 0.11655   | 0.107809  | 0.100087  | 0.111888  |
| 0.110577  | 0.11553   | 0.116987  | 0.116404  | 0.118153  | 0.108683  | 0.110286  |

|           |           |           |           |           |           |           |
|-----------|-----------|-----------|-----------|-----------|-----------|-----------|
| 0.111451  | 0.0540501 | 0.109411  | 0.113491  | 0.109703  | 0.099359  | 0.0569639 |
| 0.206876  | 0.199301  | 0.206002  | 0.203963  | 0.213287  | 0.203526  | 0.199883  |
| 0.126457  | 0.129662  | 0.127622  | 0.129079  | 0.133159  | 0.125437  | 0.125874  |
| 0.0474942 | 0.119464  | 0.112762  | 0.119172  | 0.112762  | 0.106206  | 0.11451   |
| 0.120629  | 0.125     | 0.121503  | 0.124126  | 0.125291  | 0.118735  | 0.120338  |
| 0.11655   | 0.128788  | 0.118298  | 0.126166  | 0.119464  | 0.107372  | 0.120338  |
| 0.115676  | 0.04662   | 0.112762  | 0.116259  | 0.111305  | 0.0957168 | 0.0518648 |
| 0.0872669 | 0.122815  | 0.112325  | 0.121066  | 0.103293  | 0.111014  | 0.118153  |
| 0.108537  | 0.123106  | 0.103875  | 0.12602   | 0.109994  | 0.115676  | 0.119318  |
| 0.109411  | 0.120192  | 0.114073  | 0.127185  | 0.0581294 | 0.113345  | 0.118444  |
| 0.108829  | 0.110286  | 0.106498  | 0.108537  | 0.111742  | 0.104604  | 0.108829  |
| 0.0509907 | 0.124126  | 0.115967  | 0.122669  | 0.111888  | 0.112034  | 0.119464  |
| 0.189831  | 0.180507  | 0.184586  | 0.186626  | 0.1875    | 0.180361  | 0.179633  |
| 0.108392  | 0.126748  | 0.114802  | 0.115093  | 0.124709  | 0.120192  | 0.124126  |
| 0.120484  | 0.124563  | 0.116696  | 0.0560897 | 0.129808  | 0.125     | 0.120775  |
| 0.111888  | 0.118007  | 0.113928  | 0.107517  | 0.125     | 0.112325  | 0.115093  |
| 0.113782  | 0.12602   | 0.128642  | 0.129516  | 0.119901  | 0.113054  | 0.122815  |
| 0.117279  | 0.120484  | 0.116696  | 0.11961   | 0.120192  | 0.116841  | 0.11553   |
| 0.092803  | 0.127185  | 0.113199  | 0.126311  | 0.107372  | 0.115676  | 0.120192  |
| 0.104604  | 0.117424  | 0.109266  | 0.11859   | 0.114219  | 0.100379  | 0.113345  |
| 0.108683  | 0.125291  | 0.119464  | 0.130828  | 0.112179  | 0.117279  | 0.124126  |
| 0.114948  | 0.120775  | 0.111742  | 0.0514277 | 0.125437  | 0.117716  | 0.11553   |
| 0.100962  | 0.115822  | 0.104749  | 0.107955  | 0.116696  | 0.109266  | 0.115239  |
| 0.116841  | 0.0571096 | 0.117716  | 0.117424  | 0.115385  | 0.100087  | 0.0574009 |
| 0.120192  | 0.118444  | 0.0496795 | 0.11553   | 0.11757   | 0.112179  | 0.11757   |
| 0.132576  | 0.132284  | 0.0652681 | 0.130536  | 0.131119  | 0.128059  | 0.129079  |
| 0.106061  | 0.114219  | 0.118298  | 0.11859   | 0.111305  | 0.103293  | 0.113054  |
| 0.132721  | 0.136801  | 0.135344  | 0.136509  | 0.135927  | 0.131993  | 0.131847  |
| 0.113199  | 0.0467657 | 0.111451  | 0.115239  | 0.113199  | 0.0967366 | 0.0464744 |
| 0.0989219 | 0.122232  | 0.109703  | 0.107955  | 0.122232  | 0.11655   | 0.114948  |
| 0.117716  | 0.118298  | 0.113054  | 0.121795  | 0.119464  | 0.110868  | 0.114219  |
| 0.107517  | 0.129371  | 0.118881  | 0.133159  | 0.113054  | 0.119318  | 0.124709  |
| 0.18648   | 0.183858  | 0.187937  | 0.190268  | 0.192308  | 0.1875    | 0.183858  |
| 0.0467657 | 0.116696  | 0.112034  | 0.115822  | 0.106206  | 0.104021  | 0.11553   |
| 0.0948427 | 0.108537  | 0.107663  | 0.099796  | 0.105332  | 0.100816  | 0.103293  |
| 0.112325  | 0.121649  | 0.114656  | 0.128059  | 0.0549242 | 0.113636  | 0.118444  |
| 0.179341  | 0.173805  | 0.174097  | 0.178467  | 0.180507  | 0.172786  | 0.17264   |
| 0.123543  | 0.133741  | 0.135781  | 0.141026  | 0.130245  | 0.125146  | 0.130245  |
| 0.134033  | 0.144814  | 0.147436  | 0.152098  | 0.136072  | 0.135927  | 0.143065  |
| 0.137383  | 0.143502  | 0.135635  | 0.0756119 | 0.151952  | 0.143357  | 0.138258  |
| 0.106498  | 0.114948  | 0.114365  | 0.119318  | 0.109411  | 0.106643  | 0.113491  |
| 0.116841  | 0.121212  | 0.116841  | 0.122378  | 0.12296   | 0.114656  | 0.11859   |
| 0.210227  | 0.204983  | 0.206439  | 0.20877   | 0.213141  | 0.202797  | 0.20236   |
| 0.11757   | 0.116987  | 0.10912   | 0.122523  | 0.122232  | 0.115385  | 0.120192  |

|           |           |           |           |           |           |           |
|-----------|-----------|-----------|-----------|-----------|-----------|-----------|
| 0.121503  | 0.125583  | 0.123543  | 0.125291  | 0.126166  | 0.120775  | 0.119755  |
| 0.0457459 | 0.121212  | 0.113928  | 0.119464  | 0.108974  | 0.105624  | 0.115967  |
| 0.167541  | 0.161422  | 0.157634  | 0.166375  | 0.169289  | 0.161276  | 0.160548  |
| 0.107226  | 0.107809  | 0.10373   | 0.106352  | 0.115385  | 0.100087  | 0.101107  |
| 0.133304  | 0.142337  | 0.120484  | 0.143794  | 0.14729   | 0.13986   | 0.14088   |
| 0.113491  | 0.109994  | 0.11961   | 0.127477  | 0.115239  | 0.0576923 | 0.108829  |
| 0.188957  | 0.180798  | 0.186043  | 0.188083  | 0.191871  | 0.182692  | 0.179924  |
| 0.109703  | 0.116696  | 0.120192  | 0.125437  | 0.114656  | 0.108683  | 0.11757   |
| 0.0989219 | 0.103875  | 0.102127  | 0.103875  | 0.106206  | 0.0932401 | 0.10271   |
| 0.101981  | 0.119172  | 0.106352  | 0.108974  | 0.119464  | 0.108829  | 0.115676  |
| 0.109411  | 0.114365  | 0.112617  | 0.120192  | 0.102418  | 0.102855  | 0.114656  |
| 0.112034  | 0.117861  | 0.114948  | 0.127477  | 0.0520105 | 0.108974  | 0.115822  |
| 0.112034  | 0.121941  | 0.115822  | 0.10912   | 0.121941  | 0.115385  | 0.117279  |
| 0.113928  | 0.0451632 | 0.109557  | 0.11451   | 0.111888  | 0.0968823 | 0.0504079 |
| 0.186917  | 0.183712  | 0.184878  | 0.187209  | 0.190122  | 0.18211   | 0.18109   |
| 0.117424  | 0.124709  | 0.0891608 | 0.113636  | 0.117133  | 0.11757   | 0.122086  |
| 0.108537  | 0.105915  | 0.114073  | 0.118444  | 0.109703  | 0.108974  | 0.105041  |
| 0.210664  | 0.203089  | 0.20542   | 0.209499  | 0.213287  | 0.2044    | 0.20338   |
| 0.104895  | 0.123252  | 0.11451   | 0.113636  | 0.126166  | 0.117279  | 0.12296   |
| 0.114656  | 0.0447261 | 0.110286  | 0.117279  | 0.113491  | 0.0996503 | 0.0511364 |
| 0.108246  | 0.0421037 | 0.108829  | 0.112325  | 0.107372  | 0.0961538 | 0.0453089 |
| 0.134907  | 0.131993  | 0.122669  | 0.132867  | 0.141317  | 0.129808  | 0.133741  |
| 0.189103  | 0.180653  | 0.185315  | 0.187646  | 0.190559  | 0.181964  | 0.179196  |
| 0.107955  | 0.127185  | 0.112325  | 0.126603  | 0.108246  | 0.111888  | 0.119318  |
| 0.124563  | 0.127768  | 0.0604604 | 0.125146  | 0.125728  | 0.121795  | 0.125728  |
| 0.113782  | 0.0453089 | 0.107663  | 0.112034  | 0.110577  | 0.0976107 | 0.0490967 |
| 0.11116   | 0.0493881 | 0.109411  | 0.107955  | 0.10708   | 0.0958625 | 0.0499709 |
| 0.113345  | 0.0454545 | 0.110723  | 0.112179  | 0.11014   | 0.0992133 | 0.0472028 |
| 0.11553   | 0.115822  | 0.111742  | 0.116404  | 0.116987  | 0.108392  | 0.113491  |
| 0.0979021 | 0.0976107 | 0.101399  | 0.111305  | 0.103147  | 0.0476399 | 0.0920746 |
| 0.109848  | 0.124709  | 0.125583  | 0.129953  | 0.11859   | 0.109703  | 0.120338  |
| 0.124709  | 0.136364  | 0.108683  | 0.113345  | 0.133741  | 0.128351  | 0.13345   |
| 0.109266  | 0.11655   | 0.121795  | 0.124709  | 0.11859   | 0.111742  | 0.11859   |
| 0.12398   | 0.129516  | 0.123689  | 0.132721  | 0.127185  | 0.110431  | 0.125728  |
| 0.19289   | 0.187063  | 0.188228  | 0.192016  | 0.194347  | 0.186917  | 0.183566  |
| 0.11553   | 0.11553   | 0.0476399 | 0.115822  | 0.114656  | 0.111305  | 0.114365  |
| 0.126748  | 0.129371  | 0.126748  | 0.126748  | 0.131119  | 0.124563  | 0.125     |
| 0.111451  | 0.0435606 | 0.108829  | 0.111742  | 0.108246  | 0.0961538 | 0.048514  |
| 0.0990676 | 0.0952797 | 0.105186  | 0.11014   | 0.0999417 | 0.0456002 | 0.0949883 |
| 0.107226  | 0.115676  | 0.0981935 | 0.11655   | 0.115093  | 0.108246  | 0.114219  |
| 0.104749  | 0.124272  | 0.114656  | 0.128351  | 0.109703  | 0.115093  | 0.11961   |
| 0.120775  | 0.128351  | 0.130682  | 0.123397  | 0.13243   | 0.123252  | 0.125437  |
| 0.111888  | 0.116841  | 0.105186  | 0.0492424 | 0.122378  | 0.114073  | 0.114802  |
| 0.0990676 | 0.108683  | 0.109557  | 0.117716  | 0.104312  | 0.0852273 | 0.102564  |



|           |           |           |          |           |           |           |
|-----------|-----------|-----------|----------|-----------|-----------|-----------|
| 0.0989219 | 0.106789  | 0.104749  | 0.115239 | 0.0968823 | 0.0731352 | 0.0995047 |
| 0.10169   | 0.10373   | 0.104895  | 0.106061 | 0.108392  | 0.0808566 | 0.102564  |
| 0.0878497 | 0.119901  | 0.109411  | 0.122523 | 0.102127  | 0.110723  | 0.118153  |
| 0.119755  | 0.129371  | 0.13345   | 0.13986  | 0.122086  | 0.121358  | 0.126457  |
| 0.101544  | 0.119318  | 0.109703  | 0.126894 | 0.107955  | 0.108683  | 0.117861  |
| 0.107809  | 0.11451   | 0.108392  | 0.115385 | 0.114802  | 0.104749  | 0.109557  |
| 0.0976107 | 0.119755  | 0.106643  | 0.120047 | 0.0999417 | 0.104749  | 0.112762  |
| 0.110577  | 0.0470571 | 0.107663  | 0.111742 | 0.11116   | 0.0973193 | 0.0479312 |
| 0         | 0.117133  | 0.111888  | 0.112471 | 0.105478  | 0.103293  | 0.111305  |
| 0.117133  | 0         | 0.114219  | 0.117716 | 0.111597  | 0.10067   | 0.0469114 |
| 0.111888  | 0.114219  | 0         | 0.107517 | 0.106643  | 0.107955  | 0.11014   |
| 0.112471  | 0.117716  | 0.107517  | 0        | 0.124709  | 0.111742  | 0.11014   |
| 0.105478  | 0.111597  | 0.106643  | 0.124709 | 0         | 0.106498  | 0.110723  |
| 0.103293  | 0.10067   | 0.107955  | 0.111742 | 0.106498  | 0         | 0.0948427 |
| 0.111305  | 0.0469114 | 0.11014   | 0.11014  | 0.110723  | 0.0948427 | 0         |
| 0.106935  | 0.121795  | 0.11451   | 0.114802 | 0.121212  | 0.118735  | 0.118007  |
| 0.116113  | 0.11116   | 0.117279  | 0.120484 | 0.120484  | 0.112762  | 0.108829  |
| 0.101981  | 0.105478  | 0.106352  | 0.109266 | 0.111597  | 0.0977564 | 0.104895  |
| 0.115093  | 0.0504079 | 0.1081    | 0.108683 | 0.108392  | 0.092803  | 0.0524476 |
| 0.114073  | 0.120484  | 0.11757   | 0.118735 | 0.119901  | 0.11451   | 0.117861  |
| 0.0887238 | 0.118153  | 0.11116   | 0.119901 | 0.102418  | 0.109848  | 0.113491  |
| 0.115822  | 0.11553   | 0.113491  | 0.11553  | 0.119901  | 0.113345  | 0.114656  |
| 0.105915  | 0.114948  | 0.110286  | 0.121649 | 0.048514  | 0.106061  | 0.109994  |
| 0.102418  | 0.0980478 | 0.10912   | 0.115822 | 0.107955  | 0.0469114 | 0.0989219 |
| 0.102418  | 0.105915  | 0.0954254 | 0.100379 | 0.108829  | 0.0961538 | 0.10067   |
| 0.0445804 | 0.114802  | 0.107226  | 0.112762 | 0.104021  | 0.100087  | 0.112179  |
| 0.118735  | 0.119901  | 0.118444  | 0.119027 | 0.121649  | 0.113636  | 0.119027  |
| 0.109411  | 0.126603  | 0.116696  | 0.118444 | 0.121358  | 0.120629  | 0.121358  |
| 0.109266  | 0.108683  | 0.110431  | 0.113345 | 0.115093  | 0.104749  | 0.107809  |
| 0.192016  | 0.185023  | 0.189103  | 0.192016 | 0.196096  | 0.185752  | 0.184732  |
| 0.163753  | 0.159674  | 0.153263  | 0.159382 | 0.166375  | 0.15778   | 0.15676   |
| 0.108974  | 0.119464  | 0.120629  | 0.125874 | 0.115676  | 0.113491  | 0.118881  |
| 0.112325  | 0.119901  | 0.108829  | 0.11757  | 0.116404  | 0.116259  | 0.114365  |
| 0.137966  | 0.148747  | 0.149913  | 0.153409 | 0.141171  | 0.137821  | 0.145251  |
| 0.113928  | 0.124126  | 0.092366  | 0.120629 | 0.123834  | 0.116987  | 0.117716  |
| 0.116404  | 0.081148  | 0.103001  | 0.114365 | 0.115822  | 0.106935  | 0.0826049 |
| 0.113928  | 0.0827506 | 0.113928  | 0.112179 | 0.116841  | 0.105624  | 0.0839161 |
| 0.112762  | 0.0935315 | 0.109848  | 0.117133 | 0.111888  | 0.0799825 | 0.0961538 |
| 0.118007  | 0.11014   | 0.119464  | 0.121503 | 0.120629  | 0.110286  | 0.107517  |
| 0.197115  | 0.190414  | 0.19595   | 0.197115 | 0.204691  | 0.193765  | 0.190705  |
| 0.106643  | 0.125874  | 0.115676  | 0.13141  | 0.109266  | 0.116113  | 0.119755  |
| 0.113199  | 0.116404  | 0.112325  | 0.119901 | 0.11553   | 0.112471  | 0.113782  |
| 0.109703  | 0.0587121 | 0.104458  | 0.10708  | 0.109411  | 0.0961538 | 0.0625    |
| 0.1081    | 0.118881  | 0.110431  | 0.11859  | 0.114219  | 0.0983392 | 0.11451   |

|           |           |           |           |           |           |           |
|-----------|-----------|-----------|-----------|-----------|-----------|-----------|
| 0.182255  | 0.175845  | 0.184003  | 0.174971  | 0.184878  | 0.176282  | 0.176719  |
| 0.246358  | 0.241113  | 0.243153  | 0.246358  | 0.248106  | 0.243881  | 0.240822  |
| 0.112617  | 0.116404  | 0.109411  | 0.0511364 | 0.124272  | 0.114219  | 0.112325  |
| 0.115822  | 0.109411  | 0.118735  | 0.118444  | 0.117861  | 0.109266  | 0.108537  |
| 0.111451  | 0.119027  | 0.122815  | 0.125437  | 0.119027  | 0.107809  | 0.113782  |
| 0.105186  | 0.111014  | 0.109557  | 0.119755  | 0.0504079 | 0.103584  | 0.107226  |
| 0.100087  | 0.118153  | 0.109703  | 0.121358  | 0.101836  | 0.108974  | 0.112034  |
| 0.106352  | 0.11655   | 0.0850816 | 0.107226  | 0.108974  | 0.104458  | 0.113928  |
| 0.113199  | 0.074155  | 0.109703  | 0.112908  | 0.11553   | 0.103147  | 0.0759033 |
| 0.100379  | 0.117861  | 0.109411  | 0.120484  | 0.103875  | 0.108683  | 0.116404  |
| 0.111888  | 0.0836247 | 0.111597  | 0.113928  | 0.116841  | 0.102418  | 0.083042  |
| 0.108829  | 0.107372  | 0.113491  | 0.112325  | 0.115239  | 0.101399  | 0.108829  |
| 0.102564  | 0.0984848 | 0.1081    | 0.115676  | 0.105478  | 0.048514  | 0.0952797 |
| 0.116113  | 0.116113  | 0.107955  | 0.050845  | 0.126603  | 0.11859   | 0.113199  |
| 0.113345  | 0.117424  | 0.115093  | 0.117133  | 0.118881  | 0.112908  | 0.115967  |
| 0.0949883 | 0.108683  | 0.0981935 | 0.102855  | 0.105186  | 0.104167  | 0.107226  |
| 0.119172  | 0.118007  | 0.126166  | 0.11859   | 0.124417  | 0.11757   | 0.118298  |
| 0.119755  | 0.127622  | 0.125     | 0.136072  | 0.0655594 | 0.122815  | 0.127331  |
| 0.112908  | 0.0456002 | 0.105915  | 0.113199  | 0.11116   | 0.0955711 | 0.0493881 |
| 0.116841  | 0.0844988 | 0.116841  | 0.120921  | 0.115967  | 0.106789  | 0.0865385 |
| 0.129371  | 0.0550699 | 0.126166  | 0.128205  | 0.124126  | 0.112325  | 0.0652681 |
| 0.207896  | 0.200903  | 0.205857  | 0.209645  | 0.207605  | 0.199009  | 0.201486  |
| 0.104895  | 0.112179  | 0.102273  | 0.0521562 | 0.116259  | 0.11116   | 0.105769  |
| 0.0986305 | 0.100087  | 0.109411  | 0.11553   | 0.103001  | 0.0498252 | 0.0954254 |
| 0.112908  | 0.119027  | 0.0479312 | 0.111742  | 0.111742  | 0.107517  | 0.116113  |
| 0.109266  | 0.121503  | 0.11014   | 0.113345  | 0.123543  | 0.11757   | 0.122086  |
| 0.106352  | 0.119755  | 0.108392  | 0.119755  | 0.110723  | 0.0957168 | 0.115093  |
| 0.197844  | 0.191434  | 0.193765  | 0.196678  | 0.199883  | 0.188957  | 0.189394  |
| 0.118153  | 0.121649  | 0.114656  | 0.119027  | 0.123397  | 0.114219  | 0.11553   |
| 0.111014  | 0.0463287 | 0.1081    | 0.109557  | 0.108683  | 0.0968823 | 0.0472028 |
| 0.110286  | 0.122815  | 0.120484  | 0.124272  | 0.122232  | 0.113054  | 0.121358  |
| 0.102127  | 0.11116   | 0.102418  | 0.120192  | 0.0464744 | 0.100816  | 0.107372  |
| 0.118444  | 0.116987  | 0.114365  | 0.116113  | 0.122815  | 0.113928  | 0.115239  |
| 0.105332  | 0.106789  | 0.108537  | 0.108246  | 0.110286  | 0.101399  | 0.103584  |
| 0.109411  | 0.109994  | 0.116113  | 0.115822  | 0.11553   | 0.0981935 | 0.110577  |
| 0.101836  | 0.120484  | 0.107663  | 0.108829  | 0.119318  | 0.109848  | 0.116404  |
| 0.197844  | 0.193182  | 0.195221  | 0.197261  | 0.198135  | 0.188957  | 0.191142  |
| 0.10708   | 0.114365  | 0.106498  | 0.110868  | 0.110577  | 0.104312  | 0.109411  |
| 0.19289   | 0.185315  | 0.191725  | 0.193473  | 0.196678  | 0.186917  | 0.181527  |
| 0.191288  | 0.184878  | 0.189248  | 0.190997  | 0.192745  | 0.184441  | 0.184295  |
| 0.11553   | 0.12398   | 0.121358  | 0.133596  | 0.0590035 | 0.116841  | 0.122232  |
| 0.112908  | 0.131556  | 0.121941  | 0.122523  | 0.133596  | 0.125     | 0.128351  |
| 0.099796  | 0.105332  | 0.106206  | 0.103293  | 0.112034  | 0.0885781 | 0.104749  |
| 0.105478  | 0.109557  | 0.105478  | 0.11014   | 0.111597  | 0.101836  | 0.106935  |

|           |           |          |           |           |           |           |
|-----------|-----------|----------|-----------|-----------|-----------|-----------|
| 0.110286  | 0.116987  | 0.110286 | 0.112325  | 0.119318  | 0.106061  | 0.112908  |
| 0.113491  | 0.0473485 | 0.111451 | 0.116113  | 0.10912   | 0.0981935 | 0.0470571 |
| 0.0983392 | 0.116696  | 0.104749 | 0.120192  | 0.0986305 | 0.104895  | 0.113199  |
| 0.102418  | 0.11961   | 0.10912  | 0.123397  | 0.103875  | 0.107226  | 0.115822  |
| 0.115385  | 0.11859   | 0.111014 | 0.0506993 | 0.128788  | 0.122815  | 0.115967  |
| 0.110868  | 0.117279  | 0.108829 | 0.12398   | 0.0505536 | 0.109557  | 0.110286  |
| 0.109266  | 0.044289  | 0.105769 | 0.111014  | 0.108683  | 0.0922203 | 0.0477855 |
| 0.112908  | 0.11961   | 0.114073 | 0.115822  | 0.120775  | 0.111014  | 0.112908  |
| 0.0976107 | 0.102273  | 0.101981 | 0.102273  | 0.106061  | 0.0916375 | 0.102273  |
| 0.125728  | 0.126603  | 0.123106 | 0.125728  | 0.126603  | 0.123834  | 0.125437  |
| 0.10708   | 0.116404  | 0.120484 | 0.122815  | 0.114365  | 0.106935  | 0.112908  |
| 0.130536  | 0.130245  | 0.13141  | 0.130536  | 0.134324  | 0.126311  | 0.128205  |
| 0.260198  | 0.254079  | 0.255536 | 0.25845   | 0.261946  | 0.254516  | 0.253788  |
| 0.0568182 | 0.133159  | 0.126748 | 0.130536  | 0.119464  | 0.119027  | 0.129079  |
| 0.100962  | 0.125437  | 0.120775 | 0.127185  | 0.119318  | 0.117133  | 0.126311  |
| 0.219406  | 0.20979   | 0.213869 | 0.215326  | 0.223193  | 0.211393  | 0.20979   |
| 0.113199  | 0.118444  | 0.122523 | 0.128642  | 0.115239  | 0.116841  | 0.11757   |
| 0.229167  | 0.224213  | 0.226253 | 0.228584  | 0.233246  | 0.228147  | 0.226836  |
| 0.0550699 | 0.123543  | 0.117424 | 0.121212  | 0.112762  | 0.111451  | 0.119755  |
| 0.128351  | 0.0502622 | 0.124563 | 0.127477  | 0.120192  | 0.109557  | 0.0622086 |
| 0.100379  | 0.115822  | 0.102418 | 0.105624  | 0.117279  | 0.1081    | 0.110286  |
| 0.11116   | 0.120192  | 0.117861 | 0.131265  | 0.0575466 | 0.115093  | 0.116696  |
| 0.202652  | 0.19391   | 0.196533 | 0.199738  | 0.203234  | 0.194056  | 0.192453  |
| 0.124563  | 0.128351  | 0.127768 | 0.127477  | 0.129225  | 0.124709  | 0.124854  |
| 0.114656  | 0.120484  | 0.114365 | 0.115822  | 0.122523  | 0.113345  | 0.113491  |
| 0.224068  | 0.220571  | 0.222902 | 0.223485  | 0.22873   | 0.220717  | 0.218823  |
| 0.104749  | 0.119027  | 0.112034 | 0.123397  | 0.105915  | 0.11014   | 0.112617  |
| 0.197552  | 0.189685  | 0.194639 | 0.196387  | 0.199883  | 0.191579  | 0.188811  |
| 0.105186  | 0.123543  | 0.112762 | 0.122086  | 0.106935  | 0.113199  | 0.119464  |
| 0.115385  | 0.0477855 | 0.109557 | 0.111597  | 0.109557  | 0.0977564 | 0.0515734 |
| 0.112034  | 0.108829  | 0.120192 | 0.124854  | 0.115239  | 0.0524476 | 0.106789  |
| 0.11961   | 0.122815  | 0.121358 | 0.135052  | 0.0604604 | 0.119755  | 0.122523  |
| 0.110723  | 0.112762  | 0.102564 | 0.108392  | 0.119464  | 0.0992133 | 0.107809  |
| 0.153555  | 0.15035   | 0.156177 | 0.159091  | 0.161422  | 0.129808  | 0.151807  |
| 0.112762  | 0.115385  | 0.108392 | 0.112471  | 0.116259  | 0.107372  | 0.111305  |
| 0.106061  | 0.121503  | 0.111597 | 0.109266  | 0.122378  | 0.115822  | 0.121795  |
| 0.112179  | 0.115967  | 0.115967 | 0.122669  | 0.109848  | 0.106789  | 0.113928  |
| 0.111597  | 0.132284  | 0.120629 | 0.117133  | 0.129371  | 0.12602   | 0.127914  |
| 0.195076  | 0.187209  | 0.192745 | 0.188666  | 0.195367  | 0.185606  | 0.186334  |
| 0.111888  | 0.04662   | 0.108974 | 0.115385  | 0.106352  | 0.0957168 | 0.0477855 |
| 0.114073  | 0.114948  | 0.113491 | 0.128059  | 0.0575466 | 0.109557  | 0.112908  |
| 0.0865385 | 0.11859   | 0.110723 | 0.118007  | 0.0996503 | 0.108829  | 0.117133  |
| 0.104458  | 0.124272  | 0.114365 | 0.126311  | 0.108537  | 0.111597  | 0.118153  |
| 0.122086  | 0.0477855 | 0.114219 | 0.119172  | 0.117716  | 0.105915  | 0.0576923 |

|          |           |           |           |           |           |           |
|----------|-----------|-----------|-----------|-----------|-----------|-----------|
| 0.258596 | 0.249272  | 0.250728  | 0.254516  | 0.259178  | 0.252622  | 0.247815  |
| 0.105478 | 0.105478  | 0.113636  | 0.119172  | 0.11014   | 0.0514277 | 0.103438  |
| 0.114219 | 0.0952797 | 0.0687646 | 0.112179  | 0.113636  | 0.104749  | 0.0917832 |
| 0.177739 | 0.179487  | 0.174825  | 0.182984  | 0.181235  | 0.174097  | 0.177739  |
| 0.185897 | 0.179779  | 0.179196  | 0.183275  | 0.18648   | 0.175554  | 0.177448  |
| 0.112471 | 0.11655   | 0.108683  | 0.0562354 | 0.123252  | 0.116987  | 0.113636  |
| 0.116987 | 0.116404  | 0.112908  | 0.117861  | 0.118735  | 0.109848  | 0.11553   |
| 0.107372 | 0.113491  | 0.108829  | 0.121358  | 0.0511364 | 0.102564  | 0.10912   |
| 0.140443 | 0.142774  | 0.141026  | 0.142483  | 0.143939  | 0.137966  | 0.139569  |
| 0.111597 | 0.116841  | 0.106061  | 0.0474942 | 0.120338  | 0.113199  | 0.110431  |
| 0.113199 | 0.116404  | 0.113199  | 0.0525932 | 0.126894  | 0.11655   | 0.112617  |
| 0.109848 | 0.129371  | 0.115385  | 0.128788  | 0.114802  | 0.120775  | 0.123252  |
| 0.111014 | 0.116259  | 0.115385  | 0.118881  | 0.119172  | 0.111742  | 0.115093  |
| 0.123689 | 0.127477  | 0.125437  | 0.126603  | 0.130682  | 0.125291  | 0.125437  |
| 0.106061 | 0.11655   | 0.115385  | 0.128497  | 0.113054  | 0.112617  | 0.116259  |
| 0.11553  | 0.120192  | 0.116987  | 0.129225  | 0.0592949 | 0.113636  | 0.11961   |
| 0.129662 | 0.134907  | 0.132867  | 0.141608  | 0.0743007 | 0.130099  | 0.13345   |
| 0.112325 | 0.109703  | 0.11961   | 0.126603  | 0.115239  | 0.0571096 | 0.106206  |
| 0.121503 | 0.126748  | 0.124417  | 0.136946  | 0.0632284 | 0.122523  | 0.12704   |
| 0.111305 | 0.132867  | 0.121503  | 0.135198  | 0.113345  | 0.122523  | 0.128497  |
| 0.206439 | 0.197698  | 0.203817  | 0.204983  | 0.209062  | 0.201049  | 0.196241  |
| 0.112179 | 0.111305  | 0.124417  | 0.125291  | 0.120921  | 0.099796  | 0.112471  |
| 0.190851 | 0.184732  | 0.18852   | 0.190851  | 0.194056  | 0.183421  | 0.182401  |
| 0.10169  | 0.117716  | 0.104895  | 0.106643  | 0.113054  | 0.107955  | 0.11451   |
| 0.123252 | 0.0518648 | 0.122086  | 0.123834  | 0.121212  | 0.108829  | 0.0603147 |
| 0.114802 | 0.11859   | 0.122086  | 0.128497  | 0.119755  | 0.11116   | 0.120921  |
| 0.107372 | 0.112908  | 0.119027  | 0.11757   | 0.113199  | 0.104312  | 0.114365  |
| 0.119755 | 0.121212  | 0.118007  | 0.120047  | 0.121212  | 0.116404  | 0.11859   |
| 0.117716 | 0.122669  | 0.117716  | 0.120921  | 0.121503  | 0.119318  | 0.119172  |
| 0.116841 | 0.0477855 | 0.111305  | 0.115385  | 0.111888  | 0.0995047 | 0.0504079 |
| 0.105332 | 0.116987  | 0.110286  | 0.110577  | 0.121649  | 0.114802  | 0.115239  |
| 0.11757  | 0.122232  | 0.125146  | 0.130682  | 0.11961   | 0.11655   | 0.12398   |
| 0.115967 | 0.136072  | 0.127622  | 0.139569  | 0.118881  | 0.127185  | 0.131119  |
| 0.251748 | 0.24796   | 0.247669  | 0.249417  | 0.251166  | 0.243735  | 0.244172  |
| 0.114802 | 0.0463287 | 0.112471  | 0.116259  | 0.112471  | 0.099796  | 0.0504079 |
| 0.183421 | 0.177302  | 0.176719  | 0.182255  | 0.186626  | 0.173951  | 0.174388  |
| 0.187937 | 0.18211   | 0.184441  | 0.18852   | 0.189977  | 0.180216  | 0.181818  |
| 0.115239 | 0.111451  | 0.116113  | 0.11757   | 0.121649  | 0.105186  | 0.109703  |
| 0.101253 | 0.101836  | 0.113199  | 0.11961   | 0.107955  | 0.0501166 | 0.0995047 |
| 0.123397 | 0.0493881 | 0.120484  | 0.121066  | 0.11961   | 0.106643  | 0.0566725 |
| 0.110577 | 0.114365  | 0.110868  | 0.110286  | 0.112034  | 0.106935  | 0.108537  |
| 0.108974 | 0.0949883 | 0.113054  | 0.112762  | 0.113345  | 0.0831876 | 0.0964452 |
| 0.103147 | 0.121503  | 0.109557  | 0.120047  | 0.106061  | 0.107663  | 0.112471  |
| 0.118735 | 0.117861  | 0.116987  | 0.121941  | 0.121941  | 0.110723  | 0.114365  |

|           |           |           |           |           |           |           |
|-----------|-----------|-----------|-----------|-----------|-----------|-----------|
| 0.126311  | 0.130099  | 0.129516  | 0.129225  | 0.13039   | 0.125583  | 0.127477  |
| 0.114219  | 0.0439977 | 0.111597  | 0.116259  | 0.112762  | 0.099796  | 0.0472028 |
| 0.124417  | 0.126748  | 0.124126  | 0.128205  | 0.129953  | 0.121649  | 0.125583  |
| 0.0907634 | 0.11553   | 0.110286  | 0.119318  | 0.107955  | 0.101399  | 0.115822  |
| 0.11757   | 0.123397  | 0.125146  | 0.133304  | 0.119318  | 0.114802  | 0.121358  |
| 0.109557  | 0.117716  | 0.111014  | 0.125583  | 0.0486597 | 0.11116   | 0.114219  |
| 0.116404  | 0.134178  | 0.126603  | 0.135344  | 0.118153  | 0.123834  | 0.128642  |
| 0.11451   | 0.115676  | 0.120338  | 0.116841  | 0.122378  | 0.104749  | 0.115967  |
| 0.113054  | 0.0501166 | 0.111888  | 0.115385  | 0.110431  | 0.099796  | 0.0585664 |
| 0.128205  | 0.129662  | 0.0629371 | 0.128497  | 0.127622  | 0.12398   | 0.128497  |
| 0.182547  | 0.177885  | 0.180507  | 0.184003  | 0.1875    | 0.173951  | 0.176428  |
| 0.131993  | 0.13141   | 0.132867  | 0.131702  | 0.132284  | 0.130099  | 0.130828  |
| 0.117424  | 0.122086  | 0.113928  | 0.121212  | 0.122669  | 0.115822  | 0.121503  |
| 0.107372  | 0.116987  | 0.122815  | 0.127768  | 0.114365  | 0.11014   | 0.117279  |
| 0.102273  | 0.107226  | 0.11451   | 0.116841  | 0.108974  | 0.101836  | 0.106935  |
| 0.107955  | 0.116113  | 0.110868  | 0.124272  | 0.0534674 | 0.112179  | 0.113491  |
| 0.112471  | 0.121212  | 0.11655   | 0.129079  | 0.0541958 | 0.113782  | 0.117716  |
| 0.193036  | 0.184003  | 0.186917  | 0.18954   | 0.193328  | 0.185606  | 0.182547  |
| 0.115239  | 0.117279  | 0.11553   | 0.118153  | 0.122523  | 0.109848  | 0.117861  |
| 0.102855  | 0.107517  | 0.0999417 | 0.106935  | 0.11014   | 0.10067   | 0.106352  |
| 0.120047  | 0.123252  | 0.121503  | 0.120921  | 0.123834  | 0.120775  | 0.119755  |
| 0.192453  | 0.183421  | 0.189831  | 0.189248  | 0.196533  | 0.185606  | 0.183129  |
| 0.0987762 | 0.101107  | 0.106352  | 0.116259  | 0.103438  | 0.0473485 | 0.097028  |
| 0.107955  | 0.128642  | 0.117279  | 0.130973  | 0.111451  | 0.117133  | 0.122523  |
| 0.122232  | 0.121358  | 0.119318  | 0.121358  | 0.124854  | 0.115093  | 0.116696  |
| 0.105186  | 0.114802  | 0.103438  | 0.0477855 | 0.115676  | 0.112617  | 0.1081    |
| 0.186772  | 0.180944  | 0.183275  | 0.185023  | 0.186772  | 0.178759  | 0.177448  |
| 0.104604  | 0.123834  | 0.111305  | 0.123834  | 0.108683  | 0.113199  | 0.119755  |
| 0.109848  | 0.112179  | 0.0568182 | 0.111014  | 0.110431  | 0.107372  | 0.112179  |
| 0.104895  | 0.100524  | 0.1081    | 0.113928  | 0.108683  | 0.0549242 | 0.097028  |
| 0.115967  | 0.120338  | 0.113345  | 0.122086  | 0.120047  | 0.109703  | 0.114802  |
| 0.108246  | 0.120484  | 0.108829  | 0.110577  | 0.121066  | 0.113928  | 0.118735  |
| 0.113199  | 0.131847  | 0.121358  | 0.133596  | 0.115822  | 0.120629  | 0.127768  |
| 0.112325  | 0.0418124 | 0.10912   | 0.113782  | 0.107663  | 0.0976107 | 0.0505536 |
| 0.107372  | 0.12398   | 0.125728  | 0.122232  | 0.120484  | 0.114219  | 0.123106  |
| 0.139277  | 0.142191  | 0.132867  | 0.0743007 | 0.150058  | 0.142628  | 0.138986  |
| 0.237762  | 0.229895  | 0.231935  | 0.236888  | 0.238345  | 0.233537  | 0.229895  |
| 0.117424  | 0.119755  | 0.123543  | 0.126457  | 0.125874  | 0.110577  | 0.120338  |
| 0.104312  | 0.122378  | 0.108392  | 0.108974  | 0.122378  | 0.112617  | 0.121212  |
| 0.118153  | 0.116696  | 0.110286  | 0.11961   | 0.118735  | 0.111597  | 0.113782  |
| 0.114802  | 0.122086  | 0.11859   | 0.113054  | 0.12296   | 0.114073  | 0.117716  |
| 0.105915  | 0.117279  | 0.108829  | 0.110868  | 0.116987  | 0.109266  | 0.116113  |
| 0.108537  | 0.120484  | 0.112908  | 0.121649  | 0.11757   | 0.101981  | 0.117861  |
| 0.120629  | 0.122669  | 0.120921  | 0.121795  | 0.126166  | 0.116113  | 0.11859   |

|           |           |          |           |          |           |           |
|-----------|-----------|----------|-----------|----------|-----------|-----------|
| 0.110286  | 0.130099  | 0.121941 | 0.131847  | 0.114073 | 0.119172  | 0.124272  |
| 0.10912   | 0.115239  | 0.109703 | 0.0907634 | 0.119901 | 0.115967  | 0.112325  |
| 0.238054  | 0.230478  | 0.233683 | 0.237471  | 0.240967 | 0.232663  | 0.229312  |
| 0.0995047 | 0.0977564 | 0.105041 | 0.113782  | 0.105332 | 0.048951  | 0.0962995 |
| 0.0476399 | 0.113782  | 0.104167 | 0.109411  | 0.103001 | 0.0955711 | 0.110868  |
| 0.11451   | 0.0425408 | 0.111888 | 0.112179  | 0.108683 | 0.0968823 | 0.0501166 |
| 0.124272  | 0.127185  | 0.11961  | 0.0590035 | 0.13447  | 0.127331  | 0.12398   |
| 0.127477  | 0.122815  | 0.130099 | 0.128934  | 0.133596 | 0.117133  | 0.126311  |
| 0.119901  | 0.105332  | 0.117279 | 0.112617  | 0.127768 | 0.0999417 | 0.104167  |
| 0.115822  | 0.119027  | 0.117279 | 0.116696  | 0.124272 | 0.11451   | 0.116404  |
| 0.108974  | 0.108974  | 0.102855 | 0.0693473 | 0.113928 | 0.109703  | 0.105186  |
| 0.232517  | 0.226399  | 0.22873  | 0.231352  | 0.233974 | 0.227127  | 0.22465   |
| 0.11859   | 0.125291  | 0.122378 | 0.124417  | 0.129662 | 0.119901  | 0.121795  |
| 0.10912   | 0.127477  | 0.112908 | 0.127768  | 0.109994 | 0.116841  | 0.120192  |
| 0.104458  | 0.113199  | 0.10271  | 0.0980478 | 0.110868 | 0.1081    | 0.109994  |
| 0.117716  | 0.122378  | 0.119464 | 0.121795  | 0.124126 | 0.119901  | 0.120921  |
| 0.0571096 | 0.130828  | 0.121212 | 0.127914  | 0.116841 | 0.114948  | 0.125291  |
| 0.11655   | 0.0483683 | 0.113636 | 0.114219  | 0.112179 | 0.100087  | 0.0509907 |
| 0.108683  | 0.126748  | 0.121503 | 0.131993  | 0.113054 | 0.116404  | 0.122669  |
| 0.11116   | 0.13447   | 0.123397 | 0.136509  | 0.116404 | 0.124126  | 0.129225  |
| 0.101836  | 0.11961   | 0.116696 | 0.124563  | 0.104749 | 0.110431  | 0.115239  |
| 0.110723  | 0.0428322 | 0.109266 | 0.112471  | 0.1081   | 0.0968823 | 0.0501166 |
| 0.11451   | 0.127331  | 0.11859  | 0.116841  | 0.128497 | 0.120192  | 0.126457  |
| 0.117279  | 0.131847  | 0.122815 | 0.122232  | 0.131847 | 0.126457  | 0.133013  |
| 0.117279  | 0.126311  | 0.129225 | 0.13447   | 0.121066 | 0.118298  | 0.125437  |
| 0.120192  | 0.130099  | 0.131847 | 0.13884   | 0.126894 | 0.121212  | 0.127477  |
| 0.114802  | 0.131119  | 0.120921 | 0.122086  | 0.132867 | 0.12602   | 0.128788  |
| 0.106935  | 0.087704  | 0.106061 | 0.109266  | 0.111014 | 0.0782343 | 0.0897436 |
| 0.106498  | 0.139714  | 0.128351 | 0.142337  | 0.118444 | 0.126748  | 0.137092  |
| 0.128497  | 0.122086  | 0.125    | 0.133741  | 0.128788 | 0.121649  | 0.121795  |
| 0.204837  | 0.200466  | 0.202214 | 0.204545  | 0.20979  | 0.197407  | 0.197261  |
| 0.120338  | 0.118007  | 0.12704  | 0.125     | 0.124709 | 0.117861  | 0.119172  |
| 0.0477855 | 0.115967  | 0.113636 | 0.113928  | 0.104604 | 0.101836  | 0.113054  |
| 0.120192  | 0.0464744 | 0.11961  | 0.11961   | 0.115822 | 0.104895  | 0.0543415 |
| 0.223485  | 0.218531  | 0.219697 | 0.225524  | 0.22669  | 0.216929  | 0.217657  |
| 0.212995  | 0.20542   | 0.214161 | 0.210664  | 0.216492 | 0.207896  | 0.204545  |
| 0.112617  | 0.13243   | 0.121358 | 0.135927  | 0.116404 | 0.121795  | 0.127185  |
| 0.252331  | 0.245629  | 0.245338 | 0.248834  | 0.250583 | 0.247232  | 0.24359   |
| 0.106643  | 0.0888695 | 0.106935 | 0.110431  | 0.112179 | 0.0802739 | 0.0903263 |
| 0.129953  | 0.127914  | 0.131119 | 0.134324  | 0.138403 | 0.119901  | 0.128205  |
| 0.104895  | 0.0999417 | 0.109848 | 0.11859   | 0.110723 | 0.0456002 | 0.0984848 |
| 0.10912   | 0.128059  | 0.118444 | 0.112034  | 0.13039  | 0.118881  | 0.123106  |
| 0.187937  | 0.180944  | 0.183858 | 0.185023  | 0.191725 | 0.182547  | 0.177739  |
| 0.11757   | 0.119318  | 0.113782 | 0.126311  | 0.11757  | 0.11451   | 0.121358  |

|           |           |           |           |           |           |           |
|-----------|-----------|-----------|-----------|-----------|-----------|-----------|
| 0.195659  | 0.186626  | 0.192745  | 0.192453  | 0.196824  | 0.187063  | 0.183712  |
| 0.10912   | 0.10912   | 0.114656  | 0.109703  | 0.118735  | 0.102855  | 0.105624  |
| 0.107663  | 0.116404  | 0.114073  | 0.12398   | 0.116404  | 0.113345  | 0.116696  |
| 0.115239  | 0.119027  | 0.121649  | 0.119318  | 0.126603  | 0.105186  | 0.116113  |
| 0.10708   | 0.109994  | 0.104167  | 0.110868  | 0.119027  | 0.102855  | 0.107955  |
| 0.107809  | 0.0463287 | 0.105186  | 0.107226  | 0.106061  | 0.0930944 | 0.0463287 |
| 0.108392  | 0.106643  | 0.114219  | 0.116259  | 0.113636  | 0.106789  | 0.106352  |
| 0.0987762 | 0.0987762 | 0.105186  | 0.112179  | 0.102273  | 0.0493881 | 0.0964452 |
| 0.113199  | 0.115239  | 0.111742  | 0.112034  | 0.118153  | 0.108683  | 0.111742  |
| 0.0944056 | 0.122378  | 0.112762  | 0.12704   | 0.107226  | 0.113491  | 0.120338  |
| 0.105478  | 0.106643  | 0.109848  | 0.109266  | 0.113636  | 0.100379  | 0.107226  |
| 0.101836  | 0.0986305 | 0.112034  | 0.115822  | 0.107663  | 0.0483683 | 0.100379  |
| 0.114802  | 0.105186  | 0.120921  | 0.127331  | 0.116841  | 0.109703  | 0.104312  |
| 0.126457  | 0.129079  | 0.124709  | 0.130245  | 0.13141   | 0.124854  | 0.126166  |
| 0.104749  | 0.114656  | 0.118444  | 0.116696  | 0.109703  | 0.104021  | 0.112325  |
| 0.109557  | 0.113054  | 0.0431235 | 0.111597  | 0.109266  | 0.107955  | 0.111014  |
| 0.106789  | 0.0447261 | 0.104167  | 0.109703  | 0.107372  | 0.0944056 | 0.043852  |
| 0.108246  | 0.123397  | 0.114365  | 0.124854  | 0.111742  | 0.115385  | 0.121358  |
| 0.104749  | 0.118444  | 0.103584  | 0.108829  | 0.119027  | 0.111597  | 0.116696  |
| 0.111888  | 0.116841  | 0.11451   | 0.127622  | 0.0547786 | 0.113491  | 0.114802  |
| 0.106352  | 0.118007  | 0.11859   | 0.124126  | 0.113054  | 0.110868  | 0.115676  |
| 0.11757   | 0.117279  | 0.115822  | 0.118444  | 0.119027  | 0.114219  | 0.114948  |
| 0.126166  | 0.129371  | 0.127622  | 0.127914  | 0.126166  | 0.124854  | 0.124709  |
| 0.132284  | 0.135198  | 0.135781  | 0.136364  | 0.136364  | 0.133887  | 0.131993  |
| 0.0936772 | 0.107663  | 0.100962  | 0.112325  | 0.099796  | 0.0981935 | 0.105624  |
| 0.112617  | 0.043852  | 0.107955  | 0.111742  | 0.111451  | 0.0976107 | 0.0493881 |
| 0.0984848 | 0.113928  | 0.102855  | 0.112471  | 0.107517  | 0.0910548 | 0.11014   |
| 0.120047  | 0.134615  | 0.120338  | 0.12296   | 0.133159  | 0.127185  | 0.13345   |
| 0.105332  | 0.107955  | 0.115822  | 0.121358  | 0.109411  | 0.0501166 | 0.104167  |
| 0.128059  | 0.133304  | 0.133596  | 0.144668  | 0.0744464 | 0.129079  | 0.135052  |
| 0.134178  | 0.0590035 | 0.132721  | 0.132139  | 0.13039   | 0.115093  | 0.0680361 |
| 0.117424  | 0.121503  | 0.115093  | 0.0579837 | 0.131119  | 0.12398   | 0.117716  |
| 0.107955  | 0.104167  | 0.106789  | 0.110577  | 0.113199  | 0.0944056 | 0.101544  |
| 0.100233  | 0.115385  | 0.105186  | 0.106352  | 0.115967  | 0.108246  | 0.108392  |
| 0.117133  | 0.125291  | 0.128205  | 0.134907  | 0.119755  | 0.114948  | 0.122378  |
| 0.205857  | 0.202943  | 0.203526  | 0.207896  | 0.210519  | 0.204545  | 0.200321  |
| 0.107663  | 0.114948  | 0.0490967 | 0.112034  | 0.108829  | 0.10373   | 0.112325  |
| 0.109557  | 0.113636  | 0.113054  | 0.114802  | 0.120338  | 0.0983392 | 0.112179  |
| 0.103875  | 0.119901  | 0.109994  | 0.111742  | 0.123397  | 0.113345  | 0.120192  |
| 0.111014  | 0.11859   | 0.116841  | 0.120047  | 0.111888  | 0.10708   | 0.114219  |
| 0.114365  | 0.11116   | 0.117861  | 0.116404  | 0.121649  | 0.109557  | 0.10912   |
| 0.111742  | 0.126603  | 0.117279  | 0.122523  | 0.122523  | 0.120047  | 0.123106  |
| 0.112179  | 0.130828  | 0.118007  | 0.124417  | 0.124709  | 0.123689  | 0.126457  |
| 0.116696  | 0.119318  | 0.11116   | 0.0572552 | 0.128059  | 0.11451   | 0.114365  |

|           |           |          |          |           |           |           |
|-----------|-----------|----------|----------|-----------|-----------|-----------|
| 0.088141  | 0.117861  | 0.110286 | 0.120484 | 0.103001  | 0.105478  | 0.112908  |
| 0.112325  | 0.127768  | 0.11757  | 0.117279 | 0.129516  | 0.122669  | 0.125437  |
| 0.10271   | 0.112908  | 0.113491 | 0.116696 | 0.121066  | 0.0973193 | 0.10912   |
| 0.111305  | 0.112179  | 0.117424 | 0.11655  | 0.121212  | 0.101836  | 0.112471  |
| 0.164773  | 0.171474  | 0.174679 | 0.175262 | 0.177885  | 0.17366   | 0.172931  |
| 0.116113  | 0.116113  | 0.113199 | 0.117861 | 0.11553   | 0.113345  | 0.111742  |
| 0.113928  | 0.129662  | 0.119172 | 0.119755 | 0.130828  | 0.122232  | 0.12704   |
| 0.10708   | 0.117279  | 0.11757  | 0.126311 | 0.117279  | 0.0981935 | 0.115239  |
| 0.114802  | 0.120921  | 0.12296  | 0.120921 | 0.127622  | 0.11553   | 0.119172  |
| 0.0996503 | 0.102564  | 0.105186 | 0.104895 | 0.109557  | 0.095134  | 0.104021  |
| 0.101107  | 0.102855  | 0.104604 | 0.104604 | 0.111888  | 0.0913462 | 0.102273  |
| 0.105186  | 0.11014   | 0.106643 | 0.106935 | 0.113345  | 0.099796  | 0.109266  |
| 0.111888  | 0.124417  | 0.120338 | 0.125291 | 0.122378  | 0.114948  | 0.120338  |
| 0.114219  | 0.108974  | 0.110431 | 0.112471 | 0.122669  | 0.108829  | 0.110723  |
| 0.121358  | 0.123689  | 0.123397 | 0.132139 | 0.12398   | 0.111014  | 0.122815  |
| 0.0964452 | 0.108974  | 0.108683 | 0.114802 | 0.1081    | 0.103293  | 0.1081    |
| 0.106498  | 0.119901  | 0.114365 | 0.122815 | 0.111742  | 0.10373   | 0.118153  |
| 0.117716  | 0.12704   | 0.125    | 0.130828 | 0.125874  | 0.11553   | 0.124709  |
| 0.102855  | 0.111305  | 0.115676 | 0.12296  | 0.112471  | 0.102418  | 0.111305  |
| 0.111597  | 0.118298  | 0.120629 | 0.12296  | 0.119464  | 0.113782  | 0.118881  |
| 0.0981935 | 0.107226  | 0.109848 | 0.118007 | 0.109266  | 0.0968823 | 0.105769  |
| 0.100524  | 0.110431  | 0.113636 | 0.122669 | 0.11014   | 0.105332  | 0.111597  |
| 0.101107  | 0.0964452 | 0.101107 | 0.106643 | 0.104312  | 0.0878497 | 0.0990676 |
| 0.112617  | 0.112617  | 0.122523 | 0.126894 | 0.112325  | 0.104021  | 0.112908  |
| 0.0942599 | 0.104458  | 0.106498 | 0.107663 | 0.102418  | 0.0894522 | 0.101836  |
| 0.132139  | 0.144085  | 0.136509 | 0.140589 | 0.133304  | 0.136364  | 0.139714  |
| 0.120775  | 0.131847  | 0.125437 | 0.127477 | 0.127768  | 0.125291  | 0.12602   |
| 0.0995047 | 0.108829  | 0.10912  | 0.115822 | 0.105624  | 0.100816  | 0.103293  |
| 0.127331  | 0.141317  | 0.129953 | 0.141317 | 0.124709  | 0.131556  | 0.139569  |
| 0.117133  | 0.115967  | 0.119464 | 0.11451  | 0.120921  | 0.117861  | 0.11655   |
| 0.127914  | 0.133741  | 0.132867 | 0.135198 | 0.136655  | 0.114656  | 0.13549   |
| 0.104895  | 0.106352  | 0.113636 | 0.119464 | 0.0999417 | 0.0948427 | 0.106352  |
| 0.133596  | 0.140589  | 0.139714 | 0.143502 | 0.142045  | 0.140443  | 0.141754  |
| 0.114948  | 0.128642  | 0.120192 | 0.128642 | 0.12398   | 0.119755  | 0.128059  |
| 0.122815  | 0.134761  | 0.129516 | 0.133304 | 0.130973  | 0.125874  | 0.131847  |
| 0.111742  | 0.120484  | 0.119901 | 0.124563 | 0.11757   | 0.108392  | 0.118444  |
| 0.0973193 | 0.103438  | 0.106935 | 0.115967 | 0.106352  | 0.0957168 | 0.10169   |
| 0.103293  | 0.103293  | 0.108246 | 0.114948 | 0.10912   | 0.0961538 | 0.100379  |
| 0.101981  | 0.119464  | 0.110431 | 0.115093 | 0.112471  | 0.113199  | 0.116841  |
| 0.0981935 | 0.118298  | 0.120921 | 0.128497 | 0.113636  | 0.0980478 | 0.115967  |
| 0.11553   | 0.121358  | 0.12602  | 0.131556 | 0.116404  | 0.109557  | 0.11961   |
| 0.117279  | 0.117279  | 0.121649 | 0.123397 | 0.121941  | 0.109848  | 0.116696  |
| 0.0960082 | 0.10708   | 0.103584 | 0.113199 | 0.105915  | 0.0958625 | 0.108537  |
| 0.100233  | 0.107809  | 0.106643 | 0.117133 | 0.107517  | 0.0942599 | 0.105186  |



|          |           |          |          |          |           |           |
|----------|-----------|----------|----------|----------|-----------|-----------|
| 0.113491 | 0.11116   | 0.115239 | 0.121358 | 0.121358 | 0.0979021 | 0.111742  |
| 0.105041 | 0.103584  | 0.108537 | 0.118153 | 0.107372 | 0.090035  | 0.103584  |
| 0.11014  | 0.111305  | 0.118881 | 0.125    | 0.115093 | 0.105915  | 0.113345  |
| 0.106352 | 0.104895  | 0.115676 | 0.119172 | 0.102855 | 0.0945513 | 0.104312  |
| 0.119027 | 0.108537  | 0.116696 | 0.117279 | 0.126603 | 0.102855  | 0.110286  |
| 0.106498 | 0.105041  | 0.112908 | 0.114656 | 0.11961  | 0.0938228 | 0.104749  |
| 0.105624 | 0.0910548 | 0.105915 | 0.110868 | 0.110286 | 0.0775058 | 0.090472  |
| 0.105915 | 0.105041  | 0.110868 | 0.116113 | 0.113782 | 0.092366  | 0.103001  |
| 0.113345 | 0.105478  | 0.112762 | 0.11451  | 0.123543 | 0.0995047 | 0.104021  |
| 0.10912  | 0.109994  | 0.114948 | 0.118735 | 0.117279 | 0.100816  | 0.109994  |
| 0.117861 | 0.12602   | 0.116113 | 0.123689 | 0.124272 | 0.112762  | 0.123106  |
| 0.109994 | 0.0995047 | 0.105915 | 0.103001 | 0.112325 | 0.0952797 | 0.0965909 |
| 0.118007 | 0.12704   | 0.128788 | 0.129079 | 0.127622 | 0.112617  | 0.123252  |

| TDr_2276 | TDr_2284 | TDr_2285  | TDr_2287  | TDr_2291  | TDr_2292  | TDr_2294 |
|----------|----------|-----------|-----------|-----------|-----------|----------|
| 0.11757  | 0.112471 | 0.101544  | 0.116404  | 0.115385  | 0.110431  | 0.117424 |
| 0.115967 | 0.115239 | 0.105478  | 0.100524  | 0.106498  | 0.114073  | 0.104458 |
| 0.111305 | 0.108829 | 0.102273  | 0.0990676 | 0.103875  | 0.113491  | 0.100379 |
| 0.117424 | 0.116987 | 0.112762  | 0.103438  | 0.0898893 | 0.11553   | 0.088141 |
| 0.129953 | 0.135052 | 0.126166  | 0.132284  | 0.133304  | 0.128934  | 0.134178 |
| 0.128497 | 0.129225 | 0.124126  | 0.122086  | 0.124854  | 0.129516  | 0.130099 |
| 0.128059 | 0.125583 | 0.114948  | 0.118735  | 0.127331  | 0.106643  | 0.126748 |
| 0.111451 | 0.108392 | 0.102127  | 0.101544  | 0.104312  | 0.111888  | 0.104895 |
| 0.111888 | 0.100087 | 0.0821678 | 0.10169   | 0.105041  | 0.100087  | 0.106206 |
| 0.120192 | 0.11451  | 0.0843531 | 0.0913462 | 0.117133  | 0.119172  | 0.119172 |
| 0.112471 | 0.118153 | 0.094697  | 0.108683  | 0.121358  | 0.104167  | 0.128351 |
| 0.113199 | 0.106061 | 0.103584  | 0.105915  | 0.109848  | 0.10373   | 0.104604 |
| 0.121358 | 0.108683 | 0.0898893 | 0.10067   | 0.115093  | 0.105769  | 0.110431 |
| 0.122669 | 0.129808 | 0.121503  | 0.122378  | 0.12602   | 0.141754  | 0.130099 |
| 0.131556 | 0.122378 | 0.119027  | 0.0587121 | 0.129371  | 0.128205  | 0.129079 |
| 0.12296  | 0.119027 | 0.107226  | 0.105769  | 0.120192  | 0.102418  | 0.120775 |
| 0.105041 | 0.115385 | 0.102418  | 0.105624  | 0.116259  | 0.102273  | 0.110431 |
| 0.137529 | 0.144668 | 0.135198  | 0.140152  | 0.138549  | 0.143211  | 0.139132 |
| 0.112762 | 0.109994 | 0.105186  | 0.101107  | 0.106498  | 0.110868  | 0.100379 |
| 0.188228 | 0.198864 | 0.196387  | 0.180361  | 0.196533  | 0.209353  | 0.203234 |
| 0.122232 | 0.124126 | 0.118444  | 0.114073  | 0.131119  | 0.114219  | 0.125291 |
| 0.118007 | 0.120192 | 0.111888  | 0.113636  | 0.120192  | 0.117861  | 0.117861 |
| 0.10912  | 0.109557 | 0.0989219 | 0.104458  | 0.112471  | 0.103438  | 0.104895 |
| 0.128497 | 0.128351 | 0.120921  | 0.124417  | 0.127185  | 0.10271   | 0.127185 |
| 0.11116  | 0.111305 | 0.0925117 | 0.0960082 | 0.106061  | 0.100816  | 0.107809 |
| 0.126894 | 0.130536 | 0.125437  | 0.121941  | 0.13141   | 0.122669  | 0.130536 |
| 0.129516 | 0.132867 | 0.115822  | 0.118735  | 0.125583  | 0.107809  | 0.12704  |
| 0.125437 | 0.11859  | 0.10912   | 0.114365  | 0.11859   | 0.113636  | 0.122086 |
| 0.133596 | 0.131119 | 0.121649  | 0.13039   | 0.129662  | 0.117716  | 0.130536 |
| 0.131847 | 0.127331 | 0.108829  | 0.116987  | 0.12296   | 0.117424  | 0.123252 |
| 0.127331 | 0.128351 | 0.115967  | 0.115093  | 0.127185  | 0.114948  | 0.133304 |
| 0.127185 | 0.123252 | 0.111742  | 0.112034  | 0.123252  | 0.111305  | 0.123252 |
| 0.112617 | 0.106061 | 0.10067   | 0.0962995 | 0.108683  | 0.104604  | 0.110431 |
| 0.124854 | 0.125874 | 0.102127  | 0.112617  | 0.117133  | 0.108392  | 0.119172 |
| 0.127622 | 0.124272 | 0.100816  | 0.115385  | 0.128642  | 0.0995047 | 0.128059 |
| 0.128642 | 0.127622 | 0.107372  | 0.12602   | 0.126166  | 0.105769  | 0.130245 |
| 0.141026 | 0.135344 | 0.120338  | 0.124709  | 0.133596  | 0.118153  | 0.136218 |
| 0.124272 | 0.121212 | 0.10708   | 0.11757   | 0.126457  | 0.109557  | 0.124417 |
| 0.119027 | 0.115967 | 0.102418  | 0.107663  | 0.110723  | 0.0999417 | 0.111305 |
| 0.126603 | 0.119464 | 0.112325  | 0.116696  | 0.119755  | 0.115676  | 0.122086 |
| 0.114073 | 0.114219 | 0.0989219 | 0.102418  | 0.110431  | 0.101399  | 0.109266 |
| 0.144085 | 0.142483 | 0.131556  | 0.133304  | 0.142483  | 0.129662  | 0.144522 |

|          |          |           |          |           |           |           |
|----------|----------|-----------|----------|-----------|-----------|-----------|
| 0.145833 | 0.144814 | 0.134761  | 0.139423 | 0.147436  | 0.127914  | 0.148893  |
| 0.122086 | 0.119027 | 0.101981  | 0.113054 | 0.115822  | 0.101836  | 0.115239  |
| 0.107517 | 0.110868 | 0.0874126 | 0.104604 | 0.114656  | 0.0910548 | 0.113491  |
| 0.123397 | 0.121795 | 0.095134  | 0.105915 | 0.125291  | 0.102855  | 0.125874  |
| 0.112325 | 0.117716 | 0.113199  | 0.112617 | 0.123252  | 0.10373   | 0.119755  |
| 0.139569 | 0.136509 | 0.122086  | 0.130828 | 0.137092  | 0.122523  | 0.139423  |
| 0.117716 | 0.120192 | 0.102564  | 0.107226 | 0.114073  | 0.106789  | 0.115239  |
| 0.121649 | 0.112471 | 0.0995047 | 0.10708  | 0.119464  | 0.105186  | 0.118881  |
| 0.147436 | 0.148456 | 0.142191  | 0.144522 | 0.142628  | 0.127185  | 0.145251  |
| 0.125583 | 0.134178 | 0.121212  | 0.12296  | 0.130682  | 0.119901  | 0.133596  |
| 0.120484 | 0.118298 | 0.107372  | 0.11116  | 0.117424  | 0.100524  | 0.114802  |
| 0.131556 | 0.12296  | 0.106789  | 0.112908 | 0.124417  | 0.129079  | 0.125     |
| 0.113199 | 0.11451  | 0.109703  | 0.111742 | 0.0862471 | 0.114219  | 0.0897436 |
| 0.139132 | 0.139277 | 0.13447   | 0.137966 | 0.134033  | 0.121795  | 0.136655  |
| 0.132576 | 0.130682 | 0.118881  | 0.123252 | 0.128059  | 0.111742  | 0.129516  |
| 0.119464 | 0.115822 | 0.105769  | 0.11014  | 0.115239  | 0.102418  | 0.11757   |
| 0.124417 | 0.120484 | 0.104021  | 0.108683 | 0.121066  | 0.113491  | 0.123397  |
| 0.128934 | 0.121795 | 0.097465  | 0.109703 | 0.124417  | 0.102273  | 0.125874  |
| 0.141463 | 0.139569 | 0.129516  | 0.134178 | 0.137238  | 0.119464  | 0.136072  |
| 0.142628 | 0.136946 | 0.128059  | 0.133596 | 0.129662  | 0.129079  | 0.13549   |
| 0.157925 | 0.161568 | 0.156469  | 0.155303 | 0.153118  | 0.159819  | 0.160111  |
| 0.122378 | 0.11553  | 0.106061  | 0.1081   | 0.117279  | 0.106498  | 0.115822  |
| 0.116259 | 0.118735 | 0.104604  | 0.105769 | 0.11757   | 0.105332  | 0.114365  |
| 0.11451  | 0.117279 | 0.101107  | 0.108683 | 0.114073  | 0.102127  | 0.114365  |
| 0.138549 | 0.142483 | 0.128934  | 0.136218 | 0.142774  | 0.128788  | 0.142774  |
| 0.119901 | 0.112762 | 0.10271   | 0.105041 | 0.112471  | 0.0990676 | 0.108974  |
| 0.130245 | 0.136801 | 0.125291  | 0.127331 | 0.132721  | 0.119901  | 0.134178  |
| 0.12704  | 0.123689 | 0.102855  | 0.109848 | 0.127477  | 0.0980478 | 0.124854  |
| 0.121941 | 0.121503 | 0.109411  | 0.110577 | 0.120629  | 0.106643  | 0.121795  |
| 0.148164 | 0.147145 | 0.139132  | 0.141754 | 0.144231  | 0.134033  | 0.14831   |
| 0.124563 | 0.120047 | 0.112617  | 0.120192 | 0.123543  | 0.108392  | 0.120047  |
| 0.137821 | 0.13884  | 0.123543  | 0.132867 | 0.136509  | 0.124854  | 0.137966  |
| 0.129516 | 0.134615 | 0.12398   | 0.12602  | 0.131119  | 0.124126  | 0.132867  |
| 0.108392 | 0.113491 | 0.1081    | 0.110723 | 0.107372  | 0.107955  | 0.107372  |
| 0.121212 | 0.113491 | 0.0990676 | 0.108974 | 0.115239  | 0.099796  | 0.114948  |
| 0.115967 | 0.121649 | 0.105478  | 0.109557 | 0.116404  | 0.106206  | 0.116987  |
| 0.135781 | 0.133887 | 0.125     | 0.132284 | 0.128059  | 0.117279  | 0.130099  |
| 0.116113 | 0.116841 | 0.100087  | 0.109994 | 0.115676  | 0.0958625 | 0.116841  |
| 0.142483 | 0.139423 | 0.130536  | 0.131702 | 0.136218  | 0.13243   | 0.13447   |
| 0.126457 | 0.120775 | 0.111305  | 0.117716 | 0.125728  | 0.106206  | 0.125146  |
| 0.118007 | 0.120484 | 0.11451   | 0.113928 | 0.116696  | 0.109703  | 0.118444  |
| 0.124709 | 0.114073 | 0.111888  | 0.109266 | 0.123397  | 0.105041  | 0.122232  |
| 0.12296  | 0.121066 | 0.111888  | 0.115385 | 0.118735  | 0.11553   | 0.120192  |
| 0.119172 | 0.11757  | 0.107809  | 0.1081   | 0.119318  | 0.10708   | 0.118153  |

|          |          |           |           |          |           |          |
|----------|----------|-----------|-----------|----------|-----------|----------|
| 0.119755 | 0.112034 | 0.107517  | 0.111305  | 0.117279 | 0.100379  | 0.116696 |
| 0.139714 | 0.134907 | 0.12602   | 0.130099  | 0.140152 | 0.122669  | 0.138112 |
| 0.115822 | 0.11859  | 0.10067   | 0.103001  | 0.119755 | 0.0941142 | 0.117133 |
| 0.119464 | 0.109703 | 0.0929487 | 0.105478  | 0.116404 | 0.101544  | 0.116404 |
| 0.126748 | 0.132721 | 0.118298  | 0.120047  | 0.128059 | 0.112617  | 0.129808 |
| 0.129953 | 0.128934 | 0.118007  | 0.123543  | 0.131556 | 0.105041  | 0.131265 |
| 0.130245 | 0.136218 | 0.115676  | 0.123543  | 0.135344 | 0.118153  | 0.137092 |
| 0.131265 | 0.138695 | 0.12398   | 0.128351  | 0.137529 | 0.118881  | 0.139569 |
| 0.121212 | 0.121358 | 0.109557  | 0.112471  | 0.12398  | 0.105624  | 0.123689 |
| 0.171329 | 0.186043 | 0.181527  | 0.180944  | 0.178759 | 0.176719  | 0.18546  |
| 0.113491 | 0.113636 | 0.10067   | 0.102127  | 0.11014  | 0.0990676 | 0.112762 |
| 0.129953 | 0.138549 | 0.120338  | 0.126457  | 0.133596 | 0.119901  | 0.139132 |
| 0.122086 | 0.133596 | 0.111888  | 0.115967  | 0.126894 | 0.111742  | 0.129516 |
| 0.142337 | 0.142774 | 0.124854  | 0.13039   | 0.140443 | 0.117133  | 0.142191 |
| 0.109266 | 0.112908 | 0.0984848 | 0.10373   | 0.116113 | 0.0957168 | 0.116404 |
| 0.125874 | 0.134178 | 0.118881  | 0.126748  | 0.13039  | 0.110868  | 0.131556 |
| 0.108974 | 0.114948 | 0.099359  | 0.1081    | 0.118735 | 0.101836  | 0.118735 |
| 0.117279 | 0.126166 | 0.111742  | 0.120484  | 0.126457 | 0.111305  | 0.129371 |
| 0.122232 | 0.115967 | 0.103584  | 0.108246  | 0.115385 | 0.0996503 | 0.119172 |
| 0.126894 | 0.143065 | 0.125437  | 0.135635  | 0.138112 | 0.117424  | 0.140734 |
| 0.11553  | 0.111597 | 0.0925117 | 0.104167  | 0.117716 | 0.0920746 | 0.116841 |
| 0.137821 | 0.139714 | 0.124126  | 0.128205  | 0.135344 | 0.118735  | 0.136218 |
| 0.119901 | 0.122378 | 0.107372  | 0.115822  | 0.122378 | 0.10169   | 0.121795 |
| 0.131993 | 0.129808 | 0.117133  | 0.127331  | 0.128351 | 0.121358  | 0.128934 |
| 0.136801 | 0.13141  | 0.115822  | 0.120775  | 0.138403 | 0.113928  | 0.138112 |
| 0.112617 | 0.115385 | 0.099796  | 0.105332  | 0.119172 | 0.0967366 | 0.115093 |
| 0.143502 | 0.143648 | 0.135052  | 0.140006  | 0.144231 | 0.131119  | 0.14831  |
| 0.115385 | 0.120484 | 0.105186  | 0.111014  | 0.122815 | 0.10271   | 0.121649 |
| 0.111305 | 0.112325 | 0.0976107 | 0.106643  | 0.119027 | 0.103875  | 0.117861 |
| 0.122232 | 0.122669 | 0.104458  | 0.114948  | 0.122669 | 0.1081    | 0.122669 |
| 0.141463 | 0.138112 | 0.126311  | 0.134178  | 0.141608 | 0.131119  | 0.142774 |
| 0.114656 | 0.123543 | 0.117861  | 0.120192  | 0.125874 | 0.112179  | 0.128205 |
| 0.104749 | 0.111597 | 0.0913462 | 0.10271   | 0.115385 | 0.0990676 | 0.111888 |
| 0.108246 | 0.112762 | 0.0954254 | 0.105041  | 0.116841 | 0.099359  | 0.115676 |
| 0.123834 | 0.120192 | 0.106643  | 0.111597  | 0.121358 | 0.100379  | 0.119901 |
| 0.135927 | 0.13141  | 0.105041  | 0.109703  | 0.128497 | 0.115967  | 0.128788 |
| 0.119172 | 0.119027 | 0.106352  | 0.11451   | 0.126311 | 0.0986305 | 0.120775 |
| 0.112325 | 0.103438 | 0.090472  | 0.0960082 | 0.108974 | 0.0912005 | 0.109848 |
| 0.110286 | 0.108392 | 0.0878497 | 0.099796  | 0.11014  | 0.0903263 | 0.108392 |
| 0.112471 | 0.110286 | 0.0912005 | 0.100816  | 0.115822 | 0.0983392 | 0.117279 |
| 0.123834 | 0.123689 | 0.111305  | 0.115676  | 0.117279 | 0.110286  | 0.118735 |
| 0.131556 | 0.129371 | 0.10912   | 0.119318  | 0.129079 | 0.107517  | 0.132867 |
| 0.118298 | 0.109703 | 0.0932401 | 0.100233  | 0.113491 | 0.0980478 | 0.114656 |
| 0.119318 | 0.106352 | 0.0910548 | 0.0910548 | 0.111305 | 0.0967366 | 0.112179 |

|          |          |           |           |           |           |           |
|----------|----------|-----------|-----------|-----------|-----------|-----------|
| 0.131265 | 0.126457 | 0.109411  | 0.112908  | 0.132867  | 0.104312  | 0.133159  |
| 0.116259 | 0.112908 | 0.0932401 | 0.10169   | 0.117861  | 0.0866841 | 0.113491  |
| 0.122378 | 0.124272 | 0.108392  | 0.115676  | 0.126894  | 0.112034  | 0.123689  |
| 0.134615 | 0.135344 | 0.125291  | 0.125874  | 0.132139  | 0.114073  | 0.133887  |
| 0.119464 | 0.11961  | 0.100524  | 0.106352  | 0.117861  | 0.10067   | 0.120484  |
| 0.120192 | 0.108974 | 0.0948427 | 0.0992133 | 0.115385  | 0.0961538 | 0.115676  |
| 0.11553  | 0.113636 | 0.0977564 | 0.100962  | 0.11451   | 0.100816  | 0.116841  |
| 0.110286 | 0.107517 | 0.0913462 | 0.0986305 | 0.113054  | 0.0941142 | 0.113636  |
| 0.134761 | 0.125    | 0.107372  | 0.116404  | 0.128497  | 0.120047  | 0.12704   |
| 0.114948 | 0.106352 | 0.0852273 | 0.0945513 | 0.111597  | 0.0929487 | 0.107809  |
| 0.139277 | 0.140589 | 0.12704   | 0.131993  | 0.135927  | 0.119901  | 0.139423  |
| 0.139132 | 0.136072 | 0.121358  | 0.127477  | 0.138403  | 0.126457  | 0.140443  |
| 0.130099 | 0.126748 | 0.113199  | 0.117861  | 0.127622  | 0.118881  | 0.12704   |
| 0.121212 | 0.121066 | 0.0996503 | 0.105478  | 0.127477  | 0.108246  | 0.125728  |
| 0.120338 | 0.121649 | 0.106935  | 0.104895  | 0.121941  | 0.105624  | 0.120484  |
| 0.114948 | 0.111305 | 0.0995047 | 0.101544  | 0.117716  | 0.087704  | 0.115676  |
| 0.11451  | 0.113782 | 0.0964452 | 0.111305  | 0.11553   | 0.0887238 | 0.114948  |
| 0.11655  | 0.110286 | 0.094697  | 0.102564  | 0.112617  | 0.0980478 | 0.111742  |
| 0.109848 | 0.111742 | 0.108392  | 0.106935  | 0.0957168 | 0.105624  | 0.0954254 |
| 0.129079 | 0.132139 | 0.120338  | 0.125583  | 0.132139  | 0.109994  | 0.133887  |
| 0.110286 | 0.115967 | 0.102127  | 0.107955  | 0.11859   | 0.0984848 | 0.11859   |
| 0.130828 | 0.133596 | 0.110431  | 0.118881  | 0.129808  | 0.133304  | 0.132721  |
| 0.136218 | 0.140152 | 0.125728  | 0.128059  | 0.137238  | 0.11859   | 0.141608  |
| 0.176719 | 0.189394 | 0.191288  | 0.184586  | 0.184441  | 0.194347  | 0.187063  |
| 0.221737 | 0.23412  | 0.232517  | 0.233392  | 0.22567   | 0.238199  | 0.229458  |
| 0.109994 | 0.109557 | 0.107372  | 0.108246  | 0.0719697 | 0.106352  | 0.0673077 |
| 0.11014  | 0.11757  | 0.105478  | 0.108683  | 0.114073  | 0.0939685 | 0.112325  |
| 0.106352 | 0.109703 | 0.0990676 | 0.103438  | 0.112617  | 0.0901807 | 0.110868  |
| 0.110723 | 0.122232 | 0.106061  | 0.106643  | 0.116404  | 0.100087  | 0.113782  |
| 0.129953 | 0.123397 | 0.120047  | 0.0597319 | 0.131556  | 0.130973  | 0.128059  |
| 0.112179 | 0.114073 | 0.109266  | 0.110723  | 0.11553   | 0.0957168 | 0.114073  |
| 0.143794 | 0.151515 | 0.140589  | 0.145542  | 0.147727  | 0.11655   | 0.147436  |
| 0.115093 | 0.115822 | 0.105478  | 0.115676  | 0.11961   | 0.0971737 | 0.115239  |
| 0.130536 | 0.133596 | 0.12296   | 0.126748  | 0.126603  | 0.113491  | 0.127768  |
| 0.126894 | 0.136072 | 0.124854  | 0.128934  | 0.130245  | 0.117133  | 0.130828  |
| 0.126311 | 0.134033 | 0.125728  | 0.124854  | 0.133741  | 0.113636  | 0.135781  |
| 0.143794 | 0.137238 | 0.124563  | 0.128934  | 0.139569  | 0.125291  | 0.138695  |
| 0.115822 | 0.121795 | 0.106498  | 0.112325  | 0.124126  | 0.101107  | 0.120629  |
| 0.110577 | 0.117133 | 0.103584  | 0.109411  | 0.117716  | 0.097028  | 0.113928  |
| 0.109266 | 0.121358 | 0.111305  | 0.11014   | 0.125437  | 0.101544  | 0.11961   |
| 0.107809 | 0.116404 | 0.105769  | 0.107226  | 0.11553   | 0.0995047 | 0.110577  |
| 0.111597 | 0.11757  | 0.104604  | 0.108974  | 0.114365  | 0.0965909 | 0.112908  |
| 0.118735 | 0.120047 | 0.113782  | 0.109703  | 0.119172  | 0.10169   | 0.120629  |
| 0.123252 | 0.131556 | 0.123543  | 0.121795  | 0.129516  | 0.115822  | 0.13039   |

|          |          |           |           |          |           |          |
|----------|----------|-----------|-----------|----------|-----------|----------|
| 0.129662 | 0.137675 | 0.130828  | 0.131702  | 0.135635 | 0.12602   | 0.137383 |
| 0.116113 | 0.121795 | 0.113491  | 0.116987  | 0.119464 | 0.0958625 | 0.115676 |
| 0.109848 | 0.11553  | 0.107226  | 0.111888  | 0.118153 | 0.0948427 | 0.116404 |
| 0.126748 | 0.137675 | 0.125291  | 0.13141   | 0.133304 | 0.118735  | 0.134178 |
| 0.107809 | 0.112908 | 0.10373   | 0.108392  | 0.113199 | 0.0960082 | 0.113491 |
| 0.142337 | 0.146562 | 0.135927  | 0.135052  | 0.144814 | 0.125291  | 0.145396 |
| 0.135052 | 0.138986 | 0.121941  | 0.127768  | 0.138986 | 0.133741  | 0.140734 |
| 0.122378 | 0.139423 | 0.129662  | 0.13141   | 0.13243  | 0.125728  | 0.136801 |
| 0.111888 | 0.117279 | 0.104021  | 0.106352  | 0.113199 | 0.0945513 | 0.111742 |
| 0.10708  | 0.11655  | 0.102127  | 0.106498  | 0.113928 | 0.0938228 | 0.112179 |
| 0.123252 | 0.12398  | 0.117424  | 0.12296   | 0.126603 | 0.106206  | 0.123106 |
| 0.119318 | 0.128205 | 0.121649  | 0.123106  | 0.126166 | 0.106061  | 0.124709 |
| 0.121649 | 0.134033 | 0.126311  | 0.132721  | 0.131119 | 0.1081    | 0.134324 |
| 0.110431 | 0.122232 | 0.115676  | 0.11451   | 0.121358 | 0.10067   | 0.116404 |
| 0.113491 | 0.121503 | 0.111742  | 0.114365  | 0.120338 | 0.100233  | 0.120047 |
| 0.114365 | 0.126166 | 0.114365  | 0.121066  | 0.121212 | 0.1081    | 0.122378 |
| 0.128351 | 0.138695 | 0.122815  | 0.13039   | 0.138112 | 0.114802  | 0.136946 |
| 0.123397 | 0.129953 | 0.125728  | 0.128642  | 0.130245 | 0.115676  | 0.131119 |
| 0.135198 | 0.140589 | 0.132576  | 0.130245  | 0.135927 | 0.109411  | 0.136509 |
| 0.132721 | 0.127622 | 0.124854  | 0.128934  | 0.130828 | 0.124417  | 0.133741 |
| 0.116113 | 0.115967 | 0.107955  | 0.112908  | 0.113054 | 0.0941142 | 0.111888 |
| 0.121358 | 0.13141  | 0.126311  | 0.128351  | 0.132576 | 0.119755  | 0.131119 |
| 0.110431 | 0.114656 | 0.101981  | 0.110723  | 0.114656 | 0.0939685 | 0.109411 |
| 0.11961  | 0.11859  | 0.102418  | 0.110286  | 0.117133 | 0.105478  | 0.121212 |
| 0.112325 | 0.118007 | 0.105041  | 0.110868  | 0.120047 | 0.099359  | 0.118298 |
| 0.109848 | 0.120192 | 0.108392  | 0.107517  | 0.118735 | 0.103001  | 0.11961  |
| 0.110431 | 0.113199 | 0.103438  | 0.109848  | 0.114948 | 0.0936772 | 0.111451 |
| 0.130973 | 0.136364 | 0.129516  | 0.134178  | 0.136946 | 0.113054  | 0.136946 |
| 0.117716 | 0.116987 | 0.109848  | 0.110723  | 0.120192 | 0.105332  | 0.121649 |
| 0.131993 | 0.133596 | 0.124417  | 0.130245  | 0.13039  | 0.115822  | 0.130682 |
| 0.113345 | 0.116113 | 0.1081    | 0.108392  | 0.112617 | 0.099796  | 0.111451 |
| 0.124563 | 0.129079 | 0.119318  | 0.124563  | 0.129953 | 0.10373   | 0.129371 |
| 0.127914 | 0.118153 | 0.107809  | 0.120921  | 0.12602  | 0.114073  | 0.125728 |
| 0.122086 | 0.122232 | 0.103438  | 0.106935  | 0.126603 | 0.117861  | 0.123106 |
| 0.121941 | 0.119172 | 0.101544  | 0.107663  | 0.122086 | 0.0824592 | 0.122669 |
| 0.125583 | 0.120484 | 0.11014   | 0.119464  | 0.120484 | 0.119027  | 0.121941 |
| 0.119318 | 0.120921 | 0.108246  | 0.109703  | 0.120047 | 0.104312  | 0.119755 |
| 0.122232 | 0.119172 | 0.10708   | 0.108537  | 0.120629 | 0.0987762 | 0.118881 |
| 0.136218 | 0.125874 | 0.0925117 | 0.121358  | 0.137529 | 0.132867  | 0.136364 |
| 0.148019 | 0.13884  | 0.13549   | 0.132867  | 0.13884  | 0.108829  | 0.136509 |
| 0.106352 | 0.101836 | 0.0754662 | 0.0973193 | 0.107372 | 0.105041  | 0.108537 |
| 0.128642 | 0.134033 | 0.116987  | 0.116113  | 0.13345  | 0.134907  | 0.134033 |
| 0.134033 | 0.121649 | 0.0917832 | 0.109266  | 0.13243  | 0.12398   | 0.134178 |
| 0.126457 | 0.13039  | 0.115967  | 0.118881  | 0.127768 | 0.130099  | 0.132139 |

|          |          |           |          |          |          |          |
|----------|----------|-----------|----------|----------|----------|----------|
| 0.116841 | 0.127185 | 0.104895  | 0.110431 | 0.121649 | 0.12398  | 0.122815 |
| 0.125583 | 0.118735 | 0.0740093 | 0.107517 | 0.128642 | 0.119027 | 0.128642 |
| 0.125728 | 0.111014 | 0.0782343 | 0.112908 | 0.129371 | 0.125874 | 0.128205 |
| 0.127622 | 0.131265 | 0.106061  | 0.120338 | 0.122232 | 0.130973 | 0.127185 |
| 0.136072 | 0.13884  | 0.120629  | 0.124417 | 0.137092 | 0.139714 | 0.139132 |
| 0.128497 | 0.115822 | 0.0751748 | 0.112762 | 0.124563 | 0.129808 | 0.123689 |
| 0.113054 | 0.121358 | 0.100816  | 0.105186 | 0.120484 | 0.114948 | 0.120192 |
| 0.131265 | 0.136364 | 0.137092  | 0.134178 | 0.132576 | 0.115093 | 0.132867 |
| 0.132576 | 0.12602  | 0.0862471 | 0.121212 | 0.136509 | 0.129808 | 0.135344 |
| 0.115676 | 0.114365 | 0.0897436 | 0.102564 | 0.114365 | 0.108537 | 0.113199 |
| 0.201777 | 0.214161 | 0.216638  | 0.217512 | 0.207459 | 0.220862 | 0.212995 |
| 0.12398  | 0.126166 | 0.106206  | 0.114365 | 0.125583 | 0.125    | 0.125    |
| 0.116987 | 0.107226 | 0.0793998 | 0.107372 | 0.119755 | 0.117424 | 0.121212 |
| 0.133159 | 0.134761 | 0.113928  | 0.126457 | 0.13447  | 0.133887 | 0.135344 |
| 0.120921 | 0.109703 | 0.0728438 | 0.110723 | 0.121066 | 0.114073 | 0.119027 |
| 0.138112 | 0.123106 | 0.0882867 | 0.11859  | 0.134761 | 0.133596 | 0.135635 |
| 0.114219 | 0.12398  | 0.106061  | 0.106935 | 0.121649 | 0.122232 | 0.121358 |
| 0.11757  | 0.126748 | 0.0986305 | 0.106498 | 0.117424 | 0.124709 | 0.120629 |
| 0.131847 | 0.123252 | 0.0779429 | 0.112034 | 0.12704  | 0.132284 | 0.128497 |
| 0.118881 | 0.133304 | 0.114802  | 0.118007 | 0.128934 | 0.126603 | 0.131847 |
| 0.126894 | 0.137821 | 0.116113  | 0.120775 | 0.126748 | 0.126457 | 0.130245 |
| 0.123252 | 0.137966 | 0.111597  | 0.122086 | 0.130973 | 0.132139 | 0.132721 |
| 0.124417 | 0.133887 | 0.110431  | 0.114802 | 0.125146 | 0.131265 | 0.129516 |
| 0.123834 | 0.116696 | 0.0973193 | 0.105186 | 0.121358 | 0.111742 | 0.123106 |
| 0.115967 | 0.121941 | 0.104312  | 0.111597 | 0.114948 | 0.123397 | 0.118735 |
| 0.133304 | 0.134033 | 0.11757   | 0.124272 | 0.133741 | 0.137821 | 0.138112 |
| 0.118007 | 0.119318 | 0.104604  | 0.107517 | 0.121649 | 0.121066 | 0.120192 |
| 0.137238 | 0.141463 | 0.128205  | 0.133159 | 0.135635 | 0.126603 | 0.137383 |
| 0.135635 | 0.136655 | 0.126603  | 0.129516 | 0.141026 | 0.138112 | 0.1419   |
| 0.127477 | 0.124126 | 0.107955  | 0.112908 | 0.126457 | 0.11451  | 0.127914 |
| 0.13039  | 0.121795 | 0.0884324 | 0.11553  | 0.13345  | 0.12704  | 0.134033 |
| 0.126748 | 0.123397 | 0.11451   | 0.119464 | 0.125437 | 0.122523 | 0.125146 |
| 0.13243  | 0.131993 | 0.113782  | 0.123689 | 0.126457 | 0.118298 | 0.125291 |
| 0.127768 | 0.127914 | 0.120192  | 0.123106 | 0.124126 | 0.124709 | 0.121503 |
| 0.141463 | 0.138986 | 0.127477  | 0.128351 | 0.141026 | 0.140734 | 0.141317 |
| 0.117133 | 0.114948 | 0.094697  | 0.10373  | 0.11757  | 0.105332 | 0.118153 |
| 0.136801 | 0.137821 | 0.120484  | 0.120484 | 0.136364 | 0.127914 | 0.139277 |
| 0.132867 | 0.144376 | 0.128497  | 0.134324 | 0.136218 | 0.143794 | 0.14292  |
| 0.129371 | 0.119027 | 0.0944056 | 0.109557 | 0.122232 | 0.103293 | 0.125728 |
| 0.120629 | 0.126311 | 0.113928  | 0.116841 | 0.127477 | 0.116696 | 0.129225 |
| 0.142045 | 0.145396 | 0.141754  | 0.140589 | 0.142191 | 0.122378 | 0.1419   |
| 0.128642 | 0.130536 | 0.117861  | 0.116113 | 0.124417 | 0.120629 | 0.126748 |
| 0.143648 | 0.14292  | 0.130828  | 0.128788 | 0.136509 | 0.136801 | 0.136801 |
| 0.137383 | 0.130828 | 0.116987  | 0.122523 | 0.134615 | 0.124126 | 0.135198 |

|          |          |          |           |           |           |           |
|----------|----------|----------|-----------|-----------|-----------|-----------|
| 0.116259 | 0.126311 | 0.105478 | 0.117133  | 0.125146  | 0.119027  | 0.127768  |
| 0.133013 | 0.136072 | 0.123106 | 0.125728  | 0.13141   | 0.119755  | 0.132576  |
| 0.124417 | 0.123397 | 0.106061 | 0.115093  | 0.128934  | 0.113199  | 0.130973  |
| 0.131265 | 0.137529 | 0.116113 | 0.124272  | 0.136655  | 0.113636  | 0.134324  |
| 0.130099 | 0.13345  | 0.116696 | 0.127185  | 0.131993  | 0.129079  | 0.130245  |
| 0.124563 | 0.137238 | 0.12602  | 0.131265  | 0.132576  | 0.118298  | 0.135781  |
| 0.133596 | 0.138112 | 0.121066 | 0.126894  | 0.134324  | 0.125583  | 0.138403  |
| 0.126603 | 0.13141  | 0.117861 | 0.125437  | 0.13549   | 0.112179  | 0.135198  |
| 0.137675 | 0.145396 | 0.135927 | 0.138258  | 0.143357  | 0.133741  | 0.146853  |
| 0.131265 | 0.120921 | 0.104167 | 0.111742  | 0.13141   | 0.11859   | 0.130828  |
| 0.122523 | 0.124709 | 0.105041 | 0.11116   | 0.125583  | 0.101107  | 0.127622  |
| 0.125728 | 0.132576 | 0.121941 | 0.124272  | 0.134033  | 0.113345  | 0.137529  |
| 0.130099 | 0.121795 | 0.104167 | 0.109994  | 0.125583  | 0.104312  | 0.12704   |
| 0.146562 | 0.140297 | 0.131702 | 0.130828  | 0.142337  | 0.133013  | 0.145833  |
| 0.161131 | 0.158362 | 0.149184 | 0.143939  | 0.156906  | 0.143794  | 0.156906  |
| 0.130536 | 0.127185 | 0.120629 | 0.127622  | 0.13039   | 0.114365  | 0.128642  |
| 0.123106 | 0.124709 | 0.118444 | 0.11961   | 0.121212  | 0.101981  | 0.121503  |
| 0.132576 | 0.134178 | 0.127331 | 0.126457  | 0.125146  | 0.125728  | 0.126894  |
| 0.133013 | 0.131993 | 0.110868 | 0.120484  | 0.131993  | 0.13549   | 0.134907  |
| 0.127477 | 0.130245 | 0.122815 | 0.122815  | 0.13141   | 0.111305  | 0.129079  |
| 0.126603 | 0.138986 | 0.124272 | 0.128642  | 0.13986   | 0.133741  | 0.142191  |
| 0.143502 | 0.134324 | 0.128059 | 0.126894  | 0.138986  | 0.132867  | 0.13986   |
| 0.132576 | 0.126603 | 0.104895 | 0.117424  | 0.127477  | 0.117861  | 0.129808  |
| 0.155886 | 0.162733 | 0.15472  | 0.157051  | 0.152244  | 0.154866  | 0.153992  |
| 0.132284 | 0.132721 | 0.112471 | 0.120047  | 0.136218  | 0.121358  | 0.135635  |
| 0.148893 | 0.143502 | 0.124126 | 0.126748  | 0.145833  | 0.130973  | 0.14292   |
| 0.126311 | 0.123252 | 0.106498 | 0.113491  | 0.125583  | 0.105769  | 0.12704   |
| 0.133596 | 0.141608 | 0.129225 | 0.13243   | 0.133741  | 0.123834  | 0.133159  |
| 0.116113 | 0.129079 | 0.103293 | 0.111742  | 0.123834  | 0.123252  | 0.131119  |
| 0.126166 | 0.13447  | 0.128497 | 0.131993  | 0.110868  | 0.13039   | 0.118735  |
| 0.135344 | 0.145105 | 0.133596 | 0.137966  | 0.138695  | 0.146562  | 0.141317  |
| 0.120629 | 0.112617 | 0.113928 | 0.11451   | 0.0493881 | 0.123397  | 0.0537587 |
| 0.119027 | 0.126457 | 0.126311 | 0.127477  | 0.0626457 | 0.13986   | 0.0734266 |
| 0.134907 | 0.145251 | 0.138986 | 0.143648  | 0.140297  | 0.127477  | 0.140589  |
| 0.126166 | 0.140297 | 0.138403 | 0.133741  | 0.114365  | 0.143502  | 0.114948  |
| 0.126311 | 0.123834 | 0.118735 | 0.126311  | 0.129079  | 0.0562354 | 0.126457  |
| 0.13549  | 0.136509 | 0.125874 | 0.129371  | 0.130099  | 0.136218  | 0.133013  |
| 0.115093 | 0.107372 | 0.106643 | 0.0818765 | 0.110577  | 0.11116   | 0.10912   |
| 0.11757  | 0.112179 | 0.110577 | 0.0808566 | 0.117133  | 0.10373   | 0.116841  |
| 0.118298 | 0.125728 | 0.105769 | 0.117424  | 0.122232  | 0.12398   | 0.125437  |
| 0.114219 | 0.108246 | 0.109557 | 0.112471  | 0.0456002 | 0.117279  | 0.0464744 |
| 0.114073 | 0.122669 | 0.109703 | 0.106498  | 0.123543  | 0.116259  | 0.120338  |
| 0.116113 | 0.101981 | 0.104458 | 0.0709499 | 0.0868298 | 0.113636  | 0.0856643 |
| 0.120775 | 0.106061 | 0.103875 | 0.115822  | 0.106643  | 0.115967  | 0.101107  |



|           |          |           |           |           |           |           |
|-----------|----------|-----------|-----------|-----------|-----------|-----------|
| 0.115093  | 0.11757  | 0.111305  | 0.0678904 | 0.121649  | 0.124854  | 0.121358  |
| 0.115967  | 0.111742 | 0.0941142 | 0.0955711 | 0.110868  | 0.107663  | 0.11553   |
| 0.115676  | 0.111451 | 0.114219  | 0.113928  | 0.0549242 | 0.11961   | 0.0502622 |
| 0.114365  | 0.112179 | 0.114656  | 0.108829  | 0.0480769 | 0.117424  | 0.0486597 |
| 0.126603  | 0.126166 | 0.119027  | 0.123689  | 0.125     | 0.0894522 | 0.122669  |
| 0.202069  | 0.212121 | 0.211684  | 0.209645  | 0.206002  | 0.217366  | 0.210956  |
| 0.135635  | 0.134615 | 0.137092  | 0.135344  | 0.0614802 | 0.143065  | 0.0702214 |
| 0.131119  | 0.130099 | 0.124709  | 0.125291  | 0.125437  | 0.12602   | 0.122815  |
| 0.126311  | 0.124709 | 0.118153  | 0.11553   | 0.116259  | 0.122086  | 0.112471  |
| 0.196824  | 0.206876 | 0.206148  | 0.206439  | 0.199301  | 0.214452  | 0.20542   |
| 0.121358  | 0.126457 | 0.120192  | 0.11757   | 0.125     | 0.100524  | 0.124126  |
| 0.126748  | 0.123397 | 0.115385  | 0.113345  | 0.125437  | 0.103584  | 0.127768  |
| 0.121503  | 0.124563 | 0.11655   | 0.122378  | 0.123397  | 0.119027  | 0.122815  |
| 0.124272  | 0.117424 | 0.112325  | 0.0540501 | 0.124417  | 0.122086  | 0.122669  |
| 0.237034  | 0.247086 | 0.246941  | 0.245192  | 0.239802  | 0.252622  | 0.244464  |
| 0.130245  | 0.129516 | 0.122378  | 0.119172  | 0.124563  | 0.110577  | 0.128642  |
| 0.121795  | 0.118735 | 0.109266  | 0.11655   | 0.120192  | 0.0887238 | 0.112617  |
| 0.107809  | 0.128642 | 0.120338  | 0.120338  | 0.119318  | 0.121941  | 0.121066  |
| 0.103147  | 0.122523 | 0.118007  | 0.11859   | 0.118735  | 0.118735  | 0.124272  |
| 0.131119  | 0.128934 | 0.122378  | 0.110431  | 0.124272  | 0.117861  | 0.128934  |
| 0.117133  | 0.119318 | 0.118298  | 0.107517  | 0.105915  | 0.128642  | 0.107663  |
| 0.123252  | 0.123397 | 0.114219  | 0.117424  | 0.123397  | 0.0863928 | 0.119901  |
| 0.113782  | 0.109557 | 0.113782  | 0.111451  | 0.0457459 | 0.115967  | 0.0477855 |
| 0.124126  | 0.124272 | 0.114219  | 0.119464  | 0.120484  | 0.124563  | 0.122523  |
| 0.117133  | 0.113199 | 0.106061  | 0.0472028 | 0.117861  | 0.114656  | 0.118444  |
| 0.112034  | 0.111014 | 0.110868  | 0.108537  | 0.0550699 | 0.116841  | 0.0539044 |
| 0.123834  | 0.11757  | 0.0894522 | 0.0961538 | 0.120192  | 0.121358  | 0.12398   |
| 0.135927  | 0.144814 | 0.131265  | 0.139132  | 0.137821  | 0.145688  | 0.141317  |
| 0.131556  | 0.129953 | 0.124272  | 0.125146  | 0.124709  | 0.111305  | 0.128497  |
| 0.124854  | 0.129953 | 0.122232  | 0.11961   | 0.124417  | 0.1081    | 0.129662  |
| 0.173514  | 0.182984 | 0.188083  | 0.183421  | 0.174825  | 0.18648   | 0.182984  |
| 0.190414  | 0.198718 | 0.199155  | 0.198864  | 0.191434  | 0.204254  | 0.199009  |
| 0.11961   | 0.117424 | 0.110868  | 0.055507  | 0.122669  | 0.125874  | 0.122378  |
| 0.116987  | 0.1081   | 0.10708   | 0.0499709 | 0.115093  | 0.117424  | 0.11655   |
| 0.133596  | 0.134907 | 0.129808  | 0.123106  | 0.123834  | 0.13986   | 0.125583  |
| 0.119027  | 0.121503 | 0.10708   | 0.118444  | 0.12296   | 0.0862471 | 0.120921  |
| 0.132576  | 0.128934 | 0.124126  | 0.122669  | 0.125728  | 0.11116   | 0.126603  |
| 0.0703671 | 0.126166 | 0.12398   | 0.126603  | 0.122669  | 0.128788  | 0.125874  |
| 0.20877   | 0.220862 | 0.222756  | 0.218969  | 0.213578  | 0.227564  | 0.222028  |
| 0.118735  | 0.11655  | 0.109703  | 0.10912   | 0.113636  | 0.109848  | 0.111014  |
| 0.191434  | 0.206439 | 0.204545  | 0.204545  | 0.194493  | 0.204108  | 0.201195  |
| 0.11553   | 0.110723 | 0.103293  | 0.112908  | 0.118298  | 0.0483683 | 0.114219  |
| 0.112179  | 0.113199 | 0.106935  | 0.112179  | 0.116987  | 0.101544  | 0.115239  |
| 0.117861  | 0.11859  | 0.114073  | 0.112617  | 0.101107  | 0.113636  | 0.10169   |

|           |          |           |           |           |           |           |
|-----------|----------|-----------|-----------|-----------|-----------|-----------|
| 0.110577  | 0.109848 | 0.10271   | 0.0569639 | 0.115967  | 0.113636  | 0.114802  |
| 0.19289   | 0.202069 | 0.203671  | 0.20134   | 0.196241  | 0.209645  | 0.201777  |
| 0.120629  | 0.122523 | 0.124709  | 0.125291  | 0.050845  | 0.131847  | 0.0566725 |
| 0.112762  | 0.119027 | 0.110431  | 0.117133  | 0.119901  | 0.0907634 | 0.117861  |
| 0.123543  | 0.116696 | 0.11655   | 0.119172  | 0.0464744 | 0.125728  | 0.0476399 |
| 0.123834  | 0.12398  | 0.117133  | 0.124417  | 0.11961   | 0.122523  | 0.12398   |
| 0.117716  | 0.112325 | 0.107809  | 0.0515734 | 0.11757   | 0.113782  | 0.114948  |
| 0.11961   | 0.118298 | 0.110577  | 0.113782  | 0.119755  | 0.04662   | 0.113636  |
| 0.114948  | 0.122669 | 0.117861  | 0.118444  | 0.121212  | 0.0929487 | 0.119464  |
| 0.129516  | 0.126457 | 0.121358  | 0.118153  | 0.125291  | 0.11014   | 0.127622  |
| 0.108537  | 0.108974 | 0.105915  | 0.107663  | 0.0512821 | 0.115093  | 0.0498252 |
| 0.112471  | 0.12602  | 0.110431  | 0.123834  | 0.118735  | 0.092803  | 0.123397  |
| 0.175554  | 0.184441 | 0.184878  | 0.182838  | 0.179196  | 0.189977  | 0.184149  |
| 0.109266  | 0.127768 | 0.124709  | 0.122669  | 0.121941  | 0.121649  | 0.124272  |
| 0.123106  | 0.129953 | 0.116404  | 0.121358  | 0.122669  | 0.129953  | 0.126748  |
| 0.109266  | 0.122523 | 0.111888  | 0.115385  | 0.113491  | 0.121941  | 0.110577  |
| 0.11757   | 0.129079 | 0.120484  | 0.123106  | 0.123543  | 0.107809  | 0.126166  |
| 0.119027  | 0.113636 | 0.115822  | 0.11553   | 0.0480769 | 0.120921  | 0.0501166 |
| 0.123106  | 0.11859  | 0.111742  | 0.120192  | 0.123834  | 0.0527389 | 0.120921  |
| 0.119172  | 0.115822 | 0.109848  | 0.11451   | 0.113782  | 0.107372  | 0.115239  |
| 0.129662  | 0.126311 | 0.11859   | 0.123543  | 0.126603  | 0.0936772 | 0.12398   |
| 0.116404  | 0.123543 | 0.110868  | 0.11553   | 0.116841  | 0.124126  | 0.118881  |
| 0.103293  | 0.119172 | 0.116113  | 0.111742  | 0.117716  | 0.112471  | 0.115967  |
| 0.117716  | 0.108829 | 0.110431  | 0.0579837 | 0.11757   | 0.117861  | 0.11553   |
| 0.121358  | 0.122669 | 0.116404  | 0.119318  | 0.123543  | 0.117424  | 0.121503  |
| 0.133159  | 0.135635 | 0.130245  | 0.131702  | 0.133304  | 0.131847  | 0.136801  |
| 0.122378  | 0.120192 | 0.108974  | 0.110723  | 0.120775  | 0.101836  | 0.118735  |
| 0.132139  | 0.131702 | 0.13243   | 0.131265  | 0.0588578 | 0.137529  | 0.0652681 |
| 0.116113  | 0.111014 | 0.106789  | 0.0493881 | 0.117424  | 0.113054  | 0.11451   |
| 0.0572552 | 0.113054 | 0.111742  | 0.11553   | 0.109848  | 0.11451   | 0.111014  |
| 0.102564  | 0.116404 | 0.113636  | 0.113636  | 0.0619172 | 0.121941  | 0.0686189 |
| 0.127622  | 0.12602  | 0.120629  | 0.126166  | 0.129516  | 0.0945513 | 0.125437  |
| 0.176282  | 0.188666 | 0.187937  | 0.189103  | 0.181672  | 0.18546   | 0.184878  |
| 0.108246  | 0.117716 | 0.103875  | 0.114948  | 0.115676  | 0.0882867 | 0.116841  |
| 0.106206  | 0.103147 | 0.0989219 | 0.104167  | 0.101399  | 0.102273  | 0.0999417 |
| 0.123689  | 0.127331 | 0.119901  | 0.118444  | 0.123834  | 0.107809  | 0.127331  |
| 0.165938  | 0.170746 | 0.167686  | 0.171474  | 0.168415  | 0.182692  | 0.171911  |
| 0.138112  | 0.137675 | 0.134615  | 0.133159  | 0.135052  | 0.120484  | 0.138258  |
| 0.148601  | 0.148456 | 0.139569  | 0.142483  | 0.144085  | 0.128351  | 0.147582  |
| 0.137675  | 0.146562 | 0.134761  | 0.137675  | 0.140443  | 0.148601  | 0.143357  |
| 0.118444  | 0.120921 | 0.112325  | 0.109703  | 0.120921  | 0.101981  | 0.120338  |
| 0.119755  | 0.114948 | 0.116841  | 0.116841  | 0.0447261 | 0.124563  | 0.0479312 |
| 0.196824  | 0.205711 | 0.209645  | 0.206148  | 0.199009  | 0.213578  | 0.204254  |
| 0.126603  | 0.122086 | 0.119901  | 0.114948  | 0.121212  | 0.122669  | 0.115385  |

|           |           |           |           |           |           |           |
|-----------|-----------|-----------|-----------|-----------|-----------|-----------|
| 0.123252  | 0.118153  | 0.122086  | 0.119464  | 0.0456002 | 0.128934  | 0.0543415 |
| 0.11014   | 0.119318  | 0.107226  | 0.121503  | 0.117279  | 0.0939685 | 0.120192  |
| 0.156469  | 0.162442  | 0.161713  | 0.162005  | 0.147582  | 0.170892  | 0.149913  |
| 0.113636  | 0.110577  | 0.107809  | 0.103147  | 0.110286  | 0.109703  | 0.105332  |
| 0.145542  | 0.146562  | 0.137966  | 0.141171  | 0.143065  | 0.146853  | 0.145688  |
| 0.121066  | 0.125291  | 0.109994  | 0.109411  | 0.121503  | 0.120921  | 0.128205  |
| 0.176136  | 0.187354  | 0.187791  | 0.182547  | 0.178904  | 0.190559  | 0.185023  |
| 0.126311  | 0.128788  | 0.119901  | 0.114656  | 0.124126  | 0.104895  | 0.12296   |
| 0.108829  | 0.0955711 | 0.0846445 | 0.0992133 | 0.107809  | 0.107226  | 0.107517  |
| 0.0617716 | 0.110577  | 0.109848  | 0.114219  | 0.110286  | 0.111742  | 0.109703  |
| 0.120775  | 0.113345  | 0.112908  | 0.113782  | 0.113054  | 0.106061  | 0.114802  |
| 0.126603  | 0.125874  | 0.11553   | 0.114365  | 0.121212  | 0.102564  | 0.121212  |
| 0.113491  | 0.116841  | 0.114948  | 0.112908  | 0.11859   | 0.115676  | 0.119172  |
| 0.117133  | 0.108829  | 0.103147  | 0.0501166 | 0.115822  | 0.11553   | 0.113782  |
| 0.173805  | 0.185897  | 0.184295  | 0.184295  | 0.179779  | 0.189103  | 0.184732  |
| 0.117133  | 0.126311  | 0.116259  | 0.123252  | 0.123689  | 0.116696  | 0.122523  |
| 0.113491  | 0.0515734 | 0.0942599 | 0.107372  | 0.107517  | 0.113345  | 0.106352  |
| 0.196678  | 0.206731  | 0.207751  | 0.206002  | 0.200029  | 0.213141  | 0.205274  |
| 0.105478  | 0.126311  | 0.123252  | 0.119464  | 0.119901  | 0.120484  | 0.125437  |
| 0.118444  | 0.111014  | 0.105915  | 0.050845  | 0.121795  | 0.117424  | 0.119172  |
| 0.114656  | 0.109848  | 0.10067   | 0.046183  | 0.111597  | 0.113345  | 0.111305  |
| 0.132576  | 0.129225  | 0.129371  | 0.129371  | 0.0700758 | 0.138549  | 0.0779429 |
| 0.175699  | 0.182255  | 0.185023  | 0.182692  | 0.179924  | 0.189831  | 0.182838  |
| 0.125728  | 0.123834  | 0.113491  | 0.118444  | 0.124417  | 0.085373  | 0.119755  |
| 0.128351  | 0.129662  | 0.122232  | 0.129808  | 0.129371  | 0.125874  | 0.13141   |
| 0.119027  | 0.11014   | 0.103001  | 0.0496795 | 0.119755  | 0.112471  | 0.116259  |
| 0.115239  | 0.107226  | 0.104167  | 0.0488054 | 0.117424  | 0.109848  | 0.111305  |
| 0.113928  | 0.109703  | 0.104312  | 0.0515734 | 0.117279  | 0.112325  | 0.117279  |
| 0.114656  | 0.108683  | 0.110577  | 0.107372  | 0.0524476 | 0.11451   | 0.0504079 |
| 0.112179  | 0.109703  | 0.0958625 | 0.0935315 | 0.112034  | 0.107663  | 0.112034  |
| 0.129662  | 0.127768  | 0.120047  | 0.121795  | 0.125146  | 0.108829  | 0.130973  |
| 0.117133  | 0.126894  | 0.123834  | 0.131993  | 0.119901  | 0.133013  | 0.122232  |
| 0.123543  | 0.125728  | 0.117133  | 0.115093  | 0.125437  | 0.107955  | 0.125146  |
| 0.131556  | 0.128788  | 0.121649  | 0.124854  | 0.12704   | 0.127331  | 0.128497  |
| 0.177156  | 0.190122  | 0.192016  | 0.185315  | 0.182838  | 0.191288  | 0.18546   |
| 0.120192  | 0.122669  | 0.111451  | 0.114656  | 0.122669  | 0.115967  | 0.120338  |
| 0.124126  | 0.119901  | 0.122086  | 0.123834  | 0.0523019 | 0.129808  | 0.0572552 |
| 0.11961   | 0.107809  | 0.101836  | 0.0499709 | 0.118007  | 0.113928  | 0.114802  |
| 0.11451   | 0.110577  | 0.092366  | 0.0941142 | 0.114073  | 0.108246  | 0.113491  |
| 0.115967  | 0.118153  | 0.107809  | 0.113636  | 0.113782  | 0.112617  | 0.116113  |
| 0.125437  | 0.122669  | 0.114365  | 0.121358  | 0.123543  | 0.0862471 | 0.118298  |
| 0.131265  | 0.128205  | 0.122815  | 0.125728  | 0.12296   | 0.124709  | 0.125     |
| 0.114219  | 0.116987  | 0.106061  | 0.110431  | 0.114365  | 0.11961   | 0.112325  |
| 0.115385  | 0.112908  | 0.104895  | 0.106643  | 0.118735  | 0.0942599 | 0.114073  |

|          |           |           |           |           |           |           |
|----------|-----------|-----------|-----------|-----------|-----------|-----------|
| 0.11553  | 0.110431  | 0.10067   | 0.102418  | 0.111888  | 0.0961538 | 0.1081    |
| 0.112179 | 0.099796  | 0.0850816 | 0.100233  | 0.108246  | 0.10912   | 0.106498  |
| 0.114073 | 0.114219  | 0.10708   | 0.116113  | 0.118881  | 0.0463287 | 0.11655   |
| 0.132576 | 0.134761  | 0.126166  | 0.127331  | 0.130682  | 0.116696  | 0.132139  |
| 0.122523 | 0.122378  | 0.107663  | 0.116113  | 0.123252  | 0.087704  | 0.11859   |
| 0.11014  | 0.107372  | 0.109266  | 0.1081    | 0.0525932 | 0.113199  | 0.0488054 |
| 0.119464 | 0.117279  | 0.107517  | 0.113054  | 0.11961   | 0.08581   | 0.113199  |
| 0.116987 | 0.109557  | 0.103584  | 0.0479312 | 0.114802  | 0.111597  | 0.112471  |
| 0.106935 | 0.116113  | 0.101981  | 0.115093  | 0.114073  | 0.0887238 | 0.115822  |
| 0.121795 | 0.11116   | 0.105478  | 0.0504079 | 0.120484  | 0.118153  | 0.11553   |
| 0.11451  | 0.117279  | 0.106352  | 0.1081    | 0.11757   | 0.11116   | 0.113491  |
| 0.114802 | 0.120484  | 0.109266  | 0.108683  | 0.118735  | 0.119901  | 0.11553   |
| 0.121212 | 0.120484  | 0.111597  | 0.108392  | 0.119901  | 0.102418  | 0.119901  |
| 0.118735 | 0.112762  | 0.0977564 | 0.092803  | 0.11451   | 0.109848  | 0.113345  |
| 0.118007 | 0.108829  | 0.104895  | 0.0524476 | 0.117861  | 0.113491  | 0.114656  |
| 0        | 0.120775  | 0.115093  | 0.11655   | 0.111742  | 0.118153  | 0.11553   |
| 0.120775 | 0         | 0.0962995 | 0.109703  | 0.11014   | 0.115967  | 0.11014   |
| 0.115093 | 0.0962995 | 0         | 0.104312  | 0.112325  | 0.108829  | 0.113199  |
| 0.11655  | 0.109703  | 0.104312  | 0         | 0.11553   | 0.113782  | 0.111742  |
| 0.111742 | 0.11014   | 0.112325  | 0.11553   | 0         | 0.122378  | 0.0492424 |
| 0.118153 | 0.115967  | 0.108829  | 0.113782  | 0.122378  | 0         | 0.11859   |
| 0.11553  | 0.11014   | 0.113199  | 0.111742  | 0.0492424 | 0.11859   | 0         |
| 0.118735 | 0.118881  | 0.109994  | 0.108537  | 0.121212  | 0.0996503 | 0.120921  |
| 0.118153 | 0.115676  | 0.102418  | 0.0965909 | 0.118881  | 0.111305  | 0.117133  |
| 0.108537 | 0.11451   | 0.103875  | 0.0992133 | 0.111888  | 0.109557  | 0.109266  |
| 0.105186 | 0.116404  | 0.102564  | 0.112179  | 0.116404  | 0.0866841 | 0.114365  |
| 0.119901 | 0.115093  | 0.113491  | 0.113782  | 0.0506993 | 0.124417  | 0.0512821 |
| 0.125728 | 0.105186  | 0.107955  | 0.126894  | 0.114802  | 0.109557  | 0.113928  |
| 0.112762 | 0.0962995 | 0.0976107 | 0.106935  | 0.108537  | 0.111451  | 0.104749  |
| 0.181818 | 0.188374  | 0.189685  | 0.187646  | 0.184878  | 0.193328  | 0.188666  |
| 0.150932 | 0.152826  | 0.15472   | 0.1588    | 0.14933   | 0.165355  | 0.151369  |
| 0.128497 | 0.122815  | 0.117133  | 0.118881  | 0.12398   | 0.104458  | 0.122232  |
| 0.114948 | 0.112471  | 0.110286  | 0.119318  | 0.113636  | 0.1081    | 0.108974  |
| 0.151661 | 0.152389  | 0.141463  | 0.148456  | 0.147436  | 0.130828  | 0.150932  |
| 0.126748 | 0.123106  | 0.119755  | 0.115967  | 0.123106  | 0.124272  | 0.121358  |
| 0.116987 | 0.116841  | 0.113782  | 0.081148  | 0.121212  | 0.120338  | 0.120629  |
| 0.11859  | 0.0828963 | 0.101399  | 0.0786713 | 0.11116   | 0.114365  | 0.109411  |
| 0.120629 | 0.116113  | 0.0879953 | 0.094697  | 0.120775  | 0.11961   | 0.116987  |
| 0.120338 | 0.0523019 | 0.101107  | 0.107226  | 0.112617  | 0.11757   | 0.10912   |
| 0.18546  | 0.195221  | 0.197407  | 0.192745  | 0.190268  | 0.201049  | 0.197261  |
| 0.127331 | 0.125728  | 0.116259  | 0.120047  | 0.12602   | 0.0907634 | 0.121066  |
| 0.113491 | 0.11451   | 0.112908  | 0.114365  | 0.0766317 | 0.110723  | 0.0740093 |
| 0.114365 | 0.101107  | 0.0887238 | 0.0604604 | 0.113928  | 0.11014   | 0.110431  |
| 0.121795 | 0.117279  | 0.107809  | 0.11655   | 0.118153  | 0.111451  | 0.11757   |

|           |           |           |           |           |           |           |
|-----------|-----------|-----------|-----------|-----------|-----------|-----------|
| 0.166812  | 0.160548  | 0.171474  | 0.175845  | 0.172494  | 0.187063  | 0.175699  |
| 0.229167  | 0.243298  | 0.243444  | 0.243444  | 0.234557  | 0.248543  | 0.24155   |
| 0.116404  | 0.121503  | 0.112908  | 0.10912   | 0.119172  | 0.121795  | 0.116259  |
| 0.116987  | 0.048951  | 0.0986305 | 0.107955  | 0.110431  | 0.118298  | 0.112179  |
| 0.122815  | 0.125583  | 0.11961   | 0.11553   | 0.122086  | 0.107226  | 0.123834  |
| 0.121503  | 0.120192  | 0.112471  | 0.110431  | 0.121066  | 0.101544  | 0.120192  |
| 0.119901  | 0.118007  | 0.107372  | 0.114656  | 0.116841  | 0.0850816 | 0.115093  |
| 0.110431  | 0.113782  | 0.104604  | 0.11014   | 0.11553   | 0.110577  | 0.11116   |
| 0.116696  | 0.105186  | 0.107372  | 0.076486  | 0.0839161 | 0.11655   | 0.0842075 |
| 0.121358  | 0.11655   | 0.106498  | 0.115239  | 0.119172  | 0.085373  | 0.113636  |
| 0.113054  | 0.106206  | 0.104312  | 0.0818765 | 0.071824  | 0.114948  | 0.074155  |
| 0.118735  | 0.101399  | 0.0456002 | 0.104458  | 0.118007  | 0.114219  | 0.11859   |
| 0.117133  | 0.113491  | 0.101399  | 0.0964452 | 0.114948  | 0.106498  | 0.114073  |
| 0.115822  | 0.124709  | 0.11116   | 0.113491  | 0.117716  | 0.121212  | 0.118298  |
| 0.118298  | 0.110286  | 0.113054  | 0.112762  | 0.0496795 | 0.116987  | 0.0520105 |
| 0.0661422 | 0.105332  | 0.099359  | 0.105478  | 0.105041  | 0.101544  | 0.101544  |
| 0.123543  | 0.13039   | 0.111305  | 0.115967  | 0.131265  | 0.116696  | 0.130682  |
| 0.138112  | 0.137966  | 0.127331  | 0.127914  | 0.133013  | 0.114073  | 0.136218  |
| 0.118153  | 0.105478  | 0.104167  | 0.050845  | 0.116259  | 0.111888  | 0.110723  |
| 0.122378  | 0.118153  | 0.113054  | 0.0865385 | 0.121358  | 0.11116   | 0.122815  |
| 0.132284  | 0.121649  | 0.120629  | 0.0635198 | 0.133304  | 0.131847  | 0.128934  |
| 0.197115  | 0.206585  | 0.204108  | 0.203234  | 0.199883  | 0.211247  | 0.20542   |
| 0.11014   | 0.113199  | 0.102273  | 0.107809  | 0.11116   | 0.109703  | 0.111742  |
| 0.114948  | 0.11451   | 0.0977564 | 0.0980478 | 0.113928  | 0.105186  | 0.115093  |
| 0.117279  | 0.122086  | 0.11553   | 0.11553   | 0.122378  | 0.116259  | 0.120921  |
| 0.106061  | 0.126894  | 0.120921  | 0.122086  | 0.118444  | 0.121941  | 0.122815  |
| 0.119464  | 0.113782  | 0.11014   | 0.113345  | 0.115239  | 0.112617  | 0.114073  |
| 0.185315  | 0.196533  | 0.193765  | 0.191142  | 0.189248  | 0.200321  | 0.193036  |
| 0.119027  | 0.113636  | 0.116113  | 0.11553   | 0.0501166 | 0.123252  | 0.0495338 |
| 0.115385  | 0.109994  | 0.102855  | 0.0463287 | 0.116987  | 0.113491  | 0.113491  |
| 0.130099  | 0.120047  | 0.112034  | 0.119318  | 0.117424  | 0.115093  | 0.122086  |
| 0.118153  | 0.116841  | 0.10708   | 0.107372  | 0.116841  | 0.0984848 | 0.118298  |
| 0.113782  | 0.114219  | 0.115822  | 0.112908  | 0.0501166 | 0.121212  | 0.0495338 |
| 0.108829  | 0.106643  | 0.104167  | 0.100087  | 0.0786713 | 0.113636  | 0.0763403 |
| 0.115822  | 0.100524  | 0.0470571 | 0.108246  | 0.118007  | 0.113636  | 0.11655   |
| 0.105624  | 0.122669  | 0.116696  | 0.116696  | 0.120047  | 0.115385  | 0.118007  |
| 0.18211   | 0.193619  | 0.194347  | 0.191725  | 0.184878  | 0.202069  | 0.191579  |
| 0.112325  | 0.107226  | 0.108246  | 0.104749  | 0.0536131 | 0.111597  | 0.0582751 |
| 0.177156  | 0.188666  | 0.189685  | 0.187937  | 0.184586  | 0.196533  | 0.190997  |
| 0.174097  | 0.188228  | 0.190414  | 0.185169  | 0.180944  | 0.194056  | 0.185315  |
| 0.130099  | 0.131702  | 0.124563  | 0.121649  | 0.129662  | 0.111597  | 0.134907  |
| 0.115239  | 0.13345   | 0.131265  | 0.128351  | 0.128497  | 0.127622  | 0.134615  |
| 0.10912   | 0.0987762 | 0.0479312 | 0.103584  | 0.1081    | 0.107517  | 0.107809  |
| 0.11014   | 0.105915  | 0.109848  | 0.104604  | 0.057838  | 0.109703  | 0.0587121 |

|           |          |           |           |           |           |           |
|-----------|----------|-----------|-----------|-----------|-----------|-----------|
| 0.113199  | 0.109557 | 0.108246  | 0.11116   | 0.0512821 | 0.11655   | 0.0483683 |
| 0.117279  | 0.11014  | 0.104749  | 0.048514  | 0.118007  | 0.118298  | 0.116841  |
| 0.119318  | 0.114219 | 0.103293  | 0.110868  | 0.113928  | 0.0844988 | 0.109848  |
| 0.121066  | 0.117716 | 0.105915  | 0.113491  | 0.119464  | 0.0833333 | 0.116841  |
| 0.117133  | 0.123106 | 0.112762  | 0.114802  | 0.116987  | 0.124563  | 0.120484  |
| 0.123106  | 0.120338 | 0.114365  | 0.113491  | 0.122086  | 0.103147  | 0.125291  |
| 0.115385  | 0.108246 | 0.0979021 | 0.0480769 | 0.111451  | 0.111451  | 0.111451  |
| 0.112617  | 0.109557 | 0.115822  | 0.109703  | 0.0472028 | 0.119172  | 0.0492424 |
| 0.108683  | 0.095134 | 0.0815851 | 0.100816  | 0.105041  | 0.103001  | 0.104749  |
| 0.121941  | 0.119755 | 0.121358  | 0.123689  | 0.0512821 | 0.127914  | 0.0588578 |
| 0.122523  | 0.121503 | 0.116696  | 0.114365  | 0.122086  | 0.10373   | 0.122086  |
| 0.128788  | 0.125146 | 0.128497  | 0.125     | 0.0540501 | 0.13447   | 0.0595862 |
| 0.242716  | 0.256847 | 0.255245  | 0.256119  | 0.24898   | 0.261218  | 0.254516  |
| 0.122086  | 0.133304 | 0.121503  | 0.129371  | 0.129225  | 0.101836  | 0.133013  |
| 0.123397  | 0.130245 | 0.119901  | 0.125728  | 0.127331  | 0.113636  | 0.131702  |
| 0.204837  | 0.214598 | 0.21183   | 0.210082  | 0.207896  | 0.223048  | 0.210227  |
| 0.130099  | 0.126748 | 0.12398   | 0.120192  | 0.131119  | 0.128205  | 0.131702  |
| 0.21285   | 0.22669  | 0.225962  | 0.225962  | 0.218531  | 0.233974  | 0.223776  |
| 0.113345  | 0.124272 | 0.114219  | 0.122086  | 0.121358  | 0.0960082 | 0.123106  |
| 0.131265  | 0.121795 | 0.116696  | 0.0592949 | 0.129662  | 0.129371  | 0.127914  |
| 0.10067   | 0.115967 | 0.113491  | 0.111451  | 0.118007  | 0.113928  | 0.115093  |
| 0.130099  | 0.127622 | 0.116696  | 0.116987  | 0.127331  | 0.108683  | 0.127914  |
| 0.186626  | 0.198135 | 0.198572  | 0.196824  | 0.191434  | 0.202506  | 0.197261  |
| 0.124563  | 0.119755 | 0.122523  | 0.121358  | 0.0509907 | 0.130245  | 0.0579837 |
| 0.116696  | 0.108974 | 0.113782  | 0.112908  | 0.0512821 | 0.118881  | 0.0498252 |
| 0.20979   | 0.2213   | 0.222028  | 0.223776  | 0.215181  | 0.227127  | 0.222465  |
| 0.119027  | 0.11859  | 0.112908  | 0.11757   | 0.124126  | 0.0885781 | 0.11655   |
| 0.181818  | 0.194202 | 0.194347  | 0.191434  | 0.188083  | 0.198572  | 0.191871  |
| 0.123834  | 0.118153 | 0.112471  | 0.119755  | 0.122523  | 0.0898893 | 0.116696  |
| 0.118007  | 0.110868 | 0.104021  | 0.0509907 | 0.119318  | 0.11553   | 0.116404  |
| 0.127185  | 0.124417 | 0.109703  | 0.106498  | 0.123252  | 0.122669  | 0.124126  |
| 0.134178  | 0.132576 | 0.124563  | 0.121358  | 0.131119  | 0.115676  | 0.133741  |
| 0.120338  | 0.117861 | 0.109557  | 0.108683  | 0.115239  | 0.113199  | 0.110577  |
| 0.146853  | 0.156323 | 0.14831   | 0.150932  | 0.155157  | 0.160985  | 0.15778   |
| 0.112179  | 0.105624 | 0.1081    | 0.109557  | 0.0435606 | 0.114948  | 0.046183  |
| 0.105769  | 0.124563 | 0.121503  | 0.119172  | 0.122523  | 0.118444  | 0.121066  |
| 0.115676  | 0.123397 | 0.11655   | 0.113054  | 0.120484  | 0.116987  | 0.123106  |
| 0.0673077 | 0.126894 | 0.122669  | 0.125874  | 0.116987  | 0.123106  | 0.120484  |
| 0.178176  | 0.189685 | 0.192162  | 0.188374  | 0.185023  | 0.195513  | 0.187354  |
| 0.115676  | 0.106498 | 0.103438  | 0.0472028 | 0.114073  | 0.114365  | 0.114948  |
| 0.11553   | 0.121212 | 0.114948  | 0.116696  | 0.125291  | 0.106061  | 0.125291  |
| 0.11655   | 0.114656 | 0.106643  | 0.116259  | 0.119318  | 0.0479312 | 0.112325  |
| 0.125437  | 0.124126 | 0.113782  | 0.120192  | 0.121212  | 0.087704  | 0.120921  |
| 0.123252  | 0.117861 | 0.112179  | 0.0547786 | 0.123689  | 0.121066  | 0.120775  |

|           |          |           |           |           |           |           |
|-----------|----------|-----------|-----------|-----------|-----------|-----------|
| 0.240239  | 0.254079 | 0.251894  | 0.250437  | 0.244464  | 0.257284  | 0.253205  |
| 0.121795  | 0.123106 | 0.105769  | 0.104312  | 0.119901  | 0.114073  | 0.120192  |
| 0.11451   | 0.115822 | 0.108974  | 0.0871212 | 0.120484  | 0.118153  | 0.116404  |
| 0.166667  | 0.177302 | 0.177156  | 0.184441  | 0.170309  | 0.17905   | 0.176719  |
| 0.172786  | 0.181672 | 0.181235  | 0.177739  | 0.17701   | 0.1875    | 0.182547  |
| 0.113054  | 0.120775 | 0.11014   | 0.114219  | 0.116987  | 0.120775  | 0.118153  |
| 0.116113  | 0.108392 | 0.113782  | 0.110868  | 0.0504079 | 0.119464  | 0.0506993 |
| 0.118735  | 0.117133 | 0.111451  | 0.108246  | 0.117716  | 0.103147  | 0.116841  |
| 0.138112  | 0.134178 | 0.137821  | 0.138695  | 0.064831  | 0.14729   | 0.0721154 |
| 0.111888  | 0.120484 | 0.106935  | 0.113054  | 0.114656  | 0.118735  | 0.114365  |
| 0.116696  | 0.122086 | 0.109703  | 0.112908  | 0.121503  | 0.121212  | 0.120629  |
| 0.126166  | 0.126894 | 0.121795  | 0.125291  | 0.128642  | 0.0933858 | 0.124854  |
| 0.113636  | 0.112617 | 0.112471  | 0.110431  | 0.0456002 | 0.119901  | 0.0534674 |
| 0.125437  | 0.120047 | 0.125146  | 0.122232  | 0.0498252 | 0.130245  | 0.0585664 |
| 0.112179  | 0.119318 | 0.111888  | 0.11655   | 0.114365  | 0.0960082 | 0.116404  |
| 0.131556  | 0.131119 | 0.117279  | 0.121066  | 0.127331  | 0.108974  | 0.13141   |
| 0.139569  | 0.141754 | 0.136072  | 0.132284  | 0.13884   | 0.120484  | 0.142045  |
| 0.126603  | 0.12296  | 0.110286  | 0.106498  | 0.124417  | 0.119755  | 0.126748  |
| 0.134907  | 0.135927 | 0.12704   | 0.124417  | 0.133013  | 0.112908  | 0.137092  |
| 0.133159  | 0.13039  | 0.123834  | 0.127331  | 0.13039   | 0.0960082 | 0.125728  |
| 0.193328  | 0.20134  | 0.201777  | 0.200029  | 0.195221  | 0.208625  | 0.198427  |
| 0.127622  | 0.122815 | 0.100233  | 0.105769  | 0.127185  | 0.113199  | 0.130682  |
| 0.177156  | 0.1875   | 0.189394  | 0.18648   | 0.183421  | 0.19391   | 0.184586  |
| 0.0917832 | 0.112617 | 0.110723  | 0.112179  | 0.112908  | 0.112617  | 0.11553   |
| 0.125874  | 0.119027 | 0.11451   | 0.0608974 | 0.124563  | 0.124563  | 0.124563  |
| 0.125874  | 0.125437 | 0.118298  | 0.118007  | 0.121941  | 0.112034  | 0.122815  |
| 0.122523  | 0.11859  | 0.112617  | 0.109994  | 0.121795  | 0.102855  | 0.118298  |
| 0.11859   | 0.114948 | 0.118007  | 0.11451   | 0.046183  | 0.124272  | 0.0514277 |
| 0.118007  | 0.116696 | 0.117424  | 0.118007  | 0.0458916 | 0.123397  | 0.0505536 |
| 0.115385  | 0.112617 | 0.108392  | 0.0541958 | 0.11961   | 0.116696  | 0.118444  |
| 0.103293  | 0.121503 | 0.117279  | 0.113199  | 0.119464  | 0.118881  | 0.118881  |
| 0.130099  | 0.127914 | 0.121066  | 0.125437  | 0.120921  | 0.111014  | 0.125874  |
| 0.128205  | 0.138549 | 0.128497  | 0.136072  | 0.136218  | 0.0995047 | 0.136218  |
| 0.236597  | 0.247523 | 0.247086  | 0.246795  | 0.240822  | 0.253642  | 0.245775  |
| 0.11859   | 0.112325 | 0.107809  | 0.0504079 | 0.120775  | 0.11757   | 0.119318  |
| 0.170892  | 0.175991 | 0.178467  | 0.177302  | 0.175408  | 0.185897  | 0.179196  |
| 0.173951  | 0.184878 | 0.183858  | 0.183275  | 0.178467  | 0.189831  | 0.183712  |
| 0.116696  | 0.118007 | 0.105915  | 0.110868  | 0.122669  | 0.120047  | 0.122378  |
| 0.120192  | 0.116841 | 0.101836  | 0.0989219 | 0.116841  | 0.113928  | 0.115967  |
| 0.129516  | 0.120047 | 0.114365  | 0.0575466 | 0.126166  | 0.126166  | 0.124709  |
| 0.10912   | 0.105186 | 0.110868  | 0.107955  | 0.0521562 | 0.11655   | 0.0521562 |
| 0.109557  | 0.115822 | 0.0842075 | 0.0952797 | 0.116696  | 0.117861  | 0.119901  |
| 0.124709  | 0.118444 | 0.11014   | 0.116841  | 0.123689  | 0.0878497 | 0.116987  |
| 0.118735  | 0.117424 | 0.113782  | 0.11116   | 0.0702214 | 0.123252  | 0.0804196 |

|          |          |           |           |           |           |           |
|----------|----------|-----------|-----------|-----------|-----------|-----------|
| 0.129225 | 0.124126 | 0.127185  | 0.125728  | 0.0530303 | 0.131702  | 0.0603147 |
| 0.118007 | 0.11116  | 0.106643  | 0.0527389 | 0.117279  | 0.11757   | 0.117279  |
| 0.124709 | 0.119318 | 0.121795  | 0.123834  | 0.0523019 | 0.129808  | 0.0572552 |
| 0.110577 | 0.114802 | 0.106206  | 0.118444  | 0.119172  | 0.104312  | 0.121503  |
| 0.133887 | 0.129953 | 0.122232  | 0.122815  | 0.127914  | 0.110431  | 0.128205  |
| 0.123252 | 0.121649 | 0.115093  | 0.114219  | 0.121649  | 0.103875  | 0.123689  |
| 0.133596 | 0.136655 | 0.12602   | 0.13039   | 0.134033  | 0.0958625 | 0.131119  |
| 0.12296  | 0.107955 | 0.0521562 | 0.11014   | 0.123689  | 0.11961   | 0.12602   |
| 0.11859  | 0.113199 | 0.101107  | 0.0591492 | 0.118153  | 0.115239  | 0.115822  |
| 0.130536 | 0.132721 | 0.127622  | 0.129662  | 0.131556  | 0.133304  | 0.13243   |
| 0.168852 | 0.181235 | 0.180216  | 0.177885  | 0.175991  | 0.186772  | 0.18007   |
| 0.129953 | 0.129516 | 0.129371  | 0.128497  | 0.055507  | 0.133304  | 0.0642483 |
| 0.115676 | 0.116404 | 0.114219  | 0.115967  | 0.043852  | 0.125728  | 0.0493881 |
| 0.125728 | 0.124709 | 0.114948  | 0.116404  | 0.124709  | 0.104312  | 0.124126  |
| 0.11655  | 0.117279 | 0.106643  | 0.106643  | 0.117279  | 0.099796  | 0.116404  |
| 0.122523 | 0.123543 | 0.114073  | 0.114365  | 0.122669  | 0.103438  | 0.126457  |
| 0.129079 | 0.124854 | 0.118007  | 0.117716  | 0.126311  | 0.107663  | 0.129516  |
| 0.176428 | 0.186189 | 0.187209  | 0.186626  | 0.184149  | 0.192308  | 0.185897  |
| 0.115822 | 0.107226 | 0.106498  | 0.112617  | 0.0681818 | 0.119172  | 0.0748834 |
| 0.108392 | 0.106498 | 0.0987762 | 0.106935  | 0.103875  | 0.109994  | 0.103875  |
| 0.121503 | 0.116113 | 0.120629  | 0.118007  | 0.0473485 | 0.127185  | 0.050845  |
| 0.178176 | 0.187063 | 0.188083  | 0.185752  | 0.180653  | 0.194347  | 0.186772  |
| 0.108392 | 0.11553  | 0.0990676 | 0.0961538 | 0.112617  | 0.111742  | 0.116113  |
| 0.130099 | 0.129953 | 0.121941  | 0.124272  | 0.128788  | 0.0914918 | 0.124126  |
| 0.122523 | 0.114802 | 0.118153  | 0.117861  | 0.0472028 | 0.125291  | 0.0501166 |
| 0.111888 | 0.116113 | 0.106352  | 0.107517  | 0.11553   | 0.117861  | 0.111742  |
| 0.171329 | 0.18109  | 0.181818  | 0.181527  | 0.174388  | 0.189831  | 0.180216  |
| 0.12296  | 0.123397 | 0.117424  | 0.123543  | 0.118735  | 0.0895979 | 0.116987  |
| 0.115385 | 0.11553  | 0.107517  | 0.112179  | 0.109994  | 0.114948  | 0.110577  |
| 0.110723 | 0.116404 | 0.0996503 | 0.0979021 | 0.115239  | 0.110577  | 0.114656  |
| 0.109848 | 0.121649 | 0.117424  | 0.117716  | 0.113199  | 0.115239  | 0.111451  |
| 0.108246 | 0.122086 | 0.119318  | 0.119318  | 0.122669  | 0.114802  | 0.120921  |
| 0.132721 | 0.131119 | 0.123689  | 0.128351  | 0.128788  | 0.0944056 | 0.126748  |
| 0.120192 | 0.112179 | 0.104749  | 0.0490967 | 0.118007  | 0.114802  | 0.113928  |
| 0.117861 | 0.114802 | 0.103875  | 0.123689  | 0.113928  | 0.115676  | 0.11655   |
| 0.13549  | 0.144668 | 0.13549   | 0.137821  | 0.139423  | 0.148456  | 0.142628  |
| 0.221445 | 0.232955 | 0.230186  | 0.231643  | 0.225379  | 0.237908  | 0.231498  |
| 0.129079 | 0.113491 | 0.0547786 | 0.116259  | 0.124563  | 0.124854  | 0.130682  |
| 0.104312 | 0.122232 | 0.118298  | 0.117133  | 0.122232  | 0.115822  | 0.122815  |
| 0.112908 | 0.111888 | 0.109994  | 0.113491  | 0.0504079 | 0.120629  | 0.0579837 |
| 0.119172 | 0.122232 | 0.116841  | 0.117133  | 0.120775  | 0.122815  | 0.121941  |
| 0.104167 | 0.118298 | 0.113491  | 0.113782  | 0.11014   | 0.107226  | 0.113054  |
| 0.123106 | 0.117716 | 0.111742  | 0.119901  | 0.117716  | 0.116259  | 0.120047  |
| 0.118298 | 0.117279 | 0.119464  | 0.11655   | 0.0543415 | 0.122815  | 0.0622086 |



|          |           |           |           |           |           |           |
|----------|-----------|-----------|-----------|-----------|-----------|-----------|
| 0.130099 | 0.130828  | 0.120192  | 0.12602   | 0.127914  | 0.0917832 | 0.125291  |
| 0.109994 | 0.113636  | 0.112325  | 0.110577  | 0.115967  | 0.116841  | 0.114219  |
| 0.222902 | 0.234411  | 0.234557  | 0.231643  | 0.227418  | 0.239948  | 0.233829  |
| 0.116696 | 0.11451   | 0.101253  | 0.0971737 | 0.112179  | 0.108683  | 0.112762  |
| 0.108537 | 0.111888  | 0.0968823 | 0.109703  | 0.11014   | 0.0865385 | 0.111597  |
| 0.117716 | 0.107955  | 0.104021  | 0.0518648 | 0.114948  | 0.114365  | 0.113491  |
| 0.12398  | 0.128205  | 0.121649  | 0.121941  | 0.125874  | 0.133159  | 0.125583  |
| 0.132139 | 0.118298  | 0.0613345 | 0.122232  | 0.136072  | 0.129371  | 0.138403  |
| 0.121649 | 0.116841  | 0.109411  | 0.104749  | 0.111597  | 0.122086  | 0.108683  |
| 0.11757  | 0.114219  | 0.115239  | 0.114656  | 0.0474942 | 0.123252  | 0.0486597 |
| 0.109557 | 0.110868  | 0.102855  | 0.105769  | 0.109411  | 0.112034  | 0.108829  |
| 0.220571 | 0.226544  | 0.229604  | 0.226107  | 0.220425  | 0.231789  | 0.226836  |
| 0.121503 | 0.121066  | 0.119464  | 0.118298  | 0.0470571 | 0.126603  | 0.0528846 |
| 0.12602  | 0.124126  | 0.120192  | 0.121941  | 0.124126  | 0.0879953 | 0.121795  |
| 0.109411 | 0.117424  | 0.105332  | 0.104458  | 0.11655   | 0.114219  | 0.114802  |
| 0.102273 | 0.125728  | 0.120921  | 0.118007  | 0.119027  | 0.119318  | 0.120484  |
| 0.117424 | 0.129808  | 0.116841  | 0.12704   | 0.125146  | 0.0977564 | 0.127477  |
| 0.120338 | 0.112908  | 0.1081    | 0.0518648 | 0.118444  | 0.118444  | 0.114948  |
| 0.129079 | 0.127185  | 0.117716  | 0.126457  | 0.12602   | 0.0930944 | 0.123106  |
| 0.131556 | 0.132284  | 0.125728  | 0.129225  | 0.128788  | 0.0944056 | 0.128788  |
| 0.123106 | 0.12296   | 0.112034  | 0.119318  | 0.120629  | 0.0871212 | 0.11859   |
| 0.117133 | 0.110577  | 0.106061  | 0.0495338 | 0.116987  | 0.116696  | 0.116404  |
| 0.109266 | 0.131847  | 0.125291  | 0.123252  | 0.123397  | 0.125437  | 0.128934  |
| 0.115239 | 0.134324  | 0.130682  | 0.129225  | 0.126457  | 0.130245  | 0.129953  |
| 0.133304 | 0.132576  | 0.12398   | 0.126311  | 0.127914  | 0.115093  | 0.130536  |
| 0.135052 | 0.136364  | 0.128934  | 0.131265  | 0.132284  | 0.115385  | 0.136655  |
| 0.115967 | 0.132721  | 0.129079  | 0.127914  | 0.130099  | 0.127768  | 0.132139  |
| 0.117133 | 0.106498  | 0.0798368 | 0.0862471 | 0.115822  | 0.112034  | 0.112617  |
| 0.133596 | 0.133159  | 0.126311  | 0.138258  | 0.134907  | 0.0614802 | 0.132284  |
| 0.139277 | 0.135052  | 0.120047  | 0.118881  | 0.134178  | 0.127185  | 0.133596  |
| 0.189977 | 0.202069  | 0.200758  | 0.200466  | 0.193036  | 0.207022  | 0.200612  |
| 0.126457 | 0.0642483 | 0.105186  | 0.114802  | 0.119027  | 0.12398   | 0.121941  |
| 0.113928 | 0.116696  | 0.107517  | 0.116259  | 0.117861  | 0.0875583 | 0.116987  |
| 0.119027 | 0.116841  | 0.110286  | 0.053176  | 0.123252  | 0.120338  | 0.124417  |
| 0.207168 | 0.221882  | 0.219988  | 0.219114  | 0.211976  | 0.225379  | 0.21722   |
| 0.195221 | 0.209062  | 0.210082  | 0.205128  | 0.202943  | 0.212267  | 0.207314  |
| 0.131556 | 0.131119  | 0.123689  | 0.126311  | 0.129953  | 0.0941142 | 0.128788  |
| 0.23514  | 0.247232  | 0.248543  | 0.248543  | 0.239073  | 0.252768  | 0.244318  |
| 0.115676 | 0.10912   | 0.0836247 | 0.0868298 | 0.116987  | 0.11116   | 0.114948  |
| 0.140734 | 0.139132  | 0.115385  | 0.124417  | 0.138549  | 0.136509  | 0.140297  |
| 0.119464 | 0.119027  | 0.0996503 | 0.0976107 | 0.117279  | 0.113199  | 0.11961   |
| 0.109411 | 0.129371  | 0.12398   | 0.124272  | 0.123543  | 0.123252  | 0.125291  |
| 0.17366  | 0.181381  | 0.184149  | 0.182401  | 0.177885  | 0.190122  | 0.183421  |
| 0.121649 | 0.123252  | 0.114365  | 0.118444  | 0.125583  | 0.119464  | 0.126166  |

|           |           |           |           |           |           |           |
|-----------|-----------|-----------|-----------|-----------|-----------|-----------|
| 0.180507  | 0.188811  | 0.190122  | 0.189248  | 0.184149  | 0.194639  | 0.187063  |
| 0.118444  | 0.115385  | 0.103293  | 0.10708   | 0.119464  | 0.116841  | 0.119172  |
| 0.112908  | 0.116259  | 0.115239  | 0.115822  | 0.0999417 | 0.0976107 | 0.0999417 |
| 0.119901  | 0.126748  | 0.106206  | 0.117861  | 0.122378  | 0.124126  | 0.128497  |
| 0.114656  | 0.117424  | 0.106789  | 0.107955  | 0.105769  | 0.110723  | 0.10373   |
| 0.112179  | 0.105624  | 0.0987762 | 0.0472028 | 0.110577  | 0.110286  | 0.112034  |
| 0.115385  | 0.0479312 | 0.0961538 | 0.103438  | 0.108537  | 0.110868  | 0.106498  |
| 0.112179  | 0.113782  | 0.0964452 | 0.0938228 | 0.114073  | 0.107955  | 0.113782  |
| 0.114656  | 0.11014   | 0.107372  | 0.106206  | 0.0474942 | 0.117716  | 0.0492424 |
| 0.120629  | 0.118444  | 0.111888  | 0.119464  | 0.120775  | 0.0514277 | 0.11961   |
| 0.111888  | 0.100087  | 0.0437063 | 0.106352  | 0.113199  | 0.111451  | 0.114365  |
| 0.11757   | 0.11655   | 0.10067   | 0.0980478 | 0.117133  | 0.111597  | 0.118007  |
| 0.120629  | 0.122815  | 0.115676  | 0.106352  | 0.123106  | 0.109703  | 0.122815  |
| 0.125     | 0.123106  | 0.122378  | 0.12296   | 0.0517191 | 0.13039   | 0.0613345 |
| 0.120484  | 0.116841  | 0.113199  | 0.108829  | 0.118007  | 0.104312  | 0.117133  |
| 0.115093  | 0.115239  | 0.106643  | 0.108683  | 0.116113  | 0.110286  | 0.11553   |
| 0.112034  | 0.107517  | 0.10067   | 0.0482226 | 0.111014  | 0.108392  | 0.111888  |
| 0.120192  | 0.123543  | 0.115822  | 0.121066  | 0.11655   | 0.0920746 | 0.115967  |
| 0.104458  | 0.122669  | 0.120484  | 0.115822  | 0.118881  | 0.116841  | 0.118298  |
| 0.124709  | 0.12398   | 0.116259  | 0.11451   | 0.124563  | 0.103584  | 0.128642  |
| 0.122086  | 0.120484  | 0.111597  | 0.118298  | 0.122232  | 0.103875  | 0.123106  |
| 0.116113  | 0.112471  | 0.113491  | 0.114656  | 0.0477855 | 0.118007  | 0.0498252 |
| 0.126748  | 0.122815  | 0.124417  | 0.123834  | 0.0537587 | 0.131556  | 0.0584207 |
| 0.132284  | 0.128642  | 0.130828  | 0.13141   | 0.0566725 | 0.137966  | 0.064831  |
| 0.114073  | 0.11014   | 0.0977564 | 0.103001  | 0.112179  | 0.0836247 | 0.109557  |
| 0.118735  | 0.109557  | 0.104167  | 0.0520105 | 0.11859   | 0.117716  | 0.117424  |
| 0.11451   | 0.111742  | 0.100816  | 0.107809  | 0.107955  | 0.106498  | 0.11116   |
| 0.117716  | 0.132721  | 0.130536  | 0.130828  | 0.128642  | 0.131556  | 0.133596  |
| 0.119027  | 0.118298  | 0.103875  | 0.102127  | 0.119172  | 0.11451   | 0.120629  |
| 0.141463  | 0.143357  | 0.137383  | 0.133887  | 0.138403  | 0.121795  | 0.142191  |
| 0.135927  | 0.128205  | 0.124854  | 0.0680361 | 0.137238  | 0.136946  | 0.134033  |
| 0.122378  | 0.128059  | 0.112179  | 0.115093  | 0.121066  | 0.128059  | 0.122523  |
| 0.117279  | 0.105478  | 0.088141  | 0.0989219 | 0.109266  | 0.111597  | 0.106643  |
| 0.0614802 | 0.108246  | 0.104895  | 0.111888  | 0.109703  | 0.11116   | 0.10708   |
| 0.132284  | 0.128934  | 0.123543  | 0.121212  | 0.128351  | 0.113782  | 0.130099  |
| 0.194784  | 0.201049  | 0.204983  | 0.201486  | 0.195221  | 0.206876  | 0.201923  |
| 0.112908  | 0.112179  | 0.10708   | 0.111451  | 0.116841  | 0.113054  | 0.11451   |
| 0.11655   | 0.11961   | 0.102273  | 0.112471  | 0.118444  | 0.11961   | 0.118153  |
| 0.104749  | 0.122378  | 0.11961   | 0.118444  | 0.11859   | 0.115676  | 0.120047  |
| 0.122378  | 0.12398   | 0.116841  | 0.113636  | 0.119901  | 0.106206  | 0.120484  |
| 0.123397  | 0.117424  | 0.108829  | 0.10912   | 0.124417  | 0.121212  | 0.123543  |
| 0.125437  | 0.102855  | 0.107955  | 0.124563  | 0.116259  | 0.111014  | 0.113345  |
| 0.129953  | 0.110868  | 0.113054  | 0.126457  | 0.116696  | 0.117279  | 0.117861  |
| 0.117279  | 0.120629  | 0.112325  | 0.11553   | 0.120921  | 0.122669  | 0.120338  |

|          |           |           |           |           |           |           |
|----------|-----------|-----------|-----------|-----------|-----------|-----------|
| 0.115822 | 0.112762  | 0.104749  | 0.111451  | 0.117424  | 0.0483683 | 0.115676  |
| 0.114365 | 0.129662  | 0.124563  | 0.12602   | 0.127331  | 0.127622  | 0.127914  |
| 0.117861 | 0.119172  | 0.0995047 | 0.11116   | 0.116841  | 0.117133  | 0.122086  |
| 0.118881 | 0.103001  | 0.0474942 | 0.1081    | 0.121358  | 0.117861  | 0.120775  |
| 0.169143 | 0.178613  | 0.174971  | 0.175554  | 0.168706  | 0.174825  | 0.172203  |
| 0.114365 | 0.106643  | 0.111742  | 0.111742  | 0.0521562 | 0.116841  | 0.0515734 |
| 0.105186 | 0.13039   | 0.125583  | 0.125583  | 0.12398   | 0.12602   | 0.130099  |
| 0.124563 | 0.122086  | 0.100962  | 0.113782  | 0.128788  | 0.102273  | 0.128205  |
| 0.120047 | 0.125437  | 0.118007  | 0.119172  | 0.112617  | 0.109703  | 0.115239  |
| 0.112471 | 0.0971737 | 0.0847902 | 0.103147  | 0.107663  | 0.104749  | 0.107663  |
| 0.109266 | 0.0945513 | 0.0457459 | 0.097028  | 0.112325  | 0.105915  | 0.109994  |
| 0.118007 | 0.100087  | 0.0850816 | 0.109266  | 0.112325  | 0.109411  | 0.113199  |
| 0.121503 | 0.126894  | 0.117716  | 0.120629  | 0.12398   | 0.108246  | 0.124563  |
| 0.116259 | 0.103293  | 0.0789627 | 0.108974  | 0.0852273 | 0.116113  | 0.0893065 |
| 0.133013 | 0.132867  | 0.119318  | 0.121358  | 0.128497  | 0.11451   | 0.129953  |
| 0.109848 | 0.107663  | 0.10169   | 0.106061  | 0.108246  | 0.095134  | 0.10912   |
| 0.115822 | 0.116841  | 0.0962995 | 0.114948  | 0.123543  | 0.0944056 | 0.122378  |
| 0.131119 | 0.131556  | 0.122086  | 0.125     | 0.133887  | 0.114948  | 0.134761  |
| 0.124417 | 0.116113  | 0.090035  | 0.110431  | 0.126311  | 0.090472  | 0.123106  |
| 0.127331 | 0.122232  | 0.111597  | 0.115093  | 0.119901  | 0.112034  | 0.123397  |
| 0.120047 | 0.112908  | 0.0874126 | 0.104312  | 0.121066  | 0.0831876 | 0.121358  |
| 0.121212 | 0.115239  | 0.0906177 | 0.109557  | 0.122523  | 0.0901807 | 0.122523  |
| 0.115385 | 0.107663  | 0.0961538 | 0.0967366 | 0.117279  | 0.104749  | 0.114073  |
| 0.129808 | 0.124417  | 0.10271   | 0.110868  | 0.126457  | 0.113345  | 0.124709  |
| 0.114948 | 0.112179  | 0.0907634 | 0.100379  | 0.120338  | 0.0984848 | 0.117424  |
| 0.144668 | 0.144522  | 0.140006  | 0.138258  | 0.139569  | 0.122086  | 0.137821  |
| 0.128351 | 0.132576  | 0.127185  | 0.128059  | 0.125583  | 0.116259  | 0.126457  |
| 0.116696 | 0.107517  | 0.0893065 | 0.104167  | 0.11655   | 0.0856643 | 0.113345  |
| 0.134615 | 0.137092  | 0.138986  | 0.138695  | 0.134761  | 0.121941  | 0.136801  |
| 0.122669 | 0.120192  | 0.113054  | 0.114802  | 0.119318  | 0.112908  | 0.118735  |
| 0.138695 | 0.139423  | 0.11859   | 0.128788  | 0.135344  | 0.131556  | 0.140297  |
| 0.116259 | 0.118735  | 0.100233  | 0.106352  | 0.118444  | 0.103875  | 0.119027  |
| 0.14292  | 0.148893  | 0.13884   | 0.137966  | 0.139569  | 0.141026  | 0.138986  |
| 0.124563 | 0.13141   | 0.115822  | 0.128059  | 0.13345   | 0.11655   | 0.135198  |
| 0.138549 | 0.140152  | 0.130682  | 0.135052  | 0.141026  | 0.124709  | 0.1419    |
| 0.127768 | 0.125874  | 0.107955  | 0.11553   | 0.124417  | 0.104895  | 0.121503  |
| 0.11859  | 0.113491  | 0.0929487 | 0.100524  | 0.11961   | 0.0852273 | 0.116696  |
| 0.116696 | 0.115385  | 0.095134  | 0.103001  | 0.11859   | 0.101981  | 0.119172  |
| 0.115967 | 0.120484  | 0.1081    | 0.113928  | 0.122232  | 0.10271   | 0.118153  |
| 0.130828 | 0.120775  | 0.104021  | 0.11451   | 0.123689  | 0.0989219 | 0.125437  |
| 0.129225 | 0.128788  | 0.113782  | 0.117861  | 0.129371  | 0.120921  | 0.132576  |
| 0.125146 | 0.125583  | 0.115822  | 0.115822  | 0.124126  | 0.112762  | 0.122378  |
| 0.110868 | 0.113636  | 0.100379  | 0.105041  | 0.116259  | 0.0955711 | 0.112471  |
| 0.117424 | 0.115239  | 0.0929487 | 0.102855  | 0.119901  | 0.103001  | 0.117861  |

|          |          |           |           |          |          |           |
|----------|----------|-----------|-----------|----------|----------|-----------|
| 0.123689 | 0.121795 | 0.103293  | 0.107372  | 0.123543 | 0.115093 | 0.125     |
| 0.124272 | 0.113345 | 0.101544  | 0.100379  | 0.115093 | 0.104312 | 0.115385  |
| 0.127622 | 0.124272 | 0.100233  | 0.112179  | 0.127477 | 0.111451 | 0.127477  |
| 0.125583 | 0.112617 | 0.0996503 | 0.106061  | 0.112034 | 0.106789 | 0.112034  |
| 0.118735 | 0.115676 | 0.108246  | 0.106789  | 0.106352 | 0.122086 | 0.105769  |
| 0.122232 | 0.107517 | 0.0922203 | 0.103001  | 0.113054 | 0.116259 | 0.112179  |
| 0.11553  | 0.110431 | 0.0823135 | 0.0875583 | 0.113636 | 0.11451  | 0.111597  |
| 0.117279 | 0.112471 | 0.0936772 | 0.101544  | 0.118007 | 0.107809 | 0.11655   |
| 0.113345 | 0.11553  | 0.106935  | 0.105478  | 0.106789 | 0.117861 | 0.106206  |
| 0.121358 | 0.100524 | 0.0861014 | 0.106498  | 0.109557 | 0.108974 | 0.111014  |
| 0.121649 | 0.112762 | 0.110868  | 0.124854  | 0.104604 | 0.126166 | 0.105186  |
| 0.112908 | 0.107809 | 0.0983392 | 0.0957168 | 0.101399 | 0.112762 | 0.0973193 |
| 0.133159 | 0.120775 | 0.100233  | 0.123543  | 0.121941 | 0.120192 | 0.125437  |

| TDr_2295 | TDr_2297  | TDr_2307  | TDr_2312  | TDr_2320  | TDr_2323  | TDr_2329  |
|----------|-----------|-----------|-----------|-----------|-----------|-----------|
| 0.11655  | 0.110431  | 0.115093  | 0.106789  | 0.121795  | 0.111014  | 0.106789  |
| 0.119027 | 0.102127  | 0.102127  | 0.117716  | 0.108246  | 0.110868  | 0.0926573 |
| 0.115239 | 0.099796  | 0.0989219 | 0.109266  | 0.100962  | 0.106498  | 0.0879953 |
| 0.119318 | 0.101253  | 0.10708   | 0.112471  | 0.0945513 | 0.11757   | 0.111014  |
| 0.129808 | 0.126311  | 0.122232  | 0.125583  | 0.133304  | 0.132139  | 0.128497  |
| 0.132139 | 0.11961   | 0.0919289 | 0.125291  | 0.128351  | 0.133596  | 0.128205  |
| 0.124709 | 0.110723  | 0.113345  | 0.107372  | 0.130536  | 0.131119  | 0.119318  |
| 0.109848 | 0.108683  | 0.103438  | 0.10912   | 0.106935  | 0.118298  | 0.109994  |
| 0.110286 | 0.0945513 | 0.101253  | 0.0987762 | 0.109411  | 0.0919289 | 0.0984848 |
| 0.116841 | 0.07838   | 0.103147  | 0.109994  | 0.120921  | 0.122378  | 0.112034  |
| 0.116696 | 0.107955  | 0.116404  | 0.107517  | 0.12398   | 0.121358  | 0.119172  |
| 0.104604 | 0.101107  | 0.101981  | 0.101836  | 0.107226  | 0.110723  | 0.102418  |
| 0.108392 | 0.0984848 | 0.109266  | 0.103293  | 0.115385  | 0.0882867 | 0.10067   |
| 0.139132 | 0.122523  | 0.123106  | 0.131119  | 0.130682  | 0.137966  | 0.126166  |
| 0.121503 | 0.11014   | 0.113636  | 0.130099  | 0.130536  | 0.13549   | 0.119901  |
| 0.118153 | 0.109994  | 0.112908  | 0.113636  | 0.120775  | 0.116404  | 0.117716  |
| 0.108392 | 0.10373   | 0.104604  | 0.100379  | 0.117716  | 0.113054  | 0.108246  |
| 0.153118 | 0.139714  | 0.130973  | 0.138112  | 0.141463  | 0.146999  | 0.134324  |
| 0.11553  | 0.099796  | 0.0962995 | 0.111597  | 0.105041  | 0.103875  | 0.0941142 |
| 0.2044   | 0.195659  | 0.196533  | 0.206585  | 0.199738  | 0.204691  | 0.195221  |
| 0.126748 | 0.119755  | 0.111305  | 0.118444  | 0.131119  | 0.130245  | 0.122815  |
| 0.121649 | 0.112034  | 0.113491  | 0.113636  | 0.126894  | 0.126311  | 0.120338  |
| 0.108392 | 0.10169   | 0.1081    | 0.106498  | 0.112179  | 0.116841  | 0.111742  |
| 0.121066 | 0.115822  | 0.121066  | 0.113054  | 0.129808  | 0.119318  | 0.127622  |
| 0.100233 | 0.0929487 | 0.0987762 | 0.099796  | 0.109848  | 0.11859   | 0.105332  |
| 0.13549  | 0.120921  | 0.119755  | 0.126311  | 0.136072  | 0.13141   | 0.129516  |
| 0.11655  | 0.118007  | 0.115093  | 0.108537  | 0.130536  | 0.128497  | 0.128351  |
| 0.122669 | 0.108683  | 0.120338  | 0.110868  | 0.121795  | 0.113345  | 0.117861  |
| 0.129371 | 0.124709  | 0.125     | 0.115239  | 0.131702  | 0.126457  | 0.126603  |
| 0.117133 | 0.102855  | 0.115093  | 0.106789  | 0.127914  | 0.118881  | 0.121358  |
| 0.124272 | 0.113491  | 0.117861  | 0.11451   | 0.132721  | 0.131847  | 0.124417  |
| 0.118298 | 0.109266  | 0.119755  | 0.106789  | 0.124417  | 0.114219  | 0.125728  |
| 0.1081   | 0.0981935 | 0.1081    | 0.103293  | 0.11655   | 0.113345  | 0.107663  |
| 0.108683 | 0.102273  | 0.113636  | 0.100962  | 0.118881  | 0.115676  | 0.11757   |
| 0.118735 | 0.113199  | 0.119027  | 0.108392  | 0.129808  | 0.121649  | 0.124126  |
| 0.122669 | 0.110431  | 0.121795  | 0.11757   | 0.130536  | 0.123252  | 0.128059  |
| 0.135927 | 0.122523  | 0.132139  | 0.122378  | 0.14088   | 0.135052  | 0.127914  |
| 0.115967 | 0.11451   | 0.119464  | 0.109411  | 0.128497  | 0.129371  | 0.118153  |
| 0.113928 | 0.101981  | 0.107809  | 0.10067   | 0.114802  | 0.111888  | 0.10912   |
| 0.126166 | 0.110431  | 0.120047  | 0.115239  | 0.126748  | 0.12704   | 0.117279  |
| 0.115967 | 0.0981935 | 0.101399  | 0.101253  | 0.112471  | 0.115093  | 0.104167  |
| 0.145396 | 0.123834  | 0.136946  | 0.138258  | 0.143648  | 0.14831   | 0.136801  |

|           |           |           |           |           |          |          |
|-----------|-----------|-----------|-----------|-----------|----------|----------|
| 0.145396  | 0.129079  | 0.139569  | 0.137092  | 0.14831   | 0.141608 | 0.13884  |
| 0.111742  | 0.105332  | 0.112908  | 0.107226  | 0.116113  | 0.122232 | 0.11451  |
| 0.0983392 | 0.0977564 | 0.0995047 | 0.0909091 | 0.118735  | 0.113491 | 0.104312 |
| 0.116259  | 0.104895  | 0.11014   | 0.105041  | 0.129371  | 0.125874 | 0.116696 |
| 0.119172  | 0.106352  | 0.111597  | 0.107663  | 0.123543  | 0.117716 | 0.114656 |
| 0.14088   | 0.124563  | 0.135344  | 0.13141   | 0.139423  | 0.141463 | 0.130828 |
| 0.118444  | 0.10067   | 0.104749  | 0.104312  | 0.117279  | 0.115822 | 0.112762 |
| 0.118298  | 0.107226  | 0.113636  | 0.111451  | 0.124126  | 0.118881 | 0.106498 |
| 0.14088   | 0.132721  | 0.140589  | 0.136946  | 0.150495  | 0.150204 | 0.142191 |
| 0.128059  | 0.119027  | 0.124854  | 0.122669  | 0.131265  | 0.13039  | 0.13141  |
| 0.111597  | 0.106643  | 0.112471  | 0.107663  | 0.119172  | 0.11859  | 0.107372 |
| 0.130536  | 0.104021  | 0.120921  | 0.117279  | 0.128788  | 0.12704  | 0.122232 |
| 0.120921  | 0.111888  | 0.111305  | 0.113491  | 0.0897436 | 0.121503 | 0.108537 |
| 0.133741  | 0.132576  | 0.142191  | 0.13243   | 0.136364  | 0.140443 | 0.138549 |
| 0.126311  | 0.114948  | 0.121941  | 0.119464  | 0.131265  | 0.125437 | 0.125874 |
| 0.115822  | 0.108246  | 0.110868  | 0.102855  | 0.119901  | 0.121358 | 0.111597 |
| 0.117861  | 0.104749  | 0.110577  | 0.110431  | 0.125146  | 0.121066 | 0.112471 |
| 0.119755  | 0.104312  | 0.115676  | 0.110286  | 0.132284  | 0.126748 | 0.118444 |
| 0.142191  | 0.129371  | 0.132284  | 0.128059  | 0.138112  | 0.136364 | 0.132139 |
| 0.143357  | 0.126166  | 0.134907  | 0.134178  | 0.13986   | 0.139277 | 0.131265 |
| 0.164773  | 0.1537    | 0.160985  | 0.1588    | 0.160693  | 0.167104 | 0.159091 |
| 0.115239  | 0.101253  | 0.10912   | 0.107226  | 0.119027  | 0.123106 | 0.111305 |
| 0.114073  | 0.0992133 | 0.106498  | 0.106643  | 0.119318  | 0.121358 | 0.111888 |
| 0.107663  | 0.095134  | 0.108246  | 0.0987762 | 0.117861  | 0.119027 | 0.108683 |
| 0.134615  | 0.134615  | 0.13141   | 0.13039   | 0.147727  | 0.146562 | 0.134761 |
| 0.11451   | 0.099359  | 0.107809  | 0.0989219 | 0.114802  | 0.116841 | 0.10708  |
| 0.134761  | 0.123106  | 0.133013  | 0.126748  | 0.135344  | 0.135344 | 0.13141  |
| 0.116404  | 0.103293  | 0.11757   | 0.108974  | 0.129516  | 0.128059 | 0.115093 |
| 0.116841  | 0.106643  | 0.112179  | 0.105041  | 0.122669  | 0.123543 | 0.113782 |
| 0.143939  | 0.1419    | 0.140152  | 0.13447   | 0.150058  | 0.151515 | 0.145251 |
| 0.120629  | 0.106643  | 0.118881  | 0.110577  | 0.124126  | 0.12296  | 0.116113 |
| 0.136801  | 0.121066  | 0.132721  | 0.129079  | 0.139423  | 0.134178 | 0.130536 |
| 0.130245  | 0.120047  | 0.120921  | 0.121358  | 0.130245  | 0.131702 | 0.128934 |
| 0.115822  | 0.10912   | 0.113782  | 0.104604  | 0.109703  | 0.116113 | 0.112762 |
| 0.113199  | 0.101836  | 0.109411  | 0.104604  | 0.115822  | 0.120775 | 0.1081   |
| 0.11757   | 0.105624  | 0.10708   | 0.104021  | 0.119901  | 0.117279 | 0.111305 |
| 0.135052  | 0.12602   | 0.131847  | 0.120629  | 0.13243   | 0.132721 | 0.127622 |
| 0.111597  | 0.103147  | 0.106643  | 0.103001  | 0.119755  | 0.114219 | 0.110577 |
| 0.146999  | 0.121066  | 0.135052  | 0.13549   | 0.137966  | 0.145251 | 0.131993 |
| 0.121358  | 0.108829  | 0.119318  | 0.113636  | 0.129225  | 0.128351 | 0.120629 |
| 0.116987  | 0.113491  | 0.110577  | 0.109848  | 0.121066  | 0.11961  | 0.116841 |
| 0.117279  | 0.104167  | 0.113199  | 0.110431  | 0.124563  | 0.118444 | 0.112471 |
| 0.123689  | 0.110286  | 0.119318  | 0.115385  | 0.122523  | 0.126603 | 0.118007 |
| 0.121941  | 0.103584  | 0.109703  | 0.105769  | 0.124272  | 0.116987 | 0.113928 |

|          |           |           |           |          |          |          |
|----------|-----------|-----------|-----------|----------|----------|----------|
| 0.114073 | 0.105332  | 0.111742  | 0.102564  | 0.118153 | 0.116404 | 0.110431 |
| 0.136072 | 0.12296   | 0.129662  | 0.131847  | 0.13986  | 0.144522 | 0.129225 |
| 0.103147 | 0.100816  | 0.0979021 | 0.102418  | 0.118881 | 0.117424 | 0.113199 |
| 0.110577 | 0.105332  | 0.108537  | 0.103438  | 0.11757  | 0.106498 | 0.104604 |
| 0.125146 | 0.115822  | 0.124272  | 0.113345  | 0.130973 | 0.130973 | 0.122669 |
| 0.125146 | 0.114365  | 0.114073  | 0.110723  | 0.134178 | 0.131847 | 0.125874 |
| 0.128642 | 0.121941  | 0.128642  | 0.122378  | 0.142045 | 0.133887 | 0.131119 |
| 0.136072 | 0.129662  | 0.13549   | 0.128934  | 0.144231 | 0.138112 | 0.136218 |
| 0.116696 | 0.108246  | 0.11116   | 0.101981  | 0.124563 | 0.121358 | 0.11451  |
| 0.18109  | 0.174097  | 0.176136  | 0.18007   | 0.185169 | 0.188666 | 0.182692 |
| 0.108974 | 0.101981  | 0.104604  | 0.0968823 | 0.115385 | 0.121503 | 0.107955 |
| 0.127477 | 0.130099  | 0.131556  | 0.122086  | 0.139423 | 0.137383 | 0.134324 |
| 0.120775 | 0.121941  | 0.123106  | 0.111305  | 0.133304 | 0.128934 | 0.125291 |
| 0.136655 | 0.125     | 0.128788  | 0.121649  | 0.144522 | 0.142483 | 0.13447  |
| 0.110286 | 0.107663  | 0.106789  | 0.100233  | 0.122815 | 0.11757  | 0.110431 |
| 0.128642 | 0.124854  | 0.129225  | 0.121795  | 0.136509 | 0.133596 | 0.130536 |
| 0.112034 | 0.112908  | 0.109411  | 0.100816  | 0.122815 | 0.123106 | 0.112762 |
| 0.122669 | 0.115676  | 0.122086  | 0.112908  | 0.13141  | 0.132576 | 0.127185 |
| 0.118881 | 0.104604  | 0.113636  | 0.105041  | 0.123834 | 0.124709 | 0.112325 |
| 0.132576 | 0.128497  | 0.130536  | 0.118444  | 0.143939 | 0.135781 | 0.137383 |
| 0.106352 | 0.094697  | 0.102564  | 0.092803  | 0.120338 | 0.120047 | 0.110577 |
| 0.140297 | 0.125437  | 0.127185  | 0.121503  | 0.137675 | 0.141754 | 0.13549  |
| 0.116841 | 0.104604  | 0.109266  | 0.0989219 | 0.128205 | 0.126166 | 0.114656 |
| 0.129516 | 0.118735  | 0.129225  | 0.122378  | 0.134761 | 0.128351 | 0.125874 |
| 0.126748 | 0.115385  | 0.128788  | 0.114656  | 0.141317 | 0.137238 | 0.128059 |
| 0.109266 | 0.104312  | 0.104021  | 0.0954254 | 0.120629 | 0.121503 | 0.10912  |
| 0.143648 | 0.140734  | 0.138112  | 0.137966  | 0.149184 | 0.147436 | 0.142337 |
| 0.114948 | 0.104167  | 0.110577  | 0.0984848 | 0.128059 | 0.12602  | 0.115093 |
| 0.108829 | 0.107372  | 0.106498  | 0.105186  | 0.120775 | 0.117861 | 0.112471 |
| 0.113928 | 0.108683  | 0.111597  | 0.10271   | 0.124709 | 0.120047 | 0.117279 |
| 0.141026 | 0.124126  | 0.131702  | 0.128351  | 0.141317 | 0.146853 | 0.136801 |
| 0.124417 | 0.115385  | 0.120629  | 0.115239  | 0.129079 | 0.129079 | 0.124854 |
| 0.108392 | 0.109848  | 0.106643  | 0.0983392 | 0.115385 | 0.11655  | 0.103875 |
| 0.106061 | 0.105478  | 0.105769  | 0.104749  | 0.118881 | 0.117133 | 0.110577 |
| 0.113199 | 0.103875  | 0.110577  | 0.103147  | 0.124854 | 0.124272 | 0.109557 |
| 0.127622 | 0.110431  | 0.124417  | 0.121941  | 0.13345  | 0.133741 | 0.123689 |
| 0.111451 | 0.105041  | 0.106789  | 0.101107  | 0.12398  | 0.127477 | 0.115967 |
| 0.100524 | 0.0891608 | 0.0979021 | 0.0942599 | 0.113345 | 0.114219 | 0.099796 |
| 0.108683 | 0.0938228 | 0.0987762 | 0.0939685 | 0.117716 | 0.11859  | 0.100962 |
| 0.106789 | 0.0957168 | 0.106498  | 0.0990676 | 0.120775 | 0.117861 | 0.11014  |
| 0.110286 | 0.114656  | 0.111742  | 0.104895  | 0.119901 | 0.121941 | 0.123543 |
| 0.123252 | 0.117133  | 0.125583  | 0.118444  | 0.136655 | 0.138403 | 0.124272 |
| 0.104749 | 0.0930944 | 0.106498  | 0.0967366 | 0.119318 | 0.116696 | 0.106352 |
| 0.107226 | 0.0964452 | 0.099359  | 0.097465  | 0.115093 | 0.117133 | 0.105332 |

|           |           |          |           |           |           |           |
|-----------|-----------|----------|-----------|-----------|-----------|-----------|
| 0.122669  | 0.115967  | 0.119172 | 0.108537  | 0.136946  | 0.129079  | 0.121941  |
| 0.106498  | 0.0930944 | 0.105041 | 0.0879953 | 0.115822  | 0.118153  | 0.102273  |
| 0.116404  | 0.11553   | 0.11116  | 0.113636  | 0.128059  | 0.125146  | 0.117424  |
| 0.129225  | 0.120192  | 0.126894 | 0.120921  | 0.136801  | 0.135344  | 0.128205  |
| 0.11553   | 0.100962  | 0.11116  | 0.100524  | 0.122232  | 0.122232  | 0.113928  |
| 0.106643  | 0.0944056 | 0.106352 | 0.099796  | 0.117716  | 0.115967  | 0.105624  |
| 0.105769  | 0.0958625 | 0.108392 | 0.100962  | 0.11859   | 0.119755  | 0.108537  |
| 0.0996503 | 0.0958625 | 0.101107 | 0.097465  | 0.116259  | 0.117133  | 0.103584  |
| 0.127622  | 0.106352  | 0.123543 | 0.11757   | 0.130536  | 0.13141   | 0.118444  |
| 0.10373   | 0.0935315 | 0.099359 | 0.0942599 | 0.111014  | 0.115385  | 0.103584  |
| 0.13243   | 0.126311  | 0.133304 | 0.127914  | 0.142045  | 0.140589  | 0.137529  |
| 0.131119  | 0.121503  | 0.127914 | 0.127768  | 0.139277  | 0.13549   | 0.133013  |
| 0.123834  | 0.114219  | 0.117716 | 0.115239  | 0.131119  | 0.12296   | 0.119027  |
| 0.114365  | 0.106206  | 0.106789 | 0.111014  | 0.126894  | 0.118735  | 0.116841  |
| 0.116987  | 0.0995047 | 0.10708  | 0.105186  | 0.125728  | 0.121066  | 0.11655   |
| 0.105478  | 0.0979021 | 0.102564 | 0.0960082 | 0.12296   | 0.118881  | 0.106206  |
| 0.107955  | 0.101253  | 0.107955 | 0.0964452 | 0.117279  | 0.117861  | 0.108974  |
| 0.107372  | 0.101253  | 0.100379 | 0.0964452 | 0.111451  | 0.0983392 | 0.108974  |
| 0.113199  | 0.106498  | 0.108246 | 0.106061  | 0.0962995 | 0.11757   | 0.105769  |
| 0.13039   | 0.116404  | 0.123106 | 0.118007  | 0.135052  | 0.126311  | 0.130245  |
| 0.114802  | 0.105186  | 0.11014  | 0.104749  | 0.122669  | 0.122669  | 0.111742  |
| 0.133596  | 0.11553   | 0.124272 | 0.125291  | 0.133013  | 0.135927  | 0.126748  |
| 0.134907  | 0.121212  | 0.131702 | 0.120484  | 0.145396  | 0.140152  | 0.136218  |
| 0.192599  | 0.192016  | 0.183566 | 0.196824  | 0.186772  | 0.195804  | 0.186917  |
| 0.237617  | 0.235286  | 0.226544 | 0.240676  | 0.227127  | 0.238199  | 0.231061  |
| 0.111888  | 0.108974  | 0.101107 | 0.103584  | 0.0731352 | 0.111888  | 0.0995047 |
| 0.107955  | 0.105624  | 0.104749 | 0.0955711 | 0.114948  | 0.110868  | 0.111597  |
| 0.105041  | 0.10067   | 0.107372 | 0.0938228 | 0.114948  | 0.11116   | 0.108974  |
| 0.111451  | 0.104458  | 0.102127 | 0.10373   | 0.117861  | 0.115239  | 0.113928  |
| 0.123689  | 0.112617  | 0.114365 | 0.130245  | 0.130682  | 0.13884   | 0.120338  |
| 0.11553   | 0.110577  | 0.107663 | 0.101107  | 0.11757   | 0.116113  | 0.115676  |
| 0.141026  | 0.138986  | 0.142774 | 0.129516  | 0.148019  | 0.142483  | 0.144668  |
| 0.109994  | 0.109994  | 0.111451 | 0.0996503 | 0.123689  | 0.118153  | 0.115385  |
| 0.131265  | 0.11961   | 0.127768 | 0.113345  | 0.130973  | 0.133304  | 0.128788  |
| 0.129953  | 0.122086  | 0.130536 | 0.125437  | 0.132576  | 0.136072  | 0.13039   |
| 0.13141   | 0.123252  | 0.127914 | 0.123689  | 0.140152  | 0.130245  | 0.133013  |
| 0.137821  | 0.119464  | 0.131119 | 0.131265  | 0.137238  | 0.13986   | 0.13039   |
| 0.113636  | 0.109848  | 0.113054 | 0.099796  | 0.122086  | 0.119755  | 0.116696  |
| 0.111014  | 0.108392  | 0.109266 | 0.0925117 | 0.120921  | 0.114219  | 0.112034  |
| 0.120192  | 0.111742  | 0.109994 | 0.100233  | 0.124854  | 0.123397  | 0.120047  |
| 0.106498  | 0.101253  | 0.104749 | 0.0990676 | 0.115239  | 0.116987  | 0.109557  |
| 0.109994  | 0.107955  | 0.107663 | 0.0917832 | 0.116404  | 0.116404  | 0.11014   |
| 0.112762  | 0.107226  | 0.111888 | 0.100962  | 0.118298  | 0.118007  | 0.121358  |
| 0.131847  | 0.119318  | 0.127477 | 0.120338  | 0.134761  | 0.129808  | 0.129371  |



|          |           |           |           |          |          |           |
|----------|-----------|-----------|-----------|----------|----------|-----------|
| 0.13243  | 0.127185  | 0.135052  | 0.128788  | 0.140297 | 0.135344 | 0.139277  |
| 0.111305 | 0.111597  | 0.121212  | 0.101253  | 0.120921 | 0.120921 | 0.119027  |
| 0.112034 | 0.104167  | 0.110868  | 0.105478  | 0.120484 | 0.11961  | 0.115093  |
| 0.12602  | 0.121358  | 0.129516  | 0.116841  | 0.136801 | 0.133887 | 0.128497  |
| 0.106206 | 0.101544  | 0.105041  | 0.0949883 | 0.117279 | 0.114365 | 0.108392  |
| 0.140152 | 0.129953  | 0.140152  | 0.128059  | 0.146853 | 0.13986  | 0.141754  |
| 0.134615 | 0.124709  | 0.129953  | 0.131265  | 0.140152 | 0.140443 | 0.135927  |
| 0.133013 | 0.130099  | 0.128642  | 0.121212  | 0.138549 | 0.13447  | 0.135198  |
| 0.107372 | 0.104458  | 0.104167  | 0.0938228 | 0.113491 | 0.119027 | 0.112179  |
| 0.106061 | 0.10169   | 0.104604  | 0.0910548 | 0.118298 | 0.109266 | 0.107372  |
| 0.122232 | 0.114073  | 0.122523  | 0.108683  | 0.128642 | 0.127477 | 0.121795  |
| 0.121212 | 0.119464  | 0.120921  | 0.114073  | 0.127914 | 0.120338 | 0.121066  |
| 0.124417 | 0.123834  | 0.126166  | 0.114365  | 0.136364 | 0.128788 | 0.128934  |
| 0.112325 | 0.110577  | 0.112034  | 0.101399  | 0.117861 | 0.121066 | 0.116259  |
| 0.114219 | 0.105186  | 0.116841  | 0.106789  | 0.123252 | 0.120338 | 0.122232  |
| 0.12296  | 0.114802  | 0.12296   | 0.111451  | 0.127331 | 0.126748 | 0.122815  |
| 0.131993 | 0.121503  | 0.134033  | 0.11757   | 0.142191 | 0.132284 | 0.133013  |
| 0.125874 | 0.125     | 0.12704   | 0.11961   | 0.134033 | 0.130536 | 0.133013  |
| 0.129808 | 0.125437  | 0.135344  | 0.121795  | 0.139132 | 0.132139 | 0.134907  |
| 0.131993 | 0.123252  | 0.130828  | 0.122232  | 0.138403 | 0.13141  | 0.127185  |
| 0.111305 | 0.11014   | 0.11014   | 0.0968823 | 0.115385 | 0.118298 | 0.113199  |
| 0.130536 | 0.121503  | 0.125874  | 0.117279  | 0.134033 | 0.127914 | 0.128934  |
| 0.107372 | 0.10708   | 0.106498  | 0.0999417 | 0.114365 | 0.112908 | 0.109266  |
| 0.119172 | 0.106352  | 0.106643  | 0.105041  | 0.123252 | 0.11859  | 0.116113  |
| 0.112762 | 0.107517  | 0.107517  | 0.0968823 | 0.120338 | 0.117716 | 0.114656  |
| 0.116987 | 0.10067   | 0.103584  | 0.0999417 | 0.124854 | 0.118444 | 0.121212  |
| 0.108829 | 0.105332  | 0.103584  | 0.0952797 | 0.114656 | 0.112617 | 0.112762  |
| 0.132284 | 0.128205  | 0.135198  | 0.121358  | 0.138112 | 0.13141  | 0.140006  |
| 0.118444 | 0.10708   | 0.111742  | 0.106935  | 0.125437 | 0.116404 | 0.111305  |
| 0.131556 | 0.124854  | 0.132721  | 0.123543  | 0.135927 | 0.129808 | 0.134324  |
| 0.108246 | 0.101544  | 0.108829  | 0.0981935 | 0.117279 | 0.11553  | 0.110723  |
| 0.122378 | 0.118298  | 0.125583  | 0.105041  | 0.134907 | 0.126166 | 0.123106  |
| 0.122815 | 0.116404  | 0.120192  | 0.114802  | 0.128642 | 0.105332 | 0.115676  |
| 0.121941 | 0.111742  | 0.111451  | 0.11451   | 0.125728 | 0.125728 | 0.117716  |
| 0.106935 | 0.105186  | 0.108683  | 0.100962  | 0.124126 | 0.119172 | 0.113491  |
| 0.125146 | 0.115239  | 0.116987  | 0.116841  | 0.127768 | 0.122232 | 0.12296   |
| 0.113636 | 0.112179  | 0.120338  | 0.104458  | 0.122669 | 0.121212 | 0.116696  |
| 0.107809 | 0.106643  | 0.104021  | 0.0986305 | 0.122086 | 0.118298 | 0.117279  |
| 0.131993 | 0.107517  | 0.123252  | 0.128059  | 0.137238 | 0.135198 | 0.127768  |
| 0.133887 | 0.128059  | 0.138549  | 0.128788  | 0.141171 | 0.135927 | 0.13549   |
| 0.105624 | 0.090472  | 0.0995047 | 0.0949883 | 0.11116  | 0.109411 | 0.0935315 |
| 0.13345  | 0.114219  | 0.126748  | 0.124563  | 0.144522 | 0.133741 | 0.125146  |
| 0.121066 | 0.0962995 | 0.120192  | 0.120338  | 0.136509 | 0.126894 | 0.124417  |
| 0.130099 | 0.114073  | 0.127477  | 0.123834  | 0.136801 | 0.13243  | 0.128497  |

|          |           |          |          |          |          |          |
|----------|-----------|----------|----------|----------|----------|----------|
| 0.125146 | 0.10271   | 0.112617 | 0.115967 | 0.124563 | 0.127477 | 0.119172 |
| 0.118153 | 0.103293  | 0.109703 | 0.113345 | 0.130099 | 0.119027 | 0.115967 |
| 0.121795 | 0.102564  | 0.11859  | 0.116404 | 0.128788 | 0.121795 | 0.116696 |
| 0.123397 | 0.114365  | 0.120192 | 0.119172 | 0.129808 | 0.133596 | 0.128205 |
| 0.136509 | 0.118153  | 0.131556 | 0.132576 | 0.141754 | 0.140297 | 0.136946 |
| 0.131556 | 0.106498  | 0.116987 | 0.121795 | 0.12398  | 0.117279 | 0.11014  |
| 0.117279 | 0.10067   | 0.109703 | 0.110723 | 0.123397 | 0.128934 | 0.11451  |
| 0.128205 | 0.130245  | 0.134615 | 0.123106 | 0.134033 | 0.133159 | 0.134761 |
| 0.133013 | 0.109411  | 0.125437 | 0.12296  | 0.137675 | 0.127477 | 0.120629 |
| 0.112617 | 0.0995047 | 0.106206 | 0.101107 | 0.118735 | 0.115822 | 0.105186 |
| 0.219114 | 0.215909  | 0.210082 | 0.219843 | 0.213287 | 0.21824  | 0.213724 |
| 0.12296  | 0.104895  | 0.120629 | 0.119318 | 0.126748 | 0.131119 | 0.123397 |
| 0.121503 | 0.094697  | 0.111597 | 0.106498 | 0.12296  | 0.120338 | 0.106789 |
| 0.133596 | 0.119318  | 0.131847 | 0.133159 | 0.139132 | 0.136509 | 0.134615 |
| 0.118153 | 0.101253  | 0.111451 | 0.11014  | 0.123397 | 0.116404 | 0.111597 |
| 0.132139 | 0.107372  | 0.126311 | 0.132284 | 0.135052 | 0.13243  | 0.121212 |
| 0.121649 | 0.101253  | 0.116404 | 0.11451  | 0.127768 | 0.122232 | 0.120921 |
| 0.120047 | 0.109266  | 0.11451  | 0.112908 | 0.124126 | 0.124709 | 0.120775 |
| 0.130245 | 0.102855  | 0.118881 | 0.123397 | 0.130536 | 0.127331 | 0.122523 |
| 0.135927 | 0.111451  | 0.126311 | 0.123252 | 0.134761 | 0.129808 | 0.127622 |
| 0.13141  | 0.113345  | 0.12704  | 0.121358 | 0.138695 | 0.131993 | 0.130682 |
| 0.135052 | 0.110577  | 0.123106 | 0.120338 | 0.133304 | 0.13243  | 0.129662 |
| 0.130973 | 0.112034  | 0.122523 | 0.119464 | 0.129225 | 0.13447  | 0.124126 |
| 0.104167 | 0.10271   | 0.108829 | 0.109557 | 0.123397 | 0.126603 | 0.115676 |
| 0.119027 | 0.106789  | 0.11553  | 0.111597 | 0.118444 | 0.125728 | 0.117716 |
| 0.136364 | 0.12296   | 0.129953 | 0.133887 | 0.140152 | 0.136072 | 0.135927 |
| 0.121358 | 0.103875  | 0.116696 | 0.11655  | 0.124854 | 0.125728 | 0.119464 |
| 0.137092 | 0.124272  | 0.135927 | 0.12704  | 0.140006 | 0.141754 | 0.134907 |
| 0.1419   | 0.135198  | 0.128788 | 0.133596 | 0.143939 | 0.144231 | 0.135635 |
| 0.118007 | 0.111014  | 0.11859  | 0.11553  | 0.131702 | 0.132284 | 0.121649 |
| 0.126748 | 0.107809  | 0.122086 | 0.122232 | 0.135781 | 0.127914 | 0.121066 |
| 0.121941 | 0.12398   | 0.122523 | 0.122378 | 0.132139 | 0.131847 | 0.123834 |
| 0.117716 | 0.113054  | 0.124709 | 0.108246 | 0.125583 | 0.120338 | 0.123106 |
| 0.125291 | 0.126166  | 0.116841 | 0.122232 | 0.125874 | 0.134615 | 0.126894 |
| 0.143648 | 0.134324  | 0.130245 | 0.131847 | 0.143648 | 0.145396 | 0.136218 |
| 0.110577 | 0.103293  | 0.103875 | 0.105769 | 0.120775 | 0.119901 | 0.115385 |
| 0.13141  | 0.121503  | 0.125583 | 0.125146 | 0.137821 | 0.139277 | 0.130099 |
| 0.143502 | 0.140589  | 0.136218 | 0.138695 | 0.14088  | 0.14729  | 0.13986  |
| 0.121941 | 0.105624  | 0.116696 | 0.108683 | 0.131556 | 0.124854 | 0.116259 |
| 0.126311 | 0.10708   | 0.113491 | 0.117424 | 0.128642 | 0.127185 | 0.11859  |
| 0.137238 | 0.140734  | 0.138986 | 0.131265 | 0.147436 | 0.144231 | 0.140006 |
| 0.131119 | 0.114802  | 0.122378 | 0.119901 | 0.128788 | 0.130828 | 0.124854 |
| 0.136509 | 0.128934  | 0.13884  | 0.134907 | 0.14088  | 0.142045 | 0.138695 |
| 0.131119 | 0.118298  | 0.128497 | 0.122815 | 0.138112 | 0.134615 | 0.13243  |

|          |           |           |          |           |           |          |
|----------|-----------|-----------|----------|-----------|-----------|----------|
| 0.119318 | 0.121358  | 0.116987  | 0.11655  | 0.13243   | 0.126894  | 0.125    |
| 0.133159 | 0.122378  | 0.129662  | 0.123689 | 0.134033  | 0.136072  | 0.138258 |
| 0.125146 | 0.105041  | 0.121358  | 0.113928 | 0.133304  | 0.129808  | 0.12296  |
| 0.127914 | 0.129371  | 0.127914  | 0.119901 | 0.141026  | 0.132867  | 0.132721 |
| 0.130536 | 0.113345  | 0.129079  | 0.120775 | 0.13345   | 0.131993  | 0.131265 |
| 0.128205 | 0.12704   | 0.130536  | 0.124272 | 0.140152  | 0.127331  | 0.133013 |
| 0.129371 | 0.122086  | 0.128497  | 0.121358 | 0.13986   | 0.140734  | 0.136218 |
| 0.123834 | 0.122378  | 0.12704   | 0.114948 | 0.139569  | 0.132576  | 0.12602  |
| 0.142483 | 0.136364  | 0.141026  | 0.134761 | 0.147727  | 0.144522  | 0.142628 |
| 0.121795 | 0.0976107 | 0.114802  | 0.116987 | 0.134907  | 0.126457  | 0.127768 |
| 0.125583 | 0.104604  | 0.113345  | 0.105915 | 0.126748  | 0.127331  | 0.12398  |
| 0.129371 | 0.122086  | 0.124126  | 0.11553  | 0.141026  | 0.134907  | 0.131265 |
| 0.11451  | 0.0996503 | 0.113928  | 0.109703 | 0.128788  | 0.125874  | 0.124854 |
| 0.140589 | 0.136218  | 0.134178  | 0.134615 | 0.143211  | 0.143794  | 0.13549  |
| 0.156323 | 0.141463  | 0.144668  | 0.145105 | 0.162442  | 0.154575  | 0.152681 |
| 0.126894 | 0.123689  | 0.129225  | 0.119464 | 0.133013  | 0.126894  | 0.129371 |
| 0.117716 | 0.115676  | 0.119172  | 0.106498 | 0.123543  | 0.120921  | 0.124272 |
| 0.128351 | 0.128351  | 0.130099  | 0.12296  | 0.130099  | 0.122815  | 0.132576 |
| 0.131702 | 0.118007  | 0.129079  | 0.127768 | 0.134907  | 0.135198  | 0.128351 |
| 0.12704  | 0.118007  | 0.124709  | 0.109994 | 0.133159  | 0.128788  | 0.125437 |
| 0.134907 | 0.116259  | 0.131119  | 0.125437 | 0.147145  | 0.142191  | 0.136801 |
| 0.141317 | 0.123834  | 0.13345   | 0.132721 | 0.140734  | 0.137238  | 0.133887 |
| 0.121066 | 0.105624  | 0.123689  | 0.119464 | 0.13039   | 0.130973  | 0.119755 |
| 0.157488 | 0.158945  | 0.153992  | 0.147436 | 0.157488  | 0.163316  | 0.15676  |
| 0.124854 | 0.106206  | 0.127768  | 0.117133 | 0.136509  | 0.135052  | 0.127622 |
| 0.140297 | 0.121066  | 0.133887  | 0.132576 | 0.146707  | 0.143502  | 0.136655 |
| 0.12296  | 0.111014  | 0.115676  | 0.10708  | 0.129662  | 0.125     | 0.125437 |
| 0.130828 | 0.126457  | 0.131119  | 0.119318 | 0.135198  | 0.129662  | 0.131556 |
| 0.130245 | 0.109557  | 0.118007  | 0.119027 | 0.130536  | 0.129079  | 0.127477 |
| 0.138549 | 0.131847  | 0.13039   | 0.132867 | 0.118735  | 0.136801  | 0.127331 |
| 0.146853 | 0.143939  | 0.125874  | 0.14088  | 0.143065  | 0.143065  | 0.13884  |
| 0.12602  | 0.122232  | 0.113491  | 0.118298 | 0.0560897 | 0.114365  | 0.106643 |
| 0.13549  | 0.131993  | 0.12704   | 0.133304 | 0.0754662 | 0.127914  | 0.121649 |
| 0.142045 | 0.144376  | 0.142045  | 0.136072 | 0.144959  | 0.145833  | 0.142774 |
| 0.143502 | 0.132721  | 0.131265  | 0.136072 | 0.116696  | 0.14292   | 0.130828 |
| 0.112762 | 0.122669  | 0.121503  | 0.099796 | 0.133159  | 0.118881  | 0.121358 |
| 0.134178 | 0.126894  | 0.122523  | 0.125291 | 0.131265  | 0.137966  | 0.132284 |
| 0.111742 | 0.103875  | 0.101836  | 0.108392 | 0.112617  | 0.120775  | 0.105478 |
| 0.106352 | 0.105186  | 0.1081    | 0.111451 | 0.119464  | 0.120921  | 0.11553  |
| 0.125146 | 0.103584  | 0.111451  | 0.118881 | 0.128642  | 0.12398   | 0.118298 |
| 0.120775 | 0.115239  | 0.107372  | 0.115385 | 0.0523019 | 0.113199  | 0.103147 |
| 0.105186 | 0.104604  | 0.107226  | 0.109411 | 0.124417  | 0.126748  | 0.11553  |
| 0.112179 | 0.10169   | 0.0981935 | 0.110868 | 0.0885781 | 0.115385  | 0.097465 |
| 0.121212 | 0.116841  | 0.110723  | 0.112617 | 0.107226  | 0.0955711 | 0.103875 |

|           |           |           |           |           |          |          |
|-----------|-----------|-----------|-----------|-----------|----------|----------|
| 0.119027  | 0.105624  | 0.110577  | 0.124417  | 0.122232  | 0.13039  | 0.116841 |
| 0.103001  | 0.0467657 | 0.0945513 | 0.100524  | 0.114948  | 0.117279 | 0.10169  |
| 0.123106  | 0.117861  | 0.109411  | 0.116841  | 0.0540501 | 0.118444 | 0.104604 |
| 0.120629  | 0.113636  | 0.108974  | 0.114073  | 0.0472028 | 0.115676 | 0.101544 |
| 0.111014  | 0.117133  | 0.12296   | 0.10912   | 0.127914  | 0.121503 | 0.121941 |
| 0.216783  | 0.212413  | 0.206002  | 0.216929  | 0.207459  | 0.215618 | 0.207896 |
| 0.147436  | 0.138695  | 0.132867  | 0.140589  | 0.0699301 | 0.134324 | 0.126603 |
| 0.131556  | 0.116987  | 0.123106  | 0.125291  | 0.126894  | 0.131556 | 0.125    |
| 0.129371  | 0.117424  | 0.109266  | 0.121066  | 0.120338  | 0.115385 | 0.115239 |
| 0.210373  | 0.209207  | 0.201049  | 0.21081   | 0.203089  | 0.208916 | 0.202652 |
| 0.11655   | 0.115967  | 0.118298  | 0.112617  | 0.12704   | 0.125874 | 0.120484 |
| 0.050845  | 0.107955  | 0.114948  | 0.111014  | 0.124272  | 0.12398  | 0.120338 |
| 0.118444  | 0.117861  | 0.100962  | 0.120047  | 0.125728  | 0.123689 | 0.122378 |
| 0.117716  | 0.104895  | 0.108974  | 0.122815  | 0.124417  | 0.133741 | 0.115239 |
| 0.249709  | 0.246503  | 0.240967  | 0.25102   | 0.238345  | 0.24796  | 0.243153 |
| 0.124563  | 0.111742  | 0.11757   | 0.113345  | 0.129516  | 0.130682 | 0.12296  |
| 0.103875  | 0.113491  | 0.112034  | 0.102855  | 0.120775  | 0.11553  | 0.115093 |
| 0.125728  | 0.11961   | 0.116696  | 0.108683  | 0.125146  | 0.125728 | 0.123543 |
| 0.120775  | 0.118153  | 0.11553   | 0.107517  | 0.125437  | 0.122232 | 0.119755 |
| 0.124563  | 0.116696  | 0.121066  | 0.125     | 0.132139  | 0.13447  | 0.125874 |
| 0.128351  | 0.113199  | 0.120775  | 0.124417  | 0.111451  | 0.120192 | 0.116841 |
| 0.107372  | 0.114365  | 0.114073  | 0.104021  | 0.125437  | 0.120192 | 0.11655  |
| 0.120921  | 0.115676  | 0.107517  | 0.115822  | 0.0463287 | 0.111888 | 0.103293 |
| 0.122815  | 0.11757   | 0.10708   | 0.112471  | 0.121941  | 0.125146 | 0.123252 |
| 0.11116   | 0.0992133 | 0.103584  | 0.116259  | 0.119318  | 0.125728 | 0.109557 |
| 0.117716  | 0.111888  | 0.103438  | 0.112617  | 0.0594406 | 0.115385 | 0.10271  |
| 0.119901  | 0.0861014 | 0.11116   | 0.111888  | 0.124272  | 0.12398  | 0.117716 |
| 0.146853  | 0.145105  | 0.127622  | 0.141463  | 0.141317  | 0.140443 | 0.138549 |
| 0.124417  | 0.11655   | 0.119755  | 0.116404  | 0.130536  | 0.132576 | 0.125146 |
| 0.0553613 | 0.115967  | 0.117424  | 0.114948  | 0.129079  | 0.125    | 0.125728 |
| 0.18852   | 0.183566  | 0.180944  | 0.191579  | 0.178613  | 0.190268 | 0.183129 |
| 0.202214  | 0.198718  | 0.192599  | 0.205857  | 0.197552  | 0.203089 | 0.197698 |
| 0.117716  | 0.106643  | 0.109266  | 0.121066  | 0.126166  | 0.130536 | 0.116404 |
| 0.111888  | 0.0999417 | 0.103147  | 0.117861  | 0.118298  | 0.125874 | 0.109411 |
| 0.144231  | 0.124417  | 0.123252  | 0.137675  | 0.12704   | 0.13141  | 0.111451 |
| 0.105186  | 0.113636  | 0.114219  | 0.106206  | 0.123543  | 0.119464 | 0.116113 |
| 0.127477  | 0.11553   | 0.119318  | 0.114802  | 0.129516  | 0.131556 | 0.124417 |
| 0.129953  | 0.127622  | 0.115676  | 0.11961   | 0.123543  | 0.132284 | 0.12398  |
| 0.224068  | 0.222902  | 0.215035  | 0.226253  | 0.214452  | 0.225816 | 0.217512 |
| 0.115967  | 0.104021  | 0.107226  | 0.109411  | 0.114219  | 0.118881 | 0.113782 |
| 0.207896  | 0.206148  | 0.206439  | 0.208916  | 0.200903  | 0.210227 | 0.20134  |
| 0.0979021 | 0.109848  | 0.109848  | 0.0823135 | 0.119755  | 0.111305 | 0.105332 |
| 0.103293  | 0.102127  | 0.107663  | 0.0912005 | 0.119318  | 0.120775 | 0.113928 |
| 0.117424  | 0.111305  | 0.109266  | 0.112034  | 0.106935  | 0.118007 | 0.114365 |

|           |          |          |           |           |          |           |
|-----------|----------|----------|-----------|-----------|----------|-----------|
| 0.110723  | 0.102273 | 0.101981 | 0.115239  | 0.116841  | 0.122378 | 0.110577  |
| 0.207896  | 0.203817 | 0.197115 | 0.208625  | 0.198281  | 0.208188 | 0.198135  |
| 0.133887  | 0.126311 | 0.123106 | 0.128205  | 0.0575466 | 0.121066 | 0.117716  |
| 0.11116   | 0.107372 | 0.109411 | 0.04662   | 0.122815  | 0.112034 | 0.114802  |
| 0.128934  | 0.121941 | 0.113491 | 0.122669  | 0.0517191 | 0.118153 | 0.110431  |
| 0.120775  | 0.10708  | 0.116987 | 0.116841  | 0.123689  | 0.114948 | 0.115093  |
| 0.111451  | 0.101253 | 0.103001 | 0.117133  | 0.11757   | 0.126311 | 0.110723  |
| 0.103147  | 0.113928 | 0.112179 | 0.0866841 | 0.121503  | 0.11014  | 0.111742  |
| 0.112179  | 0.116841 | 0.11451  | 0.111451  | 0.126748  | 0.121212 | 0.118735  |
| 0.0541958 | 0.11014  | 0.117716 | 0.113491  | 0.126748  | 0.126457 | 0.12398   |
| 0.114802  | 0.111014 | 0.103147 | 0.109994  | 0.0515734 | 0.111597 | 0.0977564 |
| 0.112617  | 0.111451 | 0.111451 | 0.0515734 | 0.12398   | 0.115239 | 0.119464  |
| 0.18852   | 0.185315 | 0.180361 | 0.188957  | 0.180361  | 0.185023 | 0.179341  |
| 0.12602   | 0.120484 | 0.118444 | 0.11014   | 0.127185  | 0.129225 | 0.123834  |
| 0.131119  | 0.126748 | 0.110431 | 0.123106  | 0.128788  | 0.126748 | 0.12398   |
| 0.123106  | 0.116404 | 0.118735 | 0.111888  | 0.118735  | 0.118735 | 0.120338  |
| 0.121503  | 0.115385 | 0.118298 | 0.113491  | 0.129079  | 0.127914 | 0.121649  |
| 0.121795  | 0.120047 | 0.11014  | 0.119318  | 0.0509907 | 0.11451  | 0.107663  |
| 0.106352  | 0.117716 | 0.113636 | 0.095134  | 0.127914  | 0.113345 | 0.115822  |
| 0.116113  | 0.102418 | 0.105915 | 0.104312  | 0.116987  | 0.109703 | 0.108974  |
| 0.111742  | 0.118735 | 0.120775 | 0.109557  | 0.128351  | 0.124854 | 0.122086  |
| 0.123834  | 0.12296  | 0.106352 | 0.116987  | 0.118881  | 0.123834 | 0.118153  |
| 0.117424  | 0.111305 | 0.109557 | 0.0986305 | 0.119755  | 0.121795 | 0.112908  |
| 0.117279  | 0.104167 | 0.106206 | 0.11859   | 0.121066  | 0.128351 | 0.113345  |
| 0.11655   | 0.115093 | 0.101399 | 0.117279  | 0.124417  | 0.122669 | 0.120192  |
| 0.131556  | 0.131847 | 0.11553  | 0.132576  | 0.135344  | 0.13447  | 0.134324  |
| 0.114365  | 0.107955 | 0.106498 | 0.106935  | 0.121941  | 0.125437 | 0.11655   |
| 0.139277  | 0.135198 | 0.127331 | 0.133887  | 0.0675991 | 0.131119 | 0.124563  |
| 0.112471  | 0.101107 | 0.102855 | 0.116113  | 0.118007  | 0.123834 | 0.106498  |
| 0.120047  | 0.116259 | 0.104895 | 0.104458  | 0.113054  | 0.117716 | 0.111451  |
| 0.122523  | 0.112617 | 0.113491 | 0.115967  | 0.0680361 | 0.11961  | 0.108974  |
| 0.114948  | 0.122232 | 0.119901 | 0.110723  | 0.13039   | 0.123106 | 0.123252  |
| 0.188374  | 0.186917 | 0.182255 | 0.187937  | 0.183129  | 0.188957 | 0.184732  |
| 0.106643  | 0.108392 | 0.107517 | 0.0482226 | 0.120629  | 0.113345 | 0.114073  |
| 0.107226  | 0.104604 | 0.099359 | 0.0968823 | 0.104604  | 0.108392 | 0.10067   |
| 0.0512821 | 0.112762 | 0.11859  | 0.113782  | 0.125291  | 0.122086 | 0.124854  |
| 0.18007   | 0.173368 | 0.173368 | 0.179924  | 0.170455  | 0.175117 | 0.168561  |
| 0.133596  | 0.124563 | 0.132139 | 0.122669  | 0.143502  | 0.143794 | 0.13549   |
| 0.141754  | 0.133013 | 0.137966 | 0.133741  | 0.153409  | 0.150787 | 0.141317  |
| 0.149767  | 0.144231 | 0.128788 | 0.144085  | 0.145105  | 0.143357 | 0.139132  |
| 0.114802  | 0.108683 | 0.1081   | 0.105332  | 0.123543  | 0.121795 | 0.112908  |
| 0.128934  | 0.119901 | 0.109703 | 0.119755  | 0.0499709 | 0.114656 | 0.107517  |
| 0.210664  | 0.209207 | 0.201049 | 0.211684  | 0.198135  | 0.209207 | 0.203526  |
| 0.124709  | 0.116259 | 0.111888 | 0.118735  | 0.118881  | 0.124709 | 0.111742  |

|           |           |           |           |           |           |           |
|-----------|-----------|-----------|-----------|-----------|-----------|-----------|
| 0.130099  | 0.124272  | 0.115239  | 0.122378  | 0.0514277 | 0.120192  | 0.112762  |
| 0.110868  | 0.111451  | 0.109703  | 0.0480769 | 0.124563  | 0.115822  | 0.117133  |
| 0.169435  | 0.165064  | 0.155157  | 0.165501  | 0.151661  | 0.163607  | 0.157051  |
| 0.112325  | 0.103584  | 0.0971737 | 0.107809  | 0.110286  | 0.103001  | 0.104312  |
| 0.150058  | 0.136946  | 0.132867  | 0.136218  | 0.144522  | 0.151807  | 0.143794  |
| 0.119464  | 0.0515734 | 0.108683  | 0.114073  | 0.126166  | 0.127622  | 0.11757   |
| 0.188228  | 0.185606  | 0.177156  | 0.188666  | 0.182984  | 0.190268  | 0.179924  |
| 0.118881  | 0.11014   | 0.112471  | 0.108537  | 0.12704   | 0.129662  | 0.119901  |
| 0.1081    | 0.0958625 | 0.100233  | 0.0992133 | 0.106352  | 0.0882867 | 0.095134  |
| 0.114656  | 0.11116   | 0.100379  | 0.104021  | 0.11116   | 0.121941  | 0.106352  |
| 0.101399  | 0.106352  | 0.11014   | 0.105041  | 0.114802  | 0.131119  | 0.116987  |
| 0.0477855 | 0.107226  | 0.114802  | 0.110286  | 0.124126  | 0.123834  | 0.11961   |
| 0.122086  | 0.114219  | 0.114219  | 0.116404  | 0.122378  | 0.124126  | 0.117279  |
| 0.109703  | 0.097465  | 0.105041  | 0.115093  | 0.118444  | 0.123106  | 0.1081    |
| 0.188228  | 0.185897  | 0.178613  | 0.1875    | 0.182984  | 0.18852   | 0.181672  |
| 0.116987  | 0.116404  | 0.112034  | 0.115093  | 0.121066  | 0.121358  | 0.118007  |
| 0.110723  | 0.112762  | 0.106643  | 0.107663  | 0.1081    | 0.103438  | 0.0957168 |
| 0.209353  | 0.2044    | 0.200029  | 0.213578  | 0.203234  | 0.211101  | 0.20542   |
| 0.124854  | 0.11757   | 0.117861  | 0.106935  | 0.130682  | 0.126603  | 0.124126  |
| 0.111597  | 0.10169   | 0.104312  | 0.113782  | 0.120338  | 0.125874  | 0.106498  |
| 0.108683  | 0.0967366 | 0.0990676 | 0.110286  | 0.116259  | 0.12296   | 0.106498  |
| 0.142045  | 0.133887  | 0.126603  | 0.135781  | 0.0791084 | 0.128642  | 0.12704   |
| 0.188666  | 0.181672  | 0.178176  | 0.188811  | 0.17905   | 0.187791  | 0.180944  |
| 0.104021  | 0.114802  | 0.118881  | 0.105041  | 0.124126  | 0.11859   | 0.117279  |
| 0.126748  | 0.128205  | 0.110723  | 0.125728  | 0.132576  | 0.129371  | 0.128642  |
| 0.110431  | 0.0987762 | 0.101399  | 0.112325  | 0.117716  | 0.125291  | 0.106789  |
| 0.106061  | 0.0990676 | 0.0976107 | 0.111742  | 0.116841  | 0.122378  | 0.107663  |
| 0.10912   | 0.0989219 | 0.0989219 | 0.113054  | 0.120775  | 0.125146  | 0.109557  |
| 0.11859   | 0.111014  | 0.101399  | 0.112908  | 0.0524476 | 0.112179  | 0.100087  |
| 0.101544  | 0.0490967 | 0.0942599 | 0.0979021 | 0.113491  | 0.119027  | 0.10169   |
| 0.120484  | 0.11116   | 0.118444  | 0.111305  | 0.130973  | 0.127185  | 0.118298  |
| 0.135344  | 0.129516  | 0.121941  | 0.126457  | 0.121358  | 0.128059  | 0.129953  |
| 0.118153  | 0.112325  | 0.116987  | 0.107809  | 0.130099  | 0.130099  | 0.119172  |
| 0.129371  | 0.109557  | 0.121795  | 0.119901  | 0.130828  | 0.117133  | 0.119318  |
| 0.191579  | 0.18954   | 0.184003  | 0.193473  | 0.184295  | 0.191288  | 0.186189  |
| 0.114219  | 0.112471  | 0.100524  | 0.114365  | 0.122086  | 0.120921  | 0.119318  |
| 0.13447   | 0.129225  | 0.120484  | 0.128205  | 0.0587121 | 0.124563  | 0.115385  |
| 0.1081    | 0.0941142 | 0.0996503 | 0.112617  | 0.117133  | 0.124126  | 0.105915  |
| 0.100379  | 0.0447261 | 0.0933858 | 0.0999417 | 0.115239  | 0.119901  | 0.10373   |
| 0.118444  | 0.109703  | 0.11116   | 0.105769  | 0.117861  | 0.122815  | 0.11655   |
| 0.107517  | 0.116259  | 0.118881  | 0.107372  | 0.123252  | 0.117133  | 0.118153  |
| 0.134324  | 0.125291  | 0.125     | 0.125437  | 0.129953  | 0.132576  | 0.121649  |
| 0.121358  | 0.119027  | 0.101544  | 0.113054  | 0.118444  | 0.121066  | 0.113054  |
| 0.0986305 | 0.0884324 | 0.103001  | 0.100816  | 0.121941  | 0.114365  | 0.107809  |

|           |           |           |           |           |           |           |
|-----------|-----------|-----------|-----------|-----------|-----------|-----------|
| 0.0976107 | 0.0772145 | 0.100524  | 0.0960082 | 0.113928  | 0.116259  | 0.106789  |
| 0.106498  | 0.0831876 | 0.0992133 | 0.102855  | 0.107955  | 0.0989219 | 0.10169   |
| 0.100816  | 0.113054  | 0.111597  | 0.0861014 | 0.122086  | 0.107517  | 0.108537  |
| 0.127768  | 0.120192  | 0.125437  | 0.121795  | 0.135635  | 0.137092  | 0.127914  |
| 0.104895  | 0.112762  | 0.118007  | 0.10271   | 0.124126  | 0.120047  | 0.116696  |
| 0.119027  | 0.112325  | 0.10271   | 0.107517  | 0.0569639 | 0.115822  | 0.102273  |
| 0.101253  | 0.108537  | 0.109994  | 0.0990676 | 0.119318  | 0.113491  | 0.113636  |
| 0.11014   | 0.100816  | 0.0990676 | 0.110286  | 0.117716  | 0.123834  | 0.108829  |
| 0.105915  | 0.102418  | 0.102418  | 0.0445804 | 0.118735  | 0.109411  | 0.109266  |
| 0.114948  | 0.0980478 | 0.105915  | 0.114802  | 0.119901  | 0.126603  | 0.108683  |
| 0.110286  | 0.10912   | 0.0954254 | 0.107226  | 0.118444  | 0.116696  | 0.110431  |
| 0.121649  | 0.115822  | 0.100379  | 0.112762  | 0.119027  | 0.118444  | 0.113345  |
| 0.048514  | 0.107955  | 0.108829  | 0.104021  | 0.121649  | 0.121358  | 0.115093  |
| 0.106061  | 0.0469114 | 0.0961538 | 0.100087  | 0.113636  | 0.120629  | 0.104749  |
| 0.109994  | 0.0989219 | 0.10067   | 0.112179  | 0.119027  | 0.121358  | 0.107809  |
| 0.118735  | 0.118153  | 0.108537  | 0.105186  | 0.119901  | 0.125728  | 0.112762  |
| 0.118881  | 0.115676  | 0.11451   | 0.116404  | 0.115093  | 0.105186  | 0.0962995 |
| 0.109994  | 0.102418  | 0.103875  | 0.102564  | 0.113491  | 0.107955  | 0.0976107 |
| 0.108537  | 0.0965909 | 0.0992133 | 0.112179  | 0.113782  | 0.126894  | 0.106935  |
| 0.121212  | 0.118881  | 0.111888  | 0.116404  | 0.0506993 | 0.114802  | 0.108537  |
| 0.0996503 | 0.111305  | 0.109557  | 0.0866841 | 0.124417  | 0.109557  | 0.111451  |
| 0.120921  | 0.117133  | 0.109266  | 0.114365  | 0.0512821 | 0.113928  | 0.104749  |
| 0         | 0.108392  | 0.109557  | 0.105915  | 0.119172  | 0.122669  | 0.114948  |
| 0.108392  | 0         | 0.100524  | 0.103584  | 0.11859   | 0.123252  | 0.106498  |
| 0.109557  | 0.100524  | 0         | 0.104749  | 0.111305  | 0.119464  | 0.106789  |
| 0.105915  | 0.103584  | 0.104749  | 0         | 0.119027  | 0.110286  | 0.107809  |
| 0.119172  | 0.11859   | 0.111305  | 0.119027  | 0         | 0.11451   | 0.107955  |
| 0.122669  | 0.123252  | 0.119464  | 0.110286  | 0.11451   | 0         | 0.101836  |
| 0.114948  | 0.106498  | 0.106789  | 0.107809  | 0.107955  | 0.101836  | 0         |
| 0.193328  | 0.190997  | 0.184878  | 0.191725  | 0.183421  | 0.193328  | 0.185897  |
| 0.165064  | 0.160693  | 0.155157  | 0.160256  | 0.150204  | 0.150787  | 0.152681  |
| 0.119027  | 0.113782  | 0.11116   | 0.11014   | 0.126603  | 0.125728  | 0.115385  |
| 0.113345  | 0.117133  | 0.112179  | 0.113199  | 0.118007  | 0.10373   | 0.111742  |
| 0.145979  | 0.138695  | 0.142774  | 0.135635  | 0.155594  | 0.154138  | 0.144959  |
| 0.125146  | 0.118735  | 0.109411  | 0.114219  | 0.125728  | 0.12398   | 0.120629  |
| 0.11859   | 0.106352  | 0.106352  | 0.116404  | 0.122669  | 0.129079  | 0.115822  |
| 0.113782  | 0.108246  | 0.10912   | 0.110723  | 0.112034  | 0.112034  | 0.101399  |
| 0.11757   | 0.0782343 | 0.105041  | 0.110723  | 0.121066  | 0.123397  | 0.115385  |
| 0.120484  | 0.112034  | 0.114948  | 0.116259  | 0.112034  | 0.10708   | 0.101107  |
| 0.20134   | 0.199009  | 0.189977  | 0.200612  | 0.193765  | 0.20134   | 0.190705  |
| 0.108829  | 0.116696  | 0.120192  | 0.107517  | 0.128934  | 0.121358  | 0.121212  |
| 0.11859   | 0.118881  | 0.109557  | 0.11116   | 0.0786713 | 0.115676  | 0.108537  |
| 0.1081    | 0.0990676 | 0.103438  | 0.107372  | 0.110723  | 0.115967  | 0.103875  |
| 0.114948  | 0.10067   | 0.109994  | 0.1081    | 0.117861  | 0.108829  | 0.111014  |

|           |           |           |           |           |          |           |
|-----------|-----------|-----------|-----------|-----------|----------|-----------|
| 0.18211   | 0.178613  | 0.175408  | 0.181381  | 0.173951  | 0.181235 | 0.169143  |
| 0.245921  | 0.245629  | 0.238636  | 0.246358  | 0.235431  | 0.246795 | 0.242861  |
| 0.123252  | 0.11859   | 0.104895  | 0.114948  | 0.120047  | 0.119755 | 0.114365  |
| 0.117716  | 0.111888  | 0.113345  | 0.114656  | 0.113928  | 0.1081   | 0.0962995 |
| 0.119755  | 0.111305  | 0.114219  | 0.110577  | 0.12704   | 0.128788 | 0.116987  |
| 0.048514  | 0.104749  | 0.107372  | 0.10373   | 0.121649  | 0.121066 | 0.115676  |
| 0.0987762 | 0.113054  | 0.110431  | 0.0992133 | 0.118881  | 0.111305 | 0.112034  |
| 0.112325  | 0.108246  | 0.100962  | 0.106352  | 0.114948  | 0.116113 | 0.110431  |
| 0.115093  | 0.106643  | 0.10373   | 0.116113  | 0.0844988 | 0.113345 | 0.105915  |
| 0.106061  | 0.111014  | 0.111597  | 0.100379  | 0.119755  | 0.116841 | 0.113491  |
| 0.116696  | 0.106206  | 0.105332  | 0.113345  | 0.0753205 | 0.116404 | 0.10373   |
| 0.114802  | 0.104604  | 0.106935  | 0.105041  | 0.117716  | 0.110723 | 0.100087  |
| 0.106789  | 0.0458916 | 0.097465  | 0.103147  | 0.116113  | 0.118153 | 0.107517  |
| 0.125291  | 0.120047  | 0.103438  | 0.119318  | 0.122378  | 0.118298 | 0.117861  |
| 0.122232  | 0.11757   | 0.107955  | 0.117716  | 0.0517191 | 0.115239 | 0.10169   |
| 0.105332  | 0.105041  | 0.0910548 | 0.0973193 | 0.107663  | 0.113491 | 0.103147  |
| 0.123106  | 0.11757   | 0.121066  | 0.12296   | 0.13243   | 0.126894 | 0.120921  |
| 0.0630828 | 0.11757   | 0.126311  | 0.120629  | 0.136801  | 0.130682 | 0.134033  |
| 0.111014  | 0.0990676 | 0.101107  | 0.109994  | 0.116841  | 0.121795 | 0.105041  |
| 0.116404  | 0.107663  | 0.109994  | 0.117424  | 0.124854  | 0.126603 | 0.116259  |
| 0.123397  | 0.11116   | 0.117861  | 0.129662  | 0.133013  | 0.138258 | 0.122086  |
| 0.209499  | 0.199592  | 0.197844  | 0.20877   | 0.200466  | 0.208625 | 0.201777  |
| 0.114365  | 0.112325  | 0.0936772 | 0.105478  | 0.113199  | 0.112908 | 0.109557  |
| 0.101399  | 0.0460373 | 0.0958625 | 0.0992133 | 0.118007  | 0.123252 | 0.10708   |
| 0.114219  | 0.113636  | 0.0958625 | 0.110577  | 0.123834  | 0.122669 | 0.117861  |
| 0.123689  | 0.116113  | 0.117861  | 0.107517  | 0.125146  | 0.122815 | 0.120338  |
| 0.112908  | 0.0995047 | 0.107663  | 0.105186  | 0.115822  | 0.108246 | 0.105186  |
| 0.197698  | 0.194202  | 0.191288  | 0.199301  | 0.189831  | 0.200029 | 0.192016  |
| 0.125583  | 0.119464  | 0.109848  | 0.119901  | 0.0501166 | 0.11451  | 0.103293  |
| 0.10708   | 0.0983392 | 0.097465  | 0.112762  | 0.112908  | 0.11961  | 0.105186  |
| 0.12296   | 0.114219  | 0.120629  | 0.111742  | 0.123834  | 0.112471 | 0.121066  |
| 0.0463287 | 0.106061  | 0.106935  | 0.103001  | 0.120921  | 0.11859  | 0.110868  |
| 0.124417  | 0.116259  | 0.111888  | 0.11757   | 0.0539044 | 0.116841 | 0.10708   |
| 0.112179  | 0.103147  | 0.103438  | 0.109411  | 0.0772145 | 0.113054 | 0.0992133 |
| 0.113345  | 0.100816  | 0.109266  | 0.106789  | 0.118298  | 0.111014 | 0.100379  |
| 0.120338  | 0.113054  | 0.111305  | 0.102127  | 0.122669  | 0.124126 | 0.116696  |
| 0.195659  | 0.194202  | 0.186043  | 0.195804  | 0.18954   | 0.197115 | 0.186189  |
| 0.114219  | 0.110723  | 0.0999417 | 0.107663  | 0.0562354 | 0.108392 | 0.100962  |
| 0.195076  | 0.190705  | 0.185169  | 0.193182  | 0.186043  | 0.192745 | 0.185023  |
| 0.190559  | 0.188811  | 0.183858  | 0.191579  | 0.181818  | 0.191434 | 0.184878  |
| 0.0588578 | 0.115676  | 0.120338  | 0.116696  | 0.130245  | 0.130536 | 0.126894  |
| 0.134324  | 0.126748  | 0.125291  | 0.115239  | 0.136072  | 0.129953 | 0.129808  |
| 0.112471  | 0.0973193 | 0.0984848 | 0.102418  | 0.109848  | 0.104604 | 0.0933858 |
| 0.11116   | 0.105332  | 0.101836  | 0.106061  | 0.0616259 | 0.112325 | 0.0981935 |



|           |           |           |           |           |           |           |
|-----------|-----------|-----------|-----------|-----------|-----------|-----------|
| 0.117424  | 0.113636  | 0.104604  | 0.111451  | 0.0521562 | 0.114802  | 0.101836  |
| 0.111888  | 0.100233  | 0.104604  | 0.113782  | 0.119755  | 0.12296   | 0.110286  |
| 0.101107  | 0.112179  | 0.109557  | 0.0977564 | 0.113054  | 0.111888  | 0.108537  |
| 0.103147  | 0.113054  | 0.112179  | 0.0983392 | 0.118007  | 0.116259  | 0.110868  |
| 0.126894  | 0.123106  | 0.106789  | 0.120338  | 0.122815  | 0.122523  | 0.11859   |
| 0.0501166 | 0.108683  | 0.112762  | 0.10708   | 0.125     | 0.122378  | 0.118444  |
| 0.109994  | 0.095134  | 0.0971737 | 0.109266  | 0.114948  | 0.122232  | 0.103438  |
| 0.121212  | 0.116841  | 0.106935  | 0.112325  | 0.0504079 | 0.112762  | 0.101836  |
| 0.106206  | 0.0948427 | 0.100962  | 0.0964452 | 0.106206  | 0.0863928 | 0.092366  |
| 0.13141   | 0.127331  | 0.120047  | 0.126311  | 0.0582751 | 0.123543  | 0.110868  |
| 0.115385  | 0.109557  | 0.111597  | 0.105332  | 0.124709  | 0.124126  | 0.113491  |
| 0.136801  | 0.129808  | 0.126603  | 0.129662  | 0.0625    | 0.124854  | 0.119464  |
| 0.261218  | 0.256265  | 0.252185  | 0.258741  | 0.251311  | 0.258304  | 0.252331  |
| 0.123106  | 0.120484  | 0.121358  | 0.0585664 | 0.13447   | 0.121358  | 0.127622  |
| 0.121795  | 0.115676  | 0.119464  | 0.101544  | 0.129662  | 0.131702  | 0.126311  |
| 0.221882  | 0.214889  | 0.210519  | 0.219988  | 0.20877   | 0.219843  | 0.208625  |
| 0.119755  | 0.117424  | 0.120629  | 0.114073  | 0.131702  | 0.132867  | 0.123689  |
| 0.231935  | 0.22873   | 0.221445  | 0.230624  | 0.221154  | 0.226107  | 0.223048  |
| 0.116113  | 0.112325  | 0.112617  | 0.0547786 | 0.127477  | 0.117861  | 0.11859   |
| 0.121795  | 0.105769  | 0.116259  | 0.128351  | 0.129371  | 0.136946  | 0.120484  |
| 0.117133  | 0.111014  | 0.107517  | 0.100087  | 0.119172  | 0.119755  | 0.112034  |
| 0.0524476 | 0.109848  | 0.117133  | 0.11116   | 0.129662  | 0.128788  | 0.123689  |
| 0.202214  | 0.199009  | 0.191725  | 0.201195  | 0.195221  | 0.201923  | 0.190705  |
| 0.130828  | 0.127622  | 0.119172  | 0.128351  | 0.0600233 | 0.126457  | 0.112908  |
| 0.122086  | 0.11859   | 0.109848  | 0.115239  | 0.0495338 | 0.115093  | 0.104458  |
| 0.226253  | 0.223048  | 0.217803  | 0.224942  | 0.218677  | 0.227127  | 0.219406  |
| 0.106935  | 0.115967  | 0.115676  | 0.103584  | 0.123543  | 0.11859   | 0.11757   |
| 0.197115  | 0.190414  | 0.1875    | 0.198718  | 0.191288  | 0.199155  | 0.191142  |
| 0.107372  | 0.115239  | 0.11961   | 0.103147  | 0.125146  | 0.119901  | 0.11451   |
| 0.108537  | 0.0983392 | 0.101544  | 0.11451   | 0.119027  | 0.127477  | 0.108683  |
| 0.118007  | 0.0483683 | 0.1081    | 0.112617  | 0.126457  | 0.131702  | 0.115239  |
| 0.0608974 | 0.117716  | 0.122669  | 0.118153  | 0.134033  | 0.13345   | 0.128351  |
| 0.115822  | 0.105041  | 0.0980478 | 0.111305  | 0.114073  | 0.106498  | 0.105478  |
| 0.159528  | 0.13243   | 0.150787  | 0.154429  | 0.155449  | 0.16419   | 0.151807  |
| 0.11757   | 0.113491  | 0.105915  | 0.113054  | 0.0488054 | 0.112325  | 0.0979021 |
| 0.12398   | 0.119318  | 0.114656  | 0.105186  | 0.122815  | 0.123397  | 0.120921  |
| 0.109994  | 0.106789  | 0.109994  | 0.115093  | 0.123689  | 0.128059  | 0.117424  |
| 0.126311  | 0.12602   | 0.114073  | 0.115967  | 0.122232  | 0.132139  | 0.123252  |
| 0.19289   | 0.191725  | 0.185897  | 0.194493  | 0.185023  | 0.195221  | 0.186334  |
| 0.109994  | 0.099796  | 0.099796  | 0.113636  | 0.117279  | 0.12398   | 0.107809  |
| 0.0533217 | 0.109848  | 0.117716  | 0.111451  | 0.128497  | 0.129662  | 0.11961   |
| 0.0989219 | 0.11116   | 0.111742  | 0.0842075 | 0.120775  | 0.110577  | 0.108392  |
| 0.107517  | 0.11451   | 0.115967  | 0.105624  | 0.127622  | 0.11859   | 0.118444  |
| 0.117279  | 0.104749  | 0.105915  | 0.120921  | 0.124563  | 0.129225  | 0.113636  |

|           |           |           |          |           |          |          |
|-----------|-----------|-----------|----------|-----------|----------|----------|
| 0.257576  | 0.254079  | 0.249126  | 0.258304 | 0.248252  | 0.253497 | 0.247523 |
| 0.111451  | 0.0453089 | 0.101253  | 0.105186 | 0.122523  | 0.123397 | 0.111597 |
| 0.11116   | 0.10708   | 0.0983392 | 0.112762 | 0.120192  | 0.124563 | 0.118007 |
| 0.178467  | 0.173805  | 0.173805  | 0.176282 | 0.175262  | 0.171474 | 0.171037 |
| 0.186626  | 0.180798  | 0.176428  | 0.182692 | 0.178467  | 0.185169 | 0.174825 |
| 0.124854  | 0.117861  | 0.105624  | 0.115385 | 0.118153  | 0.121066 | 0.118298 |
| 0.125291  | 0.117133  | 0.111597  | 0.116696 | 0.0547786 | 0.111597 | 0.10271  |
| 0.0492424 | 0.105769  | 0.110431  | 0.104749 | 0.121503  | 0.122086 | 0.111742 |
| 0.146416  | 0.142628  | 0.133887  | 0.142191 | 0.071824  | 0.134761 | 0.129662 |
| 0.118153  | 0.118153  | 0.100962  | 0.109848 | 0.119318  | 0.120484 | 0.113928 |
| 0.127331  | 0.121503  | 0.107517  | 0.116696 | 0.121212  | 0.124126 | 0.114365 |
| 0.113199  | 0.122232  | 0.121358  | 0.108974 | 0.131265  | 0.123397 | 0.124126 |
| 0.123106  | 0.116404  | 0.109411  | 0.11451  | 0.0546329 | 0.114656 | 0.106643 |
| 0.132284  | 0.128788  | 0.120921  | 0.127185 | 0.0559441 | 0.123834 | 0.113199 |
| 0.112325  | 0.115239  | 0.117279  | 0.107809 | 0.119901  | 0.119027 | 0.118007 |
| 0.0582751 | 0.111888  | 0.119172  | 0.112034 | 0.131702  | 0.126457 | 0.126603 |
| 0.0706585 | 0.127768  | 0.131556  | 0.130828 | 0.14088   | 0.13884  | 0.140734 |
| 0.117424  | 0.0483683 | 0.104021  | 0.109994 | 0.12704   | 0.128497 | 0.116404 |
| 0.0625    | 0.116696  | 0.122815  | 0.120629 | 0.136801  | 0.130973 | 0.130536 |
| 0.114656  | 0.124272  | 0.127477  | 0.112762 | 0.133013  | 0.126311 | 0.125291 |
| 0.206294  | 0.204545  | 0.196096  | 0.207605 | 0.198718  | 0.205128 | 0.201195 |
| 0.120775  | 0.104167  | 0.118153  | 0.111597 | 0.135344  | 0.128351 | 0.119172 |
| 0.190997  | 0.18954   | 0.178759  | 0.190851 | 0.185169  | 0.192745 | 0.183858 |
| 0.116113  | 0.114656  | 0.101836  | 0.099359 | 0.114948  | 0.120484 | 0.115385 |
| 0.119901  | 0.106206  | 0.111742  | 0.124709 | 0.126894  | 0.132721 | 0.118007 |
| 0.121358  | 0.113199  | 0.114948  | 0.113054 | 0.127768  | 0.130973 | 0.122086 |
| 0.113928  | 0.108683  | 0.106643  | 0.106789 | 0.124126  | 0.124126 | 0.114948 |
| 0.125437  | 0.121066  | 0.111742  | 0.119464 | 0.050845  | 0.117279 | 0.106352 |
| 0.12602   | 0.122523  | 0.112034  | 0.117424 | 0.0520105 | 0.114948 | 0.11014  |
| 0.115822  | 0.102127  | 0.103001  | 0.113928 | 0.122232  | 0.127185 | 0.111014 |
| 0.122669  | 0.116259  | 0.115093  | 0.105624 | 0.123543  | 0.125874 | 0.120775 |
| 0.125291  | 0.118007  | 0.117133  | 0.116987 | 0.127914  | 0.130245 | 0.119901 |
| 0.118153  | 0.127477  | 0.131556  | 0.11655  | 0.13884   | 0.128934 | 0.128497 |
| 0.252185  | 0.248106  | 0.241696  | 0.250874 | 0.24053   | 0.248397 | 0.243007 |
| 0.114365  | 0.102127  | 0.105915  | 0.115385 | 0.121941  | 0.125728 | 0.107809 |
| 0.181235  | 0.18007   | 0.17162   | 0.185752 | 0.175991  | 0.184732 | 0.17701  |
| 0.185752  | 0.186334  | 0.177302  | 0.187646 | 0.181381  | 0.187209 | 0.181818 |
| 0.120338  | 0.11014   | 0.113054  | 0.116113 | 0.126457  | 0.117424 | 0.110868 |
| 0.110431  | 0.0463287 | 0.0955711 | 0.103001 | 0.120338  | 0.123834 | 0.106789 |
| 0.120921  | 0.106352  | 0.112179  | 0.12602  | 0.126748  | 0.132576 | 0.119318 |
| 0.115093  | 0.111305  | 0.103147  | 0.109703 | 0.0544872 | 0.111597 | 0.095134 |
| 0.115239  | 0.0855186 | 0.106206  | 0.109848 | 0.119027  | 0.11961  | 0.115967 |
| 0.104458  | 0.112325  | 0.110286  | 0.103438 | 0.124272  | 0.116696 | 0.117133 |
| 0.124126  | 0.116841  | 0.113054  | 0.119901 | 0.0754662 | 0.116841 | 0.11116  |

|           |           |           |           |           |          |          |
|-----------|-----------|-----------|-----------|-----------|----------|----------|
| 0.13345   | 0.129953  | 0.120338  | 0.127477  | 0.0600233 | 0.125291 | 0.117279 |
| 0.111742  | 0.100379  | 0.103001  | 0.113636  | 0.11757   | 0.127477 | 0.110723 |
| 0.134761  | 0.128059  | 0.119901  | 0.125874  | 0.0595862 | 0.123689 | 0.115967 |
| 0.108392  | 0.107226  | 0.109557  | 0.0945513 | 0.121795  | 0.118298 | 0.113199 |
| 0.123834  | 0.116259  | 0.119464  | 0.118444  | 0.132576  | 0.132284 | 0.123106 |
| 0.0534674 | 0.113199  | 0.113782  | 0.109848  | 0.124563  | 0.124272 | 0.119755 |
| 0.117133  | 0.124417  | 0.127914  | 0.116987  | 0.135781  | 0.131119 | 0.128351 |
| 0.119901  | 0.10708   | 0.113491  | 0.111888  | 0.123106  | 0.112617 | 0.108683 |
| 0.114073  | 0.101544  | 0.103875  | 0.11655   | 0.118735  | 0.12398  | 0.110431 |
| 0.130099  | 0.127477  | 0.109703  | 0.129371  | 0.130682  | 0.135052 | 0.130536 |
| 0.184149  | 0.178613  | 0.173951  | 0.183421  | 0.17803   | 0.183275 | 0.174097 |
| 0.137966  | 0.130099  | 0.123106  | 0.131993  | 0.0636655 | 0.127185 | 0.121212 |
| 0.124854  | 0.119901  | 0.112034  | 0.119172  | 0.0511364 | 0.117279 | 0.108683 |
| 0.118881  | 0.111014  | 0.11655   | 0.109994  | 0.127622  | 0.12704  | 0.11757  |
| 0.110286  | 0.102418  | 0.100087  | 0.102273  | 0.120484  | 0.118735 | 0.108683 |
| 0.0518648 | 0.108392  | 0.113054  | 0.108246  | 0.124126  | 0.123252 | 0.120192 |
| 0.0528846 | 0.112908  | 0.116404  | 0.112179  | 0.131265  | 0.124854 | 0.125    |
| 0.191434  | 0.187937  | 0.182401  | 0.19391   | 0.184732  | 0.191725 | 0.182255 |
| 0.123543  | 0.115385  | 0.113054  | 0.11553   | 0.0748834 | 0.104021 | 0.105915 |
| 0.113491  | 0.104458  | 0.101544  | 0.101981  | 0.103875  | 0.107372 | 0.104895 |
| 0.129225  | 0.123689  | 0.112617  | 0.121503  | 0.055507  | 0.119318 | 0.112179 |
| 0.192599  | 0.189685  | 0.182692  | 0.190997  | 0.183275  | 0.194056 | 0.186043 |
| 0.103001  | 0.0467657 | 0.095134  | 0.0999417 | 0.118735  | 0.119027 | 0.104021 |
| 0.109557  | 0.118298  | 0.119464  | 0.109703  | 0.130828  | 0.120629 | 0.124272 |
| 0.128205  | 0.120338  | 0.11451   | 0.123106  | 0.0518648 | 0.11655  | 0.110868 |
| 0.116987  | 0.114656  | 0.0992133 | 0.109266  | 0.118444  | 0.118444 | 0.110431 |
| 0.186334  | 0.182255  | 0.177593  | 0.189103  | 0.179341  | 0.186334 | 0.178322 |
| 0.108246  | 0.116113  | 0.11757   | 0.105478  | 0.123106  | 0.117279 | 0.118881 |
| 0.10912   | 0.11116   | 0.0962995 | 0.109557  | 0.109703  | 0.116113 | 0.111888 |
| 0.107955  | 0.0636655 | 0.0968823 | 0.103438  | 0.118444  | 0.123106 | 0.107809 |
| 0.121066  | 0.116113  | 0.109703  | 0.115967  | 0.113491  | 0.116404 | 0.115676 |
| 0.122086  | 0.115385  | 0.114802  | 0.104749  | 0.126166  | 0.120338 | 0.11961  |
| 0.113054  | 0.12296   | 0.12704   | 0.111742  | 0.133741  | 0.125    | 0.12602  |
| 0.109848  | 0.0979021 | 0.102273  | 0.115239  | 0.114802  | 0.124709 | 0.107955 |
| 0.121503  | 0.114219  | 0.108974  | 0.107663  | 0.119464  | 0.110723 | 0.10912  |
| 0.146999  | 0.143794  | 0.127185  | 0.142774  | 0.144376  | 0.143794 | 0.138986 |
| 0.237034  | 0.235286  | 0.22567   | 0.239219  | 0.228293  | 0.234703 | 0.229604 |
| 0.125146  | 0.110286  | 0.118153  | 0.118881  | 0.127477  | 0.121066 | 0.114219 |
| 0.121941  | 0.116696  | 0.114948  | 0.10373   | 0.12398   | 0.123397 | 0.122086 |
| 0.120921  | 0.11859   | 0.108392  | 0.115239  | 0.0597319 | 0.11655  | 0.106789 |
| 0.125146  | 0.116696  | 0.112034  | 0.119172  | 0.12398   | 0.129808 | 0.120338 |
| 0.117133  | 0.112762  | 0.112762  | 0.104749  | 0.116259  | 0.117133 | 0.114656 |
| 0.118298  | 0.102273  | 0.109266  | 0.112617  | 0.11859   | 0.107517 | 0.110286 |
| 0.128642  | 0.122232  | 0.114948  | 0.122669  | 0.0607517 | 0.120192 | 0.111888 |

|          |           |           |           |           |          |           |
|----------|-----------|-----------|-----------|-----------|----------|-----------|
| 0.113636 | 0.122086  | 0.125874  | 0.110868  | 0.130828  | 0.124709 | 0.123689  |
| 0.118881 | 0.119464  | 0.106352  | 0.111451  | 0.11859   | 0.119464 | 0.114365  |
| 0.238782 | 0.236451  | 0.226836  | 0.238345  | 0.230332  | 0.237325 | 0.229895  |
| 0.105186 | 0.0457459 | 0.0935315 | 0.100962  | 0.112762  | 0.118298 | 0.105332  |
| 0.103147 | 0.0996503 | 0.102564  | 0.0473485 | 0.113345  | 0.107517 | 0.105041  |
| 0.110577 | 0.0965909 | 0.102127  | 0.116259  | 0.116113  | 0.123689 | 0.109848  |
| 0.134907 | 0.130536  | 0.114802  | 0.129516  | 0.12704   | 0.129371 | 0.127768  |
| 0.131119 | 0.115676  | 0.12296   | 0.124854  | 0.134907  | 0.124417 | 0.117279  |
| 0.126166 | 0.105186  | 0.104312  | 0.119901  | 0.111597  | 0.11451  | 0.0992133 |
| 0.125874 | 0.119464  | 0.109848  | 0.11757   | 0.0506993 | 0.116259 | 0.105624  |
| 0.115822 | 0.114365  | 0.0986305 | 0.110723  | 0.112325  | 0.114073 | 0.105769  |
| 0.230332 | 0.229167  | 0.222465  | 0.233974  | 0.221008  | 0.231789 | 0.224942  |
| 0.129225 | 0.120775  | 0.116987  | 0.11859   | 0.0525932 | 0.120775 | 0.115967  |
| 0.109557 | 0.116259  | 0.120629  | 0.108537  | 0.128205  | 0.11859  | 0.11961   |
| 0.109557 | 0.110431  | 0.10373   | 0.105915  | 0.118881  | 0.118881 | 0.109994  |
| 0.128642 | 0.118444  | 0.11553   | 0.11655   | 0.12602   | 0.127185 | 0.121212  |
| 0.119027 | 0.118444  | 0.116696  | 0.0579837 | 0.131265  | 0.119318 | 0.125     |
| 0.112325 | 0.097465  | 0.102418  | 0.113636  | 0.122523  | 0.124563 | 0.109848  |
| 0.111451 | 0.119027  | 0.121649  | 0.108683  | 0.13039   | 0.123397 | 0.122669  |
| 0.117424 | 0.125     | 0.124709  | 0.111451  | 0.135198  | 0.127914 | 0.125437  |
| 0.107517 | 0.113636  | 0.11655   | 0.105332  | 0.125874  | 0.117133 | 0.116696  |
| 0.110577 | 0.0983392 | 0.101253  | 0.111888  | 0.118153  | 0.126311 | 0.109557  |
| 0.126603 | 0.122815  | 0.123106  | 0.113636  | 0.131556  | 0.128934 | 0.125583  |
| 0.132576 | 0.127914  | 0.125291  | 0.117279  | 0.135198  | 0.13345  | 0.132721  |
| 0.127622 | 0.120047  | 0.122669  | 0.11961   | 0.134324  | 0.134033 | 0.125437  |
| 0.130536 | 0.122378  | 0.125874  | 0.121066  | 0.138986  | 0.136364 | 0.131847  |
| 0.135052 | 0.125146  | 0.127185  | 0.116841  | 0.135344  | 0.13039  | 0.128788  |
| 0.107372 | 0.0770688 | 0.102418  | 0.101981  | 0.117279  | 0.122523 | 0.107517  |
| 0.118007 | 0.13141   | 0.127914  | 0.107663  | 0.137821  | 0.127914 | 0.128642  |
| 0.131265 | 0.11961   | 0.128642  | 0.128788  | 0.133304  | 0.135052 | 0.129953  |
| 0.207022 | 0.20236   | 0.19595   | 0.206876  | 0.196824  | 0.206148 | 0.200758  |
| 0.125728 | 0.117279  | 0.122232  | 0.12296   | 0.123106  | 0.111742 | 0.109266  |
| 0.108246 | 0.10708   | 0.10912   | 0.0463287 | 0.120775  | 0.112325 | 0.115676  |
| 0.117716 | 0.105186  | 0.107517  | 0.121358  | 0.124709  | 0.127914 | 0.114365  |
| 0.223922 | 0.220134  | 0.21285   | 0.223776  | 0.215472  | 0.225379 | 0.219697  |
| 0.213432 | 0.211101  | 0.202069  | 0.212995  | 0.206439  | 0.21081  | 0.206294  |
| 0.11655  | 0.122669  | 0.12704   | 0.113199  | 0.131993  | 0.126166 | 0.128351  |
| 0.249563 | 0.250146  | 0.239365  | 0.252622  | 0.241113  | 0.249272 | 0.245338  |
| 0.112617 | 0.0828963 | 0.101253  | 0.105186  | 0.119901  | 0.120484 | 0.110723  |
| 0.139714 | 0.122523  | 0.130099  | 0.128788  | 0.141754  | 0.14088  | 0.132867  |
| 0.112617 | 0.03919   | 0.101253  | 0.103438  | 0.120775  | 0.122523 | 0.109266  |
| 0.12704  | 0.120047  | 0.120629  | 0.109994  | 0.129079  | 0.128497 | 0.126311  |
| 0.189248 | 0.1875    | 0.180216  | 0.189394  | 0.179924  | 0.188957 | 0.179196  |
| 0.122669 | 0.112471  | 0.119755  | 0.118153  | 0.125583  | 0.127914 | 0.11757   |

|           |           |           |           |           |           |           |
|-----------|-----------|-----------|-----------|-----------|-----------|-----------|
| 0.192016  | 0.189685  | 0.185897  | 0.197407  | 0.187063  | 0.19493   | 0.183712  |
| 0.118881  | 0.105769  | 0.111014  | 0.113782  | 0.120338  | 0.112762  | 0.10708   |
| 0.115385  | 0.113345  | 0.113928  | 0.106789  | 0.106643  | 0.117424  | 0.112908  |
| 0.125583  | 0.105186  | 0.111888  | 0.118735  | 0.128497  | 0.126166  | 0.119901  |
| 0.117424  | 0.105186  | 0.102273  | 0.110577  | 0.111014  | 0.111014  | 0.108829  |
| 0.107372  | 0.097465  | 0.097465  | 0.106352  | 0.113782  | 0.117861  | 0.104895  |
| 0.114948  | 0.108246  | 0.107372  | 0.106643  | 0.109994  | 0.105041  | 0.0964452 |
| 0.102418  | 0.046183  | 0.0916375 | 0.100233  | 0.118444  | 0.11757   | 0.105186  |
| 0.118881  | 0.113054  | 0.106643  | 0.110868  | 0.0469114 | 0.109848  | 0.0977564 |
| 0.106498  | 0.115239  | 0.113199  | 0.0932401 | 0.125146  | 0.114073  | 0.113345  |
| 0.11553   | 0.10271   | 0.103293  | 0.104021  | 0.115822  | 0.11116   | 0.097028  |
| 0.107809  | 0.0445804 | 0.0996503 | 0.102418  | 0.120338  | 0.122669  | 0.105332  |
| 0.11961   | 0.110868  | 0.114656  | 0.113054  | 0.12602   | 0.128059  | 0.121212  |
| 0.130682  | 0.125728  | 0.116404  | 0.126166  | 0.0592949 | 0.122523  | 0.11655   |
| 0.114219  | 0.108974  | 0.104604  | 0.106498  | 0.122669  | 0.121503  | 0.109411  |
| 0.110868  | 0.11116   | 0.0939685 | 0.108392  | 0.119027  | 0.120192  | 0.109848  |
| 0.107517  | 0.0955711 | 0.097028  | 0.10912   | 0.112471  | 0.11859   | 0.105915  |
| 0.11014   | 0.114802  | 0.117716  | 0.108829  | 0.119755  | 0.119464  | 0.11961   |
| 0.120629  | 0.113054  | 0.113054  | 0.103875  | 0.121795  | 0.122378  | 0.119901  |
| 0.0502622 | 0.110868  | 0.114948  | 0.109557  | 0.128059  | 0.121941  | 0.121503  |
| 0.116696  | 0.111742  | 0.109411  | 0.106061  | 0.125728  | 0.121941  | 0.114802  |
| 0.120338  | 0.117716  | 0.110723  | 0.118735  | 0.0515734 | 0.113636  | 0.105624  |
| 0.130973  | 0.128642  | 0.122523  | 0.127331  | 0.0619172 | 0.119901  | 0.113636  |
| 0.141171  | 0.135344  | 0.130099  | 0.13549   | 0.0680361 | 0.130099  | 0.125     |
| 0.0981935 | 0.10169   | 0.102564  | 0.0948427 | 0.113345  | 0.111597  | 0.106206  |
| 0.113636  | 0.0981935 | 0.10169   | 0.112908  | 0.117424  | 0.127914  | 0.109703  |
| 0.110286  | 0.0936772 | 0.099796  | 0.101399  | 0.112908  | 0.103875  | 0.100524  |
| 0.131556  | 0.126311  | 0.127185  | 0.119172  | 0.135927  | 0.133013  | 0.131702  |
| 0.111597  | 0.0457459 | 0.101107  | 0.103584  | 0.120921  | 0.121212  | 0.112325  |
| 0.0719697 | 0.126748  | 0.134324  | 0.129225  | 0.143065  | 0.141608  | 0.139423  |
| 0.129371  | 0.116259  | 0.11859   | 0.135927  | 0.136072  | 0.145396  | 0.126603  |
| 0.132139  | 0.126894  | 0.109703  | 0.121503  | 0.123397  | 0.122523  | 0.119755  |
| 0.117424  | 0.0973193 | 0.106352  | 0.107663  | 0.111888  | 0.113345  | 0.0840618 |
| 0.114656  | 0.113782  | 0.099796  | 0.102273  | 0.10912   | 0.116987  | 0.106352  |
| 0.124272  | 0.11553   | 0.121358  | 0.114802  | 0.135052  | 0.132139  | 0.123543  |
| 0.208625  | 0.204545  | 0.199592  | 0.208188  | 0.200175  | 0.207168  | 0.200029  |
| 0.106643  | 0.111305  | 0.092366  | 0.108829  | 0.118298  | 0.120047  | 0.114365  |
| 0.115822  | 0.101253  | 0.105624  | 0.114802  | 0.121941  | 0.126311  | 0.113636  |
| 0.122086  | 0.11655   | 0.115093  | 0.103875  | 0.122669  | 0.123834  | 0.118444  |
| 0.118735  | 0.107955  | 0.111451  | 0.107809  | 0.125728  | 0.125146  | 0.115967  |
| 0.122086  | 0.113054  | 0.114219  | 0.118153  | 0.127914  | 0.120338  | 0.112617  |
| 0.123252  | 0.120047  | 0.120338  | 0.111451  | 0.11451   | 0.0527389 | 0.104167  |
| 0.12602   | 0.122232  | 0.12398   | 0.111888  | 0.114948  | 0.0525932 | 0.106935  |
| 0.125583  | 0.118881  | 0.104604  | 0.116987  | 0.123834  | 0.120047  | 0.114365  |

|           |           |           |           |           |           |           |
|-----------|-----------|-----------|-----------|-----------|-----------|-----------|
| 0.0976107 | 0.110431  | 0.111305  | 0.0849359 | 0.119172  | 0.108683  | 0.108829  |
| 0.128205  | 0.123834  | 0.123543  | 0.110868  | 0.13141   | 0.128497  | 0.127185  |
| 0.119755  | 0.102564  | 0.106643  | 0.104167  | 0.122086  | 0.122669  | 0.114073  |
| 0.115822  | 0.103875  | 0.112325  | 0.1081    | 0.118444  | 0.110868  | 0.102564  |
| 0.178322  | 0.174825  | 0.168998  | 0.168269  | 0.171329  | 0.178904  | 0.170892  |
| 0.122086  | 0.117133  | 0.106352  | 0.116404  | 0.0515734 | 0.113054  | 0.102127  |
| 0.130973  | 0.125146  | 0.126894  | 0.116259  | 0.133596  | 0.130973  | 0.127331  |
| 0.117716  | 0.104021  | 0.121212  | 0.105624  | 0.132284  | 0.127914  | 0.119901  |
| 0.127477  | 0.117861  | 0.119318  | 0.114802  | 0.116987  | 0.128351  | 0.119464  |
| 0.106789  | 0.0977564 | 0.105915  | 0.0990676 | 0.106789  | 0.0875583 | 0.0958625 |
| 0.110868  | 0.0936772 | 0.0992133 | 0.0967366 | 0.110868  | 0.10708   | 0.0903263 |
| 0.112908  | 0.102418  | 0.109411  | 0.105769  | 0.112325  | 0.0843531 | 0.101399  |
| 0.125437  | 0.115822  | 0.119901  | 0.109266  | 0.130099  | 0.13039   | 0.124709  |
| 0.119318  | 0.11116   | 0.108246  | 0.111888  | 0.0863928 | 0.10912   | 0.100524  |
| 0.123252  | 0.115093  | 0.121795  | 0.121066  | 0.132576  | 0.132867  | 0.127768  |
| 0.106498  | 0.106498  | 0.104458  | 0.0990676 | 0.113491  | 0.115822  | 0.105186  |
| 0.111888  | 0.103438  | 0.113636  | 0.107372  | 0.123834  | 0.115967  | 0.11961   |
| 0.130973  | 0.117279  | 0.12602   | 0.119755  | 0.136218  | 0.126603  | 0.130245  |
| 0.113199  | 0.103875  | 0.112908  | 0.100233  | 0.125146  | 0.118444  | 0.112762  |
| 0.120484  | 0.114948  | 0.119901  | 0.110723  | 0.123106  | 0.110577  | 0.121212  |
| 0.108246  | 0.099796  | 0.108246  | 0.0964452 | 0.121941  | 0.113491  | 0.11014   |
| 0.112034  | 0.103001  | 0.110286  | 0.0981935 | 0.120775  | 0.116404  | 0.113054  |
| 0.105915  | 0.0919289 | 0.0986305 | 0.101981  | 0.11757   | 0.116987  | 0.106643  |
| 0.111888  | 0.103438  | 0.111597  | 0.115239  | 0.128205  | 0.128497  | 0.120484  |
| 0.100816  | 0.0944056 | 0.100233  | 0.0936772 | 0.123252  | 0.11859   | 0.110577  |
| 0.138112  | 0.140443  | 0.139569  | 0.127768  | 0.142483  | 0.139277  | 0.139714  |
| 0.128205  | 0.129953  | 0.125291  | 0.122815  | 0.132576  | 0.130828  | 0.132721  |
| 0.104312  | 0.100816  | 0.105769  | 0.100962  | 0.120338  | 0.115676  | 0.106789  |
| 0.126603  | 0.13447   | 0.134178  | 0.127331  | 0.14088   | 0.137675  | 0.134033  |
| 0.123106  | 0.116404  | 0.11757   | 0.115093  | 0.121649  | 0.126894  | 0.118298  |
| 0.139132  | 0.112908  | 0.130099  | 0.128497  | 0.139714  | 0.135052  | 0.134615  |
| 0.104458  | 0.097465  | 0.110868  | 0.105478  | 0.119901  | 0.121649  | 0.112762  |
| 0.145979  | 0.140152  | 0.138986  | 0.133596  | 0.142483  | 0.150058  | 0.144376  |
| 0.124126  | 0.122378  | 0.123543  | 0.117861  | 0.136655  | 0.133159  | 0.123106  |
| 0.130245  | 0.128497  | 0.134324  | 0.122232  | 0.143939  | 0.134615  | 0.13243   |
| 0.124417  | 0.111888  | 0.117716  | 0.110286  | 0.12704   | 0.12704   | 0.118153  |
| 0.109411  | 0.0919289 | 0.108537  | 0.0976107 | 0.121066  | 0.116987  | 0.108392  |
| 0.111014  | 0.0987762 | 0.102855  | 0.101836  | 0.118881  | 0.115676  | 0.111742  |
| 0.114948  | 0.110868  | 0.114365  | 0.099359  | 0.122523  | 0.118735  | 0.115385  |
| 0.115239  | 0.099796  | 0.120192  | 0.0996503 | 0.128642  | 0.12398   | 0.12296   |
| 0.117716  | 0.107517  | 0.121795  | 0.11757   | 0.133741  | 0.129371  | 0.127477  |
| 0.122669  | 0.113054  | 0.117133  | 0.11553   | 0.126748  | 0.129953  | 0.121358  |
| 0.107517  | 0.0955711 | 0.0981935 | 0.0936772 | 0.118298  | 0.119755  | 0.106498  |
| 0.108246  | 0.099796  | 0.10271   | 0.102273  | 0.119027  | 0.115822  | 0.115385  |

|          |           |           |          |          |           |           |
|----------|-----------|-----------|----------|----------|-----------|-----------|
| 0.120921 | 0.099359  | 0.117716  | 0.113491 | 0.130828 | 0.127331  | 0.114656  |
| 0.112179 | 0.0955711 | 0.105769  | 0.104167 | 0.118881 | 0.118881  | 0.109411  |
| 0.116404 | 0.107663  | 0.111451  | 0.108974 | 0.128642 | 0.123689  | 0.119464  |
| 0.10708  | 0.0968823 | 0.108246  | 0.104312 | 0.116696 | 0.118153  | 0.110723  |
| 0.125874 | 0.105769  | 0.104021  | 0.120192 | 0.107226 | 0.113054  | 0.0960082 |
| 0.118298 | 0.0967366 | 0.106643  | 0.103001 | 0.114219 | 0.111888  | 0.110577  |
| 0.110723 | 0.0769231 | 0.101399  | 0.103001 | 0.11451  | 0.116259  | 0.106789  |
| 0.114219 | 0.0955711 | 0.1081    | 0.104749 | 0.123543 | 0.122086  | 0.106498  |
| 0.117861 | 0.104749  | 0.102127  | 0.113928 | 0.109703 | 0.111742  | 0.0935315 |
| 0.113928 | 0.102564  | 0.111597  | 0.108246 | 0.112471 | 0.0926573 | 0.102418  |
| 0.122378 | 0.114802  | 0.115676  | 0.119318 | 0.107809 | 0.0964452 | 0.105624  |
| 0.113054 | 0.0990676 | 0.0941142 | 0.109411 | 0.104312 | 0.108683  | 0.0895979 |
| 0.126603 | 0.11553   | 0.125146  | 0.119172 | 0.125437 | 0.101544  | 0.115385  |

| TDr_2330 | TDr_2331 | TDr_2333  | TDr_2338 | TDr_2342 | TDr_2343  | TDr_2347  |
|----------|----------|-----------|----------|----------|-----------|-----------|
| 0.175262 | 0.143794 | 0.08581   | 0.1081   | 0.113928 | 0.128934  | 0.11655   |
| 0.180361 | 0.15035  | 0.115676  | 0.112908 | 0.136801 | 0.119464  | 0.113199  |
| 0.177448 | 0.145979 | 0.111888  | 0.110868 | 0.136218 | 0.117716  | 0.108829  |
| 0.188228 | 0.155303 | 0.123252  | 0.114656 | 0.146707 | 0.119755  | 0.109411  |
| 0.201632 | 0.170455 | 0.137821  | 0.131556 | 0.157197 | 0.0952797 | 0.116404  |
| 0.194347 | 0.163753 | 0.11859   | 0.123397 | 0.137966 | 0.127914  | 0.115822  |
| 0.195367 | 0.17264  | 0.104458  | 0.122378 | 0.122669 | 0.131847  | 0.127622  |
| 0.178176 | 0.152826 | 0.115822  | 0.11451  | 0.142191 | 0.113491  | 0.108974  |
| 0.184149 | 0.14831  | 0.112179  | 0.104749 | 0.137966 | 0.115676  | 0.108829  |
| 0.190122 | 0.161276 | 0.114073  | 0.118007 | 0.133741 | 0.120192  | 0.102273  |
| 0.178322 | 0.146853 | 0.112762  | 0.114073 | 0.139714 | 0.125874  | 0.112617  |
| 0.184878 | 0.152826 | 0.117279  | 0.111305 | 0.143357 | 0.116113  | 0.118007  |
| 0.193328 | 0.157488 | 0.114656  | 0.108974 | 0.144231 | 0.118153  | 0.111305  |
| 0.145688 | 0.119464 | 0.140734  | 0.128642 | 0.165938 | 0.137529  | 0.125146  |
| 0.196824 | 0.168852 | 0.129516  | 0.130536 | 0.150058 | 0.13243   | 0.0862471 |
| 0.195513 | 0.164044 | 0.122378  | 0.110868 | 0.139132 | 0.129662  | 0.114365  |
| 0.189248 | 0.160693 | 0.117279  | 0.106935 | 0.148019 | 0.114365  | 0.111597  |
| 0.206585 | 0.178613 | 0.146562  | 0.143211 | 0.169726 | 0.123834  | 0.131265  |
| 0.177739 | 0.150932 | 0.11014   | 0.107955 | 0.137966 | 0.113928  | 0.112617  |
| 0.140734 | 0.147145 | 0.20338   | 0.194202 | 0.218386 | 0.207751  | 0.172931  |
| 0.190997 | 0.161859 | 0.100379  | 0.125583 | 0.131993 | 0.126894  | 0.122086  |
| 0.196387 | 0.164918 | 0.0961538 | 0.121649 | 0.121941 | 0.120338  | 0.11757   |
| 0.185752 | 0.149038 | 0.116404  | 0.087704 | 0.144231 | 0.120484  | 0.105769  |
| 0.198718 | 0.17366  | 0.126166  | 0.118153 | 0.146999 | 0.136655  | 0.130099  |
| 0.181381 | 0.151952 | 0.106206  | 0.103147 | 0.134033 | 0.116113  | 0.104021  |
| 0.195367 | 0.170017 | 0.108829  | 0.131702 | 0.122669 | 0.131265  | 0.128497  |
| 0.193619 | 0.172057 | 0.116113  | 0.122086 | 0.142191 | 0.125146  | 0.130828  |
| 0.203234 | 0.16623  | 0.128059  | 0.112471 | 0.149767 | 0.134178  | 0.124709  |
| 0.201195 | 0.178467 | 0.12602   | 0.133159 | 0.136946 | 0.134178  | 0.136364  |
| 0.202069 | 0.17264  | 0.11961   | 0.126166 | 0.140152 | 0.128351  | 0.128497  |
| 0.193765 | 0.164044 | 0.0955711 | 0.121358 | 0.114073 | 0.131993  | 0.113491  |
| 0.198281 | 0.171474 | 0.118153  | 0.119464 | 0.137238 | 0.13243   | 0.121503  |
| 0.179633 | 0.150787 | 0.103001  | 0.106643 | 0.129079 | 0.119901  | 0.101399  |
| 0.189831 | 0.167395 | 0.117861  | 0.11859  | 0.142774 | 0.128059  | 0.128497  |
| 0.198427 | 0.170746 | 0.120338  | 0.119027 | 0.139423 | 0.122378  | 0.123397  |
| 0.20236  | 0.177593 | 0.125437  | 0.125583 | 0.141317 | 0.130682  | 0.135198  |
| 0.207751 | 0.177156 | 0.117424  | 0.136218 | 0.13243  | 0.130536  | 0.131847  |
| 0.198281 | 0.170017 | 0.116404  | 0.118007 | 0.142774 | 0.131556  | 0.127914  |
| 0.187209 | 0.157488 | 0.108246  | 0.104604 | 0.134324 | 0.129225  | 0.117424  |
| 0.198864 | 0.169143 | 0.129225  | 0.11451  | 0.150932 | 0.131556  | 0.124126  |
| 0.187791 | 0.15778  | 0.115822  | 0.103438 | 0.145688 | 0.115239  | 0.112179  |
| 0.20877  | 0.18109  | 0.146999  | 0.137238 | 0.16317  | 0.147582  | 0.133159  |



|          |          |           |          |           |          |          |
|----------|----------|-----------|----------|-----------|----------|----------|
| 0.209062 | 0.183712 | 0.146999  | 0.136364 | 0.164627  | 0.151661 | 0.145979 |
| 0.186772 | 0.163462 | 0.119172  | 0.111116 | 0.149621  | 0.123252 | 0.11961  |
| 0.187937 | 0.159382 | 0.109266  | 0.104458 | 0.135052  | 0.115385 | 0.111742 |
| 0.200321 | 0.173514 | 0.121649  | 0.119172 | 0.142483  | 0.130973 | 0.120338 |
| 0.191579 | 0.162442 | 0.124272  | 0.113054 | 0.149476  | 0.125728 | 0.11859  |
| 0.205711 | 0.177739 | 0.141317  | 0.130099 | 0.156614  | 0.144231 | 0.137383 |
| 0.19289  | 0.164336 | 0.125291  | 0.113491 | 0.151078  | 0.124417 | 0.120192 |
| 0.187791 | 0.158071 | 0.119318  | 0.110431 | 0.145979  | 0.124854 | 0.116259 |
| 0.207751 | 0.191434 | 0.0748834 | 0.146416 | 0.0400641 | 0.147145 | 0.144376 |
| 0.197261 | 0.167541 | 0.13345   | 0.122232 | 0.152826  | 0.133741 | 0.124854 |
| 0.18954  | 0.160402 | 0.119318  | 0.104895 | 0.143065  | 0.126311 | 0.121503 |
| 0.204691 | 0.170309 | 0.136801  | 0.129079 | 0.154138  | 0.12602  | 0.119755 |
| 0.179633 | 0.145542 | 0.11961   | 0.100816 | 0.147436  | 0.11961  | 0.109557 |
| 0.212267 | 0.186917 | 0.144959  | 0.136072 | 0.15472   | 0.150787 | 0.146562 |
| 0.201632 | 0.175408 | 0.132867  | 0.118735 | 0.153118  | 0.129079 | 0.127768 |
| 0.191142 | 0.162296 | 0.120338  | 0.108829 | 0.146707  | 0.122669 | 0.118735 |
| 0.191725 | 0.161131 | 0.124126  | 0.115822 | 0.147873  | 0.121503 | 0.120775 |
| 0.200029 | 0.172931 | 0.122232  | 0.120921 | 0.136364  | 0.128934 | 0.125583 |
| 0.211684 | 0.180507 | 0.138258  | 0.127914 | 0.15472   | 0.144085 | 0.137529 |
| 0.211976 | 0.182255 | 0.148747  | 0.131993 | 0.164336  | 0.145542 | 0.139277 |
| 0.160548 | 0.147436 | 0.164336  | 0.147873 | 0.177302  | 0.17162  | 0.153409 |
| 0.189977 | 0.165793 | 0.120629  | 0.109703 | 0.14729   | 0.125291 | 0.118735 |
| 0.193765 | 0.162587 | 0.118298  | 0.106789 | 0.144959  | 0.124126 | 0.121649 |
| 0.191142 | 0.16317  | 0.11655   | 0.107955 | 0.144376  | 0.11655  | 0.116987 |
| 0.202943 | 0.177885 | 0.124272  | 0.136946 | 0.138695  | 0.14729  | 0.140443 |
| 0.188083 | 0.158945 | 0.118444  | 0.106935 | 0.145105  | 0.121941 | 0.113345 |
| 0.199883 | 0.17366  | 0.138112  | 0.120775 | 0.152535  | 0.13986  | 0.126603 |
| 0.198427 | 0.172786 | 0.119464  | 0.11553  | 0.14088   | 0.128788 | 0.122815 |
| 0.190705 | 0.159528 | 0.122232  | 0.107809 | 0.148601  | 0.126603 | 0.119464 |
| 0.201777 | 0.176428 | 0.12602   | 0.14627  | 0.134324  | 0.151661 | 0.138695 |
| 0.19799  | 0.170309 | 0.125728  | 0.113054 | 0.151807  | 0.129808 | 0.118881 |
| 0.210956 | 0.180361 | 0.143648  | 0.139423 | 0.160111  | 0.141026 | 0.137675 |
| 0.197115 | 0.171474 | 0.137966  | 0.127914 | 0.15472   | 0.133596 | 0.129953 |
| 0.182401 | 0.155012 | 0.117716  | 0.110577 | 0.14292   | 0.120629 | 0.112034 |
| 0.18648  | 0.159091 | 0.121212  | 0.10912  | 0.148747  | 0.120338 | 0.121358 |
| 0.193765 | 0.161131 | 0.124126  | 0.105624 | 0.149913  | 0.122086 | 0.118444 |
| 0.206002 | 0.176282 | 0.136655  | 0.124563 | 0.15778   | 0.140734 | 0.13447  |
| 0.189831 | 0.160985 | 0.116696  | 0.106352 | 0.145105  | 0.123397 | 0.117133 |
| 0.211247 | 0.182984 | 0.145979  | 0.13243  | 0.16419   | 0.149476 | 0.137092 |
| 0.190851 | 0.166667 | 0.123543  | 0.115822 | 0.148747  | 0.130828 | 0.125437 |
| 0.196678 | 0.168998 | 0.125291  | 0.112325 | 0.142628  | 0.126457 | 0.12602  |
| 0.192016 | 0.162587 | 0.120338  | 0.108829 | 0.150495  | 0.123543 | 0.121941 |
| 0.199009 | 0.167832 | 0.128205  | 0.111742 | 0.153118  | 0.13345  | 0.126894 |
| 0.18852  | 0.161131 | 0.11859   | 0.109703 | 0.148456  | 0.120921 | 0.116987 |

|          |          |           |          |          |          |          |
|----------|----------|-----------|----------|----------|----------|----------|
| 0.189103 | 0.161131 | 0.119464  | 0.105332 | 0.148164 | 0.123834 | 0.119027 |
| 0.207022 | 0.183712 | 0.14292   | 0.134033 | 0.159965 | 0.142045 | 0.136072 |
| 0.188666 | 0.160693 | 0.112908  | 0.108683 | 0.139277 | 0.117861 | 0.109848 |
| 0.193473 | 0.158217 | 0.117716  | 0.114073 | 0.14729  | 0.117716 | 0.116696 |
| 0.199883 | 0.178322 | 0.120921  | 0.133596 | 0.139423 | 0.134907 | 0.131265 |
| 0.197844 | 0.176865 | 0.106061  | 0.129516 | 0.123689 | 0.132284 | 0.130099 |
| 0.207751 | 0.175408 | 0.133159  | 0.129516 | 0.145542 | 0.134033 | 0.132721 |
| 0.215181 | 0.186043 | 0.141754  | 0.134615 | 0.153846 | 0.140297 | 0.138695 |
| 0.185897 | 0.159674 | 0.105478  | 0.116404 | 0.133013 | 0.10169  | 0.101253 |
| 0.152681 | 0.14831  | 0.174242  | 0.177302 | 0.187209 | 0.184441 | 0.171766 |
| 0.187791 | 0.163899 | 0.107372  | 0.114219 | 0.134324 | 0.113199 | 0.113636 |
| 0.208916 | 0.180361 | 0.139569  | 0.132139 | 0.153992 | 0.140443 | 0.137092 |
| 0.203089 | 0.174242 | 0.133159  | 0.125728 | 0.151661 | 0.129953 | 0.126894 |
| 0.212558 | 0.183712 | 0.117279  | 0.137238 | 0.125    | 0.138549 | 0.136072 |
| 0.196387 | 0.161131 | 0.118298  | 0.109703 | 0.143794 | 0.120629 | 0.112034 |
| 0.208916 | 0.178613 | 0.137821  | 0.128934 | 0.151661 | 0.138112 | 0.133013 |
| 0.194347 | 0.160839 | 0.112471  | 0.116987 | 0.139714 | 0.123252 | 0.11757  |
| 0.197115 | 0.167395 | 0.125728  | 0.123252 | 0.143648 | 0.131265 | 0.123543 |
| 0.19391  | 0.165064 | 0.104458  | 0.112471 | 0.128497 | 0.126311 | 0.115093 |
| 0.210519 | 0.186043 | 0.139132  | 0.133159 | 0.15472  | 0.145833 | 0.141026 |
| 0.190414 | 0.165064 | 0.113782  | 0.109848 | 0.140443 | 0.127477 | 0.116259 |
| 0.202506 | 0.174534 | 0.119464  | 0.132139 | 0.125728 | 0.13549  | 0.129516 |
| 0.192745 | 0.167978 | 0.0977564 | 0.120047 | 0.124417 | 0.12398  | 0.120629 |
| 0.207459 | 0.175117 | 0.134324  | 0.124563 | 0.157488 | 0.138695 | 0.131265 |
| 0.200612 | 0.173514 | 0.113199  | 0.128788 | 0.125    | 0.136801 | 0.132576 |
| 0.190122 | 0.166521 | 0.0945513 | 0.116259 | 0.127622 | 0.11757  | 0.114219 |
| 0.204108 | 0.174097 | 0.131847  | 0.137238 | 0.143939 | 0.1537   | 0.137821 |
| 0.194639 | 0.168998 | 0.100524  | 0.121358 | 0.126311 | 0.118881 | 0.11961  |
| 0.19697  | 0.16521  | 0.115676  | 0.111451 | 0.144959 | 0.115385 | 0.118153 |
| 0.194784 | 0.168852 | 0.11757   | 0.111014 | 0.138112 | 0.130973 | 0.125291 |
| 0.207605 | 0.187209 | 0.123397  | 0.145105 | 0.128205 | 0.141754 | 0.140734 |
| 0.179633 | 0.149621 | 0.119027  | 0.11014  | 0.140734 | 0.13243  | 0.114802 |
| 0.192162 | 0.160402 | 0.114656  | 0.111305 | 0.140443 | 0.120775 | 0.116259 |
| 0.189831 | 0.160693 | 0.118153  | 0.110431 | 0.145105 | 0.122815 | 0.115676 |
| 0.192016 | 0.166375 | 0.0999417 | 0.117279 | 0.124854 | 0.126748 | 0.120484 |
| 0.204983 | 0.175845 | 0.126603  | 0.124126 | 0.141317 | 0.135927 | 0.127622 |
| 0.194056 | 0.170163 | 0.0961538 | 0.123106 | 0.123689 | 0.125583 | 0.122232 |
| 0.184878 | 0.158362 | 0.106498  | 0.106061 | 0.13345  | 0.121066 | 0.113054 |
| 0.187209 | 0.160111 | 0.10708   | 0.106643 | 0.131993 | 0.119901 | 0.113928 |
| 0.19289  | 0.162879 | 0.115093  | 0.109411 | 0.142337 | 0.125291 | 0.118444 |
| 0.190851 | 0.160839 | 0.123543  | 0.112617 | 0.153118 | 0.119172 | 0.120192 |
| 0.2044   | 0.178759 | 0.129808  | 0.125291 | 0.145105 | 0.140297 | 0.134615 |
| 0.194056 | 0.164918 | 0.115093  | 0.112034 | 0.140297 | 0.120338 | 0.11553  |
| 0.186626 | 0.161276 | 0.107663  | 0.105478 | 0.136946 | 0.123689 | 0.111597 |

|          |          |           |           |           |          |           |
|----------|----------|-----------|-----------|-----------|----------|-----------|
| 0.198864 | 0.175554 | 0.121358  | 0.120338  | 0.142774  | 0.132721 | 0.126166  |
| 0.187937 | 0.162587 | 0.109266  | 0.105915  | 0.13884   | 0.122378 | 0.112908  |
| 0.190268 | 0.163462 | 0.109848  | 0.119318  | 0.135344  | 0.130536 | 0.121649  |
| 0.197552 | 0.176573 | 0.0608974 | 0.133887  | 0.0514277 | 0.135781 | 0.133304  |
| 0.19493  | 0.168706 | 0.118881  | 0.114365  | 0.142628  | 0.127622 | 0.117279  |
| 0.195367 | 0.163607 | 0.116113  | 0.112471  | 0.1419    | 0.120484 | 0.114802  |
| 0.190122 | 0.164481 | 0.116987  | 0.112179  | 0.139569  | 0.125437 | 0.118298  |
| 0.184586 | 0.153992 | 0.111451  | 0.101399  | 0.13986   | 0.117861 | 0.106352  |
| 0.201195 | 0.173514 | 0.13039   | 0.12704   | 0.144231  | 0.134761 | 0.13141   |
| 0.188666 | 0.157488 | 0.108246  | 0.100524  | 0.136364  | 0.122232 | 0.111305  |
| 0.208916 | 0.183566 | 0.131119  | 0.133013  | 0.140589  | 0.142483 | 0.132721  |
| 0.198864 | 0.176719 | 0.138258  | 0.128497  | 0.152972  | 0.13884  | 0.131702  |
| 0.201195 | 0.168852 | 0.126894  | 0.120338  | 0.149767  | 0.13243  | 0.120921  |
| 0.191725 | 0.163462 | 0.121212  | 0.115239  | 0.152244  | 0.124126 | 0.115822  |
| 0.191142 | 0.162587 | 0.100233  | 0.116404  | 0.127477  | 0.125583 | 0.119027  |
| 0.191871 | 0.167978 | 0.109994  | 0.108683  | 0.138695  | 0.124854 | 0.116841  |
| 0.194347 | 0.162296 | 0.11451   | 0.106206  | 0.137966  | 0.123543 | 0.121649  |
| 0.192308 | 0.162587 | 0.113636  | 0.109703  | 0.141754  | 0.118298 | 0.113199  |
| 0.181818 | 0.144814 | 0.119172  | 0.0983392 | 0.14729   | 0.123834 | 0.110577  |
| 0.202797 | 0.178322 | 0.137529  | 0.11961   | 0.156031  | 0.140734 | 0.133887  |
| 0.200612 | 0.169435 | 0.121649  | 0.112179  | 0.14627   | 0.124272 | 0.118007  |
| 0.201923 | 0.171911 | 0.131702  | 0.13039   | 0.145251  | 0.138695 | 0.131556  |
| 0.206148 | 0.186626 | 0.127185  | 0.138695  | 0.137529  | 0.139714 | 0.138695  |
| 0.097465 | 0.126894 | 0.193036  | 0.186189  | 0.218531  | 0.196533 | 0.18211   |
| 0.127622 | 0.170163 | 0.239802  | 0.228584  | 0.252185  | 0.238928 | 0.226836  |
| 0.18109  | 0.144085 | 0.115239  | 0.102855  | 0.143939  | 0.115822 | 0.109848  |
| 0.187646 | 0.159965 | 0.11859   | 0.109703  | 0.142337  | 0.12296  | 0.120775  |
| 0.185606 | 0.152681 | 0.112179  | 0.0992133 | 0.139714  | 0.117133 | 0.108246  |
| 0.187646 | 0.157925 | 0.118007  | 0.104458  | 0.140297  | 0.121795 | 0.116696  |
| 0.19697  | 0.170163 | 0.133159  | 0.130682  | 0.14933   | 0.136072 | 0.0875583 |
| 0.19493  | 0.16317  | 0.118881  | 0.108829  | 0.145251  | 0.125874 | 0.115822  |
| 0.211976 | 0.189248 | 0.14933   | 0.138695  | 0.155886  | 0.150495 | 0.148893  |
| 0.193765 | 0.16521  | 0.120921  | 0.107663  | 0.145833  | 0.126748 | 0.122815  |
| 0.204837 | 0.178904 | 0.132576  | 0.128059  | 0.146416  | 0.139569 | 0.136509  |
| 0.197115 | 0.169143 | 0.134761  | 0.11859   | 0.152681  | 0.139132 | 0.12296   |
| 0.206148 | 0.180216 | 0.135635  | 0.126457  | 0.153555  | 0.14292  | 0.137821  |
| 0.205274 | 0.177885 | 0.144668  | 0.13345   | 0.160256  | 0.139423 | 0.136946  |
| 0.197407 | 0.165647 | 0.121941  | 0.112179  | 0.143065  | 0.127477 | 0.122378  |
| 0.195367 | 0.162442 | 0.116404  | 0.107517  | 0.141026  | 0.116404 | 0.117424  |
| 0.194056 | 0.164044 | 0.120338  | 0.109703  | 0.14729   | 0.124709 | 0.118735  |
| 0.185023 | 0.1588   | 0.117133  | 0.107663  | 0.139423  | 0.120338 | 0.118153  |
| 0.191725 | 0.160839 | 0.118007  | 0.108829  | 0.141171  | 0.117133 | 0.117861  |
| 0.19391  | 0.163607 | 0.121066  | 0.106643  | 0.148019  | 0.119318 | 0.11859   |
| 0.200758 | 0.175991 | 0.137238  | 0.119901  | 0.15574   | 0.137238 | 0.128351  |

|          |          |          |          |          |          |          |
|----------|----------|----------|----------|----------|----------|----------|
| 0.210373 | 0.18211  | 0.141317 | 0.12398  | 0.159237 | 0.14831  | 0.143211 |
| 0.194784 | 0.170017 | 0.122523 | 0.112471 | 0.14831  | 0.124272 | 0.127331 |
| 0.192016 | 0.161713 | 0.117133 | 0.105332 | 0.148164 | 0.127622 | 0.116113 |
| 0.208042 | 0.179487 | 0.133741 | 0.125728 | 0.150495 | 0.141317 | 0.138549 |
| 0.186772 | 0.158508 | 0.114802 | 0.104458 | 0.142337 | 0.122086 | 0.118153 |
| 0.20877  | 0.18546  | 0.149621 | 0.131702 | 0.165501 | 0.144959 | 0.140734 |
| 0.198281 | 0.174679 | 0.140589 | 0.134907 | 0.157051 | 0.149038 | 0.134907 |
| 0.199592 | 0.169872 | 0.137238 | 0.120775 | 0.157488 | 0.136072 | 0.126311 |
| 0.189394 | 0.160548 | 0.114802 | 0.107663 | 0.142337 | 0.116259 | 0.115822 |
| 0.191871 | 0.158071 | 0.114948 | 0.10169  | 0.137529 | 0.11961  | 0.114802 |
| 0.204254 | 0.174242 | 0.13141  | 0.116987 | 0.153118 | 0.130245 | 0.128059 |
| 0.201486 | 0.174097 | 0.125437 | 0.118298 | 0.147145 | 0.138258 | 0.132284 |
| 0.195659 | 0.176719 | 0.133304 | 0.124709 | 0.150641 | 0.134178 | 0.135198 |
| 0.19697  | 0.162879 | 0.120338 | 0.111451 | 0.146999 | 0.123543 | 0.120775 |
| 0.195367 | 0.164773 | 0.12398  | 0.1081   | 0.149184 | 0.123689 | 0.121503 |
| 0.198572 | 0.169143 | 0.129808 | 0.109266 | 0.149767 | 0.130973 | 0.126748 |
| 0.209645 | 0.181964 | 0.130099 | 0.127622 | 0.152098 | 0.142628 | 0.136946 |
| 0.203526 | 0.175845 | 0.139423 | 0.120047 | 0.157634 | 0.137383 | 0.134033 |
| 0.20542  | 0.181818 | 0.136655 | 0.122815 | 0.156031 | 0.1419   | 0.137675 |
| 0.199446 | 0.170309 | 0.127768 | 0.118881 | 0.145979 | 0.142337 | 0.12704  |
| 0.192162 | 0.165647 | 0.116404 | 0.108683 | 0.143939 | 0.123397 | 0.120921 |
| 0.2044   | 0.17701  | 0.136801 | 0.122669 | 0.157051 | 0.136801 | 0.131702 |
| 0.191434 | 0.160548 | 0.114802 | 0.105332 | 0.140297 | 0.121503 | 0.119901 |
| 0.189831 | 0.159237 | 0.120192 | 0.113928 | 0.147727 | 0.119901 | 0.118881 |
| 0.192162 | 0.161859 | 0.121649 | 0.11014  | 0.14627  | 0.11961  | 0.119464 |
| 0.18852  | 0.160548 | 0.123252 | 0.107372 | 0.144085 | 0.120047 | 0.119027 |
| 0.189394 | 0.160839 | 0.117424 | 0.107955 | 0.144085 | 0.122086 | 0.118153 |
| 0.205565 | 0.18109  | 0.135927 | 0.123834 | 0.15472  | 0.144085 | 0.138403 |
| 0.186772 | 0.162879 | 0.112471 | 0.114656 | 0.136801 | 0.128497 | 0.118153 |
| 0.20542  | 0.176282 | 0.136946 | 0.124563 | 0.149621 | 0.140734 | 0.135635 |
| 0.189394 | 0.162296 | 0.118298 | 0.107372 | 0.142628 | 0.119755 | 0.120775 |
| 0.204108 | 0.17905  | 0.128059 | 0.118298 | 0.145979 | 0.13243  | 0.129662 |
| 0.198718 | 0.155594 | 0.129953 | 0.100962 | 0.147582 | 0.137238 | 0.122815 |
| 0.187063 | 0.158508 | 0.125    | 0.121066 | 0.153992 | 0.135781 | 0.121941 |
| 0.194784 | 0.166521 | 0.113491 | 0.115093 | 0.137821 | 0.133304 | 0.120629 |
| 0.188228 | 0.164918 | 0.130536 | 0.113199 | 0.158362 | 0.129662 | 0.122523 |
| 0.197698 | 0.168561 | 0.123106 | 0.115093 | 0.156177 | 0.129516 | 0.119172 |
| 0.188374 | 0.165064 | 0.109411 | 0.11655  | 0.137529 | 0.116404 | 0.117133 |
| 0.206731 | 0.176719 | 0.135635 | 0.134324 | 0.15472  | 0.139132 | 0.135781 |
| 0.207751 | 0.176573 | 0.134615 | 0.135344 | 0.142337 | 0.152681 | 0.141171 |
| 0.188228 | 0.160839 | 0.1081   | 0.114365 | 0.133013 | 0.118298 | 0.113199 |
| 0.210519 | 0.180507 | 0.133304 | 0.132576 | 0.14831  | 0.140297 | 0.125874 |
| 0.203089 | 0.172786 | 0.124126 | 0.130099 | 0.14292  | 0.136946 | 0.124563 |
| 0.200466 | 0.17162  | 0.134033 | 0.130099 | 0.148747 | 0.135198 | 0.125437 |

|          |          |          |          |          |          |          |
|----------|----------|----------|----------|----------|----------|----------|
| 0.193182 | 0.166667 | 0.121212 | 0.126311 | 0.137966 | 0.129371 | 0.118444 |
| 0.20134  | 0.172203 | 0.125874 | 0.124563 | 0.152535 | 0.128788 | 0.123397 |
| 0.198281 | 0.167686 | 0.128059 | 0.123834 | 0.145688 | 0.13039  | 0.124126 |
| 0.20542  | 0.175408 | 0.136946 | 0.131265 | 0.152244 | 0.129953 | 0.127477 |
| 0.208333 | 0.181235 | 0.136655 | 0.140297 | 0.146707 | 0.141026 | 0.129225 |
| 0.198718 | 0.166958 | 0.129079 | 0.125437 | 0.149621 | 0.134033 | 0.128351 |
| 0.190559 | 0.162005 | 0.118007 | 0.121649 | 0.139714 | 0.123543 | 0.113782 |
| 0.200903 | 0.172348 | 0.135635 | 0.126457 | 0.15676  | 0.144085 | 0.138403 |
| 0.202797 | 0.175991 | 0.134033 | 0.13243  | 0.149913 | 0.136946 | 0.135052 |
| 0.188228 | 0.161713 | 0.111597 | 0.118735 | 0.139132 | 0.120921 | 0.112908 |
| 0.112325 | 0.151952 | 0.220134 | 0.210956 | 0.236305 | 0.2213   | 0.212995 |
| 0.198864 | 0.167686 | 0.128642 | 0.122669 | 0.149767 | 0.129225 | 0.11859  |
| 0.192745 | 0.169143 | 0.122232 | 0.122086 | 0.140443 | 0.122815 | 0.124126 |
| 0.206294 | 0.181818 | 0.137238 | 0.135052 | 0.150495 | 0.137238 | 0.125146 |
| 0.194639 | 0.163753 | 0.121795 | 0.122523 | 0.146999 | 0.128497 | 0.125728 |
| 0.204254 | 0.173368 | 0.133159 | 0.136218 | 0.148456 | 0.13549  | 0.131265 |
| 0.194056 | 0.166958 | 0.135781 | 0.124272 | 0.156323 | 0.128205 | 0.11961  |
| 0.196241 | 0.167395 | 0.126603 | 0.12704  | 0.149767 | 0.122815 | 0.116259 |
| 0.200321 | 0.172931 | 0.129808 | 0.129662 | 0.148601 | 0.128351 | 0.12296  |
| 0.190559 | 0.160839 | 0.136946 | 0.129225 | 0.154575 | 0.133741 | 0.12602  |
| 0.201486 | 0.177302 | 0.13243  | 0.134615 | 0.144522 | 0.131847 | 0.128205 |
| 0.204545 | 0.177739 | 0.130536 | 0.133596 | 0.145833 | 0.135198 | 0.126894 |
| 0.207459 | 0.174534 | 0.13141  | 0.136801 | 0.147582 | 0.129662 | 0.130099 |
| 0.195513 | 0.170746 | 0.118007 | 0.119318 | 0.144959 | 0.129371 | 0.121649 |
| 0.199592 | 0.167541 | 0.125874 | 0.123106 | 0.148164 | 0.125583 | 0.12398  |
| 0.205274 | 0.176719 | 0.139423 | 0.136946 | 0.155886 | 0.144959 | 0.133741 |
| 0.191434 | 0.162587 | 0.124709 | 0.11553  | 0.144085 | 0.126166 | 0.112908 |
| 0.207168 | 0.178322 | 0.14831  | 0.127185 | 0.163899 | 0.142483 | 0.13884  |
| 0.187209 | 0.165064 | 0.126311 | 0.1419   | 0.147145 | 0.148164 | 0.136072 |
| 0.19391  | 0.163316 | 0.121066 | 0.115385 | 0.141317 | 0.133013 | 0.117716 |
| 0.203526 | 0.175554 | 0.124563 | 0.127914 | 0.141608 | 0.141171 | 0.12704  |
| 0.187354 | 0.159382 | 0.120047 | 0.122815 | 0.138258 | 0.136946 | 0.12398  |
| 0.194493 | 0.169435 | 0.125728 | 0.129371 | 0.144814 | 0.130682 | 0.135781 |
| 0.187209 | 0.158071 | 0.121358 | 0.128497 | 0.143357 | 0.14088  | 0.130245 |
| 0.19595  | 0.171183 | 0.126603 | 0.13986  | 0.150641 | 0.140589 | 0.134615 |
| 0.188811 | 0.160548 | 0.117133 | 0.107663 | 0.145833 | 0.125291 | 0.11757  |
| 0.206148 | 0.177302 | 0.144085 | 0.131993 | 0.160839 | 0.135344 | 0.125291 |
| 0.187937 | 0.159382 | 0.131993 | 0.13884  | 0.145833 | 0.14831  | 0.136509 |
| 0.199009 | 0.172203 | 0.119464 | 0.120484 | 0.13884  | 0.129371 | 0.123106 |
| 0.192016 | 0.168415 | 0.129079 | 0.123397 | 0.1537   | 0.129953 | 0.123397 |
| 0.207896 | 0.17905  | 0.139714 | 0.136946 | 0.148893 | 0.146999 | 0.145396 |
| 0.200029 | 0.170017 | 0.136801 | 0.118881 | 0.159091 | 0.137092 | 0.129953 |
| 0.209499 | 0.182401 | 0.138695 | 0.135052 | 0.152826 | 0.152972 | 0.137966 |
| 0.204691 | 0.175554 | 0.137383 | 0.129079 | 0.15472  | 0.143794 | 0.13345  |

|          |          |           |           |          |           |           |
|----------|----------|-----------|-----------|----------|-----------|-----------|
| 0.203671 | 0.172786 | 0.127914  | 0.121358  | 0.147873 | 0.127331  | 0.126603  |
| 0.199446 | 0.169143 | 0.133887  | 0.123834  | 0.149184 | 0.142045  | 0.129079  |
| 0.19493  | 0.168706 | 0.128497  | 0.116404  | 0.151369 | 0.137529  | 0.122232  |
| 0.205565 | 0.176428 | 0.134178  | 0.121503  | 0.149767 | 0.137092  | 0.133159  |
| 0.201195 | 0.176136 | 0.133013  | 0.131119  | 0.151515 | 0.13447   | 0.129662  |
| 0.207022 | 0.179341 | 0.130973  | 0.129371  | 0.146853 | 0.14292   | 0.140734  |
| 0.209645 | 0.180216 | 0.129516  | 0.136364  | 0.147436 | 0.137675  | 0.134324  |
| 0.200903 | 0.171766 | 0.122523  | 0.124709  | 0.144814 | 0.142628  | 0.128788  |
| 0.203817 | 0.179633 | 0.144085  | 0.136072  | 0.154429 | 0.155449  | 0.13986   |
| 0.194784 | 0.172057 | 0.125728  | 0.124417  | 0.141608 | 0.13243   | 0.120338  |
| 0.199155 | 0.171183 | 0.128059  | 0.11859   | 0.152972 | 0.126311  | 0.123252  |
| 0.205274 | 0.17701  | 0.127477  | 0.125874  | 0.143357 | 0.127477  | 0.123543  |
| 0.196533 | 0.168852 | 0.116113  | 0.120338  | 0.136655 | 0.127185  | 0.121795  |
| 0.202214 | 0.175991 | 0.127914  | 0.140589  | 0.146416 | 0.14627   | 0.143794  |
| 0.21183  | 0.185315 | 0.141317  | 0.150495  | 0.153409 | 0.160256  | 0.150787  |
| 0.204545 | 0.175408 | 0.131993  | 0.122815  | 0.150204 | 0.137529  | 0.134178  |
| 0.199738 | 0.169726 | 0.12398   | 0.115385  | 0.146853 | 0.132721  | 0.129371  |
| 0.205711 | 0.182984 | 0.133741  | 0.131556  | 0.153118 | 0.136072  | 0.137966  |
| 0.205274 | 0.179924 | 0.139423  | 0.136655  | 0.155012 | 0.13884   | 0.127914  |
| 0.204983 | 0.179924 | 0.130099  | 0.126166  | 0.153846 | 0.137092  | 0.136946  |
| 0.210519 | 0.188957 | 0.140006  | 0.136072  | 0.152681 | 0.137092  | 0.130245  |
| 0.200321 | 0.171766 | 0.13243   | 0.132576  | 0.143648 | 0.148456  | 0.128497  |
| 0.202506 | 0.171911 | 0.126457  | 0.120775  | 0.141463 | 0.1419    | 0.125437  |
| 0.210664 | 0.190268 | 0.148601  | 0.159237  | 0.156906 | 0.162587  | 0.154575  |
| 0.201632 | 0.177739 | 0.131702  | 0.124272  | 0.148164 | 0.138112  | 0.128934  |
| 0.203963 | 0.181235 | 0.139277  | 0.133887  | 0.150495 | 0.147436  | 0.136218  |
| 0.201486 | 0.173805 | 0.128642  | 0.120047  | 0.150641 | 0.127768  | 0.123252  |
| 0.21081  | 0.188083 | 0.131847  | 0.138695  | 0.144522 | 0.141171  | 0.140443  |
| 0.197115 | 0.170017 | 0.127477  | 0.123252  | 0.150058 | 0.131265  | 0.120921  |
| 0.167832 | 0.138695 | 0.0949883 | 0.128059  | 0.11116  | 0.142191  | 0.128059  |
| 0.208479 | 0.176136 | 0.148456  | 0.143357  | 0.164918 | 0.139132  | 0.140152  |
| 0.184149 | 0.150932 | 0.128205  | 0.117861  | 0.152826 | 0.124126  | 0.121066  |
| 0.169726 | 0.134761 | 0.138549  | 0.126166  | 0.160256 | 0.137383  | 0.131993  |
| 0.14627  | 0.125874 | 0.148019  | 0.114073  | 0.173805 | 0.157634  | 0.146999  |
| 0.148893 | 0.119464 | 0.1419    | 0.134178  | 0.167686 | 0.145105  | 0.130099  |
| 0.202943 | 0.172057 | 0.113782  | 0.11451   | 0.130245 | 0.134761  | 0.132284  |
| 0.196678 | 0.171329 | 0.134907  | 0.135052  | 0.152244 | 0.0568182 | 0.0983392 |
| 0.180944 | 0.153555 | 0.115676  | 0.114656  | 0.142628 | 0.11655   | 0.0977564 |
| 0.185169 | 0.151952 | 0.118153  | 0.107226  | 0.145105 | 0.125437  | 0.0885781 |
| 0.188228 | 0.164336 | 0.122086  | 0.122815  | 0.140589 | 0.129953  | 0.121941  |
| 0.184441 | 0.14831  | 0.122669  | 0.112908  | 0.145251 | 0.122378  | 0.120484  |
| 0.192453 | 0.162442 | 0.123689  | 0.114219  | 0.148019 | 0.120192  | 0.113928  |
| 0.176136 | 0.144085 | 0.117279  | 0.105769  | 0.143065 | 0.117279  | 0.085373  |
| 0.190122 | 0.128934 | 0.122523  | 0.0859557 | 0.152972 | 0.11961   | 0.119755  |

|           |          |           |           |           |           |           |
|-----------|----------|-----------|-----------|-----------|-----------|-----------|
| 0.180944  | 0.155012 | 0.128205  | 0.121066  | 0.152244  | 0.129662  | 0.0898893 |
| 0.181818  | 0.157634 | 0.112471  | 0.114656  | 0.136218  | 0.116841  | 0.10708   |
| 0.184149  | 0.149476 | 0.125     | 0.116987  | 0.155157  | 0.124709  | 0.121649  |
| 0.187209  | 0.151952 | 0.120775  | 0.114219  | 0.14831   | 0.119027  | 0.117133  |
| 0.196824  | 0.168561 | 0.125437  | 0.0856643 | 0.152681  | 0.136218  | 0.13345   |
| 0.121358  | 0.149038 | 0.214598  | 0.206876  | 0.231352  | 0.213724  | 0.204254  |
| 0.203526  | 0.166812 | 0.148456  | 0.136072  | 0.161713  | 0.143211  | 0.143939  |
| 0.201049  | 0.171911 | 0.129953  | 0.131265  | 0.148747  | 0.129662  | 0.128059  |
| 0.185752  | 0.156614 | 0.124854  | 0.116841  | 0.150641  | 0.123689  | 0.116259  |
| 0.103875  | 0.143794 | 0.211976  | 0.202797  | 0.230186  | 0.209645  | 0.198718  |
| 0.183129  | 0.153118 | 0.0960082 | 0.0903263 | 0.129371  | 0.132139  | 0.118881  |
| 0.198427  | 0.167832 | 0.119464  | 0.123397  | 0.146125  | 0.128497  | 0.124563  |
| 0.189685  | 0.155303 | 0.130245  | 0.11757   | 0.155449  | 0.0981935 | 0.109411  |
| 0.189248  | 0.165355 | 0.124563  | 0.123543  | 0.150932  | 0.129516  | 0.083042  |
| 0.13039   | 0.178759 | 0.249563  | 0.24359   | 0.25845   | 0.250146  | 0.236888  |
| 0.195221  | 0.16958  | 0.0541958 | 0.125437  | 0.0668706 | 0.130828  | 0.12398   |
| 0.192599  | 0.163462 | 0.120921  | 0.0820221 | 0.150787  | 0.128497  | 0.126311  |
| 0.199592  | 0.167249 | 0.129371  | 0.121941  | 0.154575  | 0.12704   | 0.12602   |
| 0.194639  | 0.163753 | 0.127331  | 0.121066  | 0.149913  | 0.122669  | 0.122232  |
| 0.189394  | 0.162005 | 0.0737179 | 0.122815  | 0.0770688 | 0.132867  | 0.108246  |
| 0.173951  | 0.130828 | 0.125874  | 0.114365  | 0.147582  | 0.133741  | 0.105041  |
| 0.195804  | 0.164336 | 0.123252  | 0.0837704 | 0.151952  | 0.129662  | 0.129808  |
| 0.183712  | 0.151661 | 0.121649  | 0.114219  | 0.14627   | 0.121358  | 0.118298  |
| 0.187646  | 0.161131 | 0.125     | 0.122523  | 0.150495  | 0.0474942 | 0.088141  |
| 0.187646  | 0.160839 | 0.121212  | 0.119318  | 0.142337  | 0.122669  | 0.0793998 |
| 0.183421  | 0.144959 | 0.121649  | 0.108392  | 0.146562  | 0.120484  | 0.117424  |
| 0.191434  | 0.162879 | 0.118298  | 0.122232  | 0.13447   | 0.126748  | 0.108537  |
| 0.204983  | 0.177593 | 0.150787  | 0.140152  | 0.163462  | 0.136509  | 0.138403  |
| 0.19391   | 0.170892 | 0.0546329 | 0.129079  | 0.0649767 | 0.129808  | 0.12704   |
| 0.19799   | 0.170017 | 0.124272  | 0.12296   | 0.146853  | 0.129808  | 0.125874  |
| 0.0910548 | 0.124854 | 0.185169  | 0.184149  | 0.206876  | 0.191579  | 0.179196  |
| 0.100087  | 0.134761 | 0.203526  | 0.193473  | 0.222028  | 0.206148  | 0.194056  |
| 0.183129  | 0.157197 | 0.122523  | 0.122086  | 0.151515  | 0.126894  | 0.0812937 |
| 0.187209  | 0.161276 | 0.119318  | 0.116259  | 0.145105  | 0.121066  | 0.0792541 |
| 0.190414  | 0.162442 | 0.135927  | 0.129953  | 0.148601  | 0.139714  | 0.129662  |
| 0.192162  | 0.163899 | 0.119027  | 0.0810023 | 0.150641  | 0.13243   | 0.126457  |
| 0.19493   | 0.170163 | 0.0536131 | 0.128642  | 0.0662879 | 0.132867  | 0.129516  |
| 0.196533  | 0.167686 | 0.137092  | 0.126457  | 0.150932  | 0.131265  | 0.129662  |
| 0.113782  | 0.146125 | 0.225087  | 0.214161  | 0.240967  | 0.223922  | 0.212413  |
| 0.191871  | 0.160985 | 0.115822  | 0.117424  | 0.147436  | 0.120192  | 0.114802  |
| 0.135781  | 0.14627  | 0.208625  | 0.194784  | 0.229167  | 0.215326  | 0.19391   |
| 0.196241  | 0.162442 | 0.103293  | 0.102855  | 0.130245  | 0.121066  | 0.120629  |
| 0.189977  | 0.159674 | 0.117133  | 0.112617  | 0.145251  | 0.118007  | 0.113199  |
| 0.183129  | 0.14933  | 0.121066  | 0.100233  | 0.145105  | 0.125437  | 0.113345  |

|           |          |           |           |           |           |           |
|-----------|----------|-----------|-----------|-----------|-----------|-----------|
| 0.181964  | 0.151078 | 0.121358  | 0.112179  | 0.143648  | 0.119901  | 0.0804196 |
| 0.106061  | 0.131702 | 0.203963  | 0.197698  | 0.225962  | 0.206002  | 0.197115  |
| 0.183275  | 0.150932 | 0.136655  | 0.125437  | 0.159819  | 0.132576  | 0.132721  |
| 0.199592  | 0.164918 | 0.111597  | 0.113782  | 0.142337  | 0.119464  | 0.118153  |
| 0.189977  | 0.152972 | 0.131119  | 0.116404  | 0.154283  | 0.125291  | 0.12602   |
| 0.196678  | 0.161131 | 0.131993  | 0.120192  | 0.151078  | 0.135781  | 0.130099  |
| 0.187063  | 0.160256 | 0.120338  | 0.117861  | 0.149913  | 0.120921  | 0.0828963 |
| 0.197407  | 0.165064 | 0.105041  | 0.103147  | 0.128497  | 0.122815  | 0.125     |
| 0.183421  | 0.151369 | 0.128642  | 0.0859557 | 0.15472   | 0.124563  | 0.119464  |
| 0.197115  | 0.171474 | 0.124272  | 0.123834  | 0.146853  | 0.128351  | 0.128788  |
| 0.178467  | 0.146707 | 0.119318  | 0.110431  | 0.147727  | 0.119318  | 0.114802  |
| 0.194056  | 0.163462 | 0.118881  | 0.113199  | 0.142628  | 0.12296   | 0.124272  |
| 0.0893065 | 0.120775 | 0.186043  | 0.179487  | 0.210664  | 0.190122  | 0.18007   |
| 0.199592  | 0.167249 | 0.128205  | 0.125146  | 0.149913  | 0.125874  | 0.126894  |
| 0.19595   | 0.165938 | 0.133013  | 0.122086  | 0.156469  | 0.12602   | 0.125874  |
| 0.189394  | 0.162296 | 0.129079  | 0.116696  | 0.153118  | 0.125     | 0.122815  |
| 0.188374  | 0.16215  | 0.0569639 | 0.121503  | 0.0804196 | 0.131265  | 0.126166  |
| 0.189248  | 0.153409 | 0.128059  | 0.11655   | 0.151515  | 0.123106  | 0.122669  |
| 0.200903  | 0.168269 | 0.113199  | 0.109557  | 0.13141   | 0.125728  | 0.127331  |
| 0.186772  | 0.155303 | 0.100233  | 0.115822  | 0.128351  | 0.127331  | 0.122232  |
| 0.199883  | 0.16958  | 0.125874  | 0.0884324 | 0.1537    | 0.134615  | 0.131847  |
| 0.193036  | 0.158654 | 0.129225  | 0.122086  | 0.154429  | 0.121066  | 0.118298  |
| 0.192453  | 0.162442 | 0.121649  | 0.117133  | 0.149476  | 0.117861  | 0.115967  |
| 0.185606  | 0.15676  | 0.125291  | 0.118735  | 0.150204  | 0.125874  | 0.0878497 |
| 0.19595   | 0.161568 | 0.126894  | 0.115093  | 0.152389  | 0.0983392 | 0.108392  |
| 0.201632  | 0.168124 | 0.1419    | 0.132139  | 0.160693  | 0.104021  | 0.119027  |
| 0.186772  | 0.166084 | 0.0524476 | 0.118735  | 0.0808566 | 0.125874  | 0.118735  |
| 0.199738  | 0.165355 | 0.144376  | 0.130536  | 0.157343  | 0.138549  | 0.138695  |
| 0.186917  | 0.158654 | 0.11757   | 0.117133  | 0.146562  | 0.119027  | 0.0812937 |
| 0.191288  | 0.158362 | 0.121941  | 0.110723  | 0.144522  | 0.119027  | 0.115967  |
| 0.175117  | 0.133159 | 0.128497  | 0.10912   | 0.151661  | 0.121503  | 0.117279  |
| 0.193473  | 0.165793 | 0.129079  | 0.0872669 | 0.156906  | 0.135781  | 0.132139  |
| 0.11655   | 0.122086 | 0.191142  | 0.165064  | 0.209936  | 0.197844  | 0.17905   |
| 0.192453  | 0.160985 | 0.112034  | 0.11014   | 0.139569  | 0.118153  | 0.114802  |
| 0.179633  | 0.153118 | 0.109994  | 0.104021  | 0.136655  | 0.109703  | 0.112179  |
| 0.198864  | 0.172348 | 0.123397  | 0.121503  | 0.144814  | 0.129225  | 0.124709  |
| 0.112908  | 0.115239 | 0.181964  | 0.164627  | 0.206585  | 0.182838  | 0.166667  |
| 0.197552  | 0.172203 | 0.0673077 | 0.136509  | 0.0697844 | 0.143648  | 0.135052  |
| 0.207459  | 0.187063 | 0.0754662 | 0.146416  | 0.0435606 | 0.150058  | 0.146125  |
| 0.207314  | 0.177593 | 0.150204  | 0.143939  | 0.166084  | 0.140297  | 0.140734  |
| 0.184878  | 0.158071 | 0.055507  | 0.118881  | 0.0824592 | 0.123106  | 0.11655   |
| 0.185606  | 0.150932 | 0.126457  | 0.114656  | 0.150495  | 0.12296   | 0.123106  |
| 0.0977564 | 0.143502 | 0.209353  | 0.202797  | 0.229895  | 0.212558  | 0.200466  |
| 0.185169  | 0.156614 | 0.128351  | 0.122086  | 0.145396  | 0.124272  | 0.121503  |



|           |          |           |           |           |           |           |
|-----------|----------|-----------|-----------|-----------|-----------|-----------|
| 0.187646  | 0.152681 | 0.13141   | 0.120484  | 0.156031  | 0.130536  | 0.126894  |
| 0.189394  | 0.161422 | 0.113928  | 0.112325  | 0.138549  | 0.120047  | 0.121066  |
| 0.131702  | 0.112179 | 0.170746  | 0.149621  | 0.192162  | 0.166667  | 0.150204  |
| 0.180361  | 0.148601 | 0.11655   | 0.109411  | 0.147582  | 0.115676  | 0.108246  |
| 0.203234  | 0.178467 | 0.148164  | 0.148019  | 0.159091  | 0.0721154 | 0.110723  |
| 0.183712  | 0.158654 | 0.124563  | 0.128788  | 0.140443  | 0.129808  | 0.119464  |
| 0.0907634 | 0.120192 | 0.188083  | 0.180361  | 0.208916  | 0.189831  | 0.180653  |
| 0.192162  | 0.165938 | 0.0520105 | 0.124709  | 0.0798368 | 0.127768  | 0.124126  |
| 0.187791  | 0.148456 | 0.11553   | 0.102273  | 0.141317  | 0.119901  | 0.110723  |
| 0.190559  | 0.159382 | 0.123252  | 0.112617  | 0.148456  | 0.121212  | 0.118153  |
| 0.192162  | 0.161859 | 0.115822  | 0.118881  | 0.140152  | 0.120484  | 0.124417  |
| 0.196241  | 0.167104 | 0.118444  | 0.119464  | 0.143357  | 0.128642  | 0.12296   |
| 0.184003  | 0.156906 | 0.120192  | 0.120629  | 0.149184  | 0.107955  | 0.110723  |
| 0.184149  | 0.159382 | 0.117716  | 0.118153  | 0.144959  | 0.118881  | 0.0808566 |
| 0.0936772 | 0.120775 | 0.187209  | 0.185315  | 0.21183   | 0.190997  | 0.181235  |
| 0.193765  | 0.15472  | 0.128497  | 0.114365  | 0.153409  | 0.0917832 | 0.10708   |
| 0.183421  | 0.149038 | 0.121941  | 0.108683  | 0.145979  | 0.122815  | 0.11655   |
| 0.101399  | 0.141317 | 0.210956  | 0.202652  | 0.231206  | 0.207751  | 0.197115  |
| 0.199009  | 0.169289 | 0.128497  | 0.124563  | 0.151078  | 0.125     | 0.125437  |
| 0.186334  | 0.158945 | 0.118444  | 0.121503  | 0.148601  | 0.121358  | 0.0827506 |
| 0.184295  | 0.156031 | 0.118735  | 0.114219  | 0.144231  | 0.119318  | 0.0804196 |
| 0.199301  | 0.158508 | 0.1419    | 0.127477  | 0.157197  | 0.132284  | 0.131847  |
| 0.0952797 | 0.11859  | 0.186189  | 0.177593  | 0.20877   | 0.189394  | 0.180216  |
| 0.198864  | 0.168561 | 0.121066  | 0.0833333 | 0.151807  | 0.13039   | 0.129079  |
| 0.198281  | 0.164481 | 0.137383  | 0.125     | 0.155594  | 0.103293  | 0.11451   |
| 0.184878  | 0.159528 | 0.115822  | 0.117133  | 0.144814  | 0.118735  | 0.0786713 |
| 0.18546   | 0.15778  | 0.115822  | 0.11451   | 0.147727  | 0.120484  | 0.0792541 |
| 0.181527  | 0.158217 | 0.119172  | 0.117279  | 0.144668  | 0.119172  | 0.0793998 |
| 0.187209  | 0.151369 | 0.120775  | 0.111597  | 0.149767  | 0.118153  | 0.117424  |
| 0.185897  | 0.155886 | 0.109848  | 0.11116   | 0.13447   | 0.114219  | 0.104167  |
| 0.191725  | 0.168998 | 0.0498252 | 0.126311  | 0.0674534 | 0.127331  | 0.124854  |
| 0.203671  | 0.164627 | 0.139569  | 0.124563  | 0.156906  | 0.116259  | 0.126894  |
| 0.190559  | 0.166958 | 0.0504079 | 0.122523  | 0.0756119 | 0.128497  | 0.121649  |
| 0.203526  | 0.168269 | 0.135344  | 0.126166  | 0.15035   | 0.139132  | 0.136655  |
| 0.0929487 | 0.125291 | 0.192308  | 0.184295  | 0.214307  | 0.192599  | 0.18546   |
| 0.193328  | 0.159819 | 0.123397  | 0.111305  | 0.150058  | 0.0954254 | 0.106352  |
| 0.192599  | 0.157051 | 0.13549   | 0.125437  | 0.158071  | 0.132867  | 0.128934  |
| 0.187209  | 0.158654 | 0.116696  | 0.115093  | 0.1419    | 0.119901  | 0.0839161 |
| 0.18211   | 0.157634 | 0.109557  | 0.11757   | 0.133013  | 0.113054  | 0.103293  |
| 0.182401  | 0.148893 | 0.111888  | 0.109411  | 0.136801  | 0.0827506 | 0.0878497 |
| 0.19391   | 0.168561 | 0.123397  | 0.083042  | 0.151515  | 0.134761  | 0.130245  |
| 0.194784  | 0.166812 | 0.131556  | 0.129371  | 0.147727  | 0.136801  | 0.127622  |
| 0.190268  | 0.158508 | 0.123543  | 0.116404  | 0.151369  | 0.119172  | 0.117861  |
| 0.187063  | 0.153555 | 0.112762  | 0.0840618 | 0.141463  | 0.123252  | 0.108246  |

|           |          |           |           |           |           |           |
|-----------|----------|-----------|-----------|-----------|-----------|-----------|
| 0.184586  | 0.152535 | 0.107372  | 0.0842075 | 0.139277  | 0.120484  | 0.106352  |
| 0.183566  | 0.145688 | 0.111014  | 0.103001  | 0.139714  | 0.118881  | 0.107955  |
| 0.196241  | 0.162442 | 0.102418  | 0.104312  | 0.129371  | 0.125437  | 0.122669  |
| 0.199009  | 0.177156 | 0.0600233 | 0.134178  | 0.0604604 | 0.136364  | 0.130682  |
| 0.195076  | 0.169143 | 0.122523  | 0.0824592 | 0.152972  | 0.130973  | 0.126748  |
| 0.181818  | 0.14831  | 0.120047  | 0.109994  | 0.144085  | 0.115676  | 0.118444  |
| 0.19289   | 0.164044 | 0.119464  | 0.0861014 | 0.150787  | 0.12704   | 0.122523  |
| 0.182255  | 0.155449 | 0.11757   | 0.113345  | 0.147436  | 0.115239  | 0.0815851 |
| 0.192016  | 0.163753 | 0.108974  | 0.112325  | 0.137966  | 0.113928  | 0.116404  |
| 0.185023  | 0.159674 | 0.119464  | 0.119901  | 0.148747  | 0.124126  | 0.081148  |
| 0.189103  | 0.153263 | 0.120629  | 0.108829  | 0.149913  | 0.092366  | 0.103001  |
| 0.192016  | 0.159382 | 0.125874  | 0.11757   | 0.153409  | 0.120629  | 0.114365  |
| 0.196096  | 0.166375 | 0.115676  | 0.116404  | 0.141171  | 0.123834  | 0.115822  |
| 0.185752  | 0.15778  | 0.113491  | 0.116259  | 0.137821  | 0.116987  | 0.106935  |
| 0.184732  | 0.15676  | 0.118881  | 0.114365  | 0.145251  | 0.117716  | 0.0826049 |
| 0.181818  | 0.150932 | 0.128497  | 0.114948  | 0.151661  | 0.126748  | 0.116987  |
| 0.188374  | 0.152826 | 0.122815  | 0.112471  | 0.152389  | 0.123106  | 0.116841  |
| 0.189685  | 0.15472  | 0.117133  | 0.110286  | 0.141463  | 0.119755  | 0.113782  |
| 0.187646  | 0.1588   | 0.118881  | 0.119318  | 0.148456  | 0.115967  | 0.081148  |
| 0.184878  | 0.14933  | 0.12398   | 0.113636  | 0.147436  | 0.123106  | 0.121212  |
| 0.193328  | 0.165355 | 0.104458  | 0.1081    | 0.130828  | 0.124272  | 0.120338  |
| 0.188666  | 0.151369 | 0.122232  | 0.108974  | 0.150932  | 0.121358  | 0.120629  |
| 0.193328  | 0.165064 | 0.119027  | 0.113345  | 0.145979  | 0.125146  | 0.11859   |
| 0.190997  | 0.160693 | 0.113782  | 0.117133  | 0.138695  | 0.118735  | 0.106352  |
| 0.184878  | 0.155157 | 0.111116  | 0.112179  | 0.142774  | 0.109411  | 0.106352  |
| 0.191725  | 0.160256 | 0.11014   | 0.113199  | 0.135635  | 0.114219  | 0.116404  |
| 0.183421  | 0.150204 | 0.126603  | 0.118007  | 0.155594  | 0.125728  | 0.122669  |
| 0.193328  | 0.150787 | 0.125728  | 0.10373   | 0.154138  | 0.12398   | 0.129079  |
| 0.185897  | 0.152681 | 0.115385  | 0.111742  | 0.144959  | 0.120629  | 0.115822  |
| 0         | 0.128205 | 0.190851  | 0.186917  | 0.21081   | 0.189977  | 0.183129  |
| 0.128205  | 0        | 0.168998  | 0.136509  | 0.191871  | 0.162005  | 0.148747  |
| 0.190851  | 0.168998 | 0         | 0.123106  | 0.0791084 | 0.125874  | 0.122815  |
| 0.186917  | 0.136509 | 0.123106  | 0         | 0.150641  | 0.125146  | 0.113636  |
| 0.21081   | 0.191871 | 0.0791084 | 0.150641  | 0         | 0.152535  | 0.149767  |
| 0.189977  | 0.162005 | 0.125874  | 0.125146  | 0.152535  | 0         | 0.0849359 |
| 0.183129  | 0.148747 | 0.122815  | 0.113636  | 0.149767  | 0.0849359 | 0         |
| 0.184441  | 0.146853 | 0.116841  | 0.104749  | 0.148747  | 0.123252  | 0.0890152 |
| 0.18852   | 0.159091 | 0.11451   | 0.119318  | 0.139132  | 0.122086  | 0.105041  |
| 0.190559  | 0.155594 | 0.127331  | 0.114365  | 0.152244  | 0.123252  | 0.120192  |
| 0.0965909 | 0.133887 | 0.200029  | 0.195221  | 0.222611  | 0.200029  | 0.187646  |
| 0.199883  | 0.168124 | 0.123543  | 0.0820221 | 0.150787  | 0.133741  | 0.129225  |
| 0.180507  | 0.140297 | 0.121649  | 0.087704  | 0.148601  | 0.12398   | 0.118881  |
| 0.181964  | 0.146707 | 0.117279  | 0.109848  | 0.145396  | 0.121358  | 0.0804196 |
| 0.196678  | 0.157051 | 0.123252  | 0.116113  | 0.1537    | 0.127331  | 0.125728  |

|           |          |           |           |           |           |           |
|-----------|----------|-----------|-----------|-----------|-----------|-----------|
| 0.116696  | 0.111742 | 0.183421  | 0.167832  | 0.210956  | 0.187209  | 0.168124  |
| 0.127768  | 0.174097 | 0.244318  | 0.236014  | 0.256993  | 0.247523  | 0.236014  |
| 0.196241  | 0.161276 | 0.128059  | 0.117133  | 0.152098  | 0.11961   | 0.11859   |
| 0.192745  | 0.158071 | 0.125437  | 0.108974  | 0.149184  | 0.124272  | 0.115093  |
| 0.188374  | 0.163024 | 0.0499709 | 0.12296   | 0.0743007 | 0.124854  | 0.120629  |
| 0.19289   | 0.165793 | 0.115385  | 0.118735  | 0.143211  | 0.123834  | 0.120775  |
| 0.19595   | 0.164773 | 0.11961   | 0.0839161 | 0.149184  | 0.126311  | 0.126166  |
| 0.185897  | 0.152389 | 0.120921  | 0.112617  | 0.146125  | 0.0865385 | 0.103584  |
| 0.17905   | 0.14088  | 0.116696  | 0.106935  | 0.147727  | 0.11757   | 0.0818765 |
| 0.195367  | 0.165064 | 0.120484  | 0.0810023 | 0.147436  | 0.128934  | 0.122669  |
| 0.179779  | 0.1419   | 0.118298  | 0.110286  | 0.140589  | 0.119172  | 0.0887238 |
| 0.194202  | 0.156614 | 0.124854  | 0.114219  | 0.148601  | 0.122523  | 0.119755  |
| 0.187063  | 0.158508 | 0.111888  | 0.117279  | 0.135927  | 0.116841  | 0.107955  |
| 0.193619  | 0.16215  | 0.126894  | 0.117716  | 0.153263  | 0.119027  | 0.114802  |
| 0.185315  | 0.150641 | 0.123543  | 0.114365  | 0.151661  | 0.122669  | 0.117279  |
| 0.184149  | 0.151807 | 0.112762  | 0.102418  | 0.142337  | 0.114219  | 0.110577  |
| 0.201923  | 0.173077 | 0.129662  | 0.122523  | 0.152244  | 0.13345   | 0.125728  |
| 0.206294  | 0.179779 | 0.13141   | 0.131265  | 0.143502  | 0.13549   | 0.133596  |
| 0.184878  | 0.156906 | 0.118153  | 0.115676  | 0.147727  | 0.117279  | 0.0844988 |
| 0.181235  | 0.148601 | 0.110723  | 0.111742  | 0.128642  | 0.125583  | 0.0878497 |
| 0.19697   | 0.169872 | 0.13345   | 0.131265  | 0.150787  | 0.134615  | 0.0895979 |
| 0.118444  | 0.144376 | 0.206148  | 0.20134   | 0.224359  | 0.209353  | 0.20134   |
| 0.183858  | 0.152389 | 0.115676  | 0.108537  | 0.146125  | 0.11451   | 0.111742  |
| 0.188374  | 0.159528 | 0.110577  | 0.115093  | 0.13549   | 0.118153  | 0.110723  |
| 0.190997  | 0.160693 | 0.123106  | 0.117133  | 0.153846  | 0.0968823 | 0.104895  |
| 0.199592  | 0.167249 | 0.12704   | 0.120192  | 0.156323  | 0.125291  | 0.123106  |
| 0.193765  | 0.158508 | 0.121212  | 0.114656  | 0.150495  | 0.130828  | 0.124563  |
| 0.099359  | 0.130536 | 0.196678  | 0.191871  | 0.218677  | 0.199883  | 0.186917  |
| 0.190122  | 0.154866 | 0.12602   | 0.116259  | 0.153263  | 0.123397  | 0.122378  |
| 0.185315  | 0.157051 | 0.115967  | 0.115822  | 0.144085  | 0.118007  | 0.0837704 |
| 0.194202  | 0.170017 | 0.116696  | 0.121212  | 0.136655  | 0.133304  | 0.132867  |
| 0.193619  | 0.164773 | 0.115822  | 0.115093  | 0.140734  | 0.123689  | 0.118298  |
| 0.184003  | 0.149913 | 0.127185  | 0.116259  | 0.154138  | 0.119901  | 0.119172  |
| 0.178467  | 0.150787 | 0.116696  | 0.113345  | 0.140443  | 0.11757   | 0.114219  |
| 0.19391   | 0.159237 | 0.122815  | 0.11451   | 0.146562  | 0.12398   | 0.117424  |
| 0.195367  | 0.16623  | 0.123689  | 0.120921  | 0.152389  | 0.11757   | 0.119464  |
| 0.0932401 | 0.130828 | 0.19697   | 0.190997  | 0.21926   | 0.197261  | 0.186334  |
| 0.181672  | 0.146999 | 0.117861  | 0.108392  | 0.142774  | 0.111451  | 0.114802  |
| 0.0952797 | 0.121795 | 0.194639  | 0.187791  | 0.214598  | 0.196678  | 0.184295  |
| 0.0933858 | 0.119901 | 0.190122  | 0.182401  | 0.213869  | 0.192162  | 0.182401  |
| 0.20236   | 0.174097 | 0.127185  | 0.126748  | 0.147436  | 0.136509  | 0.131119  |
| 0.205274  | 0.176428 | 0.132721  | 0.130828  | 0.151807  | 0.131265  | 0.13141   |
| 0.187209  | 0.153409 | 0.11553   | 0.106935  | 0.140734  | 0.116404  | 0.113928  |
| 0.181235  | 0.15035  | 0.117716  | 0.110868  | 0.143211  | 0.118007  | 0.119318  |

|           |          |           |           |           |          |           |
|-----------|----------|-----------|-----------|-----------|----------|-----------|
| 0.183421  | 0.149038 | 0.123106  | 0.110431  | 0.14831   | 0.11757  | 0.117716  |
| 0.187791  | 0.157488 | 0.121066  | 0.117424  | 0.148893  | 0.120775 | 0.0810023 |
| 0.190997  | 0.162442 | 0.114365  | 0.0827506 | 0.143648  | 0.125437 | 0.123543  |
| 0.194202  | 0.165647 | 0.119901  | 0.0827506 | 0.148893  | 0.125146 | 0.12296   |
| 0.19289   | 0.159091 | 0.129079  | 0.121358  | 0.153118  | 0.11859  | 0.116987  |
| 0.194202  | 0.167395 | 0.11757   | 0.119172  | 0.142191  | 0.124563 | 0.124126  |
| 0.18211   | 0.157925 | 0.113928  | 0.115239  | 0.140589  | 0.116841 | 0.0785256 |
| 0.186626  | 0.149913 | 0.12602   | 0.114219  | 0.151515  | 0.120484 | 0.120047  |
| 0.185315  | 0.149184 | 0.109266  | 0.0995047 | 0.139423  | 0.115967 | 0.110868  |
| 0.193328  | 0.155449 | 0.133013  | 0.124126  | 0.155594  | 0.132721 | 0.129079  |
| 0.191288  | 0.165064 | 0.0505536 | 0.123834  | 0.0754662 | 0.126603 | 0.120921  |
| 0.19697   | 0.159382 | 0.137238  | 0.125146  | 0.157488  | 0.134615 | 0.13243   |
| 0.138403  | 0.182401 | 0.259615  | 0.250146  | 0.26588   | 0.259033 | 0.247815  |
| 0.206002  | 0.175991 | 0.125     | 0.12398   | 0.140589  | 0.130245 | 0.130099  |
| 0.200321  | 0.169435 | 0.128351  | 0.127331  | 0.142774  | 0.127477 | 0.127914  |
| 0.113928  | 0.145979 | 0.21824   | 0.210519  | 0.234411  | 0.217657 | 0.207314  |
| 0.197407  | 0.172057 | 0.130682  | 0.129371  | 0.146853  | 0.125146 | 0.126748  |
| 0.119318  | 0.160111 | 0.230624  | 0.222902  | 0.244464  | 0.230624 | 0.219114  |
| 0.199009  | 0.168706 | 0.118298  | 0.117279  | 0.144668  | 0.122669 | 0.12398   |
| 0.197698  | 0.167978 | 0.129516  | 0.129079  | 0.151515  | 0.132721 | 0.085373  |
| 0.190705  | 0.16215  | 0.123106  | 0.116841  | 0.151807  | 0.119318 | 0.118007  |
| 0.199738  | 0.173514 | 0.126311  | 0.123543  | 0.145688  | 0.128642 | 0.126748  |
| 0.095134  | 0.133304 | 0.20236   | 0.193473  | 0.22465   | 0.202069 | 0.190559  |
| 0.195367  | 0.161568 | 0.134761  | 0.123543  | 0.15472   | 0.13243  | 0.13141   |
| 0.18546   | 0.148456 | 0.124563  | 0.113636  | 0.152681  | 0.122523 | 0.122086  |
| 0.115093  | 0.154429 | 0.226107  | 0.218677  | 0.245775  | 0.227564 | 0.216929  |
| 0.195367  | 0.160111 | 0.125728  | 0.0818765 | 0.154429  | 0.13039  | 0.123834  |
| 0.0952797 | 0.130536 | 0.197261  | 0.190997  | 0.216638  | 0.199301 | 0.187209  |
| 0.195804  | 0.166958 | 0.122086  | 0.0866841 | 0.152826  | 0.129662 | 0.126311  |
| 0.188228  | 0.160548 | 0.119464  | 0.119027  | 0.148164  | 0.123543 | 0.0866841 |
| 0.195076  | 0.16623  | 0.123397  | 0.126748  | 0.136655  | 0.12602  | 0.115676  |
| 0.203817  | 0.179341 | 0.128351  | 0.128497  | 0.144814  | 0.135927 | 0.132576  |
| 0.182692  | 0.149184 | 0.114219  | 0.107955  | 0.14292   | 0.116841 | 0.108829  |
| 0.12296   | 0.11451  | 0.157051  | 0.156031  | 0.182547  | 0.16317  | 0.146999  |
| 0.18007   | 0.14627  | 0.120047  | 0.10708   | 0.145251  | 0.11655  | 0.115239  |
| 0.195513  | 0.164044 | 0.126166  | 0.121358  | 0.155157  | 0.123834 | 0.123397  |
| 0.191434  | 0.163462 | 0.125291  | 0.119318  | 0.153118  | 0.126457 | 0.117279  |
| 0.19697   | 0.16958  | 0.133741  | 0.124272  | 0.151078  | 0.127914 | 0.126894  |
| 0.0925117 | 0.124854 | 0.193328  | 0.186189  | 0.2162    | 0.194202 | 0.183858  |
| 0.185606  | 0.159382 | 0.118298  | 0.117279  | 0.145251  | 0.119172 | 0.0799825 |
| 0.182255  | 0.157488 | 0.123689  | 0.120921  | 0.152389  | 0.13243  | 0.12704   |
| 0.195804  | 0.165501 | 0.103147  | 0.103875  | 0.129225  | 0.124709 | 0.119318  |
| 0.197698  | 0.171183 | 0.124854  | 0.0827506 | 0.154429  | 0.13243  | 0.127622  |
| 0.189103  | 0.162296 | 0.125291  | 0.12398   | 0.150204  | 0.12704  | 0.0808566 |

|           |          |           |           |           |          |           |
|-----------|----------|-----------|-----------|-----------|----------|-----------|
| 0.133304  | 0.183421 | 0.25743   | 0.246795  | 0.266608  | 0.256556 | 0.246503  |
| 0.192308  | 0.164336 | 0.118298  | 0.120484  | 0.133596  | 0.122086 | 0.113782  |
| 0.186189  | 0.147436 | 0.125291  | 0.106206  | 0.152535  | 0.104895 | 0.0817308 |
| 0.13986   | 0.126166 | 0.183566  | 0.167686  | 0.196533  | 0.186189 | 0.175262  |
| 0.0964452 | 0.120338 | 0.183275  | 0.179924  | 0.208188  | 0.185315 | 0.175554  |
| 0.190559  | 0.160839 | 0.12704   | 0.119318  | 0.155157  | 0.117424 | 0.116404  |
| 0.1875    | 0.151661 | 0.124272  | 0.113636  | 0.152098  | 0.122523 | 0.11859   |
| 0.194202  | 0.161568 | 0.116987  | 0.11451   | 0.143357  | 0.122232 | 0.11859   |
| 0.202797  | 0.166667 | 0.151807  | 0.137675  | 0.162442  | 0.147727 | 0.145833  |
| 0.189394  | 0.159382 | 0.122086  | 0.113491  | 0.14933   | 0.116841 | 0.113491  |
| 0.192162  | 0.160402 | 0.127185  | 0.120338  | 0.157343  | 0.118444 | 0.117424  |
| 0.198135  | 0.16958  | 0.127622  | 0.0831876 | 0.151369  | 0.131119 | 0.133887  |
| 0.183275  | 0.147436 | 0.121503  | 0.111742  | 0.142337  | 0.121503 | 0.11961   |
| 0.190414  | 0.154283 | 0.134761  | 0.123543  | 0.154138  | 0.130099 | 0.129662  |
| 0.179487  | 0.150058 | 0.122086  | 0.0898893 | 0.150787  | 0.131993 | 0.121941  |
| 0.20236   | 0.172931 | 0.125728  | 0.12296   | 0.143065  | 0.13039  | 0.127622  |
| 0.20979   | 0.183858 | 0.137529  | 0.133887  | 0.150204  | 0.143357 | 0.13884   |
| 0.195659  | 0.166521 | 0.122523  | 0.126166  | 0.136072  | 0.127477 | 0.115093  |
| 0.208333  | 0.183275 | 0.129079  | 0.129225  | 0.144959  | 0.138986 | 0.133013  |
| 0.20338   | 0.175117 | 0.129079  | 0.0893065 | 0.153118  | 0.140443 | 0.137383  |
| 0.103293  | 0.130682 | 0.206439  | 0.199301  | 0.229021  | 0.207896 | 0.199883  |
| 0.196096  | 0.171911 | 0.120629  | 0.123397  | 0.136218  | 0.129953 | 0.121649  |
| 0.0958625 | 0.123543 | 0.189103  | 0.186626  | 0.211976  | 0.192599 | 0.182547  |
| 0.190268  | 0.16317  | 0.122378  | 0.114073  | 0.149621  | 0.118007 | 0.116696  |
| 0.187646  | 0.165793 | 0.131702  | 0.124854  | 0.151661  | 0.13141  | 0.0863928 |
| 0.189977  | 0.168998 | 0.0559441 | 0.123689  | 0.0674534 | 0.127622 | 0.12398   |
| 0.187209  | 0.160985 | 0.0525932 | 0.121795  | 0.0847902 | 0.124854 | 0.123252  |
| 0.183858  | 0.152098 | 0.127622  | 0.11757   | 0.150495  | 0.123252 | 0.123397  |
| 0.189685  | 0.152389 | 0.128205  | 0.114948  | 0.151952  | 0.126166 | 0.123106  |
| 0.182984  | 0.156177 | 0.120921  | 0.118153  | 0.148747  | 0.121795 | 0.0843531 |
| 0.193036  | 0.164481 | 0.126894  | 0.119172  | 0.153555  | 0.121649 | 0.12296   |
| 0.193619  | 0.170309 | 0.060169  | 0.125     | 0.0681818 | 0.129808 | 0.125     |
| 0.193765  | 0.167832 | 0.132867  | 0.092803  | 0.156614  | 0.144522 | 0.140589  |
| 0.136364  | 0.179196 | 0.250874  | 0.24257   | 0.260635  | 0.251748 | 0.24053   |
| 0.186189  | 0.158217 | 0.120338  | 0.121941  | 0.147873  | 0.119755 | 0.0823135 |
| 0.0936772 | 0.11961  | 0.184295  | 0.175117  | 0.205128  | 0.182255 | 0.174534  |
| 0.0935315 | 0.120338 | 0.187063  | 0.179633  | 0.213432  | 0.189685 | 0.181381  |
| 0.186043  | 0.154866 | 0.126894  | 0.113928  | 0.15676   | 0.121358 | 0.116841  |
| 0.189248  | 0.16215  | 0.111742  | 0.118298  | 0.136364  | 0.119027 | 0.107809  |
| 0.192745  | 0.164773 | 0.130099  | 0.126748  | 0.150932  | 0.128351 | 0.085373  |
| 0.17905   | 0.145542 | 0.119901  | 0.110431  | 0.14627   | 0.114656 | 0.117133  |
| 0.181527  | 0.150058 | 0.113636  | 0.117861  | 0.137966  | 0.123834 | 0.107663  |
| 0.194056  | 0.162587 | 0.118881  | 0.0802739 | 0.151078  | 0.129662 | 0.124272  |
| 0.184003  | 0.151661 | 0.127477  | 0.113636  | 0.14831   | 0.127477 | 0.11655   |

|           |          |           |           |           |           |           |
|-----------|----------|-----------|-----------|-----------|-----------|-----------|
| 0.196824  | 0.162733 | 0.137675  | 0.129079  | 0.155303  | 0.131556  | 0.131993  |
| 0.184149  | 0.160548 | 0.121795  | 0.11961   | 0.147873  | 0.120629  | 0.0796911 |
| 0.194056  | 0.1588   | 0.131702  | 0.125437  | 0.155449  | 0.132284  | 0.129808  |
| 0.193619  | 0.159528 | 0.11757   | 0.11859   | 0.144231  | 0.11961   | 0.119755  |
| 0.19391   | 0.171474 | 0.0566725 | 0.129953  | 0.0649767 | 0.133304  | 0.127622  |
| 0.192599  | 0.16521  | 0.119172  | 0.120775  | 0.146125  | 0.125291  | 0.122232  |
| 0.206731  | 0.179633 | 0.133013  | 0.0932401 | 0.152681  | 0.143211  | 0.139569  |
| 0.194347  | 0.160839 | 0.128205  | 0.116404  | 0.149621  | 0.125874  | 0.121358  |
| 0.182692  | 0.152972 | 0.112762  | 0.111742  | 0.137966  | 0.124417  | 0.0782343 |
| 0.200758  | 0.166084 | 0.139569  | 0.130099  | 0.158945  | 0.106352  | 0.119027  |
| 0.0980478 | 0.11757  | 0.1875    | 0.174534  | 0.208625  | 0.184295  | 0.173951  |
| 0.199592  | 0.166084 | 0.140152  | 0.13039   | 0.158945  | 0.134324  | 0.135052  |
| 0.185606  | 0.151807 | 0.124126  | 0.11553   | 0.150787  | 0.123543  | 0.124272  |
| 0.188374  | 0.169143 | 0.0473485 | 0.123543  | 0.0629371 | 0.128059  | 0.120629  |
| 0.186772  | 0.162587 | 0.0509907 | 0.11757   | 0.0831876 | 0.120338  | 0.114656  |
| 0.19391   | 0.167395 | 0.119901  | 0.115967  | 0.145105  | 0.12398   | 0.120921  |
| 0.200175  | 0.171911 | 0.124126  | 0.122523  | 0.145251  | 0.129953  | 0.126311  |
| 0.0957168 | 0.122523 | 0.190997  | 0.182401  | 0.212995  | 0.189248  | 0.18211   |
| 0.177302  | 0.139714 | 0.123689  | 0.102273  | 0.14831   | 0.125437  | 0.116259  |
| 0.164627  | 0.13549  | 0.114802  | 0.101836  | 0.143502  | 0.114802  | 0.107955  |
| 0.18852   | 0.153555 | 0.129953  | 0.118735  | 0.153118  | 0.129079  | 0.12602   |
| 0.0925117 | 0.123106 | 0.194493  | 0.184732  | 0.214452  | 0.193619  | 0.182692  |
| 0.183566  | 0.154429 | 0.112471  | 0.113782  | 0.133887  | 0.117424  | 0.107955  |
| 0.201777  | 0.171474 | 0.127477  | 0.0856643 | 0.151807  | 0.135344  | 0.133741  |
| 0.188957  | 0.152535 | 0.127768  | 0.115385  | 0.152389  | 0.12398   | 0.125     |
| 0.191725  | 0.158508 | 0.12296   | 0.112034  | 0.150204  | 0.11451   | 0.11553   |
| 0.0885781 | 0.118298 | 0.187063  | 0.180216  | 0.208188  | 0.18648   | 0.177593  |
| 0.19493   | 0.166375 | 0.122669  | 0.0828963 | 0.14729   | 0.130536  | 0.125728  |
| 0.182984  | 0.149767 | 0.122378  | 0.108537  | 0.149913  | 0.0958625 | 0.103001  |
| 0.178322  | 0.151807 | 0.115676  | 0.11553   | 0.137383  | 0.118881  | 0.113491  |
| 0.165501  | 0.129371 | 0.11655   | 0.112325  | 0.140297  | 0.124709  | 0.113199  |
| 0.196533  | 0.168269 | 0.125437  | 0.120921  | 0.155012  | 0.125146  | 0.123834  |
| 0.202652  | 0.17701  | 0.129808  | 0.0917832 | 0.15472   | 0.137675  | 0.137238  |
| 0.186334  | 0.159237 | 0.117279  | 0.120338  | 0.145688  | 0.120775  | 0.0804196 |
| 0.197407  | 0.165064 | 0.126603  | 0.117424  | 0.150932  | 0.120192  | 0.124126  |
| 0.205711  | 0.174825 | 0.15035   | 0.143211  | 0.163607  | 0.138403  | 0.139423  |
| 0.119172  | 0.167249 | 0.237179  | 0.228001  | 0.251603  | 0.234266  | 0.226253  |
| 0.201049  | 0.166375 | 0.13345   | 0.122232  | 0.1537    | 0.131702  | 0.130099  |
| 0.195221  | 0.166667 | 0.125583  | 0.11961   | 0.151661  | 0.121503  | 0.122523  |
| 0.183129  | 0.142045 | 0.12602   | 0.107226  | 0.147436  | 0.122523  | 0.118881  |
| 0.185897  | 0.157051 | 0.123543  | 0.121358  | 0.153118  | 0.11451   | 0.119318  |
| 0.188957  | 0.15778  | 0.119318  | 0.0979021 | 0.13986   | 0.123397  | 0.111888  |
| 0.191579  | 0.158071 | 0.122523  | 0.120338  | 0.14627   | 0.130973  | 0.129371  |
| 0.187063  | 0.15035  | 0.128205  | 0.11553   | 0.149621  | 0.128497  | 0.123689  |

|           |          |           |           |           |          |           |
|-----------|----------|-----------|-----------|-----------|----------|-----------|
| 0.200321  | 0.169435 | 0.130682  | 0.0859557 | 0.155012  | 0.137675 | 0.134907  |
| 0.188666  | 0.154283 | 0.128351  | 0.106061  | 0.153263  | 0.117279 | 0.107517  |
| 0.125     | 0.166667 | 0.23514   | 0.229749  | 0.250437  | 0.240093 | 0.226544  |
| 0.184295  | 0.156031 | 0.113199  | 0.115093  | 0.136364  | 0.115239 | 0.105186  |
| 0.190997  | 0.157488 | 0.108829  | 0.105769  | 0.136072  | 0.112908 | 0.113345  |
| 0.18648   | 0.1588   | 0.119464  | 0.116113  | 0.143211  | 0.120629 | 0.0817308 |
| 0.199738  | 0.165938 | 0.135927  | 0.128788  | 0.157925  | 0.12602  | 0.126457  |
| 0.206148  | 0.17264  | 0.138549  | 0.128497  | 0.158217  | 0.135344 | 0.13141   |
| 0.182547  | 0.150495 | 0.11961   | 0.116259  | 0.143065  | 0.124563 | 0.113636  |
| 0.185169  | 0.147582 | 0.128934  | 0.116259  | 0.152972  | 0.121066 | 0.124126  |
| 0.184732  | 0.155303 | 0.120338  | 0.11116   | 0.14729   | 0.118881 | 0.11553   |
| 0.122378  | 0.162879 | 0.232809  | 0.223631  | 0.247232  | 0.232226 | 0.222174  |
| 0.18852   | 0.152681 | 0.129953  | 0.119027  | 0.152244  | 0.127331 | 0.127768  |
| 0.198864  | 0.168852 | 0.124854  | 0.0847902 | 0.152972  | 0.13243  | 0.130245  |
| 0.189831  | 0.153118 | 0.121066  | 0.107517  | 0.149476  | 0.113782 | 0.109557  |
| 0.193765  | 0.166667 | 0.130828  | 0.118153  | 0.149038  | 0.13141  | 0.122815  |
| 0.199883  | 0.171037 | 0.120629  | 0.120775  | 0.143502  | 0.124126 | 0.127768  |
| 0.187063  | 0.162296 | 0.119172  | 0.121358  | 0.144376  | 0.122086 | 0.0820221 |
| 0.198427  | 0.171037 | 0.123252  | 0.088141  | 0.152826  | 0.136364 | 0.132721  |
| 0.205274  | 0.176428 | 0.13243   | 0.0929487 | 0.153263  | 0.139714 | 0.137238  |
| 0.19595   | 0.170309 | 0.121066  | 0.085373  | 0.14831   | 0.131265 | 0.125583  |
| 0.187937  | 0.159091 | 0.122086  | 0.119901  | 0.145251  | 0.120921 | 0.0793998 |
| 0.199592  | 0.172786 | 0.130828  | 0.128059  | 0.152535  | 0.127914 | 0.127768  |
| 0.206731  | 0.178176 | 0.135344  | 0.133159  | 0.155886  | 0.13447  | 0.132867  |
| 0.197407  | 0.173514 | 0.0604604 | 0.131993  | 0.0606061 | 0.129225 | 0.129953  |
| 0.196533  | 0.175845 | 0.0616259 | 0.134033  | 0.0620629 | 0.137966 | 0.134907  |
| 0.207459  | 0.176865 | 0.134615  | 0.127768  | 0.157488  | 0.131119 | 0.133013  |
| 0.190268  | 0.1588   | 0.11014   | 0.114656  | 0.135635  | 0.117716 | 0.103293  |
| 0.209936  | 0.177885 | 0.122815  | 0.121212  | 0.135781  | 0.140006 | 0.139277  |
| 0.205128  | 0.176282 | 0.13986   | 0.12602   | 0.158362  | 0.137821 | 0.12602   |
| 0.100816  | 0.136364 | 0.205711  | 0.199446  | 0.22567   | 0.207168 | 0.19595   |
| 0.190559  | 0.157051 | 0.132284  | 0.119027  | 0.155449  | 0.130245 | 0.123397  |
| 0.195804  | 0.162879 | 0.114802  | 0.111742  | 0.144668  | 0.120047 | 0.115239  |
| 0.182838  | 0.158654 | 0.127185  | 0.121795  | 0.150641  | 0.124854 | 0.0824592 |
| 0.123252  | 0.157051 | 0.224359  | 0.216638  | 0.24053   | 0.225816 | 0.214889  |
| 0.111597  | 0.142483 | 0.2162    | 0.204691  | 0.231498  | 0.2162   | 0.204108  |
| 0.200029  | 0.174971 | 0.126603  | 0.0917832 | 0.15676   | 0.140297 | 0.135198  |
| 0.131993  | 0.177156 | 0.248543  | 0.240239  | 0.256847  | 0.250874 | 0.237034  |
| 0.188811  | 0.160548 | 0.107226  | 0.114948  | 0.132139  | 0.11859  | 0.104458  |
| 0.20542   | 0.17803  | 0.13986   | 0.137675  | 0.152244  | 0.145396 | 0.137383  |
| 0.188228  | 0.158217 | 0.114802  | 0.120484  | 0.133013  | 0.119755 | 0.106789  |
| 0.200321  | 0.172931 | 0.130099  | 0.126457  | 0.152389  | 0.128059 | 0.126166  |
| 0.0891608 | 0.120629 | 0.188811  | 0.181381  | 0.209936  | 0.18852  | 0.178176  |
| 0.193328  | 0.163024 | 0.133887  | 0.123252  | 0.152681  | 0.121941 | 0.120921  |

|          |          |           |           |           |           |           |
|----------|----------|-----------|-----------|-----------|-----------|-----------|
| 0.101253 | 0.124563 | 0.195076  | 0.183566  | 0.218823  | 0.194493  | 0.184149  |
| 0.193036 | 0.162733 | 0.124563  | 0.112471  | 0.151515  | 0.119027  | 0.114219  |
| 0.17905  | 0.141463 | 0.122523  | 0.0842075 | 0.149184  | 0.129225  | 0.117424  |
| 0.191871 | 0.165647 | 0.122232  | 0.125     | 0.140734  | 0.135635  | 0.125583  |
| 0.173514 | 0.144376 | 0.115239  | 0.102273  | 0.141026  | 0.119027  | 0.106935  |
| 0.183858 | 0.157051 | 0.112762  | 0.113199  | 0.140297  | 0.11859   | 0.0823135 |
| 0.18852  | 0.151224 | 0.120921  | 0.10912   | 0.147873  | 0.121212  | 0.111742  |
| 0.184732 | 0.15472  | 0.110723  | 0.113199  | 0.135052  | 0.113345  | 0.104167  |
| 0.185169 | 0.150204 | 0.122815  | 0.111305  | 0.148601  | 0.118444  | 0.118007  |
| 0.195221 | 0.165793 | 0.105186  | 0.107372  | 0.12602   | 0.125     | 0.122815  |
| 0.191142 | 0.156469 | 0.122378  | 0.113491  | 0.144959  | 0.123543  | 0.119318  |
| 0.185169 | 0.159237 | 0.113782  | 0.119172  | 0.136072  | 0.118735  | 0.109557  |
| 0.187063 | 0.156469 | 0.0751748 | 0.112617  | 0.0872669 | 0.128205  | 0.10708   |
| 0.193473 | 0.157925 | 0.134907  | 0.124563  | 0.154866  | 0.129662  | 0.13243   |
| 0.183712 | 0.160693 | 0.0496795 | 0.118881  | 0.0792541 | 0.124563  | 0.119172  |
| 0.187354 | 0.152972 | 0.122378  | 0.111742  | 0.149913  | 0.0917832 | 0.103875  |
| 0.181964 | 0.155449 | 0.114656  | 0.111597  | 0.141317  | 0.114365  | 0.0789627 |
| 0.190122 | 0.160693 | 0.122232  | 0.0839161 | 0.146562  | 0.130682  | 0.12704   |
| 0.193619 | 0.161859 | 0.126603  | 0.12296   | 0.154138  | 0.120484  | 0.11859   |
| 0.19697  | 0.173077 | 0.120047  | 0.121066  | 0.14292   | 0.129371  | 0.125146  |
| 0.191142 | 0.163753 | 0.0483683 | 0.120775  | 0.0756119 | 0.126457  | 0.124563  |
| 0.186334 | 0.1537   | 0.124854  | 0.113054  | 0.148893  | 0.123689  | 0.121503  |
| 0.19493  | 0.160548 | 0.136364  | 0.124854  | 0.157197  | 0.133741  | 0.132139  |
| 0.199883 | 0.164918 | 0.143648  | 0.132139  | 0.154866  | 0.140152  | 0.139714  |
| 0.186334 | 0.154866 | 0.112908  | 0.0824592 | 0.140443  | 0.123689  | 0.117133  |
| 0.186626 | 0.156031 | 0.118735  | 0.117133  | 0.14627   | 0.121941  | 0.0827506 |
| 0.18648  | 0.150932 | 0.116259  | 0.111742  | 0.143502  | 0.12296   | 0.118735  |
| 0.207751 | 0.176573 | 0.13549   | 0.131265  | 0.149621  | 0.134324  | 0.134761  |
| 0.192453 | 0.164481 | 0.116404  | 0.121503  | 0.137529  | 0.122232  | 0.112179  |
| 0.213432 | 0.184878 | 0.139132  | 0.137821  | 0.149767  | 0.146125  | 0.140152  |
| 0.199738 | 0.172348 | 0.138549  | 0.136946  | 0.15472   | 0.139714  | 0.0941142 |
| 0.196096 | 0.166375 | 0.130536  | 0.122523  | 0.157488  | 0.124126  | 0.123689  |
| 0.187209 | 0.154575 | 0.112034  | 0.113636  | 0.143065  | 0.122232  | 0.112179  |
| 0.187937 | 0.160256 | 0.122378  | 0.110286  | 0.146999  | 0.115093  | 0.114948  |
| 0.194056 | 0.17366  | 0.0576923 | 0.130973  | 0.0662879 | 0.131119  | 0.127768  |
| 0.114656 | 0.141171 | 0.207896  | 0.198427  | 0.225233  | 0.211393  | 0.199301  |
| 0.185169 | 0.150495 | 0.121066  | 0.112762  | 0.150641  | 0.0945513 | 0.103147  |
| 0.193182 | 0.166084 | 0.118007  | 0.119901  | 0.142628  | 0.129953  | 0.119318  |
| 0.196824 | 0.167104 | 0.124563  | 0.123834  | 0.150932  | 0.123106  | 0.124709  |
| 0.187937 | 0.163462 | 0.0509907 | 0.121066  | 0.0770688 | 0.126457  | 0.117861  |
| 0.191579 | 0.160693 | 0.125146  | 0.115967  | 0.151224  | 0.11961   | 0.118881  |
| 0.195659 | 0.150787 | 0.125437  | 0.104895  | 0.14831   | 0.12602   | 0.127914  |
| 0.198427 | 0.150641 | 0.130536  | 0.109411  | 0.154575  | 0.127622  | 0.13039   |
| 0.191871 | 0.158945 | 0.127477  | 0.119172  | 0.152972  | 0.119027  | 0.117716  |



|          |          |           |           |          |          |          |
|----------|----------|-----------|-----------|----------|----------|----------|
| 0.191288 | 0.160693 | 0.105915  | 0.103438  | 0.132867 | 0.121649 | 0.12296  |
| 0.201486 | 0.173514 | 0.133596  | 0.127914  | 0.152389 | 0.13243  | 0.13141  |
| 0.18954  | 0.164773 | 0.120484  | 0.11451   | 0.143065 | 0.128934 | 0.116841 |
| 0.195804 | 0.162879 | 0.124126  | 0.118444  | 0.152244 | 0.120921 | 0.121649 |
| 0.165938 | 0.161276 | 0.173514  | 0.166667  | 0.190559 | 0.183712 | 0.175117 |
| 0.185169 | 0.14933  | 0.119901  | 0.113928  | 0.149476 | 0.122815 | 0.118007 |
| 0.191434 | 0.164627 | 0.132867  | 0.128642  | 0.154575 | 0.132284 | 0.128642 |
| 0.200321 | 0.174679 | 0.123106  | 0.121212  | 0.141026 | 0.136801 | 0.125    |
| 0.188811 | 0.159382 | 0.127622  | 0.108537  | 0.147582 | 0.131119 | 0.11553  |
| 0.187937 | 0.15035  | 0.112762  | 0.0995047 | 0.138258 | 0.117133 | 0.112908 |
| 0.18852  | 0.153555 | 0.115093  | 0.107663  | 0.141171 | 0.116841 | 0.111742 |
| 0.191725 | 0.154138 | 0.118298  | 0.105624  | 0.143794 | 0.120921 | 0.118444 |
| 0.196387 | 0.168998 | 0.12704   | 0.114656  | 0.149038 | 0.133159 | 0.122232 |
| 0.179779 | 0.143065 | 0.120921  | 0.106206  | 0.146707 | 0.119755 | 0.108829 |
| 0.202943 | 0.177302 | 0.124854  | 0.129371  | 0.145688 | 0.135052 | 0.12704  |
| 0.186772 | 0.15035  | 0.116259  | 0.10271   | 0.143502 | 0.12296  | 0.112325 |
| 0.190122 | 0.158071 | 0.116113  | 0.114219  | 0.143939 | 0.120775 | 0.12296  |
| 0.205711 | 0.17803  | 0.1419    | 0.119318  | 0.153992 | 0.142483 | 0.133596 |
| 0.196096 | 0.166667 | 0.117424  | 0.117861  | 0.136801 | 0.12704  | 0.11961  |
| 0.194639 | 0.172203 | 0.115967  | 0.120775  | 0.137966 | 0.136364 | 0.130682 |
| 0.191434 | 0.163462 | 0.112179  | 0.111451  | 0.137675 | 0.12296  | 0.112617 |
| 0.195221 | 0.166667 | 0.116259  | 0.116987  | 0.137092 | 0.122378 | 0.114948 |
| 0.187063 | 0.163462 | 0.111014  | 0.116696  | 0.138549 | 0.114219 | 0.109703 |
| 0.20236  | 0.175554 | 0.121066  | 0.12296   | 0.144522 | 0.135344 | 0.125291 |
| 0.18954  | 0.160111 | 0.113491  | 0.112179  | 0.140152 | 0.116987 | 0.115385 |
| 0.206148 | 0.176428 | 0.143794  | 0.125583  | 0.161713 | 0.152535 | 0.147436 |
| 0.194202 | 0.162442 | 0.134178  | 0.113345  | 0.159965 | 0.14292  | 0.136946 |
| 0.190705 | 0.161568 | 0.105915  | 0.110723  | 0.130536 | 0.123689 | 0.119755 |
| 0.209499 | 0.181235 | 0.140152  | 0.125437  | 0.153409 | 0.144231 | 0.141463 |
| 0.19289  | 0.159965 | 0.0979021 | 0.124272  | 0.121941 | 0.125291 | 0.121649 |
| 0.204837 | 0.172494 | 0.140152  | 0.120484  | 0.154866 | 0.136072 | 0.122232 |
| 0.190851 | 0.160839 | 0.110431  | 0.11757   | 0.133304 | 0.123252 | 0.11553  |
| 0.207605 | 0.18109  | 0.146125  | 0.141317  | 0.163753 | 0.150204 | 0.143939 |
| 0.195659 | 0.170017 | 0.132139  | 0.129662  | 0.154138 | 0.126894 | 0.12704  |
| 0.200321 | 0.175262 | 0.13243   | 0.124126  | 0.150058 | 0.140297 | 0.13345  |
| 0.201777 | 0.168561 | 0.105624  | 0.122086  | 0.125583 | 0.122232 | 0.121503 |
| 0.193182 | 0.161131 | 0.111305  | 0.107955  | 0.137383 | 0.122669 | 0.113782 |
| 0.1875   | 0.159819 | 0.11757   | 0.105478  | 0.143939 | 0.124272 | 0.113054 |
| 0.196678 | 0.167541 | 0.126457  | 0.113782  | 0.146999 | 0.120629 | 0.12398  |
| 0.203089 | 0.167541 | 0.120047  | 0.120775  | 0.137675 | 0.128497 | 0.123397 |
| 0.207605 | 0.179633 | 0.128934  | 0.132867  | 0.145688 | 0.13447  | 0.12704  |
| 0.190705 | 0.15778  | 0.125728  | 0.108683  | 0.154138 | 0.130099 | 0.117716 |
| 0.191288 | 0.166521 | 0.0890152 | 0.116259  | 0.119464 | 0.117861 | 0.117424 |
| 0.188811 | 0.161422 | 0.117716  | 0.109703  | 0.144959 | 0.121795 | 0.112034 |

|          |          |          |          |          |          |          |
|----------|----------|----------|----------|----------|----------|----------|
| 0.193328 | 0.166812 | 0.123106 | 0.11655  | 0.141608 | 0.129516 | 0.12296  |
| 0.190705 | 0.163316 | 0.116987 | 0.107517 | 0.141608 | 0.125728 | 0.116841 |
| 0.196387 | 0.167541 | 0.124126 | 0.113782 | 0.151952 | 0.13141  | 0.118153 |
| 0.189394 | 0.161422 | 0.113636 | 0.11757  | 0.137966 | 0.121795 | 0.109411 |
| 0.181381 | 0.150204 | 0.115822 | 0.115093 | 0.13986  | 0.124563 | 0.115385 |
| 0.193619 | 0.155157 | 0.127477 | 0.116259 | 0.150641 | 0.117861 | 0.111597 |
| 0.186917 | 0.15778  | 0.107955 | 0.113636 | 0.129953 | 0.118735 | 0.103438 |
| 0.18954  | 0.16215  | 0.116113 | 0.113636 | 0.140734 | 0.12398  | 0.115676 |
| 0.179487 | 0.14831  | 0.113928 | 0.112617 | 0.14088  | 0.11859  | 0.112325 |
| 0.190122 | 0.150495 | 0.118735 | 0.108392 | 0.14627  | 0.123106 | 0.114219 |
| 0.186334 | 0.144376 | 0.126603 | 0.108683 | 0.148019 | 0.12602  | 0.12296  |
| 0.17701  | 0.149038 | 0.108829 | 0.108974 | 0.138986 | 0.118444 | 0.111014 |
| 0.204837 | 0.16317  | 0.127914 | 0.122232 | 0.138549 | 0.13549  | 0.128059 |

| TDr_2348  | TDr_2349  | TDr_2350  | TDr_2355 | TDr_2363  | TDr_2365  | TDr_2366  |
|-----------|-----------|-----------|----------|-----------|-----------|-----------|
| 0.104458  | 0.106206  | 0.114656  | 0.184441 | 0.124854  | 0.109557  | 0.107517  |
| 0.110723  | 0.106643  | 0.113054  | 0.186334 | 0.121212  | 0.109703  | 0.103001  |
| 0.10373   | 0.101107  | 0.108683  | 0.183421 | 0.120047  | 0.103875  | 0.0962995 |
| 0.105478  | 0.103438  | 0.120921  | 0.195076 | 0.120629  | 0.097465  | 0.101836  |
| 0.135198  | 0.131119  | 0.133741  | 0.209353 | 0.134033  | 0.135344  | 0.132139  |
| 0.12296   | 0.121795  | 0.126166  | 0.200321 | 0.136364  | 0.124854  | 0.119318  |
| 0.125146  | 0.10912   | 0.125437  | 0.205711 | 0.121941  | 0.120047  | 0.121503  |
| 0.102418  | 0.106498  | 0.111742  | 0.18648  | 0.125437  | 0.107809  | 0.100233  |
| 0.099359  | 0.0897436 | 0.0979021 | 0.194202 | 0.113054  | 0.10708   | 0.0925117 |
| 0.105915  | 0.0403555 | 0.110868  | 0.19697  | 0.125437  | 0.120047  | 0.090035  |
| 0.111014  | 0.105186  | 0.120921  | 0.182838 | 0.118881  | 0.113782  | 0.0995047 |
| 0.109703  | 0.111742  | 0.107955  | 0.192016 | 0.110577  | 0.105769  | 0.10373   |
| 0.104458  | 0.0936772 | 0.104749  | 0.197552 | 0.117279  | 0.108974  | 0.097028  |
| 0.122378  | 0.113636  | 0.132284  | 0.15574  | 0.147727  | 0.123397  | 0.11553   |
| 0.0916375 | 0.103875  | 0.121358  | 0.198427 | 0.135635  | 0.127914  | 0.0719697 |
| 0.109266  | 0.105769  | 0.119172  | 0.202943 | 0.11014   | 0.109994  | 0.104749  |
| 0.111451  | 0.103875  | 0.117861  | 0.195513 | 0.104167  | 0.11014   | 0.104312  |
| 0.143648  | 0.138695  | 0.147727  | 0.21285  | 0.155303  | 0.142628  | 0.13884   |
| 0.106061  | 0.101981  | 0.108683  | 0.184003 | 0.11655   | 0.103293  | 0.0986305 |
| 0.17803   | 0.192308  | 0.19697   | 0.137675 | 0.212704  | 0.190122  | 0.176136  |
| 0.121358  | 0.113782  | 0.126311  | 0.198718 | 0.128351  | 0.125583  | 0.111888  |
| 0.116841  | 0.109848  | 0.120047  | 0.203817 | 0.12704   | 0.123106  | 0.114656  |
| 0.102127  | 0.0986305 | 0.113491  | 0.192308 | 0.0930944 | 0.0879953 | 0.0981935 |
| 0.129371  | 0.122086  | 0.126166  | 0.209353 | 0.106061  | 0.116987  | 0.120192  |
| 0.099796  | 0.0831876 | 0.110286  | 0.18648  | 0.106789  | 0.100524  | 0.0917832 |
| 0.125728  | 0.119027  | 0.128059  | 0.206294 | 0.136218  | 0.128497  | 0.121503  |
| 0.123689  | 0.109703  | 0.132721  | 0.204837 | 0.120775  | 0.129953  | 0.115385  |
| 0.121649  | 0.11116   | 0.116113  | 0.210664 | 0.111742  | 0.115676  | 0.113345  |
| 0.13447   | 0.120192  | 0.134178  | 0.208333 | 0.12602   | 0.129371  | 0.124709  |
| 0.122232  | 0.097465  | 0.126894  | 0.211247 | 0.124563  | 0.124709  | 0.115093  |
| 0.116259  | 0.114802  | 0.129953  | 0.199738 | 0.122086  | 0.119318  | 0.107663  |
| 0.120484  | 0.113199  | 0.124854  | 0.206294 | 0.116987  | 0.119464  | 0.11014   |
| 0.0968823 | 0.0945513 | 0.105915  | 0.18852  | 0.112617  | 0.104604  | 0.0862471 |
| 0.11757   | 0.103001  | 0.118735  | 0.20134  | 0.123689  | 0.116841  | 0.11014   |
| 0.122378  | 0.108974  | 0.120629  | 0.207022 | 0.115676  | 0.11961   | 0.110868  |
| 0.131265  | 0.108537  | 0.127185  | 0.210373 | 0.121066  | 0.125291  | 0.120338  |
| 0.132576  | 0.113345  | 0.13549   | 0.21722  | 0.134615  | 0.132721  | 0.127477  |
| 0.11961   | 0.10708   | 0.121941  | 0.20542  | 0.116113  | 0.117716  | 0.111305  |
| 0.110868  | 0.104167  | 0.116113  | 0.19493  | 0.0936772 | 0.102273  | 0.097028  |
| 0.120775  | 0.116696  | 0.118444  | 0.207459 | 0.110868  | 0.110723  | 0.113928  |
| 0.107372  | 0.100379  | 0.112617  | 0.193473 | 0.101544  | 0.102564  | 0.10373   |
| 0.137092  | 0.127768  | 0.141754  | 0.216492 | 0.130973  | 0.133159  | 0.129953  |

|          |           |          |          |           |          |          |
|----------|-----------|----------|----------|-----------|----------|----------|
| 0.143794 | 0.137966  | 0.144668 | 0.21824  | 0.130099  | 0.139569 | 0.138695 |
| 0.115676 | 0.108683  | 0.115967 | 0.195076 | 0.107517  | 0.114365 | 0.109703 |
| 0.104895 | 0.0920746 | 0.111888 | 0.196824 | 0.105478  | 0.107955 | 0.102127 |
| 0.118153 | 0.0895979 | 0.123397 | 0.209207 | 0.113199  | 0.11859  | 0.106935 |
| 0.117861 | 0.114948  | 0.119318 | 0.204254 | 0.111451  | 0.11451  | 0.111014 |
| 0.137238 | 0.122378  | 0.13345  | 0.215763 | 0.128205  | 0.133596 | 0.129225 |
| 0.113345 | 0.0996503 | 0.119464 | 0.202652 | 0.110723  | 0.109994 | 0.111116 |
| 0.108829 | 0.106206  | 0.114073 | 0.195513 | 0.106498  | 0.109557 | 0.106352 |
| 0.144814 | 0.133741  | 0.148893 | 0.218386 | 0.147727  | 0.145542 | 0.143211 |
| 0.126166 | 0.123543  | 0.131993 | 0.207022 | 0.116841  | 0.122232 | 0.118735 |
| 0.116113 | 0.111742  | 0.116987 | 0.195804 | 0.0971737 | 0.106643 | 0.110431 |
| 0.114073 | 0.0989219 | 0.120775 | 0.208625 | 0.135052  | 0.128205 | 0.107809 |
| 0.110286 | 0.114948  | 0.117279 | 0.18648  | 0.112908  | 0.083042 | 0.105186 |
| 0.144085 | 0.13884   | 0.137092 | 0.221737 | 0.126603  | 0.132284 | 0.136072 |
| 0.133159 | 0.113636  | 0.12704  | 0.206731 | 0.11451   | 0.125437 | 0.121941 |
| 0.11014  | 0.109266  | 0.114219 | 0.200029 | 0.102273  | 0.106498 | 0.108537 |
| 0.117716 | 0.100816  | 0.120338 | 0.197698 | 0.113636  | 0.115239 | 0.110868 |
| 0.11961  | 0.0965909 | 0.123397 | 0.208042 | 0.112325  | 0.119464 | 0.111597 |
| 0.136218 | 0.13039   | 0.133887 | 0.22028  | 0.118444  | 0.130245 | 0.132576 |
| 0.135052 | 0.125146  | 0.136509 | 0.220571 | 0.125146  | 0.129079 | 0.129371 |
| 0.155303 | 0.151807  | 0.157343 | 0.172057 | 0.156177  | 0.146999 | 0.151078 |
| 0.113636 | 0.105478  | 0.117424 | 0.198281 | 0.105769  | 0.109994 | 0.108537 |
| 0.116841 | 0.10169   | 0.11859  | 0.198572 | 0.100524  | 0.106206 | 0.106498 |
| 0.114219 | 0.106061  | 0.118298 | 0.201486 | 0.10169   | 0.109411 | 0.111451 |
| 0.136509 | 0.128642  | 0.143794 | 0.207459 | 0.137966  | 0.1419   | 0.136655 |
| 0.113199 | 0.10708   | 0.113199 | 0.195804 | 0.106498  | 0.106061 | 0.104604 |
| 0.128497 | 0.128497  | 0.132284 | 0.207605 | 0.121212  | 0.125146 | 0.125728 |
| 0.118007 | 0.0964452 | 0.124126 | 0.207896 | 0.111597  | 0.122232 | 0.105332 |
| 0.114073 | 0.111742  | 0.122523 | 0.194347 | 0.10271   | 0.110723 | 0.111597 |
| 0.138549 | 0.139423  | 0.149913 | 0.20979  | 0.148747  | 0.139569 | 0.138695 |
| 0.121941 | 0.116987  | 0.120775 | 0.205128 | 0.103293  | 0.112762 | 0.114219 |
| 0.134615 | 0.129953  | 0.138112 | 0.216929 | 0.127914  | 0.133013 | 0.131847 |
| 0.13039  | 0.127477  | 0.134178 | 0.208042 | 0.122523  | 0.129662 | 0.119464 |
| 0.106061 | 0.1081    | 0.113345 | 0.188666 | 0.118881  | 0.101836 | 0.105624 |
| 0.11451  | 0.106935  | 0.118007 | 0.19595  | 0.097028  | 0.105915 | 0.104167 |
| 0.113345 | 0.107809  | 0.119172 | 0.200612 | 0.106061  | 0.114073 | 0.108537 |
| 0.133741 | 0.126457  | 0.131993 | 0.215181 | 0.116841  | 0.121941 | 0.127768 |
| 0.112617 | 0.101253  | 0.116987 | 0.19697  | 0.105332  | 0.109848 | 0.108683 |
| 0.136655 | 0.126166  | 0.140443 | 0.218386 | 0.130536  | 0.128351 | 0.13039  |
| 0.120338 | 0.11014   | 0.121212 | 0.199738 | 0.109266  | 0.118735 | 0.111116 |
| 0.125291 | 0.119172  | 0.122378 | 0.204983 | 0.0990676 | 0.109994 | 0.114365 |
| 0.115967 | 0.113345  | 0.115676 | 0.199738 | 0.106061  | 0.109994 | 0.109703 |
| 0.121795 | 0.113054  | 0.124126 | 0.205274 | 0.103438  | 0.111451 | 0.11757  |
| 0.112762 | 0.106352  | 0.118881 | 0.200029 | 0.104312  | 0.109703 | 0.105915 |

|          |           |          |          |           |          |           |
|----------|-----------|----------|----------|-----------|----------|-----------|
| 0.112179 | 0.111014  | 0.112762 | 0.199446 | 0.0984848 | 0.105041 | 0.109411  |
| 0.136509 | 0.129225  | 0.132721 | 0.216783 | 0.121066  | 0.130536 | 0.130536  |
| 0.114948 | 0.100962  | 0.118153 | 0.196387 | 0.103001  | 0.111014 | 0.101107  |
| 0.109848 | 0.0958625 | 0.106352 | 0.198572 | 0.11451   | 0.115239 | 0.0986305 |
| 0.126166 | 0.109266  | 0.131119 | 0.208188 | 0.131993  | 0.128934 | 0.121649  |
| 0.127914 | 0.115385  | 0.131702 | 0.206731 | 0.126748  | 0.128642 | 0.126311  |
| 0.132867 | 0.119755  | 0.131702 | 0.217803 | 0.129953  | 0.134761 | 0.126894  |
| 0.134761 | 0.127477  | 0.136218 | 0.224068 | 0.133304  | 0.136072 | 0.131119  |
| 0.110431 | 0.107809  | 0.122378 | 0.194784 | 0.124126  | 0.118444 | 0.110286  |
| 0.174825 | 0.17366   | 0.18648  | 0.157197 | 0.186772  | 0.174097 | 0.176428  |
| 0.108246 | 0.101253  | 0.118735 | 0.199301 | 0.115822  | 0.111888 | 0.10373   |
| 0.131702 | 0.122378  | 0.138695 | 0.216055 | 0.134324  | 0.135927 | 0.13039   |
| 0.124126 | 0.115385  | 0.130245 | 0.21285  | 0.127331  | 0.127185 | 0.120192  |
| 0.136218 | 0.126603  | 0.143211 | 0.217075 | 0.134761  | 0.137529 | 0.133741  |
| 0.111305 | 0.106061  | 0.117424 | 0.200612 | 0.112179  | 0.110868 | 0.105041  |
| 0.132284 | 0.124709  | 0.13141  | 0.21722  | 0.127331  | 0.127477 | 0.127768  |
| 0.111888 | 0.102273  | 0.117424 | 0.201777 | 0.120338  | 0.116696 | 0.108246  |
| 0.119027 | 0.106206  | 0.128059 | 0.206002 | 0.122232  | 0.123543 | 0.116841  |
| 0.109411 | 0.101253  | 0.119318 | 0.200175 | 0.116113  | 0.110723 | 0.105769  |
| 0.136509 | 0.121066  | 0.142628 | 0.217366 | 0.126894  | 0.138112 | 0.132576  |
| 0.107955 | 0.0887238 | 0.115822 | 0.199009 | 0.103584  | 0.109848 | 0.10169   |
| 0.129371 | 0.121795  | 0.138986 | 0.209645 | 0.136655  | 0.127768 | 0.128642  |
| 0.114073 | 0.103584  | 0.12398  | 0.199883 | 0.118153  | 0.116841 | 0.113636  |
| 0.129371 | 0.119464  | 0.130536 | 0.215181 | 0.114802  | 0.120775 | 0.121941  |
| 0.131265 | 0.110286  | 0.132139 | 0.208042 | 0.127185  | 0.127331 | 0.120921  |
| 0.105041 | 0.0986305 | 0.11757  | 0.198427 | 0.112908  | 0.114219 | 0.101981  |
| 0.140006 | 0.135344  | 0.146416 | 0.207459 | 0.144085  | 0.137821 | 0.136072  |
| 0.113636 | 0.0999417 | 0.121212 | 0.201195 | 0.118298  | 0.11961  | 0.109703  |
| 0.107809 | 0.099359  | 0.114219 | 0.205565 | 0.110431  | 0.112908 | 0.105332  |
| 0.119318 | 0.10271   | 0.124272 | 0.203671 | 0.109703  | 0.118298 | 0.111305  |
| 0.138258 | 0.114073  | 0.141463 | 0.213287 | 0.142337  | 0.142483 | 0.135198  |
| 0.115239 | 0.109411  | 0.120775 | 0.189103 | 0.116696  | 0.112179 | 0.113345  |
| 0.107372 | 0.0989219 | 0.113491 | 0.199883 | 0.113782  | 0.110723 | 0.100816  |
| 0.110286 | 0.0992133 | 0.114948 | 0.197261 | 0.113491  | 0.112762 | 0.104604  |
| 0.117424 | 0.104895  | 0.124417 | 0.200321 | 0.120047  | 0.117279 | 0.110577  |
| 0.124854 | 0.0925117 | 0.131556 | 0.212995 | 0.119901  | 0.128205 | 0.11014   |
| 0.118007 | 0.106061  | 0.124126 | 0.201486 | 0.116841  | 0.120484 | 0.112617  |
| 0.102418 | 0.0866841 | 0.108246 | 0.192308 | 0.101253  | 0.108683 | 0.0955711 |
| 0.099796 | 0.0849359 | 0.110868 | 0.192308 | 0.10271   | 0.104895 | 0.0952797 |
| 0.109266 | 0.0839161 | 0.115385 | 0.200903 | 0.106061  | 0.113199 | 0.100962  |
| 0.117424 | 0.114802  | 0.127622 | 0.19799  | 0.11451   | 0.113782 | 0.110868  |
| 0.124854 | 0.110286  | 0.133304 | 0.211247 | 0.120192  | 0.126457 | 0.119464  |
| 0.106935 | 0.090035  | 0.111597 | 0.200612 | 0.104021  | 0.111451 | 0.0980478 |
| 0.10067  | 0.0849359 | 0.111742 | 0.19493  | 0.0992133 | 0.104604 | 0.092366  |

|           |           |          |          |           |           |           |
|-----------|-----------|----------|----------|-----------|-----------|-----------|
| 0.119901  | 0.103001  | 0.128642 | 0.20979  | 0.111451  | 0.124417  | 0.115967  |
| 0.105186  | 0.094697  | 0.11859  | 0.198864 | 0.0955711 | 0.108246  | 0.0957168 |
| 0.113054  | 0.113928  | 0.124709 | 0.197698 | 0.125     | 0.120484  | 0.113491  |
| 0.129662  | 0.121212  | 0.134033 | 0.209062 | 0.13549   | 0.131265  | 0.127185  |
| 0.114802  | 0.0885781 | 0.123252 | 0.205565 | 0.109848  | 0.112325  | 0.103293  |
| 0.108537  | 0.088141  | 0.11116  | 0.202506 | 0.106789  | 0.113636  | 0.0964452 |
| 0.109411  | 0.0884324 | 0.116113 | 0.197552 | 0.104749  | 0.112179  | 0.104604  |
| 0.102127  | 0.0872669 | 0.108537 | 0.191725 | 0.103293  | 0.105478  | 0.0981935 |
| 0.124563  | 0.0957168 | 0.12602  | 0.210956 | 0.123106  | 0.126457  | 0.113928  |
| 0.101544  | 0.081148  | 0.108829 | 0.194639 | 0.0983392 | 0.101981  | 0.0906177 |
| 0.139569  | 0.132284  | 0.141317 | 0.217512 | 0.132284  | 0.135344  | 0.126894  |
| 0.135927  | 0.116696  | 0.136801 | 0.206294 | 0.123689  | 0.132284  | 0.128788  |
| 0.121941  | 0.107955  | 0.128351 | 0.207459 | 0.11553   | 0.121212  | 0.117133  |
| 0.116259  | 0.100816  | 0.122669 | 0.200029 | 0.113636  | 0.118153  | 0.107955  |
| 0.11655   | 0.0987762 | 0.123252 | 0.197698 | 0.117716  | 0.118153  | 0.109411  |
| 0.109703  | 0.0965909 | 0.115239 | 0.198135 | 0.0945513 | 0.11014   | 0.0990676 |
| 0.11451   | 0.0987762 | 0.115385 | 0.201486 | 0.0964452 | 0.106498  | 0.10912   |
| 0.108683  | 0.097028  | 0.110723 | 0.198572 | 0.106643  | 0.108829  | 0.101253  |
| 0.102855  | 0.110723  | 0.112471 | 0.187209 | 0.108974  | 0.0843531 | 0.103001  |
| 0.129953  | 0.123252  | 0.133159 | 0.215763 | 0.106352  | 0.122815  | 0.121358  |
| 0.110286  | 0.109411  | 0.118735 | 0.207459 | 0.113782  | 0.113636  | 0.106061  |
| 0.124709  | 0.104895  | 0.138112 | 0.207314 | 0.134615  | 0.125146  | 0.114948  |
| 0.135344  | 0.117279  | 0.14088  | 0.215326 | 0.140006  | 0.138695  | 0.132576  |
| 0.182255  | 0.189831  | 0.188957 | 0.104895 | 0.198281  | 0.179779  | 0.180653  |
| 0.230478  | 0.231643  | 0.232226 | 0.12398  | 0.242716  | 0.223048  | 0.227127  |
| 0.101544  | 0.113782  | 0.110868 | 0.18648  | 0.110286  | 0.0699301 | 0.101981  |
| 0.115385  | 0.108683  | 0.115676 | 0.194493 | 0.102273  | 0.105332  | 0.105332  |
| 0.0981935 | 0.105478  | 0.111014 | 0.191579 | 0.103438  | 0.0983392 | 0.0957168 |
| 0.113928  | 0.11014   | 0.120338 | 0.198864 | 0.109266  | 0.107663  | 0.105041  |
| 0.0920746 | 0.107517  | 0.123252 | 0.200321 | 0.137238  | 0.129225  | 0.0706585 |
| 0.111597  | 0.116841  | 0.116841 | 0.203526 | 0.108683  | 0.112617  | 0.106789  |
| 0.149913  | 0.143794  | 0.14933  | 0.222319 | 0.125728  | 0.1419    | 0.143357  |
| 0.11655   | 0.115676  | 0.115676 | 0.20236  | 0.100233  | 0.111451  | 0.110868  |
| 0.131993  | 0.125874  | 0.133159 | 0.21722  | 0.116259  | 0.122523  | 0.125728  |
| 0.12602   | 0.129225  | 0.131556 | 0.20542  | 0.117279  | 0.119464  | 0.123543  |
| 0.130682  | 0.127768  | 0.132139 | 0.215618 | 0.119027  | 0.127331  | 0.124709  |
| 0.135635  | 0.127185  | 0.135927 | 0.211247 | 0.129225  | 0.132867  | 0.128788  |
| 0.115822  | 0.113199  | 0.120192 | 0.205711 | 0.10708   | 0.115093  | 0.110431  |
| 0.114948  | 0.109994  | 0.117279 | 0.203089 | 0.0995047 | 0.105478  | 0.106643  |
| 0.118881  | 0.113054  | 0.123834 | 0.201195 | 0.105769  | 0.113491  | 0.109994  |
| 0.113636  | 0.106935  | 0.114802 | 0.194493 | 0.101399  | 0.104749  | 0.103293  |
| 0.11451   | 0.109848  | 0.115967 | 0.200903 | 0.0981935 | 0.105915  | 0.10708   |
| 0.11961   | 0.115239  | 0.121649 | 0.201049 | 0.103293  | 0.108392  | 0.110723  |
| 0.128497  | 0.122086  | 0.129662 | 0.210227 | 0.115093  | 0.121066  | 0.120775  |

|          |           |          |          |           |          |           |
|----------|-----------|----------|----------|-----------|----------|-----------|
| 0.137821 | 0.134324  | 0.137238 | 0.219843 | 0.118007  | 0.129225 | 0.131847  |
| 0.12398  | 0.116113  | 0.121941 | 0.201049 | 0.100379  | 0.109266 | 0.113054  |
| 0.111597 | 0.111888  | 0.117716 | 0.197698 | 0.0996503 | 0.108537 | 0.107372  |
| 0.135198 | 0.130536  | 0.134907 | 0.216929 | 0.114219  | 0.123106 | 0.126603  |
| 0.113636 | 0.111888  | 0.115967 | 0.194202 | 0.101399  | 0.106206 | 0.107372  |
| 0.137675 | 0.139423  | 0.145542 | 0.2162   | 0.124854  | 0.137238 | 0.135198  |
| 0.13243  | 0.109703  | 0.139423 | 0.203089 | 0.136218  | 0.130536 | 0.123543  |
| 0.129371 | 0.134324  | 0.13549  | 0.208479 | 0.129079  | 0.124563 | 0.130682  |
| 0.112762 | 0.107517  | 0.121795 | 0.197698 | 0.0996503 | 0.103293 | 0.103001  |
| 0.112617 | 0.108246  | 0.116696 | 0.199592 | 0.0968823 | 0.104604 | 0.10169   |
| 0.128205 | 0.121212  | 0.125291 | 0.213724 | 0.109557  | 0.121649 | 0.119027  |
| 0.128059 | 0.124854  | 0.126603 | 0.210664 | 0.110286  | 0.11859  | 0.118298  |
| 0.131265 | 0.130682  | 0.134178 | 0.20542  | 0.111742  | 0.124709 | 0.127914  |
| 0.117716 | 0.120047  | 0.121503 | 0.205857 | 0.101107  | 0.110577 | 0.112034  |
| 0.118153 | 0.116404  | 0.120775 | 0.202506 | 0.101253  | 0.111305 | 0.113345  |
| 0.12602  | 0.12398   | 0.124272 | 0.206876 | 0.10912   | 0.115676 | 0.118007  |
| 0.137092 | 0.128351  | 0.13884  | 0.217949 | 0.119901  | 0.13345  | 0.128788  |
| 0.135635 | 0.127185  | 0.129225 | 0.213869 | 0.115822  | 0.124126 | 0.126748  |
| 0.135781 | 0.132576  | 0.139277 | 0.21722  | 0.112471  | 0.128642 | 0.130682  |
| 0.126894 | 0.129808  | 0.129225 | 0.208916 | 0.118153  | 0.120921 | 0.12296   |
| 0.11757  | 0.11553   | 0.116987 | 0.201632 | 0.101544  | 0.106935 | 0.109266  |
| 0.132721 | 0.125437  | 0.130973 | 0.215618 | 0.122523  | 0.131993 | 0.126166  |
| 0.113928 | 0.113636  | 0.114802 | 0.202652 | 0.0961538 | 0.106789 | 0.10708   |
| 0.11553  | 0.102418  | 0.121649 | 0.193765 | 0.109994  | 0.111888 | 0.110431  |
| 0.114365 | 0.11116   | 0.117861 | 0.201923 | 0.109411  | 0.112762 | 0.110431  |
| 0.117133 | 0.110431  | 0.120338 | 0.199738 | 0.106643  | 0.11116  | 0.110286  |
| 0.111305 | 0.109557  | 0.113054 | 0.19799  | 0.104021  | 0.110286 | 0.104749  |
| 0.136801 | 0.135344  | 0.135052 | 0.217366 | 0.114365  | 0.128788 | 0.129079  |
| 0.115676 | 0.109848  | 0.120338 | 0.198864 | 0.109266  | 0.114073 | 0.111451  |
| 0.131702 | 0.134033  | 0.133741 | 0.214598 | 0.118298  | 0.126311 | 0.128059  |
| 0.115967 | 0.111014  | 0.117716 | 0.194784 | 0.105478  | 0.106206 | 0.105915  |
| 0.132721 | 0.122232  | 0.128642 | 0.212995 | 0.105041  | 0.121212 | 0.121503  |
| 0.115676 | 0.108974  | 0.114802 | 0.206731 | 0.111597  | 0.110286 | 0.113491  |
| 0.115093 | 0.0981935 | 0.124417 | 0.192453 | 0.122378  | 0.113491 | 0.103293  |
| 0.118444 | 0.105332  | 0.121941 | 0.206294 | 0.10912   | 0.116259 | 0.1081    |
| 0.121503 | 0.105769  | 0.124709 | 0.197407 | 0.118881  | 0.11961  | 0.114073  |
| 0.112617 | 0.111742  | 0.123106 | 0.206002 | 0.106498  | 0.112471 | 0.11014   |
| 0.113491 | 0.105332  | 0.122815 | 0.198135 | 0.114073  | 0.121503 | 0.107517  |
| 0.127185 | 0.0872669 | 0.121941 | 0.215326 | 0.141171  | 0.140443 | 0.115967  |
| 0.138986 | 0.128205  | 0.138986 | 0.219843 | 0.129371  | 0.135344 | 0.131847  |
| 0.103438 | 0.0812937 | 0.105186 | 0.194784 | 0.113054  | 0.11116  | 0.0922203 |
| 0.124272 | 0.101544  | 0.131265 | 0.215618 | 0.141463  | 0.136655 | 0.119755  |
| 0.119755 | 0.0754662 | 0.120629 | 0.211393 | 0.136072  | 0.133304 | 0.104749  |
| 0.122086 | 0.103438  | 0.128788 | 0.209645 | 0.138112  | 0.137092 | 0.116696  |

|          |           |          |          |          |          |           |
|----------|-----------|----------|----------|----------|----------|-----------|
| 0.116259 | 0.0879953 | 0.125    | 0.203526 | 0.13345  | 0.122815 | 0.109703  |
| 0.11859  | 0.083042  | 0.118298 | 0.211393 | 0.13141  | 0.131847 | 0.101544  |
| 0.116987 | 0.0826049 | 0.111742 | 0.206585 | 0.135344 | 0.131993 | 0.10169   |
| 0.128788 | 0.0952797 | 0.131119 | 0.215181 | 0.135198 | 0.127185 | 0.116987  |
| 0.132576 | 0.10373   | 0.13986  | 0.21722  | 0.143648 | 0.14088  | 0.125728  |
| 0.119755 | 0.0804196 | 0.116259 | 0.206148 | 0.134907 | 0.127477 | 0.102418  |
| 0.111014 | 0.0859557 | 0.119464 | 0.200321 | 0.129662 | 0.121358 | 0.105624  |
| 0.133887 | 0.137966  | 0.132721 | 0.212121 | 0.116404 | 0.120921 | 0.134033  |
| 0.125291 | 0.0906177 | 0.125291 | 0.209936 | 0.141026 | 0.140589 | 0.113199  |
| 0.104895 | 0.0850816 | 0.111305 | 0.194784 | 0.12296  | 0.11553  | 0.0948427 |
| 0.214598 | 0.216055  | 0.213724 | 0.113928 | 0.223631 | 0.20542  | 0.211247  |
| 0.117279 | 0.0869755 | 0.127768 | 0.204837 | 0.131265 | 0.119755 | 0.108974  |
| 0.113491 | 0.0791084 | 0.112034 | 0.199883 | 0.122523 | 0.120047 | 0.100816  |
| 0.128205 | 0.102855  | 0.13141  | 0.214889 | 0.143357 | 0.13447  | 0.121066  |
| 0.113345 | 0.0842075 | 0.111305 | 0.201486 | 0.124126 | 0.123689 | 0.0995047 |
| 0.125291 | 0.0888695 | 0.124417 | 0.214307 | 0.140152 | 0.139423 | 0.110286  |
| 0.120921 | 0.0912005 | 0.119755 | 0.203526 | 0.12704  | 0.124272 | 0.111742  |
| 0.112034 | 0.08581   | 0.12602  | 0.201632 | 0.130099 | 0.11859  | 0.104895  |
| 0.117861 | 0.0759033 | 0.125146 | 0.20542  | 0.133304 | 0.129662 | 0.107226  |
| 0.127331 | 0.0999417 | 0.132867 | 0.200612 | 0.135198 | 0.13039  | 0.114656  |
| 0.127477 | 0.102418  | 0.137675 | 0.211538 | 0.139423 | 0.137821 | 0.120047  |
| 0.129662 | 0.0984848 | 0.136655 | 0.213141 | 0.142191 | 0.134761 | 0.122232  |
| 0.125874 | 0.0952797 | 0.130828 | 0.213724 | 0.139277 | 0.129808 | 0.11961   |
| 0.116259 | 0.0909091 | 0.115967 | 0.205274 | 0.112471 | 0.113199 | 0.105041  |
| 0.119172 | 0.0941142 | 0.120629 | 0.207314 | 0.128788 | 0.120484 | 0.112325  |
| 0.129225 | 0.104167  | 0.133596 | 0.2162   | 0.145542 | 0.13549  | 0.125583  |
| 0.110723 | 0.0903263 | 0.115385 | 0.19799  | 0.127622 | 0.119027 | 0.106789  |
| 0.136364 | 0.124417  | 0.137821 | 0.212558 | 0.120629 | 0.127768 | 0.131556  |
| 0.133304 | 0.120192  | 0.136509 | 0.197552 | 0.144959 | 0.136364 | 0.128497  |
| 0.117279 | 0.105041  | 0.126311 | 0.203089 | 0.11757  | 0.112762 | 0.108974  |
| 0.120775 | 0.0849359 | 0.119027 | 0.209207 | 0.133304 | 0.134033 | 0.107517  |
| 0.120047 | 0.113636  | 0.129079 | 0.196533 | 0.132867 | 0.123106 | 0.119027  |
| 0.127768 | 0.109994  | 0.129808 | 0.206002 | 0.13243  | 0.128788 | 0.120338  |
| 0.122815 | 0.118735  | 0.130099 | 0.196387 | 0.133013 | 0.120338 | 0.117424  |
| 0.13447  | 0.119318  | 0.141171 | 0.199301 | 0.145833 | 0.138112 | 0.127914  |
| 0.113636 | 0.090035  | 0.118298 | 0.194784 | 0.106061 | 0.110868 | 0.104167  |
| 0.129808 | 0.108246  | 0.138549 | 0.210373 | 0.127185 | 0.134324 | 0.121795  |
| 0.135781 | 0.130245  | 0.142191 | 0.194784 | 0.143939 | 0.135635 | 0.128642  |
| 0.116841 | 0.0958625 | 0.122086 | 0.207314 | 0.112471 | 0.122815 | 0.109411  |
| 0.123252 | 0.111597  | 0.126166 | 0.198572 | 0.11655  | 0.124854 | 0.117861  |
| 0.146707 | 0.144668  | 0.145542 | 0.214452 | 0.126894 | 0.13141  | 0.141026  |
| 0.126603 | 0.118735  | 0.126894 | 0.207168 | 0.106206 | 0.117133 | 0.121212  |
| 0.137529 | 0.11655   | 0.143065 | 0.216929 | 0.133741 | 0.133304 | 0.125437  |
| 0.127185 | 0.104749  | 0.129516 | 0.212413 | 0.118153 | 0.123834 | 0.117133  |



|           |           |          |          |           |           |           |
|-----------|-----------|----------|----------|-----------|-----------|-----------|
| 0.121212  | 0.112179  | 0.124709 | 0.210227 | 0.122086  | 0.126311  | 0.117279  |
| 0.126311  | 0.112034  | 0.134178 | 0.209207 | 0.125146  | 0.120629  | 0.117716  |
| 0.119464  | 0.0882867 | 0.124126 | 0.202652 | 0.115385  | 0.11757   | 0.112617  |
| 0.128642  | 0.118153  | 0.134761 | 0.213287 | 0.120192  | 0.129662  | 0.123543  |
| 0.130682  | 0.0983392 | 0.135635 | 0.210956 | 0.135344  | 0.134615  | 0.124709  |
| 0.133013  | 0.125437  | 0.135927 | 0.217366 | 0.13039   | 0.134907  | 0.130828  |
| 0.133013  | 0.114073  | 0.138549 | 0.218823 | 0.134178  | 0.134324  | 0.127622  |
| 0.122523  | 0.118153  | 0.13243  | 0.20979  | 0.124272  | 0.127914  | 0.120338  |
| 0.133596  | 0.130682  | 0.146416 | 0.214161 | 0.144668  | 0.136655  | 0.134033  |
| 0.121649  | 0.0767774 | 0.122523 | 0.202797 | 0.12398   | 0.132576  | 0.111597  |
| 0.120484  | 0.107663  | 0.125437 | 0.210373 | 0.109994  | 0.123834  | 0.111888  |
| 0.130099  | 0.118444  | 0.133304 | 0.208333 | 0.130973  | 0.131702  | 0.125     |
| 0.118153  | 0.081148  | 0.123689 | 0.202214 | 0.117861  | 0.124417  | 0.111305  |
| 0.137821  | 0.124126  | 0.143357 | 0.209062 | 0.148893  | 0.13884   | 0.135344  |
| 0.152389  | 0.138403  | 0.159674 | 0.220425 | 0.152098  | 0.151078  | 0.148747  |
| 0.129079  | 0.127914  | 0.129662 | 0.21722  | 0.117716  | 0.124854  | 0.126894  |
| 0.124272  | 0.121066  | 0.122232 | 0.206585 | 0.104458  | 0.115385  | 0.116841  |
| 0.130828  | 0.125291  | 0.129662 | 0.216346 | 0.134324  | 0.132721  | 0.12398   |
| 0.127768  | 0.0968823 | 0.133887 | 0.213287 | 0.140297  | 0.13141   | 0.120047  |
| 0.130973  | 0.126311  | 0.131265 | 0.213578 | 0.114656  | 0.120921  | 0.120921  |
| 0.133887  | 0.106206  | 0.135635 | 0.217949 | 0.143502  | 0.147436  | 0.127331  |
| 0.126603  | 0.113199  | 0.133013 | 0.212704 | 0.138549  | 0.134033  | 0.124417  |
| 0.124417  | 0.097028  | 0.12296  | 0.211684 | 0.115676  | 0.121358  | 0.115239  |
| 0.161713  | 0.160839  | 0.162296 | 0.221591 | 0.162587  | 0.151952  | 0.156614  |
| 0.127622  | 0.101107  | 0.129662 | 0.209353 | 0.114802  | 0.129808  | 0.116113  |
| 0.13549   | 0.111305  | 0.140734 | 0.211976 | 0.13345   | 0.135635  | 0.122232  |
| 0.12398   | 0.109994  | 0.124563 | 0.210956 | 0.110868  | 0.123252  | 0.111597  |
| 0.137675  | 0.127768  | 0.140297 | 0.221737 | 0.131265  | 0.131119  | 0.131702  |
| 0.117279  | 0.0957168 | 0.124272 | 0.203963 | 0.133596  | 0.12704   | 0.112471  |
| 0.122669  | 0.124417  | 0.134033 | 0.175554 | 0.145105  | 0.109994  | 0.125146  |
| 0.141463  | 0.14292   | 0.148164 | 0.213578 | 0.157488  | 0.147145  | 0.135781  |
| 0.116259  | 0.122669  | 0.11655  | 0.191288 | 0.128497  | 0.0756119 | 0.116696  |
| 0.126894  | 0.131847  | 0.128351 | 0.176573 | 0.139132  | 0.0839161 | 0.126748  |
| 0.138986  | 0.143065  | 0.148893 | 0.1537   | 0.110431  | 0.111451  | 0.136509  |
| 0.126748  | 0.130245  | 0.143939 | 0.153992 | 0.145688  | 0.115822  | 0.127185  |
| 0.128059  | 0.128059  | 0.125146 | 0.210956 | 0.0957168 | 0.11859   | 0.124417  |
| 0.138112  | 0.134324  | 0.136364 | 0.205565 | 0.144814  | 0.136218  | 0.133013  |
| 0.0961538 | 0.10169   | 0.112471 | 0.189248 | 0.121795  | 0.110286  | 0.0855186 |
| 0.0855186 | 0.108829  | 0.112617 | 0.192599 | 0.113782  | 0.107809  | 0.0745921 |
| 0.124126  | 0.092366  | 0.124126 | 0.200321 | 0.125874  | 0.124272  | 0.11116   |
| 0.111014  | 0.11859   | 0.111305 | 0.189248 | 0.123252  | 0.071824  | 0.106789  |
| 0.119318  | 0.107372  | 0.123689 | 0.201923 | 0.112034  | 0.115093  | 0.108683  |
| 0.0770688 | 0.099796  | 0.102127 | 0.182984 | 0.119318  | 0.0847902 | 0.0684732 |
| 0.108537  | 0.112617  | 0.10912  | 0.199009 | 0.123397  | 0.110431  | 0.106352  |

|           |           |          |           |           |           |           |
|-----------|-----------|----------|-----------|-----------|-----------|-----------|
| 0.090035  | 0.104021  | 0.118298 | 0.184878  | 0.134615  | 0.118444  | 0.0712413 |
| 0.105478  | 0.0801282 | 0.1081   | 0.191871  | 0.114219  | 0.114656  | 0.0945513 |
| 0.111305  | 0.118881  | 0.115093 | 0.192162  | 0.125583  | 0.0735723 | 0.114365  |
| 0.109703  | 0.114365  | 0.109411 | 0.193765  | 0.123106  | 0.0734266 | 0.107809  |
| 0.124854  | 0.126311  | 0.129516 | 0.206002  | 0.0476399 | 0.0917832 | 0.120047  |
| 0.203817  | 0.211393  | 0.213141 | 0.120047  | 0.220425  | 0.199301  | 0.204837  |
| 0.134178  | 0.140297  | 0.135052 | 0.209207  | 0.146416  | 0.094697  | 0.137238  |
| 0.127622  | 0.127622  | 0.128497 | 0.209062  | 0.128788  | 0.127768  | 0.122815  |
| 0.120484  | 0.119027  | 0.124854 | 0.192599  | 0.125728  | 0.117133  | 0.112179  |
| 0.203526  | 0.205565  | 0.208479 | 0.0999417 | 0.216055  | 0.19697   | 0.200758  |
| 0.116696  | 0.122523  | 0.125146 | 0.191434  | 0.0802739 | 0.0920746 | 0.113928  |
| 0.120921  | 0.11859   | 0.122378 | 0.207022  | 0.11655   | 0.11961   | 0.113491  |
| 0.12704   | 0.119172  | 0.125    | 0.197407  | 0.125291  | 0.119901  | 0.118735  |
| 0.0855186 | 0.100087  | 0.113491 | 0.193765  | 0.131556  | 0.120921  | 0.0632284 |
| 0.241987  | 0.244027  | 0.248397 | 0.134033  | 0.258596  | 0.234848  | 0.238928  |
| 0.121503  | 0.11451   | 0.126748 | 0.203526  | 0.129079  | 0.125437  | 0.121358  |
| 0.115385  | 0.117133  | 0.120338 | 0.201195  | 0.0527389 | 0.0855186 | 0.113491  |
| 0.127914  | 0.124417  | 0.128788 | 0.208188  | 0.124126  | 0.120775  | 0.124563  |
| 0.124126  | 0.123252  | 0.124126 | 0.202069  | 0.124126  | 0.119901  | 0.120192  |
| 0.113054  | 0.113054  | 0.128497 | 0.196241  | 0.129953  | 0.121649  | 0.107372  |
| 0.101107  | 0.116259  | 0.119464 | 0.180507  | 0.136072  | 0.10271   | 0.103293  |
| 0.122378  | 0.122378  | 0.123543 | 0.201195  | 0.0547786 | 0.0875583 | 0.116987  |
| 0.11116   | 0.119318  | 0.112034 | 0.192308  | 0.12602   | 0.0725524 | 0.111014  |
| 0.125     | 0.12296   | 0.124126 | 0.198281  | 0.131702  | 0.123689  | 0.121941  |
| 0.0812937 | 0.0964452 | 0.112471 | 0.192453  | 0.123543  | 0.116113  | 0.0595862 |
| 0.106789  | 0.114656  | 0.112908 | 0.18852   | 0.11757   | 0.0728438 | 0.106643  |
| 0.108974  | 0.0439977 | 0.119464 | 0.19799   | 0.127914  | 0.12398   | 0.0930944 |
| 0.13884   | 0.142045  | 0.145251 | 0.211538  | 0.152826  | 0.145688  | 0.136946  |
| 0.128934  | 0.118444  | 0.133013 | 0.203089  | 0.129225  | 0.12704   | 0.123252  |
| 0.124854  | 0.122523  | 0.131556 | 0.206294  | 0.116404  | 0.125583  | 0.117716  |
| 0.180507  | 0.186626  | 0.187209 | 0.0987762 | 0.197115  | 0.17366   | 0.177156  |
| 0.195659  | 0.199446  | 0.200903 | 0.0990676 | 0.210519  | 0.189103  | 0.194056  |
| 0.0875583 | 0.0992133 | 0.11757  | 0.187937  | 0.129516  | 0.12296   | 0.0641026 |
| 0.0782343 | 0.0942599 | 0.110577 | 0.192599  | 0.12398   | 0.114802  | 0.0603147 |
| 0.13243   | 0.125437  | 0.131556 | 0.195513  | 0.143211  | 0.126748  | 0.127622  |
| 0.120484  | 0.119318  | 0.125146 | 0.199883  | 0.0511364 | 0.0885781 | 0.113928  |
| 0.126166  | 0.11655   | 0.129662 | 0.204983  | 0.132867  | 0.126311  | 0.120484  |
| 0.125437  | 0.131265  | 0.123397 | 0.205128  | 0.133596  | 0.122086  | 0.125583  |
| 0.215181  | 0.219843  | 0.219843 | 0.106352  | 0.228293  | 0.211247  | 0.213287  |
| 0.113782  | 0.111451  | 0.11961  | 0.199009  | 0.116404  | 0.112471  | 0.108974  |
| 0.196096  | 0.205711  | 0.206002 | 0.141463  | 0.210082  | 0.186626  | 0.196824  |
| 0.113491  | 0.11757   | 0.112325 | 0.203089  | 0.0887238 | 0.104895  | 0.11014   |
| 0.112471  | 0.113928  | 0.113636 | 0.198281  | 0.117133  | 0.119318  | 0.108537  |
| 0.10708   | 0.114365  | 0.121066 | 0.190268  | 0.110868  | 0.0891608 | 0.102273  |

|           |           |          |           |           |           |           |
|-----------|-----------|----------|-----------|-----------|-----------|-----------|
| 0.0820221 | 0.0936772 | 0.110286 | 0.18648   | 0.122815  | 0.108683  | 0.0632284 |
| 0.195221  | 0.200758  | 0.203671 | 0.102418  | 0.20979   | 0.192453  | 0.195659  |
| 0.122669  | 0.126166  | 0.121503 | 0.190997  | 0.13549   | 0.0828963 | 0.121358  |
| 0.114802  | 0.117133  | 0.117716 | 0.207022  | 0.110723  | 0.11757   | 0.114656  |
| 0.116841  | 0.124709  | 0.114802 | 0.196824  | 0.12704   | 0.0761946 | 0.117861  |
| 0.123252  | 0.120921  | 0.122669 | 0.204691  | 0.12296   | 0.121066  | 0.121649  |
| 0.0810023 | 0.097028  | 0.111014 | 0.190414  | 0.123252  | 0.116113  | 0.0613345 |
| 0.119318  | 0.121649  | 0.117861 | 0.204254  | 0.0872669 | 0.108392  | 0.115093  |
| 0.117861  | 0.119901  | 0.126894 | 0.190851  | 0.0686189 | 0.0844988 | 0.111597  |
| 0.12602   | 0.123106  | 0.12602  | 0.205128  | 0.116696  | 0.121503  | 0.117133  |
| 0.104167  | 0.109411  | 0.107663 | 0.185606  | 0.121649  | 0.0725524 | 0.104895  |
| 0.121795  | 0.122669  | 0.122378 | 0.203817  | 0.107517  | 0.118735  | 0.117861  |
| 0.178176  | 0.183421  | 0.188957 | 0.0920746 | 0.19595   | 0.173368  | 0.17803   |
| 0.129662  | 0.127331  | 0.128205 | 0.207605  | 0.124126  | 0.120484  | 0.125146  |
| 0.125146  | 0.128351  | 0.131556 | 0.203671  | 0.136509  | 0.129953  | 0.121503  |
| 0.120338  | 0.117716  | 0.122669 | 0.195076  | 0.123543  | 0.115239  | 0.113199  |
| 0.121066  | 0.114948  | 0.130682 | 0.195221  | 0.128934  | 0.121795  | 0.124417  |
| 0.113491  | 0.121066  | 0.116987 | 0.195804  | 0.124272  | 0.076049  | 0.11451   |
| 0.122523  | 0.12398   | 0.119318 | 0.209499  | 0.0957168 | 0.113054  | 0.118881  |
| 0.114802  | 0.111305  | 0.118007 | 0.19595   | 0.11655   | 0.111451  | 0.112325  |
| 0.127914  | 0.126457  | 0.129953 | 0.208479  | 0.0533217 | 0.0962995 | 0.121066  |
| 0.118444  | 0.122523  | 0.126894 | 0.199301  | 0.133013  | 0.120921  | 0.11014   |
| 0.120775  | 0.121358  | 0.120484 | 0.200466  | 0.119901  | 0.113054  | 0.113054  |
| 0.0842075 | 0.0990676 | 0.112471 | 0.190122  | 0.126166  | 0.118153  | 0.0662879 |
| 0.121066  | 0.118153  | 0.124854 | 0.205128  | 0.125146  | 0.122378  | 0.114802  |
| 0.138403  | 0.132576  | 0.135198 | 0.207022  | 0.138403  | 0.135052  | 0.129225  |
| 0.116841  | 0.111305  | 0.124126 | 0.195659  | 0.118298  | 0.120775  | 0.110286  |
| 0.130682  | 0.135052  | 0.128059 | 0.206002  | 0.14088   | 0.0909091 | 0.131702  |
| 0.0805653 | 0.0977564 | 0.10912  | 0.186772  | 0.121358  | 0.114802  | 0.0594406 |
| 0.115239  | 0.121941  | 0.114948 | 0.197261  | 0.121066  | 0.113054  | 0.112179  |
| 0.109557  | 0.11451   | 0.115385 | 0.177593  | 0.122378  | 0.0747378 | 0.109703  |
| 0.127331  | 0.126457  | 0.129662 | 0.199155  | 0.0524476 | 0.0925117 | 0.122815  |
| 0.180653  | 0.188228  | 0.189394 | 0.114948  | 0.178322  | 0.161859  | 0.180507  |
| 0.114656  | 0.118444  | 0.120192 | 0.199592  | 0.106498  | 0.11451   | 0.1081    |
| 0.101544  | 0.108246  | 0.104749 | 0.188228  | 0.114365  | 0.103147  | 0.101107  |
| 0.125146  | 0.120775  | 0.128059 | 0.210664  | 0.116987  | 0.124417  | 0.11655   |
| 0.160693  | 0.169143  | 0.172931 | 0.115676  | 0.185169  | 0.162005  | 0.164918  |
| 0.135781  | 0.125874  | 0.138403 | 0.208188  | 0.140152  | 0.13447   | 0.131265  |
| 0.142483  | 0.134324  | 0.147727 | 0.218386  | 0.147727  | 0.146999  | 0.142337  |
| 0.140297  | 0.142337  | 0.147582 | 0.213578  | 0.156031  | 0.148019  | 0.138112  |
| 0.116404  | 0.105041  | 0.124272 | 0.195221  | 0.120192  | 0.116259  | 0.110723  |
| 0.113928  | 0.122669  | 0.118007 | 0.193036  | 0.125291  | 0.0759033 | 0.11553   |
| 0.201195  | 0.206731  | 0.207896 | 0.104021  | 0.216638  | 0.194347  | 0.199883  |
| 0.121358  | 0.118735  | 0.123689 | 0.192016  | 0.129516  | 0.120338  | 0.113345  |

|           |           |           |           |           |           |           |
|-----------|-----------|-----------|-----------|-----------|-----------|-----------|
| 0.121503  | 0.12296   | 0.116841  | 0.193328  | 0.13345   | 0.0779429 | 0.119027  |
| 0.117424  | 0.120629  | 0.121212  | 0.201195  | 0.106935  | 0.117861  | 0.113782  |
| 0.153263  | 0.162587  | 0.164627  | 0.136801  | 0.173077  | 0.141754  | 0.149913  |
| 0.109848  | 0.107517  | 0.114802  | 0.188666  | 0.119464  | 0.107372  | 0.104749  |
| 0.145542  | 0.142628  | 0.144376  | 0.211247  | 0.156323  | 0.149476  | 0.143065  |
| 0.120775  | 0.0898893 | 0.124563  | 0.193765  | 0.128642  | 0.125     | 0.108683  |
| 0.181964  | 0.187791  | 0.189831  | 0.100524  | 0.193619  | 0.174825  | 0.177448  |
| 0.118153  | 0.110286  | 0.131265  | 0.201632  | 0.127477  | 0.124126  | 0.115385  |
| 0.0954254 | 0.0890152 | 0.0968823 | 0.194347  | 0.11553   | 0.106061  | 0.0929487 |
| 0.112179  | 0.115967  | 0.11451   | 0.195367  | 0.121212  | 0.110577  | 0.107955  |
| 0.119901  | 0.11961   | 0.117279  | 0.199883  | 0.112325  | 0.115093  | 0.111597  |
| 0.120192  | 0.121066  | 0.121941  | 0.204254  | 0.111742  | 0.120338  | 0.111597  |
| 0.114073  | 0.116696  | 0.11757   | 0.194347  | 0.124563  | 0.12296   | 0.115676  |
| 0.080711  | 0.0926573 | 0.106352  | 0.188374  | 0.122669  | 0.117861  | 0.0595862 |
| 0.180507  | 0.186334  | 0.188957  | 0.0984848 | 0.194784  | 0.174534  | 0.18007   |
| 0.121212  | 0.122086  | 0.126748  | 0.199155  | 0.122669  | 0.122523  | 0.118735  |
| 0.0808566 | 0.110286  | 0.0523019 | 0.188228  | 0.118735  | 0.108974  | 0.0976107 |
| 0.199009  | 0.205128  | 0.206876  | 0.102127  | 0.215618  | 0.197115  | 0.199446  |
| 0.126457  | 0.125874  | 0.128497  | 0.205857  | 0.124709  | 0.122523  | 0.122523  |
| 0.0820221 | 0.0939685 | 0.113782  | 0.192599  | 0.122815  | 0.119464  | 0.0623543 |
| 0.0782343 | 0.0933858 | 0.108829  | 0.189394  | 0.118153  | 0.112471  | 0.0614802 |
| 0.127622  | 0.131993  | 0.12704   | 0.203817  | 0.1419    | 0.0922203 | 0.127768  |
| 0.178322  | 0.185315  | 0.184732  | 0.100962  | 0.195221  | 0.174971  | 0.180216  |
| 0.121649  | 0.123106  | 0.124563  | 0.207168  | 0.0499709 | 0.0906177 | 0.117716  |
| 0.13243   | 0.128059  | 0.131265  | 0.206585  | 0.13243   | 0.128497  | 0.125874  |
| 0.0799825 | 0.0919289 | 0.112908  | 0.188811  | 0.121066  | 0.115676  | 0.0565268 |
| 0.0750291 | 0.0922203 | 0.109411  | 0.189977  | 0.118444  | 0.111888  | 0.0588578 |
| 0.0789627 | 0.0929487 | 0.110431  | 0.186917  | 0.121795  | 0.116113  | 0.0607517 |
| 0.106206  | 0.112908  | 0.108829  | 0.193473  | 0.119901  | 0.0754662 | 0.106352  |
| 0.103438  | 0.0821678 | 0.108974  | 0.195367  | 0.113054  | 0.111451  | 0.0916375 |
| 0.122086  | 0.113054  | 0.128788  | 0.201777  | 0.126457  | 0.12602   | 0.120192  |
| 0.129371  | 0.131119  | 0.125874  | 0.21285   | 0.136946  | 0.127768  | 0.128642  |
| 0.11859   | 0.114219  | 0.126457  | 0.202652  | 0.125874  | 0.123106  | 0.114365  |
| 0.129225  | 0.122523  | 0.122232  | 0.210956  | 0.128059  | 0.129371  | 0.124709  |
| 0.185897  | 0.191434  | 0.191434  | 0.10271   | 0.198718  | 0.178467  | 0.183129  |
| 0.117861  | 0.116987  | 0.123106  | 0.199592  | 0.120192  | 0.120338  | 0.111888  |
| 0.123252  | 0.131119  | 0.11859   | 0.196241  | 0.136946  | 0.0831876 | 0.124854  |
| 0.0767774 | 0.0893065 | 0.107372  | 0.192599  | 0.123689  | 0.11655   | 0.0617716 |
| 0.104312  | 0.0766317 | 0.111888  | 0.191288  | 0.115967  | 0.11757   | 0.0919289 |
| 0.110723  | 0.11014   | 0.119172  | 0.188957  | 0.121503  | 0.110868  | 0.106206  |
| 0.121649  | 0.124272  | 0.122232  | 0.20338   | 0.0473485 | 0.087704  | 0.115385  |
| 0.127477  | 0.128059  | 0.127768  | 0.202214  | 0.135052  | 0.130536  | 0.122378  |
| 0.115093  | 0.117424  | 0.123252  | 0.195076  | 0.128205  | 0.116987  | 0.106498  |
| 0.103438  | 0.10169   | 0.114802  | 0.192745  | 0.0705128 | 0.092803  | 0.0983392 |

|           |           |           |           |           |           |           |
|-----------|-----------|-----------|-----------|-----------|-----------|-----------|
| 0.0992133 | 0.0945513 | 0.110868  | 0.193473  | 0.0805653 | 0.0888695 | 0.0967366 |
| 0.0949883 | 0.0847902 | 0.10169   | 0.19391   | 0.115093  | 0.106206  | 0.092803  |
| 0.11553   | 0.116987  | 0.11757   | 0.205711  | 0.0901807 | 0.104895  | 0.112179  |
| 0.131702  | 0.118298  | 0.136364  | 0.210227  | 0.135198  | 0.129808  | 0.125146  |
| 0.120775  | 0.121649  | 0.122232  | 0.205128  | 0.0543415 | 0.0912005 | 0.111597  |
| 0.107517  | 0.113928  | 0.110723  | 0.188957  | 0.121503  | 0.074155  | 0.105332  |
| 0.117133  | 0.118881  | 0.120338  | 0.202652  | 0.0553613 | 0.088141  | 0.112034  |
| 0.0805653 | 0.0971737 | 0.107955  | 0.187937  | 0.120775  | 0.112179  | 0.0600233 |
| 0.113928  | 0.112762  | 0.118007  | 0.197115  | 0.106643  | 0.113199  | 0.109703  |
| 0.0827506 | 0.0935315 | 0.11014   | 0.190414  | 0.125874  | 0.116404  | 0.0587121 |
| 0.113928  | 0.109848  | 0.119464  | 0.19595   | 0.115676  | 0.112325  | 0.104458  |
| 0.112179  | 0.117133  | 0.121503  | 0.197115  | 0.13141   | 0.119901  | 0.10708   |
| 0.116841  | 0.111888  | 0.120629  | 0.204691  | 0.109266  | 0.11553   | 0.109411  |
| 0.105624  | 0.0799825 | 0.110286  | 0.193765  | 0.116113  | 0.112471  | 0.0961538 |
| 0.0839161 | 0.0961538 | 0.107517  | 0.190705  | 0.119755  | 0.113782  | 0.0625    |
| 0.11859   | 0.120629  | 0.120338  | 0.18546   | 0.127331  | 0.113491  | 0.114365  |
| 0.0828963 | 0.116113  | 0.0523019 | 0.195221  | 0.125728  | 0.11451   | 0.101107  |
| 0.101399  | 0.0879953 | 0.101107  | 0.197407  | 0.116259  | 0.112908  | 0.0887238 |
| 0.0786713 | 0.094697  | 0.107226  | 0.192745  | 0.120047  | 0.114365  | 0.0604604 |
| 0.11116   | 0.120775  | 0.112617  | 0.190268  | 0.12602   | 0.0766317 | 0.113928  |
| 0.114365  | 0.11961   | 0.11757   | 0.201049  | 0.0907634 | 0.110723  | 0.11014   |
| 0.109411  | 0.116987  | 0.10912   | 0.197261  | 0.121066  | 0.0740093 | 0.110431  |
| 0.113782  | 0.11757   | 0.120484  | 0.20134   | 0.108829  | 0.11859   | 0.1081    |
| 0.108246  | 0.0782343 | 0.112034  | 0.199009  | 0.116696  | 0.118881  | 0.0990676 |
| 0.10912   | 0.105041  | 0.114948  | 0.189977  | 0.120192  | 0.109557  | 0.103438  |
| 0.110723  | 0.110723  | 0.116259  | 0.200612  | 0.107517  | 0.11116   | 0.107372  |
| 0.112034  | 0.121066  | 0.112034  | 0.193765  | 0.128934  | 0.0786713 | 0.110723  |
| 0.112034  | 0.123397  | 0.10708   | 0.20134   | 0.121358  | 0.115676  | 0.115967  |
| 0.101399  | 0.115385  | 0.101107  | 0.190705  | 0.121212  | 0.108537  | 0.103875  |
| 0.184441  | 0.18852   | 0.190559  | 0.0965909 | 0.199883  | 0.180507  | 0.181964  |
| 0.146853  | 0.159091  | 0.155594  | 0.133887  | 0.168124  | 0.140297  | 0.146707  |
| 0.116841  | 0.11451   | 0.127331  | 0.200029  | 0.123543  | 0.121649  | 0.117279  |
| 0.104749  | 0.119318  | 0.114365  | 0.195221  | 0.0820221 | 0.087704  | 0.109848  |
| 0.148747  | 0.139132  | 0.152244  | 0.222611  | 0.150787  | 0.148601  | 0.145396  |
| 0.123252  | 0.122086  | 0.123252  | 0.200029  | 0.133741  | 0.12398   | 0.121358  |
| 0.0890152 | 0.105041  | 0.120192  | 0.187646  | 0.129225  | 0.118881  | 0.0804196 |
| 0         | 0.107226  | 0.0859557 | 0.190997  | 0.121503  | 0.106206  | 0.0712413 |
| 0.107226  | 0         | 0.115385  | 0.194784  | 0.123834  | 0.11757   | 0.0936772 |
| 0.0859557 | 0.115385  | 0         | 0.196533  | 0.129371  | 0.11553   | 0.103584  |
| 0.190997  | 0.194784  | 0.196533  | 0         | 0.206731  | 0.182984  | 0.188228  |
| 0.121503  | 0.123834  | 0.129371  | 0.206731  | 0         | 0.0933858 | 0.117279  |
| 0.106206  | 0.11757   | 0.11553   | 0.182984  | 0.0933858 | 0         | 0.110431  |
| 0.0712413 | 0.0936772 | 0.103584  | 0.188228  | 0.117279  | 0.110431  | 0         |
| 0.115967  | 0.11451   | 0.114219  | 0.20236   | 0.118881  | 0.118153  | 0.112325  |

|           |           |           |          |           |           |           |
|-----------|-----------|-----------|----------|-----------|-----------|-----------|
| 0.158071  | 0.17905   | 0.164481  | 0.117424 | 0.187791  | 0.167249  | 0.166084  |
| 0.239073  | 0.245484  | 0.243735  | 0.126748 | 0.250437  | 0.22873   | 0.237471  |
| 0.113491  | 0.120192  | 0.120775  | 0.201632 | 0.133887  | 0.121503  | 0.108683  |
| 0.0793998 | 0.113782  | 0.0488054 | 0.199009 | 0.126311  | 0.116259  | 0.104312  |
| 0.119318  | 0.112617  | 0.126894  | 0.200175 | 0.126894  | 0.120921  | 0.113636  |
| 0.113636  | 0.115676  | 0.11859   | 0.199738 | 0.113345  | 0.114656  | 0.109411  |
| 0.117279  | 0.120192  | 0.121649  | 0.202214 | 0.0502622 | 0.0850816 | 0.111888  |
| 0.115093  | 0.114802  | 0.117424  | 0.192745 | 0.119172  | 0.113491  | 0.108537  |
| 0.0814394 | 0.0983392 | 0.105915  | 0.183275 | 0.122815  | 0.083042  | 0.0725524 |
| 0.118153  | 0.119901  | 0.121649  | 0.202214 | 0.0479312 | 0.0859557 | 0.110431  |
| 0.085373  | 0.101981  | 0.106935  | 0.185169 | 0.124709  | 0.0802739 | 0.081148  |
| 0.104167  | 0.088141  | 0.10271   | 0.199009 | 0.11961   | 0.119755  | 0.0871212 |
| 0.105186  | 0.0792541 | 0.111014  | 0.191871 | 0.116841  | 0.116404  | 0.0942599 |
| 0.116113  | 0.120484  | 0.124854  | 0.199883 | 0.131265  | 0.120921  | 0.109848  |
| 0.110723  | 0.120047  | 0.111888  | 0.191871 | 0.12296   | 0.0759033 | 0.108246  |
| 0.106061  | 0.105769  | 0.108683  | 0.188374 | 0.112179  | 0.103001  | 0.10271   |
| 0.122086  | 0.109557  | 0.130536  | 0.21285  | 0.125874  | 0.125437  | 0.118153  |
| 0.131993  | 0.130536  | 0.134324  | 0.214598 | 0.121212  | 0.129808  | 0.126603  |
| 0.0799825 | 0.0960082 | 0.107955  | 0.191725 | 0.118444  | 0.112179  | 0.0594406 |
| 0.0958625 | 0.105478  | 0.116259  | 0.188083 | 0.120338  | 0.112617  | 0.0826049 |
| 0.0941142 | 0.107809  | 0.121503  | 0.200903 | 0.137238  | 0.129808  | 0.0738636 |
| 0.202069  | 0.200321  | 0.203817  | 0.115385 | 0.216055  | 0.192599  | 0.199301  |
| 0.108683  | 0.111014  | 0.11451   | 0.192745 | 0.119755  | 0.110868  | 0.104167  |
| 0.106498  | 0.0796911 | 0.112908  | 0.19493  | 0.118444  | 0.117133  | 0.0961538 |
| 0.119318  | 0.114365  | 0.121358  | 0.196678 | 0.121066  | 0.119172  | 0.110723  |
| 0.125874  | 0.122669  | 0.129662  | 0.201777 | 0.120629  | 0.121066  | 0.121649  |
| 0.111305  | 0.110723  | 0.113928  | 0.200612 | 0.118881  | 0.114656  | 0.11116   |
| 0.189685  | 0.19493   | 0.199301  | 0.100379 | 0.203671  | 0.185752  | 0.18546   |
| 0.113782  | 0.124563  | 0.115239  | 0.19493  | 0.126603  | 0.0777972 | 0.114219  |
| 0.0777972 | 0.092366  | 0.108974  | 0.190997 | 0.118298  | 0.11116   | 0.0607517 |
| 0.125728  | 0.112617  | 0.124854  | 0.201049 | 0.122523  | 0.120047  | 0.115093  |
| 0.112617  | 0.114073  | 0.11961   | 0.20338  | 0.11116   | 0.115093  | 0.106935  |
| 0.110286  | 0.119027  | 0.114656  | 0.190559 | 0.127185  | 0.0743007 | 0.11014   |
| 0.0995047 | 0.105624  | 0.108246  | 0.187063 | 0.118444  | 0.0882867 | 0.0987762 |
| 0.101253  | 0.0869755 | 0.10271   | 0.201923 | 0.120775  | 0.112762  | 0.0926573 |
| 0.121941  | 0.119901  | 0.124272  | 0.202214 | 0.124272  | 0.119464  | 0.117716  |
| 0.187646  | 0.19697   | 0.198718  | 0.102127 | 0.201049  | 0.180507  | 0.185752  |
| 0.103001  | 0.111451  | 0.10708   | 0.188228 | 0.118735  | 0.0757576 | 0.104312  |
| 0.18852   | 0.189394  | 0.191142  | 0.100379 | 0.199883  | 0.182838  | 0.18109   |
| 0.182255  | 0.190414  | 0.188957  | 0.099359 | 0.196241  | 0.177156  | 0.180944  |
| 0.128934  | 0.128059  | 0.127185  | 0.212121 | 0.120192  | 0.125291  | 0.118881  |
| 0.137675  | 0.130099  | 0.133887  | 0.20979  | 0.13243   | 0.131702  | 0.130536  |
| 0.0983392 | 0.0878497 | 0.0971737 | 0.195221 | 0.113782  | 0.106643  | 0.0882867 |
| 0.105478  | 0.111014  | 0.106352  | 0.189248 | 0.11655   | 0.0791084 | 0.103584  |

|           |           |           |           |           |           |           |
|-----------|-----------|-----------|-----------|-----------|-----------|-----------|
| 0.106498  | 0.114656  | 0.112034  | 0.191725  | 0.120484  | 0.0745921 | 0.107226  |
| 0.0828963 | 0.0913462 | 0.112034  | 0.189977  | 0.122523  | 0.115967  | 0.0611888 |
| 0.11553   | 0.116987  | 0.116404  | 0.199883  | 0.0543415 | 0.0839161 | 0.109266  |
| 0.116113  | 0.119318  | 0.120775  | 0.204254  | 0.0482226 | 0.0856643 | 0.110431  |
| 0.120047  | 0.122086  | 0.124709  | 0.197115  | 0.133741  | 0.123689  | 0.112908  |
| 0.119318  | 0.119318  | 0.121941  | 0.206294  | 0.11553   | 0.119172  | 0.113928  |
| 0.0789627 | 0.0912005 | 0.1081    | 0.1875    | 0.119172  | 0.112325  | 0.0598776 |
| 0.108829  | 0.11961   | 0.109994  | 0.194056  | 0.121649  | 0.0751748 | 0.112762  |
| 0.0929487 | 0.0850816 | 0.0984848 | 0.192745  | 0.111597  | 0.106206  | 0.090472  |
| 0.121358  | 0.125146  | 0.120484  | 0.199883  | 0.137092  | 0.083042  | 0.122669  |
| 0.114948  | 0.11116   | 0.125728  | 0.200175  | 0.12398   | 0.119464  | 0.113054  |
| 0.124417  | 0.129371  | 0.123834  | 0.201777  | 0.136364  | 0.0840618 | 0.127185  |
| 0.253205  | 0.255245  | 0.256993  | 0.131556  | 0.264569  | 0.244901  | 0.248106  |
| 0.130536  | 0.129953  | 0.132867  | 0.215472  | 0.117133  | 0.128934  | 0.127768  |
| 0.125728  | 0.12602   | 0.129808  | 0.20542   | 0.129516  | 0.13141   | 0.123543  |
| 0.208625  | 0.213869  | 0.215909  | 0.10708   | 0.221737  | 0.204108  | 0.207896  |
| 0.126894  | 0.116696  | 0.122523  | 0.208333  | 0.129808  | 0.136364  | 0.116841  |
| 0.222756  | 0.226253  | 0.226253  | 0.118007  | 0.236742  | 0.214452  | 0.220862  |
| 0.121795  | 0.123252  | 0.12296   | 0.207314  | 0.11014   | 0.120775  | 0.117861  |
| 0.0925117 | 0.103584  | 0.120484  | 0.198718  | 0.135344  | 0.127622  | 0.0684732 |
| 0.118735  | 0.116113  | 0.118153  | 0.197844  | 0.115822  | 0.112179  | 0.113345  |
| 0.125728  | 0.123106  | 0.127477  | 0.210082  | 0.116987  | 0.12704   | 0.11655   |
| 0.19391   | 0.197407  | 0.201195  | 0.102273  | 0.207896  | 0.187063  | 0.191434  |
| 0.122815  | 0.13039   | 0.117861  | 0.20338   | 0.137092  | 0.083042  | 0.121212  |
| 0.10708   | 0.118153  | 0.110577  | 0.193182  | 0.123689  | 0.0722611 | 0.109266  |
| 0.218531  | 0.222902  | 0.223485  | 0.120192  | 0.232226  | 0.21285   | 0.214307  |
| 0.11757   | 0.121066  | 0.120775  | 0.198427  | 0.0502622 | 0.087704  | 0.111597  |
| 0.187354  | 0.194639  | 0.196678  | 0.097465  | 0.203089  | 0.183421  | 0.187209  |
| 0.119755  | 0.122669  | 0.125     | 0.203526  | 0.0541958 | 0.0901807 | 0.115822  |
| 0.0810023 | 0.0944056 | 0.112179  | 0.192162  | 0.123834  | 0.115822  | 0.0633741 |
| 0.11757   | 0.0869755 | 0.122232  | 0.201632  | 0.126894  | 0.125874  | 0.106935  |
| 0.131265  | 0.127768  | 0.131847  | 0.212704  | 0.122815  | 0.125874  | 0.121795  |
| 0.110431  | 0.108392  | 0.118007  | 0.192162  | 0.120338  | 0.111451  | 0.105624  |
| 0.143357  | 0.143939  | 0.157925  | 0.131556  | 0.168706  | 0.149038  | 0.142045  |
| 0.105478  | 0.115093  | 0.107226  | 0.187209  | 0.121503  | 0.0726981 | 0.106206  |
| 0.125583  | 0.122669  | 0.127622  | 0.20236   | 0.125     | 0.120484  | 0.119318  |
| 0.118298  | 0.114219  | 0.127622  | 0.201777  | 0.115093  | 0.123689  | 0.110577  |
| 0.127622  | 0.131119  | 0.122378  | 0.20236   | 0.132867  | 0.124272  | 0.123689  |
| 0.183129  | 0.190705  | 0.190122  | 0.0955711 | 0.19799   | 0.179779  | 0.184732  |
| 0.0786713 | 0.0932401 | 0.108683  | 0.189831  | 0.119755  | 0.115239  | 0.060169  |
| 0.11757   | 0.114365  | 0.122815  | 0.191725  | 0.11757   | 0.120921  | 0.111597  |
| 0.114802  | 0.120047  | 0.117133  | 0.203817  | 0.0920746 | 0.109411  | 0.108246  |
| 0.123106  | 0.123689  | 0.125728  | 0.204837  | 0.0514277 | 0.092366  | 0.119172  |
| 0.0874126 | 0.100233  | 0.115093  | 0.193036  | 0.130828  | 0.121649  | 0.0659965 |

|           |           |          |           |           |           |           |
|-----------|-----------|----------|-----------|-----------|-----------|-----------|
| 0.249563  | 0.254225  | 0.254808 | 0.13141   | 0.261218  | 0.23951   | 0.246503  |
| 0.114802  | 0.083042  | 0.119464 | 0.20236   | 0.122086  | 0.122232  | 0.104749  |
| 0.0964452 | 0.109557  | 0.120921 | 0.194784  | 0.122378  | 0.11116   | 0.0875583 |
| 0.171329  | 0.178613  | 0.176865 | 0.144959  | 0.183566  | 0.165064  | 0.173514  |
| 0.176282  | 0.18211   | 0.185606 | 0.104167  | 0.190851  | 0.170017  | 0.173223  |
| 0.115967  | 0.11859   | 0.124126 | 0.196241  | 0.131702  | 0.118444  | 0.108537  |
| 0.109994  | 0.116696  | 0.112034 | 0.194347  | 0.127768  | 0.0751748 | 0.107517  |
| 0.113199  | 0.114656  | 0.117279 | 0.20338   | 0.10708   | 0.111888  | 0.106643  |
| 0.137238  | 0.141608  | 0.133741 | 0.20877   | 0.148019  | 0.0962995 | 0.137092  |
| 0.1081    | 0.116259  | 0.119755 | 0.195659  | 0.125583  | 0.119318  | 0.105624  |
| 0.114948  | 0.121358  | 0.124854 | 0.197552  | 0.133304  | 0.123543  | 0.108392  |
| 0.126166  | 0.129953  | 0.128497 | 0.208188  | 0.0518648 | 0.0942599 | 0.120192  |
| 0.110723  | 0.119755  | 0.113636 | 0.189831  | 0.126166  | 0.0724068 | 0.110577  |
| 0.122815  | 0.127768  | 0.116987 | 0.198135  | 0.136218  | 0.0812937 | 0.119755  |
| 0.113928  | 0.117424  | 0.123834 | 0.185752  | 0.0754662 | 0.0855186 | 0.111742  |
| 0.127185  | 0.121649  | 0.129808 | 0.20979   | 0.118735  | 0.127331  | 0.118881  |
| 0.138986  | 0.135198  | 0.138986 | 0.221008  | 0.127331  | 0.137092  | 0.129808  |
| 0.116987  | 0.0852273 | 0.123397 | 0.203963  | 0.123106  | 0.125291  | 0.108392  |
| 0.131993  | 0.129371  | 0.132576 | 0.21722   | 0.122669  | 0.130682  | 0.12398   |
| 0.131119  | 0.132284  | 0.13141  | 0.211684  | 0.0521562 | 0.0980478 | 0.127185  |
| 0.19595   | 0.203817  | 0.202943 | 0.106935  | 0.211393  | 0.193765  | 0.197261  |
| 0.115093  | 0.0868298 | 0.124417 | 0.205857  | 0.118298  | 0.122815  | 0.107663  |
| 0.182984  | 0.189685  | 0.190268 | 0.102418  | 0.19697   | 0.177593  | 0.180507  |
| 0.118881  | 0.111305  | 0.114802 | 0.19595   | 0.117133  | 0.111742  | 0.111742  |
| 0.0894522 | 0.10169   | 0.117133 | 0.191288  | 0.132867  | 0.122523  | 0.0686189 |
| 0.125291  | 0.11451   | 0.127331 | 0.199446  | 0.12704   | 0.119901  | 0.118153  |
| 0.114073  | 0.108537  | 0.123106 | 0.195804  | 0.121358  | 0.119172  | 0.109848  |
| 0.113636  | 0.121503  | 0.115093 | 0.194202  | 0.129079  | 0.0770688 | 0.117279  |
| 0.115676  | 0.12296   | 0.113928 | 0.194784  | 0.125583  | 0.074155  | 0.11553   |
| 0.083042  | 0.0967366 | 0.111305 | 0.188374  | 0.125     | 0.11553   | 0.0616259 |
| 0.121358  | 0.121941  | 0.123106 | 0.199301  | 0.120192  | 0.116841  | 0.11655   |
| 0.121941  | 0.116987  | 0.130682 | 0.201923  | 0.130682  | 0.12296   | 0.123252  |
| 0.137238  | 0.134615  | 0.136364 | 0.200903  | 0.0626457 | 0.101544  | 0.130099  |
| 0.244172  | 0.245338  | 0.247086 | 0.130099  | 0.258159  | 0.234994  | 0.241404  |
| 0.0801282 | 0.0981935 | 0.113054 | 0.189831  | 0.125583  | 0.115239  | 0.0613345 |
| 0.172348  | 0.180507  | 0.180798 | 0.0958625 | 0.188666  | 0.169872  | 0.173077  |
| 0.179196  | 0.187063  | 0.190268 | 0.0925117 | 0.194056  | 0.174971  | 0.180798  |
| 0.112908  | 0.110868  | 0.120484 | 0.191725  | 0.121358  | 0.119755  | 0.106935  |
| 0.11116   | 0.0826049 | 0.115822 | 0.196678  | 0.121358  | 0.116841  | 0.100524  |
| 0.0890152 | 0.0995047 | 0.120484 | 0.196678  | 0.130973  | 0.122669  | 0.0673077 |
| 0.105915  | 0.111451  | 0.108537 | 0.189394  | 0.121358  | 0.0757576 | 0.106352  |
| 0.106061  | 0.0480769 | 0.117424 | 0.187791  | 0.122086  | 0.11553   | 0.0895979 |
| 0.119464  | 0.12296   | 0.124709 | 0.200612  | 0.0544872 | 0.0872669 | 0.113199  |
| 0.112325  | 0.113199  | 0.11553  | 0.190851  | 0.125728  | 0.0865385 | 0.109557  |



|           |           |          |           |           |           |           |
|-----------|-----------|----------|-----------|-----------|-----------|-----------|
| 0.124272  | 0.128934  | 0.121358 | 0.206876  | 0.135927  | 0.085373  | 0.123543  |
| 0.083042  | 0.0920746 | 0.112762 | 0.187791  | 0.12296   | 0.113782  | 0.0604604 |
| 0.122669  | 0.125583  | 0.121503 | 0.200903  | 0.130828  | 0.0831876 | 0.122232  |
| 0.116404  | 0.118735  | 0.114656 | 0.198427  | 0.120192  | 0.117716  | 0.111305  |
| 0.12602   | 0.116696  | 0.130682 | 0.203963  | 0.133887  | 0.125583  | 0.122378  |
| 0.119464  | 0.120338  | 0.124126 | 0.203234  | 0.115967  | 0.120192  | 0.110868  |
| 0.132139  | 0.133887  | 0.137383 | 0.213578  | 0.0569639 | 0.10169   | 0.128788  |
| 0.110431  | 0.0914918 | 0.108683 | 0.204108  | 0.128205  | 0.124272  | 0.0960082 |
| 0.0833333 | 0.097028  | 0.111888 | 0.188666  | 0.121503  | 0.114365  | 0.0604604 |
| 0.138986  | 0.128205  | 0.134324 | 0.209062  | 0.135198  | 0.131265  | 0.129225  |
| 0.175554  | 0.179924  | 0.181381 | 0.100233  | 0.190705  | 0.171329  | 0.175991  |
| 0.125874  | 0.132867  | 0.12704  | 0.2044    | 0.144231  | 0.090472  | 0.130099  |
| 0.115676  | 0.123252  | 0.118298 | 0.192745  | 0.128205  | 0.0761946 | 0.112908  |
| 0.120484  | 0.112908  | 0.127477 | 0.199883  | 0.126603  | 0.12296   | 0.115967  |
| 0.110431  | 0.106352  | 0.120338 | 0.195659  | 0.116259  | 0.113491  | 0.107372  |
| 0.121066  | 0.119027  | 0.12398  | 0.201049  | 0.112617  | 0.119172  | 0.111014  |
| 0.125583  | 0.123252  | 0.126166 | 0.209936  | 0.115385  | 0.125146  | 0.117279  |
| 0.180798  | 0.190122  | 0.188666 | 0.102273  | 0.19595   | 0.18007   | 0.180944  |
| 0.105041  | 0.114073  | 0.107663 | 0.184441  | 0.122815  | 0.0798368 | 0.105769  |
| 0.0952797 | 0.100233  | 0.104312 | 0.172057  | 0.115676  | 0.097465  | 0.099796  |
| 0.115676  | 0.125     | 0.117424 | 0.196824  | 0.128205  | 0.0770688 | 0.11961   |
| 0.181672  | 0.192162  | 0.188374 | 0.0981935 | 0.197115  | 0.175117  | 0.18007   |
| 0.105478  | 0.0810023 | 0.114219 | 0.188374  | 0.118007  | 0.112617  | 0.0960082 |
| 0.131265  | 0.129516  | 0.130973 | 0.208333  | 0.0456002 | 0.0944056 | 0.120338  |
| 0.116696  | 0.123106  | 0.11757  | 0.196096  | 0.128059  | 0.0766317 | 0.11451   |
| 0.111014  | 0.116259  | 0.119464 | 0.198572  | 0.126457  | 0.116404  | 0.10708   |
| 0.177448  | 0.185897  | 0.186189 | 0.0986305 | 0.19493   | 0.172931  | 0.177302  |
| 0.120629  | 0.124417  | 0.122378 | 0.20236   | 0.0515734 | 0.0863928 | 0.115822  |
| 0.114802  | 0.113345  | 0.115676 | 0.189248  | 0.115385  | 0.108829  | 0.106498  |
| 0.108683  | 0.0885781 | 0.113928 | 0.184003  | 0.119172  | 0.11553   | 0.099796  |
| 0.115385  | 0.11451   | 0.121503 | 0.176719  | 0.124417  | 0.10708   | 0.110577  |
| 0.121358  | 0.119901  | 0.124272 | 0.205128  | 0.122232  | 0.121503  | 0.119755  |
| 0.13243   | 0.130099  | 0.135344 | 0.210664  | 0.0569639 | 0.100524  | 0.128497  |
| 0.0805653 | 0.0930944 | 0.108829 | 0.189685  | 0.122523  | 0.11451   | 0.0568182 |
| 0.116404  | 0.123106  | 0.11553  | 0.205711  | 0.123397  | 0.11655   | 0.119172  |
| 0.140152  | 0.142191  | 0.145396 | 0.211101  | 0.157634  | 0.146999  | 0.135344  |
| 0.229895  | 0.233683  | 0.233392 | 0.124854  | 0.241259  | 0.222756  | 0.226836  |
| 0.114219  | 0.097028  | 0.113054 | 0.207314  | 0.130828  | 0.126894  | 0.0980478 |
| 0.12296   | 0.125583  | 0.124709 | 0.20236   | 0.122669  | 0.121941  | 0.120192  |
| 0.109411  | 0.113491  | 0.109411 | 0.189394  | 0.120484  | 0.0670163 | 0.1081    |
| 0.120338  | 0.11859   | 0.122086 | 0.193036  | 0.129953  | 0.124563  | 0.116987  |
| 0.114365  | 0.116404  | 0.119901 | 0.197552  | 0.100379  | 0.0964452 | 0.109557  |
| 0.120192  | 0.118444  | 0.114656 | 0.200466  | 0.121066  | 0.118007  | 0.115093  |
| 0.11655   | 0.124126  | 0.118007 | 0.194493  | 0.128205  | 0.076486  | 0.114365  |

|           |           |           |           |           |           |           |
|-----------|-----------|-----------|-----------|-----------|-----------|-----------|
| 0.128642  | 0.130682  | 0.131847  | 0.206294  | 0.050845  | 0.0955711 | 0.125874  |
| 0.10912   | 0.11757   | 0.119318  | 0.195221  | 0.121941  | 0.113345  | 0.105769  |
| 0.229312  | 0.233392  | 0.237179  | 0.123397  | 0.243007  | 0.222174  | 0.228293  |
| 0.108829  | 0.0805653 | 0.112908  | 0.189103  | 0.114948  | 0.110431  | 0.0949883 |
| 0.108246  | 0.111451  | 0.114948  | 0.197261  | 0.105041  | 0.108683  | 0.106643  |
| 0.0795455 | 0.092366  | 0.108974  | 0.190414  | 0.121212  | 0.112325  | 0.0581294 |
| 0.124563  | 0.129808  | 0.13039   | 0.205711  | 0.142628  | 0.130245  | 0.121795  |
| 0.120484  | 0.0986305 | 0.119027  | 0.211538  | 0.138258  | 0.136364  | 0.109266  |
| 0.114365  | 0.108246  | 0.117279  | 0.187937  | 0.128351  | 0.109557  | 0.106061  |
| 0.113782  | 0.121358  | 0.112034  | 0.189685  | 0.127477  | 0.0708042 | 0.112471  |
| 0.107226  | 0.11014   | 0.112179  | 0.192453  | 0.123252  | 0.112908  | 0.105332  |
| 0.223193  | 0.226981  | 0.22873   | 0.116404  | 0.236888  | 0.215181  | 0.219843  |
| 0.117424  | 0.124709  | 0.116841  | 0.196241  | 0.127622  | 0.0776515 | 0.11961   |
| 0.126311  | 0.125728  | 0.127768  | 0.208625  | 0.0488054 | 0.0938228 | 0.122086  |
| 0.107955  | 0.110286  | 0.117279  | 0.197261  | 0.119318  | 0.113636  | 0.0984848 |
| 0.122378  | 0.119755  | 0.119755  | 0.200903  | 0.125874  | 0.118153  | 0.121066  |
| 0.127331  | 0.125874  | 0.127331  | 0.210519  | 0.114219  | 0.126603  | 0.123106  |
| 0.0818765 | 0.0929487 | 0.11014   | 0.191871  | 0.125291  | 0.116404  | 0.0616259 |
| 0.127914  | 0.125583  | 0.128205  | 0.206148  | 0.0562354 | 0.097465  | 0.120192  |
| 0.13243   | 0.132139  | 0.136218  | 0.211538  | 0.0543415 | 0.0990676 | 0.129371  |
| 0.122232  | 0.120775  | 0.125728  | 0.202506  | 0.0490967 | 0.0888695 | 0.11451   |
| 0.080711  | 0.0891608 | 0.109266  | 0.191288  | 0.123834  | 0.116696  | 0.0619172 |
| 0.133741  | 0.127331  | 0.131702  | 0.207605  | 0.128497  | 0.128059  | 0.124563  |
| 0.136218  | 0.130973  | 0.135052  | 0.213287  | 0.133596  | 0.131119  | 0.131993  |
| 0.129516  | 0.119318  | 0.133304  | 0.209499  | 0.133304  | 0.129371  | 0.125874  |
| 0.130973  | 0.12398   | 0.136218  | 0.207168  | 0.138258  | 0.132867  | 0.127331  |
| 0.134907  | 0.129662  | 0.134033  | 0.21285   | 0.132284  | 0.131847  | 0.130682  |
| 0.0979021 | 0.0437063 | 0.106643  | 0.19595   | 0.118007  | 0.115822  | 0.0840618 |
| 0.13447   | 0.135052  | 0.133887  | 0.217075  | 0.105041  | 0.123252  | 0.132576  |
| 0.12704   | 0.120338  | 0.133741  | 0.211101  | 0.125874  | 0.128642  | 0.120484  |
| 0.198427  | 0.205711  | 0.203089  | 0.0992133 | 0.212704  | 0.191871  | 0.196241  |
| 0.0912005 | 0.120629  | 0.0582751 | 0.197698  | 0.127914  | 0.123397  | 0.112034  |
| 0.11451   | 0.115093  | 0.117716  | 0.203817  | 0.105478  | 0.115822  | 0.110577  |
| 0.0861014 | 0.0983392 | 0.11553   | 0.187937  | 0.128642  | 0.121503  | 0.0638112 |
| 0.216492  | 0.217075  | 0.222611  | 0.114948  | 0.230186  | 0.207896  | 0.214015  |
| 0.206294  | 0.208916  | 0.210373  | 0.11553   | 0.2162    | 0.196824  | 0.203817  |
| 0.130099  | 0.131556  | 0.133596  | 0.209207  | 0.0520105 | 0.099359  | 0.126748  |
| 0.244464  | 0.245338  | 0.249709  | 0.130099  | 0.255828  | 0.23412   | 0.241696  |
| 0.101107  | 0.0474942 | 0.110431  | 0.196824  | 0.119172  | 0.116404  | 0.0855186 |
| 0.132576  | 0.109266  | 0.142774  | 0.210519  | 0.140734  | 0.133887  | 0.122523  |
| 0.110431  | 0.0795455 | 0.115967  | 0.195659  | 0.117133  | 0.119027  | 0.100962  |
| 0.13039   | 0.127477  | 0.13039   | 0.209499  | 0.12602   | 0.126166  | 0.12704   |
| 0.179779  | 0.18852   | 0.18648   | 0.0913462 | 0.194056  | 0.173514  | 0.177593  |
| 0.121649  | 0.115239  | 0.12398   | 0.199883  | 0.12602   | 0.124417  | 0.113928  |

|           |           |           |          |           |           |           |
|-----------|-----------|-----------|----------|-----------|-----------|-----------|
| 0.183712  | 0.191871  | 0.194202  | 0.10169  | 0.199738  | 0.181527  | 0.184732  |
| 0.109994  | 0.108246  | 0.114365  | 0.198718 | 0.122232  | 0.119755  | 0.099359  |
| 0.109411  | 0.117279  | 0.117279  | 0.183566 | 0.0770688 | 0.0652681 | 0.107226  |
| 0.12602   | 0.0916375 | 0.127185  | 0.204545 | 0.127185  | 0.122086  | 0.114802  |
| 0.109411  | 0.108246  | 0.117861  | 0.179779 | 0.113491  | 0.101981  | 0.103438  |
| 0.0780886 | 0.0891608 | 0.106352  | 0.187791 | 0.118007  | 0.11116   | 0.0563811 |
| 0.07838   | 0.111305  | 0.0472028 | 0.192162 | 0.120338  | 0.110868  | 0.097465  |
| 0.10373   | 0.080711  | 0.113054  | 0.188666 | 0.112471  | 0.114365  | 0.0948427 |
| 0.106789  | 0.116696  | 0.109411  | 0.192016 | 0.120484  | 0.0719697 | 0.104895  |
| 0.119172  | 0.120338  | 0.118298  | 0.204108 | 0.0917832 | 0.109703  | 0.114656  |
| 0.10373   | 0.087704  | 0.101981  | 0.197115 | 0.119464  | 0.113199  | 0.090472  |
| 0.110577  | 0.0805653 | 0.116113  | 0.191434 | 0.116696  | 0.119464  | 0.0990676 |
| 0.106935  | 0.111305  | 0.124417  | 0.195659 | 0.121503  | 0.116696  | 0.104458  |
| 0.123252  | 0.127331  | 0.121795  | 0.201777 | 0.134907  | 0.083479  | 0.120775  |
| 0.113491  | 0.10708   | 0.121941  | 0.193473 | 0.119318  | 0.117133  | 0.11014   |
| 0.116841  | 0.11014   | 0.11655   | 0.195076 | 0.116841  | 0.111742  | 0.106206  |
| 0.0744464 | 0.0901807 | 0.108537  | 0.18648  | 0.119318  | 0.109848  | 0.0574009 |
| 0.119318  | 0.122815  | 0.125437  | 0.197261 | 0.0616259 | 0.0836247 | 0.116259  |
| 0.122523  | 0.119318  | 0.125437  | 0.203089 | 0.122523  | 0.118881  | 0.119464  |
| 0.121795  | 0.122086  | 0.123252  | 0.207605 | 0.112179  | 0.122523  | 0.111742  |
| 0.115676  | 0.112762  | 0.123834  | 0.200029 | 0.121795  | 0.119901  | 0.114656  |
| 0.112617  | 0.119901  | 0.114365  | 0.193765 | 0.125437  | 0.0751748 | 0.112762  |
| 0.120921  | 0.130245  | 0.123543  | 0.200612 | 0.132576  | 0.0823135 | 0.121649  |
| 0.128788  | 0.137238  | 0.128497  | 0.208188 | 0.143939  | 0.0910548 | 0.13039   |
| 0.10912   | 0.108537  | 0.112617  | 0.194639 | 0.0584207 | 0.0824592 | 0.100816  |
| 0.078817  | 0.0942599 | 0.112908  | 0.189685 | 0.123106  | 0.112471  | 0.0600233 |
| 0.106352  | 0.108683  | 0.111305  | 0.19391  | 0.111597  | 0.11116   | 0.106206  |
| 0.135781  | 0.134615  | 0.135198  | 0.214598 | 0.131993  | 0.131847  | 0.132139  |
| 0.113491  | 0.083479  | 0.117861  | 0.200175 | 0.120775  | 0.119755  | 0.104021  |
| 0.140297  | 0.136801  | 0.142337  | 0.221445 | 0.13039   | 0.136655  | 0.131119  |
| 0.0980478 | 0.11116   | 0.127185  | 0.205128 | 0.142628  | 0.134907  | 0.0769231 |
| 0.120921  | 0.124417  | 0.128205  | 0.200321 | 0.134033  | 0.126311  | 0.118444  |
| 0.105041  | 0.0913462 | 0.109411  | 0.193765 | 0.11757   | 0.111305  | 0.0958625 |
| 0.108974  | 0.115385  | 0.110431  | 0.193619 | 0.120047  | 0.110868  | 0.107372  |
| 0.125     | 0.115385  | 0.129079  | 0.2044   | 0.132576  | 0.128351  | 0.122523  |
| 0.198281  | 0.204108  | 0.204983  | 0.117133 | 0.20877   | 0.191142  | 0.196678  |
| 0.116987  | 0.111451  | 0.117279  | 0.193182 | 0.117861  | 0.113345  | 0.108392  |
| 0.115385  | 0.0871212 | 0.120047  | 0.201486 | 0.124126  | 0.118444  | 0.105332  |
| 0.12602   | 0.120484  | 0.122523  | 0.205128 | 0.124563  | 0.119464  | 0.117716  |
| 0.117424  | 0.109848  | 0.126166  | 0.200612 | 0.122669  | 0.117279  | 0.110868  |
| 0.114073  | 0.116404  | 0.11757   | 0.200758 | 0.124854  | 0.125     | 0.105769  |
| 0.111742  | 0.122232  | 0.103875  | 0.202214 | 0.123106  | 0.115967  | 0.117716  |
| 0.11655   | 0.126457  | 0.106643  | 0.203234 | 0.125583  | 0.117279  | 0.120192  |
| 0.119901  | 0.121649  | 0.122232  | 0.201049 | 0.131847  | 0.12296   | 0.112471  |

|           |           |           |          |           |           |           |
|-----------|-----------|-----------|----------|-----------|-----------|-----------|
| 0.11553   | 0.116696  | 0.118153  | 0.203089 | 0.0872669 | 0.106935  | 0.1081    |
| 0.131847  | 0.127477  | 0.131847  | 0.211247 | 0.128059  | 0.125874  | 0.124709  |
| 0.115239  | 0.0898893 | 0.120775  | 0.200758 | 0.120775  | 0.11859   | 0.105478  |
| 0.104895  | 0.0906177 | 0.105478  | 0.200029 | 0.127914  | 0.119901  | 0.0948427 |
| 0.167395  | 0.175262  | 0.181672  | 0.170163 | 0.178467  | 0.165793  | 0.171329  |
| 0.107955  | 0.11757   | 0.111451  | 0.191725 | 0.121941  | 0.0722611 | 0.106935  |
| 0.13345   | 0.129079  | 0.131119  | 0.195659 | 0.129953  | 0.127768  | 0.127477  |
| 0.118444  | 0.0922203 | 0.123689  | 0.210373 | 0.113199  | 0.125874  | 0.109266  |
| 0.113345  | 0.122669  | 0.123252  | 0.198572 | 0.120338  | 0.101544  | 0.114656  |
| 0.0941142 | 0.0891608 | 0.0967366 | 0.194784 | 0.113636  | 0.106789  | 0.0936772 |
| 0.0961538 | 0.0847902 | 0.0952797 | 0.19595  | 0.113345  | 0.109411  | 0.0849359 |
| 0.101399  | 0.0897436 | 0.0984848 | 0.201486 | 0.119755  | 0.115239  | 0.0989219 |
| 0.119755  | 0.11859   | 0.125291  | 0.208188 | 0.106061  | 0.117861  | 0.119901  |
| 0.0999417 | 0.102564  | 0.106352  | 0.1875   | 0.122669  | 0.0887238 | 0.092803  |
| 0.130973  | 0.122523  | 0.133304  | 0.212413 | 0.121941  | 0.126166  | 0.120047  |
| 0.104604  | 0.107517  | 0.112179  | 0.192745 | 0.106352  | 0.101544  | 0.101544  |
| 0.118735  | 0.099796  | 0.117279  | 0.196387 | 0.113491  | 0.117424  | 0.1081    |
| 0.129953  | 0.123252  | 0.129662  | 0.214598 | 0.106352  | 0.119318  | 0.123689  |
| 0.11655   | 0.0903263 | 0.114219  | 0.207314 | 0.113054  | 0.117279  | 0.107372  |
| 0.125     | 0.112179  | 0.125291  | 0.204108 | 0.121503  | 0.11961   | 0.11553   |
| 0.109266  | 0.0865385 | 0.109557  | 0.200612 | 0.106935  | 0.114073  | 0.100962  |
| 0.113928  | 0.087704  | 0.113054  | 0.2044   | 0.113636  | 0.116404  | 0.104749  |
| 0.105186  | 0.0812937 | 0.107517  | 0.19595  | 0.113928  | 0.114365  | 0.0962995 |
| 0.119901  | 0.0939685 | 0.122815  | 0.211247 | 0.117279  | 0.122378  | 0.110723  |
| 0.105624  | 0.0861014 | 0.115822  | 0.200175 | 0.112325  | 0.111305  | 0.0984848 |
| 0.144668  | 0.145833  | 0.144668  | 0.215035 | 0.114948  | 0.122086  | 0.13549   |
| 0.128059  | 0.131556  | 0.135344  | 0.20134  | 0.105332  | 0.1081    | 0.122378  |
| 0.110577  | 0.0948427 | 0.109994  | 0.200175 | 0.106789  | 0.109557  | 0.0999417 |
| 0.140152  | 0.139569  | 0.135781  | 0.218094 | 0.108974  | 0.123689  | 0.135927  |
| 0.111305  | 0.118007  | 0.124126  | 0.200321 | 0.128497  | 0.124854  | 0.115822  |
| 0.124709  | 0.11655   | 0.131993  | 0.20877  | 0.129079  | 0.130099  | 0.123689  |
| 0.113636  | 0.0862471 | 0.117133  | 0.201195 | 0.120047  | 0.118444  | 0.104167  |
| 0.145251  | 0.137966  | 0.149038  | 0.215035 | 0.143794  | 0.136655  | 0.137821  |
| 0.131556  | 0.128642  | 0.133013  | 0.200758 | 0.126311  | 0.132867  | 0.123252  |
| 0.133013  | 0.135344  | 0.138258  | 0.210664 | 0.125146  | 0.128788  | 0.127914  |
| 0.122523  | 0.101253  | 0.126603  | 0.210664 | 0.120484  | 0.121212  | 0.115676  |
| 0.107517  | 0.0865385 | 0.108683  | 0.201486 | 0.10373   | 0.112908  | 0.0986305 |
| 0.107372  | 0.0869755 | 0.118153  | 0.197552 | 0.106206  | 0.109266  | 0.101981  |
| 0.122378  | 0.118007  | 0.121503  | 0.207605 | 0.10169   | 0.113491  | 0.112325  |
| 0.120921  | 0.0914918 | 0.120047  | 0.211101 | 0.120047  | 0.122815  | 0.111742  |
| 0.128351  | 0.0983392 | 0.127185  | 0.217075 | 0.128059  | 0.131993  | 0.118881  |
| 0.116404  | 0.112034  | 0.122815  | 0.197261 | 0.109411  | 0.106061  | 0.107809  |
| 0.110868  | 0.0971737 | 0.116696  | 0.19697  | 0.107663  | 0.114219  | 0.104312  |
| 0.112762  | 0.0842075 | 0.117133  | 0.196533 | 0.104604  | 0.110286  | 0.100962  |

|          |           |          |          |          |           |           |
|----------|-----------|----------|----------|----------|-----------|-----------|
| 0.115239 | 0.0910548 | 0.120484 | 0.201632 | 0.114365 | 0.119755  | 0.105769  |
| 0.107955 | 0.0893065 | 0.114656 | 0.19493  | 0.102127 | 0.108392  | 0.104312  |
| 0.118298 | 0.0903263 | 0.125583 | 0.205274 | 0.111305 | 0.117279  | 0.112034  |
| 0.106061 | 0.0885781 | 0.109848 | 0.196241 | 0.12296  | 0.114073  | 0.10067   |
| 0.112908 | 0.105624  | 0.11757  | 0.187646 | 0.126894 | 0.108683  | 0.107809  |
| 0.102418 | 0.0878497 | 0.108537 | 0.198718 | 0.123106 | 0.117133  | 0.0941142 |
| 0.10067  | 0.0479312 | 0.109411 | 0.194639 | 0.118444 | 0.113345  | 0.0844988 |
| 0.109411 | 0.08581   | 0.114656 | 0.198718 | 0.107663 | 0.11451   | 0.0987762 |
| 0.113636 | 0.106643  | 0.117133 | 0.18546  | 0.122669 | 0.108537  | 0.103001  |
| 0.105624 | 0.095134  | 0.104458 | 0.200466 | 0.121941 | 0.115967  | 0.100233  |
| 0.121358 | 0.114365  | 0.114656 | 0.195221 | 0.128059 | 0.108392  | 0.11859   |
| 0.10271  | 0.101253  | 0.106498 | 0.183566 | 0.115239 | 0.0990676 | 0.099359  |
| 0.124417 | 0.101399  | 0.118298 | 0.210519 | 0.129371 | 0.124272  | 0.116987  |

| TDr_2369  | TDr_2372 | TDr_2377 | TDr_2385 | TDr_2390  | TDr_2400  | TDr_2401 |
|-----------|----------|----------|----------|-----------|-----------|----------|
| 0.11116   | 0.163462 | 0.228438 | 0.122086 | 0.114802  | 0.0868298 | 0.116113 |
| 0.113345  | 0.171474 | 0.231498 | 0.107955 | 0.112617  | 0.112617  | 0.117716 |
| 0.106352  | 0.170309 | 0.23208  | 0.106206 | 0.109411  | 0.110577  | 0.112762 |
| 0.113928  | 0.176428 | 0.239948 | 0.118444 | 0.11757   | 0.120484  | 0.117133 |
| 0.134615  | 0.200903 | 0.249272 | 0.124563 | 0.13447   | 0.139714  | 0.128497 |
| 0.125291  | 0.182547 | 0.243444 | 0.120192 | 0.127185  | 0.118735  | 0.130536 |
| 0.124272  | 0.191725 | 0.245921 | 0.130828 | 0.125874  | 0.108974  | 0.11961  |
| 0.114365  | 0.170163 | 0.2331   | 0.11451  | 0.112762  | 0.116259  | 0.109411 |
| 0.0990676 | 0.171474 | 0.239365 | 0.113491 | 0.0989219 | 0.112034  | 0.105186 |
| 0.11116   | 0.180361 | 0.242424 | 0.117133 | 0.111597  | 0.11014   | 0.116696 |
| 0.113054  | 0.161568 | 0.231498 | 0.124272 | 0.119901  | 0.111451  | 0.116259 |
| 0.106789  | 0.172494 | 0.240093 | 0.113345 | 0.105478  | 0.115967  | 0.101836 |
| 0.10271   | 0.179779 | 0.243881 | 0.113928 | 0.106643  | 0.117716  | 0.107955 |
| 0.13345   | 0.129808 | 0.199446 | 0.138258 | 0.130099  | 0.136509  | 0.141026 |
| 0.13039   | 0.18648  | 0.24359  | 0.124126 | 0.119755  | 0.130245  | 0.122815 |
| 0.117716  | 0.180216 | 0.243444 | 0.129225 | 0.117861  | 0.122815  | 0.117424 |
| 0.109703  | 0.177739 | 0.24359  | 0.118298 | 0.113928  | 0.120338  | 0.100962 |
| 0.147436  | 0.201195 | 0.255682 | 0.137966 | 0.144959  | 0.14729   | 0.150058 |
| 0.106061  | 0.169143 | 0.231498 | 0.107955 | 0.110286  | 0.10708   | 0.113636 |
| 0.21183   | 0.133887 | 0.144668 | 0.202069 | 0.199446  | 0.201777  | 0.20542  |
| 0.11961   | 0.183566 | 0.247086 | 0.119172 | 0.124126  | 0.100524  | 0.12398  |
| 0.121503  | 0.184003 | 0.248689 | 0.112617 | 0.121358  | 0.0965909 | 0.118881 |
| 0.11116   | 0.16521  | 0.238636 | 0.113345 | 0.111888  | 0.115967  | 0.106498 |
| 0.119172  | 0.191871 | 0.249563 | 0.127185 | 0.130099  | 0.125146  | 0.117716 |
| 0.110577  | 0.166667 | 0.233974 | 0.106061 | 0.107517  | 0.105769  | 0.103875 |
| 0.129516  | 0.191434 | 0.246795 | 0.125291 | 0.129079  | 0.106061  | 0.13039  |
| 0.121066  | 0.193473 | 0.245921 | 0.12704  | 0.134324  | 0.121503  | 0.113199 |
| 0.114656  | 0.189394 | 0.253788 | 0.121795 | 0.119172  | 0.126166  | 0.119901 |
| 0.129516  | 0.194347 | 0.246795 | 0.134324 | 0.134033  | 0.124126  | 0.12602  |
| 0.120192  | 0.19289  | 0.253497 | 0.132576 | 0.126748  | 0.119464  | 0.113491 |
| 0.128788  | 0.184003 | 0.240239 | 0.129808 | 0.127477  | 0.0965909 | 0.124417 |
| 0.121066  | 0.192599 | 0.247086 | 0.122669 | 0.124417  | 0.11859   | 0.114365 |
| 0.112908  | 0.166084 | 0.2331   | 0.113345 | 0.106643  | 0.102564  | 0.103875 |
| 0.11553   | 0.185315 | 0.241259 | 0.120921 | 0.120338  | 0.117424  | 0.106789 |
| 0.117716  | 0.189248 | 0.249272 | 0.130973 | 0.120775  | 0.123689  | 0.113636 |
| 0.11553   | 0.195513 | 0.252622 | 0.136946 | 0.125291  | 0.125874  | 0.121358 |
| 0.134033  | 0.201777 | 0.260052 | 0.138258 | 0.138549  | 0.116696  | 0.132576 |
| 0.118735  | 0.182984 | 0.249709 | 0.127914 | 0.121212  | 0.11451   | 0.116696 |
| 0.10708   | 0.176282 | 0.242716 | 0.115967 | 0.112471  | 0.108974  | 0.10912  |
| 0.121358  | 0.187063 | 0.251457 | 0.126457 | 0.119464  | 0.128497  | 0.122232 |
| 0.108246  | 0.176282 | 0.24359  | 0.11451  | 0.111597  | 0.115967  | 0.112034 |
| 0.142045  | 0.203089 | 0.256993 | 0.149184 | 0.140734  | 0.148893  | 0.141463 |

|          |          |          |          |          |           |           |
|----------|----------|----------|----------|----------|-----------|-----------|
| 0.143211 | 0.205128 | 0.255828 | 0.15035  | 0.143939 | 0.149476  | 0.145251  |
| 0.115093 | 0.179924 | 0.241696 | 0.119318 | 0.11757  | 0.119318  | 0.11451   |
| 0.102855 | 0.181964 | 0.241696 | 0.113199 | 0.109703 | 0.109703  | 0.0990676 |
| 0.116987 | 0.194056 | 0.251748 | 0.130536 | 0.119755 | 0.121212  | 0.111451  |
| 0.11961  | 0.183275 | 0.246795 | 0.11859  | 0.117716 | 0.120047  | 0.116404  |
| 0.135781 | 0.196824 | 0.256265 | 0.14729  | 0.136801 | 0.137966  | 0.137238  |
| 0.106643 | 0.184003 | 0.248397 | 0.120484 | 0.120192 | 0.122815  | 0.115385  |
| 0.115239 | 0.178322 | 0.241841 | 0.123834 | 0.11451  | 0.121212  | 0.114948  |
| 0.150058 | 0.205274 | 0.255099 | 0.147873 | 0.145251 | 0.0677448 | 0.139277  |
| 0.128788 | 0.187791 | 0.245192 | 0.13243  | 0.131847 | 0.133596  | 0.128788  |
| 0.112908 | 0.178322 | 0.243881 | 0.120921 | 0.116259 | 0.120921  | 0.110868  |
| 0.128351 | 0.192308 | 0.25     | 0.127914 | 0.122669 | 0.136072  | 0.13039   |
| 0.121066 | 0.166958 | 0.231061 | 0.117133 | 0.116841 | 0.121795  | 0.120484  |
| 0.135344 | 0.206585 | 0.260198 | 0.145105 | 0.140152 | 0.143939  | 0.13243   |
| 0.125874 | 0.193619 | 0.253059 | 0.133887 | 0.128934 | 0.13039   | 0.123543  |
| 0.116259 | 0.182255 | 0.246358 | 0.117861 | 0.116987 | 0.11961   | 0.114802  |
| 0.116841 | 0.181672 | 0.24257  | 0.123689 | 0.121066 | 0.124272  | 0.11655   |
| 0.125728 | 0.193473 | 0.250291 | 0.128205 | 0.122086 | 0.120629  | 0.117279  |
| 0.131556 | 0.205128 | 0.26049  | 0.142774 | 0.138695 | 0.1419    | 0.142045  |
| 0.136509 | 0.202506 | 0.262238 | 0.145105 | 0.137529 | 0.147145  | 0.141463  |
| 0.164918 | 0.160111 | 0.196824 | 0.167686 | 0.163899 | 0.161859  | 0.162005  |
| 0.112179 | 0.178467 | 0.246358 | 0.120775 | 0.115239 | 0.117861  | 0.114802  |
| 0.106352 | 0.179924 | 0.246941 | 0.115822 | 0.118735 | 0.11961   | 0.11014   |
| 0.108392 | 0.179633 | 0.246358 | 0.121066 | 0.116113 | 0.116696  | 0.107226  |
| 0.142337 | 0.196096 | 0.248543 | 0.147727 | 0.143939 | 0.126166  | 0.13447   |
| 0.110577 | 0.180653 | 0.244464 | 0.120047 | 0.112762 | 0.117716  | 0.109703  |
| 0.131702 | 0.189248 | 0.247523 | 0.134178 | 0.133596 | 0.138549  | 0.134615  |
| 0.122669 | 0.19391  | 0.251603 | 0.129225 | 0.12602  | 0.116113  | 0.113345  |
| 0.114656 | 0.178904 | 0.246212 | 0.122378 | 0.117133 | 0.120047  | 0.114656  |
| 0.149913 | 0.192599 | 0.245047 | 0.154138 | 0.147145 | 0.125874  | 0.141463  |
| 0.115822 | 0.187937 | 0.254662 | 0.127914 | 0.121212 | 0.128205  | 0.118444  |
| 0.133741 | 0.202652 | 0.258596 | 0.14292  | 0.140006 | 0.142337  | 0.134615  |
| 0.127185 | 0.191725 | 0.247669 | 0.132576 | 0.131702 | 0.135781  | 0.126311  |
| 0.111305 | 0.173805 | 0.23616  | 0.113491 | 0.113782 | 0.114948  | 0.113054  |
| 0.111888 | 0.176719 | 0.242861 | 0.119901 | 0.114656 | 0.121358  | 0.109848  |
| 0.111597 | 0.184295 | 0.248106 | 0.119318 | 0.11961  | 0.123397  | 0.117716  |
| 0.136072 | 0.198572 | 0.258013 | 0.137092 | 0.133013 | 0.136801  | 0.131993  |
| 0.106789 | 0.18007  | 0.245629 | 0.117424 | 0.112471 | 0.11655   | 0.109411  |
| 0.134324 | 0.200029 | 0.259761 | 0.145251 | 0.138258 | 0.143502  | 0.142774  |
| 0.120629 | 0.180798 | 0.247232 | 0.130973 | 0.122232 | 0.121066  | 0.121795  |
| 0.112762 | 0.190122 | 0.245775 | 0.124854 | 0.120775 | 0.123397  | 0.112471  |
| 0.112471 | 0.182838 | 0.246066 | 0.124563 | 0.114073 | 0.12398   | 0.116259  |
| 0.117133 | 0.186626 | 0.252185 | 0.125728 | 0.122232 | 0.129808  | 0.121503  |
| 0.113054 | 0.183421 | 0.246649 | 0.117861 | 0.117279 | 0.119027  | 0.115676  |

|          |          |          |          |          |           |           |
|----------|----------|----------|----------|----------|-----------|-----------|
| 0.113054 | 0.176719 | 0.243735 | 0.11961  | 0.112617 | 0.121649  | 0.109266  |
| 0.133013 | 0.199301 | 0.257284 | 0.140734 | 0.130536 | 0.143357  | 0.134178  |
| 0.109703 | 0.180653 | 0.245921 | 0.121795 | 0.112762 | 0.11014   | 0.0989219 |
| 0.101107 | 0.179924 | 0.249272 | 0.118735 | 0.105624 | 0.11757   | 0.109266  |
| 0.131119 | 0.197407 | 0.252185 | 0.13039  | 0.13039  | 0.122232  | 0.122378  |
| 0.129079 | 0.196241 | 0.248689 | 0.135635 | 0.131265 | 0.109411  | 0.118007  |
| 0.129079 | 0.200029 | 0.253059 | 0.123397 | 0.134178 | 0.132721  | 0.130828  |
| 0.136509 | 0.205128 | 0.261655 | 0.13345  | 0.13549  | 0.13986   | 0.136218  |
| 0.118881 | 0.177885 | 0.241113 | 0.115822 | 0.120775 | 0.106789  | 0.113345  |
| 0.187937 | 0.152535 | 0.174097 | 0.189248 | 0.184003 | 0.173223  | 0.179779  |
| 0.114073 | 0.184149 | 0.246212 | 0.115093 | 0.117133 | 0.108392  | 0.108537  |
| 0.143939 | 0.201777 | 0.254808 | 0.135927 | 0.135344 | 0.141463  | 0.132576  |
| 0.13345  | 0.196241 | 0.25102  | 0.12602  | 0.130682 | 0.133013  | 0.12296   |
| 0.138549 | 0.20542  | 0.258159 | 0.139277 | 0.140152 | 0.116259  | 0.132721  |
| 0.11014  | 0.182255 | 0.245484 | 0.112908 | 0.114365 | 0.118153  | 0.1081    |
| 0.129662 | 0.200612 | 0.25743  | 0.130099 | 0.127477 | 0.136509  | 0.127331  |
| 0.111597 | 0.185169 | 0.248106 | 0.114365 | 0.113491 | 0.115822  | 0.114219  |
| 0.125437 | 0.188811 | 0.245047 | 0.126457 | 0.125291 | 0.128497  | 0.120192  |
| 0.116987 | 0.17803  | 0.24796  | 0.125291 | 0.118007 | 0.10373   | 0.11757   |
| 0.132721 | 0.206294 | 0.259907 | 0.133159 | 0.140152 | 0.143065  | 0.131265  |
| 0.108829 | 0.182984 | 0.243007 | 0.121212 | 0.113345 | 0.113345  | 0.103001  |
| 0.136364 | 0.194202 | 0.252477 | 0.135344 | 0.136509 | 0.11961   | 0.135781  |
| 0.119027 | 0.18648  | 0.246212 | 0.124709 | 0.119172 | 0.102855  | 0.112617  |
| 0.12704  | 0.195659 | 0.254225 | 0.135635 | 0.130973 | 0.139714  | 0.129662  |
| 0.132139 | 0.198427 | 0.248252 | 0.138112 | 0.131702 | 0.116259  | 0.122815  |
| 0.113491 | 0.183275 | 0.245921 | 0.112471 | 0.115093 | 0.0976107 | 0.110868  |
| 0.148747 | 0.189977 | 0.245338 | 0.152389 | 0.146853 | 0.13345   | 0.142337  |
| 0.119172 | 0.187791 | 0.247523 | 0.118153 | 0.11961  | 0.0977564 | 0.112762  |
| 0.111305 | 0.182255 | 0.248397 | 0.114948 | 0.112034 | 0.118153  | 0.108392  |
| 0.11961  | 0.185315 | 0.246212 | 0.120338 | 0.119464 | 0.118298  | 0.116404  |
| 0.143211 | 0.201632 | 0.255536 | 0.144231 | 0.139569 | 0.122378  | 0.139132  |
| 0.119901 | 0.161422 | 0.229604 | 0.125874 | 0.124417 | 0.119172  | 0.120484  |
| 0.112034 | 0.18007  | 0.247669 | 0.111014 | 0.112762 | 0.116259  | 0.10708   |
| 0.113782 | 0.180653 | 0.242424 | 0.108392 | 0.113928 | 0.117133  | 0.111451  |
| 0.120338 | 0.183421 | 0.247815 | 0.120775 | 0.120484 | 0.0995047 | 0.110431  |
| 0.128642 | 0.197261 | 0.256119 | 0.134324 | 0.132576 | 0.125291  | 0.122815  |
| 0.119755 | 0.1875   | 0.245192 | 0.123689 | 0.123106 | 0.10067   | 0.111888  |
| 0.106498 | 0.176282 | 0.240093 | 0.113928 | 0.104604 | 0.107517  | 0.0995047 |
| 0.106498 | 0.177739 | 0.24359  | 0.115385 | 0.108974 | 0.107809  | 0.101253  |
| 0.110723 | 0.181964 | 0.245192 | 0.118153 | 0.10912  | 0.116987  | 0.106643  |
| 0.117716 | 0.181381 | 0.24461  | 0.120484 | 0.124563 | 0.12602   | 0.109266  |
| 0.130099 | 0.196387 | 0.25204  | 0.134033 | 0.131702 | 0.130245  | 0.124854  |
| 0.108392 | 0.183712 | 0.249272 | 0.114656 | 0.110577 | 0.113782  | 0.100524  |
| 0.103001 | 0.175991 | 0.242133 | 0.110723 | 0.109848 | 0.109848  | 0.103584  |



|          |          |          |          |          |           |          |
|----------|----------|----------|----------|----------|-----------|----------|
| 0.12398  | 0.193765 | 0.249709 | 0.134615 | 0.127622 | 0.123252  | 0.119318 |
| 0.108974 | 0.179924 | 0.245484 | 0.121358 | 0.114365 | 0.108537  | 0.101399 |
| 0.120047 | 0.181964 | 0.24257  | 0.122523 | 0.127477 | 0.109703  | 0.11655  |
| 0.136072 | 0.194202 | 0.24898  | 0.134761 | 0.133887 | 0.0569639 | 0.125874 |
| 0.117133 | 0.185169 | 0.247523 | 0.121941 | 0.121066 | 0.119901  | 0.112762 |
| 0.110577 | 0.185023 | 0.250874 | 0.118881 | 0.110431 | 0.114219  | 0.106498 |
| 0.113491 | 0.181818 | 0.244755 | 0.120629 | 0.114802 | 0.117424  | 0.107955 |
| 0.105915 | 0.168415 | 0.239219 | 0.111597 | 0.106352 | 0.110723  | 0.102418 |
| 0.126311 | 0.19697  | 0.25204  | 0.129953 | 0.127622 | 0.126457  | 0.124272 |
| 0.111451 | 0.176282 | 0.243881 | 0.113345 | 0.105186 | 0.108392  | 0.101253 |
| 0.135198 | 0.203526 | 0.255682 | 0.144085 | 0.13884  | 0.133013  | 0.132867 |
| 0.133596 | 0.19493  | 0.247086 | 0.140734 | 0.134033 | 0.137529  | 0.126603 |
| 0.126311 | 0.190268 | 0.251457 | 0.13141  | 0.12704  | 0.12704   | 0.118735 |
| 0.117424 | 0.182547 | 0.247815 | 0.120484 | 0.120484 | 0.122232  | 0.111305 |
| 0.115967 | 0.18546  | 0.244901 | 0.119318 | 0.118735 | 0.100087  | 0.112762 |
| 0.106789 | 0.182984 | 0.247086 | 0.117133 | 0.11451  | 0.111597  | 0.103293 |
| 0.106935 | 0.183421 | 0.248106 | 0.120484 | 0.113491 | 0.112034  | 0.104312 |
| 0.105769 | 0.180798 | 0.246066 | 0.110577 | 0.108829 | 0.114073  | 0.105186 |
| 0.113054 | 0.16419  | 0.23412  | 0.113199 | 0.112908 | 0.119318  | 0.111597 |
| 0.125583 | 0.195659 | 0.256847 | 0.13447  | 0.133304 | 0.137966  | 0.125    |
| 0.112908 | 0.186772 | 0.25204  | 0.11451  | 0.11451  | 0.119755  | 0.113491 |
| 0.129662 | 0.191579 | 0.250146 | 0.136218 | 0.13243  | 0.130682  | 0.130536 |
| 0.141171 | 0.204254 | 0.254953 | 0.139569 | 0.140152 | 0.129371  | 0.133304 |
| 0.194202 | 0.120338 | 0.13345  | 0.191725 | 0.19289  | 0.19289   | 0.192745 |
| 0.240385 | 0.155449 | 0.104458 | 0.236742 | 0.235286 | 0.237325  | 0.236888 |
| 0.110286 | 0.165501 | 0.232226 | 0.11655  | 0.111014 | 0.116259  | 0.111742 |
| 0.107517 | 0.178176 | 0.239073 | 0.117279 | 0.116696 | 0.119318  | 0.109266 |
| 0.104021 | 0.169726 | 0.239073 | 0.114365 | 0.110577 | 0.113491  | 0.10169  |
| 0.106352 | 0.177593 | 0.242861 | 0.112617 | 0.116987 | 0.114073  | 0.111305 |
| 0.134907 | 0.186917 | 0.243153 | 0.12602  | 0.123397 | 0.130099  | 0.12296  |
| 0.111305 | 0.179924 | 0.247523 | 0.116113 | 0.115822 | 0.120192  | 0.115385 |
| 0.141171 | 0.211538 | 0.259907 | 0.151807 | 0.150641 | 0.147727  | 0.139714 |
| 0.113928 | 0.181672 | 0.245192 | 0.115239 | 0.115822 | 0.122232  | 0.109557 |
| 0.122669 | 0.201195 | 0.252477 | 0.128059 | 0.133304 | 0.13243   | 0.129953 |
| 0.130099 | 0.185606 | 0.243881 | 0.132284 | 0.132576 | 0.137529  | 0.129225 |
| 0.132139 | 0.195513 | 0.253497 | 0.134907 | 0.134324 | 0.134907  | 0.129225 |
| 0.138549 | 0.197261 | 0.253497 | 0.142191 | 0.13549  | 0.13986   | 0.133013 |
| 0.116987 | 0.183566 | 0.251457 | 0.119464 | 0.11655  | 0.121795  | 0.112908 |
| 0.11116  | 0.179779 | 0.245629 | 0.11451  | 0.114802 | 0.115676  | 0.107372 |
| 0.114802 | 0.183421 | 0.246649 | 0.120192 | 0.121941 | 0.123106  | 0.11655  |
| 0.106643 | 0.175845 | 0.238782 | 0.11116  | 0.115239 | 0.114948  | 0.101981 |
| 0.109848 | 0.177885 | 0.243444 | 0.112325 | 0.114948 | 0.117279  | 0.107809 |
| 0.114073 | 0.184149 | 0.246795 | 0.118881 | 0.121212 | 0.121212  | 0.109703 |
| 0.123834 | 0.189831 | 0.249272 | 0.126311 | 0.129808 | 0.135927  | 0.12704  |

|          |          |          |          |          |          |          |
|----------|----------|----------|----------|----------|----------|----------|
| 0.131993 | 0.199738 | 0.258596 | 0.133596 | 0.137092 | 0.141463 | 0.132867 |
| 0.115239 | 0.185023 | 0.246795 | 0.119464 | 0.125    | 0.123834 | 0.110286 |
| 0.111597 | 0.174388 | 0.24257  | 0.117279 | 0.116113 | 0.121649 | 0.112471 |
| 0.126166 | 0.20236  | 0.254808 | 0.133887 | 0.138549 | 0.135635 | 0.125291 |
| 0.11014  | 0.178467 | 0.243444 | 0.116987 | 0.114948 | 0.119318 | 0.104021 |
| 0.141754 | 0.199883 | 0.252914 | 0.138986 | 0.144522 | 0.149767 | 0.13884  |
| 0.135344 | 0.18648  | 0.24155  | 0.140734 | 0.136364 | 0.137529 | 0.133596 |
| 0.131119 | 0.18954  | 0.243735 | 0.127477 | 0.135635 | 0.139423 | 0.131702 |
| 0.105769 | 0.179341 | 0.24461  | 0.115822 | 0.116696 | 0.116987 | 0.101981 |
| 0.105041 | 0.177739 | 0.241259 | 0.111888 | 0.113054 | 0.111888 | 0.104458 |
| 0.120921 | 0.193328 | 0.252477 | 0.127185 | 0.126603 | 0.133596 | 0.122378 |
| 0.116987 | 0.189103 | 0.249126 | 0.123252 | 0.127331 | 0.126166 | 0.11553  |
| 0.127768 | 0.193765 | 0.246795 | 0.131702 | 0.133741 | 0.135198 | 0.127768 |
| 0.111888 | 0.184295 | 0.24898  | 0.122232 | 0.118444 | 0.120775 | 0.113054 |
| 0.113491 | 0.184441 | 0.244755 | 0.120629 | 0.120629 | 0.123834 | 0.113199 |
| 0.126603 | 0.187646 | 0.246503 | 0.126166 | 0.125291 | 0.130828 | 0.122523 |
| 0.131847 | 0.199883 | 0.257576 | 0.136072 | 0.140734 | 0.134907 | 0.127768 |
| 0.128642 | 0.193473 | 0.254371 | 0.129953 | 0.130536 | 0.140152 | 0.127477 |
| 0.135198 | 0.200321 | 0.25743  | 0.133596 | 0.14088  | 0.136509 | 0.128205 |
| 0.131265 | 0.189103 | 0.248252 | 0.13549  | 0.129953 | 0.130536 | 0.13243  |
| 0.110577 | 0.185023 | 0.249126 | 0.118007 | 0.119755 | 0.117424 | 0.108246 |
| 0.124854 | 0.194347 | 0.253205 | 0.131119 | 0.132576 | 0.138695 | 0.128934 |
| 0.107226 | 0.175845 | 0.246941 | 0.11116  | 0.114948 | 0.11553  | 0.106643 |
| 0.113199 | 0.177156 | 0.240093 | 0.119172 | 0.122669 | 0.120047 | 0.119901 |
| 0.116113 | 0.177448 | 0.247086 | 0.112471 | 0.117716 | 0.119464 | 0.11116  |
| 0.108974 | 0.179633 | 0.24053  | 0.112908 | 0.119318 | 0.120484 | 0.113054 |
| 0.103438 | 0.18109  | 0.244901 | 0.112908 | 0.111451 | 0.117861 | 0.1081   |
| 0.131847 | 0.199592 | 0.252914 | 0.138112 | 0.136072 | 0.138695 | 0.13243  |
| 0.113054 | 0.179341 | 0.245484 | 0.118735 | 0.118444 | 0.114365 | 0.116841 |
| 0.129079 | 0.197698 | 0.251894 | 0.133013 | 0.13447  | 0.139423 | 0.131993 |
| 0.106061 | 0.177885 | 0.242861 | 0.112325 | 0.114073 | 0.118444 | 0.104604 |
| 0.121649 | 0.194347 | 0.255245 | 0.130245 | 0.127914 | 0.128497 | 0.119901 |
| 0.115967 | 0.182547 | 0.247523 | 0.127477 | 0.118444 | 0.129808 | 0.120338 |
| 0.118881 | 0.175554 | 0.238199 | 0.123689 | 0.123689 | 0.126311 | 0.11655  |
| 0.120192 | 0.185315 | 0.248543 | 0.123834 | 0.11859  | 0.115967 | 0.106206 |
| 0.11859  | 0.181672 | 0.240822 | 0.122815 | 0.125437 | 0.134178 | 0.119755 |
| 0.126894 | 0.184441 | 0.25     | 0.125583 | 0.121795 | 0.125583 | 0.10912  |
| 0.110286 | 0.183858 | 0.245629 | 0.118007 | 0.123252 | 0.111597 | 0.101253 |
| 0.127185 | 0.196678 | 0.257867 | 0.13986  | 0.123252 | 0.131993 | 0.134178 |
| 0.137529 | 0.203234 | 0.257721 | 0.148164 | 0.137966 | 0.135052 | 0.129371 |
| 0.106643 | 0.178467 | 0.242279 | 0.112908 | 0.10067  | 0.107663 | 0.105478 |
| 0.13447  | 0.199009 | 0.256993 | 0.124126 | 0.12704  | 0.13141  | 0.131556 |
| 0.123252 | 0.192453 | 0.252477 | 0.133596 | 0.12398  | 0.121649 | 0.121212 |
| 0.128497 | 0.190705 | 0.250146 | 0.120192 | 0.129808 | 0.132139 | 0.130245 |

|          |          |          |          |          |          |          |
|----------|----------|----------|----------|----------|----------|----------|
| 0.117133 | 0.185752 | 0.246649 | 0.120192 | 0.12602  | 0.119318 | 0.121795 |
| 0.118298 | 0.1875   | 0.253351 | 0.122523 | 0.117861 | 0.126311 | 0.122669 |
| 0.128059 | 0.18648  | 0.249126 | 0.127622 | 0.111597 | 0.126457 | 0.125437 |
| 0.124709 | 0.196533 | 0.253934 | 0.125146 | 0.129225 | 0.133013 | 0.126748 |
| 0.133741 | 0.197407 | 0.256265 | 0.135927 | 0.135052 | 0.136801 | 0.134615 |
| 0.127331 | 0.18954  | 0.252477 | 0.126603 | 0.116696 | 0.127185 | 0.128205 |
| 0.11451  | 0.180216 | 0.244318 | 0.114073 | 0.118153 | 0.113491 | 0.116259 |
| 0.12602  | 0.196387 | 0.25     | 0.139277 | 0.132284 | 0.135781 | 0.121066 |
| 0.130245 | 0.193619 | 0.25539  | 0.135344 | 0.123397 | 0.132721 | 0.13345  |
| 0.111014 | 0.180507 | 0.244318 | 0.110577 | 0.112908 | 0.112908 | 0.113345 |
| 0.217512 | 0.138986 | 0.120047 | 0.22028  | 0.215618 | 0.2162   | 0.217803 |
| 0.122815 | 0.188811 | 0.249126 | 0.123252 | 0.126166 | 0.125874 | 0.121941 |
| 0.116404 | 0.18007  | 0.245921 | 0.122378 | 0.109557 | 0.120338 | 0.118153 |
| 0.135198 | 0.197698 | 0.25539  | 0.128934 | 0.130099 | 0.137383 | 0.134033 |
| 0.114802 | 0.17905  | 0.246066 | 0.121358 | 0.109703 | 0.120775 | 0.119755 |
| 0.136364 | 0.193328 | 0.256556 | 0.135344 | 0.123689 | 0.131265 | 0.135198 |
| 0.118007 | 0.184878 | 0.246941 | 0.116987 | 0.11961  | 0.133887 | 0.119755 |
| 0.118444 | 0.185897 | 0.246503 | 0.119755 | 0.120921 | 0.126457 | 0.11757  |
| 0.123689 | 0.188228 | 0.25     | 0.129953 | 0.125    | 0.125583 | 0.130973 |
| 0.127331 | 0.183712 | 0.242861 | 0.122815 | 0.132721 | 0.133013 | 0.133159 |
| 0.129516 | 0.193765 | 0.251166 | 0.127331 | 0.136364 | 0.127331 | 0.131556 |
| 0.127622 | 0.197115 | 0.253059 | 0.124272 | 0.132721 | 0.128934 | 0.132284 |
| 0.126457 | 0.196533 | 0.255099 | 0.119318 | 0.129516 | 0.129808 | 0.128497 |
| 0.120921 | 0.186917 | 0.247232 | 0.12398  | 0.11553  | 0.119027 | 0.10373  |
| 0.11451  | 0.1875   | 0.254808 | 0.120192 | 0.114656 | 0.122523 | 0.118007 |
| 0.131556 | 0.197844 | 0.253497 | 0.126166 | 0.128497 | 0.139277 | 0.135927 |
| 0.121795 | 0.176136 | 0.234703 | 0.114073 | 0.117279 | 0.125437 | 0.120047 |
| 0.134615 | 0.196533 | 0.255682 | 0.144668 | 0.138258 | 0.144959 | 0.133741 |
| 0.138258 | 0.184441 | 0.240967 | 0.13986  | 0.136946 | 0.125    | 0.13884  |
| 0.125146 | 0.183858 | 0.244172 | 0.130536 | 0.126748 | 0.119755 | 0.116404 |
| 0.126603 | 0.188811 | 0.252331 | 0.131702 | 0.118298 | 0.121212 | 0.128642 |
| 0.13141  | 0.173514 | 0.237908 | 0.131556 | 0.127477 | 0.119318 | 0.120921 |
| 0.126894 | 0.192016 | 0.243881 | 0.128205 | 0.131119 | 0.124417 | 0.11757  |
| 0.125728 | 0.18211  | 0.239802 | 0.127331 | 0.13141  | 0.120921 | 0.11961  |
| 0.134761 | 0.186772 | 0.247086 | 0.138403 | 0.142191 | 0.128788 | 0.138549 |
| 0.114802 | 0.176428 | 0.240239 | 0.123397 | 0.116113 | 0.117279 | 0.106061 |
| 0.133596 | 0.195804 | 0.250583 | 0.139569 | 0.136364 | 0.1419   | 0.131556 |
| 0.142191 | 0.176719 | 0.232663 | 0.144085 | 0.146999 | 0.130099 | 0.147145 |
| 0.12296  | 0.193619 | 0.251603 | 0.129225 | 0.124563 | 0.120775 | 0.118298 |
| 0.121795 | 0.182255 | 0.246066 | 0.135344 | 0.12602  | 0.129516 | 0.126748 |
| 0.142337 | 0.201049 | 0.250291 | 0.151807 | 0.145688 | 0.137529 | 0.135344 |
| 0.122232 | 0.190268 | 0.250583 | 0.129953 | 0.129662 | 0.136364 | 0.129225 |
| 0.13549  | 0.202652 | 0.256556 | 0.146707 | 0.142045 | 0.136801 | 0.135198 |
| 0.126311 | 0.191434 | 0.250291 | 0.134033 | 0.130245 | 0.137529 | 0.127768 |

|          |          |          |           |           |           |          |
|----------|----------|----------|-----------|-----------|-----------|----------|
| 0.126748 | 0.190997 | 0.252768 | 0.119027  | 0.124563  | 0.129516  | 0.120921 |
| 0.135635 | 0.187646 | 0.246503 | 0.136364  | 0.135781  | 0.13141   | 0.131556 |
| 0.125291 | 0.184878 | 0.244027 | 0.13447   | 0.121649  | 0.129516  | 0.119172 |
| 0.132721 | 0.195804 | 0.25845  | 0.130536  | 0.137238  | 0.136072  | 0.129225 |
| 0.123689 | 0.198135 | 0.256119 | 0.13141   | 0.132576  | 0.133741  | 0.130682 |
| 0.135927 | 0.201049 | 0.254662 | 0.126166  | 0.136072  | 0.134033  | 0.132139 |
| 0.13243  | 0.199592 | 0.256993 | 0.136655  | 0.136364  | 0.132576  | 0.131847 |
| 0.130099 | 0.187937 | 0.249126 | 0.130536  | 0.128497  | 0.125     | 0.126311 |
| 0.146125 | 0.195804 | 0.249417 | 0.143357  | 0.144231  | 0.144814  | 0.142337 |
| 0.123397 | 0.187354 | 0.24796  | 0.12704   | 0.12296   | 0.123834  | 0.117279 |
| 0.119901 | 0.193182 | 0.251457 | 0.123834  | 0.125874  | 0.12704   | 0.121358 |
| 0.137383 | 0.195513 | 0.251457 | 0.136364  | 0.131993  | 0.126166  | 0.128351 |
| 0.121941 | 0.189103 | 0.246212 | 0.129662  | 0.123252  | 0.117424  | 0.112617 |
| 0.144814 | 0.195076 | 0.252185 | 0.147582  | 0.144376  | 0.129516  | 0.140734 |
| 0.15676  | 0.206439 | 0.256265 | 0.155449  | 0.161276  | 0.141463  | 0.154138 |
| 0.128497 | 0.195367 | 0.252185 | 0.124272  | 0.129516  | 0.131847  | 0.124709 |
| 0.11961  | 0.187937 | 0.249417 | 0.124417  | 0.122086  | 0.12296   | 0.116113 |
| 0.132576 | 0.199446 | 0.257721 | 0.11961   | 0.132139  | 0.132139  | 0.12704  |
| 0.128642 | 0.197844 | 0.253788 | 0.129371  | 0.130828  | 0.135198  | 0.132721 |
| 0.128351 | 0.19697  | 0.253497 | 0.131993  | 0.130536  | 0.134907  | 0.124272 |
| 0.133596 | 0.19697  | 0.259033 | 0.12704   | 0.134615  | 0.137238  | 0.138258 |
| 0.136218 | 0.188811 | 0.248252 | 0.142191  | 0.134615  | 0.132867  | 0.138549 |
| 0.126748 | 0.192453 | 0.253351 | 0.136218  | 0.12398   | 0.125728  | 0.11859  |
| 0.157925 | 0.204983 | 0.254808 | 0.155449  | 0.163607  | 0.148164  | 0.159965 |
| 0.125291 | 0.188666 | 0.254516 | 0.135052  | 0.127477  | 0.131847  | 0.123543 |
| 0.140734 | 0.19799  | 0.250146 | 0.14729   | 0.14088   | 0.13884   | 0.13345  |
| 0.125146 | 0.193473 | 0.253205 | 0.128497  | 0.126166  | 0.129953  | 0.124563 |
| 0.130973 | 0.205128 | 0.258741 | 0.131702  | 0.140443  | 0.131119  | 0.129225 |
| 0.12398  | 0.182692 | 0.245338 | 0.116259  | 0.124417  | 0.127331  | 0.129516 |
| 0.139569 | 0.154866 | 0.221008 | 0.143211  | 0.137966  | 0.0919289 | 0.138112 |
| 0.144668 | 0.198135 | 0.251166 | 0.0748834 | 0.146853  | 0.149184  | 0.147873 |
| 0.119172 | 0.177593 | 0.23616  | 0.123689  | 0.113782  | 0.125146  | 0.12296  |
| 0.136218 | 0.157925 | 0.219406 | 0.134907  | 0.129953  | 0.13549   | 0.135927 |
| 0.147145 | 0.140006 | 0.195076 | 0.153409  | 0.149621  | 0.150495  | 0.138403 |
| 0.140152 | 0.136801 | 0.199446 | 0.142337  | 0.144668  | 0.13884   | 0.145979 |
| 0.124563 | 0.198135 | 0.253497 | 0.133159  | 0.124126  | 0.116259  | 0.110286 |
| 0.13986  | 0.195659 | 0.248106 | 0.129808  | 0.134178  | 0.133887  | 0.135198 |
| 0.120629 | 0.171766 | 0.239365 | 0.111742  | 0.108829  | 0.114948  | 0.108683 |
| 0.11757  | 0.169289 | 0.240093 | 0.113928  | 0.111014  | 0.117424  | 0.108246 |
| 0.119755 | 0.184586 | 0.24257  | 0.124272  | 0.12398   | 0.11961   | 0.124126 |
| 0.116841 | 0.173805 | 0.240239 | 0.117861  | 0.107955  | 0.121358  | 0.118007 |
| 0.109411 | 0.179196 | 0.245921 | 0.11859   | 0.120921  | 0.120921  | 0.10708  |
| 0.11553  | 0.160548 | 0.232226 | 0.110723  | 0.0999417 | 0.113054  | 0.109994 |
| 0.11553  | 0.174242 | 0.243881 | 0.115385  | 0.104895  | 0.123252  | 0.120192 |

|           |          |           |           |          |           |           |
|-----------|----------|-----------|-----------|----------|-----------|-----------|
| 0.124126  | 0.170892 | 0.230041  | 0.123106  | 0.115822 | 0.125146  | 0.118881  |
| 0.0996503 | 0.173514 | 0.239656  | 0.11553   | 0.108537 | 0.108829  | 0.0999417 |
| 0.125     | 0.173223 | 0.24053   | 0.122523  | 0.114073 | 0.126311  | 0.121795  |
| 0.11553   | 0.176573 | 0.243298  | 0.118007  | 0.107226 | 0.119464  | 0.117279  |
| 0.121941  | 0.189685 | 0.247669  | 0.132284  | 0.129662 | 0.129662  | 0.112908  |
| 0.218386  | 0.138403 | 0.116841  | 0.217075  | 0.212413 | 0.213869  | 0.216055  |
| 0.143211  | 0.193473 | 0.245338  | 0.140152  | 0.135781 | 0.146853  | 0.144085  |
| 0.131119  | 0.190705 | 0.246066  | 0.126311  | 0.130682 | 0.129808  | 0.128788  |
| 0.119027  | 0.180944 | 0.238928  | 0.124417  | 0.125583 | 0.124709  | 0.122232  |
| 0.212558  | 0.128205 | 0.113054  | 0.20979   | 0.210373 | 0.210082  | 0.212267  |
| 0.122232  | 0.17162  | 0.233974  | 0.128205  | 0.12704  | 0.0964452 | 0.117861  |
| 0.119464  | 0.188957 | 0.249272  | 0.128059  | 0.122815 | 0.119027  | 0.0527389 |
| 0.11859   | 0.188374 | 0.241987  | 0.121649  | 0.12398  | 0.130973  | 0.115093  |
| 0.124563  | 0.177739 | 0.239802  | 0.118881  | 0.116841 | 0.123543  | 0.116696  |
| 0.252477  | 0.163753 | 0.0917832 | 0.25      | 0.248543 | 0.249417  | 0.25102   |
| 0.128205  | 0.188957 | 0.246941  | 0.126894  | 0.126603 | 0.050845  | 0.119755  |
| 0.112179  | 0.181381 | 0.246066  | 0.125728  | 0.121649 | 0.122232  | 0.10373   |
| 0.115676  | 0.191871 | 0.247815  | 0.11961   | 0.124272 | 0.126603  | 0.125     |
| 0.113345  | 0.188083 | 0.247232  | 0.11553   | 0.118444 | 0.122232  | 0.121212  |
| 0.13345   | 0.17701  | 0.24053   | 0.13243   | 0.127185 | 0.0700758 | 0.121795  |
| 0.111305  | 0.15574  | 0.224796  | 0.131556  | 0.11961  | 0.122815  | 0.124417  |
| 0.117424  | 0.184878 | 0.245484  | 0.125437  | 0.124563 | 0.126894  | 0.107517  |
| 0.118444  | 0.17366  | 0.236888  | 0.113928  | 0.111597 | 0.120629  | 0.120484  |
| 0.12704   | 0.184295 | 0.242861  | 0.11961   | 0.123106 | 0.123106  | 0.124417  |
| 0.122086  | 0.178467 | 0.241404  | 0.11553   | 0.109703 | 0.116113  | 0.108392  |
| 0.11553   | 0.169872 | 0.234557  | 0.116259  | 0.112471 | 0.117424  | 0.114656  |
| 0.117716  | 0.182547 | 0.242861  | 0.12398   | 0.118444 | 0.114073  | 0.122086  |
| 0.14729   | 0.198427 | 0.250583  | 0.0734266 | 0.145688 | 0.146562  | 0.147582  |
| 0.131265  | 0.190851 | 0.246795  | 0.134324  | 0.132576 | 0.0544872 | 0.121649  |
| 0.124854  | 0.187937 | 0.246503  | 0.134615  | 0.128497 | 0.123543  | 0.057838  |
| 0.189831  | 0.111014 | 0.126748  | 0.189977  | 0.18852  | 0.185897  | 0.190414  |
| 0.205857  | 0.120047 | 0.118881  | 0.204545  | 0.203089 | 0.203089  | 0.204691  |
| 0.126894  | 0.172203 | 0.234848  | 0.121795  | 0.116841 | 0.120338  | 0.116404  |
| 0.119318  | 0.175991 | 0.239219  | 0.113928  | 0.106061 | 0.117424  | 0.110577  |
| 0.134761  | 0.182692 | 0.23514   | 0.13141   | 0.133159 | 0.13345   | 0.140006  |
| 0.116404  | 0.179779 | 0.245047  | 0.126166  | 0.123252 | 0.124126  | 0.104749  |
| 0.130245  | 0.191871 | 0.243735  | 0.129516  | 0.131556 | 0.0517191 | 0.119755  |
| 0.131847  | 0.187646 | 0.24155   | 0.121503  | 0.123543 | 0.132867  | 0.13039   |
| 0.226836  | 0.138986 | 0.115093  | 0.225233  | 0.223193 | 0.223776  | 0.224505  |
| 0.115822  | 0.178904 | 0.244172  | 0.114802  | 0.11859  | 0.117716  | 0.113199  |
| 0.211538  | 0.144376 | 0.141463  | 0.211393  | 0.207896 | 0.206731  | 0.206002  |
| 0.110286  | 0.186189 | 0.251457  | 0.118298  | 0.111888 | 0.106935  | 0.0962995 |
| 0.106935  | 0.180798 | 0.241987  | 0.118444  | 0.112617 | 0.111451  | 0.105769  |
| 0.117279  | 0.166375 | 0.232517  | 0.118881  | 0.122378 | 0.120921  | 0.117861  |

|           |          |          |           |          |           |           |
|-----------|----------|----------|-----------|----------|-----------|-----------|
| 0.117861  | 0.170455 | 0.237179 | 0.11451   | 0.108683 | 0.116841  | 0.109703  |
| 0.206585  | 0.121358 | 0.119901 | 0.208188  | 0.204691 | 0.2044    | 0.209207  |
| 0.131119  | 0.174679 | 0.233537 | 0.131847  | 0.121358 | 0.135927  | 0.131993  |
| 0.111014  | 0.189831 | 0.253351 | 0.118153  | 0.117861 | 0.115822  | 0.108392  |
| 0.120629  | 0.181672 | 0.239948 | 0.121941  | 0.116987 | 0.132139  | 0.125291  |
| 0.0638112 | 0.183129 | 0.247232 | 0.128642  | 0.117861 | 0.129225  | 0.117424  |
| 0.11859   | 0.175845 | 0.243735 | 0.116404  | 0.111451 | 0.118153  | 0.108392  |
| 0.114656  | 0.189394 | 0.248834 | 0.122378  | 0.11859  | 0.108683  | 0.101253  |
| 0.117861  | 0.174534 | 0.23514  | 0.129371  | 0.125583 | 0.125291  | 0.11116   |
| 0.122232  | 0.189977 | 0.245047 | 0.134324  | 0.125874 | 0.125583  | 0.053176  |
| 0.113199  | 0.167249 | 0.233683 | 0.110431  | 0.1081   | 0.115093  | 0.114656  |
| 0.11451   | 0.186043 | 0.24461  | 0.121358  | 0.12398  | 0.121358  | 0.110723  |
| 0.190414  | 0.119172 | 0.13141  | 0.189685  | 0.187937 | 0.189103  | 0.186917  |
| 0.118007  | 0.189831 | 0.249563 | 0.120484  | 0.12398  | 0.127185  | 0.125874  |
| 0.126603  | 0.186772 | 0.245338 | 0.0597319 | 0.129371 | 0.133159  | 0.128934  |
| 0.121503  | 0.18109  | 0.240822 | 0.111451  | 0.120775 | 0.130099  | 0.124417  |
| 0.127185  | 0.176865 | 0.242716 | 0.129953  | 0.128205 | 0.0562354 | 0.117279  |
| 0.118735  | 0.180944 | 0.238345 | 0.118881  | 0.113928 | 0.128205  | 0.121358  |
| 0.118735  | 0.19493  | 0.250874 | 0.12704   | 0.119172 | 0.112179  | 0.103875  |
| 0.0748834 | 0.176428 | 0.241696 | 0.120192  | 0.114656 | 0.101544  | 0.114219  |
| 0.122669  | 0.190997 | 0.248397 | 0.133596  | 0.131265 | 0.130973  | 0.112179  |
| 0.121941  | 0.179487 | 0.244172 | 0.0544872 | 0.12296  | 0.12704   | 0.126311  |
| 0.107372  | 0.183275 | 0.246503 | 0.111597  | 0.116259 | 0.120047  | 0.116696  |
| 0.122378  | 0.172931 | 0.241113 | 0.11757   | 0.110286 | 0.120484  | 0.114219  |
| 0.113782  | 0.188811 | 0.247086 | 0.117424  | 0.12296  | 0.124709  | 0.114656  |
| 0.130828  | 0.197407 | 0.246066 | 0.132139  | 0.135344 | 0.137966  | 0.129371  |
| 0.117133  | 0.180216 | 0.242279 | 0.121066  | 0.120775 | 0.0517191 | 0.113345  |
| 0.138549  | 0.192016 | 0.242716 | 0.13549   | 0.131119 | 0.145688  | 0.138549  |
| 0.115239  | 0.173951 | 0.24155  | 0.118007  | 0.109848 | 0.115676  | 0.110286  |
| 0.120192  | 0.179487 | 0.23951  | 0.112471  | 0.110431 | 0.121212  | 0.119027  |
| 0.118298  | 0.157197 | 0.224505 | 0.120775  | 0.116987 | 0.123397  | 0.119464  |
| 0.126457  | 0.18546  | 0.245192 | 0.134178  | 0.13039  | 0.131847  | 0.115676  |
| 0.191142  | 0.116696 | 0.137966 | 0.192745  | 0.188083 | 0.189831  | 0.188228  |
| 0.10912   | 0.182692 | 0.24359  | 0.115385  | 0.117133 | 0.11451   | 0.105915  |
| 0.110286  | 0.167832 | 0.235431 | 0.102855  | 0.106061 | 0.111597  | 0.105624  |
| 0.120775  | 0.191434 | 0.249709 | 0.132867  | 0.124126 | 0.123252  | 0.0528846 |
| 0.174971  | 0.105769 | 0.155594 | 0.181527  | 0.173368 | 0.180361  | 0.17905   |
| 0.136655  | 0.193328 | 0.249563 | 0.139423  | 0.138549 | 0.0575466 | 0.130828  |
| 0.14831   | 0.204691 | 0.253642 | 0.151661  | 0.149621 | 0.0677448 | 0.140734  |
| 0.146999  | 0.197844 | 0.25204  | 0.0772145 | 0.145396 | 0.152098  | 0.147873  |
| 0.119027  | 0.181818 | 0.237762 | 0.119464  | 0.121795 | 0.0556527 | 0.113199  |
| 0.123252  | 0.176136 | 0.237617 | 0.120484  | 0.114073 | 0.127477  | 0.125291  |
| 0.211101  | 0.134907 | 0.11655  | 0.210956  | 0.208333 | 0.208916  | 0.210519  |
| 0.125728  | 0.175117 | 0.238345 | 0.122378  | 0.125291 | 0.125583  | 0.124272  |

|           |          |          |           |           |           |           |
|-----------|----------|----------|-----------|-----------|-----------|-----------|
| 0.127331  | 0.177593 | 0.238491 | 0.12398   | 0.119318  | 0.131265  | 0.130536  |
| 0.113054  | 0.181381 | 0.242279 | 0.117279  | 0.121649  | 0.116987  | 0.108392  |
| 0.167249  | 0.11553  | 0.174971 | 0.167686  | 0.165064  | 0.167104  | 0.166375  |
| 0.108683  | 0.173514 | 0.236451 | 0.108537  | 0.112325  | 0.114073  | 0.112762  |
| 0.151952  | 0.20134  | 0.251748 | 0.144814  | 0.145688  | 0.146853  | 0.148747  |
| 0.112617  | 0.179196 | 0.238636 | 0.129662  | 0.126457  | 0.118298  | 0.112034  |
| 0.190414  | 0.113636 | 0.134615 | 0.189685  | 0.189977  | 0.18852   | 0.186626  |
| 0.124854  | 0.187063 | 0.245047 | 0.12704   | 0.127914  | 0.0541958 | 0.114656  |
| 0.106789  | 0.171911 | 0.245629 | 0.105478  | 0.0938228 | 0.115385  | 0.105041  |
| 0.113345  | 0.17701  | 0.24053  | 0.114073  | 0.111451  | 0.119901  | 0.116259  |
| 0.112034  | 0.184149 | 0.245047 | 0.122378  | 0.116259  | 0.113345  | 0.101836  |
| 0.116987  | 0.187354 | 0.245629 | 0.128497  | 0.123252  | 0.118881  | 0.0511364 |
| 0.124563  | 0.176573 | 0.234848 | 0.115385  | 0.117716  | 0.120629  | 0.123397  |
| 0.118007  | 0.173514 | 0.239656 | 0.114073  | 0.106206  | 0.115822  | 0.107809  |
| 0.186917  | 0.112762 | 0.130245 | 0.190851  | 0.189685  | 0.187937  | 0.187209  |
| 0.122669  | 0.186334 | 0.245775 | 0.113199  | 0.126311  | 0.13039   | 0.118007  |
| 0.112325  | 0.154429 | 0.233974 | 0.119755  | 0.0518648 | 0.123543  | 0.110868  |
| 0.211538  | 0.13039  | 0.116113 | 0.212558  | 0.209936  | 0.20877   | 0.211538  |
| 0.116259  | 0.188374 | 0.250728 | 0.119901  | 0.124272  | 0.126603  | 0.123543  |
| 0.119901  | 0.174534 | 0.242424 | 0.115385  | 0.108392  | 0.119755  | 0.111742  |
| 0.116696  | 0.172494 | 0.236305 | 0.113928  | 0.108683  | 0.114219  | 0.106206  |
| 0.137238  | 0.18546  | 0.239365 | 0.129225  | 0.127768  | 0.14292   | 0.140734  |
| 0.187354  | 0.113199 | 0.133013 | 0.190122  | 0.187791  | 0.187791  | 0.185897  |
| 0.116113  | 0.189103 | 0.250291 | 0.128205  | 0.125874  | 0.125874  | 0.108829  |
| 0.124854  | 0.196387 | 0.247669 | 0.127331  | 0.129953  | 0.134033  | 0.126894  |
| 0.116404  | 0.175408 | 0.242133 | 0.114802  | 0.107809  | 0.115385  | 0.107663  |
| 0.114073  | 0.172786 | 0.240967 | 0.111597  | 0.104312  | 0.116841  | 0.106206  |
| 0.118007  | 0.171766 | 0.237617 | 0.116696  | 0.109411  | 0.11553   | 0.109266  |
| 0.115239  | 0.175117 | 0.240093 | 0.113928  | 0.107809  | 0.120338  | 0.118153  |
| 0.0976107 | 0.175554 | 0.241404 | 0.112908  | 0.103875  | 0.105915  | 0.0979021 |
| 0.127331  | 0.186626 | 0.245192 | 0.128934  | 0.127768  | 0.0496795 | 0.120629  |
| 0.127622  | 0.192162 | 0.254808 | 0.114656  | 0.125728  | 0.136509  | 0.135198  |
| 0.122669  | 0.186917 | 0.245192 | 0.127768  | 0.12398   | 0.0523019 | 0.118298  |
| 0.0627914 | 0.192308 | 0.251748 | 0.133159  | 0.124126  | 0.133159  | 0.12602   |
| 0.195804  | 0.114073 | 0.13447  | 0.191871  | 0.194202  | 0.189831  | 0.191725  |
| 0.114073  | 0.187063 | 0.243881 | 0.115385  | 0.121795  | 0.123834  | 0.114656  |
| 0.130245  | 0.179924 | 0.237325 | 0.128351  | 0.121358  | 0.134178  | 0.132284  |
| 0.116404  | 0.177448 | 0.241841 | 0.114802  | 0.106061  | 0.113345  | 0.106789  |
| 0.0987762 | 0.174971 | 0.239365 | 0.116987  | 0.111742  | 0.105332  | 0.101107  |
| 0.12296   | 0.170309 | 0.235577 | 0.11553   | 0.118735  | 0.113491  | 0.120047  |
| 0.118444  | 0.186189 | 0.245047 | 0.129953  | 0.123543  | 0.129371  | 0.107372  |
| 0.13039   | 0.187354 | 0.244755 | 0.129662  | 0.121503  | 0.130245  | 0.131265  |
| 0.120921  | 0.177302 | 0.246358 | 0.0549242 | 0.120192  | 0.122523  | 0.120629  |
| 0.109848  | 0.168852 | 0.237908 | 0.119901  | 0.112034  | 0.11553   | 0.101981  |

|           |          |          |           |           |           |           |
|-----------|----------|----------|-----------|-----------|-----------|-----------|
| 0.102127  | 0.167832 | 0.237471 | 0.118298  | 0.108974  | 0.111597  | 0.100087  |
| 0.097028  | 0.16419  | 0.239073 | 0.114365  | 0.0977564 | 0.109411  | 0.107226  |
| 0.110868  | 0.187646 | 0.251457 | 0.12296   | 0.11655   | 0.105186  | 0.0995047 |
| 0.135781  | 0.195367 | 0.249854 | 0.138258  | 0.136801  | 0.0575466 | 0.125583  |
| 0.11116   | 0.183566 | 0.248834 | 0.128205  | 0.123252  | 0.126457  | 0.105332  |
| 0.113054  | 0.169726 | 0.234994 | 0.114656  | 0.10708   | 0.116696  | 0.115676  |
| 0.109848  | 0.180507 | 0.245484 | 0.120775  | 0.116404  | 0.119901  | 0.101981  |
| 0.114948  | 0.171329 | 0.238636 | 0.112179  | 0.108392  | 0.113054  | 0.107955  |
| 0.1081    | 0.182255 | 0.246358 | 0.112617  | 0.115822  | 0.111451  | 0.105186  |
| 0.118881  | 0.175845 | 0.241113 | 0.116404  | 0.109411  | 0.119027  | 0.111014  |
| 0.110431  | 0.184003 | 0.243153 | 0.109411  | 0.118735  | 0.122815  | 0.109557  |
| 0.11859   | 0.174971 | 0.246358 | 0.0511364 | 0.118444  | 0.125437  | 0.119755  |
| 0.114219  | 0.184878 | 0.248106 | 0.124272  | 0.117861  | 0.119027  | 0.0504079 |
| 0.0983392 | 0.176282 | 0.243881 | 0.114219  | 0.109266  | 0.107809  | 0.103584  |
| 0.11451   | 0.176719 | 0.240822 | 0.112325  | 0.108537  | 0.113782  | 0.107226  |
| 0.121795  | 0.166812 | 0.229167 | 0.116404  | 0.116987  | 0.122815  | 0.121503  |
| 0.117279  | 0.160548 | 0.243298 | 0.121503  | 0.048951  | 0.125583  | 0.120192  |
| 0.107809  | 0.171474 | 0.243444 | 0.112908  | 0.0986305 | 0.11961   | 0.112471  |
| 0.11655   | 0.175845 | 0.243444 | 0.10912   | 0.107955  | 0.11553   | 0.110431  |
| 0.118153  | 0.172494 | 0.234557 | 0.119172  | 0.110431  | 0.122086  | 0.121066  |
| 0.111451  | 0.187063 | 0.248543 | 0.121795  | 0.118298  | 0.107226  | 0.101544  |
| 0.11757   | 0.175699 | 0.24155  | 0.116259  | 0.112179  | 0.123834  | 0.120192  |
| 0.114948  | 0.18211  | 0.245921 | 0.123252  | 0.117716  | 0.119755  | 0.048514  |
| 0.10067   | 0.178613 | 0.245629 | 0.11859   | 0.111888  | 0.111305  | 0.104749  |
| 0.109994  | 0.175408 | 0.238636 | 0.104895  | 0.113345  | 0.114219  | 0.107372  |
| 0.1081    | 0.181381 | 0.246358 | 0.114948  | 0.114656  | 0.110577  | 0.10373   |
| 0.117861  | 0.173951 | 0.235431 | 0.120047  | 0.113928  | 0.12704   | 0.121649  |
| 0.108829  | 0.181235 | 0.246795 | 0.119755  | 0.1081    | 0.128788  | 0.121066  |
| 0.111014  | 0.169143 | 0.242861 | 0.114365  | 0.0962995 | 0.116987  | 0.115676  |
| 0.196678  | 0.116696 | 0.127768 | 0.196241  | 0.192745  | 0.188374  | 0.19289   |
| 0.157051  | 0.111742 | 0.174097 | 0.161276  | 0.158071  | 0.163024  | 0.165793  |
| 0.123252  | 0.183421 | 0.244318 | 0.128059  | 0.125437  | 0.0499709 | 0.115385  |
| 0.116113  | 0.167832 | 0.236014 | 0.117133  | 0.108974  | 0.12296   | 0.118735  |
| 0.1537    | 0.210956 | 0.256993 | 0.152098  | 0.149184  | 0.0743007 | 0.143211  |
| 0.127331  | 0.187209 | 0.247523 | 0.11961   | 0.124272  | 0.124854  | 0.123834  |
| 0.125728  | 0.168124 | 0.236014 | 0.11859   | 0.115093  | 0.120629  | 0.120775  |
| 0.115967  | 0.158071 | 0.239073 | 0.113491  | 0.0793998 | 0.119318  | 0.113636  |
| 0.11451   | 0.17905  | 0.245484 | 0.120192  | 0.113782  | 0.112617  | 0.115676  |
| 0.114219  | 0.164481 | 0.243735 | 0.120775  | 0.0488054 | 0.126894  | 0.11859   |
| 0.20236   | 0.117424 | 0.126748 | 0.201632  | 0.199009  | 0.200175  | 0.199738  |
| 0.118881  | 0.187791 | 0.250437 | 0.133887  | 0.126311  | 0.126894  | 0.113345  |
| 0.118153  | 0.167249 | 0.22873  | 0.121503  | 0.116259  | 0.120921  | 0.114656  |
| 0.112325  | 0.166084 | 0.237471 | 0.108683  | 0.104312  | 0.113636  | 0.109411  |
| 0         | 0.181672 | 0.247815 | 0.120484  | 0.11116   | 0.121941  | 0.115385  |



|           |          |          |           |           |          |           |
|-----------|----------|----------|-----------|-----------|----------|-----------|
| 0.181672  | 0        | 0.15472  | 0.181818  | 0.164336  | 0.183858 | 0.184003  |
| 0.247815  | 0.15472  | 0        | 0.246503  | 0.244464  | 0.243881 | 0.245775  |
| 0.120484  | 0.181818 | 0.246503 | 0         | 0.120629  | 0.12296  | 0.124563  |
| 0.11116   | 0.164336 | 0.244464 | 0.120629  | 0         | 0.124417 | 0.116404  |
| 0.121941  | 0.183858 | 0.243881 | 0.12296   | 0.124417  | 0        | 0.115822  |
| 0.115385  | 0.184003 | 0.245775 | 0.124563  | 0.116404  | 0.115822 | 0         |
| 0.114073  | 0.185315 | 0.247086 | 0.122086  | 0.118881  | 0.125    | 0.101836  |
| 0.113054  | 0.182838 | 0.241987 | 0.105041  | 0.115822  | 0.118735 | 0.112471  |
| 0.120192  | 0.162005 | 0.230186 | 0.11859   | 0.105478  | 0.116259 | 0.116113  |
| 0.112908  | 0.183275 | 0.246503 | 0.126748  | 0.119172  | 0.120047 | 0.105915  |
| 0.114802  | 0.163899 | 0.231498 | 0.118153  | 0.106789  | 0.112034 | 0.113636  |
| 0.115239  | 0.17366  | 0.247086 | 0.11655   | 0.101981  | 0.122669 | 0.120484  |
| 0.100816  | 0.175845 | 0.242861 | 0.119318  | 0.11116   | 0.109411 | 0.102273  |
| 0.123689  | 0.185023 | 0.24155  | 0.0498252 | 0.125583  | 0.12296  | 0.12398   |
| 0.119755  | 0.175554 | 0.24257  | 0.119901  | 0.111451  | 0.123689 | 0.120629  |
| 0.106935  | 0.172348 | 0.236451 | 0.105041  | 0.104167  | 0.113199 | 0.10373   |
| 0.129662  | 0.197115 | 0.253351 | 0.120775  | 0.130682  | 0.130973 | 0.122086  |
| 0.131119  | 0.201195 | 0.252477 | 0.139423  | 0.133596  | 0.131847 | 0.0643939 |
| 0.113491  | 0.176282 | 0.242424 | 0.11451   | 0.107517  | 0.115093 | 0.109994  |
| 0.124126  | 0.165647 | 0.230915 | 0.117279  | 0.119318  | 0.104749 | 0.11451   |
| 0.132284  | 0.186043 | 0.243444 | 0.128059  | 0.121066  | 0.131265 | 0.123543  |
| 0.212267  | 0.133159 | 0.119464 | 0.209499  | 0.207751  | 0.203671 | 0.206148  |
| 0.111888  | 0.174097 | 0.238782 | 0.057838  | 0.114656  | 0.114948 | 0.114802  |
| 0.0977564 | 0.175991 | 0.242424 | 0.117133  | 0.110723  | 0.1081   | 0.0983392 |
| 0.110868  | 0.184441 | 0.246503 | 0.117133  | 0.122378  | 0.12296  | 0.112908  |
| 0.115967  | 0.1875   | 0.249272 | 0.118735  | 0.122232  | 0.12602  | 0.124417  |
| 0.0512821 | 0.181381 | 0.246358 | 0.120775  | 0.110577  | 0.120484 | 0.107226  |
| 0.198718  | 0.11961  | 0.127768 | 0.198572  | 0.197698  | 0.196824 | 0.198427  |
| 0.119318  | 0.179196 | 0.240967 | 0.119755  | 0.113928  | 0.127622 | 0.122815  |
| 0.113928  | 0.172348 | 0.241404 | 0.113491  | 0.109411  | 0.114073 | 0.106061  |
| 0.122232  | 0.186189 | 0.246795 | 0.122378  | 0.125874  | 0.117133 | 0.11757   |
| 0.110868  | 0.184732 | 0.246795 | 0.124417  | 0.111597  | 0.11451  | 0.0453089 |
| 0.121649  | 0.170746 | 0.238345 | 0.118881  | 0.114219  | 0.125    | 0.123106  |
| 0.114073  | 0.169289 | 0.2331   | 0.1081    | 0.106643  | 0.114802 | 0.112034  |
| 0.116987  | 0.17366  | 0.247086 | 0.116259  | 0.0973193 | 0.122378 | 0.116696  |
| 0.110868  | 0.18648  | 0.249709 | 0.112179  | 0.119464  | 0.122378 | 0.11757   |
| 0.199301  | 0.121649 | 0.128351 | 0.199446  | 0.197698  | 0.197407 | 0.195804  |
| 0.110868  | 0.170455 | 0.236597 | 0.11014   | 0.108392  | 0.117716 | 0.114365  |
| 0.194639  | 0.11116  | 0.13039  | 0.196824  | 0.192162  | 0.192162 | 0.194056  |
| 0.190997  | 0.115676 | 0.125583 | 0.194347  | 0.189103  | 0.188811 | 0.193328  |
| 0.12602   | 0.194639 | 0.248834 | 0.136364  | 0.128497  | 0.130245 | 0.0613345 |
| 0.124854  | 0.19697  | 0.254953 | 0.127914  | 0.129953  | 0.131119 | 0.131556  |
| 0.10912   | 0.172494 | 0.240385 | 0.107226  | 0.0961538 | 0.111888 | 0.110577  |
| 0.112471  | 0.171766 | 0.237908 | 0.111742  | 0.107663  | 0.115822 | 0.111888  |

|           |          |           |           |           |           |           |
|-----------|----------|-----------|-----------|-----------|-----------|-----------|
| 0.116404  | 0.175117 | 0.240093  | 0.116259  | 0.111597  | 0.121795  | 0.118153  |
| 0.118153  | 0.17366  | 0.242716  | 0.115967  | 0.109848  | 0.118881  | 0.110286  |
| 0.109703  | 0.181527 | 0.245338  | 0.121503  | 0.116259  | 0.118007  | 0.0983392 |
| 0.113782  | 0.184441 | 0.247378  | 0.124126  | 0.120338  | 0.123543  | 0.103584  |
| 0.125     | 0.178759 | 0.243444  | 0.0528846 | 0.124854  | 0.126894  | 0.126748  |
| 0.116113  | 0.186189 | 0.248252  | 0.129662  | 0.121212  | 0.115967  | 0.0514277 |
| 0.11451   | 0.173805 | 0.236451  | 0.111451  | 0.107663  | 0.112325  | 0.106352  |
| 0.116987  | 0.175699 | 0.23951   | 0.118298  | 0.109848  | 0.125     | 0.119027  |
| 0.0999417 | 0.169726 | 0.241113  | 0.105624  | 0.0968823 | 0.110577  | 0.104021  |
| 0.128934  | 0.18211  | 0.24155   | 0.126748  | 0.121212  | 0.134324  | 0.131265  |
| 0.120775  | 0.183566 | 0.244464  | 0.121212  | 0.121212  | 0.0524476 | 0.113491  |
| 0.131702  | 0.18954  | 0.239656  | 0.130099  | 0.126311  | 0.139132  | 0.136072  |
| 0.259615  | 0.168561 | 0.0968823 | 0.258596  | 0.257721  | 0.258887  | 0.261946  |
| 0.125291  | 0.200903 | 0.254516  | 0.131265  | 0.131847  | 0.128059  | 0.120338  |
| 0.123397  | 0.19289  | 0.245921  | 0.125291  | 0.129662  | 0.126457  | 0.116987  |
| 0.222611  | 0.136509 | 0.114656  | 0.218094  | 0.215181  | 0.216346  | 0.218823  |
| 0.124563  | 0.193473 | 0.246795  | 0.130536  | 0.125     | 0.129371  | 0.115239  |
| 0.232663  | 0.145688 | 0.104021  | 0.229895  | 0.22669   | 0.227564  | 0.23208   |
| 0.118007  | 0.189831 | 0.247232  | 0.122232  | 0.12398   | 0.123397  | 0.113345  |
| 0.129516  | 0.185897 | 0.243881  | 0.126457  | 0.120921  | 0.129662  | 0.11961   |
| 0.109994  | 0.18007  | 0.247086  | 0.114219  | 0.116259  | 0.122669  | 0.116404  |
| 0.122232  | 0.193473 | 0.249709  | 0.133741  | 0.127622  | 0.124417  | 0.0552156 |
| 0.201195  | 0.120629 | 0.129662  | 0.202506  | 0.200758  | 0.200466  | 0.202069  |
| 0.128059  | 0.187063 | 0.243881  | 0.129079  | 0.119755  | 0.13345   | 0.130099  |
| 0.119318  | 0.172494 | 0.240967  | 0.119464  | 0.112179  | 0.123834  | 0.122232  |
| 0.228438  | 0.13884  | 0.111742  | 0.226544  | 0.227127  | 0.225087  | 0.226981  |
| 0.112325  | 0.180944 | 0.246795  | 0.124709  | 0.120047  | 0.127622  | 0.105332  |
| 0.198718  | 0.121649 | 0.125146  | 0.198864  | 0.196824  | 0.194784  | 0.194639  |
| 0.115967  | 0.185169 | 0.246649  | 0.127768  | 0.125146  | 0.123689  | 0.108392  |
| 0.11859   | 0.176428 | 0.243153  | 0.115822  | 0.109994  | 0.115239  | 0.112179  |
| 0.11116   | 0.189103 | 0.247378  | 0.127622  | 0.12296   | 0.117133  | 0.112617  |
| 0.129225  | 0.200175 | 0.251748  | 0.139277  | 0.129662  | 0.127331  | 0.0590035 |
| 0.112179  | 0.175262 | 0.240239  | 0.109994  | 0.116696  | 0.112325  | 0.114219  |
| 0.155303  | 0.117279 | 0.173514  | 0.161568  | 0.161276  | 0.154866  | 0.159382  |
| 0.113928  | 0.169726 | 0.234703  | 0.113199  | 0.10708   | 0.119027  | 0.115093  |
| 0.112471  | 0.186043 | 0.249563  | 0.117279  | 0.123397  | 0.126311  | 0.121212  |
| 0.115093  | 0.18109  | 0.244318  | 0.124272  | 0.121358  | 0.125146  | 0.113636  |
| 0.128497  | 0.183421 | 0.241696  | 0.122232  | 0.122232  | 0.131556  | 0.127331  |
| 0.195659  | 0.112762 | 0.129953  | 0.194639  | 0.190559  | 0.191434  | 0.191288  |
| 0.115093  | 0.173805 | 0.240239  | 0.115239  | 0.107372  | 0.11553   | 0.109848  |
| 0.119027  | 0.170746 | 0.236597  | 0.132284  | 0.120921  | 0.119464  | 0.0560897 |
| 0.111888  | 0.1875   | 0.250728  | 0.120775  | 0.114073  | 0.104749  | 0.099359  |
| 0.116696  | 0.189394 | 0.249417  | 0.128788  | 0.123834  | 0.129079  | 0.10912   |
| 0.126166  | 0.179341 | 0.240239  | 0.119027  | 0.114656  | 0.124272  | 0.116259  |

|          |          |           |           |          |           |           |
|----------|----------|-----------|-----------|----------|-----------|-----------|
| 0.256265 | 0.166667 | 0.0976107 | 0.255828  | 0.255828 | 0.258159  | 0.256556  |
| 0.105186 | 0.185169 | 0.246649  | 0.125146  | 0.118153 | 0.113782  | 0.107809  |
| 0.115676 | 0.171766 | 0.237617  | 0.114656  | 0.116987 | 0.124563  | 0.117133  |
| 0.149767 | 0.138258 | 0.172057  | 0.184295  | 0.179633 | 0.180798  | 0.178904  |
| 0.18211  | 0.113782 | 0.137675  | 0.186626  | 0.18546  | 0.183421  | 0.183566  |
| 0.122378 | 0.177593 | 0.243735  | 0.0540501 | 0.12602  | 0.125437  | 0.127914  |
| 0.118153 | 0.178322 | 0.240385  | 0.116259  | 0.111597 | 0.123252  | 0.121358  |
| 0.113199 | 0.180653 | 0.246212  | 0.122669  | 0.116259 | 0.115676  | 0.0517191 |
| 0.143357 | 0.193036 | 0.245192  | 0.140297  | 0.135344 | 0.150495  | 0.147145  |
| 0.11859  | 0.174097 | 0.243444  | 0.0505536 | 0.116113 | 0.119901  | 0.117133  |
| 0.121941 | 0.179196 | 0.247378  | 0.0544872 | 0.120629 | 0.129662  | 0.12602   |
| 0.121503 | 0.18954  | 0.24898   | 0.128059  | 0.127477 | 0.130099  | 0.113636  |
| 0.117716 | 0.171766 | 0.230624  | 0.121358  | 0.112908 | 0.121358  | 0.11859   |
| 0.129516 | 0.184149 | 0.237762  | 0.125583  | 0.122669 | 0.134907  | 0.131556  |
| 0.120047 | 0.165355 | 0.235286  | 0.127185  | 0.121358 | 0.123106  | 0.108683  |
| 0.121941 | 0.19493  | 0.251166  | 0.13345   | 0.127622 | 0.125583  | 0.0592949 |
| 0.135198 | 0.205274 | 0.256847  | 0.146416  | 0.141754 | 0.136218  | 0.0740093 |
| 0.109411 | 0.185897 | 0.248834  | 0.131702  | 0.121503 | 0.118007  | 0.112325  |
| 0.128788 | 0.202069 | 0.255682  | 0.141754  | 0.13243  | 0.129516  | 0.0629371 |
| 0.127331 | 0.195076 | 0.253059  | 0.135344  | 0.132139 | 0.134761  | 0.116259  |
| 0.206439 | 0.120921 | 0.131993  | 0.207459  | 0.204254 | 0.20542   | 0.205857  |
| 0.124709 | 0.1875   | 0.248397  | 0.126311  | 0.121649 | 0.117279  | 0.11859   |
| 0.192599 | 0.114656 | 0.127185  | 0.191579  | 0.190414 | 0.190997  | 0.189394  |
| 0.11655  | 0.178176 | 0.244318  | 0.113782  | 0.109994 | 0.121941  | 0.113345  |
| 0.127622 | 0.178176 | 0.238199  | 0.124563  | 0.114656 | 0.128642  | 0.120047  |
| 0.125291 | 0.184878 | 0.239948  | 0.128642  | 0.127185 | 0.0528846 | 0.121503  |
| 0.118735 | 0.176865 | 0.240676  | 0.119464  | 0.118881 | 0.0553613 | 0.114365  |
| 0.123252 | 0.175554 | 0.235868  | 0.119318  | 0.114073 | 0.12602   | 0.125     |
| 0.123252 | 0.178759 | 0.238199  | 0.121941  | 0.113491 | 0.127768  | 0.123543  |
| 0.120047 | 0.172931 | 0.237908  | 0.11961   | 0.109411 | 0.119901  | 0.109557  |
| 0.113199 | 0.184732 | 0.247086  | 0.115676  | 0.11859  | 0.125874  | 0.120775  |
| 0.128642 | 0.188228 | 0.246212  | 0.130536  | 0.127622 | 0.0574009 | 0.118153  |
| 0.132867 | 0.18546  | 0.241113  | 0.140297  | 0.136801 | 0.136509  | 0.118007  |
| 0.252622 | 0.161859 | 0.0933858 | 0.24898   | 0.249563 | 0.250728  | 0.253497  |
| 0.122378 | 0.177593 | 0.242861  | 0.118444  | 0.112325 | 0.116696  | 0.114219  |
| 0.182255 | 0.110431 | 0.139277  | 0.186189  | 0.180361 | 0.179487  | 0.180798  |
| 0.187063 | 0.112617 | 0.133304  | 0.188957  | 0.189248 | 0.188374  | 0.187354  |
| 0.116113 | 0.171911 | 0.238345  | 0.116841  | 0.118298 | 0.125     | 0.118444  |
| 0.104458 | 0.178613 | 0.244755  | 0.121795  | 0.113636 | 0.109557  | 0.104749  |
| 0.128059 | 0.184441 | 0.24359   | 0.124126  | 0.119172 | 0.128205  | 0.120192  |
| 0.114656 | 0.166667 | 0.235431  | 0.113636  | 0.104312 | 0.118881  | 0.114656  |
| 0.111888 | 0.167978 | 0.23412   | 0.118153  | 0.113782 | 0.108537  | 0.113054  |
| 0.115385 | 0.183421 | 0.247815  | 0.12398   | 0.122523 | 0.123689  | 0.106935  |
| 0.121358 | 0.171911 | 0.230769  | 0.123834  | 0.113345 | 0.124709  | 0.126603  |

|           |          |          |          |          |           |           |
|-----------|----------|----------|----------|----------|-----------|-----------|
| 0.133304  | 0.188228 | 0.245921 | 0.131702 | 0.123543 | 0.13549   | 0.132721  |
| 0.118298  | 0.175554 | 0.239948 | 0.117279 | 0.111451 | 0.118153  | 0.113928  |
| 0.129371  | 0.186334 | 0.243735 | 0.129225 | 0.121941 | 0.133887  | 0.131119  |
| 0.107955  | 0.183858 | 0.244755 | 0.11655  | 0.11655  | 0.117424  | 0.108537  |
| 0.129225  | 0.19289  | 0.249417 | 0.131993 | 0.129953 | 0.0550699 | 0.121066  |
| 0.120921  | 0.185752 | 0.246649 | 0.125437 | 0.120192 | 0.122815  | 0.0512821 |
| 0.129225  | 0.197261 | 0.253788 | 0.139277 | 0.135781 | 0.136364  | 0.118444  |
| 0.121795  | 0.17905  | 0.247815 | 0.122523 | 0.106498 | 0.129808  | 0.122086  |
| 0.118007  | 0.170017 | 0.236451 | 0.117279 | 0.109703 | 0.109994  | 0.113345  |
| 0.127914  | 0.197407 | 0.245192 | 0.127768 | 0.130973 | 0.138258  | 0.125     |
| 0.184586  | 0.113054 | 0.138112 | 0.18648  | 0.183858 | 0.184149  | 0.185752  |
| 0.13549   | 0.188666 | 0.243153 | 0.13447  | 0.127768 | 0.142045  | 0.136364  |
| 0.119464  | 0.175554 | 0.237034 | 0.11961  | 0.115822 | 0.124272  | 0.122669  |
| 0.126311  | 0.185897 | 0.245338 | 0.124417 | 0.126166 | 0.0451632 | 0.11757   |
| 0.116259  | 0.182838 | 0.239948 | 0.11553  | 0.118153 | 0.0543415 | 0.107809  |
| 0.115822  | 0.187354 | 0.245338 | 0.127914 | 0.120629 | 0.120047  | 0.0517191 |
| 0.122378  | 0.193328 | 0.250728 | 0.132721 | 0.126603 | 0.121358  | 0.0515734 |
| 0.188957  | 0.110431 | 0.13141  | 0.195221 | 0.187937 | 0.191142  | 0.189248  |
| 0.118153  | 0.164627 | 0.227855 | 0.121212 | 0.107809 | 0.125874  | 0.121649  |
| 0.109266  | 0.151078 | 0.21926  | 0.112325 | 0.105624 | 0.119318  | 0.111014  |
| 0.126166  | 0.180507 | 0.239948 | 0.122815 | 0.114656 | 0.128934  | 0.125291  |
| 0.190705  | 0.107809 | 0.127331 | 0.192599 | 0.189977 | 0.192599  | 0.191871  |
| 0.0999417 | 0.172057 | 0.239656 | 0.119027 | 0.109994 | 0.105915  | 0.100524  |
| 0.121941  | 0.191725 | 0.251748 | 0.131993 | 0.133159 | 0.129079  | 0.113199  |
| 0.122523  | 0.180653 | 0.241259 | 0.121212 | 0.117133 | 0.125291  | 0.122815  |
| 0.117716  | 0.178176 | 0.246649 | 0.055507 | 0.113782 | 0.120484  | 0.113928  |
| 0.18648   | 0.116696 | 0.135344 | 0.186917 | 0.183712 | 0.1875    | 0.18648   |
| 0.117716  | 0.183712 | 0.244901 | 0.125146 | 0.121941 | 0.124272  | 0.108392  |
| 0.115676  | 0.175262 | 0.234994 | 0.113491 | 0.118153 | 0.124563  | 0.11014   |
| 0.103147  | 0.167686 | 0.23412  | 0.116696 | 0.112617 | 0.108537  | 0.107517  |
| 0.116259  | 0.156906 | 0.223339 | 0.122815 | 0.11961  | 0.111451  | 0.121795  |
| 0.11116   | 0.18852  | 0.250874 | 0.11451  | 0.119172 | 0.123543  | 0.122815  |
| 0.127477  | 0.196096 | 0.25204  | 0.136946 | 0.134615 | 0.134615  | 0.115822  |
| 0.117861  | 0.174534 | 0.241259 | 0.114219 | 0.108683 | 0.11859   | 0.110286  |
| 0.125728  | 0.183275 | 0.246503 | 0.119755 | 0.113345 | 0.129079  | 0.11961   |
| 0.147145  | 0.195367 | 0.250146 | 0.074155 | 0.146416 | 0.14729   | 0.148601  |
| 0.235431  | 0.151369 | 0.103001 | 0.238199 | 0.235577 | 0.235868  | 0.236014  |
| 0.128497  | 0.183129 | 0.250146 | 0.126603 | 0.114073 | 0.133013  | 0.12704   |
| 0.113345  | 0.1875   | 0.249272 | 0.113491 | 0.119027 | 0.121649  | 0.122086  |
| 0.120775  | 0.168998 | 0.232809 | 0.117133 | 0.112762 | 0.123543  | 0.118735  |
| 0.125291  | 0.177593 | 0.232955 | 0.114073 | 0.121066 | 0.123689  | 0.125     |
| 0.112908  | 0.17803  | 0.239802 | 0.115967 | 0.118007 | 0.11655   | 0.115822  |
| 0.0549242 | 0.18211  | 0.244172 | 0.123252 | 0.11655  | 0.122378  | 0.116404  |
| 0.121795  | 0.178759 | 0.235868 | 0.12602  | 0.116987 | 0.12602   | 0.124709  |

|          |          |           |           |           |           |          |
|----------|----------|-----------|-----------|-----------|-----------|----------|
| 0.122815 | 0.189685 | 0.246795  | 0.132284  | 0.13141   | 0.134324  | 0.114656 |
| 0.115822 | 0.170746 | 0.241259  | 0.0964452 | 0.11655   | 0.124417  | 0.121649 |
| 0.241259 | 0.153118 | 0.0995047 | 0.238491  | 0.237908  | 0.234703  | 0.238636 |
| 0.100087 | 0.173368 | 0.239219  | 0.118881  | 0.110431  | 0.109266  | 0.102418 |
| 0.105915 | 0.18007  | 0.244172  | 0.110723  | 0.112179  | 0.109557  | 0.102418 |
| 0.119755 | 0.173223 | 0.24053   | 0.112908  | 0.108829  | 0.116987  | 0.106643 |
| 0.132721 | 0.187063 | 0.248543  | 0.0606061 | 0.129662  | 0.134907  | 0.133304 |
| 0.13039  | 0.188811 | 0.255245  | 0.131119  | 0.118881  | 0.138403  | 0.134178 |
| 0.114365 | 0.172203 | 0.231643  | 0.115676  | 0.118007  | 0.115385  | 0.120484 |
| 0.120775 | 0.175117 | 0.237471  | 0.116259  | 0.117133  | 0.126748  | 0.121358 |
| 0.117424 | 0.175554 | 0.240822  | 0.0750291 | 0.112034  | 0.117279  | 0.114802 |
| 0.233683 | 0.14933  | 0.105915  | 0.23208   | 0.229749  | 0.230624  | 0.2331   |
| 0.123834 | 0.17905  | 0.238491  | 0.122232  | 0.115822  | 0.128642  | 0.129079 |
| 0.120192 | 0.189685 | 0.249709  | 0.129953  | 0.126166  | 0.128497  | 0.110868 |
| 0.109994 | 0.172786 | 0.244172  | 0.106643  | 0.113928  | 0.121212  | 0.109703 |
| 0.126457 | 0.186626 | 0.242279  | 0.118735  | 0.12398   | 0.13039   | 0.125    |
| 0.123252 | 0.194493 | 0.248689  | 0.128351  | 0.13039   | 0.125728  | 0.116841 |
| 0.121212 | 0.178759 | 0.239656  | 0.116987  | 0.11116   | 0.117279  | 0.110431 |
| 0.122669 | 0.187791 | 0.249854  | 0.134178  | 0.128059  | 0.13039   | 0.109557 |
| 0.126311 | 0.198427 | 0.25204   | 0.138986  | 0.134615  | 0.138112  | 0.119318 |
| 0.11553  | 0.187354 | 0.247669  | 0.124126  | 0.122669  | 0.122669  | 0.103875 |
| 0.117424 | 0.174679 | 0.241696  | 0.114656  | 0.107955  | 0.11553   | 0.110723 |
| 0.119172 | 0.193619 | 0.252768  | 0.121649  | 0.127768  | 0.129516  | 0.128788 |
| 0.122523 | 0.198135 | 0.254953  | 0.12704   | 0.131993  | 0.135198  | 0.13447  |
| 0.132139 | 0.196096 | 0.249126  | 0.132284  | 0.133741  | 0.0559441 | 0.123397 |
| 0.135052 | 0.194347 | 0.248252  | 0.136072  | 0.136072  | 0.0568182 | 0.12602  |
| 0.124709 | 0.198864 | 0.254516  | 0.126311  | 0.129808  | 0.132721  | 0.132576 |
| 0.106935 | 0.177302 | 0.244901  | 0.11553   | 0.10708   | 0.109411  | 0.110431 |
| 0.130099 | 0.205711 | 0.259033  | 0.142191  | 0.131993  | 0.126748  | 0.115239 |
| 0.136655 | 0.196533 | 0.255099  | 0.135052  | 0.135052  | 0.141171  | 0.129371 |
| 0.204837 | 0.125728 | 0.113199  | 0.207605  | 0.205857  | 0.2044    | 0.207168 |
| 0.125291 | 0.16623  | 0.239948  | 0.127477  | 0.0619172 | 0.134761  | 0.123252 |
| 0.112471 | 0.184878 | 0.246066  | 0.115239  | 0.116696  | 0.116987  | 0.106643 |
| 0.126311 | 0.173077 | 0.235431  | 0.118298  | 0.115967  | 0.124126  | 0.117279 |
| 0.224359 | 0.144959 | 0.105624  | 0.22567   | 0.225087  | 0.222465  | 0.224942 |
| 0.210373 | 0.13243  | 0.128351  | 0.214307  | 0.210519  | 0.213724  | 0.211247 |
| 0.128351 | 0.19289  | 0.250583  | 0.137529  | 0.134615  | 0.133741  | 0.116696 |
| 0.252331 | 0.160985 | 0.102418  | 0.249563  | 0.249272  | 0.248397  | 0.248834 |
| 0.1081   | 0.176719 | 0.245192  | 0.114073  | 0.105915  | 0.102418  | 0.111305 |
| 0.135198 | 0.199155 | 0.249854  | 0.140006  | 0.139132  | 0.139714  | 0.137238 |
| 0.100816 | 0.179924 | 0.243735  | 0.122815  | 0.114948  | 0.108829  | 0.106643 |
| 0.119027 | 0.190851 | 0.252622  | 0.119464  | 0.123252  | 0.127914  | 0.129516 |
| 0.187646 | 0.113782 | 0.123397  | 0.189248  | 0.186043  | 0.186334  | 0.188811 |
| 0.118735 | 0.185606 | 0.244172  | 0.129662  | 0.122669  | 0.132576  | 0.115822 |

|           |          |          |           |           |           |           |
|-----------|----------|----------|-----------|-----------|-----------|-----------|
| 0.194784  | 0.115676 | 0.129371 | 0.195513  | 0.192016  | 0.193765  | 0.19391   |
| 0.114365  | 0.176282 | 0.248252 | 0.109557  | 0.111305  | 0.122669  | 0.116987  |
| 0.121358  | 0.16317  | 0.227855 | 0.12704   | 0.120921  | 0.123252  | 0.114656  |
| 0.12398   | 0.183858 | 0.240967 | 0.125     | 0.123834  | 0.120047  | 0.125437  |
| 0.109703  | 0.16317  | 0.226981 | 0.115093  | 0.11859   | 0.11655   | 0.11553   |
| 0.113928  | 0.172348 | 0.237617 | 0.112908  | 0.105624  | 0.111742  | 0.104021  |
| 0.11014   | 0.16215  | 0.240239 | 0.11757   | 0.0464744 | 0.124563  | 0.112762  |
| 0.0973193 | 0.1706   | 0.237325 | 0.118153  | 0.109703  | 0.10708   | 0.102564  |
| 0.116987  | 0.17366  | 0.238928 | 0.115385  | 0.109557  | 0.12296   | 0.116987  |
| 0.11655   | 0.190705 | 0.247815 | 0.130099  | 0.118153  | 0.108829  | 0.10373   |
| 0.115093  | 0.174097 | 0.241113 | 0.114656  | 0.103875  | 0.121358  | 0.11451   |
| 0.101253  | 0.176865 | 0.241259 | 0.118007  | 0.114219  | 0.110431  | 0.103875  |
| 0.120629  | 0.177302 | 0.239948 | 0.127768  | 0.120775  | 0.0715326 | 0.116841  |
| 0.131702  | 0.184586 | 0.241696 | 0.128642  | 0.122523  | 0.13447   | 0.130536  |
| 0.117861  | 0.179779 | 0.241259 | 0.118007  | 0.119755  | 0.0483683 | 0.111742  |
| 0.112762  | 0.181381 | 0.238491 | 0.110577  | 0.116113  | 0.121941  | 0.107809  |
| 0.113199  | 0.17366  | 0.237179 | 0.108974  | 0.109557  | 0.113054  | 0.103875  |
| 0.123106  | 0.18007  | 0.23951  | 0.128497  | 0.125     | 0.124709  | 0.111451  |
| 0.112617  | 0.186772 | 0.24796  | 0.112762  | 0.11859   | 0.124126  | 0.120484  |
| 0.120338  | 0.189831 | 0.248106 | 0.131265  | 0.121358  | 0.119901  | 0.0553613 |
| 0.119755  | 0.186917 | 0.24461  | 0.125146  | 0.121941  | 0.0502622 | 0.11014   |
| 0.120775  | 0.175991 | 0.238054 | 0.123252  | 0.113636  | 0.123543  | 0.120192  |
| 0.130828  | 0.189248 | 0.241404 | 0.130682  | 0.120484  | 0.135635  | 0.13141   |
| 0.137821  | 0.193619 | 0.244318 | 0.135052  | 0.128934  | 0.14292   | 0.138986  |
| 0.106789  | 0.174825 | 0.240093 | 0.115093  | 0.110723  | 0.115385  | 0.0995047 |
| 0.118153  | 0.17366  | 0.240093 | 0.115676  | 0.107226  | 0.115676  | 0.109994  |
| 0.0509907 | 0.173805 | 0.239656 | 0.113491  | 0.108537  | 0.113199  | 0.108392  |
| 0.125291  | 0.19799  | 0.253934 | 0.126311  | 0.131847  | 0.135052  | 0.131702  |
| 0.103584  | 0.184149 | 0.246503 | 0.125583  | 0.117424  | 0.112471  | 0.107663  |
| 0.140589  | 0.206876 | 0.256993 | 0.147436  | 0.143357  | 0.139569  | 0.0735723 |
| 0.137675  | 0.188811 | 0.247669 | 0.131993  | 0.126748  | 0.136946  | 0.127768  |
| 0.126166  | 0.186334 | 0.244901 | 0.0584207 | 0.127185  | 0.132721  | 0.129371  |
| 0.103584  | 0.171329 | 0.240676 | 0.113345  | 0.105478  | 0.11451   | 0.113199  |
| 0.113636  | 0.175554 | 0.240239 | 0.110286  | 0.105624  | 0.120775  | 0.113054  |
| 0.131993  | 0.190122 | 0.246941 | 0.132139  | 0.132139  | 0.0534674 | 0.120047  |
| 0.207022  | 0.13141  | 0.132867 | 0.210956  | 0.206294  | 0.205128  | 0.208479  |
| 0.108537  | 0.177739 | 0.237179 | 0.115093  | 0.116841  | 0.123834  | 0.106498  |
| 0.113054  | 0.179924 | 0.24461  | 0.120775  | 0.116113  | 0.115239  | 0.120338  |
| 0.113491  | 0.189685 | 0.250874 | 0.113928  | 0.119172  | 0.123252  | 0.123106  |
| 0.119755  | 0.183712 | 0.241696 | 0.122523  | 0.125437  | 0.0514277 | 0.114802  |
| 0.118735  | 0.179779 | 0.248252 | 0.119464  | 0.112471  | 0.125     | 0.121358  |
| 0.109411  | 0.182401 | 0.245921 | 0.120047  | 0.106061  | 0.127914  | 0.121941  |
| 0.111014  | 0.18546  | 0.245484 | 0.122523  | 0.109703  | 0.131556  | 0.126166  |
| 0.123397  | 0.181818 | 0.245338 | 0.0568182 | 0.125874  | 0.127622  | 0.124563  |

|          |          |          |          |           |           |           |
|----------|----------|----------|----------|-----------|-----------|-----------|
| 0.111451 | 0.186189 | 0.246503 | 0.119755 | 0.115676  | 0.101981  | 0.0968823 |
| 0.123397 | 0.194639 | 0.250874 | 0.123543 | 0.129371  | 0.131702  | 0.126311  |
| 0.116696 | 0.182692 | 0.243007 | 0.119172 | 0.116841  | 0.117716  | 0.117279  |
| 0.117716 | 0.177593 | 0.249272 | 0.11757  | 0.106498  | 0.12398   | 0.119464  |
| 0.177302 | 0.165793 | 0.210664 | 0.180653 | 0.179196  | 0.170746  | 0.174679  |
| 0.118735 | 0.171329 | 0.238054 | 0.11859  | 0.108974  | 0.122086  | 0.120775  |
| 0.121503 | 0.182838 | 0.237908 | 0.125146 | 0.128642  | 0.132139  | 0.128788  |
| 0.121941 | 0.192016 | 0.253205 | 0.129953 | 0.121212  | 0.121212  | 0.117279  |
| 0.121503 | 0.177302 | 0.239365 | 0.123106 | 0.122232  | 0.125146  | 0.12296   |
| 0.101399 | 0.173223 | 0.24257  | 0.110868 | 0.0965909 | 0.112034  | 0.106352  |
| 0.109848 | 0.171766 | 0.243444 | 0.105624 | 0.0942599 | 0.114365  | 0.108392  |
| 0.105769 | 0.176719 | 0.250146 | 0.112617 | 0.0977564 | 0.118153  | 0.112471  |
| 0.119172 | 0.187791 | 0.247523 | 0.127768 | 0.128351  | 0.128059  | 0.121795  |
| 0.117716 | 0.164773 | 0.234994 | 0.117861 | 0.102418  | 0.120484  | 0.120338  |
| 0.126311 | 0.195513 | 0.251748 | 0.137238 | 0.131993  | 0.122669  | 0.123106  |
| 0.106935 | 0.169726 | 0.239365 | 0.116987 | 0.109994  | 0.116696  | 0.106643  |
| 0.10708  | 0.179487 | 0.245047 | 0.128205 | 0.118298  | 0.113636  | 0.112325  |
| 0.126457 | 0.197407 | 0.256847 | 0.136801 | 0.130682  | 0.141171  | 0.125     |
| 0.116841 | 0.188083 | 0.247815 | 0.129225 | 0.11757   | 0.118735  | 0.109266  |
| 0.123543 | 0.189248 | 0.244901 | 0.123689 | 0.125728  | 0.118444  | 0.117716  |
| 0.110723 | 0.186043 | 0.246066 | 0.122523 | 0.109994  | 0.113491  | 0.104604  |
| 0.11451  | 0.186334 | 0.246941 | 0.127185 | 0.118444  | 0.117279  | 0.11014   |
| 0.104021 | 0.177885 | 0.244901 | 0.110577 | 0.106206  | 0.109994  | 0.104604  |
| 0.121649 | 0.191434 | 0.25204  | 0.13141  | 0.121795  | 0.124709  | 0.113199  |
| 0.106206 | 0.179196 | 0.248252 | 0.114802 | 0.110723  | 0.110723  | 0.0980478 |
| 0.134761 | 0.197844 | 0.250583 | 0.143065 | 0.143065  | 0.146562  | 0.134761  |
| 0.126603 | 0.184149 | 0.246212 | 0.130245 | 0.132867  | 0.131702  | 0.126603  |
| 0.111451 | 0.179779 | 0.244755 | 0.12296  | 0.109266  | 0.105769  | 0.0980478 |
| 0.13549  | 0.200903 | 0.257139 | 0.14088  | 0.136218  | 0.139132  | 0.124417  |
| 0.125291 | 0.184586 | 0.244027 | 0.118153 | 0.122815  | 0.0989219 | 0.121795  |
| 0.13549  | 0.190997 | 0.250146 | 0.13884  | 0.134761  | 0.140297  | 0.136655  |
| 0.115093 | 0.186043 | 0.246066 | 0.122523 | 0.116987  | 0.11116   | 0.0996503 |
| 0.144085 | 0.202214 | 0.250874 | 0.14831  | 0.145688  | 0.147727  | 0.141463  |
| 0.124563 | 0.192308 | 0.244755 | 0.13345  | 0.132867  | 0.133741  | 0.124854  |
| 0.135052 | 0.189394 | 0.253205 | 0.136655 | 0.139277  | 0.134907  | 0.129808  |
| 0.121649 | 0.193473 | 0.252622 | 0.125    | 0.127622  | 0.10373   | 0.11553   |
| 0.118298 | 0.179633 | 0.246358 | 0.116696 | 0.111451  | 0.108537  | 0.107809  |
| 0.113491 | 0.178613 | 0.24155  | 0.120338 | 0.114802  | 0.116259  | 0.106498  |
| 0.116841 | 0.183421 | 0.248397 | 0.114948 | 0.124272  | 0.125437  | 0.112762  |
| 0.120629 | 0.192162 | 0.251311 | 0.13039  | 0.119027  | 0.120775  | 0.112762  |
| 0.125146 | 0.197261 | 0.257284 | 0.136655 | 0.124417  | 0.127914  | 0.11757   |
| 0.119901 | 0.17366  | 0.242716 | 0.126166 | 0.122669  | 0.122086  | 0.117279  |
| 0.114073 | 0.181527 | 0.245047 | 0.115093 | 0.117133  | 0.0952797 | 0.106206  |
| 0.112471 | 0.17905  | 0.243444 | 0.118444 | 0.113782  | 0.120484  | 0.106061  |

|          |          |          |          |          |          |          |
|----------|----------|----------|----------|----------|----------|----------|
| 0.118735 | 0.183566 | 0.246503 | 0.125874 | 0.118881 | 0.120921 | 0.118444 |
| 0.109703 | 0.179196 | 0.244172 | 0.121503 | 0.108974 | 0.11451  | 0.104749 |
| 0.123834 | 0.185169 | 0.24898  | 0.127768 | 0.125728 | 0.12602  | 0.113636 |
| 0.111888 | 0.176136 | 0.243444 | 0.121941 | 0.109411 | 0.109994 | 0.102564 |
| 0.113782 | 0.171911 | 0.230186 | 0.11451  | 0.114219 | 0.118298 | 0.121358 |
| 0.112617 | 0.175991 | 0.246503 | 0.116841 | 0.111597 | 0.123543 | 0.120192 |
| 0.106498 | 0.178322 | 0.240385 | 0.113636 | 0.107517 | 0.106643 | 0.109994 |
| 0.110577 | 0.179779 | 0.242716 | 0.115385 | 0.113054 | 0.115093 | 0.11116  |
| 0.109266 | 0.169726 | 0.231498 | 0.113782 | 0.114656 | 0.11116  | 0.119172 |
| 0.109994 | 0.175991 | 0.245629 | 0.121212 | 0.104604 | 0.120629 | 0.116404 |
| 0.117861 | 0.175408 | 0.237471 | 0.124126 | 0.113054 | 0.124126 | 0.120484 |
| 0.104749 | 0.166667 | 0.229895 | 0.104312 | 0.1081   | 0.1081   | 0.111742 |
| 0.125291 | 0.190705 | 0.250146 | 0.13243  | 0.119027 | 0.127477 | 0.126166 |



| TDr_2406  | TDr_2425  | TDr_2431  | TDr_2432  | TDr_2435  | TDr_2438  | TDr_2439  |
|-----------|-----------|-----------|-----------|-----------|-----------|-----------|
| 0.119172  | 0.119318  | 0.108392  | 0.117424  | 0.103293  | 0.107226  | 0.105915  |
| 0.117861  | 0.110431  | 0.102418  | 0.114073  | 0.10169   | 0.110577  | 0.100816  |
| 0.113491  | 0.106352  | 0.097465  | 0.111742  | 0.0981935 | 0.105915  | 0.0976107 |
| 0.114365  | 0.110723  | 0.0933858 | 0.116404  | 0.0844988 | 0.114948  | 0.0973193 |
| 0.127768  | 0.0699301 | 0.136801  | 0.129225  | 0.132284  | 0.130099  | 0.126457  |
| 0.131265  | 0.117424  | 0.118735  | 0.125728  | 0.115676  | 0.129516  | 0.118881  |
| 0.113928  | 0.114948  | 0.120047  | 0.115676  | 0.119901  | 0.118007  | 0.109411  |
| 0.112762  | 0.108829  | 0.102855  | 0.115676  | 0.10067   | 0.107809  | 0.105915  |
| 0.103293  | 0.10169   | 0.101253  | 0.108246  | 0.099359  | 0.0887238 | 0.0914918 |
| 0.11655   | 0.109703  | 0.0990676 | 0.118298  | 0.101544  | 0.0833333 | 0.0814394 |
| 0.110868  | 0.116259  | 0.106789  | 0.110286  | 0.109557  | 0.103584  | 0.104895  |
| 0.101107  | 0.0995047 | 0.109557  | 0.104895  | 0.108537  | 0.109266  | 0.0989219 |
| 0.106352  | 0.107372  | 0.099359  | 0.112179  | 0.103584  | 0.0909091 | 0.0962995 |
| 0.138549  | 0.130536  | 0.116404  | 0.140297  | 0.119172  | 0.123397  | 0.11859   |
| 0.129662  | 0.126894  | 0.0810023 | 0.131702  | 0.0933858 | 0.120921  | 0.110577  |
| 0.109411  | 0.122378  | 0.106498  | 0.105624  | 0.1081    | 0.108246  | 0.109266  |
| 0.0973193 | 0.108246  | 0.109557  | 0.100233  | 0.108537  | 0.109266  | 0.100379  |
| 0.147582  | 0.127331  | 0.136801  | 0.14729   | 0.134615  | 0.144085  | 0.139277  |
| 0.110577  | 0.107226  | 0.100087  | 0.111742  | 0.0999417 | 0.105041  | 0.0984848 |
| 0.207605  | 0.202506  | 0.167686  | 0.21081   | 0.173368  | 0.200612  | 0.195804  |
| 0.124126  | 0.11553   | 0.120047  | 0.123543  | 0.120192  | 0.123252  | 0.11553   |
| 0.125728  | 0.113928  | 0.119027  | 0.120775  | 0.116259  | 0.11757   | 0.111014  |
| 0.0888695 | 0.109411  | 0.100524  | 0.0868298 | 0.0995047 | 0.105186  | 0.0989219 |
| 0.100962  | 0.115676  | 0.122232  | 0.104458  | 0.12296   | 0.123106  | 0.112471  |
| 0.0999417 | 0.105624  | 0.0961538 | 0.099359  | 0.0995047 | 0.0961538 | 0.092803  |
| 0.128205  | 0.122232  | 0.124709  | 0.132576  | 0.12398   | 0.131119  | 0.119027  |
| 0.111888  | 0.116113  | 0.12296   | 0.11655   | 0.123106  | 0.122669  | 0.112908  |
| 0.101399  | 0.11757   | 0.113928  | 0.103438  | 0.116113  | 0.115676  | 0.106498  |
| 0.119464  | 0.125728  | 0.133159  | 0.121212  | 0.129225  | 0.124709  | 0.123106  |
| 0.120047  | 0.121941  | 0.119172  | 0.120629  | 0.119027  | 0.113054  | 0.10067   |
| 0.116404  | 0.123834  | 0.116404  | 0.119901  | 0.113636  | 0.116113  | 0.109557  |
| 0.109557  | 0.119901  | 0.117133  | 0.115385  | 0.119027  | 0.115385  | 0.106789  |
| 0.108392  | 0.11116   | 0.0949883 | 0.108392  | 0.0965909 | 0.100524  | 0.0962995 |
| 0.113054  | 0.117279  | 0.115385  | 0.115093  | 0.116404  | 0.106352  | 0.10067   |
| 0.109411  | 0.11451   | 0.118444  | 0.109703  | 0.122669  | 0.105624  | 0.114219  |
| 0.117133  | 0.121649  | 0.124417  | 0.116841  | 0.119901  | 0.11014   | 0.109994  |
| 0.128059  | 0.131702  | 0.133304  | 0.127185  | 0.127914  | 0.12602   | 0.121795  |
| 0.107226  | 0.118735  | 0.119755  | 0.111888  | 0.116987  | 0.109266  | 0.114656  |
| 0.090035  | 0.109411  | 0.106935  | 0.0871212 | 0.108537  | 0.106643  | 0.099796  |
| 0.105478  | 0.11553   | 0.117424  | 0.105186  | 0.118735  | 0.11655   | 0.11116   |
| 0.0944056 | 0.105915  | 0.109266  | 0.094697  | 0.107663  | 0.102273  | 0.0992133 |
| 0.129079  | 0.140297  | 0.13549   | 0.129079  | 0.133304  | 0.136364  | 0.12398   |

|           |          |           |           |           |           |           |
|-----------|----------|-----------|-----------|-----------|-----------|-----------|
| 0.126166  | 0.14088  | 0.141026  | 0.123543  | 0.13884   | 0.141317  | 0.133304  |
| 0.0986305 | 0.105478 | 0.114948  | 0.101544  | 0.113345  | 0.107955  | 0.107226  |
| 0.0968823 | 0.100233 | 0.110286  | 0.0986305 | 0.106061  | 0.097465  | 0.0987762 |
| 0.106061  | 0.11757  | 0.119172  | 0.106643  | 0.114948  | 0.0990676 | 0.103293  |
| 0.104604  | 0.113782 | 0.11014   | 0.103438  | 0.112908  | 0.11655   | 0.110286  |
| 0.124563  | 0.136946 | 0.134178  | 0.121066  | 0.131702  | 0.129516  | 0.126166  |
| 0.10067   | 0.1081   | 0.112908  | 0.104458  | 0.111888  | 0.107955  | 0.102273  |
| 0.0990676 | 0.116404 | 0.111597  | 0.100816  | 0.112325  | 0.10373   | 0.106789  |
| 0.145833  | 0.144231 | 0.143794  | 0.144376  | 0.138403  | 0.145542  | 0.132576  |
| 0.117279  | 0.12704  | 0.121066  | 0.111451  | 0.123252  | 0.128934  | 0.11859   |
| 0.0926573 | 0.109703 | 0.115385  | 0.0917832 | 0.113491  | 0.115093  | 0.105915  |
| 0.125291  | 0.118735 | 0.115967  | 0.129079  | 0.120192  | 0.104312  | 0.106498  |
| 0.105186  | 0.110286 | 0.0894522 | 0.105769  | 0.0843531 | 0.11451   | 0.110868  |
| 0.122086  | 0.13447  | 0.139277  | 0.120047  | 0.138258  | 0.140443  | 0.130682  |
| 0.110577  | 0.11859  | 0.124854  | 0.10912   | 0.12704   | 0.121066  | 0.115967  |
| 0.0936772 | 0.106935 | 0.112617  | 0.0968823 | 0.111305  | 0.107955  | 0.106643  |
| 0.108246  | 0.11451  | 0.117861  | 0.109703  | 0.117716  | 0.109703  | 0.106643  |
| 0.102273  | 0.119027 | 0.120338  | 0.103438  | 0.118735  | 0.103147  | 0.103293  |
| 0.118007  | 0.129225 | 0.136655  | 0.113054  | 0.131556  | 0.136655  | 0.129225  |
| 0.125291  | 0.136509 | 0.131702  | 0.118298  | 0.132139  | 0.131702  | 0.126311  |
| 0.155157  | 0.161422 | 0.146707  | 0.152244  | 0.146853  | 0.159237  | 0.154429  |
| 0.0983392 | 0.107226 | 0.112908  | 0.0992133 | 0.112471  | 0.109411  | 0.0990676 |
| 0.0930944 | 0.106061 | 0.113491  | 0.0957168 | 0.112471  | 0.10912   | 0.0999417 |
| 0.0942599 | 0.103147 | 0.115239  | 0.0971737 | 0.112471  | 0.105041  | 0.094697  |
| 0.134324  | 0.134761 | 0.133741  | 0.134907  | 0.132139  | 0.135198  | 0.131847  |
| 0.10169   | 0.106789 | 0.110431  | 0.0987762 | 0.108829  | 0.107809  | 0.100962  |
| 0.116987  | 0.128497 | 0.12398   | 0.11757   | 0.124417  | 0.134178  | 0.124709  |
| 0.102418  | 0.120047 | 0.119318  | 0.102127  | 0.119755  | 0.103584  | 0.0996503 |
| 0.0984848 | 0.112908 | 0.117133  | 0.0973193 | 0.116404  | 0.113636  | 0.105624  |
| 0.145396  | 0.144085 | 0.136072  | 0.145688  | 0.13243   | 0.142774  | 0.142337  |
| 0.0981935 | 0.11757  | 0.118007  | 0.0979021 | 0.116113  | 0.118007  | 0.107955  |
| 0.122232  | 0.131119 | 0.13243   | 0.119027  | 0.132284  | 0.128934  | 0.121795  |
| 0.118881  | 0.123397 | 0.127622  | 0.115093  | 0.130682  | 0.127622  | 0.115822  |
| 0.11116   | 0.108683 | 0.103875  | 0.112325  | 0.103438  | 0.113199  | 0.105769  |
| 0.0887238 | 0.107809 | 0.115239  | 0.0913462 | 0.111014  | 0.105041  | 0.101981  |
| 0.0995047 | 0.106643 | 0.112325  | 0.0977564 | 0.113928  | 0.109411  | 0.106061  |
| 0.111742  | 0.127331 | 0.130973  | 0.110577  | 0.130536  | 0.128642  | 0.126166  |
| 0.097028  | 0.104749 | 0.114802  | 0.10169   | 0.112617  | 0.1081    | 0.0995047 |
| 0.124854  | 0.134907 | 0.134178  | 0.124272  | 0.132576  | 0.134178  | 0.123543  |
| 0.104458  | 0.115093 | 0.120192  | 0.104458  | 0.117716  | 0.115239  | 0.106061  |
| 0.0995047 | 0.111888 | 0.114073  | 0.0939685 | 0.11655   | 0.11757   | 0.111305  |
| 0.097465  | 0.112179 | 0.11553   | 0.100379  | 0.115385  | 0.11757   | 0.106643  |
| 0.100379  | 0.118007 | 0.116987  | 0.101544  | 0.117424  | 0.115239  | 0.11014   |
| 0.0971737 | 0.105769 | 0.113491  | 0.0986305 | 0.113636  | 0.11116   | 0.104895  |

|           |          |          |           |          |           |           |
|-----------|----------|----------|-----------|----------|-----------|-----------|
| 0.0925117 | 0.112179 | 0.114656 | 0.0936772 | 0.111597 | 0.113199  | 0.104604  |
| 0.120047  | 0.131847 | 0.135781 | 0.120629  | 0.130682 | 0.130828  | 0.126311  |
| 0.0955711 | 0.108246 | 0.108392 | 0.0987762 | 0.107663 | 0.102273  | 0.100379  |
| 0.108537  | 0.105186 | 0.110577 | 0.107372  | 0.113054 | 0.095134  | 0.101107  |
| 0.125437  | 0.124126 | 0.126311 | 0.127185  | 0.12296  | 0.121358  | 0.111597  |
| 0.122815  | 0.120921 | 0.128059 | 0.122815  | 0.125583 | 0.122523  | 0.113054  |
| 0.122815  | 0.123543 | 0.131847 | 0.125437  | 0.130245 | 0.122232  | 0.119755  |
| 0.128205  | 0.132721 | 0.132576 | 0.130536  | 0.129225 | 0.13141   | 0.129516  |
| 0.118735  | 0.105478 | 0.112325 | 0.116987  | 0.111597 | 0.113491  | 0.106935  |
| 0.181964  | 0.181527 | 0.169143 | 0.183712  | 0.16958  | 0.187209  | 0.173368  |
| 0.106352  | 0.105624 | 0.109848 | 0.107809  | 0.107955 | 0.104895  | 0.0995047 |
| 0.124854  | 0.131993 | 0.130973 | 0.133013  | 0.128497 | 0.126311  | 0.130828  |
| 0.117279  | 0.122086 | 0.12398  | 0.124272  | 0.121212 | 0.118153  | 0.122086  |
| 0.129371  | 0.129808 | 0.137529 | 0.127331  | 0.135344 | 0.133741  | 0.12602   |
| 0.105041  | 0.111014 | 0.107955 | 0.105915  | 0.106935 | 0.108537  | 0.103147  |
| 0.117861  | 0.13141  | 0.124854 | 0.121358  | 0.125    | 0.126894  | 0.123834  |
| 0.112908  | 0.110723 | 0.114948 | 0.113782  | 0.112762 | 0.105041  | 0.1081    |
| 0.116259  | 0.121649 | 0.120629 | 0.116841  | 0.116696 | 0.118007  | 0.114656  |
| 0.109266  | 0.117279 | 0.109557 | 0.106935  | 0.106206 | 0.111597  | 0.102418  |
| 0.123252  | 0.13243  | 0.138695 | 0.125291  | 0.134178 | 0.130828  | 0.127477  |
| 0.0987762 | 0.110868 | 0.109848 | 0.0976107 | 0.10708  | 0.099359  | 0.0933858 |
| 0.127477  | 0.132576 | 0.126894 | 0.13039   | 0.123543 | 0.129225  | 0.123252  |
| 0.114802  | 0.113782 | 0.117424 | 0.113345  | 0.114948 | 0.112179  | 0.105332  |
| 0.110286  | 0.123834 | 0.129516 | 0.112908  | 0.129953 | 0.123689  | 0.118298  |
| 0.121795  | 0.126311 | 0.128788 | 0.122086  | 0.127477 | 0.121212  | 0.116404  |
| 0.106935  | 0.10708  | 0.110723 | 0.107809  | 0.11116  | 0.102564  | 0.100379  |
| 0.141317  | 0.146707 | 0.136072 | 0.137529  | 0.130973 | 0.13986   | 0.142045  |
| 0.108246  | 0.112471 | 0.114656 | 0.113199  | 0.117133 | 0.109703  | 0.104895  |
| 0.10271   | 0.106061 | 0.112908 | 0.107955  | 0.113054 | 0.10271   | 0.104021  |
| 0.102273  | 0.115822 | 0.122669 | 0.106643  | 0.120775 | 0.108392  | 0.11116   |
| 0.134615  | 0.136801 | 0.136364 | 0.140734  | 0.13447  | 0.129953  | 0.125437  |
| 0.111597  | 0.121066 | 0.113054 | 0.111888  | 0.110868 | 0.125291  | 0.11757   |
| 0.103147  | 0.109994 | 0.107517 | 0.105478  | 0.106206 | 0.101981  | 0.108246  |
| 0.104021  | 0.106789 | 0.111305 | 0.106061  | 0.11116  | 0.0987762 | 0.106206  |
| 0.108537  | 0.11655  | 0.116113 | 0.113491  | 0.115093 | 0.112325  | 0.10373   |
| 0.114219  | 0.128642 | 0.123252 | 0.115967  | 0.11961  | 0.110431  | 0.10912   |
| 0.110577  | 0.111014 | 0.117861 | 0.112325  | 0.11859  | 0.111451  | 0.105186  |
| 0.0949883 | 0.103875 | 0.101399 | 0.0979021 | 0.103293 | 0.0944056 | 0.0878497 |
| 0.0979021 | 0.103584 | 0.104895 | 0.0981935 | 0.102127 | 0.0885781 | 0.0925117 |
| 0.100379  | 0.11014  | 0.105915 | 0.102127  | 0.106352 | 0.0954254 | 0.0941142 |
| 0.105624  | 0.108392 | 0.11553  | 0.105915  | 0.113345 | 0.113782  | 0.113928  |
| 0.114802  | 0.125728 | 0.125291 | 0.113636  | 0.125146 | 0.111597  | 0.116696  |
| 0.0980478 | 0.11014  | 0.108246 | 0.0954254 | 0.108392 | 0.0980478 | 0.092366  |
| 0.0912005 | 0.108829 | 0.105478 | 0.0917832 | 0.102418 | 0.0944056 | 0.0936772 |

|           |          |           |           |           |           |           |
|-----------|----------|-----------|-----------|-----------|-----------|-----------|
| 0.106352  | 0.123106 | 0.122669  | 0.105769  | 0.122523  | 0.109557  | 0.112617  |
| 0.0898893 | 0.106935 | 0.107372  | 0.0925117 | 0.105478  | 0.097465  | 0.094697  |
| 0.119318  | 0.121212 | 0.114656  | 0.119901  | 0.115967  | 0.115822  | 0.115385  |
| 0.131265  | 0.130245 | 0.13039   | 0.130682  | 0.123834  | 0.134761  | 0.121795  |
| 0.102418  | 0.113928 | 0.110286  | 0.10271   | 0.110431  | 0.105041  | 0.100233  |
| 0.0981935 | 0.110286 | 0.104312  | 0.0976107 | 0.107955  | 0.0981935 | 0.0925117 |
| 0.0979021 | 0.116113 | 0.109848  | 0.0967366 | 0.107372  | 0.100816  | 0.0933858 |
| 0.094697  | 0.104458 | 0.104312  | 0.0981935 | 0.102418  | 0.0964452 | 0.0954254 |
| 0.118881  | 0.122523 | 0.123834  | 0.119755  | 0.119901  | 0.1081    | 0.106789  |
| 0.0903263 | 0.103001 | 0.0987762 | 0.0903263 | 0.100962  | 0.0912005 | 0.0962995 |
| 0.12602   | 0.130828 | 0.136509  | 0.125437  | 0.134324  | 0.131265  | 0.122086  |
| 0.118881  | 0.129225 | 0.134907  | 0.119464  | 0.129225  | 0.12704   | 0.11961   |
| 0.109266  | 0.120484 | 0.122669  | 0.111597  | 0.122523  | 0.118298  | 0.110868  |
| 0.10271   | 0.109266 | 0.116113  | 0.103584  | 0.117133  | 0.105041  | 0.102855  |
| 0.110286  | 0.109266 | 0.115822  | 0.110577  | 0.113054  | 0.112908  | 0.0952797 |
| 0.0891608 | 0.107955 | 0.108974  | 0.0891608 | 0.107372  | 0.102855  | 0.0968823 |
| 0.0893065 | 0.109557 | 0.115239  | 0.0884324 | 0.110431  | 0.103001  | 0.0990676 |
| 0.097465  | 0.105478 | 0.106498  | 0.099796  | 0.108392  | 0.100379  | 0.0987762 |
| 0.097465  | 0.110431 | 0.0936772 | 0.10271   | 0.0868298 | 0.113199  | 0.10373   |
| 0.101253  | 0.125    | 0.126894  | 0.0962995 | 0.127622  | 0.128351  | 0.115385  |
| 0.110723  | 0.113782 | 0.111305  | 0.11014   | 0.110577  | 0.109266  | 0.107955  |
| 0.125728  | 0.119755 | 0.123106  | 0.127185  | 0.121212  | 0.116113  | 0.115967  |
| 0.13549   | 0.13243  | 0.136655  | 0.133741  | 0.133304  | 0.132576  | 0.121066  |
| 0.193473  | 0.188374 | 0.177448  | 0.195513  | 0.177593  | 0.193473  | 0.188666  |
| 0.239948  | 0.232809 | 0.225087  | 0.239656  | 0.223776  | 0.238782  | 0.234848  |
| 0.102564  | 0.108829 | 0.0833333 | 0.103147  | 0.0756119 | 0.111597  | 0.106789  |
| 0.095134  | 0.104312 | 0.109703  | 0.0942599 | 0.112179  | 0.109994  | 0.106061  |
| 0.0936772 | 0.104021 | 0.105332  | 0.0936772 | 0.105186  | 0.105041  | 0.0996503 |
| 0.10067   | 0.108392 | 0.10912   | 0.101253  | 0.11014   | 0.109411  | 0.10169   |
| 0.129225  | 0.126748 | 0.083479  | 0.131556  | 0.0949883 | 0.120484  | 0.110431  |
| 0.099796  | 0.11451  | 0.110286  | 0.099796  | 0.112179  | 0.117279  | 0.1081    |
| 0.119755  | 0.143502 | 0.144814  | 0.121212  | 0.144085  | 0.147145  | 0.140297  |
| 0.0939685 | 0.114219 | 0.114656  | 0.095134  | 0.117133  | 0.112325  | 0.111888  |
| 0.110577  | 0.126166 | 0.133013  | 0.109703  | 0.130536  | 0.128934  | 0.116259  |
| 0.115093  | 0.129225 | 0.122669  | 0.112471  | 0.122232  | 0.132576  | 0.123106  |
| 0.115676  | 0.131847 | 0.126748  | 0.116259  | 0.129808  | 0.130245  | 0.121941  |
| 0.122669  | 0.136218 | 0.132284  | 0.121212  | 0.133304  | 0.129371  | 0.124272  |
| 0.0999417 | 0.113782 | 0.117133  | 0.100524  | 0.116404  | 0.112762  | 0.107372  |
| 0.0938228 | 0.10708  | 0.111888  | 0.0909091 | 0.112325  | 0.112179  | 0.112325  |
| 0.100379  | 0.109266 | 0.116987  | 0.0995047 | 0.117716  | 0.118153  | 0.111597  |
| 0.0971737 | 0.101399 | 0.112617  | 0.0980478 | 0.111888  | 0.109703  | 0.0996503 |
| 0.0930944 | 0.106061 | 0.111742  | 0.0913462 | 0.111888  | 0.110868  | 0.108392  |
| 0.094697  | 0.104458 | 0.116259  | 0.0958625 | 0.118735  | 0.119464  | 0.104167  |
| 0.109703  | 0.127622 | 0.124854  | 0.108246  | 0.125583  | 0.126894  | 0.121503  |

|           |           |          |           |          |           |           |
|-----------|-----------|----------|-----------|----------|-----------|-----------|
| 0.114365  | 0.129662  | 0.137675 | 0.113199  | 0.135198 | 0.137092  | 0.127622  |
| 0.0967366 | 0.111451  | 0.119464 | 0.0967366 | 0.115822 | 0.117133  | 0.10708   |
| 0.0907634 | 0.112762  | 0.107663 | 0.092803  | 0.112179 | 0.112908  | 0.10373   |
| 0.109411  | 0.127914  | 0.131556 | 0.10912   | 0.132867 | 0.13243   | 0.121212  |
| 0.088141  | 0.108974  | 0.111116 | 0.0925117 | 0.110723 | 0.10912   | 0.100524  |
| 0.119755  | 0.139423  | 0.137238 | 0.122378  | 0.137092 | 0.144231  | 0.132721  |
| 0.129079  | 0.138549  | 0.12704  | 0.13141   | 0.127477 | 0.126166  | 0.126603  |
| 0.122815  | 0.12704   | 0.125728 | 0.12398   | 0.126457 | 0.135344  | 0.130536  |
| 0.0890152 | 0.0981935 | 0.112034 | 0.0925117 | 0.111597 | 0.109411  | 0.100524  |
| 0.0885781 | 0.106498  | 0.11014  | 0.0894522 | 0.112617 | 0.105769  | 0.103875  |
| 0.104749  | 0.119755  | 0.125146 | 0.104458  | 0.125    | 0.122232  | 0.11859   |
| 0.104895  | 0.123689  | 0.123834 | 0.104021  | 0.125146 | 0.120921  | 0.121066  |
| 0.107517  | 0.128351  | 0.132284 | 0.107226  | 0.13243  | 0.131993  | 0.122232  |
| 0.097465  | 0.110431  | 0.11961  | 0.0957168 | 0.121212 | 0.118735  | 0.108683  |
| 0.0917832 | 0.107372  | 0.118298 | 0.094697  | 0.118444 | 0.118298  | 0.105332  |
| 0.101399  | 0.122232  | 0.120921 | 0.104895  | 0.121358 | 0.120921  | 0.116404  |
| 0.115967  | 0.128351  | 0.134615 | 0.11655   | 0.13243  | 0.13345   | 0.122232  |
| 0.111014  | 0.125437  | 0.129079 | 0.109848  | 0.129516 | 0.133159  | 0.122523  |
| 0.104749  | 0.13141   | 0.131847 | 0.108246  | 0.131993 | 0.137966  | 0.124709  |
| 0.114219  | 0.128351  | 0.124126 | 0.113636  | 0.122815 | 0.128788  | 0.123689  |
| 0.0932401 | 0.109703  | 0.117133 | 0.0926573 | 0.117279 | 0.115093  | 0.107663  |
| 0.115967  | 0.128934  | 0.128497 | 0.11451   | 0.128059 | 0.133741  | 0.119027  |
| 0.0895979 | 0.110723  | 0.112034 | 0.0884324 | 0.110723 | 0.103875  | 0.105186  |
| 0.103438  | 0.107663  | 0.115385 | 0.106935  | 0.111116 | 0.108392  | 0.10271   |
| 0.099359  | 0.108537  | 0.115385 | 0.101399  | 0.113491 | 0.111305  | 0.108246  |
| 0.0965909 | 0.104312  | 0.114948 | 0.100087  | 0.114219 | 0.115822  | 0.0990676 |
| 0.0965909 | 0.103438  | 0.113199 | 0.0960082 | 0.112762 | 0.10708   | 0.103438  |
| 0.111305  | 0.130973  | 0.133159 | 0.111888  | 0.135927 | 0.133741  | 0.129225  |
| 0.105624  | 0.114219  | 0.114073 | 0.10271   | 0.115676 | 0.116113  | 0.108974  |
| 0.113491  | 0.129953  | 0.130682 | 0.11553   | 0.134324 | 0.128351  | 0.125     |
| 0.097465  | 0.105769  | 0.113782 | 0.0977564 | 0.114802 | 0.109994  | 0.0996503 |
| 0.102855  | 0.12602   | 0.128497 | 0.102273  | 0.128934 | 0.121212  | 0.117279  |
| 0.106789  | 0.124417  | 0.113199 | 0.106789  | 0.113054 | 0.112617  | 0.113054  |
| 0.111451  | 0.119755  | 0.109994 | 0.113491  | 0.111305 | 0.109703  | 0.108974  |
| 0.100816  | 0.117861  | 0.115967 | 0.100524  | 0.11553  | 0.107809  | 0.104749  |
| 0.114073  | 0.118007  | 0.119901 | 0.111451  | 0.119464 | 0.114948  | 0.117424  |
| 0.106643  | 0.118153  | 0.115676 | 0.107517  | 0.114365 | 0.115967  | 0.111742  |
| 0.101981  | 0.106206  | 0.110723 | 0.106061  | 0.112617 | 0.113054  | 0.104167  |
| 0.132867  | 0.130682  | 0.129953 | 0.13549   | 0.130099 | 0.0932401 | 0.112034  |
| 0.122523  | 0.137529  | 0.133887 | 0.127768  | 0.133741 | 0.13447   | 0.129079  |
| 0.107372  | 0.105478  | 0.105041 | 0.108829  | 0.101981 | 0.0779429 | 0.090035  |
| 0.13141   | 0.13243   | 0.120629 | 0.13549   | 0.122815 | 0.120921  | 0.115239  |
| 0.127768  | 0.128497  | 0.118153 | 0.130099  | 0.121503 | 0.0925117 | 0.0987762 |
| 0.13039   | 0.12704   | 0.121358 | 0.132721  | 0.125583 | 0.118153  | 0.114802  |

|           |          |          |          |          |           |           |
|-----------|----------|----------|----------|----------|-----------|-----------|
| 0.124854  | 0.118881 | 0.109703 | 0.124563 | 0.110723 | 0.111451  | 0.104895  |
| 0.124272  | 0.120338 | 0.120775 | 0.123106 | 0.120921 | 0.0753205 | 0.105769  |
| 0.124417  | 0.121066 | 0.113636 | 0.127622 | 0.115822 | 0.0757576 | 0.104749  |
| 0.125437  | 0.122378 | 0.119027 | 0.129808 | 0.119464 | 0.112034  | 0.115967  |
| 0.139132  | 0.132284 | 0.128059 | 0.139132 | 0.127331 | 0.121941  | 0.121212  |
| 0.124563  | 0.123252 | 0.114656 | 0.130099 | 0.116259 | 0.0732809 | 0.107517  |
| 0.120775  | 0.116259 | 0.110868 | 0.122523 | 0.112471 | 0.108537  | 0.100233  |
| 0.111014  | 0.13447  | 0.134615 | 0.112471 | 0.133596 | 0.13986   | 0.129808  |
| 0.130682  | 0.128788 | 0.13039  | 0.135635 | 0.130245 | 0.0843531 | 0.111597  |
| 0.113782  | 0.109848 | 0.109411 | 0.116987 | 0.104895 | 0.0948427 | 0.0979021 |
| 0.220571  | 0.213141 | 0.207459 | 0.218823 | 0.204983 | 0.221154  | 0.214598  |
| 0.123834  | 0.121649 | 0.111305 | 0.128497 | 0.113491 | 0.1081    | 0.106206  |
| 0.113054  | 0.11116  | 0.11451  | 0.117133 | 0.111742 | 0.07838   | 0.0962995 |
| 0.132139  | 0.129662 | 0.125146 | 0.133887 | 0.123252 | 0.116404  | 0.120047  |
| 0.11553   | 0.116259 | 0.113782 | 0.119027 | 0.113636 | 0.0735723 | 0.105769  |
| 0.133596  | 0.130245 | 0.124854 | 0.136509 | 0.124417 | 0.0878497 | 0.112762  |
| 0.119027  | 0.119172 | 0.114656 | 0.121649 | 0.117133 | 0.107663  | 0.103147  |
| 0.120921  | 0.116987 | 0.107517 | 0.12296  | 0.109411 | 0.0999417 | 0.105041  |
| 0.125     | 0.123397 | 0.115676 | 0.124709 | 0.118444 | 0.0810023 | 0.102418  |
| 0.130099  | 0.127331 | 0.120484 | 0.129516 | 0.12296  | 0.11757   | 0.111014  |
| 0.134033  | 0.12602  | 0.125583 | 0.133159 | 0.124272 | 0.118881  | 0.114365  |
| 0.136218  | 0.122378 | 0.125437 | 0.136509 | 0.124126 | 0.114948  | 0.114219  |
| 0.130973  | 0.122086 | 0.121941 | 0.133887 | 0.120047 | 0.114073  | 0.113054  |
| 0.103875  | 0.113928 | 0.112034 | 0.10708  | 0.111597 | 0.105915  | 0.101399  |
| 0.120192  | 0.121795 | 0.119027 | 0.122523 | 0.115676 | 0.112325  | 0.105478  |
| 0.134033  | 0.133887 | 0.123834 | 0.138695 | 0.126603 | 0.119755  | 0.123689  |
| 0.120192  | 0.120921 | 0.110286 | 0.123689 | 0.112471 | 0.107372  | 0.104604  |
| 0.115822  | 0.131119 | 0.135635 | 0.114656 | 0.132576 | 0.133013  | 0.124709  |
| 0.139569  | 0.135344 | 0.129079 | 0.136946 | 0.13039  | 0.13345   | 0.134178  |
| 0.112762  | 0.123397 | 0.110431 | 0.111597 | 0.110868 | 0.111597  | 0.110286  |
| 0.129371  | 0.125728 | 0.121503 | 0.129953 | 0.123106 | 0.090035  | 0.108829  |
| 0.12398   | 0.125583 | 0.114365 | 0.125146 | 0.112179 | 0.121649  | 0.120629  |
| 0.122378  | 0.123689 | 0.124417 | 0.126457 | 0.123397 | 0.117133  | 0.11116   |
| 0.126748  | 0.126894 | 0.120047 | 0.126748 | 0.119027 | 0.127622  | 0.121941  |
| 0.139569  | 0.134178 | 0.131702 | 0.139569 | 0.128059 | 0.133159  | 0.13447   |
| 0.0968823 | 0.108974 | 0.110286 | 0.101544 | 0.108974 | 0.0995047 | 0.0990676 |
| 0.120338  | 0.125437 | 0.129662 | 0.121212 | 0.130099 | 0.124709  | 0.120775  |
| 0.141171  | 0.137238 | 0.128642 | 0.14088  | 0.128497 | 0.131556  | 0.135781  |
| 0.102127  | 0.116841 | 0.121066 | 0.105624 | 0.120921 | 0.101253  | 0.102855  |
| 0.109703  | 0.121503 | 0.123689 | 0.112034 | 0.121795 | 0.117279  | 0.1081    |
| 0.124126  | 0.141171 | 0.139569 | 0.122669 | 0.139714 | 0.142774  | 0.139423  |
| 0.10373   | 0.122523 | 0.122378 | 0.10169  | 0.12398  | 0.12296   | 0.114073  |
| 0.128642  | 0.136946 | 0.126894 | 0.126894 | 0.129662 | 0.126603  | 0.129371  |
| 0.11655   | 0.132139 | 0.125291 | 0.114219 | 0.127477 | 0.116841  | 0.120484  |

|           |           |           |           |           |          |           |
|-----------|-----------|-----------|-----------|-----------|----------|-----------|
| 0.11116   | 0.124126  | 0.124272  | 0.119318  | 0.121212  | 0.109411 | 0.120047  |
| 0.120338  | 0.129808  | 0.119172  | 0.11859   | 0.119318  | 0.124709 | 0.121649  |
| 0.107663  | 0.12296   | 0.116987  | 0.109411  | 0.115385  | 0.11116  | 0.106935  |
| 0.113054  | 0.125146  | 0.128788  | 0.115093  | 0.128351  | 0.12296  | 0.127185  |
| 0.127331  | 0.125728  | 0.129371  | 0.131993  | 0.125728  | 0.121212 | 0.112325  |
| 0.122669  | 0.127185  | 0.134615  | 0.12704   | 0.133013  | 0.128497 | 0.128351  |
| 0.12704   | 0.126311  | 0.130245  | 0.129371  | 0.125728  | 0.125291 | 0.124563  |
| 0.118298  | 0.131265  | 0.126457  | 0.119755  | 0.124272  | 0.123834 | 0.122523  |
| 0.136072  | 0.141171  | 0.137238  | 0.13986   | 0.133013  | 0.138986 | 0.137092  |
| 0.115967  | 0.121649  | 0.123252  | 0.11859   | 0.122523  | 0.107809 | 0.0983392 |
| 0.105186  | 0.114948  | 0.117133  | 0.106643  | 0.118735  | 0.110723 | 0.107372  |
| 0.129079  | 0.124563  | 0.126748  | 0.124709  | 0.126311  | 0.127331 | 0.120192  |
| 0.113928  | 0.11961   | 0.117424  | 0.114802  | 0.114656  | 0.111014 | 0.0995047 |
| 0.139132  | 0.143357  | 0.133304  | 0.142628  | 0.135781  | 0.134761 | 0.134615  |
| 0.14729   | 0.150058  | 0.149038  | 0.144376  | 0.147727  | 0.149621 | 0.142774  |
| 0.10912   | 0.125874  | 0.128351  | 0.112617  | 0.130536  | 0.124854 | 0.124709  |
| 0.100524  | 0.112325  | 0.122669  | 0.101399  | 0.119318  | 0.123834 | 0.114073  |
| 0.124563  | 0.130828  | 0.127185  | 0.130973  | 0.128205  | 0.131847 | 0.126748  |
| 0.132867  | 0.128059  | 0.124126  | 0.13549   | 0.119901  | 0.117133 | 0.124272  |
| 0.108683  | 0.124272  | 0.131702  | 0.107517  | 0.130099  | 0.128497 | 0.120775  |
| 0.133159  | 0.133887  | 0.134324  | 0.137238  | 0.136218  | 0.126457 | 0.118444  |
| 0.136946  | 0.14292   | 0.124126  | 0.132284  | 0.12398   | 0.125291 | 0.122523  |
| 0.109703  | 0.126457  | 0.116404  | 0.111451  | 0.11859   | 0.109703 | 0.11014   |
| 0.15574   | 0.155886  | 0.153992  | 0.158071  | 0.15035   | 0.161859 | 0.161131  |
| 0.111742  | 0.124417  | 0.122523  | 0.109994  | 0.128205  | 0.116987 | 0.104895  |
| 0.129225  | 0.138986  | 0.131847  | 0.12602   | 0.131702  | 0.12398  | 0.119755  |
| 0.104312  | 0.116987  | 0.120047  | 0.104021  | 0.122232  | 0.112179 | 0.112034  |
| 0.124126  | 0.13039   | 0.132284  | 0.126457  | 0.131265  | 0.133741 | 0.125146  |
| 0.124126  | 0.123689  | 0.116841  | 0.127622  | 0.119027  | 0.105186 | 0.109994  |
| 0.142337  | 0.136072  | 0.110868  | 0.136509  | 0.107226  | 0.133596 | 0.128788  |
| 0.147436  | 0.128351  | 0.138403  | 0.150641  | 0.137383  | 0.138403 | 0.143794  |
| 0.119027  | 0.113636  | 0.0843531 | 0.118153  | 0.0743007 | 0.122815 | 0.117133  |
| 0.134033  | 0.127185  | 0.0996503 | 0.132576  | 0.090472  | 0.13345  | 0.131265  |
| 0.110286  | 0.142483  | 0.13447   | 0.109703  | 0.135198  | 0.144668 | 0.142191  |
| 0.141754  | 0.137821  | 0.112908  | 0.141754  | 0.108683  | 0.140006 | 0.130245  |
| 0.0926573 | 0.122523  | 0.126457  | 0.0926573 | 0.125146  | 0.124126 | 0.122232  |
| 0.139423  | 0.0981935 | 0.131847  | 0.137383  | 0.131993  | 0.13447  | 0.127914  |
| 0.11116   | 0.110723  | 0.0930944 | 0.112908  | 0.0952797 | 0.108537 | 0.103147  |
| 0.109848  | 0.114948  | 0.0839161 | 0.109266  | 0.0893065 | 0.112762 | 0.103584  |
| 0.121066  | 0.120338  | 0.11757   | 0.12398   | 0.115385  | 0.108537 | 0.101981  |
| 0.113491  | 0.112471  | 0.0831876 | 0.113491  | 0.0716783 | 0.11757  | 0.112762  |
| 0.104604  | 0.112617  | 0.110723  | 0.106643  | 0.115822  | 0.11451  | 0.104458  |
| 0.109848  | 0.109411  | 0.0539044 | 0.111305  | 0.0607517 | 0.106643 | 0.0968823 |
| 0.117133  | 0.108246  | 0.11014   | 0.119755  | 0.103584  | 0.107517 | 0.116404  |

|           |           |           |           |           |           |           |
|-----------|-----------|-----------|-----------|-----------|-----------|-----------|
| 0.128642  | 0.123834  | 0.0805653 | 0.126894  | 0.0897436 | 0.114948  | 0.106643  |
| 0.108537  | 0.105186  | 0.10067   | 0.109703  | 0.102564  | 0.0980478 | 0.0474942 |
| 0.118444  | 0.11859   | 0.0872669 | 0.116987  | 0.0780886 | 0.11961   | 0.115676  |
| 0.113928  | 0.110577  | 0.0836247 | 0.115967  | 0.0726981 | 0.119172  | 0.112034  |
| 0.0506993 | 0.119318  | 0.122669  | 0.0434149 | 0.125146  | 0.122669  | 0.118735  |
| 0.215909  | 0.212267  | 0.197261  | 0.2162    | 0.198864  | 0.215035  | 0.208188  |
| 0.137821  | 0.135635  | 0.105769  | 0.139277  | 0.092803  | 0.142483  | 0.137966  |
| 0.124272  | 0.122086  | 0.123689  | 0.121358  | 0.122086  | 0.129808  | 0.114802  |
| 0.119755  | 0.116404  | 0.115093  | 0.118298  | 0.110868  | 0.123543  | 0.11553   |
| 0.212413  | 0.2044    | 0.194056  | 0.211538  | 0.194784  | 0.210664  | 0.207896  |
| 0.0815851 | 0.120192  | 0.112762  | 0.0757576 | 0.114656  | 0.125291  | 0.116404  |
| 0.107663  | 0.113345  | 0.116113  | 0.109411  | 0.120629  | 0.121358  | 0.111014  |
| 0.119027  | 0.0920746 | 0.11961   | 0.116696  | 0.120629  | 0.126603  | 0.115385  |
| 0.127622  | 0.120192  | 0.0795455 | 0.122378  | 0.0901807 | 0.113054  | 0.105332  |
| 0.252914  | 0.242861  | 0.232226  | 0.250874  | 0.234411  | 0.250583  | 0.242279  |
| 0.127185  | 0.119755  | 0.120775  | 0.123689  | 0.119755  | 0.12602   | 0.111305  |
| 0.0505536 | 0.113928  | 0.115239  | 0.0456002 | 0.117424  | 0.116113  | 0.110723  |
| 0.11757   | 0.117424  | 0.127185  | 0.119901  | 0.125874  | 0.127768  | 0.118007  |
| 0.118735  | 0.11655   | 0.125146  | 0.116696  | 0.122086  | 0.127185  | 0.117133  |
| 0.127185  | 0.128497  | 0.106498  | 0.12602   | 0.106061  | 0.12602   | 0.113054  |
| 0.131556  | 0.124417  | 0.08581   | 0.13039   | 0.0839161 | 0.123689  | 0.110723  |
| 0.0514277 | 0.11451   | 0.115239  | 0.0493881 | 0.120629  | 0.119318  | 0.113928  |
| 0.11655   | 0.10912   | 0.0821678 | 0.11451   | 0.071824  | 0.119172  | 0.111742  |
| 0.12602   | 0.0850816 | 0.120775  | 0.125728  | 0.121212  | 0.121066  | 0.115676  |
| 0.11757   | 0.113636  | 0.0779429 | 0.118444  | 0.0844988 | 0.108829  | 0.0976107 |
| 0.111888  | 0.110286  | 0.0812937 | 0.113636  | 0.0750291 | 0.113928  | 0.108537  |
| 0.123106  | 0.118298  | 0.101253  | 0.124272  | 0.106643  | 0.090472  | 0.0847902 |
| 0.144814  | 0.130973  | 0.140443  | 0.147727  | 0.138258  | 0.137529  | 0.141754  |
| 0.12704   | 0.123106  | 0.124126  | 0.125583  | 0.121941  | 0.130828  | 0.113491  |
| 0.111014  | 0.121066  | 0.119755  | 0.113345  | 0.124854  | 0.126457  | 0.111742  |
| 0.190268  | 0.182255  | 0.173368  | 0.188228  | 0.175262  | 0.192016  | 0.183421  |
| 0.203963  | 0.196533  | 0.186772  | 0.204837  | 0.1875    | 0.20338   | 0.197115  |
| 0.125874  | 0.119027  | 0.0780886 | 0.125291  | 0.0898893 | 0.115385  | 0.10271   |
| 0.119464  | 0.116987  | 0.0716783 | 0.11859   | 0.0808566 | 0.106935  | 0.0989219 |
| 0.136655  | 0.135052  | 0.122378  | 0.137238  | 0.122523  | 0.131702  | 0.123106  |
| 0.0492424 | 0.116404  | 0.11655   | 0.0448718 | 0.11961   | 0.11655   | 0.114073  |
| 0.130099  | 0.126166  | 0.122523  | 0.128642  | 0.12296   | 0.126311  | 0.114802  |
| 0.127622  | 0.118735  | 0.126748  | 0.129079  | 0.123106  | 0.129662  | 0.127477  |
| 0.227273  | 0.215472  | 0.207751  | 0.225524  | 0.209936  | 0.225524  | 0.219843  |
| 0.109266  | 0.106206  | 0.112762  | 0.106643  | 0.110868  | 0.118298  | 0.104458  |
| 0.206439  | 0.207168  | 0.192162  | 0.202069  | 0.186189  | 0.210227  | 0.204545  |
| 0.0810023 | 0.109703  | 0.115967  | 0.0815851 | 0.114948  | 0.107809  | 0.109703  |
| 0.109994  | 0.109557  | 0.114073  | 0.109994  | 0.11014   | 0.11553   | 0.100233  |
| 0.104895  | 0.115239  | 0.0964452 | 0.103438  | 0.092803  | 0.117133  | 0.110577  |



|           |           |           |           |           |          |           |
|-----------|-----------|-----------|-----------|-----------|----------|-----------|
| 0.114219  | 0.110868  | 0.0725524 | 0.115676  | 0.0814394 | 0.109266 | 0.0983392 |
| 0.207896  | 0.200758  | 0.191288  | 0.206439  | 0.190559  | 0.207314 | 0.200175  |
| 0.129516  | 0.124709  | 0.0898893 | 0.129225  | 0.0821678 | 0.129516 | 0.123252  |
| 0.103875  | 0.110431  | 0.117279  | 0.104749  | 0.117424  | 0.113782 | 0.107809  |
| 0.121358  | 0.117133  | 0.0893065 | 0.121649  | 0.0769231 | 0.121358 | 0.120629  |
| 0.117861  | 0.122669  | 0.119318  | 0.119027  | 0.122086  | 0.122232 | 0.10373   |
| 0.119318  | 0.114219  | 0.0761946 | 0.117279  | 0.0842075 | 0.109703 | 0.0976107 |
| 0.083042  | 0.112034  | 0.117133  | 0.0839161 | 0.114948  | 0.112471 | 0.111116  |
| 0.0658508 | 0.115239  | 0.112179  | 0.0632284 | 0.11553   | 0.121212 | 0.114948  |
| 0.106352  | 0.11961   | 0.120047  | 0.110431  | 0.123397  | 0.125291 | 0.112325  |
| 0.111888  | 0.106498  | 0.080711  | 0.112471  | 0.0703671 | 0.113636 | 0.10708   |
| 0.105915  | 0.114802  | 0.123689  | 0.106206  | 0.121212  | 0.118153 | 0.108974  |
| 0.189977  | 0.186334  | 0.173368  | 0.190851  | 0.174097  | 0.192599 | 0.18109   |
| 0.120192  | 0.119755  | 0.127768  | 0.118153  | 0.125     | 0.129808 | 0.119464  |
| 0.129079  | 0.114948  | 0.124709  | 0.130536  | 0.123397  | 0.122378 | 0.124563  |
| 0.115822  | 0.113345  | 0.118735  | 0.11553   | 0.115093  | 0.119318 | 0.115093  |
| 0.126166  | 0.121358  | 0.119464  | 0.122669  | 0.118153  | 0.126748 | 0.112325  |
| 0.115967  | 0.113782  | 0.0874126 | 0.118298  | 0.0761946 | 0.119172 | 0.113782  |
| 0.087704  | 0.11757   | 0.119172  | 0.0882867 | 0.11961   | 0.117716 | 0.115239  |
| 0.11116   | 0.113054  | 0.113199  | 0.114656  | 0.109266  | 0.114073 | 0.100816  |
| 0.0537587 | 0.122669  | 0.121941  | 0.0488054 | 0.124126  | 0.124563 | 0.119755  |
| 0.123543  | 0.109994  | 0.11655   | 0.123252  | 0.116404  | 0.11451  | 0.119027  |
| 0.113054  | 0.109994  | 0.119172  | 0.111888  | 0.116696  | 0.123252 | 0.109994  |
| 0.121066  | 0.116841  | 0.0817308 | 0.121358  | 0.0836247 | 0.112617 | 0.099359  |
| 0.115385  | 0.0872669 | 0.116841  | 0.11655   | 0.118444  | 0.121795 | 0.111742  |
| 0.130099  | 0.10169   | 0.130682  | 0.129516  | 0.13141   | 0.137675 | 0.127914  |
| 0.116113  | 0.112471  | 0.115239  | 0.112617  | 0.112179  | 0.116696 | 0.106061  |
| 0.132867  | 0.129225  | 0.101981  | 0.134324  | 0.0893065 | 0.136364 | 0.133013  |
| 0.118881  | 0.112325  | 0.0737179 | 0.118298  | 0.0808566 | 0.111597 | 0.0968823 |
| 0.116259  | 0.105624  | 0.111888  | 0.118298  | 0.11116   | 0.117716 | 0.113199  |
| 0.116696  | 0.114802  | 0.0837704 | 0.117279  | 0.0772145 | 0.118444 | 0.110723  |
| 0.0572552 | 0.122086  | 0.121941  | 0.0488054 | 0.125583  | 0.125728 | 0.119464  |
| 0.179341  | 0.185897  | 0.169435  | 0.174679  | 0.173077  | 0.192453 | 0.184441  |
| 0.100524  | 0.107663  | 0.115676  | 0.0999417 | 0.114073  | 0.112762 | 0.106789  |
| 0.107517  | 0.0992133 | 0.10373   | 0.106935  | 0.099796  | 0.101981 | 0.10067   |
| 0.108974  | 0.119318  | 0.120047  | 0.111305  | 0.120775  | 0.124126 | 0.111451  |
| 0.182401  | 0.173223  | 0.160548  | 0.183566  | 0.159819  | 0.175699 | 0.172348  |
| 0.138258  | 0.132576  | 0.130682  | 0.134178  | 0.127331  | 0.137966 | 0.121795  |
| 0.146707  | 0.145105  | 0.143502  | 0.144376  | 0.139277  | 0.143794 | 0.133159  |
| 0.148019  | 0.133013  | 0.139277  | 0.150932  | 0.139423  | 0.141317 | 0.145542  |
| 0.113928  | 0.113199  | 0.115967  | 0.115385  | 0.112908  | 0.119172 | 0.105915  |
| 0.118444  | 0.114802  | 0.0875583 | 0.118735  | 0.0772145 | 0.124272 | 0.117133  |
| 0.212413  | 0.204983  | 0.194347  | 0.210664  | 0.195367  | 0.212704 | 0.204691  |
| 0.124417  | 0.112908  | 0.111597  | 0.120629  | 0.111451  | 0.123543 | 0.118153  |

|           |           |           |           |           |           |           |
|-----------|-----------|-----------|-----------|-----------|-----------|-----------|
| 0.123397  | 0.119755  | 0.0893065 | 0.12602   | 0.07838   | 0.125728  | 0.120921  |
| 0.103584  | 0.112471  | 0.116404  | 0.101544  | 0.119755  | 0.115822  | 0.11014   |
| 0.169726  | 0.161713  | 0.138549  | 0.168852  | 0.13986   | 0.165064  | 0.160839  |
| 0.109703  | 0.108392  | 0.102418  | 0.110868  | 0.0979021 | 0.112325  | 0.102564  |
| 0.151807  | 0.113199  | 0.141026  | 0.150058  | 0.140589  | 0.143939  | 0.138258  |
| 0.120921  | 0.117279  | 0.114802  | 0.120921  | 0.112617  | 0.109557  | 0.0557984 |
| 0.188228  | 0.183129  | 0.17366   | 0.190268  | 0.174971  | 0.191725  | 0.181964  |
| 0.120921  | 0.120192  | 0.120047  | 0.120338  | 0.114948  | 0.120921  | 0.108829  |
| 0.105186  | 0.10271   | 0.103147  | 0.109557  | 0.10271   | 0.0871212 | 0.0977564 |
| 0.113199  | 0.102273  | 0.114073  | 0.115822  | 0.110723  | 0.111742  | 0.110431  |
| 0.106935  | 0.114656  | 0.118298  | 0.104604  | 0.117861  | 0.121795  | 0.103875  |
| 0.104312  | 0.118735  | 0.116841  | 0.106352  | 0.118444  | 0.120629  | 0.103875  |
| 0.118881  | 0.108829  | 0.114219  | 0.122669  | 0.114656  | 0.122086  | 0.116696  |
| 0.116696  | 0.109266  | 0.0732809 | 0.113199  | 0.083042  | 0.10708   | 0.097028  |
| 0.188811  | 0.183129  | 0.175117  | 0.190851  | 0.174679  | 0.192308  | 0.180216  |
| 0.11757   | 0.0600233 | 0.124563  | 0.119901  | 0.120921  | 0.120192  | 0.11655   |
| 0.111305  | 0.114948  | 0.104895  | 0.110431  | 0.101253  | 0.101399  | 0.107372  |
| 0.212558  | 0.202797  | 0.195659  | 0.213141  | 0.195804  | 0.209645  | 0.204545  |
| 0.117279  | 0.118007  | 0.126603  | 0.120192  | 0.124709  | 0.128059  | 0.118007  |
| 0.117133  | 0.116113  | 0.0769231 | 0.118007  | 0.0849359 | 0.107809  | 0.100087  |
| 0.113636  | 0.112617  | 0.0728438 | 0.113928  | 0.078817  | 0.106352  | 0.0957168 |
| 0.13243   | 0.125583  | 0.10067   | 0.134761  | 0.0897436 | 0.134178  | 0.130245  |
| 0.191288  | 0.183858  | 0.174388  | 0.190705  | 0.175408  | 0.189831  | 0.178613  |
| 0.0512821 | 0.116404  | 0.118881  | 0.0480769 | 0.122523  | 0.120047  | 0.115239  |
| 0.124417  | 0.0962995 | 0.125     | 0.125874  | 0.124563  | 0.132867  | 0.121649  |
| 0.116259  | 0.111451  | 0.0748834 | 0.117424  | 0.0863928 | 0.104021  | 0.095134  |
| 0.113345  | 0.11116   | 0.0725524 | 0.113636  | 0.0820221 | 0.102273  | 0.0957168 |
| 0.117279  | 0.113928  | 0.0732809 | 0.116696  | 0.0839161 | 0.107663  | 0.0976107 |
| 0.111888  | 0.112325  | 0.0844988 | 0.113636  | 0.0750291 | 0.114802  | 0.107663  |
| 0.106789  | 0.102855  | 0.100379  | 0.105915  | 0.101981  | 0.0971737 | 0.0495338 |
| 0.124272  | 0.121212  | 0.123106  | 0.123397  | 0.120629  | 0.124563  | 0.109557  |
| 0.130973  | 0.10373   | 0.128351  | 0.130099  | 0.127914  | 0.129516  | 0.128788  |
| 0.121066  | 0.116259  | 0.119027  | 0.11961   | 0.116841  | 0.123106  | 0.110431  |
| 0.123252  | 0.126603  | 0.125874  | 0.121795  | 0.125437  | 0.128497  | 0.110286  |
| 0.193619  | 0.184149  | 0.178176  | 0.192745  | 0.180361  | 0.195367  | 0.187354  |
| 0.114219  | 0.088141  | 0.115967  | 0.114219  | 0.11757   | 0.120047  | 0.110868  |
| 0.127185  | 0.124126  | 0.0916375 | 0.127768  | 0.0847902 | 0.128934  | 0.123543  |
| 0.115676  | 0.110868  | 0.0745921 | 0.117133  | 0.0843531 | 0.105186  | 0.092803  |
| 0.108246  | 0.104312  | 0.102418  | 0.107663  | 0.102855  | 0.0954254 | 0.0472028 |
| 0.118444  | 0.0917832 | 0.105041  | 0.115239  | 0.104021  | 0.114073  | 0.111888  |
| 0.0518648 | 0.117279  | 0.11859   | 0.0428322 | 0.122232  | 0.120921  | 0.116113  |
| 0.128788  | 0.124854  | 0.125     | 0.128497  | 0.125728  | 0.128497  | 0.12602   |
| 0.120775  | 0.104312  | 0.112908  | 0.11961   | 0.115676  | 0.112617  | 0.117133  |
| 0.0662879 | 0.109266  | 0.105624  | 0.0683275 | 0.105478  | 0.108537  | 0.0868298 |

|           |           |           |           |           |           |           |
|-----------|-----------|-----------|-----------|-----------|-----------|-----------|
| 0.0789627 | 0.106789  | 0.102273  | 0.076049  | 0.100087  | 0.105186  | 0.0750291 |
| 0.109411  | 0.107226  | 0.0971737 | 0.109703  | 0.0935315 | 0.0872669 | 0.0824592 |
| 0.0844988 | 0.112325  | 0.115093  | 0.0827506 | 0.114948  | 0.112762  | 0.113199  |
| 0.131847  | 0.130245  | 0.12398   | 0.131265  | 0.123252  | 0.132139  | 0.116841  |
| 0.0515734 | 0.112034  | 0.120629  | 0.0474942 | 0.121358  | 0.118881  | 0.110868  |
| 0.111116  | 0.1081    | 0.0855186 | 0.112325  | 0.0754662 | 0.114656  | 0.107809  |
| 0.0479312 | 0.108974  | 0.116696  | 0.0467657 | 0.117424  | 0.113491  | 0.11014   |
| 0.113928  | 0.110868  | 0.0728438 | 0.115967  | 0.0826049 | 0.105769  | 0.0942599 |
| 0.100087  | 0.106352  | 0.113199  | 0.100379  | 0.111888  | 0.108829  | 0.102564  |
| 0.118153  | 0.11655   | 0.074155  | 0.117861  | 0.0836247 | 0.107372  | 0.0984848 |
| 0.109703  | 0.0850816 | 0.109703  | 0.109411  | 0.111597  | 0.113491  | 0.1081    |
| 0.121358  | 0.107226  | 0.112908  | 0.120484  | 0.113928  | 0.112325  | 0.115676  |
| 0.101836  | 0.108974  | 0.11553   | 0.103875  | 0.116841  | 0.115239  | 0.105478  |
| 0.108974  | 0.104458  | 0.103147  | 0.108683  | 0.102418  | 0.101399  | 0.048514  |
| 0.112034  | 0.113928  | 0.0759033 | 0.116404  | 0.083042  | 0.108829  | 0.0952797 |
| 0.119901  | 0.110431  | 0.116696  | 0.121358  | 0.113054  | 0.118735  | 0.117133  |
| 0.118007  | 0.113782  | 0.105186  | 0.11655   | 0.106206  | 0.101399  | 0.113491  |
| 0.107372  | 0.104604  | 0.107372  | 0.106498  | 0.104312  | 0.0456002 | 0.101399  |
| 0.114656  | 0.11014   | 0.076486  | 0.115239  | 0.0818765 | 0.104458  | 0.0964452 |
| 0.116841  | 0.11553   | 0.0839161 | 0.119172  | 0.071824  | 0.118007  | 0.114948  |
| 0.0850816 | 0.110577  | 0.11655   | 0.085373  | 0.114948  | 0.114219  | 0.106498  |
| 0.115093  | 0.11116   | 0.0842075 | 0.113636  | 0.074155  | 0.11859   | 0.114073  |
| 0.0987762 | 0.112325  | 0.115093  | 0.106061  | 0.116696  | 0.114802  | 0.106789  |
| 0.113054  | 0.108246  | 0.106643  | 0.111014  | 0.106206  | 0.104604  | 0.0458916 |
| 0.110431  | 0.100962  | 0.10373   | 0.111597  | 0.105332  | 0.106935  | 0.097465  |
| 0.0992133 | 0.106352  | 0.116113  | 0.100379  | 0.113345  | 0.105041  | 0.103147  |
| 0.118881  | 0.114948  | 0.0844988 | 0.119755  | 0.0753205 | 0.117716  | 0.116113  |
| 0.111305  | 0.116113  | 0.113345  | 0.116841  | 0.116404  | 0.110723  | 0.118153  |
| 0.112034  | 0.110431  | 0.105915  | 0.113491  | 0.10373   | 0.100087  | 0.107517  |
| 0.19595   | 0.185897  | 0.17905   | 0.195367  | 0.179779  | 0.194202  | 0.187063  |
| 0.164773  | 0.152389  | 0.14088   | 0.165064  | 0.1419    | 0.156614  | 0.158508  |
| 0.11961   | 0.120921  | 0.116696  | 0.120484  | 0.118298  | 0.124854  | 0.111888  |
| 0.0839161 | 0.112617  | 0.106935  | 0.0810023 | 0.110286  | 0.114219  | 0.117279  |
| 0.149184  | 0.146125  | 0.147727  | 0.147436  | 0.140589  | 0.148601  | 0.135927  |
| 0.126311  | 0.0865385 | 0.11757   | 0.128934  | 0.119172  | 0.122523  | 0.116841  |
| 0.126166  | 0.103584  | 0.0818765 | 0.122669  | 0.0887238 | 0.119755  | 0.107955  |
| 0.117279  | 0.115093  | 0.0814394 | 0.118153  | 0.085373  | 0.104167  | 0.105186  |
| 0.120192  | 0.114802  | 0.0983392 | 0.119901  | 0.101981  | 0.088141  | 0.0792541 |
| 0.121649  | 0.117424  | 0.105915  | 0.121649  | 0.106935  | 0.10271   | 0.111014  |
| 0.202214  | 0.192745  | 0.183275  | 0.202214  | 0.185169  | 0.199009  | 0.191871  |
| 0.0502622 | 0.119172  | 0.122815  | 0.0479312 | 0.124709  | 0.11961   | 0.116841  |
| 0.0850816 | 0.113491  | 0.083042  | 0.0859557 | 0.0802739 | 0.119755  | 0.116404  |
| 0.111888  | 0.108537  | 0.0725524 | 0.110431  | 0.081148  | 0.0871212 | 0.0942599 |
| 0.114073  | 0.113054  | 0.120192  | 0.112908  | 0.114802  | 0.115239  | 0.100816  |

|           |           |           |           |           |           |           |
|-----------|-----------|-----------|-----------|-----------|-----------|-----------|
| 0.185315  | 0.182838  | 0.162005  | 0.183275  | 0.163899  | 0.17366   | 0.175845  |
| 0.247086  | 0.241987  | 0.230186  | 0.246503  | 0.231498  | 0.247086  | 0.242861  |
| 0.122086  | 0.105041  | 0.11859   | 0.126748  | 0.118153  | 0.11655   | 0.119318  |
| 0.118881  | 0.115822  | 0.105478  | 0.119172  | 0.106789  | 0.101981  | 0.111116  |
| 0.125     | 0.118735  | 0.116259  | 0.120047  | 0.112034  | 0.122669  | 0.109411  |
| 0.101836  | 0.112471  | 0.116113  | 0.105915  | 0.113636  | 0.120484  | 0.102273  |
| 0         | 0.110868  | 0.115676  | 0.0469114 | 0.116696  | 0.112179  | 0.110286  |
| 0.110868  | 0         | 0.113491  | 0.112034  | 0.112179  | 0.108537  | 0.107517  |
| 0.115676  | 0.113491  | 0         | 0.115093  | 0.0514277 | 0.109266  | 0.103584  |
| 0.0469114 | 0.112034  | 0.115093  | 0         | 0.116113  | 0.117716  | 0.112617  |
| 0.116696  | 0.112179  | 0.0514277 | 0.116113  | 0         | 0.111742  | 0.104895  |
| 0.112179  | 0.108537  | 0.109266  | 0.117716  | 0.111742  | 0         | 0.103001  |
| 0.110286  | 0.107517  | 0.103584  | 0.112617  | 0.104895  | 0.103001  | 0         |
| 0.121503  | 0.111451  | 0.116259  | 0.125291  | 0.116113  | 0.116259  | 0.116987  |
| 0.116696  | 0.112762  | 0.0837704 | 0.118735  | 0.0745921 | 0.116987  | 0.112471  |
| 0.104749  | 0.0958625 | 0.106498  | 0.105915  | 0.103147  | 0.105332  | 0.104021  |
| 0.116113  | 0.121503  | 0.123689  | 0.120484  | 0.122378  | 0.118444  | 0.120629  |
| 0.113782  | 0.126748  | 0.128351  | 0.119027  | 0.128205  | 0.135052  | 0.119755  |
| 0.111305  | 0.108829  | 0.0772145 | 0.111888  | 0.083479  | 0.106061  | 0.0957168 |
| 0.116113  | 0.119755  | 0.0863928 | 0.117279  | 0.0926573 | 0.11553   | 0.106061  |
| 0.132139  | 0.126166  | 0.0866841 | 0.132139  | 0.0973193 | 0.123397  | 0.113928  |
| 0.210956  | 0.204108  | 0.190559  | 0.212121  | 0.193328  | 0.211247  | 0.197115  |
| 0.114948  | 0.0952797 | 0.109994  | 0.114948  | 0.109557  | 0.108537  | 0.112179  |
| 0.110723  | 0.107372  | 0.104604  | 0.111888  | 0.105041  | 0.101107  | 0.0476399 |
| 0.115385  | 0.0863928 | 0.116259  | 0.114219  | 0.118444  | 0.119172  | 0.107955  |
| 0.116404  | 0.118007  | 0.124854  | 0.116113  | 0.125291  | 0.127477  | 0.116259  |
| 0.110577  | 0.113054  | 0.113782  | 0.107372  | 0.115967  | 0.114073  | 0.100233  |
| 0.201486  | 0.191725  | 0.18109   | 0.200321  | 0.183566  | 0.198572  | 0.190268  |
| 0.117424  | 0.114073  | 0.0879953 | 0.119464  | 0.0747378 | 0.122378  | 0.113782  |
| 0.110286  | 0.109557  | 0.0756119 | 0.114073  | 0.0836247 | 0.105332  | 0.0941142 |
| 0.113636  | 0.119027  | 0.120338  | 0.118881  | 0.119901  | 0.11655   | 0.113782  |
| 0.101107  | 0.10912   | 0.113928  | 0.102273  | 0.112325  | 0.113345  | 0.100962  |
| 0.115967  | 0.114948  | 0.0842075 | 0.119755  | 0.0767774 | 0.119464  | 0.114656  |
| 0.109557  | 0.105915  | 0.090035  | 0.111014  | 0.0840618 | 0.1081    | 0.102418  |
| 0.109557  | 0.109703  | 0.109266  | 0.116259  | 0.109994  | 0.0472028 | 0.104167  |
| 0.113054  | 0.112034  | 0.125291  | 0.115967  | 0.119901  | 0.122669  | 0.113199  |
| 0.198572  | 0.193182  | 0.180798  | 0.198281  | 0.181818  | 0.199446  | 0.18852   |
| 0.109557  | 0.103001  | 0.083042  | 0.111014  | 0.0738636 | 0.111305  | 0.104167  |
| 0.197115  | 0.18648   | 0.177885  | 0.195659  | 0.175117  | 0.190705  | 0.187354  |
| 0.194347  | 0.185752  | 0.175991  | 0.19289   | 0.178176  | 0.192308  | 0.186043  |
| 0.112179  | 0.123106  | 0.124417  | 0.116259  | 0.127768  | 0.128497  | 0.114656  |
| 0.126166  | 0.128642  | 0.13549   | 0.125583  | 0.134761  | 0.136072  | 0.127477  |
| 0.102855  | 0.102127  | 0.104312  | 0.10373   | 0.101544  | 0.0527389 | 0.0962995 |
| 0.105041  | 0.105478  | 0.0828963 | 0.107663  | 0.0754662 | 0.109994  | 0.104021  |

|           |          |           |           |           |           |           |
|-----------|----------|-----------|-----------|-----------|-----------|-----------|
| 0.111597  | 0.112617 | 0.085373  | 0.113054  | 0.074155  | 0.114802  | 0.108537  |
| 0.118007  | 0.112617 | 0.0757576 | 0.119172  | 0.0872669 | 0.108974  | 0.0954254 |
| 0.0498252 | 0.107663 | 0.112471  | 0.0477855 | 0.112908  | 0.114219  | 0.108537  |
| 0.0416667 | 0.108537 | 0.11451   | 0.0428322 | 0.118153  | 0.114802  | 0.110868  |
| 0.125437  | 0.110431 | 0.11757   | 0.126894  | 0.118007  | 0.11757   | 0.119755  |
| 0.106935  | 0.117861 | 0.118881  | 0.110431  | 0.120484  | 0.121503  | 0.109703  |
| 0.113491  | 0.106935 | 0.0744464 | 0.113199  | 0.0804196 | 0.103293  | 0.0906177 |
| 0.11451   | 0.111742 | 0.085373  | 0.11655   | 0.0747378 | 0.117133  | 0.112908  |
| 0.101836  | 0.101981 | 0.100379  | 0.10708   | 0.101981  | 0.0826049 | 0.0952797 |
| 0.126166  | 0.121941 | 0.0926573 | 0.125874  | 0.0817308 | 0.129079  | 0.124563  |
| 0.118881  | 0.112908 | 0.115093  | 0.118007  | 0.112617  | 0.120338  | 0.10708   |
| 0.127477  | 0.124417 | 0.097465  | 0.130099  | 0.0850816 | 0.132721  | 0.130245  |
| 0.261509  | 0.25204  | 0.246066  | 0.258887  | 0.245047  | 0.261509  | 0.254371  |
| 0.112325  | 0.122378 | 0.128351  | 0.113491  | 0.128497  | 0.129225  | 0.12296   |
| 0.121212  | 0.122523 | 0.125874  | 0.122669  | 0.125146  | 0.124417  | 0.114365  |
| 0.219551  | 0.210373 | 0.201486  | 0.219843  | 0.202214  | 0.218094  | 0.212413  |
| 0.125583  | 0.128059 | 0.124126  | 0.124417  | 0.125146  | 0.127622  | 0.119027  |
| 0.237179  | 0.223339 | 0.213869  | 0.232226  | 0.215181  | 0.231352  | 0.225379  |
| 0.103001  | 0.114802 | 0.122232  | 0.105041  | 0.120629  | 0.119901  | 0.110723  |
| 0.128205  | 0.127185 | 0.085373  | 0.130536  | 0.095134  | 0.120338  | 0.109703  |
| 0.109266  | 0.107663 | 0.12296   | 0.109848  | 0.117279  | 0.119172  | 0.111742  |
| 0.109848  | 0.116987 | 0.122086  | 0.114219  | 0.123397  | 0.123834  | 0.111451  |
| 0.20338   | 0.194493 | 0.187063  | 0.203963  | 0.186917  | 0.201923  | 0.19391   |
| 0.125583  | 0.124563 | 0.0944056 | 0.128205  | 0.0826049 | 0.129953  | 0.125146  |
| 0.114802  | 0.114656 | 0.0844988 | 0.117716  | 0.0747378 | 0.115967  | 0.113199  |
| 0.227418  | 0.217949 | 0.211976  | 0.226253  | 0.210664  | 0.228293  | 0.219697  |
| 0.0530303 | 0.113491 | 0.118298  | 0.04662   | 0.118153  | 0.118298  | 0.114948  |
| 0.20236   | 0.195221 | 0.184003  | 0.201486  | 0.185315  | 0.197407  | 0.189685  |
| 0.050845  | 0.113345 | 0.121649  | 0.0467657 | 0.120338  | 0.120192  | 0.113636  |
| 0.118735  | 0.112762 | 0.0782343 | 0.117279  | 0.083042  | 0.108246  | 0.0961538 |
| 0.123543  | 0.118735 | 0.113054  | 0.121795  | 0.113199  | 0.112179  | 0.0537587 |
| 0.115093  | 0.126311 | 0.125291  | 0.117424  | 0.128059  | 0.130245  | 0.116696  |
| 0.112617  | 0.1081   | 0.107663  | 0.112325  | 0.1081    | 0.114073  | 0.105186  |
| 0.16215   | 0.152681 | 0.141463  | 0.162442  | 0.139569  | 0.1537    | 0.130536  |
| 0.112325  | 0.109557 | 0.0808566 | 0.109703  | 0.0708042 | 0.112908  | 0.1081    |
| 0.116404  | 0.115676 | 0.12398   | 0.11757   | 0.124417  | 0.125437  | 0.115967  |
| 0.107663  | 0.119755 | 0.116113  | 0.111451  | 0.119172  | 0.116113  | 0.106643  |
| 0.124563  | 0.120047 | 0.123689  | 0.126894  | 0.121212  | 0.128351  | 0.123252  |
| 0.195221  | 0.186917 | 0.177739  | 0.196678  | 0.17905   | 0.194347  | 0.188374  |
| 0.114073  | 0.109848 | 0.0732809 | 0.114656  | 0.0827506 | 0.106789  | 0.092366  |
| 0.109557  | 0.116404 | 0.118881  | 0.112471  | 0.119901  | 0.119172  | 0.105915  |
| 0.0843531 | 0.110431 | 0.115822  | 0.0840618 | 0.116259  | 0.115239  | 0.108683  |
| 0.0506993 | 0.11757  | 0.121795  | 0.0472028 | 0.122815  | 0.119464  | 0.113491  |
| 0.121941  | 0.118881 | 0.0761946 | 0.125437  | 0.0909091 | 0.113782  | 0.103147  |

|           |           |           |           |           |           |           |
|-----------|-----------|-----------|-----------|-----------|-----------|-----------|
| 0.256702  | 0.24898   | 0.240676  | 0.256702  | 0.241987  | 0.25845   | 0.252477  |
| 0.11553   | 0.112471  | 0.109703  | 0.115239  | 0.108683  | 0.104458  | 0.0512821 |
| 0.119027  | 0.0987762 | 0.0890152 | 0.116696  | 0.094697  | 0.11553   | 0.105478  |
| 0.177885  | 0.174825  | 0.164481  | 0.180216  | 0.164918  | 0.181964  | 0.16958   |
| 0.187209  | 0.178322  | 0.168561  | 0.186917  | 0.170746  | 0.186917  | 0.176282  |
| 0.123689  | 0.105478  | 0.115822  | 0.125146  | 0.114802  | 0.117279  | 0.11655   |
| 0.118007  | 0.113782  | 0.0827506 | 0.118007  | 0.0753205 | 0.117716  | 0.112617  |
| 0.100233  | 0.110286  | 0.11014   | 0.104021  | 0.113199  | 0.118007  | 0.103584  |
| 0.13884   | 0.138403  | 0.107955  | 0.141171  | 0.0961538 | 0.142628  | 0.140443  |
| 0.118735  | 0.104895  | 0.112617  | 0.121358  | 0.112762  | 0.108829  | 0.114802  |
| 0.123834  | 0.107955  | 0.116259  | 0.123834  | 0.118444  | 0.118298  | 0.119318  |
| 0.0563811 | 0.11859   | 0.123106  | 0.0502622 | 0.12704   | 0.125146  | 0.121795  |
| 0.115239  | 0.115093  | 0.0820221 | 0.114365  | 0.0719697 | 0.116987  | 0.111014  |
| 0.125583  | 0.122232  | 0.0926573 | 0.127331  | 0.0826049 | 0.130245  | 0.125146  |
| 0.0724068 | 0.115676  | 0.107955  | 0.069493  | 0.113636  | 0.119027  | 0.111888  |
| 0.109557  | 0.121066  | 0.121795  | 0.114802  | 0.125437  | 0.12704   | 0.110577  |
| 0.120192  | 0.136655  | 0.135052  | 0.125437  | 0.137529  | 0.141463  | 0.125     |
| 0.120629  | 0.117279  | 0.114219  | 0.119755  | 0.114073  | 0.109557  | 0.0534674 |
| 0.114073  | 0.128205  | 0.128642  | 0.115822  | 0.129953  | 0.132721  | 0.120047  |
| 0.0528846 | 0.126166  | 0.128934  | 0.0488054 | 0.129371  | 0.128934  | 0.12296   |
| 0.208042  | 0.200321  | 0.189103  | 0.208042  | 0.191871  | 0.20542   | 0.200612  |
| 0.109703  | 0.123834  | 0.117861  | 0.111451  | 0.117133  | 0.101836  | 0.10169   |
| 0.192745  | 0.183275  | 0.176136  | 0.193328  | 0.176282  | 0.193036  | 0.18648   |
| 0.110868  | 0.104312  | 0.116404  | 0.114073  | 0.112471  | 0.111742  | 0.112179  |
| 0.128934  | 0.123834  | 0.0814394 | 0.126894  | 0.0932401 | 0.116404  | 0.104604  |
| 0.123106  | 0.120629  | 0.118153  | 0.121358  | 0.113928  | 0.124563  | 0.109266  |
| 0.116259  | 0.11553   | 0.114219  | 0.115967  | 0.112325  | 0.115385  | 0.105332  |
| 0.119901  | 0.118007  | 0.0875583 | 0.121066  | 0.0769231 | 0.123397  | 0.119172  |
| 0.118153  | 0.115967  | 0.08581   | 0.118444  | 0.0751748 | 0.120775  | 0.121503  |
| 0.11961   | 0.114219  | 0.0805653 | 0.118444  | 0.0897436 | 0.112325  | 0.0979021 |
| 0.116259  | 0.111742  | 0.121212  | 0.115676  | 0.120484  | 0.123543  | 0.116113  |
| 0.126457  | 0.123397  | 0.120047  | 0.124126  | 0.116113  | 0.126457  | 0.113199  |
| 0.0645396 | 0.13141   | 0.130682  | 0.0584207 | 0.131119  | 0.130973  | 0.125874  |
| 0.253059  | 0.244755  | 0.234411  | 0.251603  | 0.236597  | 0.254516  | 0.245338  |
| 0.119027  | 0.114802  | 0.0773601 | 0.120775  | 0.0862471 | 0.109994  | 0.100816  |
| 0.18648   | 0.174097  | 0.168415  | 0.185315  | 0.169143  | 0.185023  | 0.177885  |
| 0.187209  | 0.180944  | 0.172931  | 0.189831  | 0.174825  | 0.1875    | 0.183275  |
| 0.115676  | 0.111742  | 0.111014  | 0.118007  | 0.115239  | 0.106643  | 0.108537  |
| 0.113928  | 0.112034  | 0.105769  | 0.113928  | 0.105041  | 0.104895  | 0.0482226 |
| 0.125291  | 0.122523  | 0.0798368 | 0.125874  | 0.0910548 | 0.11655   | 0.107372  |
| 0.113054  | 0.10708   | 0.083042  | 0.11451   | 0.0756119 | 0.113345  | 0.107955  |
| 0.11553   | 0.112179  | 0.0960082 | 0.118444  | 0.101399  | 0.0895979 | 0.0844988 |
| 0.048514  | 0.113636  | 0.116696  | 0.0479312 | 0.120047  | 0.119027  | 0.110723  |
| 0.118298  | 0.119027  | 0.0874126 | 0.122378  | 0.0793998 | 0.118007  | 0.114073  |

|           |          |           |           |           |           |           |
|-----------|----------|-----------|-----------|-----------|-----------|-----------|
| 0.12704   | 0.125146 | 0.0961538 | 0.129371  | 0.0828963 | 0.132284  | 0.128351  |
| 0.11757   | 0.114219 | 0.074155  | 0.118153  | 0.083042  | 0.107955  | 0.0990676 |
| 0.127185  | 0.12296  | 0.0957168 | 0.124854  | 0.0821678 | 0.127768  | 0.12296   |
| 0.115676  | 0.108537 | 0.120047  | 0.11655   | 0.119027  | 0.112471  | 0.104749  |
| 0.126166  | 0.122815 | 0.123543  | 0.126166  | 0.119901  | 0.127914  | 0.114073  |
| 0.103584  | 0.113636 | 0.117861  | 0.108246  | 0.11859   | 0.118444  | 0.109557  |
| 0.0585664 | 0.128059 | 0.130245  | 0.0524476 | 0.130973  | 0.130245  | 0.126894  |
| 0.118735  | 0.11859  | 0.112325  | 0.120484  | 0.116259  | 0.0432692 | 0.105769  |
| 0.115239  | 0.11655  | 0.0735723 | 0.115239  | 0.0844988 | 0.104749  | 0.0999417 |
| 0.128059  | 0.101107 | 0.129516  | 0.125437  | 0.126457  | 0.137092  | 0.126166  |
| 0.184732  | 0.179924 | 0.169289  | 0.184732  | 0.172348  | 0.185023  | 0.174097  |
| 0.133304  | 0.128205 | 0.0989219 | 0.13243   | 0.0885781 | 0.13447   | 0.128788  |
| 0.118444  | 0.115676 | 0.0846445 | 0.118444  | 0.0748834 | 0.122523  | 0.115385  |
| 0.120921  | 0.117861 | 0.119464  | 0.118298  | 0.117279  | 0.120921  | 0.109994  |
| 0.112325  | 0.1081   | 0.109411  | 0.112908  | 0.107517  | 0.113199  | 0.102564  |
| 0.105769  | 0.115822 | 0.115676  | 0.11014   | 0.121066  | 0.121795  | 0.105332  |
| 0.10912   | 0.120047 | 0.124272  | 0.112325  | 0.125     | 0.126311  | 0.111597  |
| 0.191142  | 0.183421 | 0.176282  | 0.192599  | 0.177885  | 0.191725  | 0.184003  |
| 0.115967  | 0.117861 | 0.0839161 | 0.116259  | 0.0785256 | 0.109848  | 0.109703  |
| 0.108537  | 0.106935 | 0.0968823 | 0.109703  | 0.0967366 | 0.103001  | 0.101107  |
| 0.121358  | 0.119172 | 0.088141  | 0.124854  | 0.0772145 | 0.123689  | 0.119464  |
| 0.193473  | 0.186626 | 0.174825  | 0.194056  | 0.175554  | 0.193473  | 0.186334  |
| 0.11116   | 0.106061 | 0.10271   | 0.111742  | 0.104312  | 0.101544  | 0.0437063 |
| 0.0495338 | 0.120484 | 0.121795  | 0.04662   | 0.125728  | 0.12296   | 0.118735  |
| 0.121212  | 0.118444 | 0.0871212 | 0.123252  | 0.0761946 | 0.123252  | 0.119318  |
| 0.11553   | 0.103438 | 0.113782  | 0.116696  | 0.110723  | 0.113199  | 0.114802  |
| 0.188083  | 0.179196 | 0.172931  | 0.192162  | 0.172494  | 0.186334  | 0.177156  |
| 0.0505536 | 0.11655  | 0.115822  | 0.0476399 | 0.118007  | 0.122232  | 0.114219  |
| 0.106789  | 0.090035 | 0.105915  | 0.105915  | 0.104895  | 0.115239  | 0.106352  |
| 0.112908  | 0.107226 | 0.106498  | 0.113782  | 0.106643  | 0.104749  | 0.0620629 |
| 0.119027  | 0.115093 | 0.105041  | 0.117861  | 0.104895  | 0.122815  | 0.112471  |
| 0.116259  | 0.11553  | 0.126457  | 0.115093  | 0.125728  | 0.123834  | 0.114073  |
| 0.0576923 | 0.124854 | 0.127914  | 0.0512821 | 0.129516  | 0.129662  | 0.123106  |
| 0.117716  | 0.114073 | 0.0731352 | 0.119755  | 0.0828963 | 0.106935  | 0.0983392 |
| 0.115093  | 0.115822 | 0.120338  | 0.120047  | 0.115822  | 0.107809  | 0.114656  |
| 0.147582  | 0.133159 | 0.139132  | 0.148456  | 0.139277  | 0.141171  | 0.142774  |
| 0.236742  | 0.230186 | 0.21926   | 0.238491  | 0.221445  | 0.238491  | 0.231061  |
| 0.123106  | 0.121503 | 0.118735  | 0.12398   | 0.11859   | 0.0505536 | 0.111305  |
| 0.117279  | 0.112179 | 0.124563  | 0.115822  | 0.124709  | 0.124563  | 0.113928  |
| 0.111014  | 0.113782 | 0.0836247 | 0.110431  | 0.071824  | 0.116841  | 0.114365  |
| 0.122523  | 0.109266 | 0.11757   | 0.124563  | 0.118881  | 0.122523  | 0.117424  |
| 0.0984848 | 0.109994 | 0.112471  | 0.0917832 | 0.108537  | 0.119464  | 0.109994  |
| 0.115093  | 0.117861 | 0.116259  | 0.113054  | 0.117861  | 0.119464  | 0.102127  |
| 0.117861  | 0.120047 | 0.0884324 | 0.11757   | 0.0789627 | 0.125728  | 0.118881  |

|           |          |           |           |           |           |           |
|-----------|----------|-----------|-----------|-----------|-----------|-----------|
| 0.0556527 | 0.123689 | 0.125583  | 0.0504079 | 0.125437  | 0.125583  | 0.122815  |
| 0.11451   | 0.103293 | 0.108974  | 0.115093  | 0.106789  | 0.113636  | 0.114948  |
| 0.239073  | 0.233392 | 0.222756  | 0.238782  | 0.222611  | 0.239365  | 0.233974  |
| 0.107809  | 0.107372 | 0.0990676 | 0.108974  | 0.0989219 | 0.101399  | 0.0450175 |
| 0.0967366 | 0.103293 | 0.106643  | 0.0981935 | 0.109411  | 0.104604  | 0.0986305 |
| 0.117279  | 0.113928 | 0.0709499 | 0.114948  | 0.0812937 | 0.107663  | 0.0964452 |
| 0.134907  | 0.116404 | 0.124126  | 0.133741  | 0.12398   | 0.129079  | 0.131265  |
| 0.129662  | 0.126311 | 0.124709  | 0.129953  | 0.125437  | 0.0606061 | 0.116404  |
| 0.120629  | 0.116404 | 0.104021  | 0.118881  | 0.102418  | 0.113345  | 0.103293  |
| 0.118007  | 0.116404 | 0.083042  | 0.117424  | 0.0759033 | 0.119755  | 0.116987  |
| 0.113782  | 0.099359 | 0.108537  | 0.114656  | 0.106352  | 0.108537  | 0.112471  |
| 0.234411  | 0.22669  | 0.214598  | 0.233246  | 0.213578  | 0.233829  | 0.227273  |
| 0.121941  | 0.120338 | 0.0884324 | 0.123689  | 0.07838   | 0.126311  | 0.121503  |
| 0.0524476 | 0.11961  | 0.120921  | 0.0472028 | 0.123689  | 0.120921  | 0.116404  |
| 0.111597  | 0.10271  | 0.11014   | 0.111305  | 0.109703  | 0.108683  | 0.109703  |
| 0.121358  | 0.12296  | 0.118153  | 0.119318  | 0.118007  | 0.12602   | 0.118007  |
| 0.107955  | 0.116841 | 0.126311  | 0.109411  | 0.125291  | 0.121066  | 0.115967  |
| 0.117279  | 0.114219 | 0.0782343 | 0.119318  | 0.0879953 | 0.109411  | 0.099359  |
| 0.0575466 | 0.120921 | 0.122232  | 0.0514277 | 0.125291  | 0.124272  | 0.116841  |
| 0.0553613 | 0.126311 | 0.129371  | 0.0547786 | 0.129516  | 0.128788  | 0.124563  |
| 0.0469114 | 0.111451 | 0.120047  | 0.0407925 | 0.119318  | 0.119464  | 0.114365  |
| 0.120484  | 0.112762 | 0.0732809 | 0.118735  | 0.0827506 | 0.109703  | 0.0967366 |
| 0.123689  | 0.120047 | 0.129516  | 0.123689  | 0.127914  | 0.131847  | 0.121795  |
| 0.129662  | 0.128642 | 0.13549   | 0.129953  | 0.131847  | 0.134907  | 0.124272  |
| 0.130245  | 0.127185 | 0.125874  | 0.127331  | 0.121358  | 0.131702  | 0.11961   |
| 0.131993  | 0.128642 | 0.129079  | 0.132576  | 0.125437  | 0.132284  | 0.120484  |
| 0.125437  | 0.128205 | 0.133596  | 0.124854  | 0.129662  | 0.135635  | 0.126166  |
| 0.110868  | 0.106935 | 0.095134  | 0.113199  | 0.0990676 | 0.0823135 | 0.0777972 |
| 0.100524  | 0.13039  | 0.13141   | 0.0981935 | 0.132721  | 0.132867  | 0.12602   |
| 0.119027  | 0.127914 | 0.121941  | 0.121066  | 0.12296   | 0.125146  | 0.120921  |
| 0.210227  | 0.198718 | 0.189831  | 0.20877   | 0.190851  | 0.209645  | 0.201049  |
| 0.122232  | 0.128497 | 0.112908  | 0.123106  | 0.113345  | 0.108537  | 0.117133  |
| 0.100379  | 0.108392 | 0.115239  | 0.0995047 | 0.112471  | 0.111742  | 0.105769  |
| 0.123252  | 0.117861 | 0.0763403 | 0.124417  | 0.0884324 | 0.115385  | 0.103001  |
| 0.226544  | 0.217366 | 0.206148  | 0.225379  | 0.207751  | 0.226253  | 0.217366  |
| 0.211684  | 0.205128 | 0.196824  | 0.21285   | 0.198427  | 0.213432  | 0.207459  |
| 0.0574009 | 0.124854 | 0.126748  | 0.0533217 | 0.128934  | 0.129371  | 0.124272  |
| 0.251603  | 0.24359  | 0.235577  | 0.24898   | 0.235723  | 0.25539   | 0.247086  |
| 0.112908  | 0.107226 | 0.0962995 | 0.116113  | 0.0984848 | 0.0828963 | 0.0833333 |
| 0.134178  | 0.126748 | 0.13243   | 0.134761  | 0.129662  | 0.11961   | 0.120629  |
| 0.112908  | 0.108683 | 0.106789  | 0.111742  | 0.106061  | 0.103293  | 0.0480769 |
| 0.12296   | 0.121358 | 0.128205  | 0.121795  | 0.127185  | 0.130536  | 0.121649  |
| 0.190122  | 0.183275 | 0.171766  | 0.190414  | 0.172203  | 0.188666  | 0.182984  |
| 0.119464  | 0.115822 | 0.11859   | 0.120047  | 0.119901  | 0.120338  | 0.112034  |



|           |          |           |           |           |           |           |
|-----------|----------|-----------|-----------|-----------|-----------|-----------|
| 0.197261  | 0.185752 | 0.177739  | 0.196096  | 0.178467  | 0.195513  | 0.1875    |
| 0.113636  | 0.10912  | 0.106643  | 0.114219  | 0.11116   | 0.105186  | 0.104458  |
| 0.0751748 | 0.117279 | 0.0955711 | 0.0728438 | 0.0957168 | 0.119464  | 0.113491  |
| 0.11859   | 0.119318 | 0.119172  | 0.123834  | 0.115822  | 0.109848  | 0.106789  |
| 0.110723  | 0.107663 | 0.099359  | 0.106061  | 0.0971737 | 0.112179  | 0.104167  |
| 0.112908  | 0.111888 | 0.074155  | 0.110286  | 0.0792541 | 0.104167  | 0.0935315 |
| 0.113782  | 0.111597 | 0.101544  | 0.114073  | 0.100233  | 0.101253  | 0.106352  |
| 0.109703  | 0.104604 | 0.102127  | 0.108246  | 0.104604  | 0.097465  | 0.0480769 |
| 0.109266  | 0.109994 | 0.0818765 | 0.113636  | 0.0697844 | 0.111305  | 0.110868  |
| 0.0893065 | 0.112471 | 0.11757   | 0.0852273 | 0.117424  | 0.117279  | 0.112471  |
| 0.10912   | 0.107226 | 0.10708   | 0.112908  | 0.106935  | 0.0458916 | 0.103147  |
| 0.113636  | 0.107955 | 0.105186  | 0.112762  | 0.107372  | 0.10169   | 0.0444347 |
| 0.121649  | 0.119464 | 0.103875  | 0.118735  | 0.10169   | 0.11961   | 0.108974  |
| 0.12398   | 0.124126 | 0.092803  | 0.125437  | 0.0850816 | 0.127768  | 0.123543  |
| 0.115676  | 0.114948 | 0.113345  | 0.114219  | 0.112034  | 0.118881  | 0.105041  |
| 0.109994  | 0.083042 | 0.110286  | 0.108246  | 0.111305  | 0.113782  | 0.11014   |
| 0.112179  | 0.106789 | 0.0705128 | 0.114219  | 0.0785256 | 0.104604  | 0.0910548 |
| 0.0617716 | 0.118735 | 0.112762  | 0.0553613 | 0.114656  | 0.122669  | 0.113199  |
| 0.115385  | 0.110286 | 0.123252  | 0.115093  | 0.122232  | 0.127331  | 0.114656  |
| 0.105041  | 0.118298 | 0.119318  | 0.107663  | 0.122086  | 0.122815  | 0.1081    |
| 0.118153  | 0.118298 | 0.115822  | 0.114948  | 0.115093  | 0.119901  | 0.109266  |
| 0.115093  | 0.116113 | 0.0839161 | 0.116259  | 0.0715326 | 0.120047  | 0.114073  |
| 0.12398   | 0.124126 | 0.0939685 | 0.126603  | 0.0847902 | 0.129516  | 0.127331  |
| 0.13243   | 0.131702 | 0.101544  | 0.135344  | 0.0888695 | 0.136801  | 0.131993  |
| 0.0506993 | 0.104458 | 0.108683  | 0.0524476 | 0.10708   | 0.106352  | 0.101544  |
| 0.11859   | 0.110286 | 0.0748834 | 0.114219  | 0.0837704 | 0.107517  | 0.0995047 |
| 0.106789  | 0.106643 | 0.10912   | 0.105332  | 0.107517  | 0.109411  | 0.0941142 |
| 0.126603  | 0.126457 | 0.135927  | 0.127477  | 0.134907  | 0.138258  | 0.128205  |
| 0.114802  | 0.111451 | 0.109848  | 0.113928  | 0.110577  | 0.104604  | 0.0493881 |
| 0.121212  | 0.135635 | 0.137238  | 0.125874  | 0.137092  | 0.141608  | 0.126311  |
| 0.135781  | 0.131265 | 0.0874126 | 0.138112  | 0.0989219 | 0.127331  | 0.115239  |
| 0.128934  | 0.113928 | 0.122523  | 0.128934  | 0.122378  | 0.119318  | 0.124417  |
| 0.111014  | 0.109411 | 0.105478  | 0.112179  | 0.102127  | 0.0912005 | 0.0983392 |
| 0.109411  | 0.101107 | 0.112617  | 0.112617  | 0.1081    | 0.109994  | 0.105769  |
| 0.128934  | 0.123252 | 0.125437  | 0.127477  | 0.121212  | 0.127185  | 0.115676  |
| 0.208042  | 0.200903 | 0.191434  | 0.206876  | 0.193619  | 0.208916  | 0.201195  |
| 0.1081    | 0.08581  | 0.109557  | 0.107226  | 0.110868  | 0.118298  | 0.108829  |
| 0.115822  | 0.115676 | 0.110577  | 0.118444  | 0.113054  | 0.103875  | 0.0979021 |
| 0.113928  | 0.114365 | 0.123252  | 0.11655   | 0.120775  | 0.125     | 0.113782  |
| 0.117861  | 0.119755 | 0.116404  | 0.115239  | 0.113054  | 0.11961   | 0.107809  |
| 0.11859   | 0.112325 | 0.115385  | 0.118298  | 0.116113  | 0.111305  | 0.110868  |
| 0.113928  | 0.116404 | 0.11859   | 0.115093  | 0.117861  | 0.113054  | 0.119027  |
| 0.116696  | 0.117424 | 0.118735  | 0.121066  | 0.11859   | 0.114365  | 0.125874  |
| 0.120338  | 0.108537 | 0.121212  | 0.125291  | 0.11553   | 0.117133  | 0.119027  |

|           |          |           |           |           |           |           |
|-----------|----------|-----------|-----------|-----------|-----------|-----------|
| 0.0801282 | 0.110577 | 0.115093  | 0.0821678 | 0.116113  | 0.111597  | 0.10912   |
| 0.121212  | 0.123397 | 0.130828  | 0.125     | 0.127477  | 0.130536  | 0.122815  |
| 0.113345  | 0.11553  | 0.111888  | 0.116259  | 0.112034  | 0.104895  | 0.0995047 |
| 0.114073  | 0.113636 | 0.112034  | 0.119901  | 0.112179  | 0.0453089 | 0.102855  |
| 0.173951  | 0.170309 | 0.167249  | 0.172494  | 0.167104  | 0.176573  | 0.1706    |
| 0.109266  | 0.112034 | 0.0833333 | 0.11451   | 0.0732809 | 0.11451   | 0.113491  |
| 0.124854  | 0.121503 | 0.132139  | 0.124854  | 0.129371  | 0.131847  | 0.122378  |
| 0.1081    | 0.121066 | 0.120921  | 0.108974  | 0.120484  | 0.10169   | 0.100379  |
| 0.112617  | 0.124709 | 0.104167  | 0.112034  | 0.103147  | 0.123397  | 0.117133  |
| 0.105915  | 0.104895 | 0.10271   | 0.108537  | 0.101107  | 0.0872669 | 0.0979021 |
| 0.103584  | 0.101981 | 0.102418  | 0.104749  | 0.104895  | 0.0488054 | 0.094697  |
| 0.111742  | 0.111597 | 0.107663  | 0.113199  | 0.109266  | 0.0910548 | 0.0999417 |
| 0.10271   | 0.11859  | 0.119901  | 0.101836  | 0.119172  | 0.124854  | 0.11451   |
| 0.113491  | 0.107517 | 0.0840618 | 0.114948  | 0.0821678 | 0.0805653 | 0.109848  |
| 0.117133  | 0.124563 | 0.125     | 0.118881  | 0.124563  | 0.120629  | 0.113491  |
| 0.103293  | 0.111597 | 0.104749  | 0.102418  | 0.104604  | 0.106789  | 0.104021  |
| 0.104312  | 0.112617 | 0.113636  | 0.107517  | 0.116696  | 0.0999417 | 0.10271   |
| 0.103584  | 0.128497 | 0.127477  | 0.0986305 | 0.127622  | 0.127477  | 0.117716  |
| 0.105041  | 0.116259 | 0.113199  | 0.103875  | 0.115093  | 0.0965909 | 0.105186  |
| 0.112034  | 0.120047 | 0.11961   | 0.119027  | 0.117424  | 0.116113  | 0.113345  |
| 0.0992133 | 0.111305 | 0.106206  | 0.100087  | 0.109557  | 0.0936772 | 0.0996503 |
| 0.103875  | 0.113928 | 0.107955  | 0.103001  | 0.113345  | 0.0942599 | 0.100524  |
| 0.105915  | 0.103438 | 0.105041  | 0.109703  | 0.106352  | 0.0995047 | 0.0903263 |
| 0.111014  | 0.123689 | 0.113928  | 0.11451   | 0.116987  | 0.107517  | 0.103001  |
| 0.101399  | 0.11116  | 0.1081    | 0.102564  | 0.109703  | 0.0967366 | 0.0948427 |
| 0.111597  | 0.137675 | 0.136072  | 0.107517  | 0.137675  | 0.141026  | 0.139714  |
| 0.102855  | 0.127477 | 0.122378  | 0.0999417 | 0.123397  | 0.128497  | 0.128642  |
| 0.0999417 | 0.112034 | 0.109266  | 0.102273  | 0.110286  | 0.0926573 | 0.100962  |
| 0.104167  | 0.133159 | 0.135344  | 0.105041  | 0.135781  | 0.143211  | 0.132576  |
| 0.122232  | 0.11859  | 0.119027  | 0.122232  | 0.116259  | 0.118735  | 0.118298  |
| 0.126894  | 0.127914 | 0.125728  | 0.12398   | 0.126166  | 0.120192  | 0.114802  |
| 0.110868  | 0.109848 | 0.108246  | 0.112325  | 0.108683  | 0.101253  | 0.094697  |
| 0.136655  | 0.13884  | 0.137821  | 0.137529  | 0.136801  | 0.141608  | 0.139423  |
| 0.117716  | 0.124854 | 0.130245  | 0.120921  | 0.129225  | 0.123252  | 0.121066  |
| 0.117716  | 0.129808 | 0.134324  | 0.118298  | 0.13447   | 0.138403  | 0.127768  |
| 0.113928  | 0.118735 | 0.120629  | 0.113636  | 0.115822  | 0.113345  | 0.108829  |
| 0.0971737 | 0.111597 | 0.109703  | 0.0948427 | 0.108683  | 0.0948427 | 0.0961538 |
| 0.0958625 | 0.103875 | 0.109848  | 0.101981  | 0.110286  | 0.0979021 | 0.0960082 |
| 0.0971737 | 0.111597 | 0.116696  | 0.0986305 | 0.118007  | 0.112908  | 0.113345  |
| 0.112325  | 0.122378 | 0.114948  | 0.112908  | 0.115385  | 0.105624  | 0.100816  |
| 0.124126  | 0.121358 | 0.123834  | 0.125     | 0.125146  | 0.113636  | 0.108537  |
| 0.104895  | 0.116987 | 0.112471  | 0.104312  | 0.110286  | 0.118007  | 0.113782  |
| 0.103438  | 0.102127 | 0.108392  | 0.104604  | 0.110577  | 0.10373   | 0.0957168 |
| 0.0957168 | 0.1081   | 0.107663  | 0.102127  | 0.111597  | 0.0965909 | 0.0949883 |

|           |          |           |           |           |           |           |
|-----------|----------|-----------|-----------|-----------|-----------|-----------|
| 0.108683  | 0.120775 | 0.115676  | 0.108974  | 0.119027  | 0.106352  | 0.101253  |
| 0.0981935 | 0.110868 | 0.106061  | 0.0984848 | 0.109703  | 0.106061  | 0.0930944 |
| 0.102418  | 0.116259 | 0.119027  | 0.106206  | 0.115967  | 0.106498  | 0.105186  |
| 0.112617  | 0.109848 | 0.106789  | 0.116113  | 0.105769  | 0.100087  | 0.0929487 |
| 0.121795  | 0.11553  | 0.105186  | 0.118298  | 0.104749  | 0.111014  | 0.102418  |
| 0.113928  | 0.105915 | 0.106352  | 0.119172  | 0.10912   | 0.0856643 | 0.0957168 |
| 0.11014   | 0.109703 | 0.0958625 | 0.113636  | 0.0986305 | 0.0824592 | 0.078817  |
| 0.104312  | 0.113491 | 0.1081    | 0.104021  | 0.10912   | 0.0967366 | 0.0954254 |
| 0.114948  | 0.111597 | 0.104749  | 0.11553   | 0.102855  | 0.111742  | 0.104895  |
| 0.109266  | 0.109994 | 0.106935  | 0.114802  | 0.106206  | 0.0882867 | 0.101836  |
| 0.121212  | 0.115239 | 0.11014   | 0.122669  | 0.105915  | 0.112471  | 0.114948  |
| 0.106352  | 0.105915 | 0.0984848 | 0.109266  | 0.0954254 | 0.102564  | 0.0989219 |
| 0.11961   | 0.128205 | 0.11961   | 0.120192  | 0.119464  | 0.102127  | 0.11655   |

| TDr_2440 | TDr_2441  | TDr_2453  | TDr_2455 | TDr_2456 | TDr_2458  | TDr_2466  |
|----------|-----------|-----------|----------|----------|-----------|-----------|
| 0.122669 | 0.118444  | 0.112908  | 0.127477 | 0.13447  | 0.113636  | 0.10067   |
| 0.109411 | 0.10373   | 0.108683  | 0.119464 | 0.138403 | 0.101253  | 0.113054  |
| 0.105915 | 0.101981  | 0.103147  | 0.116259 | 0.132284 | 0.095134  | 0.109848  |
| 0.119027 | 0.0914918 | 0.102564  | 0.120047 | 0.131119 | 0.101544  | 0.113928  |
| 0.122815 | 0.132284  | 0.119464  | 0.132284 | 0.136072 | 0.13243   | 0.13345   |
| 0.119901 | 0.129371  | 0.11655   | 0.136946 | 0.13986  | 0.121358  | 0.114802  |
| 0.13141  | 0.127768  | 0.112617  | 0.122523 | 0.130682 | 0.120338  | 0.113199  |
| 0.113636 | 0.105332  | 0.0995047 | 0.122523 | 0.130973 | 0.102273  | 0.11116   |
| 0.113782 | 0.104895  | 0.0961538 | 0.114802 | 0.12296  | 0.0992133 | 0.108683  |
| 0.120629 | 0.116404  | 0.103001  | 0.103584 | 0.128059 | 0.0909091 | 0.0986305 |
| 0.122815 | 0.12296   | 0.11014   | 0.12296  | 0.136072 | 0.106498  | 0.107517  |
| 0.115967 | 0.103875  | 0.0957168 | 0.116696 | 0.121066 | 0.108392  | 0.114365  |
| 0.114219 | 0.114073  | 0.105041  | 0.118735 | 0.126311 | 0.0990676 | 0.109703  |
| 0.137383 | 0.130245  | 0.126748  | 0.145979 | 0.156469 | 0.121941  | 0.123834  |
| 0.124126 | 0.128642  | 0.120775  | 0.12398  | 0.13243  | 0.0606061 | 0.0910548 |
| 0.123689 | 0.120047  | 0.113928  | 0.115967 | 0.123543 | 0.11116   | 0.104604  |
| 0.11655  | 0.113491  | 0.0919289 | 0.117279 | 0.120192 | 0.106935  | 0.111451  |
| 0.132139 | 0.136655  | 0.124126  | 0.145105 | 0.160256 | 0.138258  | 0.143648  |
| 0.107955 | 0.102855  | 0.0976107 | 0.111888 | 0.130245 | 0.099796  | 0.1081    |
| 0.200903 | 0.200758  | 0.196678  | 0.206876 | 0.211247 | 0.181381  | 0.167249  |
| 0.116841 | 0.126894  | 0.111451  | 0.125146 | 0.144376 | 0.112471  | 0.117861  |
| 0.112908 | 0.120338  | 0.106643  | 0.121212 | 0.137821 | 0.112325  | 0.113345  |
| 0.115385 | 0.109994  | 0.0933858 | 0.112034 | 0.126603 | 0.105186  | 0.102418  |
| 0.127768 | 0.129662  | 0.113636  | 0.125874 | 0.126166 | 0.122232  | 0.118881  |
| 0.104895 | 0.108537  | 0.0945513 | 0.107372 | 0.118735 | 0.0987762 | 0.0992133 |
| 0.120338 | 0.133887  | 0.116113  | 0.125146 | 0.143502 | 0.122669  | 0.116113  |
| 0.123834 | 0.129516  | 0.115822  | 0.124272 | 0.123106 | 0.119755  | 0.11961   |
| 0.122669 | 0.121649  | 0.112908  | 0.122232 | 0.131847 | 0.113054  | 0.116113  |
| 0.133159 | 0.128934  | 0.120192  | 0.128059 | 0.13243  | 0.130536  | 0.126894  |
| 0.131993 | 0.122232  | 0.11553   | 0.125728 | 0.121941 | 0.113054  | 0.122232  |
| 0.123397 | 0.131702  | 0.115385  | 0.127331 | 0.131702 | 0.110286  | 0.0964452 |
| 0.122086 | 0.12398   | 0.114365  | 0.119901 | 0.126603 | 0.115385  | 0.116113  |
| 0.108683 | 0.106789  | 0.0986305 | 0.114656 | 0.11757  | 0.0958625 | 0.0971737 |
| 0.120629 | 0.117861  | 0.111742  | 0.123106 | 0.117279 | 0.114802  | 0.118735  |
| 0.128351 | 0.127914  | 0.108392  | 0.115676 | 0.124709 | 0.116696  | 0.118881  |
| 0.132576 | 0.129808  | 0.11553   | 0.124272 | 0.123397 | 0.127622  | 0.125146  |
| 0.137092 | 0.13345   | 0.125291  | 0.121503 | 0.143065 | 0.127477  | 0.122086  |
| 0.126457 | 0.121649  | 0.109703  | 0.124272 | 0.129225 | 0.115385  | 0.119027  |
| 0.117133 | 0.112325  | 0.103293  | 0.11757  | 0.12398  | 0.104895  | 0.10708   |
| 0.12704  | 0.123689  | 0.112325  | 0.127185 | 0.135635 | 0.116259  | 0.113199  |
| 0.115676 | 0.109994  | 0.100962  | 0.120775 | 0.129225 | 0.104604  | 0.107663  |
| 0.14627  | 0.143502  | 0.133596  | 0.142628 | 0.147582 | 0.132867  | 0.12602   |

|          |           |           |           |          |          |          |
|----------|-----------|-----------|-----------|----------|----------|----------|
| 0.150641 | 0.14933   | 0.133304  | 0.149038  | 0.151369 | 0.142483 | 0.135927 |
| 0.120775 | 0.116841  | 0.104312  | 0.124126  | 0.128497 | 0.111116 | 0.111597 |
| 0.109703 | 0.114219  | 0.0914918 | 0.0932401 | 0.114219 | 0.102127 | 0.109266 |
| 0.130828 | 0.12398   | 0.104458  | 0.105624  | 0.125146 | 0.107517 | 0.116113 |
| 0.118298 | 0.123689  | 0.100087  | 0.118735  | 0.13039  | 0.109848 | 0.107955 |
| 0.144085 | 0.13986   | 0.129371  | 0.142483  | 0.143648 | 0.133013 | 0.126457 |
| 0.118735 | 0.115093  | 0.105769  | 0.122086  | 0.129662 | 0.108246 | 0.109848 |
| 0.12296  | 0.119318  | 0.10271   | 0.121649  | 0.126894 | 0.108974 | 0.105915 |
| 0.146999 | 0.14627   | 0.140443  | 0.14831   | 0.143357 | 0.14292  | 0.123543 |
| 0.127477 | 0.133159  | 0.118298  | 0.12704   | 0.132867 | 0.122523 | 0.116841 |
| 0.117133 | 0.11553   | 0.105624  | 0.125437  | 0.123106 | 0.111597 | 0.110577 |
| 0.128205 | 0.124854  | 0.121066  | 0.123689  | 0.137383 | 0.115385 | 0.121649 |
| 0.117716 | 0.0875583 | 0.102127  | 0.128351  | 0.135052 | 0.109557 | 0.103584 |
| 0.140152 | 0.137383  | 0.126603  | 0.13243   | 0.132139 | 0.137238 | 0.13039  |
| 0.132139 | 0.128497  | 0.121795  | 0.128497  | 0.132284 | 0.123689 | 0.115967 |
| 0.118153 | 0.116259  | 0.106643  | 0.127622  | 0.129953 | 0.109411 | 0.111305 |
| 0.121066 | 0.120047  | 0.109266  | 0.11859   | 0.129371 | 0.110286 | 0.1081   |
| 0.124126 | 0.124854  | 0.112617  | 0.111451  | 0.126894 | 0.112762 | 0.113199 |
| 0.144522 | 0.135344  | 0.125146  | 0.138258  | 0.149038 | 0.134033 | 0.128059 |
| 0.146562 | 0.137092  | 0.135927  | 0.143794  | 0.146707 | 0.133159 | 0.128059 |
| 0.167686 | 0.159091  | 0.155886  | 0.168124  | 0.169872 | 0.156031 | 0.142483 |
| 0.121941 | 0.116259  | 0.110723  | 0.127331  | 0.131993 | 0.105915 | 0.111014 |
| 0.116404 | 0.116841  | 0.102564  | 0.120047  | 0.126166 | 0.108246 | 0.108974 |
| 0.120775 | 0.11451   | 0.102564  | 0.120338  | 0.123543 | 0.110577 | 0.109848 |
| 0.145105 | 0.145833  | 0.126894  | 0.12602   | 0.143794 | 0.134615 | 0.128351 |
| 0.120338 | 0.111451  | 0.105915  | 0.122815  | 0.126603 | 0.104895 | 0.108246 |
| 0.130973 | 0.136364  | 0.116259  | 0.121212  | 0.140734 | 0.130099 | 0.112471 |
| 0.126603 | 0.126748  | 0.109848  | 0.105478  | 0.126166 | 0.107372 | 0.116841 |
| 0.126457 | 0.119901  | 0.105332  | 0.122815  | 0.131556 | 0.110723 | 0.112325 |
| 0.148893 | 0.148164  | 0.137675  | 0.14088   | 0.144668 | 0.142483 | 0.128059 |
| 0.12704  | 0.119901  | 0.109703  | 0.13039   | 0.131847 | 0.117133 | 0.116987 |
| 0.14292  | 0.140443  | 0.128788  | 0.138986  | 0.143357 | 0.129225 | 0.129662 |
| 0.128497 | 0.133596  | 0.118735  | 0.127477  | 0.133887 | 0.125291 | 0.121649 |
| 0.109411 | 0.106061  | 0.0973193 | 0.112762  | 0.129371 | 0.10912  | 0.111305 |
| 0.120484 | 0.113054  | 0.104895  | 0.125     | 0.125874 | 0.107663 | 0.110723 |
| 0.11757  | 0.115967  | 0.105478  | 0.125874  | 0.133741 | 0.109994 | 0.11014  |
| 0.135052 | 0.130536  | 0.124709  | 0.138986  | 0.144522 | 0.132721 | 0.12704  |
| 0.117424 | 0.115239  | 0.105915  | 0.120484  | 0.123689 | 0.112179 | 0.108829 |
| 0.146125 | 0.136946  | 0.127914  | 0.144522  | 0.153263 | 0.135052 | 0.130828 |
| 0.128351 | 0.125583  | 0.115385  | 0.127622  | 0.13549  | 0.116113 | 0.113054 |
| 0.12602  | 0.118881  | 0.107809  | 0.125     | 0.126457 | 0.114948 | 0.11451  |
| 0.126311 | 0.121503  | 0.108392  | 0.13141   | 0.131702 | 0.109703 | 0.111888 |
| 0.125146 | 0.117716  | 0.108683  | 0.127622  | 0.134907 | 0.116987 | 0.117424 |
| 0.118735 | 0.120921  | 0.106352  | 0.123252  | 0.130245 | 0.108829 | 0.107809 |

|          |          |           |           |          |           |          |
|----------|----------|-----------|-----------|----------|-----------|----------|
| 0.11961  | 0.117133 | 0.105769  | 0.121503  | 0.12704  | 0.112034  | 0.104895 |
| 0.143065 | 0.142045 | 0.12602   | 0.136801  | 0.143211 | 0.131702  | 0.126311 |
| 0.118881 | 0.118153 | 0.0995047 | 0.11757   | 0.118735 | 0.099359  | 0.108246 |
| 0.119318 | 0.115967 | 0.0979021 | 0.119464  | 0.123543 | 0.107372  | 0.115385 |
| 0.127768 | 0.129662 | 0.113345  | 0.117133  | 0.132867 | 0.120192  | 0.123543 |
| 0.135052 | 0.129662 | 0.114802  | 0.120921  | 0.131993 | 0.125437  | 0.121212 |
| 0.125146 | 0.136655 | 0.113636  | 0.0885781 | 0.133741 | 0.124272  | 0.123543 |
| 0.130828 | 0.138258 | 0.115822  | 0.0992133 | 0.140589 | 0.133159  | 0.128642 |
| 0.116696 | 0.120338 | 0.108974  | 0.118298  | 0.128788 | 0.114656  | 0.108392 |
| 0.184878 | 0.185897 | 0.177448  | 0.175991  | 0.189685 | 0.181381  | 0.16317  |
| 0.111305 | 0.109994 | 0.0992133 | 0.112325  | 0.125437 | 0.101981  | 0.113491 |
| 0.133304 | 0.139277 | 0.114802  | 0.0821678 | 0.13549  | 0.12398   | 0.128788 |
| 0.125437 | 0.131993 | 0.108392  | 0.0801282 | 0.129371 | 0.118153  | 0.120921 |
| 0.134324 | 0.142045 | 0.125146  | 0.122232  | 0.139423 | 0.131119  | 0.130973 |
| 0.112325 | 0.115385 | 0.0926573 | 0.0929487 | 0.123543 | 0.104749  | 0.108974 |
| 0.128059 | 0.132867 | 0.109266  | 0.0952797 | 0.136655 | 0.128351  | 0.12296  |
| 0.113782 | 0.118881 | 0.0926573 | 0.0938228 | 0.124126 | 0.109703  | 0.117133 |
| 0.122086 | 0.132139 | 0.104458  | 0.102127  | 0.123106 | 0.117716  | 0.115239 |
| 0.122086 | 0.115239 | 0.10912   | 0.115239  | 0.126603 | 0.107517  | 0.103584 |
| 0.128497 | 0.141171 | 0.112908  | 0.0989219 | 0.137092 | 0.13345   | 0.129225 |
| 0.120047 | 0.11553  | 0.0977564 | 0.111116  | 0.116987 | 0.100524  | 0.10912  |
| 0.136218 | 0.137821 | 0.122669  | 0.112179  | 0.140152 | 0.131556  | 0.116259 |
| 0.12296  | 0.124272 | 0.10708   | 0.113782  | 0.130099 | 0.11451   | 0.114365 |
| 0.134761 | 0.128205 | 0.118881  | 0.13345   | 0.135198 | 0.126894  | 0.123252 |
| 0.137529 | 0.13447  | 0.122815  | 0.126311  | 0.129808 | 0.120047  | 0.120775 |
| 0.111888 | 0.116113 | 0.100087  | 0.106206  | 0.125728 | 0.104604  | 0.108829 |
| 0.148601 | 0.144085 | 0.13243   | 0.131847  | 0.147582 | 0.139277  | 0.125437 |
| 0.116113 | 0.125    | 0.106061  | 0.112762  | 0.128205 | 0.112325  | 0.113928 |
| 0.116987 | 0.117133 | 0.0938228 | 0.0882867 | 0.124126 | 0.104749  | 0.114219 |
| 0.119464 | 0.123689 | 0.10271   | 0.116987  | 0.125437 | 0.115676  | 0.111742 |
| 0.140734 | 0.145251 | 0.126894  | 0.12398   | 0.147873 | 0.135781  | 0.13039  |
| 0.126457 | 0.128059 | 0.111742  | 0.120775  | 0.129225 | 0.116259  | 0.100379 |
| 0.112762 | 0.112617 | 0.0890152 | 0.0878497 | 0.126894 | 0.102273  | 0.109994 |
| 0.105478 | 0.118153 | 0.0890152 | 0.0546329 | 0.123106 | 0.103147  | 0.110577 |
| 0.121358 | 0.120629 | 0.107809  | 0.110431  | 0.129953 | 0.110577  | 0.110431 |
| 0.130245 | 0.129225 | 0.118153  | 0.102127  | 0.133304 | 0.112471  | 0.119318 |
| 0.124272 | 0.125291 | 0.108392  | 0.116841  | 0.125583 | 0.114073  | 0.112762 |
| 0.117133 | 0.108246 | 0.0933858 | 0.105915  | 0.116696 | 0.0944056 | 0.103584 |
| 0.11451  | 0.107955 | 0.0930944 | 0.106498  | 0.122815 | 0.0987762 | 0.103875 |
| 0.118153 | 0.116841 | 0.0938228 | 0.1081    | 0.121212 | 0.10067   | 0.109557 |
| 0.121941 | 0.119464 | 0.113928  | 0.124126  | 0.125583 | 0.11553   | 0.120921 |
| 0.132867 | 0.131265 | 0.113491  | 0.114073  | 0.130099 | 0.121212  | 0.124272 |
| 0.115822 | 0.114802 | 0.10169   | 0.109848  | 0.118881 | 0.0971737 | 0.108683 |
| 0.108974 | 0.112034 | 0.100087  | 0.105332  | 0.11961  | 0.0903263 | 0.103584 |

|          |           |           |           |          |           |           |
|----------|-----------|-----------|-----------|----------|-----------|-----------|
| 0.13141  | 0.13243   | 0.110868  | 0.112034  | 0.127185 | 0.113636  | 0.118444  |
| 0.121358 | 0.112762  | 0.100233  | 0.11014   | 0.122669 | 0.0965909 | 0.106352  |
| 0.124563 | 0.125583  | 0.108974  | 0.11655   | 0.129662 | 0.116987  | 0.111888  |
| 0.13447  | 0.131702  | 0.125583  | 0.135781  | 0.135198 | 0.127768  | 0.111597  |
| 0.119027 | 0.119755  | 0.103147  | 0.104604  | 0.123543 | 0.107663  | 0.111305  |
| 0.119755 | 0.114656  | 0.104749  | 0.109411  | 0.122523 | 0.097028  | 0.107955  |
| 0.11859  | 0.114948  | 0.099796  | 0.108246  | 0.119318 | 0.103147  | 0.110577  |
| 0.111888 | 0.113199  | 0.0916375 | 0.0989219 | 0.116987 | 0.099359  | 0.0995047 |
| 0.128205 | 0.128059  | 0.11553   | 0.112908  | 0.135344 | 0.112471  | 0.120192  |
| 0.110431 | 0.107663  | 0.0939685 | 0.10271   | 0.119901 | 0.0949883 | 0.10708   |
| 0.143211 | 0.13986   | 0.125291  | 0.135198  | 0.13549  | 0.13039   | 0.131993  |
| 0.137529 | 0.137383  | 0.124854  | 0.13243   | 0.134761 | 0.125     | 0.13243   |
| 0.134324 | 0.126894  | 0.112617  | 0.124854  | 0.129516 | 0.117716  | 0.120484  |
| 0.122815 | 0.124417  | 0.105769  | 0.119755  | 0.127622 | 0.106789  | 0.116259  |
| 0.116113 | 0.121795  | 0.102564  | 0.114219  | 0.127331 | 0.104749  | 0.11014   |
| 0.119755 | 0.120484  | 0.0971737 | 0.106498  | 0.122232 | 0.100524  | 0.108537  |
| 0.122232 | 0.115676  | 0.0996503 | 0.111014  | 0.122669 | 0.111451  | 0.109557  |
| 0.110286 | 0.113345  | 0.100816  | 0.115967  | 0.123252 | 0.10271   | 0.105478  |
| 0.112034 | 0.092366  | 0.0967366 | 0.118881  | 0.129953 | 0.108246  | 0.101107  |
| 0.133596 | 0.134324  | 0.120338  | 0.127914  | 0.135781 | 0.123397  | 0.115676  |
| 0.111888 | 0.11961   | 0.0965909 | 0.0971737 | 0.13243  | 0.1081    | 0.112325  |
| 0.133304 | 0.134033  | 0.120629  | 0.12704   | 0.141317 | 0.119027  | 0.125291  |
| 0.137821 | 0.139714  | 0.120192  | 0.119318  | 0.139132 | 0.130536  | 0.13243   |
| 0.192016 | 0.185752  | 0.179924  | 0.205274  | 0.207314 | 0.180653  | 0.179633  |
| 0.234703 | 0.22873   | 0.226981  | 0.245338  | 0.24359  | 0.23208   | 0.223776  |
| 0.113636 | 0.0706585 | 0.0960082 | 0.119901  | 0.127768 | 0.1081    | 0.105915  |
| 0.114656 | 0.115676  | 0.0984848 | 0.116259  | 0.123834 | 0.107372  | 0.104021  |
| 0.112034 | 0.112179  | 0.0929487 | 0.113636  | 0.120921 | 0.103875  | 0.0984848 |
| 0.111742 | 0.11655   | 0.0958625 | 0.11014   | 0.129079 | 0.108246  | 0.107809  |
| 0.128642 | 0.12704   | 0.120047  | 0.120047  | 0.128497 | 0.0613345 | 0.0879953 |
| 0.11553  | 0.116259  | 0.097028  | 0.11655   | 0.125874 | 0.108537  | 0.104021  |
| 0.14627  | 0.14729   | 0.131847  | 0.134178  | 0.137675 | 0.143065  | 0.134761  |
| 0.112908 | 0.119464  | 0.102273  | 0.119464  | 0.126457 | 0.114948  | 0.111014  |
| 0.128059 | 0.129953  | 0.119755  | 0.128205  | 0.134033 | 0.127477  | 0.118007  |
| 0.129079 | 0.133596  | 0.110868  | 0.123397  | 0.136801 | 0.130245  | 0.108829  |
| 0.131993 | 0.135927  | 0.114656  | 0.121066  | 0.135052 | 0.124417  | 0.116696  |
| 0.141608 | 0.137675  | 0.131265  | 0.142045  | 0.140589 | 0.130536  | 0.128642  |
| 0.119464 | 0.122232  | 0.102418  | 0.117279  | 0.129225 | 0.109266  | 0.112325  |
| 0.111305 | 0.116113  | 0.0995047 | 0.115239  | 0.12398  | 0.110431  | 0.106206  |
| 0.118735 | 0.123834  | 0.0955711 | 0.111014  | 0.133741 | 0.110868  | 0.109266  |
| 0.110577 | 0.113054  | 0.094697  | 0.116259  | 0.120047 | 0.106206  | 0.104021  |
| 0.112908 | 0.111305  | 0.0999417 | 0.11451   | 0.121795 | 0.108537  | 0.106061  |
| 0.11859  | 0.11757   | 0.101544  | 0.119901  | 0.124854 | 0.114219  | 0.112325  |
| 0.12398  | 0.134033  | 0.11014   | 0.122669  | 0.136946 | 0.120775  | 0.115967  |

|          |          |           |           |          |           |          |
|----------|----------|-----------|-----------|----------|-----------|----------|
| 0.130099 | 0.139569 | 0.11859   | 0.124126  | 0.134324 | 0.133013  | 0.123834 |
| 0.118881 | 0.120192 | 0.107663  | 0.121649  | 0.123689 | 0.115967  | 0.114365 |
| 0.117279 | 0.120047 | 0.0932401 | 0.118881  | 0.129662 | 0.109994  | 0.104312 |
| 0.131265 | 0.133741 | 0.114219  | 0.126748  | 0.130245 | 0.130682  | 0.120921 |
| 0.114948 | 0.115093 | 0.0912005 | 0.117133  | 0.118881 | 0.109703  | 0.108392 |
| 0.136364 | 0.149038 | 0.129516  | 0.131556  | 0.141463 | 0.135198  | 0.127185 |
| 0.140443 | 0.139714 | 0.121358  | 0.13243   | 0.144376 | 0.123543  | 0.126894 |
| 0.123106 | 0.139277 | 0.108974  | 0.105186  | 0.133159 | 0.128351  | 0.116259 |
| 0.116113 | 0.112179 | 0.0955711 | 0.113636  | 0.123834 | 0.106206  | 0.109266 |
| 0.1081   | 0.114656 | 0.0919289 | 0.110577  | 0.118735 | 0.105769  | 0.100379 |
| 0.126894 | 0.126748 | 0.107517  | 0.123834  | 0.134324 | 0.120484  | 0.117716 |
| 0.121795 | 0.125437 | 0.104167  | 0.116696  | 0.125437 | 0.122378  | 0.113491 |
| 0.128788 | 0.136218 | 0.112325  | 0.123106  | 0.128642 | 0.130245  | 0.118444 |
| 0.119901 | 0.119464 | 0.0987762 | 0.118881  | 0.125874 | 0.113199  | 0.113054 |
| 0.115967 | 0.119027 | 0.102127  | 0.119318  | 0.124854 | 0.113054  | 0.112908 |
| 0.122669 | 0.125146 | 0.103584  | 0.118153  | 0.13039  | 0.117424  | 0.114073 |
| 0.133741 | 0.140297 | 0.112034  | 0.126894  | 0.133887 | 0.129079  | 0.121066 |
| 0.12704  | 0.131847 | 0.114073  | 0.12398   | 0.133887 | 0.130245  | 0.111451 |
| 0.129516 | 0.137821 | 0.121795  | 0.127914  | 0.131119 | 0.129225  | 0.122669 |
| 0.133741 | 0.134761 | 0.122232  | 0.135052  | 0.140589 | 0.126457  | 0.11553  |
| 0.120921 | 0.112325 | 0.101544  | 0.120192  | 0.124272 | 0.114802  | 0.111742 |
| 0.128788 | 0.13447  | 0.109703  | 0.124563  | 0.137383 | 0.129371  | 0.117279 |
| 0.11116  | 0.113345 | 0.0932401 | 0.112179  | 0.125    | 0.107955  | 0.107809 |
| 0.11859  | 0.116987 | 0.103875  | 0.123397  | 0.135052 | 0.110723  | 0.110577 |
| 0.111014 | 0.121358 | 0.0992133 | 0.114365  | 0.129808 | 0.108683  | 0.109994 |
| 0.109994 | 0.121212 | 0.097028  | 0.112179  | 0.129079 | 0.107372  | 0.105769 |
| 0.112617 | 0.111305 | 0.0920746 | 0.112179  | 0.124126 | 0.106498  | 0.106935 |
| 0.134324 | 0.140297 | 0.118153  | 0.122232  | 0.137383 | 0.133741  | 0.123106 |
| 0.119901 | 0.124417 | 0.107226  | 0.126166  | 0.132867 | 0.10912   | 0.105186 |
| 0.131265 | 0.133741 | 0.113928  | 0.123834  | 0.135781 | 0.131847  | 0.123543 |
| 0.113782 | 0.113345 | 0.0967366 | 0.11655   | 0.121212 | 0.109703  | 0.106352 |
| 0.128497 | 0.133304 | 0.110577  | 0.121941  | 0.12398  | 0.123834  | 0.115822 |
| 0.125437 | 0.126457 | 0.112179  | 0.123834  | 0.127914 | 0.120192  | 0.115676 |
| 0.121358 | 0.120629 | 0.0999417 | 0.122086  | 0.136655 | 0.103875  | 0.115967 |
| 0.121795 | 0.121941 | 0.106206  | 0.114073  | 0.118444 | 0.110723  | 0.113491 |
| 0.122232 | 0.126457 | 0.108683  | 0.119172  | 0.132576 | 0.11553   | 0.119464 |
| 0.122669 | 0.122232 | 0.107372  | 0.125728  | 0.128351 | 0.111597  | 0.122523 |
| 0.119172 | 0.11961  | 0.107663  | 0.11961   | 0.119027 | 0.109848  | 0.115239 |
| 0.142191 | 0.137383 | 0.117861  | 0.129516  | 0.141754 | 0.122378  | 0.13039  |
| 0.145542 | 0.140152 | 0.130828  | 0.129371  | 0.134907 | 0.132139  | 0.134907 |
| 0.114656 | 0.108683 | 0.0920746 | 0.106061  | 0.121503 | 0.0989219 | 0.110431 |
| 0.124417 | 0.135927 | 0.115239  | 0.102127  | 0.14088  | 0.115967  | 0.116696 |
| 0.133304 | 0.132284 | 0.113928  | 0.11859   | 0.130828 | 0.112034  | 0.121503 |
| 0.119027 | 0.131993 | 0.112471  | 0.0935315 | 0.142191 | 0.119901  | 0.121795 |



|          |          |           |           |          |          |          |
|----------|----------|-----------|-----------|----------|----------|----------|
| 0.117279 | 0.122086 | 0.104895  | 0.094697  | 0.13141  | 0.108246 | 0.109266 |
| 0.124563 | 0.127622 | 0.108392  | 0.114802  | 0.13141  | 0.11116  | 0.120338 |
| 0.128205 | 0.129516 | 0.114073  | 0.121066  | 0.132139 | 0.115093 | 0.117279 |
| 0.12398  | 0.128497 | 0.106935  | 0.100233  | 0.134033 | 0.121066 | 0.123543 |
| 0.13243  | 0.140734 | 0.122378  | 0.106935  | 0.141026 | 0.12398  | 0.126748 |
| 0.124272 | 0.121795 | 0.112762  | 0.11859   | 0.141608 | 0.112034 | 0.120629 |
| 0.112617 | 0.120629 | 0.0987762 | 0.0973193 | 0.12704  | 0.107372 | 0.106935 |
| 0.136072 | 0.132721 | 0.122815  | 0.142045  | 0.131847 | 0.135781 | 0.135635 |
| 0.135052 | 0.137821 | 0.118881  | 0.125583  | 0.136364 | 0.12398  | 0.130245 |
| 0.113782 | 0.115967 | 0.0981935 | 0.105769  | 0.129079 | 0.103001 | 0.104021 |
| 0.221154 | 0.211976 | 0.208188  | 0.228584  | 0.22771  | 0.214161 | 0.204983 |
| 0.121795 | 0.124563 | 0.105041  | 0.0986305 | 0.133304 | 0.111888 | 0.109703 |
| 0.123543 | 0.121358 | 0.097465  | 0.112617  | 0.134178 | 0.104604 | 0.11961  |
| 0.127477 | 0.136655 | 0.116841  | 0.100233  | 0.139569 | 0.124854 | 0.122086 |
| 0.119901 | 0.119755 | 0.104312  | 0.118298  | 0.133159 | 0.107372 | 0.118298 |
| 0.135344 | 0.134033 | 0.120921  | 0.124126  | 0.144814 | 0.117861 | 0.125291 |
| 0.117279 | 0.125    | 0.0999417 | 0.0999417 | 0.134907 | 0.107663 | 0.113928 |
| 0.118007 | 0.124272 | 0.107372  | 0.0992133 | 0.130973 | 0.107226 | 0.109994 |
| 0.128788 | 0.127768 | 0.114073  | 0.121649  | 0.141171 | 0.111888 | 0.119901 |
| 0.121066 | 0.130536 | 0.111597  | 0.100233  | 0.145105 | 0.117279 | 0.120921 |
| 0.127622 | 0.132139 | 0.112908  | 0.102127  | 0.141171 | 0.121212 | 0.121066 |
| 0.120775 | 0.132284 | 0.111597  | 0.105186  | 0.136364 | 0.122523 | 0.124709 |
| 0.120484 | 0.127622 | 0.115967  | 0.103438  | 0.134033 | 0.118153 | 0.119464 |
| 0.125437 | 0.121503 | 0.106352  | 0.114219  | 0.117716 | 0.105624 | 0.116841 |
| 0.116404 | 0.117133 | 0.10373   | 0.10373   | 0.130536 | 0.110577 | 0.117716 |
| 0.125583 | 0.140589 | 0.116404  | 0.103293  | 0.144085 | 0.122669 | 0.126894 |
| 0.111742 | 0.126748 | 0.101107  | 0.0909091 | 0.134324 | 0.10708  | 0.10373  |
| 0.143794 | 0.138403 | 0.131119  | 0.13549   | 0.145396 | 0.133596 | 0.130536 |
| 0.1419   | 0.141171 | 0.126311  | 0.138258  | 0.148164 | 0.12704  | 0.12398  |
| 0.129662 | 0.128642 | 0.115239  | 0.121649  | 0.122523 | 0.112471 | 0.110868 |
| 0.134615 | 0.132721 | 0.112617  | 0.124563  | 0.135635 | 0.115385 | 0.118444 |
| 0.134761 | 0.129371 | 0.114219  | 0.113636  | 0.137529 | 0.119027 | 0.106643 |
| 0.127622 | 0.128934 | 0.121066  | 0.128059  | 0.12398  | 0.123252 | 0.124272 |
| 0.128788 | 0.123397 | 0.117861  | 0.134178  | 0.136218 | 0.11859  | 0.11757  |
| 0.140443 | 0.141171 | 0.127768  | 0.136509  | 0.150787 | 0.128788 | 0.125146 |
| 0.122815 | 0.117716 | 0.0973193 | 0.115676  | 0.124417 | 0.102418 | 0.112471 |
| 0.138112 | 0.137675 | 0.123397  | 0.127477  | 0.139714 | 0.123252 | 0.125437 |
| 0.142045 | 0.143065 | 0.134033  | 0.142774  | 0.153555 | 0.131847 | 0.122378 |
| 0.125437 | 0.126457 | 0.113345  | 0.108392  | 0.128497 | 0.111742 | 0.112762 |
| 0.130099 | 0.128497 | 0.113928  | 0.130245  | 0.137821 | 0.118153 | 0.113928 |
| 0.148601 | 0.141754 | 0.133304  | 0.142628  | 0.137092 | 0.142191 | 0.140589 |
| 0.129371 | 0.126311 | 0.114948  | 0.128059  | 0.138549 | 0.119755 | 0.119318 |
| 0.144959 | 0.136364 | 0.126166  | 0.134324  | 0.141317 | 0.127185 | 0.131993 |
| 0.133741 | 0.135344 | 0.120192  | 0.125146  | 0.135927 | 0.122086 | 0.126603 |

|           |           |           |           |          |           |           |
|-----------|-----------|-----------|-----------|----------|-----------|-----------|
| 0.116987  | 0.129079  | 0.0996503 | 0.0769231 | 0.129953 | 0.117861  | 0.122378  |
| 0.133159  | 0.132139  | 0.125146  | 0.125437  | 0.136509 | 0.125     | 0.115239  |
| 0.130973  | 0.128788  | 0.107809  | 0.109266  | 0.131119 | 0.112908  | 0.118298  |
| 0.12704   | 0.136509  | 0.109994  | 0.0957168 | 0.130973 | 0.12296   | 0.122232  |
| 0.127622  | 0.131847  | 0.111116  | 0.099796  | 0.133887 | 0.12296   | 0.132139  |
| 0.12704   | 0.138549  | 0.108829  | 0.0820221 | 0.135052 | 0.131993  | 0.129225  |
| 0.13345   | 0.136509  | 0.120484  | 0.0939685 | 0.134178 | 0.128788  | 0.128351  |
| 0.130828  | 0.137675  | 0.115822  | 0.103001  | 0.136218 | 0.125583  | 0.113199  |
| 0.141026  | 0.148456  | 0.12602   | 0.103875  | 0.144085 | 0.136364  | 0.129225  |
| 0.129371  | 0.132139  | 0.113491  | 0.121358  | 0.128642 | 0.112179  | 0.116404  |
| 0.117716  | 0.123106  | 0.107372  | 0.10912   | 0.135635 | 0.111888  | 0.117279  |
| 0.135198  | 0.133887  | 0.115239  | 0.125437  | 0.141463 | 0.120921  | 0.12602   |
| 0.131993  | 0.126603  | 0.108829  | 0.104167  | 0.121066 | 0.111014  | 0.112617  |
| 0.14933   | 0.144522  | 0.136655  | 0.134324  | 0.149767 | 0.133596  | 0.128205  |
| 0.154283  | 0.157051  | 0.145396  | 0.143939  | 0.156177 | 0.147582  | 0.141608  |
| 0.124854  | 0.132867  | 0.116841  | 0.121795  | 0.133741 | 0.126894  | 0.118881  |
| 0.124709  | 0.118735  | 0.111116  | 0.122232  | 0.124272 | 0.121212  | 0.118444  |
| 0.121649  | 0.13141   | 0.117716  | 0.106352  | 0.134324 | 0.122815  | 0.12704   |
| 0.129953  | 0.132721  | 0.116987  | 0.105041  | 0.13884  | 0.122669  | 0.125728  |
| 0.129662  | 0.131265  | 0.112908  | 0.130682  | 0.132721 | 0.121795  | 0.121649  |
| 0.12704   | 0.141171  | 0.114073  | 0.107372  | 0.141171 | 0.126748  | 0.130973  |
| 0.140443  | 0.139714  | 0.130973  | 0.131265  | 0.144376 | 0.127622  | 0.114073  |
| 0.135344  | 0.129953  | 0.115385  | 0.125583  | 0.128788 | 0.11757   | 0.109848  |
| 0.15778   | 0.155594  | 0.144522  | 0.152389  | 0.160839 | 0.156614  | 0.145688  |
| 0.138258  | 0.135198  | 0.121503  | 0.129079  | 0.131993 | 0.119901  | 0.117424  |
| 0.143502  | 0.144522  | 0.13141   | 0.135781  | 0.140734 | 0.123689  | 0.131993  |
| 0.124126  | 0.128351  | 0.112908  | 0.105915  | 0.135344 | 0.113636  | 0.115239  |
| 0.131702  | 0.134761  | 0.119901  | 0.111742  | 0.13243  | 0.130536  | 0.132721  |
| 0.115676  | 0.128934  | 0.10708   | 0.090472  | 0.133596 | 0.113636  | 0.115239  |
| 0.140589  | 0.114219  | 0.132576  | 0.150932  | 0.149767 | 0.131847  | 0.110431  |
| 0.0617716 | 0.140006  | 0.128934  | 0.129225  | 0.154866 | 0.140443  | 0.139714  |
| 0.118444  | 0.0539044 | 0.106643  | 0.130828  | 0.137238 | 0.11757   | 0.124126  |
| 0.134324  | 0.0712413 | 0.120484  | 0.143794  | 0.14729  | 0.130828  | 0.131847  |
| 0.152244  | 0.145105  | 0.134033  | 0.156469  | 0.153846 | 0.140589  | 0.134324  |
| 0.145542  | 0.119755  | 0.130245  | 0.156177  | 0.160256 | 0.13243   | 0.129371  |
| 0.131702  | 0.126894  | 0.112908  | 0.119318  | 0.114656 | 0.126457  | 0.121649  |
| 0.125728  | 0.130245  | 0.123834  | 0.140443  | 0.145688 | 0.132721  | 0.134907  |
| 0.10912   | 0.111888  | 0.105186  | 0.121212  | 0.126748 | 0.0823135 | 0.099359  |
| 0.114802  | 0.118735  | 0.108246  | 0.114073  | 0.122815 | 0.0821678 | 0.0855186 |
| 0.121649  | 0.124126  | 0.109266  | 0.12296   | 0.13345  | 0.116404  | 0.115385  |
| 0.11553   | 0.0469114 | 0.104021  | 0.128205  | 0.134907 | 0.111742  | 0.119464  |
| 0.120338  | 0.124272  | 0.0992133 | 0.122523  | 0.120192 | 0.109266  | 0.116404  |
| 0.111888  | 0.0849359 | 0.104749  | 0.11961   | 0.127477 | 0.0722611 | 0.0849359 |
| 0.118007  | 0.102418  | 0.103875  | 0.128059  | 0.134761 | 0.111597  | 0.125146  |

|           |           |           |          |           |           |           |
|-----------|-----------|-----------|----------|-----------|-----------|-----------|
| 0.118735  | 0.119172  | 0.112179  | 0.123543 | 0.131993  | 0.0668706 | 0.0882867 |
| 0.117279  | 0.111305  | 0.100816  | 0.118298 | 0.115676  | 0.0954254 | 0.10373   |
| 0.119318  | 0.0530303 | 0.105769  | 0.131702 | 0.137821  | 0.114948  | 0.123543  |
| 0.117133  | 0.0511364 | 0.101836  | 0.130099 | 0.134761  | 0.112179  | 0.120192  |
| 0.130536  | 0.124854  | 0.112908  | 0.121358 | 0.11961   | 0.123252  | 0.122523  |
| 0.215618  | 0.209353  | 0.205565  | 0.222756 | 0.228293  | 0.208916  | 0.199446  |
| 0.139569  | 0.0724068 | 0.127185  | 0.142337 | 0.151369  | 0.139277  | 0.139423  |
| 0.12398   | 0.124709  | 0.118881  | 0.129079 | 0.136946  | 0.124854  | 0.125     |
| 0.120921  | 0.118444  | 0.116404  | 0.129808 | 0.136218  | 0.114802  | 0.11961   |
| 0.208042  | 0.202652  | 0.199155  | 0.219551 | 0.222465  | 0.204254  | 0.197407  |
| 0.129371  | 0.125146  | 0.112034  | 0.127768 | 0.126603  | 0.116841  | 0.0989219 |
| 0.128059  | 0.125583  | 0.109848  | 0.125583 | 0.0530303 | 0.11553   | 0.120338  |
| 0.11961   | 0.122086  | 0.106643  | 0.132284 | 0.125874  | 0.11757   | 0.120921  |
| 0.117424  | 0.124563  | 0.112908  | 0.121066 | 0.130099  | 0.0527389 | 0.0843531 |
| 0.248252  | 0.244027  | 0.241404  | 0.255099 | 0.258596  | 0.24359   | 0.237325  |
| 0.127768  | 0.125583  | 0.117716  | 0.134033 | 0.134033  | 0.121066  | 0.109848  |
| 0.123689  | 0.119172  | 0.106061  | 0.118298 | 0.122086  | 0.11553   | 0.118007  |
| 0.115239  | 0.122378  | 0.0967366 | 0.125    | 0.137821  | 0.122232  | 0.130828  |
| 0.109703  | 0.121503  | 0.0979021 | 0.124709 | 0.134324  | 0.118735  | 0.126748  |
| 0.132139  | 0.125291  | 0.122086  | 0.13549  | 0.134907  | 0.108829  | 0.0906177 |
| 0.13039   | 0.109557  | 0.116841  | 0.133741 | 0.139569  | 0.104458  | 0.102564  |
| 0.125146  | 0.122086  | 0.110431  | 0.121795 | 0.122086  | 0.115239  | 0.119755  |
| 0.116841  | 0.046183  | 0.103584  | 0.12602  | 0.133596  | 0.113054  | 0.119318  |
| 0.11961   | 0.122086  | 0.113928  | 0.134615 | 0.135781  | 0.121941  | 0.126748  |
| 0.116113  | 0.117424  | 0.107226  | 0.115967 | 0.125874  | 0.0464744 | 0.0862471 |
| 0.117424  | 0.0552156 | 0.0992133 | 0.126311 | 0.134761  | 0.11014   | 0.116987  |
| 0.123106  | 0.119172  | 0.106935  | 0.108683 | 0.132284  | 0.097465  | 0.105186  |
| 0.0585664 | 0.138549  | 0.127768  | 0.129516 | 0.150495  | 0.140443  | 0.139132  |
| 0.13141   | 0.129516  | 0.120775  | 0.135635 | 0.13039   | 0.124417  | 0.110577  |
| 0.13141   | 0.12602   | 0.112034  | 0.13039  | 0.0552156 | 0.120047  | 0.124563  |
| 0.191142  | 0.180216  | 0.177302  | 0.197407 | 0.201777  | 0.180361  | 0.177593  |
| 0.203089  | 0.195076  | 0.19391   | 0.213432 | 0.214598  | 0.195804  | 0.190122  |
| 0.121212  | 0.121941  | 0.116113  | 0.125728 | 0.129516  | 0.0536131 | 0.0872669 |
| 0.112179  | 0.116404  | 0.109703  | 0.112908 | 0.125146  | 0.0460373 | 0.0805653 |
| 0.129371  | 0.125146  | 0.130099  | 0.134761 | 0.154866  | 0.125874  | 0.128351  |
| 0.124126  | 0.121358  | 0.111451  | 0.120192 | 0.11757   | 0.117133  | 0.116696  |
| 0.130973  | 0.13141   | 0.12296   | 0.135781 | 0.13345   | 0.123397  | 0.107809  |
| 0.118881  | 0.126894  | 0.0724068 | 0.116987 | 0.135927  | 0.126166  | 0.126894  |
| 0.223485  | 0.21722   | 0.214015  | 0.233829 | 0.237034  | 0.216783  | 0.211101  |
| 0.112471  | 0.112908  | 0.106498  | 0.122815 | 0.128059  | 0.113345  | 0.120484  |
| 0.204691  | 0.201923  | 0.196387  | 0.212995 | 0.212995  | 0.207022  | 0.185606  |
| 0.122378  | 0.113782  | 0.101253  | 0.114656 | 0.113199  | 0.110723  | 0.11116   |
| 0.120484  | 0.119464  | 0.0984848 | 0.125291 | 0.119172  | 0.109411  | 0.118007  |
| 0.117716  | 0.103875  | 0.105041  | 0.125146 | 0.128642  | 0.111597  | 0.103001  |

|           |           |           |          |           |           |           |
|-----------|-----------|-----------|----------|-----------|-----------|-----------|
| 0.113636  | 0.11553   | 0.104749  | 0.11553  | 0.123689  | 0.0565268 | 0.0826049 |
| 0.206439  | 0.198135  | 0.195221  | 0.215909 | 0.219114  | 0.198572  | 0.192308  |
| 0.129808  | 0.0588578 | 0.11859   | 0.138403 | 0.144522  | 0.126894  | 0.133159  |
| 0.119027  | 0.120338  | 0.10169   | 0.123543 | 0.123252  | 0.112908  | 0.120921  |
| 0.12398   | 0.0539044 | 0.11014   | 0.133741 | 0.139277  | 0.118153  | 0.126166  |
| 0.128934  | 0.120629  | 0.111888  | 0.132867 | 0.126457  | 0.12602   | 0.123252  |
| 0.118153  | 0.113928  | 0.109848  | 0.121795 | 0.126748  | 0.0499709 | 0.0888695 |
| 0.119464  | 0.11553   | 0.101544  | 0.115239 | 0.112034  | 0.114802  | 0.114656  |
| 0.125583  | 0.11961   | 0.108246  | 0.123397 | 0.123689  | 0.11655   | 0.116696  |
| 0.131702  | 0.12602   | 0.114365  | 0.126603 | 0.0517191 | 0.118881  | 0.119901  |
| 0.108974  | 0.0496795 | 0.0957168 | 0.124854 | 0.131847  | 0.108392  | 0.117861  |
| 0.122523  | 0.123543  | 0.105186  | 0.123252 | 0.122086  | 0.11757   | 0.119464  |
| 0.189977  | 0.180216  | 0.178759  | 0.196533 | 0.202652  | 0.18007   | 0.180216  |
| 0.114656  | 0.122086  | 0.0979021 | 0.125    | 0.136072  | 0.122523  | 0.131119  |
| 0.0472028 | 0.122232  | 0.110286  | 0.120775 | 0.142628  | 0.122669  | 0.124854  |
| 0.109411  | 0.117424  | 0.101981  | 0.119464 | 0.135781  | 0.112617  | 0.120921  |
| 0.130245  | 0.125728  | 0.118735  | 0.136218 | 0.131847  | 0.122086  | 0.111451  |
| 0.119464  | 0.0488054 | 0.105915  | 0.128934 | 0.135052  | 0.116841  | 0.122815  |
| 0.124417  | 0.120484  | 0.105915  | 0.118444 | 0.112908  | 0.117716  | 0.117861  |
| 0.120484  | 0.113928  | 0.105769  | 0.124709 | 0.125291  | 0.115822  | 0.113054  |
| 0.133013  | 0.125874  | 0.114802  | 0.11859  | 0.121503  | 0.121649  | 0.120047  |
| 0.0472028 | 0.118153  | 0.10708   | 0.120775 | 0.139423  | 0.11655   | 0.122815  |
| 0.111305  | 0.114365  | 0.0878497 | 0.121066 | 0.133013  | 0.113054  | 0.124272  |
| 0.119318  | 0.115385  | 0.111888  | 0.122669 | 0.131993  | 0.0581294 | 0.0874126 |
| 0.115385  | 0.121649  | 0.106789  | 0.13447  | 0.129516  | 0.11451   | 0.124272  |
| 0.129516  | 0.135198  | 0.116259  | 0.142191 | 0.137238  | 0.130973  | 0.13345   |
| 0.11961   | 0.118881  | 0.106935  | 0.126457 | 0.126166  | 0.11116   | 0.105186  |
| 0.135198  | 0.0689103 | 0.120484  | 0.138549 | 0.144668  | 0.134907  | 0.136509  |
| 0.117424  | 0.116404  | 0.105915  | 0.122815 | 0.128642  | 0.0469114 | 0.0872669 |
| 0.109848  | 0.114656  | 0.0563811 | 0.114948 | 0.129808  | 0.115676  | 0.116987  |
| 0.120484  | 0.0673077 | 0.10373   | 0.131119 | 0.13549   | 0.114365  | 0.114802  |
| 0.13447   | 0.125874  | 0.113054  | 0.128205 | 0.124417  | 0.124854  | 0.123543  |
| 0.191871  | 0.182984  | 0.178904  | 0.200758 | 0.200466  | 0.184295  | 0.171037  |
| 0.117133  | 0.11757   | 0.0980478 | 0.121066 | 0.119027  | 0.111597  | 0.116404  |
| 0.104895  | 0.103293  | 0.088141  | 0.114948 | 0.119318  | 0.105186  | 0.111451  |
| 0.13141   | 0.126894  | 0.114365  | 0.127185 | 0.0499709 | 0.119172  | 0.121941  |
| 0.180361  | 0.169435  | 0.168561  | 0.188083 | 0.191288  | 0.172494  | 0.163024  |
| 0.13884   | 0.138986  | 0.127622  | 0.144231 | 0.1419    | 0.130682  | 0.119755  |
| 0.151661  | 0.147436  | 0.137238  | 0.147436 | 0.141026  | 0.142045  | 0.126748  |
| 0.0635198 | 0.143502  | 0.131265  | 0.128934 | 0.153992  | 0.143065  | 0.142337  |
| 0.121795  | 0.120484  | 0.106789  | 0.12398  | 0.128351  | 0.110431  | 0.103293  |
| 0.122523  | 0.0498252 | 0.107517  | 0.130828 | 0.136364  | 0.114948  | 0.123834  |
| 0.206585  | 0.201777  | 0.200903  | 0.223048 | 0.222756  | 0.203963  | 0.200029  |
| 0.12296   | 0.117279  | 0.11553   | 0.135927 | 0.135344  | 0.11655   | 0.116113  |

|           |           |           |          |          |           |           |
|-----------|-----------|-----------|----------|----------|-----------|-----------|
| 0.126311  | 0.0541958 | 0.113054  | 0.133741 | 0.140443 | 0.123397  | 0.128497  |
| 0.119318  | 0.121503  | 0.103438  | 0.121503 | 0.123543 | 0.114948  | 0.122378  |
| 0.165355  | 0.147145  | 0.1588    | 0.183566 | 0.183566 | 0.163024  | 0.150641  |
| 0.111451  | 0.109557  | 0.0996503 | 0.120338 | 0.132576 | 0.101253  | 0.108974  |
| 0.141608  | 0.145251  | 0.13447   | 0.14729  | 0.155449 | 0.1419    | 0.14292   |
| 0.127914  | 0.122815  | 0.116113  | 0.126311 | 0.124563 | 0.108974  | 0.109703  |
| 0.191142  | 0.180216  | 0.176719  | 0.19595  | 0.201195 | 0.179779  | 0.176136  |
| 0.124417  | 0.123397  | 0.114656  | 0.13039  | 0.129516 | 0.115093  | 0.107955  |
| 0.108683  | 0.103584  | 0.0945513 | 0.114948 | 0.122815 | 0.103147  | 0.10912   |
| 0.114073  | 0.111014  | 0.0568182 | 0.115967 | 0.13549  | 0.112617  | 0.122378  |
| 0.124417  | 0.112908  | 0.107955  | 0.128642 | 0.118735 | 0.112179  | 0.121066  |
| 0.127331  | 0.123689  | 0.10912   | 0.126603 | 0.055507 | 0.11451   | 0.120192  |
| 0.115385  | 0.120192  | 0.103875  | 0.122523 | 0.137092 | 0.114802  | 0.123397  |
| 0.115822  | 0.113054  | 0.108392  | 0.118007 | 0.126166 | 0.0493881 | 0.0868298 |
| 0.189977  | 0.184295  | 0.177885  | 0.196824 | 0.203817 | 0.181818  | 0.179924  |
| 0.113199  | 0.121212  | 0.108683  | 0.127622 | 0.131702 | 0.116987  | 0.125583  |
| 0.123252  | 0.106498  | 0.103584  | 0.124563 | 0.128351 | 0.106643  | 0.115239  |
| 0.20877   | 0.203089  | 0.201049  | 0.220862 | 0.223193 | 0.203817  | 0.197261  |
| 0.111451  | 0.123252  | 0.0987762 | 0.12296  | 0.136946 | 0.121941  | 0.128788  |
| 0.117133  | 0.117279  | 0.108246  | 0.118153 | 0.12602  | 0.0495338 | 0.0855186 |
| 0.112762  | 0.113782  | 0.105624  | 0.116696 | 0.126603 | 0.0451632 | 0.0817308 |
| 0.131847  | 0.0795455 | 0.121503  | 0.140443 | 0.147145 | 0.129516  | 0.131119  |
| 0.191288  | 0.181818  | 0.177448  | 0.199883 | 0.203671 | 0.179633  | 0.177156  |
| 0.127331  | 0.123689  | 0.113782  | 0.119318 | 0.118153 | 0.118298  | 0.120775  |
| 0.120921  | 0.130099  | 0.114073  | 0.139714 | 0.135052 | 0.124126  | 0.129808  |
| 0.113636  | 0.117279  | 0.108246  | 0.11757  | 0.123689 | 0.0457459 | 0.0855186 |
| 0.114802  | 0.114948  | 0.10708   | 0.118444 | 0.125728 | 0.0457459 | 0.0861014 |
| 0.114656  | 0.114802  | 0.106643  | 0.117716 | 0.125583 | 0.0456002 | 0.0812937 |
| 0.113928  | 0.0490967 | 0.103001  | 0.127477 | 0.133304 | 0.11014   | 0.121649  |
| 0.115822  | 0.112179  | 0.100524  | 0.118881 | 0.117133 | 0.0913462 | 0.103438  |
| 0.129516  | 0.128205  | 0.121212  | 0.13345  | 0.133159 | 0.120192  | 0.111597  |
| 0.113199  | 0.120921  | 0.105186  | 0.124417 | 0.143648 | 0.131265  | 0.129371  |
| 0.12602   | 0.127914  | 0.114219  | 0.128788 | 0.136364 | 0.11757   | 0.1081    |
| 0.134615  | 0.127185  | 0.119901  | 0.133887 | 0.132139 | 0.130536  | 0.127768  |
| 0.196533  | 0.18648   | 0.180944  | 0.205711 | 0.209207 | 0.183421  | 0.181235  |
| 0.115385  | 0.120775  | 0.102418  | 0.13039  | 0.128642 | 0.111888  | 0.120192  |
| 0.128642  | 0.0591492 | 0.112471  | 0.13549  | 0.139277 | 0.124854  | 0.129953  |
| 0.113054  | 0.114365  | 0.105624  | 0.115822 | 0.125437 | 0.0472028 | 0.0872669 |
| 0.115239  | 0.113636  | 0.100524  | 0.11451  | 0.115676 | 0.092803  | 0.104021  |
| 0.114656  | 0.115385  | 0.104312  | 0.124709 | 0.134033 | 0.111451  | 0.104895  |
| 0.127914  | 0.120484  | 0.111451  | 0.123689 | 0.118444 | 0.119172  | 0.120192  |
| 0.126748  | 0.124563  | 0.114365  | 0.13039  | 0.14088  | 0.124126  | 0.129808  |
| 0.0560897 | 0.114802  | 0.104021  | 0.122378 | 0.136072 | 0.112908  | 0.119755  |
| 0.121066  | 0.118298  | 0.101399  | 0.116259 | 0.116841 | 0.103584  | 0.101981  |

|          |           |           |          |           |           |           |
|----------|-----------|-----------|----------|-----------|-----------|-----------|
| 0.117424 | 0.111451  | 0.0992133 | 0.114948 | 0.112034  | 0.100524  | 0.0960082 |
| 0.114948 | 0.1081    | 0.0979021 | 0.118298 | 0.126748  | 0.10067   | 0.102564  |
| 0.124126 | 0.115822  | 0.103584  | 0.118444 | 0.111742  | 0.115676  | 0.114073  |
| 0.134761 | 0.131702  | 0.128497  | 0.13986  | 0.132284  | 0.127477  | 0.112471  |
| 0.125291 | 0.120192  | 0.109994  | 0.121941 | 0.120192  | 0.114219  | 0.121649  |
| 0.114656 | 0.0524476 | 0.0981935 | 0.125583 | 0.131993  | 0.105624  | 0.117133  |
| 0.123106 | 0.118881  | 0.103147  | 0.11859  | 0.117716  | 0.109411  | 0.115385  |
| 0.113345 | 0.112034  | 0.104749  | 0.117279 | 0.128642  | 0.0416667 | 0.0866841 |
| 0.116113 | 0.113345  | 0.0949883 | 0.119172 | 0.119755  | 0.112908  | 0.116841  |
| 0.116113 | 0.117424  | 0.108683  | 0.118007 | 0.127622  | 0.0456002 | 0.0844988 |
| 0.107955 | 0.115093  | 0.0981935 | 0.126166 | 0.125     | 0.105915  | 0.116841  |
| 0.050845 | 0.117133  | 0.102855  | 0.11859  | 0.136072  | 0.113199  | 0.120921  |
| 0.126603 | 0.118881  | 0.105186  | 0.124417 | 0.0655594 | 0.11116   | 0.115967  |
| 0.11859  | 0.112908  | 0.104167  | 0.11757  | 0.122815  | 0.0955711 | 0.106789  |
| 0.113199 | 0.115967  | 0.107226  | 0.118298 | 0.127331  | 0.0493881 | 0.0865385 |
| 0.115822 | 0.118298  | 0.0661422 | 0.123543 | 0.138112  | 0.118153  | 0.122378  |
| 0.124709 | 0.110286  | 0.105332  | 0.13039  | 0.137966  | 0.105478  | 0.118153  |
| 0.11116  | 0.113054  | 0.099359  | 0.111305 | 0.127331  | 0.104167  | 0.113054  |
| 0.113491 | 0.112762  | 0.105478  | 0.115967 | 0.127914  | 0.050845  | 0.0865385 |
| 0.117716 | 0.0496795 | 0.105041  | 0.131265 | 0.133013  | 0.116259  | 0.121358  |
| 0.121212 | 0.116987  | 0.101544  | 0.116696 | 0.114073  | 0.111888  | 0.11116   |
| 0.118298 | 0.0520105 | 0.101544  | 0.130682 | 0.136218  | 0.110723  | 0.122815  |
| 0.125291 | 0.122232  | 0.105332  | 0.123106 | 0.0630828 | 0.111014  | 0.116404  |
| 0.120047 | 0.11757   | 0.105041  | 0.11757  | 0.11757   | 0.0990676 | 0.107663  |
| 0.103438 | 0.107955  | 0.0910548 | 0.121066 | 0.126311  | 0.101107  | 0.109994  |
| 0.119318 | 0.117716  | 0.0973193 | 0.12296  | 0.120629  | 0.109994  | 0.117424  |
| 0.122378 | 0.0517191 | 0.107663  | 0.13243  | 0.136801  | 0.116841  | 0.124854  |
| 0.118298 | 0.115239  | 0.113491  | 0.126894 | 0.130682  | 0.121795  | 0.126603  |
| 0.117861 | 0.10169   | 0.103147  | 0.120921 | 0.134033  | 0.105041  | 0.116259  |
| 0.193619 | 0.185315  | 0.184149  | 0.201923 | 0.206294  | 0.184878  | 0.181235  |
| 0.16215  | 0.150641  | 0.151807  | 0.173077 | 0.179779  | 0.156906  | 0.148601  |
| 0.126894 | 0.123543  | 0.112762  | 0.129662 | 0.13141   | 0.118153  | 0.110723  |
| 0.117716 | 0.114365  | 0.102418  | 0.122523 | 0.131265  | 0.115676  | 0.111742  |
| 0.153263 | 0.151661  | 0.142337  | 0.152244 | 0.143502  | 0.147727  | 0.128642  |
| 0.119027 | 0.122669  | 0.114219  | 0.13345  | 0.13549   | 0.117279  | 0.125583  |
| 0.114802 | 0.117279  | 0.110577  | 0.125728 | 0.133596  | 0.0844988 | 0.0878497 |
| 0.116113 | 0.110723  | 0.106061  | 0.122086 | 0.131993  | 0.0799825 | 0.0958625 |
| 0.120484 | 0.120047  | 0.105769  | 0.109557 | 0.130536  | 0.0960082 | 0.105478  |
| 0.124854 | 0.111888  | 0.108683  | 0.130536 | 0.134324  | 0.107955  | 0.116259  |
| 0.199883 | 0.191871  | 0.188374  | 0.21285  | 0.214598  | 0.191725  | 0.188083  |
| 0.131265 | 0.12296   | 0.112179  | 0.125874 | 0.121212  | 0.118444  | 0.120338  |
| 0.120921 | 0.0759033 | 0.103001  | 0.125437 | 0.129808  | 0.112179  | 0.112617  |
| 0.109848 | 0.108246  | 0.10271   | 0.118153 | 0.126603  | 0.0594406 | 0.0826049 |
| 0.123689 | 0.119755  | 0.106935  | 0.129662 | 0.131119  | 0.113491  | 0.124126  |

|           |           |           |          |           |           |           |
|-----------|-----------|-----------|----------|-----------|-----------|-----------|
| 0.185023  | 0.175554  | 0.172348  | 0.197115 | 0.201195  | 0.176282  | 0.165647  |
| 0.24155   | 0.24257   | 0.236451  | 0.253351 | 0.252477  | 0.242424  | 0.230915  |
| 0.0498252 | 0.119901  | 0.105041  | 0.120775 | 0.139423  | 0.11451   | 0.117279  |
| 0.125583  | 0.111451  | 0.104167  | 0.130682 | 0.133596  | 0.107517  | 0.119318  |
| 0.12296   | 0.123689  | 0.113199  | 0.130973 | 0.131847  | 0.115093  | 0.104749  |
| 0.12398   | 0.120629  | 0.10373   | 0.122086 | 0.0643939 | 0.109994  | 0.11451   |
| 0.121503  | 0.116696  | 0.104749  | 0.116113 | 0.113782  | 0.111305  | 0.116113  |
| 0.111451  | 0.112762  | 0.0958625 | 0.121503 | 0.126748  | 0.108829  | 0.119755  |
| 0.116259  | 0.0837704 | 0.106498  | 0.123689 | 0.128351  | 0.0772145 | 0.0863928 |
| 0.125291  | 0.118735  | 0.105915  | 0.120484 | 0.119027  | 0.111888  | 0.117279  |
| 0.116113  | 0.0745921 | 0.103147  | 0.122378 | 0.128205  | 0.083479  | 0.0926573 |
| 0.116259  | 0.116987  | 0.105332  | 0.118444 | 0.135052  | 0.106061  | 0.11553   |
| 0.116987  | 0.112471  | 0.104021  | 0.120629 | 0.119755  | 0.0957168 | 0.106061  |
| 0         | 0.11757   | 0.104167  | 0.117861 | 0.137966  | 0.115093  | 0.116987  |
| 0.11757   | 0         | 0.103147  | 0.131993 | 0.135781  | 0.113199  | 0.123543  |
| 0.104167  | 0.103147  | 0         | 0.105478 | 0.120921  | 0.104167  | 0.11451   |
| 0.117861  | 0.131993  | 0.105478  | 0        | 0.129953  | 0.115822  | 0.119172  |
| 0.137966  | 0.135781  | 0.120921  | 0.129953 | 0         | 0.127185  | 0.12704   |
| 0.115093  | 0.113199  | 0.104167  | 0.115822 | 0.127185  | 0         | 0.088141  |
| 0.116987  | 0.123543  | 0.11451   | 0.119172 | 0.12704   | 0.088141  | 0         |
| 0.129516  | 0.130245  | 0.122378  | 0.121795 | 0.130536  | 0.0645396 | 0.0914918 |
| 0.20979   | 0.202943  | 0.200612  | 0.216055 | 0.217512  | 0.203671  | 0.193328  |
| 0.0563811 | 0.111305  | 0.0929487 | 0.113054 | 0.128788  | 0.108246  | 0.113928  |
| 0.120338  | 0.113782  | 0.102127  | 0.116696 | 0.11757   | 0.0944056 | 0.105041  |
| 0.116259  | 0.119318  | 0.10067   | 0.13243  | 0.128351  | 0.113345  | 0.121358  |
| 0.112908  | 0.117133  | 0.0976107 | 0.121795 | 0.136946  | 0.117861  | 0.131119  |
| 0.125437  | 0.114219  | 0.104312  | 0.12704  | 0.12704   | 0.114073  | 0.125291  |
| 0.19799   | 0.189977  | 0.188811  | 0.208916 | 0.212121  | 0.189831  | 0.18648   |
| 0.120338  | 0.0520105 | 0.10708   | 0.133013 | 0.137675  | 0.114802  | 0.127185  |
| 0.113782  | 0.111597  | 0.10373   | 0.11451  | 0.125291  | 0.0479312 | 0.0862471 |
| 0.123834  | 0.121358  | 0.112034  | 0.123397 | 0.128351  | 0.117424  | 0.122523  |
| 0.124417  | 0.116696  | 0.101836  | 0.124272 | 0.0622086 | 0.105478  | 0.114656  |
| 0.115967  | 0.0514277 | 0.106206  | 0.128934 | 0.138258  | 0.113345  | 0.122523  |
| 0.108974  | 0.0782343 | 0.0945513 | 0.114948 | 0.126311  | 0.100816  | 0.10912   |
| 0.117716  | 0.116987  | 0.104167  | 0.116987 | 0.133304  | 0.107226  | 0.117861  |
| 0.110723  | 0.11757   | 0.0930944 | 0.119027 | 0.133887  | 0.113636  | 0.125146  |
| 0.196241  | 0.187646  | 0.185897  | 0.207459 | 0.210373  | 0.188957  | 0.189103  |
| 0.111597  | 0.0534674 | 0.095134  | 0.122523 | 0.128934  | 0.108974  | 0.113782  |
| 0.196533  | 0.186189  | 0.185606  | 0.208042 | 0.208042  | 0.184586  | 0.180653  |
| 0.191725  | 0.184586  | 0.18109   | 0.202943 | 0.204983  | 0.182984  | 0.182547  |
| 0.136072  | 0.131265  | 0.118735  | 0.127185 | 0.0511364 | 0.123543  | 0.125146  |
| 0.120921  | 0.131265  | 0.105041  | 0.126603 | 0.140297  | 0.129953  | 0.133596  |
| 0.107226  | 0.105915  | 0.0939685 | 0.108537 | 0.126603  | 0.105769  | 0.113491  |
| 0.112908  | 0.0588578 | 0.0967366 | 0.121212 | 0.126457  | 0.103584  | 0.116841  |

|           |           |           |          |           |           |           |
|-----------|-----------|-----------|----------|-----------|-----------|-----------|
| 0.115967  | 0.0520105 | 0.100962  | 0.128642 | 0.134761  | 0.112179  | 0.122232  |
| 0.119172  | 0.118444  | 0.107372  | 0.119901 | 0.128642  | 0.0492424 | 0.088141  |
| 0.124709  | 0.111451  | 0.102127  | 0.117861 | 0.113491  | 0.11014   | 0.116987  |
| 0.125583  | 0.118153  | 0.105915  | 0.118735 | 0.112325  | 0.11014   | 0.113491  |
| 0.0458916 | 0.12296   | 0.108683  | 0.120629 | 0.140734  | 0.116113  | 0.122086  |
| 0.128788  | 0.122815  | 0.109994  | 0.126603 | 0.0595862 | 0.112179  | 0.121358  |
| 0.109703  | 0.11014   | 0.100524  | 0.115385 | 0.12704   | 0.046183  | 0.0839161 |
| 0.118298  | 0.0502622 | 0.103875  | 0.129516 | 0.136509  | 0.113054  | 0.123689  |
| 0.107663  | 0.104604  | 0.0958625 | 0.107809 | 0.123252  | 0.100379  | 0.104021  |
| 0.126748  | 0.0610431 | 0.112034  | 0.129516 | 0.140297  | 0.125874  | 0.126894  |
| 0.123543  | 0.121358  | 0.112617  | 0.130973 | 0.129516  | 0.114219  | 0.108829  |
| 0.130682  | 0.0632284 | 0.117133  | 0.135198 | 0.143648  | 0.129808  | 0.133741  |
| 0.257721  | 0.253788  | 0.249417  | 0.265443 | 0.2669    | 0.252185  | 0.246212  |
| 0.128934  | 0.134907  | 0.114219  | 0.124709 | 0.126457  | 0.125437  | 0.128788  |
| 0.127331  | 0.131556  | 0.111451  | 0.129808 | 0.122523  | 0.121212  | 0.124854  |
| 0.216055  | 0.209207  | 0.20542   | 0.225816 | 0.231935  | 0.210519  | 0.200758  |
| 0.129662  | 0.130099  | 0.11757   | 0.132139 | 0.121941  | 0.117716  | 0.121941  |
| 0.22669   | 0.2213    | 0.219551  | 0.239073 | 0.240822  | 0.225524  | 0.214307  |
| 0.121358  | 0.123543  | 0.106935  | 0.120338 | 0.120921  | 0.117861  | 0.120338  |
| 0.125583  | 0.128351  | 0.120484  | 0.122523 | 0.128642  | 0.0632284 | 0.0869755 |
| 0.110431  | 0.113782  | 0.0869755 | 0.11757  | 0.131847  | 0.111305  | 0.12398   |
| 0.134615  | 0.127185  | 0.113199  | 0.128934 | 0.0546329 | 0.119755  | 0.120484  |
| 0.202797  | 0.195659  | 0.192745  | 0.213141 | 0.216346  | 0.19289   | 0.189248  |
| 0.127622  | 0.0590035 | 0.114073  | 0.133596 | 0.138549  | 0.123834  | 0.131265  |
| 0.119172  | 0.0479312 | 0.104749  | 0.129808 | 0.137675  | 0.108974  | 0.123689  |
| 0.225379  | 0.219697  | 0.216783  | 0.236888 | 0.236014  | 0.2213    | 0.212704  |
| 0.124709  | 0.118444  | 0.104749  | 0.124854 | 0.120775  | 0.113636  | 0.116696  |
| 0.197407  | 0.192016  | 0.187063  | 0.208333 | 0.211247  | 0.189831  | 0.186189  |
| 0.123397  | 0.119464  | 0.109266  | 0.123543 | 0.118881  | 0.116696  | 0.120338  |
| 0.116696  | 0.115676  | 0.106061  | 0.12296  | 0.127914  | 0.0479312 | 0.090035  |
| 0.127331  | 0.122232  | 0.112908  | 0.123689 | 0.123397  | 0.108974  | 0.112617  |
| 0.137529  | 0.13243   | 0.11553   | 0.127768 | 0.0470571 | 0.12296   | 0.124563  |
| 0.113782  | 0.110723  | 0.106352  | 0.120921 | 0.136072  | 0.107955  | 0.110723  |
| 0.162733  | 0.157925  | 0.149476  | 0.168415 | 0.176282  | 0.14729   | 0.143939  |
| 0.113782  | 0.04662   | 0.0987762 | 0.124417 | 0.131993  | 0.108829  | 0.117133  |
| 0.110868  | 0.121795  | 0.0929487 | 0.124417 | 0.138112  | 0.120775  | 0.126457  |
| 0.123689  | 0.123252  | 0.104312  | 0.128497 | 0.126457  | 0.11116   | 0.120047  |
| 0.119901  | 0.123543  | 0.0705128 | 0.121503 | 0.136655  | 0.128642  | 0.127331  |
| 0.193182  | 0.186043  | 0.184003  | 0.206731 | 0.207605  | 0.187063  | 0.182838  |
| 0.115239  | 0.113928  | 0.106643  | 0.119755 | 0.123252  | 0.0456002 | 0.0847902 |
| 0.129953  | 0.124563  | 0.11116   | 0.129808 | 0.0750291 | 0.115385  | 0.11961   |
| 0.121358  | 0.114802  | 0.101107  | 0.119172 | 0.115385  | 0.112325  | 0.113345  |
| 0.12704   | 0.122523  | 0.11116   | 0.11961  | 0.116987  | 0.118881  | 0.116404  |
| 0.120484  | 0.120338  | 0.114219  | 0.115676 | 0.125583  | 0.0549242 | 0.0842075 |



|           |           |           |          |           |           |           |
|-----------|-----------|-----------|----------|-----------|-----------|-----------|
| 0.252622  | 0.248689  | 0.245192  | 0.257721 | 0.261509  | 0.249417  | 0.24461   |
| 0.123689  | 0.118007  | 0.108392  | 0.117424 | 0.118881  | 0.103875  | 0.107517  |
| 0.114073  | 0.115967  | 0.10373   | 0.130828 | 0.131119  | 0.0895979 | 0.0999417 |
| 0.180798  | 0.175699  | 0.173368  | 0.193473 | 0.186772  | 0.181381  | 0.164336  |
| 0.186917  | 0.17803   | 0.175408  | 0.196096 | 0.199301  | 0.176136  | 0.173077  |
| 0.0482226 | 0.116259  | 0.106935  | 0.122669 | 0.138695  | 0.114656  | 0.119755  |
| 0.119464  | 0.0502622 | 0.106206  | 0.132139 | 0.135052  | 0.111597  | 0.120775  |
| 0.124709  | 0.121649  | 0.106498  | 0.122232 | 0.0654138 | 0.108683  | 0.113199  |
| 0.142337  | 0.0737179 | 0.129371  | 0.145396 | 0.151515  | 0.138549  | 0.143065  |
| 0.050845  | 0.117133  | 0.102564  | 0.116259 | 0.134907  | 0.11116   | 0.11859   |
| 0.0518648 | 0.119027  | 0.10912   | 0.121941 | 0.138549  | 0.115093  | 0.123397  |
| 0.130682  | 0.129953  | 0.115676  | 0.122086 | 0.123543  | 0.123397  | 0.122378  |
| 0.11961   | 0.0518648 | 0.101107  | 0.126748 | 0.131702  | 0.115822  | 0.11859   |
| 0.126748  | 0.0560897 | 0.114073  | 0.132721 | 0.140006  | 0.124126  | 0.127185  |
| 0.129225  | 0.115093  | 0.108974  | 0.126166 | 0.124709  | 0.112617  | 0.108974  |
| 0.131119  | 0.130099  | 0.114073  | 0.124854 | 0.0447261 | 0.11859   | 0.121358  |
| 0.142337  | 0.141608  | 0.125583  | 0.138403 | 0.0506993 | 0.13243   | 0.135198  |
| 0.130536  | 0.123397  | 0.112617  | 0.122232 | 0.123397  | 0.109848  | 0.113782  |
| 0.138258  | 0.13549   | 0.120047  | 0.130536 | 0.0425408 | 0.125437  | 0.127914  |
| 0.136218  | 0.129662  | 0.11655   | 0.127622 | 0.123834  | 0.126311  | 0.128205  |
| 0.201923  | 0.197698  | 0.196533  | 0.21722  | 0.21926   | 0.196096  | 0.193619  |
| 0.126603  | 0.129662  | 0.113928  | 0.106643 | 0.130536  | 0.10912   | 0.11014   |
| 0.191579  | 0.182401  | 0.180944  | 0.202797 | 0.204545  | 0.184003  | 0.178904  |
| 0.112034  | 0.111014  | 0.0795455 | 0.120338 | 0.128205  | 0.113491  | 0.121212  |
| 0.123397  | 0.123252  | 0.11655   | 0.120629 | 0.127622  | 0.0598776 | 0.0891608 |
| 0.127185  | 0.124709  | 0.116259  | 0.132576 | 0.133159  | 0.119027  | 0.107226  |
| 0.119464  | 0.121649  | 0.108537  | 0.126311 | 0.128642  | 0.108974  | 0.103001  |
| 0.119318  | 0.0509907 | 0.106352  | 0.131702 | 0.136364  | 0.116987  | 0.124126  |
| 0.121358  | 0.0533217 | 0.107517  | 0.131702 | 0.136072  | 0.119027  | 0.123834  |
| 0.118444  | 0.118298  | 0.109266  | 0.120629 | 0.127914  | 0.0511364 | 0.0894522 |
| 0.111305  | 0.119027  | 0.0925117 | 0.122232 | 0.135052  | 0.113636  | 0.125146  |
| 0.127914  | 0.122523  | 0.116987  | 0.135344 | 0.133013  | 0.122086  | 0.10912   |
| 0.140297  | 0.136364  | 0.120629  | 0.128788 | 0.122378  | 0.132139  | 0.12704   |
| 0.248106  | 0.243007  | 0.240676  | 0.256993 | 0.255536  | 0.247523  | 0.235723  |
| 0.11757   | 0.118298  | 0.109266  | 0.120629 | 0.131119  | 0.0496795 | 0.0874126 |
| 0.185606  | 0.17701   | 0.172057  | 0.193036 | 0.197115  | 0.174534  | 0.172057  |
| 0.188666  | 0.181818  | 0.178904  | 0.200758 | 0.200175  | 0.182255  | 0.178613  |
| 0.117133  | 0.123106  | 0.110577  | 0.125146 | 0.136801  | 0.107809  | 0.11961   |
| 0.124417  | 0.114948  | 0.104458  | 0.11961  | 0.119901  | 0.100524  | 0.107955  |
| 0.123543  | 0.124272  | 0.116113  | 0.118735 | 0.129808  | 0.0571096 | 0.0846445 |
| 0.115093  | 0.050845  | 0.0965909 | 0.124563 | 0.13447   | 0.109557  | 0.118153  |
| 0.118444  | 0.11859   | 0.101399  | 0.108683 | 0.129662  | 0.095134  | 0.102855  |
| 0.123397  | 0.118881  | 0.107517  | 0.123543 | 0.11655   | 0.114656  | 0.120047  |
| 0.124709  | 0.0773601 | 0.10708   | 0.129225 | 0.133304  | 0.112762  | 0.113199  |

|           |           |           |          |           |           |           |
|-----------|-----------|-----------|----------|-----------|-----------|-----------|
| 0.129953  | 0.0610431 | 0.117861  | 0.134761 | 0.140297  | 0.125874  | 0.129808  |
| 0.11757   | 0.116841  | 0.109266  | 0.121212 | 0.12704   | 0.0473485 | 0.0882867 |
| 0.127768  | 0.0591492 | 0.113345  | 0.136364 | 0.140443  | 0.12398   | 0.129662  |
| 0.118881  | 0.120192  | 0.10067   | 0.129225 | 0.122815  | 0.114219  | 0.119318  |
| 0.132284  | 0.128642  | 0.122523  | 0.135635 | 0.132139  | 0.122086  | 0.107955  |
| 0.129225  | 0.123252  | 0.107809  | 0.12704  | 0.0641026 | 0.114365  | 0.120338  |
| 0.138695  | 0.132721  | 0.120775  | 0.124272 | 0.122232  | 0.128497  | 0.127768  |
| 0.118153  | 0.124126  | 0.107226  | 0.120921 | 0.132284  | 0.112617  | 0.115093  |
| 0.116987  | 0.11655   | 0.108974  | 0.115967 | 0.125     | 0.0607517 | 0.0775058 |
| 0.127768  | 0.131119  | 0.113054  | 0.141317 | 0.136072  | 0.128642  | 0.133159  |
| 0.184441  | 0.176719  | 0.172931  | 0.198572 | 0.198572  | 0.176282  | 0.175554  |
| 0.13243   | 0.0646853 | 0.119464  | 0.138112 | 0.1419    | 0.13039   | 0.133741  |
| 0.121649  | 0.0521562 | 0.105478  | 0.132284 | 0.137238  | 0.118735  | 0.121503  |
| 0.125291  | 0.123106  | 0.114656  | 0.128351 | 0.129808  | 0.116259  | 0.106498  |
| 0.114948  | 0.118298  | 0.105186  | 0.119464 | 0.125     | 0.10708   | 0.102564  |
| 0.127331  | 0.121941  | 0.10912   | 0.124563 | 0.0572552 | 0.115093  | 0.118153  |
| 0.130099  | 0.127331  | 0.110431  | 0.127331 | 0.0498252 | 0.119318  | 0.123252  |
| 0.19289   | 0.186917  | 0.17905   | 0.202652 | 0.204108  | 0.183275  | 0.176136  |
| 0.118007  | 0.0738636 | 0.108537  | 0.126311 | 0.133887  | 0.113928  | 0.114656  |
| 0.111451  | 0.104895  | 0.097028  | 0.117133 | 0.125291  | 0.105915  | 0.104312  |
| 0.122232  | 0.0530303 | 0.109848  | 0.132576 | 0.135781  | 0.118444  | 0.12704   |
| 0.192016  | 0.182838  | 0.180507  | 0.20236  | 0.204691  | 0.182692  | 0.179633  |
| 0.118735  | 0.114802  | 0.102855  | 0.120629 | 0.122086  | 0.0954254 | 0.107517  |
| 0.132284  | 0.125146  | 0.112325  | 0.124563 | 0.118735  | 0.121503  | 0.121941  |
| 0.122086  | 0.0488054 | 0.107955  | 0.128934 | 0.137966  | 0.115676  | 0.125146  |
| 0.0525932 | 0.116259  | 0.0961538 | 0.116841 | 0.130536  | 0.10912   | 0.118298  |
| 0.188374  | 0.178904  | 0.177739  | 0.200466 | 0.20134   | 0.176428  | 0.178322  |
| 0.12602   | 0.118298  | 0.109266  | 0.126457 | 0.118007  | 0.118735  | 0.120338  |
| 0.111742  | 0.109557  | 0.0987762 | 0.125583 | 0.125583  | 0.107663  | 0.113345  |
| 0.118735  | 0.116259  | 0.102855  | 0.121503 | 0.124709  | 0.101253  | 0.107809  |
| 0.122815  | 0.112179  | 0.114219  | 0.13141  | 0.141608  | 0.113491  | 0.111305  |
| 0.109848  | 0.123397  | 0.0925117 | 0.122523 | 0.137383  | 0.115676  | 0.125437  |
| 0.136072  | 0.13039   | 0.118153  | 0.12398  | 0.118153  | 0.125     | 0.124563  |
| 0.117424  | 0.116696  | 0.105624  | 0.116404 | 0.124563  | 0.0463287 | 0.0855186 |
| 0.120338  | 0.11553   | 0.105332  | 0.124854 | 0.130682  | 0.124126  | 0.123689  |
| 0.060169  | 0.141608  | 0.130828  | 0.132284 | 0.151515  | 0.142337  | 0.139277  |
| 0.237617  | 0.229604  | 0.226981  | 0.24155  | 0.24359   | 0.231789  | 0.222319  |
| 0.12602   | 0.126748  | 0.115676  | 0.122086 | 0.13345   | 0.11757   | 0.120629  |
| 0.107955  | 0.124126  | 0.0944056 | 0.125874 | 0.136364  | 0.119318  | 0.128205  |
| 0.11859   | 0.0598776 | 0.105332  | 0.125728 | 0.130682  | 0.112471  | 0.115239  |
| 0.114365  | 0.12296   | 0.1081    | 0.129953 | 0.141608  | 0.118444  | 0.124126  |
| 0.109266  | 0.110577  | 0.095134  | 0.118153 | 0.129516  | 0.112471  | 0.109411  |
| 0.125583  | 0.114656  | 0.110286  | 0.128934 | 0.128351  | 0.11655   | 0.122523  |
| 0.124272  | 0.0658508 | 0.109848  | 0.130245 | 0.138403  | 0.11757   | 0.121795  |

|           |           |           |          |          |           |           |
|-----------|-----------|-----------|----------|----------|-----------|-----------|
| 0.132867  | 0.128351  | 0.116404  | 0.125437 | 0.120192 | 0.12704   | 0.124854  |
| 0.092366  | 0.114948  | 0.099796  | 0.124272 | 0.134761 | 0.109557  | 0.110286  |
| 0.234703  | 0.233392  | 0.225524  | 0.241841 | 0.244755 | 0.231206  | 0.221737  |
| 0.119172  | 0.109703  | 0.104458  | 0.11757  | 0.11757  | 0.0958625 | 0.102418  |
| 0.113054  | 0.110868  | 0.0942599 | 0.114656 | 0.119318 | 0.108974  | 0.114656  |
| 0.114073  | 0.113345  | 0.106643  | 0.115967 | 0.12296  | 0.0499709 | 0.0818765 |
| 0.0536131 | 0.127185  | 0.115822  | 0.125146 | 0.146125 | 0.124709  | 0.128642  |
| 0.131993  | 0.135927  | 0.11757   | 0.125146 | 0.137966 | 0.122669  | 0.125437  |
| 0.114219  | 0.108537  | 0.113199  | 0.12602  | 0.141754 | 0.106935  | 0.112325  |
| 0.116841  | 0.0514277 | 0.106789  | 0.130682 | 0.137092 | 0.115676  | 0.125146  |
| 0.0726981 | 0.11014   | 0.0973193 | 0.109266 | 0.129079 | 0.109411  | 0.11451   |
| 0.229167  | 0.222028  | 0.221737  | 0.240093 | 0.240676 | 0.226544  | 0.215035  |
| 0.121066  | 0.0553613 | 0.109266  | 0.134907 | 0.138403 | 0.124272  | 0.128497  |
| 0.129371  | 0.124563  | 0.112325  | 0.122815 | 0.118735 | 0.121795  | 0.120775  |
| 0.103438  | 0.116696  | 0.0989219 | 0.11961  | 0.125437 | 0.108392  | 0.107372  |
| 0.120775  | 0.121795  | 0.0944056 | 0.11655  | 0.132576 | 0.122232  | 0.117424  |
| 0.12602   | 0.127914  | 0.111888  | 0.122669 | 0.123252 | 0.124272  | 0.120047  |
| 0.115239  | 0.115967  | 0.107226  | 0.117133 | 0.122086 | 0.0488054 | 0.0844988 |
| 0.130973  | 0.126748  | 0.114802  | 0.121212 | 0.118298 | 0.123397  | 0.119172  |
| 0.138986  | 0.130682  | 0.117861  | 0.123106 | 0.122232 | 0.127331  | 0.126603  |
| 0.125291  | 0.120192  | 0.105915  | 0.120775 | 0.118444 | 0.11451   | 0.119027  |
| 0.114073  | 0.116259  | 0.108683  | 0.117716 | 0.12704  | 0.0470571 | 0.0865385 |
| 0.114365  | 0.125874  | 0.0996503 | 0.124126 | 0.136946 | 0.124272  | 0.132576  |
| 0.117716  | 0.131265  | 0.104167  | 0.129516 | 0.141463 | 0.130536  | 0.137675  |
| 0.129662  | 0.133013  | 0.121941  | 0.13884  | 0.133596 | 0.125     | 0.112908  |
| 0.135781  | 0.135927  | 0.123689  | 0.137966 | 0.136218 | 0.126166  | 0.11553   |
| 0.117861  | 0.130536  | 0.102855  | 0.124709 | 0.141317 | 0.127185  | 0.133741  |
| 0.115822  | 0.116259  | 0.099359  | 0.106061 | 0.126748 | 0.0872669 | 0.101107  |
| 0.139277  | 0.133596  | 0.119027  | 0.121941 | 0.120484 | 0.135198  | 0.129516  |
| 0.13447   | 0.136072  | 0.126748  | 0.134615 | 0.137238 | 0.123397  | 0.115967  |
| 0.204983  | 0.200466  | 0.195221  | 0.216492 | 0.2162   | 0.200903  | 0.191725  |
| 0.126603  | 0.122378  | 0.115676  | 0.132576 | 0.133159 | 0.116987  | 0.12296   |
| 0.116987  | 0.122086  | 0.102855  | 0.122086 | 0.12296  | 0.110577  | 0.11859   |
| 0.121795  | 0.120775  | 0.114948  | 0.119318 | 0.13243  | 0.0518648 | 0.0855186 |
| 0.224505  | 0.216492  | 0.20979   | 0.230769 | 0.235723 | 0.217512  | 0.208333  |
| 0.213141  | 0.207459  | 0.199301  | 0.21824  | 0.223193 | 0.203526  | 0.198427  |
| 0.135781  | 0.133596  | 0.118735  | 0.124854 | 0.121066 | 0.125874  | 0.124272  |
| 0.247815  | 0.242424  | 0.239802  | 0.256702 | 0.255828 | 0.246358  | 0.238636  |
| 0.11757   | 0.115385  | 0.0984848 | 0.106061 | 0.128497 | 0.0893065 | 0.100524  |
| 0.139714  | 0.143065  | 0.127331  | 0.129662 | 0.148019 | 0.125728  | 0.133159  |
| 0.123397  | 0.118881  | 0.105769  | 0.11655  | 0.120921 | 0.0989219 | 0.106061  |
| 0.113054  | 0.12398   | 0.10067   | 0.126894 | 0.137383 | 0.122669  | 0.13447   |
| 0.190122  | 0.181235  | 0.178322  | 0.198427 | 0.201923 | 0.181672  | 0.174242  |
| 0.128205  | 0.128059  | 0.110286  | 0.127477 | 0.13039  | 0.116841  | 0.118444  |

|           |           |           |          |           |           |           |
|-----------|-----------|-----------|----------|-----------|-----------|-----------|
| 0.193182  | 0.186334  | 0.183421  | 0.205565 | 0.208188  | 0.185315  | 0.182547  |
| 0.109557  | 0.117861  | 0.105624  | 0.123397 | 0.135635  | 0.105478  | 0.117279  |
| 0.124126  | 0.100962  | 0.106789  | 0.120775 | 0.127768  | 0.112762  | 0.105624  |
| 0.120338  | 0.127477  | 0.108537  | 0.121649 | 0.134761  | 0.115676  | 0.114948  |
| 0.113636  | 0.108246  | 0.106789  | 0.122815 | 0.13039   | 0.104021  | 0.104458  |
| 0.108829  | 0.108392  | 0.10169   | 0.113345 | 0.122378  | 0.0464744 | 0.0801282 |
| 0.121649  | 0.106061  | 0.0973193 | 0.125291 | 0.129662  | 0.106789  | 0.11451   |
| 0.118735  | 0.114219  | 0.100524  | 0.115967 | 0.117716  | 0.0971737 | 0.102855  |
| 0.111888  | 0.0499709 | 0.100087  | 0.125146 | 0.131556  | 0.107809  | 0.116987  |
| 0.127768  | 0.120047  | 0.105478  | 0.115385 | 0.115385  | 0.116696  | 0.112179  |
| 0.11116   | 0.114219  | 0.097028  | 0.115093 | 0.13141   | 0.104749  | 0.113345  |
| 0.121503  | 0.116113  | 0.104167  | 0.116987 | 0.119027  | 0.0984848 | 0.103584  |
| 0.127185  | 0.124417  | 0.111305  | 0.127914 | 0.131702  | 0.108246  | 0.0909091 |
| 0.127185  | 0.0588578 | 0.113636  | 0.134033 | 0.137529  | 0.12602   | 0.13141   |
| 0.120629  | 0.118444  | 0.106789  | 0.127477 | 0.127768  | 0.111888  | 0.10271   |
| 0.112617  | 0.116841  | 0.0967366 | 0.126457 | 0.126457  | 0.106498  | 0.115676  |
| 0.11014   | 0.108829  | 0.101836  | 0.114073 | 0.123106  | 0.0448718 | 0.0831876 |
| 0.128497  | 0.116696  | 0.107955  | 0.120192 | 0.118444  | 0.117424  | 0.114948  |
| 0.108974  | 0.119318  | 0.0913462 | 0.121358 | 0.133304  | 0.112179  | 0.126311  |
| 0.131847  | 0.123834  | 0.110431  | 0.12704  | 0.0524476 | 0.116404  | 0.119172  |
| 0.12398   | 0.121503  | 0.110431  | 0.128497 | 0.125874  | 0.114948  | 0.106352  |
| 0.120338  | 0.0505536 | 0.103001  | 0.12602  | 0.133304  | 0.113928  | 0.121941  |
| 0.128351  | 0.0582751 | 0.11655   | 0.134907 | 0.139277  | 0.126311  | 0.13141   |
| 0.134761  | 0.0673077 | 0.122086  | 0.140152 | 0.144814  | 0.132721  | 0.137821  |
| 0.116259  | 0.108829  | 0.0965909 | 0.113491 | 0.111742  | 0.103438  | 0.107663  |
| 0.11451   | 0.117279  | 0.10708   | 0.114948 | 0.132139  | 0.0474942 | 0.0878497 |
| 0.116404  | 0.107517  | 0.0976107 | 0.122378 | 0.12296   | 0.109703  | 0.115093  |
| 0.120484  | 0.134324  | 0.107517  | 0.126748 | 0.140152  | 0.133013  | 0.137238  |
| 0.126748  | 0.118153  | 0.108246  | 0.120192 | 0.119027  | 0.104312  | 0.106206  |
| 0.143648  | 0.144959  | 0.124563  | 0.135344 | 0.046183  | 0.134615  | 0.13447   |
| 0.132576  | 0.133596  | 0.124272  | 0.125437 | 0.133887  | 0.0658508 | 0.0939685 |
| 0.0496795 | 0.123252  | 0.107809  | 0.121212 | 0.140734  | 0.121066  | 0.126457  |
| 0.11451   | 0.107955  | 0.100962  | 0.116987 | 0.131847  | 0.102273  | 0.11116   |
| 0.109994  | 0.111305  | 0.0550699 | 0.115093 | 0.129371  | 0.108537  | 0.119172  |
| 0.132139  | 0.131119  | 0.121795  | 0.136655 | 0.134033  | 0.120484  | 0.108392  |
| 0.211538  | 0.201486  | 0.195367  | 0.215181 | 0.218677  | 0.201049  | 0.194784  |
| 0.114802  | 0.116696  | 0.0977564 | 0.128059 | 0.125437  | 0.108974  | 0.113782  |
| 0.119901  | 0.121795  | 0.105186  | 0.126166 | 0.134324  | 0.107663  | 0.114802  |
| 0.109266  | 0.122815  | 0.0930944 | 0.121066 | 0.134761  | 0.115967  | 0.127185  |
| 0.122523  | 0.119172  | 0.109557  | 0.12704  | 0.132284  | 0.116113  | 0.101107  |
| 0.118007  | 0.124563  | 0.112034  | 0.130682 | 0.137092  | 0.11014   | 0.117279  |
| 0.121503  | 0.113782  | 0.114073  | 0.127185 | 0.127477  | 0.122378  | 0.124854  |
| 0.123397  | 0.118007  | 0.118881  | 0.129662 | 0.128205  | 0.125146  | 0.127331  |
| 0.0501166 | 0.117279  | 0.104458  | 0.115239 | 0.137675  | 0.110723  | 0.120192  |

|          |           |           |          |          |           |          |
|----------|-----------|-----------|----------|----------|-----------|----------|
| 0.120047 | 0.114656  | 0.100087  | 0.116404 | 0.114656 | 0.109848  | 0.110286 |
| 0.118298 | 0.126894  | 0.100962  | 0.119901 | 0.136509 | 0.124417  | 0.129516 |
| 0.116841 | 0.119901  | 0.104167  | 0.120775 | 0.133013 | 0.108392  | 0.110868 |
| 0.120192 | 0.118298  | 0.107226  | 0.117716 | 0.134907 | 0.108246  | 0.118007 |
| 0.178613 | 0.170892  | 0.163024  | 0.184878 | 0.188666 | 0.171037  | 0.170017 |
| 0.118298 | 0.0523019 | 0.102418  | 0.129225 | 0.136801 | 0.11014   | 0.121066 |
| 0.116696 | 0.128497  | 0.102273  | 0.12704  | 0.140152 | 0.12398   | 0.131702 |
| 0.126748 | 0.131265  | 0.107372  | 0.105915 | 0.126603 | 0.113054  | 0.11553  |
| 0.120192 | 0.114802  | 0.109266  | 0.114219 | 0.138403 | 0.117861  | 0.102855 |
| 0.108246 | 0.107226  | 0.097028  | 0.111597 | 0.123543 | 0.0995047 | 0.108683 |
| 0.108537 | 0.109266  | 0.0961538 | 0.108683 | 0.131119 | 0.0989219 | 0.111305 |
| 0.116696 | 0.112179  | 0.103438  | 0.115385 | 0.126166 | 0.107663  | 0.108974 |
| 0.125728 | 0.128788  | 0.107517  | 0.115385 | 0.132576 | 0.116987  | 0.108683 |
| 0.114073 | 0.0856643 | 0.103438  | 0.127622 | 0.134615 | 0.106498  | 0.104895 |
| 0.130536 | 0.130973  | 0.11961   | 0.129225 | 0.133596 | 0.118881  | 0.121941 |
| 0.117861 | 0.106935  | 0.0958625 | 0.112471 | 0.125    | 0.105915  | 0.107226 |
| 0.123543 | 0.121358  | 0.106206  | 0.119318 | 0.12602  | 0.115676  | 0.118444 |
| 0.135344 | 0.136655  | 0.120047  | 0.129662 | 0.135198 | 0.12602   | 0.117716 |
| 0.123397 | 0.125583  | 0.105478  | 0.106643 | 0.121503 | 0.110577  | 0.112179 |
| 0.123106 | 0.124126  | 0.113054  | 0.122378 | 0.126166 | 0.118444  | 0.122086 |
| 0.117861 | 0.121503  | 0.100233  | 0.11014  | 0.120338 | 0.104749  | 0.108974 |
| 0.124854 | 0.121212  | 0.105478  | 0.1081   | 0.123543 | 0.109411  | 0.113636 |
| 0.114365 | 0.115093  | 0.0984848 | 0.10169  | 0.121212 | 0.0936772 | 0.108392 |
| 0.129079 | 0.127477  | 0.112908  | 0.11553  | 0.121941 | 0.110723  | 0.118153 |
| 0.112762 | 0.118735  | 0.097465  | 0.113491 | 0.117861 | 0.100524  | 0.105332 |
| 0.140152 | 0.140297  | 0.130099  | 0.14292  | 0.140589 | 0.138403  | 0.137383 |
| 0.129079 | 0.127477  | 0.119318  | 0.139714 | 0.140297 | 0.123834  | 0.127768 |
| 0.120629 | 0.118735  | 0.0986305 | 0.110577 | 0.116404 | 0.106061  | 0.110286 |
| 0.141171 | 0.137238  | 0.121795  | 0.138695 | 0.13141  | 0.135052  | 0.13549  |
| 0.112617 | 0.120921  | 0.109266  | 0.125    | 0.13986  | 0.113199  | 0.112762 |
| 0.136218 | 0.136946  | 0.127331  | 0.137529 | 0.142191 | 0.13243   | 0.117716 |
| 0.122523 | 0.116259  | 0.104604  | 0.109848 | 0.111888 | 0.105915  | 0.11014  |
| 0.147436 | 0.142337  | 0.125728  | 0.136218 | 0.149913 | 0.137529  | 0.143211 |
| 0.126457 | 0.133304  | 0.114365  | 0.124563 | 0.132139 | 0.125874  | 0.127185 |
| 0.13345  | 0.141754  | 0.123689  | 0.133887 | 0.139714 | 0.129953  | 0.11757  |
| 0.124709 | 0.122523  | 0.112325  | 0.117861 | 0.130973 | 0.117133  | 0.112325 |
| 0.119027 | 0.118298  | 0.106643  | 0.11014  | 0.125    | 0.099796  | 0.104312 |
| 0.11859  | 0.116987  | 0.100962  | 0.113491 | 0.128059 | 0.10373   | 0.112617 |
| 0.113199 | 0.120338  | 0.105769  | 0.116259 | 0.125291 | 0.113782  | 0.107226 |
| 0.129808 | 0.123543  | 0.111888  | 0.119172 | 0.120047 | 0.111451  | 0.116841 |
| 0.138112 | 0.130973  | 0.112908  | 0.113491 | 0.12602  | 0.119464  | 0.123106 |
| 0.127331 | 0.125146  | 0.114948  | 0.124272 | 0.132139 | 0.114219  | 0.110286 |
| 0.115385 | 0.114365  | 0.0983392 | 0.10912  | 0.12602  | 0.105769  | 0.106789 |
| 0.121941 | 0.117424  | 0.099359  | 0.116259 | 0.124417 | 0.104167  | 0.111014 |

|          |          |           |          |          |           |          |
|----------|----------|-----------|----------|----------|-----------|----------|
| 0.122378 | 0.12602  | 0.10912   | 0.119318 | 0.132721 | 0.107226  | 0.11116  |
| 0.121503 | 0.115822 | 0.104167  | 0.116696 | 0.126603 | 0.10373   | 0.106206 |
| 0.128351 | 0.125291 | 0.106643  | 0.116259 | 0.128788 | 0.109703  | 0.117133 |
| 0.11961  | 0.113054 | 0.104021  | 0.11859  | 0.121503 | 0.100962  | 0.108392 |
| 0.112762 | 0.10708  | 0.109703  | 0.123397 | 0.139132 | 0.107226  | 0.113491 |
| 0.114219 | 0.112617 | 0.105915  | 0.122815 | 0.135635 | 0.101981  | 0.112034 |
| 0.115385 | 0.114073 | 0.097465  | 0.100962 | 0.125437 | 0.0882867 | 0.097465 |
| 0.11655  | 0.119901 | 0.103293  | 0.117279 | 0.13039  | 0.101981  | 0.106789 |
| 0.111742 | 0.107809 | 0.107226  | 0.120047 | 0.139569 | 0.101253  | 0.112762 |
| 0.119755 | 0.111451 | 0.102127  | 0.115822 | 0.130973 | 0.106061  | 0.113782 |
| 0.12704  | 0.105624 | 0.113491  | 0.135344 | 0.130973 | 0.122086  | 0.121358 |
| 0.106643 | 0.097465 | 0.0989219 | 0.113199 | 0.129516 | 0.0958625 | 0.106206 |
| 0.134178 | 0.126748 | 0.120921  | 0.125    | 0.134615 | 0.122232  | 0.12296  |

| TDr_2467  | TDr_2471 | TDr_2480  | TDr_2484  | TDr_2491 | TDr_2502  | TDr_2503 |
|-----------|----------|-----------|-----------|----------|-----------|----------|
| 0.131847  | 0.191725 | 0.112034  | 0.107517  | 0.12704  | 0.13243   | 0.111742 |
| 0.115385  | 0.195076 | 0.103147  | 0.100087  | 0.120192 | 0.119755  | 0.108683 |
| 0.112179  | 0.195076 | 0.100233  | 0.095134  | 0.114656 | 0.119172  | 0.102564 |
| 0.118298  | 0.2044   | 0.106643  | 0.101836  | 0.118735 | 0.119172  | 0.11451  |
| 0.139277  | 0.218677 | 0.116259  | 0.128642  | 0.107663 | 0.133159  | 0.133741 |
| 0.13141   | 0.206439 | 0.116259  | 0.116696  | 0.115822 | 0.13549   | 0.12704  |
| 0.127185  | 0.207751 | 0.120775  | 0.111305  | 0.121212 | 0.130099  | 0.122815 |
| 0.11961   | 0.194056 | 0.104458  | 0.107226  | 0.11014  | 0.120192  | 0.113491 |
| 0.116841  | 0.200029 | 0.100233  | 0.0916375 | 0.107955 | 0.117716  | 0.099359 |
| 0.101836  | 0.199009 | 0.110577  | 0.0772145 | 0.113345 | 0.121649  | 0.112034 |
| 0.125291  | 0.193036 | 0.11655   | 0.105915  | 0.119318 | 0.125583  | 0.110431 |
| 0.124854  | 0.200758 | 0.103293  | 0.0979021 | 0.10373  | 0.10912   | 0.103001 |
| 0.116987  | 0.206002 | 0.10912   | 0.0967366 | 0.113636 | 0.122815  | 0.104167 |
| 0.136946  | 0.160985 | 0.128205  | 0.120484  | 0.134178 | 0.141608  | 0.132576 |
| 0.0447261 | 0.206002 | 0.122232  | 0.109557  | 0.133159 | 0.137092  | 0.127768 |
| 0.115967  | 0.209936 | 0.119755  | 0.108829  | 0.12602  | 0.132867  | 0.112762 |
| 0.126894  | 0.206585 | 0.107372  | 0.101107  | 0.107517 | 0.0971737 | 0.108537 |
| 0.143648  | 0.218386 | 0.128205  | 0.13884   | 0.127768 | 0.138986  | 0.147727 |
| 0.118298  | 0.193619 | 0.097028  | 0.0965909 | 0.113199 | 0.116259  | 0.104604 |
| 0.176282  | 0.13447  | 0.198427  | 0.198864  | 0.204983 | 0.205128  | 0.208916 |
| 0.129808  | 0.209499 | 0.112617  | 0.115967  | 0.125874 | 0.120484  | 0.121066 |
| 0.129079  | 0.211101 | 0.105478  | 0.109994  | 0.11553  | 0.117716  | 0.12296  |
| 0.120484  | 0.199009 | 0.105915  | 0.0996503 | 0.113928 | 0.117279  | 0.110286 |
| 0.139569  | 0.214015 | 0.11859   | 0.111742  | 0.125146 | 0.129079  | 0.119464 |
| 0.114656  | 0.196096 | 0.0986305 | 0.0897436 | 0.109557 | 0.113782  | 0.107372 |
| 0.131847  | 0.208042 | 0.113782  | 0.12296   | 0.134033 | 0.132139  | 0.128351 |
| 0.128059  | 0.209207 | 0.11757   | 0.109266  | 0.119464 | 0.127477  | 0.117861 |
| 0.12602   | 0.215618 | 0.11116   | 0.108392  | 0.124417 | 0.120775  | 0.112617 |
| 0.136218  | 0.214161 | 0.123106  | 0.120047  | 0.130536 | 0.136509  | 0.129225 |
| 0.12398   | 0.211247 | 0.122523  | 0.0981935 | 0.122378 | 0.124272  | 0.116987 |
| 0.123543  | 0.2044   | 0.120047  | 0.109703  | 0.129225 | 0.129371  | 0.123834 |
| 0.123689  | 0.208333 | 0.115822  | 0.106643  | 0.123834 | 0.123106  | 0.11757  |
| 0.109411  | 0.194639 | 0.104749  | 0.0935315 | 0.114802 | 0.116404  | 0.108829 |
| 0.126603  | 0.205128 | 0.110286  | 0.0996503 | 0.119464 | 0.128934  | 0.116113 |
| 0.127331  | 0.21285  | 0.119755  | 0.11116   | 0.125728 | 0.131993  | 0.112762 |
| 0.133596  | 0.214452 | 0.125728  | 0.108392  | 0.130828 | 0.135052  | 0.114073 |
| 0.138986  | 0.222756 | 0.129953  | 0.122815  | 0.137383 | 0.138403  | 0.13345  |
| 0.131847  | 0.214452 | 0.121066  | 0.111014  | 0.121212 | 0.122523  | 0.116696 |
| 0.119318  | 0.202506 | 0.105915  | 0.100524  | 0.112762 | 0.114656  | 0.105332 |
| 0.126603  | 0.214161 | 0.114948  | 0.108974  | 0.125583 | 0.13039   | 0.119318 |
| 0.122232  | 0.202214 | 0.104749  | 0.0996503 | 0.106643 | 0.117861  | 0.108537 |
| 0.135927  | 0.221154 | 0.140297  | 0.125291  | 0.140443 | 0.151078  | 0.137966 |

|          |          |           |           |          |           |          |
|----------|----------|-----------|-----------|----------|-----------|----------|
| 0.145251 | 0.223193 | 0.141754  | 0.129662  | 0.14627  | 0.152826  | 0.137675 |
| 0.129371 | 0.204691 | 0.104312  | 0.103875  | 0.114948 | 0.125291  | 0.114802 |
| 0.120921 | 0.203817 | 0.0967366 | 0.092803  | 0.104749 | 0.1081    | 0.102855 |
| 0.121358 | 0.213287 | 0.117279  | 0.099359  | 0.123834 | 0.125728  | 0.116696 |
| 0.127768 | 0.20979  | 0.107372  | 0.105186  | 0.117133 | 0.114073  | 0.112325 |
| 0.139569 | 0.220717 | 0.132867  | 0.12398   | 0.137966 | 0.142191  | 0.13141  |
| 0.123543 | 0.209353 | 0.109266  | 0.0992133 | 0.116404 | 0.121212  | 0.105186 |
| 0.120192 | 0.202797 | 0.114656  | 0.102855  | 0.118298 | 0.12398   | 0.112325 |
| 0.147145 | 0.220425 | 0.142774  | 0.130973  | 0.149913 | 0.152681  | 0.148893 |
| 0.129079 | 0.213724 | 0.12296   | 0.116696  | 0.12602  | 0.124709  | 0.123834 |
| 0.125728 | 0.205711 | 0.108537  | 0.102564  | 0.119464 | 0.122815  | 0.109411 |
| 0.116987 | 0.212413 | 0.121066  | 0.109266  | 0.129662 | 0.13243   | 0.127477 |
| 0.128059 | 0.191434 | 0.109994  | 0.111888  | 0.120629 | 0.125146  | 0.118153 |
| 0.145251 | 0.229604 | 0.133887  | 0.131119  | 0.141317 | 0.137966  | 0.130973 |
| 0.134033 | 0.213141 | 0.120047  | 0.115239  | 0.12602  | 0.139277  | 0.123834 |
| 0.126166 | 0.209645 | 0.106935  | 0.106206  | 0.111451 | 0.11859   | 0.11451  |
| 0.122378 | 0.202652 | 0.110431  | 0.105624  | 0.122232 | 0.124709  | 0.11451  |
| 0.121066 | 0.213578 | 0.116404  | 0.100233  | 0.124417 | 0.131847  | 0.120484 |
| 0.13884  | 0.225524 | 0.13447   | 0.126457  | 0.131993 | 0.144959  | 0.133304 |
| 0.137092 | 0.222319 | 0.13884   | 0.125583  | 0.138986 | 0.149913  | 0.134178 |
| 0.157343 | 0.172931 | 0.157634  | 0.151661  | 0.168561 | 0.170746  | 0.160256 |
| 0.120921 | 0.206731 | 0.11014   | 0.0980478 | 0.116987 | 0.119755  | 0.111305 |
| 0.125874 | 0.207314 | 0.102564  | 0.0968823 | 0.115822 | 0.120047  | 0.105186 |
| 0.128497 | 0.208479 | 0.106352  | 0.0919289 | 0.112908 | 0.118298  | 0.105769 |
| 0.141754 | 0.213869 | 0.138258  | 0.13345   | 0.1419   | 0.14292   | 0.139132 |
| 0.118444 | 0.203089 | 0.106498  | 0.099359  | 0.113345 | 0.119027  | 0.107955 |
| 0.136946 | 0.213724 | 0.127331  | 0.122523  | 0.134761 | 0.132284  | 0.127914 |
| 0.120629 | 0.213141 | 0.117133  | 0.101544  | 0.122232 | 0.128205  | 0.119464 |
| 0.125437 | 0.206876 | 0.114073  | 0.104604  | 0.119172 | 0.119027  | 0.110286 |
| 0.145833 | 0.213287 | 0.143794  | 0.141608  | 0.146562 | 0.149621  | 0.148164 |
| 0.130099 | 0.213578 | 0.123106  | 0.109266  | 0.122669 | 0.127768  | 0.110868 |
| 0.136655 | 0.222174 | 0.134615  | 0.121649  | 0.135927 | 0.145979  | 0.131119 |
| 0.134178 | 0.217075 | 0.122232  | 0.116841  | 0.123543 | 0.128059  | 0.122815 |
| 0.12704  | 0.197407 | 0.106935  | 0.107955  | 0.114365 | 0.0979021 | 0.108974 |
| 0.12704  | 0.203526 | 0.109557  | 0.10067   | 0.116113 | 0.121212  | 0.107809 |
| 0.124709 | 0.209936 | 0.107809  | 0.102127  | 0.111451 | 0.121503  | 0.107809 |
| 0.138986 | 0.220425 | 0.128205  | 0.12398   | 0.133887 | 0.134615  | 0.129079 |
| 0.130099 | 0.205711 | 0.0995047 | 0.0973193 | 0.116841 | 0.123106  | 0.106498 |
| 0.137238 | 0.225962 | 0.136072  | 0.123689  | 0.140297 | 0.143939  | 0.129662 |
| 0.132576 | 0.205857 | 0.121795  | 0.105624  | 0.124854 | 0.129079  | 0.120047 |
| 0.127914 | 0.210227 | 0.113345  | 0.109411  | 0.113491 | 0.123543  | 0.106643 |
| 0.12704  | 0.206439 | 0.114802  | 0.103584  | 0.116404 | 0.125291  | 0.110723 |
| 0.128788 | 0.213724 | 0.11451   | 0.107663  | 0.121941 | 0.123834  | 0.117716 |
| 0.123252 | 0.20877  | 0.108683  | 0.100379  | 0.10912  | 0.117716  | 0.107809 |



|          |          |           |           |          |          |           |
|----------|----------|-----------|-----------|----------|----------|-----------|
| 0.126748 | 0.206439 | 0.107226  | 0.102127  | 0.117861 | 0.12296  | 0.110723  |
| 0.137675 | 0.221737 | 0.131556  | 0.123543  | 0.137821 | 0.144668 | 0.131265  |
| 0.116987 | 0.207168 | 0.110286  | 0.097028  | 0.111014 | 0.120484 | 0.108829  |
| 0.120338 | 0.210519 | 0.106352  | 0.10271   | 0.112325 | 0.12296  | 0.0984848 |
| 0.127914 | 0.214598 | 0.121795  | 0.112034  | 0.127185 | 0.125583 | 0.128205  |
| 0.130245 | 0.209062 | 0.12296   | 0.113782  | 0.124272 | 0.13141  | 0.124709  |
| 0.131993 | 0.218969 | 0.119172  | 0.118153  | 0.134761 | 0.129953 | 0.125583  |
| 0.137092 | 0.224068 | 0.126311  | 0.127622  | 0.143939 | 0.13884  | 0.135635  |
| 0.130536 | 0.202652 | 0.107809  | 0.106498  | 0.10708  | 0.121503 | 0.120921  |
| 0.182984 | 0.156614 | 0.180653  | 0.173514  | 0.181672 | 0.186189 | 0.185023  |
| 0.122815 | 0.206876 | 0.104167  | 0.0958625 | 0.111305 | 0.114073 | 0.113199  |
| 0.132867 | 0.220717 | 0.125     | 0.125728  | 0.149038 | 0.140152 | 0.140734  |
| 0.128788 | 0.215763 | 0.115385  | 0.118444  | 0.138549 | 0.13345  | 0.13141   |
| 0.13884  | 0.222611 | 0.130973  | 0.124126  | 0.130536 | 0.134761 | 0.135927  |
| 0.118007 | 0.207896 | 0.0996503 | 0.102127  | 0.120484 | 0.117133 | 0.108974  |
| 0.134033 | 0.220134 | 0.122378  | 0.121649  | 0.139714 | 0.131702 | 0.129371  |
| 0.124709 | 0.211101 | 0.101981  | 0.105041  | 0.120775 | 0.113054 | 0.112471  |
| 0.125728 | 0.210373 | 0.115822  | 0.115093  | 0.127914 | 0.12602  | 0.125437  |
| 0.124272 | 0.207751 | 0.113491  | 0.101399  | 0.120629 | 0.123106 | 0.11757   |
| 0.13884  | 0.223776 | 0.122523  | 0.127914  | 0.140152 | 0.135052 | 0.130973  |
| 0.122232 | 0.204545 | 0.107372  | 0.090035  | 0.114802 | 0.115239 | 0.10912   |
| 0.137529 | 0.214889 | 0.128788  | 0.121649  | 0.140006 | 0.139569 | 0.135198  |
| 0.127477 | 0.206876 | 0.113199  | 0.101981  | 0.113636 | 0.115822 | 0.11961   |
| 0.131702 | 0.21926  | 0.125291  | 0.118444  | 0.132139 | 0.138986 | 0.127331  |
| 0.126894 | 0.213578 | 0.129225  | 0.11451   | 0.13141  | 0.136509 | 0.132721  |
| 0.118735 | 0.206294 | 0.101253  | 0.101107  | 0.11014  | 0.11116  | 0.112034  |
| 0.146707 | 0.213578 | 0.142045  | 0.141026  | 0.147436 | 0.14729  | 0.144959  |
| 0.124126 | 0.207022 | 0.108974  | 0.102127  | 0.114365 | 0.111597 | 0.11655   |
| 0.122669 | 0.209353 | 0.103147  | 0.105041  | 0.114365 | 0.120047 | 0.110431  |
| 0.127768 | 0.208916 | 0.10912   | 0.107517  | 0.120921 | 0.11553  | 0.116987  |
| 0.139423 | 0.217366 | 0.135052  | 0.121795  | 0.141026 | 0.140006 | 0.142628  |
| 0.126894 | 0.189394 | 0.120192  | 0.113345  | 0.130828 | 0.128351 | 0.121358  |
| 0.118444 | 0.207751 | 0.097465  | 0.104021  | 0.115967 | 0.114656 | 0.109411  |
| 0.11757  | 0.206002 | 0.0971737 | 0.104895  | 0.11655  | 0.111451 | 0.112908  |
| 0.127331 | 0.207314 | 0.113636  | 0.103001  | 0.122232 | 0.120629 | 0.117133  |
| 0.120484 | 0.215326 | 0.125728  | 0.1081    | 0.130828 | 0.136509 | 0.128059  |
| 0.128497 | 0.209936 | 0.113345  | 0.103293  | 0.113782 | 0.121795 | 0.116841  |
| 0.114656 | 0.198718 | 0.100962  | 0.0856643 | 0.106935 | 0.110286 | 0.105624  |
| 0.116696 | 0.202797 | 0.101253  | 0.090035  | 0.107517 | 0.112325 | 0.106789  |
| 0.117133 | 0.205565 | 0.107517  | 0.0936772 | 0.112617 | 0.11655  | 0.109848  |
| 0.131702 | 0.207314 | 0.112179  | 0.111451  | 0.123106 | 0.122086 | 0.115676  |
| 0.124854 | 0.217657 | 0.12602   | 0.115093  | 0.131993 | 0.136801 | 0.126603  |
| 0.115967 | 0.211684 | 0.106935  | 0.0901807 | 0.112617 | 0.114219 | 0.1081    |
| 0.110286 | 0.202797 | 0.102418  | 0.0941142 | 0.108974 | 0.112617 | 0.102418  |

|           |          |           |           |          |          |           |
|-----------|----------|-----------|-----------|----------|----------|-----------|
| 0.124854  | 0.213578 | 0.121649  | 0.109848  | 0.12296  | 0.129516 | 0.120775  |
| 0.117716  | 0.204108 | 0.108683  | 0.0919289 | 0.108829 | 0.113054 | 0.107809  |
| 0.126166  | 0.20236  | 0.114219  | 0.115239  | 0.126311 | 0.129953 | 0.121212  |
| 0.136364  | 0.210227 | 0.130245  | 0.118735  | 0.137092 | 0.137529 | 0.133159  |
| 0.119464  | 0.206439 | 0.111597  | 0.099796  | 0.113199 | 0.118298 | 0.113928  |
| 0.117861  | 0.209499 | 0.111451  | 0.0952797 | 0.111888 | 0.115239 | 0.110577  |
| 0.116987  | 0.20542  | 0.111451  | 0.0952797 | 0.117716 | 0.113782 | 0.10912   |
| 0.117279  | 0.199301 | 0.0980478 | 0.0929487 | 0.113054 | 0.115822 | 0.105332  |
| 0.123397  | 0.213287 | 0.118444  | 0.104021  | 0.127622 | 0.129225 | 0.124563  |
| 0.113491  | 0.204254 | 0.10271   | 0.0891608 | 0.105769 | 0.114656 | 0.109703  |
| 0.138403  | 0.223339 | 0.137238  | 0.122815  | 0.140589 | 0.140152 | 0.133741  |
| 0.137383  | 0.214161 | 0.130973  | 0.121503  | 0.133159 | 0.144376 | 0.134761  |
| 0.125728  | 0.215326 | 0.122815  | 0.111597  | 0.124709 | 0.132139 | 0.123689  |
| 0.120629  | 0.208188 | 0.11014   | 0.103293  | 0.11757  | 0.124417 | 0.115093  |
| 0.124417  | 0.204691 | 0.110431  | 0.0965909 | 0.114948 | 0.114802 | 0.114802  |
| 0.118444  | 0.205711 | 0.109411  | 0.0955711 | 0.112179 | 0.109994 | 0.104749  |
| 0.129371  | 0.210519 | 0.1081    | 0.0957168 | 0.113491 | 0.117716 | 0.104312  |
| 0.120629  | 0.208479 | 0.099359  | 0.099796  | 0.106789 | 0.120047 | 0.103438  |
| 0.124126  | 0.195367 | 0.107517  | 0.101544  | 0.118444 | 0.11655  | 0.107809  |
| 0.13345   | 0.2213   | 0.123252  | 0.112325  | 0.126603 | 0.131702 | 0.12296   |
| 0.125437  | 0.212995 | 0.104167  | 0.105769  | 0.121503 | 0.120192 | 0.111451  |
| 0.122086  | 0.213724 | 0.123252  | 0.113491  | 0.130682 | 0.134033 | 0.129662  |
| 0.134178  | 0.220862 | 0.130099  | 0.121212  | 0.133741 | 0.135927 | 0.137966  |
| 0.195367  | 0.11859  | 0.185169  | 0.189103  | 0.189977 | 0.195367 | 0.194493  |
| 0.234266  | 0.125728 | 0.22873   | 0.237325  | 0.237617 | 0.242133 | 0.238636  |
| 0.12398   | 0.195221 | 0.104749  | 0.102855  | 0.115093 | 0.114073 | 0.108246  |
| 0.122669  | 0.203234 | 0.105186  | 0.101544  | 0.110286 | 0.113345 | 0.106935  |
| 0.120338  | 0.201777 | 0.103147  | 0.0962995 | 0.109703 | 0.11014  | 0.0999417 |
| 0.122669  | 0.207314 | 0.0984848 | 0.100379  | 0.110577 | 0.109557 | 0.103147  |
| 0.0407925 | 0.209353 | 0.127331  | 0.112908  | 0.131265 | 0.138695 | 0.130536  |
| 0.126166  | 0.21285  | 0.105478  | 0.103875  | 0.119318 | 0.110723 | 0.106643  |
| 0.147582  | 0.230769 | 0.141754  | 0.140152  | 0.143357 | 0.141463 | 0.136801  |
| 0.131702  | 0.214307 | 0.106061  | 0.105915  | 0.113782 | 0.107517 | 0.108974  |
| 0.136946  | 0.220134 | 0.123252  | 0.116696  | 0.129808 | 0.128497 | 0.120629  |
| 0.137092  | 0.210664 | 0.126311  | 0.121795  | 0.130536 | 0.131265 | 0.127185  |
| 0.132139  | 0.220862 | 0.122523  | 0.117716  | 0.137238 | 0.126603 | 0.127768  |
| 0.13447   | 0.217366 | 0.136218  | 0.123252  | 0.142191 | 0.146416 | 0.131556  |
| 0.127768  | 0.215326 | 0.106206  | 0.106061  | 0.117133 | 0.110286 | 0.114073  |
| 0.126603  | 0.211538 | 0.101253  | 0.11014   | 0.111888 | 0.106789 | 0.107372  |
| 0.125874  | 0.211101 | 0.110431  | 0.107955  | 0.112908 | 0.113054 | 0.110723  |
| 0.122086  | 0.203817 | 0.100233  | 0.0971737 | 0.106789 | 0.106061 | 0.102273  |
| 0.125874  | 0.207022 | 0.102564  | 0.103875  | 0.110286 | 0.106352 | 0.104312  |
| 0.129225  | 0.209499 | 0.105624  | 0.10373   | 0.110431 | 0.107955 | 0.110286  |
| 0.13345   | 0.214307 | 0.116259  | 0.117279  | 0.132721 | 0.116259 | 0.119172  |

|          |          |           |           |          |          |          |
|----------|----------|-----------|-----------|----------|----------|----------|
| 0.139569 | 0.221008 | 0.120629  | 0.126894  | 0.142628 | 0.130536 | 0.129079 |
| 0.134178 | 0.207459 | 0.110577  | 0.107809  | 0.11451  | 0.117279 | 0.112617 |
| 0.125291 | 0.207896 | 0.109557  | 0.104167  | 0.118735 | 0.117133 | 0.111597 |
| 0.142774 | 0.223631 | 0.123543  | 0.118735  | 0.133013 | 0.125    | 0.121212 |
| 0.126166 | 0.207314 | 0.10169   | 0.0992133 | 0.112617 | 0.111014 | 0.108683 |
| 0.137383 | 0.22465  | 0.133013  | 0.133159  | 0.144522 | 0.133596 | 0.14088  |
| 0.129516 | 0.209207 | 0.128934  | 0.121503  | 0.142483 | 0.138258 | 0.133887 |
| 0.13549  | 0.214598 | 0.120921  | 0.128059  | 0.137966 | 0.125583 | 0.129662 |
| 0.122378 | 0.207022 | 0.103147  | 0.0992133 | 0.104749 | 0.105478 | 0.101107 |
| 0.121358 | 0.20542  | 0.0995047 | 0.0990676 | 0.111888 | 0.105915 | 0.104167 |
| 0.131993 | 0.217803 | 0.11859   | 0.113491  | 0.124854 | 0.117424 | 0.117424 |
| 0.132721 | 0.2162   | 0.113199  | 0.116841  | 0.128788 | 0.118735 | 0.115822 |
| 0.141171 | 0.215035 | 0.12398   | 0.123252  | 0.128205 | 0.121066 | 0.126311 |
| 0.132576 | 0.213724 | 0.109848  | 0.108829  | 0.113199 | 0.106643 | 0.1081   |
| 0.131556 | 0.213869 | 0.109994  | 0.105186  | 0.114219 | 0.112034 | 0.110577 |
| 0.131265 | 0.212121 | 0.116113  | 0.111014  | 0.128497 | 0.11961  | 0.125728 |
| 0.139132 | 0.224068 | 0.125146  | 0.119172  | 0.134615 | 0.129808 | 0.129516 |
| 0.140297 | 0.22028  | 0.122815  | 0.123834  | 0.130536 | 0.128351 | 0.12398  |
| 0.139277 | 0.222465 | 0.124709  | 0.125728  | 0.139714 | 0.13345  | 0.130536 |
| 0.135344 | 0.213287 | 0.125728  | 0.124126  | 0.136364 | 0.143211 | 0.127477 |
| 0.135344 | 0.212121 | 0.109411  | 0.106643  | 0.113928 | 0.113199 | 0.110286 |
| 0.136801 | 0.217657 | 0.124272  | 0.117716  | 0.130536 | 0.119901 | 0.121649 |
| 0.125583 | 0.212558 | 0.100816  | 0.103293  | 0.112034 | 0.106061 | 0.103147 |
| 0.126311 | 0.205711 | 0.107955  | 0.101981  | 0.111888 | 0.119027 | 0.110577 |
| 0.121649 | 0.207751 | 0.102127  | 0.103147  | 0.113636 | 0.103875 | 0.113491 |
| 0.125    | 0.204691 | 0.10169   | 0.097465  | 0.112325 | 0.113054 | 0.107809 |
| 0.126748 | 0.208479 | 0.10373   | 0.103584  | 0.110577 | 0.101399 | 0.102564 |
| 0.141754 | 0.219988 | 0.125146  | 0.126457  | 0.140152 | 0.130099 | 0.129808 |
| 0.129079 | 0.206731 | 0.11014   | 0.106498  | 0.114365 | 0.119464 | 0.111888 |
| 0.13986  | 0.2213   | 0.125291  | 0.125146  | 0.137966 | 0.125583 | 0.128497 |
| 0.125    | 0.204983 | 0.10169   | 0.0962995 | 0.10708  | 0.106352 | 0.105478 |
| 0.134761 | 0.2162   | 0.11961   | 0.115967  | 0.127622 | 0.120192 | 0.119901 |
| 0.128497 | 0.206439 | 0.117133  | 0.111451  | 0.127185 | 0.13345  | 0.113054 |
| 0.121503 | 0.201777 | 0.111597  | 0.109411  | 0.123689 | 0.12296  | 0.115676 |
| 0.124854 | 0.208916 | 0.115239  | 0.104312  | 0.118007 | 0.124563 | 0.119027 |
| 0.127331 | 0.204691 | 0.11014   | 0.112325  | 0.119318 | 0.113345 | 0.117133 |
| 0.13039  | 0.212413 | 0.111742  | 0.111597  | 0.12296  | 0.119901 | 0.122523 |
| 0.123689 | 0.208916 | 0.108829  | 0.103147  | 0.111888 | 0.119901 | 0.107372 |
| 0.126894 | 0.215909 | 0.129808  | 0.1081    | 0.128497 | 0.145542 | 0.129516 |
| 0.138112 | 0.223048 | 0.135781  | 0.128934  | 0.146125 | 0.147145 | 0.137821 |
| 0.112762 | 0.204691 | 0.0999417 | 0.0875583 | 0.112325 | 0.117133 | 0.103147 |
| 0.119901 | 0.222028 | 0.118735  | 0.111888  | 0.140152 | 0.131556 | 0.131265 |
| 0.11859  | 0.213141 | 0.124417  | 0.0968823 | 0.125728 | 0.141317 | 0.122378 |
| 0.126457 | 0.215181 | 0.111888  | 0.110868  | 0.135635 | 0.132284 | 0.12704  |

|          |          |          |           |          |          |          |
|----------|----------|----------|-----------|----------|----------|----------|
| 0.11655  | 0.205565 | 0.107226 | 0.103584  | 0.126603 | 0.122086 | 0.116841 |
| 0.120338 | 0.215181 | 0.116841 | 0.0992133 | 0.119901 | 0.131119 | 0.119172 |
| 0.118735 | 0.20979  | 0.119901 | 0.101399  | 0.129371 | 0.137092 | 0.125437 |
| 0.131993 | 0.21722  | 0.116259 | 0.110286  | 0.128934 | 0.128788 | 0.122086 |
| 0.12296  | 0.2213   | 0.127914 | 0.118444  | 0.140589 | 0.13549  | 0.132576 |
| 0.125    | 0.211976 | 0.115093 | 0.106498  | 0.13039  | 0.136072 | 0.125583 |
| 0.117424 | 0.202069 | 0.103147 | 0.0992133 | 0.119901 | 0.116259 | 0.114802 |
| 0.145833 | 0.21824  | 0.129516 | 0.128788  | 0.131702 | 0.137092 | 0.124563 |
| 0.126166 | 0.216346 | 0.127331 | 0.111742  | 0.135927 | 0.141608 | 0.128788 |
| 0.115967 | 0.200612 | 0.102855 | 0.0945513 | 0.113782 | 0.116259 | 0.111014 |
| 0.221882 | 0.121212 | 0.210519 | 0.215909  | 0.218531 | 0.221591 | 0.216346 |
| 0.121941 | 0.211247 | 0.114073 | 0.104604  | 0.129371 | 0.125146 | 0.120192 |
| 0.122232 | 0.20542  | 0.10912  | 0.0929487 | 0.117424 | 0.127185 | 0.114073 |
| 0.124417 | 0.220425 | 0.122669 | 0.118735  | 0.140006 | 0.13345  | 0.132284 |
| 0.120338 | 0.209645 | 0.111888 | 0.101836  | 0.121066 | 0.129662 | 0.115093 |
| 0.12296  | 0.21722  | 0.125583 | 0.107955  | 0.134761 | 0.145396 | 0.13549  |
| 0.121503 | 0.207314 | 0.108974 | 0.100379  | 0.121066 | 0.125583 | 0.115676 |
| 0.119318 | 0.208042 | 0.108829 | 0.103438  | 0.122669 | 0.124272 | 0.116696 |
| 0.121066 | 0.208916 | 0.120775 | 0.101107  | 0.123834 | 0.13039  | 0.122815 |
| 0.125    | 0.203817 | 0.114219 | 0.112325  | 0.133596 | 0.131702 | 0.122086 |
| 0.127185 | 0.214452 | 0.11961  | 0.110723  | 0.131702 | 0.134178 | 0.130099 |
| 0.125874 | 0.214015 | 0.11451  | 0.110868  | 0.134761 | 0.124709 | 0.126457 |
| 0.124709 | 0.215472 | 0.111597 | 0.109703  | 0.131556 | 0.123543 | 0.125874 |
| 0.120338 | 0.209936 | 0.112471 | 0.0960082 | 0.120484 | 0.128788 | 0.118881 |
| 0.126748 | 0.215763 | 0.107809 | 0.102127  | 0.118735 | 0.11451  | 0.113345 |
| 0.126311 | 0.21824  | 0.120192 | 0.122378  | 0.139277 | 0.136801 | 0.128351 |
| 0.117716 | 0.199738 | 0.106935 | 0.103001  | 0.125728 | 0.123543 | 0.117424 |
| 0.141608 | 0.219843 | 0.13549  | 0.122815  | 0.136218 | 0.137529 | 0.129953 |
| 0.141171 | 0.20338  | 0.129225 | 0.132576  | 0.141608 | 0.142337 | 0.137675 |
| 0.123397 | 0.205711 | 0.123689 | 0.108392  | 0.128788 | 0.133013 | 0.123689 |
| 0.122523 | 0.2162   | 0.123106 | 0.106643  | 0.125874 | 0.138258 | 0.12602  |
| 0.132867 | 0.199155 | 0.123543 | 0.120775  | 0.13243  | 0.134615 | 0.129371 |
| 0.13039  | 0.209207 | 0.119901 | 0.109848  | 0.130245 | 0.136801 | 0.124854 |
| 0.134178 | 0.203671 | 0.121066 | 0.120629  | 0.127914 | 0.130099 | 0.12602  |
| 0.136801 | 0.208916 | 0.131847 | 0.134615  | 0.137238 | 0.145833 | 0.134761 |
| 0.120338 | 0.203234 | 0.106061 | 0.095134  | 0.111742 | 0.121795 | 0.111597 |
| 0.124854 | 0.217657 | 0.133887 | 0.119172  | 0.126748 | 0.141754 | 0.13039  |
| 0.1419   | 0.19799  | 0.137238 | 0.139714  | 0.143794 | 0.145105 | 0.143648 |
| 0.12296  | 0.211101 | 0.11859  | 0.103584  | 0.121358 | 0.131119 | 0.119464 |
| 0.131993 | 0.204983 | 0.123834 | 0.106206  | 0.123397 | 0.132576 | 0.120921 |
| 0.144376 | 0.218823 | 0.142337 | 0.138986  | 0.144814 | 0.146707 | 0.137966 |
| 0.131847 | 0.213869 | 0.121066 | 0.117424  | 0.129371 | 0.128642 | 0.11961  |
| 0.129953 | 0.223339 | 0.137821 | 0.127185  | 0.142337 | 0.140152 | 0.131993 |
| 0.129225 | 0.215909 | 0.126603 | 0.116841  | 0.133741 | 0.139132 | 0.123689 |

|           |          |           |           |          |          |          |
|-----------|----------|-----------|-----------|----------|----------|----------|
| 0.130828  | 0.215181 | 0.110723  | 0.119901  | 0.126603 | 0.12296  | 0.124709 |
| 0.128934  | 0.208625 | 0.126894  | 0.11859   | 0.131993 | 0.13447  | 0.133887 |
| 0.124709  | 0.207605 | 0.119172  | 0.106206  | 0.128642 | 0.129662 | 0.12296  |
| 0.133887  | 0.219406 | 0.118153  | 0.124126  | 0.133741 | 0.130682 | 0.131556 |
| 0.132721  | 0.217366 | 0.117279  | 0.111597  | 0.13141  | 0.130682 | 0.122232 |
| 0.133304  | 0.222319 | 0.118444  | 0.126166  | 0.137529 | 0.131847 | 0.13243  |
| 0.135052  | 0.218531 | 0.12398   | 0.119172  | 0.13345  | 0.132139 | 0.129808 |
| 0.135635  | 0.212413 | 0.121358  | 0.120047  | 0.136655 | 0.13447  | 0.124272 |
| 0.139132  | 0.215326 | 0.137383  | 0.138695  | 0.151515 | 0.142628 | 0.139714 |
| 0.114656  | 0.208625 | 0.116696  | 0.0955711 | 0.120629 | 0.133887 | 0.122815 |
| 0.128059  | 0.213869 | 0.112325  | 0.104021  | 0.11655  | 0.121649 | 0.118153 |
| 0.129516  | 0.214744 | 0.124854  | 0.118298  | 0.121212 | 0.130682 | 0.13039  |
| 0.119027  | 0.208042 | 0.120484  | 0.0976107 | 0.117133 | 0.126894 | 0.121358 |
| 0.143939  | 0.212558 | 0.140152  | 0.134761  | 0.145833 | 0.147436 | 0.141317 |
| 0.152098  | 0.222756 | 0.149184  | 0.144959  | 0.152535 | 0.156177 | 0.152098 |
| 0.134907  | 0.221591 | 0.116841  | 0.122815  | 0.132721 | 0.128205 | 0.121503 |
| 0.13243   | 0.21183  | 0.111451  | 0.111888  | 0.123252 | 0.123397 | 0.115239 |
| 0.133159  | 0.220717 | 0.115967  | 0.12602   | 0.137966 | 0.127914 | 0.132284 |
| 0.127477  | 0.219988 | 0.11961   | 0.119464  | 0.134615 | 0.133304 | 0.127477 |
| 0.134761  | 0.219114 | 0.118735  | 0.119464  | 0.125874 | 0.122232 | 0.121941 |
| 0.127477  | 0.224068 | 0.120192  | 0.115676  | 0.136655 | 0.135344 | 0.130973 |
| 0.128351  | 0.212413 | 0.133596  | 0.120338  | 0.143939 | 0.146707 | 0.134178 |
| 0.120921  | 0.215181 | 0.124126  | 0.10708   | 0.132721 | 0.135198 | 0.123834 |
| 0.1588    | 0.225379 | 0.149767  | 0.156031  | 0.160402 | 0.144814 | 0.159091 |
| 0.125     | 0.214598 | 0.125583  | 0.103001  | 0.124563 | 0.133741 | 0.12296  |
| 0.131119  | 0.215472 | 0.138986  | 0.119318  | 0.144085 | 0.15472  | 0.138112 |
| 0.127477  | 0.215618 | 0.114365  | 0.1081    | 0.121795 | 0.125728 | 0.121649 |
| 0.13884   | 0.225816 | 0.124563  | 0.125291  | 0.132284 | 0.133887 | 0.124854 |
| 0.116696  | 0.207751 | 0.109411  | 0.108974  | 0.130245 | 0.126603 | 0.121941 |
| 0.14831   | 0.182838 | 0.132867  | 0.127477  | 0.139423 | 0.144814 | 0.136072 |
| 0.14292   | 0.217949 | 0.0861014 | 0.143648  | 0.139277 | 0.134761 | 0.144959 |
| 0.131702  | 0.201195 | 0.113928  | 0.117279  | 0.122232 | 0.120921 | 0.117716 |
| 0.141171  | 0.18211  | 0.12602   | 0.134324  | 0.136946 | 0.136218 | 0.130682 |
| 0.156469  | 0.160693 | 0.143648  | 0.140297  | 0.14729  | 0.14831  | 0.143939 |
| 0.146853  | 0.165647 | 0.133741  | 0.132139  | 0.141463 | 0.144814 | 0.138986 |
| 0.138258  | 0.218823 | 0.121649  | 0.118298  | 0.126457 | 0.129808 | 0.11961  |
| 0.139277  | 0.215181 | 0.125291  | 0.130973  | 0.110286 | 0.134033 | 0.140734 |
| 0.0981935 | 0.199446 | 0.101399  | 0.103584  | 0.116113 | 0.119464 | 0.115967 |
| 0.0890152 | 0.20134  | 0.109994  | 0.105186  | 0.120338 | 0.122232 | 0.113199 |
| 0.125583  | 0.204983 | 0.112471  | 0.103001  | 0.120775 | 0.122669 | 0.118298 |
| 0.128788  | 0.201486 | 0.110723  | 0.113491  | 0.118735 | 0.118298 | 0.113636 |
| 0.124854  | 0.20542  | 0.104749  | 0.102855  | 0.115676 | 0.117861 | 0.107663 |
| 0.0875583 | 0.189394 | 0.103875  | 0.100524  | 0.113928 | 0.121358 | 0.111451 |
| 0.131265  | 0.206294 | 0.105332  | 0.119172  | 0.111888 | 0.123106 | 0.113782 |

|           |          |           |           |           |           |           |
|-----------|----------|-----------|-----------|-----------|-----------|-----------|
| 0.0661422 | 0.193036 | 0.117133  | 0.10708   | 0.126603  | 0.126457  | 0.122669  |
| 0.109557  | 0.19391  | 0.109557  | 0.043852  | 0.109994  | 0.11451   | 0.0952797 |
| 0.132284  | 0.202069 | 0.113345  | 0.117279  | 0.125728  | 0.12296   | 0.11451   |
| 0.129225  | 0.204545 | 0.108537  | 0.112179  | 0.11655   | 0.119027  | 0.110868  |
| 0.139132  | 0.214161 | 0.122815  | 0.118007  | 0.12296   | 0.12398   | 0.118153  |
| 0.215472  | 0.11451  | 0.207896  | 0.212704  | 0.216492  | 0.218969  | 0.216346  |
| 0.14292   | 0.211538 | 0.134761  | 0.137529  | 0.145979  | 0.14292   | 0.137966  |
| 0.134907  | 0.215181 | 0.11859   | 0.119318  | 0.133304  | 0.128205  | 0.130828  |
| 0.127768  | 0.20134  | 0.110577  | 0.115676  | 0.116841  | 0.126603  | 0.119027  |
| 0.211976  | 0.106935 | 0.201195  | 0.210082  | 0.210664  | 0.211976  | 0.21081   |
| 0.135635  | 0.195513 | 0.117861  | 0.11655   | 0.124126  | 0.124854  | 0.121941  |
| 0.125874  | 0.212267 | 0.116841  | 0.106206  | 0.116696  | 0.12704   | 0.113928  |
| 0.132284  | 0.205857 | 0.108392  | 0.116113  | 0.0537587 | 0.119172  | 0.115967  |
| 0.0514277 | 0.202797 | 0.114656  | 0.104604  | 0.12296   | 0.131265  | 0.122232  |
| 0.244901  | 0.122378 | 0.245484  | 0.246795  | 0.250874  | 0.253642  | 0.248689  |
| 0.132867  | 0.208188 | 0.118881  | 0.112617  | 0.128642  | 0.131993  | 0.125     |
| 0.132284  | 0.210519 | 0.113928  | 0.110868  | 0.115239  | 0.118881  | 0.108392  |
| 0.137238  | 0.21285  | 0.1081    | 0.115822  | 0.122232  | 0.0506993 | 0.112471  |
| 0.134615  | 0.210519 | 0.104895  | 0.115822  | 0.116987  | 0.048951  | 0.111014  |
| 0.11655   | 0.198864 | 0.125583  | 0.115822  | 0.133596  | 0.136072  | 0.130536  |
| 0.119172  | 0.183712 | 0.120921  | 0.111116  | 0.128351  | 0.127914  | 0.108683  |
| 0.13345   | 0.20877  | 0.11655   | 0.112617  | 0.117861  | 0.122086  | 0.11451   |
| 0.126603  | 0.200758 | 0.107372  | 0.113928  | 0.118881  | 0.116987  | 0.114365  |
| 0.135781  | 0.208188 | 0.11014   | 0.118735  | 0.0965909 | 0.123252  | 0.128205  |
| 0.0562354 | 0.202652 | 0.11014   | 0.0986305 | 0.118444  | 0.122086  | 0.11859   |
| 0.125437  | 0.196387 | 0.108246  | 0.11014   | 0.115385  | 0.116696  | 0.112325  |
| 0.104312  | 0.200903 | 0.115676  | 0.0840618 | 0.115239  | 0.127914  | 0.116259  |
| 0.144668  | 0.219114 | 0.0831876 | 0.144231  | 0.138695  | 0.133304  | 0.146707  |
| 0.136509  | 0.206585 | 0.121941  | 0.115093  | 0.131702  | 0.131556  | 0.131265  |
| 0.130973  | 0.211247 | 0.123689  | 0.11014   | 0.119755  | 0.128059  | 0.119901  |
| 0.191288  | 0.120047 | 0.181672  | 0.186772  | 0.189685  | 0.193036  | 0.190414  |
| 0.205274  | 0.113345 | 0.193036  | 0.200758  | 0.202214  | 0.204691  | 0.203526  |
| 0.0584207 | 0.194639 | 0.114656  | 0.104604  | 0.12296   | 0.127768  | 0.124563  |
| 0.0537587 | 0.202214 | 0.109994  | 0.0964452 | 0.117133  | 0.120775  | 0.117861  |
| 0.128351  | 0.202214 | 0.127768  | 0.125     | 0.142191  | 0.138258  | 0.128642  |
| 0.133887  | 0.208916 | 0.115822  | 0.113928  | 0.117716  | 0.117861  | 0.116404  |
| 0.136655  | 0.207896 | 0.119464  | 0.113782  | 0.131556  | 0.137529  | 0.127914  |
| 0.130099  | 0.208625 | 0.117861  | 0.127622  | 0.127914  | 0.112325  | 0.124854  |
| 0.223922  | 0.121212 | 0.214598  | 0.224068  | 0.224068  | 0.229458  | 0.223339  |
| 0.128351  | 0.206876 | 0.103293  | 0.104021  | 0.116259  | 0.117279  | 0.113199  |
| 0.209499  | 0.142337 | 0.202214  | 0.204691  | 0.211393  | 0.209207  | 0.208042  |
| 0.132139  | 0.211247 | 0.110286  | 0.105769  | 0.11655   | 0.117279  | 0.107955  |
| 0.129371  | 0.206731 | 0.110723  | 0.0980478 | 0.112617  | 0.113636  | 0.107517  |
| 0.124854  | 0.198718 | 0.107955  | 0.109848  | 0.120338  | 0.120192  | 0.113491  |

|           |          |           |           |           |           |           |
|-----------|----------|-----------|-----------|-----------|-----------|-----------|
| 0.0622086 | 0.193765 | 0.10708   | 0.101107  | 0.114802  | 0.117279  | 0.11757   |
| 0.20979   | 0.121066 | 0.196678  | 0.204983  | 0.208188  | 0.207751  | 0.206002  |
| 0.138112  | 0.197698 | 0.12296   | 0.125728  | 0.131265  | 0.132576  | 0.127622  |
| 0.134324  | 0.216929 | 0.112179  | 0.102127  | 0.116404  | 0.11014   | 0.110723  |
| 0.134907  | 0.202943 | 0.115967  | 0.118153  | 0.128351  | 0.127622  | 0.117424  |
| 0.134324  | 0.208479 | 0.119464  | 0.105915  | 0.120484  | 0.122086  | 0.0620629 |
| 0.0617716 | 0.200903 | 0.110723  | 0.0986305 | 0.116113  | 0.121795  | 0.118007  |
| 0.135052  | 0.21183  | 0.111742  | 0.109848  | 0.118298  | 0.120192  | 0.112908  |
| 0.132139  | 0.198427 | 0.116404  | 0.116259  | 0.107809  | 0.121941  | 0.116113  |
| 0.128059  | 0.209207 | 0.122815  | 0.108974  | 0.119464  | 0.128642  | 0.116696  |
| 0.124563  | 0.194347 | 0.100379  | 0.109848  | 0.113928  | 0.114948  | 0.108829  |
| 0.138112  | 0.207022 | 0.112179  | 0.107372  | 0.121358  | 0.11451   | 0.113928  |
| 0.192453  | 0.122378 | 0.181381  | 0.183275  | 0.187646  | 0.190414  | 0.184878  |
| 0.137529  | 0.215472 | 0.106935  | 0.117861  | 0.121941  | 0.048951  | 0.11655   |
| 0.135635  | 0.210082 | 0.0651224 | 0.128497  | 0.124126  | 0.114365  | 0.124854  |
| 0.131702  | 0.207314 | 0.104021  | 0.114948  | 0.120775  | 0.101107  | 0.120047  |
| 0.141171  | 0.202214 | 0.120775  | 0.112471  | 0.127622  | 0.13039   | 0.126603  |
| 0.130682  | 0.201923 | 0.113782  | 0.118007  | 0.124709  | 0.121649  | 0.11757   |
| 0.137383  | 0.214744 | 0.116113  | 0.114219  | 0.120629  | 0.122523  | 0.114656  |
| 0.129662  | 0.199446 | 0.109266  | 0.100962  | 0.114656  | 0.115093  | 0.0710956 |
| 0.137821  | 0.215181 | 0.122378  | 0.120775  | 0.123106  | 0.125874  | 0.119464  |
| 0.130973  | 0.206585 | 0.0595862 | 0.122086  | 0.117424  | 0.114365  | 0.124854  |
| 0.128642  | 0.208042 | 0.100962  | 0.11014   | 0.111014  | 0.0505536 | 0.107663  |
| 0.0667249 | 0.201195 | 0.112179  | 0.103293  | 0.119901  | 0.129079  | 0.119172  |
| 0.131556  | 0.212995 | 0.112325  | 0.113636  | 0.0498252 | 0.120192  | 0.114365  |
| 0.139277  | 0.215763 | 0.124417  | 0.129808  | 0.0657051 | 0.133741  | 0.130536  |
| 0.130536  | 0.202069 | 0.11014   | 0.105041  | 0.120192  | 0.125     | 0.116259  |
| 0.140589  | 0.211247 | 0.129225  | 0.133741  | 0.138695  | 0.137966  | 0.131847  |
| 0.0619172 | 0.199301 | 0.111451  | 0.0955711 | 0.112179  | 0.121941  | 0.117279  |
| 0.130099  | 0.202797 | 0.102418  | 0.113928  | 0.113054  | 0.104458  | 0.114073  |
| 0.129371  | 0.1875   | 0.113054  | 0.112617  | 0.119318  | 0.122669  | 0.115093  |
| 0.141317  | 0.209353 | 0.122669  | 0.121066  | 0.12398   | 0.12704   | 0.121212  |
| 0.195804  | 0.124272 | 0.18211   | 0.186917  | 0.189831  | 0.193473  | 0.189685  |
| 0.128351  | 0.210082 | 0.109994  | 0.104312  | 0.116259  | 0.109994  | 0.108829  |
| 0.119027  | 0.196096 | 0.0898893 | 0.0987762 | 0.109848  | 0.115822  | 0.105332  |
| 0.129516  | 0.212995 | 0.120484  | 0.1081    | 0.119464  | 0.127768  | 0.11553   |
| 0.183712  | 0.12704  | 0.171766  | 0.176865  | 0.17803   | 0.184878  | 0.176136  |
| 0.144814  | 0.212558 | 0.128788  | 0.122232  | 0.137092  | 0.142191  | 0.136072  |
| 0.147145  | 0.220717 | 0.142483  | 0.130099  | 0.151952  | 0.153263  | 0.147436  |
| 0.143502  | 0.220571 | 0.0872669 | 0.147145  | 0.144231  | 0.140006  | 0.145542  |
| 0.130682  | 0.200466 | 0.10912   | 0.107226  | 0.121212  | 0.125437  | 0.11757   |
| 0.129953  | 0.200321 | 0.113054  | 0.116987  | 0.122523  | 0.12296   | 0.117133  |
| 0.211393  | 0.115093 | 0.202652  | 0.207751  | 0.210373  | 0.212558  | 0.210227  |
| 0.126894  | 0.197552 | 0.11553   | 0.115967  | 0.11655   | 0.126603  | 0.125728  |

|           |          |           |           |           |           |           |
|-----------|----------|-----------|-----------|-----------|-----------|-----------|
| 0.134324  | 0.202069 | 0.11859   | 0.123397  | 0.127768  | 0.121795  | 0.122086  |
| 0.132867  | 0.207605 | 0.111597  | 0.105041  | 0.11961   | 0.113928  | 0.110431  |
| 0.170746  | 0.144959 | 0.159674  | 0.160402  | 0.161276  | 0.17366   | 0.168706  |
| 0.122086  | 0.196533 | 0.100233  | 0.103001  | 0.104749  | 0.11859   | 0.107226  |
| 0.142337  | 0.222611 | 0.136801  | 0.141026  | 0.123252  | 0.146125  | 0.149621  |
| 0.117279  | 0.195804 | 0.121649  | 0.0576923 | 0.122086  | 0.128059  | 0.110868  |
| 0.191579  | 0.116259 | 0.17905   | 0.184732  | 0.18852   | 0.194493  | 0.189831  |
| 0.133013  | 0.207459 | 0.116696  | 0.106935  | 0.123543  | 0.127477  | 0.124272  |
| 0.114365  | 0.201923 | 0.0968823 | 0.0981935 | 0.109557  | 0.116696  | 0.101253  |
| 0.133159  | 0.207022 | 0.105186  | 0.110577  | 0.109994  | 0.103147  | 0.112471  |
| 0.132139  | 0.20979  | 0.116404  | 0.102564  | 0.114802  | 0.118444  | 0.113199  |
| 0.127477  | 0.209207 | 0.118444  | 0.10373   | 0.118881  | 0.125146  | 0.116987  |
| 0.131847  | 0.202214 | 0.107955  | 0.117133  | 0.121795  | 0.124272  | 0.123106  |
| 0.0591492 | 0.201486 | 0.109557  | 0.0965909 | 0.114365  | 0.119755  | 0.115093  |
| 0.194784  | 0.11655  | 0.18109   | 0.183275  | 0.189103  | 0.190997  | 0.186626  |
| 0.13549   | 0.209936 | 0.102564  | 0.117861  | 0.0922203 | 0.120629  | 0.123543  |
| 0.116404  | 0.198135 | 0.109703  | 0.108683  | 0.119172  | 0.120484  | 0.108246  |
| 0.211247  | 0.116113 | 0.201632  | 0.206148  | 0.209062  | 0.212704  | 0.212413  |
| 0.137238  | 0.215763 | 0.108974  | 0.115822  | 0.119027  | 0.0472028 | 0.115093  |
| 0.0552156 | 0.20134  | 0.112034  | 0.10169   | 0.11859   | 0.121066  | 0.118153  |
| 0.0587121 | 0.199883 | 0.10708   | 0.0938228 | 0.11655   | 0.118444  | 0.113199  |
| 0.138112  | 0.208479 | 0.127622  | 0.133304  | 0.126603  | 0.134907  | 0.132867  |
| 0.193182  | 0.118153 | 0.180361  | 0.184586  | 0.188666  | 0.190851  | 0.185897  |
| 0.137092  | 0.214744 | 0.118444  | 0.113928  | 0.119755  | 0.118444  | 0.112325  |
| 0.135344  | 0.214452 | 0.117861  | 0.125583  | 0.0611888 | 0.127185  | 0.128059  |
| 0.060169  | 0.197844 | 0.111742  | 0.0979021 | 0.11451   | 0.121941  | 0.114073  |
| 0.0642483 | 0.199883 | 0.106789  | 0.0949883 | 0.112762  | 0.121941  | 0.113491  |
| 0.0582751 | 0.199738 | 0.106352  | 0.0957168 | 0.114948  | 0.122378  | 0.118881  |
| 0.127768  | 0.201632 | 0.106498  | 0.111014  | 0.117716  | 0.120192  | 0.110868  |
| 0.107809  | 0.199446 | 0.106935  | 0.046183  | 0.106789  | 0.112762  | 0.0952797 |
| 0.136072  | 0.205274 | 0.120338  | 0.109411  | 0.128351  | 0.130536  | 0.127914  |
| 0.141317  | 0.218677 | 0.108683  | 0.130682  | 0.114948  | 0.120629  | 0.127622  |
| 0.131119  | 0.209353 | 0.116259  | 0.110286  | 0.125728  | 0.128788  | 0.123543  |
| 0.132139  | 0.214452 | 0.125728  | 0.110431  | 0.128497  | 0.12398   | 0.0633741 |
| 0.200175  | 0.121066 | 0.186772  | 0.188083  | 0.190414  | 0.197552  | 0.19289   |
| 0.128059  | 0.209207 | 0.10708   | 0.111305  | 0.0518648 | 0.114656  | 0.116113  |
| 0.136655  | 0.203526 | 0.121795  | 0.126894  | 0.131847  | 0.129371  | 0.126166  |
| 0.0630828 | 0.199009 | 0.106498  | 0.0920746 | 0.113345  | 0.121358  | 0.115239  |
| 0.108974  | 0.196533 | 0.1081    | 0.0435606 | 0.10708   | 0.112471  | 0.097028  |
| 0.128205  | 0.198572 | 0.1081    | 0.110868  | 0.103293  | 0.11859   | 0.122378  |
| 0.134761  | 0.210956 | 0.11961   | 0.112762  | 0.120338  | 0.123397  | 0.114365  |
| 0.135344  | 0.208333 | 0.123106  | 0.123252  | 0.129953  | 0.133013  | 0.127768  |
| 0.130245  | 0.20877  | 0.0547786 | 0.116404  | 0.114656  | 0.116841  | 0.118007  |
| 0.122086  | 0.199738 | 0.111888  | 0.0863928 | 0.112617  | 0.116841  | 0.107517  |



|           |          |           |           |           |          |           |
|-----------|----------|-----------|-----------|-----------|----------|-----------|
| 0.11961   | 0.19493  | 0.107663  | 0.0751748 | 0.110723  | 0.115822 | 0.100379  |
| 0.118007  | 0.19799  | 0.102273  | 0.0820221 | 0.108537  | 0.117424 | 0.0967366 |
| 0.132721  | 0.211538 | 0.114948  | 0.109557  | 0.115967  | 0.118735 | 0.108537  |
| 0.13549   | 0.210519 | 0.128205  | 0.119027  | 0.137383  | 0.139277 | 0.132867  |
| 0.136509  | 0.214452 | 0.112617  | 0.111014  | 0.115676  | 0.122815 | 0.110286  |
| 0.125     | 0.196533 | 0.108392  | 0.10708   | 0.114948  | 0.11859  | 0.108974  |
| 0.131702  | 0.209062 | 0.111305  | 0.107663  | 0.113782  | 0.120047 | 0.107517  |
| 0.0636655 | 0.198135 | 0.105332  | 0.0952797 | 0.115385  | 0.119318 | 0.113782  |
| 0.129371  | 0.207896 | 0.104895  | 0.0986305 | 0.112908  | 0.109266 | 0.106352  |
| 0.0550699 | 0.200903 | 0.112179  | 0.100087  | 0.119027  | 0.121503 | 0.119755  |
| 0.126166  | 0.205857 | 0.102273  | 0.109411  | 0.0479312 | 0.11014  | 0.108392  |
| 0.128205  | 0.209645 | 0.0521562 | 0.11553   | 0.111742  | 0.113345 | 0.119755  |
| 0.124126  | 0.207605 | 0.116259  | 0.103001  | 0.111742  | 0.123543 | 0.110723  |
| 0.112325  | 0.199009 | 0.11116   | 0.0498252 | 0.107517  | 0.11757  | 0.0957168 |
| 0.0652681 | 0.201486 | 0.105769  | 0.0954254 | 0.116113  | 0.122086 | 0.115093  |
| 0.132284  | 0.197115 | 0.11014   | 0.114948  | 0.117279  | 0.106061 | 0.119464  |
| 0.121649  | 0.206585 | 0.113199  | 0.11451   | 0.122086  | 0.126894 | 0.113782  |
| 0.120629  | 0.204108 | 0.102273  | 0.0977564 | 0.11553   | 0.120921 | 0.11014   |
| 0.0635198 | 0.203234 | 0.107809  | 0.0980478 | 0.11553   | 0.122086 | 0.113345  |
| 0.133304  | 0.199883 | 0.11116   | 0.113928  | 0.122378  | 0.118444 | 0.115239  |
| 0.131847  | 0.211247 | 0.109703  | 0.105186  | 0.116259  | 0.121941 | 0.112617  |
| 0.128934  | 0.20542  | 0.111742  | 0.115093  | 0.120921  | 0.122815 | 0.114073  |
| 0.123397  | 0.209499 | 0.114365  | 0.101399  | 0.114219  | 0.123689 | 0.112908  |
| 0.11116   | 0.199592 | 0.112325  | 0.0460373 | 0.113636  | 0.116113 | 0.0995047 |
| 0.117861  | 0.197844 | 0.0936772 | 0.0958625 | 0.0958625 | 0.117861 | 0.107663  |
| 0.129662  | 0.20877  | 0.105478  | 0.0992133 | 0.110577  | 0.107517 | 0.105186  |
| 0.133013  | 0.200466 | 0.113199  | 0.118007  | 0.123834  | 0.125146 | 0.115822  |
| 0.138258  | 0.208625 | 0.112908  | 0.123252  | 0.122669  | 0.122815 | 0.108246  |
| 0.122086  | 0.201777 | 0.109557  | 0.10708   | 0.117861  | 0.120338 | 0.105186  |
| 0.19697   | 0.118444 | 0.183858  | 0.188374  | 0.190997  | 0.199592 | 0.193765  |
| 0.169872  | 0.144376 | 0.152389  | 0.159528  | 0.160693  | 0.167249 | 0.158508  |
| 0.13345   | 0.206148 | 0.115676  | 0.110577  | 0.123106  | 0.12704  | 0.121212  |
| 0.131265  | 0.20134  | 0.108537  | 0.115093  | 0.117133  | 0.120192 | 0.114656  |
| 0.150787  | 0.224359 | 0.146125  | 0.13549   | 0.153846  | 0.156323 | 0.150495  |
| 0.134615  | 0.209353 | 0.11451   | 0.118153  | 0.0968823 | 0.125291 | 0.130828  |
| 0.0895979 | 0.20134  | 0.111742  | 0.110723  | 0.104895  | 0.123106 | 0.124563  |
| 0.0941142 | 0.202069 | 0.108683  | 0.106498  | 0.119318  | 0.125874 | 0.111305  |
| 0.107809  | 0.200321 | 0.111014  | 0.0796911 | 0.114365  | 0.122669 | 0.110723  |
| 0.121503  | 0.203817 | 0.11451   | 0.112908  | 0.121358  | 0.129662 | 0.113928  |
| 0.200903  | 0.115385 | 0.192745  | 0.19493   | 0.196678  | 0.201777 | 0.200612  |
| 0.137238  | 0.216055 | 0.119755  | 0.118444  | 0.121066  | 0.120629 | 0.118881  |
| 0.129808  | 0.192599 | 0.110868  | 0.117133  | 0.119172  | 0.121066 | 0.114656  |
| 0.0738636 | 0.199301 | 0.104167  | 0.0961538 | 0.110723  | 0.121649 | 0.11116   |
| 0.132284  | 0.212267 | 0.111888  | 0.0977564 | 0.110868  | 0.115967 | 0.0512821 |

|           |          |           |           |           |           |           |
|-----------|----------|-----------|-----------|-----------|-----------|-----------|
| 0.186043  | 0.133159 | 0.174097  | 0.175991  | 0.184441  | 0.1875    | 0.181381  |
| 0.243444  | 0.119464 | 0.238782  | 0.242424  | 0.246503  | 0.249272  | 0.246358  |
| 0.128059  | 0.209499 | 0.057838  | 0.117133  | 0.117133  | 0.118735  | 0.120775  |
| 0.121066  | 0.207751 | 0.114656  | 0.110723  | 0.122378  | 0.122232  | 0.110577  |
| 0.131265  | 0.203671 | 0.114948  | 0.1081    | 0.12296   | 0.12602   | 0.120484  |
| 0.123543  | 0.206148 | 0.114802  | 0.0983392 | 0.112908  | 0.124417  | 0.107226  |
| 0.132139  | 0.210956 | 0.114948  | 0.110723  | 0.115385  | 0.116404  | 0.110577  |
| 0.126166  | 0.204108 | 0.0952797 | 0.107372  | 0.0863928 | 0.118007  | 0.113054  |
| 0.0866841 | 0.190559 | 0.109994  | 0.104604  | 0.116259  | 0.124854  | 0.113782  |
| 0.132139  | 0.212121 | 0.114948  | 0.111888  | 0.114219  | 0.116113  | 0.107372  |
| 0.0973193 | 0.193328 | 0.109557  | 0.105041  | 0.118444  | 0.125291  | 0.115967  |
| 0.123397  | 0.211247 | 0.108537  | 0.101107  | 0.119172  | 0.127477  | 0.114073  |
| 0.113928  | 0.197115 | 0.112179  | 0.0476399 | 0.107955  | 0.116259  | 0.100233  |
| 0.129516  | 0.20979  | 0.0563811 | 0.120338  | 0.116259  | 0.112908  | 0.125437  |
| 0.130245  | 0.202943 | 0.111305  | 0.113782  | 0.119318  | 0.117133  | 0.114219  |
| 0.122378  | 0.200612 | 0.0929487 | 0.102127  | 0.10067   | 0.0976107 | 0.104312  |
| 0.121795  | 0.216055 | 0.113054  | 0.116696  | 0.13243   | 0.121795  | 0.12704   |
| 0.130536  | 0.217512 | 0.128788  | 0.11757   | 0.128351  | 0.136946  | 0.12704   |
| 0.0645396 | 0.203671 | 0.108246  | 0.0944056 | 0.113345  | 0.117861  | 0.114073  |
| 0.0914918 | 0.193328 | 0.113928  | 0.105041  | 0.121358  | 0.131119  | 0.125291  |
| 0         | 0.208479 | 0.124709  | 0.113199  | 0.13243   | 0.135198  | 0.129953  |
| 0.208479  | 0        | 0.200612  | 0.20134   | 0.210082  | 0.212558  | 0.209645  |
| 0.124709  | 0.200612 | 0         | 0.111742  | 0.10912   | 0.1081    | 0.11451   |
| 0.113199  | 0.20134  | 0.111742  | 0         | 0.110723  | 0.116696  | 0.0960082 |
| 0.13243   | 0.210082 | 0.10912   | 0.110723  | 0         | 0.11757   | 0.113199  |
| 0.135198  | 0.212558 | 0.1081    | 0.116696  | 0.11757   | 0         | 0.114219  |
| 0.129953  | 0.209645 | 0.11451   | 0.0960082 | 0.113199  | 0.114219  | 0         |
| 0.201923  | 0.117279 | 0.191725  | 0.192453  | 0.195659  | 0.202214  | 0.197844  |
| 0.13243   | 0.205128 | 0.114365  | 0.118298  | 0.120338  | 0.125146  | 0.115822  |
| 0.0608974 | 0.200029 | 0.106643  | 0.0948427 | 0.114073  | 0.121795  | 0.112179  |
| 0.131265  | 0.208916 | 0.116987  | 0.113345  | 0.124709  | 0.128934  | 0.118735  |
| 0.123106  | 0.207751 | 0.113199  | 0.0987762 | 0.11014   | 0.120484  | 0.105915  |
| 0.13039   | 0.199883 | 0.111451  | 0.115676  | 0.119755  | 0.121649  | 0.115822  |
| 0.119027  | 0.19697  | 0.101253  | 0.103438  | 0.115385  | 0.113491  | 0.107372  |
| 0.123397  | 0.209499 | 0.109994  | 0.100816  | 0.119755  | 0.125728  | 0.112908  |
| 0.13447   | 0.210082 | 0.10271   | 0.113636  | 0.114219  | 0.0496795 | 0.111451  |
| 0.204837  | 0.118735 | 0.189394  | 0.193036  | 0.195076  | 0.200175  | 0.19493   |
| 0.122815  | 0.197261 | 0.0995047 | 0.106935  | 0.107517  | 0.116113  | 0.108829  |
| 0.197261  | 0.120775 | 0.185897  | 0.1875    | 0.192453  | 0.198427  | 0.192308  |
| 0.197407  | 0.120338 | 0.184295  | 0.185606  | 0.189685  | 0.195659  | 0.194784  |
| 0.128351  | 0.212995 | 0.126603  | 0.115967  | 0.123834  | 0.132721  | 0.120775  |
| 0.138549  | 0.218531 | 0.118153  | 0.124126  | 0.125874  | 0.0592949 | 0.119318  |
| 0.118153  | 0.202506 | 0.0960082 | 0.0932401 | 0.109266  | 0.116987  | 0.104749  |
| 0.122086  | 0.198572 | 0.099359  | 0.105915  | 0.11116   | 0.116259  | 0.106061  |

|           |          |           |           |          |           |           |
|-----------|----------|-----------|-----------|----------|-----------|-----------|
| 0.128059  | 0.200466 | 0.107955  | 0.110723  | 0.11451  | 0.119318  | 0.112034  |
| 0.0619172 | 0.20134  | 0.109994  | 0.0979021 | 0.114802 | 0.121649  | 0.117861  |
| 0.130099  | 0.206585 | 0.109411  | 0.107809  | 0.111014 | 0.114948  | 0.10708   |
| 0.13039   | 0.210664 | 0.111742  | 0.109848  | 0.113345 | 0.120775  | 0.109994  |
| 0.130245  | 0.209062 | 0.0606061 | 0.124272  | 0.119318 | 0.112179  | 0.125291  |
| 0.127477  | 0.210082 | 0.116404  | 0.104312  | 0.115093 | 0.121649  | 0.112325  |
| 0.0600233 | 0.196824 | 0.104604  | 0.0933858 | 0.110577 | 0.119172  | 0.112179  |
| 0.128934  | 0.202797 | 0.106206  | 0.115676  | 0.119172 | 0.116987  | 0.112908  |
| 0.113928  | 0.198864 | 0.0944056 | 0.0945513 | 0.10912  | 0.114219  | 0.0973193 |
| 0.133304  | 0.20338  | 0.11961   | 0.123834  | 0.13141  | 0.124563  | 0.121066  |
| 0.129516  | 0.207168 | 0.114656  | 0.106352  | 0.124126 | 0.125437  | 0.116987  |
| 0.136946  | 0.207605 | 0.12296   | 0.129516  | 0.135927 | 0.129953  | 0.126457  |
| 0.253497  | 0.129808 | 0.25204   | 0.256847  | 0.258013 | 0.260781  | 0.25845   |
| 0.136946  | 0.219843 | 0.12296   | 0.117861  | 0.129808 | 0.119464  | 0.120047  |
| 0.131847  | 0.212704 | 0.120775  | 0.112762  | 0.126166 | 0.129516  | 0.11961   |
| 0.215909  | 0.118444 | 0.207459  | 0.215181  | 0.21722  | 0.220571  | 0.218823  |
| 0.127768  | 0.212121 | 0.121358  | 0.113345  | 0.126748 | 0.121358  | 0.120192  |
| 0.229749  | 0.115967 | 0.220425  | 0.229021  | 0.22873  | 0.232663  | 0.231789  |
| 0.134033  | 0.212558 | 0.112471  | 0.110286  | 0.122523 | 0.112762  | 0.114219  |
| 0.0432692 | 0.207168 | 0.123689  | 0.107517  | 0.132284 | 0.134178  | 0.129516  |
| 0.130099  | 0.208042 | 0.0989219 | 0.108392  | 0.109848 | 0.0543415 | 0.108537  |
| 0.127185  | 0.21183  | 0.122523  | 0.108392  | 0.123543 | 0.131265  | 0.11757   |
| 0.205565  | 0.120921 | 0.192453  | 0.196387  | 0.198135 | 0.200903  | 0.202943  |
| 0.132721  | 0.208042 | 0.123106  | 0.125874  | 0.132867 | 0.13243   | 0.123397  |
| 0.131556  | 0.201049 | 0.109703  | 0.113928  | 0.122378 | 0.122815  | 0.112034  |
| 0.225233  | 0.116404 | 0.218823  | 0.223339  | 0.225962 | 0.229021  | 0.224942  |
| 0.133596  | 0.210373 | 0.118444  | 0.113928  | 0.115967 | 0.119027  | 0.111451  |
| 0.202214  | 0.118444 | 0.189685  | 0.191579  | 0.195659 | 0.201923  | 0.197552  |
| 0.136364  | 0.214015 | 0.115967  | 0.114073  | 0.117861 | 0.119755  | 0.115676  |
| 0.0649767 | 0.20236  | 0.106643  | 0.0971737 | 0.117861 | 0.121503  | 0.114219  |
| 0.116113  | 0.204545 | 0.120484  | 0.0547786 | 0.121795 | 0.126311  | 0.107372  |
| 0.127477  | 0.216492 | 0.126603  | 0.115093  | 0.125    | 0.13447   | 0.123106  |
| 0.123834  | 0.198864 | 0.102273  | 0.105915  | 0.105915 | 0.120338  | 0.109848  |
| 0.164336  | 0.135635 | 0.155012  | 0.133013  | 0.158945 | 0.163753  | 0.153846  |
| 0.126166  | 0.199738 | 0.107226  | 0.109994  | 0.115239 | 0.115093  | 0.1081    |
| 0.136364  | 0.21081  | 0.106352  | 0.114073  | 0.11961  | 0.0515734 | 0.11014   |
| 0.129662  | 0.207314 | 0.112471  | 0.105624  | 0.118444 | 0.11655   | 0.11014   |
| 0.13549   | 0.207896 | 0.115093  | 0.123689  | 0.123689 | 0.108392  | 0.122378  |
| 0.19595   | 0.120047 | 0.184878  | 0.18852   | 0.193473 | 0.198281  | 0.193328  |
| 0.0629371 | 0.199446 | 0.108392  | 0.095134  | 0.114073 | 0.118007  | 0.114219  |
| 0.130099  | 0.198135 | 0.121358  | 0.105186  | 0.117716 | 0.127477  | 0.116987  |
| 0.129662  | 0.212558 | 0.110723  | 0.106498  | 0.115239 | 0.120338  | 0.111305  |
| 0.136218  | 0.213869 | 0.117279  | 0.11451   | 0.118881 | 0.121066  | 0.113491  |
| 0.048951  | 0.202069 | 0.114219  | 0.105041  | 0.121358 | 0.127622  | 0.124709  |

|           |          |           |           |           |           |          |
|-----------|----------|-----------|-----------|-----------|-----------|----------|
| 0.250437  | 0.125291 | 0.248106  | 0.252622  | 0.253205  | 0.254516  | 0.25539  |
| 0.112762  | 0.204108 | 0.115967  | 0.0493881 | 0.116987  | 0.121212  | 0.10169  |
| 0.109266  | 0.202069 | 0.1081    | 0.106789  | 0.0761946 | 0.120921  | 0.115676 |
| 0.185023  | 0.148164 | 0.175991  | 0.171766  | 0.17905   | 0.179487  | 0.149767 |
| 0.189685  | 0.122232 | 0.177448  | 0.178759  | 0.181964  | 0.189394  | 0.182984 |
| 0.129662  | 0.207896 | 0.0574009 | 0.116113  | 0.112617  | 0.11655   | 0.120629 |
| 0.127768  | 0.205128 | 0.112617  | 0.114219  | 0.119172  | 0.123689  | 0.114656 |
| 0.125146  | 0.208333 | 0.114656  | 0.10169   | 0.113928  | 0.12398   | 0.111451 |
| 0.143065  | 0.213141 | 0.136072  | 0.14292   | 0.148164  | 0.1419    | 0.135198 |
| 0.128497  | 0.206148 | 0.0541958 | 0.115239  | 0.108829  | 0.113345  | 0.11655  |
| 0.131265  | 0.210664 | 0.0566725 | 0.121212  | 0.118007  | 0.116404  | 0.123689 |
| 0.138112  | 0.213724 | 0.120921  | 0.122232  | 0.122815  | 0.125     | 0.119755 |
| 0.125291  | 0.196241 | 0.113345  | 0.113782  | 0.120775  | 0.119464  | 0.11451  |
| 0.13447   | 0.203089 | 0.120484  | 0.124709  | 0.132284  | 0.128351  | 0.122232 |
| 0.13141   | 0.199155 | 0.118881  | 0.11116   | 0.123397  | 0.121795  | 0.117424 |
| 0.126603  | 0.210956 | 0.122815  | 0.108974  | 0.122086  | 0.131847  | 0.121066 |
| 0.134615  | 0.222756 | 0.134033  | 0.12398   | 0.136801  | 0.144814  | 0.131993 |
| 0.113782  | 0.203963 | 0.120192  | 0.0527389 | 0.119464  | 0.125728  | 0.108246 |
| 0.131119  | 0.218969 | 0.130536  | 0.118153  | 0.128642  | 0.138695  | 0.124417 |
| 0.142483  | 0.218677 | 0.127914  | 0.125146  | 0.126603  | 0.128788  | 0.122086 |
| 0.208479  | 0.124709 | 0.200321  | 0.202797  | 0.206294  | 0.211393  | 0.207896 |
| 0.117133  | 0.209062 | 0.119464  | 0.10067   | 0.128351  | 0.127914  | 0.121795 |
| 0.194347  | 0.120192 | 0.184149  | 0.188374  | 0.188957  | 0.196387  | 0.189103 |
| 0.129079  | 0.205857 | 0.101981  | 0.107955  | 0.108537  | 0.0882867 | 0.109848 |
| 0.0498252 | 0.199738 | 0.120629  | 0.10708   | 0.128059  | 0.131993  | 0.125291 |
| 0.132284  | 0.203234 | 0.120338  | 0.113782  | 0.123689  | 0.129953  | 0.126748 |
| 0.127477  | 0.201923 | 0.107663  | 0.108974  | 0.124126  | 0.123397  | 0.118153 |
| 0.131119  | 0.200029 | 0.113636  | 0.118735  | 0.124272  | 0.124126  | 0.115676 |
| 0.13345   | 0.201195 | 0.112762  | 0.121066  | 0.12398   | 0.122669  | 0.118298 |
| 0.0632284 | 0.198864 | 0.112762  | 0.0983392 | 0.11757   | 0.125291  | 0.122669 |
| 0.133887  | 0.208333 | 0.101253  | 0.11451   | 0.117133  | 0.0488054 | 0.110286 |
| 0.137092  | 0.207168 | 0.121649  | 0.113054  | 0.129079  | 0.130973  | 0.129225 |
| 0.145105  | 0.207896 | 0.13141   | 0.126603  | 0.130973  | 0.133159  | 0.128205 |
| 0.247378  | 0.118444 | 0.242424  | 0.249272  | 0.249854  | 0.253205  | 0.252331 |
| 0.0603147 | 0.200029 | 0.112762  | 0.100962  | 0.119027  | 0.125874  | 0.119172 |
| 0.187791  | 0.117424 | 0.176719  | 0.178904  | 0.178904  | 0.185169  | 0.177302 |
| 0.19289   | 0.114365 | 0.181235  | 0.183129  | 0.18546   | 0.190559  | 0.184149 |
| 0.126603  | 0.200466 | 0.105332  | 0.107226  | 0.124126  | 0.124272  | 0.114073 |
| 0.111742  | 0.197552 | 0.11553   | 0.0486597 | 0.111888  | 0.120484  | 0.101544 |
| 0.0496795 | 0.203671 | 0.118735  | 0.107226  | 0.129371  | 0.130973  | 0.126311 |
| 0.124854  | 0.196678 | 0.103293  | 0.109557  | 0.11451   | 0.115822  | 0.109411 |
| 0.111888  | 0.191871 | 0.109557  | 0.0826049 | 0.115239  | 0.119755  | 0.112762 |
| 0.13549   | 0.211684 | 0.112762  | 0.11116   | 0.114656  | 0.120047  | 0.111888 |
| 0.125146  | 0.194639 | 0.11757   | 0.112762  | 0.125291  | 0.122815  | 0.114656 |

|           |          |           |           |           |           |           |
|-----------|----------|-----------|-----------|-----------|-----------|-----------|
| 0.13447   | 0.210664 | 0.125146  | 0.128205  | 0.135198  | 0.13447   | 0.127185  |
| 0.0565268 | 0.197115 | 0.111014  | 0.0995047 | 0.116696  | 0.123252  | 0.119172  |
| 0.135198  | 0.206731 | 0.120338  | 0.125437  | 0.13447   | 0.130828  | 0.122669  |
| 0.131556  | 0.208625 | 0.110286  | 0.101981  | 0.113054  | 0.114656  | 0.106789  |
| 0.133304  | 0.20542  | 0.123397  | 0.112762  | 0.128788  | 0.135052  | 0.129225  |
| 0.130245  | 0.208479 | 0.119464  | 0.106206  | 0.116696  | 0.131119  | 0.118298  |
| 0.139132  | 0.219697 | 0.129225  | 0.127331  | 0.129371  | 0.133304  | 0.124563  |
| 0.124709  | 0.210227 | 0.113345  | 0.106789  | 0.126311  | 0.132867  | 0.120047  |
| 0.0623543 | 0.197407 | 0.110431  | 0.101253  | 0.118153  | 0.124709  | 0.11655   |
| 0.13986   | 0.211684 | 0.122086  | 0.126603  | 0.0645396 | 0.129662  | 0.127622  |
| 0.190414  | 0.114802 | 0.178759  | 0.180361  | 0.182692  | 0.184878  | 0.182547  |
| 0.140152  | 0.207896 | 0.12704   | 0.13039   | 0.139132  | 0.136072  | 0.127331  |
| 0.133159  | 0.200612 | 0.112471  | 0.117279  | 0.121066  | 0.12296   | 0.11451   |
| 0.131265  | 0.20542  | 0.118153  | 0.109557  | 0.125874  | 0.125437  | 0.122815  |
| 0.121795  | 0.199155 | 0.10373   | 0.103293  | 0.11961   | 0.120338  | 0.114219  |
| 0.125437  | 0.207168 | 0.118153  | 0.105186  | 0.11655   | 0.126603  | 0.113199  |
| 0.131119  | 0.211684 | 0.121212  | 0.10912   | 0.119318  | 0.13141   | 0.119755  |
| 0.194202  | 0.122669 | 0.18109   | 0.187063  | 0.188228  | 0.196241  | 0.188666  |
| 0.128351  | 0.190559 | 0.112034  | 0.112762  | 0.122086  | 0.12398   | 0.110577  |
| 0.121212  | 0.184295 | 0.0996503 | 0.102127  | 0.103293  | 0.119755  | 0.109266  |
| 0.13141   | 0.202069 | 0.115093  | 0.123397  | 0.128059  | 0.123252  | 0.118298  |
| 0.193619  | 0.120629 | 0.183421  | 0.187354  | 0.193182  | 0.194493  | 0.189248  |
| 0.115093  | 0.193328 | 0.111014  | 0.0444347 | 0.108537  | 0.115967  | 0.0964452 |
| 0.140006  | 0.214452 | 0.123397  | 0.118007  | 0.122669  | 0.125728  | 0.116404  |
| 0.13243   | 0.201923 | 0.115822  | 0.118298  | 0.125583  | 0.122523  | 0.119318  |
| 0.124417  | 0.209353 | 0.0495338 | 0.113782  | 0.110868  | 0.110723  | 0.114219  |
| 0.189685  | 0.120192 | 0.179196  | 0.179924  | 0.18546   | 0.191142  | 0.187354  |
| 0.134324  | 0.20877  | 0.116259  | 0.115239  | 0.11553   | 0.120629  | 0.113928  |
| 0.126748  | 0.200029 | 0.106643  | 0.108829  | 0.0581294 | 0.117133  | 0.112762  |
| 0.118007  | 0.191288 | 0.108392  | 0.057838  | 0.109703  | 0.11655   | 0.101981  |
| 0.134033  | 0.183712 | 0.112179  | 0.118153  | 0.116404  | 0.124126  | 0.117424  |
| 0.136801  | 0.214744 | 0.103584  | 0.114219  | 0.116259  | 0.0488054 | 0.110868  |
| 0.13884   | 0.217949 | 0.124272  | 0.123834  | 0.12704   | 0.128059  | 0.121358  |
| 0.0543415 | 0.201632 | 0.112034  | 0.0976107 | 0.116259  | 0.121066  | 0.116987  |
| 0.136218  | 0.208916 | 0.112908  | 0.111305  | 0.127622  | 0.127477  | 0.125728  |
| 0.143939  | 0.220134 | 0.0871212 | 0.144668  | 0.13884   | 0.136655  | 0.145688  |
| 0.23514   | 0.118444 | 0.230478  | 0.234994  | 0.234994  | 0.236597  | 0.238345  |
| 0.12704   | 0.214015 | 0.119464  | 0.110868  | 0.131265  | 0.137238  | 0.124126  |
| 0.136946  | 0.214307 | 0.104895  | 0.113782  | 0.114365  | 0.0498252 | 0.115385  |
| 0.127477  | 0.193765 | 0.112617  | 0.11451   | 0.118298  | 0.121358  | 0.114365  |
| 0.13345   | 0.201777 | 0.108683  | 0.114656  | 0.121941  | 0.127331  | 0.122378  |
| 0.130973  | 0.201049 | 0.107663  | 0.1081    | 0.11655   | 0.0735723 | 0.109411  |
| 0.130973  | 0.206585 | 0.112325  | 0.101399  | 0.117716  | 0.116987  | 0.0549242 |
| 0.129371  | 0.199155 | 0.11655   | 0.119318  | 0.126311  | 0.123252  | 0.118881  |

|           |          |           |           |          |           |           |
|-----------|----------|-----------|-----------|----------|-----------|-----------|
| 0.138549  | 0.214744 | 0.122815  | 0.122669  | 0.128497 | 0.125437  | 0.122232  |
| 0.129808  | 0.206876 | 0.0887238 | 0.113928  | 0.116259 | 0.111742  | 0.115239  |
| 0.232809  | 0.119318 | 0.22873   | 0.236451  | 0.237908 | 0.23951   | 0.238345  |
| 0.114073  | 0.195804 | 0.108829  | 0.0457459 | 0.105478 | 0.116113  | 0.0983392 |
| 0.126894  | 0.20542  | 0.101836  | 0.0981935 | 0.112471 | 0.105624  | 0.103293  |
| 0.0541958 | 0.200029 | 0.11014   | 0.0960082 | 0.118153 | 0.120629  | 0.116841  |
| 0.132139  | 0.21183  | 0.0674534 | 0.131119  | 0.126457 | 0.121066  | 0.130973  |
| 0.128059  | 0.218531 | 0.124563  | 0.116841  | 0.136946 | 0.139423  | 0.128642  |
| 0.120484  | 0.195513 | 0.105332  | 0.104895  | 0.123252 | 0.123397  | 0.112034  |
| 0.130682  | 0.198135 | 0.112325  | 0.117716  | 0.122378 | 0.122232  | 0.116404  |
| 0.120629  | 0.204691 | 0.0641026 | 0.110868  | 0.109703 | 0.114219  | 0.115385  |
| 0.227855  | 0.11757  | 0.223485  | 0.231206  | 0.231789 | 0.235431  | 0.230186  |
| 0.13345   | 0.201486 | 0.117716  | 0.120192  | 0.127768 | 0.126166  | 0.119464  |
| 0.136218  | 0.214744 | 0.122232  | 0.117424  | 0.12296  | 0.125437  | 0.115822  |
| 0.122815  | 0.208625 | 0.0907634 | 0.110431  | 0.107517 | 0.111742  | 0.10912   |
| 0.129662  | 0.208188 | 0.114219  | 0.117279  | 0.12602  | 0.104312  | 0.119755  |
| 0.137821  | 0.214598 | 0.120629  | 0.111742  | 0.126603 | 0.120338  | 0.119464  |
| 0.0541958 | 0.198864 | 0.1081    | 0.0992133 | 0.119901 | 0.121212  | 0.117424  |
| 0.136946  | 0.213432 | 0.122669  | 0.118153  | 0.126603 | 0.12704   | 0.120047  |
| 0.141754  | 0.217657 | 0.127477  | 0.125291  | 0.129079 | 0.130973  | 0.123689  |
| 0.132721  | 0.213578 | 0.116113  | 0.112762  | 0.120047 | 0.119901  | 0.113491  |
| 0.0617716 | 0.201777 | 0.1081    | 0.0980478 | 0.11553  | 0.120921  | 0.11655   |
| 0.137238  | 0.216638 | 0.111597  | 0.120775  | 0.122523 | 0.0524476 | 0.118881  |
| 0.13884   | 0.221737 | 0.118153  | 0.125     | 0.127331 | 0.0543415 | 0.121066  |
| 0.136218  | 0.210373 | 0.122815  | 0.118007  | 0.134615 | 0.136218  | 0.131265  |
| 0.140297  | 0.212121 | 0.128642  | 0.118007  | 0.137821 | 0.136218  | 0.13447   |
| 0.1419    | 0.21926  | 0.11655   | 0.122232  | 0.127768 | 0.0506993 | 0.123252  |
| 0.105769  | 0.203234 | 0.10373   | 0.0756119 | 0.109703 | 0.119755  | 0.108392  |
| 0.142628  | 0.224359 | 0.129808  | 0.125583  | 0.134033 | 0.137383  | 0.124272  |
| 0.127622  | 0.216929 | 0.126457  | 0.120775  | 0.13243  | 0.138403  | 0.132576  |
| 0.208625  | 0.111451 | 0.195513  | 0.201195  | 0.206148 | 0.208042  | 0.204545  |
| 0.123252  | 0.205565 | 0.119464  | 0.117861  | 0.132139 | 0.134033  | 0.124709  |
| 0.132284  | 0.209353 | 0.107226  | 0.104749  | 0.116404 | 0.112471  | 0.110723  |
| 0.0543415 | 0.197552 | 0.114656  | 0.106935  | 0.125291 | 0.124563  | 0.124272  |
| 0.223193  | 0.110577 | 0.217366  | 0.218969  | 0.223631 | 0.22669   | 0.223193  |
| 0.20979   | 0.128351 | 0.204837  | 0.210227  | 0.214307 | 0.214744  | 0.210664  |
| 0.139714  | 0.215909 | 0.126603  | 0.125     | 0.129079 | 0.13039   | 0.12398   |
| 0.245921  | 0.123689 | 0.242424  | 0.251311  | 0.249854 | 0.252331  | 0.248834  |
| 0.103147  | 0.203234 | 0.105478  | 0.0796911 | 0.108829 | 0.119464  | 0.107517  |
| 0.130536  | 0.217512 | 0.12704   | 0.121941  | 0.137675 | 0.139569  | 0.134615  |
| 0.111888  | 0.198572 | 0.114802  | 0.0435606 | 0.113199 | 0.11655   | 0.0984848 |
| 0.139423  | 0.216492 | 0.111116  | 0.119755  | 0.122378 | 0.048514  | 0.116404  |
| 0.191434  | 0.114073 | 0.177739  | 0.184878  | 0.187209 | 0.194056  | 0.189394  |
| 0.125146  | 0.206002 | 0.121649  | 0.113928  | 0.120629 | 0.122815  | 0.11553   |

|           |          |           |           |           |           |           |
|-----------|----------|-----------|-----------|-----------|-----------|-----------|
| 0.19595   | 0.119172 | 0.186917  | 0.190268  | 0.194347  | 0.200321  | 0.193619  |
| 0.11961   | 0.209207 | 0.103584  | 0.10373   | 0.118881  | 0.120192  | 0.112034  |
| 0.13039   | 0.189103 | 0.115239  | 0.115385  | 0.120629  | 0.122232  | 0.116987  |
| 0.125728  | 0.204254 | 0.112034  | 0.101981  | 0.123252  | 0.123397  | 0.120484  |
| 0.120484  | 0.190268 | 0.103293  | 0.104021  | 0.1081    | 0.11757   | 0.107372  |
| 0.0603147 | 0.195076 | 0.103438  | 0.0916375 | 0.112908  | 0.115967  | 0.111597  |
| 0.117133  | 0.201486 | 0.108974  | 0.107663  | 0.116404  | 0.125     | 0.1081    |
| 0.109848  | 0.194202 | 0.109557  | 0.0447261 | 0.105624  | 0.116259  | 0.0967366 |
| 0.125728  | 0.199009 | 0.106206  | 0.112762  | 0.118881  | 0.116987  | 0.111742  |
| 0.132576  | 0.213141 | 0.117133  | 0.11116   | 0.119318  | 0.123543  | 0.114802  |
| 0.120629  | 0.206439 | 0.10169   | 0.0992133 | 0.115822  | 0.12296   | 0.110431  |
| 0.112617  | 0.195513 | 0.11116   | 0.0431235 | 0.112762  | 0.11553   | 0.0986305 |
| 0.117424  | 0.196824 | 0.120629  | 0.107663  | 0.12398   | 0.130828  | 0.121795  |
| 0.138695  | 0.208479 | 0.120629  | 0.125437  | 0.133013  | 0.128788  | 0.123834  |
| 0.127477  | 0.20134  | 0.111742  | 0.105478  | 0.122378  | 0.121649  | 0.117279  |
| 0.124126  | 0.203234 | 0.103147  | 0.108537  | 0.0511364 | 0.116841  | 0.112179  |
| 0.0581294 | 0.19697  | 0.103293  | 0.0929487 | 0.111597  | 0.118153  | 0.109703  |
| 0.133596  | 0.203671 | 0.116696  | 0.117424  | 0.122086  | 0.122815  | 0.118153  |
| 0.131556  | 0.211538 | 0.103001  | 0.113054  | 0.110431  | 0.0525932 | 0.112908  |
| 0.128497  | 0.21081  | 0.118298  | 0.108537  | 0.11961   | 0.128497  | 0.118298  |
| 0.131119  | 0.205565 | 0.11451   | 0.106498  | 0.124854  | 0.127622  | 0.120047  |
| 0.128642  | 0.20134  | 0.110577  | 0.11451   | 0.120921  | 0.123689  | 0.114948  |
| 0.136655  | 0.204983 | 0.122378  | 0.128351  | 0.132139  | 0.127914  | 0.128497  |
| 0.13986   | 0.210519 | 0.131119  | 0.135635  | 0.140589  | 0.141026  | 0.131119  |
| 0.120775  | 0.204254 | 0.105624  | 0.100816  | 0.110723  | 0.114948  | 0.106498  |
| 0.0627914 | 0.199009 | 0.109994  | 0.099359  | 0.11655   | 0.121649  | 0.116696  |
| 0.127331  | 0.201486 | 0.105478  | 0.0893065 | 0.108246  | 0.108974  | 0.0457459 |
| 0.140734  | 0.218969 | 0.118007  | 0.125728  | 0.127477  | 0.0591492 | 0.120921  |
| 0.11116   | 0.204254 | 0.114948  | 0.0477855 | 0.118007  | 0.122815  | 0.102418  |
| 0.135344  | 0.224942 | 0.137092  | 0.12704   | 0.136655  | 0.144376  | 0.135344  |
| 0.0423951 | 0.211538 | 0.131556  | 0.115676  | 0.13549   | 0.144376  | 0.13447   |
| 0.13141   | 0.210519 | 0.0635198 | 0.124854  | 0.122523  | 0.118881  | 0.126166  |
| 0.114656  | 0.20134  | 0.107955  | 0.0964452 | 0.114219  | 0.117279  | 0.105915  |
| 0.128497  | 0.204691 | 0.102273  | 0.106498  | 0.10708   | 0.102855  | 0.112179  |
| 0.133741  | 0.209936 | 0.123252  | 0.114948  | 0.133013  | 0.13549   | 0.129953  |
| 0.210519  | 0.129953 | 0.201195  | 0.20338   | 0.20979   | 0.210519  | 0.206148  |
| 0.127477  | 0.203089 | 0.107663  | 0.105478  | 0.04662   | 0.116987  | 0.10912   |
| 0.12704   | 0.207605 | 0.111597  | 0.0965909 | 0.114365  | 0.119172  | 0.11451   |
| 0.135635  | 0.211247 | 0.106498  | 0.114219  | 0.117133  | 0.055507  | 0.10912   |
| 0.130245  | 0.2044   | 0.112179  | 0.106498  | 0.123397  | 0.124709  | 0.118007  |
| 0.12602   | 0.211538 | 0.10912   | 0.112179  | 0.124126  | 0.127185  | 0.116113  |
| 0.136801  | 0.208916 | 0.113782  | 0.12296   | 0.123252  | 0.129225  | 0.108537  |
| 0.138695  | 0.210519 | 0.113928  | 0.12398   | 0.125728  | 0.130828  | 0.111014  |
| 0.128351  | 0.206585 | 0.0598776 | 0.120047  | 0.118007  | 0.11553   | 0.126603  |

|          |          |           |           |          |           |          |
|----------|----------|-----------|-----------|----------|-----------|----------|
| 0.129516 | 0.20979  | 0.109994  | 0.107517  | 0.115385 | 0.116696  | 0.108829 |
| 0.136801 | 0.214452 | 0.114656  | 0.122669  | 0.126457 | 0.0557984 | 0.119318 |
| 0.124563 | 0.207751 | 0.110868  | 0.0976107 | 0.112471 | 0.11757   | 0.112325 |
| 0.125583 | 0.21081  | 0.111888  | 0.104458  | 0.121358 | 0.12704   | 0.113636 |
| 0.180507 | 0.179487 | 0.167104  | 0.173077  | 0.178322 | 0.177302  | 0.171183 |
| 0.129225 | 0.201632 | 0.109411  | 0.115385  | 0.116259 | 0.121358  | 0.112617 |
| 0.13986  | 0.206148 | 0.115967  | 0.119027  | 0.125728 | 0.0611888 | 0.120338 |
| 0.120775 | 0.214744 | 0.120775  | 0.0999417 | 0.121503 | 0.124272  | 0.121649 |
| 0.129953 | 0.202943 | 0.116841  | 0.114656  | 0.125437 | 0.125291  | 0.121795 |
| 0.116841 | 0.20236  | 0.0979021 | 0.0957168 | 0.10912  | 0.117716  | 0.100524 |
| 0.116259 | 0.202069 | 0.0976107 | 0.0907634 | 0.109994 | 0.119755  | 0.105186 |
| 0.122669 | 0.207605 | 0.104021  | 0.0992133 | 0.11116  | 0.116841  | 0.105478 |
| 0.129953 | 0.214015 | 0.118298  | 0.112617  | 0.127768 | 0.121795  | 0.117716 |
| 0.121795 | 0.193328 | 0.108392  | 0.111451  | 0.119027 | 0.124709  | 0.115967 |
| 0.132721 | 0.216492 | 0.125146  | 0.111305  | 0.130828 | 0.133013  | 0.124272 |
| 0.120629 | 0.201195 | 0.108683  | 0.105041  | 0.115239 | 0.117133  | 0.10373  |
| 0.13243  | 0.206876 | 0.117861  | 0.100816  | 0.121212 | 0.124272  | 0.105041 |
| 0.134324 | 0.222756 | 0.122086  | 0.114656  | 0.127185 | 0.134615  | 0.122086 |
| 0.118298 | 0.212558 | 0.118007  | 0.10067   | 0.119901 | 0.127622  | 0.113345 |
| 0.125874 | 0.208479 | 0.115385  | 0.114073  | 0.128059 | 0.128788  | 0.120338 |
| 0.119755 | 0.210227 | 0.111014  | 0.0939685 | 0.113491 | 0.123834  | 0.108392 |
| 0.121503 | 0.209936 | 0.113928  | 0.101544  | 0.117279 | 0.128205  | 0.109266 |
| 0.112762 | 0.20236  | 0.101399  | 0.0898893 | 0.10708  | 0.117133  | 0.105478 |
| 0.11757  | 0.21183  | 0.120484  | 0.101399  | 0.125583 | 0.132139  | 0.119318 |
| 0.119318 | 0.204254 | 0.103584  | 0.0885781 | 0.11014  | 0.11757   | 0.108537 |
| 0.14729  | 0.217366 | 0.135635  | 0.138695  | 0.13986  | 0.145542  | 0.133013 |
| 0.144376 | 0.211538 | 0.122232  | 0.125291  | 0.129079 | 0.131265  | 0.122523 |
| 0.120775 | 0.206294 | 0.11116   | 0.0979021 | 0.11655  | 0.119027  | 0.112617 |
| 0.146562 | 0.222174 | 0.134907  | 0.13039   | 0.133887 | 0.134907  | 0.132867 |
| 0.132284 | 0.206439 | 0.109266  | 0.116987  | 0.125146 | 0.122378  | 0.125874 |
| 0.135198 | 0.215181 | 0.128497  | 0.115822  | 0.137675 | 0.145396  | 0.129953 |
| 0.11655  | 0.207022 | 0.111305  | 0.0925117 | 0.116987 | 0.118298  | 0.113928 |
| 0.146125 | 0.220571 | 0.134761  | 0.135198  | 0.145688 | 0.129225  | 0.13884  |
| 0.135927 | 0.210373 | 0.121358  | 0.11655   | 0.125    | 0.121358  | 0.122232 |
| 0.141463 | 0.217657 | 0.129225  | 0.126166  | 0.134033 | 0.133887  | 0.131847 |
| 0.13039  | 0.215035 | 0.115239  | 0.111305  | 0.124709 | 0.132139  | 0.120484 |
| 0.117716 | 0.207896 | 0.110431  | 0.0945513 | 0.116113 | 0.122086  | 0.113636 |
| 0.120775 | 0.20542  | 0.103875  | 0.0955711 | 0.11014  | 0.11757   | 0.10912  |
| 0.130536 | 0.212267 | 0.107517  | 0.109994  | 0.11961  | 0.111305  | 0.113345 |
| 0.12296  | 0.214307 | 0.12296   | 0.0957168 | 0.123689 | 0.130536  | 0.115385 |
| 0.125437 | 0.217366 | 0.12602   | 0.107517  | 0.125874 | 0.131847  | 0.121649 |
| 0.129808 | 0.205128 | 0.11757   | 0.110431  | 0.125874 | 0.128934  | 0.116113 |
| 0.121358 | 0.204837 | 0.105624  | 0.0944056 | 0.106061 | 0.114073  | 0.109994 |
| 0.120047 | 0.205274 | 0.106935  | 0.0930944 | 0.109411 | 0.119464  | 0.112179 |



|          |          |           |           |          |          |          |
|----------|----------|-----------|-----------|----------|----------|----------|
| 0.114073 | 0.206002 | 0.118444  | 0.10169   | 0.120629 | 0.12602  | 0.11553  |
| 0.117861 | 0.202214 | 0.105332  | 0.0917832 | 0.113636 | 0.119901 | 0.107955 |
| 0.120629 | 0.211684 | 0.115093  | 0.103001  | 0.121649 | 0.129662 | 0.122378 |
| 0.11859  | 0.204691 | 0.108683  | 0.0901807 | 0.119027 | 0.120047 | 0.113636 |
| 0.11757  | 0.19493  | 0.107955  | 0.104604  | 0.122378 | 0.124563 | 0.110286 |
| 0.116696 | 0.208042 | 0.104458  | 0.094697  | 0.115093 | 0.121941 | 0.112034 |
| 0.101544 | 0.197261 | 0.104749  | 0.0740093 | 0.111014 | 0.11961  | 0.109411 |
| 0.114948 | 0.202506 | 0.108829  | 0.0929487 | 0.11655  | 0.121941 | 0.110286 |
| 0.11655  | 0.195367 | 0.106061  | 0.099796  | 0.117861 | 0.119464 | 0.106935 |
| 0.120775 | 0.208042 | 0.110577  | 0.102273  | 0.119172 | 0.119901 | 0.105624 |
| 0.135927 | 0.200758 | 0.114948  | 0.113636  | 0.118298 | 0.126311 | 0.118444 |
| 0.114656 | 0.191142 | 0.0965909 | 0.0958625 | 0.110431 | 0.114656 | 0.101253 |
| 0.131119 | 0.214015 | 0.124709  | 0.114656  | 0.13447  | 0.137821 | 0.121212 |

| TDr_2504 | TDr_2506  | TDr_2512  | TDr_2514  | TDr_2530  | TDr_2532  | TDr_2533  |
|----------|-----------|-----------|-----------|-----------|-----------|-----------|
| 0.182255 | 0.120047  | 0.11553   | 0.117716  | 0.114219  | 0.118007  | 0.107809  |
| 0.185606 | 0.105915  | 0.104312  | 0.118153  | 0.11757   | 0.108537  | 0.104749  |
| 0.181527 | 0.103584  | 0.0990676 | 0.112617  | 0.113491  | 0.099796  | 0.0992133 |
| 0.193182 | 0.0875583 | 0.104021  | 0.118153  | 0.11553   | 0.0919289 | 0.095134  |
| 0.208625 | 0.136218  | 0.13141   | 0.133304  | 0.129225  | 0.133596  | 0.126311  |
| 0.202214 | 0.131556  | 0.122086  | 0.130973  | 0.128059  | 0.131847  | 0.124272  |
| 0.204983 | 0.129371  | 0.117279  | 0.119464  | 0.118007  | 0.129371  | 0.119172  |
| 0.188374 | 0.109848  | 0.0995047 | 0.118007  | 0.106643  | 0.107226  | 0.0941142 |
| 0.191434 | 0.105915  | 0.102564  | 0.106498  | 0.10271   | 0.106498  | 0.0939685 |
| 0.193619 | 0.121795  | 0.0913462 | 0.108683  | 0.114219  | 0.118007  | 0.105186  |
| 0.178904 | 0.126311  | 0.106935  | 0.112325  | 0.119027  | 0.121066  | 0.113199  |
| 0.188957 | 0.110431  | 0.106789  | 0.113345  | 0.103147  | 0.104604  | 0.101107  |
| 0.194493 | 0.114802  | 0.0989219 | 0.112179  | 0.106352  | 0.111597  | 0.102564  |
| 0.152972 | 0.132139  | 0.119172  | 0.141171  | 0.142628  | 0.125437  | 0.124854  |
| 0.200029 | 0.132576  | 0.0560897 | 0.131702  | 0.120338  | 0.129371  | 0.113928  |
| 0.199883 | 0.125437  | 0.1081    | 0.108537  | 0.116404  | 0.121649  | 0.112325  |
| 0.194202 | 0.113928  | 0.105624  | 0.116841  | 0.0996503 | 0.116841  | 0.109557  |
| 0.215618 | 0.140297  | 0.141026  | 0.149621  | 0.149913  | 0.139423  | 0.133887  |
| 0.181818 | 0.103293  | 0.101107  | 0.114948  | 0.111742  | 0.104749  | 0.0977564 |
| 0.137821 | 0.201195  | 0.179487  | 0.203526  | 0.204983  | 0.198281  | 0.190705  |
| 0.199738 | 0.130536  | 0.114073  | 0.126166  | 0.126457  | 0.127914  | 0.121503  |
| 0.202797 | 0.122523  | 0.113345  | 0.12602   | 0.116987  | 0.122523  | 0.113782  |
| 0.192162 | 0.114802  | 0.105332  | 0.118298  | 0.105186  | 0.110431  | 0.101981  |
| 0.206294 | 0.131265  | 0.123834  | 0.0960082 | 0.118153  | 0.128059  | 0.118153  |
| 0.186043 | 0.109557  | 0.0965909 | 0.106935  | 0.0979021 | 0.109557  | 0.0958625 |
| 0.208188 | 0.134324  | 0.121066  | 0.127622  | 0.128497  | 0.132867  | 0.122378  |
| 0.201195 | 0.131702  | 0.114948  | 0.111888  | 0.111305  | 0.129079  | 0.118881  |
| 0.208188 | 0.124709  | 0.115822  | 0.0949883 | 0.115967  | 0.123834  | 0.115093  |
| 0.205565 | 0.129953  | 0.126894  | 0.0888695 | 0.125874  | 0.130536  | 0.122669  |
| 0.207022 | 0.128205  | 0.115239  | 0.094697  | 0.110431  | 0.124126  | 0.119464  |
| 0.197552 | 0.133887  | 0.110431  | 0.121066  | 0.121066  | 0.130973  | 0.120484  |
| 0.203234 | 0.126166  | 0.116113  | 0.0827506 | 0.116259  | 0.125874  | 0.11859   |
| 0.186043 | 0.113636  | 0.0971737 | 0.0961538 | 0.104604  | 0.111597  | 0.101107  |
| 0.198281 | 0.119172  | 0.111451  | 0.0949883 | 0.10373   | 0.118881  | 0.108392  |
| 0.204545 | 0.132139  | 0.11451   | 0.10912   | 0.113491  | 0.127185  | 0.11553   |
| 0.208188 | 0.133159  | 0.125437  | 0.1081    | 0.118007  | 0.129079  | 0.118881  |
| 0.215618 | 0.138258  | 0.128497  | 0.128642  | 0.130973  | 0.137383  | 0.124854  |
| 0.200903 | 0.126748  | 0.116113  | 0.123543  | 0.114802  | 0.124417  | 0.119172  |
| 0.194493 | 0.113054  | 0.103293  | 0.0885781 | 0.107226  | 0.113054  | 0.107226  |
| 0.207605 | 0.126748  | 0.114656  | 0.126748  | 0.121212  | 0.123543  | 0.115676  |
| 0.189831 | 0.112471  | 0.103001  | 0.114219  | 0.109848  | 0.109266  | 0.101399  |
| 0.220425 | 0.144814  | 0.130973  | 0.138986  | 0.137821  | 0.143939  | 0.13141   |

|          |           |          |          |           |           |           |
|----------|-----------|----------|----------|-----------|-----------|-----------|
| 0.220134 | 0.149184  | 0.140589 | 0.143648 | 0.141026  | 0.148893  | 0.141608  |
| 0.19697  | 0.117279  | 0.110431 | 0.118444 | 0.11116   | 0.116987  | 0.107372  |
| 0.196387 | 0.117279  | 0.105478 | 0.110286 | 0.0965909 | 0.115822  | 0.104749  |
| 0.207896 | 0.130536  | 0.103584 | 0.116841 | 0.109848  | 0.12704   | 0.113054  |
| 0.19799  | 0.124126  | 0.112325 | 0.120629 | 0.11451   | 0.120629  | 0.108683  |
| 0.218823 | 0.143211  | 0.130828 | 0.134178 | 0.136509  | 0.142628  | 0.131556  |
| 0.199592 | 0.118153  | 0.1081   | 0.11757  | 0.113782  | 0.116113  | 0.100962  |
| 0.196824 | 0.124417  | 0.107663 | 0.11859  | 0.111014  | 0.122669  | 0.111014  |
| 0.2162   | 0.149038  | 0.141317 | 0.13243  | 0.137966  | 0.148164  | 0.135344  |
| 0.208042 | 0.134761  | 0.123834 | 0.129808 | 0.125728  | 0.136509  | 0.124272  |
| 0.197115 | 0.118881  | 0.110286 | 0.120047 | 0.107226  | 0.116841  | 0.104604  |
| 0.204691 | 0.125874  | 0.114073 | 0.127331 | 0.128205  | 0.125583  | 0.116841  |
| 0.184878 | 0.0874126 | 0.110577 | 0.12296  | 0.117133  | 0.0862471 | 0.0894522 |
| 0.223922 | 0.138695  | 0.136801 | 0.132867 | 0.129662  | 0.137238  | 0.129662  |
| 0.210373 | 0.133596  | 0.122378 | 0.129225 | 0.123106  | 0.131265  | 0.119318  |
| 0.201049 | 0.119027  | 0.107809 | 0.118153 | 0.111451  | 0.117279  | 0.104167  |
| 0.198135 | 0.124854  | 0.109848 | 0.120192 | 0.115822  | 0.123106  | 0.110868  |
| 0.205857 | 0.130245  | 0.109994 | 0.117716 | 0.115385  | 0.12704   | 0.113054  |
| 0.21926  | 0.142483  | 0.132139 | 0.13549  | 0.138403  | 0.141608  | 0.129079  |
| 0.221591 | 0.140443  | 0.13243  | 0.139569 | 0.136364  | 0.136946  | 0.131702  |
| 0.167832 | 0.164481  | 0.154429 | 0.16419  | 0.160111  | 0.157488  | 0.1537    |
| 0.195221 | 0.119027  | 0.106352 | 0.118735 | 0.110868  | 0.117861  | 0.108537  |
| 0.197552 | 0.11961   | 0.107809 | 0.115239 | 0.107663  | 0.117861  | 0.108537  |
| 0.196678 | 0.116404  | 0.1081   | 0.11757  | 0.101836  | 0.113491  | 0.102127  |
| 0.205565 | 0.14831   | 0.133887 | 0.141317 | 0.133159  | 0.144231  | 0.137821  |
| 0.195076 | 0.112762  | 0.103875 | 0.119172 | 0.1081    | 0.114219  | 0.102564  |
| 0.210664 | 0.135344  | 0.124709 | 0.135635 | 0.132139  | 0.13447   | 0.121941  |
| 0.20979  | 0.131847  | 0.108683 | 0.116987 | 0.114073  | 0.128642  | 0.11116   |
| 0.197115 | 0.120921  | 0.111451 | 0.118298 | 0.111888  | 0.121795  | 0.111597  |
| 0.208188 | 0.15035   | 0.139423 | 0.146853 | 0.140152  | 0.147727  | 0.141026  |
| 0.2044   | 0.126457  | 0.118153 | 0.121795 | 0.11655   | 0.124709  | 0.113636  |
| 0.219114 | 0.141754  | 0.131702 | 0.135635 | 0.133596  | 0.139714  | 0.128351  |
| 0.205857 | 0.134033  | 0.124854 | 0.131702 | 0.125291  | 0.134033  | 0.124709  |
| 0.189977 | 0.112325  | 0.112471 | 0.120192 | 0.112325  | 0.110286  | 0.106206  |
| 0.192599 | 0.116696  | 0.111014 | 0.116113 | 0.108246  | 0.114948  | 0.104749  |
| 0.198427 | 0.118735  | 0.106352 | 0.120484 | 0.11116   | 0.116113  | 0.108537  |
| 0.213287 | 0.133887  | 0.130536 | 0.130099 | 0.129516  | 0.13243   | 0.123397  |
| 0.195367 | 0.121503  | 0.108246 | 0.115676 | 0.102564  | 0.117424  | 0.105769  |
| 0.21824  | 0.140297  | 0.134615 | 0.131556 | 0.137383  | 0.139423  | 0.133304  |
| 0.197552 | 0.131556  | 0.114219 | 0.127185 | 0.11961   | 0.128642  | 0.120484  |
| 0.20338  | 0.119027  | 0.113054 | 0.114948 | 0.110286  | 0.119318  | 0.109703  |
| 0.197844 | 0.122815  | 0.110431 | 0.122523 | 0.113491  | 0.124854  | 0.113782  |
| 0.202214 | 0.122232  | 0.114802 | 0.124272 | 0.116987  | 0.120192  | 0.11116   |
| 0.198135 | 0.122815  | 0.108974 | 0.115822 | 0.112325  | 0.119901  | 0.11116   |

|          |          |           |          |           |          |           |
|----------|----------|-----------|----------|-----------|----------|-----------|
| 0.197552 | 0.119318 | 0.109848  | 0.123689 | 0.108829  | 0.119901 | 0.106206  |
| 0.218094 | 0.142191 | 0.129516  | 0.13549  | 0.130828  | 0.140443 | 0.128788  |
| 0.19595  | 0.12296  | 0.0995047 | 0.107517 | 0.0981935 | 0.118298 | 0.108392  |
| 0.196678 | 0.120192 | 0.104021  | 0.105624 | 0.108246  | 0.119027 | 0.104749  |
| 0.20979  | 0.128642 | 0.118881  | 0.127185 | 0.121066  | 0.129225 | 0.122523  |
| 0.206585 | 0.132139 | 0.121795  | 0.120775 | 0.11961   | 0.133596 | 0.121941  |
| 0.213287 | 0.142628 | 0.12296   | 0.125437 | 0.128351  | 0.139423 | 0.122815  |
| 0.223339 | 0.142483 | 0.129808  | 0.133741 | 0.136946  | 0.139569 | 0.123834  |
| 0.194639 | 0.122232 | 0.111305  | 0.122815 | 0.114073  | 0.121358 | 0.113782  |
| 0.158217 | 0.186334 | 0.175991  | 0.186334 | 0.181381  | 0.180798 | 0.174097  |
| 0.19595  | 0.109266 | 0.103001  | 0.11859  | 0.104604  | 0.110431 | 0.104021  |
| 0.216492 | 0.141463 | 0.124126  | 0.131847 | 0.130973  | 0.139132 | 0.125437  |
| 0.209499 | 0.132721 | 0.11655   | 0.128059 | 0.120484  | 0.132139 | 0.119901  |
| 0.219843 | 0.143648 | 0.130973  | 0.129371 | 0.131993  | 0.143648 | 0.132284  |
| 0.201049 | 0.121649 | 0.104021  | 0.114365 | 0.10912   | 0.118444 | 0.10708   |
| 0.215618 | 0.135635 | 0.125583  | 0.130682 | 0.129225  | 0.131847 | 0.119901  |
| 0.199301 | 0.122815 | 0.107517  | 0.119318 | 0.11116   | 0.119901 | 0.112325  |
| 0.20236  | 0.13141  | 0.116987  | 0.128788 | 0.117424  | 0.127622 | 0.119464  |
| 0.200321 | 0.118007 | 0.108829  | 0.111597 | 0.11451   | 0.120047 | 0.108974  |
| 0.217803 | 0.142774 | 0.133304  | 0.13141  | 0.130828  | 0.1419   | 0.126457  |
| 0.198281 | 0.11859  | 0.100379  | 0.113345 | 0.099359  | 0.118007 | 0.106935  |
| 0.210956 | 0.14088  | 0.127622  | 0.133596 | 0.134761  | 0.137383 | 0.125728  |
| 0.199155 | 0.125291 | 0.11553   | 0.119755 | 0.112471  | 0.124126 | 0.115676  |
| 0.211247 | 0.133887 | 0.126457  | 0.131847 | 0.124854  | 0.131556 | 0.122232  |
| 0.208188 | 0.139569 | 0.119318  | 0.129662 | 0.120338  | 0.138695 | 0.126166  |
| 0.198281 | 0.119464 | 0.102127  | 0.114219 | 0.108392  | 0.117133 | 0.105769  |
| 0.206731 | 0.149184 | 0.137966  | 0.14831  | 0.1419    | 0.146562 | 0.138112  |
| 0.201632 | 0.128059 | 0.110723  | 0.112617 | 0.114073  | 0.124563 | 0.110577  |
| 0.203089 | 0.121358 | 0.105769  | 0.116404 | 0.105624  | 0.120192 | 0.106789  |
| 0.202069 | 0.12704  | 0.111742  | 0.123252 | 0.112179  | 0.123834 | 0.106643  |
| 0.213724 | 0.144231 | 0.133887  | 0.132284 | 0.134907  | 0.142774 | 0.131119  |
| 0.187209 | 0.13141  | 0.116987  | 0.120629 | 0.117133  | 0.125291 | 0.116259  |
| 0.199738 | 0.115676 | 0.101253  | 0.113636 | 0.104895  | 0.113054 | 0.0996503 |
| 0.192745 | 0.121503 | 0.103584  | 0.113054 | 0.107809  | 0.115967 | 0.104895  |
| 0.195804 | 0.12398  | 0.111597  | 0.114656 | 0.109703  | 0.123397 | 0.108246  |
| 0.209062 | 0.135198 | 0.109994  | 0.123252 | 0.121212  | 0.130245 | 0.119464  |
| 0.200758 | 0.126311 | 0.11014   | 0.118735 | 0.108537  | 0.125146 | 0.114073  |
| 0.191579 | 0.112762 | 0.095134  | 0.111597 | 0.0935315 | 0.109557 | 0.0955711 |
| 0.194784 | 0.115676 | 0.0983392 | 0.110723 | 0.0987762 | 0.110431 | 0.0944056 |
| 0.199009 | 0.121358 | 0.101399  | 0.114073 | 0.103001  | 0.116113 | 0.0977564 |
| 0.194639 | 0.121358 | 0.113928  | 0.126894 | 0.10912   | 0.119027 | 0.111451  |
| 0.209645 | 0.133159 | 0.120775  | 0.120921 | 0.120921  | 0.134907 | 0.121795  |
| 0.198427 | 0.116696 | 0.0973193 | 0.113782 | 0.103001  | 0.116404 | 0.104458  |
| 0.193328 | 0.115967 | 0.090472  | 0.113054 | 0.0999417 | 0.113636 | 0.0967366 |

|          |           |           |           |           |           |           |
|----------|-----------|-----------|-----------|-----------|-----------|-----------|
| 0.207605 | 0.137238  | 0.111742  | 0.122669  | 0.115676  | 0.136655  | 0.120921  |
| 0.19697  | 0.116113  | 0.0973193 | 0.110577  | 0.102127  | 0.11553   | 0.102127  |
| 0.194347 | 0.128934  | 0.115093  | 0.127185  | 0.117861  | 0.124272  | 0.11961   |
| 0.205711 | 0.139132  | 0.125583  | 0.119027  | 0.126603  | 0.137383  | 0.121066  |
| 0.203089 | 0.124272  | 0.105478  | 0.108537  | 0.110577  | 0.120484  | 0.108829  |
| 0.199738 | 0.118298  | 0.0992133 | 0.117424  | 0.101399  | 0.113928  | 0.105186  |
| 0.195659 | 0.118298  | 0.101836  | 0.113345  | 0.103438  | 0.115385  | 0.102273  |
| 0.191288 | 0.116841  | 0.0995047 | 0.11014   | 0.100233  | 0.115385  | 0.0999417 |
| 0.206731 | 0.129662  | 0.114948  | 0.120629  | 0.120338  | 0.127331  | 0.111888  |
| 0.194784 | 0.114219  | 0.095134  | 0.109557  | 0.0976107 | 0.11014   | 0.0990676 |
| 0.214161 | 0.140006  | 0.128205  | 0.125146  | 0.128934  | 0.142337  | 0.133013  |
| 0.205565 | 0.138695  | 0.124272  | 0.130828  | 0.125291  | 0.140152  | 0.128497  |
| 0.207896 | 0.129662  | 0.113491  | 0.124417  | 0.11859   | 0.13141   | 0.119172  |
| 0.195513 | 0.126311  | 0.104604  | 0.116696  | 0.108829  | 0.12602   | 0.112034  |
| 0.195804 | 0.125146  | 0.10373   | 0.107663  | 0.112325  | 0.12398   | 0.113199  |
| 0.19799  | 0.122669  | 0.100962  | 0.110723  | 0.10169   | 0.120047  | 0.108392  |
| 0.199009 | 0.121066  | 0.108974  | 0.114948  | 0.105041  | 0.117861  | 0.099796  |
| 0.199009 | 0.113491  | 0.103438  | 0.0945513 | 0.10271   | 0.113782  | 0.104749  |
| 0.189685 | 0.0942599 | 0.107809  | 0.122523  | 0.112325  | 0.0919289 | 0.0942599 |
| 0.214161 | 0.137092  | 0.122378  | 0.123397  | 0.121358  | 0.133304  | 0.124563  |
| 0.204983 | 0.123252  | 0.106789  | 0.120338  | 0.11451   | 0.121795  | 0.110431  |
| 0.206876 | 0.131847  | 0.115967  | 0.130099  | 0.127477  | 0.13447   | 0.120484  |
| 0.214889 | 0.138695  | 0.129225  | 0.131702  | 0.128788  | 0.139569  | 0.129371  |
| 0.101253 | 0.186772  | 0.181964  | 0.198135  | 0.193473  | 0.185606  | 0.18007   |
| 0.133741 | 0.230332  | 0.230769  | 0.238199  | 0.236742  | 0.229167  | 0.224505  |
| 0.186334 | 0.0708042 | 0.106789  | 0.119172  | 0.107809  | 0.0702214 | 0.0833333 |
| 0.191725 | 0.118444  | 0.106935  | 0.110868  | 0.105332  | 0.116987  | 0.105915  |
| 0.190268 | 0.114365  | 0.102564  | 0.110868  | 0.103293  | 0.109703  | 0.102127  |
| 0.194639 | 0.116696  | 0.105186  | 0.117861  | 0.109411  | 0.114073  | 0.101253  |
| 0.202214 | 0.130099  | 0.0614802 | 0.129225  | 0.121066  | 0.128934  | 0.114365  |
| 0.201049 | 0.115822  | 0.107517  | 0.120192  | 0.108537  | 0.114656  | 0.108537  |
| 0.222756 | 0.150641  | 0.139714  | 0.140152  | 0.137821  | 0.147436  | 0.142191  |
| 0.20134  | 0.122815  | 0.112762  | 0.120192  | 0.106789  | 0.11757   | 0.110577  |
| 0.213869 | 0.134178  | 0.130536  | 0.121358  | 0.122815  | 0.130682  | 0.123689  |
| 0.204691 | 0.135781  | 0.126603  | 0.131993  | 0.128497  | 0.132867  | 0.120338  |
| 0.214015 | 0.140734  | 0.125146  | 0.132867  | 0.125291  | 0.13549   | 0.120338  |
| 0.211976 | 0.142483  | 0.129516  | 0.136072  | 0.130536  | 0.138112  | 0.128205  |
| 0.20236  | 0.125     | 0.105624  | 0.121503  | 0.110431  | 0.12296   | 0.108974  |
| 0.199738 | 0.120338  | 0.109703  | 0.118881  | 0.106352  | 0.115093  | 0.105478  |
| 0.20134  | 0.12602   | 0.107809  | 0.121941  | 0.116987  | 0.125728  | 0.110286  |
| 0.191434 | 0.114948  | 0.106935  | 0.111451  | 0.0992133 | 0.114073  | 0.10067   |
| 0.196678 | 0.118153  | 0.111597  | 0.112908  | 0.105041  | 0.116404  | 0.105915  |
| 0.199446 | 0.121212  | 0.110577  | 0.122378  | 0.108683  | 0.118881  | 0.106643  |
| 0.207168 | 0.135635  | 0.119464  | 0.127477  | 0.126603  | 0.133013  | 0.120484  |

|          |          |           |          |          |          |           |
|----------|----------|-----------|----------|----------|----------|-----------|
| 0.217949 | 0.143211 | 0.130536  | 0.133887 | 0.128934 | 0.137966 | 0.125437  |
| 0.198572 | 0.118298 | 0.117279  | 0.118298 | 0.105769 | 0.117716 | 0.111014  |
| 0.196678 | 0.121358 | 0.108974  | 0.123689 | 0.112034 | 0.121066 | 0.111116  |
| 0.215326 | 0.136801 | 0.129662  | 0.127185 | 0.121941 | 0.139132 | 0.126311  |
| 0.194639 | 0.117279 | 0.106643  | 0.109411 | 0.102418 | 0.114656 | 0.107372  |
| 0.215472 | 0.149767 | 0.135635  | 0.140734 | 0.136072 | 0.147145 | 0.133159  |
| 0.203817 | 0.143939 | 0.124272  | 0.13345  | 0.133741 | 0.137529 | 0.128205  |
| 0.207459 | 0.140589 | 0.13141   | 0.124272 | 0.128351 | 0.137383 | 0.125437  |
| 0.196678 | 0.113491 | 0.104021  | 0.112325 | 0.099796 | 0.112617 | 0.102418  |
| 0.196241 | 0.114802 | 0.105332  | 0.110431 | 0.101981 | 0.113054 | 0.102273  |
| 0.209499 | 0.129516 | 0.120047  | 0.118444 | 0.116987 | 0.127477 | 0.118444  |
| 0.207022 | 0.130828 | 0.121649  | 0.118881 | 0.115676 | 0.125874 | 0.115093  |
| 0.204691 | 0.136072 | 0.127185  | 0.125291 | 0.121503 | 0.134324 | 0.122086  |
| 0.205128 | 0.121649 | 0.113345  | 0.121649 | 0.111451 | 0.116987 | 0.10912   |
| 0.201486 | 0.123252 | 0.109703  | 0.122669 | 0.109266 | 0.119464 | 0.111888  |
| 0.204983 | 0.128497 | 0.116987  | 0.119755 | 0.118881 | 0.12296  | 0.118298  |
| 0.214889 | 0.142191 | 0.128059  | 0.129662 | 0.127914 | 0.139277 | 0.126457  |
| 0.211684 | 0.136364 | 0.126894  | 0.131702 | 0.124417 | 0.131119 | 0.123252  |
| 0.214161 | 0.139423 | 0.127914  | 0.129808 | 0.12398  | 0.136801 | 0.126603  |
| 0.207896 | 0.138403 | 0.125146  | 0.125583 | 0.130536 | 0.134615 | 0.124126  |
| 0.201195 | 0.115385 | 0.114948  | 0.117424 | 0.106061 | 0.114219 | 0.108392  |
| 0.211976 | 0.13549  | 0.127477  | 0.13345  | 0.124709 | 0.134324 | 0.121212  |
| 0.198135 | 0.114073 | 0.108683  | 0.108246 | 0.103584 | 0.113199 | 0.103293  |
| 0.19595  | 0.122669 | 0.106498  | 0.117424 | 0.115385 | 0.120047 | 0.109848  |
| 0.199738 | 0.123834 | 0.105041  | 0.121795 | 0.111014 | 0.117716 | 0.102855  |
| 0.193182 | 0.122815 | 0.108392  | 0.112325 | 0.109994 | 0.120484 | 0.10708   |
| 0.196387 | 0.114365 | 0.105769  | 0.11757  | 0.103001 | 0.114365 | 0.103001  |
| 0.216055 | 0.143648 | 0.130973  | 0.138112 | 0.128205 | 0.138986 | 0.126166  |
| 0.197552 | 0.12602  | 0.111888  | 0.109703 | 0.115822 | 0.121358 | 0.112034  |
| 0.214161 | 0.135635 | 0.131702  | 0.130973 | 0.126603 | 0.133013 | 0.125146  |
| 0.194347 | 0.11553  | 0.106935  | 0.111116 | 0.102418 | 0.113782 | 0.103875  |
| 0.21285  | 0.134615 | 0.121358  | 0.125291 | 0.115385 | 0.130245 | 0.118881  |
| 0.204254 | 0.130682 | 0.119464  | 0.114073 | 0.118735 | 0.129225 | 0.118735  |
| 0.191142 | 0.128642 | 0.104312  | 0.12398  | 0.117861 | 0.12398  | 0.110868  |
| 0.201777 | 0.125    | 0.108829  | 0.115093 | 0.10373  | 0.123834 | 0.108392  |
| 0.19697  | 0.128934 | 0.118007  | 0.122523 | 0.120775 | 0.124563 | 0.114073  |
| 0.200612 | 0.124417 | 0.111451  | 0.125874 | 0.111888 | 0.121503 | 0.114802  |
| 0.196241 | 0.121503 | 0.107663  | 0.107517 | 0.102273 | 0.121212 | 0.109266  |
| 0.212267 | 0.1419   | 0.121358  | 0.124709 | 0.130245 | 0.139569 | 0.125     |
| 0.216783 | 0.142045 | 0.128497  | 0.13243  | 0.126311 | 0.137966 | 0.133887  |
| 0.192308 | 0.110868 | 0.0976107 | 0.106789 | 0.103001 | 0.111742 | 0.0971737 |
| 0.214889 | 0.139277 | 0.116987  | 0.125291 | 0.130536 | 0.13549  | 0.123543  |
| 0.207168 | 0.137092 | 0.110431  | 0.121066 | 0.119901 | 0.136218 | 0.114948  |
| 0.206002 | 0.136218 | 0.119755  | 0.126311 | 0.12602  | 0.13447  | 0.115822  |

|          |          |          |           |          |          |          |
|----------|----------|----------|-----------|----------|----------|----------|
| 0.203089 | 0.127477 | 0.106935 | 0.119318  | 0.122523 | 0.123689 | 0.113491 |
| 0.206294 | 0.13039  | 0.111014 | 0.116113  | 0.11757  | 0.128934 | 0.113782 |
| 0.204108 | 0.130828 | 0.109994 | 0.117716  | 0.121212 | 0.130536 | 0.119172 |
| 0.214452 | 0.130973 | 0.120629 | 0.123106  | 0.121358 | 0.129225 | 0.122232 |
| 0.215035 | 0.141754 | 0.123834 | 0.132139  | 0.134178 | 0.13884  | 0.13039  |
| 0.207459 | 0.124854 | 0.107226 | 0.123106  | 0.127768 | 0.123106 | 0.112617 |
| 0.200466 | 0.125437 | 0.104312 | 0.11961   | 0.11757  | 0.121649 | 0.109411 |
| 0.20877  | 0.136655 | 0.13243  | 0.130245  | 0.124126 | 0.133159 | 0.129371 |
| 0.211538 | 0.138258 | 0.119172 | 0.127768  | 0.129808 | 0.137675 | 0.127185 |
| 0.195221 | 0.119318 | 0.101399 | 0.115822  | 0.113491 | 0.11553  | 0.104458 |
| 0.116113 | 0.215618 | 0.214015 | 0.217075  | 0.217366 | 0.210082 | 0.204545 |
| 0.203817 | 0.129371 | 0.111116 | 0.124417  | 0.123252 | 0.126457 | 0.118298 |
| 0.198281 | 0.125291 | 0.104458 | 0.114802  | 0.115093 | 0.118881 | 0.103147 |
| 0.216492 | 0.136801 | 0.124709 | 0.132721  | 0.131556 | 0.135927 | 0.121649 |
| 0.199883 | 0.124854 | 0.104895 | 0.117861  | 0.119318 | 0.122232 | 0.105624 |
| 0.210373 | 0.138549 | 0.114802 | 0.127185  | 0.131847 | 0.137383 | 0.125146 |
| 0.201049 | 0.128642 | 0.108974 | 0.123106  | 0.118153 | 0.123397 | 0.108829 |
| 0.201195 | 0.125291 | 0.104167 | 0.122086  | 0.115967 | 0.120629 | 0.118298 |
| 0.205857 | 0.131993 | 0.111116 | 0.117133  | 0.127622 | 0.128497 | 0.115967 |
| 0.197552 | 0.134761 | 0.115093 | 0.126603  | 0.132721 | 0.128934 | 0.116113 |
| 0.209062 | 0.135781 | 0.120192 | 0.124709  | 0.129662 | 0.134324 | 0.119172 |
| 0.214161 | 0.134761 | 0.117716 | 0.129808  | 0.13039  | 0.132139 | 0.125437 |
| 0.212121 | 0.130973 | 0.115967 | 0.126311  | 0.129225 | 0.128642 | 0.120484 |
| 0.201632 | 0.125146 | 0.101399 | 0.112617  | 0.102127 | 0.125437 | 0.109411 |
| 0.20542  | 0.119901 | 0.111597 | 0.116696  | 0.11757  | 0.117279 | 0.110577 |
| 0.209936 | 0.139569 | 0.121649 | 0.131993  | 0.134324 | 0.135198 | 0.123543 |
| 0.196387 | 0.124563 | 0.1081   | 0.119318  | 0.119027 | 0.123106 | 0.107372 |
| 0.215618 | 0.140297 | 0.129662 | 0.136509  | 0.13243  | 0.138549 | 0.131265 |
| 0.19595  | 0.145396 | 0.126603 | 0.137529  | 0.137529 | 0.1419   | 0.134033 |
| 0.199738 | 0.130828 | 0.111742 | 0.116259  | 0.114802 | 0.129079 | 0.119464 |
| 0.207314 | 0.136655 | 0.113491 | 0.125     | 0.122378 | 0.134615 | 0.117133 |
| 0.194056 | 0.133596 | 0.11859  | 0.131265  | 0.123397 | 0.127185 | 0.119901 |
| 0.202943 | 0.127914 | 0.123106 | 0.0987762 | 0.114219 | 0.127914 | 0.116841 |
| 0.193619 | 0.12704  | 0.11961  | 0.132284  | 0.120338 | 0.123543 | 0.11859  |
| 0.201195 | 0.145688 | 0.125437 | 0.138403  | 0.138403 | 0.140152 | 0.130245 |
| 0.193765 | 0.119901 | 0.100233 | 0.108537  | 0.105624 | 0.11961  | 0.106498 |
| 0.209936 | 0.140152 | 0.119027 | 0.130245  | 0.12704  | 0.137238 | 0.123252 |
| 0.188228 | 0.146999 | 0.130245 | 0.143502  | 0.143794 | 0.140297 | 0.136801 |
| 0.207751 | 0.129225 | 0.107517 | 0.117279  | 0.118153 | 0.127477 | 0.115239 |
| 0.199301 | 0.131847 | 0.119172 | 0.12602   | 0.122523 | 0.124563 | 0.120775 |
| 0.213724 | 0.147145 | 0.137966 | 0.135781  | 0.135198 | 0.14627  | 0.140152 |
| 0.205857 | 0.128205 | 0.118735 | 0.128205  | 0.123543 | 0.128497 | 0.115967 |
| 0.215035 | 0.142045 | 0.126748 | 0.133304  | 0.133304 | 0.143502 | 0.132139 |
| 0.207605 | 0.137238 | 0.119027 | 0.134033  | 0.125874 | 0.138403 | 0.125    |

|          |           |           |           |          |           |           |
|----------|-----------|-----------|-----------|----------|-----------|-----------|
| 0.207751 | 0.13039   | 0.119755  | 0.121941  | 0.118444 | 0.129808  | 0.116987  |
| 0.205857 | 0.135781  | 0.122523  | 0.126166  | 0.129079 | 0.129953  | 0.127914  |
| 0.200466 | 0.133596  | 0.111888  | 0.126894  | 0.118735 | 0.129808  | 0.114948  |
| 0.214889 | 0.141026  | 0.121066  | 0.126457  | 0.129079 | 0.136946  | 0.120338  |
| 0.210227 | 0.131702  | 0.125146  | 0.12296   | 0.127622 | 0.130536  | 0.119172  |
| 0.214307 | 0.138403  | 0.128642  | 0.123834  | 0.130245 | 0.136655  | 0.121503  |
| 0.215763 | 0.139569  | 0.126603  | 0.132576  | 0.129662 | 0.138112  | 0.124417  |
| 0.2044   | 0.140443  | 0.126311  | 0.130536  | 0.125    | 0.137238  | 0.12296   |
| 0.209062 | 0.149476  | 0.135635  | 0.138986  | 0.140443 | 0.145396  | 0.132576  |
| 0.204108 | 0.134615  | 0.111451  | 0.118298  | 0.11655  | 0.131993  | 0.11655   |
| 0.205274 | 0.127622  | 0.109411  | 0.122086  | 0.121795 | 0.126457  | 0.115385  |
| 0.207314 | 0.138112  | 0.120192  | 0.136655  | 0.129953 | 0.138112  | 0.127622  |
| 0.203817 | 0.128205  | 0.108829  | 0.119172  | 0.111888 | 0.125291  | 0.113636  |
| 0.20542  | 0.147873  | 0.134033  | 0.143211  | 0.138549 | 0.144668  | 0.139423  |
| 0.215326 | 0.163899  | 0.147436  | 0.153118  | 0.155157 | 0.159819  | 0.151952  |
| 0.214744 | 0.133304  | 0.126748  | 0.125437  | 0.121066 | 0.131556  | 0.121649  |
| 0.206148 | 0.124417  | 0.120192  | 0.121503  | 0.111597 | 0.121503  | 0.111597  |
| 0.213287 | 0.130099  | 0.126166  | 0.100087  | 0.127768 | 0.129225  | 0.122815  |
| 0.213724 | 0.13345   | 0.121358  | 0.126457  | 0.130245 | 0.132576  | 0.124126  |
| 0.214889 | 0.131993  | 0.121649  | 0.129371  | 0.122086 | 0.131702  | 0.121503  |
| 0.218969 | 0.148019  | 0.12602   | 0.127914  | 0.134033 | 0.142774  | 0.132284  |
| 0.207605 | 0.145688  | 0.124854  | 0.136655  | 0.138695 | 0.140443  | 0.132576  |
| 0.209499 | 0.135052  | 0.118881  | 0.118444  | 0.11961  | 0.129516  | 0.119901  |
| 0.215909 | 0.159819  | 0.155012  | 0.161276  | 0.156323 | 0.15574   | 0.151078  |
| 0.210082 | 0.137966  | 0.118007  | 0.119901  | 0.121941 | 0.136801  | 0.124272  |
| 0.210956 | 0.144376  | 0.125583  | 0.139714  | 0.133887 | 0.145833  | 0.130973  |
| 0.209645 | 0.131702  | 0.113199  | 0.121795  | 0.121503 | 0.125583  | 0.11859   |
| 0.217803 | 0.136364  | 0.135052  | 0.0909091 | 0.126166 | 0.136072  | 0.128788  |
| 0.204691 | 0.13345   | 0.112034  | 0.126748  | 0.126166 | 0.126748  | 0.112762  |
| 0.172786 | 0.116696  | 0.132576  | 0.135052  | 0.137675 | 0.11116   | 0.114365  |
| 0.213141 | 0.1419    | 0.139423  | 0.142191  | 0.146853 | 0.138112  | 0.128205  |
| 0.194639 | 0.0520105 | 0.115093  | 0.123397  | 0.120775 | 0.0546329 | 0.0817308 |
| 0.175262 | 0.0754662 | 0.12602   | 0.133159  | 0.132284 | 0.0719697 | 0.0955711 |
| 0.156177 | 0.146999  | 0.13986   | 0.147873  | 0.138549 | 0.141171  | 0.135635  |
| 0.153846 | 0.117279  | 0.134615  | 0.145833  | 0.143502 | 0.118444  | 0.121649  |
| 0.210519 | 0.130245  | 0.12398   | 0.11655   | 0.107226 | 0.126457  | 0.120921  |
| 0.204545 | 0.132721  | 0.12704   | 0.137383  | 0.133013 | 0.131265  | 0.128642  |
| 0.188228 | 0.112325  | 0.0842075 | 0.117861  | 0.107663 | 0.110868  | 0.102418  |
| 0.191579 | 0.120921  | 0.0773601 | 0.121795  | 0.104895 | 0.115967  | 0.107226  |
| 0.196387 | 0.127185  | 0.113928  | 0.122232  | 0.118735 | 0.125728  | 0.112908  |
| 0.188811 | 0.0493881 | 0.111888  | 0.120192  | 0.115239 | 0.0464744 | 0.074155  |
| 0.198281 | 0.124417  | 0.105915  | 0.124709  | 0.102564 | 0.121212  | 0.110431  |
| 0.180798 | 0.0868298 | 0.0692016 | 0.118881  | 0.106935 | 0.0850816 | 0.0859557 |
| 0.194202 | 0.105478  | 0.114073  | 0.126457  | 0.117716 | 0.104604  | 0.104312  |



|           |           |           |          |           |           |           |
|-----------|-----------|-----------|----------|-----------|-----------|-----------|
| 0.184149  | 0.123689  | 0.0614802 | 0.128059 | 0.115822  | 0.119901  | 0.105624  |
| 0.187063  | 0.116987  | 0.0938228 | 0.107955 | 0.0980478 | 0.114073  | 0.0989219 |
| 0.188811  | 0.0560897 | 0.115967  | 0.123106 | 0.120775  | 0.0534674 | 0.0796911 |
| 0.191871  | 0.0483683 | 0.112034  | 0.119755 | 0.115676  | 0.0480769 | 0.0719697 |
| 0.205274  | 0.128788  | 0.120192  | 0.119464 | 0.108683  | 0.124126  | 0.118007  |
| 0.122232  | 0.210664  | 0.207605  | 0.215909 | 0.216783  | 0.207168  | 0.200175  |
| 0.20877   | 0.0696387 | 0.133596  | 0.138403 | 0.139569  | 0.0705128 | 0.0996503 |
| 0.206585  | 0.126894  | 0.127331  | 0.123397 | 0.124854  | 0.126603  | 0.120775  |
| 0.194784  | 0.117716  | 0.114948  | 0.123834 | 0.122669  | 0.118298  | 0.110431  |
| 0.105041  | 0.20542   | 0.202943  | 0.20979  | 0.211538  | 0.20134   | 0.194639  |
| 0.188666  | 0.128205  | 0.116987  | 0.119755 | 0.116259  | 0.126166  | 0.115093  |
| 0.201632  | 0.128934  | 0.112471  | 0.121941 | 0.0488054 | 0.127477  | 0.117279  |
| 0.19697   | 0.125437  | 0.11859   | 0.128642 | 0.115822  | 0.124563  | 0.119901  |
| 0.192162  | 0.126457  | 0.0528846 | 0.126748 | 0.113636  | 0.123834  | 0.107517  |
| 0.135344  | 0.243298  | 0.244027  | 0.248252 | 0.250583  | 0.24155   | 0.236014  |
| 0.199883  | 0.129225  | 0.118298  | 0.115822 | 0.118444  | 0.129225  | 0.117279  |
| 0.200175  | 0.11961   | 0.113928  | 0.113782 | 0.102418  | 0.118735  | 0.109411  |
| 0.204254  | 0.128351  | 0.121503  | 0.130099 | 0.11961   | 0.121941  | 0.114656  |
| 0.200175  | 0.126894  | 0.119464  | 0.128351 | 0.115822  | 0.122815  | 0.112325  |
| 0.195221  | 0.13243   | 0.106061  | 0.121649 | 0.121066  | 0.128642  | 0.119901  |
| 0.176282  | 0.112617  | 0.105769  | 0.131847 | 0.122232  | 0.103875  | 0.105915  |
| 0.199592  | 0.123106  | 0.113636  | 0.116113 | 0.109411  | 0.122232  | 0.113491  |
| 0.189831  | 0.0472028 | 0.112034  | 0.120921 | 0.118298  | 0.0486597 | 0.0737179 |
| 0.19697   | 0.124854  | 0.11859   | 0.129225 | 0.121941  | 0.121941  | 0.116987  |
| 0.190851  | 0.120192  | 0.0472028 | 0.120484 | 0.106206  | 0.11757   | 0.104167  |
| 0.185752  | 0.0574009 | 0.108246  | 0.117424 | 0.114219  | 0.0579837 | 0.0754662 |
| 0.196678  | 0.125437  | 0.0955711 | 0.112034 | 0.11757   | 0.122523  | 0.10912   |
| 0.214889  | 0.144522  | 0.13884   | 0.1419   | 0.144522  | 0.138986  | 0.131993  |
| 0.199738  | 0.128788  | 0.120775  | 0.118298 | 0.119464  | 0.130828  | 0.119755  |
| 0.201195  | 0.129662  | 0.116987  | 0.129662 | 0.0530303 | 0.13141   | 0.120629  |
| 0.0965909 | 0.181527  | 0.182255  | 0.18852  | 0.186772  | 0.17366   | 0.174242  |
| 0.0995047 | 0.197552  | 0.195659  | 0.206876 | 0.202506  | 0.193765  | 0.191142  |
| 0.186043  | 0.126748  | 0.0520105 | 0.128497 | 0.114219  | 0.12296   | 0.111305  |
| 0.191579  | 0.118881  | 0.0476399 | 0.123543 | 0.108683  | 0.116841  | 0.102564  |
| 0.196533  | 0.125874  | 0.124854  | 0.134615 | 0.140734  | 0.125874  | 0.126166  |
| 0.198572  | 0.120338  | 0.117861  | 0.115676 | 0.103438  | 0.119755  | 0.114219  |
| 0.201049  | 0.13243   | 0.120629  | 0.118735 | 0.120192  | 0.13243   | 0.120484  |
| 0.203234  | 0.128497  | 0.126311  | 0.127622 | 0.127914  | 0.125583  | 0.117133  |
| 0.106789  | 0.220862  | 0.21722   | 0.223485 | 0.225233  | 0.215909  | 0.210373  |
| 0.197698  | 0.115385  | 0.109411  | 0.120921 | 0.11014   | 0.113345  | 0.105478  |
| 0.144231  | 0.203526  | 0.206002  | 0.210227 | 0.207022  | 0.198281  | 0.196241  |
| 0.202652  | 0.118298  | 0.111451  | 0.112179 | 0.0958625 | 0.118007  | 0.111888  |
| 0.193182  | 0.119318  | 0.111014  | 0.119901 | 0.100379  | 0.11961   | 0.116404  |
| 0.1875    | 0.101981  | 0.107955  | 0.121503 | 0.115967  | 0.105186  | 0.10373   |

|           |           |           |          |           |           |           |
|-----------|-----------|-----------|----------|-----------|-----------|-----------|
| 0.18954   | 0.118007  | 0.0546329 | 0.120629 | 0.107226  | 0.11451   | 0.101981  |
| 0.102564  | 0.200321  | 0.196387  | 0.207314 | 0.209645  | 0.197407  | 0.192453  |
| 0.191142  | 0.0543415 | 0.125     | 0.131847 | 0.130099  | 0.0540501 | 0.0863928 |
| 0.202506  | 0.121649  | 0.118007  | 0.115822 | 0.106498  | 0.122815  | 0.113199  |
| 0.195221  | 0.050845  | 0.118298  | 0.125728 | 0.120775  | 0.0534674 | 0.0799825 |
| 0.197844  | 0.125146  | 0.121795  | 0.118735 | 0.116696  | 0.12398   | 0.116696  |
| 0.189685  | 0.120775  | 0.0477855 | 0.122815 | 0.106789  | 0.114656  | 0.107955  |
| 0.201195  | 0.120047  | 0.114656  | 0.114802 | 0.100524  | 0.120338  | 0.109848  |
| 0.189248  | 0.12296   | 0.113782  | 0.120338 | 0.108392  | 0.11859   | 0.113345  |
| 0.200321  | 0.131702  | 0.113782  | 0.120921 | 0.0518648 | 0.129079  | 0.119755  |
| 0.18546   | 0.0539044 | 0.105915  | 0.118007 | 0.109266  | 0.0501166 | 0.0690559 |
| 0.202214  | 0.124854  | 0.120629  | 0.116404 | 0.10912   | 0.124854  | 0.113199  |
| 0.0945513 | 0.183858  | 0.180507  | 0.189103 | 0.185897  | 0.178322  | 0.176865  |
| 0.202797  | 0.129808  | 0.123252  | 0.129225 | 0.120775  | 0.127185  | 0.113491  |
| 0.204108  | 0.129371  | 0.121066  | 0.127622 | 0.129371  | 0.124126  | 0.116259  |
| 0.192599  | 0.116696  | 0.114219  | 0.124563 | 0.118444  | 0.116113  | 0.10708   |
| 0.190997  | 0.129662  | 0.120775  | 0.120629 | 0.118298  | 0.125874  | 0.116841  |
| 0.19391   | 0.0492424 | 0.11553   | 0.122086 | 0.117716  | 0.0498252 | 0.0789627 |
| 0.208479  | 0.125     | 0.118735  | 0.111888 | 0.101399  | 0.123252  | 0.115676  |
| 0.19289   | 0.116113  | 0.111597  | 0.113491 | 0.11116   | 0.116696  | 0.106206  |
| 0.206585  | 0.127185  | 0.121795  | 0.11757  | 0.108829  | 0.126311  | 0.118735  |
| 0.198572  | 0.121503  | 0.116404  | 0.125    | 0.12296   | 0.113928  | 0.108974  |
| 0.194202  | 0.11655   | 0.114365  | 0.127914 | 0.115093  | 0.115385  | 0.111014  |
| 0.191725  | 0.121941  | 0.0579837 | 0.123689 | 0.113199  | 0.117279  | 0.106789  |
| 0.2044    | 0.119755  | 0.114365  | 0.127331 | 0.112762  | 0.122669  | 0.118007  |
| 0.206876  | 0.133596  | 0.128788  | 0.134761 | 0.128351  | 0.136218  | 0.131847  |
| 0.192308  | 0.120484  | 0.109557  | 0.113199 | 0.109994  | 0.123106  | 0.11116   |
| 0.204691  | 0.0670163 | 0.132721  | 0.13345  | 0.135198  | 0.0684732 | 0.0967366 |
| 0.189831  | 0.119172  | 0.0458916 | 0.122378 | 0.11014   | 0.114802  | 0.104604  |
| 0.195076  | 0.114219  | 0.113782  | 0.119464 | 0.11655   | 0.113054  | 0.104312  |
| 0.179487  | 0.0677448 | 0.111597  | 0.123397 | 0.119901  | 0.0622086 | 0.08581   |
| 0.201049  | 0.129808  | 0.126457  | 0.122232 | 0.112325  | 0.126894  | 0.120484  |
| 0.113054  | 0.185169  | 0.184441  | 0.194493 | 0.186043  | 0.182547  | 0.179341  |
| 0.19595   | 0.120047  | 0.112325  | 0.114219 | 0.102855  | 0.120338  | 0.107226  |
| 0.187791  | 0.105186  | 0.102127  | 0.112762 | 0.101399  | 0.104021  | 0.0897436 |
| 0.202943  | 0.131993  | 0.116696  | 0.124417 | 0.0495338 | 0.13141   | 0.120629  |
| 0.114365  | 0.173368  | 0.168852  | 0.181527 | 0.177156  | 0.168415  | 0.163462  |
| 0.203963  | 0.141171  | 0.129662  | 0.126311 | 0.13039   | 0.140297  | 0.128351  |
| 0.212995  | 0.152244  | 0.140443  | 0.132721 | 0.135927  | 0.149913  | 0.139132  |
| 0.214598  | 0.145105  | 0.139423  | 0.143648 | 0.146562  | 0.141317  | 0.131119  |
| 0.189248  | 0.124126  | 0.109703  | 0.112471 | 0.110431  | 0.120629  | 0.108974  |
| 0.191142  | 0.0493881 | 0.11655   | 0.123689 | 0.121066  | 0.0505536 | 0.0805653 |
| 0.103001  | 0.202506  | 0.203234  | 0.212121 | 0.210956  | 0.199009  | 0.192599  |
| 0.190997  | 0.119755  | 0.117279  | 0.120338 | 0.120047  | 0.120338  | 0.112762  |

|           |           |           |          |           |           |           |
|-----------|-----------|-----------|----------|-----------|-----------|-----------|
| 0.193473  | 0.053176  | 0.120921  | 0.124563 | 0.125437  | 0.0546329 | 0.0843531 |
| 0.195513  | 0.12398   | 0.117716  | 0.11553  | 0.108246  | 0.122523  | 0.111742  |
| 0.13549   | 0.151952  | 0.160256  | 0.171474 | 0.169726  | 0.144376  | 0.150787  |
| 0.18648   | 0.10912   | 0.101399  | 0.113782 | 0.11116   | 0.109411  | 0.101836  |
| 0.211976  | 0.147436  | 0.142337  | 0.15035  | 0.147436  | 0.145396  | 0.138403  |
| 0.190414  | 0.127331  | 0.10912   | 0.120338 | 0.112762  | 0.12704   | 0.1081    |
| 0.0992133 | 0.184441  | 0.182547  | 0.189977 | 0.186189  | 0.179487  | 0.175117  |
| 0.197115  | 0.128205  | 0.113199  | 0.116841 | 0.113054  | 0.125583  | 0.115093  |
| 0.192745  | 0.106352  | 0.099796  | 0.105186 | 0.105478  | 0.106061  | 0.0958625 |
| 0.19493   | 0.111451  | 0.112762  | 0.121358 | 0.112908  | 0.10912   | 0.102418  |
| 0.197115  | 0.116841  | 0.113491  | 0.114802 | 0.100524  | 0.118007  | 0.1081    |
| 0.200612  | 0.125583  | 0.114948  | 0.124417 | 0.0501166 | 0.125583  | 0.117133  |
| 0.189248  | 0.11859   | 0.11553   | 0.129953 | 0.119464  | 0.120047  | 0.116259  |
| 0.188228  | 0.116696  | 0.0480769 | 0.120192 | 0.106498  | 0.114948  | 0.102127  |
| 0.095134  | 0.185606  | 0.178759  | 0.190268 | 0.186772  | 0.180653  | 0.175408  |
| 0.19697   | 0.124854  | 0.118881  | 0.129225 | 0.116404  | 0.121066  | 0.115822  |
| 0.190122  | 0.109557  | 0.105041  | 0.119755 | 0.108683  | 0.106935  | 0.103147  |
| 0.108392  | 0.206731  | 0.202506  | 0.211684 | 0.211101  | 0.202943  | 0.197407  |
| 0.203963  | 0.129516  | 0.120047  | 0.127185 | 0.119901  | 0.123689  | 0.115239  |
| 0.193328  | 0.120629  | 0.0476399 | 0.123543 | 0.111305  | 0.118298  | 0.105769  |
| 0.186917  | 0.115967  | 0.0479312 | 0.119172 | 0.104021  | 0.113636  | 0.0979021 |
| 0.20134   | 0.0782343 | 0.131119  | 0.133013 | 0.138258  | 0.0793998 | 0.101544  |
| 0.0949883 | 0.183712  | 0.180653  | 0.188957 | 0.1875    | 0.177885  | 0.176136  |
| 0.204983  | 0.121212  | 0.118444  | 0.118881 | 0.105478  | 0.122086  | 0.115093  |
| 0.205857  | 0.130245  | 0.126894  | 0.130245 | 0.123543  | 0.131993  | 0.12704   |
| 0.188083  | 0.118298  | 0.0444347 | 0.117424 | 0.108392  | 0.113636  | 0.104604  |
| 0.187791  | 0.11451   | 0.0464744 | 0.121795 | 0.106352  | 0.113928  | 0.103147  |
| 0.187063  | 0.119901  | 0.0451632 | 0.120484 | 0.10708   | 0.116113  | 0.104167  |
| 0.193619  | 0.0515734 | 0.109411  | 0.119464 | 0.117716  | 0.0533217 | 0.0748834 |
| 0.191725  | 0.113491  | 0.0926573 | 0.110577 | 0.0954254 | 0.114656  | 0.0995047 |
| 0.198135  | 0.130682  | 0.118007  | 0.11757  | 0.116404  | 0.130099  | 0.120484  |
| 0.21183   | 0.124272  | 0.13141   | 0.131847 | 0.132721  | 0.120775  | 0.112034  |
| 0.195804  | 0.130682  | 0.113345  | 0.118444 | 0.116404  | 0.127768  | 0.116987  |
| 0.206439  | 0.130536  | 0.125437  | 0.124417 | 0.124126  | 0.129079  | 0.120338  |
| 0.0996503 | 0.187209  | 0.185023  | 0.194784 | 0.190997  | 0.182838  | 0.17701   |
| 0.196241  | 0.120047  | 0.113782  | 0.124709 | 0.113345  | 0.122378  | 0.11451   |
| 0.198718  | 0.0572552 | 0.122378  | 0.127185 | 0.13039   | 0.0595862 | 0.0869755 |
| 0.18954   | 0.117133  | 0.0429779 | 0.117424 | 0.104312  | 0.114802  | 0.102564  |
| 0.189103  | 0.118153  | 0.0912005 | 0.111742 | 0.0980478 | 0.114948  | 0.0995047 |
| 0.190559  | 0.11961   | 0.108683  | 0.124563 | 0.117279  | 0.114656  | 0.109411  |
| 0.201486  | 0.123543  | 0.118444  | 0.119464 | 0.107226  | 0.123252  | 0.115967  |
| 0.201777  | 0.129371  | 0.121649  | 0.136655 | 0.128497  | 0.126457  | 0.115093  |
| 0.196096  | 0.115822  | 0.111305  | 0.122815 | 0.11961   | 0.112034  | 0.109994  |
| 0.191434  | 0.119318  | 0.102564  | 0.114948 | 0.100087  | 0.116987  | 0.105332  |

|          |           |           |          |           |           |           |
|----------|-----------|-----------|----------|-----------|-----------|-----------|
| 0.18954  | 0.112762  | 0.10067   | 0.109557 | 0.0973193 | 0.113054  | 0.0987762 |
| 0.190851 | 0.110868  | 0.0990676 | 0.107955 | 0.106789  | 0.109703  | 0.0930944 |
| 0.202943 | 0.120338  | 0.113782  | 0.110431 | 0.0964452 | 0.118881  | 0.109557  |
| 0.205711 | 0.13447   | 0.125874  | 0.123397 | 0.124272  | 0.135344  | 0.123106  |
| 0.19799  | 0.122669  | 0.114365  | 0.117424 | 0.103147  | 0.121795  | 0.114219  |
| 0.186772 | 0.0502622 | 0.1081    | 0.114948 | 0.112325  | 0.0502622 | 0.0732809 |
| 0.197844 | 0.119027  | 0.113345  | 0.114073 | 0.0962995 | 0.116404  | 0.105624  |
| 0.186334 | 0.115676  | 0.048514  | 0.118881 | 0.110431  | 0.113345  | 0.103438  |
| 0.197844 | 0.118153  | 0.111014  | 0.110286 | 0.102127  | 0.118444  | 0.105332  |
| 0.191434 | 0.121649  | 0.0463287 | 0.122815 | 0.11116   | 0.116987  | 0.106789  |
| 0.193765 | 0.114656  | 0.1081    | 0.120484 | 0.102418  | 0.114365  | 0.108537  |
| 0.196678 | 0.119027  | 0.109557  | 0.124272 | 0.120192  | 0.116113  | 0.108246  |
| 0.199883 | 0.123397  | 0.108683  | 0.122232 | 0.0464744 | 0.122815  | 0.110286  |
| 0.188957 | 0.114219  | 0.0968823 | 0.113054 | 0.100816  | 0.113928  | 0.101399  |
| 0.189394 | 0.11553   | 0.0472028 | 0.121358 | 0.107372  | 0.115239  | 0.103584  |
| 0.185315 | 0.119027  | 0.115385  | 0.130099 | 0.118153  | 0.113782  | 0.108829  |
| 0.196533 | 0.113636  | 0.109994  | 0.120047 | 0.116841  | 0.114219  | 0.106643  |
| 0.193765 | 0.116113  | 0.102855  | 0.112034 | 0.10708   | 0.115822  | 0.104167  |
| 0.191142 | 0.11553   | 0.0463287 | 0.119318 | 0.107372  | 0.112908  | 0.100087  |
| 0.189248 | 0.0501166 | 0.116987  | 0.117424 | 0.116841  | 0.0501166 | 0.0786713 |
| 0.200321 | 0.123252  | 0.113491  | 0.115093 | 0.0984848 | 0.121212  | 0.113636  |
| 0.193036 | 0.0495338 | 0.113491  | 0.122086 | 0.118298  | 0.0495338 | 0.0763403 |
| 0.197698 | 0.125583  | 0.10708   | 0.12296  | 0.0463287 | 0.124417  | 0.112179  |
| 0.194202 | 0.119464  | 0.0983392 | 0.114219 | 0.106061  | 0.116259  | 0.103147  |
| 0.191288 | 0.109848  | 0.097465  | 0.120629 | 0.106935  | 0.111888  | 0.103438  |
| 0.199301 | 0.119901  | 0.112762  | 0.111742 | 0.103001  | 0.11757   | 0.109411  |
| 0.189831 | 0.0501166 | 0.112908  | 0.123834 | 0.120921  | 0.0539044 | 0.0772145 |
| 0.200029 | 0.11451   | 0.11961   | 0.112471 | 0.11859   | 0.116841  | 0.113054  |
| 0.192016 | 0.103293  | 0.105186  | 0.121066 | 0.110868  | 0.10708   | 0.0992133 |
| 0.099359 | 0.190122  | 0.185315  | 0.194202 | 0.193619  | 0.184003  | 0.178467  |
| 0.130536 | 0.154866  | 0.157051  | 0.170017 | 0.164773  | 0.149913  | 0.150787  |
| 0.196678 | 0.12602   | 0.115967  | 0.116696 | 0.115822  | 0.127185  | 0.116696  |
| 0.191871 | 0.116259  | 0.115822  | 0.121212 | 0.115093  | 0.116259  | 0.113345  |
| 0.218677 | 0.153263  | 0.144085  | 0.136655 | 0.140734  | 0.154138  | 0.140443  |
| 0.199883 | 0.123397  | 0.118007  | 0.133304 | 0.123689  | 0.119901  | 0.11757   |
| 0.186917 | 0.122378  | 0.0837704 | 0.132867 | 0.118298  | 0.119172  | 0.114219  |
| 0.189685 | 0.113782  | 0.0777972 | 0.125728 | 0.112617  | 0.110286  | 0.0995047 |
| 0.19493  | 0.124563  | 0.092366  | 0.112617 | 0.114073  | 0.119027  | 0.105624  |
| 0.199301 | 0.115239  | 0.108974  | 0.124854 | 0.11961   | 0.114656  | 0.108246  |
| 0.100379 | 0.19493   | 0.190997  | 0.201049 | 0.20338   | 0.190559  | 0.187063  |
| 0.203671 | 0.126603  | 0.118298  | 0.122523 | 0.11116   | 0.127185  | 0.118444  |
| 0.185752 | 0.0777972 | 0.11116   | 0.120047 | 0.115093  | 0.0743007 | 0.0882867 |
| 0.18546  | 0.114219  | 0.0607517 | 0.115093 | 0.106935  | 0.11014   | 0.0987762 |
| 0.198718 | 0.119318  | 0.113928  | 0.122232 | 0.110868  | 0.121649  | 0.114073  |

|           |           |           |          |           |           |           |
|-----------|-----------|-----------|----------|-----------|-----------|-----------|
| 0.11961   | 0.179196  | 0.172348  | 0.186189 | 0.184732  | 0.170746  | 0.169289  |
| 0.127768  | 0.240967  | 0.241404  | 0.246795 | 0.246795  | 0.238345  | 0.2331    |
| 0.198572  | 0.119755  | 0.113491  | 0.122378 | 0.124417  | 0.118881  | 0.1081    |
| 0.197698  | 0.113928  | 0.109411  | 0.125874 | 0.111597  | 0.114219  | 0.106643  |
| 0.196824  | 0.127622  | 0.114073  | 0.117133 | 0.11451   | 0.125     | 0.114802  |
| 0.198427  | 0.122815  | 0.106061  | 0.11757  | 0.0453089 | 0.123106  | 0.112034  |
| 0.201486  | 0.117424  | 0.110286  | 0.113636 | 0.101107  | 0.115967  | 0.109557  |
| 0.191725  | 0.114073  | 0.109557  | 0.119027 | 0.10912   | 0.114948  | 0.105915  |
| 0.18109   | 0.0879953 | 0.0756119 | 0.120338 | 0.113928  | 0.0842075 | 0.090035  |
| 0.200321  | 0.119464  | 0.114073  | 0.118881 | 0.102273  | 0.119755  | 0.111014  |
| 0.183566  | 0.0747378 | 0.0836247 | 0.119901 | 0.112325  | 0.0767774 | 0.0840618 |
| 0.198572  | 0.122378  | 0.105332  | 0.11655  | 0.113345  | 0.119464  | 0.1081    |
| 0.190268  | 0.113782  | 0.0941142 | 0.113782 | 0.100962  | 0.114656  | 0.102418  |
| 0.19799   | 0.120338  | 0.113782  | 0.123834 | 0.124417  | 0.115967  | 0.108974  |
| 0.189977  | 0.0520105 | 0.111597  | 0.121358 | 0.116696  | 0.0514277 | 0.0782343 |
| 0.188811  | 0.10708   | 0.10373   | 0.112034 | 0.101836  | 0.106206  | 0.0945513 |
| 0.208916  | 0.133013  | 0.11451   | 0.123397 | 0.124272  | 0.128934  | 0.114948  |
| 0.212121  | 0.137675  | 0.125291  | 0.128351 | 0.0622086 | 0.138258  | 0.126311  |
| 0.189831  | 0.114802  | 0.0479312 | 0.117424 | 0.105478  | 0.113345  | 0.100816  |
| 0.18648   | 0.127185  | 0.0862471 | 0.122523 | 0.114656  | 0.122523  | 0.10912   |
| 0.201923  | 0.13243   | 0.0608974 | 0.131265 | 0.123106  | 0.13039   | 0.119027  |
| 0.117279  | 0.205128  | 0.200029  | 0.208916 | 0.207751  | 0.199883  | 0.19697   |
| 0.191725  | 0.114365  | 0.106643  | 0.116987 | 0.113199  | 0.111451  | 0.101253  |
| 0.192453  | 0.118298  | 0.0948427 | 0.113345 | 0.0987762 | 0.115676  | 0.103438  |
| 0.195659  | 0.120338  | 0.114073  | 0.124709 | 0.11014   | 0.119755  | 0.115385  |
| 0.202214  | 0.125146  | 0.121795  | 0.128934 | 0.120484  | 0.121649  | 0.113491  |
| 0.197844  | 0.115822  | 0.112179  | 0.118735 | 0.105915  | 0.115822  | 0.107372  |
| 0         | 0.194784  | 0.191725  | 0.200029 | 0.195367  | 0.18954   | 0.183712  |
| 0.194784  | 0         | 0.116987  | 0.124126 | 0.121212  | 0.0509907 | 0.0821678 |
| 0.191725  | 0.116987  | 0         | 0.119901 | 0.105624  | 0.111742  | 0.102418  |
| 0.200029  | 0.124126  | 0.119901  | 0        | 0.118007  | 0.124709  | 0.118298  |
| 0.195367  | 0.121212  | 0.105624  | 0.118007 | 0         | 0.120338  | 0.108392  |
| 0.18954   | 0.0509907 | 0.111742  | 0.124709 | 0.120338  | 0         | 0.076049  |
| 0.183712  | 0.0821678 | 0.102418  | 0.118298 | 0.108392  | 0.076049  | 0         |
| 0.197407  | 0.119755  | 0.105624  | 0.116259 | 0.115093  | 0.11655   | 0.103438  |
| 0.200029  | 0.123252  | 0.115822  | 0.125    | 0.115093  | 0.121503  | 0.110431  |
| 0.0990676 | 0.191288  | 0.189977  | 0.201486 | 0.19595   | 0.187791  | 0.183129  |
| 0.186334  | 0.0571096 | 0.108829  | 0.114802 | 0.110723  | 0.0524476 | 0.0681818 |
| 0.0929487 | 0.186917  | 0.181818  | 0.197698 | 0.193328  | 0.18546   | 0.179341  |
| 0.0942599 | 0.186189  | 0.185169  | 0.196096 | 0.194056  | 0.182692  | 0.177448  |
| 0.204691  | 0.134907  | 0.121941  | 0.12704  | 0.0576923 | 0.132576  | 0.124126  |
| 0.210519  | 0.136072  | 0.128059  | 0.126457 | 0.128788  | 0.134033  | 0.124126  |
| 0.190997  | 0.111888  | 0.103001  | 0.11014  | 0.107226  | 0.109848  | 0.0949883 |
| 0.18648   | 0.0616259 | 0.103438  | 0.109994 | 0.107955  | 0.060169  | 0.0703671 |

|           |           |           |           |           |           |           |
|-----------|-----------|-----------|-----------|-----------|-----------|-----------|
| 0.189248  | 0.0501166 | 0.109703  | 0.117716  | 0.115385  | 0.0521562 | 0.0743007 |
| 0.189248  | 0.118881  | 0.0502622 | 0.122669  | 0.109557  | 0.116841  | 0.104604  |
| 0.19799   | 0.113928  | 0.109703  | 0.113345  | 0.0961538 | 0.115676  | 0.106352  |
| 0.200029  | 0.120047  | 0.111742  | 0.114219  | 0.0984848 | 0.119464  | 0.109848  |
| 0.196387  | 0.12398   | 0.115676  | 0.12398   | 0.124854  | 0.119027  | 0.109994  |
| 0.201486  | 0.127331  | 0.110868  | 0.121212  | 0.0492424 | 0.127622  | 0.115676  |
| 0.186189  | 0.113491  | 0.0445804 | 0.116404  | 0.103875  | 0.112034  | 0.100087  |
| 0.191579  | 0.0501166 | 0.112034  | 0.121795  | 0.116259  | 0.0518648 | 0.0734266 |
| 0.192016  | 0.106498  | 0.099359  | 0.0989219 | 0.102418  | 0.10271   | 0.0936772 |
| 0.198281  | 0.0617716 | 0.122815  | 0.126748  | 0.125583  | 0.0582751 | 0.085373  |
| 0.198864  | 0.125874  | 0.110868  | 0.11655   | 0.113054  | 0.124126  | 0.113928  |
| 0.200175  | 0.0633741 | 0.12704   | 0.133013  | 0.131847  | 0.0622086 | 0.0890152 |
| 0.133741  | 0.252768  | 0.254079  | 0.25539   | 0.260635  | 0.25102   | 0.246066  |
| 0.210956  | 0.13447   | 0.12704   | 0.122523  | 0.11757   | 0.134178  | 0.124854  |
| 0.206439  | 0.132576  | 0.121649  | 0.12704   | 0.116841  | 0.131119  | 0.123543  |
| 0.111888  | 0.210519  | 0.207751  | 0.219551  | 0.220425  | 0.207022  | 0.201777  |
| 0.206731  | 0.133741  | 0.118735  | 0.126457  | 0.117424  | 0.13345   | 0.12296   |
| 0.119318  | 0.224359  | 0.224505  | 0.229895  | 0.231352  | 0.223776  | 0.2162    |
| 0.204254  | 0.125728  | 0.119464  | 0.114948  | 0.110286  | 0.123397  | 0.114073  |
| 0.202943  | 0.130828  | 0.0587121 | 0.129662  | 0.118881  | 0.12704   | 0.117133  |
| 0.197698  | 0.115967  | 0.112034  | 0.125874  | 0.113636  | 0.113636  | 0.105769  |
| 0.206439  | 0.131993  | 0.115822  | 0.122378  | 0.0539044 | 0.133159  | 0.119464  |
| 0.0992133 | 0.194639  | 0.194784  | 0.203089  | 0.201632  | 0.193765  | 0.190851  |
| 0.202652  | 0.0579837 | 0.123397  | 0.126457  | 0.129079  | 0.0623543 | 0.0844988 |
| 0.18954   | 0.048951  | 0.111742  | 0.122669  | 0.116841  | 0.0469114 | 0.0757576 |
| 0.119755  | 0.221882  | 0.218531  | 0.226253  | 0.228584  | 0.21926   | 0.213432  |
| 0.199155  | 0.124417  | 0.113782  | 0.122378  | 0.103147  | 0.120629  | 0.113054  |
| 0.0981935 | 0.192745  | 0.189977  | 0.200029  | 0.19799   | 0.188666  | 0.186043  |
| 0.200758  | 0.124272  | 0.119172  | 0.117861  | 0.105332  | 0.117861  | 0.116113  |
| 0.19493   | 0.118735  | 0.0474942 | 0.122815  | 0.109411  | 0.115239  | 0.104167  |
| 0.202069  | 0.125874  | 0.104167  | 0.117133  | 0.111888  | 0.126166  | 0.111014  |
| 0.210227  | 0.13549   | 0.120775  | 0.123543  | 0.0600233 | 0.13549   | 0.125     |
| 0.190851  | 0.114073  | 0.105769  | 0.121066  | 0.116113  | 0.110577  | 0.104749  |
| 0.128497  | 0.159819  | 0.147727  | 0.161859  | 0.159528  | 0.156031  | 0.144668  |
| 0.188811  | 0.0467657 | 0.109266  | 0.117279  | 0.114365  | 0.0479312 | 0.0715326 |
| 0.198718  | 0.125146  | 0.121795  | 0.128642  | 0.119901  | 0.122232  | 0.114948  |
| 0.196096  | 0.124854  | 0.110431  | 0.128934  | 0.107372  | 0.123106  | 0.109703  |
| 0.201923  | 0.125146  | 0.127914  | 0.129808  | 0.121066  | 0.121649  | 0.114656  |
| 0.0980478 | 0.189685  | 0.185752  | 0.199301  | 0.194639  | 0.185023  | 0.18007   |
| 0.190268  | 0.116987  | 0.0439977 | 0.121649  | 0.105041  | 0.114365  | 0.105915  |
| 0.188957  | 0.129079  | 0.113491  | 0.126457  | 0.0541958 | 0.124417  | 0.11859   |
| 0.202797  | 0.120775  | 0.11451   | 0.113491  | 0.0971737 | 0.119027  | 0.10912   |
| 0.205565  | 0.12296   | 0.118444  | 0.114219  | 0.104895  | 0.12296   | 0.115093  |
| 0.195221  | 0.126603  | 0.0536131 | 0.124272  | 0.113782  | 0.122523  | 0.107955  |

|           |           |           |          |           |           |           |
|-----------|-----------|-----------|----------|-----------|-----------|-----------|
| 0.136801  | 0.250291  | 0.250146  | 0.254953 | 0.255536  | 0.24796   | 0.240967  |
| 0.198427  | 0.123397  | 0.101107  | 0.112908 | 0.106498  | 0.121358  | 0.105624  |
| 0.190268  | 0.121066  | 0.0906177 | 0.127477 | 0.115239  | 0.122523  | 0.111451  |
| 0.141608  | 0.17905   | 0.179779  | 0.180507 | 0.179633  | 0.173514  | 0.168852  |
| 0.104312  | 0.180507  | 0.174825  | 0.1875   | 0.183421  | 0.176136  | 0.171766  |
| 0.195804  | 0.121066  | 0.113054  | 0.124854 | 0.123397  | 0.115822  | 0.109411  |
| 0.190997  | 0.0506993 | 0.111451  | 0.122378 | 0.119172  | 0.0553613 | 0.0777972 |
| 0.198572  | 0.121503  | 0.108537  | 0.122086 | 0.0509907 | 0.120338  | 0.111014  |
| 0.206585  | 0.0729895 | 0.138112  | 0.136801 | 0.141754  | 0.0756119 | 0.100379  |
| 0.193182  | 0.116987  | 0.111305  | 0.123397 | 0.118735  | 0.113491  | 0.105624  |
| 0.196824  | 0.119755  | 0.113491  | 0.128497 | 0.126166  | 0.11655   | 0.111888  |
| 0.204837  | 0.132139  | 0.121795  | 0.121358 | 0.111451  | 0.126894  | 0.120775  |
| 0.186772  | 0.0520105 | 0.111305  | 0.117279 | 0.116113  | 0.0546329 | 0.076486  |
| 0.195367  | 0.0585664 | 0.122815  | 0.125291 | 0.128497  | 0.0588578 | 0.083042  |
| 0.187354  | 0.119027  | 0.115385  | 0.116987 | 0.110868  | 0.116404  | 0.10912   |
| 0.207022  | 0.132284  | 0.11757   | 0.125    | 0.0553613 | 0.131702  | 0.121795  |
| 0.217657  | 0.143794  | 0.129079  | 0.134761 | 0.0686189 | 0.145542  | 0.133887  |
| 0.198572  | 0.127622  | 0.105041  | 0.119755 | 0.109848  | 0.124126  | 0.109266  |
| 0.212995  | 0.13884   | 0.12296   | 0.130682 | 0.060169  | 0.137383  | 0.126894  |
| 0.210373  | 0.132139  | 0.125     | 0.123397 | 0.113782  | 0.128934  | 0.123106  |
| 0.105332  | 0.201923  | 0.196824  | 0.206585 | 0.208042  | 0.194639  | 0.193182  |
| 0.204837  | 0.13243   | 0.107226  | 0.123689 | 0.116404  | 0.128351  | 0.115822  |
| 0.0952797 | 0.185752  | 0.183275  | 0.194493 | 0.189831  | 0.182547  | 0.178176  |
| 0.195513  | 0.113491  | 0.112179  | 0.121649 | 0.109411  | 0.114948  | 0.105624  |
| 0.194639  | 0.126311  | 0.0556527 | 0.13039  | 0.118444  | 0.123397  | 0.113782  |
| 0.195513  | 0.127477  | 0.116259  | 0.11553  | 0.117279  | 0.124563  | 0.116404  |
| 0.193036  | 0.122378  | 0.109703  | 0.115385 | 0.111888  | 0.121503  | 0.109848  |
| 0.189685  | 0.0511364 | 0.115093  | 0.125728 | 0.11757   | 0.0511364 | 0.0773601 |
| 0.194056  | 0.0549242 | 0.118007  | 0.120775 | 0.11961   | 0.055507  | 0.0785256 |
| 0.186189  | 0.121941  | 0.0469114 | 0.125146 | 0.110577  | 0.118444  | 0.10912   |
| 0.198281  | 0.125     | 0.116696  | 0.125583 | 0.117424  | 0.11859   | 0.110723  |
| 0.202069  | 0.128497  | 0.119027  | 0.120047 | 0.117133  | 0.126166  | 0.116841  |
| 0.200758  | 0.137092  | 0.132284  | 0.123106 | 0.116113  | 0.134178  | 0.128934  |
| 0.132867  | 0.246066  | 0.245338  | 0.248397 | 0.251311  | 0.242279  | 0.236742  |
| 0.190268  | 0.120775  | 0.0512821 | 0.124563 | 0.112034  | 0.116113  | 0.108246  |
| 0.097465  | 0.18007   | 0.172931  | 0.187646 | 0.180944  | 0.174242  | 0.168706  |
| 0.101107  | 0.182255  | 0.180944  | 0.191871 | 0.185752  | 0.17905   | 0.176136  |
| 0.190414  | 0.125583  | 0.107372  | 0.128205 | 0.119464  | 0.123252  | 0.115967  |
| 0.194784  | 0.11655   | 0.0986305 | 0.113345 | 0.104604  | 0.117424  | 0.10373   |
| 0.198572  | 0.128205  | 0.0569639 | 0.131119 | 0.116259  | 0.124709  | 0.111014  |
| 0.188666  | 0.0562354 | 0.106498  | 0.119172 | 0.110723  | 0.0518648 | 0.0716783 |
| 0.184149  | 0.123689  | 0.0926573 | 0.108246 | 0.112908  | 0.114656  | 0.102418  |
| 0.20134   | 0.11961   | 0.11451   | 0.121649 | 0.104458  | 0.120775  | 0.113782  |
| 0.188666  | 0.076049  | 0.110868  | 0.120629 | 0.122378  | 0.07838   | 0.0944056 |

|           |           |           |          |           |           |           |
|-----------|-----------|-----------|----------|-----------|-----------|-----------|
| 0.204691  | 0.0620629 | 0.125146  | 0.126166 | 0.129371  | 0.0606061 | 0.0868298 |
| 0.189685  | 0.121358  | 0.04662   | 0.122815 | 0.111742  | 0.114656  | 0.105915  |
| 0.200758  | 0.0595862 | 0.121503  | 0.128351 | 0.125146  | 0.0610431 | 0.0907634 |
| 0.197698  | 0.125583  | 0.114656  | 0.119755 | 0.105478  | 0.11859   | 0.113345  |
| 0.202943  | 0.133159  | 0.118444  | 0.118007 | 0.118881  | 0.128205  | 0.121795  |
| 0.198135  | 0.128059  | 0.112471  | 0.125146 | 0.0479312 | 0.124854  | 0.11553   |
| 0.213432  | 0.134033  | 0.128351  | 0.123543 | 0.115385  | 0.13141   | 0.123252  |
| 0.198718  | 0.127185  | 0.109848  | 0.119901 | 0.118735  | 0.126894  | 0.113491  |
| 0.187354  | 0.120775  | 0.0591492 | 0.117279 | 0.109411  | 0.11757   | 0.106498  |
| 0.208042  | 0.132721  | 0.12704   | 0.135635 | 0.12398   | 0.132139  | 0.128934  |
| 0.097465  | 0.18007   | 0.177593  | 0.189394 | 0.184732  | 0.175408  | 0.171911  |
| 0.203963  | 0.0630828 | 0.126748  | 0.128351 | 0.13243   | 0.0651224 | 0.0936772 |
| 0.192016  | 0.0499709 | 0.116259  | 0.122523 | 0.118444  | 0.050845  | 0.0773601 |
| 0.19799   | 0.129079  | 0.113199  | 0.113054 | 0.115093  | 0.127331  | 0.115676  |
| 0.19493   | 0.118444  | 0.104604  | 0.112617 | 0.108829  | 0.116696  | 0.105332  |
| 0.199155  | 0.126748  | 0.111451  | 0.123252 | 0.0486597 | 0.127914  | 0.114802  |
| 0.202797  | 0.132139  | 0.118881  | 0.125146 | 0.0496795 | 0.132721  | 0.121941  |
| 0.0995047 | 0.187063  | 0.181964  | 0.195221 | 0.190559  | 0.183858  | 0.175408  |
| 0.184295  | 0.0780886 | 0.112325  | 0.121795 | 0.120921  | 0.0751748 | 0.0903263 |
| 0.173368  | 0.105624  | 0.104312  | 0.112908 | 0.109994  | 0.102418  | 0.0965909 |
| 0.196096  | 0.0543415 | 0.119172  | 0.12398  | 0.121649  | 0.0569639 | 0.0828963 |
| 0.0980478 | 0.188811  | 0.181964  | 0.192016 | 0.19289   | 0.180653  | 0.174825  |
| 0.183566  | 0.116113  | 0.0941142 | 0.112034 | 0.0989219 | 0.111742  | 0.099796  |
| 0.207314  | 0.129662  | 0.120775  | 0.120338 | 0.109848  | 0.129371  | 0.119172  |
| 0.196824  | 0.0492424 | 0.11757   | 0.124709 | 0.122378  | 0.0530303 | 0.0815851 |
| 0.201049  | 0.115239  | 0.107517  | 0.121941 | 0.115239  | 0.113491  | 0.104749  |
| 0.0961538 | 0.180507  | 0.178613  | 0.190705 | 0.186334  | 0.175845  | 0.173805  |
| 0.200466  | 0.119901  | 0.119755  | 0.117861 | 0.106789  | 0.118153  | 0.112908  |
| 0.186189  | 0.112908  | 0.109557  | 0.120775 | 0.107663  | 0.109411  | 0.105332  |
| 0.182984  | 0.119901  | 0.0984848 | 0.11553  | 0.105915  | 0.111742  | 0.102127  |
| 0.175408  | 0.114948  | 0.115967  | 0.12602  | 0.121649  | 0.110286  | 0.107955  |
| 0.202069  | 0.124417  | 0.118444  | 0.126166 | 0.118298  | 0.123252  | 0.112179  |
| 0.209645  | 0.132284  | 0.125146  | 0.122378 | 0.112762  | 0.128497  | 0.122378  |
| 0.190414  | 0.115676  | 0.0467657 | 0.122669 | 0.1081    | 0.11451   | 0.10373   |
| 0.201777  | 0.116841  | 0.121941  | 0.124126 | 0.119464  | 0.115385  | 0.111305  |
| 0.210373  | 0.145251  | 0.139569  | 0.142045 | 0.144668  | 0.142045  | 0.130682  |
| 0.125291  | 0.232372  | 0.229312  | 0.235286 | 0.237325  | 0.229167  | 0.222756  |
| 0.20542   | 0.130973  | 0.117133  | 0.121941 | 0.124854  | 0.130973  | 0.113782  |
| 0.200466  | 0.12602   | 0.118298  | 0.130099 | 0.119901  | 0.119318  | 0.112325  |
| 0.187791  | 0.0600233 | 0.111451  | 0.119464 | 0.117716  | 0.0603147 | 0.0818765 |
| 0.187646  | 0.124854  | 0.117716  | 0.133013 | 0.123397  | 0.117279  | 0.119901  |
| 0.193619  | 0.117424  | 0.113491  | 0.117424 | 0.110431  | 0.115093  | 0.108392  |
| 0.197698  | 0.122086  | 0.114073  | 0.115385 | 0.114219  | 0.12296   | 0.111597  |
| 0.19289   | 0.0610431 | 0.117133  | 0.123689 | 0.121649  | 0.064831  | 0.0840618 |



|           |           |           |          |           |           |           |
|-----------|-----------|-----------|----------|-----------|-----------|-----------|
| 0.205274  | 0.129079  | 0.126603  | 0.121212 | 0.112179  | 0.126457  | 0.120629  |
| 0.193036  | 0.117716  | 0.111451  | 0.127331 | 0.114802  | 0.115676  | 0.111014  |
| 0.124709  | 0.233246  | 0.230478  | 0.233829 | 0.239073  | 0.231789  | 0.224505  |
| 0.186043  | 0.112471  | 0.0960082 | 0.110723 | 0.0990676 | 0.111888  | 0.0979021 |
| 0.193328  | 0.114219  | 0.10708   | 0.111888 | 0.0987762 | 0.114802  | 0.104604  |
| 0.18852   | 0.119901  | 0.0439977 | 0.117861 | 0.107663  | 0.116696  | 0.101253  |
| 0.204108  | 0.127622  | 0.121066  | 0.129371 | 0.131702  | 0.125291  | 0.118881  |
| 0.21081   | 0.139569  | 0.119901  | 0.12704  | 0.13141   | 0.141317  | 0.124417  |
| 0.188666  | 0.112179  | 0.107663  | 0.121503 | 0.123252  | 0.110431  | 0.108974  |
| 0.188957  | 0.0506993 | 0.113782  | 0.122378 | 0.119464  | 0.0527389 | 0.0804196 |
| 0.194056  | 0.113491  | 0.104604  | 0.118444 | 0.113782  | 0.111742  | 0.101544  |
| 0.125     | 0.225962  | 0.22669   | 0.229749 | 0.233537  | 0.222465  | 0.216346  |
| 0.194639  | 0.0546329 | 0.120047  | 0.125728 | 0.12602   | 0.0520105 | 0.081148  |
| 0.207022  | 0.123834  | 0.121358  | 0.118881 | 0.108392  | 0.123252  | 0.116841  |
| 0.194493  | 0.117133  | 0.109411  | 0.122669 | 0.105186  | 0.11655   | 0.105478  |
| 0.202797  | 0.124272  | 0.121212  | 0.124854 | 0.123689  | 0.125728  | 0.115822  |
| 0.205711  | 0.128351  | 0.125     | 0.119318 | 0.113199  | 0.131847  | 0.118444  |
| 0.193765  | 0.120192  | 0.0495338 | 0.120484 | 0.109411  | 0.115239  | 0.104458  |
| 0.204545  | 0.129808  | 0.125291  | 0.121649 | 0.10912   | 0.126603  | 0.118444  |
| 0.213141  | 0.130828  | 0.126894  | 0.121503 | 0.115093  | 0.127622  | 0.122086  |
| 0.203817  | 0.121503  | 0.11553   | 0.116259 | 0.102564  | 0.120629  | 0.111597  |
| 0.191142  | 0.118444  | 0.04662   | 0.121649 | 0.109411  | 0.116404  | 0.10271   |
| 0.205128  | 0.133304  | 0.124417  | 0.128351 | 0.125146  | 0.128059  | 0.119027  |
| 0.209645  | 0.135198  | 0.129808  | 0.133159 | 0.128497  | 0.131119  | 0.123834  |
| 0.204983  | 0.13345   | 0.123106  | 0.119464 | 0.120921  | 0.132576  | 0.121503  |
| 0.206731  | 0.141317  | 0.126311  | 0.120921 | 0.124709  | 0.136655  | 0.126457  |
| 0.208916  | 0.135927  | 0.129953  | 0.130973 | 0.129225  | 0.131265  | 0.121941  |
| 0.193473  | 0.116987  | 0.0882867 | 0.107663 | 0.107663  | 0.115239  | 0.100379  |
| 0.218969  | 0.139277  | 0.133304  | 0.122378 | 0.114802  | 0.13549   | 0.130536  |
| 0.213869  | 0.135927  | 0.117133  | 0.133304 | 0.127185  | 0.13447   | 0.124854  |
| 0.100524  | 0.199155  | 0.200466  | 0.205274 | 0.205857  | 0.196241  | 0.189831  |
| 0.197844  | 0.123106  | 0.115676  | 0.124854 | 0.121358  | 0.121358  | 0.114656  |
| 0.199301  | 0.119318  | 0.112179  | 0.114948 | 0.103584  | 0.120484  | 0.108829  |
| 0.1875    | 0.126748  | 0.0520105 | 0.125291 | 0.115093  | 0.122669  | 0.110723  |
| 0.115967  | 0.216346  | 0.217366  | 0.224213 | 0.224796  | 0.215472  | 0.210227  |
| 0.118007  | 0.208479  | 0.202797  | 0.21081  | 0.212267  | 0.205565  | 0.199738  |
| 0.207314  | 0.130536  | 0.126603  | 0.121503 | 0.115967  | 0.129953  | 0.123543  |
| 0.132284  | 0.24257   | 0.245338  | 0.25102  | 0.251311  | 0.242279  | 0.236742  |
| 0.193765  | 0.120484  | 0.0894522 | 0.110577 | 0.112034  | 0.113199  | 0.100962  |
| 0.211247  | 0.140297  | 0.124126  | 0.132139 | 0.131847  | 0.144085  | 0.129516  |
| 0.19289   | 0.121358  | 0.0955711 | 0.114073 | 0.105332  | 0.118153  | 0.105624  |
| 0.206439  | 0.129371  | 0.123397  | 0.129079 | 0.122378  | 0.125874  | 0.119172  |
| 0.0955711 | 0.183129  | 0.180653  | 0.189248 | 0.189248  | 0.181381  | 0.176136  |
| 0.201195  | 0.127331  | 0.11553   | 0.129371 | 0.114219  | 0.126457  | 0.115093  |

|           |           |           |          |           |           |           |
|-----------|-----------|-----------|----------|-----------|-----------|-----------|
| 0.0986305 | 0.18852   | 0.184586  | 0.19493  | 0.193473  | 0.185315  | 0.179487  |
| 0.196241  | 0.117424  | 0.103293  | 0.126166 | 0.113345  | 0.118007  | 0.112179  |
| 0.183421  | 0.101399  | 0.114948  | 0.116259 | 0.113928  | 0.0990676 | 0.102273  |
| 0.197115  | 0.127622  | 0.114948  | 0.120047 | 0.121503  | 0.125     | 0.113928  |
| 0.181672  | 0.104604  | 0.104749  | 0.11859  | 0.114219  | 0.109848  | 0.100816  |
| 0.187646  | 0.113491  | 0.0448718 | 0.115239 | 0.102127  | 0.107955  | 0.0980478 |
| 0.192308  | 0.108829  | 0.105186  | 0.121066 | 0.108537  | 0.111451  | 0.100962  |
| 0.185606  | 0.118153  | 0.0929487 | 0.110577 | 0.0995047 | 0.116113  | 0.100087  |
| 0.190122  | 0.0495338 | 0.10708   | 0.117133 | 0.114219  | 0.0463287 | 0.0719697 |
| 0.20338   | 0.122232  | 0.11655   | 0.114948 | 0.104749  | 0.121066  | 0.116113  |
| 0.196096  | 0.114948  | 0.102855  | 0.114948 | 0.112325  | 0.115822  | 0.103001  |
| 0.188666  | 0.121212  | 0.0971737 | 0.112471 | 0.101981  | 0.119755  | 0.102273  |
| 0.190559  | 0.126894  | 0.102855  | 0.118735 | 0.11757   | 0.124272  | 0.116113  |
| 0.201049  | 0.0598776 | 0.123252  | 0.123689 | 0.126894  | 0.0622086 | 0.0898893 |
| 0.192162  | 0.122086  | 0.10912   | 0.108683 | 0.109557  | 0.119464  | 0.108392  |
| 0.195804  | 0.11961   | 0.1081    | 0.119318 | 0.105332  | 0.11553   | 0.110286  |
| 0.187209  | 0.113054  | 0.0435606 | 0.115093 | 0.102564  | 0.111305  | 0.0979021 |
| 0.196824  | 0.117133  | 0.119318  | 0.118298 | 0.107226  | 0.115967  | 0.112762  |
| 0.197698  | 0.12296   | 0.114365  | 0.125874 | 0.113928  | 0.118881  | 0.110723  |
| 0.205128  | 0.129516  | 0.112179  | 0.12398  | 0.0514277 | 0.128351  | 0.11553   |
| 0.198427  | 0.125146  | 0.113345  | 0.116404 | 0.111742  | 0.126311  | 0.112908  |
| 0.191579  | 0.0504079 | 0.11116   | 0.122086 | 0.117716  | 0.0495338 | 0.0743007 |
| 0.200175  | 0.0587121 | 0.124126  | 0.126311 | 0.12602   | 0.0616259 | 0.08581   |
| 0.206585  | 0.0645396 | 0.13141   | 0.132721 | 0.134761  | 0.0665793 | 0.0957168 |
| 0.191288  | 0.113928  | 0.103001  | 0.106935 | 0.0979021 | 0.112179  | 0.099359  |
| 0.190122  | 0.117133  | 0.0493881 | 0.120921 | 0.108392  | 0.113928  | 0.103438  |
| 0.188228  | 0.11116   | 0.11014   | 0.114073 | 0.103584  | 0.110577  | 0.0983392 |
| 0.210082  | 0.135927  | 0.131993  | 0.131847 | 0.126894  | 0.135052  | 0.124854  |
| 0.196533  | 0.121503  | 0.102418  | 0.112179 | 0.1081    | 0.122378  | 0.104895  |
| 0.218677  | 0.144814  | 0.132721  | 0.135781 | 0.0699301 | 0.145688  | 0.133159  |
| 0.206148  | 0.134907  | 0.0665793 | 0.13549  | 0.125874  | 0.132867  | 0.122378  |
| 0.20134   | 0.124854  | 0.116259  | 0.127768 | 0.126603  | 0.122815  | 0.114073  |
| 0.190997  | 0.108392  | 0.103293  | 0.115385 | 0.108683  | 0.108683  | 0.0984848 |
| 0.192016  | 0.108829  | 0.11014   | 0.118735 | 0.11116   | 0.109411  | 0.103001  |
| 0.205128  | 0.133596  | 0.119755  | 0.117861 | 0.119027  | 0.132139  | 0.122232  |
| 0.116696  | 0.201632  | 0.200321  | 0.203963 | 0.206585  | 0.195221  | 0.190851  |
| 0.191288  | 0.118298  | 0.109994  | 0.117424 | 0.105769  | 0.115676  | 0.109848  |
| 0.197844  | 0.121358  | 0.110723  | 0.126894 | 0.116113  | 0.118444  | 0.10912   |
| 0.201486  | 0.124126  | 0.118444  | 0.122378 | 0.116259  | 0.121503  | 0.111597  |
| 0.195513  | 0.125146  | 0.110431  | 0.11757  | 0.111742  | 0.124272  | 0.110286  |
| 0.199155  | 0.125874  | 0.109703  | 0.129079 | 0.119755  | 0.127914  | 0.115967  |
| 0.200321  | 0.117133  | 0.123106  | 0.111014 | 0.117716  | 0.117424  | 0.111888  |
| 0.201923  | 0.119318  | 0.124709  | 0.112617 | 0.122523  | 0.118735  | 0.11553   |
| 0.198572  | 0.123252  | 0.113199  | 0.122086 | 0.126166  | 0.117133  | 0.110431  |

|          |           |           |           |           |           |           |
|----------|-----------|-----------|-----------|-----------|-----------|-----------|
| 0.201195 | 0.120921  | 0.110868  | 0.108683  | 0.0979021 | 0.116841  | 0.111014  |
| 0.205857 | 0.13141   | 0.124272  | 0.129371  | 0.122086  | 0.128788  | 0.117716  |
| 0.197115 | 0.122669  | 0.108246  | 0.118298  | 0.114219  | 0.119755  | 0.106352  |
| 0.198427 | 0.122523  | 0.106643  | 0.119027  | 0.115822  | 0.124272  | 0.110577  |
| 0.17264  | 0.172786  | 0.169143  | 0.180361  | 0.172203  | 0.173368  | 0.162587  |
| 0.189831 | 0.0541958 | 0.110577  | 0.119464  | 0.116841  | 0.0533217 | 0.0748834 |
| 0.193765 | 0.13243   | 0.126166  | 0.13039   | 0.125437  | 0.126311  | 0.118444  |
| 0.205857 | 0.134033  | 0.110577  | 0.120629  | 0.11451   | 0.129371  | 0.113054  |
| 0.197844 | 0.117861  | 0.117716  | 0.124563  | 0.123397  | 0.112325  | 0.112325  |
| 0.195513 | 0.109703  | 0.101399  | 0.103584  | 0.107955  | 0.106206  | 0.0971737 |
| 0.193765 | 0.112034  | 0.0979021 | 0.10708   | 0.105041  | 0.111451  | 0.0977564 |
| 0.200466 | 0.116404  | 0.106643  | 0.105624  | 0.10912   | 0.112908  | 0.103584  |
| 0.205711 | 0.13243   | 0.11859   | 0.123106  | 0.119318  | 0.126603  | 0.111742  |
| 0.187937 | 0.0863928 | 0.105478  | 0.120775  | 0.116113  | 0.0852273 | 0.090472  |
| 0.206731 | 0.132284  | 0.118153  | 0.123834  | 0.118007  | 0.130536  | 0.122669  |
| 0.19289  | 0.110868  | 0.106061  | 0.11757   | 0.101544  | 0.112617  | 0.100379  |
| 0.195076 | 0.126457  | 0.113782  | 0.104021  | 0.109848  | 0.121795  | 0.111305  |
| 0.217075 | 0.138258  | 0.124709  | 0.12602   | 0.123106  | 0.135635  | 0.126311  |
| 0.202797 | 0.130099  | 0.1081    | 0.106789  | 0.112325  | 0.127185  | 0.112034  |
| 0.199883 | 0.124563  | 0.116841  | 0.0476399 | 0.116696  | 0.124272  | 0.118444  |
| 0.198135 | 0.126311  | 0.10373   | 0.108537  | 0.106498  | 0.123397  | 0.109703  |
| 0.199883 | 0.127185  | 0.107226  | 0.105915  | 0.110286  | 0.124272  | 0.111451  |
| 0.194056 | 0.118153  | 0.0941142 | 0.107663  | 0.10067   | 0.114365  | 0.10067   |
| 0.206439 | 0.12704   | 0.10708   | 0.115385  | 0.110431  | 0.127331  | 0.115385  |
| 0.194784 | 0.120338  | 0.097465  | 0.114219  | 0.0976107 | 0.117133  | 0.104312  |
| 0.211101 | 0.141608  | 0.135635  | 0.141026  | 0.131993  | 0.1419    | 0.137529  |
| 0.19799  | 0.126748  | 0.124272  | 0.13549   | 0.123252  | 0.129371  | 0.122669  |
| 0.200321 | 0.120338  | 0.100962  | 0.111888  | 0.0984848 | 0.117133  | 0.104604  |
| 0.2162   | 0.136801  | 0.137238  | 0.128934  | 0.120775  | 0.135927  | 0.130099  |
| 0.196387 | 0.121941  | 0.114802  | 0.124854  | 0.118153  | 0.121649  | 0.110577  |
| 0.210664 | 0.141754  | 0.127622  | 0.133596  | 0.134761  | 0.13884   | 0.13039   |
| 0.197552 | 0.121941  | 0.102564  | 0.117861  | 0.0983392 | 0.116987  | 0.106206  |
| 0.213141 | 0.144522  | 0.136509  | 0.138986  | 0.140152  | 0.142483  | 0.139569  |
| 0.200321 | 0.137238  | 0.126311  | 0.125583  | 0.119464  | 0.134615  | 0.127622  |
| 0.210519 | 0.14627   | 0.131847  | 0.125     | 0.129662  | 0.143648  | 0.131702  |
| 0.208188 | 0.125874  | 0.115822  | 0.118007  | 0.118881  | 0.124417  | 0.113054  |
| 0.198718 | 0.124563  | 0.099359  | 0.112908  | 0.105915  | 0.118444  | 0.105915  |
| 0.19595  | 0.120338  | 0.099796  | 0.113345  | 0.104604  | 0.122086  | 0.105478  |
| 0.203963 | 0.124563  | 0.114802  | 0.116404  | 0.112325  | 0.120192  | 0.111742  |
| 0.206002 | 0.128642  | 0.113054  | 0.121941  | 0.10912   | 0.129516  | 0.116987  |
| 0.214307 | 0.136072  | 0.116696  | 0.122669  | 0.11451   | 0.132867  | 0.119755  |
| 0.194493 | 0.125291  | 0.113199  | 0.12296   | 0.117133  | 0.122378  | 0.116841  |
| 0.193619 | 0.118298  | 0.105624  | 0.110431  | 0.10373   | 0.117133  | 0.106935  |
| 0.194056 | 0.122523  | 0.10169   | 0.112908  | 0.105915  | 0.119027  | 0.107955  |

|          |          |           |          |          |           |           |
|----------|----------|-----------|----------|----------|-----------|-----------|
| 0.200029 | 0.127331 | 0.104167  | 0.117424 | 0.117133 | 0.12704   | 0.108974  |
| 0.195076 | 0.120629 | 0.100379  | 0.114802 | 0.1081   | 0.117133  | 0.104312  |
| 0.204254 | 0.13039  | 0.106935  | 0.120484 | 0.113491 | 0.129516  | 0.112908  |
| 0.193765 | 0.117861 | 0.102564  | 0.11961  | 0.100379 | 0.112325  | 0.101836  |
| 0.185169 | 0.108683 | 0.107372  | 0.122378 | 0.121795 | 0.110431  | 0.106935  |
| 0.196241 | 0.11859  | 0.101253  | 0.116841 | 0.118007 | 0.113345  | 0.106061  |
| 0.191288 | 0.117716 | 0.0884324 | 0.106352 | 0.1081   | 0.113928  | 0.0976107 |
| 0.197698 | 0.12296  | 0.101253  | 0.113054 | 0.109266 | 0.120338  | 0.106352  |
| 0.185023 | 0.107955 | 0.105478  | 0.118444 | 0.119901 | 0.108537  | 0.105624  |
| 0.198281 | 0.112179 | 0.107663  | 0.110723 | 0.113636 | 0.113345  | 0.103147  |
| 0.195659 | 0.106935 | 0.119318  | 0.123252 | 0.120629 | 0.105769  | 0.112762  |
| 0.181964 | 0.101399 | 0.0983392 | 0.114219 | 0.109848 | 0.0987762 | 0.0935315 |
| 0.208625 | 0.126894 | 0.120921  | 0.121358 | 0.125437 | 0.130099  | 0.11961   |

| TDr_2540  | TDr_2553  | TDr_2554 | TDr_2555  | TDr_2558 | TDr_2561 | TDr_2564 |
|-----------|-----------|----------|-----------|----------|----------|----------|
| 0.105769  | 0.125291  | 0.180798 | 0.111305  | 0.175845 | 0.173077 | 0.129953 |
| 0.112325  | 0.117279  | 0.187063 | 0.101544  | 0.182692 | 0.178176 | 0.132721 |
| 0.107372  | 0.114365  | 0.183566 | 0.0983392 | 0.178904 | 0.178176 | 0.128934 |
| 0.11553   | 0.113491  | 0.191434 | 0.0861014 | 0.187354 | 0.184586 | 0.126894 |
| 0.129516  | 0.128351  | 0.208042 | 0.126894  | 0.206002 | 0.204691 | 0.13447  |
| 0.131265  | 0.129808  | 0.199883 | 0.121358  | 0.195804 | 0.195076 | 0.136801 |
| 0.117133  | 0.12704   | 0.204983 | 0.121212  | 0.198281 | 0.198427 | 0.128205 |
| 0.11014   | 0.113636  | 0.186626 | 0.0976107 | 0.182547 | 0.183858 | 0.125291 |
| 0.0884324 | 0.112325  | 0.191142 | 0.0942599 | 0.185606 | 0.182255 | 0.120484 |
| 0.0844988 | 0.11859   | 0.193619 | 0.107517  | 0.191579 | 0.191142 | 0.124709 |
| 0.102127  | 0.119901  | 0.179487 | 0.114656  | 0.177448 | 0.173805 | 0.131556 |
| 0.109266  | 0.101981  | 0.18546  | 0.102273  | 0.183129 | 0.184732 | 0.11655  |
| 0.0941142 | 0.117133  | 0.195659 | 0.102564  | 0.190122 | 0.190851 | 0.120921 |
| 0.123397  | 0.141171  | 0.149767 | 0.122232  | 0.144231 | 0.143502 | 0.151661 |
| 0.123252  | 0.132576  | 0.200612 | 0.122669  | 0.195367 | 0.194056 | 0.127331 |
| 0.109994  | 0.127768  | 0.200466 | 0.113491  | 0.199592 | 0.195659 | 0.121358 |
| 0.111597  | 0.0932401 | 0.189831 | 0.109266  | 0.186626 | 0.188811 | 0.11655  |
| 0.142337  | 0.13447   | 0.217657 | 0.131847  | 0.20979  | 0.211101 | 0.157488 |
| 0.107663  | 0.111742  | 0.178904 | 0.0968823 | 0.180361 | 0.176719 | 0.125728 |
| 0.202069  | 0.205274  | 0.136655 | 0.195659  | 0.141026 | 0.137966 | 0.21081  |
| 0.122378  | 0.120629  | 0.200612 | 0.124709  | 0.194202 | 0.192599 | 0.141317 |
| 0.114073  | 0.112617  | 0.199883 | 0.10912   | 0.197261 | 0.196533 | 0.132721 |
| 0.102564  | 0.111597  | 0.188374 | 0.102273  | 0.186626 | 0.182984 | 0.121503 |
| 0.123689  | 0.12602   | 0.204837 | 0.118444  | 0.204545 | 0.201777 | 0.122815 |
| 0.0987762 | 0.11014   | 0.185169 | 0.0973193 | 0.18109  | 0.181818 | 0.115385 |
| 0.128788  | 0.129953  | 0.206731 | 0.123834  | 0.201486 | 0.200758 | 0.141026 |
| 0.124709  | 0.119755  | 0.200029 | 0.121212  | 0.199155 | 0.195804 | 0.119464 |
| 0.114219  | 0.117133  | 0.20877  | 0.113345  | 0.203234 | 0.200758 | 0.126748 |
| 0.124126  | 0.131993  | 0.207896 | 0.12296   | 0.201195 | 0.200175 | 0.131993 |
| 0.112471  | 0.119464  | 0.206439 | 0.115676  | 0.201195 | 0.201632 | 0.120338 |
| 0.117279  | 0.122815  | 0.195221 | 0.122523  | 0.194056 | 0.192453 | 0.130682 |
| 0.116259  | 0.117133  | 0.200903 | 0.11451   | 0.200612 | 0.199009 | 0.122378 |
| 0.10169   | 0.111014  | 0.186626 | 0.107517  | 0.183421 | 0.181235 | 0.11655  |
| 0.107809  | 0.122378  | 0.197407 | 0.111305  | 0.193619 | 0.191142 | 0.115967 |
| 0.106206  | 0.12398   | 0.202506 | 0.119901  | 0.201632 | 0.200321 | 0.121358 |
| 0.113345  | 0.130536  | 0.206731 | 0.121503  | 0.2044   | 0.202214 | 0.125291 |
| 0.12602   | 0.133013  | 0.213287 | 0.126603  | 0.210373 | 0.209353 | 0.13884  |
| 0.107809  | 0.120047  | 0.202943 | 0.115385  | 0.195076 | 0.194347 | 0.126457 |
| 0.105769  | 0.113054  | 0.193036 | 0.107226  | 0.191288 | 0.189977 | 0.115676 |
| 0.113345  | 0.127331  | 0.203234 | 0.111305  | 0.201195 | 0.197844 | 0.130828 |
| 0.103438  | 0.112471  | 0.190997 | 0.0990676 | 0.188083 | 0.188228 | 0.126748 |
| 0.133159  | 0.144522  | 0.215181 | 0.133159  | 0.212267 | 0.212121 | 0.14627  |

|           |           |          |          |          |          |          |
|-----------|-----------|----------|----------|----------|----------|----------|
| 0.140443  | 0.147436  | 0.214307 | 0.138403 | 0.211684 | 0.210373 | 0.146853 |
| 0.103875  | 0.11757   | 0.192016 | 0.104167 | 0.189977 | 0.188374 | 0.125437 |
| 0.0948427 | 0.105041  | 0.193182 | 0.103875 | 0.193473 | 0.190705 | 0.113491 |
| 0.0996503 | 0.11859   | 0.203526 | 0.116841 | 0.200903 | 0.203089 | 0.120047 |
| 0.114802  | 0.110723  | 0.197698 | 0.113636 | 0.191579 | 0.188811 | 0.126457 |
| 0.123689  | 0.13884   | 0.212121 | 0.131556 | 0.207751 | 0.209645 | 0.140589 |
| 0.105041  | 0.114948  | 0.197261 | 0.106498 | 0.192308 | 0.194493 | 0.125728 |
| 0.102564  | 0.119755  | 0.19391  | 0.11014  | 0.188666 | 0.191434 | 0.122669 |
| 0.143502  | 0.149038  | 0.216492 | 0.137383 | 0.212995 | 0.20877  | 0.142628 |
| 0.127768  | 0.122523  | 0.20542  | 0.126603 | 0.198135 | 0.197407 | 0.13243  |
| 0.111305  | 0.118881  | 0.189248 | 0.106352 | 0.189831 | 0.188228 | 0.11655  |
| 0.103147  | 0.127914  | 0.206439 | 0.119464 | 0.203234 | 0.20134  | 0.136655 |
| 0.115385  | 0.119172  | 0.183421 | 0.083042 | 0.180216 | 0.177739 | 0.129662 |
| 0.137821  | 0.133159  | 0.223048 | 0.129371 | 0.215472 | 0.215618 | 0.131993 |
| 0.121358  | 0.132139  | 0.206585 | 0.120192 | 0.204254 | 0.204108 | 0.131556 |
| 0.106206  | 0.114656  | 0.197844 | 0.105041 | 0.191434 | 0.191871 | 0.12602  |
| 0.108246  | 0.11757   | 0.193473 | 0.114365 | 0.189103 | 0.190122 | 0.127768 |
| 0.104021  | 0.12704   | 0.202652 | 0.115385 | 0.205565 | 0.203089 | 0.128205 |
| 0.13549   | 0.140152  | 0.220425 | 0.125583 | 0.213724 | 0.212995 | 0.145979 |
| 0.130828  | 0.148893  | 0.220134 | 0.125583 | 0.211101 | 0.215909 | 0.147145 |
| 0.157488  | 0.170892  | 0.167249 | 0.149913 | 0.166667 | 0.158362 | 0.168561 |
| 0.105624  | 0.112908  | 0.19697  | 0.10708  | 0.192016 | 0.190705 | 0.125437 |
| 0.10708   | 0.113782  | 0.198718 | 0.105624 | 0.194056 | 0.190122 | 0.12398  |
| 0.105041  | 0.112617  | 0.191725 | 0.103293 | 0.189103 | 0.190122 | 0.121066 |
| 0.134033  | 0.142774  | 0.207896 | 0.136946 | 0.2044   | 0.199592 | 0.1419   |
| 0.104604  | 0.113928  | 0.193619 | 0.100816 | 0.188083 | 0.187063 | 0.122086 |
| 0.132139  | 0.130099  | 0.205128 | 0.125146 | 0.20134  | 0.198864 | 0.142045 |
| 0.107955  | 0.119318  | 0.20542  | 0.118735 | 0.205128 | 0.202069 | 0.126603 |
| 0.113345  | 0.115093  | 0.195659 | 0.111888 | 0.190122 | 0.190268 | 0.126748 |
| 0.143357  | 0.146853  | 0.208188 | 0.136655 | 0.2044   | 0.20542  | 0.148019 |
| 0.117716  | 0.125     | 0.201486 | 0.113345 | 0.198572 | 0.199301 | 0.12704  |
| 0.12602   | 0.140297  | 0.214452 | 0.13039  | 0.211247 | 0.21285  | 0.139423 |
| 0.129079  | 0.121212  | 0.2044   | 0.124417 | 0.201195 | 0.197844 | 0.132867 |
| 0.112908  | 0.0986305 | 0.188228 | 0.105041 | 0.185897 | 0.180798 | 0.126311 |
| 0.103875  | 0.115239  | 0.192308 | 0.104458 | 0.187063 | 0.187209 | 0.122523 |
| 0.109994  | 0.118735  | 0.195804 | 0.105332 | 0.18852  | 0.193328 | 0.132721 |
| 0.127768  | 0.132721  | 0.212121 | 0.121358 | 0.208625 | 0.206731 | 0.138549 |
| 0.104895  | 0.117424  | 0.19391  | 0.106061 | 0.188083 | 0.190268 | 0.123834 |
| 0.131556  | 0.139132  | 0.216783 | 0.126311 | 0.215035 | 0.21285  | 0.14933  |
| 0.116696  | 0.126603  | 0.199592 | 0.121358 | 0.191142 | 0.190705 | 0.134761 |
| 0.116987  | 0.121358  | 0.203089 | 0.110577 | 0.195513 | 0.19391  | 0.120484 |
| 0.114073  | 0.118735  | 0.19697  | 0.110868 | 0.190559 | 0.191579 | 0.127477 |
| 0.112034  | 0.122815  | 0.203089 | 0.112034 | 0.196096 | 0.194784 | 0.13243  |
| 0.109411  | 0.113199  | 0.195513 | 0.109703 | 0.194347 | 0.190705 | 0.127185 |

|           |          |          |           |          |          |          |
|-----------|----------|----------|-----------|----------|----------|----------|
| 0.108537  | 0.118153 | 0.194056 | 0.10912   | 0.189977 | 0.191579 | 0.122523 |
| 0.128205  | 0.142483 | 0.216929 | 0.129662  | 0.211101 | 0.210664 | 0.139277 |
| 0.101399  | 0.111014 | 0.19391  | 0.108392  | 0.188957 | 0.187646 | 0.119172 |
| 0.0965909 | 0.114656 | 0.199301 | 0.105624  | 0.194639 | 0.189248 | 0.116404 |
| 0.120775  | 0.127768 | 0.207168 | 0.120775  | 0.20338  | 0.20236  | 0.128351 |
| 0.120775  | 0.125728 | 0.205128 | 0.124272  | 0.202506 | 0.199446 | 0.126894 |
| 0.122232  | 0.126311 | 0.212995 | 0.128934  | 0.210664 | 0.207022 | 0.132139 |
| 0.130245  | 0.134615 | 0.220717 | 0.130828  | 0.21722  | 0.212413 | 0.143648 |
| 0.113199  | 0.118735 | 0.193182 | 0.113491  | 0.189977 | 0.188083 | 0.12602  |
| 0.184878  | 0.186334 | 0.157343 | 0.174971  | 0.156469 | 0.153118 | 0.188957 |
| 0.106935  | 0.11014  | 0.19391  | 0.10169   | 0.190705 | 0.190559 | 0.118298 |
| 0.128351  | 0.133596 | 0.216783 | 0.130099  | 0.212704 | 0.207896 | 0.136509 |
| 0.118735  | 0.125146 | 0.208916 | 0.121066  | 0.206585 | 0.201195 | 0.129516 |
| 0.131702  | 0.131993 | 0.216346 | 0.130828  | 0.211976 | 0.20979  | 0.139569 |
| 0.106498  | 0.11116  | 0.200175 | 0.108829  | 0.196678 | 0.192745 | 0.118153 |
| 0.121358  | 0.128351 | 0.215326 | 0.124854  | 0.209499 | 0.206148 | 0.134761 |
| 0.103293  | 0.109703 | 0.199009 | 0.111742  | 0.198135 | 0.193619 | 0.122815 |
| 0.115093  | 0.12296  | 0.2044   | 0.121795  | 0.201777 | 0.197261 | 0.124417 |
| 0.107809  | 0.119172 | 0.198281 | 0.109266  | 0.19595  | 0.193765 | 0.124126 |
| 0.131119  | 0.132284 | 0.215763 | 0.131993  | 0.215472 | 0.20979  | 0.136655 |
| 0.0973193 | 0.109266 | 0.19595  | 0.111888  | 0.190122 | 0.188811 | 0.115676 |
| 0.130682  | 0.131847 | 0.208333 | 0.124563  | 0.204837 | 0.207314 | 0.142337 |
| 0.111597  | 0.112762 | 0.196824 | 0.113345  | 0.194493 | 0.194347 | 0.127914 |
| 0.11961   | 0.136218 | 0.210373 | 0.119901  | 0.208916 | 0.205274 | 0.132139 |
| 0.121503  | 0.132576 | 0.208188 | 0.128205  | 0.20236  | 0.200466 | 0.126457 |
| 0.101399  | 0.109557 | 0.19391  | 0.109266  | 0.194784 | 0.192599 | 0.121503 |
| 0.142191  | 0.144231 | 0.210519 | 0.135198  | 0.203526 | 0.204837 | 0.146853 |
| 0.105624  | 0.109703 | 0.199009 | 0.118444  | 0.198427 | 0.193619 | 0.12398  |
| 0.10271   | 0.114073 | 0.201049 | 0.110577  | 0.196096 | 0.196533 | 0.117861 |
| 0.108392  | 0.113345 | 0.201777 | 0.112471  | 0.19595  | 0.196387 | 0.122086 |
| 0.130828  | 0.13549  | 0.215181 | 0.131119  | 0.209936 | 0.210082 | 0.145688 |
| 0.124126  | 0.12296  | 0.1875   | 0.118298  | 0.181381 | 0.177739 | 0.125874 |
| 0.101107  | 0.108392 | 0.19799  | 0.104021  | 0.195367 | 0.192599 | 0.121503 |
| 0.100233  | 0.108974 | 0.193328 | 0.108683  | 0.191288 | 0.187063 | 0.118881 |
| 0.109994  | 0.113199 | 0.195804 | 0.112034  | 0.194639 | 0.192453 | 0.125437 |
| 0.113928  | 0.127622 | 0.210519 | 0.121795  | 0.208188 | 0.208625 | 0.130245 |
| 0.109994  | 0.119318 | 0.199301 | 0.119318  | 0.197261 | 0.196241 | 0.120484 |
| 0.0944056 | 0.104604 | 0.190414 | 0.0999417 | 0.185752 | 0.183858 | 0.112762 |
| 0.0920746 | 0.107226 | 0.190122 | 0.0990676 | 0.190414 | 0.187937 | 0.118298 |
| 0.0945513 | 0.110577 | 0.196387 | 0.105041  | 0.194347 | 0.192162 | 0.11757  |
| 0.114365  | 0.119318 | 0.195513 | 0.107372  | 0.192016 | 0.189831 | 0.120484 |
| 0.114219  | 0.129953 | 0.207314 | 0.126166  | 0.204983 | 0.202797 | 0.128497 |
| 0.0977564 | 0.105041 | 0.197261 | 0.104167  | 0.196096 | 0.19391  | 0.116113 |
| 0.0958625 | 0.105769 | 0.190997 | 0.101399  | 0.190414 | 0.187646 | 0.117424 |

|           |          |          |           |           |           |          |
|-----------|----------|----------|-----------|-----------|-----------|----------|
| 0.111305  | 0.123252 | 0.203817 | 0.123252  | 0.20236   | 0.201632  | 0.126166 |
| 0.0960082 | 0.106498 | 0.192308 | 0.107955  | 0.190268  | 0.190122  | 0.119318 |
| 0.113491  | 0.127477 | 0.191434 | 0.116987  | 0.190851  | 0.186043  | 0.129516 |
| 0.130099  | 0.135052 | 0.206585 | 0.126311  | 0.204254  | 0.200612  | 0.133596 |
| 0.105041  | 0.116404 | 0.199009 | 0.114365  | 0.200175  | 0.197698  | 0.121649 |
| 0.100233  | 0.110723 | 0.199738 | 0.105769  | 0.194784  | 0.195513  | 0.116841 |
| 0.102564  | 0.107809 | 0.195076 | 0.104895  | 0.192453  | 0.189685  | 0.116259 |
| 0.0949883 | 0.110431 | 0.188957 | 0.104021  | 0.186043  | 0.182692  | 0.116259 |
| 0.11014   | 0.121212 | 0.20877  | 0.119172  | 0.205565  | 0.20338   | 0.133159 |
| 0.0914918 | 0.11014  | 0.191871 | 0.103438  | 0.18954   | 0.189394  | 0.114219 |
| 0.132721  | 0.133304 | 0.211247 | 0.131847  | 0.20979   | 0.209645  | 0.135635 |
| 0.12704   | 0.136072 | 0.206731 | 0.129662  | 0.200903  | 0.203089  | 0.133159 |
| 0.113636  | 0.128788 | 0.204691 | 0.113928  | 0.202652  | 0.200466  | 0.127914 |
| 0.101253  | 0.11757  | 0.19697  | 0.114948  | 0.192599  | 0.192453  | 0.122523 |
| 0.112908  | 0.111742 | 0.196387 | 0.114073  | 0.19289   | 0.188666  | 0.123397 |
| 0.10373   | 0.106352 | 0.196824 | 0.108974  | 0.194493  | 0.192599  | 0.118007 |
| 0.104167  | 0.112617 | 0.198135 | 0.104458  | 0.195513  | 0.192745  | 0.117279 |
| 0.100379  | 0.114948 | 0.196678 | 0.104167  | 0.191434  | 0.190705  | 0.116696 |
| 0.112617  | 0.115822 | 0.184732 | 0.0849359 | 0.182692  | 0.176428  | 0.126311 |
| 0.128351  | 0.130099 | 0.215035 | 0.124563  | 0.206876  | 0.206148  | 0.133596 |
| 0.106352  | 0.11451  | 0.201777 | 0.113636  | 0.198864  | 0.197552  | 0.126457 |
| 0.116113  | 0.129808 | 0.204254 | 0.123689  | 0.201632  | 0.200612  | 0.140006 |
| 0.130245  | 0.132867 | 0.215181 | 0.127331  | 0.211393  | 0.210373  | 0.137238 |
| 0.192308  | 0.192599 | 0.104749 | 0.182692  | 0.0971737 | 0.0979021 | 0.205128 |
| 0.239365  | 0.239948 | 0.123834 | 0.224213  | 0.135198  | 0.128934  | 0.241696 |
| 0.112179  | 0.115093 | 0.18109  | 0.0696387 | 0.17905   | 0.176573  | 0.123834 |
| 0.109994  | 0.107955 | 0.191725 | 0.105041  | 0.186772  | 0.1875    | 0.119318 |
| 0.101836  | 0.106206 | 0.191434 | 0.104167  | 0.185606  | 0.183421  | 0.115822 |
| 0.110868  | 0.102418 | 0.193765 | 0.103001  | 0.189685  | 0.188083  | 0.125437 |
| 0.121649  | 0.135344 | 0.202797 | 0.121941  | 0.197844  | 0.197698  | 0.126603 |
| 0.11553   | 0.108537 | 0.200466 | 0.108829  | 0.193765  | 0.195076  | 0.125437 |
| 0.143939  | 0.140443 | 0.21926  | 0.140152  | 0.21285   | 0.211538  | 0.138112 |
| 0.109994  | 0.106789 | 0.199592 | 0.10912   | 0.192599  | 0.191288  | 0.124563 |
| 0.125146  | 0.125146 | 0.214452 | 0.121358  | 0.211538  | 0.205565  | 0.130099 |
| 0.127914  | 0.129662 | 0.199155 | 0.123252  | 0.196533  | 0.194347  | 0.137238 |
| 0.129953  | 0.125    | 0.21285  | 0.12704   | 0.205857  | 0.204254  | 0.133741 |
| 0.128788  | 0.138986 | 0.209936 | 0.129953  | 0.20877   | 0.208625  | 0.137238 |
| 0.11014   | 0.102855 | 0.202943 | 0.111888  | 0.197115  | 0.195513  | 0.123834 |
| 0.11014   | 0.101981 | 0.197698 | 0.106935  | 0.193036  | 0.192016  | 0.117424 |
| 0.116113  | 0.105915 | 0.201049 | 0.114365  | 0.195221  | 0.19391   | 0.13039  |
| 0.10708   | 0.101253 | 0.194056 | 0.10067   | 0.187646  | 0.187209  | 0.114365 |
| 0.110577  | 0.101836 | 0.195513 | 0.105332  | 0.190268  | 0.18954   | 0.11757  |
| 0.115676  | 0.101981 | 0.199446 | 0.10373   | 0.193619  | 0.194639  | 0.123834 |
| 0.12602   | 0.11961  | 0.208625 | 0.123689  | 0.203089  | 0.20236   | 0.135344 |



|           |           |          |           |          |          |          |
|-----------|-----------|----------|-----------|----------|----------|----------|
| 0.137966  | 0.130099  | 0.2162   | 0.129225  | 0.210956 | 0.209936 | 0.133304 |
| 0.115676  | 0.111305  | 0.199155 | 0.109557  | 0.193036 | 0.193765 | 0.118298 |
| 0.112617  | 0.112617  | 0.195804 | 0.111116  | 0.189394 | 0.189248 | 0.124272 |
| 0.133013  | 0.12398   | 0.212121 | 0.127768  | 0.210082 | 0.207022 | 0.127768 |
| 0.109703  | 0.105332  | 0.191725 | 0.103875  | 0.187646 | 0.188666 | 0.11553  |
| 0.1419    | 0.130828  | 0.212267 | 0.137238  | 0.205274 | 0.203671 | 0.143065 |
| 0.124709  | 0.13345   | 0.201486 | 0.132284  | 0.19595  | 0.196387 | 0.140443 |
| 0.13447   | 0.121358  | 0.206002 | 0.128059  | 0.20134  | 0.198864 | 0.134761 |
| 0.108537  | 0.100379  | 0.194347 | 0.0992133 | 0.190559 | 0.191288 | 0.114656 |
| 0.106935  | 0.105478  | 0.19391  | 0.103147  | 0.189831 | 0.188811 | 0.115676 |
| 0.122232  | 0.114656  | 0.210956 | 0.11757   | 0.206294 | 0.203234 | 0.128059 |
| 0.121795  | 0.118007  | 0.206148 | 0.116841  | 0.201777 | 0.201049 | 0.120338 |
| 0.129662  | 0.120338  | 0.202652 | 0.125583  | 0.203526 | 0.199883 | 0.130245 |
| 0.119027  | 0.104458  | 0.202506 | 0.111451  | 0.194347 | 0.192745 | 0.124563 |
| 0.117716  | 0.107517  | 0.197698 | 0.112762  | 0.19595  | 0.192016 | 0.119172 |
| 0.118298  | 0.116841  | 0.2044   | 0.114219  | 0.199155 | 0.19697  | 0.128205 |
| 0.130536  | 0.128497  | 0.215472 | 0.130536  | 0.210227 | 0.207459 | 0.134033 |
| 0.129953  | 0.124709  | 0.209936 | 0.122086  | 0.204691 | 0.205711 | 0.131702 |
| 0.137383  | 0.131847  | 0.214161 | 0.126894  | 0.20979  | 0.206148 | 0.129808 |
| 0.126457  | 0.138112  | 0.206439 | 0.124709  | 0.202069 | 0.197844 | 0.140152 |
| 0.111597  | 0.1081    | 0.198864 | 0.104604  | 0.190997 | 0.193473 | 0.123543 |
| 0.134324  | 0.118007  | 0.209936 | 0.120629  | 0.203234 | 0.203671 | 0.13549  |
| 0.105624  | 0.102127  | 0.19697  | 0.100962  | 0.195221 | 0.190997 | 0.11961  |
| 0.105769  | 0.114802  | 0.190705 | 0.106061  | 0.188666 | 0.184441 | 0.132867 |
| 0.109266  | 0.0987762 | 0.200321 | 0.109266  | 0.192453 | 0.191725 | 0.127622 |
| 0.112617  | 0.105624  | 0.19493  | 0.110577  | 0.190851 | 0.186334 | 0.124563 |
| 0.106498  | 0.0968823 | 0.199592 | 0.105332  | 0.191142 | 0.190997 | 0.11757  |
| 0.133741  | 0.125291  | 0.211976 | 0.128497  | 0.208188 | 0.20542  | 0.133741 |
| 0.112325  | 0.114073  | 0.195804 | 0.118444  | 0.193473 | 0.188666 | 0.129225 |
| 0.132139  | 0.123106  | 0.211247 | 0.12602   | 0.209499 | 0.203234 | 0.135927 |
| 0.109703  | 0.10271   | 0.196096 | 0.103293  | 0.189394 | 0.189248 | 0.114656 |
| 0.122378  | 0.120338  | 0.209645 | 0.121503  | 0.205857 | 0.206002 | 0.122086 |
| 0.111451  | 0.128642  | 0.202506 | 0.119901  | 0.198135 | 0.199446 | 0.128351 |
| 0.107372  | 0.115822  | 0.190268 | 0.116113  | 0.186772 | 0.186043 | 0.131265 |
| 0.104604  | 0.116259  | 0.201195 | 0.110431  | 0.200029 | 0.195221 | 0.116259 |
| 0.112908  | 0.10912   | 0.196096 | 0.116987  | 0.193473 | 0.191579 | 0.130973 |
| 0.113636  | 0.115676  | 0.198281 | 0.112762  | 0.197115 | 0.195513 | 0.121795 |
| 0.114219  | 0.113345  | 0.195076 | 0.112179  | 0.193328 | 0.193473 | 0.11655  |
| 0.0929487 | 0.140734  | 0.215472 | 0.12704   | 0.212267 | 0.210664 | 0.13986  |
| 0.133887  | 0.14292   | 0.21824  | 0.131265  | 0.213578 | 0.211393 | 0.135052 |
| 0.0793998 | 0.113782  | 0.191434 | 0.097465  | 0.187937 | 0.186917 | 0.115239 |
| 0.121795  | 0.127331  | 0.21285  | 0.127914  | 0.209062 | 0.209499 | 0.138112 |
| 0.0907634 | 0.13447   | 0.207459 | 0.119901  | 0.203963 | 0.201486 | 0.128059 |
| 0.119901  | 0.133013  | 0.206294 | 0.123689  | 0.207751 | 0.201486 | 0.138258 |

|           |          |          |          |          |          |          |
|-----------|----------|----------|----------|----------|----------|----------|
| 0.111742  | 0.122232 | 0.199592 | 0.118153 | 0.197844 | 0.195367 | 0.129808 |
| 0.078817  | 0.127768 | 0.206876 | 0.117279 | 0.204545 | 0.202652 | 0.127768 |
| 0.0810023 | 0.134907 | 0.205274 | 0.121503 | 0.201195 | 0.200175 | 0.128205 |
| 0.10912   | 0.12398  | 0.20979  | 0.121066 | 0.209207 | 0.205565 | 0.130099 |
| 0.122523  | 0.133304 | 0.211538 | 0.131847 | 0.209499 | 0.207022 | 0.14088  |
| 0.0729895 | 0.131556 | 0.205711 | 0.115239 | 0.20542  | 0.203234 | 0.137966 |
| 0.107372  | 0.113782 | 0.197844 | 0.114656 | 0.194347 | 0.190705 | 0.126894 |
| 0.138112  | 0.131702 | 0.206731 | 0.127914 | 0.203817 | 0.202214 | 0.127622 |
| 0.0919289 | 0.137383 | 0.210956 | 0.128059 | 0.206294 | 0.206148 | 0.13884  |
| 0.092803  | 0.112034 | 0.192599 | 0.106498 | 0.190268 | 0.187209 | 0.125146 |
| 0.221737  | 0.217949 | 0.116404 | 0.204545 | 0.116987 | 0.118298 | 0.224359 |
| 0.107809  | 0.122378 | 0.2044   | 0.119755 | 0.201195 | 0.19697  | 0.131702 |
| 0.0815851 | 0.122086 | 0.199155 | 0.107809 | 0.191871 | 0.193182 | 0.129371 |
| 0.116987  | 0.133304 | 0.214744 | 0.126311 | 0.210956 | 0.207605 | 0.13884  |
| 0.0724068 | 0.123397 | 0.20134  | 0.110868 | 0.195804 | 0.194493 | 0.131847 |
| 0.0895979 | 0.140297 | 0.213578 | 0.12602  | 0.206002 | 0.208188 | 0.140589 |
| 0.109703  | 0.119318 | 0.201632 | 0.114365 | 0.196096 | 0.19391  | 0.129516 |
| 0.104604  | 0.12296  | 0.199738 | 0.11655  | 0.198572 | 0.19697  | 0.127622 |
| 0.080711  | 0.125    | 0.203234 | 0.119755 | 0.201777 | 0.20134  | 0.139277 |
| 0.11961   | 0.130973 | 0.199301 | 0.125146 | 0.195804 | 0.190705 | 0.143794 |
| 0.121795  | 0.131119 | 0.209645 | 0.123252 | 0.207022 | 0.206294 | 0.140443 |
| 0.116987  | 0.122232 | 0.210664 | 0.124563 | 0.205128 | 0.203817 | 0.135635 |
| 0.114656  | 0.120775 | 0.207751 | 0.11961  | 0.207459 | 0.204983 | 0.133887 |
| 0.105332  | 0.122523 | 0.199592 | 0.111451 | 0.198718 | 0.196533 | 0.115822 |
| 0.113782  | 0.110286 | 0.203089 | 0.111742 | 0.202214 | 0.199738 | 0.124272 |
| 0.118298  | 0.134907 | 0.211976 | 0.127331 | 0.206731 | 0.204254 | 0.141317 |
| 0.106789  | 0.122232 | 0.19697  | 0.112908 | 0.195513 | 0.188374 | 0.129516 |
| 0.128642  | 0.137092 | 0.212121 | 0.130099 | 0.206002 | 0.208188 | 0.139423 |
| 0.133741  | 0.140443 | 0.194202 | 0.13345  | 0.191579 | 0.188811 | 0.147727 |
| 0.113928  | 0.126748 | 0.196533 | 0.120338 | 0.195367 | 0.19289  | 0.123543 |
| 0.0906177 | 0.134324 | 0.209353 | 0.121795 | 0.204691 | 0.204254 | 0.130536 |
| 0.11961   | 0.131556 | 0.194639 | 0.116987 | 0.191725 | 0.188374 | 0.134761 |
| 0.115676  | 0.129371 | 0.202652 | 0.120629 | 0.199738 | 0.196387 | 0.121212 |
| 0.123543  | 0.127914 | 0.192162 | 0.117133 | 0.1875   | 0.184732 | 0.130536 |
| 0.132867  | 0.139277 | 0.203234 | 0.13345  | 0.199155 | 0.198718 | 0.149476 |
| 0.0992133 | 0.118153 | 0.194639 | 0.107955 | 0.186772 | 0.187209 | 0.122815 |
| 0.127622  | 0.137238 | 0.209353 | 0.12704  | 0.204108 | 0.207459 | 0.134907 |
| 0.135344  | 0.140589 | 0.191142 | 0.135052 | 0.184441 | 0.186043 | 0.152826 |
| 0.102127  | 0.124563 | 0.203089 | 0.120484 | 0.205128 | 0.202652 | 0.128351 |
| 0.118444  | 0.126894 | 0.19697  | 0.117861 | 0.19289  | 0.191579 | 0.133013 |
| 0.142774  | 0.144231 | 0.210519 | 0.137529 | 0.206731 | 0.20979  | 0.138112 |
| 0.123834  | 0.124126 | 0.200903 | 0.116841 | 0.200903 | 0.199883 | 0.134907 |
| 0.129516  | 0.135927 | 0.214744 | 0.131265 | 0.210664 | 0.211684 | 0.134178 |
| 0.117716  | 0.134907 | 0.209353 | 0.127622 | 0.204108 | 0.204254 | 0.136072 |

|          |          |          |           |          |          |          |
|----------|----------|----------|-----------|----------|----------|----------|
| 0.110286 | 0.119318 | 0.206294 | 0.121941  | 0.207168 | 0.202652 | 0.129516 |
| 0.123834 | 0.13345  | 0.207896 | 0.123834  | 0.200612 | 0.201049 | 0.133741 |
| 0.10912  | 0.125146 | 0.199301 | 0.123397  | 0.197552 | 0.196824 | 0.129225 |
| 0.122086 | 0.126457 | 0.211393 | 0.128788  | 0.20877  | 0.205711 | 0.135781 |
| 0.122378 | 0.125    | 0.20877  | 0.125     | 0.207314 | 0.202506 | 0.138403 |
| 0.131702 | 0.12704  | 0.212267 | 0.126457  | 0.213432 | 0.205711 | 0.132284 |
| 0.123834 | 0.130245 | 0.214015 | 0.125583  | 0.21285  | 0.209499 | 0.131993 |
| 0.123543 | 0.133159 | 0.203817 | 0.12704   | 0.201195 | 0.198718 | 0.134907 |
| 0.141026 | 0.13986  | 0.210519 | 0.139569  | 0.20877  | 0.204545 | 0.145688 |
| 0.106643 | 0.130245 | 0.203234 | 0.123252  | 0.197407 | 0.19697  | 0.129953 |
| 0.109266 | 0.115385 | 0.205565 | 0.11859   | 0.20236  | 0.199301 | 0.134615 |
| 0.127331 | 0.125874 | 0.211976 | 0.123543  | 0.203526 | 0.20338  | 0.135781 |
| 0.109848 | 0.124126 | 0.200321 | 0.115385  | 0.200321 | 0.19697  | 0.119755 |
| 0.132721 | 0.143794 | 0.208916 | 0.131556  | 0.204837 | 0.200903 | 0.146707 |
| 0.149621 | 0.1537   | 0.212995 | 0.147873  | 0.215326 | 0.211393 | 0.159237 |
| 0.12602  | 0.125728 | 0.212121 | 0.120775  | 0.208042 | 0.202652 | 0.129808 |
| 0.121795 | 0.120629 | 0.204691 | 0.110431  | 0.201486 | 0.198427 | 0.12296  |
| 0.131265 | 0.125146 | 0.213869 | 0.121066  | 0.211538 | 0.205274 | 0.13447  |
| 0.11655  | 0.13141  | 0.210519 | 0.127622  | 0.208479 | 0.208916 | 0.137529 |
| 0.125291 | 0.11859  | 0.211976 | 0.120921  | 0.207022 | 0.207168 | 0.126748 |
| 0.126748 | 0.132867 | 0.21722  | 0.137529  | 0.216346 | 0.210373 | 0.138986 |
| 0.128205 | 0.142483 | 0.207896 | 0.131993  | 0.202943 | 0.203089 | 0.142483 |
| 0.107955 | 0.133304 | 0.208042 | 0.119027  | 0.206585 | 0.203817 | 0.123106 |
| 0.157488 | 0.14729  | 0.219697 | 0.146416  | 0.215909 | 0.209062 | 0.159528 |
| 0.116987 | 0.129808 | 0.208042 | 0.127185  | 0.203671 | 0.204983 | 0.13243  |
| 0.129225 | 0.147873 | 0.210373 | 0.134761  | 0.201923 | 0.206439 | 0.140589 |
| 0.115385 | 0.119755 | 0.209062 | 0.118881  | 0.204691 | 0.201923 | 0.13345  |
| 0.133159 | 0.129662 | 0.216638 | 0.129079  | 0.216929 | 0.212121 | 0.13141  |
| 0.107809 | 0.125    | 0.201777 | 0.119464  | 0.198572 | 0.19697  | 0.132576 |
| 0.13243  | 0.142045 | 0.172786 | 0.110286  | 0.166667 | 0.165064 | 0.146707 |
| 0.138403 | 0.132284 | 0.213432 | 0.13141   | 0.212558 | 0.207751 | 0.152098 |
| 0.12398  | 0.120192 | 0.190268 | 0.0607517 | 0.185897 | 0.186334 | 0.135927 |
| 0.129662 | 0.137238 | 0.17264  | 0.0766317 | 0.168561 | 0.164918 | 0.141317 |
| 0.146999 | 0.146999 | 0.151515 | 0.137675  | 0.148893 | 0.144085 | 0.148456 |
| 0.140589 | 0.14292  | 0.150641 | 0.114656  | 0.145979 | 0.146125 | 0.15778  |
| 0.123252 | 0.124709 | 0.211976 | 0.120921  | 0.206439 | 0.202506 | 0.117424 |
| 0.131847 | 0.13039  | 0.203671 | 0.123689  | 0.203089 | 0.198572 | 0.140297 |
| 0.107372 | 0.114948 | 0.189685 | 0.104749  | 0.182984 | 0.183421 | 0.126894 |
| 0.11655  | 0.117424 | 0.194202 | 0.113928  | 0.189248 | 0.186772 | 0.115093 |
| 0.105624 | 0.122815 | 0.194347 | 0.115239  | 0.192308 | 0.190705 | 0.129516 |
| 0.115239 | 0.115822 | 0.188228 | 0.0514277 | 0.184441 | 0.18546  | 0.130099 |
| 0.113054 | 0.111888 | 0.19799  | 0.115967  | 0.191579 | 0.190268 | 0.118007 |
| 0.107517 | 0.118298 | 0.178759 | 0.0821678 | 0.176428 | 0.17366  | 0.122669 |
| 0.106935 | 0.11859  | 0.192745 | 0.0999417 | 0.189248 | 0.187646 | 0.129953 |

|           |           |           |           |           |           |           |
|-----------|-----------|-----------|-----------|-----------|-----------|-----------|
| 0.114073  | 0.126603  | 0.187354  | 0.116987  | 0.178322  | 0.180216  | 0.129516  |
| 0.0977564 | 0.110286  | 0.187354  | 0.102418  | 0.185023  | 0.183712  | 0.111451  |
| 0.113782  | 0.121941  | 0.187646  | 0.0587121 | 0.183858  | 0.183129  | 0.133013  |
| 0.114802  | 0.116259  | 0.190122  | 0.0506993 | 0.187791  | 0.184732  | 0.130536  |
| 0.124126  | 0.122378  | 0.202069  | 0.116841  | 0.198281  | 0.198427  | 0.116841  |
| 0.215909  | 0.216783  | 0.120775  | 0.202506  | 0.120775  | 0.120921  | 0.222611  |
| 0.138695  | 0.142191  | 0.204983  | 0.07838   | 0.202652  | 0.200758  | 0.147145  |
| 0.130682  | 0.125728  | 0.202797  | 0.120192  | 0.203963  | 0.201777  | 0.133013  |
| 0.124126  | 0.124709  | 0.193328  | 0.110431  | 0.187209  | 0.186189  | 0.137238  |
| 0.212995  | 0.211247  | 0.103001  | 0.19697   | 0.106498  | 0.100233  | 0.216783  |
| 0.126748  | 0.122669  | 0.190122  | 0.11655   | 0.184003  | 0.183858  | 0.124709  |
| 0.121358  | 0.122523  | 0.200758  | 0.119901  | 0.197552  | 0.196824  | 0.0563811 |
| 0.124854  | 0.114656  | 0.193765  | 0.11553   | 0.192016  | 0.190122  | 0.125728  |
| 0.117716  | 0.127331  | 0.194784  | 0.116841  | 0.187791  | 0.18852   | 0.122378  |
| 0.250291  | 0.252914  | 0.131847  | 0.237762  | 0.140006  | 0.135198  | 0.254953  |
| 0.124854  | 0.128642  | 0.200466  | 0.118153  | 0.198135  | 0.19391   | 0.130973  |
| 0.115822  | 0.118735  | 0.196387  | 0.110577  | 0.193765  | 0.192453  | 0.116987  |
| 0.127768  | 0.0505536 | 0.201923  | 0.117279  | 0.200758  | 0.196533  | 0.131847  |
| 0.125728  | 0.0488054 | 0.19697   | 0.114948  | 0.195221  | 0.19391   | 0.129516  |
| 0.126311  | 0.133304  | 0.195513  | 0.120484  | 0.190559  | 0.189248  | 0.128642  |
| 0.121941  | 0.127185  | 0.177156  | 0.104458  | 0.173077  | 0.171474  | 0.133887  |
| 0.119027  | 0.118735  | 0.200758  | 0.112908  | 0.191142  | 0.191871  | 0.114948  |
| 0.117716  | 0.11655   | 0.190705  | 0.0509907 | 0.18546   | 0.184441  | 0.131119  |
| 0.120775  | 0.121066  | 0.194056  | 0.112325  | 0.19289   | 0.1875    | 0.132139  |
| 0.112034  | 0.118444  | 0.19289   | 0.110868  | 0.185606  | 0.185752  | 0.121941  |
| 0.112471  | 0.115093  | 0.187209  | 0.0541958 | 0.183712  | 0.18007   | 0.131119  |
| 0.0913462 | 0.124854  | 0.195513  | 0.112325  | 0.19289   | 0.193619  | 0.130682  |
| 0.141026  | 0.130828  | 0.21285   | 0.132867  | 0.210227  | 0.206585  | 0.151807  |
| 0.128788  | 0.128788  | 0.200903  | 0.120047  | 0.195659  | 0.195221  | 0.130536  |
| 0.128497  | 0.126166  | 0.198864  | 0.120338  | 0.197407  | 0.195804  | 0.0524476 |
| 0.189103  | 0.189394  | 0.100379  | 0.175117  | 0.0939685 | 0.0932401 | 0.195804  |
| 0.204545  | 0.20542   | 0.0983392 | 0.190268  | 0.0986305 | 0.0996503 | 0.21183   |
| 0.116841  | 0.127914  | 0.189248  | 0.118007  | 0.18109   | 0.182984  | 0.127914  |
| 0.109557  | 0.11859   | 0.190997  | 0.109557  | 0.188083  | 0.187646  | 0.120921  |
| 0.133741  | 0.13549   | 0.195367  | 0.120629  | 0.190997  | 0.192016  | 0.149476  |
| 0.118007  | 0.122086  | 0.195367  | 0.113928  | 0.19391   | 0.192016  | 0.114219  |
| 0.128351  | 0.131265  | 0.204254  | 0.123397  | 0.199301  | 0.19595   | 0.129516  |
| 0.125583  | 0.112471  | 0.200903  | 0.119172  | 0.197698  | 0.194347  | 0.134324  |
| 0.225816  | 0.228438  | 0.114656  | 0.210956  | 0.11116   | 0.111305  | 0.227564  |
| 0.118007  | 0.113636  | 0.195659  | 0.102855  | 0.19391   | 0.192599  | 0.125291  |
| 0.209645  | 0.210519  | 0.13986   | 0.19595   | 0.142483  | 0.139714  | 0.210519  |
| 0.108683  | 0.111014  | 0.199738  | 0.109266  | 0.196241  | 0.194639  | 0.110723  |
| 0.11116   | 0.11116   | 0.19493   | 0.113199  | 0.189103  | 0.187209  | 0.118735  |
| 0.118007  | 0.115967  | 0.184878  | 0.0952797 | 0.182255  | 0.184149  | 0.125291  |

|          |           |           |           |           |           |           |
|----------|-----------|-----------|-----------|-----------|-----------|-----------|
| 0.109848 | 0.116841  | 0.186626  | 0.109266  | 0.183712  | 0.179487  | 0.120629  |
| 0.204108 | 0.206731  | 0.101981  | 0.195659  | 0.103147  | 0.0962995 | 0.214889  |
| 0.124272 | 0.130099  | 0.188228  | 0.0630828 | 0.183858  | 0.182255  | 0.14088   |
| 0.112617 | 0.106498  | 0.205128  | 0.113782  | 0.197844  | 0.19595   | 0.11961   |
| 0.122523 | 0.124563  | 0.191725  | 0.0592949 | 0.19289   | 0.187209  | 0.133596  |
| 0.122523 | 0.119027  | 0.198135  | 0.11757   | 0.196096  | 0.196241  | 0.121066  |
| 0.110286 | 0.121941  | 0.189685  | 0.109994  | 0.181818  | 0.182838  | 0.121358  |
| 0.111888 | 0.115676  | 0.201486  | 0.111888  | 0.198864  | 0.19493   | 0.111305  |
| 0.119755 | 0.121212  | 0.188666  | 0.112179  | 0.184295  | 0.181527  | 0.121503  |
| 0.124126 | 0.123834  | 0.198864  | 0.123252  | 0.200029  | 0.195513  | 0.0512821 |
| 0.11014  | 0.115093  | 0.179633  | 0.0521562 | 0.178467  | 0.175991  | 0.128205  |
| 0.11961  | 0.110286  | 0.200175  | 0.112325  | 0.195221  | 0.193036  | 0.115822  |
| 0.189977 | 0.189977  | 0.092803  | 0.17366   | 0.0954254 | 0.0894522 | 0.19697   |
| 0.127768 | 0.050845  | 0.200758  | 0.115822  | 0.198427  | 0.196241  | 0.13039   |
| 0.125874 | 0.111597  | 0.201486  | 0.117424  | 0.200612  | 0.197552  | 0.140152  |
| 0.116404 | 0.0962995 | 0.192016  | 0.110577  | 0.188811  | 0.186626  | 0.13243   |
| 0.123543 | 0.128497  | 0.19391   | 0.117716  | 0.188957  | 0.185315  | 0.130536  |
| 0.117424 | 0.119172  | 0.191871  | 0.0556527 | 0.187209  | 0.189103  | 0.130536  |
| 0.116259 | 0.119755  | 0.206731  | 0.115093  | 0.202943  | 0.201923  | 0.111888  |
| 0.114073 | 0.109411  | 0.192308  | 0.109994  | 0.188228  | 0.187209  | 0.121358  |
| 0.125437 | 0.124563  | 0.202797  | 0.118153  | 0.199883  | 0.199155  | 0.118444  |
| 0.117424 | 0.111305  | 0.196533  | 0.108974  | 0.196241  | 0.193765  | 0.136655  |
| 0.120338 | 0.0457459 | 0.196533  | 0.108974  | 0.193036  | 0.191434  | 0.128497  |
| 0.116113 | 0.124563  | 0.188228  | 0.112617  | 0.185897  | 0.184295  | 0.128642  |
| 0.121212 | 0.117424  | 0.202652  | 0.113636  | 0.198864  | 0.196096  | 0.127914  |
| 0.135052 | 0.127768  | 0.208042  | 0.125728  | 0.205128  | 0.200612  | 0.135344  |
| 0.116696 | 0.118735  | 0.191434  | 0.111742  | 0.192016  | 0.1875    | 0.124272  |
| 0.134033 | 0.137821  | 0.203526  | 0.0728438 | 0.199738  | 0.199883  | 0.142774  |
| 0.11014  | 0.118007  | 0.188957  | 0.110723  | 0.183712  | 0.184732  | 0.125     |
| 0.11655  | 0.0984848 | 0.192745  | 0.105478  | 0.190122  | 0.186189  | 0.126166  |
| 0.113782 | 0.123397  | 0.176865  | 0.067162  | 0.170455  | 0.170892  | 0.131556  |
| 0.128934 | 0.128642  | 0.196387  | 0.119027  | 0.194639  | 0.192453  | 0.121941  |
| 0.194493 | 0.191288  | 0.117716  | 0.180798  | 0.110431  | 0.110868  | 0.199155  |
| 0.111888 | 0.10373   | 0.19595   | 0.108683  | 0.194493  | 0.191434  | 0.115093  |
| 0.103147 | 0.106935  | 0.186334  | 0.090035  | 0.183421  | 0.178904  | 0.116841  |
| 0.123543 | 0.124709  | 0.203234  | 0.119172  | 0.200321  | 0.198427  | 0.0477855 |
| 0.175408 | 0.183858  | 0.110286  | 0.166667  | 0.106789  | 0.107226  | 0.189685  |
| 0.138549 | 0.13884   | 0.202797  | 0.129808  | 0.199883  | 0.196241  | 0.13884   |
| 0.14292  | 0.14933   | 0.214744  | 0.138258  | 0.210373  | 0.208188  | 0.143502  |
| 0.143065 | 0.136072  | 0.214015  | 0.135781  | 0.211684  | 0.208042  | 0.151807  |
| 0.118007 | 0.119172  | 0.18954   | 0.112762  | 0.188957  | 0.182692  | 0.124709  |
| 0.119901 | 0.11961   | 0.190268  | 0.055507  | 0.18648   | 0.185169  | 0.13243   |
| 0.210664 | 0.213578  | 0.0983392 | 0.198135  | 0.104749  | 0.104312  | 0.217075  |
| 0.124417 | 0.120047  | 0.18954   | 0.112762  | 0.186334  | 0.185606  | 0.131702  |

|           |           |           |           |           |           |           |
|-----------|-----------|-----------|-----------|-----------|-----------|-----------|
| 0.121649  | 0.124272  | 0.191434  | 0.0598776 | 0.187937  | 0.186917  | 0.13243   |
| 0.112617  | 0.108829  | 0.197552  | 0.113491  | 0.194347  | 0.190122  | 0.116113  |
| 0.167104  | 0.172931  | 0.136946  | 0.144959  | 0.128205  | 0.128642  | 0.177302  |
| 0.112908  | 0.114365  | 0.184441  | 0.103293  | 0.183858  | 0.178759  | 0.126894  |
| 0.143065  | 0.142774  | 0.213141  | 0.137529  | 0.210227  | 0.206002  | 0.152972  |
| 0.110431  | 0.126748  | 0.190122  | 0.116259  | 0.186334  | 0.187063  | 0.121503  |
| 0.190268  | 0.190851  | 0.0936772 | 0.175699  | 0.0960082 | 0.0912005 | 0.196678  |
| 0.120047  | 0.120921  | 0.197407  | 0.117424  | 0.197115  | 0.19289   | 0.125291  |
| 0.0842075 | 0.115093  | 0.193619  | 0.0932401 | 0.186334  | 0.186189  | 0.118298  |
| 0.109994  | 0.095134  | 0.193473  | 0.104749  | 0.189103  | 0.184878  | 0.129225  |
| 0.119755  | 0.11451   | 0.197115  | 0.107809  | 0.191871  | 0.189977  | 0.115967  |
| 0.119755  | 0.123252  | 0.198864  | 0.118007  | 0.196241  | 0.194056  | 0.0571096 |
| 0.117716  | 0.122086  | 0.18954   | 0.113345  | 0.183712  | 0.182984  | 0.135198  |
| 0.106498  | 0.119027  | 0.190559  | 0.10912   | 0.185606  | 0.182547  | 0.122815  |
| 0.187646  | 0.18852   | 0.0962995 | 0.177448  | 0.092803  | 0.0914918 | 0.199592  |
| 0.119027  | 0.119027  | 0.198718  | 0.114948  | 0.194639  | 0.190997  | 0.128351  |
| 0.0981935 | 0.117716  | 0.186626  | 0.102273  | 0.182547  | 0.18211   | 0.119172  |
| 0.210519  | 0.210227  | 0.102273  | 0.199738  | 0.107517  | 0.107955  | 0.21926   |
| 0.128642  | 0.0467657 | 0.202214  | 0.116987  | 0.200466  | 0.19799   | 0.132139  |
| 0.107517  | 0.11859   | 0.190414  | 0.113928  | 0.185169  | 0.185315  | 0.121795  |
| 0.104021  | 0.115093  | 0.187791  | 0.106643  | 0.182547  | 0.178904  | 0.119172  |
| 0.131847  | 0.134178  | 0.199301  | 0.0799825 | 0.199301  | 0.198572  | 0.145251  |
| 0.18954   | 0.190122  | 0.10373   | 0.17701   | 0.0949883 | 0.0930944 | 0.197407  |
| 0.119172  | 0.11655   | 0.203526  | 0.116259  | 0.200321  | 0.196678  | 0.115676  |
| 0.129371  | 0.12296   | 0.203234  | 0.119464  | 0.202943  | 0.199883  | 0.130828  |
| 0.107226  | 0.119172  | 0.190414  | 0.112762  | 0.184586  | 0.18648   | 0.119755  |
| 0.104604  | 0.11859   | 0.188666  | 0.107226  | 0.183421  | 0.182401  | 0.121503  |
| 0.107955  | 0.117279  | 0.187354  | 0.10912   | 0.182692  | 0.17905   | 0.121649  |
| 0.113054  | 0.116259  | 0.191579  | 0.0524476 | 0.187791  | 0.185315  | 0.129371  |
| 0.0977564 | 0.108537  | 0.190559  | 0.101544  | 0.190268  | 0.184586  | 0.113491  |
| 0.122232  | 0.128642  | 0.198135  | 0.122232  | 0.195804  | 0.192745  | 0.128642  |
| 0.128934  | 0.122232  | 0.209499  | 0.112617  | 0.206585  | 0.203817  | 0.140006  |
| 0.121649  | 0.123106  | 0.199883  | 0.118735  | 0.195804  | 0.190997  | 0.130682  |
| 0.126457  | 0.123543  | 0.205857  | 0.120629  | 0.202069  | 0.202506  | 0.127622  |
| 0.192453  | 0.196241  | 0.0981935 | 0.180507  | 0.094697  | 0.0887238 | 0.202069  |
| 0.120921  | 0.111888  | 0.198572  | 0.108974  | 0.195659  | 0.190559  | 0.125874  |
| 0.123689  | 0.13039   | 0.19493   | 0.0639569 | 0.192016  | 0.190705  | 0.135927  |
| 0.105478  | 0.11859   | 0.189831  | 0.1081    | 0.185752  | 0.184732  | 0.118298  |
| 0.0954254 | 0.108537  | 0.18648   | 0.103293  | 0.185023  | 0.184295  | 0.114365  |
| 0.112617  | 0.113782  | 0.18852   | 0.108246  | 0.182984  | 0.181381  | 0.13243   |
| 0.119755  | 0.120338  | 0.200029  | 0.115676  | 0.19595   | 0.194347  | 0.115385  |
| 0.128788  | 0.13141   | 0.197698  | 0.120338  | 0.192745  | 0.196678  | 0.135781  |
| 0.114948  | 0.115239  | 0.19697   | 0.109411  | 0.194056  | 0.188957  | 0.135052  |
| 0.108537  | 0.115822  | 0.191142  | 0.109703  | 0.185023  | 0.186917  | 0.114073  |

|           |          |           |           |           |           |           |
|-----------|----------|-----------|-----------|-----------|-----------|-----------|
| 0.103438  | 0.108683 | 0.188374  | 0.104021  | 0.186334  | 0.18211   | 0.110723  |
| 0.0910548 | 0.113782 | 0.189103  | 0.0980478 | 0.183275  | 0.182255  | 0.124854  |
| 0.109557  | 0.115385 | 0.2044    | 0.111014  | 0.19799   | 0.194639  | 0.109266  |
| 0.129808  | 0.136218 | 0.206876  | 0.124854  | 0.201923  | 0.199738  | 0.13039   |
| 0.113636  | 0.118881 | 0.199155  | 0.115385  | 0.19391   | 0.192308  | 0.117716  |
| 0.112325  | 0.112617 | 0.187646  | 0.0514277 | 0.183858  | 0.181672  | 0.128351  |
| 0.110868  | 0.115239 | 0.196387  | 0.107663  | 0.19493   | 0.190414  | 0.116696  |
| 0.109557  | 0.113928 | 0.187791  | 0.106352  | 0.182547  | 0.180944  | 0.123252  |
| 0.109411  | 0.101836 | 0.197844  | 0.10708   | 0.19289   | 0.191288  | 0.11553   |
| 0.109994  | 0.120484 | 0.193182  | 0.114365  | 0.185315  | 0.184878  | 0.12398   |
| 0.116113  | 0.107663 | 0.195221  | 0.106498  | 0.191725  | 0.189248  | 0.121358  |
| 0.115822  | 0.108829 | 0.197261  | 0.110868  | 0.193473  | 0.190997  | 0.133596  |
| 0.11553   | 0.119318 | 0.198135  | 0.110577  | 0.196678  | 0.192745  | 0.0590035 |
| 0.0981935 | 0.109848 | 0.188957  | 0.104312  | 0.186917  | 0.184441  | 0.116841  |
| 0.110577  | 0.116404 | 0.191142  | 0.109411  | 0.181527  | 0.184295  | 0.122232  |
| 0.115822  | 0.105624 | 0.18211   | 0.112325  | 0.177156  | 0.174097  | 0.130099  |
| 0.100524  | 0.122669 | 0.193619  | 0.107226  | 0.188666  | 0.188228  | 0.131702  |
| 0.0470571 | 0.116696 | 0.194347  | 0.108246  | 0.189685  | 0.190414  | 0.124563  |
| 0.108246  | 0.116696 | 0.191725  | 0.104749  | 0.187937  | 0.185169  | 0.121649  |
| 0.118007  | 0.120047 | 0.184878  | 0.0536131 | 0.184586  | 0.180944  | 0.129662  |
| 0.113636  | 0.115385 | 0.202069  | 0.111597  | 0.196533  | 0.194056  | 0.111597  |
| 0.11655   | 0.118007 | 0.191579  | 0.0582751 | 0.190997  | 0.185315  | 0.134907  |
| 0.113345  | 0.120338 | 0.195659  | 0.114219  | 0.195076  | 0.190559  | 0.0588578 |
| 0.100816  | 0.113054 | 0.194202  | 0.110723  | 0.190705  | 0.188811  | 0.115676  |
| 0.109266  | 0.111305 | 0.186043  | 0.0999417 | 0.185169  | 0.183858  | 0.120338  |
| 0.106789  | 0.102127 | 0.195804  | 0.107663  | 0.193182  | 0.191579  | 0.116696  |
| 0.118298  | 0.122669 | 0.18954   | 0.0562354 | 0.186043  | 0.181818  | 0.130245  |
| 0.111014  | 0.124126 | 0.197115  | 0.108392  | 0.192745  | 0.191434  | 0.130536  |
| 0.100379  | 0.116696 | 0.186189  | 0.100962  | 0.185023  | 0.184878  | 0.126894  |
| 0.19391   | 0.195367 | 0.0932401 | 0.181672  | 0.0952797 | 0.0933858 | 0.20236   |
| 0.159237  | 0.16623  | 0.130828  | 0.146999  | 0.121795  | 0.119901  | 0.174097  |
| 0.122815  | 0.123689 | 0.19697   | 0.117861  | 0.194639  | 0.190122  | 0.127185  |
| 0.11451   | 0.120921 | 0.190997  | 0.108392  | 0.187791  | 0.182401  | 0.126748  |
| 0.146562  | 0.152389 | 0.21926   | 0.142774  | 0.214598  | 0.213869  | 0.147436  |
| 0.12398   | 0.11757  | 0.197261  | 0.111451  | 0.196678  | 0.192162  | 0.136509  |
| 0.117424  | 0.119464 | 0.186334  | 0.114802  | 0.184295  | 0.182401  | 0.131119  |
| 0.101253  | 0.121941 | 0.187646  | 0.103001  | 0.18852   | 0.182255  | 0.128934  |
| 0.0869755 | 0.119901 | 0.19697   | 0.111451  | 0.189394  | 0.190414  | 0.128059  |
| 0.10271   | 0.124272 | 0.198718  | 0.10708   | 0.191142  | 0.188957  | 0.127185  |
| 0.201923  | 0.202214 | 0.102127  | 0.188228  | 0.100379  | 0.099359  | 0.212121  |
| 0.120775  | 0.124272 | 0.201049  | 0.118735  | 0.199883  | 0.196241  | 0.120192  |
| 0.112762  | 0.119464 | 0.180507  | 0.0757576 | 0.182838  | 0.177156  | 0.125291  |
| 0.0926573 | 0.117716 | 0.185752  | 0.104312  | 0.18109   | 0.180944  | 0.118881  |
| 0.116987  | 0.110868 | 0.199301  | 0.110868  | 0.194639  | 0.190997  | 0.12602   |

|           |           |           |           |           |           |           |
|-----------|-----------|-----------|-----------|-----------|-----------|-----------|
| 0.17366   | 0.18648   | 0.121649  | 0.170455  | 0.11116   | 0.115676  | 0.194639  |
| 0.247086  | 0.249709  | 0.128351  | 0.236597  | 0.13039   | 0.125583  | 0.248834  |
| 0.116259  | 0.112179  | 0.199446  | 0.11014   | 0.196824  | 0.194347  | 0.136364  |
| 0.0973193 | 0.119464  | 0.197698  | 0.108392  | 0.192162  | 0.189103  | 0.128497  |
| 0.122378  | 0.122378  | 0.197407  | 0.117716  | 0.192162  | 0.188811  | 0.130245  |
| 0.116696  | 0.11757   | 0.195804  | 0.114365  | 0.194056  | 0.193328  | 0.0613345 |
| 0.109557  | 0.113054  | 0.198572  | 0.109557  | 0.197115  | 0.194347  | 0.112179  |
| 0.109703  | 0.112034  | 0.193182  | 0.103001  | 0.18648   | 0.185752  | 0.123106  |
| 0.109266  | 0.125291  | 0.180798  | 0.083042  | 0.177885  | 0.175991  | 0.124417  |
| 0.116259  | 0.115967  | 0.198281  | 0.111014  | 0.195659  | 0.19289   | 0.116259  |
| 0.109994  | 0.119901  | 0.181818  | 0.0738636 | 0.175117  | 0.178176  | 0.127768  |
| 0.0472028 | 0.122669  | 0.199446  | 0.111305  | 0.190705  | 0.192308  | 0.128497  |
| 0.104167  | 0.113199  | 0.18852   | 0.104167  | 0.187354  | 0.186043  | 0.114656  |
| 0.117716  | 0.110723  | 0.196241  | 0.111597  | 0.196533  | 0.191725  | 0.136072  |
| 0.116987  | 0.11757   | 0.187646  | 0.0534674 | 0.186189  | 0.184586  | 0.131265  |
| 0.104167  | 0.0930944 | 0.185897  | 0.095134  | 0.185606  | 0.18109   | 0.118735  |
| 0.116987  | 0.119027  | 0.207459  | 0.122523  | 0.208042  | 0.202943  | 0.127185  |
| 0.133304  | 0.133887  | 0.210373  | 0.128934  | 0.208042  | 0.204983  | 0.0511364 |
| 0.107226  | 0.113636  | 0.188957  | 0.108974  | 0.184586  | 0.182984  | 0.123543  |
| 0.117861  | 0.125146  | 0.189103  | 0.113782  | 0.180653  | 0.182547  | 0.125146  |
| 0.123397  | 0.13447   | 0.204837  | 0.122815  | 0.197261  | 0.197407  | 0.128351  |
| 0.209499  | 0.210082  | 0.118735  | 0.197261  | 0.120775  | 0.120338  | 0.212995  |
| 0.109994  | 0.10271   | 0.189394  | 0.0995047 | 0.185897  | 0.184295  | 0.126603  |
| 0.100816  | 0.113636  | 0.193036  | 0.106935  | 0.1875    | 0.185606  | 0.115967  |
| 0.119755  | 0.114219  | 0.195076  | 0.107517  | 0.192453  | 0.189685  | 0.123834  |
| 0.125728  | 0.0496795 | 0.200175  | 0.116113  | 0.198427  | 0.195659  | 0.132721  |
| 0.112908  | 0.111451  | 0.19493   | 0.108829  | 0.192308  | 0.194784  | 0.120775  |
| 0.197407  | 0.200029  | 0.0990676 | 0.186334  | 0.0929487 | 0.0942599 | 0.204691  |
| 0.119755  | 0.123252  | 0.191288  | 0.0571096 | 0.186917  | 0.186189  | 0.134907  |
| 0.105624  | 0.115822  | 0.189977  | 0.108829  | 0.181818  | 0.185169  | 0.121941  |
| 0.116259  | 0.125     | 0.201486  | 0.114802  | 0.197698  | 0.196096  | 0.12704   |
| 0.115093  | 0.115093  | 0.19595   | 0.110723  | 0.193328  | 0.194056  | 0.0576923 |
| 0.11655   | 0.121503  | 0.187791  | 0.0524476 | 0.18546   | 0.182692  | 0.132576  |
| 0.103438  | 0.110431  | 0.183129  | 0.0681818 | 0.179341  | 0.177448  | 0.124126  |
| 0         | 0.122086  | 0.197698  | 0.109266  | 0.192162  | 0.189685  | 0.12704   |
| 0.122086  | 0         | 0.199738  | 0.111305  | 0.197115  | 0.195513  | 0.129662  |
| 0.197698  | 0.199738  | 0         | 0.185752  | 0.101107  | 0.0916375 | 0.204108  |
| 0.109266  | 0.111305  | 0.185752  | 0         | 0.182838  | 0.178322  | 0.124417  |
| 0.192162  | 0.197115  | 0.101107  | 0.182838  | 0         | 0.088141  | 0.203526  |
| 0.189685  | 0.195513  | 0.0916375 | 0.178322  | 0.088141  | 0         | 0.199592  |
| 0.12704   | 0.129662  | 0.204108  | 0.124417  | 0.203526  | 0.199592  | 0         |
| 0.133159  | 0.0603147 | 0.209645  | 0.125     | 0.206148  | 0.203963  | 0.138112  |
| 0.0533217 | 0.113636  | 0.188957  | 0.101399  | 0.187791  | 0.185897  | 0.12296   |
| 0.10912   | 0.112908  | 0.184441  | 0.053176  | 0.180944  | 0.180216  | 0.124272  |



|           |           |           |           |           |           |           |
|-----------|-----------|-----------|-----------|-----------|-----------|-----------|
| 0.113636  | 0.116841  | 0.184586  | 0.0515734 | 0.186334  | 0.181527  | 0.133741  |
| 0.110723  | 0.117133  | 0.190414  | 0.111597  | 0.184295  | 0.184441  | 0.124126  |
| 0.110723  | 0.110723  | 0.195659  | 0.10373   | 0.192162  | 0.190559  | 0.109557  |
| 0.113636  | 0.116841  | 0.200029  | 0.111305  | 0.195659  | 0.195513  | 0.112471  |
| 0.120484  | 0.111742  | 0.196387  | 0.110868  | 0.195804  | 0.192162  | 0.136509  |
| 0.119172  | 0.118298  | 0.198572  | 0.118881  | 0.198572  | 0.195513  | 0.0559441 |
| 0.104749  | 0.112908  | 0.18648   | 0.103293  | 0.182692  | 0.182547  | 0.11961   |
| 0.116841  | 0.115385  | 0.188957  | 0.0518648 | 0.184295  | 0.185023  | 0.129662  |
| 0.0820221 | 0.109703  | 0.190851  | 0.0919289 | 0.186772  | 0.184586  | 0.11757   |
| 0.126457  | 0.127622  | 0.197698  | 0.0652681 | 0.192745  | 0.190268  | 0.136655  |
| 0.11655   | 0.120921  | 0.196824  | 0.115676  | 0.190705  | 0.189977  | 0.127331  |
| 0.128642  | 0.130973  | 0.198427  | 0.0677448 | 0.196678  | 0.194202  | 0.138549  |
| 0.259178  | 0.261509  | 0.134615  | 0.245192  | 0.141608  | 0.133887  | 0.266171  |
| 0.126894  | 0.119318  | 0.212704  | 0.124272  | 0.207751  | 0.204691  | 0.12602   |
| 0.124126  | 0.12704   | 0.205565  | 0.123252  | 0.198864  | 0.198135  | 0.123252  |
| 0.217803  | 0.220425  | 0.116841  | 0.204108  | 0.110431  | 0.114365  | 0.228584  |
| 0.127914  | 0.115385  | 0.203234  | 0.125291  | 0.199155  | 0.198427  | 0.118881  |
| 0.231935  | 0.230478  | 0.120775  | 0.2162    | 0.120484  | 0.116259  | 0.236305  |
| 0.118444  | 0.109411  | 0.202797  | 0.115239  | 0.198427  | 0.196533  | 0.116404  |
| 0.123543  | 0.134324  | 0.201195  | 0.121503  | 0.196824  | 0.195221  | 0.126748  |
| 0.120338  | 0.0518648 | 0.194202  | 0.107809  | 0.190705  | 0.189977  | 0.127622  |
| 0.122669  | 0.12704   | 0.201777  | 0.121503  | 0.200612  | 0.198427  | 0.0539044 |
| 0.202214  | 0.203671  | 0.099796  | 0.189977  | 0.0957168 | 0.0987762 | 0.210082  |
| 0.127914  | 0.129953  | 0.198864  | 0.0649767 | 0.197407  | 0.193765  | 0.135198  |
| 0.115967  | 0.11859   | 0.190705  | 0.0539044 | 0.186043  | 0.182984  | 0.13345   |
| 0.227127  | 0.226253  | 0.122669  | 0.215181  | 0.119464  | 0.11757   | 0.231498  |
| 0.116841  | 0.117424  | 0.196533  | 0.114219  | 0.192745  | 0.190851  | 0.119172  |
| 0.198864  | 0.199738  | 0.100233  | 0.189248  | 0.0979021 | 0.097465  | 0.207605  |
| 0.118735  | 0.120192  | 0.196387  | 0.114948  | 0.197844  | 0.193619  | 0.117279  |
| 0.110286  | 0.119027  | 0.192599  | 0.108246  | 0.188228  | 0.185169  | 0.122815  |
| 0.109848  | 0.125     | 0.199155  | 0.113636  | 0.198572  | 0.197261  | 0.123543  |
| 0.128788  | 0.130828  | 0.205857  | 0.125874  | 0.207896  | 0.203963  | 0.0474942 |
| 0.111451  | 0.118735  | 0.18852   | 0.103293  | 0.183275  | 0.181672  | 0.131847  |
| 0.154866  | 0.160402  | 0.130828  | 0.149038  | 0.125291  | 0.120775  | 0.172348  |
| 0.112325  | 0.111451  | 0.185897  | 0.0505536 | 0.18211   | 0.181381  | 0.129516  |
| 0.128059  | 0.0514277 | 0.198135  | 0.119027  | 0.194056  | 0.191871  | 0.13039   |
| 0.118735  | 0.114365  | 0.194639  | 0.117861  | 0.190851  | 0.188083  | 0.121941  |
| 0.127768  | 0.107663  | 0.196387  | 0.11553   | 0.195804  | 0.192453  | 0.128934  |
| 0.193765  | 0.196678  | 0.0939685 | 0.183858  | 0.0986305 | 0.090035  | 0.204545  |
| 0.110286  | 0.119027  | 0.188228  | 0.107955  | 0.184149  | 0.184295  | 0.118735  |
| 0.119755  | 0.124709  | 0.186917  | 0.119172  | 0.182255  | 0.18007   | 0.0664336 |
| 0.112325  | 0.118444  | 0.20134   | 0.109703  | 0.196678  | 0.192453  | 0.110868  |
| 0.120629  | 0.120338  | 0.202652  | 0.115676  | 0.19799   | 0.198427  | 0.114219  |
| 0.116404  | 0.123689  | 0.195513  | 0.114656  | 0.188811  | 0.18954   | 0.122815  |

|          |           |           |           |           |           |           |
|----------|-----------|-----------|-----------|-----------|-----------|-----------|
| 0.25845  | 0.255245  | 0.133304  | 0.243298  | 0.14088   | 0.136364  | 0.263112  |
| 0.104749 | 0.115822  | 0.196387  | 0.110286  | 0.194347  | 0.193619  | 0.11553   |
| 0.116113 | 0.115239  | 0.187063  | 0.111451  | 0.185606  | 0.182547  | 0.12602   |
| 0.181381 | 0.18109   | 0.143065  | 0.169726  | 0.144814  | 0.140589  | 0.184586  |
| 0.185169 | 0.186626  | 0.0973193 | 0.173514  | 0.0967366 | 0.0983392 | 0.19595   |
| 0.118153 | 0.109994  | 0.197552  | 0.108246  | 0.194347  | 0.191288  | 0.135927  |
| 0.114802 | 0.117716  | 0.190997  | 0.0568182 | 0.186917  | 0.183275  | 0.130828  |
| 0.11655  | 0.117716  | 0.194202  | 0.110723  | 0.194493  | 0.190268  | 0.0582751 |
| 0.139132 | 0.143502  | 0.205128  | 0.0802739 | 0.201923  | 0.200029  | 0.147582  |
| 0.113491 | 0.108829  | 0.193765  | 0.107663  | 0.191142  | 0.188666  | 0.130973  |
| 0.115967 | 0.111305  | 0.196824  | 0.114802  | 0.19595   | 0.191434  | 0.137821  |
| 0.128059 | 0.120484  | 0.204254  | 0.120775  | 0.200466  | 0.198281  | 0.121066  |
| 0.114365 | 0.116404  | 0.186189  | 0.0557984 | 0.182984  | 0.179633  | 0.127185  |
| 0.126748 | 0.128788  | 0.192745  | 0.0620629 | 0.191579  | 0.18852   | 0.135781  |
| 0.116696 | 0.120775  | 0.182692  | 0.111742  | 0.18007   | 0.178759  | 0.121358  |
| 0.125874 | 0.125874  | 0.204108  | 0.122378  | 0.203817  | 0.200175  | 0.0515734 |
| 0.137383 | 0.143502  | 0.215035  | 0.134178  | 0.213869  | 0.209353  | 0.0569639 |
| 0.109266 | 0.122086  | 0.198572  | 0.113054  | 0.19595   | 0.195221  | 0.120921  |
| 0.133304 | 0.134178  | 0.210082  | 0.128934  | 0.207751  | 0.207022  | 0.0493881 |
| 0.128642 | 0.129516  | 0.207459  | 0.120775  | 0.206002  | 0.203234  | 0.121358  |
| 0.207751 | 0.210082  | 0.107372  | 0.194056  | 0.104458  | 0.0935315 | 0.214744  |
| 0.103293 | 0.121649  | 0.201923  | 0.11961   | 0.200175  | 0.200321  | 0.131265  |
| 0.190705 | 0.191288  | 0.100524  | 0.178176  | 0.0973193 | 0.0910548 | 0.199446  |
| 0.113199 | 0.0863928 | 0.191725  | 0.108829  | 0.187646  | 0.188374  | 0.123106  |
| 0.119318 | 0.129808  | 0.193182  | 0.118735  | 0.187646  | 0.188374  | 0.125437  |
| 0.12398  | 0.126311  | 0.19697   | 0.11757   | 0.193765  | 0.190122  | 0.128934  |
| 0.116259 | 0.119464  | 0.193328  | 0.11014   | 0.191288  | 0.187646  | 0.125583  |
| 0.121066 | 0.120775  | 0.187937  | 0.0563811 | 0.185897  | 0.182838  | 0.135052  |
| 0.119318 | 0.121941  | 0.193473  | 0.0569639 | 0.18852   | 0.188957  | 0.133596  |
| 0.114365 | 0.117279  | 0.186772  | 0.114073  | 0.181527  | 0.181672  | 0.123397  |
| 0.125291 | 0.0504079 | 0.197115  | 0.111888  | 0.197115  | 0.192308  | 0.129953  |
| 0.125874 | 0.127331  | 0.202943  | 0.115967  | 0.196533  | 0.196096  | 0.131993  |
| 0.13243  | 0.134178  | 0.199009  | 0.125728  | 0.19493   | 0.192162  | 0.122232  |
| 0.252768 | 0.251603  | 0.130245  | 0.237325  | 0.142774  | 0.135052  | 0.255973  |
| 0.110868 | 0.123689  | 0.189103  | 0.11116   | 0.188228  | 0.186334  | 0.125146  |
| 0.184149 | 0.183858  | 0.0925117 | 0.173077  | 0.0948427 | 0.0897436 | 0.19493   |
| 0.188666 | 0.189248  | 0.0961538 | 0.175262  | 0.0932401 | 0.092803  | 0.198864  |
| 0.106643 | 0.120921  | 0.188957  | 0.115676  | 0.182547  | 0.18211   | 0.131119  |
| 0.100816 | 0.114802  | 0.191871  | 0.106061  | 0.191579  | 0.189103  | 0.115967  |
| 0.116841 | 0.129662  | 0.197698  | 0.11655   | 0.192453  | 0.191725  | 0.12704   |
| 0.112471 | 0.111305  | 0.186917  | 0.048951  | 0.183421  | 0.179779  | 0.128205  |
| 0.088141 | 0.120775  | 0.185315  | 0.108246  | 0.180653  | 0.179924  | 0.123689  |
| 0.116404 | 0.11553   | 0.196387  | 0.114073  | 0.193765  | 0.193036  | 0.114948  |
| 0.115676 | 0.122669  | 0.188666  | 0.0795455 | 0.184003  | 0.184149  | 0.130828  |

|           |           |           |           |           |           |           |
|-----------|-----------|-----------|-----------|-----------|-----------|-----------|
| 0.128205  | 0.132284  | 0.20236   | 0.0664336 | 0.200321  | 0.197261  | 0.137529  |
| 0.112325  | 0.118735  | 0.189685  | 0.11116   | 0.185315  | 0.186917  | 0.122523  |
| 0.125437  | 0.128059  | 0.198135  | 0.0665793 | 0.193182  | 0.191288  | 0.137383  |
| 0.111597  | 0.111888  | 0.196824  | 0.113345  | 0.190997  | 0.189685  | 0.119755  |
| 0.124417  | 0.130245  | 0.203817  | 0.12296   | 0.200321  | 0.197261  | 0.129953  |
| 0.11757   | 0.124563  | 0.196387  | 0.117861  | 0.193765  | 0.19391   | 0.0619172 |
| 0.130828  | 0.131702  | 0.209645  | 0.124709  | 0.206148  | 0.206294  | 0.121795  |
| 0.0505536 | 0.127185  | 0.199883  | 0.114948  | 0.196096  | 0.195367  | 0.128642  |
| 0.106498  | 0.121649  | 0.186772  | 0.110868  | 0.179487  | 0.182547  | 0.121066  |
| 0.135344  | 0.122815  | 0.206002  | 0.121358  | 0.202797  | 0.200612  | 0.129516  |
| 0.184441  | 0.182692  | 0.0977564 | 0.171329  | 0.0968823 | 0.0903263 | 0.19493   |
| 0.133304  | 0.133887  | 0.201632  | 0.0709499 | 0.199592  | 0.197115  | 0.139132  |
| 0.119901  | 0.120484  | 0.189103  | 0.0549242 | 0.187937  | 0.185169  | 0.133013  |
| 0.119464  | 0.122086  | 0.198864  | 0.118007  | 0.195076  | 0.191725  | 0.126748  |
| 0.112325  | 0.115822  | 0.192308  | 0.109411  | 0.188811  | 0.186334  | 0.121066  |
| 0.120629  | 0.120921  | 0.19799   | 0.117716  | 0.196241  | 0.193765  | 0.0533217 |
| 0.125728  | 0.125437  | 0.203671  | 0.121941  | 0.200175  | 0.198281  | 0.0534674 |
| 0.193182  | 0.193473  | 0.100962  | 0.177156  | 0.0893065 | 0.087704  | 0.198135  |
| 0.112471  | 0.122086  | 0.181381  | 0.076049  | 0.178467  | 0.177156  | 0.130536  |
| 0.104167  | 0.113491  | 0.173077  | 0.0948427 | 0.167249  | 0.163899  | 0.120192  |
| 0.122232  | 0.11961   | 0.192016  | 0.0590035 | 0.190851  | 0.189831  | 0.133887  |
| 0.192599  | 0.192308  | 0.0980478 | 0.177739  | 0.0875583 | 0.0888695 | 0.200466  |
| 0.097465  | 0.115822  | 0.185023  | 0.103875  | 0.181235  | 0.18109   | 0.116696  |
| 0.125291  | 0.124417  | 0.204691  | 0.118881  | 0.202943  | 0.20134   | 0.116841  |
| 0.121795  | 0.122086  | 0.193036  | 0.0582751 | 0.190122  | 0.188811  | 0.135198  |
| 0.113782  | 0.10912   | 0.196387  | 0.105624  | 0.195513  | 0.192745  | 0.128351  |
| 0.186334  | 0.188957  | 0.0955711 | 0.171766  | 0.0909091 | 0.0887238 | 0.197115  |
| 0.120192  | 0.120484  | 0.198427  | 0.110286  | 0.196387  | 0.194493  | 0.117279  |
| 0.112908  | 0.111742  | 0.188811  | 0.101836  | 0.184149  | 0.183421  | 0.121358  |
| 0.103293  | 0.112325  | 0.180944  | 0.103001  | 0.179779  | 0.174097  | 0.11961   |
| 0.119027  | 0.124563  | 0.172494  | 0.105915  | 0.170163  | 0.162733  | 0.13447   |
| 0.125     | 0.0477855 | 0.203526  | 0.116259  | 0.200321  | 0.195513  | 0.134324  |
| 0.130828  | 0.126457  | 0.209353  | 0.123834  | 0.201486  | 0.201049  | 0.120921  |
| 0.107809  | 0.118007  | 0.191288  | 0.111305  | 0.186626  | 0.185315  | 0.120338  |
| 0.106352  | 0.125     | 0.199446  | 0.110723  | 0.19799   | 0.197261  | 0.130245  |
| 0.141463  | 0.133596  | 0.211247  | 0.133013  | 0.208916  | 0.206439  | 0.151078  |
| 0.235286  | 0.235577  | 0.120921  | 0.223631  | 0.130536  | 0.124854  | 0.241696  |
| 0.0584207 | 0.13243   | 0.20542   | 0.11961   | 0.201049  | 0.200612  | 0.128934  |
| 0.123106  | 0.0502622 | 0.199592  | 0.116113  | 0.198427  | 0.192162  | 0.131847  |
| 0.113928  | 0.118298  | 0.185752  | 0.0652681 | 0.180216  | 0.180653  | 0.130536  |
| 0.122232  | 0.126894  | 0.188811  | 0.115822  | 0.183275  | 0.180798  | 0.137966  |
| 0.118298  | 0.0737179 | 0.193036  | 0.107517  | 0.192745  | 0.188228  | 0.12296   |
| 0.119172  | 0.112471  | 0.194784  | 0.112179  | 0.193619  | 0.190851  | 0.122378  |
| 0.121358  | 0.121649  | 0.189685  | 0.064831  | 0.185897  | 0.183712  | 0.133013  |

|           |           |           |           |           |           |          |
|-----------|-----------|-----------|-----------|-----------|-----------|----------|
| 0.127914  | 0.125291  | 0.203817  | 0.120047  | 0.200029  | 0.197552  | 0.118881 |
| 0.115385  | 0.112179  | 0.190122  | 0.112471  | 0.189831  | 0.187937  | 0.13141  |
| 0.239365  | 0.238199  | 0.125291  | 0.224796  | 0.127914  | 0.130973  | 0.241696 |
| 0.0999417 | 0.111305  | 0.187209  | 0.101107  | 0.184586  | 0.182984  | 0.115676 |
| 0.104895  | 0.100233  | 0.190705  | 0.104312  | 0.190122  | 0.186772  | 0.11451  |
| 0.110286  | 0.117861  | 0.18852   | 0.108537  | 0.184441  | 0.184003  | 0.11757  |
| 0.127622  | 0.120338  | 0.205857  | 0.119172  | 0.203234  | 0.201923  | 0.144231 |
| 0.0623543 | 0.137238  | 0.210227  | 0.128205  | 0.208188  | 0.20542   | 0.137529 |
| 0.116259  | 0.120921  | 0.185169  | 0.105186  | 0.182838  | 0.183275  | 0.136946 |
| 0.117716  | 0.119172  | 0.188083  | 0.0574009 | 0.183421  | 0.182984  | 0.129371 |
| 0.110286  | 0.10708   | 0.192308  | 0.100379  | 0.190559  | 0.184878  | 0.128059 |
| 0.235286  | 0.232955  | 0.121795  | 0.219551  | 0.126457  | 0.124563  | 0.237034 |
| 0.125437  | 0.126894  | 0.192308  | 0.0587121 | 0.188811  | 0.188083  | 0.13447  |
| 0.124126  | 0.122378  | 0.202652  | 0.11655   | 0.200612  | 0.195804  | 0.115385 |
| 0.11014   | 0.10373   | 0.189831  | 0.107809  | 0.190414  | 0.187646  | 0.120047 |
| 0.123689  | 0.105915  | 0.199592  | 0.115239  | 0.198427  | 0.194493  | 0.13039  |
| 0.123106  | 0.115239  | 0.206294  | 0.118735  | 0.201923  | 0.199738  | 0.12398  |
| 0.113782  | 0.11757   | 0.194347  | 0.110577  | 0.18852   | 0.18954   | 0.120775 |
| 0.122523  | 0.124854  | 0.202506  | 0.11757   | 0.200466  | 0.197115  | 0.114948 |
| 0.129079  | 0.129371  | 0.207896  | 0.12296   | 0.205565  | 0.20338   | 0.120338 |
| 0.11859   | 0.117424  | 0.200903  | 0.113345  | 0.196533  | 0.194347  | 0.115093 |
| 0.108246  | 0.118444  | 0.192308  | 0.110868  | 0.186772  | 0.18546   | 0.122523 |
| 0.131556  | 0.0566725 | 0.204837  | 0.11961   | 0.20338   | 0.198281  | 0.136218 |
| 0.137529  | 0.0620629 | 0.21081   | 0.122669  | 0.206731  | 0.207459  | 0.138112 |
| 0.127622  | 0.131702  | 0.2044    | 0.121212  | 0.200903  | 0.198135  | 0.131702 |
| 0.133159  | 0.132867  | 0.207896  | 0.127914  | 0.20236   | 0.198718  | 0.135198 |
| 0.135927  | 0.055507  | 0.210664  | 0.126311  | 0.208625  | 0.205565  | 0.139132 |
| 0.081148  | 0.11553   | 0.19289   | 0.106789  | 0.189103  | 0.188083  | 0.121941 |
| 0.131993  | 0.132576  | 0.215763  | 0.126748  | 0.213432  | 0.212413  | 0.118007 |
| 0.120484  | 0.135052  | 0.210373  | 0.124272  | 0.208916  | 0.207314  | 0.136509 |
| 0.208188  | 0.207605  | 0.102855  | 0.194784  | 0.0999417 | 0.10067   | 0.215181 |
| 0.108537  | 0.130682  | 0.199883  | 0.115239  | 0.192308  | 0.188666  | 0.130973 |
| 0.111742  | 0.105041  | 0.198135  | 0.109994  | 0.193473  | 0.190414  | 0.116404 |
| 0.117133  | 0.125874  | 0.187791  | 0.116259  | 0.182838  | 0.180944  | 0.126748 |
| 0.223631  | 0.226253  | 0.111597  | 0.210519  | 0.125     | 0.120484  | 0.231206 |
| 0.211101  | 0.213724  | 0.119172  | 0.200321  | 0.106935  | 0.107663  | 0.218677 |
| 0.129371  | 0.126748  | 0.206439  | 0.123543  | 0.201777  | 0.201632  | 0.119755 |
| 0.252768  | 0.250728  | 0.131993  | 0.237908  | 0.132867  | 0.129808  | 0.256556 |
| 0.0843531 | 0.112325  | 0.197261  | 0.105624  | 0.189977  | 0.189831  | 0.124854 |
| 0.121066  | 0.134761  | 0.209499  | 0.132139  | 0.204837  | 0.206439  | 0.144085 |
| 0.10271   | 0.114073  | 0.193765  | 0.108829  | 0.189685  | 0.189248  | 0.11961  |
| 0.132867  | 0.0504079 | 0.204691  | 0.119172  | 0.201195  | 0.199883  | 0.133741 |
| 0.190122  | 0.190705  | 0.0917832 | 0.176428  | 0.092366  | 0.0913462 | 0.19799  |
| 0.118298  | 0.11655   | 0.195659  | 0.118007  | 0.196824  | 0.193182  | 0.128497 |

|           |           |           |           |          |           |           |
|-----------|-----------|-----------|-----------|----------|-----------|-----------|
| 0.19289   | 0.196387  | 0.0992133 | 0.183566  | 0.092803 | 0.0920746 | 0.20338   |
| 0.104604  | 0.115385  | 0.195659  | 0.111014  | 0.190997 | 0.192308  | 0.130245  |
| 0.118881  | 0.120047  | 0.180216  | 0.0938228 | 0.177885 | 0.173951  | 0.122669  |
| 0.106935  | 0.122086  | 0.197115  | 0.117424  | 0.192745 | 0.193182  | 0.131119  |
| 0.110723  | 0.113928  | 0.179924  | 0.10169   | 0.176428 | 0.175408  | 0.129371  |
| 0.103875  | 0.113782  | 0.187063  | 0.103001  | 0.184149 | 0.181672  | 0.117861  |
| 0.0960082 | 0.11961   | 0.193182  | 0.101544  | 0.186772 | 0.185752  | 0.124272  |
| 0.0989219 | 0.11116   | 0.186772  | 0.103001  | 0.182401 | 0.17905   | 0.114073  |
| 0.113345  | 0.115093  | 0.188957  | 0.0498252 | 0.186043 | 0.183858  | 0.127622  |
| 0.116696  | 0.120484  | 0.20338   | 0.114656  | 0.199592 | 0.194493  | 0.111451  |
| 0.050845  | 0.118735  | 0.193765  | 0.108246  | 0.188228 | 0.188957  | 0.125146  |
| 0.10169   | 0.11451   | 0.191579  | 0.107226  | 0.189248 | 0.18648   | 0.11655   |
| 0.119027  | 0.128059  | 0.19289   | 0.11757   | 0.189977 | 0.186043  | 0.131265  |
| 0.124563  | 0.128934  | 0.198427  | 0.0651224 | 0.195804 | 0.19391   | 0.137383  |
| 0.11655   | 0.11859   | 0.193328  | 0.109557  | 0.187791 | 0.185606  | 0.122669  |
| 0.114365  | 0.111451  | 0.193765  | 0.105915  | 0.187646 | 0.186917  | 0.121066  |
| 0.106061  | 0.112471  | 0.188083  | 0.101981  | 0.182255 | 0.181818  | 0.117424  |
| 0.122669  | 0.119464  | 0.192745  | 0.112471  | 0.18954  | 0.189103  | 0.11451   |
| 0.126748  | 0.0460373 | 0.200029  | 0.112471  | 0.196824 | 0.193765  | 0.128205  |
| 0.119901  | 0.122232  | 0.197552  | 0.119027  | 0.197844 | 0.19799   | 0.0502622 |
| 0.118735  | 0.121649  | 0.198427  | 0.114365  | 0.194056 | 0.190414  | 0.123397  |
| 0.116841  | 0.117424  | 0.188374  | 0.0512821 | 0.18546  | 0.184149  | 0.13141   |
| 0.124563  | 0.128642  | 0.198135  | 0.0651224 | 0.196096 | 0.193619  | 0.135635  |
| 0.133304  | 0.140006  | 0.203963  | 0.0715326 | 0.201632 | 0.200321  | 0.143794  |
| 0.104312  | 0.110723  | 0.192162  | 0.102855  | 0.186626 | 0.186772  | 0.111305  |
| 0.113054  | 0.119172  | 0.190705  | 0.112471  | 0.184878 | 0.184149  | 0.125     |
| 0.10912   | 0.104749  | 0.187937  | 0.101253  | 0.184732 | 0.181672  | 0.119901  |
| 0.13447   | 0.0607517 | 0.211247  | 0.125728  | 0.20979  | 0.206731  | 0.135635  |
| 0.105478  | 0.120047  | 0.19799   | 0.110431  | 0.196241 | 0.19289   | 0.118881  |
| 0.138986  | 0.141317  | 0.214889  | 0.137238  | 0.214307 | 0.210373  | 0.0533217 |
| 0.129371  | 0.13986   | 0.206731  | 0.129079  | 0.199446 | 0.198427  | 0.134324  |
| 0.120192  | 0.114073  | 0.197844  | 0.11553   | 0.197844 | 0.194784  | 0.137966  |
| 0.0941142 | 0.115385  | 0.192162  | 0.0999417 | 0.189248 | 0.183566  | 0.125583  |
| 0.105915  | 0.0983392 | 0.191434  | 0.10271   | 0.18648  | 0.183421  | 0.127477  |
| 0.126894  | 0.131556  | 0.201923  | 0.122815  | 0.200758 | 0.196241  | 0.131265  |
| 0.209499  | 0.210082  | 0.116696  | 0.195221  | 0.119318 | 0.11014   | 0.213578  |
| 0.114802  | 0.108683  | 0.191288  | 0.106935  | 0.186334 | 0.185897  | 0.119755  |
| 0.103001  | 0.117861  | 0.195513  | 0.111451  | 0.189685 | 0.189248  | 0.130682  |
| 0.126457  | 0.0533217 | 0.201777  | 0.113636  | 0.198864 | 0.198135  | 0.127914  |
| 0.119901  | 0.121941  | 0.195513  | 0.114073  | 0.192016 | 0.189831  | 0.129516  |
| 0.112762  | 0.121503  | 0.199446  | 0.117716  | 0.192453 | 0.191142  | 0.134033  |
| 0.113054  | 0.12704   | 0.198281  | 0.106061  | 0.194493 | 0.19289   | 0.129662  |
| 0.114656  | 0.125146  | 0.203089  | 0.109411  | 0.196678 | 0.194784  | 0.12602   |
| 0.11451   | 0.109848  | 0.197698  | 0.111305  | 0.194493 | 0.192016  | 0.134615  |

|           |           |          |           |          |          |          |
|-----------|-----------|----------|-----------|----------|----------|----------|
| 0.108974  | 0.114219  | 0.199446 | 0.110431  | 0.197115 | 0.195221 | 0.112471 |
| 0.129662  | 0.0553613 | 0.207022 | 0.120921  | 0.204691 | 0.202797 | 0.13345  |
| 0.10373   | 0.115385  | 0.194493 | 0.109266  | 0.19391  | 0.19289  | 0.128205 |
| 0.0488054 | 0.121649  | 0.199883 | 0.115239  | 0.193182 | 0.192453 | 0.129225 |
| 0.178904  | 0.178613  | 0.171766 | 0.166375  | 0.169726 | 0.171911 | 0.188811 |
| 0.11451   | 0.11859   | 0.186334 | 0.0559441 | 0.186626 | 0.183566 | 0.134324 |
| 0.129808  | 0.0665793 | 0.194056 | 0.122815  | 0.190559 | 0.188374 | 0.137675 |
| 0.105769  | 0.119464  | 0.206439 | 0.117133  | 0.203817 | 0.201632 | 0.126748 |
| 0.123106  | 0.12398   | 0.200175 | 0.10708   | 0.192308 | 0.188374 | 0.132721 |
| 0.0861014 | 0.113782  | 0.192599 | 0.0957168 | 0.187354 | 0.186334 | 0.120775 |
| 0.0499709 | 0.116404  | 0.193182 | 0.102418  | 0.18852  | 0.187791 | 0.123106 |
| 0.0913462 | 0.11757   | 0.200175 | 0.10271   | 0.193765 | 0.192745 | 0.123689 |
| 0.121941  | 0.117861  | 0.201923 | 0.118153  | 0.201632 | 0.194784 | 0.131265 |
| 0.0808566 | 0.120484  | 0.187354 | 0.0831876 | 0.18211  | 0.182547 | 0.130099 |
| 0.123834  | 0.123543  | 0.207314 | 0.125583  | 0.205274 | 0.204545 | 0.131119 |
| 0.105624  | 0.112034  | 0.190851 | 0.102127  | 0.187063 | 0.185752 | 0.120192 |
| 0.0999417 | 0.122378  | 0.195076 | 0.116259  | 0.191579 | 0.189394 | 0.125    |
| 0.127185  | 0.130973  | 0.213287 | 0.125146  | 0.205711 | 0.207896 | 0.131847 |
| 0.097465  | 0.119901  | 0.203089 | 0.115239  | 0.199883 | 0.199446 | 0.120484 |
| 0.116404  | 0.123106  | 0.199301 | 0.116404  | 0.199301 | 0.197115 | 0.125146 |
| 0.0936772 | 0.114656  | 0.198135 | 0.112034  | 0.196096 | 0.19391  | 0.117861 |
| 0.0939685 | 0.121066  | 0.202506 | 0.112325  | 0.198427 | 0.195659 | 0.117861 |
| 0.0962995 | 0.110286  | 0.19289  | 0.106789  | 0.189394 | 0.186043 | 0.115822 |
| 0.109266  | 0.126166  | 0.204108 | 0.115093  | 0.20236  | 0.202214 | 0.117424 |
| 0.0926573 | 0.113928  | 0.197115 | 0.108392  | 0.194784 | 0.191142 | 0.113928 |
| 0.142191  | 0.139277  | 0.212558 | 0.132576  | 0.203817 | 0.206876 | 0.135781 |
| 0.128205  | 0.128205  | 0.199446 | 0.119464  | 0.190997 | 0.192016 | 0.135781 |
| 0.0926573 | 0.11451   | 0.199446 | 0.109266  | 0.194493 | 0.195804 | 0.112762 |
| 0.140589  | 0.133887  | 0.212121 | 0.131265  | 0.209499 | 0.209062 | 0.13039  |
| 0.115822  | 0.119027  | 0.198135 | 0.113199  | 0.191142 | 0.189248 | 0.13447  |
| 0.121649  | 0.139714  | 0.210373 | 0.130099  | 0.206876 | 0.205274 | 0.142337 |
| 0.100962  | 0.118444  | 0.199009 | 0.106206  | 0.196387 | 0.193328 | 0.10708  |
| 0.141026  | 0.127331  | 0.211101 | 0.134907  | 0.205857 | 0.206002 | 0.145979 |
| 0.126166  | 0.117716  | 0.197407 | 0.125291  | 0.195659 | 0.194639 | 0.128788 |
| 0.138403  | 0.129079  | 0.207022 | 0.133741  | 0.203234 | 0.200758 | 0.139569 |
| 0.111597  | 0.125874  | 0.204983 | 0.113928  | 0.202652 | 0.205128 | 0.128205 |
| 0.0960082 | 0.119901  | 0.200758 | 0.111742  | 0.193765 | 0.194784 | 0.121649 |
| 0.0987762 | 0.11451   | 0.194493 | 0.109557  | 0.188666 | 0.189394 | 0.122669 |
| 0.115239  | 0.108246  | 0.199592 | 0.112034  | 0.196387 | 0.194493 | 0.121066 |
| 0.104749  | 0.125146  | 0.208333 | 0.114948  | 0.202797 | 0.200321 | 0.11553  |
| 0.11451   | 0.129953  | 0.210519 | 0.123543  | 0.207314 | 0.20542  | 0.122378 |
| 0.115385  | 0.124417  | 0.194202 | 0.119172  | 0.187791 | 0.192599 | 0.127914 |
| 0.102855  | 0.11014   | 0.194784 | 0.1081    | 0.193619 | 0.191725 | 0.120338 |
| 0.0948427 | 0.116987  | 0.193765 | 0.108829  | 0.189685 | 0.18954  | 0.121066 |

|           |          |          |           |          |          |          |
|-----------|----------|----------|-----------|----------|----------|----------|
| 0.106061  | 0.119172 | 0.199155 | 0.114802  | 0.196824 | 0.196096 | 0.127914 |
| 0.106061  | 0.113928 | 0.195659 | 0.104895  | 0.191579 | 0.189685 | 0.120921 |
| 0.106498  | 0.124272 | 0.202797 | 0.116987  | 0.198135 | 0.198572 | 0.128642 |
| 0.0983392 | 0.116696 | 0.193473 | 0.106789  | 0.192308 | 0.190122 | 0.114948 |
| 0.113928  | 0.122378 | 0.184003 | 0.102855  | 0.18109  | 0.181818 | 0.13549  |
| 0.087704  | 0.117133 | 0.198864 | 0.106352  | 0.192453 | 0.193182 | 0.130828 |
| 0.0815851 | 0.116259 | 0.192453 | 0.104604  | 0.188666 | 0.187646 | 0.122378 |
| 0.0955711 | 0.113928 | 0.19391  | 0.109266  | 0.194784 | 0.19289  | 0.122669 |
| 0.111742  | 0.117861 | 0.182984 | 0.102418  | 0.181818 | 0.177885 | 0.132139 |
| 0.0909091 | 0.114219 | 0.196241 | 0.101399  | 0.191871 | 0.190559 | 0.127622 |
| 0.112179  | 0.123543 | 0.192745 | 0.105186  | 0.184295 | 0.188228 | 0.128497 |
| 0.104604  | 0.111888 | 0.181964 | 0.0929487 | 0.179633 | 0.177156 | 0.126166 |
| 0.105624  | 0.133013 | 0.205711 | 0.117861  | 0.201632 | 0.202943 | 0.133013 |

| TDr_2572 | TDr_2575  | TDr_2577  | TDr_2580  | TDr_2581  | TDr_2591  | TDr_2593  |
|----------|-----------|-----------|-----------|-----------|-----------|-----------|
| 0.138403 | 0.101107  | 0.111742  | 0.113054  | 0.11655   | 0.113928  | 0.119755  |
| 0.126894 | 0.101836  | 0.104895  | 0.103293  | 0.105041  | 0.113199  | 0.114948  |
| 0.127477 | 0.0980478 | 0.0979021 | 0.0980478 | 0.101253  | 0.11116   | 0.111742  |
| 0.128059 | 0.108537  | 0.0903263 | 0.0895979 | 0.105624  | 0.109703  | 0.117279  |
| 0.133887 | 0.120775  | 0.126166  | 0.13039   | 0.13447   | 0.127477  | 0.129516  |
| 0.140297 | 0.123397  | 0.12704   | 0.127477  | 0.121066  | 0.12398   | 0.128642  |
| 0.131702 | 0.108974  | 0.119318  | 0.124126  | 0.124126  | 0.111014  | 0.111888  |
| 0.127622 | 0.099359  | 0.0933858 | 0.100233  | 0.104895  | 0.110723  | 0.115093  |
| 0.12398  | 0.0770688 | 0.0981935 | 0.099796  | 0.103001  | 0.103001  | 0.105624  |
| 0.127331 | 0.0850816 | 0.106789  | 0.112762  | 0.092366  | 0.113345  | 0.119755  |
| 0.134178 | 0.0989219 | 0.11655   | 0.121649  | 0.10708   | 0.109703  | 0.112325  |
| 0.118007 | 0.101107  | 0.100379  | 0.106061  | 0.112179  | 0.100816  | 0.101107  |
| 0.130536 | 0.0862471 | 0.106498  | 0.109848  | 0.0990676 | 0.105478  | 0.110431  |
| 0.152826 | 0.117279  | 0.125874  | 0.125437  | 0.123397  | 0.136801  | 0.139714  |
| 0.138112 | 0.116259  | 0.119027  | 0.128205  | 0.0600233 | 0.126748  | 0.128205  |
| 0.135344 | 0.103293  | 0.113928  | 0.118735  | 0.11116   | 0.105624  | 0.106498  |
| 0.107226 | 0.10169   | 0.109703  | 0.11014   | 0.111305  | 0.0941142 | 0.0958625 |
| 0.140006 | 0.135344  | 0.133741  | 0.136509  | 0.141463  | 0.143502  | 0.14729   |
| 0.126894 | 0.0957168 | 0.094697  | 0.0980478 | 0.103293  | 0.107663  | 0.109703  |
| 0.212558 | 0.193619  | 0.19493   | 0.199738  | 0.177593  | 0.206439  | 0.20877   |
| 0.129371 | 0.116259  | 0.118735  | 0.126457  | 0.118298  | 0.121503  | 0.125583  |
| 0.124563 | 0.110868  | 0.111014  | 0.117861  | 0.113199  | 0.119318  | 0.123397  |
| 0.129953 | 0.0920746 | 0.102418  | 0.107517  | 0.107517  | 0.0856643 | 0.0865385 |
| 0.131847 | 0.116987  | 0.119172  | 0.121066  | 0.128642  | 0.100962  | 0.100962  |
| 0.123543 | 0.0871212 | 0.0983392 | 0.10169   | 0.0999417 | 0.097028  | 0.101399  |
| 0.131993 | 0.119464  | 0.123689  | 0.132867  | 0.126166  | 0.126748  | 0.130536  |
| 0.129079 | 0.11655   | 0.116113  | 0.122669  | 0.118298  | 0.111014  | 0.113054  |
| 0.125291 | 0.106643  | 0.113199  | 0.120047  | 0.118007  | 0.0973193 | 0.10169   |
| 0.130828 | 0.118298  | 0.122815  | 0.124417  | 0.129953  | 0.119172  | 0.120338  |
| 0.124709 | 0.106061  | 0.113782  | 0.11859   | 0.116259  | 0.117716  | 0.119172  |
| 0.134178 | 0.11116   | 0.122669  | 0.12602   | 0.115822  | 0.114656  | 0.116404  |
| 0.122378 | 0.107809  | 0.116987  | 0.11859   | 0.116259  | 0.107517  | 0.111597  |
| 0.120921 | 0.094697  | 0.10271   | 0.107226  | 0.0999417 | 0.106643  | 0.111014  |
| 0.13549  | 0.101107  | 0.111451  | 0.113345  | 0.113928  | 0.110723  | 0.112179  |
| 0.135052 | 0.100087  | 0.115093  | 0.122815  | 0.116987  | 0.108246  | 0.106789  |
| 0.136364 | 0.105186  | 0.11961   | 0.126166  | 0.128788  | 0.113636  | 0.113054  |
| 0.13884  | 0.117279  | 0.128497  | 0.129808  | 0.129808  | 0.121066  | 0.130099  |
| 0.128788 | 0.106061  | 0.115239  | 0.119172  | 0.120629  | 0.108974  | 0.111305  |
| 0.123252 | 0.0984848 | 0.104749  | 0.107226  | 0.105769  | 0.0891608 | 0.0903263 |
| 0.134615 | 0.1081    | 0.113199  | 0.121212  | 0.11859   | 0.102564  | 0.104604  |
| 0.125874 | 0.0941142 | 0.10271   | 0.105769  | 0.105769  | 0.0906177 | 0.0949883 |
| 0.148893 | 0.12704   | 0.131847  | 0.137821  | 0.133741  | 0.123543  | 0.125874  |



|          |           |           |          |          |           |           |
|----------|-----------|-----------|----------|----------|-----------|-----------|
| 0.150641 | 0.129371  | 0.139423  | 0.145105 | 0.144231 | 0.124709  | 0.12296   |
| 0.13243  | 0.100962  | 0.107226  | 0.114948 | 0.114073 | 0.0962995 | 0.099796  |
| 0.11757  | 0.0855186 | 0.105186  | 0.110868 | 0.108537 | 0.0916375 | 0.0980478 |
| 0.126166 | 0.0935315 | 0.119318  | 0.119755 | 0.1081   | 0.105478  | 0.107226  |
| 0.123252 | 0.108683  | 0.109411  | 0.119172 | 0.116841 | 0.101981  | 0.103147  |
| 0.143794 | 0.119027  | 0.133741  | 0.137966 | 0.133596 | 0.119318  | 0.121066  |
| 0.128934 | 0.101836  | 0.107517  | 0.112908 | 0.11116  | 0.0983392 | 0.101836  |
| 0.128497 | 0.0996503 | 0.113491  | 0.116259 | 0.110723 | 0.0955711 | 0.100233  |
| 0.148456 | 0.138549  | 0.139569  | 0.144668 | 0.146416 | 0.140006  | 0.147582  |
| 0.126311 | 0.119027  | 0.125583  | 0.130682 | 0.130973 | 0.114948  | 0.114073  |
| 0.13141  | 0.102564  | 0.107372  | 0.112179 | 0.115385 | 0.0909091 | 0.092366  |
| 0.137529 | 0.10169   | 0.119027  | 0.119464 | 0.11451  | 0.125291  | 0.126748  |
| 0.133159 | 0.106935  | 0.0852273 | 0.083042 | 0.11451  | 0.104895  | 0.106352  |
| 0.136946 | 0.130245  | 0.126603  | 0.134907 | 0.143357 | 0.118007  | 0.120338  |
| 0.142628 | 0.114073  | 0.11859   | 0.128059 | 0.126603 | 0.106498  | 0.107372  |
| 0.128934 | 0.101836  | 0.105769  | 0.112034 | 0.113199 | 0.095134  | 0.0960082 |
| 0.131265 | 0.101836  | 0.112471  | 0.118444 | 0.109994 | 0.105624  | 0.10708   |
| 0.130536 | 0.0973193 | 0.117861  | 0.120921 | 0.113928 | 0.103147  | 0.104604  |
| 0.144522 | 0.126166  | 0.129516  | 0.138403 | 0.136655 | 0.109848  | 0.113054  |
| 0.152389 | 0.123252  | 0.128351  | 0.13345  | 0.134907 | 0.122086  | 0.120921  |
| 0.171766 | 0.151952  | 0.154138  | 0.159237 | 0.155157 | 0.150495  | 0.152244  |
| 0.128642 | 0.100962  | 0.107226  | 0.115822 | 0.111451 | 0.0948427 | 0.0965909 |
| 0.127768 | 0.100087  | 0.109266  | 0.109703 | 0.111742 | 0.0887238 | 0.090472  |
| 0.124563 | 0.0971737 | 0.104021  | 0.108829 | 0.114073 | 0.0919289 | 0.0939685 |
| 0.145396 | 0.125583  | 0.137383  | 0.140152 | 0.138986 | 0.130828  | 0.135198  |
| 0.128497 | 0.0999417 | 0.103001  | 0.109557 | 0.107809 | 0.0920746 | 0.0979021 |
| 0.131556 | 0.126603  | 0.126748  | 0.130973 | 0.130682 | 0.11757   | 0.112617  |
| 0.126894 | 0.100962  | 0.116841  | 0.120484 | 0.11116  | 0.101544  | 0.101253  |
| 0.128205 | 0.105186  | 0.11116   | 0.120629 | 0.114802 | 0.0920746 | 0.0958625 |
| 0.145688 | 0.136364  | 0.144668  | 0.143357 | 0.143065 | 0.142483  | 0.145396  |
| 0.137821 | 0.110723  | 0.114365  | 0.119755 | 0.118007 | 0.0981935 | 0.100233  |
| 0.148164 | 0.120775  | 0.129662  | 0.138549 | 0.132721 | 0.120192  | 0.121649  |
| 0.127914 | 0.116841  | 0.125146  | 0.130536 | 0.131119 | 0.115093  | 0.113928  |
| 0.112034 | 0.10271   | 0.102564  | 0.107372 | 0.11553  | 0.108829  | 0.115822  |
| 0.129225 | 0.0971737 | 0.102855  | 0.112908 | 0.113199 | 0.0884324 | 0.0893065 |
| 0.13039  | 0.100379  | 0.109266  | 0.11116  | 0.115239 | 0.0968823 | 0.0980478 |
| 0.139132 | 0.118153  | 0.120629  | 0.130682 | 0.131556 | 0.109411  | 0.11116   |
| 0.13345  | 0.097028  | 0.105041  | 0.112179 | 0.113636 | 0.092366  | 0.094697  |
| 0.146999 | 0.124563  | 0.130536  | 0.134178 | 0.137092 | 0.119901  | 0.121066  |
| 0.139132 | 0.111742  | 0.120047  | 0.128059 | 0.117861 | 0.102127  | 0.104749  |
| 0.123689 | 0.106789  | 0.109266  | 0.114365 | 0.116696 | 0.0965909 | 0.0962995 |
| 0.13039  | 0.10708   | 0.110431  | 0.118153 | 0.113491 | 0.0971737 | 0.0995047 |
| 0.137966 | 0.109703  | 0.112471  | 0.117861 | 0.117861 | 0.0968823 | 0.100962  |
| 0.126311 | 0.101544  | 0.108974  | 0.11757  | 0.112034 | 0.0960082 | 0.0954254 |

|          |           |           |          |           |           |           |
|----------|-----------|-----------|----------|-----------|-----------|-----------|
| 0.128934 | 0.102127  | 0.106061  | 0.112617 | 0.113491  | 0.092803  | 0.0910548 |
| 0.145979 | 0.120047  | 0.131265  | 0.139569 | 0.134615  | 0.113636  | 0.117424  |
| 0.123834 | 0.0961538 | 0.107955  | 0.114219 | 0.106061  | 0.0938228 | 0.0964452 |
| 0.128059 | 0.0930944 | 0.107809  | 0.114073 | 0.106789  | 0.10271   | 0.107955  |
| 0.127768 | 0.11553   | 0.120921  | 0.126603 | 0.122523  | 0.11961   | 0.124854  |
| 0.134178 | 0.114365  | 0.124417  | 0.126603 | 0.126603  | 0.119027  | 0.121941  |
| 0.127477 | 0.112325  | 0.129371  | 0.135635 | 0.129516  | 0.11961   | 0.127185  |
| 0.134033 | 0.12296   | 0.129516  | 0.134615 | 0.134324  | 0.124417  | 0.129371  |
| 0.129808 | 0.108246  | 0.114802  | 0.117279 | 0.11757   | 0.114656  | 0.120192  |
| 0.186334 | 0.174679  | 0.179779  | 0.182547 | 0.180216  | 0.180798  | 0.184003  |
| 0.120629 | 0.0996503 | 0.101544  | 0.109557 | 0.106935  | 0.104021  | 0.1081    |
| 0.141463 | 0.11961   | 0.126748  | 0.137383 | 0.127768  | 0.130099  | 0.129808  |
| 0.133596 | 0.109994  | 0.120629  | 0.128934 | 0.11961   | 0.120775  | 0.11961   |
| 0.134324 | 0.124126  | 0.137092  | 0.134033 | 0.13345   | 0.124709  | 0.125583  |
| 0.124272 | 0.0968823 | 0.105186  | 0.110868 | 0.11116   | 0.101836  | 0.102418  |
| 0.129808 | 0.117279  | 0.126457  | 0.13039  | 0.129516  | 0.118153  | 0.123689  |
| 0.118153 | 0.0989219 | 0.109557  | 0.115822 | 0.111451  | 0.110577  | 0.112908  |
| 0.125874 | 0.108974  | 0.121358  | 0.125583 | 0.120629  | 0.113928  | 0.120338  |
| 0.128497 | 0.101399  | 0.110577  | 0.114802 | 0.111305  | 0.104895  | 0.109266  |
| 0.132867 | 0.123543  | 0.128351  | 0.138695 | 0.137238  | 0.123252  | 0.125583  |
| 0.123543 | 0.0926573 | 0.107372  | 0.113636 | 0.108683  | 0.0920746 | 0.0976107 |
| 0.136509 | 0.122232  | 0.130828  | 0.134761 | 0.13243   | 0.125728  | 0.130099  |
| 0.121212 | 0.103147  | 0.116404  | 0.117424 | 0.118298  | 0.109848  | 0.115385  |
| 0.140006 | 0.113782  | 0.124417  | 0.128642 | 0.128642  | 0.106206  | 0.112034  |
| 0.13549  | 0.113928  | 0.128351  | 0.135781 | 0.122086  | 0.114802  | 0.122086  |
| 0.116841 | 0.0938228 | 0.107955  | 0.112762 | 0.107809  | 0.102273  | 0.106352  |
| 0.147145 | 0.136946  | 0.140006  | 0.140734 | 0.138695  | 0.138403  | 0.141317  |
| 0.119027 | 0.0989219 | 0.11655   | 0.11553  | 0.116696  | 0.107663  | 0.111451  |
| 0.126894 | 0.0919289 | 0.107809  | 0.113491 | 0.109411  | 0.102418  | 0.105041  |
| 0.121212 | 0.102273  | 0.111451  | 0.118298 | 0.117716  | 0.102273  | 0.103438  |
| 0.137821 | 0.124126  | 0.133304  | 0.137821 | 0.136946  | 0.132576  | 0.136946  |
| 0.131119 | 0.115967  | 0.119318  | 0.128497 | 0.119464  | 0.106935  | 0.111888  |
| 0.12296  | 0.0888695 | 0.100962  | 0.105186 | 0.106352  | 0.101107  | 0.104312  |
| 0.125583 | 0.0929487 | 0.107372  | 0.112179 | 0.105186  | 0.102273  | 0.105769  |
| 0.129516 | 0.103001  | 0.111597  | 0.11757  | 0.115239  | 0.107663  | 0.113782  |
| 0.134324 | 0.104895  | 0.123106  | 0.125    | 0.115967  | 0.109557  | 0.113636  |
| 0.129808 | 0.103875  | 0.117133  | 0.120484 | 0.115822  | 0.109703  | 0.111742  |
| 0.115967 | 0.0850816 | 0.0983392 | 0.107517 | 0.0990676 | 0.0897436 | 0.0932401 |
| 0.122086 | 0.0821678 | 0.103001  | 0.10373  | 0.101399  | 0.0944056 | 0.0958625 |
| 0.121649 | 0.0878497 | 0.104312  | 0.112325 | 0.103875  | 0.0980478 | 0.102127  |
| 0.127185 | 0.109411  | 0.112179  | 0.113491 | 0.116987  | 0.104167  | 0.106498  |
| 0.136072 | 0.103438  | 0.121649  | 0.126748 | 0.120921  | 0.111305  | 0.112179  |
| 0.119901 | 0.0916375 | 0.104604  | 0.109994 | 0.100962  | 0.090472  | 0.0965909 |
| 0.120047 | 0.0865385 | 0.103293  | 0.106935 | 0.0958625 | 0.090035  | 0.0926573 |

|          |           |           |           |           |           |           |
|----------|-----------|-----------|-----------|-----------|-----------|-----------|
| 0.125291 | 0.101981  | 0.125146  | 0.132576  | 0.116259  | 0.104895  | 0.103147  |
| 0.120775 | 0.088141  | 0.1081    | 0.111451  | 0.105332  | 0.0855186 | 0.0898893 |
| 0.13884  | 0.103875  | 0.118007  | 0.119027  | 0.120192  | 0.116987  | 0.119027  |
| 0.137383 | 0.123689  | 0.128788  | 0.131556  | 0.129808  | 0.125728  | 0.132721  |
| 0.11961  | 0.0945513 | 0.112471  | 0.116113  | 0.10912   | 0.101836  | 0.102418  |
| 0.123252 | 0.0920746 | 0.106498  | 0.110431  | 0.100524  | 0.0955711 | 0.0979021 |
| 0.120047 | 0.0920746 | 0.105041  | 0.108974  | 0.106352  | 0.0958625 | 0.099359  |
| 0.12296  | 0.0868298 | 0.104167  | 0.109557  | 0.103438  | 0.0920746 | 0.0938228 |
| 0.128497 | 0.100524  | 0.120192  | 0.122669  | 0.117716  | 0.112471  | 0.115676  |
| 0.125    | 0.0839161 | 0.103293  | 0.105769  | 0.0984848 | 0.0859557 | 0.0903263 |
| 0.142628 | 0.124272  | 0.130828  | 0.13243   | 0.131556  | 0.123397  | 0.125728  |
| 0.142774 | 0.117424  | 0.128351  | 0.136946  | 0.129371  | 0.118298  | 0.117716  |
| 0.134033 | 0.110723  | 0.116113  | 0.122669  | 0.116841  | 0.105186  | 0.111888  |
| 0.127185 | 0.0983392 | 0.112179  | 0.11961   | 0.108246  | 0.101544  | 0.102127  |
| 0.121941 | 0.106206  | 0.111597  | 0.116987  | 0.109994  | 0.108537  | 0.110868  |
| 0.119172 | 0.0929487 | 0.110286  | 0.11451   | 0.106352  | 0.0874126 | 0.0882867 |
| 0.125728 | 0.0942599 | 0.105186  | 0.11116   | 0.114365  | 0.0849359 | 0.0895979 |
| 0.125437 | 0.0930944 | 0.104604  | 0.109411  | 0.10708   | 0.097465  | 0.0980478 |
| 0.129516 | 0.103293  | 0.0897436 | 0.0933858 | 0.112908  | 0.0992133 | 0.101253  |
| 0.135635 | 0.11757   | 0.126166  | 0.131556  | 0.126894  | 0.0980478 | 0.0989219 |
| 0.125874 | 0.0981935 | 0.110868  | 0.114802  | 0.113345  | 0.104604  | 0.110431  |
| 0.136509 | 0.107372  | 0.127622  | 0.127477  | 0.119901  | 0.125146  | 0.128351  |
| 0.130828 | 0.122378  | 0.135052  | 0.134907  | 0.13141   | 0.128497  | 0.133741  |
| 0.203671 | 0.187354  | 0.181964  | 0.184441  | 0.183566  | 0.191434  | 0.196678  |
| 0.247523 | 0.233829  | 0.227855  | 0.229458  | 0.230624  | 0.235868  | 0.239073  |
| 0.12704  | 0.102564  | 0.0709499 | 0.0681818 | 0.111014  | 0.101981  | 0.10169   |
| 0.120192 | 0.101836  | 0.10373   | 0.112325  | 0.109703  | 0.092803  | 0.0942599 |
| 0.11553  | 0.0971737 | 0.100816  | 0.106498  | 0.10708   | 0.0925117 | 0.0945513 |
| 0.116987 | 0.0995047 | 0.101399  | 0.110286  | 0.110577  | 0.0989219 | 0.0995047 |
| 0.139714 | 0.116987  | 0.120047  | 0.126311  | 0.060169  | 0.130973  | 0.129808  |
| 0.120775 | 0.107955  | 0.105478  | 0.113782  | 0.112617  | 0.0960082 | 0.0980478 |
| 0.13986  | 0.136655  | 0.13884   | 0.146562  | 0.14627   | 0.121212  | 0.122378  |
| 0.11961  | 0.105624  | 0.112179  | 0.116696  | 0.116404  | 0.095134  | 0.0980478 |
| 0.129516 | 0.114948  | 0.123543  | 0.127477  | 0.134178  | 0.107372  | 0.109703  |
| 0.13345  | 0.122669  | 0.125146  | 0.131993  | 0.129079  | 0.11451   | 0.113054  |
| 0.125291 | 0.121795  | 0.123397  | 0.13549   | 0.129953  | 0.113345  | 0.115967  |
| 0.14627  | 0.120921  | 0.128934  | 0.137529  | 0.132576  | 0.121212  | 0.121795  |
| 0.115093 | 0.104604  | 0.111451  | 0.116841  | 0.112762  | 0.0964452 | 0.100524  |
| 0.116841 | 0.099359  | 0.107372  | 0.111305  | 0.113928  | 0.0903263 | 0.0952797 |
| 0.115822 | 0.110286  | 0.113054  | 0.120775  | 0.114948  | 0.0971737 | 0.0986305 |
| 0.113782 | 0.0980478 | 0.103438  | 0.110286  | 0.11116   | 0.0925117 | 0.0957168 |
| 0.113782 | 0.099796  | 0.10373   | 0.113199  | 0.111742  | 0.0895979 | 0.092803  |
| 0.116259 | 0.110431  | 0.108829  | 0.111597  | 0.116259  | 0.0897436 | 0.0958625 |
| 0.120775 | 0.118444  | 0.12296   | 0.130682  | 0.125437  | 0.105332  | 0.107372  |

|          |           |           |          |          |           |           |
|----------|-----------|-----------|----------|----------|-----------|-----------|
| 0.131265 | 0.129225  | 0.127331  | 0.136509 | 0.136218 | 0.113199  | 0.113782  |
| 0.124126 | 0.107226  | 0.106789  | 0.11655  | 0.120047 | 0.0906177 | 0.0952797 |
| 0.125146 | 0.10271   | 0.110723  | 0.116696 | 0.11553  | 0.0890152 | 0.095134  |
| 0.128059 | 0.121649  | 0.127331  | 0.131556 | 0.135344 | 0.105041  | 0.108829  |
| 0.117279 | 0.101544  | 0.103147  | 0.108246 | 0.111742 | 0.0846445 | 0.0913462 |
| 0.132284 | 0.133159  | 0.135344  | 0.144814 | 0.134033 | 0.121212  | 0.119755  |
| 0.137529 | 0.115385  | 0.131265  | 0.135781 | 0.126166 | 0.126457  | 0.131702  |
| 0.126603 | 0.125146  | 0.129953  | 0.139423 | 0.135927 | 0.120775  | 0.12398   |
| 0.113491 | 0.100087  | 0.101399  | 0.105624 | 0.110286 | 0.0861014 | 0.0930944 |
| 0.115385 | 0.0984848 | 0.102418  | 0.109266 | 0.109557 | 0.090035  | 0.0912005 |
| 0.120484 | 0.113782  | 0.119172  | 0.12602  | 0.125728 | 0.0986305 | 0.104167  |
| 0.121503 | 0.113928  | 0.113782  | 0.125    | 0.125583 | 0.101399  | 0.104895  |
| 0.119755 | 0.122669  | 0.124854  | 0.13141  | 0.13549  | 0.106061  | 0.104895  |
| 0.114948 | 0.108537  | 0.109557  | 0.120192 | 0.120192 | 0.0954254 | 0.095134  |
| 0.119172 | 0.107809  | 0.114656  | 0.120338 | 0.118881 | 0.0920746 | 0.0949883 |
| 0.121212 | 0.111014  | 0.114656  | 0.122669 | 0.120629 | 0.101107  | 0.102564  |
| 0.130828 | 0.122086  | 0.128934  | 0.136655 | 0.13141  | 0.110723  | 0.11655   |
| 0.126166 | 0.122378  | 0.12398   | 0.12704  | 0.134033 | 0.1081    | 0.111597  |
| 0.135344 | 0.128934  | 0.128205  | 0.136218 | 0.133013 | 0.106206  | 0.106498  |
| 0.142774 | 0.120629  | 0.125728  | 0.133159 | 0.130536 | 0.112179  | 0.112471  |
| 0.121212 | 0.105186  | 0.104458  | 0.111014 | 0.118007 | 0.0862471 | 0.0912005 |
| 0.12296  | 0.125     | 0.124272  | 0.129953 | 0.13141  | 0.113928  | 0.115385  |
| 0.113782 | 0.0965909 | 0.101107  | 0.10912  | 0.116404 | 0.0872669 | 0.088141  |
| 0.126457 | 0.0987762 | 0.109411  | 0.113345 | 0.112179 | 0.102855  | 0.10373   |
| 0.109848 | 0.104604  | 0.107372  | 0.116841 | 0.109848 | 0.0987762 | 0.101399  |
| 0.119027 | 0.106789  | 0.111014  | 0.116404 | 0.114073 | 0.0939685 | 0.0968823 |
| 0.106498 | 0.0983392 | 0.105478  | 0.112325 | 0.110868 | 0.090472  | 0.0939685 |
| 0.129371 | 0.125874  | 0.128059  | 0.135198 | 0.134324 | 0.110723  | 0.109557  |
| 0.126603 | 0.109411  | 0.112179  | 0.11961  | 0.115822 | 0.101836  | 0.104749  |
| 0.126311 | 0.121066  | 0.121503  | 0.130973 | 0.135635 | 0.113491  | 0.113491  |
| 0.114656 | 0.100379  | 0.102564  | 0.109703 | 0.113491 | 0.0945513 | 0.0948427 |
| 0.119172 | 0.115967  | 0.11961   | 0.129953 | 0.128497 | 0.0981935 | 0.100816  |
| 0.134761 | 0.104749  | 0.118007  | 0.123106 | 0.121649 | 0.103293  | 0.107372  |
| 0.132139 | 0.101253  | 0.111014  | 0.118735 | 0.107663 | 0.112034  | 0.112617  |
| 0.126748 | 0.0999417 | 0.109994  | 0.118298 | 0.114802 | 0.0981935 | 0.0990676 |
| 0.11757  | 0.106206  | 0.117716  | 0.122815 | 0.118444 | 0.110577  | 0.112034  |
| 0.13141  | 0.105769  | 0.115239  | 0.118298 | 0.113928 | 0.101399  | 0.10373   |
| 0.127622 | 0.10373   | 0.107372  | 0.112762 | 0.109557 | 0.104021  | 0.105478  |
| 0.146562 | 0.0935315 | 0.128642  | 0.131119 | 0.123834 | 0.13141   | 0.131702  |
| 0.145542 | 0.130099  | 0.128205  | 0.134761 | 0.13447  | 0.121649  | 0.122815  |
| 0.122232 | 0.0686189 | 0.0967366 | 0.103875 | 0.101836 | 0.102127  | 0.107663  |
| 0.132576 | 0.115676  | 0.124854  | 0.134324 | 0.116841 | 0.128205  | 0.136072  |
| 0.142045 | 0.0916375 | 0.122378  | 0.128934 | 0.113782 | 0.120484  | 0.127768  |
| 0.137966 | 0.109703  | 0.122378  | 0.129808 | 0.121649 | 0.128059  | 0.132139  |

|          |           |          |          |          |           |           |
|----------|-----------|----------|----------|----------|-----------|-----------|
| 0.125437 | 0.102127  | 0.117133 | 0.124272 | 0.110286 | 0.120484  | 0.12602   |
| 0.135052 | 0.0782343 | 0.119755 | 0.122232 | 0.112325 | 0.117861  | 0.121941  |
| 0.138695 | 0.080711  | 0.11757  | 0.12704  | 0.11451  | 0.123252  | 0.127331  |
| 0.131265 | 0.104458  | 0.121503 | 0.128934 | 0.123106 | 0.126311  | 0.128934  |
| 0.138258 | 0.117279  | 0.130536 | 0.136509 | 0.127477 | 0.135052  | 0.140297  |
| 0.142045 | 0.0767774 | 0.117716 | 0.118444 | 0.113782 | 0.121649  | 0.126603  |
| 0.11961  | 0.0980478 | 0.115385 | 0.121358 | 0.109703 | 0.117279  | 0.123397  |
| 0.135781 | 0.129953  | 0.127477 | 0.130828 | 0.136655 | 0.109848  | 0.111014  |
| 0.141463 | 0.090472  | 0.128497 | 0.133887 | 0.123689 | 0.129808  | 0.131847  |
| 0.123689 | 0.0869755 | 0.106935 | 0.110286 | 0.10708  | 0.110868  | 0.112908  |
| 0.22465  | 0.214452  | 0.207314 | 0.210082 | 0.214744 | 0.216783  | 0.220862  |
| 0.130828 | 0.104895  | 0.117279 | 0.124126 | 0.113928 | 0.12296   | 0.125583  |
| 0.131702 | 0.0748834 | 0.105624 | 0.115093 | 0.108683 | 0.109557  | 0.114802  |
| 0.136801 | 0.109994  | 0.128788 | 0.134178 | 0.128351 | 0.133304  | 0.137383  |
| 0.136218 | 0.0724068 | 0.106352 | 0.115239 | 0.112034 | 0.114656  | 0.118444  |
| 0.147582 | 0.0893065 | 0.127914 | 0.13039  | 0.122232 | 0.130099  | 0.133013  |
| 0.131556 | 0.10271   | 0.111888 | 0.118444 | 0.111451 | 0.116696  | 0.122815  |
| 0.131993 | 0.0973193 | 0.115239 | 0.122086 | 0.108683 | 0.119755  | 0.121795  |
| 0.133741 | 0.0842075 | 0.120775 | 0.123834 | 0.113054 | 0.122378  | 0.124709  |
| 0.135927 | 0.106789  | 0.120629 | 0.128642 | 0.118153 | 0.127768  | 0.13039   |
| 0.136072 | 0.114219  | 0.122232 | 0.129662 | 0.123543 | 0.129371  | 0.134907  |
| 0.125728 | 0.109994  | 0.125291 | 0.128934 | 0.125437 | 0.131265  | 0.136801  |
| 0.125146 | 0.106498  | 0.120629 | 0.127185 | 0.120775 | 0.128059  | 0.131847  |
| 0.13243  | 0.0919289 | 0.110431 | 0.116987 | 0.103584 | 0.102418  | 0.106206  |
| 0.119901 | 0.102127  | 0.109848 | 0.113199 | 0.114365 | 0.119901  | 0.121358  |
| 0.137529 | 0.111014  | 0.12602  | 0.137238 | 0.128205 | 0.133741  | 0.138403  |
| 0.127477 | 0.101544  | 0.112762 | 0.120775 | 0.110286 | 0.120484  | 0.122523  |
| 0.14088  | 0.12398   | 0.128497 | 0.13884  | 0.136509 | 0.110868  | 0.113199  |
| 0.145396 | 0.123834  | 0.131847 | 0.141026 | 0.132284 | 0.134324  | 0.13986   |
| 0.134615 | 0.104312  | 0.122523 | 0.126166 | 0.115967 | 0.110431  | 0.114802  |
| 0.13986  | 0.0935315 | 0.122815 | 0.128788 | 0.116259 | 0.122669  | 0.12704   |
| 0.14088  | 0.118735  | 0.120338 | 0.124272 | 0.120192 | 0.120192  | 0.125728  |
| 0.136946 | 0.110431  | 0.119901 | 0.120629 | 0.124126 | 0.120629  | 0.120047  |
| 0.138986 | 0.118881  | 0.118735 | 0.119755 | 0.123834 | 0.123834  | 0.126457  |
| 0.146853 | 0.125874  | 0.131556 | 0.137529 | 0.128788 | 0.135781  | 0.140734  |
| 0.127768 | 0.0895979 | 0.104604 | 0.113491 | 0.105041 | 0.095134  | 0.097465  |
| 0.141026 | 0.117716  | 0.126311 | 0.135198 | 0.123252 | 0.118881  | 0.118881  |
| 0.150495 | 0.127768  | 0.137821 | 0.136509 | 0.133013 | 0.139132  | 0.139714  |
| 0.129808 | 0.0965909 | 0.118881 | 0.121649 | 0.112034 | 0.102418  | 0.103293  |
| 0.137383 | 0.109994  | 0.120629 | 0.128642 | 0.120192 | 0.108537  | 0.109994  |
| 0.147727 | 0.136655  | 0.136218 | 0.140734 | 0.139569 | 0.121212  | 0.122086  |
| 0.136364 | 0.116841  | 0.118153 | 0.125291 | 0.120921 | 0.0987762 | 0.0996503 |
| 0.141754 | 0.125146  | 0.132867 | 0.138549 | 0.128351 | 0.124854  | 0.126894  |
| 0.142483 | 0.112471  | 0.125146 | 0.130536 | 0.123834 | 0.113636  | 0.116259  |

|          |           |           |           |           |           |           |
|----------|-----------|-----------|-----------|-----------|-----------|-----------|
| 0.126603 | 0.102127  | 0.120921  | 0.126603  | 0.120192  | 0.11757   | 0.116113  |
| 0.140734 | 0.120047  | 0.12602   | 0.129662  | 0.122378  | 0.116841  | 0.11859   |
| 0.133887 | 0.101836  | 0.11859   | 0.125437  | 0.114948  | 0.107372  | 0.11116   |
| 0.132576 | 0.113345  | 0.12398   | 0.134615  | 0.12704   | 0.114219  | 0.116259  |
| 0.13141  | 0.111014  | 0.120192  | 0.129953  | 0.127914  | 0.126457  | 0.128788  |
| 0.130828 | 0.121795  | 0.126311  | 0.132576  | 0.134324  | 0.124709  | 0.126457  |
| 0.129662 | 0.11655   | 0.126894  | 0.135198  | 0.131993  | 0.124126  | 0.129371  |
| 0.140152 | 0.116841  | 0.126311  | 0.133159  | 0.124417  | 0.118298  | 0.118881  |
| 0.143648 | 0.134324  | 0.137966  | 0.144814  | 0.139277  | 0.138695  | 0.141026  |
| 0.13141  | 0.10373   | 0.122815  | 0.127622  | 0.113928  | 0.113928  | 0.117133  |
| 0.129079 | 0.101107  | 0.112617  | 0.120921  | 0.116259  | 0.105186  | 0.106061  |
| 0.131119 | 0.119755  | 0.126603  | 0.13141   | 0.12296   | 0.120047  | 0.127914  |
| 0.127331 | 0.102273  | 0.11757   | 0.121795  | 0.114802  | 0.110431  | 0.117424  |
| 0.149913 | 0.129808  | 0.137238  | 0.138258  | 0.134178  | 0.139714  | 0.141463  |
| 0.156906 | 0.141754  | 0.150058  | 0.154866  | 0.152244  | 0.145251  | 0.148456  |
| 0.130973 | 0.118444  | 0.120338  | 0.128934  | 0.131847  | 0.108829  | 0.111742  |
| 0.125291 | 0.110723  | 0.115239  | 0.120047  | 0.125     | 0.0961538 | 0.101981  |
| 0.130099 | 0.121941  | 0.121212  | 0.128351  | 0.129516  | 0.123689  | 0.126603  |
| 0.136072 | 0.108392  | 0.127185  | 0.130536  | 0.122086  | 0.129079  | 0.135781  |
| 0.123252 | 0.117716  | 0.121358  | 0.130536  | 0.128788  | 0.104312  | 0.108392  |
| 0.136072 | 0.121795  | 0.133013  | 0.141026  | 0.130245  | 0.135198  | 0.138112  |
| 0.148893 | 0.123834  | 0.132721  | 0.137529  | 0.129953  | 0.132576  | 0.135198  |
| 0.136218 | 0.103875  | 0.122378  | 0.126894  | 0.120484  | 0.107372  | 0.108829  |
| 0.146125 | 0.151661  | 0.155012  | 0.153409  | 0.159819  | 0.154866  | 0.160111  |
| 0.135344 | 0.112617  | 0.128497  | 0.13447   | 0.121358  | 0.105915  | 0.111451  |
| 0.155157 | 0.121941  | 0.134907  | 0.140006  | 0.128642  | 0.123397  | 0.125728  |
| 0.129079 | 0.105769  | 0.118153  | 0.123543  | 0.117133  | 0.102855  | 0.106352  |
| 0.133159 | 0.123252  | 0.125146  | 0.13141   | 0.136655  | 0.122669  | 0.124709  |
| 0.131993 | 0.101399  | 0.120192  | 0.126748  | 0.113054  | 0.125583  | 0.129662  |
| 0.150204 | 0.127477  | 0.11655   | 0.114948  | 0.134178  | 0.135927  | 0.140297  |
| 0.133159 | 0.129371  | 0.133596  | 0.137529  | 0.143065  | 0.146562  | 0.151807  |
| 0.128934 | 0.112034  | 0.0646853 | 0.0575466 | 0.120484  | 0.114948  | 0.121941  |
| 0.145979 | 0.119755  | 0.0837704 | 0.0763403 | 0.13141   | 0.127622  | 0.132284  |
| 0.15778  | 0.136801  | 0.138986  | 0.141463  | 0.144085  | 0.110577  | 0.107663  |
| 0.157197 | 0.134761  | 0.118007  | 0.116404  | 0.131556  | 0.140297  | 0.142045  |
| 0.130536 | 0.11655   | 0.120192  | 0.123834  | 0.130828  | 0.0917832 | 0.0920746 |
| 0.135927 | 0.125437  | 0.129662  | 0.129225  | 0.13243   | 0.137383  | 0.137966  |
| 0.125146 | 0.103293  | 0.100233  | 0.106498  | 0.0823135 | 0.108246  | 0.111451  |
| 0.129662 | 0.111014  | 0.113491  | 0.117424  | 0.080711  | 0.106061  | 0.108683  |
| 0.127477 | 0.103293  | 0.113636  | 0.120484  | 0.118444  | 0.119318  | 0.121358  |
| 0.130682 | 0.106498  | 0.0571096 | 0.0493881 | 0.11553   | 0.10912   | 0.116113  |
| 0.12296  | 0.107809  | 0.113491  | 0.117424  | 0.111597  | 0.102564  | 0.102855  |
| 0.132284 | 0.0996503 | 0.0817308 | 0.0833333 | 0.0713869 | 0.1081    | 0.111305  |
| 0.132576 | 0.101107  | 0.0983392 | 0.104895  | 0.11451   | 0.118007  | 0.122669  |

|           |           |           |           |           |           |           |
|-----------|-----------|-----------|-----------|-----------|-----------|-----------|
| 0.135052  | 0.110868  | 0.113345  | 0.119901  | 0.0659965 | 0.124563  | 0.128059  |
| 0.121941  | 0.0872669 | 0.10373   | 0.107663  | 0.0960082 | 0.104167  | 0.105624  |
| 0.13243   | 0.108537  | 0.0603147 | 0.0546329 | 0.116404  | 0.111451  | 0.116696  |
| 0.129662  | 0.109266  | 0.0546329 | 0.0472028 | 0.11451   | 0.108974  | 0.115385  |
| 0.129953  | 0.114802  | 0.114656  | 0.122378  | 0.124709  | 0.0565268 | 0.0477855 |
| 0.225524  | 0.208916  | 0.205565  | 0.208916  | 0.208042  | 0.212121  | 0.219114  |
| 0.146853  | 0.131702  | 0.0831876 | 0.0775058 | 0.141026  | 0.134324  | 0.138986  |
| 0.133304  | 0.117861  | 0.120338  | 0.123106  | 0.12602   | 0.122815  | 0.122815  |
| 0.133159  | 0.118881  | 0.112034  | 0.11451   | 0.121795  | 0.116259  | 0.11859   |
| 0.219114  | 0.203963  | 0.200029  | 0.20134   | 0.204837  | 0.210373  | 0.212121  |
| 0.13345   | 0.116259  | 0.118153  | 0.12296   | 0.118298  | 0.0827506 | 0.0789627 |
| 0.133887  | 0.114948  | 0.116841  | 0.12602   | 0.115239  | 0.107663  | 0.106789  |
| 0.126311  | 0.112617  | 0.117716  | 0.120484  | 0.121941  | 0.111742  | 0.116404  |
| 0.136364  | 0.109848  | 0.113199  | 0.12296   | 0.0527389 | 0.12296   | 0.122669  |
| 0.258159  | 0.245338  | 0.24053   | 0.240676  | 0.242716  | 0.249417  | 0.253205  |
| 0.135344  | 0.119901  | 0.117716  | 0.123397  | 0.122232  | 0.119027  | 0.125146  |
| 0.129225  | 0.103293  | 0.106935  | 0.112325  | 0.119027  | 0.055507  | 0.0467657 |
| 0.0505536 | 0.118735  | 0.117424  | 0.120192  | 0.124272  | 0.112908  | 0.117861  |
| 0.0552156 | 0.116696  | 0.115385  | 0.121358  | 0.12398   | 0.113199  | 0.118153  |
| 0.13884   | 0.121066  | 0.120921  | 0.128059  | 0.109411  | 0.122523  | 0.127185  |
| 0.134178  | 0.117279  | 0.11014   | 0.110577  | 0.107955  | 0.125437  | 0.128934  |
| 0.128351  | 0.11116   | 0.110431  | 0.117861  | 0.119901  | 0.055507  | 0.0493881 |
| 0.129079  | 0.107809  | 0.0546329 | 0.0495338 | 0.114802  | 0.109557  | 0.115093  |
| 0.131556  | 0.114073  | 0.117133  | 0.11961   | 0.124272  | 0.124563  | 0.124854  |
| 0.128934  | 0.106789  | 0.109557  | 0.114365  | 0.0493881 | 0.11553   | 0.116113  |
| 0.127914  | 0.104895  | 0.0592949 | 0.0541958 | 0.111888  | 0.109848  | 0.111888  |
| 0.130682  | 0.090472  | 0.111014  | 0.11553   | 0.0948427 | 0.120775  | 0.123106  |
| 0.133741  | 0.130536  | 0.136509  | 0.137821  | 0.142483  | 0.148893  | 0.148893  |
| 0.132284  | 0.123252  | 0.120192  | 0.126166  | 0.126457  | 0.122669  | 0.128497  |
| 0.13986   | 0.120921  | 0.11961   | 0.128788  | 0.120921  | 0.107226  | 0.108683  |
| 0.199301  | 0.185023  | 0.174388  | 0.17803   | 0.181818  | 0.187354  | 0.191725  |
| 0.215326  | 0.196678  | 0.192162  | 0.192308  | 0.196678  | 0.203671  | 0.205128  |
| 0.138986  | 0.113054  | 0.114656  | 0.120629  | 0.0539044 | 0.122086  | 0.12296   |
| 0.128205  | 0.106061  | 0.107372  | 0.113928  | 0.0509907 | 0.114219  | 0.115967  |
| 0.139569  | 0.120338  | 0.124563  | 0.122669  | 0.130245  | 0.136655  | 0.136655  |
| 0.126748  | 0.109557  | 0.111742  | 0.11655   | 0.119755  | 0.0518648 | 0.0454545 |
| 0.135927  | 0.122523  | 0.121795  | 0.127185  | 0.124854  | 0.122815  | 0.126603  |
| 0.107809  | 0.118881  | 0.117279  | 0.125583  | 0.129371  | 0.125874  | 0.128788  |
| 0.234848  | 0.219988  | 0.21285   | 0.216783  | 0.216492  | 0.224359  | 0.229895  |
| 0.125583  | 0.107517  | 0.105915  | 0.108974  | 0.115093  | 0.107226  | 0.106352  |
| 0.216929  | 0.201777  | 0.200466  | 0.20236   | 0.205857  | 0.203817  | 0.206731  |
| 0.126748  | 0.101399  | 0.110286  | 0.114219  | 0.117133  | 0.0795455 | 0.0798368 |
| 0.124854  | 0.103875  | 0.109848  | 0.11553   | 0.113491  | 0.105332  | 0.110286  |
| 0.127914  | 0.109557  | 0.100379  | 0.100233  | 0.113636  | 0.102855  | 0.104895  |

|           |           |           |           |           |           |           |
|-----------|-----------|-----------|-----------|-----------|-----------|-----------|
| 0.127331  | 0.102273  | 0.105041  | 0.113636  | 0.0585664 | 0.111014  | 0.113636  |
| 0.216638  | 0.201195  | 0.196678  | 0.199155  | 0.198864  | 0.205274  | 0.208188  |
| 0.142628  | 0.119027  | 0.0681818 | 0.0630828 | 0.128059  | 0.124272  | 0.128642  |
| 0.118735  | 0.106498  | 0.113928  | 0.116987  | 0.118153  | 0.103293  | 0.103875  |
| 0.136801  | 0.113199  | 0.0643939 | 0.0572552 | 0.12398   | 0.116987  | 0.122523  |
| 0.12398   | 0.113199  | 0.117716  | 0.121358  | 0.128351  | 0.11553   | 0.115239  |
| 0.13243   | 0.105332  | 0.107809  | 0.113199  | 0.050845  | 0.113491  | 0.116987  |
| 0.126166  | 0.104895  | 0.10708   | 0.115093  | 0.120921  | 0.0812937 | 0.0821678 |
| 0.131702  | 0.110723  | 0.110286  | 0.116841  | 0.120047  | 0.0716783 | 0.0655594 |
| 0.134615  | 0.118007  | 0.117861  | 0.12704   | 0.121795  | 0.107226  | 0.106935  |
| 0.127331  | 0.100816  | 0.0549242 | 0.0480769 | 0.111014  | 0.107226  | 0.112179  |
| 0.118444  | 0.111742  | 0.112179  | 0.119318  | 0.120484  | 0.104167  | 0.104458  |
| 0.200175  | 0.183858  | 0.177885  | 0.177448  | 0.179196  | 0.18648   | 0.190851  |
| 0.0517191 | 0.11961   | 0.114802  | 0.123106  | 0.127477  | 0.114365  | 0.119318  |
| 0.120921  | 0.115093  | 0.118735  | 0.124126  | 0.126457  | 0.128788  | 0.130828  |
| 0.112034  | 0.112034  | 0.108683  | 0.112908  | 0.118444  | 0.116696  | 0.116987  |
| 0.13549   | 0.117133  | 0.118735  | 0.122669  | 0.125291  | 0.119755  | 0.123543  |
| 0.133159  | 0.112471  | 0.0613345 | 0.0550699 | 0.119464  | 0.111014  | 0.117133  |
| 0.128205  | 0.111305  | 0.113491  | 0.11859   | 0.124417  | 0.0874126 | 0.0856643 |
| 0.115822  | 0.103584  | 0.109848  | 0.112034  | 0.119027  | 0.108537  | 0.11116   |
| 0.128642  | 0.114948  | 0.115385  | 0.121358  | 0.127768  | 0.0592949 | 0.0537587 |
| 0.121212  | 0.108974  | 0.111742  | 0.115093  | 0.122086  | 0.123252  | 0.125291  |
| 0.0649767 | 0.11014   | 0.107372  | 0.112762  | 0.116841  | 0.107517  | 0.11451   |
| 0.13447   | 0.106498  | 0.108683  | 0.116987  | 0.0584207 | 0.120192  | 0.119318  |
| 0.128788  | 0.113054  | 0.114656  | 0.11655   | 0.11859   | 0.116259  | 0.114802  |
| 0.131556  | 0.12398   | 0.129079  | 0.13039   | 0.133304  | 0.127185  | 0.129225  |
| 0.13039   | 0.107372  | 0.113054  | 0.117861  | 0.112617  | 0.10912   | 0.116696  |
| 0.145105  | 0.126748  | 0.078817  | 0.0710956 | 0.136655  | 0.130245  | 0.13345   |
| 0.131702  | 0.104895  | 0.107663  | 0.114802  | 0.0495338 | 0.113928  | 0.116841  |
| 0.106352  | 0.105769  | 0.104749  | 0.109848  | 0.118881  | 0.113928  | 0.11451   |
| 0.134761  | 0.107955  | 0.0734266 | 0.0692016 | 0.115239  | 0.113491  | 0.116696  |
| 0.134178  | 0.116113  | 0.120047  | 0.121649  | 0.130973  | 0.0595862 | 0.0528846 |
| 0.202943  | 0.184586  | 0.18211   | 0.184878  | 0.186043  | 0.174097  | 0.175845  |
| 0.112762  | 0.101399  | 0.109703  | 0.116259  | 0.115385  | 0.0979021 | 0.102273  |
| 0.120629  | 0.0897436 | 0.0913462 | 0.0996503 | 0.104604  | 0.101399  | 0.105478  |
| 0.132867  | 0.118007  | 0.116987  | 0.128205  | 0.121503  | 0.107809  | 0.106352  |
| 0.194347  | 0.168706  | 0.167978  | 0.168998  | 0.170455  | 0.178322  | 0.181818  |
| 0.145542  | 0.13039   | 0.131119  | 0.137092  | 0.135344  | 0.132139  | 0.137092  |
| 0.150204  | 0.137092  | 0.138986  | 0.146707  | 0.145833  | 0.140297  | 0.145833  |
| 0.135781  | 0.131702  | 0.137092  | 0.140152  | 0.144814  | 0.149767  | 0.149767  |
| 0.128205  | 0.108683  | 0.107663  | 0.115676  | 0.113345  | 0.108392  | 0.115967  |
| 0.130973  | 0.111451  | 0.0594406 | 0.0552156 | 0.119027  | 0.115822  | 0.120192  |
| 0.220571  | 0.204837  | 0.198281  | 0.197844  | 0.203963  | 0.209207  | 0.214161  |
| 0.129079  | 0.116259  | 0.115822  | 0.117716  | 0.116259  | 0.122378  | 0.123834  |



|           |           |           |           |           |           |           |
|-----------|-----------|-----------|-----------|-----------|-----------|-----------|
| 0.135052  | 0.11553   | 0.0643939 | 0.0584207 | 0.122815  | 0.119318  | 0.124563  |
| 0.116696  | 0.106498  | 0.11014   | 0.117861  | 0.119318  | 0.102418  | 0.104458  |
| 0.183421  | 0.158071  | 0.149476  | 0.150204  | 0.160693  | 0.167395  | 0.169143  |
| 0.127477  | 0.105332  | 0.101981  | 0.105332  | 0.107372  | 0.108246  | 0.111742  |
| 0.144814  | 0.134907  | 0.141463  | 0.1419    | 0.143648  | 0.149184  | 0.151807  |
| 0.130536  | 0.104895  | 0.114948  | 0.121795  | 0.111305  | 0.117716  | 0.118298  |
| 0.199301  | 0.182401  | 0.175554  | 0.179196  | 0.18007   | 0.184732  | 0.187646  |
| 0.133741  | 0.115676  | 0.114073  | 0.120629  | 0.115967  | 0.115676  | 0.123252  |
| 0.124126  | 0.0812937 | 0.0960082 | 0.0999417 | 0.101981  | 0.104895  | 0.108392  |
| 0.108537  | 0.104458  | 0.104021  | 0.106498  | 0.116696  | 0.109703  | 0.114365  |
| 0.125874  | 0.111305  | 0.110286  | 0.111597  | 0.117716  | 0.102564  | 0.10373   |
| 0.136946  | 0.113928  | 0.118153  | 0.123834  | 0.115385  | 0.102855  | 0.104312  |
| 0.133741  | 0.112762  | 0.113491  | 0.121212  | 0.11859   | 0.118007  | 0.119755  |
| 0.130682  | 0.103001  | 0.106352  | 0.111742  | 0.0490967 | 0.115239  | 0.116696  |
| 0.198718  | 0.183275  | 0.177593  | 0.178904  | 0.181235  | 0.185897  | 0.190268  |
| 0.131847  | 0.112617  | 0.114219  | 0.118153  | 0.122232  | 0.115239  | 0.116113  |
| 0.127331  | 0.090035  | 0.101836  | 0.105478  | 0.106061  | 0.108392  | 0.111597  |
| 0.218677  | 0.204691  | 0.201049  | 0.201195  | 0.204983  | 0.210227  | 0.214015  |
| 0.0528846 | 0.117279  | 0.115967  | 0.120192  | 0.124854  | 0.114948  | 0.121358  |
| 0.13141   | 0.106061  | 0.107372  | 0.115967  | 0.0492424 | 0.114802  | 0.11655   |
| 0.128497  | 0.102273  | 0.104167  | 0.111305  | 0.0469114 | 0.111305  | 0.112762  |
| 0.139423  | 0.12602   | 0.0894522 | 0.0846445 | 0.135344  | 0.128642  | 0.13447   |
| 0.200321  | 0.181672  | 0.175991  | 0.178759  | 0.179924  | 0.18954   | 0.190997  |
| 0.131702  | 0.109848  | 0.111742  | 0.116841  | 0.123834  | 0.0533217 | 0.0474942 |
| 0.126748  | 0.11859   | 0.122815  | 0.125583  | 0.128788  | 0.120338  | 0.121212  |
| 0.128497  | 0.104312  | 0.107372  | 0.113345  | 0.0492424 | 0.115676  | 0.116259  |
| 0.130828  | 0.102273  | 0.103875  | 0.1081    | 0.0512821 | 0.110723  | 0.112762  |
| 0.128059  | 0.104458  | 0.106061  | 0.114948  | 0.0458916 | 0.114948  | 0.11553   |
| 0.131119  | 0.104604  | 0.0543415 | 0.0504079 | 0.112762  | 0.108392  | 0.114219  |
| 0.118444  | 0.0901807 | 0.102273  | 0.106789  | 0.0968823 | 0.100087  | 0.104167  |
| 0.133304  | 0.117861  | 0.11859   | 0.12398   | 0.121066  | 0.119027  | 0.12398   |
| 0.123397  | 0.120484  | 0.113636  | 0.117279  | 0.133596  | 0.129225  | 0.129808  |
| 0.13447   | 0.114656  | 0.120047  | 0.121358  | 0.11961   | 0.116987  | 0.122523  |
| 0.126748  | 0.118007  | 0.123106  | 0.126748  | 0.131119  | 0.120921  | 0.121503  |
| 0.2044    | 0.189831  | 0.181818  | 0.182838  | 0.182838  | 0.190414  | 0.196241  |
| 0.124126  | 0.110723  | 0.114948  | 0.117133  | 0.114219  | 0.1081    | 0.113928  |
| 0.138258  | 0.116987  | 0.0693473 | 0.0636655 | 0.129808  | 0.122523  | 0.13039   |
| 0.131119  | 0.0999417 | 0.104749  | 0.111305  | 0.0486597 | 0.114802  | 0.116841  |
| 0.119027  | 0.0884324 | 0.102564  | 0.108537  | 0.0957168 | 0.105624  | 0.106789  |
| 0.125728  | 0.108537  | 0.11014   | 0.114365  | 0.112617  | 0.114948  | 0.114948  |
| 0.129079  | 0.109266  | 0.114073  | 0.119755  | 0.123252  | 0.0521562 | 0.0445804 |
| 0.134615  | 0.121795  | 0.11961   | 0.122086  | 0.125291  | 0.124709  | 0.128788  |
| 0.127768  | 0.103584  | 0.107809  | 0.109411  | 0.11553   | 0.118444  | 0.121358  |
| 0.128642  | 0.101544  | 0.108392  | 0.112034  | 0.106206  | 0.0735723 | 0.067162  |

|          |           |           |           |           |           |           |
|----------|-----------|-----------|-----------|-----------|-----------|-----------|
| 0.123834 | 0.0958625 | 0.104749  | 0.1081    | 0.105186  | 0.076049  | 0.0780886 |
| 0.128059 | 0.0820221 | 0.101107  | 0.104458  | 0.103584  | 0.105041  | 0.111116  |
| 0.123834 | 0.1081    | 0.110577  | 0.113054  | 0.118298  | 0.083042  | 0.0815851 |
| 0.138258 | 0.124854  | 0.126457  | 0.129516  | 0.129225  | 0.124563  | 0.133013  |
| 0.13141  | 0.107226  | 0.111451  | 0.118007  | 0.120338  | 0.0527389 | 0.04662   |
| 0.124563 | 0.101836  | 0.0521562 | 0.0499709 | 0.111451  | 0.107955  | 0.111742  |
| 0.128059 | 0.104749  | 0.105186  | 0.110577  | 0.117279  | 0.0502622 | 0.0453089 |
| 0.130536 | 0.10373   | 0.104167  | 0.111305  | 0.0483683 | 0.111305  | 0.113054  |
| 0.112908 | 0.099796  | 0.105478  | 0.110286  | 0.113491  | 0.0983392 | 0.102418  |
| 0.131556 | 0.105332  | 0.109557  | 0.116987  | 0.0473485 | 0.116696  | 0.11961   |
| 0.121941 | 0.106206  | 0.105478  | 0.110286  | 0.111451  | 0.104749  | 0.10912   |
| 0.122523 | 0.103293  | 0.11014   | 0.112325  | 0.116113  | 0.120192  | 0.123397  |
| 0.133596 | 0.112034  | 0.111597  | 0.119318  | 0.10912   | 0.0986305 | 0.103875  |
| 0.125    | 0.0885781 | 0.101836  | 0.106061  | 0.0981935 | 0.104895  | 0.107226  |
| 0.128351 | 0.104749  | 0.106935  | 0.112908  | 0.0470571 | 0.113199  | 0.115822  |
| 0.115239 | 0.10912   | 0.11014   | 0.113199  | 0.117279  | 0.119318  | 0.121066  |
| 0.13345  | 0.0987762 | 0.105915  | 0.109557  | 0.11014   | 0.114219  | 0.117716  |
| 0.131265 | 0.0479312 | 0.109848  | 0.108246  | 0.104749  | 0.103293  | 0.105915  |
| 0.128351 | 0.103584  | 0.104604  | 0.11116   | 0.048514  | 0.110868  | 0.113491  |
| 0.128497 | 0.1081    | 0.057838  | 0.0512821 | 0.118007  | 0.113928  | 0.119464  |
| 0.127622 | 0.107517  | 0.109703  | 0.11655   | 0.118298  | 0.0844988 | 0.0833333 |
| 0.134615 | 0.107809  | 0.0587121 | 0.0483683 | 0.116841  | 0.109848  | 0.116841  |
| 0.134324 | 0.112471  | 0.11116   | 0.117424  | 0.111888  | 0.101107  | 0.103147  |
| 0.126748 | 0.0973193 | 0.105332  | 0.113636  | 0.100233  | 0.112179  | 0.113054  |
| 0.125291 | 0.0984848 | 0.101836  | 0.104604  | 0.104604  | 0.109557  | 0.112179  |
| 0.115239 | 0.102418  | 0.106061  | 0.111451  | 0.113782  | 0.0977564 | 0.0983392 |
| 0.136072 | 0.109848  | 0.0616259 | 0.0521562 | 0.119755  | 0.113054  | 0.118007  |
| 0.129953 | 0.104604  | 0.112325  | 0.114802  | 0.12296   | 0.111888  | 0.116259  |
| 0.129808 | 0.0933858 | 0.0981935 | 0.101836  | 0.110286  | 0.108537  | 0.110868  |
| 0.205274 | 0.187209  | 0.181235  | 0.183421  | 0.187791  | 0.190997  | 0.194202  |
| 0.176428 | 0.153409  | 0.15035   | 0.149038  | 0.157488  | 0.162442  | 0.165647  |
| 0.132721 | 0.11553   | 0.117716  | 0.123106  | 0.121066  | 0.114365  | 0.119901  |
| 0.130828 | 0.106935  | 0.110868  | 0.110431  | 0.117424  | 0.0827506 | 0.0827506 |
| 0.151807 | 0.140734  | 0.143211  | 0.14831   | 0.148893  | 0.143648  | 0.148893  |
| 0.131265 | 0.116404  | 0.118007  | 0.11757   | 0.120775  | 0.125437  | 0.125146  |
| 0.13141  | 0.113928  | 0.119318  | 0.117716  | 0.0810023 | 0.123543  | 0.12296   |
| 0.137675 | 0.0983392 | 0.105478  | 0.106498  | 0.0828963 | 0.11553   | 0.116113  |
| 0.130099 | 0.0878497 | 0.111014  | 0.114656  | 0.0913462 | 0.116987  | 0.119318  |
| 0.133887 | 0.0971737 | 0.106352  | 0.112034  | 0.112034  | 0.116404  | 0.120775  |
| 0.20979  | 0.195221  | 0.189248  | 0.191725  | 0.189977  | 0.199883  | 0.204254  |
| 0.13243  | 0.113782  | 0.11655   | 0.120484  | 0.122523  | 0.0543415 | 0.0482226 |
| 0.131702 | 0.106643  | 0.0791084 | 0.0745921 | 0.115967  | 0.0839161 | 0.0856643 |
| 0.130536 | 0.0882867 | 0.103584  | 0.107226  | 0.0611888 | 0.109266  | 0.110431  |
| 0.124854 | 0.10912   | 0.112471  | 0.116404  | 0.118153  | 0.109703  | 0.113782  |

|           |           |           |           |           |           |           |
|-----------|-----------|-----------|-----------|-----------|-----------|-----------|
| 0.19697   | 0.172494  | 0.171766  | 0.175117  | 0.17366   | 0.181527  | 0.184441  |
| 0.254953  | 0.240385  | 0.237908  | 0.240093  | 0.242716  | 0.245338  | 0.247378  |
| 0.127914  | 0.107226  | 0.111742  | 0.116259  | 0.115967  | 0.121503  | 0.124126  |
| 0.129953  | 0.0961538 | 0.107663  | 0.111597  | 0.109848  | 0.116259  | 0.120338  |
| 0.131119  | 0.111888  | 0.115822  | 0.121795  | 0.118881  | 0.118007  | 0.123543  |
| 0.131556  | 0.110577  | 0.111888  | 0.118153  | 0.110286  | 0.0983392 | 0.103584  |
| 0.126166  | 0.102855  | 0.105041  | 0.111597  | 0.118007  | 0.0498252 | 0.0416667 |
| 0.128642  | 0.102127  | 0.105478  | 0.112617  | 0.112617  | 0.107663  | 0.108537  |
| 0.13549   | 0.104312  | 0.0828963 | 0.085373  | 0.0757576 | 0.112471  | 0.11451   |
| 0.125583  | 0.10373   | 0.107663  | 0.113054  | 0.119172  | 0.0477855 | 0.0428322 |
| 0.134761  | 0.101544  | 0.0754662 | 0.074155  | 0.0872669 | 0.112908  | 0.118153  |
| 0.136072  | 0.0527389 | 0.109994  | 0.114802  | 0.108974  | 0.114219  | 0.114802  |
| 0.127477  | 0.0962995 | 0.104021  | 0.108537  | 0.0954254 | 0.108537  | 0.110868  |
| 0.120921  | 0.107226  | 0.112908  | 0.115967  | 0.119172  | 0.124709  | 0.125583  |
| 0.131265  | 0.105915  | 0.0588578 | 0.0520105 | 0.118444  | 0.111451  | 0.118153  |
| 0.105041  | 0.0939685 | 0.0967366 | 0.100962  | 0.107372  | 0.102127  | 0.105915  |
| 0.126603  | 0.108537  | 0.121212  | 0.128642  | 0.119901  | 0.117861  | 0.118735  |
| 0.140297  | 0.126603  | 0.126457  | 0.134761  | 0.128642  | 0.113491  | 0.112325  |
| 0.129953  | 0.105769  | 0.103584  | 0.112179  | 0.0492424 | 0.11014   | 0.11014   |
| 0.133596  | 0.113491  | 0.116841  | 0.122232  | 0.088141  | 0.116987  | 0.113491  |
| 0.138549  | 0.118153  | 0.122086  | 0.128059  | 0.0619172 | 0.130099  | 0.13039   |
| 0.218531  | 0.202506  | 0.198572  | 0.200466  | 0.20134   | 0.206585  | 0.210664  |
| 0.118153  | 0.0960082 | 0.099359  | 0.107955  | 0.109994  | 0.109411  | 0.111742  |
| 0.124126  | 0.0932401 | 0.105915  | 0.110723  | 0.0979021 | 0.107809  | 0.109848  |
| 0.125874  | 0.109266  | 0.11116   | 0.11451   | 0.114802  | 0.111014  | 0.113345  |
| 0.0592949 | 0.116987  | 0.116259  | 0.119318  | 0.121649  | 0.114948  | 0.120775  |
| 0.119318  | 0.104749  | 0.106061  | 0.112034  | 0.117861  | 0.10708   | 0.109994  |
| 0.210519  | 0.190997  | 0.18648   | 0.189248  | 0.189248  | 0.19799   | 0.200029  |
| 0.136072  | 0.111888  | 0.0616259 | 0.0501166 | 0.118881  | 0.113928  | 0.120047  |
| 0.128059  | 0.103001  | 0.103438  | 0.109703  | 0.0502622 | 0.109703  | 0.111742  |
| 0.126457  | 0.11014   | 0.109994  | 0.117716  | 0.122669  | 0.113345  | 0.114219  |
| 0.128788  | 0.107226  | 0.107955  | 0.115385  | 0.109557  | 0.0961538 | 0.0984848 |
| 0.134033  | 0.109848  | 0.060169  | 0.0521562 | 0.116841  | 0.115676  | 0.119464  |
| 0.124126  | 0.0949883 | 0.0703671 | 0.0743007 | 0.104604  | 0.106352  | 0.109848  |
| 0.133159  | 0.0533217 | 0.10912   | 0.113636  | 0.110723  | 0.110723  | 0.113636  |
| 0.0603147 | 0.113636  | 0.112908  | 0.116841  | 0.117133  | 0.110723  | 0.116841  |
| 0.209645  | 0.188957  | 0.184441  | 0.184586  | 0.190414  | 0.195659  | 0.200029  |
| 0.125     | 0.101399  | 0.053176  | 0.0515734 | 0.111597  | 0.10373   | 0.111305  |
| 0.206148  | 0.187791  | 0.180944  | 0.186334  | 0.184295  | 0.192162  | 0.195659  |
| 0.203963  | 0.185897  | 0.180216  | 0.181527  | 0.184441  | 0.190559  | 0.195513  |
| 0.138112  | 0.12296   | 0.124272  | 0.133741  | 0.124126  | 0.109557  | 0.112471  |
| 0         | 0.125583  | 0.125146  | 0.128788  | 0.131119  | 0.120629  | 0.126166  |
| 0.125583  | 0         | 0.0995047 | 0.104021  | 0.106352  | 0.0999417 | 0.107226  |
| 0.125146  | 0.0995047 | 0         | 0.0552156 | 0.108829  | 0.103584  | 0.106206  |

|           |           |           |           |           |           |           |
|-----------|-----------|-----------|-----------|-----------|-----------|-----------|
| 0.128788  | 0.104021  | 0.0552156 | 0         | 0.11451   | 0.110431  | 0.112179  |
| 0.131119  | 0.106352  | 0.108829  | 0.11451   | 0         | 0.116259  | 0.118298  |
| 0.120629  | 0.0999417 | 0.103584  | 0.110431  | 0.116259  | 0         | 0.04662   |
| 0.126166  | 0.107226  | 0.106206  | 0.112179  | 0.118298  | 0.04662   | 0         |
| 0.121941  | 0.110577  | 0.114219  | 0.119318  | 0.118735  | 0.124272  | 0.127768  |
| 0.134615  | 0.115676  | 0.115239  | 0.122378  | 0.113345  | 0.101107  | 0.103438  |
| 0.124272  | 0.100962  | 0.10373   | 0.107955  | 0.0479312 | 0.110286  | 0.109994  |
| 0.128497  | 0.107809  | 0.0552156 | 0.0518648 | 0.11451   | 0.110431  | 0.115385  |
| 0.123397  | 0.0756119 | 0.0935315 | 0.100087  | 0.101836  | 0.100379  | 0.106498  |
| 0.133741  | 0.11655   | 0.0692016 | 0.0614802 | 0.129371  | 0.122669  | 0.126748  |
| 0.129953  | 0.112471  | 0.11116   | 0.11859   | 0.114802  | 0.112762  | 0.120629  |
| 0.14088   | 0.122523  | 0.076049  | 0.0680361 | 0.128934  | 0.123689  | 0.129225  |
| 0.265006  | 0.255099  | 0.250291  | 0.252477  | 0.253642  | 0.258304  | 0.262675  |
| 0.117279  | 0.121066  | 0.119755  | 0.128642  | 0.131556  | 0.114656  | 0.114073  |
| 0.129079  | 0.117716  | 0.122232  | 0.127331  | 0.125874  | 0.119172  | 0.122378  |
| 0.229458  | 0.209645  | 0.206294  | 0.206731  | 0.210519  | 0.217512  | 0.221591  |
| 0.120047  | 0.120921  | 0.122232  | 0.132867  | 0.120047  | 0.122378  | 0.122086  |
| 0.236888  | 0.225233  | 0.219843  | 0.222611  | 0.225524  | 0.230186  | 0.234266  |
| 0.116113  | 0.112908  | 0.112471  | 0.119027  | 0.124272  | 0.103293  | 0.105624  |
| 0.141608  | 0.11655   | 0.118444  | 0.128788  | 0.0597319 | 0.127622  | 0.128788  |
| 0.0684732 | 0.104312  | 0.107663  | 0.110723  | 0.114802  | 0.105769  | 0.111888  |
| 0.137529  | 0.118881  | 0.120484  | 0.126457  | 0.120921  | 0.107517  | 0.1081    |
| 0.212704  | 0.19697   | 0.191579  | 0.192599  | 0.192308  | 0.201632  | 0.202214  |
| 0.137821  | 0.118298  | 0.0712413 | 0.0638112 | 0.127914  | 0.122378  | 0.127914  |
| 0.132867  | 0.106643  | 0.057838  | 0.0477855 | 0.115967  | 0.111888  | 0.115093  |
| 0.232955  | 0.221591  | 0.214744  | 0.218094  | 0.218969  | 0.224505  | 0.230041  |
| 0.127622  | 0.106935  | 0.115822  | 0.116259  | 0.116841  | 0.0541958 | 0.0498252 |
| 0.208479  | 0.194202  | 0.18852   | 0.188083  | 0.189831  | 0.19799   | 0.200321  |
| 0.130682  | 0.109994  | 0.113345  | 0.116113  | 0.122232  | 0.0528846 | 0.0470571 |
| 0.13243   | 0.104458  | 0.107517  | 0.111742  | 0.0546329 | 0.114948  | 0.118153  |
| 0.126748  | 0.103438  | 0.115239  | 0.117424  | 0.112471  | 0.11655   | 0.120047  |
| 0.134615  | 0.122669  | 0.122815  | 0.130828  | 0.12296   | 0.113345  | 0.112762  |
| 0.131265  | 0.107955  | 0.105186  | 0.108537  | 0.11116   | 0.109411  | 0.112617  |
| 0.173805  | 0.144668  | 0.151807  | 0.1537    | 0.14933   | 0.158362  | 0.160111  |
| 0.124563  | 0.103584  | 0.0524476 | 0.0473485 | 0.115822  | 0.106206  | 0.112617  |
| 0.060169  | 0.116404  | 0.115967  | 0.121066  | 0.121649  | 0.113199  | 0.118444  |
| 0.126603  | 0.112908  | 0.115676  | 0.121066  | 0.116404  | 0.10912   | 0.109994  |
| 0.109411  | 0.11757   | 0.114219  | 0.120484  | 0.128934  | 0.123106  | 0.125437  |
| 0.206002  | 0.189103  | 0.184295  | 0.185897  | 0.186772  | 0.193182  | 0.196678  |
| 0.131265  | 0.103875  | 0.106643  | 0.113199  | 0.0476399 | 0.110577  | 0.11116   |
| 0.142191  | 0.113928  | 0.115239  | 0.123543  | 0.113928  | 0.110723  | 0.111597  |
| 0.131265  | 0.103875  | 0.109557  | 0.112617  | 0.120775  | 0.0820221 | 0.0855186 |
| 0.124417  | 0.110723  | 0.113782  | 0.119172  | 0.120629  | 0.0518648 | 0.0454545 |
| 0.131265  | 0.11116   | 0.112471  | 0.11961   | 0.053176  | 0.122232  | 0.11961   |

|           |           |           |           |           |           |           |
|-----------|-----------|-----------|-----------|-----------|-----------|-----------|
| 0.259907  | 0.250874  | 0.247232  | 0.250874  | 0.24796   | 0.253497  | 0.256119  |
| 0.122232  | 0.0971737 | 0.109266  | 0.116404  | 0.105332  | 0.115239  | 0.114656  |
| 0.131847  | 0.108537  | 0.111597  | 0.113782  | 0.0893065 | 0.116113  | 0.114948  |
| 0.184586  | 0.170892  | 0.17366   | 0.176428  | 0.181964  | 0.177885  | 0.178467  |
| 0.19799   | 0.176719  | 0.172494  | 0.177302  | 0.175262  | 0.184878  | 0.186626  |
| 0.126894  | 0.107372  | 0.111014  | 0.114365  | 0.118153  | 0.123397  | 0.12398   |
| 0.13345   | 0.108683  | 0.060169  | 0.0527389 | 0.113054  | 0.113054  | 0.119464  |
| 0.134033  | 0.110431  | 0.107372  | 0.116259  | 0.110723  | 0.0999417 | 0.0996503 |
| 0.150787  | 0.133887  | 0.0836247 | 0.0791084 | 0.14088   | 0.136509  | 0.140006  |
| 0.12398   | 0.101544  | 0.107517  | 0.110868  | 0.11553   | 0.11553   | 0.120484  |
| 0.126166  | 0.106935  | 0.112908  | 0.115676  | 0.119172  | 0.12296   | 0.125874  |
| 0.132139  | 0.11553   | 0.11859   | 0.12602   | 0.126603  | 0.0587121 | 0.0523019 |
| 0.127768  | 0.107663  | 0.0641026 | 0.055507  | 0.116404  | 0.111742  | 0.117861  |
| 0.135781  | 0.118007  | 0.0674534 | 0.0620629 | 0.128788  | 0.120629  | 0.124417  |
| 0.133596  | 0.109411  | 0.113345  | 0.113782  | 0.116696  | 0.0756119 | 0.069493  |
| 0.134907  | 0.120338  | 0.122523  | 0.130828  | 0.121795  | 0.110723  | 0.107517  |
| 0.146125  | 0.133596  | 0.134907  | 0.141463  | 0.134761  | 0.119901  | 0.119901  |
| 0.130828  | 0.104312  | 0.112908  | 0.118298  | 0.1081    | 0.117133  | 0.117716  |
| 0.13884   | 0.127477  | 0.12704   | 0.133887  | 0.126894  | 0.112325  | 0.11116   |
| 0.133887  | 0.118153  | 0.120921  | 0.125728  | 0.133013  | 0.060169  | 0.053176  |
| 0.218531  | 0.20338   | 0.192745  | 0.194056  | 0.199301  | 0.208333  | 0.20979   |
| 0.129516  | 0.097465  | 0.123543  | 0.12602   | 0.111451  | 0.11116   | 0.108537  |
| 0.202652  | 0.185752  | 0.181527  | 0.182547  | 0.185752  | 0.190997  | 0.194202  |
| 0.0965909 | 0.102418  | 0.105769  | 0.114073  | 0.113782  | 0.105332  | 0.111451  |
| 0.136218  | 0.112034  | 0.115093  | 0.125146  | 0.0616259 | 0.125146  | 0.126603  |
| 0.133013  | 0.116404  | 0.116841  | 0.121358  | 0.121649  | 0.116987  | 0.121649  |
| 0.129662  | 0.105186  | 0.110577  | 0.11451   | 0.112762  | 0.111014  | 0.116841  |
| 0.133013  | 0.112034  | 0.0614802 | 0.0566725 | 0.120192  | 0.11553   | 0.119901  |
| 0.132721  | 0.110577  | 0.0641026 | 0.0610431 | 0.121649  | 0.112908  | 0.11757   |
| 0.131265  | 0.10708   | 0.112471  | 0.114073  | 0.0514277 | 0.116987  | 0.11553   |
| 0.0611888 | 0.114802  | 0.109703  | 0.11655   | 0.118298  | 0.113054  | 0.115967  |
| 0.134615  | 0.120921  | 0.116113  | 0.120921  | 0.126457  | 0.117716  | 0.124417  |
| 0.135344  | 0.121649  | 0.124417  | 0.133304  | 0.133887  | 0.069493  | 0.0613345 |
| 0.256556  | 0.246649  | 0.241841  | 0.242861  | 0.245775  | 0.250146  | 0.253934  |
| 0.135635  | 0.105915  | 0.111305  | 0.116113  | 0.0517191 | 0.11961   | 0.121066  |
| 0.194056  | 0.177156  | 0.173223  | 0.175699  | 0.176865  | 0.181527  | 0.185023  |
| 0.200903  | 0.184003  | 0.175408  | 0.178759  | 0.17905   | 0.186043  | 0.189831  |
| 0.135781  | 0.101399  | 0.116987  | 0.121795  | 0.108974  | 0.11451   | 0.115676  |
| 0.122086  | 0.0955711 | 0.105332  | 0.111597  | 0.100524  | 0.109266  | 0.110723  |
| 0.137238  | 0.113636  | 0.114656  | 0.121503  | 0.0574009 | 0.123543  | 0.124417  |
| 0.126748  | 0.103438  | 0.0543415 | 0.0486597 | 0.112179  | 0.1081    | 0.113636  |
| 0.126311  | 0.0828963 | 0.108974  | 0.114948  | 0.0939685 | 0.112325  | 0.11757   |
| 0.128059  | 0.108537  | 0.112762  | 0.116113  | 0.119027  | 0.0517191 | 0.046183  |
| 0.127914  | 0.109266  | 0.0843531 | 0.0795455 | 0.115093  | 0.11859   | 0.119172  |

|           |           |           |           |           |           |           |
|-----------|-----------|-----------|-----------|-----------|-----------|-----------|
| 0.137238  | 0.122378  | 0.0738636 | 0.0664336 | 0.130536  | 0.125     | 0.12704   |
| 0.13243   | 0.107955  | 0.108974  | 0.114948  | 0.0479312 | 0.115822  | 0.118735  |
| 0.137383  | 0.116696  | 0.0684732 | 0.0619172 | 0.128642  | 0.120192  | 0.128059  |
| 0.122669  | 0.105769  | 0.112908  | 0.118007  | 0.114802  | 0.110431  | 0.114219  |
| 0.136655  | 0.122378  | 0.121941  | 0.12704   | 0.124709  | 0.119464  | 0.12704   |
| 0.139423  | 0.114948  | 0.11655   | 0.124563  | 0.115822  | 0.0989219 | 0.104749  |
| 0.135198  | 0.119172  | 0.123689  | 0.131702  | 0.134033  | 0.0623543 | 0.0541958 |
| 0.137092  | 0.060169  | 0.115967  | 0.120484  | 0.114656  | 0.116987  | 0.118444  |
| 0.130973  | 0.100087  | 0.108683  | 0.116696  | 0.0598776 | 0.112617  | 0.11553   |
| 0.130973  | 0.123397  | 0.124126  | 0.128934  | 0.133013  | 0.124272  | 0.125437  |
| 0.195513  | 0.176573  | 0.174388  | 0.173077  | 0.176573  | 0.180944  | 0.185315  |
| 0.142045  | 0.123689  | 0.0757576 | 0.0706585 | 0.133887  | 0.131265  | 0.134178  |
| 0.132721  | 0.110868  | 0.0591492 | 0.0549242 | 0.120775  | 0.113782  | 0.118444  |
| 0.127622  | 0.115385  | 0.118735  | 0.121503  | 0.122086  | 0.113928  | 0.123252  |
| 0.124563  | 0.101836  | 0.106352  | 0.113491  | 0.109411  | 0.104749  | 0.112617  |
| 0.134324  | 0.114219  | 0.115822  | 0.123834  | 0.113345  | 0.104604  | 0.104895  |
| 0.135927  | 0.116987  | 0.121795  | 0.126894  | 0.11961   | 0.108246  | 0.107955  |
| 0.204545  | 0.186189  | 0.180216  | 0.182984  | 0.180361  | 0.188811  | 0.192016  |
| 0.13345   | 0.100816  | 0.0831876 | 0.0766317 | 0.11655   | 0.112471  | 0.115676  |
| 0.127185  | 0.0942599 | 0.0938228 | 0.10067   | 0.105915  | 0.104749  | 0.106498  |
| 0.131556  | 0.113491  | 0.0649767 | 0.0572552 | 0.123397  | 0.116404  | 0.12398   |
| 0.20134   | 0.186189  | 0.179633  | 0.182401  | 0.183275  | 0.189394  | 0.194056  |
| 0.12602   | 0.092803  | 0.102855  | 0.111742  | 0.0977564 | 0.109994  | 0.109703  |
| 0.129371  | 0.11655   | 0.116113  | 0.122378  | 0.126748  | 0.0539044 | 0.0495338 |
| 0.131119  | 0.110723  | 0.0636655 | 0.0559441 | 0.119464  | 0.116841  | 0.122086  |
| 0.119027  | 0.103001  | 0.106352  | 0.10912   | 0.112325  | 0.114656  | 0.118444  |
| 0.200321  | 0.179633  | 0.174825  | 0.176428  | 0.17905   | 0.187791  | 0.190414  |
| 0.130682  | 0.111742  | 0.108974  | 0.115239  | 0.126894  | 0.0560897 | 0.050845  |
| 0.123106  | 0.103584  | 0.104312  | 0.107663  | 0.112617  | 0.104167  | 0.104458  |
| 0.125146  | 0.090472  | 0.10373   | 0.109411  | 0.0992133 | 0.108537  | 0.112325  |
| 0.135052  | 0.113491  | 0.105186  | 0.104167  | 0.11553   | 0.112908  | 0.121066  |
| 0.0582751 | 0.112762  | 0.11553   | 0.118298  | 0.120338  | 0.113054  | 0.115093  |
| 0.133741  | 0.120047  | 0.119901  | 0.125874  | 0.130536  | 0.0635198 | 0.0533217 |
| 0.13141   | 0.104312  | 0.10912   | 0.112471  | 0.0486597 | 0.115093  | 0.118007  |
| 0.132867  | 0.101107  | 0.107955  | 0.114802  | 0.125291  | 0.115676  | 0.117424  |
| 0.135052  | 0.129808  | 0.136655  | 0.140006  | 0.143211  | 0.149913  | 0.152244  |
| 0.243735  | 0.231789  | 0.229021  | 0.226253  | 0.230624  | 0.235577  | 0.236742  |
| 0.140006  | 0.0662879 | 0.119464  | 0.127477  | 0.120192  | 0.121066  | 0.121941  |
| 0.0590035 | 0.114073  | 0.115385  | 0.118444  | 0.122232  | 0.112908  | 0.116404  |
| 0.131702  | 0.105769  | 0.0677448 | 0.0638112 | 0.115676  | 0.109266  | 0.110723  |
| 0.136801  | 0.112617  | 0.115093  | 0.122523  | 0.119901  | 0.121649  | 0.123106  |
| 0.0731352 | 0.111014  | 0.105332  | 0.110431  | 0.120047  | 0.0926573 | 0.0973193 |
| 0.119172  | 0.108392  | 0.11116   | 0.118298  | 0.122086  | 0.113054  | 0.111305  |
| 0.131265  | 0.113491  | 0.0708042 | 0.067162  | 0.121358  | 0.113782  | 0.119901  |

|           |           |           |           |           |           |           |
|-----------|-----------|-----------|-----------|-----------|-----------|-----------|
| 0.132576  | 0.118881  | 0.119318  | 0.125     | 0.129662  | 0.0582751 | 0.0504079 |
| 0.125874  | 0.110431  | 0.114656  | 0.115967  | 0.114219  | 0.114219  | 0.117424  |
| 0.241404  | 0.232372  | 0.22873   | 0.230332  | 0.230915  | 0.235868  | 0.241113  |
| 0.121503  | 0.0949883 | 0.101836  | 0.107226  | 0.0990676 | 0.105186  | 0.108392  |
| 0.11451   | 0.0952797 | 0.10067   | 0.106352  | 0.111597  | 0.0964452 | 0.0981935 |
| 0.127768  | 0.103293  | 0.106061  | 0.11553   | 0.050845  | 0.11116   | 0.114948  |
| 0.125     | 0.118298  | 0.121066  | 0.124709  | 0.128497  | 0.13141   | 0.136072  |
| 0.1419    | 0.0705128 | 0.129225  | 0.13345   | 0.126166  | 0.126166  | 0.129371  |
| 0.133159  | 0.10373   | 0.105915  | 0.104021  | 0.110431  | 0.118298  | 0.120629  |
| 0.129371  | 0.108974  | 0.0575466 | 0.0524476 | 0.118007  | 0.112179  | 0.116259  |
| 0.11961   | 0.0965909 | 0.0996503 | 0.108246  | 0.108246  | 0.113199  | 0.114073  |
| 0.239365  | 0.227127  | 0.222902  | 0.225087  | 0.227127  | 0.231206  | 0.233829  |
| 0.135344  | 0.115239  | 0.0623543 | 0.055507  | 0.125146  | 0.118444  | 0.121941  |
| 0.128205  | 0.113928  | 0.114948  | 0.12296   | 0.125291  | 0.0565268 | 0.0521562 |
| 0.117716  | 0.100524  | 0.110286  | 0.113928  | 0.107226  | 0.108974  | 0.111014  |
| 0.106498  | 0.114365  | 0.117716  | 0.121358  | 0.124272  | 0.117279  | 0.118735  |
| 0.11757   | 0.114365  | 0.11655   | 0.124272  | 0.128059  | 0.108246  | 0.110286  |
| 0.127768  | 0.105624  | 0.1081    | 0.114365  | 0.0525932 | 0.115822  | 0.118444  |
| 0.129808  | 0.112908  | 0.117133  | 0.123689  | 0.126603  | 0.0610431 | 0.0528846 |
| 0.13345   | 0.120338  | 0.121066  | 0.126166  | 0.131702  | 0.0611888 | 0.0556527 |
| 0.127622  | 0.110431  | 0.114073  | 0.118298  | 0.121212  | 0.0518648 | 0.0445804 |
| 0.132721  | 0.107663  | 0.107517  | 0.112908  | 0.0502622 | 0.117279  | 0.118444  |
| 0.0473485 | 0.122523  | 0.119464  | 0.124854  | 0.128351  | 0.11961   | 0.125146  |
| 0.0512821 | 0.12704   | 0.123689  | 0.128497  | 0.134324  | 0.123252  | 0.130245  |
| 0.137238  | 0.120629  | 0.123397  | 0.127622  | 0.129953  | 0.125583  | 0.128788  |
| 0.137821  | 0.125583  | 0.126311  | 0.132867  | 0.133159  | 0.126748  | 0.131702  |
| 0.048514  | 0.126311  | 0.124709  | 0.131556  | 0.131556  | 0.120484  | 0.124854  |
| 0.126603  | 0.0814394 | 0.105186  | 0.10912   | 0.0878497 | 0.109703  | 0.112908  |
| 0.135781  | 0.123252  | 0.127768  | 0.131119  | 0.139569  | 0.0981935 | 0.097028  |
| 0.137966  | 0.11961   | 0.125291  | 0.13243   | 0.122523  | 0.119027  | 0.115239  |
| 0.214307  | 0.200612  | 0.193182  | 0.194784  | 0.199446  | 0.205565  | 0.208479  |
| 0.133013  | 0.103293  | 0.116841  | 0.121941  | 0.117861  | 0.11961   | 0.122232  |
| 0.120775  | 0.106206  | 0.1081    | 0.115239  | 0.114073  | 0.0989219 | 0.101544  |
| 0.135781  | 0.111305  | 0.114365  | 0.122378  | 0.0509907 | 0.122669  | 0.122086  |
| 0.232955  | 0.218386  | 0.211538  | 0.212558  | 0.218677  | 0.223631  | 0.22771   |
| 0.222174  | 0.206731  | 0.200758  | 0.204108  | 0.204108  | 0.209062  | 0.211101  |
| 0.130245  | 0.119755  | 0.120484  | 0.127331  | 0.129662  | 0.0611888 | 0.0521562 |
| 0.255973  | 0.246649  | 0.23951   | 0.241404  | 0.245775  | 0.24898   | 0.252768  |
| 0.124272  | 0.0782343 | 0.104021  | 0.10912   | 0.0913462 | 0.109994  | 0.114656  |
| 0.141463  | 0.113491  | 0.132576  | 0.135927  | 0.126603  | 0.129225  | 0.135052  |
| 0.123689  | 0.0960082 | 0.109266  | 0.112617  | 0.10067   | 0.10912   | 0.110577  |
| 0.0539044 | 0.120338  | 0.119027  | 0.124417  | 0.125874  | 0.118007  | 0.121795  |
| 0.198864  | 0.181672  | 0.175408  | 0.178467  | 0.180798  | 0.188374  | 0.18954   |
| 0.126457  | 0.114802  | 0.120775  | 0.127622  | 0.116841  | 0.117716  | 0.117424  |

|           |           |           |           |           |           |           |
|-----------|-----------|-----------|-----------|-----------|-----------|-----------|
| 0.209499  | 0.189103  | 0.184295  | 0.185315  | 0.187354  | 0.193473  | 0.19697   |
| 0.130245  | 0.097028  | 0.111451  | 0.115676  | 0.107517  | 0.112179  | 0.114219  |
| 0.130536  | 0.111305  | 0.095134  | 0.0996503 | 0.117424  | 0.0775058 | 0.0757576 |
| 0.125291  | 0.104604  | 0.114365  | 0.119755  | 0.118881  | 0.118881  | 0.119172  |
| 0.122378  | 0.106643  | 0.101836  | 0.102855  | 0.110431  | 0.105478  | 0.108392  |
| 0.125728  | 0.0962995 | 0.101981  | 0.108246  | 0.0496795 | 0.109411  | 0.112908  |
| 0.128642  | 0.0948427 | 0.101107  | 0.103875  | 0.108246  | 0.110286  | 0.110868  |
| 0.121066  | 0.0910548 | 0.10373   | 0.109411  | 0.0971737 | 0.105332  | 0.107955  |
| 0.128497  | 0.102855  | 0.0537587 | 0.0495338 | 0.111014  | 0.1081    | 0.111597  |
| 0.128642  | 0.109411  | 0.114219  | 0.116696  | 0.121066  | 0.0855186 | 0.0866841 |
| 0.131265  | 0.0479312 | 0.108392  | 0.110286  | 0.110286  | 0.108246  | 0.109411  |
| 0.120629  | 0.0961538 | 0.106206  | 0.111888  | 0.100233  | 0.108683  | 0.108974  |
| 0.135635  | 0.114948  | 0.118298  | 0.120192  | 0.107372  | 0.115239  | 0.121066  |
| 0.137092  | 0.117279  | 0.0670163 | 0.0630828 | 0.129516  | 0.122523  | 0.124563  |
| 0.128205  | 0.109266  | 0.107663  | 0.114219  | 0.112471  | 0.106643  | 0.113928  |
| 0.125437  | 0.105624  | 0.109266  | 0.111451  | 0.110286  | 0.104167  | 0.106498  |
| 0.126457  | 0.0990676 | 0.100379  | 0.106352  | 0.0437063 | 0.110431  | 0.113345  |
| 0.128497  | 0.111014  | 0.108246  | 0.115967  | 0.12296   | 0.0632284 | 0.0591492 |
| 0.0641026 | 0.115385  | 0.11116   | 0.117716  | 0.117424  | 0.111597  | 0.114802  |
| 0.135344  | 0.116113  | 0.116259  | 0.126603  | 0.115239  | 0.10271   | 0.103001  |
| 0.130099  | 0.110577  | 0.11451   | 0.119318  | 0.118735  | 0.112034  | 0.116987  |
| 0.131993  | 0.109266  | 0.0587121 | 0.0495338 | 0.11859   | 0.111305  | 0.118007  |
| 0.13884   | 0.120192  | 0.0705128 | 0.0636655 | 0.128934  | 0.121358  | 0.127768  |
| 0.144376  | 0.127477  | 0.0763403 | 0.0712413 | 0.135635  | 0.130099  | 0.135927  |
| 0.122669  | 0.0920746 | 0.099796  | 0.106643  | 0.106643  | 0.0498252 | 0.0527389 |
| 0.132284  | 0.104604  | 0.108246  | 0.114219  | 0.0495338 | 0.115385  | 0.115093  |
| 0.116404  | 0.0957168 | 0.101107  | 0.10708   | 0.114073  | 0.103875  | 0.103584  |
| 0.0488054 | 0.126894  | 0.125     | 0.131265  | 0.135052  | 0.123689  | 0.127477  |
| 0.125291  | 0.0964452 | 0.108537  | 0.113054  | 0.106643  | 0.111597  | 0.111597  |
| 0.145396  | 0.134324  | 0.133887  | 0.142191  | 0.134033  | 0.120921  | 0.122086  |
| 0.144231  | 0.123543  | 0.125728  | 0.131702  | 0.0658508 | 0.135198  | 0.134907  |
| 0.123689  | 0.110286  | 0.115385  | 0.119318  | 0.119901  | 0.126311  | 0.128934  |
| 0.12704   | 0.0859557 | 0.103875  | 0.104312  | 0.100816  | 0.107226  | 0.111888  |
| 0.110577  | 0.0983392 | 0.102855  | 0.103293  | 0.113782  | 0.105332  | 0.111742  |
| 0.136509  | 0.121941  | 0.12296   | 0.127185  | 0.125437  | 0.122232  | 0.128642  |
| 0.216783  | 0.201049  | 0.194493  | 0.198718  | 0.198135  | 0.202214  | 0.208333  |
| 0.121503  | 0.10373   | 0.108829  | 0.111305  | 0.112762  | 0.10373   | 0.106061  |
| 0.129225  | 0.100087  | 0.111888  | 0.112617  | 0.112617  | 0.114656  | 0.11757   |
| 0.0544872 | 0.114219  | 0.113491  | 0.117716  | 0.121212  | 0.112471  | 0.115093  |
| 0.130973  | 0.112325  | 0.11451   | 0.11961   | 0.116987  | 0.110577  | 0.118735  |
| 0.131702  | 0.104604  | 0.117861  | 0.121212  | 0.111888  | 0.119464  | 0.120047  |
| 0.133741  | 0.104021  | 0.112908  | 0.116259  | 0.127914  | 0.111888  | 0.114802  |
| 0.131847  | 0.10912   | 0.113054  | 0.118153  | 0.129225  | 0.116404  | 0.118735  |
| 0.118298  | 0.107809  | 0.112617  | 0.11451   | 0.118881  | 0.123543  | 0.124417  |



|           |           |           |           |          |           |           |
|-----------|-----------|-----------|-----------|----------|-----------|-----------|
| 0.126166  | 0.102855  | 0.109994  | 0.11014   | 0.113636 | 0.080711  | 0.0810023 |
| 0.0530303 | 0.123252  | 0.120192  | 0.125874  | 0.127331 | 0.118881  | 0.121795  |
| 0.122086  | 0.0984848 | 0.10912   | 0.114802  | 0.111888 | 0.112179  | 0.115967  |
| 0.135927  | 0.0549242 | 0.112471  | 0.116404  | 0.112034 | 0.114073  | 0.116696  |
| 0.188228  | 0.173077  | 0.166521  | 0.169289  | 0.175991 | 0.169289  | 0.16958   |
| 0.132867  | 0.104021  | 0.057838  | 0.0506993 | 0.113054 | 0.110431  | 0.113928  |
| 0.0595862 | 0.120775  | 0.122086  | 0.127185  | 0.127768 | 0.119027  | 0.12398   |
| 0.12704   | 0.0979021 | 0.120484  | 0.123543  | 0.115676 | 0.106935  | 0.106352  |
| 0.127185  | 0.115239  | 0.112179  | 0.115239  | 0.121358 | 0.109703  | 0.114948  |
| 0.123689  | 0.0814394 | 0.100524  | 0.101253  | 0.104458 | 0.101836  | 0.108537  |
| 0.127768  | 0.0456002 | 0.100524  | 0.108246  | 0.101836 | 0.101544  | 0.104749  |
| 0.124854  | 0.0849359 | 0.106061  | 0.107663  | 0.110286 | 0.108246  | 0.114365  |
| 0.121941  | 0.116696  | 0.118881  | 0.122815  | 0.122815 | 0.10271   | 0.10271   |
| 0.134178  | 0.0820221 | 0.0882867 | 0.0852273 | 0.113782 | 0.112034  | 0.11553   |
| 0.136655  | 0.115967  | 0.122815  | 0.124709  | 0.122086 | 0.11451   | 0.115967  |
| 0.123689  | 0.0992133 | 0.102273  | 0.105624  | 0.108829 | 0.101544  | 0.100087  |
| 0.132576  | 0.0967366 | 0.113782  | 0.119464  | 0.117716 | 0.105478  | 0.104312  |
| 0.13039   | 0.117279  | 0.124126  | 0.132721  | 0.127185 | 0.100087  | 0.10067   |
| 0.129516  | 0.0913462 | 0.112179  | 0.121358  | 0.109994 | 0.101253  | 0.104458  |
| 0.13039   | 0.11116   | 0.114802  | 0.11961   | 0.118153 | 0.110868  | 0.112617  |
| 0.131265  | 0.0855186 | 0.109557  | 0.116404  | 0.103584 | 0.0983392 | 0.100962  |
| 0.129808  | 0.0910548 | 0.1081    | 0.118735  | 0.108537 | 0.10067   | 0.104458  |
| 0.122815  | 0.092803  | 0.103147  | 0.109703  | 0.099796 | 0.105041  | 0.106206  |
| 0.134324  | 0.0987762 | 0.116987  | 0.121212  | 0.11014  | 0.109557  | 0.112762  |
| 0.125     | 0.0879953 | 0.105915  | 0.112179  | 0.10373  | 0.101981  | 0.104895  |
| 0.147145  | 0.136072  | 0.13447   | 0.136364  | 0.140443 | 0.108974  | 0.106352  |
| 0.141317  | 0.12296   | 0.122523  | 0.124709  | 0.129953 | 0.103147  | 0.102273  |
| 0.126457  | 0.090035  | 0.10708   | 0.113054  | 0.108392 | 0.0984848 | 0.102273  |
| 0.130973  | 0.13039   | 0.131119  | 0.13447   | 0.141463 | 0.105041  | 0.101253  |
| 0.129808  | 0.114365  | 0.112179  | 0.116113  | 0.11961  | 0.119901  | 0.124272  |
| 0.14933   | 0.114073  | 0.132576  | 0.135635  | 0.134178 | 0.124272  | 0.122815  |
| 0.127477  | 0.097465  | 0.107226  | 0.114073  | 0.109411 | 0.109703  | 0.113491  |
| 0.129371  | 0.136364  | 0.133887  | 0.137821  | 0.1419   | 0.130828  | 0.135198  |
| 0.12296   | 0.115676  | 0.129225  | 0.129662  | 0.132284 | 0.119464  | 0.118298  |
| 0.132576  | 0.12704   | 0.133304  | 0.138112  | 0.136072 | 0.11655   | 0.118007  |
| 0.134033  | 0.105478  | 0.116113  | 0.116841  | 0.119464 | 0.1081    | 0.11451   |
| 0.131847  | 0.0916375 | 0.111014  | 0.11553   | 0.103293 | 0.0957168 | 0.0968823 |
| 0.130245  | 0.090035  | 0.106206  | 0.114802  | 0.101981 | 0.0964452 | 0.0981935 |
| 0.115822  | 0.106498  | 0.110431  | 0.118735  | 0.119901 | 0.0962995 | 0.0980478 |
| 0.128934  | 0.100962  | 0.117424  | 0.12398   | 0.118735 | 0.107955  | 0.110577  |
| 0.133159  | 0.112762  | 0.122232  | 0.129371  | 0.120047 | 0.120338  | 0.122086  |
| 0.135781  | 0.112762  | 0.116113  | 0.121795  | 0.118007 | 0.105478  | 0.101981  |
| 0.122669  | 0.0941142 | 0.106789  | 0.111888  | 0.108392 | 0.0999417 | 0.102564  |
| 0.128351  | 0.0930944 | 0.107517  | 0.112908  | 0.103293 | 0.0962995 | 0.0977564 |

|          |           |           |           |           |           |           |
|----------|-----------|-----------|-----------|-----------|-----------|-----------|
| 0.125583 | 0.0996503 | 0.116696  | 0.123834  | 0.112762  | 0.108683  | 0.109266  |
| 0.128205 | 0.0987762 | 0.105915  | 0.114219  | 0.103147  | 0.0917832 | 0.0967366 |
| 0.135344 | 0.0980478 | 0.116259  | 0.124272  | 0.111742  | 0.103875  | 0.103584  |
| 0.130099 | 0.0992133 | 0.107517  | 0.11116   | 0.105332  | 0.110868  | 0.115822  |
| 0.132284 | 0.105478  | 0.104167  | 0.102564  | 0.110431  | 0.119172  | 0.117424  |
| 0.132284 | 0.0871212 | 0.105041  | 0.108392  | 0.0999417 | 0.115676  | 0.11655   |
| 0.123543 | 0.0792541 | 0.103293  | 0.106352  | 0.0885781 | 0.108392  | 0.110431  |
| 0.121503 | 0.0917832 | 0.111742  | 0.119464  | 0.105186  | 0.101107  | 0.104312  |
| 0.129516 | 0.102127  | 0.106061  | 0.101544  | 0.107955  | 0.114073  | 0.114948  |
| 0.129953 | 0.0842075 | 0.101836  | 0.108974  | 0.106643  | 0.107809  | 0.111888  |
| 0.132284 | 0.105186  | 0.106498  | 0.105186  | 0.125583  | 0.120047  | 0.123252  |
| 0.125291 | 0.0964452 | 0.0930944 | 0.0935315 | 0.100524  | 0.105478  | 0.107517  |
| 0.135927 | 0.0989219 | 0.120338  | 0.121941  | 0.125146  | 0.116404  | 0.121941  |

| TDr_2608 | TDr_2611 | TDr_2618  | TDr_2623  | TDr_2630  | TDr_2636  | TDr_2642  |
|----------|----------|-----------|-----------|-----------|-----------|-----------|
| 0.126603 | 0.121795 | 0.112034  | 0.116259  | 0.0939685 | 0.124126  | 0.085373  |
| 0.114802 | 0.125437 | 0.0984848 | 0.106789  | 0.0987762 | 0.114365  | 0.110577  |
| 0.112179 | 0.11961  | 0.0920746 | 0.103293  | 0.0944056 | 0.109994  | 0.106789  |
| 0.124417 | 0.121941 | 0.0996503 | 0.0890152 | 0.101399  | 0.0992133 | 0.120192  |
| 0.126457 | 0.132721 | 0.126166  | 0.131847  | 0.121212  | 0.136801  | 0.134178  |
| 0.123543 | 0.136801 | 0.121212  | 0.130682  | 0.120047  | 0.134761  | 0.116113  |
| 0.13447  | 0.123543 | 0.112617  | 0.127622  | 0.109703  | 0.129953  | 0.104895  |
| 0.116113 | 0.111888 | 0.0986305 | 0.101107  | 0.100087  | 0.111305  | 0.111014  |
| 0.119172 | 0.113199 | 0.0958625 | 0.102418  | 0.0702214 | 0.113199  | 0.107955  |
| 0.121358 | 0.116841 | 0.0878497 | 0.118298  | 0.0826049 | 0.123834  | 0.110431  |
| 0.123834 | 0.119318 | 0.106935  | 0.123397  | 0.0996503 | 0.135635  | 0.110286  |
| 0.119027 | 0.109557 | 0.105041  | 0.102273  | 0.0942599 | 0.115676  | 0.113928  |
| 0.119901 | 0.114802 | 0.0968823 | 0.112179  | 0.0793998 | 0.122086  | 0.112762  |
| 0.137821 | 0.141754 | 0.119464  | 0.127768  | 0.115967  | 0.137675  | 0.135052  |
| 0.12602  | 0.126457 | 0.0560897 | 0.128788  | 0.112034  | 0.133159  | 0.12704   |
| 0.126457 | 0.120484 | 0.107809  | 0.11961   | 0.104895  | 0.12398   | 0.11961   |
| 0.120484 | 0.110723 | 0.102418  | 0.112762  | 0.0977564 | 0.125583  | 0.120629  |
| 0.136364 | 0.154575 | 0.132867  | 0.139132  | 0.128788  | 0.139423  | 0.148164  |
| 0.111597 | 0.117861 | 0.0981935 | 0.102418  | 0.0929487 | 0.112034  | 0.104458  |
| 0.197844 | 0.205857 | 0.175408  | 0.198281  | 0.194056  | 0.201195  | 0.203526  |
| 0.119901 | 0.13141  | 0.111742  | 0.127622  | 0.114365  | 0.138695  | 0.102273  |
| 0.117424 | 0.122232 | 0.109557  | 0.119318  | 0.110723  | 0.131556  | 0.0968823 |
| 0.118153 | 0.113054 | 0.101836  | 0.109557  | 0.0942599 | 0.11859   | 0.117424  |
| 0.12704  | 0.120192 | 0.120338  | 0.126603  | 0.110723  | 0.133887  | 0.12398   |
| 0.106789 | 0.106352 | 0.0960082 | 0.107517  | 0.0887238 | 0.118007  | 0.103438  |
| 0.126894 | 0.135198 | 0.119027  | 0.132576  | 0.115822  | 0.136946  | 0.103438  |
| 0.129516 | 0.115967 | 0.113782  | 0.128497  | 0.106789  | 0.134615  | 0.115385  |
| 0.123106 | 0.125    | 0.110868  | 0.120338  | 0.103293  | 0.124709  | 0.125291  |
| 0.135344 | 0.13141  | 0.123689  | 0.130245  | 0.111742  | 0.134033  | 0.125583  |
| 0.135927 | 0.115676 | 0.109994  | 0.125     | 0.0980478 | 0.129953  | 0.119464  |
| 0.131119 | 0.122815 | 0.107226  | 0.131556  | 0.115385  | 0.135635  | 0.095134  |
| 0.124563 | 0.122086 | 0.112617  | 0.12296   | 0.101544  | 0.129371  | 0.116841  |
| 0.116987 | 0.107517 | 0.0916375 | 0.11014   | 0.0936772 | 0.11859   | 0.103147  |
| 0.125146 | 0.107226 | 0.111742  | 0.119464  | 0.0995047 | 0.126748  | 0.113636  |
| 0.130828 | 0.121941 | 0.113054  | 0.127477  | 0.103147  | 0.13243   | 0.117861  |
| 0.135052 | 0.124126 | 0.124563  | 0.130245  | 0.106498  | 0.130828  | 0.121795  |
| 0.13986  | 0.133304 | 0.123252  | 0.13447   | 0.115967  | 0.137092  | 0.115822  |
| 0.13039  | 0.118881 | 0.114948  | 0.124126  | 0.106789  | 0.133741  | 0.113928  |
| 0.120192 | 0.113345 | 0.10067   | 0.111597  | 0.0957168 | 0.120629  | 0.109266  |
| 0.125437 | 0.127331 | 0.111451  | 0.120047  | 0.108829  | 0.12296   | 0.123834  |
| 0.11961  | 0.119464 | 0.099796  | 0.108392  | 0.0939685 | 0.120338  | 0.113928  |
| 0.147582 | 0.145979 | 0.126603  | 0.139569  | 0.128351  | 0.147145  | 0.143939  |

|          |          |          |          |           |           |           |
|----------|----------|----------|----------|-----------|-----------|-----------|
| 0.151078 | 0.147727 | 0.138258 | 0.147727 | 0.129808  | 0.148893  | 0.14627   |
| 0.121503 | 0.119318 | 0.107226 | 0.114656 | 0.099359  | 0.125146  | 0.116696  |
| 0.111888 | 0.101253 | 0.102273 | 0.114656 | 0.0912005 | 0.123106  | 0.108829  |
| 0.134178 | 0.11655  | 0.100962 | 0.123252 | 0.10067   | 0.129371  | 0.117133  |
| 0.121649 | 0.117424 | 0.110286 | 0.121212 | 0.108246  | 0.12704   | 0.11859   |
| 0.145105 | 0.137092 | 0.128205 | 0.137675 | 0.121503  | 0.142337  | 0.141754  |
| 0.123252 | 0.116987 | 0.108683 | 0.113782 | 0.099359  | 0.124854  | 0.119318  |
| 0.125146 | 0.11859  | 0.103293 | 0.116841 | 0.102418  | 0.125291  | 0.118298  |
| 0.150058 | 0.13884  | 0.138986 | 0.146707 | 0.135198  | 0.151661  | 0.0735723 |
| 0.13345  | 0.128351 | 0.120921 | 0.132139 | 0.115093  | 0.131847  | 0.132721  |
| 0.121941 | 0.115676 | 0.10912  | 0.111014 | 0.102418  | 0.120921  | 0.117133  |
| 0.132139 | 0.13345  | 0.110577 | 0.125291 | 0.10271   | 0.128205  | 0.131119  |
| 0.120775 | 0.123252 | 0.106206 | 0.085373 | 0.106498  | 0.0926573 | 0.118007  |
| 0.143502 | 0.134907 | 0.137383 | 0.138112 | 0.127477  | 0.139277  | 0.140443  |
| 0.137238 | 0.125437 | 0.124126 | 0.129516 | 0.115093  | 0.13243   | 0.130682  |
| 0.120338 | 0.119318 | 0.106643 | 0.114365 | 0.0976107 | 0.121649  | 0.11961   |
| 0.124709 | 0.118153 | 0.1081   | 0.121066 | 0.099359  | 0.128642  | 0.121358  |
| 0.128059 | 0.121795 | 0.108246 | 0.126748 | 0.107663  | 0.132284  | 0.120338  |
| 0.145542 | 0.14627  | 0.129516 | 0.134615 | 0.127768  | 0.139569  | 0.139277  |
| 0.146125 | 0.143648 | 0.13039  | 0.134615 | 0.126311  | 0.134324  | 0.144231  |
| 0.166667 | 0.165647 | 0.152972 | 0.157197 | 0.151515  | 0.160693  | 0.158945  |
| 0.12296  | 0.121066 | 0.10373  | 0.113491 | 0.0999417 | 0.12398   | 0.11757   |
| 0.119755 | 0.114948 | 0.103438 | 0.114365 | 0.0999417 | 0.124854  | 0.11553   |
| 0.123543 | 0.112908 | 0.107809 | 0.110868 | 0.0952797 | 0.122815  | 0.11116   |
| 0.148456 | 0.136655 | 0.133013 | 0.143065 | 0.125146  | 0.144814  | 0.124417  |
| 0.120775 | 0.112471 | 0.101836 | 0.109848 | 0.0957168 | 0.120921  | 0.113345  |
| 0.136655 | 0.137383 | 0.125874 | 0.133887 | 0.12296   | 0.133887  | 0.135927  |
| 0.129662 | 0.115239 | 0.107517 | 0.127185 | 0.101981  | 0.13039   | 0.116696  |
| 0.125437 | 0.118298 | 0.108829 | 0.120921 | 0.101253  | 0.128497  | 0.120047  |
| 0.148747 | 0.143939 | 0.136801 | 0.145688 | 0.137092  | 0.148893  | 0.125874  |
| 0.130973 | 0.123543 | 0.116696 | 0.122086 | 0.105915  | 0.130536  | 0.125     |
| 0.143065 | 0.140006 | 0.132284 | 0.137966 | 0.125     | 0.139714  | 0.139714  |
| 0.131847 | 0.130828 | 0.122815 | 0.130245 | 0.114656  | 0.134033  | 0.134615  |
| 0.110431 | 0.116113 | 0.105186 | 0.108537 | 0.104895  | 0.115239  | 0.116404  |
| 0.121503 | 0.116696 | 0.107517 | 0.111742 | 0.097028  | 0.12398   | 0.118444  |
| 0.121212 | 0.124563 | 0.106643 | 0.115239 | 0.0981935 | 0.123689  | 0.121358  |
| 0.137821 | 0.137092 | 0.128788 | 0.13039  | 0.115967  | 0.13039   | 0.134178  |
| 0.120775 | 0.112762 | 0.109411 | 0.113345 | 0.095134  | 0.125583  | 0.112471  |
| 0.147727 | 0.149621 | 0.129079 | 0.135344 | 0.127331  | 0.137675  | 0.142628  |
| 0.132576 | 0.126603 | 0.11451  | 0.126894 | 0.107226  | 0.130682  | 0.122523  |
| 0.127331 | 0.117279 | 0.112762 | 0.11553  | 0.111014  | 0.123397  | 0.11961   |
| 0.127331 | 0.121066 | 0.111888 | 0.121066 | 0.103147  | 0.130682  | 0.119318  |
| 0.126166 | 0.126894 | 0.11451  | 0.120192 | 0.104604  | 0.128934  | 0.128934  |
| 0.123252 | 0.11961  | 0.106643 | 0.120484 | 0.0990676 | 0.126603  | 0.11757   |

|          |          |           |          |           |          |           |
|----------|----------|-----------|----------|-----------|----------|-----------|
| 0.121503 | 0.113199 | 0.111014  | 0.113491 | 0.0964452 | 0.125728 | 0.11757   |
| 0.145542 | 0.141317 | 0.128351  | 0.135781 | 0.123689  | 0.139569 | 0.141317  |
| 0.120775 | 0.108683 | 0.100087  | 0.116841 | 0.0965909 | 0.127331 | 0.109557  |
| 0.120047 | 0.112325 | 0.103438  | 0.11757  | 0.0879953 | 0.127477 | 0.114365  |
| 0.131702 | 0.126311 | 0.115093  | 0.126311 | 0.111888  | 0.129516 | 0.120192  |
| 0.137238 | 0.122523 | 0.118298  | 0.131847 | 0.114802  | 0.136509 | 0.10708   |
| 0.126748 | 0.130973 | 0.118007  | 0.137092 | 0.119755  | 0.139132 | 0.131556  |
| 0.13447  | 0.142191 | 0.13039   | 0.13986  | 0.123689  | 0.139569 | 0.138695  |
| 0.123252 | 0.118153 | 0.109848  | 0.121941 | 0.105186  | 0.131265 | 0.104167  |
| 0.185606 | 0.184586 | 0.175408  | 0.182255 | 0.176282  | 0.182255 | 0.174388  |
| 0.116987 | 0.111014 | 0.0983392 | 0.108974 | 0.0971737 | 0.120921 | 0.106061  |
| 0.134324 | 0.134178 | 0.125291  | 0.137675 | 0.120921  | 0.138549 | 0.137092  |
| 0.128497 | 0.125728 | 0.114219  | 0.130973 | 0.111014  | 0.135052 | 0.128934  |
| 0.140297 | 0.137529 | 0.12398   | 0.139277 | 0.127477  | 0.144522 | 0.116259  |
| 0.116259 | 0.111451 | 0.102273  | 0.116987 | 0.0984848 | 0.12398  | 0.114948  |
| 0.13141  | 0.133596 | 0.124709  | 0.133887 | 0.119755  | 0.134178 | 0.13447   |
| 0.115676 | 0.113491 | 0.105769  | 0.121358 | 0.104021  | 0.123397 | 0.113199  |
| 0.123106 | 0.122669 | 0.115239  | 0.129079 | 0.111451  | 0.13345  | 0.126166  |
| 0.122815 | 0.116259 | 0.105332  | 0.117133 | 0.10067   | 0.120047 | 0.102855  |
| 0.131847 | 0.135198 | 0.13039   | 0.141608 | 0.121066  | 0.143939 | 0.137821  |
| 0.124563 | 0.1081   | 0.100087  | 0.117716 | 0.095134  | 0.125583 | 0.109848  |
| 0.137238 | 0.14088  | 0.126457  | 0.137966 | 0.124709  | 0.137092 | 0.120775  |
| 0.126894 | 0.118298 | 0.110868  | 0.122086 | 0.105041  | 0.129953 | 0.0996503 |
| 0.136655 | 0.131847 | 0.12296   | 0.130682 | 0.114219  | 0.132139 | 0.133887  |
| 0.140297 | 0.125874 | 0.113782  | 0.136364 | 0.116404  | 0.140443 | 0.112762  |
| 0.114365 | 0.113636 | 0.101253  | 0.114802 | 0.0968823 | 0.126457 | 0.0979021 |
| 0.151661 | 0.144231 | 0.13243   | 0.144231 | 0.133013  | 0.147145 | 0.128788  |
| 0.120629 | 0.113782 | 0.106352  | 0.12398  | 0.102855  | 0.130973 | 0.0986305 |
| 0.11859  | 0.108829 | 0.103438  | 0.115822 | 0.0976107 | 0.127768 | 0.115822  |
| 0.124563 | 0.120921 | 0.109703  | 0.120338 | 0.0980478 | 0.128497 | 0.115676  |
| 0.141754 | 0.142774 | 0.130682  | 0.143357 | 0.120484  | 0.142191 | 0.122669  |
| 0.131556 | 0.125874 | 0.116404  | 0.126748 | 0.10912   | 0.129079 | 0.115967  |
| 0.116113 | 0.111305 | 0.10067   | 0.11451  | 0.0954254 | 0.118298 | 0.111597  |
| 0.110577 | 0.109848 | 0.0992133 | 0.118007 | 0.0954254 | 0.125583 | 0.117133  |
| 0.125    | 0.112034 | 0.108683  | 0.120484 | 0.0961538 | 0.127768 | 0.10067   |
| 0.135344 | 0.125874 | 0.109703  | 0.13141  | 0.10708   | 0.133741 | 0.125874  |
| 0.127914 | 0.117279 | 0.109557  | 0.123106 | 0.105478  | 0.13243  | 0.097465  |
| 0.115822 | 0.104021 | 0.0893065 | 0.107517 | 0.0849359 | 0.117424 | 0.104895  |
| 0.117279 | 0.106352 | 0.0960082 | 0.108683 | 0.088141  | 0.118298 | 0.102855  |
| 0.121503 | 0.10912  | 0.100816  | 0.114656 | 0.0856643 | 0.121941 | 0.113491  |
| 0.12704  | 0.112617 | 0.11451   | 0.116113 | 0.103438  | 0.128059 | 0.120192  |
| 0.135052 | 0.125874 | 0.11553   | 0.132867 | 0.110577  | 0.134615 | 0.129371  |
| 0.118881 | 0.102418 | 0.0949883 | 0.113782 | 0.0912005 | 0.124563 | 0.112617  |
| 0.114073 | 0.108392 | 0.090472  | 0.110431 | 0.0837704 | 0.122086 | 0.106352  |

|          |          |           |           |           |           |           |
|----------|----------|-----------|-----------|-----------|-----------|-----------|
| 0.135344 | 0.123252 | 0.110286  | 0.132867  | 0.112617  | 0.136364  | 0.124709  |
| 0.125291 | 0.108829 | 0.0967366 | 0.111742  | 0.0917832 | 0.124854  | 0.106498  |
| 0.128497 | 0.119318 | 0.113054  | 0.126603  | 0.106352  | 0.133596  | 0.109994  |
| 0.137529 | 0.124563 | 0.12296   | 0.135052  | 0.119464  | 0.14088   | 0.0584207 |
| 0.123252 | 0.116113 | 0.102273  | 0.119901  | 0.099359  | 0.124854  | 0.116987  |
| 0.119901 | 0.108683 | 0.0968823 | 0.113636  | 0.090472  | 0.123834  | 0.114802  |
| 0.119901 | 0.108974 | 0.097465  | 0.112179  | 0.0913462 | 0.124126  | 0.115385  |
| 0.115239 | 0.103147 | 0.0986305 | 0.112762  | 0.088141  | 0.121503  | 0.106352  |
| 0.131265 | 0.128205 | 0.111451  | 0.127331  | 0.104749  | 0.13141   | 0.126748  |
| 0.11553  | 0.104895 | 0.0895979 | 0.108683  | 0.083479  | 0.120047  | 0.106061  |
| 0.146853 | 0.13447  | 0.127331  | 0.140297  | 0.126457  | 0.144085  | 0.13039   |
| 0.143502 | 0.132867 | 0.123106  | 0.138112  | 0.116696  | 0.144231  | 0.137529  |
| 0.135635 | 0.121212 | 0.110868  | 0.126166  | 0.106206  | 0.130245  | 0.123543  |
| 0.123834 | 0.11961  | 0.104312  | 0.122232  | 0.10169   | 0.133887  | 0.116696  |
| 0.11655  | 0.113491 | 0.100816  | 0.122523  | 0.101981  | 0.131556  | 0.0971737 |
| 0.119318 | 0.110723 | 0.10067   | 0.118007  | 0.0919289 | 0.128497  | 0.107226  |
| 0.123834 | 0.108829 | 0.109266  | 0.116696  | 0.0941142 | 0.125728  | 0.109703  |
| 0.117424 | 0.107955 | 0.10169   | 0.110868  | 0.0842075 | 0.118153  | 0.10912   |
| 0.118007 | 0.11757  | 0.109266  | 0.0960082 | 0.0981935 | 0.101253  | 0.113199  |
| 0.134615 | 0.13039  | 0.123543  | 0.133596  | 0.11655   | 0.135344  | 0.135344  |
| 0.117279 | 0.11859  | 0.104458  | 0.119172  | 0.101544  | 0.127622  | 0.11859   |
| 0.136655 | 0.133013 | 0.113636  | 0.132721  | 0.111597  | 0.13447   | 0.128934  |
| 0.137092 | 0.135781 | 0.122815  | 0.137238  | 0.123689  | 0.138986  | 0.126748  |
| 0.191579 | 0.196678 | 0.17905   | 0.187354  | 0.187209  | 0.192599  | 0.196387  |
| 0.234848 | 0.237617 | 0.227564  | 0.230041  | 0.231643  | 0.229458  | 0.238491  |
| 0.116404 | 0.114802 | 0.105041  | 0.0693473 | 0.104167  | 0.0818765 | 0.110723  |
| 0.118007 | 0.116696 | 0.104312  | 0.113782  | 0.0981935 | 0.122232  | 0.113491  |
| 0.116841 | 0.106789 | 0.101981  | 0.111451  | 0.0964452 | 0.11961   | 0.108537  |
| 0.113054 | 0.116404 | 0.106935  | 0.112325  | 0.101107  | 0.122815  | 0.112325  |
| 0.131993 | 0.129225 | 0.0562354 | 0.126894  | 0.113054  | 0.131847  | 0.127768  |
| 0.116841 | 0.120775 | 0.107226  | 0.114656  | 0.101981  | 0.121649  | 0.116987  |
| 0.150495 | 0.139569 | 0.140297  | 0.147727  | 0.133596  | 0.147727  | 0.145979  |
| 0.115967 | 0.113782 | 0.112471  | 0.118153  | 0.101399  | 0.125437  | 0.118153  |
| 0.134615 | 0.129225 | 0.124126  | 0.130099  | 0.11859   | 0.130973  | 0.131847  |
| 0.132139 | 0.136364 | 0.127768  | 0.131702  | 0.123106  | 0.130245  | 0.133159  |
| 0.134761 | 0.132576 | 0.123689  | 0.13549   | 0.118444  | 0.139277  | 0.134615  |
| 0.144668 | 0.138695 | 0.13039   | 0.135781  | 0.124854  | 0.142774  | 0.139569  |
| 0.11961  | 0.11655  | 0.110286  | 0.11859   | 0.100379  | 0.129953  | 0.113928  |
| 0.112617 | 0.111597 | 0.110286  | 0.113345  | 0.100962  | 0.124126  | 0.115093  |
| 0.123834 | 0.12398  | 0.1081    | 0.121066  | 0.105769  | 0.130973  | 0.118153  |
| 0.114802 | 0.107372 | 0.106352  | 0.11116   | 0.0961538 | 0.122232  | 0.112617  |
| 0.116259 | 0.109703 | 0.109266  | 0.110577  | 0.0984848 | 0.121358  | 0.114365  |
| 0.121941 | 0.115967 | 0.110577  | 0.11655   | 0.105624  | 0.125291  | 0.11655   |
| 0.127331 | 0.13243  | 0.118881  | 0.130099  | 0.120338  | 0.135052  | 0.131265  |

|          |          |           |          |           |          |          |
|----------|----------|-----------|----------|-----------|----------|----------|
| 0.134907 | 0.132139 | 0.130536  | 0.137383 | 0.121795  | 0.14088  | 0.140297 |
| 0.122523 | 0.111305 | 0.115822  | 0.117424 | 0.104167  | 0.125    | 0.118298 |
| 0.119172 | 0.116987 | 0.109848  | 0.119901 | 0.105769  | 0.126603 | 0.116987 |
| 0.135781 | 0.122523 | 0.127622  | 0.133887 | 0.121503  | 0.137675 | 0.13243  |
| 0.119172 | 0.105915 | 0.107809  | 0.111451 | 0.099359  | 0.125146 | 0.112617 |
| 0.142045 | 0.144814 | 0.133887  | 0.145688 | 0.134761  | 0.150058 | 0.143648 |
| 0.143502 | 0.141317 | 0.121358  | 0.138986 | 0.119027  | 0.142774 | 0.136072 |
| 0.126748 | 0.13243  | 0.126457  | 0.137383 | 0.123252  | 0.135052 | 0.138549 |
| 0.116841 | 0.109994 | 0.104021  | 0.107663 | 0.0984848 | 0.118444 | 0.111451 |
| 0.112617 | 0.109266 | 0.102418  | 0.113345 | 0.0971737 | 0.121795 | 0.108392 |
| 0.125874 | 0.12602  | 0.120047  | 0.12602  | 0.113054  | 0.127477 | 0.12602  |
| 0.125728 | 0.120921 | 0.120484  | 0.125    | 0.111451  | 0.130245 | 0.124709 |
| 0.13243  | 0.124417 | 0.126311  | 0.133741 | 0.120484  | 0.133159 | 0.131119 |
| 0.123252 | 0.116696 | 0.115385  | 0.118153 | 0.105186  | 0.128059 | 0.118153 |
| 0.122232 | 0.114802 | 0.112034  | 0.121795 | 0.104458  | 0.128497 | 0.121795 |
| 0.126894 | 0.126748 | 0.11553   | 0.126166 | 0.10912   | 0.128497 | 0.122086 |
| 0.136509 | 0.131119 | 0.12602   | 0.138112 | 0.119318  | 0.142483 | 0.129662 |
| 0.133304 | 0.126166 | 0.126603  | 0.132867 | 0.121066  | 0.13549  | 0.133159 |
| 0.131993 | 0.130682 | 0.125     | 0.138258 | 0.125     | 0.138549 | 0.132139 |
| 0.133887 | 0.134324 | 0.120192  | 0.132576 | 0.11757   | 0.137238 | 0.12704  |
| 0.122232 | 0.113054 | 0.112034  | 0.111888 | 0.100962  | 0.119172 | 0.11451  |
| 0.129516 | 0.132576 | 0.125146  | 0.133159 | 0.11961   | 0.134907 | 0.132284 |
| 0.112179 | 0.112325 | 0.111014  | 0.114365 | 0.0958625 | 0.122232 | 0.112325 |
| 0.11961  | 0.122669 | 0.110577  | 0.118298 | 0.101836  | 0.124709 | 0.11859  |
| 0.112908 | 0.115093 | 0.105915  | 0.117424 | 0.0992133 | 0.123252 | 0.114802 |
| 0.114802 | 0.113782 | 0.1081    | 0.121358 | 0.106352  | 0.128351 | 0.11757  |
| 0.113928 | 0.111451 | 0.108392  | 0.112617 | 0.100233  | 0.120775 | 0.113782 |
| 0.137383 | 0.129953 | 0.130973  | 0.138986 | 0.123397  | 0.142191 | 0.135198 |
| 0.120047 | 0.119027 | 0.11014   | 0.120775 | 0.104895  | 0.128351 | 0.112617 |
| 0.134615 | 0.13447  | 0.129079  | 0.13243  | 0.122086  | 0.133304 | 0.132721 |
| 0.115093 | 0.108246 | 0.105186  | 0.113199 | 0.100233  | 0.122523 | 0.116404 |
| 0.129808 | 0.120338 | 0.121358  | 0.129662 | 0.11116   | 0.131702 | 0.125    |
| 0.130245 | 0.12398  | 0.118298  | 0.12602  | 0.087704  | 0.130973 | 0.129808 |
| 0.126748 | 0.122815 | 0.101107  | 0.123106 | 0.102273  | 0.13243  | 0.11961  |
| 0.123689 | 0.108683 | 0.105624  | 0.122378 | 0.0960082 | 0.129371 | 0.114802 |
| 0.12296  | 0.127768 | 0.112762  | 0.122815 | 0.103147  | 0.128059 | 0.13039  |
| 0.123689 | 0.115093 | 0.107372  | 0.118007 | 0.102127  | 0.129371 | 0.124126 |
| 0.123106 | 0.106643 | 0.10708   | 0.120338 | 0.0922203 | 0.129371 | 0.104895 |
| 0.142045 | 0.134615 | 0.116404  | 0.138695 | 0.106789  | 0.143065 | 0.13345  |
| 0.148019 | 0.132721 | 0.129662  | 0.138549 | 0.124126  | 0.138549 | 0.135052 |
| 0.113928 | 0.10708  | 0.0932401 | 0.106498 | 0.0775058 | 0.116987 | 0.10708  |
| 0.123397 | 0.135198 | 0.11116   | 0.134615 | 0.10912   | 0.140152 | 0.131119 |
| 0.137238 | 0.127477 | 0.107517  | 0.133887 | 0.0941142 | 0.137966 | 0.121649 |
| 0.124709 | 0.131265 | 0.11655   | 0.131265 | 0.106352  | 0.135927 | 0.133887 |

|          |          |           |          |           |          |          |
|----------|----------|-----------|----------|-----------|----------|----------|
| 0.119172 | 0.124272 | 0.106643  | 0.124854 | 0.103147  | 0.126894 | 0.117861 |
| 0.127331 | 0.121066 | 0.108392  | 0.130099 | 0.0961538 | 0.135052 | 0.126311 |
| 0.129225 | 0.126166 | 0.106789  | 0.129079 | 0.0893065 | 0.136364 | 0.125291 |
| 0.12704  | 0.127477 | 0.11859   | 0.130099 | 0.107809  | 0.131847 | 0.133596 |
| 0.134615 | 0.136801 | 0.120338  | 0.141171 | 0.115967  | 0.140006 | 0.135635 |
| 0.128788 | 0.132721 | 0.108683  | 0.125146 | 0.092366  | 0.127768 | 0.125728 |
| 0.113345 | 0.119318 | 0.104312  | 0.123397 | 0.0973193 | 0.126311 | 0.115239 |
| 0.140589 | 0.130536 | 0.129808  | 0.130828 | 0.125728  | 0.136946 | 0.130828 |
| 0.136072 | 0.135052 | 0.117133  | 0.138549 | 0.0984848 | 0.142045 | 0.134178 |
| 0.115385 | 0.116696 | 0.100816  | 0.117861 | 0.0958625 | 0.123397 | 0.110577 |
| 0.2213   | 0.22028  | 0.212558  | 0.21183  | 0.211976  | 0.214161 | 0.216492 |
| 0.124854 | 0.125583 | 0.109411  | 0.128788 | 0.103875  | 0.128497 | 0.126748 |
| 0.122232 | 0.120921 | 0.101544  | 0.120629 | 0.0820221 | 0.128205 | 0.119755 |
| 0.132867 | 0.139132 | 0.122669  | 0.137383 | 0.112471  | 0.136218 | 0.137383 |
| 0.126457 | 0.122523 | 0.1081    | 0.120775 | 0.0865385 | 0.12602  | 0.121066 |
| 0.136946 | 0.133887 | 0.11451   | 0.135635 | 0.0996503 | 0.139423 | 0.131265 |
| 0.11859  | 0.124272 | 0.107809  | 0.121941 | 0.102855  | 0.124854 | 0.130099 |
| 0.121941 | 0.121212 | 0.100962  | 0.121212 | 0.0965909 | 0.12704  | 0.125    |
| 0.13039  | 0.133741 | 0.105915  | 0.12704  | 0.0983392 | 0.132284 | 0.129953 |
| 0.126166 | 0.136509 | 0.115676  | 0.130099 | 0.109848  | 0.13243  | 0.131847 |
| 0.126894 | 0.130828 | 0.117861  | 0.134324 | 0.110868  | 0.136655 | 0.131702 |
| 0.125583 | 0.133887 | 0.118298  | 0.132721 | 0.113928  | 0.13447  | 0.124563 |
| 0.122378 | 0.130973 | 0.112179  | 0.127477 | 0.106643  | 0.127185 | 0.127768 |
| 0.128497 | 0.108829 | 0.101107  | 0.120192 | 0.0976107 | 0.127185 | 0.119027 |
| 0.120921 | 0.120775 | 0.111305  | 0.116987 | 0.0944056 | 0.123397 | 0.125728 |
| 0.124854 | 0.138695 | 0.121066  | 0.138403 | 0.114365  | 0.138986 | 0.137529 |
| 0.117133 | 0.12602  | 0.104604  | 0.124272 | 0.100524  | 0.123106 | 0.122815 |
| 0.142774 | 0.13884  | 0.128788  | 0.136509 | 0.123834  | 0.140297 | 0.141463 |
| 0.14292  | 0.1419   | 0.124854  | 0.138403 | 0.122232  | 0.143648 | 0.125583 |
| 0.133304 | 0.119464 | 0.106789  | 0.127331 | 0.105332  | 0.131993 | 0.122086 |
| 0.137966 | 0.130245 | 0.10912   | 0.131993 | 0.0968823 | 0.134907 | 0.123543 |
| 0.131119 | 0.128934 | 0.115676  | 0.127768 | 0.113054  | 0.133013 | 0.118153 |
| 0.129225 | 0.117133 | 0.121358  | 0.127914 | 0.104749  | 0.129953 | 0.119755 |
| 0.132139 | 0.124417 | 0.11757   | 0.123834 | 0.112908  | 0.130245 | 0.117424 |
| 0.141171 | 0.143065 | 0.125437  | 0.140734 | 0.123106  | 0.143648 | 0.128497 |
| 0.123543 | 0.112908 | 0.0967366 | 0.118444 | 0.0912005 | 0.127768 | 0.114948 |
| 0.140589 | 0.138403 | 0.117279  | 0.13549  | 0.116987  | 0.137821 | 0.141026 |
| 0.143939 | 0.14933  | 0.129079  | 0.140006 | 0.128788  | 0.142337 | 0.128934 |
| 0.129079 | 0.121649 | 0.106061  | 0.127768 | 0.107226  | 0.130099 | 0.121358 |
| 0.134615 | 0.128351 | 0.115385  | 0.126603 | 0.111597  | 0.133887 | 0.13039  |
| 0.151369 | 0.138403 | 0.135344  | 0.143648 | 0.137092  | 0.142774 | 0.136364 |
| 0.13039  | 0.129371 | 0.11757   | 0.122378 | 0.111742  | 0.129079 | 0.13345  |
| 0.145979 | 0.140297 | 0.124126  | 0.13884  | 0.120629  | 0.143502 | 0.133596 |
| 0.139132 | 0.134907 | 0.120775  | 0.136364 | 0.111742  | 0.140443 | 0.132576 |



|           |          |           |           |           |           |           |
|-----------|----------|-----------|-----------|-----------|-----------|-----------|
| 0.120338  | 0.121358 | 0.116259  | 0.127768  | 0.111014  | 0.134178  | 0.128642  |
| 0.133013  | 0.129953 | 0.119318  | 0.135198  | 0.111451  | 0.13549   | 0.129371  |
| 0.136072  | 0.125146 | 0.108683  | 0.130682  | 0.106935  | 0.136218  | 0.128351  |
| 0.13243   | 0.131993 | 0.121649  | 0.138112  | 0.118444  | 0.140443  | 0.132576  |
| 0.128351  | 0.13141  | 0.122523  | 0.129662  | 0.105624  | 0.134324  | 0.134324  |
| 0.127185  | 0.134907 | 0.127185  | 0.131119  | 0.119901  | 0.136364  | 0.128205  |
| 0.133887  | 0.134324 | 0.123106  | 0.13549   | 0.121941  | 0.138112  | 0.129953  |
| 0.136218  | 0.129662 | 0.122523  | 0.13549   | 0.118444  | 0.138986  | 0.120338  |
| 0.142337  | 0.144231 | 0.132721  | 0.145105  | 0.129808  | 0.145979  | 0.1419    |
| 0.129516  | 0.124126 | 0.108246  | 0.132867  | 0.0983392 | 0.13986   | 0.122669  |
| 0.122523  | 0.124417 | 0.111742  | 0.125291  | 0.101253  | 0.128788  | 0.124417  |
| 0.135927  | 0.13345  | 0.11757   | 0.136946  | 0.11961   | 0.13986   | 0.12704   |
| 0.133887  | 0.11859  | 0.108537  | 0.126166  | 0.0980478 | 0.131119  | 0.117716  |
| 0.149184  | 0.143502 | 0.128788  | 0.142337  | 0.126457  | 0.144085  | 0.127477  |
| 0.156177  | 0.156906 | 0.144231  | 0.154866  | 0.142774  | 0.161568  | 0.140006  |
| 0.125     | 0.125728 | 0.124709  | 0.131556  | 0.11655   | 0.133013  | 0.129225  |
| 0.126603  | 0.121212 | 0.119318  | 0.121795  | 0.106206  | 0.127622  | 0.120047  |
| 0.120047  | 0.130099 | 0.124709  | 0.129808  | 0.117133  | 0.132139  | 0.130973  |
| 0.131847  | 0.134615 | 0.119027  | 0.13345   | 0.105041  | 0.13549   | 0.134615  |
| 0.133887  | 0.125874 | 0.121066  | 0.131993  | 0.117861  | 0.134615  | 0.129079  |
| 0.128642  | 0.138403 | 0.122815  | 0.144231  | 0.116696  | 0.146853  | 0.136655  |
| 0.141463  | 0.140152 | 0.121649  | 0.136946  | 0.121358  | 0.142483  | 0.130245  |
| 0.134324  | 0.121649 | 0.112179  | 0.127185  | 0.0996503 | 0.13039   | 0.125728  |
| 0.159091  | 0.161568 | 0.150932  | 0.156323  | 0.150932  | 0.153409  | 0.147873  |
| 0.137238  | 0.128642 | 0.11655   | 0.135344  | 0.108392  | 0.137092  | 0.129225  |
| 0.148601  | 0.141754 | 0.124126  | 0.144959  | 0.122378  | 0.147582  | 0.13447   |
| 0.129516  | 0.124709 | 0.114365  | 0.128497  | 0.101544  | 0.128788  | 0.12704   |
| 0.132139  | 0.13141  | 0.128934  | 0.13345   | 0.118444  | 0.136946  | 0.131993  |
| 0.119318  | 0.128497 | 0.11116   | 0.131993  | 0.102418  | 0.130828  | 0.125291  |
| 0.139569  | 0.137966 | 0.129079  | 0.11553   | 0.124417  | 0.122815  | 0.0962995 |
| 0.0616259 | 0.148893 | 0.13243   | 0.138986  | 0.128934  | 0.141317  | 0.143939  |
| 0.120629  | 0.126603 | 0.115093  | 0.0543415 | 0.109266  | 0.0587121 | 0.124563  |
| 0.133013  | 0.137821 | 0.125437  | 0.0716783 | 0.119318  | 0.0681818 | 0.134324  |
| 0.151807  | 0.142628 | 0.13986   | 0.141754  | 0.135198  | 0.148747  | 0.149621  |
| 0.144814  | 0.146416 | 0.129662  | 0.11553   | 0.129079  | 0.12602   | 0.138258  |
| 0.137966  | 0.116841 | 0.124272  | 0.127914  | 0.113782  | 0.132284  | 0.114802  |
| 0.125874  | 0.13884  | 0.124417  | 0.131556  | 0.127914  | 0.138549  | 0.133887  |
| 0.112471  | 0.113199 | 0.0804196 | 0.109411  | 0.0996503 | 0.120775  | 0.114948  |
| 0.116404  | 0.109848 | 0.0770688 | 0.116259  | 0.104458  | 0.124709  | 0.117424  |
| 0.125     | 0.123397 | 0.111597  | 0.122232  | 0.100816  | 0.130973  | 0.122232  |
| 0.116841  | 0.123106 | 0.109557  | 0.0499709 | 0.10373   | 0.0552156 | 0.120192  |
| 0.121941  | 0.107226 | 0.107372  | 0.120338  | 0.103293  | 0.128497  | 0.122378  |
| 0.110577  | 0.116259 | 0.069493  | 0.085373  | 0.0948427 | 0.0958625 | 0.112471  |
| 0.119318  | 0.123834 | 0.11116   | 0.10373   | 0.092803  | 0.112762  | 0.124126  |

|          |           |           |           |           |           |           |
|----------|-----------|-----------|-----------|-----------|-----------|-----------|
| 0.122669 | 0.122232  | 0.0591492 | 0.121358  | 0.107517  | 0.127768  | 0.126311  |
| 0.120338 | 0.10271   | 0.0906177 | 0.113199  | 0.0920746 | 0.122523  | 0.108829  |
| 0.120629 | 0.12398   | 0.114802  | 0.0523019 | 0.105769  | 0.0639569 | 0.125146  |
| 0.119901 | 0.123543  | 0.110868  | 0.0486597 | 0.102127  | 0.0591492 | 0.118298  |
| 0.133013 | 0.117424  | 0.121066  | 0.123834  | 0.116987  | 0.131119  | 0.123543  |
| 0.213724 | 0.220571  | 0.204691  | 0.208042  | 0.208188  | 0.212704  | 0.215035  |
| 0.140006 | 0.145396  | 0.13243   | 0.0722611 | 0.126894  | 0.0518648 | 0.143357  |
| 0.127914 | 0.131556  | 0.121795  | 0.123689  | 0.115385  | 0.130973  | 0.128351  |
| 0.12398  | 0.128788  | 0.112325  | 0.115967  | 0.106498  | 0.121503  | 0.126166  |
| 0.207314 | 0.211247  | 0.201486  | 0.202214  | 0.2044    | 0.206876  | 0.211247  |
| 0.133304 | 0.122669  | 0.114656  | 0.122378  | 0.113782  | 0.131993  | 0.0967366 |
| 0.132284 | 0.0482226 | 0.114219  | 0.125437  | 0.108683  | 0.133887  | 0.119901  |
| 0.119755 | 0.118444  | 0.114219  | 0.12398   | 0.113345  | 0.128351  | 0.128934  |
| 0.120192 | 0.122378  | 0.0502622 | 0.121212  | 0.109411  | 0.128788  | 0.12296   |
| 0.251311 | 0.253205  | 0.238199  | 0.243881  | 0.244901  | 0.243298  | 0.246795  |
| 0.127914 | 0.120484  | 0.114802  | 0.127477  | 0.11451   | 0.135052  | 0.0525932 |
| 0.127622 | 0.112034  | 0.113345  | 0.116696  | 0.105769  | 0.126603  | 0.120775  |
| 0.11859  | 0.12602   | 0.118007  | 0.119901  | 0.115385  | 0.126603  | 0.127185  |
| 0.110431 | 0.121941  | 0.115385  | 0.119901  | 0.113636  | 0.12602   | 0.125146  |
| 0.132867 | 0.125437  | 0.102273  | 0.129516  | 0.116259  | 0.135927  | 0.0756119 |
| 0.129953 | 0.130099  | 0.105478  | 0.106498  | 0.112471  | 0.112908  | 0.121649  |
| 0.130245 | 0.114365  | 0.11451   | 0.119318  | 0.110723  | 0.131556  | 0.119901  |
| 0.118735 | 0.121503  | 0.10912   | 0.0492424 | 0.104167  | 0.0556527 | 0.118881  |
| 0.11655  | 0.126894  | 0.115385  | 0.119901  | 0.11451   | 0.130682  | 0.123106  |
| 0.117716 | 0.114365  | 0.0463287 | 0.116113  | 0.103147  | 0.125728  | 0.11553   |
| 0.118444 | 0.121795  | 0.107955  | 0.0541958 | 0.0986305 | 0.0646853 | 0.119172  |
| 0.126457 | 0.122523  | 0.0929487 | 0.123106  | 0.0868298 | 0.126311  | 0.112325  |
| 0.060169 | 0.149476  | 0.134761  | 0.141026  | 0.128351  | 0.142191  | 0.146562  |
| 0.133887 | 0.123252  | 0.120192  | 0.128788  | 0.119318  | 0.137238  | 0.0539044 |
| 0.132139 | 0.0533217 | 0.116696  | 0.126748  | 0.116696  | 0.134033  | 0.123252  |
| 0.188083 | 0.190268  | 0.179633  | 0.181818  | 0.180216  | 0.18648   | 0.187646  |
| 0.201777 | 0.205711  | 0.193036  | 0.197844  | 0.197115  | 0.202214  | 0.204545  |
| 0.123689 | 0.122378  | 0.0523019 | 0.122669  | 0.108537  | 0.132867  | 0.124417  |
| 0.114365 | 0.115093  | 0.0458916 | 0.116841  | 0.101253  | 0.122086  | 0.116841  |
| 0.131556 | 0.147727  | 0.122523  | 0.125     | 0.121649  | 0.125     | 0.132576  |
| 0.128642 | 0.11014   | 0.114948  | 0.121503  | 0.10708   | 0.129953  | 0.121503  |
| 0.132576 | 0.121649  | 0.117716  | 0.129225  | 0.114802  | 0.135927  | 0.0549242 |
| 0.122523 | 0.134615  | 0.123689  | 0.12704   | 0.118153  | 0.125     | 0.132867  |
| 0.223048 | 0.225816  | 0.213141  | 0.217366  | 0.216055  | 0.222028  | 0.225233  |
| 0.115822 | 0.115967  | 0.107955  | 0.111597  | 0.103875  | 0.122669  | 0.115967  |
| 0.205711 | 0.209645  | 0.202214  | 0.201777  | 0.20338   | 0.198864  | 0.209062  |
| 0.123689 | 0.10373   | 0.10912   | 0.117716  | 0.0995047 | 0.125     | 0.102564  |
| 0.120629 | 0.106498  | 0.109266  | 0.11961   | 0.105769  | 0.126894  | 0.114948  |
| 0.120192 | 0.120338  | 0.10912   | 0.10373   | 0.107372  | 0.111597  | 0.117716  |

|           |           |           |           |           |           |           |
|-----------|-----------|-----------|-----------|-----------|-----------|-----------|
| 0.114365  | 0.110723  | 0.0575466 | 0.114219  | 0.0989219 | 0.122669  | 0.115385  |
| 0.204254  | 0.211976  | 0.19697   | 0.200321  | 0.200466  | 0.202652  | 0.205274  |
| 0.126457  | 0.136801  | 0.122669  | 0.0587121 | 0.114219  | 0.0592949 | 0.135052  |
| 0.122378  | 0.112034  | 0.114219  | 0.119901  | 0.106061  | 0.130099  | 0.111116  |
| 0.125874  | 0.128642  | 0.115093  | 0.0525932 | 0.108974  | 0.0496795 | 0.128059  |
| 0.130536  | 0.121358  | 0.119755  | 0.121649  | 0.105769  | 0.123689  | 0.128642  |
| 0.120921  | 0.116404  | 0.0474942 | 0.115239  | 0.102564  | 0.127477  | 0.116987  |
| 0.122523  | 0.105186  | 0.115239  | 0.118298  | 0.105332  | 0.126166  | 0.104312  |
| 0.128059  | 0.115967  | 0.114656  | 0.120338  | 0.111742  | 0.128205  | 0.125     |
| 0.133013  | 0.0512821 | 0.117861  | 0.128788  | 0.113782  | 0.135198  | 0.124126  |
| 0.111451  | 0.119172  | 0.102418  | 0.0495338 | 0.0960082 | 0.0600233 | 0.117716  |
| 0.125583  | 0.113199  | 0.118298  | 0.119318  | 0.106643  | 0.130682  | 0.118735  |
| 0.186917  | 0.189685  | 0.177593  | 0.182692  | 0.180216  | 0.185897  | 0.188811  |
| 0.114219  | 0.125728  | 0.120047  | 0.121358  | 0.117424  | 0.128934  | 0.128934  |
| 0.0528846 | 0.130828  | 0.118444  | 0.125     | 0.113491  | 0.131993  | 0.129079  |
| 0.109557  | 0.124272  | 0.112762  | 0.116113  | 0.107809  | 0.124272  | 0.128351  |
| 0.133304  | 0.12296   | 0.119027  | 0.127331  | 0.114365  | 0.134615  | 0.0582751 |
| 0.119901  | 0.126457  | 0.114073  | 0.0512821 | 0.105915  | 0.0539044 | 0.125291  |
| 0.128642  | 0.106935  | 0.117279  | 0.123543  | 0.109994  | 0.127914  | 0.109848  |
| 0.123834  | 0.114073  | 0.112179  | 0.111116  | 0.099359  | 0.120775  | 0.101544  |
| 0.136364  | 0.119901  | 0.121503  | 0.125728  | 0.113928  | 0.132721  | 0.126894  |
| 0.0511364 | 0.129371  | 0.109703  | 0.116841  | 0.104167  | 0.128497  | 0.126457  |
| 0.112908  | 0.118298  | 0.111451  | 0.111305  | 0.110577  | 0.124126  | 0.120629  |
| 0.12296   | 0.121649  | 0.0559441 | 0.118444  | 0.105478  | 0.126311  | 0.118444  |
| 0.117861  | 0.120047  | 0.113199  | 0.12296   | 0.109411  | 0.132284  | 0.126457  |
| 0.131119  | 0.133013  | 0.125     | 0.133887  | 0.125     | 0.136218  | 0.138549  |
| 0.119755  | 0.115822  | 0.106935  | 0.12398   | 0.108392  | 0.131556  | 0.050845  |
| 0.134178  | 0.141317  | 0.128642  | 0.0673077 | 0.122815  | 0.0512821 | 0.141317  |
| 0.118153  | 0.113928  | 0.043852  | 0.11451   | 0.101544  | 0.127331  | 0.114802  |
| 0.110577  | 0.121795  | 0.111451  | 0.111014  | 0.107955  | 0.118298  | 0.120921  |
| 0.121503  | 0.123106  | 0.112179  | 0.0662879 | 0.10373   | 0.0721154 | 0.122815  |
| 0.135198  | 0.120192  | 0.122086  | 0.125146  | 0.115967  | 0.136509  | 0.129808  |
| 0.191725  | 0.193328  | 0.183858  | 0.184003  | 0.182984  | 0.188083  | 0.189248  |
| 0.116113  | 0.112179  | 0.109994  | 0.114802  | 0.101544  | 0.128788  | 0.111014  |
| 0.104167  | 0.11014   | 0.103293  | 0.102855  | 0.0910548 | 0.108392  | 0.108392  |
| 0.13039   | 0.0463287 | 0.117861  | 0.126457  | 0.112908  | 0.134033  | 0.122669  |
| 0.17905   | 0.179779  | 0.1706    | 0.170455  | 0.156614  | 0.176573  | 0.180944  |
| 0.140734  | 0.129808  | 0.127622  | 0.139423  | 0.129371  | 0.144668  | 0.0662879 |
| 0.153846  | 0.137966  | 0.138112  | 0.150204  | 0.133741  | 0.153992  | 0.0729895 |
| 0.0657051 | 0.151224  | 0.134761  | 0.140152  | 0.129225  | 0.143357  | 0.146562  |
| 0.121649  | 0.114219  | 0.106789  | 0.118007  | 0.104167  | 0.129079  | 0.048951  |
| 0.122086  | 0.126894  | 0.113054  | 0.0490967 | 0.107226  | 0.0534674 | 0.124563  |
| 0.209353  | 0.213287  | 0.200903  | 0.203089  | 0.201777  | 0.206585  | 0.206294  |
| 0.124563  | 0.127331  | 0.110577  | 0.119172  | 0.111742  | 0.123252  | 0.121212  |

|           |           |           |           |           |           |           |
|-----------|-----------|-----------|-----------|-----------|-----------|-----------|
| 0.12296   | 0.130973  | 0.119464  | 0.0540501 | 0.113345  | 0.0525932 | 0.129225  |
| 0.120338  | 0.114365  | 0.11451   | 0.117279  | 0.104021  | 0.130099  | 0.112617  |
| 0.166958  | 0.174679  | 0.156177  | 0.147582  | 0.155886  | 0.15574   | 0.171766  |
| 0.116259  | 0.117861  | 0.102273  | 0.105041  | 0.0929487 | 0.118153  | 0.113782  |
| 0.140006  | 0.151515  | 0.135344  | 0.143357  | 0.138549  | 0.147145  | 0.146562  |
| 0.132139  | 0.115967  | 0.102127  | 0.123543  | 0.105624  | 0.131702  | 0.119755  |
| 0.189831  | 0.190851  | 0.176719  | 0.183275  | 0.18109   | 0.18648   | 0.187937  |
| 0.128351  | 0.116841  | 0.111451  | 0.123834  | 0.110577  | 0.133159  | 0.0539044 |
| 0.112034  | 0.111597  | 0.0983392 | 0.10373   | 0.0412296 | 0.114219  | 0.111014  |
| 0.111888  | 0.119027  | 0.113636  | 0.110577  | 0.10169   | 0.121941  | 0.11961   |
| 0.125146  | 0.107226  | 0.111451  | 0.11655   | 0.10708   | 0.124417  | 0.11451   |
| 0.129808  | 0.0486597 | 0.112325  | 0.122378  | 0.110868  | 0.131993  | 0.120338  |
| 0.115239  | 0.122669  | 0.109411  | 0.120047  | 0.11116   | 0.129079  | 0.119464  |
| 0.116259  | 0.114948  | 0.0439977 | 0.114948  | 0.0981935 | 0.124563  | 0.113199  |
| 0.188083  | 0.192308  | 0.179924  | 0.183566  | 0.18109   | 0.187354  | 0.188228  |
| 0.118007  | 0.121066  | 0.115093  | 0.120192  | 0.107809  | 0.130682  | 0.128642  |
| 0.124854  | 0.113636  | 0.100379  | 0.106061  | 0.0913462 | 0.113636  | 0.117133  |
| 0.208625  | 0.210519  | 0.200466  | 0.203817  | 0.202506  | 0.210519  | 0.209645  |
| 0.113345  | 0.124854  | 0.117424  | 0.120484  | 0.115676  | 0.129808  | 0.128059  |
| 0.116696  | 0.113345  | 0.0473485 | 0.117424  | 0.10067   | 0.127914  | 0.113345  |
| 0.112617  | 0.110723  | 0.0412296 | 0.111888  | 0.0977564 | 0.123252  | 0.114219  |
| 0.131119  | 0.144668  | 0.125874  | 0.0817308 | 0.123834  | 0.0657051 | 0.139423  |
| 0.185897  | 0.191871  | 0.176573  | 0.182838  | 0.178904  | 0.1875    | 0.188957  |
| 0.130973  | 0.110431  | 0.118153  | 0.121503  | 0.109703  | 0.131119  | 0.123252  |
| 0.126894  | 0.129371  | 0.119901  | 0.128788  | 0.121358  | 0.13549   | 0.136655  |
| 0.116987  | 0.114219  | 0.0426865 | 0.117716  | 0.0995047 | 0.12704   | 0.114219  |
| 0.116987  | 0.111305  | 0.046183  | 0.111597  | 0.0948427 | 0.125291  | 0.115385  |
| 0.117133  | 0.113199  | 0.044289  | 0.116987  | 0.0955711 | 0.126311  | 0.11553   |
| 0.117279  | 0.122669  | 0.108246  | 0.0498252 | 0.099796  | 0.0632284 | 0.120338  |
| 0.119172  | 0.103875  | 0.087704  | 0.110868  | 0.0891608 | 0.121649  | 0.10271   |
| 0.129079  | 0.121649  | 0.115676  | 0.128642  | 0.114802  | 0.139132  | 0.0482226 |
| 0.113054  | 0.137092  | 0.129662  | 0.121649  | 0.117133  | 0.122232  | 0.138549  |
| 0.127331  | 0.119318  | 0.110723  | 0.127768  | 0.112179  | 0.136801  | 0.0540501 |
| 0.136218  | 0.130245  | 0.123689  | 0.125583  | 0.110868  | 0.129662  | 0.130828  |
| 0.194347  | 0.195076  | 0.181818  | 0.186043  | 0.187063  | 0.191579  | 0.192453  |
| 0.113782  | 0.115385  | 0.108246  | 0.119464  | 0.109994  | 0.130828  | 0.123543  |
| 0.127331  | 0.133596  | 0.120629  | 0.0604604 | 0.11655   | 0.048514  | 0.134178  |
| 0.114365  | 0.111014  | 0.0441434 | 0.115093  | 0.0995047 | 0.123834  | 0.112471  |
| 0.118298  | 0.103875  | 0.0871212 | 0.112908  | 0.0917832 | 0.122232  | 0.105332  |
| 0.119464  | 0.120192  | 0.106643  | 0.115239  | 0.109848  | 0.124854  | 0.108829  |
| 0.133596  | 0.109557  | 0.115822  | 0.11859   | 0.111742  | 0.130536  | 0.121212  |
| 0.128934  | 0.135198  | 0.120484  | 0.125874  | 0.120775  | 0.123252  | 0.127331  |
| 0.0591492 | 0.126603  | 0.110431  | 0.110286  | 0.101107  | 0.124272  | 0.119901  |
| 0.126166  | 0.108246  | 0.101981  | 0.112617  | 0.0979021 | 0.127477  | 0.11116   |

|           |           |           |           |           |           |           |
|-----------|-----------|-----------|-----------|-----------|-----------|-----------|
| 0.121941  | 0.103147  | 0.099796  | 0.110723  | 0.0910548 | 0.120629  | 0.109848  |
| 0.117133  | 0.10912   | 0.0964452 | 0.107955  | 0.0603147 | 0.118153  | 0.11116   |
| 0.129516  | 0.103147  | 0.112034  | 0.118298  | 0.100087  | 0.125874  | 0.101981  |
| 0.138695  | 0.125437  | 0.123834  | 0.13447   | 0.118881  | 0.137675  | 0.0595862 |
| 0.128934  | 0.109557  | 0.114656  | 0.121212  | 0.106789  | 0.13141   | 0.122086  |
| 0.118298  | 0.11961   | 0.106061  | 0.0520105 | 0.0999417 | 0.0610431 | 0.117279  |
| 0.125874  | 0.105041  | 0.111888  | 0.113782  | 0.104604  | 0.127477  | 0.11553   |
| 0.114073  | 0.111305  | 0.0473485 | 0.111014  | 0.0965909 | 0.125     | 0.113928  |
| 0.115385  | 0.110868  | 0.109266  | 0.112908  | 0.0976107 | 0.125728  | 0.10708   |
| 0.11859   | 0.117279  | 0.044289  | 0.11961   | 0.102273  | 0.126603  | 0.116404  |
| 0.111014  | 0.108829  | 0.105769  | 0.114073  | 0.101981  | 0.123106  | 0.120484  |
| 0.0506993 | 0.12398   | 0.111014  | 0.115822  | 0.102273  | 0.125728  | 0.122815  |
| 0.128788  | 0.0505536 | 0.108683  | 0.120775  | 0.106061  | 0.126603  | 0.114365  |
| 0.122815  | 0.109557  | 0.0922203 | 0.111014  | 0.0916375 | 0.123834  | 0.106935  |
| 0.115967  | 0.110286  | 0.0477855 | 0.112908  | 0.102273  | 0.125437  | 0.112908  |
| 0.117133  | 0.123106  | 0.115385  | 0.112617  | 0.108683  | 0.121941  | 0.122523  |
| 0.123106  | 0.120338  | 0.108246  | 0.109557  | 0.095134  | 0.119755  | 0.121503  |
| 0.112762  | 0.114365  | 0.0979021 | 0.115822  | 0.0815851 | 0.121358  | 0.116696  |
| 0.114802  | 0.113491  | 0.0480769 | 0.109703  | 0.100816  | 0.123689  | 0.114365  |
| 0.116987  | 0.122086  | 0.111451  | 0.0472028 | 0.105041  | 0.0512821 | 0.122086  |
| 0.124563  | 0.103147  | 0.111451  | 0.119172  | 0.103001  | 0.127914  | 0.10373   |
| 0.120484  | 0.125291  | 0.111451  | 0.0492424 | 0.104749  | 0.0588578 | 0.122086  |
| 0.126894  | 0.0501166 | 0.109994  | 0.121212  | 0.106206  | 0.13141   | 0.115385  |
| 0.123106  | 0.108683  | 0.095134  | 0.116841  | 0.0948427 | 0.127331  | 0.109557  |
| 0.106789  | 0.112762  | 0.0971737 | 0.106935  | 0.100962  | 0.120047  | 0.111597  |
| 0.120338  | 0.10708   | 0.109266  | 0.112325  | 0.0964452 | 0.126311  | 0.105332  |
| 0.122815  | 0.125     | 0.114948  | 0.0504079 | 0.106206  | 0.0582751 | 0.124709  |
| 0.122523  | 0.122378  | 0.122232  | 0.112762  | 0.0863928 | 0.123543  | 0.124126  |
| 0.11859   | 0.118444  | 0.103438  | 0.101836  | 0.092366  | 0.110868  | 0.113491  |
| 0.19289   | 0.194202  | 0.18211   | 0.186626  | 0.185315  | 0.193328  | 0.191288  |
| 0.159091  | 0.167395  | 0.157925  | 0.149913  | 0.149184  | 0.155449  | 0.165064  |
| 0.129079  | 0.11757   | 0.113928  | 0.12602   | 0.109266  | 0.133013  | 0.0505536 |
| 0.121358  | 0.119172  | 0.115239  | 0.114219  | 0.0995047 | 0.124126  | 0.123834  |
| 0.153118  | 0.142191  | 0.140589  | 0.151515  | 0.139423  | 0.155594  | 0.0754662 |
| 0.11859   | 0.124563  | 0.116841  | 0.120484  | 0.115967  | 0.132721  | 0.126603  |
| 0.116987  | 0.124126  | 0.0785256 | 0.120047  | 0.110868  | 0.129079  | 0.120921  |
| 0.120047  | 0.119318  | 0.0789627 | 0.108829  | 0.0929487 | 0.121358  | 0.114948  |
| 0.122086  | 0.119318  | 0.0912005 | 0.11961   | 0.0850816 | 0.125146  | 0.11116   |
| 0.124709  | 0.121941  | 0.1081    | 0.109994  | 0.0984848 | 0.120484  | 0.125728  |
| 0.197115  | 0.206294  | 0.1875    | 0.194056  | 0.192745  | 0.199883  | 0.200175  |
| 0.133741  | 0.11553   | 0.119172  | 0.121649  | 0.111597  | 0.137092  | 0.12398   |
| 0.123689  | 0.119172  | 0.112325  | 0.0751748 | 0.106206  | 0.083042  | 0.119464  |
| 0.112908  | 0.113928  | 0.0598776 | 0.112762  | 0.090472  | 0.122669  | 0.113054  |
| 0.125     | 0.116113  | 0.11451   | 0.116987  | 0.0999417 | 0.128934  | 0.120775  |

|           |           |           |           |           |           |           |
|-----------|-----------|-----------|-----------|-----------|-----------|-----------|
| 0.178759  | 0.186189  | 0.173805  | 0.175699  | 0.169726  | 0.18211   | 0.183566  |
| 0.243444  | 0.248252  | 0.236451  | 0.23951   | 0.241113  | 0.24155   | 0.244464  |
| 0.0528846 | 0.129662  | 0.111451  | 0.118298  | 0.105624  | 0.126748  | 0.121212  |
| 0.124854  | 0.121212  | 0.107663  | 0.109848  | 0.0968823 | 0.121212  | 0.121212  |
| 0.126894  | 0.115967  | 0.112325  | 0.125     | 0.110577  | 0.134324  | 0.0524476 |
| 0.126748  | 0.0514277 | 0.106352  | 0.119027  | 0.104021  | 0.131265  | 0.113491  |
| 0.125437  | 0.106935  | 0.113491  | 0.11451   | 0.101836  | 0.126166  | 0.118881  |
| 0.110431  | 0.117861  | 0.106935  | 0.111742  | 0.101981  | 0.121941  | 0.112908  |
| 0.11757   | 0.118881  | 0.0744464 | 0.085373  | 0.100379  | 0.0926573 | 0.115093  |
| 0.126894  | 0.110431  | 0.113199  | 0.11655   | 0.10708   | 0.125874  | 0.118007  |
| 0.118007  | 0.120484  | 0.0804196 | 0.0747378 | 0.101981  | 0.0817308 | 0.112617  |
| 0.11757   | 0.121503  | 0.103293  | 0.117133  | 0.0826049 | 0.129079  | 0.120338  |
| 0.119755  | 0.109703  | 0.0906177 | 0.112908  | 0.0952797 | 0.124563  | 0.10708   |
| 0.0458916 | 0.128788  | 0.109703  | 0.118298  | 0.107663  | 0.126748  | 0.123543  |
| 0.12296   | 0.122815  | 0.11014   | 0.0502622 | 0.104604  | 0.0610431 | 0.121358  |
| 0.108683  | 0.109994  | 0.100524  | 0.103875  | 0.0958625 | 0.112034  | 0.112617  |
| 0.120629  | 0.126603  | 0.115385  | 0.129516  | 0.107809  | 0.129516  | 0.130973  |
| 0.140734  | 0.0595862 | 0.12704   | 0.136509  | 0.123252  | 0.140297  | 0.129516  |
| 0.116113  | 0.112179  | 0.046183  | 0.113054  | 0.100379  | 0.125874  | 0.114219  |
| 0.122086  | 0.121358  | 0.0839161 | 0.123689  | 0.104021  | 0.126894  | 0.108829  |
| 0.130245  | 0.127477  | 0.0600233 | 0.128934  | 0.113928  | 0.133304  | 0.129516  |
| 0.209062  | 0.210082  | 0.196824  | 0.202797  | 0.198864  | 0.20338   | 0.207168  |
| 0.0606061 | 0.116404  | 0.104604  | 0.106206  | 0.0944056 | 0.11961   | 0.114656  |
| 0.124272  | 0.104312  | 0.0933858 | 0.115676  | 0.0945513 | 0.123834  | 0.106352  |
| 0.119318  | 0.115093  | 0.110577  | 0.119172  | 0.10912   | 0.13141   | 0.124126  |
| 0.112179  | 0.121649  | 0.119172  | 0.116987  | 0.114219  | 0.124563  | 0.125437  |
| 0.125291  | 0.112325  | 0.112179  | 0.112908  | 0.0973193 | 0.121066  | 0.116987  |
| 0.196387  | 0.201486  | 0.186189  | 0.191579  | 0.192016  | 0.198281  | 0.198864  |
| 0.12398   | 0.127331  | 0.113491  | 0.0501166 | 0.106498  | 0.0617716 | 0.125874  |
| 0.115676  | 0.110868  | 0.0445804 | 0.112034  | 0.099359  | 0.122815  | 0.110868  |
| 0.12398   | 0.121212  | 0.116404  | 0.121795  | 0.0989219 | 0.126748  | 0.11655   |
| 0.124854  | 0.0492424 | 0.103875  | 0.116259  | 0.102418  | 0.125583  | 0.113054  |
| 0.119027  | 0.127622  | 0.112034  | 0.0518648 | 0.10271   | 0.0582751 | 0.124126  |
| 0.109994  | 0.115676  | 0.100087  | 0.0734266 | 0.0936772 | 0.085373  | 0.113928  |
| 0.120484  | 0.119172  | 0.104749  | 0.116841  | 0.0820221 | 0.126457  | 0.11655   |
| 0.111742  | 0.118298  | 0.112908  | 0.115385  | 0.109703  | 0.127622  | 0.120921  |
| 0.196387  | 0.198572  | 0.18648   | 0.188957  | 0.190851  | 0.197698  | 0.196824  |
| 0.110868  | 0.118881  | 0.103293  | 0.0518648 | 0.0919289 | 0.0652681 | 0.115676  |
| 0.195804  | 0.198572  | 0.182692  | 0.184295  | 0.186772  | 0.192745  | 0.190705  |
| 0.192162  | 0.195513  | 0.182547  | 0.185023  | 0.184586  | 0.190268  | 0.189977  |
| 0.136509  | 0.0559441 | 0.11961   | 0.129662  | 0.11757   | 0.136655  | 0.127331  |
| 0.121941  | 0.134615  | 0.124272  | 0.128497  | 0.123397  | 0.133741  | 0.129953  |
| 0.110577  | 0.115676  | 0.100962  | 0.107809  | 0.0756119 | 0.11655   | 0.112471  |
| 0.114219  | 0.115239  | 0.10373   | 0.0552156 | 0.0935315 | 0.0692016 | 0.11116   |

|          |           |           |           |           |           |          |
|----------|-----------|-----------|-----------|-----------|-----------|----------|
| 0.119318 | 0.122378  | 0.107955  | 0.0518648 | 0.100087  | 0.0614802 | 0.11859  |
| 0.118735 | 0.113345  | 0.0479312 | 0.11451   | 0.101836  | 0.129371  | 0.114802 |
| 0.124272 | 0.101107  | 0.110286  | 0.110431  | 0.100379  | 0.122669  | 0.112762 |
| 0.127768 | 0.103438  | 0.109994  | 0.115385  | 0.106498  | 0.126748  | 0.120629 |
| 0        | 0.128934  | 0.113345  | 0.11961   | 0.106935  | 0.129225  | 0.127185 |
| 0.128934 | 0         | 0.112034  | 0.12296   | 0.108829  | 0.133741  | 0.119464 |
| 0.113345 | 0.112034  | 0         | 0.10708   | 0.0976107 | 0.120484  | 0.110868 |
| 0.11961  | 0.12296   | 0.10708   | 0         | 0.103875  | 0.0614802 | 0.121795 |
| 0.106935 | 0.108829  | 0.0976107 | 0.103875  | 0         | 0.112908  | 0.106206 |
| 0.129225 | 0.133741  | 0.120484  | 0.0614802 | 0.112908  | 0         | 0.131119 |
| 0.127185 | 0.119464  | 0.110868  | 0.121795  | 0.106206  | 0.131119  | 0        |
| 0.132576 | 0.136218  | 0.123834  | 0.0630828 | 0.118881  | 0.0511364 | 0.13447  |
| 0.255536 | 0.261218  | 0.250291  | 0.253351  | 0.252331  | 0.253934  | 0.257721 |
| 0.130245 | 0.123397  | 0.124709  | 0.129516  | 0.114802  | 0.134761  | 0.124563 |
| 0.131847 | 0.120921  | 0.122232  | 0.129662  | 0.119318  | 0.13141   | 0.128497 |
| 0.213578 | 0.221591  | 0.206002  | 0.209936  | 0.211538  | 0.211976  | 0.21722  |
| 0.13243  | 0.116841  | 0.118735  | 0.13141   | 0.11553   | 0.136072  | 0.131119 |
| 0.227127 | 0.233392  | 0.219551  | 0.220862  | 0.224213  | 0.223193  | 0.230769 |
| 0.124126 | 0.116696  | 0.116259  | 0.121066  | 0.107226  | 0.126603  | 0.116696 |
| 0.130099 | 0.125     | 0.0590035 | 0.126748  | 0.110868  | 0.131702  | 0.127622 |
| 0.112908 | 0.116841  | 0.112034  | 0.112179  | 0.106498  | 0.122378  | 0.120921 |
| 0.136218 | 0.0533217 | 0.114073  | 0.12704   | 0.114073  | 0.13549   | 0.123834 |
| 0.199738 | 0.203963  | 0.192453  | 0.19493   | 0.194784  | 0.199592  | 0.199592 |
| 0.130099 | 0.132867  | 0.119901  | 0.0603147 | 0.118153  | 0.0515734 | 0.133159 |
| 0.119901 | 0.125291  | 0.114365  | 0.0495338 | 0.103875  | 0.0603147 | 0.123252 |
| 0.226981 | 0.228584  | 0.215618  | 0.221591  | 0.22028   | 0.223339  | 0.226253 |
| 0.127477 | 0.112471  | 0.112908  | 0.11859   | 0.110577  | 0.131993  | 0.122669 |
| 0.195804 | 0.199446  | 0.185897  | 0.191288  | 0.191725  | 0.197698  | 0.197115 |
| 0.127331 | 0.11116   | 0.116841  | 0.119901  | 0.111888  | 0.13039   | 0.124272 |
| 0.115093 | 0.114656  | 0.0483683 | 0.115239  | 0.101107  | 0.126603  | 0.115822 |
| 0.129808 | 0.119755  | 0.0983392 | 0.124709  | 0.103001  | 0.126457  | 0.120047 |
| 0.140006 | 0.0556527 | 0.120192  | 0.133159  | 0.120775  | 0.136946  | 0.129953 |
| 0.117133 | 0.120775  | 0.108392  | 0.110286  | 0.0944056 | 0.122523  | 0.112617 |
| 0.160256 | 0.163899  | 0.147145  | 0.157197  | 0.14831   | 0.163316  | 0.158654 |
| 0.115385 | 0.120192  | 0.108974  | 0.0429779 | 0.0979021 | 0.0549242 | 0.119318 |
| 0.113636 | 0.124854  | 0.118007  | 0.118444  | 0.115093  | 0.129516  | 0.123397 |
| 0.12704  | 0.113491  | 0.111014  | 0.122523  | 0.112471  | 0.129808  | 0.12602  |
| 0.120338 | 0.129516  | 0.126457  | 0.121649  | 0.116259  | 0.123106  | 0.131847 |
| 0.193328 | 0.196387  | 0.186334  | 0.189394  | 0.186043  | 0.193765  | 0.193182 |
| 0.11655  | 0.110868  | 0.0439977 | 0.113491  | 0.101399  | 0.124272  | 0.113782 |
| 0.132721 | 0.0600233 | 0.113199  | 0.121212  | 0.109703  | 0.13549   | 0.119464 |
| 0.124709 | 0.106206  | 0.111305  | 0.118153  | 0.100233  | 0.126894  | 0.103001 |
| 0.131265 | 0.112762  | 0.116113  | 0.120338  | 0.110577  | 0.127914  | 0.124417 |
| 0.121795 | 0.119901  | 0.0512821 | 0.118735  | 0.106643  | 0.124272  | 0.122523 |

|           |           |           |           |           |           |           |
|-----------|-----------|-----------|-----------|-----------|-----------|-----------|
| 0.251311  | 0.257576  | 0.247815  | 0.249126  | 0.250146  | 0.248834  | 0.257284  |
| 0.128788  | 0.111742  | 0.0979021 | 0.11757   | 0.101107  | 0.125728  | 0.113491  |
| 0.114802  | 0.115822  | 0.0891608 | 0.116987  | 0.104312  | 0.129516  | 0.12398   |
| 0.182401  | 0.184586  | 0.177739  | 0.176428  | 0.166667  | 0.174097  | 0.179341  |
| 0.187354  | 0.188083  | 0.176865  | 0.177593  | 0.177448  | 0.1875    | 0.183712  |
| 0.0556527 | 0.128351  | 0.110723  | 0.116696  | 0.106061  | 0.128059  | 0.124272  |
| 0.120484  | 0.122086  | 0.109703  | 0.0492424 | 0.104458  | 0.0608974 | 0.122378  |
| 0.123397  | 0.0512821 | 0.10708   | 0.115967  | 0.107372  | 0.126748  | 0.116259  |
| 0.138112  | 0.14729   | 0.134615  | 0.074155  | 0.130245  | 0.0540501 | 0.145251  |
| 0.0512821 | 0.125728  | 0.111597  | 0.114656  | 0.100524  | 0.12602   | 0.120775  |
| 0.0534674 | 0.129953  | 0.109994  | 0.118298  | 0.107372  | 0.129079  | 0.124709  |
| 0.131702  | 0.118444  | 0.121212  | 0.125437  | 0.114802  | 0.136218  | 0.126894  |
| 0.119755  | 0.121649  | 0.1081    | 0.0534674 | 0.105478  | 0.0520105 | 0.119027  |
| 0.127768  | 0.131702  | 0.121066  | 0.0568182 | 0.114948  | 0.0501166 | 0.133741  |
| 0.130245  | 0.115239  | 0.111597  | 0.115822  | 0.1081    | 0.126603  | 0.121066  |
| 0.135052  | 0.0547786 | 0.114656  | 0.130536  | 0.11553   | 0.134033  | 0.125291  |
| 0.143648  | 0.0692016 | 0.129079  | 0.143794  | 0.129953  | 0.146125  | 0.138258  |
| 0.132721  | 0.115385  | 0.100962  | 0.121795  | 0.104749  | 0.128497  | 0.118298  |
| 0.142191  | 0.0592949 | 0.123834  | 0.134761  | 0.122669  | 0.13884   | 0.128934  |
| 0.138986  | 0.123106  | 0.127622  | 0.128642  | 0.120338  | 0.137675  | 0.130099  |
| 0.204108  | 0.209207  | 0.196241  | 0.197552  | 0.201195  | 0.204254  | 0.206294  |
| 0.129371  | 0.123397  | 0.104604  | 0.127477  | 0.0999417 | 0.136801  | 0.120192  |
| 0.191142  | 0.194202  | 0.182692  | 0.184878  | 0.185606  | 0.191288  | 0.191579  |
| 0.115676  | 0.11553   | 0.110431  | 0.111742  | 0.107517  | 0.12398   | 0.120484  |
| 0.126457  | 0.124272  | 0.0574009 | 0.122523  | 0.108392  | 0.13039   | 0.126603  |
| 0.129371  | 0.121066  | 0.11451   | 0.125146  | 0.111597  | 0.131556  | 0.0590035 |
| 0.121649  | 0.117133  | 0.10708   | 0.122378  | 0.103001  | 0.129079  | 0.0504079 |
| 0.119755  | 0.125146  | 0.115676  | 0.0511364 | 0.108392  | 0.0525932 | 0.126603  |
| 0.12296   | 0.126311  | 0.117424  | 0.0543415 | 0.109557  | 0.0520105 | 0.124854  |
| 0.120629  | 0.11553   | 0.0486597 | 0.117279  | 0.10373   | 0.128059  | 0.121358  |
| 0.11116   | 0.123834  | 0.112325  | 0.115676  | 0.11116   | 0.128205  | 0.125291  |
| 0.131556  | 0.122086  | 0.116404  | 0.124709  | 0.114073  | 0.131119  | 0.0565268 |
| 0.1419    | 0.126894  | 0.130828  | 0.133304  | 0.120921  | 0.140297  | 0.133596  |
| 0.247086  | 0.254516  | 0.243881  | 0.244318  | 0.244172  | 0.243735  | 0.249272  |
| 0.118881  | 0.11553   | 0.0463287 | 0.119318  | 0.102855  | 0.129808  | 0.120192  |
| 0.184878  | 0.184732  | 0.173514  | 0.176865  | 0.178176  | 0.185606  | 0.182401  |
| 0.187646  | 0.18954   | 0.18007   | 0.179341  | 0.181527  | 0.188374  | 0.188083  |
| 0.118153  | 0.125583  | 0.107372  | 0.121795  | 0.105332  | 0.136364  | 0.121503  |
| 0.125437  | 0.11014   | 0.095134  | 0.115385  | 0.0980478 | 0.124126  | 0.108683  |
| 0.128059  | 0.123252  | 0.0534674 | 0.123543  | 0.107663  | 0.130536  | 0.126748  |
| 0.117279  | 0.119172  | 0.106498  | 0.0521562 | 0.0971737 | 0.0617716 | 0.11451   |
| 0.121503  | 0.119318  | 0.0926573 | 0.115822  | 0.0836247 | 0.124272  | 0.110286  |
| 0.12704   | 0.109703  | 0.114802  | 0.119027  | 0.109848  | 0.131265  | 0.120192  |
| 0.127185  | 0.125     | 0.109994  | 0.0763403 | 0.105915  | 0.0748834 | 0.122086  |



|           |           |           |           |           |           |           |
|-----------|-----------|-----------|-----------|-----------|-----------|-----------|
| 0.132139  | 0.134324  | 0.123689  | 0.0620629 | 0.115822  | 0.0509907 | 0.132867  |
| 0.115967  | 0.116404  | 0.0474942 | 0.116113  | 0.0996503 | 0.126603  | 0.116404  |
| 0.130245  | 0.133596  | 0.119755  | 0.0613345 | 0.115093  | 0.0517191 | 0.131265  |
| 0.118444  | 0.11014   | 0.113491  | 0.120921  | 0.107663  | 0.128788  | 0.117424  |
| 0.134761  | 0.121795  | 0.117279  | 0.133159  | 0.11757   | 0.134907  | 0.0565268 |
| 0.128205  | 0.0514277 | 0.112762  | 0.121941  | 0.111597  | 0.129225  | 0.117861  |
| 0.141754  | 0.124417  | 0.128351  | 0.132284  | 0.121941  | 0.137529  | 0.134324  |
| 0.121795  | 0.126603  | 0.109266  | 0.124563  | 0.0903263 | 0.130682  | 0.128642  |
| 0.11859   | 0.115822  | 0.0556527 | 0.116987  | 0.101981  | 0.126311  | 0.111742  |
| 0.129079  | 0.13039   | 0.119755  | 0.129808  | 0.121795  | 0.133304  | 0.139423  |
| 0.184003  | 0.18852   | 0.175262  | 0.178613  | 0.175845  | 0.185023  | 0.185606  |
| 0.132867  | 0.137383  | 0.124417  | 0.0654138 | 0.122669  | 0.050845  | 0.137966  |
| 0.122378  | 0.125728  | 0.113928  | 0.0505536 | 0.104604  | 0.0525932 | 0.123397  |
| 0.126894  | 0.117133  | 0.113491  | 0.125874  | 0.109994  | 0.135781  | 0.0469114 |
| 0.119464  | 0.113199  | 0.099359  | 0.116404  | 0.0990676 | 0.124854  | 0.050845  |
| 0.128351  | 0.0495338 | 0.113199  | 0.123834  | 0.10708   | 0.131702  | 0.119755  |
| 0.13345   | 0.0511364 | 0.118881  | 0.130099  | 0.113345  | 0.136509  | 0.123397  |
| 0.190122  | 0.193473  | 0.181672  | 0.18648   | 0.181964  | 0.189977  | 0.191725  |
| 0.121649  | 0.125291  | 0.110577  | 0.076049  | 0.0895979 | 0.0763403 | 0.124709  |
| 0.114802  | 0.115239  | 0.102273  | 0.100379  | 0.0812937 | 0.113491  | 0.114073  |
| 0.123252  | 0.127185  | 0.115676  | 0.0537587 | 0.111014  | 0.053176  | 0.128642  |
| 0.188374  | 0.19697   | 0.178467  | 0.18211   | 0.184878  | 0.189394  | 0.194347  |
| 0.120047  | 0.105915  | 0.0920746 | 0.112617  | 0.0920746 | 0.122232  | 0.105041  |
| 0.135344  | 0.116259  | 0.121941  | 0.123834  | 0.115239  | 0.136655  | 0.124417  |
| 0.120484  | 0.12704   | 0.113491  | 0.0524476 | 0.110868  | 0.0553613 | 0.124709  |
| 0.0547786 | 0.118735  | 0.105478  | 0.11116   | 0.100233  | 0.122523  | 0.120192  |
| 0.187063  | 0.191871  | 0.175117  | 0.178467  | 0.18007   | 0.184295  | 0.185752  |
| 0.130245  | 0.113199  | 0.11859   | 0.116987  | 0.112179  | 0.127477  | 0.121649  |
| 0.115093  | 0.112617  | 0.108974  | 0.109994  | 0.10169   | 0.117279  | 0.121941  |
| 0.120921  | 0.110577  | 0.0949883 | 0.112325  | 0.0926573 | 0.124563  | 0.107955  |
| 0.126457  | 0.124563  | 0.114802  | 0.109411  | 0.106352  | 0.12398   | 0.11116   |
| 0.113782  | 0.122086  | 0.116113  | 0.120047  | 0.111451  | 0.130245  | 0.125583  |
| 0.135927  | 0.121795  | 0.125728  | 0.128497  | 0.119901  | 0.13549   | 0.129953  |
| 0.120192  | 0.113054  | 0.043852  | 0.115676  | 0.0989219 | 0.125583  | 0.115676  |
| 0.12398   | 0.123834  | 0.117279  | 0.113054  | 0.106498  | 0.118881  | 0.130828  |
| 0.0603147 | 0.150495  | 0.136072  | 0.141171  | 0.131119  | 0.143794  | 0.145251  |
| 0.234557  | 0.237908  | 0.227273  | 0.231206  | 0.231061  | 0.230915  | 0.238491  |
| 0.126166  | 0.128059  | 0.112762  | 0.128642  | 0.0944056 | 0.131847  | 0.132139  |
| 0.110723  | 0.123106  | 0.116841  | 0.117279  | 0.113928  | 0.129808  | 0.124854  |
| 0.121066  | 0.122378  | 0.109411  | 0.0588578 | 0.105332  | 0.0559441 | 0.12296   |
| 0.117424  | 0.127477  | 0.115093  | 0.122815  | 0.11655   | 0.132139  | 0.123106  |
| 0.113782  | 0.120629  | 0.112034  | 0.111305  | 0.109994  | 0.118007  | 0.11859   |
| 0.12602   | 0.120921  | 0.110868  | 0.118881  | 0.103001  | 0.124709  | 0.121503  |
| 0.124126  | 0.128059  | 0.112762  | 0.0630828 | 0.111888  | 0.0572552 | 0.126311  |

|           |          |           |           |           |           |           |
|-----------|----------|-----------|-----------|-----------|-----------|-----------|
| 0.134761  | 0.11859  | 0.123689  | 0.124417  | 0.11757   | 0.135198  | 0.130245  |
| 0.0948427 | 0.120921 | 0.110577  | 0.115093  | 0.103584  | 0.128497  | 0.125     |
| 0.236888  | 0.238199 | 0.224068  | 0.230041  | 0.231061  | 0.232663  | 0.235577  |
| 0.119027  | 0.105186 | 0.0936772 | 0.110723  | 0.092803  | 0.120921  | 0.109848  |
| 0.114948  | 0.106352 | 0.105624  | 0.108974  | 0.0936772 | 0.120629  | 0.108683  |
| 0.115676  | 0.112617 | 0.0474942 | 0.114948  | 0.099359  | 0.122815  | 0.115239  |
| 0.0523019 | 0.136655 | 0.118153  | 0.126166  | 0.11553   | 0.129953  | 0.133741  |
| 0.13447   | 0.13549  | 0.116404  | 0.136946  | 0.10067   | 0.138695  | 0.134615  |
| 0.116404  | 0.130245 | 0.102127  | 0.109848  | 0.103584  | 0.115093  | 0.115676  |
| 0.118735  | 0.125    | 0.111742  | 0.0498252 | 0.107372  | 0.0550699 | 0.122669  |
| 0.0801282 | 0.122232 | 0.101981  | 0.109411  | 0.0961538 | 0.118735  | 0.114948  |
| 0.231352  | 0.235286 | 0.223485  | 0.225087  | 0.226981  | 0.225379  | 0.231498  |
| 0.123834  | 0.13039  | 0.117424  | 0.0560897 | 0.113054  | 0.0517191 | 0.125437  |
| 0.131556  | 0.113928 | 0.121358  | 0.119464  | 0.114073  | 0.131119  | 0.125     |
| 0.103875  | 0.110431 | 0.106789  | 0.113345  | 0.0983392 | 0.12704   | 0.120921  |
| 0.121503  | 0.124854 | 0.116259  | 0.122815  | 0.111888  | 0.123689  | 0.130099  |
| 0.129371  | 0.121066 | 0.122669  | 0.126311  | 0.110431  | 0.129516  | 0.120484  |
| 0.118298  | 0.113199 | 0.0460373 | 0.114656  | 0.10169   | 0.124563  | 0.116987  |
| 0.135781  | 0.118444 | 0.119755  | 0.123397  | 0.11451   | 0.131556  | 0.12602   |
| 0.139423  | 0.125    | 0.126603  | 0.129079  | 0.118444  | 0.135198  | 0.129079  |
| 0.128934  | 0.113928 | 0.113782  | 0.121503  | 0.109703  | 0.131119  | 0.119755  |
| 0.116841  | 0.113782 | 0.0451632 | 0.114948  | 0.100524  | 0.127185  | 0.115822  |
| 0.117133  | 0.129516 | 0.120629  | 0.126311  | 0.119755  | 0.130099  | 0.131847  |
| 0.119318  | 0.134033 | 0.126603  | 0.129371  | 0.125728  | 0.131119  | 0.138112  |
| 0.133304  | 0.124417 | 0.120484  | 0.132284  | 0.121649  | 0.138112  | 0.0649767 |
| 0.141171  | 0.127331 | 0.122523  | 0.136364  | 0.125146  | 0.141317  | 0.0623543 |
| 0.121795  | 0.132139 | 0.125     | 0.13039   | 0.123252  | 0.134178  | 0.137675  |
| 0.117424  | 0.113491 | 0.0874126 | 0.112034  | 0.0804196 | 0.125146  | 0.106789  |
| 0.144376  | 0.120338 | 0.132139  | 0.13345   | 0.119318  | 0.13549   | 0.121795  |
| 0.136655  | 0.133304 | 0.118298  | 0.132139  | 0.115967  | 0.133304  | 0.136218  |
| 0.203671  | 0.209062 | 0.19697   | 0.198572  | 0.199592  | 0.201195  | 0.207314  |
| 0.127622  | 0.126311 | 0.112471  | 0.119027  | 0.102855  | 0.126311  | 0.13039   |
| 0.119464  | 0.110286 | 0.11014   | 0.11553   | 0.100816  | 0.128934  | 0.111451  |
| 0.121358  | 0.121503 | 0.050845  | 0.120629  | 0.105041  | 0.130536  | 0.123543  |
| 0.225233  | 0.225087 | 0.213869  | 0.216929  | 0.215326  | 0.218677  | 0.224796  |
| 0.211247  | 0.216929 | 0.200758  | 0.203234  | 0.206002  | 0.210227  | 0.211393  |
| 0.139132  | 0.121795 | 0.124854  | 0.129953  | 0.118153  | 0.136364  | 0.128788  |
| 0.250583  | 0.254225 | 0.242424  | 0.243444  | 0.247378  | 0.24257   | 0.245775  |
| 0.119464  | 0.114073 | 0.0871212 | 0.114073  | 0.0769231 | 0.12398   | 0.10271   |
| 0.142774  | 0.140006 | 0.121212  | 0.139714  | 0.118007  | 0.142045  | 0.135635  |
| 0.125     | 0.109994 | 0.0920746 | 0.116404  | 0.0964452 | 0.125728  | 0.108537  |
| 0.115822  | 0.129079 | 0.122232  | 0.122086  | 0.120192  | 0.131702  | 0.129371  |
| 0.18852   | 0.193328 | 0.175991  | 0.182255  | 0.179779  | 0.184878  | 0.189248  |
| 0.129516  | 0.117716 | 0.115239  | 0.122378  | 0.108246  | 0.128205  | 0.131993  |

|           |           |           |           |           |           |           |
|-----------|-----------|-----------|-----------|-----------|-----------|-----------|
| 0.193036  | 0.200175  | 0.181672  | 0.189103  | 0.188374  | 0.193473  | 0.19493   |
| 0.115239  | 0.123252  | 0.100962  | 0.118298  | 0.100962  | 0.129662  | 0.121503  |
| 0.124854  | 0.11859   | 0.113199  | 0.099359  | 0.104458  | 0.108683  | 0.120338  |
| 0.127768  | 0.126166  | 0.112617  | 0.123543  | 0.100087  | 0.130536  | 0.119755  |
| 0.114948  | 0.120629  | 0.106498  | 0.106643  | 0.099796  | 0.111305  | 0.112179  |
| 0.112762  | 0.10912   | 0.0434149 | 0.109411  | 0.0949883 | 0.119318  | 0.107955  |
| 0.123252  | 0.116696  | 0.100233  | 0.103875  | 0.0909091 | 0.115822  | 0.116113  |
| 0.120921  | 0.106789  | 0.0909091 | 0.112908  | 0.092366  | 0.123689  | 0.107372  |
| 0.114656  | 0.121503  | 0.107372  | 0.0448718 | 0.0992133 | 0.0571096 | 0.119755  |
| 0.131702  | 0.108829  | 0.115385  | 0.11961   | 0.107517  | 0.125437  | 0.105624  |
| 0.114802  | 0.118153  | 0.0990676 | 0.112034  | 0.0801282 | 0.120192  | 0.121941  |
| 0.121358  | 0.111597  | 0.0936772 | 0.115385  | 0.0936772 | 0.123834  | 0.108392  |
| 0.131119  | 0.122232  | 0.10169   | 0.123689  | 0.109557  | 0.129808  | 0.0738636 |
| 0.127622  | 0.129808  | 0.122086  | 0.0613345 | 0.112179  | 0.0511364 | 0.132139  |
| 0.116987  | 0.113636  | 0.104749  | 0.118007  | 0.103001  | 0.127914  | 0.0518648 |
| 0.116841  | 0.112325  | 0.104021  | 0.113782  | 0.101399  | 0.123397  | 0.120484  |
| 0.112908  | 0.11014   | 0.0400641 | 0.109557  | 0.0936772 | 0.119755  | 0.111014  |
| 0.13039   | 0.112762  | 0.115822  | 0.114802  | 0.108537  | 0.121795  | 0.122669  |
| 0.111451  | 0.120338  | 0.113199  | 0.114802  | 0.111451  | 0.12704   | 0.121795  |
| 0.132867  | 0.0514277 | 0.113054  | 0.125146  | 0.112179  | 0.13447   | 0.117861  |
| 0.127622  | 0.115239  | 0.111305  | 0.123397  | 0.108392  | 0.133596  | 0.0488054 |
| 0.122523  | 0.124709  | 0.110577  | 0.0509907 | 0.105332  | 0.0533217 | 0.120629  |
| 0.131702  | 0.131847  | 0.121795  | 0.0604604 | 0.115385  | 0.0517191 | 0.134761  |
| 0.136364  | 0.140589  | 0.126457  | 0.0697844 | 0.123252  | 0.0490967 | 0.139132  |
| 0.118735  | 0.104312  | 0.102127  | 0.108392  | 0.097465  | 0.120629  | 0.109557  |
| 0.115822  | 0.116259  | 0.0464744 | 0.11451   | 0.101544  | 0.124126  | 0.115385  |
| 0.121212  | 0.109411  | 0.107517  | 0.109411  | 0.0909091 | 0.118735  | 0.113199  |
| 0.122086  | 0.13243   | 0.128205  | 0.129808  | 0.124417  | 0.135927  | 0.134178  |
| 0.127768  | 0.11014   | 0.0977564 | 0.118007  | 0.0989219 | 0.126166  | 0.111014  |
| 0.146416  | 0.0687646 | 0.133013  | 0.142483  | 0.129808  | 0.144231  | 0.138112  |
| 0.133887  | 0.133741  | 0.0627914 | 0.134033  | 0.118444  | 0.136364  | 0.134324  |
| 0.0539044 | 0.134178  | 0.113636  | 0.121066  | 0.108683  | 0.128351  | 0.128642  |
| 0.11757   | 0.115093  | 0.0980478 | 0.109557  | 0.0895979 | 0.114802  | 0.111305  |
| 0.112179  | 0.117279  | 0.108392  | 0.110286  | 0.104021  | 0.118153  | 0.119901  |
| 0.133159  | 0.121066  | 0.118007  | 0.131847  | 0.117133  | 0.137383  | 0.0584207 |
| 0.208479  | 0.210956  | 0.19799   | 0.198427  | 0.201486  | 0.202214  | 0.205711  |
| 0.117861  | 0.114219  | 0.108246  | 0.115385  | 0.103584  | 0.123543  | 0.119172  |
| 0.121795  | 0.122232  | 0.108683  | 0.119318  | 0.0955711 | 0.129516  | 0.118153  |
| 0.112325  | 0.122669  | 0.115822  | 0.118007  | 0.11553   | 0.125583  | 0.125     |
| 0.12704   | 0.11757   | 0.1081    | 0.119901  | 0.108974  | 0.128934  | 0.0499709 |
| 0.122523  | 0.121795  | 0.106206  | 0.125     | 0.107663  | 0.136655  | 0.124709  |
| 0.123397  | 0.122086  | 0.121358  | 0.113054  | 0.0869755 | 0.118298  | 0.125583  |
| 0.126457  | 0.125728  | 0.124709  | 0.114948  | 0.0909091 | 0.119027  | 0.126603  |
| 0.0563811 | 0.126748  | 0.112034  | 0.119755  | 0.105041  | 0.125     | 0.125874  |

|          |          |           |           |           |           |           |
|----------|----------|-----------|-----------|-----------|-----------|-----------|
| 0.125437 | 0.100524 | 0.110868  | 0.11859   | 0.0989219 | 0.125     | 0.101107  |
| 0.121358 | 0.128497 | 0.120192  | 0.123543  | 0.119318  | 0.129079  | 0.131702  |
| 0.120775 | 0.121795 | 0.104167  | 0.118881  | 0.0948427 | 0.130245  | 0.115967  |
| 0.123543 | 0.119901 | 0.105186  | 0.11961   | 0.0879953 | 0.130682  | 0.121066  |
| 0.177302 | 0.179487 | 0.167686  | 0.169872  | 0.167686  | 0.173951  | 0.170746  |
| 0.118735 | 0.120921 | 0.110286  | 0.0506993 | 0.103001  | 0.0638112 | 0.120921  |
| 0.120338 | 0.130099 | 0.123252  | 0.126603  | 0.123252  | 0.133013  | 0.131556  |
| 0.130099 | 0.123834 | 0.108537  | 0.129079  | 0.0989219 | 0.135781  | 0.121212  |
| 0.126748 | 0.130973 | 0.115093  | 0.115239  | 0.113928  | 0.11553   | 0.125146  |
| 0.113636 | 0.111451 | 0.102855  | 0.105915  | 0.0405012 | 0.112617  | 0.108246  |
| 0.109848 | 0.112034 | 0.0938228 | 0.110868  | 0.0728438 | 0.118153  | 0.111742  |
| 0.117133 | 0.115239 | 0.106935  | 0.10912   | 0.0472028 | 0.115822  | 0.116404  |
| 0.130828 | 0.128059 | 0.117716  | 0.127185  | 0.115093  | 0.126894  | 0.123689  |
| 0.117424 | 0.123106 | 0.105186  | 0.0863928 | 0.0906177 | 0.0930944 | 0.119901  |
| 0.138258 | 0.123252 | 0.117861  | 0.131702  | 0.120192  | 0.137238  | 0.122378  |
| 0.120047 | 0.111742 | 0.104604  | 0.10708   | 0.097028  | 0.118153  | 0.111742  |
| 0.128059 | 0.113054 | 0.115239  | 0.123834  | 0.0968823 | 0.129662  | 0.113636  |
| 0.137238 | 0.130099 | 0.124709  | 0.133304  | 0.116841  | 0.135052  | 0.136509  |
| 0.128788 | 0.116113 | 0.105478  | 0.125437  | 0.0932401 | 0.128059  | 0.116113  |
| 0.125291 | 0.119901 | 0.113636  | 0.120775  | 0.0990676 | 0.128642  | 0.116696  |
| 0.125291 | 0.109411 | 0.0990676 | 0.120192  | 0.0888695 | 0.129516  | 0.112034  |
| 0.127622 | 0.11553  | 0.105186  | 0.121941  | 0.090035  | 0.125146  | 0.114365  |
| 0.114802 | 0.107372 | 0.0932401 | 0.113199  | 0.0856643 | 0.123689  | 0.108829  |
| 0.133596 | 0.117133 | 0.103293  | 0.124417  | 0.100087  | 0.130828  | 0.123252  |
| 0.118153 | 0.100524 | 0.100962  | 0.119464  | 0.0875583 | 0.127622  | 0.109848  |
| 0.148747 | 0.138403 | 0.136801  | 0.139569  | 0.134178  | 0.143357  | 0.13986   |
| 0.135927 | 0.129662 | 0.124272  | 0.126457  | 0.121358  | 0.134324  | 0.129953  |
| 0.124272 | 0.103438 | 0.101544  | 0.116841  | 0.0898893 | 0.12296   | 0.107226  |
| 0.146562 | 0.129225 | 0.134615  | 0.137383  | 0.129371  | 0.137383  | 0.135927  |
| 0.119172 | 0.125146 | 0.111305  | 0.11757   | 0.111014  | 0.13243   | 0.0933858 |
| 0.140152 | 0.141463 | 0.128497  | 0.13884   | 0.11859   | 0.141463  | 0.139132  |
| 0.124417 | 0.100379 | 0.104312  | 0.119318  | 0.0891608 | 0.123397  | 0.10912   |
| 0.150204 | 0.147436 | 0.133596  | 0.138112  | 0.137383  | 0.142774  | 0.143939  |
| 0.131265 | 0.126457 | 0.124563  | 0.134324  | 0.116404  | 0.138112  | 0.134324  |
| 0.137383 | 0.134324 | 0.131265  | 0.143065  | 0.12398   | 0.143939  | 0.130828  |
| 0.130682 | 0.118881 | 0.113491  | 0.120338  | 0.104167  | 0.128788  | 0.10169   |
| 0.120047 | 0.112325 | 0.0996503 | 0.119901  | 0.092366  | 0.127477  | 0.109411  |
| 0.122232 | 0.112762 | 0.100379  | 0.116259  | 0.0898893 | 0.128205  | 0.111014  |
| 0.120047 | 0.116404 | 0.113636  | 0.11961   | 0.104604  | 0.123106  | 0.122232  |
| 0.134324 | 0.120192 | 0.110723  | 0.124563  | 0.10169   | 0.131556  | 0.119901  |
| 0.135635 | 0.122378 | 0.116113  | 0.128788  | 0.107955  | 0.131702  | 0.125583  |
| 0.128934 | 0.121795 | 0.112617  | 0.122086  | 0.110577  | 0.134907  | 0.121503  |
| 0.120192 | 0.111014 | 0.103293  | 0.115093  | 0.0989219 | 0.12704   | 0.0897436 |
| 0.125    | 0.109703 | 0.0996503 | 0.116987  | 0.0914918 | 0.128059  | 0.112617  |

|          |          |           |          |           |          |          |
|----------|----------|-----------|----------|-----------|----------|----------|
| 0.122815 | 0.121503 | 0.10271   | 0.124126 | 0.0992133 | 0.130536 | 0.123543 |
| 0.123397 | 0.111597 | 0.0971737 | 0.113345 | 0.0916375 | 0.123252 | 0.109557 |
| 0.13141  | 0.11961  | 0.104895  | 0.12602  | 0.0976107 | 0.133013 | 0.123106 |
| 0.124417 | 0.105915 | 0.0996503 | 0.114073 | 0.0938228 | 0.121066 | 0.109994 |
| 0.118735 | 0.129079 | 0.10067   | 0.106643 | 0.103584  | 0.113928 | 0.116259 |
| 0.118735 | 0.123252 | 0.0977564 | 0.111888 | 0.0898893 | 0.119464 | 0.118298 |
| 0.118444 | 0.111888 | 0.0852273 | 0.113928 | 0.076486  | 0.120629 | 0.104895 |
| 0.118735 | 0.118298 | 0.0965909 | 0.115967 | 0.0910548 | 0.125583 | 0.114219 |
| 0.115967 | 0.126894 | 0.0999417 | 0.10708  | 0.101399  | 0.114948 | 0.111451 |
| 0.125146 | 0.117133 | 0.104458  | 0.107517 | 0.0759033 | 0.115967 | 0.115676 |
| 0.128934 | 0.124709 | 0.11757   | 0.105769 | 0.0980478 | 0.110723 | 0.124709 |
| 0.109994 | 0.11655  | 0.0919289 | 0.101107 | 0.0945513 | 0.109557 | 0.104312 |
| 0.134615 | 0.129516 | 0.120921  | 0.12398  | 0.100524  | 0.125437 | 0.12398  |

| TDr_2643 | TDr_2645 | TDr_2650 | TDr_2655 | TDr_2660 | TDr_2663 | TDr_2664 |
|----------|----------|----------|----------|----------|----------|----------|
| 0.131556 | 0.242861 | 0.127768 | 0.127331 | 0.200321 | 0.133159 | 0.21183  |
| 0.119172 | 0.243881 | 0.133159 | 0.126311 | 0.202214 | 0.125728 | 0.217803 |
| 0.115093 | 0.24359  | 0.127914 | 0.127477 | 0.201049 | 0.122232 | 0.216055 |
| 0.101399 | 0.252331 | 0.130536 | 0.130973 | 0.211247 | 0.128642 | 0.222174 |
| 0.137529 | 0.264569 | 0.131702 | 0.131847 | 0.224942 | 0.132139 | 0.235577 |
| 0.138695 | 0.255828 | 0.137529 | 0.130973 | 0.215618 | 0.132139 | 0.230041 |
| 0.136801 | 0.25743  | 0.116113 | 0.121212 | 0.221008 | 0.127622 | 0.231643 |
| 0.116404 | 0.246358 | 0.123689 | 0.125583 | 0.204691 | 0.123252 | 0.219406 |
| 0.120338 | 0.251748 | 0.116841 | 0.120775 | 0.211538 | 0.118735 | 0.2213   |
| 0.128059 | 0.254225 | 0.126311 | 0.124417 | 0.211684 | 0.111597 | 0.223485 |
| 0.139569 | 0.242133 | 0.129662 | 0.125437 | 0.204545 | 0.130682 | 0.213432 |
| 0.118444 | 0.252477 | 0.122232 | 0.120338 | 0.210519 | 0.117424 | 0.220571 |
| 0.127477 | 0.25947  | 0.125437 | 0.12704  | 0.214598 | 0.123834 | 0.229021 |
| 0.142191 | 0.213287 | 0.149184 | 0.146999 | 0.170163 | 0.144376 | 0.18546  |
| 0.136218 | 0.255099 | 0.137675 | 0.130828 | 0.218094 | 0.126457 | 0.229021 |
| 0.128788 | 0.257576 | 0.120338 | 0.121941 | 0.21824  | 0.12602  | 0.231498 |
| 0.130682 | 0.25743  | 0.114365 | 0.117716 | 0.216055 | 0.102273 | 0.226399 |
| 0.145105 | 0.264569 | 0.144814 | 0.135635 | 0.226981 | 0.134761 | 0.240822 |
| 0.11859  | 0.244464 | 0.130828 | 0.126894 | 0.199301 | 0.121358 | 0.214598 |
| 0.206002 | 0.147727 | 0.212413 | 0.205857 | 0.140734 | 0.202943 | 0.136801 |
| 0.142337 | 0.261509 | 0.135635 | 0.137529 | 0.218386 | 0.133159 | 0.229895 |
| 0.132867 | 0.259907 | 0.13141  | 0.131556 | 0.22028  | 0.125728 | 0.229167 |
| 0.122815 | 0.251603 | 0.122815 | 0.122086 | 0.209062 | 0.122086 | 0.220862 |
| 0.136072 | 0.264569 | 0.120047 | 0.122815 | 0.228438 | 0.129516 | 0.235868 |
| 0.119901 | 0.24898  | 0.11757  | 0.117424 | 0.2044   | 0.118298 | 0.219697 |
| 0.14088  | 0.25947  | 0.136218 | 0.136655 | 0.219551 | 0.139277 | 0.231643 |
| 0.139423 | 0.260052 | 0.119901 | 0.122669 | 0.21926  | 0.126457 | 0.231935 |
| 0.12602  | 0.267337 | 0.123106 | 0.128205 | 0.227127 | 0.122669 | 0.237179 |
| 0.138549 | 0.260344 | 0.121066 | 0.12704  | 0.2213   | 0.129079 | 0.233974 |
| 0.136218 | 0.266463 | 0.117861 | 0.123252 | 0.226253 | 0.123543 | 0.236888 |
| 0.137529 | 0.25641  | 0.127622 | 0.129516 | 0.215618 | 0.128642 | 0.229167 |
| 0.133304 | 0.260927 | 0.116113 | 0.123543 | 0.22567  | 0.127622 | 0.233392 |
| 0.124563 | 0.248397 | 0.121649 | 0.118298 | 0.203234 | 0.117133 | 0.217075 |
| 0.129516 | 0.254225 | 0.121941 | 0.119172 | 0.215763 | 0.125291 | 0.224942 |
| 0.13549  | 0.263112 | 0.119172 | 0.124272 | 0.223485 | 0.128934 | 0.235577 |
| 0.137383 | 0.26384  | 0.123689 | 0.121503 | 0.226544 | 0.132284 | 0.238345 |
| 0.143065 | 0.269522 | 0.128497 | 0.133013 | 0.232517 | 0.129808 | 0.242279 |
| 0.138549 | 0.261801 | 0.127185 | 0.129371 | 0.221591 | 0.13141  | 0.233683 |
| 0.125728 | 0.253351 | 0.118153 | 0.121795 | 0.216055 | 0.122669 | 0.228147 |
| 0.132721 | 0.264132 | 0.128059 | 0.128205 | 0.223339 | 0.125583 | 0.233683 |
| 0.122523 | 0.253351 | 0.122232 | 0.119464 | 0.21285  | 0.115967 | 0.224942 |
| 0.14933  | 0.271125 | 0.143502 | 0.143357 | 0.232372 | 0.140734 | 0.244464 |

|           |          |          |          |          |          |          |
|-----------|----------|----------|----------|----------|----------|----------|
| 0.152535  | 0.263258 | 0.14292  | 0.142191 | 0.228001 | 0.142483 | 0.241259 |
| 0.129371  | 0.256993 | 0.125291 | 0.129225 | 0.215035 | 0.124563 | 0.227127 |
| 0.128205  | 0.255536 | 0.106061 | 0.112325 | 0.215909 | 0.112908 | 0.228001 |
| 0.137966  | 0.266754 | 0.11961  | 0.128497 | 0.223631 | 0.12704  | 0.236014 |
| 0.129516  | 0.25947  | 0.121649 | 0.121795 | 0.21926  | 0.126748 | 0.228147 |
| 0.147145  | 0.267191 | 0.138986 | 0.137675 | 0.227855 | 0.137675 | 0.239073 |
| 0.128497  | 0.259615 | 0.124709 | 0.125728 | 0.217949 | 0.120192 | 0.232372 |
| 0.131847  | 0.256265 | 0.124563 | 0.124709 | 0.211684 | 0.122378 | 0.226981 |
| 0.155012  | 0.263695 | 0.138695 | 0.137383 | 0.230186 | 0.144668 | 0.239365 |
| 0.13986   | 0.260198 | 0.128205 | 0.121358 | 0.219988 | 0.123106 | 0.229167 |
| 0.128934  | 0.254516 | 0.12398  | 0.124126 | 0.212267 | 0.121503 | 0.227273 |
| 0.130099  | 0.262675 | 0.132139 | 0.13345  | 0.223339 | 0.13141  | 0.235723 |
| 0.0986305 | 0.24257  | 0.126603 | 0.125291 | 0.202943 | 0.126748 | 0.215909 |
| 0.14088   | 0.270833 | 0.135635 | 0.136072 | 0.23616  | 0.135781 | 0.245629 |
| 0.138695  | 0.264277 | 0.134324 | 0.129516 | 0.223485 | 0.124272 | 0.236451 |
| 0.129371  | 0.26049  | 0.121212 | 0.123397 | 0.215618 | 0.126894 | 0.230915 |
| 0.13549   | 0.254079 | 0.125291 | 0.122815 | 0.213578 | 0.119901 | 0.227127 |
| 0.136218  | 0.264423 | 0.120192 | 0.123543 | 0.223339 | 0.12704  | 0.23514  |
| 0.144376  | 0.270251 | 0.136218 | 0.136364 | 0.232663 | 0.137238 | 0.244755 |
| 0.139714  | 0.271999 | 0.142045 | 0.144522 | 0.234703 | 0.1419   | 0.247086 |
| 0.164918  | 0.206294 | 0.164627 | 0.168269 | 0.179779 | 0.166521 | 0.187209 |
| 0.127331  | 0.259907 | 0.127622 | 0.127768 | 0.216783 | 0.124563 | 0.228584 |
| 0.129371  | 0.256702 | 0.124417 | 0.12398  | 0.216492 | 0.118444 | 0.228001 |
| 0.128205  | 0.258741 | 0.120338 | 0.121358 | 0.215618 | 0.121649 | 0.229167 |
| 0.150495  | 0.262092 | 0.138549 | 0.140734 | 0.223339 | 0.140734 | 0.23514  |
| 0.122232  | 0.255099 | 0.119901 | 0.123252 | 0.214015 | 0.116841 | 0.227273 |
| 0.140443  | 0.261072 | 0.130536 | 0.129225 | 0.223485 | 0.133596 | 0.235868 |
| 0.138695  | 0.263695 | 0.122086 | 0.119027 | 0.224359 | 0.117279 | 0.236742 |
| 0.13243   | 0.254225 | 0.124854 | 0.125583 | 0.21285  | 0.121212 | 0.227564 |
| 0.154575  | 0.258304 | 0.140297 | 0.14831  | 0.223339 | 0.152098 | 0.233683 |
| 0.136801  | 0.264132 | 0.127185 | 0.129371 | 0.223048 | 0.125583 | 0.235431 |
| 0.143357  | 0.269522 | 0.140152 | 0.13884  | 0.229604 | 0.140297 | 0.243153 |
| 0.142045  | 0.260344 | 0.126894 | 0.126166 | 0.220134 | 0.125    | 0.231352 |
| 0.123252  | 0.249417 | 0.120629 | 0.120775 | 0.206002 | 0.121358 | 0.219551 |
| 0.129371  | 0.254079 | 0.122378 | 0.122523 | 0.20979  | 0.121649 | 0.226253 |
| 0.131702  | 0.257867 | 0.119172 | 0.12398  | 0.216492 | 0.121649 | 0.230332 |
| 0.136946  | 0.268648 | 0.134324 | 0.138258 | 0.230769 | 0.135635 | 0.24257  |
| 0.131847  | 0.256847 | 0.123689 | 0.121503 | 0.214307 | 0.119172 | 0.229312 |
| 0.143648  | 0.27127  | 0.145105 | 0.136801 | 0.232809 | 0.138258 | 0.241696 |
| 0.139277  | 0.258741 | 0.131993 | 0.13447  | 0.217657 | 0.131556 | 0.228875 |
| 0.127331  | 0.262238 | 0.11655  | 0.121358 | 0.219988 | 0.118153 | 0.231498 |
| 0.134033  | 0.258159 | 0.125    | 0.128059 | 0.215909 | 0.12602  | 0.230915 |
| 0.132284  | 0.263695 | 0.134907 | 0.130973 | 0.220862 | 0.125728 | 0.234994 |
| 0.130828  | 0.25845  | 0.124126 | 0.12398  | 0.2162   | 0.123397 | 0.230332 |

|          |          |          |          |          |          |          |
|----------|----------|----------|----------|----------|----------|----------|
| 0.129079 | 0.255828 | 0.120629 | 0.119901 | 0.214161 | 0.120484 | 0.228001 |
| 0.144085 | 0.26792  | 0.137966 | 0.134907 | 0.231206 | 0.1419   | 0.241841 |
| 0.133596 | 0.257721 | 0.121941 | 0.122378 | 0.214889 | 0.120338 | 0.225816 |
| 0.129662 | 0.26049  | 0.122086 | 0.116404 | 0.219697 | 0.121649 | 0.229167 |
| 0.140152 | 0.263112 | 0.123543 | 0.127185 | 0.224942 | 0.133013 | 0.238491 |
| 0.142191 | 0.263112 | 0.118007 | 0.12602  | 0.222611 | 0.131556 | 0.235577 |
| 0.143065 | 0.265152 | 0.12296  | 0.127185 | 0.227564 | 0.128059 | 0.237617 |
| 0.147582 | 0.273164 | 0.129225 | 0.13549  | 0.237617 | 0.138112 | 0.245338 |
| 0.13549  | 0.253497 | 0.120338 | 0.124563 | 0.210956 | 0.126311 | 0.224213 |
| 0.189103 | 0.185897 | 0.182984 | 0.184003 | 0.164627 | 0.186626 | 0.169726 |
| 0.12602  | 0.256847 | 0.11757  | 0.11655  | 0.21722  | 0.119464 | 0.229312 |
| 0.145105 | 0.2669   | 0.125291 | 0.135052 | 0.231935 | 0.136509 | 0.241987 |
| 0.136072 | 0.263695 | 0.116259 | 0.128934 | 0.225233 | 0.127185 | 0.237617 |
| 0.150495 | 0.269668 | 0.126894 | 0.133741 | 0.231206 | 0.142483 | 0.244172 |
| 0.129662 | 0.261072 | 0.114802 | 0.11757  | 0.218531 | 0.118444 | 0.231206 |
| 0.140734 | 0.272145 | 0.126166 | 0.13447  | 0.231061 | 0.133887 | 0.243444 |
| 0.131702 | 0.259907 | 0.114219 | 0.116696 | 0.22028  | 0.121358 | 0.230915 |
| 0.135927 | 0.256847 | 0.119901 | 0.119755 | 0.220717 | 0.128788 | 0.231643 |
| 0.129808 | 0.259178 | 0.117861 | 0.122669 | 0.216055 | 0.122378 | 0.232226 |
| 0.147582 | 0.269085 | 0.118153 | 0.127622 | 0.231789 | 0.129953 | 0.245921 |
| 0.129225 | 0.256847 | 0.111451 | 0.120338 | 0.214889 | 0.120047 | 0.225816 |
| 0.143939 | 0.262238 | 0.124709 | 0.130682 | 0.224359 | 0.135927 | 0.237325 |
| 0.133013 | 0.256847 | 0.116696 | 0.122086 | 0.216346 | 0.125    | 0.229895 |
| 0.138986 | 0.266026 | 0.130536 | 0.130099 | 0.227564 | 0.133304 | 0.239948 |
| 0.145251 | 0.263258 | 0.120775 | 0.129371 | 0.223048 | 0.131702 | 0.237179 |
| 0.133013 | 0.258013 | 0.114948 | 0.11859  | 0.215763 | 0.12296  | 0.229604 |
| 0.151369 | 0.260927 | 0.141171 | 0.145105 | 0.223048 | 0.150641 | 0.237471 |
| 0.139569 | 0.261072 | 0.114219 | 0.121358 | 0.219988 | 0.123689 | 0.230915 |
| 0.132284 | 0.264569 | 0.120921 | 0.122815 | 0.220862 | 0.123397 | 0.232663 |
| 0.131265 | 0.259178 | 0.11553  | 0.122669 | 0.218969 | 0.118881 | 0.22873  |
| 0.151369 | 0.263549 | 0.136801 | 0.138695 | 0.228875 | 0.138695 | 0.240676 |
| 0.135052 | 0.238199 | 0.124563 | 0.131993 | 0.203817 | 0.125291 | 0.214744 |
| 0.127185 | 0.25947  | 0.114365 | 0.11859  | 0.215763 | 0.118298 | 0.229312 |
| 0.129516 | 0.256847 | 0.123397 | 0.125291 | 0.214307 | 0.121503 | 0.226981 |
| 0.134324 | 0.258741 | 0.120629 | 0.122815 | 0.215909 | 0.123397 | 0.230624 |
| 0.139132 | 0.267337 | 0.129808 | 0.133159 | 0.228584 | 0.12704  | 0.238636 |
| 0.137821 | 0.26049  | 0.113345 | 0.121941 | 0.218531 | 0.127185 | 0.232372 |
| 0.121066 | 0.255099 | 0.111451 | 0.111888 | 0.210519 | 0.115093 | 0.224359 |
| 0.122815 | 0.255682 | 0.113782 | 0.117424 | 0.212558 | 0.11859  | 0.225816 |
| 0.12704  | 0.259324 | 0.113636 | 0.116987 | 0.217949 | 0.11961  | 0.229167 |
| 0.132576 | 0.259615 | 0.122669 | 0.12398  | 0.217366 | 0.124563 | 0.228584 |
| 0.143794 | 0.265297 | 0.124854 | 0.129079 | 0.228293 | 0.131119 | 0.236597 |
| 0.12704  | 0.261364 | 0.117133 | 0.116987 | 0.217075 | 0.117861 | 0.230624 |
| 0.124272 | 0.25539  | 0.114656 | 0.124126 | 0.214015 | 0.114219 | 0.227273 |



|          |          |          |          |          |          |          |
|----------|----------|----------|----------|----------|----------|----------|
| 0.143502 | 0.263258 | 0.117279 | 0.121503 | 0.223339 | 0.126748 | 0.234266 |
| 0.129079 | 0.256993 | 0.111597 | 0.118153 | 0.215035 | 0.123689 | 0.22771  |
| 0.136946 | 0.255245 | 0.130828 | 0.133596 | 0.213578 | 0.131265 | 0.228001 |
| 0.143939 | 0.259615 | 0.131702 | 0.131847 | 0.219697 | 0.133887 | 0.230915 |
| 0.131702 | 0.258159 | 0.110723 | 0.121358 | 0.219988 | 0.122523 | 0.229749 |
| 0.129225 | 0.262675 | 0.115239 | 0.117716 | 0.218677 | 0.120047 | 0.232517 |
| 0.128059 | 0.256556 | 0.114656 | 0.121212 | 0.214889 | 0.11859  | 0.227564 |
| 0.127477 | 0.253642 | 0.118735 | 0.11655  | 0.209936 | 0.115676 | 0.223485 |
| 0.135344 | 0.262383 | 0.121358 | 0.127622 | 0.225962 | 0.122669 | 0.234848 |
| 0.122815 | 0.254516 | 0.113199 | 0.119464 | 0.21285  | 0.121795 | 0.227564 |
| 0.146562 | 0.268357 | 0.135198 | 0.134178 | 0.229604 | 0.13884  | 0.243444 |
| 0.146416 | 0.260052 | 0.135344 | 0.131119 | 0.220134 | 0.131119 | 0.233974 |
| 0.135344 | 0.265006 | 0.130682 | 0.126166 | 0.221591 | 0.131119 | 0.23514  |
| 0.136364 | 0.257867 | 0.128497 | 0.125728 | 0.217657 | 0.124272 | 0.229749 |
| 0.136072 | 0.254662 | 0.122086 | 0.12398  | 0.212413 | 0.122815 | 0.228293 |
| 0.131847 | 0.256556 | 0.112617 | 0.121795 | 0.21926  | 0.119172 | 0.230769 |
| 0.130828 | 0.260198 | 0.110431 | 0.118444 | 0.220862 | 0.118735 | 0.231498 |
| 0.124417 | 0.260781 | 0.117424 | 0.11757  | 0.218531 | 0.117279 | 0.228584 |
| 0.107517 | 0.247378 | 0.124126 | 0.123106 | 0.204837 | 0.126603 | 0.217512 |
| 0.144814 | 0.265152 | 0.123252 | 0.129516 | 0.230186 | 0.129225 | 0.238491 |
| 0.133596 | 0.265006 | 0.11757  | 0.122086 | 0.223922 | 0.123543 | 0.235723 |
| 0.138112 | 0.260198 | 0.134324 | 0.132721 | 0.218531 | 0.131265 | 0.232955 |
| 0.144085 | 0.267045 | 0.125728 | 0.13141  | 0.229749 | 0.138403 | 0.242424 |
| 0.196241 | 0.138258 | 0.209936 | 0.202506 | 0.119318 | 0.200175 | 0.123543 |
| 0.234266 | 0.099359 | 0.247086 | 0.237617 | 0.110431 | 0.237325 | 0.106789 |
| 0.083479 | 0.24461  | 0.124854 | 0.125291 | 0.202943 | 0.124709 | 0.215618 |
| 0.125874 | 0.25204  | 0.113636 | 0.122815 | 0.21183  | 0.120192 | 0.224505 |
| 0.123834 | 0.251748 | 0.115093 | 0.116404 | 0.212995 | 0.121649 | 0.222756 |
| 0.126748 | 0.25641  | 0.119755 | 0.124272 | 0.211247 | 0.120192 | 0.227127 |
| 0.136655 | 0.254662 | 0.137238 | 0.133596 | 0.217657 | 0.129808 | 0.230332 |
| 0.127331 | 0.258741 | 0.112471 | 0.118153 | 0.218823 | 0.118153 | 0.228001 |
| 0.151078 | 0.269668 | 0.129516 | 0.134033 | 0.23412  | 0.13986  | 0.247086 |
| 0.133741 | 0.260781 | 0.115967 | 0.124563 | 0.217657 | 0.121358 | 0.233537 |
| 0.137238 | 0.268357 | 0.120921 | 0.130682 | 0.226981 | 0.128059 | 0.238782 |
| 0.137966 | 0.260052 | 0.128934 | 0.130828 | 0.220425 | 0.131993 | 0.231643 |
| 0.142628 | 0.267337 | 0.128351 | 0.128497 | 0.229749 | 0.132284 | 0.238345 |
| 0.144959 | 0.264132 | 0.143794 | 0.133741 | 0.22771  | 0.134615 | 0.238636 |
| 0.133304 | 0.265006 | 0.11757  | 0.121212 | 0.222174 | 0.118881 | 0.235431 |
| 0.129808 | 0.259178 | 0.109411 | 0.121212 | 0.216929 | 0.118298 | 0.22873  |
| 0.136072 | 0.260781 | 0.115093 | 0.119901 | 0.22028  | 0.121066 | 0.230624 |
| 0.125    | 0.25204  | 0.114802 | 0.119027 | 0.20979  | 0.116696 | 0.223339 |
| 0.126457 | 0.256702 | 0.11014  | 0.116113 | 0.214744 | 0.117279 | 0.225087 |
| 0.129808 | 0.260635 | 0.114365 | 0.121503 | 0.2213   | 0.12296  | 0.230186 |
| 0.136946 | 0.263986 | 0.124709 | 0.125728 | 0.225233 | 0.128934 | 0.235286 |

|          |          |          |          |          |          |          |
|----------|----------|----------|----------|----------|----------|----------|
| 0.144814 | 0.268939 | 0.132867 | 0.135344 | 0.229895 | 0.135052 | 0.243735 |
| 0.130973 | 0.260635 | 0.116696 | 0.119464 | 0.21926  | 0.123543 | 0.231643 |
| 0.129662 | 0.256993 | 0.120338 | 0.120775 | 0.214744 | 0.124563 | 0.226836 |
| 0.141608 | 0.2669   | 0.124417 | 0.132139 | 0.230769 | 0.131556 | 0.24053  |
| 0.125583 | 0.254662 | 0.113928 | 0.120775 | 0.214161 | 0.11961  | 0.226836 |
| 0.154575 | 0.261218 | 0.131847 | 0.136072 | 0.230041 | 0.1419   | 0.238636 |
| 0.149621 | 0.256556 | 0.137092 | 0.140443 | 0.220134 | 0.135198 | 0.229021 |
| 0.141026 | 0.252331 | 0.123252 | 0.127768 | 0.22028  | 0.129808 | 0.230332 |
| 0.125291 | 0.256993 | 0.11014  | 0.118735 | 0.212995 | 0.121649 | 0.228001 |
| 0.126311 | 0.253351 | 0.112908 | 0.115967 | 0.216346 | 0.116259 | 0.223193 |
| 0.136364 | 0.269231 | 0.115385 | 0.130682 | 0.226399 | 0.125437 | 0.237325 |
| 0.133596 | 0.264423 | 0.123397 | 0.129371 | 0.226253 | 0.127914 | 0.236597 |
| 0.142337 | 0.260344 | 0.121358 | 0.121212 | 0.222174 | 0.129371 | 0.230478 |
| 0.134324 | 0.262821 | 0.114802 | 0.119318 | 0.220862 | 0.120775 | 0.233246 |
| 0.130973 | 0.25947  | 0.119901 | 0.119755 | 0.21926  | 0.124417 | 0.229604 |
| 0.129225 | 0.262383 | 0.121649 | 0.122086 | 0.221008 | 0.128788 | 0.232809 |
| 0.149621 | 0.26792  | 0.121649 | 0.126166 | 0.229167 | 0.127914 | 0.241841 |
| 0.141171 | 0.266754 | 0.127768 | 0.130245 | 0.227127 | 0.134033 | 0.238345 |
| 0.143939 | 0.268648 | 0.126457 | 0.133887 | 0.231935 | 0.135344 | 0.241987 |
| 0.141463 | 0.261218 | 0.128351 | 0.13549  | 0.225087 | 0.138112 | 0.231935 |
| 0.126311 | 0.261218 | 0.116113 | 0.118298 | 0.21722  | 0.122086 | 0.229895 |
| 0.140297 | 0.264423 | 0.125437 | 0.130828 | 0.22567  | 0.12704  | 0.238345 |
| 0.128497 | 0.258159 | 0.117133 | 0.117861 | 0.217366 | 0.121649 | 0.230332 |
| 0.133013 | 0.254808 | 0.123106 | 0.125583 | 0.211393 | 0.125291 | 0.224068 |
| 0.131265 | 0.260927 | 0.116987 | 0.11655  | 0.218677 | 0.119464 | 0.232226 |
| 0.131702 | 0.255245 | 0.115093 | 0.118153 | 0.21183  | 0.120775 | 0.226253 |
| 0.126166 | 0.257576 | 0.109557 | 0.11757  | 0.214452 | 0.116987 | 0.230041 |
| 0.14729  | 0.266171 | 0.126311 | 0.131119 | 0.229749 | 0.137238 | 0.24155  |
| 0.133741 | 0.256119 | 0.122669 | 0.126603 | 0.217657 | 0.122232 | 0.227418 |
| 0.139569 | 0.263695 | 0.126166 | 0.124563 | 0.226399 | 0.13447  | 0.237908 |
| 0.125874 | 0.253497 | 0.113054 | 0.120775 | 0.214452 | 0.116696 | 0.225962 |
| 0.140006 | 0.266754 | 0.111116 | 0.118881 | 0.228584 | 0.12296  | 0.23951  |
| 0.134324 | 0.259033 | 0.120338 | 0.121066 | 0.222902 | 0.125437 | 0.235286 |
| 0.136072 | 0.252914 | 0.129953 | 0.13243  | 0.211247 | 0.128059 | 0.222174 |
| 0.13447  | 0.264423 | 0.112034 | 0.119755 | 0.222174 | 0.133159 | 0.231935 |
| 0.133159 | 0.252622 | 0.131993 | 0.136509 | 0.212121 | 0.130099 | 0.226253 |
| 0.133304 | 0.262966 | 0.120484 | 0.133741 | 0.220717 | 0.123252 | 0.234848 |
| 0.135635 | 0.259761 | 0.117279 | 0.120921 | 0.218094 | 0.120921 | 0.231643 |
| 0.146999 | 0.268211 | 0.138258 | 0.139277 | 0.232372 | 0.137821 | 0.240967 |
| 0.145688 | 0.268939 | 0.132576 | 0.131265 | 0.231352 | 0.145542 | 0.24461  |
| 0.122669 | 0.251748 | 0.116259 | 0.115239 | 0.212413 | 0.114948 | 0.223048 |
| 0.142337 | 0.266463 | 0.137383 | 0.134033 | 0.229458 | 0.126166 | 0.23951  |
| 0.142774 | 0.265152 | 0.129953 | 0.134178 | 0.227855 | 0.127768 | 0.237908 |
| 0.142483 | 0.261072 | 0.134324 | 0.138258 | 0.223776 | 0.121649 | 0.236451 |

|          |          |          |          |          |          |          |
|----------|----------|----------|----------|----------|----------|----------|
| 0.132576 | 0.254371 | 0.126166 | 0.127477 | 0.2162   | 0.118444 | 0.228875 |
| 0.141608 | 0.265443 | 0.129079 | 0.13039  | 0.226399 | 0.124854 | 0.238199 |
| 0.140006 | 0.258013 | 0.13039  | 0.12704  | 0.223922 | 0.125583 | 0.2331   |
| 0.134907 | 0.266608 | 0.132284 | 0.135052 | 0.227273 | 0.120775 | 0.238199 |
| 0.145396 | 0.264569 | 0.137238 | 0.137092 | 0.229312 | 0.131847 | 0.241696 |
| 0.13549  | 0.266608 | 0.136072 | 0.135052 | 0.221445 | 0.125437 | 0.231789 |
| 0.131702 | 0.255828 | 0.125    | 0.127768 | 0.215618 | 0.114948 | 0.226836 |
| 0.138549 | 0.264423 | 0.135344 | 0.139569 | 0.228875 | 0.135198 | 0.233392 |
| 0.148893 | 0.265152 | 0.129953 | 0.133013 | 0.227855 | 0.133887 | 0.239365 |
| 0.126748 | 0.253205 | 0.12296  | 0.121358 | 0.210082 | 0.119318 | 0.222174 |
| 0.218094 | 0.124563 | 0.230915 | 0.220862 | 0.116696 | 0.22028  | 0.116259 |
| 0.137383 | 0.260635 | 0.131265 | 0.130245 | 0.219551 | 0.121503 | 0.232517 |
| 0.134178 | 0.260052 | 0.126603 | 0.12704  | 0.215763 | 0.12704  | 0.230478 |
| 0.142191 | 0.265152 | 0.141608 | 0.137092 | 0.230478 | 0.131847 | 0.240239 |
| 0.132284 | 0.259615 | 0.129371 | 0.127185 | 0.220571 | 0.127768 | 0.230332 |
| 0.145979 | 0.268648 | 0.142774 | 0.137383 | 0.227855 | 0.133304 | 0.242279 |
| 0.132284 | 0.257576 | 0.128497 | 0.13039  | 0.217657 | 0.123689 | 0.230041 |
| 0.132139 | 0.259178 | 0.128059 | 0.125583 | 0.217803 | 0.120338 | 0.228438 |
| 0.139132 | 0.260635 | 0.136801 | 0.129079 | 0.220717 | 0.129953 | 0.231061 |
| 0.138695 | 0.251166 | 0.134907 | 0.135635 | 0.213869 | 0.126603 | 0.224213 |
| 0.138258 | 0.26384  | 0.13039  | 0.131119 | 0.22567  | 0.129662 | 0.238928 |
| 0.142483 | 0.262238 | 0.127331 | 0.13039  | 0.226981 | 0.125146 | 0.235286 |
| 0.133741 | 0.265443 | 0.128205 | 0.131265 | 0.22669  | 0.126603 | 0.235577 |
| 0.133159 | 0.261946 | 0.123252 | 0.123689 | 0.219697 | 0.123689 | 0.234703 |
| 0.13141  | 0.266026 | 0.129662 | 0.130682 | 0.225233 | 0.119318 | 0.234703 |
| 0.143211 | 0.265589 | 0.13884  | 0.137821 | 0.229458 | 0.129371 | 0.238054 |
| 0.127622 | 0.249709 | 0.125874 | 0.126894 | 0.210082 | 0.117279 | 0.224213 |
| 0.144231 | 0.267191 | 0.135781 | 0.13039  | 0.229312 | 0.128642 | 0.243153 |
| 0.150787 | 0.251603 | 0.145542 | 0.1419   | 0.210519 | 0.144231 | 0.221445 |
| 0.136218 | 0.258304 | 0.123106 | 0.128497 | 0.217512 | 0.128497 | 0.229312 |
| 0.14088  | 0.26384  | 0.133887 | 0.131993 | 0.227127 | 0.130245 | 0.236305 |
| 0.137238 | 0.252622 | 0.134907 | 0.137675 | 0.213578 | 0.13447  | 0.221591 |
| 0.132721 | 0.255682 | 0.122232 | 0.12296  | 0.220717 | 0.128205 | 0.228438 |
| 0.135635 | 0.250728 | 0.137675 | 0.138695 | 0.211393 | 0.130245 | 0.224068 |
| 0.151661 | 0.259761 | 0.147582 | 0.13986  | 0.219843 | 0.141608 | 0.229312 |
| 0.13141  | 0.253497 | 0.120921 | 0.124563 | 0.209207 | 0.12398  | 0.224213 |
| 0.145542 | 0.261801 | 0.137092 | 0.136655 | 0.221591 | 0.136364 | 0.238054 |
| 0.148601 | 0.24359  | 0.149184 | 0.139423 | 0.208042 | 0.147582 | 0.218386 |
| 0.135198 | 0.263986 | 0.119172 | 0.118735 | 0.225524 | 0.126311 | 0.235577 |
| 0.138403 | 0.25845  | 0.128497 | 0.128642 | 0.215909 | 0.127185 | 0.229458 |
| 0.144668 | 0.265297 | 0.139714 | 0.140734 | 0.229167 | 0.1419   | 0.238054 |
| 0.136218 | 0.265006 | 0.135052 | 0.131993 | 0.221591 | 0.129662 | 0.233974 |
| 0.145396 | 0.271853 | 0.144522 | 0.146707 | 0.234557 | 0.135635 | 0.243153 |
| 0.145251 | 0.26588  | 0.133304 | 0.136364 | 0.226253 | 0.13141  | 0.236597 |

|           |          |           |          |          |          |          |
|-----------|----------|-----------|----------|----------|----------|----------|
| 0.139277  | 0.266317 | 0.125291  | 0.127185 | 0.223776 | 0.127185 | 0.237034 |
| 0.139423  | 0.258887 | 0.131265  | 0.134033 | 0.221882 | 0.131119 | 0.2331   |
| 0.141026  | 0.258741 | 0.126457  | 0.13243  | 0.217366 | 0.126603 | 0.23208  |
| 0.146125  | 0.267045 | 0.125437  | 0.128497 | 0.229167 | 0.130828 | 0.240967 |
| 0.140297  | 0.264714 | 0.129225  | 0.130245 | 0.228875 | 0.122669 | 0.236597 |
| 0.141463  | 0.266171 | 0.127768  | 0.133159 | 0.230915 | 0.134907 | 0.241841 |
| 0.141171  | 0.26792  | 0.127477  | 0.131702 | 0.229167 | 0.131119 | 0.238928 |
| 0.144376  | 0.261801 | 0.127185  | 0.131993 | 0.221882 | 0.134033 | 0.235723 |
| 0.153118  | 0.260927 | 0.140006  | 0.143648 | 0.225962 | 0.145979 | 0.235723 |
| 0.143794  | 0.25743  | 0.131265  | 0.126457 | 0.21926  | 0.123543 | 0.231935 |
| 0.138549  | 0.26588  | 0.11961   | 0.124126 | 0.223922 | 0.12296  | 0.234848 |
| 0.145542  | 0.263258 | 0.123397  | 0.12704  | 0.225379 | 0.132284 | 0.237471 |
| 0.135635  | 0.258887 | 0.116404  | 0.121503 | 0.219843 | 0.119755 | 0.232517 |
| 0.150641  | 0.265152 | 0.147727  | 0.147873 | 0.226107 | 0.146999 | 0.236742 |
| 0.164627  | 0.270979 | 0.15035   | 0.153118 | 0.231935 | 0.156906 | 0.243153 |
| 0.138986  | 0.268065 | 0.122086  | 0.126894 | 0.226107 | 0.130099 | 0.240822 |
| 0.132139  | 0.262092 | 0.121358  | 0.127331 | 0.220134 | 0.124126 | 0.2331   |
| 0.136364  | 0.267483 | 0.129371  | 0.139714 | 0.229895 | 0.129225 | 0.240822 |
| 0.13884   | 0.26384  | 0.136218  | 0.13549  | 0.227127 | 0.125291 | 0.236597 |
| 0.141171  | 0.268794 | 0.118153  | 0.12296  | 0.228584 | 0.12704  | 0.240385 |
| 0.150495  | 0.268211 | 0.136801  | 0.136364 | 0.235868 | 0.127914 | 0.245047 |
| 0.144376  | 0.258596 | 0.137383  | 0.144814 | 0.222174 | 0.13549  | 0.233974 |
| 0.137821  | 0.265443 | 0.129079  | 0.129516 | 0.227273 | 0.124272 | 0.237034 |
| 0.162879  | 0.267483 | 0.153263  | 0.156614 | 0.236305 | 0.158071 | 0.239656 |
| 0.143357  | 0.26486  | 0.132284  | 0.133304 | 0.227273 | 0.124563 | 0.238491 |
| 0.155012  | 0.265152 | 0.140734  | 0.14088  | 0.223193 | 0.138549 | 0.238782 |
| 0.136218  | 0.265589 | 0.120192  | 0.126748 | 0.227418 | 0.123543 | 0.237471 |
| 0.142045  | 0.271416 | 0.125728  | 0.132576 | 0.233537 | 0.127622 | 0.246212 |
| 0.134761  | 0.254225 | 0.130099  | 0.127622 | 0.218386 | 0.126748 | 0.228438 |
| 0.128788  | 0.229312 | 0.147727  | 0.146707 | 0.192308 | 0.149038 | 0.202652 |
| 0.144376  | 0.262966 | 0.142045  | 0.142774 | 0.226253 | 0.144522 | 0.237762 |
| 0.0559441 | 0.250874 | 0.131993  | 0.133887 | 0.208625 | 0.136801 | 0.221591 |
| 0.069493  | 0.230624 | 0.144668  | 0.13986  | 0.18954  | 0.143648 | 0.199009 |
| 0.152681  | 0.205128 | 0.150932  | 0.156614 | 0.172786 | 0.154866 | 0.180798 |
| 0.128205  | 0.210956 | 0.155303  | 0.153409 | 0.17162  | 0.151952 | 0.18109  |
| 0.13884   | 0.265589 | 0.0992133 | 0.113636 | 0.227418 | 0.128497 | 0.238345 |
| 0.138403  | 0.259615 | 0.136072  | 0.131847 | 0.221154 | 0.135052 | 0.231206 |
| 0.125874  | 0.251457 | 0.12296   | 0.124563 | 0.208042 | 0.12398  | 0.221591 |
| 0.128934  | 0.253059 | 0.125437  | 0.119464 | 0.211101 | 0.123543 | 0.222611 |
| 0.136946  | 0.254079 | 0.129662  | 0.128642 | 0.215035 | 0.125146 | 0.224796 |
| 0.0547786 | 0.250874 | 0.129662  | 0.127768 | 0.207459 | 0.128934 | 0.221008 |
| 0.135927  | 0.258887 | 0.125728  | 0.118881 | 0.216055 | 0.11859  | 0.232226 |
| 0.10067   | 0.242279 | 0.130682  | 0.126166 | 0.200029 | 0.124709 | 0.214161 |
| 0.115822  | 0.255973 | 0.130099  | 0.128205 | 0.213432 | 0.126166 | 0.224942 |

|           |           |          |           |          |          |          |
|-----------|-----------|----------|-----------|----------|----------|----------|
| 0.129953  | 0.24359   | 0.137821 | 0.133887  | 0.202214 | 0.127477 | 0.214889 |
| 0.127622  | 0.249709  | 0.120629 | 0.114073  | 0.206876 | 0.113199 | 0.221882 |
| 0.0690559 | 0.252331  | 0.136072 | 0.136218  | 0.208625 | 0.131265 | 0.219551 |
| 0.0604604 | 0.254225  | 0.131265 | 0.131993  | 0.210519 | 0.130245 | 0.224068 |
| 0.133013  | 0.262383  | 0.119027 | 0.127622  | 0.220717 | 0.12704  | 0.235723 |
| 0.213724  | 0.112034  | 0.229167 | 0.219114  | 0.117279 | 0.219697 | 0.112179 |
| 0.0482226 | 0.260052  | 0.144085 | 0.1419    | 0.218677 | 0.148601 | 0.2331   |
| 0.132284  | 0.259033  | 0.133159 | 0.128642  | 0.225524 | 0.129808 | 0.232663 |
| 0.125437  | 0.251894  | 0.135052 | 0.133741  | 0.209062 | 0.128497 | 0.222319 |
| 0.209645  | 0.109703  | 0.2213   | 0.211538  | 0.104167 | 0.212121 | 0.103438 |
| 0.136509  | 0.247232  | 0.127768 | 0.126457  | 0.209353 | 0.132576 | 0.222028 |
| 0.13549   | 0.263112  | 0.123252 | 0.121941  | 0.222902 | 0.121358 | 0.233829 |
| 0.134907  | 0.255245  | 0.130245 | 0.125437  | 0.213578 | 0.12602  | 0.225087 |
| 0.133596  | 0.254808  | 0.133887 | 0.12704   | 0.21081  | 0.125291 | 0.224359 |
| 0.246649  | 0.0901807 | 0.25743  | 0.246795  | 0.11757  | 0.251457 | 0.106352 |
| 0.138403  | 0.259615  | 0.125583 | 0.131556  | 0.217949 | 0.132139 | 0.228875 |
| 0.131702  | 0.261364  | 0.115385 | 0.126894  | 0.219988 | 0.127477 | 0.23208  |
| 0.131119  | 0.262238  | 0.11655  | 0.126603  | 0.221737 | 0.117279 | 0.23208  |
| 0.13141   | 0.259907  | 0.119464 | 0.128059  | 0.220862 | 0.117861 | 0.227418 |
| 0.136655  | 0.250583  | 0.134615 | 0.128642  | 0.21183  | 0.133304 | 0.224213 |
| 0.119755  | 0.236597  | 0.13986  | 0.134178  | 0.196678 | 0.13884  | 0.207314 |
| 0.131993  | 0.259033  | 0.118881 | 0.123689  | 0.219697 | 0.128351 | 0.231498 |
| 0.060169  | 0.251311  | 0.128934 | 0.129371  | 0.207896 | 0.128788 | 0.22028  |
| 0.133741  | 0.255536  | 0.130245 | 0.125728  | 0.216783 | 0.13039  | 0.227127 |
| 0.125874  | 0.255245  | 0.130828 | 0.124854  | 0.21183  | 0.122523 | 0.226253 |
| 0.0668706 | 0.246649  | 0.130099 | 0.125291  | 0.204983 | 0.131993 | 0.217366 |
| 0.131993  | 0.252914  | 0.127622 | 0.126603  | 0.215909 | 0.118735 | 0.225379 |
| 0.145542  | 0.260927  | 0.14088  | 0.138403  | 0.225962 | 0.143357 | 0.237762 |
| 0.139714  | 0.258887  | 0.128934 | 0.128788  | 0.218386 | 0.134324 | 0.229312 |
| 0.139423  | 0.262383  | 0.126311 | 0.11859   | 0.219551 | 0.120338 | 0.232226 |
| 0.189831  | 0.134761  | 0.204983 | 0.197552  | 0.118153 | 0.196096 | 0.120629 |
| 0.203234  | 0.124854  | 0.218386 | 0.211247  | 0.10708  | 0.206585 | 0.110723 |
| 0.136218  | 0.247523  | 0.137675 | 0.128497  | 0.204983 | 0.12296  | 0.219988 |
| 0.126894  | 0.252477  | 0.128934 | 0.125     | 0.209936 | 0.118881 | 0.223776 |
| 0.13039   | 0.245484  | 0.150495 | 0.139569  | 0.20877  | 0.136364 | 0.223193 |
| 0.134178  | 0.260927  | 0.118153 | 0.125874  | 0.219551 | 0.127914 | 0.232809 |
| 0.137238  | 0.259033  | 0.127622 | 0.129225  | 0.218531 | 0.129808 | 0.231789 |
| 0.127768  | 0.256847  | 0.119901 | 0.121212  | 0.214598 | 0.12296  | 0.227564 |
| 0.221008  | 0.115239  | 0.234411 | 0.227564  | 0.111742 | 0.226981 | 0.117133 |
| 0.126603  | 0.259178  | 0.128934 | 0.128497  | 0.220425 | 0.123252 | 0.228438 |
| 0.203963  | 0.142483  | 0.216492 | 0.210227  | 0.137821 | 0.212267 | 0.136218 |
| 0.128059  | 0.263549  | 0.10067  | 0.111597  | 0.223922 | 0.120629 | 0.234266 |
| 0.130536  | 0.254079  | 0.105769 | 0.0627914 | 0.214744 | 0.117279 | 0.225379 |
| 0.116987  | 0.244901  | 0.126311 | 0.130536  | 0.206148 | 0.125874 | 0.217366 |

|           |          |           |           |          |          |          |
|-----------|----------|-----------|-----------|----------|----------|----------|
| 0.128351  | 0.246358 | 0.126311  | 0.121212  | 0.203234 | 0.120047 | 0.219697 |
| 0.20542   | 0.125583 | 0.220862  | 0.211101  | 0.104021 | 0.208188 | 0.112908 |
| 0.0576923 | 0.246212 | 0.141608  | 0.14292   | 0.205711 | 0.140589 | 0.217803 |
| 0.133741  | 0.264569 | 0.0556527 | 0.103875  | 0.226399 | 0.116987 | 0.237325 |
| 0.0486597 | 0.251457 | 0.13345   | 0.131265  | 0.211247 | 0.135927 | 0.225087 |
| 0.131119  | 0.258741 | 0.126166  | 0.121358  | 0.221737 | 0.124272 | 0.228875 |
| 0.131993  | 0.255536 | 0.134615  | 0.129808  | 0.211247 | 0.124272 | 0.226253 |
| 0.130682  | 0.263549 | 0.0986305 | 0.11014   | 0.223339 | 0.121212 | 0.233392 |
| 0.133887  | 0.247815 | 0.122815  | 0.12704   | 0.207896 | 0.132867 | 0.221737 |
| 0.135927  | 0.262675 | 0.122523  | 0.119172  | 0.2213   | 0.119172 | 0.234557 |
| 0.067162  | 0.245775 | 0.127185  | 0.128788  | 0.202652 | 0.128788 | 0.215035 |
| 0.134615  | 0.258159 | 0.0550699 | 0.101544  | 0.220571 | 0.117279 | 0.228001 |
| 0.193619  | 0.135927 | 0.203526  | 0.196678  | 0.114656 | 0.196387 | 0.11859  |
| 0.132576  | 0.261072 | 0.119755  | 0.127185  | 0.223485 | 0.118444 | 0.229749 |
| 0.13243   | 0.256847 | 0.132139  | 0.132284  | 0.218969 | 0.131119 | 0.228438 |
| 0.123543  | 0.252914 | 0.127331  | 0.129808  | 0.212995 | 0.123106 | 0.222756 |
| 0.139423  | 0.253351 | 0.13039   | 0.131993  | 0.21285  | 0.133159 | 0.225233 |
| 0.0525932 | 0.251894 | 0.130099  | 0.127914  | 0.209353 | 0.132576 | 0.223776 |
| 0.133304  | 0.265297 | 0.0992133 | 0.111014  | 0.224505 | 0.12296  | 0.238054 |
| 0.125     | 0.252331 | 0.121503  | 0.118735  | 0.214744 | 0.123689 | 0.222756 |
| 0.136072  | 0.261946 | 0.113345  | 0.127185  | 0.223485 | 0.128059 | 0.235286 |
| 0.129808  | 0.256265 | 0.128934  | 0.127914  | 0.216929 | 0.130536 | 0.226399 |
| 0.130099  | 0.258013 | 0.119318  | 0.124709  | 0.216929 | 0.118007 | 0.228147 |
| 0.132867  | 0.253205 | 0.134033  | 0.13039   | 0.208333 | 0.127185 | 0.221591 |
| 0.135927  | 0.260927 | 0.133304  | 0.128788  | 0.2213   | 0.130245 | 0.232809 |
| 0.140152  | 0.259324 | 0.137238  | 0.13039   | 0.222902 | 0.135927 | 0.235577 |
| 0.13345   | 0.254662 | 0.125291  | 0.123689  | 0.211538 | 0.126894 | 0.225379 |
| 0.0456002 | 0.257721 | 0.140297  | 0.138695  | 0.217512 | 0.142483 | 0.230478 |
| 0.129516  | 0.252768 | 0.129808  | 0.127622  | 0.209936 | 0.120921 | 0.224359 |
| 0.119318  | 0.253059 | 0.112617  | 0.115385  | 0.211976 | 0.121503 | 0.223776 |
| 0.07838   | 0.236597 | 0.134615  | 0.128059  | 0.196096 | 0.136218 | 0.20877  |
| 0.139569  | 0.257284 | 0.121795  | 0.13039   | 0.219697 | 0.130682 | 0.231789 |
| 0.19289   | 0.146562 | 0.199592  | 0.194202  | 0.127331 | 0.19595  | 0.123397 |
| 0.131847  | 0.255682 | 0.0557984 | 0.0984848 | 0.218677 | 0.11451  | 0.22669  |
| 0.114365  | 0.248397 | 0.116404  | 0.112762  | 0.205274 | 0.118007 | 0.218531 |
| 0.135927  | 0.263549 | 0.121358  | 0.123834  | 0.223339 | 0.116259 | 0.234557 |
| 0.181672  | 0.161568 | 0.194493  | 0.187937  | 0.133596 | 0.188228 | 0.140443 |
| 0.148601  | 0.261655 | 0.136946  | 0.136801  | 0.223193 | 0.140589 | 0.230915 |
| 0.155886  | 0.263403 | 0.138112  | 0.139423  | 0.229604 | 0.144668 | 0.24053  |
| 0.145833  | 0.260635 | 0.143211  | 0.140734  | 0.228584 | 0.146853 | 0.237471 |
| 0.133887  | 0.252477 | 0.123397  | 0.123543  | 0.211684 | 0.12296  | 0.220862 |
| 0.0524476 | 0.249709 | 0.128497  | 0.129225  | 0.206002 | 0.131556 | 0.219551 |
| 0.206439  | 0.119901 | 0.222756  | 0.217075  | 0.104458 | 0.215035 | 0.116259 |
| 0.123689  | 0.247523 | 0.132721  | 0.125583  | 0.207314 | 0.128205 | 0.219697 |

|           |          |           |          |          |          |          |
|-----------|----------|-----------|----------|----------|----------|----------|
| 0.048951  | 0.250583 | 0.133741  | 0.133013 | 0.209207 | 0.13447  | 0.224213 |
| 0.134324  | 0.257284 | 0.0541958 | 0.100087 | 0.217075 | 0.11757  | 0.228584 |
| 0.159091  | 0.189394 | 0.180653  | 0.173223 | 0.153846 | 0.175554 | 0.163899 |
| 0.122669  | 0.249126 | 0.125874  | 0.127477 | 0.205711 | 0.11961  | 0.218094 |
| 0.148456  | 0.262092 | 0.13884   | 0.138695 | 0.22771  | 0.139277 | 0.236014 |
| 0.138258  | 0.248106 | 0.125437  | 0.119172 | 0.209353 | 0.121795 | 0.218823 |
| 0.190414  | 0.142337 | 0.201777  | 0.193182 | 0.117279 | 0.195221 | 0.126166 |
| 0.139423  | 0.259178 | 0.12602   | 0.127622 | 0.216929 | 0.128497 | 0.231061 |
| 0.118444  | 0.255682 | 0.120484  | 0.121795 | 0.213724 | 0.119464 | 0.223193 |
| 0.122669  | 0.254371 | 0.11859   | 0.11757  | 0.214161 | 0.124272 | 0.224213 |
| 0.128059  | 0.258887 | 0.124854  | 0.115967 | 0.215472 | 0.119755 | 0.229895 |
| 0.135635  | 0.261801 | 0.127477  | 0.121503 | 0.221591 | 0.120047 | 0.232226 |
| 0.131847  | 0.249563 | 0.129225  | 0.127331 | 0.210519 | 0.12704  | 0.219988 |
| 0.130828  | 0.253788 | 0.130828  | 0.12602  | 0.208625 | 0.119901 | 0.222465 |
| 0.194493  | 0.133304 | 0.200903  | 0.196387 | 0.118153 | 0.194639 | 0.121503 |
| 0.132284  | 0.25845  | 0.129371  | 0.129225 | 0.215909 | 0.130099 | 0.226836 |
| 0.120484  | 0.248397 | 0.124563  | 0.123543 | 0.20877  | 0.120338 | 0.218823 |
| 0.212121  | 0.118298 | 0.222028  | 0.214307 | 0.108392 | 0.213432 | 0.105041 |
| 0.133159  | 0.263695 | 0.113928  | 0.126311 | 0.224942 | 0.118444 | 0.233537 |
| 0.130973  | 0.254516 | 0.131265  | 0.125    | 0.209353 | 0.118007 | 0.224942 |
| 0.126603  | 0.251894 | 0.124563  | 0.124126 | 0.208479 | 0.117424 | 0.222028 |
| 0.0614802 | 0.253788 | 0.139569  | 0.134761 | 0.213869 | 0.14088  | 0.227418 |
| 0.191725  | 0.133741 | 0.201632  | 0.194202 | 0.115967 | 0.195659 | 0.12398  |
| 0.133013  | 0.263258 | 0.120484  | 0.129662 | 0.223339 | 0.127914 | 0.237471 |
| 0.137383  | 0.258887 | 0.133596  | 0.129662 | 0.221008 | 0.129953 | 0.230478 |
| 0.132139  | 0.254516 | 0.126894  | 0.125291 | 0.210227 | 0.117716 | 0.22465  |
| 0.128934  | 0.253351 | 0.128934  | 0.123252 | 0.213141 | 0.11859  | 0.226107 |
| 0.131119  | 0.248834 | 0.127914  | 0.124854 | 0.209207 | 0.120192 | 0.220425 |
| 0.0651224 | 0.25539  | 0.13243   | 0.130536 | 0.211101 | 0.130536 | 0.222028 |
| 0.126457  | 0.254953 | 0.115093  | 0.112034 | 0.212704 | 0.112908 | 0.222756 |
| 0.141317  | 0.260198 | 0.124709  | 0.13039  | 0.219697 | 0.131847 | 0.231206 |
| 0.128788  | 0.265152 | 0.13345   | 0.131556 | 0.22669  | 0.132139 | 0.238199 |
| 0.13986   | 0.259324 | 0.12704   | 0.130099 | 0.218823 | 0.13243  | 0.228875 |
| 0.131847  | 0.261218 | 0.128934  | 0.122086 | 0.223048 | 0.125583 | 0.231643 |
| 0.196678  | 0.13986  | 0.203963  | 0.200612 | 0.116259 | 0.201195 | 0.129225 |
| 0.135635  | 0.256847 | 0.130682  | 0.127331 | 0.217803 | 0.128497 | 0.227855 |
| 0.0541958 | 0.251457 | 0.138112  | 0.135344 | 0.210664 | 0.137383 | 0.222465 |
| 0.127768  | 0.253934 | 0.129225  | 0.120921 | 0.210519 | 0.117716 | 0.225816 |
| 0.128205  | 0.25204  | 0.117133  | 0.11116  | 0.208625 | 0.108829 | 0.224505 |
| 0.125291  | 0.25     | 0.125     | 0.124272 | 0.207459 | 0.128059 | 0.218677 |
| 0.132139  | 0.261218 | 0.117861  | 0.126748 | 0.220134 | 0.126748 | 0.232226 |
| 0.130973  | 0.25743  | 0.133887  | 0.127331 | 0.215763 | 0.132576 | 0.22465  |
| 0.130245  | 0.258741 | 0.129079  | 0.128351 | 0.217366 | 0.129808 | 0.228293 |
| 0.13141   | 0.252914 | 0.115676  | 0.119318 | 0.211538 | 0.121941 | 0.22567  |

|           |          |           |          |          |          |          |
|-----------|----------|-----------|----------|----------|----------|----------|
| 0.123397  | 0.251894 | 0.114948  | 0.118881 | 0.211393 | 0.118007 | 0.219697 |
| 0.123252  | 0.251748 | 0.122086  | 0.122232 | 0.210082 | 0.118444 | 0.223339 |
| 0.132721  | 0.262383 | 0.100087  | 0.109266 | 0.224505 | 0.126166 | 0.231935 |
| 0.143357  | 0.263403 | 0.130245  | 0.132721 | 0.224068 | 0.134178 | 0.23208  |
| 0.133887  | 0.262675 | 0.118735  | 0.127622 | 0.220134 | 0.126748 | 0.23514  |
| 0.0664336 | 0.248834 | 0.125291  | 0.121941 | 0.204837 | 0.125728 | 0.218386 |
| 0.129371  | 0.260198 | 0.113054  | 0.123397 | 0.219114 | 0.125146 | 0.232955 |
| 0.128934  | 0.25102  | 0.129808  | 0.122086 | 0.209353 | 0.11859  | 0.222611 |
| 0.130536  | 0.260198 | 0.0568182 | 0.100962 | 0.219406 | 0.113199 | 0.229167 |
| 0.130245  | 0.254079 | 0.133159  | 0.125437 | 0.20979  | 0.118444 | 0.224213 |
| 0.13141   | 0.255536 | 0.126748  | 0.120775 | 0.213869 | 0.122523 | 0.226253 |
| 0.130536  | 0.25845  | 0.130536  | 0.127185 | 0.215326 | 0.128642 | 0.228584 |
| 0.134324  | 0.261946 | 0.119464  | 0.119318 | 0.223193 | 0.115239 | 0.233246 |
| 0.126311  | 0.254516 | 0.119027  | 0.117133 | 0.211393 | 0.116841 | 0.228147 |
| 0.128205  | 0.253788 | 0.129079  | 0.126311 | 0.20979  | 0.11757  | 0.226836 |
| 0.128788  | 0.242716 | 0.122086  | 0.123397 | 0.204837 | 0.130099 | 0.21285  |
| 0.125146  | 0.256847 | 0.133304  | 0.130245 | 0.214598 | 0.126748 | 0.22669  |
| 0.128497  | 0.255245 | 0.121503  | 0.119901 | 0.21183  | 0.12398  | 0.225962 |
| 0.125     | 0.256119 | 0.129371  | 0.125728 | 0.210082 | 0.120192 | 0.225962 |
| 0.0540501 | 0.24898  | 0.129225  | 0.127331 | 0.207896 | 0.131119 | 0.218531 |
| 0.13447   | 0.261218 | 0.101836  | 0.113636 | 0.223048 | 0.128205 | 0.233974 |
| 0.0595862 | 0.254516 | 0.133013  | 0.131702 | 0.210227 | 0.131702 | 0.223776 |
| 0.136801  | 0.261218 | 0.123106  | 0.121795 | 0.221882 | 0.119755 | 0.231935 |
| 0.129808  | 0.256265 | 0.120484  | 0.115676 | 0.214889 | 0.117424 | 0.22873  |
| 0.126603  | 0.252185 | 0.121358  | 0.119464 | 0.210519 | 0.120629 | 0.221445 |
| 0.129662  | 0.258741 | 0.0585664 | 0.101544 | 0.219988 | 0.114073 | 0.230624 |
| 0.0625    | 0.251311 | 0.13447   | 0.129662 | 0.20877  | 0.131702 | 0.221154 |
| 0.124854  | 0.258304 | 0.121358  | 0.131702 | 0.219843 | 0.132867 | 0.226107 |
| 0.119464  | 0.252331 | 0.127622  | 0.126311 | 0.208625 | 0.123689 | 0.223048 |
| 0.19697   | 0.138403 | 0.206002  | 0.200321 | 0.113928 | 0.197407 | 0.119318 |
| 0.159382  | 0.182401 | 0.175991  | 0.169435 | 0.145979 | 0.172057 | 0.160111 |
| 0.137238  | 0.259615 | 0.125     | 0.128351 | 0.21824  | 0.130682 | 0.230624 |
| 0.125146  | 0.250146 | 0.12398   | 0.127331 | 0.210519 | 0.129371 | 0.222902 |
| 0.157488  | 0.26588  | 0.140589  | 0.142774 | 0.234411 | 0.146853 | 0.244464 |
| 0.134615  | 0.259033 | 0.130245  | 0.127477 | 0.217657 | 0.125146 | 0.230624 |
| 0.13243   | 0.247815 | 0.130099  | 0.127914 | 0.207314 | 0.126748 | 0.219114 |
| 0.124417  | 0.253205 | 0.130536  | 0.125728 | 0.208625 | 0.126894 | 0.222756 |
| 0.129371  | 0.255245 | 0.129953  | 0.12602  | 0.213869 | 0.116696 | 0.226253 |
| 0.123834  | 0.256993 | 0.132867  | 0.129808 | 0.215909 | 0.122523 | 0.226253 |
| 0.201777  | 0.131556 | 0.215472  | 0.20542  | 0.10708  | 0.208333 | 0.118007 |
| 0.136364  | 0.264569 | 0.117133  | 0.129516 | 0.221737 | 0.129808 | 0.236742 |
| 0.0840618 | 0.244901 | 0.128934  | 0.13141  | 0.204108 | 0.136364 | 0.214452 |
| 0.127185  | 0.248106 | 0.127768  | 0.123543 | 0.207896 | 0.116841 | 0.220862 |
| 0.131702  | 0.259615 | 0.125291  | 0.123397 | 0.222611 | 0.124563 | 0.232663 |



|           |           |          |          |          |          |          |
|-----------|-----------|----------|----------|----------|----------|----------|
| 0.18954   | 0.168561  | 0.200903 | 0.19289  | 0.136509 | 0.193473 | 0.145688 |
| 0.239656  | 0.0968823 | 0.254516 | 0.245921 | 0.114656 | 0.246795 | 0.104021 |
| 0.130099  | 0.258596  | 0.131265 | 0.125291 | 0.218094 | 0.130536 | 0.229895 |
| 0.126311  | 0.257721  | 0.131847 | 0.129662 | 0.215181 | 0.125    | 0.22669  |
| 0.139132  | 0.258887  | 0.128059 | 0.126457 | 0.216346 | 0.129371 | 0.227564 |
| 0.136072  | 0.261946  | 0.120338 | 0.116987 | 0.218823 | 0.115239 | 0.23208  |
| 0.127477  | 0.261509  | 0.112325 | 0.121212 | 0.219551 | 0.125583 | 0.237179 |
| 0.124417  | 0.25204   | 0.122378 | 0.122523 | 0.210373 | 0.128059 | 0.223339 |
| 0.097465  | 0.246066  | 0.128351 | 0.125874 | 0.201486 | 0.124126 | 0.213869 |
| 0.130099  | 0.258887  | 0.113491 | 0.122669 | 0.219843 | 0.124417 | 0.232226 |
| 0.0850816 | 0.245047  | 0.128497 | 0.125146 | 0.202214 | 0.125146 | 0.215181 |
| 0.132721  | 0.261509  | 0.129225 | 0.124417 | 0.218094 | 0.127622 | 0.231352 |
| 0.130245  | 0.254371  | 0.12296  | 0.114365 | 0.212413 | 0.119027 | 0.225379 |
| 0.130682  | 0.257721  | 0.128934 | 0.127331 | 0.216055 | 0.129662 | 0.22669  |
| 0.0632284 | 0.253788  | 0.134907 | 0.131556 | 0.209207 | 0.130099 | 0.2213   |
| 0.117133  | 0.249417  | 0.114219 | 0.111451 | 0.20542  | 0.11757  | 0.219551 |
| 0.135198  | 0.265443  | 0.124709 | 0.129808 | 0.225816 | 0.132139 | 0.239073 |
| 0.143648  | 0.2669    | 0.126457 | 0.122523 | 0.231935 | 0.121941 | 0.240822 |
| 0.129808  | 0.252185  | 0.125437 | 0.121212 | 0.210519 | 0.117716 | 0.225524 |
| 0.133741  | 0.246212  | 0.128788 | 0.124854 | 0.200758 | 0.121941 | 0.214307 |
| 0.136946  | 0.253497  | 0.136946 | 0.131847 | 0.215909 | 0.127768 | 0.229749 |
| 0.207605  | 0.129808  | 0.219843 | 0.212704 | 0.118444 | 0.212121 | 0.115967 |
| 0.12296   | 0.25204   | 0.12296  | 0.120775 | 0.207459 | 0.121358 | 0.220425 |
| 0.129516  | 0.256847  | 0.117861 | 0.112762 | 0.215181 | 0.113345 | 0.229021 |
| 0.135927  | 0.258013  | 0.129808 | 0.126166 | 0.21722  | 0.126748 | 0.22873  |
| 0.129953  | 0.260781  | 0.119464 | 0.129516 | 0.220571 | 0.121358 | 0.232663 |
| 0.126457  | 0.25845   | 0.120047 | 0.11961  | 0.218823 | 0.120192 | 0.231789 |
| 0.200175  | 0.133741  | 0.210956 | 0.206439 | 0.111888 | 0.206731 | 0.119318 |
| 0.0633741 | 0.252768  | 0.13447  | 0.132576 | 0.210519 | 0.133741 | 0.224359 |
| 0.12704   | 0.254079  | 0.12704  | 0.121649 | 0.207751 | 0.118735 | 0.224505 |
| 0.133013  | 0.25539   | 0.122523 | 0.12704  | 0.219551 | 0.126457 | 0.229895 |
| 0.131847  | 0.260635  | 0.11757  | 0.116841 | 0.220425 | 0.117424 | 0.231352 |
| 0.0622086 | 0.25102   | 0.134178 | 0.131119 | 0.207022 | 0.13345  | 0.223776 |
| 0.0890152 | 0.246066  | 0.124854 | 0.123543 | 0.201777 | 0.12296  | 0.2162   |
| 0.128642  | 0.259178  | 0.126894 | 0.124126 | 0.217803 | 0.127914 | 0.231935 |
| 0.130973  | 0.261509  | 0.119318 | 0.12704  | 0.220425 | 0.115385 | 0.230478 |
| 0.198427  | 0.134615  | 0.212704 | 0.205565 | 0.116841 | 0.203234 | 0.120775 |
| 0.0677448 | 0.245192  | 0.124272 | 0.123252 | 0.204108 | 0.125291 | 0.2162   |
| 0.196678  | 0.141608  | 0.207751 | 0.198864 | 0.110431 | 0.199155 | 0.120484 |
| 0.194202  | 0.133887  | 0.204691 | 0.198135 | 0.114365 | 0.198427 | 0.116259 |
| 0.138549  | 0.266171  | 0.12602  | 0.123252 | 0.228584 | 0.118881 | 0.236305 |
| 0.14088   | 0.265006  | 0.117279 | 0.129079 | 0.229458 | 0.120047 | 0.236888 |
| 0.122523  | 0.255099  | 0.121066 | 0.117716 | 0.209645 | 0.120921 | 0.225233 |
| 0.076049  | 0.250291  | 0.119755 | 0.122232 | 0.206294 | 0.122232 | 0.219843 |

|           |          |           |           |          |          |          |
|-----------|----------|-----------|-----------|----------|----------|----------|
| 0.0680361 | 0.252477 | 0.128642  | 0.127331  | 0.206731 | 0.132867 | 0.222611 |
| 0.128934  | 0.253642 | 0.131556  | 0.125874  | 0.210519 | 0.120047 | 0.225524 |
| 0.123689  | 0.258304 | 0.114656  | 0.119172  | 0.217512 | 0.122378 | 0.230186 |
| 0.129225  | 0.262675 | 0.114073  | 0.122378  | 0.221591 | 0.122086 | 0.234266 |
| 0.132576  | 0.255536 | 0.130245  | 0.131847  | 0.213578 | 0.13243  | 0.227127 |
| 0.136218  | 0.261218 | 0.123397  | 0.120921  | 0.221591 | 0.116841 | 0.233392 |
| 0.123834  | 0.250291 | 0.124709  | 0.122232  | 0.206002 | 0.118735 | 0.219551 |
| 0.0630828 | 0.253351 | 0.129516  | 0.129662  | 0.209936 | 0.13141  | 0.220862 |
| 0.118881  | 0.252331 | 0.114802  | 0.119318  | 0.211538 | 0.11553  | 0.224213 |
| 0.0511364 | 0.253934 | 0.134761  | 0.13141   | 0.211976 | 0.136072 | 0.223193 |
| 0.13447   | 0.257721 | 0.124563  | 0.128497  | 0.21722  | 0.131119 | 0.230769 |
| 0         | 0.255536 | 0.139569  | 0.138549  | 0.214161 | 0.141171 | 0.228293 |
| 0.255536  | 0        | 0.263403  | 0.256847  | 0.118881 | 0.261218 | 0.108537 |
| 0.139569  | 0.263403 | 0         | 0.0995047 | 0.229021 | 0.124272 | 0.241404 |
| 0.138549  | 0.256847 | 0.0995047 | 0         | 0.21926  | 0.117424 | 0.231061 |
| 0.214161  | 0.118881 | 0.229021  | 0.21926   | 0        | 0.219843 | 0.109411 |
| 0.141171  | 0.261218 | 0.124272  | 0.117424  | 0.219843 | 0        | 0.231935 |
| 0.228293  | 0.108537 | 0.241404  | 0.231061  | 0.109411 | 0.231935 | 0        |
| 0.130245  | 0.261072 | 0.0480769 | 0.0989219 | 0.22465  | 0.116987 | 0.233246 |
| 0.135052  | 0.255099 | 0.138549  | 0.129079  | 0.216638 | 0.126166 | 0.229312 |
| 0.128059  | 0.260052 | 0.118444  | 0.12296   | 0.216346 | 0.117424 | 0.229021 |
| 0.138549  | 0.261801 | 0.12398   | 0.123543  | 0.224213 | 0.122378 | 0.236597 |
| 0.204691  | 0.137383 | 0.214889  | 0.20979   | 0.120775 | 0.206585 | 0.123252 |
| 0.050845  | 0.254516 | 0.139132  | 0.138112  | 0.217512 | 0.138695 | 0.229021 |
| 0.0642483 | 0.253059 | 0.130682  | 0.129662  | 0.210227 | 0.133159 | 0.221445 |
| 0.22465   | 0.113928 | 0.237179  | 0.230332  | 0.118298 | 0.228875 | 0.110286 |
| 0.133304  | 0.260927 | 0.122232  | 0.127914  | 0.220425 | 0.12704  | 0.233392 |
| 0.200758  | 0.132576 | 0.21183   | 0.204983  | 0.117716 | 0.200903 | 0.119901 |
| 0.133159  | 0.260781 | 0.119172  | 0.129516  | 0.222028 | 0.129225 | 0.23412  |
| 0.131702  | 0.256702 | 0.130828  | 0.127477  | 0.212704 | 0.122232 | 0.226836 |
| 0.133304  | 0.258596 | 0.123397  | 0.117424  | 0.216929 | 0.118881 | 0.230478 |
| 0.141171  | 0.265297 | 0.126311  | 0.122378  | 0.228584 | 0.11655  | 0.236888 |
| 0.126457  | 0.252622 | 0.129662  | 0.131556  | 0.208333 | 0.12398  | 0.220717 |
| 0.168124  | 0.185023 | 0.174534  | 0.163316  | 0.148019 | 0.165647 | 0.159819 |
| 0.0611888 | 0.249126 | 0.130245  | 0.126894  | 0.206294 | 0.124854 | 0.218969 |
| 0.135198  | 0.261364 | 0.120047  | 0.129808  | 0.219988 | 0.117279 | 0.230041 |
| 0.13549   | 0.256702 | 0.129662  | 0.124854  | 0.217949 | 0.118735 | 0.230332 |
| 0.12296   | 0.255536 | 0.117424  | 0.119901  | 0.216783 | 0.124854 | 0.225379 |
| 0.197407  | 0.137675 | 0.209645  | 0.203089  | 0.115239 | 0.200758 | 0.123543 |
| 0.127914  | 0.253497 | 0.129079  | 0.122232  | 0.209207 | 0.116987 | 0.222465 |
| 0.139714  | 0.250437 | 0.130682  | 0.127622  | 0.21081  | 0.123834 | 0.224068 |
| 0.133159  | 0.261364 | 0.101107  | 0.112325  | 0.224068 | 0.125728 | 0.234994 |
| 0.131265  | 0.263549 | 0.115239  | 0.125874  | 0.2213   | 0.125291 | 0.236597 |
| 0.131119  | 0.25204  | 0.13141   | 0.125146  | 0.211538 | 0.123689 | 0.221882 |

|           |           |          |          |          |          |          |
|-----------|-----------|----------|----------|----------|----------|----------|
| 0.250728  | 0.0893065 | 0.264423 | 0.254079 | 0.118444 | 0.255536 | 0.110431 |
| 0.129079  | 0.256702  | 0.117424 | 0.113199 | 0.215909 | 0.11757  | 0.228001 |
| 0.132576  | 0.251748  | 0.130536 | 0.128642 | 0.20979  | 0.124854 | 0.224505 |
| 0.181527  | 0.18007   | 0.181818 | 0.178176 | 0.154429 | 0.178176 | 0.159237 |
| 0.191142  | 0.145396  | 0.197844 | 0.194493 | 0.120047 | 0.19391  | 0.127477 |
| 0.132284  | 0.255828  | 0.130245 | 0.130973 | 0.217949 | 0.130973 | 0.229167 |
| 0.0625    | 0.254516  | 0.132139 | 0.128788 | 0.21081  | 0.132284 | 0.220862 |
| 0.13039   | 0.261218  | 0.122523 | 0.118881 | 0.219551 | 0.118881 | 0.229312 |
| 0.0515734 | 0.255828  | 0.145979 | 0.146416 | 0.219114 | 0.149913 | 0.229167 |
| 0.13141   | 0.254371  | 0.129953 | 0.12602  | 0.215035 | 0.126603 | 0.22567  |
| 0.133304  | 0.25947   | 0.128934 | 0.133159 | 0.216346 | 0.130536 | 0.230478 |
| 0.138112  | 0.262529  | 0.118298 | 0.130682 | 0.222028 | 0.130973 | 0.237034 |
| 0.0533217 | 0.246503  | 0.126166 | 0.123689 | 0.204254 | 0.127768 | 0.215181 |
| 0.0467657 | 0.250437  | 0.133887 | 0.131702 | 0.21081  | 0.134615 | 0.224359 |
| 0.13345   | 0.246212  | 0.124126 | 0.123397 | 0.205711 | 0.13447  | 0.217803 |
| 0.138258  | 0.265297  | 0.122232 | 0.120047 | 0.22567  | 0.115967 | 0.2331   |
| 0.151515  | 0.269231  | 0.133159 | 0.129225 | 0.233974 | 0.128351 | 0.243735 |
| 0.133887  | 0.258887  | 0.120192 | 0.11655  | 0.216929 | 0.119755 | 0.230478 |
| 0.142483  | 0.268939  | 0.125291 | 0.122815 | 0.229895 | 0.120192 | 0.242279 |
| 0.136946  | 0.266317  | 0.119755 | 0.129808 | 0.227855 | 0.131847 | 0.24053  |
| 0.20877   | 0.135344  | 0.221882 | 0.213578 | 0.11757  | 0.211538 | 0.118007 |
| 0.140443  | 0.262238  | 0.125583 | 0.127768 | 0.222319 | 0.125146 | 0.232955 |
| 0.196387  | 0.138695  | 0.204254 | 0.196533 | 0.118007 | 0.197698 | 0.116987 |
| 0.128497  | 0.255245  | 0.115967 | 0.116404 | 0.213578 | 0.114948 | 0.225087 |
| 0.134324  | 0.251166  | 0.136946 | 0.130682 | 0.212121 | 0.124854 | 0.221882 |
| 0.135781  | 0.254079  | 0.128788 | 0.129516 | 0.212704 | 0.128059 | 0.223631 |
| 0.134178  | 0.256265  | 0.127185 | 0.124709 | 0.209936 | 0.127331 | 0.225816 |
| 0.0504079 | 0.251166  | 0.132284 | 0.130973 | 0.206585 | 0.131847 | 0.218677 |
| 0.0492424 | 0.252622  | 0.127622 | 0.130099 | 0.210082 | 0.132139 | 0.222174 |
| 0.133159  | 0.254079  | 0.132867 | 0.126603 | 0.208625 | 0.121066 | 0.221591 |
| 0.131556  | 0.260052  | 0.120484 | 0.128205 | 0.21722  | 0.116841 | 0.227564 |
| 0.134761  | 0.260052  | 0.129808 | 0.129953 | 0.216055 | 0.133741 | 0.230186 |
| 0.145396  | 0.254662  | 0.122086 | 0.129808 | 0.219406 | 0.13447  | 0.227127 |
| 0.246212  | 0.0879953 | 0.257576 | 0.248689 | 0.115967 | 0.248106 | 0.10912  |
| 0.132867  | 0.254371  | 0.134907 | 0.13039  | 0.211247 | 0.121358 | 0.226544 |
| 0.188666  | 0.14729   | 0.198281 | 0.191434 | 0.118735 | 0.189685 | 0.124709 |
| 0.190559  | 0.138695  | 0.202797 | 0.198281 | 0.115385 | 0.194784 | 0.123397 |
| 0.137383  | 0.251894  | 0.134761 | 0.129953 | 0.210227 | 0.121503 | 0.220571 |
| 0.127768  | 0.256556  | 0.118444 | 0.115385 | 0.215472 | 0.114219 | 0.226981 |
| 0.133304  | 0.256847  | 0.13447  | 0.129953 | 0.213432 | 0.123834 | 0.224359 |
| 0.0651224 | 0.249563  | 0.128642 | 0.129079 | 0.207022 | 0.126748 | 0.217949 |
| 0.129662  | 0.245338  | 0.125874 | 0.126603 | 0.204837 | 0.118444 | 0.21926  |
| 0.132576  | 0.261655  | 0.119464 | 0.126894 | 0.219406 | 0.128351 | 0.233246 |
| 0.0773601 | 0.245192  | 0.129225 | 0.126166 | 0.207605 | 0.128205 | 0.215909 |

|           |          |          |           |          |          |          |
|-----------|----------|----------|-----------|----------|----------|----------|
| 0.0499709 | 0.258887 | 0.137092 | 0.136946  | 0.220134 | 0.138986 | 0.233392 |
| 0.130245  | 0.25204  | 0.128205 | 0.123689  | 0.210664 | 0.119027 | 0.224796 |
| 0.0530303 | 0.256993 | 0.13345  | 0.131847  | 0.213869 | 0.138258 | 0.225962 |
| 0.133013  | 0.25743  | 0.10708  | 0.0626457 | 0.216346 | 0.11451  | 0.22669  |
| 0.137675  | 0.26384  | 0.129516 | 0.130828  | 0.220134 | 0.131993 | 0.233392 |
| 0.135198  | 0.262821 | 0.126166 | 0.121066  | 0.222028 | 0.121358 | 0.234703 |
| 0.140589  | 0.26588  | 0.121941 | 0.131702  | 0.228875 | 0.131993 | 0.241259 |
| 0.136072  | 0.260781 | 0.126166 | 0.121649  | 0.217949 | 0.128059 | 0.230624 |
| 0.128205  | 0.249126 | 0.129079 | 0.121358  | 0.206585 | 0.119901 | 0.218386 |
| 0.136946  | 0.259907 | 0.137821 | 0.132139  | 0.220862 | 0.13243  | 0.232663 |
| 0.189248  | 0.142045 | 0.198572 | 0.192599  | 0.11757  | 0.191142 | 0.123834 |
| 0.0506993 | 0.258159 | 0.136655 | 0.135635  | 0.217075 | 0.140589 | 0.22771  |
| 0.0562354 | 0.251457 | 0.132576 | 0.130099  | 0.210082 | 0.133304 | 0.221008 |
| 0.137092  | 0.258596 | 0.122232 | 0.126166  | 0.216055 | 0.125583 | 0.229604 |
| 0.127331  | 0.253788 | 0.116259 | 0.118153  | 0.212413 | 0.119027 | 0.225379 |
| 0.135052  | 0.260635 | 0.121941 | 0.119755  | 0.218386 | 0.11655  | 0.231061 |
| 0.141608  | 0.264569 | 0.125874 | 0.122815  | 0.222902 | 0.119318 | 0.234411 |
| 0.195367  | 0.135344 | 0.207896 | 0.199883  | 0.116113 | 0.197552 | 0.121503 |
| 0.0782343 | 0.243444 | 0.128934 | 0.129371  | 0.198572 | 0.134324 | 0.21183  |
| 0.117424  | 0.231061 | 0.119172 | 0.122232  | 0.192016 | 0.122232 | 0.202652 |
| 0.0530303 | 0.254079 | 0.13141  | 0.132139  | 0.210664 | 0.131265 | 0.224213 |
| 0.193328  | 0.137675 | 0.207022 | 0.198718  | 0.116987 | 0.198427 | 0.119172 |
| 0.130245  | 0.251166 | 0.120338 | 0.11553   | 0.209207 | 0.116696 | 0.220425 |
| 0.137092  | 0.264132 | 0.115239 | 0.127622  | 0.225379 | 0.128788 | 0.238636 |
| 0.0479312 | 0.254808 | 0.130973 | 0.129953  | 0.21081  | 0.134324 | 0.22465  |
| 0.127914  | 0.25641  | 0.122378 | 0.125146  | 0.216492 | 0.126311 | 0.228293 |
| 0.190851  | 0.140443 | 0.202506 | 0.19391   | 0.112179 | 0.193036 | 0.125146 |
| 0.131119  | 0.259324 | 0.11859  | 0.12602   | 0.218823 | 0.125728 | 0.230332 |
| 0.12296   | 0.249126 | 0.128497 | 0.121066  | 0.209207 | 0.120192 | 0.220134 |
| 0.130828  | 0.24359  | 0.123834 | 0.11961   | 0.204837 | 0.119901 | 0.216055 |
| 0.129371  | 0.234848 | 0.134907 | 0.133304  | 0.193765 | 0.133887 | 0.205274 |
| 0.135052  | 0.262092 | 0.121649 | 0.126748  | 0.225087 | 0.119172 | 0.232809 |
| 0.137675  | 0.265297 | 0.120192 | 0.128497  | 0.227418 | 0.13141  | 0.237179 |
| 0.126894  | 0.253351 | 0.130099 | 0.127331  | 0.211101 | 0.118881 | 0.226107 |
| 0.125728  | 0.261218 | 0.116404 | 0.119172  | 0.220425 | 0.128788 | 0.231352 |
| 0.149184  | 0.26049  | 0.1419   | 0.145251  | 0.225816 | 0.144376 | 0.23616  |
| 0.235723  | 0.103147 | 0.245338 | 0.236451  | 0.113345 | 0.236742 | 0.105624 |
| 0.137238  | 0.265443 | 0.129662 | 0.126311  | 0.224359 | 0.133013 | 0.23412  |
| 0.135198  | 0.263986 | 0.117716 | 0.125728  | 0.22028  | 0.119027 | 0.232955 |
| 0.0566725 | 0.246358 | 0.129225 | 0.129662  | 0.205274 | 0.129079 | 0.2162   |
| 0.136364  | 0.248252 | 0.134033 | 0.125437  | 0.209207 | 0.125728 | 0.218386 |
| 0.123689  | 0.252768 | 0.114365 | 0.12296   | 0.214015 | 0.114219 | 0.224068 |
| 0.128934  | 0.254808 | 0.120775 | 0.11859   | 0.216055 | 0.122378 | 0.224359 |
| 0.0582751 | 0.251166 | 0.132576 | 0.128934  | 0.207459 | 0.132721 | 0.2213   |

|           |           |           |           |          |          |          |
|-----------|-----------|-----------|-----------|----------|----------|----------|
| 0.135635  | 0.260927  | 0.120192  | 0.130536  | 0.220717 | 0.131702 | 0.234266 |
| 0.129808  | 0.25539   | 0.128059  | 0.124417  | 0.213724 | 0.124709 | 0.22465  |
| 0.233392  | 0.0996503 | 0.246212  | 0.239656  | 0.11014  | 0.237908 | 0.110868 |
| 0.123106  | 0.251311  | 0.11757   | 0.111597  | 0.20877  | 0.115676 | 0.221445 |
| 0.124563  | 0.257139  | 0.0607517 | 0.10373   | 0.215763 | 0.112179 | 0.226399 |
| 0.126166  | 0.251748  | 0.127622  | 0.120775  | 0.208916 | 0.118735 | 0.223631 |
| 0.132139  | 0.260344  | 0.131847  | 0.134615  | 0.218094 | 0.134324 | 0.229021 |
| 0.144085  | 0.266171  | 0.13243   | 0.125583  | 0.227418 | 0.137529 | 0.238928 |
| 0.121649  | 0.247232  | 0.139132  | 0.13345   | 0.20236  | 0.126166 | 0.215909 |
| 0.0525932 | 0.249854  | 0.134178  | 0.128788  | 0.205857 | 0.134615 | 0.218823 |
| 0.122669  | 0.254371  | 0.12704   | 0.12602   | 0.212995 | 0.126311 | 0.222756 |
| 0.228147  | 0.105478  | 0.240385  | 0.231498  | 0.112471 | 0.232372 | 0.107955 |
| 0.0492424 | 0.253205  | 0.129371  | 0.13243   | 0.208916 | 0.136509 | 0.223339 |
| 0.135344  | 0.261218  | 0.117861  | 0.126748  | 0.222174 | 0.125583 | 0.236014 |
| 0.127768  | 0.257721  | 0.123689  | 0.121795  | 0.216346 | 0.118881 | 0.226107 |
| 0.127622  | 0.258159  | 0.120338  | 0.122815  | 0.217075 | 0.12602  | 0.225962 |
| 0.134615  | 0.260781  | 0.0463287 | 0.0986305 | 0.226399 | 0.120192 | 0.233537 |
| 0.127331  | 0.252622  | 0.13141   | 0.126603  | 0.209499 | 0.120192 | 0.224213 |
| 0.135198  | 0.261364  | 0.115385  | 0.126311  | 0.224359 | 0.126603 | 0.233246 |
| 0.137383  | 0.266171  | 0.116987  | 0.130536  | 0.227418 | 0.134324 | 0.240676 |
| 0.133013  | 0.261509  | 0.117279  | 0.125874  | 0.219551 | 0.129079 | 0.2331   |
| 0.130245  | 0.257284  | 0.127622  | 0.124854  | 0.211538 | 0.119901 | 0.224213 |
| 0.13549   | 0.261946  | 0.120338  | 0.129225  | 0.224068 | 0.120192 | 0.23208  |
| 0.136509  | 0.268211  | 0.124563  | 0.13141   | 0.229749 | 0.124709 | 0.237179 |
| 0.140297  | 0.263258  | 0.128351  | 0.128205  | 0.221882 | 0.130245 | 0.233392 |
| 0.146707  | 0.262675  | 0.129808  | 0.13345   | 0.224213 | 0.135198 | 0.232226 |
| 0.136655  | 0.266608  | 0.120629  | 0.131265  | 0.230186 | 0.121358 | 0.236742 |
| 0.129371  | 0.25641   | 0.125583  | 0.123397  | 0.215618 | 0.113491 | 0.226836 |
| 0.139423  | 0.269668  | 0.103001  | 0.115967  | 0.23412  | 0.131702 | 0.244172 |
| 0.140152  | 0.267483  | 0.136072  | 0.138549  | 0.231643 | 0.135344 | 0.240239 |
| 0.20542   | 0.120047  | 0.219114  | 0.209353  | 0.107809 | 0.209062 | 0.113782 |
| 0.130828  | 0.256702  | 0.130828  | 0.129225  | 0.213287 | 0.126311 | 0.223922 |
| 0.132284  | 0.261364  | 0.0614802 | 0.105624  | 0.222319 | 0.116696 | 0.232372 |
| 0.135344  | 0.248397  | 0.135635  | 0.129662  | 0.20877  | 0.125    | 0.219114 |
| 0.221445  | 0.113054  | 0.2331    | 0.226253  | 0.112762 | 0.226544 | 0.109411 |
| 0.212995  | 0.132284  | 0.221737  | 0.215763  | 0.122669 | 0.217803 | 0.118735 |
| 0.136801  | 0.262092  | 0.119027  | 0.130536  | 0.225962 | 0.13345  | 0.238054 |
| 0.248252  | 0.0920746 | 0.260781  | 0.249563  | 0.115093 | 0.251311 | 0.105624 |
| 0.129662  | 0.256993  | 0.126457  | 0.12602   | 0.213869 | 0.114073 | 0.226836 |
| 0.145396  | 0.261946  | 0.138403  | 0.137092  | 0.224942 | 0.139423 | 0.237034 |
| 0.131119  | 0.255828  | 0.119464  | 0.113782  | 0.210664 | 0.114656 | 0.226544 |
| 0.133596  | 0.265006  | 0.11961   | 0.128205  | 0.224796 | 0.117716 | 0.234848 |
| 0.191142  | 0.133741  | 0.202506  | 0.194784  | 0.108974 | 0.195367 | 0.11553  |
| 0.132721  | 0.254516  | 0.128934  | 0.117424  | 0.216055 | 0.119755 | 0.225524 |

|           |          |          |          |          |          |          |
|-----------|----------|----------|----------|----------|----------|----------|
| 0.198572  | 0.135052 | 0.210227 | 0.200175 | 0.11116  | 0.201923 | 0.118298 |
| 0.131556  | 0.259178 | 0.130099 | 0.123252 | 0.217803 | 0.118881 | 0.228438 |
| 0.11116   | 0.241113 | 0.11961  | 0.125874 | 0.201195 | 0.131119 | 0.213287 |
| 0.13447   | 0.254516 | 0.124854 | 0.128497 | 0.216346 | 0.124417 | 0.226981 |
| 0.11757   | 0.240239 | 0.123106 | 0.127914 | 0.196824 | 0.122378 | 0.211247 |
| 0.123834  | 0.251166 | 0.124709 | 0.121066 | 0.206585 | 0.112617 | 0.218386 |
| 0.119755  | 0.253205 | 0.125874 | 0.122523 | 0.21183  | 0.123689 | 0.221882 |
| 0.129371  | 0.248543 | 0.117424 | 0.113199 | 0.206585 | 0.112034 | 0.218969 |
| 0.0598776 | 0.25102  | 0.127185 | 0.127622 | 0.20877  | 0.129953 | 0.219988 |
| 0.132576  | 0.263403 | 0.101107 | 0.113199 | 0.222902 | 0.126311 | 0.23208  |
| 0.129662  | 0.255245 | 0.121212 | 0.118153 | 0.212995 | 0.123106 | 0.224796 |
| 0.130099  | 0.253059 | 0.116696 | 0.113928 | 0.210227 | 0.113636 | 0.223485 |
| 0.136655  | 0.253205 | 0.131702 | 0.127185 | 0.211247 | 0.131556 | 0.225962 |
| 0.0533217 | 0.255828 | 0.136946 | 0.134178 | 0.214744 | 0.139132 | 0.226253 |
| 0.132721  | 0.255973 | 0.123689 | 0.124417 | 0.210227 | 0.122086 | 0.224942 |
| 0.129079  | 0.254079 | 0.125874 | 0.124272 | 0.212704 | 0.123397 | 0.223631 |
| 0.124563  | 0.25102  | 0.124272 | 0.121503 | 0.207022 | 0.113636 | 0.22028  |
| 0.122523  | 0.253351 | 0.118444 | 0.124417 | 0.214598 | 0.129953 | 0.226107 |
| 0.13447   | 0.260927 | 0.120192 | 0.129371 | 0.218677 | 0.119464 | 0.230769 |
| 0.136072  | 0.261655 | 0.126166 | 0.120484 | 0.222028 | 0.121649 | 0.233829 |
| 0.138986  | 0.258159 | 0.12296  | 0.123106 | 0.217657 | 0.126311 | 0.22771  |
| 0.0598776 | 0.250728 | 0.131556 | 0.129953 | 0.207314 | 0.131993 | 0.219114 |
| 0.0498252 | 0.255536 | 0.136364 | 0.135635 | 0.214161 | 0.137383 | 0.223339 |
| 0.0451632 | 0.256702 | 0.140734 | 0.137966 | 0.218823 | 0.145542 | 0.231498 |
| 0.122815  | 0.253059 | 0.111742 | 0.116841 | 0.209936 | 0.121795 | 0.226107 |
| 0.128351  | 0.252768 | 0.130682 | 0.125291 | 0.209062 | 0.122669 | 0.226107 |
| 0.123834  | 0.251748 | 0.119755 | 0.114948 | 0.21183  | 0.11553  | 0.222465 |
| 0.138112  | 0.267483 | 0.121795 | 0.131265 | 0.229604 | 0.120775 | 0.237908 |
| 0.129808  | 0.260344 | 0.119901 | 0.115676 | 0.217803 | 0.116841 | 0.229895 |
| 0.147873  | 0.269085 | 0.131847 | 0.126748 | 0.233829 | 0.129079 | 0.245047 |
| 0.14088   | 0.25539  | 0.142045 | 0.137821 | 0.219551 | 0.130828 | 0.232809 |
| 0.131702  | 0.258159 | 0.128788 | 0.130973 | 0.217657 | 0.133013 | 0.227418 |
| 0.120484  | 0.252768 | 0.125437 | 0.127914 | 0.208188 | 0.122086 | 0.223485 |
| 0.12296   | 0.253205 | 0.11655  | 0.118735 | 0.211247 | 0.121649 | 0.222756 |
| 0.142191  | 0.262821 | 0.128497 | 0.13039  | 0.22028  | 0.133013 | 0.232663 |
| 0.206731  | 0.140006 | 0.218969 | 0.212995 | 0.12398  | 0.214161 | 0.125874 |
| 0.130682  | 0.25102  | 0.12602  | 0.124417 | 0.209936 | 0.120921 | 0.222902 |
| 0.133159  | 0.257867 | 0.129371 | 0.130973 | 0.217657 | 0.124854 | 0.230915 |
| 0.131265  | 0.260635 | 0.116113 | 0.125583 | 0.222174 | 0.116259 | 0.229895 |
| 0.134324  | 0.257867 | 0.127622 | 0.128642 | 0.215618 | 0.12602  | 0.225087 |
| 0.138549  | 0.259178 | 0.133013 | 0.129371 | 0.21926  | 0.120338 | 0.227273 |
| 0.121941  | 0.256556 | 0.119318 | 0.131993 | 0.218094 | 0.132284 | 0.228147 |
| 0.118298  | 0.259907 | 0.117716 | 0.130973 | 0.219697 | 0.128351 | 0.227418 |
| 0.131847  | 0.255973 | 0.129516 | 0.125874 | 0.216346 | 0.128205 | 0.227273 |

|           |          |          |          |          |          |          |
|-----------|----------|----------|----------|----------|----------|----------|
| 0.127477  | 0.25947  | 0.103875 | 0.110723 | 0.218094 | 0.121795 | 0.231935 |
| 0.136801  | 0.264714 | 0.117279 | 0.128788 | 0.227418 | 0.121503 | 0.233974 |
| 0.133304  | 0.258304 | 0.119318 | 0.12296  | 0.216346 | 0.123834 | 0.227273 |
| 0.133159  | 0.262821 | 0.129953 | 0.12398  | 0.221154 | 0.129225 | 0.233537 |
| 0.180507  | 0.217512 | 0.183129 | 0.180361 | 0.184878 | 0.182692 | 0.198427 |
| 0.0639569 | 0.25102  | 0.130973 | 0.131993 | 0.207605 | 0.132867 | 0.222319 |
| 0.139277  | 0.25     | 0.124126 | 0.13039  | 0.212995 | 0.121649 | 0.220717 |
| 0.138549  | 0.26588  | 0.117861 | 0.125    | 0.226544 | 0.12704  | 0.237762 |
| 0.121795  | 0.253788 | 0.122669 | 0.127477 | 0.217075 | 0.130973 | 0.226836 |
| 0.119172  | 0.255828 | 0.119755 | 0.121941 | 0.215909 | 0.113199 | 0.22567  |
| 0.124709  | 0.252331 | 0.118298 | 0.114073 | 0.209207 | 0.11961  | 0.224213 |
| 0.125583  | 0.260198 | 0.121795 | 0.123689 | 0.218531 | 0.118735 | 0.229167 |
| 0.132867  | 0.261364 | 0.114219 | 0.122815 | 0.222028 | 0.125437 | 0.234994 |
| 0.0987762 | 0.245047 | 0.128205 | 0.125146 | 0.202797 | 0.130682 | 0.218094 |
| 0.142045  | 0.266754 | 0.13243  | 0.127914 | 0.225962 | 0.132576 | 0.238345 |
| 0.123252  | 0.251166 | 0.115385 | 0.122815 | 0.211538 | 0.122523 | 0.224505 |
| 0.137966  | 0.255973 | 0.124563 | 0.124417 | 0.217512 | 0.127914 | 0.230478 |
| 0.141026  | 0.270105 | 0.122378 | 0.128934 | 0.231352 | 0.130099 | 0.241404 |
| 0.134324  | 0.261364 | 0.110431 | 0.122815 | 0.223485 | 0.12398  | 0.234994 |
| 0.131702  | 0.256702 | 0.119755 | 0.124563 | 0.219697 | 0.13039  | 0.230915 |
| 0.133741  | 0.262238 | 0.111597 | 0.120484 | 0.219988 | 0.11961  | 0.229749 |
| 0.13345   | 0.261072 | 0.111014 | 0.121066 | 0.220862 | 0.123397 | 0.230041 |
| 0.129371  | 0.254953 | 0.118007 | 0.115239 | 0.213287 | 0.113199 | 0.225379 |
| 0.136509  | 0.26384  | 0.126603 | 0.129079 | 0.225087 | 0.124417 | 0.234848 |
| 0.13243   | 0.259178 | 0.113199 | 0.120921 | 0.214598 | 0.127622 | 0.230478 |
| 0.143794  | 0.264714 | 0.137675 | 0.144522 | 0.228001 | 0.138403 | 0.236597 |
| 0.136509  | 0.258013 | 0.135052 | 0.142191 | 0.219551 | 0.137821 | 0.229895 |
| 0.130099  | 0.261509 | 0.115239 | 0.120047 | 0.217512 | 0.124417 | 0.231643 |
| 0.141608  | 0.269522 | 0.132576 | 0.135344 | 0.231061 | 0.137675 | 0.242861 |
| 0.134615  | 0.257284 | 0.134033 | 0.133596 | 0.213869 | 0.13243  | 0.227418 |
| 0.147145  | 0.258159 | 0.137238 | 0.13243  | 0.221445 | 0.138258 | 0.234703 |
| 0.130245  | 0.259033 | 0.120047 | 0.119901 | 0.217657 | 0.115822 | 0.232372 |
| 0.146416  | 0.262092 | 0.136801 | 0.140734 | 0.22567  | 0.13141  | 0.236597 |
| 0.143502  | 0.25539  | 0.120484 | 0.124709 | 0.21722  | 0.116259 | 0.227855 |
| 0.151078  | 0.261218 | 0.13039  | 0.133159 | 0.226253 | 0.132576 | 0.235723 |
| 0.135344  | 0.266171 | 0.123397 | 0.12704  | 0.224213 | 0.12296  | 0.238054 |
| 0.133159  | 0.259907 | 0.113928 | 0.122232 | 0.216492 | 0.125146 | 0.232372 |
| 0.129516  | 0.25743  | 0.118735 | 0.125    | 0.21285  | 0.120047 | 0.226981 |
| 0.132576  | 0.258741 | 0.11014  | 0.120192 | 0.22028  | 0.120775 | 0.229458 |
| 0.13549   | 0.262238 | 0.103147 | 0.116987 | 0.228147 | 0.119901 | 0.234994 |
| 0.137966  | 0.268794 | 0.124563 | 0.121795 | 0.230332 | 0.119755 | 0.241841 |
| 0.137092  | 0.257721 | 0.133887 | 0.136364 | 0.213724 | 0.128788 | 0.229895 |
| 0.132139  | 0.257721 | 0.112325 | 0.118881 | 0.217803 | 0.120047 | 0.230769 |
| 0.132284  | 0.25845  | 0.120047 | 0.125728 | 0.212995 | 0.121649 | 0.229458 |

|          |          |          |          |          |          |          |
|----------|----------|----------|----------|----------|----------|----------|
| 0.136218 | 0.256556 | 0.124854 | 0.125583 | 0.215763 | 0.117133 | 0.225233 |
| 0.127768 | 0.257139 | 0.123397 | 0.126457 | 0.212558 | 0.120629 | 0.22669  |
| 0.137821 | 0.263403 | 0.125291 | 0.130682 | 0.220571 | 0.125437 | 0.234703 |
| 0.125291 | 0.25641  | 0.12296  | 0.119318 | 0.214744 | 0.116987 | 0.228293 |
| 0.11757  | 0.243735 | 0.133596 | 0.129371 | 0.199738 | 0.125874 | 0.215618 |
| 0.122523 | 0.258887 | 0.125437 | 0.126457 | 0.214889 | 0.122378 | 0.230186 |
| 0.127185 | 0.254516 | 0.121358 | 0.122086 | 0.21081  | 0.111597 | 0.225233 |
| 0.130682 | 0.255682 | 0.119318 | 0.12296  | 0.21285  | 0.114802 | 0.225233 |
| 0.120921 | 0.245047 | 0.134033 | 0.130973 | 0.20338  | 0.124854 | 0.217512 |
| 0.124272 | 0.256847 | 0.125728 | 0.127622 | 0.214889 | 0.124709 | 0.226981 |
| 0.112034 | 0.25102  | 0.126603 | 0.130536 | 0.21081  | 0.128788 | 0.221737 |
| 0.111742 | 0.24461  | 0.132139 | 0.12704  | 0.199155 | 0.120921 | 0.215618 |
| 0.129079 | 0.262821 | 0.126166 | 0.134178 | 0.222902 | 0.132721 | 0.234703 |



| TDr_2669 | TDr_2670  | TDr_2674  | TDr_2678 | TDr_2681 | TDr_2683  | TDr_2687 |
|----------|-----------|-----------|----------|----------|-----------|----------|
| 0.116696 | 0.131702  | 0.122086  | 0.12704  | 0.186772 | 0.130245  | 0.118881 |
| 0.126166 | 0.113491  | 0.114656  | 0.130682 | 0.190122 | 0.116987  | 0.10708  |
| 0.121212 | 0.10912   | 0.112325  | 0.123397 | 0.188957 | 0.112908  | 0.10067  |
| 0.121503 | 0.116113  | 0.113491  | 0.123689 | 0.196533 | 0.0960082 | 0.088141 |
| 0.12704  | 0.137675  | 0.126603  | 0.130973 | 0.212267 | 0.137675  | 0.134178 |
| 0.129953 | 0.13039   | 0.130099  | 0.13884  | 0.200321 | 0.133013  | 0.13039  |
| 0.109411 | 0.128788  | 0.127622  | 0.123543 | 0.205128 | 0.13549   | 0.125291 |
| 0.118153 | 0.116841  | 0.109266  | 0.117716 | 0.187646 | 0.113636  | 0.102564 |
| 0.108392 | 0.116404  | 0.107663  | 0.115239 | 0.193619 | 0.115822  | 0.103875 |
| 0.120484 | 0.0990676 | 0.115967  | 0.119172 | 0.198718 | 0.127914  | 0.116841 |
| 0.120047 | 0.121066  | 0.120484  | 0.127768 | 0.184295 | 0.137675  | 0.123106 |
| 0.107955 | 0.121212  | 0.099359  | 0.113054 | 0.192016 | 0.115967  | 0.104895 |
| 0.114073 | 0.114802  | 0.111888  | 0.11655  | 0.199592 | 0.123252  | 0.111305 |
| 0.138112 | 0.137675  | 0.135635  | 0.149621 | 0.150204 | 0.141754  | 0.129225 |
| 0.13243  | 0.0431235 | 0.128205  | 0.125583 | 0.20542  | 0.132284  | 0.127331 |
| 0.115093 | 0.11553   | 0.125146  | 0.118444 | 0.204983 | 0.125728  | 0.119901 |
| 0.106498 | 0.123252  | 0.0906177 | 0.112471 | 0.198427 | 0.128497  | 0.113054 |
| 0.137238 | 0.146707  | 0.135052  | 0.158071 | 0.217512 | 0.143211  | 0.141463 |
| 0.123543 | 0.114365  | 0.108246  | 0.120484 | 0.185752 | 0.113199  | 0.102127 |
| 0.207168 | 0.178467  | 0.205274  | 0.206148 | 0.141754 | 0.204691  | 0.200029 |
| 0.122523 | 0.127914  | 0.119172  | 0.136946 | 0.203089 | 0.137238  | 0.129662 |
| 0.122086 | 0.127477  | 0.112617  | 0.130099 | 0.206439 | 0.133304  | 0.123106 |
| 0.116404 | 0.117424  | 0.1081    | 0.117424 | 0.195221 | 0.118881  | 0.107517 |
| 0.111888 | 0.133596  | 0.11961   | 0.121358 | 0.212267 | 0.136509  | 0.127477 |
| 0.111451 | 0.111597  | 0.107517  | 0.111305 | 0.190268 | 0.118881  | 0.106061 |
| 0.13039  | 0.131702  | 0.128205  | 0.139569 | 0.207751 | 0.138112  | 0.133741 |
| 0.11757  | 0.127622  | 0.119755  | 0.116841 | 0.202506 | 0.137238  | 0.129953 |
| 0.116113 | 0.123834  | 0.11451   | 0.123543 | 0.21183  | 0.12704   | 0.119464 |
| 0.119318 | 0.138112  | 0.131119  | 0.131119 | 0.208625 | 0.138112  | 0.132576 |
| 0.111742 | 0.123252  | 0.119172  | 0.114219 | 0.209499 | 0.132576  | 0.124709 |
| 0.122086 | 0.121066  | 0.124272  | 0.127768 | 0.202069 | 0.137383  | 0.130682 |
| 0.112034 | 0.122086  | 0.115385  | 0.121795 | 0.205711 | 0.130828  | 0.122378 |
| 0.110868 | 0.1081    | 0.1081    | 0.112471 | 0.193765 | 0.11859   | 0.108974 |
| 0.11116  | 0.124417  | 0.119172  | 0.111014 | 0.200758 | 0.126166  | 0.118298 |
| 0.113928 | 0.123106  | 0.120484  | 0.11757  | 0.206148 | 0.134761  | 0.129516 |
| 0.119027 | 0.133159  | 0.127914  | 0.123834 | 0.211538 | 0.135781  | 0.130245 |
| 0.124709 | 0.138258  | 0.133887  | 0.139423 | 0.218677 | 0.140589  | 0.133304 |
| 0.116696 | 0.129371  | 0.115676  | 0.122669 | 0.206002 | 0.135198  | 0.12296  |
| 0.110286 | 0.115093  | 0.108392  | 0.11655  | 0.19697  | 0.118881  | 0.108392 |
| 0.118444 | 0.126748  | 0.12296   | 0.12704  | 0.208625 | 0.127622  | 0.123834 |
| 0.110868 | 0.119464  | 0.105478  | 0.122378 | 0.194056 | 0.121795  | 0.109848 |
| 0.139132 | 0.134907  | 0.142774  | 0.14627  | 0.220862 | 0.145979  | 0.142483 |

|          |          |           |          |          |           |           |
|----------|----------|-----------|----------|----------|-----------|-----------|
| 0.138258 | 0.144814 | 0.142774  | 0.148019 | 0.21824  | 0.151224  | 0.148601  |
| 0.115385 | 0.12602  | 0.114073  | 0.119027 | 0.197115 | 0.126603  | 0.114365  |
| 0.100233 | 0.118444 | 0.103293  | 0.109411 | 0.197407 | 0.124563  | 0.115239  |
| 0.111451 | 0.119172 | 0.118007  | 0.116841 | 0.210664 | 0.132867  | 0.124709  |
| 0.112325 | 0.124417 | 0.107226  | 0.122669 | 0.203671 | 0.130245  | 0.117424  |
| 0.132284 | 0.13884  | 0.139132  | 0.141171 | 0.218386 | 0.146999  | 0.139714  |
| 0.11451  | 0.122232 | 0.113199  | 0.122815 | 0.203817 | 0.125437  | 0.114365  |
| 0.119318 | 0.118298 | 0.114802  | 0.120921 | 0.197261 | 0.128205  | 0.117716  |
| 0.139569 | 0.146999 | 0.150204  | 0.142337 | 0.220425 | 0.150495  | 0.146416  |
| 0.12296  | 0.131847 | 0.121649  | 0.133304 | 0.205565 | 0.138549  | 0.133887  |
| 0.112908 | 0.121795 | 0.117133  | 0.117424 | 0.197552 | 0.125291  | 0.114802  |
| 0.122232 | 0.117716 | 0.124709  | 0.13549  | 0.210082 | 0.130536  | 0.124709  |
| 0.118153 | 0.123543 | 0.116841  | 0.128788 | 0.18648  | 0.0949883 | 0.0850816 |
| 0.129225 | 0.145396 | 0.130828  | 0.134615 | 0.225233 | 0.142191  | 0.136364  |
| 0.121503 | 0.13243  | 0.129808  | 0.127185 | 0.211976 | 0.139423  | 0.131556  |
| 0.114219 | 0.123106 | 0.111742  | 0.121358 | 0.20236  | 0.125437  | 0.114073  |
| 0.115676 | 0.119318 | 0.117279  | 0.123397 | 0.198572 | 0.134178  | 0.121358  |
| 0.11553  | 0.121795 | 0.122669  | 0.12296  | 0.212413 | 0.13141   | 0.123252  |
| 0.130973 | 0.138986 | 0.137821  | 0.144231 | 0.223485 | 0.141608  | 0.137529  |
| 0.135344 | 0.138403 | 0.143939  | 0.144814 | 0.222028 | 0.138112  | 0.136364  |
| 0.159382 | 0.159819 | 0.166521  | 0.168269 | 0.166812 | 0.164773  | 0.156031  |
| 0.116841 | 0.119901 | 0.110868  | 0.122232 | 0.199155 | 0.124272  | 0.113491  |
| 0.112762 | 0.121066 | 0.111451  | 0.11757  | 0.203234 | 0.128934  | 0.116696  |
| 0.111014 | 0.125437 | 0.108829  | 0.113491 | 0.198572 | 0.125437  | 0.112034  |
| 0.133304 | 0.1419   | 0.137821  | 0.135781 | 0.207459 | 0.147436  | 0.143065  |
| 0.110868 | 0.117424 | 0.112471  | 0.115385 | 0.195221 | 0.122086  | 0.11014   |
| 0.129079 | 0.134178 | 0.128934  | 0.138258 | 0.209062 | 0.138549  | 0.132721  |
| 0.113054 | 0.120484 | 0.117861  | 0.121941 | 0.209353 | 0.135635  | 0.127477  |
| 0.114365 | 0.123543 | 0.11014   | 0.12296  | 0.199301 | 0.130828  | 0.119464  |
| 0.13884  | 0.148893 | 0.143357  | 0.143939 | 0.211538 | 0.150932  | 0.148893  |
| 0.117861 | 0.129662 | 0.120338  | 0.126457 | 0.207168 | 0.133159  | 0.121795  |
| 0.134324 | 0.137675 | 0.139132  | 0.139132 | 0.219551 | 0.14292   | 0.138549  |
| 0.123106 | 0.134907 | 0.121503  | 0.130828 | 0.208333 | 0.135781  | 0.132284  |
| 0.112179 | 0.124272 | 0.0983392 | 0.122232 | 0.193619 | 0.11961   | 0.107663  |
| 0.109557 | 0.124563 | 0.110286  | 0.120192 | 0.196824 | 0.125728  | 0.112325  |
| 0.109848 | 0.122815 | 0.110286  | 0.125146 | 0.203234 | 0.126603  | 0.115822  |
| 0.128497 | 0.137383 | 0.128059  | 0.138258 | 0.215181 | 0.133887  | 0.133013  |
| 0.112034 | 0.124709 | 0.111888  | 0.11655  | 0.198718 | 0.129079  | 0.116259  |
| 0.137529 | 0.139132 | 0.139714  | 0.148164 | 0.220425 | 0.141754  | 0.138258  |
| 0.121212 | 0.129808 | 0.123689  | 0.129516 | 0.199155 | 0.137092  | 0.128059  |
| 0.110431 | 0.127185 | 0.114656  | 0.121066 | 0.204691 | 0.123397  | 0.116404  |
| 0.118881 | 0.125728 | 0.115239  | 0.126311 | 0.199738 | 0.132139  | 0.119901  |
| 0.125291 | 0.12602  | 0.117861  | 0.127768 | 0.206148 | 0.130973  | 0.120192  |
| 0.114802 | 0.119901 | 0.110868  | 0.122815 | 0.200321 | 0.13039   | 0.120484  |

|          |          |          |          |          |          |          |
|----------|----------|----------|----------|----------|----------|----------|
| 0.112471 | 0.12602  | 0.110577 | 0.11961  | 0.199155 | 0.126894 | 0.113782 |
| 0.131847 | 0.138695 | 0.135781 | 0.137238 | 0.218531 | 0.141317 | 0.138986 |
| 0.115822 | 0.115676 | 0.107226 | 0.11014  | 0.199883 | 0.129371 | 0.116841 |
| 0.110723 | 0.116404 | 0.112034 | 0.117279 | 0.203234 | 0.127768 | 0.116696 |
| 0.11655  | 0.127185 | 0.121649 | 0.130099 | 0.210519 | 0.135344 | 0.127768 |
| 0.113636 | 0.135635 | 0.127477 | 0.124854 | 0.209062 | 0.13884  | 0.130973 |
| 0.122086 | 0.132139 | 0.126894 | 0.132721 | 0.215763 | 0.14292  | 0.139132 |
| 0.126894 | 0.138986 | 0.13345  | 0.138403 | 0.224942 | 0.142191 | 0.13986  |
| 0.112471 | 0.125728 | 0.111742 | 0.122523 | 0.197698 | 0.134761 | 0.121358 |
| 0.178904 | 0.186043 | 0.187209 | 0.186334 | 0.156906 | 0.188957 | 0.186334 |
| 0.107663 | 0.118881 | 0.105769 | 0.118007 | 0.200466 | 0.123834 | 0.111597 |
| 0.122086 | 0.130682 | 0.13243  | 0.132721 | 0.218386 | 0.141754 | 0.138258 |
| 0.115093 | 0.128059 | 0.125437 | 0.125146 | 0.209645 | 0.135052 | 0.129808 |
| 0.124854 | 0.140734 | 0.132576 | 0.136946 | 0.219697 | 0.147145 | 0.141608 |
| 0.107226 | 0.118444 | 0.107372 | 0.11553  | 0.203526 | 0.125437 | 0.114656 |
| 0.12296  | 0.134761 | 0.125437 | 0.134761 | 0.217512 | 0.135927 | 0.133304 |
| 0.107226 | 0.121649 | 0.106498 | 0.117279 | 0.205274 | 0.128934 | 0.118444 |
| 0.113491 | 0.127622 | 0.121212 | 0.123543 | 0.207459 | 0.136946 | 0.128497 |
| 0.109994 | 0.121795 | 0.118298 | 0.120629 | 0.202214 | 0.121503 | 0.117133 |
| 0.115239 | 0.138695 | 0.129371 | 0.135781 | 0.217366 | 0.145979 | 0.141317 |
| 0.101836 | 0.118881 | 0.108974 | 0.1081   | 0.200466 | 0.126748 | 0.116259 |
| 0.124709 | 0.137675 | 0.130973 | 0.139132 | 0.213724 | 0.137675 | 0.135052 |
| 0.108537 | 0.12704  | 0.113054 | 0.122378 | 0.20338  | 0.130828 | 0.125    |
| 0.125    | 0.130682 | 0.13039  | 0.131847 | 0.216055 | 0.136218 | 0.132139 |
| 0.115822 | 0.125    | 0.133741 | 0.127331 | 0.212121 | 0.141317 | 0.139569 |
| 0.10271  | 0.119172 | 0.104312 | 0.120047 | 0.202214 | 0.129662 | 0.118007 |
| 0.137675 | 0.147727 | 0.143065 | 0.145396 | 0.210082 | 0.152389 | 0.146853 |
| 0.106061 | 0.124854 | 0.109411 | 0.121066 | 0.203817 | 0.135635 | 0.124563 |
| 0.108392 | 0.121941 | 0.10912  | 0.112617 | 0.204691 | 0.130099 | 0.116987 |
| 0.106206 | 0.125874 | 0.112471 | 0.122086 | 0.208042 | 0.131119 | 0.120629 |
| 0.136218 | 0.139569 | 0.135781 | 0.144231 | 0.216783 | 0.14831  | 0.144522 |
| 0.118153 | 0.125291 | 0.120629 | 0.123834 | 0.189103 | 0.134033 | 0.126748 |
| 0.104749 | 0.115385 | 0.104604 | 0.115967 | 0.203089 | 0.125291 | 0.111014 |
| 0.113491 | 0.11859  | 0.104895 | 0.113345 | 0.196387 | 0.127622 | 0.116259 |
| 0.113928 | 0.122815 | 0.111451 | 0.119027 | 0.202069 | 0.130973 | 0.119318 |
| 0.125146 | 0.122378 | 0.124417 | 0.127914 | 0.215326 | 0.135781 | 0.128788 |
| 0.106935 | 0.126603 | 0.117861 | 0.117861 | 0.2044   | 0.131847 | 0.125437 |
| 0.103875 | 0.113345 | 0.101399 | 0.107226 | 0.196387 | 0.120921 | 0.11014  |
| 0.105041 | 0.115967 | 0.103438 | 0.113345 | 0.197844 | 0.121212 | 0.111014 |
| 0.106643 | 0.114656 | 0.104458 | 0.116696 | 0.202943 | 0.125437 | 0.116987 |
| 0.113636 | 0.129225 | 0.114948 | 0.120192 | 0.198864 | 0.131556 | 0.117279 |
| 0.121066 | 0.127914 | 0.126457 | 0.12704  | 0.210373 | 0.138986 | 0.13345  |
| 0.104895 | 0.111451 | 0.102127 | 0.11116  | 0.2044   | 0.125728 | 0.115822 |
| 0.105041 | 0.107517 | 0.105478 | 0.111014 | 0.19697  | 0.120629 | 0.109557 |

|          |           |           |          |          |           |           |
|----------|-----------|-----------|----------|----------|-----------|-----------|
| 0.113199 | 0.124417  | 0.115093  | 0.125874 | 0.211538 | 0.140152  | 0.130828  |
| 0.099359 | 0.115822  | 0.105332  | 0.112908 | 0.200903 | 0.12398   | 0.112325  |
| 0.121795 | 0.125146  | 0.121066  | 0.123106 | 0.198281 | 0.136801  | 0.12398   |
| 0.126166 | 0.135635  | 0.13447   | 0.130682 | 0.213724 | 0.141754  | 0.135052  |
| 0.107517 | 0.119318  | 0.109703  | 0.117279 | 0.206731 | 0.126894  | 0.120192  |
| 0.108537 | 0.111014  | 0.106643  | 0.11655  | 0.203671 | 0.126457  | 0.115093  |
| 0.107372 | 0.113636  | 0.104895  | 0.114219 | 0.199883 | 0.125583  | 0.114219  |
| 0.106498 | 0.115385  | 0.106935  | 0.111888 | 0.195221 | 0.123543  | 0.113345  |
| 0.116987 | 0.125583  | 0.121795  | 0.128788 | 0.211538 | 0.134324  | 0.125291  |
| 0.105041 | 0.109266  | 0.106061  | 0.112762 | 0.200758 | 0.121503  | 0.11014   |
| 0.132576 | 0.134761  | 0.13447   | 0.137383 | 0.214015 | 0.142628  | 0.141754  |
| 0.126311 | 0.13549   | 0.134324  | 0.132867 | 0.211247 | 0.149184  | 0.141317  |
| 0.121649 | 0.126748  | 0.125583  | 0.126166 | 0.211247 | 0.135198  | 0.129371  |
| 0.118007 | 0.11961   | 0.115239  | 0.119318 | 0.200321 | 0.135344  | 0.123689  |
| 0.11451  | 0.120775  | 0.111116  | 0.11961  | 0.199738 | 0.133304  | 0.121649  |
| 0.10271  | 0.117424  | 0.102273  | 0.115093 | 0.202506 | 0.129662  | 0.122669  |
| 0.102855 | 0.129225  | 0.108537  | 0.113491 | 0.204108 | 0.128059  | 0.112617  |
| 0.106935 | 0.118444  | 0.111116  | 0.113491 | 0.200321 | 0.122523  | 0.112908  |
| 0.115967 | 0.119318  | 0.109994  | 0.122815 | 0.1875   | 0.10708   | 0.0907634 |
| 0.118007 | 0.133596  | 0.123397  | 0.131847 | 0.216055 | 0.141171  | 0.133304  |
| 0.109703 | 0.122669  | 0.108974  | 0.122378 | 0.207459 | 0.127914  | 0.119464  |
| 0.129371 | 0.120775  | 0.123689  | 0.135052 | 0.208479 | 0.136509  | 0.13039   |
| 0.11961  | 0.13549   | 0.129953  | 0.137238 | 0.217075 | 0.142483  | 0.137821  |
| 0.203234 | 0.192016  | 0.189977  | 0.20134  | 0.10373  | 0.197261  | 0.185315  |
| 0.242716 | 0.230624  | 0.239365  | 0.238199 | 0.128351 | 0.234411  | 0.230041  |
| 0.114073 | 0.123252  | 0.108392  | 0.120629 | 0.186772 | 0.0842075 | 0.0693473 |
| 0.105186 | 0.121066  | 0.105624  | 0.116696 | 0.196241 | 0.125146  | 0.116696  |
| 0.103438 | 0.116696  | 0.10271   | 0.114073 | 0.193036 | 0.123106  | 0.110286  |
| 0.109557 | 0.121941  | 0.099796  | 0.120484 | 0.196824 | 0.123397  | 0.112617  |
| 0.134324 | 0.0435606 | 0.13243   | 0.126894 | 0.207022 | 0.129808  | 0.130682  |
| 0.106352 | 0.123106  | 0.104749  | 0.121358 | 0.204983 | 0.123397  | 0.110286  |
| 0.126894 | 0.146853  | 0.135198  | 0.139277 | 0.223485 | 0.152098  | 0.14627   |
| 0.107809 | 0.131847  | 0.10271   | 0.116113 | 0.2044   | 0.130973  | 0.118153  |
| 0.111888 | 0.137966  | 0.121941  | 0.133304 | 0.215763 | 0.13447   | 0.130682  |
| 0.124854 | 0.133741  | 0.126457  | 0.137821 | 0.205128 | 0.13549   | 0.130828  |
| 0.122523 | 0.129079  | 0.118007  | 0.136655 | 0.216783 | 0.142191  | 0.134615  |
| 0.139132 | 0.13345   | 0.138986  | 0.138695 | 0.216492 | 0.145688  | 0.136364  |
| 0.108829 | 0.124417  | 0.10373   | 0.120921 | 0.206294 | 0.132867  | 0.121212  |
| 0.100087 | 0.125583  | 0.0987762 | 0.115676 | 0.20134  | 0.127331  | 0.115093  |
| 0.11014  | 0.124563  | 0.097465  | 0.124272 | 0.204983 | 0.134761  | 0.121941  |
| 0.105769 | 0.121649  | 0.0971737 | 0.111451 | 0.19595  | 0.121941  | 0.113782  |
| 0.10169  | 0.123689  | 0.0960082 | 0.11553  | 0.199155 | 0.125437  | 0.112325  |
| 0.10708  | 0.126748  | 0.100233  | 0.119464 | 0.205128 | 0.128788  | 0.115967  |
| 0.119464 | 0.128351  | 0.110286  | 0.134761 | 0.210227 | 0.136801  | 0.132721  |

|           |          |           |          |          |          |          |
|-----------|----------|-----------|----------|----------|----------|----------|
| 0.126748  | 0.139423 | 0.120775  | 0.136509 | 0.21926  | 0.145251 | 0.135635 |
| 0.104749  | 0.131119 | 0.106352  | 0.118881 | 0.202214 | 0.129371 | 0.117424 |
| 0.108974  | 0.123397 | 0.105332  | 0.122232 | 0.200321 | 0.127185 | 0.117861 |
| 0.116259  | 0.140589 | 0.119901  | 0.128351 | 0.216346 | 0.141754 | 0.135052 |
| 0.10373   | 0.123397 | 0.100087  | 0.111742 | 0.196824 | 0.123397 | 0.114948 |
| 0.128351  | 0.137238 | 0.12704   | 0.144231 | 0.214744 | 0.153555 | 0.147727 |
| 0.133304  | 0.132284 | 0.13345   | 0.141317 | 0.206585 | 0.144814 | 0.139277 |
| 0.117133  | 0.135635 | 0.124272  | 0.133304 | 0.208188 | 0.141171 | 0.137383 |
| 0.0996503 | 0.121358 | 0.0962995 | 0.114948 | 0.200612 | 0.119901 | 0.110577 |
| 0.101836  | 0.117716 | 0.100816  | 0.111305 | 0.199592 | 0.124709 | 0.111305 |
| 0.108392  | 0.132721 | 0.113199  | 0.128059 | 0.213432 | 0.135344 | 0.125437 |
| 0.115822  | 0.129662 | 0.111888  | 0.120921 | 0.210373 | 0.13141  | 0.123543 |
| 0.112325  | 0.139277 | 0.11451   | 0.128788 | 0.211247 | 0.142191 | 0.13345  |
| 0.106352  | 0.129225 | 0.0986305 | 0.121358 | 0.202652 | 0.130973 | 0.116113 |
| 0.109703  | 0.128205 | 0.105186  | 0.119755 | 0.20542  | 0.130536 | 0.120047 |
| 0.112034  | 0.128205 | 0.112179  | 0.128497 | 0.205128 | 0.131702 | 0.124709 |
| 0.116696  | 0.137821 | 0.125583  | 0.134033 | 0.21824  | 0.147727 | 0.140734 |
| 0.121358  | 0.138403 | 0.119172  | 0.13141  | 0.212704 | 0.138986 | 0.133159 |
| 0.115967  | 0.137675 | 0.128642  | 0.135052 | 0.218677 | 0.143211 | 0.136509 |
| 0.122232  | 0.140152 | 0.131119  | 0.137529 | 0.208333 | 0.1419   | 0.133159 |
| 0.105041  | 0.130245 | 0.104312  | 0.120629 | 0.204837 | 0.125583 | 0.112471 |
| 0.120192  | 0.137821 | 0.113928  | 0.136364 | 0.212995 | 0.137529 | 0.134615 |
| 0.105186  | 0.123397 | 0.0989219 | 0.115822 | 0.202652 | 0.121649 | 0.112034 |
| 0.112617  | 0.123543 | 0.111305  | 0.126457 | 0.195804 | 0.13141  | 0.118298 |
| 0.107372  | 0.120047 | 0.0964452 | 0.122086 | 0.200175 | 0.128205 | 0.118881 |
| 0.106061  | 0.125146 | 0.10271   | 0.119901 | 0.198281 | 0.130973 | 0.11961  |
| 0.101981  | 0.125146 | 0.0939685 | 0.115239 | 0.199738 | 0.121941 | 0.114656 |
| 0.118444  | 0.138986 | 0.123543  | 0.135198 | 0.217075 | 0.145979 | 0.138112 |
| 0.11451   | 0.125437 | 0.112325  | 0.122523 | 0.199155 | 0.13039  | 0.12398  |
| 0.120921  | 0.135052 | 0.121358  | 0.135344 | 0.215472 | 0.139132 | 0.133596 |
| 0.102855  | 0.123689 | 0.100087  | 0.114073 | 0.198864 | 0.121649 | 0.110577 |
| 0.105624  | 0.134324 | 0.11451   | 0.124126 | 0.214744 | 0.138695 | 0.131702 |
| 0.115676  | 0.128934 | 0.12398   | 0.125728 | 0.207022 | 0.134178 | 0.12602  |
| 0.120629  | 0.121358 | 0.115822  | 0.127768 | 0.196241 | 0.134761 | 0.122815 |
| 0.104458  | 0.123834 | 0.113928  | 0.113636 | 0.207751 | 0.131119 | 0.120921 |
| 0.123543  | 0.124854 | 0.107955  | 0.127477 | 0.200321 | 0.132721 | 0.125437 |
| 0.112325  | 0.12704  | 0.113345  | 0.122086 | 0.206002 | 0.131993 | 0.119464 |
| 0.108537  | 0.122378 | 0.115093  | 0.111888 | 0.197261 | 0.132576 | 0.120921 |
| 0.135635  | 0.129662 | 0.134615  | 0.134615 | 0.217075 | 0.145396 | 0.136946 |
| 0.129953  | 0.135635 | 0.137966  | 0.135635 | 0.219551 | 0.144376 | 0.136218 |
| 0.109266  | 0.111742 | 0.107372  | 0.110577 | 0.195659 | 0.11961  | 0.107955 |
| 0.131847  | 0.118007 | 0.126457  | 0.137529 | 0.219988 | 0.1419   | 0.137238 |
| 0.125874  | 0.116987 | 0.128934  | 0.12602  | 0.213432 | 0.142628 | 0.133596 |
| 0.125     | 0.123689 | 0.128934  | 0.135052 | 0.211684 | 0.137675 | 0.135927 |

|          |          |          |          |          |          |          |
|----------|----------|----------|----------|----------|----------|----------|
| 0.119172 | 0.116696 | 0.121649 | 0.126894 | 0.203234 | 0.130099 | 0.124272 |
| 0.123252 | 0.122232 | 0.121066 | 0.123397 | 0.211101 | 0.136801 | 0.128642 |
| 0.125146 | 0.117424 | 0.129662 | 0.128788 | 0.207751 | 0.138403 | 0.128497 |
| 0.125874 | 0.131556 | 0.124563 | 0.128642 | 0.214307 | 0.132721 | 0.129808 |
| 0.13345  | 0.127477 | 0.130973 | 0.141754 | 0.218969 | 0.144085 | 0.139423 |
| 0.129079 | 0.121941 | 0.130682 | 0.134178 | 0.209936 | 0.131556 | 0.121358 |
| 0.117133 | 0.11961  | 0.113782 | 0.122815 | 0.200321 | 0.126603 | 0.121941 |
| 0.127185 | 0.142191 | 0.130245 | 0.129953 | 0.208916 | 0.136946 | 0.13549  |
| 0.130245 | 0.12602  | 0.131556 | 0.136801 | 0.211976 | 0.144376 | 0.137675 |
| 0.113054 | 0.115822 | 0.109994 | 0.120775 | 0.197698 | 0.125146 | 0.116113 |
| 0.221882 | 0.223485 | 0.213578 | 0.219406 | 0.11655  | 0.218531 | 0.210664 |
| 0.123106 | 0.121795 | 0.121212 | 0.128205 | 0.206294 | 0.134033 | 0.126457 |
| 0.119318 | 0.120047 | 0.115093 | 0.124126 | 0.198718 | 0.131119 | 0.119755 |
| 0.137529 | 0.127185 | 0.130099 | 0.139714 | 0.218677 | 0.141171 | 0.136218 |
| 0.120047 | 0.119901 | 0.119318 | 0.127185 | 0.205274 | 0.128059 | 0.119901 |
| 0.138112 | 0.123689 | 0.137383 | 0.133887 | 0.216055 | 0.137675 | 0.133887 |
| 0.121212 | 0.118735 | 0.118153 | 0.128642 | 0.204983 | 0.13039  | 0.123106 |
| 0.122523 | 0.118007 | 0.119755 | 0.124417 | 0.204254 | 0.127331 | 0.12296  |
| 0.130099 | 0.11859  | 0.126748 | 0.13549  | 0.207751 | 0.134907 | 0.127331 |
| 0.127914 | 0.124563 | 0.12602  | 0.138258 | 0.200612 | 0.137092 | 0.130099 |
| 0.127185 | 0.127914 | 0.129079 | 0.132867 | 0.214161 | 0.13986  | 0.134907 |
| 0.125    | 0.12602  | 0.126603 | 0.135927 | 0.214015 | 0.138258 | 0.13447  |
| 0.122086 | 0.123397 | 0.122232 | 0.133887 | 0.21285  | 0.131265 | 0.129225 |
| 0.113054 | 0.115239 | 0.118444 | 0.110286 | 0.207022 | 0.129225 | 0.122815 |
| 0.119172 | 0.126311 | 0.112325 | 0.124272 | 0.207605 | 0.125146 | 0.11961  |
| 0.136509 | 0.128205 | 0.133741 | 0.13986  | 0.215035 | 0.141317 | 0.136072 |
| 0.119464 | 0.113199 | 0.120192 | 0.12602  | 0.200612 | 0.127185 | 0.123689 |
| 0.129079 | 0.139132 | 0.132139 | 0.140589 | 0.216055 | 0.143502 | 0.137675 |
| 0.141171 | 0.138986 | 0.136364 | 0.142483 | 0.19697  | 0.148019 | 0.142191 |
| 0.117279 | 0.118881 | 0.12704  | 0.124126 | 0.204254 | 0.135198 | 0.129079 |
| 0.126894 | 0.11859  | 0.130828 | 0.128788 | 0.212121 | 0.141026 | 0.134324 |
| 0.128497 | 0.133596 | 0.129225 | 0.130099 | 0.196241 | 0.133596 | 0.126603 |
| 0.113491 | 0.132867 | 0.126166 | 0.122378 | 0.204837 | 0.131119 | 0.127331 |
| 0.128642 | 0.134615 | 0.123543 | 0.129079 | 0.195513 | 0.132284 | 0.123834 |
| 0.13884  | 0.137821 | 0.136946 | 0.145688 | 0.203089 | 0.149767 | 0.141026 |
| 0.111014 | 0.117279 | 0.113199 | 0.114073 | 0.198572 | 0.128351 | 0.119318 |
| 0.130973 | 0.126166 | 0.13345  | 0.134615 | 0.212995 | 0.142191 | 0.136946 |
| 0.143648 | 0.141171 | 0.13884  | 0.149621 | 0.192453 | 0.148747 | 0.142628 |
| 0.113054 | 0.121358 | 0.121649 | 0.12398  | 0.212267 | 0.13243  | 0.125437 |
| 0.119464 | 0.126894 | 0.122523 | 0.132139 | 0.201486 | 0.135635 | 0.12602  |
| 0.135344 | 0.145688 | 0.142774 | 0.138695 | 0.2162   | 0.143939 | 0.144814 |
| 0.12398  | 0.128788 | 0.123543 | 0.129371 | 0.208625 | 0.13141  | 0.125583 |
| 0.139569 | 0.13039  | 0.136801 | 0.137966 | 0.21926  | 0.142045 | 0.141171 |
| 0.125728 | 0.128788 | 0.131993 | 0.136072 | 0.212704 | 0.141608 | 0.133741 |

|           |           |          |          |          |           |           |
|-----------|-----------|----------|----------|----------|-----------|-----------|
| 0.119172  | 0.130973  | 0.115239 | 0.125437 | 0.210227 | 0.135927  | 0.129225  |
| 0.126894  | 0.131993  | 0.130245 | 0.130536 | 0.211247 | 0.140152  | 0.13345   |
| 0.117424  | 0.123106  | 0.120484 | 0.128059 | 0.204691 | 0.13884   | 0.130973  |
| 0.121649  | 0.132576  | 0.126457 | 0.133159 | 0.213869 | 0.142483  | 0.136655  |
| 0.124272  | 0.130828  | 0.123252 | 0.135781 | 0.212704 | 0.138112  | 0.134033  |
| 0.121066  | 0.13549   | 0.126457 | 0.13549  | 0.217366 | 0.139277  | 0.136946  |
| 0.119901  | 0.135781  | 0.129079 | 0.133159 | 0.218531 | 0.138986  | 0.13549   |
| 0.119318  | 0.13345   | 0.127914 | 0.132576 | 0.208333 | 0.143939  | 0.136655  |
| 0.136509  | 0.143065  | 0.138112 | 0.144522 | 0.213578 | 0.148019  | 0.147436  |
| 0.126311  | 0.115385  | 0.125    | 0.12296  | 0.207751 | 0.142191  | 0.134615  |
| 0.110286  | 0.12704   | 0.115093 | 0.127622 | 0.206002 | 0.13345   | 0.123834  |
| 0.11961   | 0.130828  | 0.121795 | 0.135781 | 0.210082 | 0.142774  | 0.136364  |
| 0.113782  | 0.120338  | 0.120921 | 0.118007 | 0.208625 | 0.134033  | 0.125583  |
| 0.139569  | 0.143502  | 0.140006 | 0.146999 | 0.208479 | 0.150495  | 0.143211  |
| 0.145688  | 0.153118  | 0.151369 | 0.159237 | 0.217512 | 0.164773  | 0.156614  |
| 0.116841  | 0.133013  | 0.119901 | 0.131556 | 0.215181 | 0.136218  | 0.126894  |
| 0.111742  | 0.131993  | 0.115676 | 0.122669 | 0.207168 | 0.129371  | 0.120047  |
| 0.125     | 0.131556  | 0.125146 | 0.128059 | 0.214307 | 0.13243   | 0.128934  |
| 0.130973  | 0.130536  | 0.130245 | 0.136946 | 0.214452 | 0.138403  | 0.134615  |
| 0.110286  | 0.132284  | 0.114219 | 0.131993 | 0.215618 | 0.137821  | 0.130828  |
| 0.129808  | 0.129371  | 0.131119 | 0.138403 | 0.221154 | 0.149767  | 0.143939  |
| 0.139132  | 0.131119  | 0.139569 | 0.143065 | 0.210373 | 0.145396  | 0.141317  |
| 0.124126  | 0.121066  | 0.127185 | 0.123106 | 0.21285  | 0.137966  | 0.130099  |
| 0.145979  | 0.158654  | 0.141754 | 0.163316 | 0.21926  | 0.160402  | 0.155157  |
| 0.123252  | 0.124854  | 0.128351 | 0.129808 | 0.214598 | 0.140589  | 0.138258  |
| 0.137238  | 0.128642  | 0.145251 | 0.143502 | 0.214889 | 0.151952  | 0.143794  |
| 0.112034  | 0.127914  | 0.119755 | 0.129371 | 0.209499 | 0.130245  | 0.124709  |
| 0.118153  | 0.13986   | 0.129079 | 0.130245 | 0.220862 | 0.137821  | 0.134615  |
| 0.119901  | 0.118881  | 0.124417 | 0.133159 | 0.204254 | 0.13549   | 0.128205  |
| 0.141608  | 0.146125  | 0.140297 | 0.143211 | 0.17701  | 0.126894  | 0.118153  |
| 0.139714  | 0.145688  | 0.134615 | 0.152389 | 0.217075 | 0.143939  | 0.141317  |
| 0.123834  | 0.128351  | 0.114656 | 0.127768 | 0.197407 | 0.055507  | 0.0563811 |
| 0.137092  | 0.138112  | 0.134907 | 0.143065 | 0.178322 | 0.0710956 | 0.0731352 |
| 0.144522  | 0.15574   | 0.141171 | 0.147582 | 0.150787 | 0.1537    | 0.14088   |
| 0.148019  | 0.14729   | 0.138549 | 0.151952 | 0.152535 | 0.128934  | 0.116113  |
| 0.0983392 | 0.136655  | 0.119464 | 0.11451  | 0.20979  | 0.136655  | 0.126748  |
| 0.129371  | 0.139132  | 0.128934 | 0.136218 | 0.208479 | 0.138258  | 0.131847  |
| 0.118298  | 0.0965909 | 0.108537 | 0.119318 | 0.190122 | 0.122232  | 0.107955  |
| 0.117279  | 0.0850816 | 0.114802 | 0.116841 | 0.195513 | 0.125     | 0.118881  |
| 0.124709  | 0.125437  | 0.119901 | 0.12602  | 0.200903 | 0.13243   | 0.125437  |
| 0.119172  | 0.126603  | 0.111742 | 0.125728 | 0.193328 | 0.0540501 | 0.0502622 |
| 0.116987  | 0.120921  | 0.106643 | 0.112471 | 0.201923 | 0.134907  | 0.121212  |
| 0.119901  | 0.0824592 | 0.116259 | 0.118881 | 0.185897 | 0.0964452 | 0.083042  |
| 0.123689  | 0.127622  | 0.11655  | 0.132576 | 0.199883 | 0.113928  | 0.104312  |

|           |           |           |           |           |           |           |
|-----------|-----------|-----------|-----------|-----------|-----------|-----------|
| 0.127622  | 0.0627914 | 0.124854  | 0.125728  | 0.18954   | 0.127185  | 0.121941  |
| 0.108392  | 0.105041  | 0.107663  | 0.104167  | 0.194202  | 0.122815  | 0.112034  |
| 0.128788  | 0.131847  | 0.11757   | 0.130682  | 0.192162  | 0.0665793 | 0.0514277 |
| 0.122815  | 0.125     | 0.111305  | 0.125     | 0.19493   | 0.0571096 | 0.0460373 |
| 0.109994  | 0.137238  | 0.115676  | 0.116259  | 0.206585  | 0.134324  | 0.123252  |
| 0.221882  | 0.215326  | 0.2162    | 0.221154  | 0.122669  | 0.214744  | 0.209499  |
| 0.137675  | 0.140152  | 0.137529  | 0.146853  | 0.209207  | 0.0565268 | 0.0731352 |
| 0.124417  | 0.133887  | 0.125146  | 0.133596  | 0.210227  | 0.133013  | 0.129225  |
| 0.128059  | 0.126457  | 0.121795  | 0.129953  | 0.197261  | 0.121503  | 0.119464  |
| 0.216055  | 0.210956  | 0.209207  | 0.213578  | 0.102564  | 0.208042  | 0.202797  |
| 0.120484  | 0.132284  | 0.120047  | 0.125583  | 0.192599  | 0.136946  | 0.125     |
| 0.116259  | 0.125437  | 0.120484  | 0.0511364 | 0.206439  | 0.134761  | 0.127185  |
| 0.124417  | 0.133304  | 0.111742  | 0.123689  | 0.198281  | 0.133304  | 0.127477  |
| 0.128351  | 0.0486597 | 0.124126  | 0.122669  | 0.197844  | 0.128788  | 0.121795  |
| 0.253934  | 0.247086  | 0.251166  | 0.254953  | 0.136655  | 0.245047  | 0.241841  |
| 0.125     | 0.130099  | 0.129225  | 0.12602   | 0.206439  | 0.137092  | 0.128059  |
| 0.106935  | 0.131556  | 0.110868  | 0.113199  | 0.201486  | 0.127768  | 0.116404  |
| 0.114219  | 0.13447   | 0.0587121 | 0.128642  | 0.207022  | 0.13039   | 0.122232  |
| 0.11451   | 0.13243   | 0.0537587 | 0.126603  | 0.200903  | 0.130682  | 0.120775  |
| 0.129662  | 0.111742  | 0.133887  | 0.129516  | 0.200029  | 0.137675  | 0.128059  |
| 0.132284  | 0.117861  | 0.120192  | 0.130973  | 0.180798  | 0.118153  | 0.107372  |
| 0.110431  | 0.130973  | 0.113491  | 0.116987  | 0.201777  | 0.131265  | 0.11961   |
| 0.122232  | 0.125874  | 0.113345  | 0.127331  | 0.194056  | 0.0568182 | 0.0492424 |
| 0.118881  | 0.132139  | 0.118735  | 0.124854  | 0.200321  | 0.128934  | 0.121066  |
| 0.122086  | 0.0511364 | 0.113199  | 0.115239  | 0.197698  | 0.123689  | 0.116987  |
| 0.120484  | 0.121795  | 0.108683  | 0.125     | 0.189685  | 0.0608974 | 0.0536131 |
| 0.122378  | 0.101836  | 0.121649  | 0.127477  | 0.201195  | 0.130682  | 0.121941  |
| 0.137383  | 0.145688  | 0.134907  | 0.152972  | 0.214452  | 0.144522  | 0.140443  |
| 0.125437  | 0.134324  | 0.129079  | 0.128205  | 0.206294  | 0.138403  | 0.129953  |
| 0.119318  | 0.12704   | 0.125583  | 0.0544872 | 0.204254  | 0.13549   | 0.128205  |
| 0.196824  | 0.190851  | 0.185023  | 0.195513  | 0.097028  | 0.189977  | 0.178613  |
| 0.210519  | 0.207168  | 0.20134   | 0.208625  | 0.0987762 | 0.20542   | 0.193182  |
| 0.129225  | 0.0512821 | 0.12296   | 0.123252  | 0.189977  | 0.131702  | 0.124709  |
| 0.120484  | 0.0495338 | 0.113928  | 0.118007  | 0.196096  | 0.122086  | 0.11655   |
| 0.143211  | 0.129953  | 0.133741  | 0.150058  | 0.196678  | 0.126166  | 0.127331  |
| 0.108246  | 0.132284  | 0.11451   | 0.115967  | 0.199009  | 0.13141   | 0.121503  |
| 0.123834  | 0.13243   | 0.131847  | 0.127768  | 0.206439  | 0.137966  | 0.129225  |
| 0.116696  | 0.132284  | 0.110723  | 0.137529  | 0.206002  | 0.128205  | 0.125291  |
| 0.228875  | 0.222902  | 0.225816  | 0.227855  | 0.118007  | 0.225524  | 0.218531  |
| 0.116113  | 0.125874  | 0.1081    | 0.121795  | 0.202506  | 0.122378  | 0.113054  |
| 0.207751  | 0.209062  | 0.207022  | 0.212558  | 0.140589  | 0.2044    | 0.200321  |
| 0.0895979 | 0.129079  | 0.108974  | 0.106352  | 0.203963  | 0.126166  | 0.116259  |
| 0.0996503 | 0.123689  | 0.10708   | 0.113199  | 0.199155  | 0.129225  | 0.116696  |
| 0.117861  | 0.123834  | 0.116841  | 0.124126  | 0.191725  | 0.111014  | 0.102273  |



|           |           |           |           |          |           |           |
|-----------|-----------|-----------|-----------|----------|-----------|-----------|
| 0.122815  | 0.0576923 | 0.111888  | 0.113345  | 0.190559 | 0.12296   | 0.115093  |
| 0.211247  | 0.209062  | 0.203234  | 0.212267  | 0.104167 | 0.207896  | 0.198864  |
| 0.13345   | 0.138258  | 0.125728  | 0.135635  | 0.193036 | 0.0563811 | 0.0607517 |
| 0.0527389 | 0.130682  | 0.106498  | 0.116113  | 0.20877  | 0.130973  | 0.117861  |
| 0.126166  | 0.13039   | 0.118735  | 0.128351  | 0.200029 | 0.048514  | 0.0552156 |
| 0.11859   | 0.133304  | 0.113199  | 0.11961   | 0.205565 | 0.125146  | 0.119318  |
| 0.125     | 0.057838  | 0.117279  | 0.119901  | 0.191579 | 0.128351  | 0.117279  |
| 0.0893065 | 0.132867  | 0.112471  | 0.109557  | 0.20542  | 0.128205  | 0.118007  |
| 0.114365  | 0.131993  | 0.115967  | 0.120047  | 0.189977 | 0.129371  | 0.116841  |
| 0.115239  | 0.126457  | 0.122378  | 0.048951  | 0.206002 | 0.134033  | 0.129371  |
| 0.11961   | 0.121212  | 0.106643  | 0.12296   | 0.187937 | 0.0629371 | 0.048951  |
| 0.0518648 | 0.133013  | 0.107955  | 0.114948  | 0.203234 | 0.131847  | 0.11961   |
| 0.196824  | 0.190851  | 0.185606  | 0.194056  | 0.094697 | 0.191142  | 0.181235  |
| 0.114219  | 0.137092  | 0.0549242 | 0.131556  | 0.207605 | 0.133596  | 0.12398   |
| 0.122815  | 0.131993  | 0.115967  | 0.136072  | 0.206585 | 0.132576  | 0.124709  |
| 0.119172  | 0.127477  | 0.100087  | 0.126894  | 0.196824 | 0.123397  | 0.114365  |
| 0.123689  | 0.136655  | 0.126748  | 0.127331  | 0.196096 | 0.137238  | 0.125583  |
| 0.121941  | 0.129371  | 0.115967  | 0.125291  | 0.198135 | 0.0547786 | 0.0509907 |
| 0.0948427 | 0.134615  | 0.115093  | 0.11014   | 0.208625 | 0.129662  | 0.120338  |
| 0.111597  | 0.127768  | 0.106498  | 0.116696  | 0.197698 | 0.124272  | 0.115239  |
| 0.105478  | 0.136801  | 0.118444  | 0.118444  | 0.208479 | 0.135927  | 0.124272  |
| 0.121941  | 0.127331  | 0.113345  | 0.13345   | 0.203089 | 0.128205  | 0.117133  |
| 0.111451  | 0.128788  | 0.0474942 | 0.126166  | 0.198135 | 0.126748  | 0.116841  |
| 0.125583  | 0.0627914 | 0.120775  | 0.121941  | 0.193328 | 0.127768  | 0.118153  |
| 0.127768  | 0.131702  | 0.113345  | 0.125     | 0.204254 | 0.133741  | 0.122086  |
| 0.132284  | 0.140006  | 0.126311  | 0.135344  | 0.209936 | 0.139132  | 0.136801  |
| 0.117716  | 0.125437  | 0.118735  | 0.121066  | 0.197115 | 0.131265  | 0.120775  |
| 0.13243   | 0.138695  | 0.133741  | 0.142483  | 0.207168 | 0.0512821 | 0.0699301 |
| 0.122232  | 0.0574009 | 0.115967  | 0.119755  | 0.19493  | 0.125291  | 0.115385  |
| 0.108537  | 0.126748  | 0.0984848 | 0.122378  | 0.199301 | 0.118298  | 0.111305  |
| 0.124126  | 0.12602   | 0.119318  | 0.126894  | 0.180216 | 0.076486  | 0.0677448 |
| 0.112179  | 0.139423  | 0.119901  | 0.120775  | 0.202069 | 0.139423  | 0.125437  |
| 0.192599  | 0.194784  | 0.1875    | 0.197698  | 0.116696 | 0.195076  | 0.18109   |
| 0.0511364 | 0.125874  | 0.10373   | 0.113636  | 0.202797 | 0.127622  | 0.11859   |
| 0.106498  | 0.117716  | 0.104021  | 0.113345  | 0.191142 | 0.109848  | 0.100233  |
| 0.116404  | 0.125291  | 0.124126  | 0.0477855 | 0.210082 | 0.133159  | 0.127914  |
| 0.188957  | 0.181818  | 0.18007   | 0.183858  | 0.114802 | 0.18007   | 0.168124  |
| 0.136364  | 0.141463  | 0.138258  | 0.136218  | 0.207896 | 0.148456  | 0.139423  |
| 0.138986  | 0.147582  | 0.150204  | 0.14292   | 0.220425 | 0.153409  | 0.150495  |
| 0.139714  | 0.144522  | 0.139277  | 0.153846  | 0.216783 | 0.145105  | 0.143357  |
| 0.115239  | 0.125874  | 0.11655   | 0.123834  | 0.195804 | 0.132576  | 0.121503  |
| 0.121503  | 0.129225  | 0.116987  | 0.13039   | 0.195659 | 0.0528846 | 0.0493881 |
| 0.216929  | 0.213869  | 0.209207  | 0.216492  | 0.106643 | 0.208916  | 0.20134   |
| 0.126894  | 0.124417  | 0.118007  | 0.130245  | 0.193473 | 0.129079  | 0.121795  |

|           |           |           |           |           |           |           |
|-----------|-----------|-----------|-----------|-----------|-----------|-----------|
| 0.127331  | 0.131556  | 0.120192  | 0.131556  | 0.198864  | 0.0560897 | 0.0563811 |
| 0.0527389 | 0.130682  | 0.106498  | 0.114656  | 0.200612  | 0.130973  | 0.121941  |
| 0.175699  | 0.170892  | 0.169726  | 0.175262  | 0.137383  | 0.158945  | 0.148456  |
| 0.118007  | 0.120775  | 0.112325  | 0.126603  | 0.190705  | 0.122523  | 0.107372  |
| 0.134178  | 0.145688  | 0.1419    | 0.14831   | 0.213578  | 0.146562  | 0.145396  |
| 0.120192  | 0.117424  | 0.121795  | 0.117716  | 0.196678  | 0.13141   | 0.125291  |
| 0.194493  | 0.190559  | 0.185897  | 0.194056  | 0.0929487 | 0.190559  | 0.183566  |
| 0.121358  | 0.128497  | 0.123543  | 0.123543  | 0.202797  | 0.13549   | 0.126166  |
| 0.110868  | 0.11451   | 0.107809  | 0.114219  | 0.194639  | 0.117424  | 0.106935  |
| 0.108683  | 0.129808  | 0.0930944 | 0.123106  | 0.197115  | 0.119901  | 0.106498  |
| 0.113199  | 0.129371  | 0.115676  | 0.112471  | 0.201632  | 0.126166  | 0.116841  |
| 0.11961   | 0.121212  | 0.120921  | 0.0492424 | 0.204837  | 0.132284  | 0.124709  |
| 0.120775  | 0.12704   | 0.118298  | 0.128788  | 0.193182  | 0.130245  | 0.117133  |
| 0.124126  | 0.0543415 | 0.117861  | 0.118153  | 0.193619  | 0.127768  | 0.11553   |
| 0.193036  | 0.193765  | 0.185023  | 0.19697   | 0.0949883 | 0.191434  | 0.181235  |
| 0.11859   | 0.132721  | 0.116987  | 0.125728  | 0.201777  | 0.13039   | 0.120192  |
| 0.11553   | 0.117424  | 0.111597  | 0.120338  | 0.189685  | 0.116841  | 0.105769  |
| 0.215909  | 0.211101  | 0.207896  | 0.215763  | 0.105332  | 0.21285   | 0.204691  |
| 0.112179  | 0.134761  | 0.0552156 | 0.129808  | 0.207314  | 0.132721  | 0.124563  |
| 0.121941  | 0.0533217 | 0.118881  | 0.118298  | 0.197552  | 0.127914  | 0.117133  |
| 0.118444  | 0.0559441 | 0.113054  | 0.115967  | 0.19289   | 0.121503  | 0.111305  |
| 0.132284  | 0.139132  | 0.131556  | 0.145542  | 0.204691  | 0.0680361 | 0.0826049 |
| 0.197261  | 0.190997  | 0.189831  | 0.19595   | 0.097465  | 0.19391   | 0.181381  |
| 0.110868  | 0.133741  | 0.112471  | 0.113345  | 0.204545  | 0.132867  | 0.120338  |
| 0.126311  | 0.136946  | 0.11859   | 0.129953  | 0.207751  | 0.136364  | 0.131993  |
| 0.123106  | 0.0553613 | 0.118007  | 0.116259  | 0.193765  | 0.127914  | 0.115093  |
| 0.121649  | 0.0623543 | 0.115385  | 0.116259  | 0.193182  | 0.124709  | 0.111888  |
| 0.119172  | 0.0560897 | 0.114365  | 0.11553   | 0.190122  | 0.127768  | 0.116987  |
| 0.123106  | 0.123834  | 0.111305  | 0.12704   | 0.192599  | 0.0588578 | 0.0501166 |
| 0.108683  | 0.105915  | 0.107372  | 0.106206  | 0.19595   | 0.124854  | 0.112034  |
| 0.120921  | 0.133304  | 0.129516  | 0.128059  | 0.2044    | 0.13884   | 0.128351  |
| 0.126457  | 0.141754  | 0.120192  | 0.139714  | 0.214307  | 0.12602   | 0.120192  |
| 0.119172  | 0.128351  | 0.123689  | 0.128351  | 0.20236   | 0.136218  | 0.128642  |
| 0.121941  | 0.133741  | 0.120921  | 0.127914  | 0.210664  | 0.129662  | 0.127331  |
| 0.200175  | 0.199446  | 0.190997  | 0.199155  | 0.0962995 | 0.19391   | 0.186043  |
| 0.123106  | 0.127622  | 0.110723  | 0.121212  | 0.200758  | 0.13141   | 0.122669  |
| 0.126748  | 0.133887  | 0.126311  | 0.137383  | 0.201486  | 0.0499709 | 0.060169  |
| 0.120192  | 0.0576923 | 0.113928  | 0.113928  | 0.195804  | 0.123543  | 0.112179  |
| 0.108392  | 0.103875  | 0.105332  | 0.105624  | 0.19595   | 0.123397  | 0.116696  |
| 0.116841  | 0.123106  | 0.114365  | 0.12398   | 0.192745  | 0.126603  | 0.116404  |
| 0.110577  | 0.13549   | 0.115967  | 0.113636  | 0.202506  | 0.130245  | 0.120338  |
| 0.12602   | 0.134615  | 0.125583  | 0.13549   | 0.200758  | 0.125583  | 0.126748  |
| 0.122086  | 0.127768  | 0.107955  | 0.131556  | 0.200903  | 0.127768  | 0.113782  |
| 0.106643  | 0.121358  | 0.10912   | 0.109703  | 0.193036  | 0.128059  | 0.115822  |

|           |           |          |           |          |           |           |
|-----------|-----------|----------|-----------|----------|-----------|-----------|
| 0.106789  | 0.117133  | 0.104604 | 0.106935  | 0.19289  | 0.121795  | 0.110431  |
| 0.116259  | 0.11553   | 0.109703 | 0.116404  | 0.192745 | 0.116404  | 0.109703  |
| 0.0939685 | 0.129371  | 0.112179 | 0.106643  | 0.203671 | 0.127331  | 0.117133  |
| 0.126166  | 0.13447   | 0.136801 | 0.129516  | 0.211101 | 0.141171  | 0.13243   |
| 0.107663  | 0.132867  | 0.113636 | 0.11451   | 0.202506 | 0.132576  | 0.118881  |
| 0.114802  | 0.120775  | 0.109411 | 0.12398   | 0.18954  | 0.0616259 | 0.0479312 |
| 0.103147  | 0.130973  | 0.108246 | 0.110577  | 0.199738 | 0.127477  | 0.113199  |
| 0.11961   | 0.0617716 | 0.111014 | 0.119755  | 0.19289  | 0.124709  | 0.111014  |
| 0.0550699 | 0.128351  | 0.100379 | 0.11116   | 0.202652 | 0.124563  | 0.114656  |
| 0.123543  | 0.0502622 | 0.115822 | 0.120192  | 0.19391  | 0.128351  | 0.120484  |
| 0.117424  | 0.124563  | 0.102418 | 0.117861  | 0.196533 | 0.127768  | 0.114365  |
| 0.121212  | 0.127477  | 0.105624 | 0.131265  | 0.199738 | 0.127477  | 0.115822  |
| 0.112762  | 0.120192  | 0.117279 | 0.0575466 | 0.203234 | 0.129225  | 0.122523  |
| 0.111451  | 0.109557  | 0.1081   | 0.115093  | 0.194056 | 0.124709  | 0.113345  |
| 0.119755  | 0.0622086 | 0.110286 | 0.116696  | 0.192453 | 0.124854  | 0.113491  |
| 0.113345  | 0.131265  | 0.10067  | 0.130099  | 0.186626 | 0.124563  | 0.116696  |
| 0.124272  | 0.121795  | 0.115967 | 0.127622  | 0.198135 | 0.119755  | 0.108974  |
| 0.114219  | 0.116696  | 0.113491 | 0.116696  | 0.198572 | 0.122523  | 0.113782  |
| 0.122086  | 0.0592949 | 0.111451 | 0.116987  | 0.196824 | 0.121358  | 0.112908  |
| 0.121358  | 0.129662  | 0.118007 | 0.127331  | 0.191434 | 0.0509907 | 0.0512821 |
| 0.0960082 | 0.129371  | 0.113928 | 0.108683  | 0.202506 | 0.130245  | 0.118881  |
| 0.123106  | 0.127914  | 0.115093 | 0.127914  | 0.197261 | 0.0579837 | 0.0498252 |
| 0.116113  | 0.121795  | 0.117133 | 0.0524476 | 0.202214 | 0.130828  | 0.122086  |
| 0.112325  | 0.105769  | 0.111014 | 0.109848  | 0.199009 | 0.127622  | 0.11859   |
| 0.112617  | 0.116259  | 0.107517 | 0.117133  | 0.191725 | 0.119172  | 0.109848  |
| 0.0547786 | 0.128351  | 0.100087 | 0.11116   | 0.201195 | 0.128351  | 0.115239  |
| 0.127477  | 0.129371  | 0.119172 | 0.129662  | 0.195221 | 0.0600233 | 0.0495338 |
| 0.117861  | 0.136946  | 0.119755 | 0.128788  | 0.201923 | 0.126457  | 0.115093  |
| 0.11859   | 0.120484  | 0.112034 | 0.123689  | 0.190705 | 0.112908  | 0.104458  |
| 0.199009  | 0.197698  | 0.190705 | 0.199738  | 0.095134 | 0.195367  | 0.18546   |
| 0.168706  | 0.167978  | 0.16215  | 0.173514  | 0.133304 | 0.161568  | 0.148456  |
| 0.118298  | 0.129516  | 0.123106 | 0.126311  | 0.20236  | 0.134761  | 0.124563  |
| 0.117279  | 0.129079  | 0.116841 | 0.123543  | 0.193473 | 0.123543  | 0.113636  |
| 0.144668  | 0.151515  | 0.151807 | 0.145688  | 0.22465  | 0.15472   | 0.152681  |
| 0.122669  | 0.132721  | 0.119318 | 0.128642  | 0.202069 | 0.13243   | 0.122523  |
| 0.12398   | 0.085373  | 0.118007 | 0.126748  | 0.190559 | 0.13141   | 0.122086  |
| 0.121795  | 0.0925117 | 0.118735 | 0.125728  | 0.19391  | 0.122815  | 0.10708   |
| 0.123252  | 0.103584  | 0.116113 | 0.123106  | 0.197407 | 0.13039   | 0.118153  |
| 0.12296   | 0.120484  | 0.118153 | 0.127477  | 0.201195 | 0.117861  | 0.110577  |
| 0.207314  | 0.198718  | 0.197844 | 0.210082  | 0.102273 | 0.20338   | 0.193182  |
| 0.11014   | 0.135344  | 0.115822 | 0.116987  | 0.207896 | 0.137092  | 0.123689  |
| 0.120775  | 0.127622  | 0.112179 | 0.12704   | 0.187063 | 0.083042  | 0.0722611 |
| 0.117861  | 0.0684732 | 0.113345 | 0.11655   | 0.191434 | 0.121212  | 0.109266  |
| 0.118007  | 0.129516  | 0.109994 | 0.122232  | 0.201195 | 0.128059  | 0.119318  |

|          |           |           |           |           |           |           |
|----------|-----------|-----------|-----------|-----------|-----------|-----------|
| 0.189831 | 0.185897  | 0.18007   | 0.193473  | 0.120629  | 0.187063  | 0.172494  |
| 0.247232 | 0.243881  | 0.247086  | 0.249709  | 0.129662  | 0.243881  | 0.240967  |
| 0.122232 | 0.126457  | 0.114219  | 0.133741  | 0.202506  | 0.129079  | 0.119464  |
| 0.12398  | 0.120921  | 0.116259  | 0.127622  | 0.200758  | 0.119755  | 0.112179  |
| 0.123397 | 0.129662  | 0.122669  | 0.124417  | 0.200466  | 0.13345   | 0.123834  |
| 0.113345 | 0.11961   | 0.116404  | 0.0552156 | 0.202069  | 0.130099  | 0.122232  |
| 0.103001 | 0.128205  | 0.109266  | 0.109848  | 0.20338   | 0.125583  | 0.114802  |
| 0.114802 | 0.127185  | 0.107663  | 0.116987  | 0.194493  | 0.124563  | 0.114656  |
| 0.122232 | 0.085373  | 0.12296   | 0.122086  | 0.187063  | 0.0944056 | 0.0844988 |
| 0.105041 | 0.130536  | 0.109848  | 0.114219  | 0.203963  | 0.128205  | 0.117716  |
| 0.120629 | 0.095134  | 0.117279  | 0.123397  | 0.186917  | 0.0826049 | 0.0747378 |
| 0.119901 | 0.120338  | 0.119172  | 0.123834  | 0.201923  | 0.129953  | 0.115967  |
| 0.110723 | 0.109703  | 0.111742  | 0.111451  | 0.19391   | 0.125146  | 0.113199  |
| 0.121358 | 0.125583  | 0.110431  | 0.134615  | 0.202797  | 0.127622  | 0.119172  |
| 0.123543 | 0.128351  | 0.113782  | 0.127185  | 0.195659  | 0.0590035 | 0.0479312 |
| 0.106935 | 0.120484  | 0.0869755 | 0.113199  | 0.192745  | 0.114073  | 0.104749  |
| 0.120338 | 0.122523  | 0.11757   | 0.128934  | 0.213141  | 0.133596  | 0.129808  |
| 0.120921 | 0.128642  | 0.131847  | 0.0546329 | 0.216346  | 0.138549  | 0.137675  |
| 0.117861 | 0.0632284 | 0.111305  | 0.119755  | 0.19289   | 0.123834  | 0.108974  |
| 0.120338 | 0.0869755 | 0.12398   | 0.120484  | 0.189248  | 0.131265  | 0.123689  |
| 0.134033 | 0.0432692 | 0.130099  | 0.127185  | 0.205565  | 0.132721  | 0.131556  |
| 0.212558 | 0.207168  | 0.208042  | 0.21183   | 0.120921  | 0.208042  | 0.201049  |
| 0.112471 | 0.123689  | 0.0989219 | 0.122523  | 0.192453  | 0.123106  | 0.109703  |
| 0.110286 | 0.107517  | 0.108392  | 0.108392  | 0.196387  | 0.125874  | 0.113928  |
| 0.122523 | 0.132284  | 0.109848  | 0.123543  | 0.198135  | 0.132867  | 0.122378  |
| 0.112762 | 0.134178  | 0.0543415 | 0.131265  | 0.200903  | 0.13243   | 0.122815  |
| 0.114219 | 0.129516  | 0.108537  | 0.11757   | 0.202943  | 0.123397  | 0.112034  |
| 0.204254 | 0.202943  | 0.197698  | 0.206439  | 0.0992133 | 0.202652  | 0.18954   |
| 0.125728 | 0.130828  | 0.115967  | 0.131993  | 0.194639  | 0.0579837 | 0.048951  |
| 0.119464 | 0.0587121 | 0.112034  | 0.115822  | 0.194784  | 0.123397  | 0.111742  |
| 0.114948 | 0.129662  | 0.125874  | 0.122378  | 0.203089  | 0.126457  | 0.122669  |
| 0.110286 | 0.118881  | 0.113636  | 0.0539044 | 0.201632  | 0.129079  | 0.116841  |
| 0.123397 | 0.12704   | 0.113636  | 0.133159  | 0.193765  | 0.0623543 | 0.0469114 |
| 0.114073 | 0.117133  | 0.105769  | 0.119464  | 0.190851  | 0.0844988 | 0.0757576 |
| 0.118444 | 0.123543  | 0.120338  | 0.122669  | 0.202214  | 0.127914  | 0.115967  |
| 0.109411 | 0.134324  | 0.0518648 | 0.12704   | 0.203671  | 0.129953  | 0.11859   |
| 0.202797 | 0.201195  | 0.194202  | 0.201777  | 0.099796  | 0.198864  | 0.190705  |
| 0.115239 | 0.121503  | 0.107809  | 0.121503  | 0.189977  | 0.0649767 | 0.0539044 |
| 0.198427 | 0.196824  | 0.190705  | 0.200612  | 0.0957168 | 0.197407  | 0.186043  |
| 0.196533 | 0.195221  | 0.189977  | 0.198427  | 0.0987762 | 0.193765  | 0.182984  |
| 0.116404 | 0.126748  | 0.127622  | 0.0539044 | 0.210082  | 0.135198  | 0.13345   |
| 0.116113 | 0.141608  | 0.0684732 | 0.137529  | 0.212704  | 0.137821  | 0.132867  |
| 0.112908 | 0.11655   | 0.104312  | 0.118881  | 0.19697   | 0.118298  | 0.106643  |
| 0.112471 | 0.118444  | 0.107663  | 0.120484  | 0.191579  | 0.0712413 | 0.057838  |

|           |           |           |           |           |           |           |
|-----------|-----------|-----------|-----------|-----------|-----------|-----------|
| 0.119027  | 0.128788  | 0.110723  | 0.126457  | 0.192599  | 0.0638112 | 0.0477855 |
| 0.124272  | 0.0597319 | 0.114802  | 0.120921  | 0.192308  | 0.127914  | 0.115967  |
| 0.103293  | 0.127622  | 0.105769  | 0.107517  | 0.201632  | 0.122378  | 0.111888  |
| 0.105624  | 0.128788  | 0.111888  | 0.1081    | 0.202214  | 0.127914  | 0.115093  |
| 0.124126  | 0.130099  | 0.112908  | 0.136218  | 0.199738  | 0.130099  | 0.119901  |
| 0.116696  | 0.125     | 0.116841  | 0.0533217 | 0.203963  | 0.132867  | 0.125291  |
| 0.116259  | 0.0590035 | 0.112034  | 0.114073  | 0.192453  | 0.119901  | 0.114365  |
| 0.121066  | 0.126748  | 0.112179  | 0.12704   | 0.19493   | 0.0603147 | 0.0495338 |
| 0.107226  | 0.110868  | 0.106498  | 0.114073  | 0.194784  | 0.118153  | 0.103875  |
| 0.126603  | 0.131702  | 0.122378  | 0.13549   | 0.199592  | 0.0515734 | 0.0603147 |
| 0.116696  | 0.127622  | 0.120921  | 0.123834  | 0.199592  | 0.133159  | 0.123252  |
| 0.130245  | 0.135052  | 0.128059  | 0.138549  | 0.204691  | 0.050845  | 0.0642483 |
| 0.261072  | 0.255099  | 0.260052  | 0.261801  | 0.137383  | 0.254516  | 0.253059  |
| 0.0480769 | 0.138549  | 0.118444  | 0.12398   | 0.214889  | 0.139132  | 0.130682  |
| 0.0989219 | 0.129079  | 0.12296   | 0.123543  | 0.20979   | 0.138112  | 0.129662  |
| 0.22465   | 0.216638  | 0.216346  | 0.224213  | 0.120775  | 0.217512  | 0.210227  |
| 0.116987  | 0.126166  | 0.117424  | 0.122378  | 0.206585  | 0.138695  | 0.133159  |
| 0.233246  | 0.229312  | 0.229021  | 0.236597  | 0.123252  | 0.229021  | 0.221445  |
| 0         | 0.132139  | 0.109411  | 0.118153  | 0.208188  | 0.128642  | 0.123106  |
| 0.132139  | 0         | 0.128497  | 0.124417  | 0.205128  | 0.131993  | 0.127914  |
| 0.109411  | 0.128497  | 0         | 0.123252  | 0.19697   | 0.124709  | 0.111597  |
| 0.118153  | 0.124417  | 0.123252  | 0         | 0.208333  | 0.134615  | 0.130245  |
| 0.208188  | 0.205128  | 0.19697   | 0.208333  | 0         | 0.203963  | 0.193473  |
| 0.128642  | 0.131993  | 0.124709  | 0.134615  | 0.203963  | 0         | 0.0588578 |
| 0.123106  | 0.127914  | 0.111597  | 0.130245  | 0.193473  | 0.0588578 | 0         |
| 0.225524  | 0.226253  | 0.224796  | 0.230041  | 0.120484  | 0.22567   | 0.221008  |
| 0.111742  | 0.131993  | 0.107809  | 0.116259  | 0.203963  | 0.131993  | 0.118881  |
| 0.205711  | 0.199446  | 0.195659  | 0.204108  | 0.101253  | 0.202069  | 0.191579  |
| 0.112179  | 0.134178  | 0.113199  | 0.11553   | 0.202069  | 0.131265  | 0.121066  |
| 0.122086  | 0.0627914 | 0.113491  | 0.116696  | 0.197698  | 0.127477  | 0.114365  |
| 0.116404  | 0.113928  | 0.123543  | 0.119755  | 0.208916  | 0.128788  | 0.125583  |
| 0.11961   | 0.127331  | 0.128205  | 0.0541958 | 0.214161  | 0.13549   | 0.133741  |
| 0.11859   | 0.121941  | 0.112325  | 0.126311  | 0.193328  | 0.124272  | 0.112034  |
| 0.165793  | 0.161276  | 0.159528  | 0.165355  | 0.128059  | 0.166521  | 0.153992  |
| 0.118007  | 0.123689  | 0.109411  | 0.124563  | 0.192162  | 0.0552156 | 0.0464744 |
| 0.111305  | 0.135344  | 0.0560897 | 0.129808  | 0.201195  | 0.132721  | 0.122232  |
| 0.118881  | 0.125437  | 0.10912   | 0.120484  | 0.197698  | 0.133304  | 0.121066  |
| 0.113345  | 0.132721  | 0.103875  | 0.133013  | 0.202943  | 0.125728  | 0.122232  |
| 0.202943  | 0.19697   | 0.192016  | 0.20134   | 0.0973193 | 0.195804  | 0.18852   |
| 0.120921  | 0.0566725 | 0.113782  | 0.115239  | 0.192745  | 0.12398   | 0.113782  |
| 0.121066  | 0.125583  | 0.122669  | 0.0606061 | 0.189977  | 0.136946  | 0.12704   |
| 0.0949883 | 0.128351  | 0.113782  | 0.108537  | 0.204691  | 0.128059  | 0.118153  |
| 0.105041  | 0.132284  | 0.113054  | 0.111597  | 0.206876  | 0.129662  | 0.121212  |
| 0.124709  | 0.0502622 | 0.121941  | 0.119901  | 0.197407  | 0.126894  | 0.123106  |

|          |           |           |           |           |           |           |
|----------|-----------|-----------|-----------|-----------|-----------|-----------|
| 0.260635 | 0.249709  | 0.252914  | 0.260781  | 0.13345   | 0.249126  | 0.248834  |
| 0.110723 | 0.110577  | 0.115822  | 0.113199  | 0.203234  | 0.126311  | 0.121941  |
| 0.124126 | 0.105624  | 0.113199  | 0.12398   | 0.194202  | 0.131847  | 0.121649  |
| 0.176573 | 0.186043  | 0.17905   | 0.181964  | 0.146125  | 0.179341  | 0.175262  |
| 0.191725 | 0.189248  | 0.180798  | 0.192162  | 0.0930944 | 0.189831  | 0.177302  |
| 0.123543 | 0.126603  | 0.111742  | 0.135927  | 0.199155  | 0.127768  | 0.113199  |
| 0.126603 | 0.124709  | 0.116841  | 0.129371  | 0.196387  | 0.0600233 | 0.0492424 |
| 0.114073 | 0.120921  | 0.11655   | 0.0585664 | 0.201632  | 0.126457  | 0.120047  |
| 0.141317 | 0.143794  | 0.141754  | 0.149621  | 0.20877   | 0.055507  | 0.0753205 |
| 0.121795 | 0.128059  | 0.106789  | 0.131556  | 0.198864  | 0.125437  | 0.110286  |
| 0.121358 | 0.126457  | 0.110723  | 0.136655  | 0.200175  | 0.128788  | 0.118298  |
| 0.113636 | 0.138258  | 0.11757   | 0.119318  | 0.209062  | 0.137966  | 0.128059  |
| 0.117424 | 0.124272  | 0.113782  | 0.126894  | 0.192453  | 0.0517191 | 0.0546329 |
| 0.12602  | 0.133741  | 0.125291  | 0.134907  | 0.200175  | 0.0495338 | 0.0591492 |
| 0.115967 | 0.130099  | 0.116404  | 0.116987  | 0.186917  | 0.128934  | 0.116113  |
| 0.115822 | 0.125874  | 0.124417  | 0.0530303 | 0.210082  | 0.134907  | 0.133741  |
| 0.13141  | 0.134178  | 0.137966  | 0.0607517 | 0.221882  | 0.146707  | 0.14292   |
| 0.11553  | 0.111597  | 0.118881  | 0.116259  | 0.208042  | 0.129079  | 0.126166  |
| 0.12296  | 0.129516  | 0.133013  | 0.0525932 | 0.216929  | 0.139423  | 0.138549  |
| 0.112762 | 0.139714  | 0.121649  | 0.122523  | 0.213141  | 0.136509  | 0.127477  |
| 0.214598 | 0.209499  | 0.207751  | 0.212121  | 0.107517  | 0.208333  | 0.196096  |
| 0.120629 | 0.11757   | 0.118735  | 0.12602   | 0.206731  | 0.13884   | 0.131556  |
| 0.195513 | 0.19595   | 0.1875    | 0.197698  | 0.0986305 | 0.195076  | 0.183712  |
| 0.1081   | 0.127768  | 0.0802739 | 0.121649  | 0.197407  | 0.12602   | 0.112325  |
| 0.129371 | 0.0450175 | 0.125437  | 0.122232  | 0.198572  | 0.130682  | 0.125146  |
| 0.123834 | 0.131556  | 0.124854  | 0.127768  | 0.202943  | 0.135635  | 0.125437  |
| 0.117279 | 0.124709  | 0.115676  | 0.123252  | 0.196387  | 0.132284  | 0.117424  |
| 0.125291 | 0.130099  | 0.118444  | 0.130099  | 0.194493  | 0.0525932 | 0.0520105 |
| 0.123834 | 0.129225  | 0.119318  | 0.129808  | 0.19799   | 0.0540501 | 0.0557984 |
| 0.123252 | 0.0607517 | 0.116404  | 0.119318  | 0.190705  | 0.129808  | 0.119318  |
| 0.112034 | 0.131702  | 0.0509907 | 0.128788  | 0.199883  | 0.129953  | 0.119464  |
| 0.126603 | 0.133741  | 0.127622  | 0.126748  | 0.206876  | 0.134907  | 0.123543  |
| 0.115385 | 0.14292   | 0.128351  | 0.124563  | 0.202069  | 0.144376  | 0.135052  |
| 0.254371 | 0.246649  | 0.24898   | 0.254225  | 0.132139  | 0.247523  | 0.242861  |
| 0.125874 | 0.0590035 | 0.117861  | 0.122232  | 0.197115  | 0.128934  | 0.119027  |
| 0.191288 | 0.187354  | 0.179196  | 0.187063  | 0.0882867 | 0.187063  | 0.175408  |
| 0.193182 | 0.193036  | 0.185169  | 0.191579  | 0.100379  | 0.189831  | 0.17905   |
| 0.125728 | 0.123252  | 0.119172  | 0.128788  | 0.192016  | 0.135198  | 0.12296   |
| 0.110868 | 0.109557  | 0.112179  | 0.112471  | 0.199301  | 0.123543  | 0.117424  |
| 0.128351 | 0.0439977 | 0.121795  | 0.122086  | 0.202214  | 0.130828  | 0.123252  |
| 0.11961  | 0.123834  | 0.106061  | 0.123543  | 0.189977  | 0.0606061 | 0.0506993 |
| 0.117716 | 0.110577  | 0.11757   | 0.121066  | 0.191288  | 0.127477  | 0.119318  |
| 0.107809 | 0.13243   | 0.111451  | 0.115239  | 0.202652  | 0.131847  | 0.119027  |
| 0.123106 | 0.122086  | 0.116841  | 0.129662  | 0.192308  | 0.0745921 | 0.0795455 |

|          |           |           |           |           |           |           |
|----------|-----------|-----------|-----------|-----------|-----------|-----------|
| 0.126894 | 0.132867  | 0.128497  | 0.137821  | 0.205711  | 0.048951  | 0.0626457 |
| 0.122086 | 0.0525932 | 0.116987  | 0.119318  | 0.194493  | 0.12602   | 0.118153  |
| 0.126748 | 0.133013  | 0.121066  | 0.135344  | 0.203817  | 0.0543415 | 0.0563811 |
| 0.100087 | 0.128788  | 0.11014   | 0.117424  | 0.200466  | 0.13345   | 0.119172  |
| 0.124854 | 0.131119  | 0.13141   | 0.129079  | 0.209207  | 0.136946  | 0.129662  |
| 0.117716 | 0.127185  | 0.121941  | 0.057838  | 0.200903  | 0.130973  | 0.124854  |
| 0.11553  | 0.13986   | 0.124417  | 0.124126  | 0.212704  | 0.141317  | 0.132576  |
| 0.120629 | 0.120775  | 0.124272  | 0.125728  | 0.206731  | 0.133013  | 0.122232  |
| 0.121503 | 0.055507  | 0.117861  | 0.118444  | 0.191579  | 0.126603  | 0.118735  |
| 0.133159 | 0.139423  | 0.120484  | 0.133304  | 0.20877   | 0.136218  | 0.133596  |
| 0.190414 | 0.191434  | 0.181235  | 0.191725  | 0.0973193 | 0.188228  | 0.175117  |
| 0.128205 | 0.136509  | 0.129516  | 0.140006  | 0.206731  | 0.0502622 | 0.0662879 |
| 0.125291 | 0.129225  | 0.11961   | 0.128642  | 0.195076  | 0.0525932 | 0.0560897 |
| 0.117861 | 0.130245  | 0.120338  | 0.122669  | 0.204545  | 0.136655  | 0.12704   |
| 0.112179 | 0.120484  | 0.112617  | 0.117279  | 0.198281  | 0.126894  | 0.117279  |
| 0.114073 | 0.121795  | 0.119172  | 0.0495338 | 0.204837  | 0.131702  | 0.126457  |
| 0.11859  | 0.128059  | 0.123397  | 0.0479312 | 0.207314  | 0.13884   | 0.13039   |
| 0.198281 | 0.195513  | 0.190559  | 0.197261  | 0.0958625 | 0.194347  | 0.182401  |
| 0.122232 | 0.125874  | 0.119755  | 0.127914  | 0.190559  | 0.0775058 | 0.076049  |
| 0.110723 | 0.11961   | 0.110868  | 0.118444  | 0.173514  | 0.11553   | 0.102418  |
| 0.123834 | 0.130973  | 0.116987  | 0.129808  | 0.200612  | 0.053176  | 0.0563811 |
| 0.196824 | 0.193182  | 0.18852   | 0.199009  | 0.0967366 | 0.193182  | 0.183275  |
| 0.109848 | 0.109703  | 0.111742  | 0.11116   | 0.191871  | 0.125728  | 0.114656  |
| 0.110286 | 0.137821  | 0.119172  | 0.115676  | 0.209207  | 0.136946  | 0.125583  |
| 0.12602  | 0.128788  | 0.118881  | 0.129371  | 0.197844  | 0.0536131 | 0.0524476 |
| 0.117424 | 0.124563  | 0.104749  | 0.12398   | 0.201195  | 0.122523  | 0.112034  |
| 0.19493  | 0.190122  | 0.185752  | 0.194493  | 0.0884324 | 0.187209  | 0.178467  |
| 0.107517 | 0.13447   | 0.113199  | 0.11757   | 0.203817  | 0.128059  | 0.118153  |
| 0.117716 | 0.125437  | 0.107372  | 0.119901  | 0.191288  | 0.120775  | 0.110868  |
| 0.115676 | 0.11553   | 0.107955  | 0.116404  | 0.186334  | 0.126894  | 0.116113  |
| 0.129079 | 0.131556  | 0.119318  | 0.13243   | 0.17701   | 0.126311  | 0.112034  |
| 0.114948 | 0.134033  | 0.0492424 | 0.128205  | 0.20542   | 0.134033  | 0.123543  |
| 0.111742 | 0.13986   | 0.121212  | 0.118298  | 0.212413  | 0.138695  | 0.129079  |
| 0.12398  | 0.0530303 | 0.115385  | 0.117424  | 0.197552  | 0.123543  | 0.113345  |
| 0.110868 | 0.13141   | 0.120629  | 0.124709  | 0.206585  | 0.119755  | 0.11655   |
| 0.141026 | 0.144959  | 0.135927  | 0.153409  | 0.213432  | 0.144959  | 0.143211  |
| 0.24155  | 0.234994  | 0.235286  | 0.238491  | 0.120192  | 0.23412   | 0.228875  |
| 0.124709 | 0.126311  | 0.13039   | 0.125728  | 0.210519  | 0.133887  | 0.126311  |
| 0.11451  | 0.134761  | 0.0514277 | 0.129225  | 0.202652  | 0.135344  | 0.122815  |
| 0.121649 | 0.124126  | 0.117424  | 0.126166  | 0.191142  | 0.0603147 | 0.0614802 |
| 0.125874 | 0.130973  | 0.119318  | 0.131556  | 0.190705  | 0.13039   | 0.119318  |
| 0.112325 | 0.127331  | 0.0748834 | 0.121212  | 0.198718  | 0.123543  | 0.110723  |
| 0.112908 | 0.128788  | 0.112471  | 0.119464  | 0.201632  | 0.123543  | 0.117424  |
| 0.125291 | 0.127185  | 0.117279  | 0.131847  | 0.195367  | 0.0604604 | 0.0627914 |

|           |           |           |          |           |           |           |
|-----------|-----------|-----------|----------|-----------|-----------|-----------|
| 0.112034  | 0.138112  | 0.118881  | 0.117424 | 0.206876  | 0.136364  | 0.125291  |
| 0.120775  | 0.125     | 0.107517  | 0.12704  | 0.195221  | 0.126748  | 0.116259  |
| 0.241259  | 0.234411  | 0.237325  | 0.242861 | 0.124854  | 0.235286  | 0.23208   |
| 0.107372  | 0.1081    | 0.1081    | 0.108974 | 0.191725  | 0.120629  | 0.11014   |
| 0.0560897 | 0.125291  | 0.0996503 | 0.11014  | 0.198718  | 0.121795  | 0.111014  |
| 0.120047  | 0.050845  | 0.115822  | 0.113199 | 0.194202  | 0.121941  | 0.114365  |
| 0.127477  | 0.131993  | 0.119464  | 0.1419   | 0.208625  | 0.13141   | 0.125291  |
| 0.13243   | 0.125291  | 0.134033  | 0.132284 | 0.214744  | 0.142483  | 0.13345   |
| 0.131556  | 0.116259  | 0.118007  | 0.131993 | 0.190268  | 0.119464  | 0.111888  |
| 0.124854  | 0.12704   | 0.114802  | 0.128788 | 0.193182  | 0.0541958 | 0.0512821 |
| 0.118007  | 0.118153  | 0.104749  | 0.122815 | 0.194784  | 0.116696  | 0.110286  |
| 0.234266  | 0.228584  | 0.230332  | 0.234994 | 0.121066  | 0.228293  | 0.224505  |
| 0.125874  | 0.130099  | 0.119901  | 0.133887 | 0.200612  | 0.0514277 | 0.0557984 |
| 0.109994  | 0.134907  | 0.115967  | 0.115676 | 0.207459  | 0.134615  | 0.120921  |
| 0.115239  | 0.119464  | 0.101981  | 0.118007 | 0.196387  | 0.125     | 0.114219  |
| 0.117424  | 0.128642  | 0.103001  | 0.128642 | 0.20236   | 0.125146  | 0.122232  |
| 0.04662   | 0.134761  | 0.116696  | 0.119027 | 0.210519  | 0.133596  | 0.128059  |
| 0.120629  | 0.0490967 | 0.111742  | 0.114365 | 0.198864  | 0.124563  | 0.115822  |
| 0.105769  | 0.132139  | 0.118735  | 0.115822 | 0.207022  | 0.134761  | 0.127185  |
| 0.110286  | 0.141026  | 0.12296   | 0.121212 | 0.212995  | 0.13549   | 0.127622  |
| 0.110286  | 0.130536  | 0.111888  | 0.115385 | 0.205711  | 0.131119  | 0.120921  |
| 0.122086  | 0.0587121 | 0.116113  | 0.118735 | 0.19595   | 0.128059  | 0.114656  |
| 0.116841  | 0.136509  | 0.0627914 | 0.133596 | 0.206731  | 0.133304  | 0.128059  |
| 0.120775  | 0.138986  | 0.0646853 | 0.138112 | 0.216492  | 0.136655  | 0.130828  |
| 0.124272  | 0.134324  | 0.131702  | 0.131702 | 0.210664  | 0.139277  | 0.132284  |
| 0.124272  | 0.138112  | 0.134033  | 0.134615 | 0.20979   | 0.140734  | 0.137238  |
| 0.116841  | 0.140297  | 0.0636655 | 0.135635 | 0.213724  | 0.138549  | 0.132721  |
| 0.115385  | 0.102127  | 0.111451  | 0.115239 | 0.197698  | 0.127477  | 0.112617  |
| 0.101836  | 0.143357  | 0.129371  | 0.120629 | 0.219697  | 0.140443  | 0.135198  |
| 0.13141   | 0.126603  | 0.133596  | 0.13447  | 0.214598  | 0.13884   | 0.13039   |
| 0.210664  | 0.208188  | 0.202943  | 0.209936 | 0.106789  | 0.204691  | 0.196241  |
| 0.123543  | 0.121358  | 0.126311  | 0.130099 | 0.201777  | 0.127477  | 0.120484  |
| 0.0533217 | 0.130099  | 0.103001  | 0.116113 | 0.2044    | 0.130682  | 0.11757   |
| 0.127477  | 0.0492424 | 0.123834  | 0.121503 | 0.191725  | 0.130828  | 0.123543  |
| 0.228147  | 0.224796  | 0.221591  | 0.229167 | 0.118153  | 0.221591  | 0.215763  |
| 0.213287  | 0.211684  | 0.21081   | 0.216346 | 0.113782  | 0.214598  | 0.206148  |
| 0.112908  | 0.138695  | 0.121795  | 0.121212 | 0.208916  | 0.138112  | 0.129953  |
| 0.253497  | 0.246941  | 0.249563  | 0.254808 | 0.132721  | 0.246358  | 0.243444  |
| 0.11859   | 0.101544  | 0.112617  | 0.121066 | 0.197698  | 0.128351  | 0.114656  |
| 0.13141   | 0.128642  | 0.131556  | 0.14088  | 0.211976  | 0.14292   | 0.140589  |
| 0.112471  | 0.107372  | 0.111742  | 0.113491 | 0.201195  | 0.129225  | 0.118444  |
| 0.116696  | 0.136946  | 0.0559441 | 0.131119 | 0.20979   | 0.132867  | 0.124417  |
| 0.194639  | 0.188666  | 0.188083  | 0.196533 | 0.0916375 | 0.191579  | 0.180216  |
| 0.120192  | 0.120921  | 0.117133  | 0.123252 | 0.199883  | 0.132867  | 0.125874  |



|           |           |           |           |           |           |           |
|-----------|-----------|-----------|-----------|-----------|-----------|-----------|
| 0.203817  | 0.19697   | 0.196096  | 0.200466  | 0.0999417 | 0.199009  | 0.18648   |
| 0.121649  | 0.113636  | 0.111305  | 0.128788  | 0.201632  | 0.129079  | 0.116841  |
| 0.112908  | 0.128205  | 0.113928  | 0.121503  | 0.183858  | 0.112179  | 0.101107  |
| 0.121649  | 0.124417  | 0.119755  | 0.129079  | 0.200758  | 0.13345   | 0.124126  |
| 0.116987  | 0.120629  | 0.113928  | 0.124709  | 0.18648   | 0.113928  | 0.1081    |
| 0.114802  | 0.0572552 | 0.107372  | 0.115239  | 0.193328  | 0.121066  | 0.109411  |
| 0.115093  | 0.116113  | 0.112034  | 0.121358  | 0.198281  | 0.116404  | 0.106789  |
| 0.1081    | 0.105624  | 0.109994  | 0.106498  | 0.192745  | 0.125728  | 0.115822  |
| 0.118444  | 0.122669  | 0.112179  | 0.123543  | 0.194056  | 0.0579837 | 0.0454545 |
| 0.0981935 | 0.130682  | 0.116113  | 0.108246  | 0.206439  | 0.130682  | 0.122523  |
| 0.11451   | 0.118444  | 0.113491  | 0.120484  | 0.199446  | 0.124563  | 0.112617  |
| 0.109994  | 0.107226  | 0.109848  | 0.111597  | 0.196096  | 0.125583  | 0.118298  |
| 0.126166  | 0.115239  | 0.127477  | 0.124563  | 0.200321  | 0.134178  | 0.12602   |
| 0.128497  | 0.136509  | 0.124272  | 0.133013  | 0.204108  | 0.0540501 | 0.0590035 |
| 0.11757   | 0.123834  | 0.117133  | 0.120629  | 0.198135  | 0.129371  | 0.118298  |
| 0.116841  | 0.122815  | 0.110286  | 0.116987  | 0.196824  | 0.12602   | 0.116696  |
| 0.116113  | 0.0550699 | 0.111014  | 0.115676  | 0.193473  | 0.120629  | 0.111888  |
| 0.112617  | 0.131702  | 0.113345  | 0.114802  | 0.199009  | 0.125     | 0.115093  |
| 0.112908  | 0.131702  | 0.0498252 | 0.128497  | 0.200758  | 0.130828  | 0.119172  |
| 0.11655   | 0.123397  | 0.120484  | 0.0488054 | 0.207896  | 0.131265  | 0.127185  |
| 0.117716  | 0.128642  | 0.118444  | 0.121066  | 0.201777  | 0.132139  | 0.123689  |
| 0.122523  | 0.128205  | 0.117133  | 0.126748  | 0.193473  | 0.0565268 | 0.0515734 |
| 0.128788  | 0.135635  | 0.124563  | 0.133304  | 0.203526  | 0.0543415 | 0.0613345 |
| 0.134615  | 0.137092  | 0.136509  | 0.144085  | 0.209062  | 0.050845  | 0.0692016 |
| 0.103584  | 0.118298  | 0.101981  | 0.104312  | 0.196678  | 0.120629  | 0.1081    |
| 0.122523  | 0.0582751 | 0.113928  | 0.122378  | 0.19697   | 0.125583  | 0.116841  |
| 0.109848  | 0.124272  | 0.0992133 | 0.114656  | 0.196241  | 0.118444  | 0.108537  |
| 0.119172  | 0.143211  | 0.0677448 | 0.135052  | 0.214307  | 0.137966  | 0.130973  |
| 0.111451  | 0.112179  | 0.115967  | 0.111888  | 0.203671  | 0.12704   | 0.11859   |
| 0.12602   | 0.131119  | 0.140152  | 0.0629371 | 0.22028   | 0.143065  | 0.144522  |
| 0.136801  | 0.0434149 | 0.137238  | 0.130536  | 0.208042  | 0.136655  | 0.134615  |
| 0.124126  | 0.129225  | 0.114948  | 0.138549  | 0.204983  | 0.129808  | 0.120484  |
| 0.11757   | 0.113636  | 0.111305  | 0.123543  | 0.196096  | 0.119755  | 0.108683  |
| 0.107226  | 0.126311  | 0.0936772 | 0.123106  | 0.195076  | 0.119318  | 0.108829  |
| 0.12296   | 0.13039   | 0.131847  | 0.127477  | 0.207022  | 0.138549  | 0.131265  |
| 0.209353  | 0.212704  | 0.206294  | 0.211247  | 0.118298  | 0.205128  | 0.198427  |
| 0.116113  | 0.125583  | 0.109557  | 0.118298  | 0.194639  | 0.126166  | 0.115676  |
| 0.123543  | 0.12398   | 0.115822  | 0.125728  | 0.200903  | 0.133596  | 0.117861  |
| 0.109994  | 0.132867  | 0.0574009 | 0.129662  | 0.205128  | 0.129662  | 0.121795  |
| 0.119464  | 0.125728  | 0.120775  | 0.125728  | 0.200029  | 0.13039   | 0.121358  |
| 0.125437  | 0.123252  | 0.119172  | 0.130245  | 0.200175  | 0.13345   | 0.126748  |
| 0.116987  | 0.131993  | 0.119464  | 0.127622  | 0.202506  | 0.120921  | 0.113054  |
| 0.11451   | 0.13447   | 0.122815  | 0.129225  | 0.207314  | 0.119901  | 0.114073  |
| 0.119901  | 0.127331  | 0.1081    | 0.134324  | 0.201049  | 0.12704   | 0.117716  |

|          |          |           |          |          |           |           |
|----------|----------|-----------|----------|----------|-----------|-----------|
| 0.095134 | 0.129371 | 0.110431  | 0.104604 | 0.20338  | 0.124126  | 0.117133  |
| 0.112908 | 0.137238 | 0.0606061 | 0.134324 | 0.210956 | 0.133741  | 0.122669  |
| 0.112908 | 0.12296  | 0.113928  | 0.125291 | 0.200175 | 0.127622  | 0.119172  |
| 0.119464 | 0.122523 | 0.119027  | 0.122232 | 0.201777 | 0.131556  | 0.11961   |
| 0.176428 | 0.181527 | 0.17366   | 0.184732 | 0.171329 | 0.179487  | 0.170163  |
| 0.122815 | 0.124709 | 0.113636  | 0.128497 | 0.192599 | 0.0611888 | 0.0518648 |
| 0.119172 | 0.137966 | 0.0697844 | 0.136218 | 0.19799  | 0.137675  | 0.13039   |
| 0.114365 | 0.122086 | 0.114802  | 0.123252 | 0.210956 | 0.139277  | 0.129079  |
| 0.11655  | 0.129225 | 0.121941  | 0.131556 | 0.198281 | 0.117861  | 0.114365  |
| 0.111014 | 0.114656 | 0.109411  | 0.113782 | 0.197698 | 0.117861  | 0.104458  |
| 0.106643 | 0.112325 | 0.109994  | 0.116987 | 0.197115 | 0.11961   | 0.107663  |
| 0.116259 | 0.121358 | 0.111742  | 0.118444 | 0.202069 | 0.12398   | 0.112908  |
| 0.110723 | 0.127185 | 0.114656  | 0.129516 | 0.206148 | 0.132721  | 0.125728  |
| 0.121212 | 0.121358 | 0.118735  | 0.125728 | 0.190122 | 0.0945513 | 0.0846445 |
| 0.125437 | 0.129953 | 0.126166  | 0.128497 | 0.211538 | 0.137238  | 0.129953  |
| 0.107809 | 0.121649 | 0.107663  | 0.116696 | 0.195076 | 0.117861  | 0.109411  |
| 0.11553  | 0.128788 | 0.119755  | 0.118298 | 0.201049 | 0.132867  | 0.124126  |
| 0.118881 | 0.132139 | 0.124854  | 0.131847 | 0.214307 | 0.140006  | 0.13447   |
| 0.105478 | 0.11961  | 0.119318  | 0.117279 | 0.208188 | 0.13039   | 0.125728  |
| 0.117133 | 0.126311 | 0.121066  | 0.120775 | 0.205857 | 0.129516  | 0.121066  |
| 0.103147 | 0.117279 | 0.113491  | 0.116113 | 0.205274 | 0.130682  | 0.120192  |
| 0.104895 | 0.119318 | 0.120775  | 0.117279 | 0.206439 | 0.128351  | 0.123689  |
| 0.108974 | 0.109994 | 0.11116   | 0.109411 | 0.196824 | 0.127185  | 0.115239  |
| 0.118153 | 0.11655  | 0.124126  | 0.11655  | 0.212413 | 0.133741  | 0.128205  |
| 0.104749 | 0.118298 | 0.108392  | 0.106643 | 0.198135 | 0.129662  | 0.115385  |
| 0.133887 | 0.14627  | 0.140152  | 0.138695 | 0.214452 | 0.143065  | 0.140443  |
| 0.128642 | 0.139569 | 0.126166  | 0.134033 | 0.199301 | 0.134907  | 0.129662  |
| 0.105041 | 0.118881 | 0.112179  | 0.104895 | 0.201632 | 0.125291  | 0.119464  |
| 0.123543 | 0.144668 | 0.130682  | 0.129808 | 0.218677 | 0.139423  | 0.137966  |
| 0.126457 | 0.130099 | 0.11553   | 0.129516 | 0.204983 | 0.133013  | 0.11961   |
| 0.13549  | 0.133013 | 0.13884   | 0.142045 | 0.211684 | 0.146999  | 0.137675  |
| 0.112762 | 0.113491 | 0.114656  | 0.107663 | 0.20236  | 0.126311  | 0.117279  |
| 0.132139 | 0.143357 | 0.128205  | 0.143939 | 0.213869 | 0.147727  | 0.141026  |
| 0.116113 | 0.133741 | 0.119172  | 0.12704  | 0.204254 | 0.140152  | 0.134324  |
| 0.127477 | 0.141317 | 0.124126  | 0.137821 | 0.208333 | 0.147727  | 0.141026  |
| 0.116113 | 0.127331 | 0.123252  | 0.125583 | 0.213869 | 0.131993  | 0.123543  |
| 0.10373  | 0.11553  | 0.114073  | 0.116987 | 0.204691 | 0.126603  | 0.117861  |
| 0.110868 | 0.119172 | 0.112179  | 0.113636 | 0.198135 | 0.132284  | 0.120338  |
| 0.102564 | 0.127477 | 0.104167  | 0.119318 | 0.206731 | 0.129516  | 0.119901  |
| 0.101981 | 0.122815 | 0.121649  | 0.114948 | 0.211101 | 0.130973  | 0.122815  |
| 0.121066 | 0.123834 | 0.125583  | 0.123834 | 0.217657 | 0.138403  | 0.131993  |
| 0.122815 | 0.126166 | 0.123543  | 0.126166 | 0.198427 | 0.134907  | 0.125583  |
| 0.103875 | 0.121212 | 0.108974  | 0.11655  | 0.20134  | 0.126748  | 0.115093  |
| 0.110431 | 0.116113 | 0.110868  | 0.114656 | 0.200321 | 0.13039   | 0.120192  |

|          |           |          |          |          |          |           |
|----------|-----------|----------|----------|----------|----------|-----------|
| 0.121649 | 0.116259  | 0.115385 | 0.125874 | 0.206585 | 0.132284 | 0.124126  |
| 0.112325 | 0.114802  | 0.113928 | 0.117716 | 0.199301 | 0.126166 | 0.116259  |
| 0.117133 | 0.11961   | 0.122523 | 0.121066 | 0.209645 | 0.135927 | 0.127185  |
| 0.111305 | 0.115822  | 0.114073 | 0.114365 | 0.202069 | 0.121649 | 0.114656  |
| 0.126894 | 0.116259  | 0.120629 | 0.130828 | 0.189977 | 0.115676 | 0.109848  |
| 0.114365 | 0.115093  | 0.115093 | 0.126748 | 0.202506 | 0.125583 | 0.111597  |
| 0.113199 | 0.0976107 | 0.112762 | 0.118007 | 0.196387 | 0.124417 | 0.115093  |
| 0.114073 | 0.113636  | 0.113054 | 0.120921 | 0.20134  | 0.128788 | 0.119464  |
| 0.126457 | 0.116696  | 0.115239 | 0.130973 | 0.1875   | 0.118444 | 0.108246  |
| 0.116404 | 0.117424  | 0.111597 | 0.119172 | 0.200466 | 0.119464 | 0.109848  |
| 0.121941 | 0.131702  | 0.119755 | 0.126457 | 0.198718 | 0.112762 | 0.108683  |
| 0.121066 | 0.111305  | 0.107226 | 0.120047 | 0.185606 | 0.109557 | 0.0967366 |
| 0.126457 | 0.131265  | 0.128934 | 0.133887 | 0.213724 | 0.127768 | 0.12398   |

| TDr_2688 | TDr_2692  | TDr_2693 | TDr_2694  | TDr_2698  | TDr_2701  | TDr_2710 |
|----------|-----------|----------|-----------|-----------|-----------|----------|
| 0.205857 | 0.116841  | 0.181381 | 0.125146  | 0.114365  | 0.117424  | 0.131119 |
| 0.214161 | 0.11553   | 0.182401 | 0.119755  | 0.102564  | 0.109703  | 0.133887 |
| 0.213287 | 0.114365  | 0.180361 | 0.115093  | 0.101107  | 0.104749  | 0.128934 |
| 0.22028  | 0.117279  | 0.191725 | 0.116841  | 0.1081    | 0.113199  | 0.126603 |
| 0.230186 | 0.133887  | 0.208916 | 0.132284  | 0.135781  | 0.130973  | 0.135635 |
| 0.223485 | 0.131847  | 0.199883 | 0.13345   | 0.126748  | 0.12398   | 0.140297 |
| 0.227127 | 0.118881  | 0.202943 | 0.119318  | 0.121941  | 0.112762  | 0.125874 |
| 0.213724 | 0.117424  | 0.185752 | 0.119027  | 0.104458  | 0.116259  | 0.124126 |
| 0.21824  | 0.107372  | 0.189685 | 0.109557  | 0.101981  | 0.103001  | 0.122523 |
| 0.218969 | 0.122378  | 0.194202 | 0.121649  | 0.0913462 | 0.0812937 | 0.124417 |
| 0.210373 | 0.111451  | 0.182984 | 0.115967  | 0.107517  | 0.11961   | 0.130682 |
| 0.216929 | 0.107226  | 0.187791 | 0.106206  | 0.112908  | 0.1081    | 0.114802 |
| 0.222465 | 0.107226  | 0.195367 | 0.109703  | 0.103875  | 0.106935  | 0.122378 |
| 0.178322 | 0.141171  | 0.150058 | 0.1419    | 0.124126  | 0.130099  | 0.153992 |
| 0.226544 | 0.13141   | 0.201486 | 0.135927  | 0.0630828 | 0.113636  | 0.127331 |
| 0.229021 | 0.112325  | 0.200175 | 0.110723  | 0.110431  | 0.115822  | 0.121358 |
| 0.223922 | 0.0996503 | 0.191579 | 0.101544  | 0.106206  | 0.111014  | 0.119464 |
| 0.238928 | 0.152244  | 0.215326 | 0.14831   | 0.144522  | 0.140589  | 0.157197 |
| 0.213287 | 0.111451  | 0.182692 | 0.114219  | 0.102273  | 0.105624  | 0.12602  |
| 0.137821 | 0.208479  | 0.141608 | 0.210664  | 0.18211   | 0.203526  | 0.209062 |
| 0.224796 | 0.126166  | 0.200321 | 0.12602   | 0.116987  | 0.125     | 0.136655 |
| 0.225816 | 0.127477  | 0.203671 | 0.125     | 0.114802  | 0.121358  | 0.133013 |
| 0.219843 | 0.0897436 | 0.190705 | 0.0890152 | 0.108829  | 0.108974  | 0.121795 |
| 0.231352 | 0.105624  | 0.206002 | 0.109848  | 0.125874  | 0.11757   | 0.122815 |
| 0.214307 | 0.104895  | 0.183712 | 0.103293  | 0.0989219 | 0.101107  | 0.11655  |
| 0.233246 | 0.134033  | 0.205857 | 0.136218  | 0.124272  | 0.123543  | 0.138695 |
| 0.22567  | 0.122669  | 0.201486 | 0.119027  | 0.119318  | 0.119172  | 0.11859  |
| 0.232372 | 0.106061  | 0.211101 | 0.106789  | 0.118735  | 0.11451   | 0.126748 |
| 0.228293 | 0.126748  | 0.204691 | 0.123689  | 0.132139  | 0.125     | 0.132284 |
| 0.232955 | 0.124709  | 0.206439 | 0.12398   | 0.113782  | 0.105769  | 0.120921 |
| 0.224942 | 0.121649  | 0.197261 | 0.120921  | 0.111305  | 0.118735  | 0.128642 |
| 0.231206 | 0.116841  | 0.204691 | 0.115239  | 0.11757   | 0.112179  | 0.122086 |
| 0.211684 | 0.111597  | 0.186626 | 0.109703  | 0.0965909 | 0.10169   | 0.113636 |
| 0.224505 | 0.118298  | 0.199738 | 0.11757   | 0.11757   | 0.107226  | 0.115967 |
| 0.230769 | 0.114656  | 0.203671 | 0.114802  | 0.118007  | 0.118153  | 0.122815 |
| 0.233537 | 0.122086  | 0.20877  | 0.120484  | 0.127185  | 0.114802  | 0.126457 |
| 0.23951  | 0.13243   | 0.215909 | 0.130828  | 0.130828  | 0.124854  | 0.136801 |
| 0.228293 | 0.111597  | 0.202943 | 0.11757   | 0.119318  | 0.12296   | 0.125291 |
| 0.219843 | 0.0932401 | 0.191579 | 0.0957168 | 0.103293  | 0.109557  | 0.122086 |
| 0.23208  | 0.1081    | 0.202943 | 0.114073  | 0.118735  | 0.11451   | 0.13141  |
| 0.219843 | 0.0961538 | 0.190705 | 0.0983392 | 0.103001  | 0.11014   | 0.127331 |
| 0.238491 | 0.13141   | 0.212558 | 0.13243   | 0.133013  | 0.128497  | 0.148601 |

|          |           |          |           |          |          |          |
|----------|-----------|----------|-----------|----------|----------|----------|
| 0.237908 | 0.13141   | 0.214015 | 0.133304  | 0.139714 | 0.132867 | 0.148601 |
| 0.222319 | 0.103001  | 0.191434 | 0.105478  | 0.110723 | 0.116113 | 0.126894 |
| 0.223193 | 0.103001  | 0.194347 | 0.0996503 | 0.106061 | 0.106789 | 0.112034 |
| 0.232663 | 0.109266  | 0.206439 | 0.112908  | 0.107663 | 0.106061 | 0.118298 |
| 0.22567  | 0.107226  | 0.198864 | 0.107663  | 0.11553  | 0.118881 | 0.12704  |
| 0.238054 | 0.126894  | 0.213869 | 0.129371  | 0.13345  | 0.128642 | 0.14088  |
| 0.226399 | 0.104458  | 0.200175 | 0.106061  | 0.111888 | 0.109703 | 0.127768 |
| 0.2213   | 0.104021  | 0.192453 | 0.107663  | 0.111742 | 0.111014 | 0.124126 |
| 0.243298 | 0.150495  | 0.214452 | 0.149476  | 0.142483 | 0.133887 | 0.143211 |
| 0.230478 | 0.116696  | 0.204837 | 0.122086  | 0.123252 | 0.125437 | 0.131556 |
| 0.221882 | 0.0964452 | 0.194493 | 0.0960082 | 0.115239 | 0.11451  | 0.118881 |
| 0.230915 | 0.132867  | 0.208188 | 0.132139  | 0.116404 | 0.108392 | 0.138112 |
| 0.209936 | 0.111014  | 0.183712 | 0.110868  | 0.112034 | 0.120629 | 0.130828 |
| 0.242861 | 0.125291  | 0.219843 | 0.128351  | 0.140589 | 0.133741 | 0.129662 |
| 0.231643 | 0.111742  | 0.20542  | 0.117424  | 0.125    | 0.121358 | 0.129225 |
| 0.22669  | 0.100379  | 0.197552 | 0.10169   | 0.112762 | 0.116113 | 0.128351 |
| 0.222028 | 0.113491  | 0.19289  | 0.113054  | 0.112762 | 0.112617 | 0.126603 |
| 0.232955 | 0.110723  | 0.205274 | 0.109703  | 0.112617 | 0.106352 | 0.125    |
| 0.242861 | 0.117716  | 0.219843 | 0.11961   | 0.133887 | 0.131119 | 0.150058 |
| 0.243444 | 0.124417  | 0.21926  | 0.128351  | 0.13447  | 0.127622 | 0.145396 |
| 0.185023 | 0.155157  | 0.162005 | 0.152681  | 0.158508 | 0.154575 | 0.168269 |
| 0.221445 | 0.103001  | 0.197261 | 0.104604  | 0.108392 | 0.107663 | 0.127477 |
| 0.223776 | 0.0936772 | 0.193765 | 0.0955711 | 0.109557 | 0.105915 | 0.124563 |
| 0.22669  | 0.10067   | 0.196387 | 0.0976107 | 0.111597 | 0.105041 | 0.121066 |
| 0.230915 | 0.137238  | 0.203234 | 0.139714  | 0.136218 | 0.138112 | 0.142774 |
| 0.221591 | 0.10169   | 0.194493 | 0.103584  | 0.107663 | 0.108392 | 0.121503 |
| 0.232809 | 0.11757   | 0.204545 | 0.123252  | 0.131702 | 0.126894 | 0.136509 |
| 0.230769 | 0.106498  | 0.202506 | 0.106935  | 0.111888 | 0.106498 | 0.121941 |
| 0.223922 | 0.0999417 | 0.192162 | 0.105041  | 0.114656 | 0.113345 | 0.127622 |
| 0.235286 | 0.147727  | 0.208479 | 0.148164  | 0.146416 | 0.143939 | 0.147145 |
| 0.231206 | 0.10169   | 0.201777 | 0.103293  | 0.120192 | 0.118298 | 0.127622 |
| 0.23951  | 0.128642  | 0.214161 | 0.129662  | 0.133741 | 0.12602  | 0.141754 |
| 0.231498 | 0.121795  | 0.205857 | 0.123106  | 0.126311 | 0.126748 | 0.130536 |
| 0.217657 | 0.116113  | 0.189103 | 0.115385  | 0.113345 | 0.116113 | 0.122232 |
| 0.219406 | 0.0916375 | 0.192308 | 0.0961538 | 0.115093 | 0.11116  | 0.122523 |
| 0.226399 | 0.101544  | 0.196387 | 0.10373   | 0.109266 | 0.114948 | 0.13039  |
| 0.238636 | 0.119027  | 0.210082 | 0.120921  | 0.132867 | 0.128934 | 0.139714 |
| 0.224213 | 0.0981935 | 0.19391  | 0.100087  | 0.109411 | 0.109848 | 0.120921 |
| 0.240967 | 0.126894  | 0.215326 | 0.131993  | 0.134033 | 0.124854 | 0.146707 |
| 0.222902 | 0.10708   | 0.196387 | 0.109848  | 0.11859  | 0.11553  | 0.13447  |
| 0.228438 | 0.100087  | 0.202214 | 0.101981  | 0.114802 | 0.118735 | 0.122523 |
| 0.225524 | 0.103293  | 0.195804 | 0.102564  | 0.114802 | 0.115822 | 0.12602  |
| 0.231643 | 0.100087  | 0.201049 | 0.100816  | 0.116259 | 0.119318 | 0.132139 |
| 0.223776 | 0.0995047 | 0.194056 | 0.103147  | 0.111305 | 0.112325 | 0.128642 |

|          |           |          |           |           |          |          |
|----------|-----------|----------|-----------|-----------|----------|----------|
| 0.224942 | 0.0965909 | 0.194347 | 0.102273  | 0.113928  | 0.115239 | 0.124854 |
| 0.239656 | 0.122669  | 0.215763 | 0.124854  | 0.131265  | 0.126166 | 0.142483 |
| 0.225087 | 0.0981935 | 0.193036 | 0.100087  | 0.101544  | 0.109266 | 0.117716 |
| 0.224068 | 0.109994  | 0.199009 | 0.11451   | 0.106352  | 0.109411 | 0.121066 |
| 0.2331   | 0.126894  | 0.208333 | 0.127331  | 0.121503  | 0.115822 | 0.128934 |
| 0.231061 | 0.127477  | 0.205711 | 0.123834  | 0.126166  | 0.11757  | 0.130099 |
| 0.237179 | 0.129516  | 0.211247 | 0.128497  | 0.128788  | 0.122232 | 0.132139 |
| 0.244901 | 0.134324  | 0.218969 | 0.130099  | 0.135635  | 0.129662 | 0.140152 |
| 0.222028 | 0.120192  | 0.193182 | 0.122378  | 0.116259  | 0.118444 | 0.124563 |
| 0.168706 | 0.185169  | 0.156177 | 0.18211   | 0.181818  | 0.177593 | 0.187209 |
| 0.2213   | 0.111305  | 0.195659 | 0.109994  | 0.106498  | 0.11014  | 0.120047 |
| 0.236597 | 0.137092  | 0.215909 | 0.131119  | 0.129662  | 0.132139 | 0.134761 |
| 0.2331   | 0.129808  | 0.212121 | 0.123252  | 0.122378  | 0.127185 | 0.126894 |
| 0.244901 | 0.133741  | 0.216055 | 0.133887  | 0.133304  | 0.125    | 0.138403 |
| 0.226399 | 0.110286  | 0.200466 | 0.109266  | 0.107517  | 0.11116  | 0.119318 |
| 0.23951  | 0.122523  | 0.213287 | 0.122669  | 0.130828  | 0.128351 | 0.133304 |
| 0.225816 | 0.119027  | 0.197552 | 0.114219  | 0.111888  | 0.11757  | 0.120192 |
| 0.228001 | 0.122378  | 0.202943 | 0.119901  | 0.119027  | 0.120338 | 0.125874 |
| 0.227418 | 0.115093  | 0.201486 | 0.11116   | 0.11116   | 0.111014 | 0.121795 |
| 0.241404 | 0.131993  | 0.215763 | 0.128642  | 0.136218  | 0.135781 | 0.134033 |
| 0.224213 | 0.100233  | 0.194784 | 0.100962  | 0.105624  | 0.104895 | 0.114802 |
| 0.235431 | 0.134178  | 0.210373 | 0.134907  | 0.134033  | 0.127477 | 0.139423 |
| 0.22771  | 0.116259  | 0.196824 | 0.116113  | 0.11757   | 0.113636 | 0.123834 |
| 0.23514  | 0.112908  | 0.208042 | 0.115676  | 0.126166  | 0.119027 | 0.13243  |
| 0.231206 | 0.123834  | 0.208479 | 0.124563  | 0.121649  | 0.117424 | 0.130245 |
| 0.224505 | 0.111597  | 0.194202 | 0.110868  | 0.104167  | 0.109557 | 0.123834 |
| 0.232372 | 0.141317  | 0.203817 | 0.14292   | 0.142337  | 0.144231 | 0.145396 |
| 0.227273 | 0.115239  | 0.200175 | 0.113928  | 0.111888  | 0.109703 | 0.121941 |
| 0.22873  | 0.108537  | 0.203089 | 0.108683  | 0.11014   | 0.11757  | 0.117279 |
| 0.228001 | 0.108683  | 0.20236  | 0.111742  | 0.116113  | 0.117424 | 0.121795 |
| 0.237908 | 0.145396  | 0.214015 | 0.140589  | 0.137675  | 0.12704  | 0.146562 |
| 0.209062 | 0.113345  | 0.186626 | 0.113491  | 0.121358  | 0.118881 | 0.127914 |
| 0.228001 | 0.109557  | 0.199738 | 0.110868  | 0.105332  | 0.115385 | 0.118881 |
| 0.222756 | 0.107517  | 0.192745 | 0.108246  | 0.106206  | 0.114219 | 0.118007 |
| 0.225816 | 0.115239  | 0.19493  | 0.116259  | 0.114219  | 0.112617 | 0.125437 |
| 0.234411 | 0.120047  | 0.207896 | 0.116696  | 0.112034  | 0.109266 | 0.129953 |
| 0.228147 | 0.114656  | 0.199009 | 0.115676  | 0.116259  | 0.109411 | 0.120775 |
| 0.218094 | 0.0999417 | 0.188666 | 0.0971737 | 0.0980478 | 0.097028 | 0.112762 |
| 0.220425 | 0.0981935 | 0.191288 | 0.0995047 | 0.099796  | 0.104021 | 0.116841 |
| 0.225233 | 0.105041  | 0.19697  | 0.104895  | 0.100816  | 0.103293 | 0.117861 |
| 0.224068 | 0.11116   | 0.196387 | 0.111597  | 0.117716  | 0.121941 | 0.121941 |
| 0.233829 | 0.120629  | 0.21081  | 0.116404  | 0.121941  | 0.120047 | 0.127331 |
| 0.226981 | 0.099796  | 0.197552 | 0.101107  | 0.0979021 | 0.103293 | 0.114948 |
| 0.21926  | 0.0961538 | 0.193036 | 0.0960082 | 0.0916375 | 0.105478 | 0.115967 |

|          |           |          |           |           |          |          |
|----------|-----------|----------|-----------|-----------|----------|----------|
| 0.231206 | 0.110723  | 0.206731 | 0.108829  | 0.115822  | 0.115676 | 0.121503 |
| 0.223193 | 0.0930944 | 0.191434 | 0.0932401 | 0.100816  | 0.100962 | 0.116696 |
| 0.223193 | 0.121066  | 0.190559 | 0.120629  | 0.11451   | 0.125146 | 0.127477 |
| 0.233392 | 0.137966  | 0.206876 | 0.136655  | 0.128497  | 0.125728 | 0.13039  |
| 0.229312 | 0.108829  | 0.199301 | 0.104895  | 0.1081    | 0.102418 | 0.119901 |
| 0.228584 | 0.101399  | 0.200321 | 0.101253  | 0.100087  | 0.104604 | 0.118298 |
| 0.223048 | 0.100524  | 0.195367 | 0.103875  | 0.102418  | 0.101981 | 0.117424 |
| 0.220134 | 0.0984848 | 0.190122 | 0.10271   | 0.102418  | 0.104312 | 0.115385 |
| 0.23412  | 0.12296   | 0.207314 | 0.121358  | 0.118153  | 0.109266 | 0.129371 |
| 0.223631 | 0.0941142 | 0.193036 | 0.0948427 | 0.0992133 | 0.101107 | 0.114219 |
| 0.238928 | 0.128642  | 0.213869 | 0.13141   | 0.130245  | 0.129808 | 0.133013 |
| 0.230332 | 0.124126  | 0.205274 | 0.125728  | 0.13039   | 0.127914 | 0.132867 |
| 0.231789 | 0.115093  | 0.204691 | 0.119027  | 0.118153  | 0.117424 | 0.125    |
| 0.224068 | 0.109703  | 0.196678 | 0.11014   | 0.106352  | 0.110577 | 0.126311 |
| 0.224359 | 0.118735  | 0.193473 | 0.114219  | 0.107226  | 0.105624 | 0.122232 |
| 0.224796 | 0.0897436 | 0.194202 | 0.0916375 | 0.102418  | 0.105186 | 0.117716 |
| 0.227273 | 0.0919289 | 0.196678 | 0.0944056 | 0.110431  | 0.111742 | 0.11757  |
| 0.225524 | 0.103001  | 0.197552 | 0.106935  | 0.107809  | 0.109994 | 0.120192 |
| 0.214452 | 0.102127  | 0.186772 | 0.10373   | 0.107517  | 0.115822 | 0.126311 |
| 0.238054 | 0.103293  | 0.212413 | 0.106061  | 0.124417  | 0.120192 | 0.133596 |
| 0.233246 | 0.112179  | 0.203526 | 0.112034  | 0.112617  | 0.11655  | 0.125    |
| 0.226981 | 0.128934  | 0.206876 | 0.132284  | 0.122086  | 0.116113 | 0.137675 |
| 0.237325 | 0.137529  | 0.216638 | 0.135927  | 0.130682  | 0.120047 | 0.13345  |
| 0.124854 | 0.190559  | 0.101544 | 0.194202  | 0.185752  | 0.199592 | 0.206585 |
| 0.115385 | 0.238199  | 0.126457 | 0.240385  | 0.235431  | 0.238491 | 0.240822 |
| 0.213141 | 0.107517  | 0.181672 | 0.105041  | 0.108829  | 0.117424 | 0.125291 |
| 0.22028  | 0.097465  | 0.193473 | 0.101107  | 0.1081    | 0.114656 | 0.121066 |
| 0.217075 | 0.0989219 | 0.18852  | 0.100524  | 0.105186  | 0.111451 | 0.116113 |
| 0.223776 | 0.104167  | 0.196387 | 0.107226  | 0.110431  | 0.111742 | 0.124272 |
| 0.226981 | 0.131847  | 0.202506 | 0.137529  | 0.0638112 | 0.113782 | 0.125437 |
| 0.226107 | 0.10271   | 0.200466 | 0.105478  | 0.111014  | 0.117861 | 0.128351 |
| 0.24053  | 0.126748  | 0.217512 | 0.127185  | 0.143794  | 0.144231 | 0.140443 |
| 0.22465  | 0.0971737 | 0.199009 | 0.100524  | 0.115676  | 0.121941 | 0.123689 |
| 0.236014 | 0.115239  | 0.213869 | 0.116259  | 0.129953  | 0.124272 | 0.127477 |
| 0.228293 | 0.113345  | 0.202069 | 0.11757   | 0.130682  | 0.126748 | 0.137238 |
| 0.233537 | 0.120338  | 0.212267 | 0.11961   | 0.126894  | 0.130245 | 0.13345  |
| 0.233537 | 0.127331  | 0.209936 | 0.130682  | 0.133013  | 0.125291 | 0.136364 |
| 0.232663 | 0.104021  | 0.204108 | 0.108246  | 0.112034  | 0.114219 | 0.125    |
| 0.22567  | 0.097028  | 0.199738 | 0.0968823 | 0.112908  | 0.122086 | 0.119755 |
| 0.225816 | 0.103001  | 0.20134  | 0.102564  | 0.111305  | 0.118735 | 0.131556 |
| 0.219406 | 0.0983392 | 0.19289  | 0.101107  | 0.109848  | 0.110286 | 0.114365 |
| 0.224359 | 0.0957168 | 0.195804 | 0.0996503 | 0.11014   | 0.118735 | 0.118735 |
| 0.223631 | 0.0984848 | 0.20236  | 0.101253  | 0.112908  | 0.113345 | 0.123543 |
| 0.230769 | 0.109411  | 0.207168 | 0.112762  | 0.123834  | 0.125146 | 0.135635 |

|          |           |          |           |           |           |          |
|----------|-----------|----------|-----------|-----------|-----------|----------|
| 0.241259 | 0.116696  | 0.214161 | 0.119755  | 0.134033  | 0.130682  | 0.13243  |
| 0.227127 | 0.0990676 | 0.201777 | 0.102127  | 0.117861  | 0.11859   | 0.120047 |
| 0.223485 | 0.0948427 | 0.195221 | 0.0952797 | 0.112762  | 0.112617  | 0.123689 |
| 0.236305 | 0.115822  | 0.213578 | 0.113928  | 0.131993  | 0.125728  | 0.127477 |
| 0.220862 | 0.092803  | 0.19289  | 0.094697  | 0.111305  | 0.109703  | 0.114656 |
| 0.237325 | 0.123834  | 0.212267 | 0.125728  | 0.135635  | 0.137529  | 0.145396 |
| 0.223922 | 0.131702  | 0.201486 | 0.133596  | 0.127477  | 0.128497  | 0.140152 |
| 0.22669  | 0.127185  | 0.204545 | 0.126166  | 0.13345   | 0.136218  | 0.13039  |
| 0.222028 | 0.0945513 | 0.19697  | 0.0981935 | 0.106935  | 0.112034  | 0.116113 |
| 0.222465 | 0.0938228 | 0.19595  | 0.0936772 | 0.106498  | 0.112179  | 0.114802 |
| 0.233974 | 0.108829  | 0.210956 | 0.111597  | 0.123543  | 0.121941  | 0.128351 |
| 0.23208  | 0.107226  | 0.207896 | 0.109703  | 0.12398   | 0.125583  | 0.119464 |
| 0.229167 | 0.111305  | 0.2044   | 0.111742  | 0.131847  | 0.127331  | 0.129953 |
| 0.229021 | 0.100087  | 0.200175 | 0.101107  | 0.115093  | 0.120192  | 0.124563 |
| 0.225962 | 0.0949883 | 0.196824 | 0.097465  | 0.111451  | 0.115676  | 0.124126 |
| 0.229167 | 0.108392  | 0.204108 | 0.108829  | 0.120484  | 0.121503  | 0.127331 |
| 0.239073 | 0.119464  | 0.21081  | 0.120775  | 0.131556  | 0.123543  | 0.130245 |
| 0.23412  | 0.110431  | 0.21081  | 0.112325  | 0.130973  | 0.132284  | 0.12704  |
| 0.236305 | 0.113199  | 0.21183  | 0.111597  | 0.129371  | 0.13243   | 0.130682 |
| 0.230332 | 0.114802  | 0.204983 | 0.119901  | 0.130973  | 0.129079  | 0.140152 |
| 0.227127 | 0.0932401 | 0.197698 | 0.0954254 | 0.116404  | 0.118007  | 0.122378 |
| 0.234411 | 0.119172  | 0.210519 | 0.119901  | 0.126894  | 0.12296   | 0.13549  |
| 0.226107 | 0.0939685 | 0.198427 | 0.094697  | 0.112471  | 0.113491  | 0.119318 |
| 0.218677 | 0.106352  | 0.191579 | 0.107372  | 0.112617  | 0.11451   | 0.129953 |
| 0.227127 | 0.103147  | 0.198864 | 0.108246  | 0.111451  | 0.114219  | 0.127331 |
| 0.221154 | 0.101544  | 0.197261 | 0.10373   | 0.113636  | 0.110577  | 0.126311 |
| 0.223193 | 0.097465  | 0.196387 | 0.10169   | 0.110431  | 0.111742  | 0.119901 |
| 0.237908 | 0.113345  | 0.212267 | 0.117861  | 0.131847  | 0.13549   | 0.131993 |
| 0.22669  | 0.105332  | 0.196387 | 0.108974  | 0.116841  | 0.120192  | 0.128059 |
| 0.23514  | 0.117861  | 0.207751 | 0.120047  | 0.13345   | 0.13243   | 0.136218 |
| 0.222611 | 0.10067   | 0.194347 | 0.10169   | 0.108392  | 0.106498  | 0.114656 |
| 0.23616  | 0.103438  | 0.209353 | 0.108246  | 0.12602   | 0.12296   | 0.121795 |
| 0.229604 | 0.109703  | 0.203963 | 0.113636  | 0.124126  | 0.118735  | 0.128351 |
| 0.218531 | 0.116696  | 0.192016 | 0.116841  | 0.106935  | 0.118444  | 0.130973 |
| 0.227127 | 0.105769  | 0.201486 | 0.105624  | 0.112908  | 0.111597  | 0.115967 |
| 0.219406 | 0.112617  | 0.195513 | 0.117716  | 0.119464  | 0.122523  | 0.131556 |
| 0.228584 | 0.106935  | 0.202069 | 0.108829  | 0.110286  | 0.122086  | 0.127331 |
| 0.223631 | 0.112179  | 0.19595  | 0.109411  | 0.112034  | 0.112471  | 0.118007 |
| 0.237908 | 0.136946  | 0.211976 | 0.136801  | 0.123397  | 0.106643  | 0.139277 |
| 0.242716 | 0.131265  | 0.212995 | 0.128497  | 0.134907  | 0.128351  | 0.134761 |
| 0.221445 | 0.112325  | 0.191725 | 0.111597  | 0.0987762 | 0.095134  | 0.116696 |
| 0.240822 | 0.138403  | 0.213141 | 0.136801  | 0.11757   | 0.113345  | 0.139569 |
| 0.232809 | 0.13243   | 0.208042 | 0.131993  | 0.114219  | 0.0945513 | 0.128351 |
| 0.2331   | 0.135927  | 0.209207 | 0.135198  | 0.123543  | 0.11553   | 0.137092 |



|          |          |          |          |          |           |          |
|----------|----------|----------|----------|----------|-----------|----------|
| 0.22465  | 0.130973 | 0.199009 | 0.129079 | 0.111014 | 0.107663  | 0.128642 |
| 0.233392 | 0.126894 | 0.206002 | 0.12704  | 0.111305 | 0.106498  | 0.129808 |
| 0.230915 | 0.130828 | 0.204108 | 0.133013 | 0.110868 | 0.0999417 | 0.132284 |
| 0.234557 | 0.133887 | 0.21183  | 0.133159 | 0.121503 | 0.117861  | 0.128642 |
| 0.239219 | 0.143794 | 0.213287 | 0.13986  | 0.124709 | 0.119318  | 0.13884  |
| 0.233974 | 0.132139 | 0.206294 | 0.131993 | 0.112179 | 0.105624  | 0.137383 |
| 0.219697 | 0.127185 | 0.195513 | 0.124417 | 0.106643 | 0.106789  | 0.124272 |
| 0.231206 | 0.117716 | 0.207314 | 0.11553  | 0.138258 | 0.13141   | 0.131119 |
| 0.236597 | 0.137092 | 0.208916 | 0.138695 | 0.117716 | 0.107372  | 0.141171 |
| 0.220862 | 0.116404 | 0.194639 | 0.117716 | 0.104021 | 0.105041  | 0.124854 |
| 0.114365 | 0.217657 | 0.116113 | 0.2213   | 0.216346 | 0.223776  | 0.223485 |
| 0.229458 | 0.130245 | 0.203526 | 0.131265 | 0.114073 | 0.11014   | 0.129953 |
| 0.22567  | 0.119172 | 0.196824 | 0.117279 | 0.106206 | 0.100233  | 0.131993 |
| 0.238054 | 0.140589 | 0.212413 | 0.137529 | 0.12704  | 0.122232  | 0.13884  |
| 0.226981 | 0.119318 | 0.20134  | 0.120629 | 0.108683 | 0.111451  | 0.130099 |
| 0.238636 | 0.140589 | 0.21183  | 0.138695 | 0.118881 | 0.104749  | 0.142045 |
| 0.226107 | 0.125437 | 0.199883 | 0.123252 | 0.113928 | 0.108537  | 0.130682 |
| 0.225087 | 0.127914 | 0.20236  | 0.124854 | 0.108829 | 0.109266  | 0.124709 |
| 0.231206 | 0.131993 | 0.204983 | 0.130099 | 0.110868 | 0.10169   | 0.140734 |
| 0.220862 | 0.131556 | 0.197261 | 0.128497 | 0.121503 | 0.114365  | 0.14088  |
| 0.233537 | 0.138986 | 0.209062 | 0.13243  | 0.122232 | 0.115093  | 0.138403 |
| 0.23514  | 0.140006 | 0.208916 | 0.138695 | 0.124417 | 0.112034  | 0.137092 |
| 0.236305 | 0.139132 | 0.20979  | 0.13345  | 0.120338 | 0.111451  | 0.13039  |
| 0.229895 | 0.10912  | 0.201049 | 0.111014 | 0.107809 | 0.105624  | 0.112617 |
| 0.233392 | 0.124854 | 0.203089 | 0.124417 | 0.115385 | 0.109703  | 0.124563 |
| 0.237617 | 0.144522 | 0.21081  | 0.140589 | 0.124563 | 0.124126  | 0.141026 |
| 0.220862 | 0.126603 | 0.194347 | 0.125291 | 0.112179 | 0.108537  | 0.126894 |
| 0.23951  | 0.119901 | 0.211247 | 0.12296  | 0.135198 | 0.126603  | 0.141754 |
| 0.222174 | 0.1419   | 0.191288 | 0.139714 | 0.128934 | 0.140443  | 0.145979 |
| 0.225379 | 0.113928 | 0.19799  | 0.116404 | 0.11116  | 0.111888  | 0.124126 |
| 0.234411 | 0.131702 | 0.2044   | 0.133596 | 0.112908 | 0.109266  | 0.135781 |
| 0.221445 | 0.128059 | 0.194347 | 0.127914 | 0.124709 | 0.129516  | 0.131556 |
| 0.228001 | 0.127914 | 0.201777 | 0.125728 | 0.128059 | 0.114219  | 0.120921 |
| 0.2213   | 0.128497 | 0.190414 | 0.132721 | 0.123689 | 0.128788  | 0.129953 |
| 0.224796 | 0.142191 | 0.198864 | 0.141463 | 0.128642 | 0.138403  | 0.149767 |
| 0.219406 | 0.105041 | 0.193473 | 0.104895 | 0.1081   | 0.107955  | 0.119027 |
| 0.230041 | 0.125    | 0.209645 | 0.126311 | 0.12398  | 0.124709  | 0.137238 |
| 0.213287 | 0.141171 | 0.189977 | 0.142191 | 0.136072 | 0.143211  | 0.150495 |
| 0.232517 | 0.110577 | 0.204254 | 0.106935 | 0.115967 | 0.105915  | 0.124854 |
| 0.22465  | 0.114365 | 0.197844 | 0.116841 | 0.122378 | 0.114948  | 0.133596 |
| 0.232955 | 0.129079 | 0.211101 | 0.128642 | 0.141463 | 0.139277  | 0.138403 |
| 0.228584 | 0.107809 | 0.202652 | 0.10912  | 0.122815 | 0.119755  | 0.134033 |
| 0.241259 | 0.133013 | 0.215909 | 0.13549  | 0.129953 | 0.124854  | 0.135927 |
| 0.231789 | 0.117424 | 0.21081  | 0.120775 | 0.123397 | 0.121795  | 0.135781 |

|          |           |          |           |           |           |          |
|----------|-----------|----------|-----------|-----------|-----------|----------|
| 0.234557 | 0.121358  | 0.207459 | 0.120338  | 0.12296   | 0.128351  | 0.125728 |
| 0.229458 | 0.124709  | 0.207605 | 0.123397  | 0.122523  | 0.124417  | 0.13345  |
| 0.222902 | 0.113782  | 0.199592 | 0.111014  | 0.115385  | 0.112034  | 0.128059 |
| 0.237034 | 0.121503  | 0.209353 | 0.118444  | 0.129808  | 0.134615  | 0.13345  |
| 0.23412  | 0.13549   | 0.210227 | 0.13243   | 0.128351  | 0.11451   | 0.132576 |
| 0.237325 | 0.131702  | 0.213432 | 0.129225  | 0.137383  | 0.132867  | 0.134033 |
| 0.238782 | 0.135198  | 0.214307 | 0.135344  | 0.130973  | 0.121503  | 0.133159 |
| 0.233246 | 0.121503  | 0.203234 | 0.12398   | 0.127768  | 0.130245  | 0.13549  |
| 0.230915 | 0.144522  | 0.206148 | 0.141754  | 0.141754  | 0.143065  | 0.145688 |
| 0.226253 | 0.121212  | 0.198572 | 0.120484  | 0.113199  | 0.0996503 | 0.12704  |
| 0.233829 | 0.109848  | 0.207314 | 0.111742  | 0.114948  | 0.11451   | 0.132576 |
| 0.235577 | 0.131119  | 0.20877  | 0.128642  | 0.124563  | 0.125874  | 0.136655 |
| 0.22771  | 0.119464  | 0.200321 | 0.117861  | 0.112325  | 0.101981  | 0.119172 |
| 0.234266 | 0.144376  | 0.205711 | 0.145979  | 0.136364  | 0.144376  | 0.145251 |
| 0.240967 | 0.150495  | 0.213287 | 0.151807  | 0.147145  | 0.143794  | 0.156323 |
| 0.234848 | 0.115822  | 0.210373 | 0.118298  | 0.129371  | 0.132139  | 0.132721 |
| 0.229749 | 0.102564  | 0.205274 | 0.109703  | 0.122523  | 0.119755  | 0.121503 |
| 0.238345 | 0.135052  | 0.215618 | 0.131993  | 0.129953  | 0.133013  | 0.128934 |
| 0.23412  | 0.13986   | 0.211393 | 0.139132  | 0.122815  | 0.119755  | 0.137821 |
| 0.23412  | 0.110431  | 0.211684 | 0.114073  | 0.122815  | 0.124126  | 0.129079 |
| 0.239656 | 0.142191  | 0.214015 | 0.137383  | 0.127477  | 0.117424  | 0.140734 |
| 0.229458 | 0.13549   | 0.206439 | 0.138258  | 0.127185  | 0.120921  | 0.144522 |
| 0.234557 | 0.115239  | 0.208625 | 0.117424  | 0.118007  | 0.108246  | 0.124563 |
| 0.240967 | 0.161276  | 0.216783 | 0.162005  | 0.157051  | 0.161276  | 0.158654 |
| 0.233392 | 0.113782  | 0.20542  | 0.117133  | 0.120047  | 0.104749  | 0.130973 |
| 0.233392 | 0.130973  | 0.210082 | 0.129662  | 0.125874  | 0.118735  | 0.140589 |
| 0.23412  | 0.11014   | 0.209645 | 0.109994  | 0.118444  | 0.116259  | 0.131702 |
| 0.240239 | 0.131993  | 0.218677 | 0.128934  | 0.134178  | 0.128497  | 0.129953 |
| 0.224505 | 0.132284  | 0.202943 | 0.130973  | 0.116987  | 0.115967  | 0.13345  |
| 0.200466 | 0.138549  | 0.174242 | 0.13986   | 0.133741  | 0.137675  | 0.147582 |
| 0.236451 | 0.151224  | 0.209645 | 0.152535  | 0.139132  | 0.146562  | 0.153846 |
| 0.217657 | 0.124854  | 0.194347 | 0.12296   | 0.118007  | 0.128059  | 0.133596 |
| 0.198281 | 0.134324  | 0.175262 | 0.133304  | 0.133013  | 0.134907  | 0.142774 |
| 0.176573 | 0.106498  | 0.151515 | 0.109848  | 0.143648  | 0.150787  | 0.151369 |
| 0.179487 | 0.140589  | 0.149767 | 0.143648  | 0.133159  | 0.140297  | 0.158362 |
| 0.232955 | 0.0958625 | 0.208188 | 0.0930944 | 0.129516  | 0.12704   | 0.115676 |
| 0.229021 | 0.140006  | 0.206002 | 0.141026  | 0.131702  | 0.133013  | 0.142337 |
| 0.219406 | 0.114948  | 0.189685 | 0.115676  | 0.0824592 | 0.112034  | 0.123397 |
| 0.218094 | 0.112471  | 0.190414 | 0.112325  | 0.0814394 | 0.115967  | 0.119755 |
| 0.223193 | 0.124563  | 0.19493  | 0.127331  | 0.11451   | 0.106789  | 0.131265 |
| 0.21824  | 0.117861  | 0.189103 | 0.118881  | 0.114802  | 0.123397  | 0.131265 |
| 0.223922 | 0.106352  | 0.197698 | 0.109703  | 0.108246  | 0.113928  | 0.117133 |
| 0.211976 | 0.11451   | 0.180798 | 0.117279  | 0.071824  | 0.108974  | 0.122669 |
| 0.224505 | 0.121795  | 0.195367 | 0.122232  | 0.119318  | 0.125     | 0.132284 |

|          |           |           |           |           |           |           |
|----------|-----------|-----------|-----------|-----------|-----------|-----------|
| 0.212413 | 0.127768  | 0.185315  | 0.13141   | 0.0649767 | 0.111742  | 0.127477  |
| 0.2162   | 0.110286  | 0.187937  | 0.111305  | 0.0967366 | 0.0560897 | 0.112034  |
| 0.218531 | 0.118735  | 0.187354  | 0.120338  | 0.117716  | 0.125437  | 0.134178  |
| 0.222465 | 0.118298  | 0.192162  | 0.116987  | 0.112617  | 0.120338  | 0.131119  |
| 0.229458 | 0.0544872 | 0.199738  | 0.0525932 | 0.126894  | 0.127331  | 0.120921  |
| 0.115822 | 0.2162    | 0.117861  | 0.218094  | 0.21081   | 0.217075  | 0.22465   |
| 0.228875 | 0.143357  | 0.208479  | 0.14292   | 0.139423  | 0.140734  | 0.148893  |
| 0.229312 | 0.129225  | 0.204254  | 0.12704   | 0.126166  | 0.11961   | 0.135635  |
| 0.220134 | 0.120338  | 0.189831  | 0.120192  | 0.118735  | 0.120047  | 0.137238  |
| 0.110286 | 0.210664  | 0.102127  | 0.21285   | 0.206439  | 0.212995  | 0.218823  |
| 0.21285  | 0.0824592 | 0.190705  | 0.0808566 | 0.120775  | 0.124126  | 0.126748  |
| 0.229312 | 0.112034  | 0.200466  | 0.109848  | 0.117716  | 0.120192  | 0.0543415 |
| 0.221445 | 0.121649  | 0.195513  | 0.122086  | 0.123834  | 0.123689  | 0.125146  |
| 0.219843 | 0.125874  | 0.195659  | 0.128059  | 0.0528846 | 0.11014   | 0.124709  |
| 0.112908 | 0.250874  | 0.132139  | 0.255099  | 0.247232  | 0.249417  | 0.256119  |
| 0.227273 | 0.127477  | 0.200758  | 0.127331  | 0.120921  | 0.118735  | 0.132139  |
| 0.22669  | 0.0525932 | 0.198135  | 0.0547786 | 0.118881  | 0.122232  | 0.119318  |
| 0.228438 | 0.118444  | 0.202506  | 0.123252  | 0.123252  | 0.126311  | 0.13243   |
| 0.225233 | 0.11757   | 0.198718  | 0.120047  | 0.120629  | 0.124854  | 0.133013  |
| 0.221445 | 0.129225  | 0.194056  | 0.128497  | 0.106352  | 0.121066  | 0.130682  |
| 0.205711 | 0.127768  | 0.175991  | 0.135781  | 0.1081    | 0.11757   | 0.134761  |
| 0.22669  | 0.0549242 | 0.197261  | 0.0550699 | 0.121212  | 0.122232  | 0.117279  |
| 0.217803 | 0.118007  | 0.188666  | 0.118735  | 0.114365  | 0.121503  | 0.131993  |
| 0.223485 | 0.125437  | 0.195804  | 0.127622  | 0.121795  | 0.123689  | 0.13447   |
| 0.222028 | 0.118735  | 0.190559  | 0.122378  | 0.0477855 | 0.107372  | 0.120775  |
| 0.213724 | 0.115093  | 0.186626  | 0.115822  | 0.112617  | 0.117424  | 0.129953  |
| 0.220862 | 0.125728  | 0.194347  | 0.125583  | 0.0973193 | 0.08581   | 0.127768  |
| 0.236742 | 0.150932  | 0.207314  | 0.151661  | 0.139132  | 0.146562  | 0.152098  |
| 0.230624 | 0.13345   | 0.200903  | 0.133013  | 0.125728  | 0.120047  | 0.130536  |
| 0.228875 | 0.116841  | 0.200903  | 0.112617  | 0.119027  | 0.120921  | 0.0574009 |
| 0.116404 | 0.187354  | 0.0957168 | 0.190705  | 0.184003  | 0.193182  | 0.198427  |
| 0.112034 | 0.202506  | 0.099796  | 0.205274  | 0.197698  | 0.204837  | 0.212413  |
| 0.215181 | 0.125874  | 0.18954   | 0.128642  | 0.0525932 | 0.111597  | 0.127914  |
| 0.219843 | 0.119464  | 0.190705  | 0.124272  | 0.0467657 | 0.105478  | 0.122669  |
| 0.219551 | 0.136946  | 0.192162  | 0.139132  | 0.127477  | 0.125583  | 0.151224  |
| 0.225379 | 0.0501166 | 0.197698  | 0.0517191 | 0.121358  | 0.123834  | 0.118007  |
| 0.22873  | 0.133596  | 0.202214  | 0.133159  | 0.124126  | 0.121066  | 0.128934  |
| 0.224505 | 0.129953  | 0.200321  | 0.135052  | 0.130099  | 0.129079  | 0.132284  |
| 0.110286 | 0.223776  | 0.108246  | 0.228293  | 0.218677  | 0.228147  | 0.234266  |
| 0.223922 | 0.111014  | 0.195367  | 0.109411  | 0.112034  | 0.11451   | 0.128205  |
| 0.138112 | 0.2044    | 0.140152  | 0.20542   | 0.208333  | 0.211393  | 0.211684  |
| 0.229749 | 0.0842075 | 0.200612  | 0.0855186 | 0.114073  | 0.115676  | 0.111597  |
| 0.222902 | 0.113199  | 0.196096  | 0.113345  | 0.113928  | 0.109703  | 0.119027  |
| 0.212558 | 0.107517  | 0.185752  | 0.105915  | 0.114948  | 0.117133  | 0.124126  |

|          |           |           |           |           |          |           |
|----------|-----------|-----------|-----------|-----------|----------|-----------|
| 0.214598 | 0.114802  | 0.187791  | 0.11961   | 0.0572552 | 0.108392 | 0.122378  |
| 0.114802 | 0.205274  | 0.103147  | 0.207168  | 0.199883  | 0.210519 | 0.216346  |
| 0.213578 | 0.130099  | 0.187937  | 0.129953  | 0.126748  | 0.131556 | 0.144668  |
| 0.231935 | 0.105624  | 0.202797  | 0.110723  | 0.117716  | 0.116404 | 0.121649  |
| 0.222611 | 0.125146  | 0.19493   | 0.127914  | 0.12296   | 0.124563 | 0.135927  |
| 0.227855 | 0.11961   | 0.200466  | 0.124126  | 0.126748  | 0.111742 | 0.119318  |
| 0.222902 | 0.11757   | 0.191142  | 0.122378  | 0.0486597 | 0.107372 | 0.125437  |
| 0.229749 | 0.0885781 | 0.201777  | 0.0866841 | 0.121649  | 0.118298 | 0.110431  |
| 0.214015 | 0.0678904 | 0.188083  | 0.0683275 | 0.121066  | 0.124126 | 0.12296   |
| 0.228001 | 0.115093  | 0.202652  | 0.112034  | 0.119318  | 0.121795 | 0.0512821 |
| 0.212267 | 0.115093  | 0.183712  | 0.114365  | 0.107955  | 0.116259 | 0.126748  |
| 0.223485 | 0.107372  | 0.202214  | 0.111888  | 0.121212  | 0.11961  | 0.120484  |
| 0.115822 | 0.187354  | 0.0925117 | 0.189831  | 0.184295  | 0.189977 | 0.199592  |
| 0.230769 | 0.121358  | 0.201632  | 0.125583  | 0.125     | 0.125146 | 0.131847  |
| 0.227127 | 0.132284  | 0.201195  | 0.13447   | 0.121941  | 0.133159 | 0.140152  |
| 0.222319 | 0.118444  | 0.19493   | 0.120921  | 0.116841  | 0.121649 | 0.13243   |
| 0.221008 | 0.127622  | 0.192745  | 0.127185  | 0.122815  | 0.123834 | 0.130828  |
| 0.219551 | 0.123252  | 0.195367  | 0.121941  | 0.120775  | 0.124126 | 0.133741  |
| 0.232372 | 0.0909091 | 0.206439  | 0.0913462 | 0.121358  | 0.12296  | 0.112179  |
| 0.219114 | 0.114948  | 0.192599  | 0.116259  | 0.117424  | 0.108829 | 0.121066  |
| 0.229895 | 0.0619172 | 0.203963  | 0.0603147 | 0.127622  | 0.12602  | 0.120192  |
| 0.225379 | 0.127914  | 0.197115  | 0.127768  | 0.114948  | 0.127331 | 0.138695  |
| 0.224796 | 0.11451   | 0.19595   | 0.117861  | 0.113491  | 0.122378 | 0.129662  |
| 0.218531 | 0.120775  | 0.188228  | 0.123252  | 0.0594406 | 0.110286 | 0.127768  |
| 0.230332 | 0.117133  | 0.200321  | 0.120484  | 0.120484  | 0.124709 | 0.128497  |
| 0.231352 | 0.135052  | 0.209499  | 0.135198  | 0.13345   | 0.134761 | 0.133596  |
| 0.222319 | 0.116696  | 0.194056  | 0.11859   | 0.113636  | 0.114656 | 0.125728  |
| 0.22771  | 0.139569  | 0.2044    | 0.136509  | 0.135344  | 0.136364 | 0.1419    |
| 0.219551 | 0.117424  | 0.190414  | 0.120775  | 0.0490967 | 0.105478 | 0.125     |
| 0.223339 | 0.119755  | 0.193328  | 0.121358  | 0.118735  | 0.120338 | 0.12704   |
| 0.204545 | 0.116404  | 0.176865  | 0.121503  | 0.114219  | 0.119901 | 0.13039   |
| 0.225233 | 0.0572552 | 0.197261  | 0.0533217 | 0.12704   | 0.129225 | 0.122523  |
| 0.131119 | 0.175845  | 0.115676  | 0.177739  | 0.187063  | 0.196533 | 0.200612  |
| 0.2213   | 0.102273  | 0.197115  | 0.107955  | 0.114656  | 0.112471 | 0.117133  |
| 0.216055 | 0.108392  | 0.188083  | 0.112325  | 0.105915  | 0.110723 | 0.118298  |
| 0.231206 | 0.114219  | 0.2044    | 0.113199  | 0.120192  | 0.119172 | 0.0512821 |
| 0.14088  | 0.179196  | 0.112908  | 0.180798  | 0.173805  | 0.184441 | 0.191434  |
| 0.231352 | 0.139423  | 0.20338   | 0.136364  | 0.131702  | 0.127768 | 0.137383  |
| 0.240967 | 0.151369  | 0.213869  | 0.150932  | 0.142191  | 0.134761 | 0.140297  |
| 0.235286 | 0.154138  | 0.211101  | 0.153409  | 0.140297  | 0.147145 | 0.155594  |
| 0.217512 | 0.118881  | 0.190705  | 0.120192  | 0.111742  | 0.115385 | 0.124709  |
| 0.21824  | 0.124854  | 0.191725  | 0.124126  | 0.119755  | 0.124854 | 0.135635  |
| 0.115822 | 0.210664  | 0.105624  | 0.211976  | 0.206731  | 0.212121 | 0.220571  |
| 0.216346 | 0.12704   | 0.188374  | 0.128934  | 0.116113  | 0.122086 | 0.13141   |

|          |           |           |           |           |           |           |
|----------|-----------|-----------|-----------|-----------|-----------|-----------|
| 0.219988 | 0.129516  | 0.193473  | 0.129953  | 0.123834  | 0.127185  | 0.13447   |
| 0.221154 | 0.10708   | 0.197552  | 0.107809  | 0.120629  | 0.118153  | 0.120484  |
| 0.161422 | 0.167395  | 0.134907  | 0.171911  | 0.161713  | 0.17264   | 0.181672  |
| 0.214161 | 0.115239  | 0.18648   | 0.113928  | 0.104604  | 0.110577  | 0.128934  |
| 0.231789 | 0.15472   | 0.21081   | 0.156323  | 0.14292   | 0.1419    | 0.150932  |
| 0.216929 | 0.125874  | 0.190414  | 0.125728  | 0.110868  | 0.0504079 | 0.122378  |
| 0.118444 | 0.18648   | 0.0936772 | 0.190122  | 0.182255  | 0.192599  | 0.200466  |
| 0.225379 | 0.126748  | 0.199446  | 0.12602   | 0.116404  | 0.120338  | 0.127331  |
| 0.221591 | 0.112179  | 0.190705  | 0.113199  | 0.103293  | 0.105769  | 0.119464  |
| 0.224068 | 0.11553   | 0.194056  | 0.118298  | 0.116259  | 0.121066  | 0.129516  |
| 0.223048 | 0.107809  | 0.195076  | 0.109994  | 0.116987  | 0.112471  | 0.116841  |
| 0.229167 | 0.108392  | 0.199446  | 0.107663  | 0.116987  | 0.116841  | 0.0544872 |
| 0.216346 | 0.120921  | 0.188666  | 0.124272  | 0.116987  | 0.125874  | 0.136946  |
| 0.21824  | 0.11757   | 0.189977  | 0.121212  | 0.0474942 | 0.105332  | 0.122815  |
| 0.119901 | 0.186772  | 0.0948427 | 0.189831  | 0.183421  | 0.190559  | 0.202506  |
| 0.223776 | 0.121358  | 0.197844  | 0.119755  | 0.12296   | 0.126603  | 0.130682  |
| 0.212267 | 0.111597  | 0.185752  | 0.11757   | 0.105041  | 0.119464  | 0.124126  |
| 0.114802 | 0.211393  | 0.100816  | 0.212121  | 0.206002  | 0.21081   | 0.222465  |
| 0.231935 | 0.121358  | 0.202506  | 0.122378  | 0.122086  | 0.126894  | 0.133013  |
| 0.220134 | 0.120338  | 0.191288  | 0.123106  | 0.0499709 | 0.109266  | 0.122378  |
| 0.218386 | 0.115093  | 0.1875    | 0.11757   | 0.0470571 | 0.104312  | 0.122669  |
| 0.22465  | 0.140297  | 0.202797  | 0.138986  | 0.134615  | 0.132721  | 0.144085  |
| 0.12296  | 0.188666  | 0.0949883 | 0.191434  | 0.181235  | 0.189831  | 0.201195  |
| 0.232372 | 0.0547786 | 0.201777  | 0.053176  | 0.12398   | 0.12704   | 0.120338  |
| 0.22771  | 0.129371  | 0.205565  | 0.129516  | 0.129225  | 0.128788  | 0.130828  |
| 0.218094 | 0.118298  | 0.191288  | 0.120484  | 0.050845  | 0.105769  | 0.118007  |
| 0.220717 | 0.113054  | 0.190414  | 0.116987  | 0.0493881 | 0.108683  | 0.121795  |
| 0.216492 | 0.11961   | 0.187937  | 0.122086  | 0.0486597 | 0.109703  | 0.11961   |
| 0.218677 | 0.118298  | 0.192453  | 0.11757   | 0.112325  | 0.11859   | 0.129662  |
| 0.221445 | 0.108829  | 0.191142  | 0.109266  | 0.0935315 | 0.0543415 | 0.114365  |
| 0.227855 | 0.130973  | 0.200175  | 0.126748  | 0.120047  | 0.117861  | 0.131265  |
| 0.236888 | 0.135052  | 0.210664  | 0.136655  | 0.13549   | 0.134761  | 0.141171  |
| 0.228147 | 0.125146  | 0.199883  | 0.125     | 0.116259  | 0.11757   | 0.133013  |
| 0.233829 | 0.124709  | 0.208479  | 0.127477  | 0.129225  | 0.111888  | 0.129662  |
| 0.121795 | 0.190414  | 0.101399  | 0.193473  | 0.185023  | 0.199446  | 0.206439  |
| 0.227127 | 0.115093  | 0.200612  | 0.115822  | 0.11757   | 0.119755  | 0.127331  |
| 0.219988 | 0.132721  | 0.197261  | 0.130828  | 0.125     | 0.129808  | 0.136801  |
| 0.21926  | 0.118881  | 0.189831  | 0.123106  | 0.0476399 | 0.102855  | 0.119755  |
| 0.215909 | 0.109994  | 0.187063  | 0.111888  | 0.0941142 | 0.053176  | 0.11116   |
| 0.214744 | 0.114365  | 0.188811  | 0.120047  | 0.111014  | 0.121066  | 0.131265  |
| 0.224213 | 0.0533217 | 0.199446  | 0.0537587 | 0.125728  | 0.12704   | 0.11859   |
| 0.226253 | 0.131702  | 0.200321  | 0.134761  | 0.129225  | 0.131702  | 0.138112  |
| 0.225524 | 0.124563  | 0.195513  | 0.123252  | 0.112762  | 0.126311  | 0.135927  |
| 0.219697 | 0.0709499 | 0.189977  | 0.0728438 | 0.105478  | 0.0995047 | 0.116696  |

|          |           |           |           |           |           |           |
|----------|-----------|-----------|-----------|-----------|-----------|-----------|
| 0.216929 | 0.0792541 | 0.189248  | 0.0796911 | 0.10271   | 0.0842075 | 0.11014   |
| 0.218823 | 0.111742  | 0.18852   | 0.112471  | 0.101981  | 0.092803  | 0.125146  |
| 0.228001 | 0.0859557 | 0.202069  | 0.0884324 | 0.116987  | 0.118881  | 0.111888  |
| 0.231061 | 0.137675  | 0.205711  | 0.136946  | 0.12704   | 0.119901  | 0.130973  |
| 0.228584 | 0.0547786 | 0.200612  | 0.0517191 | 0.117861  | 0.125874  | 0.119464  |
| 0.215035 | 0.11553   | 0.185315  | 0.114802  | 0.109266  | 0.118444  | 0.128059  |
| 0.225816 | 0.0528846 | 0.199009  | 0.0541958 | 0.115385  | 0.119027  | 0.11553   |
| 0.220134 | 0.11451   | 0.185752  | 0.120775  | 0.0482226 | 0.1081    | 0.122086  |
| 0.224068 | 0.104749  | 0.197552  | 0.105186  | 0.115385  | 0.112034  | 0.11961   |
| 0.220571 | 0.119027  | 0.189685  | 0.123543  | 0.0477855 | 0.108829  | 0.122815  |
| 0.222902 | 0.112034  | 0.194639  | 0.112762  | 0.109557  | 0.120192  | 0.121358  |
| 0.223485 | 0.123397  | 0.196387  | 0.122086  | 0.111597  | 0.124854  | 0.135052  |
| 0.22873  | 0.105915  | 0.199883  | 0.106935  | 0.109557  | 0.115239  | 0.0604604 |
| 0.220717 | 0.11014   | 0.191579  | 0.113199  | 0.0977564 | 0.0524476 | 0.119755  |
| 0.218823 | 0.112617  | 0.188811  | 0.119464  | 0.0515734 | 0.106789  | 0.122523  |
| 0.20979  | 0.119027  | 0.181818  | 0.123834  | 0.118007  | 0.127185  | 0.134178  |
| 0.2213   | 0.11859   | 0.194202  | 0.118153  | 0.110868  | 0.124417  | 0.132576  |
| 0.222028 | 0.112908  | 0.194347  | 0.112471  | 0.104021  | 0.109703  | 0.124563  |
| 0.223776 | 0.11757   | 0.191434  | 0.119755  | 0.0509907 | 0.106498  | 0.121358  |
| 0.215181 | 0.124126  | 0.188083  | 0.122523  | 0.119318  | 0.123252  | 0.131119  |
| 0.227127 | 0.0885781 | 0.198572  | 0.0898893 | 0.11553   | 0.122669  | 0.115676  |
| 0.222465 | 0.11655   | 0.191871  | 0.116696  | 0.116404  | 0.124126  | 0.133741  |
| 0.226253 | 0.106935  | 0.197115  | 0.107372  | 0.108537  | 0.118007  | 0.0608974 |
| 0.223048 | 0.115967  | 0.190414  | 0.115239  | 0.0983392 | 0.0483683 | 0.117716  |
| 0.217803 | 0.115676  | 0.1875    | 0.11961   | 0.101544  | 0.1081    | 0.122669  |
| 0.224942 | 0.103584  | 0.198718  | 0.103147  | 0.11451   | 0.112617  | 0.118153  |
| 0.218677 | 0.123543  | 0.191288  | 0.125146  | 0.119027  | 0.126457  | 0.134033  |
| 0.227127 | 0.11859   | 0.199155  | 0.119901  | 0.127477  | 0.131702  | 0.13345   |
| 0.219406 | 0.11757   | 0.191142  | 0.11451   | 0.108683  | 0.115239  | 0.128351  |
| 0.115093 | 0.195367  | 0.0952797 | 0.195804  | 0.188228  | 0.195076  | 0.203817  |
| 0.154429 | 0.160111  | 0.130536  | 0.166958  | 0.160548  | 0.16623   | 0.179341  |
| 0.226107 | 0.125728  | 0.197261  | 0.122086  | 0.119464  | 0.123397  | 0.128351  |
| 0.218677 | 0.0818765 | 0.190997  | 0.0866841 | 0.119027  | 0.126748  | 0.128497  |
| 0.245775 | 0.154429  | 0.216638  | 0.152826  | 0.148164  | 0.136655  | 0.144814  |
| 0.227564 | 0.13039   | 0.199301  | 0.129662  | 0.123543  | 0.12602   | 0.135927  |
| 0.216929 | 0.123834  | 0.187209  | 0.126311  | 0.0866841 | 0.115676  | 0.132576  |
| 0.218531 | 0.11757   | 0.187354  | 0.119755  | 0.0810023 | 0.11757   | 0.131265  |
| 0.222902 | 0.121066  | 0.194639  | 0.122669  | 0.0944056 | 0.0869755 | 0.127768  |
| 0.223485 | 0.120775  | 0.196678  | 0.125     | 0.112179  | 0.122232  | 0.131847  |
| 0.120192 | 0.198427  | 0.097465  | 0.203526  | 0.192162  | 0.201632  | 0.212704  |
| 0.232226 | 0.0502622 | 0.203089  | 0.0541958 | 0.123834  | 0.126894  | 0.122815  |
| 0.21285  | 0.087704  | 0.183421  | 0.0901807 | 0.115822  | 0.125874  | 0.125874  |
| 0.214307 | 0.111597  | 0.187209  | 0.115822  | 0.0633741 | 0.106935  | 0.121795  |
| 0.228438 | 0.112325  | 0.198718  | 0.115967  | 0.11859   | 0.11116   | 0.129225  |

|          |           |           |           |           |           |           |
|----------|-----------|-----------|-----------|-----------|-----------|-----------|
| 0.13884  | 0.180944  | 0.121649  | 0.185169  | 0.176428  | 0.189103  | 0.200175  |
| 0.111742 | 0.246795  | 0.125146  | 0.246649  | 0.243153  | 0.247378  | 0.251748  |
| 0.226544 | 0.124709  | 0.198864  | 0.127768  | 0.115822  | 0.127622  | 0.139277  |
| 0.227127 | 0.120047  | 0.196824  | 0.125146  | 0.109994  | 0.12296   | 0.129662  |
| 0.225087 | 0.127622  | 0.194784  | 0.123689  | 0.115239  | 0.117133  | 0.127331  |
| 0.226981 | 0.105332  | 0.194639  | 0.108392  | 0.112179  | 0.112617  | 0.0590035 |
| 0.227418 | 0.0530303 | 0.20236   | 0.050845  | 0.118735  | 0.123543  | 0.115093  |
| 0.217949 | 0.113491  | 0.195221  | 0.113345  | 0.112762  | 0.118735  | 0.126311  |
| 0.211976 | 0.118298  | 0.184003  | 0.121649  | 0.0782343 | 0.113054  | 0.125291  |
| 0.226253 | 0.04662   | 0.201486  | 0.0467657 | 0.117279  | 0.121795  | 0.117424  |
| 0.210664 | 0.118153  | 0.185315  | 0.120338  | 0.083042  | 0.113199  | 0.128059  |
| 0.228293 | 0.118298  | 0.197407  | 0.120192  | 0.108246  | 0.112179  | 0.130245  |
| 0.219697 | 0.114948  | 0.189685  | 0.113636  | 0.0961538 | 0.0537587 | 0.116696  |
| 0.225379 | 0.124709  | 0.197407  | 0.123397  | 0.116696  | 0.127331  | 0.137529  |
| 0.219697 | 0.118444  | 0.192016  | 0.119464  | 0.115676  | 0.122232  | 0.13243   |
| 0.216783 | 0.104749  | 0.187063  | 0.109266  | 0.106061  | 0.112908  | 0.11553   |
| 0.236888 | 0.124854  | 0.208333  | 0.123543  | 0.12296   | 0.123689  | 0.127768  |
| 0.236014 | 0.120775  | 0.211247  | 0.118881  | 0.127914  | 0.123397  | 0.0470571 |
| 0.2213   | 0.113636  | 0.189831  | 0.116696  | 0.0479312 | 0.108974  | 0.12296   |
| 0.212704 | 0.116696  | 0.186189  | 0.120338  | 0.090035  | 0.112617  | 0.124563  |
| 0.225233 | 0.133596  | 0.202214  | 0.136364  | 0.0649767 | 0.116113  | 0.127477  |
| 0.116404 | 0.210373  | 0.118444  | 0.214015  | 0.20236   | 0.204545  | 0.216492  |
| 0.218823 | 0.118444  | 0.189685  | 0.115967  | 0.106643  | 0.120484  | 0.126603  |
| 0.223339 | 0.113928  | 0.191579  | 0.114073  | 0.0971737 | 0.0547786 | 0.115093  |
| 0.225962 | 0.115967  | 0.195659  | 0.117861  | 0.117861  | 0.121795  | 0.125     |
| 0.229021 | 0.119027  | 0.201923  | 0.119755  | 0.121503  | 0.126311  | 0.13447   |
| 0.224942 | 0.111451  | 0.197552  | 0.115676  | 0.114219  | 0.107372  | 0.123106  |
| 0.119755 | 0.199155  | 0.0981935 | 0.200758  | 0.19493   | 0.202069  | 0.210227  |
| 0.221882 | 0.124417  | 0.192745  | 0.124272  | 0.118735  | 0.125874  | 0.13549   |
| 0.218531 | 0.113782  | 0.189977  | 0.119172  | 0.0474942 | 0.104167  | 0.120775  |
| 0.226253 | 0.122378  | 0.200029  | 0.117861  | 0.122815  | 0.117133  | 0.123543  |
| 0.228584 | 0.103147  | 0.19799   | 0.105332  | 0.109411  | 0.111888  | 0.0600233 |
| 0.21926  | 0.120629  | 0.188666  | 0.117861  | 0.115239  | 0.126166  | 0.13549   |
| 0.213432 | 0.113054  | 0.186043  | 0.116113  | 0.104167  | 0.111014  | 0.125     |
| 0.227127 | 0.116841  | 0.198864  | 0.118735  | 0.110286  | 0.109848  | 0.128788  |
| 0.226253 | 0.117424  | 0.199738  | 0.120192  | 0.119027  | 0.125     | 0.130828  |
| 0.122669 | 0.196533  | 0.100233  | 0.196387  | 0.192599  | 0.199155  | 0.205857  |
| 0.215181 | 0.114219  | 0.189248  | 0.114948  | 0.108246  | 0.113636  | 0.125874  |
| 0.119464 | 0.192745  | 0.0979021 | 0.197844  | 0.188228  | 0.198572  | 0.207896  |
| 0.11757  | 0.190851  | 0.097465  | 0.193619  | 0.185169  | 0.197261  | 0.203963  |
| 0.231498 | 0.119172  | 0.207605  | 0.117279  | 0.122815  | 0.123543  | 0.0474942 |
| 0.232955 | 0.127622  | 0.208479  | 0.130682  | 0.13243   | 0.126748  | 0.134615  |
| 0.221591 | 0.106935  | 0.194202  | 0.109994  | 0.104458  | 0.103438  | 0.122669  |
| 0.214744 | 0.115822  | 0.18852   | 0.113345  | 0.107517  | 0.115239  | 0.122815  |

|          |           |           |           |           |           |           |
|----------|-----------|-----------|-----------|-----------|-----------|-----------|
| 0.218094 | 0.116259  | 0.188083  | 0.116113  | 0.111742  | 0.117424  | 0.130828  |
| 0.218969 | 0.116841  | 0.189831  | 0.122232  | 0.0546329 | 0.112471  | 0.12296   |
| 0.224505 | 0.0541958 | 0.19799   | 0.0528846 | 0.114948  | 0.11655   | 0.113345  |
| 0.230041 | 0.0498252 | 0.200321  | 0.0470571 | 0.118153  | 0.120047  | 0.112762  |
| 0.226981 | 0.127477  | 0.195804  | 0.127331  | 0.115093  | 0.129808  | 0.140006  |
| 0.228584 | 0.112471  | 0.199446  | 0.111116  | 0.114656  | 0.119755  | 0.0556527 |
| 0.215618 | 0.112908  | 0.185897  | 0.116841  | 0.0483683 | 0.0983392 | 0.120192  |
| 0.221591 | 0.11859   | 0.191288  | 0.119901  | 0.115239  | 0.124709  | 0.133159  |
| 0.22028  | 0.110577  | 0.191725  | 0.111888  | 0.101107  | 0.103001  | 0.120775  |
| 0.223339 | 0.131993  | 0.197698  | 0.13039   | 0.126603  | 0.126457  | 0.136946  |
| 0.226253 | 0.122669  | 0.197115  | 0.124272  | 0.115822  | 0.120047  | 0.129953  |
| 0.22465  | 0.133304  | 0.200758  | 0.133159  | 0.131702  | 0.133304  | 0.141171  |
| 0.113928 | 0.260927  | 0.132576  | 0.260781  | 0.256702  | 0.258596  | 0.265297  |
| 0.237179 | 0.122232  | 0.21183   | 0.119172  | 0.130828  | 0.123397  | 0.126311  |
| 0.230332 | 0.127914  | 0.204983  | 0.129516  | 0.127477  | 0.117424  | 0.122378  |
| 0.118298 | 0.220425  | 0.117716  | 0.222028  | 0.212704  | 0.216929  | 0.228584  |
| 0.228875 | 0.12704   | 0.200903  | 0.129225  | 0.122232  | 0.118881  | 0.11655   |
| 0.110286 | 0.233392  | 0.119901  | 0.23412   | 0.226836  | 0.230478  | 0.236888  |
| 0.225524 | 0.111742  | 0.205711  | 0.112179  | 0.122086  | 0.116404  | 0.11961   |
| 0.226253 | 0.131993  | 0.199446  | 0.134178  | 0.0627914 | 0.113928  | 0.127331  |
| 0.224796 | 0.107809  | 0.195659  | 0.113199  | 0.113491  | 0.123543  | 0.128205  |
| 0.230041 | 0.116259  | 0.204108  | 0.11553   | 0.116696  | 0.119755  | 0.0541958 |
| 0.120484 | 0.203963  | 0.101253  | 0.202069  | 0.197698  | 0.208916  | 0.214161  |
| 0.22567  | 0.131993  | 0.202069  | 0.131265  | 0.127477  | 0.128788  | 0.13549   |
| 0.221008 | 0.118881  | 0.191579  | 0.121066  | 0.114365  | 0.125583  | 0.133741  |
| 0        | 0.225087  | 0.121503  | 0.22873   | 0.220862  | 0.228584  | 0.234411  |
| 0.225087 | 0         | 0.194493  | 0.0546329 | 0.117279  | 0.125     | 0.121795  |
| 0.121503 | 0.194493  | 0         | 0.197261  | 0.192016  | 0.19799   | 0.210227  |
| 0.22873  | 0.0546329 | 0.197261  | 0         | 0.124126  | 0.125437  | 0.120775  |
| 0.220862 | 0.117279  | 0.192016  | 0.124126  | 0         | 0.106789  | 0.125146  |
| 0.228584 | 0.125     | 0.19799   | 0.125437  | 0.106789  | 0         | 0.122669  |
| 0.234411 | 0.121795  | 0.210227  | 0.120775  | 0.125146  | 0.122669  | 0         |
| 0.219114 | 0.112034  | 0.187063  | 0.11655   | 0.111888  | 0.114948  | 0.133304  |
| 0.154138 | 0.159528  | 0.125291  | 0.158508  | 0.151224  | 0.140006  | 0.174679  |
| 0.2162   | 0.11757   | 0.186772  | 0.116259  | 0.113928  | 0.11757   | 0.130682  |
| 0.227564 | 0.118735  | 0.198135  | 0.121503  | 0.120921  | 0.123397  | 0.13447   |
| 0.226107 | 0.111451  | 0.192308  | 0.113636  | 0.11451   | 0.11961   | 0.125437  |
| 0.224359 | 0.130099  | 0.200758  | 0.130536  | 0.130245  | 0.129516  | 0.134178  |
| 0.118444 | 0.194056  | 0.0983392 | 0.19595   | 0.188666  | 0.198718  | 0.208333  |
| 0.220571 | 0.11553   | 0.188811  | 0.118881  | 0.044289  | 0.106789  | 0.120484  |
| 0.216638 | 0.113928  | 0.188957  | 0.113199  | 0.114365  | 0.121795  | 0.0696387 |
| 0.229895 | 0.0878497 | 0.200466  | 0.0865385 | 0.117716  | 0.116113  | 0.113491  |
| 0.229167 | 0.0536131 | 0.203526  | 0.0505536 | 0.121649  | 0.121795  | 0.114802  |
| 0.223485 | 0.12602   | 0.19493   | 0.127914  | 0.0556527 | 0.108829  | 0.121649  |



|          |           |           |           |           |           |           |
|----------|-----------|-----------|-----------|-----------|-----------|-----------|
| 0.116113 | 0.254371  | 0.131847  | 0.257139  | 0.254516  | 0.256993  | 0.261655  |
| 0.226399 | 0.11757   | 0.197552  | 0.121795  | 0.106061  | 0.0467657 | 0.115239  |
| 0.220862 | 0.117861  | 0.188811  | 0.121212  | 0.0935315 | 0.118153  | 0.128059  |
| 0.162296 | 0.178176  | 0.144522  | 0.181527  | 0.183275  | 0.176719  | 0.186626  |
| 0.125874 | 0.18546   | 0.105186  | 0.185606  | 0.181235  | 0.189831  | 0.197115  |
| 0.22465  | 0.123689  | 0.194347  | 0.123543  | 0.11655   | 0.127768  | 0.138258  |
| 0.220717 | 0.123543  | 0.189831  | 0.123397  | 0.114656  | 0.121795  | 0.132576  |
| 0.227418 | 0.105186  | 0.19799   | 0.104167  | 0.110286  | 0.116259  | 0.0632284 |
| 0.227855 | 0.146707  | 0.206585  | 0.145105  | 0.140152  | 0.142628  | 0.147873  |
| 0.22465  | 0.121066  | 0.194639  | 0.122669  | 0.113345  | 0.12602   | 0.133596  |
| 0.227127 | 0.125     | 0.196824  | 0.125728  | 0.114073  | 0.128205  | 0.140734  |
| 0.229312 | 0.055507  | 0.204545  | 0.0571096 | 0.13141   | 0.13039   | 0.121649  |
| 0.215035 | 0.120484  | 0.18852   | 0.122378  | 0.115093  | 0.117279  | 0.12602   |
| 0.222174 | 0.132576  | 0.196824  | 0.133013  | 0.127768  | 0.126457  | 0.13549   |
| 0.214161 | 0.0724068 | 0.182692  | 0.0737179 | 0.117133  | 0.124272  | 0.124563  |
| 0.23208  | 0.115385  | 0.204983  | 0.114073  | 0.121941  | 0.118007  | 0.0472028 |
| 0.240093 | 0.128642  | 0.214744  | 0.127331  | 0.131702  | 0.129516  | 0.0557984 |
| 0.227418 | 0.124126  | 0.197115  | 0.124563  | 0.10912   | 0.0413753 | 0.122086  |
| 0.238636 | 0.121358  | 0.212121  | 0.11655   | 0.125291  | 0.12602   | 0.046183  |
| 0.233974 | 0.0587121 | 0.209207  | 0.0585664 | 0.131702  | 0.13039   | 0.119901  |
| 0.117861 | 0.20542   | 0.100379  | 0.207314  | 0.201486  | 0.208916  | 0.218823  |
| 0.230769 | 0.116696  | 0.202506  | 0.111888  | 0.110723  | 0.105624  | 0.128642  |
| 0.121503 | 0.188957  | 0.0964452 | 0.194347  | 0.182401  | 0.194493  | 0.202943  |
| 0.223485 | 0.113782  | 0.194347  | 0.117424  | 0.115676  | 0.122232  | 0.125437  |
| 0.22028  | 0.127185  | 0.19493   | 0.132576  | 0.0585664 | 0.112617  | 0.125728  |
| 0.223485 | 0.127477  | 0.196387  | 0.122378  | 0.120338  | 0.118735  | 0.128642  |
| 0.222174 | 0.120629  | 0.193328  | 0.11757   | 0.112034  | 0.115967  | 0.126748  |
| 0.217657 | 0.126311  | 0.190268  | 0.125     | 0.120921  | 0.125437  | 0.134761  |
| 0.219697 | 0.122815  | 0.193765  | 0.125     | 0.119464  | 0.127477  | 0.13243   |
| 0.214744 | 0.120192  | 0.185023  | 0.122669  | 0.0506993 | 0.109703  | 0.123106  |
| 0.224213 | 0.116841  | 0.195659  | 0.123106  | 0.11757   | 0.124709  | 0.130536  |
| 0.228001 | 0.129662  | 0.202069  | 0.130682  | 0.12398   | 0.121503  | 0.130245  |
| 0.225233 | 0.0651224 | 0.197844  | 0.0658508 | 0.136364  | 0.135052  | 0.121358  |
| 0.112471 | 0.252185  | 0.129662  | 0.253788  | 0.250291  | 0.251311  | 0.255973  |
| 0.219697 | 0.120484  | 0.189394  | 0.125     | 0.0498252 | 0.112325  | 0.124563  |
| 0.11757  | 0.182401  | 0.0948427 | 0.187791  | 0.178176  | 0.187937  | 0.195221  |
| 0.117424 | 0.184003  | 0.0935315 | 0.189103  | 0.181818  | 0.194493  | 0.200029  |
| 0.218969 | 0.117716  | 0.188374  | 0.119901  | 0.110286  | 0.120047  | 0.133741  |
| 0.223339 | 0.118007  | 0.19391   | 0.118444  | 0.100962  | 0.04662   | 0.114219  |
| 0.222756 | 0.127914  | 0.19799   | 0.130682  | 0.0557984 | 0.111888  | 0.127622  |
| 0.216055 | 0.117716  | 0.188666  | 0.119318  | 0.109994  | 0.119464  | 0.127914  |
| 0.211538 | 0.11757   | 0.185606  | 0.119464  | 0.0955711 | 0.090472  | 0.127185  |
| 0.229312 | 0.0525932 | 0.198718  | 0.0530303 | 0.117424  | 0.123397  | 0.11961   |
| 0.213724 | 0.126166  | 0.1875    | 0.126894  | 0.115822  | 0.120338  | 0.13141   |

|          |           |           |           |           |           |           |
|----------|-----------|-----------|-----------|-----------|-----------|-----------|
| 0.228293 | 0.134615  | 0.205565  | 0.131847  | 0.13039   | 0.129079  | 0.136364  |
| 0.218531 | 0.119901  | 0.189685  | 0.123252  | 0.0480769 | 0.109703  | 0.125437  |
| 0.224068 | 0.131556  | 0.200175  | 0.130536  | 0.127914  | 0.126311  | 0.138258  |
| 0.225379 | 0.117133  | 0.198281  | 0.116987  | 0.115239  | 0.114802  | 0.119464  |
| 0.23208  | 0.13141   | 0.203526  | 0.130973  | 0.122523  | 0.118007  | 0.128788  |
| 0.226981 | 0.107955  | 0.197552  | 0.110431  | 0.112762  | 0.12398   | 0.0633741 |
| 0.234994 | 0.0641026 | 0.209062  | 0.0633741 | 0.135344  | 0.13141   | 0.122086  |
| 0.227273 | 0.123689  | 0.201923  | 0.12296   | 0.114802  | 0.108537  | 0.131847  |
| 0.217366 | 0.11553   | 0.18648   | 0.117716  | 0.0603147 | 0.109411  | 0.123397  |
| 0.230186 | 0.132139  | 0.208042  | 0.131702  | 0.130828  | 0.131265  | 0.133304  |
| 0.11757  | 0.180653  | 0.0992133 | 0.185169  | 0.176136  | 0.188228  | 0.199301  |
| 0.228147 | 0.13884   | 0.202506  | 0.138112  | 0.131993  | 0.132721  | 0.142045  |
| 0.219988 | 0.125728  | 0.193473  | 0.122378  | 0.119464  | 0.124563  | 0.132721  |
| 0.227127 | 0.126457  | 0.197698  | 0.124272  | 0.118735  | 0.120047  | 0.12704   |
| 0.221445 | 0.115239  | 0.192599  | 0.116841  | 0.106061  | 0.110286  | 0.121941  |
| 0.226544 | 0.111597  | 0.19799   | 0.109703  | 0.116987  | 0.115676  | 0.0533217 |
| 0.233392 | 0.114365  | 0.203963  | 0.111597  | 0.12296   | 0.120484  | 0.0505536 |
| 0.121941 | 0.186772  | 0.0965909 | 0.192745  | 0.184586  | 0.195513  | 0.205128  |
| 0.210227 | 0.118298  | 0.183712  | 0.11757   | 0.114948  | 0.121212  | 0.133159  |
| 0.20134  | 0.10912   | 0.169289  | 0.110431  | 0.107226  | 0.114073  | 0.12398   |
| 0.221154 | 0.125437  | 0.194639  | 0.126166  | 0.123543  | 0.125146  | 0.134761  |
| 0.119027 | 0.191725  | 0.0965909 | 0.194202  | 0.186334  | 0.195513  | 0.201923  |
| 0.218531 | 0.114365  | 0.185897  | 0.113928  | 0.0967366 | 0.0546329 | 0.116987  |
| 0.231789 | 0.0576923 | 0.204691  | 0.0557984 | 0.127768  | 0.12704   | 0.115093  |
| 0.222465 | 0.126457  | 0.192745  | 0.125437  | 0.11961   | 0.126457  | 0.13549   |
| 0.224359 | 0.122232  | 0.195513  | 0.121212  | 0.105478  | 0.122523  | 0.131556  |
| 0.124126 | 0.18546   | 0.0917832 | 0.189977  | 0.18007   | 0.190122  | 0.201195  |
| 0.225524 | 0.0557984 | 0.199592  | 0.0556527 | 0.123543  | 0.124563  | 0.116404  |
| 0.216783 | 0.109411  | 0.188811  | 0.112179  | 0.113345  | 0.117861  | 0.124272  |
| 0.212121 | 0.113199  | 0.181818  | 0.115093  | 0.0990676 | 0.0709499 | 0.118153  |
| 0.200758 | 0.116404  | 0.172203  | 0.122669  | 0.117133  | 0.120775  | 0.136509  |
| 0.231498 | 0.117716  | 0.199155  | 0.119027  | 0.118735  | 0.125583  | 0.133159  |
| 0.23412  | 0.0632284 | 0.207896  | 0.0584207 | 0.131556  | 0.127622  | 0.120047  |
| 0.221008 | 0.118298  | 0.190997  | 0.121941  | 0.0482226 | 0.109557  | 0.121795  |
| 0.229749 | 0.121503  | 0.201195  | 0.123397  | 0.122232  | 0.118298  | 0.13141   |
| 0.23514  | 0.152535  | 0.209499  | 0.152972  | 0.137529  | 0.144959  | 0.153409  |
| 0.108683 | 0.236451  | 0.120629  | 0.239219  | 0.233392  | 0.237325  | 0.241404  |
| 0.232809 | 0.127185  | 0.206585  | 0.128497  | 0.11859   | 0.114365  | 0.133596  |
| 0.228147 | 0.118444  | 0.200758  | 0.120338  | 0.120629  | 0.124854  | 0.135344  |
| 0.213432 | 0.111597  | 0.18546   | 0.116696  | 0.117861  | 0.122378  | 0.13141   |
| 0.217657 | 0.125146  | 0.189103  | 0.124417  | 0.118298  | 0.129225  | 0.139423  |
| 0.219843 | 0.0990676 | 0.195076  | 0.10067   | 0.118444  | 0.120921  | 0.124126  |
| 0.223922 | 0.117716  | 0.197407  | 0.119027  | 0.116987  | 0.108392  | 0.121795  |
| 0.219697 | 0.120484  | 0.190559  | 0.121795  | 0.120921  | 0.125437  | 0.135635  |

|          |           |          |           |           |           |          |
|----------|-----------|----------|-----------|-----------|-----------|----------|
| 0.231498 | 0.0559441 | 0.202652 | 0.0575466 | 0.128642  | 0.127622  | 0.120921 |
| 0.222174 | 0.11451   | 0.190122 | 0.120192  | 0.111451  | 0.126457  | 0.134033 |
| 0.115967 | 0.238782  | 0.121212 | 0.241259  | 0.233392  | 0.238782  | 0.243153 |
| 0.218969 | 0.111014  | 0.187209 | 0.114365  | 0.0992133 | 0.0504079 | 0.115093 |
| 0.221008 | 0.101399  | 0.19391  | 0.103001  | 0.110868  | 0.107809  | 0.115093 |
| 0.219988 | 0.11757   | 0.189977 | 0.120629  | 0.0492424 | 0.104167  | 0.11961  |
| 0.22771  | 0.13549   | 0.203526 | 0.137383  | 0.124854  | 0.136364  | 0.144231 |
| 0.233537 | 0.134033  | 0.213141 | 0.135927  | 0.121358  | 0.115385  | 0.140443 |
| 0.214889 | 0.121503  | 0.184878 | 0.124272  | 0.10708   | 0.108392  | 0.138986 |
| 0.218386 | 0.123543  | 0.187209 | 0.122815  | 0.118444  | 0.123834  | 0.131993 |
| 0.219988 | 0.116987  | 0.192308 | 0.119755  | 0.105769  | 0.121941  | 0.126603 |
| 0.112471 | 0.232663  | 0.120047 | 0.234557  | 0.227564  | 0.234411  | 0.238199 |
| 0.220862 | 0.128351  | 0.19289  | 0.125874  | 0.12296   | 0.127477  | 0.140006 |
| 0.231789 | 0.0541958 | 0.203526 | 0.0511364 | 0.126894  | 0.125     | 0.119464 |
| 0.223048 | 0.113636  | 0.19391  | 0.117279  | 0.107955  | 0.121795  | 0.122086 |
| 0.226399 | 0.123689  | 0.201923 | 0.126166  | 0.124126  | 0.122232  | 0.127768 |
| 0.230186 | 0.114948  | 0.209207 | 0.11655   | 0.127622  | 0.119901  | 0.125146 |
| 0.219406 | 0.120192  | 0.192308 | 0.123834  | 0.0495338 | 0.107663  | 0.120192 |
| 0.229604 | 0.0598776 | 0.203671 | 0.0585664 | 0.126457  | 0.124272  | 0.116113 |
| 0.234703 | 0.0638112 | 0.209645 | 0.0610431 | 0.13243   | 0.130828  | 0.123252 |
| 0.228001 | 0.0506993 | 0.200029 | 0.0505536 | 0.120484  | 0.123252  | 0.118298 |
| 0.221154 | 0.118153  | 0.189977 | 0.124126  | 0.0483683 | 0.105915  | 0.125146 |
| 0.230769 | 0.12602   | 0.20542  | 0.128497  | 0.128788  | 0.126894  | 0.134761 |
| 0.236451 | 0.130245  | 0.21081  | 0.132721  | 0.133013  | 0.129662  | 0.138403 |
| 0.23208  | 0.134033  | 0.205565 | 0.132721  | 0.125728  | 0.120629  | 0.129371 |
| 0.233829 | 0.135781  | 0.204691 | 0.136509  | 0.129808  | 0.123543  | 0.133159 |
| 0.236305 | 0.127185  | 0.208042 | 0.128497  | 0.131119  | 0.127477  | 0.138258 |
| 0.222028 | 0.116987  | 0.19289  | 0.117133  | 0.087704  | 0.0855186 | 0.122815 |
| 0.24257  | 0.104895  | 0.215472 | 0.103875  | 0.138258  | 0.132867  | 0.11655  |
| 0.234848 | 0.123106  | 0.213578 | 0.125874  | 0.125     | 0.125146  | 0.134178 |
| 0.111597 | 0.206731  | 0.10169  | 0.208333  | 0.20338   | 0.205274  | 0.215763 |
| 0.222902 | 0.125437  | 0.199301 | 0.129079  | 0.118007  | 0.126894  | 0.13243  |
| 0.226107 | 0.102127  | 0.197552 | 0.104895  | 0.115385  | 0.11553   | 0.119318 |
| 0.216638 | 0.123834  | 0.188374 | 0.128642  | 0.0528846 | 0.110723  | 0.126457 |
| 0.113928 | 0.223631  | 0.115385 | 0.226107  | 0.219406  | 0.223048  | 0.230624 |
| 0.119464 | 0.212558  | 0.113345 | 0.213578  | 0.204837  | 0.21722   | 0.221008 |
| 0.231789 | 0.0626457 | 0.207314 | 0.0584207 | 0.131556  | 0.132576  | 0.119755 |
| 0.112762 | 0.248397  | 0.130245 | 0.253497  | 0.249417  | 0.251894  | 0.256847 |
| 0.221154 | 0.116404  | 0.194056 | 0.119755  | 0.0885781 | 0.0910548 | 0.122523 |
| 0.231643 | 0.136801  | 0.210956 | 0.138112  | 0.129662  | 0.121066  | 0.145251 |
| 0.224068 | 0.115822  | 0.193765 | 0.11655   | 0.100524  | 0.043852  | 0.11757  |
| 0.232955 | 0.120047  | 0.204983 | 0.127477  | 0.127477  | 0.130245  | 0.136364 |
| 0.118881 | 0.188666  | 0.094697 | 0.189977  | 0.183566  | 0.191871  | 0.201195 |
| 0.223339 | 0.123252  | 0.196241 | 0.12602   | 0.120484  | 0.11859   | 0.124709 |

|          |           |          |           |           |           |           |
|----------|-----------|----------|-----------|-----------|-----------|-----------|
| 0.11757  | 0.19289   | 0.101836 | 0.195367  | 0.18546   | 0.197261  | 0.210664  |
| 0.225962 | 0.119755  | 0.197698 | 0.118153  | 0.108246  | 0.116259  | 0.13345   |
| 0.208188 | 0.0769231 | 0.182547 | 0.0793998 | 0.11961   | 0.125874  | 0.124126  |
| 0.223048 | 0.128497  | 0.194784 | 0.126894  | 0.116404  | 0.108683  | 0.132867  |
| 0.209645 | 0.109266  | 0.178759 | 0.111742  | 0.10912   | 0.111888  | 0.129079  |
| 0.2162   | 0.112617  | 0.186189 | 0.117133  | 0.0460373 | 0.103584  | 0.118735  |
| 0.221737 | 0.116696  | 0.192016 | 0.118881  | 0.107517  | 0.118444  | 0.126311  |
| 0.2162   | 0.112034  | 0.185315 | 0.112179  | 0.0955711 | 0.0502622 | 0.114656  |
| 0.218969 | 0.115385  | 0.188666 | 0.114656  | 0.11116   | 0.120629  | 0.127914  |
| 0.230186 | 0.0930944 | 0.201632 | 0.0888695 | 0.118007  | 0.121941  | 0.112325  |
| 0.222028 | 0.113782  | 0.195513 | 0.115385  | 0.105186  | 0.10912   | 0.126894  |
| 0.221882 | 0.116259  | 0.188957 | 0.116113  | 0.100087  | 0.041958  | 0.117716  |
| 0.222028 | 0.121358  | 0.19289  | 0.124126  | 0.106352  | 0.116987  | 0.129225  |
| 0.223193 | 0.133887  | 0.20134  | 0.132284  | 0.126166  | 0.130682  | 0.13447   |
| 0.220717 | 0.11859   | 0.190705 | 0.116113  | 0.109703  | 0.112762  | 0.124417  |
| 0.218823 | 0.112034  | 0.19289  | 0.114802  | 0.112471  | 0.11757   | 0.122523  |
| 0.216638 | 0.112762  | 0.188083 | 0.117861  | 0.0453089 | 0.104604  | 0.117716  |
| 0.223048 | 0.0617716 | 0.193328 | 0.0651224 | 0.122523  | 0.125874  | 0.116841  |
| 0.227418 | 0.118298  | 0.199446 | 0.117279  | 0.118735  | 0.124126  | 0.129953  |
| 0.229312 | 0.111451  | 0.204254 | 0.111305  | 0.115967  | 0.121941  | 0.0549242 |
| 0.223776 | 0.119318  | 0.198427 | 0.120921  | 0.115676  | 0.11961   | 0.125146  |
| 0.219551 | 0.120629  | 0.191579 | 0.119318  | 0.11553   | 0.123543  | 0.131993  |
| 0.223776 | 0.130973  | 0.199883 | 0.129371  | 0.127622  | 0.132721  | 0.136218  |
| 0.230769 | 0.141754  | 0.204545 | 0.137238  | 0.134324  | 0.135344  | 0.143211  |
| 0.218969 | 0.0571096 | 0.193328 | 0.0572552 | 0.108537  | 0.111888  | 0.110723  |
| 0.220717 | 0.11655   | 0.188374 | 0.121358  | 0.0502622 | 0.1081    | 0.12704   |
| 0.219406 | 0.106789  | 0.189685 | 0.110723  | 0.112762  | 0.102418  | 0.121358  |
| 0.236888 | 0.127185  | 0.208916 | 0.13345   | 0.136072  | 0.132139  | 0.134178  |
| 0.224796 | 0.117716  | 0.196824 | 0.120484  | 0.104458  | 0.0451632 | 0.117133  |
| 0.240822 | 0.129953  | 0.215181 | 0.126894  | 0.133887  | 0.13141   | 0.0506993 |
| 0.228001 | 0.138695  | 0.203526 | 0.140006  | 0.0683275 | 0.116259  | 0.132867  |
| 0.225816 | 0.131265  | 0.198427 | 0.132576  | 0.118298  | 0.131847  | 0.140297  |
| 0.218386 | 0.11451   | 0.193328 | 0.114073  | 0.102418  | 0.106352  | 0.127331  |
| 0.220571 | 0.10912   | 0.192308 | 0.115967  | 0.111888  | 0.117861  | 0.126894  |
| 0.229021 | 0.131847  | 0.204254 | 0.134324  | 0.120338  | 0.119027  | 0.130682  |
| 0.128351 | 0.20338   | 0.121066 | 0.206439  | 0.201195  | 0.213287  | 0.219114  |
| 0.21926  | 0.111305  | 0.191288 | 0.114073  | 0.114073  | 0.117424  | 0.122086  |
| 0.225816 | 0.121358  | 0.197261 | 0.120047  | 0.110431  | 0.108829  | 0.133304  |
| 0.228001 | 0.118298  | 0.198572 | 0.11757   | 0.120775  | 0.122086  | 0.129371  |
| 0.22465  | 0.120192  | 0.195221 | 0.122086  | 0.114802  | 0.117279  | 0.129516  |
| 0.226253 | 0.118007  | 0.198864 | 0.125437  | 0.108829  | 0.122669  | 0.13549   |
| 0.22567  | 0.11655   | 0.19799  | 0.119318  | 0.125728  | 0.127622  | 0.129662  |
| 0.227855 | 0.121941  | 0.202214 | 0.126166  | 0.130245  | 0.129808  | 0.130682  |
| 0.223631 | 0.125583  | 0.195659 | 0.12602   | 0.116696  | 0.125     | 0.137821  |

|          |           |          |           |           |           |          |
|----------|-----------|----------|-----------|-----------|-----------|----------|
| 0.224505 | 0.085373  | 0.19799  | 0.0840618 | 0.116987  | 0.117133  | 0.111597 |
| 0.231498 | 0.125874  | 0.206439 | 0.127185  | 0.128934  | 0.126748  | 0.130536 |
| 0.223922 | 0.119464  | 0.195367 | 0.119318  | 0.112034  | 0.108683  | 0.130536 |
| 0.227273 | 0.118735  | 0.200175 | 0.124709  | 0.109848  | 0.112617  | 0.132721 |
| 0.195367 | 0.173077  | 0.171183 | 0.173805  | 0.170309  | 0.17803   | 0.186772 |
| 0.21722  | 0.118298  | 0.191871 | 0.119027  | 0.112325  | 0.126457  | 0.133741 |
| 0.221154 | 0.124272  | 0.195221 | 0.127622  | 0.13141   | 0.129516  | 0.13447  |
| 0.234994 | 0.111014  | 0.206731 | 0.110577  | 0.116987  | 0.10373   | 0.125    |
| 0.222611 | 0.11553   | 0.194639 | 0.113054  | 0.120629  | 0.123397  | 0.131847 |
| 0.223193 | 0.109411  | 0.193473 | 0.111597  | 0.103438  | 0.10912   | 0.119901 |
| 0.221737 | 0.110577  | 0.193182 | 0.109557  | 0.103147  | 0.10271   | 0.122815 |
| 0.227564 | 0.114656  | 0.197552 | 0.117424  | 0.108974  | 0.110577  | 0.124272 |
| 0.227564 | 0.106498  | 0.203963 | 0.107809  | 0.12296   | 0.121941  | 0.130682 |
| 0.215326 | 0.120775  | 0.186189 | 0.121503  | 0.1081    | 0.117279  | 0.132721 |
| 0.232372 | 0.121503  | 0.208188 | 0.120775  | 0.118735  | 0.120921  | 0.128497 |
| 0.217366 | 0.100087  | 0.189103 | 0.106352  | 0.108974  | 0.115822  | 0.120192 |
| 0.221882 | 0.106935  | 0.195367 | 0.109994  | 0.117279  | 0.113054  | 0.122086 |
| 0.23951  | 0.10271   | 0.211538 | 0.109557  | 0.125874  | 0.121649  | 0.133013 |
| 0.229312 | 0.108829  | 0.203671 | 0.107809  | 0.111597  | 0.106789  | 0.121649 |
| 0.22669  | 0.120775  | 0.202214 | 0.120338  | 0.122378  | 0.120775  | 0.125437 |
| 0.224068 | 0.103584  | 0.198135 | 0.104312  | 0.107226  | 0.10708   | 0.116404 |
| 0.226981 | 0.110868  | 0.201049 | 0.109266  | 0.111305  | 0.107955  | 0.11961  |
| 0.222902 | 0.113491  | 0.192308 | 0.111305  | 0.0976107 | 0.100087  | 0.114656 |
| 0.234994 | 0.115093  | 0.205565 | 0.116696  | 0.108829  | 0.107517  | 0.120338 |
| 0.22567  | 0.105769  | 0.196533 | 0.106206  | 0.103875  | 0.102273  | 0.113636 |
| 0.23208  | 0.112762  | 0.211684 | 0.113199  | 0.145542  | 0.141026  | 0.137238 |
| 0.222756 | 0.103438  | 0.19799  | 0.104749  | 0.130973  | 0.135781  | 0.138403 |
| 0.226253 | 0.106352  | 0.197407 | 0.106789  | 0.105332  | 0.106061  | 0.111888 |
| 0.237471 | 0.109994  | 0.216492 | 0.112762  | 0.141317  | 0.136218  | 0.130682 |
| 0.224359 | 0.123397  | 0.19697  | 0.124126  | 0.118298  | 0.12602   | 0.136218 |
| 0.235723 | 0.129516  | 0.207751 | 0.128497  | 0.133159  | 0.113782  | 0.14729  |
| 0.226981 | 0.11757   | 0.197844 | 0.115967  | 0.103438  | 0.100379  | 0.108537 |
| 0.235868 | 0.13986   | 0.209645 | 0.139132  | 0.139423  | 0.142483  | 0.147727 |
| 0.22567  | 0.123252  | 0.196824 | 0.124272  | 0.124563  | 0.124126  | 0.130536 |
| 0.232955 | 0.119464  | 0.206148 | 0.122523  | 0.135635  | 0.131702  | 0.136946 |
| 0.234411 | 0.11859   | 0.208188 | 0.11961   | 0.121066  | 0.115385  | 0.125874 |
| 0.226399 | 0.0971737 | 0.196096 | 0.0987762 | 0.100233  | 0.103293  | 0.123689 |
| 0.223048 | 0.103438  | 0.194202 | 0.104458  | 0.105624  | 0.108392  | 0.120921 |
| 0.228438 | 0.104458  | 0.20134  | 0.10169   | 0.117716  | 0.120775  | 0.122815 |
| 0.233392 | 0.11757   | 0.207168 | 0.117424  | 0.115967  | 0.0980478 | 0.118444 |
| 0.239073 | 0.127622  | 0.212267 | 0.128642  | 0.121066  | 0.108683  | 0.125    |
| 0.221882 | 0.106061  | 0.194784 | 0.104458  | 0.116113  | 0.123543  | 0.127622 |
| 0.223631 | 0.108683  | 0.195367 | 0.107372  | 0.107372  | 0.106061  | 0.120047 |
| 0.221154 | 0.101253  | 0.196096 | 0.103438  | 0.106643  | 0.106206  | 0.117279 |

|          |          |          |          |           |           |          |
|----------|----------|----------|----------|-----------|-----------|----------|
| 0.224505 | 0.112471 | 0.19799  | 0.114656 | 0.109411  | 0.101981  | 0.128788 |
| 0.224796 | 0.099359 | 0.193619 | 0.101836 | 0.102418  | 0.0999417 | 0.120047 |
| 0.228438 | 0.107372 | 0.202506 | 0.111305 | 0.113345  | 0.110868  | 0.124272 |
| 0.222319 | 0.116404 | 0.192308 | 0.116841 | 0.104895  | 0.102418  | 0.116113 |
| 0.213724 | 0.121212 | 0.182838 | 0.123689 | 0.108246  | 0.110723  | 0.134907 |
| 0.225962 | 0.118298 | 0.198572 | 0.120192 | 0.105041  | 0.104312  | 0.13141  |
| 0.219843 | 0.116841 | 0.192745 | 0.115822 | 0.0884324 | 0.0836247 | 0.121503 |
| 0.222465 | 0.107517 | 0.193619 | 0.108246 | 0.10271   | 0.0981935 | 0.125874 |
| 0.214452 | 0.116696 | 0.184441 | 0.119464 | 0.105186  | 0.110286  | 0.13447  |
| 0.2213   | 0.117424 | 0.195367 | 0.118153 | 0.110868  | 0.108974  | 0.128788 |
| 0.219843 | 0.123834 | 0.193328 | 0.12602  | 0.12602   | 0.117133  | 0.131119 |
| 0.211101 | 0.105769 | 0.180798 | 0.110286 | 0.0980478 | 0.104895  | 0.12704  |
| 0.232226 | 0.126894 | 0.20979  | 0.129371 | 0.126748  | 0.112908  | 0.133013 |

| TDr_2713  | TDr_2724 | TDr_2726  | TDr_2740 | TDr_2741  | TDr_2744 | TDr_2745 |
|-----------|----------|-----------|----------|-----------|----------|----------|
| 0.113491  | 0.134178 | 0.113199  | 0.126603 | 0.11961   | 0.133013 | 0.176865 |
| 0.100233  | 0.149184 | 0.10169   | 0.120629 | 0.119464  | 0.125583 | 0.184003 |
| 0.0961538 | 0.145979 | 0.0973193 | 0.115967 | 0.115676  | 0.123834 | 0.180507 |
| 0.108392  | 0.148601 | 0.087704  | 0.117716 | 0.114219  | 0.124126 | 0.188957 |
| 0.129371  | 0.172786 | 0.127622  | 0.132576 | 0.134324  | 0.129371 | 0.2044   |
| 0.121503  | 0.159965 | 0.122669  | 0.132284 | 0.134324  | 0.129371 | 0.198572 |
| 0.121649  | 0.162442 | 0.124563  | 0.128934 | 0.126603  | 0.128642 | 0.202214 |
| 0.105332  | 0.144085 | 0.099796  | 0.11757  | 0.112617  | 0.11757  | 0.18007  |
| 0.0999417 | 0.144814 | 0.100816  | 0.11451  | 0.11014   | 0.118298 | 0.18546  |
| 0.105624  | 0.147582 | 0.112908  | 0.121649 | 0.112617  | 0.124272 | 0.189977 |
| 0.114219  | 0.136364 | 0.122669  | 0.122378 | 0.120047  | 0.134907 | 0.179633 |
| 0.105624  | 0.148164 | 0.099796  | 0.107663 | 0.112617  | 0.115822 | 0.184441 |
| 0.099796  | 0.145833 | 0.106206  | 0.121649 | 0.110577  | 0.126311 | 0.192599 |
| 0.127914  | 0.109848 | 0.123834  | 0.136946 | 0.132576  | 0.145979 | 0.145251 |
| 0.122232  | 0.159819 | 0.125146  | 0.136218 | 0.126311  | 0.135927 | 0.19697  |
| 0.119755  | 0.161131 | 0.114802  | 0.13141  | 0.122669  | 0.12704  | 0.198281 |
| 0.111451  | 0.153409 | 0.109703  | 0.095134 | 0.0942599 | 0.113491 | 0.191434 |
| 0.140734  | 0.177739 | 0.134615  | 0.137238 | 0.144231  | 0.132284 | 0.209645 |
| 0.0938228 | 0.143648 | 0.0984848 | 0.115093 | 0.115967  | 0.119172 | 0.178176 |
| 0.195513  | 0.140443 | 0.194639  | 0.206294 | 0.203963  | 0.205128 | 0.136801 |
| 0.118153  | 0.160985 | 0.123106  | 0.120775 | 0.129516  | 0.129225 | 0.197261 |
| 0.109848  | 0.164627 | 0.115385  | 0.115967 | 0.124126  | 0.123252 | 0.197698 |
| 0.105041  | 0.146416 | 0.105041  | 0.11553  | 0.111451  | 0.11757  | 0.185897 |
| 0.123834  | 0.166375 | 0.122086  | 0.129371 | 0.127622  | 0.126166 | 0.204983 |
| 0.108246  | 0.138258 | 0.102127  | 0.114073 | 0.105332  | 0.114656 | 0.182692 |
| 0.125728  | 0.165647 | 0.128642  | 0.13039  | 0.139132  | 0.124563 | 0.202506 |
| 0.120484  | 0.16419  | 0.124272  | 0.120192 | 0.119027  | 0.131556 | 0.19697  |
| 0.11553   | 0.16215  | 0.113782  | 0.121649 | 0.122232  | 0.126311 | 0.205128 |
| 0.128059  | 0.171474 | 0.128059  | 0.13447  | 0.127477  | 0.133304 | 0.201049 |
| 0.123106  | 0.159528 | 0.120775  | 0.12398  | 0.121649  | 0.133304 | 0.20338  |
| 0.125874  | 0.153846 | 0.125583  | 0.128205 | 0.12704   | 0.133741 | 0.194784 |
| 0.124272  | 0.165647 | 0.120192  | 0.121941 | 0.124272  | 0.126603 | 0.202506 |
| 0.10912   | 0.144959 | 0.104167  | 0.112908 | 0.112325  | 0.116987 | 0.182984 |
| 0.119318  | 0.156031 | 0.113491  | 0.125146 | 0.121941  | 0.126894 | 0.195513 |
| 0.12296   | 0.164336 | 0.124709  | 0.126166 | 0.125     | 0.130536 | 0.201486 |
| 0.124854  | 0.168269 | 0.126311  | 0.132721 | 0.125728  | 0.126894 | 0.204837 |
| 0.127331  | 0.173951 | 0.132576  | 0.135781 | 0.13549   | 0.13986  | 0.214015 |
| 0.114656  | 0.163024 | 0.120484  | 0.120192 | 0.124563  | 0.132139 | 0.200758 |
| 0.109411  | 0.151952 | 0.108246  | 0.113199 | 0.112034  | 0.12398  | 0.191142 |
| 0.122815  | 0.163024 | 0.11553   | 0.129516 | 0.124854  | 0.126603 | 0.199592 |
| 0.105624  | 0.149038 | 0.106206  | 0.11757  | 0.109994  | 0.122232 | 0.188228 |
| 0.13884   | 0.171766 | 0.13447   | 0.149913 | 0.140006  | 0.140297 | 0.209207 |

|          |          |          |          |          |          |          |
|----------|----------|----------|----------|----------|----------|----------|
| 0.137966 | 0.174679 | 0.143211 | 0.148456 | 0.143502 | 0.144376 | 0.209207 |
| 0.116259 | 0.151807 | 0.109266 | 0.122086 | 0.111888 | 0.131702 | 0.18954  |
| 0.107809 | 0.150641 | 0.108974 | 0.109557 | 0.103438 | 0.118007 | 0.191871 |
| 0.121358 | 0.16419  | 0.118153 | 0.12398  | 0.116113 | 0.131556 | 0.204254 |
| 0.112325 | 0.158362 | 0.117279 | 0.114365 | 0.113782 | 0.118153 | 0.19493  |
| 0.136364 | 0.172494 | 0.135781 | 0.142483 | 0.138403 | 0.142483 | 0.210227 |
| 0.106935 | 0.157051 | 0.111597 | 0.119464 | 0.11655  | 0.123834 | 0.19391  |
| 0.116696 | 0.153992 | 0.112034 | 0.123106 | 0.112617 | 0.123689 | 0.191434 |
| 0.140443 | 0.179487 | 0.140152 | 0.151807 | 0.149184 | 0.144522 | 0.212267 |
| 0.127331 | 0.16317  | 0.128205 | 0.122086 | 0.126457 | 0.127622 | 0.200321 |
| 0.110577 | 0.1537   | 0.11116  | 0.119027 | 0.113782 | 0.122523 | 0.189394 |
| 0.125146 | 0.159237 | 0.119318 | 0.13243  | 0.127185 | 0.135344 | 0.204254 |
| 0.11116  | 0.143211 | 0.078817 | 0.123397 | 0.116404 | 0.120192 | 0.180653 |
| 0.142045 | 0.185752 | 0.130973 | 0.136509 | 0.143211 | 0.130682 | 0.215909 |
| 0.117716 | 0.167541 | 0.12296  | 0.137238 | 0.126457 | 0.136072 | 0.203234 |
| 0.115676 | 0.155594 | 0.111597 | 0.119172 | 0.113054 | 0.125291 | 0.195367 |
| 0.111888 | 0.153846 | 0.118298 | 0.121503 | 0.117133 | 0.128788 | 0.193619 |
| 0.119901 | 0.164773 | 0.119318 | 0.132139 | 0.122815 | 0.133013 | 0.204545 |
| 0.133013 | 0.177885 | 0.133304 | 0.141754 | 0.138549 | 0.137383 | 0.21183  |
| 0.133887 | 0.175845 | 0.129225 | 0.150204 | 0.145833 | 0.143794 | 0.214452 |
| 0.159091 | 0.140152 | 0.151807 | 0.166084 | 0.163462 | 0.169289 | 0.164481 |
| 0.115385 | 0.150641 | 0.111888 | 0.117424 | 0.112471 | 0.127331 | 0.192745 |
| 0.108974 | 0.154138 | 0.111888 | 0.117424 | 0.109266 | 0.122086 | 0.196824 |
| 0.110431 | 0.152389 | 0.108392 | 0.115093 | 0.106643 | 0.120921 | 0.19391  |
| 0.137383 | 0.169435 | 0.140006 | 0.143502 | 0.134178 | 0.14088  | 0.203963 |
| 0.108537 | 0.152244 | 0.104749 | 0.118444 | 0.10912  | 0.125437 | 0.189103 |
| 0.135781 | 0.163753 | 0.128205 | 0.133741 | 0.13345  | 0.12704  | 0.199738 |
| 0.115385 | 0.16317  | 0.120047 | 0.128205 | 0.115385 | 0.129079 | 0.204983 |
| 0.114656 | 0.152535 | 0.116696 | 0.116113 | 0.110868 | 0.126894 | 0.191434 |
| 0.146999 | 0.171474 | 0.144085 | 0.146125 | 0.146707 | 0.148164 | 0.20338  |
| 0.120775 | 0.160693 | 0.118153 | 0.128059 | 0.117861 | 0.127185 | 0.198718 |
| 0.132867 | 0.174242 | 0.132576 | 0.145396 | 0.136072 | 0.138986 | 0.209353 |
| 0.129225 | 0.166521 | 0.127185 | 0.123689 | 0.128934 | 0.129808 | 0.203089 |
| 0.112471 | 0.148019 | 0.101981 | 0.101107 | 0.115676 | 0.11451  | 0.187791 |
| 0.11014  | 0.148893 | 0.106352 | 0.119464 | 0.110431 | 0.123834 | 0.186043 |
| 0.108683 | 0.156177 | 0.112179 | 0.11859  | 0.11451  | 0.124417 | 0.194784 |
| 0.134033 | 0.174825 | 0.125291 | 0.135198 | 0.135198 | 0.134907 | 0.209645 |
| 0.107955 | 0.151952 | 0.113199 | 0.123106 | 0.113199 | 0.123689 | 0.191725 |
| 0.137238 | 0.176282 | 0.130828 | 0.1419   | 0.141317 | 0.138986 | 0.214598 |
| 0.117424 | 0.15472  | 0.123252 | 0.129371 | 0.124417 | 0.132284 | 0.192453 |
| 0.117424 | 0.167249 | 0.111305 | 0.122669 | 0.116841 | 0.120047 | 0.200321 |
| 0.112762 | 0.151807 | 0.117133 | 0.121503 | 0.115967 | 0.126166 | 0.190997 |
| 0.11859  | 0.157051 | 0.115676 | 0.127622 | 0.122086 | 0.129079 | 0.197407 |
| 0.11014  | 0.155303 | 0.114802 | 0.121212 | 0.112179 | 0.127622 | 0.193036 |



|          |          |          |          |          |          |          |
|----------|----------|----------|----------|----------|----------|----------|
| 0.110431 | 0.155886 | 0.110431 | 0.120047 | 0.113636 | 0.124126 | 0.191288 |
| 0.13884  | 0.171766 | 0.135344 | 0.144376 | 0.13447  | 0.139714 | 0.210664 |
| 0.112034 | 0.155449 | 0.113199 | 0.114948 | 0.106789 | 0.12398  | 0.191434 |
| 0.11014  | 0.159091 | 0.115967 | 0.120047 | 0.114802 | 0.123252 | 0.196241 |
| 0.126457 | 0.172494 | 0.123834 | 0.127622 | 0.130245 | 0.127622 | 0.204108 |
| 0.123834 | 0.163753 | 0.126166 | 0.13141  | 0.128205 | 0.127914 | 0.203234 |
| 0.129079 | 0.170163 | 0.132576 | 0.129079 | 0.132284 | 0.127914 | 0.211101 |
| 0.13447  | 0.178176 | 0.133596 | 0.137966 | 0.137383 | 0.128059 | 0.21824  |
| 0.112179 | 0.148893 | 0.120338 | 0.120338 | 0.120338 | 0.13141  | 0.18954  |
| 0.180944 | 0.138112 | 0.178904 | 0.187063 | 0.184441 | 0.181818 | 0.1537   |
| 0.11116  | 0.153992 | 0.104458 | 0.109703 | 0.112034 | 0.119318 | 0.194347 |
| 0.135198 | 0.173368 | 0.132576 | 0.139277 | 0.138112 | 0.129953 | 0.212267 |
| 0.124417 | 0.166667 | 0.124126 | 0.131993 | 0.13141  | 0.122086 | 0.205274 |
| 0.137092 | 0.177302 | 0.137966 | 0.134178 | 0.141171 | 0.139423 | 0.215035 |
| 0.112471 | 0.155886 | 0.109557 | 0.11451  | 0.113345 | 0.115093 | 0.197698 |
| 0.126748 | 0.173951 | 0.12704  | 0.130245 | 0.129953 | 0.125291 | 0.211393 |
| 0.112471 | 0.160839 | 0.118007 | 0.107517 | 0.119464 | 0.11655  | 0.199155 |
| 0.126603 | 0.162733 | 0.125146 | 0.12398  | 0.125146 | 0.119901 | 0.200175 |
| 0.115239 | 0.152244 | 0.114365 | 0.12398  | 0.116113 | 0.127185 | 0.195221 |
| 0.132139 | 0.17905  | 0.137383 | 0.131847 | 0.131847 | 0.12602  | 0.213869 |
| 0.113199 | 0.150787 | 0.112325 | 0.116987 | 0.111742 | 0.124272 | 0.193473 |
| 0.130245 | 0.166958 | 0.132284 | 0.13345  | 0.140152 | 0.132284 | 0.208188 |
| 0.11553  | 0.157197 | 0.118153 | 0.118153 | 0.120484 | 0.122523 | 0.197261 |
| 0.128497 | 0.170746 | 0.126457 | 0.139277 | 0.134324 | 0.135198 | 0.206148 |
| 0.130973 | 0.168561 | 0.133304 | 0.13243  | 0.129808 | 0.137966 | 0.20338  |
| 0.105915 | 0.156031 | 0.110868 | 0.110577 | 0.112034 | 0.119901 | 0.193182 |
| 0.144376 | 0.168561 | 0.140589 | 0.145542 | 0.144668 | 0.144959 | 0.204545 |
| 0.111888 | 0.158508 | 0.120629 | 0.113928 | 0.11859  | 0.126166 | 0.198281 |
| 0.110431 | 0.155012 | 0.11451  | 0.117716 | 0.114219 | 0.118298 | 0.197407 |
| 0.117279 | 0.16419  | 0.115822 | 0.117279 | 0.121066 | 0.120775 | 0.197552 |
| 0.135635 | 0.17264  | 0.139423 | 0.139132 | 0.137675 | 0.137092 | 0.20979  |
| 0.121649 | 0.140297 | 0.120775 | 0.122523 | 0.124272 | 0.12398  | 0.18211  |
| 0.108829 | 0.156031 | 0.108246 | 0.114073 | 0.11553  | 0.114365 | 0.193182 |
| 0.108537 | 0.151661 | 0.112617 | 0.111451 | 0.114073 | 0.117861 | 0.192599 |
| 0.112471 | 0.155594 | 0.115385 | 0.120047 | 0.11451  | 0.127914 | 0.196241 |
| 0.124272 | 0.166521 | 0.12398  | 0.133304 | 0.127477 | 0.137092 | 0.208625 |
| 0.113636 | 0.157051 | 0.120629 | 0.121795 | 0.118298 | 0.120629 | 0.198572 |
| 0.102418 | 0.14933  | 0.104749 | 0.111451 | 0.101544 | 0.116696 | 0.189394 |
| 0.105915 | 0.148164 | 0.105041 | 0.112325 | 0.106498 | 0.121941 | 0.187937 |
| 0.111305 | 0.154429 | 0.110723 | 0.113636 | 0.108392 | 0.119755 | 0.195659 |
| 0.114802 | 0.157051 | 0.112762 | 0.120338 | 0.115676 | 0.130536 | 0.194202 |
| 0.127185 | 0.174679 | 0.125437 | 0.136509 | 0.132139 | 0.13243  | 0.204837 |
| 0.102855 | 0.156177 | 0.106352 | 0.113054 | 0.1081   | 0.123834 | 0.195076 |
| 0.103584 | 0.149621 | 0.105332 | 0.114073 | 0.10912  | 0.125437 | 0.189977 |

|          |          |           |          |          |          |          |
|----------|----------|-----------|----------|----------|----------|----------|
| 0.12602  | 0.164481 | 0.128934  | 0.12398  | 0.121066 | 0.134761 | 0.201923 |
| 0.108974 | 0.15035  | 0.108683  | 0.112179 | 0.109848 | 0.123543 | 0.191871 |
| 0.116841 | 0.150932 | 0.119464  | 0.129371 | 0.115967 | 0.13141  | 0.190705 |
| 0.127622 | 0.166958 | 0.129953  | 0.138403 | 0.138112 | 0.136946 | 0.202943 |
| 0.117424 | 0.154429 | 0.11655   | 0.116259 | 0.115093 | 0.124126 | 0.200903 |
| 0.105332 | 0.155449 | 0.108537  | 0.11553  | 0.108829 | 0.126603 | 0.198135 |
| 0.11116  | 0.153409 | 0.107955  | 0.115239 | 0.105915 | 0.122815 | 0.192016 |
| 0.101253 | 0.140589 | 0.10912   | 0.114073 | 0.101544 | 0.117861 | 0.187063 |
| 0.120192 | 0.165064 | 0.122523  | 0.129516 | 0.126311 | 0.134761 | 0.206585 |
| 0.104749 | 0.152826 | 0.104167  | 0.113491 | 0.111451 | 0.123689 | 0.18852  |
| 0.136072 | 0.175408 | 0.134033  | 0.139277 | 0.139569 | 0.143357 | 0.210227 |
| 0.13243  | 0.172057 | 0.133304  | 0.142628 | 0.129808 | 0.141171 | 0.201632 |
| 0.123689 | 0.169435 | 0.120775  | 0.137092 | 0.128351 | 0.132139 | 0.202797 |
| 0.112179 | 0.157051 | 0.119755  | 0.117716 | 0.111597 | 0.130828 | 0.192745 |
| 0.114219 | 0.15035  | 0.115385  | 0.114219 | 0.118298 | 0.125291 | 0.193328 |
| 0.111451 | 0.154575 | 0.112325  | 0.112034 | 0.113491 | 0.122232 | 0.192599 |
| 0.111305 | 0.153846 | 0.111014  | 0.11655  | 0.111888 | 0.121795 | 0.194784 |
| 0.104895 | 0.154138 | 0.107517  | 0.115676 | 0.111305 | 0.126457 | 0.192162 |
| 0.107809 | 0.141608 | 0.0909091 | 0.116259 | 0.11655  | 0.118298 | 0.183712 |
| 0.129079 | 0.170455 | 0.127622  | 0.130245 | 0.131119 | 0.129953 | 0.209353 |
| 0.110868 | 0.159819 | 0.113491  | 0.116987 | 0.115822 | 0.120775 | 0.202214 |
| 0.124709 | 0.166084 | 0.127331  | 0.131702 | 0.127622 | 0.136364 | 0.204108 |
| 0.137383 | 0.177593 | 0.134761  | 0.13447  | 0.137966 | 0.134178 | 0.212995 |
| 0.184295 | 0.126603 | 0.183712  | 0.190705 | 0.188374 | 0.193619 | 0.100816 |
| 0.229021 | 0.168415 | 0.225233  | 0.242133 | 0.235723 | 0.23514  | 0.127477 |
| 0.104167 | 0.144085 | 0.0662879 | 0.111451 | 0.116987 | 0.114948 | 0.18007  |
| 0.109557 | 0.155012 | 0.107226  | 0.113928 | 0.115967 | 0.113928 | 0.184586 |
| 0.105186 | 0.144231 | 0.106935  | 0.106061 | 0.111305 | 0.11655  | 0.184586 |
| 0.103147 | 0.153555 | 0.108392  | 0.106352 | 0.112471 | 0.114802 | 0.193036 |
| 0.125291 | 0.162587 | 0.125583  | 0.138403 | 0.131702 | 0.134033 | 0.199155 |
| 0.112762 | 0.161713 | 0.108392  | 0.107809 | 0.11655  | 0.11451  | 0.195076 |
| 0.146416 | 0.184878 | 0.143211  | 0.137966 | 0.148164 | 0.137675 | 0.215618 |
| 0.110431 | 0.162005 | 0.112471  | 0.1081   | 0.120921 | 0.120921 | 0.194202 |
| 0.12704  | 0.176573 | 0.124417  | 0.126748 | 0.132867 | 0.129079 | 0.206148 |
| 0.128059 | 0.162733 | 0.124854  | 0.130099 | 0.133304 | 0.124563 | 0.19697  |
| 0.133596 | 0.1706   | 0.129225  | 0.127477 | 0.130099 | 0.120484 | 0.209207 |
| 0.132139 | 0.169726 | 0.133013  | 0.143502 | 0.141754 | 0.143502 | 0.208333 |
| 0.116987 | 0.160985 | 0.114948  | 0.104167 | 0.116987 | 0.125437 | 0.198135 |
| 0.10912  | 0.159819 | 0.109703  | 0.10708  | 0.115822 | 0.116404 | 0.194056 |
| 0.112471 | 0.160256 | 0.11655   | 0.109557 | 0.115676 | 0.111888 | 0.195659 |
| 0.107517 | 0.152681 | 0.105478  | 0.103438 | 0.115385 | 0.111597 | 0.188083 |
| 0.108683 | 0.156469 | 0.106643  | 0.103438 | 0.113928 | 0.113928 | 0.191871 |
| 0.113491 | 0.159819 | 0.112325  | 0.106498 | 0.116696 | 0.121358 | 0.197261 |
| 0.127622 | 0.167541 | 0.12296   | 0.114802 | 0.127331 | 0.115385 | 0.203526 |

|          |          |          |           |          |          |          |
|----------|----------|----------|-----------|----------|----------|----------|
| 0.129662 | 0.178613 | 0.133159 | 0.130536  | 0.134033 | 0.123834 | 0.211393 |
| 0.11553  | 0.16419  | 0.113782 | 0.115239  | 0.120484 | 0.122523 | 0.19493  |
| 0.109557 | 0.151224 | 0.114219 | 0.111014  | 0.111305 | 0.115093 | 0.189831 |
| 0.131993 | 0.170746 | 0.128205 | 0.126166  | 0.132867 | 0.125874 | 0.207314 |
| 0.106643 | 0.155594 | 0.106935 | 0.107226  | 0.109848 | 0.110723 | 0.18954  |
| 0.137383 | 0.17701  | 0.141754 | 0.130099  | 0.143794 | 0.134761 | 0.210956 |
| 0.135344 | 0.16623  | 0.136218 | 0.136801  | 0.135927 | 0.136801 | 0.197261 |
| 0.133741 | 0.169289 | 0.130828 | 0.125583  | 0.136655 | 0.120047 | 0.200903 |
| 0.108683 | 0.157343 | 0.105186 | 0.105186  | 0.111597 | 0.115676 | 0.192453 |
| 0.103875 | 0.154283 | 0.106789 | 0.104749  | 0.112325 | 0.112325 | 0.190559 |
| 0.123834 | 0.172786 | 0.120629 | 0.115385  | 0.127914 | 0.123834 | 0.206439 |
| 0.11757  | 0.167686 | 0.118153 | 0.119318  | 0.13243  | 0.118153 | 0.201923 |
| 0.128059 | 0.169143 | 0.127768 | 0.120484  | 0.127768 | 0.120484 | 0.20134  |
| 0.115385 | 0.157925 | 0.113928 | 0.104312  | 0.113636 | 0.115385 | 0.198572 |
| 0.118444 | 0.159819 | 0.115239 | 0.109994  | 0.120192 | 0.120484 | 0.19493  |
| 0.122815 | 0.167395 | 0.11757  | 0.118153  | 0.120775 | 0.112325 | 0.200758 |
| 0.133304 | 0.173223 | 0.13447  | 0.129808  | 0.13243  | 0.128934 | 0.210082 |
| 0.127185 | 0.169143 | 0.129225 | 0.126311  | 0.129808 | 0.125437 | 0.203671 |
| 0.132576 | 0.179196 | 0.132284 | 0.134033  | 0.134033 | 0.132576 | 0.209353 |
| 0.130682 | 0.164481 | 0.128351 | 0.140297  | 0.133887 | 0.13447  | 0.203671 |
| 0.110286 | 0.160111 | 0.106206 | 0.112908  | 0.113491 | 0.119318 | 0.195513 |
| 0.12602  | 0.169143 | 0.126894 | 0.119318  | 0.124272 | 0.118444 | 0.204545 |
| 0.109266 | 0.154429 | 0.107517 | 0.102564  | 0.111014 | 0.113345 | 0.194202 |
| 0.116113 | 0.149913 | 0.114656 | 0.121066  | 0.116987 | 0.12602  | 0.189977 |
| 0.107663 | 0.156906 | 0.111451 | 0.100379  | 0.115239 | 0.11961  | 0.19493  |
| 0.1081   | 0.152972 | 0.113636 | 0.109266  | 0.113636 | 0.113636 | 0.192162 |
| 0.108974 | 0.155594 | 0.106643 | 0.0984848 | 0.113928 | 0.111888 | 0.190997 |
| 0.129808 | 0.177593 | 0.133013 | 0.126603  | 0.13243  | 0.125437 | 0.207459 |
| 0.113345 | 0.152098 | 0.115676 | 0.116841  | 0.113345 | 0.123834 | 0.190414 |
| 0.127622 | 0.173368 | 0.128205 | 0.125291  | 0.137238 | 0.126748 | 0.207605 |
| 0.108683 | 0.155886 | 0.107517 | 0.10373   | 0.113928 | 0.118298 | 0.191288 |
| 0.126894 | 0.171766 | 0.123689 | 0.120484  | 0.125437 | 0.120484 | 0.206294 |
| 0.122086 | 0.15676  | 0.120629 | 0.130536  | 0.125291 | 0.127622 | 0.199155 |
| 0.115967 | 0.153263 | 0.117716 | 0.121212  | 0.11655  | 0.127914 | 0.187791 |
| 0.114073 | 0.159819 | 0.116404 | 0.122232  | 0.116404 | 0.124854 | 0.199009 |
| 0.122669 | 0.164336 | 0.116259 | 0.113054  | 0.123834 | 0.12704  | 0.19391  |
| 0.117279 | 0.160402 | 0.119318 | 0.121066  | 0.112908 | 0.129516 | 0.198135 |
| 0.109703 | 0.156906 | 0.113782 | 0.118153  | 0.112908 | 0.129516 | 0.190851 |
| 0.129516 | 0.168852 | 0.135927 | 0.143794  | 0.142628 | 0.143211 | 0.213287 |
| 0.139277 | 0.177739 | 0.134324 | 0.143065  | 0.140443 | 0.145688 | 0.214307 |
| 0.103438 | 0.145105 | 0.103438 | 0.117424  | 0.108683 | 0.118298 | 0.188083 |
| 0.12398  | 0.171183 | 0.130682 | 0.132139  | 0.13039  | 0.12602  | 0.211247 |
| 0.120921 | 0.164336 | 0.128497 | 0.138112  | 0.129079 | 0.136072 | 0.206439 |
| 0.124417 | 0.170455 | 0.12704  | 0.133159  | 0.125291 | 0.127331 | 0.204983 |

|          |          |          |          |          |          |          |
|----------|----------|----------|----------|----------|----------|----------|
| 0.118298 | 0.159674 | 0.119755 | 0.123252 | 0.123834 | 0.118881 | 0.196533 |
| 0.119755 | 0.166084 | 0.120629 | 0.132284 | 0.121795 | 0.129662 | 0.205274 |
| 0.122523 | 0.160985 | 0.124854 | 0.136218 | 0.124854 | 0.133013 | 0.199009 |
| 0.121212 | 0.16958  | 0.123252 | 0.126748 | 0.128497 | 0.124126 | 0.206731 |
| 0.128788 | 0.172494 | 0.134324 | 0.137529 | 0.137821 | 0.135781 | 0.209645 |
| 0.119755 | 0.16521  | 0.117424 | 0.137238 | 0.124709 | 0.136946 | 0.204983 |
| 0.110723 | 0.15472  | 0.117133 | 0.113928 | 0.117716 | 0.11655  | 0.192453 |
| 0.135344 | 0.17264  | 0.126603 | 0.133596 | 0.138549 | 0.133596 | 0.204545 |
| 0.133741 | 0.168415 | 0.134324 | 0.140443 | 0.133741 | 0.138112 | 0.208188 |
| 0.109848 | 0.151807 | 0.112471 | 0.117133 | 0.111597 | 0.123252 | 0.192162 |
| 0.209645 | 0.152535 | 0.206439 | 0.219843 | 0.216929 | 0.215472 | 0.111888 |
| 0.119318 | 0.165064 | 0.119901 | 0.124854 | 0.124272 | 0.125146 | 0.200175 |
| 0.114948 | 0.153118 | 0.114656 | 0.12398  | 0.113491 | 0.126603 | 0.193473 |
| 0.126457 | 0.173368 | 0.129371 | 0.138112 | 0.133159 | 0.131993 | 0.212558 |
| 0.111888 | 0.159091 | 0.116259 | 0.130536 | 0.118881 | 0.131119 | 0.196241 |
| 0.126748 | 0.168415 | 0.129371 | 0.142483 | 0.139277 | 0.140734 | 0.210519 |
| 0.118881 | 0.157343 | 0.118007 | 0.125    | 0.120047 | 0.11451  | 0.199446 |
| 0.118735 | 0.158654 | 0.115239 | 0.124272 | 0.121649 | 0.124854 | 0.200466 |
| 0.120775 | 0.161568 | 0.121941 | 0.130099 | 0.12602  | 0.135052 | 0.201632 |
| 0.121503 | 0.150641 | 0.126457 | 0.127622 | 0.124126 | 0.129371 | 0.195367 |
| 0.122523 | 0.167686 | 0.128351 | 0.133887 | 0.133304 | 0.126311 | 0.206876 |
| 0.124709 | 0.171037 | 0.125291 | 0.128497 | 0.132284 | 0.120629 | 0.206731 |
| 0.126166 | 0.167249 | 0.124417 | 0.126748 | 0.133741 | 0.126748 | 0.210227 |
| 0.115676 | 0.15676  | 0.11451  | 0.128497 | 0.115093 | 0.126166 | 0.200612 |
| 0.117133 | 0.162005 | 0.112471 | 0.11655  | 0.121503 | 0.119464 | 0.201486 |
| 0.128934 | 0.173223 | 0.129808 | 0.135344 | 0.13039  | 0.128934 | 0.208625 |
| 0.115093 | 0.155303 | 0.117424 | 0.124126 | 0.120921 | 0.116259 | 0.192162 |
| 0.135198 | 0.171911 | 0.134033 | 0.139569 | 0.136072 | 0.138986 | 0.209062 |
| 0.136509 | 0.157488 | 0.135344 | 0.141754 | 0.135927 | 0.145542 | 0.193182 |
| 0.123106 | 0.152535 | 0.122232 | 0.129808 | 0.120775 | 0.136801 | 0.197261 |
| 0.121358 | 0.16623  | 0.129225 | 0.138549 | 0.134178 | 0.13447  | 0.206294 |
| 0.118298 | 0.155012 | 0.120338 | 0.137529 | 0.130245 | 0.132867 | 0.189831 |
| 0.125437 | 0.16419  | 0.125437 | 0.135344 | 0.13039  | 0.134178 | 0.198135 |
| 0.123106 | 0.153118 | 0.119901 | 0.133013 | 0.126311 | 0.133596 | 0.189394 |
| 0.137383 | 0.167978 | 0.135344 | 0.140297 | 0.139423 | 0.146707 | 0.197261 |
| 0.11451  | 0.153555 | 0.112179 | 0.120047 | 0.110723 | 0.122378 | 0.193036 |
| 0.132721 | 0.1706   | 0.131556 | 0.142045 | 0.132139 | 0.137383 | 0.203963 |
| 0.140152 | 0.150058 | 0.136946 | 0.140734 | 0.138403 | 0.144814 | 0.186043 |
| 0.121212 | 0.163462 | 0.119464 | 0.127914 | 0.120921 | 0.131993 | 0.204983 |
| 0.120047 | 0.152098 | 0.120338 | 0.130828 | 0.119755 | 0.125291 | 0.192162 |
| 0.141754 | 0.180216 | 0.138258 | 0.143502 | 0.144376 | 0.142337 | 0.210664 |
| 0.123689 | 0.161276 | 0.119901 | 0.129516 | 0.128059 | 0.131556 | 0.202214 |
| 0.135198 | 0.174242 | 0.133741 | 0.140443 | 0.144231 | 0.146562 | 0.211101 |
| 0.128934 | 0.170892 | 0.129225 | 0.138258 | 0.133013 | 0.139714 | 0.205711 |

|          |          |           |          |           |          |          |
|----------|----------|-----------|----------|-----------|----------|----------|
| 0.119172 | 0.168124 | 0.124709  | 0.123252 | 0.122378  | 0.118298 | 0.206148 |
| 0.13039  | 0.16419  | 0.128934  | 0.135052 | 0.132721  | 0.138258 | 0.204545 |
| 0.122378 | 0.1588   | 0.124126  | 0.129079 | 0.119755  | 0.134907 | 0.198281 |
| 0.128934 | 0.173805 | 0.130682  | 0.132721 | 0.129516  | 0.129516 | 0.210373 |
| 0.127477 | 0.167395 | 0.126603  | 0.130682 | 0.13039   | 0.131265 | 0.207751 |
| 0.126894 | 0.177302 | 0.128934  | 0.13039  | 0.13447   | 0.120192 | 0.21183  |
| 0.133596 | 0.174971 | 0.133013  | 0.128351 | 0.138258  | 0.131265 | 0.213578 |
| 0.126603 | 0.162733 | 0.130682  | 0.136801 | 0.128642  | 0.132139 | 0.202797 |
| 0.142337 | 0.170892 | 0.139714  | 0.14088  | 0.139714  | 0.140589 | 0.207168 |
| 0.121941 | 0.162442 | 0.127477  | 0.134178 | 0.124854  | 0.135052 | 0.198135 |
| 0.122815 | 0.161859 | 0.120775  | 0.121066 | 0.121066  | 0.131265 | 0.202797 |
| 0.129516 | 0.1706   | 0.131265  | 0.125146 | 0.132721  | 0.129808 | 0.205711 |
| 0.120192 | 0.158945 | 0.121066  | 0.126311 | 0.119027  | 0.132721 | 0.199592 |
| 0.13986  | 0.166958 | 0.137821  | 0.148019 | 0.138986  | 0.153555 | 0.204108 |
| 0.149767 | 0.178904 | 0.151515  | 0.155594 | 0.148601  | 0.161713 | 0.213141 |
| 0.124417 | 0.170746 | 0.124417  | 0.127331 | 0.131119  | 0.121212 | 0.206731 |
| 0.118153 | 0.167686 | 0.116696  | 0.118735 | 0.124563  | 0.119901 | 0.201632 |
| 0.126457 | 0.177448 | 0.123543  | 0.129371 | 0.13345   | 0.125583 | 0.209645 |
| 0.129225 | 0.174679 | 0.128642  | 0.136218 | 0.138258  | 0.133304 | 0.208625 |
| 0.128351 | 0.174971 | 0.126311  | 0.121066 | 0.129516  | 0.128351 | 0.208042 |
| 0.131556 | 0.175554 | 0.139714  | 0.137092 | 0.131556  | 0.121941 | 0.214161 |
| 0.130973 | 0.16623  | 0.131556  | 0.145251 | 0.139132  | 0.144959 | 0.202214 |
| 0.124709 | 0.166667 | 0.12296   | 0.13549  | 0.125291  | 0.130828 | 0.207314 |
| 0.153555 | 0.18648  | 0.150058  | 0.148019 | 0.157925  | 0.151807 | 0.21285  |
| 0.125    | 0.166958 | 0.130245  | 0.132867 | 0.123543  | 0.134324 | 0.204983 |
| 0.138695 | 0.170455 | 0.140734  | 0.152972 | 0.141317  | 0.148893 | 0.208188 |
| 0.119901 | 0.164481 | 0.11961   | 0.122815 | 0.121358  | 0.130682 | 0.205711 |
| 0.129808 | 0.181672 | 0.129225  | 0.131847 | 0.135927  | 0.131265 | 0.213287 |
| 0.119027 | 0.161568 | 0.123397  | 0.128059 | 0.124272  | 0.116696 | 0.201632 |
| 0.13141  | 0.13345  | 0.110723  | 0.142191 | 0.142483  | 0.1419   | 0.171474 |
| 0.139132 | 0.178467 | 0.135635  | 0.13447  | 0.145542  | 0.133013 | 0.208333 |
| 0.114802 | 0.160256 | 0.0486597 | 0.120921 | 0.126166  | 0.120629 | 0.188666 |
| 0.127185 | 0.143502 | 0.0721154 | 0.135635 | 0.137675  | 0.132721 | 0.17162  |
| 0.140734 | 0.118007 | 0.137821  | 0.144522 | 0.139569  | 0.150058 | 0.146125 |
| 0.130245 | 0.119464 | 0.116841  | 0.144522 | 0.136655  | 0.147727 | 0.149621 |
| 0.121941 | 0.170309 | 0.123397  | 0.126894 | 0.133013  | 0.125146 | 0.204545 |
| 0.127331 | 0.171911 | 0.127622  | 0.134324 | 0.137821  | 0.134907 | 0.200903 |
| 0.106061 | 0.151807 | 0.106643  | 0.11859  | 0.113636  | 0.124709 | 0.184586 |
| 0.109994 | 0.145833 | 0.112908  | 0.120192 | 0.112908  | 0.127768 | 0.188811 |
| 0.115385 | 0.157343 | 0.120338  | 0.123252 | 0.120921  | 0.128497 | 0.191871 |
| 0.11014  | 0.155886 | 0.0428322 | 0.120338 | 0.12296   | 0.11859  | 0.188374 |
| 0.110286 | 0.1537   | 0.115239  | 0.112617 | 0.0476399 | 0.121941 | 0.192016 |
| 0.103001 | 0.138258 | 0.0799825 | 0.122523 | 0.113491  | 0.126311 | 0.176282 |
| 0.104167 | 0.161568 | 0.101836  | 0.121358 | 0.122232  | 0.12398  | 0.19289  |

|           |          |           |           |          |           |           |
|-----------|----------|-----------|-----------|----------|-----------|-----------|
| 0.117133  | 0.145688 | 0.115093  | 0.129079  | 0.120047 | 0.130245  | 0.18109   |
| 0.104021  | 0.128788 | 0.106643  | 0.11451   | 0.103147 | 0.121795  | 0.187209  |
| 0.115093  | 0.153555 | 0.0492424 | 0.122086  | 0.12296  | 0.12704   | 0.186334  |
| 0.10912   | 0.156906 | 0.0421037 | 0.118735  | 0.119318 | 0.117279  | 0.188228  |
| 0.121649  | 0.165647 | 0.119901  | 0.125437  | 0.120192 | 0.128351  | 0.20134   |
| 0.209062  | 0.145833 | 0.204983  | 0.21722   | 0.214307 | 0.215181  | 0.119755  |
| 0.135344  | 0.176136 | 0.0692016 | 0.145251  | 0.143502 | 0.13447   | 0.201923  |
| 0.13345   | 0.168415 | 0.120338  | 0.12704   | 0.13549  | 0.130536  | 0.203817  |
| 0.0613345 | 0.159819 | 0.112034  | 0.125146  | 0.124854 | 0.130099  | 0.187354  |
| 0.203817  | 0.13884  | 0.198864  | 0.211976  | 0.207896 | 0.208479  | 0.102273  |
| 0.114365  | 0.146416 | 0.121941  | 0.125146  | 0.11961  | 0.129808  | 0.187063  |
| 0.122378  | 0.164918 | 0.123543  | 0.124709  | 0.116841 | 0.13141   | 0.199738  |
| 0.111014  | 0.161131 | 0.118007  | 0.119755  | 0.126748 | 0.122086  | 0.194493  |
| 0.120192  | 0.1537   | 0.119318  | 0.129808  | 0.11961  | 0.130973  | 0.189394  |
| 0.240239  | 0.17905  | 0.238199  | 0.253351  | 0.249854 | 0.247815  | 0.134615  |
| 0.120047  | 0.161713 | 0.122378  | 0.131993  | 0.133159 | 0.132576  | 0.196824  |
| 0.112179  | 0.159965 | 0.112179  | 0.11859   | 0.113636 | 0.126457  | 0.196241  |
| 0.121795  | 0.166958 | 0.11859   | 0.0501166 | 0.119464 | 0.105769  | 0.202069  |
| 0.119464  | 0.161131 | 0.115093  | 0.0501166 | 0.117424 | 0.102855  | 0.196533  |
| 0.122086  | 0.152681 | 0.123252  | 0.13549   | 0.131993 | 0.132284  | 0.190414  |
| 0.118007  | 0.133159 | 0.104021  | 0.12296   | 0.128497 | 0.13549   | 0.176136  |
| 0.116841  | 0.1588   | 0.118298  | 0.120629  | 0.117133 | 0.128497  | 0.196824  |
| 0.110577  | 0.15574  | 0.0435606 | 0.119027  | 0.124563 | 0.119901  | 0.186189  |
| 0.117133  | 0.160256 | 0.11655   | 0.120629  | 0.125    | 0.128205  | 0.191579  |
| 0.113345  | 0.153846 | 0.114802  | 0.121503  | 0.115676 | 0.125     | 0.189248  |
| 0.107372  | 0.149038 | 0.0493881 | 0.117861  | 0.11961  | 0.116696  | 0.185315  |
| 0.110723  | 0.151807 | 0.118298  | 0.127622  | 0.11859  | 0.129371  | 0.194493  |
| 0.137675  | 0.179633 | 0.135344  | 0.13447   | 0.14729  | 0.131847  | 0.206585  |
| 0.12398   | 0.163024 | 0.123397  | 0.132721  | 0.135927 | 0.133596  | 0.197552  |
| 0.126311  | 0.167395 | 0.123397  | 0.130099  | 0.115822 | 0.13447   | 0.197552  |
| 0.180216  | 0.117861 | 0.174679  | 0.190122  | 0.186334 | 0.189831  | 0.0949883 |
| 0.19595   | 0.135927 | 0.191288  | 0.205565  | 0.20236  | 0.2044    | 0.0973193 |
| 0.116696  | 0.14729  | 0.118735  | 0.132139  | 0.121066 | 0.132721  | 0.180653  |
| 0.110868  | 0.150787 | 0.110286  | 0.121066  | 0.113199 | 0.124272  | 0.187646  |
| 0.118444  | 0.157197 | 0.119318  | 0.137966  | 0.140297 | 0.136801  | 0.192599  |
| 0.11553   | 0.161276 | 0.115822  | 0.11961   | 0.113491 | 0.127768  | 0.193765  |
| 0.120921  | 0.164044 | 0.124709  | 0.130828  | 0.134033 | 0.134324  | 0.198281  |
| 0.127185  | 0.168852 | 0.11961   | 0.112325  | 0.128351 | 0.0473485 | 0.195804  |
| 0.216929  | 0.151952 | 0.214889  | 0.227127  | 0.222465 | 0.21926   | 0.111888  |
| 0.115239  | 0.158654 | 0.106498  | 0.11553   | 0.120192 | 0.125437  | 0.193473  |
| 0.20338   | 0.147145 | 0.195513  | 0.211538  | 0.207459 | 0.204837  | 0.141463  |
| 0.10912   | 0.159237 | 0.113491  | 0.114948  | 0.118735 | 0.119318  | 0.197261  |
| 0.115093  | 0.152681 | 0.113054  | 0.115676  | 0.11014  | 0.116841  | 0.191288  |
| 0.109703  | 0.146125 | 0.0980478 | 0.11757   | 0.116696 | 0.126603  | 0.185606  |

|          |          |           |           |          |           |           |
|----------|----------|-----------|-----------|----------|-----------|-----------|
| 0.107372 | 0.144959 | 0.109411  | 0.116404  | 0.114948 | 0.121941  | 0.18211   |
| 0.199009 | 0.137238 | 0.193473  | 0.208042  | 0.201923 | 0.205128  | 0.099796  |
| 0.119464 | 0.156469 | 0.0539044 | 0.132867  | 0.131119 | 0.128205  | 0.185752  |
| 0.115967 | 0.160256 | 0.118298  | 0.108392  | 0.114802 | 0.118881  | 0.201777  |
| 0.119172 | 0.162005 | 0.0501166 | 0.125874  | 0.129371 | 0.121795  | 0.190705  |
| 0.119172 | 0.162005 | 0.118007  | 0.119172  | 0.119755 | 0.12296   | 0.198864  |
| 0.113054 | 0.151224 | 0.113636  | 0.122378  | 0.11655  | 0.131702  | 0.18546   |
| 0.116987 | 0.16215  | 0.112617  | 0.116987  | 0.120775 | 0.123106  | 0.198427  |
| 0.117279 | 0.14933  | 0.11553   | 0.123397  | 0.114656 | 0.128059  | 0.185897  |
| 0.125146 | 0.167395 | 0.122523  | 0.127477  | 0.121358 | 0.133013  | 0.19493   |
| 0.104458 | 0.149913 | 0.0447261 | 0.11553   | 0.116987 | 0.117279  | 0.179779  |
| 0.121503 | 0.161422 | 0.119755  | 0.113928  | 0.115676 | 0.114802  | 0.196824  |
| 0.18109  | 0.121066 | 0.17701   | 0.190122  | 0.186334 | 0.192745  | 0.0935315 |
| 0.125    | 0.169289 | 0.11655   | 0.0495338 | 0.120629 | 0.106935  | 0.202652  |
| 0.119318 | 0.168561 | 0.119027  | 0.114073  | 0.128934 | 0.120775  | 0.197844  |
| 0.115676 | 0.160256 | 0.109848  | 0.105478  | 0.122086 | 0.109848  | 0.190997  |
| 0.119901 | 0.149621 | 0.122523  | 0.127185  | 0.129516 | 0.137383  | 0.187646  |
| 0.11553  | 0.160111 | 0.0453089 | 0.120775  | 0.128934 | 0.118444  | 0.190559  |
| 0.11553  | 0.1706   | 0.117861  | 0.121358  | 0.125146 | 0.121358  | 0.203089  |
| 0.113928 | 0.147436 | 0.108683  | 0.112179  | 0.11655  | 0.119755  | 0.190414  |
| 0.122086 | 0.171037 | 0.121503  | 0.124417  | 0.118007 | 0.125874  | 0.201486  |
| 0.11553  | 0.162442 | 0.114073  | 0.110868  | 0.124854 | 0.118735  | 0.193473  |
| 0.114948 | 0.15778  | 0.108246  | 0.0528846 | 0.114948 | 0.108246  | 0.193182  |
| 0.11451  | 0.149476 | 0.113054  | 0.127331  | 0.119464 | 0.129953  | 0.184878  |
| 0.109411 | 0.164481 | 0.117861  | 0.121066  | 0.124854 | 0.127477  | 0.198718  |
| 0.126748 | 0.175408 | 0.128497  | 0.131702  | 0.136072 | 0.129079  | 0.204691  |
| 0.11451  | 0.152681 | 0.117424  | 0.123834  | 0.124126 | 0.130536  | 0.188083  |
| 0.134761 | 0.17264  | 0.0639569 | 0.140589  | 0.14292  | 0.130973  | 0.203089  |
| 0.111451 | 0.147873 | 0.112034  | 0.11961   | 0.114656 | 0.128351  | 0.18648   |
| 0.118444 | 0.15778  | 0.104458  | 0.100087  | 0.115239 | 0.0499709 | 0.190851  |
| 0.109848 | 0.140152 | 0.0623543 | 0.124709  | 0.124126 | 0.121212  | 0.17264   |
| 0.123252 | 0.162005 | 0.124417  | 0.128788  | 0.123834 | 0.134324  | 0.19799   |
| 0.182692 | 0.127331 | 0.178322  | 0.190559  | 0.186772 | 0.192016  | 0.113782  |
| 0.117279 | 0.157488 | 0.114073  | 0.10271   | 0.113199 | 0.111451  | 0.196387  |
| 0.103875 | 0.149038 | 0.0968823 | 0.107372  | 0.110286 | 0.111451  | 0.182401  |
| 0.122815 | 0.1706   | 0.122815  | 0.126311  | 0.116987 | 0.13039   | 0.20134   |
| 0.171183 | 0.111742 | 0.165647  | 0.182255  | 0.178759 | 0.184878  | 0.106352  |
| 0.131119 | 0.165793 | 0.13549   | 0.140734  | 0.141608 | 0.144231  | 0.20236   |
| 0.140443 | 0.177739 | 0.143939  | 0.153846  | 0.150641 | 0.144814  | 0.211684  |
| 0.139714 | 0.182838 | 0.13884   | 0.137966  | 0.150495 | 0.134178  | 0.208042  |
| 0.109703 | 0.151661 | 0.118444  | 0.120484  | 0.121358 | 0.130682  | 0.187354  |
| 0.115676 | 0.157634 | 0.0451632 | 0.123834  | 0.126166 | 0.120338  | 0.186626  |
| 0.203526 | 0.140006 | 0.198281  | 0.209936  | 0.209353 | 0.211101  | 0.0999417 |
| 0.112325 | 0.158071 | 0.11553   | 0.122232  | 0.121358 | 0.126894  | 0.186772  |

|           |          |           |           |          |           |           |
|-----------|----------|-----------|-----------|----------|-----------|-----------|
| 0.119172  | 0.16317  | 0.0509907 | 0.127331  | 0.132284 | 0.122669  | 0.189831  |
| 0.117424  | 0.152972 | 0.115967  | 0.108974  | 0.115385 | 0.11859   | 0.19391   |
| 0.155303  | 0.112762 | 0.144522  | 0.169872  | 0.168998 | 0.173077  | 0.129516  |
| 0.0533217 | 0.145688 | 0.104895  | 0.115967  | 0.114219 | 0.122378  | 0.180216  |
| 0.142337  | 0.179633 | 0.137966  | 0.145251  | 0.14729  | 0.141463  | 0.208042  |
| 0.113199  | 0.131556 | 0.117279  | 0.12602   | 0.11757  | 0.132721  | 0.189394  |
| 0.181672  | 0.120484 | 0.178176  | 0.192162  | 0.184878 | 0.190705  | 0.094697  |
| 0.116987  | 0.158362 | 0.120775  | 0.124272  | 0.12602  | 0.133596  | 0.194056  |
| 0.0942599 | 0.151369 | 0.101836  | 0.114948  | 0.110868 | 0.120484  | 0.187063  |
| 0.113636  | 0.15676  | 0.104021  | 0.0990676 | 0.111305 | 0.0641026 | 0.190997  |
| 0.116987  | 0.156906 | 0.109703  | 0.11961   | 0.118735 | 0.123689  | 0.19493   |
| 0.122232  | 0.165647 | 0.119027  | 0.126311  | 0.112325 | 0.131847  | 0.197552  |
| 0.112617  | 0.156323 | 0.116987  | 0.122232  | 0.11757  | 0.122815  | 0.184732  |
| 0.112179  | 0.148019 | 0.111305  | 0.124709  | 0.11655  | 0.130536  | 0.185169  |
| 0.181381  | 0.119318 | 0.17701   | 0.188957  | 0.184586 | 0.191579  | 0.0903263 |
| 0.115385  | 0.157343 | 0.11655   | 0.123834  | 0.125    | 0.125     | 0.193619  |
| 0.112325  | 0.151661 | 0.0995047 | 0.11961   | 0.119901 | 0.11961   | 0.183275  |
| 0.201923  | 0.1419   | 0.200175  | 0.212413  | 0.209207 | 0.208916  | 0.104167  |
| 0.125     | 0.166084 | 0.115967  | 0.0512821 | 0.119464 | 0.107517  | 0.201486  |
| 0.11116   | 0.152826 | 0.114948  | 0.123397  | 0.118153 | 0.130099  | 0.18852   |
| 0.107663  | 0.149038 | 0.10708   | 0.120775  | 0.109411 | 0.12398   | 0.185023  |
| 0.129371  | 0.169289 | 0.0754662 | 0.137821  | 0.144814 | 0.125874  | 0.198572  |
| 0.180653  | 0.117424 | 0.177448  | 0.18852   | 0.185606 | 0.190559  | 0.0983392 |
| 0.11757   | 0.163024 | 0.116696  | 0.121649  | 0.113199 | 0.129225  | 0.200466  |
| 0.118444  | 0.170309 | 0.12398   | 0.124854  | 0.13039  | 0.126603  | 0.200175  |
| 0.112325  | 0.149038 | 0.114656  | 0.122815  | 0.116113 | 0.13039   | 0.18648   |
| 0.109703  | 0.148164 | 0.108537  | 0.122523  | 0.110868 | 0.129516  | 0.184441  |
| 0.111014  | 0.148601 | 0.115093  | 0.120047  | 0.111888 | 0.127331  | 0.184586  |
| 0.109411  | 0.1537   | 0.0453089 | 0.120192  | 0.120192 | 0.121358  | 0.18852   |
| 0.10169   | 0.132867 | 0.107809  | 0.111888  | 0.105769 | 0.11859   | 0.187791  |
| 0.117716  | 0.160548 | 0.124417  | 0.129953  | 0.131993 | 0.134033  | 0.198281  |
| 0.123543  | 0.172203 | 0.114219  | 0.124417  | 0.135198 | 0.113928  | 0.205274  |
| 0.11859   | 0.155303 | 0.123834  | 0.124709  | 0.129662 | 0.131993  | 0.196533  |
| 0.125146  | 0.168852 | 0.123106  | 0.126603  | 0.125728 | 0.13039   | 0.204545  |
| 0.183566  | 0.119464 | 0.181235  | 0.194347  | 0.191434 | 0.196387  | 0.0930944 |
| 0.109994  | 0.158945 | 0.114656  | 0.114948  | 0.118735 | 0.121649  | 0.193473  |
| 0.126166  | 0.163462 | 0.0536131 | 0.130536  | 0.134615 | 0.122378  | 0.193328  |
| 0.10912   | 0.14729  | 0.110868  | 0.122232  | 0.10912  | 0.127477  | 0.188811  |
| 0.100233  | 0.129953 | 0.109848  | 0.11451   | 0.104312 | 0.122669  | 0.186334  |
| 0.109557  | 0.145979 | 0.109557  | 0.120047  | 0.118881 | 0.125     | 0.184295  |
| 0.118444  | 0.163607 | 0.114948  | 0.122523  | 0.120484 | 0.126894  | 0.19697   |
| 0.123397  | 0.169143 | 0.120484  | 0.129516  | 0.128934 | 0.127768  | 0.194347  |
| 0.113054  | 0.159382 | 0.111597  | 0.112471  | 0.124417 | 0.124709  | 0.18954   |
| 0.103147  | 0.140152 | 0.110723  | 0.117133  | 0.104312 | 0.124126  | 0.1875    |



|           |          |           |          |          |           |           |
|-----------|----------|-----------|----------|----------|-----------|-----------|
| 0.101544  | 0.131265 | 0.105041  | 0.112908 | 0.106498 | 0.122232  | 0.185023  |
| 0.100524  | 0.132576 | 0.102564  | 0.116259 | 0.109557 | 0.121795  | 0.182838  |
| 0.110577  | 0.163024 | 0.112325  | 0.117861 | 0.118153 | 0.122232  | 0.198718  |
| 0.125874  | 0.169289 | 0.126457  | 0.139569 | 0.135781 | 0.13986   | 0.202652  |
| 0.116113  | 0.160402 | 0.114948  | 0.120192 | 0.110286 | 0.132139  | 0.196096  |
| 0.108683  | 0.152681 | 0.0472028 | 0.117716 | 0.11655  | 0.115093  | 0.182547  |
| 0.108974  | 0.1588   | 0.112762  | 0.115676 | 0.108392 | 0.124709  | 0.193619  |
| 0.105624  | 0.149038 | 0.107663  | 0.116696 | 0.114656 | 0.127477  | 0.182692  |
| 0.110723  | 0.153555 | 0.112762  | 0.106061 | 0.112179 | 0.111597  | 0.195076  |
| 0.112762  | 0.15035  | 0.115385  | 0.121503 | 0.115967 | 0.132284  | 0.187209  |
| 0.102564  | 0.156177 | 0.108392  | 0.111597 | 0.115967 | 0.120629  | 0.192745  |
| 0.108392  | 0.159091 | 0.112471  | 0.109266 | 0.122669 | 0.117133  | 0.188666  |
| 0.119464  | 0.161422 | 0.116259  | 0.122378 | 0.109848 | 0.129371  | 0.195367  |
| 0.0992133 | 0.129808 | 0.107372  | 0.115822 | 0.106789 | 0.12602   | 0.185606  |
| 0.107809  | 0.151807 | 0.111305  | 0.121795 | 0.113928 | 0.127914  | 0.186334  |
| 0.120338  | 0.146853 | 0.112179  | 0.105769 | 0.115676 | 0.0673077 | 0.178176  |
| 0.117861  | 0.156323 | 0.105624  | 0.124563 | 0.123397 | 0.126894  | 0.189685  |
| 0.109557  | 0.14831  | 0.1081    | 0.121503 | 0.11655  | 0.122669  | 0.192162  |
| 0.108683  | 0.150932 | 0.109557  | 0.119172 | 0.113054 | 0.125874  | 0.188374  |
| 0.115239  | 0.155157 | 0.0435606 | 0.122523 | 0.120484 | 0.116987  | 0.185023  |
| 0.113199  | 0.160985 | 0.114948  | 0.118444 | 0.116987 | 0.123106  | 0.195513  |
| 0.110577  | 0.15778  | 0.046183  | 0.121066 | 0.123106 | 0.120484  | 0.187354  |
| 0.115822  | 0.159528 | 0.11757   | 0.12398  | 0.109994 | 0.126311  | 0.19289   |
| 0.105041  | 0.13243  | 0.113491  | 0.119318 | 0.106789 | 0.12602   | 0.191725  |
| 0.0980478 | 0.150787 | 0.105915  | 0.114656 | 0.109994 | 0.114073  | 0.185897  |
| 0.111305  | 0.154429 | 0.113054  | 0.105186 | 0.115093 | 0.115967  | 0.194493  |
| 0.114073  | 0.155449 | 0.0488054 | 0.122815 | 0.123689 | 0.122232  | 0.185023  |
| 0.106498  | 0.16419  | 0.112325  | 0.123397 | 0.128059 | 0.132139  | 0.195221  |
| 0.105478  | 0.151807 | 0.0979021 | 0.120921 | 0.117424 | 0.123252  | 0.186334  |
| 0.182692  | 0.12296  | 0.18007   | 0.195513 | 0.191434 | 0.19697   | 0.0925117 |
| 0.149184  | 0.11451  | 0.14627   | 0.164044 | 0.163462 | 0.16958   | 0.124854  |
| 0.114219  | 0.157051 | 0.120047  | 0.126166 | 0.125291 | 0.133741  | 0.193328  |
| 0.107955  | 0.156031 | 0.10708   | 0.121358 | 0.119318 | 0.124272  | 0.186189  |
| 0.14292   | 0.182547 | 0.145251  | 0.155157 | 0.153118 | 0.151078  | 0.2162    |
| 0.116841  | 0.16317  | 0.11655   | 0.123834 | 0.126457 | 0.127914  | 0.194202  |
| 0.108829  | 0.146999 | 0.115239  | 0.123397 | 0.117279 | 0.126894  | 0.183858  |
| 0.110431  | 0.143357 | 0.105478  | 0.125583 | 0.118298 | 0.127622  | 0.183129  |
| 0.108392  | 0.143939 | 0.115093  | 0.122669 | 0.114219 | 0.131119  | 0.190705  |
| 0.118007  | 0.157925 | 0.107226  | 0.127622 | 0.127622 | 0.122378  | 0.190122  |
| 0.192162  | 0.131556 | 0.187209  | 0.20236  | 0.201777 | 0.20236   | 0.0955711 |
| 0.120338  | 0.168706 | 0.121503  | 0.125    | 0.115093 | 0.132867  | 0.19799   |
| 0.111451  | 0.149038 | 0.0726981 | 0.120484 | 0.123689 | 0.124272  | 0.179779  |
| 0.105624  | 0.142045 | 0.106206  | 0.119318 | 0.110577 | 0.123689  | 0.184732  |
| 0.112179  | 0.155303 | 0.113928  | 0.112471 | 0.115093 | 0.128497  | 0.195659  |

|          |          |           |           |          |           |           |
|----------|----------|-----------|-----------|----------|-----------|-----------|
| 0.175262 | 0.117279 | 0.169726  | 0.186043  | 0.18109  | 0.183421  | 0.112762  |
| 0.240239 | 0.173514 | 0.234703  | 0.249563  | 0.244318 | 0.241696  | 0.129953  |
| 0.109994 | 0.161568 | 0.113199  | 0.117279  | 0.124272 | 0.122232  | 0.194639  |
| 0.116696 | 0.161276 | 0.10708   | 0.123397  | 0.121358 | 0.122232  | 0.190559  |
| 0.112325 | 0.154866 | 0.119027  | 0.126311  | 0.125146 | 0.131556  | 0.191434  |
| 0.114219 | 0.159382 | 0.115093  | 0.121212  | 0.113636 | 0.127331  | 0.191288  |
| 0.112617 | 0.16215  | 0.112325  | 0.116404  | 0.107663 | 0.124563  | 0.195221  |
| 0.1081   | 0.152681 | 0.109557  | 0.115676  | 0.119755 | 0.120047  | 0.186917  |
| 0.107663 | 0.141463 | 0.0808566 | 0.12398   | 0.116113 | 0.123689  | 0.177739  |
| 0.112325 | 0.162442 | 0.109703  | 0.11757   | 0.111451 | 0.126894  | 0.196678  |
| 0.1081   | 0.139569 | 0.0708042 | 0.124417  | 0.119172 | 0.121212  | 0.17905   |
| 0.114073 | 0.1537   | 0.112908  | 0.125437  | 0.116113 | 0.128351  | 0.194347  |
| 0.105186 | 0.130536 | 0.1081    | 0.115967  | 0.106643 | 0.123252  | 0.188374  |
| 0.113782 | 0.162733 | 0.113782  | 0.110868  | 0.123689 | 0.119901  | 0.193182  |
| 0.110723 | 0.157925 | 0.04662   | 0.121795  | 0.123252 | 0.123543  | 0.186043  |
| 0.106352 | 0.149476 | 0.0987762 | 0.0929487 | 0.104312 | 0.0705128 | 0.184003  |
| 0.120921 | 0.168415 | 0.124417  | 0.124417  | 0.128497 | 0.121503  | 0.206731  |
| 0.136072 | 0.176282 | 0.131993  | 0.138112  | 0.126457 | 0.136655  | 0.207605  |
| 0.107955 | 0.14729  | 0.108829  | 0.120775  | 0.11116  | 0.128642  | 0.187063  |
| 0.110723 | 0.143939 | 0.117133  | 0.126457  | 0.120047 | 0.127331  | 0.182838  |
| 0.123834 | 0.164336 | 0.126166  | 0.136364  | 0.129662 | 0.13549   | 0.19595   |
| 0.198864 | 0.135635 | 0.199738  | 0.21081   | 0.207314 | 0.207896  | 0.120047  |
| 0.102273 | 0.155012 | 0.107226  | 0.106352  | 0.112471 | 0.115093  | 0.184878  |
| 0.105915 | 0.133013 | 0.109994  | 0.114073  | 0.105624 | 0.123689  | 0.18852   |
| 0.105915 | 0.158945 | 0.115239  | 0.11961   | 0.118444 | 0.123689  | 0.193473  |
| 0.120338 | 0.163753 | 0.115093  | 0.0515734 | 0.11655  | 0.108392  | 0.198281  |
| 0.109848 | 0.153846 | 0.1081    | 0.11014   | 0.11014  | 0.122378  | 0.193328  |
| 0.190851 | 0.128497 | 0.188811  | 0.198718  | 0.196096 | 0.201923  | 0.0980478 |
| 0.114073 | 0.159819 | 0.0467657 | 0.125146  | 0.124854 | 0.125146  | 0.189685  |
| 0.105769 | 0.147727 | 0.109266  | 0.121795  | 0.110431 | 0.127914  | 0.185752  |
| 0.121066 | 0.161859 | 0.117279  | 0.128642  | 0.128934 | 0.129808  | 0.199301  |
| 0.116113 | 0.159528 | 0.114365  | 0.119901  | 0.107372 | 0.121066  | 0.194639  |
| 0.110577 | 0.156031 | 0.0479312 | 0.122232  | 0.123106 | 0.121649  | 0.185023  |
| 0.104749 | 0.144668 | 0.0715326 | 0.114948  | 0.109703 | 0.114656  | 0.18007   |
| 0.111451 | 0.154866 | 0.112325  | 0.128059  | 0.118735 | 0.127768  | 0.193765  |
| 0.118735 | 0.160402 | 0.111451  | 0.0514277 | 0.114365 | 0.107663  | 0.196678  |
| 0.18852  | 0.130828 | 0.185897  | 0.198135  | 0.194639 | 0.196387  | 0.0939685 |
| 0.103293 | 0.149038 | 0.0505536 | 0.119027  | 0.117861 | 0.11553   | 0.183858  |
| 0.183275 | 0.125291 | 0.18211   | 0.194056  | 0.190851 | 0.195804  | 0.0986305 |
| 0.181672 | 0.120775 | 0.181381  | 0.191871  | 0.188083 | 0.192453  | 0.090035  |
| 0.131847 | 0.172348 | 0.129516  | 0.13039   | 0.121941 | 0.128934  | 0.204545  |
| 0.131265 | 0.173805 | 0.124563  | 0.060169  | 0.126603 | 0.109411  | 0.206002  |
| 0.107955 | 0.144668 | 0.103584  | 0.116404  | 0.112908 | 0.11757   | 0.189103  |
| 0.105186 | 0.151807 | 0.0524476 | 0.115967  | 0.115676 | 0.114219  | 0.184295  |

|           |          |           |           |          |          |           |
|-----------|----------|-----------|-----------|----------|----------|-----------|
| 0.108537  | 0.1537   | 0.0473485 | 0.121066  | 0.121066 | 0.120484 | 0.185897  |
| 0.11116   | 0.14933  | 0.115822  | 0.121649  | 0.116404 | 0.128934 | 0.186772  |
| 0.109411  | 0.158362 | 0.106206  | 0.113199  | 0.10912  | 0.123106 | 0.193182  |
| 0.112617  | 0.160111 | 0.112617  | 0.118444  | 0.109994 | 0.125437 | 0.196678  |
| 0.117133  | 0.160256 | 0.115385  | 0.113636  | 0.12704  | 0.120338 | 0.193328  |
| 0.120775  | 0.163899 | 0.120192  | 0.124854  | 0.113491 | 0.129516 | 0.196387  |
| 0.108392  | 0.147145 | 0.108974  | 0.118007  | 0.111014 | 0.126457 | 0.186334  |
| 0.110286  | 0.157197 | 0.0429779 | 0.118444  | 0.122523 | 0.121649 | 0.189394  |
| 0.0944056 | 0.14831  | 0.0979021 | 0.115093  | 0.112471 | 0.116259 | 0.186043  |
| 0.122523  | 0.163316 | 0.0549242 | 0.129516  | 0.129808 | 0.123106 | 0.193765  |
| 0.112617  | 0.158654 | 0.119318  | 0.123397  | 0.12602  | 0.131847 | 0.193182  |
| 0.126457  | 0.168124 | 0.0611888 | 0.135198  | 0.13549  | 0.12296  | 0.197407  |
| 0.252622  | 0.185023 | 0.249126  | 0.261364  | 0.256702 | 0.255536 | 0.137675  |
| 0.129662  | 0.174534 | 0.130245  | 0.120047  | 0.129662 | 0.117424 | 0.209645  |
| 0.131556  | 0.163316 | 0.126894  | 0.129808  | 0.124854 | 0.119901 | 0.203089  |
| 0.208333  | 0.148019 | 0.206294  | 0.219988  | 0.217949 | 0.216783 | 0.115239  |
| 0.12398   | 0.165647 | 0.124854  | 0.117279  | 0.118735 | 0.124854 | 0.200758  |
| 0.220717  | 0.159819 | 0.218969  | 0.230041  | 0.230332 | 0.225379 | 0.123543  |
| 0.11859   | 0.165793 | 0.118007  | 0.111305  | 0.118881 | 0.113345 | 0.202943  |
| 0.121941  | 0.161276 | 0.123689  | 0.135344  | 0.125437 | 0.132721 | 0.19697   |
| 0.112325  | 0.159528 | 0.109411  | 0.0560897 | 0.10912  | 0.103875 | 0.192016  |
| 0.126311  | 0.165355 | 0.124563  | 0.129808  | 0.120484 | 0.133013 | 0.20134   |
| 0.193328  | 0.128059 | 0.192162  | 0.201195  | 0.197698 | 0.202943 | 0.0973193 |
| 0.124272  | 0.166521 | 0.0552156 | 0.132721  | 0.133304 | 0.125728 | 0.195804  |
| 0.112034  | 0.153992 | 0.0464744 | 0.122232  | 0.121066 | 0.122232 | 0.18852   |
| 0.219114  | 0.154138 | 0.2162    | 0.227564  | 0.226107 | 0.224359 | 0.118444  |
| 0.112034  | 0.159528 | 0.11757   | 0.118735  | 0.111451 | 0.130099 | 0.194056  |
| 0.187063  | 0.125291 | 0.186772  | 0.198135  | 0.192308 | 0.200758 | 0.0983392 |
| 0.11655   | 0.158508 | 0.116259  | 0.121503  | 0.113636 | 0.130536 | 0.19595   |
| 0.111888  | 0.151224 | 0.113928  | 0.120921  | 0.11451  | 0.130245 | 0.188666  |
| 0.114948  | 0.140006 | 0.11757   | 0.123397  | 0.11961  | 0.129516 | 0.198718  |
| 0.133304  | 0.174679 | 0.130682  | 0.13447   | 0.125437 | 0.134178 | 0.208333  |
| 0         | 0.152972 | 0.107517  | 0.120338  | 0.114219 | 0.127622 | 0.184295  |
| 0.152972  | 0        | 0.152389  | 0.159674  | 0.153555 | 0.166084 | 0.123106  |
| 0.107517  | 0.152389 | 0         | 0.118881  | 0.118881 | 0.113345 | 0.182255  |
| 0.120338  | 0.159674 | 0.118881  | 0         | 0.114802 | 0.107226 | 0.194493  |
| 0.114219  | 0.153555 | 0.118881  | 0.114802  | 0        | 0.12296  | 0.190414  |
| 0.127622  | 0.166084 | 0.113345  | 0.107226  | 0.12296  | 0        | 0.195367  |
| 0.184295  | 0.123106 | 0.182255  | 0.194493  | 0.190414 | 0.195367 | 0         |
| 0.112762  | 0.148019 | 0.113345  | 0.120629  | 0.11014  | 0.128205 | 0.18546   |
| 0.121066  | 0.147873 | 0.121649  | 0.12602   | 0.115822 | 0.135635 | 0.183566  |
| 0.106935  | 0.160839 | 0.112179  | 0.119464  | 0.115093 | 0.119464 | 0.197407  |
| 0.117279  | 0.167395 | 0.116987  | 0.120775  | 0.115239 | 0.126311 | 0.201632  |
| 0.115676  | 0.155594 | 0.118298  | 0.128205  | 0.120047 | 0.127622 | 0.191871  |

|          |          |           |           |          |           |           |
|----------|----------|-----------|-----------|----------|-----------|-----------|
| 0.247815 | 0.180507 | 0.245192  | 0.258304  | 0.255682 | 0.251311  | 0.137238  |
| 0.11014  | 0.138112 | 0.113636  | 0.11859   | 0.111888 | 0.121795  | 0.19799   |
| 0.104604 | 0.147436 | 0.113345  | 0.120921  | 0.116841 | 0.126457  | 0.186626  |
| 0.17162  | 0.130245 | 0.172786  | 0.17803   | 0.175408 | 0.179779  | 0.142045  |
| 0.177448 | 0.117716 | 0.174242  | 0.187937  | 0.186189 | 0.189685  | 0.0936772 |
| 0.111597 | 0.15676  | 0.112471  | 0.111597  | 0.123543 | 0.124417  | 0.18954   |
| 0.113782 | 0.155449 | 0.0470571 | 0.122815  | 0.120775 | 0.120775  | 0.188228  |
| 0.120192 | 0.156614 | 0.114365  | 0.121649  | 0.110868 | 0.126311  | 0.193765  |
| 0.13986  | 0.175699 | 0.0708042 | 0.146853  | 0.14831  | 0.134907  | 0.201777  |
| 0.109848 | 0.157925 | 0.109848  | 0.111888  | 0.119464 | 0.118298  | 0.188666  |
| 0.11553  | 0.164481 | 0.113782  | 0.112325  | 0.123106 | 0.127185  | 0.194056  |
| 0.121795 | 0.167249 | 0.12296   | 0.124126  | 0.118298 | 0.128497  | 0.20236   |
| 0.114802 | 0.152972 | 0.0480769 | 0.120338  | 0.122086 | 0.116841  | 0.184878  |
| 0.120484 | 0.163899 | 0.0523019 | 0.13039   | 0.133304 | 0.120192  | 0.19289   |
| 0.117424 | 0.143065 | 0.114802  | 0.121503  | 0.117133 | 0.13141   | 0.183129  |
| 0.125146 | 0.169726 | 0.125728  | 0.132139  | 0.121066 | 0.13039   | 0.203671  |
| 0.141608 | 0.181235 | 0.138403  | 0.143065  | 0.132576 | 0.141608  | 0.214307  |
| 0.111451 | 0.138258 | 0.118735  | 0.124272  | 0.116113 | 0.127185  | 0.19697   |
| 0.13549  | 0.174825 | 0.13345   | 0.136946  | 0.127622 | 0.13549   | 0.209645  |
| 0.12296  | 0.174825 | 0.126748  | 0.129371  | 0.122378 | 0.131119  | 0.206731  |
| 0.200029 | 0.136801 | 0.191288  | 0.208479  | 0.203817 | 0.207022  | 0.106061  |
| 0.115093 | 0.159091 | 0.121795  | 0.126166  | 0.119172 | 0.134615  | 0.199155  |
| 0.182984 | 0.123834 | 0.178613  | 0.193765  | 0.188811 | 0.193473  | 0.0960082 |
| 0.114802 | 0.160548 | 0.107809  | 0.0868298 | 0.111888 | 0.0961538 | 0.189831  |
| 0.119464 | 0.157343 | 0.117716  | 0.131119  | 0.125583 | 0.136364  | 0.18954   |
| 0.115967 | 0.155012 | 0.118881  | 0.127622  | 0.129079 | 0.130245  | 0.194784  |
| 0.107955 | 0.152826 | 0.114656  | 0.124563  | 0.123397 | 0.129808  | 0.187646  |
| 0.113928 | 0.157051 | 0.0463287 | 0.125583  | 0.12296  | 0.120629  | 0.186043  |
| 0.117133 | 0.161713 | 0.0509907 | 0.123834  | 0.129371 | 0.117716  | 0.18954   |
| 0.114802 | 0.14831  | 0.116259  | 0.124709  | 0.116259 | 0.132867  | 0.184003  |
| 0.119901 | 0.159237 | 0.112617  | 0.0488054 | 0.113491 | 0.108246  | 0.19493   |
| 0.119901 | 0.163316 | 0.118735  | 0.132139  | 0.134761 | 0.134761  | 0.197261  |
| 0.130536 | 0.164918 | 0.129371  | 0.13345   | 0.12704  | 0.134615  | 0.195659  |
| 0.242716 | 0.17803  | 0.24155   | 0.252622  | 0.253788 | 0.247086  | 0.133304  |
| 0.111888 | 0.151224 | 0.114802  | 0.124126  | 0.114802 | 0.134324  | 0.185752  |
| 0.176428 | 0.114365 | 0.175845  | 0.183421  | 0.178176 | 0.185752  | 0.0935315 |
| 0.178322 | 0.117424 | 0.176573  | 0.189103  | 0.183275 | 0.192016  | 0.088141  |
| 0.109994 | 0.151661 | 0.117861  | 0.123106  | 0.117861 | 0.133304  | 0.187646  |
| 0.105915 | 0.133013 | 0.109703  | 0.116404  | 0.110577 | 0.124272  | 0.193473  |
| 0.118444 | 0.157488 | 0.120775  | 0.13039   | 0.123689 | 0.130682  | 0.19289   |
| 0.104458 | 0.151369 | 0.043852  | 0.116696  | 0.117279 | 0.11553   | 0.183275  |
| 0.1081   | 0.135198 | 0.113928  | 0.11859   | 0.112179 | 0.126457  | 0.181672  |
| 0.113054 | 0.163462 | 0.113928  | 0.118881  | 0.110723 | 0.128788  | 0.197407  |
| 0.121649 | 0.151369 | 0.0735723 | 0.122523  | 0.121066 | 0.117279  | 0.185315  |

|           |          |           |           |          |          |           |
|-----------|----------|-----------|-----------|----------|----------|-----------|
| 0.124854  | 0.1706   | 0.0581294 | 0.135927  | 0.135052 | 0.126311 | 0.200175  |
| 0.113054  | 0.150932 | 0.114219  | 0.124126  | 0.117133 | 0.129662 | 0.185169  |
| 0.123834  | 0.166667 | 0.0539044 | 0.128205  | 0.13345  | 0.123252 | 0.196533  |
| 0.118153  | 0.155449 | 0.116404  | 0.115822  | 0.113782 | 0.116404 | 0.19289   |
| 0.120484  | 0.163899 | 0.124272  | 0.133887  | 0.13447  | 0.137383 | 0.200466  |
| 0.12296   | 0.161131 | 0.120047  | 0.125874  | 0.113928 | 0.130536 | 0.195076  |
| 0.129225  | 0.17701  | 0.128642  | 0.135052  | 0.126894 | 0.132721 | 0.207168  |
| 0.121212  | 0.155594 | 0.119172  | 0.129371  | 0.122378 | 0.129371 | 0.199446  |
| 0.111597  | 0.14627  | 0.111888  | 0.124126  | 0.116259 | 0.126166 | 0.185752  |
| 0.122086  | 0.174534 | 0.124417  | 0.128788  | 0.134907 | 0.127331 | 0.204983  |
| 0.176719  | 0.115822 | 0.17264   | 0.184295  | 0.182255 | 0.186334 | 0.0926573 |
| 0.129953  | 0.17162  | 0.0611888 | 0.137529  | 0.135781 | 0.12704  | 0.199446  |
| 0.115385  | 0.155886 | 0.0448718 | 0.122669  | 0.126457 | 0.119464 | 0.186917  |
| 0.116404  | 0.159528 | 0.120775  | 0.126894  | 0.126603 | 0.130099 | 0.194639  |
| 0.106935  | 0.151515 | 0.109266  | 0.119172  | 0.11859  | 0.125874 | 0.18954   |
| 0.12398   | 0.161568 | 0.117861  | 0.124854  | 0.114365 | 0.128351 | 0.19493   |
| 0.127622  | 0.167541 | 0.124709  | 0.128497  | 0.118007 | 0.135198 | 0.200029  |
| 0.183129  | 0.122523 | 0.181381  | 0.193619  | 0.18546  | 0.193328 | 0.0964452 |
| 0.112325  | 0.141754 | 0.0726981 | 0.125728  | 0.121941 | 0.120484 | 0.180361  |
| 0.103438  | 0.13345  | 0.0981935 | 0.115385  | 0.113636 | 0.11859  | 0.167395  |
| 0.118007  | 0.162296 | 0.0498252 | 0.124709  | 0.129953 | 0.122086 | 0.190705  |
| 0.184586  | 0.123397 | 0.178759  | 0.192453  | 0.191871 | 0.193328 | 0.0929487 |
| 0.102564  | 0.124126 | 0.1081    | 0.113636  | 0.106643 | 0.126166 | 0.183421  |
| 0.121358  | 0.170309 | 0.123106  | 0.126603  | 0.119027 | 0.128642 | 0.20542   |
| 0.115822  | 0.160693 | 0.0502622 | 0.127185  | 0.128059 | 0.123106 | 0.191725  |
| 0.109266  | 0.159965 | 0.1081    | 0.108392  | 0.119464 | 0.11655  | 0.191579  |
| 0.176282  | 0.118007 | 0.175408  | 0.190268  | 0.183275 | 0.189394 | 0.0898893 |
| 0.115676  | 0.160839 | 0.113345  | 0.121212  | 0.115093 | 0.126166 | 0.19799   |
| 0.106643  | 0.151807 | 0.101981  | 0.112179  | 0.11655  | 0.120047 | 0.18546   |
| 0.103147  | 0.12296  | 0.109266  | 0.115093  | 0.108974 | 0.127331 | 0.178759  |
| 0.0763403 | 0.134324 | 0.108392  | 0.121795  | 0.123252 | 0.132576 | 0.168852  |
| 0.121649  | 0.163024 | 0.115239  | 0.048514  | 0.116113 | 0.107955 | 0.198718  |
| 0.127185  | 0.172931 | 0.124854  | 0.129516  | 0.122815 | 0.13447  | 0.207168  |
| 0.11116   | 0.150495 | 0.112034  | 0.122815  | 0.112617 | 0.129516 | 0.187063  |
| 0.123106  | 0.161276 | 0.109994  | 0.125146  | 0.128059 | 0.12398  | 0.201632  |
| 0.138986  | 0.17803  | 0.137529  | 0.138403  | 0.146853 | 0.134324 | 0.206731  |
| 0.227273  | 0.167541 | 0.225816  | 0.238345  | 0.23514  | 0.233392 | 0.126311  |
| 0.125291  | 0.164627 | 0.121503  | 0.137529  | 0.128205 | 0.134324 | 0.206731  |
| 0.119172  | 0.162005 | 0.117424  | 0.0504079 | 0.115676 | 0.1081   | 0.19799   |
| 0.108829  | 0.151369 | 0.0557984 | 0.121649  | 0.122232 | 0.119318 | 0.184441  |
| 0.116259  | 0.158508 | 0.119755  | 0.125583  | 0.118298 | 0.127622 | 0.186043  |
| 0.114365  | 0.148164 | 0.105041  | 0.071824  | 0.110577 | 0.105332 | 0.191725  |
| 0.114073  | 0.156906 | 0.11553   | 0.114948  | 0.114948 | 0.123106 | 0.195804  |
| 0.118007  | 0.157343 | 0.0571096 | 0.12296   | 0.12704  | 0.11859  | 0.188666  |

|          |          |           |           |          |           |           |
|----------|----------|-----------|-----------|----------|-----------|-----------|
| 0.125437 | 0.168852 | 0.124272  | 0.125437  | 0.122232 | 0.131847  | 0.201049  |
| 0.114948 | 0.155157 | 0.113491  | 0.108246  | 0.115822 | 0.118735  | 0.18648   |
| 0.229895 | 0.169289 | 0.225816  | 0.239219  | 0.237471 | 0.234266  | 0.125437  |
| 0.103001 | 0.128059 | 0.105624  | 0.114073  | 0.105041 | 0.119901  | 0.185606  |
| 0.105624 | 0.151369 | 0.107372  | 0.104167  | 0.110868 | 0.112908  | 0.191725  |
| 0.111014 | 0.150058 | 0.108974  | 0.120338  | 0.114802 | 0.123543  | 0.186334  |
| 0.121941 | 0.170309 | 0.124563  | 0.123397  | 0.133596 | 0.122815  | 0.19697   |
| 0.13243  | 0.167686 | 0.13243   | 0.140006  | 0.131556 | 0.139132  | 0.208333  |
| 0.101836 | 0.149621 | 0.104458  | 0.122232  | 0.124272 | 0.127185  | 0.182984  |
| 0.114073 | 0.156323 | 0.0470571 | 0.119901  | 0.127768 | 0.11961   | 0.187937  |
| 0.1081   | 0.156469 | 0.105478  | 0.108974  | 0.115093 | 0.119172  | 0.185752  |
| 0.224942 | 0.162005 | 0.219988  | 0.234266  | 0.231935 | 0.230186  | 0.124563  |
| 0.118298 | 0.163462 | 0.0518648 | 0.128205  | 0.131993 | 0.120921  | 0.190997  |
| 0.123397 | 0.166812 | 0.116696  | 0.123397  | 0.116404 | 0.129225  | 0.203089  |
| 0.112908 | 0.155449 | 0.108829  | 0.105332  | 0.105332 | 0.118735  | 0.188228  |
| 0.120047 | 0.168998 | 0.115093  | 0.108683  | 0.127622 | 0.0964452 | 0.200612  |
| 0.128497 | 0.167249 | 0.123834  | 0.119464  | 0.126457 | 0.116841  | 0.204691  |
| 0.111597 | 0.152681 | 0.115676  | 0.123252  | 0.115967 | 0.128788  | 0.18954   |
| 0.125583 | 0.167249 | 0.121503  | 0.123834  | 0.120921 | 0.130536  | 0.20236   |
| 0.126894 | 0.175262 | 0.125728  | 0.131847  | 0.12602  | 0.129225  | 0.20979   |
| 0.115822 | 0.165355 | 0.116987  | 0.121649  | 0.114365 | 0.128642  | 0.197261  |
| 0.109557 | 0.150058 | 0.115385  | 0.123543  | 0.112471 | 0.129953  | 0.189248  |
| 0.129662 | 0.168706 | 0.120629  | 0.0553613 | 0.122669 | 0.107809  | 0.203526  |
| 0.133304 | 0.17264  | 0.124272  | 0.057838  | 0.126894 | 0.107955  | 0.209499  |
| 0.12602  | 0.16623  | 0.126603  | 0.133304  | 0.135344 | 0.135052  | 0.203089  |
| 0.12602  | 0.167686 | 0.130973  | 0.135052  | 0.136509 | 0.136801  | 0.203089  |
| 0.130536 | 0.173368 | 0.125583  | 0.0559441 | 0.123834 | 0.108683  | 0.208479  |
| 0.104895 | 0.143357 | 0.111014  | 0.118007  | 0.108392 | 0.126166  | 0.190122  |
| 0.130973 | 0.181964 | 0.129225  | 0.134178  | 0.13884  | 0.128059  | 0.212704  |
| 0.12704  | 0.166375 | 0.128497  | 0.135781  | 0.134615 | 0.141026  | 0.206439  |
| 0.199883 | 0.135198 | 0.19289   | 0.206876  | 0.206876 | 0.20338   | 0.103875  |
| 0.126457 | 0.161422 | 0.114219  | 0.132284  | 0.128205 | 0.12704   | 0.193036  |
| 0.112762 | 0.152972 | 0.11655   | 0.108974  | 0.116841 | 0.116841  | 0.195659  |
| 0.116987 | 0.148164 | 0.119318  | 0.128059  | 0.119901 | 0.134761  | 0.184149  |
| 0.215618 | 0.155594 | 0.212995  | 0.227564  | 0.22465  | 0.222319  | 0.121358  |
| 0.20542  | 0.146853 | 0.201923  | 0.213578  | 0.211538 | 0.211247  | 0.118444  |
| 0.124563 | 0.172057 | 0.125146  | 0.130099  | 0.124563 | 0.132721  | 0.204837  |
| 0.244755 | 0.17803  | 0.238345  | 0.253205  | 0.250291 | 0.247086  | 0.129808  |
| 0.104312 | 0.14627  | 0.112179  | 0.117424  | 0.109557 | 0.125874  | 0.188083  |
| 0.132284 | 0.168998 | 0.132867  | 0.137821  | 0.135198 | 0.143065  | 0.208479  |
| 0.105769 | 0.132867 | 0.110723  | 0.11859   | 0.11014  | 0.126457  | 0.192162  |
| 0.125146 | 0.169143 | 0.119901  | 0.0525932 | 0.119318 | 0.104458  | 0.204254  |
| 0.18211  | 0.123252 | 0.176865  | 0.189394  | 0.186189 | 0.187063  | 0.0910548 |
| 0.129808 | 0.161568 | 0.118735  | 0.11961   | 0.117279 | 0.122232  | 0.194347  |

|           |          |           |           |          |           |           |
|-----------|----------|-----------|-----------|----------|-----------|-----------|
| 0.186626  | 0.123689 | 0.182838  | 0.198281  | 0.193036 | 0.196241  | 0.0979021 |
| 0.110868  | 0.156031 | 0.112617  | 0.120484  | 0.114365 | 0.12398   | 0.19493   |
| 0.113782  | 0.142337 | 0.0977564 | 0.120192  | 0.122232 | 0.127768  | 0.179487  |
| 0.116696  | 0.156906 | 0.122815  | 0.121649  | 0.119901 | 0.122523  | 0.193182  |
| 0.0680361 | 0.142337 | 0.102127  | 0.115239  | 0.117279 | 0.123106  | 0.176282  |
| 0.1081    | 0.148601 | 0.105769  | 0.116259  | 0.111014 | 0.124417  | 0.181964  |
| 0.114802  | 0.155303 | 0.101399  | 0.122378  | 0.122378 | 0.118881  | 0.187791  |
| 0.101399  | 0.127331 | 0.11014   | 0.113345  | 0.105478 | 0.121212  | 0.182255  |
| 0.108537  | 0.15574  | 0.0432692 | 0.118735  | 0.119027 | 0.116696  | 0.184441  |
| 0.118298  | 0.161713 | 0.115093  | 0.120338  | 0.125    | 0.123834  | 0.199738  |
| 0.111888  | 0.151807 | 0.108392  | 0.121212  | 0.117133 | 0.125291  | 0.194493  |
| 0.10708   | 0.128059 | 0.110868  | 0.114948  | 0.107955 | 0.122232  | 0.187646  |
| 0.113054  | 0.151515 | 0.11859   | 0.130828  | 0.126748 | 0.128497  | 0.188666  |
| 0.124417  | 0.167541 | 0.0544872 | 0.132284  | 0.134615 | 0.122086  | 0.196533  |
| 0.108537  | 0.150495 | 0.112325  | 0.120192  | 0.122815 | 0.128351  | 0.190268  |
| 0.101981  | 0.156469 | 0.108683  | 0.118298  | 0.119464 | 0.118881  | 0.192453  |
| 0.105915  | 0.144959 | 0.105624  | 0.11961   | 0.11116  | 0.125437  | 0.184441  |
| 0.120484  | 0.157197 | 0.113491  | 0.118444  | 0.119318 | 0.12398   | 0.193182  |
| 0.118444  | 0.159528 | 0.114073  | 0.0546329 | 0.112617 | 0.109411  | 0.195804  |
| 0.123252  | 0.169872 | 0.122378  | 0.125874  | 0.115093 | 0.130245  | 0.200029  |
| 0.113636  | 0.157634 | 0.118298  | 0.124709  | 0.126748 | 0.131702  | 0.194202  |
| 0.113199  | 0.156031 | 0.0464744 | 0.124272  | 0.124272 | 0.121941  | 0.18648   |
| 0.123543  | 0.168124 | 0.0568182 | 0.13345   | 0.135781 | 0.125874  | 0.197407  |
| 0.131702  | 0.174534 | 0.0641026 | 0.142483  | 0.142191 | 0.130828  | 0.201195  |
| 0.105624  | 0.151078 | 0.10271   | 0.112617  | 0.105624 | 0.121358  | 0.188228  |
| 0.108537  | 0.148164 | 0.112034  | 0.119901  | 0.114365 | 0.129808  | 0.185897  |
| 0.106643  | 0.147727 | 0.10373   | 0.106935  | 0.106643 | 0.118881  | 0.187209  |
| 0.13141   | 0.173368 | 0.125291  | 0.0617716 | 0.126457 | 0.109266  | 0.209645  |
| 0.108829  | 0.137675 | 0.112617  | 0.119027  | 0.112617 | 0.12602   | 0.196096  |
| 0.146416  | 0.182547 | 0.139423  | 0.143794  | 0.133887 | 0.139132  | 0.214744  |
| 0.130973  | 0.163607 | 0.129225  | 0.142337  | 0.135052 | 0.139132  | 0.199592  |
| 0.118298  | 0.167541 | 0.117424  | 0.116841  | 0.128788 | 0.122086  | 0.197407  |
| 0.103001  | 0.151369 | 0.103584  | 0.119027  | 0.116987 | 0.12602   | 0.187063  |
| 0.111888  | 0.155594 | 0.101981  | 0.101107  | 0.110723 | 0.0632284 | 0.188666  |
| 0.123252  | 0.166084 | 0.126748  | 0.133741  | 0.138112 | 0.136946  | 0.200612  |
| 0.200903  | 0.137092 | 0.19595   | 0.210227  | 0.20236  | 0.206731  | 0.11655   |
| 0.104458  | 0.150787 | 0.106498  | 0.113199  | 0.116696 | 0.119318  | 0.186189  |
| 0.106935  | 0.157051 | 0.113928  | 0.118298  | 0.111305 | 0.124709  | 0.19391   |
| 0.118735  | 0.163024 | 0.116987  | 0.0543415 | 0.115239 | 0.10708   | 0.200466  |
| 0.109848  | 0.153846 | 0.116259  | 0.122378  | 0.118881 | 0.13141   | 0.192162  |
| 0.116113  | 0.160985 | 0.120484  | 0.124854  | 0.113782 | 0.13039   | 0.197552  |
| 0.108246  | 0.164773 | 0.113199  | 0.127477  | 0.129225 | 0.128351  | 0.196678  |
| 0.112179  | 0.166667 | 0.114219  | 0.127331  | 0.133741 | 0.128497  | 0.199446  |
| 0.11116   | 0.160985 | 0.115822  | 0.112908  | 0.125728 | 0.120775  | 0.197844  |

|           |          |           |           |          |          |          |
|-----------|----------|-----------|-----------|----------|----------|----------|
| 0.107955  | 0.156906 | 0.111742  | 0.11757   | 0.118153 | 0.121941 | 0.195221 |
| 0.128934  | 0.171766 | 0.11961   | 0.0557984 | 0.121066 | 0.106498 | 0.205128 |
| 0.107955  | 0.153409 | 0.116696  | 0.11961   | 0.113491 | 0.121649 | 0.194056 |
| 0.116841  | 0.155303 | 0.115093  | 0.127331  | 0.118007 | 0.129079 | 0.196824 |
| 0.173223  | 0.154866 | 0.167978  | 0.17701   | 0.177593 | 0.178467 | 0.16521  |
| 0.110286  | 0.15574  | 0.0488054 | 0.122232  | 0.120192 | 0.122232 | 0.186189 |
| 0.128205  | 0.159382 | 0.12296   | 0.0608974 | 0.123252 | 0.109848 | 0.193036 |
| 0.118153  | 0.164481 | 0.123106  | 0.124854  | 0.119027 | 0.127477 | 0.202214 |
| 0.122086  | 0.153263 | 0.1081    | 0.122669  | 0.125583 | 0.124126 | 0.192745 |
| 0.0964452 | 0.148601 | 0.100233  | 0.115385  | 0.114219 | 0.118298 | 0.18954  |
| 0.104604  | 0.146853 | 0.106935  | 0.117424  | 0.109266 | 0.120629 | 0.190705 |
| 0.100524  | 0.152681 | 0.106643  | 0.120047  | 0.116841 | 0.121503 | 0.195367 |
| 0.12296   | 0.158508 | 0.121503  | 0.119464  | 0.123834 | 0.115385 | 0.199155 |
| 0.111597  | 0.145396 | 0.0824592 | 0.123834  | 0.116841 | 0.125    | 0.18546  |
| 0.124854  | 0.169143 | 0.122815  | 0.131556  | 0.127768 | 0.136801 | 0.20338  |
| 0.106935  | 0.148019 | 0.105478  | 0.112471  | 0.113054 | 0.120921 | 0.187209 |
| 0.113782  | 0.1537   | 0.117861  | 0.121066  | 0.11961  | 0.125437 | 0.191142 |
| 0.129662  | 0.171329 | 0.127622  | 0.131993  | 0.132576 | 0.129371 | 0.209353 |
| 0.117133  | 0.164336 | 0.118881  | 0.125583  | 0.123252 | 0.125291 | 0.198281 |
| 0.120338  | 0.164044 | 0.120047  | 0.129079  | 0.129079 | 0.126748 | 0.19595  |
| 0.113054  | 0.156469 | 0.114802  | 0.120338  | 0.11859  | 0.125291 | 0.196241 |
| 0.114802  | 0.158508 | 0.115967  | 0.123543  | 0.120338 | 0.123543 | 0.198572 |
| 0.108974  | 0.147436 | 0.112471  | 0.116841  | 0.103438 | 0.121212 | 0.191871 |
| 0.11961   | 0.163024 | 0.118735  | 0.130973  | 0.116113 | 0.133013 | 0.205128 |
| 0.104167  | 0.143502 | 0.113782  | 0.115239  | 0.110286 | 0.125728 | 0.190268 |
| 0.138549  | 0.17905  | 0.133596  | 0.143211  | 0.142337 | 0.143502 | 0.209499 |
| 0.124563  | 0.164773 | 0.123689  | 0.129808  | 0.128059 | 0.137383 | 0.19289  |
| 0.106789  | 0.160402 | 0.110868  | 0.119027  | 0.118444 | 0.122815 | 0.196387 |
| 0.138112  | 0.178613 | 0.129371  | 0.136655  | 0.13345  | 0.126457 | 0.211684 |
| 0.114219  | 0.159965 | 0.117133  | 0.119755  | 0.123252 | 0.129079 | 0.191579 |
| 0.130828  | 0.161422 | 0.130536  | 0.143357  | 0.134033 | 0.142774 | 0.204983 |
| 0.111888  | 0.157634 | 0.111888  | 0.122669  | 0.113345 | 0.120047 | 0.196533 |
| 0.143502  | 0.17701  | 0.135052  | 0.127768  | 0.136801 | 0.135927 | 0.210664 |
| 0.129808  | 0.165355 | 0.128934  | 0.122232  | 0.124854 | 0.12602  | 0.197552 |
| 0.132139  | 0.166812 | 0.134761  | 0.130973  | 0.138258 | 0.137675 | 0.203089 |
| 0.111451  | 0.165938 | 0.115822  | 0.130099  | 0.121649 | 0.130099 | 0.20542  |
| 0.11014   | 0.154429 | 0.112179  | 0.125291  | 0.113636 | 0.127622 | 0.195367 |
| 0.114365  | 0.152826 | 0.112908  | 0.119027  | 0.110286 | 0.122523 | 0.193182 |
| 0.115967  | 0.164336 | 0.113054  | 0.1081    | 0.118881 | 0.11451  | 0.19799  |
| 0.120338  | 0.159965 | 0.11859   | 0.124126  | 0.126166 | 0.12704  | 0.206148 |
| 0.121358  | 0.171766 | 0.126603  | 0.13447   | 0.121358 | 0.127185 | 0.211538 |
| 0.122232  | 0.152244 | 0.121066  | 0.125728  | 0.122523 | 0.133596 | 0.192599 |
| 0.107372  | 0.150495 | 0.111451  | 0.115822  | 0.111742 | 0.118735 | 0.194639 |
| 0.113054  | 0.155594 | 0.113636  | 0.120921  | 0.109557 | 0.123543 | 0.191579 |



|           |          |           |          |          |          |          |
|-----------|----------|-----------|----------|----------|----------|----------|
| 0.112034  | 0.158071 | 0.116696  | 0.127477 | 0.118444 | 0.129516 | 0.196678 |
| 0.109411  | 0.154283 | 0.110868  | 0.119901 | 0.113199 | 0.131265 | 0.191725 |
| 0.124417  | 0.162587 | 0.121212  | 0.131119 | 0.119755 | 0.13345  | 0.199738 |
| 0.109848  | 0.152098 | 0.109848  | 0.120921 | 0.109266 | 0.129079 | 0.192745 |
| 0.101253  | 0.148164 | 0.10271   | 0.123689 | 0.119901 | 0.126311 | 0.183858 |
| 0.112034  | 0.149913 | 0.107663  | 0.120775 | 0.116113 | 0.124854 | 0.196096 |
| 0.101544  | 0.145251 | 0.108246  | 0.117279 | 0.109411 | 0.12398  | 0.18852  |
| 0.105624  | 0.154575 | 0.111742  | 0.121649 | 0.115239 | 0.125437 | 0.192016 |
| 0.100816  | 0.147436 | 0.102855  | 0.118298 | 0.116259 | 0.124417 | 0.18109  |
| 0.105624  | 0.150495 | 0.104167  | 0.117861 | 0.115239 | 0.127477 | 0.191725 |
| 0.116987  | 0.1537   | 0.101836  | 0.126311 | 0.125728 | 0.128059 | 0.187646 |
| 0.0945513 | 0.143502 | 0.0945513 | 0.116113 | 0.114073 | 0.120192 | 0.179196 |
| 0.120047  | 0.164336 | 0.120629  | 0.133741 | 0.128497 | 0.136946 | 0.203526 |

| TDr_2749  | TDr_2754 | TDr_2756  | TDr_2763  | TDr_2770  | TDr_2777 | TDr_2782  |
|-----------|----------|-----------|-----------|-----------|----------|-----------|
| 0.114948  | 0.114802 | 0.11116   | 0.122086  | 0.123106  | 0.239802 | 0.112325  |
| 0.102855  | 0.126311 | 0.114219  | 0.120775  | 0.109848  | 0.24053  | 0.108974  |
| 0.0976107 | 0.118735 | 0.111888  | 0.117279  | 0.105478  | 0.24257  | 0.105478  |
| 0.100816  | 0.119901 | 0.11451   | 0.118153  | 0.111014  | 0.249563 | 0.108683  |
| 0.133741  | 0.136509 | 0.130536  | 0.130099  | 0.131119  | 0.260052 | 0.124417  |
| 0.118298  | 0.136801 | 0.127331  | 0.132139  | 0.127622  | 0.252477 | 0.121212  |
| 0.119901  | 0.129079 | 0.10912   | 0.117133  | 0.122523  | 0.255245 | 0.108829  |
| 0.105041  | 0.11451  | 0.110868  | 0.118298  | 0.10912   | 0.243007 | 0.111742  |
| 0.105186  | 0.114365 | 0.0981935 | 0.107955  | 0.106352  | 0.251311 | 0.0999417 |
| 0.0901807 | 0.120921 | 0.116404  | 0.120047  | 0.095134  | 0.25204  | 0.078817  |
| 0.106643  | 0.108246 | 0.105769  | 0.120192  | 0.11655   | 0.240822 | 0.110723  |
| 0.10912   | 0.109266 | 0.103001  | 0.1081    | 0.11553   | 0.249126 | 0.104167  |
| 0.099796  | 0.112179 | 0.104458  | 0.113345  | 0.106206  | 0.256119 | 0.105041  |
| 0.123252  | 0.130099 | 0.140734  | 0.145542  | 0.128205  | 0.213432 | 0.126166  |
| 0.0587121 | 0.129371 | 0.128642  | 0.132576  | 0.0435606 | 0.25204  | 0.109411  |
| 0.11014   | 0.123397 | 0.103147  | 0.106498  | 0.109557  | 0.253934 | 0.109848  |
| 0.105041  | 0.109848 | 0.104749  | 0.103438  | 0.116404  | 0.251457 | 0.108246  |
| 0.140734  | 0.157197 | 0.138695  | 0.150787  | 0.138695  | 0.263258 | 0.138986  |
| 0.0987762 | 0.11757  | 0.109848  | 0.115822  | 0.108683  | 0.241113 | 0.103147  |
| 0.17366   | 0.195076 | 0.208042  | 0.209062  | 0.172786  | 0.140297 | 0.199883  |
| 0.114948  | 0.129953 | 0.112617  | 0.126748  | 0.123106  | 0.256702 | 0.121066  |
| 0.113928  | 0.121358 | 0.115093  | 0.125146  | 0.121212  | 0.258596 | 0.117133  |
| 0.105041  | 0.11451  | 0.101836  | 0.0929487 | 0.112034  | 0.246795 | 0.105041  |
| 0.125291  | 0.129516 | 0.0999417 | 0.101836  | 0.129079  | 0.262675 | 0.113636  |
| 0.0965909 | 0.107517 | 0.101544  | 0.104895  | 0.104458  | 0.246212 | 0.0954254 |
| 0.123106  | 0.139569 | 0.121941  | 0.131119  | 0.123397  | 0.254371 | 0.11961   |
| 0.116696  | 0.116259 | 0.10912   | 0.117716  | 0.121066  | 0.255828 | 0.112908  |
| 0.113782  | 0.129953 | 0.113491  | 0.10169   | 0.119901  | 0.262238 | 0.110286  |
| 0.127185  | 0.135781 | 0.118153  | 0.12296   | 0.129808  | 0.256702 | 0.122523  |
| 0.114656  | 0.119755 | 0.116696  | 0.118881  | 0.119901  | 0.262529 | 0.100379  |
| 0.111305  | 0.127768 | 0.114219  | 0.121649  | 0.115385  | 0.251311 | 0.11451   |
| 0.112034  | 0.126166 | 0.10912   | 0.115093  | 0.112908  | 0.259033 | 0.108829  |
| 0.0960082 | 0.107809 | 0.104749  | 0.111014  | 0.102418  | 0.244464 | 0.10271   |
| 0.112325  | 0.114219 | 0.10912   | 0.114802  | 0.118444  | 0.254079 | 0.104458  |
| 0.118007  | 0.122523 | 0.100816  | 0.114073  | 0.117716  | 0.259178 | 0.110431  |
| 0.126311  | 0.125583 | 0.10708   | 0.119755  | 0.128351  | 0.261364 | 0.10912   |
| 0.128497  | 0.140006 | 0.11655   | 0.13039   | 0.132576  | 0.270251 | 0.121795  |
| 0.118444  | 0.120921 | 0.10912   | 0.114219  | 0.126311  | 0.258741 | 0.118153  |
| 0.102418  | 0.115967 | 0.0983392 | 0.0920746 | 0.110286  | 0.252622 | 0.105332  |
| 0.112617  | 0.13141  | 0.113199  | 0.107517  | 0.121066  | 0.262529 | 0.112617  |
| 0.101836  | 0.118881 | 0.100379  | 0.0979021 | 0.112617  | 0.249709 | 0.103584  |
| 0.13039   | 0.149767 | 0.129808  | 0.12296   | 0.133013  | 0.268065 | 0.12398   |

|          |          |           |           |          |          |           |
|----------|----------|-----------|-----------|----------|----------|-----------|
| 0.137966 | 0.152681 | 0.13039   | 0.122669  | 0.145542 | 0.261655 | 0.130973  |
| 0.11014  | 0.120484 | 0.100816  | 0.103293  | 0.120047 | 0.255099 | 0.111888  |
| 0.103147 | 0.104167 | 0.0914918 | 0.103584  | 0.11451  | 0.252185 | 0.102273  |
| 0.106206 | 0.117424 | 0.105915  | 0.107809  | 0.111742 | 0.261946 | 0.102418  |
| 0.110286 | 0.123834 | 0.102127  | 0.108392  | 0.119318 | 0.256993 | 0.112034  |
| 0.129079 | 0.142628 | 0.12296   | 0.122815  | 0.134615 | 0.262675 | 0.123834  |
| 0.1081   | 0.122232 | 0.10373   | 0.104167  | 0.117424 | 0.254225 | 0.105478  |
| 0.108537 | 0.118298 | 0.105041  | 0.103147  | 0.11553  | 0.251748 | 0.108829  |
| 0.141608 | 0.147873 | 0.123252  | 0.149038  | 0.14627  | 0.265297 | 0.128788  |
| 0.122669 | 0.135052 | 0.118881  | 0.115239  | 0.123834 | 0.253934 | 0.117133  |
| 0.110577 | 0.11655  | 0.0995047 | 0.0941142 | 0.119901 | 0.252622 | 0.106789  |
| 0.114073 | 0.134615 | 0.128351  | 0.129371  | 0.112617 | 0.26049  | 0.105915  |
| 0.110286 | 0.125    | 0.113491  | 0.109266  | 0.119318 | 0.242133 | 0.115822  |
| 0.137092 | 0.144231 | 0.121941  | 0.122086  | 0.143502 | 0.265152 | 0.131847  |
| 0.12296  | 0.129516 | 0.113345  | 0.108829  | 0.12704  | 0.260635 | 0.115967  |
| 0.110723 | 0.120775 | 0.102564  | 0.099796  | 0.11655  | 0.257139 | 0.113636  |
| 0.109848 | 0.118735 | 0.111888  | 0.110286  | 0.116259 | 0.249854 | 0.111305  |
| 0.110577 | 0.126457 | 0.105332  | 0.107809  | 0.114656 | 0.26049  | 0.105332  |
| 0.130682 | 0.14831  | 0.120484  | 0.110431  | 0.134178 | 0.269814 | 0.127768  |
| 0.128351 | 0.146562 | 0.129225  | 0.119464  | 0.131556 | 0.266317 | 0.124272  |
| 0.153846 | 0.15574  | 0.160256  | 0.1537    | 0.155012 | 0.203817 | 0.149767  |
| 0.106061 | 0.122232 | 0.106352  | 0.102418  | 0.113928 | 0.253351 | 0.102855  |
| 0.1081   | 0.11757  | 0.103438  | 0.0962995 | 0.115093 | 0.255682 | 0.10169   |
| 0.108392 | 0.112617 | 0.101399  | 0.0986305 | 0.119172 | 0.254516 | 0.0981935 |
| 0.134761 | 0.141608 | 0.126311  | 0.135198  | 0.136801 | 0.257576 | 0.132721  |
| 0.105915 | 0.116259 | 0.0968823 | 0.102273  | 0.114073 | 0.253205 | 0.105041  |
| 0.125583 | 0.140297 | 0.119464  | 0.115822  | 0.131702 | 0.256265 | 0.121212  |
| 0.111014 | 0.122815 | 0.101107  | 0.103001  | 0.111888 | 0.260927 | 0.102564  |
| 0.111742 | 0.120338 | 0.106789  | 0.100524  | 0.11961  | 0.252622 | 0.110286  |
| 0.142628 | 0.149767 | 0.137383  | 0.144522  | 0.144959 | 0.256119 | 0.142045  |
| 0.116404 | 0.123834 | 0.109703  | 0.101107  | 0.123106 | 0.263695 | 0.112325  |
| 0.129953 | 0.141463 | 0.129662  | 0.122815  | 0.134324 | 0.264714 | 0.119464  |
| 0.125437 | 0.133741 | 0.123397  | 0.120338  | 0.127477 | 0.255536 | 0.11961   |
| 0.111305 | 0.117861 | 0.108683  | 0.116987  | 0.118007 | 0.247523 | 0.115676  |
| 0.108974 | 0.116113 | 0.0979021 | 0.0960082 | 0.120629 | 0.253642 | 0.106061  |
| 0.106352 | 0.125728 | 0.104604  | 0.103875  | 0.11655  | 0.25539  | 0.110431  |
| 0.130828 | 0.142628 | 0.116259  | 0.109703  | 0.134615 | 0.264714 | 0.125291  |
| 0.108829 | 0.114802 | 0.0971737 | 0.103438  | 0.118444 | 0.254953 | 0.104458  |
| 0.130536 | 0.151661 | 0.131119  | 0.122815  | 0.134324 | 0.268211 | 0.119755  |
| 0.111888 | 0.124563 | 0.10373   | 0.106789  | 0.124709 | 0.256265 | 0.110431  |
| 0.114802 | 0.123689 | 0.1081    | 0.097465  | 0.122378 | 0.256556 | 0.113928  |
| 0.109848 | 0.122523 | 0.104895  | 0.103293  | 0.121503 | 0.254516 | 0.111014  |
| 0.111305 | 0.127477 | 0.113345  | 0.101836  | 0.124709 | 0.258887 | 0.115093  |
| 0.108392 | 0.11961  | 0.107517  | 0.100962  | 0.115385 | 0.254516 | 0.107517  |

|           |          |           |           |          |          |           |
|-----------|----------|-----------|-----------|----------|----------|-----------|
| 0.111305  | 0.11757  | 0.100816  | 0.0977564 | 0.119464 | 0.254808 | 0.109557  |
| 0.128642  | 0.144231 | 0.122232  | 0.115967  | 0.134761 | 0.266026 | 0.124563  |
| 0.103001  | 0.112179 | 0.0930944 | 0.102855  | 0.107955 | 0.255828 | 0.102127  |
| 0.105478  | 0.118153 | 0.0996503 | 0.110577  | 0.111888 | 0.255973 | 0.105186  |
| 0.119464  | 0.129808 | 0.113636  | 0.125728  | 0.12296  | 0.262675 | 0.112762  |
| 0.124417  | 0.129516 | 0.108974  | 0.121941  | 0.12704  | 0.261801 | 0.112471  |
| 0.127622  | 0.139132 | 0.119464  | 0.122523  | 0.127331 | 0.25947  | 0.115967  |
| 0.132721  | 0.145105 | 0.118153  | 0.129662  | 0.135052 | 0.268648 | 0.127477  |
| 0.113636  | 0.118153 | 0.1081    | 0.121358  | 0.120338 | 0.250146 | 0.115093  |
| 0.179196  | 0.175845 | 0.178322  | 0.184003  | 0.178904 | 0.182255 | 0.173077  |
| 0.10271   | 0.113054 | 0.099796  | 0.111597  | 0.115239 | 0.255536 | 0.104749  |
| 0.129079  | 0.136509 | 0.122086  | 0.127477  | 0.130245 | 0.261801 | 0.127622  |
| 0.122378  | 0.130099 | 0.112471  | 0.120775  | 0.121212 | 0.25947  | 0.119172  |
| 0.13243   | 0.142483 | 0.118735  | 0.129953  | 0.136218 | 0.266317 | 0.122815  |
| 0.104604  | 0.114948 | 0.0926573 | 0.107955  | 0.111888 | 0.256265 | 0.108392  |
| 0.128497  | 0.135344 | 0.111888  | 0.120484  | 0.128788 | 0.267045 | 0.124417  |
| 0.1081    | 0.118735 | 0.102564  | 0.114948  | 0.113636 | 0.258304 | 0.112471  |
| 0.116696  | 0.12704  | 0.11116   | 0.114802  | 0.122815 | 0.255828 | 0.116987  |
| 0.106789  | 0.117133 | 0.101836  | 0.111305  | 0.11757  | 0.255828 | 0.107955  |
| 0.135927  | 0.141026 | 0.114948  | 0.124126  | 0.134761 | 0.270688 | 0.124854  |
| 0.100962  | 0.105186 | 0.0954254 | 0.0996503 | 0.114073 | 0.256993 | 0.0983392 |
| 0.130828  | 0.143502 | 0.120047  | 0.128934  | 0.131119 | 0.25743  | 0.124709  |
| 0.116696  | 0.120629 | 0.102418  | 0.115967  | 0.121066 | 0.256119 | 0.107955  |
| 0.123834  | 0.135052 | 0.119172  | 0.112034  | 0.130536 | 0.262092 | 0.120338  |
| 0.121358  | 0.130245 | 0.114656  | 0.122378  | 0.121649 | 0.26049  | 0.114656  |
| 0.105332  | 0.112471 | 0.0960082 | 0.110431  | 0.113491 | 0.258159 | 0.106789  |
| 0.140006  | 0.14831  | 0.136218  | 0.139569  | 0.142045 | 0.254953 | 0.141754  |
| 0.108683  | 0.117861 | 0.101399  | 0.11757   | 0.119755 | 0.258013 | 0.107517  |
| 0.1081    | 0.111742 | 0.106643  | 0.107955  | 0.115967 | 0.260927 | 0.108392  |
| 0.116404  | 0.122669 | 0.109703  | 0.107226  | 0.119901 | 0.259033 | 0.111451  |
| 0.136509  | 0.144231 | 0.130099  | 0.140734  | 0.13884  | 0.263112 | 0.125146  |
| 0.114656  | 0.118007 | 0.112034  | 0.113345  | 0.122815 | 0.238054 | 0.115239  |
| 0.102418  | 0.115385 | 0.10067   | 0.111305  | 0.110577 | 0.255245 | 0.110286  |
| 0.102127  | 0.111597 | 0.0989219 | 0.106935  | 0.111742 | 0.252914 | 0.10912   |
| 0.111597  | 0.116696 | 0.102564  | 0.115239  | 0.120629 | 0.256847 | 0.1081    |
| 0.111742  | 0.131993 | 0.112325  | 0.115385  | 0.115822 | 0.265152 | 0.107955  |
| 0.111888  | 0.11757  | 0.100233  | 0.113782  | 0.119464 | 0.260052 | 0.105769  |
| 0.0954254 | 0.106061 | 0.0910548 | 0.099359  | 0.104458 | 0.250583 | 0.0913462 |
| 0.0983392 | 0.109266 | 0.0942599 | 0.0984848 | 0.107663 | 0.253788 | 0.0968823 |
| 0.102273  | 0.113782 | 0.0987762 | 0.103875  | 0.11014  | 0.25743  | 0.100816  |
| 0.117133  | 0.115822 | 0.109848  | 0.109411  | 0.12296  | 0.253642 | 0.114802  |
| 0.119318  | 0.128497 | 0.112325  | 0.112179  | 0.124563 | 0.260781 | 0.118153  |
| 0.0967366 | 0.109703 | 0.0961538 | 0.100379  | 0.107809 | 0.258887 | 0.0964452 |
| 0.088141  | 0.107226 | 0.0968823 | 0.0958625 | 0.10271  | 0.249709 | 0.0992133 |

|           |          |           |           |           |           |           |
|-----------|----------|-----------|-----------|-----------|-----------|-----------|
| 0.111742  | 0.126748 | 0.105915  | 0.102273  | 0.120775  | 0.258741  | 0.110868  |
| 0.100816  | 0.112617 | 0.090035  | 0.0930944 | 0.109266  | 0.253642  | 0.0949883 |
| 0.115385  | 0.123397 | 0.111888  | 0.121941  | 0.119755  | 0.253934  | 0.119172  |
| 0.127331  | 0.135635 | 0.112471  | 0.137092  | 0.131702  | 0.261509  | 0.118298  |
| 0.105769  | 0.119027 | 0.102855  | 0.103875  | 0.112179  | 0.257721  | 0.099359  |
| 0.0948427 | 0.111305 | 0.0962995 | 0.103147  | 0.106789  | 0.258741  | 0.10067   |
| 0.101544  | 0.111305 | 0.103001  | 0.101107  | 0.108829  | 0.253497  | 0.0992133 |
| 0.100379  | 0.105769 | 0.0971737 | 0.101399  | 0.108246  | 0.250583  | 0.097465  |
| 0.11553   | 0.133741 | 0.11757   | 0.117424  | 0.120192  | 0.260198  | 0.104749  |
| 0.0960082 | 0.1081   | 0.0913462 | 0.097028  | 0.10271   | 0.254953  | 0.0983392 |
| 0.129953  | 0.137675 | 0.120629  | 0.12602   | 0.135781  | 0.26384   | 0.122378  |
| 0.123689  | 0.132867 | 0.122523  | 0.119464  | 0.131265  | 0.258159  | 0.121649  |
| 0.11553   | 0.128788 | 0.117861  | 0.112179  | 0.120484  | 0.259907  | 0.114656  |
| 0.106643  | 0.116696 | 0.107517  | 0.107663  | 0.111014  | 0.25743   | 0.10373   |
| 0.103438  | 0.11961  | 0.104895  | 0.116404  | 0.115385  | 0.254516  | 0.103147  |
| 0.10067   | 0.110723 | 0.0869755 | 0.094697  | 0.112908  | 0.25641   | 0.100962  |
| 0.109557  | 0.112908 | 0.0891608 | 0.0933858 | 0.121795  | 0.259761  | 0.1081    |
| 0.104312  | 0.11116  | 0.0952797 | 0.103875  | 0.112471  | 0.25743   | 0.106352  |
| 0.108683  | 0.11757  | 0.106352  | 0.106206  | 0.115676  | 0.24257   | 0.108974  |
| 0.122378  | 0.133013 | 0.110723  | 0.0980478 | 0.129371  | 0.263549  | 0.115385  |
| 0.109411  | 0.118881 | 0.099796  | 0.113054  | 0.118735  | 0.262529  | 0.112908  |
| 0.120047  | 0.13243  | 0.129662  | 0.129225  | 0.121795  | 0.253934  | 0.115093  |
| 0.13039   | 0.139569 | 0.121066  | 0.134324  | 0.131847  | 0.263112  | 0.118153  |
| 0.182547  | 0.182984 | 0.197407  | 0.197552  | 0.188083  | 0.136946  | 0.194493  |
| 0.230769  | 0.228875 | 0.24155   | 0.239656  | 0.230478  | 0.0989219 | 0.238636  |
| 0.10912   | 0.117716 | 0.105332  | 0.107809  | 0.114948  | 0.242133  | 0.111742  |
| 0.107517  | 0.115822 | 0.0949883 | 0.0983392 | 0.115385  | 0.250146  | 0.106352  |
| 0.105186  | 0.109703 | 0.0932401 | 0.10271   | 0.112471  | 0.248397  | 0.106935  |
| 0.111014  | 0.11757  | 0.101107  | 0.103875  | 0.112762  | 0.252477  | 0.104021  |
| 0.0597319 | 0.128351 | 0.129371  | 0.133887  | 0.0445804 | 0.251603  | 0.112179  |
| 0.110431  | 0.123689 | 0.0990676 | 0.10067   | 0.118298  | 0.254225  | 0.112762  |
| 0.142337  | 0.143357 | 0.120484  | 0.117133  | 0.146416  | 0.265734  | 0.135635  |
| 0.115385  | 0.120192 | 0.0976107 | 0.099796  | 0.125     | 0.257721  | 0.115967  |
| 0.125     | 0.137675 | 0.110431  | 0.111451  | 0.134907  | 0.263549  | 0.119464  |
| 0.127477  | 0.139569 | 0.115822  | 0.111888  | 0.13039   | 0.253205  | 0.121941  |
| 0.126603  | 0.136364 | 0.114365  | 0.115967  | 0.126603  | 0.261655  | 0.121941  |
| 0.129808  | 0.142191 | 0.125728  | 0.12296   | 0.130973  | 0.261946  | 0.117861  |
| 0.113199  | 0.119755 | 0.105041  | 0.102855  | 0.116404  | 0.262821  | 0.11116   |
| 0.109994  | 0.114219 | 0.095134  | 0.100524  | 0.117861  | 0.25641   | 0.113199  |
| 0.112762  | 0.127768 | 0.100233  | 0.105041  | 0.118298  | 0.256556  | 0.115676  |
| 0.107809  | 0.112325 | 0.101107  | 0.0989219 | 0.115967  | 0.248106  | 0.102855  |
| 0.109848  | 0.115822 | 0.094697  | 0.0971737 | 0.116259  | 0.253642  | 0.109848  |
| 0.11116   | 0.119172 | 0.102127  | 0.0990676 | 0.122232  | 0.253788  | 0.109994  |
| 0.120047  | 0.13884  | 0.114802  | 0.107372  | 0.125874  | 0.258596  | 0.120047  |

|           |          |           |           |          |          |           |
|-----------|----------|-----------|-----------|----------|----------|-----------|
| 0.133159  | 0.137383 | 0.126166  | 0.112617  | 0.136655 | 0.264714 | 0.126457  |
| 0.116987  | 0.116259 | 0.0986305 | 0.0979021 | 0.12602  | 0.25641  | 0.115822  |
| 0.113345  | 0.120484 | 0.0964452 | 0.0936772 | 0.11859  | 0.255099 | 0.109557  |
| 0.130245  | 0.133304 | 0.11655   | 0.110868  | 0.13549  | 0.262966 | 0.120629  |
| 0.111305  | 0.112034 | 0.0929487 | 0.095134  | 0.118007 | 0.250146 | 0.10169   |
| 0.136509  | 0.145688 | 0.123689  | 0.120629  | 0.134178 | 0.262238 | 0.130682  |
| 0.12602   | 0.139569 | 0.135052  | 0.13141   | 0.128059 | 0.253205 | 0.122815  |
| 0.130245  | 0.139132 | 0.125874  | 0.122815  | 0.130828 | 0.248106 | 0.128788  |
| 0.106643  | 0.114656 | 0.0955711 | 0.0945513 | 0.113928 | 0.254808 | 0.10373   |
| 0.10708   | 0.113928 | 0.0939685 | 0.0949883 | 0.112908 | 0.250583 | 0.107372  |
| 0.122669  | 0.131847 | 0.105478  | 0.104458  | 0.128205 | 0.266171 | 0.117424  |
| 0.123106  | 0.12704  | 0.104749  | 0.104604  | 0.127477 | 0.257576 | 0.119901  |
| 0.126894  | 0.132576 | 0.109703  | 0.105478  | 0.13447  | 0.256119 | 0.123689  |
| 0.11451   | 0.11757  | 0.103438  | 0.100087  | 0.123543 | 0.259178 | 0.11451   |
| 0.112908  | 0.120921 | 0.103293  | 0.0958625 | 0.122232 | 0.254662 | 0.109994  |
| 0.118153  | 0.129953 | 0.108537  | 0.104312  | 0.121649 | 0.257284 | 0.117861  |
| 0.131265  | 0.137529 | 0.11553   | 0.115676  | 0.135344 | 0.264569 | 0.121649  |
| 0.128934  | 0.133159 | 0.116987  | 0.112179  | 0.135052 | 0.261655 | 0.123397  |
| 0.129371  | 0.135052 | 0.111888  | 0.105332  | 0.132284 | 0.266171 | 0.129953  |
| 0.128351  | 0.136655 | 0.121358  | 0.111888  | 0.127768 | 0.258741 | 0.124272  |
| 0.112325  | 0.119464 | 0.0933858 | 0.0976107 | 0.125146 | 0.254953 | 0.113782  |
| 0.12398   | 0.136946 | 0.116113  | 0.115676  | 0.131847 | 0.262529 | 0.120484  |
| 0.108974  | 0.11553  | 0.094697  | 0.0936772 | 0.118007 | 0.256265 | 0.105186  |
| 0.11116   | 0.12296  | 0.105915  | 0.107226  | 0.118153 | 0.248834 | 0.108246  |
| 0.112617  | 0.120921 | 0.103293  | 0.104021  | 0.112908 | 0.256119 | 0.108537  |
| 0.112179  | 0.119318 | 0.105186  | 0.102418  | 0.11859  | 0.250146 | 0.102273  |
| 0.108392  | 0.114656 | 0.0955711 | 0.0980478 | 0.118298 | 0.254516 | 0.105769  |
| 0.132139  | 0.13549  | 0.114365  | 0.111014  | 0.135344 | 0.262238 | 0.129516  |
| 0.115093  | 0.120775 | 0.1081    | 0.106789  | 0.119755 | 0.258013 | 0.110431  |
| 0.13141   | 0.137675 | 0.117716  | 0.113491  | 0.134615 | 0.259178 | 0.124126  |
| 0.108392  | 0.113782 | 0.0984848 | 0.0986305 | 0.117133 | 0.249854 | 0.104895  |
| 0.123689  | 0.128788 | 0.103293  | 0.102273  | 0.128351 | 0.265734 | 0.119318  |
| 0.122378  | 0.128351 | 0.113054  | 0.108246  | 0.122086 | 0.256847 | 0.112179  |
| 0.106643  | 0.12398  | 0.118007  | 0.11757   | 0.112179 | 0.25102  | 0.113928  |
| 0.112908  | 0.113636 | 0.0823135 | 0.104604  | 0.11757  | 0.260198 | 0.107372  |
| 0.117424  | 0.128642 | 0.119755  | 0.113199  | 0.122086 | 0.251311 | 0.11451   |
| 0.109703  | 0.117716 | 0.10708   | 0.108974  | 0.11961  | 0.260198 | 0.117861  |
| 0.108829  | 0.11014  | 0.099796  | 0.110431  | 0.114073 | 0.257284 | 0.107372  |
| 0.123689  | 0.138403 | 0.13039   | 0.136655  | 0.124272 | 0.266317 | 0.107372  |
| 0.133159  | 0.138549 | 0.112762  | 0.125146  | 0.132867 | 0.266754 | 0.128497  |
| 0.0996503 | 0.110286 | 0.103438  | 0.112034  | 0.105478 | 0.251894 | 0.092366  |
| 0.116987  | 0.136655 | 0.13039   | 0.134615  | 0.114365 | 0.265443 | 0.112325  |
| 0.111597  | 0.128351 | 0.124417  | 0.131556  | 0.11451  | 0.261801 | 0.0981935 |
| 0.117424  | 0.134761 | 0.126457  | 0.130099  | 0.119172 | 0.258304 | 0.111888  |

|          |          |          |          |          |          |           |
|----------|----------|----------|----------|----------|----------|-----------|
| 0.107809 | 0.128934 | 0.119172 | 0.125146 | 0.113928 | 0.255682 | 0.104021  |
| 0.112471 | 0.12602  | 0.11859  | 0.123106 | 0.11655  | 0.263549 | 0.106935  |
| 0.110868 | 0.129371 | 0.120775 | 0.130245 | 0.116696 | 0.259324 | 0.10271   |
| 0.120047 | 0.129808 | 0.129079 | 0.126311 | 0.127622 | 0.263258 | 0.111597  |
| 0.123543 | 0.141463 | 0.136364 | 0.139423 | 0.127914 | 0.263549 | 0.118881  |
| 0.114219 | 0.13447  | 0.127622 | 0.131847 | 0.11655  | 0.262383 | 0.104895  |
| 0.106935 | 0.121941 | 0.113636 | 0.120484 | 0.108974 | 0.253934 | 0.102273  |
| 0.13243  | 0.132284 | 0.112034 | 0.113345 | 0.138549 | 0.259615 | 0.130099  |
| 0.120629 | 0.137966 | 0.128205 | 0.135635 | 0.124126 | 0.262675 | 0.11014   |
| 0.104895 | 0.115822 | 0.107517 | 0.11757  | 0.109557 | 0.252768 | 0.101399  |
| 0.214307 | 0.208333 | 0.221882 | 0.220571 | 0.216055 | 0.127331 | 0.216346  |
| 0.110868 | 0.127622 | 0.124563 | 0.128497 | 0.11757  | 0.258741 | 0.108246  |
| 0.108246 | 0.123252 | 0.11757  | 0.119755 | 0.114073 | 0.259033 | 0.0968823 |
| 0.124709 | 0.139714 | 0.13141  | 0.135344 | 0.122669 | 0.262966 | 0.119464  |
| 0.11014  | 0.122815 | 0.113345 | 0.122815 | 0.115093 | 0.25743  | 0.104604  |
| 0.120921 | 0.140006 | 0.134033 | 0.139714 | 0.118298 | 0.267045 | 0.106643  |
| 0.113054 | 0.127185 | 0.121503 | 0.122523 | 0.113928 | 0.253934 | 0.103438  |
| 0.106498 | 0.124126 | 0.121649 | 0.125874 | 0.111451 | 0.256702 | 0.104458  |
| 0.109994 | 0.13549  | 0.130973 | 0.129662 | 0.112034 | 0.256993 | 0.101253  |
| 0.117716 | 0.130682 | 0.12296  | 0.13039  | 0.11859  | 0.249854 | 0.109848  |
| 0.119318 | 0.136655 | 0.127185 | 0.134324 | 0.124272 | 0.261655 | 0.113199  |
| 0.121795 | 0.140297 | 0.127622 | 0.135927 | 0.125874 | 0.262383 | 0.109266  |
| 0.115967 | 0.134178 | 0.131993 | 0.13447  | 0.11859  | 0.260635 | 0.11014   |
| 0.103438 | 0.111451 | 0.111014 | 0.109411 | 0.110723 | 0.260635 | 0.102855  |
| 0.112471 | 0.122815 | 0.121795 | 0.122232 | 0.117133 | 0.261801 | 0.102273  |
| 0.125146 | 0.140152 | 0.134761 | 0.137821 | 0.125437 | 0.263986 | 0.120775  |
| 0.107226 | 0.127185 | 0.120629 | 0.121358 | 0.110723 | 0.247815 | 0.106352  |
| 0.131702 | 0.13884  | 0.126457 | 0.112617 | 0.137238 | 0.263258 | 0.123834  |
| 0.127185 | 0.139569 | 0.140297 | 0.139569 | 0.128351 | 0.249417 | 0.134178  |
| 0.112617 | 0.119755 | 0.112325 | 0.113054 | 0.117861 | 0.256119 | 0.112034  |
| 0.11553  | 0.131119 | 0.124272 | 0.129079 | 0.114948 | 0.261072 | 0.111742  |
| 0.122086 | 0.128351 | 0.119755 | 0.12602  | 0.123543 | 0.249563 | 0.126166  |
| 0.126894 | 0.125    | 0.118735 | 0.124709 | 0.126311 | 0.253788 | 0.113491  |
| 0.120775 | 0.129662 | 0.123397 | 0.13141  | 0.125728 | 0.249417 | 0.12602   |
| 0.130973 | 0.141026 | 0.140006 | 0.13986  | 0.128351 | 0.257867 | 0.132721  |
| 0.105186 | 0.113199 | 0.107226 | 0.103001 | 0.112762 | 0.252477 | 0.10373   |
| 0.119027 | 0.137821 | 0.128642 | 0.120921 | 0.124272 | 0.25845  | 0.120484  |
| 0.130536 | 0.14088  | 0.145688 | 0.14088  | 0.13345  | 0.241696 | 0.140152  |
| 0.111305 | 0.125437 | 0.105769 | 0.107955 | 0.113054 | 0.25947  | 0.106061  |
| 0.115967 | 0.125728 | 0.118007 | 0.112617 | 0.123252 | 0.254225 | 0.106935  |
| 0.137966 | 0.139569 | 0.120775 | 0.128205 | 0.142628 | 0.261946 | 0.133887  |
| 0.115822 | 0.133741 | 0.116987 | 0.100524 | 0.124563 | 0.258159 | 0.117279  |
| 0.125    | 0.140006 | 0.132284 | 0.128934 | 0.13141  | 0.265006 | 0.12704   |
| 0.120484 | 0.134324 | 0.121649 | 0.115385 | 0.128934 | 0.259324 | 0.119901  |

|           |          |           |           |           |          |           |
|-----------|----------|-----------|-----------|-----------|----------|-----------|
| 0.120047  | 0.126311 | 0.115967  | 0.11553   | 0.12296   | 0.262383 | 0.119755  |
| 0.120775  | 0.134324 | 0.121941  | 0.119755  | 0.124272  | 0.256702 | 0.122523  |
| 0.114802  | 0.12398  | 0.113054  | 0.113491  | 0.118298  | 0.254225 | 0.1081    |
| 0.126894  | 0.137238 | 0.112034  | 0.116259  | 0.127768  | 0.26486  | 0.128059  |
| 0.121649  | 0.136072 | 0.124854  | 0.131702  | 0.130099  | 0.260781 | 0.111451  |
| 0.134761  | 0.136655 | 0.118153  | 0.124126  | 0.13447   | 0.262238 | 0.12602   |
| 0.127768  | 0.136655 | 0.123689  | 0.129371  | 0.131556  | 0.264277 | 0.119027  |
| 0.127477  | 0.131702 | 0.114656  | 0.121212  | 0.128059  | 0.257867 | 0.123397  |
| 0.141463  | 0.149184 | 0.133304  | 0.139277  | 0.141463  | 0.254079 | 0.134761  |
| 0.108246  | 0.126166 | 0.120484  | 0.116259  | 0.115239  | 0.256993 | 0.0989219 |
| 0.111742  | 0.127914 | 0.106789  | 0.107517  | 0.118444  | 0.261072 | 0.109994  |
| 0.121649  | 0.13549  | 0.115239  | 0.128788  | 0.124563  | 0.261072 | 0.122523  |
| 0.110286  | 0.122086 | 0.105332  | 0.113345  | 0.115822  | 0.259324 | 0.100087  |
| 0.131993  | 0.145542 | 0.140734  | 0.144959  | 0.137238  | 0.257721 | 0.137238  |
| 0.148019  | 0.158945 | 0.144522  | 0.148164  | 0.148019  | 0.266171 | 0.139569  |
| 0.129079  | 0.13243  | 0.112471  | 0.112325  | 0.131702  | 0.261218 | 0.124709  |
| 0.120775  | 0.125    | 0.103001  | 0.0987762 | 0.126603  | 0.25845  | 0.113782  |
| 0.126457  | 0.133596 | 0.125     | 0.125728  | 0.127622  | 0.262383 | 0.128205  |
| 0.11961   | 0.137238 | 0.132721  | 0.137238  | 0.125146  | 0.259615 | 0.118153  |
| 0.122523  | 0.137238 | 0.111742  | 0.107809  | 0.130682  | 0.266026 | 0.122232  |
| 0.124272  | 0.140443 | 0.13039   | 0.137821  | 0.127768  | 0.266317 | 0.116404  |
| 0.126311  | 0.145105 | 0.133304  | 0.136655  | 0.126894  | 0.257576 | 0.118153  |
| 0.117716  | 0.128934 | 0.114219  | 0.112325  | 0.11655   | 0.265006 | 0.107809  |
| 0.156177  | 0.165938 | 0.15035   | 0.160111  | 0.157634  | 0.262383 | 0.156177  |
| 0.114802  | 0.130682 | 0.117716  | 0.109703  | 0.120921  | 0.261801 | 0.104895  |
| 0.125     | 0.141754 | 0.129662  | 0.128934  | 0.128205  | 0.261509 | 0.118298  |
| 0.115822  | 0.130245 | 0.104458  | 0.104021  | 0.119901  | 0.264569 | 0.110577  |
| 0.134178  | 0.137821 | 0.121649  | 0.122669  | 0.134178  | 0.268357 | 0.124272  |
| 0.115239  | 0.13345  | 0.123397  | 0.129662  | 0.110286  | 0.250583 | 0.106498  |
| 0.132284  | 0.127768 | 0.128497  | 0.143794  | 0.138112  | 0.230915 | 0.132867  |
| 0.142045  | 0.155303 | 0.145542  | 0.151224  | 0.138258  | 0.258741 | 0.143794  |
| 0.117424  | 0.127477 | 0.121212  | 0.123689  | 0.124417  | 0.245192 | 0.121795  |
| 0.128934  | 0.130828 | 0.135927  | 0.136655  | 0.132721  | 0.22669  | 0.131847  |
| 0.141317  | 0.129808 | 0.128497  | 0.11116   | 0.148893  | 0.200612 | 0.146853  |
| 0.131702  | 0.13447  | 0.142191  | 0.146416  | 0.141608  | 0.206148 | 0.138112  |
| 0.127768  | 0.11859  | 0.0581294 | 0.092366  | 0.133304  | 0.264277 | 0.121649  |
| 0.131702  | 0.141754 | 0.129953  | 0.141754  | 0.130245  | 0.257721 | 0.126748  |
| 0.0812937 | 0.115822 | 0.112471  | 0.117279  | 0.0909091 | 0.245775 | 0.109557  |
| 0.0791084 | 0.109557 | 0.10271   | 0.112471  | 0.0831876 | 0.249709 | 0.109994  |
| 0.113345  | 0.124563 | 0.122378  | 0.125146  | 0.117133  | 0.251603 | 0.10373   |
| 0.113054  | 0.125146 | 0.117133  | 0.119901  | 0.122378  | 0.247232 | 0.119755  |
| 0.106206  | 0.108392 | 0.113782  | 0.111597  | 0.118444  | 0.256119 | 0.107372  |
| 0.0709499 | 0.115385 | 0.112617  | 0.116259  | 0.0773601 | 0.238636 | 0.103875  |
| 0.116113  | 0.125    | 0.113782  | 0.126748  | 0.123397  | 0.25204  | 0.118735  |



|           |           |           |           |           |           |           |
|-----------|-----------|-----------|-----------|-----------|-----------|-----------|
| 0.0626457 | 0.114656  | 0.121795  | 0.131847  | 0.0635198 | 0.239365  | 0.109848  |
| 0.0926573 | 0.104458  | 0.106061  | 0.112034  | 0.102564  | 0.245484  | 0.0521562 |
| 0.115676  | 0.124563  | 0.119464  | 0.123397  | 0.124126  | 0.248106  | 0.121212  |
| 0.112034  | 0.123543  | 0.114948  | 0.120921  | 0.121941  | 0.251166  | 0.11757   |
| 0.121649  | 0.116259  | 0.0916375 | 0.0445804 | 0.131556  | 0.257284  | 0.119901  |
| 0.207605  | 0.208042  | 0.218386  | 0.218823  | 0.209936  | 0.115967  | 0.214889  |
| 0.136801  | 0.14831   | 0.140589  | 0.139569  | 0.140297  | 0.252622  | 0.137966  |
| 0.122669  | 0.133013  | 0.125     | 0.12602   | 0.126748  | 0.257139  | 0.113054  |
| 0.113782  | 0.131702  | 0.119027  | 0.122086  | 0.120775  | 0.245921  | 0.119027  |
| 0.202069  | 0.202797  | 0.215472  | 0.214161  | 0.203817  | 0.111305  | 0.20877   |
| 0.116987  | 0.117424  | 0.102418  | 0.0769231 | 0.124272  | 0.245921  | 0.120484  |
| 0.113928  | 0.0590035 | 0.106352  | 0.11116   | 0.119172  | 0.259178  | 0.111888  |
| 0.121503  | 0.123106  | 0.119755  | 0.117861  | 0.121212  | 0.251894  | 0.119172  |
| 0.0520105 | 0.120047  | 0.122523  | 0.126457  | 0.0453089 | 0.24796   | 0.10912   |
| 0.240822  | 0.243298  | 0.253934  | 0.255536  | 0.243735  | 0.0868298 | 0.247815  |
| 0.118298  | 0.128934  | 0.109557  | 0.130099  | 0.124709  | 0.25743   | 0.114802  |
| 0.114802  | 0.111742  | 0.085373  | 0.0493881 | 0.124417  | 0.256265  | 0.118007  |
| 0.122378  | 0.132721  | 0.12296   | 0.121066  | 0.127622  | 0.256847  | 0.118881  |
| 0.121212  | 0.127768  | 0.120047  | 0.120775  | 0.125583  | 0.253934  | 0.119172  |
| 0.108392  | 0.129225  | 0.11451   | 0.128351  | 0.110723  | 0.252185  | 0.115385  |
| 0.106643  | 0.121358  | 0.128205  | 0.133596  | 0.112179  | 0.233829  | 0.111888  |
| 0.118881  | 0.114948  | 0.0906177 | 0.0499709 | 0.123252  | 0.254808  | 0.118298  |
| 0.112325  | 0.125     | 0.115239  | 0.120047  | 0.120484  | 0.248834  | 0.117861  |
| 0.121212  | 0.129516  | 0.120047  | 0.130099  | 0.125     | 0.252768  | 0.120338  |
| 0.0437063 | 0.116696  | 0.115967  | 0.122232  | 0.0469114 | 0.250437  | 0.104604  |
| 0.109703  | 0.122669  | 0.114073  | 0.117716  | 0.116113  | 0.243007  | 0.114073  |
| 0.0944056 | 0.120192  | 0.122378  | 0.125146  | 0.099359  | 0.251311  | 0.0856643 |
| 0.14088   | 0.154429  | 0.143502  | 0.148601  | 0.138549  | 0.256702  | 0.142337  |
| 0.125437  | 0.130536  | 0.109994  | 0.130536  | 0.127768  | 0.258741  | 0.114073  |
| 0.115239  | 0.0600233 | 0.107663  | 0.11451   | 0.123689  | 0.255828  | 0.114948  |
| 0.181672  | 0.17803   | 0.192745  | 0.19493   | 0.186043  | 0.135198  | 0.189248  |
| 0.196533  | 0.19289   | 0.207314  | 0.207751  | 0.198572  | 0.124709  | 0.202652  |
| 0.0488054 | 0.118007  | 0.122232  | 0.13141   | 0.0502622 | 0.243881  | 0.10912   |
| 0.0456002 | 0.117424  | 0.118444  | 0.121503  | 0.0441434 | 0.248834  | 0.103293  |
| 0.126603  | 0.145105  | 0.137675  | 0.139277  | 0.124272  | 0.244464  | 0.124563  |
| 0.115239  | 0.110723  | 0.0893065 | 0.0463287 | 0.127185  | 0.255828  | 0.119901  |
| 0.124126  | 0.128351  | 0.108974  | 0.133304  | 0.126457  | 0.259178  | 0.119172  |
| 0.12602   | 0.140152  | 0.125728  | 0.129662  | 0.128059  | 0.251166  | 0.12398   |
| 0.215472  | 0.215326  | 0.227127  | 0.229604  | 0.217512  | 0.124126  | 0.222756  |
| 0.108537  | 0.119464  | 0.11116   | 0.112179  | 0.11961   | 0.254079  | 0.108537  |
| 0.203671  | 0.199446  | 0.206294  | 0.205274  | 0.206876  | 0.144085  | 0.207168  |
| 0.110286  | 0.106061  | 0.0470571 | 0.0836247 | 0.121358  | 0.261364  | 0.113199  |
| 0.107226  | 0.109994  | 0.0999417 | 0.115822  | 0.119172  | 0.249563  | 0.105478  |
| 0.108829  | 0.121795  | 0.112617  | 0.106061  | 0.118444  | 0.24155   | 0.113782  |

|           |           |           |           |           |          |          |
|-----------|-----------|-----------|-----------|-----------|----------|----------|
| 0.0525932 | 0.110431  | 0.111742  | 0.120629  | 0.057838  | 0.242133 | 0.103293 |
| 0.199009  | 0.199446  | 0.210664  | 0.209062  | 0.202506  | 0.131265 | 0.207459 |
| 0.12704   | 0.132139  | 0.128205  | 0.130973  | 0.129953  | 0.24257  | 0.129079 |
| 0.115967  | 0.115822  | 0.0891608 | 0.107955  | 0.124417  | 0.263258 | 0.109557 |
| 0.119755  | 0.133013  | 0.124417  | 0.124563  | 0.125583  | 0.248689 | 0.123252 |
| 0.121795  | 0.123397  | 0.120921  | 0.117861  | 0.124417  | 0.254516 | 0.104021 |
| 0.0425408 | 0.112617  | 0.114802  | 0.121649  | 0.0536131 | 0.25102  | 0.105769 |
| 0.118153  | 0.11014   | 0.0488054 | 0.0865385 | 0.125728  | 0.260781 | 0.114656 |
| 0.118444  | 0.112471  | 0.095134  | 0.0661422 | 0.124854  | 0.243298 | 0.120775 |
| 0.116696  | 0.0643939 | 0.10708   | 0.112762  | 0.122815  | 0.257284 | 0.112908 |
| 0.107663  | 0.116259  | 0.113491  | 0.117716  | 0.113199  | 0.241841 | 0.114073 |
| 0.119755  | 0.116404  | 0.0920746 | 0.108246  | 0.129079  | 0.254808 | 0.110723 |
| 0.179341  | 0.177739  | 0.191288  | 0.194056  | 0.18546   | 0.134615 | 0.189248 |
| 0.124417  | 0.135344  | 0.123252  | 0.121066  | 0.128205  | 0.256556 | 0.120338 |
| 0.123397  | 0.136655  | 0.128059  | 0.132867  | 0.126894  | 0.251748 | 0.127768 |
| 0.115676  | 0.128934  | 0.120047  | 0.119027  | 0.121503  | 0.246941 | 0.11859  |
| 0.123397  | 0.119172  | 0.109411  | 0.129079  | 0.130973  | 0.251457 | 0.118153 |
| 0.115822  | 0.128788  | 0.118444  | 0.120047  | 0.123106  | 0.247378 | 0.118153 |
| 0.121358  | 0.115967  | 0.055507  | 0.0879953 | 0.126894  | 0.262529 | 0.116696 |
| 0.115385  | 0.122523  | 0.106643  | 0.114948  | 0.121503  | 0.24898  | 0.100233 |
| 0.124709  | 0.122523  | 0.0952797 | 0.0505536 | 0.129953  | 0.258887 | 0.121795 |
| 0.115239  | 0.132576  | 0.11961   | 0.129662  | 0.121649  | 0.253788 | 0.123106 |
| 0.114656  | 0.122669  | 0.112617  | 0.118881  | 0.122523  | 0.254662 | 0.11553  |
| 0.0544872 | 0.116987  | 0.122669  | 0.121358  | 0.0585664 | 0.249272 | 0.1081   |
| 0.11553   | 0.120047  | 0.116404  | 0.123543  | 0.122523  | 0.259324 | 0.118735 |
| 0.130828  | 0.139132  | 0.132867  | 0.131556  | 0.132284  | 0.255682 | 0.127914 |
| 0.110431  | 0.119318  | 0.0990676 | 0.120192  | 0.121212  | 0.253059 | 0.111014 |
| 0.130973  | 0.142774  | 0.135635  | 0.13345   | 0.13447   | 0.253205 | 0.133887 |
| 0.0423951 | 0.113054  | 0.116113  | 0.123252  | 0.0549242 | 0.250291 | 0.102418 |
| 0.116404  | 0.128205  | 0.112034  | 0.119172  | 0.120775  | 0.249417 | 0.11757  |
| 0.113345  | 0.114073  | 0.119755  | 0.120484  | 0.120338  | 0.232663 | 0.116259 |
| 0.124417  | 0.120484  | 0.0938228 | 0.0479312 | 0.13345   | 0.254516 | 0.124709 |
| 0.185023  | 0.18109   | 0.18852   | 0.17905   | 0.189394  | 0.146999 | 0.191725 |
| 0.113199  | 0.113636  | 0.0893065 | 0.105478  | 0.120192  | 0.255828 | 0.10708  |
| 0.104749  | 0.112179  | 0.102418  | 0.109266  | 0.11116   | 0.246212 | 0.105915 |
| 0.11553   | 0.0571096 | 0.108246  | 0.111305  | 0.120192  | 0.261072 | 0.112325 |
| 0.170017  | 0.170163  | 0.185169  | 0.185897  | 0.177885  | 0.160548 | 0.181381 |
| 0.129079  | 0.136218  | 0.116841  | 0.139423  | 0.136364  | 0.25947  | 0.126748 |
| 0.141608  | 0.146999  | 0.127622  | 0.150495  | 0.145105  | 0.265589 | 0.129079 |
| 0.141754  | 0.158217  | 0.145251  | 0.151515  | 0.137966  | 0.257867 | 0.145542 |
| 0.111451  | 0.117133  | 0.101253  | 0.121212  | 0.118444  | 0.250583 | 0.112325 |
| 0.116841  | 0.129516  | 0.121503  | 0.123106  | 0.122378  | 0.245775 | 0.120629 |
| 0.20236   | 0.202506  | 0.213141  | 0.217657  | 0.206439  | 0.118007 | 0.210519 |
| 0.116987  | 0.131993  | 0.120192  | 0.129371  | 0.120192  | 0.245629 | 0.118444 |

|           |           |           |           |           |          |           |
|-----------|-----------|-----------|-----------|-----------|----------|-----------|
| 0.121503  | 0.133887  | 0.126748  | 0.127477  | 0.128205  | 0.246941 | 0.124126  |
| 0.114802  | 0.111451  | 0.092366  | 0.106206  | 0.126166  | 0.254225 | 0.109266  |
| 0.1588    | 0.159237  | 0.17162   | 0.175554  | 0.166375  | 0.184878 | 0.166958  |
| 0.104021  | 0.11961   | 0.107809  | 0.116113  | 0.114219  | 0.246066 | 0.109848  |
| 0.143211  | 0.156177  | 0.143794  | 0.152681  | 0.137675  | 0.259324 | 0.137966  |
| 0.10708   | 0.115676  | 0.119027  | 0.122086  | 0.112617  | 0.244464 | 0.0464744 |
| 0.181381  | 0.179487  | 0.192745  | 0.189977  | 0.183129  | 0.1419   | 0.189248  |
| 0.116113  | 0.121503  | 0.104458  | 0.128205  | 0.123397  | 0.259907 | 0.113782  |
| 0.102127  | 0.113345  | 0.103875  | 0.112762  | 0.107955  | 0.25204  | 0.101253  |
| 0.11451   | 0.122523  | 0.113345  | 0.121941  | 0.122378  | 0.252477 | 0.115385  |
| 0.114656  | 0.11014   | 0.105332  | 0.108974  | 0.122815  | 0.256119 | 0.109411  |
| 0.112325  | 0.0574009 | 0.105041  | 0.109557  | 0.119027  | 0.256993 | 0.109411  |
| 0.116113  | 0.125291  | 0.113199  | 0.125     | 0.122232  | 0.245921 | 0.121066  |
| 0.0448718 | 0.113199  | 0.11655   | 0.121066  | 0.0533217 | 0.248106 | 0.107226  |
| 0.17905   | 0.180361  | 0.192453  | 0.192016  | 0.185169  | 0.136655 | 0.189248  |
| 0.118881  | 0.122232  | 0.116259  | 0.121649  | 0.125291  | 0.254225 | 0.119172  |
| 0.103293  | 0.111888  | 0.112034  | 0.117716  | 0.114073  | 0.248543 | 0.114365  |
| 0.200466  | 0.200321  | 0.2162    | 0.216055  | 0.205128  | 0.114948 | 0.208916  |
| 0.121795  | 0.128934  | 0.122086  | 0.122815  | 0.128788  | 0.259761 | 0.11859   |
| 0.0473485 | 0.115385  | 0.117861  | 0.123252  | 0.0473485 | 0.25     | 0.107372  |
| 0.0418124 | 0.112471  | 0.113782  | 0.117424  | 0.0502622 | 0.246795 | 0.102127  |
| 0.132284  | 0.14729   | 0.135198  | 0.134761  | 0.132576  | 0.249272 | 0.133741  |
| 0.180944  | 0.177302  | 0.192016  | 0.192453  | 0.184732  | 0.13884  | 0.18852   |
| 0.117861  | 0.115093  | 0.0884324 | 0.0509907 | 0.128059  | 0.259615 | 0.120192  |
| 0.125728  | 0.134033  | 0.127185  | 0.125874  | 0.124563  | 0.257576 | 0.123397  |
| 0.0456002 | 0.111888  | 0.114365  | 0.118881  | 0.0496795 | 0.248543 | 0.105332  |
| 0.0450175 | 0.111888  | 0.112325  | 0.11859   | 0.055507  | 0.251457 | 0.103293  |
| 0.0454545 | 0.11116   | 0.115967  | 0.120192  | 0.0477855 | 0.247232 | 0.102855  |
| 0.109703  | 0.121795  | 0.114073  | 0.117133  | 0.11757   | 0.249126 | 0.116696  |
| 0.0906177 | 0.107955  | 0.102855  | 0.109994  | 0.0987762 | 0.252185 | 0.0539044 |
| 0.117424  | 0.12602   | 0.105186  | 0.130099  | 0.128788  | 0.260635 | 0.115093  |
| 0.132867  | 0.142628  | 0.130245  | 0.135052  | 0.133159  | 0.262966 | 0.127622  |
| 0.117133  | 0.124854  | 0.103438  | 0.127768  | 0.122378  | 0.260052 | 0.114219  |
| 0.126603  | 0.133741  | 0.124854  | 0.121212  | 0.127768  | 0.257284 | 0.105915  |
| 0.185315  | 0.180798  | 0.19493   | 0.197115  | 0.190268  | 0.13884  | 0.194639  |
| 0.112617  | 0.121212  | 0.114948  | 0.118298  | 0.119901  | 0.252914 | 0.116987  |
| 0.123543  | 0.138258  | 0.12704   | 0.129516  | 0.129662  | 0.247523 | 0.126748  |
| 0.0435606 | 0.109848  | 0.11553   | 0.121212  | 0.0540501 | 0.250874 | 0.0995047 |
| 0.0914918 | 0.103875  | 0.106643  | 0.11116   | 0.0996503 | 0.247815 | 0.0498252 |
| 0.110723  | 0.125146  | 0.108974  | 0.121066  | 0.118881  | 0.246941 | 0.115676  |
| 0.121649  | 0.11451   | 0.0878497 | 0.044289  | 0.127768  | 0.257284 | 0.119901  |
| 0.127477  | 0.142774  | 0.122232  | 0.13141   | 0.127768  | 0.251166 | 0.124854  |
| 0.111888  | 0.128059  | 0.117424  | 0.125728  | 0.121503  | 0.254808 | 0.122378  |
| 0.103438  | 0.106789  | 0.0935315 | 0.0709499 | 0.113345  | 0.24898  | 0.0926573 |

|           |           |           |           |           |          |           |
|-----------|-----------|-----------|-----------|-----------|----------|-----------|
| 0.102127  | 0.104312  | 0.0960082 | 0.0815851 | 0.107955  | 0.246795 | 0.0791084 |
| 0.101107  | 0.111451  | 0.102855  | 0.115822  | 0.110723  | 0.24898  | 0.0879953 |
| 0.116404  | 0.1081    | 0.0502622 | 0.0865385 | 0.123689  | 0.258741 | 0.113199  |
| 0.126457  | 0.133304  | 0.115676  | 0.134178  | 0.130245  | 0.263258 | 0.118881  |
| 0.117279  | 0.112179  | 0.0863928 | 0.0518648 | 0.124854  | 0.25845  | 0.120192  |
| 0.108392  | 0.123397  | 0.113636  | 0.118153  | 0.11655   | 0.24461  | 0.113928  |
| 0.113928  | 0.108829  | 0.083042  | 0.0499709 | 0.123252  | 0.255682 | 0.113928  |
| 0.0464744 | 0.113636  | 0.11116   | 0.120047  | 0.0540501 | 0.246503 | 0.106206  |
| 0.111888  | 0.114073  | 0.0865385 | 0.104458  | 0.122086  | 0.258596 | 0.105478  |
| 0.04662   | 0.114948  | 0.11859   | 0.124272  | 0.0477855 | 0.249272 | 0.105478  |
| 0.108974  | 0.113491  | 0.110723  | 0.114365  | 0.114219  | 0.250728 | 0.113636  |
| 0.115385  | 0.128059  | 0.118007  | 0.126311  | 0.119172  | 0.254516 | 0.119172  |
| 0.106352  | 0.0575466 | 0.0996503 | 0.108537  | 0.117716  | 0.259178 | 0.11014   |
| 0.0957168 | 0.109557  | 0.108829  | 0.111597  | 0.105915  | 0.252622 | 0.0514277 |
| 0.0477855 | 0.112908  | 0.117133  | 0.118153  | 0.0576923 | 0.247815 | 0.103438  |
| 0.115676  | 0.11553   | 0.11655   | 0.125437  | 0.123252  | 0.240239 | 0.121795  |
| 0.106498  | 0.121212  | 0.114656  | 0.124126  | 0.117861  | 0.254079 | 0.123106  |
| 0.103438  | 0.114948  | 0.106643  | 0.113782  | 0.112179  | 0.251894 | 0.105769  |
| 0.0472028 | 0.116696  | 0.116259  | 0.120192  | 0.0547786 | 0.250437 | 0.104312  |
| 0.114073  | 0.125291  | 0.119318  | 0.121212  | 0.123689  | 0.244464 | 0.119901  |
| 0.114365  | 0.106061  | 0.0479312 | 0.087704  | 0.121066  | 0.257284 | 0.114073  |
| 0.114948  | 0.125291  | 0.112325  | 0.120921  | 0.120775  | 0.253205 | 0.120192  |
| 0.109994  | 0.0533217 | 0.0989219 | 0.107517  | 0.117279  | 0.257576 | 0.111451  |
| 0.099796  | 0.109848  | 0.11116   | 0.11451   | 0.104749  | 0.254079 | 0.0453089 |
| 0.099796  | 0.117716  | 0.111742  | 0.115967  | 0.105915  | 0.249126 | 0.101253  |
| 0.113636  | 0.111451  | 0.0842075 | 0.105624  | 0.120921  | 0.258304 | 0.105186  |
| 0.117279  | 0.128497  | 0.120775  | 0.127622  | 0.124563  | 0.248252 | 0.122523  |
| 0.12398   | 0.129662  | 0.110577  | 0.11859   | 0.129225  | 0.253497 | 0.123397  |
| 0.107809  | 0.11961   | 0.108392  | 0.118444  | 0.113636  | 0.247523 | 0.111597  |
| 0.185606  | 0.182255  | 0.195804  | 0.197698  | 0.189103  | 0.133304 | 0.192308  |
| 0.159382  | 0.157488  | 0.165501  | 0.171183  | 0.162296  | 0.183421 | 0.164336  |
| 0.118298  | 0.123689  | 0.103147  | 0.124854  | 0.125291  | 0.25743  | 0.118298  |
| 0.117279  | 0.120921  | 0.103875  | 0.0827506 | 0.12398   | 0.246795 | 0.120484  |
| 0.145251  | 0.152389  | 0.129225  | 0.154429  | 0.150204  | 0.266608 | 0.133596  |
| 0.119172  | 0.13243   | 0.124709  | 0.13243   | 0.12704   | 0.256556 | 0.122086  |
| 0.0799825 | 0.12704   | 0.119318  | 0.127622  | 0.0808566 | 0.246503 | 0.113782  |
| 0.0786713 | 0.11757   | 0.114802  | 0.123106  | 0.0874126 | 0.249563 | 0.114802  |
| 0.0932401 | 0.114365  | 0.120047  | 0.123689  | 0.100233  | 0.254225 | 0.083042  |
| 0.108683  | 0.122815  | 0.117133  | 0.125728  | 0.115093  | 0.254808 | 0.119464  |
| 0.189831  | 0.191725  | 0.203817  | 0.204837  | 0.193036  | 0.13141  | 0.20236   |
| 0.119755  | 0.11757   | 0.0920746 | 0.0514277 | 0.130828  | 0.261218 | 0.122086  |
| 0.115239  | 0.120921  | 0.109411  | 0.092366  | 0.121649  | 0.23951  | 0.122232  |
| 0.060169  | 0.111597  | 0.108246  | 0.119172  | 0.0659965 | 0.246503 | 0.104749  |
| 0.115093  | 0.119027  | 0.111888  | 0.116696  | 0.126166  | 0.256265 | 0.105186  |

|           |           |           |           |           |           |           |
|-----------|-----------|-----------|-----------|-----------|-----------|-----------|
| 0.173805  | 0.170746  | 0.1875    | 0.189394  | 0.179341  | 0.166667  | 0.185169  |
| 0.240239  | 0.236597  | 0.250728  | 0.249417  | 0.240239  | 0.0976107 | 0.246649  |
| 0.115239  | 0.132284  | 0.120775  | 0.128788  | 0.119027  | 0.255828  | 0.125146  |
| 0.107372  | 0.120921  | 0.114073  | 0.123834  | 0.114656  | 0.255828  | 0.118153  |
| 0.11553   | 0.119464  | 0.104749  | 0.129079  | 0.124272  | 0.258159  | 0.113782  |
| 0.109848  | 0.0560897 | 0.099359  | 0.10912   | 0.116259  | 0.256556  | 0.107809  |
| 0.114073  | 0.109557  | 0.0843531 | 0.0506993 | 0.121941  | 0.256702  | 0.11553   |
| 0.109848  | 0.116404  | 0.110431  | 0.11757   | 0.118881  | 0.24898   | 0.112471  |
| 0.0732809 | 0.118881  | 0.115822  | 0.121795  | 0.0761946 | 0.240676  | 0.109703  |
| 0.114656  | 0.112471  | 0.0840618 | 0.0472028 | 0.125437  | 0.256702  | 0.115239  |
| 0.0827506 | 0.119901  | 0.116259  | 0.122815  | 0.0909091 | 0.241987  | 0.108683  |
| 0.106789  | 0.119172  | 0.115239  | 0.119464  | 0.113782  | 0.25845   | 0.104458  |
| 0.092366  | 0.105915  | 0.108683  | 0.113491  | 0.103147  | 0.252477  | 0.0512821 |
| 0.115239  | 0.129953  | 0.121358  | 0.12704   | 0.120484  | 0.252622  | 0.123689  |
| 0.113928  | 0.124563  | 0.114802  | 0.122523  | 0.120338  | 0.248689  | 0.118007  |
| 0.106643  | 0.11116   | 0.101107  | 0.11116   | 0.114219  | 0.245192  | 0.108392  |
| 0.119755  | 0.129808  | 0.119172  | 0.11961   | 0.115676  | 0.257721  | 0.117424  |
| 0.123252  | 0.0750291 | 0.115385  | 0.116987  | 0.125583  | 0.261509  | 0.118881  |
| 0.0456002 | 0.115385  | 0.112325  | 0.118881  | 0.0549242 | 0.249417  | 0.103875  |
| 0.0847902 | 0.11961   | 0.113345  | 0.116404  | 0.0842075 | 0.24461   | 0.107517  |
| 0.0629371 | 0.130099  | 0.129662  | 0.136218  | 0.048951  | 0.250437  | 0.112762  |
| 0.199446  | 0.198135  | 0.212558  | 0.213869  | 0.202069  | 0.125291  | 0.204108  |
| 0.108392  | 0.121358  | 0.110723  | 0.117279  | 0.114219  | 0.248106  | 0.115967  |
| 0.095134  | 0.105186  | 0.106498  | 0.11451   | 0.105041  | 0.252622  | 0.0493881 |
| 0.114073  | 0.117716  | 0.115239  | 0.118881  | 0.121358  | 0.253205  | 0.116987  |
| 0.118007  | 0.127477  | 0.120338  | 0.121066  | 0.127622  | 0.254516  | 0.121212  |
| 0.114219  | 0.116987  | 0.111305  | 0.113491  | 0.124709  | 0.25539   | 0.10169   |
| 0.190268  | 0.188957  | 0.202797  | 0.205565  | 0.195221  | 0.136801  | 0.198427  |
| 0.116987  | 0.129079  | 0.120775  | 0.12296   | 0.126603  | 0.250291  | 0.123397  |
| 0.0439977 | 0.113491  | 0.11451   | 0.118444  | 0.0536131 | 0.250146  | 0.101107  |
| 0.121649  | 0.126457  | 0.113491  | 0.114219  | 0.124272  | 0.254953  | 0.112908  |
| 0.105041  | 0.0541958 | 0.0971737 | 0.104895  | 0.113782  | 0.255536  | 0.106498  |
| 0.114365  | 0.124417  | 0.119027  | 0.12296   | 0.122523  | 0.24796   | 0.121358  |
| 0.105915  | 0.11859   | 0.10912   | 0.115093  | 0.107955  | 0.240967  | 0.105624  |
| 0.110286  | 0.119755  | 0.112325  | 0.120629  | 0.116404  | 0.25845   | 0.104749  |
| 0.119027  | 0.124709  | 0.118444  | 0.120338  | 0.123689  | 0.255245  | 0.115822  |
| 0.188228  | 0.186917  | 0.20134   | 0.202652  | 0.195513  | 0.133304  | 0.196387  |
| 0.107955  | 0.119172  | 0.109703  | 0.115676  | 0.114656  | 0.243298  | 0.110286  |
| 0.184149  | 0.182255  | 0.196678  | 0.19799   | 0.188811  | 0.14088   | 0.194347  |
| 0.184295  | 0.18007   | 0.192453  | 0.198427  | 0.18954   | 0.136364  | 0.193619  |
| 0.118735  | 0.0664336 | 0.110868  | 0.114219  | 0.122815  | 0.263112  | 0.11553   |
| 0.131265  | 0.142191  | 0.131265  | 0.124417  | 0.131265  | 0.259907  | 0.122232  |
| 0.103875  | 0.113928  | 0.103875  | 0.110723  | 0.11116   | 0.250874  | 0.0971737 |
| 0.106643  | 0.115239  | 0.109557  | 0.113782  | 0.112471  | 0.247232  | 0.109266  |

|           |           |           |           |           |           |           |
|-----------|-----------|-----------|-----------|-----------|-----------|-----------|
| 0.113199  | 0.123543  | 0.112617  | 0.119172  | 0.11961   | 0.250874  | 0.116404  |
| 0.0476399 | 0.113928  | 0.120775  | 0.120629  | 0.053176  | 0.24796   | 0.105332  |
| 0.110577  | 0.110723  | 0.0820221 | 0.0518648 | 0.122232  | 0.253497  | 0.115239  |
| 0.11116   | 0.111597  | 0.0855186 | 0.0454545 | 0.11961   | 0.256119  | 0.114656  |
| 0.11655   | 0.132721  | 0.124709  | 0.131265  | 0.121795  | 0.251311  | 0.128788  |
| 0.110868  | 0.0600233 | 0.106206  | 0.112762  | 0.119901  | 0.257576  | 0.111742  |
| 0.0439977 | 0.113199  | 0.111305  | 0.116113  | 0.0512821 | 0.247815  | 0.0979021 |
| 0.113491  | 0.121212  | 0.118153  | 0.120338  | 0.118735  | 0.249126  | 0.11757   |
| 0.101399  | 0.109703  | 0.100233  | 0.110577  | 0.106643  | 0.250146  | 0.101107  |
| 0.124272  | 0.13549   | 0.126894  | 0.127914  | 0.124272  | 0.248834  | 0.125728  |
| 0.113782  | 0.119464  | 0.103001  | 0.124417  | 0.122523  | 0.257284  | 0.113491  |
| 0.127914  | 0.139714  | 0.133159  | 0.131265  | 0.131119  | 0.250728  | 0.129079  |
| 0.253497  | 0.250437  | 0.261364  | 0.263549  | 0.25204   | 0.0893065 | 0.256702  |
| 0.129079  | 0.130682  | 0.101107  | 0.115239  | 0.13141   | 0.264423  | 0.117424  |
| 0.122232  | 0.127622  | 0.112325  | 0.125874  | 0.125146  | 0.254079  | 0.113199  |
| 0.209207  | 0.21081   | 0.224068  | 0.2213    | 0.211538  | 0.118444  | 0.215909  |
| 0.116987  | 0.123834  | 0.125728  | 0.125291  | 0.123689  | 0.255536  | 0.11757   |
| 0.222465  | 0.224068  | 0.234994  | 0.236597  | 0.221882  | 0.110431  | 0.228001  |
| 0.120921  | 0.121066  | 0.0949883 | 0.105041  | 0.124709  | 0.260635  | 0.110723  |
| 0.0566725 | 0.125583  | 0.128351  | 0.132284  | 0.0502622 | 0.249709  | 0.110577  |
| 0.113782  | 0.122669  | 0.113782  | 0.113054  | 0.121941  | 0.252914  | 0.115822  |
| 0.115239  | 0.0606061 | 0.108537  | 0.111597  | 0.119901  | 0.260781  | 0.113199  |
| 0.192745  | 0.189977  | 0.204691  | 0.206876  | 0.197407  | 0.13345   | 0.203234  |
| 0.12398   | 0.136946  | 0.128059  | 0.129662  | 0.126894  | 0.249126  | 0.126311  |
| 0.113782  | 0.12704   | 0.118153  | 0.121212  | 0.123106  | 0.248834  | 0.121941  |
| 0.220571  | 0.216638  | 0.229895  | 0.229167  | 0.223485  | 0.116113  | 0.226399  |
| 0.11553   | 0.113928  | 0.0878497 | 0.0536131 | 0.12602   | 0.254371  | 0.11757   |
| 0.188811  | 0.188957  | 0.200466  | 0.203526  | 0.19493   | 0.131847  | 0.197552  |
| 0.118881  | 0.113199  | 0.0865385 | 0.0505536 | 0.127914  | 0.257139  | 0.121795  |
| 0.044289  | 0.114365  | 0.117716  | 0.121649  | 0.0556527 | 0.254516  | 0.106061  |
| 0.106789  | 0.121795  | 0.116113  | 0.121795  | 0.108829  | 0.256993  | 0.0467657 |
| 0.120484  | 0.0696387 | 0.113491  | 0.114802  | 0.121649  | 0.261655  | 0.115239  |
| 0.112762  | 0.121066  | 0.106935  | 0.117279  | 0.115676  | 0.247815  | 0.11014   |
| 0.148019  | 0.147873  | 0.160839  | 0.167395  | 0.155594  | 0.180507  | 0.138112  |
| 0.113345  | 0.121649  | 0.112179  | 0.116987  | 0.118298  | 0.245192  | 0.113636  |
| 0.120629  | 0.12602   | 0.119464  | 0.120775  | 0.128205  | 0.258304  | 0.11859   |
| 0.11014   | 0.115822  | 0.115093  | 0.115239  | 0.120047  | 0.255682  | 0.111888  |
| 0.128205  | 0.135635  | 0.119464  | 0.126311  | 0.127622  | 0.251311  | 0.121795  |
| 0.18546   | 0.183566  | 0.197407  | 0.201632  | 0.191871  | 0.137238  | 0.19799   |
| 0         | 0.111742  | 0.115676  | 0.11961   | 0.0536131 | 0.247815  | 0.102855  |
| 0.111742  | 0         | 0.106206  | 0.115093  | 0.122523  | 0.24796   | 0.115822  |
| 0.115676  | 0.106206  | 0         | 0.0887238 | 0.122669  | 0.261218  | 0.112762  |
| 0.11961   | 0.115093  | 0.0887238 | 0         | 0.125437  | 0.259907  | 0.116113  |
| 0.0536131 | 0.122523  | 0.122669  | 0.125437  | 0         | 0.25102   | 0.102273  |

|           |           |           |           |           |          |           |
|-----------|-----------|-----------|-----------|-----------|----------|-----------|
| 0.247815  | 0.24796   | 0.261218  | 0.259907  | 0.25102   | 0        | 0.254808  |
| 0.102855  | 0.115822  | 0.112762  | 0.116113  | 0.102273  | 0.254808 | 0         |
| 0.087704  | 0.116113  | 0.118881  | 0.124563  | 0.0976107 | 0.24898  | 0.113636  |
| 0.17803   | 0.171183  | 0.179487  | 0.181381  | 0.18007   | 0.178176 | 0.172203  |
| 0.177448  | 0.176136  | 0.18852   | 0.189831  | 0.181235  | 0.144085 | 0.183275  |
| 0.115676  | 0.126311  | 0.121212  | 0.128934  | 0.120629  | 0.252185 | 0.125     |
| 0.111451  | 0.12704   | 0.117861  | 0.124417  | 0.118735  | 0.250291 | 0.116404  |
| 0.106206  | 0.0556527 | 0.10271   | 0.107517  | 0.118444  | 0.257284 | 0.112617  |
| 0.136946  | 0.150787  | 0.143065  | 0.143211  | 0.140443  | 0.251311 | 0.141026  |
| 0.112762  | 0.126603  | 0.117716  | 0.124854  | 0.120047  | 0.251603 | 0.123543  |
| 0.115239  | 0.13141   | 0.121358  | 0.130245  | 0.121941  | 0.254371 | 0.126311  |
| 0.126166  | 0.123106  | 0.0961538 | 0.0502622 | 0.129953  | 0.258013 | 0.124126  |
| 0.111597  | 0.126311  | 0.115967  | 0.118153  | 0.119172  | 0.241404 | 0.113928  |
| 0.124272  | 0.136072  | 0.127768  | 0.127622  | 0.127768  | 0.24796  | 0.12398   |
| 0.113054  | 0.107663  | 0.0949883 | 0.0686189 | 0.122086  | 0.24257  | 0.116259  |
| 0.116696  | 0.0681818 | 0.108246  | 0.113928  | 0.11961   | 0.261655 | 0.108829  |
| 0.131702  | 0.0820221 | 0.121212  | 0.125437  | 0.133159  | 0.267045 | 0.127914  |
| 0.105332  | 0.120338  | 0.11961   | 0.120047  | 0.10708   | 0.254953 | 0.0435606 |
| 0.123543  | 0.0738636 | 0.114802  | 0.115239  | 0.126166  | 0.265006 | 0.117133  |
| 0.127914  | 0.125728  | 0.0935315 | 0.0488054 | 0.13345   | 0.262092 | 0.122669  |
| 0.197115  | 0.196678  | 0.21081   | 0.212121  | 0.202652  | 0.138986 | 0.205274  |
| 0.108392  | 0.122815  | 0.113054  | 0.114365  | 0.111597  | 0.258887 | 0.101981  |
| 0.181818  | 0.181381  | 0.192308  | 0.197407  | 0.187354  | 0.144085 | 0.192599  |
| 0.113054  | 0.119318  | 0.111597  | 0.116696  | 0.124126  | 0.251603 | 0.116841  |
| 0.0571096 | 0.119901  | 0.125     | 0.13039   | 0.0486597 | 0.244901 | 0.110723  |
| 0.118007  | 0.125146  | 0.1081    | 0.127477  | 0.124126  | 0.253059 | 0.114219  |
| 0.109411  | 0.118298  | 0.101253  | 0.121795  | 0.119027  | 0.254662 | 0.115239  |
| 0.117424  | 0.130099  | 0.123834  | 0.126894  | 0.123252  | 0.245484 | 0.120921  |
| 0.120921  | 0.130682  | 0.120921  | 0.120775  | 0.124126  | 0.247232 | 0.121795  |
| 0.0474942 | 0.112034  | 0.11655   | 0.124272  | 0.0536131 | 0.248397 | 0.109848  |
| 0.116404  | 0.12296   | 0.120775  | 0.118881  | 0.124854  | 0.255828 | 0.118444  |
| 0.122232  | 0.129371  | 0.106789  | 0.129662  | 0.128642  | 0.257867 | 0.11757   |
| 0.131702  | 0.11757   | 0.0996503 | 0.0560897 | 0.137821  | 0.251311 | 0.127331  |
| 0.245047  | 0.243735  | 0.255245  | 0.256265  | 0.244172  | 0.08581  | 0.249417  |
| 0.0472028 | 0.11553   | 0.117716  | 0.127477  | 0.0544872 | 0.252768 | 0.1081    |
| 0.173805  | 0.170163  | 0.186626  | 0.191142  | 0.181381  | 0.144231 | 0.184878  |
| 0.177739  | 0.174971  | 0.19289   | 0.192745  | 0.186772  | 0.136218 | 0.191142  |
| 0.108537  | 0.117424  | 0.118735  | 0.121212  | 0.116404  | 0.249126 | 0.11116   |
| 0.0989219 | 0.112762  | 0.110868  | 0.115967  | 0.103875  | 0.25204  | 0.046183  |
| 0.0549242 | 0.124126  | 0.125728  | 0.129371  | 0.048514  | 0.251166 | 0.106498  |
| 0.109411  | 0.120338  | 0.114365  | 0.122669  | 0.117279  | 0.245629 | 0.114948  |
| 0.0926573 | 0.109994  | 0.115676  | 0.121066  | 0.10169   | 0.244318 | 0.087704  |
| 0.11655   | 0.114073  | 0.0885781 | 0.0482226 | 0.126166  | 0.258304 | 0.119172  |
| 0.114073  | 0.129662  | 0.122523  | 0.123252  | 0.119027  | 0.242133 | 0.113491  |

|           |           |           |           |           |          |           |
|-----------|-----------|-----------|-----------|-----------|----------|-----------|
| 0.128351  | 0.13986   | 0.127477  | 0.130536  | 0.13039   | 0.254662 | 0.12602   |
| 0.0448718 | 0.11553   | 0.118881  | 0.120192  | 0.0486597 | 0.248689 | 0.107226  |
| 0.121795  | 0.137675  | 0.126457  | 0.128059  | 0.127914  | 0.252477 | 0.123834  |
| 0.112325  | 0.113928  | 0.107372  | 0.119755  | 0.124272  | 0.251457 | 0.107955  |
| 0.120775  | 0.129953  | 0.108829  | 0.130828  | 0.128059  | 0.261946 | 0.11553   |
| 0.110431  | 0.0581294 | 0.104895  | 0.11116   | 0.122086  | 0.258013 | 0.115676  |
| 0.130973  | 0.129371  | 0.0992133 | 0.0515734 | 0.132721  | 0.262238 | 0.125437  |
| 0.112471  | 0.127768  | 0.120338  | 0.123106  | 0.117133  | 0.25743  | 0.106935  |
| 0.0576923 | 0.116113  | 0.113636  | 0.118444  | 0.0524476 | 0.245192 | 0.104021  |
| 0.129371  | 0.135344  | 0.129953  | 0.129516  | 0.131119  | 0.260344 | 0.124709  |
| 0.174388  | 0.172494  | 0.186917  | 0.187354  | 0.183421  | 0.141608 | 0.185169  |
| 0.129371  | 0.14292   | 0.133741  | 0.133304  | 0.13345   | 0.253934 | 0.128205  |
| 0.118298  | 0.127185  | 0.119172  | 0.124563  | 0.122669  | 0.245775 | 0.121503  |
| 0.116113  | 0.124126  | 0.101253  | 0.125874  | 0.123106  | 0.257867 | 0.114073  |
| 0.107226  | 0.11757   | 0.0984848 | 0.117279  | 0.113345  | 0.252185 | 0.105769  |
| 0.112325  | 0.0579837 | 0.103584  | 0.107226  | 0.117279  | 0.257867 | 0.107955  |
| 0.114802  | 0.0575466 | 0.107517  | 0.113199  | 0.125     | 0.261218 | 0.113054  |
| 0.183712  | 0.180944  | 0.194202  | 0.195221  | 0.185752  | 0.141317 | 0.190705  |
| 0.114656  | 0.125583  | 0.115239  | 0.118298  | 0.11757   | 0.238345 | 0.11553   |
| 0.106352  | 0.10912   | 0.111597  | 0.111742  | 0.110723  | 0.22771  | 0.106935  |
| 0.119172  | 0.132721  | 0.124709  | 0.124272  | 0.125291  | 0.248106 | 0.124126  |
| 0.184586  | 0.185023  | 0.196824  | 0.195804  | 0.187791  | 0.137529 | 0.194202  |
| 0.0955711 | 0.101836  | 0.107809  | 0.114948  | 0.104895  | 0.247232 | 0.0536131 |
| 0.124854  | 0.119755  | 0.0925117 | 0.0472028 | 0.130099  | 0.263112 | 0.120192  |
| 0.117861  | 0.129953  | 0.123397  | 0.125583  | 0.123397  | 0.247669 | 0.122523  |
| 0.111597  | 0.125437  | 0.113636  | 0.121649  | 0.115676  | 0.253934 | 0.118881  |
| 0.17803   | 0.177885  | 0.189977  | 0.195076  | 0.184149  | 0.137675 | 0.18648   |
| 0.120921  | 0.116987  | 0.0882867 | 0.048514  | 0.127331  | 0.256265 | 0.119755  |
| 0.111014  | 0.114073  | 0.112471  | 0.112908  | 0.114802  | 0.244901 | 0.111888  |
| 0.0976107 | 0.103001  | 0.106935  | 0.115822  | 0.108683  | 0.243153 | 0.0664336 |
| 0.117716  | 0.115239  | 0.111014  | 0.124272  | 0.124126  | 0.23208  | 0.119172  |
| 0.11961   | 0.129662  | 0.119027  | 0.119755  | 0.12602   | 0.257867 | 0.117861  |
| 0.128642  | 0.123543  | 0.0977564 | 0.0480769 | 0.133013  | 0.260781 | 0.123106  |
| 0.0458916 | 0.114219  | 0.116987  | 0.122086  | 0.0476399 | 0.251166 | 0.104749  |
| 0.122523  | 0.126748  | 0.118735  | 0.118298  | 0.126603  | 0.258159 | 0.112617  |
| 0.141026  | 0.153409  | 0.145396  | 0.151078  | 0.137238  | 0.256847 | 0.144231  |
| 0.229312  | 0.228584  | 0.240967  | 0.239073  | 0.230769  | 0.105041 | 0.237762  |
| 0.117424  | 0.131265  | 0.125583  | 0.125437  | 0.121795  | 0.260927 | 0.110723  |
| 0.119172  | 0.12602   | 0.121503  | 0.121941  | 0.127622  | 0.259178 | 0.120921  |
| 0.113199  | 0.125     | 0.11961   | 0.114219  | 0.119318  | 0.241841 | 0.11757   |
| 0.117133  | 0.129516  | 0.120629  | 0.125437  | 0.124417  | 0.244318 | 0.120921  |
| 0.11553   | 0.121795  | 0.108537  | 0.0973193 | 0.122815  | 0.250874 | 0.113491  |
| 0.114365  | 0.121212  | 0.114948  | 0.113928  | 0.120775  | 0.251457 | 0.0989219 |
| 0.116841  | 0.133013  | 0.119755  | 0.121066  | 0.123252  | 0.245192 | 0.123834  |



|           |          |           |           |           |           |           |
|-----------|----------|-----------|-----------|-----------|-----------|-----------|
| 0.125146  | 0.123252 | 0.0936772 | 0.0469114 | 0.13039   | 0.257576  | 0.121941  |
| 0.109703  | 0.126166 | 0.116987  | 0.123252  | 0.121358  | 0.248252  | 0.121649  |
| 0.22873   | 0.229749 | 0.242424  | 0.239656  | 0.231935  | 0.0968823 | 0.233683  |
| 0.0983392 | 0.109848 | 0.109994  | 0.110431  | 0.101544  | 0.247378  | 0.0450175 |
| 0.108829  | 0.107517 | 0.0852273 | 0.102855  | 0.118444  | 0.253205  | 0.100087  |
| 0.0460373 | 0.115239 | 0.115967  | 0.119318  | 0.04662   | 0.24898   | 0.103147  |
| 0.124272  | 0.142774 | 0.130682  | 0.13549   | 0.124272  | 0.254371  | 0.13243   |
| 0.121066  | 0.137529 | 0.128059  | 0.132867  | 0.12398   | 0.262529  | 0.115822  |
| 0.104458  | 0.129953 | 0.11961   | 0.127914  | 0.11116   | 0.242424  | 0.110286  |
| 0.116113  | 0.127331 | 0.120775  | 0.123543  | 0.122523  | 0.246212  | 0.11961   |
| 0.107226  | 0.118735 | 0.112762  | 0.117279  | 0.108974  | 0.247232  | 0.115385  |
| 0.224359  | 0.224213 | 0.235431  | 0.237617  | 0.227273  | 0.101836  | 0.230769  |
| 0.122378  | 0.13447  | 0.124709  | 0.127477  | 0.126748  | 0.246649  | 0.123834  |
| 0.12398   | 0.118007 | 0.0895979 | 0.0451632 | 0.130099  | 0.25845   | 0.120775  |
| 0.105332  | 0.113636 | 0.113782  | 0.11655   | 0.114656  | 0.254371  | 0.112908  |
| 0.120047  | 0.135635 | 0.120921  | 0.121066  | 0.121503  | 0.251311  | 0.120338  |
| 0.124417  | 0.124563 | 0.0976107 | 0.108829  | 0.129371  | 0.260344  | 0.113345  |
| 0.0483683 | 0.116696 | 0.118881  | 0.120484  | 0.0463287 | 0.249272  | 0.10169   |
| 0.123252  | 0.120775 | 0.0929487 | 0.0496795 | 0.129371  | 0.257139  | 0.119172  |
| 0.13039   | 0.128497 | 0.0989219 | 0.0515734 | 0.134761  | 0.262821  | 0.124854  |
| 0.117279  | 0.116841 | 0.0861014 | 0.0483683 | 0.127477  | 0.256119  | 0.119901  |
| 0.0434149 | 0.114948 | 0.114802  | 0.122815  | 0.0521562 | 0.251603  | 0.106061  |
| 0.127331  | 0.137383 | 0.126457  | 0.126603  | 0.130245  | 0.25743   | 0.119755  |
| 0.129225  | 0.142191 | 0.130099  | 0.127914  | 0.133304  | 0.262821  | 0.125728  |
| 0.121649  | 0.134324 | 0.113199  | 0.13345   | 0.13039   | 0.263112  | 0.117279  |
| 0.127768  | 0.13549  | 0.11553   | 0.134615  | 0.133304  | 0.261946  | 0.11757   |
| 0.129079  | 0.142628 | 0.127331  | 0.124854  | 0.13345   | 0.26384   | 0.124126  |
| 0.0874126 | 0.11116  | 0.111888  | 0.117279  | 0.0938228 | 0.254516  | 0.0847902 |
| 0.135927  | 0.126166 | 0.0636655 | 0.0964452 | 0.137092  | 0.270105  | 0.126894  |
| 0.120338  | 0.137383 | 0.125874  | 0.11961   | 0.122669  | 0.264714  | 0.11859   |
| 0.198135  | 0.19799  | 0.211538  | 0.209936  | 0.203089  | 0.118153  | 0.203963  |
| 0.113345  | 0.124563 | 0.120047  | 0.125437  | 0.119172  | 0.252185  | 0.122086  |
| 0.113054  | 0.112908 | 0.0885781 | 0.103584  | 0.124126  | 0.258596  | 0.111014  |
| 0.0499709 | 0.116841 | 0.12398   | 0.127622  | 0.0456002 | 0.242716  | 0.108537  |
| 0.217075  | 0.215181 | 0.228147  | 0.228001  | 0.219697  | 0.108537  | 0.221154  |
| 0.203089  | 0.202943 | 0.213578  | 0.213724  | 0.205711  | 0.136801  | 0.212413  |
| 0.127477  | 0.123543 | 0.097465  | 0.0469114 | 0.131556  | 0.25845   | 0.125437  |
| 0.243298  | 0.241113 | 0.254371  | 0.253934  | 0.245338  | 0.097465  | 0.251166  |
| 0.0871212 | 0.11116  | 0.113636  | 0.121066  | 0.0961538 | 0.252768  | 0.0868298 |
| 0.126166  | 0.140006 | 0.137821  | 0.136509  | 0.126166  | 0.258887  | 0.117424  |
| 0.097028  | 0.11553  | 0.112179  | 0.113491  | 0.10373   | 0.252477  | 0.0413753 |
| 0.124272  | 0.134907 | 0.124272  | 0.123252  | 0.130973  | 0.257576  | 0.121941  |
| 0.179779  | 0.181381 | 0.19289   | 0.191871  | 0.184149  | 0.132139  | 0.188811  |
| 0.114656  | 0.121212 | 0.120775  | 0.120629  | 0.118153  | 0.250583  | 0.112325  |

|           |           |           |           |           |          |           |
|-----------|-----------|-----------|-----------|-----------|----------|-----------|
| 0.184878  | 0.184732  | 0.199155  | 0.199009  | 0.189248  | 0.137238 | 0.193036  |
| 0.103001  | 0.121795  | 0.111742  | 0.11859   | 0.113491  | 0.256119 | 0.108537  |
| 0.116113  | 0.111014  | 0.0983392 | 0.0748834 | 0.122815  | 0.238636 | 0.119318  |
| 0.114656  | 0.127622  | 0.121649  | 0.123834  | 0.118735  | 0.252914 | 0.105332  |
| 0.10708   | 0.121212  | 0.110868  | 0.113345  | 0.112034  | 0.237471 | 0.109994  |
| 0.0428322 | 0.109703  | 0.111014  | 0.115822  | 0.0506993 | 0.246066 | 0.0981935 |
| 0.103147  | 0.118735  | 0.109557  | 0.118444  | 0.111888  | 0.251603 | 0.113054  |
| 0.0935315 | 0.104749  | 0.105769  | 0.109703  | 0.101399  | 0.245484 | 0.048951  |
| 0.109994  | 0.125874  | 0.114948  | 0.115385  | 0.116987  | 0.245921 | 0.116987  |
| 0.116259  | 0.111451  | 0.0541958 | 0.0884324 | 0.125583  | 0.260344 | 0.119172  |
| 0.104895  | 0.117279  | 0.109266  | 0.116696  | 0.114219  | 0.253642 | 0.106352  |
| 0.0962995 | 0.109557  | 0.110577  | 0.11451   | 0.10271   | 0.249709 | 0.041521  |
| 0.105769  | 0.122523  | 0.108974  | 0.124563  | 0.112471  | 0.251311 | 0.111888  |
| 0.12296   | 0.133887  | 0.129079  | 0.130973  | 0.129953  | 0.251603 | 0.125874  |
| 0.109994  | 0.118881  | 0.0986305 | 0.119172  | 0.119027  | 0.254079 | 0.112034  |
| 0.11014   | 0.113199  | 0.107809  | 0.113782  | 0.113928  | 0.250728 | 0.115093  |
| 0.0421037 | 0.111305  | 0.112617  | 0.115676  | 0.0488054 | 0.245921 | 0.100962  |
| 0.120192  | 0.115676  | 0.0939685 | 0.0579837 | 0.125146  | 0.249126 | 0.118153  |
| 0.117279  | 0.127622  | 0.115822  | 0.120629  | 0.121649  | 0.253788 | 0.116987  |
| 0.111888  | 0.0604604 | 0.106061  | 0.109411  | 0.118298  | 0.258304 | 0.111597  |
| 0.113636  | 0.121649  | 0.099359  | 0.122523  | 0.121795  | 0.255682 | 0.112471  |
| 0.115239  | 0.125     | 0.116404  | 0.120338  | 0.120775  | 0.246795 | 0.119027  |
| 0.126457  | 0.136801  | 0.126166  | 0.128934  | 0.129371  | 0.250728 | 0.126748  |
| 0.13141   | 0.145833  | 0.135781  | 0.135927  | 0.134033  | 0.252477 | 0.132867  |
| 0.107372  | 0.105769  | 0.0869755 | 0.0582751 | 0.111451  | 0.249417 | 0.105915  |
| 0.0464744 | 0.114219  | 0.115822  | 0.123834  | 0.0534674 | 0.248252 | 0.106789  |
| 0.109266  | 0.114656  | 0.105478  | 0.108829  | 0.11859   | 0.247232 | 0.0949883 |
| 0.134324  | 0.141463  | 0.131702  | 0.129225  | 0.13549   | 0.260052 | 0.12296   |
| 0.10271   | 0.115967  | 0.112325  | 0.117133  | 0.109411  | 0.255245 | 0.0423951 |
| 0.131556  | 0.0827506 | 0.122523  | 0.124709  | 0.132721  | 0.2669   | 0.128351  |
| 0.0645396 | 0.13345   | 0.135635  | 0.139277  | 0.0488054 | 0.252622 | 0.115822  |
| 0.120921  | 0.138549  | 0.128205  | 0.131556  | 0.120629  | 0.252185 | 0.127622  |
| 0.102418  | 0.119172  | 0.107955  | 0.117133  | 0.110577  | 0.248252 | 0.10271   |
| 0.112179  | 0.120484  | 0.107809  | 0.116113  | 0.117424  | 0.250437 | 0.113345  |
| 0.122378  | 0.131265  | 0.111014  | 0.134178  | 0.127914  | 0.259761 | 0.115967  |
| 0.199155  | 0.198718  | 0.207605  | 0.208333  | 0.204691  | 0.144231 | 0.207896  |
| 0.109994  | 0.113345  | 0.108246  | 0.111305  | 0.117279  | 0.246795 | 0.114073  |
| 0.107517  | 0.122232  | 0.117716  | 0.122232  | 0.116841  | 0.258596 | 0.108392  |
| 0.119901  | 0.130828  | 0.116113  | 0.119755  | 0.125146  | 0.25641  | 0.115822  |
| 0.112179  | 0.121066  | 0.101107  | 0.122815  | 0.122378  | 0.256556 | 0.113928  |
| 0.112034  | 0.126457  | 0.118153  | 0.125291  | 0.115239  | 0.257284 | 0.113199  |
| 0.124854  | 0.128788  | 0.113199  | 0.117133  | 0.125437  | 0.253205 | 0.123106  |
| 0.128497  | 0.132139  | 0.116259  | 0.120484  | 0.129953  | 0.255682 | 0.123834  |
| 0.118444  | 0.130828  | 0.121941  | 0.126748  | 0.117861  | 0.252331 | 0.120484  |

|           |          |           |           |          |          |           |
|-----------|----------|-----------|-----------|----------|----------|-----------|
| 0.112034  | 0.106061 | 0.0473485 | 0.0842075 | 0.120775 | 0.257576 | 0.110577  |
| 0.127477  | 0.13549  | 0.126603  | 0.123252  | 0.127477 | 0.259615 | 0.120484  |
| 0.109411  | 0.123252 | 0.113199  | 0.117133  | 0.11553  | 0.254079 | 0.103001  |
| 0.108683  | 0.121941 | 0.11859   | 0.125437  | 0.11655  | 0.258596 | 0.107226  |
| 0.169143  | 0.17162  | 0.175262  | 0.175991  | 0.173805 | 0.215909 | 0.176428  |
| 0.111451  | 0.122378 | 0.115822  | 0.12296   | 0.120775 | 0.247669 | 0.120484  |
| 0.126748  | 0.128642 | 0.126457  | 0.124563  | 0.131119 | 0.246358 | 0.123252  |
| 0.112325  | 0.121503 | 0.104167  | 0.109557  | 0.117279 | 0.263403 | 0.101544  |
| 0.119172  | 0.128934 | 0.106352  | 0.110286  | 0.120921 | 0.250728 | 0.119464  |
| 0.104895  | 0.111451 | 0.101107  | 0.111451  | 0.109266 | 0.254516 | 0.101399  |
| 0.0999417 | 0.11553  | 0.102564  | 0.109994  | 0.108392 | 0.25102  | 0.0976107 |
| 0.107517  | 0.117279 | 0.107809  | 0.115239  | 0.113928 | 0.257139 | 0.104021  |
| 0.120047  | 0.128934 | 0.108392  | 0.103001  | 0.122086 | 0.259178 | 0.113636  |
| 0.110431  | 0.122815 | 0.118007  | 0.121066  | 0.113054 | 0.245192 | 0.112471  |
| 0.121066  | 0.129371 | 0.114948  | 0.119172  | 0.125728 | 0.26049  | 0.114365  |
| 0.1081    | 0.110868 | 0.0929487 | 0.105624  | 0.117133 | 0.247523 | 0.109848  |
| 0.117861  | 0.109557 | 0.097465  | 0.111597  | 0.122523 | 0.254079 | 0.108246  |
| 0.123834  | 0.13447  | 0.114802  | 0.0983392 | 0.127914 | 0.262966 | 0.116259  |
| 0.111888  | 0.119318 | 0.0906177 | 0.105041  | 0.115385 | 0.259761 | 0.102855  |
| 0.120047  | 0.124854 | 0.113345  | 0.115239  | 0.121795 | 0.25539  | 0.115093  |
| 0.102273  | 0.112325 | 0.0868298 | 0.106206  | 0.111014 | 0.257721 | 0.101981  |
| 0.109266  | 0.116113 | 0.0932401 | 0.103584  | 0.114219 | 0.257139 | 0.103147  |
| 0.0964452 | 0.108537 | 0.104604  | 0.109703  | 0.101399 | 0.253642 | 0.0932401 |
| 0.107663  | 0.118298 | 0.114656  | 0.113928  | 0.112908 | 0.261364 | 0.104167  |
| 0.103293  | 0.107809 | 0.100379  | 0.108392  | 0.110868 | 0.258159 | 0.0957168 |
| 0.139132  | 0.144231 | 0.123106  | 0.108974  | 0.14292  | 0.259615 | 0.136801  |
| 0.125146  | 0.130828 | 0.114365  | 0.105186  | 0.136801 | 0.254371 | 0.134761  |
| 0.105041  | 0.108392 | 0.0866841 | 0.100233  | 0.112325 | 0.25845  | 0.104749  |
| 0.136364  | 0.138549 | 0.121795  | 0.105915  | 0.1419   | 0.264714 | 0.130245  |
| 0.115967  | 0.129225 | 0.111597  | 0.128351  | 0.122086 | 0.253059 | 0.12296   |
| 0.129953  | 0.146416 | 0.132284  | 0.124563  | 0.131993 | 0.258013 | 0.113345  |
| 0.104604  | 0.106206 | 0.105478  | 0.116696  | 0.108392 | 0.255682 | 0.0961538 |
| 0.138258  | 0.149476 | 0.137675  | 0.134324  | 0.138549 | 0.256702 | 0.137092  |
| 0.12602   | 0.130828 | 0.119027  | 0.119464  | 0.128642 | 0.252914 | 0.120192  |
| 0.133304  | 0.13986  | 0.126894  | 0.117133  | 0.135927 | 0.259324 | 0.127185  |
| 0.11757   | 0.124417 | 0.10067   | 0.116841  | 0.123397 | 0.266317 | 0.110577  |
| 0.101107  | 0.114365 | 0.0865385 | 0.0995047 | 0.108974 | 0.258304 | 0.0999417 |
| 0.100962  | 0.111888 | 0.106206  | 0.103147  | 0.110868 | 0.255245 | 0.102127  |
| 0.115093  | 0.119901 | 0.100816  | 0.100087  | 0.120921 | 0.256556 | 0.113345  |
| 0.111305  | 0.120484 | 0.0932401 | 0.113782  | 0.118007 | 0.262383 | 0.0967366 |
| 0.117861  | 0.126457 | 0.116696  | 0.125291  | 0.118444 | 0.263695 | 0.106206  |
| 0.113782  | 0.123252 | 0.114365  | 0.106352  | 0.120484 | 0.253497 | 0.11757   |
| 0.104749  | 0.112179 | 0.0968823 | 0.108974  | 0.114365 | 0.255828 | 0.0983392 |
| 0.103147  | 0.112617 | 0.10373   | 0.103001  | 0.111305 | 0.255099 | 0.101981  |

|           |          |          |           |          |          |           |
|-----------|----------|----------|-----------|----------|----------|-----------|
| 0.107663  | 0.125291 | 0.113491 | 0.110723  | 0.113491 | 0.25204  | 0.0983392 |
| 0.099796  | 0.11451  | 0.105041 | 0.0999417 | 0.109703 | 0.253788 | 0.0995047 |
| 0.111597  | 0.120775 | 0.113054 | 0.108246  | 0.115385 | 0.259178 | 0.106352  |
| 0.101981  | 0.108246 | 0.106061 | 0.116987  | 0.111888 | 0.255682 | 0.0999417 |
| 0.105915  | 0.127331 | 0.11961  | 0.123543  | 0.109994 | 0.239802 | 0.110286  |
| 0.102418  | 0.124709 | 0.117279 | 0.120338  | 0.107372 | 0.258159 | 0.100962  |
| 0.0869755 | 0.115093 | 0.111742 | 0.118007  | 0.092803 | 0.253497 | 0.0808566 |
| 0.0995047 | 0.119172 | 0.109703 | 0.106352  | 0.107955 | 0.251166 | 0.0960082 |
| 0.10169   | 0.121941 | 0.116259 | 0.121649  | 0.108392 | 0.244901 | 0.109557  |
| 0.108537  | 0.121212 | 0.106498 | 0.118881  | 0.111451 | 0.253205 | 0.106498  |
| 0.121941  | 0.126748 | 0.124854 | 0.123834  | 0.129225 | 0.248834 | 0.113491  |
| 0.0960082 | 0.117424 | 0.109411 | 0.111597  | 0.103875 | 0.242716 | 0.102127  |
| 0.122086  | 0.134761 | 0.118881 | 0.12398   | 0.12704  | 0.260635 | 0.113345  |

| TDr_2787 | TDr_2826 | TDr_2859 | TDr_2880 | TDr_2886  | TDr_2897 | TDr_2903 |
|----------|----------|----------|----------|-----------|----------|----------|
| 0.119027 | 0.158945 | 0.167395 | 0.120775 | 0.117716  | 0.11451  | 0.142337 |
| 0.113054 | 0.170746 | 0.176282 | 0.112179 | 0.107663  | 0.119027 | 0.129953 |
| 0.109848 | 0.166667 | 0.170455 | 0.107517 | 0.101253  | 0.112325 | 0.126457 |
| 0.112762 | 0.175699 | 0.178904 | 0.11655  | 0.0893065 | 0.115822 | 0.112762 |
| 0.119464 | 0.18852  | 0.196678 | 0.125    | 0.133304  | 0.130099 | 0.149184 |
| 0.113345 | 0.174825 | 0.185315 | 0.121503 | 0.129225  | 0.132721 | 0.148019 |
| 0.123397 | 0.184586 | 0.190705 | 0.133013 | 0.125291  | 0.122086 | 0.145542 |
| 0.109994 | 0.169143 | 0.171474 | 0.113782 | 0.104312  | 0.110431 | 0.127768 |
| 0.111305 | 0.166084 | 0.173951 | 0.113636 | 0.103293  | 0.110868 | 0.131119 |
| 0.110577 | 0.175845 | 0.181672 | 0.118444 | 0.115093  | 0.115385 | 0.140006 |
| 0.11014  | 0.161131 | 0.168415 | 0.120338 | 0.125437  | 0.115822 | 0.151224 |
| 0.108829 | 0.172348 | 0.175554 | 0.115822 | 0.104895  | 0.106061 | 0.130973 |
| 0.110286 | 0.171474 | 0.183129 | 0.113491 | 0.111888  | 0.111888 | 0.139714 |
| 0.121503 | 0.141608 | 0.13549  | 0.133741 | 0.127185  | 0.139423 | 0.152681 |
| 0.103875 | 0.186334 | 0.188957 | 0.126894 | 0.126457  | 0.124709 | 0.145251 |
| 0.118881 | 0.169289 | 0.189685 | 0.125    | 0.118735  | 0.116113 | 0.137529 |
| 0.108537 | 0.174679 | 0.179341 | 0.115822 | 0.112762  | 0.104312 | 0.143794 |
| 0.131702 | 0.193473 | 0.201049 | 0.139277 | 0.137966  | 0.151952 | 0.153555 |
| 0.110431 | 0.168124 | 0.168706 | 0.111014 | 0.102127  | 0.115239 | 0.12704  |
| 0.181235 | 0.15035  | 0.13549  | 0.199883 | 0.199738  | 0.204691 | 0.207459 |
| 0.123397 | 0.180216 | 0.185169 | 0.120192 | 0.129079  | 0.127622 | 0.154283 |
| 0.117716 | 0.188811 | 0.18852  | 0.115385 | 0.118444  | 0.11757  | 0.148601 |
| 0.104749 | 0.167686 | 0.17701  | 0.112617 | 0.109848  | 0.107517 | 0.136509 |
| 0.129662 | 0.183275 | 0.195221 | 0.128788 | 0.128059  | 0.120775 | 0.147145 |
| 0.102127 | 0.16623  | 0.174097 | 0.106206 | 0.107517  | 0.101107 | 0.133013 |
| 0.128934 | 0.182255 | 0.191288 | 0.126603 | 0.132867  | 0.13141  | 0.148456 |
| 0.121649 | 0.179341 | 0.186917 | 0.12398  | 0.125583  | 0.111305 | 0.150495 |
| 0.126311 | 0.180798 | 0.19595  | 0.123397 | 0.120629  | 0.118881 | 0.138549 |
| 0.137966 | 0.187791 | 0.195659 | 0.133013 | 0.129371  | 0.128497 | 0.147873 |
| 0.128642 | 0.184295 | 0.194493 | 0.131556 | 0.12296   | 0.115967 | 0.14292  |
| 0.118881 | 0.175408 | 0.184732 | 0.128497 | 0.129516  | 0.121358 | 0.151807 |
| 0.121941 | 0.180507 | 0.192453 | 0.126311 | 0.123834  | 0.116841 | 0.142045 |
| 0.104458 | 0.166812 | 0.174097 | 0.111451 | 0.108392  | 0.104895 | 0.134178 |
| 0.125146 | 0.17905  | 0.184878 | 0.120484 | 0.11859   | 0.106935 | 0.142337 |
| 0.125    | 0.17803  | 0.193473 | 0.127331 | 0.127768  | 0.116113 | 0.148019 |
| 0.133304 | 0.176719 | 0.195367 | 0.134178 | 0.130536  | 0.120047 | 0.145542 |
| 0.134907 | 0.194056 | 0.206294 | 0.136655 | 0.132721  | 0.134178 | 0.152681 |
| 0.125437 | 0.183421 | 0.188957 | 0.124563 | 0.124709  | 0.118007 | 0.1537   |
| 0.114365 | 0.173223 | 0.181381 | 0.116987 | 0.113636  | 0.109266 | 0.134178 |
| 0.126311 | 0.179341 | 0.190414 | 0.128934 | 0.122086  | 0.122086 | 0.14088  |
| 0.109994 | 0.174097 | 0.179633 | 0.113491 | 0.110723  | 0.113054 | 0.136218 |
| 0.140297 | 0.19391  | 0.202069 | 0.144376 | 0.143648  | 0.1419   | 0.155449 |

|          |          |          |          |           |           |          |
|----------|----------|----------|----------|-----------|-----------|----------|
| 0.14729  | 0.199155 | 0.202069 | 0.149913 | 0.149476  | 0.143065  | 0.160985 |
| 0.118881 | 0.175699 | 0.181818 | 0.11859  | 0.118153  | 0.116987  | 0.143065 |
| 0.108683 | 0.174242 | 0.18007  | 0.111014 | 0.116404  | 0.0989219 | 0.141317 |
| 0.122232 | 0.188957 | 0.192745 | 0.126603 | 0.123834  | 0.113345  | 0.149038 |
| 0.11553  | 0.181964 | 0.187209 | 0.121941 | 0.120921  | 0.114802  | 0.142045 |
| 0.138695 | 0.187937 | 0.199592 | 0.145105 | 0.140006  | 0.137092  | 0.154429 |
| 0.117716 | 0.177156 | 0.187937 | 0.117133 | 0.114656  | 0.11757   | 0.139277 |
| 0.116987 | 0.177885 | 0.181672 | 0.123106 | 0.120338  | 0.113928  | 0.143502 |
| 0.152389 | 0.195221 | 0.20542  | 0.151807 | 0.145833  | 0.14088   | 0.162879 |
| 0.126457 | 0.181818 | 0.195513 | 0.131702 | 0.134178  | 0.127185  | 0.149767 |
| 0.120484 | 0.174971 | 0.179341 | 0.119027 | 0.117424  | 0.109557  | 0.137383 |
| 0.125437 | 0.186917 | 0.195076 | 0.130973 | 0.121795  | 0.132867  | 0.139423 |
| 0.10912  | 0.167978 | 0.172057 | 0.114948 | 0.0856643 | 0.116841  | 0.109703 |
| 0.144376 | 0.196533 | 0.205857 | 0.145251 | 0.136364  | 0.134907  | 0.149038 |
| 0.129662 | 0.189103 | 0.193182 | 0.131702 | 0.129516  | 0.125728  | 0.152098 |
| 0.117133 | 0.178613 | 0.18648  | 0.118007 | 0.117861  | 0.114073  | 0.141608 |
| 0.120047 | 0.179487 | 0.183275 | 0.120629 | 0.121649  | 0.118153  | 0.146853 |
| 0.123106 | 0.185169 | 0.19391  | 0.124272 | 0.125874  | 0.11859   | 0.145833 |
| 0.135635 | 0.194202 | 0.206148 | 0.143502 | 0.137238  | 0.13986   | 0.153409 |
| 0.137675 | 0.193036 | 0.205857 | 0.144959 | 0.134907  | 0.141026  | 0.14729  |
| 0.159091 | 0.150932 | 0.157051 | 0.16521  | 0.158945  | 0.160693  | 0.171329 |
| 0.118298 | 0.17803  | 0.183275 | 0.120921 | 0.116404  | 0.114656  | 0.138112 |
| 0.116259 | 0.177739 | 0.185023 | 0.114802 | 0.116987  | 0.112908  | 0.143065 |
| 0.115967 | 0.173077 | 0.179779 | 0.117424 | 0.116987  | 0.109411  | 0.140443 |
| 0.141171 | 0.184878 | 0.195659 | 0.146416 | 0.146562  | 0.137529  | 0.160402 |
| 0.112908 | 0.174679 | 0.179341 | 0.118153 | 0.111888  | 0.111305  | 0.135927 |
| 0.128788 | 0.181235 | 0.192308 | 0.134033 | 0.135927  | 0.133887  | 0.149184 |
| 0.122378 | 0.186189 | 0.193765 | 0.127622 | 0.127477  | 0.11553   | 0.14831  |
| 0.119901 | 0.176428 | 0.181964 | 0.121941 | 0.122086  | 0.115093  | 0.145542 |
| 0.142628 | 0.186334 | 0.194202 | 0.148164 | 0.146853  | 0.145396  | 0.160693 |
| 0.11961  | 0.179341 | 0.190997 | 0.126603 | 0.124126  | 0.120921  | 0.146707 |
| 0.141317 | 0.190851 | 0.20338  | 0.144814 | 0.137675  | 0.136509  | 0.150932 |
| 0.128059 | 0.183421 | 0.195076 | 0.132139 | 0.134324  | 0.12704   | 0.14933  |
| 0.107809 | 0.167541 | 0.177739 | 0.107226 | 0.107372  | 0.114365  | 0.132576 |
| 0.116259 | 0.175408 | 0.177448 | 0.119755 | 0.114365  | 0.109411  | 0.138695 |
| 0.114219 | 0.176282 | 0.183566 | 0.117133 | 0.11961   | 0.11961   | 0.143357 |
| 0.138695 | 0.189103 | 0.199592 | 0.139569 | 0.130682  | 0.130973  | 0.147727 |
| 0.115239 | 0.174679 | 0.178467 | 0.114948 | 0.118298  | 0.111888  | 0.143502 |
| 0.143939 | 0.189685 | 0.203671 | 0.145979 | 0.135927  | 0.144376  | 0.150641 |
| 0.123543 | 0.181235 | 0.183858 | 0.128497 | 0.126894  | 0.121941  | 0.149767 |
| 0.120921 | 0.180653 | 0.192016 | 0.125874 | 0.118153  | 0.114948  | 0.136946 |
| 0.118007 | 0.178904 | 0.182984 | 0.123252 | 0.120192  | 0.116113  | 0.146562 |
| 0.124709 | 0.180653 | 0.190559 | 0.122378 | 0.119901  | 0.120192  | 0.141317 |
| 0.11451  | 0.177739 | 0.183858 | 0.118881 | 0.121941  | 0.114656  | 0.145979 |

|          |          |          |          |          |           |          |
|----------|----------|----------|----------|----------|-----------|----------|
| 0.116259 | 0.178904 | 0.18211  | 0.119172 | 0.114656 | 0.110868  | 0.142774 |
| 0.136509 | 0.190122 | 0.204108 | 0.142628 | 0.140152 | 0.134615  | 0.151661 |
| 0.111451 | 0.17905  | 0.183421 | 0.120484 | 0.117716 | 0.105186  | 0.144376 |
| 0.11655  | 0.176865 | 0.185315 | 0.117424 | 0.114948 | 0.109411  | 0.143357 |
| 0.129662 | 0.193765 | 0.19493  | 0.130536 | 0.128934 | 0.127477  | 0.149767 |
| 0.127622 | 0.186189 | 0.193473 | 0.138986 | 0.131265 | 0.124854  | 0.152098 |
| 0.132284 | 0.189103 | 0.201632 | 0.12704  | 0.140006 | 0.131556  | 0.150641 |
| 0.13884  | 0.196533 | 0.204108 | 0.13447  | 0.140734 | 0.138112  | 0.153118 |
| 0.1081   | 0.175699 | 0.177448 | 0.117716 | 0.121941 | 0.118444  | 0.150932 |
| 0.173951 | 0.15035  | 0.148601 | 0.187937 | 0.185169 | 0.183712  | 0.196096 |
| 0.11116  | 0.18109  | 0.181672 | 0.114073 | 0.110723 | 0.106935  | 0.136509 |
| 0.13986  | 0.195513 | 0.201049 | 0.139277 | 0.13884  | 0.130973  | 0.149184 |
| 0.133741 | 0.191142 | 0.19289  | 0.129953 | 0.128934 | 0.122815  | 0.148019 |
| 0.134761 | 0.199446 | 0.2044   | 0.140589 | 0.140152 | 0.137238  | 0.160985 |
| 0.114219 | 0.180361 | 0.184441 | 0.112471 | 0.116696 | 0.108246  | 0.142483 |
| 0.134907 | 0.190268 | 0.200466 | 0.131119 | 0.133887 | 0.13039   | 0.147436 |
| 0.117716 | 0.180361 | 0.187063 | 0.11451  | 0.117279 | 0.109703  | 0.142774 |
| 0.127768 | 0.182255 | 0.191871 | 0.124854 | 0.130536 | 0.120047  | 0.146999 |
| 0.115239 | 0.180507 | 0.188374 | 0.121649 | 0.115676 | 0.115676  | 0.13884  |
| 0.138549 | 0.188374 | 0.202652 | 0.130682 | 0.140734 | 0.134324  | 0.157197 |
| 0.110286 | 0.177885 | 0.180507 | 0.119027 | 0.118881 | 0.105478  | 0.142045 |
| 0.134324 | 0.182401 | 0.197844 | 0.133159 | 0.136218 | 0.138549  | 0.15035  |
| 0.116696 | 0.180216 | 0.185752 | 0.12398  | 0.122669 | 0.117424  | 0.147873 |
| 0.13345  | 0.186189 | 0.19493  | 0.136072 | 0.131265 | 0.126894  | 0.149184 |
| 0.131847 | 0.191288 | 0.194784 | 0.140589 | 0.135198 | 0.125874  | 0.1537   |
| 0.109994 | 0.178759 | 0.184003 | 0.113491 | 0.119464 | 0.111597  | 0.144085 |
| 0.141171 | 0.181964 | 0.197698 | 0.147582 | 0.143648 | 0.143648  | 0.159237 |
| 0.11655  | 0.180361 | 0.188228 | 0.119172 | 0.124563 | 0.112908  | 0.148601 |
| 0.112762 | 0.179779 | 0.184732 | 0.115385 | 0.118153 | 0.109703  | 0.145979 |
| 0.120484 | 0.181672 | 0.188666 | 0.12398  | 0.124709 | 0.115676  | 0.14088  |
| 0.139423 | 0.198281 | 0.203817 | 0.141171 | 0.141317 | 0.1419    | 0.157488 |
| 0.118153 | 0.156906 | 0.172931 | 0.126311 | 0.130536 | 0.120047  | 0.145542 |
| 0.113199 | 0.178467 | 0.18109  | 0.114365 | 0.115676 | 0.108683  | 0.137966 |
| 0.113782 | 0.180798 | 0.182255 | 0.105041 | 0.119755 | 0.108683  | 0.142337 |
| 0.118007 | 0.181818 | 0.185897 | 0.123543 | 0.119027 | 0.112908  | 0.145396 |
| 0.125437 | 0.190122 | 0.198572 | 0.132721 | 0.129953 | 0.126748  | 0.14729  |
| 0.11655  | 0.183566 | 0.186189 | 0.12704  | 0.125437 | 0.115822  | 0.148019 |
| 0.104458 | 0.174679 | 0.175554 | 0.114948 | 0.107809 | 0.0984848 | 0.134761 |
| 0.108829 | 0.174679 | 0.178759 | 0.113491 | 0.111014 | 0.104895  | 0.136801 |
| 0.112179 | 0.179196 | 0.184732 | 0.118881 | 0.11553  | 0.106206  | 0.139569 |
| 0.119755 | 0.179196 | 0.180653 | 0.123252 | 0.119027 | 0.11116   | 0.1419   |
| 0.130973 | 0.188666 | 0.197698 | 0.132139 | 0.13141  | 0.124417  | 0.14933  |
| 0.111597 | 0.181235 | 0.186772 | 0.11655  | 0.112325 | 0.105624  | 0.141026 |
| 0.105041 | 0.175262 | 0.178176 | 0.110868 | 0.112179 | 0.103438  | 0.136218 |

|          |          |          |          |           |          |           |
|----------|----------|----------|----------|-----------|----------|-----------|
| 0.124563 | 0.1875   | 0.19391  | 0.133013 | 0.134615  | 0.122378 | 0.152826  |
| 0.110723 | 0.178613 | 0.182692 | 0.120921 | 0.114948  | 0.108246 | 0.13986   |
| 0.117133 | 0.174825 | 0.180944 | 0.126166 | 0.124854  | 0.118735 | 0.149767  |
| 0.137238 | 0.183858 | 0.192308 | 0.138986 | 0.133596  | 0.127185 | 0.152972  |
| 0.112762 | 0.179779 | 0.189103 | 0.121795 | 0.121066  | 0.117861 | 0.141317  |
| 0.113782 | 0.180798 | 0.188666 | 0.11961  | 0.116259  | 0.106643 | 0.140297  |
| 0.114948 | 0.177593 | 0.185169 | 0.118735 | 0.115385  | 0.106935 | 0.139132  |
| 0.100962 | 0.170017 | 0.175845 | 0.109411 | 0.115093  | 0.100233 | 0.13884   |
| 0.12602  | 0.186626 | 0.194784 | 0.127477 | 0.125583  | 0.125583 | 0.143211  |
| 0.106206 | 0.179341 | 0.179633 | 0.11116  | 0.110723  | 0.102564 | 0.137092  |
| 0.136364 | 0.192599 | 0.201049 | 0.145105 | 0.137383  | 0.131847 | 0.154138  |
| 0.137966 | 0.186043 | 0.192745 | 0.139132 | 0.140734  | 0.129662 | 0.157488  |
| 0.127477 | 0.186626 | 0.192162 | 0.133304 | 0.125291  | 0.120629 | 0.144668  |
| 0.118881 | 0.178904 | 0.18211  | 0.12296  | 0.121649  | 0.114073 | 0.149767  |
| 0.113636 | 0.179779 | 0.183858 | 0.11655  | 0.123106  | 0.10912  | 0.14831   |
| 0.11116  | 0.17701  | 0.184295 | 0.11757  | 0.120338  | 0.104895 | 0.144085  |
| 0.114802 | 0.175117 | 0.185897 | 0.117716 | 0.116696  | 0.109703 | 0.141608  |
| 0.111014 | 0.179487 | 0.186189 | 0.111305 | 0.114365  | 0.107372 | 0.138986  |
| 0.106643 | 0.164336 | 0.172494 | 0.113636 | 0.0948427 | 0.110868 | 0.117716  |
| 0.129662 | 0.189103 | 0.200758 | 0.133741 | 0.135635  | 0.130099 | 0.153555  |
| 0.11553  | 0.186626 | 0.190414 | 0.112325 | 0.11859   | 0.11451  | 0.145542  |
| 0.128205 | 0.18648  | 0.190559 | 0.13345  | 0.131847  | 0.133013 | 0.147727  |
| 0.137966 | 0.196824 | 0.202069 | 0.136509 | 0.136655  | 0.13549  | 0.1537    |
| 0.181672 | 0.139132 | 0.100379 | 0.18954  | 0.184441  | 0.195221 | 0.201777  |
| 0.231352 | 0.168998 | 0.136946 | 0.235723 | 0.229167  | 0.237034 | 0.235723  |
| 0.106789 | 0.165355 | 0.171474 | 0.114948 | 0.0722611 | 0.11014  | 0.0960082 |
| 0.110431 | 0.171911 | 0.18211  | 0.117716 | 0.116987  | 0.113782 | 0.135781  |
| 0.103438 | 0.165793 | 0.179487 | 0.11014  | 0.110286  | 0.105915 | 0.136655  |
| 0.109266 | 0.173951 | 0.180653 | 0.111305 | 0.113491  | 0.111451 | 0.137238  |
| 0.106935 | 0.187354 | 0.189685 | 0.130536 | 0.126894  | 0.123106 | 0.1419    |
| 0.120338 | 0.18211  | 0.185606 | 0.119172 | 0.116404  | 0.117279 | 0.138403  |
| 0.143794 | 0.199446 | 0.206439 | 0.151661 | 0.147436  | 0.139277 | 0.157197  |
| 0.115385 | 0.178904 | 0.187937 | 0.116841 | 0.121358  | 0.110868 | 0.144231  |
| 0.132576 | 0.183858 | 0.199301 | 0.132576 | 0.130682  | 0.130099 | 0.145688  |
| 0.130682 | 0.176136 | 0.18954  | 0.134178 | 0.133159  | 0.130536 | 0.146707  |
| 0.136218 | 0.192162 | 0.200903 | 0.137092 | 0.135781  | 0.13141  | 0.150787  |
| 0.13884  | 0.188957 | 0.198572 | 0.141463 | 0.136946  | 0.135198 | 0.154283  |
| 0.11757  | 0.181672 | 0.191871 | 0.119901 | 0.122086  | 0.115676 | 0.145542  |
| 0.112908 | 0.177302 | 0.183129 | 0.112325 | 0.117133  | 0.11014  | 0.14088   |
| 0.114802 | 0.179487 | 0.185606 | 0.122086 | 0.12398   | 0.121066 | 0.14627   |
| 0.108683 | 0.17366  | 0.179487 | 0.111597 | 0.114365  | 0.103875 | 0.136946  |
| 0.113636 | 0.175408 | 0.182692 | 0.112762 | 0.115239  | 0.109994 | 0.137821  |
| 0.113199 | 0.181672 | 0.186043 | 0.118444 | 0.118007  | 0.112471 | 0.140006  |
| 0.128497 | 0.182692 | 0.194347 | 0.128788 | 0.131265  | 0.131265 | 0.146562  |



|          |          |          |          |          |          |          |
|----------|----------|----------|----------|----------|----------|----------|
| 0.139569 | 0.190559 | 0.203089 | 0.133159 | 0.136509 | 0.132721 | 0.154138 |
| 0.117279 | 0.179924 | 0.1875   | 0.120192 | 0.117716 | 0.112762 | 0.142628 |
| 0.113345 | 0.175408 | 0.182692 | 0.115385 | 0.121066 | 0.112617 | 0.143065 |
| 0.133159 | 0.189685 | 0.201049 | 0.13345  | 0.137383 | 0.126894 | 0.148019 |
| 0.11014  | 0.176573 | 0.179779 | 0.112762 | 0.114948 | 0.10708  | 0.139569 |
| 0.140589 | 0.195367 | 0.200321 | 0.141171 | 0.147727 | 0.140152 | 0.162733 |
| 0.136801 | 0.186043 | 0.192453 | 0.13884  | 0.137529 | 0.13549  | 0.156323 |
| 0.133159 | 0.177739 | 0.192016 | 0.131119 | 0.136509 | 0.129808 | 0.149184 |
| 0.111014 | 0.174534 | 0.179779 | 0.11451  | 0.111451 | 0.105332 | 0.135781 |
| 0.114365 | 0.173223 | 0.182838 | 0.112617 | 0.114802 | 0.106352 | 0.137092 |
| 0.124126 | 0.185897 | 0.195513 | 0.128497 | 0.12602  | 0.122523 | 0.145979 |
| 0.132139 | 0.182547 | 0.194202 | 0.125728 | 0.12704  | 0.121795 | 0.144085 |
| 0.132721 | 0.183421 | 0.190122 | 0.132721 | 0.135198 | 0.127914 | 0.149913 |
| 0.116259 | 0.180653 | 0.190268 | 0.118881 | 0.120192 | 0.113491 | 0.141608 |
| 0.112325 | 0.182547 | 0.188374 | 0.118735 | 0.121503 | 0.112762 | 0.142045 |
| 0.12602  | 0.181964 | 0.193328 | 0.124854 | 0.125874 | 0.125    | 0.142045 |
| 0.136509 | 0.191579 | 0.202943 | 0.136509 | 0.142191 | 0.132284 | 0.156323 |
| 0.131556 | 0.183712 | 0.196533 | 0.131556 | 0.133159 | 0.127331 | 0.149913 |
| 0.136364 | 0.190559 | 0.201632 | 0.132284 | 0.137383 | 0.13039  | 0.149476 |
| 0.135344 | 0.178176 | 0.191579 | 0.135635 | 0.138112 | 0.130828 | 0.150787 |
| 0.114073 | 0.179924 | 0.18546  | 0.121649 | 0.112762 | 0.108974 | 0.136801 |
| 0.127477 | 0.1875   | 0.196824 | 0.134761 | 0.131993 | 0.129662 | 0.148164 |
| 0.115676 | 0.174825 | 0.184441 | 0.113928 | 0.116696 | 0.108829 | 0.137238 |
| 0.111742 | 0.174679 | 0.178176 | 0.118153 | 0.121503 | 0.11655  | 0.140589 |
| 0.110286 | 0.179341 | 0.18546  | 0.117279 | 0.121503 | 0.116259 | 0.142628 |
| 0.111305 | 0.175117 | 0.18211  | 0.111305 | 0.122232 | 0.114365 | 0.143648 |
| 0.111597 | 0.172786 | 0.18211  | 0.113054 | 0.114073 | 0.107955 | 0.137238 |
| 0.136801 | 0.192745 | 0.197115 | 0.139423 | 0.138403 | 0.131993 | 0.154866 |
| 0.115967 | 0.177156 | 0.181235 | 0.118881 | 0.122523 | 0.11553  | 0.144522 |
| 0.136364 | 0.18852  | 0.199009 | 0.137821 | 0.134761 | 0.133304 | 0.145688 |
| 0.111014 | 0.175991 | 0.181818 | 0.111888 | 0.112617 | 0.109411 | 0.136655 |
| 0.131265 | 0.187791 | 0.19799  | 0.130682 | 0.132576 | 0.119755 | 0.147873 |
| 0.120338 | 0.166084 | 0.190851 | 0.127622 | 0.124563 | 0.122815 | 0.143065 |
| 0.115967 | 0.175991 | 0.18007  | 0.122669 | 0.121649 | 0.122523 | 0.14831  |
| 0.116987 | 0.182838 | 0.187791 | 0.124272 | 0.123834 | 0.107517 | 0.146125 |
| 0.119172 | 0.180653 | 0.182692 | 0.124709 | 0.123106 | 0.122815 | 0.145688 |
| 0.122232 | 0.187209 | 0.186626 | 0.121066 | 0.12296  | 0.111597 | 0.147873 |
| 0.112034 | 0.173514 | 0.181964 | 0.11553  | 0.116259 | 0.104021 | 0.146707 |
| 0.13243  | 0.191871 | 0.204108 | 0.139714 | 0.138112 | 0.13345  | 0.154283 |
| 0.143357 | 0.195804 | 0.208333 | 0.14831  | 0.136801 | 0.130973 | 0.15472  |
| 0.111014 | 0.177448 | 0.179196 | 0.113054 | 0.107372 | 0.107663 | 0.134615 |
| 0.133013 | 0.19391  | 0.201486 | 0.12602  | 0.136072 | 0.131119 | 0.151078 |
| 0.125874 | 0.189685 | 0.19493  | 0.132867 | 0.13243  | 0.126603 | 0.15472  |
| 0.129662 | 0.187646 | 0.194639 | 0.124126 | 0.133887 | 0.128351 | 0.150058 |

|          |          |          |          |          |          |          |
|----------|----------|----------|----------|----------|----------|----------|
| 0.120047 | 0.172494 | 0.184441 | 0.118881 | 0.125146 | 0.124854 | 0.138986 |
| 0.123543 | 0.192016 | 0.19493  | 0.122669 | 0.127768 | 0.122815 | 0.151224 |
| 0.124563 | 0.188374 | 0.190997 | 0.126894 | 0.127331 | 0.124126 | 0.150204 |
| 0.13141  | 0.189103 | 0.198135 | 0.125874 | 0.127185 | 0.124272 | 0.145396 |
| 0.138403 | 0.193182 | 0.200758 | 0.134907 | 0.137675 | 0.133013 | 0.148601 |
| 0.126166 | 0.189103 | 0.194056 | 0.126748 | 0.121066 | 0.131265 | 0.147145 |
| 0.115676 | 0.17366  | 0.180653 | 0.113345 | 0.12398  | 0.118444 | 0.142191 |
| 0.135927 | 0.183129 | 0.195367 | 0.13884  | 0.133159 | 0.124709 | 0.152826 |
| 0.132284 | 0.190559 | 0.198135 | 0.133741 | 0.134178 | 0.13447  | 0.155303 |
| 0.113636 | 0.170163 | 0.180653 | 0.111014 | 0.114656 | 0.114365 | 0.138695 |
| 0.214307 | 0.157197 | 0.122815 | 0.218386 | 0.212413 | 0.21824  | 0.222174 |
| 0.123397 | 0.181381 | 0.189248 | 0.119901 | 0.126748 | 0.121503 | 0.146125 |
| 0.119027 | 0.186043 | 0.184878 | 0.121358 | 0.122086 | 0.120921 | 0.143502 |
| 0.137529 | 0.18852  | 0.201923 | 0.130828 | 0.135344 | 0.137383 | 0.149476 |
| 0.119464 | 0.181235 | 0.187354 | 0.121212 | 0.121649 | 0.12398  | 0.144231 |
| 0.130828 | 0.194639 | 0.198718 | 0.134615 | 0.13243  | 0.137675 | 0.152389 |
| 0.117716 | 0.185315 | 0.186772 | 0.119172 | 0.119027 | 0.120775 | 0.143065 |
| 0.121066 | 0.179633 | 0.1875   | 0.119027 | 0.121503 | 0.117133 | 0.141754 |
| 0.12602  | 0.186917 | 0.193036 | 0.127477 | 0.126457 | 0.130536 | 0.146707 |
| 0.129953 | 0.171911 | 0.182401 | 0.121212 | 0.130682 | 0.133596 | 0.148893 |
| 0.129225 | 0.189831 | 0.19595  | 0.127477 | 0.133159 | 0.130828 | 0.14729  |
| 0.131702 | 0.192308 | 0.196096 | 0.124126 | 0.131556 | 0.131847 | 0.148601 |
| 0.129079 | 0.185023 | 0.19697  | 0.120629 | 0.12602  | 0.126894 | 0.141317 |
| 0.119755 | 0.185315 | 0.190559 | 0.123252 | 0.121358 | 0.105332 | 0.143939 |
| 0.120921 | 0.183566 | 0.190851 | 0.118007 | 0.118444 | 0.118444 | 0.142483 |
| 0.137383 | 0.190705 | 0.196241 | 0.132139 | 0.136364 | 0.136364 | 0.151369 |
| 0.119755 | 0.175991 | 0.182984 | 0.115967 | 0.121941 | 0.121358 | 0.13986  |
| 0.139277 | 0.189977 | 0.199883 | 0.144231 | 0.140297 | 0.135344 | 0.155594 |
| 0.13884  | 0.177593 | 0.181672 | 0.141754 | 0.1419   | 0.140152 | 0.163024 |
| 0.122232 | 0.173514 | 0.187791 | 0.129516 | 0.127331 | 0.117424 | 0.148164 |
| 0.127768 | 0.191579 | 0.197115 | 0.130099 | 0.130536 | 0.131993 | 0.151661 |
| 0.124126 | 0.175991 | 0.181818 | 0.132284 | 0.126894 | 0.122815 | 0.14831  |
| 0.133304 | 0.180507 | 0.188957 | 0.129808 | 0.126457 | 0.115676 | 0.140297 |
| 0.126311 | 0.174097 | 0.18109  | 0.13039  | 0.124417 | 0.120921 | 0.144959 |
| 0.13884  | 0.180216 | 0.188957 | 0.139423 | 0.140152 | 0.143357 | 0.163607 |
| 0.115093 | 0.178904 | 0.181818 | 0.119755 | 0.117861 | 0.109994 | 0.145396 |
| 0.132721 | 0.190122 | 0.195367 | 0.13884  | 0.134907 | 0.134615 | 0.153992 |
| 0.138986 | 0.16958  | 0.17803  | 0.142774 | 0.142628 | 0.146125 | 0.155012 |
| 0.122086 | 0.18648  | 0.192308 | 0.125583 | 0.126894 | 0.118735 | 0.147727 |
| 0.125583 | 0.178322 | 0.184441 | 0.130245 | 0.128351 | 0.12398  | 0.150641 |
| 0.143502 | 0.189248 | 0.200903 | 0.151078 | 0.141317 | 0.136364 | 0.153118 |
| 0.12602  | 0.181672 | 0.192162 | 0.13243  | 0.127331 | 0.124709 | 0.145542 |
| 0.140152 | 0.192308 | 0.203089 | 0.145396 | 0.138549 | 0.134178 | 0.152098 |
| 0.130099 | 0.184586 | 0.195659 | 0.135635 | 0.134907 | 0.130536 | 0.151952 |

|           |          |          |           |           |          |           |
|-----------|----------|----------|-----------|-----------|----------|-----------|
| 0.125583  | 0.192308 | 0.195513 | 0.120921  | 0.131847  | 0.118735 | 0.147727  |
| 0.128934  | 0.181381 | 0.197698 | 0.135635  | 0.133741  | 0.129953 | 0.147582  |
| 0.121212  | 0.18007  | 0.189394 | 0.130245  | 0.130099  | 0.120775 | 0.153555  |
| 0.136801  | 0.193619 | 0.195076 | 0.131265  | 0.138403  | 0.127622 | 0.151369  |
| 0.133304  | 0.184878 | 0.196241 | 0.127185  | 0.130536  | 0.129662 | 0.147582  |
| 0.140297  | 0.192745 | 0.200612 | 0.130973  | 0.138986  | 0.127914 | 0.145542  |
| 0.137675  | 0.190414 | 0.202652 | 0.133887  | 0.137529  | 0.128788 | 0.148456  |
| 0.129516  | 0.181964 | 0.190997 | 0.13243   | 0.136946  | 0.126457 | 0.154575  |
| 0.143502  | 0.184586 | 0.198572 | 0.142045  | 0.144814  | 0.139277 | 0.156906  |
| 0.124854  | 0.185169 | 0.189248 | 0.126894  | 0.13345   | 0.12296  | 0.153409  |
| 0.119318  | 0.188957 | 0.191288 | 0.119901  | 0.125583  | 0.122378 | 0.147582  |
| 0.124272  | 0.192162 | 0.197698 | 0.136509  | 0.134033  | 0.132576 | 0.153409  |
| 0.11961   | 0.183421 | 0.188666 | 0.130099  | 0.125874  | 0.116841 | 0.148456  |
| 0.141026  | 0.186772 | 0.195513 | 0.147727  | 0.14292   | 0.142045 | 0.1588    |
| 0.152389  | 0.196678 | 0.20338  | 0.154429  | 0.155449  | 0.154866 | 0.172494  |
| 0.128788  | 0.18648  | 0.199883 | 0.12704   | 0.130099  | 0.127768 | 0.144231  |
| 0.128059  | 0.178759 | 0.191871 | 0.125728  | 0.123834  | 0.119172 | 0.142628  |
| 0.142191  | 0.192599 | 0.200175 | 0.125583  | 0.13039   | 0.128351 | 0.144522  |
| 0.133304  | 0.1875   | 0.19799  | 0.131556  | 0.132867  | 0.13345  | 0.144668  |
| 0.127768  | 0.193036 | 0.197407 | 0.130682  | 0.131119  | 0.128788 | 0.151661  |
| 0.136801  | 0.191288 | 0.203234 | 0.125437  | 0.144522  | 0.136946 | 0.15778   |
| 0.138549  | 0.179341 | 0.195076 | 0.139132  | 0.135198  | 0.137529 | 0.153409  |
| 0.132576  | 0.185315 | 0.195513 | 0.13549   | 0.128059  | 0.120192 | 0.147727  |
| 0.156469  | 0.195221 | 0.207751 | 0.160256  | 0.152535  | 0.163024 | 0.167249  |
| 0.128497  | 0.187063 | 0.195221 | 0.136946  | 0.136218  | 0.125728 | 0.154138  |
| 0.136655  | 0.190268 | 0.200175 | 0.142774  | 0.142045  | 0.139132 | 0.161422  |
| 0.120775  | 0.191579 | 0.195367 | 0.123106  | 0.129662  | 0.124126 | 0.147582  |
| 0.140006  | 0.190414 | 0.206439 | 0.13243   | 0.136072  | 0.132576 | 0.14933   |
| 0.128059  | 0.179341 | 0.189248 | 0.11757   | 0.126166  | 0.127331 | 0.144668  |
| 0.132867  | 0.156177 | 0.164044 | 0.136946  | 0.112617  | 0.135052 | 0.137238  |
| 0.138258  | 0.191288 | 0.202652 | 0.0776515 | 0.138403  | 0.147727 | 0.14729   |
| 0.122378  | 0.174534 | 0.178904 | 0.123252  | 0.0514277 | 0.119901 | 0.0678904 |
| 0.133304  | 0.157197 | 0.163899 | 0.131847  | 0.0737179 | 0.131119 | 0.0738636 |
| 0.138112  | 0.147436 | 0.138112 | 0.14831   | 0.143211  | 0.136509 | 0.161422  |
| 0.131702  | 0.14831  | 0.134907 | 0.139277  | 0.116404  | 0.140297 | 0.135781  |
| 0.130682  | 0.185169 | 0.196533 | 0.135635  | 0.130245  | 0.113928 | 0.149038  |
| 0.11655   | 0.188228 | 0.193182 | 0.129371  | 0.13039   | 0.137092 | 0.15035   |
| 0.104895  | 0.17803  | 0.172494 | 0.112471  | 0.109703  | 0.112617 | 0.135781  |
| 0.0960082 | 0.170892 | 0.176428 | 0.117861  | 0.119464  | 0.105186 | 0.141171  |
| 0.121503  | 0.17803  | 0.184732 | 0.121503  | 0.123397  | 0.123397 | 0.146853  |
| 0.119464  | 0.175408 | 0.177448 | 0.119755  | 0.0499709 | 0.114656 | 0.0675991 |
| 0.11553   | 0.176428 | 0.184878 | 0.117861  | 0.122378  | 0.102855 | 0.146707  |
| 0.0898893 | 0.167395 | 0.165647 | 0.109994  | 0.083042  | 0.106352 | 0.110868  |
| 0.112325  | 0.177593 | 0.183129 | 0.115239  | 0.10169   | 0.119755 | 0.126894  |

|           |          |           |           |           |           |           |
|-----------|----------|-----------|-----------|-----------|-----------|-----------|
| 0.104895  | 0.172494 | 0.174825  | 0.118881  | 0.120484  | 0.120775  | 0.141026  |
| 0.106061  | 0.165501 | 0.173368  | 0.115967  | 0.114948  | 0.100962  | 0.138986  |
| 0.120338  | 0.177156 | 0.176282  | 0.120338  | 0.0540501 | 0.121649  | 0.0780886 |
| 0.116404  | 0.177302 | 0.180507  | 0.114073  | 0.0477855 | 0.115093  | 0.0738636 |
| 0.125146  | 0.179633 | 0.190414  | 0.131847  | 0.127914  | 0.112179  | 0.144959  |
| 0.206439  | 0.152535 | 0.128059  | 0.214307  | 0.211538  | 0.215035  | 0.219551  |
| 0.141463  | 0.184878 | 0.197407  | 0.140006  | 0.0708042 | 0.138695  | 0.0453089 |
| 0.126166  | 0.186772 | 0.192599  | 0.127331  | 0.124563  | 0.127477  | 0.141026  |
| 0.116113  | 0.173805 | 0.184003  | 0.121358  | 0.116841  | 0.125291  | 0.139423  |
| 0.2044    | 0.146125 | 0.109411  | 0.207605  | 0.204545  | 0.210956  | 0.211393  |
| 0.119901  | 0.168852 | 0.176136  | 0.129808  | 0.124126  | 0.115676  | 0.147873  |
| 0.11655   | 0.183275 | 0.189103  | 0.127331  | 0.121941  | 0.050845  | 0.14831   |
| 0.07838   | 0.175117 | 0.183566  | 0.119172  | 0.124854  | 0.116696  | 0.144522  |
| 0.100087  | 0.17905  | 0.181964  | 0.11961   | 0.121212  | 0.117424  | 0.142337  |
| 0.241987  | 0.174679 | 0.141754  | 0.249563  | 0.244464  | 0.251457  | 0.245775  |
| 0.129371  | 0.182984 | 0.187063  | 0.128788  | 0.126894  | 0.11961   | 0.148019  |
| 0.116841  | 0.178322 | 0.185023  | 0.123834  | 0.121066  | 0.101544  | 0.142483  |
| 0.123252  | 0.177448 | 0.191142  | 0.116259  | 0.123689  | 0.126311  | 0.144814  |
| 0.118881  | 0.175117 | 0.18648   | 0.11451   | 0.122815  | 0.121358  | 0.142483  |
| 0.121795  | 0.173368 | 0.182692  | 0.133741  | 0.127477  | 0.123397  | 0.147436  |
| 0.108974  | 0.143065 | 0.167249  | 0.124126  | 0.107372  | 0.125146  | 0.129371  |
| 0.119172  | 0.177156 | 0.186189  | 0.125291  | 0.121649  | 0.106498  | 0.143065  |
| 0.117861  | 0.17701  | 0.17701   | 0.114073  | 0.0498252 | 0.117716  | 0.0703671 |
| 0.105478  | 0.181527 | 0.183566  | 0.117716  | 0.121941  | 0.123106  | 0.146853  |
| 0.0912005 | 0.180361 | 0.180944  | 0.11451   | 0.115239  | 0.10912   | 0.13986   |
| 0.110577  | 0.171474 | 0.175554  | 0.114948  | 0.0574009 | 0.112762  | 0.0793998 |
| 0.111597  | 0.178613 | 0.183275  | 0.11859   | 0.118153  | 0.120775  | 0.143065  |
| 0.136801  | 0.194784 | 0.203526  | 0.0724068 | 0.13986   | 0.150058  | 0.147873  |
| 0.133596  | 0.184878 | 0.187791  | 0.136218  | 0.127622  | 0.121795  | 0.148456  |
| 0.11961   | 0.181672 | 0.190414  | 0.130682  | 0.126457  | 0.0559441 | 0.14933   |
| 0.183129  | 0.141171 | 0.0965909 | 0.185752  | 0.18211   | 0.187354  | 0.194493  |
| 0.197115  | 0.147873 | 0.102418  | 0.200903  | 0.197552  | 0.201632  | 0.209936  |
| 0.0962995 | 0.17701  | 0.175845  | 0.121066  | 0.121503  | 0.119755  | 0.146125  |
| 0.0887238 | 0.176428 | 0.181381  | 0.116696  | 0.112762  | 0.110723  | 0.137383  |
| 0.135052  | 0.17701  | 0.18546   | 0.135344  | 0.126748  | 0.141317  | 0.13447   |
| 0.11961   | 0.175554 | 0.184003  | 0.126311  | 0.122669  | 0.106061  | 0.144085  |
| 0.131993  | 0.185315 | 0.190559  | 0.131993  | 0.128351  | 0.122232  | 0.147145  |
| 0.127185  | 0.180798 | 0.191288  | 0.124563  | 0.123543  | 0.129953  | 0.13447   |
| 0.216638  | 0.157488 | 0.124272  | 0.222174  | 0.219988  | 0.224359  | 0.22771   |
| 0.112325  | 0.178467 | 0.182838  | 0.114073  | 0.112762  | 0.11451   | 0.137383  |
| 0.198135  | 0.145396 | 0.1419    | 0.205711  | 0.201486  | 0.207314  | 0.208625  |
| 0.117861  | 0.179924 | 0.189248  | 0.121941  | 0.11655   | 0.0981935 | 0.141463  |
| 0.113636  | 0.176282 | 0.184732  | 0.119172  | 0.11553   | 0.104458  | 0.143357  |
| 0.110286  | 0.164773 | 0.175554  | 0.116987  | 0.0996503 | 0.112762  | 0.124272  |

|           |          |           |           |           |           |           |
|-----------|----------|-----------|-----------|-----------|-----------|-----------|
| 0.0887238 | 0.171766 | 0.175262  | 0.112034  | 0.114219  | 0.109848  | 0.137092  |
| 0.199301  | 0.143357 | 0.109266  | 0.205711  | 0.200612  | 0.206439  | 0.212121  |
| 0.127331  | 0.17366  | 0.178322  | 0.128497  | 0.0592949 | 0.131847  | 0.0678904 |
| 0.11655   | 0.180653 | 0.192308  | 0.119755  | 0.120775  | 0.10912   | 0.147727  |
| 0.123543  | 0.174534 | 0.184441  | 0.126166  | 0.0537587 | 0.121649  | 0.0594406 |
| 0.124126  | 0.139277 | 0.187646  | 0.130536  | 0.120775  | 0.11757   | 0.136655  |
| 0.090035  | 0.181818 | 0.177448  | 0.11655   | 0.115822  | 0.106206  | 0.144522  |
| 0.121649  | 0.178759 | 0.189248  | 0.123106  | 0.11859   | 0.101107  | 0.144085  |
| 0.110868  | 0.164773 | 0.172348  | 0.12398   | 0.120338  | 0.107517  | 0.143794  |
| 0.12398   | 0.182547 | 0.188374  | 0.131556  | 0.125583  | 0.0556527 | 0.14729   |
| 0.111742  | 0.169726 | 0.170017  | 0.108246  | 0.0512821 | 0.110723  | 0.0753205 |
| 0.120921  | 0.176865 | 0.18852   | 0.12296   | 0.123106  | 0.11116   | 0.143648  |
| 0.182838  | 0.138258 | 0.0922203 | 0.186043  | 0.182401  | 0.187646  | 0.197407  |
| 0.122378  | 0.177739 | 0.192308  | 0.116841  | 0.124272  | 0.124272  | 0.142483  |
| 0.120192  | 0.18109  | 0.192745  | 0.0592949 | 0.124126  | 0.132576  | 0.144376  |
| 0.117716  | 0.182984 | 0.182401  | 0.110723  | 0.112617  | 0.121358  | 0.138695  |
| 0.127768  | 0.172931 | 0.17905   | 0.127768  | 0.128497  | 0.118881  | 0.150787  |
| 0.119901  | 0.177302 | 0.18109   | 0.120775  | 0.0515734 | 0.11859   | 0.0654138 |
| 0.124272  | 0.184878 | 0.192162  | 0.129808  | 0.12296   | 0.107809  | 0.144668  |
| 0.115967  | 0.14627  | 0.177448  | 0.11859   | 0.111451  | 0.115239  | 0.136946  |
| 0.12704   | 0.183275 | 0.19289   | 0.134033  | 0.128934  | 0.112908  | 0.147436  |
| 0.114073  | 0.18109  | 0.186917  | 0.0528846 | 0.118298  | 0.124417  | 0.13884   |
| 0.113199  | 0.178176 | 0.181381  | 0.113782  | 0.113345  | 0.117424  | 0.141463  |
| 0.094697  | 0.177448 | 0.17803   | 0.117424  | 0.11553   | 0.115822  | 0.139277  |
| 0.074155  | 0.180507 | 0.188374  | 0.113491  | 0.120921  | 0.116841  | 0.146707  |
| 0.0909091 | 0.185315 | 0.193765  | 0.129662  | 0.133887  | 0.131556  | 0.148601  |
| 0.120921  | 0.179779 | 0.179779  | 0.121795  | 0.120192  | 0.114365  | 0.145979  |
| 0.137966  | 0.181672 | 0.195367  | 0.137966  | 0.0678904 | 0.133741  | 0.0406469 |
| 0.0910548 | 0.180798 | 0.176719  | 0.113199  | 0.114802  | 0.108392  | 0.143794  |
| 0.113782  | 0.174097 | 0.180507  | 0.11116   | 0.110431  | 0.118298  | 0.134178  |
| 0.115967  | 0.158508 | 0.163462  | 0.115967  | 0.069493  | 0.118735  | 0.0882867 |
| 0.128497  | 0.177448 | 0.185606  | 0.129953  | 0.131265  | 0.114948  | 0.150058  |
| 0.182692  | 0.13345  | 0.111305  | 0.191434  | 0.186626  | 0.188374  | 0.195804  |
| 0.116113  | 0.17264  | 0.184295  | 0.116404  | 0.118298  | 0.108683  | 0.143211  |
| 0.113491  | 0.169726 | 0.173514  | 0.103875  | 0.101107  | 0.107226  | 0.126603  |
| 0.119318  | 0.180216 | 0.194202  | 0.128642  | 0.127914  | 0.0562354 | 0.146999  |
| 0.166521  | 0.133304 | 0.105624  | 0.175262  | 0.170163  | 0.174534  | 0.186626  |
| 0.13986   | 0.187063 | 0.193473  | 0.139277  | 0.135635  | 0.130682  | 0.159674  |
| 0.152098  | 0.194347 | 0.204545  | 0.153555  | 0.148164  | 0.141463  | 0.163462  |
| 0.140297  | 0.191871 | 0.20236   | 0.0808566 | 0.141317  | 0.150058  | 0.146707  |
| 0.120484  | 0.175554 | 0.176428  | 0.121358  | 0.120047  | 0.111888  | 0.146999  |
| 0.120921  | 0.175699 | 0.181818  | 0.120921  | 0.0479312 | 0.121649  | 0.0641026 |
| 0.202943  | 0.151369 | 0.112325  | 0.20877   | 0.203089  | 0.209499  | 0.213432  |
| 0.115239  | 0.174097 | 0.18109   | 0.124272  | 0.116259  | 0.120921  | 0.139423  |

|           |          |           |           |           |           |           |
|-----------|----------|-----------|-----------|-----------|-----------|-----------|
| 0.125583  | 0.175699 | 0.182401  | 0.125     | 0.0549242 | 0.125146  | 0.0585664 |
| 0.117716  | 0.172494 | 0.183858  | 0.119464  | 0.123106  | 0.106498  | 0.142191  |
| 0.149767  | 0.135198 | 0.127914  | 0.163462  | 0.151952  | 0.168852  | 0.16521   |
| 0.104021  | 0.171911 | 0.173951  | 0.113636  | 0.10708   | 0.116113  | 0.132867  |
| 0.13243   | 0.195076 | 0.200321  | 0.144085  | 0.143357  | 0.147727  | 0.156323  |
| 0.118444  | 0.165064 | 0.177593  | 0.12602   | 0.124417  | 0.117133  | 0.144959  |
| 0.183421  | 0.137383 | 0.0948427 | 0.190414  | 0.184149  | 0.18648   | 0.195367  |
| 0.126603  | 0.18546  | 0.182838  | 0.127185  | 0.125874  | 0.115093  | 0.149621  |
| 0.108537  | 0.172931 | 0.17701   | 0.107955  | 0.104021  | 0.107517  | 0.130973  |
| 0.109557  | 0.175991 | 0.180361  | 0.113636  | 0.109703  | 0.115822  | 0.136364  |
| 0.118153  | 0.178467 | 0.183129  | 0.124272  | 0.118298  | 0.104021  | 0.140297  |
| 0.11961   | 0.18109  | 0.189248  | 0.128934  | 0.122086  | 0.0512821 | 0.148456  |
| 0.116987  | 0.18109  | 0.17905   | 0.113491  | 0.123252  | 0.120047  | 0.146125  |
| 0.0906177 | 0.179196 | 0.178613  | 0.111888  | 0.114073  | 0.10912   | 0.140734  |
| 0.181381  | 0.137966 | 0.0919289 | 0.187209  | 0.184441  | 0.189394  | 0.198572  |
| 0.104312  | 0.17803  | 0.185606  | 0.111014  | 0.121649  | 0.120192  | 0.144522  |
| 0.114656  | 0.170309 | 0.173805  | 0.122232  | 0.107809  | 0.108974  | 0.128934  |
| 0.20134   | 0.148893 | 0.113054  | 0.207459  | 0.205565  | 0.212558  | 0.215326  |
| 0.122378  | 0.179779 | 0.192599  | 0.115676  | 0.123689  | 0.123106  | 0.143648  |
| 0.092803  | 0.181672 | 0.17905   | 0.119318  | 0.116259  | 0.112471  | 0.142628  |
| 0.0875583 | 0.177302 | 0.175554  | 0.111116  | 0.110431  | 0.107226  | 0.137966  |
| 0.125583  | 0.178322 | 0.191434  | 0.13345   | 0.0782343 | 0.137966  | 0.0603147 |
| 0.18211   | 0.140152 | 0.0906177 | 0.185897  | 0.184878  | 0.188374  | 0.196387  |
| 0.119318  | 0.183712 | 0.189248  | 0.128642  | 0.123252  | 0.106643  | 0.143794  |
| 0.0861014 | 0.181381 | 0.191871  | 0.124563  | 0.128788  | 0.124709  | 0.148456  |
| 0.0907634 | 0.175845 | 0.177885  | 0.115239  | 0.115967  | 0.109848  | 0.142337  |
| 0.0875583 | 0.181672 | 0.177302  | 0.111451  | 0.111888  | 0.106643  | 0.140297  |
| 0.0879953 | 0.175117 | 0.174534  | 0.113928  | 0.114948  | 0.109994  | 0.140734  |
| 0.114656  | 0.177302 | 0.181964  | 0.116404  | 0.0472028 | 0.115093  | 0.0726981 |
| 0.102564  | 0.168998 | 0.177448  | 0.115676  | 0.113491  | 0.103293  | 0.138695  |
| 0.127331  | 0.182984 | 0.187937  | 0.129662  | 0.128059  | 0.119027  | 0.15035   |
| 0.113345  | 0.183858 | 0.197844  | 0.112179  | 0.118735  | 0.13447   | 0.132867  |
| 0.123252  | 0.184732 | 0.18648   | 0.127622  | 0.127185  | 0.116987  | 0.153263  |
| 0.130973  | 0.139132 | 0.19391   | 0.137675  | 0.126748  | 0.126166  | 0.137966  |
| 0.186772  | 0.143939 | 0.097028  | 0.188228  | 0.186334  | 0.192745  | 0.200466  |
| 0.0750291 | 0.177302 | 0.186626  | 0.113199  | 0.119755  | 0.115676  | 0.145542  |
| 0.13141   | 0.179487 | 0.185315  | 0.129953  | 0.060169  | 0.128351  | 0.0568182 |
| 0.088141  | 0.18109  | 0.179341  | 0.115239  | 0.111888  | 0.107226  | 0.136509  |
| 0.105769  | 0.168124 | 0.175991  | 0.113345  | 0.11553   | 0.103584  | 0.138403  |
| 0.101107  | 0.172494 | 0.174242  | 0.113345  | 0.114365  | 0.119318  | 0.143065  |
| 0.121358  | 0.177302 | 0.186917  | 0.128934  | 0.122086  | 0.106935  | 0.144668  |
| 0.132139  | 0.181381 | 0.190414  | 0.128351  | 0.125     | 0.131993  | 0.139423  |
| 0.112762  | 0.182692 | 0.182984  | 0.0588578 | 0.114365  | 0.121649  | 0.140152  |
| 0.104312  | 0.166667 | 0.175699  | 0.120921  | 0.11757   | 0.0980478 | 0.143065  |

|           |          |           |           |           |           |           |
|-----------|----------|-----------|-----------|-----------|-----------|-----------|
| 0.10067   | 0.163899 | 0.174679  | 0.118735  | 0.111305  | 0.0979021 | 0.135635  |
| 0.101981  | 0.168124 | 0.174825  | 0.111888  | 0.105915  | 0.105041  | 0.133159  |
| 0.117279  | 0.178467 | 0.188374  | 0.126894  | 0.116841  | 0.10169   | 0.142045  |
| 0.13549   | 0.187354 | 0.193765  | 0.137529  | 0.131847  | 0.12602   | 0.153846  |
| 0.116987  | 0.18109  | 0.185752  | 0.124854  | 0.123252  | 0.102273  | 0.146416  |
| 0.112762  | 0.173077 | 0.176865  | 0.113636  | 0.0502622 | 0.11553   | 0.0757576 |
| 0.119172  | 0.179779 | 0.184732  | 0.120921  | 0.118735  | 0.101544  | 0.142774  |
| 0.0895979 | 0.178176 | 0.176428  | 0.110286  | 0.111014  | 0.108683  | 0.14088   |
| 0.114219  | 0.177739 | 0.185897  | 0.112471  | 0.116987  | 0.107372  | 0.140443  |
| 0.0952797 | 0.179487 | 0.179779  | 0.11655   | 0.116404  | 0.113491  | 0.142774  |
| 0.0687646 | 0.174825 | 0.179196  | 0.108683  | 0.112908  | 0.108829  | 0.141026  |
| 0.112179  | 0.182984 | 0.183275  | 0.0562354 | 0.117861  | 0.121358  | 0.142483  |
| 0.113636  | 0.181235 | 0.18648   | 0.123252  | 0.118735  | 0.0511364 | 0.143939  |
| 0.104749  | 0.174097 | 0.175554  | 0.116987  | 0.109848  | 0.102564  | 0.137966  |
| 0.0917832 | 0.177739 | 0.177448  | 0.113636  | 0.11553   | 0.10912   | 0.139569  |
| 0.11451   | 0.166667 | 0.172786  | 0.113054  | 0.116113  | 0.118735  | 0.138112  |
| 0.115822  | 0.177302 | 0.181672  | 0.120775  | 0.108392  | 0.117133  | 0.134178  |
| 0.108974  | 0.177156 | 0.181235  | 0.11014   | 0.113782  | 0.111451  | 0.137821  |
| 0.0871212 | 0.184441 | 0.177739  | 0.114219  | 0.110868  | 0.108246  | 0.138695  |
| 0.120484  | 0.170309 | 0.17701   | 0.116987  | 0.0504079 | 0.117716  | 0.064831  |
| 0.118153  | 0.17905  | 0.1875    | 0.120775  | 0.119464  | 0.103147  | 0.14729   |
| 0.116404  | 0.176719 | 0.182547  | 0.118153  | 0.0506993 | 0.116841  | 0.0721154 |
| 0.11116   | 0.178467 | 0.186626  | 0.124854  | 0.125291  | 0.0492424 | 0.146416  |
| 0.10708   | 0.173805 | 0.180798  | 0.117861  | 0.117133  | 0.105769  | 0.142628  |
| 0.0983392 | 0.173805 | 0.176428  | 0.105624  | 0.111597  | 0.110431  | 0.133887  |
| 0.112762  | 0.176282 | 0.182692  | 0.115385  | 0.116696  | 0.104749  | 0.142191  |
| 0.120192  | 0.175262 | 0.178467  | 0.118153  | 0.0547786 | 0.121503  | 0.071824  |
| 0.124563  | 0.171474 | 0.185169  | 0.121066  | 0.111597  | 0.122086  | 0.134761  |
| 0.118007  | 0.171037 | 0.174825  | 0.118298  | 0.10271   | 0.111742  | 0.129662  |
| 0.186189  | 0.13986  | 0.0964452 | 0.190559  | 0.1875    | 0.194202  | 0.202797  |
| 0.147436  | 0.126166 | 0.120338  | 0.160839  | 0.151661  | 0.161568  | 0.166667  |
| 0.125291  | 0.183566 | 0.183275  | 0.12704   | 0.124272  | 0.116987  | 0.151807  |
| 0.106206  | 0.167686 | 0.179924  | 0.119318  | 0.113636  | 0.11451   | 0.137675  |
| 0.152535  | 0.196533 | 0.208188  | 0.155157  | 0.152098  | 0.143357  | 0.162442  |
| 0.104895  | 0.186189 | 0.185315  | 0.117424  | 0.122523  | 0.122232  | 0.147727  |
| 0.0817308 | 0.175262 | 0.175554  | 0.116404  | 0.11859   | 0.11859   | 0.145833  |
| 0.0964452 | 0.171329 | 0.176282  | 0.115967  | 0.109994  | 0.113199  | 0.137238  |
| 0.109557  | 0.178613 | 0.18211   | 0.11859   | 0.116696  | 0.114656  | 0.141608  |
| 0.120921  | 0.176865 | 0.185606  | 0.124126  | 0.112034  | 0.117279  | 0.133741  |
| 0.194784  | 0.144959 | 0.104167  | 0.196241  | 0.194347  | 0.20338   | 0.20877   |
| 0.122378  | 0.183566 | 0.190851  | 0.131702  | 0.127768  | 0.10708   | 0.148019  |
| 0.11116   | 0.165064 | 0.170017  | 0.118444  | 0.0751748 | 0.111888  | 0.0962995 |
| 0.0875583 | 0.173514 | 0.173223  | 0.108537  | 0.107517  | 0.106643  | 0.137092  |
| 0.115676  | 0.149767 | 0.18211   | 0.122378  | 0.118153  | 0.113199  | 0.143357  |

|           |          |           |           |           |           |           |
|-----------|----------|-----------|-----------|-----------|-----------|-----------|
| 0.171766  | 0.138258 | 0.113782  | 0.177593  | 0.178322  | 0.180653  | 0.193036  |
| 0.237617  | 0.172057 | 0.137675  | 0.243735  | 0.240385  | 0.246212  | 0.245192  |
| 0.114656  | 0.184295 | 0.186626  | 0.0540501 | 0.116259  | 0.122669  | 0.140297  |
| 0.116987  | 0.179633 | 0.18546   | 0.12602   | 0.111597  | 0.116259  | 0.135344  |
| 0.124563  | 0.180798 | 0.183421  | 0.125437  | 0.123252  | 0.115676  | 0.150495  |
| 0.117133  | 0.178904 | 0.183566  | 0.127914  | 0.121358  | 0.0517191 | 0.147145  |
| 0.119027  | 0.177885 | 0.187209  | 0.123689  | 0.118007  | 0.100233  | 0.13884   |
| 0.0987762 | 0.174825 | 0.178322  | 0.105478  | 0.113782  | 0.110286  | 0.138403  |
| 0.0890152 | 0.164481 | 0.168561  | 0.115822  | 0.0827506 | 0.11014   | 0.107955  |
| 0.116696  | 0.180216 | 0.186917  | 0.125146  | 0.118007  | 0.104021  | 0.141171  |
| 0.094697  | 0.164918 | 0.170746  | 0.114802  | 0.0753205 | 0.113199  | 0.0961538 |
| 0.11553   | 0.181964 | 0.186917  | 0.117279  | 0.117716  | 0.118007  | 0.142628  |
| 0.105478  | 0.16958  | 0.176282  | 0.11655   | 0.112617  | 0.103584  | 0.140443  |
| 0.114073  | 0.180798 | 0.186917  | 0.0482226 | 0.119464  | 0.124709  | 0.142337  |
| 0.115967  | 0.175699 | 0.17803   | 0.116259  | 0.0502622 | 0.121649  | 0.0737179 |
| 0.10373   | 0.173368 | 0.175408  | 0.106935  | 0.106206  | 0.106498  | 0.129371  |
| 0.130828  | 0.193473 | 0.196096  | 0.122669  | 0.132139  | 0.122232  | 0.145396  |
| 0.131119  | 0.186772 | 0.199301  | 0.138695  | 0.135052  | 0.0654138 | 0.151515  |
| 0.0895979 | 0.181381 | 0.176136  | 0.114656  | 0.111597  | 0.108683  | 0.138549  |
| 0.0999417 | 0.164336 | 0.173077  | 0.119755  | 0.120775  | 0.113199  | 0.143065  |
| 0.109266  | 0.185023 | 0.189685  | 0.129662  | 0.127768  | 0.125146  | 0.143065  |
| 0.202069  | 0.148164 | 0.122232  | 0.207896  | 0.205128  | 0.208333  | 0.213141  |
| 0.1081    | 0.175991 | 0.177448  | 0.0574009 | 0.112617  | 0.114656  | 0.136072  |
| 0.106789  | 0.171766 | 0.178759  | 0.116113  | 0.114219  | 0.10169   | 0.14292   |
| 0.0761946 | 0.17905  | 0.181964  | 0.112617  | 0.119172  | 0.113928  | 0.148164  |
| 0.120921  | 0.179487 | 0.189394  | 0.11655   | 0.123689  | 0.12398   | 0.1419    |
| 0.115676  | 0.149767 | 0.182984  | 0.120629  | 0.114656  | 0.111451  | 0.135198  |
| 0.190268  | 0.141608 | 0.104312  | 0.195804  | 0.190997  | 0.198572  | 0.206585  |
| 0.121066  | 0.17905  | 0.180507  | 0.121066  | 0.0506993 | 0.121503  | 0.0729895 |
| 0.0906177 | 0.179779 | 0.174825  | 0.113054  | 0.111451  | 0.108537  | 0.138112  |
| 0.127477  | 0.180507 | 0.1875    | 0.124854  | 0.122378  | 0.122086  | 0.136801  |
| 0.115239  | 0.179633 | 0.183421  | 0.123397  | 0.119172  | 0.0509907 | 0.141754  |
| 0.122523  | 0.173514 | 0.176136  | 0.115822  | 0.0553613 | 0.120338  | 0.0756119 |
| 0.111451  | 0.168852 | 0.171766  | 0.109411  | 0.0777972 | 0.111014  | 0.100379  |
| 0.116113  | 0.181381 | 0.185169  | 0.118153  | 0.114802  | 0.11655   | 0.139132  |
| 0.115239  | 0.18109  | 0.186626  | 0.109994  | 0.117716  | 0.117716  | 0.143502  |
| 0.187063  | 0.143065 | 0.0973193 | 0.197552  | 0.190997  | 0.194202  | 0.205128  |
| 0.111451  | 0.169726 | 0.173514  | 0.108246  | 0.0568182 | 0.110723  | 0.0802739 |
| 0.185606  | 0.144814 | 0.0967366 | 0.194347  | 0.186917  | 0.194493  | 0.201923  |
| 0.182547  | 0.140589 | 0.0983392 | 0.191288  | 0.183275  | 0.190268  | 0.200029  |
| 0.12602   | 0.184586 | 0.19595   | 0.135927  | 0.130828  | 0.0582751 | 0.147582  |
| 0.131847  | 0.184586 | 0.19799   | 0.126894  | 0.13345   | 0.134033  | 0.150787  |
| 0.108537  | 0.170892 | 0.176719  | 0.107372  | 0.108683  | 0.110431  | 0.133887  |
| 0.111597  | 0.17366  | 0.172494  | 0.111014  | 0.060169  | 0.107372  | 0.0836247 |



|           |          |           |           |           |           |           |
|-----------|----------|-----------|-----------|-----------|-----------|-----------|
| 0.113782  | 0.176428 | 0.177302  | 0.114365  | 0.0527389 | 0.116259  | 0.0791084 |
| 0.0893065 | 0.181964 | 0.175262  | 0.118153  | 0.113054  | 0.110723  | 0.14088   |
| 0.116113  | 0.177885 | 0.184878  | 0.123397  | 0.113054  | 0.0999417 | 0.136509  |
| 0.114948  | 0.178467 | 0.186626  | 0.12398   | 0.119464  | 0.0996503 | 0.140006  |
| 0.114802  | 0.182401 | 0.187354  | 0.0556527 | 0.120484  | 0.123397  | 0.138112  |
| 0.115822  | 0.184586 | 0.188083  | 0.128351  | 0.122086  | 0.0512821 | 0.14729   |
| 0.0891608 | 0.177739 | 0.176865  | 0.110723  | 0.109703  | 0.10708   | 0.134615  |
| 0.116987  | 0.176428 | 0.177593  | 0.116696  | 0.0492424 | 0.115967  | 0.074155  |
| 0.104312  | 0.166667 | 0.177448  | 0.106061  | 0.104458  | 0.107372  | 0.130245  |
| 0.129516  | 0.174097 | 0.1875    | 0.128059  | 0.0608974 | 0.126748  | 0.0540501 |
| 0.12398   | 0.179341 | 0.183712  | 0.124272  | 0.122378  | 0.116259  | 0.145251  |
| 0.132576  | 0.181527 | 0.191142  | 0.132284  | 0.0625    | 0.13039   | 0.0515734 |
| 0.251748  | 0.18007  | 0.145396  | 0.255828  | 0.254516  | 0.261218  | 0.255828  |
| 0.130536  | 0.181818 | 0.197844  | 0.130245  | 0.132139  | 0.122523  | 0.145979  |
| 0.128642  | 0.178176 | 0.194493  | 0.130973  | 0.128788  | 0.118881  | 0.146416  |
| 0.20979   | 0.154429 | 0.120047  | 0.217949  | 0.21081   | 0.219551  | 0.219114  |
| 0.124854  | 0.178176 | 0.19391   | 0.130973  | 0.132284  | 0.118881  | 0.149913  |
| 0.224505  | 0.159237 | 0.127477  | 0.229167  | 0.220862  | 0.229312  | 0.229167  |
| 0.124126  | 0.176573 | 0.191725  | 0.123543  | 0.126603  | 0.114073  | 0.141317  |
| 0.105624  | 0.186043 | 0.189248  | 0.126603  | 0.124709  | 0.120921  | 0.143794  |
| 0.113199  | 0.17905  | 0.180798  | 0.111742  | 0.116841  | 0.11655   | 0.141754  |
| 0.12398   | 0.181964 | 0.192162  | 0.135927  | 0.129371  | 0.0585664 | 0.149621  |
| 0.194202  | 0.146125 | 0.0930944 | 0.199155  | 0.196387  | 0.201632  | 0.20877   |
| 0.131847  | 0.179341 | 0.189831  | 0.127768  | 0.0600233 | 0.126457  | 0.055507  |
| 0.121649  | 0.175262 | 0.177302  | 0.113199  | 0.0492424 | 0.120047  | 0.0753205 |
| 0.220862  | 0.162296 | 0.125874  | 0.22465   | 0.220717  | 0.227418  | 0.227855  |
| 0.117861  | 0.178176 | 0.18546   | 0.123689  | 0.123543  | 0.105186  | 0.146707  |
| 0.188811  | 0.144522 | 0.105186  | 0.194347  | 0.189831  | 0.19799   | 0.206585  |
| 0.121212  | 0.181527 | 0.185606  | 0.123543  | 0.123397  | 0.104167  | 0.145105  |
| 0.0935315 | 0.183275 | 0.181235  | 0.11655   | 0.114656  | 0.110286  | 0.140152  |
| 0.118153  | 0.176719 | 0.189831  | 0.127768  | 0.121795  | 0.116259  | 0.142628  |
| 0.128059  | 0.186626 | 0.197115  | 0.138258  | 0.132576  | 0.0632284 | 0.147873  |
| 0.104604  | 0.17162  | 0.177448  | 0.111597  | 0.113782  | 0.120192  | 0.13986   |
| 0.147436  | 0.130245 | 0.117716  | 0.15676   | 0.155449  | 0.156614  | 0.175699  |
| 0.113345  | 0.172786 | 0.174242  | 0.112471  | 0.0470571 | 0.114365  | 0.0708042 |
| 0.120921  | 0.17803  | 0.187937  | 0.111597  | 0.122815  | 0.121649  | 0.146853  |
| 0.116841  | 0.175408 | 0.186189  | 0.123543  | 0.120775  | 0.110868  | 0.14831   |
| 0.126457  | 0.179779 | 0.189685  | 0.124417  | 0.120775  | 0.126311  | 0.134907  |
| 0.186626  | 0.142045 | 0.0936772 | 0.18954   | 0.188228  | 0.193765  | 0.201777  |
| 0.087704  | 0.17803  | 0.177448  | 0.115676  | 0.111451  | 0.106206  | 0.136946  |
| 0.116113  | 0.171183 | 0.176136  | 0.126311  | 0.12704   | 0.0556527 | 0.150787  |
| 0.118881  | 0.179487 | 0.18852   | 0.121212  | 0.117861  | 0.10271   | 0.143065  |
| 0.124563  | 0.181381 | 0.189831  | 0.128934  | 0.124417  | 0.107517  | 0.143211  |
| 0.0976107 | 0.18007  | 0.181235  | 0.120629  | 0.118735  | 0.118444  | 0.140443  |

|           |          |           |           |           |           |           |
|-----------|----------|-----------|-----------|-----------|-----------|-----------|
| 0.24898   | 0.178176 | 0.144085  | 0.252185  | 0.250291  | 0.257284  | 0.251311  |
| 0.113636  | 0.172203 | 0.183275  | 0.125     | 0.116404  | 0.112617  | 0.141026  |
| 0         | 0.171911 | 0.175699  | 0.1081    | 0.116113  | 0.113782  | 0.142483  |
| 0.171911  | 0        | 0.140152  | 0.180944  | 0.17701   | 0.181964  | 0.182692  |
| 0.175699  | 0.140152 | 0         | 0.185606  | 0.181381  | 0.183421  | 0.197844  |
| 0.1081    | 0.180944 | 0.185606  | 0         | 0.116113  | 0.124563  | 0.144231  |
| 0.116113  | 0.17701  | 0.181381  | 0.116113  | 0         | 0.118007  | 0.0724068 |
| 0.113782  | 0.181964 | 0.183421  | 0.124563  | 0.118007  | 0         | 0.140589  |
| 0.142483  | 0.182692 | 0.197844  | 0.144231  | 0.0724068 | 0.140589  | 0         |
| 0.113636  | 0.180653 | 0.18211   | 0.0547786 | 0.11553   | 0.119318  | 0.1419    |
| 0.116113  | 0.183421 | 0.187209  | 0.0534674 | 0.117424  | 0.125583  | 0.144376  |
| 0.121795  | 0.180944 | 0.189394  | 0.130245  | 0.13039   | 0.111742  | 0.147436  |
| 0.118881  | 0.168998 | 0.176282  | 0.120921  | 0.0525932 | 0.118153  | 0.0638112 |
| 0.128642  | 0.178759 | 0.185752  | 0.128059  | 0.0576923 | 0.12704   | 0.0525932 |
| 0.115676  | 0.162587 | 0.169289  | 0.126166  | 0.120192  | 0.108829  | 0.142191  |
| 0.125728  | 0.185752 | 0.191871  | 0.133887  | 0.130245  | 0.0585664 | 0.149038  |
| 0.137821  | 0.192308 | 0.206585  | 0.143357  | 0.14292   | 0.0744464 | 0.157925  |
| 0.117279  | 0.17264  | 0.187209  | 0.128642  | 0.121503  | 0.115385  | 0.142337  |
| 0.132284  | 0.187937 | 0.201049  | 0.142191  | 0.135635  | 0.0633741 | 0.151515  |
| 0.132576  | 0.184149 | 0.196096  | 0.137238  | 0.129225  | 0.115822  | 0.151515  |
| 0.199446  | 0.149038 | 0.108829  | 0.203817  | 0.197844  | 0.203089  | 0.215181  |
| 0.122378  | 0.185023 | 0.190559  | 0.125874  | 0.130682  | 0.121358  | 0.153263  |
| 0.183858  | 0.137529 | 0.100233  | 0.190268  | 0.186334  | 0.188957  | 0.198718  |
| 0.1081    | 0.180653 | 0.183275  | 0.112179  | 0.114365  | 0.114073  | 0.139569  |
| 0.10169   | 0.180653 | 0.183275  | 0.125291  | 0.125728  | 0.120775  | 0.142483  |
| 0.125874  | 0.178613 | 0.185315  | 0.128788  | 0.125146  | 0.118735  | 0.145105  |
| 0.11757   | 0.178759 | 0.177885  | 0.120775  | 0.121503  | 0.113636  | 0.144959  |
| 0.12296   | 0.171037 | 0.179487  | 0.121795  | 0.048514  | 0.118444  | 0.0638112 |
| 0.123834  | 0.173077 | 0.181527  | 0.121212  | 0.0540501 | 0.11961   | 0.0565268 |
| 0.090035  | 0.177156 | 0.174242  | 0.115385  | 0.117279  | 0.112034  | 0.143357  |
| 0.118444  | 0.17701  | 0.184295  | 0.111742  | 0.121503  | 0.119172  | 0.144668  |
| 0.13039   | 0.183421 | 0.188666  | 0.130682  | 0.124709  | 0.122378  | 0.148747  |
| 0.13345   | 0.173951 | 0.182984  | 0.141026  | 0.138549  | 0.11757   | 0.152389  |
| 0.243881  | 0.173951 | 0.138986  | 0.247378  | 0.245484  | 0.252185  | 0.247669  |
| 0.0941142 | 0.181818 | 0.177739  | 0.11451   | 0.116113  | 0.112034  | 0.143065  |
| 0.174679  | 0.13243  | 0.0884324 | 0.182547  | 0.179487  | 0.178904  | 0.194493  |
| 0.177739  | 0.135781 | 0.0920746 | 0.184732  | 0.184003  | 0.1875    | 0.196678  |
| 0.119027  | 0.1706   | 0.174971  | 0.11553   | 0.121503  | 0.122086  | 0.150204  |
| 0.111451  | 0.170892 | 0.181381  | 0.122232  | 0.113928  | 0.109266  | 0.139714  |
| 0.0992133 | 0.184295 | 0.187209  | 0.126894  | 0.122086  | 0.120629  | 0.142337  |
| 0.115239  | 0.17264  | 0.172931  | 0.113782  | 0.0521562 | 0.113345  | 0.0773601 |
| 0.107809  | 0.166084 | 0.170455  | 0.113345  | 0.119318  | 0.114656  | 0.1419    |
| 0.115093  | 0.180653 | 0.185315  | 0.123543  | 0.121358  | 0.104167  | 0.145396  |
| 0.114948  | 0.165064 | 0.177593  | 0.123397  | 0.0775058 | 0.121503  | 0.0849359 |

|           |          |           |           |           |           |           |
|-----------|----------|-----------|-----------|-----------|-----------|-----------|
| 0.133887  | 0.183129 | 0.191871  | 0.130099  | 0.0608974 | 0.128788  | 0.0552156 |
| 0.0894522 | 0.17803  | 0.179487  | 0.113928  | 0.114656  | 0.112325  | 0.140152  |
| 0.130828  | 0.18007  | 0.189103  | 0.128497  | 0.0572552 | 0.126894  | 0.0606061 |
| 0.118444  | 0.171766 | 0.184586  | 0.116113  | 0.119172  | 0.108974  | 0.144959  |
| 0.133013  | 0.184586 | 0.191288  | 0.134761  | 0.128788  | 0.124126  | 0.147582  |
| 0.117133  | 0.185023 | 0.185897  | 0.125874  | 0.122523  | 0.0534674 | 0.147145  |
| 0.13447   | 0.186043 | 0.19799   | 0.139714  | 0.135781  | 0.119172  | 0.150204  |
| 0.119464  | 0.182401 | 0.190268  | 0.120338  | 0.123106  | 0.123689  | 0.143357  |
| 0.0926573 | 0.175699 | 0.174825  | 0.117133  | 0.114656  | 0.112617  | 0.139569  |
| 0.0885781 | 0.182984 | 0.192308  | 0.129371  | 0.130682  | 0.129225  | 0.147727  |
| 0.176428  | 0.135344 | 0.0895979 | 0.181964  | 0.179779  | 0.185023  | 0.195076  |
| 0.134615  | 0.18211  | 0.192599  | 0.134907  | 0.0616259 | 0.132139  | 0.0521562 |
| 0.120338  | 0.174825 | 0.18007   | 0.121503  | 0.0534674 | 0.11961   | 0.0638112 |
| 0.127768  | 0.18109  | 0.187209  | 0.129225  | 0.125583  | 0.116841  | 0.14933   |
| 0.118881  | 0.175991 | 0.176573  | 0.120047  | 0.116696  | 0.107955  | 0.142774  |
| 0.114948  | 0.18109  | 0.185169  | 0.126603  | 0.123543  | 0.0536131 | 0.145251  |
| 0.122086  | 0.184149 | 0.190559  | 0.132576  | 0.129516  | 0.0557984 | 0.152972  |
| 0.182255  | 0.139132 | 0.0901807 | 0.189248  | 0.187937  | 0.190268  | 0.199446  |
| 0.111742  | 0.159528 | 0.1706    | 0.11757   | 0.0728438 | 0.11859   | 0.08581   |
| 0.101107  | 0.153846 | 0.155886  | 0.106061  | 0.106498  | 0.111451  | 0.129953  |
| 0.123834  | 0.174242 | 0.182401  | 0.126166  | 0.0534674 | 0.122815  | 0.0614802 |
| 0.18546   | 0.140006 | 0.0954254 | 0.190997  | 0.185315  | 0.192308  | 0.199446  |
| 0.105769  | 0.166958 | 0.172494  | 0.115967  | 0.114365  | 0.10271   | 0.140152  |
| 0.124563  | 0.182255 | 0.192162  | 0.133887  | 0.126748  | 0.11014   | 0.147582  |
| 0.125437  | 0.176136 | 0.183421  | 0.121941  | 0.0518648 | 0.122669  | 0.0630828 |
| 0.107226  | 0.179779 | 0.185023  | 0.0544872 | 0.112034  | 0.116987  | 0.137529  |
| 0.178613  | 0.135198 | 0.0912005 | 0.187646  | 0.180216  | 0.184878  | 0.193182  |
| 0.122669  | 0.175408 | 0.185023  | 0.126748  | 0.121358  | 0.10912   | 0.141317  |
| 0.0740093 | 0.16958  | 0.175699  | 0.108392  | 0.108829  | 0.110577  | 0.136655  |
| 0.105769  | 0.164918 | 0.166084  | 0.114219  | 0.117279  | 0.10708   | 0.139569  |
| 0.112471  | 0.155012 | 0.160839  | 0.120338  | 0.113199  | 0.119318  | 0.138112  |
| 0.119901  | 0.180798 | 0.189831  | 0.112908  | 0.122086  | 0.121795  | 0.147582  |
| 0.131556  | 0.183421 | 0.196533  | 0.136509  | 0.131702  | 0.11451   | 0.149913  |
| 0.0898893 | 0.180216 | 0.181381  | 0.116404  | 0.112762  | 0.109266  | 0.13884   |
| 0.127768  | 0.182547 | 0.191288  | 0.121066  | 0.115676  | 0.121503  | 0.136218  |
| 0.138403  | 0.191142 | 0.20134   | 0.076049  | 0.13884   | 0.149621  | 0.148893  |
| 0.229312  | 0.164627 | 0.134907  | 0.237179  | 0.230915  | 0.236451  | 0.237471  |
| 0.123543  | 0.18852  | 0.197844  | 0.125874  | 0.125146  | 0.126311  | 0.146562  |
| 0.116259  | 0.180361 | 0.18852   | 0.113636  | 0.123689  | 0.120484  | 0.148893  |
| 0.113199  | 0.165355 | 0.176136  | 0.120484  | 0.0576923 | 0.117424  | 0.0665793 |
| 0.121212  | 0.178613 | 0.177448  | 0.112762  | 0.122523  | 0.12398   | 0.147436  |
| 0.111742  | 0.168561 | 0.181964  | 0.114656  | 0.112179  | 0.114219  | 0.134761  |
| 0.11961   | 0.140589 | 0.184003  | 0.125728  | 0.116259  | 0.11655   | 0.135344  |
| 0.123252  | 0.171911 | 0.180653  | 0.125583  | 0.0622086 | 0.122815  | 0.0681818 |

|           |          |           |           |           |          |           |
|-----------|----------|-----------|-----------|-----------|----------|-----------|
| 0.131556  | 0.17905  | 0.188666  | 0.132721  | 0.130828  | 0.113345 | 0.146416  |
| 0.104458  | 0.171183 | 0.182255  | 0.092803  | 0.115093  | 0.11655  | 0.14088   |
| 0.231352  | 0.166375 | 0.136072  | 0.236888  | 0.23208   | 0.237908 | 0.236597  |
| 0.106206  | 0.167978 | 0.175262  | 0.114656  | 0.107809  | 0.102564 | 0.138549  |
| 0.109411  | 0.172348 | 0.179633  | 0.110577  | 0.113928  | 0.101981 | 0.137092  |
| 0.0929487 | 0.175699 | 0.17803   | 0.115093  | 0.110868  | 0.109703 | 0.138403  |
| 0.124272  | 0.186626 | 0.195367  | 0.0654138 | 0.127622  | 0.138403 | 0.142337  |
| 0.131847  | 0.188957 | 0.199738  | 0.133887  | 0.134907  | 0.13549  | 0.14933   |
| 0.115239  | 0.168269 | 0.175554  | 0.117861  | 0.111597  | 0.123252 | 0.131847  |
| 0.118735  | 0.17264  | 0.177885  | 0.116113  | 0.0506993 | 0.11859  | 0.0630828 |
| 0.111305  | 0.173077 | 0.17803   | 0.0745921 | 0.11116   | 0.116696 | 0.133741  |
| 0.225233  | 0.160548 | 0.128788  | 0.229312  | 0.225379  | 0.23412  | 0.230769  |
| 0.124126  | 0.174534 | 0.184149  | 0.12296   | 0.0552156 | 0.126603 | 0.0582751 |
| 0.124563  | 0.179924 | 0.190122  | 0.130682  | 0.125     | 0.108392 | 0.146707  |
| 0.104749  | 0.173805 | 0.180507  | 0.0992133 | 0.116841  | 0.104312 | 0.142045  |
| 0.123252  | 0.178904 | 0.190268  | 0.125     | 0.121066  | 0.125437 | 0.139569  |
| 0.127331  | 0.179779 | 0.193182  | 0.129079  | 0.13039   | 0.117861 | 0.143065  |
| 0.0955711 | 0.180361 | 0.180361  | 0.116841  | 0.116404  | 0.111451 | 0.137821  |
| 0.129371  | 0.179779 | 0.190559  | 0.134324  | 0.128059  | 0.109411 | 0.147145  |
| 0.133304  | 0.183129 | 0.195659  | 0.140589  | 0.131702  | 0.117424 | 0.146416  |
| 0.122815  | 0.180798 | 0.190122  | 0.126894  | 0.122086  | 0.106643 | 0.143502  |
| 0.087704  | 0.179779 | 0.181235  | 0.112471  | 0.115239  | 0.110286 | 0.141317  |
| 0.126748  | 0.18007  | 0.195221  | 0.117716  | 0.128351  | 0.127477 | 0.148019  |
| 0.133013  | 0.184295 | 0.201195  | 0.125437  | 0.13345   | 0.133159 | 0.146707  |
| 0.133304  | 0.188083 | 0.193036  | 0.134761  | 0.130536  | 0.123543 | 0.151661  |
| 0.137675  | 0.188083 | 0.192453  | 0.137383  | 0.135781  | 0.126166 | 0.156031  |
| 0.131702  | 0.185606 | 0.201632  | 0.124709  | 0.13039   | 0.133887 | 0.149767  |
| 0.103438  | 0.175699 | 0.179196  | 0.11451   | 0.111742  | 0.109703 | 0.141608  |
| 0.137675  | 0.190122 | 0.203817  | 0.143502  | 0.13549   | 0.119464 | 0.147582  |
| 0.130828  | 0.189103 | 0.20134   | 0.136072  | 0.13447   | 0.131265 | 0.148601  |
| 0.197261  | 0.142483 | 0.104604  | 0.202214  | 0.200321  | 0.208479 | 0.210082  |
| 0.12296   | 0.176573 | 0.187646  | 0.128788  | 0.120192  | 0.122815 | 0.141317  |
| 0.118298  | 0.176865 | 0.185606  | 0.115676  | 0.120192  | 0.104167 | 0.143357  |
| 0.0980478 | 0.176428 | 0.175845  | 0.118444  | 0.120629  | 0.118007 | 0.143211  |
| 0.216492  | 0.1588   | 0.127331  | 0.222611  | 0.217512  | 0.223922 | 0.22465   |
| 0.206876  | 0.149767 | 0.116259  | 0.212413  | 0.209062  | 0.214307 | 0.216783  |
| 0.129516  | 0.18546  | 0.191871  | 0.135635  | 0.133159  | 0.115676 | 0.14729   |
| 0.243007  | 0.172203 | 0.141317  | 0.247669  | 0.244901  | 0.249854 | 0.248834  |
| 0.106352  | 0.177739 | 0.181235  | 0.112179  | 0.112908  | 0.109994 | 0.141317  |
| 0.136655  | 0.192308 | 0.197844  | 0.1419    | 0.139423  | 0.137675 | 0.151807  |
| 0.110431  | 0.173368 | 0.179779  | 0.12296   | 0.116696  | 0.10912  | 0.140734  |
| 0.124854  | 0.182255 | 0.193328  | 0.11757   | 0.12704   | 0.12704  | 0.146125  |
| 0.178904  | 0.136946 | 0.0920746 | 0.187354  | 0.182838  | 0.189248 | 0.196096  |
| 0.121941  | 0.17701  | 0.186043  | 0.127185  | 0.124417  | 0.119172 | 0.144085  |

|           |          |           |           |           |           |           |
|-----------|----------|-----------|-----------|-----------|-----------|-----------|
| 0.185169  | 0.136509 | 0.0995047 | 0.193036  | 0.190268  | 0.19493   | 0.203526  |
| 0.119027  | 0.174971 | 0.183421  | 0.111116  | 0.117716  | 0.117424  | 0.143794  |
| 0.112617  | 0.158362 | 0.170309  | 0.123397  | 0.102564  | 0.110431  | 0.123397  |
| 0.123689  | 0.178176 | 0.1875    | 0.121358  | 0.125     | 0.123834  | 0.14292   |
| 0.103584  | 0.158362 | 0.170892  | 0.114365  | 0.1081    | 0.11859   | 0.128351  |
| 0.0868298 | 0.17366  | 0.175117  | 0.108683  | 0.106498  | 0.107955  | 0.134615  |
| 0.111888  | 0.175699 | 0.180361  | 0.123252  | 0.103584  | 0.113199  | 0.132867  |
| 0.104312  | 0.163462 | 0.171329  | 0.11859   | 0.114365  | 0.103293  | 0.141317  |
| 0.118153  | 0.175262 | 0.176136  | 0.113199  | 0.0495338 | 0.113928  | 0.0724068 |
| 0.12296   | 0.180653 | 0.189394  | 0.129662  | 0.119318  | 0.104458  | 0.145105  |
| 0.113345  | 0.177739 | 0.183858  | 0.112179  | 0.112617  | 0.112908  | 0.136946  |
| 0.110577  | 0.168561 | 0.177302  | 0.120484  | 0.115385  | 0.106061  | 0.141463  |
| 0.112179  | 0.172494 | 0.179487  | 0.127914  | 0.124272  | 0.116113  | 0.148601  |
| 0.129371  | 0.179779 | 0.189977  | 0.128788  | 0.0598776 | 0.12602   | 0.0562354 |
| 0.123106  | 0.177593 | 0.17905   | 0.122232  | 0.118007  | 0.108974  | 0.143502  |
| 0.0708042 | 0.174534 | 0.179487  | 0.113054  | 0.114948  | 0.109703  | 0.139569  |
| 0.08581   | 0.174388 | 0.175262  | 0.110577  | 0.109266  | 0.107226  | 0.134761  |
| 0.119318  | 0.172348 | 0.182838  | 0.126603  | 0.117424  | 0.105478  | 0.133596  |
| 0.114948  | 0.177593 | 0.186626  | 0.108537  | 0.120338  | 0.120921  | 0.144376  |
| 0.119464  | 0.182692 | 0.189977  | 0.129953  | 0.124272  | 0.0546329 | 0.147145  |
| 0.124126  | 0.178613 | 0.182692  | 0.128497  | 0.121941  | 0.113491  | 0.14831   |
| 0.121358  | 0.174388 | 0.179633  | 0.11757   | 0.0512821 | 0.119464  | 0.064831  |
| 0.13345   | 0.182401 | 0.187646  | 0.128788  | 0.057838  | 0.125728  | 0.0559441 |
| 0.136364  | 0.180361 | 0.196387  | 0.136364  | 0.0662879 | 0.134761  | 0.0413753 |
| 0.107372  | 0.172931 | 0.175845  | 0.116696  | 0.112471  | 0.0976107 | 0.133887  |
| 0.0901807 | 0.18109  | 0.179633  | 0.115822  | 0.115385  | 0.109848  | 0.14088   |
| 0.1081    | 0.144522 | 0.175117  | 0.11451   | 0.108537  | 0.107955  | 0.134324  |
| 0.132284  | 0.186772 | 0.199592  | 0.125874  | 0.133596  | 0.130682  | 0.148893  |
| 0.116696  | 0.174388 | 0.186917  | 0.125728  | 0.11655   | 0.112471  | 0.14088   |
| 0.137966  | 0.191871 | 0.204983  | 0.148747  | 0.142774  | 0.0681818 | 0.156031  |
| 0.114656  | 0.188083 | 0.191579  | 0.134761  | 0.131993  | 0.128497  | 0.146999  |
| 0.119172  | 0.186772 | 0.189685  | 0.0606061 | 0.121649  | 0.13447   | 0.142483  |
| 0.106498  | 0.171766 | 0.178467  | 0.116404  | 0.109848  | 0.11451   | 0.133013  |
| 0.109848  | 0.177156 | 0.178322  | 0.112762  | 0.108246  | 0.114948  | 0.136072  |
| 0.134615  | 0.185606 | 0.191725  | 0.136655  | 0.13039   | 0.121358  | 0.152681  |
| 0.202652  | 0.154283 | 0.116113  | 0.208479  | 0.199883  | 0.206585  | 0.21081   |
| 0.0744464 | 0.170892 | 0.175554  | 0.112325  | 0.114802  | 0.108683  | 0.139714  |
| 0.114802  | 0.182984 | 0.185897  | 0.119172  | 0.121358  | 0.118153  | 0.14627   |
| 0.120192  | 0.177885 | 0.190122  | 0.114656  | 0.122086  | 0.122086  | 0.142628  |
| 0.121503  | 0.178322 | 0.180361  | 0.124417  | 0.121941  | 0.116113  | 0.144814  |
| 0.122523  | 0.177302 | 0.184586  | 0.11553   | 0.122669  | 0.124126  | 0.151078  |
| 0.125728  | 0.172057 | 0.187791  | 0.123106  | 0.113928  | 0.123834  | 0.131265  |
| 0.126748  | 0.172494 | 0.189977  | 0.128205  | 0.113199  | 0.127768  | 0.129953  |
| 0.11757   | 0.181964 | 0.186334  | 0.0592949 | 0.11859   | 0.124417  | 0.139132  |

|          |          |          |          |           |           |           |
|----------|----------|----------|----------|-----------|-----------|-----------|
| 0.116404 | 0.180216 | 0.185752 | 0.123689 | 0.120629  | 0.101399  | 0.140006  |
| 0.130099 | 0.18109  | 0.197115 | 0.121066 | 0.126748  | 0.12704   | 0.144668  |
| 0.115239 | 0.17264  | 0.184295 | 0.118735 | 0.117716  | 0.117424  | 0.144085  |
| 0.11859  | 0.183858 | 0.189394 | 0.11859  | 0.11961   | 0.119027  | 0.144231  |
| 0.177302 | 0.172348 | 0.163316 | 0.17701  | 0.170746  | 0.178904  | 0.18546   |
| 0.11961  | 0.173514 | 0.175845 | 0.116696 | 0.0524476 | 0.115676  | 0.0770688 |
| 0.127914 | 0.171911 | 0.182984 | 0.119464 | 0.131265  | 0.128059  | 0.150058  |
| 0.122232 | 0.186334 | 0.191288 | 0.128642 | 0.129371  | 0.118007  | 0.152244  |
| 0.119755 | 0.170163 | 0.182692 | 0.123543 | 0.114073  | 0.123106  | 0.132576  |
| 0.109266 | 0.170163 | 0.179196 | 0.109557 | 0.106789  | 0.111742  | 0.134324  |
| 0.106352 | 0.17366  | 0.178322 | 0.107517 | 0.109703  | 0.109994  | 0.134033  |
| 0.113054 | 0.175117 | 0.185315 | 0.11655  | 0.111742  | 0.114365  | 0.135781  |
| 0.125291 | 0.179196 | 0.189977 | 0.130536 | 0.128351  | 0.123397  | 0.144231  |
| 0.108974 | 0.164044 | 0.175408 | 0.113636 | 0.0852273 | 0.11961   | 0.109266  |
| 0.128642 | 0.188957 | 0.194784 | 0.138258 | 0.129953  | 0.123834  | 0.150787  |
| 0.104895 | 0.167541 | 0.174825 | 0.116259 | 0.111742  | 0.103584  | 0.13345   |
| 0.121358 | 0.169726 | 0.184295 | 0.122523 | 0.12296   | 0.111597  | 0.14729   |
| 0.129662 | 0.191142 | 0.200758 | 0.135781 | 0.13447   | 0.127768  | 0.151515  |
| 0.123252 | 0.178904 | 0.189394 | 0.129371 | 0.123689  | 0.113491  | 0.143065  |
| 0.128788 | 0.179779 | 0.188811 | 0.125    | 0.120484  | 0.11961   | 0.138986  |
| 0.112762 | 0.179196 | 0.185606 | 0.120921 | 0.118735  | 0.108829  | 0.147436  |
| 0.119172 | 0.178904 | 0.189685 | 0.125874 | 0.119901  | 0.114073  | 0.142483  |
| 0.109848 | 0.174825 | 0.179487 | 0.112179 | 0.114948  | 0.105624  | 0.141026  |
| 0.124563 | 0.18546  | 0.196824 | 0.127185 | 0.125291  | 0.113928  | 0.143794  |
| 0.110577 | 0.174679 | 0.179341 | 0.114948 | 0.118007  | 0.0990676 | 0.144085  |
| 0.145833 | 0.188083 | 0.200612 | 0.144085 | 0.138112  | 0.133741  | 0.154866  |
| 0.126894 | 0.181672 | 0.1875   | 0.127477 | 0.12704   | 0.125291  | 0.147582  |
| 0.114656 | 0.181381 | 0.186626 | 0.12398  | 0.116259  | 0.10373   | 0.141463  |
| 0.141026 | 0.190268 | 0.20134  | 0.145688 | 0.138549  | 0.126894  | 0.152681  |
| 0.120338 | 0.183566 | 0.185897 | 0.121795 | 0.120775  | 0.120484  | 0.146562  |
| 0.13141  | 0.178613 | 0.195804 | 0.13345  | 0.136801  | 0.139132  | 0.156177  |
| 0.11655  | 0.180653 | 0.185315 | 0.123252 | 0.114948  | 0.101836  | 0.141317  |
| 0.143502 | 0.192162 | 0.201486 | 0.148456 | 0.138403  | 0.143065  | 0.1537    |
| 0.129516 | 0.179633 | 0.184878 | 0.130973 | 0.134033  | 0.126457  | 0.152244  |
| 0.132721 | 0.181381 | 0.19391  | 0.137383 | 0.1419    | 0.134033  | 0.157197  |
| 0.121649 | 0.188083 | 0.198281 | 0.128351 | 0.121503  | 0.122378  | 0.146999  |
| 0.111597 | 0.178613 | 0.188811 | 0.119172 | 0.119027  | 0.106789  | 0.143939  |
| 0.112617 | 0.180798 | 0.181381 | 0.116696 | 0.117716  | 0.108974  | 0.143502  |
| 0.119464 | 0.179487 | 0.189685 | 0.11451  | 0.121358  | 0.114073  | 0.141317  |
| 0.123543 | 0.184732 | 0.194347 | 0.132576 | 0.123689  | 0.112908  | 0.144814  |
| 0.130682 | 0.190705 | 0.201777 | 0.137383 | 0.135198  | 0.123834  | 0.147873  |
| 0.119318 | 0.173805 | 0.181964 | 0.127185 | 0.122086  | 0.118881  | 0.151369  |
| 0.109411 | 0.17905  | 0.181964 | 0.116696 | 0.115676  | 0.108683  | 0.143211  |
| 0.110431 | 0.178904 | 0.181235 | 0.121795 | 0.118153  | 0.107955  | 0.143648  |

|          |          |          |          |          |          |          |
|----------|----------|----------|----------|----------|----------|----------|
| 0.121358 | 0.17701  | 0.189248 | 0.123689 | 0.124417 | 0.120338 | 0.144085 |
| 0.112325 | 0.178759 | 0.18109  | 0.119027 | 0.115385 | 0.11014  | 0.140297 |
| 0.125291 | 0.187354 | 0.190559 | 0.12704  | 0.125146 | 0.116113 | 0.149767 |
| 0.118007 | 0.177156 | 0.181818 | 0.120047 | 0.113491 | 0.104167 | 0.139277 |
| 0.116987 | 0.168852 | 0.176136 | 0.115822 | 0.106935 | 0.121795 | 0.126603 |
| 0.114948 | 0.180507 | 0.185752 | 0.11757  | 0.111597 | 0.120047 | 0.136218 |
| 0.104458 | 0.173805 | 0.176136 | 0.114073 | 0.113928 | 0.109557 | 0.139423 |
| 0.114073 | 0.173223 | 0.184586 | 0.11757  | 0.117716 | 0.11451  | 0.142337 |
| 0.110431 | 0.167541 | 0.174825 | 0.11451  | 0.10708  | 0.118444 | 0.130245 |
| 0.116113 | 0.17264  | 0.184295 | 0.121358 | 0.106352 | 0.11655  | 0.133013 |
| 0.119027 | 0.1706   | 0.183421 | 0.125146 | 0.103438 | 0.123543 | 0.121066 |
| 0.110286 | 0.166521 | 0.169726 | 0.10708  | 0.100524 | 0.112179 | 0.124272 |
| 0.134324 | 0.18211  | 0.197552 | 0.13549  | 0.120192 | 0.126603 | 0.136946 |

| TDr_2904 | TDr_2910 | TDr_2915  | TDr_2926 | TDr_2928  | TDr_2931  | TDr_2936 |
|----------|----------|-----------|----------|-----------|-----------|----------|
| 0.118735 | 0.123834 | 0.125437  | 0.110868 | 0.128497  | 0.107372  | 0.126166 |
| 0.109266 | 0.115239 | 0.124417  | 0.104895 | 0.113491  | 0.117133  | 0.132139 |
| 0.107226 | 0.110286 | 0.123834  | 0.103438 | 0.110577  | 0.115676  | 0.126603 |
| 0.113636 | 0.117861 | 0.12296   | 0.090035 | 0.0995047 | 0.117424  | 0.123106 |
| 0.123834 | 0.124563 | 0.13141   | 0.129953 | 0.133304  | 0.137238  | 0.13039  |
| 0.118298 | 0.124854 | 0.134615  | 0.125874 | 0.133596  | 0.130245  | 0.134761 |
| 0.127185 | 0.131993 | 0.121358  | 0.123397 | 0.135198  | 0.119027  | 0.125    |
| 0.110286 | 0.116841 | 0.12398   | 0.101836 | 0.113054  | 0.116404  | 0.120629 |
| 0.107517 | 0.113782 | 0.115967  | 0.106061 | 0.116987  | 0.108392  | 0.116404 |
| 0.112908 | 0.117133 | 0.129225  | 0.114365 | 0.125291  | 0.119318  | 0.119172 |
| 0.119464 | 0.123106 | 0.12296   | 0.122378 | 0.136509  | 0.0981935 | 0.128351 |
| 0.110577 | 0.11451  | 0.11116   | 0.107955 | 0.113636  | 0.107955  | 0.113928 |
| 0.10912  | 0.117133 | 0.114948  | 0.113491 | 0.12296   | 0.112325  | 0.114802 |
| 0.131993 | 0.137675 | 0.146853  | 0.127914 | 0.136509  | 0.126457  | 0.149621 |
| 0.125146 | 0.126748 | 0.135635  | 0.125728 | 0.133159  | 0.128351  | 0.125    |
| 0.123252 | 0.12398  | 0.113054  | 0.118298 | 0.129516  | 0.1081    | 0.11961  |
| 0.112617 | 0.114802 | 0.106206  | 0.112908 | 0.126457  | 0.106206  | 0.113345 |
| 0.132284 | 0.135927 | 0.152681  | 0.134324 | 0.140297  | 0.153555  | 0.153409 |
| 0.105478 | 0.109994 | 0.120047  | 0.101399 | 0.111742  | 0.112179  | 0.125146 |
| 0.199301 | 0.202652 | 0.208916  | 0.191434 | 0.201486  | 0.191142  | 0.208188 |
| 0.114073 | 0.117716 | 0.129808  | 0.128059 | 0.136072  | 0.129516  | 0.137238 |
| 0.11014  | 0.119027 | 0.130536  | 0.119755 | 0.131847  | 0.12704   | 0.131265 |
| 0.109411 | 0.115676 | 0.0954254 | 0.106206 | 0.119755  | 0.0907634 | 0.119755 |
| 0.126457 | 0.127477 | 0.106643  | 0.124126 | 0.130973  | 0.112471  | 0.124272 |
| 0.103293 | 0.106061 | 0.114073  | 0.10708  | 0.118881  | 0.0992133 | 0.112179 |
| 0.120484 | 0.128205 | 0.13447   | 0.128059 | 0.132576  | 0.133596  | 0.137529 |
| 0.122815 | 0.127622 | 0.121649  | 0.125437 | 0.137529  | 0.121358  | 0.115385 |
| 0.122232 | 0.123252 | 0.107663  | 0.117279 | 0.125874  | 0.109703  | 0.124126 |
| 0.13243  | 0.13345  | 0.12602   | 0.124563 | 0.135198  | 0.128351  | 0.131702 |
| 0.127185 | 0.134615 | 0.128059  | 0.119901 | 0.131993  | 0.123397  | 0.116259 |
| 0.124709 | 0.13039  | 0.125874  | 0.122086 | 0.138549  | 0.119464  | 0.125146 |
| 0.121358 | 0.127331 | 0.122523  | 0.118153 | 0.128788  | 0.117861  | 0.120921 |
| 0.10708  | 0.113054 | 0.115239  | 0.106789 | 0.118881  | 0.105624  | 0.11014  |
| 0.119318 | 0.122669 | 0.124563  | 0.11553  | 0.127331  | 0.118153  | 0.113345 |
| 0.125583 | 0.124563 | 0.114802  | 0.123834 | 0.135052  | 0.117133  | 0.117861 |
| 0.130682 | 0.132284 | 0.123397  | 0.12602  | 0.136072  | 0.125146  | 0.122378 |
| 0.133741 | 0.135927 | 0.134033  | 0.129953 | 0.141463  | 0.130828  | 0.138258 |
| 0.123106 | 0.125    | 0.117279  | 0.122232 | 0.134907  | 0.11553   | 0.124709 |
| 0.112034 | 0.113345 | 0.0962995 | 0.109411 | 0.122086  | 0.0962995 | 0.113928 |
| 0.124563 | 0.127331 | 0.112617  | 0.117861 | 0.126748  | 0.116987  | 0.127331 |
| 0.109994 | 0.114802 | 0.106789  | 0.109703 | 0.120629  | 0.100962  | 0.121503 |
| 0.144085 | 0.149184 | 0.130973  | 0.141171 | 0.143065  | 0.130099  | 0.147145 |



|          |          |          |          |           |          |          |
|----------|----------|----------|----------|-----------|----------|----------|
| 0.14729  | 0.151807 | 0.127477 | 0.142337 | 0.148019  | 0.13039  | 0.149767 |
| 0.115967 | 0.119027 | 0.111597 | 0.11451  | 0.128059  | 0.11014  | 0.122815 |
| 0.106352 | 0.109703 | 0.109848 | 0.111597 | 0.12602   | 0.108392 | 0.108829 |
| 0.127768 | 0.129371 | 0.11553  | 0.120484 | 0.136072  | 0.11116  | 0.11655  |
| 0.11553  | 0.120629 | 0.111451 | 0.122815 | 0.12704   | 0.109703 | 0.123252 |
| 0.142483 | 0.145833 | 0.129953 | 0.136364 | 0.140297  | 0.126457 | 0.144085 |
| 0.113928 | 0.119027 | 0.114219 | 0.11451  | 0.123397  | 0.109266 | 0.12398  |
| 0.119318 | 0.125583 | 0.108829 | 0.116987 | 0.126166  | 0.108246 | 0.125    |
| 0.147145 | 0.152535 | 0.15035  | 0.138403 | 0.151369  | 0.145688 | 0.142337 |
| 0.131993 | 0.132721 | 0.116841 | 0.12704  | 0.133887  | 0.121795 | 0.129808 |
| 0.117861 | 0.122086 | 0.103293 | 0.115239 | 0.122086  | 0.10067  | 0.118881 |
| 0.125146 | 0.130828 | 0.136801 | 0.120775 | 0.129079  | 0.133304 | 0.131702 |
| 0.112908 | 0.117133 | 0.114948 | 0.083479 | 0.0941142 | 0.104749 | 0.128788 |
| 0.144668 | 0.147145 | 0.121066 | 0.130099 | 0.136655  | 0.130973 | 0.133741 |
| 0.128788 | 0.133304 | 0.11451  | 0.12704  | 0.133304  | 0.11655  | 0.129516 |
| 0.11451  | 0.117861 | 0.107809 | 0.11451  | 0.124272  | 0.106061 | 0.123397 |
| 0.120629 | 0.121941 | 0.119464 | 0.122378 | 0.128934  | 0.111014 | 0.124854 |
| 0.124563 | 0.126457 | 0.118153 | 0.121649 | 0.133159  | 0.112908 | 0.125291 |
| 0.142045 | 0.144814 | 0.115239 | 0.133013 | 0.136946  | 0.122232 | 0.148601 |
| 0.145542 | 0.147145 | 0.125146 | 0.131556 | 0.134907  | 0.129516 | 0.143939 |
| 0.166667 | 0.169726 | 0.156177 | 0.155303 | 0.160693  | 0.142774 | 0.165938 |
| 0.119172 | 0.122232 | 0.109266 | 0.113636 | 0.125437  | 0.109266 | 0.124272 |
| 0.114219 | 0.116113 | 0.104021 | 0.11859  | 0.125146  | 0.104895 | 0.119318 |
| 0.115676 | 0.122232 | 0.107809 | 0.110431 | 0.124272  | 0.104895 | 0.116987 |
| 0.146416 | 0.149476 | 0.139423 | 0.138258 | 0.147436  | 0.138258 | 0.138112 |
| 0.114656 | 0.119755 | 0.10708  | 0.112908 | 0.119172  | 0.108537 | 0.118298 |
| 0.131993 | 0.135927 | 0.120921 | 0.130536 | 0.134178  | 0.121212 | 0.137092 |
| 0.122086 | 0.129225 | 0.110723 | 0.123252 | 0.135344  | 0.113345 | 0.11757  |
| 0.120484 | 0.122378 | 0.106789 | 0.121649 | 0.128205  | 0.104167 | 0.124417 |
| 0.146416 | 0.153846 | 0.150204 | 0.137675 | 0.150932  | 0.140297 | 0.143065 |
| 0.125146 | 0.132284 | 0.106789 | 0.123397 | 0.130245  | 0.105915 | 0.128497 |
| 0.141608 | 0.146416 | 0.126748 | 0.132576 | 0.137092  | 0.133159 | 0.142337 |
| 0.129225 | 0.131119 | 0.119027 | 0.128351 | 0.134324  | 0.128351 | 0.129953 |
| 0.105478 | 0.110868 | 0.119755 | 0.105478 | 0.11961   | 0.107226 | 0.124272 |
| 0.117133 | 0.122523 | 0.099359 | 0.115385 | 0.122523  | 0.104604 | 0.121649 |
| 0.113636 | 0.11553  | 0.111014 | 0.117133 | 0.127768  | 0.104021 | 0.128059 |
| 0.133741 | 0.137092 | 0.116259 | 0.125874 | 0.129516  | 0.120338 | 0.140006 |
| 0.111451 | 0.11655  | 0.107663 | 0.116987 | 0.127622  | 0.105915 | 0.118007 |
| 0.145979 | 0.148456 | 0.130828 | 0.13141  | 0.135052  | 0.130536 | 0.148164 |
| 0.126457 | 0.132139 | 0.115093 | 0.125291 | 0.133887  | 0.111305 | 0.129808 |
| 0.124709 | 0.127185 | 0.102273 | 0.115385 | 0.123106  | 0.105478 | 0.121358 |
| 0.120338 | 0.12602  | 0.107809 | 0.123543 | 0.128059  | 0.108683 | 0.125728 |
| 0.12296  | 0.124854 | 0.110431 | 0.120338 | 0.126311  | 0.107226 | 0.130099 |
| 0.115385 | 0.120775 | 0.108974 | 0.11859  | 0.127477  | 0.104604 | 0.128351 |

|          |          |          |          |          |          |          |
|----------|----------|----------|----------|----------|----------|----------|
| 0.115676 | 0.121941 | 0.10373  | 0.115676 | 0.121941 | 0.105769 | 0.119901 |
| 0.140297 | 0.143648 | 0.123397 | 0.134761 | 0.140152 | 0.128934 | 0.143357 |
| 0.112617 | 0.120921 | 0.107372 | 0.119027 | 0.130828 | 0.103293 | 0.113636 |
| 0.112762 | 0.118153 | 0.117424 | 0.115967 | 0.124854 | 0.113928 | 0.116113 |
| 0.124417 | 0.13039  | 0.132576 | 0.122378 | 0.135344 | 0.129662 | 0.126603 |
| 0.132284 | 0.136509 | 0.128497 | 0.125583 | 0.138549 | 0.125874 | 0.123689 |
| 0.123543 | 0.128351 | 0.12704  | 0.134033 | 0.14088  | 0.128497 | 0.131265 |
| 0.13039  | 0.136655 | 0.134761 | 0.132721 | 0.143357 | 0.137383 | 0.136072 |
| 0.114219 | 0.118153 | 0.126748 | 0.120338 | 0.135344 | 0.113928 | 0.11961  |
| 0.184441 | 0.188666 | 0.185023 | 0.175699 | 0.186334 | 0.168124 | 0.187209 |
| 0.108246 | 0.114802 | 0.118153 | 0.10912  | 0.121503 | 0.111451 | 0.117133 |
| 0.132284 | 0.137383 | 0.134907 | 0.132576 | 0.141754 | 0.133741 | 0.130682 |
| 0.125874 | 0.129225 | 0.125874 | 0.125874 | 0.13447  | 0.127331 | 0.123689 |
| 0.133887 | 0.138986 | 0.131556 | 0.133304 | 0.148019 | 0.13447  | 0.136072 |
| 0.108683 | 0.111742 | 0.113636 | 0.114219 | 0.127477 | 0.111014 | 0.116404 |
| 0.125874 | 0.132721 | 0.125874 | 0.128497 | 0.138258 | 0.127914 | 0.131556 |
| 0.112179 | 0.113199 | 0.123834 | 0.118298 | 0.13039  | 0.117716 | 0.117279 |
| 0.120775 | 0.123543 | 0.125437 | 0.122232 | 0.136364 | 0.122815 | 0.125291 |
| 0.119027 | 0.120047 | 0.119318 | 0.110286 | 0.12704  | 0.112034 | 0.120338 |
| 0.129225 | 0.130245 | 0.126894 | 0.135344 | 0.145105 | 0.13243  | 0.130536 |
| 0.116404 | 0.121795 | 0.109411 | 0.115239 | 0.130245 | 0.101836 | 0.11014  |
| 0.131119 | 0.136801 | 0.129662 | 0.128205 | 0.13884  | 0.125583 | 0.137092 |
| 0.118735 | 0.125291 | 0.121358 | 0.117279 | 0.13345  | 0.116404 | 0.122669 |
| 0.132576 | 0.136218 | 0.118298 | 0.129953 | 0.13447  | 0.122378 | 0.132139 |
| 0.134178 | 0.139569 | 0.125437 | 0.129225 | 0.143648 | 0.127185 | 0.126457 |
| 0.109411 | 0.112471 | 0.116113 | 0.117861 | 0.128497 | 0.111451 | 0.121503 |
| 0.145833 | 0.153263 | 0.144668 | 0.139132 | 0.150932 | 0.140589 | 0.143648 |
| 0.116841 | 0.116404 | 0.119464 | 0.121503 | 0.132721 | 0.118007 | 0.121066 |
| 0.11014  | 0.116113 | 0.115967 | 0.119464 | 0.129516 | 0.112471 | 0.113491 |
| 0.118735 | 0.123252 | 0.109994 | 0.120484 | 0.130828 | 0.114365 | 0.120047 |
| 0.139132 | 0.145105 | 0.145251 | 0.138549 | 0.14831  | 0.13884  | 0.143648 |
| 0.122815 | 0.130536 | 0.114365 | 0.123689 | 0.131993 | 0.10271  | 0.125    |
| 0.109703 | 0.112471 | 0.114948 | 0.11116  | 0.122378 | 0.10912  | 0.117424 |
| 0.104167 | 0.107809 | 0.114656 | 0.118153 | 0.125583 | 0.112325 | 0.112471 |
| 0.114219 | 0.122815 | 0.121212 | 0.118298 | 0.131847 | 0.116841 | 0.120775 |
| 0.13039  | 0.131993 | 0.122815 | 0.126311 | 0.136946 | 0.121941 | 0.12704  |
| 0.119464 | 0.12398  | 0.119172 | 0.120921 | 0.134178 | 0.11859  | 0.118444 |
| 0.110868 | 0.116841 | 0.104749 | 0.108537 | 0.118881 | 0.100379 | 0.107809 |
| 0.109411 | 0.113928 | 0.107663 | 0.108246 | 0.123834 | 0.103001 | 0.113054 |
| 0.112471 | 0.11757  | 0.113636 | 0.112471 | 0.125146 | 0.108683 | 0.11553  |
| 0.11859  | 0.123106 | 0.112179 | 0.118881 | 0.128351 | 0.108392 | 0.117279 |
| 0.129808 | 0.132867 | 0.120775 | 0.128059 | 0.141026 | 0.122232 | 0.129662 |
| 0.113636 | 0.116404 | 0.1081   | 0.114802 | 0.125437 | 0.109557 | 0.110868 |
| 0.106206 | 0.112179 | 0.103293 | 0.109703 | 0.121795 | 0.101836 | 0.115093 |

|          |          |           |           |           |           |          |
|----------|----------|-----------|-----------|-----------|-----------|----------|
| 0.129225 | 0.134324 | 0.111742  | 0.128934  | 0.140152  | 0.112325  | 0.123252 |
| 0.115967 | 0.119901 | 0.101399  | 0.111888  | 0.125437  | 0.0984848 | 0.114948 |
| 0.122378 | 0.125437 | 0.125874  | 0.124126  | 0.136218  | 0.12296   | 0.124854 |
| 0.133159 | 0.137966 | 0.139277  | 0.12704   | 0.140589  | 0.133741  | 0.130099 |
| 0.121795 | 0.121649 | 0.110723  | 0.11655   | 0.128059  | 0.107809  | 0.118735 |
| 0.113491 | 0.11859  | 0.109994  | 0.115822  | 0.125583  | 0.107955  | 0.115385 |
| 0.114073 | 0.117716 | 0.109411  | 0.109994  | 0.12296   | 0.108829  | 0.115676 |
| 0.106789 | 0.114219 | 0.105915  | 0.112617  | 0.122378  | 0.100087  | 0.113054 |
| 0.125728 | 0.129953 | 0.125146  | 0.123397  | 0.135198  | 0.125437  | 0.130245 |
| 0.110286 | 0.109557 | 0.103293  | 0.112034  | 0.121212  | 0.099796  | 0.113636 |
| 0.137238 | 0.145833 | 0.134324  | 0.134033  | 0.142337  | 0.132284  | 0.133304 |
| 0.138258 | 0.141608 | 0.127768  | 0.134761  | 0.142483  | 0.126894  | 0.13345  |
| 0.13039  | 0.133159 | 0.116987  | 0.12398   | 0.131993  | 0.121066  | 0.12704  |
| 0.118298 | 0.119318 | 0.11859   | 0.122378  | 0.136218  | 0.111597  | 0.120192 |
| 0.115093 | 0.119318 | 0.121503  | 0.120338  | 0.134178  | 0.116259  | 0.11961  |
| 0.113199 | 0.118007 | 0.100087  | 0.119901  | 0.128205  | 0.105332  | 0.115676 |
| 0.113928 | 0.123106 | 0.100524  | 0.113345  | 0.126311  | 0.10169   | 0.116987 |
| 0.105769 | 0.112034 | 0.111888  | 0.111888  | 0.122523  | 0.109266  | 0.114656 |
| 0.111014 | 0.116404 | 0.111305  | 0.0955711 | 0.104458  | 0.0958625 | 0.123689 |
| 0.133159 | 0.133887 | 0.101399  | 0.132576  | 0.137966  | 0.110723  | 0.133304 |
| 0.11116  | 0.113928 | 0.116696  | 0.118444  | 0.129953  | 0.117279  | 0.124126 |
| 0.132867 | 0.133596 | 0.136072  | 0.126748  | 0.135635  | 0.131702  | 0.135344 |
| 0.136218 | 0.139569 | 0.141463  | 0.129516  | 0.145396  | 0.13447   | 0.133741 |
| 0.189831 | 0.192599 | 0.197115  | 0.184295  | 0.190559  | 0.178176  | 0.201632 |
| 0.233392 | 0.234994 | 0.240385  | 0.223776  | 0.229749  | 0.223776  | 0.240822 |
| 0.109703 | 0.11451  | 0.114073  | 0.0721154 | 0.0801282 | 0.103001  | 0.121212 |
| 0.114219 | 0.118735 | 0.102564  | 0.113636  | 0.122815  | 0.104895  | 0.116404 |
| 0.109266 | 0.113199 | 0.107809  | 0.110723  | 0.122232  | 0.0973193 | 0.114656 |
| 0.108974 | 0.114073 | 0.106061  | 0.114802  | 0.121358  | 0.11014   | 0.121941 |
| 0.128788 | 0.131265 | 0.138695  | 0.125     | 0.133887  | 0.129371  | 0.125437 |
| 0.110723 | 0.115239 | 0.106061  | 0.115385  | 0.122523  | 0.109848  | 0.12398  |
| 0.151369 | 0.150641 | 0.122232  | 0.14292   | 0.147145  | 0.13447   | 0.136946 |
| 0.109848 | 0.11757  | 0.102855  | 0.119755  | 0.130099  | 0.106935  | 0.119901 |
| 0.131993 | 0.13243  | 0.11655   | 0.125874  | 0.131556  | 0.121795  | 0.130682 |
| 0.130682 | 0.133741 | 0.115822  | 0.126311  | 0.131702  | 0.116113  | 0.137238 |
| 0.132139 | 0.135781 | 0.118444  | 0.135635  | 0.139277  | 0.12398   | 0.131993 |
| 0.139132 | 0.142774 | 0.125437  | 0.133013  | 0.138695  | 0.131265  | 0.13986  |
| 0.113199 | 0.117133 | 0.108829  | 0.118444  | 0.13141   | 0.109994  | 0.122378 |
| 0.108246 | 0.111888 | 0.0983392 | 0.114948  | 0.126457  | 0.105041  | 0.115967 |
| 0.115385 | 0.120192 | 0.105769  | 0.124709  | 0.133596  | 0.109557  | 0.127477 |
| 0.106061 | 0.113782 | 0.10169   | 0.110431  | 0.11961   | 0.104895  | 0.113199 |
| 0.109848 | 0.114365 | 0.10169   | 0.113928  | 0.121358  | 0.101981  | 0.118444 |
| 0.115822 | 0.120047 | 0.104458  | 0.114365  | 0.125     | 0.105332  | 0.120047 |
| 0.124417 | 0.127185 | 0.111014  | 0.128497  | 0.133304  | 0.116841  | 0.133013 |

|          |          |           |          |          |           |          |
|----------|----------|-----------|----------|----------|-----------|----------|
| 0.133159 | 0.136509 | 0.114802  | 0.136946 | 0.140589 | 0.121795  | 0.13243  |
| 0.11961  | 0.122669 | 0.101836  | 0.116987 | 0.125    | 0.105915  | 0.118298 |
| 0.11451  | 0.117861 | 0.0999417 | 0.11859  | 0.128059 | 0.0990676 | 0.123689 |
| 0.134033 | 0.134761 | 0.111014  | 0.132576 | 0.137383 | 0.119755  | 0.128934 |
| 0.111014 | 0.113491 | 0.100233  | 0.112762 | 0.122232 | 0.102855  | 0.11553  |
| 0.137675 | 0.1419   | 0.122815  | 0.145542 | 0.14627  | 0.131265  | 0.141608 |
| 0.136801 | 0.143939 | 0.135635  | 0.137383 | 0.146562 | 0.131556  | 0.137821 |
| 0.12704  | 0.131265 | 0.124126  | 0.13141  | 0.137675 | 0.124417  | 0.128642 |
| 0.108683 | 0.114948 | 0.0996503 | 0.108392 | 0.118735 | 0.104021  | 0.114365 |
| 0.105332 | 0.114219 | 0.0995047 | 0.111742 | 0.122086 | 0.103584  | 0.113928 |
| 0.126457 | 0.127477 | 0.107517  | 0.123543 | 0.128059 | 0.120338  | 0.129225 |
| 0.121358 | 0.125874 | 0.108537  | 0.123397 | 0.13141  | 0.111742  | 0.122669 |
| 0.130973 | 0.134615 | 0.108246  | 0.127477 | 0.137238 | 0.113491  | 0.12704  |
| 0.118298 | 0.121941 | 0.100524  | 0.120338 | 0.125146 | 0.1081    | 0.124563 |
| 0.11757  | 0.120047 | 0.0980478 | 0.122232 | 0.127622 | 0.102127  | 0.118298 |
| 0.125728 | 0.125    | 0.107955  | 0.121649 | 0.128205 | 0.113782  | 0.124126 |
| 0.133013 | 0.136655 | 0.11757   | 0.137092 | 0.144522 | 0.121066  | 0.132576 |
| 0.131556 | 0.134324 | 0.111116  | 0.13039  | 0.134324 | 0.115239  | 0.129371 |
| 0.132284 | 0.135344 | 0.110431  | 0.133159 | 0.140006 | 0.119172  | 0.130099 |
| 0.132139 | 0.136655 | 0.113199  | 0.132721 | 0.138112 | 0.115822  | 0.134907 |
| 0.116404 | 0.117716 | 0.102127  | 0.111742 | 0.122086 | 0.105624  | 0.119172 |
| 0.128351 | 0.133159 | 0.120484  | 0.129808 | 0.134033 | 0.126894  | 0.13345  |
| 0.109266 | 0.112617 | 0.0952797 | 0.114219 | 0.120775 | 0.0990676 | 0.114656 |
| 0.115239 | 0.119464 | 0.112908  | 0.116113 | 0.125291 | 0.110868  | 0.126457 |
| 0.106789 | 0.113928 | 0.106789  | 0.116987 | 0.124417 | 0.109703  | 0.125291 |
| 0.111597 | 0.115239 | 0.104604  | 0.118881 | 0.127185 | 0.108392  | 0.121358 |
| 0.113636 | 0.114948 | 0.10169   | 0.110723 | 0.121358 | 0.1081    | 0.116113 |
| 0.136509 | 0.138695 | 0.109411  | 0.135927 | 0.140152 | 0.121649  | 0.134324 |
| 0.116841 | 0.119901 | 0.1081    | 0.121503 | 0.129225 | 0.11014   | 0.124272 |
| 0.130828 | 0.137383 | 0.114802  | 0.130828 | 0.133304 | 0.126166  | 0.133596 |
| 0.111305 | 0.115822 | 0.104021  | 0.111888 | 0.120775 | 0.109266  | 0.114656 |
| 0.128059 | 0.13345  | 0.103584  | 0.127185 | 0.134907 | 0.115239  | 0.119464 |
| 0.124709 | 0.125728 | 0.109557  | 0.124126 | 0.131265 | 0.108974  | 0.123397 |
| 0.120921 | 0.124854 | 0.123252  | 0.122378 | 0.133304 | 0.11655   | 0.126311 |
| 0.120484 | 0.122669 | 0.110868  | 0.119318 | 0.130536 | 0.109994  | 0.113636 |
| 0.119755 | 0.11961  | 0.120047  | 0.12296  | 0.130973 | 0.120338  | 0.129516 |
| 0.120775 | 0.121795 | 0.114948  | 0.119318 | 0.132576 | 0.111451  | 0.121503 |
| 0.113199 | 0.11655  | 0.118153  | 0.118735 | 0.131702 | 0.114365  | 0.11451  |
| 0.137966 | 0.137821 | 0.144668  | 0.134178 | 0.143357 | 0.136218  | 0.134324 |
| 0.143939 | 0.147582 | 0.130245  | 0.134324 | 0.14088  | 0.137238  | 0.131265 |
| 0.105478 | 0.115239 | 0.11859   | 0.107809 | 0.117861 | 0.112471  | 0.113199 |
| 0.119318 | 0.129371 | 0.141463  | 0.133887 | 0.140443 | 0.138549  | 0.135198 |
| 0.128497 | 0.134178 | 0.138403  | 0.128497 | 0.139132 | 0.132576  | 0.124854 |
| 0.118298 | 0.12398  | 0.138986  | 0.128788 | 0.135927 | 0.133159  | 0.133013 |

|          |          |          |          |          |          |          |
|----------|----------|----------|----------|----------|----------|----------|
| 0.113636 | 0.121066 | 0.134324 | 0.119755 | 0.128642 | 0.124126 | 0.127477 |
| 0.117716 | 0.12398  | 0.130536 | 0.126748 | 0.136801 | 0.128788 | 0.12602  |
| 0.123106 | 0.126748 | 0.138258 | 0.12602  | 0.136072 | 0.130682 | 0.128788 |
| 0.122669 | 0.127185 | 0.137529 | 0.120047 | 0.133304 | 0.132284 | 0.125728 |
| 0.13141  | 0.13447  | 0.14627  | 0.134615 | 0.141754 | 0.141608 | 0.136801 |
| 0.121212 | 0.123397 | 0.136655 | 0.122086 | 0.130099 | 0.130536 | 0.132721 |
| 0.109266 | 0.112325 | 0.130245 | 0.119172 | 0.129225 | 0.120629 | 0.121649 |
| 0.135344 | 0.13549  | 0.114656 | 0.130682 | 0.137238 | 0.119901 | 0.131702 |
| 0.13141  | 0.132721 | 0.142774 | 0.134615 | 0.143794 | 0.138403 | 0.133596 |
| 0.104895 | 0.113782 | 0.12704  | 0.113054 | 0.12602  | 0.119755 | 0.120484 |
| 0.216929 | 0.221154 | 0.2213   | 0.206148 | 0.213869 | 0.205565 | 0.222319 |
| 0.116987 | 0.121503 | 0.135052 | 0.122523 | 0.132284 | 0.126311 | 0.123543 |
| 0.11757  | 0.122378 | 0.125146 | 0.119318 | 0.127914 | 0.11961  | 0.126748 |
| 0.12704  | 0.13243  | 0.143648 | 0.130245 | 0.140006 | 0.139277 | 0.135052 |
| 0.115385 | 0.120775 | 0.130245 | 0.118007 | 0.131265 | 0.124417 | 0.128059 |
| 0.132284 | 0.133887 | 0.14627  | 0.131702 | 0.139132 | 0.140734 | 0.137092 |
| 0.113636 | 0.120484 | 0.126748 | 0.120629 | 0.128059 | 0.126166 | 0.126603 |
| 0.11553  | 0.119464 | 0.130682 | 0.119901 | 0.127331 | 0.124563 | 0.120629 |
| 0.125437 | 0.129371 | 0.140297 | 0.124854 | 0.135198 | 0.129225 | 0.134033 |
| 0.120047 | 0.126311 | 0.134324 | 0.129079 | 0.135344 | 0.119755 | 0.138258 |
| 0.124563 | 0.132284 | 0.138549 | 0.127477 | 0.134907 | 0.133887 | 0.132284 |
| 0.123543 | 0.126311 | 0.141026 | 0.130536 | 0.13447  | 0.142483 | 0.131847 |
| 0.119464 | 0.121358 | 0.13986  | 0.125583 | 0.130682 | 0.132284 | 0.129808 |
| 0.118007 | 0.12398  | 0.11451  | 0.117424 | 0.126894 | 0.111014 | 0.111742 |
| 0.111305 | 0.118444 | 0.131119 | 0.115385 | 0.125146 | 0.126166 | 0.123397 |
| 0.121066 | 0.129371 | 0.145251 | 0.133596 | 0.138403 | 0.141754 | 0.138986 |
| 0.111888 | 0.118444 | 0.128205 | 0.116259 | 0.125728 | 0.124126 | 0.12398  |
| 0.138695 | 0.142045 | 0.122378 | 0.132867 | 0.138549 | 0.123252 | 0.14088  |
| 0.140589 | 0.141317 | 0.144668 | 0.138258 | 0.147436 | 0.131847 | 0.143065 |
| 0.124563 | 0.130536 | 0.119027 | 0.122523 | 0.13549  | 0.110286 | 0.123834 |
| 0.127477 | 0.134033 | 0.140297 | 0.132139 | 0.137821 | 0.130682 | 0.13141  |
| 0.129079 | 0.133304 | 0.132284 | 0.122378 | 0.134761 | 0.122669 | 0.128351 |
| 0.128059 | 0.132284 | 0.131847 | 0.124854 | 0.131119 | 0.130682 | 0.117716 |
| 0.124272 | 0.13141  | 0.134761 | 0.122232 | 0.129953 | 0.127477 | 0.130245 |
| 0.139714 | 0.142483 | 0.145542 | 0.139132 | 0.14831  | 0.13884  | 0.143939 |
| 0.118881 | 0.121066 | 0.11014  | 0.115967 | 0.128934 | 0.106352 | 0.11757  |
| 0.135635 | 0.140443 | 0.127768 | 0.133596 | 0.141026 | 0.130682 | 0.136072 |
| 0.141317 | 0.146999 | 0.144522 | 0.138695 | 0.144376 | 0.131119 | 0.147873 |
| 0.125874 | 0.127185 | 0.115967 | 0.121503 | 0.131556 | 0.11451  | 0.122232 |
| 0.126748 | 0.133304 | 0.119172 | 0.125874 | 0.132721 | 0.120921 | 0.134761 |
| 0.146416 | 0.153555 | 0.126894 | 0.135344 | 0.143065 | 0.129225 | 0.139569 |
| 0.129225 | 0.132576 | 0.110868 | 0.123397 | 0.13141  | 0.113782 | 0.13345  |
| 0.142191 | 0.147873 | 0.134907 | 0.132284 | 0.141754 | 0.132867 | 0.140589 |
| 0.130099 | 0.136655 | 0.121358 | 0.131265 | 0.142774 | 0.120484 | 0.132867 |

|           |           |          |           |           |           |          |
|-----------|-----------|----------|-----------|-----------|-----------|----------|
| 0.116841  | 0.121649  | 0.123252 | 0.124709  | 0.134761  | 0.123543  | 0.122815 |
| 0.133013  | 0.134324  | 0.121649 | 0.125146  | 0.136946  | 0.11961   | 0.132867 |
| 0.127914  | 0.131265  | 0.115676 | 0.127622  | 0.139423  | 0.113345  | 0.126311 |
| 0.125437  | 0.13141   | 0.119901 | 0.133013  | 0.1419    | 0.124854  | 0.128497 |
| 0.121941  | 0.12704   | 0.136509 | 0.127768  | 0.13549   | 0.133596  | 0.130828 |
| 0.125437  | 0.130828  | 0.126603 | 0.131847  | 0.13549   | 0.129516  | 0.132867 |
| 0.126894  | 0.134033  | 0.137092 | 0.128934  | 0.141026  | 0.133596  | 0.131119 |
| 0.129225  | 0.134615  | 0.127477 | 0.13243   | 0.144522  | 0.12398   | 0.130828 |
| 0.14088   | 0.145688  | 0.139132 | 0.141463  | 0.148893  | 0.140297  | 0.141026 |
| 0.125437  | 0.128788  | 0.126311 | 0.131556  | 0.141317  | 0.121358  | 0.123543 |
| 0.118153  | 0.119464  | 0.112325 | 0.122815  | 0.13141   | 0.114948  | 0.127914 |
| 0.130973  | 0.135781  | 0.132721 | 0.130973  | 0.143357  | 0.129225  | 0.135781 |
| 0.126894  | 0.130536  | 0.121358 | 0.120484  | 0.134324  | 0.119027  | 0.117133 |
| 0.144522  | 0.151661  | 0.146853 | 0.138986  | 0.148164  | 0.140443  | 0.142337 |
| 0.155886  | 0.158071  | 0.156469 | 0.151807  | 0.162733  | 0.152681  | 0.15574  |
| 0.124417  | 0.127768  | 0.114219 | 0.12704   | 0.132139  | 0.119755  | 0.128351 |
| 0.119901  | 0.125291  | 0.103001 | 0.11961   | 0.126457  | 0.110286  | 0.120629 |
| 0.123543  | 0.126311  | 0.136655 | 0.127914  | 0.130682  | 0.135781  | 0.12602  |
| 0.125437  | 0.13141   | 0.143794 | 0.128351  | 0.138403  | 0.13884   | 0.133741 |
| 0.128059  | 0.131993  | 0.112034 | 0.126894  | 0.137529  | 0.118153  | 0.130828 |
| 0.125728  | 0.128788  | 0.141171 | 0.140006  | 0.147145  | 0.140006  | 0.135198 |
| 0.138258  | 0.143065  | 0.140006 | 0.133013  | 0.145688  | 0.135927  | 0.141608 |
| 0.131993  | 0.137675  | 0.11655  | 0.125     | 0.133304  | 0.116841  | 0.125146 |
| 0.155012  | 0.163316  | 0.163462 | 0.14831   | 0.157197  | 0.159382  | 0.158071 |
| 0.130828  | 0.136218  | 0.115676 | 0.128788  | 0.141171  | 0.11859   | 0.129516 |
| 0.143648  | 0.144085  | 0.135198 | 0.1419    | 0.149913  | 0.134033  | 0.137675 |
| 0.120775  | 0.128788  | 0.107663 | 0.124563  | 0.131702  | 0.112325  | 0.129662 |
| 0.131556  | 0.133159  | 0.132721 | 0.130099  | 0.138986  | 0.133013  | 0.129953 |
| 0.114073  | 0.120047  | 0.133887 | 0.124272  | 0.131702  | 0.129808  | 0.127331 |
| 0.136655  | 0.143794  | 0.147145 | 0.109557  | 0.121649  | 0.118298  | 0.144376 |
| 0.0767774 | 0.0713869 | 0.14933  | 0.137383  | 0.1419    | 0.155157  | 0.151224 |
| 0.119172  | 0.122815  | 0.130245 | 0.0527389 | 0.0546329 | 0.122086  | 0.130682 |
| 0.130973  | 0.136072  | 0.137966 | 0.0633741 | 0.0649767 | 0.116404  | 0.143065 |
| 0.147727  | 0.153992  | 0.112179 | 0.140443  | 0.148747  | 0.0979021 | 0.146999 |
| 0.140152  | 0.145251  | 0.150932 | 0.117133  | 0.126603  | 0.127331  | 0.1537   |
| 0.130099  | 0.134324  | 0.097465 | 0.124272  | 0.134615  | 0.103875  | 0.11451  |
| 0.127331  | 0.130973  | 0.142191 | 0.12704   | 0.135927  | 0.142191  | 0.135927 |
| 0.106643  | 0.110577  | 0.124417 | 0.110431  | 0.118735  | 0.113928  | 0.120775 |
| 0.113199  | 0.119755  | 0.113199 | 0.111742  | 0.127622  | 0.105332  | 0.115676 |
| 0.121795  | 0.121649  | 0.132867 | 0.119464  | 0.133013  | 0.122669  | 0.129516 |
| 0.112762  | 0.121649  | 0.124709 | 0.0469114 | 0.0528846 | 0.11655   | 0.127768 |
| 0.116404  | 0.117716  | 0.113491 | 0.122232  | 0.132284  | 0.114948  | 0.114219 |
| 0.106789  | 0.111305  | 0.120192 | 0.0849359 | 0.0964452 | 0.10708   | 0.119464 |
| 0.11116   | 0.115093  | 0.124854 | 0.105332  | 0.112762  | 0.127477  | 0.126748 |

|           |           |           |           |           |           |           |
|-----------|-----------|-----------|-----------|-----------|-----------|-----------|
| 0.120629  | 0.12398   | 0.13549   | 0.114802  | 0.129516  | 0.118007  | 0.125437  |
| 0.113345  | 0.11757   | 0.11859   | 0.111597  | 0.123106  | 0.106643  | 0.107372  |
| 0.117133  | 0.121649  | 0.127331  | 0.0588578 | 0.0627914 | 0.115093  | 0.13447   |
| 0.114073  | 0.118298  | 0.125146  | 0.0528846 | 0.0576923 | 0.116696  | 0.13141   |
| 0.130973  | 0.133741  | 0.0453089 | 0.121066  | 0.13141   | 0.0689103 | 0.115676  |
| 0.213432  | 0.217366  | 0.218094  | 0.203234  | 0.210082  | 0.20236   | 0.223193  |
| 0.142045  | 0.143065  | 0.144959  | 0.0619172 | 0.0530303 | 0.138258  | 0.145979  |
| 0.126166  | 0.128934  | 0.131119  | 0.121795  | 0.127768  | 0.132284  | 0.133887  |
| 0.121358  | 0.121503  | 0.126603  | 0.109994  | 0.118298  | 0.124854  | 0.132576  |
| 0.207896  | 0.211247  | 0.214889  | 0.19799   | 0.204545  | 0.196824  | 0.216783  |
| 0.125437  | 0.131993  | 0.0750291 | 0.122232  | 0.134033  | 0.0744464 | 0.125583  |
| 0.124126  | 0.130973  | 0.115385  | 0.124417  | 0.133304  | 0.112179  | 0.0540501 |
| 0.118007  | 0.121358  | 0.121795  | 0.122669  | 0.129225  | 0.122086  | 0.122232  |
| 0.118444  | 0.122086  | 0.130682  | 0.118153  | 0.131702  | 0.122815  | 0.12296   |
| 0.247523  | 0.251457  | 0.254516  | 0.235577  | 0.241841  | 0.238491  | 0.257284  |
| 0.126166  | 0.131265  | 0.129662  | 0.120629  | 0.135927  | 0.128497  | 0.126894  |
| 0.11859   | 0.125437  | 0.0556527 | 0.119172  | 0.126894  | 0.0710956 | 0.114073  |
| 0.117716  | 0.11961   | 0.123834  | 0.120338  | 0.129225  | 0.126166  | 0.131265  |
| 0.113054  | 0.112325  | 0.123543  | 0.119464  | 0.127185  | 0.123252  | 0.128059  |
| 0.129662  | 0.137092  | 0.131993  | 0.120921  | 0.135927  | 0.124417  | 0.127477  |
| 0.126748  | 0.131265  | 0.134615  | 0.102564  | 0.116404  | 0.111888  | 0.130099  |
| 0.121795  | 0.126894  | 0.0512821 | 0.118298  | 0.13039   | 0.0699301 | 0.116404  |
| 0.114365  | 0.119172  | 0.125437  | 0.0488054 | 0.0533217 | 0.11553   | 0.128497  |
| 0.115093  | 0.119901  | 0.132576  | 0.120338  | 0.131265  | 0.129662  | 0.128059  |
| 0.113345  | 0.116404  | 0.125291  | 0.114219  | 0.123397  | 0.117716  | 0.119318  |
| 0.112034  | 0.121795  | 0.121066  | 0.0528846 | 0.0641026 | 0.110286  | 0.128205  |
| 0.11859   | 0.12398   | 0.133159  | 0.120047  | 0.128934  | 0.121795  | 0.123106  |
| 0.0767774 | 0.0710956 | 0.150204  | 0.138549  | 0.140152  | 0.152535  | 0.149767  |
| 0.13039   | 0.134615  | 0.132721  | 0.122523  | 0.135781  | 0.126603  | 0.125291  |
| 0.128642  | 0.134033  | 0.117861  | 0.125146  | 0.135781  | 0.116987  | 0.0527389 |
| 0.186626  | 0.18852   | 0.193328  | 0.176136  | 0.185606  | 0.173805  | 0.196096  |
| 0.200029  | 0.203671  | 0.206731  | 0.190997  | 0.201923  | 0.18954   | 0.209207  |
| 0.122232  | 0.120921  | 0.133013  | 0.121358  | 0.132867  | 0.120484  | 0.121795  |
| 0.114656  | 0.115093  | 0.12602   | 0.113782  | 0.122086  | 0.116987  | 0.117716  |
| 0.132139  | 0.13549   | 0.140589  | 0.122232  | 0.120047  | 0.135052  | 0.148601  |
| 0.118735  | 0.127622  | 0.0540501 | 0.118735  | 0.129662  | 0.0677448 | 0.11451   |
| 0.129662  | 0.135052  | 0.133159  | 0.12296   | 0.136218  | 0.129953  | 0.128059  |
| 0.120775  | 0.126457  | 0.133887  | 0.122232  | 0.122086  | 0.133013  | 0.134033  |
| 0.222465  | 0.222611  | 0.228875  | 0.212558  | 0.219406  | 0.21081   | 0.230186  |
| 0.114073  | 0.113345  | 0.117861  | 0.11553   | 0.120629  | 0.119901  | 0.124417  |
| 0.205128  | 0.210519  | 0.204545  | 0.193182  | 0.200321  | 0.187937  | 0.21081   |
| 0.116113  | 0.119755  | 0.0913462 | 0.114365  | 0.125874  | 0.0942599 | 0.107226  |
| 0.115676  | 0.119318  | 0.120629  | 0.117716  | 0.127185  | 0.112762  | 0.114073  |
| 0.114948  | 0.118007  | 0.110868  | 0.0989219 | 0.109557  | 0.106498  | 0.122669  |

|           |           |           |           |           |           |           |
|-----------|-----------|-----------|-----------|-----------|-----------|-----------|
| 0.113491  | 0.115385  | 0.123689  | 0.114948  | 0.122669  | 0.107663  | 0.117424  |
| 0.203089  | 0.207314  | 0.212704  | 0.195221  | 0.201777  | 0.192599  | 0.214015  |
| 0.128205  | 0.130682  | 0.137238  | 0.0547786 | 0.0566725 | 0.123252  | 0.139132  |
| 0.119464  | 0.117861  | 0.111597  | 0.11859   | 0.128059  | 0.1081    | 0.11757   |
| 0.122378  | 0.125146  | 0.129953  | 0.0477855 | 0.0470571 | 0.122669  | 0.135344  |
| 0.126457  | 0.129516  | 0.124417  | 0.119464  | 0.125728  | 0.122086  | 0.121649  |
| 0.114802  | 0.117279  | 0.128205  | 0.11451   | 0.128351  | 0.115676  | 0.121066  |
| 0.118153  | 0.120047  | 0.0910548 | 0.113782  | 0.125583  | 0.097465  | 0.105478  |
| 0.123689  | 0.126457  | 0.0662879 | 0.116113  | 0.129953  | 0.0659965 | 0.11859   |
| 0.129225  | 0.132867  | 0.118153  | 0.121649  | 0.131702  | 0.117279  | 0.0477855 |
| 0.106789  | 0.112762  | 0.122232  | 0.0557984 | 0.0603147 | 0.110577  | 0.126166  |
| 0.119172  | 0.12398   | 0.110431  | 0.119172  | 0.126603  | 0.111888  | 0.115239  |
| 0.18546   | 0.189103  | 0.19391   | 0.177302  | 0.187063  | 0.174388  | 0.196096  |
| 0.117133  | 0.116404  | 0.125874  | 0.121212  | 0.129808  | 0.127331  | 0.131265  |
| 0.0616259 | 0.0576923 | 0.133304  | 0.122523  | 0.132867  | 0.137092  | 0.13549   |
| 0.108974  | 0.112617  | 0.124126  | 0.111014  | 0.120192  | 0.125     | 0.127768  |
| 0.12602   | 0.127622  | 0.130099  | 0.121358  | 0.138112  | 0.116696  | 0.129662  |
| 0.117861  | 0.126457  | 0.126603  | 0.0493881 | 0.0512821 | 0.121941  | 0.128788  |
| 0.123689  | 0.125583  | 0.0948427 | 0.11961   | 0.127622  | 0.102418  | 0.110431  |
| 0.11655   | 0.121358  | 0.121503  | 0.111888  | 0.121941  | 0.114219  | 0.120775  |
| 0.129953  | 0.13243   | 0.0521562 | 0.122086  | 0.132721  | 0.0766317 | 0.116987  |
| 0.0560897 | 0.0527389 | 0.126603  | 0.119901  | 0.123834  | 0.127477  | 0.13345   |
| 0.107372  | 0.112471  | 0.121066  | 0.113199  | 0.126166  | 0.118444  | 0.126166  |
| 0.118298  | 0.118444  | 0.126457  | 0.116841  | 0.12602   | 0.118007  | 0.122815  |
| 0.114365  | 0.120629  | 0.124854  | 0.121941  | 0.133159  | 0.122523  | 0.122086  |
| 0.131119  | 0.131556  | 0.134324  | 0.128497  | 0.137383  | 0.137529  | 0.135927  |
| 0.114802  | 0.11961   | 0.124709  | 0.116259  | 0.132139  | 0.121212  | 0.119318  |
| 0.137092  | 0.139277  | 0.142337  | 0.0584207 | 0.0501166 | 0.135052  | 0.142483  |
| 0.115822  | 0.116259  | 0.127185  | 0.114365  | 0.126166  | 0.113491  | 0.120921  |
| 0.109411  | 0.113636  | 0.121358  | 0.107955  | 0.115967  | 0.120192  | 0.123834  |
| 0.117716  | 0.123397  | 0.124126  | 0.0623543 | 0.0703671 | 0.101107  | 0.129516  |
| 0.129079  | 0.134761  | 0.0509907 | 0.123543  | 0.13447   | 0.0670163 | 0.120484  |
| 0.184732  | 0.191288  | 0.175117  | 0.178322  | 0.188666  | 0.160839  | 0.196241  |
| 0.113199  | 0.115967  | 0.108246  | 0.113199  | 0.126166  | 0.105332  | 0.113636  |
| 0.0986305 | 0.104021  | 0.112908  | 0.0980478 | 0.110723  | 0.112325  | 0.11451   |
| 0.127768  | 0.130536  | 0.11553   | 0.12398   | 0.131993  | 0.11757   | 0.0495338 |
| 0.175554  | 0.177739  | 0.187209  | 0.169143  | 0.174242  | 0.164773  | 0.187063  |
| 0.137529  | 0.141171  | 0.144231  | 0.133741  | 0.145542  | 0.134033  | 0.134761  |
| 0.147727  | 0.157197  | 0.151807  | 0.140152  | 0.152244  | 0.146853  | 0.140006  |
| 0.0796911 | 0.0745921 | 0.152535  | 0.13884   | 0.143648  | 0.154283  | 0.150932  |
| 0.114656  | 0.122378  | 0.125437  | 0.116113  | 0.130828  | 0.115239  | 0.122669  |
| 0.117716  | 0.123397  | 0.129662  | 0.0428322 | 0.0488054 | 0.119464  | 0.130099  |
| 0.207022  | 0.209207  | 0.216346  | 0.195659  | 0.205128  | 0.197698  | 0.218823  |
| 0.12398   | 0.127331  | 0.128642  | 0.116113  | 0.120629  | 0.127477  | 0.129953  |



|           |           |           |           |           |           |           |
|-----------|-----------|-----------|-----------|-----------|-----------|-----------|
| 0.122086  | 0.126603  | 0.129953  | 0.048951  | 0.050845  | 0.124126  | 0.13447   |
| 0.118881  | 0.119318  | 0.110431  | 0.117716  | 0.128934  | 0.1081    | 0.116696  |
| 0.164918  | 0.168561  | 0.175699  | 0.142191  | 0.1537    | 0.152098  | 0.175554  |
| 0.108392  | 0.116113  | 0.120921  | 0.108974  | 0.115822  | 0.117716  | 0.125437  |
| 0.140297  | 0.143065  | 0.154866  | 0.137966  | 0.144814  | 0.15574   | 0.149767  |
| 0.127477  | 0.13141   | 0.130682  | 0.11961   | 0.131119  | 0.115822  | 0.11859   |
| 0.187209  | 0.190268  | 0.192162  | 0.177302  | 0.185606  | 0.174388  | 0.195804  |
| 0.121358  | 0.125583  | 0.130099  | 0.122232  | 0.136655  | 0.126603  | 0.124709  |
| 0.103875  | 0.107517  | 0.119027  | 0.107372  | 0.114802  | 0.109703  | 0.115093  |
| 0.112762  | 0.115239  | 0.121212  | 0.109557  | 0.120775  | 0.117133  | 0.128351  |
| 0.119318  | 0.124417  | 0.116113  | 0.114948  | 0.12296   | 0.112325  | 0.111305  |
| 0.12398   | 0.129953  | 0.11553   | 0.121941  | 0.131993  | 0.115239  | 0.0521562 |
| 0.110286  | 0.115967  | 0.128059  | 0.120484  | 0.129371  | 0.121649  | 0.131119  |
| 0.115385  | 0.114365  | 0.126748  | 0.11451   | 0.126603  | 0.117133  | 0.118444  |
| 0.183421  | 0.189685  | 0.193619  | 0.179341  | 0.187646  | 0.171474  | 0.196387  |
| 0.11014   | 0.114948  | 0.123834  | 0.121795  | 0.128059  | 0.123543  | 0.125437  |
| 0.114948  | 0.122378  | 0.123397  | 0.108537  | 0.115093  | 0.113491  | 0.119464  |
| 0.208333  | 0.209645  | 0.214161  | 0.199301  | 0.207314  | 0.197844  | 0.217512  |
| 0.115385  | 0.116404  | 0.125583  | 0.117716  | 0.129808  | 0.125     | 0.130682  |
| 0.114365  | 0.116841  | 0.129225  | 0.11553   | 0.128788  | 0.118735  | 0.121503  |
| 0.109994  | 0.113345  | 0.123106  | 0.112325  | 0.123543  | 0.112908  | 0.118007  |
| 0.130828  | 0.132721  | 0.141317  | 0.0670163 | 0.0636655 | 0.134033  | 0.142628  |
| 0.184441  | 0.1875    | 0.195221  | 0.17803   | 0.186043  | 0.176282  | 0.197698  |
| 0.123397  | 0.129079  | 0.0528846 | 0.122232  | 0.129371  | 0.0759033 | 0.115385  |
| 0.124563  | 0.126457  | 0.129225  | 0.126894  | 0.13345   | 0.134178  | 0.130536  |
| 0.113491  | 0.114802  | 0.124563  | 0.117279  | 0.126457  | 0.11553   | 0.117133  |
| 0.109411  | 0.114219  | 0.124272  | 0.113199  | 0.124709  | 0.114365  | 0.120338  |
| 0.111597  | 0.11553   | 0.125583  | 0.113928  | 0.128351  | 0.113928  | 0.119318  |
| 0.112617  | 0.118298  | 0.124854  | 0.0546329 | 0.0617716 | 0.11553   | 0.125874  |
| 0.11014   | 0.114948  | 0.113636  | 0.11014   | 0.12398   | 0.106061  | 0.106789  |
| 0.127622  | 0.13039   | 0.130828  | 0.12296   | 0.139423  | 0.129371  | 0.128642  |
| 0.112471  | 0.117861  | 0.133741  | 0.118881  | 0.11757   | 0.134615  | 0.139714  |
| 0.123543  | 0.128059  | 0.128205  | 0.122378  | 0.137383  | 0.123252  | 0.128934  |
| 0.132139  | 0.133159  | 0.129516  | 0.123689  | 0.130536  | 0.131556  | 0.127914  |
| 0.189685  | 0.195367  | 0.197844  | 0.18211   | 0.190414  | 0.178322  | 0.203526  |
| 0.113491  | 0.115676  | 0.121358  | 0.120484  | 0.130245  | 0.123397  | 0.12296   |
| 0.126457  | 0.131847  | 0.138403  | 0.0515734 | 0.0502622 | 0.129371  | 0.135927  |
| 0.111742  | 0.115093  | 0.127185  | 0.113491  | 0.12296   | 0.116404  | 0.11655   |
| 0.112179  | 0.115239  | 0.120047  | 0.11014   | 0.122232  | 0.111888  | 0.108246  |
| 0.115967  | 0.116113  | 0.125583  | 0.113345  | 0.124854  | 0.112471  | 0.126603  |
| 0.126603  | 0.131993  | 0.0441434 | 0.121358  | 0.128788  | 0.0689103 | 0.114802  |
| 0.125146  | 0.131119  | 0.135927  | 0.11961   | 0.131702  | 0.130973  | 0.133159  |
| 0.0533217 | 0.0572552 | 0.127914  | 0.118007  | 0.125146  | 0.123834  | 0.130099  |
| 0.115967  | 0.119318  | 0.0748834 | 0.115676  | 0.127477  | 0.0745921 | 0.110286  |

|           |           |           |           |           |           |           |
|-----------|-----------|-----------|-----------|-----------|-----------|-----------|
| 0.113199  | 0.119464  | 0.0823135 | 0.109703  | 0.122378  | 0.0791084 | 0.106643  |
| 0.107809  | 0.112908  | 0.120047  | 0.1081    | 0.116987  | 0.107809  | 0.119318  |
| 0.11961   | 0.125     | 0.0898893 | 0.113782  | 0.125874  | 0.0922203 | 0.1081    |
| 0.132576  | 0.139714  | 0.137821  | 0.127622  | 0.137966  | 0.133741  | 0.128642  |
| 0.121358  | 0.123834  | 0.057838  | 0.122523  | 0.131702  | 0.071824  | 0.115967  |
| 0.110431  | 0.116113  | 0.121212  | 0.0544872 | 0.0598776 | 0.112471  | 0.127185  |
| 0.11859   | 0.123689  | 0.0588578 | 0.117133  | 0.127185  | 0.0716783 | 0.109994  |
| 0.108537  | 0.11451   | 0.121358  | 0.112617  | 0.122669  | 0.112617  | 0.120629  |
| 0.111597  | 0.113199  | 0.109848  | 0.111014  | 0.123689  | 0.106061  | 0.11553   |
| 0.116841  | 0.116404  | 0.129371  | 0.116259  | 0.127477  | 0.11655   | 0.120192  |
| 0.106061  | 0.113199  | 0.115385  | 0.115385  | 0.125437  | 0.115385  | 0.116987  |
| 0.0474942 | 0.0525932 | 0.128788  | 0.118881  | 0.126603  | 0.128497  | 0.129225  |
| 0.120338  | 0.126894  | 0.114802  | 0.119172  | 0.130682  | 0.113054  | 0.0592949 |
| 0.113199  | 0.11655   | 0.120775  | 0.111742  | 0.125291  | 0.112617  | 0.113636  |
| 0.110431  | 0.112617  | 0.123252  | 0.115093  | 0.125437  | 0.116259  | 0.11961   |
| 0.111888  | 0.116696  | 0.126166  | 0.113636  | 0.125437  | 0.112179  | 0.131556  |
| 0.120484  | 0.122086  | 0.126894  | 0.112617  | 0.120047  | 0.119318  | 0.131119  |
| 0.106935  | 0.109703  | 0.121795  | 0.112471  | 0.125146  | 0.111888  | 0.117279  |
| 0.113054  | 0.112908  | 0.125291  | 0.110431  | 0.122232  | 0.11655   | 0.121066  |
| 0.114656  | 0.121503  | 0.128642  | 0.0456002 | 0.0498252 | 0.114365  | 0.127331  |
| 0.118735  | 0.121212  | 0.0933858 | 0.119901  | 0.130245  | 0.0960082 | 0.108974  |
| 0.114365  | 0.120629  | 0.124854  | 0.0534674 | 0.0585664 | 0.116404  | 0.13141   |
| 0.118153  | 0.127331  | 0.113199  | 0.123106  | 0.132284  | 0.112325  | 0.0582751 |
| 0.118153  | 0.121503  | 0.122232  | 0.116404  | 0.128788  | 0.115239  | 0.111888  |
| 0.100962  | 0.107517  | 0.121358  | 0.109411  | 0.120921  | 0.117279  | 0.119172  |
| 0.109848  | 0.116696  | 0.108974  | 0.11451   | 0.127185  | 0.107809  | 0.112034  |
| 0.119318  | 0.121212  | 0.131265  | 0.0546329 | 0.0559441 | 0.119901  | 0.131702  |
| 0.120484  | 0.124126  | 0.123397  | 0.114656  | 0.123834  | 0.119027  | 0.126457  |
| 0.113928  | 0.114365  | 0.124126  | 0.106643  | 0.113199  | 0.118007  | 0.126603  |
| 0.189394  | 0.192162  | 0.198135  | 0.183275  | 0.190414  | 0.179487  | 0.20236   |
| 0.159382  | 0.160402  | 0.16958   | 0.147436  | 0.154283  | 0.150058  | 0.172931  |
| 0.122086  | 0.127185  | 0.127622  | 0.121503  | 0.134761  | 0.122086  | 0.125728  |
| 0.113491  | 0.120338  | 0.0831876 | 0.111742  | 0.123543  | 0.0898893 | 0.12296   |
| 0.14933   | 0.157343  | 0.151369  | 0.142337  | 0.154138  | 0.150787  | 0.143065  |
| 0.116841  | 0.118444  | 0.131119  | 0.121503  | 0.130099  | 0.131993  | 0.13039   |
| 0.113491  | 0.117424  | 0.133887  | 0.11961   | 0.129662  | 0.121941  | 0.127622  |
| 0.1081    | 0.114948  | 0.126166  | 0.110723  | 0.122815  | 0.113928  | 0.127185  |
| 0.116259  | 0.121358  | 0.129953  | 0.119755  | 0.127768  | 0.117424  | 0.121649  |
| 0.119755  | 0.124854  | 0.128497  | 0.113636  | 0.116987  | 0.123834  | 0.129808  |
| 0.195659  | 0.197552  | 0.208188  | 0.189831  | 0.198135  | 0.185752  | 0.20979   |
| 0.125583  | 0.133304  | 0.0518648 | 0.126166  | 0.136218  | 0.0754662 | 0.118735  |
| 0.119318  | 0.123543  | 0.0942599 | 0.0724068 | 0.0812937 | 0.0855186 | 0.127331  |
| 0.105624  | 0.108392  | 0.120192  | 0.110577  | 0.119755  | 0.111742  | 0.118881  |
| 0.11859   | 0.121941  | 0.121503  | 0.117716  | 0.129516  | 0.120047  | 0.121941  |

|           |           |           |           |           |           |           |
|-----------|-----------|-----------|-----------|-----------|-----------|-----------|
| 0.174097  | 0.179196  | 0.18954   | 0.171766  | 0.184149  | 0.165355  | 0.19493   |
| 0.243444  | 0.247378  | 0.24898   | 0.230624  | 0.237762  | 0.235286  | 0.251166  |
| 0.0505536 | 0.0544872 | 0.128059  | 0.121358  | 0.125583  | 0.127185  | 0.13345   |
| 0.116113  | 0.120629  | 0.127477  | 0.112908  | 0.122669  | 0.121358  | 0.127622  |
| 0.119901  | 0.129662  | 0.130099  | 0.121358  | 0.134907  | 0.123106  | 0.125583  |
| 0.117133  | 0.12602   | 0.113636  | 0.11859   | 0.131556  | 0.108683  | 0.0592949 |
| 0.118735  | 0.123834  | 0.0563811 | 0.115239  | 0.125583  | 0.0724068 | 0.109557  |
| 0.104895  | 0.107955  | 0.11859   | 0.115093  | 0.122232  | 0.115676  | 0.121066  |
| 0.112617  | 0.116259  | 0.123106  | 0.0820221 | 0.0926573 | 0.107955  | 0.121795  |
| 0.121358  | 0.123834  | 0.0502622 | 0.114365  | 0.127331  | 0.069493  | 0.114802  |
| 0.112762  | 0.118444  | 0.12704   | 0.0719697 | 0.0826049 | 0.113636  | 0.125437  |
| 0.108829  | 0.118298  | 0.125146  | 0.116987  | 0.130245  | 0.119027  | 0.12704   |
| 0.114802  | 0.119318  | 0.121795  | 0.111014  | 0.125146  | 0.111888  | 0.110577  |
| 0.050845  | 0.0518648 | 0.130682  | 0.11961   | 0.126748  | 0.129225  | 0.131119  |
| 0.117133  | 0.119027  | 0.129953  | 0.0518648 | 0.0560897 | 0.115093  | 0.130099  |
| 0.102564  | 0.10912   | 0.115676  | 0.101107  | 0.114073  | 0.108974  | 0.114073  |
| 0.116259  | 0.121941  | 0.122086  | 0.126748  | 0.132721  | 0.126166  | 0.124854  |
| 0.134907  | 0.138549  | 0.123543  | 0.131702  | 0.140006  | 0.124709  | 0.0447261 |
| 0.11116   | 0.115093  | 0.123397  | 0.115822  | 0.124126  | 0.112617  | 0.11859   |
| 0.11859   | 0.123397  | 0.122378  | 0.11859   | 0.127185  | 0.108974  | 0.121358  |
| 0.128497  | 0.131265  | 0.138112  | 0.125291  | 0.13447   | 0.13141   | 0.126603  |
| 0.206148  | 0.210664  | 0.213724  | 0.196241  | 0.203089  | 0.199155  | 0.210956  |
| 0.0541958 | 0.0566725 | 0.120921  | 0.113345  | 0.120484  | 0.118881  | 0.122815  |
| 0.115239  | 0.121212  | 0.122232  | 0.113782  | 0.124709  | 0.11116   | 0.108974  |
| 0.108829  | 0.118007  | 0.122815  | 0.120775  | 0.132284  | 0.123397  | 0.122086  |
| 0.113345  | 0.116404  | 0.125     | 0.119464  | 0.128351  | 0.121795  | 0.131847  |
| 0.11655   | 0.123689  | 0.119755  | 0.11451   | 0.122232  | 0.117424  | 0.121066  |
| 0.193182  | 0.196824  | 0.204837  | 0.186772  | 0.195367  | 0.187354  | 0.207022  |
| 0.116987  | 0.119755  | 0.132139  | 0.0520105 | 0.0585664 | 0.119027  | 0.132284  |
| 0.111305  | 0.113491  | 0.121795  | 0.111305  | 0.122815  | 0.115385  | 0.11757   |
| 0.123397  | 0.128497  | 0.121358  | 0.117279  | 0.125291  | 0.116987  | 0.125     |
| 0.118735  | 0.126166  | 0.111451  | 0.116113  | 0.128497  | 0.110868  | 0.0553613 |
| 0.113491  | 0.11655   | 0.126894  | 0.0546329 | 0.0588578 | 0.116404  | 0.131702  |
| 0.105624  | 0.111888  | 0.120775  | 0.076486  | 0.083042  | 0.10912   | 0.121795  |
| 0.113491  | 0.115967  | 0.128059  | 0.114365  | 0.126748  | 0.116696  | 0.125874  |
| 0.108829  | 0.111305  | 0.120484  | 0.116404  | 0.128788  | 0.120775  | 0.125874  |
| 0.193765  | 0.196824  | 0.204254  | 0.186189  | 0.192745  | 0.182692  | 0.204108  |
| 0.107663  | 0.114802  | 0.120775  | 0.0557984 | 0.0620629 | 0.111742  | 0.122378  |
| 0.191142  | 0.19595   | 0.200466  | 0.182984  | 0.191579  | 0.18007   | 0.203817  |
| 0.188666  | 0.191434  | 0.198281  | 0.179633  | 0.18852   | 0.178759  | 0.200175  |
| 0.130973  | 0.137821  | 0.121066  | 0.127185  | 0.135781  | 0.121358  | 0.0515734 |
| 0.12398   | 0.126166  | 0.132139  | 0.127768  | 0.135781  | 0.133596  | 0.134907  |
| 0.101544  | 0.106935  | 0.11553   | 0.107663  | 0.118007  | 0.109411  | 0.120338  |
| 0.107517  | 0.112908  | 0.11859   | 0.0641026 | 0.0674534 | 0.113345  | 0.122523  |

|           |           |           |           |           |           |           |
|-----------|-----------|-----------|-----------|-----------|-----------|-----------|
| 0.110868  | 0.115676  | 0.12602   | 0.055507  | 0.0620629 | 0.113782  | 0.130828  |
| 0.11553   | 0.119172  | 0.126603  | 0.116404  | 0.128788  | 0.116696  | 0.121795  |
| 0.11553   | 0.12296   | 0.0587121 | 0.111742  | 0.120629  | 0.0756119 | 0.110723  |
| 0.120484  | 0.125874  | 0.0523019 | 0.117861  | 0.124417  | 0.069493  | 0.107517  |
| 0.0512821 | 0.0534674 | 0.131702  | 0.119755  | 0.127768  | 0.130245  | 0.135052  |
| 0.125728  | 0.129953  | 0.118444  | 0.121649  | 0.131702  | 0.115239  | 0.0547786 |
| 0.111597  | 0.109994  | 0.121212  | 0.1081    | 0.121066  | 0.111597  | 0.114656  |
| 0.114656  | 0.118298  | 0.125437  | 0.0534674 | 0.0568182 | 0.115822  | 0.130536  |
| 0.100524  | 0.107372  | 0.114802  | 0.105478  | 0.114948  | 0.1081    | 0.11553   |
| 0.12602   | 0.129079  | 0.136218  | 0.0520105 | 0.0501166 | 0.126603  | 0.134033  |
| 0.120775  | 0.124709  | 0.126894  | 0.119027  | 0.133741  | 0.121066  | 0.125291  |
| 0.13141   | 0.133304  | 0.138112  | 0.0533217 | 0.0467657 | 0.13345   | 0.138258  |
| 0.254371  | 0.25947   | 0.262529  | 0.246503  | 0.250437  | 0.246212  | 0.265297  |
| 0.129953  | 0.128934  | 0.118298  | 0.126166  | 0.133887  | 0.124126  | 0.122232  |
| 0.12602   | 0.133159  | 0.130682  | 0.123689  | 0.131702  | 0.123397  | 0.120047  |
| 0.215035  | 0.216346  | 0.222028  | 0.204254  | 0.21081   | 0.205711  | 0.22567   |
| 0.126603  | 0.130536  | 0.130973  | 0.127768  | 0.134615  | 0.13447   | 0.115967  |
| 0.22567   | 0.230478  | 0.237034  | 0.215181  | 0.224359  | 0.217803  | 0.2331    |
| 0.121795  | 0.121358  | 0.113636  | 0.117424  | 0.12602   | 0.115967  | 0.115822  |
| 0.128059  | 0.126457  | 0.138258  | 0.124272  | 0.133741  | 0.130099  | 0.125874  |
| 0.106789  | 0.110723  | 0.11757   | 0.113782  | 0.125291  | 0.116404  | 0.124417  |
| 0.131556  | 0.136655  | 0.119318  | 0.126894  | 0.134907  | 0.116987  | 0.0530303 |
| 0.198864  | 0.200175  | 0.209062  | 0.192453  | 0.200175  | 0.186917  | 0.210082  |
| 0.125437  | 0.128788  | 0.137966  | 0.0517191 | 0.0495338 | 0.128934  | 0.134907  |
| 0.110286  | 0.118298  | 0.128059  | 0.0546329 | 0.0591492 | 0.116113  | 0.133741  |
| 0.22465   | 0.227127  | 0.229312  | 0.215035  | 0.222174  | 0.214161  | 0.23208   |
| 0.121066  | 0.125     | 0.055507  | 0.120484  | 0.132576  | 0.0724068 | 0.115385  |
| 0.194639  | 0.196824  | 0.204545  | 0.18852   | 0.196824  | 0.182692  | 0.204983  |
| 0.122669  | 0.125728  | 0.0571096 | 0.122378  | 0.133013  | 0.0737179 | 0.114073  |
| 0.113345  | 0.114073  | 0.13141   | 0.115093  | 0.127768  | 0.117133  | 0.121941  |
| 0.12602   | 0.128205  | 0.13039   | 0.117279  | 0.126457  | 0.124272  | 0.118007  |
| 0.133596  | 0.140734  | 0.121649  | 0.12602   | 0.13549   | 0.124563  | 0.0472028 |
| 0.109848  | 0.11553   | 0.121795  | 0.114802  | 0.120484  | 0.117424  | 0.125146  |
| 0.157925  | 0.164481  | 0.167249  | 0.152972  | 0.163899  | 0.143065  | 0.169726  |
| 0.109848  | 0.113782  | 0.12296   | 0.0480769 | 0.0523019 | 0.114802  | 0.125728  |
| 0.111888  | 0.112325  | 0.124126  | 0.120338  | 0.13039   | 0.121503  | 0.132139  |
| 0.119464  | 0.123106  | 0.118298  | 0.122086  | 0.133304  | 0.117133  | 0.121066  |
| 0.118298  | 0.127185  | 0.128497  | 0.116841  | 0.120192  | 0.13141   | 0.13039   |
| 0.188666  | 0.194056  | 0.20236   | 0.184878  | 0.19289   | 0.183129  | 0.203671  |
| 0.112762  | 0.115239  | 0.126166  | 0.111597  | 0.124272  | 0.113054  | 0.116696  |
| 0.126603  | 0.13141   | 0.123106  | 0.126311  | 0.136072  | 0.107663  | 0.0681818 |
| 0.117716  | 0.121358  | 0.0961538 | 0.115967  | 0.127768  | 0.0949883 | 0.108246  |
| 0.124854  | 0.130245  | 0.0502622 | 0.118153  | 0.127622  | 0.0686189 | 0.113928  |
| 0.120047  | 0.121941  | 0.129953  | 0.119172  | 0.127768  | 0.122086  | 0.11961   |

|           |           |           |           |           |           |           |
|-----------|-----------|-----------|-----------|-----------|-----------|-----------|
| 0.251603  | 0.254371  | 0.258013  | 0.241404  | 0.24796   | 0.24257   | 0.261655  |
| 0.123543  | 0.126311  | 0.124126  | 0.113928  | 0.12398   | 0.116259  | 0.108829  |
| 0.113636  | 0.116113  | 0.121795  | 0.118881  | 0.128642  | 0.115676  | 0.125728  |
| 0.180653  | 0.183421  | 0.180944  | 0.168998  | 0.178759  | 0.162587  | 0.185752  |
| 0.18211   | 0.187209  | 0.189394  | 0.176282  | 0.185752  | 0.169289  | 0.191871  |
| 0.0547786 | 0.0534674 | 0.130245  | 0.120921  | 0.128059  | 0.126166  | 0.133887  |
| 0.11553   | 0.117424  | 0.13039   | 0.0525932 | 0.0576923 | 0.120192  | 0.130245  |
| 0.119318  | 0.125583  | 0.111742  | 0.118153  | 0.12704   | 0.108829  | 0.0585664 |
| 0.1419    | 0.144376  | 0.147436  | 0.0638112 | 0.0525932 | 0.142191  | 0.149038  |
| 0         | 0.0520105 | 0.125     | 0.116259  | 0.125728  | 0.125874  | 0.128642  |
| 0.0520105 | 0         | 0.131847  | 0.121649  | 0.13141   | 0.130682  | 0.134324  |
| 0.125     | 0.131847  | 0         | 0.125583  | 0.135635  | 0.0728438 | 0.119901  |
| 0.116259  | 0.121649  | 0.125583  | 0         | 0.0523019 | 0.115093  | 0.125146  |
| 0.125728  | 0.13141   | 0.135635  | 0.0523019 | 0         | 0.127768  | 0.136072  |
| 0.125874  | 0.130682  | 0.0728438 | 0.115093  | 0.127768  | 0         | 0.11961   |
| 0.128642  | 0.134324  | 0.119901  | 0.125146  | 0.136072  | 0.11961   | 0         |
| 0.142483  | 0.148164  | 0.129371  | 0.135781  | 0.146125  | 0.131119  | 0.0546329 |
| 0.128059  | 0.132576  | 0.128059  | 0.118735  | 0.128497  | 0.12398   | 0.11655   |
| 0.136655  | 0.141754  | 0.123252  | 0.128497  | 0.139714  | 0.126166  | 0.0426865 |
| 0.130536  | 0.137383  | 0.0506993 | 0.125583  | 0.135344  | 0.0766317 | 0.119901  |
| 0.201777  | 0.206294  | 0.213432  | 0.193619  | 0.203963  | 0.192745  | 0.212995  |
| 0.123252  | 0.125146  | 0.11655   | 0.126166  | 0.137383  | 0.115967  | 0.125437  |
| 0.188228  | 0.191871  | 0.197261  | 0.179779  | 0.190414  | 0.178322  | 0.198572  |
| 0.107809  | 0.114365  | 0.119172  | 0.114802  | 0.121649  | 0.115093  | 0.125146  |
| 0.12296   | 0.122232  | 0.134033  | 0.120338  | 0.129808  | 0.124709  | 0.122523  |
| 0.126166  | 0.130682  | 0.127622  | 0.118007  | 0.133304  | 0.122669  | 0.12602   |
| 0.116404  | 0.119172  | 0.125146  | 0.117861  | 0.131702  | 0.117279  | 0.120629  |
| 0.119464  | 0.124272  | 0.129953  | 0.0477855 | 0.0482226 | 0.119755  | 0.130973  |
| 0.121503  | 0.124854  | 0.125583  | 0.0474942 | 0.048514  | 0.118881  | 0.129808  |
| 0.11655   | 0.115822  | 0.126748  | 0.117133  | 0.131556  | 0.115385  | 0.119027  |
| 0.110577  | 0.111014  | 0.122815  | 0.118444  | 0.129079  | 0.119318  | 0.129371  |
| 0.128059  | 0.132284  | 0.130682  | 0.119027  | 0.135198  | 0.125437  | 0.12704   |
| 0.136072  | 0.142337  | 0.0582751 | 0.13141   | 0.140589  | 0.0722611 | 0.120484  |
| 0.246503  | 0.250728  | 0.254953  | 0.237179  | 0.241696  | 0.240967  | 0.253642  |
| 0.116259  | 0.118444  | 0.130536  | 0.115967  | 0.128351  | 0.118007  | 0.121358  |
| 0.181964  | 0.184441  | 0.188957  | 0.174388  | 0.184732  | 0.169435  | 0.190851  |
| 0.183858  | 0.190122  | 0.192308  | 0.176573  | 0.186626  | 0.174534  | 0.193328  |
| 0.111451  | 0.116841  | 0.128642  | 0.122523  | 0.133741  | 0.115822  | 0.132576  |
| 0.119901  | 0.12296   | 0.12398   | 0.109994  | 0.123252  | 0.11757   | 0.111597  |
| 0.124563  | 0.125291  | 0.13243   | 0.120192  | 0.129079  | 0.126311  | 0.12296   |
| 0.107663  | 0.114802  | 0.122815  | 0.0549242 | 0.0608974 | 0.116696  | 0.125583  |
| 0.112471  | 0.116987  | 0.128205  | 0.116259  | 0.126311  | 0.109557  | 0.122232  |
| 0.120629  | 0.123689  | 0.0541958 | 0.120921  | 0.130099  | 0.0710956 | 0.113782  |
| 0.124854  | 0.124709  | 0.128059  | 0.0709499 | 0.076049  | 0.119318  | 0.129662  |

|           |           |           |           |           |           |           |
|-----------|-----------|-----------|-----------|-----------|-----------|-----------|
| 0.130973  | 0.134033  | 0.137675  | 0.0560897 | 0.04662   | 0.131265  | 0.138112  |
| 0.114219  | 0.116404  | 0.125874  | 0.115385  | 0.12602   | 0.11859   | 0.119027  |
| 0.126748  | 0.130682  | 0.134907  | 0.0518648 | 0.0499709 | 0.126166  | 0.136218  |
| 0.115239  | 0.120921  | 0.125728  | 0.118153  | 0.129371  | 0.113491  | 0.117133  |
| 0.130682  | 0.133741  | 0.135052  | 0.125728  | 0.134324  | 0.130682  | 0.128788  |
| 0.124417  | 0.128351  | 0.114802  | 0.121503  | 0.134178  | 0.114802  | 0.0581294 |
| 0.132139  | 0.140152  | 0.0528846 | 0.128934  | 0.137529  | 0.0776515 | 0.120338  |
| 0.115093  | 0.120484  | 0.126748  | 0.120047  | 0.13039   | 0.123252  | 0.125437  |
| 0.115385  | 0.11757   | 0.12296   | 0.113928  | 0.126603  | 0.110431  | 0.116987  |
| 0.127622  | 0.130099  | 0.131119  | 0.127914  | 0.133013  | 0.136364  | 0.128642  |
| 0.183421  | 0.185897  | 0.190122  | 0.174679  | 0.183858  | 0.167395  | 0.192308  |
| 0.134615  | 0.135927  | 0.142191  | 0.0576923 | 0.0514277 | 0.132284  | 0.138258  |
| 0.118298  | 0.123689  | 0.126748  | 0.0451632 | 0.053176  | 0.121212  | 0.13039   |
| 0.120775  | 0.129371  | 0.129516  | 0.120192  | 0.134033  | 0.126894  | 0.122378  |
| 0.110431  | 0.118735  | 0.120629  | 0.11451   | 0.126603  | 0.116841  | 0.119901  |
| 0.122232  | 0.128205  | 0.112617  | 0.118444  | 0.129953  | 0.114948  | 0.0477855 |
| 0.127622  | 0.134178  | 0.117716  | 0.125291  | 0.137966  | 0.11859   | 0.050845  |
| 0.187209  | 0.194347  | 0.195367  | 0.181381  | 0.189977  | 0.177302  | 0.197844  |
| 0.117861  | 0.120629  | 0.121358  | 0.0686189 | 0.0743007 | 0.111451  | 0.125874  |
| 0.106643  | 0.11116   | 0.114802  | 0.10373   | 0.113491  | 0.103147  | 0.11961   |
| 0.122086  | 0.12602   | 0.129079  | 0.0480769 | 0.050845  | 0.123834  | 0.13039   |
| 0.187209  | 0.192308  | 0.19799   | 0.178176  | 0.187063  | 0.179633  | 0.201923  |
| 0.115093  | 0.121358  | 0.120921  | 0.112471  | 0.124563  | 0.106935  | 0.112034  |
| 0.127185  | 0.135198  | 0.0441434 | 0.12398   | 0.13549   | 0.0747378 | 0.115967  |
| 0.119318  | 0.124709  | 0.13243   | 0.0496795 | 0.0518648 | 0.122232  | 0.133159  |
| 0.0536131 | 0.0560897 | 0.124417  | 0.114802  | 0.124854  | 0.124417  | 0.125437  |
| 0.183275  | 0.1875    | 0.194347  | 0.175117  | 0.184586  | 0.173951  | 0.196533  |
| 0.122086  | 0.128642  | 0.0445804 | 0.115385  | 0.126894  | 0.0658508 | 0.112325  |
| 0.108683  | 0.113199  | 0.115676  | 0.107809  | 0.118735  | 0.113345  | 0.117279  |
| 0.117133  | 0.11961   | 0.122669  | 0.113345  | 0.124854  | 0.107517  | 0.11553   |
| 0.119172  | 0.122232  | 0.126748  | 0.112471  | 0.120192  | 0.105769  | 0.134178  |
| 0.113199  | 0.115385  | 0.124272  | 0.122232  | 0.129953  | 0.121649  | 0.131702  |
| 0.131265  | 0.136072  | 0.0520105 | 0.126894  | 0.135781  | 0.074155  | 0.115676  |
| 0.112617  | 0.113928  | 0.126894  | 0.114948  | 0.124417  | 0.118153  | 0.119172  |
| 0.11961   | 0.121795  | 0.122815  | 0.11116   | 0.11859   | 0.123689  | 0.12704   |
| 0.0786713 | 0.0738636 | 0.151515  | 0.139569  | 0.142337  | 0.153263  | 0.151661  |
| 0.23514   | 0.236742  | 0.240676  | 0.222902  | 0.230041  | 0.222319  | 0.240239  |
| 0.120047  | 0.126603  | 0.131702  | 0.125874  | 0.132721  | 0.128497  | 0.127768  |
| 0.110431  | 0.113782  | 0.121212  | 0.122378  | 0.132139  | 0.121795  | 0.128351  |
| 0.118444  | 0.121212  | 0.118735  | 0.0514277 | 0.0568182 | 0.106789  | 0.127622  |
| 0.111305  | 0.115239  | 0.134324  | 0.123834  | 0.133304  | 0.12296   | 0.133596  |
| 0.112908  | 0.114219  | 0.0992133 | 0.107372  | 0.117716  | 0.100962  | 0.123543  |
| 0.124563  | 0.126748  | 0.121941  | 0.114365  | 0.121795  | 0.116987  | 0.123252  |
| 0.122086  | 0.125437  | 0.12704   | 0.0469114 | 0.0587121 | 0.117716  | 0.130682  |

|           |           |           |           |           |           |          |
|-----------|-----------|-----------|-----------|-----------|-----------|----------|
| 0.13039   | 0.134615  | 0.0447261 | 0.124563  | 0.134907  | 0.0683275 | 0.117716 |
| 0.0901807 | 0.0868298 | 0.124272  | 0.117861  | 0.125874  | 0.119901  | 0.127331 |
| 0.23514   | 0.237034  | 0.240676  | 0.223776  | 0.230332  | 0.228147  | 0.241404 |
| 0.113199  | 0.116259  | 0.11757   | 0.10708   | 0.121503  | 0.110577  | 0.106935 |
| 0.106498  | 0.11014   | 0.107663  | 0.109411  | 0.120338  | 0.101836  | 0.110431 |
| 0.113345  | 0.114948  | 0.12296   | 0.111014  | 0.124854  | 0.113928  | 0.115822 |
| 0.0639569 | 0.0582751 | 0.135635  | 0.126311  | 0.131119  | 0.139132  | 0.141317 |
| 0.128642  | 0.132576  | 0.137383  | 0.13243   | 0.140152  | 0.133304  | 0.132867 |
| 0.11553   | 0.117716  | 0.126894  | 0.106789  | 0.114802  | 0.123689  | 0.135198 |
| 0.11553   | 0.119172  | 0.127768  | 0.048514  | 0.0486597 | 0.11757   | 0.129079 |
| 0.0713869 | 0.0750291 | 0.120338  | 0.11014   | 0.119027  | 0.119755  | 0.124563 |
| 0.22669   | 0.23208   | 0.23514   | 0.218531  | 0.224505  | 0.221445  | 0.237034 |
| 0.120629  | 0.123689  | 0.130245  | 0.0463287 | 0.0499709 | 0.122378  | 0.135344 |
| 0.126311  | 0.133159  | 0.0444347 | 0.122232  | 0.130828  | 0.069493  | 0.11655  |
| 0.0965909 | 0.101399  | 0.118153  | 0.113782  | 0.126748  | 0.112908  | 0.11655  |
| 0.122086  | 0.125437  | 0.127622  | 0.117424  | 0.124272  | 0.124709  | 0.128059 |
| 0.127331  | 0.127768  | 0.117716  | 0.120047  | 0.130099  | 0.117424  | 0.118153 |
| 0.115967  | 0.117279  | 0.126748  | 0.114802  | 0.125146  | 0.11859   | 0.115239 |
| 0.127331  | 0.132139  | 0.0547786 | 0.120338  | 0.134178  | 0.0748834 | 0.114948 |
| 0.133013  | 0.139277  | 0.0517191 | 0.12602   | 0.134907  | 0.076486  | 0.121212 |
| 0.121066  | 0.128497  | 0.0523019 | 0.118444  | 0.129953  | 0.0706585 | 0.114802 |
| 0.115093  | 0.114365  | 0.126748  | 0.116259  | 0.127185  | 0.118881  | 0.118153 |
| 0.118007  | 0.119901  | 0.128497  | 0.121503  | 0.131265  | 0.132576  | 0.133596 |
| 0.124854  | 0.125874  | 0.133304  | 0.127768  | 0.132284  | 0.135052  | 0.137529 |
| 0.131847  | 0.136364  | 0.134761  | 0.124563  | 0.136072  | 0.131847  | 0.129079 |
| 0.134178  | 0.141608  | 0.137383  | 0.129516  | 0.139569  | 0.131847  | 0.129662 |
| 0.124417  | 0.125146  | 0.130828  | 0.125     | 0.134178  | 0.130536  | 0.136801 |
| 0.109266  | 0.115822  | 0.125291  | 0.113928  | 0.125146  | 0.111888  | 0.11757  |
| 0.13884   | 0.141608  | 0.102127  | 0.130973  | 0.137238  | 0.110286  | 0.115967 |
| 0.131702  | 0.137675  | 0.126748  | 0.129079  | 0.133596  | 0.126457  | 0.13447  |
| 0.203963  | 0.206439  | 0.210956  | 0.192308  | 0.199446  | 0.191142  | 0.211976 |
| 0.124417  | 0.128642  | 0.13345   | 0.11655   | 0.12602   | 0.125874  | 0.127477 |
| 0.113345  | 0.116404  | 0.108974  | 0.117424  | 0.12602   | 0.107226  | 0.116113 |
| 0.120192  | 0.120338  | 0.129516  | 0.120775  | 0.128788  | 0.11757   | 0.123834 |
| 0.221445  | 0.225962  | 0.228438  | 0.209499  | 0.215763  | 0.209499  | 0.229167 |
| 0.207459  | 0.212267  | 0.214452  | 0.201049  | 0.207314  | 0.196387  | 0.217512 |
| 0.133304  | 0.139277  | 0.0523019 | 0.127768  | 0.136946  | 0.0753205 | 0.119755 |
| 0.245338  | 0.250437  | 0.253205  | 0.237471  | 0.243444  | 0.236888  | 0.255973 |
| 0.107809  | 0.115822  | 0.123834  | 0.11451   | 0.126894  | 0.11655   | 0.120775 |
| 0.140152  | 0.141463  | 0.140443  | 0.13549   | 0.141463  | 0.138986  | 0.141754 |
| 0.119755  | 0.12398   | 0.122086  | 0.113636  | 0.125728  | 0.115093  | 0.111451 |
| 0.113782  | 0.119172  | 0.127768  | 0.125146  | 0.130828  | 0.128059  | 0.133159 |
| 0.185315  | 0.190122  | 0.194347  | 0.176865  | 0.186334  | 0.176282  | 0.19799  |
| 0.127477  | 0.127331  | 0.126603  | 0.121941  | 0.129662  | 0.122523  | 0.121503 |

|           |           |           |           |           |           |           |
|-----------|-----------|-----------|-----------|-----------|-----------|-----------|
| 0.192453  | 0.196387  | 0.200612  | 0.185169  | 0.194056  | 0.17905   | 0.200466  |
| 0.10912   | 0.11014   | 0.125146  | 0.117861  | 0.127914  | 0.118735  | 0.126457  |
| 0.123689  | 0.128205  | 0.0750291 | 0.097465  | 0.109848  | 0.0683275 | 0.122086  |
| 0.122815  | 0.124709  | 0.129808  | 0.121066  | 0.130536  | 0.122523  | 0.129953  |
| 0.111742  | 0.114219  | 0.115239  | 0.103001  | 0.111597  | 0.10708   | 0.124709  |
| 0.106643  | 0.10912   | 0.122669  | 0.106643  | 0.120484  | 0.111014  | 0.114948  |
| 0.115093  | 0.119901  | 0.125     | 0.106352  | 0.116696  | 0.119464  | 0.122232  |
| 0.114802  | 0.117861  | 0.117716  | 0.110431  | 0.12602   | 0.108974  | 0.109411  |
| 0.11116   | 0.116259  | 0.124854  | 0.0540501 | 0.0547786 | 0.114948  | 0.125291  |
| 0.125583  | 0.128642  | 0.0935315 | 0.115967  | 0.128934  | 0.097028  | 0.107663  |
| 0.108392  | 0.112034  | 0.123252  | 0.112471  | 0.12398   | 0.115093  | 0.123397  |
| 0.116404  | 0.122086  | 0.120484  | 0.112908  | 0.123834  | 0.112908  | 0.111305  |
| 0.125583  | 0.133887  | 0.123834  | 0.115967  | 0.134178  | 0.11859   | 0.12602   |
| 0.129079  | 0.130973  | 0.137821  | 0.0524476 | 0.0499709 | 0.12704   | 0.132139  |
| 0.116987  | 0.119755  | 0.123689  | 0.115239  | 0.129079  | 0.116987  | 0.123543  |
| 0.110431  | 0.118444  | 0.117424  | 0.11451   | 0.120484  | 0.116259  | 0.120775  |
| 0.108829  | 0.110723  | 0.120192  | 0.109411  | 0.120047  | 0.112617  | 0.115385  |
| 0.123106  | 0.128205  | 0.0552156 | 0.109703  | 0.122669  | 0.0662879 | 0.112762  |
| 0.10912   | 0.113054  | 0.123689  | 0.120192  | 0.128205  | 0.123106  | 0.128205  |
| 0.127914  | 0.133304  | 0.115093  | 0.123543  | 0.131847  | 0.116841  | 0.0493881 |
| 0.121212  | 0.127477  | 0.125     | 0.117424  | 0.135635  | 0.118007  | 0.121358  |
| 0.116113  | 0.121503  | 0.125728  | 0.048514  | 0.0556527 | 0.11553   | 0.128497  |
| 0.127622  | 0.131847  | 0.13549   | 0.0518648 | 0.0493881 | 0.126748  | 0.13447   |
| 0.13549   | 0.136801  | 0.143939  | 0.0574009 | 0.0493881 | 0.137238  | 0.14088   |
| 0.113199  | 0.117424  | 0.0616259 | 0.110868  | 0.119464  | 0.0726981 | 0.109266  |
| 0.113491  | 0.114802  | 0.12602   | 0.114073  | 0.12704   | 0.117861  | 0.121503  |
| 0.112471  | 0.117279  | 0.115676  | 0.1081    | 0.118735  | 0.111014  | 0.118735  |
| 0.124126  | 0.126894  | 0.130536  | 0.12704   | 0.136218  | 0.135198  | 0.13243   |
| 0.121358  | 0.127622  | 0.124854  | 0.114948  | 0.125583  | 0.119318  | 0.11451   |
| 0.143211  | 0.14831   | 0.128642  | 0.138258  | 0.145979  | 0.131265  | 0.0536131 |
| 0.133304  | 0.133741  | 0.143794  | 0.13039   | 0.137821  | 0.136218  | 0.130245  |
| 0.0603147 | 0.0560897 | 0.134615  | 0.123543  | 0.127185  | 0.132867  | 0.136801  |
| 0.111451  | 0.111014  | 0.123689  | 0.106789  | 0.11859   | 0.114656  | 0.122669  |
| 0.10373   | 0.111742  | 0.119464  | 0.109848  | 0.120775  | 0.114219  | 0.121066  |
| 0.132576  | 0.135344  | 0.136655  | 0.124126  | 0.140297  | 0.130828  | 0.129808  |
| 0.204983  | 0.210373  | 0.21081   | 0.191871  | 0.204254  | 0.190414  | 0.213578  |
| 0.109411  | 0.116841  | 0.115239  | 0.112617  | 0.123834  | 0.116404  | 0.119464  |
| 0.115093  | 0.11961   | 0.127331  | 0.119464  | 0.131556  | 0.122669  | 0.127185  |
| 0.112325  | 0.113928  | 0.120775  | 0.119027  | 0.125291  | 0.121358  | 0.126748  |
| 0.120629  | 0.126894  | 0.125     | 0.117716  | 0.131265  | 0.118007  | 0.127185  |
| 0.113491  | 0.116259  | 0.128934  | 0.12398   | 0.136946  | 0.122232  | 0.128497  |
| 0.121649  | 0.12296   | 0.121358  | 0.112034  | 0.118298  | 0.120775  | 0.123543  |
| 0.122378  | 0.127477  | 0.125     | 0.112471  | 0.114656  | 0.123252  | 0.125437  |
| 0.0598776 | 0.0553613 | 0.128934  | 0.121649  | 0.125     | 0.127768  | 0.132284  |



|          |          |           |           |           |          |          |
|----------|----------|-----------|-----------|-----------|----------|----------|
| 0.117861 | 0.124126 | 0.0907634 | 0.115822  | 0.127331  | 0.092803 | 0.108974 |
| 0.122232 | 0.123543 | 0.124563  | 0.122523  | 0.130245  | 0.13039  | 0.13141  |
| 0.115239 | 0.119172 | 0.122523  | 0.116987  | 0.127331  | 0.114656 | 0.12704  |
| 0.115676 | 0.11961  | 0.131119  | 0.120629  | 0.131265  | 0.119464 | 0.126311 |
| 0.176136 | 0.18007  | 0.17905   | 0.165064  | 0.175991  | 0.163316 | 0.18211  |
| 0.11553  | 0.118298 | 0.128934  | 0.0575466 | 0.0606061 | 0.117279 | 0.131119 |
| 0.120047 | 0.123106 | 0.129953  | 0.123834  | 0.130682  | 0.120338 | 0.136801 |
| 0.123689 | 0.128497 | 0.116696  | 0.125728  | 0.139277  | 0.113782 | 0.123834 |
| 0.119464 | 0.12602  | 0.117716  | 0.106935  | 0.119901  | 0.109848 | 0.130099 |
| 0.10373  | 0.10912  | 0.117133  | 0.108683  | 0.115239  | 0.112471 | 0.116404 |
| 0.101981 | 0.106206 | 0.11655   | 0.109266  | 0.120484  | 0.107226 | 0.121941 |
| 0.108974 | 0.113491 | 0.117716  | 0.111014  | 0.121066  | 0.11655  | 0.11757  |
| 0.125583 | 0.130682 | 0.105478  | 0.125     | 0.129808  | 0.111597 | 0.127768 |
| 0.109266 | 0.113782 | 0.125     | 0.0850816 | 0.0977564 | 0.112471 | 0.126603 |
| 0.130973 | 0.136072 | 0.125437  | 0.128059  | 0.139569  | 0.124563 | 0.125583 |
| 0.114219 | 0.120484 | 0.113345  | 0.107226  | 0.120192  | 0.105186 | 0.115239 |
| 0.120775 | 0.125874 | 0.117279  | 0.124563  | 0.132576  | 0.110577 | 0.121503 |
| 0.135198 | 0.136509 | 0.101399  | 0.134615  | 0.137675  | 0.111888 | 0.131556 |
| 0.12296  | 0.127185 | 0.112762  | 0.120921  | 0.131847  | 0.111597 | 0.116696 |
| 0.123834 | 0.129808 | 0.120338  | 0.117424  | 0.12398   | 0.118881 | 0.121649 |
| 0.115093 | 0.119901 | 0.108683  | 0.118298  | 0.13039   | 0.106935 | 0.111742 |
| 0.119755 | 0.125437 | 0.111888  | 0.118007  | 0.129225  | 0.111305 | 0.116987 |
| 0.106061 | 0.113491 | 0.11451   | 0.113928  | 0.125728  | 0.111014 | 0.112908 |
| 0.126603 | 0.132576 | 0.120484  | 0.120484  | 0.133741  | 0.11757  | 0.117424 |
| 0.110286 | 0.115385 | 0.114365  | 0.118153  | 0.130536  | 0.107955 | 0.110723 |
| 0.143502 | 0.145688 | 0.110868  | 0.134178  | 0.143357  | 0.121649 | 0.137821 |
| 0.129225 | 0.128497 | 0.103875  | 0.122815  | 0.137238  | 0.106789 | 0.133741 |
| 0.119027 | 0.119464 | 0.111451  | 0.111451  | 0.124709  | 0.10912  | 0.107809 |
| 0.136946 | 0.144085 | 0.106352  | 0.130245  | 0.139132  | 0.115967 | 0.128642 |
| 0.111597 | 0.117861 | 0.130828  | 0.119172  | 0.131556  | 0.126166 | 0.131847 |
| 0.133159 | 0.140297 | 0.12704   | 0.131993  | 0.142628  | 0.126166 | 0.142045 |
| 0.118298 | 0.122232 | 0.123834  | 0.114219  | 0.12602   | 0.118298 | 0.104458 |
| 0.146416 | 0.148019 | 0.141171  | 0.137092  | 0.141026  | 0.144668 | 0.143357 |
| 0.130099 | 0.129662 | 0.124854  | 0.129516  | 0.137529  | 0.124272 | 0.123834 |
| 0.134178 | 0.138695 | 0.120484  | 0.139132  | 0.147145  | 0.120484 | 0.136655 |
| 0.123689 | 0.127331 | 0.124563  | 0.11961   | 0.132576  | 0.117861 | 0.12704  |
| 0.113928 | 0.11757  | 0.10373   | 0.116841  | 0.13039   | 0.102273 | 0.118735 |
| 0.114365 | 0.11859  | 0.110577  | 0.117861  | 0.130245  | 0.103584 | 0.119172 |
| 0.110723 | 0.116696 | 0.104021  | 0.120338  | 0.12602   | 0.107809 | 0.121649 |
| 0.125874 | 0.131265 | 0.11859   | 0.119172  | 0.132139  | 0.115093 | 0.114656 |
| 0.129516 | 0.136364 | 0.130973  | 0.12398   | 0.138695  | 0.126894 | 0.119755 |
| 0.122815 | 0.126457 | 0.112325  | 0.122232  | 0.134033  | 0.104458 | 0.124709 |
| 0.111742 | 0.117133 | 0.112325  | 0.114948  | 0.126748  | 0.109994 | 0.118007 |
| 0.11451  | 0.119901 | 0.109848  | 0.117424  | 0.129225  | 0.103438 | 0.116404 |

|          |          |          |          |          |          |          |
|----------|----------|----------|----------|----------|----------|----------|
| 0.120484 | 0.124417 | 0.118444 | 0.11961  | 0.134033 | 0.114365 | 0.127331 |
| 0.118153 | 0.120629 | 0.106498 | 0.112034 | 0.125874 | 0.102418 | 0.115676 |
| 0.125583 | 0.128642 | 0.117133 | 0.125    | 0.135927 | 0.110723 | 0.121649 |
| 0.115385 | 0.120775 | 0.12704  | 0.111888 | 0.125437 | 0.118007 | 0.109994 |
| 0.113491 | 0.11655  | 0.128642 | 0.103293 | 0.111888 | 0.121941 | 0.132284 |
| 0.113491 | 0.116841 | 0.126311 | 0.110577 | 0.120338 | 0.121066 | 0.127622 |
| 0.109994 | 0.11451  | 0.125437 | 0.110868 | 0.122378 | 0.11553  | 0.116259 |
| 0.115822 | 0.11859  | 0.114073 | 0.115239 | 0.126457 | 0.110577 | 0.124126 |
| 0.113054 | 0.116404 | 0.125583 | 0.1081   | 0.118153 | 0.117133 | 0.130099 |
| 0.114948 | 0.12296  | 0.121941 | 0.109994 | 0.118007 | 0.116987 | 0.121503 |
| 0.124563 | 0.127914 | 0.129808 | 0.10067  | 0.110723 | 0.121941 | 0.125    |
| 0.103001 | 0.106935 | 0.120775 | 0.099796 | 0.107517 | 0.11116  | 0.122378 |
| 0.131119 | 0.132721 | 0.132284 | 0.117424 | 0.126603 | 0.128205 | 0.129808 |

| TDr_2946 | TDr_2948  | TDr_2965 | TDr_2970  | TDr_2973 | TDr_2974 | TDr_2975 |
|----------|-----------|----------|-----------|----------|----------|----------|
| 0.140006 | 0.115967  | 0.134178 | 0.129225  | 0.187937 | 0.11961  | 0.173514 |
| 0.142191 | 0.112034  | 0.138403 | 0.126748  | 0.194493 | 0.115385 | 0.178904 |
| 0.138695 | 0.107663  | 0.131993 | 0.124709  | 0.190997 | 0.113345 | 0.174825 |
| 0.138695 | 0.112325  | 0.131119 | 0.126457  | 0.199738 | 0.121795 | 0.185023 |
| 0.147436 | 0.129516  | 0.136946 | 0.13549   | 0.214015 | 0.135198 | 0.202506 |
| 0.147727 | 0.125146  | 0.138403 | 0.138986  | 0.206731 | 0.136364 | 0.192016 |
| 0.135052 | 0.115967  | 0.129808 | 0.11961   | 0.213287 | 0.10912  | 0.197698 |
| 0.135344 | 0.116841  | 0.127477 | 0.126894  | 0.193765 | 0.120192 | 0.178467 |
| 0.133741 | 0.101836  | 0.121503 | 0.118007  | 0.198281 | 0.106643 | 0.184149 |
| 0.133596 | 0.0810023 | 0.12602  | 0.128934  | 0.203671 | 0.081148 | 0.18954  |
| 0.143939 | 0.116113  | 0.135198 | 0.124126  | 0.188374 | 0.109266 | 0.173077 |
| 0.129225 | 0.108392  | 0.122232 | 0.116404  | 0.199301 | 0.112325 | 0.182547 |
| 0.131847 | 0.106643  | 0.124563 | 0.119901  | 0.201923 | 0.113199 | 0.189831 |
| 0.161422 | 0.128059  | 0.156177 | 0.154138  | 0.156614 | 0.134907 | 0.143357 |
| 0.136218 | 0.112762  | 0.130682 | 0.139132  | 0.208625 | 0.114365 | 0.192453 |
| 0.128497 | 0.112325  | 0.121795 | 0.113636  | 0.209353 | 0.112179 | 0.192599 |
| 0.128059 | 0.112179  | 0.120775 | 0.111451  | 0.203963 | 0.108246 | 0.186334 |
| 0.166667 | 0.143794  | 0.157925 | 0.155594  | 0.21926  | 0.140443 | 0.203963 |
| 0.136946 | 0.106498  | 0.129371 | 0.120921  | 0.191871 | 0.114219 | 0.176282 |
| 0.219114 | 0.201195  | 0.214452 | 0.215909  | 0.144668 | 0.201923 | 0.142774 |
| 0.148747 | 0.127331  | 0.144376 | 0.134761  | 0.206294 | 0.124854 | 0.191288 |
| 0.140734 | 0.118735  | 0.136946 | 0.134324  | 0.209062 | 0.119172 | 0.194056 |
| 0.131265 | 0.108392  | 0.124563 | 0.0986305 | 0.199301 | 0.106498 | 0.182838 |
| 0.130536 | 0.119027  | 0.125874 | 0.104312  | 0.215472 | 0.123543 | 0.201923 |
| 0.126603 | 0.101107  | 0.11757  | 0.115239  | 0.194347 | 0.10271  | 0.180216 |
| 0.147582 | 0.12296   | 0.141463 | 0.139132  | 0.213578 | 0.126603 | 0.196824 |
| 0.126894 | 0.118007  | 0.117861 | 0.121649  | 0.208916 | 0.116113 | 0.195367 |
| 0.139132 | 0.113345  | 0.129516 | 0.106498  | 0.214744 | 0.123106 | 0.201777 |
| 0.137966 | 0.122669  | 0.134761 | 0.130099  | 0.213578 | 0.121941 | 0.199738 |
| 0.128059 | 0.103147  | 0.120484 | 0.128351  | 0.2162   | 0.117279 | 0.200903 |
| 0.135781 | 0.117279  | 0.128497 | 0.125583  | 0.207022 | 0.118881 | 0.191434 |
| 0.133596 | 0.112471  | 0.127185 | 0.117279  | 0.212704 | 0.116404 | 0.197115 |
| 0.124272 | 0.10373   | 0.117861 | 0.118735  | 0.195221 | 0.105624 | 0.178176 |
| 0.125146 | 0.106643  | 0.114656 | 0.123397  | 0.204545 | 0.119901 | 0.192453 |
| 0.13141  | 0.11757   | 0.124417 | 0.117133  | 0.212267 | 0.104604 | 0.198718 |
| 0.133596 | 0.111305  | 0.125728 | 0.121358  | 0.217366 | 0.112325 | 0.201777 |
| 0.14831  | 0.125146  | 0.140443 | 0.136072  | 0.22567  | 0.115385 | 0.208333 |
| 0.135052 | 0.123543  | 0.129516 | 0.11757   | 0.21183  | 0.115239 | 0.19391  |
| 0.129808 | 0.1081    | 0.122523 | 0.0992133 | 0.200466 | 0.118444 | 0.185752 |
| 0.142045 | 0.114219  | 0.135052 | 0.112034  | 0.213869 | 0.121358 | 0.197115 |
| 0.138258 | 0.11014   | 0.129225 | 0.105041  | 0.200758 | 0.109994 | 0.184003 |
| 0.155449 | 0.127331  | 0.149913 | 0.131265  | 0.227273 | 0.137966 | 0.209062 |

|          |          |          |           |          |           |          |
|----------|----------|----------|-----------|----------|-----------|----------|
| 0.158071 | 0.130828 | 0.150495 | 0.128351  | 0.227564 | 0.137092  | 0.207605 |
| 0.136946 | 0.114948 | 0.129662 | 0.113054  | 0.20236  | 0.119755  | 0.187063 |
| 0.123543 | 0.106789 | 0.114802 | 0.111888  | 0.203526 | 0.0935315 | 0.189394 |
| 0.128642 | 0.106352 | 0.121358 | 0.11961   | 0.215035 | 0.0893065 | 0.197407 |
| 0.137092 | 0.119172 | 0.132721 | 0.114073  | 0.206876 | 0.123689  | 0.191288 |
| 0.15035  | 0.128351 | 0.145396 | 0.127914  | 0.224796 | 0.132867  | 0.205711 |
| 0.138695 | 0.108537 | 0.132284 | 0.111014  | 0.209062 | 0.114219  | 0.191725 |
| 0.133304 | 0.114219 | 0.128642 | 0.113199  | 0.203671 | 0.109994  | 0.185169 |
| 0.14627  | 0.133304 | 0.143357 | 0.15035   | 0.226544 | 0.13345   | 0.208625 |
| 0.136364 | 0.121941 | 0.136655 | 0.119172  | 0.21285  | 0.124709  | 0.195513 |
| 0.130973 | 0.113054 | 0.123106 | 0.101544  | 0.204254 | 0.119318  | 0.1875   |
| 0.148164 | 0.108683 | 0.139423 | 0.139132  | 0.215326 | 0.114656  | 0.196824 |
| 0.14292  | 0.120629 | 0.135635 | 0.116113  | 0.19289  | 0.121358  | 0.178176 |
| 0.140297 | 0.132284 | 0.136218 | 0.123106  | 0.22873  | 0.13884   | 0.212558 |
| 0.142191 | 0.119901 | 0.134615 | 0.115676  | 0.216638 | 0.121212  | 0.201049 |
| 0.135198 | 0.11553  | 0.130828 | 0.106935  | 0.206439 | 0.117424  | 0.190559 |
| 0.136364 | 0.112617 | 0.132867 | 0.120338  | 0.2044   | 0.107517  | 0.18852  |
| 0.135052 | 0.105186 | 0.127477 | 0.112617  | 0.217949 | 0.074155  | 0.201195 |
| 0.157197 | 0.130536 | 0.149621 | 0.112908  | 0.227564 | 0.132721  | 0.207314 |
| 0.153409 | 0.128497 | 0.14729  | 0.124272  | 0.229604 | 0.13447   | 0.210519 |
| 0.176865 | 0.154283 | 0.17162  | 0.153555  | 0.172931 | 0.157051  | 0.160548 |
| 0.136072 | 0.10912  | 0.129662 | 0.1081    | 0.205857 | 0.120047  | 0.189977 |
| 0.133159 | 0.106789 | 0.129079 | 0.105186  | 0.206439 | 0.110431  | 0.187063 |
| 0.134324 | 0.103293 | 0.124126 | 0.106643  | 0.205274 | 0.111014  | 0.189103 |
| 0.148747 | 0.134033 | 0.141754 | 0.140006  | 0.212995 | 0.128351  | 0.197115 |
| 0.133596 | 0.107809 | 0.125146 | 0.109703  | 0.203089 | 0.114073  | 0.186334 |
| 0.14627  | 0.126894 | 0.140734 | 0.118298  | 0.214015 | 0.129662  | 0.196678 |
| 0.130536 | 0.107663 | 0.123834 | 0.110723  | 0.217803 | 0.0847902 | 0.199301 |
| 0.138258 | 0.115967 | 0.134178 | 0.109411  | 0.20542  | 0.114073  | 0.185752 |
| 0.152244 | 0.141608 | 0.145833 | 0.149038  | 0.217949 | 0.134178  | 0.200321 |
| 0.138549 | 0.118298 | 0.132721 | 0.108537  | 0.212704 | 0.122232  | 0.19391  |
| 0.148601 | 0.125146 | 0.143357 | 0.124709  | 0.225962 | 0.133159  | 0.208916 |
| 0.137966 | 0.123834 | 0.13447  | 0.123106  | 0.21183  | 0.125728  | 0.197698 |
| 0.134324 | 0.117279 | 0.13141  | 0.124126  | 0.19799  | 0.122086  | 0.182401 |
| 0.134324 | 0.112325 | 0.128205 | 0.103147  | 0.20236  | 0.11014   | 0.184441 |
| 0.140734 | 0.113782 | 0.134615 | 0.1081    | 0.207314 | 0.116259  | 0.189394 |
| 0.150641 | 0.131265 | 0.143357 | 0.113928  | 0.222174 | 0.135198  | 0.202214 |
| 0.133596 | 0.11014  | 0.125437 | 0.112325  | 0.203963 | 0.110577  | 0.189831 |
| 0.159674 | 0.124563 | 0.150058 | 0.127914  | 0.228293 | 0.138112  | 0.208625 |
| 0.141026 | 0.116987 | 0.13549  | 0.113345  | 0.206439 | 0.121795  | 0.190851 |
| 0.128788 | 0.116404 | 0.126748 | 0.0999417 | 0.211976 | 0.118298  | 0.193765 |
| 0.138695 | 0.114073 | 0.131702 | 0.113054  | 0.206731 | 0.119464  | 0.189685 |
| 0.143065 | 0.115822 | 0.136072 | 0.1081    | 0.21081  | 0.126166  | 0.195513 |
| 0.140152 | 0.112034 | 0.132284 | 0.109557  | 0.207605 | 0.115967  | 0.190268 |

|          |           |          |          |          |           |          |
|----------|-----------|----------|----------|----------|-----------|----------|
| 0.13345  | 0.113199  | 0.12704  | 0.105769 | 0.207022 | 0.115093  | 0.187646 |
| 0.147873 | 0.126748  | 0.141171 | 0.122523 | 0.224942 | 0.13039   | 0.206731 |
| 0.125437 | 0.107517  | 0.117861 | 0.110577 | 0.203089 | 0.108829  | 0.187209 |
| 0.129662 | 0.110286  | 0.122378 | 0.119755 | 0.207314 | 0.106352  | 0.191725 |
| 0.136946 | 0.118735  | 0.132867 | 0.131993 | 0.216346 | 0.116259  | 0.200758 |
| 0.13549  | 0.116404  | 0.127622 | 0.130245 | 0.216055 | 0.113345  | 0.198135 |
| 0.140443 | 0.119027  | 0.135781 | 0.130828 | 0.218677 | 0.108683  | 0.207459 |
| 0.144376 | 0.130828  | 0.140006 | 0.136801 | 0.227273 | 0.120192  | 0.214889 |
| 0.134615 | 0.116696  | 0.127331 | 0.129371 | 0.203817 | 0.112471  | 0.18852  |
| 0.194056 | 0.17905   | 0.187646 | 0.187354 | 0.159528 | 0.177448  | 0.154138 |
| 0.129225 | 0.110723  | 0.122523 | 0.119318 | 0.201632 | 0.10708   | 0.190414 |
| 0.138986 | 0.129808  | 0.138403 | 0.135781 | 0.222174 | 0.120047  | 0.210373 |
| 0.135781 | 0.123689  | 0.130536 | 0.125874 | 0.216638 | 0.111597  | 0.203671 |
| 0.144959 | 0.126748  | 0.139132 | 0.133596 | 0.224359 | 0.11757   | 0.209353 |
| 0.130536 | 0.110868  | 0.124126 | 0.11859  | 0.208479 | 0.102855  | 0.19289  |
| 0.143357 | 0.127768  | 0.13549  | 0.125874 | 0.222465 | 0.114219  | 0.207459 |
| 0.130536 | 0.114656  | 0.125874 | 0.121503 | 0.211101 | 0.106352  | 0.193765 |
| 0.133596 | 0.120629  | 0.127477 | 0.125437 | 0.212995 | 0.103584  | 0.197698 |
| 0.132721 | 0.108974  | 0.125146 | 0.119901 | 0.209207 | 0.109703  | 0.194202 |
| 0.141754 | 0.127622  | 0.135052 | 0.128059 | 0.225233 | 0.118153  | 0.209936 |
| 0.125146 | 0.10169   | 0.118153 | 0.110286 | 0.205128 | 0.0977564 | 0.1875   |
| 0.144231 | 0.125728  | 0.139569 | 0.134907 | 0.221008 | 0.112762  | 0.201923 |
| 0.13884  | 0.109848  | 0.125728 | 0.123397 | 0.208333 | 0.112617  | 0.193036 |
| 0.142191 | 0.121066  | 0.133159 | 0.115385 | 0.221008 | 0.124417  | 0.204545 |
| 0.139132 | 0.119172  | 0.132139 | 0.126894 | 0.216783 | 0.112034  | 0.199738 |
| 0.131556 | 0.109557  | 0.126311 | 0.119318 | 0.207168 | 0.0962995 | 0.190997 |
| 0.1537   | 0.141026  | 0.146125 | 0.147582 | 0.217366 | 0.138549  | 0.200612 |
| 0.133741 | 0.113199  | 0.126166 | 0.122086 | 0.208479 | 0.0990676 | 0.193765 |
| 0.127914 | 0.114365  | 0.122378 | 0.120921 | 0.209936 | 0.103438  | 0.19493  |
| 0.133596 | 0.115967  | 0.127768 | 0.111451 | 0.210373 | 0.102418  | 0.195659 |
| 0.150204 | 0.125874  | 0.144959 | 0.144376 | 0.223193 | 0.118735  | 0.205565 |
| 0.136801 | 0.120338  | 0.129516 | 0.118153 | 0.193765 | 0.120192  | 0.18109  |
| 0.129225 | 0.114219  | 0.125146 | 0.117861 | 0.207751 | 0.105915  | 0.191871 |
| 0.129516 | 0.113054  | 0.123397 | 0.119901 | 0.20134  | 0.0992133 | 0.187791 |
| 0.13549  | 0.110286  | 0.127331 | 0.121503 | 0.205274 | 0.113054  | 0.190851 |
| 0.138549 | 0.112179  | 0.13039  | 0.121649 | 0.220862 | 0.0855186 | 0.202943 |
| 0.131993 | 0.109703  | 0.122086 | 0.121212 | 0.211684 | 0.108683  | 0.194056 |
| 0.122523 | 0.0964452 | 0.114656 | 0.108537 | 0.201923 | 0.08581   | 0.183129 |
| 0.129516 | 0.099359  | 0.121066 | 0.11116  | 0.200758 | 0.078817  | 0.183421 |
| 0.127622 | 0.102127  | 0.121503 | 0.11014  | 0.206731 | 0.0801282 | 0.191142 |
| 0.131702 | 0.118153  | 0.122669 | 0.118298 | 0.205857 | 0.123834  | 0.189685 |
| 0.137383 | 0.121503  | 0.133304 | 0.118735 | 0.221154 | 0.081148  | 0.20236  |
| 0.12704  | 0.103293  | 0.116841 | 0.108683 | 0.209936 | 0.0827506 | 0.193182 |
| 0.128351 | 0.101981  | 0.118735 | 0.104167 | 0.201923 | 0.0802739 | 0.186043 |

|          |          |          |          |          |           |           |
|----------|----------|----------|----------|----------|-----------|-----------|
| 0.13243  | 0.113928 | 0.127185 | 0.111742 | 0.215909 | 0.0799825 | 0.200612  |
| 0.127622 | 0.101836 | 0.119172 | 0.102855 | 0.204108 | 0.0958625 | 0.18648   |
| 0.136364 | 0.120775 | 0.128497 | 0.130828 | 0.201195 | 0.118881  | 0.186772  |
| 0.138986 | 0.12398  | 0.134324 | 0.137821 | 0.214598 | 0.124417  | 0.201049  |
| 0.128497 | 0.104458 | 0.12296  | 0.113928 | 0.210519 | 0.0821678 | 0.195221  |
| 0.129808 | 0.103438 | 0.118444 | 0.112325 | 0.212413 | 0.0793998 | 0.195367  |
| 0.12602  | 0.101107 | 0.119027 | 0.107663 | 0.204545 | 0.0823135 | 0.18954   |
| 0.128934 | 0.101107 | 0.11757  | 0.11116  | 0.199592 | 0.0936772 | 0.184295  |
| 0.141171 | 0.110431 | 0.134178 | 0.120775 | 0.218823 | 0.0898893 | 0.197407  |
| 0.129516 | 0.102855 | 0.118153 | 0.105332 | 0.203089 | 0.0823135 | 0.188083  |
| 0.141608 | 0.126311 | 0.138112 | 0.131993 | 0.223048 | 0.130245  | 0.207459  |
| 0.143211 | 0.124417 | 0.135344 | 0.124854 | 0.217657 | 0.125146  | 0.198864  |
| 0.136509 | 0.113636 | 0.130099 | 0.11757  | 0.214161 | 0.121358  | 0.198281  |
| 0.136946 | 0.11116  | 0.127914 | 0.114219 | 0.2044   | 0.112762  | 0.189103  |
| 0.131702 | 0.105332 | 0.125874 | 0.119755 | 0.201486 | 0.111305  | 0.189685  |
| 0.127768 | 0.103147 | 0.120775 | 0.102418 | 0.206002 | 0.0808566 | 0.18954   |
| 0.129371 | 0.108537 | 0.122086 | 0.103438 | 0.206148 | 0.102273  | 0.187646  |
| 0.129371 | 0.111451 | 0.121212 | 0.112179 | 0.205857 | 0.112179  | 0.190559  |
| 0.136072 | 0.117279 | 0.129662 | 0.111305 | 0.195076 | 0.117716  | 0.178904  |
| 0.138986 | 0.116696 | 0.137529 | 0.099359 | 0.223922 | 0.125291  | 0.20338   |
| 0.137092 | 0.113928 | 0.129516 | 0.124272 | 0.212995 | 0.108246  | 0.197407  |
| 0.148893 | 0.116113 | 0.142483 | 0.137529 | 0.215472 | 0.124417  | 0.198718  |
| 0.14292  | 0.121503 | 0.136801 | 0.141754 | 0.228147 | 0.11757   | 0.209062  |
| 0.211976 | 0.198427 | 0.209062 | 0.204691 | 0.105186 | 0.201777  | 0.0992133 |
| 0.247378 | 0.239948 | 0.245047 | 0.244464 | 0.125728 | 0.240676  | 0.131119  |
| 0.133304 | 0.113636 | 0.125146 | 0.115822 | 0.192599 | 0.122815  | 0.17701   |
| 0.130828 | 0.113782 | 0.123543 | 0.106643 | 0.202069 | 0.113345  | 0.185023  |
| 0.127622 | 0.110577 | 0.119172 | 0.105478 | 0.198572 | 0.1081    | 0.180944  |
| 0.137821 | 0.109703 | 0.129371 | 0.112762 | 0.202069 | 0.113636  | 0.18852   |
| 0.136655 | 0.116696 | 0.129079 | 0.142191 | 0.208479 | 0.115967  | 0.195221  |
| 0.13549  | 0.114656 | 0.12704  | 0.109557 | 0.208188 | 0.118881  | 0.193473  |
| 0.143502 | 0.140152 | 0.137092 | 0.121066 | 0.229021 | 0.143211  | 0.211101  |
| 0.130828 | 0.120484 | 0.125291 | 0.104895 | 0.207896 | 0.119755  | 0.191725  |
| 0.140152 | 0.125146 | 0.136946 | 0.113345 | 0.219843 | 0.125291  | 0.204254  |
| 0.144376 | 0.125874 | 0.140589 | 0.114365 | 0.210664 | 0.130682  | 0.19595   |
| 0.142045 | 0.124417 | 0.137092 | 0.11961  | 0.218823 | 0.129225  | 0.202652  |
| 0.14729  | 0.123543 | 0.141171 | 0.12398  | 0.222319 | 0.131265  | 0.201777  |
| 0.133887 | 0.11655  | 0.129225 | 0.108829 | 0.210664 | 0.113491  | 0.19595   |
| 0.131556 | 0.118298 | 0.122815 | 0.105041 | 0.205711 | 0.108246  | 0.189831  |
| 0.138986 | 0.118735 | 0.13345  | 0.109557 | 0.207022 | 0.115093  | 0.191142  |
| 0.124417 | 0.10708  | 0.117716 | 0.104895 | 0.199155 | 0.113345  | 0.183858  |
| 0.130536 | 0.117279 | 0.123252 | 0.10373  | 0.203526 | 0.110723  | 0.187354  |
| 0.131556 | 0.114219 | 0.12602  | 0.104749 | 0.208333 | 0.116987  | 0.190122  |
| 0.141026 | 0.125437 | 0.138403 | 0.111888 | 0.217512 | 0.125583  | 0.200175  |

|          |           |          |           |          |           |          |
|----------|-----------|----------|-----------|----------|-----------|----------|
| 0.138695 | 0.127477  | 0.138403 | 0.115385  | 0.223048 | 0.13141   | 0.211247 |
| 0.128059 | 0.118298  | 0.124272 | 0.10708   | 0.210664 | 0.119318  | 0.191871 |
| 0.136072 | 0.110868  | 0.130245 | 0.102564  | 0.2044   | 0.115967  | 0.188811 |
| 0.139277 | 0.125728  | 0.134033 | 0.113928  | 0.221882 | 0.127914  | 0.20542  |
| 0.127622 | 0.108246  | 0.120047 | 0.103147  | 0.200903 | 0.112179  | 0.186772 |
| 0.152535 | 0.13549   | 0.144376 | 0.121066  | 0.219697 | 0.136509  | 0.205565 |
| 0.149038 | 0.128497  | 0.142337 | 0.137092  | 0.210082 | 0.126603  | 0.197407 |
| 0.141026 | 0.132721  | 0.131993 | 0.127914  | 0.211393 | 0.131993  | 0.199009 |
| 0.129953 | 0.112908  | 0.120921 | 0.102564  | 0.202652 | 0.11451   | 0.185606 |
| 0.12602  | 0.109266  | 0.11961  | 0.102418  | 0.202797 | 0.10708   | 0.187791 |
| 0.139569 | 0.123106  | 0.134033 | 0.109557  | 0.217803 | 0.128788  | 0.201923 |
| 0.129516 | 0.122669  | 0.122815 | 0.109703  | 0.216492 | 0.121066  | 0.200612 |
| 0.134178 | 0.125583  | 0.131847 | 0.109994  | 0.212121 | 0.119027  | 0.199446 |
| 0.138695 | 0.119027  | 0.128788 | 0.105186  | 0.207605 | 0.117424  | 0.192599 |
| 0.131556 | 0.11451   | 0.125437 | 0.102418  | 0.207459 | 0.11757   | 0.193036 |
| 0.133013 | 0.122669  | 0.133013 | 0.10912   | 0.21183  | 0.120192  | 0.197698 |
| 0.141463 | 0.127331  | 0.137675 | 0.118153  | 0.223193 | 0.122523  | 0.207022 |
| 0.139132 | 0.129953  | 0.133596 | 0.113199  | 0.216492 | 0.122815  | 0.20236  |
| 0.138112 | 0.129808  | 0.132867 | 0.106352  | 0.221591 | 0.132284  | 0.208042 |
| 0.146416 | 0.127914  | 0.140297 | 0.116696  | 0.213869 | 0.133887  | 0.196241 |
| 0.131847 | 0.117424  | 0.125728 | 0.103584  | 0.208042 | 0.113491  | 0.194202 |
| 0.14292  | 0.121795  | 0.139423 | 0.118735  | 0.216492 | 0.132139  | 0.200612 |
| 0.126457 | 0.114073  | 0.123543 | 0.0981935 | 0.204691 | 0.110431  | 0.188811 |
| 0.139132 | 0.11451   | 0.134761 | 0.113782  | 0.202506 | 0.114073  | 0.184586 |
| 0.137675 | 0.115967  | 0.131847 | 0.112034  | 0.207751 | 0.112325  | 0.192453 |
| 0.133741 | 0.110868  | 0.128497 | 0.112179  | 0.202943 | 0.110431  | 0.187646 |
| 0.128497 | 0.111742  | 0.121795 | 0.106352  | 0.204691 | 0.113345  | 0.187354 |
| 0.140297 | 0.132284  | 0.135927 | 0.115822  | 0.222319 | 0.129225  | 0.207896 |
| 0.138986 | 0.117279  | 0.132284 | 0.111888  | 0.203526 | 0.121795  | 0.189103 |
| 0.143065 | 0.128642  | 0.136946 | 0.116259  | 0.218677 | 0.130536  | 0.20338  |
| 0.124709 | 0.107955  | 0.119755 | 0.106061  | 0.203817 | 0.117424  | 0.185315 |
| 0.129225 | 0.12296   | 0.12398  | 0.105624  | 0.220571 | 0.116404  | 0.202069 |
| 0.131993 | 0.114948  | 0.131119 | 0.111888  | 0.215181 | 0.113928  | 0.196678 |
| 0.143065 | 0.118153  | 0.136946 | 0.123543  | 0.19799  | 0.113054  | 0.185023 |
| 0.124563 | 0.110723  | 0.120775 | 0.111451  | 0.213287 | 0.101253  | 0.195367 |
| 0.139569 | 0.121941  | 0.134324 | 0.121212  | 0.206439 | 0.113636  | 0.190559 |
| 0.136218 | 0.120047  | 0.127768 | 0.117279  | 0.210664 | 0.113491  | 0.196241 |
| 0.128642 | 0.111888  | 0.119027 | 0.118735  | 0.203671 | 0.10708   | 0.190997 |
| 0.142337 | 0.106061  | 0.141754 | 0.14292   | 0.223193 | 0.114656  | 0.206731 |
| 0.13986  | 0.128934  | 0.136364 | 0.129953  | 0.227127 | 0.122669  | 0.206876 |
| 0.127331 | 0.0960082 | 0.119464 | 0.121212  | 0.202943 | 0.0941142 | 0.187646 |
| 0.146125 | 0.112471  | 0.141171 | 0.141754  | 0.221445 | 0.112617  | 0.206731 |
| 0.138403 | 0.0968823 | 0.131702 | 0.137238  | 0.218677 | 0.0981935 | 0.203963 |
| 0.146853 | 0.115239  | 0.142483 | 0.138112  | 0.214598 | 0.112471  | 0.202506 |

|          |           |          |          |          |           |          |
|----------|-----------|----------|----------|----------|-----------|----------|
| 0.13986  | 0.106206  | 0.132284 | 0.135198 | 0.209645 | 0.1081    | 0.193765 |
| 0.140734 | 0.104749  | 0.131702 | 0.134615 | 0.215763 | 0.0999417 | 0.202506 |
| 0.140006 | 0.102273  | 0.133596 | 0.139132 | 0.214161 | 0.100379  | 0.198281 |
| 0.140152 | 0.117861  | 0.132867 | 0.13986  | 0.220425 | 0.109848  | 0.206585 |
| 0.152098 | 0.11961   | 0.140734 | 0.146562 | 0.223631 | 0.11859   | 0.207168 |
| 0.147145 | 0.10708   | 0.141608 | 0.138112 | 0.215181 | 0.104604  | 0.200175 |
| 0.134615 | 0.107955  | 0.129079 | 0.13141  | 0.206148 | 0.106352  | 0.191142 |
| 0.140006 | 0.134033  | 0.134178 | 0.117861 | 0.215909 | 0.136218  | 0.200903 |
| 0.142191 | 0.107663  | 0.139277 | 0.13986  | 0.220134 | 0.104312  | 0.204254 |
| 0.135781 | 0.104749  | 0.127622 | 0.126748 | 0.2044   | 0.104604  | 0.187354 |
| 0.231789 | 0.219114  | 0.229458 | 0.226253 | 0.118881 | 0.223922  | 0.118735 |
| 0.136801 | 0.11014   | 0.133887 | 0.136801 | 0.212704 | 0.110868  | 0.198572 |
| 0.141463 | 0.0990676 | 0.135927 | 0.126894 | 0.208625 | 0.097465  | 0.193036 |
| 0.15035  | 0.122815  | 0.140443 | 0.138695 | 0.220134 | 0.117133  | 0.208042 |
| 0.142483 | 0.109411  | 0.135198 | 0.130245 | 0.208479 | 0.107517  | 0.192599 |
| 0.147436 | 0.104458  | 0.142191 | 0.14627  | 0.220134 | 0.103438  | 0.205711 |
| 0.139569 | 0.106498  | 0.134033 | 0.129662 | 0.205274 | 0.115093  | 0.193473 |
| 0.139423 | 0.108392  | 0.129516 | 0.135927 | 0.21183  | 0.103001  | 0.197698 |
| 0.148456 | 0.104312  | 0.143502 | 0.138258 | 0.211247 | 0.0989219 | 0.197698 |
| 0.150932 | 0.112325  | 0.145396 | 0.136655 | 0.203234 | 0.117133  | 0.189977 |
| 0.148164 | 0.111888  | 0.140006 | 0.14088  | 0.2162   | 0.115239  | 0.203817 |
| 0.142774 | 0.114073  | 0.138403 | 0.144231 | 0.219551 | 0.113928  | 0.206002 |
| 0.142483 | 0.111451  | 0.136946 | 0.1419   | 0.2213   | 0.11014   | 0.203963 |
| 0.122669 | 0.106498  | 0.116259 | 0.115967 | 0.211101 | 0.101981  | 0.196096 |
| 0.138695 | 0.108537  | 0.130828 | 0.132867 | 0.211393 | 0.112762  | 0.199009 |
| 0.150495 | 0.122669  | 0.144959 | 0.144959 | 0.219406 | 0.111742  | 0.203526 |
| 0.136946 | 0.109703  | 0.133159 | 0.129953 | 0.201777 | 0.106061  | 0.189977 |
| 0.149184 | 0.131556  | 0.14627  | 0.120338 | 0.224505 | 0.130828  | 0.204254 |
| 0.153409 | 0.141026  | 0.148164 | 0.150787 | 0.202506 | 0.129225  | 0.188666 |
| 0.13447  | 0.114802  | 0.125728 | 0.119027 | 0.210956 | 0.105041  | 0.194784 |
| 0.143502 | 0.110431  | 0.137383 | 0.136218 | 0.217657 | 0.111742  | 0.204108 |
| 0.143939 | 0.130682  | 0.135781 | 0.134033 | 0.201195 | 0.122669  | 0.184441 |
| 0.129225 | 0.11655   | 0.12398  | 0.132139 | 0.210956 | 0.121066  | 0.197407 |
| 0.141463 | 0.129662  | 0.135927 | 0.136509 | 0.200466 | 0.129225  | 0.183421 |
| 0.156323 | 0.137821  | 0.151078 | 0.146707 | 0.208333 | 0.133304  | 0.194202 |
| 0.129079 | 0.10708   | 0.124126 | 0.111597 | 0.203526 | 0.102855  | 0.187937 |
| 0.144085 | 0.118881  | 0.136801 | 0.127185 | 0.216492 | 0.128934  | 0.201195 |
| 0.161713 | 0.144668  | 0.156177 | 0.149767 | 0.19799  | 0.136946  | 0.184149 |
| 0.132576 | 0.109703  | 0.12704  | 0.111014 | 0.216055 | 0.0745921 | 0.20134  |
| 0.145105 | 0.112617  | 0.136946 | 0.121503 | 0.207314 | 0.119172  | 0.191434 |
| 0.146707 | 0.135781  | 0.139714 | 0.124563 | 0.223193 | 0.140589  | 0.207605 |
| 0.148164 | 0.121503  | 0.13884  | 0.109411 | 0.212704 | 0.131556  | 0.198572 |
| 0.146562 | 0.12602   | 0.140443 | 0.13141  | 0.226253 | 0.120338  | 0.206002 |
| 0.144959 | 0.120338  | 0.13884  | 0.121358 | 0.218531 | 0.114365  | 0.201486 |



|          |           |          |           |          |           |          |
|----------|-----------|----------|-----------|----------|-----------|----------|
| 0.137238 | 0.123397  | 0.128788 | 0.122669  | 0.214015 | 0.106935  | 0.200758 |
| 0.14292  | 0.123834  | 0.13884  | 0.124563  | 0.214161 | 0.122523  | 0.196533 |
| 0.134907 | 0.109703  | 0.130245 | 0.11655   | 0.209936 | 0.0949883 | 0.192599 |
| 0.141754 | 0.13141   | 0.135052 | 0.121941  | 0.218531 | 0.114948  | 0.206439 |
| 0.144085 | 0.111597  | 0.138258 | 0.136218  | 0.219697 | 0.113491  | 0.203526 |
| 0.140297 | 0.129371  | 0.137092 | 0.131847  | 0.219406 | 0.120192  | 0.210519 |
| 0.140006 | 0.122086  | 0.131556 | 0.13447   | 0.22465  | 0.107955  | 0.207896 |
| 0.142628 | 0.128205  | 0.136218 | 0.126603  | 0.213287 | 0.125146  | 0.197407 |
| 0.150495 | 0.136364  | 0.140297 | 0.146125  | 0.217075 | 0.128642  | 0.204108 |
| 0.135635 | 0.0984848 | 0.130682 | 0.123689  | 0.211538 | 0.0945513 | 0.195076 |
| 0.142045 | 0.113345  | 0.135635 | 0.114365  | 0.214452 | 0.110868  | 0.197407 |
| 0.147873 | 0.125     | 0.140006 | 0.133013  | 0.216492 | 0.115822  | 0.201777 |
| 0.128351 | 0.101981  | 0.121941 | 0.120775  | 0.211538 | 0.0930944 | 0.192745 |
| 0.155594 | 0.140589  | 0.149184 | 0.148601  | 0.213432 | 0.134324  | 0.199883 |
| 0.165501 | 0.140589  | 0.156469 | 0.152389  | 0.223922 | 0.133741  | 0.209207 |
| 0.136364 | 0.130099  | 0.134324 | 0.113928  | 0.220134 | 0.126748  | 0.205711 |
| 0.131265 | 0.120921  | 0.126894 | 0.103001  | 0.212413 | 0.122232  | 0.196533 |
| 0.139569 | 0.13243   | 0.131119 | 0.137529  | 0.21722  | 0.133741  | 0.208042 |
| 0.147582 | 0.120629  | 0.141463 | 0.142045  | 0.21824  | 0.123397  | 0.203526 |
| 0.138258 | 0.124709  | 0.134178 | 0.11116   | 0.221154 | 0.123106  | 0.203526 |
| 0.146707 | 0.117716  | 0.143502 | 0.142628  | 0.224942 | 0.122815  | 0.211393 |
| 0.150787 | 0.118298  | 0.144959 | 0.139714  | 0.217075 | 0.121358  | 0.202069 |
| 0.134907 | 0.110286  | 0.130536 | 0.115676  | 0.218969 | 0.10169   | 0.202506 |
| 0.164044 | 0.159237  | 0.161713 | 0.16317   | 0.224796 | 0.159382  | 0.207751 |
| 0.140734 | 0.106498  | 0.135781 | 0.113345  | 0.216638 | 0.112762  | 0.20134  |
| 0.149476 | 0.121649  | 0.139277 | 0.132576  | 0.218094 | 0.123834  | 0.203089 |
| 0.142337 | 0.114802  | 0.135635 | 0.110286  | 0.217949 | 0.112325  | 0.201777 |
| 0.139423 | 0.126748  | 0.135635 | 0.131265  | 0.224068 | 0.131265  | 0.21285  |
| 0.140297 | 0.11451   | 0.135635 | 0.135052  | 0.20979  | 0.110868  | 0.199446 |
| 0.153555 | 0.135927  | 0.148893 | 0.150641  | 0.180216 | 0.138695  | 0.16521  |
| 0.160111 | 0.149767  | 0.15574  | 0.159237  | 0.218531 | 0.145833  | 0.203234 |
| 0.142483 | 0.127185  | 0.136655 | 0.130245  | 0.196241 | 0.131993  | 0.186772 |
| 0.154575 | 0.137529  | 0.14729  | 0.144085  | 0.18007  | 0.14292   | 0.165064 |
| 0.160548 | 0.151661  | 0.155303 | 0.118007  | 0.160402 | 0.145979  | 0.147727 |
| 0.163753 | 0.141463  | 0.159674 | 0.154138  | 0.160693 | 0.152972  | 0.145688 |
| 0.123106 | 0.125583  | 0.113491 | 0.0936772 | 0.219988 | 0.114656  | 0.20236  |
| 0.151224 | 0.13039   | 0.143939 | 0.142483  | 0.211976 | 0.142774  | 0.196387 |
| 0.134615 | 0.11116   | 0.12704  | 0.128497  | 0.195076 | 0.11451   | 0.180944 |
| 0.126894 | 0.114802  | 0.120775 | 0.11961   | 0.201049 | 0.110868  | 0.186043 |
| 0.141317 | 0.106789  | 0.134324 | 0.132284  | 0.203817 | 0.113054  | 0.189103 |
| 0.139277 | 0.122523  | 0.13345  | 0.127622  | 0.195076 | 0.131119  | 0.184149 |
| 0.125146 | 0.112762  | 0.120484 | 0.118444  | 0.208042 | 0.113782  | 0.191288 |
| 0.131847 | 0.111305  | 0.128934 | 0.124563  | 0.188811 | 0.117279  | 0.174388 |
| 0.142045 | 0.122669  | 0.136509 | 0.132139  | 0.201923 | 0.132139  | 0.188957 |

|           |           |           |           |          |           |          |
|-----------|-----------|-----------|-----------|----------|-----------|----------|
| 0.136364  | 0.113199  | 0.131993  | 0.141026  | 0.193328 | 0.116259  | 0.179487 |
| 0.124417  | 0.0549242 | 0.115385  | 0.12296   | 0.196824 | 0.0984848 | 0.184441 |
| 0.142774  | 0.12602   | 0.136072  | 0.129953  | 0.195659 | 0.129079  | 0.181527 |
| 0.139714  | 0.121503  | 0.13447   | 0.125728  | 0.197552 | 0.128351  | 0.186043 |
| 0.12602   | 0.125     | 0.119901  | 0.0423951 | 0.212121 | 0.115822  | 0.196241 |
| 0.231206  | 0.216783  | 0.22771   | 0.224505  | 0.125583 | 0.218677  | 0.119318 |
| 0.15574   | 0.139277  | 0.152535  | 0.146125  | 0.215909 | 0.149621  | 0.200321 |
| 0.142191  | 0.123106  | 0.137821  | 0.132576  | 0.215181 | 0.129079  | 0.197844 |
| 0.144959  | 0.120921  | 0.136801  | 0.127185  | 0.200758 | 0.124272  | 0.187791 |
| 0.228001  | 0.212121  | 0.223339  | 0.220134  | 0.103147 | 0.214598  | 0.109994 |
| 0.135344  | 0.123834  | 0.125437  | 0.0814394 | 0.196096 | 0.122815  | 0.181964 |
| 0.0646853 | 0.116696  | 0.0536131 | 0.11859   | 0.211101 | 0.123834  | 0.19493  |
| 0.135198  | 0.125146  | 0.128788  | 0.12704   | 0.206148 | 0.131119  | 0.191725 |
| 0.13447   | 0.109848  | 0.127477  | 0.135635  | 0.199883 | 0.112908  | 0.186626 |
| 0.262966  | 0.249417  | 0.259178  | 0.258596  | 0.136655 | 0.250728  | 0.142628 |
| 0.138695  | 0.11961   | 0.131119  | 0.134033  | 0.206439 | 0.122086  | 0.193765 |
| 0.12704   | 0.120484  | 0.120047  | 0.0536131 | 0.205565 | 0.108974  | 0.190851 |
| 0.142774  | 0.124854  | 0.136364  | 0.127331  | 0.211101 | 0.125     | 0.199301 |
| 0.140443  | 0.123106  | 0.133159  | 0.127914  | 0.209062 | 0.126166  | 0.193182 |
| 0.136655  | 0.119901  | 0.131119  | 0.133741  | 0.203234 | 0.124126  | 0.18648  |
| 0.1419    | 0.118153  | 0.138986  | 0.13986   | 0.184878 | 0.127622  | 0.168415 |
| 0.127622  | 0.123397  | 0.119172  | 0.0556527 | 0.207896 | 0.113928  | 0.191434 |
| 0.14088   | 0.123543  | 0.13447   | 0.127185  | 0.196387 | 0.128351  | 0.181672 |
| 0.1419    | 0.123689  | 0.134907  | 0.136072  | 0.203817 | 0.134324  | 0.189394 |
| 0.130828  | 0.106498  | 0.122669  | 0.129079  | 0.200612 | 0.110723  | 0.185023 |
| 0.139714  | 0.117424  | 0.134761  | 0.122523  | 0.19493  | 0.126311  | 0.180798 |
| 0.140443  | 0.0840618 | 0.13345   | 0.13345   | 0.204983 | 0.085373  | 0.193473 |
| 0.157197  | 0.147727  | 0.156031  | 0.153992  | 0.219697 | 0.144668  | 0.204108 |
| 0.138549  | 0.11859   | 0.129225  | 0.135052  | 0.211538 | 0.124854  | 0.193328 |
| 0.0636655 | 0.119464  | 0.0543415 | 0.120775  | 0.212704 | 0.127185  | 0.19391  |
| 0.207022  | 0.190851  | 0.204108  | 0.200321  | 0.100524 | 0.194202  | 0.095134 |
| 0.219551  | 0.206002  | 0.216055  | 0.211684  | 0.106935 | 0.207896  | 0.105915 |
| 0.135344  | 0.111597  | 0.128059  | 0.134178  | 0.194639 | 0.112617  | 0.179633 |
| 0.132721  | 0.104895  | 0.123106  | 0.132139  | 0.199301 | 0.10708   | 0.18546  |
| 0.158945  | 0.126166  | 0.153118  | 0.146416  | 0.204837 | 0.13039   | 0.1875   |
| 0.126603  | 0.122669  | 0.116987  | 0.050845  | 0.206876 | 0.113491  | 0.193619 |
| 0.138112  | 0.122523  | 0.130245  | 0.136364  | 0.211684 | 0.124417  | 0.196096 |
| 0.143502  | 0.129662  | 0.137383  | 0.13243   | 0.209499 | 0.137092  | 0.194784 |
| 0.239948  | 0.223776  | 0.236451  | 0.234994  | 0.115385 | 0.230624  | 0.116987 |
| 0.134761  | 0.113345  | 0.132139  | 0.122815  | 0.204545 | 0.120192  | 0.191871 |
| 0.222611  | 0.209062  | 0.215618  | 0.207459  | 0.144376 | 0.213287  | 0.141608 |
| 0.122815  | 0.117424  | 0.113491  | 0.0895979 | 0.210373 | 0.108537  | 0.193036 |
| 0.12704   | 0.109703  | 0.121212  | 0.121212  | 0.203817 | 0.120047  | 0.188811 |
| 0.134178  | 0.119464  | 0.128934  | 0.114656  | 0.195513 | 0.119901  | 0.178759 |

|           |          |           |           |          |          |           |
|-----------|----------|-----------|-----------|----------|----------|-----------|
| 0.128934  | 0.1081   | 0.122815  | 0.126894  | 0.196096 | 0.105624 | 0.179924  |
| 0.222028  | 0.207896 | 0.220862  | 0.2162    | 0.108829 | 0.212995 | 0.102273  |
| 0.15035   | 0.13039  | 0.14627   | 0.138695  | 0.195659 | 0.138403 | 0.181235  |
| 0.130245  | 0.115822 | 0.123543  | 0.114219  | 0.212267 | 0.121212 | 0.196678  |
| 0.145105  | 0.126894 | 0.136946  | 0.131119  | 0.200903 | 0.136655 | 0.188228  |
| 0.131119  | 0.109703 | 0.125291  | 0.126166  | 0.21081  | 0.127331 | 0.193182  |
| 0.133741  | 0.110577 | 0.126748  | 0.132867  | 0.199738 | 0.111305 | 0.181235  |
| 0.121066  | 0.120921 | 0.112617  | 0.0913462 | 0.210664 | 0.11116  | 0.194493  |
| 0.128059  | 0.123252 | 0.12398   | 0.067162  | 0.19697  | 0.11757  | 0.183712  |
| 0.060169  | 0.121212 | 0.0511364 | 0.11757   | 0.210373 | 0.126311 | 0.194202  |
| 0.138549  | 0.117133 | 0.133013  | 0.127768  | 0.189103 | 0.125437 | 0.176136  |
| 0.130245  | 0.116987 | 0.122086  | 0.114802  | 0.207605 | 0.123543 | 0.191142  |
| 0.206439  | 0.190851 | 0.204691  | 0.200029  | 0.104021 | 0.196241 | 0.0933858 |
| 0.13986   | 0.124563 | 0.139277  | 0.127622  | 0.211684 | 0.127331 | 0.197844  |
| 0.146999  | 0.134033 | 0.142337  | 0.140589  | 0.208916 | 0.133013 | 0.196533  |
| 0.143648  | 0.121066 | 0.136946  | 0.127622  | 0.203817 | 0.127622 | 0.187937  |
| 0.139714  | 0.122086 | 0.130973  | 0.13243   | 0.201923 | 0.12602  | 0.188374  |
| 0.142045  | 0.124126 | 0.133596  | 0.129225  | 0.200466 | 0.133887 | 0.186917  |
| 0.121941  | 0.122669 | 0.112617  | 0.0965909 | 0.2162   | 0.112034 | 0.198864  |
| 0.134033  | 0.106789 | 0.122378  | 0.123252  | 0.198572 | 0.118298 | 0.18648   |
| 0.12704   | 0.124563 | 0.119464  | 0.0477855 | 0.213141 | 0.115093 | 0.197261  |
| 0.144668  | 0.130536 | 0.140589  | 0.135344  | 0.204254 | 0.127185 | 0.190414  |
| 0.141171  | 0.122669 | 0.133013  | 0.125146  | 0.20542  | 0.121941 | 0.1875    |
| 0.137821  | 0.112325 | 0.13141   | 0.132867  | 0.195659 | 0.115385 | 0.18211   |
| 0.135344  | 0.124417 | 0.129516  | 0.131265  | 0.21183  | 0.130099 | 0.19595   |
| 0.14627   | 0.133887 | 0.137821  | 0.138695  | 0.216055 | 0.137529 | 0.200466  |
| 0.134033  | 0.116113 | 0.126166  | 0.126457  | 0.202943 | 0.11655  | 0.186772  |
| 0.151952  | 0.135198 | 0.145251  | 0.141754  | 0.212413 | 0.146707 | 0.197115  |
| 0.133013  | 0.104312 | 0.128351  | 0.132721  | 0.200175 | 0.112325 | 0.183129  |
| 0.133596  | 0.12296  | 0.13039   | 0.127477  | 0.199592 | 0.12602  | 0.18954   |
| 0.140152  | 0.120775 | 0.136655  | 0.125874  | 0.18546  | 0.124709 | 0.168998  |
| 0.129371  | 0.127768 | 0.124126  | 0.0495338 | 0.208188 | 0.120338 | 0.191725  |
| 0.206585  | 0.192453 | 0.203671  | 0.184149  | 0.117279 | 0.195221 | 0.113345  |
| 0.128059  | 0.112762 | 0.121066  | 0.111742  | 0.204545 | 0.116696 | 0.189248  |
| 0.126311  | 0.109266 | 0.121358  | 0.117279  | 0.196678 | 0.115822 | 0.175554  |
| 0.0560897 | 0.117133 | 0.0502622 | 0.118153  | 0.213578 | 0.125728 | 0.19595   |
| 0.197698  | 0.182984 | 0.18954   | 0.19391   | 0.120921 | 0.184586 | 0.112908  |
| 0.145396  | 0.129808 | 0.139569  | 0.143357  | 0.211976 | 0.130828 | 0.197261  |
| 0.146853  | 0.133013 | 0.140734  | 0.153555  | 0.223048 | 0.13549  | 0.207459  |
| 0.157197  | 0.152389 | 0.156323  | 0.156614  | 0.21824  | 0.145251 | 0.2044    |
| 0.136509  | 0.114802 | 0.128934  | 0.125146  | 0.199301 | 0.113782 | 0.184003  |
| 0.142774  | 0.125437 | 0.136655  | 0.128205  | 0.196241 | 0.134033 | 0.183566  |
| 0.22567   | 0.213287 | 0.222174  | 0.219843  | 0.105478 | 0.216638 | 0.112617  |
| 0.138258  | 0.121212 | 0.132139  | 0.13243   | 0.201049 | 0.133887 | 0.181964  |

|           |           |           |           |           |           |           |
|-----------|-----------|-----------|-----------|-----------|-----------|-----------|
| 0.145105  | 0.127185  | 0.137529  | 0.132576  | 0.198572  | 0.136655  | 0.187354  |
| 0.130245  | 0.116113  | 0.120629  | 0.114219  | 0.204108  | 0.117716  | 0.18852   |
| 0.189394  | 0.167686  | 0.182692  | 0.181235  | 0.142337  | 0.176573  | 0.129662  |
| 0.138986  | 0.112034  | 0.13141   | 0.125291  | 0.193036  | 0.119172  | 0.180361  |
| 0.157488  | 0.141026  | 0.152826  | 0.156323  | 0.217657  | 0.146416  | 0.206148  |
| 0.132721  | 0.0504079 | 0.124272  | 0.131556  | 0.199009  | 0.107663  | 0.185169  |
| 0.205274  | 0.191142  | 0.200903  | 0.19799   | 0.105186  | 0.193328  | 0.0933858 |
| 0.135927  | 0.117424  | 0.129225  | 0.131847  | 0.208625  | 0.11961   | 0.193328  |
| 0.129808  | 0.105186  | 0.123106  | 0.118444  | 0.201923  | 0.106498  | 0.186043  |
| 0.138112  | 0.121358  | 0.133159  | 0.129371  | 0.201195  | 0.12296   | 0.18648   |
| 0.123397  | 0.115676  | 0.116113  | 0.118735  | 0.203963  | 0.121941  | 0.191288  |
| 0.0639569 | 0.113636  | 0.0543415 | 0.116113  | 0.208042  | 0.120775  | 0.194202  |
| 0.14292   | 0.125291  | 0.135344  | 0.130973  | 0.199301  | 0.121941  | 0.182255  |
| 0.13141   | 0.106789  | 0.125583  | 0.131119  | 0.199446  | 0.107809  | 0.181527  |
| 0.209062  | 0.190559  | 0.2044    | 0.198572  | 0.0973193 | 0.194784  | 0.0895979 |
| 0.138403  | 0.124854  | 0.134615  | 0.132284  | 0.206731  | 0.131702  | 0.189977  |
| 0.134178  | 0.118298  | 0.125437  | 0.124563  | 0.192016  | 0.117279  | 0.180507  |
| 0.227564  | 0.212267  | 0.223776  | 0.220571  | 0.111742  | 0.214161  | 0.109266  |
| 0.142774  | 0.124563  | 0.136946  | 0.130245  | 0.212558  | 0.126457  | 0.19697   |
| 0.134761  | 0.108392  | 0.124563  | 0.131556  | 0.200175  | 0.112908  | 0.184295  |
| 0.131265  | 0.10373   | 0.125728  | 0.128351  | 0.198135  | 0.104458  | 0.181381  |
| 0.15472   | 0.136218  | 0.147436  | 0.140443  | 0.211393  | 0.141608  | 0.195513  |
| 0.208042  | 0.18954   | 0.203963  | 0.200758  | 0.0980478 | 0.194347  | 0.0888695 |
| 0.127768  | 0.124126  | 0.117279  | 0.055507  | 0.212121  | 0.11553   | 0.195659  |
| 0.139714  | 0.128205  | 0.134178  | 0.133596  | 0.212121  | 0.137383  | 0.197698  |
| 0.129225  | 0.104604  | 0.121358  | 0.130682  | 0.199301  | 0.107372  | 0.183129  |
| 0.132721  | 0.107809  | 0.12602   | 0.127477  | 0.198135  | 0.109411  | 0.185752  |
| 0.130245  | 0.106498  | 0.124126  | 0.131119  | 0.195076  | 0.106352  | 0.180944  |
| 0.138549  | 0.118298  | 0.133013  | 0.126894  | 0.197844  | 0.126311  | 0.182838  |
| 0.123834  | 0.0572552 | 0.115967  | 0.119755  | 0.198864  | 0.0996503 | 0.185023  |
| 0.138403  | 0.119027  | 0.131702  | 0.134615  | 0.210519  | 0.120921  | 0.19493   |
| 0.150058  | 0.135927  | 0.145105  | 0.141026  | 0.21722   | 0.13549   | 0.202797  |
| 0.141026  | 0.119318  | 0.133159  | 0.130245  | 0.205565  | 0.120047  | 0.193182  |
| 0.137675  | 0.107226  | 0.129808  | 0.128351  | 0.215035  | 0.129808  | 0.197698  |
| 0.21183   | 0.196241  | 0.208333  | 0.202506  | 0.105332  | 0.199301  | 0.092366  |
| 0.135635  | 0.122378  | 0.129516  | 0.127768  | 0.207168  | 0.124854  | 0.193036  |
| 0.144814  | 0.128934  | 0.140443  | 0.137238  | 0.202652  | 0.13986   | 0.190268  |
| 0.13039   | 0.099359  | 0.12398   | 0.131556  | 0.200175  | 0.107372  | 0.186043  |
| 0.120921  | 0.0502622 | 0.115093  | 0.117716  | 0.197407  | 0.0967366 | 0.184149  |
| 0.141026  | 0.120775  | 0.133741  | 0.128497  | 0.195659  | 0.118007  | 0.183566  |
| 0.126894  | 0.123834  | 0.118735  | 0.048514  | 0.207168  | 0.116113  | 0.193328  |
| 0.145542  | 0.128205  | 0.139423  | 0.136218  | 0.209207  | 0.134761  | 0.194202  |
| 0.143357  | 0.13039   | 0.138112  | 0.13549   | 0.2044    | 0.124417  | 0.191434  |
| 0.123543  | 0.097465  | 0.11451   | 0.0795455 | 0.198864  | 0.104021  | 0.182692  |

|           |           |           |           |          |           |           |
|-----------|-----------|-----------|-----------|----------|-----------|-----------|
| 0.119318  | 0.0836247 | 0.11116   | 0.0884324 | 0.197844 | 0.0977564 | 0.181672  |
| 0.136072  | 0.0898893 | 0.125     | 0.124709  | 0.19595  | 0.104021  | 0.18007   |
| 0.120484  | 0.118298  | 0.111451  | 0.0942599 | 0.210082 | 0.112325  | 0.19391   |
| 0.137529  | 0.123689  | 0.131702  | 0.140443  | 0.214889 | 0.127622  | 0.199592  |
| 0.126603  | 0.123543  | 0.11961   | 0.0592949 | 0.210373 | 0.114948  | 0.192745  |
| 0.137238  | 0.115822  | 0.133159  | 0.123543  | 0.193328 | 0.124126  | 0.180944  |
| 0.125     | 0.116987  | 0.115967  | 0.0600233 | 0.205565 | 0.109848  | 0.190851  |
| 0.135344  | 0.110431  | 0.127477  | 0.128351  | 0.196387 | 0.108537  | 0.183129  |
| 0.129662  | 0.112325  | 0.121503  | 0.111305  | 0.206439 | 0.112179  | 0.190851  |
| 0.134907  | 0.109703  | 0.126748  | 0.132867  | 0.197698 | 0.111305  | 0.184732  |
| 0.132867  | 0.11961   | 0.124417  | 0.121503  | 0.203817 | 0.124417  | 0.18852   |
| 0.141608  | 0.126603  | 0.136946  | 0.135198  | 0.204983 | 0.125291  | 0.190851  |
| 0.0743007 | 0.115239  | 0.0632284 | 0.113345  | 0.209062 | 0.120921  | 0.194056  |
| 0.130099  | 0.0571096 | 0.122523  | 0.122523  | 0.201049 | 0.099796  | 0.183421  |
| 0.13345   | 0.106206  | 0.12704   | 0.128497  | 0.196241 | 0.112471  | 0.182401  |
| 0.139569  | 0.126603  | 0.134907  | 0.133159  | 0.193328 | 0.127622  | 0.177156  |
| 0.141754  | 0.12296   | 0.135927  | 0.13039   | 0.20134  | 0.122815  | 0.1875    |
| 0.136072  | 0.110286  | 0.12704   | 0.123834  | 0.201777 | 0.100233  | 0.189394  |
| 0.132284  | 0.106498  | 0.124417  | 0.127331  | 0.200029 | 0.105769  | 0.18648   |
| 0.13884   | 0.124417  | 0.133013  | 0.13039   | 0.195221 | 0.127185  | 0.183421  |
| 0.120484  | 0.119755  | 0.112908  | 0.0960082 | 0.208625 | 0.113199  | 0.19391   |
| 0.142045  | 0.126748  | 0.137092  | 0.125728  | 0.198427 | 0.130682  | 0.184586  |
| 0.0706585 | 0.117424  | 0.0625    | 0.114656  | 0.206294 | 0.120775  | 0.190997  |
| 0.127768  | 0.0483683 | 0.116696  | 0.124272  | 0.204545 | 0.104167  | 0.18954   |
| 0.131556  | 0.104021  | 0.122815  | 0.127477  | 0.196096 | 0.118153  | 0.178759  |
| 0.130828  | 0.109994  | 0.120629  | 0.112762  | 0.207605 | 0.111597  | 0.190851  |
| 0.14088   | 0.12704   | 0.136801  | 0.133013  | 0.198718 | 0.135344  | 0.185169  |
| 0.13884   | 0.128497  | 0.130973  | 0.126311  | 0.205128 | 0.128351  | 0.192745  |
| 0.140734  | 0.116404  | 0.130536  | 0.125291  | 0.201195 | 0.119172  | 0.183858  |
| 0.20979   | 0.195659  | 0.208333  | 0.20338   | 0.103293 | 0.196096  | 0.0958625 |
| 0.183858  | 0.166521  | 0.183275  | 0.175117  | 0.130682 | 0.171911  | 0.123543  |
| 0.137529  | 0.122523  | 0.129079  | 0.129079  | 0.206439 | 0.120629  | 0.189103  |
| 0.133887  | 0.126166  | 0.129225  | 0.0893065 | 0.199301 | 0.123397  | 0.186626  |
| 0.150204  | 0.136072  | 0.144959  | 0.153118  | 0.229021 | 0.136218  | 0.211976  |
| 0.143357  | 0.127477  | 0.138986  | 0.140443  | 0.207896 | 0.129953  | 0.192599  |
| 0.13884   | 0.115093  | 0.133013  | 0.137383  | 0.199883 | 0.121649  | 0.182547  |
| 0.138986  | 0.116987  | 0.131993  | 0.131119  | 0.19595  | 0.115093  | 0.182984  |
| 0.135198  | 0.0852273 | 0.129371  | 0.132284  | 0.203817 | 0.0868298 | 0.189685  |
| 0.138986  | 0.123397  | 0.132576  | 0.13141   | 0.202943 | 0.124417  | 0.190268  |
| 0.221008  | 0.203963  | 0.21722   | 0.211684  | 0.106935 | 0.205857  | 0.102418  |
| 0.127331  | 0.123106  | 0.122669  | 0.0521562 | 0.211393 | 0.118298  | 0.19697   |
| 0.137092  | 0.125291  | 0.130682  | 0.0980478 | 0.193765 | 0.122815  | 0.177593  |
| 0.129808  | 0.108392  | 0.12398   | 0.127185  | 0.197261 | 0.107663  | 0.180507  |
| 0.135198  | 0.109411  | 0.128788  | 0.127331  | 0.206439 | 0.124709  | 0.192599  |

|           |           |           |           |           |          |           |
|-----------|-----------|-----------|-----------|-----------|----------|-----------|
| 0.205274  | 0.185897  | 0.202069  | 0.195076  | 0.120921  | 0.1875   | 0.114656  |
| 0.256847  | 0.248834  | 0.255682  | 0.253059  | 0.131993  | 0.248397 | 0.127185  |
| 0.146416  | 0.131702  | 0.141754  | 0.135344  | 0.207459  | 0.126311 | 0.191579  |
| 0.141754  | 0.121503  | 0.13243   | 0.132139  | 0.204254  | 0.121649 | 0.190414  |
| 0.136218  | 0.118007  | 0.129516  | 0.134761  | 0.20542   | 0.117279 | 0.190997  |
| 0.0740093 | 0.112325  | 0.0629371 | 0.116259  | 0.205857  | 0.11859  | 0.189394  |
| 0.120192  | 0.120629  | 0.114073  | 0.0528846 | 0.208042  | 0.109703 | 0.192745  |
| 0.136655  | 0.117279  | 0.128205  | 0.126166  | 0.200321  | 0.123834 | 0.183275  |
| 0.135052  | 0.114219  | 0.128642  | 0.128934  | 0.189103  | 0.117861 | 0.176136  |
| 0.125437  | 0.119755  | 0.115822  | 0.0488054 | 0.208042  | 0.111451 | 0.193328  |
| 0.137529  | 0.114073  | 0.129953  | 0.129371  | 0.191871  | 0.117133 | 0.176282  |
| 0.141463  | 0.109557  | 0.132721  | 0.128934  | 0.20542   | 0.101836 | 0.193036  |
| 0.125     | 0.0534674 | 0.120047  | 0.12296   | 0.200612  | 0.10169  | 0.18648   |
| 0.142337  | 0.130536  | 0.138258  | 0.136218  | 0.201923  | 0.126603 | 0.191579  |
| 0.141608  | 0.123397  | 0.13549   | 0.129662  | 0.197698  | 0.129662 | 0.182401  |
| 0.125583  | 0.112617  | 0.120047  | 0.11655   | 0.196533  | 0.113928 | 0.180944  |
| 0.138403  | 0.122232  | 0.130536  | 0.127622  | 0.21722   | 0.106643 | 0.202797  |
| 0.0506993 | 0.123397  | 0.0425408 | 0.123834  | 0.21926   | 0.130536 | 0.204545  |
| 0.13243   | 0.109848  | 0.125437  | 0.126311  | 0.196096  | 0.10912  | 0.184003  |
| 0.135198  | 0.113782  | 0.127914  | 0.128205  | 0.193619  | 0.11014  | 0.178904  |
| 0.134615  | 0.113782  | 0.131119  | 0.142483  | 0.208479  | 0.117133 | 0.194347  |
| 0.222756  | 0.203963  | 0.218969  | 0.218677  | 0.124709  | 0.209062 | 0.120192  |
| 0.134033  | 0.120192  | 0.130536  | 0.127914  | 0.200321  | 0.119464 | 0.184149  |
| 0.12398   | 0.0527389 | 0.118153  | 0.125146  | 0.202797  | 0.10067  | 0.188374  |
| 0.136801  | 0.119464  | 0.128642  | 0.126603  | 0.206294  | 0.128351 | 0.188957  |
| 0.144814  | 0.125728  | 0.138695  | 0.128788  | 0.211393  | 0.127914 | 0.196387  |
| 0.131993  | 0.108246  | 0.124417  | 0.122086  | 0.207896  | 0.121795 | 0.189103  |
| 0.217657  | 0.198572  | 0.212995  | 0.210373  | 0.105332  | 0.204837 | 0.0952797 |
| 0.143794  | 0.127622  | 0.13884   | 0.132139  | 0.201923  | 0.13243  | 0.185752  |
| 0.129079  | 0.105041  | 0.12296   | 0.125     | 0.196824  | 0.107226 | 0.183275  |
| 0.134761  | 0.119755  | 0.130682  | 0.123397  | 0.206585  | 0.123689 | 0.194493  |
| 0.0686189 | 0.109848  | 0.060169  | 0.113782  | 0.208042  | 0.116404 | 0.189831  |
| 0.145542  | 0.124126  | 0.137383  | 0.128934  | 0.194639  | 0.128351 | 0.182547  |
| 0.133887  | 0.109266  | 0.126894  | 0.123106  | 0.193182  | 0.115822 | 0.178176  |
| 0.137383  | 0.109266  | 0.133304  | 0.128642  | 0.207751  | 0.103293 | 0.190705  |
| 0.143502  | 0.122086  | 0.134178  | 0.129516  | 0.210082  | 0.121649 | 0.191288  |
| 0.215035  | 0.198572  | 0.210082  | 0.207459  | 0.107372  | 0.201923 | 0.100524  |
| 0.134178  | 0.113054  | 0.128934  | 0.120775  | 0.194056  | 0.11961  | 0.178176  |
| 0.213869  | 0.19595   | 0.207751  | 0.206002  | 0.104458  | 0.200175 | 0.0973193 |
| 0.209353  | 0.195221  | 0.207022  | 0.203234  | 0.0935315 | 0.200321 | 0.0910548 |
| 0.0569639 | 0.120921  | 0.0493881 | 0.121358  | 0.214744  | 0.131265 | 0.199446  |
| 0.146125  | 0.130828  | 0.13884   | 0.133887  | 0.218531  | 0.129516 | 0.202652  |
| 0.133596  | 0.104312  | 0.127477  | 0.118153  | 0.20338   | 0.097465 | 0.185752  |
| 0.134907  | 0.112908  | 0.12704   | 0.120921  | 0.192745  | 0.123543 | 0.181527  |

|           |           |           |           |          |           |           |
|-----------|-----------|-----------|-----------|----------|-----------|-----------|
| 0.141463  | 0.118298  | 0.133887  | 0.125728  | 0.194056 | 0.12602   | 0.182547  |
| 0.134761  | 0.1081    | 0.126894  | 0.133013  | 0.199301 | 0.111451  | 0.185752  |
| 0.119901  | 0.117133  | 0.112325  | 0.060169  | 0.208333 | 0.11116   | 0.190997  |
| 0.119901  | 0.117716  | 0.11116   | 0.053176  | 0.20979  | 0.108537  | 0.194202  |
| 0.143648  | 0.132721  | 0.142191  | 0.138986  | 0.204108 | 0.129371  | 0.191142  |
| 0.0692016 | 0.115385  | 0.0592949 | 0.123106  | 0.209207 | 0.123397  | 0.194202  |
| 0.129079  | 0.100962  | 0.123834  | 0.127622  | 0.196241 | 0.104604  | 0.182692  |
| 0.143794  | 0.121795  | 0.134761  | 0.128642  | 0.197552 | 0.127477  | 0.184878  |
| 0.129953  | 0.104749  | 0.122669  | 0.120338  | 0.201195 | 0.0999417 | 0.185606  |
| 0.146125  | 0.128497  | 0.13884   | 0.137675  | 0.204254 | 0.136801  | 0.191288  |
| 0.138258  | 0.118298  | 0.128934  | 0.130099  | 0.206294 | 0.120192  | 0.191579  |
| 0.151515  | 0.133887  | 0.142483  | 0.136946  | 0.20877  | 0.140443  | 0.196387  |
| 0.269231  | 0.258887  | 0.268939  | 0.266317  | 0.135344 | 0.262238  | 0.138695  |
| 0.133159  | 0.120192  | 0.125291  | 0.119755  | 0.221882 | 0.125583  | 0.204254  |
| 0.129225  | 0.11655   | 0.122815  | 0.129808  | 0.213578 | 0.127768  | 0.196533  |
| 0.233974  | 0.216929  | 0.229895  | 0.227855  | 0.11757  | 0.222319  | 0.118007  |
| 0.128351  | 0.119755  | 0.120192  | 0.131847  | 0.211538 | 0.125146  | 0.197698  |
| 0.243735  | 0.230478  | 0.242279  | 0.24053   | 0.118007 | 0.232955  | 0.116987  |
| 0.13141   | 0.11553   | 0.12296   | 0.112762  | 0.214598 | 0.120629  | 0.195513  |
| 0.134178  | 0.111597  | 0.129516  | 0.139714  | 0.209499 | 0.11757   | 0.19595   |
| 0.137966  | 0.118881  | 0.133013  | 0.121649  | 0.207751 | 0.118735  | 0.1875    |
| 0.0607517 | 0.116259  | 0.0525932 | 0.122523  | 0.212121 | 0.12602   | 0.197698  |
| 0.221882  | 0.208042  | 0.216929  | 0.213141  | 0.107517 | 0.206731  | 0.0986305 |
| 0.146707  | 0.129079  | 0.139423  | 0.136509  | 0.208333 | 0.13884   | 0.195076  |
| 0.14292   | 0.126166  | 0.138549  | 0.127477  | 0.196096 | 0.131556  | 0.183712  |
| 0.240093  | 0.227418  | 0.238636  | 0.233974  | 0.117861 | 0.230769  | 0.121503  |
| 0.128642  | 0.124126  | 0.121358  | 0.0587121 | 0.20542  | 0.116696  | 0.188957  |
| 0.214744  | 0.197115  | 0.212121  | 0.209207  | 0.100379 | 0.202506  | 0.0964452 |
| 0.127331  | 0.124563  | 0.11655   | 0.0585664 | 0.207314 | 0.111888  | 0.194347  |
| 0.131702  | 0.10912   | 0.125291  | 0.131702  | 0.201486 | 0.110723  | 0.182401  |
| 0.129516  | 0.0413753 | 0.12602   | 0.13039   | 0.208916 | 0.105624  | 0.194493  |
| 0.0557984 | 0.122086  | 0.046183  | 0.119901  | 0.218823 | 0.128642  | 0.202943  |
| 0.141608  | 0.111451  | 0.13549   | 0.12296   | 0.200029 | 0.115093  | 0.182984  |
| 0.181235  | 0.138258  | 0.174825  | 0.174825  | 0.136801 | 0.159091  | 0.123834  |
| 0.138403  | 0.118735  | 0.13345   | 0.126748  | 0.191288 | 0.121795  | 0.178613  |
| 0.143065  | 0.124272  | 0.136946  | 0.129371  | 0.208479 | 0.126166  | 0.193765  |
| 0.132576  | 0.116113  | 0.127622  | 0.122378  | 0.203817 | 0.119172  | 0.188811  |
| 0.141608  | 0.127185  | 0.13549   | 0.131119  | 0.207022 | 0.134615  | 0.193473  |
| 0.214307  | 0.19697   | 0.209645  | 0.206731  | 0.106061 | 0.199155  | 0.0960082 |
| 0.131702  | 0.105332  | 0.123543  | 0.127914  | 0.197115 | 0.108392  | 0.181818  |
| 0.0820221 | 0.120338  | 0.0738636 | 0.125728  | 0.196678 | 0.122815  | 0.181381  |
| 0.121212  | 0.11961   | 0.114802  | 0.0935315 | 0.21081  | 0.113054  | 0.192308  |
| 0.125437  | 0.120047  | 0.115239  | 0.0488054 | 0.212121 | 0.114365  | 0.197407  |
| 0.133159  | 0.10708   | 0.126166  | 0.13345   | 0.202652 | 0.111597  | 0.187354  |

|           |           |           |           |           |           |           |
|-----------|-----------|-----------|-----------|-----------|-----------|-----------|
| 0.267045  | 0.254953  | 0.265006  | 0.262092  | 0.138986  | 0.258887  | 0.144085  |
| 0.127914  | 0.0435606 | 0.117133  | 0.122669  | 0.205274  | 0.101981  | 0.192599  |
| 0.137821  | 0.117279  | 0.132284  | 0.132576  | 0.199446  | 0.122378  | 0.183858  |
| 0.192308  | 0.17264   | 0.187937  | 0.184149  | 0.149038  | 0.185023  | 0.137529  |
| 0.206585  | 0.187209  | 0.201049  | 0.196096  | 0.108829  | 0.190559  | 0.100233  |
| 0.143357  | 0.128642  | 0.142191  | 0.137238  | 0.203817  | 0.125874  | 0.190268  |
| 0.14292   | 0.121503  | 0.135635  | 0.129225  | 0.197844  | 0.130682  | 0.186334  |
| 0.0744464 | 0.115385  | 0.0633741 | 0.115822  | 0.203089  | 0.121358  | 0.188957  |
| 0.157925  | 0.142337  | 0.151515  | 0.151515  | 0.215181  | 0.153263  | 0.198718  |
| 0.142483  | 0.128059  | 0.136655  | 0.130536  | 0.201777  | 0.123252  | 0.188228  |
| 0.148164  | 0.132576  | 0.141754  | 0.137383  | 0.206294  | 0.125146  | 0.191871  |
| 0.129371  | 0.128059  | 0.123252  | 0.0506993 | 0.213432  | 0.11655   | 0.197261  |
| 0.135781  | 0.118735  | 0.128497  | 0.125583  | 0.193619  | 0.126166  | 0.179779  |
| 0.146125  | 0.128497  | 0.139714  | 0.135344  | 0.203963  | 0.137383  | 0.190414  |
| 0.131119  | 0.12398   | 0.126166  | 0.0766317 | 0.192745  | 0.115967  | 0.178322  |
| 0.0546329 | 0.11655   | 0.0426865 | 0.119901  | 0.212995  | 0.125437  | 0.198572  |
| 0         | 0.13243   | 0.0492424 | 0.128205  | 0.22567   | 0.137529  | 0.208625  |
| 0.13243   | 0         | 0.122232  | 0.128059  | 0.209499  | 0.107955  | 0.196241  |
| 0.0492424 | 0.122232  | 0         | 0.12296   | 0.220425  | 0.132284  | 0.205711  |
| 0.128205  | 0.128059  | 0.12296   | 0         | 0.218386  | 0.120338  | 0.203089  |
| 0.22567   | 0.209499  | 0.220425  | 0.218386  | 0         | 0.213724  | 0.0986305 |
| 0.137529  | 0.107955  | 0.132284  | 0.120338  | 0.213724  | 0         | 0.196096  |
| 0.208625  | 0.196241  | 0.205711  | 0.203089  | 0.0986305 | 0.196096  | 0         |
| 0.136946  | 0.119901  | 0.129371  | 0.121795  | 0.204983  | 0.119172  | 0.185897  |
| 0.134615  | 0.11116   | 0.128205  | 0.139569  | 0.201195  | 0.112471  | 0.187937  |
| 0.137529  | 0.119901  | 0.129079  | 0.132576  | 0.205274  | 0.121503  | 0.189394  |
| 0.137092  | 0.116259  | 0.128642  | 0.12602   | 0.200466  | 0.116696  | 0.186334  |
| 0.143357  | 0.125728  | 0.136655  | 0.132576  | 0.195076  | 0.131702  | 0.182984  |
| 0.141608  | 0.127477  | 0.133741  | 0.129079  | 0.201777  | 0.134033  | 0.186772  |
| 0.134033  | 0.110286  | 0.128788  | 0.132867  | 0.195659  | 0.114802  | 0.18007   |
| 0.142628  | 0.125     | 0.138258  | 0.127768  | 0.205711  | 0.121649  | 0.190414  |
| 0.138258  | 0.121212  | 0.131847  | 0.133304  | 0.20979   | 0.122815  | 0.194493  |
| 0.131993  | 0.129516  | 0.122669  | 0.0515734 | 0.208479  | 0.123252  | 0.192016  |
| 0.260781  | 0.248397  | 0.256702  | 0.259033  | 0.137092  | 0.253497  | 0.139277  |
| 0.135198  | 0.111742  | 0.129953  | 0.134615  | 0.201195  | 0.110723  | 0.18211   |
| 0.202069  | 0.186189  | 0.198864  | 0.194493  | 0.0990676 | 0.192162  | 0.090472  |
| 0.204837  | 0.193036  | 0.201049  | 0.199883  | 0.104167  | 0.19493   | 0.0952797 |
| 0.144085  | 0.118298  | 0.139132  | 0.13039   | 0.198718  | 0.117279  | 0.183712  |
| 0.12602   | 0.0445804 | 0.11757   | 0.123689  | 0.206876  | 0.101544  | 0.188083  |
| 0.134178  | 0.110431  | 0.128934  | 0.136801  | 0.206876  | 0.109703  | 0.191871  |
| 0.138549  | 0.119172  | 0.131556  | 0.125728  | 0.193473  | 0.123106  | 0.17905   |
| 0.136946  | 0.0913462 | 0.129662  | 0.129953  | 0.194784  | 0.0903263 | 0.179196  |
| 0.125874  | 0.121066  | 0.118007  | 0.0556527 | 0.206439  | 0.113636  | 0.192016  |
| 0.140006  | 0.121503  | 0.135052  | 0.129808  | 0.198427  | 0.121941  | 0.184295  |



|           |           |           |           |           |           |           |
|-----------|-----------|-----------|-----------|-----------|-----------|-----------|
| 0.14729   | 0.129953  | 0.142337  | 0.136509  | 0.211538  | 0.138549  | 0.197698  |
| 0.13345   | 0.106498  | 0.125874  | 0.130245  | 0.198572  | 0.111014  | 0.183275  |
| 0.14831   | 0.127477  | 0.141026  | 0.130828  | 0.204691  | 0.138112  | 0.190851  |
| 0.129808  | 0.112471  | 0.121649  | 0.127185  | 0.202506  | 0.127185  | 0.190414  |
| 0.138549  | 0.118298  | 0.13039   | 0.133013  | 0.212704  | 0.125437  | 0.197698  |
| 0.0745921 | 0.120484  | 0.0643939 | 0.118881  | 0.207314  | 0.125291  | 0.192016  |
| 0.128351  | 0.129662  | 0.120484  | 0.043852  | 0.221737  | 0.119318  | 0.203526  |
| 0.137238  | 0.110286  | 0.131993  | 0.13141   | 0.209062  | 0.101107  | 0.195221  |
| 0.131119  | 0.107372  | 0.123543  | 0.126457  | 0.19595   | 0.106935  | 0.182401  |
| 0.142483  | 0.127185  | 0.134907  | 0.135781  | 0.213141  | 0.137238  | 0.198718  |
| 0.202943  | 0.185023  | 0.200321  | 0.195659  | 0.0990676 | 0.190997  | 0.0945513 |
| 0.148019  | 0.132721  | 0.142191  | 0.143648  | 0.211976  | 0.141608  | 0.197552  |
| 0.144231  | 0.123689  | 0.136946  | 0.129079  | 0.198281  | 0.129079  | 0.184732  |
| 0.135052  | 0.118298  | 0.126311  | 0.128934  | 0.206294  | 0.117861  | 0.191871  |
| 0.132576  | 0.108829  | 0.122378  | 0.12296   | 0.201195  | 0.109848  | 0.186189  |
| 0.0610431 | 0.11451   | 0.0537587 | 0.116987  | 0.208042  | 0.123689  | 0.192162  |
| 0.0600233 | 0.117279  | 0.0506993 | 0.11859   | 0.213432  | 0.124417  | 0.19697   |
| 0.207605  | 0.191434  | 0.203234  | 0.202069  | 0.0996503 | 0.199155  | 0.0872669 |
| 0.140589  | 0.121503  | 0.131847  | 0.127185  | 0.191434  | 0.123689  | 0.17701   |
| 0.134324  | 0.112034  | 0.126166  | 0.117424  | 0.179633  | 0.113928  | 0.164627  |
| 0.143065  | 0.126894  | 0.137821  | 0.130245  | 0.200903  | 0.134615  | 0.186772  |
| 0.20877   | 0.193765  | 0.206148  | 0.20236   | 0.0955711 | 0.198572  | 0.0957168 |
| 0.126457  | 0.0534674 | 0.120629  | 0.124709  | 0.195659  | 0.0999417 | 0.179779  |
| 0.12602   | 0.126457  | 0.118153  | 0.0441434 | 0.215035  | 0.118153  | 0.199446  |
| 0.14729   | 0.125291  | 0.136801  | 0.13243   | 0.202506  | 0.133887  | 0.190705  |
| 0.134907  | 0.122815  | 0.131119  | 0.130536  | 0.2044    | 0.120921  | 0.187646  |
| 0.207751  | 0.188083  | 0.20338   | 0.199301  | 0.102418  | 0.193182  | 0.0894522 |
| 0.126166  | 0.121066  | 0.119755  | 0.0486597 | 0.207314  | 0.115385  | 0.19289   |
| 0.131993  | 0.118153  | 0.126166  | 0.119464  | 0.192745  | 0.123543  | 0.180944  |
| 0.131993  | 0.0712413 | 0.123543  | 0.124709  | 0.190705  | 0.107809  | 0.174825  |
| 0.144231  | 0.123106  | 0.141317  | 0.128205  | 0.177885  | 0.125583  | 0.163753  |
| 0.146707  | 0.125     | 0.137675  | 0.127768  | 0.210082  | 0.120775  | 0.195367  |
| 0.125146  | 0.124417  | 0.119027  | 0.046183  | 0.218823  | 0.117279  | 0.202943  |
| 0.132721  | 0.108974  | 0.123106  | 0.13243   | 0.201049  | 0.10912   | 0.18546   |
| 0.137966  | 0.115967  | 0.133596  | 0.128934  | 0.212704  | 0.121358  | 0.19595   |
| 0.158217  | 0.14933   | 0.157925  | 0.156469  | 0.218677  | 0.146562  | 0.202214  |
| 0.246503  | 0.237034  | 0.244172  | 0.244464  | 0.123106  | 0.239802  | 0.129953  |
| 0.141608  | 0.114656  | 0.134615  | 0.13345   | 0.213724  | 0.106643  | 0.199592  |
| 0.145396  | 0.125728  | 0.136946  | 0.128788  | 0.20877   | 0.123834  | 0.195513  |
| 0.140006  | 0.122086  | 0.134761  | 0.121941  | 0.194056  | 0.126311  | 0.181964  |
| 0.148601  | 0.127185  | 0.142483  | 0.132284  | 0.19799   | 0.128205  | 0.180944  |
| 0.133304  | 0.118298  | 0.127185  | 0.104167  | 0.204254  | 0.11553   | 0.188666  |
| 0.13447   | 0.107517  | 0.127477  | 0.121358  | 0.203963  | 0.121358  | 0.188666  |
| 0.142483  | 0.12602   | 0.13549   | 0.127331  | 0.200321  | 0.131993  | 0.185023  |

|          |           |          |           |          |           |          |
|----------|-----------|----------|-----------|----------|-----------|----------|
| 0.128934 | 0.127331  | 0.122815 | 0.043852  | 0.213869 | 0.11961   | 0.19799  |
| 0.136218 | 0.127331  | 0.133596 | 0.128934  | 0.198427 | 0.12602   | 0.183712 |
| 0.249417 | 0.238491  | 0.244755 | 0.245338  | 0.125728 | 0.240093  | 0.129662 |
| 0.121066 | 0.0472028 | 0.114656 | 0.118444  | 0.199301 | 0.101544  | 0.181964 |
| 0.126894 | 0.107809  | 0.116696 | 0.108246  | 0.201923 | 0.112325  | 0.186334 |
| 0.127622 | 0.104749  | 0.122086 | 0.127914  | 0.197698 | 0.106061  | 0.183858 |
| 0.150204 | 0.137238  | 0.149038 | 0.14088   | 0.210956 | 0.134761  | 0.197698 |
| 0.144085 | 0.118881  | 0.14088  | 0.140297  | 0.218823 | 0.110286  | 0.205857 |
| 0.147582 | 0.111305  | 0.143502 | 0.133887  | 0.195221 | 0.120775  | 0.178176 |
| 0.141171 | 0.124126  | 0.136509 | 0.128934  | 0.196387 | 0.130099  | 0.184003 |
| 0.136364 | 0.120192  | 0.132576 | 0.126166  | 0.200029 | 0.121795  | 0.18648  |
| 0.246795 | 0.232955  | 0.243007 | 0.239219  | 0.124563 | 0.233392  | 0.125874 |
| 0.144522 | 0.127768  | 0.140443 | 0.129079  | 0.201486 | 0.135198  | 0.189977 |
| 0.12602  | 0.123834  | 0.119318 | 0.0470571 | 0.21183  | 0.116113  | 0.196824 |
| 0.128934 | 0.120921  | 0.124854 | 0.122232  | 0.201923 | 0.115239  | 0.181381 |
| 0.138695 | 0.122815  | 0.134033 | 0.127914  | 0.211101 | 0.129953  | 0.195221 |
| 0.133159 | 0.118444  | 0.124709 | 0.11451   | 0.214889 | 0.125     | 0.199883 |
| 0.129079 | 0.104749  | 0.121212 | 0.131119  | 0.202069 | 0.109848  | 0.184441 |
| 0.128205 | 0.121066  | 0.117716 | 0.0515734 | 0.21081  | 0.113054  | 0.196096 |
| 0.127185 | 0.127622  | 0.122523 | 0.0476399 | 0.218531 | 0.119318  | 0.204108 |
| 0.123689 | 0.122086  | 0.116404 | 0.050845  | 0.210664 | 0.108537  | 0.192745 |
| 0.130828 | 0.105332  | 0.125291 | 0.134615  | 0.201777 | 0.1081    | 0.183566 |
| 0.143357 | 0.127185  | 0.135781 | 0.131702  | 0.213141 | 0.129953  | 0.200175 |
| 0.149913 | 0.129371  | 0.142628 | 0.134178  | 0.220862 | 0.132139  | 0.204983 |
| 0.14088  | 0.123543  | 0.134761 | 0.136801  | 0.216783 | 0.123397  | 0.197698 |
| 0.142337 | 0.123543  | 0.135052 | 0.137383  | 0.214452 | 0.129225  | 0.199446 |
| 0.14627  | 0.129516  | 0.141026 | 0.132284  | 0.218677 | 0.130245  | 0.204254 |
| 0.134615 | 0.0852273 | 0.126166 | 0.123252  | 0.202652 | 0.0862471 | 0.18852  |
| 0.124854 | 0.131993  | 0.11961  | 0.100087  | 0.226981 | 0.121358  | 0.208188 |
| 0.144522 | 0.124854  | 0.138986 | 0.12296   | 0.221882 | 0.131993  | 0.205711 |
| 0.224068 | 0.204691  | 0.219114 | 0.219697  | 0.107663 | 0.210956  | 0.104895 |
| 0.139569 | 0.124563  | 0.133159 | 0.130245  | 0.201195 | 0.126166  | 0.190268 |
| 0.131993 | 0.114656  | 0.121795 | 0.111597  | 0.207896 | 0.117716  | 0.191142 |
| 0.138549 | 0.112471  | 0.131556 | 0.136801  | 0.195804 | 0.110868  | 0.181672 |
| 0.23951  | 0.2213    | 0.233974 | 0.234557  | 0.124563 | 0.225233  | 0.121212 |
| 0.225816 | 0.215472  | 0.224359 | 0.219697  | 0.112325 | 0.216492  | 0.107226 |
| 0.129808 | 0.128788  | 0.121066 | 0.0488054 | 0.216783 | 0.119901  | 0.20236  |
| 0.262238 | 0.252185  | 0.259033 | 0.256702  | 0.133013 | 0.254079  | 0.132284 |
| 0.136946 | 0.0895979 | 0.127622 | 0.129662  | 0.201777 | 0.0879953 | 0.185606 |
| 0.153555 | 0.121358  | 0.147436 | 0.143648  | 0.222174 | 0.129662  | 0.203963 |
| 0.125874 | 0.0432692 | 0.121212 | 0.123834  | 0.204108 | 0.0999417 | 0.189394 |
| 0.146125 | 0.123834  | 0.138549 | 0.13039   | 0.214161 | 0.131265  | 0.200321 |
| 0.206876 | 0.190122  | 0.203671 | 0.200175  | 0.104458 | 0.195804  | 0.092366 |
| 0.137092 | 0.116259  | 0.128642 | 0.123106  | 0.20338  | 0.120484  | 0.188666 |

|           |           |           |           |          |           |          |
|-----------|-----------|-----------|-----------|----------|-----------|----------|
| 0.212558  | 0.195221  | 0.207314  | 0.206731  | 0.101981 | 0.203234  | 0.097465 |
| 0.140589  | 0.113636  | 0.136218  | 0.126311  | 0.206002 | 0.117861  | 0.189831 |
| 0.133596  | 0.122669  | 0.127477  | 0.0785256 | 0.188228 | 0.117861  | 0.175554 |
| 0.14292   | 0.107226  | 0.135052  | 0.130973  | 0.206294 | 0.107955  | 0.191288 |
| 0.137092  | 0.112179  | 0.129225  | 0.118444  | 0.189103 | 0.11553   | 0.174388 |
| 0.128788  | 0.101836  | 0.122086  | 0.124709  | 0.19595  | 0.102273  | 0.181527 |
| 0.13549   | 0.116696  | 0.12704   | 0.126457  | 0.197698 | 0.118298  | 0.183858 |
| 0.123543  | 0.0496795 | 0.114802  | 0.122378  | 0.195076 | 0.0976107 | 0.181235 |
| 0.140006  | 0.121212  | 0.13243   | 0.124854  | 0.197261 | 0.124272  | 0.182255 |
| 0.118881  | 0.123397  | 0.113345  | 0.0949883 | 0.210519 | 0.108974  | 0.19697  |
| 0.137821  | 0.10912   | 0.130828  | 0.124126  | 0.2044   | 0.0996503 | 0.186772 |
| 0.126311  | 0.0422494 | 0.120484  | 0.122523  | 0.199301 | 0.100379  | 0.186917 |
| 0.136655  | 0.116113  | 0.128205  | 0.129079  | 0.202652 | 0.119172  | 0.187937 |
| 0.144522  | 0.131556  | 0.137529  | 0.136364  | 0.206148 | 0.140734  | 0.191142 |
| 0.133596  | 0.115676  | 0.126894  | 0.126603  | 0.201049 | 0.114948  | 0.185752 |
| 0.133159  | 0.116113  | 0.125291  | 0.121795  | 0.203234 | 0.125874  | 0.186189 |
| 0.127477  | 0.10373   | 0.121941  | 0.126311  | 0.197552 | 0.105915  | 0.180798 |
| 0.122523  | 0.122378  | 0.11757   | 0.060169  | 0.203671 | 0.112908  | 0.188083 |
| 0.143211  | 0.121503  | 0.135052  | 0.129516  | 0.206585 | 0.124563  | 0.191288 |
| 0.0629371 | 0.11757   | 0.0504079 | 0.11859   | 0.211101 | 0.125874  | 0.195221 |
| 0.13549   | 0.116987  | 0.124709  | 0.127914  | 0.206439 | 0.122086  | 0.189977 |
| 0.142628  | 0.124126  | 0.13447   | 0.127185  | 0.197552 | 0.129808  | 0.183712 |
| 0.144231  | 0.131847  | 0.140152  | 0.135198  | 0.207896 | 0.13986   | 0.193182 |
| 0.150058  | 0.136509  | 0.145688  | 0.1419    | 0.214015 | 0.144231  | 0.19697  |
| 0.118735  | 0.110431  | 0.112908  | 0.0657051 | 0.200758 | 0.104167  | 0.185169 |
| 0.135927  | 0.108683  | 0.128642  | 0.129225  | 0.197844 | 0.110286  | 0.182547 |
| 0.132576  | 0.100379  | 0.125291  | 0.118881  | 0.200029 | 0.111888  | 0.181235 |
| 0.143939  | 0.13243   | 0.137238  | 0.133741  | 0.219843 | 0.131702  | 0.204545 |
| 0.128059  | 0.0428322 | 0.121941  | 0.124854  | 0.206876 | 0.104167  | 0.19391  |
| 0.0517191 | 0.130245  | 0.0479312 | 0.129516  | 0.226107 | 0.139423  | 0.209062 |
| 0.140297  | 0.117133  | 0.135635  | 0.145833  | 0.21183  | 0.121066  | 0.195367 |
| 0.14627   | 0.132721  | 0.141608  | 0.138112  | 0.207896 | 0.127622  | 0.195221 |
| 0.136801  | 0.106061  | 0.131265  | 0.127477  | 0.199883 | 0.103001  | 0.184295 |
| 0.134907  | 0.120484  | 0.129079  | 0.124126  | 0.199738 | 0.119464  | 0.185606 |
| 0.139569  | 0.121066  | 0.130245  | 0.138112  | 0.209645 | 0.120338  | 0.196096 |
| 0.225379  | 0.210373  | 0.221008  | 0.214889  | 0.121795 | 0.211976  | 0.109411 |
| 0.134178  | 0.116841  | 0.126603  | 0.120775  | 0.199592 | 0.12398   | 0.183712 |
| 0.141026  | 0.10912   | 0.134033  | 0.131702  | 0.207605 | 0.107226  | 0.191434 |
| 0.141463  | 0.123834  | 0.134178  | 0.125437  | 0.208625 | 0.119901  | 0.19595  |
| 0.137821  | 0.115239  | 0.129953  | 0.125583  | 0.206439 | 0.115967  | 0.188811 |
| 0.143502  | 0.120047  | 0.137966  | 0.131847  | 0.206585 | 0.122232  | 0.191579 |
| 0.137383  | 0.124709  | 0.129808  | 0.125146  | 0.206876 | 0.131556  | 0.195367 |
| 0.138403  | 0.127185  | 0.130245  | 0.128497  | 0.212267 | 0.134324  | 0.198718 |
| 0.142337  | 0.128205  | 0.13884   | 0.13447   | 0.202214 | 0.123397  | 0.192162 |

|          |           |          |           |          |           |          |
|----------|-----------|----------|-----------|----------|-----------|----------|
| 0.121649 | 0.117133  | 0.112617 | 0.0933858 | 0.206876 | 0.106206  | 0.193619 |
| 0.14292  | 0.12704   | 0.137966 | 0.128934  | 0.216783 | 0.127768  | 0.200321 |
| 0.139132 | 0.106935  | 0.131847 | 0.122523  | 0.207751 | 0.107955  | 0.191871 |
| 0.142774 | 0.114948  | 0.135198 | 0.132576  | 0.209936 | 0.104312  | 0.194347 |
| 0.193619 | 0.180361  | 0.189248 | 0.181381  | 0.178613 | 0.179341  | 0.167104 |
| 0.142045 | 0.12296   | 0.134178 | 0.128059  | 0.197261 | 0.129808  | 0.183129 |
| 0.145979 | 0.129516  | 0.141317 | 0.131702  | 0.2044   | 0.127331  | 0.188228 |
| 0.136218 | 0.105186  | 0.128642 | 0.114948  | 0.217366 | 0.0799825 | 0.200612 |
| 0.142774 | 0.125728  | 0.134907 | 0.120921  | 0.201195 | 0.119172  | 0.188811 |
| 0.132576 | 0.107372  | 0.123252 | 0.117424  | 0.201486 | 0.103438  | 0.188228 |
| 0.133159 | 0.103584  | 0.128497 | 0.118881  | 0.20236  | 0.0979021 | 0.18852  |
| 0.133741 | 0.10912   | 0.124417 | 0.120338  | 0.206439 | 0.106643  | 0.192599 |
| 0.139277 | 0.119027  | 0.133159 | 0.104895  | 0.211393 | 0.123834  | 0.196096 |
| 0.138986 | 0.118444  | 0.131119 | 0.128788  | 0.195076 | 0.113928  | 0.181235 |
| 0.133596 | 0.119172  | 0.131265 | 0.128351  | 0.216492 | 0.11961   | 0.199738 |
| 0.130245 | 0.115822  | 0.123543 | 0.115676  | 0.197698 | 0.109266  | 0.181527 |
| 0.132139 | 0.111888  | 0.125728 | 0.119027  | 0.204837 | 0.110577  | 0.189248 |
| 0.142483 | 0.118444  | 0.134907 | 0.100816  | 0.223922 | 0.126166  | 0.204837 |
| 0.13141  | 0.106206  | 0.122669 | 0.113636  | 0.212267 | 0.0967366 | 0.200466 |
| 0.13141  | 0.120775  | 0.126457 | 0.121503  | 0.207605 | 0.123252  | 0.196387 |
| 0.126166 | 0.105332  | 0.120338 | 0.114219  | 0.209353 | 0.0932401 | 0.193473 |
| 0.128788 | 0.108829  | 0.122378 | 0.113928  | 0.211393 | 0.0979021 | 0.19493  |
| 0.12704  | 0.0980478 | 0.11859  | 0.118298  | 0.203817 | 0.0981935 | 0.187354 |
| 0.129516 | 0.106352  | 0.121649 | 0.119027  | 0.218531 | 0.103293  | 0.199738 |
| 0.124854 | 0.099359  | 0.116987 | 0.119318  | 0.203963 | 0.0983392 | 0.190414 |
| 0.145833 | 0.138112  | 0.137966 | 0.107372  | 0.218823 | 0.143502  | 0.203234 |
| 0.144376 | 0.136072  | 0.13884  | 0.109703  | 0.206876 | 0.135052  | 0.190705 |
| 0.120484 | 0.107226  | 0.116404 | 0.112908  | 0.206294 | 0.0977564 | 0.191871 |
| 0.138112 | 0.133887  | 0.129371 | 0.103147  | 0.224796 | 0.131993  | 0.208625 |
| 0.144522 | 0.123689  | 0.137529 | 0.132576  | 0.202943 | 0.126457  | 0.190268 |
| 0.15035  | 0.115239  | 0.147436 | 0.125583  | 0.219843 | 0.125     | 0.20134  |
| 0.121212 | 0.0992133 | 0.111888 | 0.120338  | 0.207605 | 0.105478  | 0.191434 |
| 0.153409 | 0.141026  | 0.146125 | 0.141754  | 0.219697 | 0.142337  | 0.205274 |
| 0.135344 | 0.122669  | 0.127185 | 0.127477  | 0.208625 | 0.124563  | 0.19391  |
| 0.148747 | 0.133159  | 0.140297 | 0.121941  | 0.215035 | 0.135635  | 0.200903 |
| 0.136509 | 0.116841  | 0.129225 | 0.126311  | 0.219406 | 0.111742  | 0.202069 |
| 0.131993 | 0.0992133 | 0.12296  | 0.106935  | 0.207314 | 0.100816  | 0.193182 |
| 0.131556 | 0.106061  | 0.125146 | 0.114948  | 0.203089 | 0.103584  | 0.191871 |
| 0.132284 | 0.119318  | 0.127331 | 0.104895  | 0.20877  | 0.115385  | 0.193473 |
| 0.123834 | 0.10271   | 0.120338 | 0.117424  | 0.218677 | 0.0976107 | 0.198135 |
| 0.133887 | 0.105769  | 0.125146 | 0.13039   | 0.222028 | 0.110286  | 0.204983 |
| 0.139423 | 0.121795  | 0.131556 | 0.114656  | 0.203671 | 0.123689  | 0.188083 |
| 0.131556 | 0.102273  | 0.121649 | 0.114365  | 0.206585 | 0.101253  | 0.190122 |
| 0.13141  | 0.105624  | 0.12296  | 0.111014  | 0.203526 | 0.100233  | 0.187937 |

|          |           |          |          |          |           |          |
|----------|-----------|----------|----------|----------|-----------|----------|
| 0.135927 | 0.104021  | 0.130973 | 0.118153 | 0.208916 | 0.078817  | 0.192745 |
| 0.130682 | 0.100524  | 0.12398  | 0.10912  | 0.202506 | 0.099796  | 0.188666 |
| 0.13549  | 0.107663  | 0.129079 | 0.113928 | 0.210227 | 0.101107  | 0.197261 |
| 0.125583 | 0.100087  | 0.117716 | 0.125874 | 0.202069 | 0.104895  | 0.189977 |
| 0.144959 | 0.110431  | 0.138549 | 0.131265 | 0.193765 | 0.118735  | 0.176136 |
| 0.143211 | 0.104021  | 0.134761 | 0.127768 | 0.206002 | 0.112034  | 0.192162 |
| 0.131847 | 0.0827506 | 0.124854 | 0.125146 | 0.20134  | 0.0861014 | 0.187209 |
| 0.135635 | 0.100816  | 0.127185 | 0.116113 | 0.204545 | 0.0799825 | 0.189248 |
| 0.143939 | 0.112908  | 0.139277 | 0.127331 | 0.193036 | 0.118007  | 0.177739 |
| 0.135344 | 0.106352  | 0.131847 | 0.121941 | 0.202797 | 0.11116   | 0.190997 |
| 0.137966 | 0.115385  | 0.128351 | 0.133596 | 0.203089 | 0.125728  | 0.186043 |
| 0.137675 | 0.108392  | 0.129808 | 0.11961  | 0.189685 | 0.114656  | 0.174679 |
| 0.139277 | 0.114365  | 0.134615 | 0.130245 | 0.216055 | 0.115676  | 0.20338  |

| TDr_2984  | TDr_2990  | TDr_2991  | TDr_2997  | TDr_2998 | TDr_3002  | TDr_3003  |
|-----------|-----------|-----------|-----------|----------|-----------|-----------|
| 0.122815  | 0.124854  | 0.0823135 | 0.0850816 | 0.121649 | 0.121066  | 0.114656  |
| 0.118881  | 0.110431  | 0.115385  | 0.109411  | 0.108683 | 0.109848  | 0.104604  |
| 0.109266  | 0.105478  | 0.110723  | 0.103875  | 0.104895 | 0.107226  | 0.102273  |
| 0.116259  | 0.115385  | 0.121795  | 0.116696  | 0.092366 | 0.0955711 | 0.106935  |
| 0.123543  | 0.13986   | 0.138695  | 0.135052  | 0.132576 | 0.136072  | 0.136946  |
| 0.126166  | 0.128497  | 0.116841  | 0.114656  | 0.126748 | 0.127622  | 0.125583  |
| 0.119318  | 0.127768  | 0.103584  | 0.106643  | 0.130973 | 0.127768  | 0.121358  |
| 0.110577  | 0.114948  | 0.115239  | 0.110431  | 0.105624 | 0.109703  | 0.107955  |
| 0.108392  | 0.115967  | 0.114219  | 0.104749  | 0.111305 | 0.108392  | 0.102273  |
| 0.113782  | 0.0971737 | 0.109703  | 0.104895  | 0.119901 | 0.120192  | 0.095134  |
| 0.115093  | 0.116259  | 0.112762  | 0.107955  | 0.13141  | 0.129371  | 0.104021  |
| 0.102418  | 0.120192  | 0.118735  | 0.1081    | 0.109703 | 0.111451  | 0.111451  |
| 0.114948  | 0.112617  | 0.116113  | 0.111305  | 0.116987 | 0.117861  | 0.100087  |
| 0.131119  | 0.13141   | 0.139569  | 0.130099  | 0.132867 | 0.134324  | 0.119755  |
| 0.127477  | 0.0520105 | 0.130682  | 0.125583  | 0.130099 | 0.133013  | 0.0604604 |
| 0.118007  | 0.112471  | 0.117424  | 0.118444  | 0.124417 | 0.120921  | 0.109557  |
| 0.0925117 | 0.11757   | 0.122815  | 0.113345  | 0.118153 | 0.120192  | 0.11116   |
| 0.136364  | 0.146562  | 0.147145  | 0.145542  | 0.13986  | 0.140152  | 0.141317  |
| 0.109266  | 0.111888  | 0.110723  | 0.097465  | 0.105769 | 0.108392  | 0.104895  |
| 0.202506  | 0.16958   | 0.201049  | 0.198864  | 0.199592 | 0.201049  | 0.173368  |
| 0.116696  | 0.124854  | 0.105041  | 0.0979021 | 0.131847 | 0.133304  | 0.118153  |
| 0.111888  | 0.125874  | 0.0999417 | 0.0954254 | 0.12296  | 0.123543  | 0.118007  |
| 0.104167  | 0.116987  | 0.11757   | 0.110723  | 0.113782 | 0.111742  | 0.108246  |
| 0.121795  | 0.133741  | 0.125     | 0.123689  | 0.129371 | 0.125874  | 0.129662  |
| 0.105332  | 0.108246  | 0.106498  | 0.0987762 | 0.10912  | 0.112908  | 0.100379  |
| 0.12398   | 0.127768  | 0.104167  | 0.102273  | 0.13447  | 0.130973  | 0.128934  |
| 0.120775  | 0.128934  | 0.120484  | 0.11655   | 0.129808 | 0.13039   | 0.123689  |
| 0.116987  | 0.121358  | 0.126603  | 0.120047  | 0.122232 | 0.117279  | 0.118444  |
| 0.128642  | 0.137675  | 0.127477  | 0.120629  | 0.132139 | 0.132139  | 0.13243   |
| 0.117861  | 0.121358  | 0.123106  | 0.118298  | 0.127477 | 0.128934  | 0.116404  |
| 0.124417  | 0.119172  | 0.0967366 | 0.095134  | 0.130828 | 0.132284  | 0.113345  |
| 0.119027  | 0.121649  | 0.118153  | 0.117424  | 0.127768 | 0.123397  | 0.117861  |
| 0.105624  | 0.105624  | 0.102127  | 0.102855  | 0.114656 | 0.116404  | 0.0965909 |
| 0.116113  | 0.123106  | 0.116113  | 0.111597  | 0.122232 | 0.11961   | 0.117279  |
| 0.118881  | 0.124709  | 0.120629  | 0.118444  | 0.129662 | 0.127331  | 0.11859   |
| 0.125146  | 0.129225  | 0.126311  | 0.121212  | 0.130099 | 0.13039   | 0.128642  |
| 0.13345   | 0.137238  | 0.115676  | 0.116113  | 0.137238 | 0.137821  | 0.132284  |
| 0.112617  | 0.127768  | 0.121649  | 0.111888  | 0.130682 | 0.131556  | 0.119901  |
| 0.112325  | 0.114073  | 0.109411  | 0.104604  | 0.118444 | 0.112325  | 0.106206  |
| 0.119027  | 0.125437  | 0.129225  | 0.120629  | 0.124272 | 0.120192  | 0.11961   |
| 0.107955  | 0.117279  | 0.117279  | 0.1081    | 0.114948 | 0.113199  | 0.109703  |
| 0.137966  | 0.136218  | 0.149621  | 0.140734  | 0.145542 | 0.142045  | 0.137675  |

|          |          |           |           |           |           |          |
|----------|----------|-----------|-----------|-----------|-----------|----------|
| 0.142045 | 0.148747 | 0.150495  | 0.143648  | 0.150204  | 0.146125  | 0.146416 |
| 0.113928 | 0.124417 | 0.122378  | 0.115822  | 0.121212  | 0.121212  | 0.116259 |
| 0.102564 | 0.113928 | 0.110723  | 0.101253  | 0.120338  | 0.117716  | 0.108683 |
| 0.115239 | 0.113782 | 0.121358  | 0.114219  | 0.131265  | 0.128059  | 0.112908 |
| 0.104749 | 0.122815 | 0.127768  | 0.118881  | 0.123397  | 0.120484  | 0.116404 |
| 0.13345  | 0.138112 | 0.142774  | 0.135052  | 0.142774  | 0.138403  | 0.135198 |
| 0.107809 | 0.118298 | 0.126748  | 0.116113  | 0.11655   | 0.118298  | 0.115385 |
| 0.109994 | 0.117861 | 0.122523  | 0.114219  | 0.12602   | 0.121358  | 0.112325 |
| 0.148019 | 0.14831  | 0.0611888 | 0.0826049 | 0.14831   | 0.148893  | 0.147727 |
| 0.120338 | 0.128788 | 0.137821  | 0.130973  | 0.131702  | 0.133159  | 0.128497 |
| 0.111742 | 0.122815 | 0.123689  | 0.115385  | 0.119318  | 0.119901  | 0.115239 |
| 0.12602  | 0.115239 | 0.133887  | 0.128205  | 0.128351  | 0.127768  | 0.116696 |
| 0.113199 | 0.120192 | 0.118153  | 0.117424  | 0.0878497 | 0.0910548 | 0.113491 |
| 0.131265 | 0.146707 | 0.145833  | 0.138986  | 0.141171  | 0.133887  | 0.143211 |
| 0.121212 | 0.131119 | 0.134033  | 0.128059  | 0.132867  | 0.129371  | 0.128497 |
| 0.111305 | 0.120338 | 0.123252  | 0.11553   | 0.121795  | 0.118298  | 0.112179 |
| 0.114802 | 0.121503 | 0.126748  | 0.116404  | 0.123834  | 0.124417  | 0.11451  |
| 0.121066 | 0.119027 | 0.11961   | 0.114802  | 0.128351  | 0.128059  | 0.11757  |
| 0.131556 | 0.142045 | 0.144668  | 0.135781  | 0.142045  | 0.137675  | 0.137092 |
| 0.140297 | 0.139132 | 0.14729   | 0.140152  | 0.136801  | 0.132139  | 0.137092 |
| 0.163462 | 0.153846 | 0.159674  | 0.157197  | 0.159091  | 0.1588    | 0.152389 |
| 0.112179 | 0.11859  | 0.120921  | 0.114948  | 0.117716  | 0.118881  | 0.112471 |
| 0.110431 | 0.122086 | 0.121503  | 0.11116   | 0.120047  | 0.121795  | 0.114219 |
| 0.108392 | 0.121503 | 0.119172  | 0.110868  | 0.118881  | 0.115967  | 0.114802 |
| 0.139423 | 0.137966 | 0.122815  | 0.121212  | 0.143502  | 0.142628  | 0.138258 |
| 0.108537 | 0.116404 | 0.121649  | 0.108974  | 0.11553   | 0.113782  | 0.109703 |
| 0.125291 | 0.134907 | 0.137529  | 0.135344  | 0.135198  | 0.13345   | 0.131119 |
| 0.121795 | 0.11655  | 0.120047  | 0.113491  | 0.129079  | 0.129079  | 0.112179 |
| 0.110868 | 0.122815 | 0.125728  | 0.115093  | 0.121358  | 0.123106  | 0.118153 |
| 0.144376 | 0.149038 | 0.127185  | 0.124126  | 0.146125  | 0.146999  | 0.141754 |
| 0.11961  | 0.128059 | 0.129225  | 0.124709  | 0.129808  | 0.12602   | 0.123397 |
| 0.131119 | 0.136946 | 0.145396  | 0.139423  | 0.141608  | 0.13345   | 0.136364 |
| 0.120484 | 0.133013 | 0.141171  | 0.132284  | 0.133013  | 0.13447   | 0.128934 |
| 0.100233 | 0.119755 | 0.116841  | 0.110868  | 0.112179  | 0.110723  | 0.109557 |
| 0.111888 | 0.124417 | 0.121795  | 0.112617  | 0.115967  | 0.117716  | 0.115093 |
| 0.11014  | 0.120338 | 0.123252  | 0.115822  | 0.121212  | 0.120047  | 0.113345 |
| 0.125583 | 0.138403 | 0.138695  | 0.131556  | 0.132576  | 0.127622  | 0.132867 |
| 0.110286 | 0.119901 | 0.119901  | 0.110723  | 0.120192  | 0.121066  | 0.114656 |
| 0.13549  | 0.138986 | 0.146562  | 0.141171  | 0.139569  | 0.134907  | 0.140152 |
| 0.120047 | 0.126166 | 0.126166  | 0.116987  | 0.129371  | 0.128497  | 0.118298 |
| 0.113054 | 0.126166 | 0.12704   | 0.118735  | 0.119172  | 0.116841  | 0.120338 |
| 0.115385 | 0.125583 | 0.12296   | 0.116987  | 0.125291  | 0.123543  | 0.117424 |
| 0.116259 | 0.125874 | 0.132867  | 0.122232  | 0.125291  | 0.120921  | 0.119172 |
| 0.111305 | 0.121503 | 0.122378  | 0.11553   | 0.123834  | 0.122669  | 0.115093 |

|          |          |           |           |          |          |           |
|----------|----------|-----------|-----------|----------|----------|-----------|
| 0.106643 | 0.123834 | 0.124709  | 0.114365  | 0.119464 | 0.118881 | 0.117716  |
| 0.131265 | 0.139423 | 0.146707  | 0.137529  | 0.141171 | 0.138258 | 0.140006  |
| 0.11116  | 0.114656 | 0.116404  | 0.106643  | 0.121358 | 0.121066 | 0.106789  |
| 0.109557 | 0.115676 | 0.122669  | 0.113782  | 0.122669 | 0.120047 | 0.111014  |
| 0.119464 | 0.125    | 0.121795  | 0.116113  | 0.134033 | 0.129953 | 0.120921  |
| 0.119172 | 0.133159 | 0.106935  | 0.107955  | 0.133741 | 0.13141  | 0.129079  |
| 0.124417 | 0.131702 | 0.132576  | 0.127185  | 0.138986 | 0.139277 | 0.129371  |
| 0.132721 | 0.137966 | 0.140006  | 0.13549   | 0.139714 | 0.138549 | 0.137092  |
| 0.115385 | 0.12296  | 0.108974  | 0.104458  | 0.126166 | 0.126166 | 0.118007  |
| 0.184149 | 0.181235 | 0.173368  | 0.170892  | 0.183275 | 0.184441 | 0.176282  |
| 0.101253 | 0.114948 | 0.109994  | 0.102273  | 0.112617 | 0.113491 | 0.106206  |
| 0.132284 | 0.130536 | 0.136655  | 0.135052  | 0.138695 | 0.137238 | 0.130828  |
| 0.12296  | 0.12704  | 0.128497  | 0.127477  | 0.129662 | 0.12704  | 0.124126  |
| 0.135635 | 0.139423 | 0.115822  | 0.118007  | 0.143211 | 0.142045 | 0.135344  |
| 0.109557 | 0.111888 | 0.117133  | 0.110868  | 0.120338 | 0.117716 | 0.111305  |
| 0.126748 | 0.131702 | 0.134907  | 0.130682  | 0.133741 | 0.132867 | 0.132867  |
| 0.105186 | 0.118881 | 0.11859   | 0.110286  | 0.123252 | 0.122378 | 0.113054  |
| 0.117279 | 0.122815 | 0.127477  | 0.119755  | 0.131265 | 0.133887 | 0.121649  |
| 0.11961  | 0.119318 | 0.103875  | 0.0990676 | 0.11961  | 0.122232 | 0.112325  |
| 0.131847 | 0.139132 | 0.139423  | 0.134324  | 0.143794 | 0.14088  | 0.136218  |
| 0.103584 | 0.114948 | 0.112908  | 0.105186  | 0.122523 | 0.119901 | 0.105624  |
| 0.127914 | 0.137529 | 0.117133  | 0.119027  | 0.134615 | 0.136364 | 0.133159  |
| 0.112325 | 0.12398  | 0.101836  | 0.0973193 | 0.125437 | 0.126311 | 0.118735  |
| 0.124417 | 0.13549  | 0.141317  | 0.130099  | 0.136072 | 0.13141  | 0.130245  |
| 0.127477 | 0.125146 | 0.114073  | 0.113345  | 0.139423 | 0.140589 | 0.124272  |
| 0.106206 | 0.113782 | 0.101544  | 0.0926573 | 0.123689 | 0.122523 | 0.109411  |
| 0.144085 | 0.144668 | 0.134761  | 0.130536  | 0.14729  | 0.145833 | 0.139714  |
| 0.111888 | 0.121503 | 0.100524  | 0.0965909 | 0.129662 | 0.127914 | 0.114219  |
| 0.106935 | 0.119464 | 0.118881  | 0.107955  | 0.123543 | 0.122669 | 0.111305  |
| 0.109411 | 0.120775 | 0.121358  | 0.111305  | 0.123689 | 0.123106 | 0.116113  |
| 0.133887 | 0.142628 | 0.119027  | 0.123252  | 0.142628 | 0.14292  | 0.136509  |
| 0.119027 | 0.119318 | 0.117861  | 0.11451   | 0.128351 | 0.128351 | 0.117861  |
| 0.100379 | 0.113491 | 0.112908  | 0.104895  | 0.115822 | 0.116404 | 0.107955  |
| 0.104458 | 0.113782 | 0.11757   | 0.108683  | 0.121941 | 0.122523 | 0.104458  |
| 0.111014 | 0.12296  | 0.105186  | 0.0983392 | 0.122086 | 0.124417 | 0.115093  |
| 0.128934 | 0.123106 | 0.127768  | 0.120629  | 0.130973 | 0.132721 | 0.116696  |
| 0.112179 | 0.123834 | 0.0999417 | 0.0965909 | 0.128788 | 0.126748 | 0.117424  |
| 0.103293 | 0.109703 | 0.107955  | 0.0996503 | 0.112617 | 0.112617 | 0.100379  |
| 0.105041 | 0.108537 | 0.109994  | 0.0979021 | 0.114656 | 0.113199 | 0.103584  |
| 0.106352 | 0.111888 | 0.115385  | 0.108246  | 0.120047 | 0.118881 | 0.105186  |
| 0.120047 | 0.128788 | 0.127331  | 0.116987  | 0.122669 | 0.122086 | 0.118881  |
| 0.119901 | 0.124854 | 0.130682  | 0.122378  | 0.135052 | 0.132721 | 0.122232  |
| 0.111014 | 0.108683 | 0.114802  | 0.10708   | 0.119172 | 0.11859  | 0.100233  |
| 0.106206 | 0.101836 | 0.112034  | 0.0996503 | 0.116404 | 0.115822 | 0.0960082 |



|           |           |           |           |           |           |           |
|-----------|-----------|-----------|-----------|-----------|-----------|-----------|
| 0.117279  | 0.122232  | 0.124563  | 0.118007  | 0.135344  | 0.133013  | 0.116987  |
| 0.107226  | 0.113636  | 0.111014  | 0.105915  | 0.118298  | 0.11655   | 0.104895  |
| 0.122086  | 0.123543  | 0.113054  | 0.106206  | 0.129079  | 0.131119  | 0.119172  |
| 0.134033  | 0.135198  | 0.0521562 | 0.0654138 | 0.137238  | 0.136364  | 0.131702  |
| 0.107809  | 0.117424  | 0.118881  | 0.112908  | 0.124709  | 0.121212  | 0.113054  |
| 0.109703  | 0.108537  | 0.114656  | 0.108683  | 0.122232  | 0.120484  | 0.10271   |
| 0.106789  | 0.110577  | 0.11757   | 0.109557  | 0.118444  | 0.119318  | 0.105915  |
| 0.105624  | 0.110868  | 0.110577  | 0.101981  | 0.118444  | 0.116987  | 0.105915  |
| 0.12398   | 0.12602   | 0.127768  | 0.121503  | 0.129516  | 0.128059  | 0.120484  |
| 0.10271   | 0.106206  | 0.109411  | 0.104312  | 0.116113  | 0.114365  | 0.0992133 |
| 0.129079  | 0.136072  | 0.13345   | 0.13039   | 0.142191  | 0.139277  | 0.134324  |
| 0.131556  | 0.134761  | 0.137675  | 0.131702  | 0.137675  | 0.140297  | 0.130682  |
| 0.121358  | 0.125146  | 0.127477  | 0.122669  | 0.130682  | 0.128642  | 0.119318  |
| 0.115967  | 0.115967  | 0.125583  | 0.11553   | 0.128205  | 0.128205  | 0.112179  |
| 0.115385  | 0.120338  | 0.0996503 | 0.0942599 | 0.125583  | 0.126748  | 0.112179  |
| 0.106789  | 0.11553   | 0.11553   | 0.105186  | 0.122523  | 0.123689  | 0.105915  |
| 0.106935  | 0.123834  | 0.116259  | 0.10271   | 0.121212  | 0.11859   | 0.115676  |
| 0.108392  | 0.115676  | 0.116259  | 0.106206  | 0.116259  | 0.114802  | 0.108392  |
| 0.105478  | 0.11655   | 0.119755  | 0.114365  | 0.0987762 | 0.0973193 | 0.113345  |
| 0.123834  | 0.129953  | 0.139569  | 0.131556  | 0.136655  | 0.134033  | 0.128205  |
| 0.10912   | 0.119027  | 0.122523  | 0.112762  | 0.124854  | 0.120775  | 0.114073  |
| 0.128205  | 0.120338  | 0.131702  | 0.126311  | 0.135781  | 0.135198  | 0.122086  |
| 0.127477  | 0.134178  | 0.127185  | 0.123834  | 0.140297  | 0.138258  | 0.131556  |
| 0.188957  | 0.185169  | 0.193328  | 0.188228  | 0.186917  | 0.18954   | 0.17905   |
| 0.234266  | 0.227564  | 0.233683  | 0.233246  | 0.227273  | 0.229895  | 0.229312  |
| 0.106498  | 0.118735  | 0.116696  | 0.109848  | 0.0732809 | 0.074155  | 0.113199  |
| 0.106061  | 0.118007  | 0.119755  | 0.111742  | 0.120629  | 0.115093  | 0.108974  |
| 0.105478  | 0.115385  | 0.114802  | 0.109411  | 0.115385  | 0.115385  | 0.104895  |
| 0.101981  | 0.119172  | 0.120629  | 0.109994  | 0.115385  | 0.11655   | 0.111597  |
| 0.129079  | 0.0486597 | 0.131993  | 0.127768  | 0.129079  | 0.130828  | 0.0626457 |
| 0.105769  | 0.118298  | 0.124709  | 0.116404  | 0.117133  | 0.11655   | 0.115093  |
| 0.14088   | 0.148747  | 0.149038  | 0.144522  | 0.151369  | 0.144376  | 0.146416  |
| 0.104604  | 0.12704   | 0.125583  | 0.116696  | 0.123252  | 0.118881  | 0.119464  |
| 0.124709  | 0.136946  | 0.131702  | 0.128351  | 0.132576  | 0.128788  | 0.132867  |
| 0.122815  | 0.131556  | 0.136218  | 0.130536  | 0.132139  | 0.130973  | 0.133013  |
| 0.124272  | 0.129516  | 0.137092  | 0.131119  | 0.13884   | 0.133304  | 0.128642  |
| 0.135635  | 0.135927  | 0.144376  | 0.137529  | 0.139714  | 0.135927  | 0.135927  |
| 0.107663  | 0.121358  | 0.125728  | 0.117133  | 0.126311  | 0.122232  | 0.112325  |
| 0.106206  | 0.121066  | 0.119027  | 0.111014  | 0.119901  | 0.117279  | 0.112034  |
| 0.104312  | 0.120921  | 0.12704   | 0.118153  | 0.128205  | 0.125     | 0.116259  |
| 0.0999417 | 0.120629  | 0.118007  | 0.108246  | 0.117424  | 0.113928  | 0.113054  |
| 0.101981  | 0.122378  | 0.119755  | 0.113782  | 0.115967  | 0.114219  | 0.11451   |
| 0.105332  | 0.125728  | 0.124272  | 0.117133  | 0.120192  | 0.117861  | 0.116404  |
| 0.11451   | 0.129079  | 0.137238  | 0.128934  | 0.134615  | 0.127914  | 0.12704   |

|           |          |          |          |          |          |          |
|-----------|----------|----------|----------|----------|----------|----------|
| 0.122378  | 0.138695 | 0.142774 | 0.135052 | 0.140443 | 0.136364 | 0.137238 |
| 0.10912   | 0.126894 | 0.124272 | 0.11859  | 0.122523 | 0.120775 | 0.118153 |
| 0.104312  | 0.121212 | 0.121503 | 0.114656 | 0.123543 | 0.121795 | 0.115967 |
| 0.122669  | 0.138403 | 0.135198 | 0.135052 | 0.137238 | 0.132867 | 0.134615 |
| 0.099359  | 0.122086 | 0.120047 | 0.11116  | 0.120338 | 0.116841 | 0.112471 |
| 0.133013  | 0.13884  | 0.150204 | 0.142774 | 0.150787 | 0.145833 | 0.139423 |
| 0.128934  | 0.130682 | 0.139423 | 0.134033 | 0.141463 | 0.143211 | 0.128351 |
| 0.121212  | 0.135198 | 0.138695 | 0.134178 | 0.136655 | 0.132867 | 0.133741 |
| 0.105478  | 0.119172 | 0.11859  | 0.108246 | 0.114802 | 0.114219 | 0.111305 |
| 0.100087  | 0.115822 | 0.118153 | 0.1081   | 0.117861 | 0.114948 | 0.112908 |
| 0.112762  | 0.130536 | 0.131702 | 0.125437 | 0.130828 | 0.124709 | 0.125874 |
| 0.113782  | 0.128351 | 0.132721 | 0.120047 | 0.131265 | 0.12398  | 0.129516 |
| 0.120775  | 0.135927 | 0.133013 | 0.127331 | 0.134761 | 0.131265 | 0.133887 |
| 0.107226  | 0.125583 | 0.122378 | 0.11757  | 0.123543 | 0.121212 | 0.121212 |
| 0.108246  | 0.124563 | 0.127185 | 0.118881 | 0.123397 | 0.122523 | 0.118444 |
| 0.112325  | 0.126311 | 0.129225 | 0.122086 | 0.127477 | 0.121358 | 0.118153 |
| 0.122523  | 0.137383 | 0.136218 | 0.128788 | 0.143794 | 0.141463 | 0.135344 |
| 0.117861  | 0.136801 | 0.135635 | 0.13141  | 0.137675 | 0.130682 | 0.133304 |
| 0.125874  | 0.136946 | 0.139569 | 0.131847 | 0.138112 | 0.133741 | 0.132576 |
| 0.130099  | 0.13447  | 0.130099 | 0.12704  | 0.136509 | 0.133013 | 0.133304 |
| 0.107663  | 0.128642 | 0.119027 | 0.112179 | 0.11757  | 0.114948 | 0.11961  |
| 0.110868  | 0.133887 | 0.140589 | 0.130245 | 0.133304 | 0.13039  | 0.133887 |
| 0.106061  | 0.120338 | 0.115093 | 0.107372 | 0.114802 | 0.114802 | 0.118007 |
| 0.11116   | 0.121066 | 0.122815 | 0.112762 | 0.122815 | 0.121649 | 0.114656 |
| 0.104458  | 0.119318 | 0.124272 | 0.11451  | 0.122523 | 0.120192 | 0.112034 |
| 0.0999417 | 0.122669 | 0.122378 | 0.11757  | 0.122669 | 0.122669 | 0.115967 |
| 0.100233  | 0.121212 | 0.120338 | 0.112034 | 0.117424 | 0.11451  | 0.113345 |
| 0.122523  | 0.136509 | 0.14088  | 0.132284 | 0.140006 | 0.137675 | 0.135635 |
| 0.113054  | 0.122086 | 0.113636 | 0.112617 | 0.124126 | 0.122669 | 0.11655  |
| 0.127331  | 0.137238 | 0.140443 | 0.130099 | 0.137238 | 0.128788 | 0.133741 |
| 0.101981  | 0.120629 | 0.119755 | 0.112908 | 0.119755 | 0.115676 | 0.113054 |
| 0.114948  | 0.129225 | 0.130099 | 0.123543 | 0.135052 | 0.130099 | 0.128642 |
| 0.120047  | 0.126166 | 0.129662 | 0.126311 | 0.128205 | 0.126748 | 0.126457 |
| 0.113928  | 0.114802 | 0.12704  | 0.116987 | 0.128205 | 0.128205 | 0.109848 |
| 0.116404  | 0.119027 | 0.119901 | 0.111888 | 0.126894 | 0.124272 | 0.115239 |
| 0.116259  | 0.12704  | 0.131993 | 0.124563 | 0.12704  | 0.123834 | 0.120338 |
| 0.117861  | 0.125146 | 0.131556 | 0.123543 | 0.12602  | 0.123689 | 0.114365 |
| 0.112325  | 0.122815 | 0.115822 | 0.104895 | 0.123689 | 0.12602  | 0.112617 |
| 0.135635  | 0.127185 | 0.13447  | 0.130536 | 0.140297 | 0.141463 | 0.127768 |
| 0.138695  | 0.138986 | 0.13549  | 0.131265 | 0.142774 | 0.138403 | 0.133741 |
| 0.105478  | 0.108392 | 0.109848 | 0.104458 | 0.111597 | 0.115093 | 0.103438 |
| 0.125146  | 0.120192 | 0.133596 | 0.126457 | 0.137092 | 0.137092 | 0.121941 |
| 0.12704   | 0.117716 | 0.125583 | 0.119901 | 0.134033 | 0.136364 | 0.117133 |
| 0.126457  | 0.124417 | 0.132867 | 0.130682 | 0.131119 | 0.134324 | 0.124126 |

|          |          |          |          |          |          |          |
|----------|----------|----------|----------|----------|----------|----------|
| 0.117716 | 0.115676 | 0.120047 | 0.114365 | 0.126166 | 0.126166 | 0.111305 |
| 0.124126 | 0.117424 | 0.12704  | 0.122815 | 0.132576 | 0.131993 | 0.11859  |
| 0.122523 | 0.11553  | 0.127768 | 0.122086 | 0.130973 | 0.132139 | 0.11757  |
| 0.122086 | 0.126166 | 0.134033 | 0.126894 | 0.12704  | 0.129371 | 0.125    |
| 0.130536 | 0.127331 | 0.133741 | 0.128059 | 0.13986  | 0.140443 | 0.128205 |
| 0.121795 | 0.118298 | 0.12704  | 0.124272 | 0.125874 | 0.128205 | 0.117133 |
| 0.11451  | 0.114219 | 0.118007 | 0.111742 | 0.123834 | 0.122669 | 0.108974 |
| 0.126603 | 0.142045 | 0.138549 | 0.134324 | 0.133887 | 0.131847 | 0.135052 |
| 0.128788 | 0.124417 | 0.134324 | 0.127768 | 0.138695 | 0.141608 | 0.125    |
| 0.112471 | 0.112179 | 0.111014 | 0.106789 | 0.11859  | 0.118881 | 0.104021 |
| 0.216346 | 0.215181 | 0.214307 | 0.212704 | 0.209062 | 0.212267 | 0.212267 |
| 0.121066 | 0.116696 | 0.127768 | 0.124126 | 0.128642 | 0.128351 | 0.113782 |
| 0.111742 | 0.11757  | 0.117861 | 0.114802 | 0.123689 | 0.127768 | 0.111742 |
| 0.125583 | 0.126457 | 0.138403 | 0.129225 | 0.138986 | 0.137529 | 0.128788 |
| 0.11859  | 0.113345 | 0.121212 | 0.11553  | 0.12296  | 0.125    | 0.110723 |
| 0.132867 | 0.12296  | 0.132576 | 0.128351 | 0.136364 | 0.136946 | 0.125    |
| 0.111305 | 0.119172 | 0.131119 | 0.125728 | 0.123252 | 0.12296  | 0.11655  |
| 0.116696 | 0.11553  | 0.124563 | 0.118007 | 0.124854 | 0.122523 | 0.110868 |
| 0.122232 | 0.116696 | 0.126894 | 0.121795 | 0.130099 | 0.132721 | 0.115822 |
| 0.125874 | 0.120338 | 0.131702 | 0.129225 | 0.134324 | 0.134615 | 0.117424 |
| 0.130099 | 0.126603 | 0.128351 | 0.125291 | 0.133013 | 0.134178 | 0.125146 |
| 0.121503 | 0.126166 | 0.131119 | 0.122815 | 0.132867 | 0.130245 | 0.125291 |
| 0.11859  | 0.125    | 0.128788 | 0.124563 | 0.128788 | 0.129079 | 0.121212 |
| 0.117424 | 0.116259 | 0.122086 | 0.114656 | 0.124417 | 0.124709 | 0.107517 |
| 0.115093 | 0.122086 | 0.124126 | 0.120192 | 0.118881 | 0.122086 | 0.115967 |
| 0.130682 | 0.126603 | 0.14088  | 0.132867 | 0.137383 | 0.137675 | 0.128642 |
| 0.115967 | 0.114219 | 0.123543 | 0.11961  | 0.120921 | 0.123252 | 0.113054 |
| 0.128497 | 0.138403 | 0.144522 | 0.137675 | 0.140152 | 0.13549  | 0.138986 |
| 0.135635 | 0.13447  | 0.13039  | 0.122086 | 0.14088  | 0.142628 | 0.131556 |
| 0.124854 | 0.116696 | 0.122815 | 0.11859  | 0.130682 | 0.131556 | 0.114073 |
| 0.128351 | 0.117279 | 0.125146 | 0.119172 | 0.137966 | 0.13447  | 0.117861 |
| 0.126166 | 0.130536 | 0.118298 | 0.114365 | 0.129662 | 0.131119 | 0.125583 |
| 0.123106 | 0.134761 | 0.124563 | 0.121212 | 0.129225 | 0.127185 | 0.127768 |
| 0.119027 | 0.132139 | 0.125146 | 0.119755 | 0.127185 | 0.128642 | 0.124272 |
| 0.133013 | 0.139423 | 0.127768 | 0.124417 | 0.142337 | 0.144376 | 0.129808 |
| 0.1081   | 0.11451  | 0.118881 | 0.110577 | 0.12296  | 0.122378 | 0.107809 |
| 0.131265 | 0.130682 | 0.144376 | 0.136072 | 0.13884  | 0.137966 | 0.126894 |
| 0.141317 | 0.138112 | 0.127331 | 0.124272 | 0.143939 | 0.141608 | 0.131993 |
| 0.11859  | 0.119464 | 0.120338 | 0.116113 | 0.128497 | 0.128205 | 0.114802 |
| 0.120047 | 0.129371 | 0.131702 | 0.123397 | 0.129371 | 0.130245 | 0.120338 |
| 0.139423 | 0.144668 | 0.138549 | 0.136072 | 0.142337 | 0.139423 | 0.140006 |
| 0.121358 | 0.128934 | 0.135927 | 0.126457 | 0.127477 | 0.125728 | 0.121941 |
| 0.137821 | 0.133741 | 0.140443 | 0.134761 | 0.140734 | 0.138986 | 0.131993 |
| 0.127768 | 0.126603 | 0.139132 | 0.127914 | 0.137383 | 0.137383 | 0.125437 |

|          |           |           |           |           |           |           |
|----------|-----------|-----------|-----------|-----------|-----------|-----------|
| 0.112471 | 0.127331  | 0.130828  | 0.122815  | 0.130536  | 0.131119  | 0.123543  |
| 0.125437 | 0.12602   | 0.128934  | 0.128205  | 0.134761  | 0.133596  | 0.126603  |
| 0.119755 | 0.123252  | 0.128788  | 0.122232  | 0.132284  | 0.134615  | 0.11655   |
| 0.129225 | 0.13243   | 0.136509  | 0.128788  | 0.136801  | 0.13447   | 0.126311  |
| 0.124272 | 0.128642  | 0.131265  | 0.129662  | 0.132139  | 0.133887  | 0.128351  |
| 0.125146 | 0.135052  | 0.134178  | 0.127331  | 0.138549  | 0.136509  | 0.138549  |
| 0.123397 | 0.133304  | 0.130973  | 0.123543  | 0.136509  | 0.136218  | 0.131556  |
| 0.127768 | 0.13243   | 0.125728  | 0.116841  | 0.135344  | 0.135927  | 0.129225  |
| 0.141171 | 0.139714  | 0.142045  | 0.141026  | 0.146707  | 0.145542  | 0.141754  |
| 0.122523 | 0.114656  | 0.12398   | 0.11859   | 0.136218  | 0.135635  | 0.116113  |
| 0.11553  | 0.123689  | 0.128934  | 0.12296   | 0.127185  | 0.127768  | 0.116113  |
| 0.125146 | 0.127768  | 0.128059  | 0.125291  | 0.139714  | 0.140006  | 0.126894  |
| 0.118444 | 0.116696  | 0.115822  | 0.111597  | 0.129225  | 0.129808  | 0.112908  |
| 0.1419   | 0.142483  | 0.126748  | 0.123106  | 0.144814  | 0.145688  | 0.136072  |
| 0.159674 | 0.152972  | 0.140734  | 0.136218  | 0.156469  | 0.159091  | 0.153846  |
| 0.119755 | 0.134324  | 0.134615  | 0.127477  | 0.132284  | 0.128788  | 0.134615  |
| 0.11553  | 0.128059  | 0.126603  | 0.117716  | 0.125146  | 0.122523  | 0.125728  |
| 0.128788 | 0.132867  | 0.130245  | 0.130099  | 0.130245  | 0.126166  | 0.128497  |
| 0.128642 | 0.127477  | 0.13243   | 0.128788  | 0.133887  | 0.13447   | 0.124563  |
| 0.117279 | 0.13447   | 0.135927  | 0.126166  | 0.135052  | 0.13039   | 0.127768  |
| 0.131847 | 0.129516  | 0.136509  | 0.135781  | 0.146707  | 0.144668  | 0.130973  |
| 0.141171 | 0.129516  | 0.129808  | 0.128788  | 0.141463  | 0.13884   | 0.132139  |
| 0.126166 | 0.122378  | 0.126166  | 0.122523  | 0.130536  | 0.129079  | 0.119172  |
| 0.152098 | 0.158508  | 0.15035   | 0.145542  | 0.15676   | 0.15676   | 0.1588    |
| 0.125583 | 0.120921  | 0.13141   | 0.124563  | 0.138403  | 0.137821  | 0.12296   |
| 0.142483 | 0.129953  | 0.137529  | 0.129808  | 0.147145  | 0.148019  | 0.128205  |
| 0.120775 | 0.127477  | 0.131847  | 0.123834  | 0.128351  | 0.128059  | 0.120484  |
| 0.131847 | 0.139714  | 0.130099  | 0.129662  | 0.135052  | 0.133304  | 0.137966  |
| 0.120775 | 0.113491  | 0.127185  | 0.121212  | 0.128934  | 0.129808  | 0.119027  |
| 0.13986  | 0.140152  | 0.0859557 | 0.0977564 | 0.115385  | 0.115385  | 0.130536  |
| 0.134178 | 0.144085  | 0.146999  | 0.139569  | 0.141171  | 0.142628  | 0.145542  |
| 0.116841 | 0.123543  | 0.124709  | 0.123689  | 0.0483683 | 0.048951  | 0.12296   |
| 0.130973 | 0.133013  | 0.132139  | 0.134907  | 0.0636655 | 0.0627914 | 0.128059  |
| 0.142191 | 0.147145  | 0.150058  | 0.143211  | 0.144231  | 0.143648  | 0.140734  |
| 0.139277 | 0.141608  | 0.140734  | 0.137675  | 0.119755  | 0.123252  | 0.131993  |
| 0.121066 | 0.134178  | 0.120192  | 0.113054  | 0.133887  | 0.128934  | 0.128351  |
| 0.12704  | 0.134615  | 0.131993  | 0.133887  | 0.131119  | 0.13345   | 0.13345   |
| 0.113054 | 0.0920746 | 0.116259  | 0.10708   | 0.11451   | 0.115676  | 0.0874126 |
| 0.114948 | 0.0852273 | 0.119318  | 0.114219  | 0.11961   | 0.119027  | 0.0773601 |
| 0.115967 | 0.120921  | 0.121212  | 0.116987  | 0.128497  | 0.128788  | 0.115967  |
| 0.113054 | 0.124126  | 0.120047  | 0.119027  | 0.0463287 | 0.048951  | 0.11859   |
| 0.112034 | 0.118444  | 0.124854  | 0.119464  | 0.124854  | 0.126603  | 0.110868  |
| 0.111451 | 0.0793998 | 0.117279  | 0.109266  | 0.0872669 | 0.0901807 | 0.0744464 |
| 0.121941 | 0.124854  | 0.123106  | 0.117424  | 0.107663  | 0.106498  | 0.117861  |

|           |           |           |           |           |           |           |
|-----------|-----------|-----------|-----------|-----------|-----------|-----------|
| 0.123834  | 0.0582751 | 0.123543  | 0.122815  | 0.122378  | 0.12296   | 0.0623543 |
| 0.108974  | 0.104895  | 0.113928  | 0.103584  | 0.11655   | 0.119464  | 0.0981935 |
| 0.113928  | 0.122086  | 0.12704   | 0.121358  | 0.0562354 | 0.0562354 | 0.120047  |
| 0.11116   | 0.124272  | 0.123106  | 0.116259  | 0.0493881 | 0.0528846 | 0.11757   |
| 0.119901  | 0.136218  | 0.125437  | 0.121212  | 0.125728  | 0.122232  | 0.126311  |
| 0.21285   | 0.210519  | 0.21285   | 0.211538  | 0.205274  | 0.207605  | 0.209645  |
| 0.134178  | 0.140589  | 0.146416  | 0.140734  | 0.057838  | 0.0575466 | 0.141754  |
| 0.126748  | 0.131993  | 0.129371  | 0.125728  | 0.127622  | 0.126166  | 0.128788  |
| 0.12398   | 0.124854  | 0.122815  | 0.122669  | 0.114073  | 0.116696  | 0.118153  |
| 0.207314  | 0.204691  | 0.209062  | 0.205711  | 0.197698  | 0.202652  | 0.201195  |
| 0.121649  | 0.129516  | 0.0989219 | 0.097028  | 0.128351  | 0.124272  | 0.118153  |
| 0.118881  | 0.124417  | 0.123834  | 0.118444  | 0.126166  | 0.127622  | 0.116841  |
| 0.111597  | 0.129371  | 0.130828  | 0.128351  | 0.123834  | 0.124709  | 0.121795  |
| 0.123106  | 0.0496795 | 0.123689  | 0.116841  | 0.123106  | 0.123689  | 0.0523019 |
| 0.246649  | 0.241113  | 0.246649  | 0.244172  | 0.237908  | 0.241696  | 0.241404  |
| 0.126457  | 0.129953  | 0.0498252 | 0.0592949 | 0.129079  | 0.127622  | 0.122669  |
| 0.113054  | 0.128497  | 0.122669  | 0.116113  | 0.122669  | 0.118298  | 0.120047  |
| 0.0926573 | 0.131993  | 0.129662  | 0.125437  | 0.122669  | 0.121795  | 0.125583  |
| 0.0874126 | 0.127622  | 0.123543  | 0.121358  | 0.123834  | 0.122378  | 0.123252  |
| 0.134033  | 0.113928  | 0.0638112 | 0.0796911 | 0.128497  | 0.124709  | 0.111305  |
| 0.125     | 0.109848  | 0.121503  | 0.119318  | 0.109557  | 0.109266  | 0.105186  |
| 0.116841  | 0.128497  | 0.125291  | 0.121649  | 0.125583  | 0.119755  | 0.121795  |
| 0.112034  | 0.123689  | 0.120192  | 0.117424  | 0.0493881 | 0.0505536 | 0.115239  |
| 0.11451   | 0.130828  | 0.120921  | 0.122232  | 0.122378  | 0.122669  | 0.12296   |
| 0.113928  | 0.0530303 | 0.11859   | 0.114948  | 0.114219  | 0.118007  | 0.0474942 |
| 0.112617  | 0.11961   | 0.116696  | 0.115967  | 0.0557984 | 0.0569639 | 0.113782  |
| 0.117424  | 0.104604  | 0.11655   | 0.111742  | 0.122378  | 0.126748  | 0.100233  |
| 0.132721  | 0.144959  | 0.148164  | 0.140152  | 0.139132  | 0.143794  | 0.144668  |
| 0.129225  | 0.132721  | 0.0493881 | 0.0600233 | 0.129516  | 0.127185  | 0.125437  |
| 0.122232  | 0.123106  | 0.126603  | 0.120629  | 0.127768  | 0.128351  | 0.117861  |
| 0.186917  | 0.184295  | 0.183712  | 0.180653  | 0.178467  | 0.183421  | 0.177593  |
| 0.202069  | 0.198281  | 0.197407  | 0.197552  | 0.194493  | 0.195659  | 0.193036  |
| 0.11961   | 0.0528846 | 0.123106  | 0.116841  | 0.125437  | 0.125728  | 0.0511364 |
| 0.116404  | 0.0476399 | 0.117279  | 0.112179  | 0.115822  | 0.117861  | 0.0496795 |
| 0.137092  | 0.12602   | 0.133013  | 0.129079  | 0.125728  | 0.123689  | 0.127768  |
| 0.114948  | 0.128351  | 0.123106  | 0.115093  | 0.12602   | 0.121066  | 0.121358  |
| 0.131119  | 0.130828  | 0.04662   | 0.0610431 | 0.130536  | 0.128788  | 0.127331  |
| 0.0986305 | 0.133013  | 0.134761  | 0.132576  | 0.124563  | 0.123106  | 0.131556  |
| 0.221008  | 0.216929  | 0.221008  | 0.217949  | 0.214598  | 0.217803  | 0.214015  |
| 0.110577  | 0.121358  | 0.11961   | 0.110431  | 0.116113  | 0.116696  | 0.111742  |
| 0.206002  | 0.203089  | 0.208333  | 0.207022  | 0.196096  | 0.199301  | 0.201923  |
| 0.109994  | 0.125146  | 0.108246  | 0.100233  | 0.122523  | 0.116987  | 0.116113  |
| 0.103438  | 0.121795  | 0.120338  | 0.11116   | 0.120338  | 0.121795  | 0.115385  |
| 0.116987  | 0.119901  | 0.120484  | 0.115093  | 0.103875  | 0.104458  | 0.114365  |

|           |           |           |           |           |           |           |
|-----------|-----------|-----------|-----------|-----------|-----------|-----------|
| 0.112617  | 0.0566725 | 0.116404  | 0.111888  | 0.11757   | 0.11553   | 0.0546329 |
| 0.205128  | 0.202214  | 0.203963  | 0.200321  | 0.196096  | 0.201049  | 0.195804  |
| 0.125     | 0.130828  | 0.13345   | 0.132139  | 0.0504079 | 0.0498252 | 0.126457  |
| 0.102564  | 0.128497  | 0.122669  | 0.116113  | 0.125291  | 0.120338  | 0.11859   |
| 0.120629  | 0.128497  | 0.129371  | 0.126311  | 0.0437063 | 0.0422494 | 0.127331  |
| 0.118881  | 0.129662  | 0.129953  | 0.127185  | 0.123543  | 0.121212  | 0.129371  |
| 0.114219  | 0.0574009 | 0.121212  | 0.113782  | 0.120629  | 0.120338  | 0.0495338 |
| 0.111451  | 0.128934  | 0.10708   | 0.10169   | 0.121649  | 0.11961   | 0.117279  |
| 0.116696  | 0.127185  | 0.124563  | 0.11859   | 0.120484  | 0.119901  | 0.120192  |
| 0.121066  | 0.12398   | 0.125728  | 0.122378  | 0.128059  | 0.128642  | 0.119318  |
| 0.108246  | 0.117279  | 0.117279  | 0.113054  | 0.0543415 | 0.053176  | 0.111116  |
| 0.106935  | 0.128497  | 0.121503  | 0.119318  | 0.123834  | 0.12296   | 0.122378  |
| 0.184878  | 0.18546   | 0.1875    | 0.185315  | 0.179341  | 0.18546   | 0.17701   |
| 0.092366  | 0.132867  | 0.12704   | 0.125437  | 0.124126  | 0.121795  | 0.125874  |
| 0.117861  | 0.127768  | 0.133887  | 0.124417  | 0.124563  | 0.127768  | 0.126311  |
| 0.102273  | 0.125583  | 0.129662  | 0.12398   | 0.115093  | 0.116259  | 0.116259  |
| 0.123106  | 0.133013  | 0.0604604 | 0.0614802 | 0.130682  | 0.127768  | 0.122232  |
| 0.117861  | 0.124272  | 0.124563  | 0.124126  | 0.0447261 | 0.0444347 | 0.121066  |
| 0.118153  | 0.130099  | 0.116696  | 0.108683  | 0.128934  | 0.121649  | 0.126311  |
| 0.108974  | 0.127331  | 0.104895  | 0.101253  | 0.118007  | 0.11655   | 0.121795  |
| 0.120629  | 0.135198  | 0.12704   | 0.123106  | 0.129371  | 0.125     | 0.129953  |
| 0.114948  | 0.123689  | 0.126603  | 0.120338  | 0.119027  | 0.122232  | 0.121066  |
| 0.0831876 | 0.123106  | 0.12398   | 0.118298  | 0.11961   | 0.123397  | 0.115239  |
| 0.118007  | 0.0638112 | 0.123543  | 0.116404  | 0.120921  | 0.121503  | 0.0574009 |
| 0.113491  | 0.129225  | 0.128642  | 0.124126  | 0.124272  | 0.124563  | 0.120775  |
| 0.123834  | 0.140443  | 0.139569  | 0.13884   | 0.13141   | 0.136364  | 0.135198  |
| 0.11655   | 0.125     | 0.0547786 | 0.0488054 | 0.124126  | 0.126166  | 0.11451   |
| 0.133013  | 0.136509  | 0.140589  | 0.138403  | 0.0592949 | 0.0552156 | 0.136218  |
| 0.112034  | 0.0560897 | 0.119318  | 0.113345  | 0.118444  | 0.120484  | 0.050845  |
| 0.0861014 | 0.12602   | 0.123689  | 0.119172  | 0.110577  | 0.106789  | 0.118153  |
| 0.116841  | 0.121212  | 0.125291  | 0.122815  | 0.0673077 | 0.0675991 | 0.112471  |
| 0.123252  | 0.137238  | 0.129953  | 0.127185  | 0.132284  | 0.128205  | 0.128497  |
| 0.185023  | 0.186772  | 0.18648   | 0.1875    | 0.180944  | 0.183566  | 0.181527  |
| 0.103001  | 0.121649  | 0.116113  | 0.109266  | 0.123397  | 0.120775  | 0.117279  |
| 0.102418  | 0.114073  | 0.113491  | 0.10373   | 0.103584  | 0.102418  | 0.10708   |
| 0.11961   | 0.121941  | 0.124272  | 0.120047  | 0.126311  | 0.12602   | 0.118444  |
| 0.177302  | 0.176719  | 0.179924  | 0.173951  | 0.170309  | 0.175845  | 0.1706    |
| 0.137529  | 0.139277  | 0.0600233 | 0.0700758 | 0.140443  | 0.138986  | 0.131993  |
| 0.148019  | 0.148601  | 0.0649767 | 0.0828963 | 0.149184  | 0.149476  | 0.148019  |
| 0.135927  | 0.145251  | 0.152826  | 0.140734  | 0.141463  | 0.141171  | 0.145251  |
| 0.117861  | 0.124854  | 0.0604604 | 0.0492424 | 0.124563  | 0.122523  | 0.112908  |
| 0.116259  | 0.124126  | 0.124709  | 0.120484  | 0.0445804 | 0.0472028 | 0.118881  |
| 0.205857  | 0.204983  | 0.206148  | 0.20542   | 0.198281  | 0.203817  | 0.200321  |
| 0.119901  | 0.12398   | 0.122815  | 0.120338  | 0.11757   | 0.119027  | 0.119027  |

|           |           |           |           |           |           |           |
|-----------|-----------|-----------|-----------|-----------|-----------|-----------|
| 0.120629  | 0.127914  | 0.129662  | 0.128059  | 0.0448718 | 0.0454545 | 0.124126  |
| 0.108974  | 0.126166  | 0.11859   | 0.114073  | 0.123543  | 0.122669  | 0.119172  |
| 0.166084  | 0.162879  | 0.166375  | 0.168269  | 0.150058  | 0.150641  | 0.15676   |
| 0.109557  | 0.116259  | 0.118007  | 0.110577  | 0.110723  | 0.112471  | 0.1081    |
| 0.140297  | 0.143502  | 0.146707  | 0.14627   | 0.142337  | 0.148456  | 0.143794  |
| 0.119027  | 0.113782  | 0.119027  | 0.115385  | 0.128642  | 0.127185  | 0.110577  |
| 0.184878  | 0.18546   | 0.188083  | 0.184149  | 0.181381  | 0.183712  | 0.177593  |
| 0.121649  | 0.128642  | 0.0587121 | 0.0556527 | 0.130682  | 0.129516  | 0.116404  |
| 0.106498  | 0.112908  | 0.116987  | 0.105186  | 0.10912   | 0.109411  | 0.104749  |
| 0.0842075 | 0.126748  | 0.122378  | 0.116404  | 0.114219  | 0.115385  | 0.120921  |
| 0.114073  | 0.124272  | 0.118735  | 0.112471  | 0.119901  | 0.122232  | 0.116696  |
| 0.11961   | 0.12398   | 0.121066  | 0.119172  | 0.12602   | 0.12602   | 0.11757   |
| 0.114365  | 0.126894  | 0.125437  | 0.117424  | 0.121066  | 0.123106  | 0.12398   |
| 0.11451   | 0.0539044 | 0.119755  | 0.11116   | 0.120921  | 0.119755  | 0.0469114 |
| 0.186043  | 0.188666  | 0.18954   | 0.182692  | 0.179341  | 0.184586  | 0.177593  |
| 0.11451   | 0.130536  | 0.131119  | 0.124563  | 0.123834  | 0.125     | 0.121795  |
| 0.107663  | 0.114073  | 0.124854  | 0.115093  | 0.110286  | 0.111451  | 0.106498  |
| 0.207459  | 0.204254  | 0.204545  | 0.205274  | 0.203671  | 0.207459  | 0.200175  |
| 0.0885781 | 0.129953  | 0.129662  | 0.12398   | 0.122378  | 0.125291  | 0.121503  |
| 0.118735  | 0.055507  | 0.120192  | 0.110431  | 0.122232  | 0.125146  | 0.0482226 |
| 0.112908  | 0.0549242 | 0.118735  | 0.108974  | 0.115239  | 0.114948  | 0.0490967 |
| 0.129953  | 0.136655  | 0.138403  | 0.135052  | 0.0699301 | 0.0641026 | 0.136072  |
| 0.185023  | 0.185023  | 0.188228  | 0.179924  | 0.180944  | 0.184149  | 0.177156  |
| 0.114656  | 0.133887  | 0.126311  | 0.119464  | 0.12602   | 0.123397  | 0.124563  |
| 0.119318  | 0.136509  | 0.13447   | 0.132867  | 0.128351  | 0.131556  | 0.127185  |
| 0.114073  | 0.0511364 | 0.11757   | 0.108683  | 0.120775  | 0.121358  | 0.0450175 |
| 0.113199  | 0.0592949 | 0.120484  | 0.110431  | 0.118735  | 0.120192  | 0.0505536 |
| 0.115676  | 0.0506993 | 0.118007  | 0.111451  | 0.120629  | 0.121212  | 0.0445804 |
| 0.109703  | 0.120484  | 0.123689  | 0.119172  | 0.0520105 | 0.0537587 | 0.115239  |
| 0.108683  | 0.103147  | 0.108683  | 0.100087  | 0.115967  | 0.117716  | 0.0967366 |
| 0.124126  | 0.132284  | 0.0483683 | 0.0575466 | 0.131119  | 0.129079  | 0.124126  |
| 0.11451   | 0.1419    | 0.138403  | 0.133887  | 0.118881  | 0.119755  | 0.135781  |
| 0.12296   | 0.129662  | 0.0509907 | 0.0534674 | 0.131993  | 0.12704   | 0.118298  |
| 0.127185  | 0.133013  | 0.13447   | 0.130828  | 0.130973  | 0.128351  | 0.134178  |
| 0.187646  | 0.192016  | 0.191434  | 0.1875    | 0.182984  | 0.186772  | 0.182984  |
| 0.10912   | 0.126894  | 0.12602   | 0.121503  | 0.123689  | 0.124272  | 0.116404  |
| 0.125     | 0.130536  | 0.133741  | 0.131556  | 0.0524476 | 0.0512821 | 0.130245  |
| 0.113491  | 0.0572552 | 0.116113  | 0.106061  | 0.118153  | 0.119027  | 0.0496795 |
| 0.108683  | 0.10373   | 0.107226  | 0.101253  | 0.11655   | 0.118298  | 0.0973193 |
| 0.107226  | 0.121795  | 0.111014  | 0.110286  | 0.117133  | 0.118298  | 0.113636  |
| 0.113491  | 0.131265  | 0.127477  | 0.121503  | 0.123397  | 0.119901  | 0.122232  |
| 0.123689  | 0.13039   | 0.135052  | 0.124126  | 0.125146  | 0.126311  | 0.127185  |
| 0.109848  | 0.124709  | 0.126748  | 0.116404  | 0.119464  | 0.118881  | 0.117424  |
| 0.110723  | 0.117716  | 0.116841  | 0.108537  | 0.122086  | 0.119464  | 0.109266  |

|           |           |           |           |           |           |           |
|-----------|-----------|-----------|-----------|-----------|-----------|-----------|
| 0.105332  | 0.112325  | 0.111742  | 0.104895  | 0.114948  | 0.113199  | 0.106789  |
| 0.108392  | 0.112471  | 0.112471  | 0.104749  | 0.113345  | 0.113345  | 0.102564  |
| 0.10912   | 0.125437  | 0.108537  | 0.104312  | 0.122232  | 0.11757   | 0.120775  |
| 0.137238  | 0.134615  | 0.0562354 | 0.0680361 | 0.137238  | 0.132284  | 0.129953  |
| 0.115822  | 0.129808  | 0.124272  | 0.119755  | 0.125728  | 0.122815  | 0.120192  |
| 0.109266  | 0.11859   | 0.11859   | 0.112034  | 0.0533217 | 0.0559441 | 0.113054  |
| 0.111888  | 0.127914  | 0.121503  | 0.113782  | 0.122669  | 0.118298  | 0.118007  |
| 0.111451  | 0.057838  | 0.11961   | 0.110723  | 0.119027  | 0.11961   | 0.0520105 |
| 0.10169   | 0.123252  | 0.114802  | 0.107372  | 0.119755  | 0.117716  | 0.116841  |
| 0.117716  | 0.0518648 | 0.11859   | 0.112908  | 0.121212  | 0.122669  | 0.0477855 |
| 0.104895  | 0.122086  | 0.122086  | 0.119027  | 0.118007  | 0.117716  | 0.111305  |
| 0.106643  | 0.123834  | 0.128497  | 0.11757   | 0.120047  | 0.120921  | 0.115385  |
| 0.113054  | 0.121212  | 0.119755  | 0.113199  | 0.121212  | 0.121503  | 0.111888  |
| 0.107955  | 0.108829  | 0.11116   | 0.104312  | 0.116404  | 0.119318  | 0.0995047 |
| 0.11451   | 0.0603147 | 0.120921  | 0.114365  | 0.11859   | 0.119172  | 0.0504079 |
| 0.0917832 | 0.125874  | 0.125874  | 0.122523  | 0.11859   | 0.118007  | 0.115385  |
| 0.112617  | 0.119027  | 0.125437  | 0.11859   | 0.114948  | 0.116696  | 0.112617  |
| 0.110723  | 0.11451   | 0.118298  | 0.112617  | 0.118007  | 0.117424  | 0.108392  |
| 0.112179  | 0.0608974 | 0.118007  | 0.109994  | 0.11451   | 0.118007  | 0.0541958 |
| 0.112908  | 0.124563  | 0.121941  | 0.121795  | 0.046183  | 0.0458916 | 0.11961   |
| 0.112617  | 0.124563  | 0.112034  | 0.102855  | 0.124272  | 0.123397  | 0.116696  |
| 0.11553   | 0.124563  | 0.122815  | 0.118298  | 0.0514277 | 0.0505536 | 0.118444  |
| 0.116113  | 0.119901  | 0.121358  | 0.113928  | 0.125437  | 0.12602   | 0.115822  |
| 0.114656  | 0.106206  | 0.113199  | 0.108683  | 0.121066  | 0.122523  | 0.102127  |
| 0.101836  | 0.111742  | 0.114948  | 0.106643  | 0.111742  | 0.112034  | 0.103001  |
| 0.099359  | 0.124709  | 0.113054  | 0.106789  | 0.119464  | 0.117424  | 0.113928  |
| 0.114948  | 0.126894  | 0.127768  | 0.124126  | 0.050845  | 0.0520105 | 0.122232  |
| 0.120484  | 0.132721  | 0.130973  | 0.124126  | 0.117279  | 0.114948  | 0.127185  |
| 0.115385  | 0.118007  | 0.122086  | 0.114948  | 0.106352  | 0.11014   | 0.111014  |
| 0.190268  | 0.187646  | 0.189977  | 0.187209  | 0.183858  | 0.189685  | 0.182984  |
| 0.16317   | 0.165793  | 0.168998  | 0.160985  | 0.152098  | 0.152389  | 0.156177  |
| 0.122378  | 0.131702  | 0.0559441 | 0.0525932 | 0.127622  | 0.128205  | 0.120921  |
| 0.114073  | 0.124854  | 0.123689  | 0.121795  | 0.11757   | 0.114948  | 0.118153  |
| 0.149621  | 0.151661  | 0.0674534 | 0.0847902 | 0.150495  | 0.151952  | 0.148747  |
| 0.118007  | 0.13141   | 0.127622  | 0.124854  | 0.123252  | 0.126166  | 0.121795  |
| 0.116696  | 0.0863928 | 0.12398   | 0.123252  | 0.123397  | 0.123106  | 0.0843531 |
| 0.118881  | 0.0894522 | 0.125291  | 0.114073  | 0.113636  | 0.115676  | 0.083042  |
| 0.111305  | 0.10169   | 0.11451   | 0.108537  | 0.121503  | 0.12296   | 0.0967366 |
| 0.114802  | 0.117133  | 0.127331  | 0.123106  | 0.115093  | 0.113928  | 0.111305  |
| 0.19595   | 0.191288  | 0.199446  | 0.195804  | 0.194202  | 0.194784  | 0.188374  |
| 0.117133  | 0.132867  | 0.12704   | 0.121358  | 0.129079  | 0.125583  | 0.125     |
| 0.111742  | 0.122523  | 0.119901  | 0.119172  | 0.0770688 | 0.074155  | 0.11553   |
| 0.111742  | 0.0686189 | 0.118153  | 0.109848  | 0.117279  | 0.11553   | 0.0616259 |
| 0.11655   | 0.127622  | 0.125291  | 0.118735  | 0.123252  | 0.123252  | 0.120047  |



|           |           |           |           |           |           |           |
|-----------|-----------|-----------|-----------|-----------|-----------|-----------|
| 0.178176  | 0.178176  | 0.184878  | 0.176865  | 0.175554  | 0.178759  | 0.172931  |
| 0.244318  | 0.238199  | 0.239948  | 0.240676  | 0.235868  | 0.238199  | 0.237908  |
| 0.113782  | 0.124563  | 0.128642  | 0.119464  | 0.119318  | 0.121941  | 0.11961   |
| 0.109994  | 0.114656  | 0.127185  | 0.118881  | 0.114073  | 0.113491  | 0.109411  |
| 0.121941  | 0.128642  | 0.0528846 | 0.0553613 | 0.12602   | 0.127768  | 0.119901  |
| 0.113345  | 0.120047  | 0.121503  | 0.114365  | 0.125     | 0.123543  | 0.109557  |
| 0.110868  | 0.128934  | 0.123106  | 0.116259  | 0.119901  | 0.118153  | 0.11961   |
| 0.104312  | 0.123834  | 0.120629  | 0.11553   | 0.118007  | 0.115967  | 0.114219  |
| 0.116404  | 0.0814394 | 0.118153  | 0.114219  | 0.0875583 | 0.08581   | 0.0805653 |
| 0.114073  | 0.126894  | 0.121358  | 0.115967  | 0.121066  | 0.118444  | 0.118444  |
| 0.112471  | 0.0932401 | 0.113928  | 0.112325  | 0.0769231 | 0.0751748 | 0.0897436 |
| 0.111742  | 0.116404  | 0.124563  | 0.115385  | 0.123397  | 0.120775  | 0.112325  |
| 0.112179  | 0.104604  | 0.109266  | 0.105332  | 0.119172  | 0.121503  | 0.0979021 |
| 0.112034  | 0.123397  | 0.127185  | 0.119464  | 0.119318  | 0.121358  | 0.118444  |
| 0.111014  | 0.123252  | 0.124709  | 0.121649  | 0.0509907 | 0.0533217 | 0.118298  |
| 0.0795455 | 0.11655   | 0.116259  | 0.108537  | 0.106352  | 0.107517  | 0.109266  |
| 0.120338  | 0.120629  | 0.132576  | 0.126311  | 0.131702  | 0.131702  | 0.120629  |
| 0.128205  | 0.127622  | 0.133159  | 0.128642  | 0.136364  | 0.136072  | 0.127914  |
| 0.113491  | 0.0598776 | 0.119027  | 0.108974  | 0.116987  | 0.119027  | 0.0511364 |
| 0.121212  | 0.0891608 | 0.107226  | 0.103001  | 0.124126  | 0.123834  | 0.0894522 |
| 0.129079  | 0.0498252 | 0.132284  | 0.127477  | 0.131119  | 0.13345   | 0.0632284 |
| 0.205857  | 0.199738  | 0.203234  | 0.201923  | 0.200029  | 0.201195  | 0.198864  |
| 0.101981  | 0.120629  | 0.120338  | 0.107663  | 0.113636  | 0.112762  | 0.112762  |
| 0.107955  | 0.10708   | 0.113782  | 0.108974  | 0.118735  | 0.121066  | 0.0983392 |
| 0.108537  | 0.128059  | 0.123689  | 0.124126  | 0.124272  | 0.12398   | 0.11757   |
| 0.0882867 | 0.131993  | 0.129953  | 0.123397  | 0.124126  | 0.122669  | 0.125291  |
| 0.109848  | 0.125291  | 0.126748  | 0.118153  | 0.115676  | 0.118298  | 0.122669  |
| 0.195513  | 0.194639  | 0.195513  | 0.193036  | 0.189685  | 0.194056  | 0.186189  |
| 0.113491  | 0.126311  | 0.127477  | 0.122378  | 0.0511364 | 0.0549242 | 0.121941  |
| 0.112179  | 0.0556527 | 0.116259  | 0.109703  | 0.115093  | 0.118007  | 0.0469114 |
| 0.121649  | 0.13039   | 0.11553   | 0.115385  | 0.125728  | 0.120775  | 0.125146  |
| 0.109411  | 0.118444  | 0.117279  | 0.111888  | 0.11757   | 0.11961   | 0.110577  |
| 0.114948  | 0.123397  | 0.124563  | 0.121503  | 0.0511364 | 0.055507  | 0.118444  |
| 0.105624  | 0.113782  | 0.116404  | 0.109848  | 0.0773601 | 0.0785256 | 0.10912   |
| 0.113199  | 0.119318  | 0.12398   | 0.116259  | 0.121066  | 0.119318  | 0.114365  |
| 0.0863928 | 0.129808  | 0.126311  | 0.119464  | 0.120775  | 0.121941  | 0.117279  |
| 0.191725  | 0.193182  | 0.19697   | 0.193328  | 0.187937  | 0.193473  | 0.186772  |
| 0.108829  | 0.118735  | 0.11757   | 0.11014   | 0.0563811 | 0.0569639 | 0.114073  |
| 0.187646  | 0.187646  | 0.193765  | 0.191288  | 0.185897  | 0.18852   | 0.181527  |
| 0.188374  | 0.188374  | 0.190122  | 0.187646  | 0.182838  | 0.188957  | 0.181672  |
| 0.123106  | 0.125437  | 0.128934  | 0.125583  | 0.135052  | 0.133596  | 0.123397  |
| 0.0965909 | 0.136218  | 0.133013  | 0.129662  | 0.133013  | 0.132721  | 0.131265  |
| 0.102418  | 0.112034  | 0.116404  | 0.105186  | 0.112034  | 0.110577  | 0.10708   |
| 0.105769  | 0.115093  | 0.116841  | 0.110577  | 0.0614802 | 0.0641026 | 0.112471  |

|           |           |           |           |           |           |           |
|-----------|-----------|-----------|-----------|-----------|-----------|-----------|
| 0.114073  | 0.125146  | 0.121358  | 0.11451   | 0.0566725 | 0.0610431 | 0.114073  |
| 0.113782  | 0.0616259 | 0.121649  | 0.112762  | 0.120192  | 0.121649  | 0.0514277 |
| 0.105332  | 0.125146  | 0.116987  | 0.111014  | 0.11553   | 0.112908  | 0.116987  |
| 0.111451  | 0.126603  | 0.121649  | 0.116841  | 0.119901  | 0.11757   | 0.11553   |
| 0.115676  | 0.126457  | 0.129371  | 0.121649  | 0.119755  | 0.12296   | 0.120629  |
| 0.11553   | 0.124272  | 0.121066  | 0.117133  | 0.125146  | 0.126311  | 0.11553   |
| 0.110431  | 0.0574009 | 0.11451   | 0.10708   | 0.115676  | 0.117424  | 0.0486597 |
| 0.111742  | 0.122523  | 0.125146  | 0.122378  | 0.0511364 | 0.0543415 | 0.117279  |
| 0.107517  | 0.108392  | 0.111597  | 0.103001  | 0.108392  | 0.109557  | 0.10373   |
| 0.12398   | 0.13039   | 0.131556  | 0.129079  | 0.0525932 | 0.0520105 | 0.128059  |
| 0.120484  | 0.126603  | 0.0590035 | 0.0504079 | 0.126603  | 0.124854  | 0.121358  |
| 0.128497  | 0.134324  | 0.135781  | 0.134178  | 0.0504079 | 0.0492424 | 0.133159  |
| 0.255245  | 0.251166  | 0.254079  | 0.256265  | 0.251166  | 0.252622  | 0.254079  |
| 0.115967  | 0.136946  | 0.128788  | 0.127185  | 0.132284  | 0.127622  | 0.132867  |
| 0.116404  | 0.130682  | 0.129516  | 0.124709  | 0.130973  | 0.130099  | 0.126603  |
| 0.213578  | 0.212121  | 0.212704  | 0.209936  | 0.206585  | 0.210082  | 0.208625  |
| 0.114948  | 0.124854  | 0.128059  | 0.127331  | 0.131847  | 0.132139  | 0.121066  |
| 0.225087  | 0.221882  | 0.223631  | 0.225816  | 0.218677  | 0.222174  | 0.221591  |
| 0.1081    | 0.129371  | 0.123834  | 0.117279  | 0.125291  | 0.123834  | 0.123252  |
| 0.127768  | 0.0450175 | 0.131556  | 0.124709  | 0.130099  | 0.129225  | 0.0607517 |
| 0.0802739 | 0.125437  | 0.124854  | 0.115676  | 0.118444  | 0.119318  | 0.116404  |
| 0.121649  | 0.122232  | 0.127768  | 0.123252  | 0.130099  | 0.129808  | 0.119318  |
| 0.197407  | 0.198572  | 0.202943  | 0.196387  | 0.194493  | 0.19799   | 0.190705  |
| 0.12602   | 0.130682  | 0.135635  | 0.132284  | 0.0525932 | 0.0540501 | 0.129808  |
| 0.112325  | 0.125146  | 0.125437  | 0.117424  | 0.0520105 | 0.0557984 | 0.119318  |
| 0.223485  | 0.22028   | 0.223485  | 0.222174  | 0.217657  | 0.219697  | 0.214744  |
| 0.113782  | 0.127185  | 0.127477  | 0.120629  | 0.126311  | 0.122815  | 0.120192  |
| 0.194347  | 0.19493   | 0.196387  | 0.193328  | 0.190268  | 0.193765  | 0.185023  |
| 0.117424  | 0.132576  | 0.122378  | 0.11757   | 0.125     | 0.125     | 0.122669  |
| 0.115676  | 0.0585664 | 0.120338  | 0.112034  | 0.120921  | 0.119464  | 0.0506993 |
| 0.122232  | 0.112617  | 0.118735  | 0.115967  | 0.125437  | 0.127477  | 0.109703  |
| 0.125437  | 0.125728  | 0.128642  | 0.126748  | 0.134761  | 0.13243   | 0.123106  |
| 0.114802  | 0.119464  | 0.115967  | 0.107955  | 0.113928  | 0.117133  | 0.114802  |
| 0.160548  | 0.157343  | 0.155012  | 0.152826  | 0.157051  | 0.161713  | 0.14831   |
| 0.107809  | 0.117716  | 0.118881  | 0.114656  | 0.0463287 | 0.0509907 | 0.116259  |
| 0.0868298 | 0.131119  | 0.127622  | 0.124563  | 0.125583  | 0.123834  | 0.124709  |
| 0.111888  | 0.125583  | 0.129079  | 0.123397  | 0.12296   | 0.129371  | 0.116259  |
| 0.0961538 | 0.136364  | 0.130245  | 0.129808  | 0.120629  | 0.117716  | 0.132867  |
| 0.189831  | 0.18954   | 0.194784  | 0.187646  | 0.186043  | 0.18954   | 0.184003  |
| 0.113054  | 0.0571096 | 0.118007  | 0.109411  | 0.117424  | 0.120921  | 0.0474942 |
| 0.119318  | 0.119901  | 0.125146  | 0.118298  | 0.130099  | 0.130682  | 0.112034  |
| 0.111597  | 0.125     | 0.1081    | 0.101253  | 0.123834  | 0.120921  | 0.11655   |
| 0.116696  | 0.13039   | 0.127477  | 0.121795  | 0.126894  | 0.120775  | 0.124272  |
| 0.124126  | 0.0486597 | 0.124126  | 0.119027  | 0.123252  | 0.124126  | 0.0536131 |

|          |           |           |           |           |           |           |
|----------|-----------|-----------|-----------|-----------|-----------|-----------|
| 0.251603 | 0.244901  | 0.253059  | 0.254662  | 0.245484  | 0.247232  | 0.248397  |
| 0.116841 | 0.110723  | 0.114219  | 0.115239  | 0.120921  | 0.121795  | 0.109848  |
| 0.1081   | 0.10169   | 0.125874  | 0.11757   | 0.12296   | 0.123834  | 0.090035  |
| 0.180653 | 0.180653  | 0.178613  | 0.178759  | 0.171037  | 0.173077  | 0.177156  |
| 0.183275 | 0.183275  | 0.185315  | 0.177885  | 0.179487  | 0.181527  | 0.174242  |
| 0.112179 | 0.125291  | 0.128788  | 0.120775  | 0.121795  | 0.121212  | 0.115385  |
| 0.114365 | 0.125728  | 0.125146  | 0.121503  | 0.048514  | 0.0540501 | 0.117279  |
| 0.114073 | 0.120775  | 0.118735  | 0.113636  | 0.118444  | 0.11961   | 0.112034  |
| 0.139569 | 0.142483  | 0.145105  | 0.144959  | 0.0638112 | 0.0565268 | 0.143357  |
| 0.107809 | 0.12296   | 0.126166  | 0.116404  | 0.119464  | 0.121503  | 0.11655   |
| 0.114365 | 0.122232  | 0.130682  | 0.119172  | 0.124272  | 0.124854  | 0.115822  |
| 0.119172 | 0.134033  | 0.127622  | 0.125146  | 0.129953  | 0.125583  | 0.126748  |
| 0.114802 | 0.120338  | 0.118007  | 0.117861  | 0.0477855 | 0.0474942 | 0.117133  |
| 0.121649 | 0.129808  | 0.133304  | 0.131702  | 0.0482226 | 0.048514  | 0.131556  |
| 0.115093 | 0.124709  | 0.122669  | 0.117279  | 0.119755  | 0.118881  | 0.115385  |
| 0.125146 | 0.122523  | 0.12602   | 0.120629  | 0.130973  | 0.129808  | 0.119027  |
| 0.136946 | 0.134615  | 0.137529  | 0.137092  | 0.143357  | 0.141608  | 0.134033  |
| 0.119901 | 0.11116   | 0.119901  | 0.116259  | 0.125728  | 0.127477  | 0.110286  |
| 0.129371 | 0.128205  | 0.129079  | 0.128642  | 0.136655  | 0.133741  | 0.128788  |
| 0.121795 | 0.139569  | 0.132576  | 0.12602   | 0.132576  | 0.129079  | 0.132867  |
| 0.204983 | 0.201195  | 0.205274  | 0.200466  | 0.195076  | 0.201777  | 0.195659  |
| 0.119172 | 0.112471  | 0.121503  | 0.116696  | 0.131702  | 0.134033  | 0.114802  |
| 0.185897 | 0.187937  | 0.189394  | 0.186334  | 0.182984  | 0.186772  | 0.18007   |
| 0        | 0.124417  | 0.128497  | 0.118153  | 0.11655   | 0.117133  | 0.115967  |
| 0.124417 | 0         | 0.127331  | 0.122523  | 0.126166  | 0.127331  | 0.0547786 |
| 0.128497 | 0.127331  | 0         | 0.0590035 | 0.126748  | 0.123252  | 0.122378  |
| 0.118153 | 0.122523  | 0.0590035 | 0         | 0.124272  | 0.123689  | 0.114073  |
| 0.11655  | 0.126166  | 0.126748  | 0.124272  | 0         | 0.0434149 | 0.120921  |
| 0.117133 | 0.127331  | 0.123252  | 0.123689  | 0.0434149 | 0         | 0.124417  |
| 0.115967 | 0.0547786 | 0.122378  | 0.114073  | 0.120921  | 0.124417  | 0         |
| 0.08581  | 0.127477  | 0.129225  | 0.121212  | 0.121941  | 0.120484  | 0.116113  |
| 0.128642 | 0.133887  | 0.0505536 | 0.0641026 | 0.126311  | 0.125146  | 0.125728  |
| 0.125583 | 0.139277  | 0.135198  | 0.130682  | 0.139277  | 0.134907  | 0.13549   |
| 0.248543 | 0.24155   | 0.245629  | 0.246066  | 0.23951   | 0.242133  | 0.244464  |
| 0.119755 | 0.0544872 | 0.120338  | 0.113782  | 0.12296   | 0.121503  | 0.0506993 |
| 0.179924 | 0.178759  | 0.18109   | 0.175991  | 0.175262  | 0.180216  | 0.173223  |
| 0.184732 | 0.185023  | 0.188811  | 0.184295  | 0.180653  | 0.183858  | 0.178613  |
| 0.113782 | 0.118153  | 0.131847  | 0.122378  | 0.127768  | 0.127185  | 0.110577  |
| 0.114656 | 0.10708   | 0.114073  | 0.107517  | 0.119027  | 0.11961   | 0.103584  |
| 0.124563 | 0.0517191 | 0.126894  | 0.12296   | 0.126311  | 0.125437  | 0.0592949 |
| 0.109703 | 0.120192  | 0.119901  | 0.113054  | 0.0523019 | 0.0584207 | 0.112034  |
| 0.113345 | 0.102564  | 0.111888  | 0.105041  | 0.119755  | 0.122669  | 0.0938228 |
| 0.111888 | 0.132284  | 0.125874  | 0.118735  | 0.124417  | 0.122669  | 0.118298  |
| 0.112617 | 0.121649  | 0.126894  | 0.12296   | 0.0735723 | 0.0726981 | 0.119318  |

|           |           |           |           |           |           |           |
|-----------|-----------|-----------|-----------|-----------|-----------|-----------|
| 0.127477  | 0.133304  | 0.132139  | 0.134033  | 0.0523019 | 0.0520105 | 0.133013  |
| 0.113928  | 0.0495338 | 0.120047  | 0.113199  | 0.118881  | 0.120921  | 0.0460373 |
| 0.123834  | 0.131702  | 0.130245  | 0.12602   | 0.0509907 | 0.0518648 | 0.129079  |
| 0.105332  | 0.127477  | 0.120775  | 0.114219  | 0.122232  | 0.125728  | 0.118444  |
| 0.128351  | 0.131847  | 0.0546329 | 0.0638112 | 0.131265  | 0.131556  | 0.124563  |
| 0.11655   | 0.126166  | 0.125291  | 0.119901  | 0.127914  | 0.12296   | 0.115093  |
| 0.125437  | 0.13884   | 0.135052  | 0.130828  | 0.135927  | 0.13243   | 0.133304  |
| 0.118881  | 0.117133  | 0.128788  | 0.121649  | 0.125874  | 0.126166  | 0.115967  |
| 0.116259  | 0.0571096 | 0.111597  | 0.10708   | 0.117716  | 0.11859   | 0.0591492 |
| 0.120921  | 0.137238  | 0.136655  | 0.135635  | 0.130245  | 0.13141   | 0.131702  |
| 0.179633  | 0.182255  | 0.183421  | 0.176865  | 0.17701   | 0.180216  | 0.173805  |
| 0.130536  | 0.132576  | 0.137821  | 0.135635  | 0.0536131 | 0.0536131 | 0.134033  |
| 0.117716  | 0.123834  | 0.119464  | 0.120775  | 0.0457459 | 0.0445804 | 0.121795  |
| 0.122815  | 0.128934  | 0.048514  | 0.0544872 | 0.127185  | 0.129225  | 0.121649  |
| 0.112179  | 0.119755  | 0.0608974 | 0.0502622 | 0.118298  | 0.119172  | 0.110431  |
| 0.116404  | 0.118735  | 0.122232  | 0.118881  | 0.124272  | 0.123689  | 0.113199  |
| 0.122669  | 0.127331  | 0.123543  | 0.120775  | 0.129079  | 0.130536  | 0.119755  |
| 0.186043  | 0.186917  | 0.18954   | 0.186189  | 0.184586  | 0.186626  | 0.17905   |
| 0.120192  | 0.122815  | 0.121358  | 0.122669  | 0.0697844 | 0.064831  | 0.116404  |
| 0.108974  | 0.11451   | 0.118881  | 0.10912   | 0.106061  | 0.106643  | 0.106061  |
| 0.121212  | 0.125291  | 0.126166  | 0.124563  | 0.0439977 | 0.0434149 | 0.122378  |
| 0.189248  | 0.185752  | 0.192745  | 0.187646  | 0.181964  | 0.185752  | 0.181381  |
| 0.111305  | 0.102564  | 0.108974  | 0.104458  | 0.117716  | 0.119464  | 0.0984848 |
| 0.11961   | 0.136218  | 0.129225  | 0.124417  | 0.129516  | 0.125437  | 0.129516  |
| 0.119027  | 0.125146  | 0.128934  | 0.124709  | 0.043852  | 0.0456002 | 0.121358  |
| 0.104895  | 0.120338  | 0.126166  | 0.114656  | 0.118007  | 0.116259  | 0.114802  |
| 0.184441  | 0.183566  | 0.184441  | 0.181672  | 0.176573  | 0.18211   | 0.175991  |
| 0.115093  | 0.13141   | 0.120921  | 0.119027  | 0.121503  | 0.113928  | 0.124417  |
| 0.108974  | 0.121212  | 0.123252  | 0.120484  | 0.110723  | 0.112179  | 0.114802  |
| 0.111888  | 0.11014   | 0.111014  | 0.106498  | 0.121503  | 0.120338  | 0.100233  |
| 0.119755  | 0.125874  | 0.114802  | 0.109411  | 0.115967  | 0.11655   | 0.11655   |
| 0.0869755 | 0.13039   | 0.128642  | 0.120921  | 0.124854  | 0.126311  | 0.123106  |
| 0.126311  | 0.137092  | 0.131847  | 0.127914  | 0.133887  | 0.128934  | 0.131847  |
| 0.114365  | 0.0523019 | 0.118735  | 0.112471  | 0.117861  | 0.119318  | 0.0473485 |
| 0.112908  | 0.131265  | 0.13039   | 0.126166  | 0.11553   | 0.11553   | 0.123397  |
| 0.135198  | 0.143939  | 0.149184  | 0.138258  | 0.140152  | 0.144231  | 0.143648  |
| 0.233392  | 0.230769  | 0.231935  | 0.230624  | 0.224942  | 0.229895  | 0.227855  |
| 0.120629  | 0.121212  | 0.134033  | 0.12602   | 0.13141   | 0.128497  | 0.12296   |
| 0.0894522 | 0.132867  | 0.126457  | 0.121649  | 0.123834  | 0.125874  | 0.122378  |
| 0.114365  | 0.121649  | 0.121649  | 0.121795  | 0.0517191 | 0.0493881 | 0.116113  |
| 0.116259  | 0.128497  | 0.126166  | 0.121066  | 0.125874  | 0.126748  | 0.123543  |
| 0.0945513 | 0.123689  | 0.114073  | 0.115093  | 0.110286  | 0.111451  | 0.118735  |
| 0.116404  | 0.127768  | 0.122232  | 0.121795  | 0.121066  | 0.119027  | 0.122815  |
| 0.118298  | 0.124709  | 0.123543  | 0.124563  | 0.0553613 | 0.0498252 | 0.12296   |

|           |           |           |           |           |          |           |
|-----------|-----------|-----------|-----------|-----------|----------|-----------|
| 0.121649  | 0.136218  | 0.130099  | 0.127914  | 0.131556  | 0.12602  | 0.13039   |
| 0.105624  | 0.123397  | 0.128934  | 0.120629  | 0.121358  | 0.121649 | 0.117861  |
| 0.234848  | 0.229021  | 0.232809  | 0.230915  | 0.22669   | 0.231061 | 0.229895  |
| 0.109994  | 0.105915  | 0.108537  | 0.106935  | 0.112325  | 0.113782 | 0.0992133 |
| 0.0989219 | 0.122815  | 0.113782  | 0.106643  | 0.115239  | 0.114948 | 0.111742  |
| 0.113928  | 0.0472028 | 0.118298  | 0.112617  | 0.115093  | 0.118298 | 0.0474942 |
| 0.121066  | 0.13039   | 0.13447   | 0.126457  | 0.127185  | 0.128934 | 0.128934  |
| 0.127477  | 0.122232  | 0.139423  | 0.131702  | 0.137966  | 0.138549 | 0.125146  |
| 0.120775  | 0.116404  | 0.116404  | 0.113345  | 0.114656  | 0.112908 | 0.107663  |
| 0.11553   | 0.123397  | 0.125146  | 0.122086  | 0.0467657 | 0.046183 | 0.118735  |
| 0.105769  | 0.114219  | 0.120338  | 0.111451  | 0.11451   | 0.113636 | 0.108974  |
| 0.227564  | 0.223485  | 0.229312  | 0.228584  | 0.220571  | 0.223485 | 0.223485  |
| 0.120921  | 0.128205  | 0.126457  | 0.12602   | 0.0448718 | 0.044289 | 0.125874  |
| 0.119901  | 0.134761  | 0.126894  | 0.123834  | 0.125728  | 0.124563 | 0.128351  |
| 0.101544  | 0.116404  | 0.127477  | 0.114802  | 0.118444  | 0.120192 | 0.108829  |
| 0.0938228 | 0.124709  | 0.130245  | 0.124272  | 0.120338  | 0.120338 | 0.123834  |
| 0.113345  | 0.13141   | 0.124709  | 0.121358  | 0.130245  | 0.126166 | 0.128205  |
| 0.115676  | 0.0480769 | 0.120921  | 0.111742  | 0.120047  | 0.120338 | 0.0495338 |
| 0.119172  | 0.133159  | 0.128205  | 0.121649  | 0.129371  | 0.126166 | 0.127622  |
| 0.127768  | 0.139714  | 0.132139  | 0.128788  | 0.132721  | 0.127185 | 0.134178  |
| 0.113491  | 0.129808  | 0.124854  | 0.118881  | 0.12602   | 0.11961  | 0.121941  |
| 0.11451   | 0.0550699 | 0.119172  | 0.111451  | 0.119464  | 0.120921 | 0.0486597 |
| 0.094697  | 0.13141   | 0.131119  | 0.128642  | 0.126457  | 0.127331 | 0.129371  |
| 0.0965909 | 0.135344  | 0.135927  | 0.13141   | 0.130099  | 0.131556 | 0.13447   |
| 0.128351  | 0.134761  | 0.0557984 | 0.0675991 | 0.130682  | 0.132721 | 0.128934  |
| 0.132139  | 0.138258  | 0.060169  | 0.0708042 | 0.138258  | 0.135344 | 0.131265  |
| 0.097028  | 0.134907  | 0.136072  | 0.130099  | 0.131993  | 0.129371 | 0.132576  |
| 0.108683  | 0.100524  | 0.111305  | 0.10271   | 0.120047  | 0.121212 | 0.0914918 |
| 0.130682  | 0.141171  | 0.128351  | 0.120629  | 0.140297  | 0.13243  | 0.136509  |
| 0.133741  | 0.127622  | 0.141608  | 0.135635  | 0.134033  | 0.131119 | 0.125874  |
| 0.203671  | 0.202214  | 0.202506  | 0.201486  | 0.196096  | 0.197844 | 0.197844  |
| 0.120338  | 0.11859   | 0.135198  | 0.126311  | 0.123834  | 0.124126 | 0.116841  |
| 0.102273  | 0.127331  | 0.120921  | 0.109994  | 0.12296   | 0.120629 | 0.115676  |
| 0.12398   | 0.0488054 | 0.123106  | 0.121212  | 0.125146  | 0.12398  | 0.0476399 |
| 0.219988  | 0.215618  | 0.220571  | 0.219551  | 0.21183   | 0.217657 | 0.215035  |
| 0.208333  | 0.204837  | 0.210664  | 0.20877   | 0.205128  | 0.206585 | 0.203089  |
| 0.125146  | 0.134761  | 0.129516  | 0.125874  | 0.133596  | 0.128934 | 0.131847  |
| 0.245047  | 0.242133  | 0.246212  | 0.246358  | 0.239802  | 0.244172 | 0.242424  |
| 0.1081    | 0.0999417 | 0.105186  | 0.100087  | 0.120629  | 0.120629 | 0.0909091 |
| 0.13549   | 0.128205  | 0.139277  | 0.135927  | 0.143648  | 0.141608 | 0.129079  |
| 0.115967  | 0.107226  | 0.111305  | 0.107372  | 0.121795  | 0.121795 | 0.102855  |
| 0.0895979 | 0.133887  | 0.131556  | 0.126457  | 0.12602   | 0.12602  | 0.127768  |
| 0.188228  | 0.184441  | 0.188228  | 0.183712  | 0.178322  | 0.184149 | 0.176573  |
| 0.114365  | 0.121649  | 0.135927  | 0.125874  | 0.125437  | 0.126603 | 0.119901  |

|           |           |           |           |           |           |           |
|-----------|-----------|-----------|-----------|-----------|-----------|-----------|
| 0.191288  | 0.187791  | 0.192745  | 0.187646  | 0.18546   | 0.188957  | 0.181964  |
| 0.109994  | 0.114948  | 0.125437  | 0.118298  | 0.120192  | 0.124272  | 0.110577  |
| 0.115822  | 0.122815  | 0.120192  | 0.118881  | 0.104749  | 0.100087  | 0.116987  |
| 0.114365  | 0.123106  | 0.12398   | 0.114802  | 0.126311  | 0.124272  | 0.118153  |
| 0.112034  | 0.117279  | 0.110868  | 0.109266  | 0.106206  | 0.108537  | 0.112034  |
| 0.106935  | 0.0550699 | 0.117716  | 0.103875  | 0.113054  | 0.114219  | 0.0480769 |
| 0.106352  | 0.112179  | 0.124126  | 0.116113  | 0.110431  | 0.108974  | 0.106643  |
| 0.11014   | 0.105186  | 0.106935  | 0.104167  | 0.116841  | 0.11859   | 0.0990676 |
| 0.112034  | 0.121066  | 0.122815  | 0.118007  | 0.0490967 | 0.0482226 | 0.11553   |
| 0.117133  | 0.126748  | 0.111014  | 0.105915  | 0.125     | 0.120629  | 0.120338  |
| 0.106643  | 0.112762  | 0.120047  | 0.115822  | 0.115967  | 0.117716  | 0.107517  |
| 0.114073  | 0.108246  | 0.110868  | 0.1081    | 0.118735  | 0.121066  | 0.103584  |
| 0.123543  | 0.114802  | 0.0710956 | 0.0756119 | 0.125     | 0.123543  | 0.108392  |
| 0.126748  | 0.132867  | 0.133159  | 0.128351  | 0.0533217 | 0.0530303 | 0.129079  |
| 0.115239  | 0.124563  | 0.0557984 | 0.0506993 | 0.120775  | 0.123106  | 0.116113  |
| 0.106643  | 0.121795  | 0.12296   | 0.117861  | 0.118298  | 0.115967  | 0.113054  |
| 0.112617  | 0.0537587 | 0.114948  | 0.107226  | 0.114656  | 0.116987  | 0.0453089 |
| 0.118735  | 0.128351  | 0.121066  | 0.118298  | 0.119027  | 0.112617  | 0.123106  |
| 0.0872669 | 0.129516  | 0.127477  | 0.120047  | 0.123397  | 0.122232  | 0.119318  |
| 0.120629  | 0.122086  | 0.122378  | 0.118735  | 0.128497  | 0.125     | 0.115967  |
| 0.120338  | 0.124417  | 0.0600233 | 0.0549242 | 0.127331  | 0.127914  | 0.117424  |
| 0.113782  | 0.125146  | 0.122815  | 0.119464  | 0.0464744 | 0.0499709 | 0.118735  |
| 0.124126  | 0.132284  | 0.13141   | 0.131847  | 0.0533217 | 0.0501166 | 0.131119  |
| 0.132284  | 0.136072  | 0.140443  | 0.136509  | 0.0533217 | 0.0539044 | 0.137238  |
| 0.103584  | 0.116113  | 0.114948  | 0.105769  | 0.113199  | 0.112325  | 0.109994  |
| 0.116113  | 0.0552156 | 0.120775  | 0.110723  | 0.118444  | 0.122232  | 0.0479312 |
| 0.106352  | 0.120629  | 0.119755  | 0.111451  | 0.113345  | 0.114219  | 0.115676  |
| 0.101399  | 0.13986   | 0.134615  | 0.131556  | 0.132576  | 0.132867  | 0.137238  |
| 0.116113  | 0.110868  | 0.115822  | 0.111597  | 0.121941  | 0.123397  | 0.109411  |
| 0.133887  | 0.133013  | 0.139423  | 0.136364  | 0.143794  | 0.141754  | 0.136218  |
| 0.135052  | 0.0552156 | 0.137966  | 0.131702  | 0.135052  | 0.138258  | 0.0659965 |
| 0.115967  | 0.127331  | 0.134615  | 0.123689  | 0.121212  | 0.124126  | 0.12296   |
| 0.113199  | 0.112617  | 0.114948  | 0.107226  | 0.112908  | 0.112325  | 0.106498  |
| 0.0850816 | 0.121795  | 0.120921  | 0.116404  | 0.113636  | 0.113054  | 0.115385  |
| 0.129079  | 0.13141   | 0.0544872 | 0.0610431 | 0.132867  | 0.13345   | 0.125874  |
| 0.206731  | 0.2044    | 0.206439  | 0.200758  | 0.198281  | 0.202069  | 0.198864  |
| 0.105332  | 0.122523  | 0.123397  | 0.116841  | 0.119027  | 0.11757   | 0.113782  |
| 0.113928  | 0.122086  | 0.121212  | 0.111742  | 0.123834  | 0.125583  | 0.111888  |
| 0.0916375 | 0.125728  | 0.123106  | 0.117424  | 0.121066  | 0.121941  | 0.122815  |
| 0.117133  | 0.128205  | 0.0582751 | 0.0528846 | 0.125     | 0.125583  | 0.11859   |
| 0.119318  | 0.120484  | 0.128934  | 0.12704   | 0.130099  | 0.131556  | 0.113199  |
| 0.124272  | 0.130682  | 0.129225  | 0.123252  | 0.115239  | 0.114365  | 0.126311  |
| 0.125583  | 0.131702  | 0.13345   | 0.126894  | 0.118298  | 0.111014  | 0.130828  |
| 0.112325  | 0.125146  | 0.129516  | 0.118881  | 0.121358  | 0.124272  | 0.118735  |

|           |          |           |           |           |           |           |
|-----------|----------|-----------|-----------|-----------|-----------|-----------|
| 0.112617  | 0.125437 | 0.108829  | 0.101981  | 0.123106  | 0.11961   | 0.114948  |
| 0.0936772 | 0.13447  | 0.131265  | 0.126457  | 0.128642  | 0.125437  | 0.128934  |
| 0.114073  | 0.118153 | 0.120192  | 0.112471  | 0.120484  | 0.124272  | 0.112034  |
| 0.113636  | 0.117133 | 0.129953  | 0.116987  | 0.124126  | 0.125     | 0.113928  |
| 0.174679  | 0.172931 | 0.172348  | 0.166958  | 0.167978  | 0.17264   | 0.172348  |
| 0.112908  | 0.122815 | 0.122232  | 0.118881  | 0.0517191 | 0.0543415 | 0.116404  |
| 0.0955711 | 0.131119 | 0.132284  | 0.130099  | 0.131702  | 0.129662  | 0.126166  |
| 0.118153  | 0.119027 | 0.122523  | 0.114219  | 0.133887  | 0.133887  | 0.116404  |
| 0.118298  | 0.125874 | 0.125583  | 0.124272  | 0.115967  | 0.113928  | 0.12296   |
| 0.111305  | 0.112179 | 0.112471  | 0.105041  | 0.109557  | 0.11014   | 0.105769  |
| 0.104021  | 0.110431 | 0.116259  | 0.108246  | 0.115676  | 0.11451   | 0.106352  |
| 0.111014  | 0.117133 | 0.118007  | 0.113199  | 0.11451   | 0.116259  | 0.110723  |
| 0.116841  | 0.127622 | 0.129371  | 0.123106  | 0.130536  | 0.124417  | 0.125291  |
| 0.114219  | 0.115676 | 0.11655   | 0.121358  | 0.0885781 | 0.0879953 | 0.111014  |
| 0.125437  | 0.126894 | 0.127477  | 0.120047  | 0.134178  | 0.133596  | 0.122815  |
| 0.106352  | 0.118007 | 0.119172  | 0.111742  | 0.111597  | 0.112179  | 0.113636  |
| 0.115239  | 0.125728 | 0.121649  | 0.112762  | 0.129808  | 0.127768  | 0.116987  |
| 0.122086  | 0.129079 | 0.142191  | 0.135344  | 0.137238  | 0.131119  | 0.13141   |
| 0.117424  | 0.118007 | 0.119464  | 0.113782  | 0.127914  | 0.125291  | 0.111305  |
| 0.120338  | 0.125291 | 0.113345  | 0.116696  | 0.123252  | 0.122378  | 0.120338  |
| 0.11014   | 0.113636 | 0.114802  | 0.10708   | 0.125874  | 0.122669  | 0.102855  |
| 0.117133  | 0.117424 | 0.113928  | 0.112325  | 0.128497  | 0.123834  | 0.113054  |
| 0.108683  | 0.108683 | 0.113345  | 0.104167  | 0.117424  | 0.11859   | 0.0964452 |
| 0.123397  | 0.11757  | 0.125728  | 0.119172  | 0.129516  | 0.127768  | 0.11116   |
| 0.107955  | 0.114365 | 0.11553   | 0.106352  | 0.121358  | 0.121941  | 0.105041  |
| 0.137383  | 0.146125 | 0.14292   | 0.137821  | 0.139714  | 0.138549  | 0.142337  |
| 0.124563  | 0.137092 | 0.135927  | 0.126457  | 0.130099  | 0.128351  | 0.128351  |
| 0.112617  | 0.114656 | 0.112034  | 0.102855  | 0.122523  | 0.119027  | 0.10912   |
| 0.13141   | 0.145979 | 0.137821  | 0.135344  | 0.136946  | 0.134907  | 0.144522  |
| 0.119464  | 0.126457 | 0.0999417 | 0.0957168 | 0.122378  | 0.125     | 0.119464  |
| 0.13141   | 0.135781 | 0.140443  | 0.135052  | 0.138695  | 0.139277  | 0.133741  |
| 0.113928  | 0.113928 | 0.113928  | 0.106498  | 0.121795  | 0.121795  | 0.109557  |
| 0.129808  | 0.144668 | 0.146707  | 0.142774  | 0.139714  | 0.136509  | 0.141171  |
| 0.123106  | 0.131847 | 0.135635  | 0.13141   | 0.135052  | 0.13447   | 0.128934  |
| 0.133013  | 0.139423 | 0.132139  | 0.131993  | 0.146707  | 0.139423  | 0.136801  |
| 0.120484  | 0.126311 | 0.103293  | 0.10169   | 0.128059  | 0.127477  | 0.12398   |
| 0.115967  | 0.113636 | 0.114802  | 0.104458  | 0.122669  | 0.121212  | 0.103438  |
| 0.108246  | 0.114948 | 0.116987  | 0.110723  | 0.122815  | 0.121358  | 0.105041  |
| 0.1081    | 0.123834 | 0.125583  | 0.119027  | 0.121795  | 0.121212  | 0.121503  |
| 0.119464  | 0.118298 | 0.121795  | 0.116987  | 0.128788  | 0.125583  | 0.119172  |
| 0.121066  | 0.125146 | 0.125437  | 0.119755  | 0.133596  | 0.132721  | 0.122815  |
| 0.120192  | 0.124854 | 0.125146  | 0.120629  | 0.127477  | 0.127768  | 0.116113  |
| 0.103875  | 0.11757  | 0.095134  | 0.0865385 | 0.121649  | 0.11961   | 0.110577  |
| 0.110431  | 0.115676 | 0.120047  | 0.111742  | 0.123543  | 0.124417  | 0.106352  |

|          |           |          |           |          |          |           |
|----------|-----------|----------|-----------|----------|----------|-----------|
| 0.116696 | 0.114948  | 0.123106 | 0.116841  | 0.12602  | 0.126603 | 0.112325  |
| 0.112908 | 0.113782  | 0.116696 | 0.105769  | 0.119901 | 0.116987 | 0.106789  |
| 0.121212 | 0.118007  | 0.127622 | 0.121066  | 0.130536 | 0.130828 | 0.113928  |
| 0.11655  | 0.113054  | 0.115676 | 0.105041  | 0.115093 | 0.116841 | 0.10169   |
| 0.121066 | 0.11116   | 0.113199 | 0.112471  | 0.108829 | 0.109411 | 0.108246  |
| 0.11116  | 0.114073  | 0.125146 | 0.113636  | 0.116987 | 0.115822 | 0.107372  |
| 0.11116  | 0.0939685 | 0.106206 | 0.0999417 | 0.116404 | 0.118444 | 0.0898893 |
| 0.110286 | 0.111742  | 0.11553  | 0.111014  | 0.121941 | 0.122232 | 0.106206  |
| 0.118007 | 0.113054  | 0.115676 | 0.109994  | 0.109266 | 0.113054 | 0.106061  |
| 0.117279 | 0.117279  | 0.121649 | 0.114219  | 0.114365 | 0.115239 | 0.110286  |
| 0.12398  | 0.129808  | 0.122815 | 0.122669  | 0.107372 | 0.103875 | 0.125146  |
| 0.107372 | 0.108829  | 0.110868 | 0.097028  | 0.103293 | 0.104458 | 0.100379  |
| 0.127914 | 0.129662  | 0.126457 | 0.122523  | 0.125874 | 0.124417 | 0.127914  |



| TDr_3006  | TDr_3010  | TDr_3016 | TDr_3134 | TDr_3287  | TDr_3288 | TDr_3291 |
|-----------|-----------|----------|----------|-----------|----------|----------|
| 0.124709  | 0.0888695 | 0.128351 | 0.235868 | 0.116113  | 0.164918 | 0.169726 |
| 0.11757   | 0.119027  | 0.130245 | 0.238054 | 0.108683  | 0.171766 | 0.174534 |
| 0.114948  | 0.116987  | 0.129953 | 0.236597 | 0.102273  | 0.169726 | 0.173951 |
| 0.11553   | 0.123689  | 0.13141  | 0.245921 | 0.108683  | 0.177593 | 0.180944 |
| 0.130099  | 0.13884   | 0.138695 | 0.254662 | 0.13549   | 0.192162 | 0.20134  |
| 0.13243   | 0.116987  | 0.13986  | 0.248834 | 0.126166  | 0.183712 | 0.190268 |
| 0.130536  | 0.1081    | 0.124854 | 0.250146 | 0.123397  | 0.189394 | 0.195659 |
| 0.115676  | 0.118881  | 0.133304 | 0.238199 | 0.106789  | 0.168998 | 0.173805 |
| 0.109994  | 0.118444  | 0.122086 | 0.244755 | 0.104021  | 0.176136 | 0.180944 |
| 0.120338  | 0.113636  | 0.133304 | 0.245484 | 0.0939685 | 0.179487 | 0.184878 |
| 0.122815  | 0.120484  | 0.120921 | 0.237471 | 0.108392  | 0.165647 | 0.173951 |
| 0.104604  | 0.121212  | 0.118153 | 0.244901 | 0.112908  | 0.173077 | 0.17905  |
| 0.118881  | 0.12296   | 0.125437 | 0.250146 | 0.103293  | 0.183566 | 0.182547 |
| 0.140297  | 0.141463  | 0.144814 | 0.204837 | 0.125874  | 0.134761 | 0.13986  |
| 0.130828  | 0.133741  | 0.144959 | 0.249854 | 0.0607517 | 0.187937 | 0.193036 |
| 0.129808  | 0.123397  | 0.112179 | 0.248252 | 0.114219  | 0.188666 | 0.192016 |
| 0.0979021 | 0.125583  | 0.113491 | 0.247523 | 0.110868  | 0.177739 | 0.184003 |
| 0.136801  | 0.150204  | 0.157634 | 0.257867 | 0.145979  | 0.201486 | 0.205128 |
| 0.110868  | 0.113199  | 0.126166 | 0.236597 | 0.105769  | 0.167686 | 0.173368 |
| 0.204691  | 0.205565  | 0.20338  | 0.137529 | 0.176573  | 0.135635 | 0.139569 |
| 0.118881  | 0.109848  | 0.13884  | 0.253059 | 0.11553   | 0.182401 | 0.190705 |
| 0.11553   | 0.100087  | 0.139277 | 0.253205 | 0.11655   | 0.186043 | 0.192016 |
| 0.115385  | 0.121795  | 0.106206 | 0.244027 | 0.110286  | 0.176865 | 0.178759 |
| 0.12602   | 0.125146  | 0.110723 | 0.255536 | 0.131119  | 0.192453 | 0.197844 |
| 0.110723  | 0.110431  | 0.116696 | 0.242279 | 0.103875  | 0.169872 | 0.176428 |
| 0.126748  | 0.106935  | 0.140006 | 0.252477 | 0.125146  | 0.18852  | 0.197698 |
| 0.119755  | 0.124126  | 0.124272 | 0.253351 | 0.122232  | 0.184441 | 0.190997 |
| 0.120338  | 0.128205  | 0.116113 | 0.256847 | 0.120484  | 0.194347 | 0.196533 |
| 0.130828  | 0.125874  | 0.128934 | 0.252185 | 0.131556  | 0.194347 | 0.196241 |
| 0.123834  | 0.125     | 0.131847 | 0.256847 | 0.119027  | 0.193182 | 0.197115 |
| 0.127768  | 0.0957168 | 0.128788 | 0.248252 | 0.115676  | 0.181381 | 0.189977 |
| 0.119172  | 0.123543  | 0.120484 | 0.248689 | 0.117861  | 0.190559 | 0.192745 |
| 0.111014  | 0.107517  | 0.122232 | 0.241113 | 0.0992133 | 0.17162  | 0.177302 |
| 0.124126  | 0.122086  | 0.127477 | 0.246358 | 0.116404  | 0.184441 | 0.187209 |
| 0.126311  | 0.125437  | 0.121503 | 0.25641  | 0.120338  | 0.1875   | 0.195221 |
| 0.132284  | 0.128205  | 0.124563 | 0.256556 | 0.128934  | 0.192016 | 0.198572 |
| 0.139423  | 0.11757   | 0.142774 | 0.263986 | 0.131119  | 0.205274 | 0.209207 |
| 0.114802  | 0.119755  | 0.122815 | 0.253351 | 0.124272  | 0.188228 | 0.190705 |
| 0.112471  | 0.112471  | 0.105041 | 0.247232 | 0.107663  | 0.177739 | 0.184295 |
| 0.126457  | 0.128497  | 0.11757  | 0.25539  | 0.119901  | 0.190851 | 0.195367 |
| 0.112762  | 0.120629  | 0.109703 | 0.248106 | 0.10912   | 0.178322 | 0.181964 |
| 0.146853  | 0.146853  | 0.132139 | 0.262092 | 0.136218  | 0.204545 | 0.207022 |

|           |           |          |          |          |          |          |
|-----------|-----------|----------|----------|----------|----------|----------|
| 0.144814  | 0.151807  | 0.132139 | 0.260635 | 0.144668 | 0.204545 | 0.206731 |
| 0.120192  | 0.124563  | 0.115093 | 0.24796  | 0.11655  | 0.178176 | 0.182401 |
| 0.105915  | 0.117861  | 0.11451  | 0.248543 | 0.108392 | 0.178467 | 0.181818 |
| 0.12296   | 0.122669  | 0.123689 | 0.258596 | 0.11116  | 0.193182 | 0.194493 |
| 0.112762  | 0.128788  | 0.116404 | 0.251311 | 0.114365 | 0.186189 | 0.189248 |
| 0.139423  | 0.14292   | 0.133159 | 0.261364 | 0.134615 | 0.200612 | 0.207459 |
| 0.118735  | 0.126311  | 0.122669 | 0.251457 | 0.11451  | 0.184003 | 0.190559 |
| 0.116841  | 0.122086  | 0.114656 | 0.247815 | 0.111451 | 0.178322 | 0.186043 |
| 0.152244  | 0.0627914 | 0.152389 | 0.257284 | 0.144231 | 0.203234 | 0.20979  |
| 0.122232  | 0.139423  | 0.123834 | 0.248252 | 0.128205 | 0.190997 | 0.19289  |
| 0.121212  | 0.123252  | 0.106498 | 0.247815 | 0.117861 | 0.178904 | 0.186043 |
| 0.131119  | 0.137529  | 0.140006 | 0.254808 | 0.116404 | 0.192308 | 0.198281 |
| 0.121212  | 0.12296   | 0.11961  | 0.237908 | 0.114365 | 0.170455 | 0.173223 |
| 0.134907  | 0.144231  | 0.128351 | 0.264714 | 0.143211 | 0.208333 | 0.211101 |
| 0.133887  | 0.132721  | 0.120629 | 0.256993 | 0.128788 | 0.191871 | 0.19697  |
| 0.116404  | 0.122232  | 0.113054 | 0.252622 | 0.11451  | 0.182838 | 0.189394 |
| 0.121649  | 0.125437  | 0.125    | 0.248252 | 0.115093 | 0.180507 | 0.185023 |
| 0.128497  | 0.123834  | 0.114365 | 0.255099 | 0.115239 | 0.192308 | 0.197407 |
| 0.140152  | 0.141317  | 0.119027 | 0.264423 | 0.137675 | 0.204837 | 0.209353 |
| 0.14831   | 0.145105  | 0.128351 | 0.264423 | 0.135052 | 0.208042 | 0.210227 |
| 0.167395  | 0.16419   | 0.147727 | 0.200758 | 0.154138 | 0.156614 | 0.160839 |
| 0.117279  | 0.119027  | 0.117133 | 0.250291 | 0.112762 | 0.180798 | 0.187063 |
| 0.115239  | 0.122523  | 0.111305 | 0.248834 | 0.113345 | 0.182838 | 0.188228 |
| 0.11553   | 0.122523  | 0.111888 | 0.251166 | 0.11655  | 0.180507 | 0.183566 |
| 0.143357  | 0.124709  | 0.141754 | 0.250146 | 0.137966 | 0.190851 | 0.193328 |
| 0.117424  | 0.124126  | 0.115239 | 0.249272 | 0.10912  | 0.178322 | 0.183712 |
| 0.129516  | 0.137675  | 0.12296  | 0.252331 | 0.134033 | 0.190122 | 0.198135 |
| 0.123689  | 0.124854  | 0.116841 | 0.256119 | 0.113345 | 0.192162 | 0.197552 |
| 0.117133  | 0.12704   | 0.114365 | 0.249272 | 0.11553  | 0.178904 | 0.184878 |
| 0.148893  | 0.126748  | 0.151369 | 0.252477 | 0.144959 | 0.197261 | 0.198864 |
| 0.12704   | 0.129953  | 0.114948 | 0.25743  | 0.11961  | 0.18852  | 0.191288 |
| 0.139714  | 0.145542  | 0.128497 | 0.262238 | 0.13345  | 0.203817 | 0.206876 |
| 0.122086  | 0.141317  | 0.12398  | 0.250728 | 0.133013 | 0.190559 | 0.195076 |
| 0.0962995 | 0.116696  | 0.12704  | 0.242133 | 0.112471 | 0.174388 | 0.178322 |
| 0.116696  | 0.122815  | 0.107517 | 0.248252 | 0.114219 | 0.178176 | 0.183275 |
| 0.116696  | 0.125146  | 0.115676 | 0.251748 | 0.112179 | 0.181964 | 0.188228 |
| 0.13039   | 0.138258  | 0.120921 | 0.262238 | 0.132576 | 0.198864 | 0.20542  |
| 0.117716  | 0.118881  | 0.115822 | 0.246941 | 0.116696 | 0.17803  | 0.185169 |
| 0.141171  | 0.146416  | 0.130245 | 0.263695 | 0.137529 | 0.202943 | 0.209499 |
| 0.126894  | 0.126603  | 0.11859  | 0.252331 | 0.118881 | 0.181672 | 0.189394 |
| 0.122232  | 0.126603  | 0.105769 | 0.252622 | 0.120047 | 0.188374 | 0.193473 |
| 0.120775  | 0.125728  | 0.116259 | 0.250583 | 0.117424 | 0.182838 | 0.183566 |
| 0.124272  | 0.133596  | 0.114802 | 0.252331 | 0.118007 | 0.188666 | 0.192308 |
| 0.113491  | 0.121649  | 0.111597 | 0.249709 | 0.115676 | 0.18109  | 0.185897 |

|          |          |          |          |           |          |          |
|----------|----------|----------|----------|-----------|----------|----------|
| 0.117279 | 0.124272 | 0.111305 | 0.250583 | 0.117424  | 0.18109  | 0.185023 |
| 0.1419   | 0.143939 | 0.126603 | 0.262383 | 0.140006  | 0.201923 | 0.205857 |
| 0.11451  | 0.119755 | 0.114073 | 0.251894 | 0.107372  | 0.178904 | 0.18546  |
| 0.116987 | 0.121066 | 0.122669 | 0.252622 | 0.111597  | 0.183421 | 0.189685 |
| 0.127185 | 0.119318 | 0.136364 | 0.257284 | 0.122378  | 0.194493 | 0.200466 |
| 0.133596 | 0.10912  | 0.131993 | 0.254079 | 0.128205  | 0.19391  | 0.199592 |
| 0.126603 | 0.137675 | 0.13345  | 0.255828 | 0.131702  | 0.198572 | 0.201632 |
| 0.135781 | 0.142483 | 0.138258 | 0.267628 | 0.131847  | 0.204545 | 0.211976 |
| 0.119027 | 0.110868 | 0.133159 | 0.245629 | 0.115093  | 0.179341 | 0.183275 |
| 0.185752 | 0.175845 | 0.178613 | 0.179779 | 0.180361  | 0.151952 | 0.151224 |
| 0.11014  | 0.113928 | 0.124854 | 0.251603 | 0.103875  | 0.18211  | 0.187209 |
| 0.13447  | 0.141463 | 0.137529 | 0.256993 | 0.130245  | 0.200612 | 0.203671 |
| 0.128351 | 0.135927 | 0.132576 | 0.254662 | 0.121212  | 0.19595  | 0.200175 |
| 0.138403 | 0.113928 | 0.135927 | 0.261801 | 0.135635  | 0.203089 | 0.208188 |
| 0.111742 | 0.122815 | 0.120629 | 0.253788 | 0.113345  | 0.18546  | 0.189394 |
| 0.13039  | 0.139423 | 0.130245 | 0.266026 | 0.130828  | 0.19799  | 0.20542  |
| 0.109703 | 0.119318 | 0.12704  | 0.251748 | 0.11014   | 0.184586 | 0.189103 |
| 0.125291 | 0.129953 | 0.125146 | 0.252185 | 0.124272  | 0.188811 | 0.195076 |
| 0.125    | 0.105186 | 0.122232 | 0.253059 | 0.11116   | 0.186772 | 0.191288 |
| 0.132284 | 0.143939 | 0.133304 | 0.264132 | 0.139132  | 0.201049 | 0.206439 |
| 0.113054 | 0.115967 | 0.112325 | 0.251603 | 0.107663  | 0.180361 | 0.186043 |
| 0.134178 | 0.116404 | 0.13549  | 0.254079 | 0.136072  | 0.195659 | 0.200758 |
| 0.116841 | 0.104895 | 0.124854 | 0.249854 | 0.117861  | 0.184149 | 0.18954  |
| 0.137092 | 0.139423 | 0.121503 | 0.257284 | 0.131702  | 0.199155 | 0.200175 |
| 0.137238 | 0.115967 | 0.13039  | 0.254516 | 0.121066  | 0.194347 | 0.200903 |
| 0.109266 | 0.106061 | 0.122523 | 0.253934 | 0.107663  | 0.183275 | 0.1875   |
| 0.144231 | 0.130536 | 0.142337 | 0.250728 | 0.139714  | 0.197261 | 0.199446 |
| 0.114948 | 0.108537 | 0.127622 | 0.253788 | 0.112471  | 0.186334 | 0.191725 |
| 0.116404 | 0.123397 | 0.122378 | 0.255245 | 0.111305  | 0.186334 | 0.189103 |
| 0.115385 | 0.120338 | 0.115822 | 0.252768 | 0.121066  | 0.188228 | 0.19391  |
| 0.139569 | 0.124126 | 0.149038 | 0.259178 | 0.136218  | 0.20338  | 0.205857 |
| 0.122669 | 0.121212 | 0.112325 | 0.231789 | 0.120192  | 0.171329 | 0.177593 |
| 0.111305 | 0.11859  | 0.121358 | 0.250728 | 0.108537  | 0.18211  | 0.188666 |
| 0.110723 | 0.122669 | 0.121066 | 0.248397 | 0.107372  | 0.180653 | 0.182547 |
| 0.121358 | 0.105915 | 0.127331 | 0.251457 | 0.112762  | 0.183421 | 0.190268 |
| 0.130245 | 0.127914 | 0.12602  | 0.260344 | 0.11553   | 0.194639 | 0.20236  |
| 0.121649 | 0.104167 | 0.124126 | 0.252622 | 0.120921  | 0.185752 | 0.19289  |
| 0.108683 | 0.111014 | 0.113782 | 0.246358 | 0.102127  | 0.175408 | 0.179924 |
| 0.107226 | 0.109266 | 0.112325 | 0.248106 | 0.103293  | 0.179196 | 0.182838 |
| 0.109994 | 0.120484 | 0.115093 | 0.249709 | 0.107517  | 0.185752 | 0.188811 |
| 0.118444 | 0.130099 | 0.120921 | 0.249709 | 0.119755  | 0.181672 | 0.187063 |
| 0.130245 | 0.134033 | 0.119901 | 0.257139 | 0.124272  | 0.193473 | 0.200321 |
| 0.108246 | 0.116696 | 0.113345 | 0.253497 | 0.103147  | 0.184586 | 0.190851 |
| 0.110723 | 0.113928 | 0.108829 | 0.248397 | 0.0957168 | 0.176573 | 0.180507 |

|          |           |          |           |           |           |           |
|----------|-----------|----------|-----------|-----------|-----------|-----------|
| 0.124126 | 0.126457  | 0.109703 | 0.255099  | 0.119901  | 0.190559  | 0.194784  |
| 0.110286 | 0.114073  | 0.106935 | 0.251457  | 0.105478  | 0.180216  | 0.18211   |
| 0.127185 | 0.11553   | 0.132284 | 0.246795  | 0.117716  | 0.178759  | 0.183275  |
| 0.135344 | 0.0517191 | 0.143357 | 0.253788  | 0.129371  | 0.190705  | 0.199009  |
| 0.115822 | 0.124854  | 0.115093 | 0.251457  | 0.110431  | 0.187791  | 0.190559  |
| 0.113928 | 0.11859   | 0.116113 | 0.252768  | 0.103001  | 0.184732  | 0.191288  |
| 0.109848 | 0.121795  | 0.114365 | 0.250146  | 0.105624  | 0.182984  | 0.184878  |
| 0.111888 | 0.11859   | 0.112325 | 0.247232  | 0.106498  | 0.176282  | 0.178759  |
| 0.125    | 0.130828  | 0.127768 | 0.256556  | 0.119027  | 0.19289   | 0.199155  |
| 0.111888 | 0.111597  | 0.10912  | 0.248397  | 0.100379  | 0.178904  | 0.185752  |
| 0.137092 | 0.133887  | 0.134033 | 0.259324  | 0.134615  | 0.198281  | 0.206002  |
| 0.138112 | 0.136364  | 0.128351 | 0.253351  | 0.133596  | 0.194056  | 0.199446  |
| 0.130245 | 0.12704   | 0.11757  | 0.252768  | 0.122523  | 0.192599  | 0.198864  |
| 0.120775 | 0.125437  | 0.120047 | 0.253497  | 0.111014  | 0.183421  | 0.187063  |
| 0.116113 | 0.103293  | 0.12704  | 0.248834  | 0.112471  | 0.181381  | 0.186772  |
| 0.110723 | 0.117716  | 0.105915 | 0.253642  | 0.107372  | 0.183275  | 0.184878  |
| 0.114365 | 0.117861  | 0.107517 | 0.254371  | 0.115676  | 0.183421  | 0.187937  |
| 0.114948 | 0.119901  | 0.119172 | 0.251748  | 0.108683  | 0.184003  | 0.187646  |
| 0.114948 | 0.121649  | 0.116259 | 0.24155   | 0.111014  | 0.172931  | 0.175699  |
| 0.130682 | 0.139714  | 0.105186 | 0.261655  | 0.129953  | 0.198281  | 0.202506  |
| 0.11451  | 0.126457  | 0.127768 | 0.258887  | 0.111742  | 0.191725  | 0.19595   |
| 0.129225 | 0.135635  | 0.141317 | 0.251166  | 0.121503  | 0.190414  | 0.195804  |
| 0.134033 | 0.126748  | 0.14292  | 0.260344  | 0.132139  | 0.202214  | 0.207022  |
| 0.192016 | 0.198718  | 0.194202 | 0.135927  | 0.184003  | 0.0967366 | 0.0989219 |
| 0.238782 | 0.239365  | 0.234266 | 0.0906177 | 0.233974  | 0.130682  | 0.127914  |
| 0.113636 | 0.118007  | 0.120775 | 0.23616   | 0.11116   | 0.170455  | 0.173805  |
| 0.110286 | 0.120192  | 0.107517 | 0.244172  | 0.109557  | 0.178467  | 0.180944  |
| 0.10708  | 0.121066  | 0.111888 | 0.245047  | 0.106061  | 0.171474  | 0.179487  |
| 0.105332 | 0.120775  | 0.11655  | 0.247086  | 0.113928  | 0.17905   | 0.185023  |
| 0.135052 | 0.135344  | 0.143939 | 0.249709  | 0.0600233 | 0.188374  | 0.19289   |
| 0.108537 | 0.12398   | 0.114219 | 0.251748  | 0.11655   | 0.184295  | 0.189394  |
| 0.138695 | 0.150058  | 0.121358 | 0.26588   | 0.144959  | 0.206876  | 0.208479  |
| 0.10708  | 0.12602   | 0.109848 | 0.25204   | 0.118298  | 0.183129  | 0.189103  |
| 0.122523 | 0.136801  | 0.121503 | 0.258159  | 0.133159  | 0.199155  | 0.203671  |
| 0.128205 | 0.138112  | 0.118735 | 0.249854  | 0.133304  | 0.18852   | 0.194493  |
| 0.121795 | 0.136655  | 0.121649 | 0.260344  | 0.13039   | 0.196096  | 0.203234  |
| 0.140734 | 0.144231  | 0.131847 | 0.255682  | 0.13243   | 0.199883  | 0.202943  |
| 0.104021 | 0.126457  | 0.114948 | 0.256847  | 0.118735  | 0.18852   | 0.19391   |
| 0.104895 | 0.121212  | 0.108246 | 0.251311  | 0.114948  | 0.181527  | 0.184878  |
| 0.107955 | 0.125728  | 0.11451  | 0.252622  | 0.118007  | 0.18546   | 0.190268  |
| 0.102127 | 0.120484  | 0.113345 | 0.245047  | 0.113345  | 0.177885  | 0.184149  |
| 0.102418 | 0.121941  | 0.106352 | 0.246795  | 0.113928  | 0.183129  | 0.187063  |
| 0.104021 | 0.12296   | 0.114365 | 0.251894  | 0.116113  | 0.183858  | 0.188083  |
| 0.114073 | 0.137675  | 0.115385 | 0.254953  | 0.126166  | 0.189248  | 0.199301  |

|           |          |          |          |          |          |          |
|-----------|----------|----------|----------|----------|----------|----------|
| 0.127185  | 0.142045 | 0.120921 | 0.263112 | 0.136072 | 0.201195 | 0.205128 |
| 0.112471  | 0.125291 | 0.108829 | 0.25102  | 0.118735 | 0.188228 | 0.187791 |
| 0.11553   | 0.126311 | 0.109266 | 0.248543 | 0.115385 | 0.180507 | 0.186189 |
| 0.12398   | 0.137383 | 0.117133 | 0.259615 | 0.134324 | 0.200321 | 0.204837 |
| 0.105332  | 0.120192 | 0.109557 | 0.247086 | 0.117424 | 0.177302 | 0.182984 |
| 0.130245  | 0.154429 | 0.124854 | 0.25947  | 0.140297 | 0.199592 | 0.2044   |
| 0.137529  | 0.143648 | 0.138549 | 0.246066 | 0.13039  | 0.18852  | 0.195367 |
| 0.124854  | 0.141171 | 0.131702 | 0.25     | 0.13549  | 0.190705 | 0.193473 |
| 0.10067   | 0.119318 | 0.107226 | 0.249417 | 0.113054 | 0.179341 | 0.183858 |
| 0.104604  | 0.11859  | 0.10708  | 0.247815 | 0.111451 | 0.180944 | 0.184003 |
| 0.112617  | 0.133304 | 0.113636 | 0.259033 | 0.125874 | 0.196241 | 0.199009 |
| 0.115385  | 0.129662 | 0.109703 | 0.252768 | 0.128351 | 0.192599 | 0.197407 |
| 0.117133  | 0.136072 | 0.110868 | 0.253059 | 0.133887 | 0.190559 | 0.194493 |
| 0.105624  | 0.126311 | 0.111014 | 0.255828 | 0.121503 | 0.184878 | 0.19289  |
| 0.11014   | 0.126748 | 0.10912  | 0.253351 | 0.120484 | 0.183566 | 0.190705 |
| 0.11451   | 0.130828 | 0.114365 | 0.254808 | 0.123689 | 0.191434 | 0.193036 |
| 0.126748  | 0.135781 | 0.119901 | 0.262966 | 0.135344 | 0.198718 | 0.204983 |
| 0.124126  | 0.13986  | 0.115239 | 0.258013 | 0.13447  | 0.19493  | 0.197698 |
| 0.130973  | 0.137383 | 0.111014 | 0.261072 | 0.134615 | 0.200029 | 0.204545 |
| 0.138695  | 0.131119 | 0.118735 | 0.251311 | 0.132139 | 0.190851 | 0.198281 |
| 0.112471  | 0.120629 | 0.110868 | 0.253059 | 0.120192 | 0.18648  | 0.189831 |
| 0.117716  | 0.141317 | 0.123106 | 0.256847 | 0.131265 | 0.196387 | 0.198864 |
| 0.103875  | 0.119901 | 0.105769 | 0.251748 | 0.115676 | 0.182838 | 0.188228 |
| 0.119172  | 0.124417 | 0.118444 | 0.246358 | 0.114365 | 0.175699 | 0.181672 |
| 0.100233  | 0.124709 | 0.117279 | 0.252768 | 0.115822 | 0.185023 | 0.188374 |
| 0.10912   | 0.123689 | 0.117716 | 0.246795 | 0.115385 | 0.178467 | 0.183566 |
| 0.0989219 | 0.121649 | 0.110723 | 0.250583 | 0.115385 | 0.179633 | 0.184732 |
| 0.127331  | 0.144231 | 0.118153 | 0.25743  | 0.136218 | 0.199883 | 0.201486 |
| 0.11553   | 0.118444 | 0.118881 | 0.251166 | 0.11859  | 0.182547 | 0.18648  |
| 0.122523  | 0.14088  | 0.118298 | 0.257867 | 0.137238 | 0.197115 | 0.201632 |
| 0.10271   | 0.123397 | 0.112762 | 0.245921 | 0.112762 | 0.179633 | 0.183566 |
| 0.119172  | 0.130536 | 0.110286 | 0.25947  | 0.129808 | 0.199592 | 0.199738 |
| 0.129516  | 0.129516 | 0.113928 | 0.250874 | 0.126457 | 0.189248 | 0.19289  |
| 0.120775  | 0.131556 | 0.128497 | 0.245629 | 0.11014  | 0.174679 | 0.183275 |
| 0.121212  | 0.11859  | 0.112617 | 0.253934 | 0.114948 | 0.187646 | 0.195076 |
| 0.112617  | 0.131847 | 0.126166 | 0.248543 | 0.123543 | 0.180507 | 0.185897 |
| 0.120629  | 0.133159 | 0.122232 | 0.256265 | 0.113491 | 0.187937 | 0.190122 |
| 0.116259  | 0.116259 | 0.122815 | 0.25539  | 0.112908 | 0.178904 | 0.185752 |
| 0.144231  | 0.139569 | 0.147582 | 0.258596 | 0.125728 | 0.200175 | 0.205274 |
| 0.141754  | 0.134178 | 0.134324 | 0.262529 | 0.137821 | 0.202069 | 0.208042 |
| 0.114365  | 0.114365 | 0.124417 | 0.245921 | 0.100524 | 0.178467 | 0.18211  |
| 0.130245  | 0.132284 | 0.145251 | 0.260927 | 0.118444 | 0.200466 | 0.205274 |
| 0.136218  | 0.127185 | 0.140152 | 0.256119 | 0.117133 | 0.194784 | 0.200175 |
| 0.132721  | 0.136801 | 0.141317 | 0.254371 | 0.122378 | 0.191579 | 0.197844 |

|          |          |          |          |          |          |          |
|----------|----------|----------|----------|----------|----------|----------|
| 0.122232 | 0.12398  | 0.136655 | 0.248543 | 0.111888 | 0.186043 | 0.193473 |
| 0.127185 | 0.129808 | 0.136364 | 0.258741 | 0.116259 | 0.192453 | 0.195513 |
| 0.134033 | 0.128497 | 0.138258 | 0.252768 | 0.113491 | 0.192599 | 0.194784 |
| 0.124563 | 0.138258 | 0.141608 | 0.258741 | 0.122086 | 0.197407 | 0.201632 |
| 0.135635 | 0.133013 | 0.151807 | 0.260781 | 0.125    | 0.200612 | 0.204545 |
| 0.132139 | 0.13039  | 0.144231 | 0.256119 | 0.115967 | 0.194202 | 0.197844 |
| 0.115239 | 0.121066 | 0.135781 | 0.248252 | 0.109266 | 0.181964 | 0.186189 |
| 0.131119 | 0.141317 | 0.120192 | 0.256556 | 0.139423 | 0.193765 | 0.197407 |
| 0.140297 | 0.135052 | 0.143648 | 0.254662 | 0.125    | 0.194493 | 0.202506 |
| 0.114656 | 0.116113 | 0.129662 | 0.243298 | 0.10373  | 0.17905  | 0.185315 |
| 0.2162   | 0.218823 | 0.214889 | 0.120484 | 0.216929 | 0.117424 | 0.114948 |
| 0.122086 | 0.131119 | 0.138549 | 0.251894 | 0.113491 | 0.189685 | 0.192453 |
| 0.122378 | 0.124126 | 0.131265 | 0.250437 | 0.107955 | 0.183858 | 0.190122 |
| 0.133304 | 0.138549 | 0.142774 | 0.259615 | 0.129079 | 0.200321 | 0.204254 |
| 0.128059 | 0.121941 | 0.132867 | 0.252622 | 0.115093 | 0.186334 | 0.189103 |
| 0.143794 | 0.132139 | 0.150932 | 0.26049  | 0.123252 | 0.199446 | 0.206294 |
| 0.122232 | 0.135052 | 0.135781 | 0.250874 | 0.114802 | 0.184586 | 0.190559 |
| 0.120921 | 0.130245 | 0.139132 | 0.252768 | 0.10912  | 0.187354 | 0.192745 |
| 0.12704  | 0.131702 | 0.142337 | 0.251311 | 0.114948 | 0.191725 | 0.193619 |
| 0.128642 | 0.137675 | 0.135198 | 0.246503 | 0.120338 | 0.185169 | 0.188228 |
| 0.133159 | 0.13141  | 0.145542 | 0.254225 | 0.120775 | 0.198718 | 0.201777 |
| 0.123397 | 0.134178 | 0.148893 | 0.257576 | 0.126457 | 0.197698 | 0.201923 |
| 0.124272 | 0.135052 | 0.14627  | 0.256702 | 0.121795 | 0.197115 | 0.203671 |
| 0.12398  | 0.123106 | 0.11859  | 0.255536 | 0.107517 | 0.188083 | 0.19289  |
| 0.114073 | 0.128934 | 0.136655 | 0.257867 | 0.115385 | 0.18954  | 0.196387 |
| 0.132284 | 0.144522 | 0.145833 | 0.259178 | 0.125437 | 0.195221 | 0.200612 |
| 0.121649 | 0.125728 | 0.13345  | 0.241841 | 0.111888 | 0.179924 | 0.185315 |
| 0.137966 | 0.144668 | 0.124126 | 0.259907 | 0.138695 | 0.198572 | 0.203671 |
| 0.139277 | 0.131993 | 0.144085 | 0.241404 | 0.131556 | 0.182401 | 0.1875   |
| 0.126748 | 0.125    | 0.119027 | 0.250728 | 0.114656 | 0.187354 | 0.192162 |
| 0.135198 | 0.125583 | 0.14088  | 0.256847 | 0.117861 | 0.194347 | 0.199738 |
| 0.133013 | 0.117861 | 0.139277 | 0.244464 | 0.123252 | 0.181672 | 0.182984 |
| 0.13345  | 0.130245 | 0.135344 | 0.246649 | 0.128934 | 0.189394 | 0.19391  |
| 0.130245 | 0.122086 | 0.140297 | 0.24257  | 0.124563 | 0.177448 | 0.182255 |
| 0.141608 | 0.128497 | 0.146416 | 0.249272 | 0.13243  | 0.188811 | 0.191871 |
| 0.119901 | 0.120775 | 0.116841 | 0.247378 | 0.109266 | 0.177885 | 0.184732 |
| 0.140152 | 0.140734 | 0.133013 | 0.252477 | 0.125146 | 0.196678 | 0.199738 |
| 0.140006 | 0.131556 | 0.143357 | 0.234848 | 0.133159 | 0.178467 | 0.182692 |
| 0.128059 | 0.123397 | 0.117424 | 0.256119 | 0.115385 | 0.191871 | 0.196387 |
| 0.130099 | 0.13243  | 0.12296  | 0.250874 | 0.124709 | 0.184295 | 0.185315 |
| 0.143357 | 0.141026 | 0.124563 | 0.257139 | 0.142045 | 0.198427 | 0.205565 |
| 0.127914 | 0.136946 | 0.115239 | 0.254225 | 0.123689 | 0.188228 | 0.194784 |
| 0.137675 | 0.141463 | 0.135781 | 0.262821 | 0.129662 | 0.203526 | 0.208625 |
| 0.134615 | 0.138403 | 0.12602  | 0.254516 | 0.125146 | 0.194639 | 0.196533 |

|          |          |           |          |           |          |          |
|----------|----------|-----------|----------|-----------|----------|----------|
| 0.118735 | 0.136218 | 0.128788  | 0.256702 | 0.123252  | 0.194202 | 0.198135 |
| 0.131993 | 0.136655 | 0.127185  | 0.250728 | 0.123397  | 0.191725 | 0.196241 |
| 0.127477 | 0.132721 | 0.120921  | 0.248834 | 0.116259  | 0.184295 | 0.19289  |
| 0.127914 | 0.138695 | 0.124272  | 0.261509 | 0.129516  | 0.196387 | 0.202069 |
| 0.128788 | 0.132576 | 0.141754  | 0.259761 | 0.127477  | 0.193182 | 0.198572 |
| 0.130828 | 0.135781 | 0.13243   | 0.259178 | 0.135927  | 0.197844 | 0.2044   |
| 0.129953 | 0.131993 | 0.137966  | 0.260344 | 0.130099  | 0.199883 | 0.203234 |
| 0.135781 | 0.130828 | 0.130973  | 0.253642 | 0.128059  | 0.191725 | 0.195367 |
| 0.137529 | 0.147436 | 0.145251  | 0.252768 | 0.13884   | 0.196678 | 0.201486 |
| 0.132867 | 0.12704  | 0.127477  | 0.250146 | 0.115822  | 0.187646 | 0.193036 |
| 0.120921 | 0.131119 | 0.120484  | 0.257721 | 0.117279  | 0.190559 | 0.19595  |
| 0.126748 | 0.132284 | 0.135052  | 0.255682 | 0.125437  | 0.197552 | 0.201195 |
| 0.123543 | 0.119172 | 0.125437  | 0.249563 | 0.112908  | 0.187354 | 0.193036 |
| 0.147582 | 0.132139 | 0.151807  | 0.254371 | 0.134033  | 0.193036 | 0.195221 |
| 0.155157 | 0.143794 | 0.155594  | 0.261072 | 0.149184  | 0.204983 | 0.207459 |
| 0.125728 | 0.135927 | 0.117133  | 0.260781 | 0.132284  | 0.193328 | 0.201049 |
| 0.117716 | 0.125583 | 0.109411  | 0.251894 | 0.123106  | 0.18852  | 0.196824 |
| 0.128059 | 0.136218 | 0.140734  | 0.259033 | 0.130536  | 0.196824 | 0.202214 |
| 0.132867 | 0.138695 | 0.146125  | 0.258304 | 0.123106  | 0.194639 | 0.203817 |
| 0.119464 | 0.13549  | 0.115239  | 0.262092 | 0.128059  | 0.197261 | 0.201195 |
| 0.135198 | 0.143065 | 0.146999  | 0.260052 | 0.129225  | 0.202214 | 0.206731 |
| 0.140734 | 0.137238 | 0.143794  | 0.25102  | 0.128351  | 0.195221 | 0.196824 |
| 0.131556 | 0.12602  | 0.121795  | 0.25845  | 0.116259  | 0.196241 | 0.20338  |
| 0.145833 | 0.148456 | 0.16317   | 0.260198 | 0.155886  | 0.206731 | 0.210664 |
| 0.131556 | 0.131265 | 0.119172  | 0.258159 | 0.119755  | 0.192745 | 0.201049 |
| 0.146999 | 0.139132 | 0.137238  | 0.255536 | 0.130828  | 0.196533 | 0.202506 |
| 0.122086 | 0.134907 | 0.11553   | 0.261801 | 0.119027  | 0.19493  | 0.197698 |
| 0.132576 | 0.134907 | 0.135635  | 0.262383 | 0.135635  | 0.202797 | 0.206439 |
| 0.125583 | 0.132576 | 0.137383  | 0.248106 | 0.116404  | 0.189977 | 0.195076 |
| 0.14088  | 0.090472 | 0.144522  | 0.226399 | 0.134615  | 0.158654 | 0.166375 |
| 0.133741 | 0.150641 | 0.158654  | 0.254516 | 0.143502  | 0.200175 | 0.203817 |
| 0.120775 | 0.126311 | 0.136364  | 0.24155  | 0.121503  | 0.179633 | 0.180361 |
| 0.13549  | 0.137529 | 0.139132  | 0.223048 | 0.131556  | 0.162587 | 0.165647 |
| 0.143502 | 0.152535 | 0.112179  | 0.200758 | 0.145688  | 0.137092 | 0.140152 |
| 0.143502 | 0.144085 | 0.147727  | 0.203671 | 0.13345   | 0.136801 | 0.138112 |
| 0.124709 | 0.117424 | 0.0936772 | 0.256265 | 0.130973  | 0.192599 | 0.198281 |
| 0.134761 | 0.136801 | 0.14831   | 0.252914 | 0.13345   | 0.187791 | 0.195804 |
| 0.115239 | 0.11553  | 0.129953  | 0.242424 | 0.0839161 | 0.173223 | 0.178613 |
| 0.119172 | 0.12296  | 0.121941  | 0.244901 | 0.0826049 | 0.176282 | 0.182547 |
| 0.124272 | 0.123106 | 0.131119  | 0.245338 | 0.119172  | 0.181964 | 0.188811 |
| 0.115239 | 0.122815 | 0.132284  | 0.243007 | 0.117133  | 0.175845 | 0.178322 |
| 0.110431 | 0.130245 | 0.122523  | 0.251894 | 0.111451  | 0.179487 | 0.185752 |
| 0.117133 | 0.11655  | 0.129808  | 0.235868 | 0.0726981 | 0.166084 | 0.170017 |
| 0.118007 | 0.128205 | 0.137675  | 0.247523 | 0.116404  | 0.180653 | 0.184003 |

|           |           |           |           |           |           |           |
|-----------|-----------|-----------|-----------|-----------|-----------|-----------|
| 0.12398   | 0.127185  | 0.138695  | 0.236305  | 0.0626457 | 0.1706    | 0.179196  |
| 0.112034  | 0.11553   | 0.124417  | 0.24155   | 0.0976107 | 0.173805  | 0.178904  |
| 0.120484  | 0.126311  | 0.134324  | 0.24359   | 0.117133  | 0.176428  | 0.178904  |
| 0.116259  | 0.122669  | 0.133013  | 0.245775  | 0.118153  | 0.177448  | 0.181381  |
| 0.123543  | 0.126748  | 0.0502622 | 0.254516  | 0.131265  | 0.188811  | 0.191871  |
| 0.216492  | 0.215909  | 0.21285   | 0.111116  | 0.20877   | 0.124709  | 0.122815  |
| 0.140734  | 0.144814  | 0.151661  | 0.247815  | 0.140006  | 0.19493   | 0.197407  |
| 0.125728  | 0.133013  | 0.13549   | 0.253205  | 0.129953  | 0.191288  | 0.197552  |
| 0.124709  | 0.125583  | 0.134178  | 0.243735  | 0.120775  | 0.180944  | 0.182838  |
| 0.209207  | 0.213578  | 0.209353  | 0.104167  | 0.204691  | 0.104895  | 0.105041  |
| 0.124126  | 0.100524  | 0.081148  | 0.242279  | 0.121066  | 0.175117  | 0.18109   |
| 0.127768  | 0.126603  | 0.120921  | 0.254662  | 0.116841  | 0.186043  | 0.189977  |
| 0.117279  | 0.132721  | 0.13141   | 0.245047  | 0.124126  | 0.17905   | 0.188228  |
| 0.125583  | 0.126457  | 0.139714  | 0.246066  | 0.0520105 | 0.178904  | 0.185169  |
| 0.251166  | 0.252331  | 0.246941  | 0.0852273 | 0.244027  | 0.144814  | 0.136509  |
| 0.129225  | 0.0525932 | 0.137238  | 0.251748  | 0.12296   | 0.185752  | 0.192016  |
| 0.114656  | 0.127185  | 0.0617716 | 0.252914  | 0.121503  | 0.183421  | 0.187937  |
| 0.0482226 | 0.131265  | 0.134324  | 0.252914  | 0.127622  | 0.188083  | 0.194056  |
| 0.050845  | 0.126603  | 0.129371  | 0.25204   | 0.124126  | 0.182838  | 0.189394  |
| 0.136218  | 0.0686189 | 0.133741  | 0.240967  | 0.106352  | 0.181381  | 0.188228  |
| 0.124272  | 0.124563  | 0.137238  | 0.229021  | 0.106352  | 0.160402  | 0.170746  |
| 0.11757   | 0.127768  | 0.0582751 | 0.251166  | 0.122086  | 0.185169  | 0.18648   |
| 0.115967  | 0.121795  | 0.134178  | 0.243153  | 0.117279  | 0.178904  | 0.180216  |
| 0.122815  | 0.127477  | 0.140734  | 0.25      | 0.124709  | 0.178759  | 0.18852   |
| 0.118444  | 0.122232  | 0.134907  | 0.245047  | 0.04662   | 0.17701   | 0.186189  |
| 0.115093  | 0.119464  | 0.129225  | 0.237908  | 0.112325  | 0.172203  | 0.179924  |
| 0.124854  | 0.11961   | 0.136946  | 0.243881  | 0.0987762 | 0.184295  | 0.187937  |
| 0.132576  | 0.150641  | 0.156031  | 0.252477  | 0.144376  | 0.199883  | 0.202652  |
| 0.132867  | 0.0480769 | 0.136801  | 0.249272  | 0.128059  | 0.188228  | 0.195076  |
| 0.128497  | 0.125     | 0.120484  | 0.251311  | 0.121358  | 0.186772  | 0.191871  |
| 0.189977  | 0.189394  | 0.18954   | 0.13039   | 0.183129  | 0.0914918 | 0.0925117 |
| 0.202214  | 0.204254  | 0.201486  | 0.121358  | 0.197698  | 0.0952797 | 0.0945513 |
| 0.126457  | 0.12704   | 0.136509  | 0.24053   | 0.0517191 | 0.174825  | 0.177885  |
| 0.115385  | 0.120338  | 0.135927  | 0.246649  | 0.0473485 | 0.176282  | 0.182838  |
| 0.131993  | 0.139569  | 0.144959  | 0.237034  | 0.127185  | 0.182692  | 0.187209  |
| 0.118007  | 0.126457  | 0.0543415 | 0.25102   | 0.122232  | 0.183275  | 0.186334  |
| 0.133013  | 0.0505536 | 0.13986   | 0.249709  | 0.12704   | 0.186917  | 0.194347  |
| 0.110431  | 0.136946  | 0.137383  | 0.248397  | 0.133013  | 0.187354  | 0.192745  |
| 0.225524  | 0.224359  | 0.222756  | 0.11757   | 0.218677  | 0.117133  | 0.110286  |
| 0.112762  | 0.122086  | 0.129225  | 0.248689  | 0.115239  | 0.182984  | 0.187791  |
| 0.208479  | 0.209645  | 0.198135  | 0.142774  | 0.206585  | 0.140297  | 0.139569  |
| 0.114802  | 0.1081    | 0.0960082 | 0.256556  | 0.115822  | 0.184732  | 0.193036  |
| 0.11553   | 0.122523  | 0.127622  | 0.24796   | 0.117424  | 0.18109   | 0.187937  |
| 0.118298  | 0.122086  | 0.119318  | 0.236742  | 0.113199  | 0.173368  | 0.174971  |



|           |           |           |          |           |           |           |
|-----------|-----------|-----------|----------|-----------|-----------|-----------|
| 0.113636  | 0.119464  | 0.128934  | 0.237617 | 0.0537587 | 0.169872  | 0.178759  |
| 0.206731  | 0.208188  | 0.206002  | 0.125583 | 0.199301  | 0.100962  | 0.104312  |
| 0.128642  | 0.131265  | 0.142483  | 0.238636 | 0.128788  | 0.17701   | 0.18007   |
| 0.110868  | 0.121066  | 0.118298  | 0.258741 | 0.119172  | 0.189248  | 0.194347  |
| 0.122523  | 0.128351  | 0.140152  | 0.243298 | 0.124417  | 0.18109   | 0.185897  |
| 0.11757   | 0.132139  | 0.127914  | 0.248834 | 0.129371  | 0.184003  | 0.189977  |
| 0.119901  | 0.12398   | 0.135198  | 0.248543 | 0.04662   | 0.174388  | 0.180653  |
| 0.119464  | 0.107226  | 0.0980478 | 0.255682 | 0.120192  | 0.187063  | 0.194493  |
| 0.120338  | 0.127622  | 0.0706585 | 0.240239 | 0.120775  | 0.173077  | 0.179633  |
| 0.125291  | 0.126457  | 0.122232  | 0.251603 | 0.120192  | 0.185023  | 0.190705  |
| 0.112762  | 0.119172  | 0.130099  | 0.235868 | 0.108829  | 0.167832  | 0.172348  |
| 0.113199  | 0.123397  | 0.118298  | 0.251457 | 0.125291  | 0.187209  | 0.187937  |
| 0.186772  | 0.192308  | 0.188083  | 0.135344 | 0.179633  | 0.0897436 | 0.0855186 |
| 0.0490967 | 0.130973  | 0.133159  | 0.253788 | 0.129662  | 0.188083  | 0.194639  |
| 0.113636  | 0.132576  | 0.144085  | 0.249854 | 0.128351  | 0.191725  | 0.190997  |
| 0.100379  | 0.132721  | 0.134907  | 0.245338 | 0.122086  | 0.177593  | 0.181818  |
| 0.129953  | 0.0603147 | 0.132721  | 0.246649 | 0.124854  | 0.176573  | 0.186917  |
| 0.120629  | 0.124417  | 0.136218  | 0.241987 | 0.121066  | 0.181527  | 0.183421  |
| 0.121212  | 0.113928  | 0.0992133 | 0.254808 | 0.125437  | 0.190851  | 0.196241  |
| 0.111451  | 0.106206  | 0.129662  | 0.245921 | 0.121212  | 0.175845  | 0.182401  |
| 0.125146  | 0.129808  | 0.0571096 | 0.256119 | 0.129371  | 0.189831  | 0.19493   |
| 0.113054  | 0.124126  | 0.14088   | 0.246941 | 0.119318  | 0.18648   | 0.188957  |
| 0.0480769 | 0.129079  | 0.130099  | 0.249563 | 0.118735  | 0.180653  | 0.186626  |
| 0.122815  | 0.129225  | 0.134615  | 0.243007 | 0.0565268 | 0.175554  | 0.179779  |
| 0.118298  | 0.131119  | 0.133596  | 0.252768 | 0.118735  | 0.183275  | 0.190705  |
| 0.132721  | 0.142628  | 0.139569  | 0.248834 | 0.135198  | 0.190122  | 0.197261  |
| 0.122815  | 0.0595862 | 0.130245  | 0.245629 | 0.114219  | 0.175554  | 0.184732  |
| 0.136946  | 0.142774  | 0.145542  | 0.246358 | 0.137092  | 0.194056  | 0.19391   |
| 0.115967  | 0.12296   | 0.134178  | 0.245192 | 0.0429779 | 0.175699  | 0.180798  |
| 0.0996503 | 0.124417  | 0.130682  | 0.244901 | 0.120192  | 0.178904  | 0.186043  |
| 0.121649  | 0.125437  | 0.125291  | 0.22873  | 0.115676  | 0.163316  | 0.166375  |
| 0.124272  | 0.130973  | 0.0515734 | 0.249417 | 0.129371  | 0.184586  | 0.189103  |
| 0.189831  | 0.190705  | 0.174534  | 0.1419   | 0.187937  | 0.109411  | 0.109557  |
| 0.109848  | 0.120338  | 0.114656  | 0.248397 | 0.119027  | 0.182401  | 0.188374  |
| 0.106352  | 0.113636  | 0.122523  | 0.239656 | 0.107372  | 0.169289  | 0.178467  |
| 0.12704   | 0.125291  | 0.121066  | 0.254516 | 0.119318  | 0.189685  | 0.195659  |
| 0.182692  | 0.185897  | 0.183129  | 0.154283 | 0.173223  | 0.10373   | 0.107955  |
| 0.142337  | 0.0619172 | 0.147145  | 0.251457 | 0.132576  | 0.190997  | 0.198427  |
| 0.149913  | 0.0657051 | 0.155012  | 0.257867 | 0.145688  | 0.200903  | 0.207168  |
| 0.135781  | 0.152972  | 0.159819  | 0.253642 | 0.146416  | 0.200466  | 0.205565  |
| 0.118298  | 0.0606061 | 0.128934  | 0.244901 | 0.112908  | 0.175991  | 0.18546   |
| 0.120192  | 0.124854  | 0.137821  | 0.243007 | 0.120629  | 0.178467  | 0.180653  |
| 0.20979   | 0.210956  | 0.211101  | 0.117279 | 0.204691  | 0.105478  | 0.103875  |
| 0.123252  | 0.124417  | 0.137675  | 0.237617 | 0.11757   | 0.177739  | 0.181672  |

|           |           |           |          |           |           |           |
|-----------|-----------|-----------|----------|-----------|-----------|-----------|
| 0.125146  | 0.128351  | 0.139569  | 0.241841 | 0.125874  | 0.183129  | 0.183275  |
| 0.110868  | 0.121066  | 0.116841  | 0.249126 | 0.121795  | 0.182547  | 0.186189  |
| 0.169726  | 0.17264   | 0.171329  | 0.18007  | 0.160256  | 0.132139  | 0.131119  |
| 0.113782  | 0.122232  | 0.127331  | 0.23951  | 0.106352  | 0.173805  | 0.17803   |
| 0.143065  | 0.15035   | 0.159528  | 0.255973 | 0.146999  | 0.195513  | 0.203817  |
| 0.124126  | 0.122086  | 0.130099  | 0.241404 | 0.111451  | 0.176865  | 0.182838  |
| 0.190559  | 0.193473  | 0.186917  | 0.139132 | 0.183712  | 0.0868298 | 0.0895979 |
| 0.124417  | 0.0594406 | 0.137092  | 0.251894 | 0.119901  | 0.182692  | 0.190414  |
| 0.114802  | 0.119464  | 0.126894  | 0.246649 | 0.100962  | 0.177156  | 0.183712  |
| 0.0980478 | 0.127477  | 0.133159  | 0.246795 | 0.117133  | 0.177593  | 0.184441  |
| 0.117133  | 0.119755  | 0.125146  | 0.250728 | 0.120484  | 0.183275  | 0.188374  |
| 0.126166  | 0.121795  | 0.116696  | 0.252477 | 0.118444  | 0.185023  | 0.189831  |
| 0.119464  | 0.125874  | 0.136801  | 0.241404 | 0.120775  | 0.176573  | 0.180507  |
| 0.118153  | 0.121066  | 0.133159  | 0.245338 | 0.0448718 | 0.175554  | 0.180944  |
| 0.187646  | 0.192016  | 0.188957  | 0.136801 | 0.183421  | 0.0844988 | 0.0887238 |
| 0.120775  | 0.129225  | 0.131702  | 0.249417 | 0.121795  | 0.182838  | 0.186189  |
| 0.114219  | 0.125583  | 0.125728  | 0.240822 | 0.108246  | 0.171329  | 0.178759  |
| 0.212267  | 0.210519  | 0.20979   | 0.110431 | 0.203963  | 0.11116   | 0.10373   |
| 0.0499709 | 0.130682  | 0.133741  | 0.255245 | 0.12704   | 0.187209  | 0.194347  |
| 0.119755  | 0.121503  | 0.136509  | 0.246941 | 0.048514  | 0.179487  | 0.183712  |
| 0.113054  | 0.121503  | 0.13243   | 0.244027 | 0.0432692 | 0.175117  | 0.179924  |
| 0.133596  | 0.137966  | 0.144814  | 0.241259 | 0.137238  | 0.192162  | 0.193765  |
| 0.187791  | 0.190997  | 0.190268  | 0.141608 | 0.180944  | 0.0930944 | 0.0891608 |
| 0.119755  | 0.130245  | 0.0630828 | 0.25539  | 0.126603  | 0.187354  | 0.191288  |
| 0.125874  | 0.137238  | 0.135052  | 0.249854 | 0.129225  | 0.189103  | 0.194493  |
| 0.11655   | 0.120921  | 0.135344  | 0.244318 | 0.0453089 | 0.175699  | 0.183129  |
| 0.118298  | 0.119755  | 0.131265  | 0.247523 | 0.048514  | 0.175117  | 0.179924  |
| 0.117279  | 0.121941  | 0.132867  | 0.243007 | 0.0495338 | 0.171766  | 0.177739  |
| 0.114802  | 0.124417  | 0.133887  | 0.245775 | 0.112617  | 0.177448  | 0.181381  |
| 0.112617  | 0.109703  | 0.121212  | 0.246212 | 0.0981935 | 0.177593  | 0.184149  |
| 0.130682  | 0.0490967 | 0.138695  | 0.250874 | 0.122086  | 0.184878  | 0.19289   |
| 0.120775  | 0.143502  | 0.140734  | 0.255828 | 0.134615  | 0.196533  | 0.202214  |
| 0.127768  | 0.0575466 | 0.137821  | 0.252914 | 0.119464  | 0.183712  | 0.192016  |
| 0.123252  | 0.136946  | 0.133887  | 0.253351 | 0.133887  | 0.189685  | 0.19799   |
| 0.194493  | 0.194493  | 0.194056  | 0.138403 | 0.185897  | 0.0936772 | 0.0932401 |
| 0.117716  | 0.127914  | 0.128934  | 0.248689 | 0.120775  | 0.183566  | 0.187209  |
| 0.129225  | 0.133013  | 0.141608  | 0.243007 | 0.131702  | 0.186917  | 0.184732  |
| 0.11859   | 0.120047  | 0.136509  | 0.246649 | 0.0453089 | 0.176282  | 0.184295  |
| 0.110868  | 0.108829  | 0.121795  | 0.242424 | 0.0976107 | 0.173223  | 0.180361  |
| 0.116987  | 0.113782  | 0.131702  | 0.243298 | 0.114802  | 0.173223  | 0.180361  |
| 0.121212  | 0.129662  | 0.0552156 | 0.25102  | 0.125437  | 0.185315  | 0.189248  |
| 0.131993  | 0.134907  | 0.139423  | 0.251311 | 0.129516  | 0.187063  | 0.188957  |
| 0.112034  | 0.12602   | 0.139277  | 0.250874 | 0.117716  | 0.179633  | 0.185897  |
| 0.115822  | 0.119318  | 0.0836247 | 0.243007 | 0.109266  | 0.174971  | 0.178904  |

|          |           |           |          |           |           |           |
|----------|-----------|-----------|----------|-----------|-----------|-----------|
| 0.110431 | 0.118298  | 0.0922203 | 0.241696 | 0.105915  | 0.175408  | 0.178467  |
| 0.113782 | 0.116113  | 0.129079  | 0.246503 | 0.1081    | 0.174388  | 0.178322  |
| 0.120047 | 0.108683  | 0.0962995 | 0.254808 | 0.121358  | 0.184732  | 0.191579  |
| 0.137966 | 0.0549242 | 0.13986   | 0.253497 | 0.130828  | 0.194202  | 0.196096  |
| 0.11859  | 0.129662  | 0.067162  | 0.255973 | 0.122523  | 0.184732  | 0.188083  |
| 0.112908 | 0.118735  | 0.131119  | 0.239802 | 0.111888  | 0.174679  | 0.175699  |
| 0.116404 | 0.124563  | 0.0678904 | 0.25204  | 0.118007  | 0.183712  | 0.185606  |
| 0.113928 | 0.120921  | 0.131556  | 0.24461  | 0.0476399 | 0.174242  | 0.179341  |
| 0.105332 | 0.11757   | 0.115967  | 0.251748 | 0.114802  | 0.183421  | 0.187937  |
| 0.116987 | 0.122232  | 0.136072  | 0.24796  | 0.0463287 | 0.177302  | 0.18211   |
| 0.110286 | 0.125146  | 0.127622  | 0.247669 | 0.112471  | 0.176719  | 0.184441  |
| 0.110577 | 0.130682  | 0.139569  | 0.249417 | 0.116259  | 0.182255  | 0.18852   |
| 0.121649 | 0.11961   | 0.118881  | 0.251166 | 0.112471  | 0.186626  | 0.189977  |
| 0.114802 | 0.11655   | 0.127185  | 0.243735 | 0.099796  | 0.173951  | 0.180216  |
| 0.115239 | 0.12398   | 0.131119  | 0.244172 | 0.0504079 | 0.174388  | 0.181818  |
| 0.103293 | 0.130099  | 0.128205  | 0.236597 | 0.11859   | 0.170892  | 0.173951  |
| 0.121503 | 0.127914  | 0.138549  | 0.247523 | 0.112325  | 0.175991  | 0.184878  |
| 0.117279 | 0.121066  | 0.128497  | 0.247086 | 0.107809  | 0.178467  | 0.183858  |
| 0.113199 | 0.125437  | 0.136072  | 0.246795 | 0.0504079 | 0.177302  | 0.183275  |
| 0.119464 | 0.120921  | 0.136218  | 0.240822 | 0.120775  | 0.175408  | 0.178467  |
| 0.118881 | 0.111014  | 0.0995047 | 0.253642 | 0.11757   | 0.185897  | 0.189831  |
| 0.118881 | 0.125874  | 0.136218  | 0.245775 | 0.119318  | 0.179196  | 0.183712  |
| 0.122669 | 0.125291  | 0.118153  | 0.252185 | 0.114365  | 0.181235  | 0.185752  |
| 0.116259 | 0.118007  | 0.127477  | 0.248106 | 0.102127  | 0.18007   | 0.186334  |
| 0.115093 | 0.117133  | 0.131556  | 0.241696 | 0.105915  | 0.17162   | 0.177302  |
| 0.105624 | 0.116987  | 0.11655   | 0.250874 | 0.115385  | 0.185752  | 0.187646  |
| 0.123543 | 0.127914  | 0.13884   | 0.24053  | 0.121941  | 0.175991  | 0.181381  |
| 0.125874 | 0.130245  | 0.128934  | 0.248397 | 0.125728  | 0.184732  | 0.187209  |
| 0.120775 | 0.119901  | 0.128497  | 0.243007 | 0.107809  | 0.17701   | 0.181818  |
| 0.193036 | 0.193619  | 0.193765  | 0.136364 | 0.186189  | 0.0936772 | 0.0935315 |
| 0.164481 | 0.170309  | 0.167832  | 0.179196 | 0.158217  | 0.11961   | 0.120338  |
| 0.126894 | 0.060169  | 0.132867  | 0.250874 | 0.120338  | 0.184295  | 0.187063  |
| 0.119172 | 0.125     | 0.092803  | 0.24257  | 0.121941  | 0.175117  | 0.179633  |
| 0.153555 | 0.0681818 | 0.156614  | 0.260635 | 0.147873  | 0.205128  | 0.213432  |
| 0.121649 | 0.129808  | 0.144522  | 0.251748 | 0.119755  | 0.182255  | 0.189685  |
| 0.12296  | 0.125     | 0.140589  | 0.24053  | 0.0823135 | 0.174534  | 0.181381  |
| 0.121358 | 0.121941  | 0.137238  | 0.244172 | 0.0801282 | 0.172348  | 0.179196  |
| 0.121941 | 0.116987  | 0.134615  | 0.245338 | 0.0981935 | 0.180507  | 0.187063  |
| 0.123106 | 0.130682  | 0.136364  | 0.247086 | 0.113054  | 0.180798  | 0.190268  |
| 0.199301 | 0.201923  | 0.200903  | 0.130099 | 0.189831  | 0.0958625 | 0.0925117 |
| 0.120192 | 0.130682  | 0.0626457 | 0.258159 | 0.125583  | 0.188666  | 0.194056  |
| 0.116841 | 0.12296   | 0.101544  | 0.234994 | 0.115239  | 0.169872  | 0.174971  |
| 0.11655  | 0.123252  | 0.130099  | 0.241404 | 0.0613345 | 0.173077  | 0.180798  |
| 0.113199 | 0.128642  | 0.132867  | 0.252622 | 0.122378  | 0.182255  | 0.187063  |

|           |           |           |           |           |           |           |
|-----------|-----------|-----------|-----------|-----------|-----------|-----------|
| 0.184732  | 0.188228  | 0.18546   | 0.161859  | 0.177593  | 0.110431  | 0.112617  |
| 0.247086  | 0.246212  | 0.241113  | 0.0933858 | 0.242861  | 0.139277  | 0.133304  |
| 0.115676  | 0.130536  | 0.140297  | 0.24898   | 0.118444  | 0.186189  | 0.188957  |
| 0.11859   | 0.127622  | 0.136801  | 0.249563  | 0.112325  | 0.180361  | 0.189248  |
| 0.125874  | 0.0574009 | 0.136509  | 0.250728  | 0.116696  | 0.179487  | 0.188374  |
| 0.120775  | 0.118153  | 0.118007  | 0.253497  | 0.114219  | 0.180798  | 0.187354  |
| 0.116259  | 0.126457  | 0.0645396 | 0.253059  | 0.119027  | 0.18648   | 0.187209  |
| 0.111742  | 0.123397  | 0.13141   | 0.244755  | 0.114802  | 0.174097  | 0.180944  |
| 0.121212  | 0.120047  | 0.130682  | 0.234411  | 0.0773601 | 0.168415  | 0.172931  |
| 0.115676  | 0.124126  | 0.0584207 | 0.251603  | 0.120775  | 0.185315  | 0.189831  |
| 0.120484  | 0.116113  | 0.131119  | 0.236597  | 0.0862471 | 0.169143  | 0.174825  |
| 0.123543  | 0.126457  | 0.130973  | 0.254516  | 0.109994  | 0.185023  | 0.1875    |
| 0.116113  | 0.113199  | 0.125874  | 0.245338  | 0.100816  | 0.177885  | 0.183275  |
| 0.111305  | 0.127914  | 0.140297  | 0.248106  | 0.11757   | 0.185606  | 0.188666  |
| 0.119027  | 0.122523  | 0.136364  | 0.243007  | 0.118298  | 0.17701   | 0.181818  |
| 0.0925117 | 0.116987  | 0.120629  | 0.240676  | 0.109266  | 0.172057  | 0.178904  |
| 0.122232  | 0.135344  | 0.128788  | 0.256993  | 0.120629  | 0.193036  | 0.200758  |
| 0.135052  | 0.133013  | 0.122378  | 0.255536  | 0.131119  | 0.197115  | 0.200175  |
| 0.113636  | 0.122086  | 0.132139  | 0.247523  | 0.0496795 | 0.174534  | 0.182255  |
| 0.125146  | 0.10912   | 0.12704   | 0.235723  | 0.0874126 | 0.172057  | 0.178613  |
| 0.133887  | 0.137092  | 0.145105  | 0.247378  | 0.0603147 | 0.187791  | 0.19289   |
| 0.208333  | 0.207168  | 0.207896  | 0.118444  | 0.200029  | 0.117424  | 0.114365  |
| 0.101253  | 0.121649  | 0.13141   | 0.242424  | 0.112762  | 0.176719  | 0.181235  |
| 0.11451   | 0.113054  | 0.126603  | 0.249272  | 0.100962  | 0.178904  | 0.183129  |
| 0.117133  | 0.129079  | 0.130973  | 0.249854  | 0.119027  | 0.178904  | 0.18546   |
| 0.0488054 | 0.130973  | 0.133159  | 0.253205  | 0.125874  | 0.185169  | 0.190559  |
| 0.110286  | 0.129225  | 0.128205  | 0.252331  | 0.119172  | 0.177302  | 0.184149  |
| 0.198281  | 0.202069  | 0.200758  | 0.132867  | 0.190268  | 0.097465  | 0.101107  |
| 0.125     | 0.128497  | 0.137092  | 0.246066  | 0.120775  | 0.18007   | 0.182255  |
| 0.116696  | 0.119027  | 0.132284  | 0.245338  | 0.0512821 | 0.172931  | 0.180944  |
| 0.125583  | 0.120047  | 0.123106  | 0.248397  | 0.124563  | 0.187646  | 0.191871  |
| 0.117424  | 0.117133  | 0.116113  | 0.251311  | 0.112034  | 0.180944  | 0.185752  |
| 0.11859   | 0.126166  | 0.134178  | 0.242279  | 0.116113  | 0.174242  | 0.17905   |
| 0.110723  | 0.116841  | 0.128934  | 0.236742  | 0.108246  | 0.168706  | 0.176136  |
| 0.125291  | 0.125874  | 0.13243   | 0.252768  | 0.110868  | 0.184149  | 0.188666  |
| 0.0504079 | 0.127331  | 0.134178  | 0.251603  | 0.123689  | 0.183858  | 0.189248  |
| 0.197115  | 0.202943  | 0.199009  | 0.130245  | 0.189103  | 0.0925117 | 0.0961538 |
| 0.111888  | 0.115967  | 0.125728  | 0.237325  | 0.11116   | 0.173077  | 0.175262  |
| 0.197115  | 0.196533  | 0.19493   | 0.142774  | 0.188228  | 0.0948427 | 0.0932401 |
| 0.192308  | 0.196096  | 0.192162  | 0.135052  | 0.186334  | 0.0897436 | 0.092803  |
| 0.129953  | 0.131993  | 0.122232  | 0.255973  | 0.125146  | 0.19493   | 0.198864  |
| 0.0611888 | 0.134615  | 0.135344  | 0.256556  | 0.135635  | 0.194056  | 0.200903  |
| 0.114802  | 0.120921  | 0.121649  | 0.246649  | 0.105915  | 0.177156  | 0.184003  |
| 0.109703  | 0.116113  | 0.124417  | 0.241841  | 0.111305  | 0.173223  | 0.175408  |

|           |           |           |           |           |           |           |
|-----------|-----------|-----------|-----------|-----------|-----------|-----------|
| 0.11655   | 0.120921  | 0.133304  | 0.242861  | 0.116113  | 0.175699  | 0.178759  |
| 0.118298  | 0.126457  | 0.133887  | 0.245775  | 0.0517191 | 0.176865  | 0.17905   |
| 0.113054  | 0.117716  | 0.069493  | 0.250146  | 0.11961   | 0.181527  | 0.186043  |
| 0.115967  | 0.124417  | 0.0613345 | 0.253934  | 0.121066  | 0.185023  | 0.189831  |
| 0.11116   | 0.131556  | 0.1419    | 0.247086  | 0.118881  | 0.184878  | 0.187646  |
| 0.123834  | 0.122086  | 0.126894  | 0.254516  | 0.11553   | 0.184732  | 0.18954   |
| 0.112325  | 0.116404  | 0.130828  | 0.243881  | 0.0463287 | 0.173514  | 0.18007   |
| 0.115676  | 0.124709  | 0.133304  | 0.244318  | 0.119318  | 0.176865  | 0.179341  |
| 0.11116   | 0.114073  | 0.120921  | 0.244172  | 0.102855  | 0.178176  | 0.181527  |
| 0.128205  | 0.131119  | 0.140297  | 0.243735  | 0.129808  | 0.185606  | 0.188374  |
| 0.125291  | 0.0565268 | 0.133596  | 0.249272  | 0.120192  | 0.182401  | 0.188083  |
| 0.131556  | 0.134761  | 0.145396  | 0.246212  | 0.132867  | 0.188666  | 0.190559  |
| 0.260052  | 0.260052  | 0.254662  | 0.0879953 | 0.254371  | 0.14729   | 0.138695  |
| 0.120484  | 0.129808  | 0.122086  | 0.257576  | 0.134907  | 0.198281  | 0.202797  |
| 0.128205  | 0.129953  | 0.129808  | 0.248689  | 0.13039   | 0.191434  | 0.198281  |
| 0.21722   | 0.216055  | 0.219406  | 0.115967  | 0.211247  | 0.118735  | 0.115385  |
| 0.116841  | 0.133741  | 0.13447   | 0.248106  | 0.121358  | 0.189685  | 0.194784  |
| 0.227564  | 0.230186  | 0.227127  | 0.10912   | 0.226544  | 0.124709  | 0.123397  |
| 0.112034  | 0.126603  | 0.115385  | 0.254371  | 0.125874  | 0.191288  | 0.193182  |
| 0.131702  | 0.133741  | 0.14292   | 0.246649  | 0.0590035 | 0.187354  | 0.193036  |
| 0.0509907 | 0.127622  | 0.128351  | 0.24898   | 0.117861  | 0.179196  | 0.185169  |
| 0.128788  | 0.126748  | 0.124563  | 0.254225  | 0.122232  | 0.187063  | 0.191579  |
| 0.199883  | 0.206876  | 0.202069  | 0.132139  | 0.197115  | 0.0882867 | 0.100379  |
| 0.129953  | 0.134907  | 0.144376  | 0.247523  | 0.128934  | 0.187063  | 0.189831  |
| 0.119464  | 0.123543  | 0.135052  | 0.242861  | 0.119027  | 0.175408  | 0.17905   |
| 0.224213  | 0.228001  | 0.225233  | 0.112471  | 0.219697  | 0.11757   | 0.117424  |
| 0.116841  | 0.129662  | 0.0651224 | 0.252185  | 0.120484  | 0.182401  | 0.184003  |
| 0.195659  | 0.202069  | 0.197844  | 0.129662  | 0.189394  | 0.0948427 | 0.0935315 |
| 0.123106  | 0.130682  | 0.0658508 | 0.253788  | 0.125     | 0.187791  | 0.189103  |
| 0.11757   | 0.12398   | 0.136364  | 0.250291  | 0.0498252 | 0.178176  | 0.181818  |
| 0.124709  | 0.121503  | 0.135052  | 0.251311  | 0.112325  | 0.187937  | 0.194493  |
| 0.130536  | 0.130245  | 0.121358  | 0.255973  | 0.124563  | 0.195221  | 0.200029  |
| 0.119901  | 0.119901  | 0.130536  | 0.242716  | 0.111888  | 0.176428  | 0.178322  |
| 0.159237  | 0.163316  | 0.164918  | 0.17803   | 0.151224  | 0.114365  | 0.117424  |
| 0.112617  | 0.118735  | 0.129371  | 0.24155   | 0.114802  | 0.175845  | 0.176573  |
| 0.0488054 | 0.132139  | 0.13345   | 0.252622  | 0.124126  | 0.183421  | 0.189103  |
| 0.113491  | 0.134761  | 0.12704   | 0.253788  | 0.114802  | 0.178176  | 0.183275  |
| 0.108246  | 0.134761  | 0.134615  | 0.247086  | 0.134324  | 0.185752  | 0.192016  |
| 0.19493   | 0.197261  | 0.195659  | 0.133304  | 0.185752  | 0.0935315 | 0.088141  |
| 0.116404  | 0.122232  | 0.131702  | 0.245047  | 0.0472028 | 0.173805  | 0.177739  |
| 0.12296   | 0.129371  | 0.11757   | 0.243735  | 0.11553   | 0.170163  | 0.174971  |
| 0.120775  | 0.106789  | 0.0996503 | 0.255245  | 0.117716  | 0.186626  | 0.19289   |
| 0.118881  | 0.129662  | 0.0560897 | 0.256265  | 0.127477  | 0.191142  | 0.192745  |
| 0.124854  | 0.128642  | 0.137821  | 0.244172  | 0.0544872 | 0.181381  | 0.186772  |

|          |           |           |          |           |           |           |
|----------|-----------|-----------|----------|-----------|-----------|-----------|
| 0.255828 | 0.257867  | 0.251311  | 0.08581  | 0.252768  | 0.144231  | 0.136218  |
| 0.118444 | 0.11757   | 0.127331  | 0.249417 | 0.1081    | 0.184878  | 0.191142  |
| 0.118444 | 0.13039   | 0.13345   | 0.243881 | 0.0941142 | 0.174679  | 0.177739  |
| 0.17701  | 0.183421  | 0.173951  | 0.173951 | 0.181818  | 0.13243   | 0.135781  |
| 0.184295 | 0.188666  | 0.182984  | 0.138986 | 0.177739  | 0.0884324 | 0.0920746 |
| 0.111742 | 0.130682  | 0.141026  | 0.247378 | 0.11451   | 0.182547  | 0.184732  |
| 0.121503 | 0.124709  | 0.138549  | 0.245484 | 0.116113  | 0.179487  | 0.184003  |
| 0.119172 | 0.122378  | 0.11757   | 0.252185 | 0.112034  | 0.178904  | 0.1875    |
| 0.144668 | 0.148747  | 0.152389  | 0.247669 | 0.143065  | 0.194493  | 0.196678  |
| 0.110577 | 0.128059  | 0.136072  | 0.246503 | 0.116259  | 0.181964  | 0.183858  |
| 0.111014 | 0.132284  | 0.142337  | 0.250728 | 0.118444  | 0.184441  | 0.190122  |
| 0.122815 | 0.130682  | 0.0582751 | 0.254953 | 0.130536  | 0.188957  | 0.192308  |
| 0.118444 | 0.119027  | 0.13141   | 0.237179 | 0.115967  | 0.174388  | 0.176573  |
| 0.129079 | 0.135198  | 0.140589  | 0.241696 | 0.128351  | 0.184732  | 0.186626  |
| 0.119318 | 0.125437  | 0.0722611 | 0.240967 | 0.118007  | 0.169435  | 0.174534  |
| 0.129371 | 0.12704   | 0.120484  | 0.253642 | 0.121358  | 0.190851  | 0.193328  |
| 0.142628 | 0.138258  | 0.131993  | 0.260781 | 0.135198  | 0.202069  | 0.204837  |
| 0.125    | 0.121212  | 0.129516  | 0.248397 | 0.111742  | 0.186189  | 0.193036  |
| 0.138258 | 0.131847  | 0.122669  | 0.256702 | 0.129953  | 0.198864  | 0.201049  |
| 0.127768 | 0.133304  | 0.0515734 | 0.259033 | 0.134615  | 0.194493  | 0.199883  |
| 0.205711 | 0.20979   | 0.208479  | 0.137092 | 0.201195  | 0.0990676 | 0.104167  |
| 0.121649 | 0.122815  | 0.123252  | 0.253497 | 0.110723  | 0.192162  | 0.19493   |
| 0.190414 | 0.194493  | 0.192016  | 0.139277 | 0.18211   | 0.090472  | 0.0952797 |
| 0.08581  | 0.128642  | 0.125583  | 0.248543 | 0.119755  | 0.179924  | 0.184732  |
| 0.127477 | 0.133887  | 0.139277  | 0.24155  | 0.0544872 | 0.178759  | 0.185023  |
| 0.129225 | 0.0505536 | 0.135198  | 0.245629 | 0.120338  | 0.18109   | 0.188811  |
| 0.121212 | 0.0641026 | 0.130682  | 0.246066 | 0.113782  | 0.175991  | 0.184295  |
| 0.121941 | 0.126311  | 0.139277  | 0.23951  | 0.12296   | 0.175262  | 0.180653  |
| 0.120484 | 0.125146  | 0.134907  | 0.242133 | 0.121503  | 0.180216  | 0.183858  |
| 0.116113 | 0.125728  | 0.13549   | 0.244464 | 0.0506993 | 0.173223  | 0.178613  |
| 0        | 0.133159  | 0.129225  | 0.251894 | 0.119027  | 0.181235  | 0.187791  |
| 0.133159 | 0         | 0.137383  | 0.250146 | 0.125146  | 0.187354  | 0.194493  |
| 0.129225 | 0.137383  | 0         | 0.245629 | 0.137529  | 0.184586  | 0.188228  |
| 0.251894 | 0.250146  | 0.245629  | 0        | 0.246212  | 0.14088   | 0.135198  |
| 0.119027 | 0.125146  | 0.137529  | 0.246212 | 0         | 0.177302  | 0.183566  |
| 0.181235 | 0.187354  | 0.184586  | 0.14088  | 0.177302  | 0         | 0.0890152 |
| 0.187791 | 0.194493  | 0.188228  | 0.135198 | 0.183566  | 0.0890152 | 0         |
| 0.120921 | 0.132576  | 0.131556  | 0.244318 | 0.113782  | 0.174242  | 0.177885  |
| 0.117716 | 0.115385  | 0.12602   | 0.245484 | 0.102127  | 0.181527  | 0.186626  |
| 0.123834 | 0.131702  | 0.139714  | 0.246941 | 0.0566725 | 0.185023  | 0.186917  |
| 0.110431 | 0.118007  | 0.133304  | 0.241404 | 0.113199  | 0.174242  | 0.175845  |
| 0.115822 | 0.11553   | 0.124709  | 0.237471 | 0.0938228 | 0.169435  | 0.175408  |
| 0.11757  | 0.126894  | 0.0632284 | 0.253788 | 0.123834  | 0.186043  | 0.188228  |
| 0.125    | 0.125291  | 0.134178  | 0.236742 | 0.121066  | 0.175408  | 0.178176  |

|           |           |           |           |           |           |           |
|-----------|-----------|-----------|-----------|-----------|-----------|-----------|
| 0.13141   | 0.133159  | 0.143211  | 0.249272  | 0.13039   | 0.192016  | 0.193036  |
| 0.11757   | 0.125728  | 0.134615  | 0.244172  | 0.0463287 | 0.174679  | 0.181235  |
| 0.128934  | 0.128934  | 0.142483  | 0.247378  | 0.127622  | 0.188957  | 0.191142  |
| 0.116259  | 0.123252  | 0.131265  | 0.248397  | 0.119901  | 0.183566  | 0.188083  |
| 0.134907  | 0.0524476 | 0.13884   | 0.253351  | 0.12602   | 0.188228  | 0.196241  |
| 0.124854  | 0.125437  | 0.120629  | 0.253788  | 0.116841  | 0.182255  | 0.187937  |
| 0.129953  | 0.137238  | 0.0499709 | 0.257139  | 0.135635  | 0.19697   | 0.200321  |
| 0.126603  | 0.129225  | 0.13141   | 0.249126  | 0.117133  | 0.188666  | 0.193182  |
| 0.120775  | 0.116987  | 0.129662  | 0.237471  | 0.0591492 | 0.173514  | 0.18007   |
| 0.128642  | 0.138258  | 0.135781  | 0.248834  | 0.132867  | 0.190997  | 0.197844  |
| 0.182984  | 0.187646  | 0.185752  | 0.133304  | 0.176719  | 0.090035  | 0.0866841 |
| 0.130682  | 0.139132  | 0.146853  | 0.248543  | 0.134615  | 0.193619  | 0.19289   |
| 0.120775  | 0.119318  | 0.134033  | 0.242133  | 0.121212  | 0.17701   | 0.180653  |
| 0.125874  | 0.0504079 | 0.135927  | 0.249563  | 0.118735  | 0.182984  | 0.191288  |
| 0.118444  | 0.060169  | 0.127622  | 0.246503  | 0.110723  | 0.176719  | 0.182401  |
| 0.123834  | 0.123543  | 0.118153  | 0.251311  | 0.119027  | 0.183275  | 0.188957  |
| 0.127768  | 0.12602   | 0.120629  | 0.255536  | 0.12296   | 0.188666  | 0.192308  |
| 0.191434  | 0.195221  | 0.190997  | 0.141171  | 0.184003  | 0.0926573 | 0.0875583 |
| 0.124417  | 0.123543  | 0.130682  | 0.234994  | 0.117279  | 0.16958   | 0.174097  |
| 0.115239  | 0.116404  | 0.118298  | 0.224359  | 0.111888  | 0.15778   | 0.162005  |
| 0.121649  | 0.123106  | 0.138695  | 0.24359   | 0.123252  | 0.181381  | 0.183858  |
| 0.191142  | 0.198427  | 0.193036  | 0.138258  | 0.186043  | 0.092366  | 0.0907634 |
| 0.114656  | 0.114948  | 0.123543  | 0.243298  | 0.0999417 | 0.1706    | 0.178322  |
| 0.121795  | 0.129371  | 0.0537587 | 0.25539   | 0.130682  | 0.190268  | 0.194493  |
| 0.124417  | 0.127914  | 0.140297  | 0.244318  | 0.122815  | 0.180653  | 0.184295  |
| 0.10708   | 0.125728  | 0.135198  | 0.248543  | 0.113345  | 0.184878  | 0.187937  |
| 0.187791  | 0.188957  | 0.18852   | 0.135781  | 0.180653  | 0.0852273 | 0.0865385 |
| 0.120484  | 0.123106  | 0.0544872 | 0.251748  | 0.125291  | 0.184295  | 0.188228  |
| 0.114365  | 0.12602   | 0.123543  | 0.240385  | 0.115385  | 0.173805  | 0.176282  |
| 0.110868  | 0.114365  | 0.123252  | 0.236597  | 0.100816  | 0.168561  | 0.173077  |
| 0.121649  | 0.116987  | 0.127331  | 0.227855  | 0.117424  | 0.158362  | 0.164044  |
| 0.0498252 | 0.131119  | 0.133304  | 0.256556  | 0.124272  | 0.185897  | 0.193036  |
| 0.12704   | 0.13345   | 0.0517191 | 0.257139  | 0.135635  | 0.194347  | 0.197115  |
| 0.119755  | 0.122669  | 0.136218  | 0.244901  | 0.0450175 | 0.178322  | 0.181964  |
| 0.125291  | 0.129079  | 0.130973  | 0.252477  | 0.124854  | 0.188811  | 0.191871  |
| 0.13447   | 0.150204  | 0.157634  | 0.253788  | 0.144522  | 0.198281  | 0.20134   |
| 0.233829  | 0.237034  | 0.233974  | 0.0999417 | 0.231061  | 0.13039   | 0.124709  |
| 0.133304  | 0.133596  | 0.136364  | 0.254371  | 0.121212  | 0.195367  | 0.198135  |
| 0.0502622 | 0.128351  | 0.131993  | 0.254371  | 0.121795  | 0.184295  | 0.191434  |
| 0.120047  | 0.12296   | 0.126603  | 0.235577  | 0.118444  | 0.173368  | 0.17701   |
| 0.123106  | 0.130099  | 0.137529  | 0.240676  | 0.123543  | 0.172931  | 0.18007   |
| 0.0708042 | 0.115676  | 0.111451  | 0.245775  | 0.121358  | 0.177448  | 0.184878  |
| 0.115093  | 0.125874  | 0.126311  | 0.246941  | 0.123689  | 0.181527  | 0.186917  |
| 0.121649  | 0.124272  | 0.13345   | 0.240967  | 0.120921  | 0.17905   | 0.18211   |

|           |           |           |           |           |           |           |
|-----------|-----------|-----------|-----------|-----------|-----------|-----------|
| 0.125     | 0.131702  | 0.0499709 | 0.253642  | 0.132721  | 0.190851  | 0.192745  |
| 0.111305  | 0.126457  | 0.134761  | 0.246941  | 0.116113  | 0.178322  | 0.183712  |
| 0.235868  | 0.238199  | 0.233974  | 0.0979021 | 0.231935  | 0.131847  | 0.127331  |
| 0.112762  | 0.112471  | 0.12398   | 0.245192  | 0.102418  | 0.17366   | 0.179341  |
| 0.103438  | 0.115093  | 0.112908  | 0.246358  | 0.114073  | 0.176865  | 0.181964  |
| 0.116987  | 0.120192  | 0.13345   | 0.243298  | 0.0492424 | 0.176719  | 0.181818  |
| 0.120338  | 0.135781  | 0.145251  | 0.25102   | 0.127477  | 0.19289   | 0.195076  |
| 0.138986  | 0.137821  | 0.140589  | 0.257721  | 0.126894  | 0.195804  | 0.200612  |
| 0.118007  | 0.122378  | 0.135344  | 0.236451  | 0.109703  | 0.173368  | 0.175554  |
| 0.116259  | 0.125874  | 0.136801  | 0.241696  | 0.115239  | 0.174825  | 0.17905   |
| 0.107955  | 0.124854  | 0.126748  | 0.24359   | 0.109848  | 0.17701   | 0.180653  |
| 0.231498  | 0.234994  | 0.229312  | 0.0984848 | 0.225524  | 0.125437  | 0.123252  |
| 0.122523  | 0.126311  | 0.139569  | 0.240676  | 0.126457  | 0.182838  | 0.184441  |
| 0.125291  | 0.129079  | 0.0528846 | 0.254516  | 0.128351  | 0.189394  | 0.19391   |
| 0.105478  | 0.126457  | 0.128934  | 0.249854  | 0.109411  | 0.18007   | 0.183421  |
| 0.105624  | 0.13243   | 0.13141   | 0.249126  | 0.123252  | 0.188666  | 0.192599  |
| 0.120775  | 0.125437  | 0.11859   | 0.255536  | 0.131119  | 0.194493  | 0.197261  |
| 0.116987  | 0.123689  | 0.135781  | 0.244172  | 0.0506993 | 0.177593  | 0.185023  |
| 0.12398   | 0.127185  | 0.0536131 | 0.254079  | 0.129662  | 0.190122  | 0.194347  |
| 0.128788  | 0.131993  | 0.0540501 | 0.258304  | 0.136218  | 0.19493   | 0.19799   |
| 0.118881  | 0.124417  | 0.060169  | 0.254516  | 0.123689  | 0.187354  | 0.191288  |
| 0.115822  | 0.122523  | 0.137529  | 0.247086  | 0.0472028 | 0.176136  | 0.182984  |
| 0.0557984 | 0.133887  | 0.134324  | 0.252914  | 0.131119  | 0.188957  | 0.19493   |
| 0.0574009 | 0.137529  | 0.138549  | 0.260344  | 0.136218  | 0.195513  | 0.201195  |
| 0.133159  | 0.0582751 | 0.142628  | 0.254516  | 0.126894  | 0.191142  | 0.199155  |
| 0.13549   | 0.0556527 | 0.141171  | 0.254808  | 0.130973  | 0.189685  | 0.196824  |
| 0.0543415 | 0.136509  | 0.13549   | 0.258741  | 0.134907  | 0.195076  | 0.201923  |
| 0.116113  | 0.114656  | 0.130536  | 0.249126  | 0.0929487 | 0.17905   | 0.181818  |
| 0.13345   | 0.125     | 0.097465  | 0.262675  | 0.139714  | 0.20134   | 0.207605  |
| 0.135344  | 0.138258  | 0.126166  | 0.25845   | 0.126457  | 0.197698  | 0.20134   |
| 0.205565  | 0.208479  | 0.205711  | 0.114802  | 0.200175  | 0.106206  | 0.0996503 |
| 0.127768  | 0.133887  | 0.132867  | 0.246795  | 0.116841  | 0.181672  | 0.18852   |
| 0.109703  | 0.122815  | 0.113345  | 0.254079  | 0.121212  | 0.187209  | 0.18648   |
| 0.12296   | 0.130245  | 0.13884   | 0.238782  | 0.0496795 | 0.175991  | 0.178759  |
| 0.222465  | 0.226836  | 0.220862  | 0.101981  | 0.218531  | 0.118444  | 0.12296   |
| 0.210227  | 0.216055  | 0.208042  | 0.136946  | 0.206002  | 0.112325  | 0.115385  |
| 0.128205  | 0.134324  | 0.050845  | 0.256265  | 0.13243   | 0.190851  | 0.197407  |
| 0.248397  | 0.248106  | 0.245921  | 0.0859557 | 0.247086  | 0.14088   | 0.136072  |
| 0.114948  | 0.108246  | 0.130536  | 0.247669  | 0.0891608 | 0.178759  | 0.183858  |
| 0.135344  | 0.14292   | 0.148019  | 0.254371  | 0.130828  | 0.195076  | 0.200175  |
| 0.116404  | 0.112908  | 0.128497  | 0.246503  | 0.10169   | 0.180507  | 0.185606  |
| 0.0501166 | 0.132576  | 0.13447   | 0.255099  | 0.130973  | 0.189394  | 0.194784  |
| 0.189831  | 0.193328  | 0.189103  | 0.128497  | 0.182692  | 0.0890152 | 0.0862471 |
| 0.120921  | 0.133159  | 0.129516  | 0.248106  | 0.120775  | 0.182401  | 0.188957  |



|           |           |           |          |           |          |           |
|-----------|-----------|-----------|----------|-----------|----------|-----------|
| 0.197261  | 0.197844  | 0.194493  | 0.133596 | 0.185752  | 0.094697 | 0.0939685 |
| 0.117133  | 0.128788  | 0.130099  | 0.249272 | 0.109703  | 0.183566 | 0.186334  |
| 0.119464  | 0.122378  | 0.0779429 | 0.234411 | 0.116113  | 0.16521  | 0.17264   |
| 0.123834  | 0.123834  | 0.130682  | 0.245192 | 0.11961   | 0.183858 | 0.187791  |
| 0.114802  | 0.115676  | 0.122815  | 0.231789 | 0.109703  | 0.166375 | 0.171474  |
| 0.112325  | 0.114365  | 0.129079  | 0.240385 | 0.0463287 | 0.17264  | 0.178322  |
| 0.118444  | 0.124272  | 0.131702  | 0.245921 | 0.106643  | 0.174971 | 0.183858  |
| 0.112908  | 0.112325  | 0.121795  | 0.239802 | 0.099359  | 0.171766 | 0.178613  |
| 0.115967  | 0.121795  | 0.131556  | 0.241987 | 0.116113  | 0.175117 | 0.178759  |
| 0.121358  | 0.108537  | 0.0984848 | 0.254662 | 0.122669  | 0.1875   | 0.193765  |
| 0.11961   | 0.124272  | 0.129371  | 0.248543 | 0.107809  | 0.181964 | 0.184732  |
| 0.112471  | 0.112179  | 0.124854  | 0.245192 | 0.104167  | 0.177448 | 0.182255  |
| 0.12602   | 0.0674534 | 0.131119  | 0.245921 | 0.106352  | 0.177885 | 0.184441  |
| 0.129808  | 0.130973  | 0.140152  | 0.24796  | 0.129371  | 0.186917 | 0.190268  |
| 0.11859   | 0.0559441 | 0.128351  | 0.246649 | 0.114073  | 0.175408 | 0.182255  |
| 0.113491  | 0.124563  | 0.123834  | 0.246212 | 0.113636  | 0.176428 | 0.182401  |
| 0.113928  | 0.118298  | 0.131556  | 0.24257  | 0.0435606 | 0.174825 | 0.177885  |
| 0.121503  | 0.123834  | 0.0636655 | 0.244901 | 0.124272  | 0.177156 | 0.185169  |
| 0.0515734 | 0.127622  | 0.131265  | 0.251894 | 0.120775  | 0.181527 | 0.190997  |
| 0.123689  | 0.123106  | 0.119464  | 0.254079 | 0.117424  | 0.188666 | 0.192308  |
| 0.124854  | 0.055507  | 0.130536  | 0.248834 | 0.117424  | 0.18109  | 0.189103  |
| 0.121503  | 0.121212  | 0.134178  | 0.241987 | 0.118735  | 0.177739 | 0.180216  |
| 0.126894  | 0.133013  | 0.141317  | 0.245338 | 0.128788  | 0.189248 | 0.189103  |
| 0.140006  | 0.141171  | 0.147145  | 0.247086 | 0.137238  | 0.19595  | 0.19493   |
| 0.111305  | 0.117424  | 0.0753205 | 0.24461  | 0.107372  | 0.177156 | 0.181381  |
| 0.115093  | 0.122378  | 0.135344  | 0.244901 | 0.0476399 | 0.176282 | 0.180798  |
| 0.105332  | 0.120484  | 0.123834  | 0.245338 | 0.115385  | 0.1706   | 0.179487  |
| 0.0592949 | 0.138258  | 0.138112  | 0.25845  | 0.137821  | 0.192745 | 0.201923  |
| 0.120629  | 0.116841  | 0.12602   | 0.25102  | 0.109703  | 0.183566 | 0.18954   |
| 0.143648  | 0.13986   | 0.128351  | 0.260344 | 0.136509  | 0.203963 | 0.205274  |
| 0.138695  | 0.142191  | 0.148747  | 0.251311 | 0.064831  | 0.191434 | 0.196533  |
| 0.114365  | 0.13243   | 0.145105  | 0.247086 | 0.124126  | 0.188083 | 0.192016  |
| 0.115093  | 0.11859   | 0.128934  | 0.244027 | 0.103001  | 0.176282 | 0.18109   |
| 0.100087  | 0.123397  | 0.130245  | 0.245921 | 0.116841  | 0.178467 | 0.182692  |
| 0.131556  | 0.0525932 | 0.13986   | 0.25204  | 0.125291  | 0.186626 | 0.198427  |
| 0.20979   | 0.208042  | 0.202943  | 0.140006 | 0.202652  | 0.116259 | 0.116404  |
| 0.11451   | 0.126166  | 0.123397  | 0.243153 | 0.116113  | 0.174825 | 0.179924  |
| 0.121066  | 0.122523  | 0.134615  | 0.252622 | 0.114219  | 0.182255 | 0.186189  |
| 0.0541958 | 0.130828  | 0.129516  | 0.253934 | 0.123106  | 0.185606 | 0.192745  |
| 0.123106  | 0.057838  | 0.13141   | 0.247378 | 0.116259  | 0.179924 | 0.187646  |
| 0.123543  | 0.134324  | 0.134761  | 0.250728 | 0.114365  | 0.183566 | 0.187791  |
| 0.124709  | 0.130536  | 0.13039   | 0.246649 | 0.127768  | 0.186772 | 0.186043  |
| 0.126894  | 0.133304  | 0.130536  | 0.249709 | 0.130828  | 0.190122 | 0.191142  |
| 0.112471  | 0.132284  | 0.139714  | 0.246941 | 0.120484  | 0.185897 | 0.188083  |

|           |          |           |          |          |          |          |
|-----------|----------|-----------|----------|----------|----------|----------|
| 0.116841  | 0.109848 | 0.0960082 | 0.251311 | 0.11757  | 0.184441 | 0.190122 |
| 0.0539044 | 0.13549  | 0.133304  | 0.254808 | 0.130099 | 0.191725 | 0.197698 |
| 0.119172  | 0.121212 | 0.127768  | 0.24898  | 0.114656 | 0.181235 | 0.188083 |
| 0.12602   | 0.129808 | 0.13549   | 0.255828 | 0.113054 | 0.182838 | 0.188811 |
| 0.176282  | 0.171037 | 0.177885  | 0.213432 | 0.170309 | 0.162879 | 0.163024 |
| 0.116259  | 0.122669 | 0.135052  | 0.242861 | 0.112908 | 0.176573 | 0.18109  |
| 0.0639569 | 0.136218 | 0.129371  | 0.245921 | 0.133159 | 0.17905  | 0.18648  |
| 0.121503  | 0.125874 | 0.116404  | 0.258013 | 0.11757  | 0.192308 | 0.199738 |
| 0.120775  | 0.126894 | 0.120629  | 0.248543 | 0.12296  | 0.182838 | 0.187354 |
| 0.114073  | 0.114365 | 0.125     | 0.246795 | 0.106061 | 0.17905  | 0.183858 |
| 0.115822  | 0.11961  | 0.121503  | 0.246212 | 0.103438 | 0.17905  | 0.184149 |
| 0.117279  | 0.122523 | 0.12704   | 0.251748 | 0.111597 | 0.184003 | 0.190268 |
| 0.116987  | 0.130099 | 0.109848  | 0.252914 | 0.126748 | 0.188083 | 0.196096 |
| 0.124563  | 0.121066 | 0.133741  | 0.238928 | 0.111305 | 0.173223 | 0.177448 |
| 0.129371  | 0.128497 | 0.132139  | 0.259178 | 0.124272 | 0.19289  | 0.199738 |
| 0.113199  | 0.121358 | 0.118298  | 0.245629 | 0.111888 | 0.174971 | 0.178322 |
| 0.124126  | 0.123543 | 0.120775  | 0.250437 | 0.115822 | 0.178322 | 0.186917 |
| 0.127768  | 0.143211 | 0.104604  | 0.26049  | 0.131119 | 0.200321 | 0.202797 |
| 0.124272  | 0.120192 | 0.11451   | 0.253788 | 0.114802 | 0.190122 | 0.196387 |
| 0.12398   | 0.120192 | 0.126457  | 0.24796  | 0.122086 | 0.188666 | 0.192308 |
| 0.119901  | 0.116404 | 0.119755  | 0.253205 | 0.107226 | 0.185169 | 0.190268 |
| 0.123397  | 0.119027 | 0.113636  | 0.251748 | 0.11451  | 0.186917 | 0.193182 |
| 0.114365  | 0.116113 | 0.122669  | 0.24796  | 0.10169  | 0.175262 | 0.183275 |
| 0.128788  | 0.128788 | 0.121941  | 0.256556 | 0.112325 | 0.193765 | 0.198864 |
| 0.113054  | 0.118007 | 0.122232  | 0.253059 | 0.105332 | 0.18007  | 0.188374 |
| 0.142774  | 0.144522 | 0.113491  | 0.253934 | 0.145542 | 0.199301 | 0.202943 |
| 0.127622  | 0.136364 | 0.112034  | 0.252477 | 0.130973 | 0.184441 | 0.189248 |
| 0.118007  | 0.106643 | 0.114656  | 0.252185 | 0.110577 | 0.185897 | 0.190414 |
| 0.135052  | 0.137675 | 0.111014  | 0.259615 | 0.141608 | 0.198281 | 0.204545 |
| 0.11961   | 0.10067  | 0.141026  | 0.248543 | 0.120629 | 0.182547 | 0.191142 |
| 0.139132  | 0.139714 | 0.129079  | 0.253788 | 0.136072 | 0.195659 | 0.202797 |
| 0.118444  | 0.116113 | 0.124709  | 0.251166 | 0.107517 | 0.183712 | 0.190851 |
| 0.128497  | 0.151807 | 0.144668  | 0.25539  | 0.144668 | 0.196096 | 0.201777 |
| 0.120338  | 0.138695 | 0.130682  | 0.248397 | 0.130973 | 0.185315 | 0.188957 |
| 0.131119  | 0.136364 | 0.126311  | 0.252768 | 0.136509 | 0.192599 | 0.196533 |
| 0.129079  | 0.106352 | 0.130099  | 0.260052 | 0.122523 | 0.196387 | 0.200903 |
| 0.123106  | 0.116404 | 0.112762  | 0.251166 | 0.107226 | 0.186043 | 0.189977 |
| 0.118007  | 0.116259 | 0.11757   | 0.251894 | 0.107372 | 0.180361 | 0.186917 |
| 0.106789  | 0.126311 | 0.11014   | 0.250874 | 0.120629 | 0.187791 | 0.192599 |
| 0.125437  | 0.120192 | 0.120629  | 0.254662 | 0.119172 | 0.195076 | 0.200175 |
| 0.129953  | 0.127331 | 0.137383  | 0.258887 | 0.121941 | 0.200466 | 0.2044   |
| 0.126166  | 0.127622 | 0.11553   | 0.249272 | 0.116404 | 0.180361 | 0.182255 |
| 0.114802  | 0.101981 | 0.120192  | 0.25102  | 0.111742 | 0.180944 | 0.186626 |
| 0.119901  | 0.122232 | 0.115676  | 0.249417 | 0.107226 | 0.176719 | 0.183566 |

|          |          |          |          |          |          |          |
|----------|----------|----------|----------|----------|----------|----------|
| 0.119172 | 0.124417 | 0.120775 | 0.250146 | 0.113199 | 0.186772 | 0.192162 |
| 0.117424 | 0.115676 | 0.113782 | 0.24898  | 0.106498 | 0.180653 | 0.185752 |
| 0.129516 | 0.127185 | 0.115676 | 0.255828 | 0.11655  | 0.187209 | 0.194347 |
| 0.119901 | 0.114948 | 0.131993 | 0.249417 | 0.105478 | 0.179633 | 0.187937 |
| 0.118007 | 0.120047 | 0.135344 | 0.236742 | 0.112034 | 0.172494 | 0.173223 |
| 0.120338 | 0.12704  | 0.133013 | 0.252477 | 0.106789 | 0.181527 | 0.18954  |
| 0.117133 | 0.112471 | 0.129808 | 0.244027 | 0.088141 | 0.177448 | 0.186334 |
| 0.113636 | 0.118881 | 0.118735 | 0.248106 | 0.105624 | 0.183858 | 0.185752 |
| 0.118153 | 0.121066 | 0.131702 | 0.237762 | 0.107226 | 0.172057 | 0.17366  |
| 0.118007 | 0.12296  | 0.131847 | 0.249854 | 0.110577 | 0.18211  | 0.185169 |
| 0.124126 | 0.125874 | 0.136801 | 0.245484 | 0.126311 | 0.182401 | 0.184586 |
| 0.111305 | 0.11451  | 0.123397 | 0.234994 | 0.10271  | 0.167832 | 0.169726 |
| 0.133887 | 0.129225 | 0.132867 | 0.252622 | 0.127914 | 0.19391  | 0.199301 |

| TDr_3292  | TDr_3296  | TDr_3301  | TDr_3310  | TDr_3311  | TDr_3312  | TDr_3316 |
|-----------|-----------|-----------|-----------|-----------|-----------|----------|
| 0.118007  | 0.109848  | 0.128788  | 0.114802  | 0.0980478 | 0.120192  | 0.11655  |
| 0.112325  | 0.10271   | 0.112908  | 0.101253  | 0.106643  | 0.117133  | 0.10708  |
| 0.108537  | 0.102127  | 0.108246  | 0.0980478 | 0.101107  | 0.113636  | 0.105332 |
| 0.118444  | 0.103293  | 0.111742  | 0.0852273 | 0.103438  | 0.118298  | 0.100962 |
| 0.135344  | 0.127768  | 0.135635  | 0.124854  | 0.131702  | 0.131993  | 0.130682 |
| 0.134761  | 0.119901  | 0.129225  | 0.126311  | 0.121503  | 0.129079  | 0.123106 |
| 0.129079  | 0.106935  | 0.124417  | 0.121503  | 0.112034  | 0.119901  | 0.123834 |
| 0.117716  | 0.1081    | 0.113928  | 0.0987762 | 0.107372  | 0.11757   | 0.112471 |
| 0.110286  | 0.0965909 | 0.113199  | 0.0989219 | 0.0874126 | 0.107517  | 0.105624 |
| 0.111014  | 0.0804196 | 0.0958625 | 0.112762  | 0.0493881 | 0.121066  | 0.108392 |
| 0.115239  | 0.106498  | 0.120484  | 0.118444  | 0.0958625 | 0.111888  | 0.121941 |
| 0.111888  | 0.101981  | 0.122378  | 0.101981  | 0.105041  | 0.106498  | 0.110431 |
| 0.114802  | 0.100233  | 0.112179  | 0.107226  | 0.0945513 | 0.110868  | 0.116841 |
| 0.129516  | 0.120192  | 0.134178  | 0.121649  | 0.106061  | 0.138403  | 0.130682 |
| 0.125     | 0.108974  | 0.0431235 | 0.121503  | 0.108829  | 0.130682  | 0.125583 |
| 0.121941  | 0.109703  | 0.114073  | 0.120192  | 0.105478  | 0.113345  | 0.115822 |
| 0.0979021 | 0.105769  | 0.118881  | 0.109266  | 0.101544  | 0.097465  | 0.116841 |
| 0.141171  | 0.13884   | 0.144959  | 0.13447   | 0.139277  | 0.150058  | 0.141754 |
| 0.106206  | 0.099796  | 0.112325  | 0.097465  | 0.100816  | 0.111888  | 0.108537 |
| 0.196824  | 0.194493  | 0.175845  | 0.197698  | 0.185023  | 0.211247  | 0.188666 |
| 0.128788  | 0.11655   | 0.126748  | 0.122669  | 0.11116   | 0.12602   | 0.130536 |
| 0.122523  | 0.112908  | 0.124272  | 0.115822  | 0.109557  | 0.12296   | 0.127185 |
| 0.114219  | 0.101107  | 0.113636  | 0.103438  | 0.0980478 | 0.0907634 | 0.108683 |
| 0.129516  | 0.112034  | 0.132139  | 0.122815  | 0.11859   | 0.107226  | 0.124563 |
| 0.104312  | 0.0958625 | 0.109557  | 0.102855  | 0.0814394 | 0.104167  | 0.105769 |
| 0.136946  | 0.120047  | 0.127331  | 0.129371  | 0.119901  | 0.133304  | 0.13141  |
| 0.12704   | 0.113345  | 0.125583  | 0.122378  | 0.112034  | 0.119027  | 0.126748 |
| 0.126748  | 0.1081    | 0.121795  | 0.117424  | 0.11116   | 0.105041  | 0.122378 |
| 0.13345   | 0.121503  | 0.136655  | 0.126166  | 0.122523  | 0.125728  | 0.128497 |
| 0.129079  | 0.0999417 | 0.119755  | 0.120047  | 0.101836  | 0.122523  | 0.122378 |
| 0.128059  | 0.110286  | 0.119027  | 0.125728  | 0.112762  | 0.121795  | 0.122523 |
| 0.125291  | 0.106935  | 0.120047  | 0.123834  | 0.110286  | 0.119027  | 0.12296  |
| 0.113054  | 0.0984848 | 0.10373   | 0.102855  | 0.0948427 | 0.11116   | 0.106935 |
| 0.124709  | 0.10169   | 0.123252  | 0.113345  | 0.104749  | 0.118153  | 0.120921 |
| 0.124563  | 0.110868  | 0.122232  | 0.123106  | 0.110431  | 0.114802  | 0.124854 |
| 0.129953  | 0.107517  | 0.131119  | 0.127914  | 0.10708   | 0.119027  | 0.126457 |
| 0.135927  | 0.121941  | 0.133887  | 0.129225  | 0.115676  | 0.131119  | 0.129808 |
| 0.117716  | 0.113928  | 0.128205  | 0.11859   | 0.106206  | 0.112325  | 0.125    |
| 0.120338  | 0.100816  | 0.114802  | 0.1081    | 0.101253  | 0.0942599 | 0.113054 |
| 0.123252  | 0.112762  | 0.123543  | 0.116841  | 0.11553   | 0.109994  | 0.118881 |
| 0.106935  | 0.10169   | 0.119464  | 0.104312  | 0.100087  | 0.0986305 | 0.109557 |
| 0.138695  | 0.127622  | 0.132867  | 0.138695  | 0.131265  | 0.130973  | 0.136946 |

|          |           |          |           |           |           |           |
|----------|-----------|----------|-----------|-----------|-----------|-----------|
| 0.144814 | 0.130536  | 0.145105 | 0.143357  | 0.137966  | 0.127768  | 0.1419    |
| 0.112617 | 0.109411  | 0.124272 | 0.108829  | 0.107226  | 0.103147  | 0.116987  |
| 0.112325 | 0.0989219 | 0.116113 | 0.109411  | 0.0897436 | 0.101981  | 0.114073  |
| 0.121212 | 0.100816  | 0.116259 | 0.120338  | 0.0945513 | 0.108829  | 0.12296   |
| 0.119755 | 0.111014  | 0.121503 | 0.116259  | 0.114365  | 0.107372  | 0.121795  |
| 0.132721 | 0.127185  | 0.140006 | 0.135927  | 0.125291  | 0.128205  | 0.132721  |
| 0.114948 | 0.105915  | 0.121649 | 0.109994  | 0.102564  | 0.106643  | 0.115239  |
| 0.117424 | 0.106935  | 0.115676 | 0.114219  | 0.106789  | 0.104458  | 0.114219  |
| 0.1537   | 0.13039   | 0.14729  | 0.14088   | 0.136072  | 0.147727  | 0.143794  |
| 0.13243  | 0.118444  | 0.128642 | 0.127477  | 0.119755  | 0.118007  | 0.125728  |
| 0.115676 | 0.106352  | 0.121503 | 0.110723  | 0.111742  | 0.0936772 | 0.117716  |
| 0.129371 | 0.106935  | 0.117716 | 0.118007  | 0.105041  | 0.130682  | 0.126748  |
| 0.120338 | 0.112762  | 0.121503 | 0.0801282 | 0.112617  | 0.110868  | 0.0926573 |
| 0.145396 | 0.130536  | 0.143939 | 0.134033  | 0.139132  | 0.128059  | 0.138403  |
| 0.123397 | 0.116696  | 0.133013 | 0.126311  | 0.116259  | 0.113928  | 0.128351  |
| 0.115822 | 0.109703  | 0.123397 | 0.10912   | 0.110723  | 0.099359  | 0.116404  |
| 0.116987 | 0.109703  | 0.119901 | 0.117861  | 0.100816  | 0.110431  | 0.119318  |
| 0.119172 | 0.101981  | 0.117133 | 0.122669  | 0.0971737 | 0.108246  | 0.125291  |
| 0.138695 | 0.130828  | 0.138112 | 0.133741  | 0.132721  | 0.118444  | 0.135781  |
| 0.138986 | 0.125291  | 0.137821 | 0.127622  | 0.131265  | 0.128934  | 0.13345   |
| 0.161276 | 0.151661  | 0.158362 | 0.154283  | 0.144522  | 0.158217  | 0.152826  |
| 0.113491 | 0.100962  | 0.120192 | 0.110286  | 0.1081    | 0.104312  | 0.118735  |
| 0.112617 | 0.100962  | 0.120775 | 0.111451  | 0.101399  | 0.0938228 | 0.116404  |
| 0.109994 | 0.0983392 | 0.122523 | 0.106789  | 0.107226  | 0.0973193 | 0.114948  |
| 0.145396 | 0.132576  | 0.140734 | 0.140734  | 0.128642  | 0.140006  | 0.138695  |
| 0.112179 | 0.0996503 | 0.117424 | 0.106643  | 0.108829  | 0.100379  | 0.115093  |
| 0.133013 | 0.12602   | 0.135927 | 0.128642  | 0.128205  | 0.122086  | 0.126311  |
| 0.122232 | 0.10271   | 0.118153 | 0.121941  | 0.101399  | 0.104895  | 0.128642  |
| 0.113345 | 0.108392  | 0.123543 | 0.115385  | 0.108246  | 0.0980478 | 0.11655   |
| 0.15035  | 0.136364  | 0.147436 | 0.145105  | 0.137966  | 0.146999  | 0.141317  |
| 0.123252 | 0.112179  | 0.126748 | 0.11859   | 0.119027  | 0.102127  | 0.122669  |
| 0.133304 | 0.124272  | 0.13884  | 0.134761  | 0.130828  | 0.129079  | 0.135052  |
| 0.129371 | 0.120629  | 0.131119 | 0.127331  | 0.120484  | 0.118153  | 0.130828  |
| 0.112617 | 0.11116   | 0.120484 | 0.10912   | 0.107517  | 0.11655   | 0.110868  |
| 0.113199 | 0.106206  | 0.122523 | 0.108537  | 0.104021  | 0.0944056 | 0.117279  |
| 0.112617 | 0.104749  | 0.120775 | 0.114073  | 0.106643  | 0.100816  | 0.116987  |
| 0.136218 | 0.125146  | 0.137092 | 0.124854  | 0.127914  | 0.114802  | 0.127185  |
| 0.112179 | 0.105769  | 0.123252 | 0.110723  | 0.10067   | 0.099796  | 0.118298  |
| 0.139423 | 0.121066  | 0.137966 | 0.128059  | 0.131119  | 0.129371  | 0.131556  |
| 0.123397 | 0.113199  | 0.127768 | 0.121649  | 0.107809  | 0.106935  | 0.126603  |
| 0.124563 | 0.109994  | 0.123106 | 0.11116   | 0.118007  | 0.0996503 | 0.118153  |
| 0.119318 | 0.10708   | 0.121941 | 0.114365  | 0.113345  | 0.102564  | 0.119318  |
| 0.123397 | 0.114073  | 0.125728 | 0.116113  | 0.111597  | 0.0987762 | 0.126311  |
| 0.109994 | 0.106789  | 0.119901 | 0.113199  | 0.107809  | 0.101399  | 0.119318  |

|          |           |          |          |           |           |          |
|----------|-----------|----------|----------|-----------|-----------|----------|
| 0.112034 | 0.105915  | 0.123106 | 0.109411 | 0.111597  | 0.0967366 | 0.114073 |
| 0.138695 | 0.125874  | 0.136655 | 0.13345  | 0.130099  | 0.123397  | 0.135781 |
| 0.110431 | 0.101981  | 0.112762 | 0.112762 | 0.0965909 | 0.0968823 | 0.118881 |
| 0.114073 | 0.104749  | 0.116113 | 0.113199 | 0.0976107 | 0.112762  | 0.118735 |
| 0.128934 | 0.111742  | 0.123689 | 0.124563 | 0.112762  | 0.129079  | 0.129516 |
| 0.132139 | 0.107955  | 0.127185 | 0.126894 | 0.118007  | 0.123252  | 0.131556 |
| 0.13039  | 0.11961   | 0.128642 | 0.134761 | 0.117716  | 0.125583  | 0.13243  |
| 0.140152 | 0.129662  | 0.134324 | 0.130536 | 0.125146  | 0.132139  | 0.135781 |
| 0.119318 | 0.110286  | 0.121066 | 0.116404 | 0.107226  | 0.119464  | 0.121066 |
| 0.178759 | 0.172057  | 0.18546  | 0.181672 | 0.166375  | 0.184732  | 0.173805 |
| 0.112179 | 0.101399  | 0.11451  | 0.10373  | 0.0989219 | 0.110286  | 0.11655  |
| 0.136509 | 0.128934  | 0.129516 | 0.131265 | 0.122086  | 0.134033  | 0.138258 |
| 0.128059 | 0.11961   | 0.124272 | 0.121941 | 0.115093  | 0.125     | 0.130682 |
| 0.141317 | 0.120629  | 0.136072 | 0.138986 | 0.128642  | 0.131265  | 0.138112 |
| 0.112325 | 0.102418  | 0.112908 | 0.110577 | 0.102273  | 0.107226  | 0.118153 |
| 0.129808 | 0.123106  | 0.131847 | 0.127185 | 0.122378  | 0.124417  | 0.131847 |
| 0.115239 | 0.106789  | 0.119318 | 0.115822 | 0.101399  | 0.115385  | 0.11961  |
| 0.126166 | 0.115676  | 0.123543 | 0.124709 | 0.104458  | 0.121941  | 0.121503 |
| 0.120047 | 0.104312  | 0.118007 | 0.112762 | 0.0983392 | 0.112034  | 0.113928 |
| 0.136946 | 0.12704   | 0.138403 | 0.136946 | 0.120775  | 0.131847  | 0.140734 |
| 0.110431 | 0.0952797 | 0.113928 | 0.112471 | 0.0898893 | 0.0983392 | 0.11451  |
| 0.138258 | 0.123689  | 0.132139 | 0.129516 | 0.122378  | 0.133159  | 0.130099 |
| 0.125    | 0.106061  | 0.123834 | 0.115967 | 0.103001  | 0.114365  | 0.122086 |
| 0.130099 | 0.11961   | 0.134761 | 0.126603 | 0.119755  | 0.116841  | 0.127477 |
| 0.136072 | 0.113345  | 0.125583 | 0.132576 | 0.113782  | 0.121066  | 0.131993 |
| 0.112471 | 0.102564  | 0.11451  | 0.109848 | 0.0942599 | 0.107372  | 0.120338 |
| 0.146853 | 0.139277  | 0.143939 | 0.139569 | 0.135052  | 0.143502  | 0.13986  |
| 0.120775 | 0.104749  | 0.119027 | 0.119318 | 0.100816  | 0.115093  | 0.121649 |
| 0.116404 | 0.108246  | 0.11757  | 0.11116  | 0.0955711 | 0.107517  | 0.121358 |
| 0.119755 | 0.109848  | 0.119172 | 0.118007 | 0.10271   | 0.107955  | 0.117424 |
| 0.1419   | 0.124417  | 0.141317 | 0.136946 | 0.116987  | 0.142628  | 0.136655 |
| 0.123834 | 0.11451   | 0.123252 | 0.121503 | 0.102127  | 0.114656  | 0.120629 |
| 0.112762 | 0.108974  | 0.113928 | 0.104604 | 0.0977564 | 0.109994  | 0.11859  |
| 0.111014 | 0.107226  | 0.112762 | 0.111888 | 0.0948427 | 0.10708   | 0.120921 |
| 0.119901 | 0.104458  | 0.122523 | 0.113491 | 0.104604  | 0.111888  | 0.122523 |
| 0.122669 | 0.108683  | 0.118298 | 0.123543 | 0.0930944 | 0.119318  | 0.125583 |
| 0.123106 | 0.103001  | 0.122815 | 0.119901 | 0.104895  | 0.11451   | 0.125728 |
| 0.107809 | 0.090035  | 0.108683 | 0.10373  | 0.0852273 | 0.0977564 | 0.110431 |
| 0.106352 | 0.0941142 | 0.109848 | 0.101981 | 0.0820221 | 0.0977564 | 0.113928 |
| 0.112034 | 0.0989219 | 0.109994 | 0.110577 | 0.0836247 | 0.105478  | 0.115239 |
| 0.123106 | 0.111451  | 0.126311 | 0.112617 | 0.114219  | 0.106061  | 0.123106 |
| 0.128788 | 0.115093  | 0.123543 | 0.129079 | 0.111451  | 0.11757   | 0.133159 |
| 0.111742 | 0.0960082 | 0.106789 | 0.108537 | 0.0909091 | 0.0967366 | 0.11757  |
| 0.103438 | 0.097028  | 0.10169  | 0.102855 | 0.0846445 | 0.0939685 | 0.111597 |

|          |           |           |           |           |           |           |
|----------|-----------|-----------|-----------|-----------|-----------|-----------|
| 0.125874 | 0.113928  | 0.11859   | 0.127914  | 0.105332  | 0.107372  | 0.127622  |
| 0.107663 | 0.0936772 | 0.109994  | 0.10912   | 0.0938228 | 0.092366  | 0.115239  |
| 0.121066 | 0.116987  | 0.123106  | 0.11961   | 0.112762  | 0.123543  | 0.127185  |
| 0.140006 | 0.120775  | 0.133304  | 0.129225  | 0.121212  | 0.134033  | 0.129225  |
| 0.119027 | 0.0971737 | 0.11553   | 0.114365  | 0.090035  | 0.106643  | 0.114073  |
| 0.11014  | 0.0967366 | 0.1081    | 0.110431  | 0.0901807 | 0.0995047 | 0.116841  |
| 0.1081   | 0.0964452 | 0.105478  | 0.111014  | 0.0866841 | 0.10271   | 0.114219  |
| 0.108392 | 0.0944056 | 0.113054  | 0.106935  | 0.0863928 | 0.100379  | 0.109266  |
| 0.124126 | 0.106352  | 0.121212  | 0.122086  | 0.100962  | 0.122523  | 0.122378  |
| 0.103147 | 0.0964452 | 0.1081    | 0.104021  | 0.0837704 | 0.0936772 | 0.112762  |
| 0.137383 | 0.122232  | 0.133596  | 0.135344  | 0.131993  | 0.128497  | 0.139132  |
| 0.131702 | 0.123543  | 0.132284  | 0.133159  | 0.121066  | 0.122815  | 0.134324  |
| 0.123543 | 0.112179  | 0.123543  | 0.122086  | 0.112908  | 0.113491  | 0.123834  |
| 0.109994 | 0.105332  | 0.116113  | 0.119027  | 0.0999417 | 0.106061  | 0.120775  |
| 0.113199 | 0.100087  | 0.119901  | 0.116113  | 0.100524  | 0.111014  | 0.11961   |
| 0.111014 | 0.0987762 | 0.111305  | 0.111888  | 0.0948427 | 0.0913462 | 0.120629  |
| 0.11553  | 0.104167  | 0.125146  | 0.109411  | 0.0952797 | 0.094697  | 0.119901  |
| 0.111742 | 0.100962  | 0.117279  | 0.107955  | 0.0958625 | 0.102855  | 0.114948  |
| 0.116696 | 0.107663  | 0.116987  | 0.0884324 | 0.105769  | 0.100816  | 0.0948427 |
| 0.132721 | 0.11757   | 0.130973  | 0.127477  | 0.122086  | 0.10373   | 0.129225  |
| 0.113928 | 0.108392  | 0.118298  | 0.108974  | 0.10708   | 0.109994  | 0.120338  |
| 0.125728 | 0.114073  | 0.121941  | 0.128642  | 0.106643  | 0.129953  | 0.126603  |
| 0.138695 | 0.119464  | 0.130828  | 0.134615  | 0.121066  | 0.138549  | 0.137529  |
| 0.184149 | 0.192016  | 0.191725  | 0.183858  | 0.179341  | 0.191871  | 0.182984  |
| 0.231206 | 0.234411  | 0.230915  | 0.226253  | 0.227564  | 0.240385  | 0.223339  |
| 0.115093 | 0.108974  | 0.119755  | 0.0690559 | 0.112908  | 0.106789  | 0.0833333 |
| 0.116696 | 0.106498  | 0.118444  | 0.108829  | 0.106935  | 0.0964452 | 0.11553   |
| 0.10912  | 0.10271   | 0.116113  | 0.107955  | 0.10373   | 0.0996503 | 0.109994  |
| 0.109994 | 0.103584  | 0.118735  | 0.106789  | 0.109266  | 0.101399  | 0.117279  |
| 0.12602  | 0.110286  | 0.0464744 | 0.123689  | 0.110431  | 0.13345   | 0.123689  |
| 0.116113 | 0.11116   | 0.122815  | 0.109411  | 0.112762  | 0.103438  | 0.115822  |
| 0.152098 | 0.141026  | 0.145105  | 0.146853  | 0.143502  | 0.124854  | 0.145396  |
| 0.118444 | 0.113491  | 0.127768  | 0.115822  | 0.113928  | 0.097028  | 0.124272  |
| 0.135635 | 0.117861  | 0.135344  | 0.126603  | 0.124126  | 0.114219  | 0.13039   |
| 0.131993 | 0.126166  | 0.135198  | 0.126748  | 0.128351  | 0.118444  | 0.125291  |
| 0.13345  | 0.124126  | 0.129662  | 0.13141   | 0.12398   | 0.120775  | 0.133741  |
| 0.132867 | 0.119755  | 0.136072  | 0.131702  | 0.130099  | 0.127185  | 0.134907  |
| 0.116259 | 0.11014   | 0.123252  | 0.115385  | 0.11116   | 0.10271   | 0.123543  |
| 0.115385 | 0.113054  | 0.122378  | 0.109848  | 0.109411  | 0.0989219 | 0.120047  |
| 0.121358 | 0.113782  | 0.120775  | 0.114948  | 0.109266  | 0.103438  | 0.126894  |
| 0.11116  | 0.101253  | 0.118153  | 0.107663  | 0.106352  | 0.0996503 | 0.113782  |
| 0.117279 | 0.108537  | 0.121066  | 0.107663  | 0.107517  | 0.097028  | 0.11757   |
| 0.120047 | 0.105186  | 0.123834  | 0.110723  | 0.110577  | 0.0986305 | 0.120047  |
| 0.125728 | 0.121066  | 0.128642  | 0.127768  | 0.121212  | 0.113054  | 0.12602   |

|          |           |          |          |           |           |          |
|----------|-----------|----------|----------|-----------|-----------|----------|
| 0.135927 | 0.130099  | 0.137966 | 0.132139 | 0.131702  | 0.119172  | 0.135052 |
| 0.117424 | 0.108683  | 0.126748 | 0.115967 | 0.114365  | 0.099796  | 0.120921 |
| 0.115822 | 0.106789  | 0.120775 | 0.112908 | 0.108974  | 0.0955711 | 0.116696 |
| 0.138258 | 0.121649  | 0.138549 | 0.131265 | 0.12704   | 0.111597  | 0.133304 |
| 0.10708  | 0.102127  | 0.121941 | 0.108246 | 0.106935  | 0.0938228 | 0.115239 |
| 0.140443 | 0.135198  | 0.138112 | 0.142774 | 0.138258  | 0.123397  | 0.146562 |
| 0.135198 | 0.122086  | 0.126166 | 0.134324 | 0.113199  | 0.132721  | 0.131702 |
| 0.133304 | 0.131847  | 0.136509 | 0.130973 | 0.13345   | 0.127622  | 0.128059 |
| 0.111451 | 0.106498  | 0.119318 | 0.101836 | 0.105186  | 0.094697  | 0.114656 |
| 0.106935 | 0.105769  | 0.115676 | 0.107809 | 0.104749  | 0.0962995 | 0.115385 |
| 0.124563 | 0.113491  | 0.13039  | 0.120192 | 0.121795  | 0.11014   | 0.128351 |
| 0.123834 | 0.11859   | 0.127331 | 0.123543 | 0.119901  | 0.108246  | 0.126166 |
| 0.131119 | 0.123543  | 0.136364 | 0.130536 | 0.127477  | 0.111451  | 0.129662 |
| 0.120484 | 0.111742  | 0.12602  | 0.114365 | 0.117133  | 0.0981935 | 0.125146 |
| 0.118007 | 0.111888  | 0.126748 | 0.116841 | 0.113491  | 0.0930944 | 0.122086 |
| 0.125    | 0.117716  | 0.125583 | 0.118007 | 0.121941  | 0.107955  | 0.123834 |
| 0.131119 | 0.122378  | 0.136072 | 0.136072 | 0.123689  | 0.119318  | 0.13549  |
| 0.13345  | 0.124417  | 0.136946 | 0.128497 | 0.12398   | 0.116696  | 0.130536 |
| 0.135927 | 0.127185  | 0.135927 | 0.133596 | 0.131993  | 0.109557  | 0.137966 |
| 0.136655 | 0.125874  | 0.133159 | 0.127914 | 0.129516  | 0.118153  | 0.131993 |
| 0.11655  | 0.109266  | 0.125874 | 0.11014  | 0.113199  | 0.0983392 | 0.120629 |
| 0.129662 | 0.122086  | 0.134033 | 0.127914 | 0.125437  | 0.118444  | 0.132284 |
| 0.11553  | 0.105624  | 0.121066 | 0.106206 | 0.111014  | 0.090035  | 0.117279 |
| 0.11655  | 0.107517  | 0.124126 | 0.110431 | 0.104167  | 0.105624  | 0.117424 |
| 0.112762 | 0.11014   | 0.118007 | 0.114219 | 0.109994  | 0.104167  | 0.118298 |
| 0.114656 | 0.105041  | 0.122523 | 0.112908 | 0.107809  | 0.10169   | 0.118735 |
| 0.110286 | 0.105041  | 0.120484 | 0.110286 | 0.108974  | 0.097028  | 0.114656 |
| 0.13345  | 0.13141   | 0.138403 | 0.136072 | 0.130973  | 0.114948  | 0.136364 |
| 0.116113 | 0.110868  | 0.12602  | 0.116696 | 0.111014  | 0.106061  | 0.121941 |
| 0.134761 | 0.126894  | 0.135052 | 0.129808 | 0.13141   | 0.117133  | 0.133304 |
| 0.114073 | 0.101544  | 0.121941 | 0.110577 | 0.109848  | 0.100233  | 0.11553  |
| 0.12704  | 0.119464  | 0.132284 | 0.126166 | 0.120775  | 0.106789  | 0.12704  |
| 0.12602  | 0.113782  | 0.123689 | 0.123689 | 0.111888  | 0.108683  | 0.113782 |
| 0.119901 | 0.108246  | 0.116404 | 0.116987 | 0.0990676 | 0.113928  | 0.118735 |
| 0.119755 | 0.100816  | 0.118007 | 0.117716 | 0.105915  | 0.101836  | 0.120629 |
| 0.121649 | 0.116113  | 0.124563 | 0.120192 | 0.106643  | 0.115676  | 0.123689 |
| 0.111305 | 0.115093  | 0.125874 | 0.117133 | 0.109703  | 0.107372  | 0.11655  |
| 0.115093 | 0.106352  | 0.120338 | 0.111597 | 0.102418  | 0.10912   | 0.122669 |
| 0.131993 | 0.107809  | 0.129662 | 0.131993 | 0.0954254 | 0.138549  | 0.132284 |
| 0.14292  | 0.127477  | 0.134761 | 0.13447  | 0.130536  | 0.127622  | 0.135052 |
| 0.105624 | 0.0890152 | 0.108246 | 0.103001 | 0.0815851 | 0.11014   | 0.108829 |
| 0.125291 | 0.112762  | 0.120047 | 0.129953 | 0.106498  | 0.134761  | 0.12704  |
| 0.128351 | 0.097465  | 0.116696 | 0.127477 | 0.0769231 | 0.131702  | 0.128934 |
| 0.123397 | 0.115822  | 0.122232 | 0.125728 | 0.100524  | 0.134033  | 0.130099 |



|          |           |          |          |           |          |          |
|----------|-----------|----------|----------|-----------|----------|----------|
| 0.120192 | 0.105332  | 0.116987 | 0.120484 | 0.0882867 | 0.128205 | 0.117861 |
| 0.114656 | 0.100379  | 0.117279 | 0.123397 | 0.0859557 | 0.123543 | 0.122232 |
| 0.116259 | 0.099359  | 0.118298 | 0.12704  | 0.083479  | 0.130682 | 0.123834 |
| 0.124563 | 0.112034  | 0.129808 | 0.123689 | 0.0958625 | 0.131993 | 0.12398  |
| 0.133887 | 0.119027  | 0.125728 | 0.13447  | 0.108392  | 0.142191 | 0.130099 |
| 0.115239 | 0.105624  | 0.117279 | 0.117861 | 0.0839161 | 0.129953 | 0.118444 |
| 0.120484 | 0.103001  | 0.112908 | 0.116404 | 0.0882867 | 0.124126 | 0.114073 |
| 0.136655 | 0.129662  | 0.142774 | 0.129079 | 0.134178  | 0.114365 | 0.132867 |
| 0.128934 | 0.110286  | 0.125728 | 0.134178 | 0.0958625 | 0.134615 | 0.13243  |
| 0.112325 | 0.0977564 | 0.112908 | 0.10912  | 0.0865385 | 0.115385 | 0.113199 |
| 0.21183  | 0.216492  | 0.22028  | 0.207751 | 0.206731  | 0.220425 | 0.208042 |
| 0.122086 | 0.105186  | 0.117133 | 0.122086 | 0.0922203 | 0.12602  | 0.119755 |
| 0.112471 | 0.0912005 | 0.115967 | 0.112471 | 0.0814394 | 0.118153 | 0.118298 |
| 0.132139 | 0.120192  | 0.126603 | 0.128642 | 0.106643  | 0.137529 | 0.131556 |
| 0.110286 | 0.105624  | 0.117861 | 0.116113 | 0.0856643 | 0.12296  | 0.120484 |
| 0.12602  | 0.105041  | 0.120484 | 0.130682 | 0.0929487 | 0.138112 | 0.131556 |
| 0.11961  | 0.100962  | 0.118153 | 0.11553  | 0.094697  | 0.125    | 0.121358 |
| 0.113636 | 0.103147  | 0.113928 | 0.116841 | 0.0884324 | 0.127477 | 0.115967 |
| 0.119464 | 0.100524  | 0.115093 | 0.122378 | 0.0796911 | 0.129516 | 0.124417 |
| 0.125437 | 0.112908  | 0.124272 | 0.124854 | 0.0964452 | 0.133741 | 0.128642 |
| 0.132284 | 0.113928  | 0.123834 | 0.125583 | 0.103875  | 0.136509 | 0.133159 |
| 0.129516 | 0.111451  | 0.126603 | 0.126894 | 0.102564  | 0.138112 | 0.126311 |
| 0.129225 | 0.107372  | 0.12398  | 0.122815 | 0.103438  | 0.136072 | 0.122232 |
| 0.114656 | 0.100087  | 0.113782 | 0.116987 | 0.0903263 | 0.108974 | 0.116987 |
| 0.126603 | 0.10708   | 0.123397 | 0.112325 | 0.0935315 | 0.123543 | 0.118444 |
| 0.128788 | 0.120047  | 0.125291 | 0.131119 | 0.103584  | 0.140006 | 0.131119 |
| 0.114948 | 0.105041  | 0.114656 | 0.116113 | 0.090035  | 0.125583 | 0.115239 |
| 0.130973 | 0.124272  | 0.141171 | 0.13447  | 0.128788  | 0.118881 | 0.133596 |
| 0.131119 | 0.133741  | 0.136364 | 0.135781 | 0.119901  | 0.139714 | 0.134907 |
| 0.121503 | 0.109848  | 0.119464 | 0.123834 | 0.101836  | 0.115822 | 0.120047 |
| 0.129079 | 0.111305  | 0.122669 | 0.128205 | 0.088141  | 0.129808 | 0.128497 |
| 0.132139 | 0.124563  | 0.129516 | 0.11961  | 0.111888  | 0.130828 | 0.124563 |
| 0.13549  | 0.110723  | 0.131993 | 0.123252 | 0.112034  | 0.125437 | 0.125874 |
| 0.127622 | 0.118298  | 0.132284 | 0.121503 | 0.115822  | 0.131847 | 0.125583 |
| 0.136946 | 0.130828  | 0.135198 | 0.135781 | 0.121066  | 0.137966 | 0.139277 |
| 0.116404 | 0.100379  | 0.115239 | 0.111742 | 0.0885781 | 0.104312 | 0.114073 |
| 0.136364 | 0.122086  | 0.125874 | 0.131119 | 0.114948  | 0.127768 | 0.136364 |
| 0.137383 | 0.139132  | 0.141171 | 0.137966 | 0.121503  | 0.1419   | 0.135927 |
| 0.117861 | 0.10067   | 0.118153 | 0.121649 | 0.097028  | 0.108392 | 0.124272 |
| 0.122523 | 0.109703  | 0.127768 | 0.118735 | 0.11451   | 0.115967 | 0.121066 |
| 0.145979 | 0.134033  | 0.144231 | 0.138403 | 0.139714  | 0.128059 | 0.141317 |
| 0.129079 | 0.116841  | 0.128205 | 0.120338 | 0.121649  | 0.105624 | 0.12704  |
| 0.14292  | 0.123106  | 0.131556 | 0.135344 | 0.116259  | 0.131119 | 0.13447  |
| 0.131119 | 0.11655   | 0.126166 | 0.131119 | 0.109703  | 0.118735 | 0.131702 |

|          |           |           |           |           |           |           |
|----------|-----------|-----------|-----------|-----------|-----------|-----------|
| 0.124563 | 0.118444  | 0.123689  | 0.122523  | 0.111014  | 0.117716  | 0.12602   |
| 0.133159 | 0.122669  | 0.127622  | 0.128788  | 0.111451  | 0.124272  | 0.123834  |
| 0.127768 | 0.106206  | 0.11961   | 0.125146  | 0.0938228 | 0.114219  | 0.125146  |
| 0.130536 | 0.126457  | 0.127914  | 0.128788  | 0.119318  | 0.115239  | 0.134324  |
| 0.130245 | 0.109557  | 0.129371  | 0.127331  | 0.0995047 | 0.133013  | 0.128788  |
| 0.129662 | 0.126748  | 0.135781  | 0.129079  | 0.12398   | 0.127768  | 0.134615  |
| 0.132867 | 0.118298  | 0.133741  | 0.130828  | 0.112325  | 0.130973  | 0.13345   |
| 0.133159 | 0.120921  | 0.133741  | 0.127914  | 0.116113  | 0.12398   | 0.128788  |
| 0.14627  | 0.137238  | 0.141026  | 0.140443  | 0.129808  | 0.144085  | 0.137821  |
| 0.121212 | 0.0996503 | 0.115093  | 0.128497  | 0.0843531 | 0.118153  | 0.125874  |
| 0.118007 | 0.108683  | 0.125583  | 0.122378  | 0.106206  | 0.107955  | 0.124709  |
| 0.135198 | 0.120047  | 0.126748  | 0.130828  | 0.120484  | 0.129225  | 0.135781  |
| 0.122669 | 0.0987762 | 0.115385  | 0.120921  | 0.083479  | 0.118153  | 0.121212  |
| 0.142337 | 0.133013  | 0.139423  | 0.137383  | 0.127622  | 0.144814  | 0.139714  |
| 0.148456 | 0.140297  | 0.152244  | 0.157197  | 0.138112  | 0.15035   | 0.153118  |
| 0.130099 | 0.125437  | 0.134178  | 0.126311  | 0.125583  | 0.118007  | 0.130099  |
| 0.123252 | 0.116259  | 0.128788  | 0.117424  | 0.115822  | 0.106206  | 0.125291  |
| 0.131847 | 0.124854  | 0.13447   | 0.125728  | 0.124417  | 0.134033  | 0.130682  |
| 0.132284 | 0.120047  | 0.129079  | 0.126457  | 0.101836  | 0.137383  | 0.127331  |
| 0.127914 | 0.120047  | 0.131702  | 0.127331  | 0.124854  | 0.112325  | 0.127622  |
| 0.133741 | 0.119464  | 0.131119  | 0.138112  | 0.112034  | 0.138258  | 0.138112  |
| 0.134615 | 0.120338  | 0.130536  | 0.136072  | 0.114656  | 0.139132  | 0.131993  |
| 0.127477 | 0.107955  | 0.120484  | 0.125437  | 0.10169   | 0.115385  | 0.119901  |
| 0.164773 | 0.157488  | 0.159528  | 0.152826  | 0.157925  | 0.160839  | 0.156614  |
| 0.131265 | 0.105624  | 0.126894  | 0.130099  | 0.101399  | 0.114802  | 0.132139  |
| 0.141171 | 0.120775  | 0.129225  | 0.141754  | 0.115967  | 0.127622  | 0.138549  |
| 0.12296  | 0.113345  | 0.122378  | 0.12296   | 0.108829  | 0.109411  | 0.123543  |
| 0.13986  | 0.125     | 0.141608  | 0.131993  | 0.12602   | 0.130973  | 0.134033  |
| 0.123543 | 0.11014   | 0.116841  | 0.121503  | 0.0992133 | 0.130099  | 0.122086  |
| 0.132139 | 0.130682  | 0.142045  | 0.113782  | 0.116259  | 0.139569  | 0.117861  |
| 0.140734 | 0.144522  | 0.143939  | 0.13549   | 0.141463  | 0.151661  | 0.140734  |
| 0.127185 | 0.116404  | 0.122523  | 0.0543415 | 0.119464  | 0.122086  | 0.0756119 |
| 0.134907 | 0.129079  | 0.135781  | 0.0769231 | 0.123397  | 0.136509  | 0.0874126 |
| 0.140006 | 0.145251  | 0.151661  | 0.13884   | 0.132284  | 0.111014  | 0.141463  |
| 0.137966 | 0.133887  | 0.143211  | 0.113491  | 0.122378  | 0.143065  | 0.122523  |
| 0.128205 | 0.117716  | 0.132867  | 0.125291  | 0.128059  | 0.0962995 | 0.127331  |
| 0.134761 | 0.127185  | 0.137092  | 0.125437  | 0.134033  | 0.141608  | 0.137675  |
| 0.108829 | 0.101836  | 0.0907634 | 0.101253  | 0.102273  | 0.11451   | 0.119901  |
| 0.119464 | 0.106352  | 0.0847902 | 0.113054  | 0.105915  | 0.109703  | 0.113345  |
| 0.11553  | 0.102418  | 0.121649  | 0.121358  | 0.0885781 | 0.124709  | 0.103001  |
| 0.122523 | 0.115239  | 0.122232  | 0.0464744 | 0.117424  | 0.11655   | 0.0759033 |
| 0.112762 | 0.105769  | 0.117716  | 0.115385  | 0.106498  | 0.106206  | 0.119172  |
| 0.108683 | 0.0999417 | 0.0804196 | 0.0818765 | 0.0980478 | 0.115822  | 0.0894522 |
| 0.121503 | 0.117133  | 0.125874  | 0.0981935 | 0.112908  | 0.121649  | 0.115093  |

|          |           |           |           |           |           |           |
|----------|-----------|-----------|-----------|-----------|-----------|-----------|
| 0.117279 | 0.106789  | 0.0622086 | 0.117861  | 0.0964452 | 0.130536  | 0.121358  |
| 0.104458 | 0.0502622 | 0.105041  | 0.105332  | 0.0789627 | 0.108974  | 0.112325  |
| 0.121941 | 0.114948  | 0.128059  | 0.0566725 | 0.11451   | 0.120629  | 0.083479  |
| 0.120921 | 0.112179  | 0.12296   | 0.0492424 | 0.116987  | 0.118444  | 0.0766317 |
| 0.125    | 0.120629  | 0.13141   | 0.121212  | 0.122232  | 0.050845  | 0.125     |
| 0.207751 | 0.212413  | 0.210956  | 0.206876  | 0.200903  | 0.217803  | 0.203963  |
| 0.147727 | 0.135198  | 0.140443  | 0.0740093 | 0.140297  | 0.14292   | 0.083042  |
| 0.126311 | 0.120484  | 0.129808  | 0.119901  | 0.123543  | 0.126166  | 0.124272  |
| 0.123834 | 0.114219  | 0.119755  | 0.113054  | 0.119318  | 0.121358  | 0.121795  |
| 0.201632 | 0.207751  | 0.207751  | 0.200175  | 0.19595   | 0.211684  | 0.199301  |
| 0.122669 | 0.115385  | 0.129371  | 0.119755  | 0.114656  | 0.0782343 | 0.122086  |
| 0.125146 | 0.112325  | 0.124563  | 0.123689  | 0.117424  | 0.11014   | 0.128059  |
| 0.12398  | 0.117861  | 0.129225  | 0.120484  | 0.121212  | 0.117133  | 0.121941  |
| 0.121212 | 0.10373   | 0.0472028 | 0.118881  | 0.103875  | 0.127185  | 0.12296   |
| 0.243298 | 0.245047  | 0.243298  | 0.238345  | 0.236451  | 0.253642  | 0.237179  |
| 0.129808 | 0.113199  | 0.128642  | 0.121066  | 0.114802  | 0.126457  | 0.128934  |
| 0.116987 | 0.114948  | 0.12602   | 0.112908  | 0.116259  | 0.0486597 | 0.126311  |
| 0.124272 | 0.116987  | 0.128934  | 0.116696  | 0.122378  | 0.119172  | 0.119901  |
| 0.12398  | 0.11757   | 0.125728  | 0.114948  | 0.121503  | 0.120338  | 0.11961   |
| 0.133596 | 0.114073  | 0.112034  | 0.123689  | 0.112762  | 0.125874  | 0.124563  |
| 0.118444 | 0.112034  | 0.113491  | 0.106498  | 0.105769  | 0.129953  | 0.102127  |
| 0.118153 | 0.116404  | 0.126894  | 0.118444  | 0.118881  | 0.0539044 | 0.123689  |
| 0.12296  | 0.114219  | 0.123834  | 0.0480769 | 0.118444  | 0.118444  | 0.0743007 |
| 0.123106 | 0.116987  | 0.13039   | 0.114656  | 0.121795  | 0.126457  | 0.128059  |
| 0.114073 | 0.10067   | 0.0499709 | 0.113199  | 0.0955711 | 0.120338  | 0.113782  |
| 0.119172 | 0.111014  | 0.119755  | 0.0536131 | 0.110286  | 0.114948  | 0.0777972 |
| 0.114948 | 0.0866841 | 0.102127  | 0.11757   | 0.0521562 | 0.126457  | 0.110868  |
| 0.141317 | 0.144231  | 0.144814  | 0.136364  | 0.141754  | 0.149913  | 0.140152  |
| 0.135198 | 0.117133  | 0.131119  | 0.125     | 0.118153  | 0.129225  | 0.129953  |
| 0.126166 | 0.113054  | 0.126457  | 0.124709  | 0.119027  | 0.113782  | 0.129079  |
| 0.182984 | 0.187354  | 0.187646  | 0.176282  | 0.174971  | 0.190414  | 0.178904  |
| 0.19697  | 0.201923  | 0.20134   | 0.193182  | 0.191579  | 0.2044    | 0.194347  |
| 0.114219 | 0.105186  | 0.0492424 | 0.117133  | 0.0971737 | 0.126311  | 0.122086  |
| 0.113054 | 0.0999417 | 0.0434149 | 0.108974  | 0.0962995 | 0.120484  | 0.114219  |
| 0.13141  | 0.121212  | 0.128497  | 0.122378  | 0.123106  | 0.138549  | 0.120629  |
| 0.120629 | 0.116259  | 0.130245  | 0.119755  | 0.114073  | 0.0496795 | 0.123252  |
| 0.133013 | 0.114948  | 0.131556  | 0.125437  | 0.120047  | 0.128497  | 0.128934  |
| 0.129662 | 0.126166  | 0.130245  | 0.120047  | 0.124272  | 0.132721  | 0.120338  |
| 0.217657 | 0.223485  | 0.218823  | 0.216783  | 0.209353  | 0.228001  | 0.213578  |
| 0.111014 | 0.109266  | 0.123543  | 0.106352  | 0.112617  | 0.106206  | 0.119755  |
| 0.203817 | 0.206148  | 0.20877   | 0.196824  | 0.196678  | 0.205128  | 0.190705  |
| 0.115676 | 0.109848  | 0.124709  | 0.114219  | 0.118153  | 0.0846445 | 0.121212  |
| 0.114948 | 0.104167  | 0.120192  | 0.113199  | 0.11451   | 0.110431  | 0.119318  |
| 0.11655  | 0.108392  | 0.119464  | 0.0999417 | 0.10912   | 0.106789  | 0.10169   |

|          |           |           |           |           |           |           |
|----------|-----------|-----------|-----------|-----------|-----------|-----------|
| 0.111014 | 0.0976107 | 0.0550699 | 0.111014  | 0.0913462 | 0.118444  | 0.112762  |
| 0.19799  | 0.204691  | 0.205857  | 0.196533  | 0.19289   | 0.207751  | 0.195367  |
| 0.131847 | 0.125728  | 0.133304  | 0.0616259 | 0.123543  | 0.131993  | 0.0837704 |
| 0.118153 | 0.106206  | 0.128934  | 0.11757   | 0.118007  | 0.106061  | 0.122232  |
| 0.130973 | 0.118153  | 0.12602   | 0.0552156 | 0.125583  | 0.125583  | 0.0744464 |
| 0.123106 | 0.105041  | 0.130973  | 0.116113  | 0.117424  | 0.122378  | 0.118735  |
| 0.110286 | 0.102127  | 0.0557984 | 0.113199  | 0.094697  | 0.118881  | 0.117279  |
| 0.119172 | 0.113345  | 0.129953  | 0.113928  | 0.11961   | 0.0872669 | 0.120629  |
| 0.121795 | 0.118881  | 0.124709  | 0.117133  | 0.114656  | 0.0692016 | 0.120629  |
| 0.13141  | 0.113345  | 0.124126  | 0.122378  | 0.121649  | 0.114073  | 0.129662  |
| 0.115676 | 0.111305  | 0.118881  | 0.0501166 | 0.10912   | 0.114948  | 0.0795455 |
| 0.123106 | 0.11116   | 0.131847  | 0.117279  | 0.115967  | 0.108974  | 0.122523  |
| 0.179779 | 0.184732  | 0.188228  | 0.177448  | 0.176136  | 0.187791  | 0.179487  |
| 0.128642 | 0.119027  | 0.129808  | 0.118735  | 0.125583  | 0.120921  | 0.121649  |
| 0.125    | 0.126748  | 0.127914  | 0.120338  | 0.128059  | 0.129808  | 0.12704   |
| 0.114656 | 0.117279  | 0.122815  | 0.11116   | 0.119464  | 0.117133  | 0.113491  |
| 0.126166 | 0.113345  | 0.135781  | 0.121503  | 0.107955  | 0.125146  | 0.126748  |
| 0.12704  | 0.116841  | 0.122086  | 0.0509907 | 0.119318  | 0.123397  | 0.0737179 |
| 0.122086 | 0.115385  | 0.128205  | 0.121212  | 0.12398   | 0.0942599 | 0.123834  |
| 0.115239 | 0.100962  | 0.127185  | 0.11116   | 0.108974  | 0.113928  | 0.112617  |
| 0.129225 | 0.117861  | 0.131556  | 0.124854  | 0.122669  | 0.0571096 | 0.12602   |
| 0.115967 | 0.120921  | 0.123834  | 0.111888  | 0.117279  | 0.124272  | 0.124126  |
| 0.119172 | 0.113636  | 0.126748  | 0.109266  | 0.119318  | 0.114365  | 0.120921  |
| 0.114365 | 0.104749  | 0.0587121 | 0.113782  | 0.0996503 | 0.121795  | 0.118153  |
| 0.124417 | 0.117133  | 0.127914  | 0.118007  | 0.11757   | 0.118153  | 0.12296   |
| 0.13884  | 0.128059  | 0.138549  | 0.128642  | 0.130536  | 0.133741  | 0.129516  |
| 0.123106 | 0.106498  | 0.123397  | 0.114365  | 0.106643  | 0.11859   | 0.123397  |
| 0.141608 | 0.130245  | 0.135781  | 0.0702214 | 0.136218  | 0.137675  | 0.0780886 |
| 0.108683 | 0.100816  | 0.0576923 | 0.109266  | 0.0948427 | 0.119027  | 0.115385  |
| 0.115967 | 0.114219  | 0.124126  | 0.105186  | 0.11553   | 0.120484  | 0.11014   |
| 0.116404 | 0.112617  | 0.122815  | 0.0692016 | 0.107809  | 0.119172  | 0.0799825 |
| 0.124563 | 0.121358  | 0.133887  | 0.124854  | 0.120921  | 0.0530303 | 0.129516  |
| 0.182255 | 0.188666  | 0.190414  | 0.181964  | 0.179196  | 0.173368  | 0.17905   |
| 0.120047 | 0.105186  | 0.124126  | 0.115385  | 0.111451  | 0.105041  | 0.120047  |
| 0.106643 | 0.102564  | 0.115676  | 0.0949883 | 0.107372  | 0.107372  | 0.105186  |
| 0.124417 | 0.111888  | 0.125     | 0.123252  | 0.118735  | 0.113199  | 0.12704   |
| 0.173368 | 0.177739  | 0.179487  | 0.166958  | 0.16215   | 0.180507  | 0.165501  |
| 0.140589 | 0.123397  | 0.142045  | 0.133304  | 0.126457  | 0.137821  | 0.139132  |
| 0.151952 | 0.13243   | 0.148747  | 0.144376  | 0.132576  | 0.148893  | 0.144959  |
| 0.145105 | 0.14627   | 0.143065  | 0.136364  | 0.14292   | 0.152244  | 0.143357  |
| 0.11859  | 0.108683  | 0.124417  | 0.116259  | 0.101253  | 0.11961   | 0.120629  |
| 0.12602  | 0.115822  | 0.122815  | 0.0537587 | 0.122378  | 0.124126  | 0.0732809 |
| 0.203089 | 0.208916  | 0.208916  | 0.199592  | 0.200612  | 0.211684  | 0.199883  |
| 0.124126 | 0.115676  | 0.123834  | 0.113928  | 0.120484  | 0.129808  | 0.118881  |

|          |           |           |           |           |           |           |
|----------|-----------|-----------|-----------|-----------|-----------|-----------|
| 0.129516 | 0.119027  | 0.127477  | 0.0563811 | 0.124417  | 0.129371  | 0.0721154 |
| 0.118735 | 0.107372  | 0.126894  | 0.118153  | 0.115385  | 0.107809  | 0.123397  |
| 0.156323 | 0.16215   | 0.167104  | 0.14729   | 0.152681  | 0.17162   | 0.145542  |
| 0.113199 | 0.102418  | 0.114073  | 0.102418  | 0.104312  | 0.114219  | 0.114948  |
| 0.148893 | 0.138112  | 0.145396  | 0.138986  | 0.14292   | 0.154283  | 0.143648  |
| 0.116259 | 0.0518648 | 0.113345  | 0.119755  | 0.0872669 | 0.125146  | 0.123252  |
| 0.179779 | 0.184441  | 0.187937  | 0.176573  | 0.178176  | 0.187209  | 0.177739  |
| 0.126457 | 0.109266  | 0.129371  | 0.119172  | 0.112034  | 0.123397  | 0.126166  |
| 0.107517 | 0.0984848 | 0.110431  | 0.0987762 | 0.0884324 | 0.110868  | 0.105478  |
| 0.116696 | 0.114073  | 0.12602   | 0.102418  | 0.113054  | 0.11451   | 0.114073  |
| 0.121503 | 0.109266  | 0.125874  | 0.111597  | 0.11757   | 0.109703  | 0.121795  |
| 0.126748 | 0.109557  | 0.121503  | 0.121503  | 0.120775  | 0.10708   | 0.125583  |
| 0.120338 | 0.117133  | 0.122086  | 0.115385  | 0.116987  | 0.120775  | 0.12296   |
| 0.108829 | 0.10067   | 0.0546329 | 0.110577  | 0.0944056 | 0.119464  | 0.118735  |
| 0.17803  | 0.185315  | 0.189394  | 0.179487  | 0.176719  | 0.186626  | 0.18211   |
| 0.118444 | 0.118735  | 0.129808  | 0.115822  | 0.120338  | 0.121212  | 0.125146  |
| 0.113054 | 0.111014  | 0.115676  | 0.100816  | 0.107955  | 0.116696  | 0.112179  |
| 0.201486 | 0.207314  | 0.207896  | 0.202069  | 0.198427  | 0.210373  | 0.200612  |
| 0.126311 | 0.120192  | 0.13039   | 0.116404  | 0.12296   | 0.118881  | 0.122232  |
| 0.109848 | 0.102564  | 0.0518648 | 0.114802  | 0.0965909 | 0.120192  | 0.11655   |
| 0.106935 | 0.0981935 | 0.0518648 | 0.108974  | 0.0948427 | 0.116987  | 0.111014  |
| 0.142628 | 0.131847  | 0.134761  | 0.0814394 | 0.131119  | 0.138986  | 0.0820221 |
| 0.179341 | 0.182838  | 0.188957  | 0.177593  | 0.174534  | 0.189103  | 0.179633  |
| 0.122669 | 0.118881  | 0.129953  | 0.11859   | 0.122232  | 0.0496795 | 0.124126  |
| 0.132576 | 0.12296   | 0.132284  | 0.124709  | 0.127185  | 0.129225  | 0.128205  |
| 0.109557 | 0.0981935 | 0.0518648 | 0.113054  | 0.0939685 | 0.118153  | 0.116841  |
| 0.106935 | 0.0990676 | 0.0597319 | 0.108974  | 0.0933858 | 0.114365  | 0.111888  |
| 0.10912  | 0.100379  | 0.0534674 | 0.11116   | 0.0914918 | 0.117424  | 0.115239  |
| 0.120047 | 0.110723  | 0.120629  | 0.0469114 | 0.117861  | 0.116404  | 0.0775058 |
| 0.105041 | 0.0490967 | 0.100379  | 0.105041  | 0.0821678 | 0.106643  | 0.110868  |
| 0.129225 | 0.111742  | 0.128351  | 0.121941  | 0.113928  | 0.126166  | 0.129516  |
| 0.139423 | 0.129808  | 0.137675  | 0.114948  | 0.127622  | 0.13345   | 0.119901  |
| 0.125146 | 0.113199  | 0.128059  | 0.121358  | 0.113345  | 0.12296   | 0.126603  |
| 0.129079 | 0.110431  | 0.130828  | 0.124126  | 0.121941  | 0.127477  | 0.125874  |
| 0.181672 | 0.190414  | 0.194202  | 0.181381  | 0.175699  | 0.19493   | 0.186043  |
| 0.122086 | 0.112179  | 0.123834  | 0.116259  | 0.118153  | 0.113782  | 0.122086  |
| 0.134178 | 0.123689  | 0.130973  | 0.0630828 | 0.126748  | 0.129953  | 0.0735723 |
| 0.107517 | 0.094697  | 0.0553613 | 0.110431  | 0.0939685 | 0.11961   | 0.115967  |
| 0.103584 | 0.0456002 | 0.103293  | 0.10912   | 0.0795455 | 0.109266  | 0.114073  |
| 0.11757  | 0.113491  | 0.123106  | 0.10708   | 0.108974  | 0.118881  | 0.115822  |
| 0.121212 | 0.119464  | 0.131119  | 0.120629  | 0.123106  | 0.0502622 | 0.123834  |
| 0.129662 | 0.121212  | 0.130245  | 0.122378  | 0.127477  | 0.13447   | 0.123543  |
| 0.109994 | 0.121941  | 0.122232  | 0.110868  | 0.113054  | 0.122669  | 0.122523  |
| 0.113199 | 0.0925117 | 0.116113  | 0.112617  | 0.0979021 | 0.0664336 | 0.114948  |

|          |           |           |           |           |           |           |
|----------|-----------|-----------|-----------|-----------|-----------|-----------|
| 0.1081   | 0.0777972 | 0.112762  | 0.102855  | 0.0939685 | 0.0756119 | 0.107809  |
| 0.10708  | 0.0855186 | 0.114073  | 0.100379  | 0.085373  | 0.112762  | 0.103293  |
| 0.117424 | 0.111597  | 0.123834  | 0.113636  | 0.116987  | 0.0861014 | 0.12296   |
| 0.137966 | 0.117861  | 0.133013  | 0.13039   | 0.120047  | 0.131993  | 0.130682  |
| 0.113636 | 0.115385  | 0.128788  | 0.120338  | 0.11961   | 0.0493881 | 0.126166  |
| 0.11961  | 0.109411  | 0.119027  | 0.0488054 | 0.11451   | 0.115093  | 0.0750291 |
| 0.114948 | 0.10912   | 0.123689  | 0.113199  | 0.116841  | 0.0501166 | 0.122815  |
| 0.1081   | 0.100233  | 0.0588578 | 0.109266  | 0.0954254 | 0.113491  | 0.115093  |
| 0.115239 | 0.101253  | 0.123397  | 0.110577  | 0.108974  | 0.103147  | 0.118735  |
| 0.111451 | 0.101836  | 0.0493881 | 0.114365  | 0.0949883 | 0.121503  | 0.117861  |
| 0.116113 | 0.113199  | 0.120484  | 0.110868  | 0.113054  | 0.109557  | 0.116987  |
| 0.11757  | 0.11961   | 0.121066  | 0.110286  | 0.112762  | 0.120047  | 0.121941  |
| 0.121649 | 0.107955  | 0.11961   | 0.112034  | 0.113345  | 0.106061  | 0.121941  |
| 0.105186 | 0.0501166 | 0.106643  | 0.106935  | 0.0831876 | 0.107663  | 0.110723  |
| 0.109703 | 0.0995047 | 0.0566725 | 0.108537  | 0.0964452 | 0.112471  | 0.114365  |
| 0.116696 | 0.120192  | 0.129516  | 0.10912   | 0.109557  | 0.124709  | 0.118735  |
| 0.118007 | 0.116841  | 0.120047  | 0.105186  | 0.115822  | 0.118444  | 0.117424  |
| 0.105915 | 0.101836  | 0.114365  | 0.110868  | 0.0842075 | 0.11014   | 0.113782  |
| 0.110868 | 0.0989219 | 0.0575466 | 0.107955  | 0.0952797 | 0.116841  | 0.11116   |
| 0.122669 | 0.116841  | 0.126166  | 0.0521562 | 0.116696  | 0.123689  | 0.0702214 |
| 0.120047 | 0.113928  | 0.126166  | 0.11655   | 0.117861  | 0.0878497 | 0.123252  |
| 0.122378 | 0.115967  | 0.124709  | 0.0521562 | 0.119901  | 0.116987  | 0.0804196 |
| 0.120338 | 0.110431  | 0.120921  | 0.115093  | 0.115239  | 0.104458  | 0.124126  |
| 0.11014  | 0.0463287 | 0.106352  | 0.111305  | 0.0855186 | 0.112325  | 0.116841  |
| 0.113054 | 0.0955711 | 0.112179  | 0.103147  | 0.106206  | 0.110286  | 0.113054  |
| 0.116113 | 0.103001  | 0.12602   | 0.109703  | 0.109848  | 0.103438  | 0.119901  |
| 0.126457 | 0.120338  | 0.126748  | 0.0544872 | 0.119027  | 0.124272  | 0.0754662 |
| 0.117424 | 0.123834  | 0.132576  | 0.111597  | 0.11961   | 0.116696  | 0.116841  |
| 0.110868 | 0.106789  | 0.119318  | 0.095134  | 0.115967  | 0.117133  | 0.11116   |
| 0.186043 | 0.189248  | 0.192745  | 0.17905   | 0.181527  | 0.194056  | 0.184003  |
| 0.154866 | 0.16215   | 0.164773  | 0.145542  | 0.150058  | 0.162587  | 0.151661  |
| 0.126894 | 0.111742  | 0.130099  | 0.119901  | 0.113636  | 0.118881  | 0.127477  |
| 0.113928 | 0.118298  | 0.126748  | 0.110431  | 0.117861  | 0.0802739 | 0.113636  |
| 0.15676  | 0.136364  | 0.150932  | 0.14627   | 0.137966  | 0.151078  | 0.14831   |
| 0.121358 | 0.119027  | 0.128351  | 0.114656  | 0.123834  | 0.129662  | 0.127477  |
| 0.116841 | 0.107809  | 0.085373  | 0.117133  | 0.107663  | 0.124272  | 0.11655   |
| 0.112908 | 0.11116   | 0.0890152 | 0.105915  | 0.106061  | 0.119464  | 0.112325  |
| 0.110868 | 0.0826049 | 0.0995047 | 0.111451  | 0.0480769 | 0.12296   | 0.113199  |
| 0.120484 | 0.115822  | 0.120484  | 0.108537  | 0.117424  | 0.124709  | 0.11553   |
| 0.191725 | 0.196678  | 0.196678  | 0.189394  | 0.187791  | 0.200612  | 0.190851  |
| 0.121358 | 0.121358  | 0.130973  | 0.121358  | 0.122086  | 0.0544872 | 0.125728  |
| 0.119755 | 0.116841  | 0.122669  | 0.0757576 | 0.11553   | 0.0872669 | 0.0865385 |
| 0.106935 | 0.100524  | 0.0673077 | 0.106352  | 0.0895979 | 0.113199  | 0.109557  |
| 0.116113 | 0.104458  | 0.128059  | 0.114656  | 0.111888  | 0.115385  | 0.121358  |

|          |           |           |           |           |           |           |
|----------|-----------|-----------|-----------|-----------|-----------|-----------|
| 0.171911 | 0.178613  | 0.184441  | 0.166667  | 0.167978  | 0.183421  | 0.171911  |
| 0.238345 | 0.244755  | 0.24359   | 0.235431  | 0.23412   | 0.247815  | 0.230769  |
| 0.116841 | 0.121795  | 0.124126  | 0.113636  | 0.118153  | 0.12398   | 0.123834  |
| 0.118298 | 0.113636  | 0.119172  | 0.104312  | 0.113782  | 0.122523  | 0.113345  |
| 0.125    | 0.109557  | 0.128205  | 0.118881  | 0.108537  | 0.123689  | 0.124709  |
| 0.118444 | 0.104749  | 0.120192  | 0.114656  | 0.113054  | 0.106935  | 0.126603  |
| 0.115676 | 0.113928  | 0.125291  | 0.113054  | 0.11553   | 0.048514  | 0.118298  |
| 0.111742 | 0.112034  | 0.122523  | 0.10708   | 0.112179  | 0.113636  | 0.119027  |
| 0.111014 | 0.105769  | 0.0798368 | 0.083042  | 0.0960082 | 0.116696  | 0.0874126 |
| 0.118007 | 0.113928  | 0.125874  | 0.11451   | 0.118444  | 0.0479312 | 0.122378  |
| 0.115239 | 0.105041  | 0.0910548 | 0.0756119 | 0.101399  | 0.120047  | 0.0793998 |
| 0.106643 | 0.104895  | 0.11655   | 0.113345  | 0.0895979 | 0.119027  | 0.118007  |
| 0.108537 | 0.0482226 | 0.107372  | 0.107955  | 0.0844988 | 0.110723  | 0.114073  |
| 0.117133 | 0.124417  | 0.123543  | 0.115093  | 0.118444  | 0.123397  | 0.124709  |
| 0.123106 | 0.114948  | 0.124272  | 0.050845  | 0.11859   | 0.118881  | 0.0773601 |
| 0.110577 | 0.104458  | 0.116113  | 0.0965909 | 0.101399  | 0.107517  | 0.10708   |
| 0.125146 | 0.11961   | 0.118735  | 0.124563  | 0.108683  | 0.123543  | 0.129225  |
| 0.136801 | 0.119901  | 0.129808  | 0.13447   | 0.129662  | 0.11655   | 0.133304  |
| 0.107809 | 0.100524  | 0.0571096 | 0.109557  | 0.095134  | 0.114656  | 0.112762  |
| 0.11961  | 0.107955  | 0.0846445 | 0.118153  | 0.102855  | 0.120047  | 0.113199  |
| 0.126603 | 0.111742  | 0.0496795 | 0.124854  | 0.111888  | 0.13549   | 0.125146  |
| 0.200466 | 0.197552  | 0.203671  | 0.196678  | 0.191871  | 0.211684  | 0.194639  |
| 0.105332 | 0.11553   | 0.118735  | 0.103293  | 0.109557  | 0.112762  | 0.11757   |
| 0.107226 | 0.0486597 | 0.107226  | 0.109557  | 0.0826049 | 0.11116   | 0.112762  |
| 0.124126 | 0.111888  | 0.129371  | 0.11451   | 0.115239  | 0.114656  | 0.125291  |
| 0.124272 | 0.120484  | 0.130973  | 0.115822  | 0.119755  | 0.120047  | 0.122815  |
| 0.114073 | 0.101544  | 0.126311  | 0.109411  | 0.112762  | 0.111888  | 0.114656  |
| 0.190414 | 0.194784  | 0.198572  | 0.188666  | 0.184149  | 0.20134   | 0.188666  |
| 0.125583 | 0.11655   | 0.128205  | 0.0562354 | 0.123689  | 0.11961   | 0.076049  |
| 0.107372 | 0.0986305 | 0.0569639 | 0.106498  | 0.0926573 | 0.11451   | 0.110868  |
| 0.128205 | 0.113345  | 0.131119  | 0.119172  | 0.108246  | 0.121649  | 0.120629  |
| 0.119464 | 0.104604  | 0.116259  | 0.110723  | 0.112908  | 0.104458  | 0.122378  |
| 0.123252 | 0.117424  | 0.124709  | 0.0518648 | 0.114656  | 0.120775  | 0.07838   |
| 0.115967 | 0.10373   | 0.111014  | 0.0716783 | 0.102418  | 0.113782  | 0.0944056 |
| 0.106643 | 0.100816  | 0.116841  | 0.112471  | 0.088141  | 0.116404  | 0.115676  |
| 0.120921 | 0.114802  | 0.129662  | 0.111305  | 0.120775  | 0.11553   | 0.122669  |
| 0.188957 | 0.191871  | 0.197698  | 0.186917  | 0.185315  | 0.196387  | 0.188666  |
| 0.115676 | 0.106061  | 0.11655   | 0.048951  | 0.108246  | 0.114073  | 0.0795455 |
| 0.182547 | 0.191579  | 0.192453  | 0.183421  | 0.180653  | 0.193765  | 0.184003  |
| 0.18211  | 0.189103  | 0.191725  | 0.179779  | 0.179924  | 0.193036  | 0.184149  |
| 0.131119 | 0.115967  | 0.12704   | 0.128205  | 0.123689  | 0.114948  | 0.130828  |
| 0.135781 | 0.122086  | 0.137238  | 0.126748  | 0.126311  | 0.128059  | 0.127914  |
| 0.101399 | 0.0955711 | 0.113636  | 0.103438  | 0.0828963 | 0.108537  | 0.109266  |
| 0.116987 | 0.105332  | 0.114656  | 0.0543415 | 0.108974  | 0.112762  | 0.0843531 |

|          |           |           |           |           |           |           |
|----------|-----------|-----------|-----------|-----------|-----------|-----------|
| 0.121795 | 0.111597  | 0.121503  | 0.0486597 | 0.114948  | 0.116113  | 0.0795455 |
| 0.108974 | 0.100524  | 0.0574009 | 0.112179  | 0.0939685 | 0.119027  | 0.115093  |
| 0.11451  | 0.109266  | 0.123543  | 0.1081    | 0.112325  | 0.0517191 | 0.11859   |
| 0.115676 | 0.110723  | 0.124417  | 0.113636  | 0.11757   | 0.046183  | 0.119172  |
| 0.118153 | 0.125437  | 0.128059  | 0.117279  | 0.121503  | 0.12704   | 0.127185  |
| 0.125583 | 0.11014   | 0.123252  | 0.119172  | 0.119318  | 0.109703  | 0.125     |
| 0.107372 | 0.095134  | 0.0534674 | 0.106498  | 0.0926573 | 0.114802  | 0.109994  |
| 0.121795 | 0.115385  | 0.123543  | 0.0521562 | 0.115822  | 0.119027  | 0.0763403 |
| 0.105332 | 0.0980478 | 0.107663  | 0.0971737 | 0.0836247 | 0.109848  | 0.105915  |
| 0.136364 | 0.124126  | 0.130536  | 0.0617716 | 0.124272  | 0.131265  | 0.0748834 |
| 0.121503 | 0.108683  | 0.126748  | 0.11451   | 0.110286  | 0.120192  | 0.122086  |
| 0.137383 | 0.127768  | 0.133304  | 0.0651224 | 0.129662  | 0.132576  | 0.0773601 |
| 0.251894 | 0.256556  | 0.256847  | 0.249563  | 0.245338  | 0.261655  | 0.245192  |
| 0.134761 | 0.118444  | 0.13447   | 0.128642  | 0.125874  | 0.119464  | 0.129225  |
| 0.129953 | 0.115385  | 0.129953  | 0.129079  | 0.126603  | 0.126894  | 0.126166  |
| 0.210227 | 0.215472  | 0.213432  | 0.207022  | 0.204837  | 0.219406  | 0.207605  |
| 0.121503 | 0.114219  | 0.123834  | 0.126748  | 0.118444  | 0.128351  | 0.128205  |
| 0.220571 | 0.226981  | 0.224359  | 0.217949  | 0.21926   | 0.233246  | 0.215909  |
| 0.125728 | 0.110868  | 0.128351  | 0.11961   | 0.117716  | 0.107809  | 0.123106  |
| 0.123252 | 0.109557  | 0.0439977 | 0.123834  | 0.110577  | 0.13243   | 0.122086  |
| 0.119172 | 0.112179  | 0.121795  | 0.106061  | 0.11757   | 0.111451  | 0.116841  |
| 0.128788 | 0.112471  | 0.122086  | 0.123543  | 0.121066  | 0.115239  | 0.129662  |
| 0.192016 | 0.199301  | 0.202214  | 0.189977  | 0.191288  | 0.202652  | 0.192308  |
| 0.135198 | 0.123543  | 0.130828  | 0.0606061 | 0.127477  | 0.131847  | 0.0745921 |
| 0.12296  | 0.117424  | 0.123252  | 0.0506993 | 0.119318  | 0.119027  | 0.0795455 |
| 0.218969 | 0.223339  | 0.222756  | 0.216055  | 0.211538  | 0.229312  | 0.213724  |
| 0.117716 | 0.118007  | 0.127914  | 0.117716  | 0.11757   | 0.0525932 | 0.126166  |
| 0.188374 | 0.19391   | 0.19799   | 0.188666  | 0.185606  | 0.198718  | 0.1875    |
| 0.119901 | 0.118444  | 0.130682  | 0.119318  | 0.119464  | 0.0530303 | 0.126894  |
| 0.110286 | 0.100962  | 0.0557984 | 0.109994  | 0.0955711 | 0.117424  | 0.115822  |
| 0.120047 | 0.04662   | 0.111888  | 0.119464  | 0.090472  | 0.123397  | 0.120338  |
| 0.133741 | 0.114219  | 0.127622  | 0.127914  | 0.127185  | 0.11961   | 0.13141   |
| 0.109994 | 0.105915  | 0.118444  | 0.104458  | 0.1081    | 0.113054  | 0.121649  |
| 0.151661 | 0.133013  | 0.157488  | 0.151369  | 0.135198  | 0.163462  | 0.151369  |
| 0.117861 | 0.109703  | 0.120775  | 0.043852  | 0.113928  | 0.113928  | 0.0735723 |
| 0.123106 | 0.116404  | 0.13039   | 0.116696  | 0.11859   | 0.118881  | 0.122523  |
| 0.117861 | 0.110577  | 0.123689  | 0.117279  | 0.112179  | 0.110723  | 0.121066  |
| 0.133304 | 0.124272  | 0.130682  | 0.11553   | 0.126457  | 0.128788  | 0.117279  |
| 0.187646 | 0.193473  | 0.19289   | 0.183275  | 0.181672  | 0.197407  | 0.185315  |
| 0.108537 | 0.0989219 | 0.0549242 | 0.109411  | 0.0926573 | 0.11655   | 0.114073  |
| 0.117424 | 0.112762  | 0.124126  | 0.120338  | 0.109994  | 0.114073  | 0.129662  |
| 0.118735 | 0.110868  | 0.125728  | 0.114365  | 0.115676  | 0.0885781 | 0.122523  |
| 0.121212 | 0.115967  | 0.129371  | 0.122669  | 0.121066  | 0.0482226 | 0.123252  |
| 0.116404 | 0.103875  | 0.048514  | 0.117279  | 0.10169   | 0.126166  | 0.119027  |



|          |           |           |           |           |           |           |
|----------|-----------|-----------|-----------|-----------|-----------|-----------|
| 0.249126 | 0.25204   | 0.251166  | 0.245629  | 0.244318  | 0.258304  | 0.242133  |
| 0.11116  | 0.046183  | 0.106498  | 0.114948  | 0.087704  | 0.119172  | 0.113491  |
| 0.119027 | 0.111451  | 0.0992133 | 0.115239  | 0.107809  | 0.115093  | 0.114948  |
| 0.1706   | 0.170892  | 0.184295  | 0.17264   | 0.166084  | 0.180653  | 0.165064  |
| 0.174971 | 0.181381  | 0.187209  | 0.172931  | 0.170455  | 0.185315  | 0.177593  |
| 0.11553  | 0.122232  | 0.126894  | 0.113782  | 0.113345  | 0.123543  | 0.123397  |
| 0.121503 | 0.113928  | 0.122086  | 0.0521562 | 0.119318  | 0.121358  | 0.0775058 |
| 0.122086 | 0.109266  | 0.120629  | 0.113345  | 0.114656  | 0.104167  | 0.121503  |
| 0.150204 | 0.139714  | 0.142337  | 0.0773601 | 0.1419    | 0.145396  | 0.0849359 |
| 0.111451 | 0.119901  | 0.124563  | 0.107663  | 0.112471  | 0.120629  | 0.124854  |
| 0.116841 | 0.12296   | 0.125291  | 0.114802  | 0.116987  | 0.123689  | 0.124709  |
| 0.128642 | 0.12398   | 0.13243   | 0.122815  | 0.128205  | 0.0541958 | 0.128059  |
| 0.122523 | 0.109994  | 0.120192  | 0.0549242 | 0.116259  | 0.120921  | 0.0709499 |
| 0.133741 | 0.123252  | 0.129079  | 0.0608974 | 0.126311  | 0.130099  | 0.076049  |
| 0.115822 | 0.11757   | 0.126311  | 0.116696  | 0.109557  | 0.0710956 | 0.119318  |
| 0.132576 | 0.111597  | 0.12296   | 0.125583  | 0.122232  | 0.113782  | 0.129662  |
| 0.144085 | 0.12602   | 0.134178  | 0.138549  | 0.136946  | 0.125874  | 0.140006  |
| 0.118298 | 0.0445804 | 0.110431  | 0.119172  | 0.0913462 | 0.121066  | 0.121503  |
| 0.139132 | 0.11757   | 0.128934  | 0.131556  | 0.129662  | 0.118007  | 0.135052  |
| 0.13039  | 0.123689  | 0.136801  | 0.125728  | 0.129953  | 0.0556527 | 0.129808  |
| 0.198718 | 0.206876  | 0.206876  | 0.193473  | 0.194784  | 0.206439  | 0.198427  |
| 0.117279 | 0.101544  | 0.109703  | 0.123106  | 0.0903263 | 0.113636  | 0.121941  |
| 0.183712 | 0.188083  | 0.191871  | 0.17905   | 0.179196  | 0.192016  | 0.184295  |
| 0.113782 | 0.114656  | 0.124563  | 0.109703  | 0.113345  | 0.111888  | 0.112617  |
| 0.118153 | 0.10708   | 0.0517191 | 0.120192  | 0.102564  | 0.132284  | 0.121649  |
| 0.131847 | 0.114073  | 0.126894  | 0.119901  | 0.111888  | 0.125874  | 0.126894  |
| 0.122378 | 0.107517  | 0.12296   | 0.113054  | 0.105041  | 0.118735  | 0.12296   |
| 0.127768 | 0.119027  | 0.126311  | 0.0523019 | 0.119755  | 0.124417  | 0.0735723 |
| 0.127185 | 0.11961   | 0.125437  | 0.0584207 | 0.122669  | 0.122669  | 0.0726981 |
| 0.110577 | 0.103584  | 0.0592949 | 0.112034  | 0.0938228 | 0.118298  | 0.119318  |
| 0.120921 | 0.117716  | 0.123834  | 0.110431  | 0.115822  | 0.11757   | 0.125     |
| 0.132576 | 0.115385  | 0.131702  | 0.118007  | 0.11553   | 0.126894  | 0.125291  |
| 0.131556 | 0.12602   | 0.139714  | 0.133304  | 0.124709  | 0.0632284 | 0.134178  |
| 0.244318 | 0.245484  | 0.246941  | 0.241404  | 0.237471  | 0.253788  | 0.236742  |
| 0.113782 | 0.102127  | 0.0566725 | 0.113199  | 0.0938228 | 0.123834  | 0.121066  |
| 0.174242 | 0.181527  | 0.185023  | 0.174242  | 0.169435  | 0.186043  | 0.175408  |
| 0.177885 | 0.186626  | 0.186917  | 0.175845  | 0.175408  | 0.188228  | 0.178176  |
| 0        | 0.108392  | 0.121212  | 0.118298  | 0.105915  | 0.117279  | 0.123252  |
| 0.108392 | 0         | 0.106352  | 0.109848  | 0.08581   | 0.115239  | 0.112762  |
| 0.121212 | 0.106352  | 0         | 0.118298  | 0.106206  | 0.128642  | 0.120629  |
| 0.118298 | 0.109848  | 0.118298  | 0         | 0.112617  | 0.118444  | 0.0789627 |
| 0.105915 | 0.08581   | 0.106206  | 0.112617  | 0         | 0.11859   | 0.113199  |
| 0.117279 | 0.115239  | 0.128642  | 0.118444  | 0.11859   | 0         | 0.124272  |
| 0.123252 | 0.112762  | 0.120629  | 0.0789627 | 0.113199  | 0.124272  | 0         |

|          |           |           |           |           |           |           |
|----------|-----------|-----------|-----------|-----------|-----------|-----------|
| 0.137529 | 0.124709  | 0.129662  | 0.0626457 | 0.129808  | 0.131847  | 0.0728438 |
| 0.112908 | 0.104167  | 0.0511364 | 0.114073  | 0.0961538 | 0.11859   | 0.116113  |
| 0.135052 | 0.121358  | 0.125437  | 0.0619172 | 0.126166  | 0.129079  | 0.0767774 |
| 0.115385 | 0.106061  | 0.126166  | 0.117133  | 0.116696  | 0.116987  | 0.120921  |
| 0.131119 | 0.112471  | 0.13141   | 0.123834  | 0.116113  | 0.128934  | 0.127914  |
| 0.127185 | 0.113199  | 0.123106  | 0.119901  | 0.117424  | 0.106643  | 0.127185  |
| 0.132867 | 0.12704   | 0.136072  | 0.130245  | 0.13243   | 0.0592949 | 0.13345   |
| 0.114656 | 0.106498  | 0.116987  | 0.122523  | 0.0903263 | 0.122669  | 0.120192  |
| 0.110286 | 0.100379  | 0.0546329 | 0.114365  | 0.0958625 | 0.114219  | 0.114656  |
| 0.136801 | 0.124272  | 0.134178  | 0.12602   | 0.131702  | 0.127622  | 0.128642  |
| 0.171911 | 0.180944  | 0.18648   | 0.173951  | 0.169435  | 0.184003  | 0.177739  |
| 0.140297 | 0.128059  | 0.133887  | 0.0683275 | 0.133741  | 0.13549   | 0.0770688 |
| 0.123689 | 0.114365  | 0.12602   | 0.0528846 | 0.115967  | 0.124126  | 0.0756119 |
| 0.126457 | 0.111014  | 0.126166  | 0.119464  | 0.110577  | 0.123689  | 0.125     |
| 0.115822 | 0.101544  | 0.118735  | 0.111742  | 0.103438  | 0.113636  | 0.11961   |
| 0.126457 | 0.109266  | 0.121212  | 0.119755  | 0.116696  | 0.110577  | 0.124709  |
| 0.128934 | 0.11116   | 0.126894  | 0.125146  | 0.120921  | 0.112471  | 0.129808  |
| 0.182401 | 0.18852   | 0.193182  | 0.179779  | 0.179341  | 0.192745  | 0.183858  |
| 0.120921 | 0.113636  | 0.120629  | 0.0769231 | 0.110286  | 0.118444  | 0.0772145 |
| 0.108537 | 0.105332  | 0.11757   | 0.0995047 | 0.0952797 | 0.109557  | 0.101836  |
| 0.128642 | 0.118735  | 0.127768  | 0.0537587 | 0.126457  | 0.125583  | 0.0738636 |
| 0.183275 | 0.188811  | 0.189977  | 0.179487  | 0.179924  | 0.191288  | 0.179487  |
| 0.105332 | 0.048514  | 0.109703  | 0.109703  | 0.0777972 | 0.109557  | 0.114948  |
| 0.124126 | 0.120921  | 0.132576  | 0.123543  | 0.124563  | 0.0511364 | 0.128205  |
| 0.128497 | 0.118007  | 0.125874  | 0.0571096 | 0.121066  | 0.123106  | 0.0731352 |
| 0.112034 | 0.115822  | 0.11757   | 0.106206  | 0.113636  | 0.11859   | 0.120775  |
| 0.17905  | 0.18109   | 0.186334  | 0.172348  | 0.174242  | 0.192016  | 0.17701   |
| 0.120775 | 0.116113  | 0.128934  | 0.117279  | 0.120629  | 0.0521562 | 0.120484  |
| 0.11757  | 0.109994  | 0.121358  | 0.104458  | 0.115093  | 0.106643  | 0.110868  |
| 0.107663 | 0.0639569 | 0.112034  | 0.108246  | 0.0812937 | 0.113054  | 0.115239  |
| 0.117861 | 0.117861  | 0.128351  | 0.103293  | 0.104312  | 0.122378  | 0.121066  |
| 0.121503 | 0.118881  | 0.129953  | 0.115385  | 0.119027  | 0.117279  | 0.123834  |
| 0.129953 | 0.125     | 0.134324  | 0.128205  | 0.130099  | 0.057838  | 0.129953  |
| 0.111014 | 0.100816  | 0.0504079 | 0.109848  | 0.0942599 | 0.119901  | 0.111888  |
| 0.116259 | 0.113054  | 0.132576  | 0.112762  | 0.119318  | 0.117861  | 0.115967  |
| 0.144085 | 0.145251  | 0.141463  | 0.138549  | 0.139569  | 0.151515  | 0.144668  |
| 0.230041 | 0.233537  | 0.231206  | 0.226544  | 0.223776  | 0.238928  | 0.224796  |
| 0.119318 | 0.109703  | 0.122523  | 0.125437  | 0.0967366 | 0.125     | 0.121066  |
| 0.123689 | 0.118153  | 0.13039   | 0.116113  | 0.123252  | 0.117424  | 0.125146  |
| 0.121503 | 0.11451   | 0.122086  | 0.0614802 | 0.112908  | 0.113199  | 0.0728438 |
| 0.118735 | 0.11961   | 0.128059  | 0.11961   | 0.116259  | 0.121795  | 0.126311  |
| 0.121212 | 0.113054  | 0.121795  | 0.108974  | 0.111451  | 0.101253  | 0.106643  |
| 0.116841 | 0.102273  | 0.125291  | 0.114802  | 0.114948  | 0.118444  | 0.116841  |
| 0.127185 | 0.115822  | 0.12398   | 0.0630828 | 0.120629  | 0.120629  | 0.0732809 |

|          |           |           |           |           |           |           |
|----------|-----------|-----------|-----------|-----------|-----------|-----------|
| 0.128205 | 0.122669  | 0.133741  | 0.126457  | 0.127768  | 0.0546329 | 0.126748  |
| 0.113928 | 0.120921  | 0.12296   | 0.110431  | 0.11553   | 0.11553   | 0.113928  |
| 0.229458 | 0.234703  | 0.231498  | 0.22771   | 0.225233  | 0.238928  | 0.227127  |
| 0.105478 | 0.0448718 | 0.104312  | 0.105478  | 0.0817308 | 0.10912   | 0.108392  |
| 0.112471 | 0.101981  | 0.121503  | 0.104604  | 0.106789  | 0.0995047 | 0.112762  |
| 0.110577 | 0.0995047 | 0.0490967 | 0.108829  | 0.0949883 | 0.116259  | 0.113782  |
| 0.129371 | 0.132867  | 0.128205  | 0.121795  | 0.129808  | 0.136218  | 0.130828  |
| 0.123543 | 0.113928  | 0.121503  | 0.131702  | 0.10271   | 0.133304  | 0.129079  |
| 0.111014 | 0.103438  | 0.115967  | 0.105186  | 0.108246  | 0.122523  | 0.111888  |
| 0.124417 | 0.115093  | 0.123252  | 0.0518648 | 0.117279  | 0.120775  | 0.0763403 |
| 0.105332 | 0.112908  | 0.116113  | 0.105332  | 0.108683  | 0.118881  | 0.115239  |
| 0.225087 | 0.228875  | 0.224213  | 0.221882  | 0.219114  | 0.234557  | 0.218677  |
| 0.132721 | 0.120192  | 0.127768  | 0.0590035 | 0.125291  | 0.126748  | 0.0729895 |
| 0.125874 | 0.119172  | 0.132284  | 0.120629  | 0.124272  | 0.0514277 | 0.124126  |
| 0.108974 | 0.113928  | 0.116259  | 0.108974  | 0.107372  | 0.111451  | 0.115676  |
| 0.130099 | 0.116987  | 0.127185  | 0.11757   | 0.122378  | 0.125291  | 0.120484  |
| 0.129516 | 0.11553   | 0.130682  | 0.123397  | 0.119172  | 0.112762  | 0.126894  |
| 0.113491 | 0.100379  | 0.0479312 | 0.114365  | 0.0976107 | 0.121503  | 0.114656  |
| 0.125728 | 0.116113  | 0.13039   | 0.122523  | 0.12296   | 0.0562354 | 0.128934  |
| 0.131993 | 0.124417  | 0.134033  | 0.125     | 0.130099  | 0.0575466 | 0.128205  |
| 0.119172 | 0.116841  | 0.125874  | 0.117716  | 0.121358  | 0.0470571 | 0.124417  |
| 0.113199 | 0.100379  | 0.0525932 | 0.112034  | 0.0944056 | 0.120047  | 0.11553   |
| 0.130682 | 0.120484  | 0.133596  | 0.121941  | 0.12296   | 0.126166  | 0.122815  |
| 0.136946 | 0.124709  | 0.13549   | 0.12704   | 0.128059  | 0.128934  | 0.12704   |
| 0.138403 | 0.117424  | 0.130536  | 0.12704   | 0.11961   | 0.133304  | 0.13141   |
| 0.137821 | 0.120338  | 0.138695  | 0.129953  | 0.120484  | 0.132139  | 0.133741  |
| 0.136801 | 0.123397  | 0.135927  | 0.127185  | 0.129371  | 0.124709  | 0.128059  |
| 0.106206 | 0.0820221 | 0.0980478 | 0.107663  | 0.0451632 | 0.114219  | 0.109994  |
| 0.138403 | 0.125874  | 0.142483  | 0.132284  | 0.134178  | 0.104458  | 0.132867  |
| 0.129516 | 0.121941  | 0.12398   | 0.128059  | 0.122086  | 0.125     | 0.129516  |
| 0.197115 | 0.201195  | 0.205565  | 0.196533  | 0.194347  | 0.208333  | 0.192453  |
| 0.121649 | 0.116987  | 0.120775  | 0.116987  | 0.120338  | 0.126166  | 0.118153  |
| 0.116113 | 0.105041  | 0.126603  | 0.114948  | 0.111597  | 0.100816  | 0.122815  |
| 0.112471 | 0.105478  | 0.0495338 | 0.117133  | 0.0977564 | 0.125437  | 0.119464  |
| 0.21722  | 0.218969  | 0.219843  | 0.213724  | 0.207751  | 0.227273  | 0.211684  |
| 0.201486 | 0.209645  | 0.209936  | 0.202652  | 0.199009  | 0.211247  | 0.202069  |
| 0.129079 | 0.125     | 0.135198  | 0.129079  | 0.129516  | 0.0587121 | 0.129079  |
| 0.241696 | 0.246941  | 0.24461   | 0.239073  | 0.238636  | 0.249709  | 0.237325  |
| 0.107372 | 0.0849359 | 0.0980478 | 0.108829  | 0.0492424 | 0.118007  | 0.110286  |
| 0.133887 | 0.119318  | 0.126603  | 0.136218  | 0.112471  | 0.137238  | 0.131556  |
| 0.10708  | 0.0441434 | 0.106206  | 0.111742  | 0.0824592 | 0.115385  | 0.114656  |
| 0.130245 | 0.122669  | 0.134615  | 0.119172  | 0.122815  | 0.123106  | 0.123543  |
| 0.181964 | 0.1875    | 0.186917  | 0.178759  | 0.176573  | 0.189394  | 0.178467  |
| 0.121503 | 0.115676  | 0.121503  | 0.121503  | 0.117861  | 0.120484  | 0.124126  |

|           |           |           |           |           |           |           |
|-----------|-----------|-----------|-----------|-----------|-----------|-----------|
| 0.187063  | 0.190559  | 0.192599  | 0.183566  | 0.180507  | 0.195659  | 0.18648   |
| 0.0559441 | 0.106643  | 0.116259  | 0.113636  | 0.111451  | 0.115239  | 0.117716  |
| 0.120629  | 0.118007  | 0.125583  | 0.099359  | 0.110286  | 0.0793998 | 0.10373   |
| 0.114219  | 0.104312  | 0.119755  | 0.120629  | 0.0901807 | 0.125728  | 0.0996503 |
| 0.111888  | 0.104895  | 0.117133  | 0.103147  | 0.104458  | 0.109411  | 0.109848  |
| 0.10708   | 0.0965909 | 0.0523019 | 0.105041  | 0.0891608 | 0.114802  | 0.109703  |
| 0.115822  | 0.109411  | 0.114656  | 0.102418  | 0.111014  | 0.116841  | 0.111742  |
| 0.104458  | 0.0458916 | 0.103293  | 0.109703  | 0.0798368 | 0.11014   | 0.114073  |
| 0.119755  | 0.11451   | 0.120047  | 0.0486597 | 0.114365  | 0.116987  | 0.0737179 |
| 0.121066  | 0.116113  | 0.126311  | 0.117279  | 0.119464  | 0.0912005 | 0.121941  |
| 0.107955  | 0.103293  | 0.11553   | 0.111742  | 0.0859557 | 0.113636  | 0.114656  |
| 0.106061  | 0.0422494 | 0.106061  | 0.109266  | 0.0820221 | 0.114656  | 0.113928  |
| 0.126311  | 0.11553   | 0.109411  | 0.116696  | 0.107809  | 0.121503  | 0.119027  |
| 0.136509  | 0.123106  | 0.13039   | 0.0642483 | 0.12704   | 0.129953  | 0.074155  |
| 0.118881  | 0.105769  | 0.124417  | 0.111014  | 0.105332  | 0.115822  | 0.119464  |
| 0.119901  | 0.109411  | 0.119027  | 0.108537  | 0.11014   | 0.110431  | 0.117861  |
| 0.107226  | 0.0976107 | 0.0492424 | 0.104021  | 0.0922203 | 0.114073  | 0.113054  |
| 0.125874  | 0.11655   | 0.126748  | 0.114802  | 0.117861  | 0.0627914 | 0.116841  |
| 0.120629  | 0.115967  | 0.129371  | 0.11451   | 0.117861  | 0.116696  | 0.123252  |
| 0.128059  | 0.111742  | 0.122523  | 0.121358  | 0.120338  | 0.105186  | 0.126603  |
| 0.123397  | 0.110286  | 0.12602   | 0.11757   | 0.106935  | 0.119172  | 0.127477  |
| 0.124126  | 0.115093  | 0.123543  | 0.0518648 | 0.118444  | 0.118735  | 0.0748834 |
| 0.135927  | 0.125728  | 0.129225  | 0.0607517 | 0.130828  | 0.130828  | 0.0773601 |
| 0.143502  | 0.133596  | 0.137092  | 0.0715326 | 0.136072  | 0.138403  | 0.0802739 |
| 0.111014  | 0.104021  | 0.115093  | 0.105186  | 0.108246  | 0.0557984 | 0.111888  |
| 0.113636  | 0.100816  | 0.0533217 | 0.109848  | 0.0945513 | 0.118735  | 0.117133  |
| 0.109703  | 0.0936772 | 0.122523  | 0.102418  | 0.102564  | 0.108683  | 0.109994  |
| 0.137092  | 0.125146  | 0.136509  | 0.127185  | 0.131993  | 0.13141   | 0.129808  |
| 0.113636  | 0.0445804 | 0.108683  | 0.112179  | 0.0887238 | 0.11757   | 0.114802  |
| 0.144814  | 0.126748  | 0.135781  | 0.138403  | 0.136218  | 0.125728  | 0.141026  |
| 0.129079  | 0.113928  | 0.0527389 | 0.128205  | 0.113782  | 0.13884   | 0.129371  |
| 0.119027  | 0.12602   | 0.123397  | 0.11757   | 0.125291  | 0.129079  | 0.123397  |
| 0.110723  | 0.102273  | 0.111014  | 0.102564  | 0.0878497 | 0.112617  | 0.108974  |
| 0.113491  | 0.112325  | 0.122815  | 0.101836  | 0.112179  | 0.113345  | 0.109703  |
| 0.133304  | 0.117279  | 0.130973  | 0.124854  | 0.116841  | 0.130536  | 0.132139  |
| 0.201632  | 0.206585  | 0.206002  | 0.19697   | 0.192162  | 0.206731  | 0.19697   |
| 0.116259  | 0.108683  | 0.12296   | 0.109557  | 0.110577  | 0.11116   | 0.115385  |
| 0.113782  | 0.104458  | 0.120192  | 0.114656  | 0.0850816 | 0.118007  | 0.104749  |
| 0.124126  | 0.114802  | 0.127914  | 0.114219  | 0.118153  | 0.117861  | 0.119464  |
| 0.123106  | 0.10912   | 0.127477  | 0.11553   | 0.106352  | 0.11859   | 0.121358  |
| 0.0576923 | 0.113636  | 0.120338  | 0.119755  | 0.115239  | 0.121649  | 0.125     |
| 0.120338  | 0.122086  | 0.129371  | 0.113928  | 0.124272  | 0.116113  | 0.119464  |
| 0.120775  | 0.123689  | 0.131556  | 0.114948  | 0.124126  | 0.121795  | 0.116404  |
| 0.117424  | 0.121503  | 0.122378  | 0.116841  | 0.119901  | 0.123689  | 0.122086  |

|          |           |          |           |           |           |           |
|----------|-----------|----------|-----------|-----------|-----------|-----------|
| 0.115093 | 0.110431  | 0.123834 | 0.111305  | 0.114656  | 0.0849359 | 0.118881  |
| 0.13345  | 0.121795  | 0.129079 | 0.122086  | 0.126603  | 0.12398   | 0.122378  |
| 0.110723 | 0.101981  | 0.119755 | 0.115385  | 0.0887238 | 0.116987  | 0.100524  |
| 0.112908 | 0.107372  | 0.118735 | 0.118153  | 0.0906177 | 0.118298  | 0.11757   |
| 0.175117 | 0.171037  | 0.175699 | 0.167832  | 0.170892  | 0.174388  | 0.170746  |
| 0.121212 | 0.115676  | 0.122669 | 0.0483683 | 0.114656  | 0.116113  | 0.0772145 |
| 0.13039  | 0.125146  | 0.135052 | 0.123397  | 0.119464  | 0.125874  | 0.125146  |
| 0.119464 | 0.10169   | 0.119755 | 0.124126  | 0.0939685 | 0.109994  | 0.126748  |
| 0.124854 | 0.119027  | 0.12602  | 0.106789  | 0.119172  | 0.115967  | 0.107955  |
| 0.108829 | 0.100962  | 0.111742 | 0.101253  | 0.0882867 | 0.112762  | 0.106498  |
| 0.101253 | 0.0962995 | 0.110868 | 0.106498  | 0.0859557 | 0.104895  | 0.10708   |
| 0.115239 | 0.103584  | 0.11961  | 0.103875  | 0.092366  | 0.117133  | 0.110868  |
| 0.125728 | 0.114948  | 0.126311 | 0.119901  | 0.118007  | 0.1081    | 0.125146  |
| 0.110868 | 0.112617  | 0.115822 | 0.0852273 | 0.0984848 | 0.121212  | 0.0913462 |
| 0.129079 | 0.112179  | 0.127622 | 0.125291  | 0.122523  | 0.122815  | 0.13141   |
| 0.11757  | 0.10708   | 0.117279 | 0.100962  | 0.106061  | 0.104895  | 0.108537  |
| 0.117424 | 0.104895  | 0.125874 | 0.119172  | 0.092803  | 0.110868  | 0.121795  |
| 0.13447  | 0.11961   | 0.13243  | 0.13039   | 0.124417  | 0.104604  | 0.129808  |
| 0.116987 | 0.103001  | 0.116404 | 0.121066  | 0.0932401 | 0.108392  | 0.11961   |
| 0.132139 | 0.115239  | 0.125728 | 0.11961   | 0.111888  | 0.121212  | 0.123106  |
| 0.113491 | 0.0992133 | 0.112034 | 0.11757   | 0.087704  | 0.103438  | 0.116404  |
| 0.116696 | 0.10271   | 0.116987 | 0.117861  | 0.0909091 | 0.11014   | 0.118444  |
| 0.110286 | 0.0910548 | 0.106498 | 0.109411  | 0.083042  | 0.108683  | 0.112617  |
| 0.121795 | 0.104021  | 0.11859  | 0.121795  | 0.0960082 | 0.113491  | 0.121795  |
| 0.111597 | 0.0935315 | 0.112471 | 0.107517  | 0.0861014 | 0.106498  | 0.115093  |
| 0.148019 | 0.13549   | 0.14627  | 0.137238  | 0.144085  | 0.111451  | 0.140152  |
| 0.134907 | 0.128205  | 0.135198 | 0.125     | 0.130099  | 0.104749  | 0.132284  |
| 0.119172 | 0.101399  | 0.11451  | 0.11451   | 0.0913462 | 0.103875  | 0.115385  |
| 0.147582 | 0.133887  | 0.143794 | 0.133304  | 0.135198  | 0.112762  | 0.133887  |
| 0.127768 | 0.118153  | 0.125728 | 0.113491  | 0.116841  | 0.127622  | 0.127185  |
| 0.130973 | 0.116987  | 0.137092 | 0.132139  | 0.119755  | 0.126457  | 0.126603  |
| 0.120775 | 0.0965909 | 0.111451 | 0.112325  | 0.0882867 | 0.114802  | 0.11757   |
| 0.138112 | 0.13549   | 0.138695 | 0.134324  | 0.137383  | 0.137383  | 0.136364  |
| 0.12296  | 0.117716  | 0.128497 | 0.12704   | 0.126603  | 0.121066  | 0.131702  |
| 0.135781 | 0.128497  | 0.139569 | 0.136072  | 0.134761  | 0.124854  | 0.137238  |
| 0.123252 | 0.110723  | 0.125291 | 0.117424  | 0.104749  | 0.118153  | 0.125     |
| 0.107955 | 0.0977564 | 0.112617 | 0.114948  | 0.0897436 | 0.0958625 | 0.116113  |
| 0.109848 | 0.101399  | 0.113636 | 0.111888  | 0.0893065 | 0.099796  | 0.115385  |
| 0.121941 | 0.114365  | 0.126311 | 0.116113  | 0.113636  | 0.104312  | 0.121649  |
| 0.123689 | 0.0954254 | 0.116696 | 0.121941  | 0.0973193 | 0.115967  | 0.120484  |
| 0.126457 | 0.106061  | 0.122086 | 0.12704   | 0.100962  | 0.128642  | 0.120338  |
| 0.123543 | 0.113345  | 0.126166 | 0.120047  | 0.110286  | 0.103875  | 0.121795  |
| 0.113636 | 0.0961538 | 0.118007 | 0.110431  | 0.0948427 | 0.106789  | 0.120338  |
| 0.112908 | 0.100379  | 0.113491 | 0.111742  | 0.0856643 | 0.101107  | 0.114656  |

|          |           |           |           |           |           |          |
|----------|-----------|-----------|-----------|-----------|-----------|----------|
| 0.119172 | 0.100524  | 0.115093  | 0.121503  | 0.0933858 | 0.111742  | 0.120338 |
| 0.113054 | 0.0955711 | 0.113636  | 0.11014   | 0.090472  | 0.0965909 | 0.115967 |
| 0.11757  | 0.105041  | 0.118153  | 0.121358  | 0.094697  | 0.108974  | 0.121649 |
| 0.120484 | 0.0957168 | 0.11553   | 0.107955  | 0.0909091 | 0.116841  | 0.114948 |
| 0.112179 | 0.105186  | 0.116841  | 0.104895  | 0.10708   | 0.122523  | 0.108683 |
| 0.115093 | 0.0987762 | 0.113928  | 0.105769  | 0.0939685 | 0.116404  | 0.11655  |
| 0.107226 | 0.0795455 | 0.0958625 | 0.108392  | 0.0514277 | 0.116696  | 0.108974 |
| 0.112762 | 0.0955711 | 0.109848  | 0.112762  | 0.0855186 | 0.105332  | 0.117424 |
| 0.109411 | 0.104458  | 0.114656  | 0.102418  | 0.106352  | 0.11859   | 0.108829 |
| 0.116259 | 0.101107  | 0.11451   | 0.104021  | 0.0919289 | 0.114948  | 0.111888 |
| 0.118298 | 0.111014  | 0.130536  | 0.102564  | 0.112617  | 0.124854  | 0.105769 |
| 0.104312 | 0.0999417 | 0.107809  | 0.0944056 | 0.0992133 | 0.108829  | 0.105769 |
| 0.12398  | 0.113491  | 0.130099  | 0.125437  | 0.100816  | 0.125874  | 0.119318 |

| TDr_3320 | TDr_3322  | TDr_3325 | TDr_3327 | TDr_3333  | TDr_3338 | TDr_3357 |
|----------|-----------|----------|----------|-----------|----------|----------|
| 0.132284 | 0.116404  | 0.126603 | 0.116841 | 0.0912005 | 0.118153 | 0.132284 |
| 0.120192 | 0.105769  | 0.118298 | 0.117861 | 0.121066  | 0.128205 | 0.129225 |
| 0.114656 | 0.0984848 | 0.113928 | 0.113491 | 0.114948  | 0.121503 | 0.125728 |
| 0.100962 | 0.106935  | 0.097028 | 0.122815 | 0.125728  | 0.122378 | 0.129808 |
| 0.133887 | 0.13141   | 0.135781 | 0.128059 | 0.141463  | 0.130536 | 0.137092 |
| 0.135927 | 0.122378  | 0.134033 | 0.128059 | 0.116113  | 0.136364 | 0.13884  |
| 0.134033 | 0.122232  | 0.133013 | 0.120047 | 0.106352  | 0.125728 | 0.122086 |
| 0.115676 | 0.104749  | 0.114365 | 0.111305 | 0.120047  | 0.113199 | 0.129079 |
| 0.119318 | 0.104021  | 0.11655  | 0.106789 | 0.116696  | 0.108974 | 0.122232 |
| 0.126457 | 0.0895979 | 0.124272 | 0.116259 | 0.112179  | 0.119901 | 0.13141  |
| 0.14088  | 0.109557  | 0.135781 | 0.109994 | 0.119318  | 0.120047 | 0.126894 |
| 0.118298 | 0.113199  | 0.117861 | 0.109266 | 0.121503  | 0.108537 | 0.120338 |
| 0.124417 | 0.10271   | 0.12602  | 0.111305 | 0.123252  | 0.112034 | 0.124126 |
| 0.143794 | 0.126457  | 0.138403 | 0.137966 | 0.143211  | 0.142483 | 0.156323 |
| 0.135781 | 0.0528846 | 0.131265 | 0.129662 | 0.131702  | 0.126311 | 0.13986  |
| 0.127185 | 0.108974  | 0.125    | 0.115822 | 0.123106  | 0.118881 | 0.110577 |
| 0.131993 | 0.111742  | 0.123689 | 0.106352 | 0.129079  | 0.106206 | 0.115093 |
| 0.143211 | 0.139569  | 0.144814 | 0.138549 | 0.148164  | 0.15472  | 0.157488 |
| 0.114948 | 0.102273  | 0.115385 | 0.112617 | 0.114073  | 0.120921 | 0.125437 |
| 0.209062 | 0.175117  | 0.206294 | 0.202069 | 0.208188  | 0.206294 | 0.217803 |
| 0.141026 | 0.116696  | 0.137966 | 0.124126 | 0.1081    | 0.13243  | 0.139569 |
| 0.135344 | 0.117424  | 0.127914 | 0.120775 | 0.10271   | 0.124417 | 0.138549 |
| 0.121503 | 0.109994  | 0.119318 | 0.111305 | 0.123252  | 0.114656 | 0.105478 |
| 0.133887 | 0.129371  | 0.13141  | 0.122232 | 0.125146  | 0.124709 | 0.109411 |
| 0.121212 | 0.101836  | 0.116404 | 0.107226 | 0.112471  | 0.106206 | 0.115385 |
| 0.139569 | 0.122523  | 0.136509 | 0.132867 | 0.106352  | 0.136509 | 0.138986 |
| 0.138403 | 0.120484  | 0.134178 | 0.120921 | 0.124417  | 0.115239 | 0.125583 |
| 0.127622 | 0.115822  | 0.12398  | 0.121795 | 0.127914  | 0.123397 | 0.113345 |
| 0.136072 | 0.126894  | 0.135344 | 0.126748 | 0.125     | 0.131847 | 0.127622 |
| 0.134907 | 0.11553   | 0.131556 | 0.115385 | 0.123543  | 0.117279 | 0.129953 |
| 0.137675 | 0.112471  | 0.133741 | 0.121649 | 0.0983392 | 0.125874 | 0.125728 |
| 0.132284 | 0.116404  | 0.128351 | 0.120338 | 0.118298  | 0.121941 | 0.12296  |
| 0.118007 | 0.0989219 | 0.118153 | 0.110431 | 0.104312  | 0.107663 | 0.121795 |
| 0.127331 | 0.115239  | 0.128059 | 0.109848 | 0.120629  | 0.112325 | 0.126166 |
| 0.137092 | 0.118881  | 0.133741 | 0.115822 | 0.124563  | 0.118881 | 0.117861 |
| 0.134615 | 0.124563  | 0.131847 | 0.117133 | 0.130828  | 0.125146 | 0.124709 |
| 0.140006 | 0.130245  | 0.136364 | 0.128934 | 0.115239  | 0.138695 | 0.140006 |
| 0.136364 | 0.11961   | 0.132721 | 0.119172 | 0.123834  | 0.118444 | 0.120921 |
| 0.122378 | 0.105624  | 0.122815 | 0.111305 | 0.113928  | 0.114073 | 0.103438 |
| 0.131702 | 0.118153  | 0.128059 | 0.121503 | 0.131119  | 0.125146 | 0.116841 |
| 0.125    | 0.107372  | 0.120484 | 0.104021 | 0.121795  | 0.116113 | 0.111014 |
| 0.14627  | 0.134178  | 0.147873 | 0.138403 | 0.144522  | 0.147582 | 0.132576 |

|           |          |           |          |           |          |          |
|-----------|----------|-----------|----------|-----------|----------|----------|
| 0.152972  | 0.142045 | 0.151661  | 0.13986  | 0.151224  | 0.145251 | 0.128205 |
| 0.126603  | 0.114802 | 0.127622  | 0.118153 | 0.125728  | 0.118881 | 0.116113 |
| 0.128934  | 0.108392 | 0.125583  | 0.103293 | 0.116696  | 0.103147 | 0.113199 |
| 0.135781  | 0.106789 | 0.131556  | 0.118881 | 0.125     | 0.116113 | 0.118007 |
| 0.130245  | 0.115239 | 0.13039   | 0.113636 | 0.127331  | 0.117861 | 0.115967 |
| 0.144959  | 0.134033 | 0.144814  | 0.133304 | 0.14088   | 0.13986  | 0.128642 |
| 0.126311  | 0.111305 | 0.12704   | 0.114073 | 0.126311  | 0.118298 | 0.114948 |
| 0.128497  | 0.109703 | 0.127477  | 0.11451  | 0.123834  | 0.118444 | 0.115967 |
| 0.151661  | 0.143357 | 0.152389  | 0.13884  | 0.0604604 | 0.143939 | 0.149913 |
| 0.138258  | 0.125874 | 0.134324  | 0.12398  | 0.138258  | 0.131119 | 0.119318 |
| 0.126166  | 0.116987 | 0.123397  | 0.112762 | 0.125583  | 0.113782 | 0.104021 |
| 0.130245  | 0.114656 | 0.129516  | 0.13141  | 0.136655  | 0.135052 | 0.136946 |
| 0.0984848 | 0.112034 | 0.0939685 | 0.115093 | 0.121795  | 0.124854 | 0.120921 |
| 0.140152  | 0.142628 | 0.139132  | 0.136946 | 0.144814  | 0.135635 | 0.121212 |
| 0.137675  | 0.126457 | 0.136072  | 0.124563 | 0.133013  | 0.127331 | 0.116987 |
| 0.12602   | 0.113636 | 0.125583  | 0.114073 | 0.123397  | 0.118881 | 0.111116 |
| 0.133596  | 0.112762 | 0.131702  | 0.112034 | 0.128351  | 0.121503 | 0.121649 |
| 0.136364  | 0.111742 | 0.131847  | 0.120047 | 0.125291  | 0.123106 | 0.111305 |
| 0.141608  | 0.134761 | 0.139714  | 0.132284 | 0.140443  | 0.14292  | 0.115676 |
| 0.136946  | 0.130682 | 0.140006  | 0.140734 | 0.146562  | 0.14088  | 0.123834 |
| 0.16419   | 0.152681 | 0.159965  | 0.162733 | 0.164773  | 0.164336 | 0.157488 |
| 0.12602   | 0.111014 | 0.124126  | 0.114365 | 0.121358  | 0.118298 | 0.114073 |
| 0.129808  | 0.113636 | 0.128205  | 0.111451 | 0.126311  | 0.119172 | 0.105041 |
| 0.128351  | 0.11655  | 0.122086  | 0.107372 | 0.121941  | 0.112762 | 0.110286 |
| 0.148893  | 0.137092 | 0.144959  | 0.141026 | 0.125291  | 0.141171 | 0.141608 |
| 0.122378  | 0.107955 | 0.122232  | 0.111888 | 0.121212  | 0.112325 | 0.115093 |
| 0.141463  | 0.130245 | 0.140152  | 0.130099 | 0.140006  | 0.136655 | 0.120192 |
| 0.136218  | 0.108974 | 0.13549   | 0.121066 | 0.12398   | 0.121795 | 0.111742 |
| 0.133159  | 0.116404 | 0.13039   | 0.113636 | 0.129371  | 0.120775 | 0.112762 |
| 0.15035   | 0.141463 | 0.151661  | 0.145688 | 0.127622  | 0.14933  | 0.148019 |
| 0.132284  | 0.121066 | 0.133304  | 0.115676 | 0.131993  | 0.122232 | 0.111305 |
| 0.140589  | 0.131993 | 0.139569  | 0.135052 | 0.145251  | 0.139277 | 0.124854 |
| 0.139569  | 0.129808 | 0.137383  | 0.12704  | 0.140152  | 0.130973 | 0.122086 |
| 0.121358  | 0.111888 | 0.115676  | 0.112325 | 0.124854  | 0.118881 | 0.126603 |
| 0.126311  | 0.113345 | 0.123834  | 0.116404 | 0.126311  | 0.115093 | 0.103584 |
| 0.131265  | 0.113928 | 0.12704   | 0.112034 | 0.126603  | 0.120921 | 0.110577 |
| 0.133596  | 0.132867 | 0.135198  | 0.131847 | 0.135344  | 0.135781 | 0.115822 |
| 0.130245  | 0.113782 | 0.127185  | 0.110431 | 0.12296   | 0.113491 | 0.113054 |
| 0.141754  | 0.133159 | 0.140443  | 0.133304 | 0.144959  | 0.148019 | 0.129808 |
| 0.138258  | 0.117716 | 0.136072  | 0.123397 | 0.127185  | 0.125291 | 0.116987 |
| 0.124854  | 0.120921 | 0.123834  | 0.112617 | 0.12602   | 0.119172 | 0.10067  |
| 0.133304  | 0.115676 | 0.132284  | 0.113491 | 0.125146  | 0.121795 | 0.116113 |
| 0.130973  | 0.118881 | 0.12704   | 0.116987 | 0.133304  | 0.123252 | 0.112034 |
| 0.132139  | 0.113928 | 0.131119  | 0.114656 | 0.124272  | 0.120047 | 0.111116 |



|          |           |          |          |          |          |          |
|----------|-----------|----------|----------|----------|----------|----------|
| 0.126311 | 0.117133  | 0.126748 | 0.107955 | 0.124854 | 0.11451  | 0.10912  |
| 0.143939 | 0.134761  | 0.144085 | 0.133741 | 0.145979 | 0.136801 | 0.121795 |
| 0.129953 | 0.106206  | 0.126894 | 0.108974 | 0.118881 | 0.108246 | 0.112179 |
| 0.126603 | 0.107809  | 0.125291 | 0.109411 | 0.121941 | 0.113928 | 0.121941 |
| 0.135344 | 0.121212  | 0.135198 | 0.121358 | 0.118444 | 0.127914 | 0.133013 |
| 0.137383 | 0.126748  | 0.135198 | 0.124854 | 0.107663 | 0.127622 | 0.129808 |
| 0.143211 | 0.125874  | 0.1419   | 0.127768 | 0.136218 | 0.137821 | 0.129225 |
| 0.144231 | 0.136801  | 0.141463 | 0.136072 | 0.143939 | 0.141754 | 0.13549  |
| 0.136801 | 0.117716  | 0.13141  | 0.114656 | 0.112617 | 0.119172 | 0.13039  |
| 0.18954  | 0.17803   | 0.18852  | 0.18109  | 0.176719 | 0.186772 | 0.187209 |
| 0.124417 | 0.107663  | 0.119318 | 0.107226 | 0.110431 | 0.112325 | 0.122086 |
| 0.141463 | 0.128497  | 0.143357 | 0.133596 | 0.144959 | 0.136655 | 0.131265 |
| 0.137092 | 0.121795  | 0.133741 | 0.124272 | 0.136218 | 0.125291 | 0.128351 |
| 0.14831  | 0.134178  | 0.144085 | 0.129079 | 0.116841 | 0.141754 | 0.131993 |
| 0.127185 | 0.109266  | 0.123252 | 0.111451 | 0.123397 | 0.113054 | 0.119318 |
| 0.138258 | 0.128788  | 0.136072 | 0.129808 | 0.13884  | 0.134907 | 0.127768 |
| 0.132139 | 0.112762  | 0.122669 | 0.10708  | 0.11961  | 0.111014 | 0.126894 |
| 0.136655 | 0.119901  | 0.134178 | 0.117716 | 0.128788 | 0.121941 | 0.122086 |
| 0.125583 | 0.110577  | 0.124854 | 0.113054 | 0.103147 | 0.121358 | 0.124126 |
| 0.145979 | 0.135344  | 0.144959 | 0.130245 | 0.145396 | 0.137966 | 0.127331 |
| 0.127914 | 0.104458  | 0.124854 | 0.108974 | 0.120047 | 0.112325 | 0.111014 |
| 0.14088  | 0.130245  | 0.138695 | 0.131556 | 0.119901 | 0.140152 | 0.130973 |
| 0.134033 | 0.116113  | 0.130973 | 0.114219 | 0.106935 | 0.123106 | 0.124709 |
| 0.136801 | 0.129662  | 0.136655 | 0.127477 | 0.137966 | 0.127622 | 0.11961  |
| 0.143939 | 0.121358  | 0.141754 | 0.127622 | 0.113636 | 0.13039  | 0.130245 |
| 0.130536 | 0.104167  | 0.130099 | 0.110431 | 0.104312 | 0.114365 | 0.119464 |
| 0.152098 | 0.140589  | 0.153409 | 0.144522 | 0.133159 | 0.14729  | 0.145688 |
| 0.136509 | 0.111888  | 0.131993 | 0.112034 | 0.105041 | 0.120338 | 0.124563 |
| 0.131847 | 0.111014  | 0.129953 | 0.11116  | 0.127768 | 0.111597 | 0.121358 |
| 0.131993 | 0.116113  | 0.130099 | 0.11451  | 0.122669 | 0.120192 | 0.113928 |
| 0.146853 | 0.135052  | 0.146416 | 0.137529 | 0.121503 | 0.146416 | 0.14627  |
| 0.135781 | 0.119027  | 0.133887 | 0.124126 | 0.121212 | 0.123397 | 0.11859  |
| 0.124417 | 0.105332  | 0.122523 | 0.108683 | 0.119464 | 0.111742 | 0.118007 |
| 0.130245 | 0.106206  | 0.128642 | 0.113345 | 0.122086 | 0.109994 | 0.120629 |
| 0.131556 | 0.113636  | 0.127331 | 0.114656 | 0.105041 | 0.116259 | 0.123689 |
| 0.136072 | 0.112908  | 0.13243  | 0.131702 | 0.129662 | 0.128642 | 0.122669 |
| 0.136509 | 0.119755  | 0.132284 | 0.114073 | 0.10271  | 0.117133 | 0.12398  |
| 0.12296  | 0.0995047 | 0.120192 | 0.10373  | 0.113636 | 0.104458 | 0.111014 |
| 0.124126 | 0.103293  | 0.121358 | 0.107809 | 0.113054 | 0.109411 | 0.11014  |
| 0.124854 | 0.103438  | 0.125291 | 0.10912  | 0.120484 | 0.111888 | 0.112325 |
| 0.133596 | 0.119755  | 0.130245 | 0.113782 | 0.131847 | 0.116259 | 0.118735 |
| 0.138986 | 0.119027  | 0.137675 | 0.129371 | 0.13549  | 0.126894 | 0.115093 |
| 0.129516 | 0.0987762 | 0.123834 | 0.107372 | 0.118444 | 0.105186 | 0.110868 |
| 0.124417 | 0.095134  | 0.120192 | 0.110431 | 0.11655  | 0.108246 | 0.106643 |

|           |           |           |          |          |          |          |
|-----------|-----------|-----------|----------|----------|----------|----------|
| 0.139569  | 0.115239  | 0.139423  | 0.119464 | 0.125874 | 0.12398  | 0.109266 |
| 0.125437  | 0.102855  | 0.123543  | 0.105041 | 0.11757  | 0.111597 | 0.101836 |
| 0.137966  | 0.116841  | 0.134907  | 0.122232 | 0.118153 | 0.12296  | 0.131847 |
| 0.141171  | 0.129079  | 0.141608  | 0.126603 | 0.050845 | 0.131702 | 0.141171 |
| 0.128642  | 0.107517  | 0.126166  | 0.116113 | 0.121941 | 0.120629 | 0.114365 |
| 0.127914  | 0.10067   | 0.12602   | 0.109848 | 0.121503 | 0.109994 | 0.111888 |
| 0.126166  | 0.103875  | 0.123106  | 0.112179 | 0.124709 | 0.112325 | 0.108392 |
| 0.125874  | 0.105041  | 0.122523  | 0.103438 | 0.117424 | 0.105041 | 0.112471 |
| 0.136072  | 0.116404  | 0.129808  | 0.121212 | 0.129953 | 0.129808 | 0.123834 |
| 0.123252  | 0.0992133 | 0.119027  | 0.108974 | 0.115093 | 0.107663 | 0.105769 |
| 0.146416  | 0.132867  | 0.142483  | 0.133013 | 0.133887 | 0.132867 | 0.131847 |
| 0.146853  | 0.129516  | 0.143502  | 0.129079 | 0.138695 | 0.130682 | 0.123834 |
| 0.134907  | 0.11757   | 0.132721  | 0.122086 | 0.128788 | 0.125146 | 0.123543 |
| 0.136218  | 0.111888  | 0.13345   | 0.111742 | 0.122815 | 0.115093 | 0.119318 |
| 0.132721  | 0.111888  | 0.129953  | 0.115239 | 0.10708  | 0.117716 | 0.127768 |
| 0.131702  | 0.105041  | 0.128351  | 0.108974 | 0.117424 | 0.112034 | 0.104895 |
| 0.130682  | 0.114219  | 0.12704   | 0.105041 | 0.11757  | 0.113054 | 0.104167 |
| 0.126311  | 0.108683  | 0.122086  | 0.104749 | 0.116696 | 0.11014  | 0.115239 |
| 0.106789  | 0.112762  | 0.10373   | 0.112325 | 0.125146 | 0.119755 | 0.116696 |
| 0.140297  | 0.127331  | 0.13986   | 0.127768 | 0.136801 | 0.127331 | 0.100087 |
| 0.131702  | 0.114948  | 0.128351  | 0.112179 | 0.127914 | 0.118444 | 0.124709 |
| 0.134761  | 0.117424  | 0.134033  | 0.131556 | 0.133887 | 0.138986 | 0.137383 |
| 0.1419    | 0.131265  | 0.142337  | 0.129953 | 0.125583 | 0.136218 | 0.140152 |
| 0.199009  | 0.182838  | 0.195076  | 0.193765 | 0.200758 | 0.195367 | 0.20542  |
| 0.235577  | 0.229895  | 0.233683  | 0.236451 | 0.241404 | 0.240093 | 0.245192 |
| 0.0827506 | 0.111451  | 0.0826049 | 0.116259 | 0.122086 | 0.116113 | 0.118298 |
| 0.127185  | 0.1081    | 0.129371  | 0.112325 | 0.121066 | 0.114219 | 0.105915 |
| 0.120775  | 0.108392  | 0.12296   | 0.103875 | 0.11757  | 0.11014  | 0.110577 |
| 0.125728  | 0.112762  | 0.125291  | 0.112034 | 0.121941 | 0.118007 | 0.115239 |
| 0.133013  | 0.0559441 | 0.134033  | 0.133013 | 0.131847 | 0.12704  | 0.141463 |
| 0.124854  | 0.112471  | 0.123543  | 0.109994 | 0.124272 | 0.118881 | 0.114656 |
| 0.148601  | 0.142337  | 0.150495  | 0.141026 | 0.148601 | 0.14292  | 0.116841 |
| 0.131265  | 0.11859   | 0.129953  | 0.112617 | 0.127477 | 0.112471 | 0.107955 |
| 0.134178  | 0.131702  | 0.134324  | 0.128642 | 0.133304 | 0.129953 | 0.11757  |
| 0.137529  | 0.128642  | 0.135344  | 0.129953 | 0.138403 | 0.132721 | 0.114802 |
| 0.141026  | 0.126894  | 0.142045  | 0.128497 | 0.13986  | 0.135927 | 0.119172 |
| 0.143357  | 0.131556  | 0.141463  | 0.13345  | 0.145105 | 0.137966 | 0.125874 |
| 0.132576  | 0.113491  | 0.132721  | 0.109557 | 0.124417 | 0.117861 | 0.110431 |
| 0.128497  | 0.113199  | 0.126603  | 0.109266 | 0.122378 | 0.113491 | 0.10373  |
| 0.134761  | 0.116841  | 0.13141   | 0.114656 | 0.128059 | 0.120921 | 0.110577 |
| 0.12398   | 0.112179  | 0.122669  | 0.108246 | 0.121941 | 0.106352 | 0.107663 |
| 0.12398   | 0.112471  | 0.125     | 0.10708  | 0.121649 | 0.112471 | 0.103875 |
| 0.129371  | 0.117279  | 0.127185  | 0.111888 | 0.125291 | 0.112034 | 0.111888 |
| 0.138549  | 0.124417  | 0.139277  | 0.125146 | 0.140589 | 0.134033 | 0.116987 |

|          |           |          |          |          |          |          |
|----------|-----------|----------|----------|----------|----------|----------|
| 0.142628 | 0.134615  | 0.146562 | 0.133596 | 0.145251 | 0.136655 | 0.116113 |
| 0.128497 | 0.117861  | 0.125146 | 0.113636 | 0.127914 | 0.113199 | 0.106643 |
| 0.127768 | 0.115093  | 0.128497 | 0.113782 | 0.124563 | 0.117424 | 0.10708  |
| 0.141754 | 0.134033  | 0.142483 | 0.131847 | 0.140006 | 0.129662 | 0.116404 |
| 0.123397 | 0.112471  | 0.124709 | 0.108537 | 0.11961  | 0.1081   | 0.107955 |
| 0.152681 | 0.135344  | 0.154575 | 0.137821 | 0.152389 | 0.144668 | 0.120047 |
| 0.145979 | 0.125728  | 0.144085 | 0.132867 | 0.142774 | 0.140297 | 0.137529 |
| 0.138258 | 0.132284  | 0.140152 | 0.126894 | 0.141171 | 0.134324 | 0.127185 |
| 0.122815 | 0.111597  | 0.120629 | 0.111451 | 0.119901 | 0.109557 | 0.104167 |
| 0.124709 | 0.109994  | 0.125437 | 0.107226 | 0.11655  | 0.109411 | 0.101981 |
| 0.131847 | 0.125583  | 0.132867 | 0.125437 | 0.132139 | 0.126457 | 0.110868 |
| 0.131702 | 0.125146  | 0.133304 | 0.11859  | 0.129079 | 0.120484 | 0.107809 |
| 0.140734 | 0.131556  | 0.139132 | 0.120047 | 0.13549  | 0.127768 | 0.11014  |
| 0.129225 | 0.120629  | 0.129953 | 0.110577 | 0.129225 | 0.115385 | 0.108246 |
| 0.132867 | 0.118153  | 0.130973 | 0.111888 | 0.129662 | 0.118153 | 0.103438 |
| 0.130536 | 0.11961   | 0.129808 | 0.117424 | 0.131119 | 0.122815 | 0.110431 |
| 0.147436 | 0.132721  | 0.145833 | 0.125291 | 0.136364 | 0.137383 | 0.11451  |
| 0.139277 | 0.133596  | 0.138258 | 0.125291 | 0.141317 | 0.128059 | 0.117133 |
| 0.140589 | 0.13345   | 0.145979 | 0.133013 | 0.140589 | 0.130536 | 0.107663 |
| 0.141317 | 0.128934  | 0.137675 | 0.129371 | 0.132576 | 0.136218 | 0.117716 |
| 0.126748 | 0.121649  | 0.122523 | 0.1081   | 0.122378 | 0.112908 | 0.108392 |
| 0.137238 | 0.13039   | 0.13884  | 0.127622 | 0.143065 | 0.133596 | 0.121795 |
| 0.123106 | 0.115385  | 0.12296  | 0.108829 | 0.120775 | 0.115093 | 0.104458 |
| 0.13141  | 0.114365  | 0.128934 | 0.115676 | 0.125874 | 0.125146 | 0.11655  |
| 0.128497 | 0.112325  | 0.128642 | 0.107226 | 0.123834 | 0.115822 | 0.112179 |
| 0.133013 | 0.111888  | 0.131702 | 0.107955 | 0.123397 | 0.116259 | 0.114073 |
| 0.123397 | 0.112179  | 0.121795 | 0.106789 | 0.121941 | 0.108392 | 0.109703 |
| 0.144231 | 0.13447   | 0.147582 | 0.127331 | 0.143939 | 0.133596 | 0.113928 |
| 0.131265 | 0.116841  | 0.131119 | 0.116696 | 0.117861 | 0.120338 | 0.115822 |
| 0.140297 | 0.13345   | 0.140443 | 0.125728 | 0.140589 | 0.133741 | 0.114365 |
| 0.123397 | 0.111597  | 0.126166 | 0.112617 | 0.122523 | 0.1081   | 0.109411 |
| 0.136364 | 0.12602   | 0.140297 | 0.121212 | 0.131702 | 0.121941 | 0.105769 |
| 0.133304 | 0.123252  | 0.13345  | 0.117279 | 0.13243  | 0.121212 | 0.111742 |
| 0.135344 | 0.1081    | 0.134907 | 0.118444 | 0.130682 | 0.122378 | 0.129225 |
| 0.131702 | 0.115822  | 0.127768 | 0.118007 | 0.120629 | 0.10912  | 0.113054 |
| 0.135344 | 0.117716  | 0.131993 | 0.125437 | 0.135635 | 0.125    | 0.122232 |
| 0.135781 | 0.11553   | 0.129516 | 0.118007 | 0.134615 | 0.118444 | 0.119464 |
| 0.133159 | 0.110577  | 0.131265 | 0.11451  | 0.116841 | 0.107372 | 0.123543 |
| 0.142483 | 0.121941  | 0.146416 | 0.131702 | 0.135781 | 0.139132 | 0.141317 |
| 0.141754 | 0.13549   | 0.137821 | 0.135052 | 0.133304 | 0.135781 | 0.127477 |
| 0.121358 | 0.0996503 | 0.119172 | 0.104167 | 0.116113 | 0.111305 | 0.122815 |
| 0.141026 | 0.115822  | 0.143211 | 0.130245 | 0.135198 | 0.135344 | 0.1419   |
| 0.141171 | 0.113345  | 0.140443 | 0.128934 | 0.123397 | 0.125583 | 0.136509 |
| 0.136801 | 0.119755  | 0.138112 | 0.131265 | 0.134178 | 0.132576 | 0.140006 |

|          |          |          |          |          |          |          |
|----------|----------|----------|----------|----------|----------|----------|
| 0.130973 | 0.11014  | 0.12704  | 0.120775 | 0.120775 | 0.126748 | 0.131265 |
| 0.137383 | 0.112179 | 0.138695 | 0.124272 | 0.128351 | 0.121503 | 0.135344 |
| 0.136946 | 0.112325 | 0.135635 | 0.124709 | 0.129079 | 0.126311 | 0.140152 |
| 0.136801 | 0.123543 | 0.13345  | 0.128351 | 0.136801 | 0.127914 | 0.140297 |
| 0.142337 | 0.12704  | 0.140443 | 0.13447  | 0.13447  | 0.140152 | 0.144668 |
| 0.131847 | 0.113928 | 0.128497 | 0.128642 | 0.130099 | 0.133159 | 0.140589 |
| 0.129225 | 0.106935 | 0.128497 | 0.117861 | 0.119901 | 0.119755 | 0.130099 |
| 0.140443 | 0.136801 | 0.137966 | 0.132867 | 0.138112 | 0.129225 | 0.117716 |
| 0.144959 | 0.121212 | 0.141608 | 0.130099 | 0.135635 | 0.134033 | 0.142628 |
| 0.12602  | 0.103147 | 0.124709 | 0.109411 | 0.115822 | 0.117133 | 0.129808 |
| 0.220862 | 0.213724 | 0.217512 | 0.213869 | 0.21824  | 0.220425 | 0.228147 |
| 0.133741 | 0.113491 | 0.133304 | 0.123252 | 0.129079 | 0.127185 | 0.136946 |
| 0.13141  | 0.109703 | 0.128642 | 0.115967 | 0.126166 | 0.122232 | 0.128497 |
| 0.141463 | 0.126166 | 0.13986  | 0.135344 | 0.136509 | 0.137238 | 0.143794 |
| 0.130682 | 0.111014 | 0.127622 | 0.114365 | 0.123689 | 0.122669 | 0.131847 |
| 0.142337 | 0.119464 | 0.140734 | 0.13447  | 0.134178 | 0.136072 | 0.146125 |
| 0.131265 | 0.111305 | 0.130828 | 0.121649 | 0.13243  | 0.126457 | 0.13447  |
| 0.129079 | 0.10708  | 0.128934 | 0.120338 | 0.130828 | 0.121941 | 0.136364 |
| 0.135781 | 0.112034 | 0.133596 | 0.122378 | 0.130536 | 0.133596 | 0.137238 |
| 0.136218 | 0.120629 | 0.133159 | 0.128934 | 0.141171 | 0.138112 | 0.140297 |
| 0.138986 | 0.118735 | 0.138549 | 0.131702 | 0.132284 | 0.135927 | 0.142191 |
| 0.138549 | 0.123543 | 0.137529 | 0.128934 | 0.129808 | 0.138403 | 0.144085 |
| 0.132721 | 0.120047 | 0.134033 | 0.127477 | 0.133596 | 0.134907 | 0.139714 |
| 0.133013 | 0.104604 | 0.128497 | 0.114656 | 0.12602  | 0.108974 | 0.116696 |
| 0.127477 | 0.113345 | 0.126457 | 0.119027 | 0.128642 | 0.123252 | 0.135052 |
| 0.141026 | 0.124854 | 0.140006 | 0.132576 | 0.143939 | 0.13884  | 0.145688 |
| 0.127477 | 0.111014 | 0.12704  | 0.121358 | 0.12602  | 0.12704  | 0.133013 |
| 0.143794 | 0.134615 | 0.141026 | 0.133013 | 0.144085 | 0.141317 | 0.122232 |
| 0.151807 | 0.131556 | 0.151078 | 0.134324 | 0.131119 | 0.140589 | 0.150058 |
| 0.136946 | 0.113782 | 0.133887 | 0.12296  | 0.124417 | 0.119901 | 0.121503 |
| 0.140152 | 0.114365 | 0.14088  | 0.128788 | 0.125583 | 0.128934 | 0.137529 |
| 0.135635 | 0.123252 | 0.134324 | 0.128059 | 0.122815 | 0.128205 | 0.138258 |
| 0.130536 | 0.122523 | 0.132721 | 0.11859  | 0.127914 | 0.122232 | 0.135198 |
| 0.134615 | 0.122815 | 0.131556 | 0.127331 | 0.127914 | 0.124854 | 0.141608 |
| 0.149184 | 0.128059 | 0.149913 | 0.131993 | 0.130536 | 0.140589 | 0.150058 |
| 0.131847 | 0.105186 | 0.127331 | 0.112617 | 0.124854 | 0.113345 | 0.114365 |
| 0.141026 | 0.121941 | 0.141754 | 0.131119 | 0.143939 | 0.13447  | 0.129079 |
| 0.148747 | 0.13141  | 0.144231 | 0.135927 | 0.131847 | 0.145979 | 0.149913 |
| 0.134178 | 0.113636 | 0.129953 | 0.118735 | 0.123106 | 0.12296  | 0.113491 |
| 0.135635 | 0.120047 | 0.134615 | 0.11961  | 0.131556 | 0.130828 | 0.125146 |
| 0.146853 | 0.14088  | 0.143502 | 0.135781 | 0.137821 | 0.139132 | 0.128205 |
| 0.13345  | 0.123106 | 0.131265 | 0.124417 | 0.138112 | 0.127477 | 0.114219 |
| 0.143794 | 0.129662 | 0.146562 | 0.144959 | 0.141171 | 0.138112 | 0.133304 |
| 0.140443 | 0.123106 | 0.139714 | 0.130245 | 0.138986 | 0.132139 | 0.122669 |

|           |           |           |          |          |          |           |
|-----------|-----------|-----------|----------|----------|----------|-----------|
| 0.135344  | 0.122378  | 0.134615  | 0.123689 | 0.135635 | 0.12296  | 0.126311  |
| 0.13549   | 0.121649  | 0.141171  | 0.129662 | 0.134615 | 0.133887 | 0.123834  |
| 0.141171  | 0.115967  | 0.140734  | 0.125146 | 0.134178 | 0.124417 | 0.117861  |
| 0.140443  | 0.128642  | 0.142337  | 0.130536 | 0.13549  | 0.132721 | 0.119172  |
| 0.137238  | 0.126311  | 0.136801  | 0.129371 | 0.135781 | 0.134178 | 0.138112  |
| 0.139277  | 0.13447   | 0.139423  | 0.129662 | 0.136655 | 0.137092 | 0.129079  |
| 0.141026  | 0.130682  | 0.140589  | 0.131119 | 0.136364 | 0.136509 | 0.13549   |
| 0.143939  | 0.128642  | 0.144085  | 0.124709 | 0.128205 | 0.131847 | 0.128205  |
| 0.147436  | 0.139423  | 0.150787  | 0.144814 | 0.149184 | 0.145833 | 0.142191  |
| 0.1419    | 0.112034  | 0.141463  | 0.12296  | 0.122378 | 0.123106 | 0.125291  |
| 0.13345   | 0.115822  | 0.132721  | 0.11655  | 0.131702 | 0.125728 | 0.113928  |
| 0.141317  | 0.122232  | 0.140006  | 0.124126 | 0.129662 | 0.133887 | 0.136364  |
| 0.136072  | 0.10912   | 0.134761  | 0.117133 | 0.11655  | 0.121066 | 0.121795  |
| 0.150204  | 0.134324  | 0.151515  | 0.141171 | 0.131556 | 0.144814 | 0.149913  |
| 0.16215   | 0.151807  | 0.160548  | 0.152826 | 0.140297 | 0.159674 | 0.154283  |
| 0.136509  | 0.131993  | 0.136364  | 0.124854 | 0.134761 | 0.130828 | 0.11553   |
| 0.12704   | 0.12398   | 0.129808  | 0.119464 | 0.129079 | 0.11961  | 0.105478  |
| 0.133013  | 0.126457  | 0.136072  | 0.135052 | 0.134178 | 0.130828 | 0.138258  |
| 0.137529  | 0.122232  | 0.13884   | 0.131993 | 0.137529 | 0.135344 | 0.141317  |
| 0.137529  | 0.126311  | 0.138258  | 0.119172 | 0.13549  | 0.126311 | 0.112762  |
| 0.150058  | 0.125728  | 0.151078  | 0.136072 | 0.13986  | 0.139714 | 0.142774  |
| 0.145105  | 0.128351  | 0.14292   | 0.141317 | 0.13345  | 0.141171 | 0.140152  |
| 0.133304  | 0.118298  | 0.136655  | 0.125437 | 0.126894 | 0.123252 | 0.11757   |
| 0.15778   | 0.157634  | 0.160548  | 0.157197 | 0.152244 | 0.160548 | 0.164773  |
| 0.142337  | 0.120921  | 0.141608  | 0.127477 | 0.131556 | 0.127331 | 0.117279  |
| 0.150495  | 0.125874  | 0.148893  | 0.138258 | 0.137383 | 0.139277 | 0.131847  |
| 0.13141   | 0.11757   | 0.133013  | 0.122669 | 0.131993 | 0.127477 | 0.109266  |
| 0.142191  | 0.134761  | 0.142337  | 0.128205 | 0.131119 | 0.133304 | 0.133159  |
| 0.135781  | 0.114073  | 0.135344  | 0.120047 | 0.132867 | 0.131847 | 0.13549   |
| 0.125728  | 0.132284  | 0.123252  | 0.136509 | 0.092803 | 0.136946 | 0.152535  |
| 0.145979  | 0.13884   | 0.143502  | 0.1419   | 0.148601 | 0.150204 | 0.157634  |
| 0.0566725 | 0.117424  | 0.0547786 | 0.123397 | 0.130682 | 0.126166 | 0.135927  |
| 0.0696387 | 0.131265  | 0.0689103 | 0.131702 | 0.140152 | 0.137966 | 0.147727  |
| 0.153992  | 0.144231  | 0.150058  | 0.145833 | 0.156323 | 0.143357 | 0.122523  |
| 0.128934  | 0.134907  | 0.128788  | 0.144376 | 0.145251 | 0.145688 | 0.158071  |
| 0.136655  | 0.132139  | 0.131847  | 0.115676 | 0.11451  | 0.114656 | 0.0952797 |
| 0.140589  | 0.130245  | 0.137821  | 0.129225 | 0.137675 | 0.137821 | 0.148747  |
| 0.121941  | 0.0833333 | 0.119464  | 0.114948 | 0.118153 | 0.115676 | 0.129808  |
| 0.128788  | 0.0782343 | 0.127185  | 0.116259 | 0.12296  | 0.109411 | 0.119755  |
| 0.134178  | 0.115093  | 0.130536  | 0.118735 | 0.121358 | 0.126748 | 0.135052  |
| 0.0560897 | 0.117424  | 0.0553613 | 0.116987 | 0.125437 | 0.119172 | 0.129808  |
| 0.135198  | 0.112325  | 0.131847  | 0.109557 | 0.131119 | 0.108246 | 0.122086  |
| 0.0976107 | 0.0724068 | 0.097465  | 0.118881 | 0.118881 | 0.114073 | 0.128205  |
| 0.115676  | 0.114948  | 0.112617  | 0.11451  | 0.129953 | 0.124272 | 0.134615  |

|           |           |           |           |           |           |           |
|-----------|-----------|-----------|-----------|-----------|-----------|-----------|
| 0.129808  | 0.0603147 | 0.128205  | 0.123397  | 0.129808  | 0.12296   | 0.141463  |
| 0.12602   | 0.0987762 | 0.123252  | 0.101836  | 0.114656  | 0.106935  | 0.123397  |
| 0.0662879 | 0.120338  | 0.0632284 | 0.123689  | 0.131265  | 0.12296   | 0.132721  |
| 0.0603147 | 0.115239  | 0.0584207 | 0.121795  | 0.125874  | 0.120775  | 0.130245  |
| 0.134615  | 0.12602   | 0.130973  | 0.118881  | 0.130536  | 0.112325  | 0.0469114 |
| 0.218823  | 0.209062  | 0.215472  | 0.212995  | 0.218823  | 0.217803  | 0.225233  |
| 0.0530303 | 0.137966  | 0.0592949 | 0.142774  | 0.146853  | 0.144668  | 0.148019  |
| 0.131847  | 0.127331  | 0.129953  | 0.129516  | 0.133304  | 0.130245  | 0.132139  |
| 0.123543  | 0.114948  | 0.121941  | 0.125     | 0.129371  | 0.131265  | 0.133159  |
| 0.210664  | 0.202943  | 0.209645  | 0.208042  | 0.217075  | 0.211101  | 0.219697  |
| 0.138403  | 0.119901  | 0.13243   | 0.118298  | 0.102855  | 0.118735  | 0.0836247 |
| 0.136509  | 0.115967  | 0.135781  | 0.110577  | 0.126894  | 0.0550699 | 0.119901  |
| 0.133304  | 0.119755  | 0.131993  | 0.118444  | 0.130682  | 0.120338  | 0.128351  |
| 0.133741  | 0.0482226 | 0.126894  | 0.123834  | 0.12704   | 0.122523  | 0.136946  |
| 0.25      | 0.242861  | 0.247815  | 0.247378  | 0.25204   | 0.252477  | 0.25641   |
| 0.137383  | 0.122086  | 0.133741  | 0.123689  | 0.0537587 | 0.125291  | 0.136509  |
| 0.127477  | 0.120338  | 0.126166  | 0.117279  | 0.128642  | 0.113345  | 0.0598776 |
| 0.133596  | 0.125874  | 0.127622  | 0.112908  | 0.136218  | 0.131702  | 0.133013  |
| 0.13243   | 0.120921  | 0.128788  | 0.113782  | 0.129225  | 0.128205  | 0.13039   |
| 0.135344  | 0.106935  | 0.13141   | 0.126894  | 0.067162  | 0.127331  | 0.135052  |
| 0.117861  | 0.107226  | 0.114802  | 0.124563  | 0.127477  | 0.127914  | 0.141463  |
| 0.131847  | 0.120921  | 0.129079  | 0.119901  | 0.131847  | 0.112179  | 0.0575466 |
| 0.0585664 | 0.114365  | 0.0543415 | 0.118007  | 0.124709  | 0.122523  | 0.128497  |
| 0.132721  | 0.121212  | 0.129662  | 0.118153  | 0.130682  | 0.125583  | 0.142628  |
| 0.126894  | 0.0460373 | 0.124709  | 0.116404  | 0.121358  | 0.11655   | 0.132721  |
| 0.0649767 | 0.111742  | 0.0630828 | 0.11655   | 0.126748  | 0.118444  | 0.129662  |
| 0.130099  | 0.0941142 | 0.127914  | 0.121941  | 0.118735  | 0.125874  | 0.133887  |
| 0.143939  | 0.138258  | 0.144085  | 0.140443  | 0.152098  | 0.150204  | 0.155303  |
| 0.136946  | 0.123689  | 0.133596  | 0.12296   | 0.0495338 | 0.127477  | 0.138695  |
| 0.139277  | 0.119318  | 0.133304  | 0.113345  | 0.130536  | 0.055507  | 0.121795  |
| 0.189103  | 0.182547  | 0.186334  | 0.187646  | 0.19289   | 0.188374  | 0.202506  |
| 0.208625  | 0.19595   | 0.203817  | 0.204545  | 0.206876  | 0.204691  | 0.212413  |
| 0.136072  | 0.0502622 | 0.131265  | 0.124709  | 0.127331  | 0.119027  | 0.137821  |
| 0.125874  | 0.0423951 | 0.120484  | 0.118298  | 0.124126  | 0.115239  | 0.132867  |
| 0.128205  | 0.123689  | 0.128934  | 0.136946  | 0.137238  | 0.148456  | 0.143939  |
| 0.13345   | 0.119901  | 0.127768  | 0.115967  | 0.127914  | 0.107372  | 0.0559441 |
| 0.135635  | 0.124417  | 0.134907  | 0.123397  | 0.050845  | 0.125     | 0.14088   |
| 0.126457  | 0.130099  | 0.126894  | 0.120921  | 0.136655  | 0.13447   | 0.137821  |
| 0.227273  | 0.213432  | 0.223048  | 0.222902  | 0.22873   | 0.227127  | 0.23514   |
| 0.124417  | 0.112325  | 0.119901  | 0.11655   | 0.124417  | 0.117279  | 0.126166  |
| 0.207605  | 0.203671  | 0.203963  | 0.207022  | 0.213432  | 0.208042  | 0.209062  |
| 0.129079  | 0.116987  | 0.125437  | 0.0990676 | 0.107226  | 0.100379  | 0.094697  |
| 0.132139  | 0.112179  | 0.125     | 0.0520105 | 0.125437  | 0.106643  | 0.126603  |
| 0.113636  | 0.112908  | 0.111451  | 0.119755  | 0.123834  | 0.123689  | 0.118298  |

|           |           |           |           |           |           |           |
|-----------|-----------|-----------|-----------|-----------|-----------|-----------|
| 0.125     | 0.0525932 | 0.122232  | 0.115385  | 0.121795  | 0.114073  | 0.129662  |
| 0.209936  | 0.199592  | 0.205128  | 0.206731  | 0.211684  | 0.210082  | 0.21926   |
| 0.0592949 | 0.124417  | 0.0576923 | 0.133013  | 0.137966  | 0.134615  | 0.141754  |
| 0.133013  | 0.117424  | 0.127331  | 0.0942599 | 0.122232  | 0.113345  | 0.119901  |
| 0.050845  | 0.124126  | 0.0480769 | 0.125437  | 0.13243   | 0.124709  | 0.137092  |
| 0.128642  | 0.127622  | 0.125874  | 0.116113  | 0.133887  | 0.125874  | 0.127768  |
| 0.130099  | 0.0495338 | 0.128497  | 0.115822  | 0.121941  | 0.114219  | 0.13447   |
| 0.130536  | 0.123106  | 0.124563  | 0.104895  | 0.111014  | 0.105624  | 0.0958625 |
| 0.130245  | 0.120484  | 0.124272  | 0.118298  | 0.134615  | 0.11116   | 0.0728438 |
| 0.133741  | 0.119027  | 0.133887  | 0.113345  | 0.128788  | 0.0537587 | 0.119464  |
| 0.0649767 | 0.109994  | 0.0639569 | 0.117424  | 0.125     | 0.118444  | 0.128205  |
| 0.131265  | 0.121503  | 0.128497  | 0.0977564 | 0.124854  | 0.118298  | 0.120192  |
| 0.193182  | 0.179924  | 0.190414  | 0.187063  | 0.193765  | 0.187791  | 0.202797  |
| 0.131556  | 0.12704   | 0.129371  | 0.116113  | 0.135052  | 0.131993  | 0.131847  |
| 0.136072  | 0.124272  | 0.127768  | 0.123834  | 0.136364  | 0.133887  | 0.142191  |
| 0.125728  | 0.11859   | 0.121503  | 0.118444  | 0.135052  | 0.126457  | 0.129225  |
| 0.13986   | 0.122523  | 0.134761  | 0.119755  | 0.0614802 | 0.122232  | 0.139569  |
| 0.0518648 | 0.119318  | 0.0540501 | 0.121212  | 0.129662  | 0.123106  | 0.130536  |
| 0.129079  | 0.124272  | 0.129225  | 0.111014  | 0.113345  | 0.108829  | 0.0961538 |
| 0.123397  | 0.120921  | 0.120338  | 0.105915  | 0.105624  | 0.121503  | 0.127768  |
| 0.135052  | 0.127622  | 0.13141   | 0.123397  | 0.133596  | 0.115093  | 0.0511364 |
| 0.129662  | 0.116987  | 0.123689  | 0.118298  | 0.129953  | 0.129516  | 0.137821  |
| 0.13141   | 0.117861  | 0.126894  | 0.112179  | 0.129662  | 0.122523  | 0.129371  |
| 0.128642  | 0.0553613 | 0.125291  | 0.121649  | 0.127477  | 0.120921  | 0.133304  |
| 0.137529  | 0.119318  | 0.132139  | 0.117716  | 0.132867  | 0.119318  | 0.130245  |
| 0.138258  | 0.132867  | 0.140443  | 0.128642  | 0.141171  | 0.13345   | 0.139714  |
| 0.135635  | 0.113345  | 0.130245  | 0.114365  | 0.0595862 | 0.116259  | 0.130973  |
| 0.0469114 | 0.134178  | 0.0584207 | 0.137238  | 0.1419    | 0.140297  | 0.1419    |
| 0.127331  | 0.0458916 | 0.126311  | 0.114802  | 0.122086  | 0.114656  | 0.13345   |
| 0.122669  | 0.118735  | 0.117861  | 0.108974  | 0.127622  | 0.122523  | 0.131702  |
| 0.0767774 | 0.115093  | 0.0763403 | 0.122523  | 0.131847  | 0.124709  | 0.129516  |
| 0.138258  | 0.127622  | 0.133741  | 0.123397  | 0.135344  | 0.11859   | 0.0534674 |
| 0.19595   | 0.182984  | 0.190559  | 0.1875    | 0.193036  | 0.190559  | 0.186334  |
| 0.130245  | 0.113782  | 0.124563  | 0.0885781 | 0.119755  | 0.111451  | 0.116259  |
| 0.114219  | 0.105332  | 0.111451  | 0.102855  | 0.11655   | 0.108537  | 0.120921  |
| 0.13549   | 0.119027  | 0.131265  | 0.114802  | 0.125583  | 0.0546329 | 0.122669  |
| 0.181818  | 0.171183  | 0.178467  | 0.180944  | 0.189685  | 0.179633  | 0.193765  |
| 0.146125  | 0.132284  | 0.143357  | 0.130682  | 0.0607517 | 0.136072  | 0.148164  |
| 0.152826  | 0.143357  | 0.152098  | 0.139714  | 0.0639569 | 0.144522  | 0.151661  |
| 0.144522  | 0.141463  | 0.142628  | 0.145979  | 0.151807  | 0.152535  | 0.15676   |
| 0.131993  | 0.116113  | 0.128351  | 0.116841  | 0.0626457 | 0.116987  | 0.130828  |
| 0.0537587 | 0.117133  | 0.0474942 | 0.121941  | 0.128642  | 0.126457  | 0.13243   |
| 0.211247  | 0.203234  | 0.209062  | 0.20979   | 0.214452  | 0.211393  | 0.220571  |
| 0.126166  | 0.115239  | 0.124854  | 0.118298  | 0.124126  | 0.126603  | 0.137529  |

|           |           |           |           |           |          |           |
|-----------|-----------|-----------|-----------|-----------|----------|-----------|
| 0.0520105 | 0.123543  | 0.0492424 | 0.126311  | 0.133596  | 0.13141  | 0.139423  |
| 0.129808  | 0.116259  | 0.125291  | 0.0910548 | 0.121358  | 0.114802 | 0.119027  |
| 0.159819  | 0.160839  | 0.15676   | 0.163607  | 0.17264   | 0.170455 | 0.184003  |
| 0.119318  | 0.1081    | 0.11859   | 0.113491  | 0.123689  | 0.122378 | 0.128642  |
| 0.147145  | 0.140297  | 0.148747  | 0.13986   | 0.153555  | 0.151078 | 0.157634  |
| 0.13345   | 0.109703  | 0.130099  | 0.111888  | 0.119755  | 0.118735 | 0.130536  |
| 0.192016  | 0.181381  | 0.189248  | 0.188811  | 0.193765  | 0.188666 | 0.198718  |
| 0.135781  | 0.120775  | 0.13243   | 0.118298  | 0.0579837 | 0.11961  | 0.13549   |
| 0.116259  | 0.102127  | 0.114656  | 0.105769  | 0.11859   | 0.111451 | 0.124126  |
| 0.121941  | 0.11655   | 0.121503  | 0.103875  | 0.128934  | 0.121503 | 0.131847  |
| 0.126457  | 0.117279  | 0.12602   | 0.108683  | 0.121503  | 0.109411 | 0.119755  |
| 0.135198  | 0.115239  | 0.131847  | 0.111888  | 0.124126  | 0.050845 | 0.118881  |
| 0.131993  | 0.118735  | 0.13039   | 0.11655   | 0.128205  | 0.125146 | 0.135198  |
| 0.128351  | 0.0463287 | 0.127622  | 0.11757   | 0.121941  | 0.11655  | 0.132139  |
| 0.194056  | 0.181964  | 0.191579  | 0.189103  | 0.194347  | 0.189248 | 0.20134   |
| 0.132139  | 0.121503  | 0.130828  | 0.121066  | 0.133596  | 0.124126 | 0.13243   |
| 0.117716  | 0.106789  | 0.116404  | 0.109848  | 0.127914  | 0.111451 | 0.12704   |
| 0.214598  | 0.202506  | 0.212121  | 0.208479  | 0.212558  | 0.212121 | 0.221008  |
| 0.13447   | 0.121795  | 0.129662  | 0.114365  | 0.134761  | 0.129662 | 0.133887  |
| 0.131119  | 0.0473485 | 0.12602   | 0.11859   | 0.122669  | 0.116404 | 0.132867  |
| 0.125291  | 0.0435606 | 0.121941  | 0.113054  | 0.121795  | 0.114948 | 0.130828  |
| 0.0659965 | 0.132284  | 0.0690559 | 0.132139  | 0.14088   | 0.142191 | 0.141463  |
| 0.194493  | 0.179196  | 0.190268  | 0.184295  | 0.194784  | 0.189394 | 0.202943  |
| 0.133159  | 0.123397  | 0.13039   | 0.120921  | 0.130828  | 0.111451 | 0.0559441 |
| 0.135781  | 0.127768  | 0.135635  | 0.126166  | 0.13549   | 0.132139 | 0.137529  |
| 0.129079  | 0.043852  | 0.125437  | 0.116841  | 0.121503  | 0.11553  | 0.13141   |
| 0.127622  | 0.0482226 | 0.124563  | 0.113636  | 0.120338  | 0.11116  | 0.129953  |
| 0.129808  | 0.044289  | 0.127331  | 0.11553   | 0.122232  | 0.114802 | 0.13243   |
| 0.0632284 | 0.114656  | 0.0627914 | 0.11859   | 0.128788  | 0.121941 | 0.129662  |
| 0.124272  | 0.0967366 | 0.120338  | 0.102127  | 0.111742  | 0.105478 | 0.122232  |
| 0.140589  | 0.121795  | 0.13549   | 0.121358  | 0.0496795 | 0.122669 | 0.139423  |
| 0.121649  | 0.131993  | 0.125291  | 0.128642  | 0.144959  | 0.137821 | 0.140006  |
| 0.139132  | 0.117716  | 0.133741  | 0.11961   | 0.0569639 | 0.126748 | 0.136218  |
| 0.132284  | 0.128934  | 0.131556  | 0.118881  | 0.136946  | 0.133596 | 0.132284  |
| 0.198572  | 0.185315  | 0.192308  | 0.191579  | 0.197698  | 0.192308 | 0.206148  |
| 0.135198  | 0.115239  | 0.131556  | 0.113636  | 0.129371  | 0.119901 | 0.128497  |
| 0.0490967 | 0.127331  | 0.0539044 | 0.129225  | 0.137383  | 0.13345  | 0.140589  |
| 0.127914  | 0.0479312 | 0.121649  | 0.112762  | 0.118007  | 0.110577 | 0.133741  |
| 0.124272  | 0.0952797 | 0.121795  | 0.101836  | 0.109703  | 0.106935 | 0.120192  |
| 0.127768  | 0.112762  | 0.125     | 0.112325  | 0.116696  | 0.122086 | 0.129225  |
| 0.130536  | 0.123106  | 0.129516  | 0.119755  | 0.131993  | 0.110868 | 0.0512821 |
| 0.129371  | 0.128059  | 0.129808  | 0.12296   | 0.131993  | 0.133013 | 0.140734  |
| 0.130099  | 0.11655   | 0.124417  | 0.120192  | 0.129225  | 0.125291 | 0.139423  |
| 0.129516  | 0.105769  | 0.125583  | 0.108829  | 0.123689  | 0.104604 | 0.0823135 |



|           |           |           |           |           |           |           |
|-----------|-----------|-----------|-----------|-----------|-----------|-----------|
| 0.122086  | 0.103875  | 0.118444  | 0.108683  | 0.11655   | 0.103293  | 0.0897436 |
| 0.121358  | 0.10373   | 0.119755  | 0.108537  | 0.116987  | 0.112762  | 0.126894  |
| 0.128788  | 0.119318  | 0.123689  | 0.101399  | 0.108974  | 0.105041  | 0.0973193 |
| 0.141754  | 0.129079  | 0.138695  | 0.129225  | 0.0549242 | 0.132576  | 0.141171  |
| 0.13345   | 0.121066  | 0.131556  | 0.117424  | 0.132284  | 0.108537  | 0.0620629 |
| 0.0633741 | 0.11014   | 0.0606061 | 0.112325  | 0.122815  | 0.120338  | 0.126894  |
| 0.128351  | 0.119172  | 0.125291  | 0.109994  | 0.126894  | 0.103438  | 0.0622086 |
| 0.128205  | 0.048514  | 0.124854  | 0.113928  | 0.120629  | 0.113782  | 0.130536  |
| 0.126311  | 0.114219  | 0.124417  | 0.0907634 | 0.11757   | 0.109557  | 0.116404  |
| 0.130099  | 0.0439977 | 0.126748  | 0.11553   | 0.123397  | 0.117716  | 0.134178  |
| 0.129516  | 0.111597  | 0.124126  | 0.110286  | 0.125146  | 0.111014  | 0.126603  |
| 0.129225  | 0.116259  | 0.128205  | 0.119318  | 0.133304  | 0.125583  | 0.135344  |
| 0.13039   | 0.112762  | 0.129953  | 0.107955  | 0.119318  | 0.0486597 | 0.118153  |
| 0.125583  | 0.099796  | 0.121649  | 0.101399  | 0.114802  | 0.11116   | 0.123834  |
| 0.127477  | 0.0472028 | 0.125583  | 0.115822  | 0.121358  | 0.114219  | 0.128642  |
| 0.129225  | 0.118007  | 0.124709  | 0.110577  | 0.133887  | 0.123252  | 0.133596  |
| 0.124126  | 0.11116   | 0.119318  | 0.114802  | 0.129953  | 0.121649  | 0.136655  |
| 0.127185  | 0.106643  | 0.121795  | 0.106206  | 0.122232  | 0.115093  | 0.12602   |
| 0.125728  | 0.0527389 | 0.123834  | 0.118444  | 0.122815  | 0.114219  | 0.13039   |
| 0.0530303 | 0.117279  | 0.0523019 | 0.119172  | 0.127914  | 0.121649  | 0.134033  |
| 0.131702  | 0.11757   | 0.129808  | 0.104312  | 0.110431  | 0.103875  | 0.0958625 |
| 0.0603147 | 0.117279  | 0.0572552 | 0.121503  | 0.128205  | 0.123689  | 0.131119  |
| 0.13345   | 0.111742  | 0.134761  | 0.108392  | 0.123834  | 0.0534674 | 0.117133  |
| 0.129953  | 0.100379  | 0.128059  | 0.107226  | 0.116259  | 0.113199  | 0.124417  |
| 0.120338  | 0.103001  | 0.119901  | 0.109557  | 0.119464  | 0.113782  | 0.127914  |
| 0.127477  | 0.113636  | 0.125874  | 0.0945513 | 0.118444  | 0.109848  | 0.116987  |
| 0.0600233 | 0.11757   | 0.0595862 | 0.121795  | 0.132576  | 0.124563  | 0.135781  |
| 0.125291  | 0.127477  | 0.123689  | 0.118298  | 0.132284  | 0.124272  | 0.131119  |
| 0.117279  | 0.110723  | 0.115967  | 0.113199  | 0.123106  | 0.119755  | 0.128351  |
| 0.196824  | 0.184149  | 0.194056  | 0.193619  | 0.19391   | 0.192599  | 0.206731  |
| 0.162733  | 0.160548  | 0.1588    | 0.159528  | 0.171474  | 0.16521   | 0.179633  |
| 0.137675  | 0.121795  | 0.131702  | 0.11757   | 0.0566725 | 0.119172  | 0.133013  |
| 0.129079  | 0.11961   | 0.125437  | 0.11859   | 0.129953  | 0.120775  | 0.0932401 |
| 0.155303  | 0.147873  | 0.155449  | 0.144231  | 0.0649767 | 0.146125  | 0.152681  |
| 0.131556  | 0.120629  | 0.132284  | 0.11961   | 0.133304  | 0.125291  | 0.143211  |
| 0.131993  | 0.0796911 | 0.129808  | 0.119755  | 0.127622  | 0.122232  | 0.139569  |
| 0.124272  | 0.083042  | 0.122669  | 0.116404  | 0.12602   | 0.119464  | 0.132139  |
| 0.128934  | 0.0920746 | 0.125583  | 0.118735  | 0.116696  | 0.120338  | 0.133887  |
| 0.121358  | 0.112762  | 0.121503  | 0.114656  | 0.130682  | 0.124126  | 0.137383  |
| 0.206876  | 0.187791  | 0.200903  | 0.198427  | 0.203963  | 0.203234  | 0.213578  |
| 0.135927  | 0.12296   | 0.130828  | 0.120192  | 0.133887  | 0.115967  | 0.0569639 |
| 0.085373  | 0.113782  | 0.0831876 | 0.117716  | 0.125583  | 0.120192  | 0.10169   |
| 0.123543  | 0.0604604 | 0.122232  | 0.111305  | 0.122378  | 0.110868  | 0.128788  |
| 0.133304  | 0.118298  | 0.129371  | 0.107955  | 0.129225  | 0.120921  | 0.129225  |

|           |           |           |          |           |           |           |
|-----------|-----------|-----------|----------|-----------|-----------|-----------|
| 0.188228  | 0.175554  | 0.186334  | 0.183858 | 0.19289   | 0.185752  | 0.197261  |
| 0.245921  | 0.239948  | 0.243735  | 0.244755 | 0.249417  | 0.246649  | 0.253788  |
| 0.131702  | 0.117279  | 0.129225  | 0.11655  | 0.131993  | 0.125437  | 0.139277  |
| 0.123543  | 0.111451  | 0.121941  | 0.11655  | 0.129953  | 0.120192  | 0.135781  |
| 0.13549   | 0.118153  | 0.133887  | 0.117424 | 0.0550699 | 0.122815  | 0.136364  |
| 0.132721  | 0.113928  | 0.131119  | 0.108537 | 0.121066  | 0.0512821 | 0.118444  |
| 0.12704   | 0.11757   | 0.127185  | 0.115676 | 0.126166  | 0.103584  | 0.0585664 |
| 0.125146  | 0.114219  | 0.12296   | 0.108537 | 0.122815  | 0.113636  | 0.128059  |
| 0.0961538 | 0.074155  | 0.0957168 | 0.120047 | 0.123543  | 0.117861  | 0.130245  |
| 0.129371  | 0.118153  | 0.124854  | 0.11655  | 0.126166  | 0.108246  | 0.0524476 |
| 0.0828963 | 0.083042  | 0.0821678 | 0.119027 | 0.119901  | 0.11859   | 0.130973  |
| 0.132284  | 0.107955  | 0.127768  | 0.112471 | 0.127914  | 0.118444  | 0.130245  |
| 0.128351  | 0.0990676 | 0.12296   | 0.104749 | 0.114073  | 0.109557  | 0.126894  |
| 0.129953  | 0.11757   | 0.127768  | 0.118881 | 0.132284  | 0.129225  | 0.138695  |
| 0.0610431 | 0.116841  | 0.0591492 | 0.120192 | 0.128642  | 0.123252  | 0.132721  |
| 0.117861  | 0.109266  | 0.113345  | 0.10067  | 0.122523  | 0.107809  | 0.120775  |
| 0.134761  | 0.121212  | 0.136364  | 0.129225 | 0.135635  | 0.12704   | 0.124272  |
| 0.140297  | 0.12704   | 0.140443  | 0.122815 | 0.132139  | 0.0641026 | 0.122232  |
| 0.125874  | 0.0473485 | 0.12398   | 0.114219 | 0.122086  | 0.114365  | 0.128497  |
| 0.129808  | 0.0882867 | 0.129662  | 0.119318 | 0.107955  | 0.120338  | 0.127768  |
| 0.13447   | 0.0565268 | 0.135198  | 0.131556 | 0.133304  | 0.130245  | 0.139132  |
| 0.210664  | 0.197115  | 0.206731  | 0.208625 | 0.20542   | 0.208479  | 0.219697  |
| 0.125146  | 0.111014  | 0.120338  | 0.110286 | 0.123397  | 0.119464  | 0.129225  |
| 0.128205  | 0.0995047 | 0.125437  | 0.101981 | 0.112762  | 0.106206  | 0.127331  |
| 0.135198  | 0.116696  | 0.13447   | 0.113054 | 0.128788  | 0.116696  | 0.129371  |
| 0.13447   | 0.123252  | 0.130828  | 0.114656 | 0.135052  | 0.131119  | 0.133304  |
| 0.127185  | 0.119172  | 0.122669  | 0.106789 | 0.129225  | 0.118298  | 0.124563  |
| 0.204691  | 0.189685  | 0.200758  | 0.197698 | 0.202943  | 0.198135  | 0.213432  |
| 0.0620629 | 0.121358  | 0.0595862 | 0.125583 | 0.133159  | 0.128059  | 0.134033  |
| 0.125146  | 0.04662   | 0.121503  | 0.114656 | 0.118444  | 0.112471  | 0.128351  |
| 0.126166  | 0.122815  | 0.128351  | 0.119755 | 0.118007  | 0.125146  | 0.123543  |
| 0.129371  | 0.111742  | 0.125146  | 0.105478 | 0.118881  | 0.0479312 | 0.115385  |
| 0.0606061 | 0.114656  | 0.0610431 | 0.11859  | 0.128205  | 0.124854  | 0.13141   |
| 0.0868298 | 0.105915  | 0.0907634 | 0.113345 | 0.121795  | 0.11553   | 0.123252  |
| 0.128205  | 0.112325  | 0.125437  | 0.111597 | 0.124417  | 0.11757   | 0.130828  |
| 0.132284  | 0.118735  | 0.128059  | 0.111888 | 0.130245  | 0.124563  | 0.131702  |
| 0.20236   | 0.189685  | 0.198135  | 0.196824 | 0.203817  | 0.196387  | 0.209645  |
| 0.0664336 | 0.11116   | 0.0665793 | 0.113345 | 0.12296   | 0.117861  | 0.124709  |
| 0.200321  | 0.185315  | 0.193182  | 0.190997 | 0.200321  | 0.193765  | 0.206148  |
| 0.197261  | 0.186917  | 0.191288  | 0.189685 | 0.197261  | 0.19391   | 0.206294  |
| 0.137529  | 0.122523  | 0.137383  | 0.119755 | 0.129953  | 0.0619172 | 0.121795  |
| 0.137238  | 0.13243   | 0.137383  | 0.122669 | 0.136655  | 0.139423  | 0.135198  |
| 0.122378  | 0.107955  | 0.116696  | 0.105769 | 0.122378  | 0.114948  | 0.119172  |
| 0.0738636 | 0.108974  | 0.0684732 | 0.112908 | 0.121941  | 0.11655   | 0.123689  |

|           |           |           |           |           |           |           |
|-----------|-----------|-----------|-----------|-----------|-----------|-----------|
| 0.0664336 | 0.114948  | 0.0619172 | 0.118007  | 0.12704   | 0.124563  | 0.131702  |
| 0.130536  | 0.0479312 | 0.128642  | 0.114802  | 0.124709  | 0.115822  | 0.134033  |
| 0.125     | 0.115822  | 0.120192  | 0.110431  | 0.119464  | 0.0989219 | 0.0623543 |
| 0.12704   | 0.118735  | 0.128059  | 0.114219  | 0.12704   | 0.104749  | 0.0541958 |
| 0.132139  | 0.115967  | 0.130245  | 0.118444  | 0.134761  | 0.128205  | 0.141754  |
| 0.134324  | 0.116404  | 0.133596  | 0.11014   | 0.121795  | 0.0514277 | 0.124417  |
| 0.123689  | 0.0474942 | 0.119755  | 0.113491  | 0.117279  | 0.112762  | 0.128351  |
| 0.0620629 | 0.116113  | 0.0613345 | 0.120921  | 0.133159  | 0.121941  | 0.132284  |
| 0.115822  | 0.0996503 | 0.115093  | 0.107663  | 0.11757   | 0.111597  | 0.121941  |
| 0.0509907 | 0.126603  | 0.0517191 | 0.128788  | 0.134907  | 0.129225  | 0.137529  |
| 0.132867  | 0.116404  | 0.131265  | 0.117424  | 0.0565268 | 0.117861  | 0.134324  |
| 0.0499709 | 0.130245  | 0.0530303 | 0.133013  | 0.137675  | 0.135198  | 0.140589  |
| 0.258887  | 0.25204   | 0.256993  | 0.25743   | 0.26384   | 0.262821  | 0.26588   |
| 0.137092  | 0.128205  | 0.13345   | 0.10708   | 0.129516  | 0.126166  | 0.121941  |
| 0.136946  | 0.123689  | 0.131847  | 0.0626457 | 0.130828  | 0.121066  | 0.131702  |
| 0.220134  | 0.210664  | 0.213869  | 0.216346  | 0.220134  | 0.222028  | 0.228875  |
| 0.138986  | 0.119027  | 0.138258  | 0.11451   | 0.131993  | 0.121358  | 0.131993  |
| 0.233392  | 0.224796  | 0.225962  | 0.22669   | 0.233392  | 0.234703  | 0.241259  |
| 0.126894  | 0.122086  | 0.126748  | 0.100087  | 0.124854  | 0.117716  | 0.11553   |
| 0.132867  | 0.0525932 | 0.133013  | 0.128788  | 0.131119  | 0.127185  | 0.13986   |
| 0.128497  | 0.116987  | 0.121066  | 0.11014   | 0.13141   | 0.121941  | 0.124417  |
| 0.137821  | 0.119318  | 0.135344  | 0.117424  | 0.129079  | 0.057838  | 0.124126  |
| 0.205711  | 0.194493  | 0.203817  | 0.200466  | 0.209207  | 0.200903  | 0.212704  |
| 0.048951  | 0.12602   | 0.0543415 | 0.13345   | 0.136946  | 0.130973  | 0.141317  |
| 0.0626457 | 0.118153  | 0.0563811 | 0.119172  | 0.129662  | 0.124854  | 0.132576  |
| 0.228293  | 0.218531  | 0.224068  | 0.225379  | 0.23208   | 0.226981  | 0.234994  |
| 0.134615  | 0.119901  | 0.131556  | 0.117133  | 0.13141   | 0.107955  | 0.0641026 |
| 0.205565  | 0.189685  | 0.200175  | 0.198281  | 0.203526  | 0.197552  | 0.209062  |
| 0.131847  | 0.123252  | 0.130536  | 0.116987  | 0.130973  | 0.110431  | 0.0633741 |
| 0.13039   | 0.0480769 | 0.127914  | 0.115239  | 0.122523  | 0.112762  | 0.135344  |
| 0.129079  | 0.109703  | 0.126311  | 0.114802  | 0.118007  | 0.12398   | 0.13141   |
| 0.136364  | 0.125437  | 0.138258  | 0.119464  | 0.128788  | 0.0633741 | 0.122086  |
| 0.124854  | 0.113054  | 0.123834  | 0.118153  | 0.120484  | 0.12296   | 0.129225  |
| 0.1706    | 0.150932  | 0.166667  | 0.155449  | 0.163899  | 0.161131  | 0.17701   |
| 0.0581294 | 0.114219  | 0.0539044 | 0.116404  | 0.124272  | 0.120047  | 0.128642  |
| 0.135927  | 0.124126  | 0.128205  | 0.115822  | 0.133887  | 0.125874  | 0.135052  |
| 0.135052  | 0.117133  | 0.13345   | 0.113782  | 0.13447   | 0.113928  | 0.126894  |
| 0.126311  | 0.129662  | 0.123252  | 0.116404  | 0.137383  | 0.130536  | 0.132721  |
| 0.200175  | 0.185169  | 0.196533  | 0.19289   | 0.200466  | 0.195076  | 0.207168  |
| 0.128351  | 0.0448718 | 0.121795  | 0.112325  | 0.120775  | 0.110431  | 0.130973  |
| 0.13986   | 0.11553   | 0.137675  | 0.113928  | 0.129953  | 0.0581294 | 0.129371  |
| 0.127477  | 0.118881  | 0.126457  | 0.107372  | 0.108829  | 0.104895  | 0.0992133 |
| 0.130536  | 0.120192  | 0.128059  | 0.119755  | 0.130828  | 0.11116   | 0.0515734 |
| 0.13039   | 0.0486597 | 0.127914  | 0.124272  | 0.128059  | 0.122086  | 0.132721  |

|           |           |           |          |           |           |           |
|-----------|-----------|-----------|----------|-----------|-----------|-----------|
| 0.254662  | 0.248689  | 0.252477  | 0.251457 | 0.261946  | 0.258013  | 0.262238  |
| 0.12602   | 0.107226  | 0.123834  | 0.107955 | 0.11553   | 0.115676  | 0.125437  |
| 0.133887  | 0.0894522 | 0.130828  | 0.118444 | 0.133013  | 0.117133  | 0.13447   |
| 0.183129  | 0.17803   | 0.18007   | 0.171766 | 0.184586  | 0.185023  | 0.186043  |
| 0.191871  | 0.179487  | 0.189103  | 0.184586 | 0.191288  | 0.185897  | 0.19799   |
| 0.130099  | 0.113928  | 0.128497  | 0.116113 | 0.134761  | 0.125874  | 0.139714  |
| 0.0608974 | 0.114656  | 0.0572552 | 0.119172 | 0.128788  | 0.122523  | 0.135781  |
| 0.128788  | 0.112325  | 0.126894  | 0.108974 | 0.124126  | 0.0534674 | 0.119172  |
| 0.0552156 | 0.140152  | 0.0606061 | 0.144959 | 0.147582  | 0.147145  | 0.150204  |
| 0.130973  | 0.114219  | 0.126748  | 0.115239 | 0.130682  | 0.124417  | 0.132139  |
| 0.134033  | 0.116404  | 0.130682  | 0.120921 | 0.133741  | 0.128351  | 0.140152  |
| 0.137675  | 0.125874  | 0.134907  | 0.125728 | 0.135052  | 0.114802  | 0.0528846 |
| 0.0560897 | 0.115385  | 0.0518648 | 0.118153 | 0.125728  | 0.121503  | 0.128934  |
| 0.04662   | 0.12602   | 0.0499709 | 0.129371 | 0.134324  | 0.134178  | 0.137529  |
| 0.131265  | 0.11859   | 0.126166  | 0.113491 | 0.130682  | 0.114802  | 0.0776515 |
| 0.138112  | 0.119027  | 0.136218  | 0.117133 | 0.128788  | 0.0581294 | 0.120338  |
| 0.14729   | 0.13345   | 0.14831   | 0.129808 | 0.138549  | 0.0745921 | 0.128351  |
| 0.129953  | 0.106498  | 0.127477  | 0.112471 | 0.118298  | 0.120484  | 0.129662  |
| 0.142337  | 0.125874  | 0.141026  | 0.121649 | 0.13039   | 0.0643939 | 0.120484  |
| 0.136509  | 0.130245  | 0.130828  | 0.127185 | 0.133013  | 0.118881  | 0.043852  |
| 0.211538  | 0.198572  | 0.204691  | 0.202506 | 0.212704  | 0.207314  | 0.221737  |
| 0.138549  | 0.111014  | 0.138112  | 0.127185 | 0.125437  | 0.125291  | 0.119318  |
| 0.197698  | 0.183275  | 0.190851  | 0.190414 | 0.197698  | 0.192016  | 0.203526  |
| 0.127477  | 0.113928  | 0.123834  | 0.105332 | 0.128351  | 0.11655   | 0.125437  |
| 0.133304  | 0.0495338 | 0.131702  | 0.127477 | 0.131847  | 0.126166  | 0.13884   |
| 0.132139  | 0.120047  | 0.130245  | 0.120775 | 0.0546329 | 0.125291  | 0.135052  |
| 0.134033  | 0.113199  | 0.12602   | 0.114219 | 0.0638112 | 0.119901  | 0.130828  |
| 0.0523019 | 0.118881  | 0.0509907 | 0.122232 | 0.131265  | 0.127914  | 0.135927  |
| 0.0520105 | 0.120921  | 0.0518648 | 0.125728 | 0.131556  | 0.12296   | 0.13243   |
| 0.133013  | 0.0460373 | 0.129079  | 0.118444 | 0.124563  | 0.115093  | 0.133304  |
| 0.13141   | 0.11757   | 0.128934  | 0.116259 | 0.134907  | 0.124854  | 0.129953  |
| 0.133159  | 0.125728  | 0.128934  | 0.123252 | 0.0524476 | 0.125437  | 0.137238  |
| 0.143211  | 0.134615  | 0.142483  | 0.131265 | 0.13884   | 0.120629  | 0.0499709 |
| 0.249272  | 0.244172  | 0.247378  | 0.248397 | 0.253351  | 0.253788  | 0.257139  |
| 0.13039   | 0.0463287 | 0.127622  | 0.119901 | 0.12602   | 0.116841  | 0.135635  |
| 0.192016  | 0.174679  | 0.188957  | 0.183566 | 0.188228  | 0.182255  | 0.19697   |
| 0.193036  | 0.181235  | 0.191142  | 0.188083 | 0.196241  | 0.187937  | 0.200321  |
| 0.137529  | 0.112908  | 0.135052  | 0.115385 | 0.131119  | 0.127185  | 0.132867  |
| 0.124709  | 0.104167  | 0.121358  | 0.106061 | 0.112471  | 0.113199  | 0.12704   |
| 0.129662  | 0.0511364 | 0.125437  | 0.126166 | 0.13141   | 0.123106  | 0.136072  |
| 0.0626457 | 0.114073  | 0.0619172 | 0.117133 | 0.123834  | 0.119901  | 0.130245  |
| 0.129808  | 0.0961538 | 0.126166  | 0.116696 | 0.116113  | 0.117424  | 0.13243   |
| 0.131847  | 0.11859   | 0.129079  | 0.116987 | 0.128934  | 0.106643  | 0.0592949 |
| 0.0728438 | 0.116113  | 0.0767774 | 0.120921 | 0.127914  | 0.127185  | 0.13345   |

|           |           |           |          |           |           |           |
|-----------|-----------|-----------|----------|-----------|-----------|-----------|
| 0         | 0.127768  | 0.0552156 | 0.134324 | 0.13549   | 0.134178  | 0.140734  |
| 0.127768  | 0         | 0.124709  | 0.116113 | 0.125437  | 0.117716  | 0.13243   |
| 0.0552156 | 0.124709  | 0         | 0.127477 | 0.135344  | 0.133741  | 0.139132  |
| 0.134324  | 0.116113  | 0.127477  | 0        | 0.121795  | 0.111742  | 0.130536  |
| 0.13549   | 0.125437  | 0.135344  | 0.121795 | 0         | 0.125728  | 0.139277  |
| 0.134178  | 0.117716  | 0.133741  | 0.111742 | 0.125728  | 0         | 0.121941  |
| 0.140734  | 0.13243   | 0.139132  | 0.130536 | 0.139277  | 0.121941  | 0         |
| 0.133596  | 0.116841  | 0.130828  | 0.120192 | 0.131265  | 0.124709  | 0.130682  |
| 0.128934  | 0.0536131 | 0.124126  | 0.117279 | 0.115239  | 0.115093  | 0.128059  |
| 0.137966  | 0.129079  | 0.134615  | 0.124563 | 0.137383  | 0.130536  | 0.137383  |
| 0.191725  | 0.177593  | 0.186626  | 0.183275 | 0.193182  | 0.187791  | 0.198135  |
| 0.0496795 | 0.132867  | 0.0559441 | 0.137092 | 0.142045  | 0.137238  | 0.144085  |
| 0.0566725 | 0.118298  | 0.0550699 | 0.124272 | 0.128351  | 0.125291  | 0.131556  |
| 0.136364  | 0.11757   | 0.13243   | 0.116841 | 0.0469114 | 0.121358  | 0.133159  |
| 0.13039   | 0.108683  | 0.125583  | 0.108829 | 0.0610431 | 0.114802  | 0.124854  |
| 0.137238  | 0.114073  | 0.131847  | 0.111305 | 0.125583  | 0.0528846 | 0.119755  |
| 0.140297  | 0.121212  | 0.138403  | 0.114365 | 0.127185  | 0.0553613 | 0.11961   |
| 0.197552  | 0.183421  | 0.191871  | 0.192016 | 0.197261  | 0.191288  | 0.203089  |
| 0.0801282 | 0.114948  | 0.0750291 | 0.121503 | 0.130536  | 0.122815  | 0.129953  |
| 0.117861  | 0.106935  | 0.11451   | 0.113491 | 0.122232  | 0.112471  | 0.122232  |
| 0.0502622 | 0.121212  | 0.0521562 | 0.12398  | 0.129516  | 0.127914  | 0.13447   |
| 0.194347  | 0.182255  | 0.190997  | 0.192016 | 0.199883  | 0.192162  | 0.203089  |
| 0.125146  | 0.099359  | 0.124709  | 0.103293 | 0.114365  | 0.107226  | 0.126894  |
| 0.13549   | 0.125728  | 0.134761  | 0.122669 | 0.132867  | 0.113491  | 0.0472028 |
| 0.0495338 | 0.118153  | 0.0528846 | 0.123543 | 0.130245  | 0.128059  | 0.136946  |
| 0.125728  | 0.112762  | 0.12296   | 0.114948 | 0.128642  | 0.120629  | 0.13243   |
| 0.191579  | 0.179779  | 0.187937  | 0.184878 | 0.190997  | 0.186189  | 0.201486  |
| 0.128351  | 0.12296   | 0.12704   | 0.119901 | 0.129225  | 0.108392  | 0.0499709 |
| 0.120484  | 0.111305  | 0.121503  | 0.11116  | 0.127477  | 0.114219  | 0.123397  |
| 0.126603  | 0.101399  | 0.126166  | 0.103875 | 0.118153  | 0.112471  | 0.128934  |
| 0.127185  | 0.118881  | 0.122378  | 0.117861 | 0.119027  | 0.128497  | 0.135635  |
| 0.136072  | 0.124272  | 0.130682  | 0.111305 | 0.133741  | 0.128934  | 0.13141   |
| 0.138112  | 0.128642  | 0.135052  | 0.125291 | 0.134615  | 0.119901  | 0.044289  |
| 0.125     | 0.0429779 | 0.122815  | 0.115676 | 0.123543  | 0.116987  | 0.134033  |
| 0.123543  | 0.123106  | 0.122232  | 0.113636 | 0.131702  | 0.122523  | 0.130536  |
| 0.148747  | 0.141317  | 0.145396  | 0.143211 | 0.148747  | 0.150932  | 0.156323  |
| 0.238782  | 0.227855  | 0.234266  | 0.232955 | 0.240239  | 0.237179  | 0.244318  |
| 0.13243   | 0.117716  | 0.132576  | 0.123397 | 0.135052  | 0.127331  | 0.133013  |
| 0.135635  | 0.121795  | 0.129953  | 0.112908 | 0.132139  | 0.126748  | 0.133304  |
| 0.0603147 | 0.116696  | 0.0590035 | 0.120047 | 0.129079  | 0.12398   | 0.121795  |
| 0.137092  | 0.119172  | 0.132576  | 0.11553  | 0.129808  | 0.129371  | 0.137966  |
| 0.12296   | 0.116696  | 0.116987  | 0.111305 | 0.120047  | 0.122523  | 0.107809  |
| 0.125291  | 0.11757   | 0.122523  | 0.109557 | 0.125583  | 0.124563  | 0.126457  |
| 0.0598776 | 0.120921  | 0.0597319 | 0.121358 | 0.128351  | 0.128497  | 0.129808  |

|           |           |           |           |           |          |           |
|-----------|-----------|-----------|-----------|-----------|----------|-----------|
| 0.138986  | 0.128934  | 0.133304  | 0.125     | 0.136072  | 0.115239 | 0.0460373 |
| 0.128788  | 0.110868  | 0.124563  | 0.112762  | 0.13345   | 0.121358 | 0.133159  |
| 0.238491  | 0.229312  | 0.233392  | 0.235577  | 0.238491  | 0.23951  | 0.244901  |
| 0.120921  | 0.0980478 | 0.120192  | 0.104604  | 0.112471  | 0.110577 | 0.121503  |
| 0.125291  | 0.113199  | 0.11961   | 0.0929487 | 0.116259  | 0.109411 | 0.111888  |
| 0.126311  | 0.0431235 | 0.120338  | 0.114656  | 0.120484  | 0.11451  | 0.128351  |
| 0.13345   | 0.12602   | 0.128642  | 0.129371  | 0.136946  | 0.139132 | 0.143357  |
| 0.1419    | 0.123397  | 0.138549  | 0.129371  | 0.142191  | 0.135635 | 0.138112  |
| 0.115676  | 0.107372  | 0.120775  | 0.122669  | 0.120921  | 0.13039  | 0.135781  |
| 0.0530303 | 0.119027  | 0.0528846 | 0.120921  | 0.129953  | 0.124272 | 0.134324  |
| 0.120192  | 0.108392  | 0.120047  | 0.114948  | 0.125437  | 0.119755 | 0.129516  |
| 0.230332  | 0.223776  | 0.227273  | 0.22771   | 0.234703  | 0.233683 | 0.238782  |
| 0.0520105 | 0.121212  | 0.0495338 | 0.127185  | 0.131556  | 0.131119 | 0.136509  |
| 0.133159  | 0.126311  | 0.129808  | 0.120629  | 0.13345   | 0.112617 | 0.0506993 |
| 0.130828  | 0.109703  | 0.125437  | 0.106061  | 0.127622  | 0.114365 | 0.126166  |
| 0.127477  | 0.121795  | 0.125291  | 0.118153  | 0.132139  | 0.129371 | 0.129225  |
| 0.13243   | 0.127331  | 0.129662  | 0.0977564 | 0.126603  | 0.120921 | 0.119318  |
| 0.126894  | 0.0454545 | 0.124709  | 0.120192  | 0.120775  | 0.115676 | 0.13243   |
| 0.133887  | 0.12704   | 0.131119  | 0.121649  | 0.131265  | 0.113636 | 0.050845  |
| 0.136072  | 0.132139  | 0.13447   | 0.129371  | 0.137529  | 0.121066 | 0.0434149 |
| 0.132867  | 0.119027  | 0.128642  | 0.117133  | 0.128788  | 0.110286 | 0.0521562 |
| 0.129516  | 0.0457459 | 0.125291  | 0.115822  | 0.123106  | 0.114219 | 0.133013  |
| 0.134178  | 0.126457  | 0.131119  | 0.120484  | 0.136218  | 0.13549  | 0.133887  |
| 0.136655  | 0.131847  | 0.134178  | 0.125583  | 0.137821  | 0.140297 | 0.13986   |
| 0.138403  | 0.126894  | 0.134178  | 0.120629  | 0.0524476 | 0.127185 | 0.140734  |
| 0.142483  | 0.13039   | 0.141171  | 0.125874  | 0.0527389 | 0.131556 | 0.141608  |
| 0.136801  | 0.130828  | 0.134615  | 0.122815  | 0.138258  | 0.138403 | 0.134178  |
| 0.128642  | 0.0894522 | 0.124417  | 0.109411  | 0.113199  | 0.11451  | 0.128642  |
| 0.138403  | 0.138549  | 0.137966  | 0.123252  | 0.123252  | 0.121066 | 0.0958625 |
| 0.138258  | 0.124709  | 0.137821  | 0.137092  | 0.140006  | 0.134033 | 0.126311  |
| 0.207605  | 0.198427  | 0.203671  | 0.200903  | 0.209353  | 0.209207 | 0.218386  |
| 0.127477  | 0.115967  | 0.126166  | 0.122815  | 0.136509  | 0.125291 | 0.135344  |
| 0.131265  | 0.115385  | 0.126166  | 0.0954254 | 0.121941  | 0.111305 | 0.11553   |
| 0.134324  | 0.0476399 | 0.131556  | 0.123543  | 0.129079  | 0.123397 | 0.137238  |
| 0.224213  | 0.215618  | 0.221737  | 0.222174  | 0.225379  | 0.226107 | 0.234994  |
| 0.214889  | 0.204254  | 0.212413  | 0.210519  | 0.217803  | 0.214452 | 0.222465  |
| 0.136072  | 0.128934  | 0.135052  | 0.12704   | 0.134907  | 0.11961  | 0.0454545 |
| 0.249563  | 0.244172  | 0.247086  | 0.24898   | 0.250146  | 0.251748 | 0.258887  |
| 0.125146  | 0.0894522 | 0.126166  | 0.113782  | 0.11116   | 0.115967 | 0.132721  |
| 0.141754  | 0.12704   | 0.1419    | 0.139132  | 0.142045  | 0.142774 | 0.143502  |
| 0.126894  | 0.101107  | 0.125583  | 0.107955  | 0.110868  | 0.114219 | 0.125146  |
| 0.135781  | 0.127477  | 0.129808  | 0.118298  | 0.134615  | 0.134178 | 0.133741  |
| 0.195076  | 0.180653  | 0.189394  | 0.188083  | 0.194493  | 0.190268 | 0.201486  |
| 0.134033  | 0.114656  | 0.130099  | 0.113345  | 0.132284  | 0.121941 | 0.128205  |

|           |           |           |          |           |           |           |
|-----------|-----------|-----------|----------|-----------|-----------|-----------|
| 0.200175  | 0.183712  | 0.19595   | 0.191142 | 0.200175  | 0.198572  | 0.207168  |
| 0.128788  | 0.107955  | 0.129225  | 0.110723 | 0.125583  | 0.123106  | 0.129371  |
| 0.112471  | 0.11553   | 0.10912   | 0.119464 | 0.128205  | 0.11553   | 0.0821678 |
| 0.131119  | 0.115822  | 0.13039   | 0.118007 | 0.120047  | 0.13039   | 0.130828  |
| 0.113345  | 0.109994  | 0.115239  | 0.11451  | 0.116259  | 0.123106  | 0.122669  |
| 0.122815  | 0.0448718 | 0.117424  | 0.110577 | 0.115239  | 0.108392  | 0.125728  |
| 0.116987  | 0.107226  | 0.115676  | 0.111742 | 0.129516  | 0.113928  | 0.130099  |
| 0.128642  | 0.0976107 | 0.124417  | 0.101836 | 0.114073  | 0.108392  | 0.121649  |
| 0.0582751 | 0.110286  | 0.0584207 | 0.11859  | 0.125     | 0.123106  | 0.127914  |
| 0.13039   | 0.123252  | 0.126166  | 0.109994 | 0.109994  | 0.106061  | 0.0965909 |
| 0.126603  | 0.107809  | 0.122378  | 0.109703 | 0.128059  | 0.117716  | 0.128059  |
| 0.127914  | 0.10067   | 0.122523  | 0.104895 | 0.115385  | 0.113199  | 0.125874  |
| 0.133887  | 0.104312  | 0.131119  | 0.11961  | 0.0724068 | 0.123252  | 0.131265  |
| 0.053176  | 0.127622  | 0.0524476 | 0.132139 | 0.137675  | 0.13141   | 0.138258  |
| 0.128788  | 0.115822  | 0.124563  | 0.113928 | 0.0571096 | 0.116404  | 0.131119  |
| 0.126603  | 0.112762  | 0.125583  | 0.11553  | 0.126311  | 0.113345  | 0.122523  |
| 0.123834  | 0.041521  | 0.120775  | 0.113345 | 0.118881  | 0.113199  | 0.127622  |
| 0.125874  | 0.119318  | 0.121358  | 0.120047 | 0.127914  | 0.110868  | 0.0585664 |
| 0.132284  | 0.11757   | 0.13039   | 0.115676 | 0.131702  | 0.124563  | 0.132284  |
| 0.134178  | 0.115676  | 0.132284  | 0.112617 | 0.125146  | 0.0530303 | 0.119318  |
| 0.13447   | 0.117716  | 0.131119  | 0.116404 | 0.057838  | 0.120047  | 0.131265  |
| 0.0556527 | 0.117861  | 0.0557984 | 0.122669 | 0.127622  | 0.123397  | 0.129953  |
| 0.0499709 | 0.128205  | 0.0539044 | 0.130099 | 0.13447   | 0.131993  | 0.137675  |
| 0.0511364 | 0.134324  | 0.0539044 | 0.136509 | 0.141171  | 0.13986   | 0.144668  |
| 0.12296   | 0.109994  | 0.117861  | 0.109848 | 0.122378  | 0.102418  | 0.0664336 |
| 0.128788  | 0.0479312 | 0.127185  | 0.11655  | 0.121503  | 0.115822  | 0.131993  |
| 0.124272  | 0.116841  | 0.120921  | 0.102418 | 0.122232  | 0.113928  | 0.120775  |
| 0.139132  | 0.136072  | 0.135198  | 0.124272 | 0.139714  | 0.138986  | 0.137383  |
| 0.126748  | 0.109411  | 0.125437  | 0.108683 | 0.115385  | 0.113491  | 0.12704   |
| 0.146853  | 0.135052  | 0.146707  | 0.131119 | 0.141026  | 0.0712413 | 0.128788  |
| 0.138112  | 0.0625    | 0.137966  | 0.137238 | 0.137821  | 0.133596  | 0.143939  |
| 0.132721  | 0.119755  | 0.126748  | 0.122815 | 0.135344  | 0.134615  | 0.143211  |
| 0.119755  | 0.103001  | 0.118153  | 0.11655  | 0.119755  | 0.116987  | 0.128497  |
| 0.124563  | 0.113345  | 0.118881  | 0.105041 | 0.127477  | 0.116841  | 0.128059  |
| 0.140006  | 0.124126  | 0.13549   | 0.124854 | 0.0534674 | 0.127622  | 0.139132  |
| 0.208625  | 0.200029  | 0.205857  | 0.204837 | 0.210956  | 0.209062  | 0.213287  |
| 0.126748  | 0.114656  | 0.126603  | 0.111888 | 0.123834  | 0.111451  | 0.123834  |
| 0.136509  | 0.110431  | 0.131119  | 0.116696 | 0.121066  | 0.123834  | 0.133304  |
| 0.129953  | 0.123397  | 0.127768  | 0.113054 | 0.131119  | 0.128059  | 0.128497  |
| 0.130682  | 0.117424  | 0.128788  | 0.118444 | 0.0592949 | 0.119464  | 0.131556  |
| 0.138403  | 0.113782  | 0.136218  | 0.112762 | 0.131119  | 0.12398   | 0.13549   |
| 0.120047  | 0.125146  | 0.120775  | 0.122378 | 0.129953  | 0.123397  | 0.126457  |
| 0.11961   | 0.129662  | 0.11859   | 0.125437 | 0.134178  | 0.12704   | 0.128059  |
| 0.128497  | 0.118444  | 0.12398   | 0.119755 | 0.131119  | 0.129808  | 0.135781  |

|           |           |           |          |          |          |           |
|-----------|-----------|-----------|----------|----------|----------|-----------|
| 0.126748  | 0.117279  | 0.126894  | 0.104604 | 0.108974 | 0.103293 | 0.0955711 |
| 0.130828  | 0.128934  | 0.129516  | 0.120338 | 0.136072 | 0.133887 | 0.134033  |
| 0.130245  | 0.109703  | 0.127768  | 0.113054 | 0.119464 | 0.125437 | 0.12704   |
| 0.133596  | 0.112762  | 0.129371  | 0.117279 | 0.129516 | 0.119172 | 0.133596  |
| 0.18007   | 0.173223  | 0.176428  | 0.174242 | 0.176282 | 0.175845 | 0.183275  |
| 0.0620629 | 0.113491  | 0.0610431 | 0.119755 | 0.12704  | 0.120484 | 0.131993  |
| 0.139423  | 0.129371  | 0.136072  | 0.117279 | 0.137675 | 0.13549  | 0.135344  |
| 0.141608  | 0.116113  | 0.137383  | 0.119464 | 0.127914 | 0.120775 | 0.115385  |
| 0.120484  | 0.122669  | 0.121503  | 0.120192 | 0.128934 | 0.127914 | 0.121358  |
| 0.118153  | 0.102855  | 0.116841  | 0.109411 | 0.117861 | 0.111597 | 0.121649  |
| 0.120775  | 0.104895  | 0.119755  | 0.104749 | 0.121358 | 0.113636 | 0.118735  |
| 0.125728  | 0.110723  | 0.121795  | 0.112325 | 0.12398  | 0.112471 | 0.123689  |
| 0.13447   | 0.120338  | 0.13345   | 0.12398  | 0.134178 | 0.126457 | 0.10912   |
| 0.0980478 | 0.1081    | 0.0961538 | 0.114656 | 0.127768 | 0.122086 | 0.13039   |
| 0.137821  | 0.122815  | 0.137092  | 0.123543 | 0.128788 | 0.123689 | 0.128788  |
| 0.120192  | 0.112762  | 0.123252  | 0.111451 | 0.122815 | 0.112179 | 0.116987  |
| 0.132867  | 0.117861  | 0.132139  | 0.112762 | 0.121503 | 0.116113 | 0.122086  |
| 0.141754  | 0.126748  | 0.141026  | 0.128351 | 0.136801 | 0.129371 | 0.0992133 |
| 0.131556  | 0.110723  | 0.13141   | 0.114948 | 0.118444 | 0.117424 | 0.112908  |
| 0.127768  | 0.115967  | 0.127622  | 0.120192 | 0.118735 | 0.122086 | 0.123106  |
| 0.130682  | 0.104895  | 0.127914  | 0.110577 | 0.116404 | 0.109848 | 0.114656  |
| 0.13039   | 0.108974  | 0.129371  | 0.113782 | 0.118735 | 0.115385 | 0.113491  |
| 0.128059  | 0.0976107 | 0.12704   | 0.104458 | 0.11553  | 0.107226 | 0.121358  |
| 0.138112  | 0.109411  | 0.134178  | 0.121795 | 0.128788 | 0.116987 | 0.119172  |
| 0.131993  | 0.106789  | 0.127768  | 0.109848 | 0.11859  | 0.104458 | 0.119172  |
| 0.147727  | 0.142045  | 0.144668  | 0.140152 | 0.144231 | 0.136801 | 0.108974  |
| 0.141026  | 0.130682  | 0.135344  | 0.130828 | 0.140443 | 0.12602  | 0.112179  |
| 0.126748  | 0.107955  | 0.125437  | 0.112762 | 0.107517 | 0.103875 | 0.113054  |
| 0.142628  | 0.140734  | 0.137821  | 0.135927 | 0.138258 | 0.129371 | 0.104749  |
| 0.13243   | 0.117133  | 0.129371  | 0.122232 | 0.104749 | 0.126457 | 0.140297  |
| 0.144376  | 0.13345   | 0.143939  | 0.133013 | 0.141171 | 0.141317 | 0.124563  |
| 0.127768  | 0.104895  | 0.127622  | 0.112034 | 0.11757  | 0.102564 | 0.124272  |
| 0.149476  | 0.140589  | 0.144376  | 0.142191 | 0.150058 | 0.146999 | 0.145688  |
| 0.143357  | 0.126603  | 0.139714  | 0.122086 | 0.135198 | 0.127768 | 0.130536  |
| 0.145979  | 0.135344  | 0.150787  | 0.129662 | 0.132284 | 0.136218 | 0.119755  |
| 0.133741  | 0.11961   | 0.129225  | 0.117716 | 0.106643 | 0.124272 | 0.128788  |
| 0.129225  | 0.10373   | 0.129079  | 0.112034 | 0.115822 | 0.113054 | 0.109703  |
| 0.133159  | 0.105624  | 0.128642  | 0.11014  | 0.120921 | 0.113491 | 0.115676  |
| 0.129516  | 0.117424  | 0.125583  | 0.112908 | 0.127768 | 0.117716 | 0.106789  |
| 0.133013  | 0.119172  | 0.127914  | 0.118735 | 0.122815 | 0.117424 | 0.121649  |
| 0.137821  | 0.119318  | 0.133887  | 0.120921 | 0.127331 | 0.122523 | 0.13141   |
| 0.135198  | 0.11757   | 0.135052  | 0.121503 | 0.132284 | 0.121941 | 0.115676  |
| 0.129662  | 0.110286  | 0.126894  | 0.106061 | 0.101107 | 0.111451 | 0.115676  |
| 0.131556  | 0.104604  | 0.129953  | 0.114365 | 0.123106 | 0.111014 | 0.114073  |



|          |           |          |          |          |          |          |
|----------|-----------|----------|----------|----------|----------|----------|
| 0.135198 | 0.10912   | 0.13243  | 0.120338 | 0.127914 | 0.125146 | 0.117424 |
| 0.130828 | 0.106206  | 0.12602  | 0.117133 | 0.118881 | 0.113199 | 0.110723 |
| 0.135927 | 0.112471  | 0.135198 | 0.121941 | 0.131265 | 0.119755 | 0.115239 |
| 0.124563 | 0.103438  | 0.122669 | 0.110286 | 0.115239 | 0.106352 | 0.130973 |
| 0.11859  | 0.107372  | 0.11553  | 0.119755 | 0.122086 | 0.130973 | 0.132576 |
| 0.123252 | 0.105041  | 0.120775 | 0.117133 | 0.126457 | 0.123397 | 0.130828 |
| 0.124709 | 0.0866841 | 0.120192 | 0.11451  | 0.112471 | 0.113782 | 0.127622 |
| 0.129953 | 0.100379  | 0.126311 | 0.113928 | 0.121503 | 0.117279 | 0.116841 |
| 0.119318 | 0.105478  | 0.119172 | 0.116404 | 0.122232 | 0.127622 | 0.129808 |
| 0.122086 | 0.114073  | 0.118153 | 0.115093 | 0.126166 | 0.118735 | 0.127914 |
| 0.111597 | 0.122232  | 0.111451 | 0.122378 | 0.12704  | 0.12398  | 0.136655 |
| 0.111597 | 0.10067   | 0.110577 | 0.112471 | 0.11451  | 0.11757  | 0.121503 |
| 0.128351 | 0.126457  | 0.128788 | 0.129808 | 0.128059 | 0.129662 | 0.132721 |

| TDr_3364  | TDr_3368  | TDr_3371  | TDr_3373 | TDr_3374 | TDr_3376  | TDr_3383  |
|-----------|-----------|-----------|----------|----------|-----------|-----------|
| 0.11116   | 0.110868  | 0.143502  | 0.16521  | 0.135052 | 0.115822  | 0.0833333 |
| 0.116259  | 0.106643  | 0.132284  | 0.17264  | 0.123252 | 0.108974  | 0.113199  |
| 0.111014  | 0.103147  | 0.128497  | 0.168269 | 0.118007 | 0.107809  | 0.112325  |
| 0.122086  | 0.105769  | 0.133159  | 0.17905  | 0.10373  | 0.0932401 | 0.121066  |
| 0.130828  | 0.131702  | 0.0990676 | 0.200321 | 0.143939 | 0.133741  | 0.13447   |
| 0.13345   | 0.119464  | 0.12296   | 0.186917 | 0.13986  | 0.127331  | 0.113199  |
| 0.119318  | 0.11757   | 0.129225  | 0.191142 | 0.137092 | 0.126894  | 0.102855  |
| 0.116113  | 0.107663  | 0.125728  | 0.172494 | 0.11757  | 0.106206  | 0.113928  |
| 0.0979021 | 0.106061  | 0.124126  | 0.174971 | 0.122669 | 0.108392  | 0.110868  |
| 0.0846445 | 0.0939685 | 0.126894  | 0.179779 | 0.128934 | 0.120192  | 0.108392  |
| 0.108392  | 0.104021  | 0.137238  | 0.16623  | 0.144231 | 0.125291  | 0.114656  |
| 0.113491  | 0.107372  | 0.122232  | 0.176282 | 0.122232 | 0.109411  | 0.117424  |
| 0.0965909 | 0.102418  | 0.129225  | 0.179779 | 0.128642 | 0.11553   | 0.115967  |
| 0.12704   | 0.118007  | 0.142774  | 0.135344 | 0.147727 | 0.128205  | 0.139132  |
| 0.121649  | 0.0584207 | 0.138549  | 0.190559 | 0.135635 | 0.132721  | 0.130536  |
| 0.111305  | 0.101981  | 0.132867  | 0.188666 | 0.127331 | 0.122669  | 0.118153  |
| 0.114365  | 0.108537  | 0.122523  | 0.178613 | 0.133304 | 0.116987  | 0.118881  |
| 0.142774  | 0.138986  | 0.121212  | 0.203817 | 0.148893 | 0.136655  | 0.144085  |
| 0.112762  | 0.10373   | 0.12704   | 0.167686 | 0.120629 | 0.104312  | 0.109411  |
| 0.199592  | 0.170746  | 0.211247  | 0.133596 | 0.204254 | 0.198427  | 0.204691  |
| 0.128059  | 0.113199  | 0.139423  | 0.186772 | 0.147582 | 0.13039   | 0.101107  |
| 0.121212  | 0.112471  | 0.133741  | 0.187209 | 0.138695 | 0.120629  | 0.0968823 |
| 0.109703  | 0.106789  | 0.121941  | 0.175991 | 0.126311 | 0.111742  | 0.118007  |
| 0.130245  | 0.125     | 0.131702  | 0.195076 | 0.136655 | 0.127914  | 0.123689  |
| 0.103584  | 0.101544  | 0.124854  | 0.17162  | 0.122523 | 0.109703  | 0.105769  |
| 0.13447   | 0.121066  | 0.137092  | 0.192599 | 0.142045 | 0.131265  | 0.102564  |
| 0.127768  | 0.120484  | 0.127477  | 0.186772 | 0.139423 | 0.128934  | 0.119755  |
| 0.11757   | 0.114948  | 0.131265  | 0.190851 | 0.128934 | 0.121649  | 0.124417  |
| 0.128059  | 0.127768  | 0.14292   | 0.196096 | 0.136801 | 0.132139  | 0.122086  |
| 0.114073  | 0.114073  | 0.13243   | 0.190268 | 0.13447  | 0.126311  | 0.115967  |
| 0.119464  | 0.104895  | 0.138695  | 0.185752 | 0.140152 | 0.127914  | 0.0942599 |
| 0.114656  | 0.113491  | 0.133304  | 0.189394 | 0.135927 | 0.124272  | 0.115093  |
| 0.105041  | 0.092803  | 0.12602   | 0.173077 | 0.127185 | 0.112908  | 0.10169   |
| 0.113491  | 0.111451  | 0.133596  | 0.182692 | 0.130099 | 0.121066  | 0.115967  |
| 0.107226  | 0.11655   | 0.135198  | 0.189831 | 0.140443 | 0.129079  | 0.118735  |
| 0.111742  | 0.124854  | 0.134178  | 0.197844 | 0.137383 | 0.131556  | 0.125291  |
| 0.126166  | 0.125583  | 0.144231  | 0.2044   | 0.143648 | 0.138403  | 0.114365  |
| 0.11757   | 0.117279  | 0.137383  | 0.187937 | 0.141171 | 0.129516  | 0.115385  |
| 0.113782  | 0.106498  | 0.125728  | 0.178904 | 0.126603 | 0.113199  | 0.11014   |
| 0.118735  | 0.120775  | 0.133304  | 0.189103 | 0.131265 | 0.118735  | 0.126457  |
| 0.110577  | 0.109703  | 0.123397  | 0.175408 | 0.126311 | 0.114656  | 0.113928  |
| 0.134761  | 0.13243   | 0.14292   | 0.205711 | 0.14729  | 0.143211  | 0.144231  |

|          |          |          |          |          |           |           |
|----------|----------|----------|----------|----------|-----------|-----------|
| 0.140589 | 0.14292  | 0.149038 | 0.206294 | 0.15574  | 0.146707  | 0.150058  |
| 0.110723 | 0.114219 | 0.126457 | 0.179924 | 0.133159 | 0.11859   | 0.119318  |
| 0.103147 | 0.107226 | 0.122378 | 0.180216 | 0.130536 | 0.118881  | 0.107955  |
| 0.104458 | 0.110286 | 0.135927 | 0.193473 | 0.140297 | 0.127477  | 0.118007  |
| 0.121066 | 0.113199 | 0.129225 | 0.184149 | 0.133304 | 0.121649  | 0.121503  |
| 0.127914 | 0.133159 | 0.145105 | 0.200903 | 0.146853 | 0.13986   | 0.14088   |
| 0.112179 | 0.114802 | 0.132867 | 0.186043 | 0.132284 | 0.116841  | 0.122232  |
| 0.109411 | 0.110577 | 0.128934 | 0.181527 | 0.135635 | 0.120484  | 0.121212  |
| 0.14831  | 0.134324 | 0.154429 | 0.205565 | 0.155594 | 0.144814  | 0.0616259 |
| 0.129079 | 0.120338 | 0.131993 | 0.1875   | 0.142483 | 0.130828  | 0.133887  |
| 0.119027 | 0.115822 | 0.127477 | 0.180361 | 0.131847 | 0.11757   | 0.121503  |
| 0.101836 | 0.112617 | 0.137092 | 0.193182 | 0.135052 | 0.125437  | 0.132576  |
| 0.117861 | 0.113491 | 0.127768 | 0.170746 | 0.101836 | 0.0875583 | 0.120047  |
| 0.140589 | 0.139423 | 0.144085 | 0.207168 | 0.144668 | 0.135927  | 0.142191  |
| 0.122378 | 0.124709 | 0.135781 | 0.193036 | 0.1419   | 0.128205  | 0.128642  |
| 0.112471 | 0.11451  | 0.128497 | 0.184586 | 0.13141  | 0.118007  | 0.121066  |
| 0.112179 | 0.113054 | 0.135198 | 0.180798 | 0.136946 | 0.123252  | 0.122523  |
| 0.104749 | 0.112325 | 0.128642 | 0.192308 | 0.137675 | 0.126603  | 0.11859   |
| 0.137966 | 0.135635 | 0.139132 | 0.204545 | 0.146707 | 0.136801  | 0.139569  |
| 0.134178 | 0.134761 | 0.144959 | 0.207751 | 0.141463 | 0.132139  | 0.147436  |
| 0.164336 | 0.14627  | 0.171911 | 0.15574  | 0.166084 | 0.158508  | 0.160693  |
| 0.115385 | 0.111888 | 0.129371 | 0.17905  | 0.130828 | 0.115676  | 0.118735  |
| 0.113054 | 0.113345 | 0.130536 | 0.179633 | 0.132576 | 0.120921  | 0.11961   |
| 0.113928 | 0.115093 | 0.129079 | 0.180798 | 0.132284 | 0.114219  | 0.11757   |
| 0.137966 | 0.129808 | 0.150204 | 0.193182 | 0.150787 | 0.144668  | 0.125583  |
| 0.114365 | 0.108829 | 0.123397 | 0.177156 | 0.126603 | 0.113199  | 0.116841  |
| 0.131993 | 0.127331 | 0.1419   | 0.191871 | 0.143648 | 0.129953  | 0.135344  |
| 0.106061 | 0.110723 | 0.132576 | 0.190414 | 0.136072 | 0.128788  | 0.11553   |
| 0.119318 | 0.11553  | 0.130099 | 0.182401 | 0.135344 | 0.124563  | 0.121795  |
| 0.141463 | 0.137092 | 0.155449 | 0.195804 | 0.152826 | 0.143794  | 0.124709  |
| 0.125146 | 0.11961  | 0.134761 | 0.190268 | 0.136801 | 0.125728  | 0.124417  |
| 0.13141  | 0.132867 | 0.140734 | 0.204108 | 0.143357 | 0.137529  | 0.142628  |
| 0.127768 | 0.123397 | 0.129516 | 0.191725 | 0.142337 | 0.128351  | 0.135781  |
| 0.118298 | 0.110723 | 0.127622 | 0.171474 | 0.123834 | 0.109848  | 0.113491  |
| 0.110431 | 0.114219 | 0.129371 | 0.177885 | 0.131119 | 0.114219  | 0.118735  |
| 0.112471 | 0.11014  | 0.123834 | 0.182547 | 0.134324 | 0.117424  | 0.122523  |
| 0.130828 | 0.130536 | 0.137821 | 0.199155 | 0.136072 | 0.129662  | 0.137092  |
| 0.109994 | 0.112325 | 0.130973 | 0.179487 | 0.134178 | 0.119318  | 0.117424  |
| 0.136364 | 0.132576 | 0.143065 | 0.204691 | 0.142483 | 0.136655  | 0.145833  |
| 0.122378 | 0.120921 | 0.137238 | 0.182838 | 0.143357 | 0.128497  | 0.123106  |
| 0.121795 | 0.114219 | 0.124709 | 0.189248 | 0.129079 | 0.115676  | 0.125437  |
| 0.121795 | 0.117133 | 0.129371 | 0.184003 | 0.138986 | 0.124126  | 0.122815  |
| 0.119172 | 0.11859  | 0.131702 | 0.187791 | 0.136946 | 0.122669  | 0.128351  |
| 0.118298 | 0.114219 | 0.128205 | 0.182838 | 0.135198 | 0.120629  | 0.120775  |

|          |           |          |          |          |          |           |
|----------|-----------|----------|----------|----------|----------|-----------|
| 0.117133 | 0.118007  | 0.126748 | 0.18109  | 0.132867 | 0.117424 | 0.121066  |
| 0.130099 | 0.132721  | 0.13884  | 0.205128 | 0.145251 | 0.139714 | 0.143648  |
| 0.10912  | 0.103875  | 0.126603 | 0.180653 | 0.13447  | 0.121649 | 0.111597  |
| 0.100816 | 0.107517  | 0.124126 | 0.184003 | 0.131119 | 0.117716 | 0.117861  |
| 0.123252 | 0.119172  | 0.135198 | 0.194784 | 0.142191 | 0.129662 | 0.116404  |
| 0.125291 | 0.120921  | 0.129662 | 0.194202 | 0.13986  | 0.132576 | 0.103584  |
| 0.119464 | 0.120338  | 0.136946 | 0.199738 | 0.145105 | 0.138986 | 0.130682  |
| 0.13243  | 0.129516  | 0.145542 | 0.210373 | 0.14729  | 0.137966 | 0.138695  |
| 0.11859  | 0.113054  | 0.121795 | 0.181964 | 0.137238 | 0.126748 | 0.103584  |
| 0.185315 | 0.172203  | 0.187354 | 0.147873 | 0.193473 | 0.180653 | 0.172931  |
| 0.114073 | 0.107955  | 0.121649 | 0.183275 | 0.128059 | 0.113782 | 0.107226  |
| 0.128788 | 0.125583  | 0.154429 | 0.203817 | 0.143357 | 0.136072 | 0.137092  |
| 0.122378 | 0.118007  | 0.145105 | 0.198281 | 0.139569 | 0.130536 | 0.129808  |
| 0.135052 | 0.132139  | 0.136218 | 0.204837 | 0.151661 | 0.142337 | 0.113054  |
| 0.110431 | 0.108683  | 0.127622 | 0.184586 | 0.130536 | 0.116841 | 0.118735  |
| 0.127331 | 0.123834  | 0.143939 | 0.203526 | 0.143357 | 0.132867 | 0.133887  |
| 0.109557 | 0.112762  | 0.128497 | 0.186917 | 0.131702 | 0.120629 | 0.113782  |
| 0.118735 | 0.116987  | 0.128351 | 0.189977 | 0.137966 | 0.127185 | 0.125     |
| 0.112325 | 0.108537  | 0.136218 | 0.187063 | 0.128934 | 0.11757  | 0.102273  |
| 0.133013 | 0.132139  | 0.146416 | 0.201923 | 0.147873 | 0.139132 | 0.136364  |
| 0.10708  | 0.105041  | 0.128351 | 0.181235 | 0.131847 | 0.120775 | 0.111888  |
| 0.127914 | 0.126457  | 0.1419   | 0.197698 | 0.140734 | 0.134907 | 0.116987  |
| 0.118153 | 0.111451  | 0.127768 | 0.186772 | 0.137092 | 0.124272 | 0.0944056 |
| 0.125    | 0.127622  | 0.134615 | 0.197115 | 0.139277 | 0.130828 | 0.136801  |
| 0.122523 | 0.116987  | 0.137092 | 0.196096 | 0.147873 | 0.137383 | 0.109848  |
| 0.10912  | 0.104167  | 0.125146 | 0.185315 | 0.13243  | 0.11961  | 0.097028  |
| 0.144376 | 0.130973  | 0.154283 | 0.195221 | 0.154283 | 0.145542 | 0.131119  |
| 0.111597 | 0.110723  | 0.127914 | 0.187209 | 0.140152 | 0.125874 | 0.0986305 |
| 0.108974 | 0.111305  | 0.128205 | 0.1875   | 0.134324 | 0.121795 | 0.119318  |
| 0.11116  | 0.116113  | 0.131847 | 0.189103 | 0.137092 | 0.123689 | 0.117133  |
| 0.129225 | 0.132139  | 0.148456 | 0.202797 | 0.151369 | 0.143794 | 0.119464  |
| 0.125437 | 0.114073  | 0.137092 | 0.169289 | 0.14088  | 0.128351 | 0.118881  |
| 0.106498 | 0.10708   | 0.129225 | 0.184732 | 0.127477 | 0.112617 | 0.114219  |
| 0.106789 | 0.104749  | 0.133304 | 0.181818 | 0.131556 | 0.119901 | 0.11451   |
| 0.117716 | 0.112762  | 0.132867 | 0.18546  | 0.135781 | 0.125291 | 0.0971737 |
| 0.109994 | 0.115239  | 0.133304 | 0.19697  | 0.141463 | 0.13039  | 0.124126  |
| 0.118007 | 0.113345  | 0.126457 | 0.18954  | 0.138986 | 0.125    | 0.097465  |
| 0.101836 | 0.0995047 | 0.121941 | 0.173951 | 0.122815 | 0.110577 | 0.105769  |
| 0.097465 | 0.102127  | 0.124854 | 0.179779 | 0.125437 | 0.112034 | 0.103438  |
| 0.099359 | 0.104312  | 0.126748 | 0.182838 | 0.130536 | 0.116841 | 0.113491  |
| 0.119464 | 0.116841  | 0.134033 | 0.182255 | 0.135198 | 0.121795 | 0.123689  |
| 0.112617 | 0.119318  | 0.140006 | 0.19493  | 0.139132 | 0.133013 | 0.129371  |
| 0.104021 | 0.100524  | 0.122378 | 0.18546  | 0.129079 | 0.115967 | 0.112617  |
| 0.103001 | 0.0962995 | 0.123397 | 0.177739 | 0.128642 | 0.112617 | 0.1081    |

|           |           |          |           |           |           |           |
|-----------|-----------|----------|-----------|-----------|-----------|-----------|
| 0.108829  | 0.112325  | 0.128934 | 0.192016  | 0.144376  | 0.136218  | 0.122086  |
| 0.105769  | 0.104021  | 0.123543 | 0.180216  | 0.130245  | 0.115676  | 0.10708   |
| 0.120047  | 0.111888  | 0.141026 | 0.181381  | 0.139277  | 0.127331  | 0.108829  |
| 0.135781  | 0.121212  | 0.145979 | 0.195076  | 0.144814  | 0.134615  | 0.0470571 |
| 0.108974  | 0.108683  | 0.122378 | 0.186917  | 0.132284  | 0.120921  | 0.116113  |
| 0.103293  | 0.101544  | 0.12602  | 0.184732  | 0.129808  | 0.118153  | 0.112762  |
| 0.105624  | 0.104167  | 0.128934 | 0.180361  | 0.126894  | 0.118444  | 0.113928  |
| 0.103584  | 0.102418  | 0.127477 | 0.175117  | 0.129225  | 0.115239  | 0.109848  |
| 0.111451  | 0.117861  | 0.132139 | 0.189977  | 0.135635  | 0.128351  | 0.12704   |
| 0.0989219 | 0.0995047 | 0.120775 | 0.179779  | 0.128934  | 0.113782  | 0.106935  |
| 0.132576  | 0.127331  | 0.145105 | 0.202652  | 0.147145  | 0.140152  | 0.128934  |
| 0.128351  | 0.128059  | 0.135927 | 0.193182  | 0.149621  | 0.139423  | 0.134324  |
| 0.122232  | 0.116987  | 0.13039  | 0.192016  | 0.139423  | 0.127185  | 0.126457  |
| 0.107517  | 0.111014  | 0.128788 | 0.183129  | 0.140152  | 0.125874  | 0.121358  |
| 0.120047  | 0.109266  | 0.127622 | 0.18109   | 0.139569  | 0.120921  | 0.0971737 |
| 0.110286  | 0.106206  | 0.123397 | 0.18211   | 0.135344  | 0.121066  | 0.108974  |
| 0.109848  | 0.113345  | 0.12704  | 0.182838  | 0.13345   | 0.11859   | 0.111451  |
| 0.104895  | 0.106643  | 0.121795 | 0.18109   | 0.126748  | 0.114219  | 0.112325  |
| 0.118007  | 0.109266  | 0.133159 | 0.172931  | 0.110723  | 0.0973193 | 0.121066  |
| 0.127914  | 0.121503  | 0.134324 | 0.200321  | 0.141026  | 0.134033  | 0.136509  |
| 0.113782  | 0.112034  | 0.135344 | 0.191725  | 0.133013  | 0.122523  | 0.121503  |
| 0.116841  | 0.117424  | 0.136946 | 0.193619  | 0.140443  | 0.130828  | 0.128059  |
| 0.133304  | 0.126894  | 0.142628 | 0.202214  | 0.144959  | 0.14088   | 0.122378  |
| 0.194202  | 0.182255  | 0.200903 | 0.0999417 | 0.199155  | 0.188374  | 0.196387  |
| 0.236597  | 0.224942  | 0.240385 | 0.13039   | 0.235723  | 0.229604  | 0.237908  |
| 0.11757   | 0.109994  | 0.127477 | 0.169872  | 0.0872669 | 0.0744464 | 0.114219  |
| 0.112471  | 0.1081    | 0.117716 | 0.178176  | 0.128205  | 0.113636  | 0.116987  |
| 0.111597  | 0.105478  | 0.127331 | 0.174388  | 0.12704   | 0.112179  | 0.111742  |
| 0.113636  | 0.106935  | 0.127331 | 0.179633  | 0.128205  | 0.11451   | 0.115822  |
| 0.120921  | 0.0571096 | 0.140734 | 0.191871  | 0.138112  | 0.130245  | 0.130099  |
| 0.119172  | 0.109557  | 0.130828 | 0.184586  | 0.126748  | 0.116259  | 0.120192  |
| 0.144376  | 0.14088   | 0.14729  | 0.207459  | 0.153992  | 0.146416  | 0.148893  |
| 0.117133  | 0.117716  | 0.129079 | 0.181381  | 0.13345   | 0.11859   | 0.121358  |
| 0.131993  | 0.129953  | 0.137238 | 0.199446  | 0.135781  | 0.13141   | 0.129808  |
| 0.132139  | 0.125146  | 0.137966 | 0.18852   | 0.138258  | 0.129225  | 0.134324  |
| 0.130973  | 0.122815  | 0.145251 | 0.199009  | 0.146707  | 0.136218  | 0.135781  |
| 0.127185  | 0.131556  | 0.144668 | 0.201049  | 0.142337  | 0.140297  | 0.140152  |
| 0.116404  | 0.112617  | 0.128934 | 0.187937  | 0.136801  | 0.124272  | 0.120629  |
| 0.116113  | 0.111451  | 0.124272 | 0.181818  | 0.131556  | 0.118153  | 0.115676  |
| 0.120921  | 0.113054  | 0.125583 | 0.187209  | 0.138112  | 0.12704   | 0.11961   |
| 0.11451   | 0.111305  | 0.119464 | 0.175554  | 0.128497  | 0.113345  | 0.114948  |
| 0.115676  | 0.109848  | 0.125874 | 0.180507  | 0.129953  | 0.116841  | 0.116696  |
| 0.122523  | 0.116113  | 0.12398  | 0.182984  | 0.132139  | 0.116987  | 0.120629  |
| 0.129662  | 0.123252  | 0.138986 | 0.193328  | 0.1419    | 0.131702  | 0.137675  |

|           |           |          |          |          |          |          |
|-----------|-----------|----------|----------|----------|----------|----------|
| 0.140152  | 0.133741  | 0.144522 | 0.20236  | 0.145688 | 0.136655 | 0.142628 |
| 0.122523  | 0.118444  | 0.128934 | 0.183858 | 0.133013 | 0.118735 | 0.122086 |
| 0.116841  | 0.112762  | 0.130245 | 0.181672 | 0.132867 | 0.118881 | 0.121066 |
| 0.134033  | 0.129953  | 0.138403 | 0.19799  | 0.143065 | 0.13549  | 0.133304 |
| 0.113928  | 0.111597  | 0.126748 | 0.178176 | 0.129662 | 0.117716 | 0.114948 |
| 0.145833  | 0.131847  | 0.149913 | 0.200175 | 0.15574  | 0.147873 | 0.151224 |
| 0.126894  | 0.123689  | 0.149621 | 0.188228 | 0.150495 | 0.141463 | 0.13986  |
| 0.136072  | 0.126457  | 0.141317 | 0.192453 | 0.141026 | 0.133741 | 0.138549 |
| 0.115093  | 0.111597  | 0.114802 | 0.17905  | 0.125583 | 0.112179 | 0.11553  |
| 0.109994  | 0.107372  | 0.126311 | 0.179487 | 0.128934 | 0.113491 | 0.114802 |
| 0.126166  | 0.124709  | 0.126166 | 0.195659 | 0.136364 | 0.127622 | 0.128642 |
| 0.124854  | 0.120484  | 0.135927 | 0.190268 | 0.135927 | 0.127768 | 0.129079 |
| 0.13243   | 0.130973  | 0.135052 | 0.192016 | 0.143794 | 0.133596 | 0.133159 |
| 0.125     | 0.116259  | 0.128788 | 0.187791 | 0.134907 | 0.121795 | 0.122232 |
| 0.122523  | 0.115239  | 0.126603 | 0.185315 | 0.134761 | 0.123397 | 0.122086 |
| 0.12398   | 0.117279  | 0.137383 | 0.19289  | 0.131556 | 0.12398  | 0.127622 |
| 0.129808  | 0.129516  | 0.140006 | 0.202506 | 0.14933  | 0.138258 | 0.133159 |
| 0.133887  | 0.126894  | 0.135635 | 0.192308 | 0.141171 | 0.13243  | 0.137238 |
| 0.136946  | 0.131119  | 0.148019 | 0.198281 | 0.144231 | 0.135781 | 0.136218 |
| 0.132139  | 0.122815  | 0.144668 | 0.191434 | 0.144668 | 0.136509 | 0.129953 |
| 0.120775  | 0.116404  | 0.127185 | 0.185023 | 0.130099 | 0.116696 | 0.117424 |
| 0.134178  | 0.128351  | 0.133887 | 0.195804 | 0.142628 | 0.13243  | 0.134324 |
| 0.109557  | 0.110431  | 0.126748 | 0.182547 | 0.128497 | 0.11451  | 0.113782 |
| 0.112908  | 0.114073  | 0.126603 | 0.17803  | 0.131847 | 0.119027 | 0.118881 |
| 0.114948  | 0.109994  | 0.12398  | 0.187646 | 0.130973 | 0.120775 | 0.118298 |
| 0.118298  | 0.115093  | 0.124709 | 0.180216 | 0.134033 | 0.120338 | 0.118735 |
| 0.111597  | 0.110723  | 0.121212 | 0.181672 | 0.127331 | 0.115093 | 0.117279 |
| 0.135052  | 0.133013  | 0.143794 | 0.198427 | 0.147873 | 0.139132 | 0.139569 |
| 0.120629  | 0.114219  | 0.129662 | 0.184878 | 0.134615 | 0.119755 | 0.113199 |
| 0.132284  | 0.129953  | 0.145396 | 0.198572 | 0.13986  | 0.131702 | 0.135927 |
| 0.113928  | 0.111597  | 0.120921 | 0.180507 | 0.128497 | 0.115093 | 0.119027 |
| 0.123689  | 0.126894  | 0.135635 | 0.197261 | 0.140589 | 0.128351 | 0.124709 |
| 0.110723  | 0.117716  | 0.130536 | 0.188666 | 0.134033 | 0.129371 | 0.128934 |
| 0.115385  | 0.110723  | 0.13549  | 0.178176 | 0.138986 | 0.125874 | 0.123397 |
| 0.10708   | 0.11116   | 0.12602  | 0.187063 | 0.135344 | 0.123689 | 0.114219 |
| 0.120921  | 0.118298  | 0.128205 | 0.182547 | 0.136072 | 0.125    | 0.130973 |
| 0.121649  | 0.116113  | 0.14088  | 0.187063 | 0.141171 | 0.125146 | 0.12704  |
| 0.121358  | 0.114073  | 0.125437 | 0.181235 | 0.138258 | 0.122815 | 0.110723 |
| 0.0872669 | 0.120775  | 0.137966 | 0.200175 | 0.14933  | 0.13884  | 0.133741 |
| 0.13549   | 0.131119  | 0.151224 | 0.203526 | 0.146562 | 0.139569 | 0.13243  |
| 0.085373  | 0.0987762 | 0.127331 | 0.179341 | 0.125    | 0.11014  | 0.106498 |
| 0.124272  | 0.114948  | 0.145833 | 0.202506 | 0.145251 | 0.135635 | 0.131993 |
| 0.0879953 | 0.111014  | 0.13986  | 0.195076 | 0.143357 | 0.134615 | 0.121649 |
| 0.120047  | 0.115676  | 0.138403 | 0.194784 | 0.140152 | 0.131702 | 0.132139 |

|           |          |          |          |          |          |          |
|-----------|----------|----------|----------|----------|----------|----------|
| 0.113054  | 0.109848 | 0.136072 | 0.187791 | 0.134907 | 0.123834 | 0.116404 |
| 0.0737179 | 0.109848 | 0.136072 | 0.19595  | 0.139569 | 0.128205 | 0.123689 |
| 0.0744464 | 0.11116  | 0.135052 | 0.188811 | 0.138549 | 0.132721 | 0.12296  |
| 0.113054  | 0.119755 | 0.136072 | 0.196533 | 0.13549  | 0.127331 | 0.133304 |
| 0.121503  | 0.123543 | 0.145688 | 0.201486 | 0.146562 | 0.13986  | 0.134178 |
| 0.0713869 | 0.115093 | 0.141026 | 0.190414 | 0.135781 | 0.125874 | 0.125728 |
| 0.112762  | 0.1081   | 0.128497 | 0.182255 | 0.133159 | 0.121212 | 0.114656 |
| 0.143502  | 0.133304 | 0.138258 | 0.193473 | 0.14292  | 0.131556 | 0.136655 |
| 0.07838   | 0.118881 | 0.140734 | 0.195076 | 0.147145 | 0.13986  | 0.13039  |
| 0.0981935 | 0.102855 | 0.126166 | 0.182255 | 0.13141  | 0.117133 | 0.109703 |
| 0.222465  | 0.209645 | 0.224505 | 0.120338 | 0.221882 | 0.21081  | 0.219697 |
| 0.11116   | 0.112617 | 0.137966 | 0.190559 | 0.13884  | 0.127185 | 0.126166 |
| 0.0826049 | 0.111451 | 0.131556 | 0.181818 | 0.133887 | 0.121358 | 0.116841 |
| 0.119464  | 0.120921 | 0.1419   | 0.201486 | 0.143648 | 0.136072 | 0.134178 |
| 0.0780886 | 0.11014  | 0.133159 | 0.185752 | 0.134324 | 0.11859  | 0.121066 |
| 0.0821678 | 0.115967 | 0.136364 | 0.197407 | 0.143648 | 0.136946 | 0.130099 |
| 0.111597  | 0.113928 | 0.130828 | 0.18954  | 0.134615 | 0.124709 | 0.131556 |
| 0.105624  | 0.106206 | 0.135635 | 0.190559 | 0.130973 | 0.119901 | 0.124126 |
| 0.078817  | 0.109994 | 0.135635 | 0.187063 | 0.137383 | 0.126603 | 0.126748 |
| 0.123252  | 0.11451  | 0.142191 | 0.185169 | 0.141608 | 0.130828 | 0.133304 |
| 0.122232  | 0.11961  | 0.137966 | 0.195804 | 0.140006 | 0.129516 | 0.129079 |
| 0.111888  | 0.124126 | 0.137238 | 0.199155 | 0.138695 | 0.13141  | 0.126603 |
| 0.118007  | 0.117424 | 0.138986 | 0.198281 | 0.134033 | 0.127331 | 0.130973 |
| 0.109848  | 0.109848 | 0.130828 | 0.190414 | 0.133159 | 0.123543 | 0.11961  |
| 0.117133  | 0.114802 | 0.131702 | 0.191871 | 0.13141  | 0.11859  | 0.124272 |
| 0.121358  | 0.119901 | 0.143211 | 0.197552 | 0.143502 | 0.136218 | 0.137238 |
| 0.109266  | 0.107226 | 0.132576 | 0.182255 | 0.130245 | 0.122378 | 0.122523 |
| 0.134033  | 0.13345  | 0.140734 | 0.199446 | 0.145688 | 0.138112 | 0.141754 |
| 0.135344  | 0.125728 | 0.151369 | 0.182984 | 0.153118 | 0.140006 | 0.126748 |
| 0.112617  | 0.110286 | 0.137966 | 0.187646 | 0.139132 | 0.128351 | 0.119172 |
| 0.0863928 | 0.113491 | 0.137966 | 0.194347 | 0.144959 | 0.133596 | 0.121212 |
| 0.12704   | 0.121503 | 0.1419   | 0.181381 | 0.142191 | 0.126748 | 0.118153 |
| 0.117279  | 0.124854 | 0.139714 | 0.188811 | 0.133304 | 0.131847 | 0.124417 |
| 0.129516  | 0.123106 | 0.140006 | 0.180361 | 0.137675 | 0.125146 | 0.119172 |
| 0.13447   | 0.126311 | 0.146125 | 0.187063 | 0.154866 | 0.140297 | 0.128497 |
| 0.104895  | 0.105186 | 0.126457 | 0.180507 | 0.134033 | 0.119464 | 0.117861 |
| 0.126603  | 0.120775 | 0.132139 | 0.193473 | 0.143502 | 0.135927 | 0.138986 |
| 0.134033  | 0.126166 | 0.153846 | 0.177302 | 0.149767 | 0.138695 | 0.128642 |
| 0.101399  | 0.111305 | 0.128205 | 0.193619 | 0.137821 | 0.125583 | 0.118444 |
| 0.121503  | 0.120338 | 0.132576 | 0.183129 | 0.141026 | 0.129079 | 0.129516 |
| 0.145833  | 0.136801 | 0.144376 | 0.199009 | 0.147582 | 0.14088  | 0.137821 |
| 0.127185  | 0.122232 | 0.134178 | 0.18852  | 0.138258 | 0.125728 | 0.137238 |
| 0.12704   | 0.127914 | 0.149184 | 0.201486 | 0.147145 | 0.137238 | 0.139423 |
| 0.119318  | 0.122523 | 0.141754 | 0.195221 | 0.145542 | 0.136801 | 0.136946 |

|          |           |          |          |           |           |           |
|----------|-----------|----------|----------|-----------|-----------|-----------|
| 0.11451  | 0.120629  | 0.135781 | 0.19595  | 0.136655  | 0.130245  | 0.126894  |
| 0.126311 | 0.120484  | 0.142045 | 0.194639 | 0.142337  | 0.13243   | 0.131119  |
| 0.111597 | 0.117133  | 0.137238 | 0.18546  | 0.143065  | 0.133159  | 0.128934  |
| 0.123689 | 0.119901  | 0.142337 | 0.198718 | 0.145251  | 0.135927  | 0.131993  |
| 0.123689 | 0.12398   | 0.138549 | 0.194347 | 0.141171  | 0.13039   | 0.13141   |
| 0.133887 | 0.13039   | 0.143211 | 0.201923 | 0.140006  | 0.132139  | 0.130828  |
| 0.123689 | 0.128059  | 0.14088  | 0.201049 | 0.142337  | 0.137383  | 0.129079  |
| 0.128351 | 0.120775  | 0.144959 | 0.191142 | 0.144085  | 0.137675  | 0.123543  |
| 0.137675 | 0.13447   | 0.154575 | 0.198718 | 0.152826  | 0.145251  | 0.144814  |
| 0.109703 | 0.110868  | 0.131847 | 0.187063 | 0.144959  | 0.13447   | 0.120629  |
| 0.117861 | 0.114656  | 0.13039  | 0.191142 | 0.136218  | 0.127477  | 0.125291  |
| 0.126603 | 0.119901  | 0.128059 | 0.19697  | 0.144959  | 0.135344  | 0.124126  |
| 0.111451 | 0.108246  | 0.123689 | 0.187063 | 0.137966  | 0.128934  | 0.113345  |
| 0.135198 | 0.130536  | 0.155012 | 0.191871 | 0.154138  | 0.143939  | 0.128059  |
| 0.146562 | 0.142191  | 0.157634 | 0.201195 | 0.164044  | 0.1588    | 0.139714  |
| 0.127622 | 0.129371  | 0.138112 | 0.198864 | 0.139277  | 0.129953  | 0.130973  |
| 0.126603 | 0.122523  | 0.131556 | 0.191434 | 0.134178  | 0.121066  | 0.121795  |
| 0.136364 | 0.123834  | 0.145688 | 0.201486 | 0.138112  | 0.128497  | 0.13039   |
| 0.116404 | 0.121066  | 0.143211 | 0.198427 | 0.14088   | 0.130682  | 0.133159  |
| 0.128642 | 0.127185  | 0.128642 | 0.196678 | 0.142628  | 0.129516  | 0.131993  |
| 0.13039  | 0.12602   | 0.141463 | 0.203089 | 0.151661  | 0.143211  | 0.136072  |
| 0.124854 | 0.123106  | 0.147873 | 0.192599 | 0.145542  | 0.137675  | 0.131119  |
| 0.108392 | 0.115676  | 0.139277 | 0.197115 | 0.138695  | 0.127914  | 0.126311  |
| 0.162005 | 0.153263  | 0.163462 | 0.204108 | 0.162005  | 0.157343  | 0.146999  |
| 0.115676 | 0.117716  | 0.136946 | 0.195367 | 0.145688  | 0.132867  | 0.127477  |
| 0.123834 | 0.125874  | 0.15035  | 0.198864 | 0.152972  | 0.148019  | 0.137675  |
| 0.118735 | 0.113782  | 0.131265 | 0.193473 | 0.135344  | 0.129225  | 0.127914  |
| 0.136218 | 0.13447   | 0.140297 | 0.20542  | 0.142045  | 0.133887  | 0.129079  |
| 0.109703 | 0.110577  | 0.137092 | 0.189977 | 0.133887  | 0.12602   | 0.125874  |
| 0.136946 | 0.12296   | 0.155012 | 0.161859 | 0.129371  | 0.114219  | 0.0910548 |
| 0.140297 | 0.138258  | 0.137383 | 0.204545 | 0.146707  | 0.140006  | 0.146853  |
| 0.128788 | 0.119755  | 0.13141  | 0.179924 | 0.0579837 | 0.0472028 | 0.126603  |
| 0.134761 | 0.125728  | 0.144085 | 0.160256 | 0.0726981 | 0.0659965 | 0.137529  |
| 0.150641 | 0.139569  | 0.159091 | 0.136801 | 0.156177  | 0.143357  | 0.152535  |
| 0.147436 | 0.131702  | 0.155594 | 0.141171 | 0.132867  | 0.117716  | 0.143211  |
| 0.124854 | 0.12602   | 0.133304 | 0.195221 | 0.13884   | 0.130099  | 0.112762  |
| 0.13141  | 0.129662  | 0.106935 | 0.192162 | 0.142774  | 0.131993  | 0.132721  |
| 0.113928 | 0.0862471 | 0.131993 | 0.173514 | 0.126166  | 0.112762  | 0.114365  |
| 0.121649 | 0.0785256 | 0.133887 | 0.179779 | 0.13243   | 0.11757   | 0.11859   |
| 0.11014  | 0.113636  | 0.128497 | 0.182255 | 0.136946  | 0.123543  | 0.119318  |
| 0.123543 | 0.115967  | 0.129371 | 0.177302 | 0.0617716 | 0.04662   | 0.121066  |
| 0.118735 | 0.112325  | 0.133304 | 0.182984 | 0.138258  | 0.12602   | 0.123834  |
| 0.112908 | 0.0773601 | 0.127477 | 0.167541 | 0.103293  | 0.0878497 | 0.117716  |
| 0.117279 | 0.114656  | 0.124563 | 0.18007  | 0.121941  | 0.108246  | 0.125583  |



|           |           |           |           |           |           |           |
|-----------|-----------|-----------|-----------|-----------|-----------|-----------|
| 0.118298  | 0.0617716 | 0.137238  | 0.171766  | 0.132867  | 0.120629  | 0.126603  |
| 0.102273  | 0.0979021 | 0.125291  | 0.172348  | 0.126457  | 0.116259  | 0.109411  |
| 0.124417  | 0.118007  | 0.136946  | 0.174679  | 0.0696387 | 0.0559441 | 0.126603  |
| 0.125146  | 0.11757   | 0.130099  | 0.179196  | 0.0642483 | 0.0499709 | 0.125     |
| 0.125728  | 0.121941  | 0.134178  | 0.188228  | 0.136509  | 0.124272  | 0.125291  |
| 0.213141  | 0.202069  | 0.2213    | 0.119755  | 0.216929  | 0.207314  | 0.2162    |
| 0.142045  | 0.136509  | 0.14292   | 0.194347  | 0.0493881 | 0.0642483 | 0.14831   |
| 0.132867  | 0.123834  | 0.134615  | 0.194784  | 0.13345   | 0.125291  | 0.128351  |
| 0.125437  | 0.114656  | 0.126603  | 0.182401  | 0.129225  | 0.113491  | 0.123252  |
| 0.211101  | 0.197407  | 0.214889  | 0.104312  | 0.210227  | 0.201486  | 0.21183   |
| 0.128351  | 0.111451  | 0.136801  | 0.173077  | 0.142337  | 0.124563  | 0.0973193 |
| 0.12704   | 0.116259  | 0.129953  | 0.188666  | 0.136946  | 0.127331  | 0.118735  |
| 0.128788  | 0.117716  | 0.0521562 | 0.18109   | 0.132576  | 0.122086  | 0.129808  |
| 0.115822  | 0.0517191 | 0.135927  | 0.182692  | 0.133596  | 0.12398   | 0.124126  |
| 0.249272  | 0.236742  | 0.252477  | 0.139569  | 0.249272  | 0.241696  | 0.250291  |
| 0.129371  | 0.111888  | 0.140734  | 0.188374  | 0.140152  | 0.126166  | 0.0479312 |
| 0.119755  | 0.11451   | 0.129953  | 0.183421  | 0.13549   | 0.11655   | 0.123689  |
| 0.130245  | 0.12704   | 0.12704   | 0.186334  | 0.132576  | 0.12296   | 0.127477  |
| 0.130245  | 0.118298  | 0.122378  | 0.183421  | 0.133741  | 0.121212  | 0.12398   |
| 0.127622  | 0.0958625 | 0.141026  | 0.183712  | 0.13986   | 0.125     | 0.0662879 |
| 0.126166  | 0.103147  | 0.142191  | 0.161276  | 0.123252  | 0.106061  | 0.127477  |
| 0.122669  | 0.118298  | 0.129953  | 0.184586  | 0.134033  | 0.124126  | 0.126311  |
| 0.125146  | 0.115822  | 0.130973  | 0.178322  | 0.0622086 | 0.0467657 | 0.120921  |
| 0.124417  | 0.119172  | 0.104895  | 0.184295  | 0.136364  | 0.121212  | 0.123397  |
| 0.113636  | 0.0515734 | 0.129953  | 0.179924  | 0.129953  | 0.120338  | 0.116696  |
| 0.11757   | 0.110577  | 0.127768  | 0.171329  | 0.0715326 | 0.055507  | 0.119464  |
| 0.0897436 | 0.0979021 | 0.129953  | 0.180507  | 0.134615  | 0.125     | 0.113199  |
| 0.138258  | 0.139423  | 0.13884   | 0.200466  | 0.148164  | 0.142045  | 0.146562  |
| 0.132139  | 0.116696  | 0.13884   | 0.188228  | 0.139423  | 0.125728  | 0.0463287 |
| 0.127477  | 0.117279  | 0.132721  | 0.187646  | 0.137092  | 0.128059  | 0.123834  |
| 0.192453  | 0.179341  | 0.200321  | 0.0885781 | 0.192745  | 0.178467  | 0.187354  |
| 0.205274  | 0.191579  | 0.211101  | 0.0979021 | 0.207022  | 0.194202  | 0.204837  |
| 0.116113  | 0.0514277 | 0.134178  | 0.176282  | 0.137383  | 0.123106  | 0.124709  |
| 0.112908  | 0.048514  | 0.128351  | 0.18007   | 0.126603  | 0.117279  | 0.115676  |
| 0.132721  | 0.124854  | 0.143502  | 0.181527  | 0.129808  | 0.12602   | 0.133159  |
| 0.121358  | 0.116696  | 0.129808  | 0.18211   | 0.138258  | 0.122232  | 0.123834  |
| 0.131993  | 0.11655   | 0.143648  | 0.191288  | 0.141317  | 0.128205  | 0.046183  |
| 0.129808  | 0.128351  | 0.13039   | 0.189103  | 0.128934  | 0.125146  | 0.130536  |
| 0.224213  | 0.210519  | 0.226253  | 0.116841  | 0.226253  | 0.216929  | 0.222902  |
| 0.122232  | 0.113491  | 0.12602   | 0.184732  | 0.125146  | 0.112617  | 0.116841  |
| 0.211538  | 0.196096  | 0.210373  | 0.139423  | 0.204545  | 0.197261  | 0.21285   |
| 0.116696  | 0.113782  | 0.128642  | 0.187354  | 0.13243   | 0.119318  | 0.100524  |
| 0.11859   | 0.114802  | 0.127622  | 0.181381  | 0.131993  | 0.119755  | 0.116113  |
| 0.124272  | 0.109703  | 0.13243   | 0.175117  | 0.117279  | 0.10271   | 0.11859   |

|          |           |           |           |           |           |           |
|----------|-----------|-----------|-----------|-----------|-----------|-----------|
| 0.110868 | 0.055507  | 0.127477  | 0.173368  | 0.129808  | 0.116113  | 0.119172  |
| 0.206585 | 0.195513  | 0.212704  | 0.105915  | 0.207168  | 0.197261  | 0.207022  |
| 0.132576 | 0.126457  | 0.138403  | 0.176428  | 0.0608974 | 0.0501166 | 0.137966  |
| 0.118298 | 0.118298  | 0.13141   | 0.1875    | 0.13549   | 0.125583  | 0.116696  |
| 0.124417 | 0.121795  | 0.134033  | 0.182838  | 0.0521562 | 0.0463287 | 0.132139  |
| 0.124126 | 0.121503  | 0.125     | 0.186334  | 0.130828  | 0.120629  | 0.131556  |
| 0.115093 | 0.0559441 | 0.129953  | 0.17701   | 0.132576  | 0.120338  | 0.120192  |
| 0.118153 | 0.117861  | 0.132139  | 0.189394  | 0.132139  | 0.120484  | 0.102855  |
| 0.124563 | 0.115822  | 0.121649  | 0.171911  | 0.133596  | 0.119901  | 0.127331  |
| 0.128059 | 0.11553   | 0.131556  | 0.189977  | 0.138549  | 0.126894  | 0.124126  |
| 0.119027 | 0.110577  | 0.126311  | 0.169289  | 0.0709499 | 0.0523019 | 0.121503  |
| 0.120629 | 0.123252  | 0.13141   | 0.18546   | 0.131702  | 0.124417  | 0.118153  |
| 0.193328 | 0.178759  | 0.19799   | 0.0917832 | 0.193328  | 0.18109   | 0.189977  |
| 0.133159 | 0.125583  | 0.126166  | 0.187209  | 0.135781  | 0.122669  | 0.126894  |
| 0.124854 | 0.121941  | 0.129808  | 0.190559  | 0.133887  | 0.124854  | 0.129662  |
| 0.122669 | 0.118298  | 0.134033  | 0.179924  | 0.129371  | 0.114802  | 0.128934  |
| 0.132139 | 0.116113  | 0.142628  | 0.179487  | 0.141463  | 0.12602   | 0.0562354 |
| 0.124563 | 0.119027  | 0.129516  | 0.181818  | 0.0552156 | 0.0479312 | 0.12704   |
| 0.11961  | 0.120484  | 0.128059  | 0.190559  | 0.132721  | 0.125437  | 0.110431  |
| 0.120047 | 0.114219  | 0.126457  | 0.178467  | 0.128205  | 0.115385  | 0.102127  |
| 0.123252 | 0.122669  | 0.131993  | 0.190414  | 0.139569  | 0.124417  | 0.127477  |
| 0.120192 | 0.115239  | 0.125728  | 0.187937  | 0.132139  | 0.118153  | 0.125583  |
| 0.126603 | 0.116987  | 0.122815  | 0.180361  | 0.131556  | 0.118735  | 0.122669  |
| 0.118007 | 0.0594406 | 0.131993  | 0.177593  | 0.130245  | 0.12296   | 0.124854  |
| 0.127768 | 0.119027  | 0.060169  | 0.189103  | 0.137966  | 0.122523  | 0.127622  |
| 0.137529 | 0.13141   | 0.0457459 | 0.195076  | 0.142774  | 0.132284  | 0.140006  |
| 0.123834 | 0.108683  | 0.138112  | 0.180798  | 0.137529  | 0.119172  | 0.0499709 |
| 0.137092 | 0.132721  | 0.138549  | 0.19289   | 0.0499709 | 0.0613345 | 0.145396  |
| 0.116696 | 0.0566725 | 0.13039   | 0.175991  | 0.132721  | 0.119901  | 0.118007  |
| 0.117861 | 0.116696  | 0.121358  | 0.183275  | 0.123106  | 0.107663  | 0.119755  |
| 0.122086 | 0.113928  | 0.130536  | 0.162442  | 0.0804196 | 0.0611888 | 0.128351  |
| 0.128788 | 0.12296   | 0.132867  | 0.183712  | 0.142483  | 0.128205  | 0.129516  |
| 0.193473 | 0.177156  | 0.198427  | 0.115239  | 0.193182  | 0.182692  | 0.189831  |
| 0.117279 | 0.113782  | 0.131265  | 0.183858  | 0.134178  | 0.120775  | 0.111014  |
| 0.106789 | 0.105915  | 0.127768  | 0.174242  | 0.116113  | 0.103001  | 0.111014  |
| 0.12602  | 0.11757   | 0.128642  | 0.192016  | 0.13884   | 0.128059  | 0.121795  |
| 0.176719 | 0.16623   | 0.189831  | 0.105769  | 0.186043  | 0.172057  | 0.183566  |
| 0.1419   | 0.123252  | 0.15035   | 0.191288  | 0.15035   | 0.136364  | 0.060169  |
| 0.14627  | 0.135781  | 0.158217  | 0.201777  | 0.154429  | 0.14831   | 0.0604604 |
| 0.140589 | 0.140006  | 0.139423  | 0.20338   | 0.146416  | 0.144085  | 0.149767  |
| 0.122232 | 0.110577  | 0.135344  | 0.176865  | 0.136218  | 0.118735  | 0.0544872 |
| 0.124709 | 0.115967  | 0.128788  | 0.179341  | 0.0530303 | 0.0451632 | 0.126311  |
| 0.213432 | 0.199446  | 0.216346  | 0.106352  | 0.211976  | 0.199446  | 0.210082  |
| 0.128934 | 0.114365  | 0.119027  | 0.179196  | 0.130973  | 0.11553   | 0.12296   |

|           |           |          |           |           |           |           |
|-----------|-----------|----------|-----------|-----------|-----------|-----------|
| 0.129953  | 0.123543  | 0.133741 | 0.181381  | 0.0539044 | 0.048951  | 0.131265  |
| 0.121212  | 0.117424  | 0.131702 | 0.181964  | 0.133159  | 0.121212  | 0.112325  |
| 0.167832  | 0.155303  | 0.170455 | 0.12602   | 0.161422  | 0.145396  | 0.172057  |
| 0.117133  | 0.110431  | 0.121212 | 0.172931  | 0.126748  | 0.108683  | 0.115239  |
| 0.140006  | 0.140297  | 0.114948 | 0.199009  | 0.149913  | 0.143502  | 0.144231  |
| 0.11116   | 0.108829  | 0.131847 | 0.175991  | 0.135927  | 0.124854  | 0.121212  |
| 0.190997  | 0.178467  | 0.196824 | 0.0929487 | 0.194202  | 0.182838  | 0.189977  |
| 0.126603  | 0.111742  | 0.140297 | 0.185023  | 0.141171  | 0.123689  | 0.0501166 |
| 0.0957168 | 0.100962  | 0.124272 | 0.174242  | 0.122815  | 0.107955  | 0.113054  |
| 0.120338  | 0.119755  | 0.125583 | 0.17905   | 0.126166  | 0.113636  | 0.120484  |
| 0.127185  | 0.11757   | 0.125437 | 0.182692  | 0.131556  | 0.116113  | 0.115093  |
| 0.12602   | 0.113782  | 0.130973 | 0.187937  | 0.139132  | 0.125437  | 0.120629  |
| 0.124563  | 0.118735  | 0.132721 | 0.176573  | 0.133887  | 0.120484  | 0.122669  |
| 0.112762  | 0.0594406 | 0.129662 | 0.176719  | 0.131119  | 0.119172  | 0.115822  |
| 0.190414  | 0.17905   | 0.198281 | 0.0906177 | 0.197698  | 0.183129  | 0.190268  |
| 0.124417  | 0.121212  | 0.100524 | 0.186334  | 0.136364  | 0.12296   | 0.126894  |
| 0.107663  | 0.105041  | 0.128642 | 0.172203  | 0.124563  | 0.110577  | 0.12296   |
| 0.211247  | 0.198718  | 0.213869 | 0.108246  | 0.213578  | 0.20338   | 0.211684  |
| 0.131702  | 0.125291  | 0.128788 | 0.188083  | 0.136655  | 0.123543  | 0.125728  |
| 0.111451  | 0.0540501 | 0.128642 | 0.18007   | 0.133887  | 0.121941  | 0.11859   |
| 0.110577  | 0.0552156 | 0.128351 | 0.175408  | 0.127185  | 0.116987  | 0.117424  |
| 0.137238  | 0.127331  | 0.125583 | 0.18954   | 0.0658508 | 0.0702214 | 0.140297  |
| 0.191434  | 0.178322  | 0.197552 | 0.0922203 | 0.192599  | 0.182984  | 0.190122  |
| 0.12398   | 0.119901  | 0.133887 | 0.188228  | 0.136218  | 0.122523  | 0.125291  |
| 0.13243   | 0.126894  | 0.048514 | 0.191434  | 0.14088   | 0.128934  | 0.134907  |
| 0.107663  | 0.0563811 | 0.130682 | 0.177448  | 0.130099  | 0.121649  | 0.115967  |
| 0.110577  | 0.0590035 | 0.126894 | 0.176282  | 0.128642  | 0.117279  | 0.118007  |
| 0.110431  | 0.0536131 | 0.128788 | 0.174679  | 0.130536  | 0.119755  | 0.115239  |
| 0.120775  | 0.112908  | 0.130682 | 0.177739  | 0.0668706 | 0.0511364 | 0.121503  |
| 0.101399  | 0.0967366 | 0.119172 | 0.176136  | 0.126166  | 0.111888  | 0.107372  |
| 0.129371  | 0.114219  | 0.141026 | 0.186626  | 0.143357  | 0.127622  | 0.041521  |
| 0.130245  | 0.13549   | 0.113928 | 0.200029  | 0.130828  | 0.120338  | 0.14088   |
| 0.126457  | 0.112179  | 0.139277 | 0.185752  | 0.143357  | 0.126457  | 0.048514  |
| 0.128934  | 0.124563  | 0.128642 | 0.193473  | 0.134178  | 0.125728  | 0.134033  |
| 0.197844  | 0.184441  | 0.204837 | 0.0933858 | 0.198427  | 0.186189  | 0.193328  |
| 0.12602   | 0.11553   | 0.060169 | 0.185023  | 0.137966  | 0.121358  | 0.123252  |
| 0.13141   | 0.125583  | 0.135198 | 0.183421  | 0.0486597 | 0.0536131 | 0.135344  |
| 0.110286  | 0.0546329 | 0.125728 | 0.175699  | 0.128059  | 0.120484  | 0.114219  |
| 0.100233  | 0.0961538 | 0.121503 | 0.173805  | 0.127914  | 0.113054  | 0.106498  |
| 0.119464  | 0.109848  | 0.116259 | 0.173514  | 0.134615  | 0.11655   | 0.111451  |
| 0.124272  | 0.121066  | 0.13039  | 0.185023  | 0.135927  | 0.122232  | 0.125291  |
| 0.128351  | 0.124854  | 0.139132 | 0.189685  | 0.133304  | 0.125437  | 0.132576  |
| 0.117424  | 0.118881  | 0.128788 | 0.183129  | 0.133741  | 0.117424  | 0.121066  |
| 0.115385  | 0.104604  | 0.129079 | 0.174971  | 0.135198  | 0.118298  | 0.115239  |

|           |           |           |           |           |           |           |
|-----------|-----------|-----------|-----------|-----------|-----------|-----------|
| 0.109411  | 0.102127  | 0.127768  | 0.174242  | 0.12602   | 0.114948  | 0.112762  |
| 0.097028  | 0.100816  | 0.12704   | 0.174097  | 0.124417  | 0.107517  | 0.110286  |
| 0.118735  | 0.114948  | 0.12602   | 0.186772  | 0.133887  | 0.11961   | 0.103438  |
| 0.135781  | 0.12296   | 0.145979  | 0.192745  | 0.144231  | 0.134033  | 0.0520105 |
| 0.125146  | 0.11553   | 0.130973  | 0.184441  | 0.138258  | 0.121941  | 0.124417  |
| 0.118298  | 0.111014  | 0.127331  | 0.173514  | 0.0664336 | 0.0530303 | 0.119901  |
| 0.120629  | 0.113345  | 0.125874  | 0.181964  | 0.134324  | 0.120629  | 0.120484  |
| 0.113199  | 0.0598776 | 0.129516  | 0.173368  | 0.13039   | 0.115822  | 0.117133  |
| 0.11451   | 0.113054  | 0.128205  | 0.182547  | 0.131993  | 0.117424  | 0.107372  |
| 0.115676  | 0.0501166 | 0.129662  | 0.177885  | 0.13141   | 0.122086  | 0.116987  |
| 0.120338  | 0.111888  | 0.0629371 | 0.180507  | 0.132867  | 0.113928  | 0.122815  |
| 0.116841  | 0.115385  | 0.128497  | 0.184003  | 0.131702  | 0.121212  | 0.127768  |
| 0.122378  | 0.110431  | 0.127622  | 0.1875    | 0.132284  | 0.122669  | 0.114365  |
| 0.104749  | 0.099796  | 0.12398   | 0.173951  | 0.130099  | 0.115822  | 0.11014   |
| 0.115967  | 0.0585664 | 0.128497  | 0.176428  | 0.130828  | 0.121503  | 0.117279  |
| 0.12296   | 0.11859   | 0.130536  | 0.168852  | 0.129953  | 0.115676  | 0.125728  |
| 0.107955  | 0.113199  | 0.132721  | 0.181235  | 0.129516  | 0.116404  | 0.124709  |
| 0.0521562 | 0.101107  | 0.127622  | 0.180216  | 0.129371  | 0.114219  | 0.114948  |
| 0.11014   | 0.0591492 | 0.129662  | 0.177885  | 0.128497  | 0.115967  | 0.116404  |
| 0.123689  | 0.118153  | 0.131556  | 0.175991  | 0.055507  | 0.043852  | 0.124709  |
| 0.11961   | 0.115239  | 0.133304  | 0.186772  | 0.133304  | 0.125728  | 0.104312  |
| 0.12602   | 0.115822  | 0.13243   | 0.18007   | 0.0642483 | 0.0493881 | 0.124126  |
| 0.119901  | 0.114073  | 0.130099  | 0.184149  | 0.137966  | 0.124854  | 0.118881  |
| 0.10708   | 0.101544  | 0.127477  | 0.178613  | 0.130099  | 0.119901  | 0.111014  |
| 0.113491  | 0.103875  | 0.109703  | 0.173951  | 0.123106  | 0.112034  | 0.11655   |
| 0.111888  | 0.11655   | 0.129371  | 0.183421  | 0.131993  | 0.119172  | 0.109994  |
| 0.123106  | 0.118735  | 0.130682  | 0.17803   | 0.0636655 | 0.0511364 | 0.127622  |
| 0.112617  | 0.12398   | 0.135052  | 0.183275  | 0.127185  | 0.117279  | 0.12704   |
| 0.108683  | 0.110431  | 0.130536  | 0.174097  | 0.121212  | 0.108683  | 0.11757   |
| 0.194347  | 0.182692  | 0.200758  | 0.0980478 | 0.199592  | 0.185606  | 0.188374  |
| 0.160839  | 0.152972  | 0.166084  | 0.11757   | 0.166084  | 0.151807  | 0.169143  |
| 0.128205  | 0.112762  | 0.139569  | 0.1875    | 0.140152  | 0.124126  | 0.0473485 |
| 0.116404  | 0.111742  | 0.130099  | 0.174534  | 0.13039   | 0.11553   | 0.123543  |
| 0.149621  | 0.137966  | 0.158945  | 0.208625  | 0.158945  | 0.150787  | 0.0629371 |
| 0.125874  | 0.124417  | 0.106352  | 0.184295  | 0.134324  | 0.123543  | 0.128059  |
| 0.121358  | 0.0782343 | 0.119027  | 0.173951  | 0.135052  | 0.124272  | 0.120629  |
| 0.110431  | 0.0833333 | 0.138986  | 0.175554  | 0.125874  | 0.115676  | 0.120484  |
| 0.0914918 | 0.097028  | 0.128205  | 0.179924  | 0.132867  | 0.123252  | 0.112908  |
| 0.108683  | 0.111888  | 0.134324  | 0.181381  | 0.12704   | 0.118298  | 0.127477  |
| 0.204108  | 0.188666  | 0.209062  | 0.100233  | 0.2044    | 0.192745  | 0.199883  |
| 0.128205  | 0.121503  | 0.135198  | 0.190705  | 0.144231  | 0.128205  | 0.126603  |
| 0.124272  | 0.114365  | 0.131265  | 0.171329  | 0.090472  | 0.0761946 | 0.12296   |
| 0.0960082 | 0.0604604 | 0.129225  | 0.175991  | 0.130099  | 0.112908  | 0.115967  |
| 0.121795  | 0.118007  | 0.127914  | 0.184586  | 0.13549   | 0.119464  | 0.126311  |

|           |           |           |           |           |           |           |
|-----------|-----------|-----------|-----------|-----------|-----------|-----------|
| 0.17905   | 0.170017  | 0.197407  | 0.113054  | 0.188666  | 0.175554  | 0.185897  |
| 0.247815  | 0.236451  | 0.245192  | 0.138112  | 0.243153  | 0.237034  | 0.245338  |
| 0.122523  | 0.117279  | 0.127768  | 0.18648   | 0.13447   | 0.11961   | 0.124417  |
| 0.106498  | 0.109703  | 0.130973  | 0.183858  | 0.127768  | 0.115822  | 0.126166  |
| 0.129808  | 0.109994  | 0.138258  | 0.184149  | 0.142045  | 0.124272  | 0.0451632 |
| 0.122086  | 0.113345  | 0.125     | 0.185752  | 0.136364  | 0.122669  | 0.11757   |
| 0.118735  | 0.115239  | 0.128059  | 0.184732  | 0.133304  | 0.118444  | 0.120921  |
| 0.11859   | 0.11655   | 0.101107  | 0.179924  | 0.128205  | 0.115676  | 0.117861  |
| 0.112325  | 0.0735723 | 0.129516  | 0.169289  | 0.0989219 | 0.0846445 | 0.119464  |
| 0.120484  | 0.115239  | 0.125437  | 0.184732  | 0.13243   | 0.118444  | 0.118298  |
| 0.116259  | 0.0844988 | 0.126457  | 0.172348  | 0.0885781 | 0.0748834 | 0.117279  |
| 0.0432692 | 0.104749  | 0.137092  | 0.185023  | 0.13447   | 0.122523  | 0.120921  |
| 0.105769  | 0.0999417 | 0.126166  | 0.174097  | 0.128788  | 0.115385  | 0.109994  |
| 0.118153  | 0.116987  | 0.127768  | 0.184441  | 0.13243   | 0.121649  | 0.125291  |
| 0.124126  | 0.11655   | 0.131119  | 0.176719  | 0.0646853 | 0.0521562 | 0.123106  |
| 0.107226  | 0.108974  | 0.113054  | 0.172931  | 0.119464  | 0.105478  | 0.114656  |
| 0.120921  | 0.115967  | 0.141317  | 0.198572  | 0.138112  | 0.132284  | 0.128351  |
| 0.132284  | 0.125     | 0.136072  | 0.198572  | 0.1419    | 0.137238  | 0.129808  |
| 0.112617  | 0.0607517 | 0.128642  | 0.176282  | 0.13039   | 0.118735  | 0.116259  |
| 0.115093  | 0.0775058 | 0.133159  | 0.175554  | 0.133741  | 0.121503  | 0.106498  |
| 0.124709  | 0.0623543 | 0.13986   | 0.190414  | 0.140152  | 0.133159  | 0.131265  |
| 0.210227  | 0.197407  | 0.211684  | 0.114802  | 0.207896  | 0.200612  | 0.20542   |
| 0.113345  | 0.110431  | 0.122086  | 0.178759  | 0.12704   | 0.112471  | 0.118153  |
| 0.106789  | 0.101253  | 0.126603  | 0.180361  | 0.13039   | 0.117279  | 0.109557  |
| 0.126311  | 0.118153  | 0.0645396 | 0.182692  | 0.139132  | 0.121066  | 0.125874  |
| 0.132867  | 0.124709  | 0.129662  | 0.184878  | 0.136072  | 0.12296   | 0.125437  |
| 0.120047  | 0.11655   | 0.127622  | 0.182547  | 0.127331  | 0.11451   | 0.122815  |
| 0.198718  | 0.187354  | 0.208042  | 0.097465  | 0.203963  | 0.192016  | 0.19799   |
| 0.127185  | 0.120775  | 0.132721  | 0.18007   | 0.0630828 | 0.0499709 | 0.129079  |
| 0.109848  | 0.0591492 | 0.12704   | 0.177593  | 0.126748  | 0.116259  | 0.113199  |
| 0.119901  | 0.117279  | 0.135635  | 0.189394  | 0.128351  | 0.122523  | 0.113054  |
| 0.118735  | 0.109411  | 0.12398   | 0.184732  | 0.13243   | 0.118444  | 0.115093  |
| 0.126894  | 0.11757   | 0.132139  | 0.175408  | 0.0651224 | 0.050845  | 0.127331  |
| 0.113491  | 0.106498  | 0.128934  | 0.171911  | 0.0936772 | 0.0773601 | 0.115676  |
| 0.0505536 | 0.106498  | 0.135344  | 0.184441  | 0.133304  | 0.119901  | 0.119464  |
| 0.127185  | 0.121649  | 0.122815  | 0.182692  | 0.133887  | 0.120484  | 0.122086  |
| 0.199883  | 0.186772  | 0.206002  | 0.0977564 | 0.201632  | 0.189103  | 0.198864  |
| 0.114948  | 0.110868  | 0.121358  | 0.171329  | 0.0709499 | 0.0549242 | 0.118007  |
| 0.196096  | 0.179487  | 0.202797  | 0.0968823 | 0.199592  | 0.187937  | 0.195076  |
| 0.195367  | 0.182547  | 0.200612  | 0.0903263 | 0.197115  | 0.185169  | 0.191725  |
| 0.128642  | 0.121066  | 0.129516  | 0.19493   | 0.139132  | 0.133013  | 0.126748  |
| 0.137092  | 0.130973  | 0.130973  | 0.195513  | 0.142045  | 0.132721  | 0.127622  |
| 0.060169  | 0.100087  | 0.123397  | 0.176573  | 0.123689  | 0.110868  | 0.115385  |
| 0.115967  | 0.108683  | 0.124126  | 0.174388  | 0.0757576 | 0.0591492 | 0.118735  |

|           |           |          |           |           |           |           |
|-----------|-----------|----------|-----------|-----------|-----------|-----------|
| 0.120484  | 0.116696  | 0.128934 | 0.173077  | 0.0706585 | 0.0549242 | 0.121503  |
| 0.114656  | 0.0598776 | 0.133013 | 0.176573  | 0.133887  | 0.120775  | 0.122086  |
| 0.116987  | 0.112617  | 0.124272 | 0.180944  | 0.131265  | 0.113782  | 0.113928  |
| 0.118444  | 0.11553   | 0.125437 | 0.185315  | 0.134178  | 0.118444  | 0.123252  |
| 0.121795  | 0.11859   | 0.129079 | 0.184003  | 0.132867  | 0.122378  | 0.126894  |
| 0.126603  | 0.115822  | 0.13039  | 0.18852   | 0.137383  | 0.125728  | 0.117133  |
| 0.109266  | 0.0556527 | 0.119755 | 0.175262  | 0.124417  | 0.113928  | 0.113491  |
| 0.124563  | 0.116987  | 0.129808 | 0.178613  | 0.0654138 | 0.0505536 | 0.125874  |
| 0.0903263 | 0.101981  | 0.121795 | 0.175845  | 0.122669  | 0.104604  | 0.109994  |
| 0.130682  | 0.126311  | 0.133304 | 0.185023  | 0.050845  | 0.0525932 | 0.135781  |
| 0.128642  | 0.111742  | 0.139423 | 0.185606  | 0.137966  | 0.123397  | 0.0469114 |
| 0.136072  | 0.128205  | 0.136946 | 0.189248  | 0.0506993 | 0.0562354 | 0.137092  |
| 0.260781  | 0.249126  | 0.259907 | 0.142045  | 0.258159  | 0.251457  | 0.258596  |
| 0.126166  | 0.129079  | 0.137821 | 0.198572  | 0.136655  | 0.132576  | 0.122232  |
| 0.121649  | 0.121358  | 0.132139 | 0.192599  | 0.135635  | 0.130099  | 0.126166  |
| 0.217949  | 0.206585  | 0.220862 | 0.11757   | 0.217075  | 0.210082  | 0.216055  |
| 0.128059  | 0.119901  | 0.13243  | 0.191142  | 0.140589  | 0.133304  | 0.125583  |
| 0.230624  | 0.218386  | 0.232663 | 0.123834  | 0.22771   | 0.221008  | 0.229604  |
| 0.120629  | 0.121503  | 0.133159 | 0.190414  | 0.128205  | 0.125291  | 0.117861  |
| 0.120775  | 0.055507  | 0.139423 | 0.191434  | 0.136509  | 0.129225  | 0.130245  |
| 0.124272  | 0.117861  | 0.120484 | 0.181235  | 0.129516  | 0.11961   | 0.120338  |
| 0.125728  | 0.118444  | 0.133304 | 0.191725  | 0.140006  | 0.128642  | 0.122669  |
| 0.206731  | 0.191579  | 0.20877  | 0.0973193 | 0.206731  | 0.195076  | 0.204545  |
| 0.133013  | 0.126603  | 0.136218 | 0.188228  | 0.0502622 | 0.0525932 | 0.136655  |
| 0.122232  | 0.118735  | 0.133596 | 0.175117  | 0.0662879 | 0.0560897 | 0.12704   |
| 0.227273  | 0.217366  | 0.230186 | 0.11757   | 0.228147  | 0.219988  | 0.227127  |
| 0.123689  | 0.11553   | 0.132139 | 0.180653  | 0.13884   | 0.125728  | 0.126457  |
| 0.201923  | 0.18648   | 0.208042 | 0.0992133 | 0.202506  | 0.193473  | 0.197698  |
| 0.12296   | 0.117716  | 0.131702 | 0.185169  | 0.138112  | 0.122378  | 0.124272  |
| 0.114802  | 0.0603147 | 0.130828 | 0.176136  | 0.131993  | 0.119464  | 0.118735  |
| 0.108537  | 0.109411  | 0.131265 | 0.188228  | 0.132721  | 0.124563  | 0.120047  |
| 0.131847  | 0.123397  | 0.133304 | 0.199301  | 0.142045  | 0.132721  | 0.12704   |
| 0.121212  | 0.111597  | 0.122086 | 0.176719  | 0.129953  | 0.115385  | 0.116404  |
| 0.155594  | 0.14627   | 0.174534 | 0.115822  | 0.17162   | 0.155886  | 0.159528  |
| 0.119172  | 0.111888  | 0.124417 | 0.17264   | 0.0611888 | 0.0448718 | 0.120775  |
| 0.129371  | 0.124126  | 0.128788 | 0.184295  | 0.137529  | 0.122669  | 0.126894  |
| 0.122378  | 0.116259  | 0.134907 | 0.182255  | 0.135781  | 0.126457  | 0.126603  |
| 0.129371  | 0.126166  | 0.127331 | 0.186334  | 0.12704   | 0.119464  | 0.130099  |
| 0.199446  | 0.185752  | 0.204983 | 0.0926573 | 0.199446  | 0.186917  | 0.194639  |
| 0.112471  | 0.0576923 | 0.129371 | 0.174388  | 0.129371  | 0.118298  | 0.116113  |
| 0.127768  | 0.116113  | 0.135344 | 0.172494  | 0.14292   | 0.127185  | 0.124126  |
| 0.120338  | 0.113636  | 0.129953 | 0.186917  | 0.133741  | 0.119172  | 0.101253  |
| 0.123106  | 0.118444  | 0.129516 | 0.187354  | 0.133304  | 0.124563  | 0.125874  |
| 0.117133  | 0.0524476 | 0.131119 | 0.183421  | 0.13345   | 0.122669  | 0.123106  |

|           |           |           |           |           |           |           |
|-----------|-----------|-----------|-----------|-----------|-----------|-----------|
| 0.25743   | 0.245192  | 0.260344  | 0.141608  | 0.253934  | 0.245775  | 0.257867  |
| 0.106935  | 0.104021  | 0.124709  | 0.185169  | 0.128205  | 0.121503  | 0.114073  |
| 0.119464  | 0.0926573 | 0.0885781 | 0.176428  | 0.134615  | 0.120338  | 0.127768  |
| 0.182401  | 0.175699  | 0.182984  | 0.135344  | 0.18211   | 0.174825  | 0.18109   |
| 0.190268  | 0.174825  | 0.192308  | 0.0895979 | 0.192599  | 0.18007   | 0.187209  |
| 0.120338  | 0.117133  | 0.129371  | 0.181964  | 0.134907  | 0.121503  | 0.129225  |
| 0.123106  | 0.114656  | 0.130682  | 0.179779  | 0.0616259 | 0.0534674 | 0.125583  |
| 0.123689  | 0.112617  | 0.129225  | 0.185023  | 0.132139  | 0.11961   | 0.116841  |
| 0.143357  | 0.139569  | 0.147727  | 0.195076  | 0.0521562 | 0.0638112 | 0.14933   |
| 0.115093  | 0.115385  | 0.127622  | 0.183421  | 0.134615  | 0.118298  | 0.120775  |
| 0.120484  | 0.11757   | 0.130099  | 0.185897  | 0.135927  | 0.123689  | 0.129371  |
| 0.126748  | 0.12296   | 0.131119  | 0.190122  | 0.142191  | 0.126748  | 0.129516  |
| 0.120047  | 0.113928  | 0.127914  | 0.174679  | 0.0576923 | 0.0451632 | 0.120192  |
| 0.13039   | 0.126603  | 0.133013  | 0.183858  | 0.0514277 | 0.053176  | 0.134033  |
| 0.123252  | 0.110431  | 0.136364  | 0.167395  | 0.132284  | 0.121212  | 0.126894  |
| 0.125437  | 0.116987  | 0.128642  | 0.192308  | 0.138258  | 0.13039   | 0.122378  |
| 0.137238  | 0.131119  | 0.142483  | 0.202943  | 0.148019  | 0.144231  | 0.135052  |
| 0.110286  | 0.107372  | 0.127185  | 0.185023  | 0.132721  | 0.123689  | 0.118298  |
| 0.131993  | 0.123543  | 0.134907  | 0.200321  | 0.142191  | 0.136946  | 0.126311  |
| 0.13141   | 0.126457  | 0.135781  | 0.195659  | 0.143648  | 0.129079  | 0.128934  |
| 0.209062  | 0.19595   | 0.213141  | 0.0990676 | 0.211976  | 0.198281  | 0.206294  |
| 0.101107  | 0.106935  | 0.137238  | 0.190997  | 0.141608  | 0.129079  | 0.117861  |
| 0.195221  | 0.182401  | 0.198718  | 0.0945513 | 0.197552  | 0.184732  | 0.191871  |
| 0.118881  | 0.116259  | 0.120921  | 0.179633  | 0.130536  | 0.117716  | 0.122815  |
| 0.117133  | 0.0571096 | 0.137238  | 0.182255  | 0.132576  | 0.123834  | 0.128934  |
| 0.128788  | 0.111597  | 0.136655  | 0.183421  | 0.137821  | 0.119464  | 0.048514  |
| 0.121649  | 0.10708   | 0.135635  | 0.176865  | 0.135635  | 0.120775  | 0.0544872 |
| 0.125874  | 0.117716  | 0.130245  | 0.17701   | 0.0536131 | 0.0457459 | 0.127185  |
| 0.126166  | 0.11859   | 0.13141   | 0.180216  | 0.0536131 | 0.0445804 | 0.129225  |
| 0.115967  | 0.0591492 | 0.131702  | 0.173805  | 0.134033  | 0.121795  | 0.121649  |
| 0.126603  | 0.120775  | 0.128642  | 0.182984  | 0.130682  | 0.120775  | 0.125874  |
| 0.129225  | 0.116987  | 0.138258  | 0.187646  | 0.139132  | 0.119318  | 0.0504079 |
| 0.13141   | 0.129662  | 0.135781  | 0.185752  | 0.146853  | 0.134033  | 0.135927  |
| 0.249126  | 0.237471  | 0.248834  | 0.133304  | 0.248543  | 0.242133  | 0.249563  |
| 0.117133  | 0.0591492 | 0.132867  | 0.176719  | 0.134615  | 0.121212  | 0.118735  |
| 0.188666  | 0.173514  | 0.190997  | 0.090035  | 0.193619  | 0.17701   | 0.182984  |
| 0.193182  | 0.18007   | 0.197844  | 0.0866841 | 0.19289   | 0.180653  | 0.191288  |
| 0.114656  | 0.110286  | 0.136801  | 0.171911  | 0.140297  | 0.123689  | 0.126457  |
| 0.106498  | 0.100379  | 0.124272  | 0.180944  | 0.128059  | 0.114365  | 0.111014  |
| 0.116987  | 0.0546329 | 0.134178  | 0.18648   | 0.133887  | 0.12602   | 0.126166  |
| 0.122523  | 0.114365  | 0.12602   | 0.173951  | 0.0683275 | 0.0528846 | 0.119464  |
| 0.0903263 | 0.0958625 | 0.131702  | 0.169435  | 0.133741  | 0.115967  | 0.110577  |
| 0.122669  | 0.114219  | 0.127622  | 0.184003  | 0.13549   | 0.124126  | 0.123689  |
| 0.120192  | 0.114656  | 0.128642  | 0.177739  | 0.0770688 | 0.0756119 | 0.125     |

|           |           |           |           |           |           |           |
|-----------|-----------|-----------|-----------|-----------|-----------|-----------|
| 0.133596  | 0.128934  | 0.137966  | 0.191725  | 0.0496795 | 0.0566725 | 0.136364  |
| 0.116841  | 0.0536131 | 0.129079  | 0.177593  | 0.132867  | 0.118298  | 0.11757   |
| 0.130828  | 0.124126  | 0.134615  | 0.186626  | 0.0559441 | 0.0550699 | 0.13243   |
| 0.120192  | 0.117279  | 0.124563  | 0.183275  | 0.137092  | 0.124272  | 0.116841  |
| 0.131265  | 0.115239  | 0.137383  | 0.193182  | 0.142045  | 0.128351  | 0.0469114 |
| 0.124709  | 0.115093  | 0.130536  | 0.187791  | 0.137238  | 0.125291  | 0.121358  |
| 0.130682  | 0.128059  | 0.137383  | 0.198135  | 0.144085  | 0.131556  | 0.133159  |
| 0         | 0.108974  | 0.138112  | 0.186043  | 0.134324  | 0.125874  | 0.125728  |
| 0.108974  | 0         | 0.127622  | 0.176428  | 0.130536  | 0.116841  | 0.109703  |
| 0.138112  | 0.127622  | 0         | 0.192745  | 0.140734  | 0.12704   | 0.140589  |
| 0.186043  | 0.176428  | 0.192745  | 0         | 0.190122  | 0.178759  | 0.186189  |
| 0.134324  | 0.130536  | 0.140734  | 0.190122  | 0         | 0.0597319 | 0.141463  |
| 0.125874  | 0.116841  | 0.12704   | 0.178759  | 0.0597319 | 0         | 0.12398   |
| 0.125728  | 0.109703  | 0.140589  | 0.186189  | 0.141463  | 0.12398   | 0         |
| 0.120338  | 0.10373   | 0.131993  | 0.180216  | 0.132284  | 0.116259  | 0.0517191 |
| 0.123689  | 0.113491  | 0.129516  | 0.188228  | 0.135927  | 0.124563  | 0.119172  |
| 0.126457  | 0.119464  | 0.131993  | 0.190414  | 0.142774  | 0.127914  | 0.120484  |
| 0.192745  | 0.178759  | 0.199738  | 0.0909091 | 0.198281  | 0.185752  | 0.193473  |
| 0.114948  | 0.11116   | 0.127768  | 0.172494  | 0.081148  | 0.0692016 | 0.125     |
| 0.106643  | 0.104312  | 0.118881  | 0.15574   | 0.121503  | 0.10373   | 0.116987  |
| 0.126748  | 0.118881  | 0.131702  | 0.185169  | 0.0536131 | 0.0474942 | 0.129225  |
| 0.193328  | 0.181964  | 0.200612  | 0.0979021 | 0.196241  | 0.182255  | 0.194347  |
| 0.102564  | 0.0984848 | 0.128205  | 0.171474  | 0.128497  | 0.113636  | 0.108829  |
| 0.127185  | 0.122815  | 0.132721  | 0.192599  | 0.143794  | 0.126894  | 0.125     |
| 0.128059  | 0.117861  | 0.132139  | 0.181818  | 0.055507  | 0.0505536 | 0.127914  |
| 0.116259  | 0.111888  | 0.119464  | 0.183712  | 0.130536  | 0.114219  | 0.121649  |
| 0.189394  | 0.176865  | 0.196096  | 0.0893065 | 0.191142  | 0.179196  | 0.188374  |
| 0.123834  | 0.117424  | 0.127622  | 0.185169  | 0.134033  | 0.116259  | 0.123689  |
| 0.120629  | 0.11014   | 0.0661422 | 0.174971  | 0.125291  | 0.109266  | 0.123397  |
| 0.1081    | 0.102273  | 0.12704   | 0.163899  | 0.131702  | 0.115967  | 0.112034  |
| 0.126748  | 0.115385  | 0.130536  | 0.156323  | 0.133741  | 0.112179  | 0.114948  |
| 0.129225  | 0.123689  | 0.127768  | 0.184149  | 0.139132  | 0.124272  | 0.125     |
| 0.128059  | 0.125146  | 0.134178  | 0.193473  | 0.140297  | 0.128934  | 0.130536  |
| 0.113782  | 0.0520105 | 0.128351  | 0.180944  | 0.13039   | 0.118735  | 0.11655   |
| 0.109411  | 0.117861  | 0.135344  | 0.187063  | 0.123689  | 0.118735  | 0.128497  |
| 0.139569  | 0.139277  | 0.138695  | 0.200321  | 0.14831   | 0.143065  | 0.148456  |
| 0.23514   | 0.22465   | 0.238054  | 0.126894  | 0.236597  | 0.229021  | 0.235868  |
| 0.0451632 | 0.112471  | 0.140152  | 0.19391   | 0.13549   | 0.128788  | 0.130682  |
| 0.127331  | 0.123252  | 0.125874  | 0.183129  | 0.138986  | 0.124126  | 0.122523  |
| 0.119027  | 0.114073  | 0.124563  | 0.17366   | 0.0598776 | 0.0517191 | 0.125291  |
| 0.126748  | 0.120629  | 0.134907  | 0.174097  | 0.136364  | 0.124126  | 0.125728  |
| 0.120775  | 0.113199  | 0.125437  | 0.177739  | 0.12602   | 0.111451  | 0.115093  |
| 0.122523  | 0.118153  | 0.125437  | 0.183566  | 0.130973  | 0.119318  | 0.124126  |
| 0.127622  | 0.114802  | 0.131702  | 0.17905   | 0.0608974 | 0.0536131 | 0.126311  |



|           |           |          |          |           |           |           |
|-----------|-----------|----------|----------|-----------|-----------|-----------|
| 0.127185  | 0.124563  | 0.135927 | 0.188811 | 0.139132  | 0.129808  | 0.131702  |
| 0.121358  | 0.115239  | 0.127768 | 0.18007  | 0.134761  | 0.11757   | 0.125291  |
| 0.238054  | 0.226399  | 0.241259 | 0.131556 | 0.237179  | 0.229604  | 0.234994  |
| 0.103001  | 0.0977564 | 0.124563 | 0.172494 | 0.124854  | 0.110286  | 0.108974  |
| 0.10912   | 0.111451  | 0.126311 | 0.17803  | 0.126311  | 0.112908  | 0.109848  |
| 0.111888  | 0.0501166 | 0.129079 | 0.178176 | 0.128205  | 0.117716  | 0.116404  |
| 0.127185  | 0.123397  | 0.130682 | 0.193182 | 0.136218  | 0.125437  | 0.134324  |
| 0.0479312 | 0.119027  | 0.142045 | 0.19697  | 0.143794  | 0.138258  | 0.136946  |
| 0.117861  | 0.107663  | 0.133304 | 0.174242 | 0.125728  | 0.11116   | 0.118007  |
| 0.125437  | 0.117861  | 0.13039  | 0.177156 | 0.0584207 | 0.0476399 | 0.128205  |
| 0.113928  | 0.108683  | 0.123834 | 0.178176 | 0.122378  | 0.111888  | 0.119318  |
| 0.2331    | 0.219697  | 0.234848 | 0.128934 | 0.229312  | 0.222028  | 0.232663  |
| 0.128205  | 0.122378  | 0.133741 | 0.181964 | 0.0515734 | 0.0445804 | 0.129808  |
| 0.125146  | 0.123397  | 0.13243  | 0.190559 | 0.137383  | 0.126311  | 0.126166  |
| 0.11553   | 0.110286  | 0.122232 | 0.179779 | 0.132721  | 0.117861  | 0.122669  |
| 0.129953  | 0.119464  | 0.127914 | 0.188957 | 0.129079  | 0.121503  | 0.127768  |
| 0.120047  | 0.126166  | 0.13345  | 0.192162 | 0.133741  | 0.128788  | 0.121358  |
| 0.112471  | 0.0533217 | 0.127914 | 0.180507 | 0.128497  | 0.120047  | 0.116696  |
| 0.123543  | 0.121503  | 0.134324 | 0.190414 | 0.139569  | 0.123834  | 0.127185  |
| 0.131847  | 0.129516  | 0.136509 | 0.195804 | 0.139714  | 0.128934  | 0.132284  |
| 0.123397  | 0.116404  | 0.129516 | 0.187063 | 0.138549  | 0.123397  | 0.120629  |
| 0.115385  | 0.0608974 | 0.127331 | 0.17701  | 0.13141   | 0.120338  | 0.118444  |
| 0.132867  | 0.126166  | 0.129079 | 0.190997 | 0.138695  | 0.128497  | 0.126894  |
| 0.137383  | 0.130682  | 0.131847 | 0.197552 | 0.13884   | 0.128642  | 0.131993  |
| 0.132139  | 0.116987  | 0.14292  | 0.192599 | 0.141463  | 0.131847  | 0.0524476 |
| 0.136509  | 0.123689  | 0.145542 | 0.194347 | 0.145542  | 0.134178  | 0.0527389 |
| 0.136072  | 0.129953  | 0.131993 | 0.194493 | 0.140443  | 0.13141   | 0.131265  |
| 0.0894522 | 0.0929487 | 0.129079 | 0.17905  | 0.134324  | 0.118881  | 0.106206  |
| 0.132139  | 0.133304  | 0.136801 | 0.202506 | 0.140297  | 0.134178  | 0.120921  |
| 0.123252  | 0.120047  | 0.136655 | 0.198281 | 0.141026  | 0.132284  | 0.136509  |
| 0.209207  | 0.193473  | 0.210664 | 0.101836 | 0.206876  | 0.197261  | 0.206731  |
| 0.106352  | 0.114802  | 0.135781 | 0.183712 | 0.131993  | 0.123834  | 0.133013  |
| 0.119755  | 0.11859   | 0.13345  | 0.184586 | 0.13345   | 0.123252  | 0.115822  |
| 0.119318  | 0.0534674 | 0.136218 | 0.175699 | 0.133887  | 0.124563  | 0.123834  |
| 0.22669   | 0.212704  | 0.229312 | 0.121358 | 0.222902  | 0.215618  | 0.223339  |
| 0.212704  | 0.201632  | 0.219406 | 0.118444 | 0.217366  | 0.206002  | 0.216346  |
| 0.130682  | 0.126894  | 0.137092 | 0.190559 | 0.141463  | 0.129225  | 0.131702  |
| 0.251457  | 0.237762  | 0.254079 | 0.136509 | 0.245921  | 0.242424  | 0.247815  |
| 0.0903263 | 0.0932401 | 0.126457 | 0.179633 | 0.132576  | 0.118007  | 0.104458  |
| 0.122086  | 0.125     | 0.142483 | 0.198864 | 0.144814  | 0.140152  | 0.137383  |
| 0.104312  | 0.0996503 | 0.127331 | 0.178176 | 0.130536  | 0.118298  | 0.108246  |
| 0.134178  | 0.127477  | 0.129516 | 0.190559 | 0.137383  | 0.127185  | 0.126166  |
| 0.192599  | 0.176282  | 0.196096 | 0.095134 | 0.192599  | 0.18007   | 0.191288  |
| 0.120484  | 0.119027  | 0.130682 | 0.186189 | 0.134178  | 0.125728  | 0.128497  |

|           |           |           |           |           |           |           |
|-----------|-----------|-----------|-----------|-----------|-----------|-----------|
| 0.196824  | 0.180798  | 0.20236   | 0.0964452 | 0.19799   | 0.186626  | 0.194347  |
| 0.112034  | 0.107372  | 0.131556  | 0.182692  | 0.133304  | 0.11961   | 0.123834  |
| 0.124272  | 0.110286  | 0.130973  | 0.166084  | 0.11961   | 0.0980478 | 0.120921  |
| 0.109994  | 0.115822  | 0.130682  | 0.183275  | 0.136801  | 0.125437  | 0.120629  |
| 0.118153  | 0.105915  | 0.120484  | 0.168415  | 0.118153  | 0.103001  | 0.113636  |
| 0.108974  | 0.0556527 | 0.123834  | 0.173223  | 0.125     | 0.113928  | 0.113199  |
| 0.105769  | 0.104895  | 0.127622  | 0.17701   | 0.124126  | 0.110431  | 0.120484  |
| 0.102855  | 0.0949883 | 0.125291  | 0.170017  | 0.127914  | 0.113928  | 0.108829  |
| 0.118444  | 0.114948  | 0.13039   | 0.175699  | 0.0625    | 0.0476399 | 0.123834  |
| 0.119755  | 0.117424  | 0.131119  | 0.190122  | 0.132867  | 0.122378  | 0.104749  |
| 0.0506993 | 0.105769  | 0.127331  | 0.180798  | 0.127914  | 0.117133  | 0.118735  |
| 0.102418  | 0.0992133 | 0.126311  | 0.175991  | 0.130099  | 0.115822  | 0.110431  |
| 0.123543  | 0.097028  | 0.135198  | 0.182547  | 0.13986   | 0.120921  | 0.0659965 |
| 0.130536  | 0.127331  | 0.134907  | 0.186626  | 0.0536131 | 0.0533217 | 0.134178  |
| 0.122815  | 0.107955  | 0.138258  | 0.180361  | 0.133304  | 0.118153  | 0.048951  |
| 0.120629  | 0.112471  | 0.0594406 | 0.179341  | 0.131119  | 0.114219  | 0.122815  |
| 0.108246  | 0.0534674 | 0.124854  | 0.175699  | 0.124272  | 0.113491  | 0.112471  |
| 0.122232  | 0.116987  | 0.127477  | 0.178904  | 0.128351  | 0.112908  | 0.122086  |
| 0.130099  | 0.123106  | 0.12398   | 0.183858  | 0.134761  | 0.121066  | 0.123834  |
| 0.123252  | 0.117424  | 0.129953  | 0.190122  | 0.136072  | 0.125874  | 0.119901  |
| 0.123834  | 0.109848  | 0.136946  | 0.184586  | 0.138986  | 0.12296   | 0.0517191 |
| 0.126603  | 0.114656  | 0.133887  | 0.177739  | 0.0604604 | 0.0493881 | 0.124126  |
| 0.133741  | 0.125583  | 0.137529  | 0.187791  | 0.0536131 | 0.0541958 | 0.135927  |
| 0.136072  | 0.130828  | 0.140734  | 0.194784  | 0.0472028 | 0.0603147 | 0.142337  |
| 0.110286  | 0.105624  | 0.121358  | 0.176573  | 0.126603  | 0.114073  | 0.116259  |
| 0.115239  | 0.0537587 | 0.130099  | 0.177156  | 0.131265  | 0.118444  | 0.117424  |
| 0.113345  | 0.114219  | 0.125583  | 0.173514  | 0.123834  | 0.112179  | 0.116987  |
| 0.134324  | 0.135781  | 0.132284  | 0.196533  | 0.142191  | 0.13141   | 0.131265  |
| 0.105624  | 0.10708   | 0.131265  | 0.185897  | 0.128642  | 0.120484  | 0.113636  |
| 0.13884   | 0.130099  | 0.142628  | 0.204254  | 0.148747  | 0.145833  | 0.138695  |
| 0.126311  | 0.0668706 | 0.142045  | 0.193765  | 0.143502  | 0.136218  | 0.135198  |
| 0.120338  | 0.119755  | 0.127331  | 0.18954   | 0.134324  | 0.125     | 0.130099  |
| 0.100087  | 0.104749  | 0.128351  | 0.175699  | 0.122523  | 0.109703  | 0.113054  |
| 0.116259  | 0.111888  | 0.119755  | 0.177302  | 0.125583  | 0.110431  | 0.120192  |
| 0.130536  | 0.117716  | 0.143648  | 0.190705  | 0.143357  | 0.130245  | 0.0464744 |
| 0.209353  | 0.199155  | 0.218094  | 0.115967  | 0.208188  | 0.197698  | 0.208625  |
| 0.121649  | 0.114073  | 0.0610431 | 0.177739  | 0.132139  | 0.114948  | 0.124417  |
| 0.106935  | 0.113054  | 0.130828  | 0.181381  | 0.139277  | 0.120921  | 0.116696  |
| 0.130682  | 0.122232  | 0.124272  | 0.185897  | 0.133304  | 0.120192  | 0.121212  |
| 0.125583  | 0.112762  | 0.139569  | 0.180798  | 0.134324  | 0.122378  | 0.0511364 |
| 0.117279  | 0.10912   | 0.133887  | 0.185023  | 0.142337  | 0.127768  | 0.123543  |
| 0.11553   | 0.121358  | 0.130682  | 0.181235  | 0.123397  | 0.117279  | 0.12704   |
| 0.118007  | 0.125583  | 0.131119  | 0.187209  | 0.123834  | 0.115967  | 0.131847  |
| 0.11757   | 0.117279  | 0.125146  | 0.186189  | 0.133304  | 0.123397  | 0.126166  |

|           |           |          |          |           |           |           |
|-----------|-----------|----------|----------|-----------|-----------|-----------|
| 0.119027  | 0.115239  | 0.126894 | 0.185023 | 0.132139  | 0.118735  | 0.103438  |
| 0.132721  | 0.128059  | 0.130099 | 0.191434 | 0.137092  | 0.128934  | 0.129662  |
| 0.106206  | 0.112325  | 0.127185 | 0.183275 | 0.133887  | 0.121358  | 0.115093  |
| 0.0504079 | 0.109557  | 0.136946 | 0.18546  | 0.135198  | 0.122669  | 0.123397  |
| 0.181964  | 0.167104  | 0.189831 | 0.162296 | 0.181964  | 0.170309  | 0.173077  |
| 0.121649  | 0.116113  | 0.129225 | 0.175699 | 0.0651224 | 0.0523019 | 0.121795  |
| 0.13345   | 0.127914  | 0.134033 | 0.182547 | 0.143357  | 0.128497  | 0.128059  |
| 0.103584  | 0.114073  | 0.13039  | 0.19289  | 0.143502  | 0.134178  | 0.119464  |
| 0.125583  | 0.115385  | 0.136655 | 0.180798 | 0.123543  | 0.114219  | 0.126603  |
| 0.0938228 | 0.10169   | 0.12296  | 0.177593 | 0.123834  | 0.108683  | 0.10912   |
| 0.0576923 | 0.101107  | 0.125583 | 0.180216 | 0.123252  | 0.115093  | 0.113199  |
| 0.0967366 | 0.107226  | 0.124417 | 0.186626 | 0.127331  | 0.109848  | 0.117279  |
| 0.127622  | 0.120921  | 0.136655 | 0.188374 | 0.135781  | 0.126457  | 0.126603  |
| 0.0836247 | 0.106935  | 0.130245 | 0.171766 | 0.100816  | 0.0874126 | 0.120775  |
| 0.126311  | 0.119318  | 0.139423 | 0.19493  | 0.140297  | 0.129516  | 0.121795  |
| 0.114219  | 0.111014  | 0.130245 | 0.174971 | 0.126457  | 0.111888  | 0.116987  |
| 0.106498  | 0.11757   | 0.138549 | 0.18211  | 0.138549  | 0.126311  | 0.117716  |
| 0.128497  | 0.122378  | 0.135198 | 0.200029 | 0.142483  | 0.134907  | 0.139423  |
| 0.0973193 | 0.109557  | 0.130828 | 0.191288 | 0.135781  | 0.125874  | 0.114948  |
| 0.119172  | 0.115385  | 0.134907 | 0.1875   | 0.126457  | 0.125     | 0.112617  |
| 0.0964452 | 0.106352  | 0.129953 | 0.184878 | 0.13549   | 0.124126  | 0.110286  |
| 0.0964452 | 0.1081    | 0.128788 | 0.188083 | 0.131702  | 0.121503  | 0.114365  |
| 0.104021  | 0.0999417 | 0.121795 | 0.17905  | 0.131119  | 0.11655   | 0.109411  |
| 0.10912   | 0.111742  | 0.134761 | 0.194639 | 0.137966  | 0.127477  | 0.124126  |
| 0.0986305 | 0.106206  | 0.130099 | 0.181818 | 0.133596  | 0.120192  | 0.112179  |
| 0.142045  | 0.137383  | 0.145542 | 0.199883 | 0.144959  | 0.13884   | 0.142191  |
| 0.137383  | 0.125146  | 0.140297 | 0.186189 | 0.142337  | 0.127185  | 0.134324  |
| 0.0962995 | 0.105624  | 0.126894 | 0.185023 | 0.131847  | 0.114656  | 0.104021  |
| 0.146562  | 0.136946  | 0.138986 | 0.199446 | 0.145979  | 0.135198  | 0.137675  |
| 0.124417  | 0.11451   | 0.136655 | 0.183712 | 0.136072  | 0.120047  | 0.0962995 |
| 0.118007  | 0.12704   | 0.142774 | 0.196241 | 0.147145  | 0.137529  | 0.140589  |
| 0.104312  | 0.107226  | 0.13345  | 0.1875   | 0.129371  | 0.119172  | 0.107955  |
| 0.143794  | 0.135927  | 0.151369 | 0.20134  | 0.147582  | 0.139132  | 0.147145  |
| 0.124854  | 0.123689  | 0.130973 | 0.185606 | 0.141171  | 0.134178  | 0.130828  |
| 0.139132  | 0.130973  | 0.143211 | 0.193182 | 0.151952  | 0.142045  | 0.131702  |
| 0.117861  | 0.114656  | 0.133596 | 0.198135 | 0.136801  | 0.124563  | 0.102273  |
| 0.104021  | 0.104604  | 0.128205 | 0.183712 | 0.135781  | 0.122378  | 0.110286  |
| 0.106498  | 0.103875  | 0.127185 | 0.180653 | 0.135344  | 0.121941  | 0.113928  |
| 0.117716  | 0.116259  | 0.128497 | 0.187209 | 0.13141   | 0.121212  | 0.124563  |
| 0.105478  | 0.114802  | 0.127331 | 0.194202 | 0.137238  | 0.128497  | 0.11961   |
| 0.114948  | 0.119901  | 0.133887 | 0.199301 | 0.140589  | 0.133013  | 0.124126  |
| 0.124272  | 0.112908  | 0.13884  | 0.181235 | 0.14088   | 0.125728  | 0.124126  |
| 0.109994  | 0.107955  | 0.124272 | 0.183566 | 0.131265  | 0.118153  | 0.0929487 |
| 0.104604  | 0.106352  | 0.127622 | 0.181964 | 0.136946  | 0.120338  | 0.116404  |

|           |          |          |          |          |          |          |
|-----------|----------|----------|----------|----------|----------|----------|
| 0.105041  | 0.112034 | 0.129225 | 0.185315 | 0.137675 | 0.125437 | 0.119755 |
| 0.110286  | 0.104458 | 0.126311 | 0.17803  | 0.130973 | 0.11757  | 0.113636 |
| 0.112762  | 0.112179 | 0.134324 | 0.188957 | 0.140734 | 0.129079 | 0.124854 |
| 0.1081    | 0.105186 | 0.135198 | 0.17905  | 0.129079 | 0.115676 | 0.111451 |
| 0.116696  | 0.105915 | 0.133013 | 0.172494 | 0.120192 | 0.103584 | 0.117716 |
| 0.0948427 | 0.103875 | 0.130973 | 0.183858 | 0.130099 | 0.116113 | 0.121503 |
| 0.0866841 | 0.090472 | 0.124854 | 0.177448 | 0.128642 | 0.114948 | 0.104312 |
| 0.0992133 | 0.104458 | 0.127477 | 0.182401 | 0.133304 | 0.11961  | 0.114802 |
| 0.116841  | 0.106352 | 0.13141  | 0.169726 | 0.124709 | 0.11014  | 0.11553  |
| 0.0925117 | 0.106789 | 0.13447  | 0.181818 | 0.124563 | 0.112325 | 0.118298 |
| 0.110868  | 0.116696 | 0.125146 | 0.181527 | 0.113199 | 0.104167 | 0.125291 |
| 0.110868  | 0.101836 | 0.124272 | 0.165793 | 0.116987 | 0.102418 | 0.109266 |
| 0.0981935 | 0.120921 | 0.13986  | 0.191288 | 0.131119 | 0.125583 | 0.12602  |

| TDr_3389  | TDr_3400 | TDr_3408 | TDr_3414 | TDr_3419  | TDr_3430  | TDr_3433  |
|-----------|----------|----------|----------|-----------|-----------|-----------|
| 0.0799825 | 0.118881 | 0.124272 | 0.171329 | 0.104895  | 0.0960082 | 0.124854  |
| 0.104604  | 0.123106 | 0.128205 | 0.182255 | 0.105915  | 0.104604  | 0.111014  |
| 0.099359  | 0.119027 | 0.12296  | 0.177302 | 0.103584  | 0.0964452 | 0.109266  |
| 0.113928  | 0.120484 | 0.124417 | 0.184295 | 0.0960082 | 0.104895  | 0.0926573 |
| 0.129371  | 0.127185 | 0.131119 | 0.200903 | 0.130973  | 0.124126  | 0.136364  |
| 0.112179  | 0.130973 | 0.135198 | 0.192745 | 0.123397  | 0.116259  | 0.129662  |
| 0.102418  | 0.122378 | 0.124854 | 0.195513 | 0.123543  | 0.114073  | 0.129516  |
| 0.103293  | 0.115676 | 0.119901 | 0.179779 | 0.106643  | 0.104749  | 0.108246  |
| 0.102855  | 0.112617 | 0.113636 | 0.180798 | 0.0986305 | 0.0926573 | 0.112471  |
| 0.102127  | 0.117424 | 0.120775 | 0.188228 | 0.112762  | 0.0992133 | 0.122815  |
| 0.107517  | 0.120775 | 0.125583 | 0.172931 | 0.118153  | 0.101399  | 0.134324  |
| 0.105915  | 0.1081   | 0.111742 | 0.180653 | 0.106643  | 0.101836  | 0.110868  |
| 0.108829  | 0.110431 | 0.11553  | 0.185606 | 0.103147  | 0.097465  | 0.118735  |
| 0.129662  | 0.144085 | 0.147727 | 0.143211 | 0.119318  | 0.105478  | 0.137238  |
| 0.117861  | 0.122378 | 0.130682 | 0.192308 | 0.125874  | 0.118153  | 0.13039   |
| 0.114219  | 0.116404 | 0.121212 | 0.193036 | 0.112325  | 0.109266  | 0.122086  |
| 0.112325  | 0.108683 | 0.110868 | 0.183566 | 0.115385  | 0.10271   | 0.11961   |
| 0.140152  | 0.152826 | 0.156177 | 0.207314 | 0.138549  | 0.134033  | 0.139569  |
| 0.0958625 | 0.11757  | 0.121212 | 0.174971 | 0.107372  | 0.0932401 | 0.107809  |
| 0.199592  | 0.203526 | 0.206002 | 0.143502 | 0.184003  | 0.176573  | 0.201632  |
| 0.0922203 | 0.129079 | 0.135635 | 0.192599 | 0.129371  | 0.11553   | 0.13243   |
| 0.0914918 | 0.122232 | 0.128205 | 0.192162 | 0.124563  | 0.117133  | 0.126166  |
| 0.10912   | 0.113054 | 0.116404 | 0.183275 | 0.104021  | 0.0995047 | 0.114656  |
| 0.116841  | 0.123689 | 0.123543 | 0.202069 | 0.124854  | 0.116259  | 0.127914  |
| 0.0980478 | 0.107517 | 0.109994 | 0.178613 | 0.105186  | 0.0948427 | 0.11553   |
| 0.100962  | 0.134907 | 0.139132 | 0.198718 | 0.132284  | 0.122232  | 0.135344  |
| 0.110577  | 0.113636 | 0.116404 | 0.193473 | 0.125583  | 0.114073  | 0.135052  |
| 0.114365  | 0.122669 | 0.126603 | 0.200466 | 0.115385  | 0.110577  | 0.122232  |
| 0.118735  | 0.132576 | 0.128351 | 0.197844 | 0.129953  | 0.119318  | 0.132139  |
| 0.115822  | 0.11859  | 0.115822 | 0.198718 | 0.122086  | 0.11553   | 0.127477  |
| 0.090035  | 0.12398  | 0.125874 | 0.188957 | 0.123106  | 0.114802  | 0.130245  |
| 0.112617  | 0.122378 | 0.121066 | 0.196678 | 0.118298  | 0.113199  | 0.125728  |
| 0.0983392 | 0.107809 | 0.109411 | 0.178904 | 0.103147  | 0.100962  | 0.115239  |
| 0.110286  | 0.1081   | 0.110577 | 0.18852  | 0.122086  | 0.108829  | 0.125437  |
| 0.112762  | 0.118735 | 0.123543 | 0.197698 | 0.121358  | 0.111305  | 0.13345   |
| 0.116404  | 0.120047 | 0.123106 | 0.200175 | 0.125874  | 0.11961   | 0.129808  |
| 0.111597  | 0.138258 | 0.136655 | 0.209936 | 0.130973  | 0.128497  | 0.139569  |
| 0.114365  | 0.120047 | 0.121358 | 0.195221 | 0.122378  | 0.116113  | 0.13039   |
| 0.10067   | 0.112471 | 0.118735 | 0.183858 | 0.1081    | 0.101836  | 0.116696  |
| 0.115822  | 0.126166 | 0.127477 | 0.195804 | 0.122086  | 0.110868  | 0.123397  |
| 0.101836  | 0.118298 | 0.122523 | 0.184732 | 0.114219  | 0.0980478 | 0.116987  |
| 0.135344  | 0.145396 | 0.150787 | 0.210373 | 0.137821  | 0.129808  | 0.141463  |

|           |          |          |          |           |           |          |
|-----------|----------|----------|----------|-----------|-----------|----------|
| 0.138549  | 0.145396 | 0.148164 | 0.20979  | 0.142774  | 0.133596  | 0.151078 |
| 0.109266  | 0.116113 | 0.123834 | 0.187791 | 0.116696  | 0.104021  | 0.120047 |
| 0.0961538 | 0.10271  | 0.105478 | 0.187791 | 0.112908  | 0.0955711 | 0.121212 |
| 0.113199  | 0.11655  | 0.116113 | 0.199883 | 0.12296   | 0.112908  | 0.128934 |
| 0.114365  | 0.121795 | 0.125437 | 0.190559 | 0.120338  | 0.111451  | 0.123397 |
| 0.13141   | 0.139714 | 0.143648 | 0.206439 | 0.137675  | 0.12704   | 0.139569 |
| 0.113054  | 0.119027 | 0.122378 | 0.190997 | 0.117861  | 0.107517  | 0.121795 |
| 0.109411  | 0.116841 | 0.121358 | 0.186772 | 0.119755  | 0.104749  | 0.125146 |
| 0.07838   | 0.144668 | 0.143357 | 0.209645 | 0.146125  | 0.140734  | 0.14831  |
| 0.127622  | 0.128059 | 0.132576 | 0.196824 | 0.125728  | 0.119464  | 0.136655 |
| 0.110868  | 0.111305 | 0.116696 | 0.187937 | 0.113345  | 0.103875  | 0.120484 |
| 0.123106  | 0.135198 | 0.137383 | 0.197552 | 0.119464  | 0.112908  | 0.127768 |
| 0.109703  | 0.121212 | 0.128642 | 0.178613 | 0.0888695 | 0.0980478 | 0.090472 |
| 0.134761  | 0.136655 | 0.135927 | 0.210373 | 0.138986  | 0.130682  | 0.139132 |
| 0.122086  | 0.127477 | 0.129079 | 0.200612 | 0.126311  | 0.119464  | 0.133159 |
| 0.111305  | 0.120484 | 0.123252 | 0.190997 | 0.117861  | 0.101399  | 0.119172 |
| 0.111888  | 0.121066 | 0.123543 | 0.188374 | 0.120775  | 0.1081    | 0.12704  |
| 0.110577  | 0.123834 | 0.123397 | 0.201049 | 0.122086  | 0.117279  | 0.134178 |
| 0.132139  | 0.144522 | 0.144959 | 0.211538 | 0.136072  | 0.127768  | 0.142045 |
| 0.138549  | 0.1419   | 0.145542 | 0.210956 | 0.133159  | 0.131556  | 0.13243  |
| 0.152972  | 0.165064 | 0.164336 | 0.163607 | 0.150204  | 0.138986  | 0.158217 |
| 0.108392  | 0.11961  | 0.12296  | 0.187209 | 0.119318  | 0.102564  | 0.11859  |
| 0.108683  | 0.114948 | 0.119755 | 0.1875   | 0.116404  | 0.101981  | 0.123543 |
| 0.105186  | 0.110868 | 0.116259 | 0.1875   | 0.112617  | 0.0999417 | 0.12296  |
| 0.118153  | 0.136946 | 0.138549 | 0.199009 | 0.137238  | 0.132139  | 0.143211 |
| 0.105041  | 0.114219 | 0.118735 | 0.183858 | 0.114802  | 0.105041  | 0.115239 |
| 0.127331  | 0.133596 | 0.136946 | 0.198572 | 0.126894  | 0.120921  | 0.136655 |
| 0.111888  | 0.117861 | 0.119755 | 0.199155 | 0.123689  | 0.118007  | 0.13345  |
| 0.111451  | 0.117716 | 0.123689 | 0.187937 | 0.120629  | 0.104167  | 0.125146 |
| 0.122232  | 0.142191 | 0.144668 | 0.201923 | 0.137238  | 0.132139  | 0.145542 |
| 0.118153  | 0.121503 | 0.127185 | 0.194639 | 0.121503  | 0.111742  | 0.127185 |
| 0.134324  | 0.139132 | 0.142191 | 0.209936 | 0.135635  | 0.127914  | 0.139277 |
| 0.128059  | 0.126748 | 0.132721 | 0.197844 | 0.130245  | 0.121941  | 0.131265 |
| 0.109848  | 0.115822 | 0.120338 | 0.185752 | 0.107663  | 0.104604  | 0.113345 |
| 0.1081    | 0.114948 | 0.118881 | 0.184586 | 0.112908  | 0.099359  | 0.119172 |
| 0.114219  | 0.122232 | 0.127331 | 0.190414 | 0.115822  | 0.103438  | 0.123834 |
| 0.129079  | 0.137092 | 0.140734 | 0.205565 | 0.128351  | 0.123543  | 0.130536 |
| 0.106789  | 0.110723 | 0.117279 | 0.187063 | 0.115676  | 0.105915  | 0.121358 |
| 0.13549   | 0.147582 | 0.150932 | 0.211684 | 0.137675  | 0.130828  | 0.134615 |
| 0.11451   | 0.125146 | 0.129662 | 0.190705 | 0.123397  | 0.112471  | 0.130828 |
| 0.111597  | 0.118153 | 0.121212 | 0.195367 | 0.118735  | 0.113636  | 0.121212 |
| 0.112471  | 0.117279 | 0.123252 | 0.192745 | 0.119027  | 0.107809  | 0.125583 |
| 0.120629  | 0.123397 | 0.130828 | 0.195076 | 0.119318  | 0.113928  | 0.12296  |
| 0.107809  | 0.121358 | 0.126166 | 0.188957 | 0.118735  | 0.102564  | 0.125583 |

|           |          |          |          |          |           |          |
|-----------|----------|----------|----------|----------|-----------|----------|
| 0.108683  | 0.115239 | 0.118007 | 0.187791 | 0.116113 | 0.10169   | 0.120921 |
| 0.131556  | 0.136655 | 0.142045 | 0.208333 | 0.134615 | 0.12398   | 0.139714 |
| 0.106789  | 0.108683 | 0.111451 | 0.186189 | 0.117716 | 0.105332  | 0.125146 |
| 0.109848  | 0.111451 | 0.115967 | 0.188083 | 0.113491 | 0.101981  | 0.123252 |
| 0.111305  | 0.12398  | 0.127914 | 0.201777 | 0.126311 | 0.120047  | 0.129371 |
| 0.100233  | 0.122523 | 0.125874 | 0.196533 | 0.128351 | 0.120629  | 0.134615 |
| 0.121212  | 0.13039  | 0.132576 | 0.207022 | 0.134761 | 0.123543  | 0.138403 |
| 0.129225  | 0.13549  | 0.140589 | 0.212121 | 0.132867 | 0.127477  | 0.139423 |
| 0.101107  | 0.116987 | 0.121212 | 0.187791 | 0.120484 | 0.106352  | 0.128205 |
| 0.170746  | 0.182547 | 0.185606 | 0.153992 | 0.170892 | 0.157051  | 0.182692 |
| 0.0977564 | 0.110431 | 0.116404 | 0.190851 | 0.113345 | 0.105624  | 0.114948 |
| 0.128205  | 0.129225 | 0.13345  | 0.209062 | 0.135635 | 0.125874  | 0.136946 |
| 0.119464  | 0.122232 | 0.126166 | 0.202652 | 0.127768 | 0.118881  | 0.130828 |
| 0.112034  | 0.136655 | 0.137092 | 0.210082 | 0.139277 | 0.133013  | 0.142337 |
| 0.106061  | 0.111742 | 0.115967 | 0.190997 | 0.112908 | 0.105186  | 0.120921 |
| 0.123834  | 0.130682 | 0.134033 | 0.206148 | 0.125437 | 0.123543  | 0.132576 |
| 0.104312  | 0.113199 | 0.117424 | 0.190997 | 0.118444 | 0.106061  | 0.122669 |
| 0.116404  | 0.120629 | 0.123397 | 0.195221 | 0.121795 | 0.114073  | 0.129808 |
| 0.0992133 | 0.119464 | 0.116987 | 0.192599 | 0.113054 | 0.106498  | 0.122523 |
| 0.124272  | 0.130536 | 0.136509 | 0.208042 | 0.136946 | 0.12602   | 0.143211 |
| 0.101544  | 0.109266 | 0.109703 | 0.186189 | 0.117424 | 0.103584  | 0.122232 |
| 0.115093  | 0.136218 | 0.141608 | 0.201486 | 0.130099 | 0.121795  | 0.136655 |
| 0.0968823 | 0.117424 | 0.122523 | 0.190268 | 0.120921 | 0.110286  | 0.126603 |
| 0.126748  | 0.128351 | 0.13345  | 0.204983 | 0.128351 | 0.120921  | 0.132867 |
| 0.10708   | 0.125583 | 0.127768 | 0.201632 | 0.133159 | 0.120484  | 0.140006 |
| 0.0887238 | 0.113054 | 0.119901 | 0.189103 | 0.114219 | 0.103293  | 0.123689 |
| 0.12398   | 0.143939 | 0.14729  | 0.199009 | 0.13549  | 0.129808  | 0.148164 |
| 0.0938228 | 0.117861 | 0.120338 | 0.193328 | 0.121358 | 0.111305  | 0.128205 |
| 0.109557  | 0.110286 | 0.115385 | 0.194202 | 0.118735 | 0.105769  | 0.124126 |
| 0.107955  | 0.115676 | 0.120484 | 0.193765 | 0.117716 | 0.105624  | 0.126894 |
| 0.118735  | 0.141317 | 0.146125 | 0.208625 | 0.139277 | 0.128934  | 0.144376 |
| 0.110868  | 0.120338 | 0.123689 | 0.178613 | 0.117716 | 0.103584  | 0.13039  |
| 0.103584  | 0.112471 | 0.117861 | 0.190559 | 0.11451  | 0.104167  | 0.11757  |
| 0.105915  | 0.109848 | 0.114365 | 0.187354 | 0.114802 | 0.102418  | 0.122232 |
| 0.0949883 | 0.114656 | 0.120921 | 0.190414 | 0.117861 | 0.113636  | 0.123252 |
| 0.11757   | 0.127622 | 0.127185 | 0.204254 | 0.125291 | 0.117279  | 0.135344 |
| 0.0926573 | 0.114073 | 0.120921 | 0.190705 | 0.124563 | 0.111888  | 0.129079 |
| 0.0962995 | 0.104895 | 0.109994 | 0.182984 | 0.105769 | 0.0965909 | 0.113782 |
| 0.0939685 | 0.108974 | 0.114948 | 0.186189 | 0.107809 | 0.0960082 | 0.116113 |
| 0.104312  | 0.109703 | 0.112762 | 0.18954  | 0.112325 | 0.0996503 | 0.119464 |
| 0.114802  | 0.113491 | 0.115967 | 0.189248 | 0.116987 | 0.111305  | 0.125291 |
| 0.120484  | 0.12704  | 0.128059 | 0.201632 | 0.133159 | 0.121066  | 0.133304 |
| 0.103438  | 0.106498 | 0.110431 | 0.19391  | 0.113782 | 0.104895  | 0.120047 |
| 0.097465  | 0.106935 | 0.113199 | 0.187063 | 0.110431 | 0.0942599 | 0.117279 |

|           |          |          |          |           |           |           |
|-----------|----------|----------|----------|-----------|-----------|-----------|
| 0.114656  | 0.122378 | 0.120484 | 0.200758 | 0.129662  | 0.114073  | 0.135927  |
| 0.101981  | 0.10708  | 0.115093 | 0.186917 | 0.109703  | 0.101981  | 0.120338  |
| 0.099359  | 0.11553  | 0.122086 | 0.184003 | 0.11961   | 0.115676  | 0.132284  |
| 0.0626457 | 0.130099 | 0.131119 | 0.198572 | 0.132139  | 0.126457  | 0.138403  |
| 0.109266  | 0.114948 | 0.119755 | 0.196533 | 0.115822  | 0.106061  | 0.126457  |
| 0.105041  | 0.110723 | 0.112908 | 0.195221 | 0.115967  | 0.106789  | 0.123397  |
| 0.10912   | 0.110723 | 0.112034 | 0.188811 | 0.112179  | 0.104167  | 0.122232  |
| 0.0989219 | 0.106935 | 0.111742 | 0.182401 | 0.108392  | 0.0948427 | 0.119901  |
| 0.118444  | 0.129662 | 0.130973 | 0.201049 | 0.125874  | 0.115239  | 0.129516  |
| 0.0971737 | 0.106352 | 0.109411 | 0.18648  | 0.109266  | 0.100087  | 0.11961   |
| 0.125874  | 0.132721 | 0.136655 | 0.206731 | 0.135635  | 0.131702  | 0.142483  |
| 0.129225  | 0.130245 | 0.130682 | 0.199009 | 0.136072  | 0.125146  | 0.142045  |
| 0.118735  | 0.125291 | 0.126894 | 0.200175 | 0.126457  | 0.116987  | 0.127477  |
| 0.111597  | 0.116987 | 0.118007 | 0.188957 | 0.122232  | 0.108392  | 0.129079  |
| 0.0944056 | 0.114656 | 0.118881 | 0.190997 | 0.121358  | 0.107226  | 0.127914  |
| 0.0995047 | 0.112471 | 0.113782 | 0.188811 | 0.117133  | 0.108829  | 0.125437  |
| 0.102855  | 0.11116  | 0.113054 | 0.187791 | 0.11553   | 0.102564  | 0.122086  |
| 0.102564  | 0.111451 | 0.113636 | 0.18954  | 0.111451  | 0.100524  | 0.118007  |
| 0.109266  | 0.118153 | 0.121503 | 0.17905  | 0.0925117 | 0.0958625 | 0.101107  |
| 0.126166  | 0.127477 | 0.130828 | 0.203817 | 0.130973  | 0.11859   | 0.134615  |
| 0.10912   | 0.117716 | 0.121066 | 0.197261 | 0.117716  | 0.108537  | 0.123397  |
| 0.120629  | 0.13447  | 0.13549  | 0.198864 | 0.129808  | 0.125     | 0.134615  |
| 0.118444  | 0.132867 | 0.134761 | 0.209499 | 0.136655  | 0.129516  | 0.139423  |
| 0.194202  | 0.196096 | 0.200321 | 0.101107 | 0.179196  | 0.168269  | 0.190414  |
| 0.234266  | 0.237617 | 0.238054 | 0.135344 | 0.220425  | 0.21183   | 0.230478  |
| 0.106498  | 0.114802 | 0.119901 | 0.176573 | 0.080711  | 0.0922203 | 0.0761946 |
| 0.109266  | 0.111742 | 0.117424 | 0.185752 | 0.115239  | 0.103438  | 0.119172  |
| 0.104895  | 0.110868 | 0.11451  | 0.181381 | 0.105624  | 0.0984848 | 0.118881  |
| 0.104604  | 0.114948 | 0.120629 | 0.187791 | 0.116696  | 0.104021  | 0.118298  |
| 0.120047  | 0.124272 | 0.130245 | 0.195076 | 0.125728  | 0.120338  | 0.129662  |
| 0.108683  | 0.116987 | 0.120047 | 0.190705 | 0.113782  | 0.106061  | 0.116259  |
| 0.139132  | 0.136364 | 0.139714 | 0.211247 | 0.143357  | 0.133887  | 0.14933   |
| 0.111305  | 0.115822 | 0.117133 | 0.192453 | 0.121066  | 0.106352  | 0.125583  |
| 0.124417  | 0.129516 | 0.131993 | 0.206439 | 0.133013  | 0.120629  | 0.131702  |
| 0.127185  | 0.132576 | 0.135927 | 0.195513 | 0.126166  | 0.116696  | 0.133887  |
| 0.128351  | 0.131119 | 0.135052 | 0.20542  | 0.134615  | 0.126603  | 0.138258  |
| 0.13447   | 0.134324 | 0.140297 | 0.203671 | 0.133741  | 0.128059  | 0.140297  |
| 0.108829  | 0.115676 | 0.122232 | 0.193765 | 0.121212  | 0.110286  | 0.12398   |
| 0.10912   | 0.11014  | 0.116404 | 0.189394 | 0.115967  | 0.103293  | 0.119901  |
| 0.112471  | 0.120775 | 0.128788 | 0.191871 | 0.122815  | 0.109848  | 0.126748  |
| 0.10373   | 0.107955 | 0.111597 | 0.182838 | 0.114365  | 0.102855  | 0.119172  |
| 0.109557  | 0.111742 | 0.114802 | 0.188957 | 0.114948  | 0.101107  | 0.119464  |
| 0.108246  | 0.113928 | 0.119901 | 0.189685 | 0.117424  | 0.106206  | 0.121358  |
| 0.126166  | 0.131556 | 0.134033 | 0.200612 | 0.129516  | 0.120921  | 0.133159  |



|           |          |          |          |          |           |          |
|-----------|----------|----------|----------|----------|-----------|----------|
| 0.132284  | 0.133304 | 0.134033 | 0.207896 | 0.136801 | 0.127622  | 0.140443 |
| 0.111742  | 0.11451  | 0.116987 | 0.191725 | 0.121503 | 0.107955  | 0.124272 |
| 0.108974  | 0.116696 | 0.121503 | 0.185752 | 0.11757  | 0.104895  | 0.122669 |
| 0.124709  | 0.128934 | 0.129662 | 0.205274 | 0.135927 | 0.124417  | 0.139277 |
| 0.107226  | 0.110286 | 0.114219 | 0.186334 | 0.118444 | 0.0999417 | 0.120047 |
| 0.138258  | 0.13986  | 0.141754 | 0.206294 | 0.144231 | 0.133304  | 0.14933  |
| 0.129516  | 0.139277 | 0.141463 | 0.193473 | 0.131993 | 0.124563  | 0.144959 |
| 0.126457  | 0.130682 | 0.132576 | 0.198281 | 0.129516 | 0.118298  | 0.134033 |
| 0.104021  | 0.110868 | 0.11451  | 0.188083 | 0.116987 | 0.101399  | 0.113928 |
| 0.103584  | 0.106935 | 0.109994 | 0.187937 | 0.11451  | 0.103584  | 0.118444 |
| 0.120047  | 0.123106 | 0.131119 | 0.202069 | 0.127477 | 0.11655   | 0.129079 |
| 0.119318  | 0.120047 | 0.121649 | 0.200758 | 0.12704  | 0.119318  | 0.129516 |
| 0.12398   | 0.127622 | 0.129808 | 0.195221 | 0.132284 | 0.120775  | 0.136509 |
| 0.110431  | 0.118444 | 0.123834 | 0.192745 | 0.118153 | 0.106643  | 0.121503 |
| 0.11116   | 0.11655  | 0.11961  | 0.191434 | 0.118007 | 0.108246  | 0.122815 |
| 0.119318  | 0.124126 | 0.125728 | 0.195804 | 0.126457 | 0.115822  | 0.128934 |
| 0.123106  | 0.131119 | 0.132139 | 0.207168 | 0.1419   | 0.124563  | 0.141171 |
| 0.128934  | 0.129371 | 0.130682 | 0.201923 | 0.129953 | 0.120484  | 0.135927 |
| 0.125291  | 0.128351 | 0.130245 | 0.207605 | 0.137966 | 0.125     | 0.139569 |
| 0.118735  | 0.135198 | 0.137092 | 0.196387 | 0.125583 | 0.123106  | 0.137092 |
| 0.106789  | 0.115093 | 0.115822 | 0.193182 | 0.117133 | 0.10708   | 0.119318 |
| 0.125146  | 0.129662 | 0.136218 | 0.199592 | 0.134615 | 0.123689  | 0.137966 |
| 0.106935  | 0.113199 | 0.115385 | 0.189248 | 0.116696 | 0.10373   | 0.115967 |
| 0.107372  | 0.121503 | 0.125146 | 0.184732 | 0.117133 | 0.104749  | 0.122523 |
| 0.107955  | 0.118298 | 0.120775 | 0.191142 | 0.118881 | 0.108246  | 0.122232 |
| 0.107809  | 0.115239 | 0.117716 | 0.186334 | 0.116404 | 0.102564  | 0.124126 |
| 0.107517  | 0.110868 | 0.117716 | 0.186334 | 0.113199 | 0.103438  | 0.117424 |
| 0.127768  | 0.129662 | 0.131847 | 0.204254 | 0.136364 | 0.125728  | 0.142628 |
| 0.100816  | 0.118444 | 0.124417 | 0.189831 | 0.118153 | 0.110431  | 0.123252 |
| 0.124417  | 0.130099 | 0.133159 | 0.207314 | 0.13243  | 0.123834  | 0.135198 |
| 0.108683  | 0.110577 | 0.115093 | 0.186043 | 0.116113 | 0.104895  | 0.121503 |
| 0.116696  | 0.121212 | 0.122523 | 0.201632 | 0.127622 | 0.116987  | 0.131265 |
| 0.122086  | 0.121941 | 0.123543 | 0.19595  | 0.106498 | 0.105769  | 0.127622 |
| 0.114219  | 0.122523 | 0.128205 | 0.183129 | 0.122232 | 0.107809  | 0.127331 |
| 0.107663  | 0.110431 | 0.112034 | 0.195513 | 0.115385 | 0.10912   | 0.126603 |
| 0.118298  | 0.124272 | 0.128205 | 0.191871 | 0.121066 | 0.113345  | 0.130245 |
| 0.116113  | 0.116259 | 0.118735 | 0.195221 | 0.118881 | 0.111451  | 0.124563 |
| 0.100379  | 0.1081   | 0.110868 | 0.187937 | 0.120629 | 0.104749  | 0.128351 |
| 0.12602   | 0.137238 | 0.136801 | 0.207168 | 0.131993 | 0.123689  | 0.142045 |
| 0.129371  | 0.132721 | 0.132284 | 0.212558 | 0.135052 | 0.131993  | 0.138695 |
| 0.0961538 | 0.108246 | 0.112179 | 0.186334 | 0.107663 | 0.0958625 | 0.115385 |
| 0.120775  | 0.134033 | 0.139132 | 0.206002 | 0.131119 | 0.11961   | 0.136509 |
| 0.115093  | 0.124563 | 0.125291 | 0.202069 | 0.128059 | 0.115676  | 0.138403 |
| 0.120921  | 0.130099 | 0.135781 | 0.200612 | 0.130682 | 0.117716  | 0.134324 |

|          |          |          |          |          |          |          |
|----------|----------|----------|----------|----------|----------|----------|
| 0.11014  | 0.124563 | 0.129953 | 0.191871 | 0.120484 | 0.107517 | 0.124126 |
| 0.116841 | 0.122523 | 0.122378 | 0.200612 | 0.12398  | 0.114802 | 0.131993 |
| 0.116404 | 0.126748 | 0.129808 | 0.198135 | 0.123543 | 0.112617 | 0.136509 |
| 0.121503 | 0.125728 | 0.128788 | 0.206148 | 0.127185 | 0.119172 | 0.130245 |
| 0.121503 | 0.141171 | 0.142483 | 0.209062 | 0.135344 | 0.127331 | 0.13986  |
| 0.120921 | 0.133887 | 0.138695 | 0.200903 | 0.117861 | 0.114802 | 0.129953 |
| 0.106643 | 0.118153 | 0.123543 | 0.18954  | 0.116404 | 0.1081   | 0.123834 |
| 0.123106 | 0.127331 | 0.128642 | 0.198718 | 0.131119 | 0.123689 | 0.134761 |
| 0.125    | 0.134178 | 0.138112 | 0.203817 | 0.131847 | 0.120921 | 0.143648 |
| 0.10373  | 0.116696 | 0.120338 | 0.186917 | 0.113199 | 0.101981 | 0.120047 |
| 0.21285  | 0.216783 | 0.220134 | 0.113928 | 0.204254 | 0.193619 | 0.212558 |
| 0.115239 | 0.122669 | 0.127768 | 0.196387 | 0.120338 | 0.111742 | 0.130973 |
| 0.108537 | 0.121503 | 0.12398  | 0.189103 | 0.11655  | 0.103584 | 0.127768 |
| 0.125    | 0.135927 | 0.141026 | 0.209936 | 0.129808 | 0.121212 | 0.134907 |
| 0.113928 | 0.122232 | 0.127914 | 0.192745 | 0.11961  | 0.106352 | 0.124417 |
| 0.121503 | 0.137092 | 0.138986 | 0.207022 | 0.127768 | 0.122086 | 0.13986  |
| 0.119464 | 0.123397 | 0.12704  | 0.193036 | 0.119901 | 0.110431 | 0.126457 |
| 0.110868 | 0.119755 | 0.126603 | 0.195513 | 0.113054 | 0.10708  | 0.125146 |
| 0.120192 | 0.134615 | 0.137092 | 0.197844 | 0.124709 | 0.114365 | 0.13243  |
| 0.12296  | 0.136218 | 0.140734 | 0.188957 | 0.127185 | 0.113928 | 0.134615 |
| 0.121941 | 0.13345  | 0.137383 | 0.203089 | 0.131119 | 0.122523 | 0.133887 |
| 0.118007 | 0.133013 | 0.139569 | 0.206731 | 0.130682 | 0.121503 | 0.131993 |
| 0.117716 | 0.131556 | 0.135781 | 0.205857 | 0.12398  | 0.115093 | 0.128205 |
| 0.110431 | 0.110286 | 0.110723 | 0.196241 | 0.119027 | 0.108392 | 0.125874 |
| 0.114802 | 0.118444 | 0.122086 | 0.196824 | 0.116696 | 0.107517 | 0.121503 |
| 0.12602  | 0.137238 | 0.140006 | 0.20338  | 0.13141  | 0.122815 | 0.138258 |
| 0.109848 | 0.12398  | 0.127914 | 0.188957 | 0.113491 | 0.104604 | 0.123543 |
| 0.132576 | 0.137092 | 0.141608 | 0.205274 | 0.137675 | 0.126748 | 0.138112 |
| 0.121358 | 0.1419   | 0.143502 | 0.188811 | 0.134033 | 0.125146 | 0.145833 |
| 0.110577 | 0.120921 | 0.122523 | 0.193473 | 0.119755 | 0.112908 | 0.131265 |
| 0.115239 | 0.131119 | 0.132139 | 0.198718 | 0.126748 | 0.113491 | 0.138549 |
| 0.112471 | 0.126311 | 0.128205 | 0.185169 | 0.121649 | 0.115093 | 0.131993 |
| 0.120192 | 0.120338 | 0.12398  | 0.194639 | 0.128788 | 0.118153 | 0.131556 |
| 0.112908 | 0.126166 | 0.129516 | 0.185023 | 0.120047 | 0.113491 | 0.128351 |
| 0.121358 | 0.1419   | 0.144376 | 0.193182 | 0.136946 | 0.128351 | 0.14292  |
| 0.109266 | 0.113199 | 0.114802 | 0.18546  | 0.116113 | 0.106352 | 0.123834 |
| 0.13243  | 0.135198 | 0.135635 | 0.202506 | 0.133741 | 0.124854 | 0.139132 |
| 0.122669 | 0.144668 | 0.151515 | 0.184295 | 0.133304 | 0.129953 | 0.143939 |
| 0.111014 | 0.121358 | 0.124126 | 0.201486 | 0.121066 | 0.115385 | 0.131702 |
| 0.11655  | 0.128059 | 0.13141  | 0.190122 | 0.126603 | 0.113345 | 0.130245 |
| 0.133596 | 0.136946 | 0.138258 | 0.204837 | 0.141026 | 0.137092 | 0.144376 |
| 0.125146 | 0.131702 | 0.13447  | 0.197552 | 0.128497 | 0.118153 | 0.125437 |
| 0.128788 | 0.138549 | 0.135781 | 0.21081  | 0.136218 | 0.130536 | 0.13986  |
| 0.125437 | 0.134615 | 0.133013 | 0.200466 | 0.128497 | 0.122815 | 0.139423 |

|           |          |          |          |           |           |           |
|-----------|----------|----------|----------|-----------|-----------|-----------|
| 0.116841  | 0.121941 | 0.124709 | 0.201777 | 0.129225  | 0.11655   | 0.132576  |
| 0.125146  | 0.133741 | 0.135052 | 0.202214 | 0.126166  | 0.120192  | 0.133596  |
| 0.115967  | 0.124563 | 0.124709 | 0.19391  | 0.121941  | 0.108974  | 0.134324  |
| 0.120775  | 0.129371 | 0.134178 | 0.202797 | 0.132284  | 0.122232  | 0.138549  |
| 0.119901  | 0.130245 | 0.135927 | 0.204545 | 0.127331  | 0.116113  | 0.13447   |
| 0.120192  | 0.13345  | 0.136509 | 0.205711 | 0.13549   | 0.127477  | 0.135635  |
| 0.11961   | 0.131993 | 0.135927 | 0.20979  | 0.13549   | 0.124854  | 0.135927  |
| 0.111451  | 0.129953 | 0.129808 | 0.198135 | 0.127331  | 0.11961   | 0.13884   |
| 0.133887  | 0.141317 | 0.144668 | 0.203671 | 0.132867  | 0.131556  | 0.145833  |
| 0.113199  | 0.123543 | 0.123106 | 0.195221 | 0.129953  | 0.112034  | 0.136218  |
| 0.114365  | 0.125    | 0.128934 | 0.198135 | 0.122669  | 0.112325  | 0.127768  |
| 0.121649  | 0.133159 | 0.134761 | 0.198427 | 0.13549   | 0.121358  | 0.137092  |
| 0.10708   | 0.117424 | 0.117861 | 0.194639 | 0.120921  | 0.110868  | 0.129225  |
| 0.123543  | 0.144376 | 0.14627  | 0.19799  | 0.13884   | 0.128205  | 0.148601  |
| 0.136364  | 0.158945 | 0.155886 | 0.207022 | 0.152535  | 0.145979  | 0.160256  |
| 0.122086  | 0.125728 | 0.129662 | 0.205274 | 0.128934  | 0.123543  | 0.134324  |
| 0.114365  | 0.117716 | 0.121941 | 0.198135 | 0.123834  | 0.116113  | 0.124854  |
| 0.124417  | 0.128642 | 0.130536 | 0.207896 | 0.130099  | 0.124126  | 0.130828  |
| 0.122523  | 0.13549  | 0.137092 | 0.206002 | 0.131702  | 0.119901  | 0.133887  |
| 0.121941  | 0.129371 | 0.130099 | 0.203671 | 0.129953  | 0.120484  | 0.135344  |
| 0.128351  | 0.136364 | 0.144376 | 0.213869 | 0.140443  | 0.124854  | 0.144668  |
| 0.123689  | 0.140734 | 0.14292  | 0.199883 | 0.128205  | 0.121066  | 0.142337  |
| 0.116259  | 0.125728 | 0.123543 | 0.203234 | 0.122815  | 0.114219  | 0.130536  |
| 0.143065  | 0.160402 | 0.162587 | 0.209936 | 0.151661  | 0.154138  | 0.155012  |
| 0.122669  | 0.128059 | 0.128497 | 0.200612 | 0.131847  | 0.118881  | 0.136364  |
| 0.126166  | 0.138549 | 0.141026 | 0.203234 | 0.137092  | 0.128205  | 0.150932  |
| 0.116113  | 0.123834 | 0.129225 | 0.202214 | 0.122378  | 0.115822  | 0.130973  |
| 0.123397  | 0.129953 | 0.130099 | 0.212704 | 0.136946  | 0.124854  | 0.135635  |
| 0.115239  | 0.125291 | 0.133013 | 0.196678 | 0.122378  | 0.112617  | 0.130099  |
| 0.0955711 | 0.137966 | 0.141026 | 0.16623  | 0.107372  | 0.111305  | 0.118298  |
| 0.138258  | 0.149476 | 0.155449 | 0.207751 | 0.139569  | 0.13447   | 0.141171  |
| 0.117133  | 0.122815 | 0.129371 | 0.188374 | 0.0689103 | 0.106061  | 0.048951  |
| 0.127768  | 0.136364 | 0.142045 | 0.168706 | 0.0795455 | 0.109411  | 0.0636655 |
| 0.141317  | 0.142337 | 0.146562 | 0.143794 | 0.132139  | 0.121795  | 0.146853  |
| 0.135198  | 0.148456 | 0.152098 | 0.143211 | 0.117279  | 0.119755  | 0.120047  |
| 0.109703  | 0.113345 | 0.116696 | 0.202506 | 0.122086  | 0.119318  | 0.13039   |
| 0.126457  | 0.132721 | 0.139569 | 0.196824 | 0.134178  | 0.121503  | 0.132576  |
| 0.104312  | 0.118735 | 0.121503 | 0.181381 | 0.112617  | 0.104895  | 0.116841  |
| 0.111451  | 0.108392 | 0.112908 | 0.183566 | 0.111014  | 0.103875  | 0.11961   |
| 0.112762  | 0.12398  | 0.125291 | 0.190122 | 0.121649  | 0.107517  | 0.128788  |
| 0.114219  | 0.122523 | 0.12704  | 0.186043 | 0.069493  | 0.104895  | 0.0457459 |
| 0.114365  | 0.107226 | 0.11116  | 0.18852  | 0.121212  | 0.109703  | 0.131265  |
| 0.104458  | 0.116259 | 0.122523 | 0.175117 | 0.087704  | 0.0901807 | 0.090472  |
| 0.115239  | 0.122086 | 0.128059 | 0.188811 | 0.105186  | 0.10708   | 0.108246  |

|           |          |           |           |           |           |           |
|-----------|----------|-----------|-----------|-----------|-----------|-----------|
| 0.116259  | 0.123397 | 0.127914  | 0.177885  | 0.114948  | 0.109848  | 0.124126  |
| 0.0990676 | 0.102418 | 0.105186  | 0.184586  | 0.110286  | 0.0973193 | 0.119755  |
| 0.117133  | 0.127185 | 0.131702  | 0.182547  | 0.0817308 | 0.104312  | 0.0568182 |
| 0.114073  | 0.124417 | 0.128642  | 0.187063  | 0.0772145 | 0.103293  | 0.053176  |
| 0.118153  | 0.112471 | 0.113782  | 0.195513  | 0.120338  | 0.112908  | 0.126894  |
| 0.212267  | 0.217075 | 0.221882  | 0.121503  | 0.197844  | 0.188666  | 0.210519  |
| 0.139132  | 0.144814 | 0.152535  | 0.20134   | 0.0874126 | 0.128059  | 0.0587121 |
| 0.120047  | 0.13039  | 0.134033  | 0.199446  | 0.128351  | 0.117424  | 0.127331  |
| 0.116696  | 0.128788 | 0.128642  | 0.188228  | 0.11655   | 0.114656  | 0.116113  |
| 0.206439  | 0.211247 | 0.214015  | 0.110723  | 0.19289   | 0.182838  | 0.203234  |
| 0.0919289 | 0.117716 | 0.118735  | 0.18007   | 0.114802  | 0.105332  | 0.129808  |
| 0.11451   | 0.050845 | 0.04662   | 0.193619  | 0.123397  | 0.115093  | 0.132576  |
| 0.125291  | 0.116696 | 0.121503  | 0.188666  | 0.120484  | 0.108683  | 0.126457  |
| 0.114365  | 0.118881 | 0.124272  | 0.186189  | 0.121212  | 0.113491  | 0.12602   |
| 0.243735  | 0.249709 | 0.255099  | 0.144231  | 0.233974  | 0.226836  | 0.241696  |
| 0.0574009 | 0.121941 | 0.126748  | 0.191579  | 0.127768  | 0.121212  | 0.128205  |
| 0.112471  | 0.10912  | 0.111888  | 0.188957  | 0.118153  | 0.107226  | 0.123252  |
| 0.119755  | 0.126603 | 0.129079  | 0.197698  | 0.125146  | 0.120047  | 0.12296   |
| 0.119172  | 0.122523 | 0.126166  | 0.192162  | 0.123689  | 0.114802  | 0.120629  |
| 0.0795455 | 0.12602  | 0.127914  | 0.186334  | 0.117279  | 0.118881  | 0.12704   |
| 0.11859   | 0.128059 | 0.130245  | 0.170892  | 0.0962995 | 0.100524  | 0.11014   |
| 0.117133  | 0.108537 | 0.112762  | 0.193036  | 0.118444  | 0.112179  | 0.126457  |
| 0.114656  | 0.124709 | 0.128642  | 0.183566  | 0.0745921 | 0.103293  | 0.0502622 |
| 0.117716  | 0.119901 | 0.126166  | 0.188957  | 0.122523  | 0.109557  | 0.124417  |
| 0.111014  | 0.111451 | 0.117424  | 0.186626  | 0.11553   | 0.110431  | 0.120629  |
| 0.112034  | 0.121795 | 0.125437  | 0.180361  | 0.0769231 | 0.100087  | 0.0584207 |
| 0.106061  | 0.122815 | 0.126166  | 0.190997  | 0.114948  | 0.10169   | 0.128788  |
| 0.140297  | 0.147145 | 0.153409  | 0.207168  | 0.140152  | 0.132139  | 0.141463  |
| 0.0613345 | 0.123834 | 0.125728  | 0.193473  | 0.127622  | 0.122815  | 0.130682  |
| 0.118735  | 0.048951 | 0.0479312 | 0.192308  | 0.124709  | 0.11757   | 0.130099  |
| 0.185169  | 0.192308 | 0.193328  | 0.0929487 | 0.174825  | 0.163316  | 0.184586  |
| 0.198864  | 0.203671 | 0.207896  | 0.103147  | 0.186772  | 0.180216  | 0.198281  |
| 0.113199  | 0.117716 | 0.124563  | 0.178613  | 0.118881  | 0.112034  | 0.125437  |
| 0.108246  | 0.113345 | 0.119027  | 0.184732  | 0.113345  | 0.107372  | 0.11757   |
| 0.126603  | 0.144814 | 0.150495  | 0.192308  | 0.121795  | 0.123689  | 0.12602   |
| 0.111451  | 0.106935 | 0.111742  | 0.189103  | 0.118881  | 0.109411  | 0.124272  |
| 0.0603147 | 0.123397 | 0.126166  | 0.196533  | 0.127477  | 0.124126  | 0.130536  |
| 0.126894  | 0.132576 | 0.138549  | 0.195804  | 0.124417  | 0.124272  | 0.124272  |
| 0.218094  | 0.224068 | 0.229458  | 0.114802  | 0.209499  | 0.195367  | 0.220717  |
| 0.10912   | 0.117716 | 0.121358  | 0.189685  | 0.117424  | 0.108246  | 0.116113  |
| 0.205711  | 0.208188 | 0.209207  | 0.141463  | 0.186334  | 0.177739  | 0.201923  |
| 0.0989219 | 0.102564 | 0.105041  | 0.194056  | 0.115967  | 0.108537  | 0.122523  |
| 0.108974  | 0.109411 | 0.109557  | 0.190705  | 0.120484  | 0.112762  | 0.122378  |
| 0.114073  | 0.119172 | 0.122232  | 0.180944  | 0.0973193 | 0.104167  | 0.106498  |

|           |           |           |           |           |           |           |
|-----------|-----------|-----------|-----------|-----------|-----------|-----------|
| 0.108829  | 0.111014  | 0.118153  | 0.179779  | 0.111888  | 0.103584  | 0.119027  |
| 0.20134   | 0.207605  | 0.213578  | 0.101544  | 0.188666  | 0.17803   | 0.202214  |
| 0.127622  | 0.132139  | 0.138112  | 0.183129  | 0.0756119 | 0.109848  | 0.0504079 |
| 0.109557  | 0.113491  | 0.117716  | 0.199155  | 0.121066  | 0.109848  | 0.124417  |
| 0.122669  | 0.126894  | 0.134615  | 0.189248  | 0.0729895 | 0.11014   | 0.0437063 |
| 0.122086  | 0.118735  | 0.123543  | 0.192453  | 0.115822  | 0.11451   | 0.12296   |
| 0.109557  | 0.113199  | 0.118881  | 0.185752  | 0.11553   | 0.11014   | 0.122086  |
| 0.099796  | 0.101981  | 0.106498  | 0.192308  | 0.114802  | 0.10912   | 0.121358  |
| 0.119901  | 0.113636  | 0.116987  | 0.18007   | 0.11451   | 0.106789  | 0.123689  |
| 0.119027  | 0.0425408 | 0.0493881 | 0.19289   | 0.125874  | 0.118735  | 0.127768  |
| 0.108829  | 0.119172  | 0.121941  | 0.177448  | 0.0748834 | 0.095134  | 0.0575466 |
| 0.112179  | 0.11116   | 0.115385  | 0.193036  | 0.120192  | 0.107226  | 0.124709  |
| 0.182547  | 0.188811  | 0.194493  | 0.0917832 | 0.171911  | 0.159237  | 0.184586  |
| 0.120338  | 0.125728  | 0.130536  | 0.196241  | 0.125728  | 0.121503  | 0.122669  |
| 0.121941  | 0.13141   | 0.134761  | 0.195804  | 0.125291  | 0.11553   | 0.126603  |
| 0.122378  | 0.123689  | 0.126748  | 0.187791  | 0.116404  | 0.117133  | 0.117133  |
| 0.0625    | 0.123252  | 0.126311  | 0.183858  | 0.124417  | 0.112325  | 0.133304  |
| 0.11757   | 0.121795  | 0.127185  | 0.187354  | 0.0699301 | 0.106206  | 0.0423951 |
| 0.105332  | 0.107809  | 0.110577  | 0.201049  | 0.119464  | 0.116113  | 0.125728  |
| 0.0955711 | 0.118444  | 0.119755  | 0.184586  | 0.106789  | 0.106061  | 0.118881  |
| 0.119755  | 0.114365  | 0.115385  | 0.195659  | 0.122815  | 0.114219  | 0.131119  |
| 0.117861  | 0.127331  | 0.13243   | 0.191725  | 0.116259  | 0.111742  | 0.11961   |
| 0.113199  | 0.119464  | 0.124563  | 0.190559  | 0.121795  | 0.114073  | 0.120484  |
| 0.114219  | 0.115822  | 0.123252  | 0.182547  | 0.114365  | 0.108392  | 0.121212  |
| 0.124272  | 0.120047  | 0.123106  | 0.195221  | 0.123252  | 0.110286  | 0.129808  |
| 0.134033  | 0.131556  | 0.134033  | 0.201195  | 0.133304  | 0.120629  | 0.136072  |
| 0.0504079 | 0.114656  | 0.116841  | 0.1875    | 0.123397  | 0.110431  | 0.126457  |
| 0.135052  | 0.141026  | 0.144668  | 0.199301  | 0.083042  | 0.122232  | 0.0563811 |
| 0.10708   | 0.115093  | 0.120484  | 0.183858  | 0.118007  | 0.108246  | 0.121649  |
| 0.112325  | 0.117716  | 0.125728  | 0.187646  | 0.108683  | 0.106789  | 0.112908  |
| 0.117133  | 0.123689  | 0.129079  | 0.171474  | 0.0756119 | 0.0917832 | 0.0710956 |
| 0.124126  | 0.11553   | 0.116841  | 0.190414  | 0.123106  | 0.113636  | 0.13141   |
| 0.185897  | 0.188957  | 0.195513  | 0.111742  | 0.170892  | 0.162296  | 0.185897  |
| 0.103875  | 0.107517  | 0.112325  | 0.189685  | 0.11859   | 0.104458  | 0.120775  |
| 0.101253  | 0.107226  | 0.112617  | 0.17803   | 0.104021  | 0.0948427 | 0.103584  |
| 0.116696  | 0.0422494 | 0.0444347 | 0.196678  | 0.125     | 0.115822  | 0.127185  |
| 0.177885  | 0.18007   | 0.183129  | 0.108974  | 0.153555  | 0.143794  | 0.177302  |
| 0.0728438 | 0.135052  | 0.136072  | 0.197115  | 0.14088   | 0.131702  | 0.138695  |
| 0.0810023 | 0.142337  | 0.142191  | 0.206439  | 0.146707  | 0.1419    | 0.152098  |
| 0.139714  | 0.148601  | 0.15574   | 0.208333  | 0.140443  | 0.136801  | 0.143211  |
| 0.0488054 | 0.118298  | 0.121358  | 0.184149  | 0.122669  | 0.104749  | 0.126311  |
| 0.118881  | 0.124272  | 0.130245  | 0.18546   | 0.0697844 | 0.106061  | 0.0425408 |
| 0.20236   | 0.210373  | 0.215763  | 0.106935  | 0.192016  | 0.184295  | 0.203526  |
| 0.119027  | 0.123834  | 0.128934  | 0.184732  | 0.118298  | 0.120775  | 0.119318  |

|           |           |           |           |           |           |           |
|-----------|-----------|-----------|-----------|-----------|-----------|-----------|
| 0.122378  | 0.127185  | 0.13549   | 0.188374  | 0.0738636 | 0.110431  | 0.0431235 |
| 0.108683  | 0.110577  | 0.114219  | 0.192162  | 0.117279  | 0.106935  | 0.123834  |
| 0.166375  | 0.170892  | 0.174242  | 0.131556  | 0.137092  | 0.138403  | 0.150932  |
| 0.106352  | 0.122523  | 0.123834  | 0.178759  | 0.109703  | 0.103147  | 0.113636  |
| 0.13884   | 0.146853  | 0.151078  | 0.20338   | 0.145688  | 0.133596  | 0.148164  |
| 0.110577  | 0.117424  | 0.11961   | 0.183275  | 0.122086  | 0.109994  | 0.129225  |
| 0.183712  | 0.190559  | 0.194202  | 0.0903263 | 0.17366   | 0.161859  | 0.184003  |
| 0.0523019 | 0.120338  | 0.123689  | 0.193182  | 0.129371  | 0.115822  | 0.129225  |
| 0.102127  | 0.109848  | 0.114656  | 0.182984  | 0.0917832 | 0.0840618 | 0.112617  |
| 0.115676  | 0.12398   | 0.126457  | 0.18954   | 0.116113  | 0.110723  | 0.116841  |
| 0.107955  | 0.107809  | 0.110577  | 0.189685  | 0.122086  | 0.117279  | 0.121066  |
| 0.114656  | 0.0463287 | 0.0467657 | 0.191142  | 0.122378  | 0.114656  | 0.127768  |
| 0.112325  | 0.12704   | 0.130682  | 0.183275  | 0.122669  | 0.113491  | 0.12398   |
| 0.1081    | 0.113199  | 0.119755  | 0.181672  | 0.116696  | 0.107517  | 0.121795  |
| 0.184295  | 0.188811  | 0.195659  | 0.0920746 | 0.174825  | 0.160693  | 0.186043  |
| 0.122086  | 0.118153  | 0.125583  | 0.18954   | 0.119901  | 0.112179  | 0.127331  |
| 0.109703  | 0.113928  | 0.120192  | 0.179487  | 0.100524  | 0.0965909 | 0.113199  |
| 0.206294  | 0.211684  | 0.214744  | 0.110868  | 0.194784  | 0.184441  | 0.206294  |
| 0.121212  | 0.126311  | 0.129371  | 0.198281  | 0.12602   | 0.119172  | 0.124417  |
| 0.107372  | 0.114219  | 0.120484  | 0.182984  | 0.11859   | 0.109411  | 0.121941  |
| 0.103875  | 0.109848  | 0.11757   | 0.181527  | 0.111305  | 0.103293  | 0.116113  |
| 0.134907  | 0.142045  | 0.147436  | 0.197407  | 0.0826049 | 0.119464  | 0.0699301 |
| 0.18007   | 0.189831  | 0.197261  | 0.0884324 | 0.172931  | 0.161131  | 0.18648   |
| 0.117861  | 0.108974  | 0.111451  | 0.195804  | 0.121212  | 0.112034  | 0.127477  |
| 0.129225  | 0.126166  | 0.130099  | 0.197552  | 0.127914  | 0.11553   | 0.133887  |
| 0.105624  | 0.111305  | 0.116987  | 0.185606  | 0.116259  | 0.105624  | 0.121358  |
| 0.104167  | 0.112179  | 0.117861  | 0.182692  | 0.111597  | 0.105332  | 0.118153  |
| 0.107226  | 0.113491  | 0.117424  | 0.179341  | 0.114948  | 0.104895  | 0.123252  |
| 0.11553   | 0.121212  | 0.128934  | 0.186189  | 0.0743007 | 0.103584  | 0.0540501 |
| 0.0973193 | 0.101544  | 0.11014   | 0.184586  | 0.108829  | 0.0979021 | 0.118007  |
| 0.0588578 | 0.121941  | 0.126457  | 0.193036  | 0.128934  | 0.120047  | 0.13345   |
| 0.131119  | 0.136218  | 0.139569  | 0.200321  | 0.123106  | 0.119172  | 0.123252  |
| 0.0527389 | 0.124272  | 0.125874  | 0.193036  | 0.126311  | 0.117716  | 0.13141   |
| 0.125728  | 0.125583  | 0.130973  | 0.198427  | 0.123252  | 0.122232  | 0.128642  |
| 0.186772  | 0.194784  | 0.201049  | 0.0945513 | 0.179633  | 0.167249  | 0.188228  |
| 0.119027  | 0.115385  | 0.121066  | 0.190851  | 0.122086  | 0.106498  | 0.127768  |
| 0.127331  | 0.129516  | 0.138403  | 0.189831  | 0.0773601 | 0.113928  | 0.048951  |
| 0.103584  | 0.109557  | 0.11553   | 0.183275  | 0.114219  | 0.106789  | 0.11961   |
| 0.0973193 | 0.104749  | 0.107517  | 0.181964  | 0.109703  | 0.0996503 | 0.120047  |
| 0.104021  | 0.119901  | 0.124417  | 0.181381  | 0.109703  | 0.100233  | 0.120629  |
| 0.118153  | 0.108974  | 0.114365  | 0.192599  | 0.118007  | 0.11116   | 0.126311  |
| 0.125437  | 0.13141   | 0.135927  | 0.189394  | 0.126457  | 0.123106  | 0.125728  |
| 0.109557  | 0.124563  | 0.13141   | 0.191579  | 0.117861  | 0.105769  | 0.121795  |
| 0.104895  | 0.10708   | 0.108974  | 0.18109   | 0.109703  | 0.0996503 | 0.124417  |

|           |           |           |           |           |           |           |
|-----------|-----------|-----------|-----------|-----------|-----------|-----------|
| 0.10271   | 0.104021  | 0.106206  | 0.180361  | 0.104895  | 0.0939685 | 0.116404  |
| 0.100233  | 0.113491  | 0.113928  | 0.180216  | 0.0890152 | 0.0871212 | 0.113345  |
| 0.0995047 | 0.101981  | 0.107955  | 0.194347  | 0.114219  | 0.112325  | 0.122232  |
| 0.0655594 | 0.128642  | 0.128497  | 0.199155  | 0.13243   | 0.125874  | 0.136946  |
| 0.11757   | 0.111305  | 0.112325  | 0.191434  | 0.119755  | 0.110868  | 0.129516  |
| 0.111305  | 0.119901  | 0.125     | 0.178467  | 0.0793998 | 0.102273  | 0.0571096 |
| 0.11014   | 0.107372  | 0.107226  | 0.189831  | 0.116696  | 0.107517  | 0.123834  |
| 0.10708   | 0.113345  | 0.121649  | 0.180653  | 0.113054  | 0.103875  | 0.120484  |
| 0.102273  | 0.107955  | 0.112471  | 0.193036  | 0.115239  | 0.102855  | 0.120047  |
| 0.107226  | 0.116113  | 0.121212  | 0.184003  | 0.117279  | 0.107517  | 0.123252  |
| 0.11451   | 0.110868  | 0.11655   | 0.186917  | 0.11553   | 0.0999417 | 0.121503  |
| 0.116841  | 0.124272  | 0.129079  | 0.18954   | 0.118153  | 0.106935  | 0.120921  |
| 0.108974  | 0.0534674 | 0.0541958 | 0.193328  | 0.122523  | 0.11014   | 0.123834  |
| 0.101836  | 0.112179  | 0.113782  | 0.185606  | 0.109848  | 0.10067   | 0.120775  |
| 0.106935  | 0.113491  | 0.117716  | 0.182547  | 0.117861  | 0.106352  | 0.119755  |
| 0.11655   | 0.122523  | 0.129079  | 0.176428  | 0.115822  | 0.108392  | 0.121503  |
| 0.117279  | 0.123543  | 0.124854  | 0.186189  | 0.107226  | 0.106498  | 0.116113  |
| 0.106643  | 0.114073  | 0.118007  | 0.187209  | 0.106498  | 0.0987762 | 0.120629  |
| 0.106643  | 0.114365  | 0.117716  | 0.186626  | 0.112617  | 0.106935  | 0.118007  |
| 0.117279  | 0.122669  | 0.126311  | 0.184149  | 0.0681818 | 0.103875  | 0.0473485 |
| 0.099796  | 0.103438  | 0.107663  | 0.192308  | 0.119172  | 0.109994  | 0.127185  |
| 0.116404  | 0.126457  | 0.129516  | 0.185897  | 0.0748834 | 0.103875  | 0.050845  |
| 0.110286  | 0.0518648 | 0.0528846 | 0.191434  | 0.123543  | 0.113491  | 0.129225  |
| 0.102418  | 0.108392  | 0.112908  | 0.187937  | 0.115385  | 0.104458  | 0.123689  |
| 0.100087  | 0.113054  | 0.116404  | 0.182401  | 0.113054  | 0.101544  | 0.112617  |
| 0.102273  | 0.108246  | 0.112179  | 0.19391   | 0.11553   | 0.101981  | 0.121503  |
| 0.120484  | 0.124126  | 0.131265  | 0.184732  | 0.0748834 | 0.103875  | 0.055507  |
| 0.118735  | 0.123252  | 0.124854  | 0.191725  | 0.104021  | 0.107372  | 0.119318  |
| 0.108683  | 0.120192  | 0.125     | 0.182255  | 0.105915  | 0.104895  | 0.112179  |
| 0.186772  | 0.19391   | 0.200175  | 0.0957168 | 0.177302  | 0.164627  | 0.18852   |
| 0.162587  | 0.167395  | 0.171911  | 0.122523  | 0.139714  | 0.13549   | 0.153555  |
| 0.0509907 | 0.119901  | 0.124126  | 0.190997  | 0.123689  | 0.114802  | 0.129953  |
| 0.11757   | 0.115967  | 0.122523  | 0.182401  | 0.102273  | 0.101836  | 0.118735  |
| 0.0831876 | 0.145105  | 0.145251  | 0.212995  | 0.14831   | 0.143502  | 0.153118  |
| 0.120338  | 0.12398   | 0.129953  | 0.189248  | 0.125437  | 0.114802  | 0.129079  |
| 0.114656  | 0.120921  | 0.126311  | 0.18211   | 0.116259  | 0.107955  | 0.12602   |
| 0.110431  | 0.121066  | 0.125583  | 0.180798  | 0.105041  | 0.0952797 | 0.115676  |
| 0.106352  | 0.119027  | 0.123252  | 0.190122  | 0.114073  | 0.100233  | 0.125     |
| 0.120338  | 0.12398   | 0.126166  | 0.188666  | 0.107663  | 0.104312  | 0.117424  |
| 0.195659  | 0.201049  | 0.209936  | 0.102273  | 0.184441  | 0.172057  | 0.196824  |
| 0.116259  | 0.112617  | 0.115385  | 0.19595   | 0.122815  | 0.115676  | 0.128205  |
| 0.113491  | 0.119172  | 0.125146  | 0.18007   | 0.0798368 | 0.097465  | 0.0770688 |
| 0.107372  | 0.111014  | 0.117279  | 0.180944  | 0.105769  | 0.099796  | 0.11961   |
| 0.116259  | 0.115822  | 0.122378  | 0.188957  | 0.118153  | 0.109266  | 0.126166  |

|           |           |           |           |           |           |           |
|-----------|-----------|-----------|-----------|-----------|-----------|-----------|
| 0.182838  | 0.187354  | 0.193328  | 0.110431  | 0.164627  | 0.151078  | 0.180507  |
| 0.239948  | 0.245338  | 0.250728  | 0.13141   | 0.227855  | 0.21926   | 0.239948  |
| 0.11553   | 0.127914  | 0.132721  | 0.195221  | 0.121212  | 0.112325  | 0.122815  |
| 0.118153  | 0.120629  | 0.126603  | 0.187937  | 0.107809  | 0.105624  | 0.114656  |
| 0.0543415 | 0.120047  | 0.121358  | 0.191142  | 0.125874  | 0.119318  | 0.128934  |
| 0.107809  | 0.0517191 | 0.0515734 | 0.189248  | 0.121649  | 0.111014  | 0.125291  |
| 0.112325  | 0.105769  | 0.10912   | 0.191142  | 0.115967  | 0.108537  | 0.121358  |
| 0.1081    | 0.115822  | 0.120047  | 0.183421  | 0.117861  | 0.106935  | 0.119172  |
| 0.109411  | 0.115676  | 0.124272  | 0.176282  | 0.0839161 | 0.0968823 | 0.088141  |
| 0.112908  | 0.11014   | 0.112325  | 0.192599  | 0.116259  | 0.109703  | 0.124854  |
| 0.107517  | 0.121066  | 0.125     | 0.177885  | 0.0785256 | 0.0967366 | 0.0772145 |
| 0.113199  | 0.121795  | 0.126311  | 0.191725  | 0.109848  | 0.103001  | 0.123689  |
| 0.102564  | 0.105332  | 0.111597  | 0.184003  | 0.109703  | 0.101107  | 0.119464  |
| 0.114948  | 0.127331  | 0.130099  | 0.19289   | 0.118007  | 0.111451  | 0.122232  |
| 0.118298  | 0.121941  | 0.127331  | 0.186917  | 0.0738636 | 0.104895  | 0.0530303 |
| 0.105186  | 0.10912   | 0.110431  | 0.17905   | 0.108537  | 0.097028  | 0.109848  |
| 0.119464  | 0.124563  | 0.127331  | 0.202652  | 0.126311  | 0.117133  | 0.132576  |
| 0.125     | 0.0572552 | 0.0498252 | 0.204108  | 0.133887  | 0.125291  | 0.135781  |
| 0.10708   | 0.115093  | 0.119318  | 0.183275  | 0.113928  | 0.105915  | 0.118444  |
| 0.102564  | 0.118153  | 0.123252  | 0.176136  | 0.114656  | 0.104312  | 0.12704   |
| 0.121795  | 0.125437  | 0.131119  | 0.194202  | 0.128351  | 0.121212  | 0.13141   |
| 0.199155  | 0.207168  | 0.211684  | 0.122669  | 0.190559  | 0.184295  | 0.202069  |
| 0.10373   | 0.118153  | 0.121212  | 0.18109   | 0.112034  | 0.0996503 | 0.115093  |
| 0.103293  | 0.105186  | 0.10912   | 0.187063  | 0.112762  | 0.102127  | 0.123397  |
| 0.11961   | 0.11655   | 0.119318  | 0.188228  | 0.122086  | 0.103293  | 0.128059  |
| 0.120338  | 0.126603  | 0.13141   | 0.196241  | 0.12398   | 0.119755  | 0.123252  |
| 0.114219  | 0.113199  | 0.119755  | 0.188666  | 0.110577  | 0.109266  | 0.118298  |
| 0.19493   | 0.199155  | 0.202797  | 0.0995047 | 0.184295  | 0.173368  | 0.196096  |
| 0.118444  | 0.126748  | 0.132139  | 0.187063  | 0.0780886 | 0.105624  | 0.0543415 |
| 0.104604  | 0.111451  | 0.118881  | 0.181964  | 0.112325  | 0.104312  | 0.119172  |
| 0.112617  | 0.123252  | 0.125146  | 0.195221  | 0.121795  | 0.112908  | 0.12398   |
| 0.108829  | 0.0486597 | 0.0496795 | 0.190559  | 0.120921  | 0.109994  | 0.121649  |
| 0.116696  | 0.127914  | 0.132721  | 0.183858  | 0.0751748 | 0.102418  | 0.0569639 |
| 0.105332  | 0.114802  | 0.121941  | 0.175408  | 0.0903263 | 0.0965909 | 0.0828963 |
| 0.112325  | 0.120629  | 0.125728  | 0.193182  | 0.112471  | 0.104167  | 0.122232  |
| 0.115822  | 0.120921  | 0.125437  | 0.193473  | 0.122086  | 0.113491  | 0.11961   |
| 0.192308  | 0.19799   | 0.203671  | 0.100962  | 0.181381  | 0.173077  | 0.192016  |
| 0.109411  | 0.117716  | 0.121941  | 0.177156  | 0.076049  | 0.0948427 | 0.0590035 |
| 0.188811  | 0.196241  | 0.200175  | 0.0893065 | 0.178467  | 0.167249  | 0.190851  |
| 0.186334  | 0.193765  | 0.198281  | 0.087704  | 0.177156  | 0.163899  | 0.189831  |
| 0.121066  | 0.0533217 | 0.0534674 | 0.198135  | 0.130536  | 0.120192  | 0.133887  |
| 0.124563  | 0.134324  | 0.135927  | 0.204545  | 0.13345   | 0.127185  | 0.131556  |
| 0.101836  | 0.114219  | 0.116987  | 0.186189  | 0.100816  | 0.0942599 | 0.113491  |
| 0.106352  | 0.115822  | 0.121795  | 0.180216  | 0.0831876 | 0.0938228 | 0.0649767 |



|           |           |           |           |           |           |           |
|-----------|-----------|-----------|-----------|-----------|-----------|-----------|
| 0.113491  | 0.123834  | 0.126894  | 0.182984  | 0.0766317 | 0.10067   | 0.0572552 |
| 0.109411  | 0.113345  | 0.11961   | 0.180361  | 0.11655   | 0.105915  | 0.123397  |
| 0.104749  | 0.104604  | 0.108246  | 0.188811  | 0.112471  | 0.104749  | 0.116404  |
| 0.112617  | 0.104895  | 0.107955  | 0.192016  | 0.115676  | 0.106498  | 0.12398   |
| 0.119464  | 0.128351  | 0.13345   | 0.190122  | 0.121649  | 0.114802  | 0.123252  |
| 0.113199  | 0.0495338 | 0.0511364 | 0.193473  | 0.125291  | 0.115239  | 0.127185  |
| 0.099359  | 0.113199  | 0.118881  | 0.181672  | 0.110577  | 0.102273  | 0.115676  |
| 0.116404  | 0.123834  | 0.130099  | 0.18648   | 0.076049  | 0.100379  | 0.0537587 |
| 0.0990676 | 0.10708   | 0.113345  | 0.181964  | 0.0895979 | 0.0812937 | 0.111014  |
| 0.124854  | 0.131702  | 0.136509  | 0.189977  | 0.0763403 | 0.113491  | 0.053176  |
| 0.050845  | 0.119755  | 0.123397  | 0.191725  | 0.124709  | 0.114073  | 0.128642  |
| 0.127331  | 0.135052  | 0.141608  | 0.195367  | 0.0782343 | 0.117424  | 0.0530303 |
| 0.253788  | 0.260635  | 0.264569  | 0.135344  | 0.243444  | 0.231061  | 0.254079  |
| 0.116259  | 0.121941  | 0.125874  | 0.207896  | 0.128934  | 0.119172  | 0.13141   |
| 0.118153  | 0.119755  | 0.122815  | 0.199883  | 0.129371  | 0.122232  | 0.132139  |
| 0.212413  | 0.218386  | 0.222902  | 0.116113  | 0.198572  | 0.192016  | 0.210664  |
| 0.119027  | 0.11655   | 0.119318  | 0.197552  | 0.134324  | 0.122232  | 0.131265  |
| 0.225379  | 0.231061  | 0.234411  | 0.121503  | 0.21183   | 0.202652  | 0.224213  |
| 0.112179  | 0.114073  | 0.11859   | 0.198281  | 0.122232  | 0.110723  | 0.123834  |
| 0.120484  | 0.121795  | 0.128059  | 0.195513  | 0.125874  | 0.11961   | 0.130973  |
| 0.112617  | 0.119172  | 0.123397  | 0.190559  | 0.119755  | 0.110868  | 0.116987  |
| 0.117279  | 0.0495338 | 0.0479312 | 0.197261  | 0.127914  | 0.118444  | 0.129808  |
| 0.198281  | 0.204837  | 0.207314  | 0.0958625 | 0.190559  | 0.173514  | 0.200612  |
| 0.126894  | 0.131702  | 0.13884   | 0.194347  | 0.0775058 | 0.11553   | 0.053176  |
| 0.117279  | 0.126457  | 0.13039   | 0.182401  | 0.076049  | 0.102418  | 0.0563811 |
| 0.221445  | 0.226544  | 0.233392  | 0.121941  | 0.210227  | 0.20134   | 0.221154  |
| 0.115239  | 0.111597  | 0.114365  | 0.186772  | 0.118298  | 0.10912   | 0.125437  |
| 0.192599  | 0.19799   | 0.203963  | 0.0965909 | 0.183712  | 0.169289  | 0.194639  |
| 0.116841  | 0.109703  | 0.111597  | 0.192745  | 0.11757   | 0.110431  | 0.126166  |
| 0.106061  | 0.116987  | 0.12296   | 0.184586  | 0.114948  | 0.107226  | 0.123543  |
| 0.110286  | 0.115676  | 0.120484  | 0.195513  | 0.121212  | 0.114073  | 0.125146  |
| 0.121941  | 0.0533217 | 0.0505536 | 0.205128  | 0.133159  | 0.12398   | 0.134761  |
| 0.106935  | 0.12398   | 0.127622  | 0.183129  | 0.112325  | 0.103438  | 0.118007  |
| 0.151515  | 0.161568  | 0.167541  | 0.122523  | 0.141754  | 0.13345   | 0.162296  |
| 0.109266  | 0.117861  | 0.124709  | 0.181381  | 0.0726981 | 0.0981935 | 0.0498252 |
| 0.119172  | 0.124854  | 0.128497  | 0.193619  | 0.125728  | 0.115385  | 0.124709  |
| 0.11859   | 0.114365  | 0.118007  | 0.18546   | 0.121941  | 0.113636  | 0.129953  |
| 0.125874  | 0.128351  | 0.135198  | 0.193328  | 0.120484  | 0.11859   | 0.122086  |
| 0.18954   | 0.19493   | 0.200029  | 0.0964452 | 0.180361  | 0.167395  | 0.190705  |
| 0.107226  | 0.112325  | 0.114802  | 0.183712  | 0.114656  | 0.106352  | 0.119172  |
| 0.11757   | 0.0579837 | 0.0575466 | 0.180944  | 0.125583  | 0.10912   | 0.132721  |
| 0.0984848 | 0.103584  | 0.107517  | 0.194202  | 0.115239  | 0.111597  | 0.124709  |
| 0.117279  | 0.107226  | 0.113199  | 0.195221  | 0.118298  | 0.111742  | 0.124272  |
| 0.113345  | 0.117279  | 0.125     | 0.185752  | 0.11757   | 0.110723  | 0.125291  |

|           |           |           |           |           |           |           |
|-----------|-----------|-----------|-----------|-----------|-----------|-----------|
| 0.252185  | 0.257867  | 0.261218  | 0.141317  | 0.238345  | 0.22771   | 0.248106  |
| 0.105769  | 0.107955  | 0.113054  | 0.190705  | 0.11553   | 0.106935  | 0.124126  |
| 0.118881  | 0.114948  | 0.122086  | 0.182255  | 0.111742  | 0.101107  | 0.123834  |
| 0.175991  | 0.18109   | 0.184149  | 0.139132  | 0.159528  | 0.153846  | 0.174242  |
| 0.176573  | 0.185169  | 0.190559  | 0.0901807 | 0.1706    | 0.155886  | 0.182401  |
| 0.120047  | 0.126603  | 0.132576  | 0.189248  | 0.11757   | 0.106061  | 0.126166  |
| 0.116696  | 0.123543  | 0.129516  | 0.187937  | 0.0728438 | 0.106498  | 0.0534674 |
| 0.107955  | 0.0536131 | 0.0557984 | 0.190268  | 0.11859   | 0.111451  | 0.122815  |
| 0.142774  | 0.145251  | 0.152972  | 0.199446  | 0.08581   | 0.129953  | 0.0614802 |
| 0.110431  | 0.122232  | 0.127622  | 0.187209  | 0.117861  | 0.106643  | 0.122086  |
| 0.118735  | 0.128205  | 0.134178  | 0.194347  | 0.120629  | 0.11116   | 0.12602   |
| 0.120629  | 0.112617  | 0.117716  | 0.195367  | 0.121358  | 0.114802  | 0.129079  |
| 0.11451   | 0.118444  | 0.125291  | 0.181381  | 0.0686189 | 0.10373   | 0.0480769 |
| 0.126603  | 0.129953  | 0.137966  | 0.189977  | 0.0743007 | 0.113491  | 0.050845  |
| 0.116841  | 0.114948  | 0.11859   | 0.177302  | 0.111451  | 0.103147  | 0.123834  |
| 0.119901  | 0.0477855 | 0.050845  | 0.197844  | 0.125874  | 0.11961   | 0.13039   |
| 0.132576  | 0.0610431 | 0.0600233 | 0.207605  | 0.140589  | 0.134324  | 0.143065  |
| 0.108829  | 0.11451   | 0.117279  | 0.191434  | 0.121503  | 0.112034  | 0.126894  |
| 0.122378  | 0.0537587 | 0.0506993 | 0.203234  | 0.131847  | 0.126166  | 0.137821  |
| 0.12296   | 0.116987  | 0.11859   | 0.202069  | 0.127185  | 0.117424  | 0.130245  |
| 0.201195  | 0.208042  | 0.213432  | 0.0996503 | 0.191434  | 0.179633  | 0.200903  |
| 0.109848  | 0.123689  | 0.124417  | 0.199155  | 0.123689  | 0.113928  | 0.134615  |
| 0.186189  | 0.192162  | 0.19697   | 0.0872669 | 0.17701   | 0.164627  | 0.186772  |
| 0.112179  | 0.116404  | 0.122669  | 0.186043  | 0.120192  | 0.108974  | 0.121212  |
| 0.119755  | 0.118735  | 0.127331  | 0.186917  | 0.122815  | 0.11451   | 0.125291  |
| 0.0608974 | 0.122232  | 0.123543  | 0.18954   | 0.121358  | 0.118881  | 0.126166  |
| 0.0502622 | 0.118881  | 0.120775  | 0.186189  | 0.122669  | 0.10912   | 0.124563  |
| 0.118298  | 0.124272  | 0.129079  | 0.184586  | 0.0697844 | 0.106061  | 0.0439977 |
| 0.119172  | 0.123689  | 0.130536  | 0.186626  | 0.064831  | 0.106643  | 0.0434149 |
| 0.110431  | 0.113199  | 0.119755  | 0.17905   | 0.116404  | 0.106061  | 0.122378  |
| 0.118444  | 0.123834  | 0.127768  | 0.191434  | 0.124417  | 0.115239  | 0.121649  |
| 0.060169  | 0.123543  | 0.12602   | 0.195221  | 0.123543  | 0.116404  | 0.123106  |
| 0.127622  | 0.118153  | 0.120629  | 0.190997  | 0.130682  | 0.118298  | 0.138695  |
| 0.246503  | 0.251311  | 0.255536  | 0.141171  | 0.234994  | 0.224359  | 0.24359   |
| 0.110723  | 0.119027  | 0.12296   | 0.184003  | 0.117279  | 0.111888  | 0.123252  |
| 0.176719  | 0.183275  | 0.188666  | 0.0926573 | 0.16958   | 0.15778   | 0.181381  |
| 0.182401  | 0.188957  | 0.192308  | 0.0875583 | 0.174097  | 0.162005  | 0.183858  |
| 0.115822  | 0.126457  | 0.128934  | 0.182401  | 0.120921  | 0.108537  | 0.128642  |
| 0.101544  | 0.109266  | 0.11116   | 0.18852   | 0.113636  | 0.105332  | 0.118735  |
| 0.118735  | 0.121212  | 0.126894  | 0.193182  | 0.120629  | 0.11757   | 0.127768  |
| 0.111742  | 0.119755  | 0.125146  | 0.179779  | 0.0769231 | 0.0995047 | 0.0537587 |
| 0.103438  | 0.116696  | 0.120921  | 0.179341  | 0.110286  | 0.0952797 | 0.126457  |
| 0.113636  | 0.110577  | 0.112471  | 0.192745  | 0.118444  | 0.109557  | 0.125583  |
| 0.11961   | 0.124709  | 0.129808  | 0.183858  | 0.0772145 | 0.101836  | 0.0738636 |

|           |           |           |           |           |           |           |
|-----------|-----------|-----------|-----------|-----------|-----------|-----------|
| 0.13039   | 0.137238  | 0.140297  | 0.197552  | 0.0801282 | 0.117861  | 0.0502622 |
| 0.108683  | 0.114073  | 0.121212  | 0.183421  | 0.114948  | 0.106935  | 0.121212  |
| 0.125583  | 0.131847  | 0.138403  | 0.191871  | 0.0750291 | 0.11451   | 0.0521562 |
| 0.108829  | 0.111305  | 0.114365  | 0.192016  | 0.121503  | 0.113491  | 0.12398   |
| 0.0610431 | 0.125583  | 0.127185  | 0.197261  | 0.130536  | 0.122232  | 0.129516  |
| 0.114802  | 0.0528846 | 0.0553613 | 0.191288  | 0.122815  | 0.112471  | 0.127914  |
| 0.124854  | 0.119755  | 0.11961   | 0.203089  | 0.129953  | 0.122232  | 0.13447   |
| 0.120338  | 0.123689  | 0.126457  | 0.192745  | 0.114948  | 0.106643  | 0.126748  |
| 0.10373   | 0.113491  | 0.119464  | 0.178759  | 0.11116   | 0.104312  | 0.118881  |
| 0.131993  | 0.129516  | 0.131993  | 0.199738  | 0.127768  | 0.118881  | 0.131702  |
| 0.180216  | 0.188228  | 0.190414  | 0.0909091 | 0.172494  | 0.15574   | 0.185169  |
| 0.132284  | 0.135927  | 0.142774  | 0.198281  | 0.081148  | 0.121503  | 0.0536131 |
| 0.116259  | 0.124563  | 0.127914  | 0.185752  | 0.0692016 | 0.10373   | 0.0474942 |
| 0.0517191 | 0.119172  | 0.120484  | 0.193473  | 0.125     | 0.116987  | 0.129225  |
| 0         | 0.113491  | 0.118298  | 0.186626  | 0.118444  | 0.102564  | 0.119172  |
| 0.113491  | 0         | 0.0456002 | 0.190851  | 0.118007  | 0.111451  | 0.124272  |
| 0.118298  | 0.0456002 | 0         | 0.197407  | 0.125728  | 0.117424  | 0.132867  |
| 0.186626  | 0.190851  | 0.197407  | 0         | 0.176865  | 0.162442  | 0.189831  |
| 0.118444  | 0.118007  | 0.125728  | 0.176865  | 0         | 0.090472  | 0.0700758 |
| 0.102564  | 0.111451  | 0.117424  | 0.162442  | 0.090472  | 0         | 0.108974  |
| 0.119172  | 0.124272  | 0.132867  | 0.189831  | 0.0700758 | 0.108974  | 0         |
| 0.188083  | 0.193765  | 0.200903  | 0.0879953 | 0.175408  | 0.163899  | 0.186626  |
| 0.0996503 | 0.107663  | 0.109266  | 0.18109   | 0.109411  | 0.0984848 | 0.120629  |
| 0.120775  | 0.111888  | 0.114365  | 0.199883  | 0.122669  | 0.11757   | 0.129808  |
| 0.118153  | 0.126457  | 0.131847  | 0.189977  | 0.0693473 | 0.109994  | 0.0482226 |
| 0.113636  | 0.119318  | 0.12704   | 0.18954   | 0.116696  | 0.106061  | 0.11859   |
| 0.180361  | 0.191579  | 0.196678  | 0.0884324 | 0.172057  | 0.158508  | 0.181818  |
| 0.116841  | 0.109411  | 0.111597  | 0.190705  | 0.117279  | 0.109266  | 0.121212  |
| 0.116259  | 0.114656  | 0.117716  | 0.178759  | 0.109994  | 0.0952797 | 0.115093  |
| 0.102564  | 0.111742  | 0.115093  | 0.174679  | 0.111451  | 0.0932401 | 0.122086  |
| 0.107517  | 0.125437  | 0.130828  | 0.16419   | 0.10912   | 0.0999417 | 0.119464  |
| 0.117861  | 0.128788  | 0.129225  | 0.196387  | 0.126457  | 0.116404  | 0.12602   |
| 0.123106  | 0.115676  | 0.114656  | 0.20134   | 0.125874  | 0.117279  | 0.131556  |
| 0.106498  | 0.111597  | 0.11961   | 0.185606  | 0.113054  | 0.107372  | 0.117861  |
| 0.11757   | 0.122378  | 0.125728  | 0.193182  | 0.11451   | 0.112908  | 0.113782  |
| 0.138695  | 0.147873  | 0.15472   | 0.206731  | 0.140006  | 0.133741  | 0.143939  |
| 0.231352  | 0.235868  | 0.241259  | 0.127185  | 0.21926   | 0.210956  | 0.229604  |
| 0.122669  | 0.127185  | 0.130245  | 0.199155  | 0.116404  | 0.114219  | 0.129953  |
| 0.116259  | 0.122523  | 0.128497  | 0.195659  | 0.123397  | 0.115967  | 0.126457  |
| 0.116113  | 0.12296   | 0.12602   | 0.182692  | 0.0670163 | 0.101544  | 0.0528846 |
| 0.112471  | 0.131556  | 0.134615  | 0.183129  | 0.128934  | 0.113928  | 0.129079  |
| 0.109411  | 0.118298  | 0.119901  | 0.186772  | 0.107517  | 0.105041  | 0.114656  |
| 0.116404  | 0.115676  | 0.124563  | 0.185897  | 0.112762  | 0.110868  | 0.121941  |
| 0.120629  | 0.12398   | 0.132576  | 0.184878  | 0.0703671 | 0.107226  | 0.0524476 |

|           |          |          |           |           |           |           |
|-----------|----------|----------|-----------|-----------|-----------|-----------|
| 0.122523  | 0.115676 | 0.116113 | 0.197552  | 0.124417  | 0.116404  | 0.130099  |
| 0.116696  | 0.122378 | 0.127477 | 0.187937  | 0.113636  | 0.105624  | 0.121941  |
| 0.229312  | 0.236742 | 0.242424 | 0.130682  | 0.218677  | 0.213287  | 0.231061  |
| 0.103293  | 0.104312 | 0.110286 | 0.181818  | 0.1081    | 0.099796  | 0.114948  |
| 0.101836  | 0.105186 | 0.111116 | 0.187354  | 0.112471  | 0.0965909 | 0.117279  |
| 0.107809  | 0.111116 | 0.116841 | 0.184003  | 0.110868  | 0.105478  | 0.11859   |
| 0.126603  | 0.138403 | 0.141171 | 0.198135  | 0.127331  | 0.121649  | 0.128642  |
| 0.127477  | 0.133159 | 0.138258 | 0.202506  | 0.123543  | 0.121066  | 0.137092  |
| 0.109994  | 0.129662 | 0.133304 | 0.18211   | 0.110723  | 0.111116  | 0.113491  |
| 0.118444  | 0.121503 | 0.130973 | 0.185897  | 0.0716783 | 0.106206  | 0.0488054 |
| 0.106935  | 0.11961  | 0.121212 | 0.185169  | 0.116987  | 0.0990676 | 0.11451   |
| 0.225524  | 0.231789 | 0.236014 | 0.128059  | 0.215181  | 0.206585  | 0.226107  |
| 0.121212  | 0.127477 | 0.134615 | 0.189831  | 0.0703671 | 0.111305  | 0.0422494 |
| 0.118444  | 0.111014 | 0.112908 | 0.197552  | 0.120047  | 0.113491  | 0.126603  |
| 0.111451  | 0.109848 | 0.114948 | 0.184149  | 0.113636  | 0.10067   | 0.121066  |
| 0.122378  | 0.125146 | 0.127914 | 0.196241  | 0.123106  | 0.11859   | 0.125     |
| 0.115967  | 0.116987 | 0.120629 | 0.201486  | 0.126603  | 0.11655   | 0.127914  |
| 0.108683  | 0.113199 | 0.117716 | 0.186917  | 0.113782  | 0.109266  | 0.119755  |
| 0.117716  | 0.112325 | 0.11451  | 0.19391   | 0.123106  | 0.114219  | 0.128205  |
| 0.125146  | 0.120338 | 0.120192 | 0.204545  | 0.126457  | 0.121358  | 0.13243   |
| 0.113199  | 0.11014  | 0.112908 | 0.194347  | 0.120921  | 0.110577  | 0.12602   |
| 0.108392  | 0.112325 | 0.119755 | 0.184586  | 0.114948  | 0.108683  | 0.120047  |
| 0.123834  | 0.131265 | 0.13345  | 0.200612  | 0.130682  | 0.123252  | 0.127331  |
| 0.128059  | 0.134907 | 0.137675 | 0.206002  | 0.132284  | 0.128059  | 0.128934  |
| 0.067162  | 0.126166 | 0.126894 | 0.199009  | 0.129953  | 0.127768  | 0.133596  |
| 0.0668706 | 0.131702 | 0.134178 | 0.200758  | 0.137238  | 0.128351  | 0.138549  |
| 0.127622  | 0.135635 | 0.137238 | 0.204691  | 0.132721  | 0.125     | 0.130536  |
| 0.099359  | 0.111742 | 0.115385 | 0.187209  | 0.111742  | 0.0961538 | 0.125     |
| 0.118153  | 0.117716 | 0.120775 | 0.209207  | 0.130536  | 0.125437  | 0.135052  |
| 0.129953  | 0.133013 | 0.138112 | 0.2044    | 0.126603  | 0.122378  | 0.132867  |
| 0.201632  | 0.207605 | 0.210373 | 0.106789  | 0.189248  | 0.177739  | 0.199592  |
| 0.125291  | 0.126603 | 0.130828 | 0.191288  | 0.113782  | 0.107517  | 0.125     |
| 0.10373   | 0.112617 | 0.116841 | 0.193036  | 0.11961   | 0.104895  | 0.12296   |
| 0.114948  | 0.120338 | 0.126603 | 0.180653  | 0.118881  | 0.111451  | 0.128059  |
| 0.21824   | 0.223048 | 0.228438 | 0.123106  | 0.207896  | 0.198135  | 0.218531  |
| 0.20979   | 0.213141 | 0.217949 | 0.113199  | 0.195659  | 0.187646  | 0.210373  |
| 0.121941  | 0.119172 | 0.120484 | 0.198135  | 0.127331  | 0.119027  | 0.131847  |
| 0.245629  | 0.25102  | 0.253788 | 0.135635  | 0.234994  | 0.225524  | 0.244464  |
| 0.0990676 | 0.116404 | 0.118298 | 0.1875    | 0.108246  | 0.0999417 | 0.124709  |
| 0.128497  | 0.140006 | 0.142191 | 0.204691  | 0.137675  | 0.132576  | 0.143357  |
| 0.104021  | 0.107372 | 0.112471 | 0.187209  | 0.113782  | 0.106352  | 0.123543  |
| 0.121358  | 0.129371 | 0.132139 | 0.198135  | 0.129371  | 0.121066  | 0.124854  |
| 0.184149  | 0.188957 | 0.195804 | 0.0922203 | 0.17264   | 0.162879  | 0.184149  |
| 0.122232  | 0.116259 | 0.122523 | 0.187354  | 0.125874  | 0.11553   | 0.126894  |

|           |           |           |           |           |           |           |
|-----------|-----------|-----------|-----------|-----------|-----------|-----------|
| 0.188374  | 0.19289   | 0.200612  | 0.0914918 | 0.180361  | 0.167978  | 0.192162  |
| 0.113782  | 0.121795  | 0.127185  | 0.188811  | 0.117716  | 0.112034  | 0.122232  |
| 0.112908  | 0.116259  | 0.118153  | 0.172786  | 0.0938228 | 0.0971737 | 0.105332  |
| 0.113199  | 0.128205  | 0.129808  | 0.191142  | 0.116841  | 0.110577  | 0.126603  |
| 0.107372  | 0.120047  | 0.125146  | 0.175991  | 0.101981  | 0.101253  | 0.107955  |
| 0.10169   | 0.10912   | 0.114219  | 0.180216  | 0.108537  | 0.100233  | 0.11655   |
| 0.109557  | 0.11553   | 0.120338  | 0.182838  | 0.104749  | 0.097028  | 0.113636  |
| 0.0984848 | 0.103001  | 0.106935  | 0.177885  | 0.109703  | 0.0967366 | 0.119464  |
| 0.113491  | 0.121503  | 0.125437  | 0.182401  | 0.0719697 | 0.0986305 | 0.0511364 |
| 0.101981  | 0.105915  | 0.110723  | 0.196241  | 0.115822  | 0.113636  | 0.123543  |
| 0.108683  | 0.119027  | 0.120921  | 0.186043  | 0.105915  | 0.0996503 | 0.118298  |
| 0.10271   | 0.105769  | 0.110286  | 0.183858  | 0.113928  | 0.10271   | 0.121649  |
| 0.0734266 | 0.120484  | 0.123834  | 0.184295  | 0.116113  | 0.110431  | 0.127622  |
| 0.126457  | 0.128351  | 0.138112  | 0.19391   | 0.0779429 | 0.113636  | 0.0533217 |
| 0.0464744 | 0.115093  | 0.121649  | 0.187937  | 0.120629  | 0.111451  | 0.120775  |
| 0.111597  | 0.114365  | 0.116259  | 0.184295  | 0.114948  | 0.0979021 | 0.121503  |
| 0.10271   | 0.107809  | 0.116404  | 0.18007   | 0.111305  | 0.102127  | 0.117279  |
| 0.114948  | 0.108683  | 0.114656  | 0.18852   | 0.109557  | 0.106206  | 0.118444  |
| 0.118153  | 0.124417  | 0.127768  | 0.193473  | 0.124126  | 0.113199  | 0.121649  |
| 0.113636  | 0.0450175 | 0.0509907 | 0.193619  | 0.124272  | 0.116841  | 0.128497  |
| 0.0527389 | 0.116404  | 0.120338  | 0.190705  | 0.125437  | 0.112179  | 0.127914  |
| 0.116113  | 0.122669  | 0.129808  | 0.182401  | 0.0740093 | 0.103875  | 0.0505536 |
| 0.125     | 0.128934  | 0.137821  | 0.193328  | 0.0756119 | 0.115093  | 0.0498252 |
| 0.133159  | 0.138258  | 0.144814  | 0.199446  | 0.0823135 | 0.12296   | 0.0530303 |
| 0.100962  | 0.102273  | 0.105041  | 0.185897  | 0.109266  | 0.0977564 | 0.115822  |
| 0.106789  | 0.116259  | 0.121649  | 0.183275  | 0.115967  | 0.109411  | 0.121066  |
| 0.105769  | 0.109994  | 0.114219  | 0.182838  | 0.10708   | 0.101981  | 0.113928  |
| 0.127331  | 0.13243   | 0.134615  | 0.204691  | 0.133304  | 0.125583  | 0.131993  |
| 0.106789  | 0.111014  | 0.11553   | 0.191434  | 0.119755  | 0.10708   | 0.122523  |
| 0.133887  | 0.0635198 | 0.0604604 | 0.206585  | 0.140152  | 0.133304  | 0.146125  |
| 0.126894  | 0.131702  | 0.135052  | 0.197552  | 0.133159  | 0.12398   | 0.136509  |
| 0.122378  | 0.131847  | 0.136655  | 0.194493  | 0.122232  | 0.115967  | 0.126748  |
| 0.107372  | 0.11859   | 0.12398   | 0.185897  | 0.113345  | 0.108246  | 0.116696  |
| 0.113345  | 0.118735  | 0.122086  | 0.18546   | 0.111742  | 0.104604  | 0.111888  |
| 0.0608974 | 0.128642  | 0.127331  | 0.198864  | 0.130099  | 0.125291  | 0.134324  |
| 0.200029  | 0.208042  | 0.213724  | 0.115967  | 0.192308  | 0.180507  | 0.201777  |
| 0.11553   | 0.111305  | 0.115239  | 0.181235  | 0.114802  | 0.0965909 | 0.121941  |
| 0.111888  | 0.122232  | 0.124417  | 0.18954   | 0.116404  | 0.107226  | 0.126166  |
| 0.116113  | 0.125291  | 0.128059  | 0.195513  | 0.123252  | 0.117279  | 0.122523  |
| 0.0524476 | 0.122815  | 0.121503  | 0.188957  | 0.12398   | 0.111888  | 0.127622  |
| 0.116113  | 0.126166  | 0.129808  | 0.190268  | 0.122669  | 0.115239  | 0.128642  |
| 0.120192  | 0.121795  | 0.126894  | 0.191434  | 0.10373   | 0.107663  | 0.117861  |
| 0.125     | 0.12398   | 0.128205  | 0.19595   | 0.106789  | 0.108974  | 0.118298  |
| 0.118735  | 0.130536  | 0.131265  | 0.190559  | 0.120047  | 0.113199  | 0.126311  |

|           |          |          |          |           |           |           |
|-----------|----------|----------|----------|-----------|-----------|-----------|
| 0.0983392 | 0.102273 | 0.105041 | 0.192016 | 0.114219  | 0.109703  | 0.122815  |
| 0.125728  | 0.130536 | 0.132721 | 0.200758 | 0.130536  | 0.125146  | 0.124563  |
| 0.109411  | 0.122669 | 0.122815 | 0.190268 | 0.115385  | 0.105041  | 0.124854  |
| 0.116259  | 0.121358 | 0.124417 | 0.19595  | 0.113491  | 0.104604  | 0.128205  |
| 0.16623   | 0.178322 | 0.182255 | 0.163462 | 0.170746  | 0.156614  | 0.171474  |
| 0.114365  | 0.122378 | 0.129225 | 0.184149 | 0.076049  | 0.103001  | 0.0540501 |
| 0.123834  | 0.133887 | 0.13345  | 0.188083 | 0.128351  | 0.120629  | 0.129371  |
| 0.111451  | 0.119755 | 0.122523 | 0.199592 | 0.121795  | 0.113491  | 0.136218  |
| 0.119172  | 0.127768 | 0.131993 | 0.188374 | 0.105041  | 0.106061  | 0.11451   |
| 0.0996503 | 0.110286 | 0.113928 | 0.183712 | 0.0861014 | 0.0842075 | 0.111597  |
| 0.104895  | 0.112908 | 0.117424 | 0.1875   | 0.101544  | 0.0949883 | 0.116259  |
| 0.109557  | 0.112034 | 0.118881 | 0.188666 | 0.090472  | 0.0914918 | 0.117424  |
| 0.115676  | 0.124563 | 0.127331 | 0.197698 | 0.122815  | 0.112471  | 0.130828  |
| 0.113928  | 0.124563 | 0.12704  | 0.181381 | 0.0791084 | 0.0932401 | 0.0920746 |
| 0.116113  | 0.12296  | 0.130973 | 0.199009 | 0.130828  | 0.12602   | 0.132721  |
| 0.106935  | 0.110286 | 0.116841 | 0.182838 | 0.105332  | 0.103147  | 0.112762  |
| 0.109703  | 0.115093 | 0.119901 | 0.188228 | 0.119755  | 0.111451  | 0.129225  |
| 0.128205  | 0.131556 | 0.13345  | 0.205565 | 0.13243   | 0.120921  | 0.134615  |
| 0.111305  | 0.117279 | 0.116259 | 0.194202 | 0.116404  | 0.109266  | 0.128497  |
| 0.111014  | 0.121941 | 0.122378 | 0.194784 | 0.119318  | 0.115385  | 0.12296   |
| 0.107809  | 0.109411 | 0.112471 | 0.190705 | 0.111742  | 0.105186  | 0.126748  |
| 0.109848  | 0.113199 | 0.115385 | 0.193328 | 0.113491  | 0.106061  | 0.127914  |
| 0.0976107 | 0.106498 | 0.110723 | 0.186917 | 0.11116   | 0.0961538 | 0.123543  |
| 0.113199  | 0.114802 | 0.118735 | 0.198427 | 0.121212  | 0.110868  | 0.129225  |
| 0.103293  | 0.104021 | 0.106206 | 0.18648  | 0.11451   | 0.0989219 | 0.127477  |
| 0.133013  | 0.135198 | 0.13884  | 0.202797 | 0.133741  | 0.131265  | 0.141754  |
| 0.12602   | 0.127331 | 0.132139 | 0.188811 | 0.122378  | 0.121649  | 0.13039   |
| 0.102127  | 0.103147 | 0.108829 | 0.192016 | 0.113636  | 0.103875  | 0.122815  |
| 0.129079  | 0.127768 | 0.129079 | 0.206439 | 0.138258  | 0.129953  | 0.137821  |
| 0.0941142 | 0.127185 | 0.130245 | 0.190705 | 0.125146  | 0.11655   | 0.125     |
| 0.131702  | 0.139423 | 0.140443 | 0.201777 | 0.124854  | 0.11655   | 0.140443  |
| 0.104312  | 0.102127 | 0.104895 | 0.191579 | 0.114365  | 0.105186  | 0.123543  |
| 0.138549  | 0.145396 | 0.147873 | 0.203671 | 0.139277  | 0.13243   | 0.142045  |
| 0.12602   | 0.125874 | 0.129225 | 0.191434 | 0.12704   | 0.120484  | 0.135635  |
| 0.128059  | 0.134033 | 0.137092 | 0.200758 | 0.133741  | 0.126311  | 0.145833  |
| 0.0977564 | 0.124126 | 0.124272 | 0.200175 | 0.120921  | 0.115822  | 0.130099  |
| 0.103438  | 0.112034 | 0.115676 | 0.191871 | 0.113199  | 0.10373   | 0.125     |
| 0.106789  | 0.113928 | 0.11757  | 0.18852  | 0.114219  | 0.10271   | 0.125146  |
| 0.115676  | 0.117279 | 0.118007 | 0.193036 | 0.120192  | 0.108683  | 0.125     |
| 0.115676  | 0.11553  | 0.117133 | 0.199738 | 0.120192  | 0.114219  | 0.126748  |
| 0.115822  | 0.12296  | 0.122815 | 0.203671 | 0.128205  | 0.121358  | 0.132139  |
| 0.114365  | 0.121503 | 0.124854 | 0.190268 | 0.116259  | 0.107955  | 0.129808  |
| 0.0828963 | 0.110723 | 0.113782 | 0.187063 | 0.115385  | 0.103584  | 0.123106  |
| 0.1081    | 0.110868 | 0.11655  | 0.18954  | 0.114365  | 0.10169   | 0.124417  |

|          |          |          |          |           |           |          |
|----------|----------|----------|----------|-----------|-----------|----------|
| 0.10912  | 0.123543 | 0.127477 | 0.192016 | 0.119464  | 0.109411  | 0.13039  |
| 0.104458 | 0.113345 | 0.116696 | 0.185315 | 0.115676  | 0.101836  | 0.122232 |
| 0.116259 | 0.119027 | 0.121503 | 0.196241 | 0.121649  | 0.111888  | 0.130828 |
| 0.10373  | 0.108246 | 0.109266 | 0.188083 | 0.114073  | 0.104312  | 0.11859  |
| 0.108246 | 0.125291 | 0.130682 | 0.18007  | 0.105186  | 0.106206  | 0.109411 |
| 0.112325 | 0.123252 | 0.127768 | 0.188811 | 0.108974  | 0.101253  | 0.118444 |
| 0.099796 | 0.114802 | 0.117861 | 0.185897 | 0.108683  | 0.0995047 | 0.121649 |
| 0.104167 | 0.120629 | 0.122815 | 0.190268 | 0.11655   | 0.104167  | 0.124563 |
| 0.104312 | 0.124272 | 0.130536 | 0.17905  | 0.109411  | 0.104895  | 0.114219 |
| 0.110286 | 0.118298 | 0.119901 | 0.186189 | 0.0979021 | 0.0992133 | 0.115239 |
| 0.117861 | 0.121503 | 0.12398  | 0.185897 | 0.0926573 | 0.104167  | 0.105041 |
| 0.097465 | 0.11655  | 0.120484 | 0.174242 | 0.104895  | 0.0945513 | 0.103001 |
| 0.120047 | 0.130682 | 0.131702 | 0.199155 | 0.118735  | 0.119172  | 0.125    |

| TDr_3446 | TDr_3447  | TDr_3452  | TDr_3461  | TDr_3466 | TDr_3469 | TDr_3472  |
|----------|-----------|-----------|-----------|----------|----------|-----------|
| 0.175408 | 0.103584  | 0.126748  | 0.123252  | 0.119318 | 0.169726 | 0.11961   |
| 0.178759 | 0.099359  | 0.12398   | 0.109994  | 0.1081   | 0.171037 | 0.116841  |
| 0.178176 | 0.0987762 | 0.121066  | 0.107372  | 0.106061 | 0.172786 | 0.117133  |
| 0.184586 | 0.101107  | 0.121066  | 0.0919289 | 0.113054 | 0.180361 | 0.11655   |
| 0.203234 | 0.12704   | 0.13243   | 0.131265  | 0.120629 | 0.199301 | 0.13141   |
| 0.19391  | 0.119755  | 0.135052  | 0.133887  | 0.115385 | 0.190559 | 0.129953  |
| 0.200758 | 0.110577  | 0.119172  | 0.129371  | 0.125437 | 0.194784 | 0.116987  |
| 0.179487 | 0.104458  | 0.124417  | 0.108392  | 0.10708  | 0.17264  | 0.119901  |
| 0.182255 | 0.0903263 | 0.113782  | 0.111451  | 0.108683 | 0.176282 | 0.109557  |
| 0.190851 | 0.0808566 | 0.124709  | 0.119172  | 0.112034 | 0.184003 | 0.123397  |
| 0.174388 | 0.0964452 | 0.121066  | 0.129808  | 0.121212 | 0.168706 | 0.114219  |
| 0.184441 | 0.097465  | 0.113345  | 0.112179  | 0.107663 | 0.176428 | 0.106789  |
| 0.189685 | 0.0980478 | 0.117424  | 0.118007  | 0.114948 | 0.184003 | 0.109703  |
| 0.14292  | 0.112762  | 0.147582  | 0.133013  | 0.134324 | 0.142191 | 0.141608  |
| 0.189977 | 0.109703  | 0.137529  | 0.130828  | 0.122232 | 0.188957 | 0.134761  |
| 0.195076 | 0.107809  | 0.110577  | 0.121649  | 0.119172 | 0.189977 | 0.107226  |
| 0.186772 | 0.103875  | 0.106352  | 0.122086  | 0.112034 | 0.184878 | 0.102418  |
| 0.208479 | 0.139277  | 0.154866  | 0.137966  | 0.126748 | 0.203963 | 0.149184  |
| 0.17701  | 0.0996503 | 0.119027  | 0.106789  | 0.105186 | 0.17366  | 0.117133  |
| 0.140006 | 0.191142  | 0.212267  | 0.201195  | 0.20134  | 0.138695 | 0.207459  |
| 0.193182 | 0.114656  | 0.13345   | 0.131993  | 0.114073 | 0.186334 | 0.126894  |
| 0.196241 | 0.111597  | 0.130099  | 0.125728  | 0.107809 | 0.190851 | 0.126748  |
| 0.184441 | 0.0986305 | 0.094697  | 0.112762  | 0.107955 | 0.179341 | 0.0913462 |
| 0.198864 | 0.113636  | 0.10271   | 0.129225  | 0.123834 | 0.197552 | 0.102855  |
| 0.178904 | 0.092803  | 0.1081    | 0.111888  | 0.101253 | 0.175262 | 0.106206  |
| 0.197552 | 0.120192  | 0.136072  | 0.135198  | 0.116987 | 0.193036 | 0.131265  |
| 0.195221 | 0.114948  | 0.120338  | 0.130536  | 0.121941 | 0.190414 | 0.119318  |
| 0.198718 | 0.107372  | 0.107517  | 0.122378  | 0.11757  | 0.196533 | 0.106498  |
| 0.197844 | 0.121066  | 0.125583  | 0.132576  | 0.13039  | 0.196533 | 0.124563  |
| 0.200175 | 0.100962  | 0.126748  | 0.12704   | 0.127185 | 0.19799  | 0.12398   |
| 0.192745 | 0.108974  | 0.122232  | 0.130099  | 0.124126 | 0.188811 | 0.118881  |
| 0.197552 | 0.109703  | 0.117716  | 0.125583  | 0.119027 | 0.191579 | 0.11553   |
| 0.177448 | 0.0962995 | 0.115093  | 0.11451   | 0.107372 | 0.175554 | 0.108537  |
| 0.191434 | 0.10067   | 0.121795  | 0.122669  | 0.117279 | 0.187209 | 0.116404  |
| 0.197115 | 0.113928  | 0.113782  | 0.129808  | 0.122669 | 0.19493  | 0.11451   |
| 0.199592 | 0.109703  | 0.119172  | 0.129953  | 0.130099 | 0.197698 | 0.121358  |
| 0.211101 | 0.124417  | 0.133596  | 0.134761  | 0.13345  | 0.209207 | 0.133741  |
| 0.19493  | 0.113782  | 0.114219  | 0.129079  | 0.121941 | 0.192162 | 0.113491  |
| 0.185023 | 0.0992133 | 0.0984848 | 0.115385  | 0.110286 | 0.182838 | 0.0910548 |
| 0.195221 | 0.110577  | 0.108974  | 0.124417  | 0.119901 | 0.194493 | 0.106498  |
| 0.185897 | 0.0977564 | 0.102273  | 0.115967  | 0.107955 | 0.179341 | 0.0992133 |
| 0.211247 | 0.126311  | 0.128205  | 0.144231  | 0.141754 | 0.205857 | 0.129516  |



|          |           |           |           |          |          |           |
|----------|-----------|-----------|-----------|----------|----------|-----------|
| 0.210373 | 0.13243   | 0.127331  | 0.148601  | 0.144376 | 0.204691 | 0.127185  |
| 0.188083 | 0.106935  | 0.108246  | 0.120484  | 0.115385 | 0.181527 | 0.107809  |
| 0.18954  | 0.097028  | 0.108537  | 0.120484  | 0.106061 | 0.183566 | 0.105769  |
| 0.20338  | 0.101836  | 0.115676  | 0.129953  | 0.121649 | 0.197698 | 0.113782  |
| 0.191725 | 0.108246  | 0.109266  | 0.126166  | 0.111451 | 0.189248 | 0.105915  |
| 0.207314 | 0.125874  | 0.128351  | 0.143502  | 0.138403 | 0.204254 | 0.127622  |
| 0.191871 | 0.100816  | 0.109703  | 0.11961   | 0.115385 | 0.186772 | 0.108392  |
| 0.186189 | 0.105332  | 0.106643  | 0.124126  | 0.116696 | 0.184295 | 0.10708   |
| 0.213432 | 0.132867  | 0.146999  | 0.14729   | 0.145396 | 0.205711 | 0.143357  |
| 0.197698 | 0.120338  | 0.116987  | 0.133596  | 0.123252 | 0.19493  | 0.115676  |
| 0.186189 | 0.104749  | 0.0987762 | 0.121212  | 0.112908 | 0.181381 | 0.0960082 |
| 0.20134  | 0.106206  | 0.137821  | 0.12704   | 0.12398  | 0.194493 | 0.130973  |
| 0.178904 | 0.110286  | 0.113345  | 0.0882867 | 0.114656 | 0.172931 | 0.109994  |
| 0.21183  | 0.133887  | 0.120629  | 0.139277  | 0.137383 | 0.209353 | 0.121066  |
| 0.202069 | 0.117133  | 0.11553   | 0.13243   | 0.127914 | 0.199009 | 0.110723  |
| 0.18954  | 0.109557  | 0.104167  | 0.119901  | 0.112471 | 0.185023 | 0.0999417 |
| 0.190122 | 0.107517  | 0.113491  | 0.127185  | 0.117133 | 0.186772 | 0.112762  |
| 0.200175 | 0.103875  | 0.112762  | 0.129079  | 0.120484 | 0.196241 | 0.111451  |
| 0.212413 | 0.130682  | 0.114802  | 0.139569  | 0.13884  | 0.205857 | 0.11757   |
| 0.213869 | 0.125437  | 0.126748  | 0.138112  | 0.136218 | 0.207314 | 0.122232  |
| 0.16623  | 0.147436  | 0.154866  | 0.159819  | 0.164918 | 0.15676  | 0.152098  |
| 0.186917 | 0.101399  | 0.105332  | 0.121066  | 0.114219 | 0.184149 | 0.104021  |
| 0.191871 | 0.0979021 | 0.100962  | 0.123106  | 0.109557 | 0.184732 | 0.0984848 |
| 0.1875   | 0.0932401 | 0.104167  | 0.118735  | 0.111597 | 0.182984 | 0.101399  |
| 0.201923 | 0.133596  | 0.140443  | 0.146853  | 0.139423 | 0.196241 | 0.136509  |
| 0.185606 | 0.0992133 | 0.105478  | 0.113054  | 0.110577 | 0.180798 | 0.10271   |
| 0.201195 | 0.126748  | 0.120775  | 0.140006  | 0.129079 | 0.196096 | 0.118881  |
| 0.200903 | 0.103438  | 0.109411  | 0.128059  | 0.124126 | 0.198135 | 0.109266  |
| 0.187063 | 0.104749  | 0.104312  | 0.126166  | 0.118153 | 0.184878 | 0.103001  |
| 0.20338  | 0.14292   | 0.147436  | 0.147436  | 0.145251 | 0.198281 | 0.145542  |
| 0.194056 | 0.111116  | 0.103147  | 0.128497  | 0.124272 | 0.192745 | 0.10067   |
| 0.210519 | 0.124709  | 0.122232  | 0.138549  | 0.137529 | 0.203671 | 0.123543  |
| 0.198718 | 0.120775  | 0.118881  | 0.135781  | 0.12398  | 0.197407 | 0.11553   |
| 0.184295 | 0.106061  | 0.118444  | 0.112325  | 0.109266 | 0.180361 | 0.113636  |
| 0.18546  | 0.100816  | 0.099796  | 0.11961   | 0.114802 | 0.179779 | 0.0961538 |
| 0.190122 | 0.104895  | 0.106206  | 0.123106  | 0.112471 | 0.186189 | 0.103438  |
| 0.2044   | 0.127622  | 0.112908  | 0.132139  | 0.130536 | 0.202797 | 0.115093  |
| 0.188228 | 0.0983392 | 0.106061  | 0.122669  | 0.112325 | 0.182547 | 0.105332  |
| 0.208479 | 0.124709  | 0.128059  | 0.137675  | 0.13986  | 0.203963 | 0.125583  |
| 0.18954  | 0.1081    | 0.109994  | 0.131556  | 0.125    | 0.187354 | 0.111597  |
| 0.197115 | 0.110431  | 0.0965909 | 0.11961   | 0.116841 | 0.191725 | 0.0976107 |
| 0.190705 | 0.105478  | 0.106206  | 0.125437  | 0.120047 | 0.182984 | 0.104895  |
| 0.191871 | 0.109266  | 0.106789  | 0.12398   | 0.11859  | 0.191725 | 0.102855  |
| 0.188957 | 0.10373   | 0.105332  | 0.125437  | 0.11451  | 0.182984 | 0.102855  |

|          |           |          |          |          |          |          |
|----------|-----------|----------|----------|----------|----------|----------|
| 0.188083 | 0.105186  | 0.101544 | 0.119027 | 0.111597 | 0.184732 | 0.100816 |
| 0.208916 | 0.12602   | 0.121503 | 0.141026 | 0.133887 | 0.203817 | 0.119901 |
| 0.189103 | 0.0968823 | 0.10373  | 0.123543 | 0.112908 | 0.183712 | 0.103293 |
| 0.190414 | 0.0996503 | 0.114948 | 0.121649 | 0.112762 | 0.189103 | 0.112762 |
| 0.2044   | 0.113345  | 0.13039  | 0.13039  | 0.123543 | 0.197844 | 0.129079 |
| 0.202652 | 0.113636  | 0.128934 | 0.133304 | 0.12704  | 0.196387 | 0.125    |
| 0.208188 | 0.120921  | 0.128642 | 0.138258 | 0.122669 | 0.202797 | 0.127331 |
| 0.212121 | 0.131556  | 0.134324 | 0.142774 | 0.127477 | 0.209645 | 0.131556 |
| 0.190414 | 0.105769  | 0.126603 | 0.126894 | 0.113345 | 0.184149 | 0.118007 |
| 0.154575 | 0.169289  | 0.186334 | 0.183712 | 0.185023 | 0.148601 | 0.18211  |
| 0.190851 | 0.0995047 | 0.115967 | 0.115093 | 0.108829 | 0.185169 | 0.112617 |
| 0.209062 | 0.129953  | 0.135344 | 0.14088  | 0.129662 | 0.203671 | 0.132284 |
| 0.202652 | 0.122086  | 0.125437 | 0.132721 | 0.119172 | 0.199592 | 0.125291 |
| 0.209499 | 0.126894  | 0.129662 | 0.145688 | 0.131265 | 0.207022 | 0.133013 |
| 0.190414 | 0.104312  | 0.112617 | 0.123397 | 0.104604 | 0.188811 | 0.109848 |
| 0.205274 | 0.125583  | 0.124854 | 0.133596 | 0.125583 | 0.203089 | 0.125    |
| 0.194493 | 0.110723  | 0.123397 | 0.126311 | 0.105186 | 0.18852  | 0.118298 |
| 0.197844 | 0.117861  | 0.122378 | 0.131993 | 0.118153 | 0.194784 | 0.122232 |
| 0.19493  | 0.105041  | 0.117133 | 0.117424 | 0.119318 | 0.189831 | 0.115239 |
| 0.210956 | 0.132721  | 0.126457 | 0.143939 | 0.121358 | 0.207022 | 0.12602  |
| 0.190559 | 0.0954254 | 0.1081   | 0.123252 | 0.11553  | 0.186917 | 0.104749 |
| 0.205857 | 0.129079  | 0.130099 | 0.137383 | 0.129662 | 0.198135 | 0.129079 |
| 0.193765 | 0.104167  | 0.120629 | 0.12704  | 0.117861 | 0.188666 | 0.117279 |
| 0.203817 | 0.120629  | 0.115239 | 0.133887 | 0.130828 | 0.200758 | 0.115093 |
| 0.206002 | 0.117279  | 0.125291 | 0.138403 | 0.131556 | 0.196241 | 0.124854 |
| 0.190268 | 0.103001  | 0.115967 | 0.122669 | 0.104458 | 0.185752 | 0.111742 |
| 0.202214 | 0.144376  | 0.141026 | 0.146853 | 0.142045 | 0.19799  | 0.142337 |
| 0.193619 | 0.103438  | 0.121066 | 0.129516 | 0.112471 | 0.190268 | 0.113928 |
| 0.194493 | 0.108974  | 0.113199 | 0.12398  | 0.110723 | 0.192016 | 0.111888 |
| 0.19493  | 0.108537  | 0.108974 | 0.125583 | 0.115239 | 0.192453 | 0.108537 |
| 0.210082 | 0.125437  | 0.142774 | 0.142774 | 0.136801 | 0.203526 | 0.145833 |
| 0.179487 | 0.113782  | 0.11655  | 0.129079 | 0.127477 | 0.174097 | 0.112908 |
| 0.194347 | 0.107955  | 0.115385 | 0.120047 | 0.107372 | 0.188666 | 0.110286 |
| 0.187354 | 0.107372  | 0.114802 | 0.12296  | 0.105041 | 0.185169 | 0.109994 |
| 0.191871 | 0.103147  | 0.118735 | 0.124563 | 0.118298 | 0.185897 | 0.117424 |
| 0.206585 | 0.112034  | 0.119172 | 0.130828 | 0.126894 | 0.202652 | 0.119027 |
| 0.194784 | 0.107226  | 0.118735 | 0.129225 | 0.117424 | 0.18852  | 0.116259 |
| 0.184732 | 0.0855186 | 0.103438 | 0.112471 | 0.106498 | 0.179341 | 0.10271  |
| 0.186189 | 0.0925117 | 0.105186 | 0.114802 | 0.107663 | 0.181672 | 0.10271  |
| 0.191871 | 0.0941142 | 0.108829 | 0.120484 | 0.110723 | 0.188811 | 0.1081   |
| 0.191579 | 0.111888  | 0.110577 | 0.12398  | 0.117133 | 0.184149 | 0.110723 |
| 0.20134  | 0.11757   | 0.118298 | 0.134907 | 0.130099 | 0.200321 | 0.119318 |
| 0.194493 | 0.0906177 | 0.105915 | 0.118153 | 0.109848 | 0.191142 | 0.103147 |
| 0.187063 | 0.0945513 | 0.101107 | 0.115385 | 0.105624 | 0.179924 | 0.099796 |

|           |           |           |           |          |           |           |
|-----------|-----------|-----------|-----------|----------|-----------|-----------|
| 0.200175  | 0.113782  | 0.109557  | 0.13345   | 0.128059 | 0.198281  | 0.108246  |
| 0.188666  | 0.0926573 | 0.0980478 | 0.11757   | 0.114802 | 0.185023  | 0.0958625 |
| 0.188374  | 0.118007  | 0.127185  | 0.131556  | 0.119172 | 0.184149  | 0.123252  |
| 0.203526  | 0.118881  | 0.135344  | 0.135927  | 0.134907 | 0.197261  | 0.131993  |
| 0.197115  | 0.101399  | 0.11116   | 0.12398   | 0.115093 | 0.192308  | 0.106935  |
| 0.193182  | 0.0916375 | 0.109266  | 0.119172  | 0.114073 | 0.190414  | 0.102127  |
| 0.187937  | 0.0933858 | 0.105186  | 0.118007  | 0.112617 | 0.1875    | 0.104167  |
| 0.183858  | 0.0925117 | 0.106061  | 0.116259  | 0.104458 | 0.178176  | 0.102418  |
| 0.202214  | 0.105624  | 0.122086  | 0.129953  | 0.125437 | 0.198572  | 0.121649  |
| 0.187937  | 0.0913462 | 0.10169   | 0.113636  | 0.109411 | 0.184878  | 0.0989219 |
| 0.208479  | 0.123543  | 0.13039   | 0.141754  | 0.139569 | 0.206002  | 0.130536  |
| 0.197552  | 0.121066  | 0.123834  | 0.138986  | 0.136509 | 0.195659  | 0.122232  |
| 0.201632  | 0.110868  | 0.114802  | 0.127914  | 0.123397 | 0.194784  | 0.115822  |
| 0.190997  | 0.102855  | 0.11116   | 0.126603  | 0.113345 | 0.185023  | 0.109557  |
| 0.188957  | 0.0981935 | 0.118444  | 0.126311  | 0.11014  | 0.185315  | 0.115676  |
| 0.191725  | 0.0957168 | 0.0976107 | 0.123252  | 0.111742 | 0.186626  | 0.0971737 |
| 0.191579  | 0.101107  | 0.095134  | 0.120775  | 0.112179 | 0.188228  | 0.0952797 |
| 0.190997  | 0.0979021 | 0.109994  | 0.116404  | 0.106352 | 0.18648   | 0.107226  |
| 0.17905   | 0.101981  | 0.108246  | 0.0989219 | 0.109266 | 0.175408  | 0.103438  |
| 0.205274  | 0.11655   | 0.099796  | 0.138549  | 0.125583 | 0.202797  | 0.0990676 |
| 0.197844  | 0.105915  | 0.118881  | 0.125583  | 0.106789 | 0.194202  | 0.118153  |
| 0.198281  | 0.11451   | 0.135052  | 0.133304  | 0.128205 | 0.197552  | 0.132867  |
| 0.20979   | 0.122815  | 0.138986  | 0.138112  | 0.132721 | 0.2044    | 0.138549  |
| 0.0999417 | 0.18546   | 0.198718  | 0.187937  | 0.193328 | 0.0971737 | 0.190997  |
| 0.132721  | 0.231352  | 0.241696  | 0.230624  | 0.233392 | 0.128205  | 0.237179  |
| 0.178322  | 0.105915  | 0.111888  | 0.0734266 | 0.108537 | 0.173805  | 0.105915  |
| 0.184586  | 0.104021  | 0.0992133 | 0.119318  | 0.112471 | 0.18211   | 0.099359  |
| 0.182255  | 0.0976107 | 0.105915  | 0.116404  | 0.106352 | 0.180944  | 0.102855  |
| 0.187209  | 0.099359  | 0.105624  | 0.116987  | 0.106643 | 0.182984  | 0.104312  |
| 0.194493  | 0.112762  | 0.139132  | 0.128934  | 0.125291 | 0.190268  | 0.135781  |
| 0.189831  | 0.106352  | 0.106498  | 0.117861  | 0.112471 | 0.192599  | 0.104895  |
| 0.214161  | 0.140297  | 0.120047  | 0.14627   | 0.144085 | 0.210519  | 0.121066  |
| 0.192453  | 0.107809  | 0.102127  | 0.124272  | 0.107517 | 0.188228  | 0.097028  |
| 0.203526  | 0.119464  | 0.114948  | 0.130973  | 0.127622 | 0.20338   | 0.111014  |
| 0.198135  | 0.124854  | 0.115093  | 0.134907  | 0.126603 | 0.193036  | 0.113782  |
| 0.206002  | 0.121649  | 0.117716  | 0.138986  | 0.127477 | 0.203234  | 0.114365  |
| 0.204837  | 0.125437  | 0.125583  | 0.141317  | 0.135635 | 0.201486  | 0.126894  |
| 0.194056  | 0.105915  | 0.107517  | 0.124417  | 0.112617 | 0.192453  | 0.105624  |
| 0.192016  | 0.109411  | 0.0990676 | 0.120047  | 0.105041 | 0.185752  | 0.0980478 |
| 0.195076  | 0.109557  | 0.105915  | 0.129516  | 0.110431 | 0.190268  | 0.106061  |
| 0.183421  | 0.0996503 | 0.103001  | 0.116696  | 0.106935 | 0.181818  | 0.0996503 |
| 0.188666  | 0.106935  | 0.100962  | 0.118444  | 0.105769 | 0.183566  | 0.0976107 |
| 0.193182  | 0.105915  | 0.101107  | 0.120338  | 0.11116  | 0.189831  | 0.100379  |
| 0.200612  | 0.120629  | 0.109703  | 0.134761  | 0.120921 | 0.19697   | 0.107226  |

|          |           |           |          |          |          |           |
|----------|-----------|-----------|----------|----------|----------|-----------|
| 0.20877  | 0.128788  | 0.112034  | 0.139423 | 0.129371 | 0.206294 | 0.111014  |
| 0.192308 | 0.107663  | 0.101399  | 0.122669 | 0.119027 | 0.18954  | 0.0992133 |
| 0.186626 | 0.101981  | 0.102127  | 0.125146 | 0.114219 | 0.183566 | 0.092366  |
| 0.207314 | 0.121503  | 0.113199  | 0.136509 | 0.131993 | 0.202797 | 0.111014  |
| 0.185752 | 0.0999417 | 0.0983392 | 0.121358 | 0.1081   | 0.181235 | 0.0984848 |
| 0.208042 | 0.136218  | 0.122378  | 0.150641 | 0.135052 | 0.2044   | 0.122523  |
| 0.195221 | 0.123106  | 0.132576  | 0.140152 | 0.134761 | 0.193619 | 0.134761  |
| 0.198572 | 0.130828  | 0.125437  | 0.136801 | 0.125    | 0.196096 | 0.123834  |
| 0.186334 | 0.0996503 | 0.0968823 | 0.115822 | 0.107809 | 0.184149 | 0.0973193 |
| 0.186189 | 0.10067   | 0.0987762 | 0.117716 | 0.104749 | 0.18546  | 0.095134  |
| 0.203234 | 0.115967  | 0.102127  | 0.128351 | 0.122378 | 0.200175 | 0.106352  |
| 0.198718 | 0.118444  | 0.104604  | 0.127622 | 0.117279 | 0.195367 | 0.104458  |
| 0.197261 | 0.122232  | 0.109848  | 0.138986 | 0.125146 | 0.195659 | 0.105624  |
| 0.192745 | 0.107517  | 0.10271   | 0.12398  | 0.116259 | 0.18852  | 0.0999417 |
| 0.192016 | 0.107372  | 0.0999417 | 0.124709 | 0.115239 | 0.190414 | 0.0965909 |
| 0.196096 | 0.118153  | 0.105186  | 0.126748 | 0.120775 | 0.192745 | 0.106498  |
| 0.204254 | 0.120484  | 0.11451   | 0.142191 | 0.131556 | 0.204983 | 0.113782  |
| 0.204837 | 0.12398   | 0.114802  | 0.13549  | 0.127185 | 0.201486 | 0.110286  |
| 0.205857 | 0.125874  | 0.103875  | 0.139423 | 0.129079 | 0.201923 | 0.106643  |
| 0.198135 | 0.122232  | 0.113636  | 0.137821 | 0.13039  | 0.19595  | 0.113199  |
| 0.192308 | 0.107955  | 0.101981  | 0.119172 | 0.113782 | 0.188957 | 0.0971737 |
| 0.202797 | 0.122815  | 0.117716  | 0.136072 | 0.126603 | 0.196533 | 0.119027  |
| 0.188374 | 0.105186  | 0.0942599 | 0.118444 | 0.1081   | 0.187354 | 0.0914918 |
| 0.185606 | 0.102127  | 0.11014   | 0.12296  | 0.115822 | 0.180216 | 0.109411  |
| 0.190559 | 0.106498  | 0.106935  | 0.122086 | 0.105915 | 0.187209 | 0.105915  |
| 0.186626 | 0.101107  | 0.105332  | 0.125146 | 0.107809 | 0.185606 | 0.105186  |
| 0.187209 | 0.104021  | 0.0995047 | 0.114948 | 0.106061 | 0.184732 | 0.101981  |
| 0.207751 | 0.128351  | 0.111597  | 0.137238 | 0.135635 | 0.202943 | 0.112034  |
| 0.189248 | 0.109266  | 0.109411  | 0.128059 | 0.11655  | 0.185606 | 0.106643  |
| 0.2044   | 0.126748  | 0.114365  | 0.13447  | 0.130536 | 0.200758 | 0.115967  |
| 0.185752 | 0.099359  | 0.103875  | 0.11553  | 0.104604 | 0.182401 | 0.100524  |
| 0.202506 | 0.116113  | 0.101981  | 0.134907 | 0.124272 | 0.20236  | 0.103293  |
| 0.197698 | 0.115093  | 0.109411  | 0.128642 | 0.117424 | 0.193765 | 0.104604  |
| 0.184295 | 0.106352  | 0.119027  | 0.124272 | 0.118007 | 0.180944 | 0.119755  |
| 0.195221 | 0.103001  | 0.104604  | 0.126457 | 0.11757  | 0.192745 | 0.105332  |
| 0.188083 | 0.11859   | 0.11961   | 0.127477 | 0.11655  | 0.187354 | 0.11859   |
| 0.195513 | 0.111451  | 0.113054  | 0.125291 | 0.114656 | 0.193036 | 0.109411  |
| 0.188811 | 0.103001  | 0.113054  | 0.124709 | 0.114073 | 0.184295 | 0.110286  |
| 0.210664 | 0.110577  | 0.142774  | 0.139277 | 0.13447  | 0.202652 | 0.13884   |
| 0.211101 | 0.131119  | 0.12602   | 0.137675 | 0.138695 | 0.207751 | 0.128788  |
| 0.186043 | 0.0868298 | 0.116987  | 0.111742 | 0.107809 | 0.181527 | 0.113636  |
| 0.208333 | 0.114948  | 0.141317  | 0.139277 | 0.11961  | 0.203234 | 0.138258  |
| 0.204108 | 0.10169   | 0.132139  | 0.135052 | 0.128788 | 0.197261 | 0.131702  |
| 0.200612 | 0.11655   | 0.137675  | 0.135927 | 0.117133 | 0.195513 | 0.132576  |

|          |           |          |          |          |          |          |
|----------|-----------|----------|----------|----------|----------|----------|
| 0.19595  | 0.106643  | 0.129808 | 0.125728 | 0.109266 | 0.189394 | 0.128205 |
| 0.20236  | 0.106061  | 0.128351 | 0.129516 | 0.120047 | 0.199009 | 0.125583 |
| 0.199592 | 0.103584  | 0.13141  | 0.131119 | 0.121649 | 0.193328 | 0.128351 |
| 0.206731 | 0.11451   | 0.136801 | 0.129516 | 0.119172 | 0.201049 | 0.131702 |
| 0.209645 | 0.122378  | 0.143794 | 0.140297 | 0.128497 | 0.201632 | 0.142191 |
| 0.200612 | 0.106935  | 0.133596 | 0.125146 | 0.12296  | 0.197844 | 0.134033 |
| 0.190997 | 0.103147  | 0.127768 | 0.124854 | 0.104021 | 0.18648  | 0.121212 |
| 0.200758 | 0.129516  | 0.117133 | 0.136364 | 0.131847 | 0.199446 | 0.115239 |
| 0.207022 | 0.113054  | 0.137966 | 0.140589 | 0.125583 | 0.198427 | 0.137529 |
| 0.189248 | 0.100524  | 0.124854 | 0.119318 | 0.106935 | 0.181235 | 0.119172 |
| 0.119464 | 0.211684  | 0.222319 | 0.215035 | 0.220134 | 0.119027 | 0.217512 |
| 0.199883 | 0.11116   | 0.13345  | 0.129079 | 0.116404 | 0.192745 | 0.129808 |
| 0.19289  | 0.0916375 | 0.126166 | 0.126457 | 0.11757  | 0.186626 | 0.121358 |
| 0.207605 | 0.122378  | 0.139714 | 0.137383 | 0.126748 | 0.20338  | 0.138112 |
| 0.193619 | 0.10373   | 0.128351 | 0.125437 | 0.117424 | 0.18852  | 0.123543 |
| 0.206439 | 0.109848  | 0.142628 | 0.137675 | 0.127622 | 0.202214 | 0.140152 |
| 0.196533 | 0.104604  | 0.127477 | 0.127477 | 0.113345 | 0.190559 | 0.125874 |
| 0.19697  | 0.104167  | 0.132576 | 0.126166 | 0.112908 | 0.190997 | 0.128642 |
| 0.199592 | 0.102418  | 0.136364 | 0.130536 | 0.12398  | 0.195367 | 0.133013 |
| 0.192162 | 0.11014   | 0.137092 | 0.134178 | 0.120629 | 0.185606 | 0.131993 |
| 0.206585 | 0.113491  | 0.138986 | 0.13549  | 0.123106 | 0.198572 | 0.134178 |
| 0.205857 | 0.115385  | 0.14292  | 0.136801 | 0.115676 | 0.200175 | 0.141608 |
| 0.205857 | 0.111014  | 0.138258 | 0.128351 | 0.113928 | 0.200175 | 0.13549  |
| 0.194784 | 0.101981  | 0.112325 | 0.123397 | 0.118881 | 0.190851 | 0.112762 |
| 0.196824 | 0.104604  | 0.129808 | 0.120484 | 0.111305 | 0.193473 | 0.127622 |
| 0.203671 | 0.124563  | 0.142191 | 0.138403 | 0.122232 | 0.198864 | 0.142045 |
| 0.189831 | 0.106935  | 0.128351 | 0.124272 | 0.111888 | 0.184732 | 0.125    |
| 0.203526 | 0.124417  | 0.11757  | 0.140006 | 0.135781 | 0.200758 | 0.119755 |
| 0.18852  | 0.130099  | 0.144231 | 0.142483 | 0.139132 | 0.184586 | 0.141171 |
| 0.19289  | 0.112034  | 0.114802 | 0.129662 | 0.126894 | 0.18954  | 0.116987 |
| 0.199883 | 0.112617  | 0.134615 | 0.136072 | 0.128351 | 0.198572 | 0.131556 |
| 0.187209 | 0.121212  | 0.131265 | 0.130682 | 0.126166 | 0.183275 | 0.131119 |
| 0.195221 | 0.112908  | 0.131119 | 0.127622 | 0.126603 | 0.192162 | 0.127477 |
| 0.185897 | 0.120192  | 0.134907 | 0.128497 | 0.12398  | 0.179341 | 0.131265 |
| 0.195221 | 0.136509  | 0.143357 | 0.145688 | 0.135635 | 0.191579 | 0.140589 |
| 0.186043 | 0.0996503 | 0.105332 | 0.122815 | 0.114219 | 0.185315 | 0.106643 |
| 0.203671 | 0.121358  | 0.127622 | 0.137529 | 0.133596 | 0.199446 | 0.124854 |
| 0.184586 | 0.135198  | 0.145542 | 0.142337 | 0.143065 | 0.181527 | 0.141317 |
| 0.200321 | 0.10373   | 0.115239 | 0.130099 | 0.122669 | 0.197552 | 0.111888 |
| 0.190997 | 0.109557  | 0.11757  | 0.130682 | 0.128788 | 0.187063 | 0.117716 |
| 0.206585 | 0.137966  | 0.120921 | 0.143648 | 0.144959 | 0.204691 | 0.125437 |
| 0.196387 | 0.115822  | 0.1081   | 0.129371 | 0.12602  | 0.194493 | 0.106498 |
| 0.212267 | 0.125     | 0.13039  | 0.140006 | 0.13986  | 0.205711 | 0.130828 |
| 0.204837 | 0.121066  | 0.119755 | 0.138403 | 0.128642 | 0.199155 | 0.115822 |

|          |           |           |           |           |          |           |
|----------|-----------|-----------|-----------|-----------|----------|-----------|
| 0.20236  | 0.120921  | 0.121941  | 0.130099  | 0.115093  | 0.199883 | 0.121212  |
| 0.202214 | 0.121941  | 0.122378  | 0.132867  | 0.130973  | 0.19595  | 0.120484  |
| 0.196824 | 0.104021  | 0.113782  | 0.13447   | 0.126166  | 0.189685 | 0.11451   |
| 0.206002 | 0.129808  | 0.118298  | 0.138695  | 0.123106  | 0.201777 | 0.119901  |
| 0.204837 | 0.113199  | 0.136655  | 0.133741  | 0.124272  | 0.200029 | 0.133013  |
| 0.205711 | 0.128351  | 0.131119  | 0.139569  | 0.124854  | 0.203817 | 0.128351  |
| 0.210373 | 0.123689  | 0.132867  | 0.136072  | 0.127477  | 0.206148 | 0.135635  |
| 0.200175 | 0.122815  | 0.125874  | 0.141026  | 0.130099  | 0.19391  | 0.12398   |
| 0.206876 | 0.136218  | 0.143357  | 0.14831   | 0.135635  | 0.200321 | 0.141754  |
| 0.195221 | 0.0995047 | 0.123834  | 0.134033  | 0.125437  | 0.193036 | 0.11961   |
| 0.201049 | 0.108829  | 0.109557  | 0.128497  | 0.116696  | 0.19799  | 0.108246  |
| 0.199592 | 0.119027  | 0.130828  | 0.138695  | 0.127768  | 0.198864 | 0.125437  |
| 0.198427 | 0.101253  | 0.11859   | 0.128205  | 0.123106  | 0.190997 | 0.116987  |
| 0.201777 | 0.135781  | 0.147582  | 0.147873  | 0.146853  | 0.193765 | 0.145979  |
| 0.210227 | 0.142774  | 0.149621  | 0.158071  | 0.152389  | 0.206585 | 0.151515  |
| 0.203817 | 0.125874  | 0.111742  | 0.131847  | 0.121795  | 0.201632 | 0.111014  |
| 0.196678 | 0.114073  | 0.10169   | 0.125291  | 0.120192  | 0.193619 | 0.10067   |
| 0.2044   | 0.129371  | 0.133887  | 0.129225  | 0.119172  | 0.200175 | 0.129371  |
| 0.204837 | 0.124563  | 0.142191  | 0.136946  | 0.123106  | 0.199738 | 0.138258  |
| 0.20338  | 0.120775  | 0.107809  | 0.134033  | 0.123689  | 0.201777 | 0.108537  |
| 0.209499 | 0.122815  | 0.139277  | 0.147145  | 0.123689  | 0.205857 | 0.139423  |
| 0.206585 | 0.122815  | 0.136364  | 0.1419    | 0.137092  | 0.197407 | 0.136218  |
| 0.205857 | 0.109557  | 0.113782  | 0.131556  | 0.130536  | 0.200466 | 0.113636  |
| 0.208188 | 0.159965  | 0.161568  | 0.155157  | 0.151515  | 0.20542  | 0.160256  |
| 0.204691 | 0.105769  | 0.116696  | 0.140589  | 0.126166  | 0.196678 | 0.109557  |
| 0.207314 | 0.121503  | 0.132721  | 0.145542  | 0.138112  | 0.199301 | 0.13141   |
| 0.203671 | 0.113199  | 0.106061  | 0.129371  | 0.120775  | 0.200321 | 0.108246  |
| 0.209207 | 0.127185  | 0.130536  | 0.137238  | 0.128351  | 0.207314 | 0.126894  |
| 0.19697  | 0.112617  | 0.131702  | 0.130828  | 0.114365  | 0.19391  | 0.129225  |
| 0.168852 | 0.121212  | 0.14729   | 0.117279  | 0.141026  | 0.164044 | 0.136655  |
| 0.20542  | 0.143502  | 0.152972  | 0.142774  | 0.0729895 | 0.203526 | 0.150787  |
| 0.182255 | 0.117133  | 0.129808  | 0.0467657 | 0.115385  | 0.18007  | 0.121503  |
| 0.165501 | 0.121941  | 0.139277  | 0.0632284 | 0.130682  | 0.161859 | 0.130973  |
| 0.148164 | 0.134324  | 0.115239  | 0.148747  | 0.148601  | 0.141608 | 0.111014  |
| 0.148164 | 0.124709  | 0.150787  | 0.120192  | 0.143648  | 0.13986  | 0.142191  |
| 0.203963 | 0.121649  | 0.0926573 | 0.13141   | 0.125437  | 0.198864 | 0.0930944 |
| 0.200029 | 0.126457  | 0.144668  | 0.133887  | 0.127914  | 0.193473 | 0.13986   |
| 0.18109  | 0.101399  | 0.121649  | 0.113199  | 0.100816  | 0.173368 | 0.11655   |
| 0.184149 | 0.105332  | 0.11451   | 0.120047  | 0.112034  | 0.182255 | 0.10912   |
| 0.191579 | 0.100524  | 0.130099  | 0.128059  | 0.118881  | 0.183858 | 0.123834  |
| 0.180507 | 0.111888  | 0.123106  | 0.0456002 | 0.113928  | 0.176573 | 0.115967  |
| 0.193473 | 0.102127  | 0.115385  | 0.127622  | 0.112908  | 0.187209 | 0.112034  |
| 0.173368 | 0.0971737 | 0.120629  | 0.090035  | 0.105624  | 0.169143 | 0.114948  |
| 0.186772 | 0.116987  | 0.127331  | 0.107517  | 0.111451  | 0.179924 | 0.122815  |

|           |           |           |           |           |           |           |
|-----------|-----------|-----------|-----------|-----------|-----------|-----------|
| 0.177593  | 0.102273  | 0.135927  | 0.120484  | 0.119755  | 0.173951  | 0.132284  |
| 0.183129  | 0.0483683 | 0.117279  | 0.114656  | 0.112179  | 0.176865  | 0.114219  |
| 0.181964  | 0.111305  | 0.128059  | 0.0557984 | 0.115967  | 0.176865  | 0.120629  |
| 0.185315  | 0.112325  | 0.124126  | 0.0530303 | 0.112034  | 0.178467  | 0.116404  |
| 0.19697   | 0.118153  | 0.0410839 | 0.126748  | 0.126603  | 0.193619  | 0.0470571 |
| 0.125291  | 0.207022  | 0.221154  | 0.210956  | 0.21285   | 0.120484  | 0.214598  |
| 0.201632  | 0.136509  | 0.146562  | 0.0591492 | 0.135344  | 0.195659  | 0.140297  |
| 0.197698  | 0.121503  | 0.130973  | 0.126894  | 0.120047  | 0.195804  | 0.127331  |
| 0.183275  | 0.112908  | 0.125583  | 0.117716  | 0.115822  | 0.179341  | 0.121358  |
| 0.105186  | 0.203234  | 0.216783  | 0.203671  | 0.209062  | 0.107372  | 0.209353  |
| 0.182401  | 0.114365  | 0.0766317 | 0.126457  | 0.126311  | 0.18109   | 0.0750291 |
| 0.197698  | 0.108392  | 0.114073  | 0.130099  | 0.120921  | 0.192308  | 0.114219  |
| 0.192745  | 0.115967  | 0.120192  | 0.124272  | 0.111014  | 0.18648   | 0.118298  |
| 0.185315  | 0.105915  | 0.133159  | 0.125     | 0.114656  | 0.181964  | 0.128059  |
| 0.138695  | 0.241404  | 0.25641   | 0.244172  | 0.251311  | 0.137383  | 0.250728  |
| 0.197698  | 0.111888  | 0.130682  | 0.130973  | 0.126748  | 0.188811  | 0.126166  |
| 0.191579  | 0.108683  | 0.0496795 | 0.123106  | 0.118881  | 0.189103  | 0.0504079 |
| 0.196824  | 0.119755  | 0.121941  | 0.124272  | 0.112762  | 0.191725  | 0.121795  |
| 0.190414  | 0.115093  | 0.126311  | 0.125728  | 0.106643  | 0.186772  | 0.119755  |
| 0.18954   | 0.117424  | 0.128351  | 0.127477  | 0.129662  | 0.185897  | 0.124126  |
| 0.168269  | 0.106061  | 0.138258  | 0.111451  | 0.128205  | 0.165501  | 0.127622  |
| 0.191579  | 0.111888  | 0.0488054 | 0.125146  | 0.119464  | 0.190268  | 0.0504079 |
| 0.184149  | 0.113491  | 0.124126  | 0.0512821 | 0.112617  | 0.178176  | 0.116404  |
| 0.190122  | 0.112762  | 0.133596  | 0.124563  | 0.115093  | 0.182401  | 0.127914  |
| 0.186043  | 0.099359  | 0.125146  | 0.118735  | 0.111014  | 0.182692  | 0.123834  |
| 0.177156  | 0.106789  | 0.121212  | 0.0571096 | 0.112617  | 0.170892  | 0.112034  |
| 0.193328  | 0.0847902 | 0.128351  | 0.123689  | 0.118881  | 0.187937  | 0.127914  |
| 0.204837  | 0.143502  | 0.152972  | 0.1419    | 0.0729895 | 0.202069  | 0.148747  |
| 0.19697   | 0.112617  | 0.128788  | 0.125291  | 0.129516  | 0.193036  | 0.126894  |
| 0.197552  | 0.11116   | 0.115385  | 0.128788  | 0.127477  | 0.191288  | 0.114073  |
| 0.0944056 | 0.178759  | 0.198427  | 0.183566  | 0.192162  | 0.0866841 | 0.189831  |
| 0.0979021 | 0.194784  | 0.207459  | 0.199592  | 0.201777  | 0.097465  | 0.202069  |
| 0.179487  | 0.10271   | 0.13345   | 0.125     | 0.118444  | 0.175554  | 0.128934  |
| 0.183858  | 0.0986305 | 0.124126  | 0.117133  | 0.108537  | 0.178759  | 0.120484  |
| 0.189685  | 0.120192  | 0.143065  | 0.125874  | 0.126603  | 0.185169  | 0.136801  |
| 0.191725  | 0.112908  | 0.0547786 | 0.125874  | 0.120192  | 0.188083  | 0.0502622 |
| 0.199155  | 0.113928  | 0.131556  | 0.128351  | 0.130245  | 0.192308  | 0.13141   |
| 0.192308  | 0.126894  | 0.13345   | 0.125291  | 0.118153  | 0.188666  | 0.13243   |
| 0.114802  | 0.214015  | 0.232517  | 0.220862  | 0.222756  | 0.112908  | 0.22567   |
| 0.189977  | 0.104749  | 0.117424  | 0.117133  | 0.104749  | 0.184878  | 0.113491  |
| 0.139714  | 0.202797  | 0.209353  | 0.204108  | 0.206876  | 0.141317  | 0.20134   |
| 0.193765  | 0.104749  | 0.0891608 | 0.120338  | 0.112034  | 0.189248  | 0.0890152 |
| 0.190705  | 0.099359  | 0.119318  | 0.123106  | 0.115093  | 0.185023  | 0.114219  |
| 0.184732  | 0.107663  | 0.110431  | 0.102564  | 0.114365  | 0.176428  | 0.107372  |

|           |           |           |           |           |           |           |
|-----------|-----------|-----------|-----------|-----------|-----------|-----------|
| 0.18211   | 0.0980478 | 0.123834  | 0.115967  | 0.109411  | 0.176719  | 0.120192  |
| 0.102418  | 0.198135  | 0.214598  | 0.201777  | 0.205711  | 0.102564  | 0.206585  |
| 0.182547  | 0.120047  | 0.13884   | 0.0523019 | 0.127331  | 0.178613  | 0.129371  |
| 0.198864  | 0.106061  | 0.110286  | 0.12602   | 0.115676  | 0.192599  | 0.1081    |
| 0.186043  | 0.120338  | 0.128642  | 0.0467657 | 0.120921  | 0.179779  | 0.122086  |
| 0.192162  | 0.105186  | 0.123397  | 0.125437  | 0.122378  | 0.187937  | 0.119172  |
| 0.183421  | 0.097028  | 0.128934  | 0.119027  | 0.111597  | 0.178904  | 0.123834  |
| 0.195804  | 0.108829  | 0.0879953 | 0.123543  | 0.115239  | 0.19391   | 0.08581   |
| 0.18211   | 0.112325  | 0.0667249 | 0.124709  | 0.121358  | 0.175845  | 0.0625    |
| 0.194347  | 0.112908  | 0.112762  | 0.129371  | 0.123689  | 0.192453  | 0.111451  |
| 0.176282  | 0.105332  | 0.122086  | 0.0562354 | 0.106206  | 0.171474  | 0.109994  |
| 0.194784  | 0.106935  | 0.110286  | 0.125146  | 0.11859   | 0.190268  | 0.107809  |
| 0.0961538 | 0.176136  | 0.197552  | 0.183858  | 0.188666  | 0.0875583 | 0.191288  |
| 0.195367  | 0.120629  | 0.123106  | 0.126311  | 0.110431  | 0.193765  | 0.120338  |
| 0.194347  | 0.125146  | 0.137238  | 0.125291  | 0.0575466 | 0.193036  | 0.133887  |
| 0.189831  | 0.115676  | 0.126603  | 0.117861  | 0.1081    | 0.181818  | 0.120629  |
| 0.189394  | 0.10708   | 0.13345   | 0.127914  | 0.128642  | 0.17905   | 0.123689  |
| 0.185023  | 0.116113  | 0.124709  | 0.04662   | 0.116987  | 0.182547  | 0.119027  |
| 0.199592  | 0.115239  | 0.0914918 | 0.124709  | 0.11757   | 0.195367  | 0.0919289 |
| 0.185169  | 0.100233  | 0.118153  | 0.118153  | 0.113928  | 0.182401  | 0.114802  |
| 0.197407  | 0.119172  | 0.0467657 | 0.128934  | 0.125     | 0.194347  | 0.0518648 |
| 0.192016  | 0.120484  | 0.132284  | 0.121503  | 0.0534674 | 0.187209  | 0.126894  |
| 0.189977  | 0.112617  | 0.119172  | 0.123543  | 0.107955  | 0.186626  | 0.11757   |
| 0.186334  | 0.100524  | 0.129225  | 0.119318  | 0.116841  | 0.175991  | 0.12296   |
| 0.198135  | 0.112908  | 0.124709  | 0.124126  | 0.110286  | 0.190997  | 0.118444  |
| 0.202652  | 0.128788  | 0.133596  | 0.13447   | 0.124417  | 0.196678  | 0.130536  |
| 0.190122  | 0.104895  | 0.121941  | 0.125728  | 0.115676  | 0.182984  | 0.120047  |
| 0.197261  | 0.13243   | 0.141026  | 0.0576923 | 0.130973  | 0.193036  | 0.131847  |
| 0.185023  | 0.0960082 | 0.127622  | 0.118298  | 0.111451  | 0.17905   | 0.124854  |
| 0.185606  | 0.114073  | 0.122378  | 0.114802  | 0.105624  | 0.183129  | 0.118153  |
| 0.169726  | 0.104604  | 0.124272  | 0.0665793 | 0.117424  | 0.164044  | 0.115093  |
| 0.192745  | 0.118881  | 0.0493881 | 0.133596  | 0.129371  | 0.188811  | 0.0480769 |
| 0.112325  | 0.181818  | 0.179341  | 0.1875    | 0.192016  | 0.112762  | 0.173951  |
| 0.191434  | 0.105041  | 0.108392  | 0.124417  | 0.11116   | 0.186043  | 0.104458  |
| 0.177156  | 0.101253  | 0.113928  | 0.107517  | 0.0977564 | 0.174097  | 0.109411  |
| 0.199592  | 0.109703  | 0.115385  | 0.128205  | 0.12398   | 0.193328  | 0.111742  |
| 0.11014   | 0.169435  | 0.187937  | 0.173951  | 0.176719  | 0.105332  | 0.184586  |
| 0.198281  | 0.12296   | 0.141171  | 0.141171  | 0.136072  | 0.193182  | 0.136072  |
| 0.210227  | 0.131119  | 0.146999  | 0.149913  | 0.149184  | 0.20542   | 0.146562  |
| 0.207168  | 0.145542  | 0.156177  | 0.145105  | 0.074155  | 0.204108  | 0.151952  |
| 0.185023  | 0.103293  | 0.122086  | 0.122669  | 0.11553   | 0.180216  | 0.117279  |
| 0.182547  | 0.115385  | 0.128934  | 0.0450175 | 0.116259  | 0.178613  | 0.119464  |
| 0.105186  | 0.200612  | 0.217075  | 0.204254  | 0.211101  | 0.103293  | 0.21081   |
| 0.182401  | 0.116404  | 0.128788  | 0.116259  | 0.11757   | 0.17905   | 0.125437  |



|           |           |           |           |           |           |           |
|-----------|-----------|-----------|-----------|-----------|-----------|-----------|
| 0.186626  | 0.120629  | 0.132139  | 0.0470571 | 0.121503  | 0.180653  | 0.124709  |
| 0.191288  | 0.102273  | 0.109411  | 0.122815  | 0.115676  | 0.186772  | 0.107517  |
| 0.126894  | 0.155886  | 0.177302  | 0.14729   | 0.164336  | 0.126166  | 0.167541  |
| 0.179341  | 0.0999417 | 0.120192  | 0.112034  | 0.1081    | 0.174242  | 0.116259  |
| 0.206876  | 0.140006  | 0.156177  | 0.143065  | 0.13884   | 0.201486  | 0.151952  |
| 0.185606  | 0.055507  | 0.127914  | 0.12704   | 0.12398   | 0.177885  | 0.122815  |
| 0.0926573 | 0.178176  | 0.193473  | 0.183858  | 0.1875    | 0.0869755 | 0.1875    |
| 0.194347  | 0.108537  | 0.126748  | 0.127914  | 0.119318  | 0.1875    | 0.127477  |
| 0.186189  | 0.0942599 | 0.118881  | 0.110431  | 0.10067   | 0.180216  | 0.113491  |
| 0.18546   | 0.108683  | 0.123106  | 0.114948  | 0.109266  | 0.182984  | 0.121795  |
| 0.189977  | 0.106498  | 0.11655   | 0.119172  | 0.119027  | 0.186043  | 0.110286  |
| 0.196096  | 0.10708   | 0.111888  | 0.126166  | 0.122815  | 0.188666  | 0.10912   |
| 0.183858  | 0.116113  | 0.130245  | 0.124126  | 0.108829  | 0.179633  | 0.126603  |
| 0.183129  | 0.0976107 | 0.127185  | 0.120484  | 0.11014   | 0.179779  | 0.121795  |
| 0.092366  | 0.176428  | 0.196387  | 0.187937  | 0.188083  | 0.0866841 | 0.187209  |
| 0.191579  | 0.11451   | 0.12602   | 0.124563  | 0.11014   | 0.188228  | 0.120629  |
| 0.179196  | 0.106206  | 0.123252  | 0.113054  | 0.114365  | 0.176136  | 0.117279  |
| 0.106789  | 0.201632  | 0.218969  | 0.207022  | 0.209207  | 0.106061  | 0.210082  |
| 0.195076  | 0.118007  | 0.125146  | 0.126311  | 0.111597  | 0.19289   | 0.120921  |
| 0.183566  | 0.102418  | 0.128205  | 0.121503  | 0.113199  | 0.183421  | 0.12398   |
| 0.183275  | 0.095134  | 0.123252  | 0.116841  | 0.108537  | 0.178176  | 0.119027  |
| 0.195367  | 0.132867  | 0.140297  | 0.067162  | 0.129079  | 0.190268  | 0.132576  |
| 0.090472  | 0.175991  | 0.19799   | 0.184586  | 0.18852   | 0.0917832 | 0.192016  |
| 0.197261  | 0.116113  | 0.0530303 | 0.128497  | 0.122815  | 0.194493  | 0.0517191 |
| 0.202214  | 0.124563  | 0.131119  | 0.130536  | 0.116696  | 0.193619  | 0.12602   |
| 0.183566  | 0.0971737 | 0.125583  | 0.119172  | 0.110868  | 0.17905   | 0.122815  |
| 0.182401  | 0.0968823 | 0.12296   | 0.11859   | 0.10708   | 0.177593  | 0.11757   |
| 0.179633  | 0.0958625 | 0.126603  | 0.121066  | 0.112762  | 0.176282  | 0.122669  |
| 0.182984  | 0.110868  | 0.123834  | 0.0524476 | 0.11116   | 0.179341  | 0.116404  |
| 0.185752  | 0.0492424 | 0.113491  | 0.115822  | 0.106643  | 0.178322  | 0.108974  |
| 0.196533  | 0.110431  | 0.129225  | 0.131556  | 0.125583  | 0.188811  | 0.125874  |
| 0.202069  | 0.127914  | 0.138549  | 0.120484  | 0.108392  | 0.199592  | 0.131993  |
| 0.194202  | 0.107809  | 0.129516  | 0.131847  | 0.122669  | 0.189977  | 0.121212  |
| 0.199883  | 0.11116   | 0.124709  | 0.131702  | 0.125728  | 0.197407  | 0.124563  |
| 0.0968823 | 0.180944  | 0.200903  | 0.189248  | 0.195221  | 0.0885781 | 0.19289   |
| 0.192308  | 0.112617  | 0.12296   | 0.123252  | 0.109994  | 0.186043  | 0.117279  |
| 0.188666  | 0.124417  | 0.137092  | 0.0523019 | 0.124126  | 0.185606  | 0.127331  |
| 0.184441  | 0.0930944 | 0.127331  | 0.118007  | 0.108246  | 0.179633  | 0.122815  |
| 0.182547  | 0.0448718 | 0.116404  | 0.118444  | 0.108392  | 0.175408  | 0.11451   |
| 0.183129  | 0.109848  | 0.125146  | 0.118735  | 0.111888  | 0.177156  | 0.119464  |
| 0.194056  | 0.114656  | 0.0448718 | 0.124709  | 0.12398   | 0.189248  | 0.0421037 |
| 0.191142  | 0.123689  | 0.135781  | 0.125291  | 0.119901  | 0.188083  | 0.13243   |
| 0.188957  | 0.117716  | 0.130682  | 0.117861  | 0.0544872 | 0.185023  | 0.124126  |
| 0.184003  | 0.085373  | 0.074155  | 0.121941  | 0.115967  | 0.179779  | 0.0710956 |

|           |           |           |           |           |           |           |
|-----------|-----------|-----------|-----------|-----------|-----------|-----------|
| 0.183566  | 0.0747378 | 0.0818765 | 0.115967  | 0.114656  | 0.177885  | 0.0802739 |
| 0.182838  | 0.080711  | 0.121941  | 0.114365  | 0.108392  | 0.179196  | 0.114802  |
| 0.197261  | 0.106789  | 0.0882867 | 0.121795  | 0.118153  | 0.190997  | 0.0878497 |
| 0.204108  | 0.118881  | 0.13447   | 0.135635  | 0.135781  | 0.195513  | 0.133159  |
| 0.193182  | 0.110286  | 0.0550699 | 0.127622  | 0.120484  | 0.18954   | 0.0560897 |
| 0.178759  | 0.1081    | 0.121649  | 0.0520105 | 0.109848  | 0.173951  | 0.113054  |
| 0.190997  | 0.108392  | 0.0537587 | 0.121066  | 0.11451   | 0.189394  | 0.0521562 |
| 0.18211   | 0.0965909 | 0.121212  | 0.117133  | 0.109994  | 0.174679  | 0.117861  |
| 0.192453  | 0.0987762 | 0.107955  | 0.122232  | 0.105186  | 0.186772  | 0.104604  |
| 0.183421  | 0.101107  | 0.128642  | 0.121358  | 0.114802  | 0.180944  | 0.123834  |
| 0.189831  | 0.106352  | 0.117279  | 0.119318  | 0.103438  | 0.183275  | 0.111305  |
| 0.189248  | 0.116259  | 0.130973  | 0.121358  | 0.0477855 | 0.185023  | 0.123834  |
| 0.196533  | 0.103438  | 0.111451  | 0.124854  | 0.115676  | 0.186772  | 0.108683  |
| 0.185606  | 0.0473485 | 0.117133  | 0.115093  | 0.112617  | 0.178759  | 0.113199  |
| 0.183129  | 0.097028  | 0.122523  | 0.116696  | 0.1081    | 0.177448  | 0.119755  |
| 0.178176  | 0.108392  | 0.130099  | 0.122523  | 0.111888  | 0.171329  | 0.12296   |
| 0.187063  | 0.11553   | 0.129953  | 0.114802  | 0.116113  | 0.18109   | 0.123397  |
| 0.188083  | 0.0990676 | 0.121941  | 0.118153  | 0.106352  | 0.181818  | 0.117424  |
| 0.185752  | 0.0961538 | 0.124272  | 0.117861  | 0.107517  | 0.181527  | 0.123543  |
| 0.180653  | 0.112617  | 0.128788  | 0.0472028 | 0.11553   | 0.174388  | 0.118735  |
| 0.194347  | 0.111742  | 0.0914918 | 0.125291  | 0.117861  | 0.189831  | 0.0895979 |
| 0.186772  | 0.116113  | 0.124126  | 0.0501166 | 0.111742  | 0.180216  | 0.116987  |
| 0.192599  | 0.103001  | 0.109557  | 0.128205  | 0.116987  | 0.186334  | 0.108246  |
| 0.189685  | 0.0467657 | 0.118298  | 0.120338  | 0.114656  | 0.182255  | 0.116113  |
| 0.182692  | 0.095134  | 0.119464  | 0.11451   | 0.0992133 | 0.177593  | 0.11757   |
| 0.190997  | 0.0999417 | 0.109703  | 0.123106  | 0.109266  | 0.189103  | 0.105478  |
| 0.183275  | 0.118735  | 0.130828  | 0.0518648 | 0.118444  | 0.179341  | 0.123106  |
| 0.194056  | 0.119027  | 0.120629  | 0.11655   | 0.118444  | 0.186334  | 0.117279  |
| 0.186043  | 0.104021  | 0.124272  | 0.110868  | 0.110431  | 0.178322  | 0.118881  |
| 0.0925117 | 0.183566  | 0.201777  | 0.188957  | 0.191725  | 0.0885781 | 0.19493   |
| 0.123106  | 0.154429  | 0.171474  | 0.152535  | 0.158508  | 0.118298  | 0.166375  |
| 0.194493  | 0.112471  | 0.127477  | 0.127768  | 0.12296   | 0.187063  | 0.122669  |
| 0.184732  | 0.113782  | 0.0856643 | 0.115385  | 0.112034  | 0.180216  | 0.0828963 |
| 0.214452  | 0.133887  | 0.151807  | 0.152389  | 0.150204  | 0.208188  | 0.14729   |
| 0.193619  | 0.117424  | 0.135344  | 0.12398   | 0.11451   | 0.18648   | 0.130536  |
| 0.182692  | 0.107955  | 0.133741  | 0.125     | 0.11553   | 0.177593  | 0.125728  |
| 0.181672  | 0.105478  | 0.131265  | 0.116696  | 0.111014  | 0.177448  | 0.120629  |
| 0.192162  | 0.0810023 | 0.129516  | 0.123106  | 0.116259  | 0.185897  | 0.124417  |
| 0.188374  | 0.114219  | 0.130973  | 0.11757   | 0.119464  | 0.186189  | 0.122378  |
| 0.0981935 | 0.188374  | 0.208333  | 0.196096  | 0.198572  | 0.0986305 | 0.20236   |
| 0.197115  | 0.118007  | 0.0456002 | 0.128059  | 0.126457  | 0.19493   | 0.0515734 |
| 0.175117  | 0.112617  | 0.0944056 | 0.0766317 | 0.116404  | 0.172931  | 0.0863928 |
| 0.18007   | 0.0960082 | 0.120338  | 0.11451   | 0.10708   | 0.177302  | 0.115822  |
| 0.190705  | 0.0999417 | 0.121941  | 0.122523  | 0.117716  | 0.18648   | 0.117716  |

|           |           |           |           |           |           |           |
|-----------|-----------|-----------|-----------|-----------|-----------|-----------|
| 0.107809  | 0.172057  | 0.191725  | 0.180653  | 0.178176  | 0.116696  | 0.183712  |
| 0.127331  | 0.239656  | 0.251748  | 0.241259  | 0.246649  | 0.135344  | 0.244901  |
| 0.192599  | 0.119027  | 0.131993  | 0.121212  | 0.055507  | 0.186917  | 0.125146  |
| 0.189977  | 0.109994  | 0.133159  | 0.117133  | 0.113782  | 0.183712  | 0.121941  |
| 0.192599  | 0.105915  | 0.129079  | 0.125291  | 0.120484  | 0.1875    | 0.124272  |
| 0.191871  | 0.100524  | 0.113199  | 0.122815  | 0.113928  | 0.18648   | 0.108392  |
| 0.193473  | 0.111116  | 0.0495338 | 0.121212  | 0.11553   | 0.188083  | 0.0505536 |
| 0.186626  | 0.106061  | 0.120484  | 0.118444  | 0.103438  | 0.179196  | 0.11655   |
| 0.174825  | 0.10271   | 0.121795  | 0.0871212 | 0.113782  | 0.172931  | 0.115822  |
| 0.194056  | 0.111742  | 0.04662   | 0.123252  | 0.116696  | 0.192162  | 0.0476399 |
| 0.175554  | 0.104312  | 0.125728  | 0.0761946 | 0.110723  | 0.172494  | 0.118007  |
| 0.193473  | 0.101544  | 0.12296   | 0.123252  | 0.113199  | 0.186334  | 0.122232  |
| 0.186334  | 0.0437063 | 0.118735  | 0.119318  | 0.114802  | 0.177156  | 0.114219  |
| 0.192016  | 0.118735  | 0.132284  | 0.122086  | 0.0525932 | 0.188374  | 0.12602   |
| 0.182838  | 0.114802  | 0.125146  | 0.0488054 | 0.116259  | 0.178904  | 0.118298  |
| 0.180507  | 0.102855  | 0.112325  | 0.107955  | 0.0961538 | 0.177739  | 0.109266  |
| 0.20236   | 0.120629  | 0.124563  | 0.128934  | 0.116841  | 0.200466  | 0.126457  |
| 0.204691  | 0.122086  | 0.118735  | 0.137966  | 0.130536  | 0.20134   | 0.118007  |
| 0.182692  | 0.0954254 | 0.121503  | 0.115676  | 0.10912   | 0.176428  | 0.118735  |
| 0.179633  | 0.107517  | 0.121941  | 0.125146  | 0.118298  | 0.178322  | 0.120338  |
| 0.193619  | 0.115093  | 0.140006  | 0.13243   | 0.124417  | 0.189685  | 0.134324  |
| 0.120629  | 0.193328  | 0.214452  | 0.201923  | 0.209353  | 0.120192  | 0.20877   |
| 0.183421  | 0.111014  | 0.123397  | 0.115822  | 0.0495338 | 0.179196  | 0.116259  |
| 0.187354  | 0.0444347 | 0.118007  | 0.118298  | 0.113782  | 0.179924  | 0.115239  |
| 0.193182  | 0.108537  | 0.122669  | 0.125583  | 0.110868  | 0.18546   | 0.11553   |
| 0.194493  | 0.115967  | 0.125728  | 0.122523  | 0.110723  | 0.191142  | 0.120629  |
| 0.189248  | 0.0964452 | 0.116404  | 0.119318  | 0.114219  | 0.187354  | 0.113928  |
| 0.0980478 | 0.183566  | 0.207314  | 0.196824  | 0.201049  | 0.0961538 | 0.200466  |
| 0.188811  | 0.116113  | 0.129662  | 0.0492424 | 0.115239  | 0.180507  | 0.119901  |
| 0.181964  | 0.0941142 | 0.120775  | 0.11757   | 0.107517  | 0.178613  | 0.119755  |
| 0.192016  | 0.112034  | 0.120338  | 0.124709  | 0.121941  | 0.190705  | 0.117861  |
| 0.19289   | 0.0989219 | 0.109848  | 0.122378  | 0.115239  | 0.186334  | 0.106789  |
| 0.180653  | 0.111742  | 0.129371  | 0.0530303 | 0.113491  | 0.175845  | 0.118153  |
| 0.174825  | 0.099796  | 0.119172  | 0.0815851 | 0.104749  | 0.173805  | 0.112908  |
| 0.192599  | 0.097465  | 0.125291  | 0.121795  | 0.113782  | 0.186334  | 0.120192  |
| 0.192308  | 0.115822  | 0.124417  | 0.122086  | 0.10912   | 0.188957  | 0.120484  |
| 0.0980478 | 0.185023  | 0.204691  | 0.193036  | 0.196387  | 0.0955711 | 0.198427  |
| 0.177739  | 0.103875  | 0.118881  | 0.0582751 | 0.105624  | 0.171766  | 0.110286  |
| 0.0875583 | 0.181235  | 0.202943  | 0.190122  | 0.195513  | 0.0909091 | 0.196387  |
| 0.0888695 | 0.18109   | 0.20134   | 0.188811  | 0.192745  | 0.0887238 | 0.194493  |
| 0.200466  | 0.116696  | 0.116841  | 0.135198  | 0.128351  | 0.197115  | 0.117279  |
| 0.20134   | 0.12602   | 0.129371  | 0.131119  | 0.119027  | 0.200321  | 0.130682  |
| 0.186189  | 0.092803  | 0.11655   | 0.110723  | 0.103001  | 0.179633  | 0.111742  |
| 0.179633  | 0.102855  | 0.116113  | 0.0636655 | 0.106352  | 0.174825  | 0.108974  |

|           |           |           |           |           |           |           |
|-----------|-----------|-----------|-----------|-----------|-----------|-----------|
| 0.182401  | 0.111742  | 0.122378  | 0.0559441 | 0.10912   | 0.176428  | 0.115239  |
| 0.183275  | 0.0977564 | 0.126748  | 0.119464  | 0.112325  | 0.17905   | 0.126894  |
| 0.189394  | 0.109994  | 0.0539044 | 0.116841  | 0.114656  | 0.187791  | 0.0560897 |
| 0.194056  | 0.109703  | 0.0495338 | 0.122086  | 0.118444  | 0.190414  | 0.050845  |
| 0.188374  | 0.120047  | 0.135344  | 0.120484  | 0.0547786 | 0.187063  | 0.130245  |
| 0.19697   | 0.105915  | 0.116259  | 0.12704   | 0.118735  | 0.191871  | 0.113199  |
| 0.178467  | 0.0920746 | 0.121941  | 0.113491  | 0.105478  | 0.175117  | 0.11859   |
| 0.18211   | 0.112617  | 0.123834  | 0.0524476 | 0.11116   | 0.178467  | 0.116987  |
| 0.184878  | 0.0920746 | 0.115239  | 0.110868  | 0.100233  | 0.18007   | 0.112179  |
| 0.189394  | 0.122232  | 0.136655  | 0.0553613 | 0.122523  | 0.184295  | 0.127477  |
| 0.194347  | 0.105041  | 0.124417  | 0.124709  | 0.120192  | 0.185752  | 0.121649  |
| 0.193328  | 0.130245  | 0.137092  | 0.0479312 | 0.127914  | 0.190851  | 0.131119  |
| 0.137675  | 0.251166  | 0.264132  | 0.254808  | 0.25641   | 0.140443  | 0.259324  |
| 0.207022  | 0.120338  | 0.115239  | 0.130973  | 0.122378  | 0.202506  | 0.11859   |
| 0.198718  | 0.11553   | 0.127622  | 0.129953  | 0.125146  | 0.19391   | 0.12602   |
| 0.116987  | 0.209207  | 0.225379  | 0.21081   | 0.216492  | 0.112179  | 0.218823  |
| 0.198427  | 0.116696  | 0.128788  | 0.134324  | 0.126311  | 0.193036  | 0.125728  |
| 0.119172  | 0.220425  | 0.238636  | 0.22465   | 0.228293  | 0.125146  | 0.230332  |
| 0.196824  | 0.109848  | 0.110286  | 0.12602   | 0.117424  | 0.19493   | 0.107517  |
| 0.193182  | 0.109703  | 0.137821  | 0.128788  | 0.124563  | 0.190122  | 0.13447   |
| 0.18852   | 0.111742  | 0.119172  | 0.118881  | 0.104749  | 0.185752  | 0.113199  |
| 0.199009  | 0.11116   | 0.115676  | 0.129371  | 0.12398   | 0.194493  | 0.11757   |
| 0.0967366 | 0.191871  | 0.209207  | 0.197844  | 0.201195  | 0.0884324 | 0.203817  |
| 0.193182  | 0.125728  | 0.136946  | 0.0536131 | 0.122523  | 0.187209  | 0.128059  |
| 0.183275  | 0.114656  | 0.125583  | 0.0524476 | 0.112034  | 0.178467  | 0.118153  |
| 0.119027  | 0.218531  | 0.231789  | 0.222465  | 0.224359  | 0.124126  | 0.225524  |
| 0.191725  | 0.114365  | 0.0576923 | 0.126457  | 0.122232  | 0.18546   | 0.0557984 |
| 0.0965909 | 0.185897  | 0.204691  | 0.192745  | 0.195513  | 0.0917832 | 0.199592  |
| 0.194202  | 0.113928  | 0.0557984 | 0.125437  | 0.121212  | 0.189977  | 0.0556527 |
| 0.186334  | 0.0967366 | 0.127768  | 0.11961   | 0.105478  | 0.18007   | 0.123543  |
| 0.195513  | 0.0546329 | 0.12704   | 0.126457  | 0.122523  | 0.190122  | 0.124563  |
| 0.201923  | 0.116987  | 0.115093  | 0.13549   | 0.131556  | 0.201195  | 0.116404  |
| 0.184586  | 0.102564  | 0.121358  | 0.115822  | 0.109266  | 0.176282  | 0.115676  |
| 0.123397  | 0.124126  | 0.170309  | 0.160693  | 0.159965  | 0.118007  | 0.160839  |
| 0.178759  | 0.1081    | 0.123106  | 0.0502622 | 0.1081    | 0.175408  | 0.113345  |
| 0.192453  | 0.113636  | 0.126603  | 0.127185  | 0.108392  | 0.190268  | 0.121212  |
| 0.191871  | 0.106643  | 0.119027  | 0.128059  | 0.119464  | 0.183275  | 0.115093  |
| 0.193328  | 0.126166  | 0.128642  | 0.123106  | 0.11655   | 0.189394  | 0.126166  |
| 0.0929487 | 0.183421  | 0.20542   | 0.191725  | 0.191579  | 0.0898893 | 0.19799   |
| 0.184586  | 0.0955711 | 0.124854  | 0.117861  | 0.111597  | 0.17803   | 0.120921  |
| 0.185023  | 0.101836  | 0.119755  | 0.129953  | 0.125437  | 0.177885  | 0.116987  |
| 0.196824  | 0.107809  | 0.0925117 | 0.123397  | 0.113636  | 0.189977  | 0.0882867 |
| 0.195804  | 0.114948  | 0.0472028 | 0.125583  | 0.121649  | 0.195076  | 0.048514  |
| 0.187791  | 0.104895  | 0.130099  | 0.123397  | 0.115676  | 0.184149  | 0.127331  |

|           |           |           |           |           |           |           |
|-----------|-----------|-----------|-----------|-----------|-----------|-----------|
| 0.137529  | 0.247232  | 0.263112  | 0.247669  | 0.253934  | 0.137675  | 0.256265  |
| 0.194202  | 0.0536131 | 0.120192  | 0.122523  | 0.118881  | 0.18648   | 0.119755  |
| 0.18546   | 0.105769  | 0.124563  | 0.125437  | 0.107226  | 0.178613  | 0.122669  |
| 0.140006  | 0.166958  | 0.182255  | 0.176136  | 0.179779  | 0.135198  | 0.175408  |
| 0.0954254 | 0.172494  | 0.192162  | 0.183421  | 0.185023  | 0.0912005 | 0.185023  |
| 0.190997  | 0.115967  | 0.133887  | 0.121941  | 0.0544872 | 0.187646  | 0.126748  |
| 0.185315  | 0.114365  | 0.126748  | 0.0518648 | 0.112034  | 0.180216  | 0.121358  |
| 0.192308  | 0.10271   | 0.11014   | 0.122669  | 0.116987  | 0.184878  | 0.10912   |
| 0.199446  | 0.140152  | 0.147582  | 0.0630828 | 0.137529  | 0.193182  | 0.141317  |
| 0.187209  | 0.115093  | 0.127185  | 0.119318  | 0.0536131 | 0.183275  | 0.122086  |
| 0.192308  | 0.121358  | 0.135198  | 0.124709  | 0.0560897 | 0.1875    | 0.128642  |
| 0.19799   | 0.120921  | 0.0441434 | 0.13243   | 0.124417  | 0.194347  | 0.0445804 |
| 0.178176  | 0.112471  | 0.12398   | 0.0496795 | 0.114802  | 0.175117  | 0.115385  |
| 0.187063  | 0.124563  | 0.13549   | 0.0518648 | 0.124854  | 0.184586  | 0.126894  |
| 0.179633  | 0.106935  | 0.0747378 | 0.122232  | 0.124417  | 0.173951  | 0.0658508 |
| 0.201923  | 0.112034  | 0.115967  | 0.133159  | 0.125437  | 0.196533  | 0.112325  |
| 0.20877   | 0.126457  | 0.12602   | 0.14729   | 0.134907  | 0.207751  | 0.126166  |
| 0.193765  | 0.0534674 | 0.126457  | 0.125291  | 0.122815  | 0.188083  | 0.121066  |
| 0.206148  | 0.120629  | 0.118153  | 0.136801  | 0.131119  | 0.20338   | 0.119755  |
| 0.20236   | 0.124709  | 0.0441434 | 0.13243   | 0.130536  | 0.199301  | 0.0486597 |
| 0.0955711 | 0.195659  | 0.215035  | 0.202506  | 0.2044    | 0.102418  | 0.207314  |
| 0.198572  | 0.0999417 | 0.118153  | 0.133887  | 0.120921  | 0.193182  | 0.115385  |
| 0.0957168 | 0.179779  | 0.199446  | 0.190705  | 0.187646  | 0.0894522 | 0.19289   |
| 0.189248  | 0.111305  | 0.11961   | 0.119027  | 0.104895  | 0.184441  | 0.115093  |
| 0.185752  | 0.102564  | 0.136218  | 0.125146  | 0.120338  | 0.183566  | 0.13141   |
| 0.192745  | 0.108974  | 0.129225  | 0.128934  | 0.126166  | 0.184441  | 0.120921  |
| 0.187646  | 0.104458  | 0.124417  | 0.124709  | 0.114656  | 0.181672  | 0.119027  |
| 0.181964  | 0.117716  | 0.129516  | 0.043852  | 0.118007  | 0.176573  | 0.121503  |
| 0.185752  | 0.119464  | 0.125437  | 0.0456002 | 0.116259  | 0.18211   | 0.113928  |
| 0.181381  | 0.0984848 | 0.129516  | 0.121358  | 0.114802  | 0.175991  | 0.124417  |
| 0.191142  | 0.114656  | 0.121795  | 0.124417  | 0.10708   | 0.187791  | 0.120484  |
| 0.198427  | 0.114948  | 0.129371  | 0.127914  | 0.125728  | 0.188957  | 0.123106  |
| 0.193036  | 0.123543  | 0.0537587 | 0.140297  | 0.135198  | 0.18852   | 0.0544872 |
| 0.138258  | 0.243298  | 0.25539   | 0.244318  | 0.248543  | 0.135781  | 0.251748  |
| 0.186043  | 0.0999417 | 0.130682  | 0.122815  | 0.113345  | 0.180653  | 0.125291  |
| 0.092366  | 0.1706    | 0.190268  | 0.180653  | 0.184878  | 0.0852273 | 0.184295  |
| 0.0907634 | 0.178322  | 0.194493  | 0.184295  | 0.187937  | 0.0865385 | 0.188228  |
| 0.183275  | 0.105332  | 0.124126  | 0.128497  | 0.112034  | 0.17905   | 0.120775  |
| 0.188811  | 0.048514  | 0.120921  | 0.118007  | 0.115822  | 0.18109   | 0.116113  |
| 0.189977  | 0.109703  | 0.132576  | 0.125874  | 0.11757   | 0.186334  | 0.128934  |
| 0.179487  | 0.109703  | 0.123543  | 0.0571096 | 0.106206  | 0.172348  | 0.117279  |
| 0.179924  | 0.0777972 | 0.124563  | 0.121066  | 0.113636  | 0.174242  | 0.120629  |
| 0.191288  | 0.109557  | 0.0511364 | 0.123106  | 0.11859   | 0.192016  | 0.0521562 |
| 0.179487  | 0.114948  | 0.128205  | 0.0731352 | 0.120775  | 0.17701   | 0.120484  |

|           |           |           |           |           |           |           |
|-----------|-----------|-----------|-----------|-----------|-----------|-----------|
| 0.194347  | 0.125146  | 0.13549   | 0.0495338 | 0.125728  | 0.191579  | 0.128351  |
| 0.182255  | 0.099359  | 0.125728  | 0.118153  | 0.112762  | 0.179779  | 0.12296   |
| 0.190997  | 0.124709  | 0.134761  | 0.0528846 | 0.12296   | 0.187937  | 0.12704   |
| 0.192016  | 0.103293  | 0.122669  | 0.123543  | 0.114948  | 0.184878  | 0.119901  |
| 0.199883  | 0.114365  | 0.132867  | 0.130245  | 0.128642  | 0.190997  | 0.129225  |
| 0.192162  | 0.107226  | 0.113491  | 0.128059  | 0.120629  | 0.186189  | 0.108392  |
| 0.203089  | 0.126894  | 0.0472028 | 0.136946  | 0.13243   | 0.201486  | 0.0499709 |
| 0.193328  | 0.102564  | 0.127185  | 0.128059  | 0.116259  | 0.189394  | 0.123834  |
| 0.181964  | 0.0984848 | 0.122815  | 0.117861  | 0.111888  | 0.176865  | 0.117424  |
| 0.200612  | 0.128205  | 0.132721  | 0.132139  | 0.119464  | 0.196096  | 0.127622  |
| 0.0979021 | 0.171474  | 0.192599  | 0.181818  | 0.183712  | 0.0893065 | 0.185169  |
| 0.196241  | 0.128497  | 0.143794  | 0.055507  | 0.130536  | 0.191142  | 0.134033  |
| 0.182255  | 0.113636  | 0.126894  | 0.0505536 | 0.114219  | 0.179196  | 0.116259  |
| 0.194347  | 0.108829  | 0.125     | 0.127914  | 0.121649  | 0.188374  | 0.123689  |
| 0.188083  | 0.0996503 | 0.120775  | 0.118153  | 0.113636  | 0.180361  | 0.116841  |
| 0.193765  | 0.107663  | 0.111888  | 0.126457  | 0.119318  | 0.191579  | 0.109411  |
| 0.200903  | 0.109266  | 0.114365  | 0.131847  | 0.12704   | 0.196678  | 0.111597  |
| 0.0879953 | 0.18109   | 0.199883  | 0.189977  | 0.18954   | 0.0884324 | 0.190705  |
| 0.175408  | 0.109411  | 0.122669  | 0.0693473 | 0.116696  | 0.172057  | 0.117279  |
| 0.163899  | 0.0984848 | 0.11757   | 0.109994  | 0.106061  | 0.158508  | 0.109266  |
| 0.186626  | 0.120629  | 0.129808  | 0.0482226 | 0.11859   | 0.181818  | 0.121212  |
| 0         | 0.181964  | 0.199301  | 0.185606  | 0.190997  | 0.0884324 | 0.192453  |
| 0.181964  | 0         | 0.120775  | 0.116987  | 0.11451   | 0.172494  | 0.111305  |
| 0.199301  | 0.120775  | 0         | 0.126457  | 0.124854  | 0.197698  | 0.0453089 |
| 0.185606  | 0.116987  | 0.126457  | 0         | 0.119318  | 0.183712  | 0.124854  |
| 0.190997  | 0.11451   | 0.124854  | 0.119318  | 0         | 0.186772  | 0.120338  |
| 0.0884324 | 0.172494  | 0.197698  | 0.183712  | 0.186772  | 0         | 0.188228  |
| 0.192453  | 0.111305  | 0.0453089 | 0.124854  | 0.120338  | 0.188228  | 0         |
| 0.183129  | 0.105769  | 0.114656  | 0.112325  | 0.106935  | 0.176282  | 0.109557  |
| 0.178759  | 0.0553613 | 0.121066  | 0.120192  | 0.114219  | 0.169289  | 0.115676  |
| 0.166812  | 0.106352  | 0.125728  | 0.116404  | 0.116841  | 0.158217  | 0.11859   |
| 0.195804  | 0.116113  | 0.122378  | 0.126748  | 0.109411  | 0.190122  | 0.120484  |
| 0.201632  | 0.122232  | 0.0495338 | 0.132576  | 0.129516  | 0.200029  | 0.0479312 |
| 0.185315  | 0.099796  | 0.125     | 0.117133  | 0.110577  | 0.180216  | 0.123689  |
| 0.19493   | 0.114073  | 0.125     | 0.119755  | 0.117861  | 0.190122  | 0.119027  |
| 0.204108  | 0.143939  | 0.15574   | 0.144376  | 0.0757576 | 0.201632  | 0.150932  |
| 0.12602   | 0.230186  | 0.241696  | 0.229167  | 0.236597  | 0.126166  | 0.235431  |
| 0.199446  | 0.11014   | 0.130099  | 0.130973  | 0.120921  | 0.197261  | 0.129662  |
| 0.194202  | 0.115676  | 0.123689  | 0.126894  | 0.110723  | 0.189977  | 0.120047  |
| 0.179196  | 0.112617  | 0.118298  | 0.0553613 | 0.11757   | 0.174679  | 0.110286  |
| 0.184295  | 0.116841  | 0.130682  | 0.126311  | 0.112762  | 0.177156  | 0.128205  |
| 0.186772  | 0.10912   | 0.0996503 | 0.115676  | 0.112908  | 0.184295  | 0.0954254 |
| 0.189103  | 0.102127  | 0.118298  | 0.122378  | 0.117279  | 0.184878  | 0.115822  |
| 0.182838  | 0.118007  | 0.125728  | 0.053176  | 0.117424  | 0.179779  | 0.11859   |

|           |           |           |           |           |           |           |
|-----------|-----------|-----------|-----------|-----------|-----------|-----------|
| 0.195804  | 0.121649  | 0.0437063 | 0.13141   | 0.128934  | 0.194202  | 0.0456002 |
| 0.186189  | 0.116404  | 0.126457  | 0.124709  | 0.0849359 | 0.183129  | 0.120775  |
| 0.128934  | 0.230478  | 0.243735  | 0.231498  | 0.236597  | 0.128205  | 0.239802  |
| 0.180653  | 0.0467657 | 0.113636  | 0.113345  | 0.112617  | 0.176719  | 0.108829  |
| 0.188228  | 0.0983392 | 0.104312  | 0.117424  | 0.106789  | 0.184295  | 0.103001  |
| 0.181672  | 0.0976107 | 0.121941  | 0.114948  | 0.110431  | 0.179487  | 0.119755  |
| 0.197552  | 0.131847  | 0.140734  | 0.12704   | 0.0590035 | 0.19595   | 0.137092  |
| 0.206002  | 0.117861  | 0.137238  | 0.136364  | 0.126894  | 0.201195  | 0.135927  |
| 0.18211   | 0.105332  | 0.127622  | 0.114219  | 0.113782  | 0.174971  | 0.124272  |
| 0.181818  | 0.116113  | 0.126166  | 0.0448718 | 0.114948  | 0.177885  | 0.119027  |
| 0.182838  | 0.111888  | 0.124563  | 0.114948  | 0.0690559 | 0.178322  | 0.117133  |
| 0.121066  | 0.224359  | 0.237325  | 0.225379  | 0.232517  | 0.12296   | 0.231935  |
| 0.186043  | 0.120921  | 0.128934  | 0.0456002 | 0.118881  | 0.183275  | 0.12296   |
| 0.197261  | 0.117279  | 0.0405012 | 0.126457  | 0.123689  | 0.194202  | 0.0412296 |
| 0.18648   | 0.109411  | 0.121212  | 0.120921  | 0.0939685 | 0.187209  | 0.118153  |
| 0.194493  | 0.120338  | 0.128934  | 0.124854  | 0.118298  | 0.192016  | 0.125     |
| 0.201486  | 0.114219  | 0.115239  | 0.131556  | 0.123834  | 0.199592  | 0.112762  |
| 0.183712  | 0.0990676 | 0.126311  | 0.118153  | 0.110723  | 0.181818  | 0.122669  |
| 0.194784  | 0.117424  | 0.0499709 | 0.129516  | 0.126748  | 0.194056  | 0.0506993 |
| 0.201923  | 0.126311  | 0.0428322 | 0.131993  | 0.13039   | 0.201195  | 0.0499709 |
| 0.195513  | 0.114365  | 0.0457459 | 0.124709  | 0.11757   | 0.191871  | 0.0528846 |
| 0.186917  | 0.097028  | 0.13039   | 0.120775  | 0.108974  | 0.181527  | 0.122378  |
| 0.196824  | 0.121212  | 0.126894  | 0.128059  | 0.113928  | 0.194347  | 0.124709  |
| 0.202797  | 0.125728  | 0.133741  | 0.130245  | 0.118444  | 0.198572  | 0.128351  |
| 0.201049  | 0.116987  | 0.134907  | 0.133159  | 0.130099  | 0.193619  | 0.128059  |
| 0.200466  | 0.120192  | 0.133159  | 0.136072  | 0.134761  | 0.195076  | 0.131265  |
| 0.202652  | 0.126166  | 0.130099  | 0.131265  | 0.118007  | 0.201049  | 0.127622  |
| 0.187791  | 0.0777972 | 0.120192  | 0.119901  | 0.110723  | 0.184732  | 0.117133  |
| 0.211247  | 0.127185  | 0.0996503 | 0.135781  | 0.130973  | 0.207896  | 0.0992133 |
| 0.207022  | 0.123543  | 0.121066  | 0.135344  | 0.129371  | 0.200175  | 0.123834  |
| 0.10271   | 0.195221  | 0.213141  | 0.199155  | 0.204545  | 0.106061  | 0.206585  |
| 0.186917  | 0.117133  | 0.13243   | 0.124272  | 0.12296   | 0.186189  | 0.125874  |
| 0.192745  | 0.104895  | 0.107955  | 0.124854  | 0.11014   | 0.187937  | 0.105186  |
| 0.180361  | 0.100962  | 0.131119  | 0.124126  | 0.118444  | 0.177593  | 0.127185  |
| 0.122523  | 0.213869  | 0.230332  | 0.218094  | 0.224359  | 0.121795  | 0.223776  |
| 0.105624  | 0.201923  | 0.216929  | 0.209936  | 0.20979   | 0.114219  | 0.210664  |
| 0.201632  | 0.12398   | 0.0472028 | 0.130828  | 0.133596  | 0.199446  | 0.050845  |
| 0.133887  | 0.244172  | 0.256556  | 0.243735  | 0.250291  | 0.136655  | 0.248834  |
| 0.189831  | 0.083042  | 0.124854  | 0.121066  | 0.108974  | 0.183858  | 0.121795  |
| 0.202943  | 0.121795  | 0.139714  | 0.137966  | 0.134615  | 0.202214  | 0.138403  |
| 0.187791  | 0.0454545 | 0.116987  | 0.120192  | 0.118881  | 0.181818  | 0.11655   |
| 0.196678  | 0.121358  | 0.127914  | 0.12704   | 0.112325  | 0.192453  | 0.123689  |
| 0.0910548 | 0.180361  | 0.196241  | 0.184003  | 0.18648   | 0.0879953 | 0.190559  |
| 0.189977  | 0.113199  | 0.12704   | 0.12704   | 0.120192  | 0.188666  | 0.124272  |

|           |           |           |           |           |           |           |
|-----------|-----------|-----------|-----------|-----------|-----------|-----------|
| 0.0920746 | 0.183421  | 0.202506  | 0.189103  | 0.194202  | 0.0957168 | 0.195659  |
| 0.191725  | 0.105915  | 0.122669  | 0.122086  | 0.106498  | 0.186626  | 0.119027  |
| 0.175699  | 0.108537  | 0.0748834 | 0.103147  | 0.121649  | 0.171474  | 0.067162  |
| 0.194056  | 0.105041  | 0.127622  | 0.129662  | 0.116113  | 0.187791  | 0.121649  |
| 0.173077  | 0.099796  | 0.114219  | 0.107809  | 0.109703  | 0.169726  | 0.108829  |
| 0.182255  | 0.0929487 | 0.121358  | 0.113782  | 0.104312  | 0.176282  | 0.117133  |
| 0.184586  | 0.106061  | 0.123397  | 0.112908  | 0.112179  | 0.179779  | 0.11655   |
| 0.178467  | 0.0454545 | 0.114365  | 0.119318  | 0.112471  | 0.173077  | 0.109266  |
| 0.181235  | 0.110868  | 0.121795  | 0.0474942 | 0.109703  | 0.175554  | 0.114656  |
| 0.197407  | 0.113636  | 0.0878497 | 0.124854  | 0.122669  | 0.193473  | 0.087704  |
| 0.190414  | 0.0981935 | 0.123397  | 0.116113  | 0.1081    | 0.185023  | 0.118881  |
| 0.184149  | 0.0432692 | 0.115676  | 0.120921  | 0.114365  | 0.17701   | 0.112908  |
| 0.187791  | 0.1081    | 0.124272  | 0.126894  | 0.121795  | 0.182984  | 0.121795  |
| 0.192745  | 0.123252  | 0.133887  | 0.0543415 | 0.123834  | 0.187354  | 0.126748  |
| 0.186189  | 0.104749  | 0.121503  | 0.122378  | 0.113199  | 0.18109   | 0.119027  |
| 0.185169  | 0.108683  | 0.116987  | 0.119318  | 0.104604  | 0.181527  | 0.111597  |
| 0.179487  | 0.0922203 | 0.121212  | 0.114802  | 0.106206  | 0.176428  | 0.116987  |
| 0.187646  | 0.114073  | 0.0530303 | 0.118298  | 0.120192  | 0.185169  | 0.0520105 |
| 0.190851  | 0.112325  | 0.124417  | 0.125     | 0.107372  | 0.187791  | 0.120775  |
| 0.195367  | 0.108683  | 0.111451  | 0.13039   | 0.120921  | 0.193182  | 0.111597  |
| 0.192453  | 0.106935  | 0.123689  | 0.125728  | 0.119755  | 0.185897  | 0.121503  |
| 0.182401  | 0.11553   | 0.123252  | 0.0501166 | 0.114365  | 0.176428  | 0.116404  |
| 0.193328  | 0.125874  | 0.13447   | 0.0511364 | 0.125291  | 0.187354  | 0.125583  |
| 0.199155  | 0.133741  | 0.14292   | 0.0528846 | 0.130828  | 0.193473  | 0.135198  |
| 0.183275  | 0.100087  | 0.0611888 | 0.115093  | 0.111742  | 0.180798  | 0.0622086 |
| 0.185023  | 0.0986305 | 0.127914  | 0.118881  | 0.11116   | 0.17905   | 0.124854  |
| 0.183712  | 0.0891608 | 0.116404  | 0.115822  | 0.109557  | 0.179487  | 0.108974  |
| 0.202652  | 0.125583  | 0.13243   | 0.133304  | 0.120047  | 0.199592  | 0.129079  |
| 0.192016  | 0.0520105 | 0.119755  | 0.122086  | 0.118153  | 0.1875    | 0.118444  |
| 0.20979   | 0.129516  | 0.126166  | 0.144522  | 0.137966  | 0.208479  | 0.122815  |
| 0.196387  | 0.116696  | 0.144814  | 0.134615  | 0.127185  | 0.192453  | 0.139423  |
| 0.192453  | 0.126166  | 0.135052  | 0.12398   | 0.0565268 | 0.189977  | 0.132867  |
| 0.184441  | 0.0980478 | 0.121212  | 0.113636  | 0.107955  | 0.18109   | 0.117861  |
| 0.184295  | 0.1081    | 0.120775  | 0.114073  | 0.105478  | 0.179196  | 0.115385  |
| 0.200321  | 0.113054  | 0.132139  | 0.131265  | 0.127622  | 0.193473  | 0.131993  |
| 0.111597  | 0.197115  | 0.211538  | 0.20134   | 0.207314  | 0.11553   | 0.205274  |
| 0.183858  | 0.107663  | 0.118298  | 0.120338  | 0.108246  | 0.17905   | 0.110577  |
| 0.193328  | 0.101399  | 0.125728  | 0.124563  | 0.11655   | 0.18648   | 0.120047  |
| 0.193182  | 0.114073  | 0.121212  | 0.124709  | 0.109703  | 0.189831  | 0.118735  |
| 0.191871  | 0.104021  | 0.122815  | 0.12398   | 0.120047  | 0.184732  | 0.120338  |
| 0.19289   | 0.112617  | 0.12704   | 0.130536  | 0.108246  | 0.187209  | 0.124563  |
| 0.191434  | 0.121066  | 0.120629  | 0.113636  | 0.11961   | 0.184878  | 0.116404  |
| 0.197115  | 0.121795  | 0.122815  | 0.116696  | 0.120629  | 0.188811  | 0.121503  |
| 0.190851  | 0.120484  | 0.129953  | 0.120338  | 0.0590035 | 0.188666  | 0.125728  |



|          |           |           |           |          |          |           |
|----------|-----------|-----------|-----------|----------|----------|-----------|
| 0.194639 | 0.107372  | 0.087704  | 0.120047  | 0.113199 | 0.18954  | 0.0875583 |
| 0.199009 | 0.122232  | 0.126166  | 0.13141   | 0.116987 | 0.195659 | 0.124272  |
| 0.193473 | 0.099796  | 0.122086  | 0.125     | 0.113491 | 0.184586 | 0.117279  |
| 0.19391  | 0.10373   | 0.129808  | 0.124854  | 0.11655  | 0.189103 | 0.127331  |
| 0.164044 | 0.170017  | 0.177739  | 0.174825  | 0.173805 | 0.159819 | 0.171474  |
| 0.183566 | 0.114948  | 0.124417  | 0.0533217 | 0.112034 | 0.176428 | 0.117279  |
| 0.186334 | 0.115093  | 0.130099  | 0.129808  | 0.119755 | 0.18211  | 0.125583  |
| 0.200758 | 0.100379  | 0.113054  | 0.134907  | 0.122523 | 0.198281 | 0.113199  |
| 0.189248 | 0.11655   | 0.11757   | 0.118153  | 0.119464 | 0.184149 | 0.113054  |
| 0.1875   | 0.0932401 | 0.11757   | 0.111742  | 0.100524 | 0.180944 | 0.111597  |
| 0.186334 | 0.090035  | 0.116404  | 0.116113  | 0.10373  | 0.180361 | 0.111888  |
| 0.191871 | 0.0999417 | 0.119901  | 0.117279  | 0.107809 | 0.186189 | 0.113636  |
| 0.199446 | 0.115967  | 0.105332  | 0.13039   | 0.122378 | 0.193473 | 0.104021  |
| 0.182255 | 0.110431  | 0.126603  | 0.0901807 | 0.112762 | 0.174242 | 0.117424  |
| 0.20338  | 0.112617  | 0.123543  | 0.133741  | 0.129808 | 0.198864 | 0.121941  |
| 0.184586 | 0.101107  | 0.108537  | 0.113491  | 0.113928 | 0.17803  | 0.106061  |
| 0.187646 | 0.0989219 | 0.111305  | 0.127331  | 0.121941 | 0.186626 | 0.111742  |
| 0.207022 | 0.119755  | 0.0995047 | 0.135052  | 0.126166 | 0.204254 | 0.0999417 |
| 0.197407 | 0.104312  | 0.108537  | 0.126311  | 0.121503 | 0.198427 | 0.109848  |
| 0.19391  | 0.113636  | 0.11961   | 0.124563  | 0.121503 | 0.189394 | 0.116841  |
| 0.19391  | 0.0964452 | 0.106789  | 0.124563  | 0.114219 | 0.191725 | 0.105769  |
| 0.195076 | 0.102564  | 0.108537  | 0.125146  | 0.119172 | 0.194639 | 0.109557  |
| 0.1875   | 0.090035  | 0.112617  | 0.117279  | 0.107226 | 0.18211  | 0.111305  |
| 0.201923 | 0.105041  | 0.118298  | 0.129662  | 0.12398  | 0.196824 | 0.119318  |
| 0.192308 | 0.0907634 | 0.11451   | 0.123543  | 0.107372 | 0.184878 | 0.109703  |
| 0.208042 | 0.139132  | 0.108683  | 0.139569  | 0.140006 | 0.203526 | 0.107955  |
| 0.193765 | 0.124272  | 0.105769  | 0.129953  | 0.124854 | 0.1875   | 0.104458  |
| 0.192016 | 0.100087  | 0.106935  | 0.120047  | 0.111742 | 0.188957 | 0.103584  |
| 0.207896 | 0.132576  | 0.105041  | 0.140006  | 0.137821 | 0.203963 | 0.105186  |
| 0.193328 | 0.118881  | 0.132721  | 0.126311  | 0.113928 | 0.183858 | 0.125874  |
| 0.202943 | 0.117133  | 0.125437  | 0.140006  | 0.134324 | 0.199592 | 0.125291  |
| 0.19391  | 0.0961538 | 0.121358  | 0.121941  | 0.115967 | 0.187354 | 0.115385  |
| 0.206294 | 0.139714  | 0.13986   | 0.141608  | 0.140589 | 0.198864 | 0.137966  |
| 0.192599 | 0.120484  | 0.124126  | 0.136072  | 0.123689 | 0.190414 | 0.121941  |
| 0.201049 | 0.129225  | 0.118881  | 0.142483  | 0.13243  | 0.198281 | 0.118153  |
| 0.203963 | 0.111451  | 0.122086  | 0.127914  | 0.121066 | 0.198864 | 0.119901  |
| 0.192453 | 0.0952797 | 0.103293  | 0.122232  | 0.112471 | 0.188811 | 0.102273  |
| 0.189977 | 0.0971737 | 0.108392  | 0.121503  | 0.114656 | 0.186917 | 0.107372  |
| 0.194493 | 0.112471  | 0.103293  | 0.124854  | 0.111888 | 0.191434 | 0.103147  |
| 0.202069 | 0.099359  | 0.115822  | 0.129808  | 0.121212 | 0.195221 | 0.11451   |
| 0.208042 | 0.109411  | 0.126457  | 0.131993  | 0.130099 | 0.201777 | 0.127185  |
| 0.190268 | 0.11116   | 0.110723  | 0.127914  | 0.120775 | 0.183421 | 0.106206  |
| 0.192016 | 0.0945513 | 0.110723  | 0.120921  | 0.110577 | 0.186334 | 0.10912   |
| 0.188666 | 0.0973193 | 0.106789  | 0.122815  | 0.115676 | 0.185315 | 0.105186  |

|          |           |          |          |          |          |           |
|----------|-----------|----------|----------|----------|----------|-----------|
| 0.194347 | 0.097465  | 0.115093 | 0.128205 | 0.118444 | 0.189248 | 0.114365  |
| 0.188811 | 0.090472  | 0.103147 | 0.119755 | 0.114073 | 0.18546  | 0.0983392 |
| 0.19595  | 0.104895  | 0.110868 | 0.130682 | 0.123252 | 0.19697  | 0.112762  |
| 0.188374 | 0.094697  | 0.12398  | 0.115239 | 0.119464 | 0.183858 | 0.119172  |
| 0.180361 | 0.103293  | 0.127622 | 0.110723 | 0.11116  | 0.174388 | 0.124854  |
| 0.191434 | 0.0962995 | 0.125291 | 0.115967 | 0.113782 | 0.18546  | 0.122232  |
| 0.187354 | 0.0770688 | 0.120629 | 0.116259 | 0.10912  | 0.18109  | 0.118735  |
| 0.189394 | 0.0919289 | 0.111597 | 0.123252 | 0.112908 | 0.184003 | 0.11116   |
| 0.178176 | 0.0996503 | 0.122815 | 0.111451 | 0.110723 | 0.173368 | 0.119755  |
| 0.188811 | 0.10067   | 0.120047 | 0.113054 | 0.116113 | 0.186334 | 0.11961   |
| 0.188228 | 0.111451  | 0.130245 | 0.105769 | 0.119901 | 0.183129 | 0.124854  |
| 0.174242 | 0.097465  | 0.117133 | 0.102855 | 0.10271  | 0.170017 | 0.112325  |
| 0.20236  | 0.115967  | 0.128059 | 0.12602  | 0.127914 | 0.197552 | 0.124417  |

| TDr_3473 | TDr_3477  | TDr_3483  | TDr_3484  | TDr_3507  | TDr_3508  | TDr_3510 |
|----------|-----------|-----------|-----------|-----------|-----------|----------|
| 0.119027 | 0.099796  | 0.0971737 | 0.129371  | 0.13141   | 0.11859   | 0.120047 |
| 0.11451  | 0.104604  | 0.109848  | 0.117861  | 0.128642  | 0.103001  | 0.12398  |
| 0.108392 | 0.0996503 | 0.106352  | 0.114073  | 0.125146  | 0.0983392 | 0.116696 |
| 0.114802 | 0.104604  | 0.117424  | 0.11757   | 0.128059  | 0.104458  | 0.118153 |
| 0.104895 | 0.125583  | 0.134615  | 0.133304  | 0.135052  | 0.131265  | 0.129808 |
| 0.113054 | 0.120629  | 0.125     | 0.133013  | 0.137092  | 0.123106  | 0.130099 |
| 0.117861 | 0.115822  | 0.128642  | 0.129662  | 0.121503  | 0.120338  | 0.121795 |
| 0.110577 | 0.105624  | 0.114948  | 0.115385  | 0.128205  | 0.104312  | 0.122378 |
| 0.10373  | 0.0917832 | 0.105478  | 0.112325  | 0.11961   | 0.10271   | 0.103875 |
| 0.11116  | 0.0875583 | 0.115239  | 0.121795  | 0.128788  | 0.0897436 | 0.116259 |
| 0.109848 | 0.099359  | 0.104604  | 0.124563  | 0.127477  | 0.10708   | 0.122523 |
| 0.105041 | 0.099796  | 0.113491  | 0.107517  | 0.115967  | 0.108974  | 0.107809 |
| 0.107955 | 0.099796  | 0.112908  | 0.119755  | 0.122086  | 0.101981  | 0.117133 |
| 0.122669 | 0.108974  | 0.111305  | 0.143211  | 0.151952  | 0.125437  | 0.137675 |
| 0.123397 | 0.114365  | 0.129808  | 0.134907  | 0.140734  | 0.0512821 | 0.135198 |
| 0.120047 | 0.111305  | 0.123252  | 0.130682  | 0.110868  | 0.109411  | 0.11757  |
| 0.104749 | 0.110286  | 0.117861  | 0.0952797 | 0.1081    | 0.11014   | 0.115093 |
| 0.123252 | 0.142774  | 0.148893  | 0.137383  | 0.157488  | 0.13884   | 0.144668 |
| 0.108974 | 0.0961538 | 0.102273  | 0.116113  | 0.122815  | 0.102127  | 0.117279 |
| 0.194056 | 0.186772  | 0.180944  | 0.209936  | 0.213724  | 0.176136  | 0.205857 |
| 0.121941 | 0.116696  | 0.122815  | 0.120629  | 0.134615  | 0.115967  | 0.130828 |
| 0.116841 | 0.114219  | 0.11451   | 0.115822  | 0.134761  | 0.115239  | 0.126311 |
| 0.101836 | 0.104167  | 0.108537  | 0.115385  | 0.102855  | 0.106935  | 0.115967 |
| 0.122669 | 0.113928  | 0.128497  | 0.121941  | 0.107955  | 0.127185  | 0.123397 |
| 0.103875 | 0.0957168 | 0.107663  | 0.111597  | 0.114802  | 0.0979021 | 0.113928 |
| 0.12602  | 0.124854  | 0.129225  | 0.129953  | 0.136655  | 0.12296   | 0.13345  |
| 0.112034 | 0.114948  | 0.127477  | 0.120338  | 0.121795  | 0.120629  | 0.125583 |
| 0.117279 | 0.107955  | 0.125146  | 0.120921  | 0.107809  | 0.118007  | 0.12296  |
| 0.126603 | 0.122232  | 0.133887  | 0.132284  | 0.127914  | 0.130828  | 0.129662 |
| 0.119027 | 0.104458  | 0.127185  | 0.12296   | 0.124126  | 0.115093  | 0.118298 |
| 0.120629 | 0.111597  | 0.121212  | 0.127477  | 0.124854  | 0.113199  | 0.123397 |
| 0.120484 | 0.10912   | 0.124563  | 0.119464  | 0.119172  | 0.115385  | 0.124417 |
| 0.107372 | 0.0977564 | 0.108537  | 0.110723  | 0.119464  | 0.0958625 | 0.11014  |
| 0.116696 | 0.107955  | 0.120484  | 0.123834  | 0.122086  | 0.113345  | 0.124417 |
| 0.119755 | 0.11451   | 0.129371  | 0.124272  | 0.115239  | 0.118444  | 0.118444 |
| 0.128934 | 0.117861  | 0.130973  | 0.131993  | 0.122378  | 0.127331  | 0.125874 |
| 0.133159 | 0.124417  | 0.132867  | 0.136218  | 0.135635  | 0.127768  | 0.136509 |
| 0.120192 | 0.114365  | 0.122815  | 0.118298  | 0.120629  | 0.117133  | 0.12296  |
| 0.107663 | 0.099796  | 0.112034  | 0.112762  | 0.0987762 | 0.102855  | 0.117133 |
| 0.119318 | 0.115239  | 0.131847  | 0.128788  | 0.113345  | 0.119464  | 0.123543 |
| 0.100962 | 0.0986305 | 0.110868  | 0.113054  | 0.107809  | 0.104895  | 0.109557 |
| 0.135635 | 0.128934  | 0.144668  | 0.145105  | 0.135198  | 0.132576  | 0.140734 |

|          |           |          |          |           |          |          |
|----------|-----------|----------|----------|-----------|----------|----------|
| 0.142337 | 0.134761  | 0.145251 | 0.145688 | 0.128497  | 0.142191 | 0.141026 |
| 0.108392 | 0.106935  | 0.119172 | 0.120192 | 0.114073  | 0.114365 | 0.117279 |
| 0.107226 | 0.100233  | 0.114802 | 0.105624 | 0.11116   | 0.105041 | 0.109703 |
| 0.117279 | 0.10708   | 0.127185 | 0.12296  | 0.114219  | 0.108683 | 0.118881 |
| 0.115239 | 0.109703  | 0.121358 | 0.111888 | 0.112471  | 0.113636 | 0.120047 |
| 0.134324 | 0.126457  | 0.13986  | 0.140589 | 0.13039   | 0.135052 | 0.133013 |
| 0.111014 | 0.104604  | 0.117424 | 0.116696 | 0.11553   | 0.111742 | 0.119901 |
| 0.112034 | 0.107955  | 0.116404 | 0.121503 | 0.112762  | 0.110723 | 0.11655  |
| 0.145688 | 0.134033  | 0.140152 | 0.1537   | 0.147582  | 0.143211 | 0.146707 |
| 0.120921 | 0.121503  | 0.132576 | 0.121941 | 0.118444  | 0.125437 | 0.129225 |
| 0.109411 | 0.105041  | 0.113491 | 0.122669 | 0.104895  | 0.113928 | 0.11859  |
| 0.123397 | 0.108829  | 0.132139 | 0.132576 | 0.134907  | 0.114219 | 0.123252 |
| 0.106498 | 0.112617  | 0.108829 | 0.123543 | 0.118007  | 0.112762 | 0.115093 |
| 0.13447  | 0.136218  | 0.144085 | 0.134033 | 0.11859   | 0.143939 | 0.137529 |
| 0.121503 | 0.117716  | 0.129953 | 0.136218 | 0.116404  | 0.127477 | 0.125437 |
| 0.106935 | 0.106935  | 0.118881 | 0.119027 | 0.107955  | 0.112034 | 0.114365 |
| 0.11451  | 0.108974  | 0.120338 | 0.121066 | 0.116987  | 0.11116  | 0.116404 |
| 0.120484 | 0.105624  | 0.128351 | 0.125291 | 0.112762  | 0.115385 | 0.122086 |
| 0.124854 | 0.129808  | 0.137675 | 0.1419   | 0.117716  | 0.135198 | 0.140443 |
| 0.133304 | 0.127477  | 0.141754 | 0.148601 | 0.124126  | 0.13345  | 0.139277 |
| 0.159382 | 0.143939  | 0.147727 | 0.169726 | 0.156323  | 0.15574  | 0.165355 |
| 0.111888 | 0.102564  | 0.120047 | 0.116987 | 0.112908  | 0.108246 | 0.121941 |
| 0.110723 | 0.100524  | 0.118298 | 0.11553  | 0.106206  | 0.10912  | 0.117861 |
| 0.111305 | 0.0958625 | 0.117133 | 0.114656 | 0.106789  | 0.11553  | 0.110868 |
| 0.133887 | 0.133013  | 0.141463 | 0.144522 | 0.138986  | 0.136655 | 0.14627  |
| 0.106498 | 0.103875  | 0.116113 | 0.118298 | 0.111888  | 0.108392 | 0.115385 |
| 0.126457 | 0.123252  | 0.134324 | 0.129225 | 0.120192  | 0.130973 | 0.131265 |
| 0.118298 | 0.108683  | 0.125291 | 0.123397 | 0.109994  | 0.109994 | 0.125437 |
| 0.108829 | 0.106498  | 0.12398  | 0.11655  | 0.11014   | 0.11451  | 0.11655  |
| 0.145542 | 0.144959  | 0.144376 | 0.145979 | 0.146853  | 0.143065 | 0.148601 |
| 0.114656 | 0.115239  | 0.125728 | 0.12704  | 0.1081    | 0.117133 | 0.123543 |
| 0.130828 | 0.126457  | 0.141026 | 0.141463 | 0.122232  | 0.133304 | 0.132139 |
| 0.116987 | 0.120192  | 0.135344 | 0.120921 | 0.11859   | 0.126748 | 0.129079 |
| 0.113054 | 0.104312  | 0.113054 | 0.100379 | 0.124563  | 0.110286 | 0.114073 |
| 0.1081   | 0.104604  | 0.115385 | 0.119901 | 0.104749  | 0.114073 | 0.117279 |
| 0.107517 | 0.106061  | 0.122669 | 0.118153 | 0.11116   | 0.114365 | 0.116113 |
| 0.123834 | 0.127331  | 0.138986 | 0.133887 | 0.11553   | 0.133304 | 0.126894 |
| 0.111742 | 0.100962  | 0.116404 | 0.119172 | 0.112471  | 0.111888 | 0.114219 |
| 0.13549  | 0.124417  | 0.143357 | 0.140006 | 0.130973  | 0.135052 | 0.140006 |
| 0.120047 | 0.109848  | 0.12296  | 0.129516 | 0.114948  | 0.119027 | 0.123689 |
| 0.113345 | 0.113928  | 0.126166 | 0.121941 | 0.0995047 | 0.113491 | 0.120484 |
| 0.112471 | 0.109266  | 0.120338 | 0.120192 | 0.115239  | 0.113491 | 0.121941 |
| 0.11655  | 0.111597  | 0.128205 | 0.12398  | 0.109411  | 0.115822 | 0.125437 |
| 0.111597 | 0.10373   | 0.120629 | 0.114656 | 0.109994  | 0.11116  | 0.114365 |

|          |           |          |          |          |           |          |
|----------|-----------|----------|----------|----------|-----------|----------|
| 0.107809 | 0.104895  | 0.11451  | 0.117279 | 0.10708  | 0.116404  | 0.114073 |
| 0.130099 | 0.128351  | 0.141463 | 0.1419   | 0.119755 | 0.13345   | 0.133159 |
| 0.105624 | 0.102127  | 0.118153 | 0.115093 | 0.110431 | 0.103147  | 0.11655  |
| 0.109848 | 0.104604  | 0.118881 | 0.118153 | 0.120484 | 0.109703  | 0.116987 |
| 0.123252 | 0.11859   | 0.130828 | 0.128934 | 0.13243  | 0.119027  | 0.124563 |
| 0.124126 | 0.116841  | 0.13141  | 0.132721 | 0.128934 | 0.126311  | 0.127768 |
| 0.130828 | 0.12296   | 0.135198 | 0.129225 | 0.127185 | 0.124272  | 0.128642 |
| 0.140297 | 0.128642  | 0.142628 | 0.136946 | 0.134907 | 0.13345   | 0.136946 |
| 0.104604 | 0.1081    | 0.11655  | 0.117861 | 0.127768 | 0.113491  | 0.117861 |
| 0.176282 | 0.165501  | 0.164336 | 0.187209 | 0.186626 | 0.177885  | 0.180798 |
| 0.104749 | 0.10271   | 0.11757  | 0.110723 | 0.119755 | 0.106935  | 0.108974 |
| 0.142191 | 0.132576  | 0.1419   | 0.136801 | 0.130682 | 0.129808  | 0.135635 |
| 0.134033 | 0.124709  | 0.133159 | 0.128934 | 0.126603 | 0.120775  | 0.125146 |
| 0.131556 | 0.129516  | 0.142337 | 0.135198 | 0.133159 | 0.133159  | 0.134324 |
| 0.112471 | 0.105186  | 0.118007 | 0.115822 | 0.116404 | 0.109411  | 0.119901 |
| 0.136364 | 0.123834  | 0.139277 | 0.131265 | 0.127185 | 0.128934  | 0.130973 |
| 0.115676 | 0.109266  | 0.121212 | 0.110577 | 0.124272 | 0.108829  | 0.116404 |
| 0.119901 | 0.116987  | 0.128642 | 0.123834 | 0.122086 | 0.118007  | 0.125    |
| 0.115822 | 0.103875  | 0.116404 | 0.120921 | 0.120047 | 0.112762  | 0.118298 |
| 0.137092 | 0.130682  | 0.141754 | 0.131702 | 0.127331 | 0.136655  | 0.133741 |
| 0.110577 | 0.100087  | 0.119901 | 0.113345 | 0.110431 | 0.10373   | 0.111305 |
| 0.136072 | 0.128205  | 0.138695 | 0.136509 | 0.133887 | 0.127768  | 0.132139 |
| 0.115822 | 0.108829  | 0.122523 | 0.117133 | 0.125    | 0.114802  | 0.115676 |
| 0.126748 | 0.123252  | 0.137529 | 0.135344 | 0.118444 | 0.128934  | 0.126603 |
| 0.129808 | 0.121066  | 0.135052 | 0.13549  | 0.130536 | 0.118298  | 0.131702 |
| 0.106206 | 0.103875  | 0.113782 | 0.109266 | 0.11859  | 0.107517  | 0.115385 |
| 0.14292  | 0.143211  | 0.143211 | 0.146562 | 0.144231 | 0.139277  | 0.148893 |
| 0.114219 | 0.106061  | 0.116841 | 0.111451 | 0.123397 | 0.113491  | 0.117861 |
| 0.113054 | 0.107226  | 0.119464 | 0.114365 | 0.119027 | 0.107955  | 0.11757  |
| 0.112034 | 0.109994  | 0.12602  | 0.113928 | 0.111014 | 0.115676  | 0.115385 |
| 0.13884  | 0.13039   | 0.142628 | 0.138112 | 0.148019 | 0.136072  | 0.136946 |
| 0.122523 | 0.106498  | 0.10912  | 0.125291 | 0.120047 | 0.117133  | 0.123834 |
| 0.110868 | 0.106789  | 0.116113 | 0.111597 | 0.118007 | 0.106352  | 0.113345 |
| 0.112034 | 0.104458  | 0.115822 | 0.111014 | 0.116259 | 0.103438  | 0.111597 |
| 0.116259 | 0.105769  | 0.11655  | 0.11961  | 0.126894 | 0.114073  | 0.120484 |
| 0.125146 | 0.109994  | 0.133304 | 0.132576 | 0.123252 | 0.113345  | 0.131702 |
| 0.112762 | 0.106643  | 0.122086 | 0.122523 | 0.123106 | 0.111742  | 0.118153 |
| 0.102418 | 0.0895979 | 0.10912  | 0.107517 | 0.108683 | 0.0990676 | 0.111305 |
| 0.107663 | 0.0936772 | 0.114948 | 0.108392 | 0.110431 | 0.101107  | 0.111305 |
| 0.111597 | 0.0987762 | 0.117716 | 0.111451 | 0.11116  | 0.102418  | 0.110868 |
| 0.115676 | 0.113054  | 0.119464 | 0.118735 | 0.116404 | 0.118444  | 0.120484 |
| 0.127185 | 0.120192  | 0.136801 | 0.131702 | 0.11655  | 0.121503  | 0.125    |
| 0.108974 | 0.097028  | 0.115676 | 0.108829 | 0.108246 | 0.0986305 | 0.116113 |
| 0.106498 | 0.095134  | 0.10912  | 0.109848 | 0.106352 | 0.092366  | 0.112179 |

|          |           |          |          |           |           |          |
|----------|-----------|----------|----------|-----------|-----------|----------|
| 0.122523 | 0.11553   | 0.131265 | 0.121795 | 0.109557  | 0.115676  | 0.123252 |
| 0.107226 | 0.0964452 | 0.115385 | 0.108537 | 0.103875  | 0.100087  | 0.114656 |
| 0.120629 | 0.115967  | 0.122086 | 0.127768 | 0.130099  | 0.116696  | 0.131265 |
| 0.131993 | 0.121503  | 0.125291 | 0.136509 | 0.13884   | 0.129225  | 0.135927 |
| 0.112179 | 0.102273  | 0.125874 | 0.114948 | 0.109411  | 0.107955  | 0.118735 |
| 0.10912  | 0.0962995 | 0.116113 | 0.113054 | 0.109557  | 0.0987762 | 0.115967 |
| 0.113782 | 0.0957168 | 0.120484 | 0.111014 | 0.1081    | 0.10373   | 0.115093 |
| 0.10912  | 0.097465  | 0.107663 | 0.112179 | 0.11014   | 0.104312  | 0.11014  |
| 0.122523 | 0.105915  | 0.131847 | 0.123834 | 0.121795  | 0.115676  | 0.127622 |
| 0.105041 | 0.0919289 | 0.112034 | 0.109557 | 0.105769  | 0.0952797 | 0.111305 |
| 0.134033 | 0.127622  | 0.138986 | 0.138258 | 0.130682  | 0.13039   | 0.13447  |
| 0.125437 | 0.126894  | 0.139714 | 0.140152 | 0.128205  | 0.127622  | 0.130828 |
| 0.121066 | 0.118153  | 0.13039  | 0.131119 | 0.120629  | 0.117424  | 0.122669 |
| 0.1081   | 0.106935  | 0.118881 | 0.121358 | 0.115822  | 0.10708   | 0.118444 |
| 0.108392 | 0.0996503 | 0.119464 | 0.113199 | 0.121941  | 0.109703  | 0.11961  |
| 0.10708  | 0.0989219 | 0.119027 | 0.105769 | 0.100816  | 0.104021  | 0.118007 |
| 0.107226 | 0.0984848 | 0.115967 | 0.114365 | 0.102418  | 0.114073  | 0.114656 |
| 0.106935 | 0.101107  | 0.108683 | 0.113782 | 0.111742  | 0.104167  | 0.114948 |
| 0.106352 | 0.10169   | 0.109266 | 0.116404 | 0.116404  | 0.108246  | 0.11116  |
| 0.121503 | 0.117424  | 0.137821 | 0.127768 | 0.0965909 | 0.127477  | 0.124563 |
| 0.119318 | 0.108829  | 0.12398  | 0.11655  | 0.122669  | 0.112471  | 0.122086 |
| 0.128205 | 0.117133  | 0.133741 | 0.131265 | 0.135927  | 0.116696  | 0.133887 |
| 0.133304 | 0.128059  | 0.140589 | 0.134033 | 0.137529  | 0.128788  | 0.129371 |
| 0.183129 | 0.17701   | 0.168852 | 0.194639 | 0.20338   | 0.182984  | 0.197552 |
| 0.225233 | 0.226981  | 0.212413 | 0.241696 | 0.24461   | 0.23208   | 0.237034 |
| 0.105624 | 0.107663  | 0.102127 | 0.116841 | 0.114802  | 0.107517  | 0.11014  |
| 0.10169  | 0.104021  | 0.116841 | 0.110286 | 0.102418  | 0.107372  | 0.113782 |
| 0.104312 | 0.102273  | 0.111014 | 0.106789 | 0.108537  | 0.104749  | 0.108829 |
| 0.108974 | 0.100524  | 0.111305 | 0.105041 | 0.112908  | 0.10912   | 0.11553  |
| 0.124709 | 0.117716  | 0.131702 | 0.136801 | 0.142628  | 0.053176  | 0.135344 |
| 0.113928 | 0.108683  | 0.120921 | 0.108537 | 0.10708   | 0.111742  | 0.110286 |
| 0.136801 | 0.140006  | 0.148456 | 0.140152 | 0.11859   | 0.143065  | 0.141026 |
| 0.110431 | 0.11014   | 0.120338 | 0.107372 | 0.107663  | 0.117861  | 0.114073 |
| 0.122086 | 0.118298  | 0.137238 | 0.123397 | 0.116113  | 0.13243   | 0.127477 |
| 0.121941 | 0.121941  | 0.129808 | 0.131119 | 0.113636  | 0.131119  | 0.128788 |
| 0.133304 | 0.121941  | 0.141171 | 0.121795 | 0.11859   | 0.125874  | 0.13141  |
| 0.133887 | 0.126603  | 0.137092 | 0.143357 | 0.129662  | 0.131993  | 0.133159 |
| 0.10912  | 0.108537  | 0.120775 | 0.104895 | 0.106643  | 0.111597  | 0.115093 |
| 0.108246 | 0.109411  | 0.114073 | 0.105478 | 0.101981  | 0.114219  | 0.112762 |
| 0.109848 | 0.110723  | 0.122086 | 0.109994 | 0.109703  | 0.114073  | 0.118735 |
| 0.103438 | 0.100524  | 0.11451  | 0.101253 | 0.10708   | 0.11116   | 0.11116  |
| 0.104895 | 0.106352  | 0.113054 | 0.101253 | 0.103584  | 0.112617  | 0.112908 |
| 0.10912  | 0.106498  | 0.116404 | 0.105769 | 0.1081    | 0.115385  | 0.116841 |
| 0.127331 | 0.119172  | 0.132576 | 0.114948 | 0.110868  | 0.124854  | 0.12602  |

|          |           |          |           |          |           |          |
|----------|-----------|----------|-----------|----------|-----------|----------|
| 0.134324 | 0.130536  | 0.141317 | 0.127477  | 0.112617 | 0.136801  | 0.133304 |
| 0.11116  | 0.110868  | 0.122232 | 0.113636  | 0.105769 | 0.119464  | 0.120047 |
| 0.111014 | 0.106643  | 0.113928 | 0.111742  | 0.103293 | 0.112617  | 0.117861 |
| 0.126457 | 0.12296   | 0.142191 | 0.121358  | 0.111742 | 0.130973  | 0.128642 |
| 0.106352 | 0.100233  | 0.113636 | 0.10708   | 0.102127 | 0.111451  | 0.106206 |
| 0.135052 | 0.133013  | 0.144085 | 0.127622  | 0.122669 | 0.134033  | 0.137821 |
| 0.134178 | 0.128642  | 0.137092 | 0.13549   | 0.136946 | 0.122669  | 0.138695 |
| 0.128788 | 0.130828  | 0.140443 | 0.123689  | 0.123689 | 0.128934  | 0.130682 |
| 0.100524 | 0.102564  | 0.11451  | 0.104167  | 0.103001 | 0.10708   | 0.113782 |
| 0.108829 | 0.105332  | 0.112034 | 0.104021  | 0.100233 | 0.11014   | 0.107809 |
| 0.115676 | 0.116259  | 0.131702 | 0.11553   | 0.109994 | 0.121649  | 0.125437 |
| 0.124272 | 0.120484  | 0.125728 | 0.117133  | 0.105769 | 0.124417  | 0.122086 |
| 0.122232 | 0.121941  | 0.133596 | 0.115967  | 0.107809 | 0.13345   | 0.128205 |
| 0.108683 | 0.110431  | 0.124417 | 0.103001  | 0.106498 | 0.118735  | 0.114365 |
| 0.108537 | 0.109411  | 0.125437 | 0.106061  | 0.100524 | 0.117133  | 0.115676 |
| 0.119901 | 0.116696  | 0.130682 | 0.115967  | 0.1081   | 0.120338  | 0.121503 |
| 0.130099 | 0.120775  | 0.137675 | 0.12704   | 0.115093 | 0.133741  | 0.125874 |
| 0.126311 | 0.123106  | 0.127477 | 0.123252  | 0.115385 | 0.132867  | 0.130245 |
| 0.134324 | 0.126457  | 0.138695 | 0.129516  | 0.103584 | 0.131847  | 0.135344 |
| 0.129225 | 0.121358  | 0.132721 | 0.139277  | 0.115093 | 0.128205  | 0.129079 |
| 0.107663 | 0.108246  | 0.11757  | 0.110431  | 0.102855 | 0.118298  | 0.115093 |
| 0.123106 | 0.11961   | 0.134178 | 0.117133  | 0.119464 | 0.129371  | 0.125874 |
| 0.104312 | 0.101981  | 0.111305 | 0.0995047 | 0.100087 | 0.111742  | 0.110286 |
| 0.107372 | 0.101253  | 0.118735 | 0.116259  | 0.11451  | 0.11451   | 0.115385 |
| 0.107372 | 0.106498  | 0.115822 | 0.100524  | 0.108974 | 0.11014   | 0.113345 |
| 0.107809 | 0.101981  | 0.117716 | 0.106206  | 0.110868 | 0.111451  | 0.113491 |
| 0.103438 | 0.104895  | 0.116259 | 0.0977564 | 0.106789 | 0.113782  | 0.10912  |
| 0.131556 | 0.128059  | 0.137092 | 0.125291  | 0.113054 | 0.133741  | 0.130536 |
| 0.109848 | 0.107517  | 0.119755 | 0.114656  | 0.112034 | 0.113199  | 0.120775 |
| 0.132867 | 0.124417  | 0.136946 | 0.122815  | 0.114656 | 0.133013  | 0.125437 |
| 0.106352 | 0.101399  | 0.120047 | 0.104458  | 0.108246 | 0.111742  | 0.114073 |
| 0.121358 | 0.118444  | 0.133596 | 0.118007  | 0.104895 | 0.127622  | 0.121212 |
| 0.120629 | 0.116841  | 0.123252 | 0.128642  | 0.110868 | 0.121941  | 0.119901 |
| 0.117133 | 0.113345  | 0.120338 | 0.120484  | 0.126894 | 0.107663  | 0.126311 |
| 0.113491 | 0.107663  | 0.117279 | 0.119755  | 0.11014  | 0.112471  | 0.121503 |
| 0.11655  | 0.117133  | 0.127914 | 0.11116   | 0.121066 | 0.119027  | 0.122232 |
| 0.121649 | 0.115239  | 0.12602  | 0.120338  | 0.117133 | 0.112471  | 0.118881 |
| 0.10708  | 0.105624  | 0.116696 | 0.11451   | 0.118007 | 0.108683  | 0.115967 |
| 0.127477 | 0.112908  | 0.137966 | 0.142191  | 0.141608 | 0.122378  | 0.13549  |
| 0.1419   | 0.132576  | 0.145979 | 0.14088   | 0.129225 | 0.133596  | 0.132721 |
| 0.107517 | 0.0897436 | 0.117133 | 0.114073  | 0.120775 | 0.0980478 | 0.107663 |
| 0.134761 | 0.116696  | 0.140006 | 0.127622  | 0.141026 | 0.115385  | 0.129079 |
| 0.12704  | 0.105478  | 0.13345  | 0.134178  | 0.137675 | 0.112617  | 0.126603 |
| 0.128497 | 0.117133  | 0.135781 | 0.130682  | 0.139132 | 0.120484  | 0.133304 |

|          |           |          |          |          |          |          |
|----------|-----------|----------|----------|----------|----------|----------|
| 0.120047 | 0.107809  | 0.124709 | 0.121649 | 0.130099 | 0.110577 | 0.125728 |
| 0.117133 | 0.107226  | 0.13141  | 0.126311 | 0.131556 | 0.109994 | 0.114073 |
| 0.124563 | 0.10708   | 0.129516 | 0.134907 | 0.138403 | 0.113345 | 0.119464 |
| 0.127914 | 0.11655   | 0.13345  | 0.126311 | 0.137675 | 0.11961  | 0.130973 |
| 0.136655 | 0.120629  | 0.143357 | 0.135344 | 0.145542 | 0.123689 | 0.137675 |
| 0.121503 | 0.1081    | 0.128788 | 0.134761 | 0.140006 | 0.111742 | 0.119027 |
| 0.115676 | 0.103147  | 0.120338 | 0.114365 | 0.13039  | 0.10708  | 0.123106 |
| 0.129225 | 0.133013  | 0.134178 | 0.134615 | 0.115967 | 0.136655 | 0.134615 |
| 0.13345  | 0.117424  | 0.138403 | 0.136509 | 0.139132 | 0.120484 | 0.122232 |
| 0.111305 | 0.0999417 | 0.117133 | 0.116987 | 0.126311 | 0.100962 | 0.11553  |
| 0.208479 | 0.206439  | 0.192162 | 0.220862 | 0.225816 | 0.214161 | 0.224359 |
| 0.121358 | 0.112325  | 0.127185 | 0.124417 | 0.134324 | 0.111597 | 0.127622 |
| 0.116696 | 0.095134  | 0.126311 | 0.121503 | 0.127622 | 0.107809 | 0.11451  |
| 0.13141  | 0.120338  | 0.13986  | 0.133013 | 0.142045 | 0.121941 | 0.133013 |
| 0.115093 | 0.1081    | 0.122669 | 0.125728 | 0.13039  | 0.109411 | 0.116987 |
| 0.126166 | 0.112762  | 0.136072 | 0.141171 | 0.146125 | 0.116696 | 0.127477 |
| 0.115093 | 0.105186  | 0.126748 | 0.124563 | 0.129516 | 0.112034 | 0.12602  |
| 0.120484 | 0.105624  | 0.124854 | 0.122669 | 0.132576 | 0.106643 | 0.120047 |
| 0.121066 | 0.106789  | 0.131265 | 0.126457 | 0.136364 | 0.112762 | 0.123834 |
| 0.126457 | 0.111597  | 0.121212 | 0.130099 | 0.136801 | 0.121649 | 0.133304 |
| 0.128059 | 0.112325  | 0.135344 | 0.130245 | 0.137238 | 0.119464 | 0.137821 |
| 0.129953 | 0.115676  | 0.135198 | 0.125437 | 0.142628 | 0.125146 | 0.13243  |
| 0.130245 | 0.113345  | 0.135781 | 0.124563 | 0.139132 | 0.119901 | 0.13039  |
| 0.113054 | 0.102564  | 0.12296  | 0.125728 | 0.114948 | 0.105624 | 0.115239 |
| 0.118007 | 0.106935  | 0.124417 | 0.115239 | 0.133013 | 0.113491 | 0.127185 |
| 0.133596 | 0.12602   | 0.141754 | 0.136364 | 0.143648 | 0.120629 | 0.136364 |
| 0.119172 | 0.107226  | 0.124417 | 0.118735 | 0.130099 | 0.109411 | 0.123397 |
| 0.129079 | 0.126748  | 0.142483 | 0.139132 | 0.121941 | 0.136218 | 0.136801 |
| 0.136509 | 0.13243   | 0.131556 | 0.141026 | 0.147436 | 0.127914 | 0.140443 |
| 0.121066 | 0.109994  | 0.123106 | 0.131993 | 0.119755 | 0.111888 | 0.117424 |
| 0.125146 | 0.110577  | 0.131265 | 0.134615 | 0.13549  | 0.115385 | 0.123834 |
| 0.12704  | 0.120338  | 0.119755 | 0.135635 | 0.133013 | 0.122232 | 0.135344 |
| 0.126603 | 0.114365  | 0.128059 | 0.132284 | 0.130536 | 0.125    | 0.131119 |
| 0.12398  | 0.121358  | 0.122815 | 0.131119 | 0.13986  | 0.124417 | 0.136364 |
| 0.131265 | 0.136509  | 0.14088  | 0.143357 | 0.148019 | 0.129079 | 0.13986  |
| 0.111305 | 0.102564  | 0.119755 | 0.119901 | 0.111742 | 0.104167 | 0.111451 |
| 0.121941 | 0.125437  | 0.141171 | 0.139569 | 0.128497 | 0.118881 | 0.13141  |
| 0.134033 | 0.131119  | 0.128788 | 0.14292  | 0.145833 | 0.134178 | 0.140297 |
| 0.121212 | 0.106935  | 0.126748 | 0.124272 | 0.114948 | 0.112908 | 0.120775 |
| 0.116259 | 0.108974  | 0.126748 | 0.131556 | 0.124563 | 0.119901 | 0.122232 |
| 0.142628 | 0.137675  | 0.141463 | 0.146562 | 0.123834 | 0.1419   | 0.144522 |
| 0.120484 | 0.116113  | 0.132721 | 0.128205 | 0.112179 | 0.121503 | 0.127914 |
| 0.135781 | 0.128788  | 0.140734 | 0.140006 | 0.130973 | 0.128059 | 0.142045 |
| 0.127477 | 0.123397  | 0.137675 | 0.13549  | 0.120629 | 0.120047 | 0.136655 |



|          |           |          |          |          |           |          |
|----------|-----------|----------|----------|----------|-----------|----------|
| 0.124417 | 0.120338  | 0.13345  | 0.120775 | 0.125728 | 0.120192  | 0.124272 |
| 0.127185 | 0.123689  | 0.131847 | 0.134324 | 0.122669 | 0.122378  | 0.133741 |
| 0.120629 | 0.11014   | 0.127914 | 0.12602  | 0.118735 | 0.114656  | 0.123106 |
| 0.128642 | 0.128642  | 0.133887 | 0.131119 | 0.120921 | 0.126457  | 0.130536 |
| 0.129225 | 0.116404  | 0.136509 | 0.129079 | 0.135198 | 0.126166  | 0.131702 |
| 0.135344 | 0.126311  | 0.135052 | 0.128788 | 0.123543 | 0.132576  | 0.129953 |
| 0.135052 | 0.124563  | 0.140589 | 0.130828 | 0.134324 | 0.129662  | 0.128497 |
| 0.130973 | 0.123689  | 0.130682 | 0.132576 | 0.125291 | 0.125874  | 0.131993 |
| 0.145833 | 0.137383  | 0.145251 | 0.143648 | 0.142191 | 0.141026  | 0.143357 |
| 0.116404 | 0.105332  | 0.133013 | 0.127331 | 0.122086 | 0.111014  | 0.12296  |
| 0.116113 | 0.108246  | 0.126894 | 0.118881 | 0.11451  | 0.115385  | 0.117424 |
| 0.121066 | 0.123106  | 0.135635 | 0.126457 | 0.131119 | 0.124417  | 0.13141  |
| 0.114948 | 0.105041  | 0.125437 | 0.122669 | 0.118881 | 0.110431  | 0.119464 |
| 0.140443 | 0.133159  | 0.140152 | 0.145833 | 0.150495 | 0.134178  | 0.144959 |
| 0.151224 | 0.143939  | 0.157051 | 0.154283 | 0.151369 | 0.149913  | 0.156031 |
| 0.126748 | 0.126748  | 0.13345  | 0.123397 | 0.114656 | 0.129516  | 0.124854 |
| 0.119901 | 0.114948  | 0.126311 | 0.117716 | 0.103438 | 0.122669  | 0.123252 |
| 0.131702 | 0.126748  | 0.134324 | 0.125728 | 0.133887 | 0.124854  | 0.13243  |
| 0.129225 | 0.120192  | 0.139714 | 0.134907 | 0.140734 | 0.120338  | 0.132284 |
| 0.118735 | 0.121066  | 0.13447  | 0.118298 | 0.111014 | 0.12296   | 0.120921 |
| 0.13447  | 0.122815  | 0.143502 | 0.132867 | 0.141026 | 0.124417  | 0.143065 |
| 0.140297 | 0.12398   | 0.133304 | 0.142774 | 0.137529 | 0.130536  | 0.139569 |
| 0.126748 | 0.111305  | 0.128497 | 0.134178 | 0.115822 | 0.118735  | 0.121066 |
| 0.149476 | 0.153263  | 0.157634 | 0.144959 | 0.16215  | 0.156906  | 0.160111 |
| 0.123543 | 0.110431  | 0.132867 | 0.133304 | 0.114073 | 0.119027  | 0.130099 |
| 0.13345  | 0.127331  | 0.143357 | 0.149913 | 0.131847 | 0.124854  | 0.142045 |
| 0.116987 | 0.112034  | 0.129516 | 0.120629 | 0.108392 | 0.118007  | 0.119755 |
| 0.130682 | 0.129225  | 0.136801 | 0.13345  | 0.129953 | 0.131993  | 0.135198 |
| 0.12398  | 0.116404  | 0.130099 | 0.126457 | 0.136072 | 0.110723  | 0.124126 |
| 0.132867 | 0.116841  | 0.108683 | 0.143211 | 0.150495 | 0.134178  | 0.138258 |
| 0.134178 | 0.142045  | 0.14292  | 0.133741 | 0.157051 | 0.13986   | 0.138986 |
| 0.113636 | 0.114802  | 0.115385 | 0.122523 | 0.131556 | 0.11757   | 0.116987 |
| 0.124272 | 0.120775  | 0.110868 | 0.139277 | 0.142483 | 0.129953  | 0.130245 |
| 0.135198 | 0.129079  | 0.12296  | 0.147582 | 0.119901 | 0.145833  | 0.152535 |
| 0.135198 | 0.120921  | 0.116259 | 0.148456 | 0.154866 | 0.134761  | 0.144959 |
| 0.125437 | 0.122232  | 0.125728 | 0.125583 | 0.094697 | 0.127914  | 0.122378 |
| 0.105478 | 0.129079  | 0.132284 | 0.135344 | 0.145833 | 0.131556  | 0.130682 |
| 0.113928 | 0.101981  | 0.111305 | 0.116987 | 0.126894 | 0.0823135 | 0.119318 |
| 0.112325 | 0.107955  | 0.112617 | 0.120338 | 0.118881 | 0.0786713 | 0.121795 |
| 0.117424 | 0.104021  | 0.121795 | 0.123689 | 0.130682 | 0.114948  | 0.123106 |
| 0.11014  | 0.115676  | 0.110723 | 0.120192 | 0.126603 | 0.112908  | 0.112617 |
| 0.112617 | 0.102418  | 0.119318 | 0.113345 | 0.116841 | 0.112179  | 0.123252 |
| 0.105915 | 0.0986305 | 0.10271  | 0.120629 | 0.125    | 0.0728438 | 0.116841 |
| 0.105041 | 0.114656  | 0.110577 | 0.120921 | 0.133159 | 0.115385  | 0.114219 |

|           |           |           |           |           |           |          |
|-----------|-----------|-----------|-----------|-----------|-----------|----------|
| 0.118881  | 0.10373   | 0.11859   | 0.128351  | 0.140589  | 0.0598776 | 0.13039  |
| 0.104312  | 0.0576923 | 0.113345  | 0.111451  | 0.121649  | 0.0965909 | 0.109703 |
| 0.112471  | 0.114802  | 0.108974  | 0.123106  | 0.131265  | 0.116113  | 0.118153 |
| 0.10708   | 0.113491  | 0.110577  | 0.11859   | 0.128788  | 0.112471  | 0.114802 |
| 0.116404  | 0.11961   | 0.12602   | 0.122086  | 0.0439977 | 0.125874  | 0.125    |
| 0.203526  | 0.202069  | 0.192745  | 0.21824   | 0.222902  | 0.20979   | 0.22028  |
| 0.131556  | 0.138549  | 0.136509  | 0.145396  | 0.146853  | 0.136364  | 0.131119 |
| 0.122086  | 0.117716  | 0.136946  | 0.12398   | 0.130682  | 0.12602   | 0.119027 |
| 0.114073  | 0.115822  | 0.0887238 | 0.123543  | 0.129371  | 0.114219  | 0.127331 |
| 0.200612  | 0.196824  | 0.186334  | 0.211538  | 0.219114  | 0.204545  | 0.214744 |
| 0.113491  | 0.109411  | 0.105624  | 0.125     | 0.0824592 | 0.120629  | 0.127914 |
| 0.112762  | 0.111305  | 0.127331  | 0.125146  | 0.11757   | 0.112908  | 0.126894 |
| 0.0574009 | 0.115967  | 0.119755  | 0.118735  | 0.124854  | 0.120484  | 0.128059 |
| 0.118444  | 0.109703  | 0.126603  | 0.129079  | 0.13345   | 0.0474942 | 0.130536 |
| 0.239073  | 0.237617  | 0.225087  | 0.254079  | 0.257576  | 0.241259  | 0.251166 |
| 0.127331  | 0.113928  | 0.116259  | 0.129516  | 0.135052  | 0.121066  | 0.128934 |
| 0.106352  | 0.113054  | 0.116259  | 0.117279  | 0.0557984 | 0.118735  | 0.119318 |
| 0.115676  | 0.117133  | 0.125874  | 0.0496795 | 0.125437  | 0.123397  | 0.126894 |
| 0.113054  | 0.113636  | 0.123543  | 0.0490967 | 0.127185  | 0.121358  | 0.125437 |
| 0.128205  | 0.117716  | 0.117716  | 0.13884   | 0.133596  | 0.106206  | 0.133013 |
| 0.118298  | 0.106935  | 0.100816  | 0.127477  | 0.141171  | 0.108246  | 0.125728 |
| 0.111888  | 0.113345  | 0.120921  | 0.118444  | 0.0560897 | 0.121358  | 0.120484 |
| 0.10912   | 0.113491  | 0.111451  | 0.117424  | 0.125291  | 0.115385  | 0.113345 |
| 0.0967366 | 0.114802  | 0.125291  | 0.12398   | 0.137383  | 0.122523  | 0.120775 |
| 0.11451   | 0.104021  | 0.119172  | 0.11961   | 0.130099  | 0.0435606 | 0.124854 |
| 0.10271   | 0.107663  | 0.108246  | 0.115967  | 0.125291  | 0.109557  | 0.112179 |
| 0.115967  | 0.0914918 | 0.119464  | 0.124854  | 0.133304  | 0.0968823 | 0.121066 |
| 0.135344  | 0.139714  | 0.14729   | 0.131702  | 0.155594  | 0.141026  | 0.138112 |
| 0.128934  | 0.117279  | 0.119901  | 0.129371  | 0.131993  | 0.124126  | 0.13345  |
| 0.118735  | 0.114073  | 0.13243   | 0.131702  | 0.118298  | 0.116841  | 0.125874 |
| 0.180798  | 0.173514  | 0.159237  | 0.191725  | 0.199301  | 0.182692  | 0.193182 |
| 0.192162  | 0.192453  | 0.178759  | 0.206876  | 0.211538  | 0.197261  | 0.208333 |
| 0.116696  | 0.104458  | 0.120484  | 0.132284  | 0.138112  | 0.0498252 | 0.12704  |
| 0.111742  | 0.103001  | 0.11961   | 0.118298  | 0.130245  | 0.0425408 | 0.120629 |
| 0.131847  | 0.122232  | 0.128059  | 0.138986  | 0.144231  | 0.126166  | 0.138695 |
| 0.109994  | 0.111742  | 0.117279  | 0.120921  | 0.0553613 | 0.11859   | 0.118007 |
| 0.130536  | 0.118007  | 0.122086  | 0.134761  | 0.136801  | 0.124272  | 0.131847 |
| 0.122232  | 0.128642  | 0.13447   | 0.112471  | 0.138986  | 0.12704   | 0.124417 |
| 0.212558  | 0.212558  | 0.196533  | 0.229312  | 0.233974  | 0.217366  | 0.229021 |
| 0.108829  | 0.106789  | 0.119027  | 0.116841  | 0.120629  | 0.111888  | 0.114219 |
| 0.199009  | 0.199009  | 0.187646  | 0.211101  | 0.209062  | 0.204691  | 0.207896 |
| 0.109411  | 0.110577  | 0.111742  | 0.113928  | 0.090035  | 0.115385  | 0.112471 |
| 0.11014   | 0.106352  | 0.120629  | 0.112325  | 0.122232  | 0.112908  | 0.116696 |
| 0.112325  | 0.110577  | 0.113782  | 0.120047  | 0.113345  | 0.109266  | 0.119464 |

|           |           |           |           |           |           |           |
|-----------|-----------|-----------|-----------|-----------|-----------|-----------|
| 0.10912   | 0.0965909 | 0.107663  | 0.116841  | 0.128497  | 0.0559441 | 0.122086  |
| 0.199009  | 0.192308  | 0.179487  | 0.209353  | 0.214307  | 0.200029  | 0.211101  |
| 0.118298  | 0.120629  | 0.11451   | 0.132721  | 0.139132  | 0.12602   | 0.123397  |
| 0.113636  | 0.111014  | 0.122086  | 0.10912   | 0.11553   | 0.117861  | 0.111116  |
| 0.115385  | 0.120338  | 0.120047  | 0.127185  | 0.132721  | 0.118735  | 0.118735  |
| 0.117424  | 0.109266  | 0.122378  | 0.118735  | 0.126311  | 0.126894  | 0.129516  |
| 0.114219  | 0.100816  | 0.117133  | 0.12398   | 0.131847  | 0.0453089 | 0.124563  |
| 0.113782  | 0.111116  | 0.115239  | 0.11655   | 0.0903263 | 0.120338  | 0.112471  |
| 0.103584  | 0.113199  | 0.112325  | 0.123834  | 0.0702214 | 0.119755  | 0.12296   |
| 0.116696  | 0.114948  | 0.132139  | 0.129662  | 0.115967  | 0.118298  | 0.128788  |
| 0.104749  | 0.105915  | 0.100087  | 0.115385  | 0.123834  | 0.108683  | 0.1081    |
| 0.113636  | 0.111888  | 0.124126  | 0.112034  | 0.116113  | 0.121941  | 0.113199  |
| 0.178176  | 0.1706    | 0.163899  | 0.191142  | 0.199883  | 0.180944  | 0.191434  |
| 0.115967  | 0.118007  | 0.127914  | 0.0464744 | 0.125146  | 0.123689  | 0.126894  |
| 0.116696  | 0.125437  | 0.130973  | 0.11451   | 0.138695  | 0.124126  | 0.126166  |
| 0.11655   | 0.115967  | 0.123543  | 0.0962995 | 0.12602   | 0.116696  | 0.12398   |
| 0.12398   | 0.107955  | 0.107372  | 0.128497  | 0.134324  | 0.125291  | 0.129662  |
| 0.110286  | 0.116987  | 0.116987  | 0.124709  | 0.129953  | 0.114802  | 0.115385  |
| 0.118735  | 0.119901  | 0.121358  | 0.122378  | 0.0938228 | 0.12296   | 0.118298  |
| 0.112179  | 0.10373   | 0.113636  | 0.109703  | 0.123106  | 0.118444  | 0.122815  |
| 0.115093  | 0.122378  | 0.125291  | 0.123689  | 0.0496795 | 0.12602   | 0.124272  |
| 0.112908  | 0.117861  | 0.123689  | 0.111888  | 0.135781  | 0.118007  | 0.120629  |
| 0.109994  | 0.110286  | 0.11961   | 0.0498252 | 0.127331  | 0.114802  | 0.122086  |
| 0.113636  | 0.104021  | 0.117716  | 0.126894  | 0.131847  | 0.0563811 | 0.128059  |
| 0.0590035 | 0.11553   | 0.122232  | 0.117716  | 0.128788  | 0.120629  | 0.130536  |
| 0.0690559 | 0.128788  | 0.133159  | 0.129516  | 0.137092  | 0.132721  | 0.138258  |
| 0.120921  | 0.105769  | 0.112762  | 0.121358  | 0.128934  | 0.111451  | 0.125146  |
| 0.127185  | 0.13243   | 0.135052  | 0.143065  | 0.140152  | 0.132576  | 0.126166  |
| 0.111742  | 0.0962995 | 0.119901  | 0.120629  | 0.132576  | 0.0460373 | 0.122086  |
| 0.111451  | 0.116404  | 0.123689  | 0.0987762 | 0.126166  | 0.116841  | 0.114219  |
| 0.108683  | 0.106643  | 0.0987762 | 0.126311  | 0.128059  | 0.114948  | 0.114656  |
| 0.116259  | 0.115676  | 0.123252  | 0.127185  | 0.050845  | 0.127768  | 0.125728  |
| 0.177448  | 0.175991  | 0.164627  | 0.194493  | 0.182838  | 0.186334  | 0.192162  |
| 0.108246  | 0.106206  | 0.116696  | 0.108392  | 0.111014  | 0.11655   | 0.106061  |
| 0.105624  | 0.10067   | 0.113491  | 0.109557  | 0.117424  | 0.1081    | 0.0856643 |
| 0.118735  | 0.114948  | 0.128934  | 0.129079  | 0.11859   | 0.115676  | 0.125583  |
| 0.170017  | 0.165355  | 0.154575  | 0.183566  | 0.190559  | 0.172203  | 0.184732  |
| 0.138112  | 0.123543  | 0.127622  | 0.139714  | 0.142045  | 0.134761  | 0.143794  |
| 0.148601  | 0.13141   | 0.140734  | 0.150204  | 0.149038  | 0.143211  | 0.148456  |
| 0.136218  | 0.143211  | 0.14729   | 0.136655  | 0.15676   | 0.141026  | 0.141608  |
| 0.115239  | 0.104167  | 0.105332  | 0.120921  | 0.124709  | 0.114219  | 0.12704   |
| 0.109266  | 0.116841  | 0.116259  | 0.124272  | 0.128351  | 0.11757   | 0.118735  |
| 0.198281  | 0.19595   | 0.18546   | 0.213578  | 0.221737  | 0.204837  | 0.216783  |
| 0.109703  | 0.116113  | 0.119027  | 0.124126  | 0.133159  | 0.115967  | 0.127622  |

|           |           |           |           |           |           |          |
|-----------|-----------|-----------|-----------|-----------|-----------|----------|
| 0.113928  | 0.121212  | 0.117716  | 0.127185  | 0.135635  | 0.121358  | 0.122523 |
| 0.112471  | 0.109557  | 0.11859   | 0.111451  | 0.114365  | 0.117861  | 0.110868 |
| 0.153846  | 0.152389  | 0.136946  | 0.176136  | 0.181672  | 0.16215   | 0.167395 |
| 0.101981  | 0.101107  | 0.0751748 | 0.115822  | 0.125437  | 0.105624  | 0.119027 |
| 0.118444  | 0.140589  | 0.146707  | 0.147727  | 0.158217  | 0.141608  | 0.138112 |
| 0.119027  | 0.0657051 | 0.116696  | 0.125874  | 0.130245  | 0.112179  | 0.115967 |
| 0.179924  | 0.173805  | 0.160402  | 0.19289   | 0.19697   | 0.181235  | 0.191434 |
| 0.123689  | 0.112325  | 0.113782  | 0.125291  | 0.13345   | 0.116259  | 0.129953 |
| 0.106498  | 0.0948427 | 0.106498  | 0.113636  | 0.122086  | 0.100524  | 0.109557 |
| 0.109557  | 0.113928  | 0.122086  | 0.0968823 | 0.129808  | 0.116696  | 0.114365 |
| 0.112034  | 0.103875  | 0.118735  | 0.115676  | 0.115093  | 0.115093  | 0.124709 |
| 0.114948  | 0.110286  | 0.127477  | 0.125874  | 0.114802  | 0.113054  | 0.123543 |
| 0.116696  | 0.117279  | 0.124563  | 0.125     | 0.133159  | 0.117424  | 0.128788 |
| 0.11014   | 0.102273  | 0.119755  | 0.123106  | 0.128934  | 0.0467657 | 0.122815 |
| 0.177302  | 0.17264   | 0.162733  | 0.192016  | 0.198718  | 0.182692  | 0.191434 |
| 0.0944056 | 0.113054  | 0.123543  | 0.123397  | 0.130973  | 0.121941  | 0.122815 |
| 0.111742  | 0.10708   | 0.114073  | 0.119172  | 0.126748  | 0.104021  | 0.111305 |
| 0.198718  | 0.196096  | 0.187063  | 0.215181  | 0.220425  | 0.201777  | 0.213724 |
| 0.11655   | 0.115385  | 0.129662  | 0.0464744 | 0.128351  | 0.122815  | 0.124272 |
| 0.112617  | 0.104458  | 0.118444  | 0.121503  | 0.131119  | 0.0463287 | 0.126166 |
| 0.109703  | 0.0983392 | 0.11757   | 0.118881  | 0.126748  | 0.0405012 | 0.120338 |
| 0.115385  | 0.132867  | 0.128497  | 0.137383  | 0.144085  | 0.129516  | 0.124272 |
| 0.179779  | 0.172494  | 0.161422  | 0.192162  | 0.201486  | 0.181672  | 0.192453 |
| 0.111451  | 0.115239  | 0.124563  | 0.119755  | 0.0550699 | 0.120629  | 0.120921 |
| 0.064831  | 0.124854  | 0.125146  | 0.123543  | 0.134907  | 0.128205  | 0.133741 |
| 0.112617  | 0.100379  | 0.118735  | 0.122669  | 0.130536  | 0.0439977 | 0.121503 |
| 0.108246  | 0.0995047 | 0.116404  | 0.118298  | 0.127914  | 0.0460373 | 0.118007 |
| 0.110723  | 0.0981935 | 0.116259  | 0.116987  | 0.128934  | 0.0447261 | 0.121066 |
| 0.107372  | 0.111742  | 0.109411  | 0.120338  | 0.128497  | 0.111888  | 0.11451  |
| 0.102564  | 0.0576923 | 0.108683  | 0.109994  | 0.117861  | 0.0957168 | 0.113199 |
| 0.126748  | 0.113054  | 0.11859   | 0.130682  | 0.135927  | 0.120775  | 0.131556 |
| 0.109557  | 0.130828  | 0.13141   | 0.120775  | 0.14292   | 0.133013  | 0.127185 |
| 0.124126  | 0.113345  | 0.118007  | 0.126311  | 0.131265  | 0.116987  | 0.127768 |
| 0.125728  | 0.116404  | 0.133304  | 0.124417  | 0.12704   | 0.132576  | 0.130536 |
| 0.183566  | 0.175991  | 0.159965  | 0.196241  | 0.203234  | 0.1875    | 0.19799  |
| 0.0598776 | 0.112617  | 0.118153  | 0.115385  | 0.126166  | 0.115676  | 0.129953 |
| 0.119464  | 0.124709  | 0.124417  | 0.134178  | 0.137383  | 0.122815  | 0.119901 |
| 0.111451  | 0.0968823 | 0.114365  | 0.119172  | 0.130245  | 0.0472028 | 0.118007 |
| 0.105478  | 0.0553613 | 0.112762  | 0.110868  | 0.119027  | 0.0939685 | 0.110868 |
| 0.0958625 | 0.107809  | 0.11014   | 0.117861  | 0.128934  | 0.112617  | 0.117861 |
| 0.112034  | 0.11757   | 0.121358  | 0.120338  | 0.0498252 | 0.121795  | 0.121503 |
| 0.124563  | 0.127477  | 0.13447   | 0.131702  | 0.138403  | 0.126166  | 0.129371 |
| 0.111014  | 0.116259  | 0.11859   | 0.112325  | 0.133304  | 0.114948  | 0.123106 |
| 0.105478  | 0.0894522 | 0.108392  | 0.116987  | 0.0808566 | 0.106206  | 0.115239 |

|           |           |          |          |           |           |          |
|-----------|-----------|----------|----------|-----------|-----------|----------|
| 0.10271   | 0.0802739 | 0.106206 | 0.11014  | 0.090035  | 0.105186  | 0.110431 |
| 0.105769  | 0.0818765 | 0.103147 | 0.11553  | 0.121941  | 0.101836  | 0.107955 |
| 0.113782  | 0.111451  | 0.112617 | 0.114219 | 0.092366  | 0.116841  | 0.116841 |
| 0.132576  | 0.120921  | 0.124417 | 0.137675 | 0.137383  | 0.128642  | 0.136218 |
| 0.107372  | 0.113199  | 0.122815 | 0.118881 | 0.0571096 | 0.118881  | 0.120921 |
| 0.105186  | 0.105769  | 0.110431 | 0.11757  | 0.125728  | 0.108246  | 0.110577 |
| 0.104021  | 0.108974  | 0.115967 | 0.114365 | 0.0584207 | 0.115239  | 0.116696 |
| 0.109703  | 0.0954254 | 0.114365 | 0.115967 | 0.128497  | 0.0492424 | 0.125583 |
| 0.109848  | 0.104895  | 0.115967 | 0.108246 | 0.113199  | 0.112325  | 0.107372 |
| 0.112179  | 0.100524  | 0.120338 | 0.120484 | 0.131847  | 0.0418124 | 0.12398  |
| 0.0568182 | 0.1081    | 0.113345 | 0.108829 | 0.121358  | 0.10912   | 0.125728 |
| 0.111014  | 0.113928  | 0.122086 | 0.110577 | 0.133596  | 0.113782  | 0.122232 |
| 0.110431  | 0.108683  | 0.120047 | 0.121066 | 0.115822  | 0.107663  | 0.120484 |
| 0.107372  | 0.0549242 | 0.109703 | 0.113928 | 0.120629  | 0.0976107 | 0.114219 |
| 0.112179  | 0.097028  | 0.114802 | 0.118735 | 0.127768  | 0.0505536 | 0.123106 |
| 0.115385  | 0.110723  | 0.109848 | 0.108246 | 0.132721  | 0.120192  | 0.117861 |
| 0.11553   | 0.116404  | 0.121649 | 0.122086 | 0.131119  | 0.112179  | 0.114802 |
| 0.107517  | 0.0996503 | 0.117424 | 0.119318 | 0.123689  | 0.104749  | 0.103875 |
| 0.112179  | 0.0979021 | 0.117716 | 0.119318 | 0.128351  | 0.0490967 | 0.123689 |
| 0.109994  | 0.115239  | 0.113199 | 0.122669 | 0.128788  | 0.118007  | 0.113928 |
| 0.114948  | 0.110577  | 0.115239 | 0.114802 | 0.0944056 | 0.114802  | 0.115676 |
| 0.110577  | 0.114656  | 0.111451 | 0.120921 | 0.126748  | 0.113928  | 0.11655  |
| 0.10912   | 0.107955  | 0.121066 | 0.122086 | 0.113054  | 0.109848  | 0.121503 |
| 0.11116   | 0.0636655 | 0.116113 | 0.115385 | 0.12296   | 0.0979021 | 0.114219 |
| 0.0962995 | 0.0968823 | 0.109703 | 0.114802 | 0.12704   | 0.102273  | 0.108974 |
| 0.109557  | 0.103438  | 0.115967 | 0.104749 | 0.111742  | 0.115239  | 0.107663 |
| 0.109703  | 0.118444  | 0.113491 | 0.126166 | 0.133741  | 0.114802  | 0.119464 |
| 0.116113  | 0.123106  | 0.116404 | 0.120338 | 0.125     | 0.124709  | 0.110723 |
| 0.111888  | 0.107809  | 0.115676 | 0.11961  | 0.12602   | 0.107955  | 0.10912  |
| 0.182984  | 0.178322  | 0.165501 | 0.196533 | 0.202652  | 0.186334  | 0.197407 |
| 0.149767  | 0.151807  | 0.129371 | 0.168269 | 0.17701   | 0.159237  | 0.165064 |
| 0.122378  | 0.115676  | 0.11655  | 0.125437 | 0.129808  | 0.117279  | 0.126603 |
| 0.108537  | 0.11553   | 0.112325 | 0.120921 | 0.0917832 | 0.120338  | 0.117424 |
| 0.149913  | 0.137383  | 0.140297 | 0.155012 | 0.15472   | 0.145688  | 0.150932 |
| 0.0958625 | 0.118881  | 0.124709 | 0.125146 | 0.137675  | 0.120775  | 0.120192 |
| 0.103001  | 0.113491  | 0.113199 | 0.123834 | 0.137238  | 0.0804196 | 0.124126 |
| 0.114802  | 0.108683  | 0.115385 | 0.121358 | 0.13243   | 0.0805653 | 0.116404 |
| 0.113345  | 0.0885781 | 0.11451  | 0.119901 | 0.130099  | 0.0930944 | 0.123106 |
| 0.115676  | 0.113928  | 0.121503 | 0.124272 | 0.135344  | 0.108829  | 0.11553  |
| 0.189248  | 0.184003  | 0.176719 | 0.205128 | 0.210664  | 0.189685  | 0.205711 |
| 0.115385  | 0.119172  | 0.124417 | 0.122232 | 0.0569639 | 0.122523  | 0.123397 |
| 0.108829  | 0.11553   | 0.10708  | 0.121503 | 0.100524  | 0.11451   | 0.11655  |
| 0.106498  | 0.099796  | 0.110577 | 0.119755 | 0.128497  | 0.0568182 | 0.119172 |
| 0.115676  | 0.103147  | 0.116259 | 0.11116  | 0.127477  | 0.117861  | 0.125728 |

|           |           |          |           |           |           |          |
|-----------|-----------|----------|-----------|-----------|-----------|----------|
| 0.175262  | 0.167686  | 0.156906 | 0.18852   | 0.196096  | 0.174534  | 0.183275 |
| 0.234994  | 0.23412   | 0.223339 | 0.250874  | 0.25204   | 0.241259  | 0.246503 |
| 0.113491  | 0.116696  | 0.122815 | 0.11451   | 0.136946  | 0.114219  | 0.119755 |
| 0.118153  | 0.112617  | 0.11961  | 0.119172  | 0.134615  | 0.108683  | 0.113345 |
| 0.124563  | 0.108537  | 0.111451 | 0.123543  | 0.134615  | 0.11859   | 0.129079 |
| 0.11014   | 0.107517  | 0.121795 | 0.122815  | 0.115822  | 0.110286  | 0.11961  |
| 0.106789  | 0.112908  | 0.119027 | 0.116259  | 0.0576923 | 0.117716  | 0.115093 |
| 0.090035  | 0.107226  | 0.115093 | 0.11553   | 0.124854  | 0.114073  | 0.115822 |
| 0.105915  | 0.106498  | 0.105041 | 0.126457  | 0.127914  | 0.0731352 | 0.120338 |
| 0.105915  | 0.113782  | 0.117861 | 0.115093  | 0.0512821 | 0.119755  | 0.120047 |
| 0.104895  | 0.106643  | 0.104895 | 0.125728  | 0.129516  | 0.0828963 | 0.115822 |
| 0.115239  | 0.104749  | 0.122815 | 0.123834  | 0.129662  | 0.106935  | 0.107809 |
| 0.106352  | 0.0620629 | 0.112471 | 0.114073  | 0.123106  | 0.0983392 | 0.114656 |
| 0.111742  | 0.118735  | 0.122815 | 0.109848  | 0.136072  | 0.117424  | 0.120338 |
| 0.109557  | 0.116259  | 0.112179 | 0.123397  | 0.13039   | 0.116696  | 0.11553  |
| 0.0987762 | 0.102855  | 0.114219 | 0.0925117 | 0.118153  | 0.105624  | 0.105332 |
| 0.125583  | 0.121503  | 0.13141  | 0.122523  | 0.12398   | 0.116404  | 0.124854 |
| 0.125583  | 0.124709  | 0.141608 | 0.137383  | 0.118153  | 0.124563  | 0.130682 |
| 0.107663  | 0.101253  | 0.113491 | 0.115676  | 0.125     | 0.0463287 | 0.124126 |
| 0.113345  | 0.107809  | 0.111305 | 0.125437  | 0.124563  | 0.0855186 | 0.123689 |
| 0.126748  | 0.118007  | 0.134033 | 0.136801  | 0.13884   | 0.0543415 | 0.136218 |
| 0.200029  | 0.191288  | 0.183712 | 0.214744  | 0.217949  | 0.201632  | 0.208916 |
| 0.106643  | 0.108392  | 0.112179 | 0.103584  | 0.124272  | 0.112034  | 0.112908 |
| 0.108829  | 0.057838  | 0.118153 | 0.114219  | 0.123834  | 0.0976107 | 0.111305 |
| 0.0581294 | 0.109703  | 0.116404 | 0.116259  | 0.12704   | 0.116259  | 0.127622 |
| 0.117133  | 0.11655   | 0.124126 | 0.0488054 | 0.128059  | 0.121066  | 0.127477 |
| 0.112762  | 0.101981  | 0.117424 | 0.110868  | 0.121358  | 0.116987  | 0.125728 |
| 0.186189  | 0.182984  | 0.175408 | 0.202069  | 0.209645  | 0.190414  | 0.201777 |
| 0.112908  | 0.119901  | 0.114948 | 0.124417  | 0.132284  | 0.115676  | 0.116841 |
| 0.109557  | 0.0984848 | 0.115967 | 0.118444  | 0.125146  | 0.0467657 | 0.121941 |
| 0.120775  | 0.11553   | 0.12602  | 0.126166  | 0.122378  | 0.122669  | 0.124126 |
| 0.107663  | 0.105915  | 0.121649 | 0.118298  | 0.112762  | 0.1081    | 0.119464 |
| 0.109411  | 0.111742  | 0.110286 | 0.123252  | 0.128497  | 0.11451   | 0.115385 |
| 0.105332  | 0.102127  | 0.107955 | 0.112179  | 0.122378  | 0.10373   | 0.111305 |
| 0.112908  | 0.103293  | 0.119027 | 0.125     | 0.130828  | 0.107809  | 0.106352 |
| 0.111742  | 0.112325  | 0.124563 | 0.0477855 | 0.126457  | 0.118007  | 0.125    |
| 0.188811  | 0.180944  | 0.172494 | 0.203526  | 0.209353  | 0.191288  | 0.199446 |
| 0.101836  | 0.103001  | 0.105915 | 0.116259  | 0.123834  | 0.111305  | 0.110723 |
| 0.184149  | 0.179779  | 0.170163 | 0.200321  | 0.201486  | 0.186626  | 0.19799  |
| 0.183421  | 0.174097  | 0.162733 | 0.195513  | 0.201049  | 0.185315  | 0.197261 |
| 0.121358  | 0.11961   | 0.13447  | 0.134324  | 0.120921  | 0.120338  | 0.130245 |
| 0.123106  | 0.125146  | 0.135052 | 0.0582751 | 0.133741  | 0.13141   | 0.132867 |
| 0.103584  | 0.090472  | 0.113491 | 0.112762  | 0.120047  | 0.104312  | 0.101107 |
| 0.104312  | 0.10373   | 0.105186 | 0.11553   | 0.119901  | 0.10912   | 0.107955 |

|          |           |           |           |           |           |          |
|----------|-----------|-----------|-----------|-----------|-----------|----------|
| 0.107663 | 0.109411  | 0.104167  | 0.118298  | 0.125874  | 0.112471  | 0.114802 |
| 0.112617 | 0.0992133 | 0.11553   | 0.120338  | 0.130536  | 0.0486597 | 0.125291 |
| 0.104167 | 0.108537  | 0.112908  | 0.113054  | 0.0635198 | 0.115093  | 0.115676 |
| 0.104458 | 0.112325  | 0.121066  | 0.115093  | 0.0533217 | 0.118007  | 0.117424 |
| 0.115093 | 0.120921  | 0.126457  | 0.113782  | 0.135927  | 0.120192  | 0.12398  |
| 0.112617 | 0.110577  | 0.124563  | 0.122086  | 0.121795  | 0.113054  | 0.123834 |
| 0.108974 | 0.0949883 | 0.114802  | 0.116113  | 0.125728  | 0.043852  | 0.117279 |
| 0.109994 | 0.112325  | 0.109411  | 0.120047  | 0.128497  | 0.115676  | 0.113054 |
| 0.10169  | 0.0926573 | 0.106352  | 0.111451  | 0.119901  | 0.0989219 | 0.106498 |
| 0.117279 | 0.124563  | 0.12398   | 0.130245  | 0.13549   | 0.125583  | 0.118881 |
| 0.121941 | 0.107955  | 0.11116   | 0.125583  | 0.129953  | 0.115676  | 0.130828 |
| 0.12296  | 0.130828  | 0.129371  | 0.135052  | 0.137675  | 0.126894  | 0.125728 |
| 0.249126 | 0.24359   | 0.234848  | 0.262092  | 0.265297  | 0.253351  | 0.261218 |
| 0.128497 | 0.123834  | 0.134907  | 0.121649  | 0.120192  | 0.130099  | 0.116404 |
| 0.121066 | 0.11961   | 0.133304  | 0.126748  | 0.128497  | 0.127331  | 0.119172 |
| 0.209207 | 0.204837  | 0.193765  | 0.225087  | 0.227418  | 0.211101  | 0.220425 |
| 0.120192 | 0.119901  | 0.133887  | 0.119172  | 0.13141   | 0.118881  | 0.128788 |
| 0.220134 | 0.216055  | 0.205274  | 0.232809  | 0.237179  | 0.226107  | 0.231352 |
| 0.117716 | 0.115676  | 0.129079  | 0.114948  | 0.111742  | 0.12398   | 0.110868 |
| 0.125437 | 0.11553   | 0.131556  | 0.134033  | 0.13986   | 0.0530303 | 0.13141  |
| 0.107372 | 0.107955  | 0.119318  | 0.0492424 | 0.121212  | 0.115385  | 0.120629 |
| 0.119901 | 0.116404  | 0.13243   | 0.128205  | 0.118298  | 0.117424  | 0.124709 |
| 0.191288 | 0.186334  | 0.17701   | 0.20542   | 0.212413  | 0.197552  | 0.206585 |
| 0.120775 | 0.126894  | 0.126311  | 0.134033  | 0.138695  | 0.123543  | 0.119755 |
| 0.110868 | 0.116113  | 0.112034  | 0.123543  | 0.129079  | 0.113345  | 0.11655  |
| 0.216783 | 0.212121  | 0.200758  | 0.231498  | 0.23412   | 0.221008  | 0.229749 |
| 0.109411 | 0.113199  | 0.116404  | 0.117716  | 0.0632284 | 0.118298  | 0.121503 |
| 0.188811 | 0.181818  | 0.172203  | 0.199155  | 0.207896  | 0.190997  | 0.201195 |
| 0.112179 | 0.115093  | 0.122669  | 0.119027  | 0.0584207 | 0.121941  | 0.123397 |
| 0.113345 | 0.0990676 | 0.117133  | 0.118735  | 0.131556  | 0.0482226 | 0.122232 |
| 0.117861 | 0.0709499 | 0.120775  | 0.125583  | 0.127622  | 0.109557  | 0.118298 |
| 0.124272 | 0.118153  | 0.136509  | 0.133159  | 0.120047  | 0.121795  | 0.13141  |
| 0.106643 | 0.103147  | 0.0763403 | 0.121649  | 0.127185  | 0.11116   | 0.123106 |
| 0.151807 | 0.12296   | 0.134324  | 0.163024  | 0.172931  | 0.150495  | 0.161276 |
| 0.101981 | 0.109266  | 0.108392  | 0.115239  | 0.124854  | 0.112034  | 0.109994 |
| 0.112179 | 0.115093  | 0.121795  | 0.048514  | 0.129516  | 0.122815  | 0.125146 |
| 0.11655  | 0.108974  | 0.123252  | 0.116113  | 0.122815  | 0.112617  | 0.128059 |
| 0.120047 | 0.127331  | 0.132576  | 0.107955  | 0.13447   | 0.129516  | 0.12398  |
| 0.18546  | 0.178759  | 0.168852  | 0.198718  | 0.207168  | 0.187063  | 0.201632 |
| 0.111014 | 0.0976107 | 0.117716  | 0.11961   | 0.128642  | 0.0458916 | 0.122523 |
| 0.114073 | 0.103001  | 0.115239  | 0.129662  | 0.123543  | 0.114219  | 0.126748 |
| 0.112471 | 0.106935  | 0.111014  | 0.119027  | 0.0977564 | 0.116987  | 0.118735 |
| 0.112908 | 0.115822  | 0.124272  | 0.119755  | 0.0480769 | 0.122086  | 0.118298 |
| 0.114802 | 0.108683  | 0.124126  | 0.12602   | 0.133013  | 0.0476399 | 0.126603 |

|           |           |          |           |           |           |          |
|-----------|-----------|----------|-----------|-----------|-----------|----------|
| 0.244901  | 0.243153  | 0.23208  | 0.257867  | 0.260781  | 0.251166  | 0.258159 |
| 0.111888  | 0.0664336 | 0.119172 | 0.117861  | 0.123106  | 0.104749  | 0.112617 |
| 0.0740093 | 0.105769  | 0.112471 | 0.119901  | 0.131556  | 0.0898893 | 0.127768 |
| 0.16958   | 0.164918  | 0.155012 | 0.180798  | 0.183421  | 0.180216  | 0.182547 |
| 0.175699  | 0.166084  | 0.160839 | 0.189831  | 0.196533  | 0.181381  | 0.191288 |
| 0.108392  | 0.114219  | 0.120338 | 0.112908  | 0.136509  | 0.116404  | 0.121066 |
| 0.108829  | 0.117279  | 0.113199 | 0.122086  | 0.131702  | 0.112762  | 0.115676 |
| 0.110577  | 0.10708   | 0.119318 | 0.121795  | 0.11451   | 0.109266  | 0.121503 |
| 0.136655  | 0.139569  | 0.138112 | 0.147582  | 0.149913  | 0.13884   | 0.136218 |
| 0.108683  | 0.117133  | 0.119172 | 0.113199  | 0.131265  | 0.112617  | 0.11961  |
| 0.113199  | 0.11961   | 0.122232 | 0.115385  | 0.136072  | 0.113928  | 0.121795 |
| 0.115676  | 0.122669  | 0.126748 | 0.124272  | 0.0520105 | 0.126894  | 0.122815 |
| 0.107809  | 0.113345  | 0.112471 | 0.122232  | 0.126894  | 0.114948  | 0.11116  |
| 0.118735  | 0.124854  | 0.120192 | 0.129953  | 0.135781  | 0.124417  | 0.11859  |
| 0.113345  | 0.107517  | 0.105769 | 0.121649  | 0.074155  | 0.118153  | 0.123689 |
| 0.117279  | 0.11553   | 0.134178 | 0.131702  | 0.115676  | 0.119172  | 0.12704  |
| 0.131993  | 0.131993  | 0.144231 | 0.146707  | 0.125146  | 0.132721  | 0.137966 |
| 0.118153  | 0.0712413 | 0.123106 | 0.125     | 0.124417  | 0.108974  | 0.115967 |
| 0.126166  | 0.123543  | 0.141317 | 0.137675  | 0.119027  | 0.123106  | 0.133596 |
| 0.119464  | 0.124709  | 0.128205 | 0.127768  | 0.046183  | 0.13243   | 0.128934 |
| 0.192745  | 0.190705  | 0.177885 | 0.210082  | 0.218823  | 0.201049  | 0.212704 |
| 0.123543  | 0.107809  | 0.125583 | 0.120775  | 0.117279  | 0.10912   | 0.121358 |
| 0.180944  | 0.174825  | 0.163753 | 0.195367  | 0.202943  | 0.18546   | 0.19595  |
| 0.108974  | 0.111888  | 0.119755 | 0.0869755 | 0.126311  | 0.114365  | 0.112908 |
| 0.121212  | 0.11014   | 0.125874 | 0.13039   | 0.137092  | 0.0523019 | 0.131265 |
| 0.123252  | 0.111014  | 0.114802 | 0.128642  | 0.131847  | 0.118735  | 0.13039  |
| 0.120484  | 0.106498  | 0.109411 | 0.120921  | 0.127914  | 0.112471  | 0.126166 |
| 0.110723  | 0.121503  | 0.115967 | 0.124854  | 0.133887  | 0.117861  | 0.11553  |
| 0.112179  | 0.120338  | 0.11655  | 0.126311  | 0.128934  | 0.119318  | 0.11553  |
| 0.114802  | 0.100233  | 0.11655  | 0.123106  | 0.131847  | 0.0473485 | 0.123397 |
| 0.114365  | 0.110868  | 0.121649 | 0.0498252 | 0.12704   | 0.119755  | 0.125291 |
| 0.12602   | 0.114365  | 0.116987 | 0.131119  | 0.13345   | 0.122669  | 0.129079 |
| 0.123543  | 0.123252  | 0.127331 | 0.133304  | 0.0517191 | 0.136218  | 0.130973 |
| 0.240385  | 0.236597  | 0.227855 | 0.256556  | 0.257139  | 0.244901  | 0.252477 |
| 0.115385  | 0.100816  | 0.117424 | 0.124272  | 0.135635  | 0.0450175 | 0.124854 |
| 0.173805  | 0.168561  | 0.158362 | 0.185897  | 0.194347  | 0.178322  | 0.188811 |
| 0.176282  | 0.173077  | 0.164044 | 0.193036  | 0.197115  | 0.181964  | 0.191871 |
| 0.11757   | 0.107663  | 0.117861 | 0.121503  | 0.129953  | 0.111014  | 0.116259 |
| 0.109994  | 0.0639569 | 0.117861 | 0.118881  | 0.125     | 0.100816  | 0.113054 |
| 0.121358  | 0.112034  | 0.128351 | 0.129953  | 0.134324  | 0.0504079 | 0.132576 |
| 0.104458  | 0.108246  | 0.103293 | 0.115385  | 0.128205  | 0.109848  | 0.112762 |
| 0.115093  | 0.0812937 | 0.104312 | 0.119027  | 0.130099  | 0.0942599 | 0.119318 |
| 0.106643  | 0.113054  | 0.122378 | 0.117279  | 0.057838  | 0.119901  | 0.117861 |
| 0.110868  | 0.115239  | 0.121066 | 0.123834  | 0.129953  | 0.111888  | 0.115967 |



|           |           |           |           |           |           |          |
|-----------|-----------|-----------|-----------|-----------|-----------|----------|
| 0.120484  | 0.126603  | 0.127185  | 0.136072  | 0.138112  | 0.125     | 0.123543 |
| 0.111305  | 0.101399  | 0.118881  | 0.124272  | 0.128642  | 0.0429779 | 0.123106 |
| 0.121503  | 0.126166  | 0.122378  | 0.130682  | 0.135052  | 0.122815  | 0.122232 |
| 0.11116   | 0.103875  | 0.117861  | 0.111305  | 0.125291  | 0.115676  | 0.113636 |
| 0.127477  | 0.118153  | 0.119027  | 0.133741  | 0.134615  | 0.123543  | 0.131702 |
| 0.114219  | 0.112471  | 0.128497  | 0.128934  | 0.119901  | 0.116987  | 0.122523 |
| 0.123397  | 0.128934  | 0.135635  | 0.13141   | 0.044289  | 0.134033  | 0.130536 |
| 0.120629  | 0.1081    | 0.126748  | 0.129225  | 0.128059  | 0.113782  | 0.109411 |
| 0.11014   | 0.102273  | 0.115385  | 0.123689  | 0.125146  | 0.0520105 | 0.117861 |
| 0.0661422 | 0.12704   | 0.130536  | 0.127768  | 0.134178  | 0.128351  | 0.135344 |
| 0.174971  | 0.163899  | 0.156323  | 0.184149  | 0.193473  | 0.180944  | 0.187063 |
| 0.125291  | 0.131702  | 0.133741  | 0.139132  | 0.140297  | 0.13039   | 0.123689 |
| 0.109266  | 0.115967  | 0.112179  | 0.124272  | 0.128934  | 0.118735  | 0.118735 |
| 0.123397  | 0.112034  | 0.114948  | 0.125     | 0.130536  | 0.11655   | 0.128497 |
| 0.116259  | 0.102564  | 0.107517  | 0.117861  | 0.123106  | 0.106498  | 0.11757  |
| 0.114656  | 0.111742  | 0.125437  | 0.128788  | 0.115676  | 0.111597  | 0.122378 |
| 0.117716  | 0.115093  | 0.130828  | 0.129225  | 0.114656  | 0.11961   | 0.125728 |
| 0.178759  | 0.174679  | 0.16419   | 0.196387  | 0.20134   | 0.185606  | 0.193182 |
| 0.109994  | 0.111451  | 0.10912   | 0.126457  | 0.125874  | 0.113054  | 0.11451  |
| 0.0952797 | 0.0932401 | 0.0999417 | 0.116404  | 0.117279  | 0.107372  | 0.112908 |
| 0.115093  | 0.122086  | 0.119464  | 0.12602   | 0.131556  | 0.117861  | 0.113782 |
| 0.183129  | 0.178759  | 0.166812  | 0.195804  | 0.201632  | 0.185315  | 0.19493  |
| 0.105769  | 0.0553613 | 0.106352  | 0.116113  | 0.122232  | 0.099796  | 0.114073 |
| 0.114656  | 0.121066  | 0.125728  | 0.122378  | 0.0495338 | 0.125     | 0.125    |
| 0.112325  | 0.120192  | 0.116404  | 0.126748  | 0.132576  | 0.117133  | 0.119755 |
| 0.106935  | 0.114219  | 0.116841  | 0.109411  | 0.129516  | 0.110577  | 0.117861 |
| 0.176282  | 0.169289  | 0.158217  | 0.190122  | 0.200029  | 0.180216  | 0.190122 |
| 0.109557  | 0.115676  | 0.11859   | 0.120484  | 0.0479312 | 0.123689  | 0.119027 |
| 0         | 0.106643  | 0.109848  | 0.113782  | 0.118444  | 0.113199  | 0.121358 |
| 0.106643  | 0         | 0.105478  | 0.112617  | 0.124854  | 0.101253  | 0.11553  |
| 0.109848  | 0.105478  | 0         | 0.123689  | 0.133013  | 0.121066  | 0.131847 |
| 0.113782  | 0.112617  | 0.123689  | 0         | 0.126748  | 0.121795  | 0.125874 |
| 0.118444  | 0.124854  | 0.133013  | 0.126748  | 0         | 0.13141   | 0.129662 |
| 0.113199  | 0.101253  | 0.121066  | 0.121795  | 0.13141   | 0         | 0.123252 |
| 0.121358  | 0.11553   | 0.131847  | 0.125874  | 0.129662  | 0.123252  | 0        |
| 0.13549   | 0.13986   | 0.144814  | 0.135052  | 0.157488  | 0.142628  | 0.139132 |
| 0.227564  | 0.224068  | 0.209499  | 0.239656  | 0.243444  | 0.230332  | 0.239365 |
| 0.125583  | 0.114219  | 0.134324  | 0.135635  | 0.132721  | 0.117279  | 0.114365 |
| 0.111597  | 0.113636  | 0.121795  | 0.0458916 | 0.126894  | 0.120775  | 0.124854 |
| 0.104458  | 0.112034  | 0.106498  | 0.123252  | 0.118881  | 0.113054  | 0.117133 |
| 0.118298  | 0.11451   | 0.127914  | 0.124563  | 0.132721  | 0.120775  | 0.12602  |
| 0.108246  | 0.110577  | 0.114073  | 0.0710956 | 0.105186  | 0.117424  | 0.120338 |
| 0.113782  | 0.106206  | 0.120775  | 0.114219  | 0.122378  | 0.11859   | 0.123252 |
| 0.113928  | 0.118007  | 0.115385  | 0.125146  | 0.128059  | 0.118153  | 0.119027 |

|          |           |          |           |           |           |          |
|----------|-----------|----------|-----------|-----------|-----------|----------|
| 0.121066 | 0.122232  | 0.126894 | 0.123252  | 0.0460373 | 0.129953  | 0.124709 |
| 0.107955 | 0.11757   | 0.11757  | 0.111597  | 0.128497  | 0.114219  | 0.120047 |
| 0.230769 | 0.224359  | 0.214744 | 0.240822  | 0.24461   | 0.230915  | 0.241113 |
| 0.101836 | 0.0622086 | 0.109411 | 0.115385  | 0.117716  | 0.0981935 | 0.111888 |
| 0.105915 | 0.0977564 | 0.112325 | 0.104312  | 0.109266  | 0.110723  | 0.102564 |
| 0.111014 | 0.099359  | 0.120047 | 0.119901  | 0.126603  | 0.0426865 | 0.122232 |
| 0.124272 | 0.131265  | 0.13447  | 0.122086  | 0.141317  | 0.124709  | 0.130828 |
| 0.132721 | 0.119027  | 0.140006 | 0.138112  | 0.141026  | 0.122086  | 0.117716 |
| 0.116696 | 0.103584  | 0.113782 | 0.122378  | 0.133741  | 0.105769  | 0.125    |
| 0.111451 | 0.113782  | 0.112908 | 0.12296   | 0.130245  | 0.115967  | 0.11655  |
| 0.104312 | 0.108392  | 0.11655  | 0.109994  | 0.124272  | 0.10708   | 0.113491 |
| 0.220862 | 0.218823  | 0.206876 | 0.235868  | 0.238491  | 0.225087  | 0.236742 |
| 0.115385 | 0.120921  | 0.119755 | 0.129225  | 0.131847  | 0.120484  | 0.118735 |
| 0.115822 | 0.119027  | 0.123689 | 0.123252  | 0.0472028 | 0.125291  | 0.125874 |
| 0.103293 | 0.109411  | 0.113782 | 0.107809  | 0.124126  | 0.107226  | 0.115385 |
| 0.120047 | 0.122669  | 0.12704  | 0.102127  | 0.126311  | 0.121649  | 0.122523 |
| 0.120338 | 0.11451   | 0.130828 | 0.117861  | 0.113782  | 0.129225  | 0.116404 |
| 0.113928 | 0.104604  | 0.121212 | 0.120484  | 0.127768  | 0.0470571 | 0.122815 |
| 0.116841 | 0.121212  | 0.128497 | 0.124272  | 0.0520105 | 0.128642  | 0.122523 |
| 0.123106 | 0.129516  | 0.133304 | 0.129371  | 0.0474942 | 0.131119  | 0.127622 |
| 0.111451 | 0.115822  | 0.122232 | 0.117424  | 0.0533217 | 0.119172  | 0.118881 |
| 0.113636 | 0.103147  | 0.118881 | 0.121649  | 0.130682  | 0.0458916 | 0.122815 |
| 0.118298 | 0.119464  | 0.13141  | 0.0528846 | 0.131265  | 0.127185  | 0.127477 |
| 0.125146 | 0.126311  | 0.136218 | 0.0536131 | 0.134907  | 0.130536  | 0.131993 |
| 0.130682 | 0.119901  | 0.12398  | 0.130536  | 0.136364  | 0.125291  | 0.130828 |
| 0.133887 | 0.121358  | 0.12602  | 0.134907  | 0.137821  | 0.129371  | 0.13549  |
| 0.122378 | 0.124709  | 0.136946 | 0.0511364 | 0.129516  | 0.129516  | 0.130973 |
| 0.105478 | 0.0850816 | 0.111597 | 0.116696  | 0.126603  | 0.088141  | 0.116404 |
| 0.129808 | 0.129516  | 0.132139 | 0.136946  | 0.0976107 | 0.137821  | 0.13141  |
| 0.125291 | 0.120338  | 0.132576 | 0.138549  | 0.125146  | 0.121066  | 0.128934 |
| 0.19697  | 0.190559  | 0.179779 | 0.206731  | 0.215472  | 0.200321  | 0.209062 |
| 0.123252 | 0.119464  | 0.13141  | 0.130099  | 0.134178  | 0.116987  | 0.116113 |
| 0.112762 | 0.106352  | 0.117424 | 0.107663  | 0.113491  | 0.116113  | 0.111451 |
| 0.11757  | 0.105915  | 0.120484 | 0.127914  | 0.134033  | 0.0460373 | 0.128205 |
| 0.213287 | 0.206876  | 0.199009 | 0.228001  | 0.232955  | 0.216346  | 0.224213 |
| 0.204545 | 0.19697   | 0.187937 | 0.217803  | 0.21722   | 0.207022  | 0.215181 |
| 0.118153 | 0.124272  | 0.13039  | 0.125     | 0.0451632 | 0.131119  | 0.13141  |
| 0.240967 | 0.238928  | 0.224359 | 0.253351  | 0.255682  | 0.24461   | 0.251311 |
| 0.107809 | 0.0815851 | 0.110723 | 0.116113  | 0.129225  | 0.0872669 | 0.117861 |
| 0.135198 | 0.122378  | 0.143065 | 0.136509  | 0.139714  | 0.123689  | 0.139132 |
| 0.11014  | 0.0617716 | 0.11655  | 0.114948  | 0.122232  | 0.103293  | 0.116696 |
| 0.118153 | 0.121066  | 0.129808 | 0.0495338 | 0.129662  | 0.125     | 0.126748 |
| 0.18007  | 0.175699  | 0.163753 | 0.19391   | 0.200321  | 0.183421  | 0.193036 |
| 0.112325 | 0.117861  | 0.13039  | 0.118881  | 0.125874  | 0.116841  | 0.125583 |

|           |           |           |           |           |           |          |
|-----------|-----------|-----------|-----------|-----------|-----------|----------|
| 0.183421  | 0.178176  | 0.167978  | 0.202797  | 0.20338   | 0.18648   | 0.19697  |
| 0.116696  | 0.107663  | 0.121358  | 0.119172  | 0.12704   | 0.105478  | 0.114219 |
| 0.110286  | 0.109411  | 0.105041  | 0.124417  | 0.0804196 | 0.115967  | 0.122086 |
| 0.11757   | 0.109411  | 0.123106  | 0.120338  | 0.131993  | 0.117424  | 0.122378 |
| 0.10271   | 0.105041  | 0.0773601 | 0.117716  | 0.118298  | 0.106935  | 0.117424 |
| 0.108974  | 0.0932401 | 0.113928  | 0.115239  | 0.124563  | 0.0447261 | 0.118153 |
| 0.112179  | 0.1081    | 0.118881  | 0.118153  | 0.127185  | 0.103001  | 0.110577 |
| 0.103147  | 0.0579837 | 0.11014   | 0.113199  | 0.119027  | 0.0954254 | 0.110286 |
| 0.106789  | 0.110868  | 0.108246  | 0.120338  | 0.123543  | 0.110723  | 0.111597 |
| 0.114802  | 0.116259  | 0.117133  | 0.121649  | 0.0948427 | 0.123397  | 0.117279 |
| 0.111305  | 0.0987762 | 0.11655   | 0.118153  | 0.126603  | 0.106206  | 0.104749 |
| 0.108246  | 0.060169  | 0.11553   | 0.113345  | 0.121212  | 0.100233  | 0.11014  |
| 0.116259  | 0.108683  | 0.106643  | 0.130099  | 0.128934  | 0.105624  | 0.127185 |
| 0.117424  | 0.125     | 0.126457  | 0.131847  | 0.137092  | 0.12602   | 0.121066 |
| 0.119027  | 0.105041  | 0.107955  | 0.121212  | 0.126457  | 0.111305  | 0.124417 |
| 0.0562354 | 0.109266  | 0.109848  | 0.11553   | 0.122232  | 0.113199  | 0.12398  |
| 0.10708   | 0.0948427 | 0.114073  | 0.117133  | 0.124709  | 0.0416667 | 0.119172 |
| 0.112325  | 0.115822  | 0.120192  | 0.122378  | 0.0574009 | 0.121795  | 0.120629 |
| 0.112908  | 0.111742  | 0.120775  | 0.0492424 | 0.128205  | 0.11859   | 0.125583 |
| 0.117133  | 0.113054  | 0.130245  | 0.128059  | 0.114948  | 0.114948  | 0.128351 |
| 0.120921  | 0.108392  | 0.110723  | 0.122232  | 0.128351  | 0.116113  | 0.128351 |
| 0.11116   | 0.116113  | 0.114365  | 0.123834  | 0.128205  | 0.113636  | 0.117133 |
| 0.120629  | 0.12704   | 0.124126  | 0.130973  | 0.133887  | 0.12602   | 0.121941 |
| 0.129079  | 0.135781  | 0.134615  | 0.14292   | 0.143211  | 0.131556  | 0.128059 |
| 0.10271   | 0.104458  | 0.112325  | 0.112762  | 0.0664336 | 0.107517  | 0.111014 |
| 0.110286  | 0.099796  | 0.119318  | 0.119755  | 0.13141   | 0.0463287 | 0.123252 |
| 0.107809  | 0.0976107 | 0.108974  | 0.104458  | 0.11961   | 0.113491  | 0.116987 |
| 0.123543  | 0.124126  | 0.136072  | 0.060169  | 0.133596  | 0.133596  | 0.132139 |
| 0.114948  | 0.0668706 | 0.119027  | 0.121212  | 0.124709  | 0.106061  | 0.114802 |
| 0.132139  | 0.13243   | 0.14729   | 0.14627   | 0.126457  | 0.129662  | 0.136655 |
| 0.130973  | 0.120484  | 0.137966  | 0.141608  | 0.144522  | 0.0591492 | 0.139277 |
| 0.117133  | 0.123252  | 0.131702  | 0.115822  | 0.138258  | 0.119318  | 0.123397 |
| 0.109411  | 0.0977564 | 0.11553   | 0.115967  | 0.125874  | 0.10169   | 0.115967 |
| 0.105186  | 0.110431  | 0.11859   | 0.0977564 | 0.123397  | 0.112617  | 0.112325 |
| 0.129953  | 0.117133  | 0.120338  | 0.133304  | 0.138258  | 0.123397  | 0.131847 |
| 0.199446  | 0.192745  | 0.180798  | 0.212121  | 0.212413  | 0.20338   | 0.210373 |
| 0.0517191 | 0.106789  | 0.109703  | 0.113054  | 0.119755  | 0.114802  | 0.123834 |
| 0.115676  | 0.104021  | 0.118881  | 0.119027  | 0.131847  | 0.107955  | 0.122815 |
| 0.11116   | 0.113491  | 0.124563  | 0.0469114 | 0.126166  | 0.122378  | 0.123543 |
| 0.122378  | 0.105769  | 0.111597  | 0.122815  | 0.128059  | 0.116113  | 0.128934 |
| 0.119318  | 0.115239  | 0.126311  | 0.125     | 0.130245  | 0.109557  | 0.119172 |
| 0.114073  | 0.123689  | 0.118735  | 0.125583  | 0.124126  | 0.126457  | 0.109266 |
| 0.117424  | 0.125     | 0.123252  | 0.126894  | 0.127477  | 0.127768  | 0.114365 |
| 0.10912   | 0.119318  | 0.121649  | 0.109848  | 0.134324  | 0.117424  | 0.119464 |

|          |           |          |           |           |           |          |
|----------|-----------|----------|-----------|-----------|-----------|----------|
| 0.10912  | 0.106498  | 0.110577 | 0.115385  | 0.0932401 | 0.116259  | 0.113636 |
| 0.121941 | 0.121941  | 0.132721 | 0.0541958 | 0.130536  | 0.128497  | 0.129371 |
| 0.112617 | 0.102127  | 0.120192 | 0.118881  | 0.126457  | 0.110723  | 0.118298 |
| 0.118881 | 0.110431  | 0.123252 | 0.121941  | 0.132721  | 0.109703  | 0.111116 |
| 0.168852 | 0.166521  | 0.167686 | 0.176865  | 0.18007   | 0.173951  | 0.179487 |
| 0.10912  | 0.115239  | 0.108246 | 0.122669  | 0.129662  | 0.111305  | 0.114802 |
| 0.119464 | 0.112762  | 0.121212 | 0.060169  | 0.13039   | 0.128934  | 0.129808 |
| 0.120192 | 0.105915  | 0.126311 | 0.119464  | 0.113636  | 0.113928  | 0.120629 |
| 0.11859  | 0.116841  | 0.119172 | 0.123106  | 0.121066  | 0.119027  | 0.124272 |
| 0.10373  | 0.0967366 | 0.106061 | 0.114948  | 0.119318  | 0.103293  | 0.10912  |
| 0.107226 | 0.0952797 | 0.116259 | 0.117279  | 0.120484  | 0.101253  | 0.102418 |
| 0.106643 | 0.100816  | 0.112471 | 0.11553   | 0.122523  | 0.108246  | 0.113782 |
| 0.12296  | 0.113928  | 0.127622 | 0.118444  | 0.104749  | 0.121941  | 0.119901 |
| 0.110723 | 0.109848  | 0.111305 | 0.121941  | 0.130099  | 0.107663  | 0.108246 |
| 0.124272 | 0.116696  | 0.127477 | 0.129662  | 0.127622  | 0.120629  | 0.128788 |
| 0.108392 | 0.107226  | 0.108683 | 0.112325  | 0.114948  | 0.10912   | 0.116113 |
| 0.118153 | 0.102127  | 0.115239 | 0.120338  | 0.118881  | 0.115093  | 0.120338 |
| 0.121795 | 0.119172  | 0.13986  | 0.13039   | 0.099796  | 0.128642  | 0.124854 |
| 0.119172 | 0.108974  | 0.124126 | 0.121941  | 0.111742  | 0.113782  | 0.119027 |
| 0.123834 | 0.117424  | 0.126457 | 0.125437  | 0.119027  | 0.119318  | 0.122232 |
| 0.113345 | 0.102855  | 0.120921 | 0.118735  | 0.110868  | 0.107663  | 0.116696 |
| 0.115385 | 0.1081    | 0.123543 | 0.12398   | 0.111451  | 0.110577  | 0.120192 |
| 0.108392 | 0.0926573 | 0.115967 | 0.114365  | 0.116987  | 0.0939685 | 0.116696 |
| 0.119318 | 0.104458  | 0.129808 | 0.128497  | 0.118007  | 0.111305  | 0.115385 |
| 0.110577 | 0.0942599 | 0.110286 | 0.113054  | 0.119172  | 0.105186  | 0.115385 |
| 0.135635 | 0.142045  | 0.139714 | 0.143648  | 0.107809  | 0.140443  | 0.142191 |
| 0.121649 | 0.126311  | 0.124563 | 0.129371  | 0.110431  | 0.129662  | 0.137821 |
| 0.110868 | 0.101253  | 0.112325 | 0.117133  | 0.112179  | 0.106935  | 0.114802 |
| 0.127622 | 0.137821  | 0.143065 | 0.132721  | 0.100379  | 0.138549  | 0.135635 |
| 0.117716 | 0.11655   | 0.113928 | 0.11961   | 0.135635  | 0.116696  | 0.134761 |
| 0.129662 | 0.118298  | 0.138695 | 0.140589  | 0.127768  | 0.133013  | 0.12602  |
| 0.112762 | 0.0990676 | 0.120921 | 0.119901  | 0.123106  | 0.106206  | 0.114656 |
| 0.138258 | 0.141463  | 0.146707 | 0.126457  | 0.143357  | 0.138986  | 0.14831  |
| 0.11961  | 0.12398   | 0.135635 | 0.120338  | 0.123543  | 0.12704   | 0.126457 |
| 0.128934 | 0.123106  | 0.137675 | 0.130245  | 0.120338  | 0.134324  | 0.130536 |
| 0.120775 | 0.109703  | 0.121066 | 0.128205  | 0.125583  | 0.11859   | 0.128497 |
| 0.110431 | 0.100233  | 0.116259 | 0.119318  | 0.108537  | 0.101836  | 0.115239 |
| 0.107372 | 0.100379  | 0.118444 | 0.117424  | 0.113054  | 0.105478  | 0.112762 |
| 0.112179 | 0.112471  | 0.120047 | 0.106789  | 0.106498  | 0.119901  | 0.113491 |
| 0.120047 | 0.106352  | 0.127331 | 0.125728  | 0.120192  | 0.11553   | 0.119901 |
| 0.12602  | 0.116113  | 0.134761 | 0.13141   | 0.131119  | 0.118881  | 0.124126 |
| 0.115822 | 0.113491  | 0.121941 | 0.12704   | 0.11451   | 0.115676  | 0.129371 |
| 0.10708  | 0.0962995 | 0.114073 | 0.114219  | 0.115676  | 0.107809  | 0.111597 |
| 0.1081   | 0.104895  | 0.11655  | 0.119318  | 0.112908  | 0.101836  | 0.112034 |

|          |           |          |          |          |           |          |
|----------|-----------|----------|----------|----------|-----------|----------|
| 0.118444 | 0.100962  | 0.124854 | 0.119464 | 0.115385 | 0.108683  | 0.124126 |
| 0.10912  | 0.095134  | 0.119027 | 0.117133 | 0.105769 | 0.105478  | 0.119464 |
| 0.115676 | 0.110431  | 0.128497 | 0.126603 | 0.110868 | 0.110868  | 0.116696 |
| 0.113928 | 0.0981935 | 0.120629 | 0.118153 | 0.127185 | 0.103875  | 0.115239 |
| 0.116696 | 0.107372  | 0.113491 | 0.120047 | 0.131702 | 0.108392  | 0.120921 |
| 0.108537 | 0.0962995 | 0.11757  | 0.120338 | 0.130536 | 0.103438  | 0.113636 |
| 0.105041 | 0.0846445 | 0.111742 | 0.115967 | 0.125874 | 0.0885781 | 0.115093 |
| 0.113491 | 0.0922203 | 0.118444 | 0.114802 | 0.116841 | 0.101107  | 0.118881 |
| 0.111597 | 0.104895  | 0.108974 | 0.11961  | 0.127185 | 0.105041  | 0.122523 |
| 0.114073 | 0.101544  | 0.113199 | 0.118298 | 0.125874 | 0.109557  | 0.110723 |
| 0.114656 | 0.112908  | 0.114948 | 0.125874 | 0.132576 | 0.122669  | 0.116259 |
| 0.104749 | 0.0989219 | 0.100962 | 0.112471 | 0.119755 | 0.0967366 | 0.115967 |
| 0.125874 | 0.119172  | 0.123252 | 0.134178 | 0.129516 | 0.125728  | 0.126311 |

| TDr_3518 | TDr_3519 | TDr_3524 | TDr_3527  | TDr_3536  | TDr_3540 | TDr_3543  |
|----------|----------|----------|-----------|-----------|----------|-----------|
| 0.145251 | 0.217803 | 0.119901 | 0.129808  | 0.112471  | 0.127477 | 0.113345  |
| 0.132284 | 0.222028 | 0.120629 | 0.118881  | 0.106498  | 0.119464 | 0.110868  |
| 0.133159 | 0.224359 | 0.116259 | 0.117424  | 0.101544  | 0.111597 | 0.107955  |
| 0.145688 | 0.230478 | 0.127622 | 0.120629  | 0.0936772 | 0.124417 | 0.112617  |
| 0.137238 | 0.24359  | 0.130536 | 0.132867  | 0.130973  | 0.12704  | 0.125728  |
| 0.13549  | 0.23514  | 0.136072 | 0.131993  | 0.123106  | 0.131119 | 0.120484  |
| 0.151078 | 0.235286 | 0.121649 | 0.13039   | 0.123252  | 0.131265 | 0.117424  |
| 0.136801 | 0.222465 | 0.119318 | 0.117279  | 0.106061  | 0.114948 | 0.114802  |
| 0.137238 | 0.229604 | 0.100233 | 0.113636  | 0.106206  | 0.116259 | 0.109411  |
| 0.140006 | 0.231498 | 0.090472 | 0.124563  | 0.114802  | 0.114073 | 0.112762  |
| 0.15035  | 0.219988 | 0.115385 | 0.124709  | 0.118735  | 0.125291 | 0.114365  |
| 0.140006 | 0.228293 | 0.121941 | 0.106789  | 0.106061  | 0.114948 | 0.10373   |
| 0.142337 | 0.234703 | 0.104458 | 0.11961   | 0.111305  | 0.124854 | 0.111888  |
| 0.154429 | 0.191725 | 0.134615 | 0.139569  | 0.124272  | 0.134907 | 0.132139  |
| 0.142628 | 0.23412  | 0.12602  | 0.135344  | 0.125874  | 0.129808 | 0.126166  |
| 0.141608 | 0.234848 | 0.113636 | 0.131702  | 0.116696  | 0.12704  | 0.11116   |
| 0.14088  | 0.231206 | 0.121649 | 0.0954254 | 0.113636  | 0.117279 | 0.0917832 |
| 0.142483 | 0.245047 | 0.145396 | 0.136946  | 0.140297  | 0.135198 | 0.133013  |
| 0.131702 | 0.219406 | 0.11655  | 0.117424  | 0.105915  | 0.112471 | 0.107372  |
| 0.211247 | 0.137238 | 0.202797 | 0.208625  | 0.188666  | 0.199009 | 0.195076  |
| 0.139132 | 0.237325 | 0.133596 | 0.122523  | 0.129371  | 0.120484 | 0.118298  |
| 0.137529 | 0.238054 | 0.126748 | 0.113636  | 0.123689  | 0.118298 | 0.111451  |
| 0.141463 | 0.229167 | 0.11116  | 0.115239  | 0.105478  | 0.114948 | 0.101107  |
| 0.145979 | 0.24155  | 0.131119 | 0.128497  | 0.12398   | 0.134033 | 0.114073  |
| 0.13243  | 0.22567  | 0.110577 | 0.111742  | 0.103438  | 0.108246 | 0.100524  |
| 0.132721 | 0.237908 | 0.138549 | 0.130682  | 0.130828  | 0.128059 | 0.121212  |
| 0.144376 | 0.238491 | 0.128642 | 0.125146  | 0.12704   | 0.124563 | 0.117133  |
| 0.140589 | 0.244318 | 0.116404 | 0.121066  | 0.117424  | 0.127185 | 0.107517  |
| 0.148456 | 0.238199 | 0.129225 | 0.135344  | 0.129371  | 0.133596 | 0.123834  |
| 0.152826 | 0.242861 | 0.119318 | 0.125728  | 0.122669  | 0.135344 | 0.114802  |
| 0.14831  | 0.236305 | 0.12296  | 0.129953  | 0.126311  | 0.132576 | 0.116696  |
| 0.142628 | 0.236742 | 0.120484 | 0.122232  | 0.122378  | 0.131847 | 0.115676  |
| 0.133304 | 0.225379 | 0.110286 | 0.11116   | 0.107226  | 0.118153 | 0.0996503 |
| 0.145833 | 0.232663 | 0.115822 | 0.12602   | 0.118298  | 0.127185 | 0.119755  |
| 0.146853 | 0.240385 | 0.113345 | 0.127331  | 0.124272  | 0.129953 | 0.117279  |
| 0.14933  | 0.242279 | 0.113491 | 0.134178  | 0.127622  | 0.133887 | 0.125     |
| 0.151224 | 0.251457 | 0.129079 | 0.138986  | 0.135052  | 0.13549  | 0.12602   |
| 0.149038 | 0.240822 | 0.120775 | 0.121941  | 0.124126  | 0.129808 | 0.114802  |
| 0.142337 | 0.231498 | 0.117279 | 0.114073  | 0.107517  | 0.11757  | 0.0987762 |
| 0.146707 | 0.24053  | 0.12398  | 0.127768  | 0.117133  | 0.129516 | 0.115967  |
| 0.142337 | 0.228875 | 0.115822 | 0.114948  | 0.110723  | 0.113491 | 0.104895  |
| 0.158654 | 0.25539  | 0.137092 | 0.148747  | 0.140443  | 0.141463 | 0.13549   |

|          |          |          |           |           |          |           |
|----------|----------|----------|-----------|-----------|----------|-----------|
| 0.158362 | 0.25102  | 0.145833 | 0.146707  | 0.143357  | 0.146416 | 0.137821  |
| 0.146562 | 0.234266 | 0.115093 | 0.120921  | 0.114948  | 0.121212 | 0.115822  |
| 0.133159 | 0.234848 | 0.106935 | 0.109266  | 0.112325  | 0.115093 | 0.100962  |
| 0.152244 | 0.245192 | 0.105915 | 0.127185  | 0.124417  | 0.127477 | 0.115967  |
| 0.142337 | 0.234703 | 0.128059 | 0.111742  | 0.120629  | 0.114365 | 0.106352  |
| 0.157925 | 0.25     | 0.129371 | 0.143065  | 0.135344  | 0.141608 | 0.13243   |
| 0.144522 | 0.236597 | 0.118007 | 0.120047  | 0.112325  | 0.120921 | 0.110577  |
| 0.144085 | 0.23412  | 0.113782 | 0.122232  | 0.117133  | 0.116987 | 0.111888  |
| 0.160256 | 0.249126 | 0.152098 | 0.150641  | 0.145251  | 0.147436 | 0.137383  |
| 0.1419   | 0.237179 | 0.130536 | 0.124417  | 0.124272  | 0.134615 | 0.109411  |
| 0.141754 | 0.234411 | 0.12398  | 0.121941  | 0.113636  | 0.119318 | 0.107517  |
| 0.143794 | 0.241987 | 0.107372 | 0.132721  | 0.121212  | 0.131847 | 0.130536  |
| 0.13884  | 0.221008 | 0.125728 | 0.121941  | 0.0859557 | 0.117279 | 0.101399  |
| 0.151078 | 0.252768 | 0.14292  | 0.137383  | 0.134033  | 0.149038 | 0.123252  |
| 0.154138 | 0.242424 | 0.125583 | 0.136072  | 0.124272  | 0.127622 | 0.123106  |
| 0.143065 | 0.236888 | 0.118298 | 0.116259  | 0.115822  | 0.118298 | 0.108537  |
| 0.146562 | 0.230769 | 0.115385 | 0.12296   | 0.118735  | 0.120921 | 0.116404  |
| 0.143794 | 0.241113 | 0.105624 | 0.129225  | 0.122086  | 0.127768 | 0.11859   |
| 0.158071 | 0.253059 | 0.140006 | 0.143211  | 0.131702  | 0.137675 | 0.128788  |
| 0.159819 | 0.254516 | 0.133304 | 0.153118  | 0.129953  | 0.142337 | 0.134615  |
| 0.178904 | 0.189394 | 0.163462 | 0.171037  | 0.151078  | 0.162879 | 0.1537    |
| 0.14627  | 0.234848 | 0.120047 | 0.119172  | 0.114948  | 0.123252 | 0.110868  |
| 0.1419   | 0.234557 | 0.115967 | 0.11655   | 0.114365  | 0.119172 | 0.106206  |
| 0.147145 | 0.234557 | 0.119172 | 0.117424  | 0.114656  | 0.113345 | 0.107955  |
| 0.161568 | 0.241404 | 0.139714 | 0.145542  | 0.140443  | 0.136801 | 0.136072  |
| 0.146999 | 0.232663 | 0.118153 | 0.117861  | 0.113345  | 0.117861 | 0.113928  |
| 0.14831  | 0.238345 | 0.138986 | 0.132284  | 0.129225  | 0.136946 | 0.114656  |
| 0.147145 | 0.242424 | 0.106643 | 0.12704   | 0.12398   | 0.128205 | 0.11553   |
| 0.149621 | 0.234994 | 0.12398  | 0.118735  | 0.120047  | 0.116987 | 0.111014  |
| 0.161568 | 0.24053  | 0.149038 | 0.145833  | 0.144814  | 0.150787 | 0.132576  |
| 0.152826 | 0.243153 | 0.127768 | 0.127477  | 0.118298  | 0.129225 | 0.116841  |
| 0.156177 | 0.251166 | 0.131119 | 0.144814  | 0.133887  | 0.143648 | 0.135927  |
| 0.144085 | 0.235577 | 0.131556 | 0.121941  | 0.128497  | 0.13447  | 0.117424  |
| 0.133159 | 0.227855 | 0.124126 | 0.0990676 | 0.10708   | 0.117133 | 0.0919289 |
| 0.143939 | 0.232226 | 0.117133 | 0.120921  | 0.111742  | 0.122378 | 0.10912   |
| 0.143648 | 0.237471 | 0.120921 | 0.118881  | 0.116404  | 0.114802 | 0.112908  |
| 0.152972 | 0.25     | 0.132576 | 0.134615  | 0.126603  | 0.13549  | 0.120484  |
| 0.143502 | 0.23412  | 0.11961  | 0.120775  | 0.113636  | 0.116404 | 0.110723  |
| 0.159674 | 0.250583 | 0.138695 | 0.145105  | 0.133304  | 0.144231 | 0.129808  |
| 0.153846 | 0.236014 | 0.127331 | 0.129662  | 0.123689  | 0.120629 | 0.118735  |
| 0.143065 | 0.239219 | 0.123543 | 0.120338  | 0.111451  | 0.125    | 0.108829  |
| 0.148893 | 0.235723 | 0.127914 | 0.125     | 0.11961   | 0.124417 | 0.110868  |
| 0.148893 | 0.239219 | 0.125291 | 0.125583  | 0.120484  | 0.128788 | 0.114948  |
| 0.144231 | 0.236305 | 0.121503 | 0.113928  | 0.115822  | 0.116841 | 0.109411  |

|          |          |           |          |          |          |           |
|----------|----------|-----------|----------|----------|----------|-----------|
| 0.143065 | 0.234266 | 0.121212  | 0.120338 | 0.114948 | 0.119172 | 0.107663  |
| 0.156614 | 0.251311 | 0.133596  | 0.144376 | 0.134033 | 0.139714 | 0.132576  |
| 0.144376 | 0.235286 | 0.114365  | 0.117861 | 0.11859  | 0.116404 | 0.105769  |
| 0.1419   | 0.238928 | 0.10373   | 0.120629 | 0.116404 | 0.12296  | 0.115239  |
| 0.149476 | 0.241259 | 0.126748  | 0.126457 | 0.126603 | 0.136655 | 0.119901  |
| 0.151807 | 0.240385 | 0.123543  | 0.131119 | 0.128934 | 0.137529 | 0.122232  |
| 0.134615 | 0.244755 | 0.121212  | 0.128788 | 0.133013 | 0.132576 | 0.116987  |
| 0.144085 | 0.254225 | 0.133013  | 0.137675 | 0.136364 | 0.14088  | 0.124126  |
| 0.1419   | 0.231643 | 0.120921  | 0.116841 | 0.12398  | 0.120921 | 0.111451  |
| 0.197261 | 0.169872 | 0.188228  | 0.184441 | 0.175554 | 0.182984 | 0.172057  |
| 0.13884  | 0.236451 | 0.119318  | 0.109994 | 0.109848 | 0.121066 | 0.104312  |
| 0.144814 | 0.245629 | 0.128788  | 0.138695 | 0.135344 | 0.140152 | 0.127185  |
| 0.13986  | 0.241841 | 0.125583  | 0.129953 | 0.126603 | 0.132284 | 0.119027  |
| 0.156323 | 0.251311 | 0.13447   | 0.134178 | 0.136946 | 0.146416 | 0.127622  |
| 0.13345  | 0.236888 | 0.115093  | 0.11655  | 0.117279 | 0.116259 | 0.104749  |
| 0.141026 | 0.249709 | 0.132576  | 0.130828 | 0.129808 | 0.132576 | 0.116404  |
| 0.132867 | 0.23951  | 0.111888  | 0.109557 | 0.117279 | 0.116259 | 0.108829  |
| 0.136218 | 0.238199 | 0.121941  | 0.128934 | 0.125874 | 0.127768 | 0.110723  |
| 0.142045 | 0.234703 | 0.116113  | 0.122815 | 0.115093 | 0.119318 | 0.106935  |
| 0.140297 | 0.251603 | 0.135052  | 0.133596 | 0.137238 | 0.132139 | 0.120047  |
| 0.145542 | 0.236742 | 0.110286  | 0.113782 | 0.118007 | 0.116113 | 0.104021  |
| 0.148893 | 0.239219 | 0.129662  | 0.136655 | 0.13039  | 0.138695 | 0.122523  |
| 0.149038 | 0.234994 | 0.119901  | 0.116404 | 0.124417 | 0.127185 | 0.112762  |
| 0.148893 | 0.247378 | 0.128497  | 0.137529 | 0.126894 | 0.13549  | 0.124563  |
| 0.154283 | 0.242861 | 0.123397  | 0.135927 | 0.133159 | 0.138549 | 0.124417  |
| 0.135635 | 0.23616  | 0.115239  | 0.10912  | 0.119755 | 0.119901 | 0.105478  |
| 0.16215  | 0.240822 | 0.143502  | 0.148747 | 0.141026 | 0.150495 | 0.132867  |
| 0.136655 | 0.237179 | 0.115676  | 0.112471 | 0.122815 | 0.124417 | 0.10912   |
| 0.138695 | 0.240385 | 0.111888  | 0.119464 | 0.11757  | 0.114802 | 0.112034  |
| 0.140589 | 0.237908 | 0.112325  | 0.116987 | 0.121212 | 0.128351 | 0.107226  |
| 0.151952 | 0.248689 | 0.133304  | 0.137092 | 0.141608 | 0.146125 | 0.134615  |
| 0.145833 | 0.216929 | 0.131265  | 0.126311 | 0.117716 | 0.129516 | 0.102564  |
| 0.136218 | 0.236742 | 0.111451  | 0.113491 | 0.113054 | 0.113491 | 0.108392  |
| 0.130973 | 0.230332 | 0.111742  | 0.112908 | 0.116841 | 0.115239 | 0.105769  |
| 0.145688 | 0.236305 | 0.11859   | 0.120629 | 0.118735 | 0.130245 | 0.114365  |
| 0.147873 | 0.247232 | 0.112908  | 0.133304 | 0.127914 | 0.131847 | 0.12296   |
| 0.143648 | 0.239802 | 0.117716  | 0.123252 | 0.123689 | 0.127914 | 0.115822  |
| 0.137675 | 0.229749 | 0.104749  | 0.108829 | 0.106935 | 0.112617 | 0.0987762 |
| 0.135635 | 0.231206 | 0.0989219 | 0.114073 | 0.110723 | 0.117279 | 0.104895  |
| 0.13986  | 0.237471 | 0.101399  | 0.114219 | 0.115822 | 0.117424 | 0.109411  |
| 0.146853 | 0.234557 | 0.124417  | 0.118298 | 0.119318 | 0.119755 | 0.112325  |
| 0.150787 | 0.24257  | 0.112908  | 0.136801 | 0.129953 | 0.137383 | 0.122378  |
| 0.13986  | 0.237471 | 0.105769  | 0.110723 | 0.113491 | 0.118298 | 0.106498  |
| 0.131847 | 0.23208  | 0.105041  | 0.112325 | 0.111305 | 0.116404 | 0.102273  |



|          |          |          |          |           |          |           |
|----------|----------|----------|----------|-----------|----------|-----------|
| 0.151661 | 0.241404 | 0.116987 | 0.127185 | 0.132576  | 0.127768 | 0.113636  |
| 0.147727 | 0.236014 | 0.1081   | 0.113054 | 0.111451  | 0.121212 | 0.105041  |
| 0.150641 | 0.2331   | 0.125291 | 0.128497 | 0.127185  | 0.121212 | 0.121358  |
| 0.15472  | 0.240676 | 0.139277 | 0.137238 | 0.131265  | 0.134907 | 0.123106  |
| 0.140734 | 0.238928 | 0.111014 | 0.119172 | 0.116696  | 0.124126 | 0.109411  |
| 0.142337 | 0.237325 | 0.105915 | 0.113782 | 0.115967  | 0.11757  | 0.1081    |
| 0.14088  | 0.235868 | 0.107955 | 0.115239 | 0.115385  | 0.121941 | 0.105478  |
| 0.137966 | 0.230041 | 0.107663 | 0.112325 | 0.109557  | 0.112617 | 0.102564  |
| 0.143794 | 0.244027 | 0.11116  | 0.127477 | 0.126748  | 0.128642 | 0.118298  |
| 0.137092 | 0.233537 | 0.10271  | 0.112908 | 0.107809  | 0.114365 | 0.106935  |
| 0.157634 | 0.249709 | 0.131702 | 0.137529 | 0.137675  | 0.149184 | 0.131265  |
| 0.156031 | 0.243153 | 0.132721 | 0.141171 | 0.133741  | 0.141171 | 0.131993  |
| 0.154575 | 0.245192 | 0.123397 | 0.135344 | 0.123543  | 0.135344 | 0.125583  |
| 0.145979 | 0.236305 | 0.116259 | 0.121503 | 0.122815  | 0.121795 | 0.111451  |
| 0.139277 | 0.236014 | 0.125291 | 0.114802 | 0.123397  | 0.111305 | 0.110577  |
| 0.143794 | 0.239073 | 0.116113 | 0.109703 | 0.116841  | 0.11961  | 0.104895  |
| 0.145979 | 0.238636 | 0.111014 | 0.115385 | 0.117861  | 0.120338 | 0.103293  |
| 0.138112 | 0.236305 | 0.109848 | 0.118007 | 0.109411  | 0.11655  | 0.107372  |
| 0.13986  | 0.222611 | 0.121503 | 0.119755 | 0.0930944 | 0.113345 | 0.104167  |
| 0.15035  | 0.246212 | 0.130536 | 0.129662 | 0.131556  | 0.136946 | 0.11757   |
| 0.138258 | 0.244901 | 0.118444 | 0.115822 | 0.119464  | 0.11757  | 0.106643  |
| 0.149184 | 0.240093 | 0.115385 | 0.13141  | 0.126894  | 0.134907 | 0.122232  |
| 0.149038 | 0.246066 | 0.13447  | 0.131556 | 0.135781  | 0.146999 | 0.125874  |
| 0.20877  | 0.129225 | 0.199155 | 0.193036 | 0.181818  | 0.184878 | 0.187354  |
| 0.243007 | 0.10373  | 0.241259 | 0.243298 | 0.223048  | 0.226981 | 0.233829  |
| 0.139423 | 0.222174 | 0.123689 | 0.114365 | 0.0719697 | 0.120484 | 0.0987762 |
| 0.139569 | 0.229312 | 0.121795 | 0.11014  | 0.114073  | 0.118881 | 0.105041  |
| 0.140443 | 0.232226 | 0.113054 | 0.107517 | 0.107955  | 0.115676 | 0.0948427 |
| 0.134033 | 0.231061 | 0.122669 | 0.102855 | 0.109994  | 0.114219 | 0.0980478 |
| 0.143357 | 0.23514  | 0.125291 | 0.137238 | 0.126311  | 0.133741 | 0.129516  |
| 0.13986  | 0.237471 | 0.124126 | 0.110431 | 0.114948  | 0.118881 | 0.101253  |
| 0.160111 | 0.250146 | 0.148164 | 0.13884  | 0.142774  | 0.14933  | 0.130536  |
| 0.137529 | 0.23514  | 0.122086 | 0.109266 | 0.116987  | 0.119755 | 0.105041  |
| 0.147436 | 0.244172 | 0.133159 | 0.130536 | 0.126603  | 0.13345  | 0.114073  |
| 0.147582 | 0.236742 | 0.137383 | 0.130973 | 0.125583  | 0.13243  | 0.115967  |
| 0.147582 | 0.243735 | 0.133304 | 0.122815 | 0.134324  | 0.132139 | 0.113928  |
| 0.154575 | 0.247232 | 0.13039  | 0.144376 | 0.134033  | 0.142045 | 0.131119  |
| 0.146707 | 0.240822 | 0.122815 | 0.10912  | 0.122669  | 0.121649 | 0.106352  |
| 0.135344 | 0.233537 | 0.122232 | 0.106498 | 0.115385  | 0.11757  | 0.10169   |
| 0.139277 | 0.236597 | 0.123252 | 0.108974 | 0.122523  | 0.119464 | 0.102418  |
| 0.13549  | 0.228147 | 0.120629 | 0.101981 | 0.112034  | 0.113345 | 0.0948427 |
| 0.137821 | 0.232226 | 0.118881 | 0.105186 | 0.112034  | 0.115676 | 0.0989219 |
| 0.141463 | 0.232372 | 0.128059 | 0.105041 | 0.116259  | 0.118444 | 0.0999417 |
| 0.144231 | 0.241259 | 0.13141  | 0.115676 | 0.128351  | 0.129953 | 0.106789  |

|          |          |           |          |          |          |           |
|----------|----------|-----------|----------|----------|----------|-----------|
| 0.143939 | 0.248252 | 0.141608  | 0.125291 | 0.133013 | 0.138403 | 0.113491  |
| 0.145833 | 0.237034 | 0.12602   | 0.114948 | 0.117133 | 0.122815 | 0.106352  |
| 0.142191 | 0.232809 | 0.125583  | 0.113054 | 0.116113 | 0.115385 | 0.101253  |
| 0.150932 | 0.247378 | 0.135781  | 0.126166 | 0.130973 | 0.136655 | 0.112617  |
| 0.140734 | 0.232517 | 0.120921  | 0.107517 | 0.111742 | 0.113928 | 0.0995047 |
| 0.150787 | 0.244318 | 0.148747  | 0.128934 | 0.144522 | 0.140297 | 0.124417  |
| 0.154866 | 0.239073 | 0.129225  | 0.137092 | 0.135781 | 0.139423 | 0.126748  |
| 0.138112 | 0.236888 | 0.138695  | 0.126457 | 0.13039  | 0.129371 | 0.109994  |
| 0.140734 | 0.232517 | 0.118881  | 0.104312 | 0.112617 | 0.113636 | 0.100379  |
| 0.130973 | 0.232955 | 0.114073  | 0.107372 | 0.114219 | 0.117861 | 0.0967366 |
| 0.145396 | 0.242716 | 0.127914  | 0.117716 | 0.12602  | 0.12704  | 0.10708   |
| 0.139714 | 0.238491 | 0.127477  | 0.119027 | 0.124126 | 0.128934 | 0.105186  |
| 0.148164 | 0.236451 | 0.136801  | 0.11961  | 0.130245 | 0.135635 | 0.11014   |
| 0.145105 | 0.236888 | 0.130536  | 0.104604 | 0.120192 | 0.121212 | 0.100962  |
| 0.142337 | 0.234994 | 0.126603  | 0.112325 | 0.119172 | 0.117861 | 0.10373   |
| 0.143502 | 0.238491 | 0.127768  | 0.119027 | 0.123252 | 0.128059 | 0.106352  |
| 0.149038 | 0.247232 | 0.135344  | 0.130682 | 0.136072 | 0.133596 | 0.117133  |
| 0.147873 | 0.243153 | 0.138258  | 0.126603 | 0.129371 | 0.133596 | 0.113636  |
| 0.14831  | 0.247086 | 0.141317  | 0.132867 | 0.131556 | 0.138695 | 0.121066  |
| 0.152244 | 0.240822 | 0.13243   | 0.139714 | 0.131119 | 0.140006 | 0.12296   |
| 0.144668 | 0.237908 | 0.126311  | 0.111451 | 0.111888 | 0.123106 | 0.102564  |
| 0.144376 | 0.241113 | 0.13884   | 0.118153 | 0.129079 | 0.131556 | 0.111014  |
| 0.135198 | 0.236305 | 0.116841  | 0.105478 | 0.112908 | 0.112471 | 0.0986305 |
| 0.142045 | 0.230041 | 0.119901  | 0.119318 | 0.117133 | 0.116404 | 0.111888  |
| 0.137966 | 0.23412  | 0.119318  | 0.100379 | 0.117716 | 0.117861 | 0.103147  |
| 0.136072 | 0.231061 | 0.12296   | 0.106352 | 0.117861 | 0.112179 | 0.0992133 |
| 0.136364 | 0.232809 | 0.117133  | 0.097028 | 0.113199 | 0.114802 | 0.097465  |
| 0.150787 | 0.242861 | 0.137966  | 0.126311 | 0.135781 | 0.141463 | 0.114802  |
| 0.143939 | 0.236597 | 0.125291  | 0.118007 | 0.119318 | 0.120921 | 0.105041  |
| 0.146853 | 0.240967 | 0.134033  | 0.125    | 0.130682 | 0.13549  | 0.115822  |
| 0.137821 | 0.229021 | 0.121212  | 0.1081   | 0.113199 | 0.116259 | 0.101253  |
| 0.150495 | 0.24461  | 0.126603  | 0.122232 | 0.128788 | 0.133596 | 0.106935  |
| 0.141317 | 0.237762 | 0.116259  | 0.130828 | 0.119027 | 0.131993 | 0.110868  |
| 0.146562 | 0.2331   | 0.119755  | 0.122378 | 0.122232 | 0.123543 | 0.116987  |
| 0.144376 | 0.24053  | 0.106789  | 0.119027 | 0.119172 | 0.124563 | 0.112471  |
| 0.142483 | 0.229021 | 0.120629  | 0.112471 | 0.121941 | 0.128788 | 0.107372  |
| 0.149038 | 0.239073 | 0.125437  | 0.118444 | 0.120338 | 0.129516 | 0.113345  |
| 0.142337 | 0.236742 | 0.125437  | 0.116696 | 0.120629 | 0.115239 | 0.117424  |
| 0.156031 | 0.245192 | 0.0898893 | 0.143211 | 0.136072 | 0.136218 | 0.140152  |
| 0.162879 | 0.251457 | 0.138403  | 0.143065 | 0.135344 | 0.148601 | 0.134178  |
| 0.138695 | 0.230769 | 0.0879953 | 0.115385 | 0.10912  | 0.113928 | 0.108246  |
| 0.138258 | 0.251311 | 0.124563  | 0.131847 | 0.135781 | 0.13447  | 0.126748  |
| 0.152972 | 0.244464 | 0.0882867 | 0.136364 | 0.131265 | 0.133159 | 0.130682  |
| 0.130828 | 0.242424 | 0.123543  | 0.133159 | 0.130973 | 0.129662 | 0.125728  |

|          |          |           |          |          |          |          |
|----------|----------|-----------|----------|----------|----------|----------|
| 0.131702 | 0.234266 | 0.116841  | 0.123543 | 0.119318 | 0.125874 | 0.110577 |
| 0.145396 | 0.24359  | 0.0766317 | 0.130828 | 0.127477 | 0.126166 | 0.125437 |
| 0.144376 | 0.239656 | 0.0799825 | 0.134761 | 0.126166 | 0.128059 | 0.129662 |
| 0.139569 | 0.243298 | 0.114219  | 0.130245 | 0.124854 | 0.129079 | 0.121358 |
| 0.142774 | 0.247086 | 0.125291  | 0.135781 | 0.135635 | 0.136655 | 0.125437 |
| 0.146562 | 0.239219 | 0.076049  | 0.135781 | 0.122232 | 0.130245 | 0.128934 |
| 0.127331 | 0.2331   | 0.114802  | 0.116841 | 0.117861 | 0.121795 | 0.10708  |
| 0.15778  | 0.246649 | 0.146707  | 0.134761 | 0.128788 | 0.142045 | 0.127331 |
| 0.144814 | 0.243881 | 0.0856643 | 0.138403 | 0.134761 | 0.137238 | 0.136218 |
| 0.135781 | 0.231061 | 0.101399  | 0.117716 | 0.114656 | 0.119755 | 0.109703 |
| 0.230624 | 0.116987 | 0.226836  | 0.220425 | 0.207168 | 0.207896 | 0.212121 |
| 0.140006 | 0.239365 | 0.116113  | 0.125728 | 0.122669 | 0.124563 | 0.117424 |
| 0.14292  | 0.235577 | 0.0875583 | 0.121649 | 0.118881 | 0.121358 | 0.120338 |
| 0.137529 | 0.248252 | 0.118298  | 0.13345  | 0.131265 | 0.133741 | 0.125437 |
| 0.143065 | 0.237471 | 0.0824592 | 0.129079 | 0.120775 | 0.122378 | 0.121941 |
| 0.148601 | 0.247086 | 0.0856643 | 0.143648 | 0.132139 | 0.133159 | 0.137675 |
| 0.135781 | 0.239802 | 0.115676  | 0.122378 | 0.120775 | 0.128205 | 0.114073 |
| 0.138258 | 0.239073 | 0.108246  | 0.12398  | 0.117424 | 0.121358 | 0.11655  |
| 0.148164 | 0.238782 | 0.0791084 | 0.131556 | 0.123543 | 0.127768 | 0.125    |
| 0.136364 | 0.233974 | 0.126457  | 0.130828 | 0.127185 | 0.135198 | 0.126603 |
| 0.139423 | 0.243735 | 0.120775  | 0.130973 | 0.129371 | 0.129225 | 0.126457 |
| 0.134907 | 0.243298 | 0.117424  | 0.127914 | 0.131265 | 0.136364 | 0.124272 |
| 0.132284 | 0.241841 | 0.115676  | 0.129662 | 0.12398  | 0.130828 | 0.122523 |
| 0.148601 | 0.240385 | 0.109557  | 0.129079 | 0.119318 | 0.128205 | 0.118735 |
| 0.140734 | 0.243881 | 0.119464  | 0.114219 | 0.118444 | 0.128205 | 0.115822 |
| 0.136218 | 0.24898  | 0.11961   | 0.135344 | 0.132284 | 0.130682 | 0.128205 |
| 0.128788 | 0.230478 | 0.113345  | 0.123543 | 0.118735 | 0.120338 | 0.113199 |
| 0.160256 | 0.248834 | 0.13345   | 0.136946 | 0.131556 | 0.136946 | 0.129808 |
| 0.157488 | 0.232955 | 0.136801  | 0.143502 | 0.135781 | 0.139714 | 0.132284 |
| 0.149621 | 0.235868 | 0.114948  | 0.130099 | 0.12296  | 0.136509 | 0.11655  |
| 0.147582 | 0.241696 | 0.0884324 | 0.135635 | 0.128497 | 0.133887 | 0.129662 |
| 0.149184 | 0.229021 | 0.127622  | 0.137238 | 0.124563 | 0.125874 | 0.121941 |
| 0.14292  | 0.235868 | 0.119027  | 0.135635 | 0.125874 | 0.136801 | 0.130828 |
| 0.14729  | 0.231789 | 0.13243   | 0.13039  | 0.121795 | 0.126894 | 0.124126 |
| 0.159528 | 0.236742 | 0.137675  | 0.144085 | 0.138112 | 0.137966 | 0.137529 |
| 0.143939 | 0.230769 | 0.1081    | 0.121795 | 0.116987 | 0.122086 | 0.113199 |
| 0.154866 | 0.246066 | 0.127768  | 0.142337 | 0.134324 | 0.13884  | 0.13141  |
| 0.159965 | 0.225816 | 0.137238  | 0.140443 | 0.13243  | 0.144522 | 0.134178 |
| 0.145979 | 0.241259 | 0.102564  | 0.128788 | 0.120484 | 0.131702 | 0.116696 |
| 0.155012 | 0.233683 | 0.123252  | 0.13141  | 0.125437 | 0.127914 | 0.119901 |
| 0.162442 | 0.245775 | 0.150495  | 0.14729  | 0.13549  | 0.151952 | 0.134033 |
| 0.152826 | 0.240239 | 0.128934  | 0.13039  | 0.122669 | 0.131265 | 0.119755 |
| 0.159382 | 0.253497 | 0.132576  | 0.142774 | 0.136801 | 0.148601 | 0.131265 |
| 0.150787 | 0.24461  | 0.122523  | 0.13884  | 0.129662 | 0.141171 | 0.121795 |

|           |          |          |          |           |          |          |
|-----------|----------|----------|----------|-----------|----------|----------|
| 0.134324  | 0.243298 | 0.114802 | 0.124126 | 0.126311  | 0.122669 | 0.11553  |
| 0.150495  | 0.239656 | 0.128642 | 0.135052 | 0.12704   | 0.136509 | 0.119755 |
| 0.152972  | 0.236597 | 0.11451  | 0.128205 | 0.124272  | 0.132867 | 0.114073 |
| 0.14292   | 0.247815 | 0.122815 | 0.13039  | 0.129079  | 0.136801 | 0.116841 |
| 0.139423  | 0.246649 | 0.128934 | 0.129516 | 0.127914  | 0.131847 | 0.123252 |
| 0.136509  | 0.249272 | 0.13447  | 0.13039  | 0.134615  | 0.141463 | 0.120047 |
| 0.144376  | 0.246066 | 0.124563 | 0.135344 | 0.132284  | 0.135635 | 0.123252 |
| 0.150204  | 0.244027 | 0.132139 | 0.135344 | 0.130536  | 0.133304 | 0.120047 |
| 0.147873  | 0.243444 | 0.140006 | 0.144376 | 0.140734  | 0.146707 | 0.124417 |
| 0.146416  | 0.239656 | 0.112908 | 0.132139 | 0.129079  | 0.127477 | 0.125291 |
| 0.140589  | 0.240822 | 0.118735 | 0.121358 | 0.123543  | 0.124563 | 0.113054 |
| 0.151661  | 0.240239 | 0.132139 | 0.125437 | 0.13345   | 0.129225 | 0.11859  |
| 0.152244  | 0.236451 | 0.113491 | 0.126894 | 0.125     | 0.122232 | 0.115093 |
| 0.165501  | 0.24359  | 0.139277 | 0.147145 | 0.138549  | 0.140734 | 0.141463 |
| 0.165793  | 0.250874 | 0.151515 | 0.1588   | 0.153118  | 0.151807 | 0.144959 |
| 0.139569  | 0.241841 | 0.131119 | 0.129079 | 0.127477  | 0.134907 | 0.114073 |
| 0.143211  | 0.239073 | 0.132139 | 0.118735 | 0.122669  | 0.123689 | 0.108392 |
| 0.137238  | 0.244464 | 0.137238 | 0.129662 | 0.125728  | 0.134033 | 0.120775 |
| 0.13884   | 0.244318 | 0.119027 | 0.135927 | 0.131702  | 0.133013 | 0.128788 |
| 0.147873  | 0.247523 | 0.130099 | 0.120192 | 0.128497  | 0.128642 | 0.112762 |
| 0.136509  | 0.252768 | 0.129225 | 0.135052 | 0.138695  | 0.135344 | 0.129953 |
| 0.149913  | 0.242861 | 0.13243  | 0.144085 | 0.132284  | 0.140006 | 0.129079 |
| 0.152389  | 0.243007 | 0.112179 | 0.134907 | 0.127768  | 0.133741 | 0.118735 |
| 0.166375  | 0.248543 | 0.166084 | 0.145979 | 0.152826  | 0.155886 | 0.144668 |
| 0.15472   | 0.244464 | 0.120921 | 0.133741 | 0.130973  | 0.134907 | 0.121358 |
| 0.157634  | 0.249709 | 0.130245 | 0.152098 | 0.138549  | 0.147145 | 0.133596 |
| 0.144668  | 0.244901 | 0.116987 | 0.124563 | 0.122086  | 0.125437 | 0.114802 |
| 0.146416  | 0.250728 | 0.13884  | 0.137092 | 0.132576  | 0.143502 | 0.12296  |
| 0.129225  | 0.235868 | 0.112617 | 0.127185 | 0.124709  | 0.122815 | 0.118298 |
| 0.158508  | 0.212121 | 0.142774 | 0.143939 | 0.10708   | 0.136655 | 0.126311 |
| 0.0432692 | 0.246941 | 0.142337 | 0.131847 | 0.140443  | 0.136218 | 0.131119 |
| 0.141026  | 0.22669  | 0.131993 | 0.123834 | 0.0560897 | 0.124709 | 0.109411 |
| 0.150204  | 0.207896 | 0.137966 | 0.138549 | 0.0652681 | 0.135635 | 0.123834 |
| 0.170746  | 0.18648  | 0.152389 | 0.147436 | 0.135052  | 0.148019 | 0.127185 |
| 0.166375  | 0.190268 | 0.153263 | 0.146562 | 0.115822  | 0.140152 | 0.137383 |
| 0.153992  | 0.243153 | 0.127477 | 0.127185 | 0.126166  | 0.13447  | 0.111888 |
| 0.143939  | 0.237471 | 0.136364 | 0.134033 | 0.131847  | 0.124709 | 0.131265 |
| 0.134324  | 0.226981 | 0.119464 | 0.116841 | 0.111451  | 0.113928 | 0.111742 |
| 0.138549  | 0.230624 | 0.124272 | 0.121066 | 0.114219  | 0.119901 | 0.106935 |
| 0.141608  | 0.232517 | 0.112179 | 0.12296  | 0.123689  | 0.126748 | 0.113782 |
| 0.138403  | 0.226981 | 0.125583 | 0.118881 | 0.0546329 | 0.121795 | 0.109411 |
| 0.143211  | 0.236451 | 0.123397 | 0.111451 | 0.122378  | 0.116987 | 0.107226 |
| 0.133596  | 0.220717 | 0.116987 | 0.121066 | 0.0865385 | 0.114073 | 0.107809 |
| 0.139423  | 0.232372 | 0.118444 | 0.119318 | 0.106061  | 0.121066 | 0.117716 |

|           |          |           |           |           |          |           |
|-----------|----------|-----------|-----------|-----------|----------|-----------|
| 0.142483  | 0.222611 | 0.122669  | 0.129371  | 0.114948  | 0.128205 | 0.121358  |
| 0.142191  | 0.226981 | 0.106061  | 0.111597  | 0.114073  | 0.115385 | 0.107955  |
| 0.144231  | 0.229021 | 0.125583  | 0.124126  | 0.0610431 | 0.125291 | 0.112908  |
| 0.140297  | 0.231498 | 0.128934  | 0.121358  | 0.0571096 | 0.120192 | 0.111305  |
| 0.153992  | 0.240239 | 0.130099  | 0.123689  | 0.117424  | 0.130099 | 0.0976107 |
| 0.225087  | 0.10912  | 0.220134  | 0.218677  | 0.201049  | 0.206439 | 0.211538  |
| 0.150495  | 0.238199 | 0.144085  | 0.145251  | 0.0643939 | 0.144959 | 0.13141   |
| 0.140152  | 0.238636 | 0.13549   | 0.129953  | 0.125437  | 0.128497 | 0.120775  |
| 0.14292   | 0.22567  | 0.128642  | 0.12602   | 0.112471  | 0.128351 | 0.116259  |
| 0.218677  | 0.101836 | 0.214889  | 0.212558  | 0.197261  | 0.201195 | 0.205128  |
| 0.1537    | 0.225087 | 0.133596  | 0.125146  | 0.113636  | 0.128059 | 0.100816  |
| 0.151515  | 0.238054 | 0.131702  | 0.12704   | 0.121066  | 0.129371 | 0.120484  |
| 0.138695  | 0.231643 | 0.13141   | 0.11655   | 0.114365  | 0.127914 | 0.116696  |
| 0.139132  | 0.230915 | 0.122232  | 0.129516  | 0.120338  | 0.126603 | 0.121212  |
| 0.254516  | 0.103001 | 0.254808  | 0.253934  | 0.234557  | 0.239365 | 0.245629  |
| 0.151224  | 0.238345 | 0.136946  | 0.127622  | 0.125728  | 0.129953 | 0.120192  |
| 0.150932  | 0.236305 | 0.123834  | 0.11655   | 0.11116   | 0.121212 | 0.0977564 |
| 0.138112  | 0.238054 | 0.134033  | 0.0498252 | 0.120775  | 0.127622 | 0.0680361 |
| 0.132867  | 0.234557 | 0.134324  | 0.0501166 | 0.121941  | 0.125291 | 0.0680361 |
| 0.151224  | 0.229312 | 0.130828  | 0.137529  | 0.120484  | 0.127914 | 0.118444  |
| 0.148893  | 0.213578 | 0.132576  | 0.126166  | 0.102127  | 0.130536 | 0.110286  |
| 0.151807  | 0.234848 | 0.125874  | 0.122086  | 0.112908  | 0.126457 | 0.100379  |
| 0.139714  | 0.228875 | 0.127768  | 0.120192  | 0.0547786 | 0.123689 | 0.110431  |
| 0.13986   | 0.232226 | 0.13141   | 0.120338  | 0.121358  | 0.114219 | 0.117861  |
| 0.13986   | 0.231061 | 0.11859   | 0.121212  | 0.114948  | 0.121503 | 0.113491  |
| 0.139714  | 0.22567  | 0.121066  | 0.117279  | 0.0646853 | 0.117861 | 0.109266  |
| 0.139569  | 0.234557 | 0.0941142 | 0.129079  | 0.116696  | 0.12296  | 0.120192  |
| 0.0409382 | 0.244901 | 0.14088   | 0.132139  | 0.139277  | 0.138549 | 0.130245  |
| 0.151078  | 0.235868 | 0.137675  | 0.130099  | 0.125874  | 0.131847 | 0.11859   |
| 0.152826  | 0.237617 | 0.129225  | 0.129516  | 0.125291  | 0.131847 | 0.122378  |
| 0.200903  | 0.123689 | 0.197698  | 0.190414  | 0.177156  | 0.182838 | 0.18211   |
| 0.215181  | 0.112617 | 0.209645  | 0.204983  | 0.191725  | 0.193328 | 0.198427  |
| 0.143211  | 0.225379 | 0.124272  | 0.130973  | 0.120047  | 0.129225 | 0.12296   |
| 0.135052  | 0.228875 | 0.11553   | 0.119318  | 0.113054  | 0.123689 | 0.11451   |
| 0.141171  | 0.226544 | 0.134761  | 0.138549  | 0.121212  | 0.133596 | 0.128497  |
| 0.14933   | 0.23616  | 0.122232  | 0.118444  | 0.113054  | 0.125146 | 0.101107  |
| 0.15035   | 0.240093 | 0.136364  | 0.132867  | 0.127185  | 0.131702 | 0.121358  |
| 0.131265  | 0.23412  | 0.133304  | 0.114073  | 0.120338  | 0.126603 | 0.107517  |
| 0.232663  | 0.112908 | 0.230624  | 0.230624  | 0.210082  | 0.214598 | 0.218823  |
| 0.137092  | 0.235286 | 0.125728  | 0.115239  | 0.111597  | 0.116987 | 0.111888  |
| 0.213578  | 0.1419   | 0.21183   | 0.212121  | 0.190122  | 0.203089 | 0.194202  |
| 0.146707  | 0.241987 | 0.120775  | 0.116113  | 0.113636  | 0.119318 | 0.106061  |
| 0.143357  | 0.233683 | 0.122378  | 0.113928  | 0.120775  | 0.114219 | 0.109703  |
| 0.142628  | 0.224796 | 0.129225  | 0.122523  | 0.099359  | 0.121941 | 0.100524  |

|           |          |          |           |           |          |           |
|-----------|----------|----------|-----------|-----------|----------|-----------|
| 0.138258  | 0.225087 | 0.11553  | 0.116987  | 0.110723  | 0.118735 | 0.111597  |
| 0.216783  | 0.116259 | 0.208916 | 0.207751  | 0.191871  | 0.196387 | 0.201486  |
| 0.148019  | 0.224942 | 0.134615 | 0.132867  | 0.0572552 | 0.132867 | 0.121649  |
| 0.145105  | 0.243881 | 0.124126 | 0.109848  | 0.119318  | 0.121795 | 0.110868  |
| 0.144231  | 0.231643 | 0.129953 | 0.128205  | 0.0523019 | 0.129662 | 0.11553   |
| 0.145105  | 0.236014 | 0.130536 | 0.122086  | 0.119318  | 0.129371 | 0.116113  |
| 0.145105  | 0.231061 | 0.124417 | 0.120338  | 0.114365  | 0.120047 | 0.118735  |
| 0.144668  | 0.239948 | 0.122523 | 0.116696  | 0.115385  | 0.123689 | 0.104604  |
| 0.150787  | 0.224213 | 0.127185 | 0.121358  | 0.111014  | 0.125728 | 0.0984848 |
| 0.152826  | 0.238199 | 0.133596 | 0.129225  | 0.125583  | 0.131265 | 0.120338  |
| 0.13447   | 0.223922 | 0.122232 | 0.114073  | 0.0571096 | 0.11553  | 0.106061  |
| 0.144522  | 0.236888 | 0.125291 | 0.113054  | 0.121358  | 0.122378 | 0.107955  |
| 0.201486  | 0.124854 | 0.199155 | 0.190997  | 0.178904  | 0.179924 | 0.183275  |
| 0.13345   | 0.237471 | 0.136364 | 0.0504079 | 0.121941  | 0.128497 | 0.0657051 |
| 0.0587121 | 0.237034 | 0.130682 | 0.114656  | 0.123834  | 0.121649 | 0.113928  |
| 0.130245  | 0.228147 | 0.126748 | 0.101107  | 0.113782  | 0.127622 | 0.10271   |
| 0.150787  | 0.232663 | 0.136218 | 0.127768  | 0.123543  | 0.131265 | 0.118298  |
| 0.143794  | 0.229458 | 0.126311 | 0.12398   | 0.0559441 | 0.129225 | 0.112471  |
| 0.148747  | 0.241987 | 0.120484 | 0.121066  | 0.120921  | 0.125437 | 0.108392  |
| 0.142483  | 0.232809 | 0.125874 | 0.110431  | 0.112325  | 0.125    | 0.103001  |
| 0.153555  | 0.240967 | 0.128788 | 0.125     | 0.117861  | 0.131993 | 0.102418  |
| 0.0668706 | 0.234703 | 0.125437 | 0.111742  | 0.119464  | 0.115239 | 0.109848  |
| 0.135635  | 0.232372 | 0.135052 | 0.0479312 | 0.11859   | 0.121649 | 0.0743007 |
| 0.141026  | 0.227855 | 0.122669 | 0.126166  | 0.113782  | 0.122086 | 0.120775  |
| 0.13884   | 0.238782 | 0.132139 | 0.112617  | 0.118007  | 0.124563 | 0.119755  |
| 0.139277  | 0.238928 | 0.142191 | 0.129079  | 0.128059  | 0.138403 | 0.128351  |
| 0.142191  | 0.232226 | 0.129662 | 0.122378  | 0.121358  | 0.122086 | 0.113199  |
| 0.146125  | 0.235868 | 0.139423 | 0.143211  | 0.0611888 | 0.138549 | 0.129079  |
| 0.14292   | 0.231789 | 0.122523 | 0.120775  | 0.113636  | 0.11961  | 0.116259  |
| 0.129516  | 0.23208  | 0.125437 | 0.0986305 | 0.108683  | 0.116696 | 0.0961538 |
| 0.142774  | 0.215326 | 0.125    | 0.123834  | 0.0595862 | 0.124417 | 0.112617  |
| 0.156469  | 0.234557 | 0.13345  | 0.127622  | 0.120192  | 0.131993 | 0.103001  |
| 0.204545  | 0.137238 | 0.199301 | 0.193182  | 0.174388  | 0.18648  | 0.175845  |
| 0.137383  | 0.234703 | 0.121358 | 0.105915  | 0.11859   | 0.117861 | 0.105769  |
| 0.128642  | 0.225087 | 0.110868 | 0.109994  | 0.100816  | 0.111451 | 0.101399  |
| 0.150204  | 0.239948 | 0.128351 | 0.127185  | 0.125874  | 0.133013 | 0.119172  |
| 0.194493  | 0.145542 | 0.18109  | 0.183421  | 0.163462  | 0.173514 | 0.172494  |
| 0.159382  | 0.242424 | 0.146853 | 0.138112  | 0.135635  | 0.135198 | 0.129808  |
| 0.16317   | 0.245338 | 0.149767 | 0.149767  | 0.145833  | 0.147145 | 0.137966  |
| 0.0406469 | 0.247815 | 0.142337 | 0.137092  | 0.143648  | 0.137675 | 0.136364  |
| 0.142045  | 0.229458 | 0.13039  | 0.120192  | 0.120047  | 0.11757  | 0.111597  |
| 0.143357  | 0.225524 | 0.129953 | 0.125291  | 0.0534674 | 0.125    | 0.110577  |
| 0.221591  | 0.11116  | 0.221591 | 0.211101  | 0.19697   | 0.201486 | 0.203963  |
| 0.142045  | 0.224505 | 0.131847 | 0.121358  | 0.116841  | 0.127768 | 0.116259  |

|           |          |           |           |           |          |           |
|-----------|----------|-----------|-----------|-----------|----------|-----------|
| 0.144814  | 0.229604 | 0.134033  | 0.127914  | 0.0537587 | 0.132867 | 0.114948  |
| 0.140152  | 0.233974 | 0.123543  | 0.1081    | 0.11961   | 0.120338 | 0.107372  |
| 0.181235  | 0.169289 | 0.17366   | 0.175117  | 0.142628  | 0.162296 | 0.158945  |
| 0.138695  | 0.223776 | 0.12296   | 0.115967  | 0.106789  | 0.121795 | 0.110286  |
| 0.146416  | 0.241696 | 0.146416  | 0.144959  | 0.144814  | 0.135052 | 0.140734  |
| 0.147582  | 0.228293 | 0.114948  | 0.127477  | 0.120921  | 0.129225 | 0.118881  |
| 0.201777  | 0.124563 | 0.200321  | 0.192453  | 0.178613  | 0.179341 | 0.184441  |
| 0.149621  | 0.237325 | 0.133013  | 0.124272  | 0.123252  | 0.12602  | 0.118298  |
| 0.133304  | 0.231789 | 0.0995047 | 0.116404  | 0.104312  | 0.116404 | 0.109266  |
| 0.136072  | 0.233683 | 0.123252  | 0.0987762 | 0.111451  | 0.111014 | 0.099796  |
| 0.14729   | 0.234703 | 0.131847  | 0.117279  | 0.114802  | 0.123397 | 0.108974  |
| 0.153409  | 0.237617 | 0.125437  | 0.124854  | 0.119755  | 0.129516 | 0.118007  |
| 0.137966  | 0.226836 | 0.128934  | 0.123397  | 0.123834  | 0.050845 | 0.118881  |
| 0.140443  | 0.229895 | 0.117424  | 0.123543  | 0.115239  | 0.120338 | 0.119027  |
| 0.20236   | 0.121066 | 0.199155  | 0.188083  | 0.178322  | 0.179633 | 0.184149  |
| 0.136655  | 0.236597 | 0.129079  | 0.123543  | 0.121066  | 0.119172 | 0.118444  |
| 0.143211  | 0.22567  | 0.109994  | 0.121358  | 0.105186  | 0.116404 | 0.113928  |
| 0.21824   | 0.11451  | 0.215326  | 0.214452  | 0.19799   | 0.201049 | 0.205565  |
| 0.134324  | 0.240093 | 0.136655  | 0.0492424 | 0.122815  | 0.127914 | 0.0674534 |
| 0.142628  | 0.230332 | 0.116696  | 0.121358  | 0.116841  | 0.120484 | 0.118298  |
| 0.134178  | 0.227127 | 0.112034  | 0.117279  | 0.111305  | 0.117279 | 0.111888  |
| 0.141026  | 0.232517 | 0.136072  | 0.138403  | 0.0680361 | 0.140152 | 0.12398   |
| 0.200175  | 0.123834 | 0.198135  | 0.192016  | 0.178176  | 0.179779 | 0.184586  |
| 0.151369  | 0.24257  | 0.128351  | 0.118444  | 0.11451   | 0.127768 | 0.0999417 |
| 0.136801  | 0.236742 | 0.138258  | 0.120484  | 0.124709  | 0.132139 | 0.123252  |
| 0.137675  | 0.228875 | 0.115239  | 0.121649  | 0.117133  | 0.121941 | 0.116259  |
| 0.139423  | 0.231206 | 0.11553   | 0.119318  | 0.113928  | 0.119027 | 0.118007  |
| 0.139277  | 0.226399 | 0.115385  | 0.120629  | 0.116987  | 0.119755 | 0.114948  |
| 0.141171  | 0.231789 | 0.124854  | 0.120775  | 0.0623543 | 0.122815 | 0.112179  |
| 0.137821  | 0.234848 | 0.106935  | 0.109266  | 0.110577  | 0.115676 | 0.105332  |
| 0.148601  | 0.239219 | 0.134033  | 0.127622  | 0.129225  | 0.126166 | 0.119027  |
| 0.120629  | 0.245047 | 0.13141   | 0.121795  | 0.120192  | 0.131119 | 0.111742  |
| 0.15035   | 0.237762 | 0.132867  | 0.126457  | 0.128351  | 0.125    | 0.116987  |
| 0.146707  | 0.239948 | 0.135052  | 0.127185  | 0.124709  | 0.134178 | 0.120338  |
| 0.208333  | 0.126748 | 0.204837  | 0.194639  | 0.183712  | 0.182692 | 0.188374  |
| 0.13884   | 0.23412  | 0.130099  | 0.111451  | 0.116259  | 0.121649 | 0.114802  |
| 0.147145  | 0.229895 | 0.134033  | 0.13345   | 0.0587121 | 0.131993 | 0.120775  |
| 0.138258  | 0.23208  | 0.116113  | 0.118444  | 0.114802  | 0.117861 | 0.115676  |
| 0.136946  | 0.228438 | 0.106061  | 0.11014   | 0.112325  | 0.11451  | 0.106498  |
| 0.138403  | 0.224942 | 0.125     | 0.114802  | 0.112034  | 0.111597 | 0.105332  |
| 0.154866  | 0.238491 | 0.12602   | 0.120775  | 0.113345  | 0.129516 | 0.0990676 |
| 0.143794  | 0.235868 | 0.13884   | 0.132139  | 0.123252  | 0.124854 | 0.125     |
| 0.0827506 | 0.23514  | 0.125874  | 0.111888  | 0.11757   | 0.111014 | 0.11553   |
| 0.147436  | 0.230186 | 0.11655   | 0.116841  | 0.111742  | 0.118298 | 0.0948427 |

|           |          |           |          |           |          |           |
|-----------|----------|-----------|----------|-----------|----------|-----------|
| 0.144085  | 0.228584 | 0.112908  | 0.112325 | 0.105186  | 0.116987 | 0.0932401 |
| 0.136655  | 0.229312 | 0.101981  | 0.117133 | 0.107955  | 0.116259 | 0.108246  |
| 0.149038  | 0.24053  | 0.120775  | 0.118735 | 0.116259  | 0.122232 | 0.104312  |
| 0.153846  | 0.240093 | 0.136946  | 0.137529 | 0.130682  | 0.134324 | 0.125728  |
| 0.155157  | 0.239073 | 0.12602   | 0.117861 | 0.115093  | 0.12398  | 0.100233  |
| 0.138403  | 0.223776 | 0.122378  | 0.11859  | 0.0613345 | 0.117424 | 0.106206  |
| 0.149476  | 0.237179 | 0.124126  | 0.115967 | 0.111451  | 0.122086 | 0.0977564 |
| 0.140297  | 0.228293 | 0.118153  | 0.11757  | 0.113345  | 0.117279 | 0.115967  |
| 0.139277  | 0.237762 | 0.117424  | 0.104312 | 0.118153  | 0.114802 | 0.105915  |
| 0.142191  | 0.229895 | 0.119755  | 0.122378 | 0.116696  | 0.122086 | 0.117279  |
| 0.132867  | 0.231935 | 0.123543  | 0.108392 | 0.110286  | 0.11859  | 0.108829  |
| 0.0743007 | 0.236888 | 0.126457  | 0.108974 | 0.11961   | 0.113054 | 0.110868  |
| 0.150058  | 0.238345 | 0.125874  | 0.122378 | 0.118735  | 0.12296  | 0.116987  |
| 0.142628  | 0.233537 | 0.110577  | 0.112617 | 0.111597  | 0.114073 | 0.109266  |
| 0.138986  | 0.229895 | 0.120338  | 0.121212 | 0.113782  | 0.117716 | 0.116113  |
| 0.13549   | 0.221445 | 0.129079  | 0.104312 | 0.112908  | 0.119172 | 0.104167  |
| 0.144668  | 0.232955 | 0.113491  | 0.122232 | 0.111888  | 0.122232 | 0.118298  |
| 0.13549   | 0.230186 | 0.0547786 | 0.118298 | 0.109994  | 0.116841 | 0.113491  |
| 0.137821  | 0.231643 | 0.116259  | 0.117133 | 0.113491  | 0.117133 | 0.113782  |
| 0.139423  | 0.225379 | 0.124563  | 0.122232 | 0.0504079 | 0.120775 | 0.11014   |
| 0.148456  | 0.237908 | 0.124854  | 0.115822 | 0.120629  | 0.122815 | 0.107226  |
| 0.142628  | 0.231498 | 0.130682  | 0.122815 | 0.0579837 | 0.121941 | 0.113054  |
| 0.146999  | 0.237034 | 0.125146  | 0.121941 | 0.120921  | 0.125146 | 0.117133  |
| 0.143794  | 0.235286 | 0.110286  | 0.116696 | 0.11859   | 0.116696 | 0.112762  |
| 0.127185  | 0.22567  | 0.118153  | 0.114948 | 0.108392  | 0.112034 | 0.112762  |
| 0.142774  | 0.239219 | 0.118881  | 0.10373  | 0.115239  | 0.119172 | 0.104749  |
| 0.144376  | 0.228293 | 0.127477  | 0.12398  | 0.0597319 | 0.12398  | 0.116259  |
| 0.143794  | 0.234703 | 0.121066  | 0.123397 | 0.11655   | 0.129808 | 0.117133  |
| 0.138986  | 0.229604 | 0.114219  | 0.122086 | 0.106789  | 0.120338 | 0.114656  |
| 0.205711  | 0.119172 | 0.201049  | 0.195221 | 0.183129  | 0.185897 | 0.188957  |
| 0.174825  | 0.167249 | 0.166375  | 0.166667 | 0.142045  | 0.157051 | 0.15778   |
| 0.15035   | 0.237179 | 0.13345   | 0.125583 | 0.12602   | 0.123543 | 0.119318  |
| 0.143211  | 0.228001 | 0.122232  | 0.11961  | 0.107226  | 0.121358 | 0.0979021 |
| 0.163607  | 0.251603 | 0.1537    | 0.151661 | 0.147436  | 0.153118 | 0.13986   |
| 0.138403  | 0.234266 | 0.131702  | 0.121503 | 0.122523  | 0.11451  | 0.123397  |
| 0.139423  | 0.226253 | 0.130099  | 0.122523 | 0.118881  | 0.119318 | 0.111888  |
| 0.140152  | 0.229895 | 0.114219  | 0.12296  | 0.109411  | 0.120338 | 0.114365  |
| 0.142191  | 0.233683 | 0.097028  | 0.125583 | 0.113491  | 0.11859  | 0.116404  |
| 0.145396  | 0.233392 | 0.113054  | 0.124709 | 0.109411  | 0.122086 | 0.119901  |
| 0.211101  | 0.124854 | 0.207314  | 0.20236  | 0.189394  | 0.193036 | 0.197552  |
| 0.157634  | 0.241259 | 0.130828  | 0.122669 | 0.120484  | 0.129953 | 0.100379  |
| 0.146999  | 0.222756 | 0.126894  | 0.121941 | 0.0670163 | 0.124563 | 0.0964452 |
| 0.135344  | 0.226836 | 0.0980478 | 0.120192 | 0.1081    | 0.116987 | 0.109557  |
| 0.147145  | 0.235431 | 0.128497  | 0.113345 | 0.120775  | 0.125291 | 0.112908  |



|           |          |           |           |           |          |           |
|-----------|----------|-----------|-----------|-----------|----------|-----------|
| 0.195367  | 0.151369 | 0.183129  | 0.1875    | 0.168998  | 0.177593 | 0.17803   |
| 0.250146  | 0.103001 | 0.250146  | 0.249272  | 0.232809  | 0.232955 | 0.239802  |
| 0.074155  | 0.238199 | 0.126603  | 0.113491  | 0.117133  | 0.114073 | 0.115967  |
| 0.146416  | 0.235577 | 0.114073  | 0.119027  | 0.112762  | 0.121066 | 0.118007  |
| 0.14729   | 0.235868 | 0.133013  | 0.121649  | 0.123543  | 0.123689 | 0.11655   |
| 0.148601  | 0.236014 | 0.12704   | 0.122086  | 0.118735  | 0.125    | 0.115822  |
| 0.147582  | 0.236742 | 0.123106  | 0.117279  | 0.111014  | 0.122523 | 0.0984848 |
| 0.133159  | 0.230186 | 0.121503  | 0.112179  | 0.113782  | 0.109266 | 0.109994  |
| 0.139132  | 0.21926  | 0.118735  | 0.124563  | 0.0836247 | 0.11757  | 0.112471  |
| 0.148456  | 0.238491 | 0.12398   | 0.115822  | 0.110431  | 0.124563 | 0.0917832 |
| 0.139277  | 0.221445 | 0.11859   | 0.124709  | 0.071824  | 0.118881 | 0.108537  |
| 0.141171  | 0.238491 | 0.0505536 | 0.124563  | 0.116841  | 0.122523 | 0.119464  |
| 0.142774  | 0.231061 | 0.111305  | 0.113928  | 0.114365  | 0.117424 | 0.109994  |
| 0.060169  | 0.237617 | 0.12602   | 0.107955  | 0.11859   | 0.114365 | 0.109266  |
| 0.141608  | 0.229604 | 0.126748  | 0.124126  | 0.0598776 | 0.12296  | 0.110577  |
| 0.130828  | 0.226981 | 0.115676  | 0.0944056 | 0.105332  | 0.1081   | 0.095134  |
| 0.132284  | 0.24155  | 0.122086  | 0.125874  | 0.125728  | 0.129953 | 0.118153  |
| 0.151515  | 0.24359  | 0.13345   | 0.136364  | 0.130682  | 0.141608 | 0.129516  |
| 0.142337  | 0.231789 | 0.11757   | 0.119318  | 0.112471  | 0.118444 | 0.112471  |
| 0.139277  | 0.222319 | 0.120629  | 0.128205  | 0.115239  | 0.124126 | 0.109411  |
| 0.143939  | 0.23514  | 0.12704   | 0.136946  | 0.127477  | 0.13345  | 0.130973  |
| 0.220134  | 0.118444 | 0.214015  | 0.214307  | 0.193765  | 0.201777 | 0.201049  |
| 0.0871212 | 0.230478 | 0.119464  | 0.104895  | 0.112617  | 0.108683 | 0.107663  |
| 0.144668  | 0.234994 | 0.110868  | 0.113782  | 0.11451   | 0.114656 | 0.1081    |
| 0.13884   | 0.234994 | 0.131265  | 0.114365  | 0.118298  | 0.121941 | 0.11655   |
| 0.136655  | 0.236597 | 0.137238  | 0.0498252 | 0.121358  | 0.127331 | 0.0735723 |
| 0.145688  | 0.238345 | 0.124126  | 0.115385  | 0.114365  | 0.122378 | 0.109411  |
| 0.210373  | 0.125291 | 0.20542   | 0.200466  | 0.187791  | 0.187646 | 0.193619  |
| 0.145251  | 0.232372 | 0.130973  | 0.12602   | 0.0600233 | 0.124854 | 0.117424  |
| 0.139569  | 0.229312 | 0.117133  | 0.118298  | 0.111451  | 0.117716 | 0.113491  |
| 0.142045  | 0.235286 | 0.121941  | 0.130099  | 0.119464  | 0.133013 | 0.117424  |
| 0.144668  | 0.237325 | 0.124854  | 0.119901  | 0.117716  | 0.123397 | 0.110431  |
| 0.142045  | 0.229167 | 0.130973  | 0.119318  | 0.0603147 | 0.117279 | 0.115093  |
| 0.130682  | 0.222756 | 0.113782  | 0.112325  | 0.0818765 | 0.119901 | 0.108392  |
| 0.141463  | 0.235286 | 0.0584207 | 0.123106  | 0.113928  | 0.122232 | 0.118298  |
| 0.133596  | 0.235577 | 0.13243   | 0.0502622 | 0.118298  | 0.126894 | 0.0737179 |
| 0.211247  | 0.120921 | 0.20542   | 0.199592  | 0.185752  | 0.188811 | 0.193036  |
| 0.133013  | 0.223631 | 0.11961   | 0.116113  | 0.0652681 | 0.115822 | 0.107517  |
| 0.208916  | 0.130536 | 0.201049  | 0.198427  | 0.180216  | 0.183275 | 0.192745  |
| 0.206439  | 0.124854 | 0.200612  | 0.192162  | 0.180653  | 0.180798 | 0.188228  |
| 0.151078  | 0.241696 | 0.128934  | 0.131847  | 0.130536  | 0.137966 | 0.12296   |
| 0.135052  | 0.243735 | 0.140006  | 0.0590035 | 0.131702  | 0.136801 | 0.0731352 |
| 0.129808  | 0.231789 | 0.0662879 | 0.114073  | 0.105769  | 0.112617 | 0.111014  |
| 0.136655  | 0.229021 | 0.119464  | 0.115385  | 0.0677448 | 0.115093 | 0.105332  |

|           |          |           |           |           |          |           |
|-----------|----------|-----------|-----------|-----------|----------|-----------|
| 0.140006  | 0.226253 | 0.127477  | 0.118444  | 0.0638112 | 0.122523 | 0.110431  |
| 0.143211  | 0.230624 | 0.120192  | 0.122232  | 0.115676  | 0.119901 | 0.120047  |
| 0.149913  | 0.235577 | 0.121066  | 0.112908  | 0.109266  | 0.121649 | 0.0926573 |
| 0.152244  | 0.236742 | 0.121941  | 0.116404  | 0.110723  | 0.123106 | 0.0973193 |
| 0.0603147 | 0.234557 | 0.126166  | 0.110723  | 0.121066  | 0.117424 | 0.113782  |
| 0.150495  | 0.237908 | 0.128059  | 0.123106  | 0.122378  | 0.127477 | 0.120629  |
| 0.136072  | 0.227273 | 0.112762  | 0.116841  | 0.109411  | 0.115093 | 0.112034  |
| 0.141171  | 0.231206 | 0.128642  | 0.117279  | 0.0588578 | 0.122815 | 0.111305  |
| 0.131119  | 0.231061 | 0.0944056 | 0.113928  | 0.105332  | 0.11655  | 0.109994  |
| 0.143794  | 0.230915 | 0.131847  | 0.129808  | 0.0559441 | 0.132139 | 0.118007  |
| 0.145251  | 0.238491 | 0.132139  | 0.124854  | 0.12296   | 0.123106 | 0.11859   |
| 0.149184  | 0.235723 | 0.137238  | 0.135198  | 0.0566725 | 0.136364 | 0.123689  |
| 0.26049   | 0.103147 | 0.265443  | 0.263986  | 0.246358  | 0.248252 | 0.252768  |
| 0.1419    | 0.245338 | 0.129662  | 0.117716  | 0.129225  | 0.134033 | 0.114365  |
| 0.145251  | 0.236451 | 0.126311  | 0.125728  | 0.129662  | 0.125437 | 0.12296   |
| 0.225816  | 0.113345 | 0.224359  | 0.22028   | 0.205274  | 0.209207 | 0.214015  |
| 0.144376  | 0.236742 | 0.133013  | 0.119027  | 0.129079  | 0.125728 | 0.114219  |
| 0.23616   | 0.105624 | 0.23412   | 0.232955  | 0.2162    | 0.218386 | 0.224068  |
| 0.141026  | 0.24155  | 0.124709  | 0.11451   | 0.121649  | 0.125874 | 0.112325  |
| 0.144959  | 0.234994 | 0.126311  | 0.134761  | 0.124126  | 0.130973 | 0.127331  |
| 0.135927  | 0.235286 | 0.13039   | 0.0514277 | 0.117424  | 0.119318 | 0.0748834 |
| 0.153409  | 0.238491 | 0.125728  | 0.129225  | 0.126166  | 0.131556 | 0.121212  |
| 0.213432  | 0.120192 | 0.210519  | 0.202652  | 0.191142  | 0.190705 | 0.198718  |
| 0.144959  | 0.23412  | 0.133887  | 0.135344  | 0.0603147 | 0.13039  | 0.123543  |
| 0.143211  | 0.228875 | 0.126311  | 0.122815  | 0.0614802 | 0.119318 | 0.110723  |
| 0.23514   | 0.108683 | 0.232809  | 0.228147  | 0.213432  | 0.217657 | 0.219843  |
| 0.152535  | 0.236451 | 0.127185  | 0.118444  | 0.111597  | 0.125146 | 0.0990676 |
| 0.209499  | 0.120629 | 0.206585  | 0.200758  | 0.18546   | 0.189103 | 0.195076  |
| 0.152972  | 0.239219 | 0.128497  | 0.120338  | 0.116696  | 0.124417 | 0.10067   |
| 0.137529  | 0.233392 | 0.11859   | 0.120629  | 0.117861  | 0.118298 | 0.118444  |
| 0.144959  | 0.237325 | 0.114365  | 0.124854  | 0.122378  | 0.129225 | 0.120921  |
| 0.153409  | 0.241404 | 0.133596  | 0.135344  | 0.13141   | 0.139423 | 0.124126  |
| 0.138986  | 0.227273 | 0.125291  | 0.119172  | 0.108829  | 0.116259 | 0.114365  |
| 0.17803   | 0.167541 | 0.164627  | 0.162005  | 0.151369  | 0.158508 | 0.148164  |
| 0.137529  | 0.225816 | 0.121503  | 0.117424  | 0.0557984 | 0.119755 | 0.105041  |
| 0.138403  | 0.238345 | 0.137529  | 0.0504079 | 0.121649  | 0.125583 | 0.071824  |
| 0.146853  | 0.23514  | 0.128205  | 0.115676  | 0.122232  | 0.118298 | 0.110577  |
| 0.134324  | 0.233392 | 0.134324  | 0.1081    | 0.119318  | 0.127622 | 0.105332  |
| 0.206731  | 0.126311 | 0.206731  | 0.19799   | 0.184441  | 0.186043 | 0.191725  |
| 0.141026  | 0.229312 | 0.117424  | 0.119172  | 0.113199  | 0.117133 | 0.11553   |
| 0.153409  | 0.228584 | 0.131265  | 0.12602   | 0.125     | 0.129516 | 0.121795  |
| 0.145396  | 0.240967 | 0.125583  | 0.121503  | 0.11961   | 0.120629 | 0.108537  |
| 0.151078  | 0.239073 | 0.125437  | 0.121941  | 0.114219  | 0.125437 | 0.0973193 |
| 0.137238  | 0.230769 | 0.121795  | 0.127622  | 0.119318  | 0.124417 | 0.122815  |

|           |           |           |           |           |          |           |
|-----------|-----------|-----------|-----------|-----------|----------|-----------|
| 0.256847  | 0.105041  | 0.260927  | 0.259178  | 0.241841  | 0.244318 | 0.250874  |
| 0.144231  | 0.237762  | 0.110723  | 0.120921  | 0.11757   | 0.120921 | 0.113491  |
| 0.138403  | 0.229312  | 0.123543  | 0.116259  | 0.113199  | 0.121212 | 0.111742  |
| 0.191142  | 0.164627  | 0.18852   | 0.180361  | 0.165355  | 0.178613 | 0.168561  |
| 0.20134   | 0.134907  | 0.197844  | 0.18852   | 0.176136  | 0.177448 | 0.181964  |
| 0.076049  | 0.237179  | 0.125874  | 0.113636  | 0.120484  | 0.112762 | 0.114656  |
| 0.13884   | 0.230915  | 0.125146  | 0.123689  | 0.0576923 | 0.122523 | 0.112179  |
| 0.149621  | 0.236451  | 0.126311  | 0.120484  | 0.117424  | 0.12398  | 0.114219  |
| 0.148893  | 0.237471  | 0.146562  | 0.148893  | 0.0665793 | 0.147436 | 0.134761  |
| 0.0786713 | 0.23514   | 0.120047  | 0.110431  | 0.118444  | 0.111305 | 0.112908  |
| 0.0738636 | 0.236742  | 0.126603  | 0.113782  | 0.121212  | 0.115239 | 0.114219  |
| 0.151515  | 0.240676  | 0.131702  | 0.121212  | 0.118735  | 0.134324 | 0.0992133 |
| 0.139569  | 0.222902  | 0.125874  | 0.122378  | 0.0514277 | 0.123834 | 0.107372  |
| 0.142337  | 0.230041  | 0.132721  | 0.132139  | 0.0568182 | 0.133304 | 0.117716  |
| 0.153263  | 0.222319  | 0.128497  | 0.121795  | 0.106789  | 0.12296  | 0.100962  |
| 0.151661  | 0.240239  | 0.127768  | 0.128351  | 0.127622  | 0.133596 | 0.123543  |
| 0.158217  | 0.246503  | 0.141608  | 0.145396  | 0.140006  | 0.148601 | 0.133304  |
| 0.14933   | 0.237034  | 0.114656  | 0.125728  | 0.122086  | 0.127185 | 0.118298  |
| 0.157925  | 0.244172  | 0.134615  | 0.136946  | 0.134761  | 0.142483 | 0.127185  |
| 0.156469  | 0.244464  | 0.13345   | 0.128788  | 0.121941  | 0.132284 | 0.104167  |
| 0.218677  | 0.123106  | 0.213724  | 0.20877   | 0.194056  | 0.19799  | 0.204254  |
| 0.146562  | 0.239802  | 0.106643  | 0.123834  | 0.126311  | 0.128205 | 0.11553   |
| 0.202214  | 0.129953  | 0.199592  | 0.195513  | 0.181964  | 0.180944 | 0.188666  |
| 0.135198  | 0.233392  | 0.120629  | 0.0894522 | 0.114365  | 0.116259 | 0.0945513 |
| 0.143939  | 0.230769  | 0.121212  | 0.132867  | 0.121649  | 0.128497 | 0.123689  |
| 0.149184  | 0.231935  | 0.134033  | 0.126457  | 0.121649  | 0.126166 | 0.114073  |
| 0.138258  | 0.230624  | 0.12602   | 0.121649  | 0.121795  | 0.121066 | 0.115093  |
| 0.140152  | 0.224942  | 0.13141   | 0.123834  | 0.0517191 | 0.125874 | 0.110286  |
| 0.144231  | 0.229895  | 0.128497  | 0.125874  | 0.0493881 | 0.126748 | 0.111451  |
| 0.143648  | 0.227855  | 0.12296   | 0.122378  | 0.116113  | 0.123543 | 0.118735  |
| 0.13447   | 0.233829  | 0.133304  | 0.0502622 | 0.120047  | 0.123106 | 0.0708042 |
| 0.150204  | 0.237034  | 0.133596  | 0.128351  | 0.12296   | 0.130099 | 0.115676  |
| 0.157634  | 0.233974  | 0.136364  | 0.131993  | 0.126603  | 0.137529 | 0.111451  |
| 0.253788  | 0.0999417 | 0.254371  | 0.254371  | 0.235577  | 0.240676 | 0.245775  |
| 0.144522  | 0.231061  | 0.121212  | 0.121795  | 0.118444  | 0.123543 | 0.121358  |
| 0.198281  | 0.13039   | 0.195367  | 0.184295  | 0.173368  | 0.172931 | 0.177448  |
| 0.20134   | 0.124709  | 0.198135  | 0.191434  | 0.17701   | 0.18007  | 0.184878  |
| 0.144085  | 0.230041  | 0.119318  | 0.123689  | 0.121503  | 0.118735 | 0.121212  |
| 0.145251  | 0.233537  | 0.109703  | 0.118153  | 0.11451   | 0.11961  | 0.113054  |
| 0.141463  | 0.231206  | 0.122523  | 0.13039   | 0.122086  | 0.128059 | 0.121795  |
| 0.138549  | 0.226544  | 0.125437  | 0.116113  | 0.0614802 | 0.11961  | 0.108974  |
| 0.139569  | 0.223776  | 0.0967366 | 0.123252  | 0.112908  | 0.116259 | 0.111451  |
| 0.151515  | 0.238928  | 0.125     | 0.117424  | 0.113199  | 0.121795 | 0.101253  |
| 0.144668  | 0.224796  | 0.121066  | 0.125146  | 0.0728438 | 0.126311 | 0.106643  |

|           |          |           |           |           |          |           |
|-----------|----------|-----------|-----------|-----------|----------|-----------|
| 0.148747  | 0.238782 | 0.13243   | 0.135635  | 0.0603147 | 0.137092 | 0.12296   |
| 0.141317  | 0.227855 | 0.117716  | 0.121795  | 0.116696  | 0.119172 | 0.116696  |
| 0.145396  | 0.234266 | 0.132576  | 0.129953  | 0.0590035 | 0.132576 | 0.116987  |
| 0.143211  | 0.232955 | 0.123397  | 0.112908  | 0.120047  | 0.11553  | 0.111305  |
| 0.148747  | 0.240239 | 0.135052  | 0.132139  | 0.129079  | 0.129808 | 0.120047  |
| 0.150932  | 0.237179 | 0.127331  | 0.126748  | 0.12398   | 0.129371 | 0.122523  |
| 0.156323  | 0.244318 | 0.133013  | 0.133304  | 0.121795  | 0.137966 | 0.107809  |
| 0.139569  | 0.23514  | 0.0451632 | 0.127331  | 0.119027  | 0.126748 | 0.120775  |
| 0.139277  | 0.22465  | 0.112471  | 0.123252  | 0.114073  | 0.120629 | 0.113199  |
| 0.138695  | 0.238054 | 0.140152  | 0.125874  | 0.124563  | 0.134907 | 0.125437  |
| 0.200321  | 0.126894 | 0.19391   | 0.183129  | 0.17366   | 0.174097 | 0.177739  |
| 0.14831   | 0.236597 | 0.13549   | 0.138986  | 0.0598776 | 0.136364 | 0.12602   |
| 0.143065  | 0.229021 | 0.128788  | 0.124126  | 0.0517191 | 0.124126 | 0.111451  |
| 0.148456  | 0.235868 | 0.130682  | 0.122523  | 0.125291  | 0.125728 | 0.115093  |
| 0.138695  | 0.231352 | 0.122669  | 0.116259  | 0.116113  | 0.112471 | 0.109411  |
| 0.147873  | 0.235868 | 0.127185  | 0.122523  | 0.12296   | 0.131556 | 0.118298  |
| 0.15472   | 0.241259 | 0.130245  | 0.128497  | 0.12602   | 0.134615 | 0.119901  |
| 0.206731  | 0.127185 | 0.199155  | 0.195659  | 0.182692  | 0.183129 | 0.186772  |
| 0.140006  | 0.21926  | 0.116404  | 0.123397  | 0.0670163 | 0.128934 | 0.107517  |
| 0.133741  | 0.210956 | 0.114219  | 0.115967  | 0.101544  | 0.113928 | 0.105041  |
| 0.143939  | 0.229604 | 0.129953  | 0.126457  | 0.0528846 | 0.129079 | 0.114656  |
| 0.204108  | 0.12602  | 0.199446  | 0.194202  | 0.179196  | 0.184295 | 0.186772  |
| 0.143939  | 0.230186 | 0.11014   | 0.115676  | 0.112617  | 0.116841 | 0.10912   |
| 0.15574   | 0.241696 | 0.130099  | 0.123689  | 0.118298  | 0.130682 | 0.0996503 |
| 0.144376  | 0.229167 | 0.130973  | 0.126894  | 0.0553613 | 0.126311 | 0.115676  |
| 0.0757576 | 0.236597 | 0.120921  | 0.110723  | 0.11757   | 0.112762 | 0.112908  |
| 0.201632  | 0.126166 | 0.197261  | 0.189977  | 0.174679  | 0.177156 | 0.184295  |
| 0.150932  | 0.235431 | 0.129662  | 0.120047  | 0.110286  | 0.128205 | 0.0954254 |
| 0.13549   | 0.227564 | 0.125583  | 0.111597  | 0.104458  | 0.118298 | 0.108246  |
| 0.13986   | 0.224068 | 0.114219  | 0.113636  | 0.112034  | 0.11451  | 0.110577  |
| 0.144814  | 0.209499 | 0.134324  | 0.121795  | 0.106498  | 0.127914 | 0.114073  |
| 0.135052  | 0.239656 | 0.135635  | 0.0458916 | 0.123252  | 0.124563 | 0.0710956 |
| 0.157488  | 0.243444 | 0.132721  | 0.126894  | 0.118881  | 0.132721 | 0.105186  |
| 0.142628  | 0.230332 | 0.117279  | 0.120775  | 0.113054  | 0.120775 | 0.117424  |
| 0.139132  | 0.239365 | 0.114365  | 0.124854  | 0.117133  | 0.12602  | 0.120338  |
| 0         | 0.248252 | 0.144231  | 0.134324  | 0.14088   | 0.136364 | 0.130973  |
| 0.248252  | 0        | 0.240385  | 0.238636  | 0.223339  | 0.225524 | 0.228584  |
| 0.144231  | 0.240385 | 0         | 0.134615  | 0.122523  | 0.132576 | 0.127768  |
| 0.134324  | 0.238636 | 0.134615  | 0         | 0.122523  | 0.123252 | 0.069493  |
| 0.14088   | 0.223339 | 0.122523  | 0.122523  | 0         | 0.125437 | 0.106352  |
| 0.136364  | 0.225524 | 0.132576  | 0.123252  | 0.125437  | 0        | 0.122232  |
| 0.130973  | 0.228584 | 0.127768  | 0.069493  | 0.106352  | 0.122232 | 0         |
| 0.144376  | 0.23208  | 0.126603  | 0.116113  | 0.115385  | 0.125437 | 0.109266  |
| 0.142774  | 0.226981 | 0.130536  | 0.123543  | 0.0557984 | 0.129371 | 0.106789  |

|           |          |           |           |           |          |           |
|-----------|----------|-----------|-----------|-----------|----------|-----------|
| 0.157488  | 0.239073 | 0.13243   | 0.125728  | 0.117716  | 0.131847 | 0.103438  |
| 0.118735  | 0.227418 | 0.125728  | 0.111116  | 0.118881  | 0.114948 | 0.105769  |
| 0.244755  | 0.102273 | 0.242424  | 0.241259  | 0.226544  | 0.229021 | 0.230041  |
| 0.14292   | 0.228584 | 0.109703  | 0.114365  | 0.108683  | 0.117279 | 0.105186  |
| 0.138549  | 0.233829 | 0.113782  | 0.103001  | 0.110431  | 0.115822 | 0.10373   |
| 0.137238  | 0.229312 | 0.11655   | 0.12296   | 0.109411  | 0.122086 | 0.112325  |
| 0.0587121 | 0.241696 | 0.135052  | 0.120192  | 0.126457  | 0.124563 | 0.118007  |
| 0.143211  | 0.243444 | 0.050845  | 0.136218  | 0.132284  | 0.137675 | 0.134324  |
| 0.137675  | 0.223048 | 0.122232  | 0.123397  | 0.108974  | 0.122815 | 0.113928  |
| 0.141463  | 0.226836 | 0.130682  | 0.12398   | 0.0530303 | 0.125728 | 0.113928  |
| 0.100524  | 0.233683 | 0.118298  | 0.112179  | 0.112908  | 0.112179 | 0.111742  |
| 0.236305  | 0.106935 | 0.23514   | 0.235431  | 0.216055  | 0.221154 | 0.224796  |
| 0.13986   | 0.231643 | 0.131702  | 0.12704   | 0.0523019 | 0.127914 | 0.116113  |
| 0.1537    | 0.239656 | 0.128642  | 0.122232  | 0.117424  | 0.130099 | 0.101107  |
| 0.127185  | 0.23208  | 0.118735  | 0.108246  | 0.115093  | 0.111742 | 0.106061  |
| 0.134324  | 0.234557 | 0.129662  | 0.107226  | 0.116113  | 0.13345  | 0.104749  |
| 0.145105  | 0.243007 | 0.123834  | 0.11859   | 0.122815  | 0.124709 | 0.112325  |
| 0.136946  | 0.230478 | 0.116841  | 0.122378  | 0.116113  | 0.121503 | 0.116404  |
| 0.151224  | 0.238054 | 0.125583  | 0.124126  | 0.117279  | 0.131993 | 0.102418  |
| 0.158654  | 0.242861 | 0.133013  | 0.128351  | 0.121503  | 0.136218 | 0.106643  |
| 0.151078  | 0.238199 | 0.129225  | 0.115822  | 0.116259  | 0.126894 | 0.0964452 |
| 0.139277  | 0.233392 | 0.119464  | 0.119755  | 0.114656  | 0.121795 | 0.116404  |
| 0.134033  | 0.237762 | 0.140152  | 0.0568182 | 0.125728  | 0.132284 | 0.0680361 |
| 0.136801  | 0.242861 | 0.142337  | 0.0590035 | 0.129953  | 0.135927 | 0.0728438 |
| 0.148747  | 0.241696 | 0.136509  | 0.131556  | 0.129371  | 0.129808 | 0.120338  |
| 0.156031  | 0.241987 | 0.139423  | 0.132721  | 0.132867  | 0.134761 | 0.126748  |
| 0.136946  | 0.24359  | 0.13986   | 0.0565268 | 0.125728  | 0.131993 | 0.0724068 |
| 0.140152  | 0.2331   | 0.0952797 | 0.116841  | 0.111742  | 0.112471 | 0.110868  |
| 0.154866  | 0.24898  | 0.134761  | 0.135635  | 0.130536  | 0.140589 | 0.12296   |
| 0.152098  | 0.245047 | 0.132576  | 0.138695  | 0.129225  | 0.138112 | 0.125728  |
| 0.217075  | 0.107226 | 0.215618  | 0.205711  | 0.191288  | 0.195804 | 0.199738  |
| 0.142483  | 0.23514  | 0.112179  | 0.129953  | 0.117861  | 0.125583 | 0.125146  |
| 0.141026  | 0.238054 | 0.124126  | 0.108974  | 0.11961   | 0.119464 | 0.107663  |
| 0.141463  | 0.223339 | 0.123689  | 0.127477  | 0.118881  | 0.126603 | 0.120629  |
| 0.232226  | 0.107809 | 0.230769  | 0.227855  | 0.21081   | 0.211538 | 0.218094  |
| 0.221445  | 0.125583 | 0.218531  | 0.217075  | 0.200612  | 0.20338  | 0.209353  |
| 0.157488  | 0.240822 | 0.133304  | 0.127477  | 0.120338  | 0.13243  | 0.103147  |
| 0.254371  | 0.105478 | 0.256119  | 0.254079  | 0.236742  | 0.240676 | 0.24461   |
| 0.138403  | 0.234266 | 0.0944056 | 0.118881  | 0.114656  | 0.116841 | 0.112617  |
| 0.152972  | 0.242424 | 0.121795  | 0.137238  | 0.135635  | 0.140152 | 0.129516  |
| 0.147145  | 0.233392 | 0.109266  | 0.117133  | 0.116404  | 0.120629 | 0.111116  |
| 0.131847  | 0.241696 | 0.140006  | 0.050845  | 0.126166  | 0.131556 | 0.0716783 |
| 0.202797  | 0.120338 | 0.197261  | 0.192016  | 0.177885  | 0.179487 | 0.184003  |
| 0.148164  | 0.229458 | 0.124563  | 0.120484  | 0.123543  | 0.123689 | 0.120047  |

|           |          |           |           |           |          |           |
|-----------|----------|-----------|-----------|-----------|----------|-----------|
| 0.21081   | 0.124854 | 0.203234  | 0.200321  | 0.181818  | 0.18546  | 0.190559  |
| 0.138258  | 0.238491 | 0.117861  | 0.118735  | 0.120921  | 0.116696 | 0.114802  |
| 0.148164  | 0.218969 | 0.127768  | 0.122232  | 0.0897436 | 0.125437 | 0.0938228 |
| 0.143211  | 0.233829 | 0.112617  | 0.122815  | 0.121795  | 0.128351 | 0.112179  |
| 0.135344  | 0.21722  | 0.120775  | 0.120192  | 0.099359  | 0.123397 | 0.102564  |
| 0.133741  | 0.227273 | 0.112179  | 0.114802  | 0.107372  | 0.113636 | 0.110577  |
| 0.143939  | 0.230769 | 0.109848  | 0.119172  | 0.107955  | 0.119464 | 0.11553   |
| 0.13986   | 0.225233 | 0.108974  | 0.114802  | 0.111742  | 0.117133 | 0.105915  |
| 0.13884   | 0.228293 | 0.123106  | 0.119318  | 0.0544872 | 0.118444 | 0.109266  |
| 0.15035   | 0.240676 | 0.123252  | 0.12296   | 0.117861  | 0.12704  | 0.107663  |
| 0.135781  | 0.232226 | 0.0536131 | 0.119172  | 0.111742  | 0.115967 | 0.114365  |
| 0.141171  | 0.230624 | 0.108829  | 0.114948  | 0.114219  | 0.119901 | 0.108974  |
| 0.151515  | 0.230186 | 0.129371  | 0.128205  | 0.120192  | 0.125583 | 0.111451  |
| 0.144522  | 0.232226 | 0.132867  | 0.133159  | 0.0607517 | 0.135198 | 0.122815  |
| 0.138258  | 0.230624 | 0.127477  | 0.11961   | 0.118881  | 0.120192 | 0.112762  |
| 0.136655  | 0.231352 | 0.121795  | 0.113345  | 0.108537  | 0.121503 | 0.114365  |
| 0.131847  | 0.226253 | 0.114073  | 0.116404  | 0.11014   | 0.116987 | 0.110723  |
| 0.151661  | 0.228875 | 0.126603  | 0.122523  | 0.106061  | 0.127185 | 0.0952797 |
| 0.133596  | 0.236742 | 0.137092  | 0.0458916 | 0.121503  | 0.124854 | 0.0751748 |
| 0.154429  | 0.237179 | 0.126457  | 0.128205  | 0.123689  | 0.131119 | 0.117861  |
| 0.148019  | 0.236888 | 0.12704   | 0.121503  | 0.124563  | 0.12296  | 0.116987  |
| 0.14088   | 0.22771  | 0.127477  | 0.12602   | 0.0579837 | 0.122232 | 0.112179  |
| 0.147436  | 0.231935 | 0.136364  | 0.13141   | 0.0569639 | 0.13549  | 0.118735  |
| 0.147145  | 0.237762 | 0.138403  | 0.143939  | 0.0642483 | 0.139569 | 0.130099  |
| 0.142628  | 0.232955 | 0.113491  | 0.110577  | 0.102273  | 0.118153 | 0.0926573 |
| 0.139423  | 0.231498 | 0.120775  | 0.120192  | 0.115385  | 0.120484 | 0.115093  |
| 0.139569  | 0.231352 | 0.117716  | 0.1081    | 0.108246  | 0.112471 | 0.104749  |
| 0.134615  | 0.243298 | 0.1419    | 0.0603147 | 0.130682  | 0.137529 | 0.0703671 |
| 0.145251  | 0.238199 | 0.107372  | 0.122523  | 0.11859   | 0.121649 | 0.115093  |
| 0.157488  | 0.249272 | 0.140006  | 0.144376  | 0.136655  | 0.148747 | 0.134907  |
| 0.145251  | 0.237617 | 0.131265  | 0.143794  | 0.131702  | 0.137383 | 0.13549   |
| 0.0652681 | 0.238636 | 0.126166  | 0.115093  | 0.123397  | 0.119755 | 0.115822  |
| 0.136801  | 0.228001 | 0.104749  | 0.120775  | 0.108974  | 0.11553  | 0.115093  |
| 0.131993  | 0.230769 | 0.122378  | 0.097028  | 0.109411  | 0.111014 | 0.099796  |
| 0.151515  | 0.238928 | 0.134033  | 0.131119  | 0.129516  | 0.13141  | 0.124272  |
| 0.2213    | 0.133304 | 0.214307  | 0.210227  | 0.194639  | 0.19595  | 0.200466  |
| 0.135635  | 0.227127 | 0.123689  | 0.113199  | 0.109848  | 0.120484 | 0.111305  |
| 0.14627   | 0.236888 | 0.11451   | 0.116841  | 0.121066  | 0.124126 | 0.112908  |
| 0.13039   | 0.236451 | 0.135635  | 0.0534674 | 0.120047  | 0.125728 | 0.0710956 |
| 0.146853  | 0.235431 | 0.134033  | 0.122669  | 0.119318  | 0.121503 | 0.112034  |
| 0.142045  | 0.238491 | 0.122815  | 0.124272  | 0.126748  | 0.122815 | 0.121795  |
| 0.142628  | 0.235868 | 0.116404  | 0.124563  | 0.113054  | 0.131556 | 0.120047  |
| 0.142191  | 0.240093 | 0.118881  | 0.126457  | 0.110868  | 0.136364 | 0.118444  |
| 0.0709499 | 0.236742 | 0.122815  | 0.110286  | 0.11859   | 0.11553  | 0.11014   |

|          |          |           |           |           |          |           |
|----------|----------|-----------|-----------|-----------|----------|-----------|
| 0.147582 | 0.237325 | 0.122523  | 0.116113  | 0.11655   | 0.119318 | 0.1081    |
| 0.13447  | 0.240239 | 0.136509  | 0.0569639 | 0.124709  | 0.135927 | 0.0713869 |
| 0.143502 | 0.235868 | 0.110868  | 0.11757   | 0.121503  | 0.123106 | 0.108974  |
| 0.142191 | 0.238636 | 0.0547786 | 0.125583  | 0.121358  | 0.124417 | 0.120775  |
| 0.192162 | 0.197115 | 0.186626  | 0.177302  | 0.167832  | 0.1706   | 0.171037  |
| 0.142628 | 0.226836 | 0.127185  | 0.123689  | 0.0594406 | 0.121941 | 0.113636  |
| 0.137238 | 0.229895 | 0.138112  | 0.0652681 | 0.124563  | 0.132867 | 0.0750291 |
| 0.145251 | 0.244318 | 0.10708   | 0.121066  | 0.125291  | 0.131265 | 0.11655   |
| 0.142191 | 0.234848 | 0.127914  | 0.124709  | 0.111742  | 0.123543 | 0.104458  |
| 0.134033 | 0.232226 | 0.0979021 | 0.117133  | 0.105332  | 0.120047 | 0.105624  |
| 0.132867 | 0.231643 | 0.0632284 | 0.119755  | 0.107663  | 0.112762 | 0.111742  |
| 0.137238 | 0.237179 | 0.101107  | 0.11859   | 0.110577  | 0.123543 | 0.110868  |
| 0.144522 | 0.238054 | 0.129662  | 0.118298  | 0.12398   | 0.126457 | 0.106498  |
| 0.140152 | 0.222028 | 0.0894522 | 0.122378  | 0.0849359 | 0.119172 | 0.109703  |
| 0.154283 | 0.244027 | 0.128351  | 0.129225  | 0.129662  | 0.13884  | 0.126748  |
| 0.140734 | 0.230186 | 0.120047  | 0.113345  | 0.10912   | 0.118007 | 0.104167  |
| 0.151078 | 0.234994 | 0.110868  | 0.123689  | 0.121503  | 0.126311 | 0.118298  |
| 0.14831  | 0.247086 | 0.130828  | 0.131119  | 0.131556  | 0.136655 | 0.115822  |
| 0.145979 | 0.236888 | 0.100233  | 0.123834  | 0.11961   | 0.12704  | 0.112034  |
| 0.144231 | 0.234266 | 0.122378  | 0.128205  | 0.119901  | 0.131119 | 0.116113  |
| 0.147436 | 0.235723 | 0.101107  | 0.122086  | 0.11961   | 0.120338 | 0.110868  |
| 0.146853 | 0.237179 | 0.0981935 | 0.125291  | 0.119027  | 0.123834 | 0.113782  |
| 0.13549  | 0.232809 | 0.111888  | 0.114219  | 0.112908  | 0.115676 | 0.108829  |
| 0.149913 | 0.243444 | 0.109994  | 0.132139  | 0.125     | 0.13039  | 0.120921  |
| 0.138258 | 0.234994 | 0.106789  | 0.114073  | 0.118007  | 0.119318 | 0.109266  |
| 0.161568 | 0.247232 | 0.146416  | 0.143502  | 0.131119  | 0.144959 | 0.125874  |
| 0.153118 | 0.236742 | 0.140006  | 0.130682  | 0.122378  | 0.135927 | 0.117716  |
| 0.144085 | 0.233829 | 0.103293  | 0.117861  | 0.113054  | 0.123106 | 0.108683  |
| 0.156177 | 0.250874 | 0.147145  | 0.13549   | 0.130099  | 0.143065 | 0.118153  |
| 0.139277 | 0.237762 | 0.129662  | 0.118881  | 0.120775  | 0.117424 | 0.114656  |
| 0.150058 | 0.242716 | 0.125583  | 0.141317  | 0.130973  | 0.135781 | 0.12602   |
| 0.142191 | 0.238345 | 0.107517  | 0.119755  | 0.117861  | 0.122378 | 0.113199  |
| 0.160402 | 0.245192 | 0.14729   | 0.128059  | 0.138403  | 0.144376 | 0.125583  |
| 0.14729  | 0.232372 | 0.129516  | 0.122232  | 0.130828  | 0.126894 | 0.113928  |
| 0.148747 | 0.241696 | 0.145542  | 0.130682  | 0.138403  | 0.140589 | 0.113928  |
| 0.144376 | 0.244901 | 0.121358  | 0.129516  | 0.122378  | 0.122523 | 0.118298  |
| 0.143648 | 0.238345 | 0.103438  | 0.123543  | 0.114073  | 0.119464 | 0.116113  |
| 0.143211 | 0.236451 | 0.110577  | 0.121358  | 0.118881  | 0.122232 | 0.11014   |
| 0.135781 | 0.23514  | 0.121212  | 0.108683  | 0.121358  | 0.121795 | 0.104167  |
| 0.147145 | 0.243298 | 0.110431  | 0.128788  | 0.124563  | 0.13141  | 0.11757   |
| 0.151952 | 0.247523 | 0.11757   | 0.130682  | 0.126166  | 0.13243  | 0.119755  |
| 0.151661 | 0.239365 | 0.128351  | 0.125728  | 0.118881  | 0.128059 | 0.108683  |
| 0.138258 | 0.235577 | 0.113782  | 0.117279  | 0.113636  | 0.116113 | 0.106643  |
| 0.14627  | 0.235431 | 0.109848  | 0.120629  | 0.119318  | 0.120921 | 0.111742  |

|          |          |           |          |           |          |          |
|----------|----------|-----------|----------|-----------|----------|----------|
| 0.138549 | 0.234703 | 0.10708   | 0.124272 | 0.121795  | 0.126894 | 0.113636 |
| 0.144668 | 0.235577 | 0.116987  | 0.120192 | 0.112762  | 0.11961  | 0.113054 |
| 0.148893 | 0.243881 | 0.113054  | 0.130536 | 0.124854  | 0.130536 | 0.119318 |
| 0.146562 | 0.235723 | 0.112762  | 0.120629 | 0.114365  | 0.120629 | 0.114365 |
| 0.135635 | 0.220425 | 0.119901  | 0.126894 | 0.106061  | 0.119901 | 0.112179 |
| 0.137092 | 0.236451 | 0.101544  | 0.120484 | 0.109557  | 0.120775 | 0.115967 |
| 0.135344 | 0.23208  | 0.0933858 | 0.117861 | 0.111888  | 0.114073 | 0.113345 |
| 0.136509 | 0.232955 | 0.0992133 | 0.11553  | 0.115967  | 0.118444 | 0.111888 |
| 0.136946 | 0.222611 | 0.120921  | 0.121212 | 0.105915  | 0.118007 | 0.110577 |
| 0.143502 | 0.235868 | 0.0977564 | 0.120484 | 0.113345  | 0.128642 | 0.113636 |
| 0.147582 | 0.230332 | 0.116696  | 0.125728 | 0.0999417 | 0.128351 | 0.120338 |
| 0.131847 | 0.218677 | 0.114073  | 0.11553  | 0.0996503 | 0.113491 | 0.109848 |
| 0.151807 | 0.241841 | 0.104021  | 0.133741 | 0.119901  | 0.134907 | 0.122815 |



| TDr_3544 | TDr_3547  | TDr_3551  | TDr_3556 | TDr_3564 | TDr_3567  | TDr_3568  |
|----------|-----------|-----------|----------|----------|-----------|-----------|
| 0.114802 | 0.118153  | 0.126457  | 0.116259 | 0.221008 | 0.102855  | 0.105769  |
| 0.112325 | 0.110431  | 0.126311  | 0.114948 | 0.224942 | 0.101836  | 0.114365  |
| 0.105624 | 0.107517  | 0.122815  | 0.112325 | 0.221737 | 0.0980478 | 0.107955  |
| 0.114948 | 0.0958625 | 0.123106  | 0.115239 | 0.230769 | 0.0992133 | 0.106498  |
| 0.133596 | 0.135198  | 0.136509  | 0.121358 | 0.24155  | 0.125146  | 0.121649  |
| 0.125728 | 0.127914  | 0.135635  | 0.121649 | 0.235723 | 0.119027  | 0.11961   |
| 0.119755 | 0.128351  | 0.120629  | 0.127331 | 0.236451 | 0.109848  | 0.104604  |
| 0.11451  | 0.107955  | 0.125874  | 0.113345 | 0.223048 | 0.106061  | 0.1081    |
| 0.103001 | 0.110723  | 0.11757   | 0.112325 | 0.232809 | 0.0907634 | 0.0960082 |
| 0.115385 | 0.118444  | 0.129371  | 0.114802 | 0.23208  | 0.0772145 | 0.106935  |
| 0.113491 | 0.128497  | 0.123689  | 0.116696 | 0.224068 | 0.102418  | 0.104167  |
| 0.103147 | 0.113782  | 0.114802  | 0.112471 | 0.230332 | 0.0984848 | 0.0952797 |
| 0.107226 | 0.118444  | 0.120047  | 0.113928 | 0.236451 | 0.0967366 | 0.10169   |
| 0.137675 | 0.134324  | 0.148456  | 0.135344 | 0.192016 | 0.116404  | 0.128059  |
| 0.128497 | 0.128934  | 0.136364  | 0.125583 | 0.235286 | 0.1081    | 0.124709  |
| 0.114073 | 0.119755  | 0.109703  | 0.118153 | 0.239219 | 0.104458  | 0.110577  |
| 0.112762 | 0.121941  | 0.108974  | 0.104895 | 0.236742 | 0.102273  | 0.0952797 |
| 0.146125 | 0.136072  | 0.157488  | 0.139714 | 0.246795 | 0.137092  | 0.135052  |
| 0.10708  | 0.107517  | 0.120484  | 0.108537 | 0.223193 | 0.0968823 | 0.108829  |
| 0.205274 | 0.198427  | 0.210227  | 0.193619 | 0.140152 | 0.191871  | 0.20236   |
| 0.122669 | 0.129808  | 0.134324  | 0.120338 | 0.236742 | 0.116259  | 0.116259  |
| 0.124272 | 0.125     | 0.13447   | 0.116696 | 0.238636 | 0.113199  | 0.11116   |
| 0.112471 | 0.111742  | 0.0990676 | 0.106643 | 0.232372 | 0.0996503 | 0.10169   |
| 0.119318 | 0.126166  | 0.106206  | 0.119027 | 0.24359  | 0.110286  | 0.112034  |
| 0.112471 | 0.112617  | 0.111888  | 0.104021 | 0.226253 | 0.0929487 | 0.0964452 |
| 0.124709 | 0.13243   | 0.136946  | 0.126748 | 0.239365 | 0.119464  | 0.121795  |
| 0.120338 | 0.130973  | 0.123834  | 0.129953 | 0.238491 | 0.111888  | 0.107809  |
| 0.111014 | 0.11961   | 0.105769  | 0.11859  | 0.245775 | 0.106352  | 0.111888  |
| 0.124126 | 0.132721  | 0.129953  | 0.129953 | 0.237908 | 0.117133  | 0.115676  |
| 0.117424 | 0.126894  | 0.130245  | 0.131993 | 0.244318 | 0.0984848 | 0.108392  |
| 0.12398  | 0.129079  | 0.124272  | 0.123106 | 0.230478 | 0.109994  | 0.110868  |
| 0.113928 | 0.122523  | 0.11859   | 0.119172 | 0.241987 | 0.106643  | 0.105769  |
| 0.109557 | 0.113199  | 0.11859   | 0.104604 | 0.225962 | 0.0929487 | 0.100816  |
| 0.117424 | 0.119318  | 0.119172  | 0.122669 | 0.235868 | 0.0987762 | 0.104604  |
| 0.113491 | 0.128788  | 0.116696  | 0.123397 | 0.242424 | 0.10912   | 0.106206  |
| 0.112471 | 0.130099  | 0.124417  | 0.129079 | 0.242861 | 0.109848  | 0.112179  |
| 0.13039  | 0.13345   | 0.134761  | 0.137675 | 0.250874 | 0.121941  | 0.119318  |
| 0.119755 | 0.126603  | 0.11859   | 0.12296  | 0.241696 | 0.109557  | 0.104895  |
| 0.105769 | 0.114365  | 0.0967366 | 0.108683 | 0.233829 | 0.0979021 | 0.0999417 |
| 0.11859  | 0.121066  | 0.110431  | 0.121795 | 0.241987 | 0.108974  | 0.109266  |
| 0.112471 | 0.114365  | 0.105478  | 0.105769 | 0.232372 | 0.0984848 | 0.0979021 |
| 0.137529 | 0.140297  | 0.130245  | 0.143939 | 0.250146 | 0.122086  | 0.128788  |

|          |           |           |          |          |           |           |
|----------|-----------|-----------|----------|----------|-----------|-----------|
| 0.140734 | 0.14729   | 0.12704   | 0.145396 | 0.248397 | 0.130245  | 0.131119  |
| 0.117279 | 0.120338  | 0.110286  | 0.109411 | 0.236014 | 0.105624  | 0.103293  |
| 0.104749 | 0.120338  | 0.108246  | 0.107663 | 0.233974 | 0.0995047 | 0.0895979 |
| 0.11451  | 0.126603  | 0.117133  | 0.124417 | 0.241987 | 0.104604  | 0.107226  |
| 0.117424 | 0.119901  | 0.113928  | 0.111597 | 0.235577 | 0.106352  | 0.105769  |
| 0.132721 | 0.13986   | 0.127185  | 0.134761 | 0.248543 | 0.126311  | 0.124272  |
| 0.111742 | 0.119755  | 0.110868  | 0.113199 | 0.237179 | 0.101836  | 0.101253  |
| 0.113928 | 0.122815  | 0.109557  | 0.11451  | 0.23208  | 0.105186  | 0.107226  |
| 0.141171 | 0.145396  | 0.151369  | 0.149621 | 0.248543 | 0.13243   | 0.134761  |
| 0.125728 | 0.129662  | 0.120775  | 0.126311 | 0.236888 | 0.114365  | 0.11961   |
| 0.113636 | 0.119318  | 0.0979021 | 0.114219 | 0.234411 | 0.10373   | 0.102855  |
| 0.127622 | 0.126603  | 0.135781  | 0.131993 | 0.246066 | 0.104895  | 0.11451   |
| 0.118298 | 0.0910548 | 0.117424  | 0.109266 | 0.221882 | 0.106935  | 0.11014   |
| 0.129662 | 0.135344  | 0.122086  | 0.136364 | 0.252185 | 0.129079  | 0.127622  |
| 0.123689 | 0.131993  | 0.114365  | 0.126311 | 0.243881 | 0.111742  | 0.115239  |
| 0.11757  | 0.118298  | 0.10708   | 0.113199 | 0.239802 | 0.103293  | 0.100087  |
| 0.116987 | 0.125874  | 0.116987  | 0.114656 | 0.231061 | 0.105041  | 0.106498  |
| 0.122378 | 0.13039   | 0.111888  | 0.124709 | 0.244901 | 0.103438  | 0.108392  |
| 0.126748 | 0.135927  | 0.115093  | 0.13549  | 0.252477 | 0.129079  | 0.125874  |
| 0.129662 | 0.132721  | 0.124126  | 0.138695 | 0.253934 | 0.124417  | 0.127622  |
| 0.156323 | 0.157925  | 0.151952  | 0.159819 | 0.187646 | 0.147582  | 0.154283  |
| 0.110577 | 0.117716  | 0.108246  | 0.114073 | 0.234557 | 0.0977564 | 0.103584  |
| 0.108829 | 0.121503  | 0.103293  | 0.110577 | 0.234557 | 0.0965909 | 0.10271   |
| 0.108537 | 0.116259  | 0.105332  | 0.10912  | 0.237762 | 0.0957168 | 0.0954254 |
| 0.139277 | 0.140589  | 0.13986   | 0.138986 | 0.239365 | 0.134324  | 0.129662  |
| 0.111888 | 0.116987  | 0.1081    | 0.111305 | 0.234703 | 0.0999417 | 0.0987762 |
| 0.128059 | 0.134324  | 0.119027  | 0.124854 | 0.239802 | 0.120775  | 0.11961   |
| 0.122815 | 0.129371  | 0.111742  | 0.126311 | 0.240676 | 0.100087  | 0.110286  |
| 0.117133 | 0.12398   | 0.105769  | 0.112179 | 0.233246 | 0.106061  | 0.100524  |
| 0.149184 | 0.145542  | 0.150641  | 0.142483 | 0.241113 | 0.140152  | 0.134907  |
| 0.116259 | 0.126894  | 0.106935  | 0.119755 | 0.243735 | 0.108974  | 0.106643  |
| 0.130973 | 0.135198  | 0.124563  | 0.135052 | 0.250874 | 0.119901  | 0.125728  |
| 0.125291 | 0.13447   | 0.122378  | 0.124709 | 0.239948 | 0.116841  | 0.116841  |
| 0.110868 | 0.111014  | 0.121358  | 0.106206 | 0.227855 | 0.105915  | 0.101253  |
| 0.112034 | 0.120338  | 0.0989219 | 0.112617 | 0.232517 | 0.101544  | 0.104167  |
| 0.111742 | 0.118881  | 0.108829  | 0.10912  | 0.239219 | 0.106498  | 0.0986305 |
| 0.131847 | 0.127914  | 0.114365  | 0.130099 | 0.24796  | 0.121941  | 0.118153  |
| 0.111597 | 0.121941  | 0.109266  | 0.109848 | 0.235286 | 0.100233  | 0.0984848 |
| 0.129516 | 0.132576  | 0.127185  | 0.142337 | 0.250291 | 0.120484  | 0.130973  |
| 0.123106 | 0.129371  | 0.115239  | 0.117861 | 0.237179 | 0.109703  | 0.109703  |
| 0.10912  | 0.116841  | 0.0995047 | 0.120775 | 0.238054 | 0.10912   | 0.105041  |
| 0.116696 | 0.125874  | 0.110286  | 0.115239 | 0.234848 | 0.105041  | 0.105332  |
| 0.117861 | 0.123834  | 0.106498  | 0.11757  | 0.240093 | 0.110868  | 0.109994  |
| 0.113199 | 0.122378  | 0.108246  | 0.110577 | 0.235431 | 0.105332  | 0.10271   |

|          |          |          |          |          |           |           |
|----------|----------|----------|----------|----------|-----------|-----------|
| 0.115239 | 0.117133 | 0.105624 | 0.112617 | 0.234557 | 0.102418  | 0.0983392 |
| 0.131119 | 0.135344 | 0.122378 | 0.135781 | 0.249563 | 0.124126  | 0.126748  |
| 0.112762 | 0.122232 | 0.109266 | 0.113345 | 0.234703 | 0.0987762 | 0.101981  |
| 0.10271  | 0.120629 | 0.118444 | 0.116696 | 0.237471 | 0.100962  | 0.101544  |
| 0.129516 | 0.128497 | 0.130973 | 0.131847 | 0.244464 | 0.113491  | 0.111116  |
| 0.124272 | 0.131993 | 0.128642 | 0.132139 | 0.238054 | 0.112034  | 0.110577  |
| 0.123397 | 0.137238 | 0.13039  | 0.129516 | 0.245629 | 0.119027  | 0.11961   |
| 0.136364 | 0.137966 | 0.133741 | 0.133159 | 0.254225 | 0.128788  | 0.124417  |
| 0.122815 | 0.125583 | 0.12602  | 0.107372 | 0.234557 | 0.10708   | 0.100379  |
| 0.183129 | 0.18007  | 0.186917 | 0.183129 | 0.172786 | 0.170309  | 0.173805  |
| 0.112471 | 0.113782 | 0.119464 | 0.113345 | 0.237034 | 0.0979021 | 0.0949883 |
| 0.142628 | 0.136946 | 0.137383 | 0.135344 | 0.246795 | 0.129808  | 0.120775  |
| 0.130099 | 0.129079 | 0.128642 | 0.127185 | 0.244464 | 0.122232  | 0.112325  |
| 0.134615 | 0.140006 | 0.13141  | 0.138403 | 0.251894 | 0.123543  | 0.117424  |
| 0.110577 | 0.120047 | 0.114656 | 0.112908 | 0.237471 | 0.104458  | 0.0983392 |
| 0.124563 | 0.129953 | 0.128642 | 0.131556 | 0.248543 | 0.123397  | 0.118153  |
| 0.112908 | 0.122378 | 0.121649 | 0.114365 | 0.239219 | 0.109411  | 0.0983392 |
| 0.126166 | 0.128642 | 0.120921 | 0.119172 | 0.23616  | 0.114802  | 0.111888  |
| 0.119464 | 0.117279 | 0.120921 | 0.11655  | 0.238782 | 0.100524  | 0.102273  |
| 0.129953 | 0.140297 | 0.128205 | 0.131119 | 0.253059 | 0.125291  | 0.11859   |
| 0.108392 | 0.11961  | 0.108974 | 0.115093 | 0.23616  | 0.0952797 | 0.0938228 |
| 0.135344 | 0.130828 | 0.132721 | 0.131847 | 0.242424 | 0.121941  | 0.117279  |
| 0.120338 | 0.125728 | 0.124126 | 0.120921 | 0.234994 | 0.104021  | 0.0981935 |
| 0.125437 | 0.132576 | 0.113199 | 0.128059 | 0.244172 | 0.116696  | 0.115239  |
| 0.126748 | 0.137092 | 0.126748 | 0.136072 | 0.243153 | 0.117424  | 0.111014  |
| 0.112762 | 0.122523 | 0.120629 | 0.112762 | 0.234994 | 0.101981  | 0.0941142 |
| 0.145105 | 0.144668 | 0.145979 | 0.1419   | 0.238199 | 0.136364  | 0.136946  |
| 0.117279 | 0.127331 | 0.122232 | 0.117279 | 0.236597 | 0.105332  | 0.0980478 |
| 0.113782 | 0.125    | 0.120192 | 0.111451 | 0.241841 | 0.103293  | 0.103001  |
| 0.11655  | 0.124272 | 0.110723 | 0.119464 | 0.239365 | 0.108683  | 0.100233  |
| 0.143648 | 0.14088  | 0.149476 | 0.142191 | 0.246941 | 0.124417  | 0.12704   |
| 0.121212 | 0.126894 | 0.113928 | 0.120047 | 0.220717 | 0.112179  | 0.11014   |
| 0.11014  | 0.118153 | 0.115676 | 0.109848 | 0.23616  | 0.106643  | 0.097028  |
| 0.117133 | 0.122232 | 0.114802 | 0.108392 | 0.23208  | 0.104604  | 0.103147  |
| 0.120192 | 0.121212 | 0.123689 | 0.121066 | 0.236597 | 0.103001  | 0.102418  |
| 0.125    | 0.131265 | 0.122669 | 0.130828 | 0.246358 | 0.109557  | 0.119755  |
| 0.119901 | 0.128788 | 0.121941 | 0.122815 | 0.238928 | 0.103293  | 0.0989219 |
| 0.107226 | 0.112034 | 0.106061 | 0.111014 | 0.230915 | 0.0850816 | 0.0891608 |
| 0.109848 | 0.11553  | 0.108683 | 0.108683 | 0.231789 | 0.0914918 | 0.0935315 |
| 0.112908 | 0.11859  | 0.111451 | 0.114073 | 0.238345 | 0.0965909 | 0.095134  |
| 0.120192 | 0.122669 | 0.116113 | 0.122815 | 0.231935 | 0.108246  | 0.103293  |
| 0.127331 | 0.131265 | 0.118007 | 0.13345  | 0.243444 | 0.116841  | 0.113636  |
| 0.109411 | 0.11655  | 0.108537 | 0.113491 | 0.240093 | 0.0919289 | 0.0954254 |
| 0.107226 | 0.11553  | 0.10373  | 0.109266 | 0.233537 | 0.0944056 | 0.0935315 |

|          |           |           |          |          |           |           |
|----------|-----------|-----------|----------|----------|-----------|-----------|
| 0.116841 | 0.135927  | 0.109266  | 0.130245 | 0.243153 | 0.111597  | 0.108683  |
| 0.11116  | 0.114219  | 0.101253  | 0.114656 | 0.236014 | 0.0919289 | 0.0910548 |
| 0.121066 | 0.130828  | 0.128934  | 0.121941 | 0.230478 | 0.118735  | 0.112034  |
| 0.131556 | 0.134033  | 0.140006  | 0.135927 | 0.23951  | 0.120484  | 0.121358  |
| 0.113782 | 0.120921  | 0.113199  | 0.115239 | 0.237762 | 0.100962  | 0.102127  |
| 0.113928 | 0.118153  | 0.108974  | 0.114219 | 0.24053  | 0.0935315 | 0.0952797 |
| 0.114219 | 0.116404  | 0.108392  | 0.115676 | 0.235286 | 0.0932401 | 0.0961538 |
| 0.108392 | 0.115822  | 0.108392  | 0.104604 | 0.23208  | 0.0926573 | 0.0984848 |
| 0.125291 | 0.125728  | 0.125583  | 0.131993 | 0.24053  | 0.105478  | 0.11451   |
| 0.113054 | 0.119318  | 0.0999417 | 0.11014  | 0.23412  | 0.0941142 | 0.0917832 |
| 0.132721 | 0.141317  | 0.134761  | 0.14088  | 0.245921 | 0.12602   | 0.12398   |
| 0.131993 | 0.141754  | 0.125583  | 0.137529 | 0.240239 | 0.120047  | 0.122086  |
| 0.122086 | 0.127477  | 0.117424  | 0.129371 | 0.242279 | 0.111888  | 0.112179  |
| 0.119318 | 0.126166  | 0.115822  | 0.118444 | 0.238054 | 0.100962  | 0.107663  |
| 0.114948 | 0.126457  | 0.120192  | 0.111451 | 0.232226 | 0.0983392 | 0.101836  |
| 0.109557 | 0.121649  | 0.102564  | 0.11451  | 0.237908 | 0.0990676 | 0.0920746 |
| 0.11116  | 0.11655   | 0.0983392 | 0.110577 | 0.242424 | 0.0995047 | 0.0893065 |
| 0.107955 | 0.111888  | 0.112908  | 0.112034 | 0.237762 | 0.0983392 | 0.0930944 |
| 0.114073 | 0.0987762 | 0.110868  | 0.101836 | 0.225233 | 0.10271   | 0.103875  |
| 0.122232 | 0.133159  | 0.0989219 | 0.12398  | 0.246212 | 0.11116   | 0.112908  |
| 0.113636 | 0.122232  | 0.120629  | 0.111014 | 0.244027 | 0.106352  | 0.100816  |
| 0.129808 | 0.129662  | 0.136801  | 0.130973 | 0.237762 | 0.113199  | 0.121358  |
| 0.136946 | 0.136218  | 0.138986  | 0.141608 | 0.247815 | 0.120921  | 0.119172  |
| 0.191725 | 0.186626  | 0.199301  | 0.187354 | 0.127477 | 0.184441  | 0.190851  |
| 0.233246 | 0.22669   | 0.238782  | 0.230915 | 0.104021 | 0.230915  | 0.23412   |
| 0.113054 | 0.0770688 | 0.113636  | 0.105769 | 0.223048 | 0.10169   | 0.10169   |
| 0.105332 | 0.117716  | 0.102127  | 0.10912  | 0.229604 | 0.103293  | 0.0971737 |
| 0.10708  | 0.114219  | 0.110286  | 0.105041 | 0.228438 | 0.099796  | 0.0957168 |
| 0.105915 | 0.115676  | 0.109411  | 0.109994 | 0.232226 | 0.0992133 | 0.0971737 |
| 0.130099 | 0.131119  | 0.140006  | 0.127185 | 0.233974 | 0.113199  | 0.127768  |
| 0.112034 | 0.117716  | 0.109411  | 0.106789 | 0.236305 | 0.107663  | 0.0977564 |
| 0.135198 | 0.144376  | 0.122378  | 0.146562 | 0.250728 | 0.136364  | 0.122669  |
| 0.114948 | 0.120338  | 0.104458  | 0.111451 | 0.239219 | 0.110286  | 0.0971737 |
| 0.11961  | 0.130245  | 0.113491  | 0.127477 | 0.245921 | 0.116113  | 0.112908  |
| 0.128497 | 0.127185  | 0.117424  | 0.121212 | 0.239948 | 0.120338  | 0.119172  |
| 0.128497 | 0.135344  | 0.118298  | 0.129079 | 0.24461  | 0.119172  | 0.117716  |
| 0.132867 | 0.137092  | 0.125     | 0.137821 | 0.244027 | 0.119755  | 0.127914  |
| 0.11655  | 0.124854  | 0.106643  | 0.113636 | 0.241987 | 0.106935  | 0.0976107 |
| 0.113928 | 0.119318  | 0.101981  | 0.102855 | 0.238782 | 0.108683  | 0.0917832 |
| 0.114365 | 0.125     | 0.109994  | 0.114656 | 0.237471 | 0.111742  | 0.10271   |
| 0.105624 | 0.116841  | 0.104167  | 0.102418 | 0.228438 | 0.0968823 | 0.0957168 |
| 0.106498 | 0.116259  | 0.101836  | 0.104167 | 0.233683 | 0.106206  | 0.0919289 |
| 0.116259 | 0.116987  | 0.104895  | 0.113345 | 0.23616  | 0.104021  | 0.097028  |
| 0.122523 | 0.130828  | 0.109703  | 0.120484 | 0.24155  | 0.119027  | 0.113199  |

|          |          |           |          |          |           |           |
|----------|----------|-----------|----------|----------|-----------|-----------|
| 0.126603 | 0.136655 | 0.113491  | 0.127768 | 0.249417 | 0.125437  | 0.121358  |
| 0.11451  | 0.122232 | 0.103438  | 0.118298 | 0.238491 | 0.106643  | 0.099359  |
| 0.114948 | 0.119755 | 0.101836  | 0.109411 | 0.235723 | 0.103293  | 0.0995047 |
| 0.120484 | 0.136946 | 0.110868  | 0.129808 | 0.246795 | 0.11961   | 0.114073  |
| 0.110286 | 0.117424 | 0.101836  | 0.10708  | 0.232809 | 0.0986305 | 0.0939685 |
| 0.136072 | 0.144668 | 0.119755  | 0.131993 | 0.247232 | 0.130828  | 0.12296   |
| 0.130245 | 0.141171 | 0.137529  | 0.1419   | 0.234994 | 0.120921  | 0.129079  |
| 0.126894 | 0.131702 | 0.123397  | 0.119027 | 0.233683 | 0.126311  | 0.118153  |
| 0.104458 | 0.116259 | 0.100379  | 0.107372 | 0.234266 | 0.0992133 | 0.0916375 |
| 0.106061 | 0.11553  | 0.100233  | 0.104312 | 0.232663 | 0.100524  | 0.0932401 |
| 0.115822 | 0.126166 | 0.108246  | 0.122815 | 0.244755 | 0.116113  | 0.104749  |
| 0.112762 | 0.124272 | 0.106352  | 0.119755 | 0.239656 | 0.114802  | 0.109557  |
| 0.124126 | 0.133596 | 0.108392  | 0.129079 | 0.238491 | 0.11859   | 0.111597  |
| 0.110577 | 0.124709 | 0.105624  | 0.112034 | 0.239219 | 0.107663  | 0.0992133 |
| 0.113636 | 0.124854 | 0.0990676 | 0.109848 | 0.236451 | 0.106643  | 0.100524  |
| 0.123543 | 0.123689 | 0.108392  | 0.119464 | 0.238199 | 0.112762  | 0.11014   |
| 0.13345  | 0.14088  | 0.112179  | 0.128497 | 0.247523 | 0.119172  | 0.112471  |
| 0.122669 | 0.13447  | 0.114802  | 0.127914 | 0.241404 | 0.121212  | 0.118881  |
| 0.131556 | 0.134033 | 0.105915  | 0.13243  | 0.248252 | 0.124854  | 0.116404  |
| 0.125    | 0.135344 | 0.115093  | 0.129662 | 0.240239 | 0.122086  | 0.117424  |
| 0.113054 | 0.113199 | 0.103147  | 0.117133 | 0.236742 | 0.109848  | 0.0941142 |
| 0.123252 | 0.13243  | 0.121795  | 0.12296  | 0.244901 | 0.119755  | 0.114802  |
| 0.104167 | 0.116259 | 0.095134  | 0.105041 | 0.236597 | 0.102418  | 0.0977564 |
| 0.11451  | 0.123106 | 0.113928  | 0.111014 | 0.232372 | 0.104604  | 0.101981  |
| 0.11451  | 0.118735 | 0.108392  | 0.107226 | 0.237325 | 0.106935  | 0.0964452 |
| 0.110868 | 0.120629 | 0.109411  | 0.107663 | 0.233683 | 0.0977564 | 0.0980478 |
| 0.105624 | 0.115385 | 0.105041  | 0.108246 | 0.236888 | 0.101836  | 0.0913462 |
| 0.128205 | 0.137092 | 0.112471  | 0.134033 | 0.247815 | 0.12704   | 0.115967  |
| 0.114948 | 0.124709 | 0.111451  | 0.111451 | 0.237471 | 0.106206  | 0.106789  |
| 0.126603 | 0.132284 | 0.113782  | 0.129225 | 0.245338 | 0.12398   | 0.115239  |
| 0.106206 | 0.118881 | 0.104458  | 0.104749 | 0.2331   | 0.0986305 | 0.0933858 |
| 0.120047 | 0.131847 | 0.105769  | 0.123543 | 0.243153 | 0.11451   | 0.102273  |
| 0.111742 | 0.125    | 0.109411  | 0.120484 | 0.237179 | 0.108829  | 0.113199  |
| 0.114365 | 0.125874 | 0.124272  | 0.124563 | 0.232809 | 0.108537  | 0.110286  |
| 0.121795 | 0.123397 | 0.108392  | 0.12296  | 0.241113 | 0.104604  | 0.0958625 |
| 0.117861 | 0.126748 | 0.119027  | 0.123106 | 0.231643 | 0.111451  | 0.113199  |
| 0.127622 | 0.122815 | 0.112762  | 0.120338 | 0.243735 | 0.11014   | 0.101399  |
| 0.112179 | 0.129225 | 0.118007  | 0.118298 | 0.237908 | 0.10373   | 0.0976107 |
| 0.13141  | 0.140006 | 0.143357  | 0.135198 | 0.249272 | 0.109266  | 0.129371  |
| 0.138549 | 0.137529 | 0.13243   | 0.143502 | 0.251166 | 0.12398   | 0.127477  |
| 0.105332 | 0.115093 | 0.121066  | 0.118444 | 0.232226 | 0.0863928 | 0.0968823 |
| 0.133741 | 0.139132 | 0.140152  | 0.129079 | 0.249563 | 0.112762  | 0.121503  |
| 0.125437 | 0.135198 | 0.138258  | 0.138258 | 0.24359  | 0.0977564 | 0.116987  |
| 0.127768 | 0.133741 | 0.13884   | 0.127185 | 0.24359  | 0.112617  | 0.121066  |

|          |          |          |          |          |           |          |
|----------|----------|----------|----------|----------|-----------|----------|
| 0.112617 | 0.123834 | 0.132721 | 0.121649 | 0.236305 | 0.104167  | 0.110868 |
| 0.123106 | 0.13549  | 0.132139 | 0.129808 | 0.245629 | 0.0980478 | 0.112034 |
| 0.123834 | 0.132139 | 0.136072 | 0.125874 | 0.240239 | 0.100816  | 0.114219 |
| 0.123106 | 0.128788 | 0.135344 | 0.127768 | 0.24359  | 0.110868  | 0.119027 |
| 0.135052 | 0.140734 | 0.144668 | 0.135052 | 0.248543 | 0.118444  | 0.126603 |
| 0.126603 | 0.128788 | 0.137966 | 0.126603 | 0.242424 | 0.102127  | 0.11553  |
| 0.116113 | 0.123252 | 0.129225 | 0.118735 | 0.236014 | 0.102127  | 0.107955 |
| 0.125583 | 0.133013 | 0.115967 | 0.137238 | 0.242861 | 0.126457  | 0.121212 |
| 0.130682 | 0.141317 | 0.138258 | 0.131265 | 0.248252 | 0.112325  | 0.120192 |
| 0.112034 | 0.11859  | 0.127768 | 0.114948 | 0.232517 | 0.0960082 | 0.104749 |
| 0.215035 | 0.211393 | 0.221737 | 0.2162   | 0.11757  | 0.209499  | 0.216783 |
| 0.126748 | 0.126603 | 0.134033 | 0.123252 | 0.238491 | 0.10373   | 0.115967 |
| 0.119172 | 0.123689 | 0.126748 | 0.122086 | 0.236742 | 0.0932401 | 0.109557 |
| 0.134761 | 0.136072 | 0.143794 | 0.132721 | 0.249126 | 0.11961   | 0.128642 |
| 0.116987 | 0.127622 | 0.129225 | 0.120192 | 0.238054 | 0.105332  | 0.108829 |
| 0.135344 | 0.134615 | 0.144668 | 0.139423 | 0.251457 | 0.107372  | 0.125728 |
| 0.118153 | 0.125    | 0.13039  | 0.122523 | 0.236597 | 0.099796  | 0.113199 |
| 0.118298 | 0.122523 | 0.134615 | 0.118298 | 0.237034 | 0.101981  | 0.11451  |
| 0.125874 | 0.130682 | 0.136072 | 0.126748 | 0.241987 | 0.0990676 | 0.117716 |
| 0.121941 | 0.13141  | 0.134178 | 0.129808 | 0.23514  | 0.10912   | 0.120484 |
| 0.13141  | 0.13447  | 0.140443 | 0.129662 | 0.243735 | 0.113636  | 0.120629 |
| 0.127768 | 0.134907 | 0.142628 | 0.128059 | 0.244172 | 0.114656  | 0.120192 |
| 0.123397 | 0.129662 | 0.139714 | 0.129225 | 0.245047 | 0.108829  | 0.119901 |
| 0.117861 | 0.126166 | 0.115822 | 0.124272 | 0.239802 | 0.0980478 | 0.104749 |
| 0.116987 | 0.124417 | 0.133013 | 0.123397 | 0.243881 | 0.104167  | 0.112325 |
| 0.127622 | 0.137092 | 0.147145 | 0.134907 | 0.244901 | 0.122086  | 0.129953 |
| 0.11757  | 0.123543 | 0.130973 | 0.121649 | 0.231643 | 0.104167  | 0.114365 |
| 0.132139 | 0.135781 | 0.118444 | 0.134178 | 0.247378 | 0.124272  | 0.122232 |
| 0.134615 | 0.140589 | 0.145688 | 0.140152 | 0.231206 | 0.13141   | 0.132867 |
| 0.122086 | 0.127768 | 0.118881 | 0.123543 | 0.237325 | 0.108683  | 0.109557 |
| 0.127914 | 0.136509 | 0.136655 | 0.134907 | 0.248106 | 0.108392  | 0.119172 |
| 0.132721 | 0.129371 | 0.134178 | 0.121649 | 0.229895 | 0.119901  | 0.121358 |
| 0.125874 | 0.128934 | 0.130828 | 0.129953 | 0.235577 | 0.11014   | 0.112179 |
| 0.125    | 0.125437 | 0.136946 | 0.129662 | 0.230332 | 0.120338  | 0.123543 |
| 0.133159 | 0.142045 | 0.14627  | 0.136072 | 0.238782 | 0.130828  | 0.133159 |
| 0.114656 | 0.122086 | 0.109703 | 0.116987 | 0.234848 | 0.097465  | 0.104167 |
| 0.131119 | 0.136801 | 0.129079 | 0.137238 | 0.243444 | 0.122086  | 0.124709 |
| 0.14088  | 0.1419   | 0.146416 | 0.142045 | 0.226399 | 0.137966  | 0.137675 |
| 0.120192 | 0.130536 | 0.113491 | 0.126603 | 0.244172 | 0.10271   | 0.105624 |
| 0.122815 | 0.131119 | 0.11961  | 0.122232 | 0.235723 | 0.105041  | 0.112908 |
| 0.136946 | 0.13884  | 0.125    | 0.147727 | 0.242279 | 0.137529  | 0.125    |
| 0.121503 | 0.126311 | 0.106352 | 0.124126 | 0.238782 | 0.112762  | 0.112471 |
| 0.135052 | 0.136946 | 0.134178 | 0.145251 | 0.252622 | 0.124854  | 0.130682 |
| 0.125291 | 0.134761 | 0.12296  | 0.130536 | 0.243735 | 0.118881  | 0.119464 |

|          |           |           |          |          |           |           |
|----------|-----------|-----------|----------|----------|-----------|-----------|
| 0.128642 | 0.133741  | 0.12398   | 0.122232 | 0.245047 | 0.11757   | 0.114073  |
| 0.134615 | 0.13039   | 0.125     | 0.126166 | 0.238491 | 0.115967  | 0.121503  |
| 0.12602  | 0.130828  | 0.117279  | 0.126603 | 0.236014 | 0.103875  | 0.110577  |
| 0.13345  | 0.135927  | 0.123543  | 0.129079 | 0.246941 | 0.123834  | 0.119755  |
| 0.122086 | 0.132721  | 0.136364  | 0.131993 | 0.245484 | 0.109266  | 0.119172  |
| 0.132867 | 0.137966  | 0.128788  | 0.131119 | 0.246941 | 0.126457  | 0.118298  |
| 0.128497 | 0.135927  | 0.136072  | 0.132867 | 0.247523 | 0.115967  | 0.119172  |
| 0.129662 | 0.136801  | 0.125583  | 0.123543 | 0.241404 | 0.123543  | 0.115385  |
| 0.1419   | 0.14292   | 0.145979  | 0.134615 | 0.239073 | 0.136655  | 0.134033  |
| 0.124709 | 0.134761  | 0.123834  | 0.129079 | 0.239073 | 0.099359  | 0.116259  |
| 0.119464 | 0.130099  | 0.113345  | 0.11451  | 0.245775 | 0.102273  | 0.104312  |
| 0.131702 | 0.137383  | 0.13345   | 0.131993 | 0.244027 | 0.120629  | 0.116841  |
| 0.122378 | 0.128642  | 0.120338  | 0.127622 | 0.238199 | 0.101399  | 0.106352  |
| 0.139714 | 0.142774  | 0.148747  | 0.144376 | 0.239802 | 0.133596  | 0.133304  |
| 0.150787 | 0.156177  | 0.154866  | 0.152244 | 0.248834 | 0.141754  | 0.142628  |
| 0.125146 | 0.128788  | 0.10912   | 0.125146 | 0.245338 | 0.122815  | 0.113199  |
| 0.118298 | 0.125146  | 0.104895  | 0.115967 | 0.238491 | 0.109557  | 0.104895  |
| 0.127185 | 0.13141   | 0.135635  | 0.133596 | 0.248252 | 0.124272  | 0.121066  |
| 0.126166 | 0.132721  | 0.141608  | 0.131993 | 0.242861 | 0.118881  | 0.122086  |
| 0.125583 | 0.131847  | 0.11014   | 0.128497 | 0.246649 | 0.119172  | 0.109557  |
| 0.129662 | 0.145542  | 0.143065  | 0.129371 | 0.250728 | 0.11859   | 0.125291  |
| 0.135781 | 0.135927  | 0.136072  | 0.135198 | 0.237617 | 0.120921  | 0.127914  |
| 0.124854 | 0.127331  | 0.114365  | 0.131265 | 0.245629 | 0.107372  | 0.116404  |
| 0.152535 | 0.15676   | 0.163607  | 0.159237 | 0.245629 | 0.156323  | 0.146999  |
| 0.125146 | 0.13345   | 0.114948  | 0.128642 | 0.244464 | 0.103875  | 0.116113  |
| 0.139714 | 0.142483  | 0.135052  | 0.142337 | 0.246212 | 0.119027  | 0.130973  |
| 0.124417 | 0.130682  | 0.108392  | 0.120047 | 0.246941 | 0.107226  | 0.106352  |
| 0.121795 | 0.13884   | 0.132867  | 0.136364 | 0.25102  | 0.120921  | 0.119755  |
| 0.121795 | 0.126894  | 0.133159  | 0.122378 | 0.23616  | 0.108974  | 0.11859   |
| 0.135344 | 0.113928  | 0.145251  | 0.134178 | 0.214744 | 0.121358  | 0.132721  |
| 0.143648 | 0.140297  | 0.155594  | 0.115385 | 0.244901 | 0.142483  | 0.134033  |
| 0.121066 | 0.0562354 | 0.129808  | 0.11757  | 0.229895 | 0.114365  | 0.113782  |
| 0.131702 | 0.0689103 | 0.138403  | 0.133741 | 0.211393 | 0.125874  | 0.128788  |
| 0.147582 | 0.142191  | 0.113491  | 0.140589 | 0.186189 | 0.137092  | 0.134178  |
| 0.139423 | 0.121795  | 0.149621  | 0.135635 | 0.189977 | 0.126894  | 0.134178  |
| 0.122086 | 0.127477  | 0.0929487 | 0.13141  | 0.245192 | 0.118298  | 0.0944056 |
| 0.138258 | 0.134324  | 0.146416  | 0.131556 | 0.242133 | 0.125728  | 0.121066  |
| 0.121066 | 0.115385  | 0.125146  | 0.112034 | 0.226981 | 0.101544  | 0.10708   |
| 0.11655  | 0.115239  | 0.115676  | 0.107226 | 0.230332 | 0.104604  | 0.107809  |
| 0.118444 | 0.127331  | 0.131556  | 0.120484 | 0.231935 | 0.101253  | 0.113491  |
| 0.11757  | 0.0571096 | 0.125728  | 0.116987 | 0.230478 | 0.110286  | 0.111451  |
| 0.111888 | 0.127768  | 0.11655   | 0.113345 | 0.236451 | 0.102855  | 0.106935  |
| 0.113928 | 0.0936772 | 0.121795  | 0.101981 | 0.221882 | 0.0932401 | 0.108392  |
| 0.117716 | 0.109994  | 0.129953  | 0.111597 | 0.23616  | 0.114802  | 0.110723  |

|          |           |           |          |           |           |           |
|----------|-----------|-----------|----------|-----------|-----------|-----------|
| 0.122815 | 0.120338  | 0.135927  | 0.122232 | 0.222028  | 0.103584  | 0.11961   |
| 0.10067  | 0.117133  | 0.119318  | 0.114948 | 0.229604  | 0.0488054 | 0.0962995 |
| 0.122232 | 0.0661422 | 0.128934  | 0.119318 | 0.229312  | 0.111742  | 0.114073  |
| 0.116841 | 0.0619172 | 0.123834  | 0.117133 | 0.233246  | 0.108392  | 0.109557  |
| 0.120047 | 0.122523  | 0.0405012 | 0.123834 | 0.238199  | 0.115967  | 0.102855  |
| 0.213578 | 0.206148  | 0.219697  | 0.211247 | 0.113491  | 0.205128  | 0.212995  |
| 0.136364 | 0.0639569 | 0.14627   | 0.140734 | 0.24053   | 0.13345   | 0.134907  |
| 0.126894 | 0.129079  | 0.130682  | 0.12602  | 0.241259  | 0.116696  | 0.11961   |
| 0.11859  | 0.114656  | 0.128205  | 0.12296  | 0.230041  | 0.111597  | 0.118007  |
| 0.206876 | 0.202652  | 0.213578  | 0.206585 | 0.105041  | 0.202506  | 0.209499  |
| 0.120338 | 0.123689  | 0.0743007 | 0.120629 | 0.223339  | 0.112762  | 0.110723  |
| 0.118735 | 0.131993  | 0.11757   | 0.122232 | 0.23951   | 0.107955  | 0.108246  |
| 0.116987 | 0.127331  | 0.127477  | 0.121066 | 0.234557  | 0.112617  | 0.114948  |
| 0.124417 | 0.122232  | 0.132284  | 0.121795 | 0.230041  | 0.104604  | 0.121795  |
| 0.245629 | 0.238199  | 0.254953  | 0.242424 | 0.0965909 | 0.240676  | 0.246503  |
| 0.126603 | 0.127622  | 0.133304  | 0.128351 | 0.239802  | 0.11116   | 0.113199  |
| 0.112325 | 0.118298  | 0.053176  | 0.11757  | 0.240676  | 0.109994  | 0.0968823 |
| 0.112325 | 0.120921  | 0.12398   | 0.113199 | 0.238928  | 0.115239  | 0.10708   |
| 0.109994 | 0.11859   | 0.12398   | 0.111451 | 0.238345  | 0.112034  | 0.103001  |
| 0.127477 | 0.120921  | 0.13243   | 0.128642 | 0.228438  | 0.112034  | 0.122232  |
| 0.109994 | 0.108974  | 0.135344  | 0.115822 | 0.217075  | 0.105915  | 0.120484  |
| 0.115822 | 0.119464  | 0.0493881 | 0.122523 | 0.236305  | 0.112034  | 0.103001  |
| 0.115385 | 0.0607517 | 0.124126  | 0.113636 | 0.230332  | 0.110723  | 0.108392  |
| 0.127477 | 0.125583  | 0.136509  | 0.115239 | 0.236305  | 0.113491  | 0.112034  |
| 0.11961  | 0.115967  | 0.127185  | 0.114365 | 0.231643  | 0.0983392 | 0.112034  |
| 0.114219 | 0.0625    | 0.123543  | 0.117133 | 0.22567   | 0.104312  | 0.109266  |
| 0.119318 | 0.125291  | 0.133887  | 0.121066 | 0.233683  | 0.0843531 | 0.109994  |
| 0.143357 | 0.142337  | 0.152098  | 0.113928 | 0.245192  | 0.141608  | 0.134907  |
| 0.127331 | 0.130099  | 0.134324  | 0.134033 | 0.236742  | 0.114219  | 0.11655   |
| 0.119755 | 0.128642  | 0.117716  | 0.125583 | 0.239073  | 0.11014   | 0.112762  |
| 0.190268 | 0.180216  | 0.196096  | 0.182401 | 0.125437  | 0.177739  | 0.18648   |
| 0.199301 | 0.195659  | 0.207168  | 0.195513 | 0.11961   | 0.193182  | 0.200466  |
| 0.125    | 0.124563  | 0.134615  | 0.120338 | 0.224796  | 0.102855  | 0.119464  |
| 0.118298 | 0.117861  | 0.129079  | 0.112762 | 0.230332  | 0.0979021 | 0.112471  |
| 0.130245 | 0.124563  | 0.143357  | 0.136946 | 0.226253  | 0.124417  | 0.134907  |
| 0.118298 | 0.121066  | 0.048951  | 0.120629 | 0.23616   | 0.112471  | 0.100816  |
| 0.128059 | 0.128788  | 0.137092  | 0.132721 | 0.238928  | 0.113199  | 0.11553   |
| 0.123834 | 0.122815  | 0.136364  | 0.120047 | 0.232663  | 0.123543  | 0.117716  |
| 0.221154 | 0.216055  | 0.229895  | 0.217657 | 0.121358  | 0.215035  | 0.222902  |
| 0.116259 | 0.119901  | 0.120338  | 0.115676 | 0.235868  | 0.106643  | 0.107809  |
| 0.206148 | 0.19697   | 0.203234  | 0.199738 | 0.138403  | 0.20236   | 0.202943  |
| 0.112471 | 0.119318  | 0.0894522 | 0.118298 | 0.242861  | 0.106643  | 0.0833333 |
| 0.110286 | 0.122378  | 0.120775  | 0.109994 | 0.234848  | 0.101544  | 0.0898893 |
| 0.116259 | 0.103001  | 0.110723  | 0.111597 | 0.223631  | 0.106061  | 0.105186  |



|           |           |           |           |          |           |           |
|-----------|-----------|-----------|-----------|----------|-----------|-----------|
| 0.116841  | 0.113782  | 0.123543  | 0.113636  | 0.227127 | 0.0981935 | 0.107517  |
| 0.203526  | 0.198718  | 0.209645  | 0.201486  | 0.117716 | 0.198864  | 0.201486  |
| 0.127768  | 0.0568182 | 0.135052  | 0.129516  | 0.227273 | 0.119901  | 0.122523  |
| 0.112034  | 0.123543  | 0.111742  | 0.112325  | 0.243881 | 0.104458  | 0.0473485 |
| 0.118735  | 0.0530303 | 0.129225  | 0.121358  | 0.233392 | 0.114073  | 0.114948  |
| 0.0525932 | 0.121795  | 0.125728  | 0.123106  | 0.238345 | 0.103001  | 0.111742  |
| 0.118735  | 0.119755  | 0.129808  | 0.114365  | 0.232226 | 0.0977564 | 0.113491  |
| 0.115676  | 0.11961   | 0.0882867 | 0.116259  | 0.243444 | 0.109557  | 0.0862471 |
| 0.118298  | 0.11757   | 0.0658508 | 0.117716  | 0.228584 | 0.111305  | 0.106935  |
| 0.119755  | 0.128059  | 0.117133  | 0.125     | 0.239656 | 0.108974  | 0.111597  |
| 0.112471  | 0.0642483 | 0.123834  | 0.110431  | 0.225087 | 0.104604  | 0.103438  |
| 0.113199  | 0.125     | 0.110577  | 0.119318  | 0.237762 | 0.107663  | 0.0557984 |
| 0.186189  | 0.18109   | 0.195513  | 0.183275  | 0.128934 | 0.17803   | 0.184441  |
| 0.113782  | 0.11859   | 0.12398   | 0.114365  | 0.237179 | 0.11553   | 0.10708   |
| 0.124126  | 0.126311  | 0.136946  | 0.0981935 | 0.238199 | 0.123834  | 0.117133  |
| 0.123397  | 0.115967  | 0.125437  | 0.114656  | 0.233392 | 0.111742  | 0.10912   |
| 0.125291  | 0.128059  | 0.132576  | 0.127622  | 0.231206 | 0.113928  | 0.110723  |
| 0.119755  | 0.0552156 | 0.127331  | 0.121795  | 0.231498 | 0.112762  | 0.112762  |
| 0.115385  | 0.12398   | 0.094697  | 0.121795  | 0.243735 | 0.112179  | 0.0914918 |
| 0.0692016 | 0.115676  | 0.121649  | 0.11553   | 0.232517 | 0.0989219 | 0.101544  |
| 0.121066  | 0.123834  | 0.0470571 | 0.125437  | 0.241259 | 0.114365  | 0.103584  |
| 0.121212  | 0.121358  | 0.132284  | 0.0903263 | 0.237908 | 0.117716  | 0.113054  |
| 0.113054  | 0.119318  | 0.122378  | 0.107517  | 0.235286 | 0.1081    | 0.0990676 |
| 0.122232  | 0.120921  | 0.128642  | 0.114656  | 0.229895 | 0.101544  | 0.114073  |
| 0.120921  | 0.125437  | 0.128788  | 0.113636  | 0.243735 | 0.1081    | 0.113054  |
| 0.129225  | 0.135198  | 0.13884   | 0.132139  | 0.242133 | 0.125437  | 0.127477  |
| 0.119027  | 0.124417  | 0.125437  | 0.119027  | 0.2331   | 0.104167  | 0.103875  |
| 0.132284  | 0.064831  | 0.138403  | 0.135198  | 0.237325 | 0.129662  | 0.129662  |
| 0.118881  | 0.119027  | 0.129662  | 0.115385  | 0.232663 | 0.0973193 | 0.11014   |
| 0.115093  | 0.110577  | 0.126457  | 0.107226  | 0.23208  | 0.109848  | 0.103438  |
| 0.119027  | 0.0702214 | 0.125728  | 0.117279  | 0.215618 | 0.105915  | 0.114073  |
| 0.123106  | 0.127331  | 0.0473485 | 0.126311  | 0.235723 | 0.11757   | 0.108829  |
| 0.18954   | 0.18211   | 0.178176  | 0.184295  | 0.134033 | 0.180798  | 0.184295  |
| 0.108392  | 0.123689  | 0.108683  | 0.112179  | 0.235577 | 0.103147  | 0.04662   |
| 0.109266  | 0.107372  | 0.114802  | 0.104895  | 0.225962 | 0.100233  | 0.0932401 |
| 0.11655   | 0.13039   | 0.115967  | 0.124126  | 0.239365 | 0.109266  | 0.109557  |
| 0.173951  | 0.171474  | 0.188228  | 0.166958  | 0.148456 | 0.170746  | 0.171037  |
| 0.135344  | 0.13986   | 0.144376  | 0.141754  | 0.23951  | 0.124272  | 0.124854  |
| 0.141754  | 0.14831   | 0.152244  | 0.150204  | 0.248834 | 0.13447   | 0.131556  |
| 0.143357  | 0.144959  | 0.155303  | 0.115967  | 0.244901 | 0.144231  | 0.135781  |
| 0.11859   | 0.122232  | 0.126748  | 0.123252  | 0.230624 | 0.108974  | 0.104021  |
| 0.117861  | 0.0539044 | 0.128059  | 0.119027  | 0.22873  | 0.11116   | 0.115239  |
| 0.207751  | 0.201777  | 0.217657  | 0.200758  | 0.108829 | 0.200175  | 0.208042  |
| 0.12704   | 0.119318  | 0.134033  | 0.121795  | 0.22567  | 0.111597  | 0.115676  |

|           |           |           |           |          |           |           |
|-----------|-----------|-----------|-----------|----------|-----------|-----------|
| 0.122523  | 0.0536131 | 0.134761  | 0.126894  | 0.229604 | 0.116696  | 0.118444  |
| 0.111451  | 0.12296   | 0.11116   | 0.11757   | 0.233974 | 0.106498  | 0.0505536 |
| 0.169435  | 0.14627   | 0.173223  | 0.156906  | 0.173077 | 0.158654  | 0.164773  |
| 0.113782  | 0.111305  | 0.125437  | 0.115239  | 0.225233 | 0.103875  | 0.103875  |
| 0.150641  | 0.146416  | 0.157925  | 0.138112  | 0.245192 | 0.13549   | 0.132867  |
| 0.108683  | 0.126603  | 0.128205  | 0.130828  | 0.225379 | 0.0524476 | 0.109557  |
| 0.188228  | 0.18109   | 0.194639  | 0.184149  | 0.128642 | 0.179196  | 0.184441  |
| 0.126748  | 0.128934  | 0.130828  | 0.12296   | 0.238199 | 0.108974  | 0.110723  |
| 0.108974  | 0.109703  | 0.119755  | 0.105478  | 0.233246 | 0.0952797 | 0.0973193 |
| 0.118153  | 0.116841  | 0.127768  | 0.105915  | 0.233974 | 0.108829  | 0.100962  |
| 0.114219  | 0.120484  | 0.118007  | 0.119172  | 0.238782 | 0.104312  | 0.104021  |
| 0.116841  | 0.129225  | 0.115093  | 0.12296   | 0.238491 | 0.105769  | 0.108683  |
| 0.126748  | 0.12398   | 0.131993  | 0.111305  | 0.228584 | 0.115676  | 0.111597  |
| 0.119318  | 0.11859   | 0.127477  | 0.112034  | 0.230478 | 0.0962995 | 0.111742  |
| 0.18648   | 0.183712  | 0.193182  | 0.182984  | 0.12398  | 0.177448  | 0.181527  |
| 0.125728  | 0.128205  | 0.128934  | 0.114073  | 0.237179 | 0.114948  | 0.110577  |
| 0.111014  | 0.112325  | 0.124126  | 0.113345  | 0.227127 | 0.110431  | 0.108392  |
| 0.207022  | 0.204837  | 0.215472  | 0.203817  | 0.111014 | 0.201777  | 0.206439  |
| 0.114365  | 0.124417  | 0.12602   | 0.114656  | 0.23951  | 0.115239  | 0.103875  |
| 0.120629  | 0.121358  | 0.127914  | 0.114219  | 0.230332 | 0.100524  | 0.111305  |
| 0.11655   | 0.115822  | 0.123543  | 0.108683  | 0.228001 | 0.0941142 | 0.107226  |
| 0.13039   | 0.0705128 | 0.141463  | 0.129808  | 0.2331   | 0.127477  | 0.12602   |
| 0.184003  | 0.182984  | 0.195367  | 0.181381  | 0.128788 | 0.179633  | 0.181964  |
| 0.117424  | 0.123106  | 0.0512821 | 0.120047  | 0.243444 | 0.112762  | 0.102564  |
| 0.125583  | 0.133596  | 0.134033  | 0.124709  | 0.238782 | 0.120921  | 0.123834  |
| 0.119464  | 0.119901  | 0.128497  | 0.115676  | 0.228584 | 0.0973193 | 0.110723  |
| 0.117424  | 0.11757   | 0.125874  | 0.108974  | 0.232372 | 0.0955711 | 0.108392  |
| 0.118444  | 0.120047  | 0.127768  | 0.112325  | 0.227273 | 0.0962995 | 0.109703  |
| 0.116841  | 0.0639569 | 0.125583  | 0.114219  | 0.232663 | 0.105769  | 0.109557  |
| 0.0989219 | 0.116259  | 0.118153  | 0.110868  | 0.232226 | 0.0490967 | 0.0968823 |
| 0.125437  | 0.128205  | 0.134178  | 0.130973  | 0.238928 | 0.11116   | 0.112034  |
| 0.123689  | 0.124709  | 0.140006  | 0.121066  | 0.245338 | 0.127185  | 0.124272  |
| 0.125437  | 0.129079  | 0.130973  | 0.126311  | 0.236305 | 0.111451  | 0.109703  |
| 0.0544872 | 0.127185  | 0.12704   | 0.125583  | 0.242279 | 0.109848  | 0.118007  |
| 0.191579  | 0.184441  | 0.200321  | 0.187791  | 0.129371 | 0.185169  | 0.188083  |
| 0.11655   | 0.127185  | 0.125291  | 0.115093  | 0.240239 | 0.107517  | 0.112471  |
| 0.125728  | 0.0568182 | 0.136509  | 0.132139  | 0.229312 | 0.119318  | 0.120775  |
| 0.116259  | 0.116404  | 0.127914  | 0.115676  | 0.231498 | 0.0932401 | 0.108974  |
| 0.0983392 | 0.11655   | 0.118444  | 0.112325  | 0.230478 | 0.0467657 | 0.0962995 |
| 0.12398   | 0.11859   | 0.128642  | 0.107372  | 0.227564 | 0.10708   | 0.104167  |
| 0.115676  | 0.121649  | 0.0439977 | 0.124709  | 0.238199 | 0.113054  | 0.102564  |
| 0.128205  | 0.126311  | 0.138695  | 0.128788  | 0.236451 | 0.12296   | 0.123543  |
| 0.121358  | 0.12296   | 0.130973  | 0.0898893 | 0.236305 | 0.116113  | 0.108246  |
| 0.112617  | 0.119172  | 0.0782343 | 0.109703  | 0.231061 | 0.0866841 | 0.0989219 |

|           |           |           |           |          |           |           |
|-----------|-----------|-----------|-----------|----------|-----------|-----------|
| 0.104604  | 0.113491  | 0.0859557 | 0.107226  | 0.228584 | 0.0705128 | 0.0935315 |
| 0.101544  | 0.113345  | 0.123106  | 0.101253  | 0.230186 | 0.0808566 | 0.0960082 |
| 0.113054  | 0.118153  | 0.0906177 | 0.118881  | 0.24053  | 0.108974  | 0.0882867 |
| 0.133013  | 0.135198  | 0.137092  | 0.13884   | 0.240676 | 0.117861  | 0.119318  |
| 0.115676  | 0.122815  | 0.0571096 | 0.119755  | 0.241404 | 0.109557  | 0.0996503 |
| 0.114073  | 0.0646853 | 0.12398   | 0.113782  | 0.226399 | 0.103293  | 0.104749  |
| 0.111742  | 0.118881  | 0.0566725 | 0.116404  | 0.237179 | 0.104749  | 0.0930944 |
| 0.116841  | 0.118444  | 0.124709  | 0.110723  | 0.228293 | 0.0987762 | 0.106643  |
| 0.108537  | 0.120629  | 0.110286  | 0.10912   | 0.238054 | 0.0995047 | 0.0476399 |
| 0.120484  | 0.122669  | 0.130099  | 0.115239  | 0.230478 | 0.0977564 | 0.113782  |
| 0.112908  | 0.120921  | 0.121941  | 0.109703  | 0.233683 | 0.105041  | 0.104167  |
| 0.121649  | 0.121795  | 0.131847  | 0.0907634 | 0.237471 | 0.113782  | 0.109411  |
| 0.11757   | 0.126166  | 0.114073  | 0.119901  | 0.240967 | 0.105332  | 0.103001  |
| 0.101981  | 0.116113  | 0.119172  | 0.115967  | 0.232663 | 0.048951  | 0.0955711 |
| 0.117861  | 0.11859   | 0.124272  | 0.112325  | 0.229312 | 0.0962995 | 0.110868  |
| 0.123106  | 0.118298  | 0.130099  | 0.109994  | 0.222902 | 0.116696  | 0.108537  |
| 0.117716  | 0.117279  | 0.130828  | 0.113636  | 0.234411 | 0.11451   | 0.111888  |
| 0.111742  | 0.119464  | 0.120192  | 0.112325  | 0.234557 | 0.101253  | 0.0968823 |
| 0.119901  | 0.11655   | 0.12602   | 0.110577  | 0.231643 | 0.0971737 | 0.109703  |
| 0.117716  | 0.0543415 | 0.127914  | 0.115967  | 0.227418 | 0.112179  | 0.11014   |
| 0.116259  | 0.122815  | 0.0917832 | 0.116841  | 0.239948 | 0.108683  | 0.0865385 |
| 0.120047  | 0.0622086 | 0.125291  | 0.114219  | 0.233829 | 0.112762  | 0.111597  |
| 0.118298  | 0.128642  | 0.113636  | 0.118881  | 0.238782 | 0.105186  | 0.103147  |
| 0.102273  | 0.122232  | 0.122086  | 0.119464  | 0.236451 | 0.0457459 | 0.0996503 |
| 0.109266  | 0.114948  | 0.125874  | 0.106352  | 0.226836 | 0.0935315 | 0.102564  |
| 0.112617  | 0.122669  | 0.110868  | 0.111451  | 0.238345 | 0.100962  | 0.0473485 |
| 0.11859   | 0.0607517 | 0.130828  | 0.11859   | 0.230332 | 0.112762  | 0.113345  |
| 0.107517  | 0.120192  | 0.124709  | 0.119464  | 0.237325 | 0.118298  | 0.107517  |
| 0.110286  | 0.111888  | 0.123689  | 0.114365  | 0.229895 | 0.105332  | 0.105041  |
| 0.191579  | 0.187063  | 0.200321  | 0.188666  | 0.125    | 0.184295  | 0.190997  |
| 0.158071  | 0.15035   | 0.169435  | 0.154283  | 0.166667 | 0.156031  | 0.157488  |
| 0.122523  | 0.128205  | 0.130682  | 0.128351  | 0.23514  | 0.113199  | 0.108829  |
| 0.120338  | 0.11553   | 0.0859557 | 0.106061  | 0.229749 | 0.115093  | 0.105769  |
| 0.14627   | 0.149621  | 0.155012  | 0.153263  | 0.250437 | 0.136364  | 0.136072  |
| 0.130973  | 0.128497  | 0.137675  | 0.117279  | 0.240093 | 0.115239  | 0.112908  |
| 0.129371  | 0.123689  | 0.134907  | 0.107517  | 0.226544 | 0.105186  | 0.113345  |
| 0.120192  | 0.11655   | 0.128642  | 0.10912   | 0.229312 | 0.108829  | 0.108246  |
| 0.118444  | 0.124126  | 0.130682  | 0.11757   | 0.233392 | 0.0805653 | 0.111451  |
| 0.114656  | 0.118007  | 0.131847  | 0.119318  | 0.237179 | 0.112908  | 0.114948  |
| 0.200466  | 0.194493  | 0.206294  | 0.195221  | 0.123397 | 0.189103  | 0.197261  |
| 0.121066  | 0.128205  | 0.050845  | 0.121941  | 0.243007 | 0.114948  | 0.105041  |
| 0.118007  | 0.076486  | 0.0955711 | 0.113345  | 0.222174 | 0.110431  | 0.108683  |
| 0.115093  | 0.114365  | 0.125874  | 0.105769  | 0.228293 | 0.0949883 | 0.106643  |
| 0.0549242 | 0.121795  | 0.122815  | 0.115822  | 0.241259 | 0.100087  | 0.105915  |

|           |           |           |           |           |           |           |
|-----------|-----------|-----------|-----------|-----------|-----------|-----------|
| 0.18211   | 0.178759  | 0.189685  | 0.170746  | 0.153118  | 0.173368  | 0.18007   |
| 0.244172  | 0.235868  | 0.246795  | 0.241259  | 0.0995047 | 0.239219  | 0.244172  |
| 0.123252  | 0.12602   | 0.132284  | 0.0964452 | 0.238491  | 0.118881  | 0.110723  |
| 0.11655   | 0.116987  | 0.13141   | 0.11655   | 0.237908  | 0.110431  | 0.112179  |
| 0.122378  | 0.12602   | 0.134324  | 0.124417  | 0.234703  | 0.109266  | 0.109557  |
| 0.116404  | 0.124709  | 0.114656  | 0.121649  | 0.238636  | 0.102418  | 0.102418  |
| 0.115093  | 0.117861  | 0.0556527 | 0.11451   | 0.239073  | 0.107809  | 0.0967366 |
| 0.117861  | 0.120047  | 0.123689  | 0.103293  | 0.233392  | 0.107372  | 0.103293  |
| 0.116259  | 0.0884324 | 0.125583  | 0.108974  | 0.222756  | 0.0990676 | 0.106643  |
| 0.113054  | 0.11757   | 0.0504079 | 0.115093  | 0.238782  | 0.108974  | 0.0981935 |
| 0.117861  | 0.0789627 | 0.125437  | 0.106789  | 0.222611  | 0.0989219 | 0.109411  |
| 0.119464  | 0.125728  | 0.125583  | 0.113636  | 0.239365  | 0.101399  | 0.104604  |
| 0.102127  | 0.118881  | 0.122815  | 0.114948  | 0.233974  | 0.0450175 | 0.0986305 |
| 0.125583  | 0.124272  | 0.132867  | 0.092366  | 0.234703  | 0.119172  | 0.113054  |
| 0.114656  | 0.0658508 | 0.128351  | 0.114948  | 0.233392  | 0.109703  | 0.110868  |
| 0.110286  | 0.109848  | 0.116404  | 0.099796  | 0.225524  | 0.104458  | 0.0942599 |
| 0.128934  | 0.130245  | 0.125437  | 0.124272  | 0.241841  | 0.11757   | 0.114656  |
| 0.128351  | 0.138403  | 0.120192  | 0.134761  | 0.244755  | 0.11757   | 0.119318  |
| 0.11655   | 0.11757   | 0.12704   | 0.109557  | 0.231206  | 0.0958625 | 0.108974  |
| 0.122523  | 0.121795  | 0.124854  | 0.110286  | 0.221737  | 0.102418  | 0.114656  |
| 0.130973  | 0.129371  | 0.138549  | 0.129808  | 0.232809  | 0.114073  | 0.126894  |
| 0.206585  | 0.199155  | 0.214744  | 0.206876  | 0.119318  | 0.195804  | 0.20542   |
| 0.112325  | 0.11655   | 0.122815  | 0.0887238 | 0.22873   | 0.108829  | 0.101836  |
| 0.101399  | 0.119318  | 0.122669  | 0.113928  | 0.236451  | 0.0457459 | 0.0981935 |
| 0.117716  | 0.126311  | 0.128497  | 0.116259  | 0.237908  | 0.105478  | 0.112471  |
| 0.116987  | 0.123252  | 0.125437  | 0.111742  | 0.23951   | 0.116113  | 0.105624  |
| 0.0549242 | 0.118881  | 0.122232  | 0.115239  | 0.238345  | 0.0983392 | 0.103293  |
| 0.197698  | 0.19289   | 0.205274  | 0.193036  | 0.124709  | 0.186043  | 0.193328  |
| 0.122086  | 0.0610431 | 0.129079  | 0.117716  | 0.233246  | 0.112471  | 0.114219  |
| 0.114073  | 0.117133  | 0.126603  | 0.111451  | 0.230478  | 0.0960082 | 0.10708   |
| 0.115385  | 0.123689  | 0.121212  | 0.127331  | 0.233829  | 0.110723  | 0.111888  |
| 0.114219  | 0.121649  | 0.112179  | 0.114802  | 0.239073  | 0.0990676 | 0.0987762 |
| 0.12296   | 0.064831  | 0.126457  | 0.115676  | 0.231789  | 0.111888  | 0.114802  |
| 0.111597  | 0.0840618 | 0.120629  | 0.111014  | 0.224505  | 0.0979021 | 0.104604  |
| 0.119172  | 0.121358  | 0.127914  | 0.115385  | 0.239365  | 0.0999417 | 0.104895  |
| 0.112471  | 0.121649  | 0.125291  | 0.112179  | 0.238199  | 0.111305  | 0.100233  |
| 0.194784  | 0.189685  | 0.203817  | 0.190122  | 0.125291  | 0.187209  | 0.190705  |
| 0.112179  | 0.064831  | 0.120047  | 0.112471  | 0.224796  | 0.101107  | 0.104312  |
| 0.193619  | 0.185897  | 0.200029  | 0.189831  | 0.127914  | 0.184586  | 0.190122  |
| 0.190851  | 0.183712  | 0.197552  | 0.187937  | 0.130973  | 0.182984  | 0.186772  |
| 0.122378  | 0.133013  | 0.118881  | 0.13141   | 0.241696  | 0.115676  | 0.11451   |
| 0.119172  | 0.131265  | 0.132576  | 0.125874  | 0.241404  | 0.121503  | 0.11451   |
| 0.108392  | 0.113491  | 0.118881  | 0.110431  | 0.232372  | 0.0949883 | 0.0952797 |
| 0.11116   | 0.0708042 | 0.119318  | 0.114656  | 0.22873   | 0.101836  | 0.10067   |

|          |           |           |           |           |           |           |
|----------|-----------|-----------|-----------|-----------|-----------|-----------|
| 0.118298 | 0.067162  | 0.125     | 0.115967  | 0.230332  | 0.107226  | 0.106352  |
| 0.122086 | 0.121358  | 0.129662  | 0.114219  | 0.230915  | 0.0990676 | 0.111597  |
| 0.113054 | 0.113782  | 0.0582751 | 0.114219  | 0.235868  | 0.105186  | 0.0964452 |
| 0.111305 | 0.119901  | 0.0504079 | 0.117424  | 0.241113  | 0.108392  | 0.0981935 |
| 0.12602  | 0.124126  | 0.134761  | 0.0948427 | 0.236888  | 0.119027  | 0.114948  |
| 0.120921 | 0.128059  | 0.11859   | 0.120921  | 0.238199  | 0.105186  | 0.106352  |
| 0.110868 | 0.112762  | 0.123689  | 0.110577  | 0.224068  | 0.0936772 | 0.105624  |
| 0.118881 | 0.0630828 | 0.124417  | 0.115093  | 0.230041  | 0.110723  | 0.108974  |
| 0.103001 | 0.111888  | 0.11757   | 0.103584  | 0.231061  | 0.092803  | 0.0936772 |
| 0.124709 | 0.0572552 | 0.135198  | 0.128497  | 0.232663  | 0.120921  | 0.120629  |
| 0.121503 | 0.126311  | 0.130245  | 0.125     | 0.235577  | 0.109848  | 0.108683  |
| 0.128934 | 0.0582751 | 0.135635  | 0.129808  | 0.233392  | 0.123106  | 0.124563  |
| 0.254808 | 0.251166  | 0.260927  | 0.25539   | 0.0996503 | 0.251311  | 0.257139  |
| 0.120775 | 0.132576  | 0.120192  | 0.128059  | 0.246212  | 0.11757   | 0.0607517 |
| 0.11859  | 0.128934  | 0.130536  | 0.124417  | 0.239656  | 0.111597  | 0.10373   |
| 0.216055 | 0.207459  | 0.220717  | 0.213724  | 0.11014   | 0.20877   | 0.215763  |
| 0.122378 | 0.132721  | 0.131702  | 0.124709  | 0.237908  | 0.115676  | 0.112179  |
| 0.224359 | 0.2213    | 0.234266  | 0.22465   | 0.110868  | 0.221445  | 0.226399  |
| 0.112908 | 0.125291  | 0.112034  | 0.120775  | 0.241259  | 0.107372  | 0.0560897 |
| 0.128788 | 0.127185  | 0.138112  | 0.125     | 0.234411  | 0.1081    | 0.125291  |
| 0.112471 | 0.117279  | 0.118881  | 0.107517  | 0.237325  | 0.1081    | 0.0996503 |
| 0.119464 | 0.131847  | 0.117424  | 0.12704   | 0.242861  | 0.108974  | 0.11014   |
| 0.201632 | 0.195367  | 0.206876  | 0.195221  | 0.124854  | 0.191725  | 0.198718  |
| 0.123543 | 0.0604604 | 0.136364  | 0.126748  | 0.235286  | 0.120629  | 0.121795  |
| 0.117424 | 0.0627914 | 0.125291  | 0.116259  | 0.23208   | 0.11014   | 0.111014  |
| 0.223922 | 0.219697  | 0.231498  | 0.222174  | 0.115967  | 0.218969  | 0.221008  |
| 0.117716 | 0.120484  | 0.0559441 | 0.11451   | 0.238782  | 0.111014  | 0.101399  |
| 0.197407 | 0.190559  | 0.202652  | 0.190122  | 0.121212  | 0.187209  | 0.19391   |
| 0.119027 | 0.121795  | 0.0575466 | 0.120192  | 0.241259  | 0.114365  | 0.103001  |
| 0.116987 | 0.120921  | 0.128642  | 0.111451  | 0.233392  | 0.0992133 | 0.110868  |
| 0.108392 | 0.125437  | 0.127622  | 0.126457  | 0.238782  | 0.0504079 | 0.107809  |
| 0.121795 | 0.135635  | 0.120921  | 0.134033  | 0.243153  | 0.115093  | 0.115093  |
| 0.114073 | 0.118007  | 0.125437  | 0.114948  | 0.229895  | 0.103001  | 0.105624  |
| 0.156906 | 0.157343  | 0.168852  | 0.155157  | 0.169289  | 0.128059  | 0.151369  |
| 0.11553  | 0.0571096 | 0.124272  | 0.113491  | 0.225816  | 0.105624  | 0.107372  |
| 0.114948 | 0.12296   | 0.125437  | 0.108246  | 0.239219  | 0.114073  | 0.104167  |
| 0.114948 | 0.12704   | 0.122232  | 0.115822  | 0.237471  | 0.105041  | 0.110868  |
| 0.123106 | 0.11859   | 0.131847  | 0.118735  | 0.234266  | 0.119901  | 0.112908  |
| 0.195804 | 0.188666  | 0.201049  | 0.18648   | 0.125437  | 0.185606  | 0.191725  |
| 0.114365 | 0.116841  | 0.125146  | 0.109703  | 0.22873   | 0.0983392 | 0.108829  |
| 0.121212 | 0.133013  | 0.123252  | 0.126166  | 0.229749  | 0.109848  | 0.107517  |
| 0.114948 | 0.119755  | 0.0936772 | 0.116987  | 0.242424  | 0.109994  | 0.0852273 |
| 0.113928 | 0.121066  | 0.0469114 | 0.123252  | 0.239656  | 0.110431  | 0.102855  |
| 0.120775 | 0.123252  | 0.13039   | 0.121358  | 0.231935  | 0.101544  | 0.118444  |

|           |           |           |           |           |           |           |
|-----------|-----------|-----------|-----------|-----------|-----------|-----------|
| 0.251457  | 0.245192  | 0.257576  | 0.248252  | 0.0968823 | 0.247378  | 0.253205  |
| 0.0989219 | 0.123834  | 0.121941  | 0.121649  | 0.233683  | 0.0450175 | 0.100087  |
| 0.11961   | 0.123252  | 0.131556  | 0.104458  | 0.231352  | 0.106206  | 0.109411  |
| 0.140589  | 0.171911  | 0.17905   | 0.171183  | 0.166375  | 0.167978  | 0.172348  |
| 0.184003  | 0.180653  | 0.188666  | 0.182255  | 0.136072  | 0.175262  | 0.179633  |
| 0.125728  | 0.125583  | 0.132721  | 0.092803  | 0.236888  | 0.114656  | 0.110577  |
| 0.116259  | 0.0622086 | 0.130828  | 0.115093  | 0.23208   | 0.107809  | 0.113928  |
| 0.11655   | 0.122815  | 0.113345  | 0.11655   | 0.237908  | 0.102564  | 0.101981  |
| 0.135344  | 0.0681818 | 0.146416  | 0.14088   | 0.236597  | 0.138549  | 0.137092  |
| 0.124563  | 0.122086  | 0.13039   | 0.0901807 | 0.23514   | 0.113199  | 0.106498  |
| 0.126748  | 0.125437  | 0.134615  | 0.0868298 | 0.237034  | 0.116259  | 0.11014   |
| 0.121941  | 0.12704   | 0.0447261 | 0.124272  | 0.240676  | 0.11757   | 0.107663  |
| 0.114365  | 0.0469114 | 0.124563  | 0.117861  | 0.223776  | 0.10708   | 0.109411  |
| 0.121795  | 0.0587121 | 0.134907  | 0.125874  | 0.230332  | 0.121503  | 0.120338  |
| 0.116987  | 0.117716  | 0.0683275 | 0.119901  | 0.228147  | 0.110577  | 0.101836  |
| 0.123252  | 0.130682  | 0.117716  | 0.127331  | 0.241404  | 0.106935  | 0.110431  |
| 0.13447   | 0.142483  | 0.128934  | 0.136218  | 0.249417  | 0.121066  | 0.126894  |
| 0.107517  | 0.12602   | 0.127331  | 0.127331  | 0.238491  | 0.0472028 | 0.107809  |
| 0.127477  | 0.13549   | 0.122815  | 0.133596  | 0.244755  | 0.114656  | 0.116696  |
| 0.121358  | 0.127331  | 0.043852  | 0.128934  | 0.245338  | 0.118444  | 0.108246  |
| 0.203963  | 0.200321  | 0.213869  | 0.198427  | 0.125728  | 0.199301  | 0.201923  |
| 0.121358  | 0.131993  | 0.11961   | 0.12602   | 0.240093  | 0.101544  | 0.112325  |
| 0.188666  | 0.185023  | 0.19799   | 0.183712  | 0.129662  | 0.181964  | 0.186334  |
| 0.116404  | 0.118298  | 0.121649  | 0.105624  | 0.234848  | 0.109994  | 0.0989219 |
| 0.127768  | 0.124709  | 0.136218  | 0.123397  | 0.229021  | 0.105915  | 0.122815  |
| 0.122232  | 0.123543  | 0.130099  | 0.128934  | 0.232809  | 0.108537  | 0.113782  |
| 0.121795  | 0.124563  | 0.127914  | 0.120629  | 0.230915  | 0.106935  | 0.106643  |
| 0.121066  | 0.0553613 | 0.131556  | 0.121358  | 0.22669   | 0.112325  | 0.115239  |
| 0.119027  | 0.0498252 | 0.12602   | 0.121649  | 0.231061  | 0.113782  | 0.114948  |
| 0.122815  | 0.12296   | 0.13039   | 0.117861  | 0.229895  | 0.0992133 | 0.111742  |
| 0.115093  | 0.121649  | 0.125     | 0.111305  | 0.235868  | 0.112762  | 0.103438  |
| 0.125874  | 0.124272  | 0.131702  | 0.126457  | 0.238199  | 0.112471  | 0.115093  |
| 0.126311  | 0.13345   | 0.0499709 | 0.134761  | 0.233974  | 0.12398   | 0.112908  |
| 0.246941  | 0.240967  | 0.253642  | 0.246941  | 0.0979021 | 0.245192  | 0.246358  |
| 0.123689  | 0.120921  | 0.132721  | 0.116113  | 0.231935  | 0.102418  | 0.114073  |
| 0.181527  | 0.17905   | 0.190851  | 0.178322  | 0.131847  | 0.17366   | 0.176865  |
| 0.186917  | 0.18211   | 0.192745  | 0.183712  | 0.127331  | 0.179341  | 0.181964  |
| 0.116841  | 0.127185  | 0.128205  | 0.113928  | 0.229458  | 0.105478  | 0.112471  |
| 0.102273  | 0.115822  | 0.122669  | 0.120921  | 0.234703  | 0.0448718 | 0.101981  |
| 0.125291  | 0.12398   | 0.133741  | 0.12296   | 0.231498  | 0.104312  | 0.121503  |
| 0.114802  | 0.0630828 | 0.126457  | 0.110431  | 0.22771   | 0.105478  | 0.104604  |
| 0.114948  | 0.120629  | 0.127768  | 0.11553   | 0.225233  | 0.0817308 | 0.106789  |
| 0.118444  | 0.120629  | 0.0546329 | 0.11553   | 0.238928  | 0.10912   | 0.0995047 |
| 0.116841  | 0.0732809 | 0.126748  | 0.113928  | 0.227127  | 0.108392  | 0.112762  |

|          |           |           |           |          |           |           |
|----------|-----------|-----------|-----------|----------|-----------|-----------|
| 0.125291 | 0.0598776 | 0.138986  | 0.128788  | 0.238491 | 0.120921  | 0.125291  |
| 0.11757  | 0.120921  | 0.128934  | 0.110868  | 0.229312 | 0.0980478 | 0.113199  |
| 0.122523 | 0.0597319 | 0.133304  | 0.124563  | 0.233392 | 0.120192  | 0.11961   |
| 0.109557 | 0.121358  | 0.125     | 0.112762  | 0.235577 | 0.104604  | 0.0929487 |
| 0.125583 | 0.128351  | 0.136072  | 0.13345   | 0.238491 | 0.112471  | 0.116259  |
| 0.124563 | 0.128497  | 0.115239  | 0.121358  | 0.23951  | 0.110577  | 0.109411  |
| 0.126457 | 0.129808  | 0.0460373 | 0.133159  | 0.244901 | 0.121503  | 0.111888  |
| 0.122523 | 0.127622  | 0.127185  | 0.121358  | 0.238054 | 0.103001  | 0.10912   |
| 0.118153 | 0.114802  | 0.124563  | 0.115239  | 0.226399 | 0.0977564 | 0.111451  |
| 0.125437 | 0.131702  | 0.135927  | 0.127768  | 0.241259 | 0.124563  | 0.126311  |
| 0.183566 | 0.17905   | 0.188811  | 0.18007   | 0.131556 | 0.172494  | 0.17803   |
| 0.130973 | 0.0608974 | 0.139132  | 0.134761  | 0.237179 | 0.124854  | 0.126311  |
| 0.119318 | 0.0536131 | 0.129808  | 0.11757   | 0.229604 | 0.110286  | 0.112908  |
| 0.124126 | 0.126311  | 0.131702  | 0.125291  | 0.234994 | 0.108974  | 0.109848  |
| 0.116404 | 0.120629  | 0.122523  | 0.116696  | 0.229312 | 0.103293  | 0.101836  |
| 0.115676 | 0.12398   | 0.115676  | 0.122378  | 0.236742 | 0.104312  | 0.105186  |
| 0.124563 | 0.132576  | 0.116113  | 0.127477  | 0.242424 | 0.110286  | 0.11116   |
| 0.185897 | 0.184878  | 0.197552  | 0.187937  | 0.130682 | 0.181818  | 0.187354  |
| 0.112762 | 0.0703671 | 0.124417  | 0.113636  | 0.218677 | 0.1081    | 0.112471  |
| 0.110868 | 0.107226  | 0.116404  | 0.105624  | 0.213287 | 0.099796  | 0.0965909 |
| 0.121941 | 0.0524476 | 0.130099  | 0.121941  | 0.231061 | 0.114948  | 0.117279  |
| 0.189103 | 0.182838  | 0.195804  | 0.186189  | 0.128934 | 0.180653  | 0.188228  |
| 0.102127 | 0.118007  | 0.121649  | 0.116404  | 0.230478 | 0.0467657 | 0.0983392 |
| 0.118298 | 0.125728  | 0.0437063 | 0.126457  | 0.243735 | 0.113636  | 0.104312  |
| 0.122378 | 0.053176  | 0.13141   | 0.124709  | 0.231498 | 0.113345  | 0.117424  |
| 0.117279 | 0.117424  | 0.128934  | 0.0849359 | 0.236597 | 0.112617  | 0.106789  |
| 0.184878 | 0.179779  | 0.194202  | 0.183129  | 0.128205 | 0.176719  | 0.184295  |
| 0.115822 | 0.11859   | 0.0456002 | 0.120775  | 0.239802 | 0.108829  | 0.103001  |
| 0.113782 | 0.113928  | 0.121066  | 0.107955  | 0.230769 | 0.101836  | 0.105915  |
| 0.106206 | 0.118007  | 0.122232  | 0.11757   | 0.224359 | 0.0622086 | 0.0977564 |
| 0.120775 | 0.115385  | 0.126894  | 0.11757   | 0.214744 | 0.109411  | 0.112325  |
| 0.114219 | 0.125146  | 0.123252  | 0.111597  | 0.240822 | 0.115385  | 0.104312  |
| 0.122378 | 0.128059  | 0.0460373 | 0.128497  | 0.24461  | 0.117716  | 0.109266  |
| 0.11859  | 0.118153  | 0.129953  | 0.114219  | 0.230915 | 0.0981935 | 0.110723  |
| 0.123252 | 0.119027  | 0.124709  | 0.120047  | 0.241113 | 0.111888  | 0.102564  |
| 0.144376 | 0.142774  | 0.157488  | 0.118735  | 0.244755 | 0.14292   | 0.138549  |
| 0.23208  | 0.226981  | 0.239073  | 0.227418  | 0.102273 | 0.228584  | 0.233829  |
| 0.126603 | 0.130536  | 0.13243   | 0.125728  | 0.242424 | 0.109703  | 0.113782  |
| 0.116113 | 0.123543  | 0.125728  | 0.11116   | 0.241259 | 0.114365  | 0.103001  |
| 0.115385 | 0.0557984 | 0.117716  | 0.118881  | 0.226544 | 0.108683  | 0.110431  |
| 0.125437 | 0.129371  | 0.131847  | 0.114948  | 0.229021 | 0.117279  | 0.115822  |
| 0.109266 | 0.106789  | 0.103438  | 0.105769  | 0.230041 | 0.105186  | 0.10373   |
| 0        | 0.119318  | 0.122378  | 0.118298  | 0.235577 | 0.101981  | 0.106352  |
| 0.119318 | 0         | 0.126311  | 0.124272  | 0.229312 | 0.112908  | 0.116113  |

|          |           |           |           |          |           |           |
|----------|-----------|-----------|-----------|----------|-----------|-----------|
| 0.122378 | 0.126311  | 0         | 0.125     | 0.241113 | 0.117716  | 0.104895  |
| 0.118298 | 0.124272  | 0.125     | 0         | 0.23208  | 0.112762  | 0.110723  |
| 0.235577 | 0.229312  | 0.241113  | 0.23208   | 0        | 0.230041  | 0.235868  |
| 0.101981 | 0.112908  | 0.117716  | 0.112762  | 0.230041 | 0         | 0.0961538 |
| 0.106352 | 0.116113  | 0.104895  | 0.110723  | 0.235868 | 0.0961538 | 0         |
| 0.114365 | 0.117424  | 0.123689  | 0.113491  | 0.232517 | 0.0945513 | 0.110577  |
| 0.130536 | 0.128642  | 0.141317  | 0.102273  | 0.239073 | 0.127622  | 0.122086  |
| 0.13141  | 0.138258  | 0.138695  | 0.132576  | 0.246649 | 0.116841  | 0.122086  |
| 0.112471 | 0.110577  | 0.129953  | 0.115676  | 0.223048 | 0.105186  | 0.118298  |
| 0.118881 | 0.0560897 | 0.125874  | 0.120338  | 0.228584 | 0.110431  | 0.112471  |
| 0.115822 | 0.115385  | 0.123397  | 0.095134  | 0.230769 | 0.106789  | 0.105332  |
| 0.228584 | 0.223485  | 0.234411  | 0.225379  | 0.104021 | 0.222756  | 0.229167  |
| 0.123106 | 0.0544872 | 0.129225  | 0.124854  | 0.231643 | 0.116404  | 0.116404  |
| 0.119464 | 0.12398   | 0.0407925 | 0.123252  | 0.239948 | 0.115385  | 0.102564  |
| 0.113054 | 0.121649  | 0.122378  | 0.0687646 | 0.235286 | 0.107517  | 0.101399  |
| 0.121941 | 0.121795  | 0.127185  | 0.116404  | 0.236888 | 0.117861  | 0.119027  |
| 0.116404 | 0.127331  | 0.116696  | 0.12602   | 0.244172 | 0.112325  | 0.0616259 |
| 0.120192 | 0.120921  | 0.129516  | 0.117279  | 0.229312 | 0.0977564 | 0.115239  |
| 0.118735 | 0.125291  | 0.050845  | 0.124563  | 0.240093 | 0.113199  | 0.105332  |
| 0.125    | 0.127768  | 0.0480769 | 0.129953  | 0.244318 | 0.118881  | 0.1081    |
| 0.113054 | 0.121358  | 0.0486597 | 0.118881  | 0.239656 | 0.112762  | 0.100233  |
| 0.119027 | 0.120047  | 0.130682  | 0.109994  | 0.2331   | 0.0971737 | 0.113199  |
| 0.116696 | 0.129079  | 0.131265  | 0.118735  | 0.238928 | 0.11757   | 0.11116   |
| 0.121503 | 0.128642  | 0.134033  | 0.12296   | 0.243444 | 0.124126  | 0.115676  |
| 0.127914 | 0.129516  | 0.13549   | 0.134907  | 0.241696 | 0.119464  | 0.118298  |
| 0.131702 | 0.137675  | 0.136946  | 0.136655  | 0.241404 | 0.118298  | 0.118881  |
| 0.119901 | 0.127622  | 0.130682  | 0.122523  | 0.245629 | 0.120192  | 0.11116   |
| 0.112034 | 0.119464  | 0.125437  | 0.112034  | 0.235431 | 0.076486  | 0.10271   |
| 0.129079 | 0.132721  | 0.0976107 | 0.137821  | 0.25102  | 0.126457  | 0.10373   |
| 0.133596 | 0.134324  | 0.125437  | 0.128934  | 0.246795 | 0.117861  | 0.124563  |
| 0.202652 | 0.194347  | 0.208188  | 0.200903  | 0.111305 | 0.194784  | 0.20236   |
| 0.123106 | 0.123252  | 0.131556  | 0.125437  | 0.233974 | 0.120775  | 0.118444  |
| 0.112034 | 0.124126  | 0.109703  | 0.113199  | 0.23951  | 0.103293  | 0.0505536 |
| 0.121795 | 0.12398   | 0.131119  | 0.121795  | 0.226544 | 0.104021  | 0.118298  |
| 0.221008 | 0.214161  | 0.229458  | 0.218094  | 0.105186 | 0.213432  | 0.219843  |
| 0.205857 | 0.205128  | 0.214015  | 0.207022  | 0.129953 | 0.203817  | 0.207896  |
| 0.123543 | 0.129225  | 0.0472028 | 0.132284  | 0.24053  | 0.119755  | 0.109266  |
| 0.247815 | 0.238928  | 0.250437  | 0.243735  | 0.104895 | 0.243153  | 0.246358  |
| 0.113782 | 0.121795  | 0.129808  | 0.11116   | 0.231935 | 0.0831876 | 0.103875  |
| 0.135052 | 0.138403  | 0.141463  | 0.136218  | 0.240676 | 0.119027  | 0.126311  |
| 0.103001 | 0.118298  | 0.122523  | 0.121649  | 0.233392 | 0.0412296 | 0.10067   |
| 0.117133 | 0.123397  | 0.127331  | 0.115676  | 0.242279 | 0.120338  | 0.107517  |
| 0.188083 | 0.18211   | 0.19391   | 0.183129  | 0.119755 | 0.178176  | 0.185752  |
| 0.117716 | 0.127768  | 0.126166  | 0.090035  | 0.232372 | 0.111597  | 0.112471  |



|           |           |           |           |          |           |           |
|-----------|-----------|-----------|-----------|----------|-----------|-----------|
| 0.193765  | 0.186043  | 0.198718  | 0.189977  | 0.127477 | 0.184149  | 0.191725  |
| 0.115385  | 0.121066  | 0.126748  | 0.1081    | 0.236451 | 0.10373   | 0.107517  |
| 0.119464  | 0.0992133 | 0.0745921 | 0.115093  | 0.220717 | 0.112179  | 0.105186  |
| 0.120921  | 0.122523  | 0.130828  | 0.120338  | 0.231789 | 0.0987762 | 0.114219  |
| 0.110723  | 0.105041  | 0.116259  | 0.113928  | 0.220425 | 0.0999417 | 0.104895  |
| 0.112908  | 0.112179  | 0.123397  | 0.106789  | 0.225816 | 0.0945513 | 0.103875  |
| 0.112617  | 0.113054  | 0.125728  | 0.112908  | 0.231643 | 0.108246  | 0.106206  |
| 0.0971737 | 0.117133  | 0.118735  | 0.113199  | 0.227855 | 0.0432692 | 0.0960082 |
| 0.115676  | 0.0610431 | 0.123543  | 0.11451   | 0.229749 | 0.109848  | 0.108392  |
| 0.117861  | 0.118881  | 0.0922203 | 0.121649  | 0.242133 | 0.112325  | 0.0919289 |
| 0.114365  | 0.117424  | 0.123689  | 0.112034  | 0.234266 | 0.101253  | 0.100087  |
| 0.101107  | 0.121649  | 0.119755  | 0.115967  | 0.232955 | 0.0399184 | 0.0961538 |
| 0.122232  | 0.12296   | 0.128059  | 0.120484  | 0.232226 | 0.108246  | 0.112034  |
| 0.122815  | 0.0606061 | 0.135927  | 0.127768  | 0.233974 | 0.120484  | 0.119901  |
| 0.119172  | 0.122232  | 0.125874  | 0.118881  | 0.23208  | 0.107226  | 0.106935  |
| 0.114656  | 0.119464  | 0.121941  | 0.111451  | 0.232226 | 0.10912   | 0.106206  |
| 0.113054  | 0.116113  | 0.123543  | 0.106643  | 0.226253 | 0.0932401 | 0.101399  |
| 0.116259  | 0.112325  | 0.0509907 | 0.120338  | 0.230332 | 0.110431  | 0.104021  |
| 0.114219  | 0.121066  | 0.124126  | 0.111305  | 0.237325 | 0.111888  | 0.103147  |
| 0.118444  | 0.129953  | 0.115822  | 0.122815  | 0.238928 | 0.108829  | 0.110577  |
| 0.118153  | 0.125     | 0.126603  | 0.126311  | 0.236014 | 0.110286  | 0.104167  |
| 0.116841  | 0.0627914 | 0.125583  | 0.118881  | 0.228584 | 0.110723  | 0.113054  |
| 0.127477  | 0.0576923 | 0.133304  | 0.13243   | 0.236014 | 0.121358  | 0.122232  |
| 0.130682  | 0.0614802 | 0.14292   | 0.135052  | 0.236305 | 0.130099  | 0.129808  |
| 0.107517  | 0.114365  | 0.0623543 | 0.111305  | 0.230624 | 0.099359  | 0.092366  |
| 0.122086  | 0.119318  | 0.129662  | 0.112179  | 0.230915 | 0.097028  | 0.108392  |
| 0.0528846 | 0.112179  | 0.116696  | 0.110577  | 0.231935 | 0.0913462 | 0.0977564 |
| 0.119027  | 0.129371  | 0.132139  | 0.126603  | 0.242424 | 0.121649  | 0.115239  |
| 0.105769  | 0.123689  | 0.125     | 0.123252  | 0.234411 | 0.0472028 | 0.103438  |
| 0.136364  | 0.144959  | 0.127331  | 0.140734  | 0.251311 | 0.124126  | 0.126457  |
| 0.135781  | 0.135344  | 0.144814  | 0.132284  | 0.237617 | 0.11451   | 0.13141   |
| 0.126311  | 0.126748  | 0.136218  | 0.0983392 | 0.236888 | 0.124272  | 0.116404  |
| 0.110431  | 0.115239  | 0.123543  | 0.113928  | 0.228875 | 0.0979021 | 0.102855  |
| 0.118444  | 0.114802  | 0.122523  | 0.101253  | 0.231935 | 0.108246  | 0.10067   |
| 0.13039   | 0.133741  | 0.137675  | 0.129808  | 0.23951  | 0.115822  | 0.116987  |
| 0.205128  | 0.199446  | 0.206876  | 0.203963  | 0.132139 | 0.198135  | 0.203089  |
| 0.111597  | 0.118153  | 0.120629  | 0.110723  | 0.230624 | 0.106643  | 0.106061  |
| 0.118153  | 0.123252  | 0.132721  | 0.114073  | 0.239219 | 0.0986305 | 0.108537  |
| 0.112179  | 0.120775  | 0.124126  | 0.111888  | 0.237034 | 0.111597  | 0.100816  |
| 0.120775  | 0.122086  | 0.128934  | 0.120775  | 0.233392 | 0.107663  | 0.109994  |
| 0.118298  | 0.129808  | 0.130828  | 0.112179  | 0.238199 | 0.111888  | 0.115967  |
| 0.105769  | 0.119027  | 0.123834  | 0.122669  | 0.238199 | 0.118881  | 0.106643  |
| 0.105915  | 0.116841  | 0.127185  | 0.125437  | 0.240093 | 0.121941  | 0.108829  |
| 0.122669  | 0.125437  | 0.133159  | 0.0935315 | 0.235577 | 0.115093  | 0.111014  |

|          |           |           |          |          |           |           |
|----------|-----------|-----------|----------|----------|-----------|-----------|
| 0.111597 | 0.118153  | 0.0917832 | 0.119172 | 0.238491 | 0.106643  | 0.0842075 |
| 0.115385 | 0.126311  | 0.128205  | 0.120338 | 0.241113 | 0.119755  | 0.108974  |
| 0.113054 | 0.123106  | 0.124709  | 0.115385 | 0.234703 | 0.0967366 | 0.102855  |
| 0.122232 | 0.126166  | 0.129808  | 0.117279 | 0.240093 | 0.103584  | 0.106789  |
| 0.173077 | 0.174388  | 0.176282  | 0.17366  | 0.205274 | 0.170163  | 0.164918  |
| 0.121503 | 0.0607517 | 0.128205  | 0.115093 | 0.229458 | 0.108392  | 0.111888  |
| 0.118444 | 0.127914  | 0.128934  | 0.123106 | 0.232517 | 0.119901  | 0.111742  |
| 0.124126 | 0.133013  | 0.113636  | 0.126166 | 0.24461  | 0.100524  | 0.104604  |
| 0.121649 | 0.113054  | 0.119318  | 0.115239 | 0.232517 | 0.114656  | 0.111451  |
| 0.101544 | 0.110723  | 0.118444  | 0.104167 | 0.234848 | 0.095134  | 0.0980478 |
| 0.10708  | 0.113636  | 0.117279  | 0.108829 | 0.2331   | 0.0945513 | 0.0936772 |
| 0.107663 | 0.115967  | 0.121941  | 0.11116  | 0.238345 | 0.0995047 | 0.102127  |
| 0.118735 | 0.127331  | 0.10708   | 0.120484 | 0.240093 | 0.113782  | 0.10708   |
| 0.120192 | 0.0906177 | 0.128351  | 0.108829 | 0.227273 | 0.106789  | 0.108537  |
| 0.124417 | 0.131847  | 0.127331  | 0.131993 | 0.24257  | 0.110723  | 0.11655   |
| 0.107663 | 0.113345  | 0.111742  | 0.106206 | 0.232809 | 0.104749  | 0.0936772 |
| 0.107517 | 0.127477  | 0.116259  | 0.119755 | 0.234411 | 0.105769  | 0.101981  |
| 0.121358 | 0.134615  | 0.0995047 | 0.122815 | 0.246795 | 0.113199  | 0.116987  |
| 0.116696 | 0.122669  | 0.111451  | 0.12398  | 0.238928 | 0.0992133 | 0.10067   |
| 0.119027 | 0.124126  | 0.119901  | 0.128351 | 0.236597 | 0.114365  | 0.111742  |
| 0.113199 | 0.120629  | 0.109994  | 0.118153 | 0.236888 | 0.0948427 | 0.095134  |
| 0.114656 | 0.119755  | 0.113199  | 0.120192 | 0.238636 | 0.099796  | 0.0989219 |
| 0.104749 | 0.118881  | 0.118444  | 0.115239 | 0.233392 | 0.0887238 | 0.097465  |
| 0.118881 | 0.128642  | 0.119464  | 0.127331 | 0.243735 | 0.105186  | 0.11014   |
| 0.113345 | 0.119318  | 0.116841  | 0.113345 | 0.237034 | 0.0909091 | 0.0932401 |
| 0.135198 | 0.135052  | 0.109848  | 0.144231 | 0.244901 | 0.134615  | 0.125291  |
| 0.13141  | 0.126311  | 0.108392  | 0.127622 | 0.237908 | 0.125291  | 0.119172  |
| 0.117424 | 0.118153  | 0.109557  | 0.117716 | 0.237325 | 0.0996503 | 0.0961538 |
| 0.128934 | 0.135198  | 0.10708   | 0.137966 | 0.25     | 0.128642  | 0.124563  |
| 0.128351 | 0.124709  | 0.134178  | 0.117279 | 0.235431 | 0.116404  | 0.114656  |
| 0.131847 | 0.136946  | 0.12398   | 0.130682 | 0.246795 | 0.114073  | 0.121649  |
| 0.116696 | 0.120921  | 0.122232  | 0.11757  | 0.236014 | 0.0948427 | 0.102418  |
| 0.135781 | 0.136801  | 0.143357  | 0.146853 | 0.241404 | 0.136655  | 0.129953  |
| 0.120921 | 0.13243   | 0.124126  | 0.127622 | 0.23616  | 0.117424  | 0.114219  |
| 0.128205 | 0.141463  | 0.11859   | 0.132284 | 0.241404 | 0.12296   | 0.119464  |
| 0.120338 | 0.128934  | 0.124126  | 0.125    | 0.24461  | 0.110723  | 0.109557  |
| 0.119901 | 0.118881  | 0.106498  | 0.116113 | 0.239219 | 0.0948427 | 0.0962995 |
| 0.112471 | 0.122523  | 0.11014   | 0.115093 | 0.236742 | 0.0961538 | 0.10169   |
| 0.113491 | 0.123543  | 0.103875  | 0.111451 | 0.238054 | 0.110577  | 0.0954254 |
| 0.117279 | 0.125874  | 0.119901  | 0.128642 | 0.242133 | 0.0983392 | 0.0971737 |
| 0.123543 | 0.127185  | 0.128497  | 0.134907 | 0.249272 | 0.107809  | 0.115093  |
| 0.124709 | 0.125437  | 0.111597  | 0.116841 | 0.235868 | 0.111597  | 0.115676  |
| 0.111305 | 0.122523  | 0.113345  | 0.115385 | 0.234703 | 0.0958625 | 0.092366  |
| 0.114073 | 0.121795  | 0.110577  | 0.119027 | 0.236014 | 0.0965909 | 0.0995047 |

|          |          |          |          |          |           |          |
|----------|----------|----------|----------|----------|-----------|----------|
| 0.11655  | 0.125437 | 0.113928 | 0.126748 | 0.234703 | 0.0996503 | 0.109848 |
| 0.109557 | 0.11757  | 0.103438 | 0.121212 | 0.235286 | 0.0909091 | 0.106352 |
| 0.120484 | 0.130245 | 0.113491 | 0.125728 | 0.239802 | 0.106206  | 0.107372 |
| 0.114073 | 0.119755 | 0.128059 | 0.115822 | 0.236014 | 0.0907634 | 0.101836 |
| 0.114219 | 0.108246 | 0.129953 | 0.115385 | 0.221591 | 0.105186  | 0.11451  |
| 0.115385 | 0.116404 | 0.127622 | 0.115967 | 0.238782 | 0.0949883 | 0.10169  |
| 0.110431 | 0.119027 | 0.126457 | 0.113636 | 0.233537 | 0.0777972 | 0.100233 |
| 0.109557 | 0.121358 | 0.113345 | 0.11859  | 0.233246 | 0.092366  | 0.103147 |
| 0.109994 | 0.110723 | 0.124563 | 0.11553  | 0.224359 | 0.103293  | 0.113782 |
| 0.11014  | 0.112908 | 0.125    | 0.115676 | 0.23616  | 0.0996503 | 0.102564 |
| 0.116259 | 0.104167 | 0.129662 | 0.122669 | 0.231206 | 0.106643  | 0.113636 |
| 0.104021 | 0.107663 | 0.115967 | 0.106643 | 0.221591 | 0.0955711 | 0.105769 |
| 0.121649 | 0.122086 | 0.128934 | 0.131265 | 0.240676 | 0.11116   | 0.116987 |

| TDr_3569  | TDr_3576 | TDr_3579  | TDr_3584  | TDr_3585 | TDr_3590  | TDr_3592 |
|-----------|----------|-----------|-----------|----------|-----------|----------|
| 0.118735  | 0.136946 | 0.123834  | 0.106643  | 0.119464 | 0.113199  | 0.215181 |
| 0.10373   | 0.121358 | 0.124854  | 0.0470571 | 0.106789 | 0.105769  | 0.21824  |
| 0.0981935 | 0.11961  | 0.123397  | 0.0528846 | 0.101836 | 0.102273  | 0.218823 |
| 0.103438  | 0.126311 | 0.133887  | 0.10708   | 0.090472 | 0.111597  | 0.224942 |
| 0.131119  | 0.127185 | 0.131847  | 0.134178  | 0.132721 | 0.121795  | 0.23514  |
| 0.120047  | 0.125437 | 0.141463  | 0.125437  | 0.128934 | 0.123252  | 0.227855 |
| 0.120192  | 0.136072 | 0.125     | 0.123252  | 0.128788 | 0.121066  | 0.233246 |
| 0.104458  | 0.122669 | 0.125     | 0.109557  | 0.106643 | 0.10708   | 0.217512 |
| 0.102855  | 0.12398  | 0.106498  | 0.103293  | 0.108829 | 0.101399  | 0.225524 |
| 0.0925117 | 0.125291 | 0.0920746 | 0.102855  | 0.120921 | 0.110577  | 0.227418 |
| 0.108392  | 0.134761 | 0.121066  | 0.11553   | 0.125728 | 0.115093  | 0.216492 |
| 0.111451  | 0.122669 | 0.128205  | 0.10373   | 0.106643 | 0.105041  | 0.226253 |
| 0.102418  | 0.127622 | 0.113054  | 0.105478  | 0.11655  | 0.105915  | 0.230041 |
| 0.122669  | 0.146416 | 0.139132  | 0.126603  | 0.128934 | 0.130245  | 0.186772 |
| 0.0488054 | 0.129371 | 0.128497  | 0.11859   | 0.128788 | 0.117279  | 0.229749 |
| 0.104021  | 0.127185 | 0.121941  | 0.117279  | 0.121358 | 0.112471  | 0.229021 |
| 0.107663  | 0.127914 | 0.125583  | 0.114219  | 0.115967 | 0.10912   | 0.229458 |
| 0.139277  | 0.13447  | 0.146707  | 0.133887  | 0.14088  | 0.135198  | 0.240385 |
| 0.102564  | 0.11961  | 0.12398   | 0.064831  | 0.103001 | 0.0999417 | 0.215618 |
| 0.172786  | 0.207314 | 0.206731  | 0.186626  | 0.198864 | 0.198135  | 0.131702 |
| 0.116404  | 0.125874 | 0.140443  | 0.120629  | 0.129079 | 0.110577  | 0.232663 |
| 0.117133  | 0.122232 | 0.131847  | 0.118153  | 0.11961  | 0.107517  | 0.235723 |
| 0.107372  | 0.12704  | 0.117716  | 0.111014  | 0.112471 | 0.10912   | 0.221882 |
| 0.124709  | 0.131265 | 0.135344  | 0.126603  | 0.127477 | 0.120338  | 0.237179 |
| 0.0983392 | 0.117133 | 0.113636  | 0.106643  | 0.108683 | 0.102127  | 0.223339 |
| 0.121358  | 0.125874 | 0.144814  | 0.125874  | 0.13345  | 0.113491  | 0.232663 |
| 0.121066  | 0.13549  | 0.133741  | 0.128497  | 0.129079 | 0.119027  | 0.233537 |
| 0.113199  | 0.129079 | 0.124417  | 0.113928  | 0.123252 | 0.115239  | 0.238782 |
| 0.128351  | 0.136946 | 0.135198  | 0.130536  | 0.134615 | 0.125437  | 0.231206 |
| 0.112325  | 0.139569 | 0.122086  | 0.125874  | 0.127622 | 0.124854  | 0.239948 |
| 0.109848  | 0.137383 | 0.128642  | 0.122232  | 0.132139 | 0.121503  | 0.228438 |
| 0.112908  | 0.129953 | 0.126748  | 0.120047  | 0.125583 | 0.114365  | 0.23412  |
| 0.0954254 | 0.11859  | 0.119172  | 0.104312  | 0.112762 | 0.103875  | 0.219551 |
| 0.112325  | 0.130245 | 0.120921  | 0.116841  | 0.119755 | 0.114365  | 0.230332 |
| 0.114219  | 0.132721 | 0.113782  | 0.122232  | 0.123689 | 0.114802  | 0.236014 |
| 0.123106  | 0.138403 | 0.11655   | 0.128788  | 0.131993 | 0.121066  | 0.234411 |
| 0.125583  | 0.140006 | 0.133013  | 0.129808  | 0.134761 | 0.132284  | 0.243298 |
| 0.119027  | 0.136946 | 0.125583  | 0.122378  | 0.127914 | 0.11757   | 0.23616  |
| 0.104749  | 0.125    | 0.120921  | 0.110431  | 0.112762 | 0.104458  | 0.228001 |
| 0.116113  | 0.131702 | 0.126748  | 0.122669  | 0.122669 | 0.116987  | 0.238491 |
| 0.10708   | 0.124417 | 0.121503  | 0.111014  | 0.113928 | 0.105332  | 0.228001 |
| 0.130973  | 0.15035  | 0.13986   | 0.1419    | 0.142191 | 0.138549  | 0.246941 |

|          |          |          |          |           |          |          |
|----------|----------|----------|----------|-----------|----------|----------|
| 0.140006 | 0.154138 | 0.144814 | 0.144231 | 0.146853  | 0.142337 | 0.239365 |
| 0.112762 | 0.127477 | 0.116696 | 0.120775 | 0.120484  | 0.106935 | 0.229604 |
| 0.107226 | 0.11961  | 0.110577 | 0.112617 | 0.117861  | 0.101981 | 0.228147 |
| 0.107372 | 0.137529 | 0.111597 | 0.117424 | 0.126457  | 0.119318 | 0.238199 |
| 0.112908 | 0.125    | 0.130245 | 0.12296  | 0.122378  | 0.112325 | 0.231206 |
| 0.131993 | 0.14933  | 0.133013 | 0.139423 | 0.140297  | 0.13345  | 0.23951  |
| 0.111305 | 0.126311 | 0.122815 | 0.115239 | 0.116696  | 0.111888 | 0.231935 |
| 0.110286 | 0.128788 | 0.117716 | 0.115676 | 0.120629  | 0.117861 | 0.228293 |
| 0.138986 | 0.152535 | 0.156906 | 0.136801 | 0.150495  | 0.141317 | 0.245629 |
| 0.122086 | 0.131847 | 0.13243  | 0.127185 | 0.133013  | 0.122086 | 0.229312 |
| 0.112325 | 0.129662 | 0.12704  | 0.117716 | 0.119172  | 0.109994 | 0.228584 |
| 0.11116  | 0.134033 | 0.107809 | 0.122086 | 0.125291  | 0.11961  | 0.238199 |
| 0.110577 | 0.125291 | 0.128788 | 0.111888 | 0.0871212 | 0.112325 | 0.216638 |
| 0.13884  | 0.142774 | 0.146562 | 0.144231 | 0.137238  | 0.131847 | 0.246358 |
| 0.122669 | 0.140006 | 0.134761 | 0.124272 | 0.132139  | 0.120921 | 0.237179 |
| 0.108974 | 0.127477 | 0.124272 | 0.118153 | 0.117279  | 0.106352 | 0.234266 |
| 0.111597 | 0.132139 | 0.120484 | 0.118735 | 0.122232  | 0.113054 | 0.224068 |
| 0.110577 | 0.133159 | 0.110723 | 0.118007 | 0.127622  | 0.117861 | 0.237034 |
| 0.13039  | 0.146853 | 0.143357 | 0.136655 | 0.138986  | 0.134178 | 0.245192 |
| 0.131265 | 0.145396 | 0.141608 | 0.134033 | 0.13549   | 0.134761 | 0.250728 |
| 0.150932 | 0.173805 | 0.169143 | 0.154283 | 0.159237  | 0.159674 | 0.185023 |
| 0.107226 | 0.127185 | 0.123106 | 0.115239 | 0.116987  | 0.107517 | 0.229312 |
| 0.113345 | 0.124854 | 0.123397 | 0.111742 | 0.117861  | 0.106643 | 0.230478 |
| 0.114802 | 0.130682 | 0.123397 | 0.113782 | 0.114365  | 0.106935 | 0.233392 |
| 0.134761 | 0.150641 | 0.139277 | 0.13549  | 0.145396  | 0.134761 | 0.23616  |
| 0.105041 | 0.126748 | 0.122669 | 0.114219 | 0.112471  | 0.107372 | 0.229749 |
| 0.128497 | 0.136509 | 0.140006 | 0.137675 | 0.133887  | 0.128788 | 0.233683 |
| 0.107517 | 0.133887 | 0.116696 | 0.117861 | 0.128059  | 0.118881 | 0.236014 |
| 0.114073 | 0.134324 | 0.126166 | 0.121795 | 0.124126  | 0.114365 | 0.228001 |
| 0.141171 | 0.157343 | 0.152389 | 0.144814 | 0.147727  | 0.143794 | 0.234411 |
| 0.11757  | 0.138695 | 0.133159 | 0.125583 | 0.122669  | 0.122815 | 0.238491 |
| 0.129662 | 0.148747 | 0.135344 | 0.13243  | 0.138258  | 0.131702 | 0.245629 |
| 0.126894 | 0.136364 | 0.137821 | 0.13141  | 0.135198  | 0.120775 | 0.23208  |
| 0.1081   | 0.11961  | 0.131265 | 0.113491 | 0.107955  | 0.107517 | 0.221445 |
| 0.112179 | 0.128642 | 0.121941 | 0.116987 | 0.118153  | 0.113054 | 0.226981 |
| 0.110723 | 0.127185 | 0.123106 | 0.116404 | 0.119901  | 0.107226 | 0.232226 |
| 0.130245 | 0.140589 | 0.137966 | 0.133887 | 0.129808  | 0.124709 | 0.24359  |
| 0.113491 | 0.128788 | 0.122086 | 0.112179 | 0.119172  | 0.10708  | 0.230041 |
| 0.131993 | 0.149913 | 0.139714 | 0.136218 | 0.137383  | 0.134615 | 0.245921 |
| 0.115967 | 0.137383 | 0.13243  | 0.127768 | 0.129808  | 0.120047 | 0.229312 |
| 0.113636 | 0.127768 | 0.131265 | 0.121066 | 0.118444  | 0.117716 | 0.236597 |
| 0.11451  | 0.133887 | 0.131265 | 0.117279 | 0.121358  | 0.118298 | 0.230478 |
| 0.115093 | 0.13243  | 0.130682 | 0.125146 | 0.122232  | 0.11655  | 0.235723 |
| 0.112471 | 0.129225 | 0.12602  | 0.11553  | 0.121358  | 0.1081   | 0.233974 |

|           |          |          |          |          |           |          |
|-----------|----------|----------|----------|----------|-----------|----------|
| 0.112471  | 0.126311 | 0.125146 | 0.121066 | 0.116113 | 0.11014   | 0.230769 |
| 0.130099  | 0.145105 | 0.13549  | 0.142774 | 0.137821 | 0.133596  | 0.241987 |
| 0.101544  | 0.131993 | 0.120338 | 0.113054 | 0.121795 | 0.112034  | 0.229749 |
| 0.106935  | 0.128351 | 0.10912  | 0.115239 | 0.117279 | 0.106061  | 0.232517 |
| 0.117716  | 0.133887 | 0.131847 | 0.127185 | 0.129516 | 0.121503  | 0.237762 |
| 0.124709  | 0.139423 | 0.129516 | 0.125728 | 0.135927 | 0.125291  | 0.235431 |
| 0.123252  | 0.128934 | 0.12602  | 0.126603 | 0.137092 | 0.122669  | 0.243881 |
| 0.130099  | 0.132867 | 0.135781 | 0.136946 | 0.138403 | 0.128642  | 0.247815 |
| 0.114802  | 0.128934 | 0.127768 | 0.116113 | 0.12602  | 0.113345  | 0.22669  |
| 0.174534  | 0.192745 | 0.19391  | 0.177593 | 0.184295 | 0.180361  | 0.16958  |
| 0.103875  | 0.122378 | 0.125291 | 0.114219 | 0.112471 | 0.107955  | 0.232663 |
| 0.12704   | 0.136509 | 0.134178 | 0.138258 | 0.140297 | 0.128205  | 0.242133 |
| 0.119172  | 0.130682 | 0.126311 | 0.129225 | 0.130973 | 0.11859   | 0.239219 |
| 0.13243   | 0.142483 | 0.140443 | 0.137821 | 0.141317 | 0.128934  | 0.245192 |
| 0.106352  | 0.120775 | 0.120775 | 0.111451 | 0.117861 | 0.106643  | 0.232809 |
| 0.125583  | 0.132139 | 0.134178 | 0.133013 | 0.13243  | 0.122669  | 0.249709 |
| 0.111888  | 0.123689 | 0.117279 | 0.117279 | 0.121066 | 0.109557  | 0.235431 |
| 0.117279  | 0.126457 | 0.126457 | 0.127622 | 0.129079 | 0.121649  | 0.235577 |
| 0.108537  | 0.128205 | 0.121795 | 0.119755 | 0.119464 | 0.11757   | 0.23208  |
| 0.130682  | 0.131702 | 0.137821 | 0.138112 | 0.143939 | 0.125437  | 0.246066 |
| 0.105332  | 0.131702 | 0.115676 | 0.112762 | 0.120338 | 0.11116   | 0.230915 |
| 0.127622  | 0.142045 | 0.135052 | 0.13243  | 0.135344 | 0.129953  | 0.236888 |
| 0.116404  | 0.131993 | 0.126457 | 0.114802 | 0.124417 | 0.116696  | 0.233829 |
| 0.125     | 0.137383 | 0.130973 | 0.133304 | 0.131265 | 0.125291  | 0.240967 |
| 0.118735  | 0.142191 | 0.129662 | 0.127914 | 0.13986  | 0.128642  | 0.235577 |
| 0.107663  | 0.11859  | 0.118881 | 0.11451  | 0.121503 | 0.105915  | 0.232372 |
| 0.135635  | 0.157343 | 0.148601 | 0.1419   | 0.146562 | 0.138549  | 0.237908 |
| 0.113345  | 0.122232 | 0.119901 | 0.116696 | 0.124272 | 0.112471  | 0.231352 |
| 0.109557  | 0.125437 | 0.118444 | 0.114073 | 0.120775 | 0.11014   | 0.235723 |
| 0.111742  | 0.126457 | 0.120921 | 0.119755 | 0.127914 | 0.112617  | 0.233537 |
| 0.137092  | 0.146853 | 0.136655 | 0.139277 | 0.145979 | 0.134761  | 0.241987 |
| 0.114948  | 0.13549  | 0.134324 | 0.123834 | 0.125291 | 0.121066  | 0.213141 |
| 0.106498  | 0.119464 | 0.115093 | 0.110723 | 0.115093 | 0.103001  | 0.232663 |
| 0.104458  | 0.118007 | 0.117716 | 0.111597 | 0.118881 | 0.0962995 | 0.229749 |
| 0.112179  | 0.13039  | 0.124272 | 0.118153 | 0.124563 | 0.112471  | 0.231352 |
| 0.114073  | 0.13986  | 0.116259 | 0.125291 | 0.131993 | 0.12602   | 0.240822 |
| 0.116259  | 0.133013 | 0.126894 | 0.116987 | 0.127477 | 0.113054  | 0.231061 |
| 0.099796  | 0.124417 | 0.112179 | 0.109266 | 0.110723 | 0.106498  | 0.226544 |
| 0.100379  | 0.124709 | 0.104895 | 0.1081   | 0.112762 | 0.103001  | 0.226836 |
| 0.104021  | 0.125146 | 0.107955 | 0.11553  | 0.118153 | 0.107226  | 0.232517 |
| 0.117716  | 0.131265 | 0.129225 | 0.122815 | 0.123689 | 0.111305  | 0.229312 |
| 0.11757   | 0.139569 | 0.118007 | 0.129953 | 0.132867 | 0.123689  | 0.238199 |
| 0.0981935 | 0.126311 | 0.112034 | 0.115239 | 0.116404 | 0.111014  | 0.23514  |
| 0.0933858 | 0.120338 | 0.111597 | 0.1081   | 0.111888 | 0.100962  | 0.227127 |

|           |          |          |          |           |          |          |
|-----------|----------|----------|----------|-----------|----------|----------|
| 0.114073  | 0.13986  | 0.117424 | 0.127331 | 0.134907  | 0.122232 | 0.235868 |
| 0.100524  | 0.13243  | 0.113199 | 0.110868 | 0.116987  | 0.109848 | 0.229312 |
| 0.115093  | 0.138258 | 0.129225 | 0.118444 | 0.128934  | 0.11859  | 0.22873  |
| 0.125874  | 0.142045 | 0.146416 | 0.127185 | 0.135052  | 0.130536 | 0.236597 |
| 0.109266  | 0.128642 | 0.116696 | 0.11757  | 0.120484  | 0.113928 | 0.232517 |
| 0.101544  | 0.130245 | 0.112471 | 0.113928 | 0.117424  | 0.113491 | 0.23412  |
| 0.103001  | 0.12704  | 0.112762 | 0.112762 | 0.116259  | 0.107372 | 0.232372 |
| 0.103293  | 0.120921 | 0.109848 | 0.108683 | 0.115967  | 0.10067  | 0.224505 |
| 0.116696  | 0.135198 | 0.118881 | 0.121503 | 0.12704   | 0.11961  | 0.237034 |
| 0.0954254 | 0.122669 | 0.109848 | 0.106643 | 0.112179  | 0.101836 | 0.228293 |
| 0.128788  | 0.151078 | 0.138549 | 0.13884  | 0.139714  | 0.137238 | 0.243007 |
| 0.124272  | 0.146853 | 0.134907 | 0.137238 | 0.1419    | 0.133013 | 0.234411 |
| 0.114365  | 0.138986 | 0.126748 | 0.126457 | 0.129371  | 0.121649 | 0.240822 |
| 0.107226  | 0.13039  | 0.119318 | 0.119901 | 0.125146  | 0.111888 | 0.231935 |
| 0.1081    | 0.125437 | 0.129516 | 0.111451 | 0.122232  | 0.109557 | 0.230478 |
| 0.103875  | 0.129079 | 0.11859  | 0.114219 | 0.120629  | 0.108829 | 0.231498 |
| 0.112179  | 0.131265 | 0.118735 | 0.114365 | 0.116987  | 0.109848 | 0.2331   |
| 0.107226  | 0.122232 | 0.116113 | 0.112908 | 0.114948  | 0.104604 | 0.229604 |
| 0.108392  | 0.126894 | 0.127768 | 0.107372 | 0.0960082 | 0.1081   | 0.219988 |
| 0.122086  | 0.136218 | 0.135927 | 0.129225 | 0.135927  | 0.124126 | 0.243298 |
| 0.109994  | 0.123543 | 0.124417 | 0.117424 | 0.119464  | 0.109703 | 0.239365 |
| 0.11655   | 0.137966 | 0.121941 | 0.123106 | 0.135635  | 0.124417 | 0.232226 |
| 0.127768  | 0.142191 | 0.137529 | 0.13986  | 0.140734  | 0.130973 | 0.244318 |
| 0.182838  | 0.202506 | 0.203963 | 0.179487 | 0.184732  | 0.186917 | 0.128642 |
| 0.22873   | 0.236742 | 0.244318 | 0.224213 | 0.228001  | 0.230478 | 0.104021 |
| 0.107372  | 0.125291 | 0.132867 | 0.108392 | 0.0702214 | 0.103875 | 0.218094 |
| 0.108974  | 0.124563 | 0.124272 | 0.116404 | 0.115239  | 0.111014 | 0.226107 |
| 0.106061  | 0.123689 | 0.120192 | 0.112908 | 0.112034  | 0.105478 | 0.222319 |
| 0.110431  | 0.121941 | 0.127185 | 0.115822 | 0.114365  | 0.102273 | 0.227273 |
| 0.0539044 | 0.135344 | 0.126311 | 0.120484 | 0.128351  | 0.119464 | 0.229021 |
| 0.111597  | 0.126311 | 0.130973 | 0.120192 | 0.116404  | 0.1081   | 0.231935 |
| 0.143794  | 0.152681 | 0.148601 | 0.152098 | 0.14831   | 0.143502 | 0.247815 |
| 0.116259  | 0.122523 | 0.129808 | 0.121358 | 0.120192  | 0.108683 | 0.233392 |
| 0.128497  | 0.135052 | 0.139132 | 0.130099 | 0.132139  | 0.123252 | 0.23951  |
| 0.123397  | 0.134615 | 0.138112 | 0.134615 | 0.132284  | 0.125146 | 0.233537 |
| 0.12398   | 0.134907 | 0.139277 | 0.139569 | 0.134324  | 0.128351 | 0.241696 |
| 0.128642  | 0.147145 | 0.13345  | 0.132867 | 0.136072  | 0.131265 | 0.234703 |
| 0.110868  | 0.128788 | 0.12704  | 0.119464 | 0.12296   | 0.10912  | 0.238199 |
| 0.113199  | 0.123834 | 0.127622 | 0.118881 | 0.117716  | 0.10708  | 0.23208  |
| 0.111597  | 0.125146 | 0.128642 | 0.121358 | 0.12602   | 0.113636 | 0.231935 |
| 0.111305  | 0.119318 | 0.12602  | 0.112617 | 0.11116   | 0.103438 | 0.224359 |
| 0.110723  | 0.123106 | 0.125728 | 0.11961  | 0.116113  | 0.106352 | 0.229604 |
| 0.11553   | 0.126748 | 0.130828 | 0.120921 | 0.116259  | 0.11116  | 0.232663 |
| 0.120047  | 0.129808 | 0.136509 | 0.127477 | 0.129808  | 0.119755 | 0.23951  |

|           |          |           |          |          |          |          |
|-----------|----------|-----------|----------|----------|----------|----------|
| 0.129953  | 0.133596 | 0.145542  | 0.142045 | 0.137675 | 0.124709 | 0.244172 |
| 0.11757   | 0.129371 | 0.133741  | 0.125    | 0.118298 | 0.110868 | 0.232372 |
| 0.114802  | 0.126894 | 0.129808  | 0.118735 | 0.120192 | 0.111888 | 0.229312 |
| 0.133741  | 0.139423 | 0.140297  | 0.135344 | 0.135927 | 0.123543 | 0.242133 |
| 0.110723  | 0.126894 | 0.125437  | 0.112617 | 0.116404 | 0.1081   | 0.229021 |
| 0.133304  | 0.145396 | 0.151515  | 0.140734 | 0.147145 | 0.134178 | 0.239365 |
| 0.121941  | 0.143357 | 0.132867  | 0.13141  | 0.142774 | 0.131847 | 0.227418 |
| 0.127914  | 0.127185 | 0.13884   | 0.132139 | 0.135344 | 0.125583 | 0.233974 |
| 0.109848  | 0.123397 | 0.125437  | 0.119318 | 0.113782 | 0.106352 | 0.229895 |
| 0.108829  | 0.122378 | 0.120629  | 0.113345 | 0.115385 | 0.102127 | 0.228875 |
| 0.120047  | 0.129516 | 0.136218  | 0.128642 | 0.126603 | 0.120047 | 0.239802 |
| 0.121358  | 0.127914 | 0.133159  | 0.128205 | 0.126457 | 0.113782 | 0.237034 |
| 0.13039   | 0.135198 | 0.137529  | 0.140152 | 0.132576 | 0.122815 | 0.233829 |
| 0.119464  | 0.129516 | 0.135344  | 0.121649 | 0.122232 | 0.110723 | 0.23514  |
| 0.116113  | 0.128205 | 0.131702  | 0.128788 | 0.123834 | 0.110286 | 0.23208  |
| 0.114948  | 0.127622 | 0.130536  | 0.123834 | 0.123543 | 0.112908 | 0.235868 |
| 0.129225  | 0.137821 | 0.136946  | 0.13986  | 0.140734 | 0.125146 | 0.244901 |
| 0.128934  | 0.134324 | 0.141317  | 0.132867 | 0.132576 | 0.12398  | 0.239365 |
| 0.126166  | 0.138258 | 0.145833  | 0.141463 | 0.137675 | 0.12704  | 0.242716 |
| 0.125728  | 0.137238 | 0.138695  | 0.131119 | 0.136655 | 0.13039  | 0.232955 |
| 0.117279  | 0.127914 | 0.130245  | 0.11859  | 0.114219 | 0.108829 | 0.23412  |
| 0.128934  | 0.135198 | 0.141317  | 0.132284 | 0.134907 | 0.125437 | 0.238491 |
| 0.109266  | 0.119318 | 0.121066  | 0.115239 | 0.114948 | 0.104021 | 0.232517 |
| 0.113491  | 0.128205 | 0.120338  | 0.117133 | 0.120338 | 0.105332 | 0.226544 |
| 0.109994  | 0.119172 | 0.125583  | 0.115967 | 0.120047 | 0.103001 | 0.234703 |
| 0.112471  | 0.122815 | 0.128642  | 0.118444 | 0.122523 | 0.108683 | 0.228438 |
| 0.11014   | 0.121066 | 0.121649  | 0.114656 | 0.115822 | 0.104021 | 0.228438 |
| 0.131556  | 0.140734 | 0.143648  | 0.141026 | 0.137529 | 0.126603 | 0.241696 |
| 0.114219  | 0.128642 | 0.130682  | 0.112617 | 0.123397 | 0.111014 | 0.231352 |
| 0.130828  | 0.140589 | 0.138549  | 0.129808 | 0.132139 | 0.123834 | 0.240093 |
| 0.110431  | 0.120192 | 0.126894  | 0.113491 | 0.115239 | 0.105186 | 0.226399 |
| 0.123689  | 0.132867 | 0.132284  | 0.134324 | 0.131993 | 0.123689 | 0.238782 |
| 0.118881  | 0.131847 | 0.116987  | 0.121358 | 0.127768 | 0.121503 | 0.231643 |
| 0.106935  | 0.132721 | 0.123397  | 0.116696 | 0.12398  | 0.112471 | 0.224942 |
| 0.110577  | 0.129079 | 0.11655   | 0.118298 | 0.124126 | 0.113491 | 0.23616  |
| 0.115385  | 0.128059 | 0.127768  | 0.118735 | 0.121941 | 0.115967 | 0.227855 |
| 0.113199  | 0.133741 | 0.135198  | 0.12296  | 0.124126 | 0.114365 | 0.236451 |
| 0.110286  | 0.128788 | 0.130245  | 0.117716 | 0.119755 | 0.110286 | 0.233829 |
| 0.121941  | 0.143939 | 0.0885781 | 0.127914 | 0.140443 | 0.133596 | 0.241696 |
| 0.130245  | 0.149621 | 0.140297  | 0.136801 | 0.137966 | 0.135781 | 0.245338 |
| 0.0984848 | 0.12398  | 0.0965909 | 0.104749 | 0.112617 | 0.101107 | 0.227855 |
| 0.114948  | 0.129079 | 0.126748  | 0.124126 | 0.135781 | 0.121941 | 0.245192 |
| 0.11014   | 0.139423 | 0.0907634 | 0.122523 | 0.135344 | 0.126457 | 0.237762 |
| 0.117716  | 0.124563 | 0.126894  | 0.125146 | 0.133013 | 0.11451  | 0.236888 |



|          |          |           |          |          |          |          |
|----------|----------|-----------|----------|----------|----------|----------|
| 0.109266 | 0.122232 | 0.118444  | 0.114073 | 0.125146 | 0.112762 | 0.230186 |
| 0.111888 | 0.135927 | 0.0866841 | 0.116987 | 0.131265 | 0.117716 | 0.237762 |
| 0.112617 | 0.132867 | 0.0801282 | 0.117716 | 0.129953 | 0.119901 | 0.235577 |
| 0.12296  | 0.131556 | 0.120192  | 0.126603 | 0.127768 | 0.118007 | 0.242716 |
| 0.121212 | 0.137675 | 0.124563  | 0.132721 | 0.142337 | 0.132867 | 0.243298 |
| 0.111888 | 0.133013 | 0.0814394 | 0.113199 | 0.124563 | 0.115967 | 0.238928 |
| 0.106643 | 0.117279 | 0.11961   | 0.113491 | 0.124854 | 0.108392 | 0.229895 |
| 0.135635 | 0.144814 | 0.15035   | 0.137529 | 0.130245 | 0.131847 | 0.237034 |
| 0.119172 | 0.138258 | 0.0779429 | 0.129516 | 0.13884  | 0.125    | 0.238928 |
| 0.104021 | 0.121941 | 0.105624  | 0.10708  | 0.116987 | 0.104895 | 0.226107 |
| 0.214015 | 0.222028 | 0.229604  | 0.206585 | 0.208916 | 0.214307 | 0.114073 |
| 0.110577 | 0.131119 | 0.119464  | 0.118881 | 0.127622 | 0.115822 | 0.235286 |
| 0.110286 | 0.129662 | 0.0897436 | 0.112179 | 0.122669 | 0.110868 | 0.233246 |
| 0.119464 | 0.134178 | 0.120192  | 0.128351 | 0.13884  | 0.122378 | 0.245338 |
| 0.108683 | 0.129225 | 0.0869755 | 0.118735 | 0.124272 | 0.109266 | 0.231935 |
| 0.115676 | 0.139714 | 0.0861014 | 0.127185 | 0.137675 | 0.125874 | 0.245047 |
| 0.113345 | 0.122232 | 0.121941  | 0.119027 | 0.122815 | 0.113928 | 0.232226 |
| 0.106789 | 0.126748 | 0.11451   | 0.113054 | 0.122378 | 0.108829 | 0.233537 |
| 0.10912  | 0.131993 | 0.0798368 | 0.119464 | 0.128497 | 0.122232 | 0.234703 |
| 0.117716 | 0.128934 | 0.130973  | 0.120192 | 0.130099 | 0.115676 | 0.228147 |
| 0.120192 | 0.131702 | 0.125874  | 0.125291 | 0.134033 | 0.122523 | 0.239656 |
| 0.124709 | 0.125146 | 0.119901  | 0.120775 | 0.131847 | 0.122086 | 0.240676 |
| 0.116841 | 0.123397 | 0.11961   | 0.120192 | 0.127185 | 0.117133 | 0.241841 |
| 0.104021 | 0.133304 | 0.11757   | 0.119027 | 0.121649 | 0.113636 | 0.234848 |
| 0.11451  | 0.126311 | 0.12602   | 0.116696 | 0.120192 | 0.111305 | 0.238928 |
| 0.121941 | 0.127622 | 0.122086  | 0.126457 | 0.137238 | 0.123689 | 0.241987 |
| 0.106935 | 0.117861 | 0.117861  | 0.116113 | 0.122523 | 0.109557 | 0.226107 |
| 0.132576 | 0.145251 | 0.139714  | 0.140589 | 0.135635 | 0.130828 | 0.243007 |
| 0.129516 | 0.148019 | 0.144231  | 0.13345  | 0.142774 | 0.135927 | 0.225379 |
| 0.107663 | 0.138986 | 0.121795  | 0.122378 | 0.128788 | 0.123106 | 0.232372 |
| 0.113199 | 0.13986  | 0.0917832 | 0.12296  | 0.134907 | 0.12398  | 0.240239 |
| 0.12296  | 0.136509 | 0.134178  | 0.126894 | 0.128934 | 0.125874 | 0.224942 |
| 0.124272 | 0.13549  | 0.122378  | 0.127622 | 0.127622 | 0.123689 | 0.231498 |
| 0.122815 | 0.13986  | 0.138986  | 0.123543 | 0.125    | 0.119318 | 0.224505 |
| 0.128059 | 0.148019 | 0.141317  | 0.130536 | 0.143939 | 0.129516 | 0.232955 |
| 0.100524 | 0.128059 | 0.112908  | 0.114656 | 0.120192 | 0.110723 | 0.225524 |
| 0.118153 | 0.142483 | 0.131702  | 0.13345  | 0.137821 | 0.128351 | 0.236742 |
| 0.13141  | 0.153118 | 0.142337  | 0.135927 | 0.14088  | 0.13345  | 0.218531 |
| 0.110723 | 0.132139 | 0.105332  | 0.118153 | 0.127477 | 0.115676 | 0.236597 |
| 0.118298 | 0.141754 | 0.130682  | 0.124563 | 0.128351 | 0.125583 | 0.22873  |
| 0.139132 | 0.157343 | 0.152972  | 0.141317 | 0.141608 | 0.139423 | 0.241113 |
| 0.121358 | 0.134033 | 0.134033  | 0.129079 | 0.125    | 0.120484 | 0.237034 |
| 0.125874 | 0.147582 | 0.133304  | 0.138258 | 0.139132 | 0.136072 | 0.246795 |
| 0.119027 | 0.140443 | 0.125874  | 0.127331 | 0.137821 | 0.128059 | 0.234994 |

|           |           |          |          |           |           |          |
|-----------|-----------|----------|----------|-----------|-----------|----------|
| 0.121795  | 0.127477  | 0.124272 | 0.127185 | 0.130099  | 0.115093  | 0.239802 |
| 0.122232  | 0.138986  | 0.13141  | 0.129079 | 0.132576  | 0.128351  | 0.235577 |
| 0.113636  | 0.139714  | 0.117861 | 0.122815 | 0.13447   | 0.121212  | 0.231352 |
| 0.124854  | 0.134324  | 0.128205 | 0.131119 | 0.138403  | 0.123689  | 0.241987 |
| 0.125146  | 0.129371  | 0.129953 | 0.130536 | 0.134033  | 0.120192  | 0.240239 |
| 0.128351  | 0.128497  | 0.138695 | 0.13549  | 0.134615  | 0.121066  | 0.243153 |
| 0.126894  | 0.136655  | 0.130245 | 0.136072 | 0.136072  | 0.125146  | 0.241113 |
| 0.124272  | 0.13986   | 0.136946 | 0.129079 | 0.137238  | 0.126603  | 0.236451 |
| 0.135927  | 0.146562  | 0.145396 | 0.143939 | 0.148019  | 0.137092  | 0.236451 |
| 0.109703  | 0.134324  | 0.116841 | 0.122086 | 0.135781  | 0.119027  | 0.231498 |
| 0.112908  | 0.126166  | 0.124417 | 0.123543 | 0.128788  | 0.112034  | 0.238782 |
| 0.120484  | 0.138403  | 0.137529 | 0.129662 | 0.137238  | 0.130099  | 0.239656 |
| 0.109411  | 0.136946  | 0.11859  | 0.122378 | 0.129371  | 0.118444  | 0.232955 |
| 0.13345   | 0.158362  | 0.140297 | 0.133596 | 0.144668  | 0.138695  | 0.237762 |
| 0.147727  | 0.160402  | 0.1537   | 0.151952 | 0.15778   | 0.146562  | 0.245047 |
| 0.125583  | 0.127768  | 0.136218 | 0.135344 | 0.129516  | 0.120047  | 0.240676 |
| 0.119027  | 0.127914  | 0.134907 | 0.126748 | 0.123252  | 0.111742  | 0.235868 |
| 0.123252  | 0.126311  | 0.13884  | 0.136218 | 0.129516  | 0.119464  | 0.241259 |
| 0.122523  | 0.130828  | 0.121212 | 0.125874 | 0.13549   | 0.121941  | 0.239365 |
| 0.123397  | 0.134033  | 0.134033 | 0.13549  | 0.134033  | 0.123689  | 0.238491 |
| 0.125146  | 0.128497  | 0.130828 | 0.130536 | 0.143648  | 0.124563  | 0.246066 |
| 0.124563  | 0.143939  | 0.132867 | 0.130828 | 0.13986   | 0.135635  | 0.235868 |
| 0.113054  | 0.139714  | 0.113782 | 0.122815 | 0.130099  | 0.126748  | 0.237179 |
| 0.155886  | 0.158071  | 0.167978 | 0.158362 | 0.154575  | 0.153555  | 0.244464 |
| 0.11655   | 0.139132  | 0.127185 | 0.125437 | 0.136801  | 0.125583  | 0.238345 |
| 0.12296   | 0.151952  | 0.133013 | 0.132721 | 0.14933   | 0.138986  | 0.237471 |
| 0.114948  | 0.13345   | 0.125    | 0.126457 | 0.129371  | 0.115822  | 0.24053  |
| 0.131556  | 0.137238  | 0.140443 | 0.134907 | 0.136364  | 0.126603  | 0.245775 |
| 0.110577  | 0.12296   | 0.117133 | 0.120338 | 0.130245  | 0.113782  | 0.230915 |
| 0.129079  | 0.149038  | 0.149038 | 0.125437 | 0.114073  | 0.130536  | 0.205711 |
| 0.140006  | 0.0594406 | 0.144522 | 0.134615 | 0.139277  | 0.0977564 | 0.240239 |
| 0.117133  | 0.127185  | 0.138549 | 0.109994 | 0.050845  | 0.113345  | 0.222902 |
| 0.128351  | 0.138986  | 0.146562 | 0.121795 | 0.0649767 | 0.12602   | 0.203234 |
| 0.141317  | 0.160402  | 0.160402 | 0.146707 | 0.141463  | 0.142774  | 0.182401 |
| 0.132867  | 0.153992  | 0.160402 | 0.130099 | 0.115239  | 0.136946  | 0.185606 |
| 0.125146  | 0.139277  | 0.134033 | 0.129371 | 0.129079  | 0.122815  | 0.237325 |
| 0.127914  | 0.133887  | 0.138258 | 0.133596 | 0.133596  | 0.128205  | 0.233392 |
| 0.0844988 | 0.115822  | 0.12602  | 0.105332 | 0.110868  | 0.102273  | 0.222902 |
| 0.0753205 | 0.127622  | 0.129953 | 0.110431 | 0.11859   | 0.112908  | 0.223631 |
| 0.11451   | 0.132139  | 0.118444 | 0.119901 | 0.126311  | 0.115385  | 0.229895 |
| 0.111888  | 0.123397  | 0.133887 | 0.108537 | 0.0467657 | 0.108974  | 0.224359 |
| 0.110868  | 0.128788  | 0.12704  | 0.119464 | 0.122669  | 0.111451  | 0.233246 |
| 0.0692016 | 0.120921  | 0.123543 | 0.101399 | 0.0865385 | 0.100379  | 0.216638 |
| 0.114656  | 0.126748  | 0.127331 | 0.113345 | 0.104895  | 0.105624  | 0.229749 |

|           |           |           |           |           |           |           |
|-----------|-----------|-----------|-----------|-----------|-----------|-----------|
| 0.0547786 | 0.128351  | 0.126311  | 0.109703  | 0.119901  | 0.111305  | 0.215909  |
| 0.0941142 | 0.128059  | 0.111742  | 0.10271   | 0.116113  | 0.106643  | 0.223193  |
| 0.11655   | 0.128934  | 0.138549  | 0.112034  | 0.0525932 | 0.111597  | 0.222611  |
| 0.113199  | 0.125583  | 0.136655  | 0.106643  | 0.0480769 | 0.108246  | 0.225962  |
| 0.122523  | 0.13986   | 0.137821  | 0.127914  | 0.121795  | 0.121358  | 0.234994  |
| 0.207896  | 0.219988  | 0.224359  | 0.203963  | 0.206585  | 0.209936  | 0.111116  |
| 0.13447   | 0.139569  | 0.149476  | 0.130245  | 0.0632284 | 0.131556  | 0.23208   |
| 0.12704   | 0.135635  | 0.138258  | 0.126603  | 0.125146  | 0.122086  | 0.231643  |
| 0.112325  | 0.128497  | 0.136655  | 0.1081    | 0.119172  | 0.116404  | 0.223339  |
| 0.201486  | 0.214452  | 0.219406  | 0.195804  | 0.199883  | 0.202943  | 0.100087  |
| 0.11757   | 0.1419    | 0.138986  | 0.124709  | 0.124417  | 0.121358  | 0.222174  |
| 0.11451   | 0.140589  | 0.138258  | 0.132139  | 0.126894  | 0.118881  | 0.233683  |
| 0.120629  | 0.124272  | 0.137675  | 0.125437  | 0.121941  | 0.112179  | 0.226107  |
| 0.0426865 | 0.125874  | 0.122669  | 0.112762  | 0.120921  | 0.111116  | 0.223631  |
| 0.24257   | 0.250583  | 0.255536  | 0.235431  | 0.238636  | 0.243444  | 0.0989219 |
| 0.121795  | 0.135344  | 0.13884   | 0.120192  | 0.127185  | 0.12296   | 0.2331    |
| 0.116259  | 0.13447   | 0.135052  | 0.121649  | 0.117279  | 0.112762  | 0.230478  |
| 0.120629  | 0.124272  | 0.137966  | 0.124563  | 0.120775  | 0.113054  | 0.234266  |
| 0.118007  | 0.115239  | 0.137675  | 0.119901  | 0.121066  | 0.109266  | 0.232226  |
| 0.102855  | 0.140006  | 0.139423  | 0.121941  | 0.128059  | 0.128788  | 0.223776  |
| 0.104895  | 0.137675  | 0.139423  | 0.114365  | 0.105332  | 0.122669  | 0.210082  |
| 0.115093  | 0.135052  | 0.132721  | 0.120775  | 0.118153  | 0.115967  | 0.232809  |
| 0.111742  | 0.122378  | 0.135781  | 0.108392  | 0.0472028 | 0.108829  | 0.221882  |
| 0.118881  | 0.126894  | 0.13447   | 0.122232  | 0.123397  | 0.117424  | 0.229021  |
| 0.0402098 | 0.124272  | 0.121649  | 0.105915  | 0.118153  | 0.107809  | 0.227273  |
| 0.10912   | 0.125874  | 0.13345   | 0.107809  | 0.0536131 | 0.105624  | 0.214598  |
| 0.094697  | 0.131556  | 0.0980478 | 0.109411  | 0.124272  | 0.113928  | 0.227273  |
| 0.137675  | 0.0576923 | 0.144231  | 0.136946  | 0.137238  | 0.0957168 | 0.238782  |
| 0.122815  | 0.138695  | 0.1419    | 0.123834  | 0.128205  | 0.125146  | 0.231789  |
| 0.115239  | 0.1419    | 0.137238  | 0.131702  | 0.128205  | 0.124854  | 0.235577  |
| 0.183712  | 0.193473  | 0.203089  | 0.176282  | 0.18007   | 0.183129  | 0.118444  |
| 0.197115  | 0.208916  | 0.215909  | 0.191725  | 0.193473  | 0.19595   | 0.112908  |
| 0.0470571 | 0.129371  | 0.125583  | 0.11014   | 0.124709  | 0.112617  | 0.218094  |
| 0.0394814 | 0.122086  | 0.122378  | 0.1081    | 0.116259  | 0.106206  | 0.224796  |
| 0.12398   | 0.138986  | 0.138403  | 0.0608974 | 0.123834  | 0.128351  | 0.224505  |
| 0.118153  | 0.137238  | 0.130245  | 0.12296   | 0.123543  | 0.115239  | 0.229167  |
| 0.121503  | 0.136218  | 0.141754  | 0.120484  | 0.127477  | 0.123252  | 0.234557  |
| 0.125437  | 0.122378  | 0.136655  | 0.126748  | 0.123543  | 0.116987  | 0.23208   |
| 0.213141  | 0.225816  | 0.233683  | 0.208625  | 0.213869  | 0.218677  | 0.114365  |
| 0.113491  | 0.124709  | 0.130245  | 0.115385  | 0.11451   | 0.109703  | 0.229458  |
| 0.202797  | 0.209936  | 0.217512  | 0.200903  | 0.196533  | 0.203671  | 0.134324  |
| 0.114073  | 0.129953  | 0.12704   | 0.119464  | 0.118881  | 0.109994  | 0.233829  |
| 0.111305  | 0.127768  | 0.124272  | 0.11961   | 0.119318  | 0.116259  | 0.225524  |
| 0.107955  | 0.129079  | 0.134324  | 0.111014  | 0.104312  | 0.112908  | 0.218386  |

|           |           |          |          |           |           |          |
|-----------|-----------|----------|----------|-----------|-----------|----------|
| 0.050845  | 0.122086  | 0.11859  | 0.108974 | 0.115385  | 0.106789  | 0.216638 |
| 0.197552  | 0.21285   | 0.214598 | 0.194784 | 0.19391   | 0.200466  | 0.117133 |
| 0.123252  | 0.135052  | 0.146707 | 0.119318 | 0.0496795 | 0.122378  | 0.219114 |
| 0.11859   | 0.128934  | 0.131265 | 0.124854 | 0.121649  | 0.11451   | 0.239219 |
| 0.117133  | 0.129225  | 0.137383 | 0.114656 | 0.0447261 | 0.117424  | 0.22465  |
| 0.12296   | 0.134178  | 0.132139 | 0.116113 | 0.120484  | 0.121795  | 0.229604 |
| 0.0474942 | 0.128059  | 0.126603 | 0.106206 | 0.114656  | 0.108683  | 0.226981 |
| 0.118735  | 0.130536  | 0.127914 | 0.121212 | 0.118881  | 0.113782  | 0.235286 |
| 0.117861  | 0.135198  | 0.134615 | 0.127331 | 0.118298  | 0.115239  | 0.2213   |
| 0.113782  | 0.140152  | 0.137821 | 0.133741 | 0.124709  | 0.123689  | 0.232955 |
| 0.107372  | 0.120047  | 0.131119 | 0.104604 | 0.0501166 | 0.100379  | 0.21722  |
| 0.120629  | 0.131847  | 0.133596 | 0.128351 | 0.122232  | 0.116259  | 0.230478 |
| 0.179924  | 0.196096  | 0.204254 | 0.175991 | 0.18007   | 0.181381  | 0.122232 |
| 0.120921  | 0.119318  | 0.142045 | 0.12398  | 0.121358  | 0.113928  | 0.233392 |
| 0.117861  | 0.0515734 | 0.133741 | 0.12296  | 0.125291  | 0.0831876 | 0.233246 |
| 0.114219  | 0.11757   | 0.133596 | 0.116404 | 0.114365  | 0.111305  | 0.227273 |
| 0.121358  | 0.137238  | 0.140443 | 0.119755 | 0.129079  | 0.121358  | 0.227418 |
| 0.114948  | 0.128205  | 0.136655 | 0.111014 | 0.0463287 | 0.114948  | 0.224213 |
| 0.120775  | 0.132284  | 0.129371 | 0.124709 | 0.123543  | 0.11757   | 0.237617 |
| 0.117424  | 0.128934  | 0.128934 | 0.112617 | 0.116113  | 0.108683  | 0.22465  |
| 0.121795  | 0.138258  | 0.13447  | 0.129808 | 0.12602   | 0.122086  | 0.234266 |
| 0.113199  | 0.0530303 | 0.131119 | 0.116259 | 0.116841  | 0.0761946 | 0.228875 |
| 0.114948  | 0.121212  | 0.136364 | 0.118881 | 0.118298  | 0.108537  | 0.228875 |
| 0.0568182 | 0.129516  | 0.128351 | 0.109411 | 0.118735  | 0.105769  | 0.222611 |
| 0.121358  | 0.125291  | 0.134615 | 0.124417 | 0.123834  | 0.109994  | 0.237617 |
| 0.13345   | 0.134178  | 0.144085 | 0.133887 | 0.133304  | 0.125291  | 0.234557 |
| 0.112179  | 0.127185  | 0.135052 | 0.115239 | 0.123397  | 0.111597  | 0.228147 |
| 0.13039   | 0.136655  | 0.145688 | 0.124709 | 0.0597319 | 0.125437  | 0.231206 |
| 0.0458916 | 0.125291  | 0.126748 | 0.104312 | 0.115385  | 0.10912   | 0.225379 |
| 0.114073  | 0.113636  | 0.130245 | 0.115676 | 0.109557  | 0.108246  | 0.226836 |
| 0.114219  | 0.13039   | 0.135052 | 0.109994 | 0.0659965 | 0.114219  | 0.208916 |
| 0.125583  | 0.143211  | 0.13884  | 0.128642 | 0.128934  | 0.123834  | 0.229021 |
| 0.182692  | 0.19595   | 0.20236  | 0.176136 | 0.180798  | 0.185315  | 0.128788 |
| 0.114365  | 0.125291  | 0.126748 | 0.125    | 0.121212  | 0.111451  | 0.227418 |
| 0.103584  | 0.113928  | 0.120629 | 0.109557 | 0.101399  | 0.0895979 | 0.220717 |
| 0.113491  | 0.137529  | 0.134615 | 0.13141  | 0.124417  | 0.121066  | 0.237908 |
| 0.172348  | 0.186189  | 0.187646 | 0.167249 | 0.171329  | 0.174679  | 0.143502 |
| 0.130245  | 0.145251  | 0.151952 | 0.129516 | 0.140297  | 0.13345   | 0.237762 |
| 0.139277  | 0.156031  | 0.154283 | 0.140297 | 0.149621  | 0.143939  | 0.242424 |
| 0.139423  | 0.0594406 | 0.145688 | 0.138986 | 0.138112  | 0.099796  | 0.238491 |
| 0.112908  | 0.12704   | 0.134324 | 0.113345 | 0.121503  | 0.111451  | 0.223631 |
| 0.114219  | 0.126311  | 0.137675 | 0.113782 | 0.0458916 | 0.112471  | 0.222028 |
| 0.203234  | 0.214744  | 0.226107 | 0.194639 | 0.197261  | 0.20236   | 0.11116  |
| 0.113491  | 0.129079  | 0.137821 | 0.113345 | 0.117424  | 0.118444  | 0.221591 |

|           |           |          |          |           |           |          |
|-----------|-----------|----------|----------|-----------|-----------|----------|
| 0.120338  | 0.131847  | 0.140297 | 0.114948 | 0.0432692 | 0.115967  | 0.222902 |
| 0.116841  | 0.127185  | 0.131847 | 0.126894 | 0.120775  | 0.115385  | 0.231352 |
| 0.1588    | 0.174097  | 0.181672 | 0.151369 | 0.145251  | 0.159382  | 0.162879 |
| 0.106061  | 0.122523  | 0.128642 | 0.100087 | 0.110577  | 0.106935  | 0.218823 |
| 0.13884   | 0.140443  | 0.143065 | 0.144522 | 0.146853  | 0.14088   | 0.237325 |
| 0.108246  | 0.138112  | 0.118881 | 0.112762 | 0.125874  | 0.118735  | 0.221008 |
| 0.182547  | 0.196096  | 0.20338  | 0.178322 | 0.181818  | 0.18109   | 0.126894 |
| 0.118444  | 0.136072  | 0.137238 | 0.116841 | 0.125583  | 0.118153  | 0.23208  |
| 0.0992133 | 0.115676  | 0.104895 | 0.106935 | 0.106643  | 0.101253  | 0.228293 |
| 0.116259  | 0.11961   | 0.129516 | 0.116113 | 0.110577  | 0.110723  | 0.22873  |
| 0.112908  | 0.134033  | 0.136655 | 0.122086 | 0.119464  | 0.115822  | 0.230332 |
| 0.110868  | 0.140152  | 0.13549  | 0.127914 | 0.124126  | 0.120484  | 0.234994 |
| 0.118444  | 0.120629  | 0.132576 | 0.120629 | 0.123252  | 0.10912   | 0.221882 |
| 0.04662   | 0.125146  | 0.121941 | 0.103875 | 0.114656  | 0.106643  | 0.22465  |
| 0.181964  | 0.19697   | 0.202506 | 0.178322 | 0.178904  | 0.181381  | 0.121941 |
| 0.119755  | 0.120775  | 0.133304 | 0.124563 | 0.122523  | 0.110431  | 0.232226 |
| 0.10271   | 0.128497  | 0.113928 | 0.112471 | 0.107226  | 0.108246  | 0.21926  |
| 0.202506  | 0.212558  | 0.219843 | 0.195659 | 0.203234  | 0.203963  | 0.107809 |
| 0.119464  | 0.122815  | 0.140006 | 0.12398  | 0.124563  | 0.111305  | 0.234557 |
| 0.0456002 | 0.127622  | 0.121503 | 0.106643 | 0.119172  | 0.109411  | 0.225087 |
| 0.0441434 | 0.123252  | 0.120921 | 0.10169  | 0.113928  | 0.103584  | 0.220717 |
| 0.129371  | 0.131265  | 0.145251 | 0.127768 | 0.0706585 | 0.12704   | 0.226399 |
| 0.18007   | 0.195659  | 0.200029 | 0.176719 | 0.179341  | 0.183566  | 0.125    |
| 0.121649  | 0.138986  | 0.134615 | 0.12704  | 0.122378  | 0.11757   | 0.237325 |
| 0.127477  | 0.127914  | 0.139277 | 0.129662 | 0.129953  | 0.11757   | 0.23412  |
| 0.0473485 | 0.122378  | 0.117716 | 0.106643 | 0.118007  | 0.106789  | 0.223922 |
| 0.0479312 | 0.122378  | 0.120921 | 0.104312 | 0.115967  | 0.103584  | 0.226836 |
| 0.0431235 | 0.123689  | 0.120775 | 0.108537 | 0.118153  | 0.104895  | 0.222028 |
| 0.110577  | 0.126748  | 0.132284 | 0.107226 | 0.0506993 | 0.106206  | 0.225962 |
| 0.0929487 | 0.123397  | 0.111451 | 0.101253 | 0.115822  | 0.106935  | 0.225233 |
| 0.121212  | 0.135927  | 0.138549 | 0.121358 | 0.129516  | 0.121795  | 0.237179 |
| 0.130245  | 0.116696  | 0.137675 | 0.132721 | 0.119318  | 0.112179  | 0.239802 |
| 0.118881  | 0.137675  | 0.137966 | 0.118735 | 0.129225  | 0.118298  | 0.234557 |
| 0.126311  | 0.137821  | 0.13345  | 0.121212 | 0.128788  | 0.124563  | 0.237034 |
| 0.185897  | 0.201777  | 0.20877  | 0.183129 | 0.184295  | 0.187937  | 0.123252 |
| 0.116987  | 0.125     | 0.136072 | 0.122378 | 0.125     | 0.111451  | 0.23208  |
| 0.123252  | 0.133596  | 0.142337 | 0.118444 | 0.0520105 | 0.11859   | 0.225233 |
| 0.0467657 | 0.121795  | 0.119172 | 0.104312 | 0.114219  | 0.105624  | 0.22771  |
| 0.0932401 | 0.123689  | 0.109703 | 0.097465 | 0.117279  | 0.106935  | 0.22465  |
| 0.111305  | 0.124563  | 0.127768 | 0.116696 | 0.117861  | 0.114802  | 0.220862 |
| 0.119318  | 0.140152  | 0.134615 | 0.125291 | 0.119464  | 0.119027  | 0.231206 |
| 0.124272  | 0.129953  | 0.138112 | 0.124417 | 0.125583  | 0.124272  | 0.231206 |
| 0.115385  | 0.0639569 | 0.128934 | 0.114948 | 0.113199  | 0.0731352 | 0.232517 |
| 0.106061  | 0.135052  | 0.126311 | 0.113782 | 0.120484  | 0.113345  | 0.226107 |

|           |           |           |           |           |           |          |
|-----------|-----------|-----------|-----------|-----------|-----------|----------|
| 0.103001  | 0.129079  | 0.120921  | 0.107517  | 0.113636  | 0.111451  | 0.21926  |
| 0.102564  | 0.123106  | 0.107663  | 0.103584  | 0.113491  | 0.105478  | 0.226399 |
| 0.116987  | 0.133159  | 0.125583  | 0.121795  | 0.119464  | 0.113782  | 0.234411 |
| 0.125583  | 0.142628  | 0.140297  | 0.126603  | 0.137092  | 0.127914  | 0.236597 |
| 0.11757   | 0.136946  | 0.134324  | 0.124417  | 0.123543  | 0.116696  | 0.235577 |
| 0.107226  | 0.121358  | 0.130099  | 0.105624  | 0.0517191 | 0.106061  | 0.219114 |
| 0.113636  | 0.131556  | 0.128351  | 0.118735  | 0.120484  | 0.114802  | 0.231643 |
| 0.0493881 | 0.124417  | 0.123252  | 0.104312  | 0.112471  | 0.107663  | 0.223631 |
| 0.11451   | 0.124272  | 0.127477  | 0.119901  | 0.115822  | 0.108974  | 0.232517 |
| 0.0425408 | 0.127185  | 0.122815  | 0.105332  | 0.119027  | 0.108974  | 0.226399 |
| 0.111888  | 0.11961   | 0.130099  | 0.117279  | 0.117279  | 0.102855  | 0.22873  |
| 0.112179  | 0.0590035 | 0.128934  | 0.112617  | 0.116696  | 0.0693473 | 0.231352 |
| 0.108683  | 0.13447   | 0.133596  | 0.127768  | 0.124272  | 0.113928  | 0.233974 |
| 0.0968823 | 0.127331  | 0.117133  | 0.0999417 | 0.11451   | 0.109703  | 0.227127 |
| 0.0501166 | 0.12398   | 0.126311  | 0.104167  | 0.116404  | 0.105186  | 0.22465  |
| 0.117716  | 0.12398   | 0.132139  | 0.121649  | 0.11757   | 0.109557  | 0.220571 |
| 0.107955  | 0.128205  | 0.118298  | 0.116841  | 0.114219  | 0.110868  | 0.226544 |
| 0.104021  | 0.121649  | 0.0613345 | 0.109411  | 0.115239  | 0.102855  | 0.229604 |
| 0.0518648 | 0.121941  | 0.122232  | 0.104749  | 0.114656  | 0.105769  | 0.226107 |
| 0.114948  | 0.125874  | 0.136072  | 0.111597  | 0.0474942 | 0.109411  | 0.220425 |
| 0.114365  | 0.133159  | 0.129371  | 0.122086  | 0.123252  | 0.112034  | 0.231789 |
| 0.113491  | 0.125583  | 0.138403  | 0.108683  | 0.0486597 | 0.108829  | 0.226836 |
| 0.110577  | 0.134907  | 0.131119  | 0.126166  | 0.125874  | 0.115822  | 0.230332 |
| 0.0965909 | 0.130536  | 0.115676  | 0.105186  | 0.119464  | 0.114365  | 0.229167 |
| 0.102127  | 0.114802  | 0.12296   | 0.104312  | 0.109848  | 0.0986305 | 0.222465 |
| 0.116259  | 0.129516  | 0.124854  | 0.119901  | 0.11757   | 0.110723  | 0.233974 |
| 0.116113  | 0.12704   | 0.134907  | 0.111597  | 0.0506993 | 0.112325  | 0.221008 |
| 0.123689  | 0.129371  | 0.124417  | 0.11451   | 0.116259  | 0.114073  | 0.231789 |
| 0.109848  | 0.127768  | 0.117279  | 0.0992133 | 0.105624  | 0.105769  | 0.224942 |
| 0.18648   | 0.199738  | 0.206148  | 0.182547  | 0.185169  | 0.184732  | 0.122378 |
| 0.1588    | 0.165938  | 0.17264   | 0.150495  | 0.147582  | 0.155303  | 0.162879 |
| 0.119464  | 0.135927  | 0.138549  | 0.11961   | 0.128934  | 0.120338  | 0.232809 |
| 0.116113  | 0.128788  | 0.128497  | 0.116259  | 0.116259  | 0.11116   | 0.223631 |
| 0.143211  | 0.157925  | 0.158217  | 0.143065  | 0.152972  | 0.14729   | 0.247232 |
| 0.120629  | 0.12602   | 0.135344  | 0.124563  | 0.121066  | 0.118881  | 0.232226 |
| 0.0817308 | 0.126457  | 0.13141   | 0.113636  | 0.124126  | 0.11553   | 0.222174 |
| 0.0795455 | 0.124563  | 0.120484  | 0.114365  | 0.113782  | 0.107226  | 0.223193 |
| 0.092366  | 0.129808  | 0.0986305 | 0.108246  | 0.121358  | 0.11014   | 0.226981 |
| 0.108974  | 0.13039   | 0.119027  | 0.117279  | 0.112034  | 0.112179  | 0.22873  |
| 0.190414  | 0.205711  | 0.211538  | 0.187937  | 0.189685  | 0.192453  | 0.116404 |
| 0.121212  | 0.142628  | 0.138258  | 0.128351  | 0.127477  | 0.123252  | 0.236888 |
| 0.112325  | 0.130245  | 0.136364  | 0.109557  | 0.0708042 | 0.112908  | 0.215181 |
| 0.0581294 | 0.121795  | 0.109266  | 0.106061  | 0.112471  | 0.105332  | 0.219843 |
| 0.119755  | 0.132721  | 0.13039   | 0.114365  | 0.120775  | 0.117424  | 0.233683 |

|           |           |           |          |           |           |          |
|-----------|-----------|-----------|----------|-----------|-----------|----------|
| 0.173223  | 0.187063  | 0.188811  | 0.172203 | 0.175117  | 0.175554  | 0.14933  |
| 0.24053   | 0.248543  | 0.255245  | 0.231643 | 0.237471  | 0.240822  | 0.105915 |
| 0.112908  | 0.0606061 | 0.131119  | 0.115676 | 0.116259  | 0.0750291 | 0.23208  |
| 0.108829  | 0.129662  | 0.118881  | 0.118007 | 0.117133  | 0.112034  | 0.229749 |
| 0.116987  | 0.134907  | 0.138403  | 0.115385 | 0.126748  | 0.117279  | 0.230624 |
| 0.106643  | 0.133304  | 0.134178  | 0.120484 | 0.121358  | 0.114802  | 0.2331   |
| 0.117279  | 0.134907  | 0.129662  | 0.120629 | 0.118007  | 0.113782  | 0.234411 |
| 0.113928  | 0.116404  | 0.126311  | 0.116404 | 0.116404  | 0.099359  | 0.22669  |
| 0.0709499 | 0.124126  | 0.124709  | 0.104021 | 0.083042  | 0.108537  | 0.214598 |
| 0.114948  | 0.133741  | 0.129953  | 0.118881 | 0.117424  | 0.114656  | 0.233246 |
| 0.0812937 | 0.12398   | 0.125437  | 0.102418 | 0.0759033 | 0.106352  | 0.213578 |
| 0.107663  | 0.129079  | 0.0606061 | 0.113345 | 0.119755  | 0.108537  | 0.233829 |
| 0.0964452 | 0.131265  | 0.116404  | 0.103293 | 0.116987  | 0.112471  | 0.227273 |
| 0.114073  | 0.0536131 | 0.131993  | 0.114219 | 0.116841  | 0.0726981 | 0.229167 |
| 0.113345  | 0.127185  | 0.135927  | 0.108537 | 0.0514277 | 0.11014   | 0.222028 |
| 0.106643  | 0.115822  | 0.11757   | 0.113199 | 0.106789  | 0.0973193 | 0.221737 |
| 0.115967  | 0.125146  | 0.125146  | 0.12602  | 0.130682  | 0.109266  | 0.240093 |
| 0.12296   | 0.146125  | 0.137966  | 0.141754 | 0.137092  | 0.129079  | 0.240676 |
| 0.0499709 | 0.124709  | 0.122669  | 0.106935 | 0.115676  | 0.109411  | 0.226544 |
| 0.0818765 | 0.128642  | 0.125437  | 0.112325 | 0.125146  | 0.11451   | 0.215035 |
| 0.0541958 | 0.132139  | 0.128059  | 0.120484 | 0.130682  | 0.120629  | 0.227855 |
| 0.200029  | 0.21183   | 0.218531  | 0.195513 | 0.198135  | 0.204691  | 0.11757  |
| 0.11014   | 0.0674534 | 0.124563  | 0.105332 | 0.112325  | 0.0641026 | 0.223485 |
| 0.0960082 | 0.131119  | 0.116841  | 0.104895 | 0.117716  | 0.110868  | 0.231206 |
| 0.118153  | 0.126457  | 0.136946  | 0.123252 | 0.122378  | 0.109703  | 0.231789 |
| 0.120629  | 0.121066  | 0.139423  | 0.123397 | 0.122232  | 0.114219  | 0.235431 |
| 0.116841  | 0.130973  | 0.128642  | 0.112034 | 0.116404  | 0.115385  | 0.230186 |
| 0.18852   | 0.204108  | 0.21081   | 0.188666 | 0.188957  | 0.194056  | 0.125    |
| 0.119901  | 0.127622  | 0.139569  | 0.112179 | 0.0506993 | 0.113491  | 0.225962 |
| 0.0439977 | 0.121066  | 0.119901  | 0.107663 | 0.113782  | 0.104604  | 0.22669  |
| 0.117861  | 0.129371  | 0.12704   | 0.121503 | 0.122378  | 0.118444  | 0.229749 |
| 0.107663  | 0.131702  | 0.13141   | 0.123252 | 0.119464  | 0.113782  | 0.233537 |
| 0.116696  | 0.125291  | 0.141317  | 0.110431 | 0.0527389 | 0.111742  | 0.222465 |
| 0.101253  | 0.118881  | 0.124417  | 0.108974 | 0.0804196 | 0.101544  | 0.216346 |
| 0.110286  | 0.127622  | 0.0623543 | 0.116259 | 0.117716  | 0.110286  | 0.235286 |
| 0.117861  | 0.120338  | 0.137238  | 0.120921 | 0.119172  | 0.10708   | 0.232955 |
| 0.18852   | 0.205857  | 0.210227  | 0.185169 | 0.188083  | 0.192308  | 0.121795 |
| 0.108537  | 0.119172  | 0.128205  | 0.105186 | 0.0574009 | 0.100379  | 0.219551 |
| 0.184441  | 0.203234  | 0.208188  | 0.182838 | 0.183421  | 0.190559  | 0.126457 |
| 0.184003  | 0.201923  | 0.20542   | 0.183275 | 0.182984  | 0.184878  | 0.124563 |
| 0.11757   | 0.144231  | 0.137529  | 0.136946 | 0.129371  | 0.128059  | 0.237034 |
| 0.127768  | 0.125     | 0.1419    | 0.133159 | 0.129371  | 0.11961   | 0.239365 |
| 0.103293  | 0.118298  | 0.0705128 | 0.10373  | 0.108974  | 0.0965909 | 0.227127 |
| 0.106061  | 0.121066  | 0.129225  | 0.105915 | 0.0575466 | 0.0996503 | 0.222902 |

|           |           |          |          |           |           |          |
|-----------|-----------|----------|----------|-----------|-----------|----------|
| 0.11553   | 0.124709  | 0.13345  | 0.104021 | 0.0524476 | 0.108246  | 0.225087 |
| 0.050845  | 0.128497  | 0.126166 | 0.110431 | 0.118007  | 0.108246  | 0.227127 |
| 0.11116   | 0.13141   | 0.126166 | 0.118298 | 0.112179  | 0.113199  | 0.231206 |
| 0.114948  | 0.136072  | 0.129371 | 0.120629 | 0.116259  | 0.114073  | 0.233829 |
| 0.115676  | 0.0523019 | 0.13447  | 0.116404 | 0.118735  | 0.0801282 | 0.231352 |
| 0.112617  | 0.136655  | 0.13549  | 0.130245 | 0.125     | 0.122232  | 0.235286 |
| 0.0474942 | 0.118153  | 0.116404 | 0.102127 | 0.111742  | 0.101981  | 0.223485 |
| 0.114948  | 0.126166  | 0.136946 | 0.109848 | 0.0498252 | 0.109411  | 0.225087 |
| 0.099359  | 0.11553   | 0.10067  | 0.103584 | 0.107372  | 0.0961538 | 0.226981 |
| 0.122815  | 0.129953  | 0.138695 | 0.115093 | 0.0550699 | 0.118735  | 0.225379 |
| 0.115239  | 0.133741  | 0.134615 | 0.115676 | 0.122669  | 0.114948  | 0.231498 |
| 0.126166  | 0.132139  | 0.144085 | 0.121649 | 0.0525932 | 0.122669  | 0.228147 |
| 0.251748  | 0.260344  | 0.266171 | 0.247232 | 0.249854  | 0.254371  | 0.105478 |
| 0.127622  | 0.131847  | 0.13243  | 0.139132 | 0.134178  | 0.12704   | 0.240385 |
| 0.120775  | 0.134615  | 0.125583 | 0.13345  | 0.128788  | 0.12602   | 0.231498 |
| 0.208916  | 0.218094  | 0.227418 | 0.20236  | 0.205857  | 0.212995  | 0.112471 |
| 0.118735  | 0.134324  | 0.137529 | 0.126166 | 0.134615  | 0.126311  | 0.232372 |
| 0.223631  | 0.229021  | 0.238928 | 0.215909 | 0.218823  | 0.222756  | 0.107955 |
| 0.120047  | 0.127477  | 0.13243  | 0.131556 | 0.124854  | 0.118007  | 0.234266 |
| 0.050845  | 0.131993  | 0.125291 | 0.116259 | 0.12704   | 0.118153  | 0.228584 |
| 0.115822  | 0.119464  | 0.134033 | 0.118007 | 0.114802  | 0.104749  | 0.230332 |
| 0.113199  | 0.1419    | 0.132284 | 0.131993 | 0.128788  | 0.122815  | 0.234994 |
| 0.194202  | 0.208625  | 0.214744 | 0.190268 | 0.193182  | 0.194784  | 0.121066 |
| 0.121941  | 0.13141   | 0.142483 | 0.119464 | 0.0541958 | 0.116696  | 0.228293 |
| 0.114365  | 0.125291  | 0.13345  | 0.111888 | 0.0512821 | 0.110286  | 0.224505 |
| 0.219988  | 0.22771   | 0.233537 | 0.214889 | 0.218386  | 0.219988  | 0.112471 |
| 0.11757   | 0.13549   | 0.134033 | 0.121503 | 0.123543  | 0.116987  | 0.232663 |
| 0.189977  | 0.203526  | 0.213141 | 0.184878 | 0.187209  | 0.192308  | 0.120047 |
| 0.120629  | 0.137383  | 0.135927 | 0.124272 | 0.122815  | 0.119755  | 0.234557 |
| 0.0492424 | 0.124854  | 0.121358 | 0.10708  | 0.118444  | 0.105769  | 0.227564 |
| 0.104167  | 0.136364  | 0.115385 | 0.108392 | 0.123834  | 0.121941  | 0.234411 |
| 0.11961   | 0.144231  | 0.140443 | 0.138986 | 0.131993  | 0.126603  | 0.238199 |
| 0.111014  | 0.121941  | 0.13243  | 0.101836 | 0.114073  | 0.1081    | 0.224942 |
| 0.150058  | 0.170309  | 0.167686 | 0.149621 | 0.156323  | 0.156469  | 0.162005 |
| 0.108974  | 0.124563  | 0.13243  | 0.104458 | 0.0470571 | 0.105478  | 0.219988 |
| 0.120338  | 0.123397  | 0.140006 | 0.122232 | 0.119901  | 0.108974  | 0.234266 |
| 0.114802  | 0.133596  | 0.131556 | 0.124272 | 0.127768  | 0.115093  | 0.231935 |
| 0.123543  | 0.122815  | 0.139132 | 0.127185 | 0.11961   | 0.119172  | 0.230186 |
| 0.186334  | 0.19697   | 0.208333 | 0.182984 | 0.187937  | 0.185752  | 0.124563 |
| 0.0460373 | 0.124272  | 0.121066 | 0.104458 | 0.116113  | 0.107226  | 0.224359 |
| 0.115239  | 0.142774  | 0.137529 | 0.129953 | 0.127331  | 0.118735  | 0.224213 |
| 0.115967  | 0.130682  | 0.128059 | 0.11961  | 0.120775  | 0.112762  | 0.235431 |
| 0.119318  | 0.13549   | 0.132867 | 0.127914 | 0.123543  | 0.117279  | 0.237617 |
| 0.04662   | 0.124272  | 0.12398  | 0.11116  | 0.122523  | 0.108974  | 0.227273 |



|           |           |          |          |           |           |           |
|-----------|-----------|----------|----------|-----------|-----------|-----------|
| 0.24898   | 0.254371  | 0.262529 | 0.242424 | 0.246212  | 0.247232  | 0.101836  |
| 0.103147  | 0.13243   | 0.115822 | 0.110286 | 0.11961   | 0.115385  | 0.230769  |
| 0.0929487 | 0.124272  | 0.131847 | 0.115239 | 0.118735  | 0.111305  | 0.225233  |
| 0.175699  | 0.186626  | 0.188957 | 0.168269 | 0.17264   | 0.173077  | 0.160548  |
| 0.17803   | 0.195367  | 0.199738 | 0.175554 | 0.177885  | 0.17803   | 0.128788  |
| 0.115093  | 0.0654138 | 0.133887 | 0.117861 | 0.116113  | 0.0745921 | 0.229312  |
| 0.110868  | 0.127622  | 0.134907 | 0.111597 | 0.0506993 | 0.11116   | 0.225379  |
| 0.109703  | 0.138403  | 0.13549  | 0.123252 | 0.11859   | 0.116696  | 0.23412   |
| 0.138403  | 0.142337  | 0.14933  | 0.131847 | 0.0630828 | 0.133741  | 0.230769  |
| 0.113345  | 0.0639569 | 0.128642 | 0.11553  | 0.11553   | 0.0713869 | 0.22669   |
| 0.114948  | 0.0582751 | 0.132576 | 0.117716 | 0.119172  | 0.0750291 | 0.23208   |
| 0.12296   | 0.135635  | 0.137383 | 0.126894 | 0.127768  | 0.120338  | 0.23514   |
| 0.111014  | 0.126311  | 0.13243  | 0.106789 | 0.048514  | 0.11014   | 0.218531  |
| 0.124854  | 0.131119  | 0.140152 | 0.114802 | 0.0486597 | 0.119027  | 0.224505  |
| 0.113928  | 0.139132  | 0.133304 | 0.123689 | 0.11757   | 0.119755  | 0.221445  |
| 0.115822  | 0.141317  | 0.132867 | 0.135198 | 0.129079  | 0.124563  | 0.237034  |
| 0.127622  | 0.150204  | 0.144085 | 0.147582 | 0.141171  | 0.136364  | 0.246795  |
| 0.104749  | 0.137238  | 0.118881 | 0.111305 | 0.124126  | 0.120192  | 0.232955  |
| 0.122086  | 0.149038  | 0.14088  | 0.143502 | 0.136509  | 0.132576  | 0.243007  |
| 0.127914  | 0.14088   | 0.140297 | 0.133887 | 0.128934  | 0.126166  | 0.239219  |
| 0.197698  | 0.210956  | 0.218823 | 0.195221 | 0.196387  | 0.200029  | 0.124563  |
| 0.106061  | 0.134761  | 0.110286 | 0.120775 | 0.130099  | 0.121795  | 0.233392  |
| 0.183858  | 0.197698  | 0.205857 | 0.178176 | 0.184003  | 0.18648   | 0.125874  |
| 0.113928  | 0.121066  | 0.127477 | 0.120775 | 0.11553   | 0.105769  | 0.227564  |
| 0.0472028 | 0.13039   | 0.122232 | 0.116404 | 0.123397  | 0.114219  | 0.223485  |
| 0.118298  | 0.13447   | 0.139423 | 0.116404 | 0.125146  | 0.120338  | 0.229312  |
| 0.112617  | 0.126457  | 0.131702 | 0.113345 | 0.122086  | 0.111451  | 0.228584  |
| 0.115093  | 0.127185  | 0.137966 | 0.114656 | 0.0467657 | 0.11451   | 0.220571  |
| 0.118298  | 0.128934  | 0.138549 | 0.112908 | 0.046183  | 0.113636  | 0.223485  |
| 0.0474942 | 0.128934  | 0.125146 | 0.107663 | 0.118735  | 0.108974  | 0.223485  |
| 0.116987  | 0.120338  | 0.138986 | 0.118007 | 0.116259  | 0.107955  | 0.231498  |
| 0.120192  | 0.135781  | 0.137821 | 0.122378 | 0.125874  | 0.124854  | 0.234994  |
| 0.13345   | 0.145251  | 0.140589 | 0.135344 | 0.136801  | 0.126748  | 0.229312  |
| 0.243298  | 0.25102   | 0.257721 | 0.236451 | 0.241696  | 0.24359   | 0.0984848 |
| 0.0492424 | 0.127477  | 0.126894 | 0.109703 | 0.115239  | 0.109848  | 0.225524  |
| 0.176719  | 0.19289   | 0.195804 | 0.173368 | 0.174825  | 0.17701   | 0.125437  |
| 0.181818  | 0.195076  | 0.200612 | 0.175554 | 0.17905   | 0.180653  | 0.123252  |
| 0.110577  | 0.129371  | 0.123543 | 0.111014 | 0.124417  | 0.105332  | 0.225087  |
| 0.0995047 | 0.132867  | 0.113928 | 0.103438 | 0.115093  | 0.112908  | 0.228875  |
| 0.0490967 | 0.128205  | 0.121503 | 0.115967 | 0.123252  | 0.116113  | 0.224213  |
| 0.108829  | 0.121795  | 0.131702 | 0.105186 | 0.0518648 | 0.105332  | 0.221882  |
| 0.0949883 | 0.129808  | 0.10271  | 0.108246 | 0.117279  | 0.108683  | 0.219114  |
| 0.116259  | 0.136218  | 0.133304 | 0.122523 | 0.120775  | 0.118881  | 0.234557  |
| 0.113782  | 0.130828  | 0.129079 | 0.111888 | 0.0763403 | 0.115239  | 0.218677  |

|           |           |           |          |           |           |          |
|-----------|-----------|-----------|----------|-----------|-----------|----------|
| 0.126311  | 0.13345   | 0.1419    | 0.115676 | 0.0530303 | 0.120192  | 0.230332 |
| 0.0431235 | 0.12602   | 0.123397  | 0.107372 | 0.119027  | 0.108392  | 0.223776 |
| 0.120338  | 0.128642  | 0.138549  | 0.120775 | 0.0528846 | 0.120047  | 0.227273 |
| 0.114656  | 0.129371  | 0.129371  | 0.122669 | 0.120921  | 0.114948  | 0.22771  |
| 0.120484  | 0.136946  | 0.142191  | 0.120921 | 0.129953  | 0.125437  | 0.234703 |
| 0.11451   | 0.139132  | 0.135635  | 0.13039  | 0.124272  | 0.119755  | 0.233683 |
| 0.128351  | 0.143357  | 0.138112  | 0.135781 | 0.134324  | 0.129516  | 0.238782 |
| 0.111888  | 0.127185  | 0.0479312 | 0.117861 | 0.125437  | 0.113928  | 0.2331   |
| 0.0501166 | 0.123397  | 0.119027  | 0.107663 | 0.117861  | 0.108683  | 0.219697 |
| 0.129079  | 0.130682  | 0.142045  | 0.133304 | 0.13039   | 0.123834  | 0.234848 |
| 0.178176  | 0.193182  | 0.19697   | 0.174242 | 0.177156  | 0.178176  | 0.128934 |
| 0.128205  | 0.136218  | 0.143794  | 0.125728 | 0.0584207 | 0.122378  | 0.229312 |
| 0.117716  | 0.125437  | 0.138258  | 0.11116  | 0.0476399 | 0.111888  | 0.222028 |
| 0.116404  | 0.134324  | 0.136946  | 0.118007 | 0.128205  | 0.119318  | 0.232663 |
| 0.107809  | 0.126603  | 0.127477  | 0.109994 | 0.118444  | 0.106935  | 0.225524 |
| 0.11116   | 0.138403  | 0.133159  | 0.129662 | 0.121503  | 0.11961   | 0.231789 |
| 0.116841  | 0.141171  | 0.138258  | 0.133304 | 0.130973  | 0.121212  | 0.236014 |
| 0.184003  | 0.198135  | 0.202506  | 0.18211  | 0.185897  | 0.185169  | 0.128059 |
| 0.110868  | 0.127331  | 0.123543  | 0.110723 | 0.0716783 | 0.116987  | 0.215181 |
| 0.105478  | 0.121649  | 0.121066  | 0.11116  | 0.106206  | 0.0990676 | 0.206585 |
| 0.11859   | 0.128642  | 0.137092  | 0.113491 | 0.0488054 | 0.11451   | 0.226107 |
| 0.181672  | 0.197552  | 0.206002  | 0.18211  | 0.181818  | 0.182838  | 0.121066 |
| 0.0976107 | 0.131847  | 0.117861  | 0.105332 | 0.116113  | 0.111888  | 0.224359 |
| 0.121941  | 0.140734  | 0.137238  | 0.127622 | 0.126166  | 0.124563  | 0.237325 |
| 0.114948  | 0.12704   | 0.136364  | 0.114219 | 0.0448718 | 0.114948  | 0.225379 |
| 0.110431  | 0.0590035 | 0.126894  | 0.113782 | 0.114948  | 0.0690559 | 0.232517 |
| 0.179487  | 0.19595   | 0.201195  | 0.174971 | 0.177885  | 0.178322  | 0.12296  |
| 0.119755  | 0.137092  | 0.135927  | 0.124272 | 0.119027  | 0.117133  | 0.231935 |
| 0.111014  | 0.124272  | 0.132721  | 0.116696 | 0.111451  | 0.104312  | 0.220862 |
| 0.099359  | 0.131265  | 0.119027  | 0.103584 | 0.113782  | 0.108392  | 0.218823 |
| 0.120047  | 0.13447   | 0.140006  | 0.113782 | 0.112908  | 0.11655   | 0.206876 |
| 0.119901  | 0.122086  | 0.138112  | 0.122378 | 0.12296   | 0.109994  | 0.235868 |
| 0.126603  | 0.141317  | 0.141026  | 0.133741 | 0.130245  | 0.124272  | 0.238491 |
| 0.0426865 | 0.124709  | 0.122086  | 0.105769 | 0.115967  | 0.10708   | 0.225087 |
| 0.122232  | 0.130828  | 0.117716  | 0.125    | 0.11655   | 0.113491  | 0.236742 |
| 0.137238  | 0.0587121 | 0.143211  | 0.137675 | 0.141463  | 0.100524  | 0.236305 |
| 0.229312  | 0.241696  | 0.243444  | 0.223048 | 0.226836  | 0.233683  | 0.106935 |
| 0.11655   | 0.135052  | 0.050845  | 0.122232 | 0.130682  | 0.118298  | 0.23514  |
| 0.12296   | 0.120192  | 0.136218  | 0.123397 | 0.12398   | 0.112179  | 0.235431 |
| 0.109411  | 0.126457  | 0.132284  | 0.108974 | 0.0530303 | 0.112908  | 0.216055 |
| 0.122086  | 0.124563  | 0.137675  | 0.122815 | 0.125728  | 0.112179  | 0.221154 |
| 0.112325  | 0.118007  | 0.134324  | 0.113928 | 0.113928  | 0.111742  | 0.224796 |
| 0.114365  | 0.130536  | 0.13141   | 0.112471 | 0.118881  | 0.115822  | 0.228584 |
| 0.117424  | 0.128642  | 0.138258  | 0.110577 | 0.0560897 | 0.115385  | 0.223485 |

|           |           |          |          |           |           |          |
|-----------|-----------|----------|----------|-----------|-----------|----------|
| 0.123689  | 0.141317  | 0.138695 | 0.129953 | 0.125874  | 0.123397  | 0.234411 |
| 0.113491  | 0.102273  | 0.132576 | 0.115676 | 0.120338  | 0.095134  | 0.225379 |
| 0.232517  | 0.239073  | 0.246649 | 0.223048 | 0.228584  | 0.230769  | 0.104021 |
| 0.0945513 | 0.127622  | 0.116841 | 0.105186 | 0.110431  | 0.106789  | 0.222756 |
| 0.110577  | 0.122086  | 0.122086 | 0.118298 | 0.112471  | 0.105332  | 0.229167 |
| 0         | 0.121358  | 0.118153 | 0.10708  | 0.112617  | 0.107517  | 0.224068 |
| 0.121358  | 0         | 0.136364 | 0.124126 | 0.124126  | 0.0843531 | 0.234703 |
| 0.118153  | 0.136364  | 0        | 0.128497 | 0.139277  | 0.126311  | 0.240239 |
| 0.10708   | 0.124126  | 0.128497 | 0        | 0.108683  | 0.109703  | 0.218969 |
| 0.112617  | 0.124126  | 0.139277 | 0.108683 | 0         | 0.111742  | 0.222465 |
| 0.107517  | 0.0843531 | 0.126311 | 0.109703 | 0.111742  | 0         | 0.225524 |
| 0.224068  | 0.234703  | 0.240239 | 0.218969 | 0.222465  | 0.225524  | 0        |
| 0.119755  | 0.125728  | 0.141754 | 0.113199 | 0.0464744 | 0.11859   | 0.223193 |
| 0.120484  | 0.140152  | 0.136655 | 0.129662 | 0.12296   | 0.121941  | 0.237034 |
| 0.107663  | 0.110431  | 0.126748 | 0.117424 | 0.118007  | 0.0995047 | 0.22771  |
| 0.117133  | 0.125146  | 0.136509 | 0.121649 | 0.121066  | 0.113636  | 0.230769 |
| 0.126166  | 0.13447   | 0.129516 | 0.133887 | 0.13039   | 0.122378  | 0.236014 |
| 0.0474942 | 0.120484  | 0.120775 | 0.10708  | 0.116987  | 0.106061  | 0.223193 |
| 0.12296   | 0.140589  | 0.132721 | 0.128642 | 0.12602   | 0.122669  | 0.234557 |
| 0.128351  | 0.143648  | 0.136072 | 0.134324 | 0.131119  | 0.128059  | 0.239656 |
| 0.116113  | 0.13345   | 0.133741 | 0.120921 | 0.122378  | 0.118444  | 0.23412  |
| 0.0480769 | 0.123106  | 0.122815 | 0.107663 | 0.11757   | 0.107517  | 0.228147 |
| 0.125291  | 0.120775  | 0.142628 | 0.125146 | 0.125437  | 0.113636  | 0.237179 |
| 0.128934  | 0.122086  | 0.144231 | 0.13141  | 0.128788  | 0.119318  | 0.241404 |
| 0.123106  | 0.13986   | 0.143357 | 0.126166 | 0.133741  | 0.128934  | 0.236742 |
| 0.126311  | 0.145396  | 0.144522 | 0.127622 | 0.136364  | 0.130682  | 0.236451 |
| 0.126748  | 0.124854  | 0.143211 | 0.133596 | 0.130973  | 0.120629  | 0.24155  |
| 0.087704  | 0.128059  | 0.100087 | 0.103875 | 0.115822  | 0.107517  | 0.229895 |
| 0.133887  | 0.145979  | 0.135781 | 0.138112 | 0.13345   | 0.130099  | 0.244027 |
| 0.119755  | 0.137383  | 0.129516 | 0.137966 | 0.13243   | 0.128205  | 0.24155  |
| 0.198427  | 0.21081   | 0.220134 | 0.191579 | 0.195076  | 0.199301  | 0.106935 |
| 0.111305  | 0.128351  | 0.114656 | 0.121066 | 0.121358  | 0.115676  | 0.228147 |
| 0.115967  | 0.125728  | 0.131265 | 0.120775 | 0.123689  | 0.112762  | 0.234557 |
| 0.0447261 | 0.128205  | 0.125874 | 0.109848 | 0.120921  | 0.109703  | 0.218969 |
| 0.217366  | 0.227418  | 0.234703 | 0.21081  | 0.213724  | 0.215909  | 0.106935 |
| 0.203963  | 0.215472  | 0.222756 | 0.198281 | 0.20236   | 0.20542   | 0.121212 |
| 0.127768  | 0.142483  | 0.139277 | 0.132867 | 0.129662  | 0.126311  | 0.236451 |
| 0.241841  | 0.249854  | 0.257721 | 0.236742 | 0.241113  | 0.243007  | 0.107809 |
| 0.090035  | 0.126311  | 0.100087 | 0.102127 | 0.119901  | 0.107226  | 0.226981 |
| 0.126457  | 0.144376  | 0.122815 | 0.130099 | 0.142628  | 0.130828  | 0.238345 |
| 0.0981935 | 0.132139  | 0.114656 | 0.107663 | 0.117861  | 0.113636  | 0.229021 |
| 0.124563  | 0.120338  | 0.143357 | 0.126166 | 0.126457  | 0.112908  | 0.237034 |
| 0.18211   | 0.196241  | 0.200612 | 0.174971 | 0.180216  | 0.18007   | 0.117133 |
| 0.115822  | 0.129371  | 0.128788 | 0.13141  | 0.12704   | 0.120484  | 0.224505 |

|           |           |           |           |           |           |          |
|-----------|-----------|-----------|-----------|-----------|-----------|----------|
| 0.183712  | 0.200466  | 0.206002  | 0.183275  | 0.183858  | 0.186626  | 0.121358 |
| 0.105915  | 0.120338  | 0.120921  | 0.109848  | 0.116841  | 0.103293  | 0.231498 |
| 0.113199  | 0.131993  | 0.13549   | 0.115676  | 0.099359  | 0.118153  | 0.215763 |
| 0.114656  | 0.129953  | 0.117716  | 0.121503  | 0.125     | 0.116696  | 0.228584 |
| 0.105041  | 0.121503  | 0.131702  | 0.106935  | 0.103147  | 0.107372  | 0.214307 |
| 0.0472028 | 0.120484  | 0.11757   | 0.102127  | 0.11116   | 0.0996503 | 0.221737 |
| 0.105478  | 0.126894  | 0.113199  | 0.113491  | 0.108537  | 0.108392  | 0.225524 |
| 0.0932401 | 0.127185  | 0.113491  | 0.099796  | 0.11757   | 0.107226  | 0.222319 |
| 0.109703  | 0.122669  | 0.132867  | 0.106643  | 0.0492424 | 0.104749  | 0.223922 |
| 0.117133  | 0.137092  | 0.128351  | 0.121649  | 0.121358  | 0.120047  | 0.233683 |
| 0.105769  | 0.124272  | 0.0613345 | 0.107955  | 0.11553   | 0.104604  | 0.228438 |
| 0.0960082 | 0.128205  | 0.111305  | 0.102564  | 0.117424  | 0.110286  | 0.226253 |
| 0.103147  | 0.137675  | 0.133887  | 0.113782  | 0.124272  | 0.122669  | 0.225233 |
| 0.124126  | 0.133013  | 0.140006  | 0.11961   | 0.0523019 | 0.120921  | 0.228438 |
| 0.112034  | 0.127914  | 0.133159  | 0.111597  | 0.118007  | 0.110868  | 0.227418 |
| 0.113345  | 0.122523  | 0.129808  | 0.117861  | 0.11553   | 0.105478  | 0.226981 |
| 0.0418124 | 0.118881  | 0.118881  | 0.101107  | 0.110723  | 0.100379  | 0.220717 |
| 0.116404  | 0.135781  | 0.132576  | 0.126166  | 0.113345  | 0.120484  | 0.225379 |
| 0.119901  | 0.120338  | 0.140734  | 0.121795  | 0.121212  | 0.107372  | 0.233829 |
| 0.112471  | 0.142045  | 0.13447   | 0.132139  | 0.124272  | 0.120047  | 0.23514  |
| 0.115676  | 0.133596  | 0.133304  | 0.11553   | 0.126311  | 0.114219  | 0.232809 |
| 0.114365  | 0.128497  | 0.136072  | 0.109848  | 0.0501166 | 0.10912   | 0.2213   |
| 0.124417  | 0.133596  | 0.145542  | 0.118444  | 0.0520105 | 0.119464  | 0.226981 |
| 0.131993  | 0.136801  | 0.145251  | 0.127185  | 0.0584207 | 0.127914  | 0.232226 |
| 0.10708   | 0.127914  | 0.120047  | 0.112471  | 0.111888  | 0.106498  | 0.225962 |
| 0.0450175 | 0.12296   | 0.126166  | 0.107226  | 0.115385  | 0.105624  | 0.226544 |
| 0.112471  | 0.127185  | 0.123689  | 0.106789  | 0.110577  | 0.106352  | 0.224359 |
| 0.130828  | 0.122232  | 0.14292   | 0.13243   | 0.129516  | 0.11859   | 0.240967 |
| 0.104458  | 0.134033  | 0.111305  | 0.106643  | 0.119172  | 0.114656  | 0.229458 |
| 0.128642  | 0.152389  | 0.143065  | 0.148601  | 0.141608  | 0.138258  | 0.246941 |
| 0.0575466 | 0.136946  | 0.128788  | 0.125291  | 0.134907  | 0.124854  | 0.232372 |
| 0.11655   | 0.0543415 | 0.13039   | 0.119901  | 0.11961   | 0.0815851 | 0.231643 |
| 0.10708   | 0.124709  | 0.108683  | 0.0976107 | 0.109848  | 0.107663  | 0.225962 |
| 0.109557  | 0.117861  | 0.126603  | 0.116404  | 0.11116   | 0.108974  | 0.227855 |
| 0.120629  | 0.139714  | 0.140297  | 0.124854  | 0.133596  | 0.126748  | 0.235723 |
| 0.200612  | 0.215326  | 0.218531  | 0.197552  | 0.198427  | 0.201486  | 0.129808 |
| 0.113491  | 0.123543  | 0.131702  | 0.116259  | 0.116259  | 0.104749  | 0.223922 |
| 0.113636  | 0.130682  | 0.119027  | 0.114948  | 0.121358  | 0.113928  | 0.233392 |
| 0.119901  | 0.119172  | 0.137821  | 0.121503  | 0.119464  | 0.107372  | 0.234703 |
| 0.11451   | 0.13243   | 0.135052  | 0.113491  | 0.123689  | 0.11451   | 0.231061 |
| 0.111451  | 0.125874  | 0.126166  | 0.115093  | 0.128497  | 0.105915  | 0.234994 |
| 0.122815  | 0.128788  | 0.123252  | 0.113928  | 0.117133  | 0.113491  | 0.231498 |
| 0.126166  | 0.128351  | 0.125146  | 0.11961   | 0.118444  | 0.115676  | 0.233392 |
| 0.114948  | 0.0574009 | 0.128788  | 0.113054  | 0.120921  | 0.0791084 | 0.228293 |

|           |          |           |          |           |          |          |
|-----------|----------|-----------|----------|-----------|----------|----------|
| 0.115239  | 0.131993 | 0.128788  | 0.117424 | 0.119755  | 0.112617 | 0.232663 |
| 0.125437  | 0.122378 | 0.138403  | 0.127331 | 0.123834  | 0.115239 | 0.238199 |
| 0.109411  | 0.126748 | 0.11655   | 0.117424 | 0.121212  | 0.109703 | 0.231498 |
| 0.111305  | 0.130099 | 0.0598776 | 0.116113 | 0.121066  | 0.113054 | 0.234557 |
| 0.167978  | 0.186189 | 0.190851  | 0.174825 | 0.171037  | 0.167978 | 0.195076 |
| 0.112908  | 0.125874 | 0.134615  | 0.109266 | 0.0495338 | 0.107663 | 0.221591 |
| 0.127914  | 0.125437 | 0.143794  | 0.126311 | 0.126311  | 0.116259 | 0.22465  |
| 0.112617  | 0.134324 | 0.111597  | 0.124126 | 0.135198  | 0.11757  | 0.237617 |
| 0.117424  | 0.128642 | 0.135344  | 0.120484 | 0.11553   | 0.118007 | 0.230769 |
| 0.102273  | 0.116404 | 0.105915  | 0.103875 | 0.110577  | 0.101399 | 0.229021 |
| 0.100233  | 0.116404 | 0.0677448 | 0.105041 | 0.110577  | 0.097028 | 0.228147 |
| 0.107517  | 0.11961  | 0.103875  | 0.10708  | 0.116404  | 0.106352 | 0.233974 |
| 0.120047  | 0.131556 | 0.134178  | 0.131265 | 0.126311  | 0.117716 | 0.235723 |
| 0.108683  | 0.125437 | 0.0922203 | 0.108829 | 0.08581   | 0.11014  | 0.219406 |
| 0.121649  | 0.143939 | 0.132867  | 0.127914 | 0.128205  | 0.126894 | 0.241113 |
| 0.1081    | 0.127768 | 0.124563  | 0.114656 | 0.109411  | 0.106352 | 0.22669  |
| 0.118153  | 0.136946 | 0.118298  | 0.118007 | 0.123834  | 0.112034 | 0.227418 |
| 0.123834  | 0.13884  | 0.135927  | 0.131556 | 0.135052  | 0.123543 | 0.243007 |
| 0.107226  | 0.132139 | 0.103584  | 0.118153 | 0.12602   | 0.113928 | 0.232809 |
| 0.114802  | 0.128059 | 0.125728  | 0.121358 | 0.122232  | 0.120047 | 0.230478 |
| 0.104312  | 0.130682 | 0.107955  | 0.110577 | 0.11961   | 0.111597 | 0.232809 |
| 0.1081    | 0.132721 | 0.104458  | 0.113199 | 0.122523  | 0.113345 | 0.233974 |
| 0.0964452 | 0.119901 | 0.113199  | 0.106206 | 0.117279  | 0.101107 | 0.229604 |
| 0.106206  | 0.139277 | 0.118881  | 0.121212 | 0.127622  | 0.119027 | 0.241696 |
| 0.104458  | 0.125    | 0.111597  | 0.111014 | 0.11859   | 0.106789 | 0.234994 |
| 0.139132  | 0.149184 | 0.149476  | 0.1419   | 0.141608  | 0.140006 | 0.237908 |
| 0.127185  | 0.138986 | 0.145396  | 0.13141  | 0.129953  | 0.127185 | 0.230041 |
| 0.105041  | 0.129662 | 0.111014  | 0.111888 | 0.116841  | 0.106789 | 0.231206 |
| 0.135198  | 0.145833 | 0.153409  | 0.146416 | 0.140006  | 0.136072 | 0.243881 |
| 0.115676  | 0.123397 | 0.133304  | 0.117861 | 0.122523  | 0.112179 | 0.229021 |
| 0.127331  | 0.143794 | 0.123397  | 0.130099 | 0.139423  | 0.128788 | 0.23514  |
| 0.104895  | 0.129808 | 0.114073  | 0.114365 | 0.121358  | 0.112179 | 0.232517 |
| 0.137383  | 0.150641 | 0.14831   | 0.141317 | 0.140734  | 0.138258 | 0.241113 |
| 0.125437  | 0.135198 | 0.132284  | 0.133159 | 0.134615  | 0.125437 | 0.230624 |
| 0.131265  | 0.141026 | 0.146562  | 0.134907 | 0.143939  | 0.131265 | 0.237617 |
| 0.117861  | 0.13141  | 0.12704   | 0.117133 | 0.124126  | 0.122232 | 0.239365 |
| 0.102273  | 0.128351 | 0.111451  | 0.110577 | 0.120484  | 0.107517 | 0.233392 |
| 0.100379  | 0.129662 | 0.115676  | 0.113636 | 0.124126  | 0.108537 | 0.23208  |
| 0.114219  | 0.122232 | 0.126311  | 0.124854 | 0.123106  | 0.111597 | 0.231352 |
| 0.111888  | 0.134761 | 0.109994  | 0.125728 | 0.126603  | 0.119172 | 0.237762 |
| 0.118153  | 0.138695 | 0.118007  | 0.127622 | 0.135198  | 0.12602  | 0.242279 |
| 0.114365  | 0.138403 | 0.13549   | 0.118298 | 0.126457  | 0.120775 | 0.230332 |
| 0.106789  | 0.126166 | 0.118881  | 0.111014 | 0.118007  | 0.108537 | 0.229458 |
| 0.104021  | 0.132139 | 0.113782  | 0.114948 | 0.121358  | 0.113054 | 0.231935 |

|           |          |           |           |          |           |          |
|-----------|----------|-----------|-----------|----------|-----------|----------|
| 0.106498  | 0.127622 | 0.111597  | 0.112179  | 0.127331 | 0.119318  | 0.228875 |
| 0.099796  | 0.129662 | 0.120047  | 0.108974  | 0.115093 | 0.10912   | 0.229749 |
| 0.1081    | 0.137675 | 0.116987  | 0.120775  | 0.13039  | 0.11655   | 0.235431 |
| 0.101981  | 0.132139 | 0.116987  | 0.121358  | 0.116113 | 0.111014  | 0.22873  |
| 0.105624  | 0.122669 | 0.126748  | 0.0474942 | 0.106935 | 0.109994  | 0.216929 |
| 0.102127  | 0.123834 | 0.107517  | 0.107226  | 0.113928 | 0.107372  | 0.233246 |
| 0.0863928 | 0.125291 | 0.0964452 | 0.102855  | 0.114219 | 0.105332  | 0.228875 |
| 0.101836  | 0.122378 | 0.106935  | 0.106061  | 0.120629 | 0.110868  | 0.225379 |
| 0.105186  | 0.126311 | 0.125728  | 0.0479312 | 0.109411 | 0.109557  | 0.21824  |
| 0.10912   | 0.129662 | 0.104895  | 0.108974  | 0.111305 | 0.109411  | 0.231789 |
| 0.121066  | 0.13345  | 0.121503  | 0.106352  | 0.102855 | 0.119027  | 0.227418 |
| 0.0992133 | 0.117133 | 0.121795  | 0.0591492 | 0.100816 | 0.0954254 | 0.216638 |
| 0.122086  | 0.137966 | 0.104458  | 0.120192  | 0.126894 | 0.121795  | 0.23951  |

| TDr_3593  | TDr_3594  | TDr_3598 | TDr_3600 | TDr_3605 | TDr_3610  | TDr_3616  |
|-----------|-----------|----------|----------|----------|-----------|-----------|
| 0.12398   | 0.126457  | 0.113636 | 0.129808 | 0.120192 | 0.118444  | 0.122232  |
| 0.112179  | 0.120775  | 0.113491 | 0.119172 | 0.128205 | 0.104021  | 0.121795  |
| 0.107809  | 0.121649  | 0.108829 | 0.11655  | 0.122086 | 0.101399  | 0.122086  |
| 0.0967366 | 0.119027  | 0.113782 | 0.124126 | 0.127914 | 0.104021  | 0.121503  |
| 0.134033  | 0.131847  | 0.122815 | 0.134615 | 0.128205 | 0.129079  | 0.129953  |
| 0.134907  | 0.13447   | 0.121358 | 0.129662 | 0.13141  | 0.12296   | 0.134033  |
| 0.129808  | 0.120629  | 0.122669 | 0.12398  | 0.113199 | 0.116987  | 0.117861  |
| 0.109994  | 0.122086  | 0.110431 | 0.11961  | 0.121649 | 0.104749  | 0.123689  |
| 0.113345  | 0.113491  | 0.103875 | 0.115967 | 0.113636 | 0.102564  | 0.112762  |
| 0.123397  | 0.125583  | 0.106935 | 0.117279 | 0.120484 | 0.0901807 | 0.122815  |
| 0.132576  | 0.119901  | 0.111451 | 0.128205 | 0.123252 | 0.113345  | 0.118881  |
| 0.114948  | 0.112762  | 0.102855 | 0.118444 | 0.116404 | 0.112908  | 0.112325  |
| 0.121066  | 0.113636  | 0.110723 | 0.122815 | 0.121358 | 0.101544  | 0.116987  |
| 0.135198  | 0.144085  | 0.130973 | 0.145396 | 0.144522 | 0.127914  | 0.145105  |
| 0.131265  | 0.135198  | 0.121795 | 0.129225 | 0.135052 | 0.0499709 | 0.134178  |
| 0.124709  | 0.108537  | 0.114948 | 0.12296  | 0.117716 | 0.1081    | 0.107809  |
| 0.121941  | 0.107226  | 0.097028 | 0.111742 | 0.108246 | 0.108829  | 0.10708   |
| 0.142483  | 0.1537    | 0.142045 | 0.1419   | 0.143357 | 0.138986  | 0.152098  |
| 0.109557  | 0.11961   | 0.105332 | 0.112762 | 0.125291 | 0.104604  | 0.117133  |
| 0.201049  | 0.211684  | 0.198572 | 0.202214 | 0.207459 | 0.174242  | 0.208333  |
| 0.135927  | 0.133741  | 0.118007 | 0.122523 | 0.13039  | 0.115822  | 0.128934  |
| 0.127622  | 0.128934  | 0.115822 | 0.11859  | 0.128497 | 0.11451   | 0.131119  |
| 0.116113  | 0.0961538 | 0.102855 | 0.110577 | 0.117861 | 0.10708   | 0.097465  |
| 0.130245  | 0.101544  | 0.118735 | 0.121795 | 0.115676 | 0.125291  | 0.107226  |
| 0.114365  | 0.107517  | 0.100233 | 0.113782 | 0.114365 | 0.101544  | 0.110577  |
| 0.135635  | 0.13549   | 0.126457 | 0.122232 | 0.135927 | 0.120192  | 0.133596  |
| 0.132139  | 0.119755  | 0.120047 | 0.128059 | 0.117279 | 0.120192  | 0.120484  |
| 0.122232  | 0.104895  | 0.111597 | 0.116987 | 0.11961  | 0.112908  | 0.104458  |
| 0.133304  | 0.124417  | 0.119464 | 0.133013 | 0.120192 | 0.127477  | 0.123397  |
| 0.128934  | 0.123543  | 0.12296  | 0.126894 | 0.115822 | 0.112034  | 0.121649  |
| 0.132867  | 0.12398   | 0.11961  | 0.128205 | 0.121795 | 0.109266  | 0.120921  |
| 0.127477  | 0.11655   | 0.112179 | 0.122815 | 0.112617 | 0.112325  | 0.119318  |
| 0.116987  | 0.113928  | 0.101107 | 0.112908 | 0.116696 | 0.0983392 | 0.113782  |
| 0.123397  | 0.11655   | 0.115385 | 0.118444 | 0.112617 | 0.114656  | 0.120775  |
| 0.13141   | 0.114073  | 0.117279 | 0.126748 | 0.117133 | 0.117424  | 0.109266  |
| 0.130973  | 0.118007  | 0.124417 | 0.127768 | 0.119901 | 0.125437  | 0.117279  |
| 0.138986  | 0.132721  | 0.130973 | 0.134324 | 0.126457 | 0.127331  | 0.134324  |
| 0.130973  | 0.115676  | 0.11655  | 0.125146 | 0.125146 | 0.120192  | 0.116696  |
| 0.116696  | 0.0958625 | 0.104604 | 0.116696 | 0.114656 | 0.106498  | 0.0992133 |
| 0.127185  | 0.109848  | 0.115967 | 0.120775 | 0.124272 | 0.115239  | 0.109994  |
| 0.117279  | 0.10169   | 0.100816 | 0.119318 | 0.115239 | 0.110286  | 0.102418  |
| 0.146999  | 0.128788  | 0.135781 | 0.144668 | 0.140589 | 0.129225  | 0.129225  |

|           |           |           |          |          |          |          |
|-----------|-----------|-----------|----------|----------|----------|----------|
| 0.148164  | 0.123543  | 0.141317  | 0.145542 | 0.140589 | 0.141171 | 0.126894 |
| 0.122669  | 0.107663  | 0.105915  | 0.126748 | 0.120629 | 0.113345 | 0.1081   |
| 0.119464  | 0.107955  | 0.0980478 | 0.106643 | 0.105186 | 0.108392 | 0.107517 |
| 0.133013  | 0.115093  | 0.114219  | 0.11961  | 0.116113 | 0.105915 | 0.11116  |
| 0.123397  | 0.107517  | 0.104604  | 0.114073 | 0.119027 | 0.112034 | 0.109703 |
| 0.142483  | 0.125146  | 0.125728  | 0.136655 | 0.136072 | 0.131702 | 0.128788 |
| 0.121503  | 0.106789  | 0.10708   | 0.116259 | 0.117424 | 0.111888 | 0.113636 |
| 0.12602   | 0.105769  | 0.111014  | 0.119318 | 0.122815 | 0.110577 | 0.10708  |
| 0.147145  | 0.147582  | 0.144668  | 0.144231 | 0.138695 | 0.142191 | 0.148019 |
| 0.136655  | 0.118153  | 0.121649  | 0.120338 | 0.125    | 0.125583 | 0.119464 |
| 0.122232  | 0.0955711 | 0.108392  | 0.126603 | 0.120192 | 0.112617 | 0.100087 |
| 0.129225  | 0.13141   | 0.125291  | 0.13447  | 0.129516 | 0.110868 | 0.129225 |
| 0.0913462 | 0.111888  | 0.107517  | 0.121066 | 0.122232 | 0.115239 | 0.112908 |
| 0.140589  | 0.119172  | 0.130828  | 0.128059 | 0.133304 | 0.141171 | 0.121358 |
| 0.134907  | 0.113199  | 0.120775  | 0.12704  | 0.126457 | 0.124417 | 0.113345 |
| 0.122086  | 0.105332  | 0.10912   | 0.122378 | 0.11859  | 0.11014  | 0.106061 |
| 0.128205  | 0.113782  | 0.107955  | 0.125291 | 0.120629 | 0.113636 | 0.115676 |
| 0.130973  | 0.111597  | 0.118298  | 0.123106 | 0.112617 | 0.111451 | 0.108829 |
| 0.14088   | 0.113054  | 0.131702  | 0.139714 | 0.13243  | 0.130973 | 0.11553  |
| 0.137383  | 0.122378  | 0.137238  | 0.136801 | 0.139132 | 0.133596 | 0.125728 |
| 0.159382  | 0.153992  | 0.159237  | 0.16317  | 0.162879 | 0.155303 | 0.155594 |
| 0.124417  | 0.104167  | 0.104749  | 0.121795 | 0.122669 | 0.107517 | 0.1081   |
| 0.12704   | 0.100962  | 0.104749  | 0.117133 | 0.119464 | 0.111014 | 0.100524 |
| 0.120921  | 0.103584  | 0.102127  | 0.121503 | 0.111888 | 0.113636 | 0.10373  |
| 0.146416  | 0.138403  | 0.138695  | 0.13884  | 0.132721 | 0.13243  | 0.136509 |
| 0.120192  | 0.100816  | 0.106352  | 0.121066 | 0.119027 | 0.109703 | 0.105624 |
| 0.138403  | 0.117279  | 0.123689  | 0.128205 | 0.127914 | 0.130536 | 0.11859  |
| 0.134033  | 0.106789  | 0.116696  | 0.123543 | 0.117716 | 0.109557 | 0.106352 |
| 0.128642  | 0.10373   | 0.102855  | 0.121649 | 0.119901 | 0.11553  | 0.108246 |
| 0.147873  | 0.147436  | 0.143939  | 0.144959 | 0.138549 | 0.141754 | 0.148164 |
| 0.130973  | 0.101981  | 0.11451   | 0.128351 | 0.124272 | 0.119027 | 0.105624 |
| 0.141608  | 0.123106  | 0.131556  | 0.134324 | 0.13345  | 0.131702 | 0.125291 |
| 0.133887  | 0.119755  | 0.113636  | 0.125146 | 0.126311 | 0.128059 | 0.120484 |
| 0.113054  | 0.117861  | 0.101836  | 0.107226 | 0.118881 | 0.112179 | 0.119464 |
| 0.122086  | 0.0968823 | 0.107372  | 0.119172 | 0.117716 | 0.115093 | 0.100524 |
| 0.122669  | 0.106206  | 0.100379  | 0.122086 | 0.117133 | 0.110723 | 0.106643 |
| 0.13141   | 0.114948  | 0.127768  | 0.133741 | 0.130828 | 0.132867 | 0.113928 |
| 0.125146  | 0.107517  | 0.104021  | 0.119901 | 0.117861 | 0.114656 | 0.10708  |
| 0.140443  | 0.126603  | 0.137383  | 0.137821 | 0.142483 | 0.134033 | 0.126748 |
| 0.133741  | 0.111451  | 0.114073  | 0.13141  | 0.124709 | 0.118881 | 0.11451  |
| 0.120921  | 0.0962995 | 0.111742  | 0.114802 | 0.115967 | 0.119755 | 0.102855 |
| 0.129953  | 0.103293  | 0.114656  | 0.124126 | 0.123834 | 0.11655  | 0.109266 |
| 0.125583  | 0.103584  | 0.113782  | 0.128497 | 0.126748 | 0.117424 | 0.1081   |
| 0.124709  | 0.103875  | 0.103001  | 0.11859  | 0.119172 | 0.112762 | 0.106061 |



|          |           |           |          |          |           |          |
|----------|-----------|-----------|----------|----------|-----------|----------|
| 0.124126 | 0.101544  | 0.105915  | 0.118007 | 0.115676 | 0.114802  | 0.103147 |
| 0.139714 | 0.119464  | 0.126457  | 0.136218 | 0.136509 | 0.129808  | 0.119901 |
| 0.123689 | 0.103438  | 0.103438  | 0.12398  | 0.118444 | 0.105624  | 0.103875 |
| 0.122669 | 0.113782  | 0.108537  | 0.117716 | 0.117133 | 0.106935  | 0.114802 |
| 0.134615 | 0.128351  | 0.12602   | 0.125    | 0.118881 | 0.11859   | 0.129079 |
| 0.134324 | 0.127185  | 0.126894  | 0.124126 | 0.115093 | 0.12296   | 0.124709 |
| 0.139277 | 0.128642  | 0.128351  | 0.116841 | 0.121795 | 0.124417  | 0.127914 |
| 0.140589 | 0.129662  | 0.13345   | 0.126603 | 0.127477 | 0.135052  | 0.132721 |
| 0.130828 | 0.122815  | 0.111742  | 0.12296  | 0.113928 | 0.115385  | 0.12296  |
| 0.183858 | 0.184878  | 0.180798  | 0.185606 | 0.180653 | 0.180653  | 0.185897 |
| 0.118444 | 0.116259  | 0.105478  | 0.118444 | 0.108537 | 0.107663  | 0.116696 |
| 0.140443 | 0.129808  | 0.133013  | 0.123252 | 0.123252 | 0.129662  | 0.13141  |
| 0.134615 | 0.124272  | 0.122815  | 0.117424 | 0.116841 | 0.120047  | 0.125583 |
| 0.143211 | 0.134324  | 0.135198  | 0.137092 | 0.128642 | 0.132139  | 0.132139 |
| 0.12296  | 0.110868  | 0.10708   | 0.112762 | 0.111305 | 0.107226  | 0.110723 |
| 0.134907 | 0.124272  | 0.128351  | 0.124126 | 0.124417 | 0.128205  | 0.124417 |
| 0.12296  | 0.118735  | 0.111742  | 0.108974 | 0.112179 | 0.113054  | 0.117133 |
| 0.13243  | 0.121795  | 0.119172  | 0.114073 | 0.111742 | 0.118153  | 0.121358 |
| 0.124272 | 0.113928  | 0.110723  | 0.121649 | 0.113199 | 0.112034  | 0.114073 |
| 0.142045 | 0.125     | 0.129371  | 0.12398  | 0.11553  | 0.133887  | 0.125728 |
| 0.12602  | 0.106643  | 0.104604  | 0.115822 | 0.105624 | 0.105915  | 0.104458 |
| 0.135198 | 0.132139  | 0.130973  | 0.128497 | 0.125    | 0.129953  | 0.131993 |
| 0.129808 | 0.120338  | 0.116259  | 0.121066 | 0.112908 | 0.116113  | 0.117861 |
| 0.13549  | 0.114365  | 0.126603  | 0.129079 | 0.128497 | 0.128497  | 0.113636 |
| 0.142337 | 0.127331  | 0.133159  | 0.13243  | 0.119027 | 0.119318  | 0.122523 |
| 0.123689 | 0.116259  | 0.108392  | 0.118735 | 0.107955 | 0.105624  | 0.114073 |
| 0.148164 | 0.143939  | 0.142191  | 0.141171 | 0.141463 | 0.137383  | 0.141463 |
| 0.128788 | 0.119318  | 0.113782  | 0.120338 | 0.111014 | 0.113345  | 0.118007 |
| 0.127622 | 0.113491  | 0.105332  | 0.11451  | 0.11655  | 0.109557  | 0.113345 |
| 0.124563 | 0.110723  | 0.108392  | 0.113782 | 0.113199 | 0.114656  | 0.106206 |
| 0.146416 | 0.145396  | 0.136364  | 0.137383 | 0.136509 | 0.135927  | 0.143794 |
| 0.130682 | 0.114219  | 0.120338  | 0.121941 | 0.11961  | 0.116696  | 0.112617 |
| 0.118735 | 0.114219  | 0.104895  | 0.108537 | 0.109703 | 0.103875  | 0.11116  |
| 0.12602  | 0.111888  | 0.105478  | 0.109994 | 0.118735 | 0.105332  | 0.114073 |
| 0.128205 | 0.11757   | 0.114656  | 0.122086 | 0.119755 | 0.11451   | 0.117424 |
| 0.132721 | 0.121212  | 0.12296   | 0.129808 | 0.124563 | 0.113782  | 0.121358 |
| 0.129953 | 0.118444  | 0.118444  | 0.121503 | 0.108392 | 0.114219  | 0.115093 |
| 0.116404 | 0.104021  | 0.101399  | 0.113491 | 0.10912  | 0.100087  | 0.104167 |
| 0.117279 | 0.105478  | 0.0958625 | 0.119027 | 0.109994 | 0.103875  | 0.104458 |
| 0.119172 | 0.110286  | 0.104749  | 0.116841 | 0.108974 | 0.103438  | 0.109266 |
| 0.127914 | 0.11116   | 0.11553   | 0.131119 | 0.117424 | 0.120921  | 0.110723 |
| 0.136801 | 0.117424  | 0.125     | 0.122815 | 0.120484 | 0.120484  | 0.11553  |
| 0.121503 | 0.107663  | 0.104749  | 0.118881 | 0.109848 | 0.100233  | 0.105478 |
| 0.119027 | 0.0996503 | 0.100816  | 0.117861 | 0.11116  | 0.0933858 | 0.101253 |

|           |           |           |          |          |           |           |
|-----------|-----------|-----------|----------|----------|-----------|-----------|
| 0.139423  | 0.108392  | 0.119755  | 0.125437 | 0.114073 | 0.113491  | 0.106206  |
| 0.121503  | 0.0977564 | 0.105915  | 0.120921 | 0.105478 | 0.104895  | 0.0984848 |
| 0.131119  | 0.125728  | 0.11757   | 0.126748 | 0.125    | 0.11859   | 0.124709  |
| 0.136946  | 0.135052  | 0.13243   | 0.135198 | 0.130245 | 0.125291  | 0.136946  |
| 0.124709  | 0.110577  | 0.110577  | 0.115093 | 0.108683 | 0.108974  | 0.108392  |
| 0.124272  | 0.106352  | 0.10373   | 0.118444 | 0.112617 | 0.103875  | 0.106789  |
| 0.120775  | 0.104895  | 0.10373   | 0.116404 | 0.109411 | 0.10271   | 0.104458  |
| 0.121649  | 0.105186  | 0.100816  | 0.111742 | 0.112034 | 0.105041  | 0.106206  |
| 0.131556  | 0.122669  | 0.119172  | 0.126603 | 0.117861 | 0.118444  | 0.123689  |
| 0.116696  | 0.0987762 | 0.100524  | 0.11553  | 0.111451 | 0.0992133 | 0.100379  |
| 0.140443  | 0.132139  | 0.131847  | 0.135198 | 0.131702 | 0.130536  | 0.13141   |
| 0.145251  | 0.124417  | 0.126748  | 0.133304 | 0.130973 | 0.127185  | 0.121941  |
| 0.132139  | 0.116841  | 0.124126  | 0.125437 | 0.124563 | 0.116113  | 0.114073  |
| 0.130828  | 0.112034  | 0.108246  | 0.12704  | 0.123543 | 0.108392  | 0.109848  |
| 0.129662  | 0.116987  | 0.107663  | 0.121212 | 0.115967 | 0.111014  | 0.120338  |
| 0.127185  | 0.0984848 | 0.104895  | 0.119318 | 0.106206 | 0.105915  | 0.100087  |
| 0.121503  | 0.0977564 | 0.102127  | 0.11655  | 0.106935 | 0.115676  | 0.10169   |
| 0.11859   | 0.105915  | 0.103001  | 0.118881 | 0.110723 | 0.107226  | 0.109848  |
| 0.101107  | 0.104749  | 0.100087  | 0.11859  | 0.116841 | 0.111888  | 0.110723  |
| 0.137821  | 0.0968823 | 0.118735  | 0.125583 | 0.117424 | 0.124126  | 0.10169   |
| 0.126603  | 0.11655   | 0.110431  | 0.116113 | 0.116404 | 0.114656  | 0.115822  |
| 0.132284  | 0.134761  | 0.125146  | 0.131119 | 0.13141  | 0.115967  | 0.132867  |
| 0.142628  | 0.138695  | 0.134907  | 0.129808 | 0.123106 | 0.127477  | 0.135344  |
| 0.189831  | 0.197844  | 0.186772  | 0.199446 | 0.205565 | 0.184586  | 0.199155  |
| 0.227564  | 0.239365  | 0.232955  | 0.237762 | 0.243298 | 0.229604  | 0.240385  |
| 0.0738636 | 0.108683  | 0.104312  | 0.119027 | 0.123689 | 0.110286  | 0.112034  |
| 0.120047  | 0.102418  | 0.103584  | 0.114802 | 0.1081   | 0.109557  | 0.101107  |
| 0.118881  | 0.104458  | 0.0983392 | 0.110723 | 0.111305 | 0.106061  | 0.10169   |
| 0.119172  | 0.106498  | 0.100379  | 0.115385 | 0.117133 | 0.111014  | 0.111014  |
| 0.132576  | 0.135927  | 0.123397  | 0.130536 | 0.136072 | 0.0506993 | 0.135781  |
| 0.120338  | 0.105332  | 0.103875  | 0.115093 | 0.111888 | 0.111888  | 0.108392  |
| 0.149038  | 0.119755  | 0.140152  | 0.14088  | 0.128059 | 0.144959  | 0.123397  |
| 0.123252  | 0.101253  | 0.107372  | 0.117133 | 0.113054 | 0.117133  | 0.102855  |
| 0.13345   | 0.113199  | 0.121649  | 0.116841 | 0.115967 | 0.129953  | 0.114219  |
| 0.13447   | 0.113345  | 0.116841  | 0.124854 | 0.124563 | 0.131556  | 0.114656  |
| 0.141171  | 0.112179  | 0.126166  | 0.119901 | 0.127768 | 0.125146  | 0.116404  |
| 0.141463  | 0.124126  | 0.129953  | 0.141171 | 0.139423 | 0.129516  | 0.126603  |
| 0.129808  | 0.105769  | 0.104021  | 0.123397 | 0.109994 | 0.112908  | 0.106206  |
| 0.122815  | 0.0973193 | 0.0973193 | 0.11116  | 0.109411 | 0.112034  | 0.101544  |
| 0.13141   | 0.105041  | 0.105332  | 0.114219 | 0.11655  | 0.112762  | 0.106061  |
| 0.119172  | 0.100087  | 0.0965909 | 0.110723 | 0.109557 | 0.111014  | 0.104895  |
| 0.120047  | 0.0962995 | 0.0983392 | 0.1081   | 0.108392 | 0.113928  | 0.100816  |
| 0.122815  | 0.10169   | 0.104021  | 0.118735 | 0.112325 | 0.11553   | 0.106498  |
| 0.133159  | 0.108829  | 0.120192  | 0.121795 | 0.123252 | 0.122086  | 0.111888  |

|          |           |           |          |          |           |           |
|----------|-----------|-----------|----------|----------|-----------|-----------|
| 0.141317 | 0.112908  | 0.125728  | 0.125    | 0.131702 | 0.131993  | 0.113054  |
| 0.124854 | 0.0999417 | 0.111888  | 0.112034 | 0.113491 | 0.120775  | 0.102127  |
| 0.125583 | 0.097465  | 0.105332  | 0.115676 | 0.115093 | 0.113345  | 0.0999417 |
| 0.141026 | 0.109994  | 0.122523  | 0.119755 | 0.122086 | 0.132576  | 0.112179  |
| 0.121795 | 0.0995047 | 0.102127  | 0.116259 | 0.1081   | 0.111305  | 0.102855  |
| 0.150787 | 0.121795  | 0.131702  | 0.130682 | 0.129225 | 0.133596  | 0.122815  |
| 0.144668 | 0.135198  | 0.136655  | 0.133013 | 0.137675 | 0.119318  | 0.130973  |
| 0.141317 | 0.123397  | 0.122815  | 0.118881 | 0.121503 | 0.131993  | 0.124126  |
| 0.117716 | 0.099796  | 0.0986305 | 0.116841 | 0.106643 | 0.109848  | 0.100233  |
| 0.118444 | 0.0973193 | 0.099359  | 0.11116  | 0.109411 | 0.106498  | 0.0983392 |
| 0.130536 | 0.106206  | 0.116696  | 0.113928 | 0.113345 | 0.123543  | 0.108392  |
| 0.129808 | 0.104312  | 0.115676  | 0.117861 | 0.119318 | 0.124272  | 0.106789  |
| 0.139423 | 0.106643  | 0.122378  | 0.121941 | 0.113782 | 0.129808  | 0.111742  |
| 0.12704  | 0.100962  | 0.10912   | 0.116841 | 0.111305 | 0.119464  | 0.104604  |
| 0.127477 | 0.0984848 | 0.105769  | 0.113199 | 0.116404 | 0.116696  | 0.100962  |
| 0.127185 | 0.106643  | 0.117424  | 0.113782 | 0.118153 | 0.120192  | 0.107372  |
| 0.143211 | 0.113054  | 0.12296   | 0.128059 | 0.118735 | 0.130099  | 0.11116   |
| 0.137675 | 0.112471  | 0.123543  | 0.120484 | 0.122232 | 0.129516  | 0.115822  |
| 0.137821 | 0.105041  | 0.130099  | 0.126166 | 0.121212 | 0.127331  | 0.106935  |
| 0.140006 | 0.114802  | 0.127331  | 0.135927 | 0.128351 | 0.127185  | 0.114073  |
| 0.120775 | 0.0987762 | 0.108974  | 0.116113 | 0.10912  | 0.120775  | 0.103293  |
| 0.134178 | 0.118298  | 0.118007  | 0.114656 | 0.11961  | 0.129225  | 0.119901  |
| 0.119464 | 0.0945513 | 0.10271   | 0.115967 | 0.111305 | 0.111305  | 0.0976107 |
| 0.125728 | 0.109848  | 0.104312  | 0.123397 | 0.117861 | 0.114656  | 0.11116   |
| 0.124272 | 0.105769  | 0.102855  | 0.117279 | 0.11116  | 0.112034  | 0.110577  |
| 0.125583 | 0.108537  | 0.10271   | 0.107517 | 0.112471 | 0.113928  | 0.108974  |
| 0.119172 | 0.100962  | 0.101544  | 0.112179 | 0.1081   | 0.110723  | 0.104021  |
| 0.140297 | 0.111305  | 0.129953  | 0.126603 | 0.121649 | 0.13243   | 0.112908  |
| 0.128788 | 0.108537  | 0.10708   | 0.122669 | 0.11859  | 0.115967  | 0.110431  |
| 0.136946 | 0.112908  | 0.123397  | 0.120629 | 0.124126 | 0.131702  | 0.11655   |
| 0.120338 | 0.10271   | 0.0968823 | 0.109848 | 0.109848 | 0.111888  | 0.106643  |
| 0.135927 | 0.100816  | 0.119755  | 0.118735 | 0.110868 | 0.124272  | 0.103001  |
| 0.131702 | 0.107955  | 0.119027  | 0.128788 | 0.11859  | 0.121795  | 0.1081    |
| 0.131119 | 0.122232  | 0.119318  | 0.124126 | 0.127622 | 0.107517  | 0.121212  |
| 0.126311 | 0.104895  | 0.111305  | 0.119027 | 0.107955 | 0.112325  | 0.107663  |
| 0.130245 | 0.11757   | 0.114365  | 0.115967 | 0.129371 | 0.118881  | 0.117133  |
| 0.128059 | 0.112471  | 0.113636  | 0.126894 | 0.117861 | 0.114073  | 0.112034  |
| 0.127185 | 0.112471  | 0.111305  | 0.123689 | 0.112617 | 0.113199  | 0.112617  |
| 0.142628 | 0.140734  | 0.134615  | 0.136218 | 0.133887 | 0.120192  | 0.139714  |
| 0.137821 | 0.127477  | 0.135052  | 0.138695 | 0.134615 | 0.132284  | 0.129662  |
| 0.117133 | 0.115239  | 0.107663  | 0.109266 | 0.111305 | 0.0999417 | 0.119172  |
| 0.142045 | 0.137238  | 0.127331  | 0.121941 | 0.135635 | 0.113199  | 0.139714  |
| 0.138695 | 0.133887  | 0.128642  | 0.129953 | 0.126748 | 0.111014  | 0.131119  |
| 0.137529 | 0.137383  | 0.125437  | 0.119172 | 0.127914 | 0.120047  | 0.132867  |

|          |          |          |          |          |          |          |
|----------|----------|----------|----------|----------|----------|----------|
| 0.128788 | 0.129808 | 0.11961  | 0.117424 | 0.12296  | 0.111014 | 0.129953 |
| 0.13345  | 0.128059 | 0.117279 | 0.127331 | 0.12296  | 0.112179 | 0.12704  |
| 0.133596 | 0.132867 | 0.125583 | 0.132139 | 0.12398  | 0.111742 | 0.131847 |
| 0.131702 | 0.134761 | 0.123689 | 0.125    | 0.13141  | 0.121212 | 0.133741 |
| 0.141317 | 0.143502 | 0.131556 | 0.132284 | 0.136655 | 0.124417 | 0.143065 |
| 0.129662 | 0.133304 | 0.119318 | 0.130536 | 0.131702 | 0.112762 | 0.132284 |
| 0.126166 | 0.126311 | 0.110577 | 0.115967 | 0.121795 | 0.107517 | 0.126748 |
| 0.133304 | 0.115093 | 0.13141  | 0.133304 | 0.129808 | 0.135344 | 0.113782 |
| 0.140734 | 0.137675 | 0.129225 | 0.135781 | 0.130245 | 0.117424 | 0.135781 |
| 0.121503 | 0.122523 | 0.107955 | 0.114802 | 0.115385 | 0.103438 | 0.120921 |
| 0.213432 | 0.223193 | 0.215035 | 0.21926  | 0.224505 | 0.212558 | 0.220717 |
| 0.130682 | 0.133159 | 0.117716 | 0.114948 | 0.127768 | 0.111116 | 0.133304 |
| 0.12602  | 0.12296  | 0.115385 | 0.12398  | 0.123397 | 0.108246 | 0.122232 |
| 0.136946 | 0.14088  | 0.128059 | 0.124709 | 0.136655 | 0.12296  | 0.140443 |
| 0.125291 | 0.127477 | 0.112908 | 0.123543 | 0.124126 | 0.108974 | 0.125291 |
| 0.138695 | 0.141754 | 0.13243  | 0.137529 | 0.136946 | 0.11655  | 0.13986  |
| 0.125583 | 0.123397 | 0.116987 | 0.112762 | 0.125291 | 0.110723 | 0.126166 |
| 0.128059 | 0.131702 | 0.115093 | 0.116404 | 0.123689 | 0.107955 | 0.13039  |
| 0.134761 | 0.135198 | 0.117716 | 0.129808 | 0.130099 | 0.109703 | 0.131847 |
| 0.135781 | 0.133013 | 0.127768 | 0.124417 | 0.131702 | 0.120338 | 0.132867 |
| 0.136218 | 0.137529 | 0.126457 | 0.119318 | 0.126311 | 0.119901 | 0.137966 |
| 0.13549  | 0.14088  | 0.129516 | 0.120629 | 0.124417 | 0.120629 | 0.141317 |
| 0.131702 | 0.135927 | 0.128059 | 0.119172 | 0.125291 | 0.11655  | 0.138112 |
| 0.127331 | 0.111742 | 0.114656 | 0.126748 | 0.118881 | 0.104604 | 0.113054 |
| 0.124417 | 0.127477 | 0.117861 | 0.115676 | 0.124709 | 0.116841 | 0.125583 |
| 0.140297 | 0.143648 | 0.131119 | 0.127477 | 0.138258 | 0.120192 | 0.141171 |
| 0.126166 | 0.126894 | 0.118735 | 0.11014  | 0.120338 | 0.1081   | 0.125874 |
| 0.138112 | 0.119901 | 0.128934 | 0.136364 | 0.13549  | 0.133741 | 0.120629 |
| 0.144376 | 0.144814 | 0.135198 | 0.138258 | 0.143211 | 0.128642 | 0.14088  |
| 0.13243  | 0.116841 | 0.117716 | 0.130682 | 0.118444 | 0.113782 | 0.116987 |
| 0.137092 | 0.134907 | 0.127914 | 0.131265 | 0.127768 | 0.113782 | 0.13039  |
| 0.13345  | 0.134178 | 0.120192 | 0.12704  | 0.131119 | 0.124709 | 0.129953 |
| 0.130973 | 0.128497 | 0.123543 | 0.125728 | 0.112908 | 0.12398  | 0.130099 |
| 0.130682 | 0.132576 | 0.12704  | 0.13243  | 0.133304 | 0.125146 | 0.133887 |
| 0.146125 | 0.143357 | 0.132576 | 0.139132 | 0.142045 | 0.126603 | 0.14088  |
| 0.126457 | 0.107955 | 0.108246 | 0.119172 | 0.117424 | 0.107226 | 0.104604 |
| 0.139714 | 0.125583 | 0.126748 | 0.133887 | 0.135052 | 0.117861 | 0.125728 |
| 0.146562 | 0.146999 | 0.138549 | 0.140152 | 0.143065 | 0.13345  | 0.143648 |
| 0.131993 | 0.112908 | 0.117279 | 0.12296  | 0.112471 | 0.113054 | 0.108683 |
| 0.133741 | 0.116404 | 0.11553  | 0.126457 | 0.124126 | 0.121503 | 0.11655  |
| 0.14292  | 0.123252 | 0.138403 | 0.14088  | 0.13447  | 0.139423 | 0.126311 |
| 0.128934 | 0.106061 | 0.120629 | 0.127185 | 0.127185 | 0.119901 | 0.108537 |
| 0.142191 | 0.133596 | 0.137675 | 0.143648 | 0.141317 | 0.125291 | 0.127914 |
| 0.139423 | 0.119464 | 0.127622 | 0.133596 | 0.128934 | 0.121649 | 0.11961  |

|           |           |          |          |           |           |          |
|-----------|-----------|----------|----------|-----------|-----------|----------|
| 0.135198  | 0.122232  | 0.117861 | 0.110723 | 0.121212  | 0.121503  | 0.122086 |
| 0.134178  | 0.121795  | 0.126748 | 0.128642 | 0.127185  | 0.120192  | 0.120775 |
| 0.136072  | 0.114365  | 0.122232 | 0.125874 | 0.121795  | 0.113636  | 0.112471 |
| 0.139423  | 0.120629  | 0.125    | 0.126894 | 0.122523  | 0.126311  | 0.118153 |
| 0.137966  | 0.136946  | 0.125583 | 0.125437 | 0.125146  | 0.12602   | 0.133304 |
| 0.137675  | 0.126166  | 0.128205 | 0.119901 | 0.125146  | 0.129516  | 0.128934 |
| 0.138258  | 0.134615  | 0.129953 | 0.128351 | 0.123106  | 0.127185  | 0.13039  |
| 0.138549  | 0.120921  | 0.124709 | 0.122523 | 0.11961   | 0.125146  | 0.124563 |
| 0.146416  | 0.143065  | 0.140152 | 0.135052 | 0.135635  | 0.136218  | 0.144668 |
| 0.137675  | 0.12296   | 0.119172 | 0.129516 | 0.125437  | 0.108537  | 0.120484 |
| 0.132721  | 0.108392  | 0.108683 | 0.124272 | 0.112908  | 0.116696  | 0.112034 |
| 0.139423  | 0.129662  | 0.132284 | 0.127477 | 0.122815  | 0.121358  | 0.128642 |
| 0.131847  | 0.120047  | 0.119172 | 0.119901 | 0.112908  | 0.109703  | 0.115822 |
| 0.14831   | 0.146999  | 0.141754 | 0.147436 | 0.143648  | 0.134033  | 0.144522 |
| 0.161131  | 0.150787  | 0.150495 | 0.152681 | 0.147727  | 0.144522  | 0.14831  |
| 0.133741  | 0.109994  | 0.123397 | 0.118298 | 0.123834  | 0.127622  | 0.112179 |
| 0.128642  | 0.101107  | 0.110431 | 0.117279 | 0.11553   | 0.123106  | 0.102127 |
| 0.131993  | 0.131265  | 0.13243  | 0.120338 | 0.129662  | 0.125     | 0.13345  |
| 0.135344  | 0.142483  | 0.127622 | 0.123397 | 0.132721  | 0.120484  | 0.142045 |
| 0.135635  | 0.108974  | 0.119172 | 0.122232 | 0.118444  | 0.125146  | 0.110577 |
| 0.146125  | 0.1419    | 0.131119 | 0.123106 | 0.13243   | 0.123397  | 0.139714 |
| 0.143211  | 0.134324  | 0.131702 | 0.141171 | 0.139423  | 0.127477  | 0.137383 |
| 0.133159  | 0.112617  | 0.121649 | 0.129662 | 0.128788  | 0.113928  | 0.11451  |
| 0.157634  | 0.160985  | 0.157488 | 0.148893 | 0.152098  | 0.15472   | 0.159382 |
| 0.138986  | 0.113199  | 0.121649 | 0.134033 | 0.127622  | 0.117133  | 0.115093 |
| 0.147436  | 0.13243   | 0.138549 | 0.143939 | 0.137529  | 0.124126  | 0.12704  |
| 0.132139  | 0.107226  | 0.110431 | 0.120484 | 0.111451  | 0.119318  | 0.110577 |
| 0.137092  | 0.128205  | 0.131702 | 0.126894 | 0.125146  | 0.132139  | 0.129808 |
| 0.13039   | 0.133159  | 0.122086 | 0.110577 | 0.12602   | 0.113199  | 0.132139 |
| 0.117133  | 0.140589  | 0.134178 | 0.1419   | 0.1419    | 0.136072  | 0.143357 |
| 0.139714  | 0.154138  | 0.126748 | 0.135052 | 0.143211  | 0.137966  | 0.1537   |
| 0.0480769 | 0.12602   | 0.11757  | 0.120047 | 0.126457  | 0.119172  | 0.128205 |
| 0.0651224 | 0.136072  | 0.13345  | 0.134178 | 0.140297  | 0.130682  | 0.138549 |
| 0.147145  | 0.110868  | 0.139714 | 0.149476 | 0.146562  | 0.147145  | 0.116841 |
| 0.123834  | 0.146707  | 0.135635 | 0.146853 | 0.150641  | 0.13345   | 0.14831  |
| 0.132139  | 0.0894522 | 0.126748 | 0.12398  | 0.0986305 | 0.13039   | 0.092803 |
| 0.134033  | 0.141171  | 0.124854 | 0.140734 | 0.132284  | 0.128205  | 0.143939 |
| 0.118007  | 0.121941  | 0.108537 | 0.121503 | 0.120921  | 0.0844988 | 0.123252 |
| 0.122232  | 0.112471  | 0.104604 | 0.124854 | 0.123689  | 0.0796911 | 0.114948 |
| 0.128788  | 0.129516  | 0.11757  | 0.11859  | 0.122669  | 0.114219  | 0.127622 |
| 0.0469114 | 0.121066  | 0.117279 | 0.118881 | 0.127622  | 0.115967  | 0.12296  |
| 0.129808  | 0.113054  | 0.100524 | 0.123397 | 0.124272  | 0.107955  | 0.114073 |
| 0.0936772 | 0.117716  | 0.103147 | 0.117861 | 0.126894  | 0.0750291 | 0.120484 |
| 0.10912   | 0.126457  | 0.109848 | 0.124272 | 0.12602   | 0.119318  | 0.130973 |

|           |           |          |           |           |           |           |
|-----------|-----------|----------|-----------|-----------|-----------|-----------|
| 0.125874  | 0.136509  | 0.118444 | 0.125874  | 0.131119  | 0.0603147 | 0.133741  |
| 0.118881  | 0.114073  | 0.107372 | 0.114219  | 0.112179  | 0.097028  | 0.117133  |
| 0.0600233 | 0.12398   | 0.117861 | 0.122378  | 0.131993  | 0.118298  | 0.125     |
| 0.0511364 | 0.120338  | 0.113054 | 0.120192  | 0.129516  | 0.115239  | 0.124563  |
| 0.125728  | 0.039627  | 0.121212 | 0.126894  | 0.114073  | 0.125728  | 0.0476399 |
| 0.21081   | 0.219697  | 0.212121 | 0.216638  | 0.224213  | 0.208188  | 0.21926   |
| 0.0557984 | 0.142774  | 0.138986 | 0.134761  | 0.140006  | 0.136801  | 0.146416  |
| 0.128497  | 0.129225  | 0.124854 | 0.129079  | 0.127914  | 0.124126  | 0.129079  |
| 0.116696  | 0.126748  | 0.121503 | 0.122232  | 0.131265  | 0.116113  | 0.12602   |
| 0.202652  | 0.215326  | 0.208042 | 0.210519  | 0.217512  | 0.2044    | 0.213432  |
| 0.130973  | 0.076049  | 0.118007 | 0.127768  | 0.122523  | 0.122232  | 0.0796911 |
| 0.133741  | 0.112034  | 0.113782 | 0.125583  | 0.120629  | 0.115967  | 0.115967  |
| 0.125874  | 0.121358  | 0.115822 | 0.121795  | 0.126748  | 0.122378  | 0.125583  |
| 0.125437  | 0.130245  | 0.115967 | 0.124854  | 0.129808  | 0.0447261 | 0.129516  |
| 0.241987  | 0.254371  | 0.247669 | 0.249854  | 0.253351  | 0.242279  | 0.254808  |
| 0.127331  | 0.130973  | 0.124854 | 0.129371  | 0.124709  | 0.120921  | 0.130828  |
| 0.123543  | 0.0514277 | 0.113199 | 0.119464  | 0.110723  | 0.119755  | 0.0559441 |
| 0.123543  | 0.123689  | 0.112034 | 0.105769  | 0.115676  | 0.120047  | 0.12704   |
| 0.123834  | 0.123397  | 0.107663 | 0.105186  | 0.118298  | 0.119172  | 0.126748  |
| 0.128205  | 0.126894  | 0.127477 | 0.132284  | 0.131119  | 0.106935  | 0.129953  |
| 0.110723  | 0.134761  | 0.114656 | 0.127622  | 0.136946  | 0.108974  | 0.136364  |
| 0.125874  | 0.0502622 | 0.116696 | 0.125     | 0.114219  | 0.121503  | 0.0576923 |
| 0.0479312 | 0.120338  | 0.116841 | 0.121941  | 0.126894  | 0.11553   | 0.124272  |
| 0.125291  | 0.129808  | 0.113782 | 0.132284  | 0.122669  | 0.121503  | 0.134324  |
| 0.121795  | 0.123106  | 0.109703 | 0.119464  | 0.127622  | 0.0448718 | 0.125     |
| 0.0575466 | 0.119464  | 0.11451  | 0.117279  | 0.125146  | 0.110868  | 0.121941  |
| 0.126457  | 0.128934  | 0.113782 | 0.122086  | 0.124417  | 0.0976107 | 0.128205  |
| 0.140006  | 0.153555  | 0.127622 | 0.130682  | 0.14088   | 0.137383  | 0.151661  |
| 0.129516  | 0.130245  | 0.128497 | 0.131265  | 0.126311  | 0.123106  | 0.130973  |
| 0.130973  | 0.11451   | 0.118007 | 0.128059  | 0.122815  | 0.118444  | 0.117279  |
| 0.183712  | 0.194056  | 0.185606 | 0.191871  | 0.200612  | 0.183421  | 0.19391   |
| 0.196824  | 0.208042  | 0.200758 | 0.206148  | 0.216055  | 0.196533  | 0.206731  |
| 0.128059  | 0.134615  | 0.118881 | 0.128642  | 0.13243   | 0.0490967 | 0.132139  |
| 0.120192  | 0.125583  | 0.1081   | 0.119027  | 0.126894  | 0.0453089 | 0.127477  |
| 0.126603  | 0.140443  | 0.134033 | 0.133596  | 0.145833  | 0.122815  | 0.143794  |
| 0.124563  | 0.0492424 | 0.113345 | 0.121066  | 0.112325  | 0.121649  | 0.0560897 |
| 0.128788  | 0.130682  | 0.126603 | 0.132867  | 0.126748  | 0.122378  | 0.13141   |
| 0.12398   | 0.131702  | 0.122086 | 0.0957168 | 0.121066  | 0.128934  | 0.135052  |
| 0.21926   | 0.230186  | 0.219697 | 0.224213  | 0.230332  | 0.216929  | 0.228584  |
| 0.117279  | 0.119172  | 0.112179 | 0.121066  | 0.123397  | 0.111742  | 0.120484  |
| 0.199592  | 0.205274  | 0.200903 | 0.204837  | 0.211538  | 0.206585  | 0.203671  |
| 0.121941  | 0.0888695 | 0.11014  | 0.117279  | 0.0945513 | 0.116987  | 0.0875583 |
| 0.123252  | 0.114948  | 0.106206 | 0.11859   | 0.0984848 | 0.115385  | 0.11859   |
| 0.107663  | 0.107517  | 0.109848 | 0.125437  | 0.12398   | 0.113491  | 0.112034  |

|           |           |           |           |           |           |           |
|-----------|-----------|-----------|-----------|-----------|-----------|-----------|
| 0.118444  | 0.122378  | 0.109266  | 0.118153  | 0.126603  | 0.0563811 | 0.125728  |
| 0.202506  | 0.210519  | 0.200029  | 0.208333  | 0.214452  | 0.203089  | 0.20979   |
| 0.0472028 | 0.13447   | 0.127477  | 0.130828  | 0.138986  | 0.127331  | 0.136364  |
| 0.123834  | 0.107663  | 0.113491  | 0.121503  | 0.0562354 | 0.119755  | 0.110723  |
| 0.0413753 | 0.125146  | 0.122232  | 0.122378  | 0.128788  | 0.121212  | 0.130245  |
| 0.124126  | 0.122523  | 0.118735  | 0.124709  | 0.124417  | 0.122669  | 0.122378  |
| 0.125583  | 0.124272  | 0.109411  | 0.123543  | 0.129662  | 0.0512821 | 0.126166  |
| 0.123397  | 0.0868298 | 0.111014  | 0.11961   | 0.0922203 | 0.122815  | 0.0887238 |
| 0.123689  | 0.0643939 | 0.11655   | 0.124563  | 0.119318  | 0.122232  | 0.0689103 |
| 0.128934  | 0.113345  | 0.117133  | 0.128642  | 0.118735  | 0.118444  | 0.114073  |
| 0.0569639 | 0.120629  | 0.110723  | 0.118153  | 0.124563  | 0.109994  | 0.120484  |
| 0.126166  | 0.10912   | 0.115239  | 0.116841  | 0.0524476 | 0.122669  | 0.109557  |
| 0.186043  | 0.195513  | 0.184441  | 0.190705  | 0.199738  | 0.184586  | 0.19595   |
| 0.124709  | 0.123689  | 0.112908  | 0.100816  | 0.120629  | 0.122378  | 0.125874  |
| 0.125146  | 0.135781  | 0.105478  | 0.119318  | 0.128059  | 0.121941  | 0.133013  |
| 0.118007  | 0.124563  | 0.111451  | 0.0958625 | 0.122378  | 0.118007  | 0.124126  |
| 0.129808  | 0.130245  | 0.124126  | 0.131265  | 0.124854  | 0.125437  | 0.127477  |
| 0.0473485 | 0.123252  | 0.118298  | 0.11961   | 0.127477  | 0.119027  | 0.126311  |
| 0.126311  | 0.0912005 | 0.118881  | 0.120775  | 0.0965909 | 0.123689  | 0.0945513 |
| 0.120047  | 0.116696  | 0.111742  | 0.120338  | 0.117133  | 0.116259  | 0.118007  |
| 0.128788  | 0.0473485 | 0.121066  | 0.124126  | 0.112762  | 0.128497  | 0.0486597 |
| 0.120192  | 0.130828  | 0.101107  | 0.124272  | 0.126603  | 0.116987  | 0.13447   |
| 0.121358  | 0.121795  | 0.10169   | 0.104167  | 0.117861  | 0.115822  | 0.124272  |
| 0.124709  | 0.128642  | 0.113491  | 0.124709  | 0.130828  | 0.0574009 | 0.126457  |
| 0.130099  | 0.125     | 0.11014   | 0.125728  | 0.131265  | 0.121066  | 0.129516  |
| 0.136655  | 0.135927  | 0.129225  | 0.13141   | 0.131702  | 0.132284  | 0.136655  |
| 0.124709  | 0.121941  | 0.116987  | 0.128497  | 0.121212  | 0.115676  | 0.124126  |
| 0.0517191 | 0.138695  | 0.134615  | 0.130099  | 0.135635  | 0.131265  | 0.140589  |
| 0.122232  | 0.126166  | 0.110431  | 0.119027  | 0.127185  | 0.0511364 | 0.127768  |
| 0.110868  | 0.121503  | 0.106352  | 0.0925117 | 0.112034  | 0.11961   | 0.122523  |
| 0.0684732 | 0.121649  | 0.116404  | 0.123252  | 0.13141   | 0.115385  | 0.124417  |
| 0.131702  | 0.0464744 | 0.123397  | 0.128497  | 0.114802  | 0.127331  | 0.0501166 |
| 0.184732  | 0.17905   | 0.186917  | 0.190268  | 0.194639  | 0.18648   | 0.177739  |
| 0.123106  | 0.106643  | 0.108974  | 0.117861  | 0.0537587 | 0.116404  | 0.105041  |
| 0.107663  | 0.110431  | 0.0984848 | 0.112617  | 0.112034  | 0.106498  | 0.114365  |
| 0.129516  | 0.113928  | 0.114802  | 0.128934  | 0.119901  | 0.116696  | 0.116113  |
| 0.175554  | 0.185315  | 0.17162   | 0.18546   | 0.191288  | 0.173223  | 0.187209  |
| 0.143065  | 0.139132  | 0.135927  | 0.139569  | 0.135198  | 0.13345   | 0.138403  |
| 0.15035   | 0.149621  | 0.144668  | 0.145396  | 0.138112  | 0.141608  | 0.150641  |
| 0.139423  | 0.153555  | 0.125874  | 0.13447   | 0.143502  | 0.138549  | 0.151661  |
| 0.125146  | 0.122378  | 0.115385  | 0.128059  | 0.11961   | 0.114073  | 0.121358  |
| 0.0439977 | 0.12398   | 0.119318  | 0.122378  | 0.126748  | 0.11859   | 0.12704   |
| 0.201195  | 0.215909  | 0.207168  | 0.211393  | 0.220134  | 0.205857  | 0.216346  |
| 0.120775  | 0.127331  | 0.118881  | 0.127768  | 0.126894  | 0.112325  | 0.131556  |

|           |           |           |           |           |           |           |
|-----------|-----------|-----------|-----------|-----------|-----------|-----------|
| 0.0428322 | 0.128642  | 0.124272  | 0.12704   | 0.132284  | 0.123543  | 0.131702  |
| 0.124417  | 0.107955  | 0.11116   | 0.119464  | 0.0565268 | 0.120629  | 0.104895  |
| 0.150058  | 0.174097  | 0.161859  | 0.171037  | 0.176573  | 0.16317   | 0.176282  |
| 0.113928  | 0.119027  | 0.112908  | 0.116259  | 0.122669  | 0.107226  | 0.121795  |
| 0.146707  | 0.153846  | 0.135198  | 0.146999  | 0.137675  | 0.140589  | 0.154866  |
| 0.13039   | 0.127331  | 0.124709  | 0.122523  | 0.121066  | 0.109994  | 0.12398   |
| 0.18546   | 0.19289   | 0.184441  | 0.190997  | 0.198281  | 0.183129  | 0.191871  |
| 0.129808  | 0.129662  | 0.120921  | 0.128642  | 0.12398   | 0.118735  | 0.129808  |
| 0.114656  | 0.115093  | 0.0976107 | 0.114365  | 0.116696  | 0.103001  | 0.118444  |
| 0.118007  | 0.122523  | 0.104167  | 0.0984848 | 0.113928  | 0.119172  | 0.125583  |
| 0.122523  | 0.115385  | 0.110431  | 0.123689  | 0.117861  | 0.117279  | 0.116987  |
| 0.129516  | 0.111014  | 0.113636  | 0.12602   | 0.122523  | 0.113491  | 0.112908  |
| 0.125437  | 0.128205  | 0.109557  | 0.129225  | 0.123106  | 0.119027  | 0.129516  |
| 0.123252  | 0.124563  | 0.107663  | 0.120629  | 0.127331  | 0.0492424 | 0.125     |
| 0.188666  | 0.194056  | 0.18211   | 0.194202  | 0.196824  | 0.183712  | 0.193036  |
| 0.128788  | 0.124563  | 0.109411  | 0.130536  | 0.125291  | 0.120921  | 0.126166  |
| 0.113491  | 0.120047  | 0.107226  | 0.11757   | 0.122815  | 0.107955  | 0.120484  |
| 0.204545  | 0.216346  | 0.207896  | 0.210082  | 0.2162    | 0.20542   | 0.2162    |
| 0.123543  | 0.125728  | 0.110577  | 0.103438  | 0.11655   | 0.122378  | 0.125874  |
| 0.12398   | 0.125291  | 0.11014   | 0.123397  | 0.125728  | 0.048514  | 0.127768  |
| 0.118153  | 0.12296   | 0.105186  | 0.118444  | 0.122232  | 0.0476399 | 0.12398   |
| 0.0641026 | 0.139132  | 0.133013  | 0.129662  | 0.134615  | 0.130245  | 0.138403  |
| 0.186772  | 0.196241  | 0.183421  | 0.192016  | 0.198135  | 0.182692  | 0.194056  |
| 0.127185  | 0.0498252 | 0.115676  | 0.121358  | 0.116404  | 0.123689  | 0.0587121 |
| 0.132721  | 0.130245  | 0.11859   | 0.125437  | 0.13243   | 0.127185  | 0.13243   |
| 0.122523  | 0.124709  | 0.11014   | 0.123689  | 0.126603  | 0.0467657 | 0.126603  |
| 0.11961   | 0.121795  | 0.106061  | 0.121941  | 0.124272  | 0.050845  | 0.123397  |
| 0.123252  | 0.126311  | 0.107663  | 0.119464  | 0.125291  | 0.0448718 | 0.123834  |
| 0.0566725 | 0.121503  | 0.113928  | 0.119027  | 0.126603  | 0.112325  | 0.123689  |
| 0.117716  | 0.112908  | 0.104749  | 0.116841  | 0.110723  | 0.097028  | 0.113928  |
| 0.129371  | 0.130973  | 0.126894  | 0.131119  | 0.123252  | 0.121503  | 0.130536  |
| 0.117133  | 0.135927  | 0.12398   | 0.121503  | 0.129662  | 0.132576  | 0.138112  |
| 0.132284  | 0.127768  | 0.121358  | 0.130828  | 0.120629  | 0.118881  | 0.126166  |
| 0.129516  | 0.125583  | 0.12296   | 0.125146  | 0.124854  | 0.127185  | 0.126311  |
| 0.190268  | 0.198281  | 0.189248  | 0.197261  | 0.201632  | 0.188811  | 0.199592  |
| 0.128351  | 0.122669  | 0.111014  | 0.121941  | 0.12602   | 0.11757   | 0.12398   |
| 0.0474942 | 0.133013  | 0.129225  | 0.128788  | 0.133159  | 0.125291  | 0.134033  |
| 0.120484  | 0.125583  | 0.109557  | 0.122523  | 0.125437  | 0.0496795 | 0.126603  |
| 0.119172  | 0.118735  | 0.107663  | 0.114802  | 0.111014  | 0.0961538 | 0.113345  |
| 0.121795  | 0.123689  | 0.107663  | 0.123834  | 0.120047  | 0.114802  | 0.125874  |
| 0.125728  | 0.0431235 | 0.118881  | 0.121941  | 0.114948  | 0.12398   | 0.0523019 |
| 0.124563  | 0.136364  | 0.125583  | 0.130973  | 0.133887  | 0.12398   | 0.134761  |
| 0.121503  | 0.127768  | 0.0971737 | 0.126457  | 0.128205  | 0.113636  | 0.131993  |
| 0.124126  | 0.0756119 | 0.104749  | 0.121212  | 0.112471  | 0.108392  | 0.0780886 |



|           |           |           |          |           |           |           |
|-----------|-----------|-----------|----------|-----------|-----------|-----------|
| 0.116696  | 0.0815851 | 0.103438  | 0.116696 | 0.110286  | 0.104458  | 0.0823135 |
| 0.114219  | 0.119027  | 0.0962995 | 0.118007 | 0.115967  | 0.103438  | 0.120047  |
| 0.123689  | 0.0874126 | 0.115967  | 0.118444 | 0.0971737 | 0.120192  | 0.0878497 |
| 0.137238  | 0.137092  | 0.134178  | 0.137238 | 0.127622  | 0.125     | 0.136364  |
| 0.127477  | 0.0556527 | 0.111305  | 0.125437 | 0.114073  | 0.122815  | 0.0616259 |
| 0.0559441 | 0.11961   | 0.110868  | 0.116841 | 0.119755  | 0.111888  | 0.119464  |
| 0.122086  | 0.055507  | 0.108537  | 0.119755 | 0.107517  | 0.115967  | 0.0597319 |
| 0.121941  | 0.120629  | 0.108683  | 0.122232 | 0.125437  | 0.0540501 | 0.123106  |
| 0.11859   | 0.10912   | 0.104458  | 0.117716 | 0.0571096 | 0.11655   | 0.108683  |
| 0.125291  | 0.127477  | 0.113199  | 0.122378 | 0.130828  | 0.0483683 | 0.126748  |
| 0.122378  | 0.112908  | 0.10271   | 0.119464 | 0.121212  | 0.113636  | 0.121503  |
| 0.124417  | 0.127768  | 0.0980478 | 0.121795 | 0.127914  | 0.114219  | 0.131993  |
| 0.129662  | 0.109994  | 0.110868  | 0.124126 | 0.116841  | 0.112179  | 0.113054  |
| 0.119901  | 0.116841  | 0.1081    | 0.119901 | 0.114948  | 0.100087  | 0.116404  |
| 0.121795  | 0.120192  | 0.109994  | 0.120921 | 0.125291  | 0.0509907 | 0.122669  |
| 0.121503  | 0.12602   | 0.109411  | 0.102273 | 0.117424  | 0.120338  | 0.129079  |
| 0.121066  | 0.124126  | 0.117424  | 0.125728 | 0.129808  | 0.112908  | 0.127185  |
| 0.119464  | 0.120192  | 0.105332  | 0.120921 | 0.116841  | 0.1081    | 0.117716  |
| 0.118298  | 0.121941  | 0.104458  | 0.118007 | 0.12704   | 0.0518648 | 0.126457  |
| 0.0470571 | 0.124126  | 0.11655   | 0.119027 | 0.125146  | 0.118444  | 0.12602   |
| 0.126603  | 0.0879953 | 0.114219  | 0.119318 | 0.0977564 | 0.118444  | 0.0930944 |
| 0.0528846 | 0.121795  | 0.114802  | 0.120484 | 0.127477  | 0.114948  | 0.123106  |
| 0.129225  | 0.109557  | 0.109557  | 0.128642 | 0.119027  | 0.112325  | 0.111451  |
| 0.120775  | 0.116259  | 0.110431  | 0.118444 | 0.118444  | 0.097465  | 0.119027  |
| 0.116987  | 0.120629  | 0.10373   | 0.11553  | 0.116696  | 0.102418  | 0.121649  |
| 0.11859   | 0.108537  | 0.105915  | 0.11655  | 0.0579837 | 0.113636  | 0.108683  |
| 0.0525932 | 0.128205  | 0.118881  | 0.12602  | 0.131265  | 0.122523  | 0.13039   |
| 0.120775  | 0.11859   | 0.118881  | 0.127185 | 0.119318  | 0.124563  | 0.123397  |
| 0.115967  | 0.11961   | 0.109994  | 0.121212 | 0.125     | 0.109848  | 0.122669  |
| 0.18852   | 0.198864  | 0.189831  | 0.193765 | 0.199883  | 0.187063  | 0.198427  |
| 0.152681  | 0.168852  | 0.153118  | 0.166667 | 0.171037  | 0.162296  | 0.171037  |
| 0.129953  | 0.124854  | 0.121066  | 0.130828 | 0.120629  | 0.119172  | 0.123252  |
| 0.119027  | 0.0847902 | 0.107517  | 0.118153 | 0.120775  | 0.121358  | 0.088141  |
| 0.152244  | 0.152972  | 0.149476  | 0.149038 | 0.143502  | 0.144376  | 0.152826  |
| 0.127331  | 0.13243   | 0.113782  | 0.13141  | 0.124126  | 0.122086  | 0.136364  |
| 0.127768  | 0.130245  | 0.109557  | 0.122815 | 0.127768  | 0.0820221 | 0.132721  |
| 0.117424  | 0.126311  | 0.107955  | 0.122378 | 0.127331  | 0.0818765 | 0.127914  |
| 0.124709  | 0.125728  | 0.110286  | 0.119755 | 0.125874  | 0.0929487 | 0.125583  |
| 0.116841  | 0.127768  | 0.117279  | 0.119755 | 0.127331  | 0.11014   | 0.128205  |
| 0.196241  | 0.208625  | 0.197261  | 0.200903 | 0.210519  | 0.191871  | 0.206148  |
| 0.127622  | 0.0488054 | 0.119318  | 0.125874 | 0.114219  | 0.125291  | 0.0562354 |
| 0.0776515 | 0.0938228 | 0.113636  | 0.118153 | 0.126603  | 0.116404  | 0.097465  |
| 0.11961   | 0.122086  | 0.0984848 | 0.121066 | 0.123106  | 0.0616259 | 0.120192  |
| 0.123834  | 0.120192  | 0.109994  | 0.126457 | 0.123252  | 0.121212  | 0.122669  |

|           |           |           |           |          |           |           |
|-----------|-----------|-----------|-----------|----------|-----------|-----------|
| 0.17905   | 0.189685  | 0.172786  | 0.186626  | 0.194493 | 0.178759  | 0.187791  |
| 0.238491  | 0.249709  | 0.244172  | 0.242279  | 0.248689 | 0.239656  | 0.249854  |
| 0.122232  | 0.129953  | 0.106643  | 0.118735  | 0.128351 | 0.116987  | 0.134178  |
| 0.115822  | 0.126166  | 0.113928  | 0.12398   | 0.13039  | 0.11116   | 0.128059  |
| 0.128642  | 0.128497  | 0.121212  | 0.13039   | 0.125728 | 0.117279  | 0.13039   |
| 0.129079  | 0.110868  | 0.109703  | 0.125     | 0.116841 | 0.110431  | 0.109557  |
| 0.121941  | 0.0524476 | 0.111597  | 0.121358  | 0.107955 | 0.117279  | 0.0575466 |
| 0.120338  | 0.11961   | 0.10271   | 0.12296   | 0.116841 | 0.114219  | 0.120921  |
| 0.0884324 | 0.120921  | 0.11014   | 0.118153  | 0.126311 | 0.0782343 | 0.122232  |
| 0.123689  | 0.0472028 | 0.111305  | 0.119318  | 0.109411 | 0.119318  | 0.0514277 |
| 0.07838   | 0.123689  | 0.109703  | 0.118007  | 0.125291 | 0.0879953 | 0.125291  |
| 0.126311  | 0.120921  | 0.108683  | 0.12602   | 0.121066 | 0.109411  | 0.124272  |
| 0.121503  | 0.116404  | 0.109703  | 0.118007  | 0.115967 | 0.099359  | 0.116841  |
| 0.121066  | 0.129371  | 0.103438  | 0.120775  | 0.12602  | 0.115239  | 0.130973  |
| 0.0553613 | 0.124563  | 0.116696  | 0.121795  | 0.127914 | 0.115967  | 0.126748  |
| 0.109266  | 0.112325  | 0.0989219 | 0.0944056 | 0.111888 | 0.107226  | 0.114802  |
| 0.134907  | 0.122815  | 0.11961   | 0.11655   | 0.122669 | 0.117133  | 0.121212  |
| 0.138403  | 0.118735  | 0.125437  | 0.132576  | 0.123252 | 0.122086  | 0.118298  |
| 0.124272  | 0.121795  | 0.108392  | 0.122232  | 0.124272 | 0.0488054 | 0.123397  |
| 0.128497  | 0.120775  | 0.107372  | 0.117424  | 0.120047 | 0.0844988 | 0.119172  |
| 0.13345   | 0.136218  | 0.122815  | 0.129662  | 0.137821 | 0.0541958 | 0.136946  |
| 0.201486  | 0.214744  | 0.208625  | 0.208188  | 0.214598 | 0.198864  | 0.213432  |
| 0.117716  | 0.122232  | 0.0907634 | 0.114219  | 0.120629 | 0.1081    | 0.122669  |
| 0.120192  | 0.117424  | 0.110431  | 0.117279  | 0.111742 | 0.0992133 | 0.118153  |
| 0.127768  | 0.12296   | 0.107517  | 0.12602   | 0.126603 | 0.119901  | 0.126603  |
| 0.126166  | 0.125437  | 0.111742  | 0.104312  | 0.120338 | 0.121212  | 0.12704   |
| 0.119464  | 0.115822  | 0.10912   | 0.119755  | 0.119464 | 0.117424  | 0.120047  |
| 0.194639  | 0.207022  | 0.194493  | 0.202797  | 0.205711 | 0.193765  | 0.204545  |
| 0.0546329 | 0.123834  | 0.117133  | 0.124272  | 0.128351 | 0.120192  | 0.129808  |
| 0.120047  | 0.121358  | 0.109411  | 0.121212  | 0.125    | 0.0495338 | 0.125291  |
| 0.125728  | 0.118881  | 0.122669  | 0.124854  | 0.119318 | 0.120484  | 0.121649  |
| 0.12602   | 0.108392  | 0.105186  | 0.123689  | 0.113199 | 0.109411  | 0.10912   |
| 0.0520105 | 0.123252  | 0.11655   | 0.125728  | 0.131847 | 0.115239  | 0.126603  |
| 0.081148  | 0.116841  | 0.105478  | 0.115822  | 0.118444 | 0.104458  | 0.118444  |
| 0.125437  | 0.124126  | 0.11014   | 0.123689  | 0.123106 | 0.113782  | 0.122523  |
| 0.126894  | 0.122378  | 0.10373   | 0.105915  | 0.115239 | 0.11757   | 0.124854  |
| 0.192308  | 0.202652  | 0.189831  | 0.199592  | 0.206294 | 0.194347  | 0.202506  |
| 0.0587121 | 0.11655   | 0.107809  | 0.115239  | 0.118735 | 0.110577  | 0.11757   |
| 0.188811  | 0.200612  | 0.190414  | 0.198427  | 0.201923 | 0.18852   | 0.200466  |
| 0.188083  | 0.195804  | 0.187646  | 0.194493  | 0.199738 | 0.18954   | 0.197115  |
| 0.13447   | 0.115385  | 0.120047  | 0.13039   | 0.12398  | 0.120775  | 0.114948  |
| 0.135344  | 0.128205  | 0.117716  | 0.106498  | 0.11757  | 0.127768  | 0.129808  |
| 0.115239  | 0.113928  | 0.100524  | 0.114365  | 0.114365 | 0.105624  | 0.112908  |
| 0.0623543 | 0.114948  | 0.110286  | 0.117716  | 0.11655  | 0.1081    | 0.117133  |

|           |           |           |           |           |           |           |
|-----------|-----------|-----------|-----------|-----------|-----------|-----------|
| 0.055507  | 0.12296   | 0.113928  | 0.121358  | 0.124272  | 0.114365  | 0.123689  |
| 0.125146  | 0.125291  | 0.107226  | 0.124272  | 0.128059  | 0.0525932 | 0.126603  |
| 0.118444  | 0.0565268 | 0.108974  | 0.117279  | 0.108246  | 0.115822  | 0.0610431 |
| 0.121941  | 0.0521562 | 0.111014  | 0.118735  | 0.110286  | 0.118444  | 0.0528846 |
| 0.123834  | 0.131556  | 0.103875  | 0.121503  | 0.129371  | 0.118298  | 0.135781  |
| 0.13039   | 0.113928  | 0.110431  | 0.124854  | 0.121066  | 0.113199  | 0.118444  |
| 0.117424  | 0.121358  | 0.106789  | 0.116259  | 0.122669  | 0.0460373 | 0.119755  |
| 0.0560897 | 0.119464  | 0.113345  | 0.122815  | 0.126311  | 0.114656  | 0.123397  |
| 0.113054  | 0.114073  | 0.0983392 | 0.111888  | 0.110431  | 0.10169   | 0.11451   |
| 0.0517191 | 0.131119  | 0.12704   | 0.123689  | 0.129516  | 0.124563  | 0.131556  |
| 0.125437  | 0.125     | 0.120921  | 0.130099  | 0.120484  | 0.116987  | 0.12602   |
| 0.0492424 | 0.135344  | 0.127768  | 0.127622  | 0.134615  | 0.127331  | 0.135198  |
| 0.253205  | 0.261218  | 0.257721  | 0.258159  | 0.260781  | 0.252622  | 0.261364  |
| 0.129371  | 0.117861  | 0.123689  | 0.120338  | 0.0463287 | 0.13141   | 0.115385  |
| 0.13243   | 0.126748  | 0.121795  | 0.122815  | 0.0986305 | 0.126603  | 0.126311  |
| 0.208916  | 0.222174  | 0.216346  | 0.217075  | 0.226399  | 0.209499  | 0.224359  |
| 0.136509  | 0.125583  | 0.118881  | 0.12602   | 0.120192  | 0.120192  | 0.126603  |
| 0.223339  | 0.236014  | 0.226107  | 0.225962  | 0.233537  | 0.224213  | 0.233246  |
| 0.125874  | 0.109994  | 0.115239  | 0.117424  | 0.04662   | 0.120629  | 0.105769  |
| 0.130099  | 0.134907  | 0.119464  | 0.128642  | 0.134761  | 0.0490967 | 0.132139  |
| 0.119901  | 0.115967  | 0.101981  | 0.103001  | 0.116696  | 0.111742  | 0.118735  |
| 0.133887  | 0.115676  | 0.118007  | 0.128642  | 0.119027  | 0.114365  | 0.115822  |
| 0.200612  | 0.207459  | 0.196387  | 0.20236   | 0.210519  | 0.198864  | 0.207022  |
| 0.0514277 | 0.134615  | 0.125     | 0.125146  | 0.133596  | 0.124563  | 0.134761  |
| 0.0557984 | 0.120921  | 0.114219  | 0.122232  | 0.128059  | 0.115822  | 0.127185  |
| 0.220862  | 0.231789  | 0.223048  | 0.226399  | 0.230186  | 0.219406  | 0.229604  |
| 0.128351  | 0.0541958 | 0.113636  | 0.123689  | 0.114948  | 0.120192  | 0.0598776 |
| 0.19289   | 0.203526  | 0.19391   | 0.201923  | 0.209207  | 0.192308  | 0.203671  |
| 0.125874  | 0.0511364 | 0.117279  | 0.126166  | 0.11655   | 0.123834  | 0.0585664 |
| 0.12296   | 0.126894  | 0.107955  | 0.124126  | 0.127622  | 0.0495338 | 0.126457  |
| 0.127477  | 0.125     | 0.121795  | 0.122232  | 0.119901  | 0.107663  | 0.124272  |
| 0.140006  | 0.119464  | 0.122086  | 0.127768  | 0.125146  | 0.120192  | 0.116113  |
| 0.118298  | 0.123397  | 0.112908  | 0.120047  | 0.128497  | 0.111597  | 0.125583  |
| 0.163462  | 0.166812  | 0.155449  | 0.168998  | 0.167249  | 0.152681  | 0.167249  |
| 0.0518648 | 0.116696  | 0.108829  | 0.115093  | 0.123834  | 0.115676  | 0.121503  |
| 0.128205  | 0.123397  | 0.105332  | 0.108683  | 0.119464  | 0.123252  | 0.123834  |
| 0.131993  | 0.116404  | 0.105332  | 0.127622  | 0.126457  | 0.115967  | 0.120921  |
| 0.120921  | 0.129225  | 0.118735  | 0.0964452 | 0.116841  | 0.128788  | 0.130536  |
| 0.190997  | 0.203089  | 0.188228  | 0.200612  | 0.204691  | 0.18954   | 0.20236   |
| 0.122378  | 0.12398   | 0.105332  | 0.120047  | 0.124417  | 0.0483683 | 0.123252  |
| 0.13447   | 0.118007  | 0.113636  | 0.135635  | 0.124563  | 0.116696  | 0.120775  |
| 0.124709  | 0.0895979 | 0.113782  | 0.120921  | 0.0976107 | 0.118881  | 0.0929487 |
| 0.127477  | 0.0451632 | 0.11655   | 0.121066  | 0.108829  | 0.120484  | 0.0496795 |
| 0.126748  | 0.130099  | 0.114656  | 0.121503  | 0.129371  | 0.0463287 | 0.129371  |

|           |           |           |           |          |           |           |
|-----------|-----------|-----------|-----------|----------|-----------|-----------|
| 0.246649  | 0.25845   | 0.254371  | 0.251311  | 0.260344 | 0.249272  | 0.257139  |
| 0.123834  | 0.120775  | 0.112908  | 0.120338  | 0.113345 | 0.10169   | 0.119172  |
| 0.124126  | 0.124563  | 0.104749  | 0.123252  | 0.127331 | 0.0955711 | 0.129371  |
| 0.174534  | 0.179924  | 0.173805  | 0.178904  | 0.179779 | 0.180361  | 0.179779  |
| 0.184149  | 0.190122  | 0.180507  | 0.190268  | 0.193182 | 0.180361  | 0.190559  |
| 0.12296   | 0.130682  | 0.0992133 | 0.125     | 0.129079 | 0.116841  | 0.134324  |
| 0.0552156 | 0.125     | 0.116841  | 0.121066  | 0.13039  | 0.116404  | 0.128059  |
| 0.126603  | 0.108392  | 0.104312  | 0.125437  | 0.117861 | 0.111451  | 0.109411  |
| 0.0582751 | 0.146707  | 0.142045  | 0.139569  | 0.143065 | 0.137821  | 0.147145  |
| 0.120629  | 0.126311  | 0.0965909 | 0.122086  | 0.127331 | 0.115967  | 0.127331  |
| 0.123689  | 0.133159  | 0.101399  | 0.125437  | 0.127768 | 0.117279  | 0.132139  |
| 0.130245  | 0.0444347 | 0.118153  | 0.127622  | 0.117716 | 0.126748  | 0.0547786 |
| 0.0463287 | 0.122232  | 0.113782  | 0.117424  | 0.120047 | 0.114802  | 0.120338  |
| 0.0499709 | 0.130828  | 0.126748  | 0.124272  | 0.130099 | 0.125146  | 0.134178  |
| 0.122378  | 0.069493  | 0.112908  | 0.124709  | 0.117424 | 0.11859   | 0.0748834 |
| 0.135344  | 0.11655   | 0.11655   | 0.128059  | 0.118153 | 0.115239  | 0.114948  |
| 0.144522  | 0.12602   | 0.128934  | 0.138695  | 0.133159 | 0.129079  | 0.128205  |
| 0.127768  | 0.123834  | 0.120921  | 0.122815  | 0.118444 | 0.104749  | 0.121066  |
| 0.140443  | 0.119318  | 0.124854  | 0.134033  | 0.124709 | 0.121212  | 0.117716  |
| 0.129079  | 0.0470571 | 0.122232  | 0.127914  | 0.11451  | 0.131119  | 0.0515734 |
| 0.201486  | 0.21183   | 0.201923  | 0.211101  | 0.214889 | 0.202069  | 0.21081   |
| 0.135198  | 0.116113  | 0.115239  | 0.129953  | 0.125    | 0.109848  | 0.113054  |
| 0.189977  | 0.196824  | 0.181381  | 0.195221  | 0.199883 | 0.184441  | 0.196096  |
| 0.120921  | 0.119901  | 0.101544  | 0.0938228 | 0.113345 | 0.115676  | 0.119172  |
| 0.128205  | 0.134761  | 0.116404  | 0.124709  | 0.13141  | 0.0480769 | 0.133159  |
| 0.126457  | 0.126894  | 0.127477  | 0.130245  | 0.124709 | 0.120921  | 0.128205  |
| 0.12602   | 0.123834  | 0.114802  | 0.124272  | 0.121358 | 0.111742  | 0.121649  |
| 0.0448718 | 0.125728  | 0.118444  | 0.120338  | 0.130245 | 0.120047  | 0.129371  |
| 0.044289  | 0.124563  | 0.120192  | 0.120338  | 0.126166 | 0.120338  | 0.126166  |
| 0.125874  | 0.128351  | 0.108829  | 0.123834  | 0.128205 | 0.0495338 | 0.127622  |
| 0.122523  | 0.125291  | 0.105478  | 0.105624  | 0.120775 | 0.116987  | 0.12398   |
| 0.126311  | 0.129079  | 0.126457  | 0.13243   | 0.125437 | 0.123689  | 0.127185  |
| 0.139569  | 0.0528846 | 0.128934  | 0.13141   | 0.11859  | 0.135781  | 0.0536131 |
| 0.240676  | 0.254516  | 0.249854  | 0.249126  | 0.255536 | 0.244172  | 0.254079  |
| 0.126457  | 0.128351  | 0.109411  | 0.123252  | 0.131119 | 0.0506993 | 0.129662  |
| 0.182838  | 0.189394  | 0.18007   | 0.188666  | 0.194493 | 0.177593  | 0.190122  |
| 0.184441  | 0.19391   | 0.183421  | 0.192599  | 0.197261 | 0.185023  | 0.194347  |
| 0.132721  | 0.125874  | 0.108974  | 0.130099  | 0.129516 | 0.113491  | 0.125728  |
| 0.120192  | 0.119172  | 0.113928  | 0.116987  | 0.11553  | 0.100379  | 0.116113  |
| 0.127768  | 0.132284  | 0.116259  | 0.127185  | 0.130682 | 0.0479312 | 0.13039   |
| 0.0590035 | 0.120629  | 0.108974  | 0.11757   | 0.123397 | 0.114365  | 0.122523  |
| 0.125291  | 0.124272  | 0.107372  | 0.122378  | 0.119172 | 0.0976107 | 0.12296   |
| 0.126748  | 0.0514277 | 0.111451  | 0.125291  | 0.112762 | 0.121503  | 0.0562354 |
| 0.0729895 | 0.124126  | 0.115676  | 0.120484  | 0.126894 | 0.114656  | 0.128934  |

|           |           |           |          |           |           |           |
|-----------|-----------|-----------|----------|-----------|-----------|-----------|
| 0.0520105 | 0.133159  | 0.130828  | 0.127477 | 0.13243   | 0.126894  | 0.133887  |
| 0.121212  | 0.126311  | 0.109703  | 0.121795 | 0.127331  | 0.0454545 | 0.12704   |
| 0.0495338 | 0.129808  | 0.125437  | 0.125291 | 0.129662  | 0.124709  | 0.131119  |
| 0.127185  | 0.120629  | 0.106061  | 0.118153 | 0.0977564 | 0.120192  | 0.121649  |
| 0.131556  | 0.13345   | 0.127622  | 0.132139 | 0.126603  | 0.120775  | 0.131265  |
| 0.131119  | 0.112617  | 0.114365  | 0.129371 | 0.120921  | 0.115676  | 0.113636  |
| 0.136509  | 0.0506993 | 0.126166  | 0.129225 | 0.119318  | 0.13243   | 0.050845  |
| 0.128205  | 0.125146  | 0.11553   | 0.129953 | 0.120047  | 0.112471  | 0.123543  |
| 0.122378  | 0.123397  | 0.110286  | 0.119464 | 0.126166  | 0.0533217 | 0.121503  |
| 0.133741  | 0.13243   | 0.122232  | 0.127914 | 0.13345   | 0.127914  | 0.134324  |
| 0.181964  | 0.190559  | 0.179779  | 0.188957 | 0.192162  | 0.180507  | 0.190414  |
| 0.0515734 | 0.137383  | 0.132721  | 0.129079 | 0.133741  | 0.128497  | 0.139569  |
| 0.0445804 | 0.126311  | 0.117861  | 0.121503 | 0.128788  | 0.120047  | 0.123834  |
| 0.129808  | 0.126166  | 0.122669  | 0.127768 | 0.121358  | 0.116696  | 0.127185  |
| 0.121212  | 0.118444  | 0.111451  | 0.122378 | 0.115967  | 0.108683  | 0.117716  |
| 0.127477  | 0.111014  | 0.109848  | 0.125146 | 0.116987  | 0.113199  | 0.112325  |
| 0.134615  | 0.112908  | 0.114948  | 0.127914 | 0.120629  | 0.117716  | 0.11451   |
| 0.189831  | 0.197552  | 0.184149  | 0.196241 | 0.201486  | 0.186917  | 0.19391   |
| 0.0703671 | 0.120047  | 0.113636  | 0.123106 | 0.126603  | 0.113782  | 0.123106  |
| 0.111305  | 0.113491  | 0.10067   | 0.11859  | 0.11655   | 0.109266  | 0.114219  |
| 0.0422494 | 0.126603  | 0.121066  | 0.125    | 0.127914  | 0.119755  | 0.128205  |
| 0.186043  | 0.197261  | 0.18648   | 0.194493 | 0.201486  | 0.183712  | 0.194784  |
| 0.120921  | 0.117279  | 0.109411  | 0.120338 | 0.114219  | 0.0990676 | 0.117424  |
| 0.128934  | 0.0405012 | 0.121212  | 0.128934 | 0.115239  | 0.126311  | 0.0499709 |
| 0.0456002 | 0.126457  | 0.120921  | 0.124854 | 0.131556  | 0.118153  | 0.129516  |
| 0.118881  | 0.123689  | 0.0939685 | 0.118298 | 0.123834  | 0.110723  | 0.126748  |
| 0.183275  | 0.194202  | 0.187209  | 0.192016 | 0.199592  | 0.181818  | 0.194056  |
| 0.12296   | 0.0412296 | 0.118153  | 0.125    | 0.112762  | 0.122669  | 0.0506993 |
| 0.115385  | 0.115822  | 0.103293  | 0.120047 | 0.120338  | 0.113928  | 0.116841  |
| 0.120921  | 0.119027  | 0.109411  | 0.122669 | 0.11451   | 0.104604  | 0.121212  |
| 0.119755  | 0.123689  | 0.113782  | 0.12704  | 0.130828  | 0.121212  | 0.128497  |
| 0.129225  | 0.123252  | 0.107809  | 0.102127 | 0.117861  | 0.120484  | 0.124272  |
| 0.131847  | 0.0472028 | 0.124126  | 0.126311 | 0.113782  | 0.127768  | 0.0520105 |
| 0.120484  | 0.125291  | 0.107226  | 0.121649 | 0.129225  | 0.0470571 | 0.128642  |
| 0.118735  | 0.125874  | 0.115385  | 0.122523 | 0.116404  | 0.122815  | 0.122523  |
| 0.13986   | 0.1537    | 0.127185  | 0.134324 | 0.145105  | 0.136946  | 0.151224  |
| 0.231643  | 0.239656  | 0.23208   | 0.234557 | 0.243007  | 0.230478  | 0.238054  |
| 0.131702  | 0.128642  | 0.118735  | 0.129662 | 0.123834  | 0.116841  | 0.125583  |
| 0.12704   | 0.122232  | 0.108246  | 0.107226 | 0.11859   | 0.122378  | 0.124126  |
| 0.0523019 | 0.117424  | 0.115093  | 0.116113 | 0.122815  | 0.116113  | 0.117279  |
| 0.127914  | 0.130099  | 0.111742  | 0.13345  | 0.124709  | 0.121503  | 0.131993  |
| 0.116113  | 0.101107  | 0.106061  | 0.104749 | 0.112325  | 0.116404  | 0.102418  |
| 0.123106  | 0.119464  | 0.113054  | 0.121941 | 0.116404  | 0.120192  | 0.118735  |
| 0.0544872 | 0.12398   | 0.121649  | 0.121795 | 0.127331  | 0.120921  | 0.125291  |

|           |           |           |          |           |           |           |
|-----------|-----------|-----------|----------|-----------|-----------|-----------|
| 0.129225  | 0.0407925 | 0.122378  | 0.127185 | 0.116696  | 0.129516  | 0.050845  |
| 0.124854  | 0.123252  | 0.0687646 | 0.116404 | 0.12602   | 0.117279  | 0.124563  |
| 0.231643  | 0.239948  | 0.235286  | 0.236888 | 0.244172  | 0.229312  | 0.240093  |
| 0.116404  | 0.115385  | 0.107517  | 0.117861 | 0.112325  | 0.0977564 | 0.113199  |
| 0.116404  | 0.102564  | 0.101399  | 0.119027 | 0.0616259 | 0.115239  | 0.105332  |
| 0.119755  | 0.120484  | 0.107663  | 0.117133 | 0.126166  | 0.0474942 | 0.12296   |
| 0.125728  | 0.140152  | 0.110431  | 0.125146 | 0.13447   | 0.120484  | 0.140589  |
| 0.141754  | 0.136655  | 0.126748  | 0.136509 | 0.129516  | 0.120775  | 0.132721  |
| 0.113199  | 0.129662  | 0.117424  | 0.121649 | 0.133887  | 0.10708   | 0.128642  |
| 0.0464744 | 0.12296   | 0.118007  | 0.121066 | 0.13039   | 0.116987  | 0.12602   |
| 0.11859   | 0.121941  | 0.0995047 | 0.113636 | 0.122378  | 0.106061  | 0.122669  |
| 0.223193  | 0.237034  | 0.22771   | 0.230769 | 0.236014  | 0.223193  | 0.234557  |
| 0         | 0.127477  | 0.123689  | 0.124709 | 0.130245  | 0.120629  | 0.13141   |
| 0.127477  | 0         | 0.119464  | 0.128642 | 0.114365  | 0.126894  | 0.0496795 |
| 0.123689  | 0.119464  | 0         | 0.114656 | 0.119318  | 0.110577  | 0.121358  |
| 0.124709  | 0.128642  | 0.114656  | 0        | 0.117424  | 0.118881  | 0.126166  |
| 0.130245  | 0.114365  | 0.119318  | 0.117424 | 0         | 0.127914  | 0.110723  |
| 0.120629  | 0.126894  | 0.110577  | 0.118881 | 0.127914  | 0         | 0.126166  |
| 0.13141   | 0.0496795 | 0.121358  | 0.126166 | 0.110723  | 0.126166  | 0         |
| 0.133596  | 0.044289  | 0.128205  | 0.129516 | 0.118444  | 0.128934  | 0.0514277 |
| 0.127768  | 0.048951  | 0.115967  | 0.121066 | 0.114365  | 0.121941  | 0.0552156 |
| 0.123252  | 0.129516  | 0.111451  | 0.122378 | 0.128205  | 0.0504079 | 0.128788  |
| 0.128497  | 0.128059  | 0.116113  | 0.104312 | 0.120047  | 0.124126  | 0.128497  |
| 0.130682  | 0.133159  | 0.119172  | 0.10708  | 0.12398   | 0.126311  | 0.134178  |
| 0.133304  | 0.134324  | 0.129662  | 0.130973 | 0.125728  | 0.124272  | 0.132721  |
| 0.139714  | 0.13549   | 0.13345   | 0.137383 | 0.129225  | 0.128351  | 0.135635  |
| 0.132284  | 0.131265  | 0.117861  | 0.10373  | 0.120921  | 0.12704   | 0.128788  |
| 0.123252  | 0.120192  | 0.101836  | 0.117716 | 0.119172  | 0.0909091 | 0.118007  |
| 0.136218  | 0.0961538 | 0.13345   | 0.129516 | 0.103875  | 0.137675  | 0.0954254 |
| 0.137529  | 0.123397  | 0.125728  | 0.135781 | 0.136364  | 0.121212  | 0.123252  |
| 0.19697   | 0.211393  | 0.202652  | 0.207168 | 0.212995  | 0.199883  | 0.211247  |
| 0.125291  | 0.126603  | 0.120484  | 0.123252 | 0.126166  | 0.114219  | 0.127331  |
| 0.125583  | 0.107372  | 0.11116   | 0.119464 | 0.0574009 | 0.120338  | 0.108392  |
| 0.129516  | 0.129953  | 0.116259  | 0.127185 | 0.131847  | 0.0453089 | 0.131847  |
| 0.216783  | 0.229167  | 0.221591  | 0.220571 | 0.228147  | 0.217949  | 0.227564  |
| 0.208333  | 0.214015  | 0.208479  | 0.21183  | 0.217366  | 0.203089  | 0.215035  |
| 0.132721  | 0.0483683 | 0.12704   | 0.129225 | 0.114073  | 0.130099  | 0.050845  |
| 0.24359   | 0.252768  | 0.246941  | 0.24796  | 0.255245  | 0.242133  | 0.252622  |
| 0.122669  | 0.121649  | 0.104167  | 0.119172 | 0.120629  | 0.090035  | 0.121503  |
| 0.142191  | 0.140006  | 0.129516  | 0.138403 | 0.13549   | 0.122378  | 0.143357  |
| 0.122669  | 0.117861  | 0.116987  | 0.120629 | 0.115967  | 0.100233  | 0.11859   |
| 0.126894  | 0.126748  | 0.114802  | 0.105332 | 0.119901  | 0.12398   | 0.13039   |
| 0.185606  | 0.197407  | 0.181381  | 0.190851 | 0.198135  | 0.183858  | 0.19493   |
| 0.131556  | 0.122669  | 0.0769231 | 0.121066 | 0.123397  | 0.118735  | 0.121066  |

|           |           |          |           |           |           |           |
|-----------|-----------|----------|-----------|-----------|-----------|-----------|
| 0.190997  | 0.200758  | 0.191725 | 0.194202  | 0.204691  | 0.189248  | 0.199738  |
| 0.125437  | 0.122669  | 0.101981 | 0.126311  | 0.123689  | 0.108829  | 0.123397  |
| 0.105041  | 0.0725524 | 0.113345 | 0.122815  | 0.116404  | 0.116404  | 0.0776515 |
| 0.124854  | 0.127622  | 0.11655  | 0.11961   | 0.121941  | 0.116113  | 0.126603  |
| 0.107955  | 0.113345  | 0.112762 | 0.114948  | 0.121066  | 0.110286  | 0.117279  |
| 0.118298  | 0.11961   | 0.102127 | 0.115967  | 0.120047  | 0.0477855 | 0.118881  |
| 0.112471  | 0.121066  | 0.110577 | 0.118007  | 0.122086  | 0.107517  | 0.121795  |
| 0.119464  | 0.116696  | 0.107955 | 0.11655   | 0.112762  | 0.097028  | 0.114219  |
| 0.0528846 | 0.118881  | 0.110431 | 0.121649  | 0.123689  | 0.110577  | 0.11961   |
| 0.123543  | 0.0875583 | 0.11961  | 0.120921  | 0.0987762 | 0.121212  | 0.0882867 |
| 0.122378  | 0.120484  | 0.105624 | 0.120047  | 0.116259  | 0.106935  | 0.118007  |
| 0.121941  | 0.118881  | 0.111014 | 0.118735  | 0.113199  | 0.100379  | 0.114948  |
| 0.127331  | 0.127185  | 0.119318 | 0.127914  | 0.124417  | 0.105478  | 0.124417  |
| 0.0506993 | 0.132139  | 0.125146 | 0.124417  | 0.132867  | 0.12296   | 0.133159  |
| 0.120775  | 0.121795  | 0.115676 | 0.124854  | 0.120192  | 0.112617  | 0.120484  |
| 0.121795  | 0.114948  | 0.105332 | 0.118007  | 0.123543  | 0.111888  | 0.119464  |
| 0.117279  | 0.120921  | 0.104021 | 0.119318  | 0.118444  | 0.0441434 | 0.122232  |
| 0.118153  | 0.0524476 | 0.113054 | 0.122523  | 0.116696  | 0.122232  | 0.0598776 |
| 0.125437  | 0.120921  | 0.108974 | 0.106498  | 0.119027  | 0.119318  | 0.123689  |
| 0.131993  | 0.112617  | 0.115239 | 0.126457  | 0.118298  | 0.112762  | 0.110723  |
| 0.129079  | 0.123397  | 0.120775 | 0.126457  | 0.11859   | 0.118007  | 0.122378  |
| 0.0505536 | 0.122669  | 0.117424 | 0.123689  | 0.130682  | 0.117861  | 0.123106  |
| 0.0515734 | 0.131265  | 0.129808 | 0.123834  | 0.132867  | 0.124126  | 0.134324  |
| 0.0495338 | 0.139714  | 0.135927 | 0.132867  | 0.137529  | 0.131702  | 0.1419    |
| 0.117279  | 0.0638112 | 0.1081   | 0.114656  | 0.108246  | 0.108829  | 0.0651224 |
| 0.122815  | 0.126166  | 0.108392 | 0.121358  | 0.127185  | 0.0496795 | 0.127477  |
| 0.114219  | 0.111451  | 0.101836 | 0.11451   | 0.113054  | 0.115967  | 0.11655   |
| 0.133159  | 0.130973  | 0.120192 | 0.109848  | 0.124417  | 0.131993  | 0.132284  |
| 0.122815  | 0.119172  | 0.116259 | 0.118444  | 0.111742  | 0.104749  | 0.116404  |
| 0.149038  | 0.125583  | 0.129953 | 0.136801  | 0.129225  | 0.130682  | 0.124854  |
| 0.136218  | 0.141026  | 0.129662 | 0.137092  | 0.14088   | 0.0563811 | 0.13884   |
| 0.124126  | 0.133887  | 0.105041 | 0.123543  | 0.129371  | 0.119172  | 0.137821  |
| 0.11553   | 0.120047  | 0.111597 | 0.118444  | 0.121941  | 0.105041  | 0.119901  |
| 0.11451   | 0.119027  | 0.103584 | 0.0949883 | 0.112762  | 0.113928  | 0.123543  |
| 0.135198  | 0.133596  | 0.128351 | 0.130536  | 0.12704   | 0.11859   | 0.132284  |
| 0.201486  | 0.207459  | 0.201923 | 0.208188  | 0.214889  | 0.200612  | 0.209645  |
| 0.123689  | 0.114802  | 0.103438 | 0.121066  | 0.121358  | 0.11553   | 0.116987  |
| 0.129371  | 0.127477  | 0.110286 | 0.121212  | 0.12296   | 0.113636  | 0.126166  |
| 0.122815  | 0.118881  | 0.108683 | 0.103875  | 0.114948  | 0.119318  | 0.123689  |
| 0.127331  | 0.127477  | 0.116987 | 0.126166  | 0.123834  | 0.115967  | 0.125291  |
| 0.131847  | 0.125291  | 0.106643 | 0.131556  | 0.128059  | 0.109994  | 0.128642  |
| 0.118735  | 0.121795  | 0.119172 | 0.122232  | 0.117861  | 0.122232  | 0.119901  |
| 0.118298  | 0.124563  | 0.122232 | 0.126166  | 0.117424  | 0.125291  | 0.124709  |
| 0.124272  | 0.129079  | 0.103438 | 0.11961   | 0.126894  | 0.113782  | 0.131556  |

|           |           |           |          |           |           |           |
|-----------|-----------|-----------|----------|-----------|-----------|-----------|
| 0.121358  | 0.0888695 | 0.113345  | 0.119027 | 0.0980478 | 0.116113  | 0.0901807 |
| 0.130099  | 0.12704   | 0.11655   | 0.104749 | 0.118153  | 0.122815  | 0.129808  |
| 0.124854  | 0.119755  | 0.111014  | 0.114365 | 0.112908  | 0.110868  | 0.120484  |
| 0.130536  | 0.128059  | 0.109703  | 0.128497 | 0.123543  | 0.111014  | 0.126166  |
| 0.174388  | 0.177739  | 0.172786  | 0.178467 | 0.178759  | 0.171766  | 0.176719  |
| 0.0563811 | 0.123543  | 0.113928  | 0.119901 | 0.129225  | 0.115822  | 0.125437  |
| 0.132284  | 0.129225  | 0.118153  | 0.111888 | 0.122086  | 0.127622  | 0.130245  |
| 0.133596  | 0.113636  | 0.115967  | 0.121941 | 0.111742  | 0.114656  | 0.111451  |
| 0.117133  | 0.116113  | 0.11757   | 0.120921 | 0.118881  | 0.120921  | 0.118298  |
| 0.114802  | 0.115239  | 0.0983392 | 0.116259 | 0.114802  | 0.104021  | 0.117133  |
| 0.117424  | 0.114656  | 0.100087  | 0.114219 | 0.113054  | 0.103438  | 0.113636  |
| 0.119464  | 0.119318  | 0.104749  | 0.120047 | 0.117424  | 0.109848  | 0.11859   |
| 0.13141   | 0.101836  | 0.116113  | 0.11451  | 0.111597  | 0.120047  | 0.104895  |
| 0.0914918 | 0.122815  | 0.112325  | 0.125874 | 0.122669  | 0.111305  | 0.123252  |
| 0.134178  | 0.124126  | 0.125     | 0.13039  | 0.127768  | 0.121066  | 0.121358  |
| 0.115385  | 0.108829  | 0.104458  | 0.117424 | 0.115676  | 0.109848  | 0.11014   |
| 0.131265  | 0.109557  | 0.115093  | 0.126603 | 0.117861  | 0.119901  | 0.112617  |
| 0.138112  | 0.0989219 | 0.118153  | 0.126457 | 0.121795  | 0.124709  | 0.104021  |
| 0.130245  | 0.110577  | 0.114656  | 0.120629 | 0.107226  | 0.111888  | 0.107809  |
| 0.124126  | 0.116696  | 0.121649  | 0.124417 | 0.120921  | 0.116841  | 0.120338  |
| 0.126166  | 0.106206  | 0.106498  | 0.116259 | 0.108974  | 0.106935  | 0.107226  |
| 0.126748  | 0.10912   | 0.111116  | 0.120338 | 0.106061  | 0.111597  | 0.110723  |
| 0.122669  | 0.113491  | 0.105041  | 0.118881 | 0.116841  | 0.0973193 | 0.113636  |
| 0.128642  | 0.117424  | 0.117716  | 0.127768 | 0.11961   | 0.109994  | 0.114656  |
| 0.125728  | 0.113345  | 0.105769  | 0.120775 | 0.108246  | 0.107372  | 0.114948  |
| 0.14088   | 0.106643  | 0.138112  | 0.146416 | 0.137966  | 0.140006  | 0.109703  |
| 0.129225  | 0.104312  | 0.122669  | 0.136218 | 0.134178  | 0.128934  | 0.107955  |
| 0.122523  | 0.107226  | 0.111305  | 0.115239 | 0.109994  | 0.105915  | 0.105915  |
| 0.136946  | 0.108246  | 0.13039   | 0.124126 | 0.127331  | 0.137529  | 0.107226  |
| 0.126457  | 0.128059  | 0.119318  | 0.126748 | 0.127914  | 0.118007  | 0.131993  |
| 0.140443  | 0.125437  | 0.127185  | 0.138403 | 0.13141   | 0.13141   | 0.125874  |
| 0.122669  | 0.120484  | 0.112034  | 0.115093 | 0.115676  | 0.106935  | 0.117716  |
| 0.142045  | 0.140443  | 0.142191  | 0.138258 | 0.135635  | 0.13447   | 0.138549  |
| 0.139714  | 0.125     | 0.119464  | 0.12602  | 0.116404  | 0.125146  | 0.12398   |
| 0.147873  | 0.119172  | 0.129079  | 0.137966 | 0.128642  | 0.133304  | 0.11961   |
| 0.130099  | 0.120921  | 0.121795  | 0.127185 | 0.120775  | 0.11757   | 0.120484  |
| 0.125     | 0.100962  | 0.106206  | 0.119755 | 0.108683  | 0.102855  | 0.106061  |
| 0.128059  | 0.108392  | 0.106352  | 0.11757  | 0.11553   | 0.105915  | 0.107663  |
| 0.125     | 0.100962  | 0.102418  | 0.110431 | 0.109848  | 0.118007  | 0.10169   |
| 0.128497  | 0.114948  | 0.125146  | 0.127622 | 0.101107  | 0.113636  | 0.112471  |
| 0.132721  | 0.128205  | 0.126748  | 0.128934 | 0.125437  | 0.116113  | 0.126311  |
| 0.13039   | 0.109848  | 0.115967  | 0.132139 | 0.129516  | 0.115822  | 0.108829  |
| 0.123397  | 0.111888  | 0.110723  | 0.118444 | 0.106498  | 0.107955  | 0.108829  |
| 0.12704   | 0.108246  | 0.106498  | 0.117716 | 0.118007  | 0.106935  | 0.107517  |



|          |          |          |          |          |           |          |
|----------|----------|----------|----------|----------|-----------|----------|
| 0.127768 | 0.11451  | 0.117424 | 0.123689 | 0.122815 | 0.110577  | 0.11553  |
| 0.122815 | 0.104604 | 0.113928 | 0.124272 | 0.11961  | 0.104749  | 0.102127 |
| 0.134907 | 0.111742 | 0.116404 | 0.126166 | 0.120047 | 0.111597  | 0.1081   |
| 0.121212 | 0.122815 | 0.110868 | 0.123543 | 0.116841 | 0.104021  | 0.120629 |
| 0.107955 | 0.127914 | 0.113636 | 0.120484 | 0.130682 | 0.105041  | 0.127185 |
| 0.119901 | 0.122669 | 0.111597 | 0.12602  | 0.119027 | 0.106206  | 0.122815 |
| 0.117279 | 0.118881 | 0.102855 | 0.115239 | 0.118444 | 0.0869755 | 0.117861 |
| 0.123106 | 0.111597 | 0.111014 | 0.121358 | 0.116113 | 0.105624  | 0.112034 |
| 0.113345 | 0.123397 | 0.110868 | 0.122086 | 0.127622 | 0.107226  | 0.123834 |
| 0.117279 | 0.116259 | 0.110723 | 0.123397 | 0.121066 | 0.109411  | 0.119901 |
| 0.108537 | 0.125874 | 0.120047 | 0.12602  | 0.123397 | 0.121941  | 0.128642 |
| 0.104749 | 0.11655  | 0.105478 | 0.114365 | 0.126311 | 0.0957168 | 0.117279 |
| 0.127331 | 0.125146 | 0.125728 | 0.129371 | 0.12704  | 0.120921  | 0.128205 |

| TDr_3620 | TDr_3621  | TDr_3623  | TDr_3624 | TDr_3631 | TDr_3633  | TDr_3637  |
|----------|-----------|-----------|----------|----------|-----------|-----------|
| 0.13141  | 0.121503  | 0.116404  | 0.133304 | 0.141026 | 0.0961538 | 0.0961538 |
| 0.128642 | 0.115822  | 0.104312  | 0.122378 | 0.128642 | 0.11961   | 0.125146  |
| 0.127185 | 0.113491  | 0.0996503 | 0.120921 | 0.126311 | 0.121066  | 0.120775  |
| 0.12602  | 0.117861  | 0.105478  | 0.12296  | 0.127185 | 0.126311  | 0.132721  |
| 0.13447  | 0.129225  | 0.133159  | 0.132576 | 0.140297 | 0.140297  | 0.146416  |
| 0.138549 | 0.128059  | 0.120921  | 0.133741 | 0.138549 | 0.11757   | 0.124563  |
| 0.11859  | 0.11655   | 0.121066  | 0.13243  | 0.136946 | 0.107809  | 0.111305  |
| 0.128205 | 0.121212  | 0.105915  | 0.126311 | 0.129953 | 0.122669  | 0.123252  |
| 0.119901 | 0.10912   | 0.102273  | 0.122086 | 0.124272 | 0.119027  | 0.121066  |
| 0.129953 | 0.119172  | 0.088141  | 0.124563 | 0.127914 | 0.11655   | 0.119755  |
| 0.128059 | 0.116987  | 0.110431  | 0.13141  | 0.13884  | 0.123397  | 0.124854  |
| 0.119172 | 0.107517  | 0.112617  | 0.116696 | 0.119172 | 0.122669  | 0.129662  |
| 0.121795 | 0.11014   | 0.102418  | 0.12602  | 0.131993 | 0.125583  | 0.129953  |
| 0.151952 | 0.143211  | 0.125874  | 0.147436 | 0.152535 | 0.147582  | 0.151078  |
| 0.138695 | 0.13345   | 0.0569639 | 0.135927 | 0.139277 | 0.133159  | 0.138986  |
| 0.111742 | 0.108246  | 0.110431  | 0.13141  | 0.136218 | 0.124563  | 0.126603  |
| 0.113054 | 0.100233  | 0.106789  | 0.102127 | 0.1081   | 0.127331  | 0.133741  |
| 0.156906 | 0.149621  | 0.141317  | 0.138403 | 0.142045 | 0.152244  | 0.15778   |
| 0.124563 | 0.112034  | 0.10373   | 0.122086 | 0.124854 | 0.119027  | 0.120484  |
| 0.216929 | 0.209645  | 0.177156  | 0.208042 | 0.214889 | 0.20877   | 0.212267  |
| 0.138112 | 0.128497  | 0.116113  | 0.126603 | 0.127331 | 0.108974  | 0.111888  |
| 0.13884  | 0.126311  | 0.112471  | 0.121795 | 0.124272 | 0.104458  | 0.107955  |
| 0.101399 | 0.0897436 | 0.10708   | 0.126311 | 0.127622 | 0.122669  | 0.129371  |
| 0.105332 | 0.103875  | 0.127914  | 0.125874 | 0.131556 | 0.125437  | 0.13039   |
| 0.114219 | 0.104021  | 0.0983392 | 0.11961  | 0.12296  | 0.114219  | 0.117133  |
| 0.136364 | 0.129079  | 0.124854  | 0.130973 | 0.136072 | 0.106935  | 0.109266  |
| 0.124126 | 0.122086  | 0.120775  | 0.12602  | 0.130828 | 0.125291  | 0.125583  |
| 0.109557 | 0.10373   | 0.118444  | 0.122523 | 0.127914 | 0.130828  | 0.132867  |
| 0.125874 | 0.120338  | 0.13039   | 0.132139 | 0.136364 | 0.124417  | 0.129662  |
| 0.127622 | 0.121212  | 0.113491  | 0.123106 | 0.128497 | 0.124126  | 0.127622  |
| 0.125437 | 0.120775  | 0.113928  | 0.132284 | 0.137966 | 0.0992133 | 0.100379  |
| 0.119172 | 0.115676  | 0.115822  | 0.123106 | 0.124126 | 0.119172  | 0.118298  |
| 0.120629 | 0.110723  | 0.0954254 | 0.118444 | 0.122378 | 0.109557  | 0.109848  |
| 0.122669 | 0.113054  | 0.115239  | 0.13039  | 0.133159 | 0.121503  | 0.124126  |
| 0.117861 | 0.110577  | 0.118007  | 0.131993 | 0.13884  | 0.124563  | 0.128934  |
| 0.121795 | 0.11655   | 0.128642  | 0.134178 | 0.140152 | 0.133159  | 0.134324  |
| 0.139132 | 0.129516  | 0.13141   | 0.136364 | 0.14088  | 0.117279  | 0.124272  |
| 0.120921 | 0.111888  | 0.117861  | 0.124563 | 0.129079 | 0.123252  | 0.125874  |
| 0.100524 | 0.0917832 | 0.104749  | 0.114656 | 0.124417 | 0.11655   | 0.117424  |
| 0.113345 | 0.106643  | 0.119318  | 0.131265 | 0.134033 | 0.131993  | 0.134033  |
| 0.109848 | 0.097028  | 0.108829  | 0.120192 | 0.12704  | 0.123543  | 0.12704   |
| 0.130245 | 0.126748  | 0.132139  | 0.147873 | 0.150641 | 0.146562  | 0.151807  |

|           |           |          |          |          |           |           |
|-----------|-----------|----------|----------|----------|-----------|-----------|
| 0.128497  | 0.123834  | 0.142337 | 0.148747 | 0.152389 | 0.150641  | 0.155303  |
| 0.114948  | 0.103584  | 0.114802 | 0.127622 | 0.133596 | 0.129516  | 0.130973  |
| 0.112617  | 0.102418  | 0.106352 | 0.111888 | 0.116696 | 0.116987  | 0.120775  |
| 0.116841  | 0.104895  | 0.109703 | 0.126311 | 0.131702 | 0.125874  | 0.127914  |
| 0.115676  | 0.105769  | 0.112908 | 0.118153 | 0.122086 | 0.128205  | 0.132867  |
| 0.131847  | 0.125728  | 0.130828 | 0.143648 | 0.147582 | 0.142337  | 0.147582  |
| 0.115239  | 0.10271   | 0.112762 | 0.124126 | 0.127768 | 0.130973  | 0.133304  |
| 0.111305  | 0.10169   | 0.111742 | 0.125728 | 0.129371 | 0.126166  | 0.129953  |
| 0.149621  | 0.145251  | 0.142483 | 0.151224 | 0.156031 | 0.0584207 | 0.0607517 |
| 0.122232  | 0.118444  | 0.120047 | 0.120921 | 0.128059 | 0.136509  | 0.141463  |
| 0.10373   | 0.0941142 | 0.115822 | 0.124563 | 0.130828 | 0.124709  | 0.129079  |
| 0.134615  | 0.130245  | 0.115822 | 0.136218 | 0.13986  | 0.136364  | 0.141608  |
| 0.118007  | 0.111014  | 0.116113 | 0.129808 | 0.134907 | 0.126748  | 0.128205  |
| 0.124126  | 0.11859   | 0.138258 | 0.137383 | 0.140734 | 0.145979  | 0.143648  |
| 0.118444  | 0.112617  | 0.127914 | 0.140734 | 0.146707 | 0.135052  | 0.136218  |
| 0.110577  | 0.0980478 | 0.11014  | 0.120921 | 0.12602  | 0.128642  | 0.131265  |
| 0.120484  | 0.109994  | 0.113054 | 0.129371 | 0.131265 | 0.128351  | 0.132139  |
| 0.112471  | 0.105186  | 0.111116 | 0.130973 | 0.137529 | 0.123252  | 0.128205  |
| 0.117716  | 0.114802  | 0.135052 | 0.142337 | 0.148601 | 0.13986   | 0.143357  |
| 0.127622  | 0.121795  | 0.132721 | 0.146999 | 0.150058 | 0.148601  | 0.150641  |
| 0.158362  | 0.1537    | 0.156469 | 0.171329 | 0.177885 | 0.165355  | 0.1706    |
| 0.111742  | 0.0992133 | 0.111305 | 0.123252 | 0.126311 | 0.12602   | 0.129808  |
| 0.108246  | 0.0954254 | 0.111305 | 0.124126 | 0.128642 | 0.127768  | 0.128642  |
| 0.108246  | 0.0962995 | 0.11655  | 0.122378 | 0.127185 | 0.123397  | 0.128059  |
| 0.139569  | 0.137529  | 0.135927 | 0.143211 | 0.150058 | 0.129662  | 0.132576  |
| 0.112762  | 0.0999417 | 0.107372 | 0.125728 | 0.129662 | 0.125874  | 0.125874  |
| 0.120775  | 0.117861  | 0.131702 | 0.13345  | 0.135052 | 0.139132  | 0.141463  |
| 0.111742  | 0.105915  | 0.112179 | 0.129079 | 0.133013 | 0.12398   | 0.124854  |
| 0.111597  | 0.099359  | 0.113782 | 0.124272 | 0.129371 | 0.127914  | 0.131119  |
| 0.149184  | 0.145105  | 0.141754 | 0.146416 | 0.15035  | 0.127331  | 0.13141   |
| 0.1081    | 0.100233  | 0.119901 | 0.133013 | 0.137529 | 0.132576  | 0.135781  |
| 0.126894  | 0.122815  | 0.134324 | 0.147436 | 0.150204 | 0.144376  | 0.146707  |
| 0.122086  | 0.120047  | 0.127185 | 0.124563 | 0.128788 | 0.13986   | 0.145396  |
| 0.12602   | 0.113782  | 0.112471 | 0.105186 | 0.108829 | 0.12602   | 0.127768  |
| 0.105041  | 0.0930944 | 0.115967 | 0.124709 | 0.129808 | 0.128351  | 0.131556  |
| 0.113199  | 0.100379  | 0.112471 | 0.124417 | 0.129808 | 0.128642  | 0.13447   |
| 0.118153  | 0.113199  | 0.132284 | 0.13141  | 0.139714 | 0.140589  | 0.144376  |
| 0.112471  | 0.103147  | 0.113782 | 0.126894 | 0.134615 | 0.125291  | 0.127622  |
| 0.129516  | 0.124272  | 0.133741 | 0.142191 | 0.148164 | 0.146707  | 0.147873  |
| 0.120192  | 0.106789  | 0.117424 | 0.133741 | 0.138258 | 0.132721  | 0.131556  |
| 0.0992133 | 0.0948427 | 0.118007 | 0.12296  | 0.127768 | 0.12398   | 0.129225  |
| 0.114073  | 0.10271   | 0.114802 | 0.125874 | 0.130682 | 0.129808  | 0.13243   |
| 0.111742  | 0.099796  | 0.117716 | 0.132867 | 0.135344 | 0.135635  | 0.140006  |
| 0.109703  | 0.099796  | 0.114219 | 0.120921 | 0.127477 | 0.128642  | 0.129516  |

|          |           |           |          |          |          |          |
|----------|-----------|-----------|----------|----------|----------|----------|
| 0.108537 | 0.0968823 | 0.115967  | 0.128497 | 0.131556 | 0.128059 | 0.130973 |
| 0.124417 | 0.11859   | 0.131847  | 0.143502 | 0.147436 | 0.145979 | 0.151515 |
| 0.11014  | 0.0984848 | 0.104749  | 0.120192 | 0.127331 | 0.121212 | 0.125291 |
| 0.122232 | 0.109703  | 0.106643  | 0.123543 | 0.128351 | 0.125728 | 0.128351 |
| 0.130973 | 0.121358  | 0.119464  | 0.127331 | 0.129516 | 0.122232 | 0.127185 |
| 0.128934 | 0.122815  | 0.122669  | 0.136364 | 0.139132 | 0.110286 | 0.116987 |
| 0.129808 | 0.124854  | 0.12704   | 0.126748 | 0.129225 | 0.138258 | 0.139714 |
| 0.134324 | 0.131119  | 0.133887  | 0.133596 | 0.13986  | 0.144814 | 0.147436 |
| 0.128059 | 0.11961   | 0.11451   | 0.124126 | 0.131265 | 0.114073 | 0.118153 |
| 0.189248 | 0.184878  | 0.179779  | 0.183566 | 0.190705 | 0.179924 | 0.179924 |
| 0.121212 | 0.1081    | 0.105915  | 0.117861 | 0.120338 | 0.114219 | 0.119755 |
| 0.132139 | 0.130973  | 0.128497  | 0.138403 | 0.144085 | 0.145833 | 0.145833 |
| 0.125437 | 0.123397  | 0.120629  | 0.131119 | 0.137675 | 0.135927 | 0.141463 |
| 0.134033 | 0.129953  | 0.129516  | 0.134761 | 0.13986  | 0.118298 | 0.121503 |
| 0.114948 | 0.107372  | 0.107226  | 0.11859  | 0.127477 | 0.12602  | 0.128642 |
| 0.128351 | 0.120775  | 0.130536  | 0.128205 | 0.13447  | 0.140006 | 0.144959 |
| 0.122815 | 0.117279  | 0.109266  | 0.114802 | 0.119027 | 0.123397 | 0.124272 |
| 0.125583 | 0.118298  | 0.120192  | 0.12602  | 0.129662 | 0.129371 | 0.134324 |
| 0.119464 | 0.111888  | 0.111742  | 0.128934 | 0.133741 | 0.108683 | 0.112762 |
| 0.128205 | 0.126166  | 0.135052  | 0.133596 | 0.140734 | 0.145105 | 0.149476 |
| 0.111305 | 0.097028  | 0.103875  | 0.120484 | 0.126166 | 0.120047 | 0.123543 |
| 0.13243  | 0.129808  | 0.131119  | 0.138403 | 0.14088  | 0.120484 | 0.120192 |
| 0.123252 | 0.115676  | 0.116113  | 0.118444 | 0.123543 | 0.109557 | 0.11014  |
| 0.120192 | 0.110286  | 0.129953  | 0.138112 | 0.142337 | 0.138549 | 0.144376 |
| 0.12704  | 0.122086  | 0.123397  | 0.133596 | 0.141026 | 0.114219 | 0.113928 |
| 0.119464 | 0.111014  | 0.10708   | 0.11553  | 0.118298 | 0.108392 | 0.112471 |
| 0.143065 | 0.142191  | 0.140297  | 0.147873 | 0.151807 | 0.135781 | 0.138403 |
| 0.123689 | 0.113782  | 0.108974  | 0.115676 | 0.121066 | 0.107955 | 0.111451 |
| 0.117279 | 0.11116   | 0.107226  | 0.124709 | 0.131556 | 0.127768 | 0.128059 |
| 0.113345 | 0.106643  | 0.117279  | 0.120192 | 0.122086 | 0.122086 | 0.126166 |
| 0.146853 | 0.140734  | 0.137383  | 0.142337 | 0.142483 | 0.125    | 0.125583 |
| 0.118881 | 0.112762  | 0.118444  | 0.128351 | 0.130245 | 0.125583 | 0.125874 |
| 0.118298 | 0.107517  | 0.107372  | 0.120775 | 0.125    | 0.120338 | 0.123834 |
| 0.119755 | 0.107809  | 0.104167  | 0.115239 | 0.122669 | 0.125583 | 0.126748 |
| 0.12398  | 0.115822  | 0.114802  | 0.124709 | 0.132721 | 0.108246 | 0.110577 |
| 0.123252 | 0.118007  | 0.114073  | 0.133596 | 0.138403 | 0.132284 | 0.131702 |
| 0.122815 | 0.114073  | 0.11655   | 0.127331 | 0.13243  | 0.104458 | 0.10708  |
| 0.107809 | 0.0984848 | 0.0989219 | 0.114948 | 0.120921 | 0.112762 | 0.11655  |
| 0.110431 | 0.0999417 | 0.103293  | 0.11961  | 0.125291 | 0.115967 | 0.11655  |
| 0.114656 | 0.101836  | 0.101981  | 0.119464 | 0.122815 | 0.121649 | 0.127768 |
| 0.118153 | 0.109411  | 0.118881  | 0.126457 | 0.130682 | 0.131847 | 0.135344 |
| 0.120921 | 0.114802  | 0.123106  | 0.136218 | 0.137238 | 0.133159 | 0.138986 |
| 0.112034 | 0.0989219 | 0.0987762 | 0.120047 | 0.121649 | 0.118153 | 0.124563 |
| 0.104604 | 0.0926573 | 0.0945513 | 0.118444 | 0.122378 | 0.118007 | 0.123252 |

|          |           |           |          |          |           |           |
|----------|-----------|-----------|----------|----------|-----------|-----------|
| 0.111014 | 0.105478  | 0.117279  | 0.12602  | 0.129953 | 0.126748  | 0.131702  |
| 0.103293 | 0.092803  | 0.103438  | 0.120338 | 0.124272 | 0.117861  | 0.11961   |
| 0.133013 | 0.122523  | 0.118007  | 0.136655 | 0.140297 | 0.116987  | 0.123397  |
| 0.140297 | 0.130973  | 0.127914  | 0.137821 | 0.144085 | 0.0499709 | 0.0514277 |
| 0.113782 | 0.106789  | 0.108974  | 0.120629 | 0.124272 | 0.125146  | 0.129516  |
| 0.112762 | 0.101399  | 0.100379  | 0.121358 | 0.126166 | 0.120629  | 0.128788  |
| 0.11014  | 0.102273  | 0.103584  | 0.11757  | 0.122669 | 0.122086  | 0.129371  |
| 0.109557 | 0.100524  | 0.103875  | 0.119318 | 0.125    | 0.119755  | 0.118881  |
| 0.125874 | 0.121212  | 0.11757   | 0.128351 | 0.131702 | 0.132284  | 0.135198  |
| 0.106935 | 0.0932401 | 0.0995047 | 0.120484 | 0.125    | 0.115093  | 0.119464  |
| 0.133887 | 0.128642  | 0.133741  | 0.1419   | 0.145833 | 0.133013  | 0.136218  |
| 0.130828 | 0.117424  | 0.125728  | 0.142337 | 0.145105 | 0.137529  | 0.143357  |
| 0.119464 | 0.110723  | 0.117861  | 0.133887 | 0.139569 | 0.131993  | 0.13345   |
| 0.120775 | 0.106789  | 0.108974  | 0.12704  | 0.13039  | 0.128934  | 0.130973  |
| 0.12398  | 0.113491  | 0.107809  | 0.118881 | 0.123689 | 0.10912   | 0.10708   |
| 0.104312 | 0.0912005 | 0.105041  | 0.116696 | 0.122669 | 0.11859   | 0.125     |
| 0.10271  | 0.0898893 | 0.113928  | 0.122086 | 0.128059 | 0.120192  | 0.122815  |
| 0.116404 | 0.103001  | 0.105769  | 0.124126 | 0.129225 | 0.118735  | 0.123397  |
| 0.110868 | 0.105915  | 0.115676  | 0.125583 | 0.129808 | 0.128642  | 0.131556  |
| 0.102127 | 0.100379  | 0.125     | 0.132284 | 0.137383 | 0.140589  | 0.144085  |
| 0.120921 | 0.114219  | 0.108829  | 0.122523 | 0.131119 | 0.128205  | 0.131993  |
| 0.136801 | 0.13039   | 0.119172  | 0.131702 | 0.137966 | 0.135052  | 0.136509  |
| 0.137821 | 0.132867  | 0.127185  | 0.132721 | 0.135198 | 0.123543  | 0.130536  |
| 0.203671 | 0.193473  | 0.184586  | 0.198572 | 0.204545 | 0.204837  | 0.203671  |
| 0.244318 | 0.237617  | 0.2331    | 0.24359  | 0.248106 | 0.242279  | 0.243735  |
| 0.117133 | 0.108392  | 0.110286  | 0.121649 | 0.126457 | 0.124417  | 0.12704   |
| 0.104749 | 0.0957168 | 0.11014   | 0.118007 | 0.121066 | 0.124563  | 0.126894  |
| 0.109703 | 0.0971737 | 0.107809  | 0.115385 | 0.120192 | 0.121649  | 0.123397  |
| 0.112908 | 0.104749  | 0.112471  | 0.113345 | 0.119318 | 0.124272  | 0.126603  |
| 0.141754 | 0.132139  | 0.0603147 | 0.139277 | 0.142628 | 0.137383  | 0.139423  |
| 0.10912  | 0.101836  | 0.111597  | 0.116259 | 0.119027 | 0.128351  | 0.129225  |
| 0.120629 | 0.120047  | 0.143502  | 0.139714 | 0.143065 | 0.149476  | 0.154138  |
| 0.108537 | 0.0977564 | 0.113345  | 0.114219 | 0.120192 | 0.129516  | 0.133596  |
| 0.11757  | 0.112617  | 0.13141   | 0.126457 | 0.130682 | 0.133013  | 0.136801  |
| 0.119755 | 0.115967  | 0.131265  | 0.131847 | 0.136655 | 0.139277  | 0.142483  |
| 0.118298 | 0.116841  | 0.128351  | 0.122815 | 0.124709 | 0.141608  | 0.141608  |
| 0.129371 | 0.124709  | 0.133596  | 0.144376 | 0.149184 | 0.1419    | 0.14831   |
| 0.112471 | 0.103438  | 0.114365  | 0.113491 | 0.118881 | 0.12704   | 0.130245  |
| 0.105769 | 0.097028  | 0.111451  | 0.112617 | 0.118298 | 0.123834  | 0.128497  |
| 0.109411 | 0.100962  | 0.114219  | 0.113928 | 0.120192 | 0.132721  | 0.133596  |
| 0.109994 | 0.0968823 | 0.109557  | 0.109266 | 0.114656 | 0.121941  | 0.124272  |
| 0.106498 | 0.097465  | 0.112471  | 0.109848 | 0.114365 | 0.122815  | 0.126603  |
| 0.107226 | 0.0987762 | 0.114365  | 0.114365 | 0.119464 | 0.130828  | 0.130828  |
| 0.114656 | 0.110577  | 0.122378  | 0.115093 | 0.120484 | 0.142045  | 0.141463  |

|          |           |           |          |          |          |          |
|----------|-----------|-----------|----------|----------|----------|----------|
| 0.116113 | 0.114656  | 0.135781  | 0.126748 | 0.133304 | 0.146125 | 0.146416 |
| 0.106935 | 0.100233  | 0.117861  | 0.121649 | 0.12704  | 0.129079 | 0.134033 |
| 0.104458 | 0.097465  | 0.115093  | 0.123252 | 0.125437 | 0.128351 | 0.128642 |
| 0.114656 | 0.108829  | 0.132284  | 0.127622 | 0.131556 | 0.139423 | 0.14292  |
| 0.101836 | 0.095134  | 0.113054  | 0.113636 | 0.121358 | 0.123106 | 0.123106 |
| 0.12296  | 0.119464  | 0.135635  | 0.131847 | 0.135781 | 0.151224 | 0.155303 |
| 0.135198 | 0.130828  | 0.125146  | 0.135635 | 0.138986 | 0.141317 | 0.144814 |
| 0.126894 | 0.12398   | 0.129662  | 0.124126 | 0.128059 | 0.144959 | 0.144085 |
| 0.103584 | 0.0939685 | 0.112179  | 0.110431 | 0.113199 | 0.123397 | 0.122232 |
| 0.100233 | 0.0935315 | 0.106206  | 0.111451 | 0.115093 | 0.118007 | 0.124417 |
| 0.110577 | 0.105624  | 0.123834  | 0.120629 | 0.121066 | 0.134761 | 0.136218 |
| 0.109266 | 0.102273  | 0.12602   | 0.117279 | 0.121212 | 0.13141  | 0.134033 |
| 0.110723 | 0.109848  | 0.128351  | 0.118444 | 0.125291 | 0.135781 | 0.140734 |
| 0.106206 | 0.099796  | 0.117716  | 0.111888 | 0.11757  | 0.129808 | 0.133887 |
| 0.103438 | 0.0952797 | 0.11757   | 0.116113 | 0.121795 | 0.130536 | 0.133159 |
| 0.107809 | 0.104604  | 0.120775  | 0.120484 | 0.12296  | 0.130536 | 0.134907 |
| 0.117133 | 0.116841  | 0.135635  | 0.128642 | 0.130245 | 0.139569 | 0.137529 |
| 0.118298 | 0.113345  | 0.13243   | 0.129808 | 0.129953 | 0.1419   | 0.143357 |
| 0.10708  | 0.106206  | 0.133159  | 0.132576 | 0.137092 | 0.13884  | 0.143211 |
| 0.113345 | 0.114802  | 0.129225  | 0.143502 | 0.148019 | 0.131119 | 0.134324 |
| 0.106643 | 0.0976107 | 0.119027  | 0.120775 | 0.123834 | 0.124126 | 0.125291 |
| 0.124417 | 0.118007  | 0.128642  | 0.119027 | 0.120921 | 0.139277 | 0.145105 |
| 0.101836 | 0.0916375 | 0.112762  | 0.108974 | 0.113199 | 0.11961  | 0.126311 |
| 0.117424 | 0.105186  | 0.113491  | 0.119901 | 0.126748 | 0.127622 | 0.129079 |
| 0.113345 | 0.104021  | 0.110577  | 0.107955 | 0.111014 | 0.126457 | 0.129079 |
| 0.112034 | 0.103293  | 0.112471  | 0.11451  | 0.120775 | 0.12602  | 0.127768 |
| 0.107955 | 0.0971737 | 0.113636  | 0.105186 | 0.108537 | 0.125728 | 0.126311 |
| 0.115093 | 0.110431  | 0.135052  | 0.130099 | 0.133159 | 0.142191 | 0.143357 |
| 0.114948 | 0.108829  | 0.113928  | 0.124126 | 0.129808 | 0.120484 | 0.120484 |
| 0.116404 | 0.112325  | 0.13345   | 0.126166 | 0.131556 | 0.14088  | 0.141171 |
| 0.11116  | 0.100379  | 0.110723  | 0.109848 | 0.11553  | 0.126894 | 0.126894 |
| 0.105769 | 0.10373   | 0.12602   | 0.11961  | 0.123252 | 0.132867 | 0.13345  |
| 0.111742 | 0.109411  | 0.119755  | 0.133741 | 0.135635 | 0.133596 | 0.137675 |
| 0.127477 | 0.113199  | 0.106935  | 0.126457 | 0.130682 | 0.133887 | 0.133596 |
| 0.111888 | 0.102855  | 0.113199  | 0.125437 | 0.129079 | 0.12296  | 0.125583 |
| 0.122815 | 0.11116   | 0.121503  | 0.116841 | 0.117861 | 0.139132 | 0.13884  |
| 0.117716 | 0.104895  | 0.112325  | 0.12602  | 0.131119 | 0.135198 | 0.138112 |
| 0.121212 | 0.110723  | 0.109411  | 0.124854 | 0.128497 | 0.117424 | 0.120338 |
| 0.145688 | 0.136072  | 0.121066  | 0.144085 | 0.149184 | 0.139569 | 0.1419   |
| 0.125728 | 0.126311  | 0.134615  | 0.144522 | 0.147873 | 0.137092 | 0.139714 |
| 0.122232 | 0.112325  | 0.0999417 | 0.11859  | 0.123689 | 0.116404 | 0.120484 |
| 0.137821 | 0.133159  | 0.114073  | 0.130099 | 0.133741 | 0.13986  | 0.138695 |
| 0.137383 | 0.130099  | 0.112762  | 0.138695 | 0.142337 | 0.125728 | 0.13039  |
| 0.142628 | 0.133596  | 0.117424  | 0.131702 | 0.140297 | 0.138258 | 0.139714 |

|          |          |          |          |          |          |          |
|----------|----------|----------|----------|----------|----------|----------|
| 0.133596 | 0.126603 | 0.106643 | 0.123543 | 0.128642 | 0.124854 | 0.127768 |
| 0.13243  | 0.126894 | 0.111888 | 0.13141  | 0.136218 | 0.13243  | 0.134761 |
| 0.138695 | 0.13141  | 0.112617 | 0.137383 | 0.143065 | 0.13141  | 0.132576 |
| 0.13884  | 0.131265 | 0.119755 | 0.125874 | 0.130682 | 0.137675 | 0.14088  |
| 0.142337 | 0.139423 | 0.122378 | 0.13345  | 0.136218 | 0.138258 | 0.140006 |
| 0.137675 | 0.133887 | 0.114802 | 0.137238 | 0.142337 | 0.13243  | 0.133304 |
| 0.131556 | 0.124563 | 0.104021 | 0.11859  | 0.121941 | 0.125146 | 0.126603 |
| 0.121212 | 0.11451  | 0.135635 | 0.135052 | 0.138403 | 0.13986  | 0.1419   |
| 0.139423 | 0.134761 | 0.121503 | 0.140152 | 0.145542 | 0.135344 | 0.137966 |
| 0.127477 | 0.11757  | 0.104895 | 0.120338 | 0.12602  | 0.11961  | 0.122232 |
| 0.228147 | 0.222611 | 0.216055 | 0.223631 | 0.228147 | 0.222611 | 0.222902 |
| 0.135781 | 0.129662 | 0.110577 | 0.126603 | 0.131993 | 0.13141  | 0.131993 |
| 0.127622 | 0.119172 | 0.10708  | 0.128934 | 0.132284 | 0.126748 | 0.129371 |
| 0.142045 | 0.131556 | 0.124417 | 0.134615 | 0.135052 | 0.142337 | 0.143502 |
| 0.133887 | 0.122815 | 0.108974 | 0.130245 | 0.137092 | 0.125146 | 0.127768 |
| 0.145833 | 0.138549 | 0.118881 | 0.144522 | 0.147582 | 0.13447  | 0.138549 |
| 0.131847 | 0.121649 | 0.110431 | 0.126748 | 0.133013 | 0.141463 | 0.13884  |
| 0.134033 | 0.126457 | 0.105915 | 0.126894 | 0.13141  | 0.129079 | 0.133741 |
| 0.137529 | 0.127914 | 0.109411 | 0.131847 | 0.134324 | 0.132576 | 0.137238 |
| 0.139714 | 0.131556 | 0.121503 | 0.133741 | 0.139423 | 0.140006 | 0.138258 |
| 0.138986 | 0.13345  | 0.119901 | 0.13243  | 0.140443 | 0.136072 | 0.136655 |
| 0.144959 | 0.137383 | 0.12296  | 0.124709 | 0.130099 | 0.133887 | 0.132139 |
| 0.139132 | 0.136218 | 0.115967 | 0.125583 | 0.128059 | 0.133596 | 0.137675 |
| 0.118444 | 0.109411 | 0.106061 | 0.131119 | 0.135635 | 0.124563 | 0.125728 |
| 0.135344 | 0.125437 | 0.112471 | 0.117424 | 0.122523 | 0.131847 | 0.131556 |
| 0.145105 | 0.138112 | 0.123397 | 0.135052 | 0.137238 | 0.145105 | 0.144522 |
| 0.132721 | 0.124563 | 0.108683 | 0.124417 | 0.130973 | 0.129225 | 0.130682 |
| 0.121941 | 0.11553  | 0.135198 | 0.138986 | 0.145542 | 0.145542 | 0.149038 |
| 0.150932 | 0.1419   | 0.129808 | 0.145251 | 0.150641 | 0.128205 | 0.134907 |
| 0.122378 | 0.115385 | 0.113199 | 0.133596 | 0.137529 | 0.125874 | 0.128205 |
| 0.138986 | 0.129953 | 0.114948 | 0.137675 | 0.141608 | 0.129371 | 0.129953 |
| 0.135344 | 0.127768 | 0.122378 | 0.13986  | 0.142628 | 0.123397 | 0.124272 |
| 0.133159 | 0.125583 | 0.12602  | 0.136509 | 0.139569 | 0.127331 | 0.129953 |
| 0.139277 | 0.130536 | 0.123689 | 0.136218 | 0.140443 | 0.128497 | 0.127914 |
| 0.14831  | 0.13986  | 0.13039  | 0.146707 | 0.149476 | 0.133159 | 0.137821 |
| 0.112034 | 0.103001 | 0.104312 | 0.123543 | 0.130973 | 0.123106 | 0.125728 |
| 0.128497 | 0.122086 | 0.119901 | 0.139423 | 0.144231 | 0.145688 | 0.148601 |
| 0.14933  | 0.143502 | 0.13549  | 0.146562 | 0.146999 | 0.130973 | 0.136218 |
| 0.113199 | 0.107372 | 0.112471 | 0.129662 | 0.135344 | 0.123689 | 0.128351 |
| 0.123106 | 0.116696 | 0.123252 | 0.13549  | 0.140006 | 0.133887 | 0.136509 |
| 0.128497 | 0.123252 | 0.139714 | 0.144668 | 0.14831  | 0.140443 | 0.142191 |
| 0.113636 | 0.106352 | 0.122815 | 0.133013 | 0.135781 | 0.140443 | 0.141608 |
| 0.135635 | 0.126894 | 0.126748 | 0.140734 | 0.14292  | 0.142337 | 0.14729  |
| 0.121795 | 0.117133 | 0.116404 | 0.138549 | 0.142191 | 0.138112 | 0.144814 |

|          |           |           |          |          |           |           |
|----------|-----------|-----------|----------|----------|-----------|-----------|
| 0.125146 | 0.120484  | 0.121212  | 0.12296  | 0.128351 | 0.13243   | 0.136509  |
| 0.123252 | 0.123252  | 0.121941  | 0.138258 | 0.140443 | 0.138403  | 0.140152  |
| 0.116404 | 0.109994  | 0.113636  | 0.13141  | 0.135344 | 0.133887  | 0.13884   |
| 0.121503 | 0.11655   | 0.127477  | 0.130973 | 0.136655 | 0.139569  | 0.141026  |
| 0.138403 | 0.129953  | 0.125146  | 0.129225 | 0.133741 | 0.141026  | 0.140443  |
| 0.129079 | 0.125583  | 0.133887  | 0.13243  | 0.135198 | 0.140734  | 0.135781  |
| 0.13549  | 0.13141   | 0.127185  | 0.130099 | 0.13549  | 0.136364  | 0.136655  |
| 0.129079 | 0.123252  | 0.127477  | 0.139423 | 0.143648 | 0.130828  | 0.133159  |
| 0.143357 | 0.139569  | 0.137383  | 0.14088  | 0.144814 | 0.149767  | 0.151515  |
| 0.125583 | 0.118007  | 0.110577  | 0.135344 | 0.137529 | 0.126166  | 0.13345   |
| 0.113636 | 0.11014   | 0.113199  | 0.12398  | 0.132867 | 0.132867  | 0.134033  |
| 0.134907 | 0.126457  | 0.122232  | 0.12602  | 0.134033 | 0.130245  | 0.136655  |
| 0.121795 | 0.115967  | 0.112908  | 0.127477 | 0.131702 | 0.120921  | 0.124709  |
| 0.14933  | 0.146707  | 0.134324  | 0.149476 | 0.15574  | 0.133304  | 0.135635  |
| 0.154283 | 0.150495  | 0.151224  | 0.155012 | 0.160693 | 0.14292   | 0.148164  |
| 0.114365 | 0.112617  | 0.127622  | 0.127622 | 0.129808 | 0.137092  | 0.137383  |
| 0.106061 | 0.0996503 | 0.121649  | 0.121941 | 0.125874 | 0.128788  | 0.132576  |
| 0.133887 | 0.130973  | 0.125874  | 0.124709 | 0.13243  | 0.139423  | 0.138549  |
| 0.140734 | 0.136072  | 0.120192  | 0.133596 | 0.136072 | 0.1419    | 0.144522  |
| 0.113054 | 0.110431  | 0.125146  | 0.122232 | 0.125    | 0.136655  | 0.138695  |
| 0.143357 | 0.136364  | 0.124272  | 0.135344 | 0.139569 | 0.145105  | 0.145396  |
| 0.1419   | 0.13549   | 0.126894  | 0.145251 | 0.15035  | 0.13345   | 0.139277  |
| 0.118735 | 0.113491  | 0.116259  | 0.13549  | 0.141171 | 0.128059  | 0.134178  |
| 0.16623  | 0.159237  | 0.158217  | 0.145396 | 0.14729  | 0.148456  | 0.153118  |
| 0.118735 | 0.114656  | 0.116841  | 0.133741 | 0.137675 | 0.133013  | 0.137675  |
| 0.134178 | 0.124854  | 0.123543  | 0.15035  | 0.15778  | 0.136218  | 0.144376  |
| 0.111305 | 0.108683  | 0.116987  | 0.125146 | 0.132576 | 0.134907  | 0.134907  |
| 0.129662 | 0.127331  | 0.134178  | 0.131847 | 0.137529 | 0.132867  | 0.134907  |
| 0.134907 | 0.128205  | 0.112617  | 0.126894 | 0.130536 | 0.134907  | 0.134907  |
| 0.150787 | 0.141171  | 0.136072  | 0.148601 | 0.153409 | 0.0954254 | 0.0977564 |
| 0.155886 | 0.150641  | 0.140006  | 0.130973 | 0.13549  | 0.151224  | 0.153263  |
| 0.129516 | 0.122523  | 0.122378  | 0.124417 | 0.125728 | 0.132721  | 0.138258  |
| 0.143357 | 0.136072  | 0.133013  | 0.139714 | 0.142191 | 0.138986  | 0.146562  |
| 0.122523 | 0.112325  | 0.147727  | 0.156177 | 0.159237 | 0.159528  | 0.157488  |
| 0.155157 | 0.14729   | 0.132284  | 0.153263 | 0.159528 | 0.149038  | 0.150204  |
| 0.092366 | 0.0920746 | 0.128351  | 0.127185 | 0.131993 | 0.118881  | 0.119464  |
| 0.145542 | 0.137966  | 0.130536  | 0.134907 | 0.14088  | 0.137383  | 0.144668  |
| 0.12602  | 0.117861  | 0.0847902 | 0.121795 | 0.125146 | 0.122523  | 0.126311  |
| 0.119755 | 0.111305  | 0.0817308 | 0.12602  | 0.132576 | 0.126457  | 0.129079  |
| 0.136218 | 0.125728  | 0.112762  | 0.122669 | 0.131265 | 0.125437  | 0.127185  |
| 0.125146 | 0.119318  | 0.114802  | 0.124126 | 0.128351 | 0.128934  | 0.129808  |
| 0.120921 | 0.109557  | 0.10708   | 0.119027 | 0.126457 | 0.133159  | 0.134907  |
| 0.126166 | 0.118007  | 0.0729895 | 0.127477 | 0.132576 | 0.125     | 0.126748  |
| 0.134324 | 0.122669  | 0.113491  | 0.125437 | 0.132284 | 0.131702  | 0.134615  |



|           |           |           |           |           |           |           |
|-----------|-----------|-----------|-----------|-----------|-----------|-----------|
| 0.141463  | 0.129516  | 0.0675991 | 0.130245  | 0.133013  | 0.131847  | 0.135927  |
| 0.12398   | 0.111451  | 0.0967366 | 0.118007  | 0.123397  | 0.120192  | 0.120192  |
| 0.131265  | 0.121066  | 0.119172  | 0.129662  | 0.133304  | 0.135344  | 0.137966  |
| 0.126457  | 0.11859   | 0.114365  | 0.123106  | 0.128205  | 0.130245  | 0.134033  |
| 0.0448718 | 0.0472028 | 0.128642  | 0.127768  | 0.130245  | 0.133159  | 0.136364  |
| 0.222902  | 0.218531  | 0.20877   | 0.222174  | 0.228147  | 0.222319  | 0.221154  |
| 0.143065  | 0.1419    | 0.139714  | 0.144376  | 0.143357  | 0.150058  | 0.153263  |
| 0.131265  | 0.12398   | 0.125874  | 0.130245  | 0.132139  | 0.131556  | 0.135927  |
| 0.130536  | 0.120338  | 0.115822  | 0.13039   | 0.13345   | 0.129662  | 0.134907  |
| 0.220862  | 0.213578  | 0.204983  | 0.215472  | 0.219988  | 0.21824   | 0.218531  |
| 0.0827506 | 0.0751748 | 0.122815  | 0.131556  | 0.136364  | 0.107809  | 0.109557  |
| 0.120192  | 0.108829  | 0.113345  | 0.130536  | 0.135344  | 0.128642  | 0.128934  |
| 0.128934  | 0.120192  | 0.119172  | 0.122669  | 0.126311  | 0.135635  | 0.140297  |
| 0.136072  | 0.126457  | 0.0511364 | 0.135052  | 0.135781  | 0.130245  | 0.133741  |
| 0.257284  | 0.251748  | 0.245775  | 0.254516  | 0.257284  | 0.253205  | 0.254662  |
| 0.135052  | 0.12602   | 0.118881  | 0.133741  | 0.137966  | 0.0546329 | 0.0566725 |
| 0.0572552 | 0.0479312 | 0.119464  | 0.125874  | 0.127477  | 0.128642  | 0.131265  |
| 0.128059  | 0.119027  | 0.123543  | 0.048951  | 0.0499709 | 0.132139  | 0.135052  |
| 0.131265  | 0.118735  | 0.120338  | 0.0498252 | 0.0514277 | 0.130682  | 0.133013  |
| 0.135927  | 0.127768  | 0.107809  | 0.137821  | 0.143211  | 0.0686189 | 0.0709499 |
| 0.140006  | 0.133887  | 0.105478  | 0.128788  | 0.135927  | 0.131556  | 0.13243   |
| 0.0546329 | 0.0499709 | 0.121212  | 0.125291  | 0.131847  | 0.131556  | 0.13447   |
| 0.126748  | 0.117716  | 0.115239  | 0.123397  | 0.126748  | 0.128788  | 0.129662  |
| 0.137966  | 0.127477  | 0.122086  | 0.125     | 0.13039   | 0.128351  | 0.135052  |
| 0.129808  | 0.119027  | 0.0460373 | 0.124709  | 0.128642  | 0.123106  | 0.128351  |
| 0.126166  | 0.116841  | 0.111451  | 0.122815  | 0.126457  | 0.126166  | 0.128497  |
| 0.135052  | 0.126311  | 0.0938228 | 0.128497  | 0.133596  | 0.120484  | 0.124272  |
| 0.155303  | 0.14831   | 0.14088   | 0.129808  | 0.134615  | 0.15035   | 0.155886  |
| 0.135198  | 0.127331  | 0.124854  | 0.13243   | 0.135781  | 0.0533217 | 0.0539044 |
| 0.120921  | 0.115385  | 0.118153  | 0.133304  | 0.137529  | 0.128497  | 0.134907  |
| 0.199592  | 0.191434  | 0.183129  | 0.196824  | 0.200175  | 0.195513  | 0.193473  |
| 0.213578  | 0.205711  | 0.196824  | 0.209353  | 0.215618  | 0.209207  | 0.208625  |
| 0.13986   | 0.125874  | 0.0482226 | 0.134761  | 0.137238  | 0.128788  | 0.134615  |
| 0.13141   | 0.121212  | 0.0447261 | 0.122815  | 0.125874  | 0.121212  | 0.128497  |
| 0.144231  | 0.138403  | 0.128934  | 0.137966  | 0.140734  | 0.139277  | 0.141026  |
| 0.0576923 | 0.0474942 | 0.121358  | 0.126311  | 0.130828  | 0.132284  | 0.130536  |
| 0.137383  | 0.129808  | 0.120921  | 0.138112  | 0.142337  | 0.053176  | 0.0552156 |
| 0.134907  | 0.13141   | 0.126603  | 0.105624  | 0.108974  | 0.136655  | 0.13986   |
| 0.236014  | 0.227564  | 0.217803  | 0.229167  | 0.237179  | 0.229021  | 0.232809  |
| 0.125291  | 0.109848  | 0.112617  | 0.123106  | 0.125583  | 0.125291  | 0.125583  |
| 0.209062  | 0.207022  | 0.20542   | 0.213578  | 0.21926   | 0.216929  | 0.214015  |
| 0.0917832 | 0.0842075 | 0.116113  | 0.123689  | 0.128497  | 0.111597  | 0.114802  |
| 0.12398   | 0.112325  | 0.113928  | 0.121795  | 0.123397  | 0.122815  | 0.127477  |
| 0.115967  | 0.106643  | 0.112034  | 0.122815  | 0.127331  | 0.124417  | 0.128788  |

|           |           |           |           |           |           |           |
|-----------|-----------|-----------|-----------|-----------|-----------|-----------|
| 0.129079  | 0.120338  | 0.0540501 | 0.122523  | 0.12704   | 0.123834  | 0.126457  |
| 0.218094  | 0.208188  | 0.199883  | 0.211247  | 0.219843  | 0.214598  | 0.214307  |
| 0.13884   | 0.131265  | 0.127622  | 0.135198  | 0.139714  | 0.140589  | 0.144376  |
| 0.115239  | 0.105332  | 0.117716  | 0.117716  | 0.121649  | 0.124563  | 0.122232  |
| 0.13243   | 0.125728  | 0.121503  | 0.129662  | 0.131847  | 0.135344  | 0.139714  |
| 0.124563  | 0.119318  | 0.124417  | 0.119464  | 0.12398   | 0.136218  | 0.14088   |
| 0.135635  | 0.120484  | 0.0457459 | 0.127622  | 0.133596  | 0.126894  | 0.13039   |
| 0.0932401 | 0.0891608 | 0.120484  | 0.122815  | 0.129662  | 0.112179  | 0.115676  |
| 0.0699301 | 0.0687646 | 0.119027  | 0.129516  | 0.131702  | 0.133741  | 0.137821  |
| 0.119755  | 0.111597  | 0.11757   | 0.132139  | 0.137529  | 0.127914  | 0.133159  |
| 0.124709  | 0.11451   | 0.108537  | 0.120775  | 0.125583  | 0.127622  | 0.13345   |
| 0.11553   | 0.110868  | 0.122378  | 0.117133  | 0.121066  | 0.122232  | 0.123397  |
| 0.201632  | 0.192308  | 0.183421  | 0.195076  | 0.200466  | 0.197261  | 0.196678  |
| 0.127768  | 0.120192  | 0.124709  | 0.0463287 | 0.0456002 | 0.128642  | 0.137966  |
| 0.141608  | 0.130828  | 0.123397  | 0.114656  | 0.121503  | 0.136072  | 0.141026  |
| 0.130099  | 0.118153  | 0.116259  | 0.104021  | 0.109994  | 0.133304  | 0.135052  |
| 0.137529  | 0.126166  | 0.124272  | 0.133887  | 0.139569  | 0.0667249 | 0.0667249 |
| 0.12704   | 0.123543  | 0.119027  | 0.127768  | 0.129953  | 0.133159  | 0.137821  |
| 0.0914918 | 0.0885781 | 0.121941  | 0.127185  | 0.129662  | 0.118007  | 0.120338  |
| 0.123689  | 0.116113  | 0.117716  | 0.114219  | 0.119027  | 0.111742  | 0.109411  |
| 0.048514  | 0.0502622 | 0.128205  | 0.125583  | 0.133596  | 0.134178  | 0.135344  |
| 0.138695  | 0.125583  | 0.116113  | 0.114365  | 0.118881  | 0.132284  | 0.134907  |
| 0.127914  | 0.113636  | 0.117279  | 0.0604604 | 0.0623543 | 0.129371  | 0.132284  |
| 0.133013  | 0.122232  | 0.0541958 | 0.132576  | 0.135927  | 0.131847  | 0.135344  |
| 0.130245  | 0.118881  | 0.112908  | 0.12398   | 0.129371  | 0.134907  | 0.138112  |
| 0.14088   | 0.135344  | 0.130828  | 0.129953  | 0.137092  | 0.144668  | 0.148747  |
| 0.129516  | 0.116404  | 0.111597  | 0.127331  | 0.133304  | 0.0627914 | 0.0659965 |
| 0.136946  | 0.136655  | 0.135635  | 0.137966  | 0.141026  | 0.147436  | 0.15035   |
| 0.132867  | 0.122086  | 0.046183  | 0.125437  | 0.132867  | 0.123834  | 0.127622  |
| 0.125291  | 0.118881  | 0.120192  | 0.103001  | 0.105769  | 0.129079  | 0.127914  |
| 0.126603  | 0.122232  | 0.11655   | 0.130536  | 0.134178  | 0.13447   | 0.136509  |
| 0.0520105 | 0.053176  | 0.127914  | 0.131993  | 0.135635  | 0.136509  | 0.13884   |
| 0.183129  | 0.176136  | 0.188228  | 0.197844  | 0.204108  | 0.196824  | 0.198281  |
| 0.113928  | 0.102855  | 0.116696  | 0.112034  | 0.11859   | 0.118007  | 0.119755  |
| 0.11655   | 0.106935  | 0.107372  | 0.116404  | 0.120338  | 0.115385  | 0.119464  |
| 0.122669  | 0.113345  | 0.114948  | 0.130099  | 0.133159  | 0.126748  | 0.129662  |
| 0.193182  | 0.183275  | 0.174388  | 0.188957  | 0.194056  | 0.191434  | 0.192599  |
| 0.144959  | 0.138258  | 0.130245  | 0.143939  | 0.148164  | 0.0619172 | 0.0619172 |
| 0.151369  | 0.143794  | 0.142191  | 0.149184  | 0.153992  | 0.0595862 | 0.060169  |
| 0.157051  | 0.151224  | 0.14088   | 0.134178  | 0.136946  | 0.152389  | 0.159674  |
| 0.127622  | 0.117716  | 0.113491  | 0.128642  | 0.132284  | 0.0667249 | 0.0673077 |
| 0.130973  | 0.122523  | 0.119755  | 0.127331  | 0.131556  | 0.132139  | 0.136218  |
| 0.221737  | 0.210082  | 0.204691  | 0.215181  | 0.221154  | 0.2162    | 0.217366  |
| 0.134324  | 0.126166  | 0.115822  | 0.125437  | 0.130245  | 0.130245  | 0.134907  |

|           |           |           |           |           |           |           |
|-----------|-----------|-----------|-----------|-----------|-----------|-----------|
| 0.133887  | 0.129225  | 0.124417  | 0.131119  | 0.131847  | 0.135052  | 0.139714  |
| 0.112034  | 0.105624  | 0.120047  | 0.118298  | 0.122232  | 0.121358  | 0.123689  |
| 0.183129  | 0.17264   | 0.160839  | 0.179487  | 0.181672  | 0.175554  | 0.181964  |
| 0.126894  | 0.115822  | 0.105478  | 0.124126  | 0.128059  | 0.125437  | 0.128934  |
| 0.15676   | 0.153263  | 0.142628  | 0.143794  | 0.152389  | 0.147727  | 0.154138  |
| 0.131702  | 0.123834  | 0.109703  | 0.128642  | 0.132576  | 0.124126  | 0.125     |
| 0.195513  | 0.191434  | 0.184586  | 0.196533  | 0.202797  | 0.197261  | 0.197261  |
| 0.133159  | 0.123252  | 0.116113  | 0.131847  | 0.134033  | 0.0655594 | 0.0646853 |
| 0.120047  | 0.111305  | 0.101253  | 0.123689  | 0.126457  | 0.121212  | 0.125291  |
| 0.126603  | 0.117861  | 0.11655   | 0.105478  | 0.110577  | 0.129808  | 0.133887  |
| 0.120047  | 0.108392  | 0.115822  | 0.122232  | 0.125583  | 0.120921  | 0.127331  |
| 0.118298  | 0.107517  | 0.11553   | 0.129225  | 0.134324  | 0.126166  | 0.127914  |
| 0.132576  | 0.12296   | 0.11757   | 0.130099  | 0.134324  | 0.129079  | 0.133159  |
| 0.134178  | 0.116696  | 0.0454545 | 0.12704   | 0.133596  | 0.125437  | 0.12602   |
| 0.200758  | 0.19289   | 0.182838  | 0.195076  | 0.199009  | 0.196678  | 0.196387  |
| 0.128642  | 0.121358  | 0.120629  | 0.126166  | 0.133596  | 0.133596  | 0.13884   |
| 0.126457  | 0.115093  | 0.10708   | 0.128934  | 0.130245  | 0.129953  | 0.132576  |
| 0.221882  | 0.213724  | 0.202797  | 0.215326  | 0.223339  | 0.217803  | 0.216929  |
| 0.130682  | 0.121941  | 0.123252  | 0.0474942 | 0.0473485 | 0.131847  | 0.133596  |
| 0.133741  | 0.122669  | 0.0464744 | 0.128351  | 0.132576  | 0.126748  | 0.130536  |
| 0.130245  | 0.113636  | 0.0406469 | 0.12398   | 0.129953  | 0.122669  | 0.126457  |
| 0.140297  | 0.137675  | 0.13345   | 0.134907  | 0.135635  | 0.141171  | 0.148456  |
| 0.201195  | 0.193036  | 0.182401  | 0.195221  | 0.202943  | 0.195076  | 0.194784  |
| 0.0571096 | 0.0501166 | 0.121941  | 0.128351  | 0.133741  | 0.133159  | 0.134615  |
| 0.13549   | 0.129371  | 0.126603  | 0.127477  | 0.130245  | 0.137821  | 0.1419    |
| 0.131119  | 0.120629  | 0.0441434 | 0.125146  | 0.131119  | 0.125     | 0.126748  |
| 0.128788  | 0.116259  | 0.0456002 | 0.125728  | 0.131702  | 0.124417  | 0.129079  |
| 0.13039   | 0.119027  | 0.0486597 | 0.124417  | 0.131265  | 0.123106  | 0.128934  |
| 0.126166  | 0.120047  | 0.110868  | 0.125728  | 0.129953  | 0.130245  | 0.135198  |
| 0.120775  | 0.106789  | 0.0941142 | 0.117133  | 0.119901  | 0.116404  | 0.115822  |
| 0.133887  | 0.124272  | 0.119172  | 0.133741  | 0.137966  | 0.0523019 | 0.0557984 |
| 0.138549  | 0.132139  | 0.131119  | 0.120338  | 0.12398   | 0.140589  | 0.148456  |
| 0.133596  | 0.121941  | 0.11655   | 0.130536  | 0.135344  | 0.0590035 | 0.0607517 |
| 0.129662  | 0.122378  | 0.128642  | 0.125146  | 0.124709  | 0.138403  | 0.142483  |
| 0.2044    | 0.194493  | 0.187354  | 0.200758  | 0.209062  | 0.20236   | 0.202652  |
| 0.129953  | 0.117133  | 0.113782  | 0.121358  | 0.124709  | 0.13345   | 0.134907  |
| 0.136801  | 0.133596  | 0.125583  | 0.133741  | 0.133887  | 0.138549  | 0.144376  |
| 0.132284  | 0.120629  | 0.0450175 | 0.126311  | 0.131119  | 0.11859   | 0.125583  |
| 0.122232  | 0.107372  | 0.0941142 | 0.11655   | 0.11961   | 0.11553   | 0.114656  |
| 0.128642  | 0.118153  | 0.112471  | 0.122669  | 0.130099  | 0.11553   | 0.121358  |
| 0.0509907 | 0.0480769 | 0.124563  | 0.128059  | 0.132867  | 0.131993  | 0.13141   |
| 0.138403  | 0.129953  | 0.126894  | 0.13039   | 0.134615  | 0.134907  | 0.137529  |
| 0.136218  | 0.122815  | 0.113054  | 0.120921  | 0.124563  | 0.133013  | 0.135344  |
| 0.0802739 | 0.0712413 | 0.107226  | 0.125291  | 0.129225  | 0.125146  | 0.126603  |

|           |           |           |          |          |           |           |
|-----------|-----------|-----------|----------|----------|-----------|-----------|
| 0.0903263 | 0.0786713 | 0.104749  | 0.120484 | 0.125583 | 0.121212  | 0.126166  |
| 0.128059  | 0.114365  | 0.101107  | 0.123834 | 0.126894 | 0.119901  | 0.123106  |
| 0.0909091 | 0.0850816 | 0.116113  | 0.124563 | 0.129079 | 0.112179  | 0.111888  |
| 0.137966  | 0.133596  | 0.125874  | 0.137238 | 0.14292  | 0.053176  | 0.0543415 |
| 0.0623543 | 0.0527389 | 0.121649  | 0.129808 | 0.134324 | 0.13345   | 0.134907  |
| 0.124272  | 0.116404  | 0.11014   | 0.121212 | 0.125437 | 0.124854  | 0.126311  |
| 0.0622086 | 0.0488054 | 0.115385  | 0.125    | 0.129808 | 0.127768  | 0.128642  |
| 0.129953  | 0.115093  | 0.0473485 | 0.123106 | 0.130245 | 0.125     | 0.12704   |
| 0.11116   | 0.101836  | 0.110723  | 0.11451  | 0.117279 | 0.117279  | 0.120192  |
| 0.13447   | 0.11961   | 0.0428322 | 0.127331 | 0.131847 | 0.126311  | 0.130099  |
| 0.123397  | 0.116696  | 0.109266  | 0.11859  | 0.122815 | 0.129225  | 0.131847  |
| 0.136509  | 0.124563  | 0.112471  | 0.116841 | 0.122232 | 0.13447   | 0.13884   |
| 0.116404  | 0.104749  | 0.1081    | 0.128497 | 0.131847 | 0.121066  | 0.126894  |
| 0.124126  | 0.110431  | 0.0968823 | 0.120192 | 0.126457 | 0.118298  | 0.121212  |
| 0.129225  | 0.115239  | 0.0501166 | 0.126457 | 0.133013 | 0.125437  | 0.127477  |
| 0.131556  | 0.123106  | 0.117133  | 0.109266 | 0.115239 | 0.133304  | 0.135052  |
| 0.132284  | 0.12296   | 0.110577  | 0.131847 | 0.134324 | 0.132576  | 0.136364  |
| 0.125728  | 0.112034  | 0.106061  | 0.125291 | 0.130682 | 0.12398   | 0.128934  |
| 0.129225  | 0.119318  | 0.0495338 | 0.123252 | 0.129225 | 0.126311  | 0.131265  |
| 0.128788  | 0.120629  | 0.116987  | 0.123397 | 0.126457 | 0.127914  | 0.132284  |
| 0.0944056 | 0.0871212 | 0.116696  | 0.125437 | 0.130245 | 0.115093  | 0.115385  |
| 0.128788  | 0.11859   | 0.116404  | 0.128934 | 0.129953 | 0.130536  | 0.136655  |
| 0.117424  | 0.107517  | 0.110577  | 0.126603 | 0.132576 | 0.127622  | 0.130536  |
| 0.125     | 0.113636  | 0.0983392 | 0.122815 | 0.127914 | 0.120047  | 0.122378  |
| 0.124709  | 0.11655   | 0.101253  | 0.123106 | 0.125291 | 0.122669  | 0.125874  |
| 0.111451  | 0.105332  | 0.111888  | 0.113636 | 0.117279 | 0.11961   | 0.121066  |
| 0.135198  | 0.125874  | 0.118153  | 0.131556 | 0.135198 | 0.134324  | 0.138986  |
| 0.127914  | 0.117133  | 0.126311  | 0.128934 | 0.13345  | 0.134033  | 0.136364  |
| 0.125437  | 0.116696  | 0.109557  | 0.125583 | 0.132721 | 0.125437  | 0.131847  |
| 0.205274  | 0.19595   | 0.187937  | 0.199592 | 0.206731 | 0.197407  | 0.196533  |
| 0.176428  | 0.170309  | 0.159091  | 0.172786 | 0.178176 | 0.173514  | 0.175845  |
| 0.13243   | 0.121066  | 0.122086  | 0.130828 | 0.135344 | 0.0604604 | 0.0616259 |
| 0.0929487 | 0.085373  | 0.119901  | 0.128059 | 0.133159 | 0.131993  | 0.134033  |
| 0.153263  | 0.14831   | 0.145251  | 0.152535 | 0.155886 | 0.0606061 | 0.0620629 |
| 0.139714  | 0.131265  | 0.120921  | 0.127914 | 0.13447  | 0.129225  | 0.137966  |
| 0.137238  | 0.125583  | 0.0793998 | 0.127768 | 0.132867 | 0.129953  | 0.134907  |
| 0.13243   | 0.122232  | 0.080711  | 0.133741 | 0.136218 | 0.129516  | 0.130973  |
| 0.132139  | 0.120775  | 0.0891608 | 0.127331 | 0.130973 | 0.119318  | 0.12398   |
| 0.136218  | 0.125728  | 0.109266  | 0.131702 | 0.135052 | 0.133304  | 0.136218  |
| 0.211538  | 0.202506  | 0.191288  | 0.207605 | 0.213287 | 0.209499  | 0.207168  |
| 0.0543415 | 0.0490967 | 0.123834  | 0.128497 | 0.133596 | 0.133304  | 0.138258  |
| 0.0990676 | 0.0888695 | 0.116696  | 0.128059 | 0.131119 | 0.129371  | 0.132867  |
| 0.129371  | 0.11451   | 0.0619172 | 0.124563 | 0.131993 | 0.125874  | 0.127331  |
| 0.126311  | 0.11553   | 0.117424  | 0.119172 | 0.122523 | 0.132139  | 0.135052  |

|           |           |           |           |           |           |           |
|-----------|-----------|-----------|-----------|-----------|-----------|-----------|
| 0.198427  | 0.187354  | 0.174679  | 0.193619  | 0.198135  | 0.196096  | 0.194347  |
| 0.25204   | 0.247669  | 0.241696  | 0.252768  | 0.254953  | 0.249126  | 0.248252  |
| 0.138986  | 0.124126  | 0.114656  | 0.121649  | 0.12704   | 0.132284  | 0.136072  |
| 0.134615  | 0.122669  | 0.107955  | 0.127768  | 0.131993  | 0.133741  | 0.136072  |
| 0.138112  | 0.122669  | 0.11553   | 0.129516  | 0.135198  | 0.0559441 | 0.0568182 |
| 0.119318  | 0.103875  | 0.110723  | 0.128788  | 0.13447   | 0.123397  | 0.12602   |
| 0.0553613 | 0.0469114 | 0.120484  | 0.123689  | 0.129662  | 0.130245  | 0.131993  |
| 0.126311  | 0.111451  | 0.112762  | 0.120047  | 0.128642  | 0.127185  | 0.128642  |
| 0.129371  | 0.120047  | 0.0732809 | 0.129516  | 0.13549   | 0.125874  | 0.129079  |
| 0.0547786 | 0.0407925 | 0.118735  | 0.123689  | 0.129953  | 0.127331  | 0.132576  |
| 0.129516  | 0.119318  | 0.0827506 | 0.127914  | 0.131847  | 0.121358  | 0.125437  |
| 0.128788  | 0.119464  | 0.109703  | 0.131847  | 0.134907  | 0.131702  | 0.132284  |
| 0.124563  | 0.114365  | 0.0967366 | 0.121795  | 0.124272  | 0.11961   | 0.120484  |
| 0.138986  | 0.125291  | 0.114073  | 0.114365  | 0.117716  | 0.129662  | 0.135781  |
| 0.130682  | 0.120192  | 0.116259  | 0.125874  | 0.131265  | 0.133013  | 0.135927  |
| 0.117861  | 0.105915  | 0.108683  | 0.0996503 | 0.104167  | 0.121941  | 0.123689  |
| 0.123106  | 0.120775  | 0.117716  | 0.124126  | 0.129516  | 0.13884   | 0.137966  |
| 0.122232  | 0.118444  | 0.12704   | 0.136946  | 0.141463  | 0.133596  | 0.136218  |
| 0.127331  | 0.11451   | 0.0470571 | 0.124272  | 0.130536  | 0.125     | 0.126166  |
| 0.126603  | 0.119027  | 0.0865385 | 0.132576  | 0.137675  | 0.112908  | 0.11553   |
| 0.141754  | 0.132721  | 0.0617716 | 0.137238  | 0.13884   | 0.136218  | 0.140297  |
| 0.217657  | 0.213578  | 0.201777  | 0.216638  | 0.221737  | 0.210373  | 0.212121  |
| 0.127477  | 0.116113  | 0.1081    | 0.111597  | 0.118153  | 0.122815  | 0.128642  |
| 0.125291  | 0.112762  | 0.0980478 | 0.120775  | 0.125     | 0.118007  | 0.118007  |
| 0.129079  | 0.120047  | 0.11553   | 0.122523  | 0.127331  | 0.134615  | 0.137821  |
| 0.130973  | 0.119901  | 0.120921  | 0.0524476 | 0.0543415 | 0.136218  | 0.136218  |
| 0.123689  | 0.113491  | 0.11655   | 0.118881  | 0.121066  | 0.131265  | 0.13447   |
| 0.213141  | 0.203817  | 0.191142  | 0.205128  | 0.209645  | 0.204983  | 0.206731  |
| 0.130828  | 0.121503  | 0.118444  | 0.133304  | 0.135198  | 0.13345   | 0.141317  |
| 0.126894  | 0.11553   | 0.04662   | 0.124417  | 0.129808  | 0.123106  | 0.126311  |
| 0.121503  | 0.116259  | 0.121649  | 0.128351  | 0.133159  | 0.119464  | 0.120921  |
| 0.115093  | 0.102564  | 0.109411  | 0.125146  | 0.128497  | 0.120921  | 0.124709  |
| 0.127622  | 0.120629  | 0.116404  | 0.128059  | 0.131119  | 0.132576  | 0.136655  |
| 0.122086  | 0.111597  | 0.10271   | 0.119027  | 0.123834  | 0.121503  | 0.126457  |
| 0.129079  | 0.11859   | 0.108246  | 0.131556  | 0.137529  | 0.127622  | 0.133159  |
| 0.129371  | 0.117424  | 0.118444  | 0.0566725 | 0.0620629 | 0.131702  | 0.132867  |
| 0.207896  | 0.200903  | 0.192308  | 0.204837  | 0.21081   | 0.2044    | 0.207896  |
| 0.12296   | 0.113345  | 0.110868  | 0.11961   | 0.122669  | 0.121212  | 0.127914  |
| 0.205565  | 0.196533  | 0.186772  | 0.20338   | 0.206731  | 0.200903  | 0.20236   |
| 0.20338   | 0.194347  | 0.18546   | 0.198281  | 0.207459  | 0.198135  | 0.198718  |
| 0.120338  | 0.115093  | 0.122523  | 0.136218  | 0.138112  | 0.131702  | 0.135198  |
| 0.13345   | 0.127622  | 0.132721  | 0.0473485 | 0.0512821 | 0.137238  | 0.137821  |
| 0.120338  | 0.110431  | 0.107663  | 0.122523  | 0.12704   | 0.120629  | 0.125583  |
| 0.121066  | 0.114073  | 0.107517  | 0.119464  | 0.123689  | 0.123397  | 0.126311  |

|           |           |           |           |           |           |           |
|-----------|-----------|-----------|-----------|-----------|-----------|-----------|
| 0.126166  | 0.118298  | 0.112908  | 0.124854  | 0.128497  | 0.127622  | 0.132867  |
| 0.131702  | 0.121212  | 0.0502622 | 0.128351  | 0.134324  | 0.129953  | 0.133159  |
| 0.0611888 | 0.0518648 | 0.117279  | 0.11961   | 0.123252  | 0.125583  | 0.126748  |
| 0.0556527 | 0.0445804 | 0.118444  | 0.125146  | 0.130245  | 0.128788  | 0.131702  |
| 0.139423  | 0.128934  | 0.116841  | 0.117133  | 0.119318  | 0.133304  | 0.141171  |
| 0.125     | 0.113928  | 0.113782  | 0.129516  | 0.134033  | 0.124417  | 0.127331  |
| 0.126603  | 0.113782  | 0.0451632 | 0.120629  | 0.126603  | 0.120484  | 0.122523  |
| 0.129079  | 0.121503  | 0.114948  | 0.126311  | 0.129371  | 0.132284  | 0.136364  |
| 0.118444  | 0.109703  | 0.100524  | 0.119755  | 0.125728  | 0.121649  | 0.125146  |
| 0.135198  | 0.131119  | 0.127185  | 0.130099  | 0.131119  | 0.138112  | 0.141317  |
| 0.129079  | 0.119755  | 0.115822  | 0.131847  | 0.138112  | 0.0649767 | 0.0623543 |
| 0.137383  | 0.133013  | 0.130245  | 0.13549   | 0.136509  | 0.140297  | 0.146707  |
| 0.266171  | 0.261509  | 0.257284  | 0.261946  | 0.268211  | 0.263258  | 0.262675  |
| 0.116987  | 0.117279  | 0.127622  | 0.120338  | 0.124563  | 0.128351  | 0.129808  |
| 0.130536  | 0.125874  | 0.124854  | 0.129225  | 0.13141   | 0.128205  | 0.13345   |
| 0.227418  | 0.219551  | 0.211538  | 0.224068  | 0.229749  | 0.221882  | 0.224213  |
| 0.134324  | 0.129079  | 0.119901  | 0.120192  | 0.124709  | 0.130245  | 0.135198  |
| 0.240676  | 0.2331    | 0.224213  | 0.23208   | 0.237179  | 0.233392  | 0.232226  |
| 0.110286  | 0.110286  | 0.122086  | 0.116841  | 0.120775  | 0.124272  | 0.124272  |
| 0.141026  | 0.130536  | 0.0587121 | 0.136509  | 0.138986  | 0.134324  | 0.138112  |
| 0.12296   | 0.111888  | 0.116113  | 0.0627914 | 0.0646853 | 0.131702  | 0.134033  |
| 0.121212  | 0.115385  | 0.118735  | 0.133596  | 0.138112  | 0.131702  | 0.134615  |
| 0.212995  | 0.205711  | 0.19595   | 0.206731  | 0.216492  | 0.210664  | 0.20979   |
| 0.13549   | 0.131119  | 0.128059  | 0.133304  | 0.136655  | 0.139277  | 0.140734  |
| 0.127622  | 0.120921  | 0.114656  | 0.128059  | 0.130828  | 0.132284  | 0.137238  |
| 0.234703  | 0.228001  | 0.221154  | 0.230769  | 0.236451  | 0.23208   | 0.233829  |
| 0.0638112 | 0.0506993 | 0.118153  | 0.12602   | 0.130245  | 0.134033  | 0.135781  |
| 0.209645  | 0.200029  | 0.189977  | 0.20542   | 0.21081   | 0.205565  | 0.204691  |
| 0.0610431 | 0.0505536 | 0.124126  | 0.128497  | 0.132721  | 0.132721  | 0.136509  |
| 0.13243   | 0.120484  | 0.0483683 | 0.128788  | 0.133013  | 0.125728  | 0.129808  |
| 0.130828  | 0.123252  | 0.105915  | 0.126894  | 0.129662  | 0.120629  | 0.123543  |
| 0.123252  | 0.118298  | 0.125146  | 0.134761  | 0.138403  | 0.129371  | 0.133159  |
| 0.126894  | 0.115822  | 0.109557  | 0.129662  | 0.133304  | 0.12602   | 0.12602   |
| 0.175262  | 0.165355  | 0.150058  | 0.168706  | 0.17264   | 0.16623   | 0.167686  |
| 0.125728  | 0.116987  | 0.115385  | 0.120629  | 0.124272  | 0.126603  | 0.130973  |
| 0.131847  | 0.121649  | 0.123543  | 0.0553613 | 0.057838  | 0.133304  | 0.135052  |
| 0.12602   | 0.114365  | 0.112471  | 0.122669  | 0.126894  | 0.135344  | 0.136509  |
| 0.129225  | 0.128642  | 0.129953  | 0.107809  | 0.107955  | 0.135052  | 0.136801  |
| 0.20979   | 0.197261  | 0.189248  | 0.203526  | 0.209499  | 0.203089  | 0.203089  |
| 0.13039   | 0.117279  | 0.0434149 | 0.127331  | 0.129225  | 0.121649  | 0.127768  |
| 0.128497  | 0.116841  | 0.114948  | 0.137383  | 0.142191  | 0.134324  | 0.13549   |
| 0.0989219 | 0.0861014 | 0.114802  | 0.126457  | 0.130099  | 0.113199  | 0.11553   |
| 0.0515734 | 0.0483683 | 0.122815  | 0.126603  | 0.127914  | 0.13345   | 0.134615  |
| 0.134761  | 0.127477  | 0.0521562 | 0.130245  | 0.133304  | 0.13039   | 0.133304  |

|           |           |           |           |           |           |           |
|-----------|-----------|-----------|-----------|-----------|-----------|-----------|
| 0.262821  | 0.256119  | 0.251603  | 0.25743   | 0.262821  | 0.263112  | 0.261946  |
| 0.124854  | 0.119901  | 0.106061  | 0.119755  | 0.125728  | 0.117279  | 0.11757   |
| 0.133304  | 0.122815  | 0.087704  | 0.126748  | 0.133013  | 0.133304  | 0.137675  |
| 0.183129  | 0.180798  | 0.179779  | 0.18007   | 0.184295  | 0.188083  | 0.188083  |
| 0.195659  | 0.190122  | 0.181235  | 0.195221  | 0.201195  | 0.193036  | 0.192453  |
| 0.140589  | 0.126894  | 0.112471  | 0.117716  | 0.125437  | 0.134761  | 0.137383  |
| 0.131702  | 0.122086  | 0.115239  | 0.128351  | 0.13345   | 0.130536  | 0.135781  |
| 0.117424  | 0.106643  | 0.110286  | 0.127477  | 0.133159  | 0.123543  | 0.126166  |
| 0.146416  | 0.143502  | 0.141317  | 0.148019  | 0.146707  | 0.151661  | 0.156031  |
| 0.133013  | 0.121066  | 0.115093  | 0.118007  | 0.124854  | 0.131847  | 0.134178  |
| 0.139277  | 0.128497  | 0.114365  | 0.119901  | 0.125874  | 0.136364  | 0.141608  |
| 0.0517191 | 0.0523019 | 0.126748  | 0.128497  | 0.133304  | 0.134761  | 0.137383  |
| 0.12602   | 0.118444  | 0.116259  | 0.121503  | 0.127768  | 0.124563  | 0.129516  |
| 0.134907  | 0.129953  | 0.127185  | 0.131265  | 0.132284  | 0.136072  | 0.139569  |
| 0.076486  | 0.0706585 | 0.118881  | 0.132576  | 0.135052  | 0.131847  | 0.131847  |
| 0.121212  | 0.114802  | 0.118153  | 0.133596  | 0.137529  | 0.129079  | 0.129662  |
| 0.127185  | 0.123689  | 0.130828  | 0.143357  | 0.149913  | 0.14088   | 0.142337  |
| 0.127622  | 0.122086  | 0.105332  | 0.127185  | 0.129371  | 0.123543  | 0.123543  |
| 0.122523  | 0.116404  | 0.125291  | 0.135781  | 0.142628  | 0.134761  | 0.135052  |
| 0.0476399 | 0.050845  | 0.134615  | 0.131702  | 0.134178  | 0.136801  | 0.137383  |
| 0.218531  | 0.210664  | 0.201777  | 0.213141  | 0.220862  | 0.216783  | 0.214452  |
| 0.119318  | 0.108537  | 0.1081    | 0.129953  | 0.132139  | 0.123397  | 0.129225  |
| 0.204108  | 0.192745  | 0.183566  | 0.200175  | 0.204983  | 0.197698  | 0.199446  |
| 0.127768  | 0.113491  | 0.11451   | 0.094697  | 0.0965909 | 0.128351  | 0.132139  |
| 0.139714  | 0.129808  | 0.0550699 | 0.13141   | 0.135344  | 0.134761  | 0.138258  |
| 0.132139  | 0.124854  | 0.119172  | 0.131119  | 0.135927  | 0.0557984 | 0.060169  |
| 0.128788  | 0.118881  | 0.111451  | 0.128642  | 0.13141   | 0.0675991 | 0.0708042 |
| 0.132721  | 0.12602   | 0.119464  | 0.126457  | 0.130099  | 0.130682  | 0.138258  |
| 0.127185  | 0.11961   | 0.120921  | 0.127331  | 0.131556  | 0.132721  | 0.135344  |
| 0.134178  | 0.121941  | 0.0486597 | 0.129371  | 0.13447   | 0.128934  | 0.131265  |
| 0.128788  | 0.118881  | 0.115822  | 0.0557984 | 0.0574009 | 0.133159  | 0.13549   |
| 0.131993  | 0.124417  | 0.122523  | 0.133887  | 0.137529  | 0.0582751 | 0.0556527 |
| 0.0540501 | 0.060169  | 0.137529  | 0.134324  | 0.138549  | 0.142628  | 0.141171  |
| 0.258304  | 0.254516  | 0.247086  | 0.252914  | 0.260344  | 0.254516  | 0.254808  |
| 0.136218  | 0.123689  | 0.0472028 | 0.131119  | 0.136218  | 0.126894  | 0.130973  |
| 0.19493   | 0.187354  | 0.176136  | 0.188957  | 0.195513  | 0.191142  | 0.189685  |
| 0.19799   | 0.191288  | 0.182984  | 0.19493   | 0.201195  | 0.199155  | 0.196824  |
| 0.131993  | 0.119172  | 0.113199  | 0.130682  | 0.136946  | 0.138403  | 0.137821  |
| 0.124417  | 0.116841  | 0.100379  | 0.120484  | 0.124709  | 0.117424  | 0.120338  |
| 0.134033  | 0.125874  | 0.0525932 | 0.133596  | 0.13549   | 0.130536  | 0.138695  |
| 0.125     | 0.117716  | 0.112034  | 0.121941  | 0.12704   | 0.12704   | 0.129953  |
| 0.130099  | 0.121358  | 0.0944056 | 0.12296   | 0.128059  | 0.11961   | 0.120484  |
| 0.0575466 | 0.0470571 | 0.120047  | 0.126166  | 0.128934  | 0.133304  | 0.132139  |
| 0.128205  | 0.124417  | 0.11553   | 0.122815  | 0.12704   | 0.13141   | 0.133741  |

|           |           |           |           |           |           |           |
|-----------|-----------|-----------|-----------|-----------|-----------|-----------|
| 0.136072  | 0.132867  | 0.129516  | 0.134178  | 0.136655  | 0.138403  | 0.142483  |
| 0.132139  | 0.119027  | 0.0457459 | 0.126457  | 0.131847  | 0.126894  | 0.13039   |
| 0.13447   | 0.128642  | 0.125291  | 0.131119  | 0.134178  | 0.134178  | 0.141171  |
| 0.129371  | 0.117133  | 0.115822  | 0.120484  | 0.125583  | 0.120629  | 0.125874  |
| 0.137529  | 0.128788  | 0.123106  | 0.136218  | 0.137821  | 0.0524476 | 0.0527389 |
| 0.121066  | 0.110286  | 0.114219  | 0.13549   | 0.140297  | 0.127185  | 0.131556  |
| 0.0434149 | 0.0521562 | 0.133013  | 0.133887  | 0.13986   | 0.140734  | 0.141608  |
| 0.131847  | 0.123397  | 0.115385  | 0.132867  | 0.137383  | 0.132139  | 0.136509  |
| 0.129516  | 0.116404  | 0.0608974 | 0.126166  | 0.130682  | 0.116987  | 0.123689  |
| 0.136509  | 0.129516  | 0.127331  | 0.129079  | 0.131847  | 0.14292   | 0.145542  |
| 0.195804  | 0.187063  | 0.17701   | 0.190997  | 0.197552  | 0.192599  | 0.194347  |
| 0.139714  | 0.138549  | 0.13141   | 0.138695  | 0.13884   | 0.141463  | 0.145542  |
| 0.128934  | 0.123397  | 0.120338  | 0.128497  | 0.128642  | 0.131847  | 0.134178  |
| 0.132284  | 0.120629  | 0.118444  | 0.126894  | 0.131993  | 0.0524476 | 0.0527389 |
| 0.125146  | 0.113199  | 0.108392  | 0.123834  | 0.128059  | 0.067162  | 0.0668706 |
| 0.120338  | 0.11014   | 0.112325  | 0.131265  | 0.134907  | 0.126166  | 0.131702  |
| 0.120192  | 0.112908  | 0.119755  | 0.13345   | 0.137675  | 0.126894  | 0.134178  |
| 0.204545  | 0.194347  | 0.184586  | 0.200612  | 0.206002  | 0.199009  | 0.200758  |
| 0.126457  | 0.120921  | 0.114948  | 0.130682  | 0.132284  | 0.129953  | 0.137238  |
| 0.121358  | 0.110577  | 0.108683  | 0.123252  | 0.128059  | 0.127768  | 0.128351  |
| 0.13243   | 0.12602   | 0.120047  | 0.127331  | 0.128934  | 0.133596  | 0.138549  |
| 0.201923  | 0.195513  | 0.186917  | 0.196824  | 0.202797  | 0.201049  | 0.200466  |
| 0.126311  | 0.114365  | 0.097028  | 0.121212  | 0.125728  | 0.116987  | 0.120192  |
| 0.0428322 | 0.0457459 | 0.13039   | 0.126894  | 0.133741  | 0.134907  | 0.133159  |
| 0.131993  | 0.124709  | 0.120775  | 0.128059  | 0.130245  | 0.133159  | 0.136072  |
| 0.13039   | 0.11757   | 0.108974  | 0.113928  | 0.118444  | 0.130099  | 0.134761  |
| 0.201195  | 0.191871  | 0.181527  | 0.194347  | 0.198572  | 0.193619  | 0.195076  |
| 0.0499709 | 0.0528846 | 0.122378  | 0.124709  | 0.128351  | 0.128059  | 0.131265  |
| 0.123106  | 0.111451  | 0.113636  | 0.118298  | 0.125146  | 0.130682  | 0.133887  |
| 0.129516  | 0.115822  | 0.103147  | 0.119464  | 0.126311  | 0.119901  | 0.121358  |
| 0.133304  | 0.122232  | 0.118881  | 0.13141   | 0.136218  | 0.12398   | 0.12602   |
| 0.129371  | 0.117424  | 0.121649  | 0.0528846 | 0.0536131 | 0.130536  | 0.134907  |
| 0.0474942 | 0.0533217 | 0.130682  | 0.131265  | 0.134907  | 0.136364  | 0.137821  |
| 0.131119  | 0.119172  | 0.0458916 | 0.127185  | 0.130536  | 0.125291  | 0.129371  |
| 0.127622  | 0.118881  | 0.122815  | 0.127477  | 0.131993  | 0.130828  | 0.13549   |
| 0.158654  | 0.151078  | 0.139277  | 0.134033  | 0.136801  | 0.148747  | 0.156031  |
| 0.242861  | 0.238199  | 0.233392  | 0.237762  | 0.242861  | 0.241696  | 0.241987  |
| 0.133013  | 0.129225  | 0.119464  | 0.140152  | 0.142337  | 0.136509  | 0.139423  |
| 0.128351  | 0.115822  | 0.119755  | 0.0568182 | 0.0590035 | 0.131556  | 0.132721  |
| 0.121503  | 0.116259  | 0.114656  | 0.125728  | 0.129953  | 0.129371  | 0.132867  |
| 0.136218  | 0.126894  | 0.121795  | 0.132284  | 0.135927  | 0.129808  | 0.134761  |
| 0.106643  | 0.0964452 | 0.116404  | 0.0680361 | 0.0728438 | 0.120338  | 0.126748  |
| 0.125     | 0.113054  | 0.119027  | 0.116696  | 0.121503  | 0.127914  | 0.131702  |
| 0.127768  | 0.121358  | 0.120047  | 0.129079  | 0.128642  | 0.129516  | 0.137675  |



|           |           |           |           |           |           |           |
|-----------|-----------|-----------|-----------|-----------|-----------|-----------|
| 0.0480769 | 0.0486597 | 0.130682  | 0.131265  | 0.134033  | 0.13549   | 0.136946  |
| 0.129953  | 0.118881  | 0.109994  | 0.118735  | 0.12296   | 0.134907  | 0.136655  |
| 0.244318  | 0.239656  | 0.2331    | 0.238928  | 0.243444  | 0.241696  | 0.241404  |
| 0.118881  | 0.112762  | 0.0971737 | 0.11757   | 0.124126  | 0.119464  | 0.118298  |
| 0.1081    | 0.100233  | 0.113199  | 0.11116   | 0.115676  | 0.118298  | 0.118881  |
| 0.128351  | 0.116113  | 0.0480769 | 0.125291  | 0.128934  | 0.123106  | 0.126311  |
| 0.143648  | 0.13345   | 0.123106  | 0.120775  | 0.122086  | 0.13986   | 0.145396  |
| 0.136072  | 0.133741  | 0.122815  | 0.142628  | 0.144231  | 0.143357  | 0.144522  |
| 0.134324  | 0.120921  | 0.107663  | 0.125146  | 0.13141   | 0.126166  | 0.127622  |
| 0.131119  | 0.122378  | 0.11757   | 0.125437  | 0.128788  | 0.133741  | 0.136364  |
| 0.128059  | 0.118444  | 0.107517  | 0.113636  | 0.119318  | 0.128934  | 0.130682  |
| 0.239656  | 0.23412   | 0.228147  | 0.237179  | 0.241404  | 0.236742  | 0.236451  |
| 0.133596  | 0.127768  | 0.123252  | 0.128497  | 0.130682  | 0.133304  | 0.139714  |
| 0.044289  | 0.048951  | 0.129516  | 0.128059  | 0.133159  | 0.134324  | 0.13549   |
| 0.128205  | 0.115967  | 0.111451  | 0.116113  | 0.119172  | 0.129662  | 0.13345   |
| 0.129516  | 0.121066  | 0.122378  | 0.104312  | 0.10708   | 0.130973  | 0.137383  |
| 0.118444  | 0.114365  | 0.128205  | 0.120047  | 0.12398   | 0.125728  | 0.129225  |
| 0.128934  | 0.121941  | 0.0504079 | 0.124126  | 0.126311  | 0.124272  | 0.128351  |
| 0.0514277 | 0.0552156 | 0.128788  | 0.128497  | 0.134178  | 0.132721  | 0.135635  |
| 0         | 0.0509907 | 0.132721  | 0.132139  | 0.137529  | 0.138112  | 0.136655  |
| 0.0509907 | 0         | 0.121358  | 0.123397  | 0.128497  | 0.130828  | 0.133159  |
| 0.132721  | 0.121358  | 0         | 0.126748  | 0.131847  | 0.12398   | 0.13039   |
| 0.132139  | 0.123397  | 0.126748  | 0         | 0.0450175 | 0.135635  | 0.137966  |
| 0.137529  | 0.128497  | 0.131847  | 0.0450175 | 0         | 0.137821  | 0.1419    |
| 0.138112  | 0.130828  | 0.12398   | 0.135635  | 0.137821  | 0         | 0.0565268 |
| 0.136655  | 0.133159  | 0.13039   | 0.137966  | 0.1419    | 0.0565268 | 0         |
| 0.131556  | 0.124854  | 0.130828  | 0.0460373 | 0.0488054 | 0.136218  | 0.140297  |
| 0.126311  | 0.114948  | 0.0868298 | 0.124126  | 0.127768  | 0.116696  | 0.120192  |
| 0.0967366 | 0.100233  | 0.137675  | 0.137383  | 0.141026  | 0.129079  | 0.126748  |
| 0.12602   | 0.123689  | 0.123543  | 0.136946  | 0.142628  | 0.143794  | 0.145251  |
| 0.214889  | 0.20877   | 0.20134   | 0.210082  | 0.213724  | 0.209645  | 0.214307  |
| 0.133013  | 0.125437  | 0.115676  | 0.134907  | 0.135344  | 0.139423  | 0.141171  |
| 0.113199  | 0.104749  | 0.115093  | 0.120047  | 0.121649  | 0.123106  | 0.124272  |
| 0.135781  | 0.125583  | 0.0514277 | 0.132139  | 0.136655  | 0.131993  | 0.133741  |
| 0.233829  | 0.228001  | 0.218531  | 0.229021  | 0.233537  | 0.227418  | 0.228001  |
| 0.219551  | 0.212267  | 0.206002  | 0.217657  | 0.223631  | 0.2213    | 0.221882  |
| 0.0483683 | 0.0544872 | 0.131847  | 0.131265  | 0.135781  | 0.139569  | 0.140734  |
| 0.258013  | 0.25102   | 0.245921  | 0.251457  | 0.256556  | 0.252768  | 0.253934  |
| 0.129808  | 0.11757   | 0.0874126 | 0.122378  | 0.128351  | 0.114073  | 0.116113  |
| 0.142628  | 0.136509  | 0.127622  | 0.136364  | 0.140297  | 0.142337  | 0.13884   |
| 0.122523  | 0.115822  | 0.100233  | 0.120047  | 0.126311  | 0.116696  | 0.116696  |
| 0.133159  | 0.122086  | 0.127768  | 0.0496795 | 0.0506993 | 0.134615  | 0.137238  |
| 0.201486  | 0.191288  | 0.181235  | 0.196387  | 0.201195  | 0.195659  | 0.195659  |
| 0.132576  | 0.121212  | 0.119027  | 0.12398   | 0.127914  | 0.132576  | 0.138112  |

|           |           |           |           |           |           |           |
|-----------|-----------|-----------|-----------|-----------|-----------|-----------|
| 0.205128  | 0.197261  | 0.18546   | 0.2044    | 0.210082  | 0.202214  | 0.204254  |
| 0.129953  | 0.11655   | 0.104749  | 0.123689  | 0.131702  | 0.132284  | 0.134907  |
| 0.0801282 | 0.0777972 | 0.11961   | 0.127477  | 0.131119  | 0.130245  | 0.134615  |
| 0.132284  | 0.125874  | 0.112617  | 0.121358  | 0.128205  | 0.123543  | 0.127331  |
| 0.121795  | 0.110431  | 0.107663  | 0.120484  | 0.124417  | 0.120921  | 0.125     |
| 0.125146  | 0.113491  | 0.0472028 | 0.119755  | 0.126894  | 0.118735  | 0.12398   |
| 0.126603  | 0.114948  | 0.105769  | 0.129371  | 0.13039   | 0.129808  | 0.133596  |
| 0.121941  | 0.11116   | 0.0961538 | 0.116841  | 0.121941  | 0.114948  | 0.118444  |
| 0.125291  | 0.117424  | 0.112617  | 0.123689  | 0.128205  | 0.128497  | 0.131993  |
| 0.0936772 | 0.0895979 | 0.120047  | 0.126748  | 0.133013  | 0.114365  | 0.114365  |
| 0.127477  | 0.116113  | 0.106643  | 0.127914  | 0.127477  | 0.125146  | 0.134178  |
| 0.122086  | 0.113054  | 0.0992133 | 0.116987  | 0.123252  | 0.119172  | 0.117716  |
| 0.129516  | 0.119901  | 0.106643  | 0.132284  | 0.138258  | 0.0776515 | 0.0773601 |
| 0.134178  | 0.130682  | 0.128205  | 0.129953  | 0.135927  | 0.141171  | 0.141463  |
| 0.127914  | 0.117133  | 0.114365  | 0.124563  | 0.128205  | 0.0617716 | 0.0643939 |
| 0.121649  | 0.111742  | 0.109848  | 0.12296   | 0.125728  | 0.129808  | 0.13039   |
| 0.126748  | 0.11451   | 0.0447261 | 0.122232  | 0.127914  | 0.120338  | 0.125291  |
| 0.0579837 | 0.0562354 | 0.122523  | 0.126311  | 0.131119  | 0.130828  | 0.132867  |
| 0.129953  | 0.11655   | 0.116113  | 0.0610431 | 0.0632284 | 0.131119  | 0.133741  |
| 0.118153  | 0.109703  | 0.115385  | 0.130828  | 0.136218  | 0.128059  | 0.131265  |
| 0.13039   | 0.118444  | 0.11451   | 0.130828  | 0.134178  | 0.0581294 | 0.0622086 |
| 0.127622  | 0.119172  | 0.118444  | 0.127477  | 0.130828  | 0.131702  | 0.133159  |
| 0.134178  | 0.13039   | 0.126457  | 0.129662  | 0.133887  | 0.137383  | 0.142045  |
| 0.14088   | 0.137383  | 0.133741  | 0.141608  | 0.140589  | 0.143794  | 0.148747  |
| 0.0635198 | 0.0556527 | 0.107663  | 0.118735  | 0.123543  | 0.123834  | 0.126166  |
| 0.131702  | 0.119172  | 0.0456002 | 0.127477  | 0.131702  | 0.125291  | 0.129079  |
| 0.119901  | 0.10912   | 0.111597  | 0.112471  | 0.114365  | 0.123397  | 0.127185  |
| 0.136509  | 0.128934  | 0.134907  | 0.0495338 | 0.0482226 | 0.137675  | 0.141171  |
| 0.123834  | 0.115676  | 0.103001  | 0.124854  | 0.128205  | 0.120047  | 0.120047  |
| 0.129371  | 0.124126  | 0.134761  | 0.145833  | 0.14831   | 0.140443  | 0.142774  |
| 0.145688  | 0.136946  | 0.0659965 | 0.143211  | 0.145105  | 0.143065  | 0.143939  |
| 0.139423  | 0.129516  | 0.120338  | 0.119755  | 0.119901  | 0.135635  | 0.140006  |
| 0.125874  | 0.113345  | 0.103293  | 0.123106  | 0.129079  | 0.119172  | 0.128788  |
| 0.125437  | 0.114365  | 0.115093  | 0.105769  | 0.109411  | 0.128642  | 0.130973  |
| 0.135635  | 0.12602   | 0.124417  | 0.135198  | 0.140589  | 0.0540501 | 0.0569639 |
| 0.210956  | 0.206876  | 0.203234  | 0.212267  | 0.217949  | 0.212413  | 0.210664  |
| 0.124417  | 0.111888  | 0.111451  | 0.121066  | 0.124126  | 0.129953  | 0.134033  |
| 0.132139  | 0.120775  | 0.107517  | 0.124417  | 0.129225  | 0.127768  | 0.128642  |
| 0.12704   | 0.116841  | 0.121358  | 0.0502622 | 0.0515734 | 0.128788  | 0.130536  |
| 0.128934  | 0.118153  | 0.112762  | 0.12704   | 0.132139  | 0.0627914 | 0.0645396 |
| 0.13345   | 0.119172  | 0.112908  | 0.126311  | 0.135781  | 0.136072  | 0.13549   |
| 0.126457  | 0.119172  | 0.126894  | 0.130973  | 0.131993  | 0.130245  | 0.135781  |
| 0.12602   | 0.122523  | 0.127914  | 0.130536  | 0.135052  | 0.137092  | 0.139132  |
| 0.136072  | 0.126166  | 0.118735  | 0.112325  | 0.119172  | 0.131993  | 0.136655  |

|           |           |           |           |           |          |          |
|-----------|-----------|-----------|-----------|-----------|----------|----------|
| 0.0909091 | 0.0839161 | 0.117861  | 0.12398   | 0.129371  | 0.117133 | 0.116841 |
| 0.13141   | 0.123543  | 0.128059  | 0.0476399 | 0.0501166 | 0.136072 | 0.13986  |
| 0.124709  | 0.114802  | 0.107955  | 0.117861  | 0.124709  | 0.125874 | 0.124126 |
| 0.129516  | 0.123106  | 0.112179  | 0.134615  | 0.135927  | 0.132139 | 0.134178 |
| 0.181527  | 0.174534  | 0.172348  | 0.184586  | 0.18852   | 0.179779 | 0.179779 |
| 0.127914  | 0.119464  | 0.113199  | 0.128059  | 0.130828  | 0.13141  | 0.132867 |
| 0.134761  | 0.124563  | 0.131702  | 0.0559441 | 0.0581294 | 0.135635 | 0.138258 |
| 0.120338  | 0.109266  | 0.114365  | 0.12398   | 0.126457  | 0.12704  | 0.129079 |
| 0.121649  | 0.114073  | 0.121503  | 0.125874  | 0.131265  | 0.134761 | 0.133887 |
| 0.121649  | 0.111451  | 0.103438  | 0.12296   | 0.126311  | 0.122523 | 0.125437 |
| 0.118153  | 0.108537  | 0.102273  | 0.122378  | 0.128642  | 0.121649 | 0.128642 |
| 0.12602   | 0.116987  | 0.109557  | 0.124126  | 0.128351  | 0.12602  | 0.128642 |
| 0.107663  | 0.103584  | 0.122086  | 0.120921  | 0.124563  | 0.131847 | 0.135635 |
| 0.128642  | 0.122232  | 0.110431  | 0.128788  | 0.13447   | 0.129225 | 0.130973 |
| 0.128205  | 0.120338  | 0.121941  | 0.135927  | 0.141608  | 0.128497 | 0.131993 |
| 0.115822  | 0.103584  | 0.111014  | 0.121503  | 0.124563  | 0.12602  | 0.130099 |
| 0.119755  | 0.111305  | 0.118735  | 0.131265  | 0.135781  | 0.126457 | 0.126166 |
| 0.101836  | 0.10067   | 0.127331  | 0.132284  | 0.137092  | 0.143794 | 0.144085 |
| 0.112617  | 0.10708   | 0.112471  | 0.127331  | 0.130682  | 0.122232 | 0.12602  |
| 0.118735  | 0.114948  | 0.11859   | 0.128205  | 0.133887  | 0.119027 | 0.118444 |
| 0.113491  | 0.103584  | 0.103147  | 0.127622  | 0.130973  | 0.117861 | 0.121066 |
| 0.111451  | 0.109703  | 0.110431  | 0.129371  | 0.133304  | 0.121066 | 0.124272 |
| 0.121066  | 0.108246  | 0.0987762 | 0.119464  | 0.124854  | 0.120192 | 0.119901 |
| 0.121503  | 0.115676  | 0.110577  | 0.133596  | 0.136655  | 0.12704  | 0.13141  |
| 0.11859   | 0.107809  | 0.104167  | 0.124272  | 0.127914  | 0.120629 | 0.125    |
| 0.111597  | 0.110723  | 0.141171  | 0.145833  | 0.148893  | 0.14831  | 0.15035  |
| 0.113345  | 0.102855  | 0.12602   | 0.139714  | 0.144814  | 0.140443 | 0.143357 |
| 0.112471  | 0.10373   | 0.107663  | 0.121649  | 0.127914  | 0.112762 | 0.113345 |
| 0.106498  | 0.103875  | 0.141026  | 0.13549   | 0.139714  | 0.138549 | 0.143211 |
| 0.134178  | 0.125146  | 0.114802  | 0.130245  | 0.129808  | 0.105915 | 0.107372 |
| 0.128934  | 0.124854  | 0.132867  | 0.144814  | 0.149038  | 0.141171 | 0.145251 |
| 0.126311  | 0.115239  | 0.105769  | 0.124126  | 0.129808  | 0.117279 | 0.120192 |
| 0.142483  | 0.137821  | 0.140297  | 0.126894  | 0.126457  | 0.152681 | 0.155594 |
| 0.125     | 0.120921  | 0.127477  | 0.121941  | 0.126166  | 0.138112 | 0.141317 |
| 0.119755  | 0.118298  | 0.135635  | 0.128642  | 0.137238  | 0.136946 | 0.137821 |
| 0.125291  | 0.11655   | 0.118735  | 0.133013  | 0.138112  | 0.108683 | 0.117424 |
| 0.107663  | 0.0995047 | 0.102564  | 0.129662  | 0.133304  | 0.118444 | 0.122232 |
| 0.113928  | 0.101399  | 0.105332  | 0.127768  | 0.131702  | 0.122378 | 0.125    |
| 0.107663  | 0.103293  | 0.118298  | 0.11014   | 0.11553   | 0.128351 | 0.131556 |
| 0.118444  | 0.11553   | 0.114802  | 0.129953  | 0.130099  | 0.123106 | 0.126894 |
| 0.13141   | 0.126748  | 0.118444  | 0.133596  | 0.13549   | 0.131993 | 0.135781 |
| 0.11655   | 0.104604  | 0.116987  | 0.133887  | 0.137238  | 0.132867 | 0.13345  |
| 0.115093  | 0.106643  | 0.10708   | 0.119901  | 0.127331  | 0.102564 | 0.107809 |
| 0.112908  | 0.102127  | 0.104604  | 0.126457  | 0.132139  | 0.124272 | 0.128351 |

|          |           |           |          |          |          |          |
|----------|-----------|-----------|----------|----------|----------|----------|
| 0.120338 | 0.111014  | 0.110577  | 0.12398  | 0.127622 | 0.127331 | 0.131702 |
| 0.108974 | 0.0955711 | 0.103293  | 0.12398  | 0.129079 | 0.121212 | 0.123252 |
| 0.11553  | 0.107663  | 0.114802  | 0.132576 | 0.137383 | 0.130682 | 0.133887 |
| 0.129808 | 0.117279  | 0.101399  | 0.128788 | 0.131265 | 0.119901 | 0.120775 |
| 0.131702 | 0.122378  | 0.109703  | 0.126603 | 0.129662 | 0.124126 | 0.125583 |
| 0.131119 | 0.119755  | 0.105624  | 0.127477 | 0.127914 | 0.128497 | 0.133159 |
| 0.125583 | 0.117133  | 0.0869755 | 0.119318 | 0.128497 | 0.113636 | 0.117424 |
| 0.117133 | 0.104604  | 0.103001  | 0.121066 | 0.127331 | 0.119464 | 0.125    |
| 0.128351 | 0.116987  | 0.104604  | 0.124126 | 0.128934 | 0.124272 | 0.126311 |
| 0.125874 | 0.117424  | 0.111742  | 0.124854 | 0.129662 | 0.128205 | 0.129079 |
| 0.132576 | 0.125     | 0.125728  | 0.127477 | 0.133159 | 0.129371 | 0.134324 |
| 0.121503 | 0.108974  | 0.0992133 | 0.119901 | 0.123543 | 0.120047 | 0.120921 |
| 0.128642 | 0.12602   | 0.122669  | 0.135198 | 0.13884  | 0.131556 | 0.134761 |

| TDr_3643 | TDr_3647  | TDr_3648 | TDr_3649  | TDr_3660 | TDr_3663 | TDr_3668 |
|----------|-----------|----------|-----------|----------|----------|----------|
| 0.140006 | 0.101253  | 0.128788 | 0.13884   | 0.187791 | 0.120192 | 0.110286 |
| 0.127914 | 0.100816  | 0.131847 | 0.131119  | 0.192599 | 0.11859  | 0.118881 |
| 0.124709 | 0.0958625 | 0.131556 | 0.12704   | 0.190559 | 0.117424 | 0.114219 |
| 0.12704  | 0.097028  | 0.135052 | 0.131119  | 0.199883 | 0.125291 | 0.113345 |
| 0.138695 | 0.127914  | 0.136509 | 0.139277  | 0.215909 | 0.135198 | 0.12704  |
| 0.137821 | 0.117716  | 0.140006 | 0.138695  | 0.203671 | 0.128497 | 0.12704  |
| 0.135635 | 0.108246  | 0.111888 | 0.129225  | 0.208188 | 0.129225 | 0.112617 |
| 0.125728 | 0.103001  | 0.129371 | 0.124272  | 0.19391  | 0.11961  | 0.113491 |
| 0.125874 | 0.080711  | 0.119027 | 0.117716  | 0.199301 | 0.104895 | 0.100233 |
| 0.127185 | 0.0426865 | 0.134907 | 0.118444  | 0.203234 | 0.116696 | 0.114073 |
| 0.134907 | 0.0961538 | 0.124272 | 0.129079  | 0.191725 | 0.12296  | 0.11014  |
| 0.116696 | 0.100379  | 0.120921 | 0.122523  | 0.198572 | 0.114948 | 0.104458 |
| 0.130682 | 0.0887238 | 0.131119 | 0.122815  | 0.2044   | 0.112617 | 0.106498 |
| 0.152681 | 0.11451   | 0.159528 | 0.144231  | 0.156177 | 0.132867 | 0.13141  |
| 0.141171 | 0.10271   | 0.142774 | 0.125146  | 0.208479 | 0.124854 | 0.128059 |
| 0.136364 | 0.105186  | 0.106206 | 0.118298  | 0.208042 | 0.120629 | 0.118881 |
| 0.106498 | 0.0965909 | 0.121503 | 0.126311  | 0.200321 | 0.121066 | 0.101253 |
| 0.140152 | 0.136946  | 0.148456 | 0.143065  | 0.219988 | 0.146562 | 0.137821 |
| 0.121795 | 0.0976107 | 0.128351 | 0.126457  | 0.190268 | 0.118007 | 0.111597 |
| 0.213578 | 0.19289   | 0.220425 | 0.206876  | 0.132867 | 0.197844 | 0.20542  |
| 0.127768 | 0.108246  | 0.135198 | 0.13884   | 0.205274 | 0.130682 | 0.120484 |
| 0.126457 | 0.104604  | 0.136801 | 0.134907  | 0.209207 | 0.127331 | 0.119755 |
| 0.122815 | 0.0913462 | 0.120921 | 0.124563  | 0.200612 | 0.116696 | 0.106498 |
| 0.129662 | 0.115676  | 0.108537 | 0.118007  | 0.212121 | 0.129953 | 0.11451  |
| 0.11961  | 0.0759033 | 0.11859  | 0.118153  | 0.194493 | 0.113782 | 0.102127 |
| 0.13243  | 0.116987  | 0.134907 | 0.137383  | 0.208479 | 0.130973 | 0.125146 |
| 0.128351 | 0.105332  | 0.120047 | 0.132139  | 0.207022 | 0.13039  | 0.112034 |
| 0.123397 | 0.107955  | 0.124417 | 0.114656  | 0.213141 | 0.119318 | 0.116113 |
| 0.135052 | 0.120192  | 0.126166 | 0.129516  | 0.212267 | 0.133887 | 0.121358 |
| 0.12602  | 0.095134  | 0.128788 | 0.134761  | 0.214889 | 0.130682 | 0.111451 |
| 0.134033 | 0.110723  | 0.128059 | 0.127622  | 0.206585 | 0.129371 | 0.118881 |
| 0.12398  | 0.107663  | 0.118007 | 0.125437  | 0.209645 | 0.120484 | 0.109703 |
| 0.121941 | 0.0890152 | 0.122378 | 0.121066  | 0.193328 | 0.110868 | 0.107955 |
| 0.133304 | 0.0992133 | 0.122378 | 0.128059  | 0.202652 | 0.122815 | 0.106498 |
| 0.13345  | 0.103438  | 0.105624 | 0.125874  | 0.210664 | 0.124417 | 0.116259 |
| 0.138549 | 0.105041  | 0.11451  | 0.13447   | 0.216929 | 0.125728 | 0.122815 |
| 0.138695 | 0.110431  | 0.123106 | 0.134324  | 0.225233 | 0.137529 | 0.125583 |
| 0.128642 | 0.103584  | 0.128205 | 0.13243   | 0.21285  | 0.126894 | 0.11116  |
| 0.122815 | 0.0986305 | 0.117133 | 0.119318  | 0.201777 | 0.120775 | 0.105041 |
| 0.134761 | 0.109994  | 0.128497 | 0.0942599 | 0.21081  | 0.122232 | 0.116113 |
| 0.125437 | 0.095134  | 0.121212 | 0.103584  | 0.200321 | 0.11961  | 0.10271  |
| 0.149913 | 0.128059  | 0.136072 | 0.10067   | 0.221591 | 0.141463 | 0.138549 |

|          |           |          |           |          |          |           |
|----------|-----------|----------|-----------|----------|----------|-----------|
| 0.151369 | 0.13447   | 0.137821 | 0.11116   | 0.224213 | 0.146125 | 0.137966  |
| 0.130828 | 0.0987762 | 0.124563 | 0.0719697 | 0.20134  | 0.123543 | 0.109266  |
| 0.111014 | 0.0844988 | 0.111742 | 0.122669  | 0.202506 | 0.11451  | 0.0961538 |
| 0.128642 | 0.0861014 | 0.115093 | 0.125146  | 0.215472 | 0.122232 | 0.109411  |
| 0.11961  | 0.111451  | 0.117133 | 0.116113  | 0.203817 | 0.123106 | 0.107663  |
| 0.144814 | 0.120921  | 0.13243  | 0.101107  | 0.222902 | 0.137529 | 0.133741  |
| 0.126748 | 0.0958625 | 0.123689 | 0.107226  | 0.206294 | 0.124709 | 0.109557  |
| 0.129808 | 0.100087  | 0.120921 | 0.097465  | 0.202069 | 0.117279 | 0.116113  |
| 0.154138 | 0.133159  | 0.13243  | 0.157634  | 0.222611 | 0.151515 | 0.141608  |
| 0.124709 | 0.120047  | 0.126894 | 0.124709  | 0.20979  | 0.134615 | 0.124417  |
| 0.13039  | 0.103875  | 0.11859  | 0.0960082 | 0.203817 | 0.12398  | 0.109411  |
| 0.137092 | 0.0954254 | 0.136072 | 0.125437  | 0.211101 | 0.120775 | 0.121941  |
| 0.13243  | 0.108246  | 0.131119 | 0.108246  | 0.192453 | 0.123106 | 0.112908  |
| 0.137675 | 0.135927  | 0.121503 | 0.131265  | 0.223048 | 0.14088  | 0.133887  |
| 0.1419   | 0.111014  | 0.122523 | 0.102564  | 0.214744 | 0.135198 | 0.121795  |
| 0.126166 | 0.104021  | 0.120484 | 0.0979021 | 0.206294 | 0.123543 | 0.107517  |
| 0.130536 | 0.094697  | 0.130099 | 0.0979021 | 0.204837 | 0.12704  | 0.112471  |
| 0.133304 | 0.095134  | 0.109848 | 0.121649  | 0.214307 | 0.124272 | 0.111116  |
| 0.144376 | 0.127477  | 0.125583 | 0.107955  | 0.225962 | 0.140589 | 0.129225  |
| 0.150787 | 0.126894  | 0.13986  | 0.10912   | 0.228001 | 0.139714 | 0.135344  |
| 0.179196 | 0.155012  | 0.165938 | 0.152972  | 0.166958 | 0.160839 | 0.157051  |
| 0.12704  | 0.100816  | 0.124563 | 0.0967366 | 0.204545 | 0.122086 | 0.109557  |
| 0.125291 | 0.0944056 | 0.119901 | 0.106352  | 0.203963 | 0.126748 | 0.112179  |
| 0.124417 | 0.0961538 | 0.122815 | 0.101399  | 0.203671 | 0.124709 | 0.0999417 |
| 0.147582 | 0.126311  | 0.13345  | 0.144376  | 0.210519 | 0.144668 | 0.136801  |
| 0.128059 | 0.0995047 | 0.116841 | 0.103293  | 0.201486 | 0.119318 | 0.10271   |
| 0.132867 | 0.124126  | 0.129516 | 0.0906177 | 0.211247 | 0.140152 | 0.125291  |
| 0.129953 | 0.0955711 | 0.107663 | 0.127331  | 0.215326 | 0.128788 | 0.112471  |
| 0.125728 | 0.104749  | 0.123543 | 0.108537  | 0.204691 | 0.128934 | 0.107663  |
| 0.149038 | 0.135052  | 0.137238 | 0.148456  | 0.21081  | 0.14729  | 0.137383  |
| 0.136218 | 0.111742  | 0.12704  | 0.10708   | 0.21081  | 0.130682 | 0.115239  |
| 0.149767 | 0.12704   | 0.133596 | 0.102273  | 0.223193 | 0.13986  | 0.13141   |
| 0.128351 | 0.120775  | 0.13141  | 0.12398   | 0.209353 | 0.137092 | 0.124854  |
| 0.108974 | 0.106935  | 0.128059 | 0.126166  | 0.195513 | 0.117133 | 0.110431  |
| 0.127622 | 0.100816  | 0.120192 | 0.0987762 | 0.199301 | 0.121503 | 0.105478  |
| 0.127622 | 0.101981  | 0.121941 | 0.10373   | 0.204837 | 0.125    | 0.106643  |
| 0.136655 | 0.125583  | 0.128642 | 0.105478  | 0.220571 | 0.133741 | 0.12296   |
| 0.13039  | 0.0965909 | 0.113636 | 0.103584  | 0.203526 | 0.121649 | 0.105332  |
| 0.145688 | 0.125     | 0.138258 | 0.108683  | 0.223485 | 0.142191 | 0.136946  |
| 0.136655 | 0.106643  | 0.125146 | 0.104895  | 0.206876 | 0.128497 | 0.115967  |
| 0.124417 | 0.113636  | 0.115822 | 0.119755  | 0.206876 | 0.124417 | 0.110723  |
| 0.131119 | 0.105769  | 0.123106 | 0.0990676 | 0.204545 | 0.124126 | 0.113345  |
| 0.132867 | 0.107517  | 0.131847 | 0.100233  | 0.210956 | 0.128788 | 0.117133  |
| 0.126166 | 0.102273  | 0.127185 | 0.0999417 | 0.206585 | 0.123543 | 0.109557  |

|          |           |          |           |          |          |           |
|----------|-----------|----------|-----------|----------|----------|-----------|
| 0.128497 | 0.103438  | 0.119318 | 0.0961538 | 0.202214 | 0.120921 | 0.105478  |
| 0.144959 | 0.126603  | 0.130828 | 0.0954254 | 0.222174 | 0.135052 | 0.133887  |
| 0.126894 | 0.0945513 | 0.112471 | 0.122523  | 0.204691 | 0.122232 | 0.107372  |
| 0.125583 | 0.0917832 | 0.113199 | 0.125291  | 0.208625 | 0.114802 | 0.106935  |
| 0.128788 | 0.108392  | 0.123106 | 0.130536  | 0.216783 | 0.131702 | 0.115676  |
| 0.134907 | 0.113636  | 0.114948 | 0.13549   | 0.212995 | 0.133741 | 0.111597  |
| 0.128788 | 0.11451   | 0.119318 | 0.135781  | 0.2162   | 0.13141  | 0.124709  |
| 0.136801 | 0.125437  | 0.121795 | 0.148164  | 0.222756 | 0.13447  | 0.130682  |
| 0.127331 | 0.100233  | 0.12602  | 0.13141   | 0.201923 | 0.12704  | 0.105478  |
| 0.189977 | 0.173368  | 0.183712 | 0.185897  | 0.158508 | 0.183566 | 0.180944  |
| 0.119901 | 0.0960082 | 0.11859  | 0.121358  | 0.204983 | 0.123397 | 0.0989219 |
| 0.143065 | 0.119172  | 0.121358 | 0.141608  | 0.220571 | 0.134907 | 0.124417  |
| 0.134615 | 0.110431  | 0.116113 | 0.136364  | 0.215326 | 0.126166 | 0.111597  |
| 0.135927 | 0.121941  | 0.12296  | 0.140006  | 0.221591 | 0.146999 | 0.124854  |
| 0.12296  | 0.0990676 | 0.106206 | 0.129371  | 0.207168 | 0.118007 | 0.100233  |
| 0.130828 | 0.120047  | 0.116404 | 0.140734  | 0.218823 | 0.129953 | 0.120921  |
| 0.11451  | 0.0967366 | 0.11553  | 0.13141   | 0.20979  | 0.121212 | 0.101981  |
| 0.127185 | 0.106789  | 0.115967 | 0.132721  | 0.210519 | 0.126603 | 0.112034  |
| 0.13039  | 0.0922203 | 0.117133 | 0.119027  | 0.208188 | 0.121358 | 0.106789  |
| 0.133304 | 0.11961   | 0.119464 | 0.145542  | 0.224505 | 0.14292  | 0.119318  |
| 0.121649 | 0.0808566 | 0.114219 | 0.11757   | 0.206148 | 0.120192 | 0.0960082 |
| 0.137529 | 0.122378  | 0.121649 | 0.140152  | 0.213287 | 0.137821 | 0.127331  |
| 0.121358 | 0.0965909 | 0.116259 | 0.126311  | 0.206731 | 0.124563 | 0.104458  |
| 0.141608 | 0.115967  | 0.131265 | 0.0999417 | 0.217075 | 0.130536 | 0.124709  |
| 0.137966 | 0.109411  | 0.120921 | 0.12602   | 0.216055 | 0.135927 | 0.117279  |
| 0.118153 | 0.0913462 | 0.115385 | 0.125437  | 0.205857 | 0.122232 | 0.100379  |
| 0.147873 | 0.135052  | 0.134324 | 0.143502  | 0.21081  | 0.14088  | 0.136509  |
| 0.121503 | 0.0949883 | 0.119901 | 0.130536  | 0.208042 | 0.125874 | 0.104021  |
| 0.12704  | 0.0932401 | 0.119027 | 0.127331  | 0.211538 | 0.121212 | 0.104895  |
| 0.120192 | 0.097465  | 0.117716 | 0.124854  | 0.21081  | 0.125146 | 0.10708   |
| 0.142045 | 0.115239  | 0.136946 | 0.139423  | 0.221008 | 0.140589 | 0.130682  |
| 0.130973 | 0.112908  | 0.123834 | 0.12398   | 0.188957 | 0.122523 | 0.116113  |
| 0.121358 | 0.0936772 | 0.113636 | 0.125437  | 0.206731 | 0.120775 | 0.102418  |
| 0.121066 | 0.0916375 | 0.117424 | 0.129808  | 0.202652 | 0.121358 | 0.107955  |
| 0.127331 | 0.0967366 | 0.118444 | 0.129079  | 0.206294 | 0.13141  | 0.1081    |
| 0.135052 | 0.0919289 | 0.115967 | 0.126894  | 0.219843 | 0.131556 | 0.123397  |
| 0.131119 | 0.0999417 | 0.114073 | 0.129662  | 0.20979  | 0.130828 | 0.101399  |
| 0.115822 | 0.0796911 | 0.105769 | 0.114365  | 0.197407 | 0.112034 | 0.0957168 |
| 0.120192 | 0.0779429 | 0.1081   | 0.119901  | 0.201195 | 0.116987 | 0.099796  |
| 0.119172 | 0.0795455 | 0.113199 | 0.120338  | 0.206876 | 0.11655  | 0.0984848 |
| 0.130245 | 0.108392  | 0.128934 | 0.130245  | 0.20338  | 0.129662 | 0.107809  |
| 0.136509 | 0.109703  | 0.105769 | 0.135635  | 0.218094 | 0.133013 | 0.121649  |
| 0.116259 | 0.0844988 | 0.109411 | 0.122669  | 0.208625 | 0.11859  | 0.100816  |
| 0.119027 | 0.078817  | 0.111888 | 0.113491  | 0.202069 | 0.114656 | 0.0971737 |

|          |           |          |           |          |          |           |
|----------|-----------|----------|-----------|----------|----------|-----------|
| 0.125728 | 0.10067   | 0.111305 | 0.120775  | 0.214889 | 0.130099 | 0.11116   |
| 0.120629 | 0.0862471 | 0.106789 | 0.116841  | 0.203671 | 0.120047 | 0.0935315 |
| 0.139569 | 0.106061  | 0.128059 | 0.133159  | 0.202214 | 0.131119 | 0.117424  |
| 0.140734 | 0.118007  | 0.12602  | 0.144814  | 0.214161 | 0.138986 | 0.128205  |
| 0.120629 | 0.0844988 | 0.108829 | 0.126457  | 0.208042 | 0.123834 | 0.104895  |
| 0.121066 | 0.0828963 | 0.113636 | 0.125146  | 0.208479 | 0.119318 | 0.101253  |
| 0.119901 | 0.0846445 | 0.115967 | 0.118153  | 0.204691 | 0.117861 | 0.103293  |
| 0.124272 | 0.0817308 | 0.112471 | 0.117861  | 0.198281 | 0.111451 | 0.100379  |
| 0.129225 | 0.0954254 | 0.121795 | 0.127477  | 0.215472 | 0.127477 | 0.11961   |
| 0.121066 | 0.0776515 | 0.107226 | 0.119901  | 0.204108 | 0.117861 | 0.0986305 |
| 0.142774 | 0.126457  | 0.125437 | 0.140152  | 0.222319 | 0.140152 | 0.127914  |
| 0.143794 | 0.117861  | 0.134615 | 0.115822  | 0.214889 | 0.136509 | 0.127768  |
| 0.13884  | 0.106498  | 0.126748 | 0.11116   | 0.214889 | 0.128934 | 0.119027  |
| 0.127914 | 0.0917832 | 0.126311 | 0.10373   | 0.205128 | 0.129079 | 0.113345  |
| 0.120921 | 0.094697  | 0.122815 | 0.120921  | 0.204545 | 0.126748 | 0.109266  |
| 0.117861 | 0.0884324 | 0.104604 | 0.122523  | 0.207896 | 0.121649 | 0.0957168 |
| 0.123543 | 0.0914918 | 0.103001 | 0.121503  | 0.206294 | 0.120047 | 0.097028  |
| 0.126166 | 0.0941142 | 0.113199 | 0.113636  | 0.205128 | 0.114802 | 0.100524  |
| 0.129953 | 0.101107  | 0.12398  | 0.120338  | 0.194056 | 0.118881 | 0.11014   |
| 0.133741 | 0.122086  | 0.115822 | 0.108974  | 0.217949 | 0.133741 | 0.120629  |
| 0.12602  | 0.102127  | 0.113928 | 0.131265  | 0.213141 | 0.118735 | 0.105041  |
| 0.139277 | 0.104895  | 0.143502 | 0.13986   | 0.208916 | 0.13345  | 0.128497  |
| 0.133887 | 0.115822  | 0.123834 | 0.13884   | 0.222174 | 0.138549 | 0.12398   |
| 0.202652 | 0.189248  | 0.213287 | 0.206148  | 0.104458 | 0.191288 | 0.199446  |
| 0.249709 | 0.234557  | 0.25102  | 0.24796   | 0.114219 | 0.233392 | 0.24155   |
| 0.12398  | 0.107663  | 0.125    | 0.125437  | 0.190705 | 0.11961  | 0.109411  |
| 0.119755 | 0.104021  | 0.107372 | 0.114219  | 0.197844 | 0.122086 | 0.10373   |
| 0.115093 | 0.0996503 | 0.106789 | 0.11655   | 0.198427 | 0.11451  | 0.0999417 |
| 0.115967 | 0.104604  | 0.116404 | 0.11451   | 0.200758 | 0.12296  | 0.104895  |
| 0.145105 | 0.104895  | 0.14292  | 0.127622  | 0.208625 | 0.124126 | 0.131993  |
| 0.115385 | 0.108683  | 0.109411 | 0.117424  | 0.207168 | 0.123252 | 0.10373   |
| 0.140297 | 0.141171  | 0.113345 | 0.139714  | 0.223048 | 0.149038 | 0.132139  |
| 0.118007 | 0.1081    | 0.113199 | 0.117424  | 0.205128 | 0.125    | 0.100524  |
| 0.128788 | 0.121795  | 0.118153 | 0.129953  | 0.218531 | 0.135198 | 0.117133  |
| 0.131847 | 0.127477  | 0.121212 | 0.0837704 | 0.209062 | 0.136218 | 0.124563  |
| 0.126894 | 0.124563  | 0.118881 | 0.128642  | 0.215181 | 0.132139 | 0.126311  |
| 0.146125 | 0.126311  | 0.136072 | 0.092803  | 0.2213   | 0.137675 | 0.136509  |
| 0.115239 | 0.107372  | 0.11451  | 0.113199  | 0.210519 | 0.12398  | 0.102418  |
| 0.112908 | 0.105915  | 0.111888 | 0.112617  | 0.204108 | 0.124272 | 0.0983392 |
| 0.115676 | 0.107517  | 0.113199 | 0.120921  | 0.208333 | 0.128205 | 0.104604  |
| 0.113928 | 0.103438  | 0.114656 | 0.11859   | 0.198427 | 0.120047 | 0.102855  |
| 0.112179 | 0.104604  | 0.109411 | 0.113054  | 0.201923 | 0.12296  | 0.0958625 |
| 0.114365 | 0.107955  | 0.113928 | 0.116696  | 0.206148 | 0.124854 | 0.10271   |
| 0.116259 | 0.12296   | 0.121941 | 0.124417  | 0.212413 | 0.130828 | 0.120047  |



|          |           |           |           |          |          |           |
|----------|-----------|-----------|-----------|----------|----------|-----------|
| 0.129662 | 0.131993  | 0.12602   | 0.127622  | 0.219406 | 0.140443 | 0.129079  |
| 0.120192 | 0.112034  | 0.111014  | 0.119318  | 0.204108 | 0.129516 | 0.105915  |
| 0.12296  | 0.108683  | 0.112034  | 0.115967  | 0.20338  | 0.122086 | 0.105478  |
| 0.12704  | 0.127622  | 0.123689  | 0.131993  | 0.219114 | 0.138986 | 0.123834  |
| 0.116259 | 0.104312  | 0.109703  | 0.114802  | 0.201049 | 0.11859  | 0.0987762 |
| 0.133304 | 0.137675  | 0.131119  | 0.123689  | 0.216929 | 0.146416 | 0.124272  |
| 0.140006 | 0.110577  | 0.145688  | 0.139132  | 0.211101 | 0.138549 | 0.130973  |
| 0.124417 | 0.130245  | 0.131847  | 0.131702  | 0.207751 | 0.138403 | 0.12296   |
| 0.113636 | 0.102273  | 0.10912   | 0.111597  | 0.20134  | 0.123834 | 0.0981935 |
| 0.111742 | 0.099796  | 0.111597  | 0.114365  | 0.201195 | 0.119027 | 0.10067   |
| 0.116841 | 0.11859   | 0.112034  | 0.124126  | 0.215618 | 0.125583 | 0.109557  |
| 0.117279 | 0.120775  | 0.112762  | 0.124563  | 0.209936 | 0.130099 | 0.114656  |
| 0.118153 | 0.127477  | 0.11655   | 0.124563  | 0.21081  | 0.136509 | 0.117279  |
| 0.115093 | 0.113345  | 0.116987  | 0.119172  | 0.209207 | 0.128497 | 0.100233  |
| 0.116113 | 0.109994  | 0.116259  | 0.124272  | 0.208479 | 0.127768 | 0.109411  |
| 0.120484 | 0.120775  | 0.11655   | 0.119901  | 0.208188 | 0.12602  | 0.112617  |
| 0.128351 | 0.124272  | 0.118298  | 0.12602   | 0.218677 | 0.140589 | 0.119901  |
| 0.126603 | 0.125146  | 0.119755  | 0.128059  | 0.214889 | 0.13447  | 0.120484  |
| 0.131993 | 0.129371  | 0.11553   | 0.12704   | 0.22028  | 0.138112 | 0.122086  |
| 0.146416 | 0.125437  | 0.129371  | 0.120192  | 0.211976 | 0.131265 | 0.122523  |
| 0.121941 | 0.106206  | 0.1081    | 0.117861  | 0.207896 | 0.122815 | 0.0992133 |
| 0.118153 | 0.124563  | 0.127622  | 0.126894  | 0.216055 | 0.13243  | 0.11961   |
| 0.112179 | 0.108392  | 0.109994  | 0.112471  | 0.204837 | 0.120047 | 0.10169   |
| 0.128059 | 0.0983392 | 0.124417  | 0.0960082 | 0.202069 | 0.126311 | 0.108246  |
| 0.108829 | 0.10708   | 0.117716  | 0.108246  | 0.204691 | 0.122815 | 0.100962  |
| 0.113928 | 0.104312  | 0.118444  | 0.121795  | 0.200466 | 0.125874 | 0.0999417 |
| 0.106643 | 0.106643  | 0.109994  | 0.11451   | 0.201923 | 0.11655  | 0.0967366 |
| 0.128351 | 0.132139  | 0.116841  | 0.128934  | 0.218969 | 0.139714 | 0.121941  |
| 0.128497 | 0.104604  | 0.123106  | 0.117716  | 0.204545 | 0.127622 | 0.111597  |
| 0.128205 | 0.12704   | 0.116987  | 0.124126  | 0.216492 | 0.134324 | 0.122378  |
| 0.111888 | 0.106061  | 0.112908  | 0.117716  | 0.198718 | 0.122086 | 0.102273  |
| 0.118444 | 0.119027  | 0.106935  | 0.119027  | 0.216638 | 0.133013 | 0.109703  |
| 0.134907 | 0.106935  | 0.119318  | 0.122669  | 0.209499 | 0.118881 | 0.117424  |
| 0.130245 | 0.0935315 | 0.133887  | 0.129371  | 0.201049 | 0.129371 | 0.11655   |
| 0.128059 | 0.101544  | 0.0909091 | 0.124563  | 0.211393 | 0.119318 | 0.10067   |
| 0.118881 | 0.100233  | 0.135635  | 0.121795  | 0.203963 | 0.128497 | 0.117716  |
| 0.13039  | 0.103001  | 0.123543  | 0.130099  | 0.21081  | 0.13039  | 0.108246  |
| 0.128059 | 0.0945513 | 0.117424  | 0.129516  | 0.205857 | 0.125437 | 0.100087  |
| 0.146999 | 0.0916375 | 0.142191  | 0.137383  | 0.222174 | 0.124272 | 0.132721  |
| 0.146562 | 0.126748  | 0.104458  | 0.137529  | 0.222611 | 0.137821 | 0.131702  |
| 0.12296  | 0.0743007 | 0.125437  | 0.120629  | 0.200466 | 0.109266 | 0.102855  |
| 0.13039  | 0.101544  | 0.14627   | 0.135344  | 0.2213   | 0.13243  | 0.129808  |
| 0.1419   | 0.0769231 | 0.137675  | 0.13141   | 0.217366 | 0.121795 | 0.123252  |
| 0.134615 | 0.0984848 | 0.139714  | 0.141026  | 0.214161 | 0.129371 | 0.128205  |

|          |           |          |          |          |          |          |
|----------|-----------|----------|----------|----------|----------|----------|
| 0.126457 | 0.0879953 | 0.133887 | 0.128788 | 0.206876 | 0.127914 | 0.118881 |
| 0.136072 | 0.0798368 | 0.134761 | 0.129371 | 0.215909 | 0.119172 | 0.120047 |
| 0.139423 | 0.0808566 | 0.13345  | 0.137383 | 0.213432 | 0.113199 | 0.119027 |
| 0.129953 | 0.0976107 | 0.139132 | 0.139277 | 0.217949 | 0.13345  | 0.123543 |
| 0.136072 | 0.106061  | 0.147873 | 0.145979 | 0.223193 | 0.138403 | 0.129953 |
| 0.141608 | 0.0775058 | 0.140006 | 0.131993 | 0.215909 | 0.117424 | 0.12704  |
| 0.121795 | 0.0847902 | 0.132721 | 0.126457 | 0.206585 | 0.122378 | 0.114219 |
| 0.139132 | 0.131265  | 0.116841 | 0.137383 | 0.21285  | 0.136509 | 0.128642 |
| 0.1419   | 0.0935315 | 0.13884  | 0.144522 | 0.219114 | 0.120047 | 0.12704  |
| 0.120921 | 0.0821678 | 0.127185 | 0.126457 | 0.20134  | 0.117716 | 0.108974 |
| 0.228293 | 0.218386  | 0.232809 | 0.228584 | 0.111742 | 0.214015 | 0.2213   |
| 0.128934 | 0.0890152 | 0.13986  | 0.135052 | 0.211101 | 0.133013 | 0.121358 |
| 0.132721 | 0.0770688 | 0.134324 | 0.126311 | 0.206439 | 0.115239 | 0.116987 |
| 0.13549  | 0.100524  | 0.146125 | 0.139277 | 0.223193 | 0.13141  | 0.131993 |
| 0.137238 | 0.0812937 | 0.130099 | 0.128788 | 0.209207 | 0.115093 | 0.11655  |
| 0.147145 | 0.0894522 | 0.144085 | 0.142483 | 0.218531 | 0.121212 | 0.133159 |
| 0.129079 | 0.0914918 | 0.136218 | 0.135198 | 0.208333 | 0.122378 | 0.117133 |
| 0.129516 | 0.0878497 | 0.138695 | 0.135635 | 0.207605 | 0.123689 | 0.116987 |
| 0.13447  | 0.0776515 | 0.143648 | 0.124272 | 0.214015 | 0.122815 | 0.126894 |
| 0.134615 | 0.0987762 | 0.139423 | 0.138403 | 0.204837 | 0.133159 | 0.123834 |
| 0.133887 | 0.105041  | 0.137529 | 0.141463 | 0.216055 | 0.135052 | 0.124854 |
| 0.127331 | 0.102855  | 0.137966 | 0.137238 | 0.217949 | 0.136655 | 0.123252 |
| 0.123252 | 0.099359  | 0.141171 | 0.141317 | 0.217657 | 0.13141  | 0.122669 |
| 0.133159 | 0.0882867 | 0.126311 | 0.123252 | 0.211538 | 0.121212 | 0.1081   |
| 0.118298 | 0.0888695 | 0.139423 | 0.137238 | 0.212413 | 0.125    | 0.120047 |
| 0.135052 | 0.102127  | 0.146562 | 0.140589 | 0.216055 | 0.13243  | 0.132139 |
| 0.126457 | 0.0868298 | 0.132721 | 0.13141  | 0.203089 | 0.119172 | 0.118298 |
| 0.141608 | 0.127331  | 0.133887 | 0.115093 | 0.221154 | 0.142774 | 0.125583 |
| 0.148747 | 0.119318  | 0.153263 | 0.146416 | 0.202069 | 0.139423 | 0.135052 |
| 0.134178 | 0.099796  | 0.122086 | 0.123689 | 0.210227 | 0.12602  | 0.111451 |
| 0.140006 | 0.0849359 | 0.137821 | 0.132721 | 0.217803 | 0.119901 | 0.126311 |
| 0.1419   | 0.111888  | 0.135052 | 0.13345  | 0.200175 | 0.130245 | 0.124126 |
| 0.137383 | 0.107955  | 0.128788 | 0.133887 | 0.207022 | 0.128351 | 0.113199 |
| 0.141754 | 0.113199  | 0.136946 | 0.136801 | 0.200612 | 0.135635 | 0.122523 |
| 0.148164 | 0.119027  | 0.153555 | 0.140589 | 0.205274 | 0.14292  | 0.137092 |
| 0.12704  | 0.0839161 | 0.123397 | 0.120047 | 0.20338  | 0.12296  | 0.105769 |
| 0.143502 | 0.109411  | 0.138112 | 0.107955 | 0.216638 | 0.138258 | 0.132721 |
| 0.150641 | 0.128497  | 0.154283 | 0.145979 | 0.195221 | 0.143939 | 0.139277 |
| 0.130828 | 0.0944056 | 0.110286 | 0.121503 | 0.213869 | 0.12704  | 0.111014 |
| 0.139277 | 0.107517  | 0.133013 | 0.104312 | 0.202797 | 0.129371 | 0.11655  |
| 0.150204 | 0.144959  | 0.120047 | 0.143211 | 0.220425 | 0.145833 | 0.134178 |
| 0.133596 | 0.114365  | 0.132284 | 0.101836 | 0.20877  | 0.133013 | 0.120775 |
| 0.144814 | 0.113054  | 0.143502 | 0.143939 | 0.225816 | 0.14627  | 0.13549  |
| 0.142045 | 0.105041  | 0.134615 | 0.135052 | 0.21722  | 0.130973 | 0.122815 |

|          |           |           |          |          |          |           |
|----------|-----------|-----------|----------|----------|----------|-----------|
| 0.123834 | 0.106935  | 0.126311  | 0.141026 | 0.2162   | 0.126748 | 0.118007  |
| 0.141463 | 0.112908  | 0.129079  | 0.126311 | 0.211101 | 0.13447  | 0.126894  |
| 0.129371 | 0.0871212 | 0.124563  | 0.127914 | 0.208625 | 0.125874 | 0.117716  |
| 0.129516 | 0.114656  | 0.115967  | 0.135344 | 0.21926  | 0.13884  | 0.123106  |
| 0.131556 | 0.0968823 | 0.140152  | 0.141754 | 0.218969 | 0.129808 | 0.123689  |
| 0.133887 | 0.123689  | 0.122086  | 0.14088  | 0.220425 | 0.137092 | 0.124272  |
| 0.13243  | 0.114073  | 0.130828  | 0.14292  | 0.223048 | 0.139132 | 0.125728  |
| 0.142628 | 0.115239  | 0.124417  | 0.137675 | 0.212558 | 0.131847 | 0.120192  |
| 0.143794 | 0.13243   | 0.136946  | 0.147873 | 0.215472 | 0.145542 | 0.134178  |
| 0.135344 | 0.0796911 | 0.13549   | 0.127768 | 0.211393 | 0.124272 | 0.121358  |
| 0.13039  | 0.0989219 | 0.115967  | 0.117279 | 0.214015 | 0.128351 | 0.10708   |
| 0.131556 | 0.118153  | 0.119464  | 0.138258 | 0.216346 | 0.133596 | 0.119318  |
| 0.13039  | 0.0805653 | 0.113636  | 0.122232 | 0.209645 | 0.120775 | 0.110577  |
| 0.150932 | 0.126166  | 0.14292   | 0.143648 | 0.212121 | 0.141608 | 0.13986   |
| 0.159091 | 0.137821  | 0.148456  | 0.151515 | 0.223193 | 0.1588   | 0.147145  |
| 0.130828 | 0.124126  | 0.119318  | 0.121503 | 0.215618 | 0.13141  | 0.118298  |
| 0.124854 | 0.118735  | 0.114219  | 0.119027 | 0.210519 | 0.127477 | 0.111451  |
| 0.130828 | 0.123252  | 0.135927  | 0.142483 | 0.219697 | 0.129953 | 0.126166  |
| 0.134761 | 0.0992133 | 0.146562  | 0.138549 | 0.216346 | 0.133887 | 0.130973  |
| 0.122815 | 0.121941  | 0.119755  | 0.125728 | 0.21722  | 0.132139 | 0.114365  |
| 0.137092 | 0.107663  | 0.1419    | 0.144085 | 0.223631 | 0.137383 | 0.130099  |
| 0.146707 | 0.11553   | 0.139277  | 0.122815 | 0.214307 | 0.130682 | 0.137675  |
| 0.139569 | 0.0984848 | 0.126311  | 0.114219 | 0.217366 | 0.128497 | 0.122378  |
| 0.148019 | 0.159091  | 0.157488  | 0.161713 | 0.222611 | 0.162296 | 0.150932  |
| 0.137529 | 0.10169   | 0.13039   | 0.117716 | 0.215909 | 0.131993 | 0.123252  |
| 0.154429 | 0.111597  | 0.140006  | 0.137238 | 0.221445 | 0.145688 | 0.13141   |
| 0.131556 | 0.105332  | 0.115676  | 0.116696 | 0.215763 | 0.125146 | 0.114073  |
| 0.133013 | 0.121649  | 0.127914  | 0.144085 | 0.223048 | 0.14292  | 0.12602   |
| 0.129225 | 0.0945513 | 0.138403  | 0.131265 | 0.206731 | 0.125146 | 0.121649  |
| 0.152098 | 0.123834  | 0.145542  | 0.152098 | 0.180653 | 0.134615 | 0.137238  |
| 0.136509 | 0.139714  | 0.153846  | 0.152535 | 0.217803 | 0.144085 | 0.137966  |
| 0.126748 | 0.118007  | 0.135344  | 0.134324 | 0.197261 | 0.121503 | 0.121503  |
| 0.14729  | 0.132139  | 0.148893  | 0.143794 | 0.176428 | 0.128934 | 0.13243   |
| 0.159091 | 0.141026  | 0.145833  | 0.154429 | 0.160256 | 0.150058 | 0.138403  |
| 0.157634 | 0.128205  | 0.162733  | 0.156177 | 0.158217 | 0.144231 | 0.140443  |
| 0.128059 | 0.125146  | 0.0434149 | 0.127768 | 0.217803 | 0.124854 | 0.0989219 |
| 0.139569 | 0.128205  | 0.143502  | 0.141317 | 0.210956 | 0.135781 | 0.129662  |
| 0.12704  | 0.0996503 | 0.131265  | 0.126457 | 0.194347 | 0.116259 | 0.111014  |
| 0.130099 | 0.102127  | 0.121503  | 0.124854 | 0.199446 | 0.118153 | 0.111451  |
| 0.127914 | 0.0888695 | 0.141171  | 0.128497 | 0.204254 | 0.129662 | 0.123834  |
| 0.128788 | 0.113928  | 0.13039   | 0.128788 | 0.197261 | 0.11859  | 0.117424  |
| 0.123397 | 0.101544  | 0.13345   | 0.128059 | 0.206731 | 0.128351 | 0.112034  |
| 0.130682 | 0.0945513 | 0.132576  | 0.119318 | 0.188374 | 0.107663 | 0.112908  |
| 0.129808 | 0.109994  | 0.133159  | 0.136509 | 0.200903 | 0.11553  | 0.115822  |

|           |           |           |          |           |          |           |
|-----------|-----------|-----------|----------|-----------|----------|-----------|
| 0.13549   | 0.101981  | 0.143502  | 0.129371 | 0.192308  | 0.118298 | 0.124126  |
| 0.124709  | 0.0754662 | 0.125146  | 0.117133 | 0.195513  | 0.114219 | 0.104895  |
| 0.134324  | 0.115676  | 0.134761  | 0.13345  | 0.19697   | 0.123252 | 0.119755  |
| 0.128642  | 0.111742  | 0.13345   | 0.131265 | 0.200903  | 0.119901 | 0.114948  |
| 0.128934  | 0.121941  | 0.0976107 | 0.124563 | 0.209353  | 0.130973 | 0.10708   |
| 0.224796  | 0.211976  | 0.227273  | 0.226544 | 0.106206  | 0.213724 | 0.217803  |
| 0.148747  | 0.140589  | 0.145396  | 0.146416 | 0.211684  | 0.137092 | 0.141171  |
| 0.131702  | 0.125874  | 0.134178  | 0.142774 | 0.213287  | 0.129079 | 0.124417  |
| 0.130682  | 0.112908  | 0.138403  | 0.135344 | 0.199155  | 0.130682 | 0.121941  |
| 0.218969  | 0.207314  | 0.227564  | 0.2213   | 0.0910548 | 0.208188 | 0.214015  |
| 0.133013  | 0.116696  | 0.114219  | 0.127477 | 0.194202  | 0.128934 | 0.112617  |
| 0.13345   | 0.115385  | 0.117279  | 0.135781 | 0.20979   | 0.128497 | 0.112179  |
| 0.126457  | 0.117424  | 0.131556  | 0.132284 | 0.203089  | 0.131993 | 0.120338  |
| 0.134761  | 0.0971737 | 0.13986   | 0.125728 | 0.200612  | 0.119318 | 0.12398   |
| 0.260635  | 0.246066  | 0.263112  | 0.255099 | 0.119318  | 0.246066 | 0.250728  |
| 0.136364  | 0.108974  | 0.124563  | 0.138986 | 0.208333  | 0.134033 | 0.120047  |
| 0.128205  | 0.112471  | 0.101253  | 0.121503 | 0.206294  | 0.121503 | 0.102273  |
| 0.048951  | 0.120921  | 0.13447   | 0.136655 | 0.206294  | 0.133741 | 0.113054  |
| 0.0506993 | 0.122378  | 0.134178  | 0.137529 | 0.204545  | 0.128788 | 0.11014   |
| 0.13986   | 0.111888  | 0.127477  | 0.136655 | 0.200758  | 0.132576 | 0.128205  |
| 0.134033  | 0.113345  | 0.142628  | 0.13549  | 0.180944  | 0.121212 | 0.127914  |
| 0.129662  | 0.116841  | 0.100087  | 0.122669 | 0.206294  | 0.124126 | 0.104895  |
| 0.127768  | 0.116696  | 0.130245  | 0.13243  | 0.196533  | 0.117861 | 0.118153  |
| 0.132576  | 0.116841  | 0.140297  | 0.137529 | 0.202214  | 0.127622 | 0.11859   |
| 0.128205  | 0.0917832 | 0.136801  | 0.119464 | 0.200175  | 0.114219 | 0.118298  |
| 0.126311  | 0.11116   | 0.131702  | 0.130099 | 0.194784  | 0.119318 | 0.116987  |
| 0.133741  | 0.048951  | 0.135344  | 0.119172 | 0.207168  | 0.120629 | 0.116259  |
| 0.135052  | 0.140589  | 0.152098  | 0.151661 | 0.217803  | 0.14088  | 0.138258  |
| 0.137092  | 0.114656  | 0.124709  | 0.140589 | 0.207896  | 0.13884  | 0.125146  |
| 0.136509  | 0.120484  | 0.121503  | 0.137092 | 0.209936  | 0.132139 | 0.115822  |
| 0.201777  | 0.18546   | 0.210373  | 0.203526 | 0.0989219 | 0.189831 | 0.190705  |
| 0.214598  | 0.198572  | 0.222902  | 0.216055 | 0.0957168 | 0.201486 | 0.208188  |
| 0.136801  | 0.0957168 | 0.145688  | 0.126311 | 0.195076  | 0.11961  | 0.122523  |
| 0.124854  | 0.0884324 | 0.136072  | 0.11961  | 0.199738  | 0.113199 | 0.118444  |
| 0.141463  | 0.126894  | 0.14627   | 0.145251 | 0.19799   | 0.131265 | 0.14088   |
| 0.126603  | 0.114656  | 0.0967366 | 0.121649 | 0.206148  | 0.124563 | 0.102127  |
| 0.139569  | 0.11451   | 0.123689  | 0.141608 | 0.210664  | 0.137238 | 0.122669  |
| 0.109703  | 0.125437  | 0.133741  | 0.13884  | 0.205565  | 0.126603 | 0.119901  |
| 0.234703  | 0.220134  | 0.238636  | 0.234703 | 0.10271   | 0.220134 | 0.224505  |
| 0.125146  | 0.110577  | 0.125291  | 0.133304 | 0.205857  | 0.12398  | 0.109994  |
| 0.216492  | 0.206294  | 0.215763  | 0.212121 | 0.134324  | 0.202797 | 0.209207  |
| 0.123397  | 0.109994  | 0.0620629 | 0.124563 | 0.21081   | 0.116987 | 0.0852273 |
| 0.122086  | 0.107517  | 0.119318  | 0.135198 | 0.203671  | 0.122378 | 0.0932401 |
| 0.127185  | 0.108246  | 0.129079  | 0.128351 | 0.190705  | 0.124272 | 0.110577  |

|           |           |           |          |           |          |           |
|-----------|-----------|-----------|----------|-----------|----------|-----------|
| 0.125437  | 0.092803  | 0.131702  | 0.120484 | 0.19391   | 0.112908 | 0.114656  |
| 0.2162    | 0.201632  | 0.223048  | 0.219988 | 0.102564  | 0.202506 | 0.210373  |
| 0.139277  | 0.126748  | 0.144668  | 0.142191 | 0.194056  | 0.128788 | 0.131993  |
| 0.116259  | 0.110723  | 0.106498  | 0.134907 | 0.212413  | 0.125874 | 0.0506993 |
| 0.131119  | 0.121795  | 0.136801  | 0.134324 | 0.199301  | 0.123543 | 0.121795  |
| 0.124709  | 0.115676  | 0.127768  | 0.13549  | 0.204545  | 0.128788 | 0.121503  |
| 0.132867  | 0.0914918 | 0.138258  | 0.122378 | 0.19697   | 0.115967 | 0.117133  |
| 0.126311  | 0.114656  | 0.0594406 | 0.125146 | 0.212558  | 0.120484 | 0.0875583 |
| 0.131556  | 0.11553   | 0.110723  | 0.123106 | 0.198281  | 0.126894 | 0.111742  |
| 0.134761  | 0.117861  | 0.117716  | 0.134178 | 0.209353  | 0.128642 | 0.114365  |
| 0.125437  | 0.106789  | 0.130828  | 0.127477 | 0.190705  | 0.116404 | 0.11553   |
| 0.120338  | 0.114219  | 0.106206  | 0.132867 | 0.206002  | 0.124126 | 0.0565268 |
| 0.200029  | 0.183129  | 0.208625  | 0.201486 | 0.10271   | 0.190414 | 0.187209  |
| 0.0457459 | 0.121795  | 0.132721  | 0.138986 | 0.206294  | 0.132576 | 0.113345  |
| 0.121066  | 0.126311  | 0.141026  | 0.13884  | 0.207022  | 0.13039  | 0.121358  |
| 0.107226  | 0.112471  | 0.138258  | 0.13345  | 0.198427  | 0.126748 | 0.112762  |
| 0.139714  | 0.113199  | 0.125874  | 0.142045 | 0.202652  | 0.135927 | 0.117861  |
| 0.131265  | 0.11757   | 0.131993  | 0.133304 | 0.198864  | 0.123689 | 0.11961   |
| 0.125146  | 0.118444  | 0.0515734 | 0.128642 | 0.213432  | 0.121358 | 0.0948427 |
| 0.116841  | 0.105478  | 0.121066  | 0.129953 | 0.198427  | 0.125583 | 0.1081    |
| 0.129079  | 0.11859   | 0.0992133 | 0.123543 | 0.211538  | 0.129953 | 0.109266  |
| 0.120775  | 0.116113  | 0.1419    | 0.134761 | 0.205565  | 0.128351 | 0.11553   |
| 0.0595862 | 0.112617  | 0.130536  | 0.134761 | 0.201777  | 0.129808 | 0.107372  |
| 0.136072  | 0.0967366 | 0.140589  | 0.127331 | 0.193765  | 0.11451  | 0.118007  |
| 0.127185  | 0.114365  | 0.136946  | 0.133887 | 0.20877   | 0.13243  | 0.120775  |
| 0.137821  | 0.128205  | 0.137675  | 0.138112 | 0.213578  | 0.141608 | 0.136072  |
| 0.132284  | 0.102273  | 0.122815  | 0.134324 | 0.20134   | 0.130245 | 0.108974  |
| 0.142045  | 0.134178  | 0.13986   | 0.143794 | 0.207896  | 0.132139 | 0.136509  |
| 0.129516  | 0.0901807 | 0.138112  | 0.119318 | 0.198572  | 0.11553  | 0.116404  |
| 0.103875  | 0.113491  | 0.128497  | 0.133304 | 0.200321  | 0.119318 | 0.10708   |
| 0.133159  | 0.114219  | 0.133304  | 0.128497 | 0.181818  | 0.120921 | 0.119755  |
| 0.130828  | 0.12296   | 0.103293  | 0.124126 | 0.204837  | 0.131993 | 0.107517  |
| 0.200175  | 0.18852   | 0.199738  | 0.201049 | 0.117716  | 0.187354 | 0.187646  |
| 0.114656  | 0.107955  | 0.10373   | 0.127768 | 0.204983  | 0.123397 | 0.0470571 |
| 0.117861  | 0.101253  | 0.120047  | 0.11757  | 0.195076  | 0.107955 | 0.103584  |
| 0.133887  | 0.119027  | 0.118881  | 0.134178 | 0.214307  | 0.127185 | 0.113491  |
| 0.19391   | 0.167686  | 0.201049  | 0.18954  | 0.121941  | 0.174097 | 0.182255  |
| 0.143648  | 0.122669  | 0.131847  | 0.152389 | 0.211538  | 0.142774 | 0.127914  |
| 0.151224  | 0.129953  | 0.135344  | 0.15676  | 0.222028  | 0.15035  | 0.143357  |
| 0.137092  | 0.141754  | 0.150932  | 0.151661 | 0.21926   | 0.144668 | 0.141171  |
| 0.131847  | 0.0986305 | 0.120047  | 0.13243  | 0.201486  | 0.128351 | 0.108829  |
| 0.130536  | 0.121212  | 0.13243   | 0.134324 | 0.19697   | 0.121795 | 0.122378  |
| 0.222174  | 0.20877   | 0.227564  | 0.223048 | 0.0965909 | 0.207605 | 0.212558  |
| 0.129225  | 0.116404  | 0.132867  | 0.13447  | 0.19595   | 0.126603 | 0.122815  |

|           |           |           |          |          |           |           |
|-----------|-----------|-----------|----------|----------|-----------|-----------|
| 0.133159  | 0.12296   | 0.137675  | 0.138695 | 0.199301 | 0.126457  | 0.125291  |
| 0.120338  | 0.111597  | 0.10708   | 0.134615 | 0.204254 | 0.121503  | 0.0524476 |
| 0.183858  | 0.164336  | 0.186043  | 0.177156 | 0.144231 | 0.16317   | 0.170746  |
| 0.125     | 0.102855  | 0.128351  | 0.127914 | 0.193473 | 0.119755  | 0.109557  |
| 0.149621  | 0.137675  | 0.150058  | 0.150495 | 0.21926  | 0.143502  | 0.140297  |
| 0.133596  | 0.0910548 | 0.135198  | 0.125437 | 0.197407 | 0.127477  | 0.117279  |
| 0.201195  | 0.186334  | 0.205711  | 0.201777 | 0.101253 | 0.190997  | 0.190414  |
| 0.133304  | 0.108537  | 0.122086  | 0.139132 | 0.207896 | 0.135052  | 0.116696  |
| 0.125437  | 0.0846445 | 0.125291  | 0.118735 | 0.200029 | 0.103584  | 0.107663  |
| 0.107517  | 0.109848  | 0.130682  | 0.138986 | 0.202797 | 0.122669  | 0.107517  |
| 0.126894  | 0.113782  | 0.124417  | 0.135052 | 0.204691 | 0.12398   | 0.109994  |
| 0.133887  | 0.112908  | 0.117716  | 0.13447  | 0.210227 | 0.126311  | 0.114656  |
| 0.132139  | 0.114656  | 0.135781  | 0.134178 | 0.198572 | 0.12398   | 0.113782  |
| 0.131993  | 0.0862471 | 0.136509  | 0.123543 | 0.197844 | 0.112179  | 0.116259  |
| 0.201486  | 0.184295  | 0.206002  | 0.200903 | 0.100962 | 0.189248  | 0.188666  |
| 0.130536  | 0.117424  | 0.130682  | 0.134615 | 0.205128 | 0.131993  | 0.113928  |
| 0.128059  | 0.103293  | 0.126166  | 0.128351 | 0.196824 | 0.0607517 | 0.112034  |
| 0.22028   | 0.208042  | 0.228001  | 0.224942 | 0.102564 | 0.205711  | 0.212995  |
| 0.0439977 | 0.120338  | 0.134761  | 0.137529 | 0.20979  | 0.130828  | 0.110431  |
| 0.132721  | 0.0895979 | 0.13549   | 0.123106 | 0.199155 | 0.114365  | 0.11553   |
| 0.127185  | 0.0887238 | 0.13549   | 0.119318 | 0.194784 | 0.112617  | 0.110868  |
| 0.134907  | 0.130828  | 0.139423  | 0.141026 | 0.206002 | 0.131119  | 0.136655  |
| 0.201632  | 0.183566  | 0.207605  | 0.201923 | 0.105186 | 0.187646  | 0.18852   |
| 0.129516  | 0.116113  | 0.0981935 | 0.122815 | 0.211976 | 0.12602   | 0.107955  |
| 0.13039   | 0.121941  | 0.13549   | 0.137966 | 0.210227 | 0.135052  | 0.128642  |
| 0.129808  | 0.0887238 | 0.136364  | 0.121649 | 0.198572 | 0.11757   | 0.113491  |
| 0.130973  | 0.0840618 | 0.13345   | 0.120192 | 0.19799  | 0.112908  | 0.113491  |
| 0.127622  | 0.0856643 | 0.138549  | 0.11859  | 0.195221 | 0.114219  | 0.114802  |
| 0.130973  | 0.112325  | 0.129953  | 0.133304 | 0.200612 | 0.118444  | 0.118735  |
| 0.119464  | 0.0786713 | 0.124854  | 0.118007 | 0.201049 | 0.111888  | 0.0999417 |
| 0.136655  | 0.109557  | 0.125728  | 0.139277 | 0.210082 | 0.134615  | 0.120338  |
| 0.125     | 0.126748  | 0.139132  | 0.147727 | 0.215909 | 0.129079  | 0.127331  |
| 0.134615  | 0.105478  | 0.12398   | 0.140734 | 0.207168 | 0.13345   | 0.114219  |
| 0.126311  | 0.117861  | 0.134033  | 0.137966 | 0.21081  | 0.129225  | 0.128934  |
| 0.207751  | 0.190851  | 0.213432  | 0.207459 | 0.10169  | 0.19493   | 0.192016  |
| 0.122232  | 0.109994  | 0.131993  | 0.13039  | 0.204691 | 0.128642  | 0.118735  |
| 0.136655  | 0.127622  | 0.136801  | 0.139569 | 0.199592 | 0.125583  | 0.129662  |
| 0.129225  | 0.0828963 | 0.134907  | 0.121941 | 0.198572 | 0.116113  | 0.112908  |
| 0.117716  | 0.0745921 | 0.124854  | 0.115676 | 0.197552 | 0.115967  | 0.102273  |
| 0.124709  | 0.101107  | 0.130973  | 0.124709 | 0.196678 | 0.125291  | 0.107809  |
| 0.128059  | 0.120192  | 0.0938228 | 0.123106 | 0.207022 | 0.12602   | 0.10271   |
| 0.13447   | 0.123106  | 0.138112  | 0.143794 | 0.205274 | 0.125728  | 0.126311  |
| 0.128788  | 0.111597  | 0.138549  | 0.132576 | 0.20542  | 0.125583  | 0.11655   |
| 0.126457  | 0.0964452 | 0.10912   | 0.11655  | 0.198427 | 0.120921  | 0.100233  |

|          |           |           |          |           |           |           |
|----------|-----------|-----------|----------|-----------|-----------|-----------|
| 0.121649 | 0.0875583 | 0.113054  | 0.114365 | 0.196241  | 0.112034  | 0.097465  |
| 0.126748 | 0.0810023 | 0.128934  | 0.121503 | 0.19697   | 0.105478  | 0.102855  |
| 0.126603 | 0.111742  | 0.0611888 | 0.126603 | 0.212267  | 0.11961   | 0.0898893 |
| 0.142774 | 0.117133  | 0.128934  | 0.141026 | 0.213287  | 0.140443  | 0.125874  |
| 0.130682 | 0.113491  | 0.10373   | 0.125728 | 0.208479  | 0.124854  | 0.102127  |
| 0.124126 | 0.109557  | 0.128351  | 0.128788 | 0.19289   | 0.119172  | 0.113345  |
| 0.123834 | 0.111305  | 0.102127  | 0.121795 | 0.205128  | 0.120047  | 0.0952797 |
| 0.126894 | 0.0872669 | 0.136072  | 0.121358 | 0.19799   | 0.118153  | 0.112908  |
| 0.114802 | 0.106935  | 0.106498  | 0.128497 | 0.204837  | 0.120338  | 0.0477855 |
| 0.131119 | 0.087704  | 0.139714  | 0.122086 | 0.200466  | 0.118007  | 0.115967  |
| 0.120921 | 0.106061  | 0.128351  | 0.125    | 0.202214  | 0.12704   | 0.113636  |
| 0.122086 | 0.109266  | 0.142337  | 0.133741 | 0.204545  | 0.125     | 0.113928  |
| 0.132867 | 0.111014  | 0.118444  | 0.128788 | 0.20979   | 0.124709  | 0.104604  |
| 0.12602  | 0.0782343 | 0.126748  | 0.121649 | 0.197407  | 0.117861  | 0.101836  |
| 0.128788 | 0.0897436 | 0.137092  | 0.121795 | 0.197261  | 0.119172  | 0.113054  |
| 0.115967 | 0.117133  | 0.133596  | 0.139277 | 0.189977  | 0.126457  | 0.113928  |
| 0.132721 | 0.106498  | 0.133159  | 0.135052 | 0.202069  | 0.0642483 | 0.116696  |
| 0.129079 | 0.0798368 | 0.126311  | 0.120047 | 0.200758  | 0.105186  | 0.107517  |
| 0.127914 | 0.0862471 | 0.138258  | 0.118881 | 0.200466  | 0.114802  | 0.116259  |
| 0.130099 | 0.115822  | 0.134907  | 0.134178 | 0.193036  | 0.119027  | 0.117861  |
| 0.127768 | 0.112034  | 0.0614802 | 0.127185 | 0.207022  | 0.12398   | 0.0875583 |
| 0.132139 | 0.112617  | 0.132284  | 0.133596 | 0.200612  | 0.121941  | 0.116987  |
| 0.135052 | 0.107372  | 0.118007  | 0.131265 | 0.207022  | 0.125728  | 0.108246  |
| 0.125146 | 0.0770688 | 0.13141   | 0.11961  | 0.20236   | 0.117279  | 0.10708   |
| 0.127185 | 0.102418  | 0.127914  | 0.128642 | 0.19595   | 0.122232  | 0.10912   |
| 0.116841 | 0.101981  | 0.107663  | 0.128788 | 0.206876  | 0.12296   | 0.0463287 |
| 0.135344 | 0.117279  | 0.137821  | 0.133304 | 0.196824  | 0.123106  | 0.120775  |
| 0.13039  | 0.122523  | 0.127914  | 0.135052 | 0.206148  | 0.111742  | 0.112325  |
| 0.128788 | 0.107517  | 0.128642  | 0.129953 | 0.200758  | 0.109266  | 0.115676  |
| 0.207459 | 0.190268  | 0.209936  | 0.205128 | 0.100816  | 0.190559  | 0.195804  |
| 0.176865 | 0.1588    | 0.177885  | 0.176282 | 0.136364  | 0.157051  | 0.162879  |
| 0.134615 | 0.11014   | 0.122815  | 0.13986  | 0.205711  | 0.132284  | 0.114802  |
| 0.127768 | 0.114656  | 0.121212  | 0.12602  | 0.199446  | 0.119027  | 0.111742  |
| 0.157488 | 0.135635  | 0.135781  | 0.158362 | 0.22567   | 0.155449  | 0.144668  |
| 0.131119 | 0.117716  | 0.140006  | 0.137821 | 0.207168  | 0.130245  | 0.120047  |
| 0.133013 | 0.103293  | 0.139277  | 0.12602  | 0.19595   | 0.123397  | 0.115239  |
| 0.134907 | 0.0979021 | 0.13447   | 0.12704  | 0.198427  | 0.0912005 | 0.11451   |
| 0.129662 | 0.0437063 | 0.135052  | 0.120338 | 0.205711  | 0.120629  | 0.115093  |
| 0.134033 | 0.106643  | 0.133887  | 0.133741 | 0.203089  | 0.0582751 | 0.117716  |
| 0.21285  | 0.19595   | 0.217075  | 0.211101 | 0.0992133 | 0.197698  | 0.203817  |
| 0.132284 | 0.118007  | 0.105041  | 0.125874 | 0.212704  | 0.127914  | 0.105478  |
| 0.131847 | 0.115822  | 0.123252  | 0.128642 | 0.191871  | 0.123397  | 0.115822  |
| 0.130682 | 0.0840618 | 0.132576  | 0.120484 | 0.196241  | 0.112034  | 0.110577  |
| 0.124709 | 0.106935  | 0.130099  | 0.136655 | 0.204837  | 0.125291  | 0.112471  |

|           |           |           |          |           |           |           |
|-----------|-----------|-----------|----------|-----------|-----------|-----------|
| 0.198864  | 0.177302  | 0.205711  | 0.196533 | 0.125728  | 0.16623   | 0.184878  |
| 0.254516  | 0.244901  | 0.259033  | 0.255099 | 0.113199  | 0.239948  | 0.246066  |
| 0.126311  | 0.11553   | 0.142191  | 0.135052 | 0.207605  | 0.127477  | 0.115239  |
| 0.129808  | 0.10708   | 0.131993  | 0.135052 | 0.205857  | 0.0619172 | 0.116696  |
| 0.132721  | 0.109411  | 0.126748  | 0.141171 | 0.2044    | 0.134761  | 0.116987  |
| 0.132576  | 0.110431  | 0.115239  | 0.129371 | 0.207168  | 0.123252  | 0.106643  |
| 0.125437  | 0.110868  | 0.100524  | 0.119027 | 0.210227  | 0.122232  | 0.100379  |
| 0.128205  | 0.106935  | 0.13039   | 0.127914 | 0.198718  | 0.128497  | 0.108392  |
| 0.133596  | 0.095134  | 0.13141   | 0.121941 | 0.189831  | 0.112908  | 0.115239  |
| 0.124854  | 0.113199  | 0.0981935 | 0.121066 | 0.20877   | 0.123106  | 0.0995047 |
| 0.129662  | 0.0990676 | 0.132721  | 0.12296  | 0.190851  | 0.113345  | 0.112471  |
| 0.135635  | 0.0823135 | 0.132867  | 0.125146 | 0.209645  | 0.108537  | 0.111742  |
| 0.126166  | 0.0777972 | 0.12602   | 0.120921 | 0.201049  | 0.117133  | 0.105769  |
| 0.117861  | 0.115822  | 0.139277  | 0.13447  | 0.204983  | 0.126603  | 0.116987  |
| 0.130536  | 0.116259  | 0.133596  | 0.136072 | 0.200466  | 0.122378  | 0.122086  |
| 0.102855  | 0.099359  | 0.119027  | 0.126748 | 0.195221  | 0.115676  | 0.102855  |
| 0.124709  | 0.106061  | 0.121941  | 0.134615 | 0.216492  | 0.132576  | 0.122086  |
| 0.141317  | 0.126748  | 0.120484  | 0.137238 | 0.2162    | 0.133159  | 0.12296   |
| 0.127185  | 0.0872669 | 0.135198  | 0.123397 | 0.200903  | 0.116987  | 0.110577  |
| 0.133741  | 0.101107  | 0.129516  | 0.115967 | 0.191725  | 0.12296   | 0.11859   |
| 0.1419    | 0.105769  | 0.142628  | 0.127622 | 0.208625  | 0.123252  | 0.132284  |
| 0.21926   | 0.203234  | 0.224359  | 0.216929 | 0.111451  | 0.205565  | 0.209353  |
| 0.11655   | 0.10373   | 0.129808  | 0.126457 | 0.195513  | 0.119464  | 0.107226  |
| 0.122232  | 0.0756119 | 0.125583  | 0.120775 | 0.201195  | 0.117861  | 0.104749  |
| 0.127768  | 0.109703  | 0.134033  | 0.13243  | 0.206148  | 0.132139  | 0.116404  |
| 0.0506993 | 0.119755  | 0.137383  | 0.138403 | 0.208042  | 0.134033  | 0.112471  |
| 0.123252  | 0.108392  | 0.124272  | 0.132576 | 0.204545  | 0.124709  | 0.110723  |
| 0.208916  | 0.193473  | 0.218969  | 0.213869 | 0.100524  | 0.197844  | 0.199301  |
| 0.135927  | 0.116987  | 0.139277  | 0.135927 | 0.199155  | 0.123106  | 0.119318  |
| 0.129953  | 0.0882867 | 0.133304  | 0.117133 | 0.200466  | 0.115676  | 0.112179  |
| 0.130973  | 0.107663  | 0.122378  | 0.133304 | 0.205274  | 0.124854  | 0.114948  |
| 0.129225  | 0.107663  | 0.114802  | 0.127185 | 0.205857  | 0.121358  | 0.103584  |
| 0.131265  | 0.115239  | 0.13549   | 0.13447  | 0.196241  | 0.121358  | 0.120484  |
| 0.121941  | 0.100379  | 0.130536  | 0.124854 | 0.189831  | 0.114656  | 0.108829  |
| 0.135927  | 0.081148  | 0.131993  | 0.120484 | 0.208188  | 0.108537  | 0.111742  |
| 0.055507  | 0.11553   | 0.132576  | 0.135052 | 0.207605  | 0.130682  | 0.105041  |
| 0.210664  | 0.19289   | 0.215763  | 0.210373 | 0.102855  | 0.199883  | 0.198135  |
| 0.126311  | 0.106789  | 0.126748  | 0.124272 | 0.194784  | 0.115239  | 0.109994  |
| 0.208625  | 0.189103  | 0.213432  | 0.208916 | 0.0999417 | 0.192308  | 0.193473  |
| 0.205565  | 0.188083  | 0.212413  | 0.207314 | 0.10067   | 0.188666  | 0.190414  |
| 0.139132  | 0.121941  | 0.118007  | 0.136509 | 0.215181  | 0.130973  | 0.116404  |
| 0.048514  | 0.126603  | 0.135781  | 0.137966 | 0.214307  | 0.133013  | 0.120775  |
| 0.126311  | 0.0814394 | 0.123252  | 0.11961  | 0.200612  | 0.103293  | 0.106206  |
| 0.124709  | 0.105186  | 0.127768  | 0.125291 | 0.193182  | 0.116841  | 0.1081    |



|           |           |           |          |          |          |           |
|-----------|-----------|-----------|----------|----------|----------|-----------|
| 0.131556  | 0.10912   | 0.131119  | 0.13243  | 0.194784 | 0.121941 | 0.115239  |
| 0.131556  | 0.0878497 | 0.139569  | 0.122523 | 0.199446 | 0.117861 | 0.114073  |
| 0.120484  | 0.109703  | 0.0981935 | 0.119027 | 0.205565 | 0.11961  | 0.0989219 |
| 0.124854  | 0.112908  | 0.097028  | 0.115239 | 0.208479 | 0.122232 | 0.101544  |
| 0.121795  | 0.117424  | 0.144376  | 0.136655 | 0.203671 | 0.127622 | 0.119464  |
| 0.132139  | 0.113491  | 0.120338  | 0.133304 | 0.209062 | 0.126311 | 0.110286  |
| 0.125     | 0.0874126 | 0.132139  | 0.118298 | 0.19697  | 0.112471 | 0.11014   |
| 0.13039   | 0.112034  | 0.13345   | 0.132139 | 0.198572 | 0.119027 | 0.11553   |
| 0.123252  | 0.0804196 | 0.119318  | 0.115967 | 0.199592 | 0.102855 | 0.100816  |
| 0.134178  | 0.125146  | 0.13549   | 0.133304 | 0.201195 | 0.126311 | 0.128934  |
| 0.137675  | 0.106789  | 0.121795  | 0.136218 | 0.207314 | 0.13039  | 0.111451  |
| 0.136655  | 0.129371  | 0.139423  | 0.140152 | 0.20542  | 0.130828 | 0.132284  |
| 0.266608  | 0.25641   | 0.269668  | 0.267483 | 0.120047 | 0.256702 | 0.261364  |
| 0.120629  | 0.125583  | 0.103001  | 0.136072 | 0.219114 | 0.130828 | 0.0614802 |
| 0.131265  | 0.123397  | 0.115967  | 0.138549 | 0.209353 | 0.129225 | 0.105624  |
| 0.230186  | 0.215618  | 0.23412   | 0.231643 | 0.107809 | 0.213287 | 0.222319  |
| 0.121358  | 0.113491  | 0.131702  | 0.135344 | 0.209062 | 0.126311 | 0.116696  |
| 0.236742  | 0.226836  | 0.244172  | 0.240239 | 0.113782 | 0.223922 | 0.232372  |
| 0.116841  | 0.115385  | 0.101836  | 0.13141  | 0.210664 | 0.123543 | 0.0533217 |
| 0.140297  | 0.102127  | 0.143357  | 0.126603 | 0.208188 | 0.121358 | 0.130099  |
| 0.0636655 | 0.111451  | 0.129371  | 0.133596 | 0.202943 | 0.126311 | 0.103001  |
| 0.135635  | 0.115239  | 0.120629  | 0.13447  | 0.209936 | 0.130099 | 0.116113  |
| 0.213724  | 0.197698  | 0.219697  | 0.214598 | 0.106789 | 0.201777 | 0.2044    |
| 0.138549  | 0.127477  | 0.140443  | 0.13884  | 0.204691 | 0.127477 | 0.130682  |
| 0.132721  | 0.112617  | 0.135198  | 0.13039  | 0.196241 | 0.120484 | 0.11757   |
| 0.236305  | 0.222028  | 0.24257   | 0.234848 | 0.111597 | 0.222902 | 0.226107  |
| 0.127185  | 0.116987  | 0.104895  | 0.123106 | 0.206731 | 0.125437 | 0.102127  |
| 0.208042  | 0.19289   | 0.215472  | 0.213578 | 0.10169  | 0.199301 | 0.197552  |
| 0.128497  | 0.117133  | 0.103875  | 0.125874 | 0.208333 | 0.129079 | 0.104895  |
| 0.131119  | 0.087704  | 0.138258  | 0.125    | 0.20338  | 0.118007 | 0.115385  |
| 0.127477  | 0.0855186 | 0.132867  | 0.125146 | 0.205274 | 0.126894 | 0.11553   |
| 0.138258  | 0.122815  | 0.11655   | 0.134178 | 0.215763 | 0.13243  | 0.119318  |
| 0.130536  | 0.104895  | 0.130973  | 0.12704  | 0.199883 | 0.126457 | 0.112762  |
| 0.173368  | 0.143357  | 0.181964  | 0.166375 | 0.135198 | 0.161422 | 0.152972  |
| 0.125583  | 0.111014  | 0.129225  | 0.128497 | 0.19289  | 0.114219 | 0.11655   |
| 0.0559441 | 0.118007  | 0.134178  | 0.135781 | 0.206876 | 0.132284 | 0.108974  |
| 0.123834  | 0.108392  | 0.13884   | 0.134615 | 0.206876 | 0.128205 | 0.116841  |
| 0.108683  | 0.126166  | 0.128059  | 0.141026 | 0.20338  | 0.12704  | 0.116841  |
| 0.208479  | 0.190122  | 0.212704  | 0.206439 | 0.103875 | 0.193036 | 0.195659  |
| 0.129079  | 0.0874126 | 0.135927  | 0.120338 | 0.198135 | 0.113345 | 0.113054  |
| 0.142628  | 0.11116   | 0.126166  | 0.137383 | 0.19799  | 0.124563 | 0.112908  |
| 0.127331  | 0.111888  | 0.0636655 | 0.125874 | 0.211538 | 0.120047 | 0.0885781 |
| 0.124854  | 0.117279  | 0.0964452 | 0.11961  | 0.209936 | 0.125437 | 0.103584  |
| 0.13345   | 0.0938228 | 0.137092  | 0.122669 | 0.203089 | 0.119172 | 0.124126  |

|           |           |          |          |           |          |          |
|-----------|-----------|----------|----------|-----------|----------|----------|
| 0.26384   | 0.254516  | 0.270105 | 0.264714 | 0.118153  | 0.252185 | 0.258596 |
| 0.124126  | 0.0847902 | 0.126894 | 0.11859  | 0.203963  | 0.122086 | 0.111014 |
| 0.131702  | 0.103438  | 0.137675 | 0.130828 | 0.197261  | 0.12296  | 0.118298 |
| 0.185606  | 0.175699  | 0.190122 | 0.189103 | 0.142483  | 0.176573 | 0.176865 |
| 0.201632  | 0.179196  | 0.203817 | 0.20134  | 0.104604  | 0.187646 | 0.185606 |
| 0.124709  | 0.11451   | 0.143502 | 0.136072 | 0.202214  | 0.128788 | 0.115676 |
| 0.13039   | 0.111742  | 0.13549  | 0.13447  | 0.200321  | 0.120192 | 0.120192 |
| 0.133887  | 0.109703  | 0.119464 | 0.131265 | 0.208479  | 0.122815 | 0.104167 |
| 0.149767  | 0.141608  | 0.147582 | 0.148601 | 0.210082  | 0.141317 | 0.143357 |
| 0.124417  | 0.109266  | 0.13884  | 0.131702 | 0.203963  | 0.124417 | 0.113345 |
| 0.125146  | 0.115822  | 0.141608 | 0.137675 | 0.206439  | 0.128642 | 0.116404 |
| 0.130828  | 0.125291  | 0.102127 | 0.126748 | 0.210956  | 0.13345  | 0.108974 |
| 0.125     | 0.113928  | 0.130973 | 0.129079 | 0.192308  | 0.11655  | 0.117424 |
| 0.134178  | 0.125146  | 0.137238 | 0.133596 | 0.199446  | 0.12602  | 0.12602  |
| 0.130536  | 0.111888  | 0.110286 | 0.126457 | 0.191142  | 0.125874 | 0.107226 |
| 0.136801  | 0.11757   | 0.115967 | 0.13447  | 0.211976  | 0.127477 | 0.116113 |
| 0.14627   | 0.134615  | 0.124854 | 0.144522 | 0.224068  | 0.139569 | 0.131993 |
| 0.129516  | 0.0852273 | 0.131993 | 0.124854 | 0.204691  | 0.124563 | 0.114656 |
| 0.141026  | 0.126166  | 0.11961  | 0.138986 | 0.219114  | 0.133159 | 0.121795 |
| 0.132284  | 0.123252  | 0.100087 | 0.12296  | 0.219697  | 0.130245 | 0.111597 |
| 0.218677  | 0.202652  | 0.226981 | 0.221882 | 0.107663  | 0.201195 | 0.207896 |
| 0.130245  | 0.0862471 | 0.121358 | 0.131993 | 0.210956  | 0.126166 | 0.117716 |
| 0.204254  | 0.18852   | 0.208188 | 0.205711 | 0.104895  | 0.190268 | 0.191142 |
| 0.097028  | 0.108683  | 0.130682 | 0.133741 | 0.203671  | 0.120338 | 0.102273 |
| 0.134907  | 0.100524  | 0.141171 | 0.127622 | 0.202214  | 0.11859  | 0.127331 |
| 0.136072  | 0.111305  | 0.128351 | 0.141608 | 0.202506  | 0.135198 | 0.120921 |
| 0.130099  | 0.10271   | 0.120629 | 0.135635 | 0.201486  | 0.126311 | 0.109994 |
| 0.131993  | 0.120047  | 0.140297 | 0.134033 | 0.196096  | 0.123834 | 0.12296  |
| 0.129371  | 0.121212  | 0.13243  | 0.131119 | 0.197844  | 0.124126 | 0.120629 |
| 0.132576  | 0.0914918 | 0.136509 | 0.125874 | 0.197844  | 0.116841 | 0.115676 |
| 0.0543415 | 0.116113  | 0.13345  | 0.135344 | 0.205565  | 0.127768 | 0.109703 |
| 0.136509  | 0.114656  | 0.125    | 0.138258 | 0.208479  | 0.133887 | 0.122815 |
| 0.13549   | 0.130536  | 0.097465 | 0.126166 | 0.205711  | 0.132867 | 0.113345 |
| 0.258741  | 0.249126  | 0.262675 | 0.25845  | 0.114802  | 0.246795 | 0.254079 |
| 0.134907  | 0.0929487 | 0.139714 | 0.126457 | 0.200175  | 0.116841 | 0.121212 |
| 0.195076  | 0.17905   | 0.20134  | 0.197698 | 0.106206  | 0.181672 | 0.187209 |
| 0.201923  | 0.181818  | 0.207605 | 0.20134  | 0.0996503 | 0.18852  | 0.18648  |
| 0.136801  | 0.106206  | 0.138403 | 0.129516 | 0.197115  | 0.121649 | 0.116113 |
| 0.123397  | 0.0820221 | 0.125874 | 0.121941 | 0.201195  | 0.116987 | 0.105041 |
| 0.135927  | 0.0980478 | 0.142483 | 0.12398  | 0.205565  | 0.120775 | 0.126603 |
| 0.127185  | 0.107663  | 0.132284 | 0.128059 | 0.196533  | 0.116987 | 0.114948 |
| 0.129371  | 0.0451632 | 0.134178 | 0.122086 | 0.194347  | 0.120338 | 0.111597 |
| 0.124709  | 0.114219  | 0.104458 | 0.125    | 0.208333  | 0.126166 | 0.100816 |
| 0.128059  | 0.109994  | 0.132867 | 0.129516 | 0.192453  | 0.118153 | 0.122815 |

|           |           |           |          |          |          |           |
|-----------|-----------|-----------|----------|----------|----------|-----------|
| 0.136801  | 0.128642  | 0.138403  | 0.138258 | 0.207605 | 0.127477 | 0.131265  |
| 0.130828  | 0.0894522 | 0.138549  | 0.124709 | 0.198427 | 0.115967 | 0.115385  |
| 0.134615  | 0.124417  | 0.137966  | 0.137821 | 0.203671 | 0.126166 | 0.126166  |
| 0.122815  | 0.109411  | 0.123252  | 0.137092 | 0.200903 | 0.122815 | 0.0954254 |
| 0.138258  | 0.113199  | 0.123252  | 0.140006 | 0.209353 | 0.136509 | 0.121941  |
| 0.138403  | 0.11451   | 0.121066  | 0.134033 | 0.209207 | 0.125291 | 0.111305  |
| 0.134178  | 0.128642  | 0.0958625 | 0.126311 | 0.218386 | 0.135344 | 0.11553   |
| 0.136072  | 0.0894522 | 0.132139  | 0.123252 | 0.209207 | 0.106352 | 0.119755  |
| 0.129953  | 0.0929487 | 0.133304  | 0.120047 | 0.193473 | 0.114802 | 0.11859   |
| 0.131993  | 0.129079  | 0.136801  | 0.136655 | 0.210664 | 0.135781 | 0.13345   |
| 0.194493  | 0.17905   | 0.202506  | 0.198281 | 0.101836 | 0.183712 | 0.184586  |
| 0.140443  | 0.134324  | 0.140297  | 0.141026 | 0.206876 | 0.131993 | 0.13345   |
| 0.13141   | 0.118881  | 0.134178  | 0.132284 | 0.197261 | 0.123834 | 0.123252  |
| 0.131265  | 0.106206  | 0.120921  | 0.136509 | 0.206731 | 0.133013 | 0.115822  |
| 0.127622  | 0.099359  | 0.118153  | 0.129953 | 0.201632 | 0.125291 | 0.10373   |
| 0.135635  | 0.111742  | 0.117716  | 0.133013 | 0.207605 | 0.126603 | 0.112617  |
| 0.137238  | 0.115385  | 0.120775  | 0.138112 | 0.210373 | 0.130828 | 0.116841  |
| 0.204691  | 0.187209  | 0.209207  | 0.2044   | 0.106789 | 0.191288 | 0.193036  |
| 0.132721  | 0.111742  | 0.130536  | 0.126603 | 0.189248 | 0.113782 | 0.11961   |
| 0.125     | 0.0961538 | 0.125437  | 0.122378 | 0.177739 | 0.107517 | 0.104895  |
| 0.130536  | 0.125     | 0.135052  | 0.132867 | 0.199592 | 0.125    | 0.12296   |
| 0.202652  | 0.187791  | 0.211247  | 0.207022 | 0.10271  | 0.186917 | 0.192745  |
| 0.126166  | 0.0777972 | 0.127185  | 0.123543 | 0.195221 | 0.117133 | 0.104895  |
| 0.130099  | 0.120192  | 0.0996503 | 0.121066 | 0.213141 | 0.13243  | 0.107955  |
| 0.131265  | 0.119901  | 0.135781  | 0.135344 | 0.199155 | 0.124272 | 0.124854  |
| 0.118007  | 0.110723  | 0.130973  | 0.129371 | 0.204545 | 0.12296  | 0.11014   |
| 0.201049  | 0.184732  | 0.207896  | 0.200175 | 0.106061 | 0.186189 | 0.187937  |
| 0.127622  | 0.117133  | 0.0992133 | 0.123834 | 0.206585 | 0.125874 | 0.105186  |
| 0.122378  | 0.105478  | 0.129808  | 0.125291 | 0.19697  | 0.123252 | 0.112762  |
| 0.124709  | 0.0850816 | 0.129516  | 0.120338 | 0.190559 | 0.119464 | 0.106352  |
| 0.136946  | 0.111597  | 0.132139  | 0.132576 | 0.179779 | 0.13141  | 0.117424  |
| 0.0511364 | 0.116696  | 0.136946  | 0.138549 | 0.206731 | 0.130099 | 0.107663  |
| 0.129516  | 0.126603  | 0.0976107 | 0.125146 | 0.215472 | 0.134178 | 0.113491  |
| 0.129516  | 0.088141  | 0.137821  | 0.121066 | 0.200321 | 0.116987 | 0.116113  |
| 0.130973  | 0.116404  | 0.13141   | 0.128934 | 0.209062 | 0.116113 | 0.111451  |
| 0.136946  | 0.140152  | 0.154866  | 0.152098 | 0.217075 | 0.142483 | 0.141026  |
| 0.24359   | 0.2331    | 0.24898   | 0.245047 | 0.107226 | 0.23514  | 0.238054  |
| 0.13986   | 0.0952797 | 0.134761  | 0.132576 | 0.215618 | 0.112179 | 0.124126  |
| 0.0565268 | 0.116841  | 0.135635  | 0.138695 | 0.205711 | 0.129953 | 0.108974  |
| 0.125728  | 0.111742  | 0.130536  | 0.129225 | 0.191288 | 0.117861 | 0.11961   |
| 0.131993  | 0.112471  | 0.140589  | 0.138112 | 0.195804 | 0.125583 | 0.119464  |
| 0.0724068 | 0.110868  | 0.12296   | 0.125728 | 0.199738 | 0.125146 | 0.107663  |
| 0.119901  | 0.112034  | 0.129079  | 0.133596 | 0.202652 | 0.123106 | 0.112034  |
| 0.127622  | 0.119464  | 0.132721  | 0.134324 | 0.194347 | 0.123252 | 0.124126  |

|           |           |           |          |           |          |           |
|-----------|-----------|-----------|----------|-----------|----------|-----------|
| 0.130682  | 0.125437  | 0.0976107 | 0.125437 | 0.208188  | 0.131556 | 0.109703  |
| 0.122523  | 0.112034  | 0.137821  | 0.128934 | 0.200903  | 0.125437 | 0.113199  |
| 0.245629  | 0.235431  | 0.25102   | 0.246795 | 0.111305  | 0.233974 | 0.23951   |
| 0.120192  | 0.076486  | 0.126457  | 0.117861 | 0.194784  | 0.120775 | 0.103293  |
| 0.11116   | 0.10271   | 0.10373   | 0.124563 | 0.20236   | 0.118444 | 0.0505536 |
| 0.126748  | 0.087704  | 0.133887  | 0.119755 | 0.198427  | 0.111305 | 0.115967  |
| 0.124854  | 0.128059  | 0.145979  | 0.137383 | 0.21081   | 0.128351 | 0.125728  |
| 0.143211  | 0.100087  | 0.135781  | 0.129516 | 0.220134  | 0.114656 | 0.131265  |
| 0.133596  | 0.103875  | 0.138112  | 0.137966 | 0.191579  | 0.121066 | 0.120775  |
| 0.130973  | 0.115822  | 0.13345   | 0.13243  | 0.195076  | 0.121358 | 0.123689  |
| 0.120629  | 0.107517  | 0.130099  | 0.128205 | 0.199301  | 0.115676 | 0.112762  |
| 0.24155   | 0.229895  | 0.244027  | 0.24155  | 0.106935  | 0.228147 | 0.234557  |
| 0.132284  | 0.123252  | 0.136218  | 0.137529 | 0.19697   | 0.125291 | 0.125583  |
| 0.131265  | 0.120192  | 0.0961538 | 0.123397 | 0.211393  | 0.126603 | 0.107372  |
| 0.117861  | 0.101836  | 0.13345   | 0.125728 | 0.202652  | 0.120484 | 0.11116   |
| 0.10373   | 0.117716  | 0.129516  | 0.135781 | 0.207168  | 0.123252 | 0.119464  |
| 0.120921  | 0.119172  | 0.103875  | 0.136364 | 0.212995  | 0.126166 | 0.0574009 |
| 0.12704   | 0.0909091 | 0.137675  | 0.121212 | 0.199883  | 0.114219 | 0.120338  |
| 0.128788  | 0.118007  | 0.0954254 | 0.123252 | 0.211247  | 0.127331 | 0.108392  |
| 0.131556  | 0.126311  | 0.0967366 | 0.12602  | 0.214889  | 0.133013 | 0.113199  |
| 0.124854  | 0.114948  | 0.100233  | 0.123689 | 0.20877   | 0.125437 | 0.104749  |
| 0.130828  | 0.0868298 | 0.137675  | 0.123543 | 0.20134   | 0.115676 | 0.115093  |
| 0.0460373 | 0.124126  | 0.137383  | 0.136946 | 0.210082  | 0.134907 | 0.120047  |
| 0.0488054 | 0.127768  | 0.141026  | 0.142628 | 0.213724  | 0.135344 | 0.121649  |
| 0.136218  | 0.116696  | 0.129079  | 0.143794 | 0.209645  | 0.139423 | 0.123106  |
| 0.140297  | 0.120192  | 0.126748  | 0.145251 | 0.214307  | 0.141171 | 0.124272  |
| 0         | 0.12704   | 0.137675  | 0.1419   | 0.215326  | 0.137238 | 0.118881  |
| 0.12704   | 0         | 0.133596  | 0.11859  | 0.202506  | 0.117424 | 0.107226  |
| 0.137675  | 0.133596  | 0         | 0.135344 | 0.223048  | 0.131847 | 0.106206  |
| 0.1419    | 0.11859   | 0.135344  | 0        | 0.218823  | 0.136072 | 0.130536  |
| 0.215326  | 0.202506  | 0.223048  | 0.218823 | 0         | 0.203671 | 0.207751  |
| 0.137238  | 0.117424  | 0.131847  | 0.136072 | 0.203671  | 0        | 0.123834  |
| 0.118881  | 0.107226  | 0.106206  | 0.130536 | 0.207751  | 0.123834 | 0         |
| 0.137092  | 0.0960082 | 0.143357  | 0.126311 | 0.194493  | 0.117279 | 0.122232  |
| 0.233392  | 0.217366  | 0.237034  | 0.234266 | 0.107226  | 0.223485 | 0.22465   |
| 0.223193  | 0.209499  | 0.22567   | 0.224359 | 0.115093  | 0.208625 | 0.213578  |
| 0.13039   | 0.127477  | 0.0952797 | 0.125437 | 0.213141  | 0.13243  | 0.110577  |
| 0.25845   | 0.249709  | 0.265006  | 0.25845  | 0.11655   | 0.245921 | 0.254662  |
| 0.128788  | 0.0437063 | 0.13243   | 0.115967 | 0.203963  | 0.115385 | 0.111014  |
| 0.142191  | 0.111597  | 0.148747  | 0.140152 | 0.215909  | 0.138695 | 0.133159  |
| 0.124709  | 0.0795455 | 0.128642  | 0.11859  | 0.199009  | 0.122086 | 0.108974  |
| 0.0517191 | 0.122523  | 0.137238  | 0.142337 | 0.209645  | 0.132139 | 0.112617  |
| 0.201632  | 0.185897  | 0.206439  | 0.200758 | 0.0944056 | 0.186772 | 0.191434  |
| 0.12602   | 0.112325  | 0.132867  | 0.125728 | 0.204691  | 0.128642 | 0.116987  |

|           |           |           |          |           |           |           |
|-----------|-----------|-----------|----------|-----------|-----------|-----------|
| 0.209062  | 0.189831  | 0.21183   | 0.21081  | 0.0962995 | 0.194493  | 0.195367  |
| 0.127477  | 0.103584  | 0.134907  | 0.124854 | 0.204691  | 0.116113  | 0.113199  |
| 0.130099  | 0.112617  | 0.111597  | 0.123397 | 0.1875    | 0.121066  | 0.108537  |
| 0.125437  | 0.0901807 | 0.138403  | 0.128642 | 0.204983  | 0.130973  | 0.120775  |
| 0.123689  | 0.104458  | 0.128497  | 0.124563 | 0.187209  | 0.125146  | 0.113782  |
| 0.122086  | 0.083042  | 0.130682  | 0.117424 | 0.195221  | 0.110431  | 0.111305  |
| 0.128788  | 0.102855  | 0.125728  | 0.128205 | 0.200175  | 0.0614802 | 0.109848  |
| 0.120047  | 0.0772145 | 0.12602   | 0.118007 | 0.194056  | 0.117424  | 0.103147  |
| 0.127477  | 0.110577  | 0.131993  | 0.126894 | 0.197698  | 0.117279  | 0.113491  |
| 0.129371  | 0.116841  | 0.0549242 | 0.126748 | 0.212121  | 0.119464  | 0.0952797 |
| 0.129079  | 0.0818765 | 0.125728  | 0.123252 | 0.202506  | 0.109266  | 0.11014   |
| 0.120484  | 0.0782343 | 0.12704   | 0.117861 | 0.196824  | 0.11961   | 0.107663  |
| 0.136364  | 0.105478  | 0.123397  | 0.131119 | 0.199592  | 0.128497  | 0.119172  |
| 0.135781  | 0.12704   | 0.137383  | 0.138112 | 0.20338   | 0.12296   | 0.129079  |
| 0.128642  | 0.104458  | 0.120921  | 0.135052 | 0.200321  | 0.128059  | 0.11116   |
| 0.124126  | 0.105478  | 0.125146  | 0.126457 | 0.199592  | 0.120921  | 0.112471  |
| 0.127185  | 0.0849359 | 0.130245  | 0.117861 | 0.194784  | 0.113491  | 0.109411  |
| 0.126603  | 0.117279  | 0.100233  | 0.124272 | 0.200903  | 0.124854  | 0.10912   |
| 0.0610431 | 0.114656  | 0.132576  | 0.135635 | 0.204691  | 0.130099  | 0.103875  |
| 0.135781  | 0.116259  | 0.11961   | 0.133159 | 0.211247  | 0.125291  | 0.11451   |
| 0.132284  | 0.106643  | 0.119318  | 0.139569 | 0.206002  | 0.127331  | 0.113054  |
| 0.134178  | 0.114656  | 0.133159  | 0.131556 | 0.19799   | 0.121649  | 0.121066  |
| 0.134907  | 0.129662  | 0.140297  | 0.140734 | 0.204837  | 0.129079  | 0.128497  |
| 0.144814  | 0.135781  | 0.140589  | 0.142483 | 0.208625  | 0.136072  | 0.135781  |
| 0.121941  | 0.103875  | 0.105478  | 0.11757  | 0.198572  | 0.115822  | 0.0980478 |
| 0.130099  | 0.0898893 | 0.139277  | 0.122232 | 0.200029  | 0.116696  | 0.114948  |
| 0.115093  | 0.100816  | 0.123397  | 0.127622 | 0.192599  | 0.11859   | 0.105769  |
| 0.0504079 | 0.130245  | 0.139423  | 0.1419   | 0.2162    | 0.137821  | 0.123543  |
| 0.126894  | 0.0808566 | 0.127331  | 0.117279 | 0.203817  | 0.119901  | 0.10912   |
| 0.148164  | 0.132139  | 0.122378  | 0.146416 | 0.224796  | 0.137383  | 0.13039   |
| 0.146999  | 0.108537  | 0.14627   | 0.131265 | 0.211684  | 0.127477  | 0.136509  |
| 0.123252  | 0.121795  | 0.144668  | 0.134615 | 0.206876  | 0.129953  | 0.120047  |
| 0.125437  | 0.0869755 | 0.129662  | 0.128351 | 0.199446  | 0.112617  | 0.111742  |
| 0.107517  | 0.106643  | 0.125437  | 0.136364 | 0.200758  | 0.114219  | 0.104021  |
| 0.1419    | 0.113636  | 0.127185  | 0.140443 | 0.211538  | 0.138112  | 0.124417  |
| 0.218094  | 0.202069  | 0.221737  | 0.216346 | 0.119027  | 0.207022  | 0.20877   |
| 0.122523  | 0.105915  | 0.126166  | 0.124563 | 0.197115  | 0.123397  | 0.115239  |
| 0.130536  | 0.0827506 | 0.139132  | 0.125874 | 0.208625  | 0.130245  | 0.115967  |
| 0.0502622 | 0.116987  | 0.131119  | 0.134178 | 0.205857  | 0.129225  | 0.107955  |
| 0.134033  | 0.104895  | 0.123689  | 0.135198 | 0.205711  | 0.131993  | 0.112762  |
| 0.13243   | 0.107955  | 0.136364  | 0.133304 | 0.204983  | 0.120192  | 0.122523  |
| 0.130099  | 0.120775  | 0.124126  | 0.13243  | 0.2044    | 0.106498  | 0.113199  |
| 0.130828  | 0.123543  | 0.124563  | 0.135781 | 0.206876  | 0.104604  | 0.112762  |
| 0.116696  | 0.116987  | 0.140152  | 0.134761 | 0.204691  | 0.126603  | 0.114656  |

|           |           |           |          |          |           |           |
|-----------|-----------|-----------|----------|----------|-----------|-----------|
| 0.123689  | 0.109703  | 0.0606061 | 0.12398  | 0.209062 | 0.122232  | 0.0878497 |
| 0.0479312 | 0.123397  | 0.134907  | 0.137092 | 0.210519 | 0.135927  | 0.116404  |
| 0.123397  | 0.0863928 | 0.131702  | 0.12398  | 0.205274 | 0.123689  | 0.10912   |
| 0.136072  | 0.0850816 | 0.134761  | 0.129079 | 0.20979  | 0.112179  | 0.117424  |
| 0.185752  | 0.173805  | 0.187937  | 0.186917 | 0.177302 | 0.181672  | 0.1706    |
| 0.129808  | 0.112617  | 0.133159  | 0.130099 | 0.197698 | 0.11961   | 0.120192  |
| 0.0597319 | 0.124709  | 0.137675  | 0.13986  | 0.199009 | 0.133159  | 0.119755  |
| 0.123689  | 0.0910548 | 0.109557  | 0.124563 | 0.216638 | 0.126894  | 0.108537  |
| 0.128788  | 0.117424  | 0.119318  | 0.121212 | 0.202797 | 0.121795  | 0.112762  |
| 0.126166  | 0.0824592 | 0.119901  | 0.118298 | 0.199592 | 0.104021  | 0.104604  |
| 0.126166  | 0.0804196 | 0.121358  | 0.118881 | 0.200466 | 0.0996503 | 0.106061  |
| 0.12704   | 0.0879953 | 0.125437  | 0.121795 | 0.208333 | 0.104021  | 0.11014   |
| 0.125291  | 0.114802  | 0.11553   | 0.116259 | 0.210373 | 0.128205  | 0.111888  |
| 0.136946  | 0.100524  | 0.135344  | 0.125291 | 0.193473 | 0.108974  | 0.113345  |
| 0.137675  | 0.115822  | 0.123252  | 0.133887 | 0.215181 | 0.133596  | 0.122523  |
| 0.125291  | 0.0996503 | 0.112325  | 0.129371 | 0.200466 | 0.119755  | 0.101107  |
| 0.134761  | 0.0977564 | 0.113636  | 0.128059 | 0.206731 | 0.122815  | 0.109411  |
| 0.134907  | 0.121503  | 0.117861  | 0.107226 | 0.22028  | 0.134907  | 0.120047  |
| 0.129662  | 0.0903263 | 0.0948427 | 0.119172 | 0.210082 | 0.118298  | 0.105186  |
| 0.129662  | 0.109848  | 0.121066  | 0.131119 | 0.207168 | 0.126748  | 0.115093  |
| 0.129371  | 0.0836247 | 0.099796  | 0.120921 | 0.208333 | 0.115385  | 0.0990676 |
| 0.131702  | 0.0891608 | 0.0977564 | 0.122086 | 0.210373 | 0.11859   | 0.103147  |
| 0.123252  | 0.0751748 | 0.123106  | 0.122378 | 0.201923 | 0.113636  | 0.105769  |
| 0.135344  | 0.0913462 | 0.125     | 0.121941 | 0.21722  | 0.123689  | 0.114948  |
| 0.123689  | 0.0796911 | 0.117424  | 0.123397 | 0.2044   | 0.121941  | 0.0957168 |
| 0.147582  | 0.141754  | 0.127914  | 0.134761 | 0.219551 | 0.147873  | 0.131847  |
| 0.142337  | 0.13039   | 0.128788  | 0.136218 | 0.207314 | 0.140589  | 0.122232  |
| 0.12602   | 0.08581   | 0.0981935 | 0.12398  | 0.205857 | 0.11553   | 0.10271   |
| 0.136946  | 0.133741  | 0.125728  | 0.143065 | 0.221154 | 0.138403  | 0.127331  |
| 0.128788  | 0.108392  | 0.133596  | 0.13549  | 0.203963 | 0.128205  | 0.122086  |
| 0.149184  | 0.115967  | 0.139714  | 0.110431 | 0.217657 | 0.13345   | 0.134033  |
| 0.126748  | 0.0844988 | 0.119901  | 0.12704  | 0.206876 | 0.120921  | 0.106061  |
| 0.129516  | 0.134178  | 0.145396  | 0.14729  | 0.217803 | 0.149038  | 0.131847  |
| 0.122523  | 0.122232  | 0.127331  | 0.137092 | 0.204983 | 0.133013  | 0.119027  |
| 0.133887  | 0.131556  | 0.134615  | 0.127768 | 0.211393 | 0.143502  | 0.127477  |
| 0.133887  | 0.101544  | 0.115967  | 0.128351 | 0.218386 | 0.130099  | 0.112617  |
| 0.132867  | 0.0847902 | 0.104167  | 0.119464 | 0.208625 | 0.11655   | 0.0999417 |
| 0.127477  | 0.0823135 | 0.122669  | 0.116987 | 0.206439 | 0.122232  | 0.102418  |
| 0.113636  | 0.111597  | 0.114073  | 0.113636 | 0.207459 | 0.126457  | 0.104895  |
| 0.127622  | 0.0935315 | 0.0989219 | 0.127914 | 0.216783 | 0.121503  | 0.0987762 |
| 0.135927  | 0.0983392 | 0.129662  | 0.138549 | 0.2213   | 0.126894  | 0.120484  |
| 0.136509  | 0.106789  | 0.130245  | 0.126603 | 0.204691 | 0.13039   | 0.118153  |
| 0.122523  | 0.0898893 | 0.113345  | 0.122232 | 0.204108 | 0.123106  | 0.0980478 |
| 0.129079  | 0.0786713 | 0.121358  | 0.116259 | 0.207168 | 0.121503  | 0.103147  |

|          |           |          |          |          |          |          |
|----------|-----------|----------|----------|----------|----------|----------|
| 0.128934 | 0.0901807 | 0.124126 | 0.123397 | 0.208479 | 0.126894 | 0.114365 |
| 0.126603 | 0.0863928 | 0.11859  | 0.120484 | 0.203234 | 0.119901 | 0.10708  |
| 0.134324 | 0.0882867 | 0.128351 | 0.121795 | 0.215618 | 0.127622 | 0.111014 |
| 0.127914 | 0.0847902 | 0.127768 | 0.128205 | 0.204837 | 0.118881 | 0.105478 |
| 0.133304 | 0.104167  | 0.135198 | 0.134761 | 0.190997 | 0.120484 | 0.120484 |
| 0.128934 | 0.0849359 | 0.134907 | 0.11961  | 0.206439 | 0.115239 | 0.109411 |
| 0.126311 | 0.0447261 | 0.130828 | 0.117861 | 0.203817 | 0.112325 | 0.111742 |
| 0.124272 | 0.0843531 | 0.124417 | 0.123689 | 0.203817 | 0.119318 | 0.108246 |
| 0.13141  | 0.0987762 | 0.135052 | 0.131119 | 0.192016 | 0.124417 | 0.117716 |
| 0.130099 | 0.08581   | 0.126457 | 0.123397 | 0.206731 | 0.107955 | 0.110286 |
| 0.130099 | 0.114073  | 0.134324 | 0.139714 | 0.19799  | 0.112617 | 0.120484 |
| 0.122232 | 0.0957168 | 0.129662 | 0.12398  | 0.188957 | 0.115239 | 0.112908 |
| 0.138986 | 0.102273  | 0.128351 | 0.130245 | 0.213578 | 0.121795 | 0.122378 |

| TDr_3671  | TDr_3678 | TDr_3681 | TDr_3682  | TDr_3721 | TDr_3729  | TDr_3765 |
|-----------|----------|----------|-----------|----------|-----------|----------|
| 0.121212  | 0.205274 | 0.191579 | 0.131702  | 0.232372 | 0.101544  | 0.137675 |
| 0.10708   | 0.210664 | 0.200758 | 0.127477  | 0.236014 | 0.103147  | 0.126748 |
| 0.105915  | 0.207168 | 0.199883 | 0.124563  | 0.236888 | 0.0979021 | 0.12704  |
| 0.108537  | 0.218531 | 0.206585 | 0.127185  | 0.242133 | 0.0999417 | 0.125291 |
| 0.136509  | 0.227855 | 0.219406 | 0.136218  | 0.254371 | 0.125874  | 0.138986 |
| 0.128934  | 0.220571 | 0.212704 | 0.137383  | 0.246795 | 0.119464  | 0.139569 |
| 0.123834  | 0.223922 | 0.215763 | 0.121795  | 0.250146 | 0.109703  | 0.128642 |
| 0.110431  | 0.212267 | 0.202069 | 0.127331  | 0.238491 | 0.10271   | 0.135927 |
| 0.108537  | 0.2162   | 0.202506 | 0.119318  | 0.245047 | 0.0821678 | 0.122669 |
| 0.099359  | 0.216055 | 0.208188 | 0.129371  | 0.248689 | 0.0444347 | 0.106789 |
| 0.107955  | 0.207751 | 0.194639 | 0.122232  | 0.235723 | 0.100524  | 0.136946 |
| 0.117716  | 0.215472 | 0.2044   | 0.11859   | 0.243444 | 0.101544  | 0.13039  |
| 0.106352  | 0.224213 | 0.207896 | 0.121212  | 0.250728 | 0.0875583 | 0.129225 |
| 0.124272  | 0.176865 | 0.166958 | 0.151661  | 0.20542  | 0.112762  | 0.143065 |
| 0.0501166 | 0.224213 | 0.212558 | 0.138403  | 0.248106 | 0.101544  | 0.131847 |
| 0.112908  | 0.222028 | 0.211247 | 0.10912   | 0.249417 | 0.105478  | 0.132284 |
| 0.113636  | 0.219551 | 0.206148 | 0.111888  | 0.249272 | 0.097465  | 0.124854 |
| 0.143794  | 0.235723 | 0.226107 | 0.157197  | 0.255828 | 0.136072  | 0.150932 |
| 0.110286  | 0.208916 | 0.199009 | 0.121358  | 0.237762 | 0.0984848 | 0.126166 |
| 0.167686  | 0.135198 | 0.145105 | 0.212558  | 0.143939 | 0.192599  | 0.210373 |
| 0.122669  | 0.223048 | 0.211976 | 0.139277  | 0.250146 | 0.108537  | 0.134178 |
| 0.121941  | 0.225233 | 0.21183  | 0.135635  | 0.250291 | 0.10373   | 0.134907 |
| 0.112471  | 0.214889 | 0.2044   | 0.102564  | 0.243735 | 0.0948427 | 0.126603 |
| 0.132139  | 0.229895 | 0.217366 | 0.106789  | 0.258159 | 0.117716  | 0.140152 |
| 0.106352  | 0.209936 | 0.201195 | 0.115093  | 0.241113 | 0.0826049 | 0.118735 |
| 0.127914  | 0.223631 | 0.214889 | 0.136655  | 0.252185 | 0.116987  | 0.133887 |
| 0.126457  | 0.223339 | 0.216346 | 0.122086  | 0.253059 | 0.10708   | 0.13243  |
| 0.119464  | 0.234703 | 0.219843 | 0.108974  | 0.259761 | 0.109703  | 0.134761 |
| 0.137529  | 0.22771  | 0.217803 | 0.129662  | 0.253642 | 0.11757   | 0.137092 |
| 0.120338  | 0.229167 | 0.221008 | 0.128788  | 0.259761 | 0.0971737 | 0.132721 |
| 0.117861  | 0.218531 | 0.213287 | 0.12602   | 0.247378 | 0.11014   | 0.136364 |
| 0.119755  | 0.226544 | 0.214598 | 0.118881  | 0.252477 | 0.10708   | 0.132139 |
| 0.103147  | 0.208188 | 0.202069 | 0.120629  | 0.239365 | 0.0933858 | 0.125728 |
| 0.121212  | 0.223048 | 0.212558 | 0.125     | 0.246941 | 0.103293  | 0.128059 |
| 0.121066  | 0.22873  | 0.215909 | 0.11757   | 0.255245 | 0.105186  | 0.13141  |
| 0.130536  | 0.230332 | 0.219551 | 0.122669  | 0.256556 | 0.105041  | 0.127768 |
| 0.133304  | 0.238345 | 0.22669  | 0.134761  | 0.261364 | 0.112471  | 0.140443 |
| 0.124126  | 0.224796 | 0.216055 | 0.121503  | 0.255682 | 0.102127  | 0.127185 |
| 0.111888  | 0.220425 | 0.206731 | 0.0999417 | 0.248106 | 0.099796  | 0.125146 |
| 0.12296   | 0.230624 | 0.21722  | 0.113636  | 0.25539  | 0.110868  | 0.135052 |
| 0.113928  | 0.217512 | 0.209936 | 0.106935  | 0.246358 | 0.0954254 | 0.128059 |
| 0.138695  | 0.239073 | 0.228584 | 0.130828  | 0.262383 | 0.128351  | 0.144959 |



|          |          |          |          |          |           |          |
|----------|----------|----------|----------|----------|-----------|----------|
| 0.146853 | 0.237034 | 0.226253 | 0.127331 | 0.259178 | 0.133596  | 0.149038 |
| 0.122232 | 0.220862 | 0.207751 | 0.111451 | 0.247086 | 0.10169   | 0.130245 |
| 0.113782 | 0.216492 | 0.209499 | 0.113491 | 0.247378 | 0.0862471 | 0.114802 |
| 0.113054 | 0.228584 | 0.217512 | 0.11859  | 0.255973 | 0.0855186 | 0.122815 |
| 0.121212 | 0.223631 | 0.212267 | 0.111014 | 0.250146 | 0.111116  | 0.133596 |
| 0.137966 | 0.237179 | 0.22465  | 0.129516 | 0.259907 | 0.121795  | 0.147145 |
| 0.118735 | 0.223485 | 0.213578 | 0.114656 | 0.25204  | 0.0979021 | 0.130828 |
| 0.117133 | 0.219551 | 0.209062 | 0.109848 | 0.246649 | 0.102127  | 0.133013 |
| 0.146999 | 0.239219 | 0.230186 | 0.151369 | 0.258159 | 0.130245  | 0.149476 |
| 0.130099 | 0.223485 | 0.215035 | 0.118444 | 0.25204  | 0.118007  | 0.137529 |
| 0.119464 | 0.222174 | 0.208188 | 0.102564 | 0.246358 | 0.106206  | 0.131556 |
| 0.116259 | 0.227127 | 0.221882 | 0.13549  | 0.255682 | 0.0968823 | 0.123689 |
| 0.11859  | 0.205565 | 0.198572 | 0.115385 | 0.236742 | 0.109411  | 0.137092 |
| 0.145688 | 0.240822 | 0.229167 | 0.123543 | 0.267337 | 0.137092  | 0.150204 |
| 0.130682 | 0.229604 | 0.222319 | 0.118735 | 0.256119 | 0.109557  | 0.135781 |
| 0.116987 | 0.224359 | 0.21183  | 0.111116 | 0.249709 | 0.105769  | 0.130828 |
| 0.116113 | 0.219406 | 0.20979  | 0.117279 | 0.247086 | 0.0964452 | 0.129079 |
| 0.118298 | 0.228584 | 0.220425 | 0.113345 | 0.254225 | 0.0965909 | 0.123106 |
| 0.140443 | 0.24053  | 0.228584 | 0.119172 | 0.263549 | 0.126603  | 0.149621 |
| 0.137238 | 0.241113 | 0.230915 | 0.124709 | 0.26588  | 0.127477  | 0.146416 |
| 0.147873 | 0.181235 | 0.175408 | 0.154575 | 0.201049 | 0.150058  | 0.172203 |
| 0.115822 | 0.222319 | 0.206876 | 0.111742 | 0.249709 | 0.100816  | 0.131702 |
| 0.116404 | 0.221445 | 0.209207 | 0.108537 | 0.251748 | 0.0973193 | 0.129371 |
| 0.118444 | 0.223485 | 0.210082 | 0.108537 | 0.251166 | 0.099359  | 0.128205 |
| 0.139277 | 0.228001 | 0.214598 | 0.137821 | 0.25102  | 0.12398   | 0.152826 |
| 0.114219 | 0.21926  | 0.207022 | 0.110723 | 0.246941 | 0.101544  | 0.124272 |
| 0.134178 | 0.224942 | 0.218531 | 0.121358 | 0.252331 | 0.124709  | 0.143939 |
| 0.113782 | 0.227855 | 0.219114 | 0.110577 | 0.255536 | 0.0952797 | 0.127622 |
| 0.119172 | 0.221008 | 0.208188 | 0.111305 | 0.248106 | 0.107663  | 0.128351 |
| 0.149767 | 0.229167 | 0.222465 | 0.149184 | 0.251603 | 0.134761  | 0.156614 |
| 0.125    | 0.229749 | 0.214307 | 0.111014 | 0.25539  | 0.112617  | 0.142045 |
| 0.137383 | 0.238345 | 0.226981 | 0.124272 | 0.262821 | 0.126457  | 0.142483 |
| 0.132576 | 0.226836 | 0.214889 | 0.121212 | 0.250437 | 0.120775  | 0.139132 |
| 0.117279 | 0.213869 | 0.202214 | 0.124272 | 0.238928 | 0.104312  | 0.129371 |
| 0.119027 | 0.220571 | 0.207459 | 0.103584 | 0.24796  | 0.103438  | 0.129079 |
| 0.117279 | 0.224942 | 0.209207 | 0.110577 | 0.251457 | 0.104604  | 0.129662 |
| 0.135635 | 0.236014 | 0.223485 | 0.117861 | 0.261072 | 0.127622  | 0.143065 |
| 0.120047 | 0.220425 | 0.210519 | 0.113345 | 0.24898  | 0.0954254 | 0.127768 |
| 0.139714 | 0.240385 | 0.228147 | 0.128059 | 0.263695 | 0.124126  | 0.140734 |
| 0.123689 | 0.224068 | 0.212704 | 0.116696 | 0.249709 | 0.106643  | 0.138986 |
| 0.12398  | 0.224068 | 0.213869 | 0.102127 | 0.249709 | 0.111888  | 0.130245 |
| 0.121066 | 0.222902 | 0.212995 | 0.110868 | 0.250583 | 0.107226  | 0.134033 |
| 0.12398  | 0.228147 | 0.216492 | 0.109994 | 0.255536 | 0.106352  | 0.135781 |
| 0.117279 | 0.224068 | 0.213578 | 0.107372 | 0.250583 | 0.102855  | 0.129953 |

|          |          |          |          |          |           |          |
|----------|----------|----------|----------|----------|-----------|----------|
| 0.121066 | 0.221737 | 0.210664 | 0.104167 | 0.248252 | 0.107226  | 0.131993 |
| 0.138403 | 0.238491 | 0.225087 | 0.120921 | 0.260052 | 0.127185  | 0.146125 |
| 0.111888 | 0.222174 | 0.206148 | 0.109266 | 0.250146 | 0.0939685 | 0.128642 |
| 0.112617 | 0.222611 | 0.210664 | 0.120484 | 0.252622 | 0.0917832 | 0.124709 |
| 0.125437 | 0.230769 | 0.219988 | 0.134761 | 0.257284 | 0.108974  | 0.136946 |
| 0.13039  | 0.229312 | 0.217657 | 0.129516 | 0.253205 | 0.112471  | 0.133159 |
| 0.128934 | 0.231352 | 0.225233 | 0.130682 | 0.257576 | 0.11655   | 0.135781 |
| 0.134324 | 0.24053  | 0.228293 | 0.136072 | 0.269959 | 0.123689  | 0.139423 |
| 0.120192 | 0.218531 | 0.210082 | 0.129808 | 0.245047 | 0.0999417 | 0.134033 |
| 0.171474 | 0.163462 | 0.164918 | 0.18546  | 0.177448 | 0.175408  | 0.192599 |
| 0.111305 | 0.222174 | 0.211976 | 0.120629 | 0.249854 | 0.0971737 | 0.130973 |
| 0.129225 | 0.232517 | 0.225233 | 0.13243  | 0.259615 | 0.120338  | 0.136946 |
| 0.120484 | 0.229604 | 0.220571 | 0.126311 | 0.257867 | 0.113345  | 0.13549  |
| 0.137529 | 0.241113 | 0.227127 | 0.134615 | 0.262092 | 0.122232  | 0.145833 |
| 0.110286 | 0.224068 | 0.21183  | 0.11553  | 0.253788 | 0.0958625 | 0.124417 |
| 0.131847 | 0.237179 | 0.223776 | 0.125728 | 0.263112 | 0.118881  | 0.140734 |
| 0.119318 | 0.223776 | 0.212995 | 0.122815 | 0.253205 | 0.0961538 | 0.129079 |
| 0.124126 | 0.223631 | 0.216638 | 0.120629 | 0.25539  | 0.104167  | 0.131265 |
| 0.116841 | 0.223339 | 0.215181 | 0.119172 | 0.252477 | 0.0942599 | 0.129516 |
| 0.138403 | 0.238199 | 0.223339 | 0.129079 | 0.264132 | 0.119901  | 0.139714 |
| 0.111305 | 0.222465 | 0.21081  | 0.108683 | 0.249563 | 0.0831876 | 0.121358 |
| 0.134178 | 0.229895 | 0.224359 | 0.135052 | 0.255536 | 0.118298  | 0.138986 |
| 0.125874 | 0.221882 | 0.214598 | 0.124709 | 0.250728 | 0.0995047 | 0.128059 |
| 0.133596 | 0.233683 | 0.224359 | 0.117861 | 0.258159 | 0.114802  | 0.13986  |
| 0.12296  | 0.230041 | 0.21926  | 0.131119 | 0.252185 | 0.109703  | 0.129225 |
| 0.113054 | 0.222174 | 0.211101 | 0.119464 | 0.249563 | 0.0919289 | 0.126894 |
| 0.143357 | 0.226836 | 0.219551 | 0.143939 | 0.250146 | 0.132721  | 0.157197 |
| 0.117279 | 0.220862 | 0.213287 | 0.121358 | 0.250583 | 0.0938228 | 0.130245 |
| 0.116696 | 0.227273 | 0.214744 | 0.117861 | 0.255245 | 0.0926573 | 0.131119 |
| 0.12296  | 0.223048 | 0.214598 | 0.113636 | 0.252185 | 0.100087  | 0.124563 |
| 0.138986 | 0.23412  | 0.224796 | 0.146562 | 0.258596 | 0.114656  | 0.136801 |
| 0.118881 | 0.207605 | 0.198864 | 0.114219 | 0.231498 | 0.111742  | 0.139132 |
| 0.111888 | 0.224505 | 0.211393 | 0.117133 | 0.252185 | 0.0945513 | 0.129225 |
| 0.110431 | 0.217803 | 0.206731 | 0.117716 | 0.248106 | 0.0936772 | 0.121358 |
| 0.120484 | 0.22465  | 0.210373 | 0.122815 | 0.249709 | 0.0964452 | 0.133159 |
| 0.118881 | 0.232955 | 0.223048 | 0.120921 | 0.260052 | 0.0898893 | 0.124854 |
| 0.121649 | 0.223776 | 0.212704 | 0.123106 | 0.250874 | 0.0999417 | 0.130828 |
| 0.104604 | 0.216346 | 0.204983 | 0.106935 | 0.245484 | 0.0802739 | 0.113491 |
| 0.107517 | 0.21722  | 0.206148 | 0.108683 | 0.245192 | 0.0791084 | 0.114656 |
| 0.110577 | 0.221154 | 0.210373 | 0.112617 | 0.250291 | 0.080711  | 0.12296  |
| 0.122815 | 0.219988 | 0.211247 | 0.117279 | 0.25     | 0.109557  | 0.136072 |
| 0.127331 | 0.228001 | 0.222174 | 0.113928 | 0.254516 | 0.109994  | 0.131847 |
| 0.109411 | 0.224359 | 0.213869 | 0.107663 | 0.255536 | 0.0862471 | 0.123543 |
| 0.101107 | 0.217512 | 0.208479 | 0.104312 | 0.246066 | 0.0796911 | 0.120775 |

|           |          |          |          |           |           |           |
|-----------|----------|----------|----------|-----------|-----------|-----------|
| 0.120629  | 0.228293 | 0.220134 | 0.111014 | 0.252768  | 0.10271   | 0.129225  |
| 0.106789  | 0.221445 | 0.210082 | 0.100379 | 0.248834  | 0.0885781 | 0.115385  |
| 0.122232  | 0.219114 | 0.205711 | 0.129516 | 0.246795  | 0.105769  | 0.141608  |
| 0.133013  | 0.228147 | 0.220571 | 0.139714 | 0.251748  | 0.115385  | 0.144522  |
| 0.112325  | 0.222028 | 0.211538 | 0.111451 | 0.253497  | 0.0874126 | 0.121212  |
| 0.105769  | 0.22567  | 0.214015 | 0.109266 | 0.253934  | 0.08581   | 0.125728  |
| 0.108974  | 0.21926  | 0.210519 | 0.109557 | 0.246649  | 0.0895979 | 0.121649  |
| 0.1081    | 0.215181 | 0.205857 | 0.1081   | 0.246066  | 0.0814394 | 0.115822  |
| 0.122669  | 0.227127 | 0.218969 | 0.120921 | 0.253934  | 0.0954254 | 0.128059  |
| 0.106352  | 0.21926  | 0.209645 | 0.105769 | 0.246941  | 0.0793998 | 0.116696  |
| 0.13884   | 0.233392 | 0.226399 | 0.13243  | 0.259033  | 0.129662  | 0.143939  |
| 0.130245  | 0.229167 | 0.214889 | 0.127331 | 0.252185  | 0.11757   | 0.13447   |
| 0.123834  | 0.228001 | 0.220134 | 0.120629 | 0.25539   | 0.107372  | 0.134178  |
| 0.112908  | 0.226107 | 0.20979  | 0.117861 | 0.25204   | 0.0938228 | 0.129079  |
| 0.115239  | 0.221737 | 0.206294 | 0.121941 | 0.249709  | 0.0941142 | 0.126748  |
| 0.109848  | 0.222174 | 0.209645 | 0.101981 | 0.251311  | 0.0893065 | 0.128351  |
| 0.122523  | 0.224359 | 0.213869 | 0.102418 | 0.254079  | 0.0929487 | 0.127622  |
| 0.110577  | 0.223776 | 0.213578 | 0.112617 | 0.250291  | 0.0935315 | 0.120047  |
| 0.113199  | 0.210373 | 0.20134  | 0.112034 | 0.240093  | 0.102855  | 0.133741  |
| 0.13039   | 0.234557 | 0.225233 | 0.099796 | 0.26049   | 0.123252  | 0.136072  |
| 0.118298  | 0.230624 | 0.218386 | 0.122086 | 0.259178  | 0.0992133 | 0.132139  |
| 0.123689  | 0.224942 | 0.216783 | 0.137966 | 0.250291  | 0.102564  | 0.0457459 |
| 0.131119  | 0.234994 | 0.229458 | 0.1419   | 0.260052  | 0.118444  | 0.140297  |
| 0.181527  | 0.121358 | 0.113782 | 0.20134  | 0.136218  | 0.1875    | 0.205274  |
| 0.224213  | 0.106061 | 0.126166 | 0.241404 | 0.0999417 | 0.236014  | 0.23951   |
| 0.119464  | 0.207605 | 0.199738 | 0.116259 | 0.238782  | 0.108829  | 0.135344  |
| 0.116404  | 0.214744 | 0.206294 | 0.103584 | 0.242716  | 0.105478  | 0.131119  |
| 0.112034  | 0.214452 | 0.205128 | 0.109411 | 0.244464  | 0.0981935 | 0.12704   |
| 0.115822  | 0.219114 | 0.210664 | 0.112908 | 0.243881  | 0.103438  | 0.127331  |
| 0.0514277 | 0.225816 | 0.213287 | 0.140297 | 0.247378  | 0.10373   | 0.132576  |
| 0.119318  | 0.223485 | 0.21183  | 0.108246 | 0.252914  | 0.110723  | 0.132576  |
| 0.148019  | 0.241404 | 0.227418 | 0.118881 | 0.264714  | 0.144376  | 0.149621  |
| 0.124563  | 0.224068 | 0.21183  | 0.107663 | 0.249417  | 0.110723  | 0.134907  |
| 0.136509  | 0.231643 | 0.222611 | 0.118444 | 0.25845   | 0.121795  | 0.137821  |
| 0.134324  | 0.223048 | 0.216346 | 0.117133 | 0.248106  | 0.125437  | 0.146416  |
| 0.131119  | 0.233246 | 0.220425 | 0.118881 | 0.258887  | 0.12602   | 0.137383  |
| 0.13549   | 0.235577 | 0.222756 | 0.127331 | 0.255973  | 0.124563  | 0.146999  |
| 0.118298  | 0.228584 | 0.216055 | 0.110723 | 0.254808  | 0.107955  | 0.127768  |
| 0.120629  | 0.222756 | 0.211393 | 0.104021 | 0.250728  | 0.105624  | 0.129808  |
| 0.121066  | 0.222902 | 0.214452 | 0.109994 | 0.251457  | 0.109848  | 0.134615  |
| 0.11757   | 0.215326 | 0.205711 | 0.105915 | 0.243881  | 0.102273  | 0.125     |
| 0.119027  | 0.221445 | 0.210373 | 0.105041 | 0.248252  | 0.105186  | 0.12704   |
| 0.122669  | 0.221591 | 0.212558 | 0.107517 | 0.249854  | 0.108246  | 0.134178  |
| 0.130099  | 0.230769 | 0.218531 | 0.11116  | 0.256993  | 0.124126  | 0.134324  |

|          |          |          |          |          |           |          |
|----------|----------|----------|----------|----------|-----------|----------|
| 0.138258 | 0.233683 | 0.228147 | 0.115822 | 0.262529 | 0.132867  | 0.143648 |
| 0.125874 | 0.223922 | 0.213724 | 0.10373  | 0.251894 | 0.11116   | 0.133013 |
| 0.120192 | 0.221154 | 0.210082 | 0.100379 | 0.247669 | 0.106061  | 0.130828 |
| 0.13884  | 0.236014 | 0.224068 | 0.113491 | 0.261364 | 0.126166  | 0.140734 |
| 0.118735 | 0.217657 | 0.207168 | 0.103001 | 0.245047 | 0.1081    | 0.126166 |
| 0.138112 | 0.235868 | 0.223048 | 0.12296  | 0.260052 | 0.138258  | 0.148456 |
| 0.128205 | 0.226544 | 0.214015 | 0.136946 | 0.249272 | 0.111451  | 0.13243  |
| 0.134761 | 0.222319 | 0.212995 | 0.125437 | 0.249709 | 0.130536  | 0.13986  |
| 0.116987 | 0.221154 | 0.208916 | 0.104167 | 0.24796  | 0.101399  | 0.123543 |
| 0.11655  | 0.218969 | 0.208479 | 0.105186 | 0.24898  | 0.100962  | 0.127477 |
| 0.128059 | 0.231935 | 0.22028  | 0.109411 | 0.260781 | 0.118881  | 0.133741 |
| 0.131119 | 0.22567  | 0.218094 | 0.107226 | 0.254225 | 0.121358  | 0.136801 |
| 0.135781 | 0.224213 | 0.214015 | 0.108974 | 0.250728 | 0.130682  | 0.14088  |
| 0.124854 | 0.226107 | 0.213287 | 0.105041 | 0.253205 | 0.115385  | 0.132284 |
| 0.12296  | 0.221591 | 0.210519 | 0.102273 | 0.251603 | 0.111742  | 0.13039  |
| 0.12296  | 0.225962 | 0.213141 | 0.108392 | 0.253351 | 0.120192  | 0.137092 |
| 0.136364 | 0.234994 | 0.225379 | 0.115676 | 0.262675 | 0.123106  | 0.13884  |
| 0.134615 | 0.229167 | 0.222465 | 0.115093 | 0.256847 | 0.124563  | 0.141754 |
| 0.135052 | 0.234557 | 0.22669  | 0.10912  | 0.261364 | 0.131702  | 0.144814 |
| 0.131702 | 0.226544 | 0.215763 | 0.115967 | 0.253059 | 0.124272  | 0.146999 |
| 0.126166 | 0.223631 | 0.215181 | 0.105478 | 0.25102  | 0.109994  | 0.131556 |
| 0.138986 | 0.229458 | 0.21926  | 0.120629 | 0.25539  | 0.124272  | 0.141463 |
| 0.116113 | 0.225816 | 0.209207 | 0.10067  | 0.248543 | 0.109848  | 0.131702 |
| 0.117133 | 0.216638 | 0.207605 | 0.11655  | 0.244901 | 0.100379  | 0.124563 |
| 0.115385 | 0.226253 | 0.215763 | 0.112179 | 0.251311 | 0.107372  | 0.12602  |
| 0.118444 | 0.215618 | 0.207751 | 0.110868 | 0.24796  | 0.105186  | 0.126457 |
| 0.116696 | 0.223485 | 0.20979  | 0.105915 | 0.247669 | 0.106643  | 0.123543 |
| 0.137238 | 0.233829 | 0.223631 | 0.112762 | 0.262383 | 0.131847  | 0.148747 |
| 0.120192 | 0.221154 | 0.211538 | 0.113491 | 0.249126 | 0.104604  | 0.13141  |
| 0.137092 | 0.230769 | 0.220571 | 0.116404 | 0.255245 | 0.129953  | 0.142483 |
| 0.11961  | 0.218531 | 0.206294 | 0.108246 | 0.247669 | 0.105186  | 0.127914 |
| 0.133741 | 0.233537 | 0.223631 | 0.104895 | 0.261218 | 0.121066  | 0.143211 |
| 0.126603 | 0.226981 | 0.215326 | 0.112034 | 0.255245 | 0.110431  | 0.130828 |
| 0.114073 | 0.218823 | 0.204545 | 0.127477 | 0.244755 | 0.0941142 | 0.127622 |
| 0.119172 | 0.228001 | 0.213724 | 0.111597 | 0.256265 | 0.103584  | 0.129225 |
| 0.123106 | 0.219697 | 0.206002 | 0.122523 | 0.246503 | 0.103438  | 0.125874 |
| 0.121503 | 0.22771  | 0.215763 | 0.118007 | 0.255973 | 0.105332  | 0.134761 |
| 0.115093 | 0.221882 | 0.21285  | 0.118881 | 0.252185 | 0.0954254 | 0.131847 |
| 0.129371 | 0.233537 | 0.223339 | 0.144231 | 0.262092 | 0.0901807 | 0.130682 |
| 0.139423 | 0.236888 | 0.22669  | 0.13039  | 0.266317 | 0.125291  | 0.142483 |
| 0.105624 | 0.215618 | 0.206294 | 0.120775 | 0.247669 | 0.0748834 | 0.115967 |
| 0.119755 | 0.237908 | 0.225087 | 0.141317 | 0.262092 | 0.102127  | 0.135344 |
| 0.116113 | 0.229895 | 0.221445 | 0.139423 | 0.258741 | 0.076049  | 0.119464 |
| 0.123397 | 0.227273 | 0.21824  | 0.141171 | 0.25641  | 0.0984848 | 0.130828 |

|          |          |          |          |          |           |          |
|----------|----------|----------|----------|----------|-----------|----------|
| 0.113782 | 0.220862 | 0.213287 | 0.135052 | 0.249126 | 0.0868298 | 0.124126 |
| 0.119318 | 0.229312 | 0.221445 | 0.134178 | 0.259324 | 0.0810023 | 0.126457 |
| 0.116841 | 0.226836 | 0.21722  | 0.134907 | 0.258596 | 0.0826049 | 0.121066 |
| 0.124563 | 0.228438 | 0.224068 | 0.138549 | 0.259615 | 0.0964452 | 0.128497 |
| 0.128351 | 0.233683 | 0.224942 | 0.145542 | 0.260198 | 0.103438  | 0.130828 |
| 0.11757  | 0.231061 | 0.216492 | 0.138258 | 0.254953 | 0.0792541 | 0.11859  |
| 0.110577 | 0.219114 | 0.208916 | 0.131847 | 0.25     | 0.0842075 | 0.121795 |
| 0.143648 | 0.231206 | 0.217803 | 0.117424 | 0.256265 | 0.133887  | 0.153118 |
| 0.126311 | 0.232517 | 0.220571 | 0.142628 | 0.257576 | 0.092366  | 0.121795 |
| 0.110868 | 0.216492 | 0.206585 | 0.126894 | 0.247086 | 0.0839161 | 0.120047 |
| 0.21183  | 0.113491 | 0.118444 | 0.22465  | 0.123397 | 0.214307  | 0.22771  |
| 0.113345 | 0.222756 | 0.215181 | 0.137238 | 0.253351 | 0.0895979 | 0.125728 |
| 0.113054 | 0.222756 | 0.209936 | 0.127622 | 0.251311 | 0.0773601 | 0.112325 |
| 0.126311 | 0.232226 | 0.226399 | 0.143502 | 0.259324 | 0.101981  | 0.127331 |
| 0.117861 | 0.225524 | 0.212413 | 0.129808 | 0.254079 | 0.0786713 | 0.120338 |
| 0.122232 | 0.236014 | 0.222611 | 0.145542 | 0.261655 | 0.0914918 | 0.126457 |
| 0.114365 | 0.223193 | 0.210373 | 0.131265 | 0.252331 | 0.0903263 | 0.124709 |
| 0.109557 | 0.219551 | 0.212558 | 0.136364 | 0.254808 | 0.0895979 | 0.116404 |
| 0.117716 | 0.226836 | 0.215181 | 0.136946 | 0.252768 | 0.0791084 | 0.117861 |
| 0.118444 | 0.219988 | 0.207751 | 0.136218 | 0.247378 | 0.0979021 | 0.132576 |
| 0.126166 | 0.228293 | 0.220425 | 0.141026 | 0.256847 | 0.103001  | 0.128642 |
| 0.126894 | 0.230186 | 0.220571 | 0.143502 | 0.259033 | 0.0996503 | 0.129079 |
| 0.118444 | 0.229895 | 0.219988 | 0.140006 | 0.25845  | 0.0973193 | 0.12296  |
| 0.111742 | 0.226107 | 0.213287 | 0.11553  | 0.255828 | 0.0903263 | 0.123834 |
| 0.121649 | 0.230769 | 0.220571 | 0.13447  | 0.259615 | 0.0888695 | 0.133741 |
| 0.126748 | 0.231789 | 0.218386 | 0.146853 | 0.260927 | 0.103875  | 0.128351 |
| 0.111742 | 0.215618 | 0.204545 | 0.130973 | 0.245338 | 0.0859557 | 0.125874 |
| 0.138258 | 0.236014 | 0.222319 | 0.124854 | 0.26049  | 0.128205  | 0.141026 |
| 0.128205 | 0.218094 | 0.205565 | 0.147436 | 0.245775 | 0.116987  | 0.144959 |
| 0.115093 | 0.2213   | 0.211976 | 0.119172 | 0.249854 | 0.103875  | 0.13243  |
| 0.119172 | 0.234411 | 0.218677 | 0.137821 | 0.25947  | 0.0872669 | 0.128642 |
| 0.12602  | 0.217075 | 0.205711 | 0.134178 | 0.245629 | 0.111014  | 0.140152 |
| 0.130828 | 0.224505 | 0.217512 | 0.130245 | 0.245775 | 0.10912   | 0.131265 |
| 0.130828 | 0.217803 | 0.206148 | 0.136364 | 0.241113 | 0.111451  | 0.148747 |
| 0.132867 | 0.223631 | 0.210519 | 0.145396 | 0.250437 | 0.117861  | 0.14933  |
| 0.11116  | 0.219697 | 0.20542  | 0.113199 | 0.247086 | 0.083042  | 0.112471 |
| 0.126457 | 0.229749 | 0.221008 | 0.129079 | 0.252477 | 0.109994  | 0.133304 |
| 0.129808 | 0.210082 | 0.201923 | 0.146707 | 0.237471 | 0.125874  | 0.156177 |
| 0.117861 | 0.229312 | 0.219697 | 0.114656 | 0.255828 | 0.0961538 | 0.124126 |
| 0.124272 | 0.222319 | 0.21183  | 0.122523 | 0.248543 | 0.1081    | 0.134324 |
| 0.142774 | 0.231789 | 0.219843 | 0.126457 | 0.255973 | 0.144668  | 0.155157 |
| 0.127331 | 0.228875 | 0.216055 | 0.108974 | 0.252185 | 0.116987  | 0.133304 |
| 0.133013 | 0.236888 | 0.226399 | 0.133013 | 0.264277 | 0.112471  | 0.1419   |
| 0.128205 | 0.229458 | 0.21926  | 0.120921 | 0.25539  | 0.103875  | 0.130973 |

|           |          |          |           |          |           |          |
|-----------|----------|----------|-----------|----------|-----------|----------|
| 0.123689  | 0.227273 | 0.219406 | 0.128059  | 0.25845  | 0.108392  | 0.131119 |
| 0.127914  | 0.224505 | 0.217512 | 0.125291  | 0.257139 | 0.110286  | 0.135052 |
| 0.117861  | 0.22028  | 0.213287 | 0.119027  | 0.251166 | 0.0888695 | 0.125874 |
| 0.128205  | 0.232955 | 0.2213   | 0.121795  | 0.261801 | 0.116113  | 0.135927 |
| 0.129371  | 0.231498 | 0.218969 | 0.137529  | 0.256265 | 0.100087  | 0.123106 |
| 0.135198  | 0.235868 | 0.221882 | 0.127914  | 0.258596 | 0.121649  | 0.137675 |
| 0.133741  | 0.235868 | 0.223048 | 0.13549   | 0.262092 | 0.112034  | 0.135635 |
| 0.129662  | 0.227418 | 0.216929 | 0.126166  | 0.253059 | 0.113491  | 0.140589 |
| 0.13986   | 0.228293 | 0.216055 | 0.143648  | 0.252477 | 0.127768  | 0.145833 |
| 0.115093  | 0.223631 | 0.215763 | 0.124417  | 0.251311 | 0.0802739 | 0.122815 |
| 0.11859   | 0.227418 | 0.218386 | 0.115093  | 0.259761 | 0.101836  | 0.129225 |
| 0.129371  | 0.229167 | 0.221591 | 0.134907  | 0.256556 | 0.116987  | 0.140006 |
| 0.115676  | 0.221591 | 0.213724 | 0.123252  | 0.251603 | 0.0820221 | 0.122815 |
| 0.139132  | 0.230769 | 0.217366 | 0.146125  | 0.253788 | 0.123252  | 0.157051 |
| 0.153118  | 0.238928 | 0.226399 | 0.153118  | 0.26049  | 0.137238  | 0.162587 |
| 0.133596  | 0.231352 | 0.222611 | 0.114365  | 0.25845  | 0.126166  | 0.138695 |
| 0.128205  | 0.227418 | 0.218386 | 0.104021  | 0.253934 | 0.116404  | 0.134178 |
| 0.126894  | 0.235723 | 0.223776 | 0.133013  | 0.259907 | 0.125     | 0.137821 |
| 0.123834  | 0.231498 | 0.218969 | 0.144522  | 0.256847 | 0.0992133 | 0.126894 |
| 0.131993  | 0.233829 | 0.222756 | 0.111597  | 0.260052 | 0.123397  | 0.13447  |
| 0.129079  | 0.237617 | 0.230915 | 0.143648  | 0.264714 | 0.109411  | 0.138549 |
| 0.131702  | 0.228584 | 0.219551 | 0.13986   | 0.253351 | 0.113199  | 0.146416 |
| 0.120192  | 0.231352 | 0.22028  | 0.116696  | 0.25641  | 0.0964452 | 0.138695 |
| 0.158362  | 0.238345 | 0.225524 | 0.161276  | 0.260198 | 0.15676   | 0.168124 |
| 0.125146  | 0.233392 | 0.224359 | 0.118153  | 0.257576 | 0.0990676 | 0.134907 |
| 0.129808  | 0.233683 | 0.222902 | 0.133887  | 0.257867 | 0.110431  | 0.136072 |
| 0.121503  | 0.230624 | 0.219843 | 0.110723  | 0.258887 | 0.105041  | 0.126311 |
| 0.136946  | 0.240822 | 0.225962 | 0.132867  | 0.265589 | 0.124272  | 0.146125 |
| 0.112762  | 0.223048 | 0.214015 | 0.134324  | 0.248106 | 0.0933858 | 0.125146 |
| 0.134178  | 0.197844 | 0.189103 | 0.148164  | 0.222902 | 0.122378  | 0.155886 |
| 0.141608  | 0.232663 | 0.222174 | 0.155886  | 0.25539  | 0.135635  | 0.152244 |
| 0.124854  | 0.217949 | 0.205128 | 0.131265  | 0.240967 | 0.119172  | 0.137529 |
| 0.127622  | 0.192745 | 0.18546  | 0.142774  | 0.221008 | 0.129808  | 0.151078 |
| 0.143211  | 0.175408 | 0.164918 | 0.116696  | 0.197261 | 0.13986   | 0.162005 |
| 0.135052  | 0.176573 | 0.164918 | 0.151661  | 0.204837 | 0.127914  | 0.156177 |
| 0.136072  | 0.229167 | 0.217512 | 0.0932401 | 0.255682 | 0.125728  | 0.146707 |
| 0.133887  | 0.22873  | 0.218823 | 0.148456  | 0.25204  | 0.129953  | 0.148601 |
| 0.0890152 | 0.213869 | 0.201923 | 0.125437  | 0.240967 | 0.0964452 | 0.128205 |
| 0.0824592 | 0.216929 | 0.206439 | 0.118298  | 0.244901 | 0.103584  | 0.130099 |
| 0.117861  | 0.216492 | 0.20979  | 0.133596  | 0.243881 | 0.0888695 | 0.129371 |
| 0.121941  | 0.215618 | 0.20542  | 0.126603  | 0.24155  | 0.114219  | 0.138403 |
| 0.11655   | 0.224505 | 0.209936 | 0.121212  | 0.251311 | 0.10271   | 0.132139 |
| 0.076049  | 0.208188 | 0.19595  | 0.125     | 0.234994 | 0.095134  | 0.127768 |
| 0.12296   | 0.220717 | 0.208188 | 0.135781  | 0.247815 | 0.109411  | 0.135344 |

|           |          |          |           |           |           |          |
|-----------|----------|----------|-----------|-----------|-----------|----------|
| 0.0557984 | 0.210664 | 0.198718 | 0.137675  | 0.234848  | 0.0976107 | 0.132867 |
| 0.103875  | 0.215618 | 0.205128 | 0.120775  | 0.243298  | 0.0798368 | 0.117716 |
| 0.121649  | 0.216783 | 0.203963 | 0.129808  | 0.24155   | 0.115676  | 0.142483 |
| 0.121795  | 0.218386 | 0.20877  | 0.125874  | 0.244318  | 0.111451  | 0.140297 |
| 0.129079  | 0.228875 | 0.213724 | 0.0474942 | 0.251894  | 0.126311  | 0.140589 |
| 0.204254  | 0.110286 | 0.125146 | 0.221154  | 0.117279  | 0.211976  | 0.223922 |
| 0.142483  | 0.225962 | 0.217512 | 0.144522  | 0.249563  | 0.140006  | 0.148164 |
| 0.13039   | 0.22669  | 0.215326 | 0.130973  | 0.254079  | 0.123834  | 0.136655 |
| 0.120338  | 0.217803 | 0.208479 | 0.126457  | 0.238782  | 0.115822  | 0.135344 |
| 0.198718  | 0.10271  | 0.112034 | 0.217366  | 0.110286  | 0.206439  | 0.2213   |
| 0.121503  | 0.214889 | 0.200612 | 0.0792541 | 0.239948  | 0.117861  | 0.140297 |
| 0.121649  | 0.227273 | 0.217366 | 0.117861  | 0.253497  | 0.114802  | 0.140734 |
| 0.125437  | 0.220571 | 0.213287 | 0.127185  | 0.246795  | 0.118298  | 0.135198 |
| 0.0448718 | 0.219551 | 0.204691 | 0.135781  | 0.244318  | 0.0968823 | 0.128351 |
| 0.237762  | 0.104458 | 0.135635 | 0.253497  | 0.0930944 | 0.247815  | 0.251894 |
| 0.128351  | 0.223776 | 0.216783 | 0.135927  | 0.249417  | 0.108392  | 0.141026 |
| 0.122523  | 0.223776 | 0.210664 | 0.0581294 | 0.249417  | 0.11451   | 0.135781 |
| 0.128351  | 0.226399 | 0.21824  | 0.128059  | 0.251748  | 0.121503  | 0.138112 |
| 0.12398   | 0.225524 | 0.213869 | 0.127768  | 0.248834  | 0.119172  | 0.136946 |
| 0.109411  | 0.218823 | 0.209207 | 0.13447   | 0.24155   | 0.107226  | 0.141026 |
| 0.108246  | 0.199009 | 0.189977 | 0.138258  | 0.229312  | 0.115093  | 0.142191 |
| 0.123397  | 0.223485 | 0.207751 | 0.0552156 | 0.248834  | 0.115385  | 0.137529 |
| 0.118881  | 0.216055 | 0.204983 | 0.126748  | 0.239656  | 0.116113  | 0.139132 |
| 0.12398   | 0.222611 | 0.212121 | 0.139423  | 0.247669  | 0.118007  | 0.143357 |
| 0.0450175 | 0.219697 | 0.204545 | 0.129516  | 0.243007  | 0.0882867 | 0.126166 |
| 0.119464  | 0.209062 | 0.200321 | 0.12296   | 0.238199  | 0.10912   | 0.136509 |
| 0.10271   | 0.21824  | 0.212704 | 0.133304  | 0.245338  | 0.0501166 | 0.109266 |
| 0.141026  | 0.235286 | 0.222465 | 0.154429  | 0.254225  | 0.137966  | 0.155157 |
| 0.130828  | 0.223631 | 0.216638 | 0.13549   | 0.249272  | 0.114656  | 0.142045 |
| 0.122378  | 0.224796 | 0.215472 | 0.119755  | 0.250728  | 0.122815  | 0.144085 |
| 0.178904  | 0.119901 | 0.113491 | 0.194639  | 0.131265  | 0.184295  | 0.199446 |
| 0.189977  | 0.112325 | 0.108829 | 0.210082  | 0.124563  | 0.199155  | 0.215181 |
| 0.0454545 | 0.214598 | 0.202069 | 0.138986  | 0.237325  | 0.0977564 | 0.132721 |
| 0.0451632 | 0.217512 | 0.206439 | 0.130245  | 0.243444  | 0.0922203 | 0.125146 |
| 0.123834  | 0.21722  | 0.206148 | 0.143648  | 0.238491  | 0.124854  | 0.137675 |
| 0.124709  | 0.223922 | 0.210519 | 0.0559441 | 0.249854  | 0.116113  | 0.133887 |
| 0.130682  | 0.22465  | 0.217949 | 0.136801  | 0.25      | 0.111305  | 0.140443 |
| 0.130828  | 0.2213   | 0.211684 | 0.136364  | 0.244318  | 0.126894  | 0.143502 |
| 0.212121  | 0.115239 | 0.118444 | 0.231352  | 0.116987  | 0.2213    | 0.231206 |
| 0.11859   | 0.223048 | 0.210519 | 0.124126  | 0.250146  | 0.109411  | 0.135635 |
| 0.201195  | 0.141026 | 0.146562 | 0.209062  | 0.145396  | 0.206294  | 0.219114 |
| 0.123834  | 0.226836 | 0.213724 | 0.0897436 | 0.255682  | 0.112325  | 0.135635 |
| 0.120484  | 0.219697 | 0.208625 | 0.121941  | 0.246795  | 0.109557  | 0.135198 |
| 0.116841  | 0.210227 | 0.19799  | 0.116259  | 0.237617  | 0.107663  | 0.13039  |

|           |          |          |           |          |           |          |
|-----------|----------|----------|-----------|----------|-----------|----------|
| 0.0539044 | 0.209062 | 0.200321 | 0.126748  | 0.238491 | 0.0884324 | 0.124563 |
| 0.19391   | 0.118298 | 0.109557 | 0.213432  | 0.123834 | 0.202797  | 0.217366 |
| 0.129225  | 0.214452 | 0.203671 | 0.138549  | 0.236888 | 0.127622  | 0.147727 |
| 0.124272  | 0.229604 | 0.216492 | 0.116696  | 0.255536 | 0.111597  | 0.136946 |
| 0.127477  | 0.217657 | 0.208916 | 0.133596  | 0.241259 | 0.125     | 0.141608 |
| 0.13243   | 0.22465  | 0.211247 | 0.128059  | 0.250583 | 0.117424  | 0.138403 |
| 0.0514277 | 0.219114 | 0.203963 | 0.131265  | 0.243007 | 0.0920746 | 0.131702 |
| 0.126166  | 0.227418 | 0.213724 | 0.0926573 | 0.255682 | 0.118735  | 0.136801 |
| 0.121795  | 0.211976 | 0.200029 | 0.0710956 | 0.238782 | 0.119027  | 0.139714 |
| 0.125874  | 0.227418 | 0.214307 | 0.118881  | 0.252477 | 0.119027  | 0.14292  |
| 0.115093  | 0.209353 | 0.199446 | 0.125583  | 0.237908 | 0.106498  | 0.136218 |
| 0.125146  | 0.222902 | 0.212121 | 0.11553   | 0.250291 | 0.116259  | 0.13549  |
| 0.177739  | 0.116404 | 0.113491 | 0.197552  | 0.134761 | 0.185752  | 0.203526 |
| 0.129516  | 0.229021 | 0.215909 | 0.127477  | 0.251166 | 0.123834  | 0.138403 |
| 0.125291  | 0.22771  | 0.215181 | 0.140443  | 0.247523 | 0.124272  | 0.13884  |
| 0.121358  | 0.216492 | 0.206876 | 0.128351  | 0.24359  | 0.115676  | 0.134324 |
| 0.127622  | 0.217803 | 0.208479 | 0.131119  | 0.243153 | 0.109411  | 0.143211 |
| 0.123252  | 0.21722  | 0.207022 | 0.129662  | 0.241987 | 0.121358  | 0.139714 |
| 0.127914  | 0.229167 | 0.216346 | 0.094697  | 0.25947  | 0.118444  | 0.140589 |
| 0.123397  | 0.215326 | 0.205128 | 0.124272  | 0.244172 | 0.104604  | 0.129662 |
| 0.130973  | 0.229604 | 0.214744 | 0.0511364 | 0.253788 | 0.124417  | 0.138986 |
| 0.120921  | 0.224796 | 0.212267 | 0.137529  | 0.249563 | 0.118153  | 0.137966 |
| 0.121795  | 0.221882 | 0.21285  | 0.125291  | 0.247523 | 0.11553   | 0.130973 |
| 0.0552156 | 0.215618 | 0.203671 | 0.131556  | 0.243007 | 0.0938228 | 0.127331 |
| 0.12704   | 0.228875 | 0.21722  | 0.129662  | 0.251894 | 0.114948  | 0.137383 |
| 0.13884   | 0.228438 | 0.220571 | 0.136509  | 0.254953 | 0.128205  | 0.144814 |
| 0.120775  | 0.221737 | 0.209499 | 0.12602   | 0.243007 | 0.101399  | 0.134324 |
| 0.137821  | 0.225379 | 0.214015 | 0.139569  | 0.24898  | 0.135052  | 0.145542 |
| 0.0512821 | 0.218094 | 0.203817 | 0.131119  | 0.246066 | 0.0890152 | 0.128934 |
| 0.122378  | 0.218094 | 0.207605 | 0.126457  | 0.244901 | 0.112034  | 0.136801 |
| 0.115239  | 0.200175 | 0.191725 | 0.126311  | 0.229895 | 0.112762  | 0.13986  |
| 0.131265  | 0.222319 | 0.210373 | 0.0520105 | 0.249417 | 0.124709  | 0.141026 |
| 0.182838  | 0.130828 | 0.122378 | 0.182547  | 0.138986 | 0.187937  | 0.20338  |
| 0.120921  | 0.221882 | 0.209645 | 0.112471  | 0.250437 | 0.108537  | 0.132139 |
| 0.112762  | 0.212267 | 0.200029 | 0.116841  | 0.240239 | 0.103001  | 0.128059 |
| 0.123543  | 0.228875 | 0.215763 | 0.120047  | 0.255682 | 0.118735  | 0.142628 |
| 0.170746  | 0.138258 | 0.13243  | 0.189685  | 0.158071 | 0.171766  | 0.189831 |
| 0.138258  | 0.225524 | 0.22028  | 0.145251  | 0.253205 | 0.120047  | 0.150058 |
| 0.147873  | 0.237179 | 0.226981 | 0.154575  | 0.254953 | 0.129662  | 0.150058 |
| 0.144522  | 0.233246 | 0.223631 | 0.157634  | 0.256556 | 0.137966  | 0.15574  |
| 0.117716  | 0.216346 | 0.204691 | 0.125874  | 0.243153 | 0.0977564 | 0.13447  |
| 0.123397  | 0.214161 | 0.205128 | 0.131556  | 0.240967 | 0.120047  | 0.140734 |
| 0.20134   | 0.106789 | 0.117279 | 0.217075  | 0.121649 | 0.207605  | 0.220134 |
| 0.120047  | 0.215763 | 0.205565 | 0.13549   | 0.239365 | 0.116696  | 0.136509 |



|           |          |          |           |          |           |          |
|-----------|----------|----------|-----------|----------|-----------|----------|
| 0.125437  | 0.215035 | 0.208333 | 0.134761  | 0.242133 | 0.124126  | 0.144522 |
| 0.124272  | 0.221154 | 0.211247 | 0.111451  | 0.25     | 0.113636  | 0.135198 |
| 0.159819  | 0.157051 | 0.15035  | 0.17905   | 0.178613 | 0.161131  | 0.182984 |
| 0.112617  | 0.211247 | 0.20134  | 0.123689  | 0.238345 | 0.101399  | 0.131993 |
| 0.145396  | 0.232372 | 0.226836 | 0.157343  | 0.256556 | 0.139132  | 0.155157 |
| 0.110431  | 0.211684 | 0.207896 | 0.130828  | 0.239365 | 0.0960082 | 0.124854 |
| 0.177156  | 0.116696 | 0.110286 | 0.19493   | 0.136509 | 0.186043  | 0.20236  |
| 0.125583  | 0.224505 | 0.215763 | 0.133741  | 0.249563 | 0.105915  | 0.138549 |
| 0.107517  | 0.217803 | 0.206439 | 0.119755  | 0.248397 | 0.0817308 | 0.120192 |
| 0.126311  | 0.220862 | 0.206294 | 0.127477  | 0.245629 | 0.110723  | 0.137238 |
| 0.122378  | 0.225962 | 0.211976 | 0.11859   | 0.249272 | 0.117279  | 0.129808 |
| 0.120629  | 0.224796 | 0.214889 | 0.118298  | 0.251894 | 0.115822  | 0.14088  |
| 0.121503  | 0.214015 | 0.202652 | 0.130536  | 0.239656 | 0.110577  | 0.139423 |
| 0.0493881 | 0.217075 | 0.203089 | 0.129808  | 0.242133 | 0.0879953 | 0.12704  |
| 0.179196  | 0.114656 | 0.105624 | 0.195513  | 0.130682 | 0.18546   | 0.203526 |
| 0.126311  | 0.221445 | 0.212704 | 0.129808  | 0.248252 | 0.11451   | 0.135781 |
| 0.110723  | 0.214015 | 0.201195 | 0.125     | 0.240239 | 0.106498  | 0.135052 |
| 0.200612  | 0.105769 | 0.113345 | 0.216638  | 0.114802 | 0.205128  | 0.221154 |
| 0.129808  | 0.227855 | 0.217366 | 0.130973  | 0.254953 | 0.120047  | 0.137529 |
| 0.0486597 | 0.21722  | 0.206439 | 0.131702  | 0.245192 | 0.0869755 | 0.127477 |
| 0.0472028 | 0.214015 | 0.202069 | 0.127622  | 0.243153 | 0.0875583 | 0.126894 |
| 0.137966  | 0.22028  | 0.215326 | 0.14088   | 0.244755 | 0.131119  | 0.144814 |
| 0.179633  | 0.125    | 0.110431 | 0.19799   | 0.134615 | 0.183566  | 0.20134  |
| 0.130245  | 0.229167 | 0.215181 | 0.0553613 | 0.253351 | 0.118444  | 0.137675 |
| 0.133741  | 0.229749 | 0.220134 | 0.134907  | 0.252477 | 0.122232  | 0.140589 |
| 0.0492424 | 0.216929 | 0.2044   | 0.128788  | 0.244318 | 0.0861014 | 0.125146 |
| 0.0524476 | 0.216346 | 0.204691 | 0.12704   | 0.246066 | 0.083479  | 0.12398  |
| 0.0441434 | 0.215618 | 0.201632 | 0.129225  | 0.241841 | 0.0868298 | 0.127622 |
| 0.119464  | 0.218969 | 0.207314 | 0.127622  | 0.244027 | 0.111451  | 0.137966 |
| 0.0995047 | 0.219114 | 0.20542  | 0.119027  | 0.245921 | 0.0780886 | 0.115967 |
| 0.128934  | 0.22669  | 0.217075 | 0.134761  | 0.250874 | 0.1081    | 0.140443 |
| 0.135927  | 0.232226 | 0.222611 | 0.137383  | 0.257867 | 0.125     | 0.145105 |
| 0.123689  | 0.226107 | 0.215035 | 0.132139  | 0.250874 | 0.105769  | 0.138695 |
| 0.132867  | 0.22771  | 0.216055 | 0.134033  | 0.252768 | 0.121941  | 0.137675 |
| 0.182547  | 0.128497 | 0.112762 | 0.199446  | 0.138986 | 0.189394  | 0.206002 |
| 0.120629  | 0.224796 | 0.21722  | 0.125874  | 0.25102  | 0.112034  | 0.134761 |
| 0.131265  | 0.217366 | 0.207751 | 0.137383  | 0.244464 | 0.128205  | 0.144522 |
| 0.0509907 | 0.218386 | 0.203817 | 0.129662  | 0.246649 | 0.0907634 | 0.121649 |
| 0.102127  | 0.214161 | 0.203963 | 0.11961   | 0.245338 | 0.0763403 | 0.116259 |
| 0.118153  | 0.215326 | 0.206002 | 0.128642  | 0.242133 | 0.104312  | 0.138695 |
| 0.12704   | 0.226253 | 0.211101 | 0.0498252 | 0.249854 | 0.11961   | 0.139423 |
| 0.134033  | 0.224213 | 0.21285  | 0.140152  | 0.246649 | 0.122523  | 0.140006 |
| 0.119027  | 0.221737 | 0.20979  | 0.133887  | 0.249126 | 0.110431  | 0.139277 |
| 0.110577  | 0.213869 | 0.204545 | 0.0802739 | 0.244464 | 0.0990676 | 0.133159 |

|           |          |          |           |          |           |          |
|-----------|----------|----------|-----------|----------|-----------|----------|
| 0.110723  | 0.213724 | 0.203234 | 0.0856643 | 0.24053  | 0.090472  | 0.127477 |
| 0.108246  | 0.2162   | 0.204837 | 0.125728  | 0.245921 | 0.0824592 | 0.120047 |
| 0.125     | 0.225087 | 0.214598 | 0.0914918 | 0.252477 | 0.112034  | 0.135344 |
| 0.130973  | 0.227564 | 0.219114 | 0.138549  | 0.251166 | 0.11451   | 0.1419   |
| 0.123834  | 0.228293 | 0.215181 | 0.0603147 | 0.252477 | 0.116987  | 0.136509 |
| 0.118735  | 0.210664 | 0.20134  | 0.125437  | 0.238345 | 0.107226  | 0.134907 |
| 0.122815  | 0.224359 | 0.211247 | 0.0587121 | 0.250291 | 0.110431  | 0.132284 |
| 0.0512821 | 0.216638 | 0.201486 | 0.12704   | 0.244318 | 0.0890152 | 0.126311 |
| 0.120192  | 0.223485 | 0.212995 | 0.112617  | 0.252331 | 0.106643  | 0.129953 |
| 0.0464744 | 0.218531 | 0.20542  | 0.13243   | 0.245629 | 0.0888695 | 0.127914 |
| 0.11961   | 0.219697 | 0.214161 | 0.121358  | 0.245338 | 0.106935  | 0.131119 |
| 0.11961   | 0.225524 | 0.210664 | 0.135927  | 0.248834 | 0.110431  | 0.134324 |
| 0.115822  | 0.22669  | 0.216492 | 0.116404  | 0.250583 | 0.112179  | 0.138403 |
| 0.104895  | 0.216929 | 0.207896 | 0.121795  | 0.247232 | 0.0802739 | 0.119901 |
| 0.0543415 | 0.217657 | 0.204545 | 0.127185  | 0.24359  | 0.0903263 | 0.128205 |
| 0.119027  | 0.207168 | 0.195221 | 0.131556  | 0.23514  | 0.115676  | 0.140734 |
| 0.116841  | 0.221882 | 0.209062 | 0.131119  | 0.247232 | 0.10912   | 0.139132 |
| 0.110286  | 0.219988 | 0.210082 | 0.123689  | 0.248543 | 0.0836247 | 0.115385 |
| 0.053176  | 0.219114 | 0.205128 | 0.126311  | 0.248543 | 0.0868298 | 0.124417 |
| 0.123252  | 0.211976 | 0.202943 | 0.129953  | 0.239073 | 0.116987  | 0.138549 |
| 0.120338  | 0.225379 | 0.212267 | 0.0941142 | 0.252768 | 0.11116   | 0.136509 |
| 0.124417  | 0.21722  | 0.207314 | 0.128788  | 0.244318 | 0.114948  | 0.140297 |
| 0.117716  | 0.223922 | 0.213432 | 0.11655   | 0.249563 | 0.112617  | 0.139714 |
| 0.105186  | 0.220134 | 0.211101 | 0.122669  | 0.250146 | 0.0828963 | 0.122523 |
| 0.107517  | 0.21285  | 0.202069 | 0.12704   | 0.239365 | 0.101253  | 0.130099 |
| 0.121358  | 0.223776 | 0.212995 | 0.113199  | 0.252622 | 0.105186  | 0.128788 |
| 0.124709  | 0.215472 | 0.206439 | 0.131993  | 0.241113 | 0.119901  | 0.141754 |
| 0.127914  | 0.225379 | 0.21081  | 0.126166  | 0.249272 | 0.120484  | 0.14088  |
| 0.114365  | 0.219697 | 0.206294 | 0.128351  | 0.245338 | 0.110723  | 0.132867 |
| 0.182838  | 0.123252 | 0.111597 | 0.200029  | 0.131993 | 0.188811  | 0.20542  |
| 0.158654  | 0.157051 | 0.142483 | 0.174971  | 0.177156 | 0.160548  | 0.17803  |
| 0.127185  | 0.224359 | 0.2162   | 0.126603  | 0.248543 | 0.107226  | 0.13986  |
| 0.121795  | 0.216638 | 0.204691 | 0.0917832 | 0.240239 | 0.114948  | 0.137675 |
| 0.150641  | 0.24053  | 0.231498 | 0.15676   | 0.256847 | 0.132139  | 0.152244 |
| 0.124854  | 0.225816 | 0.2162   | 0.140297  | 0.250874 | 0.11859   | 0.145396 |
| 0.0824592 | 0.214889 | 0.204108 | 0.135198  | 0.237034 | 0.104458  | 0.137383 |
| 0.0861014 | 0.216492 | 0.206294 | 0.130099  | 0.244464 | 0.101107  | 0.132576 |
| 0.0983392 | 0.217075 | 0.208916 | 0.131556  | 0.245338 | 0.0474942 | 0.109266 |
| 0.11553   | 0.222611 | 0.210373 | 0.133596  | 0.249709 | 0.110431  | 0.142774 |
| 0.187937  | 0.114948 | 0.11553  | 0.209207  | 0.130099 | 0.196824  | 0.210519 |
| 0.128642  | 0.230186 | 0.2162   | 0.0520105 | 0.255828 | 0.119172  | 0.140734 |
| 0.121503  | 0.207896 | 0.196824 | 0.099359  | 0.23412  | 0.116404  | 0.133887 |
| 0.0638112 | 0.214015 | 0.203817 | 0.126748  | 0.241696 | 0.0855186 | 0.122523 |
| 0.126311  | 0.224359 | 0.210373 | 0.128351  | 0.252331 | 0.1081    | 0.135198 |

|           |          |          |           |          |           |          |
|-----------|----------|----------|-----------|----------|-----------|----------|
| 0.173077  | 0.144959 | 0.13243  | 0.19289   | 0.160985 | 0.176719  | 0.199155 |
| 0.235431  | 0.105624 | 0.128351 | 0.250583  | 0.102418 | 0.245192  | 0.249854 |
| 0.118298  | 0.22567  | 0.214307 | 0.137529  | 0.249563 | 0.114073  | 0.140006 |
| 0.115967  | 0.225087 | 0.210519 | 0.134615  | 0.249272 | 0.105915  | 0.139132 |
| 0.124126  | 0.222465 | 0.213724 | 0.133741  | 0.248397 | 0.102418  | 0.139714 |
| 0.117279  | 0.224942 | 0.211247 | 0.116696  | 0.248834 | 0.111305  | 0.137238 |
| 0.123252  | 0.226544 | 0.211684 | 0.0574009 | 0.251603 | 0.112908  | 0.134178 |
| 0.117861  | 0.217366 | 0.205128 | 0.124854  | 0.24359  | 0.107226  | 0.126748 |
| 0.0763403 | 0.206148 | 0.196824 | 0.126748  | 0.235577 | 0.0962995 | 0.13243  |
| 0.124417  | 0.225379 | 0.21285  | 0.0533217 | 0.24898  | 0.116113  | 0.134761 |
| 0.0884324 | 0.207751 | 0.198427 | 0.128934  | 0.235723 | 0.0984848 | 0.129662 |
| 0.115385  | 0.226253 | 0.213432 | 0.129371  | 0.25539  | 0.0828963 | 0.11961  |
| 0.103001  | 0.217366 | 0.207459 | 0.124272  | 0.247086 | 0.0833333 | 0.120629 |
| 0.121795  | 0.224505 | 0.213141 | 0.135781  | 0.247815 | 0.11757   | 0.139714 |
| 0.120775  | 0.216492 | 0.207459 | 0.133596  | 0.242424 | 0.115385  | 0.143065 |
| 0.114948  | 0.20979  | 0.199301 | 0.118735  | 0.239802 | 0.0984848 | 0.127331 |
| 0.119318  | 0.230769 | 0.21824  | 0.124854  | 0.256702 | 0.106061  | 0.129662 |
| 0.13243   | 0.235723 | 0.223193 | 0.121066  | 0.255828 | 0.128497  | 0.148019 |
| 0.0518648 | 0.217512 | 0.203526 | 0.125874  | 0.246358 | 0.0893065 | 0.125728 |
| 0.0855186 | 0.208333 | 0.198427 | 0.124272  | 0.238636 | 0.100524  | 0.133159 |
| 0.0543415 | 0.223193 | 0.20979  | 0.139714  | 0.245921 | 0.103147  | 0.130536 |
| 0.197552  | 0.110577 | 0.128351 | 0.215909  | 0.123689 | 0.203234  | 0.217512 |
| 0.114656  | 0.217366 | 0.204837 | 0.126603  | 0.242424 | 0.105478  | 0.12704  |
| 0.106935  | 0.218969 | 0.210227 | 0.125     | 0.251311 | 0.0796911 | 0.121941 |
| 0.125291  | 0.223631 | 0.214307 | 0.129079  | 0.249854 | 0.108829  | 0.137675 |
| 0.124563  | 0.22669  | 0.214744 | 0.13039   | 0.252331 | 0.119464  | 0.139569 |
| 0.124272  | 0.223193 | 0.210664 | 0.12398   | 0.248834 | 0.107517  | 0.134615 |
| 0.1875    | 0.115967 | 0.118007 | 0.207314  | 0.132284 | 0.193765  | 0.211247 |
| 0.126748  | 0.216346 | 0.208479 | 0.130536  | 0.24257  | 0.120484  | 0.140297 |
| 0.0520105 | 0.217366 | 0.202797 | 0.126603  | 0.245338 | 0.0894522 | 0.124126 |
| 0.125291  | 0.224213 | 0.21081  | 0.121503  | 0.25102  | 0.110577  | 0.132139 |
| 0.115093  | 0.224796 | 0.212267 | 0.115967  | 0.251311 | 0.112034  | 0.131847 |
| 0.122669  | 0.215472 | 0.205565 | 0.129953  | 0.242279 | 0.113199  | 0.144085 |
| 0.110723  | 0.210227 | 0.199738 | 0.123543  | 0.236742 | 0.100962  | 0.129516 |
| 0.117133  | 0.223631 | 0.211101 | 0.129371  | 0.252768 | 0.0843531 | 0.121066 |
| 0.125874  | 0.226253 | 0.213724 | 0.126748  | 0.250728 | 0.112325  | 0.134761 |
| 0.187791  | 0.111597 | 0.119172 | 0.206439  | 0.131993 | 0.197261  | 0.209499 |
| 0.116259  | 0.210519 | 0.200321 | 0.123543  | 0.237908 | 0.105624  | 0.132139 |
| 0.182838  | 0.125    | 0.106935 | 0.201777  | 0.132867 | 0.189977  | 0.204837 |
| 0.180944  | 0.120484 | 0.107663 | 0.201632  | 0.129808 | 0.189831  | 0.206439 |
| 0.126748  | 0.231206 | 0.218677 | 0.119755  | 0.256556 | 0.124854  | 0.144085 |
| 0.135781  | 0.232955 | 0.222174 | 0.130245  | 0.255973 | 0.124272  | 0.141463 |
| 0.111305  | 0.218386 | 0.206731 | 0.119755  | 0.246649 | 0.0782343 | 0.113491 |
| 0.114365  | 0.211538 | 0.200758 | 0.120484  | 0.23951  | 0.104021  | 0.132576 |

|           |          |          |           |           |           |          |
|-----------|----------|----------|-----------|-----------|-----------|----------|
| 0.122378  | 0.212558 | 0.204108 | 0.127331  | 0.241404  | 0.10912   | 0.135927 |
| 0.0509907 | 0.218677 | 0.204108 | 0.129662  | 0.245775  | 0.0913462 | 0.126603 |
| 0.122669  | 0.223631 | 0.209062 | 0.0611888 | 0.24898   | 0.109994  | 0.129225 |
| 0.122086  | 0.22771  | 0.211101 | 0.0521562 | 0.252768  | 0.114656  | 0.135052 |
| 0.121358  | 0.225233 | 0.211247 | 0.139132  | 0.250583  | 0.119464  | 0.142774 |
| 0.121503  | 0.225087 | 0.216929 | 0.121795  | 0.254225  | 0.114073  | 0.140006 |
| 0.050845  | 0.213869 | 0.200758 | 0.124854  | 0.242424  | 0.0871212 | 0.121212 |
| 0.120629  | 0.216929 | 0.203234 | 0.129953  | 0.243444  | 0.114073  | 0.139714 |
| 0.105041  | 0.215326 | 0.206002 | 0.118153  | 0.247378  | 0.0769231 | 0.118007 |
| 0.130536  | 0.218677 | 0.210227 | 0.136364  | 0.24257   | 0.12398   | 0.142045 |
| 0.123543  | 0.224796 | 0.211393 | 0.128788  | 0.245775  | 0.10271   | 0.135635 |
| 0.135344  | 0.221445 | 0.212995 | 0.136801  | 0.248252  | 0.129662  | 0.145396 |
| 0.248397  | 0.113054 | 0.132284 | 0.262092  | 0.0920746 | 0.256993  | 0.261946 |
| 0.135635  | 0.2331   | 0.221737 | 0.119027  | 0.260781  | 0.126457  | 0.138403 |
| 0.129662  | 0.226253 | 0.215763 | 0.130536  | 0.249563  | 0.12602   | 0.137092 |
| 0.20877   | 0.112762 | 0.122669 | 0.225962  | 0.115093  | 0.213869  | 0.224942 |
| 0.125     | 0.226544 | 0.217803 | 0.13345   | 0.251311  | 0.114073  | 0.139423 |
| 0.219114  | 0.109411 | 0.118735 | 0.238054  | 0.105624  | 0.226836  | 0.237034 |
| 0.127477  | 0.228147 | 0.213287 | 0.112908  | 0.253497  | 0.11859   | 0.13141  |
| 0.0492424 | 0.224796 | 0.211684 | 0.138695  | 0.246941  | 0.101544  | 0.128642 |
| 0.123834  | 0.221591 | 0.21081  | 0.121795  | 0.249563  | 0.112617  | 0.131556 |
| 0.121503  | 0.229167 | 0.216346 | 0.121212  | 0.254808  | 0.121066  | 0.14088  |
| 0.191725  | 0.118153 | 0.113782 | 0.208916  | 0.132721  | 0.197698  | 0.211976 |
| 0.130828  | 0.221591 | 0.214598 | 0.138112  | 0.246358  | 0.128351  | 0.14292  |
| 0.123543  | 0.215763 | 0.206148 | 0.129953  | 0.243444  | 0.114656  | 0.140589 |
| 0.216638  | 0.113928 | 0.119464 | 0.231789  | 0.112762  | 0.221154  | 0.231643 |
| 0.123834  | 0.223631 | 0.212558 | 0.0626457 | 0.248397  | 0.116404  | 0.136801 |
| 0.188374  | 0.115385 | 0.113345 | 0.207314  | 0.130245  | 0.194056  | 0.210956 |
| 0.128642  | 0.226107 | 0.213578 | 0.0584207 | 0.253497  | 0.119755  | 0.138112 |
| 0.0528846 | 0.219406 | 0.204837 | 0.131556  | 0.249417  | 0.0885781 | 0.129662 |
| 0.110723  | 0.223048 | 0.21722  | 0.132576  | 0.251894  | 0.0910548 | 0.121066 |
| 0.126457  | 0.230624 | 0.221008 | 0.119755  | 0.256847  | 0.122523  | 0.145251 |
| 0.116987  | 0.215618 | 0.20542  | 0.124563  | 0.244755  | 0.104312  | 0.132284 |
| 0.148164  | 0.155594 | 0.146853 | 0.172057  | 0.17803   | 0.14627   | 0.168998 |
| 0.119318  | 0.212995 | 0.201923 | 0.125146  | 0.238345  | 0.112179  | 0.132867 |
| 0.128059  | 0.227564 | 0.213578 | 0.130099  | 0.253205  | 0.117424  | 0.137821 |
| 0.119901  | 0.22465  | 0.211538 | 0.124563  | 0.250291  | 0.109557  | 0.135198 |
| 0.134761  | 0.222319 | 0.211247 | 0.132721  | 0.247086  | 0.125874  | 0.143065 |
| 0.184149  | 0.121358 | 0.118444 | 0.204837  | 0.129808  | 0.188083  | 0.208479 |
| 0.0499709 | 0.217075 | 0.203089 | 0.127477  | 0.243298  | 0.0871212 | 0.126166 |
| 0.116841  | 0.215181 | 0.202943 | 0.123543  | 0.241113  | 0.11116   | 0.140006 |
| 0.12398   | 0.228147 | 0.213578 | 0.097465  | 0.254371  | 0.113636  | 0.137821 |
| 0.127622  | 0.228001 | 0.213724 | 0.0469114 | 0.253934  | 0.121066  | 0.136509 |
| 0.0456002 | 0.219697 | 0.205711 | 0.131556  | 0.245338  | 0.0961538 | 0.126166 |

|           |          |          |           |           |           |          |
|-----------|----------|----------|-----------|-----------|-----------|----------|
| 0.242716  | 0.108537 | 0.136801 | 0.25845   | 0.097465  | 0.252768  | 0.258887 |
| 0.108537  | 0.221154 | 0.212413 | 0.125437  | 0.251166  | 0.0868298 | 0.117424 |
| 0.0980478 | 0.216492 | 0.206876 | 0.129516  | 0.243007  | 0.106352  | 0.136655 |
| 0.176428  | 0.1588   | 0.149767 | 0.18546   | 0.172203  | 0.177739  | 0.192308 |
| 0.175845  | 0.127331 | 0.116259 | 0.191871  | 0.141317  | 0.181235  | 0.197844 |
| 0.118444  | 0.222611 | 0.212413 | 0.135635  | 0.247669  | 0.112179  | 0.1419   |
| 0.120629  | 0.217512 | 0.209062 | 0.133159  | 0.244901  | 0.112908  | 0.139423 |
| 0.118007  | 0.223922 | 0.214307 | 0.115676  | 0.249854  | 0.109994  | 0.137675 |
| 0.143211  | 0.22465  | 0.216783 | 0.14729   | 0.248834  | 0.141317  | 0.151807 |
| 0.120192  | 0.221445 | 0.207459 | 0.133304  | 0.245338  | 0.107809  | 0.140152 |
| 0.120338  | 0.225962 | 0.212267 | 0.139277  | 0.250437  | 0.115822  | 0.141463 |
| 0.129516  | 0.228438 | 0.214452 | 0.0523019 | 0.253205  | 0.123834  | 0.140443 |
| 0.120775  | 0.209499 | 0.201049 | 0.127768  | 0.237471  | 0.11451   | 0.13549  |
| 0.128788  | 0.215763 | 0.207314 | 0.136946  | 0.243444  | 0.126894  | 0.141463 |
| 0.11757   | 0.209499 | 0.196387 | 0.0753205 | 0.236888  | 0.11655   | 0.138986 |
| 0.123834  | 0.229167 | 0.217512 | 0.119755  | 0.255973  | 0.120775  | 0.141754 |
| 0.138549  | 0.23951  | 0.225816 | 0.129808  | 0.262238  | 0.136946  | 0.153555 |
| 0.112471  | 0.2213   | 0.215472 | 0.128788  | 0.252185  | 0.0895979 | 0.121358 |
| 0.131556  | 0.233974 | 0.224359 | 0.121066  | 0.259033  | 0.127622  | 0.147436 |
| 0.136801  | 0.234557 | 0.219697 | 0.0488054 | 0.256702  | 0.129662  | 0.143648 |
| 0.195804  | 0.124563 | 0.112325 | 0.216783  | 0.133013  | 0.201777  | 0.222174 |
| 0.110868  | 0.225233 | 0.216492 | 0.119901  | 0.254079  | 0.0879953 | 0.129662 |
| 0.181672  | 0.121212 | 0.107226 | 0.20236   | 0.132284  | 0.185606  | 0.203963 |
| 0.12398   | 0.219988 | 0.208333 | 0.125146  | 0.245047  | 0.1081    | 0.13549  |
| 0.0488054 | 0.215618 | 0.204837 | 0.134761  | 0.242133  | 0.0999417 | 0.128205 |
| 0.123106  | 0.220571 | 0.210664 | 0.129516  | 0.246212  | 0.105186  | 0.139277 |
| 0.121212  | 0.219551 | 0.20877  | 0.125874  | 0.246358  | 0.100087  | 0.135927 |
| 0.125146  | 0.21183  | 0.205128 | 0.133596  | 0.239802  | 0.120629  | 0.143648 |
| 0.12398   | 0.217657 | 0.206585 | 0.128934  | 0.244172  | 0.120629  | 0.141608 |
| 0.0476399 | 0.215035 | 0.203089 | 0.131847  | 0.242424  | 0.0909091 | 0.129079 |
| 0.12296   | 0.222465 | 0.210227 | 0.128205  | 0.248397  | 0.114948  | 0.135344 |
| 0.130245  | 0.226836 | 0.216055 | 0.134324  | 0.248106  | 0.108246  | 0.14292  |
| 0.13884   | 0.220862 | 0.208042 | 0.050845  | 0.245921  | 0.130536  | 0.148019 |
| 0.238782  | 0.101981 | 0.136946 | 0.256265  | 0.0859557 | 0.247669  | 0.254371 |
| 0.0496795 | 0.218531 | 0.206002 | 0.13243   | 0.247086  | 0.0891608 | 0.130828 |
| 0.175991  | 0.118444 | 0.112325 | 0.190851  | 0.14088   | 0.178759  | 0.195076 |
| 0.178759  | 0.12296  | 0.115385 | 0.197407  | 0.136072  | 0.183858  | 0.200175 |
| 0.112471  | 0.21722  | 0.201486 | 0.129079  | 0.241696  | 0.107372  | 0.133887 |
| 0.105478  | 0.218969 | 0.209645 | 0.125     | 0.246941  | 0.0849359 | 0.119318 |
| 0.0495338 | 0.219843 | 0.209936 | 0.135198  | 0.24461   | 0.0980478 | 0.126603 |
| 0.117133  | 0.213724 | 0.202652 | 0.129079  | 0.239073  | 0.108829  | 0.136218 |
| 0.0977564 | 0.207751 | 0.199009 | 0.129516  | 0.238636  | 0.0492424 | 0.112471 |
| 0.125437  | 0.227273 | 0.211247 | 0.0587121 | 0.249709  | 0.118007  | 0.137238 |
| 0.119464  | 0.211684 | 0.202069 | 0.129079  | 0.237325  | 0.110286  | 0.131556 |

|           |          |          |           |          |           |          |
|-----------|----------|----------|-----------|----------|-----------|----------|
| 0.134324  | 0.224213 | 0.214889 | 0.136072  | 0.249563 | 0.125146  | 0.141754 |
| 0.0476399 | 0.215618 | 0.204254 | 0.128934  | 0.244172 | 0.0894522 | 0.12704  |
| 0.131556  | 0.221737 | 0.212413 | 0.135052  | 0.247086 | 0.126166  | 0.1419   |
| 0.123543  | 0.222174 | 0.210519 | 0.12704   | 0.24898  | 0.113782  | 0.139132 |
| 0.129079  | 0.225379 | 0.217803 | 0.134907  | 0.250146 | 0.111116  | 0.142045 |
| 0.123397  | 0.226107 | 0.214452 | 0.11961   | 0.251748 | 0.115967  | 0.142774 |
| 0.137238  | 0.234994 | 0.222465 | 0.0454545 | 0.258887 | 0.132721  | 0.143502 |
| 0.119318  | 0.22669  | 0.212704 | 0.130682  | 0.251457 | 0.0903263 | 0.122086 |
| 0.0534674 | 0.212704 | 0.201632 | 0.126894  | 0.237762 | 0.0932401 | 0.125    |
| 0.136218  | 0.229312 | 0.219406 | 0.137092  | 0.254079 | 0.126457  | 0.142483 |
| 0.175699  | 0.121358 | 0.118444 | 0.190559  | 0.136509 | 0.179633  | 0.198864 |
| 0.133887  | 0.222902 | 0.217366 | 0.141463  | 0.245921 | 0.132576  | 0.144814 |
| 0.124563  | 0.215618 | 0.206002 | 0.129225  | 0.242424 | 0.118007  | 0.140152 |
| 0.123834  | 0.223339 | 0.216346 | 0.131702  | 0.247815 | 0.104458  | 0.137383 |
| 0.114948  | 0.21824  | 0.20979  | 0.121941  | 0.245629 | 0.0990676 | 0.128497 |
| 0.120338  | 0.223048 | 0.213141 | 0.119172  | 0.25102  | 0.116404  | 0.140006 |
| 0.126603  | 0.228438 | 0.217949 | 0.120484  | 0.253788 | 0.118298  | 0.142191 |
| 0.180653  | 0.123106 | 0.113199 | 0.198135  | 0.135635 | 0.1875    | 0.204691 |
| 0.118881  | 0.207896 | 0.195659 | 0.127331  | 0.234994 | 0.108246  | 0.137675 |
| 0.111451  | 0.198135 | 0.187646 | 0.119027  | 0.225524 | 0.0999417 | 0.132576 |
| 0.128059  | 0.218531 | 0.210373 | 0.131847  | 0.244464 | 0.124709  | 0.143357 |
| 0.180361  | 0.122523 | 0.105624 | 0.201632  | 0.133887 | 0.189831  | 0.202943 |
| 0.100962  | 0.213869 | 0.201923 | 0.12398   | 0.244172 | 0.083042  | 0.121795 |
| 0.131119  | 0.230332 | 0.216929 | 0.0472028 | 0.256556 | 0.124854  | 0.139714 |
| 0.124126  | 0.218094 | 0.209936 | 0.130828  | 0.243735 | 0.121066  | 0.137966 |
| 0.118444  | 0.224359 | 0.20979  | 0.133596  | 0.250291 | 0.108974  | 0.134615 |
| 0.177593  | 0.121795 | 0.114219 | 0.199446  | 0.136655 | 0.183858  | 0.202214 |
| 0.127185  | 0.223776 | 0.210664 | 0.050845  | 0.248834 | 0.121795  | 0.138403 |
| 0.11757   | 0.213287 | 0.204545 | 0.118153  | 0.240967 | 0.107809  | 0.135198 |
| 0.105915  | 0.206876 | 0.19697  | 0.124272  | 0.238928 | 0.0815851 | 0.122378 |
| 0.120484  | 0.199009 | 0.187937 | 0.13039   | 0.224359 | 0.110723  | 0.143065 |
| 0.127914  | 0.228001 | 0.217803 | 0.125     | 0.253351 | 0.116113  | 0.136509 |
| 0.134033  | 0.232955 | 0.21722  | 0.0451632 | 0.255682 | 0.129225  | 0.139714 |
| 0.0460373 | 0.216346 | 0.207022 | 0.131119  | 0.24461  | 0.0872669 | 0.123689 |
| 0.128205  | 0.224213 | 0.215181 | 0.13141   | 0.251311 | 0.117861  | 0.139132 |
| 0.141463  | 0.232226 | 0.221445 | 0.157488  | 0.254371 | 0.138403  | 0.152972 |
| 0.223339  | 0.107809 | 0.125583 | 0.240822  | 0.105478 | 0.234266  | 0.242424 |
| 0.123689  | 0.230769 | 0.218531 | 0.133304  | 0.256119 | 0.0944056 | 0.121795 |
| 0.127477  | 0.227855 | 0.217075 | 0.127477  | 0.254079 | 0.118881  | 0.137238 |
| 0.118881  | 0.21081  | 0.200612 | 0.120338  | 0.236742 | 0.114656  | 0.135635 |
| 0.126603  | 0.211538 | 0.20338  | 0.13243   | 0.240676 | 0.116841  | 0.140152 |
| 0.120629  | 0.218094 | 0.209353 | 0.103147  | 0.24461  | 0.112617  | 0.129516 |
| 0.121795  | 0.221008 | 0.205857 | 0.123543  | 0.247815 | 0.113782  | 0.135052 |
| 0.12398   | 0.214161 | 0.205128 | 0.129225  | 0.238928 | 0.121795  | 0.138403 |

|           |          |          |           |          |           |          |
|-----------|----------|----------|-----------|----------|-----------|----------|
| 0.131119  | 0.229458 | 0.214015 | 0.0472028 | 0.250437 | 0.129808  | 0.141463 |
| 0.121795  | 0.218094 | 0.207022 | 0.132284  | 0.243735 | 0.11116   | 0.136218 |
| 0.226544  | 0.105186 | 0.129953 | 0.24053   | 0.104895 | 0.231935  | 0.240676 |
| 0.104021  | 0.213432 | 0.203817 | 0.119755  | 0.243153 | 0.0831876 | 0.119027 |
| 0.118298  | 0.219843 | 0.207896 | 0.109266  | 0.246358 | 0.103875  | 0.126311 |
| 0.0447261 | 0.217366 | 0.203963 | 0.127768  | 0.241841 | 0.090035  | 0.126457 |
| 0.128205  | 0.227418 | 0.215472 | 0.142483  | 0.249854 | 0.126311  | 0.144376 |
| 0.125874  | 0.234703 | 0.222756 | 0.139277  | 0.257721 | 0.100087  | 0.122815 |
| 0.109848  | 0.21081  | 0.198281 | 0.132867  | 0.236742 | 0.102127  | 0.130099 |
| 0.120921  | 0.213724 | 0.20236  | 0.129662  | 0.241113 | 0.119901  | 0.142628 |
| 0.109703  | 0.215909 | 0.20542  | 0.126311  | 0.243007 | 0.107226  | 0.130828 |
| 0.218969  | 0.106935 | 0.121212 | 0.236451  | 0.107809 | 0.226981  | 0.238345 |
| 0.129516  | 0.216783 | 0.208333 | 0.132721  | 0.24359  | 0.122669  | 0.142191 |
| 0.129953  | 0.229167 | 0.214015 | 0.0483683 | 0.252768 | 0.121649  | 0.140006 |
| 0.116259  | 0.221591 | 0.208479 | 0.12704   | 0.246941 | 0.104167  | 0.129516 |
| 0.127185  | 0.220571 | 0.21183  | 0.129225  | 0.24796  | 0.119172  | 0.138403 |
| 0.131847  | 0.228147 | 0.217366 | 0.114073  | 0.255245 | 0.120629  | 0.13549  |
| 0.0453089 | 0.217949 | 0.203089 | 0.130099  | 0.242133 | 0.090035  | 0.122378 |
| 0.131847  | 0.227564 | 0.215035 | 0.050845  | 0.252622 | 0.121503  | 0.143357 |
| 0.135781  | 0.233829 | 0.219551 | 0.0483683 | 0.258013 | 0.129808  | 0.142628 |
| 0.125583  | 0.228001 | 0.212267 | 0.0544872 | 0.25102  | 0.11757   | 0.136509 |
| 0.0514277 | 0.218531 | 0.206002 | 0.131847  | 0.245921 | 0.0874126 | 0.127622 |
| 0.132139  | 0.229021 | 0.217657 | 0.131265  | 0.251457 | 0.122378  | 0.136364 |
| 0.136655  | 0.233537 | 0.223631 | 0.135781  | 0.256556 | 0.128351  | 0.140297 |
| 0.131993  | 0.227418 | 0.2213   | 0.139569  | 0.252768 | 0.114073  | 0.142337 |
| 0.133741  | 0.228001 | 0.221882 | 0.140734  | 0.253934 | 0.116113  | 0.13884  |
| 0.137092  | 0.233392 | 0.223193 | 0.13039   | 0.25845  | 0.128788  | 0.142191 |
| 0.0960082 | 0.217366 | 0.209499 | 0.127477  | 0.249709 | 0.0437063 | 0.111597 |
| 0.143357  | 0.237034 | 0.22567  | 0.0952797 | 0.265006 | 0.13243   | 0.148747 |
| 0.126311  | 0.234266 | 0.224359 | 0.125437  | 0.25845  | 0.115967  | 0.140152 |
| 0.194493  | 0.107226 | 0.115093 | 0.213141  | 0.11655  | 0.203963  | 0.215909 |
| 0.117279  | 0.223485 | 0.208625 | 0.13243   | 0.245921 | 0.115385  | 0.138695 |
| 0.122232  | 0.22465  | 0.213578 | 0.110577  | 0.254662 | 0.111014  | 0.133159 |
| 0         | 0.212267 | 0.200029 | 0.134033  | 0.238199 | 0.095134  | 0.128351 |
| 0.212267  | 0        | 0.124417 | 0.231206  | 0.109848 | 0.216492  | 0.230478 |
| 0.200029  | 0.124417 | 0        | 0.216638  | 0.127914 | 0.208625  | 0.221737 |
| 0.134033  | 0.231206 | 0.216638 | 0         | 0.254516 | 0.130099  | 0.14292  |
| 0.238199  | 0.109848 | 0.127914 | 0.254516  | 0        | 0.248834  | 0.253205 |
| 0.095134  | 0.216492 | 0.208625 | 0.130099  | 0.248834 | 0         | 0.111014 |
| 0.128351  | 0.230478 | 0.221737 | 0.14292   | 0.253205 | 0.111014  | 0        |
| 0.106206  | 0.219114 | 0.210373 | 0.123397  | 0.248543 | 0.083042  | 0.11859  |
| 0.133741  | 0.230041 | 0.218969 | 0.129662  | 0.25539  | 0.121941  | 0.142337 |
| 0.178759  | 0.116259 | 0.112179 | 0.197115  | 0.129079 | 0.186189  | 0.199883 |
| 0.125     | 0.218677 | 0.207896 | 0.127331  | 0.246941 | 0.115822  | 0.130973 |

|           |          |          |           |          |           |          |
|-----------|----------|----------|-----------|----------|-----------|----------|
| 0.183566  | 0.11961  | 0.110577 | 0.202797  | 0.128351 | 0.192745  | 0.205857 |
| 0.112762  | 0.222465 | 0.210519 | 0.127914  | 0.248689 | 0.103001  | 0.128059 |
| 0.119172  | 0.205274 | 0.195659 | 0.0798368 | 0.234994 | 0.113199  | 0.136509 |
| 0.120629  | 0.217803 | 0.211393 | 0.13141   | 0.247232 | 0.0890152 | 0.129516 |
| 0.112471  | 0.205565 | 0.196533 | 0.118007  | 0.229749 | 0.106498  | 0.130682 |
| 0.0517191 | 0.212995 | 0.202214 | 0.124272  | 0.240385 | 0.0836247 | 0.120047 |
| 0.112908  | 0.217657 | 0.204254 | 0.127768  | 0.246795 | 0.106061  | 0.13345  |
| 0.100962  | 0.21183  | 0.200758 | 0.11961   | 0.241841 | 0.0789627 | 0.116259 |
| 0.119172  | 0.214889 | 0.202652 | 0.125874  | 0.241404 | 0.112325  | 0.13884  |
| 0.124563  | 0.227855 | 0.214744 | 0.0910548 | 0.254079 | 0.114219  | 0.139277 |
| 0.112034  | 0.219114 | 0.208625 | 0.126603  | 0.247086 | 0.0839161 | 0.11859  |
| 0.104021  | 0.216638 | 0.208188 | 0.125     | 0.246358 | 0.081148  | 0.118153 |
| 0.112325  | 0.217657 | 0.207751 | 0.129516  | 0.242133 | 0.104021  | 0.138112 |
| 0.129808  | 0.22465  | 0.211538 | 0.136218  | 0.248252 | 0.124709  | 0.142774 |
| 0.120047  | 0.218094 | 0.207896 | 0.125     | 0.244318 | 0.101544  | 0.133887 |
| 0.116987  | 0.218823 | 0.208625 | 0.121358  | 0.246212 | 0.1081    | 0.130245 |
| 0.0451632 | 0.216638 | 0.201777 | 0.126166  | 0.240239 | 0.0863928 | 0.12398  |
| 0.125874  | 0.218677 | 0.208188 | 0.0594406 | 0.24461  | 0.11961   | 0.140006 |
| 0.126166  | 0.227127 | 0.21285  | 0.12704   | 0.251311 | 0.114073  | 0.135052 |
| 0.123106  | 0.228438 | 0.214452 | 0.117861  | 0.252622 | 0.117424  | 0.138986 |
| 0.124563  | 0.222611 | 0.213869 | 0.127185  | 0.248252 | 0.106352  | 0.136072 |
| 0.122669  | 0.215763 | 0.204108 | 0.127622  | 0.239948 | 0.116404  | 0.137092 |
| 0.130973  | 0.221737 | 0.211538 | 0.135052  | 0.247086 | 0.129079  | 0.144231 |
| 0.137966  | 0.226107 | 0.21824  | 0.141754  | 0.250291 | 0.135198  | 0.147436 |
| 0.113345  | 0.219843 | 0.204983 | 0.0667249 | 0.244901 | 0.105915  | 0.12398  |
| 0.0527389 | 0.217512 | 0.20236  | 0.131119  | 0.241404 | 0.0913462 | 0.126603 |
| 0.119318  | 0.215035 | 0.204545 | 0.119901  | 0.243881 | 0.102273  | 0.130536 |
| 0.139423  | 0.233683 | 0.222611 | 0.132139  | 0.255828 | 0.130245  | 0.143939 |
| 0.110431  | 0.223048 | 0.213432 | 0.124417  | 0.252768 | 0.0846445 | 0.119027 |
| 0.138695  | 0.238199 | 0.227127 | 0.131119  | 0.261801 | 0.138258  | 0.151661 |
| 0.0544872 | 0.227418 | 0.214598 | 0.145688  | 0.248106 | 0.105624  | 0.131847 |
| 0.124854  | 0.226107 | 0.214452 | 0.139714  | 0.24796  | 0.120047  | 0.138112 |
| 0.111597  | 0.21722  | 0.208188 | 0.126166  | 0.245484 | 0.0855186 | 0.120775 |
| 0.11961   | 0.219406 | 0.206002 | 0.12602   | 0.24359  | 0.108683  | 0.13549  |
| 0.129808  | 0.22669  | 0.218823 | 0.13884   | 0.250291 | 0.110431  | 0.13986  |
| 0.199592  | 0.128934 | 0.120484 | 0.209207  | 0.132721 | 0.204108  | 0.2213   |
| 0.118298  | 0.21722  | 0.205857 | 0.120921  | 0.242279 | 0.106206  | 0.134761 |
| 0.117861  | 0.221154 | 0.211247 | 0.133304  | 0.25     | 0.0850816 | 0.129662 |
| 0.124417  | 0.223922 | 0.214307 | 0.125291  | 0.252477 | 0.116696  | 0.135344 |
| 0.124563  | 0.222611 | 0.211247 | 0.127477  | 0.244464 | 0.100524  | 0.136946 |
| 0.114802  | 0.225087 | 0.212558 | 0.131119  | 0.249272 | 0.109703  | 0.13243  |
| 0.129371  | 0.223631 | 0.21285  | 0.127331  | 0.250437 | 0.11961   | 0.137966 |
| 0.13243   | 0.224068 | 0.214744 | 0.127477  | 0.251748 | 0.12296   | 0.140734 |
| 0.120338  | 0.223339 | 0.20877  | 0.134324  | 0.247815 | 0.113491  | 0.136801 |



|          |          |          |           |          |           |          |
|----------|----------|----------|-----------|----------|-----------|----------|
| 0.120629 | 0.224505 | 0.210227 | 0.0906177 | 0.253351 | 0.107955  | 0.135927 |
| 0.132867 | 0.231206 | 0.21926  | 0.130536  | 0.252768 | 0.12398   | 0.137092 |
| 0.11655  | 0.218677 | 0.20877  | 0.127914  | 0.248397 | 0.0898893 | 0.129225 |
| 0.118444 | 0.227273 | 0.215326 | 0.133887  | 0.254953 | 0.0850816 | 0.120047 |
| 0.17162  | 0.193619 | 0.183712 | 0.18007   | 0.210519 | 0.172057  | 0.194202 |
| 0.122086 | 0.215763 | 0.205857 | 0.129953  | 0.241113 | 0.112908  | 0.140589 |
| 0.129516 | 0.219406 | 0.205711 | 0.132139  | 0.243298 | 0.126457  | 0.143065 |
| 0.119755 | 0.228875 | 0.220425 | 0.11451   | 0.256847 | 0.0910548 | 0.123689 |
| 0.123397 | 0.219114 | 0.208042 | 0.11757   | 0.245047 | 0.11655   | 0.140152 |
| 0.108246 | 0.221445 | 0.20542  | 0.118735  | 0.248543 | 0.0815851 | 0.120921 |
| 0.107955 | 0.219988 | 0.206294 | 0.11961   | 0.246795 | 0.080711  | 0.11655  |
| 0.112908 | 0.224068 | 0.211538 | 0.124563  | 0.252622 | 0.0847902 | 0.124709 |
| 0.12602  | 0.223776 | 0.217949 | 0.107372  | 0.252331 | 0.117133  | 0.13549  |
| 0.11553  | 0.213869 | 0.203671 | 0.128642  | 0.239219 | 0.0967366 | 0.127622 |
| 0.130245 | 0.231206 | 0.222174 | 0.128205  | 0.257721 | 0.119027  | 0.139423 |
| 0.116404 | 0.216783 | 0.202506 | 0.115239  | 0.244172 | 0.100816  | 0.127622 |
| 0.122086 | 0.218969 | 0.20877  | 0.116841  | 0.250437 | 0.0954254 | 0.128934 |
| 0.13039  | 0.236305 | 0.226107 | 0.101544  | 0.259033 | 0.124417  | 0.136946 |
| 0.114656 | 0.227273 | 0.216783 | 0.11116   | 0.253788 | 0.0909091 | 0.119755 |
| 0.122232 | 0.224942 | 0.211538 | 0.121066  | 0.251166 | 0.110431  | 0.130245 |
| 0.112908 | 0.223193 | 0.211538 | 0.111451  | 0.252331 | 0.0821678 | 0.120921 |
| 0.114656 | 0.224068 | 0.212121 | 0.110868  | 0.251166 | 0.0903263 | 0.120047 |
| 0.10067  | 0.217366 | 0.208042 | 0.120484  | 0.247669 | 0.076049  | 0.117716 |
| 0.113928 | 0.229458 | 0.216929 | 0.120629  | 0.258013 | 0.0925117 | 0.123397 |
| 0.111597 | 0.222465 | 0.212267 | 0.116841  | 0.249563 | 0.0823135 | 0.121358 |
| 0.145688 | 0.235286 | 0.220134 | 0.112179  | 0.257139 | 0.14292   | 0.146999 |
| 0.134033 | 0.226544 | 0.211684 | 0.111305  | 0.249272 | 0.12602   | 0.146707 |
| 0.112471 | 0.222756 | 0.209353 | 0.113054  | 0.252185 | 0.0861014 | 0.128059 |
| 0.143794 | 0.235723 | 0.224942 | 0.106789  | 0.261655 | 0.136655  | 0.155012 |
| 0.123397 | 0.222319 | 0.212121 | 0.135635  | 0.247378 | 0.107809  | 0.142774 |
| 0.133013 | 0.230186 | 0.222902 | 0.128934  | 0.254371 | 0.116259  | 0.137238 |
| 0.112908 | 0.222319 | 0.213869 | 0.125437  | 0.252622 | 0.087704  | 0.124126 |
| 0.143357 | 0.230332 | 0.220425 | 0.143065  | 0.255973 | 0.131556  | 0.144668 |
| 0.129079 | 0.221882 | 0.209645 | 0.123252  | 0.25102  | 0.125146  | 0.143794 |
| 0.138112 | 0.231789 | 0.217512 | 0.121503  | 0.253934 | 0.130682  | 0.146125 |
| 0.125583 | 0.23208  | 0.220717 | 0.125583  | 0.256556 | 0.099796  | 0.131847 |
| 0.109703 | 0.224359 | 0.212995 | 0.110868  | 0.252331 | 0.085373  | 0.124417 |
| 0.109848 | 0.222465 | 0.206731 | 0.113928  | 0.249563 | 0.0840618 | 0.112617 |
| 0.122523 | 0.226981 | 0.212413 | 0.104167  | 0.252331 | 0.115385  | 0.131702 |
| 0.121066 | 0.228147 | 0.219697 | 0.120775  | 0.256993 | 0.0938228 | 0.13141  |
| 0.121503 | 0.233246 | 0.223631 | 0.130536  | 0.261801 | 0.10067   | 0.129225 |
| 0.122669 | 0.2213   | 0.208479 | 0.113345  | 0.250437 | 0.108246  | 0.136801 |
| 0.115385 | 0.219843 | 0.21081  | 0.11451   | 0.24898  | 0.0922203 | 0.125728 |
| 0.109994 | 0.219114 | 0.209207 | 0.113491  | 0.25     | 0.0818765 | 0.116259 |

|           |          |          |          |          |           |          |
|-----------|----------|----------|----------|----------|-----------|----------|
| 0.11451   | 0.220717 | 0.21285  | 0.117716 | 0.248397 | 0.090472  | 0.119901 |
| 0.106935  | 0.218969 | 0.206439 | 0.107517 | 0.250146 | 0.08581   | 0.123689 |
| 0.115239  | 0.228438 | 0.2162   | 0.113199 | 0.25641  | 0.0885781 | 0.115093 |
| 0.112908  | 0.216783 | 0.212413 | 0.128642 | 0.250583 | 0.0891608 | 0.128788 |
| 0.111014  | 0.210227 | 0.198572 | 0.133159 | 0.234994 | 0.105624  | 0.124563 |
| 0.109848  | 0.224213 | 0.212558 | 0.128788 | 0.253059 | 0.0852273 | 0.123689 |
| 0.0935315 | 0.214889 | 0.205857 | 0.126166 | 0.247523 | 0.0458916 | 0.110577 |
| 0.108974  | 0.217803 | 0.210519 | 0.114802 | 0.245484 | 0.0831876 | 0.116404 |
| 0.109703  | 0.210082 | 0.200758 | 0.129808 | 0.235723 | 0.101981  | 0.129953 |
| 0.112471  | 0.222465 | 0.208479 | 0.126748 | 0.249272 | 0.0884324 | 0.128059 |
| 0.127914  | 0.217803 | 0.207022 | 0.134324 | 0.242279 | 0.112325  | 0.130973 |
| 0.104312  | 0.209062 | 0.200612 | 0.122086 | 0.234703 | 0.0971737 | 0.127185 |
| 0.129808  | 0.22873  | 0.221737 | 0.13243  | 0.254371 | 0.100524  | 0.129079 |

| TDr_3766  | TDr_3782 | TDr_3783 | TDr_3785 | TDr_3801 | TDr_3814  | TDr_3820  |
|-----------|----------|----------|----------|----------|-----------|-----------|
| 0.109703  | 0.134907 | 0.172057 | 0.127914 | 0.174825 | 0.120047  | 0.105186  |
| 0.104604  | 0.122232 | 0.173951 | 0.124854 | 0.182255 | 0.108537  | 0.112617  |
| 0.101981  | 0.120775 | 0.172786 | 0.121941 | 0.178759 | 0.10271   | 0.110286  |
| 0.10373   | 0.121649 | 0.182984 | 0.123397 | 0.18954  | 0.10912   | 0.105624  |
| 0.127914  | 0.134178 | 0.199009 | 0.128059 | 0.205274 | 0.126894  | 0.134178  |
| 0.121212  | 0.136509 | 0.189685 | 0.128642 | 0.196533 | 0.127185  | 0.123689  |
| 0.10708   | 0.135198 | 0.194493 | 0.123834 | 0.198427 | 0.127914  | 0.119755  |
| 0.108537  | 0.123834 | 0.175554 | 0.118007 | 0.183566 | 0.11451   | 0.112762  |
| 0.0958625 | 0.120192 | 0.178613 | 0.113491 | 0.186334 | 0.105624  | 0.105915  |
| 0.0759033 | 0.126166 | 0.185169 | 0.111597 | 0.191434 | 0.105478  | 0.11655   |
| 0.1081    | 0.131847 | 0.17366  | 0.122815 | 0.176428 | 0.117861  | 0.103584  |
| 0.105915  | 0.11451  | 0.17701  | 0.115676 | 0.187354 | 0.108974  | 0.109557  |
| 0.0989219 | 0.125583 | 0.185752 | 0.118298 | 0.193182 | 0.108974  | 0.112179  |
| 0.119755  | 0.146999 | 0.1419   | 0.140589 | 0.143502 | 0.13447   | 0.121649  |
| 0.108246  | 0.137529 | 0.190705 | 0.12296  | 0.19493  | 0.116841  | 0.127331  |
| 0.111014  | 0.133304 | 0.191142 | 0.11757  | 0.196533 | 0.117861  | 0.106498  |
| 0.105041  | 0.102855 | 0.184878 | 0.109557 | 0.191434 | 0.0929487 | 0.106352  |
| 0.137821  | 0.140006 | 0.203671 | 0.143794 | 0.211976 | 0.135927  | 0.145833  |
| 0.10169   | 0.118735 | 0.171911 | 0.11757  | 0.177302 | 0.104167  | 0.108246  |
| 0.19697   | 0.212267 | 0.133741 | 0.200612 | 0.139423 | 0.201777  | 0.181672  |
| 0.119318  | 0.126166 | 0.188666 | 0.129953 | 0.197844 | 0.125583  | 0.123252  |
| 0.114802  | 0.117861 | 0.191725 | 0.128934 | 0.197115 | 0.119027  | 0.127477  |
| 0.102418  | 0.122086 | 0.181964 | 0.115967 | 0.187063 | 0.108392  | 0.0856643 |
| 0.112762  | 0.130099 | 0.195221 | 0.123689 | 0.204691 | 0.128642  | 0.109994  |
| 0.097465  | 0.118007 | 0.179341 | 0.115093 | 0.181527 | 0.10373   | 0.101107  |
| 0.121066  | 0.132867 | 0.194493 | 0.129953 | 0.201923 | 0.132576  | 0.127914  |
| 0.112617  | 0.126457 | 0.18954  | 0.127914 | 0.195804 | 0.121795  | 0.126166  |
| 0.106789  | 0.120629 | 0.197115 | 0.115385 | 0.206294 | 0.122669  | 0.1081    |
| 0.122523  | 0.134907 | 0.193619 | 0.120629 | 0.202506 | 0.129371  | 0.127331  |
| 0.100087  | 0.127622 | 0.198281 | 0.129662 | 0.20134  | 0.12296   | 0.12296   |
| 0.111014  | 0.13039  | 0.189394 | 0.130682 | 0.193328 | 0.124854  | 0.116113  |
| 0.108537  | 0.123834 | 0.191871 | 0.119172 | 0.201632 | 0.120921  | 0.114219  |
| 0.0960082 | 0.119755 | 0.175554 | 0.115385 | 0.183858 | 0.110431  | 0.101981  |
| 0.100379  | 0.13141  | 0.188666 | 0.119755 | 0.190851 | 0.118298  | 0.117716  |
| 0.114802  | 0.133013 | 0.195513 | 0.119901 | 0.20236  | 0.122232  | 0.115822  |
| 0.11116   | 0.136364 | 0.198572 | 0.121795 | 0.205711 | 0.125291  | 0.123834  |
| 0.120338  | 0.137675 | 0.205128 | 0.137383 | 0.211101 | 0.133304  | 0.130973  |
| 0.114073  | 0.122086 | 0.195076 | 0.128497 | 0.199883 | 0.119755  | 0.115385  |
| 0.10271   | 0.11859  | 0.184878 | 0.115093 | 0.189685 | 0.115676  | 0.0990676 |
| 0.110868  | 0.132576 | 0.19391  | 0.122378 | 0.200175 | 0.117424  | 0.112179  |
| 0.10067   | 0.119755 | 0.181964 | 0.107517 | 0.190851 | 0.105478  | 0.105769  |
| 0.124272  | 0.149767 | 0.207896 | 0.132284 | 0.215326 | 0.132867  | 0.131119  |

|           |          |          |          |          |          |           |
|-----------|----------|----------|----------|----------|----------|-----------|
| 0.128642  | 0.150058 | 0.204108 | 0.135781 | 0.215618 | 0.141608 | 0.132576  |
| 0.107809  | 0.128351 | 0.183858 | 0.112617 | 0.191871 | 0.110286 | 0.109703  |
| 0.0987762 | 0.111742 | 0.185897 | 0.110577 | 0.189248 | 0.105915 | 0.105624  |
| 0.101253  | 0.128788 | 0.198864 | 0.115967 | 0.203089 | 0.119172 | 0.11655   |
| 0.110286  | 0.117424 | 0.187209 | 0.11014  | 0.195221 | 0.115093 | 0.111305  |
| 0.125291  | 0.141171 | 0.204254 | 0.12398  | 0.211393 | 0.13243  | 0.131847  |
| 0.101399  | 0.122523 | 0.189977 | 0.115822 | 0.198281 | 0.114073 | 0.110286  |
| 0.105332  | 0.12704  | 0.184586 | 0.11655  | 0.190268 | 0.113345 | 0.109557  |
| 0.129953  | 0.149621 | 0.206585 | 0.150787 | 0.214015 | 0.145833 | 0.143211  |
| 0.117133  | 0.121358 | 0.191142 | 0.11961  | 0.202652 | 0.127768 | 0.117861  |
| 0.107372  | 0.125291 | 0.184586 | 0.11655  | 0.189977 | 0.111014 | 0.100524  |
| 0.105915  | 0.136655 | 0.196533 | 0.129079 | 0.20338  | 0.124709 | 0.127914  |
| 0.112908  | 0.129371 | 0.175554 | 0.119172 | 0.182401 | 0.114219 | 0.0903263 |
| 0.129516  | 0.138112 | 0.208188 | 0.125291 | 0.217366 | 0.140734 | 0.128205  |
| 0.11451   | 0.140589 | 0.198427 | 0.11961  | 0.207022 | 0.120484 | 0.122523  |
| 0.108392  | 0.122815 | 0.187063 | 0.116696 | 0.194784 | 0.11116  | 0.105041  |
| 0.106935  | 0.129225 | 0.185023 | 0.110577 | 0.194784 | 0.114948 | 0.115239  |
| 0.10067   | 0.134324 | 0.199155 | 0.11859  | 0.203963 | 0.119172 | 0.114802  |
| 0.128059  | 0.145688 | 0.207896 | 0.131702 | 0.215618 | 0.13345  | 0.122378  |
| 0.12398   | 0.149767 | 0.208479 | 0.131119 | 0.21824  | 0.132284 | 0.127622  |
| 0.148601  | 0.174097 | 0.158217 | 0.159819 | 0.164481 | 0.16419  | 0.137383  |
| 0.100816  | 0.120775 | 0.184441 | 0.112325 | 0.192453 | 0.110286 | 0.10912   |
| 0.0981935 | 0.125146 | 0.18648  | 0.112034 | 0.19391  | 0.108537 | 0.10912   |
| 0.0958625 | 0.120484 | 0.18648  | 0.10912  | 0.194493 | 0.107955 | 0.108246  |
| 0.133887  | 0.143065 | 0.196533 | 0.141317 | 0.198718 | 0.13986  | 0.136072  |
| 0.101253  | 0.124417 | 0.182547 | 0.111014 | 0.190559 | 0.11014  | 0.108974  |
| 0.122378  | 0.131847 | 0.195804 | 0.120484 | 0.204691 | 0.127477 | 0.113491  |
| 0.101107  | 0.130682 | 0.195804 | 0.118735 | 0.203817 | 0.119901 | 0.114365  |
| 0.107372  | 0.123252 | 0.181672 | 0.113054 | 0.193182 | 0.11014  | 0.109557  |
| 0.140589  | 0.147145 | 0.195659 | 0.148893 | 0.204545 | 0.147727 | 0.137238  |
| 0.11116   | 0.129953 | 0.194784 | 0.115676 | 0.200758 | 0.120047 | 0.108683  |
| 0.120921  | 0.146999 | 0.209207 | 0.127185 | 0.213141 | 0.133887 | 0.129808  |
| 0.11961   | 0.123834 | 0.193328 | 0.117716 | 0.20338  | 0.128788 | 0.125291  |
| 0.109557  | 0.103584 | 0.180361 | 0.118444 | 0.187209 | 0.114656 | 0.107372  |
| 0.103438  | 0.125728 | 0.182984 | 0.112908 | 0.190414 | 0.109411 | 0.100379  |
| 0.106352  | 0.122815 | 0.187063 | 0.110577 | 0.196533 | 0.109994 | 0.110286  |
| 0.124709  | 0.134761 | 0.201923 | 0.127477 | 0.20877  | 0.128351 | 0.121941  |
| 0.101836  | 0.127914 | 0.184003 | 0.116259 | 0.192599 | 0.11014  | 0.11014   |
| 0.120629  | 0.143502 | 0.206294 | 0.13243  | 0.214307 | 0.137675 | 0.127477  |
| 0.108683  | 0.13447  | 0.18648  | 0.119318 | 0.194202 | 0.120192 | 0.113491  |
| 0.110431  | 0.125146 | 0.191434 | 0.114073 | 0.196533 | 0.118735 | 0.105624  |
| 0.106935  | 0.128059 | 0.185606 | 0.118735 | 0.196241 | 0.114073 | 0.10912   |
| 0.111014  | 0.129516 | 0.195221 | 0.116987 | 0.201195 | 0.118153 | 0.10912   |
| 0.106935  | 0.120192 | 0.188811 | 0.10708  | 0.195659 | 0.105041 | 0.11116   |

|           |          |          |          |          |          |           |
|-----------|----------|----------|----------|----------|----------|-----------|
| 0.106061  | 0.125728 | 0.182984 | 0.115822 | 0.194202 | 0.108537 | 0.103001  |
| 0.125728  | 0.143939 | 0.204108 | 0.125583 | 0.212121 | 0.133159 | 0.126166  |
| 0.10067   | 0.119464 | 0.184295 | 0.116259 | 0.191434 | 0.110431 | 0.107226  |
| 0.105478  | 0.123106 | 0.189685 | 0.111742 | 0.194202 | 0.108829 | 0.114365  |
| 0.113928  | 0.129225 | 0.199883 | 0.131556 | 0.204691 | 0.127185 | 0.126311  |
| 0.111597  | 0.135927 | 0.195804 | 0.128059 | 0.199446 | 0.128642 | 0.126311  |
| 0.11655   | 0.125146 | 0.202214 | 0.132721 | 0.209936 | 0.125728 | 0.125728  |
| 0.127185  | 0.137238 | 0.209062 | 0.137821 | 0.216492 | 0.134033 | 0.128497  |
| 0.108683  | 0.123106 | 0.184732 | 0.121066 | 0.191288 | 0.117279 | 0.115239  |
| 0.173077  | 0.18954  | 0.149476 | 0.185752 | 0.156323 | 0.184295 | 0.163899  |
| 0.102418  | 0.114802 | 0.186334 | 0.118881 | 0.192599 | 0.108683 | 0.111888  |
| 0.127331  | 0.139714 | 0.202214 | 0.13039  | 0.209353 | 0.132139 | 0.130973  |
| 0.121212  | 0.133887 | 0.199301 | 0.129225 | 0.204691 | 0.126894 | 0.124272  |
| 0.121941  | 0.133741 | 0.209062 | 0.138986 | 0.212995 | 0.136364 | 0.137238  |
| 0.106935  | 0.119901 | 0.190268 | 0.120775 | 0.195659 | 0.10912  | 0.10912   |
| 0.125     | 0.13039  | 0.20134  | 0.130973 | 0.21081  | 0.127477 | 0.121649  |
| 0.111014  | 0.114073 | 0.189977 | 0.11757  | 0.197407 | 0.111742 | 0.11553   |
| 0.115822  | 0.128205 | 0.193328 | 0.121212 | 0.201049 | 0.123543 | 0.120047  |
| 0.105624  | 0.126748 | 0.190705 | 0.121503 | 0.19493  | 0.118298 | 0.106061  |
| 0.128351  | 0.137821 | 0.206439 | 0.131119 | 0.213578 | 0.13345  | 0.128205  |
| 0.0983392 | 0.118881 | 0.1875   | 0.11451  | 0.188811 | 0.109557 | 0.106352  |
| 0.12296   | 0.133887 | 0.197552 | 0.138549 | 0.207896 | 0.131847 | 0.12398   |
| 0.104458  | 0.118881 | 0.190122 | 0.123543 | 0.194639 | 0.116259 | 0.115967  |
| 0.117716  | 0.142045 | 0.201049 | 0.125437 | 0.209062 | 0.12602  | 0.121358  |
| 0.112908  | 0.138112 | 0.19799  | 0.13345  | 0.200466 | 0.131702 | 0.128205  |
| 0.104458  | 0.113054 | 0.189831 | 0.115676 | 0.194056 | 0.107517 | 0.113636  |
| 0.14088   | 0.149476 | 0.196533 | 0.147145 | 0.20338  | 0.147145 | 0.132867  |
| 0.102855  | 0.116696 | 0.193473 | 0.117279 | 0.197698 | 0.113491 | 0.116987  |
| 0.108392  | 0.121649 | 0.192599 | 0.113199 | 0.199446 | 0.114948 | 0.115822  |
| 0.110286  | 0.122669 | 0.191579 | 0.116841 | 0.198135 | 0.116841 | 0.112471  |
| 0.123106  | 0.141026 | 0.201777 | 0.141026 | 0.210956 | 0.137529 | 0.141026  |
| 0.114365  | 0.129079 | 0.176428 | 0.129662 | 0.180944 | 0.126457 | 0.0976107 |
| 0.107372  | 0.118881 | 0.190705 | 0.113636 | 0.194347 | 0.106352 | 0.111888  |
| 0.10708   | 0.115676 | 0.184295 | 0.119172 | 0.191434 | 0.106643 | 0.110431  |
| 0.104312  | 0.124272 | 0.18852  | 0.124272 | 0.191288 | 0.114656 | 0.115239  |
| 0.105915  | 0.135781 | 0.200029 | 0.127914 | 0.210664 | 0.124709 | 0.122669  |
| 0.104021  | 0.126894 | 0.190559 | 0.121649 | 0.195367 | 0.119901 | 0.119027  |
| 0.0878497 | 0.115967 | 0.178176 | 0.113054 | 0.185897 | 0.106643 | 0.104604  |
| 0.0948427 | 0.118007 | 0.184295 | 0.107517 | 0.18852  | 0.104021 | 0.102564  |
| 0.0976107 | 0.116987 | 0.188228 | 0.109994 | 0.195076 | 0.106206 | 0.108829  |
| 0.112179  | 0.124854 | 0.185023 | 0.127185 | 0.190997 | 0.119318 | 0.112617  |
| 0.116113  | 0.137821 | 0.198864 | 0.128205 | 0.206876 | 0.123834 | 0.121212  |
| 0.0932401 | 0.112908 | 0.188811 | 0.113491 | 0.196533 | 0.108537 | 0.109994  |
| 0.0965909 | 0.115676 | 0.18546  | 0.116841 | 0.189685 | 0.102564 | 0.10169   |

|           |          |           |          |          |          |           |
|-----------|----------|-----------|----------|----------|----------|-----------|
| 0.110286  | 0.130245 | 0.195367  | 0.125874 | 0.202214 | 0.124126 | 0.115093  |
| 0.0929487 | 0.118735 | 0.187063  | 0.114948 | 0.191288 | 0.10912  | 0.101544  |
| 0.11655   | 0.133887 | 0.184149  | 0.129225 | 0.187209 | 0.121358 | 0.121066  |
| 0.11655   | 0.137966 | 0.197844  | 0.136801 | 0.202652 | 0.13243  | 0.13243   |
| 0.0987762 | 0.121358 | 0.194056  | 0.113782 | 0.198572 | 0.113491 | 0.109703  |
| 0.0957168 | 0.117133 | 0.190414  | 0.115093 | 0.197844 | 0.107809 | 0.108683  |
| 0.0960082 | 0.115967 | 0.186334  | 0.11451  | 0.192599 | 0.104604 | 0.107517  |
| 0.0954254 | 0.118298 | 0.180507  | 0.114219 | 0.185315 | 0.104895 | 0.102855  |
| 0.102127  | 0.129371 | 0.197698  | 0.123834 | 0.205711 | 0.121795 | 0.124709  |
| 0.0948427 | 0.117424 | 0.185169  | 0.109557 | 0.192016 | 0.104312 | 0.0987762 |
| 0.125583  | 0.139423 | 0.204545  | 0.139132 | 0.211684 | 0.134178 | 0.132721  |
| 0.123106  | 0.141026 | 0.194493  | 0.132576 | 0.200758 | 0.127622 | 0.127914  |
| 0.112034  | 0.136364 | 0.197115  | 0.127622 | 0.203089 | 0.118881 | 0.115093  |
| 0.104312  | 0.125437 | 0.187063  | 0.119901 | 0.192745 | 0.104458 | 0.116404  |
| 0.0984848 | 0.121649 | 0.18648   | 0.119318 | 0.192745 | 0.109703 | 0.116113  |
| 0.0983392 | 0.113345 | 0.189248  | 0.114219 | 0.19493  | 0.108392 | 0.104021  |
| 0.101399  | 0.119901 | 0.191725  | 0.110577 | 0.194784 | 0.11757  | 0.097465  |
| 0.103147  | 0.122523 | 0.187354  | 0.112034 | 0.195659 | 0.109994 | 0.109994  |
| 0.107226  | 0.122523 | 0.176573  | 0.114656 | 0.182255 | 0.116696 | 0.0884324 |
| 0.115967  | 0.131556 | 0.199883  | 0.114656 | 0.211101 | 0.130099 | 0.111451  |
| 0.109411  | 0.121503 | 0.195367  | 0.122086 | 0.201923 | 0.109848 | 0.114219  |
| 0.111597  | 0.13447  | 0.196096  | 0.124563 | 0.200321 | 0.119027 | 0.129808  |
| 0.121941  | 0.133159 | 0.206148  | 0.138695 | 0.211538 | 0.134324 | 0.136072  |
| 0.190414  | 0.200758 | 0.0957168 | 0.192599 | 0.105186 | 0.189977 | 0.177739  |
| 0.233683  | 0.244027 | 0.124126  | 0.230041 | 0.128351 | 0.237617 | 0.218969  |
| 0.109411  | 0.120047 | 0.172057  | 0.11859  | 0.17803  | 0.109848 | 0.0868298 |
| 0.106061  | 0.114656 | 0.182401  | 0.107663 | 0.188083 | 0.111742 | 0.102127  |
| 0.104021  | 0.114365 | 0.181818  | 0.111742 | 0.186334 | 0.107372 | 0.0960082 |
| 0.101399  | 0.11116  | 0.184149  | 0.109994 | 0.190997 | 0.108537 | 0.107663  |
| 0.111305  | 0.143211 | 0.191725  | 0.124272 | 0.19595  | 0.121066 | 0.130099  |
| 0.11014   | 0.113199 | 0.188811  | 0.108537 | 0.196533 | 0.113782 | 0.10708   |
| 0.137675  | 0.13986  | 0.206439  | 0.131993 | 0.215618 | 0.149476 | 0.132867  |
| 0.111305  | 0.112908 | 0.190559  | 0.117861 | 0.194784 | 0.114948 | 0.108829  |
| 0.116841  | 0.130682 | 0.201632  | 0.122523 | 0.21081  | 0.133887 | 0.121066  |
| 0.123397  | 0.130828 | 0.191288  | 0.11859  | 0.20134  | 0.124709 | 0.110723  |
| 0.121066  | 0.125    | 0.200029  | 0.121795 | 0.208916 | 0.129953 | 0.119464  |
| 0.121066  | 0.141317 | 0.201486  | 0.125874 | 0.20979  | 0.130536 | 0.131119  |
| 0.10912   | 0.112762 | 0.192453  | 0.110723 | 0.200758 | 0.111305 | 0.110431  |
| 0.111742  | 0.111014 | 0.1875    | 0.106061 | 0.196387 | 0.113636 | 0.10169   |
| 0.112762  | 0.114073 | 0.189685  | 0.114365 | 0.196241 | 0.11961  | 0.109411  |
| 0.0996503 | 0.110577 | 0.183566  | 0.103293 | 0.189831 | 0.108829 | 0.104458  |
| 0.108683  | 0.109411 | 0.185315  | 0.103875 | 0.193619 | 0.112617 | 0.103001  |
| 0.106789  | 0.113054 | 0.190414  | 0.114802 | 0.197261 | 0.114802 | 0.105186  |
| 0.117716  | 0.116696 | 0.194347  | 0.118444 | 0.205274 | 0.122815 | 0.114365  |

|           |          |          |          |          |          |          |
|-----------|----------|----------|----------|----------|----------|----------|
| 0.124126  | 0.13243  | 0.20338  | 0.125437 | 0.211684 | 0.130682 | 0.11757  |
| 0.111451  | 0.120921 | 0.189248 | 0.113928 | 0.195804 | 0.113928 | 0.104604 |
| 0.106061  | 0.116404 | 0.183275 | 0.112908 | 0.192162 | 0.112034 | 0.100379 |
| 0.120338  | 0.126894 | 0.202214 | 0.124272 | 0.207896 | 0.136801 | 0.118444 |
| 0.101981  | 0.112908 | 0.183858 | 0.111742 | 0.18954  | 0.108829 | 0.10271  |
| 0.133013  | 0.131702 | 0.200612 | 0.12704  | 0.210082 | 0.137238 | 0.132867 |
| 0.124563  | 0.137238 | 0.193619 | 0.135781 | 0.196387 | 0.136946 | 0.127622 |
| 0.129662  | 0.125146 | 0.194056 | 0.128351 | 0.201486 | 0.131265 | 0.11757  |
| 0.102855  | 0.110286 | 0.186772 | 0.106498 | 0.193036 | 0.107663 | 0.104167 |
| 0.101836  | 0.108974 | 0.184878 | 0.110431 | 0.191434 | 0.104604 | 0.101399 |
| 0.116259  | 0.119318 | 0.199301 | 0.120192 | 0.204108 | 0.121358 | 0.115239 |
| 0.115239  | 0.121503 | 0.195659 | 0.120629 | 0.202797 | 0.120629 | 0.111597 |
| 0.121649  | 0.123252 | 0.19391  | 0.11451  | 0.199592 | 0.127914 | 0.11655  |
| 0.112179  | 0.111116 | 0.192016 | 0.113199 | 0.198864 | 0.119027 | 0.109703 |
| 0.110286  | 0.115093 | 0.190414 | 0.106935 | 0.197552 | 0.11655  | 0.107517 |
| 0.114656  | 0.120338 | 0.193619 | 0.118881 | 0.199883 | 0.118298 | 0.111597 |
| 0.120192  | 0.129953 | 0.204691 | 0.120047 | 0.210664 | 0.128788 | 0.122669 |
| 0.12398   | 0.129953 | 0.200612 | 0.12704  | 0.206002 | 0.128497 | 0.113054 |
| 0.125     | 0.135927 | 0.204837 | 0.125146 | 0.207605 | 0.13447  | 0.114365 |
| 0.123689  | 0.142774 | 0.196824 | 0.133159 | 0.199883 | 0.132867 | 0.109557 |
| 0.110577  | 0.116259 | 0.189248 | 0.117424 | 0.197552 | 0.112471 | 0.10373  |
| 0.121358  | 0.118007 | 0.197698 | 0.11859  | 0.205711 | 0.125    | 0.124126 |
| 0.107809  | 0.108829 | 0.188811 | 0.109703 | 0.19391  | 0.10708  | 0.100087 |
| 0.107372  | 0.12296  | 0.180507 | 0.113928 | 0.191434 | 0.109848 | 0.112762 |
| 0.108246  | 0.104312 | 0.188083 | 0.106352 | 0.197552 | 0.1081   | 0.110431 |
| 0.101399  | 0.114656 | 0.185606 | 0.109411 | 0.190705 | 0.110577 | 0.108246 |
| 0.104895  | 0.105624 | 0.185606 | 0.105624 | 0.192745 | 0.107372 | 0.104167 |
| 0.127477  | 0.129079 | 0.202069 | 0.128788 | 0.208333 | 0.132576 | 0.120338 |
| 0.109557  | 0.123689 | 0.185315 | 0.121358 | 0.195076 | 0.115239 | 0.107372 |
| 0.125     | 0.128351 | 0.200758 | 0.124854 | 0.206439 | 0.131265 | 0.122815 |
| 0.0999417 | 0.110286 | 0.181818 | 0.107663 | 0.190414 | 0.112325 | 0.10708  |
| 0.116696  | 0.12296  | 0.201195 | 0.117424 | 0.207168 | 0.123543 | 0.112471 |
| 0.112471  | 0.133013 | 0.191725 | 0.122523 | 0.200321 | 0.120192 | 0.103584 |
| 0.111305  | 0.127185 | 0.185315 | 0.127477 | 0.18546  | 0.119318 | 0.116987 |
| 0.105915  | 0.125291 | 0.191288 | 0.120047 | 0.199009 | 0.117716 | 0.108974 |
| 0.116841  | 0.116987 | 0.181235 | 0.122523 | 0.193328 | 0.123397 | 0.120192 |
| 0.113782  | 0.124417 | 0.192745 | 0.124709 | 0.198427 | 0.114219 | 0.109557 |
| 0.105041  | 0.125291 | 0.185169 | 0.123834 | 0.194056 | 0.111597 | 0.117133 |
| 0.105624  | 0.146853 | 0.204108 | 0.132284 | 0.21183  | 0.129371 | 0.139569 |
| 0.128788  | 0.145833 | 0.202506 | 0.141754 | 0.213724 | 0.13884  | 0.131556 |
| 0.0891608 | 0.120192 | 0.182984 | 0.114656 | 0.188083 | 0.100087 | 0.114365 |
| 0.113491  | 0.132284 | 0.204108 | 0.134033 | 0.210373 | 0.121212 | 0.134324 |
| 0.0944056 | 0.140589 | 0.201049 | 0.128059 | 0.205565 | 0.125728 | 0.130682 |
| 0.113345  | 0.133887 | 0.199301 | 0.129516 | 0.204983 | 0.116404 | 0.130973 |

|           |          |          |          |          |          |          |
|-----------|----------|----------|----------|----------|----------|----------|
| 0.104604  | 0.123689 | 0.188811 | 0.121649 | 0.196533 | 0.117861 | 0.120484 |
| 0.100816  | 0.133887 | 0.197261 | 0.125146 | 0.204108 | 0.112034 | 0.130099 |
| 0.10271   | 0.137821 | 0.195367 | 0.126166 | 0.199592 | 0.113636 | 0.129371 |
| 0.113054  | 0.128642 | 0.20134  | 0.129808 | 0.209645 | 0.124563 | 0.13039  |
| 0.117133  | 0.136509 | 0.204837 | 0.136801 | 0.212558 | 0.126603 | 0.138258 |
| 0.104312  | 0.140589 | 0.199009 | 0.125728 | 0.202652 | 0.113782 | 0.129516 |
| 0.102564  | 0.116696 | 0.184149 | 0.120192 | 0.19595  | 0.11757  | 0.119318 |
| 0.129225  | 0.13549  | 0.196533 | 0.133741 | 0.20338  | 0.132867 | 0.120629 |
| 0.111888  | 0.142337 | 0.200758 | 0.129808 | 0.205857 | 0.120775 | 0.136509 |
| 0.0999417 | 0.121649 | 0.183566 | 0.114948 | 0.190414 | 0.102127 | 0.113199 |
| 0.214889  | 0.222611 | 0.107955 | 0.214744 | 0.115967 | 0.219406 | 0.201632 |
| 0.108246  | 0.129079 | 0.195367 | 0.123834 | 0.200175 | 0.119464 | 0.122378 |
| 0.0933858 | 0.129079 | 0.187791 | 0.120629 | 0.193765 | 0.112471 | 0.120047 |
| 0.119755  | 0.137092 | 0.204545 | 0.133596 | 0.21081  | 0.12398  | 0.132139 |
| 0.104895  | 0.133304 | 0.191434 | 0.119901 | 0.198864 | 0.104749 | 0.123689 |
| 0.105186  | 0.146416 | 0.204545 | 0.136218 | 0.207314 | 0.128642 | 0.139714 |
| 0.103438  | 0.126311 | 0.190851 | 0.122523 | 0.196533 | 0.114656 | 0.124272 |
| 0.105041  | 0.129371 | 0.192453 | 0.118881 | 0.194347 | 0.110723 | 0.118881 |
| 0.0989219 | 0.132576 | 0.196533 | 0.119464 | 0.200758 | 0.119755 | 0.132867 |
| 0.112179  | 0.133304 | 0.187937 | 0.132139 | 0.19391  | 0.122232 | 0.123689 |
| 0.112617  | 0.135198 | 0.200321 | 0.129662 | 0.206294 | 0.120921 | 0.13141  |
| 0.11014   | 0.126894 | 0.202214 | 0.130973 | 0.206731 | 0.120192 | 0.136218 |
| 0.11014   | 0.126311 | 0.20134  | 0.131847 | 0.207314 | 0.124563 | 0.133013 |
| 0.10169   | 0.130682 | 0.192308 | 0.118444 | 0.198864 | 0.112617 | 0.112325 |
| 0.107517  | 0.113782 | 0.193182 | 0.125437 | 0.20236  | 0.118444 | 0.120484 |
| 0.123397  | 0.137238 | 0.198572 | 0.136364 | 0.207168 | 0.125583 | 0.134907 |
| 0.106061  | 0.125437 | 0.187646 | 0.123106 | 0.193328 | 0.112908 | 0.119027 |
| 0.120629  | 0.138549 | 0.200758 | 0.127185 | 0.208479 | 0.128934 | 0.126894 |
| 0.131556  | 0.14627  | 0.185169 | 0.141608 | 0.190851 | 0.136072 | 0.13549  |
| 0.109994  | 0.132576 | 0.192745 | 0.124709 | 0.195804 | 0.120629 | 0.108974 |
| 0.110577  | 0.138695 | 0.200612 | 0.132284 | 0.20542  | 0.125    | 0.132284 |
| 0.12296   | 0.140297 | 0.185897 | 0.135635 | 0.189248 | 0.124854 | 0.121649 |
| 0.108246  | 0.140443 | 0.192162 | 0.127914 | 0.198718 | 0.128788 | 0.127622 |
| 0.122232  | 0.136072 | 0.183712 | 0.135198 | 0.187646 | 0.123834 | 0.125291 |
| 0.133887  | 0.148019 | 0.189248 | 0.135781 | 0.195513 | 0.138695 | 0.138695 |
| 0.100524  | 0.12602  | 0.182984 | 0.11553  | 0.190997 | 0.115239 | 0.107372 |
| 0.119318  | 0.13986  | 0.201195 | 0.128788 | 0.204254 | 0.131119 | 0.129079 |
| 0.136946  | 0.146999 | 0.182401 | 0.142337 | 0.186043 | 0.143794 | 0.13447  |
| 0.101981  | 0.134178 | 0.19697  | 0.116696 | 0.2044   | 0.118153 | 0.116113 |
| 0.107517  | 0.13447  | 0.188228 | 0.11961  | 0.194202 | 0.118735 | 0.121649 |
| 0.137383  | 0.148019 | 0.202652 | 0.136072 | 0.208625 | 0.143939 | 0.130245 |
| 0.116113  | 0.132576 | 0.195076 | 0.121795 | 0.201632 | 0.121795 | 0.1081   |
| 0.125583  | 0.140006 | 0.206002 | 0.145542 | 0.212558 | 0.141171 | 0.125728 |
| 0.118444  | 0.138986 | 0.197115 | 0.129079 | 0.205711 | 0.129371 | 0.120921 |



|           |          |          |          |          |          |           |
|-----------|----------|----------|----------|----------|----------|-----------|
| 0.120629  | 0.125146 | 0.197261 | 0.126603 | 0.202652 | 0.121358 | 0.125437  |
| 0.122523  | 0.137238 | 0.196533 | 0.131993 | 0.207168 | 0.128205 | 0.113636  |
| 0.105186  | 0.133304 | 0.188811 | 0.123397 | 0.196241 | 0.124563 | 0.107955  |
| 0.12602   | 0.132867 | 0.200903 | 0.128788 | 0.208625 | 0.129079 | 0.123834  |
| 0.111451  | 0.131702 | 0.199446 | 0.126748 | 0.206585 | 0.125583 | 0.128205  |
| 0.127477  | 0.13141  | 0.204983 | 0.135781 | 0.209499 | 0.125874 | 0.129079  |
| 0.120775  | 0.131993 | 0.205857 | 0.133159 | 0.211247 | 0.130828 | 0.133159  |
| 0.120775  | 0.137821 | 0.193619 | 0.131119 | 0.199883 | 0.129079 | 0.119755  |
| 0.135052  | 0.143357 | 0.201486 | 0.143939 | 0.208625 | 0.140734 | 0.131702  |
| 0.0957168 | 0.134615 | 0.193328 | 0.125    | 0.199301 | 0.118007 | 0.123543  |
| 0.106498  | 0.126166 | 0.194493 | 0.106935 | 0.205128 | 0.115967 | 0.117133  |
| 0.122815  | 0.131702 | 0.199155 | 0.131119 | 0.204254 | 0.13141  | 0.123834  |
| 0.099796  | 0.12704  | 0.192453 | 0.119464 | 0.195804 | 0.11859  | 0.115676  |
| 0.134907  | 0.150787 | 0.196387 | 0.143502 | 0.204108 | 0.139423 | 0.138258  |
| 0.137529  | 0.158362 | 0.208042 | 0.151369 | 0.213141 | 0.150787 | 0.147582  |
| 0.124709  | 0.129225 | 0.199883 | 0.124854 | 0.209353 | 0.128059 | 0.118735  |
| 0.114948  | 0.124126 | 0.193619 | 0.115676 | 0.20134  | 0.118298 | 0.108683  |
| 0.127622  | 0.127768 | 0.20338  | 0.133887 | 0.208188 | 0.124563 | 0.13243   |
| 0.120192  | 0.133741 | 0.200029 | 0.13141  | 0.208042 | 0.126166 | 0.133741  |
| 0.121066  | 0.123834 | 0.199446 | 0.123252 | 0.209207 | 0.126457 | 0.116259  |
| 0.120484  | 0.136655 | 0.207022 | 0.132284 | 0.212704 | 0.125874 | 0.137529  |
| 0.119318  | 0.148019 | 0.197407 | 0.13549  | 0.206585 | 0.137821 | 0.126748  |
| 0.104895  | 0.138258 | 0.199301 | 0.120775 | 0.207314 | 0.124563 | 0.114948  |
| 0.155303  | 0.148164 | 0.206585 | 0.161276 | 0.214889 | 0.161859 | 0.156323  |
| 0.103438  | 0.131556 | 0.196678 | 0.118735 | 0.204983 | 0.123106 | 0.118153  |
| 0.118881  | 0.155449 | 0.201049 | 0.137675 | 0.206439 | 0.135344 | 0.131556  |
| 0.107663  | 0.12704  | 0.195076 | 0.112762 | 0.206294 | 0.122086 | 0.115676  |
| 0.125437  | 0.13549  | 0.207896 | 0.136364 | 0.215618 | 0.134615 | 0.129953  |
| 0.108537  | 0.129371 | 0.193328 | 0.127622 | 0.198718 | 0.115967 | 0.125     |
| 0.130245  | 0.148456 | 0.164044 | 0.146125 | 0.168269 | 0.13884  | 0.109994  |
| 0.146416  | 0.133159 | 0.20236  | 0.145979 | 0.210373 | 0.134615 | 0.149476  |
| 0.120338  | 0.123689 | 0.183566 | 0.127185 | 0.186626 | 0.121358 | 0.100087  |
| 0.13243   | 0.13986  | 0.163316 | 0.141026 | 0.168998 | 0.135781 | 0.103438  |
| 0.142483  | 0.153409 | 0.143648 | 0.144668 | 0.149038 | 0.14729  | 0.103875  |
| 0.133741  | 0.151661 | 0.141317 | 0.151952 | 0.149621 | 0.141463 | 0.119318  |
| 0.121941  | 0.126748 | 0.198281 | 0.127914 | 0.206294 | 0.126166 | 0.10373   |
| 0.128497  | 0.136801 | 0.194056 | 0.127185 | 0.199155 | 0.131556 | 0.137675  |
| 0.104021  | 0.122232 | 0.177448 | 0.119318 | 0.182838 | 0.107372 | 0.113199  |
| 0.108246  | 0.126166 | 0.182255 | 0.118881 | 0.189103 | 0.111888 | 0.102564  |
| 0.104312  | 0.125146 | 0.18852  | 0.126603 | 0.193328 | 0.113491 | 0.12398   |
| 0.116841  | 0.123106 | 0.180653 | 0.126603 | 0.188083 | 0.116404 | 0.0980478 |
| 0.106498  | 0.119755 | 0.18954  | 0.112762 | 0.194639 | 0.108974 | 0.116841  |
| 0.101836  | 0.126457 | 0.170309 | 0.118881 | 0.175991 | 0.106643 | 0.094697  |
| 0.119318  | 0.124709 | 0.184878 | 0.120047 | 0.189103 | 0.11655  | 0.117424  |

|           |           |           |          |           |          |           |
|-----------|-----------|-----------|----------|-----------|----------|-----------|
| 0.1081    | 0.132721  | 0.177739  | 0.123397 | 0.179633  | 0.114365 | 0.116113  |
| 0.0454545 | 0.113782  | 0.18007   | 0.109411 | 0.18546   | 0.102127 | 0.112034  |
| 0.120047  | 0.126603  | 0.179487  | 0.127477 | 0.18546   | 0.122232 | 0.101544  |
| 0.115822  | 0.122086  | 0.182838  | 0.125291 | 0.189394  | 0.114802 | 0.0999417 |
| 0.119901  | 0.12704   | 0.196241  | 0.123252 | 0.198135  | 0.123252 | 0.0710956 |
| 0.211101  | 0.224068  | 0.116987  | 0.215035 | 0.113345  | 0.215326 | 0.19697   |
| 0.138258  | 0.144814  | 0.195659  | 0.144522 | 0.202797  | 0.142483 | 0.118007  |
| 0.117424  | 0.129516  | 0.193473  | 0.125728 | 0.202943  | 0.124854 | 0.13039   |
| 0.117279  | 0.127331  | 0.184295  | 0.132284 | 0.18852   | 0.121212 | 0.118007  |
| 0.207605  | 0.214744  | 0.0992133 | 0.207168 | 0.108392  | 0.209207 | 0.193765  |
| 0.115822  | 0.129662  | 0.179633  | 0.126748 | 0.182401  | 0.125874 | 0.0745921 |
| 0.113345  | 0.130973  | 0.193765  | 0.121358 | 0.201195  | 0.12398  | 0.11961   |
| 0.117424  | 0.123689  | 0.187063  | 0.120775 | 0.193328  | 0.12398  | 0.120484  |
| 0.106789  | 0.131119  | 0.183129  | 0.121795 | 0.186772  | 0.116259 | 0.122378  |
| 0.243735  | 0.255828  | 0.129225  | 0.246503 | 0.130828  | 0.248834 | 0.233974  |
| 0.111597  | 0.133013  | 0.194347  | 0.134178 | 0.196533  | 0.125728 | 0.12602   |
| 0.113928  | 0.121649  | 0.188811  | 0.121066 | 0.195367  | 0.115822 | 0.0732809 |
| 0.117133  | 0.0450175 | 0.195513  | 0.119901 | 0.201777  | 0.123397 | 0.123106  |
| 0.118007  | 0.0482226 | 0.188811  | 0.117861 | 0.196824  | 0.117279 | 0.121358  |
| 0.113636  | 0.138549  | 0.185606  | 0.134761 | 0.191288  | 0.127477 | 0.116404  |
| 0.111014  | 0.129225  | 0.169289  | 0.13039  | 0.171474  | 0.124563 | 0.105332  |
| 0.114219  | 0.123397  | 0.190559  | 0.123397 | 0.192162  | 0.118735 | 0.0726981 |
| 0.116404  | 0.121212  | 0.180507  | 0.125874 | 0.186772  | 0.115967 | 0.100524  |
| 0.118881  | 0.125437  | 0.187063  | 0.121358 | 0.190997  | 0.119027 | 0.127768  |
| 0.100233  | 0.123689  | 0.18211   | 0.118444 | 0.186917  | 0.10708  | 0.115239  |
| 0.110286  | 0.119172  | 0.17701   | 0.124417 | 0.181818  | 0.11655  | 0.097028  |
| 0.0833333 | 0.129516  | 0.18852   | 0.114656 | 0.193036  | 0.110868 | 0.121941  |
| 0.145251  | 0.131119  | 0.201195  | 0.146562 | 0.208333  | 0.135198 | 0.14831   |
| 0.111451  | 0.134324  | 0.193619  | 0.134907 | 0.198427  | 0.129953 | 0.125291  |
| 0.116404  | 0.131993  | 0.193619  | 0.125583 | 0.199009  | 0.12704  | 0.119172  |
| 0.185169  | 0.19493   | 0.0895979 | 0.188811 | 0.0973193 | 0.191434 | 0.171037  |
| 0.198864  | 0.208625  | 0.0971737 | 0.201923 | 0.0984848 | 0.203963 | 0.184149  |
| 0.104749  | 0.134324  | 0.178759  | 0.125    | 0.181527  | 0.111014 | 0.121795  |
| 0.100962  | 0.122669  | 0.182547  | 0.115676 | 0.184441  | 0.107809 | 0.117133  |
| 0.125728  | 0.138112  | 0.184878  | 0.144814 | 0.189685  | 0.130245 | 0.129371  |
| 0.116404  | 0.124709  | 0.189248  | 0.118881 | 0.193765  | 0.118298 | 0.0743007 |
| 0.113928  | 0.13884   | 0.196678  | 0.137966 | 0.197115  | 0.129225 | 0.127185  |
| 0.127185  | 0.106935  | 0.186043  | 0.124417 | 0.200175  | 0.125874 | 0.128788  |
| 0.222756  | 0.2331    | 0.11116   | 0.22028  | 0.108392  | 0.223776 | 0.207751  |
| 0.107663  | 0.120047  | 0.187209  | 0.119172 | 0.190559  | 0.107226 | 0.116259  |
| 0.206585  | 0.214015  | 0.134615  | 0.204691 | 0.13884   | 0.212267 | 0.179633  |
| 0.108829  | 0.119172  | 0.192162  | 0.117424 | 0.19697   | 0.113345 | 0.0961538 |
| 0.105186  | 0.119901  | 0.186772  | 0.112034 | 0.191288  | 0.109411 | 0.115239  |
| 0.111451  | 0.122669  | 0.177885  | 0.124417 | 0.181527  | 0.112471 | 0.0926573 |

|           |           |           |          |           |           |           |
|-----------|-----------|-----------|----------|-----------|-----------|-----------|
| 0.100379  | 0.121503  | 0.177885  | 0.119464 | 0.180944  | 0.108974  | 0.110723  |
| 0.203089  | 0.21285   | 0.10169   | 0.202652 | 0.0995047 | 0.206439  | 0.18546   |
| 0.127331  | 0.133596  | 0.179196  | 0.135052 | 0.184586  | 0.128351  | 0.106206  |
| 0.107809  | 0.115822  | 0.195513  | 0.121066 | 0.20236   | 0.118153  | 0.110868  |
| 0.120921  | 0.128351  | 0.184732  | 0.127768 | 0.190414  | 0.123397  | 0.105332  |
| 0.106061  | 0.122232  | 0.189977  | 0.123689 | 0.197115  | 0.119318  | 0.123397  |
| 0.101981  | 0.128642  | 0.181527  | 0.122523 | 0.184295  | 0.10708   | 0.116696  |
| 0.114656  | 0.123543  | 0.194784  | 0.120047 | 0.199883  | 0.114802  | 0.0938228 |
| 0.118735  | 0.127331  | 0.18109   | 0.123834 | 0.184149  | 0.122378  | 0.0708042 |
| 0.113491  | 0.130536  | 0.193619  | 0.12296  | 0.198427  | 0.125874  | 0.117133  |
| 0.111742  | 0.11859   | 0.173805  | 0.122378 | 0.179196  | 0.1081    | 0.097028  |
| 0.111597  | 0.11553   | 0.191434  | 0.119901 | 0.197407  | 0.11961   | 0.110868  |
| 0.183421  | 0.196387  | 0.0919289 | 0.187354 | 0.0976107 | 0.187063  | 0.17162   |
| 0.119755  | 0.043852  | 0.193473  | 0.123689 | 0.200903  | 0.12398   | 0.123689  |
| 0.129808  | 0.113928  | 0.191871  | 0.127914 | 0.19697   | 0.117716  | 0.133741  |
| 0.116259  | 0.100962  | 0.183275  | 0.125437 | 0.191288  | 0.113491  | 0.124563  |
| 0.113199  | 0.131119  | 0.184003  | 0.134324 | 0.186772  | 0.126748  | 0.118881  |
| 0.119318  | 0.126166  | 0.183421  | 0.126166 | 0.188228  | 0.123252  | 0.100524  |
| 0.116404  | 0.124417  | 0.196824  | 0.123252 | 0.201632  | 0.121212  | 0.104604  |
| 0.101399  | 0.111451  | 0.185897  | 0.119901 | 0.190414  | 0.112325  | 0.114365  |
| 0.117424  | 0.130099  | 0.193473  | 0.123397 | 0.198572  | 0.124854  | 0.0770688 |
| 0.12398   | 0.114802  | 0.186334  | 0.127331 | 0.194639  | 0.111305  | 0.124126  |
| 0.112617  | 0.0576923 | 0.186043  | 0.116841 | 0.19493   | 0.11451   | 0.11655   |
| 0.106935  | 0.129225  | 0.178322  | 0.121649 | 0.181672  | 0.110286  | 0.117861  |
| 0.116696  | 0.122669  | 0.190997  | 0.122669 | 0.197552  | 0.120338  | 0.122378  |
| 0.130828  | 0.133596  | 0.194639  | 0.130099 | 0.203817  | 0.132721  | 0.134761  |
| 0.106352  | 0.126894  | 0.184732  | 0.127185 | 0.18954   | 0.119901  | 0.117279  |
| 0.135344  | 0.141608  | 0.196241  | 0.139569 | 0.201923  | 0.13549   | 0.116259  |
| 0.0986305 | 0.127622  | 0.182255  | 0.120338 | 0.184441  | 0.105186  | 0.116841  |
| 0.116696  | 0.0996503 | 0.181381  | 0.112471 | 0.191142  | 0.113636  | 0.117424  |
| 0.113636  | 0.130682  | 0.165501  | 0.122232 | 0.172057  | 0.11961   | 0.0907634 |
| 0.122378  | 0.131556  | 0.192016  | 0.125146 | 0.19595   | 0.12602   | 0.0735723 |
| 0.185606  | 0.197115  | 0.109848  | 0.18954  | 0.111742  | 0.188083  | 0.159237  |
| 0.10708   | 0.109848  | 0.188083  | 0.113345 | 0.194347  | 0.112179  | 0.104021  |
| 0.105332  | 0.115093  | 0.174971  | 0.115967 | 0.18211   | 0.0999417 | 0.106643  |
| 0.113199  | 0.126457  | 0.195659  | 0.122378 | 0.202214  | 0.125     | 0.116259  |
| 0.176428  | 0.188228  | 0.104458  | 0.17803  | 0.118007  | 0.18007   | 0.155886  |
| 0.124417  | 0.142045  | 0.194347  | 0.142337 | 0.200612  | 0.135927  | 0.135052  |
| 0.130245  | 0.151661  | 0.20542   | 0.152244 | 0.211101  | 0.148164  | 0.146416  |
| 0.14729   | 0.135198  | 0.202943  | 0.144231 | 0.210664  | 0.136655  | 0.149767  |
| 0.107955  | 0.126748  | 0.181964  | 0.129079 | 0.188228  | 0.122378  | 0.114219  |
| 0.11859   | 0.12602   | 0.18211   | 0.128351 | 0.186334  | 0.121358  | 0.10271   |
| 0.208479  | 0.218531  | 0.100087  | 0.21183  | 0.104604  | 0.208625  | 0.192308  |
| 0.116404  | 0.128497  | 0.180216  | 0.125583 | 0.185897  | 0.122378  | 0.119755  |

|           |           |           |          |           |          |           |
|-----------|-----------|-----------|----------|-----------|----------|-----------|
| 0.12296   | 0.128934  | 0.185023  | 0.13243  | 0.190705  | 0.12398  | 0.106498  |
| 0.110431  | 0.114365  | 0.187937  | 0.119901 | 0.194202  | 0.116404 | 0.10708   |
| 0.164627  | 0.179341  | 0.130536  | 0.172348 | 0.128934  | 0.166812 | 0.139714  |
| 0.104895  | 0.119901  | 0.176865  | 0.127768 | 0.180216  | 0.108246 | 0.109411  |
| 0.139714  | 0.147436  | 0.200321  | 0.135198 | 0.210373  | 0.1419   | 0.15035   |
| 0.0488054 | 0.130828  | 0.18109   | 0.120921 | 0.18648   | 0.117424 | 0.121212  |
| 0.185169  | 0.19493   | 0.0861014 | 0.189103 | 0.0941142 | 0.187646 | 0.170163  |
| 0.109411  | 0.129079  | 0.188374  | 0.130828 | 0.195513  | 0.124126 | 0.125     |
| 0.0989219 | 0.122086  | 0.181381  | 0.11014  | 0.188228  | 0.102564 | 0.106061  |
| 0.11451   | 0.103293  | 0.185023  | 0.115239 | 0.190997  | 0.109411 | 0.118153  |
| 0.108537  | 0.122378  | 0.186043  | 0.118298 | 0.193182  | 0.120921 | 0.115093  |
| 0.107663  | 0.130536  | 0.193328  | 0.119172 | 0.19697   | 0.123543 | 0.114802  |
| 0.117861  | 0.130536  | 0.180216  | 0.119755 | 0.187354  | 0.115093 | 0.123834  |
| 0.0996503 | 0.127768  | 0.180653  | 0.116113 | 0.184003  | 0.104458 | 0.116987  |
| 0.183712  | 0.196387  | 0.0852273 | 0.187937 | 0.0935315 | 0.189394 | 0.17162   |
| 0.117716  | 0.129516  | 0.189685  | 0.122523 | 0.192745  | 0.114073 | 0.123397  |
| 0.114073  | 0.122669  | 0.174679  | 0.11859  | 0.182984  | 0.107517 | 0.11014   |
| 0.205711  | 0.21926   | 0.10373   | 0.208188 | 0.105915  | 0.210519 | 0.192745  |
| 0.118881  | 0.0453089 | 0.194639  | 0.121358 | 0.201486  | 0.119901 | 0.122815  |
| 0.100087  | 0.127622  | 0.181964  | 0.117133 | 0.18648   | 0.105478 | 0.118007  |
| 0.0977564 | 0.124709  | 0.177885  | 0.117716 | 0.18211   | 0.104021 | 0.113345  |
| 0.133741  | 0.137675  | 0.191725  | 0.13447  | 0.200903  | 0.133013 | 0.115822  |
| 0.183858  | 0.198864  | 0.0894522 | 0.184878 | 0.0933858 | 0.187209 | 0.17264   |
| 0.116696  | 0.126166  | 0.193619  | 0.122086 | 0.198427  | 0.118881 | 0.0780886 |
| 0.126894  | 0.125874  | 0.192745  | 0.125    | 0.202214  | 0.130245 | 0.130828  |
| 0.0977564 | 0.125874  | 0.180507  | 0.117133 | 0.184732  | 0.1081   | 0.11655   |
| 0.099796  | 0.125874  | 0.181381  | 0.118881 | 0.183566  | 0.104895 | 0.112471  |
| 0.0990676 | 0.125437  | 0.177156  | 0.115822 | 0.181672  | 0.108829 | 0.115239  |
| 0.113782  | 0.122669  | 0.181672  | 0.123252 | 0.185606  | 0.112762 | 0.0996503 |
| 0.0460373 | 0.11553   | 0.182984  | 0.108829 | 0.188083  | 0.102418 | 0.111742  |
| 0.109848  | 0.131556  | 0.193473  | 0.135927 | 0.197407  | 0.126603 | 0.124563  |
| 0.131702  | 0.122523  | 0.201049  | 0.132139 | 0.208479  | 0.130682 | 0.13039   |
| 0.111305  | 0.131847  | 0.190268  | 0.133887 | 0.19391   | 0.122815 | 0.120775  |
| 0.106789  | 0.12704   | 0.196241  | 0.12704  | 0.204545  | 0.123252 | 0.129662  |
| 0.189394  | 0.202943  | 0.0952797 | 0.193036 | 0.0948427 | 0.194493 | 0.174971  |
| 0.112617  | 0.123543  | 0.18954   | 0.120338 | 0.19493   | 0.11859  | 0.119464  |
| 0.12704   | 0.132721  | 0.185897  | 0.13447  | 0.190997  | 0.129225 | 0.109994  |
| 0.092803  | 0.124709  | 0.18109   | 0.115967 | 0.182984  | 0.102855 | 0.117716  |
| 0.0451632 | 0.11553   | 0.179196  | 0.106206 | 0.186917  | 0.100087 | 0.112908  |
| 0.111305  | 0.121649  | 0.180653  | 0.118153 | 0.182547  | 0.115239 | 0.10912   |
| 0.117279  | 0.125291  | 0.192453  | 0.12296  | 0.195804  | 0.120338 | 0.0731352 |
| 0.125146  | 0.129662  | 0.189831  | 0.128497 | 0.193473  | 0.124126 | 0.132284  |
| 0.120047  | 0.119901  | 0.185606  | 0.126603 | 0.191871  | 0.109994 | 0.122232  |
| 0.090035  | 0.11961   | 0.183566  | 0.11961  | 0.186334  | 0.114948 | 0.0779429 |

|           |          |           |          |          |          |           |
|-----------|----------|-----------|----------|----------|----------|-----------|
| 0.0767774 | 0.117133 | 0.179341  | 0.115676 | 0.184149 | 0.109848 | 0.0839161 |
| 0.0847902 | 0.120484 | 0.179779  | 0.110868 | 0.188374 | 0.105915 | 0.105332  |
| 0.112617  | 0.122086 | 0.194202  | 0.119755 | 0.19697  | 0.115385 | 0.0981935 |
| 0.115385  | 0.140589 | 0.195804  | 0.138258 | 0.204691 | 0.133013 | 0.132721  |
| 0.114948  | 0.127331 | 0.189831  | 0.122669 | 0.196678 | 0.115385 | 0.0818765 |
| 0.111888  | 0.120775 | 0.176573  | 0.121066 | 0.180507 | 0.11116  | 0.0983392 |
| 0.111597  | 0.122232 | 0.190268  | 0.123106 | 0.195367 | 0.112325 | 0.0782343 |
| 0.0992133 | 0.124417 | 0.17905   | 0.118881 | 0.184149 | 0.106061 | 0.110431  |
| 0.104895  | 0.10912  | 0.187937  | 0.11757  | 0.195659 | 0.10912  | 0.107663  |
| 0.0999417 | 0.128059 | 0.180944  | 0.119318 | 0.186626 | 0.10912  | 0.116404  |
| 0.109848  | 0.118444 | 0.183858  | 0.113782 | 0.192745 | 0.114656 | 0.114073  |
| 0.11859   | 0.112034 | 0.185023  | 0.126311 | 0.192453 | 0.109703 | 0.12398   |
| 0.110723  | 0.13039  | 0.191725  | 0.11757  | 0.196824 | 0.118735 | 0.116404  |
| 0.0456002 | 0.118881 | 0.182547  | 0.11451  | 0.187063 | 0.102855 | 0.113345  |
| 0.0984848 | 0.123106 | 0.177739  | 0.121358 | 0.183712 | 0.105624 | 0.116696  |
| 0.119464  | 0.109411 | 0.17366   | 0.121649 | 0.180507 | 0.118444 | 0.112908  |
| 0.119027  | 0.129371 | 0.181381  | 0.123252 | 0.188811 | 0.115385 | 0.116259  |
| 0.0996503 | 0.12398  | 0.184149  | 0.114365 | 0.190122 | 0.103293 | 0.115239  |
| 0.0976107 | 0.124272 | 0.182401  | 0.118444 | 0.189248 | 0.10708  | 0.115822  |
| 0.117279  | 0.123543 | 0.177885  | 0.125583 | 0.184149 | 0.119464 | 0.0999417 |
| 0.113199  | 0.123252 | 0.190122  | 0.119464 | 0.194639 | 0.116841 | 0.0976107 |
| 0.11961   | 0.125291 | 0.183421  | 0.126166 | 0.187063 | 0.119172 | 0.0999417 |
| 0.112617  | 0.12704  | 0.189248  | 0.122669 | 0.192016 | 0.118881 | 0.115385  |
| 0.03919   | 0.120047 | 0.1875    | 0.112471 | 0.189685 | 0.105769 | 0.113345  |
| 0.101253  | 0.120629 | 0.180216  | 0.119755 | 0.185897 | 0.111014 | 0.113928  |
| 0.103438  | 0.109994 | 0.189394  | 0.118153 | 0.197407 | 0.113782 | 0.106789  |
| 0.120775  | 0.129079 | 0.179924  | 0.125583 | 0.187063 | 0.120338 | 0.106643  |
| 0.122523  | 0.128497 | 0.188957  | 0.127914 | 0.19493  | 0.112762 | 0.117424  |
| 0.109266  | 0.126311 | 0.179196  | 0.11757  | 0.183712 | 0.10708  | 0.112908  |
| 0.188228  | 0.200321 | 0.0891608 | 0.193328 | 0.101253 | 0.193036 | 0.17905   |
| 0.158217  | 0.172931 | 0.120629  | 0.163024 | 0.124563 | 0.162733 | 0.141463  |
| 0.114802  | 0.130099 | 0.188811  | 0.133887 | 0.195076 | 0.124563 | 0.122523  |
| 0.120484  | 0.126457 | 0.181381  | 0.123252 | 0.183566 | 0.112471 | 0.0842075 |
| 0.133013  | 0.152389 | 0.209936  | 0.152681 | 0.218823 | 0.151515 | 0.149184  |
| 0.119755  | 0.128059 | 0.18852   | 0.121941 | 0.194493 | 0.119027 | 0.129225  |
| 0.106789  | 0.126166 | 0.178176  | 0.120921 | 0.184149 | 0.114219 | 0.117424  |
| 0.110431  | 0.13039  | 0.179779  | 0.121649 | 0.183712 | 0.109994 | 0.109411  |
| 0.0795455 | 0.127477 | 0.18852   | 0.115239 | 0.191871 | 0.108246 | 0.117279  |
| 0.115967  | 0.13039  | 0.18648   | 0.12398  | 0.194202 | 0.114365 | 0.117279  |
| 0.195659  | 0.209499 | 0.0913462 | 0.199883 | 0.10169  | 0.198718 | 0.183566  |
| 0.117133  | 0.12602  | 0.194056  | 0.12602  | 0.199738 | 0.122232 | 0.0770688 |
| 0.119027  | 0.126166 | 0.173514  | 0.124417 | 0.181527 | 0.119755 | 0.0652681 |
| 0.100962  | 0.12704  | 0.177593  | 0.113928 | 0.184732 | 0.099359 | 0.107226  |
| 0.100816  | 0.119027 | 0.187646  | 0.118735 | 0.194784 | 0.114365 | 0.121358  |

|           |           |           |          |           |          |           |
|-----------|-----------|-----------|----------|-----------|----------|-----------|
| 0.179924  | 0.190851  | 0.113782  | 0.185606 | 0.115676  | 0.176282 | 0.16317   |
| 0.243735  | 0.252622  | 0.123397  | 0.244172 | 0.129371  | 0.248252 | 0.227855  |
| 0.122815  | 0.119464  | 0.189248  | 0.129662 | 0.195513  | 0.109557 | 0.12704   |
| 0.114948  | 0.123252  | 0.186043  | 0.122669 | 0.192016  | 0.111305 | 0.120921  |
| 0.108829  | 0.127914  | 0.186334  | 0.132576 | 0.193765  | 0.122669 | 0.123252  |
| 0.106643  | 0.129516  | 0.188811  | 0.115822 | 0.19391   | 0.116987 | 0.114656  |
| 0.112908  | 0.12296   | 0.190122  | 0.119464 | 0.197261  | 0.113636 | 0.0751748 |
| 0.108683  | 0.121358  | 0.183275  | 0.115822 | 0.185752  | 0.10912  | 0.117279  |
| 0.106789  | 0.128205  | 0.171766  | 0.11859  | 0.177739  | 0.106643 | 0.0955711 |
| 0.111742  | 0.121795  | 0.190414  | 0.120047 | 0.196096  | 0.114219 | 0.0728438 |
| 0.106061  | 0.127185  | 0.172203  | 0.119901 | 0.178467  | 0.11116  | 0.0957168 |
| 0.103293  | 0.130536  | 0.188666  | 0.120338 | 0.195513  | 0.105186 | 0.119464  |
| 0.0480769 | 0.121649  | 0.182984  | 0.112034 | 0.1875    | 0.104458 | 0.113491  |
| 0.123397  | 0.113054  | 0.190122  | 0.128205 | 0.193182  | 0.109557 | 0.124126  |
| 0.118881  | 0.12398   | 0.181235  | 0.128059 | 0.186334  | 0.117861 | 0.100962  |
| 0.105769  | 0.10067   | 0.178322  | 0.110286 | 0.183421  | 0.105624 | 0.106789  |
| 0.11655   | 0.126894  | 0.198427  | 0.127477 | 0.205565  | 0.123397 | 0.120775  |
| 0.120921  | 0.137383  | 0.201923  | 0.13039  | 0.208188  | 0.135635 | 0.127768  |
| 0.0989219 | 0.122669  | 0.181672  | 0.116841 | 0.185315  | 0.105478 | 0.112762  |
| 0.106061  | 0.13447   | 0.174242  | 0.118444 | 0.182547  | 0.117279 | 0.105624  |
| 0.111888  | 0.139423  | 0.191434  | 0.125146 | 0.19595   | 0.11961  | 0.13039   |
| 0.198572  | 0.216492  | 0.114073  | 0.206002 | 0.119172  | 0.209207 | 0.189103  |
| 0.114802  | 0.11116   | 0.177739  | 0.121649 | 0.186917  | 0.103584 | 0.115239  |
| 0.0435606 | 0.119755  | 0.184878  | 0.113928 | 0.190268  | 0.10373  | 0.115385  |
| 0.113199  | 0.122378  | 0.187209  | 0.120629 | 0.194347  | 0.118881 | 0.120629  |
| 0.11655   | 0.048514  | 0.194056  | 0.122815 | 0.200321  | 0.120192 | 0.122232  |
| 0.0984848 | 0.116404  | 0.189394  | 0.11553  | 0.193619  | 0.112034 | 0.116987  |
| 0.19289   | 0.206439  | 0.0955711 | 0.201195 | 0.0986305 | 0.196241 | 0.183421  |
| 0.121358  | 0.129371  | 0.183129  | 0.127331 | 0.18852   | 0.117424 | 0.101399  |
| 0.0955711 | 0.123397  | 0.180653  | 0.11553  | 0.184586  | 0.103293 | 0.114948  |
| 0.114073  | 0.129079  | 0.189248  | 0.129371 | 0.19493   | 0.126166 | 0.116259  |
| 0.105332  | 0.122378  | 0.189248  | 0.114219 | 0.193473  | 0.113345 | 0.113928  |
| 0.118153  | 0.125874  | 0.181381  | 0.126457 | 0.185315  | 0.118007 | 0.0990676 |
| 0.105624  | 0.119172  | 0.176136  | 0.115093 | 0.179487  | 0.112179 | 0.102273  |
| 0.10271   | 0.132867  | 0.190122  | 0.118298 | 0.19289   | 0.104604 | 0.118881  |
| 0.114073  | 0.0504079 | 0.190705  | 0.11655  | 0.196387  | 0.115385 | 0.120047  |
| 0.193765  | 0.204691  | 0.0917832 | 0.195659 | 0.0992133 | 0.195659 | 0.180216  |
| 0.108829  | 0.119172  | 0.176428  | 0.118007 | 0.183566  | 0.111014 | 0.0938228 |
| 0.189685  | 0.201195  | 0.092366  | 0.196824 | 0.092803  | 0.190997 | 0.177885  |
| 0.189248  | 0.199883  | 0.0913462 | 0.193182 | 0.0920746 | 0.192308 | 0.173951  |
| 0.11961   | 0.133741  | 0.19799   | 0.128497 | 0.20338   | 0.130245 | 0.122669  |
| 0.123689  | 0.0539044 | 0.198864  | 0.126457 | 0.209499  | 0.130245 | 0.130536  |
| 0.0960082 | 0.120338  | 0.181672  | 0.114802 | 0.189103  | 0.097028 | 0.111305  |
| 0.109266  | 0.119027  | 0.175408  | 0.120775 | 0.184295  | 0.111451 | 0.095134  |

|           |           |           |          |           |          |           |
|-----------|-----------|-----------|----------|-----------|----------|-----------|
| 0.112617  | 0.124417  | 0.178467  | 0.127622 | 0.185315  | 0.115676 | 0.0996503 |
| 0.10067   | 0.125874  | 0.180798  | 0.116841 | 0.187354  | 0.107517 | 0.117424  |
| 0.10912   | 0.118007  | 0.188374  | 0.117716 | 0.193473  | 0.112179 | 0.0775058 |
| 0.110577  | 0.121795  | 0.18954   | 0.117424 | 0.19697   | 0.114219 | 0.0757576 |
| 0.125     | 0.115822  | 0.18852   | 0.129516 | 0.193036  | 0.115239 | 0.124854  |
| 0.109994  | 0.129079  | 0.193328  | 0.117716 | 0.200175  | 0.123252 | 0.11859   |
| 0.0920746 | 0.122232  | 0.175991  | 0.115239 | 0.181672  | 0.100962 | 0.113199  |
| 0.116404  | 0.122086  | 0.182255  | 0.122378 | 0.189103  | 0.118298 | 0.099359  |
| 0.0964452 | 0.120192  | 0.179779  | 0.108246 | 0.188374  | 0.100962 | 0.104458  |
| 0.125728  | 0.131702  | 0.184878  | 0.128205 | 0.193473  | 0.129662 | 0.108683  |
| 0.108537  | 0.129371  | 0.189248  | 0.131993 | 0.19493   | 0.121503 | 0.120338  |
| 0.131119  | 0.133596  | 0.191142  | 0.132721 | 0.198572  | 0.131556 | 0.11116   |
| 0.255828  | 0.265006  | 0.133741  | 0.254516 | 0.135052  | 0.259178 | 0.241113  |
| 0.119464  | 0.11961   | 0.202506  | 0.128934 | 0.210227  | 0.130099 | 0.11961   |
| 0.113782  | 0.128205  | 0.194784  | 0.117424 | 0.200175  | 0.123252 | 0.125874  |
| 0.210664  | 0.224796  | 0.108974  | 0.216055 | 0.11116   | 0.217803 | 0.201195  |
| 0.114656  | 0.117716  | 0.195367  | 0.119755 | 0.201923  | 0.118881 | 0.131119  |
| 0.226544  | 0.234848  | 0.11553   | 0.225524 | 0.118298  | 0.228438 | 0.213287  |
| 0.112471  | 0.116696  | 0.194639  | 0.120192 | 0.203817  | 0.121649 | 0.112908  |
| 0.107372  | 0.136946  | 0.188666  | 0.120921 | 0.19697   | 0.113636 | 0.128205  |
| 0.111742  | 0.0559441 | 0.188083  | 0.117133 | 0.196096  | 0.111305 | 0.113928  |
| 0.113491  | 0.131119  | 0.196533  | 0.123252 | 0.200466  | 0.128788 | 0.121503  |
| 0.201195  | 0.20979   | 0.0916375 | 0.199883 | 0.0999417 | 0.201632 | 0.183858  |
| 0.129225  | 0.132867  | 0.191579  | 0.132867 | 0.199009  | 0.129079 | 0.112179  |
| 0.118444  | 0.124417  | 0.180216  | 0.125874 | 0.18648   | 0.116841 | 0.101107  |
| 0.224068  | 0.232955  | 0.118881  | 0.223339 | 0.11757   | 0.225962 | 0.208188  |
| 0.115822  | 0.120047  | 0.188666  | 0.123252 | 0.19289   | 0.119755 | 0.0769231 |
| 0.193765  | 0.204983  | 0.094697  | 0.196241 | 0.101836  | 0.197698 | 0.182547  |
| 0.11655   | 0.127477  | 0.189977  | 0.12602  | 0.195367  | 0.118153 | 0.0793998 |
| 0.100524  | 0.127477  | 0.183566  | 0.120484 | 0.18546   | 0.108246 | 0.11961   |
| 0.043852  | 0.130245  | 0.191871  | 0.11859  | 0.197261  | 0.116259 | 0.125874  |
| 0.11757   | 0.136364  | 0.201195  | 0.124709 | 0.210664  | 0.13345  | 0.124126  |
| 0.105769  | 0.125146  | 0.18211   | 0.129808 | 0.186626  | 0.110868 | 0.113782  |
| 0.132867  | 0.169143  | 0.123252  | 0.161568 | 0.123689  | 0.156031 | 0.142337  |
| 0.110723  | 0.119901  | 0.176865  | 0.118735 | 0.182838  | 0.112617 | 0.0977564 |
| 0.11859   | 0.0525932 | 0.189394  | 0.11961  | 0.198281  | 0.120484 | 0.120192  |
| 0.11014   | 0.119318  | 0.186189  | 0.117279 | 0.193036  | 0.114365 | 0.122232  |
| 0.126457  | 0.104458  | 0.187063  | 0.122232 | 0.196241  | 0.12398  | 0.127768  |
| 0.192162  | 0.204254  | 0.0910548 | 0.194347 | 0.0979021 | 0.19493  | 0.179487  |
| 0.097028  | 0.124272  | 0.179779  | 0.114656 | 0.184878  | 0.103001 | 0.116113  |
| 0.11553   | 0.134907  | 0.181381  | 0.121212 | 0.184732  | 0.121795 | 0.111014  |
| 0.112179  | 0.124272  | 0.19289   | 0.120775 | 0.199155  | 0.111742 | 0.0983392 |
| 0.113491  | 0.123252  | 0.191871  | 0.120629 | 0.199009  | 0.11859  | 0.0748834 |
| 0.10373   | 0.130973  | 0.184149  | 0.118153 | 0.189248  | 0.113491 | 0.122815  |

|           |           |           |          |           |           |           |
|-----------|-----------|-----------|----------|-----------|-----------|-----------|
| 0.252477  | 0.257576  | 0.132139  | 0.250583 | 0.137238  | 0.256119  | 0.238636  |
| 0.0413753 | 0.121941  | 0.188811  | 0.112325 | 0.193036  | 0.108537  | 0.119318  |
| 0.110431  | 0.124854  | 0.178904  | 0.121941 | 0.185169  | 0.119027  | 0.112617  |
| 0.173368  | 0.182255  | 0.136946  | 0.17701  | 0.136509  | 0.174971  | 0.158362  |
| 0.179779  | 0.193328  | 0.0920746 | 0.186043 | 0.0995047 | 0.183421  | 0.170309  |
| 0.12296   | 0.11757   | 0.187354  | 0.127185 | 0.193036  | 0.11116   | 0.123397  |
| 0.116696  | 0.12704   | 0.182838  | 0.124417 | 0.190268  | 0.117716  | 0.102564  |
| 0.10912   | 0.12704   | 0.189248  | 0.119172 | 0.19493   | 0.117424  | 0.110431  |
| 0.140734  | 0.146125  | 0.196096  | 0.144085 | 0.203526  | 0.143794  | 0.123397  |
| 0.119755  | 0.113782  | 0.185315  | 0.127477 | 0.192453  | 0.10912   | 0.123689  |
| 0.12398   | 0.119172  | 0.190122  | 0.127331 | 0.196387  | 0.11014   | 0.128205  |
| 0.122086  | 0.127768  | 0.194347  | 0.126603 | 0.200612  | 0.125146  | 0.0750291 |
| 0.113636  | 0.125146  | 0.176865  | 0.121941 | 0.185169  | 0.117861  | 0.097465  |
| 0.125728  | 0.130828  | 0.186334  | 0.129662 | 0.194056  | 0.127914  | 0.109848  |
| 0.115093  | 0.128059  | 0.176282  | 0.122523 | 0.17905   | 0.118735  | 0.0683275 |
| 0.111451  | 0.133159  | 0.19799   | 0.121503 | 0.200466  | 0.126457  | 0.122086  |
| 0.125874  | 0.146125  | 0.206876  | 0.137092 | 0.212558  | 0.140589  | 0.133596  |
| 0.0432692 | 0.123834  | 0.190122  | 0.116259 | 0.195221  | 0.113636  | 0.122669  |
| 0.121212  | 0.138549  | 0.203671  | 0.128642 | 0.207314  | 0.136218  | 0.127477  |
| 0.123834  | 0.13039   | 0.200175  | 0.123106 | 0.206731  | 0.126311  | 0.0785256 |
| 0.204108  | 0.214161  | 0.104458  | 0.20338  | 0.101981  | 0.206002  | 0.188228  |
| 0.0999417 | 0.131265  | 0.195804  | 0.120484 | 0.203234  | 0.117861  | 0.117861  |
| 0.189394  | 0.200321  | 0.092366  | 0.188666 | 0.097465  | 0.189831  | 0.175554  |
| 0.115967  | 0.0895979 | 0.188228  | 0.114365 | 0.191288  | 0.109994  | 0.115822  |
| 0.107226  | 0.133887  | 0.184441  | 0.121649 | 0.187791  | 0.114948  | 0.122815  |
| 0.111305  | 0.131556  | 0.188228  | 0.135927 | 0.192745  | 0.125437  | 0.120192  |
| 0.107372  | 0.126457  | 0.183712  | 0.125874 | 0.187646  | 0.118298  | 0.118881  |
| 0.121795  | 0.12602   | 0.178322  | 0.125437 | 0.18546   | 0.120192  | 0.104749  |
| 0.121795  | 0.12602   | 0.184149  | 0.126603 | 0.188957  | 0.124272  | 0.100087  |
| 0.102855  | 0.127768  | 0.176573  | 0.119901 | 0.181964  | 0.110577  | 0.116987  |
| 0.116404  | 0.0501166 | 0.189831  | 0.120921 | 0.197261  | 0.117133  | 0.119464  |
| 0.112908  | 0.132576  | 0.193328  | 0.133159 | 0.197844  | 0.128788  | 0.122378  |
| 0.128497  | 0.13447   | 0.189103  | 0.129516 | 0.194493  | 0.130099  | 0.0779429 |
| 0.246503  | 0.255099  | 0.128497  | 0.248106 | 0.133596  | 0.249272  | 0.234411  |
| 0.10169   | 0.130973  | 0.182692  | 0.120775 | 0.185752  | 0.109703  | 0.116113  |
| 0.180507  | 0.189394  | 0.0890152 | 0.182401 | 0.094697  | 0.183566  | 0.16521   |
| 0.185606  | 0.194784  | 0.0862471 | 0.188957 | 0.0939685 | 0.186334  | 0.17264   |
| 0.10708   | 0.130245  | 0.181964  | 0.121503 | 0.187063  | 0.0559441 | 0.120629  |
| 0.0441434 | 0.122669  | 0.1875    | 0.115676 | 0.190559  | 0.106643  | 0.118007  |
| 0.106206  | 0.134615  | 0.186917  | 0.121503 | 0.192599  | 0.116259  | 0.125583  |
| 0.111742  | 0.119172  | 0.178759  | 0.121503 | 0.183566  | 0.113636  | 0.099359  |
| 0.0824592 | 0.122815  | 0.176573  | 0.117861 | 0.180507  | 0.111451  | 0.110286  |
| 0.115385  | 0.123106  | 0.189394  | 0.120484 | 0.195659  | 0.115239  | 0.0793998 |
| 0.114656  | 0.123543  | 0.178467  | 0.124126 | 0.18648   | 0.117716  | 0.10373   |



|           |           |           |          |           |          |           |
|-----------|-----------|-----------|----------|-----------|----------|-----------|
| 0.126894  | 0.135781  | 0.195076  | 0.134033 | 0.200175  | 0.128788 | 0.112471  |
| 0.101107  | 0.127477  | 0.180653  | 0.114656 | 0.183712  | 0.107955 | 0.11553   |
| 0.125583  | 0.129808  | 0.189394  | 0.130099 | 0.19595   | 0.129225 | 0.10912   |
| 0.107955  | 0.118298  | 0.188083  | 0.113345 | 0.191142  | 0.110723 | 0.119464  |
| 0.110868  | 0.134615  | 0.194493  | 0.132284 | 0.200175  | 0.125583 | 0.128205  |
| 0.114219  | 0.134178  | 0.190268  | 0.121941 | 0.198572  | 0.123106 | 0.11553   |
| 0.125146  | 0.133741  | 0.201486  | 0.128205 | 0.207168  | 0.129371 | 0.0821678 |
| 0.104312  | 0.134178  | 0.192599  | 0.120484 | 0.196824  | 0.112034 | 0.124272  |
| 0.0996503 | 0.127477  | 0.176282  | 0.119027 | 0.180798  | 0.107372 | 0.110286  |
| 0.127331  | 0.129516  | 0.196096  | 0.130682 | 0.20236   | 0.131556 | 0.130973  |
| 0.178176  | 0.190559  | 0.095134  | 0.186189 | 0.0964452 | 0.182692 | 0.166084  |
| 0.130536  | 0.137383  | 0.192599  | 0.134178 | 0.19799   | 0.133304 | 0.11961   |
| 0.118298  | 0.127185  | 0.18007   | 0.125728 | 0.186626  | 0.11961  | 0.0980478 |
| 0.108246  | 0.126166  | 0.191288  | 0.128497 | 0.194347  | 0.123834 | 0.120921  |
| 0.104021  | 0.121358  | 0.184149  | 0.122232 | 0.188374  | 0.113782 | 0.112908  |
| 0.107372  | 0.129371  | 0.188957  | 0.116259 | 0.19289   | 0.121795 | 0.116259  |
| 0.112471  | 0.132139  | 0.195804  | 0.122523 | 0.200612  | 0.127185 | 0.118153  |
| 0.187209  | 0.198135  | 0.0922203 | 0.187354 | 0.0914918 | 0.188811 | 0.172786  |
| 0.113782  | 0.129371  | 0.17264   | 0.125874 | 0.180361  | 0.117716 | 0.0938228 |
| 0.106352  | 0.121066  | 0.162879  | 0.11553  | 0.167978  | 0.112034 | 0.0971737 |
| 0.123543  | 0.124854  | 0.184149  | 0.126894 | 0.192162  | 0.122232 | 0.105332  |
| 0.187791  | 0.196678  | 0.0910548 | 0.189977 | 0.0920746 | 0.191725 | 0.175699  |
| 0.0454545 | 0.121358  | 0.180361  | 0.113199 | 0.183421  | 0.105915 | 0.108537  |
| 0.116987  | 0.127914  | 0.196241  | 0.12704  | 0.202506  | 0.122669 | 0.0748834 |
| 0.120192  | 0.12704   | 0.184003  | 0.12704  | 0.189103  | 0.122086 | 0.103147  |
| 0.118881  | 0.112325  | 0.18648   | 0.120192 | 0.194202  | 0.106498 | 0.121649  |
| 0.181818  | 0.192453  | 0.0879953 | 0.188666 | 0.0957168 | 0.186626 | 0.171474  |
| 0.11655   | 0.123689  | 0.190559  | 0.124272 | 0.195659  | 0.119027 | 0.067162  |
| 0.11014   | 0.118153  | 0.18007   | 0.112325 | 0.183421  | 0.116696 | 0.110286  |
| 0.0617716 | 0.121066  | 0.175699  | 0.117861 | 0.178176  | 0.107663 | 0.109411  |
| 0.11655   | 0.129808  | 0.163753  | 0.13039  | 0.167978  | 0.121358 | 0.105041  |
| 0.114948  | 0.0495338 | 0.19391   | 0.118881 | 0.202797  | 0.119172 | 0.124417  |
| 0.122232  | 0.129662  | 0.200321  | 0.125874 | 0.20338   | 0.12704  | 0.0804196 |
| 0.103293  | 0.125     | 0.183421  | 0.116841 | 0.18648   | 0.105478 | 0.115967  |
| 0.116696  | 0.126748  | 0.193036  | 0.125583 | 0.19697   | 0.114219 | 0.122086  |
| 0.147145  | 0.131847  | 0.202797  | 0.148164 | 0.21081   | 0.138258 | 0.148164  |
| 0.233392  | 0.241696  | 0.120338  | 0.229458 | 0.124854  | 0.238491 | 0.218969  |
| 0.109266  | 0.140006  | 0.197261  | 0.124563 | 0.203234  | 0.117861 | 0.127768  |
| 0.117133  | 0.050845  | 0.192016  | 0.120484 | 0.200321  | 0.118735 | 0.122232  |
| 0.116404  | 0.126166  | 0.177885  | 0.123543 | 0.181818  | 0.120921 | 0.0897436 |
| 0.120629  | 0.131556  | 0.179487  | 0.123689 | 0.18546   | 0.116696 | 0.125437  |
| 0.11116   | 0.0716783 | 0.184003  | 0.120047 | 0.190559  | 0.114802 | 0.0938228 |
| 0.103001  | 0.117133  | 0.188083  | 0.117716 | 0.193765  | 0.115385 | 0.119464  |
| 0.118298  | 0.123397  | 0.18211   | 0.127768 | 0.186043  | 0.121066 | 0.0992133 |

|           |           |           |           |           |          |           |
|-----------|-----------|-----------|-----------|-----------|----------|-----------|
| 0.122523  | 0.127331  | 0.19391   | 0.126166  | 0.198718  | 0.126748 | 0.0745921 |
| 0.121649  | 0.115676  | 0.183129  | 0.090035  | 0.189977  | 0.1081   | 0.115093  |
| 0.233392  | 0.242279  | 0.119755  | 0.232372  | 0.127477  | 0.236451 | 0.220717  |
| 0.0412296 | 0.120338  | 0.178176  | 0.111597  | 0.184149  | 0.10373  | 0.112179  |
| 0.10067   | 0.107517  | 0.185752  | 0.112471  | 0.191725  | 0.107517 | 0.105186  |
| 0.0981935 | 0.124563  | 0.18211   | 0.115822  | 0.183712  | 0.105915 | 0.113199  |
| 0.132139  | 0.120338  | 0.196241  | 0.129371  | 0.200466  | 0.120338 | 0.131993  |
| 0.114656  | 0.143357  | 0.200612  | 0.128788  | 0.206002  | 0.120921 | 0.13549   |
| 0.107663  | 0.126166  | 0.174971  | 0.13141   | 0.183275  | 0.109848 | 0.115676  |
| 0.117861  | 0.126457  | 0.180216  | 0.12704   | 0.183858  | 0.116841 | 0.099359  |
| 0.113636  | 0.112908  | 0.18007   | 0.120484  | 0.186626  | 0.103293 | 0.118153  |
| 0.229021  | 0.237034  | 0.117133  | 0.224505  | 0.121358  | 0.231498 | 0.215763  |
| 0.122669  | 0.126894  | 0.185606  | 0.131556  | 0.190997  | 0.125437 | 0.105041  |
| 0.117861  | 0.126748  | 0.197407  | 0.122669  | 0.200758  | 0.122669 | 0.0725524 |
| 0.116987  | 0.114802  | 0.181381  | 0.0769231 | 0.191725  | 0.101981 | 0.113345  |
| 0.120629  | 0.105332  | 0.190851  | 0.121066  | 0.194202  | 0.126311 | 0.122815  |
| 0.115967  | 0.119901  | 0.198135  | 0.123397  | 0.204691  | 0.123689 | 0.116404  |
| 0.100233  | 0.12398   | 0.183858  | 0.118735  | 0.189248  | 0.108829 | 0.116404  |
| 0.11859   | 0.13039   | 0.19493   | 0.121066  | 0.199738  | 0.123397 | 0.0776515 |
| 0.122523  | 0.133159  | 0.201486  | 0.132576  | 0.205128  | 0.129953 | 0.0801282 |
| 0.115822  | 0.122086  | 0.191288  | 0.121212  | 0.197261  | 0.11655  | 0.0777972 |
| 0.100233  | 0.127768  | 0.181235  | 0.119027  | 0.18546   | 0.104749 | 0.11961   |
| 0.120047  | 0.0496795 | 0.196387  | 0.12398   | 0.2044    | 0.123689 | 0.127477  |
| 0.126311  | 0.0506993 | 0.201195  | 0.127914  | 0.210082  | 0.131702 | 0.131119  |
| 0.116696  | 0.134615  | 0.195659  | 0.132576  | 0.202214  | 0.132284 | 0.130245  |
| 0.116696  | 0.137238  | 0.195659  | 0.138112  | 0.204254  | 0.134907 | 0.134615  |
| 0.124709  | 0.0517191 | 0.201632  | 0.12602   | 0.209062  | 0.127477 | 0.130099  |
| 0.0795455 | 0.122523  | 0.185897  | 0.112325  | 0.189831  | 0.103584 | 0.112617  |
| 0.128642  | 0.137238  | 0.206439  | 0.132867  | 0.21183   | 0.134907 | 0.111597  |
| 0.11859   | 0.142337  | 0.200758  | 0.125728  | 0.21081   | 0.124854 | 0.123397  |
| 0.199009  | 0.209645  | 0.0944056 | 0.204691  | 0.0962995 | 0.204691 | 0.1875    |
| 0.122086  | 0.132139  | 0.186772  | 0.128642  | 0.194493  | 0.116113 | 0.121066  |
| 0.108974  | 0.112617  | 0.191434  | 0.116987  | 0.195367  | 0.113199 | 0.108537  |
| 0.106206  | 0.133741  | 0.178759  | 0.125     | 0.183566  | 0.112762 | 0.119172  |
| 0.219114  | 0.230041  | 0.116259  | 0.218677  | 0.11961   | 0.222465 | 0.205274  |
| 0.210373  | 0.218969  | 0.112179  | 0.207896  | 0.110577  | 0.210519 | 0.195659  |
| 0.123397  | 0.129662  | 0.197115  | 0.127331  | 0.202797  | 0.127914 | 0.0798368 |
| 0.248543  | 0.25539   | 0.129079  | 0.246941  | 0.128351  | 0.248689 | 0.234994  |
| 0.083042  | 0.121941  | 0.186189  | 0.115822  | 0.192745  | 0.103001 | 0.113199  |
| 0.11859   | 0.142337  | 0.199883  | 0.130973  | 0.205857  | 0.128059 | 0.136509  |
| 0         | 0.121941  | 0.185606  | 0.112325  | 0.188957  | 0.107372 | 0.116113  |
| 0.121941  | 0         | 0.196241  | 0.125     | 0.204254  | 0.123834 | 0.127331  |
| 0.185606  | 0.196241  | 0         | 0.188666  | 0.0933858 | 0.188666 | 0.172931  |
| 0.112325  | 0.125     | 0.188666  | 0         | 0.194347  | 0.116259 | 0.12296   |

|           |           |           |          |          |           |           |
|-----------|-----------|-----------|----------|----------|-----------|-----------|
| 0.188957  | 0.204254  | 0.0933858 | 0.194347 | 0        | 0.195221  | 0.176573  |
| 0.107372  | 0.123834  | 0.188666  | 0.116259 | 0.195221 | 0         | 0.121503  |
| 0.116113  | 0.127331  | 0.172931  | 0.12296  | 0.176573 | 0.121503  | 0         |
| 0.103584  | 0.123543  | 0.189831  | 0.125874 | 0.194347 | 0.113636  | 0.12296   |
| 0.104167  | 0.120921  | 0.173514  | 0.128497 | 0.173368 | 0.108392  | 0.100816  |
| 0.0961538 | 0.120775  | 0.17803   | 0.114656 | 0.183421 | 0.103001  | 0.110286  |
| 0.111597  | 0.126311  | 0.181818  | 0.118153 | 0.187209 | 0.109994  | 0.111451  |
| 0.0448718 | 0.116404  | 0.17803   | 0.110286 | 0.180798 | 0.103001  | 0.110868  |
| 0.115822  | 0.121212  | 0.17701   | 0.12296  | 0.184441 | 0.112471  | 0.0979021 |
| 0.115967  | 0.126311  | 0.196096  | 0.120192 | 0.201486 | 0.120192  | 0.0971737 |
| 0.103438  | 0.127477  | 0.185897  | 0.115822 | 0.190414 | 0.103584  | 0.114365  |
| 0.0374417 | 0.117133  | 0.181672  | 0.112762 | 0.185606 | 0.105186  | 0.115093  |
| 0.107517  | 0.133596  | 0.183858  | 0.13039  | 0.187791 | 0.122232  | 0.114656  |
| 0.12704   | 0.133887  | 0.191142  | 0.133887 | 0.197115 | 0.127185  | 0.110286  |
| 0.106206  | 0.124417  | 0.184003  | 0.129953 | 0.190268 | 0.11655   | 0.11655   |
| 0.111305  | 0.119318  | 0.181527  | 0.116404 | 0.188957 | 0.116404  | 0.114656  |
| 0.0942599 | 0.121795  | 0.176136  | 0.11451  | 0.18211  | 0.0996503 | 0.112762  |
| 0.118153  | 0.126166  | 0.184878  | 0.121212 | 0.189977 | 0.122086  | 0.0649767 |
| 0.113782  | 0.0527389 | 0.190997  | 0.120047 | 0.197844 | 0.11859   | 0.121503  |
| 0.111888  | 0.129225  | 0.195221  | 0.121941 | 0.198281 | 0.123689  | 0.11757   |
| 0.108974  | 0.128351  | 0.188228  | 0.130973 | 0.192745 | 0.121358  | 0.119901  |
| 0.117861  | 0.127622  | 0.179341  | 0.124417 | 0.186189 | 0.118298  | 0.0996503 |
| 0.128788  | 0.131847  | 0.190268  | 0.136509 | 0.197698 | 0.128059  | 0.110868  |
| 0.136072  | 0.142337  | 0.195221  | 0.138258 | 0.203234 | 0.133887  | 0.118735  |
| 0.10271   | 0.116259  | 0.182255  | 0.116841 | 0.188811 | 0.109557  | 0.0786713 |
| 0.100087  | 0.125874  | 0.18109   | 0.115967 | 0.18648  | 0.106061  | 0.117133  |
| 0.0929487 | 0.109703  | 0.17803   | 0.112034 | 0.186334 | 0.105332  | 0.114365  |
| 0.124126  | 0.0543415 | 0.202214  | 0.128642 | 0.209645 | 0.133013  | 0.132139  |
| 0.0421037 | 0.126457  | 0.190705  | 0.115967 | 0.194347 | 0.108974  | 0.119172  |
| 0.129808  | 0.14831   | 0.206731  | 0.136072 | 0.212995 | 0.141317  | 0.130828  |
| 0.114365  | 0.146562  | 0.195076  | 0.128497 | 0.200175 | 0.123834  | 0.134615  |
| 0.124709  | 0.117279  | 0.190559  | 0.127185 | 0.197115 | 0.116696  | 0.132721  |
| 0.0968823 | 0.123252  | 0.182838  | 0.119755 | 0.188228 | 0.104895  | 0.111888  |
| 0.114219  | 0.104458  | 0.183275  | 0.116404 | 0.190997 | 0.109994  | 0.116113  |
| 0.115385  | 0.136801  | 0.195513  | 0.133304 | 0.201195 | 0.130973  | 0.128059  |
| 0.205274  | 0.2162    | 0.114073  | 0.20542  | 0.115676 | 0.206002  | 0.189977  |
| 0.108829  | 0.116841  | 0.181672  | 0.117133 | 0.18648  | 0.115676  | 0.112762  |
| 0.102273  | 0.12398   | 0.187354  | 0.125437 | 0.194784 | 0.108829  | 0.120484  |
| 0.114948  | 0.0498252 | 0.193619  | 0.119755 | 0.199592 | 0.120047  | 0.118007  |
| 0.106352  | 0.12602   | 0.185606  | 0.129516 | 0.193328 | 0.11961   | 0.118153  |
| 0.11553   | 0.12704   | 0.188083  | 0.120921 | 0.196096 | 0.0506993 | 0.12704   |
| 0.121649  | 0.131119  | 0.187791  | 0.12704  | 0.193473 | 0.115093  | 0.118298  |
| 0.124126  | 0.129808  | 0.190851  | 0.130682 | 0.200321 | 0.118735  | 0.120192  |
| 0.119901  | 0.113345  | 0.188083  | 0.125874 | 0.195513 | 0.111597  | 0.125     |

|           |           |          |          |          |           |           |
|-----------|-----------|----------|----------|----------|-----------|-----------|
| 0.110577  | 0.120047  | 0.190705 | 0.120047 | 0.19697  | 0.111888  | 0.0996503 |
| 0.121649  | 0.0521562 | 0.199446 | 0.122378 | 0.206585 | 0.125874  | 0.126166  |
| 0.10067   | 0.119172  | 0.189248 | 0.121503 | 0.19289  | 0.106643  | 0.115385  |
| 0.106061  | 0.13243   | 0.189685 | 0.120192 | 0.196824 | 0.110286  | 0.122815  |
| 0.173223  | 0.185023  | 0.16419  | 0.179487 | 0.166958 | 0.177448  | 0.167541  |
| 0.118735  | 0.123543  | 0.181672 | 0.123834 | 0.184441 | 0.117133  | 0.100816  |
| 0.120921  | 0.0613345 | 0.185315 | 0.12602  | 0.193328 | 0.128351  | 0.121941  |
| 0.101836  | 0.123252  | 0.199446 | 0.11859  | 0.204545 | 0.119755  | 0.11859   |
| 0.117133  | 0.126311  | 0.186772 | 0.126894 | 0.193036 | 0.123397  | 0.0995047 |
| 0.099359  | 0.120775  | 0.183566 | 0.107663 | 0.190705 | 0.103875  | 0.106498  |
| 0.0955711 | 0.123397  | 0.182401 | 0.111451 | 0.188666 | 0.0962995 | 0.111116  |
| 0.104021  | 0.121941  | 0.187937 | 0.110868 | 0.197115 | 0.10912   | 0.10912   |
| 0.112762  | 0.122815  | 0.193182 | 0.115239 | 0.202652 | 0.121941  | 0.10708   |
| 0.111014  | 0.132139  | 0.178322 | 0.124563 | 0.182547 | 0.108246  | 0.097465  |
| 0.112034  | 0.134907  | 0.199155 | 0.134615 | 0.204254 | 0.12704   | 0.125874  |
| 0.108683  | 0.120192  | 0.184441 | 0.120192 | 0.18546  | 0.118153  | 0.0971737 |
| 0.105915  | 0.128788  | 0.186334 | 0.116841 | 0.191725 | 0.120047  | 0.112471  |
| 0.117716  | 0.133304  | 0.200466 | 0.114656 | 0.214307 | 0.13243   | 0.112617  |
| 0.102273  | 0.128934  | 0.19289  | 0.114073 | 0.201777 | 0.116404  | 0.109994  |
| 0.11655   | 0.13039   | 0.191434 | 0.130682 | 0.197407 | 0.128934  | 0.11553   |
| 0.0964452 | 0.126603  | 0.187937 | 0.109411 | 0.198281 | 0.107955  | 0.108537  |
| 0.100524  | 0.131265  | 0.189394 | 0.112617 | 0.199446 | 0.113782  | 0.107955  |
| 0.0906177 | 0.121066  | 0.182401 | 0.112617 | 0.18954  | 0.105332  | 0.112908  |
| 0.104749  | 0.132867  | 0.197407 | 0.122669 | 0.20338  | 0.115385  | 0.116841  |
| 0.0916375 | 0.120629  | 0.186917 | 0.117424 | 0.191434 | 0.110431  | 0.111014  |
| 0.139132  | 0.145105  | 0.200612 | 0.139569 | 0.205711 | 0.142483  | 0.116841  |
| 0.13039   | 0.136946  | 0.190414 | 0.136655 | 0.19493  | 0.131993  | 0.105186  |
| 0.100087  | 0.122378  | 0.186917 | 0.117716 | 0.194639 | 0.117133  | 0.105769  |
| 0.133159  | 0.13447   | 0.203089 | 0.135635 | 0.209353 | 0.141171  | 0.119318  |
| 0.120629  | 0.125437  | 0.189103 | 0.135052 | 0.192453 | 0.121358  | 0.123106  |
| 0.113345  | 0.143502  | 0.198718 | 0.132139 | 0.207022 | 0.128351  | 0.121941  |
| 0.0938228 | 0.125728  | 0.18852  | 0.114656 | 0.196533 | 0.113491  | 0.118444  |
| 0.138549  | 0.127914  | 0.202652 | 0.144231 | 0.210373 | 0.134615  | 0.136946  |
| 0.11757   | 0.124417  | 0.191871 | 0.120629 | 0.194639 | 0.120338  | 0.129953  |
| 0.124563  | 0.132867  | 0.197115 | 0.132867 | 0.204837 | 0.134907  | 0.120047  |
| 0.11116   | 0.133159  | 0.200029 | 0.129953 | 0.204254 | 0.120629  | 0.118298  |
| 0.0944056 | 0.127185  | 0.189685 | 0.118444 | 0.196533 | 0.107372  | 0.105915  |
| 0.099796  | 0.126166  | 0.187791 | 0.115385 | 0.188228 | 0.109266  | 0.105478  |
| 0.113636  | 0.112617  | 0.188811 | 0.106206 | 0.200321 | 0.118444  | 0.108829  |
| 0.0984848 | 0.129808  | 0.199301 | 0.126894 | 0.204983 | 0.119901  | 0.113782  |
| 0.107955  | 0.130828  | 0.203817 | 0.126457 | 0.209499 | 0.125     | 0.12704   |
| 0.114365  | 0.131119  | 0.186334 | 0.129953 | 0.189685 | 0.12296   | 0.100816  |
| 0.0962995 | 0.119172  | 0.186917 | 0.117716 | 0.189685 | 0.108392  | 0.108683  |
| 0.0996503 | 0.125437  | 0.187354 | 0.117279 | 0.191288 | 0.109411  | 0.10708   |

|           |          |          |          |          |          |          |
|-----------|----------|----------|----------|----------|----------|----------|
| 0.0965909 | 0.124709 | 0.190705 | 0.121503 | 0.198718 | 0.11451  | 0.113928 |
| 0.0913462 | 0.124417 | 0.18546  | 0.118298 | 0.191142 | 0.112762 | 0.104021 |
| 0.104604  | 0.131847 | 0.193765 | 0.119318 | 0.200321 | 0.118735 | 0.112325 |
| 0.0961538 | 0.129225 | 0.185315 | 0.121941 | 0.190122 | 0.112034 | 0.118444 |
| 0.107663  | 0.128497 | 0.174679 | 0.124709 | 0.18211  | 0.108392 | 0.116259 |
| 0.0962995 | 0.125    | 0.188666 | 0.118298 | 0.193473 | 0.111305 | 0.120338 |
| 0.076486  | 0.124126 | 0.184295 | 0.115385 | 0.188228 | 0.101981 | 0.112471 |
| 0.092803  | 0.122669 | 0.186334 | 0.11859  | 0.192016 | 0.111014 | 0.109266 |
| 0.106061  | 0.124563 | 0.172494 | 0.124854 | 0.177302 | 0.10708  | 0.112034 |
| 0.101836  | 0.122086 | 0.187209 | 0.11859  | 0.191725 | 0.113928 | 0.112762 |
| 0.111742  | 0.130245 | 0.184295 | 0.128205 | 0.191725 | 0.116259 | 0.112471 |
| 0.103001  | 0.118298 | 0.171183 | 0.120338 | 0.177739 | 0.105186 | 0.1081   |
| 0.111014  | 0.137383 | 0.196678 | 0.13039  | 0.205274 | 0.11961  | 0.123106 |

| TDr_3824  | TDr_3825  | TDr_3828  | TDr_3842 | TDr_3852  | TDr_3856  | TDr_3863  |
|-----------|-----------|-----------|----------|-----------|-----------|-----------|
| 0.116259  | 0.104021  | 0.109994  | 0.108537 | 0.105041  | 0.115093  | 0.112325  |
| 0.11553   | 0.101253  | 0.0984848 | 0.11014  | 0.0990676 | 0.103001  | 0.115385  |
| 0.112325  | 0.0977564 | 0.0920746 | 0.104021 | 0.0973193 | 0.0977564 | 0.115676  |
| 0.116696  | 0.102418  | 0.0979021 | 0.113345 | 0.100524  | 0.0887238 | 0.117424  |
| 0.130973  | 0.123106  | 0.129371  | 0.130536 | 0.119755  | 0.130099  | 0.130245  |
| 0.128351  | 0.114365  | 0.11655   | 0.124709 | 0.115385  | 0.126603  | 0.129662  |
| 0.122378  | 0.115385  | 0.116404  | 0.119901 | 0.105332  | 0.124417  | 0.105332  |
| 0.118881  | 0.108392  | 0.0962995 | 0.108537 | 0.104749  | 0.10169   | 0.117279  |
| 0.0995047 | 0.103293  | 0.097028  | 0.092366 | 0.0882867 | 0.0986305 | 0.106935  |
| 0.0868298 | 0.105186  | 0.0840618 | 0.107955 | 0.0750291 | 0.113345  | 0.119318  |
| 0.119901  | 0.109411  | 0.101981  | 0.115093 | 0.10169   | 0.119901  | 0.106643  |
| 0.114802  | 0.106935  | 0.104167  | 0.100962 | 0.0960082 | 0.099359  | 0.109703  |
| 0.115093  | 0.104312  | 0.0957168 | 0.105624 | 0.0939685 | 0.107809  | 0.112034  |
| 0.133013  | 0.121941  | 0.118298  | 0.126748 | 0.115676  | 0.127477  | 0.142483  |
| 0.125     | 0.11859   | 0.0563811 | 0.118153 | 0.106498  | 0.123543  | 0.132139  |
| 0.117861  | 0.112617  | 0.103147  | 0.113928 | 0.105186  | 0.11757   | 0.102564  |
| 0.111597  | 0.111888  | 0.104749  | 0.110868 | 0.100087  | 0.112179  | 0.107663  |
| 0.147873  | 0.135927  | 0.138403  | 0.137529 | 0.136072  | 0.13243   | 0.145979  |
| 0.108829  | 0.0968823 | 0.0981935 | 0.103147 | 0.0964452 | 0.0995047 | 0.110431  |
| 0.200029  | 0.185169  | 0.173368  | 0.198718 | 0.189394  | 0.197698  | 0.208625  |
| 0.125     | 0.119464  | 0.109411  | 0.122232 | 0.114073  | 0.126166  | 0.11961   |
| 0.117279  | 0.110577  | 0.108392  | 0.115676 | 0.109266  | 0.117861  | 0.121503  |
| 0.112179  | 0.102855  | 0.103001  | 0.107955 | 0.0971737 | 0.107809  | 0.10708   |
| 0.12602   | 0.119318  | 0.119172  | 0.120629 | 0.109266  | 0.12398   | 0.0976107 |
| 0.104895  | 0.101107  | 0.0936772 | 0.105332 | 0.0901807 | 0.104312  | 0.105041  |
| 0.12704   | 0.119464  | 0.114073  | 0.123397 | 0.119318  | 0.125583  | 0.123397  |
| 0.120921  | 0.11655   | 0.112908  | 0.127185 | 0.10912   | 0.124126  | 0.10912   |
| 0.118881  | 0.115967  | 0.110286  | 0.112617 | 0.107663  | 0.115967  | 0.114073  |
| 0.127331  | 0.125583  | 0.122523  | 0.127768 | 0.118444  | 0.127622  | 0.116696  |
| 0.1081    | 0.121503  | 0.10912   | 0.121066 | 0.0965909 | 0.124126  | 0.117279  |
| 0.119901  | 0.117861  | 0.105769  | 0.123834 | 0.108392  | 0.12602   | 0.112471  |
| 0.121212  | 0.117716  | 0.108829  | 0.11961  | 0.105041  | 0.118881  | 0.108246  |
| 0.108683  | 0.0990676 | 0.0887238 | 0.101253 | 0.0945513 | 0.106643  | 0.105624  |
| 0.117716  | 0.113928  | 0.109411  | 0.112617 | 0.100379  | 0.117424  | 0.111742  |
| 0.120484  | 0.121358  | 0.113054  | 0.113345 | 0.108683  | 0.121066  | 0.0964452 |
| 0.121212  | 0.119755  | 0.120775  | 0.119027 | 0.106498  | 0.127331  | 0.107663  |
| 0.125728  | 0.12602   | 0.120629  | 0.134324 | 0.119464  | 0.131265  | 0.114219  |
| 0.119172  | 0.117424  | 0.112908  | 0.115239 | 0.109703  | 0.124709  | 0.114073  |
| 0.111305  | 0.105769  | 0.0962995 | 0.11116  | 0.099796  | 0.108392  | 0.104167  |
| 0.119464  | 0.118298  | 0.11116   | 0.114656 | 0.105624  | 0.115385  | 0.116113  |
| 0.1081    | 0.106935  | 0.100087  | 0.107955 | 0.0986305 | 0.104312  | 0.104749  |
| 0.135198  | 0.134615  | 0.129225  | 0.135927 | 0.122232  | 0.138112  | 0.131556  |

|          |          |           |          |           |           |           |
|----------|----------|-----------|----------|-----------|-----------|-----------|
| 0.136655 | 0.138695 | 0.135635  | 0.13884  | 0.12602   | 0.142483  | 0.13243   |
| 0.113199 | 0.111742 | 0.1081    | 0.111014 | 0.103147  | 0.111451  | 0.108974  |
| 0.103293 | 0.108829 | 0.0996503 | 0.104604 | 0.092366  | 0.111742  | 0.0976107 |
| 0.109848 | 0.121795 | 0.10271   | 0.11553  | 0.0977564 | 0.122086  | 0.101253  |
| 0.117424 | 0.116259 | 0.110577  | 0.112617 | 0.107663  | 0.118881  | 0.105624  |
| 0.130099 | 0.133013 | 0.127914  | 0.13141  | 0.123252  | 0.135344  | 0.124709  |
| 0.111742 | 0.107372 | 0.104895  | 0.115385 | 0.099359  | 0.112617  | 0.111888  |
| 0.113345 | 0.114219 | 0.103875  | 0.10912  | 0.10067   | 0.115385  | 0.107372  |
| 0.138258 | 0.13447  | 0.138112  | 0.145105 | 0.129079  | 0.143502  | 0.124126  |
| 0.125437 | 0.123397 | 0.119464  | 0.130245 | 0.113345  | 0.129808  | 0.119172  |
| 0.113054 | 0.106352 | 0.106789  | 0.113199 | 0.102127  | 0.111014  | 0.107372  |
| 0.125874 | 0.124126 | 0.107955  | 0.114365 | 0.107372  | 0.120629  | 0.130682  |
| 0.119464 | 0.104312 | 0.108246  | 0.11116  | 0.111742  | 0.0818765 | 0.116404  |
| 0.141026 | 0.137238 | 0.135344  | 0.133887 | 0.130099  | 0.129662  | 0.121649  |
| 0.126603 | 0.122815 | 0.119464  | 0.124417 | 0.112179  | 0.124854  | 0.115093  |
| 0.114073 | 0.110286 | 0.106643  | 0.110431 | 0.104604  | 0.111742  | 0.106643  |
| 0.111451 | 0.11116  | 0.107517  | 0.115967 | 0.101399  | 0.116696  | 0.113928  |
| 0.108974 | 0.118007 | 0.105624  | 0.11757  | 0.0986305 | 0.120047  | 0.101544  |
| 0.134615 | 0.127914 | 0.127185  | 0.133304 | 0.124854  | 0.131702  | 0.121066  |
| 0.13345  | 0.131702 | 0.126894  | 0.131847 | 0.120775  | 0.131702  | 0.130682  |
| 0.160402 | 0.154866 | 0.148601  | 0.1588   | 0.14627   | 0.157197  | 0.157634  |
| 0.118153 | 0.10912  | 0.10373   | 0.113345 | 0.0967366 | 0.11116   | 0.111014  |
| 0.111451 | 0.109411 | 0.104895  | 0.112471 | 0.0938228 | 0.110286  | 0.109266  |
| 0.112908 | 0.110577 | 0.105769  | 0.112471 | 0.0932401 | 0.109994  | 0.106352  |
| 0.134033 | 0.134033 | 0.130099  | 0.13884  | 0.129808  | 0.137821  | 0.128059  |
| 0.115967 | 0.111014 | 0.10271   | 0.106498 | 0.0977564 | 0.104604  | 0.103875  |
| 0.131265 | 0.127185 | 0.127622  | 0.129079 | 0.119464  | 0.130973  | 0.123834  |
| 0.116987 | 0.113782 | 0.106061  | 0.121795 | 0.100524  | 0.121066  | 0.10373   |
| 0.119464 | 0.111305 | 0.110577  | 0.116113 | 0.101544  | 0.116841  | 0.111742  |
| 0.142483 | 0.140734 | 0.13447   | 0.145833 | 0.135927  | 0.14627   | 0.130973  |
| 0.126166 | 0.115676 | 0.114073  | 0.11961  | 0.107372  | 0.118298  | 0.112908  |
| 0.133887 | 0.130099 | 0.125874  | 0.133741 | 0.120047  | 0.133887  | 0.130245  |
| 0.128788 | 0.126457 | 0.122815  | 0.127185 | 0.116113  | 0.128205  | 0.120775  |
| 0.118444 | 0.10912  | 0.104604  | 0.107809 | 0.106643  | 0.108246  | 0.111888  |
| 0.118444 | 0.109994 | 0.1081    | 0.109848 | 0.0973193 | 0.107663  | 0.105769  |
| 0.118735 | 0.108537 | 0.107226  | 0.115676 | 0.102855  | 0.112908  | 0.111888  |
| 0.126311 | 0.129808 | 0.12704   | 0.126166 | 0.122086  | 0.126603  | 0.119755  |
| 0.11655  | 0.110431 | 0.106789  | 0.112034 | 0.0971737 | 0.111305  | 0.103875  |
| 0.135052 | 0.130682 | 0.130245  | 0.134615 | 0.120047  | 0.13039   | 0.134324  |
| 0.122815 | 0.116404 | 0.111597  | 0.116841 | 0.105186  | 0.123106  | 0.111888  |
| 0.123397 | 0.114365 | 0.107517  | 0.117424 | 0.107809  | 0.11553   | 0.107226  |
| 0.116696 | 0.112325 | 0.106935  | 0.112762 | 0.101981  | 0.11757   | 0.108392  |
| 0.126311 | 0.114656 | 0.11014   | 0.118298 | 0.109848  | 0.116696  | 0.118881  |
| 0.114948 | 0.10912  | 0.106643  | 0.11451  | 0.100233  | 0.112908  | 0.111888  |

|           |          |           |           |           |          |           |
|-----------|----------|-----------|-----------|-----------|----------|-----------|
| 0.112034  | 0.108537 | 0.106643  | 0.106643  | 0.100233  | 0.112034 | 0.106352  |
| 0.131119  | 0.133159 | 0.13039   | 0.128351  | 0.119901  | 0.132576 | 0.12602   |
| 0.112471  | 0.110431 | 0.0992133 | 0.110577  | 0.0945513 | 0.112762 | 0.0986305 |
| 0.113491  | 0.111742 | 0.10169   | 0.099359  | 0.0999417 | 0.111116 | 0.102855  |
| 0.121066  | 0.119027 | 0.110431  | 0.125291  | 0.111888  | 0.12398  | 0.115093  |
| 0.125437  | 0.117861 | 0.120921  | 0.124709  | 0.107226  | 0.13039  | 0.106061  |
| 0.125146  | 0.126894 | 0.118298  | 0.130245  | 0.11451   | 0.136218 | 0.116259  |
| 0.136655  | 0.130245 | 0.127185  | 0.131556  | 0.124563  | 0.137238 | 0.116987  |
| 0.11961   | 0.109703 | 0.108683  | 0.118881  | 0.104895  | 0.119901 | 0.106643  |
| 0.174388  | 0.167104 | 0.174242  | 0.181818  | 0.165793  | 0.181381 | 0.181235  |
| 0.114219  | 0.109848 | 0.097465  | 0.109411  | 0.097465  | 0.107517 | 0.103001  |
| 0.139132  | 0.132139 | 0.123543  | 0.133741  | 0.124126  | 0.133887 | 0.117424  |
| 0.129516  | 0.123397 | 0.115676  | 0.124126  | 0.11655   | 0.126894 | 0.108974  |
| 0.125874  | 0.131702 | 0.126603  | 0.138258  | 0.120775  | 0.137821 | 0.112617  |
| 0.115239  | 0.112034 | 0.102273  | 0.109557  | 0.0990676 | 0.111116 | 0.0952797 |
| 0.129808  | 0.127185 | 0.121795  | 0.127914  | 0.118881  | 0.127477 | 0.108974  |
| 0.10912   | 0.116987 | 0.104021  | 0.1081    | 0.105769  | 0.117861 | 0.101107  |
| 0.110431  | 0.121503 | 0.112908  | 0.121358  | 0.107955  | 0.126457 | 0.108829  |
| 0.110431  | 0.107809 | 0.104458  | 0.114656  | 0.100379  | 0.11451  | 0.103001  |
| 0.132576  | 0.128497 | 0.130973  | 0.136218  | 0.122815  | 0.138403 | 0.115239  |
| 0.0981935 | 0.109266 | 0.0971737 | 0.107372  | 0.0898893 | 0.112762 | 0.0971737 |
| 0.128059  | 0.126894 | 0.122669  | 0.135781  | 0.121212  | 0.131847 | 0.119755  |
| 0.111305  | 0.114802 | 0.109411  | 0.114365  | 0.0992133 | 0.118881 | 0.103293  |
| 0.121066  | 0.125146 | 0.122669  | 0.124126  | 0.114802  | 0.124854 | 0.123543  |
| 0.119172  | 0.126166 | 0.11553   | 0.128059  | 0.111742  | 0.131993 | 0.112325  |
| 0.110723  | 0.104312 | 0.100087  | 0.10912   | 0.0992133 | 0.113345 | 0.101544  |
| 0.143939  | 0.138112 | 0.132139  | 0.138549  | 0.136801  | 0.138986 | 0.127477  |
| 0.110286  | 0.109994 | 0.107517  | 0.113928  | 0.100816  | 0.121649 | 0.103438  |
| 0.116404  | 0.11553  | 0.104312  | 0.107517  | 0.100524  | 0.114656 | 0.103438  |
| 0.106935  | 0.112471 | 0.109703  | 0.114948  | 0.105915  | 0.11655  | 0.106789  |
| 0.129079  | 0.133159 | 0.13039   | 0.13447   | 0.120775  | 0.138403 | 0.130973  |
| 0.120629  | 0.111014 | 0.112908  | 0.120775  | 0.109994  | 0.121795 | 0.110868  |
| 0.111597  | 0.111597 | 0.0986305 | 0.104167  | 0.102418  | 0.106352 | 0.102418  |
| 0.112762  | 0.111305 | 0.101544  | 0.10912   | 0.102127  | 0.112471 | 0.102127  |
| 0.115239  | 0.111742 | 0.105478  | 0.118881  | 0.10169   | 0.114656 | 0.10169   |
| 0.111305  | 0.121503 | 0.104749  | 0.127768  | 0.105624  | 0.123834 | 0.110868  |
| 0.116404  | 0.108537 | 0.112762  | 0.115967  | 0.0981935 | 0.120484 | 0.100233  |
| 0.10169   | 0.102855 | 0.092803  | 0.0977564 | 0.0843531 | 0.103438 | 0.0954254 |
| 0.103147  | 0.101981 | 0.092803  | 0.102127  | 0.088141  | 0.105478 | 0.0939685 |
| 0.104458  | 0.110286 | 0.0964452 | 0.106061  | 0.0885781 | 0.111742 | 0.101107  |
| 0.126603  | 0.115239 | 0.112471  | 0.119755  | 0.108392  | 0.115239 | 0.114219  |
| 0.121795  | 0.125583 | 0.114656  | 0.125146  | 0.109411  | 0.128205 | 0.108537  |
| 0.108829  | 0.107955 | 0.0926573 | 0.106061  | 0.0888695 | 0.109703 | 0.0976107 |
| 0.101399  | 0.102855 | 0.0840618 | 0.104749  | 0.0898893 | 0.107517 | 0.0971737 |



|          |           |           |          |           |           |           |
|----------|-----------|-----------|----------|-----------|-----------|-----------|
| 0.114802 | 0.124709  | 0.106206  | 0.124854 | 0.106498  | 0.128497  | 0.104167  |
| 0.108829 | 0.106789  | 0.0941142 | 0.111597 | 0.0909091 | 0.111116  | 0.087704  |
| 0.122815 | 0.119027  | 0.111014  | 0.119464 | 0.111014  | 0.121649  | 0.114219  |
| 0.12398  | 0.124563  | 0.120629  | 0.130536 | 0.118007  | 0.132721  | 0.113636  |
| 0.102418 | 0.114656  | 0.100816  | 0.115093 | 0.0955711 | 0.116404  | 0.101981  |
| 0.106643 | 0.108392  | 0.0942599 | 0.105624 | 0.0919289 | 0.108392  | 0.10067   |
| 0.105769 | 0.107226  | 0.0957168 | 0.107663 | 0.0907634 | 0.108683  | 0.103584  |
| 0.104021 | 0.0999417 | 0.0962995 | 0.103875 | 0.0901807 | 0.111597  | 0.100087  |
| 0.106061 | 0.122669  | 0.112617  | 0.120192 | 0.101836  | 0.120338  | 0.118735  |
| 0.101981 | 0.105478  | 0.090472  | 0.101836 | 0.0884324 | 0.101981  | 0.0954254 |
| 0.133013 | 0.132721  | 0.126457  | 0.137238 | 0.123252  | 0.139132  | 0.117424  |
| 0.12704  | 0.129953  | 0.123397  | 0.132139 | 0.119027  | 0.136072  | 0.127477  |
| 0.11655  | 0.121212  | 0.111451  | 0.121066 | 0.108246  | 0.122669  | 0.116696  |
| 0.107955 | 0.110286  | 0.102273  | 0.116259 | 0.100816  | 0.119318  | 0.112471  |
| 0.106789 | 0.113199  | 0.103438  | 0.114219 | 0.0952797 | 0.118444  | 0.104895  |
| 0.108683 | 0.107809  | 0.0954254 | 0.109703 | 0.0936772 | 0.112471  | 0.0913462 |
| 0.107372 | 0.108829  | 0.104895  | 0.109266 | 0.0984848 | 0.113199  | 0.0909091 |
| 0.110286 | 0.106206  | 0.0979021 | 0.103147 | 0.0976107 | 0.107955  | 0.101107  |
| 0.119318 | 0.104749  | 0.105478  | 0.106061 | 0.104021  | 0.090472  | 0.108392  |
| 0.127185 | 0.127768  | 0.118007  | 0.127622 | 0.112179  | 0.130973  | 0.108683  |
| 0.116841 | 0.115385  | 0.108537  | 0.113491 | 0.105332  | 0.11655   | 0.0986305 |
| 0.121066 | 0.122523  | 0.113345  | 0.128788 | 0.111888  | 0.129516  | 0.133159  |
| 0.130245 | 0.131993  | 0.119318  | 0.13447  | 0.117861  | 0.134324  | 0.120775  |
| 0.192016 | 0.176282  | 0.18109   | 0.186043 | 0.18546   | 0.185897  | 0.200903  |
| 0.234411 | 0.21722   | 0.227273  | 0.231061 | 0.228438  | 0.228001  | 0.241841  |
| 0.117133 | 0.0964452 | 0.103001  | 0.105041 | 0.103001  | 0.0664336 | 0.112908  |
| 0.118153 | 0.10912   | 0.102855  | 0.11014  | 0.100524  | 0.110577  | 0.099359  |
| 0.112908 | 0.102127  | 0.0990676 | 0.102564 | 0.099359  | 0.10708   | 0.0958625 |
| 0.118444 | 0.105624  | 0.103438  | 0.114219 | 0.099359  | 0.110577  | 0.105769  |
| 0.127477 | 0.121358  | 0.0597319 | 0.118298 | 0.109266  | 0.123397  | 0.129662  |
| 0.118735 | 0.11116   | 0.105769  | 0.108392 | 0.104312  | 0.10912   | 0.0987762 |
| 0.145396 | 0.143065  | 0.137092  | 0.144376 | 0.136509  | 0.144231  | 0.11961   |
| 0.121941 | 0.112325  | 0.109266  | 0.111014 | 0.106352  | 0.11553   | 0.100524  |
| 0.13039  | 0.127185  | 0.127622  | 0.128497 | 0.113345  | 0.126894  | 0.113928  |
| 0.129953 | 0.123252  | 0.123397  | 0.128934 | 0.118444  | 0.125874  | 0.119318  |
| 0.135781 | 0.131993  | 0.119318  | 0.126311 | 0.118444  | 0.132576  | 0.115822  |
| 0.132576 | 0.134907  | 0.128642  | 0.132721 | 0.122523  | 0.131119  | 0.130682  |
| 0.12296  | 0.115093  | 0.105915  | 0.113491 | 0.106206  | 0.114802  | 0.102418  |
| 0.120629 | 0.110431  | 0.105915  | 0.110868 | 0.107372  | 0.109266  | 0.0983392 |
| 0.12398  | 0.111451  | 0.107517  | 0.113636 | 0.106643  | 0.120192  | 0.102855  |
| 0.112617 | 0.106206  | 0.104021  | 0.107809 | 0.0999417 | 0.108537  | 0.10169   |
| 0.11553  | 0.10708   | 0.104895  | 0.109848 | 0.104021  | 0.108829  | 0.0996503 |
| 0.123834 | 0.114802  | 0.108246  | 0.109703 | 0.103875  | 0.112179  | 0.104458  |
| 0.127768 | 0.123689  | 0.116841  | 0.125583 | 0.116841  | 0.128059  | 0.118298  |

|           |          |           |           |           |          |           |
|-----------|----------|-----------|-----------|-----------|----------|-----------|
| 0.135635  | 0.12602  | 0.126166  | 0.134907  | 0.125     | 0.134761 | 0.126457  |
| 0.120047  | 0.112471 | 0.112908  | 0.11757   | 0.105624  | 0.113928 | 0.102418  |
| 0.120192  | 0.108829 | 0.109557  | 0.112179  | 0.101399  | 0.113782 | 0.100524  |
| 0.130973  | 0.128059 | 0.128497  | 0.130536  | 0.118007  | 0.130099 | 0.11859   |
| 0.117279  | 0.10912  | 0.106352  | 0.109266  | 0.0990676 | 0.107663 | 0.0987762 |
| 0.143648  | 0.136072 | 0.131556  | 0.141463  | 0.128351  | 0.142191 | 0.127185  |
| 0.117716  | 0.13141  | 0.119901  | 0.13447   | 0.118735  | 0.136364 | 0.135344  |
| 0.133887  | 0.127768 | 0.125291  | 0.131119  | 0.125291  | 0.132721 | 0.125     |
| 0.116696  | 0.10708  | 0.102273  | 0.112471  | 0.099359  | 0.104458 | 0.100816  |
| 0.111014  | 0.101981 | 0.0992133 | 0.106498  | 0.0986305 | 0.106935 | 0.0980478 |
| 0.129225  | 0.120192 | 0.119464  | 0.120047  | 0.111597  | 0.122815 | 0.104604  |
| 0.123252  | 0.117133 | 0.116696  | 0.122523  | 0.114073  | 0.12296  | 0.106789  |
| 0.12704   | 0.126166 | 0.125146  | 0.129225  | 0.118444  | 0.13141  | 0.109994  |
| 0.124854  | 0.11757  | 0.113345  | 0.118007  | 0.106643  | 0.116987 | 0.105769  |
| 0.123252  | 0.114802 | 0.108829  | 0.117279  | 0.106498  | 0.116841 | 0.103001  |
| 0.128788  | 0.120047 | 0.114073  | 0.121066  | 0.110868  | 0.120047 | 0.109703  |
| 0.128497  | 0.128497 | 0.127185  | 0.134761  | 0.117279  | 0.13345  | 0.114948  |
| 0.128205  | 0.125291 | 0.126603  | 0.125146  | 0.121941  | 0.127914 | 0.113782  |
| 0.136218  | 0.128059 | 0.124709  | 0.132867  | 0.122378  | 0.13243  | 0.114219  |
| 0.134324  | 0.125874 | 0.121358  | 0.124563  | 0.11961   | 0.128788 | 0.121649  |
| 0.124126  | 0.108392 | 0.112617  | 0.109703  | 0.104458  | 0.108683 | 0.0962995 |
| 0.128205  | 0.123252 | 0.124854  | 0.124563  | 0.119318  | 0.130245 | 0.121941  |
| 0.118153  | 0.105041 | 0.106935  | 0.110723  | 0.102564  | 0.10912  | 0.0979021 |
| 0.114802  | 0.111305 | 0.105332  | 0.116696  | 0.100962  | 0.113636 | 0.112034  |
| 0.118298  | 0.113636 | 0.103584  | 0.114948  | 0.104749  | 0.113054 | 0.105041  |
| 0.115239  | 0.108829 | 0.105769  | 0.113928  | 0.0964452 | 0.116696 | 0.106935  |
| 0.11553   | 0.109994 | 0.107809  | 0.107517  | 0.100816  | 0.111451 | 0.0961538 |
| 0.135198  | 0.129079 | 0.125437  | 0.131556  | 0.123106  | 0.134907 | 0.11553   |
| 0.11961   | 0.112034 | 0.112471  | 0.11451   | 0.105478  | 0.118444 | 0.108392  |
| 0.139132  | 0.125146 | 0.127331  | 0.126457  | 0.121795  | 0.129225 | 0.117716  |
| 0.113782  | 0.109703 | 0.104895  | 0.111014  | 0.0999417 | 0.108537 | 0.105478  |
| 0.123252  | 0.124709 | 0.120192  | 0.122523  | 0.113491  | 0.126748 | 0.100962  |
| 0.113199  | 0.118153 | 0.114219  | 0.111597  | 0.106643  | 0.122232 | 0.116259  |
| 0.109411  | 0.113491 | 0.101107  | 0.116841  | 0.106061  | 0.11553  | 0.120047  |
| 0.111597  | 0.113054 | 0.105332  | 0.113491  | 0.101253  | 0.117424 | 0.0843531 |
| 0.116113  | 0.117279 | 0.113636  | 0.118007  | 0.111305  | 0.119027 | 0.123834  |
| 0.11451   | 0.120047 | 0.10708   | 0.121358  | 0.108537  | 0.117424 | 0.10912   |
| 0.115385  | 0.109557 | 0.101836  | 0.114656  | 0.10067   | 0.115967 | 0.103584  |
| 0.114802  | 0.129371 | 0.118153  | 0.120484  | 0.106498  | 0.132576 | 0.134178  |
| 0.137383  | 0.139423 | 0.12704   | 0.130536  | 0.127914  | 0.13447  | 0.107517  |
| 0.0989219 | 0.104749 | 0.0938228 | 0.0967366 | 0.0827506 | 0.105332 | 0.109557  |
| 0.115676  | 0.125    | 0.107663  | 0.125728  | 0.109703  | 0.131702 | 0.138258  |
| 0.105915  | 0.125437 | 0.106643  | 0.116841  | 0.0926573 | 0.127768 | 0.126166  |
| 0.117861  | 0.126603 | 0.112762  | 0.123543  | 0.109266  | 0.128059 | 0.129662  |

|          |          |           |          |           |          |          |
|----------|----------|-----------|----------|-----------|----------|----------|
| 0.106789 | 0.117279 | 0.102855  | 0.122378 | 0.10169   | 0.120192 | 0.124126 |
| 0.105624 | 0.120484 | 0.106061  | 0.115967 | 0.0981935 | 0.123397 | 0.121795 |
| 0.107517 | 0.121795 | 0.105624  | 0.107955 | 0.0983392 | 0.124126 | 0.122232 |
| 0.115822 | 0.121941 | 0.115967  | 0.126748 | 0.109266  | 0.124854 | 0.127622 |
| 0.114073 | 0.124854 | 0.118007  | 0.132867 | 0.117133  | 0.136801 | 0.13986  |
| 0.101544 | 0.120192 | 0.104895  | 0.115093 | 0.10373   | 0.117861 | 0.126166 |
| 0.102127 | 0.112034 | 0.0990676 | 0.117716 | 0.0973193 | 0.11757  | 0.11859  |
| 0.137821 | 0.129079 | 0.131556  | 0.128059 | 0.126311  | 0.129953 | 0.112617 |
| 0.120484 | 0.13039  | 0.113928  | 0.120047 | 0.107226  | 0.133596 | 0.129953 |
| 0.107372 | 0.10912  | 0.0967366 | 0.1081   | 0.0949883 | 0.112908 | 0.112471 |
| 0.216492 | 0.20134  | 0.211976  | 0.213141 | 0.207896  | 0.210956 | 0.2213   |
| 0.110431 | 0.117716 | 0.107955  | 0.12398  | 0.101544  | 0.122378 | 0.126894 |
| 0.106061 | 0.115967 | 0.101836  | 0.105624 | 0.0901807 | 0.113636 | 0.11961  |
| 0.117861 | 0.124563 | 0.119464  | 0.127331 | 0.11655   | 0.132721 | 0.136072 |
| 0.107372 | 0.116987 | 0.102273  | 0.109848 | 0.101981  | 0.115822 | 0.117424 |
| 0.117279 | 0.126603 | 0.111888  | 0.119755 | 0.104895  | 0.130682 | 0.134033 |
| 0.112034 | 0.116696 | 0.109557  | 0.117133 | 0.100816  | 0.119318 | 0.124417 |
| 0.112179 | 0.115093 | 0.101253  | 0.118444 | 0.0983392 | 0.118298 | 0.12398  |
| 0.106352 | 0.121212 | 0.106206  | 0.119027 | 0.0980478 | 0.123543 | 0.131847 |
| 0.120484 | 0.120775 | 0.111014  | 0.129953 | 0.1081    | 0.127477 | 0.125291 |
| 0.119755 | 0.123252 | 0.113491  | 0.129516 | 0.106789  | 0.127622 | 0.129808 |
| 0.113491 | 0.124272 | 0.117424  | 0.129371 | 0.108974  | 0.127185 | 0.130828 |
| 0.11116  | 0.124854 | 0.112179  | 0.12704  | 0.108683  | 0.121941 | 0.133159 |
| 0.106498 | 0.116404 | 0.100233  | 0.110431 | 0.0958625 | 0.117861 | 0.112179 |
| 0.110577 | 0.119027 | 0.105769  | 0.111888 | 0.102273  | 0.112617 | 0.126166 |
| 0.117424 | 0.128205 | 0.11757   | 0.126603 | 0.116987  | 0.13345  | 0.137966 |
| 0.104749 | 0.110286 | 0.105478  | 0.113928 | 0.099359  | 0.116696 | 0.119464 |
| 0.13447  | 0.127768 | 0.131702  | 0.131993 | 0.119755  | 0.131847 | 0.126166 |
| 0.126457 | 0.131993 | 0.12398   | 0.132721 | 0.128351  | 0.134907 | 0.138549 |
| 0.117716 | 0.11655  | 0.106498  | 0.122815 | 0.105624  | 0.121212 | 0.111742 |
| 0.106935 | 0.127622 | 0.109703  | 0.114656 | 0.10708   | 0.125583 | 0.130099 |
| 0.125437 | 0.120484 | 0.114219  | 0.121503 | 0.11655   | 0.121358 | 0.122378 |
| 0.121503 | 0.123834 | 0.119318  | 0.124272 | 0.110868  | 0.125874 | 0.122815 |
| 0.125874 | 0.120338 | 0.115239  | 0.125728 | 0.120192  | 0.120629 | 0.122815 |
| 0.136072 | 0.132284 | 0.122523  | 0.137092 | 0.126603  | 0.136072 | 0.142045 |
| 0.103293 | 0.114948 | 0.100524  | 0.112762 | 0.0935315 | 0.115239 | 0.108392 |
| 0.127622 | 0.129662 | 0.116404  | 0.13243  | 0.116696  | 0.133741 | 0.130099 |
| 0.136801 | 0.131265 | 0.131119  | 0.139569 | 0.134033  | 0.132721 | 0.141317 |
| 0.109411 | 0.119318 | 0.105186  | 0.118298 | 0.100233  | 0.120192 | 0.101399 |
| 0.117279 | 0.119901 | 0.113054  | 0.123834 | 0.107226  | 0.121649 | 0.123834 |
| 0.147436 | 0.135198 | 0.135927  | 0.140589 | 0.134761  | 0.141608 | 0.118444 |
| 0.123543 | 0.120629 | 0.117861  | 0.126311 | 0.110868  | 0.120338 | 0.121066 |
| 0.130682 | 0.130973 | 0.123543  | 0.139277 | 0.119755  | 0.135927 | 0.137529 |
| 0.120338 | 0.123834 | 0.114656  | 0.124563 | 0.111742  | 0.133159 | 0.124563 |

|           |           |           |           |           |           |           |
|-----------|-----------|-----------|-----------|-----------|-----------|-----------|
| 0.118735  | 0.11961   | 0.11655   | 0.120338  | 0.115385  | 0.128059  | 0.114802  |
| 0.120338  | 0.124709  | 0.116987  | 0.132721  | 0.116696  | 0.127622  | 0.120192  |
| 0.112325  | 0.120484  | 0.109266  | 0.117133  | 0.101107  | 0.126311  | 0.112179  |
| 0.123543  | 0.126166  | 0.120192  | 0.13039   | 0.120192  | 0.133741  | 0.109703  |
| 0.117133  | 0.128497  | 0.119901  | 0.12602   | 0.107955  | 0.130536  | 0.126603  |
| 0.127331  | 0.124126  | 0.127768  | 0.134761  | 0.121941  | 0.132576  | 0.116696  |
| 0.120629  | 0.127331  | 0.122815  | 0.130099  | 0.114948  | 0.135198  | 0.12398   |
| 0.126748  | 0.126457  | 0.120192  | 0.125728  | 0.119318  | 0.132284  | 0.109703  |
| 0.140734  | 0.138986  | 0.132139  | 0.141754  | 0.133013  | 0.142191  | 0.131556  |
| 0.103438  | 0.118881  | 0.107663  | 0.119318  | 0.0939685 | 0.128497  | 0.121941  |
| 0.120047  | 0.11859   | 0.106498  | 0.120192  | 0.103584  | 0.121795  | 0.10067   |
| 0.130828  | 0.12704   | 0.118444  | 0.128642  | 0.118153  | 0.131993  | 0.113199  |
| 0.0996503 | 0.115967  | 0.104749  | 0.119318  | 0.0945513 | 0.123543  | 0.10708   |
| 0.137966  | 0.143502  | 0.128205  | 0.139277  | 0.132867  | 0.139714  | 0.136364  |
| 0.14729   | 0.148456  | 0.144231  | 0.156177  | 0.138695  | 0.152244  | 0.142774  |
| 0.133013  | 0.123689  | 0.125583  | 0.12704   | 0.124126  | 0.127477  | 0.113636  |
| 0.126457  | 0.113636  | 0.116987  | 0.116696  | 0.108246  | 0.119172  | 0.106789  |
| 0.128059  | 0.124272  | 0.121795  | 0.127914  | 0.124126  | 0.126311  | 0.125     |
| 0.115093  | 0.127622  | 0.116696  | 0.129225  | 0.113491  | 0.129371  | 0.139714  |
| 0.124709  | 0.123834  | 0.119901  | 0.125146  | 0.118153  | 0.125     | 0.114365  |
| 0.126166  | 0.13141   | 0.119901  | 0.136218  | 0.114656  | 0.142191  | 0.133304  |
| 0.126166  | 0.128788  | 0.121649  | 0.129516  | 0.120192  | 0.134324  | 0.132721  |
| 0.107955  | 0.120775  | 0.112179  | 0.120921  | 0.105478  | 0.122815  | 0.115967  |
| 0.163024  | 0.149038  | 0.150641  | 0.160839  | 0.153846  | 0.153118  | 0.150932  |
| 0.115822  | 0.121941  | 0.112762  | 0.128497  | 0.0987762 | 0.133013  | 0.119755  |
| 0.131265  | 0.133596  | 0.122669  | 0.13549   | 0.118298  | 0.143502  | 0.133159  |
| 0.120629  | 0.122669  | 0.110868  | 0.121358  | 0.10912   | 0.122378  | 0.103293  |
| 0.127622  | 0.129662  | 0.129516  | 0.135344  | 0.117861  | 0.129953  | 0.121649  |
| 0.112179  | 0.120629  | 0.105915  | 0.122523  | 0.10708   | 0.125583  | 0.126894  |
| 0.137383  | 0.119901  | 0.128788  | 0.13141   | 0.120921  | 0.11553   | 0.127331  |
| 0.1419    | 0.134033  | 0.134178  | 0.143794  | 0.140297  | 0.13549   | 0.149913  |
| 0.125146  | 0.105915  | 0.112471  | 0.109848  | 0.116259  | 0.0534674 | 0.122086  |
| 0.136364  | 0.113054  | 0.124854  | 0.125728  | 0.126894  | 0.0728438 | 0.134761  |
| 0.148164  | 0.134761  | 0.138403  | 0.147145  | 0.137238  | 0.140297  | 0.130536  |
| 0.143211  | 0.122523  | 0.129079  | 0.139277  | 0.127622  | 0.114948  | 0.147436  |
| 0.127331  | 0.121212  | 0.123397  | 0.121066  | 0.118153  | 0.125583  | 0.0479312 |
| 0.141171  | 0.127477  | 0.129079  | 0.129371  | 0.124709  | 0.126894  | 0.134615  |
| 0.120775  | 0.104458  | 0.07838   | 0.106061  | 0.10169   | 0.105915  | 0.116259  |
| 0.120629  | 0.105186  | 0.0729895 | 0.107955  | 0.101544  | 0.113636  | 0.106789  |
| 0.0502622 | 0.113199  | 0.108974  | 0.121795  | 0.0984848 | 0.11961   | 0.123543  |
| 0.127768  | 0.103584  | 0.109848  | 0.105478  | 0.113054  | 0.0447261 | 0.116841  |
| 0.115385  | 0.115093  | 0.107372  | 0.119027  | 0.103001  | 0.117716  | 0.117861  |
| 0.117716  | 0.0981935 | 0.0686189 | 0.0960082 | 0.0968823 | 0.0824592 | 0.116696  |
| 0.122086  | 0.104312  | 0.112908  | 0.102127  | 0.116696  | 0.101981  | 0.120192  |

|           |           |           |          |           |           |           |
|-----------|-----------|-----------|----------|-----------|-----------|-----------|
| 0.123397  | 0.112325  | 0.0585664 | 0.114219 | 0.099359  | 0.118153  | 0.126748  |
| 0.101253  | 0.104167  | 0.0929487 | 0.105186 | 0.0472028 | 0.110868  | 0.109557  |
| 0.126311  | 0.107663  | 0.110723  | 0.105769 | 0.115093  | 0.0520105 | 0.122378  |
| 0.12296   | 0.105186  | 0.108537  | 0.104458 | 0.111451  | 0.0472028 | 0.118444  |
| 0.124709  | 0.114802  | 0.118444  | 0.123689 | 0.114948  | 0.119755  | 0.0866841 |
| 0.212413  | 0.197261  | 0.205857  | 0.20877  | 0.205274  | 0.207459  | 0.217803  |
| 0.141026  | 0.126166  | 0.132721  | 0.13039  | 0.137092  | 0.0708042 | 0.141463  |
| 0.131556  | 0.126894  | 0.119464  | 0.125291 | 0.115385  | 0.120775  | 0.126457  |
| 0.121212  | 0.0641026 | 0.110868  | 0.121649 | 0.110577  | 0.113054  | 0.122523  |
| 0.206876  | 0.192599  | 0.199446  | 0.205565 | 0.200903  | 0.20134   | 0.215472  |
| 0.125291  | 0.110723  | 0.115239  | 0.121649 | 0.112034  | 0.121212  | 0.102127  |
| 0.127768  | 0.125146  | 0.111305  | 0.118881 | 0.106061  | 0.122232  | 0.111014  |
| 0.123689  | 0.111451  | 0.116841  | 0.121212 | 0.115967  | 0.122232  | 0.121795  |
| 0.122086  | 0.113636  | 0.050845  | 0.11116  | 0.10067   | 0.117424  | 0.125437  |
| 0.246212  | 0.231643  | 0.240239  | 0.246066 | 0.238782  | 0.241259  | 0.253642  |
| 0.120775  | 0.116696  | 0.115385  | 0.12296  | 0.109848  | 0.126603  | 0.11014   |
| 0.123106  | 0.107663  | 0.114219  | 0.115676 | 0.107809  | 0.113491  | 0.0871212 |
| 0.120775  | 0.115822  | 0.120338  | 0.125583 | 0.115093  | 0.120192  | 0.125583  |
| 0.121066  | 0.114656  | 0.115676  | 0.120629 | 0.112179  | 0.119318  | 0.122669  |
| 0.121649  | 0.117861  | 0.102564  | 0.127622 | 0.113636  | 0.125437  | 0.112179  |
| 0.124272  | 0.103875  | 0.102855  | 0.117424 | 0.107226  | 0.104458  | 0.126748  |
| 0.125728  | 0.112034  | 0.117716  | 0.118881 | 0.112471  | 0.117279  | 0.087704  |
| 0.123543  | 0.10373   | 0.108829  | 0.107372 | 0.114365  | 0.0448718 | 0.117861  |
| 0.133304  | 0.11757   | 0.119755  | 0.120047 | 0.112179  | 0.118444  | 0.124126  |
| 0.115239  | 0.109411  | 0.0445804 | 0.108683 | 0.0952797 | 0.111742  | 0.117133  |
| 0.120629  | 0.101981  | 0.107372  | 0.101253 | 0.106789  | 0.0544872 | 0.116696  |
| 0.0922203 | 0.11116   | 0.0888695 | 0.112762 | 0.0798368 | 0.116113  | 0.122086  |
| 0.143357  | 0.137238  | 0.134178  | 0.144668 | 0.139423  | 0.135198  | 0.150204  |
| 0.124709  | 0.118007  | 0.118153  | 0.128059 | 0.112908  | 0.125291  | 0.111742  |
| 0.130536  | 0.125291  | 0.114073  | 0.123689 | 0.108829  | 0.12704   | 0.109994  |
| 0.190851  | 0.172494  | 0.179341  | 0.182547 | 0.178467  | 0.178904  | 0.193619  |
| 0.199883  | 0.184732  | 0.194784  | 0.19595  | 0.192453  | 0.19493   | 0.20877   |
| 0.119464  | 0.112179  | 0.0505536 | 0.111451 | 0.0995047 | 0.120921  | 0.126894  |
| 0.11655   | 0.106643  | 0.0444347 | 0.103875 | 0.0945513 | 0.112762  | 0.119901  |
| 0.134033  | 0.118881  | 0.121649  | 0.129516 | 0.121649  | 0.122669  | 0.140006  |
| 0.12296   | 0.111597  | 0.115239  | 0.119901 | 0.109703  | 0.11655   | 0.0866841 |
| 0.125437  | 0.116987  | 0.119464  | 0.126166 | 0.114219  | 0.124272  | 0.112762  |
| 0.124417  | 0.124709  | 0.123397  | 0.121066 | 0.124272  | 0.11859   | 0.129808  |
| 0.219988  | 0.204837  | 0.211976  | 0.217512 | 0.213432  | 0.217366  | 0.228875  |
| 0.125     | 0.109557  | 0.105915  | 0.109703 | 0.103584  | 0.104895  | 0.114948  |
| 0.205857  | 0.194202  | 0.198427  | 0.202506 | 0.202214  | 0.19799   | 0.206294  |
| 0.120338  | 0.111888  | 0.107663  | 0.105915 | 0.105041  | 0.113054  | 0.0528846 |
| 0.120192  | 0.116987  | 0.107226  | 0.106352 | 0.0981935 | 0.116404  | 0.108392  |
| 0.122086  | 0.101107  | 0.105332  | 0.116987 | 0.109411  | 0.0987762 | 0.117861  |

|          |           |           |           |           |           |           |
|----------|-----------|-----------|-----------|-----------|-----------|-----------|
| 0.111597 | 0.101107  | 0.0540501 | 0.105041  | 0.0962995 | 0.112471  | 0.115822  |
| 0.204983 | 0.186043  | 0.194639  | 0.200175  | 0.19493   | 0.198572  | 0.208916  |
| 0.131556 | 0.110868  | 0.119755  | 0.119755  | 0.122669  | 0.0543415 | 0.13141   |
| 0.120484 | 0.113199  | 0.115385  | 0.113928  | 0.105186  | 0.118735  | 0.0952797 |
| 0.128642 | 0.105332  | 0.11451   | 0.111597  | 0.118007  | 0.0514277 | 0.12296   |
| 0.122232 | 0.113782  | 0.11859   | 0.117133  | 0.101981  | 0.119318  | 0.122669  |
| 0.118735 | 0.108829  | 0.048951  | 0.107809  | 0.0955711 | 0.111742  | 0.121212  |
| 0.124417 | 0.112471  | 0.112617  | 0.11116   | 0.107663  | 0.11655   | 0.0464744 |
| 0.123834 | 0.108392  | 0.113199  | 0.120192  | 0.11116   | 0.116841  | 0.0942599 |
| 0.129079 | 0.122378  | 0.114073  | 0.120192  | 0.110286  | 0.124417  | 0.108246  |
| 0.117716 | 0.100524  | 0.101836  | 0.102418  | 0.106789  | 0.0457459 | 0.11553   |
| 0.121358 | 0.114073  | 0.117133  | 0.117716  | 0.1081    | 0.118444  | 0.0949883 |
| 0.188228 | 0.17162   | 0.176719  | 0.182547  | 0.176136  | 0.179487  | 0.194202  |
| 0.122232 | 0.116987  | 0.117716  | 0.122378  | 0.116259  | 0.120484  | 0.125291  |
| 0.123252 | 0.119172  | 0.117279  | 0.127185  | 0.123689  | 0.119755  | 0.132721  |
| 0.11116  | 0.114656  | 0.112471  | 0.117716  | 0.114802  | 0.111742  | 0.121212  |
| 0.121503 | 0.115093  | 0.116696  | 0.125728  | 0.109703  | 0.124126  | 0.109411  |
| 0.126748 | 0.108392  | 0.112034  | 0.108537  | 0.114656  | 0.0469114 | 0.123397  |
| 0.123252 | 0.117133  | 0.116404  | 0.114656  | 0.115239  | 0.11859   | 0.0511364 |
| 0.11757  | 0.105624  | 0.109557  | 0.110723  | 0.0958625 | 0.108537  | 0.106352  |
| 0.126603 | 0.116113  | 0.118881  | 0.124417  | 0.115967  | 0.120775  | 0.0938228 |
| 0.122378 | 0.113636  | 0.112617  | 0.123106  | 0.118735  | 0.11451   | 0.128642  |
| 0.122086 | 0.11451   | 0.109703  | 0.114073  | 0.112034  | 0.112762  | 0.116696  |
| 0.121358 | 0.10912   | 0.0544872 | 0.108392  | 0.0999417 | 0.114948  | 0.122669  |
| 0.125291 | 0.11014   | 0.116113  | 0.119901  | 0.112034  | 0.120629  | 0.120484  |
| 0.132139 | 0.12398   | 0.127914  | 0.130828  | 0.125874  | 0.133596  | 0.131702  |
| 0.120775 | 0.109411  | 0.104604  | 0.116259  | 0.102564  | 0.118444  | 0.104895  |
| 0.138403 | 0.120047  | 0.129225  | 0.124272  | 0.133013  | 0.0664336 | 0.135635  |
| 0.116841 | 0.107517  | 0.0450175 | 0.10708   | 0.0948427 | 0.113345  | 0.118735  |
| 0.116259 | 0.115967  | 0.11116   | 0.106206  | 0.109703  | 0.1081    | 0.11757   |
| 0.121358 | 0.103875  | 0.108974  | 0.108392  | 0.111305  | 0.0636655 | 0.119755  |
| 0.132139 | 0.118735  | 0.122378  | 0.122669  | 0.115967  | 0.123397  | 0.092366  |
| 0.190705 | 0.169435  | 0.181818  | 0.184149  | 0.178613  | 0.182547  | 0.187354  |
| 0.119464 | 0.108683  | 0.107372  | 0.111451  | 0.103001  | 0.114219  | 0.092803  |
| 0.112762 | 0.0990676 | 0.0992133 | 0.0983392 | 0.100087  | 0.0952797 | 0.10708   |
| 0.127622 | 0.120921  | 0.113782  | 0.121649  | 0.109703  | 0.124709  | 0.110577  |
| 0.181235 | 0.160256  | 0.167395  | 0.169435  | 0.168561  | 0.168415  | 0.185169  |
| 0.132721 | 0.128059  | 0.126166  | 0.136364  | 0.121795  | 0.135344  | 0.116841  |
| 0.140297 | 0.136218  | 0.136655  | 0.142483  | 0.129662  | 0.146125  | 0.128788  |
| 0.143065 | 0.138403  | 0.134178  | 0.14088   | 0.142337  | 0.136946  | 0.149621  |
| 0.11451  | 0.111014  | 0.105332  | 0.116113  | 0.106498  | 0.11451   | 0.103584  |
| 0.124563 | 0.104167  | 0.112179  | 0.107517  | 0.117424  | 0.0476399 | 0.122669  |
| 0.208625 | 0.190851  | 0.200029  | 0.204691  | 0.200321  | 0.201923  | 0.216055  |
| 0.127622 | 0.107517  | 0.112908  | 0.118444  | 0.11553   | 0.11451   | 0.121941  |

|          |           |           |           |           |           |           |
|----------|-----------|-----------|-----------|-----------|-----------|-----------|
| 0.128934 | 0.10912   | 0.11859   | 0.113054  | 0.121503  | 0.0520105 | 0.124417  |
| 0.121941 | 0.112325  | 0.111597  | 0.116259  | 0.104604  | 0.117861  | 0.094697  |
| 0.172348 | 0.137675  | 0.157051  | 0.159091  | 0.15676   | 0.147873  | 0.16958   |
| 0.115239 | 0.0659965 | 0.101399  | 0.109266  | 0.0996503 | 0.105332  | 0.115967  |
| 0.150932 | 0.13986   | 0.139714  | 0.140589  | 0.136509  | 0.140443  | 0.146707  |
| 0.107517 | 0.112762  | 0.105041  | 0.11961   | 0.0534674 | 0.120629  | 0.122815  |
| 0.189103 | 0.171911  | 0.177302  | 0.182255  | 0.178759  | 0.178904  | 0.191871  |
| 0.121795 | 0.114802  | 0.111451  | 0.123397  | 0.106789  | 0.122669  | 0.105915  |
| 0.101107 | 0.104021  | 0.0960082 | 0.0898893 | 0.0939685 | 0.100816  | 0.11116   |
| 0.116987 | 0.114073  | 0.113345  | 0.107517  | 0.111014  | 0.107663  | 0.115967  |
| 0.126457 | 0.115093  | 0.109994  | 0.112617  | 0.104167  | 0.112471  | 0.110868  |
| 0.129371 | 0.120338  | 0.110868  | 0.117861  | 0.103875  | 0.121212  | 0.108537  |
| 0.125583 | 0.121503  | 0.111451  | 0.114365  | 0.114656  | 0.11655   | 0.119318  |
| 0.116113 | 0.106498  | 0.0425408 | 0.10373   | 0.0952797 | 0.110868  | 0.11655   |
| 0.187063 | 0.171037  | 0.179341  | 0.183129  | 0.176136  | 0.178904  | 0.194784  |
| 0.128059 | 0.114073  | 0.115967  | 0.123252  | 0.112471  | 0.118735  | 0.119755  |
| 0.119464 | 0.113345  | 0.099796  | 0.0453089 | 0.106498  | 0.102855  | 0.113199  |
| 0.210227 | 0.188666  | 0.200758  | 0.205128  | 0.197261  | 0.20236   | 0.214161  |
| 0.120484 | 0.118153  | 0.115093  | 0.121212  | 0.112762  | 0.120192  | 0.122086  |
| 0.117424 | 0.106935  | 0.0456002 | 0.109703  | 0.0986305 | 0.115385  | 0.117861  |
| 0.111597 | 0.106935  | 0.0421037 | 0.105915  | 0.0945513 | 0.1081    | 0.117861  |
| 0.132721 | 0.115239  | 0.125583  | 0.125583  | 0.130828  | 0.0738636 | 0.134907  |
| 0.188374 | 0.171474  | 0.176282  | 0.180361  | 0.175117  | 0.178176  | 0.195221  |
| 0.127914 | 0.112179  | 0.116404  | 0.120775  | 0.112617  | 0.117133  | 0.0901807 |
| 0.128497 | 0.117424  | 0.123397  | 0.12602   | 0.122523  | 0.128205  | 0.129225  |
| 0.117133 | 0.107226  | 0.0450175 | 0.108246  | 0.0948427 | 0.112762  | 0.120484  |
| 0.112762 | 0.106061  | 0.0456002 | 0.103293  | 0.0954254 | 0.108974  | 0.116113  |
| 0.114656 | 0.107663  | 0.0425408 | 0.104021  | 0.0941142 | 0.112325  | 0.119172  |
| 0.122086 | 0.106061  | 0.106789  | 0.103001  | 0.108829  | 0.0477855 | 0.116987  |
| 0.101836 | 0.101253  | 0.0920746 | 0.0999417 | 0.0463287 | 0.107955  | 0.107809  |
| 0.118153 | 0.116113  | 0.11451   | 0.126457  | 0.11014   | 0.128642  | 0.106935  |
| 0.128351 | 0.121649  | 0.127622  | 0.123543  | 0.127331  | 0.119027  | 0.129662  |
| 0.118735 | 0.116696  | 0.112762  | 0.12296   | 0.109266  | 0.124563  | 0.107809  |
| 0.128497 | 0.118298  | 0.123106  | 0.119901  | 0.106206  | 0.124709  | 0.123397  |
| 0.19391  | 0.177593  | 0.182984  | 0.18852   | 0.180944  | 0.184586  | 0.196096  |
| 0.123834 | 0.108974  | 0.112034  | 0.119027  | 0.108829  | 0.11859   | 0.116987  |
| 0.130973 | 0.113782  | 0.120921  | 0.117133  | 0.123834  | 0.0572552 | 0.129662  |
| 0.113928 | 0.106935  | 0.0432692 | 0.10271   | 0.0913462 | 0.109557  | 0.119901  |
| 0.100962 | 0.103001  | 0.0882867 | 0.103438  | 0.0416667 | 0.110577  | 0.111888  |
| 0.122523 | 0.103584  | 0.110431  | 0.113054  | 0.106352  | 0.110286  | 0.11451   |
| 0.125    | 0.111305  | 0.116987  | 0.119027  | 0.112908  | 0.118007  | 0.0855186 |
| 0.129953 | 0.126457  | 0.122523  | 0.121941  | 0.122523  | 0.122086  | 0.129808  |
| 0.125146 | 0.114073  | 0.109266  | 0.115385  | 0.117424  | 0.110286  | 0.123252  |
| 0.114073 | 0.103001  | 0.100816  | 0.106643  | 0.0842075 | 0.112617  | 0.0961538 |

|           |           |           |           |           |           |           |
|-----------|-----------|-----------|-----------|-----------|-----------|-----------|
| 0.107226  | 0.0996503 | 0.0977564 | 0.108246  | 0.0735723 | 0.107809  | 0.0986305 |
| 0.0986305 | 0.102418  | 0.0990676 | 0.0976107 | 0.0815851 | 0.104167  | 0.112762  |
| 0.121212  | 0.111014  | 0.111742  | 0.110868  | 0.107955  | 0.114802  | 0.048514  |
| 0.125146  | 0.12398   | 0.120338  | 0.129953  | 0.116841  | 0.128059  | 0.114802  |
| 0.12704   | 0.11014   | 0.114656  | 0.11757   | 0.108829  | 0.115676  | 0.090472  |
| 0.116987  | 0.102418  | 0.104312  | 0.103147  | 0.106061  | 0.0467657 | 0.116259  |
| 0.120484  | 0.105624  | 0.111305  | 0.114219  | 0.102564  | 0.112617  | 0.0888695 |
| 0.116259  | 0.10373   | 0.0470571 | 0.103293  | 0.0968823 | 0.108974  | 0.117861  |
| 0.115239  | 0.10708   | 0.107809  | 0.108392  | 0.0987762 | 0.113199  | 0.0944056 |
| 0.119027  | 0.109994  | 0.0463287 | 0.106643  | 0.0987762 | 0.115239  | 0.122378  |
| 0.121649  | 0.104167  | 0.105186  | 0.114219  | 0.105186  | 0.111742  | 0.112762  |
| 0.119318  | 0.110868  | 0.107226  | 0.116259  | 0.112179  | 0.112034  | 0.12704   |
| 0.126603  | 0.119027  | 0.106061  | 0.113636  | 0.102273  | 0.118153  | 0.107226  |
| 0.105186  | 0.102855  | 0.0930944 | 0.106789  | 0.0493881 | 0.108683  | 0.113491  |
| 0.116113  | 0.107955  | 0.0463287 | 0.106352  | 0.0964452 | 0.111742  | 0.120338  |
| 0.119901  | 0.114656  | 0.112179  | 0.115385  | 0.112179  | 0.114656  | 0.120629  |
| 0.126748  | 0.117424  | 0.105624  | 0.0479312 | 0.113782  | 0.11014   | 0.118444  |
| 0.106206  | 0.106789  | 0.0987762 | 0.0961538 | 0.0964452 | 0.107372  | 0.111888  |
| 0.117861  | 0.107955  | 0.0472028 | 0.103438  | 0.0938228 | 0.106206  | 0.119464  |
| 0.122378  | 0.105769  | 0.110577  | 0.108537  | 0.114073  | 0.0474942 | 0.120775  |
| 0.124126  | 0.110723  | 0.110286  | 0.110868  | 0.107955  | 0.117716  | 0.0514277 |
| 0.128497  | 0.10373   | 0.112034  | 0.106498  | 0.113782  | 0.0492424 | 0.11961   |
| 0.125583  | 0.117424  | 0.107372  | 0.114948  | 0.102418  | 0.118881  | 0.106498  |
| 0.105186  | 0.105186  | 0.097465  | 0.108246  | 0.046183  | 0.113054  | 0.115239  |
| 0.111888  | 0.102273  | 0.097465  | 0.107372  | 0.0916375 | 0.106643  | 0.113199  |
| 0.118735  | 0.110577  | 0.106352  | 0.106643  | 0.100233  | 0.110868  | 0.0932401 |
| 0.128497  | 0.111014  | 0.113782  | 0.109994  | 0.118444  | 0.0469114 | 0.125146  |
| 0.126166  | 0.111014  | 0.117861  | 0.105041  | 0.11757   | 0.109848  | 0.114073  |
| 0.119901  | 0.108829  | 0.104895  | 0.0964452 | 0.105186  | 0.0977564 | 0.113345  |
| 0.191871  | 0.173514  | 0.183858  | 0.18852   | 0.184732  | 0.185169  | 0.195221  |
| 0.165647  | 0.144376  | 0.157051  | 0.151224  | 0.15472   | 0.150204  | 0.165793  |
| 0.122232  | 0.115239  | 0.112762  | 0.120921  | 0.110723  | 0.122815  | 0.105186  |
| 0.125     | 0.102273  | 0.113199  | 0.10912   | 0.113199  | 0.111305  | 0.107372  |
| 0.140734  | 0.141026  | 0.140297  | 0.147873  | 0.135052  | 0.148601  | 0.12602   |
| 0.135635  | 0.119027  | 0.11859   | 0.121212  | 0.113345  | 0.118444  | 0.125     |
| 0.125583  | 0.106935  | 0.0823135 | 0.111742  | 0.104167  | 0.118007  | 0.122815  |
| 0.12602   | 0.109411  | 0.0780886 | 0.07838   | 0.10373   | 0.106789  | 0.119172  |
| 0.0916375 | 0.108246  | 0.0891608 | 0.111305  | 0.080711  | 0.116696  | 0.120338  |
| 0.127185  | 0.117861  | 0.106352  | 0.0472028 | 0.113054  | 0.109411  | 0.118298  |
| 0.204545  | 0.179779  | 0.187791  | 0.192162  | 0.188666  | 0.192016  | 0.204108  |
| 0.127185  | 0.113491  | 0.118007  | 0.120338  | 0.112471  | 0.120484  | 0.0917832 |
| 0.122086  | 0.101981  | 0.11116   | 0.110868  | 0.114365  | 0.0719697 | 0.109703  |
| 0.114802  | 0.103438  | 0.0563811 | 0.097465  | 0.0948427 | 0.104895  | 0.114656  |
| 0.12398   | 0.109703  | 0.113928  | 0.11014   | 0.0973193 | 0.116987  | 0.11655   |



|          |           |           |           |           |           |           |
|----------|-----------|-----------|-----------|-----------|-----------|-----------|
| 0.183858 | 0.16317   | 0.172348  | 0.16215   | 0.1706    | 0.17366   | 0.190705  |
| 0.240967 | 0.226981  | 0.237617  | 0.240239  | 0.237325  | 0.238928  | 0.247815  |
| 0.125    | 0.115093  | 0.112908  | 0.11757   | 0.118153  | 0.115385  | 0.130099  |
| 0.123834 | 0.11859   | 0.105624  | 0.0464744 | 0.109703  | 0.109557  | 0.118153  |
| 0.120047 | 0.11655   | 0.111742  | 0.124563  | 0.10708   | 0.12296   | 0.108829  |
| 0.125437 | 0.11553   | 0.104021  | 0.112762  | 0.102564  | 0.116987  | 0.10373   |
| 0.11859  | 0.110723  | 0.112908  | 0.113782  | 0.109703  | 0.109266  | 0.0893065 |
| 0.119318 | 0.107663  | 0.111888  | 0.111597  | 0.104604  | 0.109994  | 0.112471  |
| 0.119172 | 0.099359  | 0.074155  | 0.101544  | 0.102127  | 0.0818765 | 0.11757   |
| 0.123834 | 0.106061  | 0.110286  | 0.114073  | 0.108246  | 0.113636  | 0.0852273 |
| 0.115822 | 0.0971737 | 0.0792541 | 0.100233  | 0.104604  | 0.0697844 | 0.117424  |
| 0.109848 | 0.112179  | 0.104167  | 0.101253  | 0.097465  | 0.111305  | 0.117279  |
| 0.106789 | 0.104167  | 0.0935315 | 0.106352  | 0.0480769 | 0.110868  | 0.112471  |
| 0.120338 | 0.113636  | 0.108829  | 0.121649  | 0.118735  | 0.111888  | 0.127768  |
| 0.127477 | 0.108246  | 0.108392  | 0.106061  | 0.114219  | 0.0499709 | 0.120047  |
| 0.108537 | 0.106789  | 0.10169   | 0.0973193 | 0.100524  | 0.100087  | 0.105478  |
| 0.121649 | 0.122815  | 0.113345  | 0.125291  | 0.115967  | 0.125146  | 0.115385  |
| 0.134761 | 0.13039   | 0.122378  | 0.129662  | 0.117716  | 0.131556  | 0.115385  |
| 0.115676 | 0.104021  | 0.0464744 | 0.106789  | 0.0971737 | 0.107809  | 0.116696  |
| 0.114948 | 0.104458  | 0.0801282 | 0.11451   | 0.102855  | 0.116987  | 0.112179  |
| 0.125728 | 0.120484  | 0.0603147 | 0.117133  | 0.109848  | 0.125728  | 0.132576  |
| 0.204254 | 0.190268  | 0.195076  | 0.201486  | 0.194202  | 0.199009  | 0.213141  |
| 0.112034 | 0.103293  | 0.103438  | 0.108974  | 0.109557  | 0.106206  | 0.117133  |
| 0.101981 | 0.104021  | 0.0916375 | 0.107663  | 0.0447261 | 0.112762  | 0.11116   |
| 0.123252 | 0.1081    | 0.112908  | 0.116404  | 0.105624  | 0.118881  | 0.119318  |
| 0.123397 | 0.11757   | 0.115967  | 0.125     | 0.116259  | 0.116987  | 0.123543  |
| 0.120484 | 0.107372  | 0.111597  | 0.1081    | 0.0967366 | 0.111742  | 0.114802  |
| 0.197115 | 0.181672  | 0.187646  | 0.192308  | 0.185606  | 0.190122  | 0.20338   |
| 0.127622 | 0.104604  | 0.113491  | 0.108829  | 0.118153  | 0.0495338 | 0.122232  |
| 0.114948 | 0.104749  | 0.0448718 | 0.105186  | 0.0929487 | 0.10708   | 0.11655   |
| 0.120047 | 0.11859   | 0.115239  | 0.121066  | 0.110577  | 0.117133  | 0.114948  |
| 0.121503 | 0.114219  | 0.102127  | 0.108537  | 0.0995047 | 0.114219  | 0.104749  |
| 0.125    | 0.109848  | 0.107955  | 0.111451  | 0.116113  | 0.0463287 | 0.121066  |
| 0.113928 | 0.100816  | 0.0980478 | 0.100962  | 0.100087  | 0.0719697 | 0.116113  |
| 0.106935 | 0.110723  | 0.103875  | 0.0960082 | 0.0989219 | 0.113345  | 0.116696  |
| 0.122086 | 0.113928  | 0.113782  | 0.11961   | 0.11116   | 0.115093  | 0.120484  |
| 0.197115 | 0.179924  | 0.187063  | 0.193182  | 0.186772  | 0.188957  | 0.20338   |
| 0.117424 | 0.10169   | 0.103001  | 0.101544  | 0.103001  | 0.0498252 | 0.114656  |
| 0.192745 | 0.176428  | 0.184149  | 0.186772  | 0.182401  | 0.186043  | 0.199592  |
| 0.193182 | 0.175408  | 0.181672  | 0.185752  | 0.17905   | 0.183858  | 0.194493  |
| 0.131119 | 0.129371  | 0.117861  | 0.124272  | 0.114073  | 0.127622  | 0.111451  |
| 0.125291 | 0.122378  | 0.125728  | 0.128642  | 0.121066  | 0.128497  | 0.128642  |
| 0.104604 | 0.106643  | 0.0962995 | 0.0948427 | 0.0910548 | 0.102855  | 0.109411  |
| 0.114365 | 0.101836  | 0.101981  | 0.101107  | 0.10373   | 0.0537587 | 0.114219  |

|          |           |           |           |           |           |           |
|----------|-----------|-----------|-----------|-----------|-----------|-----------|
| 0.119755 | 0.102855  | 0.108246  | 0.103875  | 0.109411  | 0.0495338 | 0.116696  |
| 0.118881 | 0.110431  | 0.0496795 | 0.108246  | 0.0971737 | 0.111014  | 0.121066  |
| 0.118881 | 0.105478  | 0.109411  | 0.110286  | 0.105332  | 0.1081    | 0.0855186 |
| 0.119172 | 0.108392  | 0.112908  | 0.110868  | 0.107955  | 0.111597  | 0.0866841 |
| 0.127768 | 0.114948  | 0.112762  | 0.123252  | 0.120921  | 0.114656  | 0.131702  |
| 0.126166 | 0.120629  | 0.10912   | 0.116696  | 0.106789  | 0.121503  | 0.108829  |
| 0.112617 | 0.106498  | 0.0434149 | 0.100233  | 0.0909091 | 0.107372  | 0.115385  |
| 0.123543 | 0.106643  | 0.109411  | 0.103875  | 0.112908  | 0.0448718 | 0.11961   |
| 0.100087 | 0.099796  | 0.0949883 | 0.0909091 | 0.092366  | 0.0992133 | 0.107517  |
| 0.130536 | 0.111305  | 0.119318  | 0.115822  | 0.123689  | 0.0571096 | 0.125437  |
| 0.119755 | 0.112179  | 0.107955  | 0.116113  | 0.107372  | 0.119755  | 0.105624  |
| 0.13447  | 0.11757   | 0.123834  | 0.119755  | 0.129371  | 0.0598776 | 0.132576  |
| 0.254516 | 0.240239  | 0.251166  | 0.253205  | 0.248543  | 0.25102   | 0.263403  |
| 0.124854 | 0.123106  | 0.124709  | 0.125874  | 0.117424  | 0.127185  | 0.101107  |
| 0.128497 | 0.127914  | 0.121066  | 0.122523  | 0.113199  | 0.127622  | 0.113199  |
| 0.216346 | 0.196824  | 0.206585  | 0.21183   | 0.206585  | 0.20877   | 0.222902  |
| 0.124417 | 0.122378  | 0.112617  | 0.123689  | 0.112034  | 0.129953  | 0.126311  |
| 0.226981 | 0.211247  | 0.218386  | 0.221882  | 0.218969  | 0.219988  | 0.23208   |
| 0.121649 | 0.116987  | 0.114802  | 0.115093  | 0.1081    | 0.118444  | 0.0981935 |
| 0.124417 | 0.120629  | 0.0572552 | 0.116113  | 0.105624  | 0.122669  | 0.130682  |
| 0.119755 | 0.113928  | 0.107372  | 0.112034  | 0.109994  | 0.112179  | 0.116113  |
| 0.129079 | 0.124709  | 0.115239  | 0.121358  | 0.106498  | 0.123543  | 0.108246  |
| 0.200758 | 0.18648   | 0.193328  | 0.198281  | 0.192745  | 0.194056  | 0.206439  |
| 0.13345  | 0.113928  | 0.121066  | 0.116404  | 0.125728  | 0.0579837 | 0.130682  |
| 0.124126 | 0.1081    | 0.109411  | 0.106789  | 0.115822  | 0.0454545 | 0.122523  |
| 0.223048 | 0.209645  | 0.2162    | 0.221737  | 0.2162    | 0.218969  | 0.230186  |
| 0.128497 | 0.109266  | 0.112617  | 0.116696  | 0.112034  | 0.115385  | 0.0930944 |
| 0.194784 | 0.178759  | 0.186189  | 0.192016  | 0.185315  | 0.188666  | 0.201632  |
| 0.126894 | 0.111742  | 0.117133  | 0.118881  | 0.112179  | 0.114656  | 0.0888695 |
| 0.116404 | 0.10912   | 0.0460373 | 0.107517  | 0.0955711 | 0.11116   | 0.118007  |
| 0.108683 | 0.111888  | 0.103584  | 0.118444  | 0.0502622 | 0.120629  | 0.121941  |
| 0.132867 | 0.129079  | 0.118735  | 0.126311  | 0.114656  | 0.127914  | 0.112325  |
| 0.116696 | 0.0680361 | 0.1081    | 0.114802  | 0.101399  | 0.108537  | 0.118298  |
| 0.156906 | 0.142337  | 0.148601  | 0.155303  | 0.127331  | 0.15574   | 0.161713  |
| 0.122815 | 0.102127  | 0.105769  | 0.101399  | 0.11014   | 0.0432692 | 0.115093  |
| 0.121649 | 0.115239  | 0.116259  | 0.122378  | 0.113345  | 0.118735  | 0.120338  |
| 0.119901 | 0.117279  | 0.111014  | 0.122378  | 0.105478  | 0.119027  | 0.125     |
| 0.122523 | 0.123106  | 0.124417  | 0.118881  | 0.121212  | 0.116696  | 0.123834  |
| 0.193182 | 0.176282  | 0.181964  | 0.187791  | 0.182255  | 0.184441  | 0.199738  |
| 0.114656 | 0.10708   | 0.0428322 | 0.103147  | 0.0935315 | 0.109994  | 0.116259  |
| 0.127622 | 0.121212  | 0.109703  | 0.118735  | 0.104749  | 0.125874  | 0.111451  |
| 0.121649 | 0.110868  | 0.111014  | 0.109557  | 0.105769  | 0.114948  | 0.0541958 |
| 0.123834 | 0.113345  | 0.115822  | 0.118444  | 0.109703  | 0.115385  | 0.0884324 |
| 0.118735 | 0.112034  | 0.0506993 | 0.111888  | 0.101399  | 0.116987  | 0.125583  |

|           |          |           |          |           |           |           |
|-----------|----------|-----------|----------|-----------|-----------|-----------|
| 0.252914  | 0.237471 | 0.246066  | 0.251603 | 0.245484  | 0.245921  | 0.260344  |
| 0.105332  | 0.109994 | 0.0981935 | 0.113054 | 0.048951  | 0.116987  | 0.119172  |
| 0.123689  | 0.103584 | 0.0868298 | 0.111888 | 0.104312  | 0.118153  | 0.12296   |
| 0.178176  | 0.158362 | 0.17366   | 0.175699 | 0.163462  | 0.175262  | 0.180653  |
| 0.1875    | 0.170892 | 0.175117  | 0.180361 | 0.171329  | 0.176136  | 0.189394  |
| 0.121358  | 0.114365 | 0.108683  | 0.123252 | 0.11859   | 0.113199  | 0.129662  |
| 0.125     | 0.1081   | 0.106498  | 0.103584 | 0.114365  | 0.0495338 | 0.119318  |
| 0.123834  | 0.11859  | 0.107955  | 0.113199 | 0.103293  | 0.113928  | 0.104458  |
| 0.14292   | 0.128351 | 0.134615  | 0.132867 | 0.141317  | 0.0724068 | 0.145105  |
| 0.122815  | 0.111742 | 0.106643  | 0.115093 | 0.114802  | 0.11116   | 0.125583  |
| 0.124709  | 0.114219 | 0.10912   | 0.119901 | 0.117861  | 0.116259  | 0.128642  |
| 0.129808  | 0.115239 | 0.122669  | 0.125    | 0.117716  | 0.124854  | 0.0935315 |
| 0.121066  | 0.103001 | 0.106643  | 0.106352 | 0.110431  | 0.0540501 | 0.115967  |
| 0.130536  | 0.111597 | 0.120484  | 0.116696 | 0.12602   | 0.0547786 | 0.128934  |
| 0.122523  | 0.10708  | 0.111014  | 0.119464 | 0.108974  | 0.114948  | 0.097028  |
| 0.129953  | 0.124709 | 0.114948  | 0.122232 | 0.109411  | 0.125291  | 0.107663  |
| 0.14292   | 0.137092 | 0.128788  | 0.13549  | 0.123543  | 0.140006  | 0.118881  |
| 0.107226  | 0.112179 | 0.101836  | 0.116696 | 0.0496795 | 0.121212  | 0.123397  |
| 0.135052  | 0.129225 | 0.122086  | 0.12704  | 0.114802  | 0.13243   | 0.113345  |
| 0.130973  | 0.118444 | 0.124709  | 0.126457 | 0.122378  | 0.124854  | 0.0949883 |
| 0.206294  | 0.189103 | 0.19595   | 0.197698 | 0.195076  | 0.197261  | 0.210519  |
| 0.107955  | 0.11553  | 0.102273  | 0.118298 | 0.0976107 | 0.124272  | 0.108974  |
| 0.191288  | 0.174388 | 0.181527  | 0.183858 | 0.181235  | 0.182255  | 0.19697   |
| 0.114365  | 0.112034 | 0.106935  | 0.106352 | 0.11014   | 0.112034  | 0.117133  |
| 0.123106  | 0.117279 | 0.0550699 | 0.112179 | 0.105186  | 0.121066  | 0.126748  |
| 0.12398   | 0.110868 | 0.117716  | 0.124126 | 0.106935  | 0.122815  | 0.111014  |
| 0.114802  | 0.109266 | 0.103875  | 0.116113 | 0.104167  | 0.118007  | 0.105915  |
| 0.126311  | 0.106206 | 0.113054  | 0.110431 | 0.116841  | 0.0490967 | 0.125     |
| 0.124272  | 0.108537 | 0.114219  | 0.108974 | 0.11859   | 0.0482226 | 0.120629  |
| 0.118153  | 0.112034 | 0.0480769 | 0.106643 | 0.0990676 | 0.11553   | 0.120338  |
| 0.123834  | 0.114802 | 0.112325  | 0.118444 | 0.112908  | 0.115967  | 0.121358  |
| 0.123834  | 0.115676 | 0.114365  | 0.124272 | 0.112325  | 0.121795  | 0.108537  |
| 0.130682  | 0.122815 | 0.129079  | 0.131702 | 0.121795  | 0.131556  | 0.0984848 |
| 0.245192  | 0.231789 | 0.240385  | 0.245921 | 0.239802  | 0.241987  | 0.254662  |
| 0.11961   | 0.109703 | 0.0463287 | 0.106643 | 0.099359  | 0.116113  | 0.122669  |
| 0.183858  | 0.166375 | 0.17264   | 0.174971 | 0.171766  | 0.175117  | 0.1875    |
| 0.187791  | 0.171474 | 0.178322  | 0.183858 | 0.178613  | 0.178759  | 0.193765  |
| 0.114219  | 0.111888 | 0.10708   | 0.115822 | 0.104458  | 0.119755  | 0.121066  |
| 0.104312  | 0.104895 | 0.0965909 | 0.109411 | 0.0458916 | 0.11451   | 0.116113  |
| 0.119755  | 0.117133 | 0.0523019 | 0.114656 | 0.103293  | 0.120047  | 0.126311  |
| 0.120629  | 0.103147 | 0.105041  | 0.102418 | 0.109703  | 0.0486597 | 0.117279  |
| 0.0901807 | 0.104458 | 0.0891608 | 0.111014 | 0.0798368 | 0.114365  | 0.119464  |
| 0.125728  | 0.109411 | 0.114802  | 0.116841 | 0.11014   | 0.116987  | 0.0912005 |
| 0.0996503 | 0.109848 | 0.109703  | 0.111742 | 0.114073  | 0.0737179 | 0.121941  |

|          |           |           |          |           |           |           |
|----------|-----------|-----------|----------|-----------|-----------|-----------|
| 0.131119 | 0.113345  | 0.122815  | 0.116987 | 0.128642  | 0.0582751 | 0.13039   |
| 0.115822 | 0.109994  | 0.0448718 | 0.107226 | 0.0976107 | 0.110286  | 0.123252  |
| 0.13039  | 0.115239  | 0.117424  | 0.115676 | 0.124417  | 0.0584207 | 0.126166  |
| 0.118007 | 0.11451   | 0.110577  | 0.111742 | 0.101836  | 0.11859   | 0.109994  |
| 0.120047 | 0.116259  | 0.115239  | 0.129516 | 0.114073  | 0.125     | 0.109994  |
| 0.13039  | 0.123106  | 0.108392  | 0.113928 | 0.108392  | 0.123106  | 0.106061  |
| 0.130828 | 0.122669  | 0.125728  | 0.130099 | 0.121649  | 0.127914  | 0.0965909 |
| 0.109994 | 0.118153  | 0.108974  | 0.105769 | 0.102855  | 0.118444  | 0.119755  |
| 0.115822 | 0.105915  | 0.0556527 | 0.104895 | 0.0949883 | 0.114948  | 0.117424  |
| 0.130682 | 0.120484  | 0.123834  | 0.127622 | 0.125291  | 0.13039   | 0.131119  |
| 0.183275 | 0.168415  | 0.173223  | 0.17701  | 0.170017  | 0.175699  | 0.190122  |
| 0.136801 | 0.118153  | 0.125     | 0.124126 | 0.127914  | 0.0625    | 0.132867  |
| 0.125437 | 0.103001  | 0.113928  | 0.110431 | 0.113928  | 0.0476399 | 0.122378  |
| 0.120629 | 0.113636  | 0.113199  | 0.120484 | 0.108829  | 0.123834  | 0.104749  |
| 0.113199 | 0.107372  | 0.10169   | 0.109557 | 0.0984848 | 0.113491  | 0.101981  |
| 0.128205 | 0.120047  | 0.10912   | 0.11553  | 0.103001  | 0.121503  | 0.105915  |
| 0.129808 | 0.125146  | 0.114219  | 0.120338 | 0.106935  | 0.125437  | 0.110723  |
| 0.191142 | 0.175991  | 0.180216  | 0.182838 | 0.177885  | 0.182401  | 0.196241  |
| 0.116841 | 0.101981  | 0.108537  | 0.104749 | 0.109703  | 0.0719697 | 0.115822  |
| 0.110577 | 0.101253  | 0.100233  | 0.097028 | 0.0967366 | 0.0986305 | 0.113636  |
| 0.126603 | 0.107955  | 0.11655   | 0.113636 | 0.119464  | 0.0511364 | 0.123543  |
| 0.194056 | 0.173077  | 0.182255  | 0.184586 | 0.178467  | 0.181235  | 0.197407  |
| 0.105041 | 0.099796  | 0.0929487 | 0.106061 | 0.0454545 | 0.110868  | 0.113636  |
| 0.127622 | 0.114219  | 0.121358  | 0.123397 | 0.114365  | 0.121795  | 0.0878497 |
| 0.129662 | 0.107809  | 0.113782  | 0.112908 | 0.119318  | 0.0474942 | 0.124854  |
| 0.116113 | 0.109703  | 0.104312  | 0.112179 | 0.112471  | 0.109703  | 0.122669  |
| 0.187791 | 0.169726  | 0.176282  | 0.179779 | 0.173077  | 0.175554  | 0.193473  |
| 0.121649 | 0.108829  | 0.117133  | 0.11655  | 0.109266  | 0.114656  | 0.087704  |
| 0.11757  | 0.10271   | 0.108974  | 0.112179 | 0.103147  | 0.106789  | 0.114802  |
| 0.109411 | 0.105041  | 0.0932401 | 0.1081   | 0.0579837 | 0.110868  | 0.116259  |
| 0.123106 | 0.0773601 | 0.113928  | 0.118881 | 0.11014   | 0.108246  | 0.117133  |
| 0.120338 | 0.117716  | 0.115239  | 0.118153 | 0.113199  | 0.120338  | 0.121649  |
| 0.131993 | 0.118298  | 0.124563  | 0.127185 | 0.119027  | 0.123543  | 0.0948427 |
| 0.117424 | 0.106935  | 0.0447261 | 0.103001 | 0.0954254 | 0.110723  | 0.123397  |
| 0.122378 | 0.117424  | 0.118153  | 0.110577 | 0.110286  | 0.111597  | 0.117279  |
| 0.143211 | 0.135344  | 0.133741  | 0.143939 | 0.13986   | 0.13884   | 0.15035   |
| 0.233829 | 0.21722   | 0.227273  | 0.230769 | 0.225233  | 0.228293  | 0.240676  |
| 0.112617 | 0.120775  | 0.112179  | 0.109848 | 0.108974  | 0.123106  | 0.123252  |
| 0.122815 | 0.120192  | 0.114802  | 0.119172 | 0.114802  | 0.119318  | 0.12296   |
| 0.121795 | 0.099359  | 0.107372  | 0.107955 | 0.111742  | 0.0544872 | 0.117861  |
| 0.128351 | 0.123397  | 0.113636  | 0.119464 | 0.117133  | 0.118444  | 0.12704   |
| 0.112179 | 0.102564  | 0.110577  | 0.11553  | 0.105915  | 0.109266  | 0.107663  |
| 0.120921 | 0.110723  | 0.112908  | 0.112617 | 0.0971737 | 0.115676  | 0.117861  |
| 0.122523 | 0.105041  | 0.112179  | 0.113054 | 0.117133  | 0.0610431 | 0.118881  |

|           |           |           |           |           |           |           |
|-----------|-----------|-----------|-----------|-----------|-----------|-----------|
| 0.130828  | 0.116259  | 0.123397  | 0.125728  | 0.118735  | 0.123543  | 0.0922203 |
| 0.120338  | 0.113928  | 0.106789  | 0.112908  | 0.113199  | 0.11451   | 0.121649  |
| 0.231789  | 0.220425  | 0.225816  | 0.231643  | 0.227855  | 0.229749  | 0.242133  |
| 0.0987762 | 0.0999417 | 0.0945513 | 0.108246  | 0.0432692 | 0.109848  | 0.112325  |
| 0.114219  | 0.104895  | 0.103875  | 0.106206  | 0.0960082 | 0.108392  | 0.0919289 |
| 0.114656  | 0.105041  | 0.0472028 | 0.105478  | 0.0932401 | 0.109703  | 0.117133  |
| 0.129953  | 0.121503  | 0.120484  | 0.126894  | 0.127185  | 0.122669  | 0.137092  |
| 0.117716  | 0.131702  | 0.11757   | 0.113199  | 0.113491  | 0.132867  | 0.128351  |
| 0.121503  | 0.106935  | 0.102127  | 0.113491  | 0.099796  | 0.106643  | 0.121649  |
| 0.125     | 0.103147  | 0.11116   | 0.108537  | 0.11757   | 0.0492424 | 0.121358  |
| 0.116696  | 0.107372  | 0.0996503 | 0.108392  | 0.107226  | 0.104749  | 0.120047  |
| 0.228584  | 0.214307  | 0.221737  | 0.225524  | 0.222319  | 0.223922  | 0.233683  |
| 0.124854  | 0.107955  | 0.118298  | 0.112471  | 0.119464  | 0.0528846 | 0.123543  |
| 0.127622  | 0.113345  | 0.11961   | 0.121066  | 0.116696  | 0.118881  | 0.0875583 |
| 0.11655   | 0.112762  | 0.102127  | 0.110577  | 0.107955  | 0.110431  | 0.11961   |
| 0.11961   | 0.114948  | 0.115967  | 0.118007  | 0.11655   | 0.121649  | 0.120921  |
| 0.121941  | 0.121066  | 0.120047  | 0.122086  | 0.112762  | 0.123689  | 0.0987762 |
| 0.116113  | 0.110286  | 0.0477855 | 0.107517  | 0.097028  | 0.110577  | 0.121212  |
| 0.126603  | 0.117279  | 0.118881  | 0.121795  | 0.114219  | 0.11961   | 0.0882867 |
| 0.132284  | 0.121795  | 0.125146  | 0.126603  | 0.121941  | 0.125291  | 0.0936772 |
| 0.125874  | 0.110431  | 0.113491  | 0.114948  | 0.11116   | 0.117424  | 0.0895979 |
| 0.112617  | 0.107663  | 0.0472028 | 0.105769  | 0.0961538 | 0.112617  | 0.120047  |
| 0.121358  | 0.120484  | 0.119755  | 0.129371  | 0.116841  | 0.123689  | 0.126748  |
| 0.128205  | 0.124417  | 0.126894  | 0.13039   | 0.121941  | 0.128205  | 0.133013  |
| 0.123543  | 0.120921  | 0.118735  | 0.129808  | 0.114948  | 0.128497  | 0.114365  |
| 0.127331  | 0.125     | 0.12398   | 0.133596  | 0.118444  | 0.131993  | 0.114365  |
| 0.125437  | 0.123689  | 0.122086  | 0.128788  | 0.120047  | 0.127477  | 0.129371  |
| 0.0901807 | 0.104458  | 0.083042  | 0.102855  | 0.0772145 | 0.110577  | 0.116841  |
| 0.138403  | 0.128497  | 0.130682  | 0.125728  | 0.12602   | 0.131993  | 0.0549242 |
| 0.128642  | 0.124563  | 0.117424  | 0.128205  | 0.118007  | 0.126894  | 0.126748  |
| 0.204983  | 0.187209  | 0.195221  | 0.200175  | 0.194056  | 0.197698  | 0.212121  |
| 0.130973  | 0.125146  | 0.110431  | 0.0614802 | 0.117424  | 0.117279  | 0.119464  |
| 0.120775  | 0.113782  | 0.111305  | 0.109848  | 0.103147  | 0.113491  | 0.0952797 |
| 0.120629  | 0.112471  | 0.0517191 | 0.112908  | 0.100962  | 0.119172  | 0.124563  |
| 0.217803  | 0.205565  | 0.212995  | 0.217657  | 0.21183   | 0.214889  | 0.227855  |
| 0.211393  | 0.196533  | 0.202214  | 0.204254  | 0.200758  | 0.202652  | 0.214744  |
| 0.13141   | 0.118007  | 0.124272  | 0.127768  | 0.11961   | 0.125874  | 0.0910548 |
| 0.247232  | 0.229749  | 0.240385  | 0.246795  | 0.241841  | 0.241404  | 0.254079  |
| 0.0890152 | 0.106498  | 0.0836247 | 0.106061  | 0.0789627 | 0.112325  | 0.114219  |
| 0.129516  | 0.130682  | 0.120047  | 0.13345   | 0.116259  | 0.13884   | 0.139277  |
| 0.103584  | 0.104167  | 0.0961538 | 0.111597  | 0.0448718 | 0.115822  | 0.115967  |
| 0.123543  | 0.120921  | 0.120775  | 0.126311  | 0.116404  | 0.121212  | 0.126311  |
| 0.189831  | 0.173514  | 0.17803   | 0.181818  | 0.17803   | 0.17701   | 0.196096  |
| 0.125874  | 0.128497  | 0.114656  | 0.118153  | 0.110286  | 0.12296   | 0.120192  |

|           |          |           |           |           |           |           |
|-----------|----------|-----------|-----------|-----------|-----------|-----------|
| 0.194347  | 0.173368 | 0.183421  | 0.187209  | 0.180798  | 0.184441  | 0.201486  |
| 0.113636  | 0.108392 | 0.103001  | 0.109994  | 0.103001  | 0.112471  | 0.120192  |
| 0.12296   | 0.100816 | 0.110286  | 0.111451  | 0.110868  | 0.0979021 | 0.0971737 |
| 0         | 0.118007 | 0.110286  | 0.123397  | 0.099796  | 0.122086  | 0.123397  |
| 0.118007  | 0        | 0.103584  | 0.113491  | 0.100087  | 0.10373   | 0.114656  |
| 0.110286  | 0.103584 | 0         | 0.0996503 | 0.0920746 | 0.103001  | 0.113636  |
| 0.123397  | 0.113491 | 0.0996503 | 0         | 0.104604  | 0.100379  | 0.113345  |
| 0.099796  | 0.100087 | 0.0920746 | 0.104604  | 0         | 0.110868  | 0.112762  |
| 0.122086  | 0.10373  | 0.103001  | 0.100379  | 0.110868  | 0         | 0.119027  |
| 0.123397  | 0.114656 | 0.113636  | 0.113345  | 0.112762  | 0.119027  | 0         |
| 0.102418  | 0.107955 | 0.102273  | 0.0984848 | 0.100233  | 0.109411  | 0.113636  |
| 0.101107  | 0.103438 | 0.0954254 | 0.10708   | 0.0383159 | 0.114802  | 0.112617  |
| 0.122815  | 0.105624 | 0.0987762 | 0.116841  | 0.106643  | 0.120192  | 0.106643  |
| 0.130973  | 0.114656 | 0.120921  | 0.114802  | 0.124709  | 0.0566725 | 0.125291  |
| 0.118007  | 0.108683 | 0.105915  | 0.116987  | 0.104749  | 0.116841  | 0.104167  |
| 0.11961   | 0.106498 | 0.107809  | 0.110431  | 0.106061  | 0.112325  | 0.115385  |
| 0.113345  | 0.104021 | 0.03919   | 0.101836  | 0.0910548 | 0.104312  | 0.116696  |
| 0.122086  | 0.11014  | 0.114073  | 0.118735  | 0.112617  | 0.111305  | 0.0916375 |
| 0.12296   | 0.117716 | 0.113491  | 0.119318  | 0.113782  | 0.117133  | 0.121649  |
| 0.127185  | 0.124272 | 0.109848  | 0.115967  | 0.106061  | 0.122815  | 0.109557  |
| 0.119318  | 0.111742 | 0.109266  | 0.117716  | 0.106643  | 0.123106  | 0.102855  |
| 0.123834  | 0.104021 | 0.110286  | 0.109703  | 0.113782  | 0.0483683 | 0.119901  |
| 0.13039   | 0.113199 | 0.119464  | 0.11655   | 0.126166  | 0.0563811 | 0.130536  |
| 0.135344  | 0.122523 | 0.126748  | 0.123834  | 0.134615  | 0.0651224 | 0.135198  |
| 0.11655   | 0.105478 | 0.0992133 | 0.105624  | 0.0989219 | 0.104312  | 0.0887238 |
| 0.119755  | 0.1081   | 0.0447261 | 0.10708   | 0.0989219 | 0.113054  | 0.120192  |
| 0.113199  | 0.104749 | 0.104604  | 0.102564  | 0.0888695 | 0.106498  | 0.108974  |
| 0.128059  | 0.123106 | 0.127622  | 0.131119  | 0.121795  | 0.129225  | 0.130828  |
| 0.102855  | 0.108974 | 0.101253  | 0.113491  | 0.0453089 | 0.116841  | 0.115822  |
| 0.141608  | 0.13986  | 0.129225  | 0.135635  | 0.125728  | 0.138986  | 0.123106  |
| 0.131702  | 0.12704  | 0.064831  | 0.122232  | 0.112034  | 0.129371  | 0.138258  |
| 0.122232  | 0.118735 | 0.111597  | 0.125     | 0.122086  | 0.115822  | 0.131993  |
| 0.108974  | 0.104312 | 0.0971737 | 0.10067   | 0.0945513 | 0.104604  | 0.115239  |
| 0.11961   | 0.112325 | 0.107809  | 0.101399  | 0.107517  | 0.108246  | 0.113054  |
| 0.125437  | 0.118444 | 0.117716  | 0.125291  | 0.110723  | 0.128059  | 0.112762  |
| 0.206294  | 0.191142 | 0.197698  | 0.202069  | 0.196533  | 0.194347  | 0.207896  |
| 0.117424  | 0.104312 | 0.106498  | 0.110577  | 0.104167  | 0.112471  | 0.112034  |
| 0.0598776 | 0.112325 | 0.106643  | 0.117424  | 0.0967366 | 0.113491  | 0.12296   |
| 0.118881  | 0.115967 | 0.11553   | 0.119318  | 0.114073  | 0.117133  | 0.11961   |
| 0.116696  | 0.112325 | 0.1081    | 0.121212  | 0.104895  | 0.117861  | 0.105478  |
| 0.119755  | 0.118007 | 0.110286  | 0.114656  | 0.109411  | 0.122669  | 0.121941  |
| 0.127622  | 0.111014 | 0.11757   | 0.10271   | 0.118444  | 0.112179  | 0.112617  |
| 0.128351  | 0.114656 | 0.120047  | 0.104895  | 0.122086  | 0.110286  | 0.11451   |
| 0.119172  | 0.113345 | 0.111451  | 0.11961   | 0.118444  | 0.115385  | 0.125437  |

|           |          |           |           |           |           |           |
|-----------|----------|-----------|-----------|-----------|-----------|-----------|
| 0.11859   | 0.109848 | 0.10708   | 0.107955  | 0.106206  | 0.113345  | 0.0499709 |
| 0.121212  | 0.119755 | 0.118153  | 0.127477  | 0.11961   | 0.123543  | 0.126603  |
| 0.0562354 | 0.110723 | 0.104167  | 0.115239  | 0.0957168 | 0.116259  | 0.119901  |
| 0.112617  | 0.118153 | 0.106352  | 0.101107  | 0.103147  | 0.115239  | 0.118298  |
| 0.179779  | 0.166958 | 0.168561  | 0.173514  | 0.169435  | 0.170455  | 0.176719  |
| 0.123252  | 0.105186 | 0.108537  | 0.10708   | 0.113491  | 0.0486597 | 0.11961   |
| 0.127185  | 0.118444 | 0.122086  | 0.128497  | 0.116841  | 0.126603  | 0.127622  |
| 0.110723  | 0.11859  | 0.106206  | 0.11961   | 0.0960082 | 0.125874  | 0.103875  |
| 0.125437  | 0.11553  | 0.113345  | 0.11859   | 0.112762  | 0.110868  | 0.107226  |
| 0.102418  | 0.100962 | 0.0964452 | 0.092366  | 0.0941142 | 0.0992133 | 0.109266  |
| 0.104458  | 0.106498 | 0.0961538 | 0.0897436 | 0.0926573 | 0.103875  | 0.1081    |
| 0.105041  | 0.107372 | 0.104021  | 0.0973193 | 0.094697  | 0.10912   | 0.112179  |
| 0.125728  | 0.118735 | 0.115385  | 0.119755  | 0.113054  | 0.123106  | 0.111014  |
| 0.114365  | 0.103001 | 0.106352  | 0.101107  | 0.106643  | 0.0823135 | 0.121212  |
| 0.123834  | 0.122086 | 0.116404  | 0.128642  | 0.110868  | 0.128205  | 0.114365  |
| 0.118444  | 0.103875 | 0.104312  | 0.104312  | 0.10169   | 0.105915  | 0.0979021 |
| 0.116259  | 0.111597 | 0.109994  | 0.113199  | 0.0995047 | 0.119464  | 0.0989219 |
| 0.128351  | 0.128934 | 0.122669  | 0.127914  | 0.113345  | 0.129516  | 0.115093  |
| 0.109703  | 0.116696 | 0.106643  | 0.11014   | 0.100233  | 0.11961   | 0.0871212 |
| 0.121649  | 0.117279 | 0.112471  | 0.119464  | 0.111597  | 0.120192  | 0.113636  |
| 0.107955  | 0.111451 | 0.0979021 | 0.106352  | 0.0955711 | 0.11757   | 0.083042  |
| 0.109411  | 0.112617 | 0.10373   | 0.106643  | 0.0981935 | 0.118153  | 0.090035  |
| 0.095134  | 0.106498 | 0.0935315 | 0.100524  | 0.087704  | 0.110868  | 0.107226  |
| 0.109557  | 0.119755 | 0.101544  | 0.117861  | 0.0986305 | 0.119755  | 0.115822  |
| 0.103147  | 0.106061 | 0.0983392 | 0.108537  | 0.0898893 | 0.115676  | 0.0995047 |
| 0.145396  | 0.13141  | 0.137675  | 0.140006  | 0.135927  | 0.135198  | 0.122815  |
| 0.135198  | 0.119464 | 0.123106  | 0.130099  | 0.125728  | 0.125874  | 0.114656  |
| 0.101981  | 0.106352 | 0.0983392 | 0.10912   | 0.0968823 | 0.112762  | 0.0855186 |
| 0.13243   | 0.130682 | 0.132576  | 0.129953  | 0.127914  | 0.133596  | 0.124126  |
| 0.122815  | 0.116113 | 0.109848  | 0.117424  | 0.113345  | 0.117279  | 0.117716  |
| 0.131556  | 0.126603 | 0.126457  | 0.132284  | 0.113636  | 0.132721  | 0.134615  |
| 0.109411  | 0.110577 | 0.100524  | 0.111888  | 0.0938228 | 0.115239  | 0.1081    |
| 0.134907  | 0.139569 | 0.136218  | 0.141171  | 0.133596  | 0.136946  | 0.136801  |
| 0.123834  | 0.124417 | 0.122815  | 0.128642  | 0.112617  | 0.130828  | 0.116696  |
| 0.137529  | 0.129371 | 0.12602   | 0.137675  | 0.122815  | 0.135198  | 0.128059  |
| 0.118881  | 0.112471 | 0.112034  | 0.121649  | 0.10912   | 0.122086  | 0.105041  |
| 0.109411  | 0.107372 | 0.0958625 | 0.108683  | 0.094697  | 0.114365  | 0.0912005 |
| 0.103147  | 0.108974 | 0.0992133 | 0.109703  | 0.0936772 | 0.113928  | 0.107663  |
| 0.119901  | 0.115822 | 0.112471  | 0.118298  | 0.108974  | 0.114073  | 0.104021  |
| 0.111451  | 0.115239 | 0.108392  | 0.114219  | 0.0935315 | 0.122523  | 0.0967366 |
| 0.107809  | 0.125583 | 0.11553   | 0.122232  | 0.101836  | 0.130828  | 0.121358  |
| 0.119464  | 0.113636 | 0.111742  | 0.118153  | 0.109994  | 0.119172  | 0.116113  |
| 0.112471  | 0.104895 | 0.101253  | 0.111742  | 0.092803  | 0.112471  | 0.0977564 |
| 0.10271   | 0.109703 | 0.100816  | 0.108974  | 0.0912005 | 0.114365  | 0.108683  |

|          |           |           |           |           |           |          |
|----------|-----------|-----------|-----------|-----------|-----------|----------|
| 0.108974 | 0.115385  | 0.100962  | 0.116404  | 0.095134  | 0.120338  | 0.115822 |
| 0.111597 | 0.109557  | 0.097465  | 0.110868  | 0.0878497 | 0.110723  | 0.104749 |
| 0.109994 | 0.121941  | 0.106061  | 0.121212  | 0.0996503 | 0.121941  | 0.114802 |
| 0.103875 | 0.112908  | 0.0967366 | 0.102855  | 0.0914918 | 0.109411  | 0.113636 |
| 0.119172 | 0.102855  | 0.103293  | 0.113199  | 0.100962  | 0.103147  | 0.122232 |
| 0.116841 | 0.109266  | 0.0992133 | 0.106206  | 0.0962995 | 0.107809  | 0.11961  |
| 0.090035 | 0.101399  | 0.0808566 | 0.103001  | 0.0747378 | 0.109848  | 0.113491 |
| 0.104895 | 0.106352  | 0.0957168 | 0.110868  | 0.0895979 | 0.11451   | 0.113199 |
| 0.116696 | 0.103293  | 0.100816  | 0.114219  | 0.100524  | 0.103875  | 0.119464 |
| 0.106643 | 0.1081    | 0.102418  | 0.0977564 | 0.0986305 | 0.105769  | 0.112908 |
| 0.116841 | 0.107517  | 0.116696  | 0.108537  | 0.10912   | 0.102855  | 0.123106 |
| 0.112471 | 0.0981935 | 0.090472  | 0.103001  | 0.0960082 | 0.0955711 | 0.112034 |
| 0.112617 | 0.119901  | 0.117133  | 0.115676  | 0.111305  | 0.118444  | 0.116259 |



| TDr_3881  | TDr_3882  | TDr_3886  | TDr_3887  | TDr_3956  | TDr_3958 | TDr_3961  |
|-----------|-----------|-----------|-----------|-----------|----------|-----------|
| 0.103584  | 0.107226  | 0.0820221 | 0.128934  | 0.0818765 | 0.120484 | 0.111888  |
| 0.104895  | 0.0992133 | 0.113636  | 0.117424  | 0.106498  | 0.111014 | 0.0968823 |
| 0.10169   | 0.0992133 | 0.108392  | 0.112762  | 0.101836  | 0.109557 | 0.0933858 |
| 0.113345  | 0.103875  | 0.120921  | 0.0973193 | 0.115822  | 0.116841 | 0.0989219 |
| 0.125     | 0.124854  | 0.136364  | 0.134324  | 0.134178  | 0.101399 | 0.126894  |
| 0.129371  | 0.120775  | 0.109848  | 0.136072  | 0.11553   | 0.113054 | 0.11757   |
| 0.114365  | 0.109266  | 0.108537  | 0.133596  | 0.105186  | 0.11757  | 0.115967  |
| 0.103875  | 0.109557  | 0.113782  | 0.114656  | 0.107809  | 0.10708  | 0.0984848 |
| 0.0847902 | 0.092803  | 0.109266  | 0.11655   | 0.10708   | 0.104604 | 0.0968823 |
| 0.0843531 | 0.0786713 | 0.104749  | 0.12602   | 0.105478  | 0.111451 | 0.0894522 |
| 0.101399  | 0.106789  | 0.110431  | 0.136364  | 0.107663  | 0.117133 | 0.105041  |
| 0.104749  | 0.100524  | 0.120192  | 0.115822  | 0.111305  | 0.100962 | 0.105769  |
| 0.0910548 | 0.0981935 | 0.114656  | 0.124563  | 0.113345  | 0.109411 | 0.0952797 |
| 0.119464  | 0.118153  | 0.132284  | 0.142483  | 0.133304  | 0.129079 | 0.121941  |
| 0.120192  | 0.106935  | 0.116404  | 0.138549  | 0.125291  | 0.122815 | 0.0506993 |
| 0.106643  | 0.108246  | 0.109266  | 0.126166  | 0.119027  | 0.121212 | 0.105332  |
| 0.105041  | 0.102564  | 0.121066  | 0.126311  | 0.113928  | 0.105332 | 0.103147  |
| 0.13549   | 0.139714  | 0.147727  | 0.145688  | 0.144668  | 0.122378 | 0.134178  |
| 0.10169   | 0.0977564 | 0.108974  | 0.111014  | 0.0995047 | 0.108392 | 0.0989219 |
| 0.194639  | 0.195659  | 0.187063  | 0.203671  | 0.199446  | 0.20134  | 0.174388  |
| 0.12398   | 0.117716  | 0.107372  | 0.138258  | 0.0984848 | 0.119318 | 0.110431  |
| 0.112762  | 0.112908  | 0.104895  | 0.13141   | 0.0960082 | 0.11655  | 0.109994  |
| 0.0986305 | 0.10169   | 0.107955  | 0.121358  | 0.111305  | 0.105041 | 0.104604  |
| 0.120629  | 0.110286  | 0.12296   | 0.134033  | 0.11757   | 0.119755 | 0.122523  |
| 0.0962995 | 0.0944056 | 0.103875  | 0.116987  | 0.0967366 | 0.102418 | 0.0958625 |
| 0.127477  | 0.119755  | 0.110577  | 0.137092  | 0.105769  | 0.124854 | 0.116259  |
| 0.121066  | 0.113054  | 0.118735  | 0.137092  | 0.113054  | 0.112034 | 0.113636  |
| 0.110286  | 0.107809  | 0.122523  | 0.126311  | 0.120338  | 0.119318 | 0.108974  |
| 0.121941  | 0.120338  | 0.128059  | 0.136801  | 0.119464  | 0.129808 | 0.126166  |
| 0.109411  | 0.0999417 | 0.124272  | 0.128642  | 0.11655   | 0.120484 | 0.109848  |
| 0.115967  | 0.109703  | 0.092366  | 0.137238  | 0.0925117 | 0.123252 | 0.105915  |
| 0.112908  | 0.107517  | 0.119027  | 0.129516  | 0.113928  | 0.119901 | 0.110723  |
| 0.0995047 | 0.0964452 | 0.0962995 | 0.121941  | 0.0976107 | 0.107955 | 0.0920746 |
| 0.106498  | 0.104604  | 0.118153  | 0.127185  | 0.113928  | 0.118444 | 0.108974  |
| 0.102273  | 0.110286  | 0.121795  | 0.134907  | 0.116404  | 0.119755 | 0.114073  |
| 0.108537  | 0.107809  | 0.123106  | 0.13447   | 0.122378  | 0.126894 | 0.123543  |
| 0.122086  | 0.123397  | 0.122378  | 0.142191  | 0.113199  | 0.135198 | 0.122523  |
| 0.109411  | 0.113928  | 0.124272  | 0.135344  | 0.111888  | 0.119901 | 0.11655   |
| 0.106206  | 0.100816  | 0.106498  | 0.121358  | 0.101981  | 0.106206 | 0.100816  |
| 0.113199  | 0.108683  | 0.121941  | 0.127477  | 0.120921  | 0.115822 | 0.110723  |
| 0.101253  | 0.0973193 | 0.116113  | 0.121066  | 0.1081    | 0.10271  | 0.100524  |
| 0.13039   | 0.124126  | 0.137966  | 0.146707  | 0.13986   | 0.134761 | 0.127331  |

|           |           |           |           |           |          |          |
|-----------|-----------|-----------|-----------|-----------|----------|----------|
| 0.134761  | 0.12704   | 0.144668  | 0.156031  | 0.144231  | 0.142045 | 0.136072 |
| 0.100524  | 0.106498  | 0.122378  | 0.127331  | 0.112325  | 0.109557 | 0.107372 |
| 0.0909091 | 0.0971737 | 0.110723  | 0.124126  | 0.104458  | 0.102564 | 0.102418 |
| 0.097465  | 0.101981  | 0.11961   | 0.131556  | 0.115967  | 0.120484 | 0.105478 |
| 0.111451  | 0.11014   | 0.122815  | 0.129516  | 0.11859   | 0.110868 | 0.1081   |
| 0.12296   | 0.125146  | 0.138112  | 0.143357  | 0.134761  | 0.13141  | 0.12602  |
| 0.104604  | 0.102127  | 0.120047  | 0.126166  | 0.116987  | 0.111888 | 0.105332 |
| 0.10271   | 0.104604  | 0.118444  | 0.129225  | 0.111305  | 0.111742 | 0.105769 |
| 0.144522  | 0.132721  | 0.0862471 | 0.151515  | 0.0726981 | 0.145105 | 0.138549 |
| 0.122378  | 0.11553   | 0.129662  | 0.137529  | 0.133304  | 0.121212 | 0.123397 |
| 0.108829  | 0.105186  | 0.116987  | 0.125146  | 0.113636  | 0.114073 | 0.108392 |
| 0.099796  | 0.105186  | 0.130973  | 0.130682  | 0.127331  | 0.121649 | 0.11014  |
| 0.108537  | 0.111305  | 0.112908  | 0.0965909 | 0.113345  | 0.113199 | 0.106643 |
| 0.136801  | 0.127622  | 0.14292   | 0.136218  | 0.140443  | 0.130099 | 0.134324 |
| 0.117716  | 0.113491  | 0.129371  | 0.138403  | 0.126311  | 0.122378 | 0.119901 |
| 0.105478  | 0.109411  | 0.121795  | 0.125874  | 0.111742  | 0.106061 | 0.105041 |
| 0.105478  | 0.107372  | 0.122669  | 0.131702  | 0.11553   | 0.116259 | 0.108829 |
| 0.100379  | 0.100233  | 0.118735  | 0.131556  | 0.115676  | 0.119027 | 0.108974 |
| 0.131847  | 0.126457  | 0.134178  | 0.143502  | 0.136655  | 0.125728 | 0.128788 |
| 0.130973  | 0.123252  | 0.141171  | 0.137966  | 0.141026  | 0.13243  | 0.125291 |
| 0.156177  | 0.150204  | 0.154429  | 0.164918  | 0.15778   | 0.163462 | 0.151078 |
| 0.105769  | 0.100379  | 0.119464  | 0.124709  | 0.109411  | 0.109557 | 0.105332 |
| 0.103438  | 0.100379  | 0.118881  | 0.126457  | 0.112617  | 0.109266 | 0.105915 |
| 0.101107  | 0.0948427 | 0.114802  | 0.123543  | 0.110868  | 0.111597 | 0.107372 |
| 0.132139  | 0.131119  | 0.125728  | 0.148747  | 0.122378  | 0.139423 | 0.133159 |
| 0.104167  | 0.101107  | 0.115822  | 0.121649  | 0.113345  | 0.103293 | 0.103147 |
| 0.127914  | 0.121358  | 0.130245  | 0.140152  | 0.133304  | 0.129371 | 0.124563 |
| 0.100233  | 0.10271   | 0.121212  | 0.134615  | 0.114656  | 0.116841 | 0.105624 |
| 0.10912   | 0.106643  | 0.121941  | 0.129516  | 0.113345  | 0.113782 | 0.106643 |
| 0.142337  | 0.140443  | 0.123106  | 0.152826  | 0.124417  | 0.144668 | 0.137821 |
| 0.115822  | 0.110431  | 0.124563  | 0.131556  | 0.121503  | 0.112617 | 0.114219 |
| 0.125583  | 0.120775  | 0.137529  | 0.141026  | 0.137383  | 0.127622 | 0.127185 |
| 0.124854  | 0.115676  | 0.13447   | 0.137675  | 0.132284  | 0.121358 | 0.121795 |
| 0.110431  | 0.110286  | 0.115967  | 0.117716  | 0.111451  | 0.11014  | 0.105332 |
| 0.102564  | 0.103001  | 0.119172  | 0.123543  | 0.112617  | 0.109266 | 0.107955 |
| 0.102564  | 0.104167  | 0.118007  | 0.126457  | 0.116987  | 0.107809 | 0.105041 |
| 0.125     | 0.124272  | 0.135198  | 0.134615  | 0.126311  | 0.125291 | 0.12602  |
| 0.105915  | 0.0999417 | 0.116696  | 0.127477  | 0.107809  | 0.113782 | 0.105769 |
| 0.13141   | 0.121066  | 0.137529  | 0.139277  | 0.138549  | 0.132284 | 0.129808 |
| 0.115967  | 0.107372  | 0.121212  | 0.13549   | 0.119027  | 0.11655  | 0.109994 |
| 0.113928  | 0.112325  | 0.123543  | 0.124709  | 0.116113  | 0.108392 | 0.112617 |
| 0.114219  | 0.105915  | 0.11859   | 0.13345   | 0.116404  | 0.112762 | 0.109994 |
| 0.114802  | 0.110577  | 0.128497  | 0.128497  | 0.122815  | 0.115385 | 0.108829 |
| 0.110723  | 0.103293  | 0.117716  | 0.129079  | 0.11116   | 0.106352 | 0.107372 |

|           |           |           |          |           |          |           |
|-----------|-----------|-----------|----------|-----------|----------|-----------|
| 0.106352  | 0.105332  | 0.118298  | 0.126457 | 0.113491  | 0.109266 | 0.11116   |
| 0.126603  | 0.122378  | 0.139714  | 0.141754 | 0.137238  | 0.127185 | 0.128788  |
| 0.103001  | 0.0999417 | 0.107955  | 0.127477 | 0.1081    | 0.108829 | 0.101399  |
| 0.0952797 | 0.103001  | 0.119755  | 0.125583 | 0.112617  | 0.107809 | 0.103293  |
| 0.118881  | 0.112908  | 0.119755  | 0.135198 | 0.116987  | 0.123543 | 0.116404  |
| 0.120047  | 0.112617  | 0.113636  | 0.137238 | 0.107955  | 0.119755 | 0.119901  |
| 0.118881  | 0.116696  | 0.129953  | 0.143648 | 0.127477  | 0.128497 | 0.120484  |
| 0.129516  | 0.128205  | 0.135635  | 0.142337 | 0.135781  | 0.136801 | 0.128497  |
| 0.113054  | 0.108537  | 0.105769  | 0.132867 | 0.104458  | 0.11014  | 0.108246  |
| 0.182984  | 0.17264   | 0.169289  | 0.188811 | 0.172348  | 0.180944 | 0.172931  |
| 0.101836  | 0.10169   | 0.107663  | 0.122232 | 0.103147  | 0.106789 | 0.0999417 |
| 0.123543  | 0.125437  | 0.138112  | 0.141608 | 0.136218  | 0.138695 | 0.123689  |
| 0.113928  | 0.11757   | 0.129079  | 0.13549  | 0.126311  | 0.129662 | 0.11757   |
| 0.129516  | 0.12296   | 0.119318  | 0.14729  | 0.11451   | 0.129516 | 0.12704   |
| 0.102855  | 0.10271   | 0.114219  | 0.122378 | 0.110286  | 0.110431 | 0.101253  |
| 0.122669  | 0.120192  | 0.130828  | 0.135781 | 0.131847  | 0.132576 | 0.124272  |
| 0.100233  | 0.106498  | 0.118298  | 0.127622 | 0.10912   | 0.115676 | 0.10708   |
| 0.114365  | 0.113345  | 0.123106  | 0.13447  | 0.122086  | 0.123106 | 0.112179  |
| 0.105041  | 0.10373   | 0.103001  | 0.127185 | 0.100816  | 0.119318 | 0.105478  |
| 0.129225  | 0.126166  | 0.137675  | 0.144959 | 0.134907  | 0.137383 | 0.128788  |
| 0.0939685 | 0.0929487 | 0.112617  | 0.124272 | 0.108392  | 0.109411 | 0.0990676 |
| 0.127622  | 0.121941  | 0.11451   | 0.138403 | 0.118735  | 0.13549  | 0.124272  |
| 0.11116   | 0.10169   | 0.0989219 | 0.132139 | 0.101107  | 0.110577 | 0.11014   |
| 0.119755  | 0.115822  | 0.135198  | 0.137529 | 0.128934  | 0.126166 | 0.122232  |
| 0.11757   | 0.114802  | 0.113782  | 0.143211 | 0.111014  | 0.127185 | 0.11451   |
| 0.10067   | 0.103438  | 0.105041  | 0.128642 | 0.0938228 | 0.105915 | 0.101399  |
| 0.13884   | 0.138112  | 0.125146  | 0.149621 | 0.130245  | 0.143502 | 0.134324  |
| 0.106061  | 0.103875  | 0.107809  | 0.13141  | 0.0977564 | 0.110431 | 0.107372  |
| 0.10169   | 0.103584  | 0.116259  | 0.127622 | 0.112034  | 0.108974 | 0.102418  |
| 0.105332  | 0.109266  | 0.119901  | 0.127768 | 0.112179  | 0.115822 | 0.112762  |
| 0.127477  | 0.123543  | 0.126894  | 0.148456 | 0.119464  | 0.139423 | 0.131993  |
| 0.121358  | 0.113345  | 0.111451  | 0.134761 | 0.114219  | 0.122815 | 0.114219  |
| 0.0965909 | 0.103438  | 0.112034  | 0.119901 | 0.111014  | 0.112034 | 0.0973193 |
| 0.0992133 | 0.106935  | 0.115239  | 0.127185 | 0.110723  | 0.113782 | 0.100816  |
| 0.1081    | 0.105624  | 0.104021  | 0.130536 | 0.0962995 | 0.117133 | 0.109703  |
| 0.108829  | 0.106643  | 0.122815  | 0.137383 | 0.118298  | 0.122815 | 0.11014   |
| 0.108974  | 0.104458  | 0.105769  | 0.13345  | 0.0968823 | 0.111014 | 0.112034  |
| 0.0884324 | 0.0859557 | 0.10708   | 0.118444 | 0.101399  | 0.10271  | 0.0917832 |
| 0.0861014 | 0.0909091 | 0.107955  | 0.120775 | 0.100816  | 0.10271  | 0.0952797 |
| 0.0914918 | 0.092803  | 0.116841  | 0.124126 | 0.110577  | 0.110431 | 0.0965909 |
| 0.113928  | 0.110868  | 0.126457  | 0.129662 | 0.118444  | 0.115676 | 0.111451  |
| 0.107663  | 0.115385  | 0.130099  | 0.137966 | 0.127331  | 0.12602  | 0.115093  |
| 0.0944056 | 0.0930944 | 0.115385  | 0.124709 | 0.108829  | 0.107809 | 0.0939685 |
| 0.0933858 | 0.0935315 | 0.107372  | 0.121649 | 0.104021  | 0.102127 | 0.0868298 |

|           |           |           |          |           |          |           |
|-----------|-----------|-----------|----------|-----------|----------|-----------|
| 0.107663  | 0.108974  | 0.123106  | 0.142045 | 0.120629  | 0.122523 | 0.110431  |
| 0.0958625 | 0.0939685 | 0.11014   | 0.125291 | 0.105915  | 0.10373  | 0.0971737 |
| 0.111597  | 0.116113  | 0.109266  | 0.13345  | 0.106206  | 0.121795 | 0.110868  |
| 0.131119  | 0.120192  | 0.0722611 | 0.139569 | 0.0616259 | 0.132576 | 0.123689  |
| 0.0987762 | 0.0977564 | 0.121503  | 0.125583 | 0.114948  | 0.110723 | 0.103001  |
| 0.0936772 | 0.0929487 | 0.117279  | 0.125437 | 0.111014  | 0.107955 | 0.0958625 |
| 0.0971737 | 0.0926573 | 0.116113  | 0.12398  | 0.109557  | 0.110868 | 0.0979021 |
| 0.0936772 | 0.092366  | 0.106789  | 0.122523 | 0.105478  | 0.105915 | 0.099359  |
| 0.103875  | 0.10373   | 0.129225  | 0.134761 | 0.122669  | 0.123397 | 0.112471  |
| 0.0893065 | 0.0938228 | 0.110286  | 0.121649 | 0.10373   | 0.102127 | 0.0929487 |
| 0.129953  | 0.124272  | 0.132576  | 0.141608 | 0.128934  | 0.134324 | 0.126311  |
| 0.122232  | 0.119755  | 0.137675  | 0.144668 | 0.132867  | 0.128642 | 0.124126  |
| 0.113782  | 0.110723  | 0.124854  | 0.132139 | 0.121795  | 0.121941 | 0.113636  |
| 0.104895  | 0.103584  | 0.120921  | 0.13345  | 0.11553   | 0.113345 | 0.103584  |
| 0.110723  | 0.0971737 | 0.106352  | 0.128205 | 0.0919289 | 0.114802 | 0.103293  |
| 0.0980478 | 0.0964452 | 0.110286  | 0.130099 | 0.104604  | 0.106789 | 0.0996503 |
| 0.0996503 | 0.101836  | 0.112179  | 0.126166 | 0.107663  | 0.106061 | 0.108537  |
| 0.0967366 | 0.10271   | 0.115676  | 0.122669 | 0.107663  | 0.103147 | 0.099796  |
| 0.1081    | 0.104749  | 0.108974  | 0.105186 | 0.112034  | 0.111305 | 0.105332  |
| 0.122669  | 0.112325  | 0.130828  | 0.13986  | 0.13243   | 0.121212 | 0.118444  |
| 0.105041  | 0.1081    | 0.117279  | 0.127768 | 0.11859   | 0.118444 | 0.107226  |
| 0.111597  | 0.112908  | 0.131702  | 0.136072 | 0.128642  | 0.124709 | 0.114656  |
| 0.128934  | 0.12296   | 0.126894  | 0.143502 | 0.123543  | 0.130973 | 0.124126  |
| 0.188374  | 0.186189  | 0.189248  | 0.196533 | 0.190559  | 0.188666 | 0.180361  |
| 0.231935  | 0.233246  | 0.231935  | 0.233974 | 0.233829  | 0.230478 | 0.227127  |
| 0.108537  | 0.110723  | 0.10912   | 0.081148 | 0.108392  | 0.10708  | 0.104312  |
| 0.104895  | 0.102127  | 0.118298  | 0.121503 | 0.113491  | 0.103147 | 0.102127  |
| 0.099359  | 0.101836  | 0.109848  | 0.121503 | 0.105624  | 0.103438 | 0.100962  |
| 0.107226  | 0.10067   | 0.115385  | 0.121503 | 0.109994  | 0.1081   | 0.103584  |
| 0.118881  | 0.111742  | 0.114802  | 0.135198 | 0.125146  | 0.124709 | 0.0540501 |
| 0.11014   | 0.108537  | 0.11859   | 0.123543 | 0.111742  | 0.112471 | 0.105624  |
| 0.14088   | 0.136946  | 0.143502  | 0.148747 | 0.146562  | 0.134178 | 0.136946  |
| 0.106352  | 0.108829  | 0.121795  | 0.126166 | 0.114073  | 0.107517 | 0.113782  |
| 0.123543  | 0.114948  | 0.133159  | 0.132576 | 0.128059  | 0.122669 | 0.12602   |
| 0.126311  | 0.121795  | 0.127477  | 0.136509 | 0.127622  | 0.127477 | 0.124417  |
| 0.125146  | 0.119464  | 0.133304  | 0.141754 | 0.132867  | 0.129516 | 0.120338  |
| 0.12602   | 0.120629  | 0.138258  | 0.141463 | 0.13549   | 0.132721 | 0.12704   |
| 0.107372  | 0.106352  | 0.122232  | 0.130973 | 0.116259  | 0.11116  | 0.107226  |
| 0.107663  | 0.11014   | 0.116404  | 0.121066 | 0.111597  | 0.105915 | 0.106352  |
| 0.113928  | 0.108537  | 0.118298  | 0.130245 | 0.117861  | 0.106352 | 0.107372  |
| 0.107517  | 0.0989219 | 0.113636  | 0.121212 | 0.110868  | 0.100816 | 0.103584  |
| 0.106061  | 0.10708   | 0.117424  | 0.121212 | 0.112034  | 0.105186 | 0.105915  |
| 0.115239  | 0.106061  | 0.119027  | 0.122815 | 0.11451   | 0.104749 | 0.110723  |
| 0.122669  | 0.11757   | 0.132284  | 0.136946 | 0.130099  | 0.125874 | 0.119027  |

|           |           |          |          |          |          |           |
|-----------|-----------|----------|----------|----------|----------|-----------|
| 0.133741  | 0.122815  | 0.139277 | 0.143357 | 0.139132 | 0.134324 | 0.128351  |
| 0.115822  | 0.109557  | 0.125728 | 0.12602  | 0.117424 | 0.108829 | 0.111888  |
| 0.111305  | 0.104167  | 0.117133 | 0.129371 | 0.112908 | 0.113345 | 0.110286  |
| 0.12704   | 0.119318  | 0.136364 | 0.13986  | 0.131556 | 0.125583 | 0.126894  |
| 0.11014   | 0.0986305 | 0.115967 | 0.12296  | 0.110868 | 0.105478 | 0.106789  |
| 0.138258  | 0.129662  | 0.145251 | 0.152535 | 0.144231 | 0.135344 | 0.130536  |
| 0.119318  | 0.12296   | 0.140006 | 0.14729  | 0.13549  | 0.136218 | 0.120921  |
| 0.128788  | 0.126311  | 0.130245 | 0.138403 | 0.133596 | 0.129662 | 0.126603  |
| 0.106061  | 0.10067   | 0.117716 | 0.119172 | 0.108246 | 0.099359 | 0.103001  |
| 0.101544  | 0.103438  | 0.113199 | 0.120192 | 0.107226 | 0.105624 | 0.105769  |
| 0.120047  | 0.114073  | 0.130536 | 0.132576 | 0.124272 | 0.113928 | 0.119027  |
| 0.121649  | 0.116841  | 0.128642 | 0.130099 | 0.120047 | 0.123106 | 0.120047  |
| 0.124854  | 0.119755  | 0.133304 | 0.137383 | 0.127331 | 0.123106 | 0.12704   |
| 0.115676  | 0.108537  | 0.121503 | 0.128497 | 0.114365 | 0.108392 | 0.114948  |
| 0.114073  | 0.108974  | 0.121649 | 0.128934 | 0.120047 | 0.10912  | 0.111014  |
| 0.116696  | 0.113636  | 0.126603 | 0.127477 | 0.120921 | 0.122232 | 0.113054  |
| 0.125146  | 0.116259  | 0.132139 | 0.145542 | 0.127914 | 0.130099 | 0.126166  |
| 0.12602   | 0.121795  | 0.134761 | 0.137675 | 0.133159 | 0.124563 | 0.128788  |
| 0.13141   | 0.124854  | 0.135781 | 0.1419   | 0.131847 | 0.130245 | 0.127185  |
| 0.124563  | 0.122086  | 0.124854 | 0.139714 | 0.125874 | 0.130099 | 0.121503  |
| 0.110577  | 0.108974  | 0.119318 | 0.121358 | 0.109557 | 0.110286 | 0.111888  |
| 0.126894  | 0.119755  | 0.133887 | 0.140006 | 0.130245 | 0.123397 | 0.121503  |
| 0.103147  | 0.103293  | 0.115385 | 0.122086 | 0.10708  | 0.110723 | 0.107372  |
| 0.102127  | 0.104895  | 0.119027 | 0.124854 | 0.113345 | 0.107663 | 0.104604  |
| 0.105332  | 0.104895  | 0.121649 | 0.127477 | 0.11451  | 0.105332 | 0.104895  |
| 0.106935  | 0.0989219 | 0.113054 | 0.12704  | 0.114365 | 0.105769 | 0.105041  |
| 0.101981  | 0.101544  | 0.118007 | 0.121212 | 0.110577 | 0.102273 | 0.107955  |
| 0.13039   | 0.126457  | 0.136218 | 0.144959 | 0.134033 | 0.133596 | 0.127914  |
| 0.112179  | 0.105332  | 0.115385 | 0.134033 | 0.108537 | 0.111597 | 0.109994  |
| 0.125874  | 0.124272  | 0.13141  | 0.136072 | 0.13243  | 0.131702 | 0.128642  |
| 0.107809  | 0.10067   | 0.117424 | 0.122378 | 0.113782 | 0.102855 | 0.105041  |
| 0.119901  | 0.115967  | 0.128351 | 0.136509 | 0.121503 | 0.119027 | 0.122669  |
| 0.109557  | 0.111742  | 0.123252 | 0.132867 | 0.126311 | 0.12296  | 0.11553   |
| 0.102855  | 0.109994  | 0.125291 | 0.132867 | 0.122232 | 0.115967 | 0.101253  |
| 0.10271   | 0.102564  | 0.115822 | 0.128351 | 0.109557 | 0.110286 | 0.106935  |
| 0.110723  | 0.114656  | 0.128205 | 0.129371 | 0.124854 | 0.114219 | 0.114365  |
| 0.10912   | 0.111014  | 0.128934 | 0.131847 | 0.120629 | 0.119318 | 0.106352  |
| 0.11116   | 0.105769  | 0.112034 | 0.133304 | 0.102855 | 0.103001 | 0.10373   |
| 0.0968823 | 0.106935  | 0.135927 | 0.145251 | 0.129371 | 0.125146 | 0.118298  |
| 0.13141   | 0.127185  | 0.134907 | 0.142774 | 0.13039  | 0.137529 | 0.130099  |
| 0.0743007 | 0.088141  | 0.112179 | 0.120047 | 0.104458 | 0.109848 | 0.0945513 |
| 0.121066  | 0.107517  | 0.128351 | 0.139132 | 0.126166 | 0.131847 | 0.111597  |
| 0.0909091 | 0.0957168 | 0.125583 | 0.141317 | 0.119027 | 0.121212 | 0.108829  |
| 0.117716  | 0.106789  | 0.128205 | 0.13986  | 0.128059 | 0.127622 | 0.113199  |

|           |           |          |          |          |          |          |
|-----------|-----------|----------|----------|----------|----------|----------|
| 0.1081    | 0.101253  | 0.116259 | 0.130828 | 0.115239 | 0.120338 | 0.105915 |
| 0.0772145 | 0.100379  | 0.125    | 0.137821 | 0.119901 | 0.117424 | 0.107955 |
| 0.0785256 | 0.0996503 | 0.123689 | 0.137383 | 0.121503 | 0.124272 | 0.108683 |
| 0.106352  | 0.110577  | 0.132867 | 0.131702 | 0.129516 | 0.125    | 0.117279 |
| 0.119172  | 0.116404  | 0.128497 | 0.142774 | 0.129808 | 0.136946 | 0.119027 |
| 0.0728438 | 0.103584  | 0.125583 | 0.13141  | 0.121649 | 0.124126 | 0.107663 |
| 0.105478  | 0.0992133 | 0.115676 | 0.129079 | 0.110868 | 0.113928 | 0.10271  |
| 0.135635  | 0.130245  | 0.136801 | 0.141171 | 0.127622 | 0.126894 | 0.13141  |
| 0.0891608 | 0.106789  | 0.132867 | 0.142483 | 0.127477 | 0.134324 | 0.116696 |
| 0.0888695 | 0.0992133 | 0.11014  | 0.126166 | 0.106206 | 0.109848 | 0.100087 |
| 0.218677  | 0.211247  | 0.21285  | 0.216929 | 0.212413 | 0.212558 | 0.213287 |
| 0.103293  | 0.10373   | 0.121941 | 0.131556 | 0.120629 | 0.12398  | 0.107809 |
| 0.0767774 | 0.0917832 | 0.124563 | 0.12602  | 0.115676 | 0.113491 | 0.102855 |
| 0.113345  | 0.118735  | 0.13141  | 0.1419   | 0.130973 | 0.132576 | 0.118444 |
| 0.0728438 | 0.101544  | 0.119464 | 0.128497 | 0.117861 | 0.115676 | 0.105915 |
| 0.0888695 | 0.104458  | 0.130828 | 0.141608 | 0.127185 | 0.126166 | 0.11553  |
| 0.107517  | 0.0995047 | 0.125583 | 0.12704  | 0.127768 | 0.113054 | 0.107955 |
| 0.0995047 | 0.104021  | 0.121649 | 0.126894 | 0.120921 | 0.118735 | 0.104312 |
| 0.081148  | 0.100524  | 0.12398  | 0.136509 | 0.122086 | 0.123106 | 0.107809 |
| 0.11451   | 0.108537  | 0.130536 | 0.136364 | 0.131265 | 0.130245 | 0.113782 |
| 0.117279  | 0.107809  | 0.124563 | 0.135344 | 0.126166 | 0.125728 | 0.112471 |
| 0.113345  | 0.111451  | 0.127331 | 0.138695 | 0.123689 | 0.125291 | 0.116987 |
| 0.11014   | 0.108246  | 0.134324 | 0.131119 | 0.125146 | 0.125583 | 0.112034 |
| 0.0996503 | 0.100379  | 0.120629 | 0.127622 | 0.114365 | 0.11451  | 0.100379 |
| 0.111888  | 0.10271   | 0.124417 | 0.126748 | 0.120192 | 0.113345 | 0.108537 |
| 0.11553   | 0.119172  | 0.135635 | 0.142337 | 0.132576 | 0.130973 | 0.119172 |
| 0.106061  | 0.101836  | 0.117133 | 0.129079 | 0.120192 | 0.120338 | 0.105624 |
| 0.129953  | 0.122232  | 0.13986  | 0.143357 | 0.135052 | 0.131993 | 0.127768 |
| 0.128059  | 0.131993  | 0.125146 | 0.147873 | 0.121795 | 0.135635 | 0.125291 |
| 0.109411  | 0.108974  | 0.117279 | 0.137675 | 0.113928 | 0.122815 | 0.106643 |
| 0.0895979 | 0.108392  | 0.126311 | 0.140589 | 0.117424 | 0.123106 | 0.108683 |
| 0.116841  | 0.119318  | 0.111305 | 0.136072 | 0.114656 | 0.125291 | 0.116404 |
| 0.114365  | 0.111597  | 0.127185 | 0.132721 | 0.120338 | 0.127185 | 0.11859  |
| 0.118153  | 0.121503  | 0.121941 | 0.134178 | 0.115093 | 0.121358 | 0.119464 |
| 0.128059  | 0.131119  | 0.127768 | 0.150204 | 0.124126 | 0.137092 | 0.125583 |
| 0.0932401 | 0.0986305 | 0.117716 | 0.125583 | 0.113491 | 0.110431 | 0.100962 |
| 0.119901  | 0.120629  | 0.137675 | 0.141754 | 0.134907 | 0.125728 | 0.119464 |
| 0.128497  | 0.138258  | 0.12296  | 0.147145 | 0.126894 | 0.13986  | 0.130973 |
| 0.0990676 | 0.10067   | 0.119755 | 0.132576 | 0.116404 | 0.119172 | 0.109411 |
| 0.113345  | 0.107663  | 0.125291 | 0.134324 | 0.123397 | 0.118298 | 0.115239 |
| 0.141171  | 0.137238  | 0.139714 | 0.146416 | 0.135781 | 0.137383 | 0.136946 |
| 0.120192  | 0.114219  | 0.131556 | 0.131847 | 0.127622 | 0.11961  | 0.117133 |
| 0.125874  | 0.123106  | 0.139277 | 0.145396 | 0.13039  | 0.135198 | 0.125728 |
| 0.115822  | 0.116841  | 0.131265 | 0.145251 | 0.130245 | 0.127768 | 0.117716 |

|          |           |           |           |           |          |           |
|----------|-----------|-----------|-----------|-----------|----------|-----------|
| 0.106643 | 0.118735  | 0.125583  | 0.134324  | 0.125728  | 0.125291 | 0.114948  |
| 0.122523 | 0.119755  | 0.125146  | 0.139714  | 0.127622  | 0.130682 | 0.115967  |
| 0.103147 | 0.106498  | 0.126166  | 0.138986  | 0.126603  | 0.122086 | 0.109703  |
| 0.117861 | 0.124126  | 0.127768  | 0.140297  | 0.128497  | 0.12602  | 0.121795  |
| 0.119318 | 0.108392  | 0.131847  | 0.135635  | 0.127914  | 0.128934 | 0.121795  |
| 0.130973 | 0.124417  | 0.131847  | 0.136218  | 0.126748  | 0.13447  | 0.12704   |
| 0.121941 | 0.117133  | 0.132139  | 0.141171  | 0.126166  | 0.133013 | 0.126457  |
| 0.120484 | 0.120921  | 0.119318  | 0.143211  | 0.120629  | 0.130099 | 0.121503  |
| 0.137383 | 0.136364  | 0.132139  | 0.152244  | 0.137529  | 0.144959 | 0.132284  |
| 0.105041 | 0.0987762 | 0.122523  | 0.143794  | 0.119464  | 0.116696 | 0.108392  |
| 0.105041 | 0.104312  | 0.123689  | 0.133304  | 0.123834  | 0.11553  | 0.108392  |
| 0.122232 | 0.120629  | 0.127768  | 0.141754  | 0.125874  | 0.120484 | 0.117133  |
| 0.103293 | 0.0984848 | 0.115822  | 0.135635  | 0.113054  | 0.112908 | 0.107517  |
| 0.129953 | 0.133596  | 0.129662  | 0.149184  | 0.128934  | 0.139569 | 0.127477  |
| 0.14627  | 0.139423  | 0.142774  | 0.161713  | 0.137383  | 0.151807 | 0.146125  |
| 0.123252 | 0.12398   | 0.133741  | 0.131702  | 0.125437  | 0.127914 | 0.125146  |
| 0.118153 | 0.113345  | 0.124854  | 0.129516  | 0.119464  | 0.118153 | 0.117133  |
| 0.13141  | 0.124854  | 0.132867  | 0.131702  | 0.125437  | 0.13141  | 0.122815  |
| 0.110577 | 0.116259  | 0.137966  | 0.136218  | 0.131702  | 0.128934 | 0.117716  |
| 0.121941 | 0.118881  | 0.134761  | 0.136509  | 0.129662  | 0.118153 | 0.120629  |
| 0.126311 | 0.116259  | 0.133887  | 0.14933   | 0.132284  | 0.13243  | 0.121212  |
| 0.123106 | 0.117424  | 0.123106  | 0.148164  | 0.128788  | 0.13884  | 0.121795  |
| 0.101399 | 0.10271   | 0.121212  | 0.136655  | 0.120192  | 0.125583 | 0.113199  |
| 0.155303 | 0.158654  | 0.149184  | 0.159674  | 0.145542  | 0.153846 | 0.153409  |
| 0.113928 | 0.0995047 | 0.127622  | 0.1419    | 0.124272  | 0.125291 | 0.114073  |
| 0.123834 | 0.118735  | 0.131119  | 0.153555  | 0.130973  | 0.13549  | 0.122232  |
| 0.108246 | 0.107517  | 0.12602   | 0.133304  | 0.124709  | 0.114656 | 0.112179  |
| 0.131556 | 0.122086  | 0.133013  | 0.137383  | 0.125583  | 0.128059 | 0.127622  |
| 0.108246 | 0.109557  | 0.123397  | 0.133887  | 0.122669  | 0.125146 | 0.107517  |
| 0.132284 | 0.128351  | 0.0912005 | 0.125874  | 0.0945513 | 0.136655 | 0.130973  |
| 0.136509 | 0.142191  | 0.149038  | 0.144376  | 0.139569  | 0.135635 | 0.13345   |
| 0.118007 | 0.118444  | 0.125874  | 0.0568182 | 0.119027  | 0.115676 | 0.113199  |
| 0.12602  | 0.130828  | 0.135344  | 0.0680361 | 0.129953  | 0.129225 | 0.126457  |
| 0.142191 | 0.143211  | 0.144814  | 0.151807  | 0.142337  | 0.141026 | 0.140006  |
| 0.136072 | 0.133304  | 0.134033  | 0.126166  | 0.13447   | 0.138695 | 0.131556  |
| 0.120484 | 0.119755  | 0.116113  | 0.134178  | 0.112762  | 0.120192 | 0.123834  |
| 0.129953 | 0.129516  | 0.13549   | 0.136655  | 0.133596  | 0.105478 | 0.126311  |
| 0.108683 | 0.103875  | 0.111888  | 0.122669  | 0.107663  | 0.113054 | 0.0770688 |
| 0.112908 | 0.106061  | 0.103293  | 0.125437  | 0.113928  | 0.113491 | 0.0748834 |
| 0.104312 | 0.0980478 | 0.125     | 0.131119  | 0.116404  | 0.117716 | 0.110286  |
| 0.113054 | 0.116987  | 0.121795  | 0.0541958 | 0.114365  | 0.113636 | 0.109703  |
| 0.110868 | 0.104312  | 0.122232  | 0.130099  | 0.117424  | 0.114656 | 0.105769  |
| 0.105041 | 0.0999417 | 0.103584  | 0.0980478 | 0.108392  | 0.107372 | 0.0678904 |
| 0.10912  | 0.117133  | 0.124563  | 0.114073  | 0.120338  | 0.109703 | 0.111597  |

|           |           |           |           |           |           |           |
|-----------|-----------|-----------|-----------|-----------|-----------|-----------|
| 0.109557  | 0.107372  | 0.111597  | 0.130828  | 0.122523  | 0.121795  | 0.057838  |
| 0.0958625 | 0.0476399 | 0.11014   | 0.12296   | 0.100962  | 0.106643  | 0.0916375 |
| 0.113928  | 0.118153  | 0.127331  | 0.0635198 | 0.118444  | 0.118007  | 0.110868  |
| 0.114948  | 0.114219  | 0.123106  | 0.0546329 | 0.113054  | 0.112617  | 0.108683  |
| 0.120192  | 0.117716  | 0.123397  | 0.130099  | 0.121212  | 0.119318  | 0.119172  |
| 0.211393  | 0.209499  | 0.207022  | 0.21285   | 0.210082  | 0.211393  | 0.205128  |
| 0.137092  | 0.138695  | 0.146999  | 0.0569639 | 0.139277  | 0.135635  | 0.133159  |
| 0.129953  | 0.116404  | 0.126166  | 0.129371  | 0.123397  | 0.124709  | 0.121941  |
| 0.11961   | 0.113345  | 0.122815  | 0.123397  | 0.120338  | 0.113199  | 0.110431  |
| 0.207605  | 0.20542   | 0.205565  | 0.207896  | 0.204545  | 0.205857  | 0.20134   |
| 0.123106  | 0.114802  | 0.0971737 | 0.133887  | 0.0938228 | 0.114656  | 0.115385  |
| 0.119755  | 0.111451  | 0.122378  | 0.13141   | 0.117279  | 0.110431  | 0.112617  |
| 0.120338  | 0.116987  | 0.129079  | 0.129953  | 0.127477  | 0.0524476 | 0.113491  |
| 0.112325  | 0.103438  | 0.107955  | 0.134761  | 0.119172  | 0.117861  | 0.0480769 |
| 0.246066  | 0.242716  | 0.244027  | 0.247232  | 0.245921  | 0.244901  | 0.241259  |
| 0.125     | 0.113199  | 0.0687646 | 0.134907  | 0.0520105 | 0.126748  | 0.116696  |
| 0.111305  | 0.111742  | 0.121212  | 0.128205  | 0.114365  | 0.110723  | 0.113199  |
| 0.11859   | 0.116113  | 0.130245  | 0.131702  | 0.123397  | 0.117424  | 0.11961   |
| 0.120921  | 0.114365  | 0.126457  | 0.128497  | 0.11961   | 0.113054  | 0.117279  |
| 0.125291  | 0.116696  | 0.0670163 | 0.136364  | 0.0724068 | 0.127622  | 0.105332  |
| 0.120338  | 0.109703  | 0.107517  | 0.117133  | 0.118735  | 0.124126  | 0.104749  |
| 0.117716  | 0.114073  | 0.122378  | 0.130536  | 0.118153  | 0.112471  | 0.114656  |
| 0.113782  | 0.114802  | 0.121358  | 0.0552156 | 0.115676  | 0.114948  | 0.108392  |
| 0.119464  | 0.116404  | 0.125291  | 0.130536  | 0.119901  | 0.0935315 | 0.117861  |
| 0.108974  | 0.0971737 | 0.10373   | 0.12704   | 0.116987  | 0.112179  | 0.0453089 |
| 0.110286  | 0.107809  | 0.119318  | 0.0636655 | 0.112471  | 0.109411  | 0.10373   |
| 0.0909091 | 0.0826049 | 0.110723  | 0.129662  | 0.110577  | 0.115093  | 0.090472  |
| 0.134761  | 0.140734  | 0.150495  | 0.144668  | 0.141317  | 0.137092  | 0.130536  |
| 0.13039   | 0.114219  | 0.069493  | 0.136801  | 0.0562354 | 0.126311  | 0.119172  |
| 0.121649  | 0.11451   | 0.127185  | 0.133304  | 0.121212  | 0.117861  | 0.115676  |
| 0.187209  | 0.181527  | 0.182838  | 0.188666  | 0.182401  | 0.186043  | 0.179196  |
| 0.200029  | 0.196387  | 0.197407  | 0.20236   | 0.198427  | 0.197115  | 0.194639  |
| 0.112617  | 0.102564  | 0.108246  | 0.13447   | 0.118007  | 0.117279  | 0.0469114 |
| 0.107372  | 0.097028  | 0.103875  | 0.125437  | 0.112471  | 0.111742  | 0.0390443 |
| 0.126311  | 0.12296   | 0.135344  | 0.12602   | 0.12704   | 0.134178  | 0.121795  |
| 0.112908  | 0.114219  | 0.121358  | 0.13039   | 0.11451   | 0.111742  | 0.116259  |
| 0.126457  | 0.114656  | 0.0719697 | 0.136946  | 0.0569639 | 0.127622  | 0.119027  |
| 0.123689  | 0.125874  | 0.131847  | 0.126311  | 0.129371  | 0.122232  | 0.125     |
| 0.222174  | 0.219988  | 0.217803  | 0.222465  | 0.219697  | 0.217512  | 0.212413  |
| 0.114948  | 0.105478  | 0.11961   | 0.120192  | 0.11014   | 0.113491  | 0.108392  |
| 0.204545  | 0.205857  | 0.201923  | 0.201632  | 0.207022  | 0.202797  | 0.202943  |
| 0.106498  | 0.107226  | 0.106498  | 0.12602   | 0.100524  | 0.107663  | 0.110431  |
| 0.108683  | 0.103584  | 0.11655   | 0.127914  | 0.113199  | 0.115385  | 0.111451  |
| 0.112617  | 0.111597  | 0.114656  | 0.112325  | 0.116259  | 0.116696  | 0.10373   |



|          |           |           |           |           |           |           |
|----------|-----------|-----------|-----------|-----------|-----------|-----------|
| 0.105624 | 0.099359  | 0.102127  | 0.123689  | 0.112179  | 0.107372  | 0.0530303 |
| 0.203963 | 0.198864  | 0.199592  | 0.203671  | 0.200321  | 0.20338   | 0.19595   |
| 0.123252 | 0.127185  | 0.132576  | 0.0585664 | 0.130682  | 0.125291  | 0.121358  |
| 0.11014  | 0.106498  | 0.120629  | 0.130828  | 0.112617  | 0.113054  | 0.111742  |
| 0.119172 | 0.120192  | 0.126457  | 0.0518648 | 0.125146  | 0.120921  | 0.116696  |
| 0.116841 | 0.105332  | 0.122669  | 0.126748  | 0.125437  | 0.116841  | 0.119901  |
| 0.110431 | 0.100087  | 0.108683  | 0.128497  | 0.11553   | 0.111597  | 0.0444347 |
| 0.110577 | 0.111305  | 0.105915  | 0.126603  | 0.10169   | 0.112325  | 0.113345  |
| 0.118153 | 0.116841  | 0.121358  | 0.128351  | 0.119755  | 0.106206  | 0.115385  |
| 0.12398  | 0.112471  | 0.124854  | 0.131556  | 0.121212  | 0.117861  | 0.11655   |
| 0.103875 | 0.106643  | 0.120192  | 0.0619172 | 0.113928  | 0.106498  | 0.101107  |
| 0.113054 | 0.109411  | 0.123252  | 0.131702  | 0.116113  | 0.115967  | 0.115822  |
| 0.188083 | 0.18007   | 0.186043  | 0.189248  | 0.180361  | 0.184878  | 0.175991  |
| 0.121795 | 0.116987  | 0.131702  | 0.130828  | 0.123689  | 0.118881  | 0.119901  |
| 0.118153 | 0.125874  | 0.131847  | 0.129808  | 0.125     | 0.118735  | 0.115093  |
| 0.115676 | 0.113782  | 0.127914  | 0.122669  | 0.126603  | 0.116259  | 0.113199  |
| 0.123397 | 0.113345  | 0.0738636 | 0.136218  | 0.0603147 | 0.12602   | 0.117716  |
| 0.117861 | 0.117716  | 0.124272  | 0.0523019 | 0.120338  | 0.115239  | 0.113054  |
| 0.111742 | 0.115967  | 0.112908  | 0.128351  | 0.1081    | 0.114073  | 0.115967  |
| 0.111014 | 0.0992133 | 0.104895  | 0.12296   | 0.0980478 | 0.113345  | 0.113199  |
| 0.121503 | 0.117279  | 0.125583  | 0.132576  | 0.121941  | 0.119172  | 0.122815  |
| 0.112908 | 0.121795  | 0.126894  | 0.127768  | 0.120629  | 0.114948  | 0.111597  |
| 0.116696 | 0.111597  | 0.127477  | 0.12602   | 0.116841  | 0.109994  | 0.111888  |
| 0.111888 | 0.103293  | 0.111888  | 0.127622  | 0.117279  | 0.114802  | 0.0511364 |
| 0.11757  | 0.115093  | 0.124854  | 0.130973  | 0.126457  | 0.0517191 | 0.113345  |
| 0.131119 | 0.13039   | 0.13549   | 0.136364  | 0.138258  | 0.0652681 | 0.124272  |
| 0.115385 | 0.106206  | 0.0740093 | 0.130828  | 0.0514277 | 0.122378  | 0.108537  |
| 0.131847 | 0.134033  | 0.141754  | 0.0514277 | 0.137238  | 0.131556  | 0.127914  |
| 0.107955 | 0.0984848 | 0.105041  | 0.128351  | 0.110723  | 0.110577  | 0.0448718 |
| 0.112617 | 0.112471  | 0.116404  | 0.119901  | 0.116259  | 0.110577  | 0.113636  |
| 0.113345 | 0.113491  | 0.120921  | 0.0734266 | 0.121649  | 0.11014   | 0.10912   |
| 0.122378 | 0.120775  | 0.128497  | 0.137821  | 0.122815  | 0.118007  | 0.122815  |
| 0.187354 | 0.184003  | 0.179196  | 0.191725  | 0.185752  | 0.188811  | 0.182547  |
| 0.108537 | 0.104312  | 0.116113  | 0.130099  | 0.108392  | 0.114365  | 0.108974  |
| 0.100379 | 0.101399  | 0.108537  | 0.109994  | 0.104604  | 0.108537  | 0.0996503 |
| 0.123106 | 0.112179  | 0.124854  | 0.131265  | 0.118298  | 0.116404  | 0.114802  |
| 0.170017 | 0.172494  | 0.171183  | 0.179924  | 0.175117  | 0.174097  | 0.168415  |
| 0.138403 | 0.124563  | 0.0839161 | 0.148019  | 0.0659965 | 0.137529  | 0.129808  |
| 0.142774 | 0.131265  | 0.0871212 | 0.151224  | 0.0732809 | 0.14627   | 0.136801  |
| 0.134761 | 0.142483  | 0.150204  | 0.143211  | 0.142774  | 0.139132  | 0.134033  |
| 0.116696 | 0.107809  | 0.0744464 | 0.130973  | 0.0509907 | 0.116696  | 0.107517  |
| 0.116841 | 0.119027  | 0.126748  | 0.0512821 | 0.120192  | 0.11655   | 0.11116   |
| 0.20877  | 0.204545  | 0.203526  | 0.209062  | 0.203089  | 0.206731  | 0.198718  |
| 0.120775 | 0.11451   | 0.121358  | 0.126603  | 0.121795  | 0.109994  | 0.110431  |

|           |           |           |           |           |           |           |
|-----------|-----------|-----------|-----------|-----------|-----------|-----------|
| 0.120921  | 0.123689  | 0.130536  | 0.0515734 | 0.124272  | 0.123834  | 0.118735  |
| 0.110431  | 0.105915  | 0.11859   | 0.128205  | 0.11116   | 0.114802  | 0.11116   |
| 0.16317   | 0.162733  | 0.157051  | 0.157051  | 0.167395  | 0.158217  | 0.157488  |
| 0.106935  | 0.104458  | 0.108683  | 0.118881  | 0.107955  | 0.102273  | 0.100379  |
| 0.142045  | 0.138112  | 0.14729   | 0.147582  | 0.145979  | 0.119318  | 0.13549   |
| 0.108829  | 0.0498252 | 0.119318  | 0.131556  | 0.115093  | 0.119027  | 0.105186  |
| 0.188083  | 0.181235  | 0.184586  | 0.189248  | 0.183566  | 0.183712  | 0.177156  |
| 0.122232  | 0.111305  | 0.0750291 | 0.133887  | 0.0477855 | 0.122815  | 0.112762  |
| 0.0863928 | 0.0961538 | 0.114365  | 0.114656  | 0.108974  | 0.103875  | 0.0984848 |
| 0.107517  | 0.112034  | 0.120629  | 0.119172  | 0.114948  | 0.109266  | 0.11116   |
| 0.121358  | 0.105478  | 0.11961   | 0.128642  | 0.1081    | 0.112908  | 0.110431  |
| 0.117861  | 0.108392  | 0.121066  | 0.132721  | 0.11655   | 0.11757   | 0.112762  |
| 0.114656  | 0.118007  | 0.121649  | 0.130973  | 0.114802  | 0.117861  | 0.113054  |
| 0.105478  | 0.099796  | 0.10169   | 0.125583  | 0.112617  | 0.112471  | 0.03919   |
| 0.186626  | 0.179779  | 0.184878  | 0.192453  | 0.183566  | 0.184878  | 0.176573  |
| 0.118007  | 0.116404  | 0.128497  | 0.130245  | 0.126894  | 0.087704  | 0.113199  |
| 0.0957168 | 0.109266  | 0.11757   | 0.116696  | 0.113345  | 0.108537  | 0.103438  |
| 0.207459  | 0.205857  | 0.205128  | 0.212121  | 0.208188  | 0.206876  | 0.200903  |
| 0.122669  | 0.11553   | 0.128497  | 0.128205  | 0.121358  | 0.11859   | 0.116404  |
| 0.107955  | 0.101107  | 0.106206  | 0.128351  | 0.111888  | 0.110286  | 0.0434149 |
| 0.103293  | 0.0961538 | 0.102127  | 0.123689  | 0.108683  | 0.108829  | 0.0381702 |
| 0.130828  | 0.131847  | 0.136072  | 0.0690559 | 0.136509  | 0.120629  | 0.127477  |
| 0.185315  | 0.180798  | 0.183566  | 0.187937  | 0.18109   | 0.187063  | 0.175845  |
| 0.118153  | 0.118298  | 0.124563  | 0.129808  | 0.117716  | 0.114656  | 0.115967  |
| 0.125146  | 0.126748  | 0.133304  | 0.135635  | 0.13549   | 0.0613345 | 0.120047  |
| 0.105332  | 0.0990676 | 0.105041  | 0.129516  | 0.108974  | 0.109703  | 0.0393357 |
| 0.105915  | 0.0981935 | 0.104749  | 0.125146  | 0.109848  | 0.108829  | 0.0445804 |
| 0.106061  | 0.0983392 | 0.105186  | 0.127331  | 0.112325  | 0.110431  | 0.03919   |
| 0.110577  | 0.113345  | 0.123689  | 0.0587121 | 0.115676  | 0.110868  | 0.105478  |
| 0.0990676 | 0.0476399 | 0.107517  | 0.120338  | 0.100962  | 0.102564  | 0.0884324 |
| 0.123834  | 0.111451  | 0.0687646 | 0.137529  | 0.0482226 | 0.125874  | 0.116987  |
| 0.123834  | 0.128642  | 0.137529  | 0.121503  | 0.134761  | 0.1081    | 0.129516  |
| 0.120629  | 0.113491  | 0.0740093 | 0.137529  | 0.0499709 | 0.123834  | 0.113199  |
| 0.124854  | 0.1081    | 0.129516  | 0.131556  | 0.129079  | 0.124272  | 0.124126  |
| 0.193765  | 0.18546   | 0.189103  | 0.192599  | 0.186626  | 0.187646  | 0.183421  |
| 0.117279  | 0.114802  | 0.122523  | 0.130099  | 0.12296   | 0.0467657 | 0.109557  |
| 0.121795  | 0.12602   | 0.134033  | 0.0518648 | 0.128351  | 0.12704   | 0.121358  |
| 0.102127  | 0.0949883 | 0.104749  | 0.124563  | 0.109557  | 0.108829  | 0.0407925 |
| 0.0964452 | 0.0423951 | 0.106352  | 0.124709  | 0.099796  | 0.106643  | 0.0907634 |
| 0.109266  | 0.112034  | 0.107517  | 0.127331  | 0.108829  | 0.0987762 | 0.108829  |
| 0.11757   | 0.11859   | 0.124272  | 0.129516  | 0.118881  | 0.112908  | 0.118298  |
| 0.126311  | 0.124126  | 0.131265  | 0.128642  | 0.125291  | 0.127185  | 0.122086  |
| 0.1081    | 0.117861  | 0.124126  | 0.125     | 0.114365  | 0.108683  | 0.107663  |
| 0.107517  | 0.0875583 | 0.107809  | 0.128788  | 0.108537  | 0.109266  | 0.104167  |

|           |           |           |           |           |           |           |
|-----------|-----------|-----------|-----------|-----------|-----------|-----------|
| 0.102127  | 0.0763403 | 0.106789  | 0.123397  | 0.106352  | 0.108246  | 0.0984848 |
| 0.0842075 | 0.0823135 | 0.106935  | 0.118007  | 0.105041  | 0.104604  | 0.097465  |
| 0.109411  | 0.111305  | 0.107663  | 0.126603  | 0.102855  | 0.10912   | 0.112179  |
| 0.130245  | 0.118153  | 0.0798368 | 0.141608  | 0.0642483 | 0.132284  | 0.121941  |
| 0.114365  | 0.113928  | 0.123106  | 0.130682  | 0.117424  | 0.111451  | 0.115093  |
| 0.106061  | 0.109703  | 0.118007  | 0.0611888 | 0.112325  | 0.109557  | 0.10271   |
| 0.11014   | 0.109994  | 0.120338  | 0.128497  | 0.113199  | 0.108974  | 0.113782  |
| 0.105041  | 0.0996503 | 0.103875  | 0.123397  | 0.111597  | 0.105915  | 0.0457459 |
| 0.105478  | 0.101836  | 0.114802  | 0.126457  | 0.104749  | 0.109557  | 0.106789  |
| 0.106643  | 0.0986305 | 0.105186  | 0.129079  | 0.114656  | 0.113054  | 0.0447261 |
| 0.109848  | 0.112034  | 0.120921  | 0.124709  | 0.118444  | 0.0431235 | 0.104167  |
| 0.109266  | 0.115822  | 0.127331  | 0.130245  | 0.116696  | 0.111597  | 0.109703  |
| 0.113636  | 0.107663  | 0.116841  | 0.13141   | 0.109703  | 0.109266  | 0.107372  |
| 0.100379  | 0.0483683 | 0.109703  | 0.124854  | 0.104021  | 0.107955  | 0.0944056 |
| 0.107226  | 0.100379  | 0.104312  | 0.126166  | 0.112325  | 0.111014  | 0.043852  |
| 0.111888  | 0.11757   | 0.120629  | 0.125     | 0.120484  | 0.115093  | 0.112034  |
| 0.100087  | 0.11655   | 0.122815  | 0.123106  | 0.116841  | 0.115239  | 0.107517  |
| 0.0437063 | 0.10067   | 0.115676  | 0.122378  | 0.113199  | 0.106643  | 0.10067   |
| 0.106352  | 0.0980478 | 0.106352  | 0.12296   | 0.108829  | 0.108683  | 0.0482226 |
| 0.113199  | 0.117133  | 0.123106  | 0.0517191 | 0.118007  | 0.116113  | 0.111014  |
| 0.111451  | 0.111597  | 0.109703  | 0.13039   | 0.104312  | 0.110286  | 0.108392  |
| 0.114365  | 0.118007  | 0.122815  | 0.0613345 | 0.117133  | 0.11553   | 0.111888  |
| 0.11553   | 0.107809  | 0.11961   | 0.130682  | 0.114219  | 0.110868  | 0.107517  |
| 0.10271   | 0.0445804 | 0.110868  | 0.125728  | 0.108974  | 0.11116   | 0.0955711 |
| 0.103293  | 0.0996503 | 0.114656  | 0.116404  | 0.104604  | 0.0939685 | 0.097028  |
| 0.104021  | 0.102418  | 0.113054  | 0.126166  | 0.106498  | 0.108392  | 0.10912   |
| 0.115822  | 0.120338  | 0.12602   | 0.0592949 | 0.122669  | 0.119027  | 0.112471  |
| 0.11116   | 0.122669  | 0.128059  | 0.122523  | 0.121503  | 0.120192  | 0.11859   |
| 0.097028  | 0.105332  | 0.121212  | 0.11655   | 0.109411  | 0.109848  | 0.105915  |
| 0.191142  | 0.185169  | 0.187063  | 0.193473  | 0.183712  | 0.187354  | 0.181964  |
| 0.156469  | 0.159237  | 0.156469  | 0.157925  | 0.160693  | 0.152972  | 0.155449  |
| 0.122378  | 0.113782  | 0.0751748 | 0.134907  | 0.0496795 | 0.122378  | 0.114656  |
| 0.113491  | 0.119172  | 0.112617  | 0.124563  | 0.118881  | 0.111742  | 0.111597  |
| 0.144959  | 0.136072  | 0.0872669 | 0.154866  | 0.0792541 | 0.149913  | 0.141317  |
| 0.123543  | 0.118735  | 0.128205  | 0.129662  | 0.124563  | 0.0917832 | 0.114365  |
| 0.119318  | 0.109557  | 0.10708   | 0.13243   | 0.119172  | 0.103875  | 0.0789627 |
| 0.10373   | 0.110577  | 0.106935  | 0.123252  | 0.113491  | 0.116841  | 0.0744464 |
| 0.087704  | 0.0805653 | 0.111305  | 0.127331  | 0.10708   | 0.11014   | 0.0901807 |
| 0.101981  | 0.116113  | 0.124417  | 0.121795  | 0.121941  | 0.11655   | 0.108537  |
| 0.197115  | 0.191434  | 0.195659  | 0.201777  | 0.193473  | 0.195076  | 0.18648   |
| 0.119464  | 0.116696  | 0.121503  | 0.134907  | 0.119318  | 0.116841  | 0.119318  |
| 0.113199  | 0.119464  | 0.116696  | 0.083479  | 0.117133  | 0.111742  | 0.109848  |
| 0.090472  | 0.0990676 | 0.104458  | 0.120775  | 0.11014   | 0.106206  | 0.0574009 |
| 0.115093  | 0.101253  | 0.120629  | 0.131702  | 0.117861  | 0.112762  | 0.113199  |

|           |           |           |           |           |           |           |
|-----------|-----------|-----------|-----------|-----------|-----------|-----------|
| 0.174097  | 0.176865  | 0.177302  | 0.184586  | 0.179779  | 0.181381  | 0.17366   |
| 0.241113  | 0.241259  | 0.239948  | 0.241696  | 0.241259  | 0.238491  | 0.237179  |
| 0.114656  | 0.118007  | 0.127768  | 0.128642  | 0.118007  | 0.110577  | 0.108974  |
| 0.103875  | 0.114219  | 0.120775  | 0.122523  | 0.119755  | 0.116113  | 0.109557  |
| 0.121358  | 0.110431  | 0.0715326 | 0.13447   | 0.0483683 | 0.121941  | 0.113054  |
| 0.11451   | 0.103875  | 0.116841  | 0.130536  | 0.111742  | 0.107809  | 0.103875  |
| 0.10912   | 0.113636  | 0.121649  | 0.12398   | 0.115676  | 0.109994  | 0.112179  |
| 0.107226  | 0.107955  | 0.119464  | 0.124126  | 0.114948  | 0.083042  | 0.106789  |
| 0.10708   | 0.105186  | 0.103875  | 0.092803  | 0.113345  | 0.110286  | 0.0705128 |
| 0.112908  | 0.112762  | 0.118735  | 0.125437  | 0.114219  | 0.108246  | 0.114219  |
| 0.106935  | 0.107372  | 0.10169   | 0.0850816 | 0.112034  | 0.111305  | 0.0785256 |
| 0.0458916 | 0.10169   | 0.11961   | 0.127768  | 0.118881  | 0.113782  | 0.104604  |
| 0.103147  | 0.0444347 | 0.108974  | 0.123543  | 0.105041  | 0.11014   | 0.0910548 |
| 0.11116   | 0.121503  | 0.127185  | 0.127185  | 0.120629  | 0.112617  | 0.11014   |
| 0.114219  | 0.116113  | 0.124417  | 0.0588578 | 0.118444  | 0.116841  | 0.108829  |
| 0.097028  | 0.104167  | 0.111305  | 0.113636  | 0.106789  | 0.0967366 | 0.101836  |
| 0.115093  | 0.116987  | 0.127914  | 0.134033  | 0.127477  | 0.126457  | 0.114073  |
| 0.13141   | 0.119027  | 0.131702  | 0.137529  | 0.127768  | 0.126457  | 0.123106  |
| 0.104749  | 0.0984848 | 0.108246  | 0.12602   | 0.111888  | 0.106498  | 0.0448718 |
| 0.113345  | 0.103584  | 0.0909091 | 0.13141   | 0.10271   | 0.115676  | 0.0831876 |
| 0.120629  | 0.112617  | 0.117424  | 0.138695  | 0.127477  | 0.124126  | 0.0581294 |
| 0.206439  | 0.195513  | 0.196824  | 0.208479  | 0.20134   | 0.203234  | 0.19697   |
| 0.10169   | 0.11116   | 0.120629  | 0.120629  | 0.111742  | 0.103147  | 0.103293  |
| 0.0992133 | 0.0431235 | 0.107663  | 0.125437  | 0.105478  | 0.108537  | 0.0929487 |
| 0.115822  | 0.112762  | 0.12398   | 0.133013  | 0.122378  | 0.0511364 | 0.111597  |
| 0.12296   | 0.11553   | 0.130828  | 0.128788  | 0.121649  | 0.116841  | 0.118153  |
| 0.110431  | 0.0986305 | 0.121795  | 0.123834  | 0.117279  | 0.112179  | 0.109703  |
| 0.196096  | 0.188666  | 0.190559  | 0.201049  | 0.192162  | 0.195804  | 0.187209  |
| 0.114948  | 0.121212  | 0.126894  | 0.0598776 | 0.122086  | 0.11961   | 0.113054  |
| 0.102855  | 0.0971737 | 0.102855  | 0.123252  | 0.10912   | 0.1081    | 0.0435606 |
| 0.114948  | 0.112471  | 0.118735  | 0.123689  | 0.108683  | 0.119318  | 0.115093  |
| 0.112325  | 0.101981  | 0.11757   | 0.126894  | 0.109557  | 0.105332  | 0.102564  |
| 0.115822  | 0.119755  | 0.124272  | 0.0622086 | 0.119464  | 0.11553   | 0.111305  |
| 0.103001  | 0.102273  | 0.116113  | 0.0898893 | 0.108392  | 0.110286  | 0.0979021 |
| 0.050845  | 0.10169   | 0.119027  | 0.124563  | 0.11655   | 0.114365  | 0.106061  |
| 0.118735  | 0.11451   | 0.128059  | 0.128934  | 0.11859   | 0.111451  | 0.112471  |
| 0.193765  | 0.191579  | 0.19289   | 0.198427  | 0.193328  | 0.193765  | 0.188083  |
| 0.108246  | 0.107226  | 0.11757   | 0.0651224 | 0.109557  | 0.105915  | 0.101981  |
| 0.188228  | 0.189248  | 0.189977  | 0.195804  | 0.187791  | 0.187646  | 0.182255  |
| 0.188957  | 0.18648   | 0.186043  | 0.19391   | 0.185606  | 0.186917  | 0.181818  |
| 0.125146  | 0.11655   | 0.131265  | 0.137383  | 0.122669  | 0.121066  | 0.117424  |
| 0.131265  | 0.120629  | 0.135635  | 0.137092  | 0.128205  | 0.125437  | 0.126457  |
| 0.0479312 | 0.0961538 | 0.114948  | 0.117279  | 0.109266  | 0.105624  | 0.0990676 |
| 0.108392  | 0.106206  | 0.118298  | 0.0670163 | 0.107663  | 0.109266  | 0.100379  |

|           |           |           |           |           |          |           |
|-----------|-----------|-----------|-----------|-----------|----------|-----------|
| 0.110286  | 0.111888  | 0.120192  | 0.0630828 | 0.114219  | 0.111451 | 0.106352  |
| 0.110286  | 0.100233  | 0.107372  | 0.129516  | 0.112471  | 0.110286 | 0.0437063 |
| 0.108246  | 0.108683  | 0.115239  | 0.122523  | 0.106643  | 0.104167 | 0.110431  |
| 0.109411  | 0.108974  | 0.121066  | 0.124563  | 0.113928  | 0.106498 | 0.113345  |
| 0.114802  | 0.121358  | 0.131119  | 0.127622  | 0.116987  | 0.116841 | 0.112908  |
| 0.118153  | 0.111597  | 0.122232  | 0.129808  | 0.113636  | 0.112325 | 0.11014   |
| 0.0990676 | 0.0936772 | 0.10169   | 0.122086  | 0.104749  | 0.104021 | 0.0400641 |
| 0.112034  | 0.115385  | 0.123689  | 0.0613345 | 0.118007  | 0.113782 | 0.109557  |
| 0.0801282 | 0.0936772 | 0.109557  | 0.112179  | 0.103001  | 0.101399 | 0.0936772 |
| 0.120192  | 0.123834  | 0.129808  | 0.0511364 | 0.127914  | 0.123397 | 0.119755  |
| 0.121941  | 0.108392  | 0.0738636 | 0.132139  | 0.0518648 | 0.120484 | 0.111014  |
| 0.129662  | 0.130099  | 0.136655  | 0.0533217 | 0.132721  | 0.129079 | 0.124563  |
| 0.255245  | 0.253059  | 0.253205  | 0.255828  | 0.255973  | 0.254079 | 0.25102   |
| 0.121212  | 0.116696  | 0.131702  | 0.136946  | 0.123689  | 0.125874 | 0.124272  |
| 0.118153  | 0.113928  | 0.127185  | 0.134178  | 0.124417  | 0.124272 | 0.121503  |
| 0.212995  | 0.210227  | 0.211247  | 0.214744  | 0.210227  | 0.212704 | 0.207022  |
| 0.123106  | 0.113636  | 0.131556  | 0.139132  | 0.122086  | 0.123397 | 0.113636  |
| 0.224796  | 0.223485  | 0.225962  | 0.226253  | 0.224942  | 0.223631 | 0.22028   |
| 0.11451   | 0.109994  | 0.126166  | 0.128497  | 0.11757   | 0.116841 | 0.116113  |
| 0.118444  | 0.107226  | 0.115239  | 0.136509  | 0.123834  | 0.122815 | 0.0550699 |
| 0.113491  | 0.109848  | 0.127477  | 0.124272  | 0.117133  | 0.110286 | 0.111014  |
| 0.120484  | 0.111597  | 0.124563  | 0.133013  | 0.120629  | 0.116987 | 0.115676  |
| 0.199446  | 0.196096  | 0.200321  | 0.204108  | 0.198135  | 0.196824 | 0.193473  |
| 0.124563  | 0.125583  | 0.134178  | 0.0540501 | 0.129371  | 0.12602  | 0.120629  |
| 0.112617  | 0.118298  | 0.12602   | 0.0590035 | 0.118298  | 0.116696 | 0.111888  |
| 0.222028  | 0.221882  | 0.222028  | 0.223193  | 0.220717  | 0.218823 | 0.216638  |
| 0.113782  | 0.116259  | 0.121358  | 0.133887  | 0.11859   | 0.112034 | 0.112762  |
| 0.195513  | 0.188957  | 0.19289   | 0.20134   | 0.190705  | 0.19289  | 0.188083  |
| 0.115385  | 0.116113  | 0.124126  | 0.132284  | 0.116113  | 0.114802 | 0.117861  |
| 0.105186  | 0.100087  | 0.106352  | 0.126166  | 0.109703  | 0.112471 | 0.0453089 |
| 0.10912   | 0.041958  | 0.116987  | 0.130682  | 0.112762  | 0.11757  | 0.104604  |
| 0.126894  | 0.117716  | 0.129225  | 0.13447   | 0.124417  | 0.122523 | 0.117716  |
| 0.111888  | 0.10708   | 0.113054  | 0.124417  | 0.108537  | 0.101981 | 0.105915  |
| 0.151807  | 0.128059  | 0.151515  | 0.167541  | 0.150495  | 0.156469 | 0.144959  |
| 0.108392  | 0.110868  | 0.11859   | 0.0544872 | 0.112325  | 0.108683 | 0.105624  |
| 0.121212  | 0.114948  | 0.130828  | 0.132284  | 0.120192  | 0.118298 | 0.11961   |
| 0.117133  | 0.107955  | 0.126748  | 0.134615  | 0.122815  | 0.119464 | 0.11116   |
| 0.125291  | 0.122232  | 0.128497  | 0.122086  | 0.128351  | 0.118881 | 0.125437  |
| 0.194493  | 0.187646  | 0.188666  | 0.196533  | 0.190268  | 0.192453 | 0.184441  |
| 0.104895  | 0.0962995 | 0.105769  | 0.12296   | 0.109994  | 0.11014  | 0.0421037 |
| 0.117279  | 0.109557  | 0.122523  | 0.133887  | 0.118881  | 0.113199 | 0.111305  |
| 0.109266  | 0.110577  | 0.108974  | 0.129079  | 0.0986305 | 0.107809 | 0.112617  |
| 0.116696  | 0.11451   | 0.124563  | 0.130973  | 0.119172  | 0.113782 | 0.115676  |
| 0.114219  | 0.10271   | 0.112471  | 0.129953  | 0.119027  | 0.113928 | 0.0488054 |

|           |           |           |           |           |           |           |
|-----------|-----------|-----------|-----------|-----------|-----------|-----------|
| 0.253642  | 0.249709  | 0.251311  | 0.251603  | 0.254079  | 0.250728  | 0.245921  |
| 0.106352  | 0.041521  | 0.111888  | 0.125874  | 0.112034  | 0.115093  | 0.100962  |
| 0.113345  | 0.110577  | 0.112179  | 0.129371  | 0.123106  | 0.0708042 | 0.08581   |
| 0.177739  | 0.168561  | 0.172494  | 0.179779  | 0.177593  | 0.174534  | 0.174388  |
| 0.183858  | 0.177302  | 0.179487  | 0.189977  | 0.17905   | 0.179487  | 0.175262  |
| 0.112179  | 0.120484  | 0.127914  | 0.128788  | 0.122232  | 0.113054  | 0.110577  |
| 0.112617  | 0.115385  | 0.124272  | 0.0598776 | 0.118007  | 0.114948  | 0.109266  |
| 0.112908  | 0.106061  | 0.116113  | 0.12602   | 0.108974  | 0.109703  | 0.107226  |
| 0.136946  | 0.141463  | 0.148601  | 0.0562354 | 0.143502  | 0.139569  | 0.134761  |
| 0.108392  | 0.116404  | 0.125583  | 0.129079  | 0.116987  | 0.110431  | 0.108829  |
| 0.112034  | 0.122086  | 0.133887  | 0.130973  | 0.119755  | 0.118444  | 0.110723  |
| 0.123252  | 0.120484  | 0.123834  | 0.137821  | 0.123689  | 0.117424  | 0.120192  |
| 0.112471  | 0.112908  | 0.115967  | 0.0524476 | 0.115239  | 0.11451   | 0.109411  |
| 0.12398   | 0.123834  | 0.134178  | 0.0499709 | 0.129079  | 0.120484  | 0.120047  |
| 0.115093  | 0.112908  | 0.11859   | 0.12704   | 0.116987  | 0.116259  | 0.112617  |
| 0.123397  | 0.111305  | 0.12602   | 0.132139  | 0.123543  | 0.120775  | 0.115385  |
| 0.137821  | 0.126311  | 0.136655  | 0.144522  | 0.133596  | 0.133159  | 0.127477  |
| 0.10912   | 0.0422494 | 0.116113  | 0.131556  | 0.115676  | 0.116113  | 0.10373   |
| 0.130828  | 0.120484  | 0.128205  | 0.137529  | 0.126894  | 0.125291  | 0.121941  |
| 0.124126  | 0.122523  | 0.129079  | 0.136364  | 0.126603  | 0.121795  | 0.126311  |
| 0.2044    | 0.199301  | 0.202652  | 0.206148  | 0.201049  | 0.203234  | 0.197552  |
| 0.0996503 | 0.100379  | 0.119172  | 0.140734  | 0.114948  | 0.125874  | 0.105915  |
| 0.186772  | 0.186917  | 0.187937  | 0.191142  | 0.185752  | 0.186189  | 0.180798  |
| 0.106643  | 0.114073  | 0.123543  | 0.126748  | 0.115239  | 0.106643  | 0.112617  |
| 0.112762  | 0.108246  | 0.114802  | 0.132867  | 0.124563  | 0.121795  | 0.0537587 |
| 0.120047  | 0.110868  | 0.0710956 | 0.133159  | 0.0557984 | 0.12296   | 0.114948  |
| 0.115822  | 0.1081    | 0.0756119 | 0.128351  | 0.0506993 | 0.117861  | 0.107226  |
| 0.115967  | 0.118735  | 0.125     | 0.0533217 | 0.120775  | 0.118298  | 0.114656  |
| 0.117716  | 0.121066  | 0.123543  | 0.0530303 | 0.123106  | 0.115967  | 0.116987  |
| 0.107517  | 0.103584  | 0.108392  | 0.129079  | 0.116113  | 0.113054  | 0.0453089 |
| 0.11961   | 0.112471  | 0.12602   | 0.129808  | 0.11859   | 0.113491  | 0.113928  |
| 0.124272  | 0.112179  | 0.0674534 | 0.130973  | 0.0559441 | 0.124563  | 0.118298  |
| 0.129371  | 0.124854  | 0.131119  | 0.140152  | 0.128351  | 0.123834  | 0.131556  |
| 0.248543  | 0.245192  | 0.245921  | 0.24796   | 0.246649  | 0.246212  | 0.24257   |
| 0.107809  | 0.104167  | 0.106352  | 0.129371  | 0.114073  | 0.113636  | 0.0435606 |
| 0.181964  | 0.177448  | 0.177885  | 0.186917  | 0.175408  | 0.176428  | 0.174825  |
| 0.184732  | 0.182255  | 0.184441  | 0.190268  | 0.182255  | 0.182401  | 0.177885  |
| 0.107955  | 0.106061  | 0.126311  | 0.136509  | 0.118881  | 0.119901  | 0.107226  |
| 0.103293  | 0.0422494 | 0.11553   | 0.123106  | 0.105769  | 0.109411  | 0.0976107 |
| 0.11553   | 0.106061  | 0.109411  | 0.13039   | 0.124417  | 0.119027  | 0.0492424 |
| 0.111742  | 0.109266  | 0.116696  | 0.0642483 | 0.111014  | 0.108537  | 0.104021  |
| 0.0859557 | 0.0820221 | 0.107809  | 0.12704   | 0.105332  | 0.11014   | 0.0922203 |
| 0.113636  | 0.114656  | 0.121503  | 0.129953  | 0.115822  | 0.110431  | 0.114073  |
| 0.114656  | 0.113928  | 0.119027  | 0.074155  | 0.119464  | 0.117861  | 0.113054  |

|           |           |           |           |           |           |           |
|-----------|-----------|-----------|-----------|-----------|-----------|-----------|
| 0.126603  | 0.127914  | 0.133887  | 0.053176  | 0.128788  | 0.126603  | 0.123834  |
| 0.107809  | 0.10067   | 0.104312  | 0.127622  | 0.115822  | 0.112762  | 0.041521  |
| 0.122378  | 0.122523  | 0.131119  | 0.0524476 | 0.124563  | 0.125583  | 0.120775  |
| 0.109703  | 0.104895  | 0.11961   | 0.132139  | 0.113928  | 0.11553   | 0.113345  |
| 0.128059  | 0.115385  | 0.0724068 | 0.137675  | 0.0571096 | 0.126311  | 0.118881  |
| 0.117716  | 0.113199  | 0.123252  | 0.13141   | 0.116404  | 0.113345  | 0.113199  |
| 0.128059  | 0.125874  | 0.131265  | 0.138258  | 0.131119  | 0.122523  | 0.127622  |
| 0.0506993 | 0.102418  | 0.123543  | 0.130536  | 0.122815  | 0.120629  | 0.108246  |
| 0.105769  | 0.0992133 | 0.097028  | 0.127331  | 0.107955  | 0.112471  | 0.0534674 |
| 0.127331  | 0.126311  | 0.135198  | 0.134907  | 0.138258  | 0.0594406 | 0.124854  |
| 0.180798  | 0.175991  | 0.182547  | 0.186626  | 0.180361  | 0.179341  | 0.175699  |
| 0.127914  | 0.130099  | 0.13986   | 0.0536131 | 0.133304  | 0.131119  | 0.124272  |
| 0.117133  | 0.115822  | 0.120921  | 0.0533217 | 0.118153  | 0.114219  | 0.113491  |
| 0.118735  | 0.110431  | 0.0659965 | 0.134178  | 0.048951  | 0.122815  | 0.112471  |
| 0.108683  | 0.10271   | 0.0734266 | 0.126457  | 0.0464744 | 0.111597  | 0.10271   |
| 0.119027  | 0.105769  | 0.120484  | 0.128351  | 0.115093  | 0.114365  | 0.107809  |
| 0.120921  | 0.110286  | 0.123834  | 0.138112  | 0.121649  | 0.116259  | 0.116404  |
| 0.186043  | 0.183858  | 0.184295  | 0.19391   | 0.187937  | 0.184295  | 0.18007   |
| 0.105915  | 0.113928  | 0.116113  | 0.0779429 | 0.120629  | 0.114948  | 0.111305  |
| 0.0996503 | 0.10271   | 0.110431  | 0.113636  | 0.111451  | 0.0979021 | 0.102127  |
| 0.118298  | 0.121649  | 0.127622  | 0.0533217 | 0.120775  | 0.121503  | 0.117279  |
| 0.190414  | 0.184149  | 0.187791  | 0.192745  | 0.186189  | 0.185169  | 0.179487  |
| 0.0981935 | 0.0432692 | 0.1081    | 0.123252  | 0.104749  | 0.108683  | 0.0922203 |
| 0.123397  | 0.115676  | 0.124272  | 0.133887  | 0.121503  | 0.116987  | 0.121212  |
| 0.116113  | 0.120921  | 0.126894  | 0.0543415 | 0.122378  | 0.119318  | 0.114802  |
| 0.1081    | 0.114365  | 0.121795  | 0.123834  | 0.113199  | 0.104604  | 0.106206  |
| 0.185023  | 0.17701   | 0.182984  | 0.187354  | 0.18109   | 0.181527  | 0.176428  |
| 0.118881  | 0.112908  | 0.121795  | 0.126748  | 0.119027  | 0.111597  | 0.116987  |
| 0.111305  | 0.108246  | 0.116259  | 0.117424  | 0.119027  | 0.0562354 | 0.10708   |
| 0.0987762 | 0.060169  | 0.108683  | 0.125     | 0.105041  | 0.109266  | 0.0948427 |
| 0.11655   | 0.11553   | 0.106643  | 0.126457  | 0.107955  | 0.109848  | 0.114073  |
| 0.118153  | 0.113345  | 0.130099  | 0.131847  | 0.121212  | 0.11553   | 0.117133  |
| 0.126603  | 0.121212  | 0.128934  | 0.137092  | 0.126457  | 0.122232  | 0.124709  |
| 0.106206  | 0.100233  | 0.105624  | 0.12602   | 0.111305  | 0.113199  | 0.0416667 |
| 0.104749  | 0.11014   | 0.127185  | 0.121066  | 0.124417  | 0.12398   | 0.119172  |
| 0.135781  | 0.141171  | 0.151515  | 0.144522  | 0.138258  | 0.136655  | 0.131847  |
| 0.232226  | 0.230624  | 0.230186  | 0.232226  | 0.230624  | 0.231352  | 0.226253  |
| 0.0536131 | 0.108829  | 0.129371  | 0.132867  | 0.127477  | 0.121795  | 0.114073  |
| 0.119172  | 0.114948  | 0.128205  | 0.133159  | 0.11961   | 0.113345  | 0.116404  |
| 0.111742  | 0.114219  | 0.120192  | 0.0607517 | 0.118881  | 0.108537  | 0.11014   |
| 0.115967  | 0.119901  | 0.125583  | 0.135198  | 0.120192  | 0.121503  | 0.116987  |
| 0.114365  | 0.108974  | 0.111451  | 0.122815  | 0.112762  | 0.114365  | 0.110723  |
| 0.114365  | 0.101107  | 0.122232  | 0.122815  | 0.119172  | 0.114656  | 0.113054  |
| 0.117424  | 0.121649  | 0.12296   | 0.0606061 | 0.122232  | 0.119464  | 0.116113  |

|           |           |           |           |           |          |           |
|-----------|-----------|-----------|-----------|-----------|----------|-----------|
| 0.123689  | 0.119755  | 0.128059  | 0.135927  | 0.125874  | 0.121941 | 0.123543  |
| 0.112034  | 0.115967  | 0.120484  | 0.127768  | 0.118881  | 0.111451 | 0.106643  |
| 0.234266  | 0.232955  | 0.232226  | 0.233974  | 0.23208   | 0.232226 | 0.226253  |
| 0.101253  | 0.0399184 | 0.108246  | 0.120484  | 0.107226  | 0.10912  | 0.0932401 |
| 0.100087  | 0.0961538 | 0.112034  | 0.119901  | 0.106935  | 0.106206 | 0.101399  |
| 0.105769  | 0.0960082 | 0.103147  | 0.124126  | 0.112034  | 0.113345 | 0.0418124 |
| 0.124272  | 0.128205  | 0.137675  | 0.133013  | 0.127914  | 0.122523 | 0.118881  |
| 0.0613345 | 0.111305  | 0.133887  | 0.140006  | 0.133159  | 0.129808 | 0.118881  |
| 0.107955  | 0.102564  | 0.113782  | 0.11961   | 0.111597  | 0.117861 | 0.101107  |
| 0.11553   | 0.117424  | 0.124272  | 0.0523019 | 0.118007  | 0.11553  | 0.110723  |
| 0.104604  | 0.110286  | 0.122669  | 0.120921  | 0.110868  | 0.105478 | 0.100379  |
| 0.228438  | 0.226253  | 0.225233  | 0.228438  | 0.227418  | 0.226981 | 0.220717  |
| 0.122378  | 0.121941  | 0.127331  | 0.0506993 | 0.120775  | 0.121795 | 0.117279  |
| 0.120484  | 0.118881  | 0.127185  | 0.132139  | 0.121795  | 0.114948 | 0.120921  |
| 0.105624  | 0.111014  | 0.119318  | 0.125146  | 0.115676  | 0.105332 | 0.104021  |
| 0.120047  | 0.118735  | 0.127914  | 0.124417  | 0.124854  | 0.118007 | 0.119318  |
| 0.116259  | 0.113199  | 0.124417  | 0.132867  | 0.120192  | 0.123543 | 0.118444  |
| 0.106935  | 0.100379  | 0.105478  | 0.12296   | 0.112617  | 0.111888 | 0.0441434 |
| 0.118007  | 0.114948  | 0.124417  | 0.133159  | 0.120484  | 0.119464 | 0.122232  |
| 0.127477  | 0.122086  | 0.129516  | 0.134178  | 0.127914  | 0.121649 | 0.126748  |
| 0.116113  | 0.113054  | 0.119901  | 0.130682  | 0.117133  | 0.111742 | 0.11451   |
| 0.106643  | 0.0992133 | 0.106643  | 0.128205  | 0.114365  | 0.109848 | 0.0447261 |
| 0.127914  | 0.116987  | 0.132284  | 0.129953  | 0.124563  | 0.12296  | 0.122232  |
| 0.127477  | 0.123252  | 0.138258  | 0.135927  | 0.128205  | 0.125728 | 0.127914  |
| 0.125146  | 0.119172  | 0.0776515 | 0.141171  | 0.0617716 | 0.129808 | 0.120338  |
| 0.134178  | 0.117716  | 0.0773601 | 0.141463  | 0.0643939 | 0.13039  | 0.125291  |
| 0.129079  | 0.120484  | 0.136364  | 0.135781  | 0.128642  | 0.124126 | 0.127185  |
| 0.0818765 | 0.0782343 | 0.105478  | 0.12704   | 0.104458  | 0.105478 | 0.0849359 |
| 0.125728  | 0.12704   | 0.123397  | 0.137383  | 0.120921  | 0.125146 | 0.130245  |
| 0.123252  | 0.117861  | 0.131119  | 0.138112  | 0.135052  | 0.126457 | 0.117861  |
| 0.202506  | 0.196824  | 0.199592  | 0.20338   | 0.200321  | 0.199592 | 0.194784  |
| 0.109266  | 0.11961   | 0.128497  | 0.12296   | 0.128059  | 0.120921 | 0.113491  |
| 0.11014   | 0.107663  | 0.119172  | 0.129079  | 0.11116   | 0.112471 | 0.109411  |
| 0.112034  | 0.104021  | 0.112325  | 0.129808  | 0.120047  | 0.116987 | 0.0451632 |
| 0.219114  | 0.216638  | 0.217657  | 0.22465   | 0.218094  | 0.218823 | 0.216638  |
| 0.208625  | 0.208188  | 0.207751  | 0.211538  | 0.207896  | 0.208625 | 0.201777  |
| 0.126603  | 0.125     | 0.129516  | 0.136218  | 0.125     | 0.121358 | 0.126166  |
| 0.247086  | 0.246358  | 0.242133  | 0.248252  | 0.244318  | 0.246212 | 0.240239  |
| 0.0839161 | 0.081148  | 0.104021  | 0.124709  | 0.101544  | 0.1081   | 0.0863928 |
| 0.11859   | 0.118153  | 0.138112  | 0.142774  | 0.133887  | 0.130245 | 0.12398   |
| 0.103438  | 0.0374417 | 0.107517  | 0.12704   | 0.106206  | 0.111305 | 0.0942599 |
| 0.127477  | 0.117133  | 0.133596  | 0.133887  | 0.124417  | 0.119318 | 0.121795  |
| 0.185897  | 0.181672  | 0.183858  | 0.191142  | 0.184003  | 0.181527 | 0.176136  |
| 0.115822  | 0.112762  | 0.13039   | 0.133887  | 0.129953  | 0.116404 | 0.11451   |



|           |           |           |           |           |           |           |
|-----------|-----------|-----------|-----------|-----------|-----------|-----------|
| 0.190414  | 0.185606  | 0.187791  | 0.197115  | 0.190268  | 0.188957  | 0.18211   |
| 0.103584  | 0.105186  | 0.122232  | 0.127185  | 0.11655   | 0.116404  | 0.0996503 |
| 0.114365  | 0.115093  | 0.114656  | 0.110286  | 0.11655   | 0.114656  | 0.112762  |
| 0.102418  | 0.101107  | 0.122815  | 0.130973  | 0.118007  | 0.11961   | 0.113345  |
| 0.107955  | 0.103438  | 0.105624  | 0.114656  | 0.108683  | 0.106498  | 0.104021  |
| 0.102273  | 0.0954254 | 0.0987762 | 0.120921  | 0.105915  | 0.107809  | 0.03919   |
| 0.0984848 | 0.10708   | 0.116841  | 0.114802  | 0.116987  | 0.110431  | 0.101836  |
| 0.100233  | 0.0383159 | 0.106643  | 0.124709  | 0.104749  | 0.106061  | 0.0910548 |
| 0.109411  | 0.114802  | 0.120192  | 0.0566725 | 0.116841  | 0.112325  | 0.104312  |
| 0.113636  | 0.112617  | 0.106643  | 0.125291  | 0.104167  | 0.115385  | 0.116696  |
| 0         | 0.102127  | 0.118007  | 0.123834  | 0.115822  | 0.109557  | 0.103293  |
| 0.102127  | 0         | 0.108829  | 0.126311  | 0.107226  | 0.109994  | 0.0938228 |
| 0.118007  | 0.108829  | 0         | 0.131702  | 0.0726981 | 0.118007  | 0.10067   |
| 0.123834  | 0.126311  | 0.131702  | 0         | 0.128351  | 0.124126  | 0.121066  |
| 0.115822  | 0.107226  | 0.0726981 | 0.128351  | 0         | 0.118735  | 0.107809  |
| 0.109557  | 0.109994  | 0.118007  | 0.124126  | 0.118735  | 0         | 0.105332  |
| 0.103293  | 0.0938228 | 0.10067   | 0.121066  | 0.107809  | 0.105332  | 0         |
| 0.11961   | 0.115676  | 0.119901  | 0.120192  | 0.120338  | 0.114073  | 0.117133  |
| 0.121066  | 0.113345  | 0.128642  | 0.131556  | 0.11859   | 0.110577  | 0.113636  |
| 0.12296   | 0.11116   | 0.12296   | 0.130245  | 0.116987  | 0.11655   | 0.109994  |
| 0.114802  | 0.111451  | 0.0737179 | 0.132284  | 0.0511364 | 0.11859   | 0.110577  |
| 0.114656  | 0.118007  | 0.124272  | 0.0560897 | 0.116259  | 0.115239  | 0.109848  |
| 0.123543  | 0.128934  | 0.134324  | 0.0533217 | 0.126894  | 0.125     | 0.122232  |
| 0.133741  | 0.136218  | 0.140152  | 0.0501166 | 0.135635  | 0.13345   | 0.126311  |
| 0.10271   | 0.100233  | 0.112325  | 0.11961   | 0.105769  | 0.101253  | 0.101107  |
| 0.107372  | 0.100816  | 0.104167  | 0.126894  | 0.111597  | 0.110286  | 0.0425408 |
| 0.102273  | 0.0936772 | 0.11451   | 0.119172  | 0.107955  | 0.105769  | 0.104749  |
| 0.130245  | 0.122815  | 0.137238  | 0.136946  | 0.130682  | 0.126457  | 0.130099  |
| 0.104167  | 0.0422494 | 0.114365  | 0.124563  | 0.109557  | 0.114073  | 0.0996503 |
| 0.136509  | 0.128788  | 0.140589  | 0.145251  | 0.136655  | 0.134178  | 0.130245  |
| 0.123106  | 0.113636  | 0.122523  | 0.14292   | 0.131993  | 0.128934  | 0.0608974 |
| 0.114802  | 0.123397  | 0.131993  | 0.13141   | 0.124563  | 0.119464  | 0.112617  |
| 0.0936772 | 0.0984848 | 0.113491  | 0.119027  | 0.107809  | 0.11116   | 0.0976107 |
| 0.107226  | 0.110868  | 0.11655   | 0.120338  | 0.112908  | 0.104604  | 0.106789  |
| 0.126166  | 0.114948  | 0.0699301 | 0.137238  | 0.0572552 | 0.127914  | 0.120775  |
| 0.202943  | 0.203671  | 0.204108  | 0.205565  | 0.200758  | 0.205565  | 0.199592  |
| 0.111451  | 0.109848  | 0.120484  | 0.126894  | 0.118881  | 0.0453089 | 0.107226  |
| 0.099359  | 0.0995047 | 0.118881  | 0.132284  | 0.115239  | 0.114802  | 0.107663  |
| 0.11961   | 0.113928  | 0.129808  | 0.128059  | 0.11859   | 0.114365  | 0.115967  |
| 0.118007  | 0.107372  | 0.0748834 | 0.13141   | 0.0496795 | 0.119464  | 0.11116   |
| 0.110868  | 0.113054  | 0.127185  | 0.135635  | 0.122086  | 0.121649  | 0.106643  |
| 0.11116   | 0.120338  | 0.126894  | 0.119901  | 0.124417  | 0.119027  | 0.11859   |
| 0.115967  | 0.122523  | 0.130828  | 0.120629  | 0.126894  | 0.118881  | 0.121358  |
| 0.11116   | 0.117133  | 0.129808  | 0.129225  | 0.120047  | 0.114948  | 0.11014   |

|           |           |          |           |           |          |           |
|-----------|-----------|----------|-----------|-----------|----------|-----------|
| 0.109703  | 0.108683  | 0.107663 | 0.124563  | 0.102855  | 0.107955 | 0.107809  |
| 0.125146  | 0.117716  | 0.13447  | 0.129808  | 0.127914  | 0.121941 | 0.123252  |
| 0.100962  | 0.100524  | 0.117861 | 0.126894  | 0.11451   | 0.112325 | 0.108392  |
| 0.0483683 | 0.105041  | 0.125583 | 0.128205  | 0.120775  | 0.117716 | 0.107663  |
| 0.177593  | 0.171911  | 0.171474 | 0.17701   | 0.164918  | 0.177302 | 0.167541  |
| 0.110868  | 0.117424  | 0.121649 | 0.0613345 | 0.115967  | 0.114073 | 0.109266  |
| 0.126166  | 0.119027  | 0.132284 | 0.139277  | 0.128642  | 0.124417 | 0.124272  |
| 0.0989219 | 0.097028  | 0.123397 | 0.140297  | 0.116841  | 0.120192 | 0.110723  |
| 0.120921  | 0.116404  | 0.119172 | 0.120629  | 0.122232  | 0.120921 | 0.114656  |
| 0.0836247 | 0.097465  | 0.106643 | 0.116841  | 0.107372  | 0.104021 | 0.0965909 |
| 0.0501166 | 0.0933858 | 0.115967 | 0.117716  | 0.10708   | 0.105769 | 0.0960082 |
| 0.0903263 | 0.0992133 | 0.113054 | 0.122086  | 0.115239  | 0.107809 | 0.103293  |
| 0.119755  | 0.111451  | 0.121795 | 0.13549   | 0.123106  | 0.120338 | 0.116113  |
| 0.0792541 | 0.110286  | 0.114219 | 0.0973193 | 0.117279  | 0.113636 | 0.106789  |
| 0.120775  | 0.115676  | 0.123689 | 0.13447   | 0.120629  | 0.12602  | 0.115676  |
| 0.106352  | 0.105624  | 0.113636 | 0.119172  | 0.110577  | 0.110723 | 0.102418  |
| 0.10271   | 0.104895  | 0.116404 | 0.133304  | 0.111597  | 0.119901 | 0.11451   |
| 0.122086  | 0.114948  | 0.136946 | 0.139569  | 0.135344  | 0.123543 | 0.122232  |
| 0.0917832 | 0.101836  | 0.11655  | 0.130828  | 0.112617  | 0.11859  | 0.106498  |
| 0.115093  | 0.113782  | 0.118881 | 0.128205  | 0.111451  | 0.120047 | 0.115239  |
| 0.0891608 | 0.0986305 | 0.11014  | 0.128788  | 0.112034  | 0.110431 | 0.10271   |
| 0.0926573 | 0.10067   | 0.11451  | 0.127622  | 0.112908  | 0.115967 | 0.10271   |
| 0.097028  | 0.0887238 | 0.11451  | 0.124417  | 0.105915  | 0.102564 | 0.0936772 |
| 0.102418  | 0.104021  | 0.122815 | 0.134178  | 0.117424  | 0.121649 | 0.104021  |
| 0.0936772 | 0.0920746 | 0.112325 | 0.128934  | 0.107517  | 0.110577 | 0.0990676 |
| 0.136509  | 0.137821  | 0.142628 | 0.148164  | 0.138403  | 0.132721 | 0.135781  |
| 0.126311  | 0.130536  | 0.130099 | 0.136509  | 0.129371  | 0.12398  | 0.123252  |
| 0.0922203 | 0.101399  | 0.107663 | 0.124563  | 0.10373   | 0.107372 | 0.101981  |
| 0.142483  | 0.132721  | 0.138403 | 0.139569  | 0.133887  | 0.128788 | 0.133887  |
| 0.115967  | 0.118444  | 0.104021 | 0.13141   | 0.0945513 | 0.11859  | 0.109703  |
| 0.117424  | 0.112325  | 0.131702 | 0.145396  | 0.13447   | 0.13141  | 0.125146  |
| 0.101981  | 0.0942599 | 0.107226 | 0.124417  | 0.106206  | 0.112762 | 0.101253  |
| 0.137383  | 0.13549   | 0.147582 | 0.146125  | 0.142191  | 0.140006 | 0.134907  |
| 0.119901  | 0.11859   | 0.135927 | 0.140006  | 0.130536  | 0.123106 | 0.122669  |
| 0.134761  | 0.125     | 0.129225 | 0.147582  | 0.128497  | 0.130682 | 0.128497  |
| 0.108246  | 0.110723  | 0.108537 | 0.133304  | 0.0990676 | 0.11961  | 0.113928  |
| 0.092366  | 0.0965909 | 0.112762 | 0.129662  | 0.106206  | 0.106643 | 0.0992133 |
| 0.0919289 | 0.0996503 | 0.113199 | 0.124563  | 0.113345  | 0.106789 | 0.0999417 |
| 0.11014   | 0.110868  | 0.123543 | 0.124126  | 0.120192  | 0.112179 | 0.112617  |
| 0.102564  | 0.0954254 | 0.120047 | 0.132576  | 0.11757   | 0.117133 | 0.10912   |
| 0.112908  | 0.1081    | 0.121941 | 0.137675  | 0.123252  | 0.123106 | 0.115967  |
| 0.116404  | 0.112179  | 0.119318 | 0.135635  | 0.11859   | 0.120192 | 0.113928  |
| 0.10067   | 0.0952797 | 0.099796 | 0.126603  | 0.0894522 | 0.103293 | 0.102273  |
| 0.0952797 | 0.097465  | 0.115676 | 0.126457  | 0.113782  | 0.106935 | 0.101836  |

|           |           |          |          |          |          |           |
|-----------|-----------|----------|----------|----------|----------|-----------|
| 0.101544  | 0.0984848 | 0.123106 | 0.13243  | 0.115676 | 0.11757  | 0.103147  |
| 0.0989219 | 0.0914918 | 0.113782 | 0.124854 | 0.110431 | 0.109703 | 0.100816  |
| 0.10169   | 0.103875  | 0.125874 | 0.132576 | 0.120192 | 0.115967 | 0.108537  |
| 0.101107  | 0.095134  | 0.114802 | 0.123252 | 0.10708  | 0.113928 | 0.10271   |
| 0.109411  | 0.105769  | 0.113782 | 0.116113 | 0.109557 | 0.117861 | 0.102855  |
| 0.0852273 | 0.0955711 | 0.119318 | 0.121649 | 0.115093 | 0.109994 | 0.0987762 |
| 0.0817308 | 0.076049  | 0.103001 | 0.121941 | 0.101107 | 0.106498 | 0.0821678 |
| 0.0942599 | 0.0929487 | 0.114948 | 0.126894 | 0.11014  | 0.110286 | 0.0973193 |
| 0.106643  | 0.103001  | 0.111888 | 0.119464 | 0.106789 | 0.113054 | 0.0983392 |
| 0.0869755 | 0.101981  | 0.119027 | 0.119027 | 0.115093 | 0.111451 | 0.103147  |
| 0.107955  | 0.110723  | 0.122232 | 0.110286 | 0.122378 | 0.112325 | 0.118007  |
| 0.10067   | 0.0961538 | 0.109411 | 0.11116  | 0.100233 | 0.105041 | 0.0929487 |
| 0.101107  | 0.11116   | 0.131993 | 0.128497 | 0.121649 | 0.125874 | 0.121066  |

| TDr_3965  | TDr_3974  | TDr_3978 | TDr_3983  | TDr_3985  | TDr_4005  | TDr_4017 |
|-----------|-----------|----------|-----------|-----------|-----------|----------|
| 0.11655   | 0.126748  | 0.122815 | 0.0846445 | 0.115093  | 0.126894  | 0.135635 |
| 0.118153  | 0.118153  | 0.127914 | 0.111597  | 0.107955  | 0.115967  | 0.124709 |
| 0.120484  | 0.115239  | 0.122086 | 0.1081    | 0.105041  | 0.111888  | 0.120338 |
| 0.11553   | 0.115822  | 0.121212 | 0.119755  | 0.0890152 | 0.0979021 | 0.105769 |
| 0.131556  | 0.130973  | 0.13141  | 0.138695  | 0.133304  | 0.140443  | 0.141317 |
| 0.128934  | 0.129808  | 0.134033 | 0.117424  | 0.128934  | 0.138403  | 0.139569 |
| 0.116841  | 0.131702  | 0.12398  | 0.105624  | 0.125583  | 0.133304  | 0.140297 |
| 0.116841  | 0.112179  | 0.117861 | 0.113782  | 0.102855  | 0.114656  | 0.121941 |
| 0.110868  | 0.110868  | 0.114219 | 0.107517  | 0.104458  | 0.116841  | 0.125583 |
| 0.122086  | 0.120338  | 0.117861 | 0.108829  | 0.118881  | 0.126894  | 0.130973 |
| 0.116113  | 0.125146  | 0.123252 | 0.11014   | 0.125146  | 0.138403  | 0.146853 |
| 0.109557  | 0.104895  | 0.11116  | 0.114948  | 0.108974  | 0.117861  | 0.126311 |
| 0.115093  | 0.117424  | 0.117279 | 0.114073  | 0.111888  | 0.124563  | 0.133887 |
| 0.139714  | 0.140297  | 0.146562 | 0.138403  | 0.129225  | 0.1419    | 0.149476 |
| 0.13345   | 0.131993  | 0.123689 | 0.128934  | 0.127622  | 0.136801  | 0.140297 |
| 0.108537  | 0.129516  | 0.120338 | 0.11859   | 0.121941  | 0.127622  | 0.131702 |
| 0.106352  | 0.0981935 | 0.10912  | 0.118153  | 0.115385  | 0.128351  | 0.135344 |
| 0.150787  | 0.136218  | 0.1588   | 0.147145  | 0.139714  | 0.144231  | 0.146562 |
| 0.114656  | 0.113782  | 0.119464 | 0.101981  | 0.100962  | 0.114219  | 0.121503 |
| 0.199738  | 0.207022  | 0.208042 | 0.201923  | 0.201195  | 0.204837  | 0.208625 |
| 0.131119  | 0.121795  | 0.132139 | 0.10271   | 0.129079  | 0.137966  | 0.145251 |
| 0.129516  | 0.115822  | 0.124126 | 0.0973193 | 0.121941  | 0.132284  | 0.139569 |
| 0.0920746 | 0.113636  | 0.112908 | 0.118153  | 0.110723  | 0.121941  | 0.13039  |
| 0.107663  | 0.125728  | 0.120629 | 0.123543  | 0.127477  | 0.132284  | 0.142774 |
| 0.103147  | 0.110431  | 0.10912  | 0.100962  | 0.106643  | 0.119318  | 0.125728 |
| 0.130245  | 0.130245  | 0.136218 | 0.106498  | 0.129371  | 0.137092  | 0.142337 |
| 0.122378  | 0.123252  | 0.116113 | 0.11757   | 0.128788  | 0.136801  | 0.141463 |
| 0.107517  | 0.117424  | 0.121941 | 0.121941  | 0.120338  | 0.125437  | 0.133304 |
| 0.124417  | 0.13345   | 0.127768 | 0.123689  | 0.129662  | 0.132139  | 0.140589 |
| 0.121795  | 0.124709  | 0.118444 | 0.117279  | 0.126457  | 0.130973  | 0.138258 |
| 0.116113  | 0.127477  | 0.125583 | 0.0958625 | 0.129808  | 0.138112  | 0.142774 |
| 0.11655   | 0.121212  | 0.120775 | 0.115822  | 0.125583  | 0.127768  | 0.136218 |
| 0.109266  | 0.112762  | 0.108829 | 0.101836  | 0.109848  | 0.118153  | 0.127185 |
| 0.116259  | 0.125291  | 0.108246 | 0.112908  | 0.117133  | 0.127768  | 0.133887 |
| 0.112908  | 0.127185  | 0.11859  | 0.121503  | 0.128934  | 0.137238  | 0.140443 |
| 0.120047  | 0.133159  | 0.122523 | 0.122523  | 0.129079  | 0.137675  | 0.135927 |
| 0.130973  | 0.136218  | 0.137238 | 0.114802  | 0.135635  | 0.141317  | 0.146853 |
| 0.11655   | 0.117716  | 0.120775 | 0.114365  | 0.124126  | 0.131847  | 0.14292  |
| 0.0944056 | 0.111597  | 0.109703 | 0.106206  | 0.112762  | 0.120484  | 0.131556 |
| 0.108974  | 0.12704   | 0.125146 | 0.125437  | 0.121795  | 0.129516  | 0.135052 |
| 0.105769  | 0.111597  | 0.120192 | 0.113782  | 0.110723  | 0.121066  | 0.128351 |
| 0.131993  | 0.144522  | 0.144376 | 0.141754  | 0.141317  | 0.147873  | 0.149621 |

|          |          |          |           |           |           |          |
|----------|----------|----------|-----------|-----------|-----------|----------|
| 0.127622 | 0.143939 | 0.147582 | 0.146125  | 0.143357  | 0.152535  | 0.156906 |
| 0.109411 | 0.11961  | 0.117716 | 0.118298  | 0.114365  | 0.12704   | 0.13549  |
| 0.103293 | 0.105332 | 0.107226 | 0.106061  | 0.114656  | 0.124709  | 0.132284 |
| 0.111597 | 0.123252 | 0.115239 | 0.117861  | 0.123543  | 0.134178  | 0.142337 |
| 0.111305 | 0.109848 | 0.117861 | 0.123106  | 0.122669  | 0.129225  | 0.137966 |
| 0.128642 | 0.139132 | 0.136655 | 0.136655  | 0.136218  | 0.144814  | 0.148893 |
| 0.112325 | 0.115822 | 0.118298 | 0.117716  | 0.113491  | 0.125874  | 0.131993 |
| 0.108392 | 0.119755 | 0.116696 | 0.116987  | 0.118298  | 0.13039   | 0.136218 |
| 0.143211 | 0.148456 | 0.141026 | 0.0743007 | 0.14292   | 0.151224  | 0.153555 |
| 0.11757  | 0.122523 | 0.130245 | 0.131702  | 0.133013  | 0.135781  | 0.141026 |
| 0.100816 | 0.120921 | 0.112908 | 0.116696  | 0.113054  | 0.125728  | 0.133887 |
| 0.128788 | 0.128788 | 0.133887 | 0.131556  | 0.122378  | 0.131265  | 0.135344 |
| 0.106643 | 0.121795 | 0.126311 | 0.121941  | 0.0868298 | 0.0977564 | 0.104167 |
| 0.122669 | 0.13549  | 0.131556 | 0.141463  | 0.136364  | 0.141171  | 0.144085 |
| 0.11757  | 0.130682 | 0.127622 | 0.129371  | 0.127768  | 0.13549   | 0.142483 |
| 0.104458 | 0.11553  | 0.120629 | 0.118881  | 0.115239  | 0.123834  | 0.133741 |
| 0.111742 | 0.11961  | 0.121212 | 0.121795  | 0.120484  | 0.134033  | 0.140734 |
| 0.109848 | 0.128497 | 0.122523 | 0.118153  | 0.123834  | 0.136801  | 0.139714 |
| 0.120047 | 0.138986 | 0.143211 | 0.135344  | 0.137238  | 0.14088   | 0.148164 |
| 0.124709 | 0.14627  | 0.140297 | 0.143794  | 0.131993  | 0.137675  | 0.139423 |
| 0.146416 | 0.167104 | 0.16521  | 0.162005  | 0.157488  | 0.163462  | 0.166958 |
| 0.105915 | 0.114365 | 0.120629 | 0.115385  | 0.11553   | 0.124709  | 0.134907 |
| 0.10271  | 0.115239 | 0.119464 | 0.11451   | 0.114948  | 0.128205  | 0.13549  |
| 0.105624 | 0.113491 | 0.108974 | 0.112762  | 0.113199  | 0.124709  | 0.13345  |
| 0.135781 | 0.143939 | 0.139423 | 0.125146  | 0.141317  | 0.14729   | 0.152826 |
| 0.104604 | 0.115093 | 0.116404 | 0.114365  | 0.111014  | 0.121358  | 0.129225 |
| 0.120484 | 0.13039  | 0.133159 | 0.136364  | 0.134761  | 0.1419    | 0.143939 |
| 0.107663 | 0.123689 | 0.11859  | 0.116841  | 0.127477  | 0.134615  | 0.142191 |
| 0.104895 | 0.115967 | 0.11961  | 0.119318  | 0.121212  | 0.132139  | 0.137092 |
| 0.141026 | 0.143065 | 0.143502 | 0.12398   | 0.142191  | 0.154283  | 0.153409 |
| 0.104895 | 0.125874 | 0.121358 | 0.124563  | 0.121212  | 0.133596  | 0.140006 |
| 0.127768 | 0.143211 | 0.137821 | 0.140443  | 0.137383  | 0.139569  | 0.145688 |
| 0.122669 | 0.122669 | 0.128351 | 0.134761  | 0.130828  | 0.137675  | 0.142045 |
| 0.112617 | 0.099796 | 0.120338 | 0.115676  | 0.109994  | 0.121212  | 0.125874 |
| 0.099796 | 0.11757  | 0.115676 | 0.118881  | 0.113491  | 0.125291  | 0.13345  |
| 0.108246 | 0.113491 | 0.125583 | 0.118298  | 0.115822  | 0.129662  | 0.136072 |
| 0.118153 | 0.133013 | 0.136072 | 0.133159  | 0.129808  | 0.132576  | 0.1419   |
| 0.109848 | 0.11655  | 0.113491 | 0.112617  | 0.114802  | 0.128059  | 0.135635 |
| 0.131265 | 0.142337 | 0.145979 | 0.141608  | 0.136509  | 0.140152  | 0.143648 |
| 0.111742 | 0.128934 | 0.124126 | 0.12296   | 0.126311  | 0.136072  | 0.143065 |
| 0.100962 | 0.118735 | 0.119172 | 0.119172  | 0.116404  | 0.121795  | 0.131993 |
| 0.109411 | 0.119318 | 0.122378 | 0.119172  | 0.119901  | 0.134033  | 0.13986  |
| 0.108246 | 0.122523 | 0.125291 | 0.129662  | 0.119318  | 0.127331  | 0.136655 |
| 0.106498 | 0.112617 | 0.122669 | 0.118007  | 0.118153  | 0.131119  | 0.136946 |

|           |          |          |           |          |          |          |
|-----------|----------|----------|-----------|----------|----------|----------|
| 0.103584  | 0.119901 | 0.114802 | 0.11655   | 0.118735 | 0.125874 | 0.134324 |
| 0.122086  | 0.1419   | 0.13884  | 0.14088   | 0.136655 | 0.14292  | 0.14729  |
| 0.105186  | 0.112762 | 0.10708  | 0.109703  | 0.118007 | 0.129808 | 0.137966 |
| 0.114948  | 0.118444 | 0.113345 | 0.11451   | 0.118444 | 0.125874 | 0.137238 |
| 0.123689  | 0.127768 | 0.125583 | 0.116259  | 0.128934 | 0.137821 | 0.142191 |
| 0.122523  | 0.129516 | 0.124126 | 0.107809  | 0.131847 | 0.140152 | 0.143065 |
| 0.125728  | 0.125728 | 0.136364 | 0.13141   | 0.134178 | 0.143065 | 0.142774 |
| 0.130828  | 0.13549  | 0.140006 | 0.135927  | 0.135198 | 0.141754 | 0.146125 |
| 0.118444  | 0.120484 | 0.120338 | 0.106643  | 0.122815 | 0.135198 | 0.141317 |
| 0.176428  | 0.184586 | 0.185023 | 0.174825  | 0.179924 | 0.187937 | 0.192599 |
| 0.111888  | 0.111305 | 0.113491 | 0.106206  | 0.112179 | 0.120775 | 0.130973 |
| 0.129808  | 0.135052 | 0.134907 | 0.136655  | 0.135052 | 0.142774 | 0.14627  |
| 0.123106  | 0.126894 | 0.126166 | 0.128205  | 0.128934 | 0.13549  | 0.142774 |
| 0.129953  | 0.132284 | 0.137675 | 0.116696  | 0.141026 | 0.149038 | 0.152826 |
| 0.108829  | 0.112034 | 0.115967 | 0.113928  | 0.116113 | 0.126166 | 0.135198 |
| 0.121941  | 0.129516 | 0.133741 | 0.132576  | 0.126311 | 0.136364 | 0.142483 |
| 0.116404  | 0.109994 | 0.117716 | 0.111014  | 0.120484 | 0.128788 | 0.134324 |
| 0.11859   | 0.124709 | 0.121649 | 0.124563  | 0.126457 | 0.135635 | 0.137092 |
| 0.110431  | 0.121795 | 0.119027 | 0.10271   | 0.116841 | 0.127185 | 0.13243  |
| 0.127622  | 0.134324 | 0.134178 | 0.135344  | 0.138695 | 0.145251 | 0.147873 |
| 0.105478  | 0.110431 | 0.10912  | 0.106789  | 0.115676 | 0.127477 | 0.133596 |
| 0.124854  | 0.133887 | 0.138403 | 0.118881  | 0.133013 | 0.143357 | 0.143648 |
| 0.115967  | 0.115676 | 0.121649 | 0.0983392 | 0.122669 | 0.131847 | 0.13884  |
| 0.119027  | 0.137092 | 0.129662 | 0.134324  | 0.129516 | 0.136946 | 0.137238 |
| 0.12296   | 0.13345  | 0.126311 | 0.112617  | 0.13345  | 0.146125 | 0.146416 |
| 0.11451   | 0.112471 | 0.114656 | 0.0971737 | 0.117424 | 0.128934 | 0.137092 |
| 0.138986  | 0.144814 | 0.143211 | 0.128642  | 0.142483 | 0.150204 | 0.155449 |
| 0.11757   | 0.114365 | 0.119755 | 0.0990676 | 0.12602  | 0.135198 | 0.142483 |
| 0.112908  | 0.112617 | 0.113345 | 0.112471  | 0.118735 | 0.13141  | 0.137821 |
| 0.11014   | 0.119755 | 0.119318 | 0.114073  | 0.122086 | 0.129516 | 0.136509 |
| 0.142483  | 0.137238 | 0.146999 | 0.123397  | 0.142483 | 0.14933  | 0.152244 |
| 0.108974  | 0.124126 | 0.12398  | 0.116404  | 0.126457 | 0.135635 | 0.142045 |
| 0.112179  | 0.109848 | 0.114365 | 0.110868  | 0.111888 | 0.12398  | 0.130973 |
| 0.112179  | 0.1081   | 0.113782 | 0.116113  | 0.117716 | 0.126894 | 0.136509 |
| 0.11553   | 0.116987 | 0.118007 | 0.099359  | 0.121066 | 0.130828 | 0.139569 |
| 0.11655   | 0.126166 | 0.129225 | 0.125728  | 0.129953 | 0.136509 | 0.141754 |
| 0.119318  | 0.125146 | 0.118298 | 0.101107  | 0.125728 | 0.137821 | 0.144231 |
| 0.0990676 | 0.106061 | 0.105624 | 0.105041  | 0.108974 | 0.119027 | 0.127185 |
| 0.102855  | 0.111014 | 0.11116  | 0.101253  | 0.107517 | 0.118735 | 0.129225 |
| 0.106498  | 0.114656 | 0.110431 | 0.113928  | 0.116113 | 0.124417 | 0.132867 |
| 0.112325  | 0.118153 | 0.116841 | 0.119172  | 0.118444 | 0.129079 | 0.138403 |
| 0.115093  | 0.133159 | 0.125146 | 0.128059  | 0.130828 | 0.139132 | 0.142628 |
| 0.105915  | 0.111742 | 0.106643 | 0.110431  | 0.113782 | 0.125874 | 0.131119 |
| 0.0979021 | 0.109848 | 0.109411 | 0.107663  | 0.110723 | 0.121066 | 0.13039  |

|           |          |          |           |           |          |           |
|-----------|----------|----------|-----------|-----------|----------|-----------|
| 0.106643  | 0.123252 | 0.123689 | 0.121649  | 0.133159  | 0.141754 | 0.145542  |
| 0.0980478 | 0.107372 | 0.111597 | 0.106935  | 0.112034  | 0.122669 | 0.13345   |
| 0.122523  | 0.128642 | 0.122378 | 0.108392  | 0.124563  | 0.136946 | 0.143648  |
| 0.130682  | 0.136218 | 0.128788 | 0.0574009 | 0.132139  | 0.138403 | 0.144522  |
| 0.106206  | 0.114948 | 0.11655  | 0.117716  | 0.120775  | 0.129662 | 0.134615  |
| 0.104021  | 0.113054 | 0.111742 | 0.112325  | 0.114219  | 0.126894 | 0.133887  |
| 0.10373   | 0.113345 | 0.11116  | 0.115822  | 0.113636  | 0.124854 | 0.13243   |
| 0.102855  | 0.109848 | 0.107372 | 0.108537  | 0.11451   | 0.125728 | 0.132721  |
| 0.120629  | 0.12296  | 0.128351 | 0.128351  | 0.125     | 0.132721 | 0.137092  |
| 0.0987762 | 0.112179 | 0.10912  | 0.105915  | 0.111888  | 0.122232 | 0.129516  |
| 0.130973  | 0.137675 | 0.135781 | 0.127331  | 0.139714  | 0.14627  | 0.147145  |
| 0.125583  | 0.137821 | 0.13243  | 0.136218  | 0.138403  | 0.144959 | 0.152244  |
| 0.11655   | 0.130828 | 0.123397 | 0.120192  | 0.125291  | 0.13447  | 0.137675  |
| 0.112325  | 0.118735 | 0.120338 | 0.118298  | 0.122815  | 0.134615 | 0.144522  |
| 0.116696  | 0.112908 | 0.118881 | 0.0981935 | 0.121358  | 0.131993 | 0.13986   |
| 0.101981  | 0.108392 | 0.112034 | 0.110286  | 0.118881  | 0.130682 | 0.138258  |
| 0.095134  | 0.110868 | 0.113345 | 0.106935  | 0.113782  | 0.127914 | 0.135198  |
| 0.10912   | 0.112617 | 0.111597 | 0.109848  | 0.113199  | 0.12296  | 0.131119  |
| 0.10271   | 0.119318 | 0.120629 | 0.118298  | 0.0933858 | 0.106061 | 0.111597  |
| 0.103293  | 0.128934 | 0.130245 | 0.13345   | 0.132721  | 0.140152 | 0.145979  |
| 0.112762  | 0.114219 | 0.121066 | 0.119318  | 0.118881  | 0.129808 | 0.138549  |
| 0.132139  | 0.130973 | 0.131702 | 0.127622  | 0.130099  | 0.138695 | 0.141026  |
| 0.134615  | 0.131702 | 0.134761 | 0.124272  | 0.139277  | 0.145251 | 0.144376  |
| 0.187063  | 0.193473 | 0.196824 | 0.193328  | 0.184441  | 0.194784 | 0.200903  |
| 0.230332  | 0.240822 | 0.240385 | 0.236305  | 0.226836  | 0.230478 | 0.238054  |
| 0.10373   | 0.115967 | 0.117861 | 0.112325  | 0.0725524 | 0.081148 | 0.0878497 |
| 0.101253  | 0.10912  | 0.113636 | 0.113345  | 0.115239  | 0.124126 | 0.129079  |
| 0.100087  | 0.106498 | 0.108974 | 0.11014   | 0.112617  | 0.123834 | 0.129079  |
| 0.10708   | 0.100087 | 0.117133 | 0.116841  | 0.112325  | 0.125874 | 0.132284  |
| 0.133596  | 0.134178 | 0.125291 | 0.129079  | 0.12602   | 0.136072 | 0.138403  |
| 0.106498  | 0.105624 | 0.118298 | 0.115093  | 0.115822  | 0.123252 | 0.131993  |
| 0.124417  | 0.137821 | 0.135927 | 0.144376  | 0.14627   | 0.14933  | 0.149621  |
| 0.106789  | 0.107372 | 0.116841 | 0.119464  | 0.120192  | 0.128205 | 0.136655  |
| 0.118735  | 0.125437 | 0.128788 | 0.128788  | 0.130682  | 0.133159 | 0.137529  |
| 0.11451   | 0.130536 | 0.132721 | 0.133887  | 0.131119  | 0.135344 | 0.139132  |
| 0.116841  | 0.121795 | 0.129225 | 0.130682  | 0.134907  | 0.140297 | 0.146416  |
| 0.128788  | 0.138695 | 0.136509 | 0.141754  | 0.137238  | 0.14292  | 0.148456  |
| 0.108392  | 0.105186 | 0.118444 | 0.117279  | 0.118881  | 0.131556 | 0.139132  |
| 0.100816  | 0.102564 | 0.110868 | 0.114656  | 0.11451   | 0.125146 | 0.133013  |
| 0.106498  | 0.105915 | 0.125291 | 0.11859   | 0.123106  | 0.134907 | 0.137821  |
| 0.101836  | 0.10067  | 0.106643 | 0.114219  | 0.114656  | 0.12296  | 0.129953  |
| 0.101544  | 0.100962 | 0.113054 | 0.114802  | 0.114365  | 0.123834 | 0.129662  |
| 0.101399  | 0.104021 | 0.113491 | 0.11757   | 0.115676  | 0.126603 | 0.133887  |
| 0.112034  | 0.116404 | 0.131702 | 0.131119  | 0.131556  | 0.136946 | 0.141608  |

|           |           |          |          |          |          |          |
|-----------|-----------|----------|----------|----------|----------|----------|
| 0.114365  | 0.12602   | 0.134907 | 0.13986  | 0.139132 | 0.144231 | 0.148893 |
| 0.102855  | 0.112179  | 0.112034 | 0.119318 | 0.116841 | 0.128934 | 0.13447  |
| 0.101836  | 0.112617  | 0.11859  | 0.11859  | 0.118444 | 0.129953 | 0.136655 |
| 0.11553   | 0.121649  | 0.126457 | 0.130828 | 0.13447  | 0.138695 | 0.146562 |
| 0.101253  | 0.104749  | 0.107809 | 0.112471 | 0.113491 | 0.125    | 0.131702 |
| 0.125583  | 0.127331  | 0.14088  | 0.144668 | 0.145688 | 0.153118 | 0.158071 |
| 0.130828  | 0.135198  | 0.139714 | 0.136218 | 0.133741 | 0.145833 | 0.151369 |
| 0.123106  | 0.122815  | 0.131119 | 0.136655 | 0.135927 | 0.13986  | 0.143648 |
| 0.099796  | 0.0983392 | 0.111597 | 0.112471 | 0.108829 | 0.120921 | 0.128205 |
| 0.0984848 | 0.105769  | 0.10912  | 0.10708  | 0.113928 | 0.121941 | 0.130099 |
| 0.114656  | 0.114365  | 0.125874 | 0.12704  | 0.12602  | 0.131702 | 0.138695 |
| 0.106061  | 0.114802  | 0.121066 | 0.122815 | 0.124709 | 0.131556 | 0.137966 |
| 0.111305  | 0.11859   | 0.123689 | 0.131265 | 0.133741 | 0.140297 | 0.143794 |
| 0.105041  | 0.103001  | 0.118298 | 0.120047 | 0.11961  | 0.128788 | 0.137821 |
| 0.100233  | 0.108683  | 0.117279 | 0.123106 | 0.120629 | 0.130682 | 0.135927 |
| 0.109557  | 0.11451   | 0.122523 | 0.127768 | 0.12296  | 0.131265 | 0.134178 |
| 0.117133  | 0.125583  | 0.135052 | 0.130973 | 0.138695 | 0.14729  | 0.151369 |
| 0.113636  | 0.125583  | 0.128059 | 0.134178 | 0.129662 | 0.139423 | 0.14292  |
| 0.11116   | 0.128642  | 0.126457 | 0.131702 | 0.135052 | 0.141317 | 0.147145 |
| 0.111305  | 0.136364  | 0.133304 | 0.124272 | 0.133159 | 0.139132 | 0.146125 |
| 0.102855  | 0.109848  | 0.116113 | 0.112617 | 0.116259 | 0.121066 | 0.129516 |
| 0.12296   | 0.116259  | 0.133887 | 0.131265 | 0.13345  | 0.140589 | 0.142628 |
| 0.100087  | 0.103584  | 0.113345 | 0.111305 | 0.111451 | 0.122086 | 0.129371 |
| 0.112471  | 0.115093  | 0.125146 | 0.118735 | 0.117424 | 0.128642 | 0.135344 |
| 0.108974  | 0.0976107 | 0.121358 | 0.117279 | 0.120338 | 0.128351 | 0.133013 |
| 0.10708   | 0.101544  | 0.11859  | 0.118007 | 0.11961  | 0.130536 | 0.136364 |
| 0.103293  | 0.0960082 | 0.114219 | 0.113345 | 0.116404 | 0.123834 | 0.129371 |
| 0.117716  | 0.125     | 0.130099 | 0.134178 | 0.138112 | 0.144085 | 0.150204 |
| 0.108246  | 0.115822  | 0.121212 | 0.114802 | 0.123689 | 0.131993 | 0.141317 |
| 0.118444  | 0.124272  | 0.131702 | 0.133741 | 0.133304 | 0.138403 | 0.141608 |
| 0.103293  | 0.103875  | 0.107809 | 0.115967 | 0.114365 | 0.120047 | 0.129079 |
| 0.106643  | 0.119464  | 0.11757  | 0.123397 | 0.131119 | 0.136801 | 0.140297 |
| 0.104749  | 0.127477  | 0.124709 | 0.128497 | 0.125437 | 0.129953 | 0.137238 |
| 0.120192  | 0.116113  | 0.127622 | 0.120338 | 0.120192 | 0.134033 | 0.142191 |
| 0.104021  | 0.118298  | 0.110286 | 0.111742 | 0.123543 | 0.133596 | 0.137675 |
| 0.118153  | 0.112034  | 0.126748 | 0.129662 | 0.125437 | 0.134033 | 0.13986  |
| 0.109848  | 0.114802  | 0.120192 | 0.124272 | 0.120047 | 0.135052 | 0.139132 |
| 0.116259  | 0.112762  | 0.109994 | 0.107955 | 0.120629 | 0.133596 | 0.139132 |
| 0.137821  | 0.138986  | 0.136801 | 0.13039  | 0.139277 | 0.144376 | 0.14729  |
| 0.125146  | 0.142628  | 0.132867 | 0.134033 | 0.137675 | 0.13986  | 0.147145 |
| 0.113199  | 0.115239  | 0.110723 | 0.105186 | 0.107663 | 0.118007 | 0.127622 |
| 0.134324  | 0.127331  | 0.133887 | 0.131847 | 0.131993 | 0.141463 | 0.146125 |
| 0.131265  | 0.135635  | 0.126748 | 0.120629 | 0.13243  | 0.140152 | 0.147727 |
| 0.133887  | 0.128351  | 0.134033 | 0.13141  | 0.133013 | 0.139569 | 0.143648 |



|          |          |          |          |          |          |          |
|----------|----------|----------|----------|----------|----------|----------|
| 0.126603 | 0.117279 | 0.128497 | 0.11859  | 0.122232 | 0.13141  | 0.134324 |
| 0.13039  | 0.126603 | 0.124709 | 0.121503 | 0.125146 | 0.139569 | 0.145105 |
| 0.129371 | 0.134615 | 0.128642 | 0.121941 | 0.130536 | 0.138549 | 0.141171 |
| 0.133013 | 0.124563 | 0.128497 | 0.130536 | 0.126603 | 0.130536 | 0.136946 |
| 0.142337 | 0.134178 | 0.138986 | 0.13549  | 0.136218 | 0.143357 | 0.144814 |
| 0.130973 | 0.135635 | 0.133741 | 0.122669 | 0.121941 | 0.130536 | 0.140152 |
| 0.121941 | 0.112617 | 0.122378 | 0.115093 | 0.119318 | 0.129371 | 0.135781 |
| 0.115385 | 0.133741 | 0.125728 | 0.128934 | 0.133159 | 0.140297 | 0.143211 |
| 0.133887 | 0.136509 | 0.134615 | 0.128497 | 0.137383 | 0.145105 | 0.145105 |
| 0.120484 | 0.11553  | 0.118007 | 0.106352 | 0.113199 | 0.125    | 0.13141  |
| 0.213578 | 0.217949 | 0.218677 | 0.214889 | 0.210373 | 0.215763 | 0.222174 |
| 0.128205 | 0.123834 | 0.127768 | 0.121649 | 0.126457 | 0.13447  | 0.139132 |
| 0.119464 | 0.120629 | 0.124563 | 0.117279 | 0.117424 | 0.132139 | 0.136801 |
| 0.139714 | 0.131847 | 0.139277 | 0.136364 | 0.131556 | 0.140734 | 0.144522 |
| 0.122232 | 0.122523 | 0.127914 | 0.116259 | 0.121649 | 0.130245 | 0.136072 |
| 0.138258 | 0.138258 | 0.136946 | 0.129662 | 0.135052 | 0.141317 | 0.145396 |
| 0.124563 | 0.118444 | 0.12704  | 0.129953 | 0.121358 | 0.129662 | 0.137238 |
| 0.125583 | 0.119755 | 0.122232 | 0.119027 | 0.121795 | 0.127477 | 0.133596 |
| 0.129079 | 0.127622 | 0.134178 | 0.127185 | 0.129079 | 0.134761 | 0.143211 |
| 0.13039  | 0.127185 | 0.139569 | 0.129662 | 0.128934 | 0.133741 | 0.144231 |
| 0.133741 | 0.128788 | 0.13447  | 0.13039  | 0.129662 | 0.137383 | 0.142337 |
| 0.144085 | 0.125728 | 0.134907 | 0.126166 | 0.132139 | 0.137821 | 0.141608 |
| 0.13039  | 0.121649 | 0.130828 | 0.13141  | 0.125146 | 0.13345  | 0.136072 |
| 0.109994 | 0.123689 | 0.110723 | 0.117716 | 0.120775 | 0.128788 | 0.137529 |
| 0.126603 | 0.109994 | 0.120629 | 0.118881 | 0.117279 | 0.126166 | 0.134907 |
| 0.140152 | 0.134033 | 0.140297 | 0.137675 | 0.136655 | 0.140006 | 0.145251 |
| 0.124272 | 0.11961  | 0.128205 | 0.123252 | 0.120484 | 0.12704  | 0.133159 |
| 0.120484 | 0.134178 | 0.139569 | 0.141608 | 0.135927 | 0.140734 | 0.148893 |
| 0.141026 | 0.138695 | 0.143211 | 0.124563 | 0.141317 | 0.150495 | 0.156906 |
| 0.112179 | 0.127914 | 0.122815 | 0.118735 | 0.127914 | 0.137966 | 0.139714 |
| 0.130536 | 0.131702 | 0.128351 | 0.123106 | 0.132284 | 0.139132 | 0.145833 |
| 0.127768 | 0.132139 | 0.128788 | 0.118007 | 0.12398  | 0.137238 | 0.144522 |
| 0.129079 | 0.134615 | 0.116696 | 0.124854 | 0.125874 | 0.132139 | 0.136218 |
| 0.131119 | 0.125291 | 0.128059 | 0.119318 | 0.123543 | 0.133013 | 0.139714 |
| 0.142191 | 0.143357 | 0.145542 | 0.128642 | 0.138986 | 0.149621 | 0.156614 |
| 0.107663 | 0.118153 | 0.116841 | 0.115676 | 0.116404 | 0.130536 | 0.137821 |
| 0.128205 | 0.13549  | 0.135052 | 0.13884  | 0.136946 | 0.144085 | 0.148456 |
| 0.135344 | 0.143211 | 0.149184 | 0.127914 | 0.143211 | 0.149476 | 0.151807 |
| 0.110286 | 0.127768 | 0.122378 | 0.118881 | 0.123106 | 0.135198 | 0.141608 |
| 0.120192 | 0.127768 | 0.128788 | 0.127331 | 0.127185 | 0.135781 | 0.145396 |
| 0.122378 | 0.148893 | 0.131265 | 0.135635 | 0.142191 | 0.145251 | 0.148456 |
| 0.108974 | 0.126457 | 0.128059 | 0.131556 | 0.125583 | 0.133887 | 0.139423 |
| 0.130682 | 0.137675 | 0.133741 | 0.136655 | 0.137966 | 0.144231 | 0.146853 |
| 0.121503 | 0.137529 | 0.133887 | 0.133013 | 0.13549  | 0.141754 | 0.146125 |

|           |          |          |           |           |           |           |
|-----------|----------|----------|-----------|-----------|-----------|-----------|
| 0.120484  | 0.122523 | 0.12296  | 0.125874  | 0.128642  | 0.134033  | 0.141608  |
| 0.117133  | 0.132576 | 0.130973 | 0.131847  | 0.129953  | 0.137675  | 0.14088   |
| 0.107663  | 0.12602  | 0.12704  | 0.125583  | 0.13039   | 0.138986  | 0.145396  |
| 0.120629  | 0.128497 | 0.130099 | 0.130099  | 0.135781  | 0.143211  | 0.147582  |
| 0.130245  | 0.124709 | 0.136218 | 0.128934  | 0.128788  | 0.137092  | 0.142628  |
| 0.128497  | 0.129079 | 0.134178 | 0.128934  | 0.132576  | 0.139714  | 0.140589  |
| 0.130828  | 0.13141  | 0.129808 | 0.128351  | 0.132576  | 0.140589  | 0.143502  |
| 0.122669  | 0.132867 | 0.131556 | 0.11961   | 0.133741  | 0.141463  | 0.148164  |
| 0.138403  | 0.139569 | 0.142337 | 0.144376  | 0.143357  | 0.150787  | 0.152244  |
| 0.123834  | 0.131993 | 0.12602  | 0.122815  | 0.131119  | 0.142045  | 0.146125  |
| 0.111888  | 0.117716 | 0.129225 | 0.12398   | 0.124126  | 0.133304  | 0.141463  |
| 0.125583  | 0.123834 | 0.135052 | 0.125728  | 0.134615  | 0.144959  | 0.146999  |
| 0.113054  | 0.124126 | 0.117279 | 0.114656  | 0.123543  | 0.135927  | 0.141754  |
| 0.140006  | 0.145542 | 0.146562 | 0.124126  | 0.141171  | 0.148601  | 0.157634  |
| 0.148456  | 0.154283 | 0.154429 | 0.141026  | 0.156031  | 0.165501  | 0.165793  |
| 0.11116   | 0.125437 | 0.129953 | 0.129953  | 0.131265  | 0.13345   | 0.138403  |
| 0.106061  | 0.11859  | 0.117279 | 0.11757   | 0.120047  | 0.128934  | 0.137675  |
| 0.132721  | 0.124563 | 0.129079 | 0.130245  | 0.129225  | 0.133159  | 0.1419    |
| 0.13549   | 0.133159 | 0.135052 | 0.134761  | 0.130245  | 0.137383  | 0.142337  |
| 0.112179  | 0.119172 | 0.12602  | 0.128351  | 0.131702  | 0.137675  | 0.144668  |
| 0.139569  | 0.131993 | 0.138549 | 0.13447   | 0.13986   | 0.148747  | 0.151661  |
| 0.134324  | 0.141317 | 0.142045 | 0.131556  | 0.136946  | 0.144668  | 0.149621  |
| 0.115822  | 0.133013 | 0.123834 | 0.120629  | 0.127477  | 0.13345   | 0.143648  |
| 0.161276  | 0.143794 | 0.158508 | 0.143939  | 0.151661  | 0.159965  | 0.162005  |
| 0.114656  | 0.13039  | 0.128497 | 0.128788  | 0.135344  | 0.138986  | 0.147727  |
| 0.131265  | 0.146707 | 0.137821 | 0.136072  | 0.144376  | 0.148601  | 0.153555  |
| 0.109848  | 0.121503 | 0.127768 | 0.127185  | 0.127331  | 0.133304  | 0.140006  |
| 0.132576  | 0.132284 | 0.131556 | 0.127768  | 0.132867  | 0.137383  | 0.143211  |
| 0.127622  | 0.125583 | 0.128351 | 0.128351  | 0.127914  | 0.131265  | 0.136509  |
| 0.13243   | 0.142337 | 0.140443 | 0.0967366 | 0.114073  | 0.126166  | 0.132284  |
| 0.150058  | 0.132867 | 0.154575 | 0.146125  | 0.140152  | 0.144959  | 0.145542  |
| 0.11757   | 0.121066 | 0.125    | 0.126457  | 0.0499709 | 0.0530303 | 0.0588578 |
| 0.124417  | 0.136946 | 0.13884  | 0.135052  | 0.0693473 | 0.0680361 | 0.0726981 |
| 0.106498  | 0.144668 | 0.145105 | 0.144814  | 0.140297  | 0.152681  | 0.1588    |
| 0.137383  | 0.144959 | 0.154429 | 0.138986  | 0.119027  | 0.126748  | 0.134615  |
| 0.0996503 | 0.124417 | 0.114656 | 0.108537  | 0.126166  | 0.13447   | 0.142045  |
| 0.139132  | 0.132139 | 0.137821 | 0.133741  | 0.130682  | 0.138112  | 0.142483  |
| 0.116404  | 0.11553  | 0.116259 | 0.115676  | 0.110577  | 0.121795  | 0.129953  |
| 0.109266  | 0.117424 | 0.111451 | 0.116404  | 0.115676  | 0.127477  | 0.134761  |
| 0.123106  | 0.121358 | 0.125874 | 0.116259  | 0.122232  | 0.131993  | 0.138403  |
| 0.11553   | 0.119027 | 0.122378 | 0.121212  | 0.0450175 | 0.0524476 | 0.0582751 |
| 0.113054  | 0.111305 | 0.11116  | 0.121941  | 0.121795  | 0.13447   | 0.141463  |
| 0.112179  | 0.118881 | 0.11553  | 0.113199  | 0.0839161 | 0.0962995 | 0.103875  |
| 0.120047  | 0.119464 | 0.125146 | 0.121358  | 0.105186  | 0.115239  | 0.123689  |

|           |           |           |           |           |           |           |
|-----------|-----------|-----------|-----------|-----------|-----------|-----------|
| 0.128642  | 0.125146  | 0.123543  | 0.124417  | 0.119318  | 0.12704   | 0.135781  |
| 0.113782  | 0.109411  | 0.105478  | 0.108392  | 0.112034  | 0.125874  | 0.132576  |
| 0.117279  | 0.120192  | 0.127914  | 0.12704   | 0.0549242 | 0.0670163 | 0.0725524 |
| 0.114802  | 0.117716  | 0.122523  | 0.122232  | 0.0463287 | 0.0581294 | 0.0680361 |
| 0.0515734 | 0.121212  | 0.110577  | 0.12398   | 0.121503  | 0.130973  | 0.137383  |
| 0.208625  | 0.216492  | 0.21926   | 0.215181  | 0.208042  | 0.214598  | 0.218677  |
| 0.133159  | 0.143357  | 0.144376  | 0.144959  | 0.0632284 | 0.053176  | 0.0409382 |
| 0.127768  | 0.128934  | 0.129079  | 0.128497  | 0.126894  | 0.131702  | 0.134615  |
| 0.123252  | 0.126457  | 0.129808  | 0.123106  | 0.115967  | 0.123397  | 0.131265  |
| 0.204545  | 0.210664  | 0.214015  | 0.210519  | 0.199883  | 0.20877   | 0.214015  |
| 0.0737179 | 0.124709  | 0.119027  | 0.0939685 | 0.122378  | 0.133596  | 0.142628  |
| 0.112325  | 0.125146  | 0.0506993 | 0.119464  | 0.125437  | 0.134324  | 0.141608  |
| 0.118735  | 0.11553   | 0.12296   | 0.127622  | 0.12398   | 0.132284  | 0.136655  |
| 0.126166  | 0.126166  | 0.119901  | 0.123397  | 0.12296   | 0.133304  | 0.137675  |
| 0.245338  | 0.252331  | 0.253642  | 0.249272  | 0.241841  | 0.244901  | 0.247232  |
| 0.126311  | 0.128059  | 0.123252  | 0.0524476 | 0.125146  | 0.136072  | 0.141608  |
| 0.0575466 | 0.11757   | 0.109557  | 0.118298  | 0.11757   | 0.125874  | 0.137238  |
| 0.123106  | 0.0549242 | 0.125874  | 0.127331  | 0.12602   | 0.129662  | 0.140152  |
| 0.120775  | 0.0517191 | 0.124126  | 0.120338  | 0.120775  | 0.126166  | 0.137529  |
| 0.121066  | 0.133304  | 0.125583  | 0.0751748 | 0.128059  | 0.136946  | 0.141608  |
| 0.124563  | 0.123689  | 0.129953  | 0.119755  | 0.104458  | 0.118007  | 0.123252  |
| 0.057838  | 0.11757   | 0.111014  | 0.119755  | 0.119901  | 0.129079  | 0.137238  |
| 0.112762  | 0.11655   | 0.126311  | 0.121358  | 0.0469114 | 0.0566725 | 0.0636655 |
| 0.128642  | 0.121066  | 0.125     | 0.126166  | 0.123397  | 0.129371  | 0.138986  |
| 0.121649  | 0.117861  | 0.11451   | 0.115967  | 0.11757   | 0.128497  | 0.131119  |
| 0.111305  | 0.115385  | 0.122232  | 0.118444  | 0.0553613 | 0.0633741 | 0.0715326 |
| 0.125728  | 0.123397  | 0.123543  | 0.115093  | 0.120484  | 0.130245  | 0.135198  |
| 0.147727  | 0.130536  | 0.152244  | 0.146707  | 0.139277  | 0.145833  | 0.145542  |
| 0.124126  | 0.128788  | 0.123106  | 0.0549242 | 0.125291  | 0.136509  | 0.14088   |
| 0.115676  | 0.129079  | 0.0511364 | 0.118735  | 0.127331  | 0.135635  | 0.140589  |
| 0.185315  | 0.188811  | 0.192745  | 0.186334  | 0.180653  | 0.18954   | 0.194784  |
| 0.19697   | 0.204837  | 0.206148  | 0.202652  | 0.192599  | 0.203234  | 0.209062  |
| 0.127914  | 0.127331  | 0.121066  | 0.119027  | 0.123252  | 0.133013  | 0.13884   |
| 0.121212  | 0.119464  | 0.114073  | 0.115822  | 0.113345  | 0.123397  | 0.130099  |
| 0.134907  | 0.136072  | 0.14933   | 0.130973  | 0.125     | 0.128351  | 0.13243   |
| 0.0588578 | 0.120338  | 0.108537  | 0.118153  | 0.121503  | 0.129516  | 0.137092  |
| 0.127185  | 0.132721  | 0.12296   | 0.0571096 | 0.127477  | 0.137238  | 0.142774  |
| 0.130245  | 0.110431  | 0.134178  | 0.133887  | 0.125291  | 0.128934  | 0.132139  |
| 0.219114  | 0.226981  | 0.228584  | 0.224505  | 0.216783  | 0.221008  | 0.226253  |
| 0.119464  | 0.113636  | 0.118444  | 0.115239  | 0.112471  | 0.122815  | 0.129516  |
| 0.19595   | 0.210227  | 0.211538  | 0.209499  | 0.198864  | 0.204837  | 0.208625  |
| 0.0897436 | 0.111597  | 0.103584  | 0.0995047 | 0.117424  | 0.125146  | 0.136801  |
| 0.113491  | 0.114073  | 0.109848  | 0.115676  | 0.119901  | 0.128497  | 0.136072  |
| 0.105478  | 0.115967  | 0.121941  | 0.11961   | 0.100233  | 0.112034  | 0.11757   |

|           |           |           |           |           |           |           |
|-----------|-----------|-----------|-----------|-----------|-----------|-----------|
| 0.11859   | 0.115967  | 0.116696  | 0.114073  | 0.116259  | 0.123106  | 0.13039   |
| 0.201486  | 0.207314  | 0.210373  | 0.20338   | 0.19799   | 0.207751  | 0.211538  |
| 0.123397  | 0.130973  | 0.135198  | 0.132867  | 0.0546329 | 0.0591492 | 0.0597319 |
| 0.111742  | 0.107372  | 0.116841  | 0.111014  | 0.123397  | 0.131993  | 0.140152  |
| 0.119318  | 0.126894  | 0.131119  | 0.129079  | 0.053176  | 0.0506993 | 0.0530303 |
| 0.120484  | 0.119027  | 0.119464  | 0.126748  | 0.122232  | 0.127914  | 0.132867  |
| 0.120775  | 0.120192  | 0.115967  | 0.115967  | 0.118735  | 0.128205  | 0.135781  |
| 0.0914918 | 0.116259  | 0.105915  | 0.10271   | 0.114802  | 0.128351  | 0.136509  |
| 0.0649767 | 0.120047  | 0.116696  | 0.121649  | 0.118298  | 0.127477  | 0.137092  |
| 0.110723  | 0.126166  | 0.0482226 | 0.120192  | 0.125583  | 0.131556  | 0.141171  |
| 0.11014   | 0.112471  | 0.119318  | 0.117861  | 0.0527389 | 0.0627914 | 0.071824  |
| 0.112325  | 0.11116   | 0.113345  | 0.112471  | 0.123689  | 0.130536  | 0.139569  |
| 0.186189  | 0.188811  | 0.192162  | 0.187791  | 0.178904  | 0.188666  | 0.19595   |
| 0.120192  | 0.0511364 | 0.125874  | 0.125874  | 0.125728  | 0.128497  | 0.138986  |
| 0.131119  | 0.115385  | 0.133596  | 0.129808  | 0.126748  | 0.130973  | 0.136801  |
| 0.122815  | 0.101253  | 0.126457  | 0.129371  | 0.113782  | 0.122378  | 0.13141   |
| 0.122378  | 0.126457  | 0.123397  | 0.0575466 | 0.124417  | 0.137383  | 0.145542  |
| 0.115093  | 0.120629  | 0.12398   | 0.12398   | 0.0486597 | 0.0511364 | 0.060169  |
| 0.094697  | 0.118881  | 0.107372  | 0.105332  | 0.121503  | 0.129225  | 0.137383  |
| 0.118444  | 0.10912   | 0.118881  | 0.097028  | 0.114073  | 0.124126  | 0.13141   |
| 0.0575466 | 0.123106  | 0.113928  | 0.125     | 0.12398   | 0.134615  | 0.141608  |
| 0.128788  | 0.113054  | 0.131265  | 0.124854  | 0.117133  | 0.126894  | 0.13447   |
| 0.117133  | 0.0498252 | 0.12398   | 0.121358  | 0.115967  | 0.128642  | 0.136509  |
| 0.122815  | 0.124272  | 0.118298  | 0.119172  | 0.116113  | 0.127914  | 0.133741  |
| 0.121212  | 0.114802  | 0.124272  | 0.12398   | 0.126457  | 0.134178  | 0.139132  |
| 0.13039   | 0.127768  | 0.13549   | 0.136364  | 0.13447   | 0.137821  | 0.1419    |
| 0.118735  | 0.121649  | 0.116259  | 0.0518648 | 0.11961   | 0.131993  | 0.138695  |
| 0.126457  | 0.140443  | 0.140006  | 0.142337  | 0.0614802 | 0.0523019 | 0.0400641 |
| 0.123543  | 0.117716  | 0.117279  | 0.114948  | 0.116259  | 0.125437  | 0.132139  |
| 0.115385  | 0.0987762 | 0.121358  | 0.121358  | 0.111014  | 0.121358  | 0.126311  |
| 0.110286  | 0.122815  | 0.125291  | 0.125874  | 0.0686189 | 0.0751748 | 0.0798368 |
| 0.0569639 | 0.124854  | 0.115676  | 0.127914  | 0.124854  | 0.134615  | 0.145105  |
| 0.167686  | 0.189831  | 0.19493   | 0.187937  | 0.182838  | 0.191142  | 0.197844  |
| 0.107226  | 0.105186  | 0.111742  | 0.108246  | 0.11859   | 0.129516  | 0.136801  |
| 0.109848  | 0.108392  | 0.107955  | 0.10708   | 0.0979021 | 0.112325  | 0.120192  |
| 0.112471  | 0.125291  | 0.0470571 | 0.118153  | 0.125291  | 0.132721  | 0.137675  |
| 0.178613  | 0.181527  | 0.180507  | 0.18109   | 0.170163  | 0.181381  | 0.184878  |
| 0.135344  | 0.138258  | 0.13141   | 0.0632284 | 0.135344  | 0.145688  | 0.150932  |
| 0.144376  | 0.148164  | 0.13986   | 0.0710956 | 0.145833  | 0.15472   | 0.155303  |
| 0.151515  | 0.136364  | 0.154283  | 0.147582  | 0.142191  | 0.146416  | 0.143794  |
| 0.117424  | 0.116841  | 0.119901  | 0.0520105 | 0.120629  | 0.13039   | 0.138549  |
| 0.11757   | 0.121941  | 0.125874  | 0.123252  | 0.048514  | 0.0504079 | 0.0568182 |
| 0.206585  | 0.209499  | 0.215181  | 0.208479  | 0.200466  | 0.206439  | 0.213141  |
| 0.125291  | 0.122378  | 0.126603  | 0.122815  | 0.122086  | 0.123689  | 0.129808  |

|           |           |           |           |           |           |           |
|-----------|-----------|-----------|-----------|-----------|-----------|-----------|
| 0.122523  | 0.124563  | 0.130245  | 0.130536  | 0.0520105 | 0.0518648 | 0.0541958 |
| 0.108246  | 0.110577  | 0.113928  | 0.109848  | 0.121066  | 0.131702  | 0.138112  |
| 0.165064  | 0.171183  | 0.173368  | 0.16958   | 0.148747  | 0.157051  | 0.164627  |
| 0.11961   | 0.115822  | 0.121503  | 0.113345  | 0.108246  | 0.118881  | 0.129371  |
| 0.150641  | 0.144522  | 0.151369  | 0.147582  | 0.144814  | 0.151078  | 0.150787  |
| 0.122669  | 0.125     | 0.120775  | 0.115822  | 0.123252  | 0.130973  | 0.139132  |
| 0.182692  | 0.189685  | 0.195076  | 0.187791  | 0.18007   | 0.191871  | 0.195076  |
| 0.125874  | 0.12296   | 0.119318  | 0.0523019 | 0.123834  | 0.13447   | 0.142045  |
| 0.112762  | 0.113928  | 0.112325  | 0.113782  | 0.105186  | 0.116113  | 0.123689  |
| 0.119027  | 0.097465  | 0.121212  | 0.121212  | 0.110577  | 0.125     | 0.129662  |
| 0.112471  | 0.115676  | 0.109411  | 0.114656  | 0.115676  | 0.124854  | 0.13447   |
| 0.109848  | 0.124417  | 0.0473485 | 0.118153  | 0.122378  | 0.131847  | 0.140589  |
| 0.122086  | 0.122378  | 0.126894  | 0.123106  | 0.120047  | 0.131265  | 0.135635  |
| 0.122523  | 0.118735  | 0.114802  | 0.115676  | 0.116113  | 0.126457  | 0.133159  |
| 0.184732  | 0.18852   | 0.193619  | 0.188666  | 0.181818  | 0.193036  | 0.200029  |
| 0.120484  | 0.119027  | 0.124417  | 0.127331  | 0.119901  | 0.130245  | 0.137529  |
| 0.114219  | 0.119464  | 0.114948  | 0.117861  | 0.109266  | 0.118735  | 0.125728  |
| 0.206148  | 0.21285   | 0.212995  | 0.211247  | 0.202069  | 0.21183   | 0.215909  |
| 0.12398   | 0.0566725 | 0.125     | 0.125583  | 0.124272  | 0.129953  | 0.13986   |
| 0.123252  | 0.120338  | 0.116404  | 0.116404  | 0.120047  | 0.130973  | 0.13447   |
| 0.120047  | 0.115093  | 0.112325  | 0.112034  | 0.113636  | 0.123106  | 0.130682  |
| 0.128059  | 0.137966  | 0.143648  | 0.141026  | 0.0744464 | 0.0684732 | 0.0603147 |
| 0.184295  | 0.190414  | 0.192016  | 0.189685  | 0.179924  | 0.188811  | 0.19289   |
| 0.0603147 | 0.118298  | 0.112325  | 0.121358  | 0.118881  | 0.130682  | 0.139714  |
| 0.12704   | 0.122378  | 0.130682  | 0.132721  | 0.132867  | 0.134761  | 0.13884   |
| 0.12296   | 0.119172  | 0.114073  | 0.116404  | 0.118007  | 0.127768  | 0.136509  |
| 0.118298  | 0.117133  | 0.114365  | 0.114365  | 0.116259  | 0.123397  | 0.130682  |
| 0.118444  | 0.11757   | 0.113345  | 0.113928  | 0.115239  | 0.127914  | 0.134615  |
| 0.115093  | 0.117716  | 0.120775  | 0.119318  | 0.0495338 | 0.060169  | 0.0665793 |
| 0.11116   | 0.107955  | 0.106352  | 0.106352  | 0.113491  | 0.123834  | 0.131702  |
| 0.125728  | 0.126603  | 0.120338  | 0.048951  | 0.127185  | 0.13549   | 0.143939  |
| 0.135344  | 0.119318  | 0.138112  | 0.13986   | 0.121649  | 0.124126  | 0.127622  |
| 0.12398   | 0.122232  | 0.125874  | 0.0541958 | 0.125437  | 0.136655  | 0.145979  |
| 0.126166  | 0.125291  | 0.127477  | 0.128642  | 0.128205  | 0.134178  | 0.134761  |
| 0.18954   | 0.193328  | 0.198427  | 0.192016  | 0.184003  | 0.193182  | 0.199592  |
| 0.119172  | 0.111305  | 0.118444  | 0.121066  | 0.120338  | 0.132721  | 0.140006  |
| 0.124272  | 0.129225  | 0.133159  | 0.134033  | 0.0549242 | 0.0486597 | 0.0527389 |
| 0.121795  | 0.115093  | 0.112617  | 0.112034  | 0.114802  | 0.12398   | 0.13039   |
| 0.112617  | 0.106206  | 0.104895  | 0.107809  | 0.112908  | 0.123834  | 0.132867  |
| 0.11961   | 0.113782  | 0.125583  | 0.113345  | 0.115822  | 0.126166  | 0.134324  |
| 0.0547786 | 0.119464  | 0.109411  | 0.119901  | 0.11859   | 0.129808  | 0.137966  |
| 0.131119  | 0.129662  | 0.133887  | 0.124854  | 0.12296   | 0.130099  | 0.132139  |
| 0.12602   | 0.111742  | 0.128205  | 0.118881  | 0.118735  | 0.127331  | 0.133159  |
| 0.0753205 | 0.115822  | 0.105478  | 0.111014  | 0.114948  | 0.129662  | 0.138695  |

|           |          |           |           |           |           |           |
|-----------|----------|-----------|-----------|-----------|-----------|-----------|
| 0.0827506 | 0.108683 | 0.105041  | 0.108829  | 0.109848  | 0.120775  | 0.130682  |
| 0.114948  | 0.114073 | 0.115093  | 0.1081    | 0.108246  | 0.119755  | 0.127914  |
| 0.0912005 | 0.115093 | 0.105041  | 0.0995047 | 0.115967  | 0.127768  | 0.136218  |
| 0.132139  | 0.138549 | 0.128788  | 0.0600233 | 0.132139  | 0.140443  | 0.145688  |
| 0.0646853 | 0.118298 | 0.110868  | 0.121066  | 0.119755  | 0.134178  | 0.14088   |
| 0.111742  | 0.114656 | 0.124126  | 0.117716  | 0.0488054 | 0.0620629 | 0.0675991 |
| 0.0636655 | 0.115239 | 0.107809  | 0.115676  | 0.116404  | 0.127914  | 0.136072  |
| 0.116841  | 0.114802 | 0.116113  | 0.114948  | 0.11451   | 0.127477  | 0.133013  |
| 0.108246  | 0.104749 | 0.111888  | 0.106352  | 0.11757   | 0.126166  | 0.132284  |
| 0.123397  | 0.118444 | 0.116841  | 0.118007  | 0.117279  | 0.129371  | 0.135198  |
| 0.114365  | 0.103584 | 0.11451   | 0.11859   | 0.115822  | 0.127622  | 0.135781  |
| 0.124854  | 0.108829 | 0.127622  | 0.124126  | 0.118444  | 0.127914  | 0.136364  |
| 0.111742  | 0.119027 | 0.0547786 | 0.113054  | 0.119027  | 0.126166  | 0.136364  |
| 0.115385  | 0.111597 | 0.113491  | 0.110868  | 0.114219  | 0.124854  | 0.133887  |
| 0.121358  | 0.116696 | 0.114802  | 0.115676  | 0.114948  | 0.124709  | 0.131993  |
| 0.120192  | 0.104458 | 0.124709  | 0.122086  | 0.116113  | 0.126748  | 0.132284  |
| 0.123543  | 0.122669 | 0.12398   | 0.120484  | 0.112471  | 0.122815  | 0.128642  |
| 0.115822  | 0.120484 | 0.116259  | 0.111597  | 0.113491  | 0.124417  | 0.130828  |
| 0.121066  | 0.115822 | 0.11451   | 0.118298  | 0.114656  | 0.123834  | 0.13141   |
| 0.11655   | 0.118881 | 0.124563  | 0.122232  | 0.0477855 | 0.0537587 | 0.0566725 |
| 0.0920746 | 0.116841 | 0.103584  | 0.103875  | 0.118007  | 0.131556  | 0.137966  |
| 0.115967  | 0.118298 | 0.128642  | 0.123106  | 0.0498252 | 0.0584207 | 0.064831  |
| 0.11014   | 0.120629 | 0.0502622 | 0.116696  | 0.120338  | 0.130973  | 0.141171  |
| 0.114802  | 0.113054 | 0.110868  | 0.111742  | 0.117716  | 0.128642  | 0.135344  |
| 0.117716  | 0.113054 | 0.114948  | 0.109411  | 0.110723  | 0.122523  | 0.130099  |
| 0.108829  | 0.103875 | 0.109557  | 0.106061  | 0.118735  | 0.127331  | 0.13549   |
| 0.119755  | 0.121795 | 0.128059  | 0.125728  | 0.0515734 | 0.0619172 | 0.0680361 |
| 0.119464  | 0.122378 | 0.121941  | 0.121941  | 0.113636  | 0.119901  | 0.130099  |
| 0.11961   | 0.119901 | 0.121503  | 0.114802  | 0.105624  | 0.113636  | 0.125     |
| 0.190122  | 0.193619 | 0.19697   | 0.191142  | 0.186334  | 0.19493   | 0.199883  |
| 0.160693  | 0.161859 | 0.173077  | 0.163753  | 0.1537    | 0.160548  | 0.164918  |
| 0.122232  | 0.126603 | 0.120047  | 0.0483683 | 0.124854  | 0.136364  | 0.143648  |
| 0.0839161 | 0.12296  | 0.121066  | 0.120775  | 0.113054  | 0.124854  | 0.132139  |
| 0.146562  | 0.154138 | 0.14292   | 0.0756119 | 0.148893  | 0.157197  | 0.154866  |
| 0.130682  | 0.120484 | 0.129371  | 0.126457  | 0.123689  | 0.133741  | 0.140152  |
| 0.12704   | 0.11859  | 0.125146  | 0.124563  | 0.121503  | 0.132139  | 0.139714  |
| 0.119318  | 0.122523 | 0.121795  | 0.115676  | 0.112617  | 0.120921  | 0.128788  |
| 0.122815  | 0.119318 | 0.122086  | 0.112762  | 0.119901  | 0.130245  | 0.137238  |
| 0.125437  | 0.125437 | 0.123252  | 0.123834  | 0.114365  | 0.123543  | 0.128497  |
| 0.197261  | 0.203089 | 0.207605  | 0.200029  | 0.193765  | 0.200612  | 0.208188  |
| 0.0616259 | 0.122523 | 0.112179  | 0.121795  | 0.125437  | 0.132576  | 0.143939  |
| 0.0836247 | 0.118881 | 0.122523  | 0.119901  | 0.0751748 | 0.0823135 | 0.0910548 |
| 0.116259  | 0.119464 | 0.111742  | 0.114656  | 0.112762  | 0.121649  | 0.13039   |
| 0.123106  | 0.112617 | 0.120338  | 0.119755  | 0.120775  | 0.130828  | 0.137821  |

|           |           |           |           |           |           |           |
|-----------|-----------|-----------|-----------|-----------|-----------|-----------|
| 0.18007   | 0.186772  | 0.189831  | 0.186917  | 0.175991  | 0.189248  | 0.193619  |
| 0.23951   | 0.24796   | 0.248106  | 0.24461   | 0.238054  | 0.241404  | 0.244318  |
| 0.128497  | 0.112762  | 0.131265  | 0.125146  | 0.123252  | 0.130682  | 0.135052  |
| 0.125     | 0.11859   | 0.121358  | 0.121941  | 0.113636  | 0.120484  | 0.128934  |
| 0.124709  | 0.124126  | 0.119901  | 0.0502622 | 0.123543  | 0.135635  | 0.14292   |
| 0.111451  | 0.120484  | 0.0553613 | 0.11014   | 0.120192  | 0.13141   | 0.138986  |
| 0.0617716 | 0.115385  | 0.105041  | 0.118153  | 0.115093  | 0.12398   | 0.13243   |
| 0.118735  | 0.110286  | 0.118298  | 0.118298  | 0.116113  | 0.124126  | 0.131702  |
| 0.112762  | 0.123252  | 0.119318  | 0.115822  | 0.0839161 | 0.0939685 | 0.101544  |
| 0.0553613 | 0.115093  | 0.107663  | 0.114948  | 0.116259  | 0.126603  | 0.135344  |
| 0.114656  | 0.122232  | 0.122086  | 0.115093  | 0.0715326 | 0.0847902 | 0.0888695 |
| 0.122669  | 0.127331  | 0.122815  | 0.119901  | 0.120047  | 0.129516  | 0.136801  |
| 0.113199  | 0.114656  | 0.1081    | 0.109266  | 0.114073  | 0.127331  | 0.131993  |
| 0.128497  | 0.108974  | 0.131847  | 0.12398   | 0.120338  | 0.128351  | 0.134761  |
| 0.116696  | 0.119318  | 0.123834  | 0.121503  | 0.0505536 | 0.0582751 | 0.0673077 |
| 0.107955  | 0.0913462 | 0.110431  | 0.110431  | 0.103001  | 0.11655   | 0.122086  |
| 0.120192  | 0.121358  | 0.12704   | 0.128497  | 0.12602   | 0.134907  | 0.140152  |
| 0.118444  | 0.133304  | 0.0524476 | 0.125874  | 0.133304  | 0.139277  | 0.144814  |
| 0.117424  | 0.112179  | 0.116404  | 0.114948  | 0.113928  | 0.126311  | 0.132721  |
| 0.114948  | 0.126311  | 0.119172  | 0.106352  | 0.121941  | 0.13141   | 0.137821  |
| 0.133596  | 0.131556  | 0.128497  | 0.131119  | 0.128642  | 0.136655  | 0.13986   |
| 0.203671  | 0.211538  | 0.21081   | 0.205565  | 0.20134   | 0.204983  | 0.210519  |
| 0.116696  | 0.103001  | 0.118298  | 0.11451   | 0.110577  | 0.122378  | 0.131119  |
| 0.117424  | 0.113054  | 0.108537  | 0.106498  | 0.11451   | 0.128351  | 0.135635  |
| 0.122086  | 0.110431  | 0.11961   | 0.124854  | 0.120921  | 0.132139  | 0.140589  |
| 0.122815  | 0.0525932 | 0.128497  | 0.127622  | 0.123689  | 0.127914  | 0.141026  |
| 0.118153  | 0.112908  | 0.118298  | 0.120047  | 0.114948  | 0.128497  | 0.131119  |
| 0.196824  | 0.197698  | 0.205128  | 0.198427  | 0.191579  | 0.200175  | 0.206585  |
| 0.117133  | 0.12296   | 0.129516  | 0.125146  | 0.0504079 | 0.0587121 | 0.0645396 |
| 0.119318  | 0.114365  | 0.112179  | 0.113345  | 0.11116   | 0.124126  | 0.13141   |
| 0.118298  | 0.125874  | 0.12398   | 0.116404  | 0.122086  | 0.126311  | 0.132721  |
| 0.107226  | 0.113928  | 0.0514277 | 0.111742  | 0.117716  | 0.12602   | 0.134761  |
| 0.115967  | 0.118881  | 0.128351  | 0.126311  | 0.0495338 | 0.0616259 | 0.0665793 |
| 0.112762  | 0.110723  | 0.11553   | 0.112908  | 0.0743007 | 0.08581   | 0.0957168 |
| 0.122669  | 0.126748  | 0.119901  | 0.118735  | 0.116841  | 0.124563  | 0.133304  |
| 0.119464  | 0.0460373 | 0.122232  | 0.121649  | 0.117424  | 0.128642  | 0.140006  |
| 0.192745  | 0.200029  | 0.197552  | 0.198427  | 0.188374  | 0.198135  | 0.203963  |
| 0.112471  | 0.112471  | 0.119027  | 0.114365  | 0.0512821 | 0.0651224 | 0.0715326 |
| 0.18954   | 0.196824  | 0.197844  | 0.194056  | 0.18546   | 0.196096  | 0.201632  |
| 0.189103  | 0.193765  | 0.19799   | 0.190414  | 0.184149  | 0.193619  | 0.200321  |
| 0.11451   | 0.128205  | 0.0502622 | 0.123397  | 0.13141   | 0.135635  | 0.143794  |
| 0.128497  | 0.0641026 | 0.135344  | 0.130099  | 0.131993  | 0.13884   | 0.144376  |
| 0.111014  | 0.115385  | 0.116113  | 0.110577  | 0.109266  | 0.120192  | 0.127477  |
| 0.108246  | 0.11116   | 0.116259  | 0.11451   | 0.0587121 | 0.0705128 | 0.0763403 |

|           |           |           |           |           |           |           |
|-----------|-----------|-----------|-----------|-----------|-----------|-----------|
| 0.115967  | 0.117716  | 0.126603  | 0.119318  | 0.0495338 | 0.0636655 | 0.0712413 |
| 0.12296   | 0.117424  | 0.115239  | 0.118735  | 0.11859   | 0.128934  | 0.135635  |
| 0.0632284 | 0.111597  | 0.10271   | 0.112034  | 0.111305  | 0.121358  | 0.130099  |
| 0.0591492 | 0.114802  | 0.103001  | 0.116987  | 0.118007  | 0.127768  | 0.135927  |
| 0.13039   | 0.111451  | 0.132867  | 0.127622  | 0.122523  | 0.131702  | 0.136364  |
| 0.112762  | 0.120338  | 0.0514277 | 0.115239  | 0.124709  | 0.131847  | 0.140589  |
| 0.115822  | 0.113199  | 0.113054  | 0.111305  | 0.110577  | 0.121795  | 0.126457  |
| 0.114802  | 0.114802  | 0.125146  | 0.123397  | 0.0509907 | 0.0604604 | 0.0697844 |
| 0.108537  | 0.111451  | 0.112179  | 0.108392  | 0.105332  | 0.115385  | 0.123252  |
| 0.121795  | 0.12704   | 0.13447   | 0.133596  | 0.0533217 | 0.0517191 | 0.0490967 |
| 0.122669  | 0.121795  | 0.117861  | 0.0488054 | 0.120629  | 0.134761  | 0.139132  |
| 0.122523  | 0.13447   | 0.136072  | 0.138986  | 0.0598776 | 0.0498252 | 0.0451632 |
| 0.253351  | 0.260927  | 0.261655  | 0.258159  | 0.250728  | 0.255536  | 0.256702  |
| 0.118444  | 0.120192  | 0.126166  | 0.12296   | 0.131556  | 0.136364  | 0.140734  |
| 0.124417  | 0.129371  | 0.120484  | 0.123106  | 0.129953  | 0.135635  | 0.137966  |
| 0.214598  | 0.218677  | 0.222028  | 0.217657  | 0.207314  | 0.214161  | 0.218823  |
| 0.129953  | 0.119464  | 0.121649  | 0.126311  | 0.131993  | 0.137383  | 0.145542  |
| 0.226107  | 0.230769  | 0.233829  | 0.22771   | 0.219114  | 0.223339  | 0.231498  |
| 0.112617  | 0.112908  | 0.11655   | 0.117716  | 0.122523  | 0.128788  | 0.134615  |
| 0.131702  | 0.131702  | 0.123397  | 0.128642  | 0.128205  | 0.135635  | 0.137092  |
| 0.113345  | 0.0498252 | 0.120484  | 0.118444  | 0.117133  | 0.124563  | 0.136509  |
| 0.114802  | 0.128497  | 0.0488054 | 0.121066  | 0.126748  | 0.133304  | 0.144085  |
| 0.199009  | 0.200758  | 0.207896  | 0.201777  | 0.193473  | 0.203526  | 0.209062  |
| 0.125     | 0.130828  | 0.131265  | 0.132139  | 0.0565268 | 0.0543415 | 0.050845  |
| 0.115093  | 0.119172  | 0.127185  | 0.123689  | 0.0515734 | 0.0613345 | 0.0692016 |
| 0.223048  | 0.227418  | 0.229312  | 0.223776  | 0.219551  | 0.223776  | 0.230769  |
| 0.0617716 | 0.118298  | 0.111451  | 0.119318  | 0.120629  | 0.130973  | 0.141754  |
| 0.193328  | 0.199446  | 0.204254  | 0.198427  | 0.191579  | 0.199883  | 0.204545  |
| 0.0651224 | 0.117279  | 0.111305  | 0.120921  | 0.119318  | 0.129371  | 0.137238  |
| 0.122523  | 0.118735  | 0.115967  | 0.115676  | 0.11553   | 0.127622  | 0.134324  |
| 0.125874  | 0.124126  | 0.121941  | 0.11961   | 0.123543  | 0.132721  | 0.135344  |
| 0.116841  | 0.129953  | 0.0549242 | 0.125146  | 0.131993  | 0.136218  | 0.143211  |
| 0.120484  | 0.118444  | 0.123252  | 0.113636  | 0.113199  | 0.123543  | 0.131702  |
| 0.157197  | 0.159528  | 0.169872  | 0.157634  | 0.156031  | 0.168124  | 0.174534  |
| 0.113491  | 0.114073  | 0.122378  | 0.118298  | 0.0464744 | 0.0568182 | 0.0641026 |
| 0.118444  | 0.0546329 | 0.125874  | 0.124709  | 0.124272  | 0.13345   | 0.142483  |
| 0.119318  | 0.112617  | 0.115093  | 0.126748  | 0.124272  | 0.135781  | 0.142191  |
| 0.12398   | 0.109411  | 0.130245  | 0.131702  | 0.121941  | 0.125874  | 0.130828  |
| 0.193182  | 0.195804  | 0.200029  | 0.194202  | 0.18648   | 0.197407  | 0.201195  |
| 0.120192  | 0.117279  | 0.111888  | 0.113636  | 0.115239  | 0.126457  | 0.13141   |
| 0.115676  | 0.127622  | 0.0604604 | 0.121649  | 0.125     | 0.136801  | 0.145833  |
| 0.0939685 | 0.115822  | 0.106061  | 0.099359  | 0.116404  | 0.126166  | 0.135781  |
| 0.0579837 | 0.120629  | 0.109411  | 0.122523  | 0.120338  | 0.128934  | 0.135927  |
| 0.125146  | 0.121649  | 0.118298  | 0.121795  | 0.120775  | 0.129371  | 0.134033  |



|           |           |           |           |           |           |           |
|-----------|-----------|-----------|-----------|-----------|-----------|-----------|
| 0.249126  | 0.253788  | 0.258304  | 0.255682  | 0.246795  | 0.250728  | 0.252477  |
| 0.118153  | 0.116987  | 0.111597  | 0.112471  | 0.119027  | 0.126748  | 0.132867  |
| 0.119318  | 0.114948  | 0.119464  | 0.124126  | 0.121358  | 0.13345   | 0.136364  |
| 0.172348  | 0.177593  | 0.182692  | 0.178613  | 0.174388  | 0.182401  | 0.180361  |
| 0.182838  | 0.186626  | 0.189977  | 0.182692  | 0.179633  | 0.187646  | 0.196387  |
| 0.126603  | 0.108537  | 0.129953  | 0.128497  | 0.11757   | 0.128788  | 0.136364  |
| 0.117424  | 0.120338  | 0.124272  | 0.121941  | 0.0512821 | 0.057838  | 0.0662879 |
| 0.105478  | 0.120921  | 0.0546329 | 0.113491  | 0.119464  | 0.125728  | 0.134761  |
| 0.133596  | 0.144376  | 0.147145  | 0.14831   | 0.064831  | 0.0559441 | 0.0413753 |
| 0.123106  | 0.10912   | 0.127914  | 0.121212  | 0.116113  | 0.127622  | 0.13549   |
| 0.128205  | 0.113054  | 0.133304  | 0.127477  | 0.121503  | 0.131847  | 0.136801  |
| 0.0552156 | 0.123689  | 0.115093  | 0.125     | 0.125728  | 0.13549   | 0.143939  |
| 0.109703  | 0.120192  | 0.123543  | 0.117424  | 0.048514  | 0.0518648 | 0.0574009 |
| 0.122669  | 0.128205  | 0.131847  | 0.135635  | 0.0556527 | 0.0493881 | 0.0493881 |
| 0.0662879 | 0.123106  | 0.116841  | 0.118007  | 0.11553   | 0.126748  | 0.137238  |
| 0.112762  | 0.128205  | 0.0493881 | 0.121358  | 0.128497  | 0.13447   | 0.14088   |
| 0.122523  | 0.143211  | 0.0629371 | 0.13549   | 0.142628  | 0.144231  | 0.150058  |
| 0.122378  | 0.121503  | 0.11757   | 0.116987  | 0.124126  | 0.131847  | 0.136509  |
| 0.11757   | 0.135052  | 0.0504079 | 0.124709  | 0.13447   | 0.140152  | 0.145688  |
| 0.060169  | 0.129516  | 0.11859   | 0.127914  | 0.127185  | 0.135198  | 0.1419    |
| 0.203671  | 0.206585  | 0.211101  | 0.206439  | 0.197552  | 0.207896  | 0.214015  |
| 0.112908  | 0.124563  | 0.125874  | 0.122086  | 0.129808  | 0.13986   | 0.144231  |
| 0.188083  | 0.191288  | 0.195221  | 0.189977  | 0.183712  | 0.193182  | 0.19697   |
| 0.118735  | 0.0872669 | 0.120629  | 0.120338  | 0.113782  | 0.124126  | 0.132284  |
| 0.128351  | 0.129516  | 0.122086  | 0.124417  | 0.125146  | 0.132284  | 0.136072  |
| 0.121066  | 0.127477  | 0.122378  | 0.0600233 | 0.122815  | 0.13141   | 0.140443  |
| 0.118298  | 0.120047  | 0.118735  | 0.0549242 | 0.119464  | 0.131847  | 0.136509  |
| 0.119027  | 0.123397  | 0.128497  | 0.127331  | 0.0464744 | 0.0533217 | 0.0533217 |
| 0.112617  | 0.122232  | 0.125     | 0.127914  | 0.0499709 | 0.0501166 | 0.0539044 |
| 0.123106  | 0.119318  | 0.115967  | 0.117424  | 0.118735  | 0.131119  | 0.137238  |
| 0.121503  | 0.0515734 | 0.123689  | 0.124854  | 0.121503  | 0.126894  | 0.140006  |
| 0.123834  | 0.127622  | 0.123106  | 0.055507  | 0.121212  | 0.133013  | 0.141171  |
| 0.0636655 | 0.131265  | 0.119464  | 0.130536  | 0.134178  | 0.141317  | 0.147145  |
| 0.244901  | 0.251894  | 0.254079  | 0.248834  | 0.241987  | 0.245338  | 0.247086  |
| 0.124272  | 0.120775  | 0.117424  | 0.117424  | 0.118735  | 0.128788  | 0.137238  |
| 0.177156  | 0.181527  | 0.188666  | 0.18109   | 0.177739  | 0.189248  | 0.19595   |
| 0.185169  | 0.190997  | 0.192308  | 0.189103  | 0.180216  | 0.189103  | 0.19493   |
| 0.125874  | 0.120629  | 0.128059  | 0.123397  | 0.124126  | 0.135927  | 0.143502  |
| 0.11655   | 0.115967  | 0.111742  | 0.110286  | 0.115093  | 0.125728  | 0.133596  |
| 0.126748  | 0.129371  | 0.122523  | 0.12602   | 0.123543  | 0.129225  | 0.137092  |
| 0.114802  | 0.11451   | 0.121358  | 0.11757   | 0.0518648 | 0.0607517 | 0.0715326 |
| 0.117861  | 0.117861  | 0.120338  | 0.106935  | 0.118444  | 0.130828  | 0.136072  |
| 0.0627914 | 0.116696  | 0.105186  | 0.119172  | 0.118735  | 0.130828  | 0.138403  |
| 0.116841  | 0.123252  | 0.126603  | 0.127477  | 0.0748834 | 0.0773601 | 0.0802739 |

|           |           |           |           |           |           |           |
|-----------|-----------|-----------|-----------|-----------|-----------|-----------|
| 0.125874  | 0.132284  | 0.134178  | 0.13447   | 0.0556527 | 0.0499709 | 0.0511364 |
| 0.119318  | 0.11757   | 0.115676  | 0.117716  | 0.117861  | 0.128205  | 0.134324  |
| 0.121358  | 0.13039   | 0.132284  | 0.131119  | 0.0557984 | 0.0539044 | 0.0539044 |
| 0.120047  | 0.115676  | 0.112617  | 0.116404  | 0.122669  | 0.130099  | 0.136509  |
| 0.127914  | 0.131702  | 0.125146  | 0.057838  | 0.127622  | 0.13447   | 0.141171  |
| 0.110868  | 0.124563  | 0.0530303 | 0.120047  | 0.123397  | 0.131993  | 0.13986   |
| 0.0585664 | 0.132284  | 0.119318  | 0.131265  | 0.129953  | 0.137675  | 0.144668  |
| 0.122232  | 0.130099  | 0.123252  | 0.123834  | 0.126603  | 0.133741  | 0.136072  |
| 0.116987  | 0.123106  | 0.117424  | 0.109848  | 0.114656  | 0.125583  | 0.130828  |
| 0.127477  | 0.12398   | 0.129953  | 0.136946  | 0.133887  | 0.137529  | 0.140734  |
| 0.178904  | 0.183858  | 0.190122  | 0.184586  | 0.177739  | 0.187791  | 0.194784  |
| 0.128351  | 0.134761  | 0.136072  | 0.138986  | 0.0604604 | 0.0536131 | 0.0472028 |
| 0.112908  | 0.121066  | 0.125874  | 0.12296   | 0.0493881 | 0.0541958 | 0.0603147 |
| 0.122086  | 0.123834  | 0.119901  | 0.0517191 | 0.124126  | 0.135927  | 0.142337  |
| 0.114948  | 0.118153  | 0.113636  | 0.0527389 | 0.116113  | 0.125     | 0.133159  |
| 0.108683  | 0.124417  | 0.0450175 | 0.116404  | 0.122669  | 0.128934  | 0.138258  |
| 0.114656  | 0.127768  | 0.0509907 | 0.120338  | 0.129808  | 0.137821  | 0.144814  |
| 0.18852   | 0.193473  | 0.193619  | 0.190705  | 0.182401  | 0.193328  | 0.199446  |
| 0.109557  | 0.124126  | 0.124272  | 0.125437  | 0.0740093 | 0.0756119 | 0.0823135 |
| 0.106206  | 0.113199  | 0.116841  | 0.112179  | 0.103875  | 0.115093  | 0.12296   |
| 0.118444  | 0.121649  | 0.128497  | 0.127914  | 0.0505536 | 0.0498252 | 0.0530303 |
| 0.187646  | 0.190851  | 0.195367  | 0.192453  | 0.182401  | 0.193328  | 0.199155  |
| 0.114073  | 0.112325  | 0.108683  | 0.106935  | 0.11553   | 0.125874  | 0.133741  |
| 0.0530303 | 0.124417  | 0.111451  | 0.123689  | 0.123252  | 0.13447   | 0.14292   |
| 0.118298  | 0.125     | 0.13039   | 0.125728  | 0.0501166 | 0.0511364 | 0.0528846 |
| 0.120192  | 0.107372  | 0.120921  | 0.119755  | 0.114365  | 0.125291  | 0.130828  |
| 0.185169  | 0.187791  | 0.193182  | 0.185897  | 0.176428  | 0.187354  | 0.193473  |
| 0.0520105 | 0.120775  | 0.111597  | 0.121503  | 0.116404  | 0.125583  | 0.135198  |
| 0.112325  | 0.112908  | 0.117133  | 0.120921  | 0.11116   | 0.120629  | 0.129079  |
| 0.115822  | 0.111742  | 0.113054  | 0.108392  | 0.116113  | 0.12704   | 0.135781  |
| 0.120192  | 0.120775  | 0.130245  | 0.110723  | 0.114365  | 0.124126  | 0.134615  |
| 0.122378  | 0.0492424 | 0.128059  | 0.122232  | 0.123834  | 0.130973  | 0.14292   |
| 0.0574009 | 0.128205  | 0.114948  | 0.128351  | 0.128205  | 0.133887  | 0.143211  |
| 0.121795  | 0.11859   | 0.114948  | 0.116113  | 0.113636  | 0.12602   | 0.131556  |
| 0.120629  | 0.125583  | 0.128351  | 0.128351  | 0.117133  | 0.121941  | 0.128059  |
| 0.151661  | 0.133596  | 0.154429  | 0.148019  | 0.14088   | 0.147436  | 0.147145  |
| 0.228875  | 0.236742  | 0.237179  | 0.236888  | 0.22771   | 0.231935  | 0.237762  |
| 0.126603  | 0.137092  | 0.126457  | 0.12704   | 0.127477  | 0.136364  | 0.138403  |
| 0.122523  | 0.0458916 | 0.128205  | 0.121503  | 0.12602   | 0.13141   | 0.143939  |
| 0.106061  | 0.121503  | 0.123689  | 0.124563  | 0.0579837 | 0.0569639 | 0.0642483 |
| 0.127185  | 0.124854  | 0.131119  | 0.12296   | 0.122232  | 0.13549   | 0.139569  |
| 0.0952797 | 0.0751748 | 0.117861  | 0.116987  | 0.112179  | 0.118735  | 0.130099  |
| 0.116259  | 0.114219  | 0.118444  | 0.118153  | 0.116841  | 0.127477  | 0.130682  |
| 0.112325  | 0.121066  | 0.129953  | 0.125     | 0.0627914 | 0.0576923 | 0.0614802 |

|           |           |          |           |           |           |           |
|-----------|-----------|----------|-----------|-----------|-----------|-----------|
| 0.0509907 | 0.124126  | 0.115822 | 0.126603  | 0.125583  | 0.133304  | 0.14292   |
| 0.120338  | 0.111305  | 0.122815 | 0.126311  | 0.118881  | 0.13243   | 0.135052  |
| 0.230332  | 0.237325  | 0.238928 | 0.236014  | 0.228584  | 0.236014  | 0.236305  |
| 0.110431  | 0.111888  | 0.108829 | 0.110286  | 0.110723  | 0.121358  | 0.130099  |
| 0.104021  | 0.103147  | 0.110577 | 0.104167  | 0.113054  | 0.122232  | 0.129808  |
| 0.116404  | 0.119901  | 0.112471 | 0.115676  | 0.114365  | 0.124417  | 0.131993  |
| 0.135781  | 0.120338  | 0.142045 | 0.133596  | 0.128497  | 0.133596  | 0.136801  |
| 0.132576  | 0.140734  | 0.13447  | 0.133304  | 0.136072  | 0.145542  | 0.145251  |
| 0.126166  | 0.121795  | 0.132139 | 0.11553   | 0.109848  | 0.118444  | 0.127185  |
| 0.113345  | 0.121212  | 0.124272 | 0.126311  | 0.0501166 | 0.0520105 | 0.0584207 |
| 0.120484  | 0.107372  | 0.120047 | 0.114219  | 0.10912   | 0.119464  | 0.127914  |
| 0.225379  | 0.233829  | 0.23514  | 0.232809  | 0.2213    | 0.226981  | 0.232226  |
| 0.118153  | 0.125437  | 0.131993 | 0.129079  | 0.0505536 | 0.0515734 | 0.0495338 |
| 0.0524476 | 0.120921  | 0.112617 | 0.123397  | 0.122669  | 0.131265  | 0.139714  |
| 0.113054  | 0.108974  | 0.115239 | 0.120775  | 0.117424  | 0.129808  | 0.135927  |
| 0.122523  | 0.106498  | 0.126457 | 0.126457  | 0.123689  | 0.123834  | 0.132867  |
| 0.116696  | 0.119027  | 0.118298 | 0.11859   | 0.130682  | 0.132867  | 0.137529  |
| 0.122232  | 0.119318  | 0.112762 | 0.118007  | 0.117861  | 0.124126  | 0.131702  |
| 0.0598776 | 0.123689  | 0.110723 | 0.122378  | 0.123106  | 0.134324  | 0.1419    |
| 0.0579837 | 0.129953  | 0.118153 | 0.13039   | 0.127622  | 0.134178  | 0.14088   |
| 0.0562354 | 0.11655   | 0.109703 | 0.118444  | 0.119172  | 0.13039   | 0.137383  |
| 0.122523  | 0.116113  | 0.115385 | 0.11451   | 0.118444  | 0.126457  | 0.133741  |
| 0.126311  | 0.0610431 | 0.130828 | 0.130828  | 0.127477  | 0.129662  | 0.141608  |
| 0.131119  | 0.0632284 | 0.136218 | 0.134178  | 0.130828  | 0.133887  | 0.140589  |
| 0.130828  | 0.131119  | 0.128059 | 0.0581294 | 0.131702  | 0.137383  | 0.143794  |
| 0.132867  | 0.133741  | 0.131265 | 0.0622086 | 0.133159  | 0.142045  | 0.148747  |
| 0.126603  | 0.0610431 | 0.135781 | 0.132284  | 0.134178  | 0.134907  | 0.144814  |
| 0.117279  | 0.114656  | 0.116259 | 0.106643  | 0.114656  | 0.129662  | 0.135781  |
| 0.100233  | 0.132576  | 0.11961  | 0.119318  | 0.133159  | 0.140297  | 0.140589  |
| 0.124272  | 0.135635  | 0.133159 | 0.139569  | 0.131556  | 0.140734  | 0.142483  |
| 0.200903  | 0.204691  | 0.211247 | 0.206002  | 0.19799   | 0.204837  | 0.208625  |
| 0.124854  | 0.130099  | 0.125291 | 0.127331  | 0.121649  | 0.129079  | 0.136072  |
| 0.10912   | 0.103875  | 0.11451  | 0.113054  | 0.121066  | 0.128497  | 0.135781  |
| 0.125874  | 0.126166  | 0.123106 | 0.124563  | 0.122669  | 0.130973  | 0.137966  |
| 0.218677  | 0.227127  | 0.228438 | 0.222611  | 0.215763  | 0.221737  | 0.226107  |
| 0.208188  | 0.21285   | 0.214452 | 0.213869  | 0.204108  | 0.211538  | 0.21824   |
| 0.0594406 | 0.12704   | 0.117861 | 0.127185  | 0.127622  | 0.135052  | 0.141754  |
| 0.24461   | 0.251311  | 0.252622 | 0.248252  | 0.239948  | 0.247086  | 0.250291  |
| 0.11961   | 0.114073  | 0.117424 | 0.106352  | 0.116404  | 0.129079  | 0.135198  |
| 0.140006  | 0.135052  | 0.138986 | 0.136072  | 0.137092  | 0.144231  | 0.147436  |
| 0.118153  | 0.113782  | 0.111888 | 0.108974  | 0.117861  | 0.128788  | 0.136072  |
| 0.126166  | 0.0527389 | 0.129225 | 0.128351  | 0.127622  | 0.131847  | 0.142337  |
| 0.184878  | 0.190997  | 0.195221 | 0.188228  | 0.179341  | 0.190268  | 0.195221  |
| 0.121212  | 0.120047  | 0.121941 | 0.130973  | 0.124417  | 0.136509  | 0.138258  |

|           |           |           |           |           |           |           |
|-----------|-----------|-----------|-----------|-----------|-----------|-----------|
| 0.189977  | 0.197844  | 0.198281  | 0.192745  | 0.186189  | 0.197698  | 0.203234  |
| 0.122086  | 0.11859   | 0.123689  | 0.121358  | 0.118298  | 0.128059  | 0.133887  |
| 0.0649767 | 0.121503  | 0.11757   | 0.119901  | 0.0996503 | 0.110868  | 0.118735  |
| 0.122086  | 0.12296   | 0.127185  | 0.119318  | 0.123834  | 0.13039   | 0.135344  |
| 0.11014   | 0.117716  | 0.124272  | 0.111742  | 0.104021  | 0.113199  | 0.122523  |
| 0.114073  | 0.113491  | 0.109848  | 0.109266  | 0.110286  | 0.119464  | 0.126748  |
| 0.118735  | 0.119318  | 0.115967  | 0.117716  | 0.109703  | 0.11655   | 0.123834  |
| 0.112617  | 0.113782  | 0.106061  | 0.106643  | 0.113782  | 0.126166  | 0.134615  |
| 0.111305  | 0.117133  | 0.122815  | 0.123106  | 0.0483683 | 0.0563811 | 0.0651224 |
| 0.0916375 | 0.121649  | 0.109557  | 0.102855  | 0.119901  | 0.130536  | 0.135198  |
| 0.11961   | 0.121066  | 0.12296   | 0.114802  | 0.114656  | 0.123543  | 0.133741  |
| 0.115676  | 0.113345  | 0.11116   | 0.111451  | 0.118007  | 0.128934  | 0.136218  |
| 0.119901  | 0.128642  | 0.12296   | 0.0737179 | 0.124272  | 0.134324  | 0.140152  |
| 0.120192  | 0.131556  | 0.130245  | 0.132284  | 0.0560897 | 0.0533217 | 0.0501166 |
| 0.120338  | 0.11859   | 0.116987  | 0.0511364 | 0.116259  | 0.126894  | 0.135635  |
| 0.114073  | 0.110577  | 0.11655   | 0.11859   | 0.115239  | 0.125     | 0.13345   |
| 0.117133  | 0.113636  | 0.109994  | 0.110577  | 0.109848  | 0.122232  | 0.126311  |
| 0         | 0.119755  | 0.110577  | 0.11961   | 0.113345  | 0.121941  | 0.128351  |
| 0.119755  | 0         | 0.125728  | 0.121649  | 0.120338  | 0.130682  | 0.14088   |
| 0.110577  | 0.125728  | 0         | 0.116841  | 0.12398   | 0.130245  | 0.139569  |
| 0.11961   | 0.121649  | 0.116841  | 0         | 0.118153  | 0.131702  | 0.140734  |
| 0.113345  | 0.120338  | 0.12398   | 0.118153  | 0         | 0.0563811 | 0.0610431 |
| 0.121941  | 0.130682  | 0.130245  | 0.131702  | 0.0563811 | 0         | 0.0509907 |
| 0.128351  | 0.14088   | 0.139569  | 0.140734  | 0.0610431 | 0.0509907 | 0         |
| 0.0661422 | 0.109557  | 0.101836  | 0.112034  | 0.106352  | 0.121066  | 0.127768  |
| 0.122378  | 0.117716  | 0.118444  | 0.116404  | 0.116259  | 0.127477  | 0.133013  |
| 0.113491  | 0.107955  | 0.113928  | 0.110431  | 0.112034  | 0.12296   | 0.127622  |
| 0.128059  | 0.0636655 | 0.132576  | 0.132284  | 0.131556  | 0.135781  | 0.144814  |
| 0.119464  | 0.119464  | 0.114656  | 0.112325  | 0.118007  | 0.130099  | 0.135052  |
| 0.125     | 0.143065  | 0.0619172 | 0.133887  | 0.142774  | 0.144376  | 0.150495  |
| 0.139277  | 0.140152  | 0.131847  | 0.137966  | 0.132867  | 0.143211  | 0.14088   |
| 0.13243   | 0.115822  | 0.13345   | 0.127914  | 0.123397  | 0.131993  | 0.137821  |
| 0.117424  | 0.11451   | 0.119901  | 0.109994  | 0.11014   | 0.120192  | 0.125437  |
| 0.11553   | 0.0986305 | 0.120047  | 0.119172  | 0.109994  | 0.120921  | 0.128497  |
| 0.128351  | 0.132139  | 0.125     | 0.0568182 | 0.13039   | 0.139277  | 0.14627   |
| 0.199009  | 0.210082  | 0.210227  | 0.2044    | 0.195513  | 0.207022  | 0.211976  |
| 0.115093  | 0.109266  | 0.114948  | 0.120775  | 0.113636  | 0.128059  | 0.13447   |
| 0.122232  | 0.120775  | 0.125583  | 0.11859   | 0.119901  | 0.134615  | 0.138986  |
| 0.119464  | 0.0556527 | 0.12602   | 0.120775  | 0.122669  | 0.128059  | 0.137966  |
| 0.120192  | 0.119901  | 0.122669  | 0.0533217 | 0.117861  | 0.131119  | 0.138112  |
| 0.12704   | 0.123543  | 0.129225  | 0.125437  | 0.12704   | 0.135052  | 0.143794  |
| 0.120047  | 0.125583  | 0.118444  | 0.120775  | 0.111305  | 0.120484  | 0.127185  |
| 0.120192  | 0.12602   | 0.126748  | 0.124709  | 0.11553   | 0.116841  | 0.125874  |
| 0.126166  | 0.112471  | 0.130973  | 0.123106  | 0.119172  | 0.126603  | 0.135052  |

|           |           |          |           |           |           |           |
|-----------|-----------|----------|-----------|-----------|-----------|-----------|
| 0.0929487 | 0.115093  | 0.104749 | 0.101253  | 0.115676  | 0.124272  | 0.134761  |
| 0.125291  | 0.0591492 | 0.128934 | 0.127768  | 0.127331  | 0.13039   | 0.14088   |
| 0.117424  | 0.115967  | 0.121649 | 0.115822  | 0.119172  | 0.129808  | 0.135635  |
| 0.122232  | 0.12602   | 0.123252 | 0.119755  | 0.120192  | 0.135198  | 0.139569  |
| 0.169289  | 0.179196  | 0.180798 | 0.170309  | 0.167249  | 0.17701   | 0.182838  |
| 0.117133  | 0.119755  | 0.124563 | 0.125146  | 0.0521562 | 0.0607517 | 0.0689103 |
| 0.126603  | 0.0689103 | 0.132867 | 0.128205  | 0.13039   | 0.134615  | 0.145105  |
| 0.115093  | 0.121795  | 0.122815 | 0.121066  | 0.13141   | 0.140297  | 0.144668  |
| 0.111451  | 0.121358  | 0.131993 | 0.123543  | 0.11116   | 0.118007  | 0.125     |
| 0.110868  | 0.115822  | 0.113054 | 0.108683  | 0.107372  | 0.115967  | 0.125874  |
| 0.11116   | 0.115239  | 0.116259 | 0.109557  | 0.111451  | 0.120047  | 0.128205  |
| 0.116987  | 0.120484  | 0.116259 | 0.11451   | 0.109994  | 0.122669  | 0.130245  |
| 0.105915  | 0.118153  | 0.122086 | 0.125874  | 0.128059  | 0.132284  | 0.140152  |
| 0.11757   | 0.12398   | 0.124417 | 0.122378  | 0.0849359 | 0.0967366 | 0.102273  |
| 0.124417  | 0.128788  | 0.125437 | 0.118444  | 0.129079  | 0.138258  | 0.146125  |
| 0.106789  | 0.110286  | 0.114219 | 0.114219  | 0.108246  | 0.121212  | 0.128788  |
| 0.114219  | 0.122669  | 0.11757  | 0.114365  | 0.123252  | 0.135635  | 0.141463  |
| 0.105332  | 0.130682  | 0.130536 | 0.137238  | 0.133013  | 0.138986  | 0.145105  |
| 0.110286  | 0.122232  | 0.118881 | 0.115967  | 0.122815  | 0.133159  | 0.138695  |
| 0.116696  | 0.126311  | 0.120921 | 0.117716  | 0.121649  | 0.125874  | 0.134324  |
| 0.104749  | 0.116696  | 0.112762 | 0.11014   | 0.121066  | 0.132867  | 0.1419    |
| 0.108537  | 0.123397  | 0.116259 | 0.115385  | 0.121649  | 0.132576  | 0.134324  |
| 0.113782  | 0.113782  | 0.110431 | 0.107517  | 0.113491  | 0.125291  | 0.134033  |
| 0.116259  | 0.129662  | 0.116113 | 0.121649  | 0.123834  | 0.134178  | 0.137383  |
| 0.111014  | 0.110431  | 0.107955 | 0.108537  | 0.116259  | 0.127477  | 0.137675  |
| 0.109848  | 0.140734  | 0.135344 | 0.138549  | 0.138695  | 0.142337  | 0.148747  |
| 0.106643  | 0.131993  | 0.129808 | 0.128642  | 0.125874  | 0.137675  | 0.142045  |
| 0.104021  | 0.11859   | 0.105915 | 0.104167  | 0.118007  | 0.124272  | 0.13447   |
| 0.109703  | 0.133887  | 0.128788 | 0.136364  | 0.133596  | 0.143065  | 0.146562  |
| 0.124272  | 0.118444  | 0.128788 | 0.0958625 | 0.120775  | 0.129953  | 0.140152  |
| 0.12398   | 0.13884   | 0.13986  | 0.136946  | 0.135052  | 0.144231  | 0.150058  |
| 0.113782  | 0.118444  | 0.103438 | 0.109266  | 0.117861  | 0.128788  | 0.133741  |
| 0.137529  | 0.130828  | 0.144085 | 0.14292   | 0.137529  | 0.144668  | 0.150787  |
| 0.123252  | 0.124126  | 0.126603 | 0.13039   | 0.133741  | 0.139714  | 0.145542  |
| 0.119755  | 0.130245  | 0.135344 | 0.133596  | 0.13986   | 0.147582  | 0.156031  |
| 0.115676  | 0.125583  | 0.124563 | 0.100962  | 0.122669  | 0.134178  | 0.141463  |
| 0.10271   | 0.119318  | 0.114219 | 0.108683  | 0.119318  | 0.129371  | 0.138986  |
| 0.105769  | 0.118881  | 0.116404 | 0.112034  | 0.118007  | 0.128934  | 0.139132  |
| 0.105332  | 0.106206  | 0.117133 | 0.121795  | 0.120484  | 0.128788  | 0.134324  |
| 0.114948  | 0.123397  | 0.115093 | 0.115093  | 0.124563  | 0.132867  | 0.137821  |
| 0.12704   | 0.126748  | 0.121649 | 0.126894  | 0.127914  | 0.136801  | 0.142628  |
| 0.106643  | 0.125291  | 0.122815 | 0.123397  | 0.126166  | 0.136218  | 0.143502  |
| 0.111888  | 0.114802  | 0.112325 | 0.0936772 | 0.118007  | 0.128351  | 0.137675  |
| 0.106206  | 0.116404  | 0.117133 | 0.115385  | 0.119027  | 0.13141   | 0.137821  |

|           |          |          |          |           |          |          |
|-----------|----------|----------|----------|-----------|----------|----------|
| 0.112179  | 0.119172 | 0.123106 | 0.121066 | 0.124709  | 0.130973 | 0.137675 |
| 0.0999417 | 0.115093 | 0.112908 | 0.112617 | 0.115385  | 0.125728 | 0.13447  |
| 0.109411  | 0.126311 | 0.123252 | 0.122086 | 0.12602   | 0.136655 | 0.143939 |
| 0.119901  | 0.11961  | 0.108974 | 0.112762 | 0.113491  | 0.122378 | 0.130828 |
| 0.121212  | 0.122086 | 0.13039  | 0.112908 | 0.106935  | 0.116113 | 0.119901 |
| 0.125291  | 0.11655  | 0.12602  | 0.121358 | 0.112471  | 0.122523 | 0.130973 |
| 0.119172  | 0.115676 | 0.11553  | 0.105041 | 0.112471  | 0.12398  | 0.131556 |
| 0.110723  | 0.115676 | 0.116113 | 0.114948 | 0.120338  | 0.127477 | 0.135635 |
| 0.120484  | 0.119318 | 0.128497 | 0.111305 | 0.108246  | 0.119464 | 0.125583 |
| 0.118007  | 0.118298 | 0.121066 | 0.113782 | 0.108683  | 0.121358 | 0.128059 |
| 0.118298  | 0.123834 | 0.123689 | 0.122232 | 0.106935  | 0.110286 | 0.11757  |
| 0.114219  | 0.113345 | 0.11961  | 0.105915 | 0.0999417 | 0.108537 | 0.119318 |
| 0.120484  | 0.132721 | 0.130828 | 0.121212 | 0.123397  | 0.129079 | 0.130828 |

| TDr_4020  | TDr_4028  | TDr_4029  | TDr_4031 | TDr_4033  | TDr_4038 | TDr_4067  |
|-----------|-----------|-----------|----------|-----------|----------|-----------|
| 0.111014  | 0.117133  | 0.105915  | 0.136801 | 0.112179  | 0.139277 | 0.136946  |
| 0.107663  | 0.103875  | 0.10169   | 0.130245 | 0.104458  | 0.145251 | 0.122232  |
| 0.102418  | 0.0995047 | 0.0952797 | 0.128497 | 0.103584  | 0.139423 | 0.116404  |
| 0.107663  | 0.106206  | 0.109557  | 0.127622 | 0.106789  | 0.134761 | 0.124563  |
| 0.123397  | 0.131847  | 0.130245  | 0.138112 | 0.124563  | 0.144668 | 0.141754  |
| 0.121649  | 0.122523  | 0.120338  | 0.141608 | 0.121358  | 0.146416 | 0.133887  |
| 0.107517  | 0.123834  | 0.11757   | 0.133887 | 0.107809  | 0.136364 | 0.131993  |
| 0.106352  | 0.105478  | 0.106789  | 0.13039  | 0.113054  | 0.138112 | 0.123543  |
| 0.0965909 | 0.104749  | 0.0917832 | 0.126457 | 0.0948427 | 0.133013 | 0.120192  |
| 0.107809  | 0.0958625 | 0.106498  | 0.130973 | 0.0789627 | 0.135198 | 0.104895  |
| 0.104458  | 0.109703  | 0.106061  | 0.138112 | 0.113491  | 0.142045 | 0.128059  |
| 0.0996503 | 0.110431  | 0.0954254 | 0.120484 | 0.106061  | 0.125874 | 0.130536  |
| 0.100524  | 0.101399  | 0.102418  | 0.13447  | 0.101981  | 0.134033 | 0.120047  |
| 0.12602   | 0.125437  | 0.127914  | 0.152681 | 0.123689  | 0.163607 | 0.139132  |
| 0.117716  | 0.0568182 | 0.124272  | 0.138549 | 0.113636  | 0.136364 | 0.0460373 |
| 0.103293  | 0.111742  | 0.1081    | 0.138403 | 0.10912   | 0.128059 | 0.122232  |
| 0.0949883 | 0.108974  | 0.102418  | 0.109703 | 0.106352  | 0.12704  | 0.130536  |
| 0.143794  | 0.138258  | 0.141608  | 0.143357 | 0.141754  | 0.165938 | 0.142045  |
| 0.10067   | 0.105041  | 0.0976107 | 0.126457 | 0.100962  | 0.13884  | 0.122815  |
| 0.199155  | 0.17701   | 0.20134   | 0.213869 | 0.200029  | 0.218094 | 0.177885  |
| 0.116841  | 0.114802  | 0.114656  | 0.131847 | 0.120047  | 0.15035  | 0.132867  |
| 0.114948  | 0.11553   | 0.115676  | 0.125    | 0.11553   | 0.144668 | 0.135927  |
| 0.0804196 | 0.1081    | 0.10271   | 0.130682 | 0.10169   | 0.133159 | 0.125583  |
| 0.101836  | 0.126603  | 0.112471  | 0.133741 | 0.114073  | 0.133013 | 0.143502  |
| 0.0920746 | 0.100524  | 0.0989219 | 0.124272 | 0.0967366 | 0.125291 | 0.117716  |
| 0.120629  | 0.123543  | 0.119901  | 0.136509 | 0.121795  | 0.148019 | 0.134324  |
| 0.107517  | 0.118881  | 0.108829  | 0.131556 | 0.116259  | 0.126748 | 0.134033  |
| 0.0967366 | 0.117133  | 0.106789  | 0.128934 | 0.110431  | 0.138695 | 0.131993  |
| 0.114219  | 0.130536  | 0.121358  | 0.137675 | 0.120921  | 0.141317 | 0.142483  |
| 0.115676  | 0.118298  | 0.112325  | 0.127477 | 0.0990676 | 0.12704  | 0.127914  |
| 0.112325  | 0.112325  | 0.11859   | 0.138695 | 0.112325  | 0.137675 | 0.126603  |
| 0.107517  | 0.115385  | 0.110577  | 0.122815 | 0.108974  | 0.131993 | 0.129371  |
| 0.0996503 | 0.0979021 | 0.099796  | 0.122815 | 0.0987762 | 0.123252 | 0.113928  |
| 0.107809  | 0.115676  | 0.107372  | 0.137092 | 0.101107  | 0.123834 | 0.129953  |
| 0.105915  | 0.116696  | 0.106935  | 0.135781 | 0.111742  | 0.133887 | 0.131265  |
| 0.111597  | 0.126748  | 0.109411  | 0.140589 | 0.110431  | 0.133741 | 0.138112  |
| 0.121649  | 0.131265  | 0.125874  | 0.140443 | 0.118444  | 0.148747 | 0.144085  |
| 0.107226  | 0.121212  | 0.112034  | 0.131847 | 0.117133  | 0.137238 | 0.137238  |
| 0.0868298 | 0.101399  | 0.100087  | 0.12398  | 0.105769  | 0.128788 | 0.124417  |
| 0.100816  | 0.120629  | 0.115239  | 0.137383 | 0.110723  | 0.1419   | 0.13141   |
| 0.085373  | 0.106352  | 0.102127  | 0.127768 | 0.103438  | 0.137529 | 0.126748  |
| 0.120047  | 0.133741  | 0.133013  | 0.152826 | 0.124126  | 0.155012 | 0.137238  |

|           |          |           |          |           |          |          |
|-----------|----------|-----------|----------|-----------|----------|----------|
| 0.120921  | 0.144814 | 0.132139  | 0.151661 | 0.127331  | 0.156177 | 0.145979 |
| 0.0945513 | 0.114948 | 0.109848  | 0.134033 | 0.109411  | 0.137966 | 0.132721 |
| 0.0893065 | 0.106789 | 0.0955711 | 0.117133 | 0.10067   | 0.122815 | 0.126894 |
| 0.0996503 | 0.11014  | 0.111742  | 0.13243  | 0.103147  | 0.129662 | 0.124126 |
| 0.103147  | 0.113636 | 0.107372  | 0.122232 | 0.111888  | 0.137238 | 0.132867 |
| 0.116696  | 0.134761 | 0.127914  | 0.146853 | 0.123689  | 0.152244 | 0.143794 |
| 0.095134  | 0.112617 | 0.0984848 | 0.129662 | 0.101836  | 0.135927 | 0.130682 |
| 0.092366  | 0.111597 | 0.10708   | 0.128059 | 0.106935  | 0.134615 | 0.125874 |
| 0.13884   | 0.14292  | 0.139569  | 0.149767 | 0.131847  | 0.146416 | 0.154283 |
| 0.112034  | 0.125437 | 0.120047  | 0.12704  | 0.118153  | 0.137675 | 0.13447  |
| 0.0859557 | 0.115967 | 0.105624  | 0.129808 | 0.107226  | 0.130536 | 0.131119 |
| 0.114802  | 0.114802 | 0.118444  | 0.137092 | 0.106352  | 0.145105 | 0.119464 |
| 0.100524  | 0.113345 | 0.110577  | 0.135635 | 0.115093  | 0.141317 | 0.130536 |
| 0.11859   | 0.138403 | 0.126603  | 0.135344 | 0.129371  | 0.13549  | 0.148893 |
| 0.103584  | 0.127477 | 0.119172  | 0.145688 | 0.114365  | 0.142628 | 0.140589 |
| 0.0933858 | 0.113491 | 0.109557  | 0.129079 | 0.109703  | 0.137092 | 0.130099 |
| 0.102127  | 0.11553  | 0.111597  | 0.131702 | 0.108537  | 0.135635 | 0.128934 |
| 0.0999417 | 0.117133 | 0.114656  | 0.135927 | 0.100524  | 0.135198 | 0.125874 |
| 0.112762  | 0.137821 | 0.127477  | 0.148164 | 0.127914  | 0.156469 | 0.144814 |
| 0.117424  | 0.135781 | 0.126603  | 0.151369 | 0.125583  | 0.156177 | 0.141608 |
| 0.147873  | 0.156031 | 0.15472   | 0.17366  | 0.153118  | 0.176136 | 0.160985 |
| 0.0919289 | 0.11116  | 0.106061  | 0.129079 | 0.101544  | 0.137966 | 0.126894 |
| 0.0846445 | 0.110577 | 0.0990676 | 0.128788 | 0.100379  | 0.13447  | 0.128642 |
| 0.0863928 | 0.114948 | 0.101107  | 0.12704  | 0.0968823 | 0.132139 | 0.132139 |
| 0.130245  | 0.137821 | 0.134178  | 0.146416 | 0.133159  | 0.146562 | 0.14831  |
| 0.0952797 | 0.11014  | 0.104167  | 0.129808 | 0.101399  | 0.134324 | 0.126748 |
| 0.11553   | 0.130973 | 0.123834  | 0.132867 | 0.123397  | 0.148164 | 0.140589 |
| 0.101836  | 0.111742 | 0.112471  | 0.131702 | 0.104749  | 0.131265 | 0.125146 |
| 0.0909091 | 0.115967 | 0.103875  | 0.130099 | 0.109848  | 0.139277 | 0.132284 |
| 0.138986  | 0.143357 | 0.142628  | 0.149913 | 0.140152  | 0.152098 | 0.152972 |
| 0.094697  | 0.120629 | 0.109703  | 0.137966 | 0.112471  | 0.140443 | 0.137821 |
| 0.116113  | 0.134178 | 0.127622  | 0.147727 | 0.11961   | 0.147873 | 0.140297 |
| 0.115967  | 0.128788 | 0.118444  | 0.129225 | 0.119755  | 0.142774 | 0.138112 |
| 0.105041  | 0.111742 | 0.102855  | 0.111597 | 0.113491  | 0.135635 | 0.131556 |
| 0.0820221 | 0.114073 | 0.101107  | 0.132867 | 0.104749  | 0.133596 | 0.132139 |
| 0.0948427 | 0.11116  | 0.105769  | 0.129371 | 0.109703  | 0.141754 | 0.129225 |
| 0.11116   | 0.128934 | 0.125583  | 0.140734 | 0.124272  | 0.147873 | 0.144959 |
| 0.0859557 | 0.112762 | 0.100087  | 0.134761 | 0.104021  | 0.131993 | 0.134324 |
| 0.120775  | 0.135635 | 0.128788  | 0.145688 | 0.118735  | 0.156323 | 0.140297 |
| 0.100087  | 0.118444 | 0.115676  | 0.142483 | 0.112034  | 0.14292  | 0.136509 |
| 0.0945513 | 0.116696 | 0.101981  | 0.127331 | 0.111451  | 0.130973 | 0.133013 |
| 0.0948427 | 0.11553  | 0.106643  | 0.132576 | 0.10708   | 0.139423 | 0.133013 |
| 0.0962995 | 0.116696 | 0.111597  | 0.138112 | 0.112908  | 0.144085 | 0.133013 |
| 0.0916375 | 0.114948 | 0.10169   | 0.129079 | 0.106206  | 0.141754 | 0.13039  |



|           |           |           |          |           |          |          |
|-----------|-----------|-----------|----------|-----------|----------|----------|
| 0.0895979 | 0.11553   | 0.100816  | 0.128205 | 0.107372  | 0.134761 | 0.130682 |
| 0.111597  | 0.136072  | 0.127477  | 0.146707 | 0.122669  | 0.149476 | 0.143648 |
| 0.0917832 | 0.106061  | 0.105041  | 0.129225 | 0.102855  | 0.129662 | 0.120921 |
| 0.103293  | 0.109703  | 0.0952797 | 0.130245 | 0.106498  | 0.130099 | 0.127185 |
| 0.114073  | 0.119318  | 0.12296   | 0.132284 | 0.112908  | 0.140006 | 0.134178 |
| 0.115239  | 0.128642  | 0.120338  | 0.136946 | 0.111742  | 0.13884  | 0.137675 |
| 0.115239  | 0.128059  | 0.120338  | 0.130245 | 0.120192  | 0.14088  | 0.134178 |
| 0.120047  | 0.135781  | 0.127477  | 0.135344 | 0.12704   | 0.145979 | 0.142191 |
| 0.10912   | 0.114948  | 0.115967  | 0.128788 | 0.110868  | 0.136801 | 0.133013 |
| 0.178467  | 0.182255  | 0.180653  | 0.187063 | 0.174388  | 0.195076 | 0.186917 |
| 0.0981935 | 0.104312  | 0.101836  | 0.122232 | 0.106643  | 0.130245 | 0.127622 |
| 0.123106  | 0.13039   | 0.135198  | 0.143939 | 0.129516  | 0.14088  | 0.135927 |
| 0.114073  | 0.122815  | 0.125874  | 0.135781 | 0.12398   | 0.137675 | 0.129225 |
| 0.120921  | 0.130536  | 0.13039   | 0.137966 | 0.124417  | 0.149184 | 0.143065 |
| 0.0980478 | 0.110577  | 0.102273  | 0.124417 | 0.104749  | 0.130099 | 0.124563 |
| 0.113491  | 0.131265  | 0.121795  | 0.131702 | 0.124854  | 0.141463 | 0.140006 |
| 0.104167  | 0.109411  | 0.105478  | 0.121795 | 0.112617  | 0.131556 | 0.126894 |
| 0.112179  | 0.119464  | 0.119027  | 0.129808 | 0.117133  | 0.133159 | 0.129953 |
| 0.104604  | 0.111597  | 0.110286  | 0.131847 | 0.103438  | 0.133741 | 0.130245 |
| 0.120629  | 0.134907  | 0.122523  | 0.135635 | 0.128788  | 0.140152 | 0.142483 |
| 0.0894522 | 0.106352  | 0.100962  | 0.12602  | 0.097028  | 0.126748 | 0.12704  |
| 0.122815  | 0.131847  | 0.128788  | 0.137821 | 0.125437  | 0.144668 | 0.13884  |
| 0.106643  | 0.115385  | 0.110286  | 0.126311 | 0.106061  | 0.136946 | 0.13345  |
| 0.105332  | 0.128642  | 0.120921  | 0.142774 | 0.116987  | 0.137966 | 0.136801 |
| 0.111888  | 0.122086  | 0.125728  | 0.13884  | 0.114219  | 0.138695 | 0.132284 |
| 0.0999417 | 0.107226  | 0.105915  | 0.122523 | 0.10373   | 0.13345  | 0.125291 |
| 0.13345   | 0.136364  | 0.139714  | 0.151078 | 0.138695  | 0.150641 | 0.150058 |
| 0.105041  | 0.113491  | 0.109848  | 0.122669 | 0.103001  | 0.134761 | 0.132721 |
| 0.0980478 | 0.108537  | 0.106352  | 0.130245 | 0.10912   | 0.130682 | 0.128642 |
| 0.0979021 | 0.117424  | 0.109411  | 0.123397 | 0.112471  | 0.132576 | 0.131702 |
| 0.128497  | 0.13549   | 0.136801  | 0.141463 | 0.126166  | 0.152681 | 0.143939 |
| 0.106061  | 0.121503  | 0.116404  | 0.130973 | 0.115093  | 0.136655 | 0.128497 |
| 0.0984848 | 0.106352  | 0.103584  | 0.125437 | 0.109557  | 0.129953 | 0.121503 |
| 0.0981935 | 0.102564  | 0.105041  | 0.125146 | 0.108974  | 0.128497 | 0.123252 |
| 0.102418  | 0.114365  | 0.109848  | 0.130536 | 0.104749  | 0.135052 | 0.132139 |
| 0.1081    | 0.117133  | 0.118735  | 0.134178 | 0.109266  | 0.139569 | 0.122378 |
| 0.106498  | 0.118735  | 0.112762  | 0.131993 | 0.105332  | 0.132139 | 0.133887 |
| 0.0894522 | 0.0990676 | 0.0933858 | 0.121066 | 0.0932401 | 0.125291 | 0.120629 |
| 0.0917832 | 0.104895  | 0.0960082 | 0.123689 | 0.0958625 | 0.129662 | 0.120338 |
| 0.0954254 | 0.103001  | 0.101399  | 0.125583 | 0.0986305 | 0.128642 | 0.122232 |
| 0.0992133 | 0.118153  | 0.112762  | 0.127622 | 0.114365  | 0.131265 | 0.136509 |
| 0.111014  | 0.123834  | 0.11757   | 0.135344 | 0.115967  | 0.134324 | 0.13141  |
| 0.0907634 | 0.0992133 | 0.0981935 | 0.122669 | 0.0962995 | 0.125728 | 0.11961  |
| 0.087704  | 0.0935315 | 0.0971737 | 0.123106 | 0.0984848 | 0.127914 | 0.112471 |

|           |           |           |          |           |          |           |
|-----------|-----------|-----------|----------|-----------|----------|-----------|
| 0.102564  | 0.116259  | 0.113491  | 0.131265 | 0.111597  | 0.133159 | 0.131993  |
| 0.08581   | 0.101836  | 0.102564  | 0.123252 | 0.0954254 | 0.128934 | 0.121941  |
| 0.113491  | 0.117861  | 0.113636  | 0.142774 | 0.118153  | 0.136218 | 0.134761  |
| 0.123689  | 0.129225  | 0.123834  | 0.140443 | 0.120192  | 0.142337 | 0.143794  |
| 0.100379  | 0.114073  | 0.108974  | 0.122669 | 0.10067   | 0.131556 | 0.123397  |
| 0.0903263 | 0.0976107 | 0.103001  | 0.125437 | 0.0996503 | 0.129662 | 0.121795  |
| 0.0944056 | 0.102564  | 0.103293  | 0.123689 | 0.0973193 | 0.126166 | 0.121503  |
| 0.0888695 | 0.101981  | 0.0965909 | 0.126894 | 0.097028  | 0.125874 | 0.123543  |
| 0.110723  | 0.119464  | 0.116696  | 0.126603 | 0.106643  | 0.1419   | 0.126748  |
| 0.0839161 | 0.0952797 | 0.102127  | 0.127477 | 0.0987762 | 0.126166 | 0.11655   |
| 0.120775  | 0.134178  | 0.128497  | 0.145979 | 0.121358  | 0.137675 | 0.141754  |
| 0.112762  | 0.129371  | 0.127477  | 0.14729  | 0.119755  | 0.140734 | 0.1419    |
| 0.104895  | 0.122669  | 0.11757   | 0.140006 | 0.110431  | 0.136364 | 0.131993  |
| 0.0965909 | 0.109411  | 0.111888  | 0.131993 | 0.103001  | 0.135927 | 0.125146  |
| 0.102127  | 0.10912   | 0.107809  | 0.126457 | 0.101544  | 0.132721 | 0.128059  |
| 0.087704  | 0.103147  | 0.0986305 | 0.123106 | 0.101107  | 0.130828 | 0.122669  |
| 0.0869755 | 0.116113  | 0.101107  | 0.125874 | 0.106206  | 0.128934 | 0.135635  |
| 0.0919289 | 0.109411  | 0.0952797 | 0.129079 | 0.106206  | 0.130682 | 0.12602   |
| 0.095134  | 0.110577  | 0.102855  | 0.129953 | 0.107955  | 0.136801 | 0.125437  |
| 0.0977564 | 0.12602   | 0.114802  | 0.136946 | 0.114948  | 0.143211 | 0.140006  |
| 0.100233  | 0.112471  | 0.105624  | 0.128934 | 0.111888  | 0.138112 | 0.129371  |
| 0.11961   | 0.119027  | 0.123252  | 0.140152 | 0.109703  | 0.148164 | 0.124563  |
| 0.124417  | 0.128205  | 0.131265  | 0.133596 | 0.122086  | 0.141608 | 0.138112  |
| 0.184732  | 0.185023  | 0.186043  | 0.204108 | 0.195513  | 0.213287 | 0.197844  |
| 0.231789  | 0.231789  | 0.232226  | 0.247086 | 0.238199  | 0.247815 | 0.236451  |
| 0.0964452 | 0.109266  | 0.101836  | 0.127477 | 0.111597  | 0.135198 | 0.129662  |
| 0.0890152 | 0.109994  | 0.100524  | 0.122378 | 0.108246  | 0.131556 | 0.127477  |
| 0.0898893 | 0.105915  | 0.0958625 | 0.120629 | 0.103001  | 0.126894 | 0.125728  |
| 0.088141  | 0.11116   | 0.0979021 | 0.117133 | 0.106206  | 0.136801 | 0.127185  |
| 0.119027  | 0.0607517 | 0.126166  | 0.143939 | 0.114365  | 0.133596 | 0.0397727 |
| 0.0945513 | 0.114073  | 0.102855  | 0.121503 | 0.110286  | 0.135052 | 0.129225  |
| 0.118007  | 0.14627   | 0.133304  | 0.14088  | 0.140443  | 0.142483 | 0.152389  |
| 0.0910548 | 0.118444  | 0.104604  | 0.118007 | 0.116987  | 0.135635 | 0.137675  |
| 0.108829  | 0.133013  | 0.113636  | 0.130828 | 0.117279  | 0.137966 | 0.144376  |
| 0.111597  | 0.130828  | 0.123397  | 0.133887 | 0.122086  | 0.143939 | 0.1419    |
| 0.111597  | 0.127331  | 0.120484  | 0.126894 | 0.121503  | 0.140734 | 0.13549   |
| 0.115093  | 0.135198  | 0.128351  | 0.146416 | 0.120047  | 0.147436 | 0.141317  |
| 0.0941142 | 0.115385  | 0.10912   | 0.118444 | 0.111305  | 0.134324 | 0.132867  |
| 0.0850816 | 0.113345  | 0.103875  | 0.11757  | 0.113928  | 0.132867 | 0.132576  |
| 0.0968823 | 0.113199  | 0.107517  | 0.120047 | 0.112325  | 0.139132 | 0.131556  |
| 0.0910548 | 0.111742  | 0.0964452 | 0.111597 | 0.104749  | 0.123397 | 0.127477  |
| 0.0895979 | 0.112034  | 0.0984848 | 0.115385 | 0.111742  | 0.13039  | 0.130099  |
| 0.0949883 | 0.116259  | 0.105041  | 0.116113 | 0.108683  | 0.133159 | 0.136072  |
| 0.105332  | 0.122523  | 0.115967  | 0.120047 | 0.121358  | 0.144376 | 0.138258  |

|           |           |           |          |           |          |          |
|-----------|-----------|-----------|----------|-----------|----------|----------|
| 0.110577  | 0.134178  | 0.124126  | 0.131119 | 0.127768  | 0.139423 | 0.143794 |
| 0.0917832 | 0.11655   | 0.107372  | 0.12398  | 0.111305  | 0.131119 | 0.139277 |
| 0.0866841 | 0.113782  | 0.104604  | 0.127914 | 0.108537  | 0.136218 | 0.130973 |
| 0.103584  | 0.134761  | 0.119755  | 0.132284 | 0.122815  | 0.136509 | 0.145833 |
| 0.0852273 | 0.112908  | 0.101399  | 0.118881 | 0.102418  | 0.127768 | 0.133304 |
| 0.116259  | 0.136655  | 0.133596  | 0.133887 | 0.134033  | 0.148893 | 0.143648 |
| 0.121212  | 0.127622  | 0.130682  | 0.135927 | 0.121503  | 0.145688 | 0.132867 |
| 0.117279  | 0.132139  | 0.124126  | 0.125583 | 0.131265  | 0.137383 | 0.139423 |
| 0.0828963 | 0.10912   | 0.0961538 | 0.113928 | 0.104167  | 0.127185 | 0.128351 |
| 0.0862471 | 0.107517  | 0.0922203 | 0.118735 | 0.103438  | 0.126748 | 0.128788 |
| 0.100087  | 0.124563  | 0.113345  | 0.123252 | 0.11553   | 0.13884  | 0.14088  |
| 0.099359  | 0.125291  | 0.109703  | 0.121649 | 0.117133  | 0.130245 | 0.138112 |
| 0.106061  | 0.130828  | 0.119901  | 0.12398  | 0.121503  | 0.138403 | 0.148893 |
| 0.0922203 | 0.117861  | 0.106935  | 0.11859  | 0.113491  | 0.136509 | 0.139132 |
| 0.0926573 | 0.114802  | 0.109411  | 0.122815 | 0.111888  | 0.131702 | 0.135198 |
| 0.0996503 | 0.119755  | 0.117279  | 0.124563 | 0.119464  | 0.136655 | 0.136072 |
| 0.111014  | 0.132284  | 0.124272  | 0.130973 | 0.120047  | 0.140152 | 0.141608 |
| 0.107517  | 0.13345   | 0.116987  | 0.131847 | 0.122669  | 0.139569 | 0.14627  |
| 0.107663  | 0.129808  | 0.125291  | 0.137529 | 0.127477  | 0.139132 | 0.142628 |
| 0.111014  | 0.129953  | 0.125437  | 0.146125 | 0.123252  | 0.145105 | 0.140734 |
| 0.090035  | 0.118881  | 0.10271   | 0.124563 | 0.112471  | 0.132576 | 0.141026 |
| 0.112762  | 0.130828  | 0.119318  | 0.123689 | 0.122086  | 0.142483 | 0.141317 |
| 0.0837704 | 0.112908  | 0.0973193 | 0.113928 | 0.109411  | 0.128934 | 0.129808 |
| 0.0938228 | 0.112179  | 0.10271   | 0.128934 | 0.108683  | 0.141317 | 0.130536 |
| 0.0932401 | 0.110723  | 0.106789  | 0.113199 | 0.110431  | 0.138112 | 0.128205 |
| 0.090472  | 0.114365  | 0.099359  | 0.11859  | 0.106206  | 0.137383 | 0.130682 |
| 0.0895979 | 0.111742  | 0.0990676 | 0.110723 | 0.106206  | 0.131556 | 0.131847 |
| 0.106352  | 0.134324  | 0.126603  | 0.129225 | 0.128788  | 0.139277 | 0.148019 |
| 0.0986305 | 0.11553   | 0.106352  | 0.132576 | 0.113199  | 0.139423 | 0.133304 |
| 0.111742  | 0.131847  | 0.121212  | 0.127331 | 0.124563  | 0.140006 | 0.143211 |
| 0.0957168 | 0.112034  | 0.0996503 | 0.115676 | 0.104167  | 0.124854 | 0.130099 |
| 0.100233  | 0.127331  | 0.113491  | 0.122815 | 0.120047  | 0.132576 | 0.143648 |
| 0.099796  | 0.124563  | 0.107809  | 0.133159 | 0.112908  | 0.134761 | 0.131556 |
| 0.10067   | 0.108537  | 0.111014  | 0.134033 | 0.111742  | 0.144376 | 0.127185 |
| 0.0964452 | 0.113345  | 0.109703  | 0.131556 | 0.105478  | 0.122669 | 0.128205 |
| 0.103293  | 0.119027  | 0.112762  | 0.119464 | 0.115239  | 0.140589 | 0.132721 |
| 0.099359  | 0.113636  | 0.118735  | 0.13039  | 0.116841  | 0.136655 | 0.134033 |
| 0.0996503 | 0.111597  | 0.099796  | 0.130682 | 0.106061  | 0.130245 | 0.128788 |
| 0.125291  | 0.125583  | 0.123397  | 0.149038 | 0.1081    | 0.146562 | 0.130245 |
| 0.121066  | 0.135927  | 0.131119  | 0.148893 | 0.130099  | 0.137092 | 0.143211 |
| 0.0962995 | 0.0986305 | 0.0958625 | 0.125583 | 0.0887238 | 0.13039  | 0.118444 |
| 0.125     | 0.116259  | 0.126603  | 0.134761 | 0.111014  | 0.145979 | 0.123543 |
| 0.118735  | 0.11553   | 0.114802  | 0.1419   | 0.095134  | 0.136218 | 0.123689 |
| 0.122815  | 0.119027  | 0.120629  | 0.138986 | 0.115239  | 0.146999 | 0.129516 |

|           |          |          |          |           |          |          |
|-----------|----------|----------|----------|-----------|----------|----------|
| 0.114365  | 0.111742 | 0.110723 | 0.126166 | 0.105332  | 0.13884  | 0.120775 |
| 0.113782  | 0.110868 | 0.112179 | 0.138695 | 0.0983392 | 0.140297 | 0.126894 |
| 0.118007  | 0.115093 | 0.118735 | 0.141754 | 0.100524  | 0.141026 | 0.122669 |
| 0.121941  | 0.122815 | 0.11655  | 0.13141  | 0.116113  | 0.140297 | 0.133887 |
| 0.131556  | 0.12398  | 0.130536 | 0.137529 | 0.120775  | 0.145833 | 0.124563 |
| 0.116987  | 0.113782 | 0.120047 | 0.142191 | 0.101836  | 0.148747 | 0.126894 |
| 0.112617  | 0.107955 | 0.110723 | 0.122086 | 0.103584  | 0.136801 | 0.122232 |
| 0.111597  | 0.139277 | 0.122523 | 0.141754 | 0.129079  | 0.138403 | 0.149767 |
| 0.126311  | 0.123689 | 0.125583 | 0.145979 | 0.10912   | 0.145251 | 0.131265 |
| 0.104458  | 0.105332 | 0.104312 | 0.128788 | 0.10067   | 0.13447  | 0.11961  |
| 0.21183   | 0.216492 | 0.20877  | 0.226544 | 0.217366  | 0.233683 | 0.226107 |
| 0.121503  | 0.113928 | 0.118444 | 0.131556 | 0.109557  | 0.139569 | 0.125    |
| 0.104021  | 0.109848 | 0.108829 | 0.133304 | 0.0958625 | 0.142483 | 0.125    |
| 0.126603  | 0.126603 | 0.127331 | 0.141317 | 0.118735  | 0.145542 | 0.13039  |
| 0.106498  | 0.112325 | 0.110723 | 0.140152 | 0.103293  | 0.143211 | 0.129225 |
| 0.122815  | 0.121358 | 0.129079 | 0.144814 | 0.106789  | 0.150204 | 0.126603 |
| 0.112617  | 0.112908 | 0.111597 | 0.13345  | 0.106498  | 0.141754 | 0.126603 |
| 0.116841  | 0.1081   | 0.112908 | 0.13243  | 0.105186  | 0.136364 | 0.122669 |
| 0.118298  | 0.11451  | 0.115239 | 0.136509 | 0.101107  | 0.150641 | 0.123252 |
| 0.121066  | 0.119318 | 0.119172 | 0.138695 | 0.113199  | 0.150204 | 0.127768 |
| 0.123834  | 0.121212 | 0.124272 | 0.140297 | 0.111305  | 0.147145 | 0.132576 |
| 0.124563  | 0.125146 | 0.121795 | 0.127914 | 0.10912   | 0.142045 | 0.131847 |
| 0.122815  | 0.121358 | 0.119464 | 0.127914 | 0.109703  | 0.142628 | 0.127477 |
| 0.099796  | 0.108537 | 0.112179 | 0.135781 | 0.10067   | 0.126311 | 0.125728 |
| 0.113199  | 0.114656 | 0.1081   | 0.123834 | 0.106789  | 0.139423 | 0.131556 |
| 0.126457  | 0.124709 | 0.125146 | 0.14088  | 0.121212  | 0.147727 | 0.130536 |
| 0.113199  | 0.110868 | 0.115093 | 0.128205 | 0.106498  | 0.138258 | 0.121358 |
| 0.111742  | 0.135344 | 0.126748 | 0.143939 | 0.126603  | 0.151369 | 0.147582 |
| 0.127914  | 0.132576 | 0.131265 | 0.150204 | 0.135198  | 0.154138 | 0.141317 |
| 0.112762  | 0.111305 | 0.118153 | 0.137092 | 0.111305  | 0.132284 | 0.125291 |
| 0.118007  | 0.115093 | 0.118735 | 0.141463 | 0.108392  | 0.138986 | 0.124417 |
| 0.118444  | 0.12398  | 0.126457 | 0.142774 | 0.124854  | 0.144668 | 0.139714 |
| 0.117424  | 0.127622 | 0.114365 | 0.140297 | 0.109848  | 0.12704  | 0.136364 |
| 0.11859   | 0.123834 | 0.118735 | 0.139132 | 0.125     | 0.142191 | 0.139277 |
| 0.132576  | 0.128205 | 0.131265 | 0.152535 | 0.13345   | 0.158217 | 0.13986  |
| 0.090472  | 0.105332 | 0.107226 | 0.128788 | 0.101544  | 0.131265 | 0.121941 |
| 0.114802  | 0.121795 | 0.124854 | 0.144085 | 0.116841  | 0.145396 | 0.130536 |
| 0.132721  | 0.135927 | 0.136364 | 0.151807 | 0.139423  | 0.157488 | 0.145833 |
| 0.100087  | 0.114073 | 0.113636 | 0.134324 | 0.103293  | 0.133013 | 0.126603 |
| 0.105915  | 0.122232 | 0.113345 | 0.142191 | 0.105332  | 0.144959 | 0.136801 |
| 0.125583  | 0.140734 | 0.134761 | 0.148747 | 0.136655  | 0.14627  | 0.148019 |
| 0.0996503 | 0.122669 | 0.115239 | 0.135052 | 0.116841  | 0.144522 | 0.136364 |
| 0.12398   | 0.128642 | 0.128497 | 0.144814 | 0.127477  | 0.143794 | 0.13243  |
| 0.111305  | 0.123834 | 0.11961  | 0.140589 | 0.120338  | 0.143065 | 0.128788 |

|           |           |          |          |           |          |           |
|-----------|-----------|----------|----------|-----------|----------|-----------|
| 0.112034  | 0.122232  | 0.116841 | 0.127331 | 0.121358  | 0.135344 | 0.133304  |
| 0.113636  | 0.121503  | 0.129808 | 0.139714 | 0.123543  | 0.144814 | 0.132284  |
| 0.103293  | 0.115239  | 0.116259 | 0.133741 | 0.10708   | 0.136509 | 0.128351  |
| 0.107517  | 0.127622  | 0.123689 | 0.135927 | 0.127622  | 0.140152 | 0.137529  |
| 0.122378  | 0.127622  | 0.116696 | 0.136218 | 0.110723  | 0.141608 | 0.137238  |
| 0.120047  | 0.132284  | 0.124272 | 0.134761 | 0.12704   | 0.135781 | 0.137529  |
| 0.122378  | 0.130536  | 0.12602  | 0.135344 | 0.118881  | 0.140734 | 0.138695  |
| 0.113928  | 0.128205  | 0.119901 | 0.141171 | 0.123834  | 0.141026 | 0.140734  |
| 0.130245  | 0.136655  | 0.133304 | 0.14088  | 0.136072  | 0.14627  | 0.13986   |
| 0.104604  | 0.115093  | 0.119027 | 0.139714 | 0.0981935 | 0.136364 | 0.119755  |
| 0.102855  | 0.115676  | 0.115239 | 0.130973 | 0.109848  | 0.142191 | 0.129371  |
| 0.124417  | 0.120338  | 0.127185 | 0.134761 | 0.123834  | 0.146853 | 0.133159  |
| 0.109557  | 0.112471  | 0.114948 | 0.134178 | 0.101107  | 0.128205 | 0.123252  |
| 0.136509  | 0.135344  | 0.135781 | 0.153846 | 0.137092  | 0.156031 | 0.147873  |
| 0.145251  | 0.150787  | 0.148019 | 0.157343 | 0.140006  | 0.161568 | 0.155449  |
| 0.108829  | 0.128934  | 0.120047 | 0.130245 | 0.125437  | 0.137675 | 0.140589  |
| 0.0964452 | 0.122086  | 0.112034 | 0.126311 | 0.115676  | 0.133159 | 0.138986  |
| 0.121941  | 0.126894  | 0.124709 | 0.132576 | 0.128642  | 0.14088  | 0.137675  |
| 0.125583  | 0.120047  | 0.122232 | 0.138549 | 0.119464  | 0.14627  | 0.130536  |
| 0.108683  | 0.129662  | 0.119901 | 0.125146 | 0.118007  | 0.136946 | 0.141317  |
| 0.127914  | 0.129662  | 0.12602  | 0.138549 | 0.118881  | 0.144522 | 0.13345   |
| 0.126748  | 0.130828  | 0.130973 | 0.146707 | 0.119755  | 0.15035  | 0.130828  |
| 0.106206  | 0.118153  | 0.120338 | 0.136655 | 0.107663  | 0.137092 | 0.127185  |
| 0.153118  | 0.158945  | 0.151224 | 0.144522 | 0.159237  | 0.163024 | 0.168561  |
| 0.108246  | 0.11961   | 0.118007 | 0.137821 | 0.105332  | 0.140006 | 0.129225  |
| 0.118153  | 0.128934  | 0.136072 | 0.157051 | 0.121358  | 0.14729  | 0.132139  |
| 0.100233  | 0.117133  | 0.11757  | 0.133304 | 0.109848  | 0.140734 | 0.133159  |
| 0.120338  | 0.132284  | 0.120484 | 0.134178 | 0.123834  | 0.139277 | 0.145396  |
| 0.118881  | 0.115385  | 0.116404 | 0.13243  | 0.111305  | 0.141608 | 0.121795  |
| 0.132721  | 0.134178  | 0.126166 | 0.151807 | 0.13243   | 0.158654 | 0.151661  |
| 0.1419    | 0.139569  | 0.139132 | 0.134178 | 0.145396  | 0.157343 | 0.143939  |
| 0.111742  | 0.120192  | 0.113636 | 0.129371 | 0.121066  | 0.145251 | 0.135052  |
| 0.124709  | 0.130828  | 0.125728 | 0.144085 | 0.134324  | 0.153555 | 0.143648  |
| 0.109994  | 0.142045  | 0.139277 | 0.158217 | 0.14933   | 0.160985 | 0.159819  |
| 0.134761  | 0.13243   | 0.133159 | 0.158508 | 0.135635  | 0.164773 | 0.150787  |
| 0.0941142 | 0.130245  | 0.11553  | 0.131265 | 0.120921  | 0.12296  | 0.144231  |
| 0.135344  | 0.133304  | 0.134324 | 0.137238 | 0.13039   | 0.149038 | 0.141463  |
| 0.103875  | 0.083479  | 0.111014 | 0.128497 | 0.109703  | 0.135052 | 0.10271   |
| 0.102273  | 0.0786713 | 0.11116  | 0.130973 | 0.112179  | 0.127622 | 0.0958625 |
| 0.114365  | 0.118444  | 0.11451  | 0.130245 | 0.101836  | 0.142045 | 0.133304  |
| 0.108537  | 0.113782  | 0.108392 | 0.130536 | 0.116696  | 0.140589 | 0.132139  |
| 0.0981935 | 0.109557  | 0.106789 | 0.124563 | 0.1081    | 0.127331 | 0.129079  |
| 0.100816  | 0.0734266 | 0.106789 | 0.131847 | 0.106935  | 0.134907 | 0.0909091 |
| 0.112762  | 0.113054  | 0.110868 | 0.133596 | 0.123834  | 0.1419   | 0.13549   |

|           |           |           |           |           |           |           |
|-----------|-----------|-----------|-----------|-----------|-----------|-----------|
| 0.114073  | 0.0625    | 0.118881  | 0.136364  | 0.109994  | 0.138549  | 0.0662879 |
| 0.0957168 | 0.0939685 | 0.0862471 | 0.12296   | 0.0514277 | 0.124563  | 0.11116   |
| 0.11116   | 0.117861  | 0.111305  | 0.134907  | 0.118735  | 0.145542  | 0.135927  |
| 0.106643  | 0.114802  | 0.107663  | 0.127477  | 0.114802  | 0.142191  | 0.132867  |
| 0.0588578 | 0.126166  | 0.11553   | 0.13039   | 0.121212  | 0.127914  | 0.145688  |
| 0.210082  | 0.207168  | 0.20877   | 0.227127  | 0.2162    | 0.231935  | 0.21824   |
| 0.131702  | 0.137529  | 0.132139  | 0.146999  | 0.140734  | 0.154429  | 0.143648  |
| 0.118153  | 0.125728  | 0.120629  | 0.13141   | 0.116696  | 0.14292   | 0.137966  |
| 0.115093  | 0.116841  | 0.115822  | 0.134178  | 0.118007  | 0.147727  | 0.134033  |
| 0.205128  | 0.20338   | 0.20236   | 0.2213    | 0.20979   | 0.226107  | 0.212704  |
| 0.0804196 | 0.119755  | 0.114656  | 0.135927  | 0.119464  | 0.133741  | 0.141026  |
| 0.103584  | 0.117279  | 0.112762  | 0.134615  | 0.114656  | 0.0639569 | 0.129516  |
| 0.109994  | 0.120775  | 0.11451   | 0.128788  | 0.119901  | 0.136218  | 0.137675  |
| 0.113345  | 0.0506993 | 0.119901  | 0.139714  | 0.108974  | 0.133741  | 0.0533217 |
| 0.245047  | 0.242424  | 0.242279  | 0.256556  | 0.248252  | 0.262529  | 0.249417  |
| 0.119318  | 0.11961   | 0.118007  | 0.138695  | 0.115239  | 0.140589  | 0.139132  |
| 0.0557984 | 0.116696  | 0.104312  | 0.129371  | 0.115239  | 0.127185  | 0.13884   |
| 0.111742  | 0.12398   | 0.107226  | 0.0515734 | 0.123397  | 0.143211  | 0.14292   |
| 0.113782  | 0.121941  | 0.106643  | 0.0550699 | 0.121066  | 0.143211  | 0.141171  |
| 0.119901  | 0.107955  | 0.124126  | 0.141317  | 0.11757   | 0.138258  | 0.122815  |
| 0.121941  | 0.107955  | 0.103438  | 0.134615  | 0.112325  | 0.146707  | 0.121358  |
| 0.0581294 | 0.119901  | 0.111014  | 0.129371  | 0.11757   | 0.127477  | 0.137383  |
| 0.108974  | 0.115676  | 0.109411  | 0.128642  | 0.115676  | 0.141026  | 0.131993  |
| 0.121941  | 0.123397  | 0.121503  | 0.132867  | 0.120484  | 0.14292   | 0.14088   |
| 0.108537  | 0.0450175 | 0.111597  | 0.131702  | 0.104749  | 0.131556  | 0.0581294 |
| 0.104312  | 0.11014   | 0.103584  | 0.126603  | 0.113054  | 0.141608  | 0.129371  |
| 0.113199  | 0.0995047 | 0.109848  | 0.134615  | 0.0840618 | 0.140297  | 0.10708   |
| 0.138986  | 0.138403  | 0.139132  | 0.132139  | 0.144814  | 0.158508  | 0.143939  |
| 0.120629  | 0.124126  | 0.120484  | 0.135052  | 0.117424  | 0.136655  | 0.143065  |
| 0.107517  | 0.12296   | 0.116113  | 0.13447   | 0.117133  | 0.0608974 | 0.134907  |
| 0.181818  | 0.180944  | 0.181964  | 0.200903  | 0.189103  | 0.207459  | 0.196678  |
| 0.196678  | 0.197552  | 0.196241  | 0.215472  | 0.204545  | 0.222028  | 0.20979   |
| 0.11451   | 0.0495338 | 0.120484  | 0.140589  | 0.111014  | 0.137238  | 0.0582751 |
| 0.106935  | 0.0445804 | 0.113199  | 0.130099  | 0.104312  | 0.131993  | 0.0547786 |
| 0.127914  | 0.127622  | 0.124272  | 0.140297  | 0.127331  | 0.159091  | 0.134907  |
| 0.0588578 | 0.119172  | 0.108829  | 0.130973  | 0.116841  | 0.126748  | 0.138695  |
| 0.121649  | 0.122232  | 0.123543  | 0.139277  | 0.116696  | 0.138549  | 0.141463  |
| 0.123543  | 0.128497  | 0.122523  | 0.109994  | 0.125583  | 0.138986  | 0.135198  |
| 0.219406  | 0.215035  | 0.218094  | 0.234703  | 0.227564  | 0.23951   | 0.227273  |
| 0.0999417 | 0.115676  | 0.105624  | 0.128351  | 0.106935  | 0.136655  | 0.133159  |
| 0.195659  | 0.204983  | 0.201632  | 0.216492  | 0.207314  | 0.216346  | 0.211976  |
| 0.0844988 | 0.115093  | 0.103875  | 0.126894  | 0.111888  | 0.122669  | 0.137529  |
| 0.103875  | 0.11757   | 0.100816  | 0.124126  | 0.105915  | 0.127185  | 0.13039   |
| 0.0996503 | 0.112471  | 0.110577  | 0.129808  | 0.113054  | 0.131702  | 0.128497  |

|           |           |           |           |          |           |           |
|-----------|-----------|-----------|-----------|----------|-----------|-----------|
| 0.105186  | 0.0574009 | 0.112617  | 0.128351  | 0.105186 | 0.133159  | 0.0658508 |
| 0.200903  | 0.200903  | 0.198718  | 0.215909  | 0.207605 | 0.225087  | 0.211101  |
| 0.120775  | 0.126311  | 0.121503  | 0.141317  | 0.128059 | 0.153118  | 0.143211  |
| 0.103001  | 0.11757   | 0.107809  | 0.121503  | 0.109994 | 0.130099  | 0.13884   |
| 0.114948  | 0.121066  | 0.112179  | 0.134033  | 0.121358 | 0.143794  | 0.137675  |
| 0.109411  | 0.128642  | 0.0579837 | 0.125291  | 0.105624 | 0.132139  | 0.137966  |
| 0.108829  | 0.0467657 | 0.112179  | 0.137238  | 0.106789 | 0.135344  | 0.0654138 |
| 0.0839161 | 0.120629  | 0.106789  | 0.127185  | 0.114802 | 0.119464  | 0.141317  |
| 0.0687646 | 0.118298  | 0.114365  | 0.13039   | 0.121503 | 0.130245  | 0.137529  |
| 0.105769  | 0.119172  | 0.116987  | 0.135344  | 0.113636 | 0.0600233 | 0.132867  |
| 0.101981  | 0.109848  | 0.100962  | 0.127768  | 0.112179 | 0.138112  | 0.127331  |
| 0.104167  | 0.120775  | 0.108392  | 0.121212  | 0.114365 | 0.128059  | 0.142045  |
| 0.183566  | 0.178322  | 0.178759  | 0.200612  | 0.190268 | 0.209499  | 0.196096  |
| 0.11553   | 0.124272  | 0.108974  | 0.0498252 | 0.124563 | 0.142045  | 0.144668  |
| 0.123834  | 0.121212  | 0.119901  | 0.118444  | 0.129079 | 0.149767  | 0.136655  |
| 0.110868  | 0.116696  | 0.113054  | 0.110431  | 0.119027 | 0.14292   | 0.136509  |
| 0.116259  | 0.124709  | 0.119318  | 0.140297  | 0.119172 | 0.142483  | 0.144522  |
| 0.109266  | 0.117716  | 0.111116  | 0.13039   | 0.118881 | 0.140734  | 0.136946  |
| 0.0903263 | 0.123834  | 0.107955  | 0.129516  | 0.118298 | 0.121795  | 0.13986   |
| 0.102418  | 0.120192  | 0.0652681 | 0.118881  | 0.10067  | 0.135052  | 0.135635  |
| 0.0668706 | 0.126603  | 0.115676  | 0.130536  | 0.120775 | 0.126603  | 0.14292   |
| 0.118881  | 0.11655   | 0.115822  | 0.122232  | 0.128497 | 0.145979  | 0.132576  |
| 0.107226  | 0.11655   | 0.103584  | 0.0668706 | 0.117133 | 0.142191  | 0.135198  |
| 0.110286  | 0.0592949 | 0.117716  | 0.139277  | 0.108537 | 0.138258  | 0.067162  |
| 0.113345  | 0.11859   | 0.111742  | 0.126894  | 0.12296  | 0.138403  | 0.136946  |
| 0.124854  | 0.133013  | 0.125874  | 0.134324  | 0.13243  | 0.143794  | 0.14292   |
| 0.107372  | 0.110868  | 0.109557  | 0.131119  | 0.11116  | 0.133887  | 0.132139  |
| 0.127331  | 0.13345   | 0.126603  | 0.144376  | 0.134907 | 0.149767  | 0.141317  |
| 0.106935  | 0.0460373 | 0.112908  | 0.134178  | 0.104312 | 0.134615  | 0.0632284 |
| 0.110723  | 0.117716  | 0.108537  | 0.107663  | 0.119172 | 0.134907  | 0.132284  |
| 0.108246  | 0.117279  | 0.11014   | 0.135198  | 0.116987 | 0.142045  | 0.134178  |
| 0.0630828 | 0.126311  | 0.118298  | 0.136072  | 0.122232 | 0.131556  | 0.144376  |
| 0.172057  | 0.187209  | 0.182692  | 0.202506  | 0.189831 | 0.207896  | 0.199738  |
| 0.0981935 | 0.113928  | 0.104167  | 0.117861  | 0.106935 | 0.126748  | 0.134324  |
| 0.0976107 | 0.104895  | 0.0980478 | 0.120775  | 0.105186 | 0.12704   | 0.124709  |
| 0.106643  | 0.121212  | 0.116404  | 0.13243   | 0.116841 | 0.0603147 | 0.133159  |
| 0.171329  | 0.172203  | 0.168852  | 0.195076  | 0.18211  | 0.198427  | 0.187354  |
| 0.130099  | 0.130973  | 0.130828  | 0.149767  | 0.12602  | 0.146707  | 0.151369  |
| 0.140297  | 0.142628  | 0.13986   | 0.15035   | 0.131265 | 0.147873  | 0.155157  |
| 0.143939  | 0.13986   | 0.138549  | 0.135344  | 0.147145 | 0.157051  | 0.144231  |
| 0.105769  | 0.112179  | 0.108246  | 0.131265  | 0.112471 | 0.135781  | 0.133741  |
| 0.114073  | 0.118735  | 0.111888  | 0.130245  | 0.121941 | 0.143502  | 0.13447   |
| 0.20338   | 0.200466  | 0.203526  | 0.221008  | 0.210082 | 0.226399  | 0.217075  |
| 0.120047  | 0.115385  | 0.11961   | 0.13039   | 0.120047 | 0.138403  | 0.131702  |

|           |           |           |           |           |           |           |
|-----------|-----------|-----------|-----------|-----------|-----------|-----------|
| 0.116987  | 0.123106  | 0.11655   | 0.134033  | 0.123397  | 0.145833  | 0.139423  |
| 0.0995047 | 0.118153  | 0.106643  | 0.120629  | 0.111451  | 0.129516  | 0.138549  |
| 0.164481  | 0.160985  | 0.162296  | 0.180944  | 0.16623   | 0.190122  | 0.174679  |
| 0.106206  | 0.104749  | 0.101981  | 0.129371  | 0.104458  | 0.140297  | 0.127185  |
| 0.146853  | 0.142191  | 0.146416  | 0.144959  | 0.137821  | 0.154429  | 0.145396  |
| 0.110431  | 0.112762  | 0.102127  | 0.132139  | 0.048951  | 0.131702  | 0.119172  |
| 0.18007   | 0.18211   | 0.18109   | 0.200612  | 0.189977  | 0.206002  | 0.193765  |
| 0.114802  | 0.11451   | 0.116696  | 0.13447   | 0.115385  | 0.136364  | 0.136655  |
| 0.0979021 | 0.102564  | 0.0992133 | 0.12602   | 0.0999417 | 0.131702  | 0.121503  |
| 0.106206  | 0.113491  | 0.105478  | 0.111014  | 0.116404  | 0.137092  | 0.135344  |
| 0.103147  | 0.115385  | 0.105915  | 0.126603  | 0.112179  | 0.124417  | 0.134907  |
| 0.102855  | 0.11859   | 0.114948  | 0.135635  | 0.110431  | 0.0611888 | 0.131993  |
| 0.118007  | 0.114802  | 0.114656  | 0.133596  | 0.118298  | 0.148019  | 0.13345   |
| 0.107372  | 0.0467657 | 0.111014  | 0.137238  | 0.103293  | 0.132721  | 0.0627914 |
| 0.182692  | 0.181527  | 0.179633  | 0.199738  | 0.189103  | 0.208333  | 0.197261  |
| 0.116696  | 0.121066  | 0.118007  | 0.132576  | 0.121358  | 0.136801  | 0.139132  |
| 0.104021  | 0.107809  | 0.103293  | 0.129225  | 0.115676  | 0.134324  | 0.124417  |
| 0.205565  | 0.202943  | 0.202506  | 0.220571  | 0.21081   | 0.227127  | 0.214307  |
| 0.115239  | 0.122523  | 0.1081    | 0.0530303 | 0.121066  | 0.140589  | 0.14292   |
| 0.107226  | 0.0480769 | 0.113491  | 0.138549  | 0.105769  | 0.13345   | 0.0579837 |
| 0.101981  | 0.04662   | 0.106498  | 0.131556  | 0.102564  | 0.131702  | 0.0641026 |
| 0.127477  | 0.130099  | 0.125     | 0.138986  | 0.133013  | 0.153409  | 0.139132  |
| 0.182255  | 0.179341  | 0.179196  | 0.202214  | 0.188666  | 0.207896  | 0.194202  |
| 0.0588578 | 0.121212  | 0.109411  | 0.132721  | 0.120338  | 0.127331  | 0.143648  |
| 0.118298  | 0.126748  | 0.123106  | 0.128642  | 0.129079  | 0.140443  | 0.139277  |
| 0.107517  | 0.04662   | 0.112034  | 0.13447   | 0.106061  | 0.131119  | 0.0579837 |
| 0.105769  | 0.0486597 | 0.108246  | 0.135052  | 0.102855  | 0.13549   | 0.0690559 |
| 0.106789  | 0.0479312 | 0.110723  | 0.133159  | 0.104458  | 0.133013  | 0.0607517 |
| 0.104604  | 0.111597  | 0.104167  | 0.129225  | 0.113928  | 0.13986   | 0.132284  |
| 0.0945513 | 0.095134  | 0.0903263 | 0.121795  | 0.050845  | 0.125146  | 0.110286  |
| 0.11757   | 0.11961   | 0.117716  | 0.136364  | 0.113782  | 0.139714  | 0.143794  |
| 0.123397  | 0.135052  | 0.12296   | 0.122378  | 0.129516  | 0.150204  | 0.144959  |
| 0.113491  | 0.116696  | 0.116259  | 0.136364  | 0.113199  | 0.142628  | 0.137966  |
| 0.119172  | 0.130536  | 0.0607517 | 0.124563  | 0.108974  | 0.138403  | 0.138986  |
| 0.18546   | 0.186334  | 0.186772  | 0.207168  | 0.194784  | 0.212558  | 0.202069  |
| 0.109266  | 0.115676  | 0.110868  | 0.125146  | 0.119172  | 0.136946  | 0.134324  |
| 0.122232  | 0.128934  | 0.121795  | 0.136655  | 0.12602   | 0.144959  | 0.14292   |
| 0.105186  | 0.0480769 | 0.108246  | 0.132139  | 0.100816  | 0.130828  | 0.0661422 |
| 0.0971737 | 0.0942599 | 0.0909091 | 0.120629  | 0.0488054 | 0.122523  | 0.112908  |
| 0.110286  | 0.114948  | 0.115967  | 0.126748  | 0.116113  | 0.140297  | 0.13039   |
| 0.0576923 | 0.125583  | 0.11116   | 0.130973  | 0.120629  | 0.125874  | 0.13986   |
| 0.125874  | 0.126166  | 0.123106  | 0.137675  | 0.124709  | 0.144522  | 0.139277  |
| 0.114073  | 0.114948  | 0.112471  | 0.128497  | 0.125146  | 0.145833  | 0.133304  |
| 0.0689103 | 0.108246  | 0.101399  | 0.129079  | 0.0945513 | 0.124854  | 0.126894  |



|           |           |           |          |           |           |           |
|-----------|-----------|-----------|----------|-----------|-----------|-----------|
| 0.0710956 | 0.105186  | 0.095134  | 0.123106 | 0.0801282 | 0.121795  | 0.123834  |
| 0.101544  | 0.100379  | 0.0894522 | 0.129953 | 0.0878497 | 0.134761  | 0.121066  |
| 0.0839161 | 0.119755  | 0.102127  | 0.129225 | 0.115385  | 0.119172  | 0.136072  |
| 0.123106  | 0.127768  | 0.128497  | 0.142774 | 0.119027  | 0.141463  | 0.142628  |
| 0.0533217 | 0.120047  | 0.108537  | 0.134178 | 0.118007  | 0.127914  | 0.141317  |
| 0.104458  | 0.109703  | 0.104895  | 0.127331 | 0.110868  | 0.140297  | 0.128059  |
| 0.0511364 | 0.115822  | 0.103147  | 0.129371 | 0.110868  | 0.12602   | 0.135927  |
| 0.10373   | 0.048951  | 0.109994  | 0.132721 | 0.105478  | 0.136655  | 0.0684732 |
| 0.0936772 | 0.112617  | 0.0984848 | 0.120047 | 0.105332  | 0.128059  | 0.134178  |
| 0.107663  | 0.043852  | 0.113928  | 0.134615 | 0.107955  | 0.133304  | 0.0590035 |
| 0.100962  | 0.107955  | 0.102855  | 0.120338 | 0.115822  | 0.133596  | 0.132721  |
| 0.112325  | 0.111742  | 0.112471  | 0.12296  | 0.121358  | 0.144668  | 0.132139  |
| 0.099796  | 0.111451  | 0.107517  | 0.133159 | 0.109411  | 0.0744464 | 0.13039   |
| 0.0981935 | 0.0976107 | 0.0910548 | 0.127185 | 0.0501166 | 0.129079  | 0.115093  |
| 0.105624  | 0.0493881 | 0.11014   | 0.13345  | 0.104167  | 0.135052  | 0.0680361 |
| 0.114073  | 0.118735  | 0.11451   | 0.117716 | 0.119027  | 0.141463  | 0.135927  |
| 0.11014   | 0.109557  | 0.111742  | 0.132721 | 0.118298  | 0.143357  | 0.128205  |
| 0.0977564 | 0.104167  | 0.100816  | 0.130536 | 0.103875  | 0.137383  | 0.124854  |
| 0.103001  | 0.0520105 | 0.107809  | 0.130828 | 0.102127  | 0.133887  | 0.0680361 |
| 0.112179  | 0.11859   | 0.107955  | 0.128642 | 0.119172  | 0.138403  | 0.137238  |
| 0.0836247 | 0.117716  | 0.106498  | 0.131556 | 0.11451   | 0.121795  | 0.136946  |
| 0.109557  | 0.117424  | 0.11116   | 0.133596 | 0.120629  | 0.142191  | 0.134033  |
| 0.0981935 | 0.113636  | 0.110286  | 0.131556 | 0.111597  | 0.0719697 | 0.129371  |
| 0.10169   | 0.0981935 | 0.0936772 | 0.126311 | 0.0457459 | 0.126748  | 0.116259  |
| 0.102564  | 0.10169   | 0.099796  | 0.127185 | 0.101107  | 0.134324  | 0.11859   |
| 0.0948427 | 0.112908  | 0.101399  | 0.119172 | 0.103584  | 0.129225  | 0.135927  |
| 0.113345  | 0.117424  | 0.112908  | 0.135927 | 0.120921  | 0.143065  | 0.136072  |
| 0.111597  | 0.127914  | 0.103875  | 0.133013 | 0.121212  | 0.141608  | 0.145396  |
| 0.106206  | 0.109703  | 0.100524  | 0.131702 | 0.112325  | 0.139423  | 0.126603  |
| 0.186334  | 0.186626  | 0.18648   | 0.207751 | 0.192453  | 0.213432  | 0.199738  |
| 0.154866  | 0.156031  | 0.150932  | 0.176573 | 0.164481  | 0.184878  | 0.172348  |
| 0.112908  | 0.118735  | 0.116259  | 0.13549  | 0.116404  | 0.139132  | 0.138549  |
| 0.0824592 | 0.117133  | 0.111742  | 0.131265 | 0.121503  | 0.137821  | 0.136946  |
| 0.140443  | 0.14627   | 0.143502  | 0.149621 | 0.137529  | 0.149767  | 0.15472   |
| 0.123689  | 0.121941  | 0.12296   | 0.134324 | 0.122232  | 0.146125  | 0.139714  |
| 0.117133  | 0.0827506 | 0.118735  | 0.134761 | 0.112179  | 0.140152  | 0.0941142 |
| 0.10912   | 0.078817  | 0.106352  | 0.135781 | 0.113491  | 0.140297  | 0.0980478 |
| 0.108537  | 0.0942599 | 0.108683  | 0.134615 | 0.083479  | 0.136801  | 0.11116   |
| 0.112617  | 0.112908  | 0.111305  | 0.135198 | 0.117861  | 0.142337  | 0.127185  |
| 0.194639  | 0.189685  | 0.19391   | 0.214598 | 0.200175  | 0.221445  | 0.205128  |
| 0.0584207 | 0.123106  | 0.111597  | 0.131993 | 0.120775  | 0.13039   | 0.142628  |
| 0.0824592 | 0.112471  | 0.11116   | 0.131847 | 0.119755  | 0.136655  | 0.134907  |
| 0.100816  | 0.0600233 | 0.106206  | 0.132139 | 0.104021  | 0.131119  | 0.0769231 |
| 0.106789  | 0.118153  | 0.0509907 | 0.125291 | 0.103584  | 0.140589  | 0.137675  |

|           |           |           |           |           |           |           |
|-----------|-----------|-----------|-----------|-----------|-----------|-----------|
| 0.174825  | 0.17366   | 0.173805  | 0.19799   | 0.184149  | 0.206876  | 0.188811  |
| 0.240093  | 0.240093  | 0.239656  | 0.253934  | 0.246503  | 0.256993  | 0.247669  |
| 0.115093  | 0.115676  | 0.113491  | 0.126311  | 0.125583  | 0.147436  | 0.131993  |
| 0.110723  | 0.107226  | 0.108537  | 0.131847  | 0.117424  | 0.143357  | 0.126748  |
| 0.115385  | 0.115676  | 0.113199  | 0.135052  | 0.112471  | 0.139569  | 0.136946  |
| 0.0995047 | 0.109994  | 0.108392  | 0.131702  | 0.107663  | 0.0735723 | 0.127768  |
| 0.0506993 | 0.11859   | 0.106789  | 0.126603  | 0.114802  | 0.121212  | 0.135781  |
| 0.104458  | 0.110286  | 0.106643  | 0.126457  | 0.111451  | 0.135635  | 0.131265  |
| 0.108683  | 0.0748834 | 0.10912   | 0.135927  | 0.109848  | 0.137238  | 0.0874126 |
| 0.0524476 | 0.114219  | 0.105332  | 0.127477  | 0.113928  | 0.125874  | 0.138112  |
| 0.10708   | 0.0837704 | 0.107517  | 0.134907  | 0.110577  | 0.137092  | 0.0989219 |
| 0.106352  | 0.107517  | 0.109411  | 0.138258  | 0.104604  | 0.141608  | 0.127331  |
| 0.101544  | 0.0995047 | 0.0941142 | 0.128205  | 0.0493881 | 0.126311  | 0.115239  |
| 0.116259  | 0.11451   | 0.116404  | 0.120484  | 0.126748  | 0.143648  | 0.132576  |
| 0.108829  | 0.117279  | 0.107517  | 0.134324  | 0.118153  | 0.144959  | 0.133596  |
| 0.0965909 | 0.10708   | 0.0976107 | 0.107517  | 0.108246  | 0.124563  | 0.124272  |
| 0.113491  | 0.114948  | 0.122378  | 0.126748  | 0.120192  | 0.135344  | 0.125437  |
| 0.111742  | 0.132139  | 0.12296   | 0.140152  | 0.119027  | 0.046183  | 0.133887  |
| 0.103438  | 0.0474942 | 0.109703  | 0.133013  | 0.104312  | 0.134615  | 0.0658508 |
| 0.107663  | 0.0878497 | 0.115093  | 0.137238  | 0.106206  | 0.13447   | 0.0939685 |
| 0.120775  | 0.0627914 | 0.127331  | 0.140734  | 0.11116   | 0.135344  | 0.0423951 |
| 0.204254  | 0.199009  | 0.201486  | 0.218969  | 0.204254  | 0.224942  | 0.211538  |
| 0.105624  | 0.109994  | 0.105478  | 0.118007  | 0.114948  | 0.137092  | 0.131556  |
| 0.100816  | 0.099359  | 0.0893065 | 0.125728  | 0.0477855 | 0.12704   | 0.115676  |
| 0.110723  | 0.11655   | 0.108246  | 0.127477  | 0.118007  | 0.136655  | 0.13549   |
| 0.114948  | 0.121649  | 0.108974  | 0.0591492 | 0.122815  | 0.144376  | 0.144376  |
| 0.106498  | 0.116696  | 0.0457459 | 0.120921  | 0.102418  | 0.135344  | 0.13447   |
| 0.191288  | 0.190122  | 0.188228  | 0.210082  | 0.196533  | 0.218677  | 0.206148  |
| 0.113928  | 0.117133  | 0.11116   | 0.135927  | 0.121503  | 0.144814  | 0.134907  |
| 0.103001  | 0.0493881 | 0.11014   | 0.131993  | 0.102418  | 0.132721  | 0.0665793 |
| 0.106935  | 0.120921  | 0.114073  | 0.131847  | 0.112179  | 0.135781  | 0.13549   |
| 0.0979021 | 0.108392  | 0.103584  | 0.126894  | 0.1081    | 0.0699301 | 0.125874  |
| 0.112179  | 0.113928  | 0.110577  | 0.135052  | 0.122378  | 0.145688  | 0.132867  |
| 0.099359  | 0.103438  | 0.0983392 | 0.124854  | 0.104895  | 0.133159  | 0.122378  |
| 0.104312  | 0.113054  | 0.10912   | 0.13447   | 0.105478  | 0.138986  | 0.129371  |
| 0.110723  | 0.119172  | 0.104749  | 0.0607517 | 0.120047  | 0.141317  | 0.13986   |
| 0.192162  | 0.190705  | 0.187937  | 0.211247  | 0.19799   | 0.214889  | 0.206731  |
| 0.102855  | 0.112471  | 0.101253  | 0.125728  | 0.110431  | 0.137238  | 0.129079  |
| 0.186626  | 0.184878  | 0.184732  | 0.20979   | 0.196241  | 0.214307  | 0.199446  |
| 0.186772  | 0.184149  | 0.181672  | 0.206731  | 0.19289   | 0.210373  | 0.198427  |
| 0.111305  | 0.125     | 0.119901  | 0.135635  | 0.118881  | 0.0533217 | 0.134324  |
| 0.122669  | 0.132284  | 0.116404  | 0.0488054 | 0.125291  | 0.145396  | 0.144231  |
| 0.0920746 | 0.104604  | 0.0957168 | 0.126894  | 0.0964452 | 0.134324  | 0.123543  |
| 0.099796  | 0.108246  | 0.101107  | 0.125     | 0.108537  | 0.133887  | 0.125728  |

|           |           |           |           |           |           |           |
|-----------|-----------|-----------|-----------|-----------|-----------|-----------|
| 0.106643  | 0.114219  | 0.10708   | 0.131265  | 0.113054  | 0.142191  | 0.131702  |
| 0.106643  | 0.0495338 | 0.114073  | 0.135052  | 0.106643  | 0.134033  | 0.0658508 |
| 0.0498252 | 0.115385  | 0.103875  | 0.123689  | 0.111597  | 0.120921  | 0.135198  |
| 0.0527389 | 0.115093  | 0.103584  | 0.127477  | 0.111597  | 0.122086  | 0.134907  |
| 0.118735  | 0.115822  | 0.121212  | 0.122086  | 0.127768  | 0.146416  | 0.133887  |
| 0.104312  | 0.116259  | 0.109411  | 0.13243   | 0.11014   | 0.0687646 | 0.133741  |
| 0.102127  | 0.0464744 | 0.107517  | 0.128205  | 0.0977564 | 0.133013  | 0.0627914 |
| 0.108392  | 0.11451   | 0.109411  | 0.129808  | 0.118007  | 0.142483  | 0.134033  |
| 0.097465  | 0.101544  | 0.0909091 | 0.124417  | 0.0989219 | 0.129808  | 0.118444  |
| 0.120629  | 0.124126  | 0.118735  | 0.135927  | 0.126166  | 0.144231  | 0.136364  |
| 0.109557  | 0.115385  | 0.113199  | 0.134178  | 0.111014  | 0.138112  | 0.134324  |
| 0.122815  | 0.128351  | 0.123834  | 0.138112  | 0.129808  | 0.147873  | 0.14088   |
| 0.253059  | 0.252768  | 0.251748  | 0.267483  | 0.260344  | 0.269085  | 0.25539   |
| 0.111742  | 0.130682  | 0.119755  | 0.121795  | 0.119901  | 0.131847  | 0.142045  |
| 0.116841  | 0.125291  | 0.114948  | 0.131265  | 0.115676  | 0.126748  | 0.137821  |
| 0.209936  | 0.209062  | 0.21183   | 0.229604  | 0.217803  | 0.233829  | 0.219551  |
| 0.121795  | 0.122669  | 0.11553   | 0.120775  | 0.116841  | 0.129079  | 0.130828  |
| 0.226107  | 0.226107  | 0.222465  | 0.237908  | 0.229895  | 0.245047  | 0.232809  |
| 0.103584  | 0.122523  | 0.109848  | 0.119172  | 0.111451  | 0.12602   | 0.136801  |
| 0.118298  | 0.0582751 | 0.124272  | 0.143211  | 0.112179  | 0.131119  | 0.0434149 |
| 0.101981  | 0.113928  | 0.0992133 | 0.0677448 | 0.115967  | 0.140152  | 0.137238  |
| 0.104312  | 0.122378  | 0.114656  | 0.135052  | 0.111888  | 0.0629371 | 0.130536  |
| 0.196678  | 0.19697   | 0.196241  | 0.214307  | 0.203671  | 0.22028   | 0.208042  |
| 0.120629  | 0.125583  | 0.118444  | 0.137966  | 0.12704   | 0.143065  | 0.136655  |
| 0.1081    | 0.116841  | 0.108537  | 0.130973  | 0.11859   | 0.144522  | 0.134615  |
| 0.218969  | 0.220717  | 0.219406  | 0.236888  | 0.224796  | 0.240822  | 0.228001  |
| 0.0571096 | 0.11655   | 0.106789  | 0.127185  | 0.117716  | 0.129953  | 0.138695  |
| 0.193328  | 0.188374  | 0.189685  | 0.208916  | 0.196824  | 0.215181  | 0.203526  |
| 0.0572552 | 0.121358  | 0.110723  | 0.13345   | 0.120484  | 0.126894  | 0.140006  |
| 0.108537  | 0.0502622 | 0.112762  | 0.136072  | 0.104458  | 0.133887  | 0.0683275 |
| 0.111888  | 0.1081    | 0.102418  | 0.132139  | 0.0451632 | 0.13141   | 0.116259  |
| 0.110723  | 0.12704   | 0.121358  | 0.134178  | 0.117133  | 0.0506993 | 0.132867  |
| 0.105624  | 0.108537  | 0.106643  | 0.13141   | 0.108829  | 0.146416  | 0.130973  |
| 0.151078  | 0.148164  | 0.147727  | 0.173368  | 0.137675  | 0.182547  | 0.163607  |
| 0.10271   | 0.112034  | 0.10373   | 0.125291  | 0.112617  | 0.139423  | 0.129225  |
| 0.112617  | 0.119901  | 0.106935  | 0.0617716 | 0.119027  | 0.143794  | 0.142337  |
| 0.105624  | 0.114365  | 0.106643  | 0.126457  | 0.112617  | 0.133887  | 0.135052  |
| 0.121358  | 0.129808  | 0.118881  | 0.109266  | 0.12602   | 0.139132  | 0.139132  |
| 0.188228  | 0.185897  | 0.187209  | 0.209645  | 0.196096  | 0.214744  | 0.199592  |
| 0.107372  | 0.0464744 | 0.109266  | 0.134324  | 0.10271   | 0.131556  | 0.0645396 |
| 0.105769  | 0.114219  | 0.114656  | 0.141463  | 0.115967  | 0.0827506 | 0.13345   |
| 0.0869755 | 0.115822  | 0.105478  | 0.131702  | 0.112325  | 0.122523  | 0.135635  |
| 0.0582751 | 0.123834  | 0.108829  | 0.129225  | 0.117133  | 0.124709  | 0.139277  |
| 0.111451  | 0.0534674 | 0.11859   | 0.13549   | 0.109411  | 0.132721  | 0.0488054 |

|           |           |           |           |           |           |           |
|-----------|-----------|-----------|-----------|-----------|-----------|-----------|
| 0.249417  | 0.248252  | 0.247232  | 0.260052  | 0.255245  | 0.2669    | 0.252622  |
| 0.105915  | 0.106789  | 0.0949883 | 0.12296   | 0.0423951 | 0.128351  | 0.115822  |
| 0.107372  | 0.0901807 | 0.1081    | 0.132284  | 0.116696  | 0.137966  | 0.114656  |
| 0.172931  | 0.18109   | 0.144522  | 0.186772  | 0.174388  | 0.191871  | 0.188083  |
| 0.175845  | 0.179633  | 0.175117  | 0.199592  | 0.186917  | 0.204983  | 0.191579  |
| 0.116696  | 0.115822  | 0.11451   | 0.125874  | 0.125728  | 0.148747  | 0.134761  |
| 0.112471  | 0.115385  | 0.108537  | 0.133596  | 0.11655   | 0.142774  | 0.131993  |
| 0.0976107 | 0.109848  | 0.107955  | 0.130682  | 0.112471  | 0.0681818 | 0.128497  |
| 0.133887  | 0.14088   | 0.134324  | 0.148893  | 0.14088   | 0.156031  | 0.146999  |
| 0.113199  | 0.113491  | 0.112471  | 0.124126  | 0.121358  | 0.143211  | 0.133304  |
| 0.117424  | 0.114802  | 0.117279  | 0.126894  | 0.127622  | 0.14831   | 0.133741  |
| 0.0616259 | 0.12602   | 0.115676  | 0.130536  | 0.124854  | 0.128642  | 0.143794  |
| 0.110868  | 0.114073  | 0.1081    | 0.12704   | 0.114948  | 0.138258  | 0.13039   |
| 0.119464  | 0.12704   | 0.118735  | 0.136218  | 0.125583  | 0.145979  | 0.137821  |
| 0.0726981 | 0.117861  | 0.111014  | 0.135198  | 0.119318  | 0.131265  | 0.136218  |
| 0.109266  | 0.121503  | 0.118735  | 0.13243   | 0.11451   | 0.0536131 | 0.130245  |
| 0.118735  | 0.135927  | 0.132576  | 0.143939  | 0.128059  | 0.0517191 | 0.140297  |
| 0.110431  | 0.108683  | 0.100379  | 0.13243   | 0.0428322 | 0.130245  | 0.117133  |
| 0.112908  | 0.128642  | 0.125291  | 0.137238  | 0.121941  | 0.0479312 | 0.135635  |
| 0.0657051 | 0.129225  | 0.118881  | 0.133741  | 0.124854  | 0.129516  | 0.145833  |
| 0.200758  | 0.197844  | 0.200029  | 0.219843  | 0.206876  | 0.226107  | 0.21183   |
| 0.104167  | 0.110286  | 0.111888  | 0.131702  | 0.104167  | 0.139423  | 0.121066  |
| 0.185169  | 0.182547  | 0.181235  | 0.204545  | 0.19391   | 0.209062  | 0.195367  |
| 0.103584  | 0.116113  | 0.106352  | 0.101399  | 0.116113  | 0.133887  | 0.135052  |
| 0.116113  | 0.0552156 | 0.120629  | 0.13986   | 0.110868  | 0.133013  | 0.0552156 |
| 0.114948  | 0.120775  | 0.119755  | 0.134615  | 0.115822  | 0.139423  | 0.137966  |
| 0.105769  | 0.110723  | 0.111451  | 0.131556  | 0.111597  | 0.136364  | 0.131702  |
| 0.113199  | 0.118444  | 0.113345  | 0.132576  | 0.121941  | 0.143794  | 0.135052  |
| 0.112325  | 0.122232  | 0.114219  | 0.132867  | 0.123397  | 0.141754  | 0.138258  |
| 0.109994  | 0.0479312 | 0.115676  | 0.137238  | 0.109411  | 0.136218  | 0.0659965 |
| 0.111305  | 0.115093  | 0.105332  | 0.0592949 | 0.120629  | 0.143648  | 0.138695  |
| 0.117424  | 0.122378  | 0.120484  | 0.138258  | 0.116841  | 0.13986   | 0.142191  |
| 0.0753205 | 0.135344  | 0.123834  | 0.138112  | 0.12602   | 0.128351  | 0.148747  |
| 0.24461   | 0.244901  | 0.245338  | 0.25845   | 0.25102   | 0.260344  | 0.251311  |
| 0.107372  | 0.0476399 | 0.115385  | 0.137821  | 0.109703  | 0.136509  | 0.064831  |
| 0.177156  | 0.176282  | 0.1706    | 0.192745  | 0.183566  | 0.203963  | 0.191434  |
| 0.181381  | 0.180798  | 0.179487  | 0.201923  | 0.18954   | 0.205274  | 0.196533  |
| 0.111014  | 0.113636  | 0.109703  | 0.137092  | 0.113636  | 0.144814  | 0.129079  |
| 0.104021  | 0.100816  | 0.0936772 | 0.125146  | 0.0445804 | 0.126748  | 0.113928  |
| 0.115093  | 0.0533217 | 0.122523  | 0.136509  | 0.108683  | 0.135781  | 0.0527389 |
| 0.105186  | 0.109848  | 0.102418  | 0.127185  | 0.112179  | 0.138403  | 0.128205  |
| 0.108246  | 0.0945513 | 0.102564  | 0.131993  | 0.0887238 | 0.136218  | 0.113782  |
| 0.0557984 | 0.118735  | 0.108683  | 0.13141   | 0.11757   | 0.125728  | 0.13884   |
| 0.111888  | 0.117133  | 0.109994  | 0.129808  | 0.114802  | 0.141026  | 0.129371  |

|           |           |           |           |           |           |           |
|-----------|-----------|-----------|-----------|-----------|-----------|-----------|
| 0.12296   | 0.128788  | 0.124272  | 0.139132  | 0.126748  | 0.146853  | 0.138112  |
| 0.109994  | 0.0479312 | 0.116841  | 0.136072  | 0.109411  | 0.135052  | 0.0625    |
| 0.117861  | 0.127185  | 0.120921  | 0.135198  | 0.125437  | 0.146707  | 0.137966  |
| 0.109848  | 0.11655   | 0.102418  | 0.124272  | 0.108683  | 0.131119  | 0.137238  |
| 0.122378  | 0.121503  | 0.122232  | 0.139714  | 0.115385  | 0.141026  | 0.137821  |
| 0.102418  | 0.115822  | 0.113928  | 0.138986  | 0.113491  | 0.0712413 | 0.133596  |
| 0.0664336 | 0.131993  | 0.120775  | 0.137383  | 0.12704   | 0.128788  | 0.143939  |
| 0.110286  | 0.115239  | 0.113345  | 0.134324  | 0.105624  | 0.13884   | 0.126311  |
| 0.105624  | 0.0537587 | 0.114219  | 0.135781  | 0.10708   | 0.130099  | 0.0668706 |
| 0.121358  | 0.130099  | 0.125583  | 0.132284  | 0.131265  | 0.142628  | 0.142045  |
| 0.176573  | 0.177156  | 0.173514  | 0.196533  | 0.185897  | 0.204254  | 0.193765  |
| 0.126603  | 0.131265  | 0.123834  | 0.142191  | 0.128642  | 0.148747  | 0.143502  |
| 0.114073  | 0.118444  | 0.112179  | 0.13141   | 0.120484  | 0.145833  | 0.136218  |
| 0.116259  | 0.117424  | 0.116987  | 0.131265  | 0.113636  | 0.138695  | 0.135198  |
| 0.100962  | 0.106789  | 0.105769  | 0.127331  | 0.106789  | 0.133887  | 0.126894  |
| 0.102273  | 0.116259  | 0.109994  | 0.13243   | 0.111014  | 0.0635198 | 0.131702  |
| 0.105041  | 0.121649  | 0.114219  | 0.134615  | 0.11553   | 0.0604604 | 0.135052  |
| 0.185897  | 0.183275  | 0.182838  | 0.204691  | 0.191434  | 0.206585  | 0.197552  |
| 0.109266  | 0.115967  | 0.10708   | 0.133304  | 0.119755  | 0.140152  | 0.133159  |
| 0.0977564 | 0.109411  | 0.101981  | 0.125583  | 0.10708   | 0.133304  | 0.12398   |
| 0.115822  | 0.121066  | 0.113928  | 0.131993  | 0.122523  | 0.146125  | 0.136509  |
| 0.183275  | 0.185023  | 0.183712  | 0.202652  | 0.192016  | 0.20979   | 0.196387  |
| 0.100087  | 0.0986305 | 0.0891608 | 0.125583  | 0.0520105 | 0.129516  | 0.116696  |
| 0.0611888 | 0.127914  | 0.116404  | 0.13243   | 0.119755  | 0.126166  | 0.144814  |
| 0.115093  | 0.118881  | 0.115822  | 0.133304  | 0.122086  | 0.144522  | 0.134615  |
| 0.111742  | 0.11116   | 0.109557  | 0.120047  | 0.118153  | 0.137966  | 0.127185  |
| 0.180798  | 0.17905   | 0.179487  | 0.199592  | 0.1875    | 0.208479  | 0.192453  |
| 0.0622086 | 0.124854  | 0.108974  | 0.129079  | 0.118444  | 0.122815  | 0.139423  |
| 0.10271   | 0.110286  | 0.107809  | 0.123543  | 0.114948  | 0.132139  | 0.130973  |
| 0.104458  | 0.099796  | 0.0976107 | 0.124126  | 0.0668706 | 0.13243   | 0.120484  |
| 0.112325  | 0.119318  | 0.108974  | 0.136072  | 0.119027  | 0.14729   | 0.137966  |
| 0.112762  | 0.119755  | 0.104458  | 0.060169  | 0.121212  | 0.14627   | 0.141608  |
| 0.0664336 | 0.13141   | 0.11961   | 0.133596  | 0.124709  | 0.126457  | 0.144522  |
| 0.107517  | 0.0463287 | 0.113491  | 0.133596  | 0.106061  | 0.129662  | 0.0591492 |
| 0.111014  | 0.123252  | 0.116987  | 0.132139  | 0.114802  | 0.136655  | 0.139277  |
| 0.142628  | 0.139423  | 0.139569  | 0.134615  | 0.145251  | 0.157488  | 0.145251  |
| 0.232955  | 0.231498  | 0.231352  | 0.243298  | 0.238199  | 0.249272  | 0.237617  |
| 0.113491  | 0.120775  | 0.117716  | 0.1419    | 0.107372  | 0.140006  | 0.131265  |
| 0.110577  | 0.120192  | 0.1081    | 0.0603147 | 0.122523  | 0.144376  | 0.143794  |
| 0.102273  | 0.115385  | 0.108246  | 0.130682  | 0.11859   | 0.136655  | 0.131702  |
| 0.118153  | 0.120484  | 0.112471  | 0.137529  | 0.121649  | 0.148747  | 0.137383  |
| 0.0926573 | 0.115093  | 0.104749  | 0.0703671 | 0.115093  | 0.134907  | 0.13549   |
| 0.107517  | 0.122086  | 0.0528846 | 0.119027  | 0.105769  | 0.136364  | 0.135781  |
| 0.114365  | 0.119318  | 0.112179  | 0.129371  | 0.123689  | 0.144959  | 0.135344  |

|           |           |           |           |           |          |           |
|-----------|-----------|-----------|-----------|-----------|----------|-----------|
| 0.0623543 | 0.129662  | 0.116696  | 0.132139  | 0.125     | 0.127331 | 0.144814  |
| 0.111305  | 0.112179  | 0.110577  | 0.126603  | 0.123252  | 0.140734 | 0.132284  |
| 0.230624  | 0.230915  | 0.231935  | 0.242424  | 0.234411  | 0.251311 | 0.237617  |
| 0.099359  | 0.097028  | 0.0913462 | 0.121649  | 0.0472028 | 0.124126 | 0.11451   |
| 0.092366  | 0.108392  | 0.0977564 | 0.115239  | 0.103438  | 0.126457 | 0.13141   |
| 0.10708   | 0.0450175 | 0.112471  | 0.130828  | 0.104458  | 0.128642 | 0.0575466 |
| 0.127914  | 0.12296   | 0.127185  | 0.122232  | 0.134033  | 0.152389 | 0.136946  |
| 0.120047  | 0.126166  | 0.123689  | 0.14292   | 0.111305  | 0.143065 | 0.128788  |
| 0.112471  | 0.107226  | 0.106789  | 0.13243   | 0.106643  | 0.148601 | 0.125291  |
| 0.111888  | 0.115385  | 0.110577  | 0.129516  | 0.119172  | 0.141608 | 0.134907  |
| 0.106498  | 0.105624  | 0.106352  | 0.11859   | 0.114656  | 0.138258 | 0.124854  |
| 0.225962  | 0.226544  | 0.224359  | 0.240967  | 0.229458  | 0.246941 | 0.232372  |
| 0.117279  | 0.122815  | 0.114219  | 0.133159  | 0.122815  | 0.149038 | 0.136218  |
| 0.0638112 | 0.126166  | 0.111451  | 0.130973  | 0.119172  | 0.125583 | 0.141026  |
| 0.1081    | 0.108392  | 0.101836  | 0.120192  | 0.116259  | 0.129953 | 0.129662  |
| 0.114656  | 0.121358  | 0.11451   | 0.109848  | 0.118444  | 0.136801 | 0.137092  |
| 0.108246  | 0.127185  | 0.113054  | 0.124417  | 0.111742  | 0.129225 | 0.14088   |
| 0.108829  | 0.0496795 | 0.115967  | 0.131993  | 0.104749  | 0.130682 | 0.0563811 |
| 0.0651224 | 0.127477  | 0.11655   | 0.132284  | 0.116404  | 0.124854 | 0.13884   |
| 0.0635198 | 0.131702  | 0.119901  | 0.136509  | 0.123834  | 0.129371 | 0.145688  |
| 0.0556527 | 0.119172  | 0.10912   | 0.128934  | 0.115676  | 0.124126 | 0.136946  |
| 0.107663  | 0.0456002 | 0.111597  | 0.134907  | 0.103001  | 0.134761 | 0.0659965 |
| 0.118735  | 0.127477  | 0.112471  | 0.0495338 | 0.124854  | 0.145833 | 0.143211  |
| 0.123543  | 0.131702  | 0.114365  | 0.0482226 | 0.128205  | 0.14831  | 0.145105  |
| 0.123834  | 0.125291  | 0.123397  | 0.137675  | 0.120047  | 0.140443 | 0.143065  |
| 0.126166  | 0.129079  | 0.127185  | 0.141171  | 0.120047  | 0.142774 | 0.143939  |
| 0.121941  | 0.130099  | 0.115093  | 0.0504079 | 0.126894  | 0.148164 | 0.146999  |
| 0.103875  | 0.0898893 | 0.100816  | 0.130245  | 0.0808566 | 0.132139 | 0.108537  |
| 0.105478  | 0.139277  | 0.123397  | 0.139423  | 0.127331  | 0.122378 | 0.14627   |
| 0.11757   | 0.122232  | 0.127622  | 0.1419    | 0.117279  | 0.146416 | 0.131265  |
| 0.198572  | 0.200029  | 0.192599  | 0.2162    | 0.203817  | 0.224796 | 0.211684  |
| 0.115822  | 0.116696  | 0.11859   | 0.137821  | 0.119901  | 0.137383 | 0.127477  |
| 0.0980478 | 0.114948  | 0.105769  | 0.123543  | 0.10912   | 0.13039  | 0.136509  |
| 0.113345  | 0.0527389 | 0.119318  | 0.139423  | 0.110431  | 0.138695 | 0.0544872 |
| 0.219843  | 0.217512  | 0.215035  | 0.233683  | 0.223048  | 0.238199 | 0.227418  |
| 0.204983  | 0.20236   | 0.204545  | 0.222611  | 0.213432  | 0.227127 | 0.214598  |
| 0.0667249 | 0.131119  | 0.119901  | 0.132139  | 0.124417  | 0.131119 | 0.145688  |
| 0.244901  | 0.241404  | 0.243881  | 0.255828  | 0.252768  | 0.261801 | 0.248106  |
| 0.105915  | 0.0913462 | 0.102273  | 0.130245  | 0.0846445 | 0.138258 | 0.105624  |
| 0.12398   | 0.126603  | 0.130536  | 0.143939  | 0.119027  | 0.151661 | 0.131847  |
| 0.10271   | 0.100087  | 0.0929487 | 0.124126  | 0.0421037 | 0.129808 | 0.114365  |
| 0.116259  | 0.125874  | 0.109703  | 0.0543415 | 0.126457  | 0.14831  | 0.146562  |
| 0.182255  | 0.18109   | 0.17803   | 0.202214  | 0.190705  | 0.206731 | 0.195076  |
| 0.116841  | 0.115967  | 0.112034  | 0.128642  | 0.115967  | 0.136072 | 0.128497  |

|           |           |           |           |           |           |           |
|-----------|-----------|-----------|-----------|-----------|-----------|-----------|
| 0.188811  | 0.18648   | 0.186334  | 0.209645  | 0.194347  | 0.212995  | 0.200175  |
| 0.109557  | 0.106061  | 0.105332  | 0.133013  | 0.108974  | 0.141317  | 0.123834  |
| 0.0786713 | 0.117133  | 0.114365  | 0.132139  | 0.119172  | 0.130828  | 0.134615  |
| 0.11655   | 0.119755  | 0.113199  | 0.128059  | 0.102855  | 0.141608  | 0.131702  |
| 0.105478  | 0.1081    | 0.104749  | 0.123106  | 0.108974  | 0.13986   | 0.12704   |
| 0.0992133 | 0.0447261 | 0.104604  | 0.127622  | 0.101253  | 0.129225  | 0.064831  |
| 0.105624  | 0.10708   | 0.102564  | 0.131119  | 0.113491  | 0.135635  | 0.122232  |
| 0.0989219 | 0.0989219 | 0.0888695 | 0.121795  | 0.0453089 | 0.125728  | 0.112034  |
| 0.104312  | 0.113054  | 0.106498  | 0.129225  | 0.116841  | 0.138986  | 0.129371  |
| 0.0887238 | 0.120192  | 0.108974  | 0.130828  | 0.115822  | 0.123106  | 0.138258  |
| 0.10271   | 0.107372  | 0.102273  | 0.130245  | 0.104167  | 0.136509  | 0.123106  |
| 0.100233  | 0.100816  | 0.0936772 | 0.122815  | 0.0422494 | 0.128788  | 0.113636  |
| 0.112325  | 0.104167  | 0.11451   | 0.137238  | 0.114365  | 0.140589  | 0.122523  |
| 0.11961   | 0.126894  | 0.119172  | 0.136946  | 0.124563  | 0.145251  | 0.14292   |
| 0.105769  | 0.111597  | 0.107955  | 0.130682  | 0.109557  | 0.136655  | 0.131993  |
| 0.101253  | 0.110286  | 0.105769  | 0.126457  | 0.114073  | 0.134178  | 0.128934  |
| 0.101107  | 0.0425408 | 0.104749  | 0.130099  | 0.0996503 | 0.130245  | 0.0608974 |
| 0.0661422 | 0.122378  | 0.113491  | 0.128059  | 0.119464  | 0.125     | 0.139277  |
| 0.109557  | 0.117716  | 0.107955  | 0.0636655 | 0.119464  | 0.143065  | 0.140152  |
| 0.101836  | 0.118444  | 0.113928  | 0.132576  | 0.114656  | 0.0619172 | 0.131847  |
| 0.112034  | 0.116404  | 0.110431  | 0.132284  | 0.112325  | 0.133887  | 0.137966  |
| 0.106352  | 0.116259  | 0.112034  | 0.131556  | 0.118007  | 0.142774  | 0.132867  |
| 0.121066  | 0.127477  | 0.12296   | 0.135781  | 0.130099  | 0.144376  | 0.143211  |
| 0.127768  | 0.133013  | 0.127622  | 0.144814  | 0.135052  | 0.150495  | 0.14088   |
| 0         | 0.106935  | 0.0983392 | 0.12398   | 0.104021  | 0.121212  | 0.125291  |
| 0.106935  | 0         | 0.110868  | 0.135344  | 0.108392  | 0.13549   | 0.0620629 |
| 0.0983392 | 0.110868  | 0         | 0.117424  | 0.0960082 | 0.133887  | 0.131556  |
| 0.12398   | 0.135344  | 0.117424  | 0         | 0.129808  | 0.144085  | 0.148164  |
| 0.104021  | 0.108392  | 0.0960082 | 0.129808  | 0         | 0.127914  | 0.118881  |
| 0.121212  | 0.13549   | 0.133887  | 0.144085  | 0.127914  | 0         | 0.136072  |
| 0.125291  | 0.0620629 | 0.131556  | 0.148164  | 0.118881  | 0.136072  | 0         |
| 0.120192  | 0.120192  | 0.119172  | 0.120921  | 0.128351  | 0.149621  | 0.135635  |
| 0.104604  | 0.102273  | 0.100087  | 0.130099  | 0.101399  | 0.138986  | 0.120047  |
| 0.105624  | 0.112908  | 0.102855  | 0.112471  | 0.116113  | 0.135635  | 0.131847  |
| 0.122523  | 0.123106  | 0.124126  | 0.141026  | 0.11553   | 0.141171  | 0.141171  |
| 0.199009  | 0.201632  | 0.200321  | 0.217512  | 0.208625  | 0.225524  | 0.214452  |
| 0.101981  | 0.113054  | 0.104749  | 0.121649  | 0.114219  | 0.134615  | 0.130536  |
| 0.110868  | 0.11116   | 0.110431  | 0.13141   | 0.104749  | 0.143502  | 0.13039   |
| 0.109557  | 0.120047  | 0.103875  | 0.0560897 | 0.11859   | 0.141608  | 0.140734  |
| 0.10912   | 0.112617  | 0.110431  | 0.132284  | 0.111742  | 0.140006  | 0.137675  |
| 0.114219  | 0.111305  | 0.110286  | 0.137092  | 0.113054  | 0.144231  | 0.129079  |
| 0.107809  | 0.126748  | 0.104458  | 0.136509  | 0.122669  | 0.136655  | 0.1419    |
| 0.113199  | 0.128934  | 0.106643  | 0.133741  | 0.125146  | 0.137966  | 0.143502  |
| 0.114802  | 0.116841  | 0.116113  | 0.117861  | 0.120629  | 0.144231  | 0.132576  |

|           |           |           |           |           |          |          |
|-----------|-----------|-----------|-----------|-----------|----------|----------|
| 0.0810023 | 0.117133  | 0.103293  | 0.130973  | 0.111014  | 0.120338 | 0.13549  |
| 0.118007  | 0.126748  | 0.112617  | 0.0502622 | 0.125874  | 0.1419   | 0.140734 |
| 0.108974  | 0.110723  | 0.107372  | 0.125146  | 0.103147  | 0.141026 | 0.127914 |
| 0.109994  | 0.112908  | 0.109557  | 0.136072  | 0.106206  | 0.14292  | 0.128642 |
| 0.162879  | 0.169872  | 0.169143  | 0.1875    | 0.177448  | 0.191725 | 0.184441 |
| 0.106935  | 0.113928  | 0.109703  | 0.131556  | 0.117716  | 0.143939 | 0.133159 |
| 0.121066  | 0.128934  | 0.112471  | 0.0594406 | 0.126894  | 0.145833 | 0.144668 |
| 0.101981  | 0.116841  | 0.110868  | 0.126894  | 0.100816  | 0.134033 | 0.125291 |
| 0.109703  | 0.121941  | 0.117716  | 0.129371  | 0.120484  | 0.141754 | 0.134761 |
| 0.10067   | 0.104167  | 0.0935315 | 0.125     | 0.101544  | 0.133596 | 0.121941 |
| 0.0925117 | 0.103001  | 0.097028  | 0.129079  | 0.0992133 | 0.135052 | 0.121066 |
| 0.105915  | 0.109703  | 0.100233  | 0.128497  | 0.105041  | 0.134178 | 0.128642 |
| 0.100087  | 0.123689  | 0.111597  | 0.12296   | 0.114656  | 0.137383 | 0.132721 |
| 0.109994  | 0.111116  | 0.109557  | 0.136364  | 0.113491  | 0.140297 | 0.124563 |
| 0.114802  | 0.122669  | 0.117279  | 0.137383  | 0.112471  | 0.136072 | 0.136364 |
| 0.0919289 | 0.110286  | 0.0973193 | 0.125291  | 0.108829  | 0.131265 | 0.126603 |
| 0.104021  | 0.116841  | 0.099796  | 0.135927  | 0.106935  | 0.131993 | 0.137529 |
| 0.100962  | 0.127477  | 0.11859   | 0.131993  | 0.11553   | 0.141463 | 0.138549 |
| 0.102127  | 0.114365  | 0.111014  | 0.134033  | 0.104167  | 0.130099 | 0.124563 |
| 0.108246  | 0.11961   | 0.114802  | 0.130828  | 0.114656  | 0.132721 | 0.133596 |
| 0.0992133 | 0.107955  | 0.103438  | 0.132576  | 0.10271   | 0.129808 | 0.125146 |
| 0.102418  | 0.112325  | 0.108392  | 0.132867  | 0.103584  | 0.13039  | 0.125437 |
| 0.0986305 | 0.0995047 | 0.0987762 | 0.125583  | 0.0960082 | 0.126603 | 0.113782 |
| 0.106935  | 0.108683  | 0.116113  | 0.136509  | 0.103438  | 0.130245 | 0.120921 |
| 0.094697  | 0.104604  | 0.102418  | 0.125728  | 0.092366  | 0.125583 | 0.123834 |
| 0.113054  | 0.142483  | 0.13243   | 0.149038  | 0.139277  | 0.144522 | 0.150058 |
| 0.10373   | 0.126748  | 0.121358  | 0.143794  | 0.133741  | 0.146562 | 0.145688 |
| 0.0979021 | 0.1081    | 0.103875  | 0.129225  | 0.103147  | 0.120338 | 0.126166 |
| 0.105915  | 0.137383  | 0.126748  | 0.136655  | 0.131556  | 0.135052 | 0.152826 |
| 0.11553   | 0.116113  | 0.118007  | 0.130245  | 0.119318  | 0.144959 | 0.136801 |
| 0.117279  | 0.131556  | 0.125291  | 0.147727  | 0.11553   | 0.149621 | 0.13884  |
| 0.105915  | 0.106206  | 0.105186  | 0.129371  | 0.0942599 | 0.119027 | 0.122815 |
| 0.131702  | 0.140734  | 0.137383  | 0.126894  | 0.138112  | 0.155012 | 0.146853 |
| 0.120921  | 0.127914  | 0.120192  | 0.125728  | 0.121503  | 0.137529 | 0.140734 |
| 0.11451   | 0.135781  | 0.130099  | 0.134761  | 0.129662  | 0.147145 | 0.14627  |
| 0.107226  | 0.121795  | 0.11553   | 0.13447   | 0.11014   | 0.139569 | 0.136655 |
| 0.092803  | 0.103293  | 0.108974  | 0.13549   | 0.10067   | 0.132721 | 0.122523 |
| 0.0885781 | 0.104021  | 0.106789  | 0.128059  | 0.102273  | 0.134907 | 0.124709 |
| 0.0960082 | 0.119318  | 0.107226  | 0.11655   | 0.114073  | 0.135344 | 0.135635 |
| 0.108829  | 0.117861  | 0.113345  | 0.13141   | 0.0980478 | 0.12602  | 0.126894 |
| 0.115967  | 0.118881  | 0.116404  | 0.136509  | 0.106352  | 0.13345  | 0.129662 |
| 0.0979021 | 0.11655   | 0.116696  | 0.137966  | 0.118881  | 0.13986  | 0.132284 |
| 0.0952797 | 0.108392  | 0.103584  | 0.121941  | 0.0973193 | 0.13141  | 0.125874 |
| 0.0907634 | 0.108829  | 0.106061  | 0.131993  | 0.0995047 | 0.131847 | 0.125437 |



|           |           |          |          |           |          |          |
|-----------|-----------|----------|----------|-----------|----------|----------|
| 0.105186  | 0.11014   | 0.108829 | 0.12602  | 0.0979021 | 0.138695 | 0.121795 |
| 0.0894522 | 0.105769  | 0.103875 | 0.129516 | 0.0944056 | 0.132867 | 0.12296  |
| 0.100379  | 0.112908  | 0.115967 | 0.134907 | 0.103875  | 0.135927 | 0.12602  |
| 0.106206  | 0.103875  | 0.107226 | 0.131993 | 0.099796  | 0.125437 | 0.122815 |
| 0.112179  | 0.106643  | 0.106206 | 0.133596 | 0.107226  | 0.145688 | 0.124126 |
| 0.105478  | 0.104021  | 0.107663 | 0.131847 | 0.0973193 | 0.143648 | 0.121503 |
| 0.104021  | 0.0894522 | 0.100379 | 0.127477 | 0.0812937 | 0.134324 | 0.106061 |
| 0.0990676 | 0.103438  | 0.103293 | 0.124272 | 0.0949883 | 0.138403 | 0.11859  |
| 0.107663  | 0.104167  | 0.10169  | 0.133159 | 0.106206  | 0.145251 | 0.122815 |
| 0.102564  | 0.1081    | 0.101544 | 0.127768 | 0.100816  | 0.136364 | 0.124417 |
| 0.11859   | 0.124126  | 0.114365 | 0.13243  | 0.114219  | 0.138986 | 0.138112 |
| 0.0981935 | 0.0996503 | 0.095134 | 0.125437 | 0.10373   | 0.138986 | 0.118298 |
| 0.116696  | 0.128351  | 0.119464 | 0.138112 | 0.112617  | 0.137675 | 0.134178 |

| TDr_4070 | TDr_4078  | TDr_4084  | TDr_4086  | TDr_4087 | TDr_4091 | TDr_4092  |
|----------|-----------|-----------|-----------|----------|----------|-----------|
| 0.130973 | 0.105769  | 0.120484  | 0.0916375 | 0.187354 | 0.119464 | 0.113199  |
| 0.116259 | 0.100379  | 0.110431  | 0.122669  | 0.195659 | 0.113782 | 0.113928  |
| 0.113054 | 0.0960082 | 0.105478  | 0.120921  | 0.193619 | 0.108246 | 0.108392  |
| 0.124709 | 0.105624  | 0.108392  | 0.129371  | 0.200321 | 0.114656 | 0.113928  |
| 0.126166 | 0.127768  | 0.123543  | 0.141026  | 0.218969 | 0.101836 | 0.138112  |
| 0.121503 | 0.125728  | 0.120047  | 0.117133  | 0.209062 | 0.114073 | 0.127331  |
| 0.133304 | 0.121212  | 0.11757   | 0.107372  | 0.210664 | 0.118298 | 0.121358  |
| 0.118444 | 0.109266  | 0.101836  | 0.121358  | 0.193182 | 0.106352 | 0.11553   |
| 0.117424 | 0.0884324 | 0.0976107 | 0.117716  | 0.198864 | 0.102418 | 0.0941142 |
| 0.119027 | 0.0856643 | 0.110577  | 0.112034  | 0.202797 | 0.111888 | 0.0869755 |
| 0.131702 | 0.111742  | 0.113636  | 0.120921  | 0.191871 | 0.112617 | 0.111305  |
| 0.119318 | 0.104604  | 0.103001  | 0.123689  | 0.198135 | 0.100816 | 0.108537  |
| 0.119318 | 0.0987762 | 0.112617  | 0.125146  | 0.204545 | 0.109557 | 0.105332  |
| 0.143357 | 0.124854  | 0.132284  | 0.143939  | 0.160402 | 0.127477 | 0.130536  |
| 0.128934 | 0.11655   | 0.128351  | 0.133596  | 0.211247 | 0.124126 | 0.125146  |
| 0.127331 | 0.112617  | 0.120629  | 0.122086  | 0.206731 | 0.121941 | 0.12296   |
| 0.123397 | 0.107226  | 0.0968823 | 0.128059  | 0.202506 | 0.105478 | 0.106206  |
| 0.135198 | 0.137383  | 0.129953  | 0.153263  | 0.223922 | 0.124563 | 0.147145  |
| 0.114219 | 0.0989219 | 0.104895  | 0.120338  | 0.191288 | 0.108246 | 0.106643  |
| 0.205711 | 0.196824  | 0.200175  | 0.20542   | 0.14292  | 0.195076 | 0.201049  |
| 0.121941 | 0.119464  | 0.116404  | 0.109994  | 0.206294 | 0.122669 | 0.120192  |
| 0.120629 | 0.115822  | 0.115385  | 0.101107  | 0.211393 | 0.116113 | 0.113054  |
| 0.119901 | 0.104312  | 0.102127  | 0.123397  | 0.199592 | 0.105478 | 0.108537  |
| 0.127331 | 0.122815  | 0.118298  | 0.128205  | 0.211101 | 0.11961  | 0.125583  |
| 0.113782 | 0.0949883 | 0.103293  | 0.112034  | 0.193473 | 0.105478 | 0.0962995 |
| 0.123689 | 0.125291  | 0.116696  | 0.105915  | 0.210664 | 0.126748 | 0.128059  |
| 0.130682 | 0.11655   | 0.120775  | 0.125728  | 0.210373 | 0.113345 | 0.121066  |
| 0.120775 | 0.112762  | 0.11757   | 0.129225  | 0.214452 | 0.117424 | 0.117279  |
| 0.135344 | 0.121503  | 0.127477  | 0.126311  | 0.210956 | 0.125    | 0.129225  |
| 0.134178 | 0.117716  | 0.125728  | 0.123106  | 0.214744 | 0.117716 | 0.110868  |
| 0.131993 | 0.116696  | 0.122086  | 0.100524  | 0.2044   | 0.125146 | 0.120629  |
| 0.124854 | 0.120921  | 0.121649  | 0.121649  | 0.208916 | 0.116841 | 0.122523  |
| 0.116987 | 0.102273  | 0.105332  | 0.106498  | 0.196678 | 0.106643 | 0.106789  |
| 0.123689 | 0.107809  | 0.117861  | 0.119027  | 0.206002 | 0.119464 | 0.117861  |
| 0.130245 | 0.115239  | 0.120629  | 0.121503  | 0.211393 | 0.120192 | 0.12296   |
| 0.135344 | 0.117424  | 0.123397  | 0.130973  | 0.215909 | 0.127331 | 0.121649  |
| 0.136072 | 0.124563  | 0.131702  | 0.11859   | 0.219551 | 0.13243  | 0.126457  |
| 0.133013 | 0.107517  | 0.11757   | 0.120775  | 0.214161 | 0.120047 | 0.114948  |
| 0.121066 | 0.105478  | 0.111742  | 0.117279  | 0.199009 | 0.106643 | 0.110577  |
| 0.129808 | 0.114219  | 0.119027  | 0.129516  | 0.208042 | 0.11859  | 0.117279  |
| 0.117861 | 0.102273  | 0.105915  | 0.124854  | 0.200175 | 0.102564 | 0.105332  |
| 0.146707 | 0.13345   | 0.140297  | 0.148456  | 0.220862 | 0.134033 | 0.138258  |

|          |           |          |           |          |          |           |
|----------|-----------|----------|-----------|----------|----------|-----------|
| 0.148747 | 0.137238  | 0.142045 | 0.150495  | 0.221154 | 0.138695 | 0.139132  |
| 0.120921 | 0.109994  | 0.115967 | 0.128205  | 0.200321 | 0.112034 | 0.108974  |
| 0.117424 | 0.0977564 | 0.100524 | 0.11451   | 0.203526 | 0.101253 | 0.0967366 |
| 0.130973 | 0.10169   | 0.114073 | 0.123106  | 0.213287 | 0.118298 | 0.10708   |
| 0.124563 | 0.118007  | 0.104458 | 0.130973  | 0.20542  | 0.11451  | 0.118153  |
| 0.145688 | 0.129225  | 0.135781 | 0.1419    | 0.217803 | 0.129225 | 0.130245  |
| 0.121503 | 0.105915  | 0.110431 | 0.130245  | 0.206731 | 0.108246 | 0.108392  |
| 0.12398  | 0.103147  | 0.114656 | 0.123689  | 0.197552 | 0.113636 | 0.109703  |
| 0.156177 | 0.136801  | 0.140734 | 0.0611888 | 0.223922 | 0.144959 | 0.138112  |
| 0.130245 | 0.124854  | 0.127331 | 0.140734  | 0.212558 | 0.120192 | 0.128205  |
| 0.120775 | 0.111305  | 0.115822 | 0.124563  | 0.201632 | 0.111014 | 0.113199  |
| 0.129516 | 0.11655   | 0.123106 | 0.135635  | 0.212413 | 0.126457 | 0.124272  |
| 0.11961  | 0.109266  | 0.110286 | 0.126894  | 0.188811 | 0.113928 | 0.114656  |
| 0.14292  | 0.140443  | 0.129516 | 0.146125  | 0.226107 | 0.131119 | 0.143211  |
| 0.132867 | 0.120484  | 0.125291 | 0.134615  | 0.211976 | 0.121941 | 0.122378  |
| 0.123543 | 0.113491  | 0.112179 | 0.126457  | 0.203817 | 0.106789 | 0.109266  |
| 0.122378 | 0.110577  | 0.11655  | 0.129371  | 0.200321 | 0.116696 | 0.108974  |
| 0.126894 | 0.104312  | 0.119027 | 0.120484  | 0.215035 | 0.119755 | 0.110577  |
| 0.146707 | 0.13345   | 0.134761 | 0.143794  | 0.222902 | 0.123252 | 0.135635  |
| 0.147582 | 0.129371  | 0.136509 | 0.147873  | 0.222902 | 0.134033 | 0.137092  |
| 0.172203 | 0.152826  | 0.160256 | 0.164627  | 0.176136 | 0.158071 | 0.164044  |
| 0.124126 | 0.113199  | 0.115676 | 0.124709  | 0.203817 | 0.110577 | 0.112762  |
| 0.120921 | 0.103001  | 0.110723 | 0.124126  | 0.2044   | 0.112325 | 0.105186  |
| 0.122086 | 0.106789  | 0.109557 | 0.124709  | 0.20236  | 0.108537 | 0.109848  |
| 0.14729  | 0.128788  | 0.136218 | 0.127768  | 0.21183  | 0.136655 | 0.134761  |
| 0.123106 | 0.103147  | 0.112034 | 0.123106  | 0.200466 | 0.104604 | 0.111451  |
| 0.134033 | 0.131265  | 0.125291 | 0.139569  | 0.212558 | 0.130099 | 0.131119  |
| 0.130245 | 0.110868  | 0.115093 | 0.120338  | 0.213724 | 0.119318 | 0.116841  |
| 0.125437 | 0.112471  | 0.114073 | 0.128351  | 0.201632 | 0.112179 | 0.112617  |
| 0.153992 | 0.137529  | 0.142628 | 0.130099  | 0.21183  | 0.143648 | 0.14292   |
| 0.132721 | 0.117424  | 0.116113 | 0.134761  | 0.210082 | 0.115093 | 0.119901  |
| 0.145105 | 0.133013  | 0.134324 | 0.147145  | 0.225379 | 0.127477 | 0.134324  |
| 0.13039  | 0.124709  | 0.123689 | 0.14292   | 0.213287 | 0.118298 | 0.129808  |
| 0.112471 | 0.112617  | 0.101981 | 0.121503  | 0.199155 | 0.112325 | 0.116841  |
| 0.123543 | 0.104167  | 0.111014 | 0.125291  | 0.198572 | 0.109994 | 0.111597  |
| 0.122378 | 0.110868  | 0.111305 | 0.129371  | 0.206731 | 0.10708  | 0.112179  |
| 0.138112 | 0.131847  | 0.130245 | 0.141608  | 0.218677 | 0.127185 | 0.128497  |
| 0.121066 | 0.103147  | 0.109411 | 0.125146  | 0.201049 | 0.113345 | 0.110577  |
| 0.149184 | 0.129808  | 0.137238 | 0.145105  | 0.225087 | 0.13039  | 0.137238  |
| 0.134324 | 0.121941  | 0.121795 | 0.129662  | 0.203817 | 0.118444 | 0.117716  |
| 0.12704  | 0.11553   | 0.111014 | 0.126457  | 0.207896 | 0.111742 | 0.121795  |
| 0.127331 | 0.10912   | 0.115093 | 0.128497  | 0.204983 | 0.109703 | 0.111305  |
| 0.128205 | 0.116113  | 0.116259 | 0.137821  | 0.209062 | 0.11553  | 0.118881  |
| 0.12296  | 0.110286  | 0.115093 | 0.125583  | 0.206148 | 0.10708  | 0.112762  |

|          |           |           |          |          |          |           |
|----------|-----------|-----------|----------|----------|----------|-----------|
| 0.121503 | 0.110286  | 0.110431  | 0.12704  | 0.203526 | 0.109411 | 0.108683  |
| 0.141754 | 0.130536  | 0.135635  | 0.146125 | 0.217657 | 0.127622 | 0.133887  |
| 0.123689 | 0.107226  | 0.10912   | 0.117279 | 0.202797 | 0.107809 | 0.108246  |
| 0.120921 | 0.0995047 | 0.109848  | 0.123543 | 0.206148 | 0.106789 | 0.112179  |
| 0.132576 | 0.118735  | 0.118007  | 0.122669 | 0.214307 | 0.122815 | 0.117716  |
| 0.137238 | 0.123106  | 0.118007  | 0.109848 | 0.213724 | 0.120775 | 0.12704   |
| 0.12704  | 0.120775  | 0.120921  | 0.136946 | 0.219843 | 0.130973 | 0.128497  |
| 0.135052 | 0.130828  | 0.123397  | 0.144085 | 0.226981 | 0.138112 | 0.137092  |
| 0.122669 | 0.109994  | 0.114802  | 0.113636 | 0.203526 | 0.107372 | 0.115676  |
| 0.192308 | 0.180798  | 0.179487  | 0.177739 | 0.165064 | 0.176719 | 0.180361  |
| 0.118153 | 0.104021  | 0.104749  | 0.114656 | 0.204837 | 0.105186 | 0.10708   |
| 0.136364 | 0.13039   | 0.12296   | 0.143065 | 0.216638 | 0.143211 | 0.13986   |
| 0.127914 | 0.120775  | 0.112762  | 0.136364 | 0.213432 | 0.131847 | 0.13141   |
| 0.138549 | 0.127331  | 0.135052  | 0.11757  | 0.22028  | 0.129371 | 0.131265  |
| 0.115093 | 0.106498  | 0.0981935 | 0.124126 | 0.207605 | 0.112908 | 0.115385  |
| 0.129953 | 0.127477  | 0.115676  | 0.142191 | 0.222756 | 0.135635 | 0.133159  |
| 0.118007 | 0.108246  | 0.102855  | 0.123252 | 0.211684 | 0.118153 | 0.109266  |
| 0.124563 | 0.119755  | 0.114073  | 0.131847 | 0.210373 | 0.123252 | 0.115822  |
| 0.126311 | 0.106935  | 0.114948  | 0.106498 | 0.204837 | 0.116841 | 0.110286  |
| 0.130099 | 0.130828  | 0.119901  | 0.142337 | 0.22028  | 0.141026 | 0.134761  |
| 0.121358 | 0.101399  | 0.104749  | 0.119318 | 0.202214 | 0.11014  | 0.0954254 |
| 0.136364 | 0.128934  | 0.127622  | 0.121795 | 0.216346 | 0.133013 | 0.134033  |
| 0.126603 | 0.109848  | 0.108829  | 0.103584 | 0.206876 | 0.111597 | 0.10912   |
| 0.134907 | 0.119901  | 0.125874  | 0.139569 | 0.21722  | 0.124854 | 0.122086  |
| 0.140297 | 0.12296   | 0.129516  | 0.114948 | 0.213287 | 0.129371 | 0.121066  |
| 0.116987 | 0.10373   | 0.104458  | 0.107372 | 0.206876 | 0.107517 | 0.104749  |
| 0.152535 | 0.138403  | 0.142337  | 0.136218 | 0.210956 | 0.144522 | 0.149038  |
| 0.123252 | 0.10708   | 0.108392  | 0.103438 | 0.209062 | 0.113199 | 0.107809  |
| 0.120629 | 0.099796  | 0.0964452 | 0.12296  | 0.210227 | 0.110577 | 0.1081    |
| 0.120192 | 0.112179  | 0.11116   | 0.122523 | 0.207168 | 0.114219 | 0.10708   |
| 0.142337 | 0.127331  | 0.131847  | 0.123106 | 0.219406 | 0.137238 | 0.125728  |
| 0.13243  | 0.120338  | 0.120192  | 0.123689 | 0.192016 | 0.120921 | 0.121941  |
| 0.114656 | 0.097028  | 0.0971737 | 0.120484 | 0.207459 | 0.111597 | 0.109411  |
| 0.113782 | 0.0996503 | 0.097465  | 0.122232 | 0.202797 | 0.112471 | 0.109994  |
| 0.123834 | 0.110868  | 0.11451   | 0.107226 | 0.204108 | 0.116113 | 0.112471  |
| 0.131556 | 0.103438  | 0.123397  | 0.127768 | 0.219697 | 0.125291 | 0.111451  |
| 0.128497 | 0.11553   | 0.11014   | 0.104604 | 0.207022 | 0.11116  | 0.115093  |
| 0.118444 | 0.0935315 | 0.10067   | 0.110868 | 0.198135 | 0.103438 | 0.097465  |
| 0.117861 | 0.0891608 | 0.101544  | 0.109411 | 0.200466 | 0.10373  | 0.0965909 |
| 0.120047 | 0.0907634 | 0.104604  | 0.120047 | 0.2044   | 0.109411 | 0.0984848 |
| 0.126748 | 0.120484  | 0.119172  | 0.132284 | 0.204983 | 0.116696 | 0.123252  |
| 0.136801 | 0.113928  | 0.121358  | 0.128934 | 0.214161 | 0.128205 | 0.124563  |
| 0.120338 | 0.0948427 | 0.106643  | 0.11859  | 0.209936 | 0.107955 | 0.103147  |
| 0.113491 | 0.0914918 | 0.107955  | 0.117279 | 0.199009 | 0.103147 | 0.0983392 |

|          |           |           |          |          |           |           |
|----------|-----------|-----------|----------|----------|-----------|-----------|
| 0.135927 | 0.112471  | 0.125146  | 0.12602  | 0.215035 | 0.121212  | 0.115822  |
| 0.125    | 0.0954254 | 0.106935  | 0.115385 | 0.2044   | 0.103293  | 0.106352  |
| 0.128788 | 0.110868  | 0.118007  | 0.115385 | 0.200903 | 0.121649  | 0.115967  |
| 0.142191 | 0.124563  | 0.131119  | 0.048951 | 0.213432 | 0.132139  | 0.129662  |
| 0.123252 | 0.0977564 | 0.109848  | 0.124126 | 0.209645 | 0.109994  | 0.10373   |
| 0.122815 | 0.094697  | 0.110286  | 0.119318 | 0.208916 | 0.106352  | 0.0971737 |
| 0.121066 | 0.099359  | 0.109411  | 0.120192 | 0.206294 | 0.110431  | 0.097465  |
| 0.116113 | 0.0929487 | 0.0992133 | 0.114948 | 0.199301 | 0.107226  | 0.100087  |
| 0.127768 | 0.104895  | 0.121941  | 0.131556 | 0.212704 | 0.124709  | 0.107372  |
| 0.116404 | 0.0906177 | 0.105041  | 0.110577 | 0.20134  | 0.102855  | 0.095134  |
| 0.147145 | 0.13243   | 0.131702  | 0.132284 | 0.220134 | 0.135344  | 0.137529  |
| 0.142628 | 0.125583  | 0.133013  | 0.137383 | 0.212704 | 0.125874  | 0.128934  |
| 0.133887 | 0.111597  | 0.122523  | 0.126894 | 0.213578 | 0.119172  | 0.118444  |
| 0.125583 | 0.109411  | 0.114802  | 0.129079 | 0.2044   | 0.109703  | 0.106352  |
| 0.118298 | 0.106789  | 0.109557  | 0.104604 | 0.204983 | 0.111451  | 0.105478  |
| 0.122232 | 0.0984848 | 0.106206  | 0.116113 | 0.206876 | 0.104021  | 0.101544  |
| 0.125874 | 0.0986305 | 0.104604  | 0.120047 | 0.204983 | 0.107372  | 0.100816  |
| 0.114219 | 0.100379  | 0.109266  | 0.11859  | 0.20877  | 0.103001  | 0.106935  |
| 0.117716 | 0.107663  | 0.102564  | 0.127622 | 0.194202 | 0.112617  | 0.115385  |
| 0.134033 | 0.124854  | 0.126166  | 0.140152 | 0.21722  | 0.120484  | 0.128788  |
| 0.11961  | 0.109266  | 0.103293  | 0.129516 | 0.212995 | 0.116841  | 0.113199  |
| 0.134907 | 0.113491  | 0.129953  | 0.133159 | 0.214307 | 0.126311  | 0.122086  |
| 0.140297 | 0.12704   | 0.125728  | 0.127185 | 0.221445 | 0.132576  | 0.132139  |
| 0.194202 | 0.18648   | 0.184878  | 0.200903 | 0.119172 | 0.185897  | 0.193036  |
| 0.23514  | 0.231206  | 0.231643  | 0.240676 | 0.138258 | 0.229458  | 0.237179  |
| 0.11757  | 0.106061  | 0.102418  | 0.122232 | 0.192599 | 0.110723  | 0.112034  |
| 0.119464 | 0.105041  | 0.104895  | 0.123252 | 0.200321 | 0.103584  | 0.112762  |
| 0.118881 | 0.105915  | 0.100233  | 0.116841 | 0.197115 | 0.103875  | 0.109848  |
| 0.116259 | 0.114365  | 0.100816  | 0.124709 | 0.202652 | 0.108246  | 0.111014  |
| 0.132284 | 0.116696  | 0.124709  | 0.132867 | 0.213432 | 0.127477  | 0.126166  |
| 0.120047 | 0.116696  | 0.101981  | 0.125291 | 0.206731 | 0.110868  | 0.114219  |
| 0.150787 | 0.143648  | 0.140297  | 0.151952 | 0.22669  | 0.138403  | 0.149621  |
| 0.120629 | 0.113782  | 0.108974  | 0.128788 | 0.202943 | 0.107955  | 0.115676  |
| 0.131702 | 0.122815  | 0.122086  | 0.134907 | 0.218677 | 0.120484  | 0.130536  |
| 0.131265 | 0.130245  | 0.123397  | 0.136509 | 0.210373 | 0.123834  | 0.132139  |
| 0.132139 | 0.130536  | 0.118444  | 0.137675 | 0.217075 | 0.132867  | 0.135344  |
| 0.142628 | 0.131702  | 0.140006  | 0.142628 | 0.217366 | 0.134907  | 0.135635  |
| 0.121941 | 0.117424  | 0.112325  | 0.126603 | 0.210373 | 0.110723  | 0.116404  |
| 0.117279 | 0.108392  | 0.106498  | 0.121358 | 0.205128 | 0.107226  | 0.112325  |
| 0.122669 | 0.117861  | 0.101981  | 0.126166 | 0.206731 | 0.108246  | 0.120629  |
| 0.115676 | 0.107955  | 0.10169   | 0.119464 | 0.202943 | 0.0983392 | 0.110431  |
| 0.118007 | 0.109703  | 0.103438  | 0.12296  | 0.202943 | 0.108246  | 0.113636  |
| 0.122523 | 0.115093  | 0.10708   | 0.12602  | 0.207751 | 0.104895  | 0.118444  |
| 0.126457 | 0.128059  | 0.112471  | 0.140152 | 0.21285  | 0.127185  | 0.126166  |

|          |           |           |          |          |           |          |
|----------|-----------|-----------|----------|----------|-----------|----------|
| 0.130828 | 0.137092  | 0.122669  | 0.147145 | 0.222756 | 0.136801  | 0.134615 |
| 0.123689 | 0.113345  | 0.110577  | 0.128642 | 0.206002 | 0.109266  | 0.113782 |
| 0.120629 | 0.112908  | 0.100233  | 0.128205 | 0.201195 | 0.113491  | 0.112179 |
| 0.136364 | 0.128934  | 0.121795  | 0.139569 | 0.219843 | 0.126603  | 0.129953 |
| 0.11655  | 0.10912   | 0.0964452 | 0.121503 | 0.198572 | 0.105332  | 0.111888 |
| 0.139423 | 0.143065  | 0.134761  | 0.151952 | 0.214452 | 0.138112  | 0.14292  |
| 0.14292  | 0.125291  | 0.127768  | 0.143794 | 0.205128 | 0.13549   | 0.123106 |
| 0.128205 | 0.135635  | 0.11655   | 0.143648 | 0.21081  | 0.128351  | 0.135781 |
| 0.119172 | 0.104458  | 0.104021  | 0.119464 | 0.20236  | 0.0968823 | 0.11451  |
| 0.114073 | 0.107517  | 0.100379  | 0.118444 | 0.202797 | 0.106352  | 0.10912  |
| 0.130536 | 0.120192  | 0.118881  | 0.134324 | 0.216638 | 0.111742  | 0.127331 |
| 0.122523 | 0.120629  | 0.112034  | 0.131556 | 0.212704 | 0.120338  | 0.123689 |
| 0.133013 | 0.130828  | 0.11961   | 0.137675 | 0.208916 | 0.121795  | 0.129516 |
| 0.125583 | 0.118444  | 0.107809  | 0.128205 | 0.207896 | 0.110577  | 0.11859  |
| 0.124272 | 0.115676  | 0.108246  | 0.129225 | 0.206585 | 0.1081    | 0.118153 |
| 0.125437 | 0.123543  | 0.10912   | 0.132139 | 0.208625 | 0.120629  | 0.126311 |
| 0.133596 | 0.128205  | 0.123397  | 0.138258 | 0.219114 | 0.128205  | 0.131265 |
| 0.133887 | 0.131702  | 0.11757   | 0.139714 | 0.2162   | 0.12296   | 0.129516 |
| 0.132867 | 0.135052  | 0.128788  | 0.139569 | 0.217803 | 0.134761  | 0.137238 |
| 0.137092 | 0.129079  | 0.130682  | 0.13243  | 0.208916 | 0.131993  | 0.135927 |
| 0.12398  | 0.108683  | 0.105624  | 0.125146 | 0.207751 | 0.106352  | 0.115822 |
| 0.13243  | 0.127914  | 0.116404  | 0.144959 | 0.2162   | 0.124126  | 0.127768 |
| 0.11451  | 0.105915  | 0.10169   | 0.120921 | 0.204691 | 0.110868  | 0.114802 |
| 0.120775 | 0.108683  | 0.112325  | 0.125728 | 0.197844 | 0.108683  | 0.109703 |
| 0.113491 | 0.111888  | 0.108537  | 0.126603 | 0.205128 | 0.107226  | 0.112908 |
| 0.117424 | 0.112034  | 0.0996503 | 0.125291 | 0.201486 | 0.105915  | 0.111597 |
| 0.116259 | 0.107955  | 0.102273  | 0.122378 | 0.203817 | 0.104167  | 0.111888 |
| 0.133887 | 0.138403  | 0.124272  | 0.142337 | 0.214452 | 0.130536  | 0.13447  |
| 0.123543 | 0.115822  | 0.113636  | 0.119755 | 0.203234 | 0.110868  | 0.113345 |
| 0.134033 | 0.132721  | 0.124709  | 0.13986  | 0.213141 | 0.131265  | 0.135198 |
| 0.116259 | 0.110286  | 0.104604  | 0.124417 | 0.202652 | 0.102418  | 0.113636 |
| 0.130682 | 0.121503  | 0.115822  | 0.13243  | 0.214744 | 0.119464  | 0.125146 |
| 0.129371 | 0.110286  | 0.11859   | 0.13345  | 0.211393 | 0.121649  | 0.11859  |
| 0.126166 | 0.107372  | 0.111305  | 0.131119 | 0.199738 | 0.11553   | 0.104895 |
| 0.123106 | 0.105769  | 0.112617  | 0.120484 | 0.210664 | 0.111888  | 0.108829 |
| 0.123252 | 0.113782  | 0.115676  | 0.134615 | 0.20236  | 0.114948  | 0.113636 |
| 0.128642 | 0.114219  | 0.114365  | 0.132139 | 0.208625 | 0.119172  | 0.112325 |
| 0.125437 | 0.109266  | 0.112034  | 0.114948 | 0.205711 | 0.106352  | 0.109994 |
| 0.142045 | 0.111305  | 0.125728  | 0.13447  | 0.222611 | 0.127331  | 0.117279 |
| 0.14627  | 0.131847  | 0.138695  | 0.13141  | 0.2213   | 0.140297  | 0.140443 |
| 0.11655  | 0.0872669 | 0.101107  | 0.114219 | 0.200903 | 0.110286  | 0.092366 |
| 0.128642 | 0.120629  | 0.119027  | 0.133013 | 0.220862 | 0.135198  | 0.114656 |
| 0.13345  | 0.0980478 | 0.123834  | 0.122669 | 0.216346 | 0.122232  | 0.106935 |
| 0.123543 | 0.109411  | 0.116841  | 0.135198 | 0.215472 | 0.130682  | 0.120047 |

|          |           |          |          |          |          |           |
|----------|-----------|----------|----------|----------|----------|-----------|
| 0.120629 | 0.10912   | 0.113345 | 0.124417 | 0.204983 | 0.120484 | 0.106935  |
| 0.126748 | 0.0980478 | 0.11451  | 0.130245 | 0.216346 | 0.118153 | 0.102273  |
| 0.130099 | 0.100524  | 0.119901 | 0.132721 | 0.213578 | 0.124417 | 0.110577  |
| 0.127914 | 0.114948  | 0.11859  | 0.134324 | 0.219551 | 0.123106 | 0.113636  |
| 0.135781 | 0.121941  | 0.125874 | 0.136946 | 0.224213 | 0.135344 | 0.11859   |
| 0.124417 | 0.0960082 | 0.117133 | 0.127622 | 0.215763 | 0.125437 | 0.0996503 |
| 0.113928 | 0.105624  | 0.106935 | 0.122086 | 0.205565 | 0.113782 | 0.102273  |
| 0.142628 | 0.134615  | 0.135635 | 0.139714 | 0.213869 | 0.124709 | 0.137383  |
| 0.133741 | 0.105624  | 0.125291 | 0.133741 | 0.218969 | 0.135927 | 0.118007  |
| 0.115676 | 0.0971737 | 0.103438 | 0.119755 | 0.201486 | 0.112034 | 0.104895  |
| 0.222174 | 0.212704  | 0.213724 | 0.220425 | 0.12704  | 0.209499 | 0.21722   |
| 0.126311 | 0.11451   | 0.116113 | 0.130099 | 0.212704 | 0.125    | 0.108246  |
| 0.123106 | 0.092366  | 0.110577 | 0.122523 | 0.206294 | 0.113928 | 0.0986305 |
| 0.131702 | 0.128642  | 0.125874 | 0.136072 | 0.221882 | 0.134178 | 0.119464  |
| 0.125874 | 0.0942599 | 0.113928 | 0.123543 | 0.206731 | 0.11553  | 0.104312  |
| 0.137529 | 0.110577  | 0.127914 | 0.130828 | 0.223048 | 0.126311 | 0.11859   |
| 0.116259 | 0.112617  | 0.105478 | 0.137238 | 0.210227 | 0.11757  | 0.109848  |
| 0.121941 | 0.11014   | 0.115239 | 0.128642 | 0.211247 | 0.121212 | 0.110868  |
| 0.128059 | 0.102273  | 0.120775 | 0.129808 | 0.211538 | 0.120338 | 0.105041  |
| 0.12704  | 0.120484  | 0.11655  | 0.140152 | 0.202943 | 0.130973 | 0.120338  |
| 0.130973 | 0.111305  | 0.121649 | 0.131847 | 0.215909 | 0.13141  | 0.119027  |
| 0.121212 | 0.118444  | 0.115385 | 0.130828 | 0.218094 | 0.129516 | 0.11451   |
| 0.119755 | 0.116113  | 0.120047 | 0.13141  | 0.21926  | 0.126603 | 0.11655   |
| 0.126166 | 0.105332  | 0.111597 | 0.123252 | 0.211684 | 0.113782 | 0.101981  |
| 0.120921 | 0.103293  | 0.108974 | 0.127914 | 0.215472 | 0.116987 | 0.109266  |
| 0.126603 | 0.121503  | 0.121649 | 0.142045 | 0.219697 | 0.13345  | 0.117861  |
| 0.115385 | 0.104167  | 0.108392 | 0.123252 | 0.20236  | 0.118153 | 0.104604  |
| 0.144814 | 0.134761  | 0.13345  | 0.14627  | 0.218094 | 0.129225 | 0.135198  |
| 0.142337 | 0.128205  | 0.136218 | 0.131265 | 0.199592 | 0.137238 | 0.129516  |
| 0.132721 | 0.115967  | 0.122815 | 0.126311 | 0.205711 | 0.124126 | 0.116696  |
| 0.135927 | 0.104021  | 0.118153 | 0.125146 | 0.21824  | 0.124709 | 0.106789  |
| 0.13549  | 0.114365  | 0.119172 | 0.121503 | 0.195659 | 0.125146 | 0.121212  |
| 0.130682 | 0.117424  | 0.12398  | 0.128351 | 0.20979  | 0.129079 | 0.127477  |
| 0.13039  | 0.124709  | 0.122523 | 0.128351 | 0.198135 | 0.122086 | 0.121649  |
| 0.143211 | 0.130828  | 0.137383 | 0.13243  | 0.208916 | 0.134615 | 0.133596  |
| 0.12296  | 0.099796  | 0.108392 | 0.122086 | 0.198864 | 0.110577 | 0.0976107 |
| 0.14088  | 0.121795  | 0.132721 | 0.144668 | 0.213869 | 0.119755 | 0.127768  |
| 0.147145 | 0.133304  | 0.139277 | 0.134907 | 0.19799  | 0.137383 | 0.135198  |
| 0.126166 | 0.106789  | 0.120338 | 0.124417 | 0.213724 | 0.11757  | 0.108392  |
| 0.13345  | 0.11757   | 0.116841 | 0.13345  | 0.207314 | 0.11553  | 0.117133  |
| 0.152535 | 0.143065  | 0.146416 | 0.140297 | 0.222028 | 0.136946 | 0.14933   |
| 0.132139 | 0.120338  | 0.122523 | 0.142045 | 0.209499 | 0.120047 | 0.126894  |
| 0.147727 | 0.128934  | 0.137821 | 0.140734 | 0.223339 | 0.135927 | 0.132284  |
| 0.135927 | 0.118298  | 0.130099 | 0.141463 | 0.217949 | 0.127622 | 0.121941  |

|           |           |          |           |          |          |           |
|-----------|-----------|----------|-----------|----------|----------|-----------|
| 0.121212  | 0.112908  | 0.106935 | 0.133741  | 0.216346 | 0.125437 | 0.120629  |
| 0.137383  | 0.122378  | 0.129808 | 0.135344  | 0.21183  | 0.129371 | 0.120192  |
| 0.134033  | 0.105041  | 0.120629 | 0.13345   | 0.208479 | 0.123397 | 0.111014  |
| 0.131556  | 0.128205  | 0.120192 | 0.138549  | 0.216492 | 0.130536 | 0.128351  |
| 0.129516  | 0.120338  | 0.121941 | 0.138258  | 0.218823 | 0.127622 | 0.11553   |
| 0.129808  | 0.131119  | 0.119027 | 0.135344  | 0.219697 | 0.134324 | 0.134761  |
| 0.136509  | 0.125874  | 0.127768 | 0.132721  | 0.222028 | 0.132284 | 0.127185  |
| 0.135344  | 0.123543  | 0.121941 | 0.128351  | 0.210373 | 0.132284 | 0.127477  |
| 0.144376  | 0.137529  | 0.132721 | 0.146416  | 0.213287 | 0.147727 | 0.143502  |
| 0.13039   | 0.103438  | 0.122232 | 0.12398   | 0.20979  | 0.116841 | 0.0968823 |
| 0.119901  | 0.114802  | 0.116404 | 0.131847  | 0.214744 | 0.116841 | 0.117861  |
| 0.139714  | 0.12704   | 0.117279 | 0.130973  | 0.21824  | 0.119464 | 0.131556  |
| 0.133304  | 0.104604  | 0.118444 | 0.117861  | 0.208625 | 0.112762 | 0.0968823 |
| 0.150058  | 0.128934  | 0.141026 | 0.132867  | 0.21081  | 0.141754 | 0.136364  |
| 0.156469  | 0.146416  | 0.151515 | 0.13986   | 0.224505 | 0.149621 | 0.147436  |
| 0.127914  | 0.123106  | 0.120921 | 0.133741  | 0.216346 | 0.125437 | 0.130245  |
| 0.126311  | 0.115676  | 0.118444 | 0.128059  | 0.210956 | 0.117716 | 0.124563  |
| 0.128205  | 0.128351  | 0.121503 | 0.134033  | 0.21722  | 0.133013 | 0.13141   |
| 0.133304  | 0.113636  | 0.129225 | 0.138549  | 0.216783 | 0.128205 | 0.116696  |
| 0.130682  | 0.120921  | 0.121941 | 0.135927  | 0.215326 | 0.119172 | 0.127185  |
| 0.133013  | 0.126748  | 0.118735 | 0.141754  | 0.223193 | 0.13549  | 0.123689  |
| 0.139132  | 0.125291  | 0.138258 | 0.133013  | 0.215035 | 0.137529 | 0.129225  |
| 0.13345   | 0.112617  | 0.124709 | 0.125874  | 0.211684 | 0.124854 | 0.107809  |
| 0.1588    | 0.156323  | 0.150932 | 0.14831   | 0.21926  | 0.153409 | 0.165793  |
| 0.138112  | 0.118444  | 0.127622 | 0.129371  | 0.216346 | 0.123106 | 0.114802  |
| 0.148601  | 0.125728  | 0.138986 | 0.137529  | 0.216638 | 0.139423 | 0.13345   |
| 0.125728  | 0.11655   | 0.121066 | 0.133304  | 0.214744 | 0.115967 | 0.123106  |
| 0.133013  | 0.126748  | 0.127185 | 0.129225  | 0.222902 | 0.129371 | 0.129808  |
| 0.118444  | 0.115385  | 0.110286 | 0.129516  | 0.209499 | 0.129079 | 0.114365  |
| 0.149184  | 0.126603  | 0.133159 | 0.0926573 | 0.182255 | 0.134761 | 0.138403  |
| 0.0674534 | 0.134615  | 0.130682 | 0.150787  | 0.222319 | 0.134615 | 0.144668  |
| 0.121503  | 0.112034  | 0.112179 | 0.132867  | 0.19799  | 0.118735 | 0.121503  |
| 0.138258  | 0.128497  | 0.13039  | 0.142337  | 0.180944 | 0.127331 | 0.137383  |
| 0.155012  | 0.139714  | 0.140734 | 0.1588    | 0.156906 | 0.137383 | 0.148601  |
| 0.151515  | 0.133596  | 0.135198 | 0.147436  | 0.166521 | 0.135635 | 0.137529  |
| 0.136509  | 0.121503  | 0.118735 | 0.117279  | 0.215618 | 0.122378 | 0.127185  |
| 0.133159  | 0.134761  | 0.127914 | 0.138112  | 0.213724 | 0.104749 | 0.141317  |
| 0.115676  | 0.0983392 | 0.109266 | 0.118881  | 0.199738 | 0.114073 | 0.11655   |
| 0.122232  | 0.106061  | 0.113782 | 0.125728  | 0.196678 | 0.115093 | 0.11553   |
| 0.123834  | 0.104167  | 0.118007 | 0.12296   | 0.205565 | 0.114365 | 0.0620629 |
| 0.122378  | 0.109703  | 0.106061 | 0.12704   | 0.197698 | 0.112325 | 0.120047  |
| 0.124272  | 0.113928  | 0.11116  | 0.130973  | 0.203089 | 0.111597 | 0.109703  |
| 0.116987  | 0.0987762 | 0.109411 | 0.12398   | 0.190268 | 0.107517 | 0.112034  |
| 0.121649  | 0.104021  | 0.113199 | 0.131556  | 0.206294 | 0.107517 | 0.117279  |



|          |           |           |           |          |           |           |
|----------|-----------|-----------|-----------|----------|-----------|-----------|
| 0.124709 | 0.111742  | 0.119755  | 0.131993  | 0.19391  | 0.120192  | 0.120921  |
| 0.121212 | 0.0930944 | 0.106643  | 0.112471  | 0.200903 | 0.106206  | 0.0967366 |
| 0.123834 | 0.112034  | 0.111597  | 0.132867  | 0.199155 | 0.116987  | 0.122669  |
| 0.120484 | 0.106061  | 0.105915  | 0.129516  | 0.200466 | 0.113636  | 0.11553   |
| 0.133013 | 0.120629  | 0.118444  | 0.135344  | 0.205711 | 0.118298  | 0.127185  |
| 0.21722  | 0.210082  | 0.211101  | 0.218677  | 0.129371 | 0.208042  | 0.215181  |
| 0.140297 | 0.131119  | 0.131847  | 0.152244  | 0.212995 | 0.138986  | 0.144668  |
| 0.126457 | 0.125437  | 0.123834  | 0.133741  | 0.214307 | 0.127185  | 0.135781  |
| 0.12602  | 0.113636  | 0.122232  | 0.131556  | 0.201923 | 0.114219  | 0.119901  |
| 0.209936 | 0.206294  | 0.207314  | 0.216055  | 0.115967 | 0.20134   | 0.20877   |
| 0.135344 | 0.118298  | 0.122232  | 0.105624  | 0.195804 | 0.115967  | 0.125146  |
| 0.134324 | 0.119318  | 0.119464  | 0.124126  | 0.212558 | 0.112908  | 0.125     |
| 0.123252 | 0.120484  | 0.111014  | 0.136946  | 0.210519 | 0.0540501 | 0.121795  |
| 0.11961  | 0.111014  | 0.118444  | 0.129808  | 0.203671 | 0.119755  | 0.117861  |
| 0.251603 | 0.243881  | 0.245484  | 0.251311  | 0.13986  | 0.241259  | 0.250728  |
| 0.132576 | 0.116113  | 0.124126  | 0.0498252 | 0.208188 | 0.126311  | 0.120921  |
| 0.127622 | 0.114656  | 0.112762  | 0.129079  | 0.203526 | 0.108537  | 0.118298  |
| 0.113928 | 0.118735  | 0.10373   | 0.133741  | 0.211393 | 0.116404  | 0.122669  |
| 0.114802 | 0.117861  | 0.0981935 | 0.133159  | 0.208479 | 0.110868  | 0.117716  |
| 0.138986 | 0.116113  | 0.126166  | 0.0699301 | 0.202652 | 0.128059  | 0.123543  |
| 0.13345  | 0.116696  | 0.124417  | 0.127622  | 0.18546  | 0.120775  | 0.125291  |
| 0.129079 | 0.116696  | 0.11859   | 0.132867  | 0.206439 | 0.109994  | 0.124417  |
| 0.121358 | 0.107809  | 0.106789  | 0.125146  | 0.196387 | 0.11451   | 0.119318  |
| 0.124417 | 0.125728  | 0.11451   | 0.129662  | 0.206148 | 0.0962995 | 0.129371  |
| 0.118007 | 0.105332  | 0.112471  | 0.121212  | 0.204983 | 0.116404  | 0.114802  |
| 0.122232 | 0.105769  | 0.105624  | 0.12398   | 0.193473 | 0.11014   | 0.117279  |
| 0.123543 | 0.0925117 | 0.114802  | 0.118007  | 0.20877  | 0.114948  | 0.0920746 |
| 0.060169 | 0.136655  | 0.129225  | 0.152535  | 0.224068 | 0.137238  | 0.145542  |
| 0.135344 | 0.121503  | 0.12602   | 0.053176  | 0.209207 | 0.127331  | 0.124272  |
| 0.140297 | 0.126166  | 0.123106  | 0.129808  | 0.210664 | 0.11859   | 0.127477  |
| 0.193619 | 0.183275  | 0.183129  | 0.19391   | 0.112762 | 0.181818  | 0.190414  |
| 0.204983 | 0.197844  | 0.199155  | 0.205857  | 0.118298 | 0.194347  | 0.201486  |
| 0.126603 | 0.108683  | 0.121358  | 0.128059  | 0.200175 | 0.117716  | 0.117861  |
| 0.117279 | 0.103438  | 0.111451  | 0.122232  | 0.201923 | 0.113636  | 0.112325  |
| 0.132139 | 0.120047  | 0.13243   | 0.138549  | 0.203963 | 0.13549   | 0.138258  |
| 0.133304 | 0.113928  | 0.115822  | 0.130682  | 0.203963 | 0.109557  | 0.121066  |
| 0.135781 | 0.120484  | 0.125874  | 0.0498252 | 0.212267 | 0.129225  | 0.121795  |
| 0.124563 | 0.128205  | 0.0677448 | 0.13884   | 0.208042 | 0.122378  | 0.128351  |
| 0.223631 | 0.217949  | 0.218677  | 0.228001  | 0.123543 | 0.217366  | 0.223922  |
| 0.118735 | 0.113636  | 0.11116   | 0.123106  | 0.206294 | 0.111305  | 0.121066  |
| 0.208625 | 0.2044    | 0.202506  | 0.218823  | 0.144668 | 0.200321  | 0.211247  |
| 0.123689 | 0.108392  | 0.107955  | 0.111451  | 0.205711 | 0.107517  | 0.118444  |
| 0.123834 | 0.114073  | 0.103147  | 0.122669  | 0.205857 | 0.10912   | 0.113345  |
| 0.12398  | 0.111597  | 0.111742  | 0.12602   | 0.195513 | 0.114802  | 0.11961   |

|           |          |           |           |          |           |          |
|-----------|----------|-----------|-----------|----------|-----------|----------|
| 0.118153  | 0.100524 | 0.109411  | 0.122232  | 0.197261 | 0.110723  | 0.110286 |
| 0.206876  | 0.200903 | 0.199301  | 0.210664  | 0.112034 | 0.202069  | 0.205128 |
| 0.127622  | 0.120484 | 0.120921  | 0.141026  | 0.196241 | 0.12602   | 0.129079 |
| 0.123543  | 0.110577 | 0.10373   | 0.122086  | 0.214015 | 0.111742  | 0.115385 |
| 0.122669  | 0.113199 | 0.11451   | 0.136364  | 0.202943 | 0.123106  | 0.126166 |
| 0.131993  | 0.116113 | 0.119755  | 0.136072  | 0.209936 | 0.116113  | 0.122086 |
| 0.123543  | 0.100962 | 0.113345  | 0.123834  | 0.201777 | 0.114073  | 0.111014 |
| 0.12398   | 0.112179 | 0.111742  | 0.111116  | 0.209207 | 0.110723  | 0.120775 |
| 0.131847  | 0.11451  | 0.116987  | 0.13243   | 0.191142 | 0.103147  | 0.122232 |
| 0.136218  | 0.124126 | 0.122523  | 0.128934  | 0.212121 | 0.116259  | 0.126603 |
| 0.113782  | 0.10373  | 0.106789  | 0.12602   | 0.19289  | 0.107517  | 0.10912  |
| 0.125     | 0.117279 | 0.105769  | 0.125583  | 0.206731 | 0.116404  | 0.119464 |
| 0.190705  | 0.183858 | 0.181672  | 0.195659  | 0.116841 | 0.183275  | 0.187791 |
| 0.117133  | 0.121941 | 0.102564  | 0.13549   | 0.21285  | 0.115822  | 0.125874 |
| 0.0517191 | 0.120047 | 0.115239  | 0.137675  | 0.215035 | 0.119464  | 0.128351 |
| 0.11451   | 0.117861 | 0.104895  | 0.136364  | 0.205857 | 0.114656  | 0.105478 |
| 0.134178  | 0.120338 | 0.124272  | 0.0622086 | 0.203089 | 0.124126  | 0.119027 |
| 0.12398   | 0.112762 | 0.111116  | 0.132139  | 0.200758 | 0.115385  | 0.123397 |
| 0.132139  | 0.116841 | 0.112617  | 0.114948  | 0.212121 | 0.113636  | 0.12398  |
| 0.122378  | 0.108829 | 0.112471  | 0.108974  | 0.200612 | 0.109994  | 0.11451  |
| 0.134033  | 0.121066 | 0.122378  | 0.133159  | 0.207605 | 0.118444  | 0.125    |
| 0.0517191 | 0.117716 | 0.111451  | 0.133887  | 0.208625 | 0.114802  | 0.120775 |
| 0.114073  | 0.115385 | 0.0954254 | 0.129808  | 0.206585 | 0.106935  | 0.119027 |
| 0.123543  | 0.10708  | 0.116259  | 0.127914  | 0.198864 | 0.113782  | 0.118881 |
| 0.124563  | 0.115967 | 0.112034  | 0.133887  | 0.213578 | 0.0536131 | 0.116987 |
| 0.132284  | 0.128351 | 0.121212  | 0.143939  | 0.21926  | 0.0659965 | 0.132867 |
| 0.125291  | 0.108246 | 0.115676  | 0.0571096 | 0.201486 | 0.11961   | 0.118007 |
| 0.137383  | 0.128205 | 0.128642  | 0.148164  | 0.211247 | 0.134907  | 0.140589 |
| 0.123106  | 0.101981 | 0.111742  | 0.12398   | 0.202214 | 0.111014  | 0.112908 |
| 0.112034  | 0.118298 | 0.0514277 | 0.126894  | 0.202506 | 0.109848  | 0.11553  |
| 0.126166  | 0.110286 | 0.109848  | 0.13141   | 0.185169 | 0.112034  | 0.119464 |
| 0.137529  | 0.124563 | 0.121212  | 0.136072  | 0.205274 | 0.116404  | 0.129953 |
| 0.193473  | 0.187791 | 0.185315  | 0.19493   | 0.12602  | 0.184003  | 0.191725 |
| 0.118444  | 0.112762 | 0.101836  | 0.120775  | 0.206002 | 0.109557  | 0.114656 |
| 0.107372  | 0.101981 | 0.0980478 | 0.114948  | 0.193765 | 0.106352  | 0.10912  |
| 0.136509  | 0.124126 | 0.122232  | 0.128351  | 0.212413 | 0.11655   | 0.125728 |
| 0.18109   | 0.172203 | 0.177593  | 0.18546   | 0.129953 | 0.172494  | 0.175845 |
| 0.145105  | 0.130099 | 0.134615  | 0.0608974 | 0.208188 | 0.137966  | 0.131993 |
| 0.156469  | 0.137092 | 0.144522  | 0.0614802 | 0.221008 | 0.147873  | 0.141026 |
| 0.0622086 | 0.136072 | 0.131847  | 0.154866  | 0.223776 | 0.137529  | 0.148456 |
| 0.12398   | 0.109848 | 0.116696  | 0.0622086 | 0.196678 | 0.115676  | 0.111742 |
| 0.124709  | 0.111451 | 0.109557  | 0.133741  | 0.197698 | 0.116987  | 0.12296  |
| 0.211976  | 0.204837 | 0.205857  | 0.21285   | 0.122669 | 0.203089  | 0.209936 |
| 0.126894  | 0.116259 | 0.118735  | 0.127768  | 0.201923 | 0.11014   | 0.122523 |

|           |           |           |           |          |           |           |
|-----------|-----------|-----------|-----------|----------|-----------|-----------|
| 0.124709  | 0.115822  | 0.11655   | 0.13549   | 0.200612 | 0.120484  | 0.127622  |
| 0.12296   | 0.116696  | 0.108392  | 0.120047  | 0.204983 | 0.114656  | 0.118298  |
| 0.170163  | 0.159237  | 0.162879  | 0.176865  | 0.146416 | 0.153992  | 0.17162   |
| 0.118298  | 0.103293  | 0.107226  | 0.124417  | 0.198281 | 0.102418  | 0.11014   |
| 0.144376  | 0.145979  | 0.133596  | 0.14933   | 0.221154 | 0.121212  | 0.151369  |
| 0.134761  | 0.104895  | 0.121649  | 0.121358  | 0.200758 | 0.118298  | 0.113782  |
| 0.190705  | 0.182401  | 0.182838  | 0.194202  | 0.112762 | 0.181527  | 0.187209  |
| 0.132139  | 0.112762  | 0.120775  | 0.057838  | 0.205711 | 0.122086  | 0.118735  |
| 0.112908  | 0.0949883 | 0.105915  | 0.120484  | 0.20134  | 0.104604  | 0.100087  |
| 0.117424  | 0.112617  | 0.0504079 | 0.128205  | 0.2044   | 0.10912   | 0.112471  |
| 0.13039   | 0.115093  | 0.110868  | 0.120192  | 0.205711 | 0.108974  | 0.124272  |
| 0.136218  | 0.118298  | 0.118153  | 0.12602   | 0.210082 | 0.115676  | 0.120775  |
| 0.117861  | 0.114219  | 0.106498  | 0.128934  | 0.198718 | 0.118298  | 0.121066  |
| 0.120047  | 0.101253  | 0.115385  | 0.121212  | 0.201486 | 0.112325  | 0.110723  |
| 0.18954   | 0.18648   | 0.182547  | 0.19391   | 0.110431 | 0.180361  | 0.187791  |
| 0.118007  | 0.118153  | 0.114219  | 0.134907  | 0.209353 | 0.0910548 | 0.125874  |
| 0.12398   | 0.103147  | 0.103584  | 0.126603  | 0.19697  | 0.109266  | 0.116987  |
| 0.210664  | 0.202943  | 0.206002  | 0.213869  | 0.117279 | 0.201486  | 0.209207  |
| 0.116259  | 0.118153  | 0.103147  | 0.13345   | 0.213141 | 0.116113  | 0.12296   |
| 0.120192  | 0.102564  | 0.114948  | 0.123397  | 0.203671 | 0.115093  | 0.110868  |
| 0.11553   | 0.0999417 | 0.109411  | 0.121358  | 0.199009 | 0.11014   | 0.108829  |
| 0.131119  | 0.126311  | 0.125291  | 0.144814  | 0.207896 | 0.122232  | 0.136655  |
| 0.190851  | 0.181381  | 0.185023  | 0.194056  | 0.112325 | 0.181381  | 0.186772  |
| 0.13243   | 0.115676  | 0.118444  | 0.132139  | 0.209207 | 0.111597  | 0.122815  |
| 0.127185  | 0.125874  | 0.11757   | 0.13884   | 0.217657 | 0.0568182 | 0.126894  |
| 0.117861  | 0.102564  | 0.113199  | 0.123106  | 0.201923 | 0.113636  | 0.112617  |
| 0.120484  | 0.0999417 | 0.110868  | 0.122232  | 0.201923 | 0.107226  | 0.10708   |
| 0.11859   | 0.10271   | 0.112179  | 0.122378  | 0.198281 | 0.112034  | 0.110723  |
| 0.119901  | 0.106935  | 0.109994  | 0.129808  | 0.201923 | 0.112179  | 0.114656  |
| 0.118007  | 0.0919289 | 0.10373   | 0.111888  | 0.201195 | 0.105332  | 0.0964452 |
| 0.131119  | 0.115822  | 0.124709  | 0.048951  | 0.209062 | 0.124563  | 0.120047  |
| 0.113054  | 0.128351  | 0.1081    | 0.1419    | 0.221591 | 0.11116   | 0.134033  |
| 0.130245  | 0.113199  | 0.119464  | 0.0553613 | 0.207896 | 0.121649  | 0.118007  |
| 0.135927  | 0.118881  | 0.126603  | 0.138258  | 0.213287 | 0.12296   | 0.129808  |
| 0.197552  | 0.186334  | 0.18648   | 0.19697   | 0.111742 | 0.185752  | 0.191725  |
| 0.120192  | 0.114219  | 0.107372  | 0.132139  | 0.210082 | 0.0498252 | 0.113782  |
| 0.132284  | 0.121941  | 0.11859   | 0.139569  | 0.204108 | 0.125728  | 0.132284  |
| 0.11553   | 0.102564  | 0.113199  | 0.120484  | 0.201923 | 0.11014   | 0.109703  |
| 0.119172  | 0.0930944 | 0.108683  | 0.111305  | 0.199446 | 0.105332  | 0.0967366 |
| 0.122086  | 0.113199  | 0.111305  | 0.113928  | 0.196241 | 0.100962  | 0.117424  |
| 0.133304  | 0.118298  | 0.11757   | 0.132139  | 0.20542  | 0.111014  | 0.12398   |
| 0.130099  | 0.124417  | 0.121358  | 0.135052  | 0.207459 | 0.126748  | 0.133013  |
| 0.0643939 | 0.109994  | 0.108683  | 0.131119  | 0.204983 | 0.109411  | 0.11655   |
| 0.129079  | 0.102127  | 0.11014   | 0.122669  | 0.197115 | 0.108829  | 0.106935  |

|           |           |           |           |          |           |           |
|-----------|-----------|-----------|-----------|----------|-----------|-----------|
| 0.120775  | 0.0964452 | 0.107955  | 0.118444  | 0.197552 | 0.104895  | 0.105332  |
| 0.11859   | 0.0936772 | 0.103147  | 0.117424  | 0.200321 | 0.106206  | 0.0949883 |
| 0.128351  | 0.110723  | 0.109703  | 0.110868  | 0.208625 | 0.110431  | 0.118444  |
| 0.139569  | 0.123106  | 0.13345   | 0.0550699 | 0.212267 | 0.132139  | 0.125874  |
| 0.13039   | 0.115385  | 0.112617  | 0.13243   | 0.206876 | 0.109266  | 0.119027  |
| 0.118298  | 0.105915  | 0.105186  | 0.12296   | 0.193619 | 0.109703  | 0.113345  |
| 0.125583  | 0.109411  | 0.109557  | 0.12704   | 0.201777 | 0.10708   | 0.11655   |
| 0.121358  | 0.102564  | 0.111451  | 0.121066  | 0.199301 | 0.110723  | 0.10912   |
| 0.117424  | 0.107955  | 0.100233  | 0.117133  | 0.205857 | 0.107663  | 0.109557  |
| 0.121503  | 0.104167  | 0.115385  | 0.125291  | 0.202943 | 0.114948  | 0.113636  |
| 0.115093  | 0.106789  | 0.105186  | 0.128205  | 0.203526 | 0.0490967 | 0.113054  |
| 0.0579837 | 0.110577  | 0.106352  | 0.134907  | 0.207896 | 0.112034  | 0.114802  |
| 0.131119  | 0.113199  | 0.115967  | 0.119755  | 0.210519 | 0.108829  | 0.120338  |
| 0.12398   | 0.0944056 | 0.108246  | 0.114948  | 0.204545 | 0.10373   | 0.0983392 |
| 0.117716  | 0.101544  | 0.108392  | 0.122378  | 0.200321 | 0.112325  | 0.112179  |
| 0.122378  | 0.117279  | 0.0614802 | 0.132284  | 0.194784 | 0.112908  | 0.11655   |
| 0.128059  | 0.105478  | 0.108246  | 0.128934  | 0.201049 | 0.112179  | 0.11961   |
| 0.112179  | 0.088141  | 0.104895  | 0.123543  | 0.204983 | 0.10708   | 0.102273  |
| 0.115093  | 0.0989219 | 0.111888  | 0.121212  | 0.201486 | 0.111451  | 0.112471  |
| 0.121066  | 0.109266  | 0.109703  | 0.128351  | 0.195221 | 0.116841  | 0.118444  |
| 0.128059  | 0.111597  | 0.11116   | 0.113782  | 0.206876 | 0.113054  | 0.11961   |
| 0.122523  | 0.106643  | 0.10708   | 0.130099  | 0.201923 | 0.11451   | 0.118153  |
| 0.132139  | 0.117424  | 0.114656  | 0.124272  | 0.208625 | 0.106643  | 0.115822  |
| 0.126894  | 0.0973193 | 0.113782  | 0.11553   | 0.204545 | 0.111305  | 0.101253  |
| 0.109703  | 0.106352  | 0.099796  | 0.121358  | 0.199592 | 0.092366  | 0.105624  |
| 0.121503  | 0.107663  | 0.102273  | 0.114802  | 0.208188 | 0.108829  | 0.114802  |
| 0.123397  | 0.111888  | 0.10912   | 0.135052  | 0.200175 | 0.118298  | 0.121941  |
| 0.122523  | 0.113345  | 0.116987  | 0.132139  | 0.207168 | 0.120047  | 0.126311  |
| 0.119755  | 0.0840618 | 0.106352  | 0.123543  | 0.200029 | 0.114365  | 0.113636  |
| 0.196096  | 0.187209  | 0.187937  | 0.194056  | 0.114656 | 0.185169  | 0.193182  |
| 0.166375  | 0.154575  | 0.160256  | 0.17366   | 0.141171 | 0.150495  | 0.166084  |
| 0.130536  | 0.112034  | 0.122378  | 0.0576923 | 0.207896 | 0.121066  | 0.118007  |
| 0.122523  | 0.113636  | 0.110286  | 0.130973  | 0.198427 | 0.112762  | 0.119901  |
| 0.157488  | 0.143065  | 0.146999  | 0.0662879 | 0.225233 | 0.150641  | 0.142628  |
| 0.124126  | 0.122232  | 0.115093  | 0.131119  | 0.211393 | 0.0945513 | 0.129953  |
| 0.123689  | 0.112179  | 0.114948  | 0.127768  | 0.199301 | 0.103147  | 0.119318  |
| 0.120921  | 0.105041  | 0.108974  | 0.125     | 0.198281 | 0.116987  | 0.115385  |
| 0.124417  | 0.0913462 | 0.115385  | 0.115385  | 0.204108 | 0.111451  | 0.0871212 |
| 0.128205  | 0.109411  | 0.110431  | 0.129079  | 0.204983 | 0.117279  | 0.120047  |
| 0.200321  | 0.193765  | 0.193619  | 0.2044    | 0.117133 | 0.193182  | 0.201486  |
| 0.134033  | 0.11757   | 0.120047  | 0.132576  | 0.20877  | 0.117861  | 0.124126  |
| 0.126311  | 0.111305  | 0.110868  | 0.128351  | 0.191142 | 0.113345  | 0.118444  |
| 0.118444  | 0.0958625 | 0.107372  | 0.122523  | 0.196678 | 0.108392  | 0.105332  |
| 0.126166  | 0.103584  | 0.113636  | 0.131993  | 0.207022 | 0.108537  | 0.113054  |

|           |           |           |           |          |           |           |
|-----------|-----------|-----------|-----------|----------|-----------|-----------|
| 0.186334  | 0.171329  | 0.175554  | 0.190122  | 0.13141  | 0.177739  | 0.179924  |
| 0.244901  | 0.240676  | 0.240239  | 0.246941  | 0.132867 | 0.237179  | 0.24461   |
| 0.0584207 | 0.113345  | 0.110286  | 0.132139  | 0.210956 | 0.115093  | 0.120775  |
| 0.127185  | 0.105478  | 0.105624  | 0.132139  | 0.206294 | 0.116841  | 0.116113  |
| 0.132721  | 0.11451   | 0.120775  | 0.0534674 | 0.205128 | 0.123834  | 0.115239  |
| 0.129371  | 0.113199  | 0.113054  | 0.120047  | 0.208479 | 0.106498  | 0.120338  |
| 0.128934  | 0.111014  | 0.109411  | 0.128934  | 0.208042 | 0.1081    | 0.115822  |
| 0.113928  | 0.109411  | 0.101107  | 0.123252  | 0.200903 | 0.08581   | 0.115676  |
| 0.122523  | 0.105478  | 0.112617  | 0.125437  | 0.191434 | 0.109557  | 0.110577  |
| 0.128934  | 0.112179  | 0.112617  | 0.127477  | 0.206876 | 0.107226  | 0.118444  |
| 0.122378  | 0.102127  | 0.1081    | 0.121212  | 0.193619 | 0.110868  | 0.113054  |
| 0.119318  | 0.0912005 | 0.109994  | 0.127185  | 0.208916 | 0.118298  | 0.103875  |
| 0.124417  | 0.0983392 | 0.105769  | 0.115676  | 0.201195 | 0.108829  | 0.0979021 |
| 0.0496795 | 0.11451   | 0.109994  | 0.132139  | 0.211538 | 0.114802  | 0.119901  |
| 0.123252  | 0.107955  | 0.111305  | 0.131119  | 0.201486 | 0.116696  | 0.121795  |
| 0.107809  | 0.100962  | 0.0550699 | 0.121795  | 0.195367 | 0.0977564 | 0.105186  |
| 0.121212  | 0.116987  | 0.115093  | 0.136655  | 0.215181 | 0.128059  | 0.126166  |
| 0.140734  | 0.131847  | 0.129371  | 0.134033  | 0.218677 | 0.125437  | 0.134324  |
| 0.121066  | 0.102273  | 0.108537  | 0.120484  | 0.201049 | 0.108974  | 0.107663  |
| 0.126457  | 0.11116   | 0.119172  | 0.108392  | 0.194784 | 0.113782  | 0.114802  |
| 0.13141   | 0.114656  | 0.128497  | 0.133741  | 0.210519 | 0.127477  | 0.12704   |
| 0.210519  | 0.20134   | 0.204691  | 0.209936  | 0.129953 | 0.203089  | 0.207605  |
| 0.0635198 | 0.107955  | 0.102273  | 0.123252  | 0.201195 | 0.107663  | 0.111597  |
| 0.124854  | 0.0964452 | 0.106498  | 0.114948  | 0.20338  | 0.105478  | 0.0965909 |
| 0.122523  | 0.114219  | 0.10708   | 0.133013  | 0.20979  | 0.04662   | 0.114365  |
| 0.118881  | 0.117279  | 0.102855  | 0.13549   | 0.210519 | 0.116987  | 0.119172  |
| 0.126166  | 0.105915  | 0.112179  | 0.129953  | 0.206148 | 0.10912   | 0.11451   |
| 0.20134   | 0.190997  | 0.192016  | 0.205128  | 0.116696 | 0.191288  | 0.197844  |
| 0.124854  | 0.108392  | 0.108829  | 0.133596  | 0.201632 | 0.118298  | 0.121358  |
| 0.116259  | 0.103293  | 0.11014   | 0.119755  | 0.200321 | 0.109994  | 0.110723  |
| 0.127768  | 0.115385  | 0.118735  | 0.117861  | 0.203963 | 0.117424  | 0.126894  |
| 0.126603  | 0.108683  | 0.11116   | 0.119027  | 0.206585 | 0.105769  | 0.116113  |
| 0.122815  | 0.108683  | 0.109411  | 0.132139  | 0.195221 | 0.115676  | 0.118444  |
| 0.114073  | 0.0984848 | 0.103001  | 0.122232  | 0.190851 | 0.109848  | 0.10912   |
| 0.120192  | 0.0941142 | 0.105915  | 0.126894  | 0.209499 | 0.114802  | 0.103001  |
| 0.114073  | 0.115385  | 0.0983392 | 0.131556  | 0.210082 | 0.108683  | 0.117861  |
| 0.197844  | 0.192162  | 0.191434  | 0.201923  | 0.116696 | 0.191288  | 0.195513  |
| 0.11553   | 0.0999417 | 0.10271   | 0.122815  | 0.195221 | 0.106935  | 0.111451  |
| 0.197844  | 0.189248  | 0.18648   | 0.200758  | 0.119318 | 0.186334  | 0.189685  |
| 0.194784  | 0.183566  | 0.183421  | 0.196241  | 0.11014  | 0.185897  | 0.189248  |
| 0.137966  | 0.125583  | 0.127477  | 0.131265  | 0.213578 | 0.119755  | 0.130682  |
| 0.123689  | 0.12704   | 0.110577  | 0.136509  | 0.216783 | 0.121503  | 0.129225  |
| 0.110286  | 0.0859557 | 0.0983392 | 0.121941  | 0.201049 | 0.10373   | 0.100087  |
| 0.115385  | 0.103875  | 0.102855  | 0.12296   | 0.194493 | 0.108829  | 0.111888  |

|           |           |           |           |          |          |           |
|-----------|-----------|-----------|-----------|----------|----------|-----------|
| 0.119318  | 0.104312  | 0.103293  | 0.127185  | 0.198718 | 0.111305 | 0.112617  |
| 0.119901  | 0.100816  | 0.113782  | 0.125437  | 0.198135 | 0.112762 | 0.112617  |
| 0.126311  | 0.107226  | 0.105332  | 0.122232  | 0.202214 | 0.10373  | 0.114656  |
| 0.128934  | 0.111888  | 0.111742  | 0.128642  | 0.208333 | 0.106061 | 0.11757   |
| 0.0539044 | 0.11757   | 0.112179  | 0.133159  | 0.208479 | 0.117861 | 0.121795  |
| 0.134178  | 0.115093  | 0.117279  | 0.121066  | 0.210956 | 0.114219 | 0.122232  |
| 0.113636  | 0.0980478 | 0.108392  | 0.118007  | 0.19799  | 0.108246 | 0.108683  |
| 0.121066  | 0.109557  | 0.110286  | 0.131847  | 0.198427 | 0.115385 | 0.119318  |
| 0.108683  | 0.0895979 | 0.104021  | 0.117133  | 0.201486 | 0.103584 | 0.0955711 |
| 0.128351  | 0.114802  | 0.118153  | 0.137383  | 0.202214 | 0.123543 | 0.129516  |
| 0.128642  | 0.111305  | 0.119901  | 0.0584207 | 0.205711 | 0.119172 | 0.118153  |
| 0.131702  | 0.120484  | 0.12296   | 0.142191  | 0.206731 | 0.130682 | 0.133159  |
| 0.258159  | 0.252768  | 0.253205  | 0.262821  | 0.140006 | 0.25102  | 0.257867  |
| 0.128788  | 0.125437  | 0.11655   | 0.128497  | 0.218969 | 0.12602  | 0.129371  |
| 0.130973  | 0.127914  | 0.118735  | 0.13039   | 0.212995 | 0.124417 | 0.130973  |
| 0.217657  | 0.208188  | 0.211247  | 0.22028   | 0.12398  | 0.209936 | 0.217657  |
| 0.133013  | 0.122086  | 0.121649  | 0.133013  | 0.214161 | 0.120921 | 0.124854  |
| 0.227418  | 0.223485  | 0.222756  | 0.232663  | 0.125874 | 0.222902 | 0.230915  |
| 0.124126  | 0.11757   | 0.107226  | 0.12296   | 0.209353 | 0.116113 | 0.123543  |
| 0.129225  | 0.113636  | 0.126311  | 0.13039   | 0.212704 | 0.125583 | 0.12398   |
| 0.114948  | 0.111305  | 0.0936772 | 0.131847  | 0.206294 | 0.109557 | 0.115822  |
| 0.138549  | 0.123543  | 0.123106  | 0.127477  | 0.211247 | 0.118298 | 0.125728  |
| 0.204983  | 0.196096  | 0.195076  | 0.207022  | 0.118298 | 0.194639 | 0.200903  |
| 0.129808  | 0.119755  | 0.119318  | 0.138549  | 0.205128 | 0.126166 | 0.133596  |
| 0.120484  | 0.108683  | 0.108829  | 0.131265  | 0.198427 | 0.115676 | 0.117861  |
| 0.225816  | 0.218386  | 0.220571  | 0.229021  | 0.128351 | 0.21926  | 0.225816  |
| 0.131265  | 0.11451   | 0.10912   | 0.131847  | 0.20338  | 0.111305 | 0.121358  |
| 0.198427  | 0.193328  | 0.192308  | 0.204254  | 0.121066 | 0.191288 | 0.197261  |
| 0.132576  | 0.114073  | 0.115967  | 0.134324  | 0.206439 | 0.114073 | 0.120047  |
| 0.118298  | 0.102418  | 0.111888  | 0.120338  | 0.201195 | 0.114073 | 0.110431  |
| 0.131847  | 0.106352  | 0.117861  | 0.119027  | 0.213287 | 0.117424 | 0.108829  |
| 0.140297  | 0.127331  | 0.126894  | 0.130682  | 0.219114 | 0.122086 | 0.133304  |
| 0.118298  | 0.103001  | 0.111888  | 0.123252  | 0.200903 | 0.104458 | 0.106935  |
| 0.167541  | 0.151369  | 0.155594  | 0.166084  | 0.137092 | 0.150787 | 0.157051  |
| 0.117424  | 0.103584  | 0.101981  | 0.126748  | 0.19595  | 0.106498 | 0.113928  |
| 0.116841  | 0.119027  | 0.101107  | 0.133741  | 0.210227 | 0.113199 | 0.118298  |
| 0.128788  | 0.116987  | 0.110723  | 0.138112  | 0.20236  | 0.116696 | 0.111305  |
| 0.122086  | 0.12602   | 0.0632284 | 0.136946  | 0.206731 | 0.119318 | 0.124709  |
| 0.197407  | 0.187063  | 0.188666  | 0.200612  | 0.11655  | 0.186189 | 0.19391   |
| 0.120921  | 0.102418  | 0.112179  | 0.122378  | 0.199155 | 0.109994 | 0.107517  |
| 0.138549  | 0.119172  | 0.120484  | 0.131265  | 0.198718 | 0.113345 | 0.122232  |
| 0.128205  | 0.107955  | 0.107809  | 0.111014  | 0.207605 | 0.108246 | 0.117716  |
| 0.131556  | 0.117133  | 0.116113  | 0.134178  | 0.208333 | 0.111305 | 0.122232  |
| 0.120629  | 0.110577  | 0.117424  | 0.127914  | 0.204691 | 0.117279 | 0.116841  |

|           |           |           |           |          |           |           |
|-----------|-----------|-----------|-----------|----------|-----------|-----------|
| 0.252185  | 0.248252  | 0.250437  | 0.259761  | 0.144231 | 0.246795  | 0.258596  |
| 0.127622  | 0.10271   | 0.113345  | 0.115967  | 0.207896 | 0.114073  | 0.108392  |
| 0.119172  | 0.106498  | 0.109848  | 0.134615  | 0.202652 | 0.0744464 | 0.114802  |
| 0.186772  | 0.171766  | 0.177156  | 0.185606  | 0.154283 | 0.170892  | 0.182984  |
| 0.189685  | 0.178467  | 0.178322  | 0.191725  | 0.116113 | 0.175554  | 0.185897  |
| 0.0606061 | 0.116404  | 0.112762  | 0.136655  | 0.208479 | 0.112325  | 0.119172  |
| 0.121649  | 0.109848  | 0.108246  | 0.13039   | 0.199883 | 0.114802  | 0.121358  |
| 0.13447   | 0.11451   | 0.114948  | 0.121358  | 0.206585 | 0.108683  | 0.118153  |
| 0.142483  | 0.133013  | 0.136072  | 0.152681  | 0.21081  | 0.139714  | 0.14627   |
| 0.0603147 | 0.111451  | 0.10373   | 0.132576  | 0.204983 | 0.109411  | 0.115093  |
| 0.0560897 | 0.111014  | 0.111742  | 0.135344  | 0.210373 | 0.116841  | 0.11961   |
| 0.134615  | 0.123689  | 0.119464  | 0.136655  | 0.21081  | 0.115239  | 0.127331  |
| 0.123543  | 0.106789  | 0.109848  | 0.124126  | 0.191871 | 0.112617  | 0.119464  |
| 0.127185  | 0.11859   | 0.120775  | 0.140297  | 0.204254 | 0.123834  | 0.131556  |
| 0.132867  | 0.114656  | 0.114219  | 0.130828  | 0.190414 | 0.116404  | 0.122669  |
| 0.136801  | 0.122669  | 0.121066  | 0.129808  | 0.213578 | 0.119464  | 0.127185  |
| 0.14627   | 0.136801  | 0.134907  | 0.139569  | 0.225379 | 0.134178  | 0.141026  |
| 0.132721  | 0.106061  | 0.120484  | 0.121066  | 0.210373 | 0.116841  | 0.10912   |
| 0.141608  | 0.131265  | 0.129079  | 0.130245  | 0.221008 | 0.126603  | 0.134033  |
| 0.138112  | 0.127477  | 0.124126  | 0.138112  | 0.214889 | 0.120775  | 0.131702  |
| 0.207896  | 0.199883  | 0.199738  | 0.209645  | 0.121795 | 0.199592  | 0.207605  |
| 0.127622  | 0.103001  | 0.119464  | 0.120338  | 0.211976 | 0.12398   | 0.107226  |
| 0.195221  | 0.184295  | 0.185606  | 0.196096  | 0.109411 | 0.183712  | 0.191434  |
| 0.115967  | 0.113199  | 0.0850816 | 0.129079  | 0.206731 | 0.105332  | 0.113928  |
| 0.127331  | 0.112617  | 0.121795  | 0.13141   | 0.2044   | 0.122523  | 0.122086  |
| 0.134615  | 0.114948  | 0.120921  | 0.0544872 | 0.206439 | 0.123397  | 0.121212  |
| 0.123689  | 0.107226  | 0.116404  | 0.0610431 | 0.200758 | 0.116841  | 0.111742  |
| 0.121212  | 0.112908  | 0.113636  | 0.132867  | 0.198281 | 0.119027  | 0.123834  |
| 0.124126  | 0.112325  | 0.113054  | 0.13345   | 0.202069 | 0.11757   | 0.125583  |
| 0.12296   | 0.106498  | 0.115385  | 0.125874  | 0.198864 | 0.113782  | 0.111888  |
| 0.114365  | 0.115093  | 0.100087  | 0.131556  | 0.20979  | 0.11451   | 0.121066  |
| 0.13243   | 0.11859   | 0.123397  | 0.0525932 | 0.208042 | 0.126166  | 0.122523  |
| 0.145105  | 0.128934  | 0.130245  | 0.13986   | 0.202943 | 0.123397  | 0.134615  |
| 0.247086  | 0.244027  | 0.245921  | 0.25204   | 0.140006 | 0.243153  | 0.252622  |
| 0.124126  | 0.103001  | 0.116841  | 0.125291  | 0.202652 | 0.116113  | 0.114219  |
| 0.188083  | 0.176282  | 0.178467  | 0.186626  | 0.116259 | 0.174825  | 0.182255  |
| 0.192016  | 0.18109   | 0.182692  | 0.198427  | 0.116404 | 0.179924  | 0.186189  |
| 0.119027  | 0.110723  | 0.113491  | 0.133304  | 0.201632 | 0.116259  | 0.113782  |
| 0.12602   | 0.102273  | 0.112325  | 0.117279  | 0.206585 | 0.108683  | 0.104458  |
| 0.123397  | 0.111014  | 0.122815  | 0.130973  | 0.206002 | 0.12296   | 0.120192  |
| 0.11757   | 0.102564  | 0.101836  | 0.124854  | 0.19697  | 0.109557  | 0.114656  |
| 0.125291  | 0.0878497 | 0.112179  | 0.116841  | 0.192162 | 0.110577  | 0.0850816 |
| 0.129079  | 0.112617  | 0.113345  | 0.130536  | 0.206731 | 0.11116   | 0.118007  |
| 0.123397  | 0.108974  | 0.109703  | 0.132139  | 0.19697  | 0.115385  | 0.104749  |

|           |           |           |           |          |           |          |
|-----------|-----------|-----------|-----------|----------|-----------|----------|
| 0.132721  | 0.119755  | 0.124563  | 0.140006  | 0.208625 | 0.126748  | 0.136509 |
| 0.119755  | 0.103001  | 0.113345  | 0.124126  | 0.200029 | 0.114656  | 0.110431 |
| 0.126748  | 0.118153  | 0.118881  | 0.13549   | 0.205857 | 0.126603  | 0.131119 |
| 0.122815  | 0.11655   | 0.105041  | 0.124854  | 0.204837 | 0.111888  | 0.116696 |
| 0.135344  | 0.119755  | 0.127477  | 0.0534674 | 0.210956 | 0.123834  | 0.121066 |
| 0.134615  | 0.116987  | 0.116841  | 0.127622  | 0.209062 | 0.111451  | 0.123834 |
| 0.143211  | 0.128497  | 0.128059  | 0.139132  | 0.213287 | 0.123834  | 0.133304 |
| 0.120338  | 0.100087  | 0.116259  | 0.130536  | 0.209353 | 0.121649  | 0.106935 |
| 0.119755  | 0.104749  | 0.111888  | 0.117716  | 0.199155 | 0.114073  | 0.113054 |
| 0.127331  | 0.128351  | 0.119755  | 0.143648  | 0.218094 | 0.0610431 | 0.130828 |
| 0.18954   | 0.175699  | 0.177302  | 0.190705  | 0.115967 | 0.177739  | 0.181381 |
| 0.134324  | 0.122523  | 0.125583  | 0.143357  | 0.208188 | 0.132139  | 0.139277 |
| 0.125     | 0.109703  | 0.110431  | 0.130245  | 0.197698 | 0.114948  | 0.120921 |
| 0.130099  | 0.113054  | 0.120192  | 0.0464744 | 0.208625 | 0.124417  | 0.116696 |
| 0.122378  | 0.107372  | 0.113345  | 0.0608974 | 0.200029 | 0.11553   | 0.111888 |
| 0.131847  | 0.11859   | 0.118735  | 0.128642  | 0.208042 | 0.111305  | 0.122232 |
| 0.136655  | 0.12398   | 0.122086  | 0.127331  | 0.213724 | 0.115239  | 0.124417 |
| 0.194493  | 0.185897  | 0.18546   | 0.198864  | 0.115967 | 0.181235  | 0.18954  |
| 0.122232  | 0.113345  | 0.111742  | 0.130099  | 0.192308 | 0.114802  | 0.116404 |
| 0.115967  | 0.108246  | 0.104604  | 0.125291  | 0.180507 | 0.0965909 | 0.107226 |
| 0.126748  | 0.116696  | 0.111888  | 0.134324  | 0.201777 | 0.121941  | 0.126166 |
| 0.192453  | 0.184441  | 0.184295  | 0.200321  | 0.111597 | 0.183858  | 0.193328 |
| 0.126166  | 0.0980478 | 0.1081    | 0.113054  | 0.197115 | 0.107663  | 0.101399 |
| 0.135052  | 0.121212  | 0.120775  | 0.132139  | 0.211538 | 0.118298  | 0.125728 |
| 0.12398   | 0.113636  | 0.114073  | 0.131265  | 0.20134  | 0.120338  | 0.124563 |
| 0.0565268 | 0.107955  | 0.105478  | 0.127622  | 0.207314 | 0.108246  | 0.11655  |
| 0.189977  | 0.18109   | 0.179196  | 0.193473  | 0.11553  | 0.17905   | 0.18648  |
| 0.132867  | 0.117861  | 0.115385  | 0.131993  | 0.205274 | 0.110577  | 0.120047 |
| 0.117133  | 0.109411  | 0.105186  | 0.129953  | 0.199446 | 0.0517191 | 0.115676 |
| 0.123252  | 0.0977564 | 0.110431  | 0.117133  | 0.192745 | 0.106789  | 0.104021 |
| 0.131702  | 0.11553   | 0.11859   | 0.120338  | 0.180798 | 0.109703  | 0.118881 |
| 0.115822  | 0.115967  | 0.0977564 | 0.133304  | 0.212121 | 0.113054  | 0.119027 |
| 0.138258  | 0.125874  | 0.123397  | 0.138258  | 0.212413 | 0.119755  | 0.131847 |
| 0.119318  | 0.10169   | 0.112617  | 0.123397  | 0.20338  | 0.114802  | 0.107955 |
| 0.123397  | 0.115967  | 0.112325  | 0.131847  | 0.210373 | 0.123834  | 0.122815 |
| 0.0652681 | 0.136801  | 0.131993  | 0.151515  | 0.2213   | 0.135635  | 0.14627  |
| 0.238636  | 0.228001  | 0.230769  | 0.238928  | 0.133304 | 0.227127  | 0.236888 |
| 0.126166  | 0.104749  | 0.122378  | 0.134033  | 0.214307 | 0.123689  | 0.11451  |
| 0.115093  | 0.120775  | 0.097028  | 0.131119  | 0.210227 | 0.113199  | 0.116841 |
| 0.123397  | 0.108974  | 0.109411  | 0.129516  | 0.194639 | 0.109848  | 0.121066 |
| 0.119755  | 0.11553   | 0.111014  | 0.13141   | 0.19595  | 0.120484  | 0.124126 |
| 0.115822  | 0.115093  | 0.099796  | 0.124272  | 0.200466 | 0.111305  | 0.112908 |
| 0.126311  | 0.110431  | 0.118444  | 0.13039   | 0.205128 | 0.111597  | 0.118153 |
| 0.126748  | 0.115239  | 0.114802  | 0.133741  | 0.199446 | 0.118153  | 0.123252 |



|           |           |           |           |          |          |           |
|-----------|-----------|-----------|-----------|----------|----------|-----------|
| 0.136218  | 0.123543  | 0.122523  | 0.137675  | 0.206876 | 0.120629 | 0.132721  |
| 0.0983392 | 0.113928  | 0.101253  | 0.129808  | 0.203963 | 0.110723 | 0.114073  |
| 0.236888  | 0.228875  | 0.231935  | 0.23951   | 0.132139 | 0.230624 | 0.239219  |
| 0.124272  | 0.0979021 | 0.108246  | 0.115822  | 0.198135 | 0.106643 | 0.0986305 |
| 0.116404  | 0.102855  | 0.10067   | 0.116987  | 0.203089 | 0.106061 | 0.108537  |
| 0.11655   | 0.10708   | 0.109557  | 0.120629  | 0.200612 | 0.113491 | 0.113636  |
| 0.0543415 | 0.124709  | 0.117861  | 0.139714  | 0.215326 | 0.123543 | 0.130682  |
| 0.13039   | 0.108683  | 0.126603  | 0.140297  | 0.218531 | 0.131702 | 0.119027  |
| 0.119901  | 0.0976107 | 0.116404  | 0.124854  | 0.197552 | 0.116259 | 0.114948  |
| 0.11961   | 0.109848  | 0.111116  | 0.133596  | 0.198427 | 0.116259 | 0.121358  |
| 0.0815851 | 0.107663  | 0.108974  | 0.126748  | 0.201486 | 0.104749 | 0.113928  |
| 0.231643  | 0.225962  | 0.227855  | 0.235723  | 0.129808 | 0.223922 | 0.233392  |
| 0.124126  | 0.11553   | 0.11451   | 0.135198  | 0.201486 | 0.123689 | 0.129371  |
| 0.133887  | 0.120047  | 0.119027  | 0.133596  | 0.207459 | 0.114802 | 0.127477  |
| 0.105041  | 0.111597  | 0.103584  | 0.128351  | 0.201923 | 0.103438 | 0.110286  |
| 0.123543  | 0.118444  | 0.0949883 | 0.130536  | 0.208188 | 0.121066 | 0.121212  |
| 0.129371  | 0.121941  | 0.112762  | 0.12704   | 0.214889 | 0.121358 | 0.12296   |
| 0.119172  | 0.105041  | 0.113928  | 0.11859   | 0.200612 | 0.11553  | 0.113636  |
| 0.137821  | 0.119901  | 0.123543  | 0.132284  | 0.209645 | 0.116987 | 0.126166  |
| 0.139423  | 0.125874  | 0.125437  | 0.135635  | 0.210956 | 0.124417 | 0.132139  |
| 0.129516  | 0.113345  | 0.114365  | 0.12602   | 0.206876 | 0.111888 | 0.120775  |
| 0.120338  | 0.103293  | 0.115093  | 0.124417  | 0.203234 | 0.111451 | 0.107517  |
| 0.119755  | 0.123106  | 0.105769  | 0.135198  | 0.212267 | 0.121066 | 0.124417  |
| 0.119901  | 0.129079  | 0.109411  | 0.140589  | 0.217949 | 0.124126 | 0.129225  |
| 0.135635  | 0.119172  | 0.128642  | 0.0540501 | 0.212413 | 0.129953 | 0.127768  |
| 0.140006  | 0.128788  | 0.130973  | 0.0569639 | 0.210664 | 0.134033 | 0.128642  |
| 0.123252  | 0.125437  | 0.107517  | 0.1419    | 0.218094 | 0.122523 | 0.130536  |
| 0.121795  | 0.0869755 | 0.106643  | 0.113636  | 0.202069 | 0.105915 | 0.0827506 |
| 0.144668  | 0.129662  | 0.125437  | 0.127185  | 0.221737 | 0.126166 | 0.139132  |
| 0.134615  | 0.128351  | 0.136364  | 0.140443  | 0.216346 | 0.124563 | 0.125874  |
| 0.206876  | 0.199446  | 0.200758  | 0.211538  | 0.119027 | 0.197115 | 0.208625  |
| 0.129953  | 0.112617  | 0.114219  | 0.138112  | 0.207022 | 0.123397 | 0.130245  |
| 0.120047  | 0.111742  | 0.104021  | 0.124417  | 0.20877  | 0.115239 | 0.115967  |
| 0.124854  | 0.111597  | 0.11961   | 0.129808  | 0.199592 | 0.118298 | 0.117861  |
| 0.226107  | 0.21722   | 0.219406  | 0.22669   | 0.128934 | 0.21722  | 0.221154  |
| 0.214452  | 0.208188  | 0.206002  | 0.218823  | 0.120484 | 0.205857 | 0.211247  |
| 0.139714  | 0.126166  | 0.12602   | 0.13884   | 0.209207 | 0.120921 | 0.133304  |
| 0.24796   | 0.245484  | 0.24359   | 0.250291  | 0.132721 | 0.242279 | 0.25      |
| 0.120047  | 0.0855186 | 0.108683  | 0.110431  | 0.204108 | 0.106206 | 0.0850816 |
| 0.138112  | 0.120775  | 0.13549   | 0.13986   | 0.2213   | 0.134761 | 0.129662  |
| 0.124709  | 0.0968823 | 0.114219  | 0.115385  | 0.205274 | 0.108829 | 0.102273  |
| 0.117279  | 0.123252  | 0.104458  | 0.136801  | 0.2162   | 0.116841 | 0.12398   |
| 0.190559  | 0.182838  | 0.183275  | 0.195513  | 0.114073 | 0.181672 | 0.187354  |
| 0.127185  | 0.119755  | 0.116404  | 0.133304  | 0.20542  | 0.117133 | 0.125437  |

|           |           |           |           |          |           |           |
|-----------|-----------|-----------|-----------|----------|-----------|-----------|
| 0.197115  | 0.188228  | 0.190997  | 0.201195  | 0.115676 | 0.18648   | 0.194784  |
| 0.116696  | 0.104895  | 0.109994  | 0.130973  | 0.206002 | 0.115676  | 0.108829  |
| 0.132721  | 0.111888  | 0.116113  | 0.128059  | 0.189977 | 0.112762  | 0.120484  |
| 0.122232  | 0.108974  | 0.11961   | 0.125437  | 0.206294 | 0.117424  | 0.0598776 |
| 0.118735  | 0.104312  | 0.112325  | 0.118444  | 0.191142 | 0.104312  | 0.112325  |
| 0.111597  | 0.0971737 | 0.107809  | 0.117716  | 0.197698 | 0.106498  | 0.106643  |
| 0.125     | 0.10067   | 0.101399  | 0.125291  | 0.202069 | 0.110577  | 0.117424  |
| 0.122086  | 0.0945513 | 0.107517  | 0.110723  | 0.196533 | 0.104167  | 0.0967366 |
| 0.115822  | 0.104604  | 0.108246  | 0.128059  | 0.194347 | 0.112471  | 0.113491  |
| 0.131993  | 0.115239  | 0.113054  | 0.112762  | 0.207896 | 0.112034  | 0.12296   |
| 0.114802  | 0.0936772 | 0.107226  | 0.126166  | 0.202943 | 0.111451  | 0.099359  |
| 0.123397  | 0.0984848 | 0.110868  | 0.114948  | 0.203671 | 0.109848  | 0.0995047 |
| 0.131993  | 0.113491  | 0.11655   | 0.0699301 | 0.204108 | 0.120484  | 0.118881  |
| 0.13141   | 0.119027  | 0.120338  | 0.137238  | 0.205565 | 0.126894  | 0.132284  |
| 0.124563  | 0.107809  | 0.112908  | 0.0572552 | 0.200758 | 0.118881  | 0.115239  |
| 0.119464  | 0.11116   | 0.104604  | 0.127914  | 0.205565 | 0.0453089 | 0.114802  |
| 0.112617  | 0.0976107 | 0.106789  | 0.120775  | 0.199592 | 0.107226  | 0.107663  |
| 0.13243   | 0.117424  | 0.11553   | 0.128351  | 0.199009 | 0.115093  | 0.122232  |
| 0.115822  | 0.11451   | 0.0986305 | 0.132139  | 0.210082 | 0.109266  | 0.120775  |
| 0.13345   | 0.119901  | 0.120047  | 0.125     | 0.210227 | 0.114948  | 0.125583  |
| 0.127914  | 0.109994  | 0.119172  | 0.0568182 | 0.2044   | 0.120775  | 0.11859   |
| 0.123397  | 0.11014   | 0.109994  | 0.13039   | 0.195513 | 0.113636  | 0.119901  |
| 0.131993  | 0.120192  | 0.120921  | 0.139277  | 0.207022 | 0.128059  | 0.134615  |
| 0.137821  | 0.125437  | 0.128497  | 0.14627   | 0.211976 | 0.13447   | 0.138986  |
| 0.120192  | 0.104604  | 0.105624  | 0.122523  | 0.199009 | 0.101981  | 0.110868  |
| 0.120192  | 0.102273  | 0.112908  | 0.123106  | 0.201632 | 0.113054  | 0.11116   |
| 0.119172  | 0.100087  | 0.102855  | 0.124126  | 0.200321 | 0.104749  | 0.110431  |
| 0.120921  | 0.130099  | 0.112471  | 0.141026  | 0.217512 | 0.121649  | 0.13141   |
| 0.128351  | 0.101399  | 0.116113  | 0.11553   | 0.208625 | 0.114219  | 0.104749  |
| 0.149621  | 0.138986  | 0.135635  | 0.141171  | 0.225524 | 0.134615  | 0.143502  |
| 0.135635  | 0.120047  | 0.131847  | 0.141171  | 0.214452 | 0.130536  | 0.13039   |
| 0         | 0.116987  | 0.113054  | 0.135781  | 0.209645 | 0.120192  | 0.123252  |
| 0.116987  | 0         | 0.109703  | 0.116987  | 0.202506 | 0.110431  | 0.101544  |
| 0.113054  | 0.109703  | 0         | 0.127914  | 0.203817 | 0.106498  | 0.113054  |
| 0.135781  | 0.116987  | 0.127914  | 0         | 0.211976 | 0.129516  | 0.124126  |
| 0.209645  | 0.202506  | 0.203817  | 0.211976  | 0        | 0.201923  | 0.206439  |
| 0.120192  | 0.110431  | 0.106498  | 0.129516  | 0.201923 | 0         | 0.112034  |
| 0.123252  | 0.101544  | 0.113054  | 0.124126  | 0.206439 | 0.112034  | 0         |
| 0.112908  | 0.11655   | 0.100087  | 0.131265  | 0.209499 | 0.112471  | 0.121358  |
| 0.128497  | 0.110286  | 0.118298  | 0.0562354 | 0.202652 | 0.119318  | 0.113928  |
| 0.121066  | 0.113636  | 0.111451  | 0.132139  | 0.206876 | 0.119464  | 0.115239  |
| 0.12398   | 0.111014  | 0.117861  | 0.131847  | 0.207459 | 0.117716  | 0.124854  |
| 0.122669  | 0.116404  | 0.121212  | 0.135198  | 0.209936 | 0.119901  | 0.129079  |
| 0.0540501 | 0.113054  | 0.108829  | 0.132721  | 0.206876 | 0.115967  | 0.121358  |

|          |           |          |          |          |          |           |
|----------|-----------|----------|----------|----------|----------|-----------|
| 0.12602  | 0.107809  | 0.107372 | 0.112034 | 0.206294 | 0.1081   | 0.119027  |
| 0.116696 | 0.124709  | 0.108537 | 0.137383 | 0.214744 | 0.121212 | 0.126603  |
| 0.121358 | 0.103438  | 0.112325 | 0.122815 | 0.206294 | 0.111888 | 0.060169  |
| 0.122378 | 0.0965909 | 0.109557 | 0.129079 | 0.209353 | 0.11757  | 0.105186  |
| 0.181381 | 0.169872  | 0.171183 | 0.17701  | 0.168124 | 0.17366  | 0.178467  |
| 0.12398  | 0.106935  | 0.108537 | 0.129225 | 0.197552 | 0.115385 | 0.115822  |
| 0.123543 | 0.123106  | 0.108683 | 0.137238 | 0.201486 | 0.119027 | 0.127331  |
| 0.128934 | 0.104895  | 0.115822 | 0.125437 | 0.213869 | 0.120047 | 0.107955  |
| 0.129371 | 0.121358  | 0.114219 | 0.131993 | 0.201486 | 0.118735 | 0.123252  |
| 0.11014  | 0.0962995 | 0.104021 | 0.118298 | 0.203234 | 0.105915 | 0.097028  |
| 0.108683 | 0.0831876 | 0.103147 | 0.118298 | 0.200903 | 0.105624 | 0.100233  |
| 0.118298 | 0.10271   | 0.109848 | 0.124126 | 0.206731 | 0.106789 | 0.101107  |
| 0.125583 | 0.118735  | 0.113054 | 0.130536 | 0.209353 | 0.121066 | 0.124709  |
| 0.117424 | 0.0989219 | 0.109266 | 0.125583 | 0.195659 | 0.11553  | 0.108683  |
| 0.137092 | 0.119172  | 0.125437 | 0.128934 | 0.216783 | 0.12296  | 0.126894  |
| 0.12296  | 0.103875  | 0.104312 | 0.122669 | 0.196533 | 0.107955 | 0.113636  |
| 0.130099 | 0.11014   | 0.115239 | 0.124854 | 0.203963 | 0.117424 | 0.112325  |
| 0.13345  | 0.127477  | 0.125291 | 0.141026 | 0.216346 | 0.123397 | 0.12704   |
| 0.128205 | 0.104458  | 0.11859  | 0.119464 | 0.211101 | 0.113782 | 0.113928  |
| 0.128788 | 0.117861  | 0.119464 | 0.11859  | 0.206731 | 0.120775 | 0.124417  |
| 0.120629 | 0.0965909 | 0.111305 | 0.116259 | 0.206148 | 0.110286 | 0.107809  |
| 0.126166 | 0.10271   | 0.116841 | 0.118007 | 0.210227 | 0.113782 | 0.110431  |
| 0.115676 | 0.0989219 | 0.106061 | 0.116841 | 0.203234 | 0.10271  | 0.090035  |
| 0.131847 | 0.11014   | 0.121066 | 0.129516 | 0.215035 | 0.123252 | 0.106789  |
| 0.118444 | 0.0973193 | 0.107955 | 0.119318 | 0.207168 | 0.105769 | 0.0986305 |
| 0.145542 | 0.140152  | 0.139132 | 0.147582 | 0.217366 | 0.134907 | 0.14729   |
| 0.135344 | 0.129079  | 0.127185 | 0.14088  | 0.206585 | 0.124417 | 0.133596  |
| 0.124854 | 0.0967366 | 0.109994 | 0.108246 | 0.203089 | 0.108974 | 0.0989219 |
| 0.145396 | 0.135344  | 0.125291 | 0.13986  | 0.2213   | 0.128934 | 0.132576  |
| 0.119755 | 0.117861  | 0.115385 | 0.106061 | 0.204983 | 0.119027 | 0.121503  |
| 0.13986  | 0.128642  | 0.132576 | 0.140734 | 0.218094 | 0.129516 | 0.132576  |
| 0.123834 | 0.101544  | 0.104021 | 0.114219 | 0.208479 | 0.118735 | 0.105769  |
| 0.147582 | 0.144522  | 0.13243  | 0.153409 | 0.215326 | 0.138695 | 0.13884   |
| 0.129808 | 0.127622  | 0.121358 | 0.139132 | 0.206876 | 0.12296  | 0.125437  |
| 0.136218 | 0.136655  | 0.130099 | 0.137383 | 0.212704 | 0.129371 | 0.140297  |
| 0.128934 | 0.109266  | 0.119318 | 0.105915 | 0.215909 | 0.119464 | 0.115239  |
| 0.120338 | 0.0995047 | 0.11451  | 0.11451  | 0.206731 | 0.109411 | 0.10169   |
| 0.121358 | 0.100816  | 0.109411 | 0.118735 | 0.202797 | 0.109266 | 0.0983392 |
| 0.117133 | 0.114948  | 0.110723 | 0.127914 | 0.205274 | 0.114948 | 0.118881  |
| 0.131702 | 0.110868  | 0.118881 | 0.124709 | 0.214598 | 0.119027 | 0.112179  |
| 0.136509 | 0.117716  | 0.119901 | 0.127185 | 0.22028  | 0.123252 | 0.109994  |
| 0.134761 | 0.116841  | 0.123397 | 0.13039  | 0.204837 | 0.119755 | 0.116404  |
| 0.121358 | 0.102564  | 0.103875 | 0.101544 | 0.205128 | 0.105186 | 0.107372  |
| 0.125583 | 0.0962995 | 0.108392 | 0.123834 | 0.200321 | 0.108246 | 0.0958625 |

|          |           |          |          |          |          |           |
|----------|-----------|----------|----------|----------|----------|-----------|
| 0.12602  | 0.0981935 | 0.11757  | 0.122815 | 0.208333 | 0.116841 | 0.107372  |
| 0.121066 | 0.0990676 | 0.116696 | 0.11757  | 0.199009 | 0.108974 | 0.106498  |
| 0.129662 | 0.106498  | 0.119172 | 0.129371 | 0.211684 | 0.117861 | 0.108974  |
| 0.126457 | 0.100087  | 0.111305 | 0.114219 | 0.200612 | 0.11553  | 0.100524  |
| 0.116696 | 0.10169   | 0.111451 | 0.124563 | 0.196387 | 0.117424 | 0.114656  |
| 0.116404 | 0.102273  | 0.111742 | 0.127768 | 0.206294 | 0.111597 | 0.10912   |
| 0.118444 | 0.0818765 | 0.105041 | 0.107372 | 0.201923 | 0.105478 | 0.0855186 |
| 0.120484 | 0.0879953 | 0.114073 | 0.116113 | 0.204545 | 0.110431 | 0.103293  |
| 0.117716 | 0.0995047 | 0.111597 | 0.125    | 0.193619 | 0.112908 | 0.109848  |
| 0.123689 | 0.0987762 | 0.112034 | 0.12602  | 0.204545 | 0.112471 | 0.101544  |
| 0.128642 | 0.108392  | 0.118153 | 0.130099 | 0.204254 | 0.11451  | 0.115822  |
| 0.112034 | 0.0955711 | 0.104458 | 0.116696 | 0.190559 | 0.104895 | 0.108246  |
| 0.136072 | 0.108537  | 0.130536 | 0.127331 | 0.214307 | 0.126311 | 0.111305  |

| TDr_4100  | TDr_4152  | TDr_4154  | TDr_4155  | TDr_4168  | TDr_4172 | TDr_4173  |
|-----------|-----------|-----------|-----------|-----------|----------|-----------|
| 0.129953  | 0.0828963 | 0.123252  | 0.111305  | 0.114073  | 0.125583 | 0.107809  |
| 0.116113  | 0.111305  | 0.11116   | 0.110868  | 0.117133  | 0.110577 | 0.112908  |
| 0.112617  | 0.107517  | 0.11116   | 0.104167  | 0.11014   | 0.109411 | 0.109703  |
| 0.116404  | 0.117133  | 0.117861  | 0.116696  | 0.119755  | 0.115822 | 0.116987  |
| 0.128351  | 0.138986  | 0.130682  | 0.131847  | 0.128205  | 0.122523 | 0.125146  |
| 0.127185  | 0.119755  | 0.135052  | 0.13039   | 0.13345   | 0.120775 | 0.128059  |
| 0.125874  | 0.104749  | 0.129079  | 0.128205  | 0.13039   | 0.13141  | 0.106061  |
| 0.115967  | 0.110577  | 0.117424  | 0.117424  | 0.118735  | 0.116841 | 0.109266  |
| 0.114365  | 0.106643  | 0.112617  | 0.090472  | 0.0958625 | 0.112617 | 0.0995047 |
| 0.119755  | 0.106498  | 0.115093  | 0.120047  | 0.123106  | 0.115093 | 0.11451   |
| 0.125437  | 0.108392  | 0.120484  | 0.126894  | 0.129371  | 0.123397 | 0.100962  |
| 0.105186  | 0.114073  | 0.114219  | 0.108683  | 0.111742  | 0.115093 | 0.10373   |
| 0.120338  | 0.113491  | 0.115676  | 0.0906177 | 0.0936772 | 0.11655  | 0.105478  |
| 0.142337  | 0.13549   | 0.138258  | 0.139714  | 0.13986   | 0.135635 | 0.138549  |
| 0.132867  | 0.128059  | 0.125     | 0.132284  | 0.134761  | 0.124126 | 0.127331  |
| 0.128934  | 0.119172  | 0.121358  | 0.116113  | 0.117716  | 0.124854 | 0.103584  |
| 0.0958625 | 0.116113  | 0.0981935 | 0.118007  | 0.119027  | 0.117133 | 0.101981  |
| 0.137383  | 0.147436  | 0.142045  | 0.146125  | 0.145105  | 0.131847 | 0.139423  |
| 0.111451  | 0.104895  | 0.111742  | 0.105624  | 0.109848  | 0.10912  | 0.106789  |
| 0.206439  | 0.202797  | 0.204691  | 0.204691  | 0.20338   | 0.201195 | 0.206439  |
| 0.11859   | 0.100379  | 0.125583  | 0.128788  | 0.133013  | 0.119755 | 0.113636  |
| 0.116696  | 0.0973193 | 0.124854  | 0.128351  | 0.132867  | 0.116113 | 0.118153  |
| 0.117716  | 0.114365  | 0.114802  | 0.117133  | 0.121358  | 0.11655  | 0.102564  |
| 0.121358  | 0.120338  | 0.133887  | 0.119901  | 0.120047  | 0.122523 | 0.0995047 |
| 0.108683  | 0.100962  | 0.11014   | 0.115967  | 0.118444  | 0.106643 | 0.099359  |
| 0.12296   | 0.104458  | 0.13549   | 0.128205  | 0.131556  | 0.118881 | 0.121212  |
| 0.121503  | 0.116404  | 0.124709  | 0.127331  | 0.129516  | 0.123252 | 0.105478  |
| 0.117424  | 0.125728  | 0.126748  | 0.107809  | 0.11116   | 0.118881 | 0.110431  |
| 0.130245  | 0.12398   | 0.133741  | 0.120921  | 0.125437  | 0.127622 | 0.113054  |
| 0.119464  | 0.119027  | 0.125291  | 0.119464  | 0.117861  | 0.13141  | 0.113345  |
| 0.125146  | 0.0941142 | 0.128642  | 0.130099  | 0.129079  | 0.127477 | 0.11116   |
| 0.119755  | 0.115239  | 0.125874  | 0.111305  | 0.110868  | 0.120921 | 0.106061  |
| 0.112762  | 0.0992133 | 0.114802  | 0.109848  | 0.114948  | 0.109266 | 0.101399  |
| 0.127914  | 0.112908  | 0.125     | 0.11451   | 0.116404  | 0.122378 | 0.105769  |
| 0.125146  | 0.117424  | 0.122815  | 0.122232  | 0.121212  | 0.127768 | 0.101836  |
| 0.13141   | 0.12602   | 0.129953  | 0.119755  | 0.121941  | 0.133159 | 0.106352  |
| 0.135052  | 0.112471  | 0.135052  | 0.13447   | 0.136946  | 0.133013 | 0.116987  |
| 0.119755  | 0.112034  | 0.122669  | 0.126748  | 0.130682  | 0.124417 | 0.106935  |
| 0.111888  | 0.104749  | 0.122086  | 0.109848  | 0.112617  | 0.113928 | 0.0981935 |
| 0.126457  | 0.121358  | 0.123252  | 0.125583  | 0.128351  | 0.127331 | 0.113928  |
| 0.111888  | 0.110868  | 0.109557  | 0.112471  | 0.117861  | 0.11451  | 0.0979021 |
| 0.142191  | 0.141171  | 0.137821  | 0.143939  | 0.146999  | 0.145396 | 0.131702  |

|          |           |          |          |          |          |           |
|----------|-----------|----------|----------|----------|----------|-----------|
| 0.142191 | 0.144085  | 0.150058 | 0.141317 | 0.143502 | 0.147145 | 0.129079  |
| 0.122523 | 0.116259  | 0.113491 | 0.118153 | 0.124126 | 0.119027 | 0.103875  |
| 0.103584 | 0.104895  | 0.112908 | 0.113782 | 0.115967 | 0.109703 | 0.0916375 |
| 0.120338 | 0.115239  | 0.120921 | 0.126457 | 0.126894 | 0.123252 | 0.101399  |
| 0.111888 | 0.121066  | 0.117133 | 0.120921 | 0.122523 | 0.118298 | 0.10169   |
| 0.137383 | 0.136655  | 0.137383 | 0.136509 | 0.141026 | 0.144668 | 0.121066  |
| 0.116113 | 0.118007  | 0.120775 | 0.116404 | 0.120921 | 0.119901 | 0.10271   |
| 0.120338 | 0.115822  | 0.12296  | 0.11859  | 0.121941 | 0.121503 | 0.103147  |
| 0.150495 | 0.0716783 | 0.146999 | 0.144668 | 0.150932 | 0.14933  | 0.128642  |
| 0.118735 | 0.131119  | 0.132139 | 0.128059 | 0.129662 | 0.128351 | 0.120484  |
| 0.11655  | 0.11553   | 0.119464 | 0.116841 | 0.120775 | 0.11655  | 0.0996503 |
| 0.130245 | 0.133013  | 0.130536 | 0.127331 | 0.123106 | 0.126457 | 0.125     |
| 0.121212 | 0.115239  | 0.120629 | 0.121503 | 0.122815 | 0.115093 | 0.112179  |
| 0.13345  | 0.140006  | 0.144231 | 0.133741 | 0.13447  | 0.136364 | 0.123252  |
| 0.133596 | 0.129079  | 0.123106 | 0.123397 | 0.127331 | 0.130973 | 0.107663  |
| 0.116113 | 0.113928  | 0.115822 | 0.118444 | 0.12296  | 0.114365 | 0.102418  |
| 0.121941 | 0.118881  | 0.11961  | 0.119901 | 0.125583 | 0.120192 | 0.109994  |
| 0.125583 | 0.116696  | 0.123252 | 0.125    | 0.128934 | 0.125291 | 0.101107  |
| 0.138695 | 0.135635  | 0.142483 | 0.132867 | 0.135344 | 0.140443 | 0.121212  |
| 0.145688 | 0.144085  | 0.142191 | 0.138112 | 0.140297 | 0.144814 | 0.125     |
| 0.167978 | 0.15676   | 0.167104 | 0.163899 | 0.165793 | 0.165938 | 0.157197  |
| 0.115822 | 0.112471  | 0.118444 | 0.119318 | 0.124709 | 0.121066 | 0.103875  |
| 0.114365 | 0.114219  | 0.114948 | 0.118444 | 0.123252 | 0.114365 | 0.10067   |
| 0.114656 | 0.111014  | 0.114365 | 0.116696 | 0.125    | 0.119318 | 0.0983392 |
| 0.139569 | 0.122815  | 0.1419   | 0.144814 | 0.147873 | 0.143939 | 0.125583  |
| 0.115385 | 0.113199  | 0.113928 | 0.114219 | 0.120775 | 0.120047 | 0.0961538 |
| 0.129225 | 0.132867  | 0.133304 | 0.137092 | 0.138986 | 0.135635 | 0.120484  |
| 0.120775 | 0.114802  | 0.122523 | 0.13039  | 0.133741 | 0.122232 | 0.0968823 |
| 0.113054 | 0.116113  | 0.117133 | 0.121212 | 0.127768 | 0.122669 | 0.103438  |
| 0.145979 | 0.127768  | 0.150641 | 0.151224 | 0.150495 | 0.150058 | 0.135198  |
| 0.125291 | 0.123689  | 0.124126 | 0.120921 | 0.127185 | 0.129662 | 0.108974  |
| 0.137966 | 0.141317  | 0.140006 | 0.133596 | 0.134033 | 0.141463 | 0.125437  |
| 0.118881 | 0.135344  | 0.131119 | 0.127622 | 0.129516 | 0.128788 | 0.121795  |
| 0.103001 | 0.112471  | 0.118153 | 0.116696 | 0.117716 | 0.112034 | 0.108246  |
| 0.120775 | 0.11451   | 0.115239 | 0.120192 | 0.125    | 0.121358 | 0.0968823 |
| 0.116987 | 0.120047  | 0.118153 | 0.112034 | 0.118298 | 0.119318 | 0.103875  |
| 0.126603 | 0.130828  | 0.133013 | 0.130973 | 0.13141  | 0.132139 | 0.116404  |
| 0.119464 | 0.109994  | 0.116259 | 0.111888 | 0.119027 | 0.117424 | 0.092366  |
| 0.137092 | 0.139277  | 0.142337 | 0.140589 | 0.138986 | 0.145833 | 0.131847  |
| 0.127185 | 0.11859   | 0.126311 | 0.126894 | 0.132867 | 0.12602  | 0.104458  |
| 0.116113 | 0.120338  | 0.119901 | 0.121066 | 0.118881 | 0.120775 | 0.105915  |
| 0.120192 | 0.118298  | 0.121066 | 0.117279 | 0.121795 | 0.123689 | 0.106206  |
| 0.126311 | 0.125583  | 0.126894 | 0.12602  | 0.129953 | 0.124854 | 0.109411  |
| 0.114073 | 0.115676  | 0.111742 | 0.115239 | 0.119464 | 0.121358 | 0.099796  |

|          |           |          |          |          |          |           |
|----------|-----------|----------|----------|----------|----------|-----------|
| 0.116113 | 0.11655   | 0.116113 | 0.115239 | 0.11655  | 0.119901 | 0.100087  |
| 0.138112 | 0.137966  | 0.139277 | 0.138112 | 0.141171 | 0.142483 | 0.123834  |
| 0.113928 | 0.106789  | 0.112762 | 0.11859  | 0.121941 | 0.118881 | 0.0909091 |
| 0.114365 | 0.113928  | 0.115239 | 0.109411 | 0.108683 | 0.116696 | 0.0965909 |
| 0.121941 | 0.118007  | 0.129808 | 0.130099 | 0.134324 | 0.129808 | 0.113782  |
| 0.13039  | 0.106935  | 0.135344 | 0.131847 | 0.134615 | 0.135344 | 0.106206  |
| 0.124272 | 0.127622  | 0.127185 | 0.129225 | 0.131119 | 0.121649 | 0.116404  |
| 0.130828 | 0.138258  | 0.13549  | 0.141026 | 0.140006 | 0.126166 | 0.117716  |
| 0.116987 | 0.107226  | 0.118444 | 0.122232 | 0.122669 | 0.115239 | 0.10708   |
| 0.184878 | 0.17162   | 0.18546  | 0.187209 | 0.191434 | 0.1875   | 0.17905   |
| 0.107226 | 0.104458  | 0.111888 | 0.121795 | 0.124854 | 0.111305 | 0.0981935 |
| 0.135344 | 0.136364  | 0.136218 | 0.139714 | 0.138695 | 0.13039  | 0.120775  |
| 0.125728 | 0.127914  | 0.127768 | 0.131265 | 0.129371 | 0.123106 | 0.112617  |
| 0.130828 | 0.116113  | 0.138986 | 0.138403 | 0.14088  | 0.136364 | 0.117716  |
| 0.113491 | 0.115967  | 0.113491 | 0.122815 | 0.120047 | 0.109411 | 0.0901807 |
| 0.12398  | 0.129371  | 0.128934 | 0.135635 | 0.135781 | 0.124563 | 0.108246  |
| 0.107372 | 0.111888  | 0.115822 | 0.121649 | 0.126748 | 0.112617 | 0.100379  |
| 0.121795 | 0.123106  | 0.127914 | 0.132284 | 0.135052 | 0.121795 | 0.111597  |
| 0.120921 | 0.100379  | 0.124417 | 0.120921 | 0.128934 | 0.120629 | 0.101399  |
| 0.129079 | 0.135344  | 0.13549  | 0.137821 | 0.136218 | 0.126748 | 0.115676  |
| 0.11451  | 0.10708   | 0.116841 | 0.121795 | 0.125728 | 0.121503 | 0.0917832 |
| 0.13243  | 0.119464  | 0.138549 | 0.138549 | 0.13986  | 0.13447  | 0.121649  |
| 0.113928 | 0.0977564 | 0.122378 | 0.127331 | 0.127768 | 0.124417 | 0.101399  |
| 0.133596 | 0.129662  | 0.132721 | 0.125437 | 0.129371 | 0.132139 | 0.11757   |
| 0.13141  | 0.11116   | 0.135198 | 0.129953 | 0.136218 | 0.137529 | 0.115385  |
| 0.108974 | 0.0971737 | 0.113928 | 0.120921 | 0.126311 | 0.111888 | 0.0952797 |
| 0.145979 | 0.130973  | 0.14831  | 0.149767 | 0.147582 | 0.149476 | 0.131702  |
| 0.109703 | 0.100233  | 0.11961  | 0.126603 | 0.130245 | 0.114073 | 0.104458  |
| 0.116404 | 0.11451   | 0.120484 | 0.121358 | 0.122378 | 0.114365 | 0.102127  |
| 0.115093 | 0.112617  | 0.120047 | 0.119464 | 0.120484 | 0.116841 | 0.101981  |
| 0.135198 | 0.121066  | 0.143065 | 0.145105 | 0.148456 | 0.142191 | 0.128205  |
| 0.121212 | 0.114948  | 0.131119 | 0.129371 | 0.128059 | 0.126457 | 0.113636  |
| 0.110723 | 0.112325  | 0.113345 | 0.120047 | 0.123106 | 0.111014 | 0.0952797 |
| 0.109848 | 0.113199  | 0.11451  | 0.114802 | 0.121941 | 0.106061 | 0.0981935 |
| 0.119027 | 0.0961538 | 0.117279 | 0.124272 | 0.126748 | 0.120484 | 0.0980478 |
| 0.128788 | 0.118735  | 0.128497 | 0.134324 | 0.133304 | 0.129371 | 0.109266  |
| 0.121358 | 0.0976107 | 0.123397 | 0.125146 | 0.129662 | 0.123106 | 0.0995047 |
| 0.107809 | 0.102127  | 0.111597 | 0.113636 | 0.117861 | 0.111888 | 0.0894522 |
| 0.11014  | 0.10271   | 0.110723 | 0.120338 | 0.12398  | 0.113054 | 0.090035  |
| 0.10912  | 0.111597  | 0.111742 | 0.116113 | 0.119464 | 0.115239 | 0.0960082 |
| 0.120484 | 0.121795  | 0.125728 | 0.123397 | 0.124126 | 0.120484 | 0.106498  |
| 0.131119 | 0.126311  | 0.130536 | 0.136364 | 0.142337 | 0.130828 | 0.107226  |
| 0.110286 | 0.109557  | 0.113491 | 0.114365 | 0.11859  | 0.116696 | 0.0907634 |
| 0.112762 | 0.103875  | 0.110431 | 0.114219 | 0.121941 | 0.111305 | 0.0885781 |

|          |           |          |          |          |          |           |
|----------|-----------|----------|----------|----------|----------|-----------|
| 0.121503 | 0.117279  | 0.128497 | 0.128497 | 0.132721 | 0.130245 | 0.103147  |
| 0.108246 | 0.104895  | 0.116113 | 0.116696 | 0.120047 | 0.120192 | 0.0872669 |
| 0.126311 | 0.109848  | 0.12602  | 0.123106 | 0.129662 | 0.127185 | 0.109703  |
| 0.13243  | 0.0591492 | 0.135927 | 0.134178 | 0.137238 | 0.136801 | 0.112034  |
| 0.114365 | 0.114802  | 0.121941 | 0.124854 | 0.125583 | 0.120192 | 0.0965909 |
| 0.113636 | 0.109411  | 0.113054 | 0.115093 | 0.121358 | 0.120047 | 0.0909091 |
| 0.111014 | 0.110286  | 0.111888 | 0.117716 | 0.123397 | 0.118007 | 0.100524  |
| 0.113345 | 0.103584  | 0.108392 | 0.116259 | 0.119901 | 0.111305 | 0.0941142 |
| 0.122378 | 0.121649  | 0.129953 | 0.132284 | 0.131265 | 0.125583 | 0.115676  |
| 0.111597 | 0.104749  | 0.11014  | 0.114802 | 0.120192 | 0.112179 | 0.087704  |
| 0.138549 | 0.128205  | 0.135635 | 0.133304 | 0.13986  | 0.139714 | 0.118444  |
| 0.138112 | 0.134761  | 0.13345  | 0.133159 | 0.137966 | 0.135781 | 0.125     |
| 0.131119 | 0.123397  | 0.125    | 0.122669 | 0.125728 | 0.130536 | 0.113928  |
| 0.117861 | 0.117424  | 0.110868 | 0.117861 | 0.125583 | 0.118735 | 0.102418  |
| 0.112325 | 0.0976107 | 0.116404 | 0.124563 | 0.126166 | 0.113782 | 0.100379  |
| 0.108974 | 0.105915  | 0.116259 | 0.119172 | 0.124854 | 0.117133 | 0.083042  |
| 0.112617 | 0.107517  | 0.119027 | 0.116404 | 0.120047 | 0.121358 | 0.0866841 |
| 0.114365 | 0.111597  | 0.113491 | 0.10271  | 0.104895 | 0.113491 | 0.0930944 |
| 0.117279 | 0.116259  | 0.122523 | 0.119027 | 0.121503 | 0.113491 | 0.103875  |
| 0.124854 | 0.135198  | 0.130099 | 0.124563 | 0.127331 | 0.130682 | 0.108246  |
| 0.115676 | 0.115239  | 0.115967 | 0.123543 | 0.122523 | 0.112179 | 0.0973193 |
| 0.13039  | 0.128788  | 0.124563 | 0.133596 | 0.136364 | 0.128934 | 0.129225  |
| 0.130245 | 0.125146  | 0.138695 | 0.137529 | 0.141171 | 0.139277 | 0.122378  |
| 0.196096 | 0.193036  | 0.191725 | 0.194639 | 0.197698 | 0.189103 | 0.196096  |
| 0.240822 | 0.236305  | 0.237034 | 0.235286 | 0.236597 | 0.233829 | 0.238782  |
| 0.112762 | 0.110577  | 0.117133 | 0.114219 | 0.113782 | 0.113928 | 0.107226  |
| 0.110286 | 0.114219  | 0.121941 | 0.111742 | 0.113054 | 0.118735 | 0.0922203 |
| 0.106206 | 0.1081    | 0.11116  | 0.111451 | 0.113345 | 0.113199 | 0.090472  |
| 0.105915 | 0.111014  | 0.112908 | 0.11553  | 0.120629 | 0.111451 | 0.099796  |
| 0.135927 | 0.132284  | 0.124272 | 0.13447  | 0.137529 | 0.127477 | 0.128351  |
| 0.108829 | 0.117716  | 0.118444 | 0.114656 | 0.119464 | 0.119318 | 0.0936772 |
| 0.138403 | 0.144668  | 0.152098 | 0.138986 | 0.139132 | 0.144522 | 0.119172  |
| 0.108246 | 0.115967  | 0.119318 | 0.117861 | 0.118007 | 0.116987 | 0.092803  |
| 0.122232 | 0.129662  | 0.136509 | 0.127768 | 0.130245 | 0.129808 | 0.110577  |
| 0.127622 | 0.128642  | 0.132576 | 0.135198 | 0.135635 | 0.132284 | 0.115967  |
| 0.120047 | 0.132139  | 0.132867 | 0.134324 | 0.133887 | 0.130828 | 0.116841  |
| 0.135781 | 0.136218  | 0.136946 | 0.136364 | 0.139714 | 0.13986  | 0.12704   |
| 0.107517 | 0.11757   | 0.115967 | 0.120338 | 0.124272 | 0.120629 | 0.0967366 |
| 0.104021 | 0.112908  | 0.118007 | 0.116259 | 0.119318 | 0.113636 | 0.0955711 |
| 0.107663 | 0.117716  | 0.123689 | 0.122232 | 0.125    | 0.11961  | 0.0986305 |
| 0.103001 | 0.111597  | 0.114656 | 0.115239 | 0.116841 | 0.111451 | 0.0945513 |
| 0.101836 | 0.11451   | 0.119318 | 0.114948 | 0.117133 | 0.11553  | 0.0933858 |
| 0.1081   | 0.116987  | 0.122669 | 0.12296  | 0.124272 | 0.118881 | 0.0987762 |
| 0.114073 | 0.131119  | 0.126894 | 0.128934 | 0.128788 | 0.124272 | 0.114073  |



|           |          |          |          |          |          |           |
|-----------|----------|----------|----------|----------|----------|-----------|
| 0.125437  | 0.138112 | 0.137092 | 0.13039  | 0.131993 | 0.128642 | 0.124563  |
| 0.115385  | 0.121358 | 0.121212 | 0.119172 | 0.123106 | 0.122378 | 0.0976107 |
| 0.113491  | 0.118298 | 0.116987 | 0.121358 | 0.125291 | 0.119027 | 0.095134  |
| 0.119901  | 0.130245 | 0.137675 | 0.130682 | 0.132284 | 0.13243  | 0.116404  |
| 0.106206  | 0.111014 | 0.111116 | 0.114948 | 0.11655  | 0.116113 | 0.0948427 |
| 0.123252  | 0.144959 | 0.13986  | 0.139569 | 0.139714 | 0.136946 | 0.127622  |
| 0.134033  | 0.135344 | 0.138986 | 0.140734 | 0.141171 | 0.136655 | 0.131702  |
| 0.120775  | 0.136364 | 0.135052 | 0.135052 | 0.132284 | 0.123106 | 0.126603  |
| 0.101253  | 0.111014 | 0.116113 | 0.118735 | 0.120921 | 0.114365 | 0.0933858 |
| 0.105186  | 0.108829 | 0.111014 | 0.109557 | 0.113199 | 0.111305 | 0.0917832 |
| 0.111742  | 0.125    | 0.128934 | 0.127477 | 0.126748 | 0.12398  | 0.105041  |
| 0.114219  | 0.122523 | 0.125874 | 0.119464 | 0.121649 | 0.118881 | 0.103438  |
| 0.11451   | 0.127768 | 0.13345  | 0.129662 | 0.132139 | 0.128497 | 0.110431  |
| 0.104458  | 0.11859  | 0.119318 | 0.120192 | 0.125874 | 0.123397 | 0.10271   |
| 0.109848  | 0.120484 | 0.119755 | 0.118298 | 0.121358 | 0.121212 | 0.0981935 |
| 0.113636  | 0.122815 | 0.125583 | 0.127914 | 0.128059 | 0.121212 | 0.108392  |
| 0.12296   | 0.129516 | 0.131702 | 0.133159 | 0.137092 | 0.131993 | 0.11451   |
| 0.121795  | 0.133596 | 0.132576 | 0.13141  | 0.131847 | 0.128497 | 0.112179  |
| 0.127477  | 0.131993 | 0.139132 | 0.132721 | 0.135198 | 0.130973 | 0.113491  |
| 0.137238  | 0.12602  | 0.136364 | 0.12704  | 0.131847 | 0.134324 | 0.120047  |
| 0.111597  | 0.112908 | 0.117716 | 0.118881 | 0.122232 | 0.118881 | 0.0917832 |
| 0.115385  | 0.131556 | 0.13345  | 0.128788 | 0.129225 | 0.130245 | 0.118007  |
| 0.10067   | 0.111305 | 0.117279 | 0.114656 | 0.121212 | 0.108537 | 0.0948427 |
| 0.113636  | 0.116404 | 0.120047 | 0.119464 | 0.124854 | 0.119464 | 0.10373   |
| 0.100524  | 0.114365 | 0.111888 | 0.120921 | 0.121358 | 0.111305 | 0.0999417 |
| 0.107663  | 0.118298 | 0.115822 | 0.120775 | 0.121503 | 0.112325 | 0.100379  |
| 0.0960082 | 0.114802 | 0.112617 | 0.112325 | 0.115967 | 0.110577 | 0.0922203 |
| 0.123543  | 0.132139 | 0.134615 | 0.130536 | 0.135052 | 0.134907 | 0.114802  |
| 0.116404  | 0.11014  | 0.11757  | 0.115822 | 0.118298 | 0.117861 | 0.102127  |
| 0.122523  | 0.131993 | 0.137675 | 0.129516 | 0.130536 | 0.131847 | 0.11553   |
| 0.105332  | 0.115093 | 0.113491 | 0.114948 | 0.118881 | 0.112908 | 0.0992133 |
| 0.115385  | 0.12398  | 0.126457 | 0.125583 | 0.125728 | 0.126457 | 0.10373   |
| 0.128059  | 0.126748 | 0.127185 | 0.104458 | 0.105769 | 0.125728 | 0.109411  |
| 0.117861  | 0.121503 | 0.121649 | 0.128934 | 0.130536 | 0.122815 | 0.113199  |
| 0.120047  | 0.113199 | 0.121212 | 0.118881 | 0.121649 | 0.117716 | 0.0815851 |
| 0.111451  | 0.127622 | 0.128059 | 0.12602  | 0.125291 | 0.121358 | 0.114948  |
| 0.12296   | 0.123689 | 0.118298 | 0.124126 | 0.128351 | 0.124709 | 0.10169   |
| 0.115385  | 0.107955 | 0.118007 | 0.120338 | 0.125437 | 0.115676 | 0.0967366 |
| 0.140152  | 0.132721 | 0.137238 | 0.13345  | 0.137092 | 0.136946 | 0.127331  |
| 0.141171  | 0.133159 | 0.142628 | 0.133304 | 0.135781 | 0.140589 | 0.110286  |
| 0.114365  | 0.103438 | 0.106206 | 0.107663 | 0.113636 | 0.111116 | 0.101253  |
| 0.127331  | 0.12602  | 0.128497 | 0.135198 | 0.137383 | 0.120629 | 0.133159  |
| 0.133013  | 0.121795 | 0.133887 | 0.127185 | 0.128788 | 0.132139 | 0.121066  |
| 0.130682  | 0.12704  | 0.123397 | 0.131265 | 0.136364 | 0.116404 | 0.127477  |

|          |          |          |          |          |          |          |
|----------|----------|----------|----------|----------|----------|----------|
| 0.120192 | 0.115676 | 0.121941 | 0.129808 | 0.129371 | 0.116404 | 0.120484 |
| 0.129516 | 0.124417 | 0.118444 | 0.118735 | 0.120921 | 0.122815 | 0.116696 |
| 0.132576 | 0.122232 | 0.117424 | 0.124126 | 0.123689 | 0.125583 | 0.118881 |
| 0.120192 | 0.130245 | 0.127768 | 0.137383 | 0.134615 | 0.122232 | 0.127477 |
| 0.133596 | 0.131119 | 0.133887 | 0.141754 | 0.141608 | 0.130682 | 0.137675 |
| 0.132721 | 0.124709 | 0.117861 | 0.119027 | 0.118881 | 0.122232 | 0.125437 |
| 0.114656 | 0.113345 | 0.120775 | 0.125437 | 0.128497 | 0.112034 | 0.114656 |
| 0.133741 | 0.132139 | 0.138403 | 0.13141  | 0.133596 | 0.138112 | 0.112179 |
| 0.136218 | 0.13141  | 0.126894 | 0.128642 | 0.129662 | 0.130973 | 0.128059 |
| 0.114948 | 0.109266 | 0.10912  | 0.118153 | 0.120338 | 0.11116  | 0.107955 |
| 0.219697 | 0.214015 | 0.219697 | 0.217366 | 0.219551 | 0.216492 | 0.21824  |
| 0.121212 | 0.121941 | 0.124709 | 0.132284 | 0.135635 | 0.118881 | 0.124417 |
| 0.120338 | 0.114948 | 0.11451  | 0.117716 | 0.123397 | 0.120047 | 0.114802 |
| 0.13039  | 0.129662 | 0.13039  | 0.135927 | 0.13986  | 0.12602  | 0.135927 |
| 0.125437 | 0.120629 | 0.110868 | 0.114365 | 0.118007 | 0.121066 | 0.111742 |
| 0.140589 | 0.127914 | 0.131847 | 0.131556 | 0.133741 | 0.128642 | 0.128351 |
| 0.121649 | 0.126166 | 0.120192 | 0.123106 | 0.123252 | 0.115239 | 0.120192 |
| 0.121795 | 0.121649 | 0.118881 | 0.125291 | 0.124272 | 0.11859  | 0.121503 |
| 0.129371 | 0.124563 | 0.125291 | 0.127914 | 0.130973 | 0.126457 | 0.126166 |
| 0.128351 | 0.128205 | 0.124272 | 0.131265 | 0.130536 | 0.119027 | 0.120484 |
| 0.129953 | 0.12398  | 0.130245 | 0.13141  | 0.13447  | 0.126166 | 0.127331 |
| 0.123397 | 0.123543 | 0.129516 | 0.134761 | 0.132867 | 0.120484 | 0.130682 |
| 0.120775 | 0.128497 | 0.129808 | 0.131847 | 0.136946 | 0.119901 | 0.131847 |
| 0.123397 | 0.115093 | 0.118153 | 0.123397 | 0.128788 | 0.122523 | 0.105041 |
| 0.112325 | 0.121503 | 0.123397 | 0.12398  | 0.126748 | 0.115822 | 0.120192 |
| 0.131993 | 0.135052 | 0.128788 | 0.138695 | 0.135052 | 0.122378 | 0.132867 |
| 0.121649 | 0.116841 | 0.11757  | 0.126894 | 0.128205 | 0.110286 | 0.119318 |
| 0.135635 | 0.138695 | 0.136801 | 0.138258 | 0.139277 | 0.143502 | 0.123397 |
| 0.140443 | 0.124563 | 0.138695 | 0.140734 | 0.146125 | 0.140152 | 0.135198 |
| 0.127331 | 0.116404 | 0.129662 | 0.127622 | 0.13039  | 0.126748 | 0.111014 |
| 0.131702 | 0.118735 | 0.129079 | 0.126748 | 0.12602  | 0.132867 | 0.124417 |
| 0.134178 | 0.11451  | 0.133596 | 0.13243  | 0.136364 | 0.128934 | 0.119027 |
| 0.131119 | 0.123106 | 0.133741 | 0.120338 | 0.120775 | 0.127914 | 0.114219 |
| 0.131119 | 0.116987 | 0.130245 | 0.13549  | 0.137966 | 0.125583 | 0.121212 |
| 0.144231 | 0.124563 | 0.137238 | 0.143648 | 0.152244 | 0.140734 | 0.138112 |
| 0.11961  | 0.112179 | 0.117279 | 0.119318 | 0.120921 | 0.118444 | 0.105624 |
| 0.138112 | 0.135344 | 0.137238 | 0.134615 | 0.13884  | 0.138112 | 0.127622 |
| 0.141171 | 0.126166 | 0.145251 | 0.146416 | 0.14627  | 0.142045 | 0.138258 |
| 0.124563 | 0.115967 | 0.122232 | 0.124563 | 0.129662 | 0.121941 | 0.100379 |
| 0.127477 | 0.127622 | 0.126603 | 0.125437 | 0.129953 | 0.127185 | 0.116696 |
| 0.143648 | 0.136509 | 0.150058 | 0.142191 | 0.144959 | 0.147436 | 0.119464 |
| 0.126166 | 0.127185 | 0.134324 | 0.129953 | 0.131265 | 0.129953 | 0.112762 |
| 0.140006 | 0.131119 | 0.148456 | 0.145833 | 0.145105 | 0.145251 | 0.133304 |
| 0.136072 | 0.128642 | 0.134615 | 0.134324 | 0.132721 | 0.13345  | 0.121503 |

|          |          |          |           |          |           |           |
|----------|----------|----------|-----------|----------|-----------|-----------|
| 0.118735 | 0.124417 | 0.124272 | 0.127768  | 0.133159 | 0.116113  | 0.112325  |
| 0.132576 | 0.129516 | 0.137529 | 0.13141   | 0.137092 | 0.13345   | 0.119172  |
| 0.123689 | 0.12296  | 0.127477 | 0.131847  | 0.134324 | 0.131265  | 0.113491  |
| 0.125874 | 0.129516 | 0.132576 | 0.132284  | 0.13447  | 0.12296   | 0.110431  |
| 0.128205 | 0.130099 | 0.128497 | 0.131702  | 0.129516 | 0.124126  | 0.125874  |
| 0.127914 | 0.126603 | 0.132867 | 0.129953  | 0.128934 | 0.122669  | 0.117716  |
| 0.129079 | 0.127185 | 0.135781 | 0.138986  | 0.140589 | 0.12704   | 0.124126  |
| 0.131702 | 0.116696 | 0.133159 | 0.131702  | 0.133887 | 0.130245  | 0.111597  |
| 0.138986 | 0.13447  | 0.143939 | 0.143357  | 0.145251 | 0.138695  | 0.134033  |
| 0.130245 | 0.11757  | 0.127331 | 0.122669  | 0.13039  | 0.125583  | 0.11859   |
| 0.119755 | 0.125728 | 0.124417 | 0.126457  | 0.126894 | 0.115676  | 0.101981  |
| 0.124126 | 0.124854 | 0.135781 | 0.13141   | 0.134761 | 0.132284  | 0.114802  |
| 0.121503 | 0.112325 | 0.123834 | 0.126457  | 0.128934 | 0.129662  | 0.105478  |
| 0.144085 | 0.125874 | 0.143794 | 0.141463  | 0.145979 | 0.145542  | 0.132139  |
| 0.152535 | 0.138112 | 0.155449 | 0.1537    | 0.157634 | 0.153409  | 0.142628  |
| 0.12398  | 0.127622 | 0.131556 | 0.123397  | 0.125874 | 0.123689  | 0.114365  |
| 0.11655  | 0.119318 | 0.122669 | 0.121212  | 0.123689 | 0.122669  | 0.103147  |
| 0.124563 | 0.129371 | 0.131265 | 0.122523  | 0.124126 | 0.121941  | 0.122815  |
| 0.133159 | 0.133013 | 0.129953 | 0.13549   | 0.137675 | 0.127331  | 0.130536  |
| 0.113636 | 0.127185 | 0.131119 | 0.128205  | 0.126894 | 0.126748  | 0.110723  |
| 0.132867 | 0.134178 | 0.133159 | 0.138986  | 0.141463 | 0.126166  | 0.13345   |
| 0.142191 | 0.128059 | 0.1419   | 0.138695  | 0.135927 | 0.139277  | 0.133159  |
| 0.132139 | 0.120629 | 0.131847 | 0.128059  | 0.129371 | 0.131556  | 0.114365  |
| 0.144376 | 0.142774 | 0.165647 | 0.157197  | 0.158508 | 0.154283  | 0.150204  |
| 0.129516 | 0.124417 | 0.130973 | 0.136218  | 0.134907 | 0.133596  | 0.117279  |
| 0.148747 | 0.134324 | 0.14088  | 0.139714  | 0.1419   | 0.142045  | 0.131847  |
| 0.120921 | 0.12398  | 0.125874 | 0.125     | 0.125146 | 0.121795  | 0.103438  |
| 0.129371 | 0.129808 | 0.136946 | 0.128205  | 0.129225 | 0.129079  | 0.119464  |
| 0.124417 | 0.123397 | 0.121212 | 0.128788  | 0.129516 | 0.116259  | 0.121795  |
| 0.143502 | 0.100524 | 0.139714 | 0.137383  | 0.138403 | 0.143211  | 0.130973  |
| 0.129662 | 0.146999 | 0.138112 | 0.143648  | 0.140006 | 0.0673077 | 0.145105  |
| 0.11961  | 0.124126 | 0.128059 | 0.114656  | 0.116841 | 0.120775  | 0.118153  |
| 0.136364 | 0.133304 | 0.1419   | 0.127914  | 0.125728 | 0.133159  | 0.132867  |
| 0.144376 | 0.145979 | 0.147873 | 0.146416  | 0.148893 | 0.153992  | 0.125728  |
| 0.147582 | 0.136655 | 0.141754 | 0.144085  | 0.145105 | 0.145542  | 0.143211  |
| 0.122086 | 0.114656 | 0.128497 | 0.116259  | 0.119901 | 0.130828  | 0.0544872 |
| 0.130682 | 0.134615 | 0.13243  | 0.133887  | 0.13345  | 0.130099  | 0.134178  |
| 0.114656 | 0.111305 | 0.113491 | 0.119027  | 0.124417 | 0.112325  | 0.108246  |
| 0.118007 | 0.116113 | 0.119755 | 0.120629  | 0.125146 | 0.117133  | 0.103438  |
| 0.122815 | 0.11655  | 0.116113 | 0.125728  | 0.127622 | 0.120484  | 0.120484  |
| 0.119318 | 0.120629 | 0.120192 | 0.11553   | 0.116259 | 0.118735  | 0.113782  |
| 0.112179 | 0.116987 | 0.112762 | 0.126457  | 0.128351 | 0.119755  | 0.112179  |
| 0.118298 | 0.112325 | 0.11014  | 0.115676  | 0.120192 | 0.113054  | 0.113345  |
| 0.120338 | 0.120192 | 0.119172 | 0.0949883 | 0.100087 | 0.11451   | 0.115093  |

|           |           |          |          |          |           |           |
|-----------|-----------|----------|----------|----------|-----------|-----------|
| 0.124854  | 0.123252  | 0.119318 | 0.128059 | 0.133159 | 0.120775  | 0.123106  |
| 0.112034  | 0.105186  | 0.109703 | 0.118444 | 0.123543 | 0.116404  | 0.102127  |
| 0.122815  | 0.121795  | 0.126311 | 0.116696 | 0.119172 | 0.121358  | 0.11757   |
| 0.117716  | 0.118444  | 0.122378 | 0.11451  | 0.116696 | 0.119172  | 0.115093  |
| 0.119755  | 0.122232  | 0.130245 | 0.121212 | 0.122523 | 0.128788  | 0.0888695 |
| 0.219114  | 0.213141  | 0.215326 | 0.217075 | 0.216638 | 0.215326  | 0.213869  |
| 0.1419    | 0.141463  | 0.147436 | 0.129953 | 0.13039  | 0.140152  | 0.13986   |
| 0.123397  | 0.127331  | 0.13039  | 0.135052 | 0.131702 | 0.125728  | 0.119901  |
| 0.122086  | 0.12398   | 0.125291 | 0.113636 | 0.120192 | 0.118881  | 0.119464  |
| 0.212413  | 0.207896  | 0.20979  | 0.208916 | 0.213432 | 0.206876  | 0.212121  |
| 0.122669  | 0.0957168 | 0.127331 | 0.126457 | 0.127768 | 0.129079  | 0.099359  |
| 0.124272  | 0.121503  | 0.125146 | 0.124272 | 0.125291 | 0.130099  | 0.104167  |
| 0.116987  | 0.127622  | 0.127477 | 0.123397 | 0.122669 | 0.117861  | 0.117861  |
| 0.128788  | 0.120775  | 0.119755 | 0.128205 | 0.132139 | 0.121212  | 0.12296   |
| 0.251748  | 0.246358  | 0.253205 | 0.248834 | 0.251311 | 0.248834  | 0.253497  |
| 0.128059  | 0.0574009 | 0.129808 | 0.126603 | 0.134033 | 0.129225  | 0.10912   |
| 0.11553   | 0.117716  | 0.120775 | 0.115239 | 0.120629 | 0.123689  | 0.0872669 |
| 0.0467657 | 0.127914  | 0.125437 | 0.12602  | 0.12704  | 0.116696  | 0.120775  |
| 0.0499709 | 0.122378  | 0.123106 | 0.123689 | 0.120921 | 0.109994  | 0.116696  |
| 0.131847  | 0.0766317 | 0.13039  | 0.135635 | 0.138112 | 0.133304  | 0.116113  |
| 0.124272  | 0.121795  | 0.129516 | 0.121358 | 0.122086 | 0.126894  | 0.126603  |
| 0.116696  | 0.120921  | 0.123397 | 0.119901 | 0.121212 | 0.123106  | 0.0861014 |
| 0.11859   | 0.11757   | 0.123834 | 0.112762 | 0.112034 | 0.118298  | 0.113928  |
| 0.123689  | 0.124417  | 0.120775 | 0.12398  | 0.124417 | 0.119318  | 0.123689  |
| 0.11757   | 0.115093  | 0.114656 | 0.126311 | 0.130828 | 0.117279  | 0.116404  |
| 0.116259  | 0.115239  | 0.12296  | 0.11451  | 0.117279 | 0.117716  | 0.110431  |
| 0.125728  | 0.109266  | 0.118153 | 0.124854 | 0.126166 | 0.121649  | 0.11553   |
| 0.130536  | 0.147873  | 0.140443 | 0.141026 | 0.139132 | 0.0690559 | 0.142774  |
| 0.129371  | 0.0566725 | 0.13141  | 0.129371 | 0.133013 | 0.134324  | 0.11014   |
| 0.127914  | 0.123689  | 0.130245 | 0.127622 | 0.130099 | 0.133741  | 0.1081    |
| 0.191434  | 0.184003  | 0.190268 | 0.189394 | 0.193619 | 0.187937  | 0.191142  |
| 0.206002  | 0.203234  | 0.204254 | 0.20338  | 0.204691 | 0.200758  | 0.20542   |
| 0.129662  | 0.122815  | 0.118298 | 0.130536 | 0.131847 | 0.120629  | 0.123543  |
| 0.118881  | 0.116987  | 0.111305 | 0.121503 | 0.124854 | 0.112762  | 0.117424  |
| 0.129662  | 0.133304  | 0.13549  | 0.132284 | 0.13243  | 0.128788  | 0.130536  |
| 0.11859   | 0.11961   | 0.12296  | 0.115967 | 0.121941 | 0.126166  | 0.0859557 |
| 0.130682  | 0.0559441 | 0.132139 | 0.129225 | 0.134907 | 0.133304  | 0.111451  |
| 0.106643  | 0.131265  | 0.129953 | 0.129953 | 0.129808 | 0.121503  | 0.125583  |
| 0.228438  | 0.223339  | 0.225233 | 0.222028 | 0.224505 | 0.222902  | 0.22669   |
| 0.11451   | 0.112034  | 0.113636 | 0.121795 | 0.123397 | 0.115676  | 0.107517  |
| 0.209936  | 0.206585  | 0.213724 | 0.211684 | 0.212121 | 0.206148  | 0.204108  |
| 0.114219  | 0.101836  | 0.116259 | 0.111014 | 0.111742 | 0.120047  | 0.0448718 |
| 0.112617  | 0.116841  | 0.116113 | 0.122232 | 0.127622 | 0.119027  | 0.100379  |
| 0.118298  | 0.11553   | 0.119755 | 0.118881 | 0.121066 | 0.117716  | 0.112179  |

|           |           |          |          |          |           |           |
|-----------|-----------|----------|----------|----------|-----------|-----------|
| 0.117133  | 0.117861  | 0.117133 | 0.123543 | 0.123397 | 0.114802  | 0.112471  |
| 0.211101  | 0.205711  | 0.205857 | 0.208479 | 0.210082 | 0.205565  | 0.210227  |
| 0.13039   | 0.134324  | 0.137092 | 0.122815 | 0.120629 | 0.130682  | 0.12602   |
| 0.10912   | 0.115385  | 0.118735 | 0.113782 | 0.114219 | 0.11757   | 0.0925117 |
| 0.124854  | 0.125874  | 0.133596 | 0.116987 | 0.115093 | 0.124854  | 0.123397  |
| 0.117279  | 0.128497  | 0.127768 | 0.109703 | 0.108683 | 0.127768  | 0.11757   |
| 0.124563  | 0.11655   | 0.111451 | 0.129225 | 0.13141  | 0.120484  | 0.117279  |
| 0.115676  | 0.105332  | 0.120629 | 0.111305 | 0.112908 | 0.120629  | 0.0515734 |
| 0.120921  | 0.122815  | 0.125874 | 0.123543 | 0.125146 | 0.127331  | 0.0949883 |
| 0.127331  | 0.126603  | 0.128497 | 0.124417 | 0.126603 | 0.132576  | 0.107517  |
| 0.115093  | 0.114365  | 0.117716 | 0.109848 | 0.114656 | 0.111888  | 0.112179  |
| 0.109411  | 0.118298  | 0.124563 | 0.114656 | 0.113928 | 0.122232  | 0.097465  |
| 0.191434  | 0.185752  | 0.189394 | 0.188228 | 0.191579 | 0.189685  | 0.191434  |
| 0.0473485 | 0.126166  | 0.125728 | 0.127185 | 0.129079 | 0.111451  | 0.121066  |
| 0.113928  | 0.128059  | 0.121212 | 0.126748 | 0.127768 | 0.0553613 | 0.128788  |
| 0.10271   | 0.12704   | 0.116696 | 0.119901 | 0.123252 | 0.110286  | 0.118735  |
| 0.127622  | 0.0587121 | 0.13141  | 0.126166 | 0.132139 | 0.130828  | 0.1081    |
| 0.123252  | 0.124854  | 0.131119 | 0.116259 | 0.114948 | 0.12296   | 0.116259  |
| 0.115385  | 0.109703  | 0.121795 | 0.113054 | 0.114073 | 0.12296   | 0.0492424 |
| 0.105041  | 0.0987762 | 0.115239 | 0.108246 | 0.110431 | 0.118444  | 0.103001  |
| 0.121066  | 0.123543  | 0.129516 | 0.123397 | 0.125291 | 0.130682  | 0.0945513 |
| 0.109266  | 0.123689  | 0.117716 | 0.123252 | 0.125437 | 0.0556527 | 0.12296   |
| 0.0541958 | 0.120192  | 0.120338 | 0.124126 | 0.124563 | 0.111888  | 0.110431  |
| 0.123397  | 0.119172  | 0.115239 | 0.12398  | 0.129662 | 0.116696  | 0.119318  |
| 0.118298  | 0.125437  | 0.126748 | 0.123543 | 0.125146 | 0.116841  | 0.117424  |
| 0.129516  | 0.13986   | 0.137383 | 0.135052 | 0.132576 | 0.128059  | 0.127185  |
| 0.120484  | 0.0501166 | 0.124563 | 0.124272 | 0.129079 | 0.120192  | 0.102418  |
| 0.138695  | 0.140006  | 0.144231 | 0.126166 | 0.12398  | 0.136946  | 0.131702  |
| 0.121212  | 0.11553   | 0.111305 | 0.125874 | 0.130099 | 0.119755  | 0.114219  |
| 0.0999417 | 0.120192  | 0.118298 | 0.116841 | 0.118735 | 0.111305  | 0.113345  |
| 0.123106  | 0.124417  | 0.125728 | 0.118735 | 0.118881 | 0.121066  | 0.11553   |
| 0.123689  | 0.127914  | 0.128351 | 0.12398  | 0.127622 | 0.133304  | 0.0898893 |
| 0.195367  | 0.187646  | 0.190414 | 0.188666 | 0.192308 | 0.192453  | 0.185752  |
| 0.102855  | 0.112325  | 0.11655  | 0.111888 | 0.112617 | 0.115385  | 0.0894522 |
| 0.107226  | 0.108537  | 0.105186 | 0.104312 | 0.109411 | 0.104895  | 0.103147  |
| 0.125583  | 0.122232  | 0.125874 | 0.122378 | 0.124563 | 0.131119  | 0.108974  |
| 0.18648   | 0.180798  | 0.18007  | 0.17366  | 0.178176 | 0.180361  | 0.18211   |
| 0.138258  | 0.0675991 | 0.13884  | 0.137383 | 0.143065 | 0.139423  | 0.120192  |
| 0.150495  | 0.0731352 | 0.148456 | 0.144668 | 0.148601 | 0.151952  | 0.130682  |
| 0.132867  | 0.150495  | 0.142483 | 0.143065 | 0.140006 | 0.0708042 | 0.145105  |
| 0.118881  | 0.0476399 | 0.124126 | 0.12296  | 0.124563 | 0.120338  | 0.0996503 |
| 0.122232  | 0.125874  | 0.127477 | 0.11553  | 0.113345 | 0.122523  | 0.120192  |
| 0.212704  | 0.205565  | 0.211538 | 0.208625 | 0.211684 | 0.209207  | 0.212121  |
| 0.121795  | 0.126311  | 0.124709 | 0.123252 | 0.12398  | 0.123252  | 0.121212  |

|           |           |          |           |           |           |           |
|-----------|-----------|----------|-----------|-----------|-----------|-----------|
| 0.125146  | 0.129662  | 0.133013 | 0.118444  | 0.118298  | 0.125437  | 0.123689  |
| 0.108246  | 0.114802  | 0.121649 | 0.113782  | 0.115967  | 0.117279  | 0.0916375 |
| 0.173805  | 0.170746  | 0.167104 | 0.16419   | 0.166958  | 0.167395  | 0.172057  |
| 0.11553   | 0.111888  | 0.116696 | 0.104749  | 0.109266  | 0.11116   | 0.106498  |
| 0.1419    | 0.148456  | 0.142483 | 0.146853  | 0.145251  | 0.139277  | 0.145979  |
| 0.123834  | 0.116404  | 0.125    | 0.131119  | 0.13039   | 0.127914  | 0.115385  |
| 0.190851  | 0.186626  | 0.187646 | 0.189977  | 0.193328  | 0.18648   | 0.187063  |
| 0.124709  | 0.0493881 | 0.123252 | 0.131702  | 0.135052  | 0.126457  | 0.105478  |
| 0.116841  | 0.111451  | 0.1081   | 0.0882867 | 0.0925117 | 0.108392  | 0.104312  |
| 0.100087  | 0.117716  | 0.116987 | 0.11961   | 0.125     | 0.112617  | 0.111451  |
| 0.115676  | 0.112325  | 0.121795 | 0.126166  | 0.130099  | 0.123543  | 0.0990676 |
| 0.126748  | 0.120775  | 0.124709 | 0.122378  | 0.12602   | 0.127331  | 0.10373   |
| 0.12296   | 0.117861  | 0.118298 | 0.126748  | 0.128351  | 0.111888  | 0.11655   |
| 0.121941  | 0.115967  | 0.109703 | 0.123689  | 0.12704   | 0.118153  | 0.114365  |
| 0.189977  | 0.185752  | 0.190559 | 0.188228  | 0.191288  | 0.187937  | 0.188811  |
| 0.12398   | 0.128497  | 0.11961  | 0.124563  | 0.121795  | 0.112908  | 0.114365  |
| 0.117716  | 0.118444  | 0.112471 | 0.103438  | 0.104458  | 0.121503  | 0.111305  |
| 0.215472  | 0.20979   | 0.209936 | 0.211684  | 0.211538  | 0.207314  | 0.21285   |
| 0.0488054 | 0.126748  | 0.125728 | 0.128059  | 0.129371  | 0.113491  | 0.118735  |
| 0.122086  | 0.11961   | 0.111888 | 0.124126  | 0.128351  | 0.11655   | 0.115093  |
| 0.119464  | 0.112325  | 0.107809 | 0.123543  | 0.123689  | 0.11451   | 0.113345  |
| 0.131556  | 0.13986   | 0.140297 | 0.127185  | 0.120047  | 0.130099  | 0.130973  |
| 0.193036  | 0.184149  | 0.189248 | 0.186334  | 0.19289   | 0.186626  | 0.190705  |
| 0.118881  | 0.120484  | 0.124417 | 0.116841  | 0.121649  | 0.130536  | 0.0865385 |
| 0.121795  | 0.135344  | 0.133159 | 0.132867  | 0.129516  | 0.124126  | 0.123543  |
| 0.119172  | 0.114948  | 0.1081   | 0.122669  | 0.124272  | 0.115967  | 0.114802  |
| 0.120629  | 0.112617  | 0.105769 | 0.12296   | 0.126894  | 0.11655   | 0.110723  |
| 0.119901  | 0.114802  | 0.110577 | 0.125146  | 0.129079  | 0.11553   | 0.113491  |
| 0.11859   | 0.120192  | 0.124417 | 0.11014   | 0.11553   | 0.118007  | 0.112762  |
| 0.107372  | 0.10373   | 0.107955 | 0.117861  | 0.122378  | 0.115822  | 0.101253  |
| 0.127768  | 0.0539044 | 0.130099 | 0.130099  | 0.132576  | 0.130682  | 0.108246  |
| 0.116404  | 0.138403  | 0.13447  | 0.128934  | 0.125583  | 0.110286  | 0.127185  |
| 0.124854  | 0.0521562 | 0.123397 | 0.130973  | 0.132576  | 0.129808  | 0.106498  |
| 0.121503  | 0.13039   | 0.126748 | 0.112471  | 0.112034  | 0.132867  | 0.124126  |
| 0.199738  | 0.190851  | 0.193328 | 0.19391   | 0.198135  | 0.192453  | 0.191871  |
| 0.11451   | 0.122815  | 0.121503 | 0.119464  | 0.124272  | 0.11655   | 0.113928  |
| 0.129516  | 0.131119  | 0.135927 | 0.119318  | 0.119172  | 0.13039   | 0.12602   |
| 0.117424  | 0.112617  | 0.112179 | 0.122086  | 0.127185  | 0.115093  | 0.111597  |
| 0.110286  | 0.101981  | 0.108537 | 0.118735  | 0.123252  | 0.113782  | 0.103293  |
| 0.11757   | 0.110723  | 0.118444 | 0.124854  | 0.123543  | 0.116113  | 0.11116   |
| 0.120629  | 0.124272  | 0.125291 | 0.115093  | 0.121066  | 0.130245  | 0.083042  |
| 0.124709  | 0.124272  | 0.126748 | 0.133159  | 0.131847  | 0.124126  | 0.126166  |
| 0.114365  | 0.120047  | 0.114365 | 0.122815  | 0.126457  | 0.0622086 | 0.11757   |
| 0.118153  | 0.110723  | 0.114365 | 0.114365  | 0.121212  | 0.120192  | 0.0933858 |

|          |           |          |           |           |           |           |
|----------|-----------|----------|-----------|-----------|-----------|-----------|
| 0.111597 | 0.103293  | 0.111888 | 0.112762  | 0.117279  | 0.116841  | 0.0935315 |
| 0.117279 | 0.105769  | 0.109994 | 0.100379  | 0.105186  | 0.114365  | 0.104167  |
| 0.115385 | 0.104458  | 0.115676 | 0.109848  | 0.112617  | 0.124126  | 0.0501166 |
| 0.136218 | 0.0623543 | 0.136509 | 0.13447   | 0.13549   | 0.135052  | 0.116113  |
| 0.120921 | 0.120775  | 0.120629 | 0.117133  | 0.121941  | 0.125     | 0.0856643 |
| 0.113782 | 0.115676  | 0.118735 | 0.111742  | 0.113054  | 0.114656  | 0.111451  |
| 0.114948 | 0.116841  | 0.117861 | 0.112325  | 0.116841  | 0.121649  | 0.0796911 |
| 0.119464 | 0.11553   | 0.113345 | 0.124417  | 0.126603  | 0.115385  | 0.113054  |
| 0.103875 | 0.111014  | 0.114365 | 0.111742  | 0.112179  | 0.116696  | 0.088141  |
| 0.119901 | 0.11859   | 0.11116  | 0.126603  | 0.130828  | 0.119318  | 0.117861  |
| 0.109994 | 0.116841  | 0.117861 | 0.117279  | 0.118007  | 0.11116   | 0.110286  |
| 0.111742 | 0.120047  | 0.116404 | 0.122523  | 0.124417  | 0.0572552 | 0.120484  |
| 0.123397 | 0.111888  | 0.121649 | 0.122523  | 0.124709  | 0.128059  | 0.103001  |
| 0.113345 | 0.10708   | 0.109557 | 0.120047  | 0.123689  | 0.11451   | 0.105478  |
| 0.120192 | 0.114219  | 0.10912  | 0.123106  | 0.126457  | 0.114365  | 0.112908  |
| 0.104749 | 0.122378  | 0.123397 | 0.125437  | 0.129953  | 0.117279  | 0.115822  |
| 0.122378 | 0.12398   | 0.117424 | 0.102855  | 0.110868  | 0.120629  | 0.112762  |
| 0.11961  | 0.116841  | 0.108829 | 0.107955  | 0.113054  | 0.112325  | 0.104749  |
| 0.118444 | 0.113636  | 0.10912  | 0.124563  | 0.126457  | 0.11553   | 0.111451  |
| 0.11859  | 0.119901  | 0.124417 | 0.116259  | 0.116696  | 0.120921  | 0.117424  |
| 0.115676 | 0.106206  | 0.121212 | 0.111014  | 0.117279  | 0.122669  | 0.0483683 |
| 0.120047 | 0.120484  | 0.123543 | 0.113345  | 0.117861  | 0.120338  | 0.115676  |
| 0.122086 | 0.118735  | 0.122086 | 0.123252  | 0.12602   | 0.125583  | 0.0976107 |
| 0.11655  | 0.107955  | 0.113054 | 0.120047  | 0.122232  | 0.118881  | 0.110431  |
| 0.115093 | 0.111451  | 0.114219 | 0.120338  | 0.12398   | 0.104604  | 0.111305  |
| 0.103875 | 0.107809  | 0.118153 | 0.111451  | 0.111888  | 0.116987  | 0.0849359 |
| 0.122669 | 0.125728  | 0.127914 | 0.11451   | 0.114948  | 0.123834  | 0.119172  |
| 0.123834 | 0.125146  | 0.120338 | 0.0527389 | 0.0525932 | 0.120047  | 0.108683  |
| 0.118444 | 0.115967  | 0.112617 | 0.104167  | 0.106935  | 0.114365  | 0.108829  |
| 0.196824 | 0.187937  | 0.191579 | 0.195659  | 0.198427  | 0.191871  | 0.191288  |
| 0.167104 | 0.163462  | 0.160693 | 0.150787  | 0.150641  | 0.158945  | 0.160693  |
| 0.124563 | 0.0509907 | 0.125146 | 0.125437  | 0.130536  | 0.127477  | 0.105915  |
| 0.123834 | 0.121066  | 0.115967 | 0.104895  | 0.109411  | 0.119172  | 0.103438  |
| 0.150932 | 0.0770688 | 0.151224 | 0.14831   | 0.154575  | 0.152972  | 0.132867  |
| 0.123106 | 0.126457  | 0.11961  | 0.12602   | 0.127622  | 0.119027  | 0.121649  |
| 0.124709 | 0.117861  | 0.118881 | 0.127914  | 0.13039   | 0.117716  | 0.12296   |
| 0.12602  | 0.117424  | 0.114073 | 0.111742  | 0.11655   | 0.119901  | 0.11553   |
| 0.120484 | 0.109848  | 0.116404 | 0.122232  | 0.126457  | 0.121649  | 0.116696  |
| 0.122523 | 0.126166  | 0.11757  | 0.103875  | 0.106643  | 0.122232  | 0.118153  |
| 0.205128 | 0.200612  | 0.200758 | 0.202214  | 0.203234  | 0.201049  | 0.203089  |
| 0.124563 | 0.122669  | 0.124854 | 0.123106  | 0.125583  | 0.131847  | 0.0872669 |
| 0.119464 | 0.117279  | 0.125    | 0.115967  | 0.117279  | 0.12296   | 0.106935  |
| 0.117716 | 0.110868  | 0.105769 | 0.117716  | 0.120192  | 0.112471  | 0.1081    |
| 0.113491 | 0.119755  | 0.118735 | 0.109411  | 0.111014  | 0.123397  | 0.111451  |

|           |           |          |          |          |           |           |
|-----------|-----------|----------|----------|----------|-----------|-----------|
| 0.189685  | 0.183712  | 0.179779 | 0.182401 | 0.18546  | 0.181818  | 0.186189  |
| 0.250874  | 0.241696  | 0.248252 | 0.245921 | 0.245484 | 0.245338  | 0.246503  |
| 0.113928  | 0.122523  | 0.119464 | 0.120047 | 0.122523 | 0.0568182 | 0.119755  |
| 0.119172  | 0.125437  | 0.112471 | 0.106061 | 0.109703 | 0.125874  | 0.115676  |
| 0.123252  | 0.0514277 | 0.125    | 0.127914 | 0.131556 | 0.127622  | 0.101981  |
| 0.123106  | 0.114802  | 0.121358 | 0.121941 | 0.126166 | 0.124563  | 0.0968823 |
| 0.113928  | 0.117861  | 0.11859  | 0.113928 | 0.116696 | 0.120338  | 0.0801282 |
| 0.114365  | 0.119755  | 0.112325 | 0.116404 | 0.117424 | 0.108537  | 0.110577  |
| 0.123252  | 0.116404  | 0.115385 | 0.11859  | 0.118735 | 0.121212  | 0.115093  |
| 0.11655   | 0.115239  | 0.118298 | 0.115093 | 0.121066 | 0.125291  | 0.0821678 |
| 0.120775  | 0.113054  | 0.116113 | 0.117861 | 0.11859  | 0.11553   | 0.116113  |
| 0.125     | 0.11961   | 0.111305 | 0.113054 | 0.114365 | 0.117133  | 0.111597  |
| 0.113782  | 0.107809  | 0.110868 | 0.119027 | 0.125874 | 0.119027  | 0.10912   |
| 0.109266  | 0.122523  | 0.118007 | 0.121503 | 0.123397 | 0.0501166 | 0.120047  |
| 0.122815  | 0.119172  | 0.124563 | 0.113782 | 0.118007 | 0.117279  | 0.114656  |
| 0.0930944 | 0.109557  | 0.112034 | 0.114073 | 0.118881 | 0.104458  | 0.100087  |
| 0.121066  | 0.12704   | 0.130682 | 0.127185 | 0.129662 | 0.115239  | 0.116404  |
| 0.134761  | 0.132284  | 0.137092 | 0.127477 | 0.128205 | 0.137675  | 0.114656  |
| 0.115967  | 0.116113  | 0.11014  | 0.122378 | 0.125146 | 0.110723  | 0.109848  |
| 0.127185  | 0.101107  | 0.117279 | 0.124854 | 0.127331 | 0.120192  | 0.110286  |
| 0.135635  | 0.130245  | 0.12602  | 0.136801 | 0.138695 | 0.128351  | 0.129516  |
| 0.211247  | 0.2044    | 0.211538 | 0.208916 | 0.210519 | 0.206585  | 0.20979   |
| 0.106498  | 0.112179  | 0.10912  | 0.113782 | 0.113928 | 0.0598776 | 0.109994  |
| 0.114219  | 0.106498  | 0.112179 | 0.12296  | 0.12398  | 0.120047  | 0.107517  |
| 0.117133  | 0.123397  | 0.124126 | 0.123252 | 0.125728 | 0.118007  | 0.115385  |
| 0.055507  | 0.124709  | 0.127185 | 0.129225 | 0.130828 | 0.11553   | 0.116696  |
| 0.10912   | 0.118007  | 0.116113 | 0.108537 | 0.111014 | 0.126603  | 0.108829  |
| 0.201486  | 0.195513  | 0.199155 | 0.200321 | 0.201923 | 0.198572  | 0.201195  |
| 0.124126  | 0.125146  | 0.125874 | 0.117133 | 0.119318 | 0.123252  | 0.120921  |
| 0.118444  | 0.110431  | 0.109703 | 0.123106 | 0.124709 | 0.113199  | 0.110868  |
| 0.122378  | 0.11757   | 0.129079 | 0.111014 | 0.112617 | 0.122086  | 0.108683  |
| 0.116259  | 0.111742  | 0.119755 | 0.117716 | 0.122523 | 0.126166  | 0.0979021 |
| 0.121503  | 0.124272  | 0.127914 | 0.117424 | 0.118735 | 0.117133  | 0.116841  |
| 0.111597  | 0.110286  | 0.115967 | 0.111888 | 0.11553  | 0.110431  | 0.111014  |
| 0.126457  | 0.119901  | 0.112762 | 0.113054 | 0.114656 | 0.11451   | 0.108974  |
| 0.0533217 | 0.121941  | 0.121503 | 0.12704  | 0.125146 | 0.109848  | 0.114219  |
| 0.201777  | 0.195513  | 0.199446 | 0.198281 | 0.203089 | 0.197698  | 0.199446  |
| 0.113636  | 0.114073  | 0.117716 | 0.106061 | 0.109411 | 0.111305  | 0.110431  |
| 0.198864  | 0.192016  | 0.192453 | 0.194493 | 0.196678 | 0.194493  | 0.197115  |
| 0.198135  | 0.189831  | 0.191142 | 0.19289  | 0.194784 | 0.192016  | 0.195221  |
| 0.127914  | 0.129516  | 0.134033 | 0.129662 | 0.12602  | 0.134615  | 0.112471  |
| 0.0544872 | 0.130973  | 0.131702 | 0.133741 | 0.131847 | 0.118298  | 0.126166  |
| 0.114219  | 0.112325  | 0.104604 | 0.104021 | 0.10912  | 0.107809  | 0.102855  |
| 0.113491  | 0.11451   | 0.117861 | 0.112908 | 0.113054 | 0.112617  | 0.109994  |



|           |           |          |           |           |           |           |
|-----------|-----------|----------|-----------|-----------|-----------|-----------|
| 0.117716  | 0.11961   | 0.121212 | 0.116259  | 0.118153  | 0.11451   | 0.11014   |
| 0.121212  | 0.116987  | 0.111888 | 0.127914  | 0.129225  | 0.118881  | 0.113636  |
| 0.112471  | 0.110577  | 0.119464 | 0.111888  | 0.116404  | 0.123543  | 0.080711  |
| 0.115093  | 0.118735  | 0.120047 | 0.114802  | 0.118735  | 0.124417  | 0.0810023 |
| 0.112325  | 0.12704   | 0.122523 | 0.123397  | 0.126457  | 0.0563811 | 0.125437  |
| 0.122669  | 0.11757   | 0.121795 | 0.122086  | 0.125728  | 0.126748  | 0.100524  |
| 0.115822  | 0.1081    | 0.106206 | 0.121358  | 0.124709  | 0.112034  | 0.110868  |
| 0.118007  | 0.119901  | 0.125    | 0.113054  | 0.114948  | 0.119755  | 0.11859   |
| 0.11553   | 0.108974  | 0.107663 | 0.0869755 | 0.0909091 | 0.105041  | 0.0989219 |
| 0.125583  | 0.128934  | 0.136655 | 0.118298  | 0.119027  | 0.125     | 0.125     |
| 0.125     | 0.0499709 | 0.124709 | 0.125583  | 0.126603  | 0.125874  | 0.101107  |
| 0.131265  | 0.134324  | 0.138549 | 0.121941  | 0.118298  | 0.131847  | 0.127477  |
| 0.260635  | 0.257867  | 0.259178 | 0.256556  | 0.259907  | 0.255973  | 0.25947   |
| 0.116113  | 0.127622  | 0.133013 | 0.119318  | 0.117716  | 0.129516  | 0.103875  |
| 0.125583  | 0.128642  | 0.129371 | 0.131993  | 0.130973  | 0.125874  | 0.110723  |
| 0.222174  | 0.215618  | 0.21926  | 0.218094  | 0.219697  | 0.216346  | 0.218094  |
| 0.116259  | 0.12602   | 0.120338 | 0.132284  | 0.128351  | 0.128205  | 0.121795  |
| 0.229895  | 0.225087  | 0.227273 | 0.228147  | 0.227418  | 0.227273  | 0.231935  |
| 0.109994  | 0.119464  | 0.125437 | 0.116987  | 0.11451   | 0.119901  | 0.095134  |
| 0.132867  | 0.125728  | 0.123252 | 0.131993  | 0.13447   | 0.127331  | 0.129371  |
| 0.0574009 | 0.120775  | 0.119172 | 0.119464  | 0.122815  | 0.1081    | 0.110431  |
| 0.129662  | 0.125728  | 0.130245 | 0.127622  | 0.129225  | 0.134324  | 0.104604  |
| 0.205128  | 0.200029  | 0.200175 | 0.202506  | 0.207314  | 0.201049  | 0.20338   |
| 0.129662  | 0.13039   | 0.13345  | 0.120921  | 0.119901  | 0.12704   | 0.124126  |
| 0.121795  | 0.121358  | 0.126748 | 0.113054  | 0.114073  | 0.117716  | 0.117133  |
| 0.228001  | 0.22465   | 0.226253 | 0.22567   | 0.227855  | 0.223631  | 0.224505  |
| 0.118298  | 0.120192  | 0.118007 | 0.11655   | 0.121941  | 0.125583  | 0.085373  |
| 0.198572  | 0.195221  | 0.198864 | 0.19799   | 0.202214  | 0.195659  | 0.19799   |
| 0.11757   | 0.122086  | 0.125437 | 0.119318  | 0.126166  | 0.12602   | 0.0840618 |
| 0.120775  | 0.114802  | 0.108829 | 0.125728  | 0.130245  | 0.116696  | 0.116987  |
| 0.122086  | 0.117279  | 0.122669 | 0.127622  | 0.129808  | 0.125     | 0.117133  |
| 0.129371  | 0.129516  | 0.13549  | 0.129662  | 0.130682  | 0.137821  | 0.111597  |
| 0.118735  | 0.109848  | 0.116113 | 0.108246  | 0.112179  | 0.11116   | 0.107955  |
| 0.163024  | 0.153846  | 0.160985 | 0.164773  | 0.166667  | 0.160985  | 0.156906  |
| 0.116987  | 0.116259  | 0.120484 | 0.113199  | 0.114219  | 0.115822  | 0.111742  |
| 0.0543415 | 0.122378  | 0.124854 | 0.127477  | 0.127331  | 0.112908  | 0.11757   |
| 0.115239  | 0.118881  | 0.113782 | 0.129225  | 0.133741  | 0.125728  | 0.118153  |
| 0.10708   | 0.13141   | 0.13039  | 0.128351  | 0.128497  | 0.120775  | 0.121941  |
| 0.200466  | 0.192162  | 0.197552 | 0.196678  | 0.199446  | 0.197844  | 0.195221  |
| 0.119901  | 0.112179  | 0.112034 | 0.124854  | 0.128497  | 0.118444  | 0.112034  |
| 0.130828  | 0.121066  | 0.126457 | 0.128788  | 0.132139  | 0.130828  | 0.106061  |
| 0.116113  | 0.101107  | 0.118153 | 0.113199  | 0.116259  | 0.121941  | 0.0473485 |
| 0.119755  | 0.122815  | 0.125291 | 0.117133  | 0.120484  | 0.126748  | 0.0842075 |
| 0.125146  | 0.122378  | 0.115239 | 0.125437  | 0.129953  | 0.117861  | 0.120775  |

|           |           |           |          |          |           |           |
|-----------|-----------|-----------|----------|----------|-----------|-----------|
| 0.25641   | 0.256556  | 0.257284  | 0.253205 | 0.255682 | 0.252331  | 0.257576  |
| 0.115822  | 0.113928  | 0.113199  | 0.123106 | 0.123834 | 0.120484  | 0.110577  |
| 0.120192  | 0.121503  | 0.122523  | 0.125728 | 0.126748 | 0.11757   | 0.116404  |
| 0.177885  | 0.178322  | 0.177302  | 0.172057 | 0.172494 | 0.181964  | 0.180216  |
| 0.190122  | 0.180361  | 0.184586  | 0.187791 | 0.189977 | 0.186334  | 0.185752  |
| 0.114656  | 0.124417  | 0.11553   | 0.123106 | 0.128205 | 0.0592949 | 0.123689  |
| 0.122086  | 0.121941  | 0.122669  | 0.113928 | 0.113199 | 0.11859   | 0.120629  |
| 0.122086  | 0.116113  | 0.124126  | 0.123834 | 0.127768 | 0.124417  | 0.101399  |
| 0.142628  | 0.144814  | 0.151078  | 0.131265 | 0.129953 | 0.139132  | 0.140006  |
| 0.112325  | 0.120629  | 0.113491  | 0.121649 | 0.122378 | 0.0598776 | 0.117861  |
| 0.113928  | 0.126894  | 0.116259  | 0.12296  | 0.127477 | 0.0553613 | 0.124126  |
| 0.120775  | 0.125     | 0.128934  | 0.121358 | 0.125    | 0.128934  | 0.0907634 |
| 0.119027  | 0.117716  | 0.12398   | 0.112034 | 0.112471 | 0.121649  | 0.115822  |
| 0.125291  | 0.131265  | 0.136946  | 0.118298 | 0.114656 | 0.125     | 0.127331  |
| 0.121358  | 0.118007  | 0.122232  | 0.120775 | 0.123252 | 0.127768  | 0.092803  |
| 0.126748  | 0.127185  | 0.128497  | 0.123543 | 0.125437 | 0.132284  | 0.108974  |
| 0.141463  | 0.137821  | 0.143502  | 0.137383 | 0.138403 | 0.142337  | 0.121649  |
| 0.123834  | 0.115239  | 0.120047  | 0.124709 | 0.127185 | 0.128205  | 0.117133  |
| 0.134178  | 0.129953  | 0.137966  | 0.129808 | 0.130245 | 0.13884   | 0.112617  |
| 0.125437  | 0.125583  | 0.131847  | 0.125146 | 0.128497 | 0.13447   | 0.0933858 |
| 0.208625  | 0.206439  | 0.206585  | 0.206876 | 0.212267 | 0.202214  | 0.206876  |
| 0.119901  | 0.115967  | 0.122232  | 0.131556 | 0.134324 | 0.123397  | 0.106206  |
| 0.19595   | 0.188811  | 0.191579  | 0.195367 | 0.198718 | 0.192162  | 0.193619  |
| 0.0916375 | 0.117133  | 0.119318  | 0.124272 | 0.125583 | 0.112325  | 0.112617  |
| 0.125728  | 0.128205  | 0.120484  | 0.130682 | 0.131702 | 0.125146  | 0.125437  |
| 0.123106  | 0.0582751 | 0.128934  | 0.129225 | 0.13345  | 0.129516  | 0.108829  |
| 0.117424  | 0.0528846 | 0.12704   | 0.123252 | 0.126894 | 0.118881  | 0.101981  |
| 0.121066  | 0.125     | 0.130099  | 0.115239 | 0.118298 | 0.121358  | 0.123106  |
| 0.121941  | 0.125583  | 0.131556  | 0.114365 | 0.111014 | 0.124272  | 0.11961   |
| 0.122815  | 0.11859   | 0.113199  | 0.126311 | 0.130828 | 0.118735  | 0.114948  |
| 0.0541958 | 0.123106  | 0.123543  | 0.124709 | 0.126894 | 0.112471  | 0.116841  |
| 0.130828  | 0.057838  | 0.134324  | 0.130536 | 0.133304 | 0.132284  | 0.109848  |
| 0.129516  | 0.13141   | 0.134761  | 0.13039  | 0.130536 | 0.139714  | 0.0960082 |
| 0.253934  | 0.247378  | 0.250728  | 0.246649 | 0.249709 | 0.246941  | 0.251311  |
| 0.123106  | 0.116259  | 0.114365  | 0.127768 | 0.130828 | 0.120484  | 0.11757   |
| 0.185606  | 0.179924  | 0.183566  | 0.186772 | 0.190122 | 0.185897  | 0.184441  |
| 0.192745  | 0.187646  | 0.187791  | 0.186043 | 0.191142 | 0.188083  | 0.190122  |
| 0.124126  | 0.123106  | 0.0576923 | 0.120338 | 0.120775 | 0.117424  | 0.115093  |
| 0.114802  | 0.10912   | 0.113636  | 0.122086 | 0.123689 | 0.121503  | 0.110431  |
| 0.127914  | 0.127477  | 0.120338  | 0.129371 | 0.131556 | 0.122378  | 0.123834  |
| 0.114219  | 0.11553   | 0.119755  | 0.113928 | 0.114948 | 0.116841  | 0.111305  |
| 0.118153  | 0.106352  | 0.115239  | 0.124272 | 0.124126 | 0.119901  | 0.114656  |
| 0.117861  | 0.11859   | 0.121649  | 0.116113 | 0.121795 | 0.123689  | 0.0849359 |
| 0.119464  | 0.121358  | 0.125     | 0.119464 | 0.116404 | 0.122086  | 0.118881  |

|           |           |          |          |          |           |           |
|-----------|-----------|----------|----------|----------|-----------|-----------|
| 0.129953  | 0.130682  | 0.138403 | 0.120047 | 0.11961  | 0.128497  | 0.126748  |
| 0.123397  | 0.117424  | 0.113782 | 0.125146 | 0.129662 | 0.118444  | 0.117279  |
| 0.127768  | 0.128788  | 0.136218 | 0.120775 | 0.11859  | 0.12398   | 0.126894  |
| 0.113054  | 0.118444  | 0.112762 | 0.122378 | 0.125437 | 0.119755  | 0.104604  |
| 0.131119  | 0.0592949 | 0.131119 | 0.129953 | 0.134178 | 0.131119  | 0.108974  |
| 0.128059  | 0.119464  | 0.12398  | 0.123397 | 0.12704  | 0.129808  | 0.103293  |
| 0.128497  | 0.131556  | 0.13549  | 0.126457 | 0.128059 | 0.135781  | 0.0955711 |
| 0.130682  | 0.125583  | 0.117279 | 0.11553  | 0.118007 | 0.11757   | 0.119027  |
| 0.122232  | 0.112762  | 0.10912  | 0.121358 | 0.125583 | 0.117279  | 0.115239  |
| 0.124272  | 0.139569  | 0.133887 | 0.130682 | 0.131119 | 0.125146  | 0.126894  |
| 0.185897  | 0.180798  | 0.185023 | 0.181235 | 0.187209 | 0.186189  | 0.185023  |
| 0.133304  | 0.134324  | 0.142337 | 0.123397 | 0.123834 | 0.133304  | 0.132139  |
| 0.120192  | 0.122378  | 0.127768 | 0.117279 | 0.115967 | 0.123397  | 0.118735  |
| 0.121212  | 0.0511364 | 0.123543 | 0.12704  | 0.131847 | 0.126166  | 0.103438  |
| 0.116113  | 0.0524476 | 0.116113 | 0.120192 | 0.125    | 0.118735  | 0.0983392 |
| 0.125291  | 0.122815  | 0.126166 | 0.121795 | 0.12398  | 0.130536  | 0.102273  |
| 0.128059  | 0.121503  | 0.129808 | 0.126894 | 0.128205 | 0.131265  | 0.105041  |
| 0.195513  | 0.188957  | 0.190268 | 0.191434 | 0.19595  | 0.190559  | 0.192016  |
| 0.123252  | 0.12398   | 0.122669 | 0.10373  | 0.106789 | 0.120047  | 0.114219  |
| 0.117279  | 0.111888  | 0.115239 | 0.107663 | 0.108974 | 0.113199  | 0.109703  |
| 0.122523  | 0.127622  | 0.128642 | 0.117861 | 0.118298 | 0.126311  | 0.122815  |
| 0.193182  | 0.191871  | 0.19289  | 0.191434 | 0.197115 | 0.190851  | 0.194639  |
| 0.114073  | 0.104021  | 0.112617 | 0.121066 | 0.121795 | 0.120484  | 0.107372  |
| 0.121212  | 0.122815  | 0.12704  | 0.120629 | 0.122815 | 0.129953  | 0.087704  |
| 0.124709  | 0.12398   | 0.130536 | 0.113636 | 0.116696 | 0.120338  | 0.120047  |
| 0.109703  | 0.120047  | 0.108246 | 0.11961  | 0.120629 | 0.0590035 | 0.113199  |
| 0.189831  | 0.184732  | 0.187209 | 0.184878 | 0.188811 | 0.188666  | 0.18954   |
| 0.118735  | 0.120338  | 0.124563 | 0.116404 | 0.121503 | 0.125728  | 0.0875583 |
| 0.11116   | 0.122378  | 0.119318 | 0.114073 | 0.117424 | 0.10912   | 0.10912   |
| 0.113491  | 0.105769  | 0.115239 | 0.123689 | 0.125    | 0.119318  | 0.106498  |
| 0.124563  | 0.111597  | 0.126311 | 0.118735 | 0.123252 | 0.121649  | 0.110577  |
| 0.0469114 | 0.122815  | 0.125    | 0.125583 | 0.126894 | 0.109848  | 0.115385  |
| 0.126166  | 0.128059  | 0.130245 | 0.124126 | 0.127477 | 0.134324  | 0.0932401 |
| 0.122378  | 0.116113  | 0.109557 | 0.126457 | 0.127768 | 0.117424  | 0.116259  |
| 0.123543  | 0.128934  | 0.119172 | 0.109266 | 0.114365 | 0.119464  | 0.113636  |
| 0.13039   | 0.146853  | 0.142045 | 0.142628 | 0.142191 | 0.0709499 | 0.147582  |
| 0.236451  | 0.235431  | 0.238491 | 0.235868 | 0.240093 | 0.236742  | 0.237325  |
| 0.135635  | 0.134033  | 0.122815 | 0.116404 | 0.118881 | 0.122815  | 0.122523  |
| 0.0534674 | 0.122669  | 0.124272 | 0.124563 | 0.126457 | 0.110286  | 0.116113  |
| 0.120047  | 0.119318  | 0.126748 | 0.113054 | 0.110868 | 0.11859   | 0.11655   |
| 0.125728  | 0.121503  | 0.122815 | 0.131556 | 0.136364 | 0.11553   | 0.119318  |
| 0.0710956 | 0.112034  | 0.121795 | 0.120047 | 0.118444 | 0.11014   | 0.1081    |
| 0.112179  | 0.120775  | 0.118298 | 0.105769 | 0.105915 | 0.122669  | 0.111597  |
| 0.120775  | 0.122086  | 0.129808 | 0.119027 | 0.116841 | 0.125437  | 0.118153  |

|           |           |          |          |          |           |           |
|-----------|-----------|----------|----------|----------|-----------|-----------|
| 0.124126  | 0.128934  | 0.130828 | 0.123834 | 0.127185 | 0.133159  | 0.0917832 |
| 0.111888  | 0.120775  | 0.112179 | 0.122669 | 0.125437 | 0.0935315 | 0.119172  |
| 0.237034  | 0.233392  | 0.238199 | 0.238199 | 0.240093 | 0.235577  | 0.238491  |
| 0.111597  | 0.107663  | 0.111888 | 0.118881 | 0.121941 | 0.115093  | 0.106643  |
| 0.100816  | 0.109994  | 0.115967 | 0.106643 | 0.108829 | 0.111014  | 0.0842075 |
| 0.119901  | 0.11451   | 0.111451 | 0.122815 | 0.126166 | 0.114948  | 0.115239  |
| 0.119172  | 0.13243   | 0.125874 | 0.128788 | 0.128351 | 0.0574009 | 0.131993  |
| 0.137821  | 0.135052  | 0.126166 | 0.123252 | 0.125146 | 0.128788  | 0.128788  |
| 0.121503  | 0.113491  | 0.115093 | 0.113928 | 0.11961  | 0.113054  | 0.117424  |
| 0.119464  | 0.123689  | 0.128497 | 0.117133 | 0.118444 | 0.120921  | 0.119755  |
| 0.107372  | 0.11451   | 0.105915 | 0.113491 | 0.115676 | 0.0791084 | 0.112617  |
| 0.234703  | 0.231061  | 0.234994 | 0.231498 | 0.233392 | 0.228293  | 0.232663  |
| 0.122815  | 0.127331  | 0.131847 | 0.118735 | 0.118298 | 0.124272  | 0.121358  |
| 0.118881  | 0.127477  | 0.125291 | 0.121795 | 0.124563 | 0.129079  | 0.0888695 |
| 0.108683  | 0.116987  | 0.106643 | 0.119172 | 0.122232 | 0.103438  | 0.113345  |
| 0.103875  | 0.126166  | 0.131556 | 0.122232 | 0.126166 | 0.11961   | 0.119027  |
| 0.114948  | 0.123834  | 0.128059 | 0.117861 | 0.117424 | 0.126894  | 0.0980478 |
| 0.119318  | 0.115967  | 0.109994 | 0.122232 | 0.125291 | 0.113782  | 0.116113  |
| 0.123689  | 0.125291  | 0.128642 | 0.119901 | 0.124709 | 0.131556  | 0.0901807 |
| 0.12704   | 0.128934  | 0.13345  | 0.126457 | 0.12602  | 0.136072  | 0.0909091 |
| 0.116841  | 0.118153  | 0.119172 | 0.119172 | 0.122523 | 0.126166  | 0.0839161 |
| 0.121358  | 0.112762  | 0.112908 | 0.126894 | 0.127914 | 0.118735  | 0.117861  |
| 0.0502622 | 0.12704   | 0.126311 | 0.130973 | 0.130536 | 0.112325  | 0.12398   |
| 0.0515734 | 0.132139  | 0.135781 | 0.131993 | 0.135052 | 0.119172  | 0.129371  |
| 0.128788  | 0.0627914 | 0.136072 | 0.130245 | 0.137092 | 0.131993  | 0.117133  |
| 0.130536  | 0.0645396 | 0.13549  | 0.135781 | 0.139132 | 0.136655  | 0.116841  |
| 0.0502622 | 0.134033  | 0.13243  | 0.130099 | 0.130828 | 0.116696  | 0.123689  |
| 0.116987  | 0.104895  | 0.107955 | 0.120775 | 0.123543 | 0.116987  | 0.109703  |
| 0.131119  | 0.123689  | 0.136364 | 0.124126 | 0.124563 | 0.140152  | 0.0606061 |
| 0.134178  | 0.135198  | 0.133304 | 0.13243  | 0.135781 | 0.134761  | 0.12398   |
| 0.205857  | 0.205711  | 0.204983 | 0.2044   | 0.206876 | 0.204691  | 0.209062  |
| 0.129225  | 0.131993  | 0.120192 | 0.106498 | 0.104604 | 0.126603  | 0.122232  |
| 0.107955  | 0.112762  | 0.122523 | 0.113199 | 0.112762 | 0.114656  | 0.0878497 |
| 0.124417  | 0.124563  | 0.114802 | 0.129371 | 0.13243  | 0.120338  | 0.120629  |
| 0.223922  | 0.222611  | 0.225087 | 0.223631 | 0.224068 | 0.223339  | 0.224505  |
| 0.214307  | 0.211247  | 0.212558 | 0.21285  | 0.214744 | 0.20877   | 0.210227  |
| 0.125291  | 0.127477  | 0.131119 | 0.127331 | 0.127477 | 0.134324  | 0.0906177 |
| 0.252477  | 0.244464  | 0.249272 | 0.250437 | 0.251748 | 0.247815  | 0.253351  |
| 0.116696  | 0.100524  | 0.109703 | 0.11961  | 0.12296  | 0.113491  | 0.107955  |
| 0.135344  | 0.136946  | 0.13243  | 0.137966 | 0.140734 | 0.136801  | 0.135927  |
| 0.114948  | 0.106352  | 0.11553  | 0.121649 | 0.124126 | 0.119901  | 0.110577  |
| 0.0498252 | 0.12602   | 0.12704  | 0.131119 | 0.129808 | 0.113345  | 0.120047  |
| 0.193619  | 0.185606  | 0.188083 | 0.187791 | 0.190851 | 0.188083  | 0.190705  |
| 0.119755  | 0.129516  | 0.120921 | 0.12704  | 0.130682 | 0.125874  | 0.120047  |

|           |           |           |           |           |           |           |
|-----------|-----------|-----------|-----------|-----------|-----------|-----------|
| 0.199592  | 0.193328  | 0.196096  | 0.193473  | 0.200321  | 0.195513  | 0.19697   |
| 0.120047  | 0.11961   | 0.0506993 | 0.115093  | 0.118735  | 0.111597  | 0.111888  |
| 0.118007  | 0.118153  | 0.12704   | 0.118298  | 0.120192  | 0.125     | 0.0996503 |
| 0.118881  | 0.116696  | 0.119755  | 0.127622  | 0.128351  | 0.119172  | 0.11859   |
| 0.115967  | 0.112325  | 0.118007  | 0.111014  | 0.114656  | 0.113345  | 0.109848  |
| 0.11553   | 0.1081    | 0.110286  | 0.11757   | 0.120047  | 0.111451  | 0.10708   |
| 0.119318  | 0.121212  | 0.114656  | 0.10271   | 0.104895  | 0.11961   | 0.107955  |
| 0.114073  | 0.104895  | 0.109411  | 0.118444  | 0.122086  | 0.118444  | 0.106206  |
| 0.117133  | 0.117861  | 0.122669  | 0.112179  | 0.110286  | 0.115385  | 0.113345  |
| 0.11961   | 0.105478  | 0.121941  | 0.112617  | 0.11451   | 0.125437  | 0.0499709 |
| 0.11961   | 0.118007  | 0.110868  | 0.11116   | 0.115967  | 0.11116   | 0.109703  |
| 0.113928  | 0.107372  | 0.113054  | 0.120338  | 0.122523  | 0.117133  | 0.108683  |
| 0.129808  | 0.0748834 | 0.127185  | 0.126894  | 0.130828  | 0.129808  | 0.107663  |
| 0.128059  | 0.13141   | 0.135635  | 0.119901  | 0.120629  | 0.129225  | 0.124563  |
| 0.11859   | 0.0496795 | 0.122086  | 0.124417  | 0.126894  | 0.120047  | 0.102855  |
| 0.114365  | 0.119464  | 0.121649  | 0.119027  | 0.118881  | 0.114948  | 0.107955  |
| 0.115967  | 0.11116   | 0.106643  | 0.11859   | 0.121358  | 0.11014   | 0.107809  |
| 0.119464  | 0.120192  | 0.12704   | 0.120047  | 0.120192  | 0.126166  | 0.0929487 |
| 0.0556527 | 0.119901  | 0.123543  | 0.125583  | 0.12602   | 0.112471  | 0.115093  |
| 0.12602   | 0.122669  | 0.129225  | 0.118444  | 0.126748  | 0.130973  | 0.104749  |
| 0.120775  | 0.0533217 | 0.125437  | 0.120775  | 0.124709  | 0.123106  | 0.101253  |
| 0.122669  | 0.117861  | 0.12704   | 0.111305  | 0.11553   | 0.119172  | 0.115676  |
| 0.128059  | 0.131119  | 0.135052  | 0.120484  | 0.116841  | 0.126603  | 0.124272  |
| 0.137966  | 0.138112  | 0.143794  | 0.127185  | 0.125874  | 0.135052  | 0.134761  |
| 0.109557  | 0.10912   | 0.114219  | 0.107809  | 0.113199  | 0.114802  | 0.0810023 |
| 0.120047  | 0.112617  | 0.111305  | 0.126748  | 0.128934  | 0.116841  | 0.117133  |
| 0.103875  | 0.110431  | 0.110286  | 0.104458  | 0.106643  | 0.116113  | 0.103293  |
| 0.0560897 | 0.132284  | 0.137092  | 0.136509  | 0.133741  | 0.117861  | 0.130973  |
| 0.11859   | 0.111742  | 0.113054  | 0.122669  | 0.125146  | 0.120629  | 0.111014  |
| 0.141608  | 0.140006  | 0.144231  | 0.136655  | 0.137966  | 0.144231  | 0.120338  |
| 0.140734  | 0.137675  | 0.129079  | 0.1419    | 0.143502  | 0.132576  | 0.13549   |
| 0.112908  | 0.128497  | 0.121066  | 0.12398   | 0.122669  | 0.0540501 | 0.12602   |
| 0.11655   | 0.110286  | 0.113636  | 0.111014  | 0.116404  | 0.113054  | 0.107809  |
| 0.100087  | 0.118298  | 0.111451  | 0.117861  | 0.121212  | 0.108829  | 0.107372  |
| 0.131265  | 0.0562354 | 0.132139  | 0.131847  | 0.135198  | 0.132721  | 0.112034  |
| 0.209499  | 0.202652  | 0.206876  | 0.207459  | 0.209936  | 0.206876  | 0.206294  |
| 0.112471  | 0.119318  | 0.119464  | 0.117716  | 0.119901  | 0.115967  | 0.1081    |
| 0.121358  | 0.113928  | 0.115239  | 0.124854  | 0.129079  | 0.121358  | 0.119027  |
| 0         | 0.122232  | 0.123543  | 0.125874  | 0.125437  | 0.106643  | 0.113054  |
| 0.122232  | 0         | 0.126311  | 0.127185  | 0.129371  | 0.12398   | 0.104458  |
| 0.123543  | 0.126311  | 0         | 0.120921  | 0.123397  | 0.119172  | 0.118007  |
| 0.125874  | 0.127185  | 0.120921  | 0         | 0.0488054 | 0.117424  | 0.111597  |
| 0.125437  | 0.129371  | 0.123397  | 0.0488054 | 0         | 0.119901  | 0.114073  |
| 0.106643  | 0.12398   | 0.119172  | 0.117424  | 0.119901  | 0         | 0.119755  |

|           |           |          |           |           |          |           |
|-----------|-----------|----------|-----------|-----------|----------|-----------|
| 0.113054  | 0.104458  | 0.118007 | 0.111597  | 0.114073  | 0.119755 | 0         |
| 0.0521562 | 0.130099  | 0.132576 | 0.130828  | 0.128059  | 0.113636 | 0.123252  |
| 0.115967  | 0.114365  | 0.113636 | 0.122086  | 0.124272  | 0.118298 | 0.114219  |
| 0.126603  | 0.122086  | 0.113782 | 0.115239  | 0.117133  | 0.119027 | 0.113491  |
| 0.178322  | 0.170017  | 0.179487 | 0.176573  | 0.181964  | 0.176282 | 0.173368  |
| 0.122378  | 0.117279  | 0.124126 | 0.114802  | 0.118153  | 0.121212 | 0.115967  |
| 0.0592949 | 0.129371  | 0.130682 | 0.133596  | 0.129953  | 0.11757  | 0.124563  |
| 0.118298  | 0.118444  | 0.122378 | 0.128497  | 0.133887  | 0.12704  | 0.0984848 |
| 0.119901  | 0.121795  | 0.127477 | 0.125728  | 0.125291  | 0.121066 | 0.107955  |
| 0.11757   | 0.109557  | 0.108829 | 0.0878497 | 0.0894522 | 0.107663 | 0.10067   |
| 0.115239  | 0.110431  | 0.103001 | 0.105915  | 0.109848  | 0.106789 | 0.0986305 |
| 0.11961   | 0.113636  | 0.114656 | 0.0872669 | 0.0888695 | 0.114073 | 0.105332  |
| 0.119318  | 0.123834  | 0.12602  | 0.126603  | 0.128497  | 0.124854 | 0.107372  |
| 0.124272  | 0.118881  | 0.112034 | 0.111451  | 0.112179  | 0.114073 | 0.11553   |
| 0.130536  | 0.120775  | 0.128788 | 0.129662  | 0.136218  | 0.132284 | 0.109557  |
| 0.112325  | 0.113345  | 0.116404 | 0.11553   | 0.119755  | 0.120192 | 0.0913462 |
| 0.125874  | 0.114948  | 0.12296  | 0.115967  | 0.11757   | 0.126166 | 0.0944056 |
| 0.128059  | 0.13549   | 0.13039  | 0.125146  | 0.127914  | 0.13447  | 0.114656  |
| 0.122523  | 0.113636  | 0.121649 | 0.119318  | 0.118881  | 0.123397 | 0.0878497 |
| 0.123397  | 0.117424  | 0.131847 | 0.109411  | 0.113636  | 0.122815 | 0.108537  |
| 0.11961   | 0.109557  | 0.11553  | 0.115822  | 0.116841  | 0.11961  | 0.0828963 |
| 0.124854  | 0.113636  | 0.11961  | 0.117279  | 0.117133  | 0.12398  | 0.0890152 |
| 0.112034  | 0.105478  | 0.10912  | 0.117279  | 0.120629  | 0.108829 | 0.103001  |
| 0.127622  | 0.120192  | 0.122378 | 0.126457  | 0.13243   | 0.129953 | 0.112179  |
| 0.115385  | 0.108537  | 0.113636 | 0.117133  | 0.121649  | 0.111597 | 0.0894522 |
| 0.1419    | 0.140006  | 0.15035  | 0.140734  | 0.137092  | 0.13986  | 0.119755  |
| 0.128788  | 0.128059  | 0.136946 | 0.13345   | 0.13243   | 0.129662 | 0.112762  |
| 0.115967  | 0.105041  | 0.120629 | 0.114219  | 0.120484  | 0.119172 | 0.0812937 |
| 0.133304  | 0.134033  | 0.144085 | 0.13243   | 0.134615  | 0.139132 | 0.120775  |
| 0.120192  | 0.0973193 | 0.125437 | 0.128642  | 0.131119  | 0.116113 | 0.111451  |
| 0.139714  | 0.13549   | 0.135927 | 0.133887  | 0.132284  | 0.136509 | 0.132721  |
| 0.118444  | 0.106643  | 0.119027 | 0.118444  | 0.119755  | 0.117861 | 0.103875  |
| 0.126166  | 0.144668  | 0.138112 | 0.145979  | 0.146125  | 0.141317 | 0.137238  |
| 0.118007  | 0.135635  | 0.120338 | 0.128788  | 0.131265  | 0.126166 | 0.116259  |
| 0.12704   | 0.131265  | 0.136946 | 0.135198  | 0.135635  | 0.132576 | 0.123543  |
| 0.127914  | 0.10067   | 0.125583 | 0.122378  | 0.128059  | 0.124126 | 0.101107  |
| 0.120484  | 0.105478  | 0.113491 | 0.114656  | 0.120629  | 0.119027 | 0.0855186 |
| 0.117133  | 0.11116   | 0.115093 | 0.11859   | 0.121358  | 0.120338 | 0.10169   |
| 0.103293  | 0.119755  | 0.121941 | 0.118153  | 0.122086  | 0.112325 | 0.10271   |
| 0.124563  | 0.117716  | 0.126603 | 0.12398   | 0.121795  | 0.13039  | 0.0960082 |
| 0.128788  | 0.122232  | 0.12704  | 0.129662  | 0.130682  | 0.134033 | 0.11655   |
| 0.127331  | 0.120192  | 0.125874 | 0.131119  | 0.13039   | 0.126166 | 0.110431  |
| 0.111597  | 0.0890152 | 0.115967 | 0.120338  | 0.122815  | 0.115093 | 0.0932401 |
| 0.118735  | 0.113054  | 0.116696 | 0.11757   | 0.122086  | 0.121066 | 0.099796  |

|          |          |          |           |           |          |          |
|----------|----------|----------|-----------|-----------|----------|----------|
| 0.119755 | 0.115822 | 0.121503 | 0.12704   | 0.130973  | 0.120921 | 0.109557 |
| 0.117133 | 0.108537 | 0.117424 | 0.120629  | 0.124854  | 0.120338 | 0.101981 |
| 0.126603 | 0.121795 | 0.12398  | 0.123397  | 0.126748  | 0.126894 | 0.109994 |
| 0.121358 | 0.107517 | 0.11961  | 0.121066  | 0.124709  | 0.121649 | 0.106498 |
| 0.11859  | 0.113199 | 0.113345 | 0.112179  | 0.11553   | 0.114802 | 0.117424 |
| 0.120338 | 0.119901 | 0.120338 | 0.115676  | 0.113782  | 0.113054 | 0.111597 |
| 0.115093 | 0.099796 | 0.108683 | 0.115093  | 0.119318  | 0.112471 | 0.108392 |
| 0.114802 | 0.111451 | 0.119755 | 0.120921  | 0.125146  | 0.116841 | 0.107226 |
| 0.115822 | 0.11014  | 0.112325 | 0.113782  | 0.117716  | 0.114656 | 0.115239 |
| 0.119464 | 0.115239 | 0.117133 | 0.0920746 | 0.0960082 | 0.118007 | 0.1081   |
| 0.124126 | 0.124272 | 0.122669 | 0.0964452 | 0.0945513 | 0.124709 | 0.118298 |
| 0.113054 | 0.103001 | 0.107809 | 0.106643  | 0.111742  | 0.104312 | 0.106352 |
| 0.130099 | 0.121795 | 0.128059 | 0.0992133 | 0.0984848 | 0.133013 | 0.11757  |

| TDr_4178 | TDr_4180  | TDr_4185  | TDr_4187 | TDr_4191 | TDr_4192 | TDr_87_00211 |
|----------|-----------|-----------|----------|----------|----------|--------------|
| 0.134615 | 0.111014  | 0.110868  | 0.166667 | 0.115967 | 0.125728 | 0.118007     |
| 0.125728 | 0.115239  | 0.110723  | 0.171474 | 0.108537 | 0.12296  | 0.118735     |
| 0.123689 | 0.106498  | 0.108683  | 0.165647 | 0.099796 | 0.121503 | 0.114948     |
| 0.121358 | 0.11553   | 0.119755  | 0.170892 | 0.092803 | 0.124417 | 0.120775     |
| 0.136801 | 0.128642  | 0.129371  | 0.1875   | 0.133304 | 0.134324 | 0.136509     |
| 0.135927 | 0.121649  | 0.131702  | 0.182838 | 0.127477 | 0.138695 | 0.134178     |
| 0.131119 | 0.119172  | 0.120484  | 0.175408 | 0.125291 | 0.130099 | 0.109557     |
| 0.122378 | 0.108974  | 0.109411  | 0.164918 | 0.101399 | 0.123106 | 0.115967     |
| 0.12398  | 0.0939685 | 0.0912005 | 0.167104 | 0.103875 | 0.11859  | 0.105332     |
| 0.125874 | 0.0844988 | 0.088141  | 0.174534 | 0.115967 | 0.125728 | 0.0868298    |
| 0.133013 | 0.113491  | 0.106352  | 0.166521 | 0.121941 | 0.120629 | 0.11116      |
| 0.112179 | 0.109848  | 0.111742  | 0.167249 | 0.104312 | 0.114656 | 0.115385     |
| 0.126748 | 0.108974  | 0.0965909 | 0.175117 | 0.111597 | 0.128059 | 0.11451      |
| 0.150204 | 0.131556  | 0.12704   | 0.156906 | 0.128642 | 0.137529 | 0.137092     |
| 0.136655 | 0.122669  | 0.122523  | 0.177739 | 0.127331 | 0.137675 | 0.12296      |
| 0.132139 | 0.114948  | 0.117424  | 0.180216 | 0.118735 | 0.13345  | 0.103293     |
| 0.104312 | 0.1081    | 0.10912   | 0.168706 | 0.113928 | 0.103584 | 0.108392     |
| 0.140297 | 0.145542  | 0.144231  | 0.195076 | 0.139132 | 0.140734 | 0.14729      |
| 0.121649 | 0.105915  | 0.108974  | 0.163316 | 0.103001 | 0.120921 | 0.116113     |
| 0.209353 | 0.199155  | 0.20338   | 0.189248 | 0.198572 | 0.197552 | 0.207314     |
| 0.127622 | 0.119172  | 0.128059  | 0.178322 | 0.126166 | 0.126603 | 0.127622     |
| 0.121066 | 0.111451  | 0.121212  | 0.182255 | 0.116404 | 0.123252 | 0.121941     |
| 0.122378 | 0.107226  | 0.106206  | 0.168415 | 0.1081   | 0.122523 | 0.1081       |
| 0.126894 | 0.122815  | 0.128788  | 0.188083 | 0.125146 | 0.130536 | 0.116404     |
| 0.119464 | 0.0952797 | 0.100087  | 0.165501 | 0.105478 | 0.11757  | 0.0990676    |
| 0.130828 | 0.123252  | 0.133304  | 0.179487 | 0.13345  | 0.13447  | 0.133741     |
| 0.125291 | 0.115967  | 0.126311  | 0.179779 | 0.128205 | 0.125437 | 0.116259     |
| 0.121795 | 0.111014  | 0.116113  | 0.181818 | 0.122378 | 0.126894 | 0.119755     |
| 0.134615 | 0.125583  | 0.129516  | 0.179779 | 0.129371 | 0.135052 | 0.121795     |
| 0.124709 | 0.108683  | 0.112908  | 0.182401 | 0.125291 | 0.129225 | 0.113928     |
| 0.134178 | 0.115822  | 0.120921  | 0.175554 | 0.12602  | 0.133159 | 0.117279     |
| 0.121503 | 0.120047  | 0.119027  | 0.178613 | 0.123252 | 0.125437 | 0.113345     |
| 0.115676 | 0.10373   | 0.108246  | 0.167249 | 0.108392 | 0.116696 | 0.108683     |
| 0.130536 | 0.11451   | 0.108246  | 0.175117 | 0.116259 | 0.132721 | 0.115385     |
| 0.129516 | 0.118153  | 0.107809  | 0.183421 | 0.126603 | 0.130245 | 0.109994     |
| 0.135781 | 0.119172  | 0.114656  | 0.186772 | 0.127914 | 0.135927 | 0.112179     |
| 0.135344 | 0.121941  | 0.12704   | 0.193036 | 0.135927 | 0.13986  | 0.116404     |
| 0.124709 | 0.114802  | 0.109703  | 0.181818 | 0.125    | 0.12602  | 0.113636     |
| 0.116259 | 0.104604  | 0.110868  | 0.168415 | 0.108683 | 0.120775 | 0.112471     |
| 0.131119 | 0.114219  | 0.120775  | 0.177156 | 0.119755 | 0.135635 | 0.116841     |
| 0.124417 | 0.101981  | 0.109411  | 0.164044 | 0.108392 | 0.121649 | 0.106935     |
| 0.147145 | 0.13141   | 0.134178  | 0.193473 | 0.141317 | 0.150204 | 0.129079     |



|          |          |           |          |           |          |           |
|----------|----------|-----------|----------|-----------|----------|-----------|
| 0.148893 | 0.137821 | 0.14292   | 0.189394 | 0.145979  | 0.152535 | 0.131119  |
| 0.127477 | 0.107663 | 0.108392  | 0.1706   | 0.114073  | 0.129662 | 0.111742  |
| 0.113199 | 0.095134 | 0.0996503 | 0.165355 | 0.112034  | 0.115093 | 0.0945513 |
| 0.124417 | 0.10373  | 0.0986305 | 0.180653 | 0.122669  | 0.130099 | 0.0932401 |
| 0.117133 | 0.116259 | 0.118735  | 0.175408 | 0.119172  | 0.122232 | 0.116841  |
| 0.146416 | 0.125437 | 0.129371  | 0.188666 | 0.136509  | 0.147145 | 0.127477  |
| 0.123106 | 0.10271  | 0.108392  | 0.173223 | 0.113199  | 0.122378 | 0.106789  |
| 0.125291 | 0.109266 | 0.106789  | 0.167832 | 0.116841  | 0.12602  | 0.108974  |
| 0.152826 | 0.137383 | 0.151224  | 0.189831 | 0.145542  | 0.149767 | 0.13884   |
| 0.125437 | 0.124854 | 0.129371  | 0.180798 | 0.132139  | 0.12704  | 0.122232  |
| 0.124709 | 0.1081   | 0.117861  | 0.168415 | 0.113345  | 0.12602  | 0.113054  |
| 0.132867 | 0.125291 | 0.106498  | 0.180361 | 0.125583  | 0.135927 | 0.115093  |
| 0.127914 | 0.115967 | 0.119901  | 0.167541 | 0.0839161 | 0.130099 | 0.120338  |
| 0.133741 | 0.140152 | 0.140006  | 0.195804 | 0.137238  | 0.138549 | 0.129662  |
| 0.139423 | 0.11757  | 0.12296   | 0.185169 | 0.128059  | 0.138695 | 0.115822  |
| 0.123689 | 0.107663 | 0.111597  | 0.169726 | 0.112325  | 0.123834 | 0.112908  |
| 0.127185 | 0.112034 | 0.108392  | 0.172348 | 0.120192  | 0.130245 | 0.11116   |
| 0.130828 | 0.105769 | 0.107372  | 0.181527 | 0.125291  | 0.132139 | 0.0789627 |
| 0.142483 | 0.130245 | 0.13884   | 0.191725 | 0.137238  | 0.144668 | 0.125291  |
| 0.149476 | 0.128497 | 0.133013  | 0.192016 | 0.135781  | 0.152826 | 0.128788  |
| 0.169726 | 0.159528 | 0.163753  | 0.176719 | 0.158362  | 0.161422 | 0.16215   |
| 0.121066 | 0.11116  | 0.110723  | 0.170309 | 0.111742  | 0.129953 | 0.116987  |
| 0.122232 | 0.107372 | 0.110723  | 0.172057 | 0.114365  | 0.12704  | 0.110286  |
| 0.122815 | 0.10912  | 0.11014   | 0.166812 | 0.11116   | 0.12296  | 0.103584  |
| 0.142191 | 0.130536 | 0.135052  | 0.180361 | 0.13986   | 0.146125 | 0.13345   |
| 0.124417 | 0.111014 | 0.110286  | 0.167832 | 0.108974  | 0.126603 | 0.108392  |
| 0.129516 | 0.128059 | 0.134033  | 0.186043 | 0.133013  | 0.130536 | 0.122815  |
| 0.128059 | 0.109411 | 0.1081    | 0.184878 | 0.126603  | 0.130245 | 0.0796911 |
| 0.125    | 0.112762 | 0.116113  | 0.170746 | 0.121795  | 0.125437 | 0.115093  |
| 0.147145 | 0.142191 | 0.143794  | 0.186772 | 0.145105  | 0.145542 | 0.134324  |
| 0.13141  | 0.118881 | 0.116696  | 0.175408 | 0.121503  | 0.135052 | 0.119172  |
| 0.146416 | 0.129808 | 0.131702  | 0.191871 | 0.137383  | 0.14627  | 0.127185  |
| 0.126457 | 0.128205 | 0.13243   | 0.180361 | 0.133159  | 0.129808 | 0.125874  |
| 0.104749 | 0.112617 | 0.116841  | 0.1706   | 0.108246  | 0.108392 | 0.111742  |
| 0.124272 | 0.107955 | 0.109266  | 0.163899 | 0.112617  | 0.126457 | 0.105041  |
| 0.126894 | 0.112034 | 0.111597  | 0.167686 | 0.115239  | 0.125291 | 0.109703  |
| 0.135052 | 0.124272 | 0.13141   | 0.18546  | 0.129225  | 0.139569 | 0.126311  |
| 0.128788 | 0.107517 | 0.108537  | 0.168124 | 0.112179  | 0.128351 | 0.106935  |
| 0.140589 | 0.130682 | 0.136072  | 0.187791 | 0.134178  | 0.144522 | 0.135927  |
| 0.132139 | 0.117861 | 0.119464  | 0.176136 | 0.124854  | 0.133741 | 0.119027  |
| 0.125146 | 0.116696 | 0.121212  | 0.180507 | 0.116696  | 0.125583 | 0.113491  |
| 0.126311 | 0.114073 | 0.117424  | 0.170017 | 0.118735  | 0.129953 | 0.115239  |
| 0.132721 | 0.116987 | 0.118007  | 0.17701  | 0.115822  | 0.13549  | 0.120192  |
| 0.123106 | 0.10708  | 0.113636  | 0.172348 | 0.11757   | 0.123252 | 0.113199  |

|          |           |           |          |          |          |           |
|----------|-----------|-----------|----------|----------|----------|-----------|
| 0.12398  | 0.10708   | 0.113636  | 0.169143 | 0.113199 | 0.125    | 0.109994  |
| 0.144814 | 0.130828  | 0.133013  | 0.186772 | 0.135198 | 0.146999 | 0.126748  |
| 0.12296  | 0.108974  | 0.10708   | 0.174242 | 0.117424 | 0.12398  | 0.103147  |
| 0.123689 | 0.108246  | 0.0955711 | 0.176719 | 0.116404 | 0.126457 | 0.104167  |
| 0.127185 | 0.119027  | 0.123834  | 0.184586 | 0.127768 | 0.130536 | 0.11116   |
| 0.133013 | 0.123397  | 0.123543  | 0.178467 | 0.130973 | 0.13549  | 0.116113  |
| 0.125437 | 0.120775  | 0.123252  | 0.188957 | 0.137675 | 0.130245 | 0.114073  |
| 0.134907 | 0.134324  | 0.133596  | 0.192308 | 0.138112 | 0.137675 | 0.12296   |
| 0.128642 | 0.112908  | 0.11451   | 0.1706   | 0.122232 | 0.127622 | 0.113199  |
| 0.188957 | 0.175845  | 0.189103  | 0.181964 | 0.181672 | 0.175699 | 0.175554  |
| 0.116841 | 0.112179  | 0.109411  | 0.172494 | 0.109266 | 0.116987 | 0.102855  |
| 0.13884  | 0.135052  | 0.127331  | 0.190705 | 0.136801 | 0.143357 | 0.121649  |
| 0.129225 | 0.123106  | 0.120921  | 0.185169 | 0.128642 | 0.134615 | 0.118444  |
| 0.13549  | 0.125291  | 0.134178  | 0.187937 | 0.138112 | 0.138549 | 0.114802  |
| 0.11961  | 0.110577  | 0.108683  | 0.172057 | 0.114948 | 0.121503 | 0.10271   |
| 0.129516 | 0.124854  | 0.129662  | 0.188666 | 0.13243  | 0.131702 | 0.116696  |
| 0.116113 | 0.10708   | 0.108392  | 0.176428 | 0.117279 | 0.117424 | 0.107372  |
| 0.126457 | 0.113054  | 0.119027  | 0.182401 | 0.127622 | 0.125728 | 0.0996503 |
| 0.129953 | 0.104604  | 0.11116   | 0.167832 | 0.115676 | 0.128642 | 0.107226  |
| 0.131702 | 0.128788  | 0.138258  | 0.18852  | 0.1419   | 0.134761 | 0.11451   |
| 0.121212 | 0.0949883 | 0.101253  | 0.175699 | 0.115967 | 0.122232 | 0.0944056 |
| 0.136509 | 0.125728  | 0.131119  | 0.181964 | 0.133596 | 0.137529 | 0.116987  |
| 0.121795 | 0.104895  | 0.114948  | 0.175699 | 0.121212 | 0.122815 | 0.101107  |
| 0.139132 | 0.11757   | 0.125     | 0.188666 | 0.132721 | 0.142191 | 0.116113  |
| 0.134907 | 0.115385  | 0.123689  | 0.182401 | 0.134324 | 0.137383 | 0.112471  |
| 0.114802 | 0.107517  | 0.107372  | 0.173368 | 0.115093 | 0.116987 | 0.0976107 |
| 0.145688 | 0.142774  | 0.143794  | 0.18211  | 0.143939 | 0.146707 | 0.136655  |
| 0.115239 | 0.10708   | 0.107517  | 0.175262 | 0.120775 | 0.121212 | 0.105624  |
| 0.124272 | 0.110286  | 0.102855  | 0.175262 | 0.116404 | 0.127622 | 0.105915  |
| 0.118298 | 0.101981  | 0.110868  | 0.174534 | 0.123834 | 0.122523 | 0.104021  |
| 0.140734 | 0.125291  | 0.130682  | 0.191434 | 0.141608 | 0.142045 | 0.115967  |
| 0.127331 | 0.116841  | 0.127768  | 0.16958  | 0.128205 | 0.123397 | 0.119172  |
| 0.118298 | 0.108392  | 0.101836  | 0.169872 | 0.111014 | 0.122232 | 0.101107  |
| 0.116841 | 0.109557  | 0.103584  | 0.171911 | 0.115093 | 0.11961  | 0.100524  |
| 0.123397 | 0.110577  | 0.112471  | 0.175845 | 0.119027 | 0.128497 | 0.103293  |
| 0.131993 | 0.111597  | 0.111451  | 0.187063 | 0.129953 | 0.136801 | 0.090035  |
| 0.129225 | 0.113199  | 0.112179  | 0.17264  | 0.122523 | 0.126166 | 0.106789  |
| 0.113636 | 0.0984848 | 0.0965909 | 0.166958 | 0.109848 | 0.115822 | 0.0763403 |
| 0.11859  | 0.0949883 | 0.0933858 | 0.166958 | 0.107517 | 0.118444 | 0.0815851 |
| 0.119027 | 0.095134  | 0.0976107 | 0.171766 | 0.11553  | 0.118298 | 0.0779429 |
| 0.125146 | 0.120192  | 0.116841  | 0.174097 | 0.120775 | 0.127331 | 0.121358  |
| 0.134615 | 0.120338  | 0.114365  | 0.189394 | 0.132867 | 0.133304 | 0.0827506 |
| 0.116404 | 0.101836  | 0.0979021 | 0.177885 | 0.110577 | 0.119755 | 0.0826049 |
| 0.117716 | 0.094697  | 0.0977564 | 0.16958  | 0.107517 | 0.118444 | 0.0827506 |

|          |           |           |          |           |          |           |
|----------|-----------|-----------|----------|-----------|----------|-----------|
| 0.124417 | 0.110431  | 0.112908  | 0.182984 | 0.134033  | 0.128934 | 0.087704  |
| 0.11757  | 0.102418  | 0.0981935 | 0.171183 | 0.113782  | 0.121795 | 0.0878497 |
| 0.136801 | 0.116113  | 0.120047  | 0.170309 | 0.125437  | 0.138695 | 0.119901  |
| 0.137675 | 0.123397  | 0.135781  | 0.182547 | 0.131265  | 0.138986 | 0.130682  |
| 0.119901 | 0.099796  | 0.1081    | 0.176136 | 0.118153  | 0.123252 | 0.088141  |
| 0.119755 | 0.101399  | 0.0980478 | 0.179779 | 0.11451   | 0.123397 | 0.087704  |
| 0.116841 | 0.0981935 | 0.103293  | 0.175991 | 0.113636  | 0.120192 | 0.0818765 |
| 0.119755 | 0.0964452 | 0.0980478 | 0.165793 | 0.111305  | 0.119901 | 0.0912005 |
| 0.124709 | 0.103147  | 0.111451  | 0.184441 | 0.125291  | 0.131265 | 0.0920746 |
| 0.11859  | 0.0929487 | 0.0962995 | 0.167541 | 0.109266  | 0.121066 | 0.0810023 |
| 0.14088  | 0.128642  | 0.134615  | 0.194202 | 0.141754  | 0.144814 | 0.121649  |
| 0.142774 | 0.122378  | 0.128351  | 0.183858 | 0.136655  | 0.145251 | 0.120629  |
| 0.135198 | 0.113636  | 0.117279  | 0.18211  | 0.125291  | 0.134178 | 0.109557  |
| 0.126603 | 0.105624  | 0.106352  | 0.171183 | 0.121358  | 0.128205 | 0.108246  |
| 0.117861 | 0.10271   | 0.113928  | 0.171474 | 0.120484  | 0.12296  | 0.104749  |
| 0.116841 | 0.106352  | 0.106789  | 0.174242 | 0.117424  | 0.119027 | 0.0818765 |
| 0.120775 | 0.101253  | 0.104021  | 0.170017 | 0.113782  | 0.121212 | 0.0965909 |
| 0.123397 | 0.103001  | 0.101981  | 0.174971 | 0.110286  | 0.124126 | 0.108537  |
| 0.124854 | 0.114365  | 0.115967  | 0.164481 | 0.0933858 | 0.12296  | 0.119027  |
| 0.130973 | 0.120484  | 0.130828  | 0.186917 | 0.134178  | 0.13345  | 0.116696  |
| 0.125874 | 0.115093  | 0.108829  | 0.175991 | 0.114802  | 0.125146 | 0.108392  |
| 0.133013 | 0.120484  | 0.115093  | 0.188083 | 0.132721  | 0.135198 | 0.11757   |
| 0.129953 | 0.129079  | 0.13243   | 0.192308 | 0.136946  | 0.133596 | 0.115676  |
| 0.199883 | 0.193182  | 0.193619  | 0.166667 | 0.183858  | 0.187791 | 0.20338   |
| 0.245192 | 0.236742  | 0.241259  | 0.204691 | 0.231498  | 0.231352 | 0.245484  |
| 0.123252 | 0.110723  | 0.117279  | 0.165793 | 0.0675991 | 0.123106 | 0.12296   |
| 0.115822 | 0.111451  | 0.112762  | 0.172348 | 0.11553   | 0.119755 | 0.105332  |
| 0.114365 | 0.107663  | 0.106352  | 0.167978 | 0.108537  | 0.116259 | 0.10708   |
| 0.110286 | 0.110286  | 0.112762  | 0.16623  | 0.111742  | 0.114802 | 0.113491  |
| 0.137383 | 0.122815  | 0.120629  | 0.179341 | 0.127768  | 0.139569 | 0.123689  |
| 0.115822 | 0.110577  | 0.117716  | 0.17264  | 0.112325  | 0.117424 | 0.116696  |
| 0.137821 | 0.143939  | 0.148164  | 0.196096 | 0.148893  | 0.142045 | 0.134033  |
| 0.113491 | 0.11553   | 0.113054  | 0.174097 | 0.117861  | 0.117133 | 0.113491  |
| 0.124563 | 0.123689  | 0.128497  | 0.186626 | 0.129516  | 0.128788 | 0.119901  |
| 0.130245 | 0.125874  | 0.133887  | 0.179196 | 0.127331  | 0.131265 | 0.119172  |
| 0.119464 | 0.130828  | 0.132721  | 0.187937 | 0.136946  | 0.126603 | 0.122669  |
| 0.14627  | 0.127622  | 0.129225  | 0.18852  | 0.135198  | 0.148164 | 0.129371  |
| 0.111305 | 0.115676  | 0.112617  | 0.176282 | 0.120629  | 0.115239 | 0.110723  |
| 0.11014  | 0.112179  | 0.114948  | 0.173951 | 0.11451   | 0.11553  | 0.105769  |
| 0.111742 | 0.116404  | 0.118298  | 0.175845 | 0.123106  | 0.117424 | 0.108537  |
| 0.107955 | 0.105624  | 0.112762  | 0.168561 | 0.114948  | 0.111888 | 0.109703  |
| 0.108246 | 0.108246  | 0.113636  | 0.171474 | 0.115239  | 0.111597 | 0.106498  |
| 0.112179 | 0.117716  | 0.119318  | 0.172203 | 0.113928  | 0.114365 | 0.113345  |
| 0.114073 | 0.120775  | 0.129662  | 0.180507 | 0.13039   | 0.116259 | 0.123689  |

|          |           |           |          |          |          |           |
|----------|-----------|-----------|----------|----------|----------|-----------|
| 0.121649 | 0.132139  | 0.141317  | 0.190414 | 0.138549 | 0.130828 | 0.128642  |
| 0.119755 | 0.113928  | 0.11961   | 0.175699 | 0.11655  | 0.121649 | 0.111014  |
| 0.119027 | 0.112325  | 0.115385  | 0.169435 | 0.114656 | 0.120047 | 0.112034  |
| 0.126603 | 0.124563  | 0.132284  | 0.189831 | 0.135927 | 0.129953 | 0.125437  |
| 0.112908 | 0.110577  | 0.111597  | 0.17264  | 0.114073 | 0.113636 | 0.108246  |
| 0.128497 | 0.137821  | 0.142337  | 0.190268 | 0.145979 | 0.133013 | 0.137529  |
| 0.137529 | 0.121503  | 0.125146  | 0.183858 | 0.140152 | 0.140006 | 0.128497  |
| 0.123397 | 0.130099  | 0.135781  | 0.181964 | 0.135927 | 0.128788 | 0.130099  |
| 0.10708  | 0.10912   | 0.110723  | 0.16623  | 0.109994 | 0.113054 | 0.100962  |
| 0.111597 | 0.102564  | 0.109411  | 0.16958  | 0.113636 | 0.114365 | 0.109266  |
| 0.114948 | 0.122815  | 0.128205  | 0.179924 | 0.127185 | 0.120629 | 0.116696  |
| 0.116841 | 0.117424  | 0.124854  | 0.179196 | 0.126166 | 0.122815 | 0.119464  |
| 0.118298 | 0.123834  | 0.134761  | 0.180361 | 0.135781 | 0.120775 | 0.118881  |
| 0.111742 | 0.117279  | 0.122378  | 0.170017 | 0.116696 | 0.112471 | 0.117279  |
| 0.117133 | 0.115093  | 0.118735  | 0.175699 | 0.120921 | 0.117279 | 0.115385  |
| 0.118007 | 0.122086  | 0.121358  | 0.18007  | 0.123834 | 0.122523 | 0.121212  |
| 0.125    | 0.124709  | 0.13039   | 0.188228 | 0.139277 | 0.124563 | 0.117716  |
| 0.123543 | 0.125874  | 0.13243   | 0.190851 | 0.132867 | 0.125437 | 0.117716  |
| 0.129225 | 0.129516  | 0.140152  | 0.185169 | 0.135344 | 0.13345  | 0.126603  |
| 0.140443 | 0.128788  | 0.130682  | 0.183858 | 0.134907 | 0.141754 | 0.125583  |
| 0.11655  | 0.116259  | 0.117861  | 0.172203 | 0.112471 | 0.118153 | 0.106643  |
| 0.118298 | 0.124417  | 0.138258  | 0.181527 | 0.133741 | 0.121066 | 0.125583  |
| 0.108829 | 0.114365  | 0.110723  | 0.167395 | 0.113199 | 0.114219 | 0.107663  |
| 0.123252 | 0.107226  | 0.112325  | 0.170455 | 0.115385 | 0.124272 | 0.112762  |
| 0.105478 | 0.111305  | 0.112908  | 0.170163 | 0.116259 | 0.109994 | 0.108392  |
| 0.112325 | 0.10708   | 0.114219  | 0.172348 | 0.11961  | 0.11655  | 0.11116   |
| 0.103875 | 0.107955  | 0.108683  | 0.170892 | 0.112908 | 0.109848 | 0.105915  |
| 0.124417 | 0.13141   | 0.137092  | 0.185023 | 0.13549  | 0.128351 | 0.120921  |
| 0.124854 | 0.112034  | 0.115967  | 0.171183 | 0.120192 | 0.125874 | 0.119027  |
| 0.125146 | 0.129516  | 0.132576  | 0.184878 | 0.133596 | 0.125874 | 0.130682  |
| 0.110286 | 0.107955  | 0.113928  | 0.171766 | 0.114656 | 0.113928 | 0.110868  |
| 0.118007 | 0.11859   | 0.124272  | 0.178322 | 0.130828 | 0.122232 | 0.110723  |
| 0.132721 | 0.109411  | 0.114802  | 0.178176 | 0.125728 | 0.134615 | 0.111451  |
| 0.125728 | 0.107663  | 0.1081    | 0.172348 | 0.11961  | 0.130536 | 0.116987  |
| 0.121795 | 0.109557  | 0.107955  | 0.175991 | 0.121212 | 0.126603 | 0.0914918 |
| 0.118153 | 0.111451  | 0.117133  | 0.180798 | 0.123106 | 0.117716 | 0.112325  |
| 0.128205 | 0.1081    | 0.116696  | 0.181235 | 0.11859  | 0.127768 | 0.11451   |
| 0.124126 | 0.11014   | 0.11553   | 0.172203 | 0.117424 | 0.125146 | 0.111014  |
| 0.143939 | 0.113054  | 0.0962995 | 0.196387 | 0.136072 | 0.146416 | 0.108974  |
| 0.14088  | 0.137675  | 0.138112  | 0.193036 | 0.137675 | 0.147145 | 0.124563  |
| 0.121941 | 0.0942599 | 0.0824592 | 0.167978 | 0.106789 | 0.120338 | 0.0957168 |
| 0.132284 | 0.115676  | 0.121941  | 0.185897 | 0.136364 | 0.134178 | 0.123834  |
| 0.139714 | 0.106498  | 0.0917832 | 0.188666 | 0.132139 | 0.138986 | 0.0983392 |
| 0.134178 | 0.11757   | 0.122086  | 0.182547 | 0.129808 | 0.135781 | 0.120775  |

|          |           |           |          |          |          |           |
|----------|-----------|-----------|----------|----------|----------|-----------|
| 0.123397 | 0.105332  | 0.11451   | 0.177885 | 0.124272 | 0.125    | 0.112034  |
| 0.135344 | 0.0983392 | 0.07838   | 0.186334 | 0.126311 | 0.135198 | 0.104749  |
| 0.136364 | 0.106935  | 0.0796911 | 0.185315 | 0.127622 | 0.140006 | 0.100524  |
| 0.127185 | 0.111116  | 0.113928  | 0.188666 | 0.126311 | 0.132284 | 0.116113  |
| 0.133013 | 0.114365  | 0.126748  | 0.186043 | 0.139132 | 0.138112 | 0.124854  |
| 0.136801 | 0.101253  | 0.0754662 | 0.180798 | 0.122815 | 0.137529 | 0.108246  |
| 0.119027 | 0.101544  | 0.109557  | 0.175554 | 0.123397 | 0.120629 | 0.10912   |
| 0.137821 | 0.13141   | 0.143211  | 0.189685 | 0.13141  | 0.136801 | 0.132867  |
| 0.14088  | 0.116696  | 0.0885781 | 0.186334 | 0.136801 | 0.145396 | 0.105915  |
| 0.119318 | 0.101253  | 0.0958625 | 0.173514 | 0.114365 | 0.120921 | 0.101253  |
| 0.224068 | 0.215909  | 0.222465  | 0.18852  | 0.212995 | 0.211976 | 0.224942  |
| 0.126748 | 0.107226  | 0.10912   | 0.182984 | 0.126748 | 0.129516 | 0.109557  |
| 0.128788 | 0.0979021 | 0.0802739 | 0.179196 | 0.119464 | 0.131265 | 0.097028  |
| 0.13447  | 0.122815  | 0.118298  | 0.190997 | 0.135927 | 0.137529 | 0.124563  |
| 0.131556 | 0.103875  | 0.0748834 | 0.179341 | 0.114365 | 0.13345  | 0.104749  |
| 0.144085 | 0.116404  | 0.0894522 | 0.190122 | 0.134178 | 0.14627  | 0.112034  |
| 0.126311 | 0.108246  | 0.111888  | 0.181381 | 0.119901 | 0.129079 | 0.119901  |
| 0.125583 | 0.106061  | 0.104458  | 0.180653 | 0.121212 | 0.128642 | 0.111014  |
| 0.132284 | 0.104895  | 0.0826049 | 0.181235 | 0.125874 | 0.135344 | 0.106352  |
| 0.131556 | 0.120484  | 0.120629  | 0.176719 | 0.130682 | 0.125291 | 0.11961   |
| 0.135198 | 0.118881  | 0.121358  | 0.183858 | 0.130828 | 0.137675 | 0.117716  |
| 0.125728 | 0.114948  | 0.117133  | 0.189248 | 0.133887 | 0.128497 | 0.112908  |
| 0.124272 | 0.111451  | 0.115093  | 0.185169 | 0.129516 | 0.129079 | 0.112908  |
| 0.130682 | 0.101544  | 0.104895  | 0.184003 | 0.118735 | 0.132284 | 0.104749  |
| 0.118153 | 0.103584  | 0.113928  | 0.181964 | 0.115822 | 0.120921 | 0.108829  |
| 0.131702 | 0.111305  | 0.123689  | 0.186189 | 0.138403 | 0.137383 | 0.121503  |
| 0.12602  | 0.104167  | 0.113054  | 0.175554 | 0.122523 | 0.127331 | 0.111116  |
| 0.139132 | 0.126894  | 0.134033  | 0.187209 | 0.139132 | 0.141317 | 0.130682  |
| 0.148019 | 0.128205  | 0.133596  | 0.176282 | 0.142191 | 0.144085 | 0.130536  |
| 0.131119 | 0.113928  | 0.116113  | 0.179779 | 0.126457 | 0.131556 | 0.111014  |
| 0.137529 | 0.104895  | 0.090472  | 0.187063 | 0.132284 | 0.138549 | 0.108974  |
| 0.134178 | 0.122815  | 0.123252  | 0.172931 | 0.124854 | 0.138695 | 0.11553   |
| 0.134615 | 0.12296   | 0.117279  | 0.180653 | 0.125291 | 0.139423 | 0.122378  |
| 0.136072 | 0.121503  | 0.126311  | 0.170746 | 0.120921 | 0.134761 | 0.122086  |
| 0.145979 | 0.128497  | 0.135635  | 0.177739 | 0.140152 | 0.145833 | 0.134907  |
| 0.124272 | 0.0957168 | 0.0981935 | 0.171474 | 0.112908 | 0.123252 | 0.0968823 |
| 0.141026 | 0.120338  | 0.125437  | 0.186772 | 0.133741 | 0.143211 | 0.119172  |
| 0.146416 | 0.133596  | 0.134033  | 0.176136 | 0.140589 | 0.140152 | 0.138549  |
| 0.126311 | 0.104458  | 0.104895  | 0.180507 | 0.124854 | 0.129662 | 0.0791084 |
| 0.136509 | 0.110286  | 0.120629  | 0.17905  | 0.123106 | 0.135781 | 0.120484  |
| 0.147145 | 0.145979  | 0.149621  | 0.193473 | 0.143648 | 0.144376 | 0.137821  |
| 0.130245 | 0.120047  | 0.121941  | 0.180944 | 0.124126 | 0.135927 | 0.122086  |
| 0.141171 | 0.128351  | 0.127622  | 0.191871 | 0.138258 | 0.144522 | 0.11961   |
| 0.137529 | 0.11451   | 0.121066  | 0.187354 | 0.133159 | 0.144085 | 0.112179  |

|          |           |          |          |           |          |           |
|----------|-----------|----------|----------|-----------|----------|-----------|
| 0.121941 | 0.116113  | 0.110723 | 0.181964 | 0.125728  | 0.126166 | 0.112908  |
| 0.138695 | 0.119464  | 0.126603 | 0.185606 | 0.131119  | 0.140297 | 0.122086  |
| 0.128642 | 0.105915  | 0.109848 | 0.182547 | 0.128934  | 0.127622 | 0.0992133 |
| 0.129079 | 0.120047  | 0.124854 | 0.185315 | 0.135198  | 0.137966 | 0.109266  |
| 0.132576 | 0.117133  | 0.123106 | 0.185023 | 0.131702  | 0.134761 | 0.11655   |
| 0.128205 | 0.12704   | 0.134761 | 0.190268 | 0.134033  | 0.13243  | 0.117424  |
| 0.133159 | 0.120338  | 0.127768 | 0.194056 | 0.13549   | 0.135052 | 0.112179  |
| 0.139277 | 0.121795  | 0.12398  | 0.17803  | 0.134907  | 0.140297 | 0.115385  |
| 0.137821 | 0.138695  | 0.141171 | 0.189394 | 0.145396  | 0.143794 | 0.128497  |
| 0.13549  | 0.100524  | 0.110868 | 0.178322 | 0.131993  | 0.135344 | 0.0976107 |
| 0.125    | 0.110431  | 0.113199 | 0.182692 | 0.124126  | 0.127477 | 0.106935  |
| 0.128497 | 0.127331  | 0.128642 | 0.181527 | 0.13549   | 0.13039  | 0.113928  |
| 0.127914 | 0.0938228 | 0.112034 | 0.182984 | 0.124417  | 0.128934 | 0.090035  |
| 0.149621 | 0.133596  | 0.133741 | 0.183129 | 0.143211  | 0.152389 | 0.132139  |
| 0.157197 | 0.144085  | 0.149767 | 0.193619 | 0.156614  | 0.158508 | 0.137092  |
| 0.126311 | 0.124854  | 0.12704  | 0.183712 | 0.130682  | 0.129662 | 0.126603  |
| 0.122669 | 0.119172  | 0.126603 | 0.177448 | 0.121795  | 0.125437 | 0.118298  |
| 0.129225 | 0.128059  | 0.13345  | 0.189248 | 0.127185  | 0.132576 | 0.128934  |
| 0.132576 | 0.113054  | 0.118153 | 0.189685 | 0.129953  | 0.137675 | 0.125     |
| 0.120047 | 0.123834  | 0.127768 | 0.187937 | 0.129953  | 0.125728 | 0.115967  |
| 0.133741 | 0.124126  | 0.128351 | 0.190268 | 0.143065  | 0.136801 | 0.123252  |
| 0.146562 | 0.126748  | 0.131556 | 0.185897 | 0.138112  | 0.147873 | 0.119755  |
| 0.135635 | 0.110286  | 0.108974 | 0.183129 | 0.129225  | 0.135781 | 0.104749  |
| 0.145251 | 0.160693  | 0.162587 | 0.191288 | 0.156906  | 0.145396 | 0.153409  |
| 0.135635 | 0.11116   | 0.118007 | 0.185169 | 0.133596  | 0.13549  | 0.110577  |
| 0.152244 | 0.131556  | 0.129371 | 0.190705 | 0.144085  | 0.153555 | 0.125146  |
| 0.124417 | 0.115093  | 0.114948 | 0.18007  | 0.128205  | 0.128351 | 0.106935  |
| 0.131702 | 0.126166  | 0.136218 | 0.194056 | 0.132867  | 0.136218 | 0.127622  |
| 0.12704  | 0.111888  | 0.110286 | 0.180944 | 0.126166  | 0.129225 | 0.114802  |
| 0.151078 | 0.132139  | 0.137529 | 0.168561 | 0.116113  | 0.134907 | 0.14292   |
| 0.133741 | 0.1419    | 0.140589 | 0.196678 | 0.139569  | 0.135635 | 0.145979  |
| 0.125146 | 0.120775  | 0.125583 | 0.170309 | 0.0514277 | 0.128205 | 0.133013  |
| 0.142191 | 0.136364  | 0.135052 | 0.16958  | 0.0769231 | 0.129225 | 0.142774  |
| 0.1537   | 0.145833  | 0.14831  | 0.163316 | 0.14088   | 0.142191 | 0.145542  |
| 0.158071 | 0.140006  | 0.143939 | 0.161276 | 0.114948  | 0.144231 | 0.151078  |
| 0.126457 | 0.123834  | 0.12602  | 0.182401 | 0.126748  | 0.129225 | 0.102564  |
| 0.140297 | 0.133013  | 0.133159 | 0.188374 | 0.133304  | 0.137238 | 0.14088   |
| 0.121358 | 0.116113  | 0.11451  | 0.167686 | 0.108829  | 0.125    | 0.118735  |
| 0.126457 | 0.117133  | 0.116696 | 0.171911 | 0.11655   | 0.127477 | 0.115385  |
| 0.124563 | 0.0592949 | 0.111014 | 0.178759 | 0.123689  | 0.125583 | 0.109703  |
| 0.12602  | 0.118153  | 0.118881 | 0.170309 | 0.048514  | 0.127331 | 0.129516  |
| 0.11859  | 0.112471  | 0.114365 | 0.177156 | 0.117424  | 0.122232 | 0.114219  |
| 0.12704  | 0.111014  | 0.110868 | 0.16317  | 0.0844988 | 0.128642 | 0.117424  |
| 0.126166 | 0.113345  | 0.112034 | 0.171037 | 0.104312  | 0.131556 | 0.128788  |

|           |           |           |          |           |           |           |
|-----------|-----------|-----------|----------|-----------|-----------|-----------|
| 0.130099  | 0.118153  | 0.11859   | 0.168852 | 0.118444  | 0.124709  | 0.11961   |
| 0.120484  | 0.0989219 | 0.0987762 | 0.1706   | 0.109994  | 0.11859   | 0.0965909 |
| 0.130099  | 0.122815  | 0.120921  | 0.171766 | 0.057838  | 0.126748  | 0.131847  |
| 0.123252  | 0.117424  | 0.121358  | 0.168415 | 0.0506993 | 0.128059  | 0.126457  |
| 0.128497  | 0.120338  | 0.128351  | 0.175699 | 0.124417  | 0.126311  | 0.113054  |
| 0.221445  | 0.215035  | 0.217803  | 0.183858 | 0.208333  | 0.212558  | 0.223776  |
| 0.145105  | 0.141026  | 0.143794  | 0.184149 | 0.0725524 | 0.14933   | 0.149476  |
| 0.128059  | 0.129225  | 0.131119  | 0.184878 | 0.126603  | 0.130828  | 0.133596  |
| 0.129371  | 0.119172  | 0.127477  | 0.172494 | 0.11859   | 0.130099  | 0.126166  |
| 0.216783  | 0.209207  | 0.211684  | 0.182692 | 0.201923  | 0.204108  | 0.220571  |
| 0.133159  | 0.120629  | 0.131265  | 0.166667 | 0.125583  | 0.127477  | 0.120047  |
| 0.130682  | 0.120484  | 0.123252  | 0.181964 | 0.126311  | 0.130828  | 0.121941  |
| 0.125728  | 0.118153  | 0.125874  | 0.18109  | 0.124563  | 0.125     | 0.124854  |
| 0.131702  | 0.117133  | 0.116987  | 0.173951 | 0.121212  | 0.13243   | 0.115676  |
| 0.254079  | 0.249126  | 0.252477  | 0.212995 | 0.240967  | 0.243153  | 0.255245  |
| 0.134178  | 0.119318  | 0.130245  | 0.174679 | 0.126311  | 0.136946  | 0.124272  |
| 0.124272  | 0.114365  | 0.121212  | 0.169435 | 0.114656  | 0.124709  | 0.107372  |
| 0.0482226 | 0.119901  | 0.128788  | 0.180507 | 0.121941  | 0.0588578 | 0.123106  |
| 0.0511364 | 0.114948  | 0.124417  | 0.178467 | 0.121941  | 0.0579837 | 0.120484  |
| 0.137966  | 0.125437  | 0.127914  | 0.176428 | 0.128059  | 0.137238  | 0.126603  |
| 0.130973  | 0.122232  | 0.125874  | 0.172057 | 0.107663  | 0.124126  | 0.128642  |
| 0.125146  | 0.120192  | 0.119464  | 0.172931 | 0.121649  | 0.124417  | 0.110286  |
| 0.12296   | 0.118298  | 0.120484  | 0.170455 | 0.0504079 | 0.125146  | 0.129662  |
| 0.13243   | 0.124854  | 0.123252  | 0.180507 | 0.120775  | 0.130828  | 0.135052  |
| 0.124272  | 0.110577  | 0.111597  | 0.174097 | 0.114365  | 0.130245  | 0.115822  |
| 0.122378  | 0.115676  | 0.11757   | 0.166958 | 0.0541958 | 0.125146  | 0.125291  |
| 0.131265  | 0.0901807 | 0.094697  | 0.176428 | 0.119318  | 0.129079  | 0.0866841 |
| 0.132284  | 0.141317  | 0.138258  | 0.193473 | 0.142191  | 0.136218  | 0.144522  |
| 0.134033  | 0.122378  | 0.133013  | 0.177156 | 0.128788  | 0.132139  | 0.125583  |
| 0.131119  | 0.126457  | 0.128059  | 0.179196 | 0.129371  | 0.133596  | 0.124417  |
| 0.19697   | 0.192016  | 0.192453  | 0.168415 | 0.179487  | 0.185752  | 0.197844  |
| 0.211247  | 0.201632  | 0.205565  | 0.173951 | 0.19493   | 0.200321  | 0.210664  |
| 0.13345   | 0.117133  | 0.118444  | 0.172786 | 0.120921  | 0.132139  | 0.119755  |
| 0.122378  | 0.111888  | 0.111451  | 0.170746 | 0.112762  | 0.125146  | 0.110723  |
| 0.140443  | 0.133741  | 0.13243   | 0.182401 | 0.12704   | 0.13884   | 0.138403  |
| 0.123543  | 0.116841  | 0.120484  | 0.169289 | 0.120338  | 0.125728  | 0.1081    |
| 0.136509  | 0.122815  | 0.131119  | 0.175554 | 0.124854  | 0.13986   | 0.12602   |
| 0.108974  | 0.12296   | 0.128934  | 0.179779 | 0.123252  | 0.11116   | 0.127331  |
| 0.230186  | 0.222611  | 0.226253  | 0.188228 | 0.218531  | 0.218677  | 0.233392  |
| 0.123252  | 0.118881  | 0.121358  | 0.176282 | 0.109557  | 0.125146  | 0.122669  |
| 0.212267  | 0.206439  | 0.210373  | 0.192745 | 0.200612  | 0.204837  | 0.21285   |
| 0.121503  | 0.114802  | 0.109994  | 0.172786 | 0.114219  | 0.122523  | 0.100816  |
| 0.122232  | 0.111451  | 0.111305  | 0.170892 | 0.118735  | 0.119464  | 0.112617  |
| 0.123834  | 0.11655   | 0.123106  | 0.169289 | 0.102855  | 0.127185  | 0.124709  |

|           |          |          |          |           |           |          |
|-----------|----------|----------|----------|-----------|-----------|----------|
| 0.124126  | 0.108392 | 0.111742 | 0.167832 | 0.111305  | 0.121649  | 0.111597 |
| 0.21285   | 0.207314 | 0.206876 | 0.176428 | 0.197115  | 0.200466  | 0.216346 |
| 0.136801  | 0.13039  | 0.13141  | 0.172057 | 0.0613345 | 0.135198  | 0.142628 |
| 0.113491  | 0.109703 | 0.113636 | 0.172931 | 0.120775  | 0.116259  | 0.113199 |
| 0.130099  | 0.125437 | 0.125583 | 0.172348 | 0.053176  | 0.133159  | 0.136801 |
| 0.117861  | 0.118735 | 0.124709 | 0.177593 | 0.123397  | 0.122669  | 0.125728 |
| 0.130099  | 0.111742 | 0.110431 | 0.171766 | 0.115822  | 0.129953  | 0.114073 |
| 0.121795  | 0.117716 | 0.118153 | 0.177448 | 0.115676  | 0.123689  | 0.101399 |
| 0.128497  | 0.116841 | 0.12602  | 0.164627 | 0.116259  | 0.12398   | 0.113636 |
| 0.13141   | 0.123834 | 0.125437 | 0.180944 | 0.128205  | 0.133013  | 0.123252 |
| 0.119464  | 0.111305 | 0.115822 | 0.166084 | 0.0515734 | 0.120484  | 0.120338 |
| 0.118153  | 0.109411 | 0.118881 | 0.17264  | 0.122815  | 0.117133  | 0.114365 |
| 0.196096  | 0.185897 | 0.192745 | 0.162587 | 0.18007   | 0.183712  | 0.198427 |
| 0.048514  | 0.119318 | 0.13141  | 0.180798 | 0.12398   | 0.0582751 | 0.123397 |
| 0.118007  | 0.123543 | 0.124563 | 0.180944 | 0.123543  | 0.119318  | 0.132284 |
| 0.105332  | 0.106498 | 0.120047 | 0.173805 | 0.115239  | 0.106643  | 0.121941 |
| 0.137238  | 0.116841 | 0.127477 | 0.17162  | 0.12296   | 0.127768  | 0.125291 |
| 0.126166  | 0.121795 | 0.123397 | 0.172203 | 0.0498252 | 0.130099  | 0.13345  |
| 0.122669  | 0.119172 | 0.117861 | 0.178613 | 0.120047  | 0.12602   | 0.106061 |
| 0.114073  | 0.112617 | 0.118007 | 0.174388 | 0.11553   | 0.115385  | 0.114073 |
| 0.125728  | 0.120192 | 0.126457 | 0.176136 | 0.12398   | 0.128788  | 0.112908 |
| 0.11859   | 0.117424 | 0.121649 | 0.177156 | 0.117716  | 0.116696  | 0.126748 |
| 0.0600233 | 0.116841 | 0.121358 | 0.173368 | 0.115967  | 0.0703671 | 0.118007 |
| 0.130682  | 0.11553  | 0.117716 | 0.167978 | 0.117861  | 0.131119  | 0.118444 |
| 0.126748  | 0.120338 | 0.124563 | 0.18007  | 0.121503  | 0.127768  | 0.124709 |
| 0.135635  | 0.128642 | 0.138403 | 0.188374 | 0.133013  | 0.135198  | 0.13243  |
| 0.13039   | 0.11553  | 0.119755 | 0.167395 | 0.120775  | 0.129079  | 0.117861 |
| 0.138403  | 0.135781 | 0.141463 | 0.182692 | 0.0702214 | 0.142337  | 0.143939 |
| 0.12704   | 0.11014  | 0.114365 | 0.172494 | 0.111888  | 0.126603  | 0.115093 |
| 0.10373   | 0.115385 | 0.117279 | 0.171037 | 0.109266  | 0.105332  | 0.121212 |
| 0.13243   | 0.119901 | 0.119755 | 0.164481 | 0.0665793 | 0.123834  | 0.128934 |
| 0.13039   | 0.122523 | 0.131993 | 0.176719 | 0.12398   | 0.132867  | 0.118153 |
| 0.19799   | 0.188083 | 0.193765 | 0.165647 | 0.183129  | 0.18648   | 0.195659 |
| 0.111888  | 0.105478 | 0.116696 | 0.166667 | 0.118881  | 0.112908  | 0.106643 |
| 0.115093  | 0.103147 | 0.105915 | 0.162879 | 0.100524  | 0.116696  | 0.111305 |
| 0.129371  | 0.123252 | 0.124854 | 0.182984 | 0.125874  | 0.131847  | 0.121503 |
| 0.192308  | 0.176282 | 0.174971 | 0.160548 | 0.167832  | 0.179633  | 0.187937 |
| 0.145542  | 0.13039  | 0.140734 | 0.169435 | 0.138549  | 0.143648  | 0.13447  |
| 0.152535  | 0.141754 | 0.147727 | 0.186917 | 0.145833  | 0.151224  | 0.137966 |
| 0.134033  | 0.143939 | 0.140297 | 0.195804 | 0.142483  | 0.137966  | 0.146562 |
| 0.127914  | 0.11451  | 0.119318 | 0.166667 | 0.120338  | 0.126311  | 0.117716 |
| 0.126894  | 0.121066 | 0.12296  | 0.17264  | 0.0511364 | 0.130536  | 0.135344 |
| 0.216783  | 0.208916 | 0.215472 | 0.183858 | 0.201923  | 0.202943  | 0.22028  |
| 0.125291  | 0.12296  | 0.129516 | 0.170455 | 0.117424  | 0.126311  | 0.130828 |



|           |           |           |          |           |           |           |
|-----------|-----------|-----------|----------|-----------|-----------|-----------|
| 0.129808  | 0.125728  | 0.128205  | 0.173805 | 0.0540501 | 0.132867  | 0.139714  |
| 0.118153  | 0.109411  | 0.11655   | 0.167978 | 0.119901  | 0.116259  | 0.111451  |
| 0.179924  | 0.166812  | 0.168706  | 0.163316 | 0.147582  | 0.167832  | 0.177885  |
| 0.123397  | 0.109703  | 0.117424  | 0.169435 | 0.105915  | 0.122669  | 0.121066  |
| 0.149476  | 0.145688  | 0.143502  | 0.196678 | 0.145688  | 0.147582  | 0.147436  |
| 0.128205  | 0.1081    | 0.113491  | 0.173951 | 0.123834  | 0.124563  | 0.107809  |
| 0.196387  | 0.189394  | 0.190997  | 0.167832 | 0.180361  | 0.184586  | 0.200175  |
| 0.131993  | 0.119464  | 0.124563  | 0.171037 | 0.121212  | 0.132139  | 0.122086  |
| 0.124417  | 0.0987762 | 0.0884324 | 0.167541 | 0.101107  | 0.127185  | 0.104604  |
| 0.10708   | 0.113491  | 0.114219  | 0.17264  | 0.107955  | 0.109848  | 0.118444  |
| 0.122669  | 0.122378  | 0.122232  | 0.180653 | 0.115093  | 0.124563  | 0.123834  |
| 0.130245  | 0.122378  | 0.124272  | 0.179779 | 0.124417  | 0.129808  | 0.11859   |
| 0.129953  | 0.122669  | 0.119027  | 0.173368 | 0.117716  | 0.131556  | 0.129953  |
| 0.128642  | 0.111116  | 0.109848  | 0.171766 | 0.114948  | 0.131702  | 0.113199  |
| 0.196096  | 0.189685  | 0.192162  | 0.164627 | 0.183566  | 0.184003  | 0.199009  |
| 0.128351  | 0.12398   | 0.122669  | 0.175845 | 0.121649  | 0.130245  | 0.13039   |
| 0.124417  | 0.113928  | 0.101544  | 0.173368 | 0.105769  | 0.126894  | 0.118881  |
| 0.217512  | 0.21081   | 0.212121  | 0.177885 | 0.204691  | 0.205711  | 0.217803  |
| 0.0493881 | 0.117279  | 0.129371  | 0.181672 | 0.124563  | 0.0571096 | 0.121358  |
| 0.126748  | 0.111305  | 0.110868  | 0.173077 | 0.117716  | 0.13039   | 0.113345  |
| 0.122086  | 0.106352  | 0.109703  | 0.167541 | 0.111014  | 0.123106  | 0.109557  |
| 0.133596  | 0.133013  | 0.137821  | 0.183421 | 0.0796911 | 0.138112  | 0.139714  |
| 0.199446  | 0.189248  | 0.191142  | 0.163316 | 0.179924  | 0.185606  | 0.198864  |
| 0.127622  | 0.120047  | 0.120775  | 0.175991 | 0.118007  | 0.13039   | 0.112179  |
| 0.128788  | 0.124417  | 0.131847  | 0.187937 | 0.128205  | 0.131556  | 0.128205  |
| 0.125583  | 0.112471  | 0.110286  | 0.171329 | 0.11451   | 0.127185  | 0.112179  |
| 0.129371  | 0.105186  | 0.106206  | 0.168998 | 0.112471  | 0.128351  | 0.1081    |
| 0.125728  | 0.107955  | 0.110431  | 0.171766 | 0.113782  | 0.124417  | 0.111451  |
| 0.12704   | 0.117716  | 0.116987  | 0.17162  | 0.0501166 | 0.127185  | 0.128205  |
| 0.119027  | 0.0965909 | 0.102273  | 0.169435 | 0.112325  | 0.121212  | 0.0957168 |
| 0.133013  | 0.11757   | 0.127914  | 0.172931 | 0.12602   | 0.134907  | 0.123689  |
| 0.118735  | 0.128351  | 0.130536  | 0.185752 | 0.121066  | 0.126457  | 0.13243   |
| 0.133304  | 0.116696  | 0.126457  | 0.174388 | 0.126311  | 0.134615  | 0.124272  |
| 0.124417  | 0.123543  | 0.128934  | 0.18648  | 0.130245  | 0.129808  | 0.129662  |
| 0.201486  | 0.19391   | 0.196387  | 0.168852 | 0.182547  | 0.190268  | 0.204983  |
| 0.123834  | 0.116841  | 0.121941  | 0.179487 | 0.121212  | 0.124854  | 0.123543  |
| 0.132139  | 0.129516  | 0.134033  | 0.177593 | 0.0604604 | 0.135781  | 0.139714  |
| 0.124709  | 0.108392  | 0.106498  | 0.173077 | 0.113345  | 0.125728  | 0.109266  |
| 0.115822  | 0.0971737 | 0.099359  | 0.16623  | 0.112325  | 0.114802  | 0.0916375 |
| 0.127185  | 0.114948  | 0.116259  | 0.172931 | 0.116404  | 0.125583  | 0.121358  |
| 0.12296   | 0.118007  | 0.122232  | 0.175699 | 0.119464  | 0.128642  | 0.113928  |
| 0.129953  | 0.128205  | 0.129516  | 0.18211  | 0.124417  | 0.133887  | 0.131119  |
| 0.123689  | 0.120775  | 0.115093  | 0.176719 | 0.116113  | 0.121795  | 0.128059  |
| 0.125146  | 0.103584  | 0.111597  | 0.168561 | 0.113199  | 0.122669  | 0.103875  |

|          |           |           |          |           |          |           |
|----------|-----------|-----------|----------|-----------|----------|-----------|
| 0.119755 | 0.100524  | 0.109994  | 0.164627 | 0.108974  | 0.120192 | 0.0976107 |
| 0.123106 | 0.0939685 | 0.0944056 | 0.16623  | 0.107663  | 0.125    | 0.101836  |
| 0.122378 | 0.116841  | 0.114073  | 0.174825 | 0.115385  | 0.124854 | 0.10169   |
| 0.140006 | 0.12602   | 0.134907  | 0.17905  | 0.135344  | 0.13986  | 0.124563  |
| 0.129079 | 0.120047  | 0.119318  | 0.176573 | 0.119755  | 0.13039  | 0.113345  |
| 0.121941 | 0.111451  | 0.114802  | 0.168561 | 0.0517191 | 0.12296  | 0.126603  |
| 0.124563 | 0.115239  | 0.119755  | 0.170017 | 0.113782  | 0.124417 | 0.107372  |
| 0.123543 | 0.111014  | 0.10912   | 0.169289 | 0.112762  | 0.124854 | 0.11655   |
| 0.112325 | 0.10271   | 0.111305  | 0.164773 | 0.116113  | 0.113928 | 0.10708   |
| 0.127768 | 0.112908  | 0.112179  | 0.171474 | 0.116113  | 0.129662 | 0.117279  |
| 0.11757  | 0.113491  | 0.117424  | 0.174679 | 0.113199  | 0.119172 | 0.11757   |
| 0.117279 | 0.116696  | 0.11655   | 0.175262 | 0.117861  | 0.119755 | 0.126311  |
| 0.129516 | 0.121066  | 0.121212  | 0.177885 | 0.11553   | 0.130828 | 0.117279  |
| 0.122669 | 0.0973193 | 0.101836  | 0.17366  | 0.113345  | 0.122232 | 0.0981935 |
| 0.125437 | 0.10912   | 0.112471  | 0.172931 | 0.111742  | 0.12704  | 0.115239  |
| 0.114365 | 0.117861  | 0.118881  | 0.169143 | 0.114365  | 0.105186 | 0.124563  |
| 0.129662 | 0.119172  | 0.103001  | 0.178613 | 0.106643  | 0.13039  | 0.122086  |
| 0.124563 | 0.0995047 | 0.0474942 | 0.174971 | 0.111742  | 0.125583 | 0.100962  |
| 0.12602  | 0.11116   | 0.1081    | 0.175554 | 0.111742  | 0.125583 | 0.113782  |
| 0.127331 | 0.116841  | 0.121358  | 0.168706 | 0.0521562 | 0.12398  | 0.128788  |
| 0.127622 | 0.117133  | 0.117861  | 0.174825 | 0.116841  | 0.12602  | 0.102273  |
| 0.127914 | 0.122086  | 0.120775  | 0.172203 | 0.0515734 | 0.130099 | 0.128205  |
| 0.128205 | 0.119755  | 0.115822  | 0.178322 | 0.122086  | 0.130973 | 0.117716  |
| 0.123834 | 0.102564  | 0.103875  | 0.174825 | 0.117133  | 0.125146 | 0.104021  |
| 0.123543 | 0.106643  | 0.112325  | 0.168998 | 0.106352  | 0.126894 | 0.121212  |
| 0.110868 | 0.104167  | 0.1081    | 0.168269 | 0.116404  | 0.116259 | 0.105624  |
| 0.13141  | 0.122086  | 0.118444  | 0.171329 | 0.0515734 | 0.133596 | 0.132284  |
| 0.128497 | 0.122669  | 0.110868  | 0.178904 | 0.113054  | 0.130973 | 0.127914  |
| 0.127185 | 0.114073  | 0.102564  | 0.170892 | 0.102127  | 0.127331 | 0.119901  |
| 0.201486 | 0.18954   | 0.195804  | 0.165938 | 0.185169  | 0.191434 | 0.200321  |
| 0.173514 | 0.164773  | 0.162879  | 0.161276 | 0.14933   | 0.164627 | 0.174679  |
| 0.133596 | 0.120484  | 0.124126  | 0.173514 | 0.119901  | 0.132867 | 0.123106  |
| 0.127914 | 0.11451   | 0.118444  | 0.166667 | 0.113928  | 0.128642 | 0.121212  |
| 0.152389 | 0.143065  | 0.152244  | 0.190559 | 0.149476  | 0.154575 | 0.141026  |
| 0.13243  | 0.128934  | 0.120921  | 0.183712 | 0.122815  | 0.132284 | 0.136801  |
| 0.13141  | 0.116841  | 0.121649  | 0.175117 | 0.118007  | 0.128642 | 0.125     |
| 0.131847 | 0.115239  | 0.104895  | 0.167395 | 0.107955  | 0.13345  | 0.118444  |
| 0.127477 | 0.0898893 | 0.0906177 | 0.175262 | 0.11757   | 0.129079 | 0.0922203 |
| 0.131847 | 0.120775  | 0.105478  | 0.181672 | 0.111451  | 0.131119 | 0.123689  |
| 0.211247 | 0.200758  | 0.200029  | 0.170163 | 0.191725  | 0.195659 | 0.210373  |
| 0.128059 | 0.120775  | 0.127914  | 0.178467 | 0.121941  | 0.129953 | 0.113199  |
| 0.125874 | 0.11859   | 0.119901  | 0.165793 | 0.0722611 | 0.127768 | 0.125874  |
| 0.124709 | 0.105478  | 0.0948427 | 0.171329 | 0.106935  | 0.127477 | 0.109266  |
| 0.123397 | 0.116696  | 0.117716  | 0.177302 | 0.118735  | 0.121503 | 0.121941  |

|           |           |           |          |           |           |           |
|-----------|-----------|-----------|----------|-----------|-----------|-----------|
| 0.194639  | 0.182692  | 0.177593  | 0.165793 | 0.171329  | 0.182838  | 0.192016  |
| 0.250874  | 0.243007  | 0.249272  | 0.210664 | 0.238054  | 0.237908  | 0.253205  |
| 0.123543  | 0.119172  | 0.11757   | 0.180653 | 0.11859   | 0.125146  | 0.129953  |
| 0.129371  | 0.116841  | 0.106498  | 0.179196 | 0.108974  | 0.128642  | 0.121212  |
| 0.131702  | 0.117716  | 0.12398   | 0.170746 | 0.122086  | 0.132139  | 0.121212  |
| 0.126311  | 0.117279  | 0.119464  | 0.174679 | 0.120775  | 0.128788  | 0.117279  |
| 0.121212  | 0.113345  | 0.114073  | 0.173951 | 0.109266  | 0.124854  | 0.1081    |
| 0.123397  | 0.11553   | 0.113636  | 0.170309 | 0.112034  | 0.121503  | 0.121066  |
| 0.130828  | 0.111888  | 0.112034  | 0.167249 | 0.0833333 | 0.132139  | 0.120921  |
| 0.125     | 0.116259  | 0.119901  | 0.172494 | 0.11451   | 0.124854  | 0.108974  |
| 0.127477  | 0.112034  | 0.112179  | 0.167104 | 0.0732809 | 0.129371  | 0.120484  |
| 0.130536  | 0.104895  | 0.0453089 | 0.176573 | 0.11451   | 0.131847  | 0.10169   |
| 0.122815  | 0.0995047 | 0.102855  | 0.1706   | 0.113491  | 0.122378  | 0.100379  |
| 0.118298  | 0.116841  | 0.120192  | 0.178613 | 0.118298  | 0.116696  | 0.126748  |
| 0.126894  | 0.119901  | 0.118298  | 0.170892 | 0.0523019 | 0.128497  | 0.131265  |
| 0.100962  | 0.104167  | 0.107226  | 0.163024 | 0.102418  | 0.102273  | 0.107372  |
| 0.119901  | 0.120775  | 0.117716  | 0.184878 | 0.129225  | 0.12704   | 0.105915  |
| 0.136509  | 0.133013  | 0.134907  | 0.188666 | 0.136801  | 0.140152  | 0.126603  |
| 0.124417  | 0.108392  | 0.108246  | 0.171037 | 0.11014   | 0.12398   | 0.113054  |
| 0.129516  | 0.110868  | 0.118007  | 0.170017 | 0.121066  | 0.131702  | 0.11553   |
| 0.136801  | 0.124563  | 0.125583  | 0.180507 | 0.129225  | 0.13986   | 0.120775  |
| 0.214452  | 0.207751  | 0.21081   | 0.179487 | 0.201632  | 0.206148  | 0.214744  |
| 0.114656  | 0.110868  | 0.111888  | 0.167104 | 0.109411  | 0.115967  | 0.120775  |
| 0.122669  | 0.0976107 | 0.104458  | 0.173077 | 0.115385  | 0.119027  | 0.0999417 |
| 0.126457  | 0.112471  | 0.121358  | 0.178322 | 0.116259  | 0.125728  | 0.121503  |
| 0.0557984 | 0.11757   | 0.12704   | 0.177302 | 0.121358  | 0.0611888 | 0.124272  |
| 0.119318  | 0.112325  | 0.113636  | 0.171183 | 0.112617  | 0.120338  | 0.121649  |
| 0.205857  | 0.197115  | 0.198427  | 0.17264  | 0.189831  | 0.193765  | 0.205857  |
| 0.13141   | 0.122669  | 0.122523  | 0.172786 | 0.0541958 | 0.13243   | 0.134033  |
| 0.124272  | 0.108246  | 0.106643  | 0.169143 | 0.110577  | 0.126166  | 0.110577  |
| 0.129371  | 0.118298  | 0.119027  | 0.180361 | 0.119464  | 0.13039   | 0.120629  |
| 0.122086  | 0.114219  | 0.115822  | 0.172203 | 0.116841  | 0.125437  | 0.11451   |
| 0.128788  | 0.119755  | 0.124272  | 0.173368 | 0.0533217 | 0.126311  | 0.129371  |
| 0.117716  | 0.106352  | 0.110577  | 0.162587 | 0.0748834 | 0.118444  | 0.113054  |
| 0.129662  | 0.10373   | 0.0488054 | 0.178904 | 0.11451   | 0.129808  | 0.105769  |
| 0.0553613 | 0.115385  | 0.121649  | 0.178613 | 0.11859   | 0.0665793 | 0.119464  |
| 0.207022  | 0.194493  | 0.199883  | 0.171766 | 0.186334  | 0.194056  | 0.206439  |
| 0.120921  | 0.109266  | 0.115239  | 0.166375 | 0.0559441 | 0.122815  | 0.117133  |
| 0.204691  | 0.19391   | 0.193182  | 0.169726 | 0.186626  | 0.190559  | 0.203817  |
| 0.202797  | 0.19289   | 0.192453  | 0.171911 | 0.183566  | 0.188374  | 0.201632  |
| 0.13345   | 0.128205  | 0.129225  | 0.188811 | 0.134324  | 0.137675  | 0.126748  |
| 0.0530303 | 0.122086  | 0.135927  | 0.188228 | 0.132867  | 0.0595862 | 0.12704   |
| 0.123252  | 0.0984848 | 0.0549242 | 0.173077 | 0.104021  | 0.120775  | 0.0979021 |
| 0.120192  | 0.10912   | 0.112471  | 0.166521 | 0.057838  | 0.122086  | 0.120484  |

|           |           |           |          |           |           |           |
|-----------|-----------|-----------|----------|-----------|-----------|-----------|
| 0.125874  | 0.114802  | 0.116404  | 0.169289 | 0.0506993 | 0.127185  | 0.123543  |
| 0.127331  | 0.111888  | 0.112034  | 0.175991 | 0.113054  | 0.127768  | 0.115676  |
| 0.118881  | 0.112179  | 0.114073  | 0.169289 | 0.110431  | 0.119027  | 0.106935  |
| 0.121795  | 0.115967  | 0.116696  | 0.16958  | 0.113928  | 0.12398   | 0.106352  |
| 0.121358  | 0.120775  | 0.123543  | 0.177302 | 0.118735  | 0.120338  | 0.130099  |
| 0.128497  | 0.121795  | 0.119901  | 0.179487 | 0.120921  | 0.130099  | 0.123834  |
| 0.120192  | 0.104167  | 0.105186  | 0.167686 | 0.110286  | 0.123252  | 0.108537  |
| 0.123543  | 0.118881  | 0.11961   | 0.169872 | 0.0506993 | 0.126603  | 0.129079  |
| 0.119318  | 0.0948427 | 0.0879953 | 0.167686 | 0.103001  | 0.123252  | 0.0989219 |
| 0.129079  | 0.130245  | 0.130682  | 0.173951 | 0.0638112 | 0.133013  | 0.135781  |
| 0.131702  | 0.115967  | 0.121066  | 0.170746 | 0.120921  | 0.131556  | 0.121212  |
| 0.136801  | 0.133304  | 0.133159  | 0.180507 | 0.0639569 | 0.139277  | 0.138549  |
| 0.264714  | 0.258304  | 0.262821  | 0.217512 | 0.25102   | 0.25      | 0.26588   |
| 0.117279  | 0.119318  | 0.129953  | 0.183129 | 0.130973  | 0.124126  | 0.117861  |
| 0.128788  | 0.12296   | 0.12398   | 0.180361 | 0.131993  | 0.13039   | 0.125     |
| 0.227418  | 0.216346  | 0.221154  | 0.184878 | 0.207605  | 0.212995  | 0.226544  |
| 0.121503  | 0.123834  | 0.129225  | 0.182692 | 0.132867  | 0.121649  | 0.12704   |
| 0.233974  | 0.227273  | 0.233537  | 0.198427 | 0.222319  | 0.220717  | 0.237762  |
| 0.112908  | 0.112908  | 0.119464  | 0.176428 | 0.122815  | 0.119172  | 0.114365  |
| 0.137238  | 0.12296   | 0.122523  | 0.181527 | 0.124709  | 0.137966  | 0.122086  |
| 0.0606061 | 0.113928  | 0.119027  | 0.17366  | 0.113636  | 0.0697844 | 0.114802  |
| 0.134324  | 0.125291  | 0.122232  | 0.184732 | 0.128497  | 0.136218  | 0.123252  |
| 0.210956  | 0.200175  | 0.201777  | 0.171329 | 0.192599  | 0.19799   | 0.210956  |
| 0.133741  | 0.127622  | 0.131556  | 0.179487 | 0.0611888 | 0.137675  | 0.139277  |
| 0.122669  | 0.119172  | 0.11961   | 0.170163 | 0.0518648 | 0.13039   | 0.129079  |
| 0.231498  | 0.223922  | 0.227273  | 0.195367 | 0.21722   | 0.221154  | 0.234994  |
| 0.125874  | 0.119464  | 0.118735  | 0.173077 | 0.118298  | 0.124272  | 0.111014  |
| 0.206439  | 0.195367  | 0.200175  | 0.171183 | 0.191871  | 0.195221  | 0.206731  |
| 0.127185  | 0.119318  | 0.124709  | 0.173805 | 0.119027  | 0.127622  | 0.110577  |
| 0.128934  | 0.112034  | 0.109848  | 0.170309 | 0.112325  | 0.13141   | 0.116987  |
| 0.126748  | 0.108683  | 0.112617  | 0.17803  | 0.126457  | 0.129516  | 0.10373   |
| 0.130536  | 0.130536  | 0.132721  | 0.186772 | 0.133741  | 0.13447   | 0.125     |
| 0.128934  | 0.107955  | 0.116841  | 0.173223 | 0.110286  | 0.128205  | 0.118153  |
| 0.171766  | 0.153409  | 0.155303  | 0.154866 | 0.15574   | 0.159382  | 0.164481  |
| 0.11961   | 0.116696  | 0.115093  | 0.167978 | 0.0488054 | 0.12296   | 0.123106  |
| 0.0557984 | 0.11961   | 0.127331  | 0.17701  | 0.122232  | 0.0608974 | 0.124854  |
| 0.121066  | 0.113491  | 0.118007  | 0.177593 | 0.120192  | 0.123252  | 0.119027  |
| 0.106498  | 0.121649  | 0.129079  | 0.178467 | 0.122232  | 0.109848  | 0.127477  |
| 0.205128  | 0.194056  | 0.196824  | 0.16521  | 0.186189  | 0.193036  | 0.202214  |
| 0.127477  | 0.109411  | 0.108683  | 0.169143 | 0.111451  | 0.126748  | 0.112325  |
| 0.13549   | 0.123252  | 0.121941  | 0.17162  | 0.122378  | 0.128642  | 0.121503  |
| 0.126603  | 0.113199  | 0.11859   | 0.175262 | 0.115822  | 0.126457  | 0.104167  |
| 0.123252  | 0.117133  | 0.125437  | 0.175991 | 0.12296   | 0.124563  | 0.109557  |
| 0.127477  | 0.11553   | 0.11655   | 0.173805 | 0.120775  | 0.131119  | 0.117279  |

|           |           |           |          |           |           |           |
|-----------|-----------|-----------|----------|-----------|-----------|-----------|
| 0.259615  | 0.254079  | 0.258596  | 0.215909 | 0.247669  | 0.246358  | 0.263403  |
| 0.120484  | 0.103001  | 0.107226  | 0.176428 | 0.120484  | 0.123252  | 0.101544  |
| 0.130099  | 0.115239  | 0.11859   | 0.177302 | 0.11961   | 0.127914  | 0.122232  |
| 0.18109   | 0.17264   | 0.183858  | 0.172348 | 0.173514  | 0.171911  | 0.186334  |
| 0.197115  | 0.184295  | 0.189394  | 0.163316 | 0.175845  | 0.182984  | 0.191288  |
| 0.121066  | 0.118735  | 0.11859   | 0.17701  | 0.116696  | 0.119464  | 0.128642  |
| 0.126748  | 0.117716  | 0.11961   | 0.170746 | 0.0524476 | 0.131265  | 0.129371  |
| 0.12704   | 0.117424  | 0.119027  | 0.178904 | 0.115676  | 0.128059  | 0.118007  |
| 0.144668  | 0.144085  | 0.144231  | 0.18546  | 0.0770688 | 0.150058  | 0.152244  |
| 0.122232  | 0.115239  | 0.115676  | 0.176136 | 0.11553   | 0.120047  | 0.123689  |
| 0.123543  | 0.119172  | 0.11961   | 0.18007  | 0.118298  | 0.123106  | 0.128497  |
| 0.124563  | 0.122523  | 0.131119  | 0.17905  | 0.128934  | 0.129953  | 0.116696  |
| 0.122523  | 0.116987  | 0.120629  | 0.165064 | 0.0575466 | 0.123834  | 0.125728  |
| 0.130245  | 0.127331  | 0.131265  | 0.175991 | 0.0606061 | 0.130682  | 0.139277  |
| 0.13039   | 0.114656  | 0.119464  | 0.163316 | 0.117279  | 0.120338  | 0.113782  |
| 0.13141   | 0.12704   | 0.126311  | 0.18211  | 0.131119  | 0.136801  | 0.123834  |
| 0.14292   | 0.139132  | 0.142774  | 0.193619 | 0.142045  | 0.145979  | 0.136218  |
| 0.12704   | 0.106935  | 0.114948  | 0.180361 | 0.12296   | 0.129516  | 0.105186  |
| 0.137966  | 0.131847  | 0.135198  | 0.189248 | 0.134178  | 0.141317  | 0.128642  |
| 0.128934  | 0.122523  | 0.132576  | 0.181381 | 0.128059  | 0.131702  | 0.114948  |
| 0.216783  | 0.207751  | 0.209936  | 0.178613 | 0.197261  | 0.2044    | 0.217366  |
| 0.127768  | 0.107955  | 0.104312  | 0.179341 | 0.129808  | 0.127331  | 0.0799825 |
| 0.200321  | 0.191871  | 0.194347  | 0.167104 | 0.183129  | 0.188228  | 0.200612  |
| 0.0936772 | 0.114073  | 0.113636  | 0.174679 | 0.112908  | 0.0955711 | 0.118153  |
| 0.13447   | 0.118153  | 0.117133  | 0.172931 | 0.122815  | 0.131119  | 0.119027  |
| 0.131265  | 0.120192  | 0.129953  | 0.172348 | 0.122232  | 0.132284  | 0.122523  |
| 0.126457  | 0.112471  | 0.116987  | 0.166958 | 0.118881  | 0.130099  | 0.114219  |
| 0.128642  | 0.120484  | 0.124126  | 0.167978 | 0.0517191 | 0.131702  | 0.133887  |
| 0.125437  | 0.124272  | 0.125     | 0.17264  | 0.0543415 | 0.129662  | 0.133887  |
| 0.128934  | 0.112034  | 0.113928  | 0.172348 | 0.116404  | 0.126166  | 0.116404  |
| 0.0539044 | 0.119172  | 0.12602   | 0.176282 | 0.116259  | 0.0639569 | 0.121503  |
| 0.13549   | 0.121212  | 0.129808  | 0.171037 | 0.122669  | 0.136218  | 0.125874  |
| 0.133304  | 0.127768  | 0.13549   | 0.177885 | 0.135052  | 0.129371  | 0.116404  |
| 0.254808  | 0.24898   | 0.255828  | 0.213432 | 0.242861  | 0.245921  | 0.258013  |
| 0.130099  | 0.114656  | 0.113054  | 0.170309 | 0.112908  | 0.133159  | 0.11757   |
| 0.191725  | 0.181235  | 0.182838  | 0.162879 | 0.176573  | 0.17905   | 0.192308  |
| 0.197698  | 0.188083  | 0.188811  | 0.163024 | 0.18109   | 0.18648   | 0.199738  |
| 0.13345   | 0.110723  | 0.112908  | 0.175117 | 0.121212  | 0.13039   | 0.119464  |
| 0.121795  | 0.101981  | 0.107372  | 0.171037 | 0.115676  | 0.125146  | 0.10169   |
| 0.129079  | 0.119755  | 0.118735  | 0.175699 | 0.122669  | 0.135052  | 0.119755  |
| 0.122086  | 0.115385  | 0.118153  | 0.167832 | 0.0483683 | 0.123397  | 0.124126  |
| 0.126603  | 0.0887238 | 0.0906177 | 0.170892 | 0.114656  | 0.119464  | 0.0939685 |
| 0.12398   | 0.116987  | 0.118298  | 0.174388 | 0.116113  | 0.125874  | 0.109994  |
| 0.122378  | 0.100524  | 0.11757   | 0.170746 | 0.0772145 | 0.125146  | 0.126748  |

|           |          |           |          |           |           |          |
|-----------|----------|-----------|----------|-----------|-----------|----------|
| 0.130828  | 0.130245 | 0.133596  | 0.18007  | 0.0620629 | 0.139423  | 0.141608 |
| 0.128934  | 0.109703 | 0.112762  | 0.173223 | 0.113491  | 0.129371  | 0.116113 |
| 0.129516  | 0.127768 | 0.129371  | 0.176428 | 0.0610431 | 0.136072  | 0.137383 |
| 0.120338  | 0.113054 | 0.117279  | 0.174242 | 0.119755  | 0.117279  | 0.119464 |
| 0.136072  | 0.119464 | 0.129516  | 0.176282 | 0.12704   | 0.137675  | 0.127914 |
| 0.133887  | 0.125437 | 0.119172  | 0.175845 | 0.120484  | 0.13549   | 0.120775 |
| 0.134033  | 0.12704  | 0.133596  | 0.183275 | 0.131993  | 0.135344  | 0.115385 |
| 0.132721  | 0.106206 | 0.0504079 | 0.181964 | 0.121649  | 0.13345   | 0.103584 |
| 0.128059  | 0.112325 | 0.109557  | 0.167104 | 0.116113  | 0.127914  | 0.114073 |
| 0.130099  | 0.127185 | 0.136946  | 0.189831 | 0.129225  | 0.134033  | 0.13039  |
| 0.191434  | 0.183275 | 0.18546   | 0.162296 | 0.175699  | 0.182547  | 0.19289  |
| 0.137092  | 0.133887 | 0.135198  | 0.181964 | 0.0651224 | 0.143357  | 0.143502 |
| 0.128934  | 0.121358 | 0.122669  | 0.170309 | 0.0523019 | 0.128497  | 0.134178 |
| 0.129662  | 0.115093 | 0.123397  | 0.173077 | 0.121795  | 0.128059  | 0.119464 |
| 0.125728  | 0.109411 | 0.116259  | 0.16623  | 0.114365  | 0.123834  | 0.111451 |
| 0.130536  | 0.122669 | 0.121358  | 0.178322 | 0.122378  | 0.133887  | 0.119755 |
| 0.132721  | 0.122815 | 0.124417  | 0.182255 | 0.129225  | 0.13345   | 0.122523 |
| 0.200758  | 0.190268 | 0.19595   | 0.163462 | 0.184149  | 0.188083  | 0.199592 |
| 0.130536  | 0.115385 | 0.113491  | 0.170746 | 0.076049  | 0.128351  | 0.121795 |
| 0.125146  | 0.105041 | 0.104604  | 0.156614 | 0.103001  | 0.120629  | 0.113491 |
| 0.124563  | 0.124854 | 0.128205  | 0.171474 | 0.0540501 | 0.129371  | 0.136218 |
| 0.199009  | 0.193473 | 0.19391   | 0.164044 | 0.183566  | 0.186334  | 0.200758 |
| 0.122232  | 0.099796 | 0.10373   | 0.170017 | 0.114948  | 0.115093  | 0.100379 |
| 0.126166  | 0.122086 | 0.129808  | 0.177739 | 0.124417  | 0.130099  | 0.113054 |
| 0.13141   | 0.125    | 0.124854  | 0.174825 | 0.0533217 | 0.129808  | 0.134907 |
| 0.116987  | 0.113491 | 0.11655   | 0.173805 | 0.112034  | 0.119755  | 0.122523 |
| 0.195659  | 0.184586 | 0.189103  | 0.159819 | 0.176428  | 0.18211   | 0.198281 |
| 0.124272  | 0.117279 | 0.127331  | 0.171474 | 0.117279  | 0.125583  | 0.113199 |
| 0.121941  | 0.112617 | 0.118881  | 0.168852 | 0.10912   | 0.119464  | 0.120192 |
| 0.121941  | 0.102127 | 0.110431  | 0.166521 | 0.115239  | 0.112762  | 0.105915 |
| 0.132721  | 0.120192 | 0.123252  | 0.167686 | 0.108246  | 0.121212  | 0.126311 |
| 0.0541958 | 0.118881 | 0.121941  | 0.176865 | 0.122669  | 0.060169  | 0.119464 |
| 0.130536  | 0.126457 | 0.132721  | 0.18007  | 0.129662  | 0.13039   | 0.113636 |
| 0.128497  | 0.110723 | 0.109703  | 0.173951 | 0.111305  | 0.128934  | 0.113928 |
| 0.129371  | 0.118298 | 0.11116   | 0.179487 | 0.114802  | 0.129808  | 0.120629 |
| 0.13447   | 0.143502 | 0.142191  | 0.192162 | 0.142628  | 0.137238  | 0.145251 |
| 0.240239  | 0.235868 | 0.238636  | 0.197115 | 0.226836  | 0.229895  | 0.244318 |
| 0.136509  | 0.110868 | 0.0547786 | 0.186626 | 0.127185  | 0.138112  | 0.10708  |
| 0.0569639 | 0.11757  | 0.125583  | 0.177302 | 0.123689  | 0.0652681 | 0.121066 |
| 0.124709  | 0.121503 | 0.121358  | 0.167832 | 0.0594406 | 0.124563  | 0.125291 |
| 0.135927  | 0.123106 | 0.124417  | 0.1706   | 0.121941  | 0.132867  | 0.131265 |
| 0.0713869 | 0.108974 | 0.120775  | 0.171037 | 0.113636  | 0.0750291 | 0.11655  |
| 0.115385  | 0.113054 | 0.122232  | 0.173077 | 0.121503  | 0.118444  | 0.124126 |
| 0.126311  | 0.123106 | 0.126166  | 0.174388 | 0.0607517 | 0.127914  | 0.133013 |

|           |           |           |          |           |           |           |
|-----------|-----------|-----------|----------|-----------|-----------|-----------|
| 0.128205  | 0.124709  | 0.129808  | 0.176282 | 0.128205  | 0.128934  | 0.113636  |
| 0.120338  | 0.115385  | 0.117279  | 0.17366  | 0.115093  | 0.123106  | 0.126166  |
| 0.241113  | 0.234703  | 0.240093  | 0.205274 | 0.229458  | 0.232517  | 0.24461   |
| 0.119755  | 0.0967366 | 0.103584  | 0.170163 | 0.108392  | 0.119901  | 0.100524  |
| 0.108974  | 0.102855  | 0.106789  | 0.164918 | 0.111888  | 0.111742  | 0.104604  |
| 0.125437  | 0.109411  | 0.111305  | 0.167978 | 0.112908  | 0.127914  | 0.112617  |
| 0.122378  | 0.126748  | 0.130099  | 0.186189 | 0.125874  | 0.125437  | 0.134324  |
| 0.138403  | 0.11655   | 0.0598776 | 0.190851 | 0.134615  | 0.143794  | 0.111597  |
| 0.127331  | 0.117424  | 0.116113  | 0.174825 | 0.109266  | 0.126311  | 0.124126  |
| 0.123834  | 0.121212  | 0.121066  | 0.171037 | 0.0495338 | 0.126311  | 0.135198  |
| 0.115239  | 0.109703  | 0.113054  | 0.167978 | 0.107663  | 0.116259  | 0.11757   |
| 0.238199  | 0.231498  | 0.234557  | 0.195076 | 0.221591  | 0.22465   | 0.237617  |
| 0.130099  | 0.124854  | 0.130536  | 0.174388 | 0.0563811 | 0.132284  | 0.133596  |
| 0.12704   | 0.119755  | 0.128059  | 0.177739 | 0.123543  | 0.129225  | 0.113636  |
| 0.11655   | 0.111014  | 0.109703  | 0.172786 | 0.113928  | 0.118153  | 0.115967  |
| 0.104749  | 0.114365  | 0.128497  | 0.178467 | 0.119901  | 0.111888  | 0.121941  |
| 0.118153  | 0.112908  | 0.123543  | 0.178759 | 0.129225  | 0.122086  | 0.111742  |
| 0.122815  | 0.110868  | 0.111014  | 0.171766 | 0.115822  | 0.127622  | 0.114656  |
| 0.129808  | 0.120484  | 0.126166  | 0.176719 | 0.125437  | 0.130245  | 0.111451  |
| 0.13141   | 0.124709  | 0.129516  | 0.181527 | 0.127914  | 0.134761  | 0.120338  |
| 0.123543  | 0.114802  | 0.123106  | 0.174534 | 0.119464  | 0.124563  | 0.109266  |
| 0.128059  | 0.107955  | 0.112179  | 0.172348 | 0.113199  | 0.131702  | 0.114365  |
| 0.0476399 | 0.117861  | 0.134615  | 0.184586 | 0.128059  | 0.0559441 | 0.12398   |
| 0.0501166 | 0.124709  | 0.135927  | 0.18852  | 0.130828  | 0.0581294 | 0.126457  |
| 0.136072  | 0.125874  | 0.132139  | 0.179779 | 0.13141   | 0.135635  | 0.12704   |
| 0.13986   | 0.124126  | 0.134178  | 0.179779 | 0.132867  | 0.138258  | 0.129079  |
| 0.0479312 | 0.123397  | 0.136072  | 0.185752 | 0.129808  | 0.0597319 | 0.123689  |
| 0.123397  | 0.0863928 | 0.0850816 | 0.173805 | 0.112617  | 0.124709  | 0.0910548 |
| 0.134907  | 0.131702  | 0.134761  | 0.187937 | 0.133159  | 0.137675  | 0.109557  |
| 0.137092  | 0.12398   | 0.129079  | 0.186917 | 0.130099  | 0.13986   | 0.124563  |
| 0.210519  | 0.205274  | 0.20979   | 0.177302 | 0.197698  | 0.199009  | 0.216638  |
| 0.135927  | 0.123689  | 0.112179  | 0.181672 | 0.11961   | 0.133159  | 0.126894  |
| 0.116404  | 0.10912   | 0.117424  | 0.1706   | 0.120192  | 0.119755  | 0.108537  |
| 0.132867  | 0.11655   | 0.118444  | 0.17162  | 0.122086  | 0.129516  | 0.119755  |
| 0.231206  | 0.218677  | 0.227273  | 0.193619 | 0.215763  | 0.219406  | 0.228875  |
| 0.21926   | 0.20877   | 0.215326  | 0.183712 | 0.205857  | 0.205711  | 0.220425  |
| 0.130536  | 0.127914  | 0.133887  | 0.18007  | 0.129953  | 0.132139  | 0.11451   |
| 0.252768  | 0.248397  | 0.254953  | 0.210519 | 0.241113  | 0.243298  | 0.256847  |
| 0.12398   | 0.0898893 | 0.0850816 | 0.172057 | 0.112908  | 0.126457  | 0.0910548 |
| 0.137092  | 0.129225  | 0.120047  | 0.194202 | 0.140589  | 0.143065  | 0.123689  |
| 0.121649  | 0.10067   | 0.106061  | 0.173223 | 0.118735  | 0.120921  | 0.101836  |
| 0.0521562 | 0.119172  | 0.13243   | 0.185023 | 0.123543  | 0.0613345 | 0.123252  |
| 0.199446  | 0.189248  | 0.189685  | 0.16419  | 0.181672  | 0.185315  | 0.199446  |
| 0.122378  | 0.121503  | 0.120192  | 0.179487 | 0.123834  | 0.12602   | 0.11859   |

|           |           |           |          |           |           |           |
|-----------|-----------|-----------|----------|-----------|-----------|-----------|
| 0.206585  | 0.19289   | 0.196824  | 0.166958 | 0.184441  | 0.193328  | 0.204545  |
| 0.125874  | 0.106643  | 0.110286  | 0.177448 | 0.117133  | 0.128351  | 0.119755  |
| 0.126166  | 0.115385  | 0.122815  | 0.167541 | 0.100816  | 0.121941  | 0.11859   |
| 0.121212  | 0.0562354 | 0.112617  | 0.179779 | 0.123252  | 0.127185  | 0.110723  |
| 0.119755  | 0.110723  | 0.118153  | 0.166958 | 0.105186  | 0.118444  | 0.11859   |
| 0.118153  | 0.104167  | 0.106352  | 0.168561 | 0.108537  | 0.122086  | 0.106206  |
| 0.127477  | 0.115239  | 0.101107  | 0.173514 | 0.10708   | 0.128497  | 0.11961   |
| 0.11961   | 0.0957168 | 0.103147  | 0.169435 | 0.113491  | 0.116841  | 0.0960082 |
| 0.123543  | 0.116259  | 0.115239  | 0.170455 | 0.0486597 | 0.126603  | 0.125874  |
| 0.126603  | 0.119901  | 0.118298  | 0.176719 | 0.11961   | 0.127622  | 0.103875  |
| 0.125146  | 0.100962  | 0.0483683 | 0.177593 | 0.110868  | 0.126166  | 0.0989219 |
| 0.117716  | 0.100524  | 0.105041  | 0.171911 | 0.117424  | 0.119027  | 0.097028  |
| 0.13447   | 0.117861  | 0.125583  | 0.171474 | 0.121649  | 0.132284  | 0.123397  |
| 0.129808  | 0.126894  | 0.128205  | 0.17701  | 0.0613345 | 0.139277  | 0.140297  |
| 0.127914  | 0.11451   | 0.120775  | 0.164918 | 0.115967  | 0.128642  | 0.116841  |
| 0.121941  | 0.112325  | 0.117716  | 0.177302 | 0.114073  | 0.124417  | 0.120192  |
| 0.123252  | 0.108392  | 0.107663  | 0.167541 | 0.109266  | 0.124272  | 0.110723  |
| 0.125291  | 0.117424  | 0.122232  | 0.169289 | 0.117133  | 0.126603  | 0.115093  |
| 0.0591492 | 0.115967  | 0.12602   | 0.179196 | 0.119755  | 0.0689103 | 0.121795  |
| 0.128934  | 0.121649  | 0.123252  | 0.180798 | 0.124563  | 0.132867  | 0.122815  |
| 0.127768  | 0.115822  | 0.119755  | 0.170309 | 0.125146  | 0.128205  | 0.121066  |
| 0.127331  | 0.119172  | 0.120192  | 0.167249 | 0.0521562 | 0.13039   | 0.13141   |
| 0.13039   | 0.129808  | 0.135198  | 0.17701  | 0.0607517 | 0.134615  | 0.140297  |
| 0.14088   | 0.135635  | 0.139569  | 0.182838 | 0.0689103 | 0.145105  | 0.144668  |
| 0.118007  | 0.108974  | 0.109994  | 0.162879 | 0.106935  | 0.121066  | 0.101981  |
| 0.126748  | 0.110723  | 0.112908  | 0.169872 | 0.113928  | 0.128934  | 0.116841  |
| 0.112617  | 0.107372  | 0.109557  | 0.169143 | 0.109703  | 0.112471  | 0.110868  |
| 0.0502622 | 0.125146  | 0.136072  | 0.1875   | 0.131556  | 0.0594406 | 0.126894  |
| 0.125874  | 0.103147  | 0.106206  | 0.177448 | 0.117716  | 0.126894  | 0.100816  |
| 0.1419    | 0.141026  | 0.14292   | 0.191725 | 0.143939  | 0.145833  | 0.134033  |
| 0.140734  | 0.127914  | 0.128642  | 0.184441 | 0.133159  | 0.144668  | 0.125291  |
| 0.116696  | 0.121358  | 0.122378  | 0.181381 | 0.12398   | 0.123543  | 0.128934  |
| 0.124709  | 0.103438  | 0.0965909 | 0.169872 | 0.106935  | 0.123106  | 0.104895  |
| 0.108537  | 0.112325  | 0.109557  | 0.171183 | 0.108537  | 0.108683  | 0.115822  |
| 0.137383  | 0.122815  | 0.129079  | 0.17701  | 0.129225  | 0.137238  | 0.125437  |
| 0.214744  | 0.206294  | 0.209353  | 0.168124 | 0.197552  | 0.201486  | 0.213869  |
| 0.121212  | 0.111888  | 0.11757   | 0.17366  | 0.115385  | 0.119027  | 0.120047  |
| 0.126603  | 0.060169  | 0.105186  | 0.178467 | 0.115822  | 0.127331  | 0.107955  |
| 0.0521562 | 0.115967  | 0.126603  | 0.178322 | 0.122378  | 0.0592949 | 0.118298  |
| 0.130099  | 0.114365  | 0.122086  | 0.170017 | 0.117279  | 0.129371  | 0.118444  |
| 0.132576  | 0.113636  | 0.113782  | 0.179487 | 0.124126  | 0.130682  | 0.122378  |
| 0.130828  | 0.122086  | 0.115239  | 0.176573 | 0.114802  | 0.133596  | 0.128497  |
| 0.128059  | 0.124272  | 0.117133  | 0.181964 | 0.118153  | 0.129953  | 0.133887  |
| 0.113636  | 0.118298  | 0.119027  | 0.176282 | 0.121212  | 0.11757   | 0.12704   |



|           |           |           |          |           |           |           |
|-----------|-----------|-----------|----------|-----------|-----------|-----------|
| 0.123252  | 0.114219  | 0.113491  | 0.173368 | 0.115967  | 0.124563  | 0.0984848 |
| 0         | 0.120921  | 0.131265  | 0.182984 | 0.126457  | 0.0572552 | 0.122086  |
| 0.120921  | 0         | 0.108246  | 0.176865 | 0.116841  | 0.120775  | 0.1081    |
| 0.131265  | 0.108246  | 0         | 0.181672 | 0.117279  | 0.132284  | 0.107372  |
| 0.182984  | 0.176865  | 0.181672  | 0        | 0.169289  | 0.179633  | 0.181527  |
| 0.126457  | 0.116841  | 0.117279  | 0.169289 | 0         | 0.13039   | 0.130828  |
| 0.0572552 | 0.120775  | 0.132284  | 0.179633 | 0.13039   | 0         | 0.122815  |
| 0.122086  | 0.1081    | 0.107372  | 0.181527 | 0.130828  | 0.122815  | 0         |
| 0.123106  | 0.120775  | 0.127914  | 0.172931 | 0.115239  | 0.12704   | 0.118153  |
| 0.122232  | 0.0962995 | 0.0920746 | 0.168561 | 0.103293  | 0.122086  | 0.100379  |
| 0.121066  | 0.099796  | 0.0536131 | 0.171183 | 0.107663  | 0.123543  | 0.0986305 |
| 0.125437  | 0.100962  | 0.0935315 | 0.172348 | 0.112034  | 0.124417  | 0.101544  |
| 0.119318  | 0.116113  | 0.126748  | 0.180507 | 0.126603  | 0.118007  | 0.115822  |
| 0.127768  | 0.10912   | 0.0844988 | 0.167686 | 0.0855186 | 0.130536  | 0.118444  |
| 0.135198  | 0.11859   | 0.125146  | 0.187646 | 0.128205  | 0.135344  | 0.114802  |
| 0.121066  | 0.11116   | 0.111597  | 0.172057 | 0.10912   | 0.119464  | 0.110286  |
| 0.129953  | 0.111888  | 0.101836  | 0.175699 | 0.115093  | 0.125437  | 0.109266  |
| 0.132139  | 0.12398   | 0.128788  | 0.187209 | 0.133887  | 0.134907  | 0.115822  |
| 0.12602   | 0.107372  | 0.0973193 | 0.18109  | 0.119901  | 0.127331  | 0.0901807 |
| 0.128059  | 0.11757   | 0.121212  | 0.17905  | 0.118735  | 0.129953  | 0.11961   |
| 0.127185  | 0.102418  | 0.094697  | 0.178176 | 0.116404  | 0.127622  | 0.0930944 |
| 0.127477  | 0.106498  | 0.0961538 | 0.18109  | 0.119027  | 0.128497  | 0.0962995 |
| 0.120192  | 0.092803  | 0.101399  | 0.17264  | 0.115239  | 0.121795  | 0.0971737 |
| 0.134615  | 0.107517  | 0.10708   | 0.189685 | 0.126166  | 0.135635  | 0.101399  |
| 0.122378  | 0.0984848 | 0.0965909 | 0.171911 | 0.113928  | 0.122523  | 0.0917832 |
| 0.145105  | 0.143939  | 0.146416  | 0.192016 | 0.136655  | 0.146999  | 0.140734  |
| 0.13986   | 0.134324  | 0.133887  | 0.178322 | 0.12704   | 0.139714  | 0.135198  |
| 0.121795  | 0.099359  | 0.0980478 | 0.17162  | 0.115093  | 0.124272  | 0.0964452 |
| 0.131265  | 0.128934  | 0.14627   | 0.189831 | 0.13447   | 0.137238  | 0.129516  |
| 0.125728  | 0.121358  | 0.120921  | 0.174097 | 0.118153  | 0.130536  | 0.126603  |
| 0.144959  | 0.126603  | 0.123252  | 0.180798 | 0.137675  | 0.143939  | 0.121358  |
| 0.124854  | 0.099796  | 0.104604  | 0.171474 | 0.118153  | 0.126457  | 0.0980478 |
| 0.125583  | 0.137238  | 0.143794  | 0.192308 | 0.142483  | 0.129516  | 0.145396  |
| 0.123252  | 0.119755  | 0.125437  | 0.18007  | 0.134033  | 0.123106  | 0.129079  |
| 0.131702  | 0.132284  | 0.13884   | 0.187063 | 0.143939  | 0.133887  | 0.132867  |
| 0.132284  | 0.113636  | 0.114948  | 0.18007  | 0.123834  | 0.133596  | 0.111597  |
| 0.127768  | 0.104167  | 0.0979021 | 0.174679 | 0.114656  | 0.131119  | 0.0910548 |
| 0.125291  | 0.0987762 | 0.0983392 | 0.172494 | 0.115676  | 0.126603  | 0.101107  |
| 0.108537  | 0.118153  | 0.11859   | 0.17905  | 0.118153  | 0.11451   | 0.111451  |
| 0.124854  | 0.104167  | 0.107517  | 0.178759 | 0.125728  | 0.127331  | 0.099796  |
| 0.132576  | 0.109557  | 0.118735  | 0.185315 | 0.13345   | 0.13447   | 0.114802  |
| 0.134615  | 0.117133  | 0.11961   | 0.175117 | 0.121795  | 0.132721  | 0.122086  |
| 0.119464  | 0.106352  | 0.105915  | 0.166667 | 0.112179  | 0.121649  | 0.100233  |
| 0.125728  | 0.0960082 | 0.0952797 | 0.175554 | 0.114365  | 0.127622  | 0.0980478 |

|          |          |           |          |          |          |           |
|----------|----------|-----------|----------|----------|----------|-----------|
| 0.123834 | 0.106061 | 0.107955  | 0.180361 | 0.128205 | 0.124563 | 0.0777972 |
| 0.124417 | 0.107809 | 0.104749  | 0.169872 | 0.113928 | 0.128059 | 0.0984848 |
| 0.129808 | 0.105041 | 0.106643  | 0.180798 | 0.125437 | 0.132284 | 0.0980478 |
| 0.128642 | 0.099796 | 0.106352  | 0.167978 | 0.109703 | 0.127622 | 0.107955  |
| 0.127622 | 0.115385 | 0.114365  | 0.168998 | 0.108974 | 0.127768 | 0.121503  |
| 0.126748 | 0.112179 | 0.092803  | 0.171911 | 0.111305 | 0.127185 | 0.108392  |
| 0.123252 | 0.087704 | 0.0861014 | 0.166667 | 0.111888 | 0.123106 | 0.0874126 |
| 0.119755 | 0.10169  | 0.100379  | 0.175408 | 0.119172 | 0.122523 | 0.0824592 |
| 0.128934 | 0.113782 | 0.112471  | 0.168561 | 0.106206 | 0.123252 | 0.118735  |
| 0.123834 | 0.101107 | 0.0930944 | 0.171911 | 0.107226 | 0.125146 | 0.110431  |
| 0.129079 | 0.112762 | 0.112908  | 0.176573 | 0.109266 | 0.130099 | 0.128497  |
| 0.11859  | 0.109266 | 0.105915  | 0.163462 | 0.097028 | 0.119318 | 0.114802  |
| 0.133887 | 0.112908 | 0.104021  | 0.184003 | 0.124854 | 0.138112 | 0.115822  |

| <b>TDr_89_00727</b> | <b>TDr_89_02475</b> | <b>TDr_89_02617</b> | <b>TDr_89_02665</b> | <b>TDr_89_02672</b> | <b>TDr_89_02677</b> | <b>TDr_93_2</b> |
|---------------------|---------------------|---------------------|---------------------|---------------------|---------------------|-----------------|
| 0.116113            | 0.0962995           | 0.101253            | 0.10067             | 0.122815            | 0.10067             | 0.127331        |
| 0.11655             | 0.10169             | 0.0999417           | 0.105478            | 0.127914            | 0.107517            | 0.124272        |
| 0.11655             | 0.0955711           | 0.0944056           | 0.0996503           | 0.121212            | 0.103438            | 0.124272        |
| 0.111888            | 0.102855            | 0.108683            | 0.110431            | 0.126457            | 0.103438            | 0.124854        |
| 0.13986             | 0.122669            | 0.124417            | 0.12296             | 0.134033            | 0.129953            | 0.137675        |
| 0.123252            | 0.122669            | 0.119755            | 0.127914            | 0.126748            | 0.12296             | 0.134761        |
| 0.114656            | 0.112034            | 0.110286            | 0.114948            | 0.116404            | 0.118735            | 0.115385        |
| 0.113491            | 0.10271             | 0.0980478           | 0.106498            | 0.121358            | 0.104167            | 0.123543        |
| 0.112179            | 0.0693473           | 0.0795455           | 0.0763403           | 0.113054            | 0.094697            | 0.119027        |
| 0.11961             | 0.0843531           | 0.0831876           | 0.0887238           | 0.116404            | 0.0977564           | 0.113636        |
| 0.111014            | 0.104021            | 0.0952797           | 0.109266            | 0.123834            | 0.107517            | 0.123106        |
| 0.118444            | 0.0957168           | 0.0983392           | 0.103875            | 0.116113            | 0.109994            | 0.121212        |
| 0.117279            | 0.0793998           | 0.0901807           | 0.0831876           | 0.122232            | 0.097465            | 0.116259        |
| 0.132576            | 0.119755            | 0.119172            | 0.122378            | 0.142191            | 0.116259            | 0.146416        |
| 0.127768            | 0.114656            | 0.113199            | 0.120484            | 0.132139            | 0.11961             | 0.129953        |
| 0.109848            | 0.106061            | 0.102564            | 0.107809            | 0.112762            | 0.111305            | 0.113491        |
| 0.116113            | 0.100379            | 0.102127            | 0.102418            | 0.11961             | 0.110577            | 0.117424        |
| 0.1419              | 0.134615            | 0.135198            | 0.135781            | 0.143648            | 0.132284            | 0.154283        |
| 0.117133            | 0.0944056           | 0.097028            | 0.101399            | 0.119464            | 0.106643            | 0.119027        |
| 0.194347            | 0.195221            | 0.194056            | 0.199592            | 0.205128            | 0.187063            | 0.209062        |
| 0.123689            | 0.11116             | 0.115822            | 0.116696            | 0.125728            | 0.122523            | 0.126166        |
| 0.126166            | 0.111014            | 0.110431            | 0.116841            | 0.123834            | 0.121503            | 0.121941        |
| 0.103584            | 0.10067             | 0.0936772           | 0.106789            | 0.11116             | 0.0977564           | 0.125           |
| 0.125874            | 0.11451             | 0.115385            | 0.112179            | 0.108683            | 0.128497            | 0.121649        |
| 0.104167            | 0.0930944           | 0.0936772           | 0.0983392           | 0.107372            | 0.0945513           | 0.113636        |
| 0.126311            | 0.118444            | 0.121066            | 0.122815            | 0.125728            | 0.127477            | 0.13141         |
| 0.121941            | 0.113199            | 0.117279            | 0.112034            | 0.11961             | 0.125146            | 0.115093        |
| 0.116696            | 0.103875            | 0.104749            | 0.105624            | 0.107372            | 0.121066            | 0.122086        |
| 0.129225            | 0.115239            | 0.114948            | 0.11553             | 0.125146            | 0.131847            | 0.128205        |
| 0.129516            | 0.0968823           | 0.106498            | 0.100379            | 0.129225            | 0.116696            | 0.121212        |
| 0.120047            | 0.116259            | 0.111597            | 0.119464            | 0.126748            | 0.120629            | 0.0878497       |
| 0.11961             | 0.101544            | 0.108246            | 0.105915            | 0.118735            | 0.119318            | 0.120629        |
| 0.106206            | 0.0939685           | 0.0957168           | 0.101836            | 0.114365            | 0.101544            | 0.111014        |
| 0.126311            | 0.101544            | 0.10067             | 0.105041            | 0.122523            | 0.111451            | 0.120047        |
| 0.11859             | 0.106643            | 0.0976107           | 0.108974            | 0.11859             | 0.113928            | 0.114656        |
| 0.128351            | 0.110868            | 0.105624            | 0.113491            | 0.12398             | 0.120775            | 0.124709        |
| 0.121795            | 0.117716            | 0.115676            | 0.119755            | 0.131702            | 0.129079            | 0.137675        |
| 0.126603            | 0.108246            | 0.105332            | 0.113491            | 0.124563            | 0.11757             | 0.129371        |
| 0.112325            | 0.0977564           | 0.10067             | 0.101544            | 0.103293            | 0.108537            | 0.11655         |
| 0.115822            | 0.11116             | 0.108246            | 0.11553             | 0.111742            | 0.119318            | 0.126748        |
| 0.106498            | 0.0992133           | 0.0960082           | 0.103875            | 0.104749            | 0.107663            | 0.120921        |
| 0.130682            | 0.133304            | 0.126603            | 0.136218            | 0.124854            | 0.137383            | 0.137821        |

|           |           |           |           |           |           |          |
|-----------|-----------|-----------|-----------|-----------|-----------|----------|
| 0.134178  | 0.129516  | 0.133304  | 0.132139  | 0.124854  | 0.139714  | 0.141026 |
| 0.111888  | 0.101107  | 0.0987762 | 0.109266  | 0.106061  | 0.108683  | 0.119318 |
| 0.102273  | 0.0929487 | 0.0868298 | 0.0987762 | 0.109557  | 0.106643  | 0.109411 |
| 0.116404  | 0.102418  | 0.0925117 | 0.10708   | 0.118153  | 0.112325  | 0.117133 |
| 0.113491  | 0.108537  | 0.10912   | 0.112617  | 0.0910548 | 0.122232  | 0.126457 |
| 0.131993  | 0.125291  | 0.122378  | 0.127914  | 0.117133  | 0.13345   | 0.136801 |
| 0.107809  | 0.102855  | 0.102564  | 0.106352  | 0.105478  | 0.113054  | 0.116113 |
| 0.111451  | 0.106789  | 0.099796  | 0.11116   | 0.106789  | 0.112617  | 0.121503 |
| 0.143357  | 0.135198  | 0.137529  | 0.13986   | 0.143939  | 0.141317  | 0.14088  |
| 0.123834  | 0.113345  | 0.121795  | 0.115967  | 0.113928  | 0.125583  | 0.130682 |
| 0.108537  | 0.102418  | 0.10271   | 0.108537  | 0.106498  | 0.116113  | 0.122378 |
| 0.128934  | 0.103001  | 0.10067   | 0.107955  | 0.12602   | 0.112034  | 0.13345  |
| 0.0960082 | 0.10912   | 0.10708   | 0.115822  | 0.113782  | 0.0913462 | 0.12296  |
| 0.135052  | 0.129808  | 0.132721  | 0.134178  | 0.102418  | 0.13884   | 0.138695 |
| 0.120629  | 0.112762  | 0.113636  | 0.117716  | 0.115676  | 0.125291  | 0.12398  |
| 0.100524  | 0.099359  | 0.0996503 | 0.106061  | 0.111305  | 0.112762  | 0.125728 |
| 0.11451   | 0.102564  | 0.10169   | 0.108974  | 0.112471  | 0.115093  | 0.125437 |
| 0.116987  | 0.109994  | 0.0989219 | 0.11116   | 0.116987  | 0.113491  | 0.115093 |
| 0.121066  | 0.128642  | 0.130682  | 0.131265  | 0.119901  | 0.135927  | 0.13986  |
| 0.131847  | 0.130099  | 0.124563  | 0.130682  | 0.116987  | 0.135344  | 0.143939 |
| 0.15035   | 0.153555  | 0.152389  | 0.159382  | 0.151224  | 0.152098  | 0.170892 |
| 0.111014  | 0.104895  | 0.0999417 | 0.109557  | 0.1081    | 0.112762  | 0.122815 |
| 0.108974  | 0.103438  | 0.0987762 | 0.108392  | 0.107226  | 0.114802  | 0.118444 |
| 0.108392  | 0.0981935 | 0.0958625 | 0.102273  | 0.103438  | 0.113928  | 0.115822 |
| 0.129808  | 0.127185  | 0.126311  | 0.131847  | 0.135635  | 0.133887  | 0.145979 |
| 0.109994  | 0.0995047 | 0.0971737 | 0.106498  | 0.110868  | 0.113782  | 0.122378 |
| 0.117424  | 0.122669  | 0.124709  | 0.125     | 0.0795455 | 0.127331  | 0.135635 |
| 0.118007  | 0.106643  | 0.0999417 | 0.1081    | 0.110431  | 0.121212  | 0.112034 |
| 0.106498  | 0.10912   | 0.101544  | 0.112908  | 0.113491  | 0.118153  | 0.124126 |
| 0.132139  | 0.14088   | 0.137383  | 0.144668  | 0.141754  | 0.136801  | 0.153846 |
| 0.115822  | 0.109703  | 0.10912   | 0.11116   | 0.115822  | 0.121941  | 0.120047 |
| 0.133741  | 0.128205  | 0.120338  | 0.132284  | 0.123543  | 0.131702  | 0.137675 |
| 0.131556  | 0.116987  | 0.123689  | 0.118444  | 0.119901  | 0.133013  | 0.13345  |
| 0.104312  | 0.106643  | 0.102855  | 0.112179  | 0.115676  | 0.107517  | 0.122815 |
| 0.112762  | 0.100233  | 0.0961538 | 0.107226  | 0.111014  | 0.111597  | 0.119318 |
| 0.111014  | 0.099359  | 0.0987762 | 0.103147  | 0.113054  | 0.112471  | 0.124563 |
| 0.108392  | 0.119172  | 0.118881  | 0.120921  | 0.121212  | 0.130245  | 0.138258 |
| 0.11116   | 0.100087  | 0.0968823 | 0.103584  | 0.109994  | 0.112908  | 0.112471 |
| 0.121503  | 0.13141   | 0.127331  | 0.134324  | 0.124709  | 0.133741  | 0.142628 |
| 0.117424  | 0.109266  | 0.111305  | 0.112179  | 0.111888  | 0.122086  | 0.129808 |
| 0.115385  | 0.111014  | 0.11014   | 0.112762  | 0.104021  | 0.120629  | 0.125728 |
| 0.114219  | 0.104312  | 0.109266  | 0.1081    | 0.112762  | 0.11655   | 0.122232 |
| 0.11859   | 0.110723  | 0.107517  | 0.112471  | 0.113345  | 0.12296   | 0.128351 |
| 0.107809  | 0.103438  | 0.0999417 | 0.109848  | 0.106643  | 0.113636  | 0.123106 |

|           |           |           |           |          |          |          |
|-----------|-----------|-----------|-----------|----------|----------|----------|
| 0.107517  | 0.0990676 | 0.105769  | 0.105478  | 0.106061 | 0.116841 | 0.120192 |
| 0.12398   | 0.126894  | 0.122523  | 0.127185  | 0.123689 | 0.133013 | 0.137529 |
| 0.113199  | 0.0983392 | 0.0942599 | 0.10271   | 0.118153 | 0.10708  | 0.107517 |
| 0.120629  | 0.0917832 | 0.0862471 | 0.0961538 | 0.119755 | 0.108974 | 0.118444 |
| 0.121503  | 0.115676  | 0.112471  | 0.116841  | 0.128497 | 0.128497 | 0.125728 |
| 0.120629  | 0.117424  | 0.115676  | 0.119172  | 0.124126 | 0.125    | 0.11757  |
| 0.109557  | 0.119464  | 0.112471  | 0.122378  | 0.120921 | 0.130536 | 0.125437 |
| 0.0992133 | 0.127185  | 0.122523  | 0.128934  | 0.122815 | 0.133304 | 0.140152 |
| 0.1081    | 0.107226  | 0.107226  | 0.111888  | 0.120338 | 0.11014  | 0.126894 |
| 0.16521   | 0.178613  | 0.176573  | 0.184732  | 0.179487 | 0.169872 | 0.18954  |
| 0.110868  | 0.102127  | 0.0948427 | 0.107372  | 0.117279 | 0.110868 | 0.116841 |
| 0.117424  | 0.122669  | 0.118881  | 0.125     | 0.119755 | 0.130536 | 0.13884  |
| 0.111597  | 0.114802  | 0.108683  | 0.115676  | 0.115676 | 0.123834 | 0.132139 |
| 0.127768  | 0.12602   | 0.123689  | 0.131265  | 0.134761 | 0.135052 | 0.129371 |
| 0.0850816 | 0.100816  | 0.0987762 | 0.11014   | 0.107226 | 0.111597 | 0.116987 |
| 0.0897436 | 0.119755  | 0.11655   | 0.12296   | 0.11451  | 0.126457 | 0.133887 |
| 0.105769  | 0.108392  | 0.0990676 | 0.109266  | 0.114219 | 0.11655  | 0.121066 |
| 0.105915  | 0.111742  | 0.110286  | 0.113491  | 0.117279 | 0.121358 | 0.129079 |
| 0.101544  | 0.101544  | 0.102127  | 0.108829  | 0.114073 | 0.105332 | 0.124417 |
| 0.116404  | 0.123106  | 0.124563  | 0.124854  | 0.116987 | 0.135052 | 0.134615 |
| 0.111742  | 0.0977564 | 0.0907634 | 0.103584  | 0.108246 | 0.109703 | 0.117424 |
| 0.111305  | 0.125291  | 0.120047  | 0.128497  | 0.124709 | 0.124417 | 0.134761 |
| 0.113199  | 0.104167  | 0.100379  | 0.109703  | 0.121358 | 0.116696 | 0.116841 |
| 0.123252  | 0.117716  | 0.117424  | 0.118881  | 0.116841 | 0.125583 | 0.130682 |
| 0.123689  | 0.119027  | 0.113491  | 0.12398   | 0.132139 | 0.127185 | 0.127622 |
| 0.110868  | 0.0989219 | 0.0939685 | 0.103875  | 0.109994 | 0.109411 | 0.113928 |
| 0.12398   | 0.137092  | 0.13447   | 0.139132  | 0.137092 | 0.137092 | 0.150058 |
| 0.114802  | 0.104312  | 0.099359  | 0.109266  | 0.114219 | 0.114219 | 0.119027 |
| 0.111014  | 0.104604  | 0.094697  | 0.106643  | 0.115385 | 0.111014 | 0.121649 |
| 0.126894  | 0.10067   | 0.101544  | 0.105915  | 0.105624 | 0.116696 | 0.121795 |
| 0.135052  | 0.125437  | 0.121358  | 0.128642  | 0.140589 | 0.131556 | 0.141317 |
| 0.103875  | 0.112325  | 0.116987  | 0.118735  | 0.101253 | 0.114948 | 0.128205 |
| 0.10271   | 0.0960082 | 0.0898893 | 0.10067   | 0.107663 | 0.106206 | 0.115676 |
| 0.106789  | 0.097465  | 0.0945513 | 0.103001  | 0.110286 | 0.111451 | 0.118298 |
| 0.115676  | 0.099359  | 0.0987762 | 0.103438  | 0.125583 | 0.113345 | 0.116696 |
| 0.118444  | 0.112908  | 0.106206  | 0.114073  | 0.121358 | 0.11757  | 0.128497 |
| 0.118298  | 0.1081    | 0.105478  | 0.109266  | 0.118007 | 0.118007 | 0.111742 |
| 0.106498  | 0.0901807 | 0.0840618 | 0.092803  | 0.109703 | 0.10271  | 0.110723 |
| 0.106498  | 0.0925117 | 0.0820221 | 0.0968823 | 0.106498 | 0.103001 | 0.110723 |
| 0.112179  | 0.0903263 | 0.0885781 | 0.0932401 | 0.109557 | 0.106643 | 0.117861 |
| 0.118007  | 0.106643  | 0.106061  | 0.111305  | 0.117133 | 0.115385 | 0.126311 |
| 0.120775  | 0.114073  | 0.106789  | 0.11553   | 0.125728 | 0.125728 | 0.121795 |
| 0.115093  | 0.0917832 | 0.0903263 | 0.0955711 | 0.120629 | 0.11014  | 0.113199 |
| 0.110286  | 0.0887238 | 0.0878497 | 0.0942599 | 0.107663 | 0.107663 | 0.109557 |

|           |           |           |           |           |           |           |
|-----------|-----------|-----------|-----------|-----------|-----------|-----------|
| 0.116404  | 0.114948  | 0.104167  | 0.117861  | 0.115822  | 0.125146  | 0.124709  |
| 0.1081    | 0.0967366 | 0.0865385 | 0.101399  | 0.1081    | 0.106061  | 0.113491  |
| 0.119464  | 0.110431  | 0.106935  | 0.113636  | 0.126166  | 0.118007  | 0.131847  |
| 0.134615  | 0.120338  | 0.123834  | 0.127331  | 0.132867  | 0.129953  | 0.130973  |
| 0.108392  | 0.101981  | 0.0958625 | 0.101981  | 0.108392  | 0.11451   | 0.119901  |
| 0.11553   | 0.0942599 | 0.088141  | 0.0962995 | 0.118444  | 0.110577  | 0.111305  |
| 0.114365  | 0.0983392 | 0.092803  | 0.100962  | 0.109994  | 0.107955  | 0.114802  |
| 0.100962  | 0.0895979 | 0.0895979 | 0.0971737 | 0.105332  | 0.0995047 | 0.117424  |
| 0.125728  | 0.108246  | 0.100962  | 0.108829  | 0.120484  | 0.118735  | 0.126748  |
| 0.109994  | 0.090472  | 0.0837704 | 0.0936772 | 0.112617  | 0.103001  | 0.111014  |
| 0.136946  | 0.131119  | 0.124709  | 0.131119  | 0.138112  | 0.138986  | 0.0610431 |
| 0.131847  | 0.122232  | 0.11553   | 0.124854  | 0.135344  | 0.131847  | 0.127622  |
| 0.117861  | 0.109994  | 0.10708   | 0.113199  | 0.125437  | 0.119318  | 0.125874  |
| 0.117133  | 0.101107  | 0.0955711 | 0.109557  | 0.124709  | 0.117716  | 0.11757   |
| 0.11655   | 0.104604  | 0.101981  | 0.107517  | 0.11859   | 0.11655   | 0.118153  |
| 0.110868  | 0.097465  | 0.0945513 | 0.10067   | 0.110868  | 0.114365  | 0.108683  |
| 0.108683  | 0.0941142 | 0.094697  | 0.100233  | 0.106935  | 0.112471  | 0.116404  |
| 0.116841  | 0.0839161 | 0.0903263 | 0.092366  | 0.1081    | 0.105478  | 0.11961   |
| 0.100233  | 0.102273  | 0.103438  | 0.109557  | 0.101981  | 0.0938228 | 0.12602   |
| 0.124417  | 0.11655   | 0.118881  | 0.117716  | 0.0976107 | 0.134033  | 0.13447   |
| 0.0893065 | 0.104458  | 0.099796  | 0.110868  | 0.112034  | 0.112908  | 0.123543  |
| 0.131702  | 0.113636  | 0.108974  | 0.119464  | 0.128497  | 0.121503  | 0.132721  |
| 0.127768  | 0.128059  | 0.121649  | 0.127477  | 0.134761  | 0.134761  | 0.134324  |
| 0.193619  | 0.187209  | 0.185752  | 0.195367  | 0.199738  | 0.178759  | 0.208625  |
| 0.236014  | 0.232517  | 0.231935  | 0.238636  | 0.240385  | 0.226399  | 0.245192  |
| 0.10067   | 0.103293  | 0.105624  | 0.110868  | 0.106789  | 0.0861014 | 0.123834  |
| 0.115385  | 0.0996503 | 0.100816  | 0.106061  | 0.0879953 | 0.117133  | 0.119027  |
| 0.0979021 | 0.0984848 | 0.0944056 | 0.102564  | 0.0981935 | 0.101399  | 0.113199  |
| 0.112471  | 0.104604  | 0.101399  | 0.108974  | 0.0912005 | 0.113928  | 0.122523  |
| 0.128205  | 0.118007  | 0.115093  | 0.123834  | 0.129662  | 0.120921  | 0.131556  |
| 0.114219  | 0.102273  | 0.107809  | 0.108974  | 0.0903263 | 0.117424  | 0.124854  |
| 0.135052  | 0.133596  | 0.135344  | 0.14088   | 0.109703  | 0.148747  | 0.144522  |
| 0.112471  | 0.10373   | 0.104895  | 0.108974  | 0.0888695 | 0.118298  | 0.124272  |
| 0.127622  | 0.121795  | 0.11859   | 0.12296   | 0.0990676 | 0.133741  | 0.128642  |
| 0.111451  | 0.120484  | 0.122815  | 0.122815  | 0.0802739 | 0.127477  | 0.131119  |
| 0.118735  | 0.120484  | 0.121649  | 0.125437  | 0.0893065 | 0.13243   | 0.136364  |
| 0.131847  | 0.125437  | 0.121358  | 0.129808  | 0.122815  | 0.134761  | 0.13549   |
| 0.114073  | 0.10271   | 0.101544  | 0.109703  | 0.0962995 | 0.116696  | 0.125874  |
| 0.111742  | 0.099796  | 0.104167  | 0.107372  | 0.0890152 | 0.117861  | 0.124709  |
| 0.111888  | 0.108974  | 0.108974  | 0.112762  | 0.0871212 | 0.120629  | 0.12398   |
| 0.114219  | 0.0999417 | 0.100233  | 0.106352  | 0.0894522 | 0.114219  | 0.119027  |
| 0.111305  | 0.0981935 | 0.102564  | 0.107809  | 0.0882867 | 0.112762  | 0.12398   |
| 0.114948  | 0.110577  | 0.112617  | 0.113199  | 0.0901807 | 0.11757   | 0.121795  |
| 0.121212  | 0.121212  | 0.119464  | 0.123834  | 0.0847902 | 0.129953  | 0.137092  |

|          |           |           |           |           |           |          |
|----------|-----------|-----------|-----------|-----------|-----------|----------|
| 0.129953 | 0.126748  | 0.129953  | 0.129079  | 0.0967366 | 0.139569  | 0.13884  |
| 0.122815 | 0.108246  | 0.107955  | 0.112325  | 0.099796  | 0.121358  | 0.118881 |
| 0.112179 | 0.105478  | 0.104312  | 0.111597  | 0.0897436 | 0.114219  | 0.121358 |
| 0.129079 | 0.123252  | 0.119755  | 0.127331  | 0.099359  | 0.134615  | 0.133596 |
| 0.111888 | 0.104021  | 0.10169   | 0.1081    | 0.0958625 | 0.112471  | 0.121066 |
| 0.132139 | 0.13447   | 0.135344  | 0.139714  | 0.0980478 | 0.144085  | 0.145396 |
| 0.130682 | 0.11961   | 0.117861  | 0.124854  | 0.137966  | 0.126603  | 0.136072 |
| 0.104312 | 0.125874  | 0.128205  | 0.12704   | 0.106352  | 0.13141   | 0.139714 |
| 0.108392 | 0.100524  | 0.0961538 | 0.107809  | 0.0935315 | 0.113054  | 0.116987 |
| 0.108537 | 0.101836  | 0.0995047 | 0.107372  | 0.0893065 | 0.112325  | 0.117133 |
| 0.11859  | 0.117133  | 0.112471  | 0.119464  | 0.097028  | 0.129662  | 0.133887 |
| 0.117279 | 0.11553   | 0.114656  | 0.120484  | 0.0933858 | 0.127768  | 0.128497 |
| 0.122523 | 0.123689  | 0.121649  | 0.123106  | 0.0916375 | 0.135344  | 0.129662 |
| 0.115385 | 0.106935  | 0.111305  | 0.111888  | 0.0909091 | 0.120338  | 0.125146 |
| 0.115822 | 0.104458  | 0.109703  | 0.113782  | 0.0960082 | 0.122232  | 0.126166 |
| 0.114365 | 0.116987  | 0.11116   | 0.118735  | 0.0907634 | 0.120775  | 0.12296  |
| 0.128351 | 0.122815  | 0.122232  | 0.124272  | 0.10067   | 0.136509  | 0.136072 |
| 0.123397 | 0.120484  | 0.122232  | 0.122232  | 0.0930944 | 0.129808  | 0.131702 |
| 0.126748 | 0.128788  | 0.126166  | 0.130536  | 0.0914918 | 0.139277  | 0.135635 |
| 0.123397 | 0.121358  | 0.119318  | 0.123689  | 0.119901  | 0.126603  | 0.133741 |
| 0.116404 | 0.104167  | 0.103875  | 0.112325  | 0.095134  | 0.115239  | 0.119755 |
| 0.122232 | 0.12398   | 0.123397  | 0.122815  | 0.095134  | 0.137092  | 0.131119 |
| 0.1081   | 0.101107  | 0.0952797 | 0.103438  | 0.0912005 | 0.113636  | 0.115822 |
| 0.112325 | 0.105624  | 0.0977564 | 0.10912   | 0.106789  | 0.114073  | 0.120629 |
| 0.110868 | 0.101544  | 0.100962  | 0.107955  | 0.0919289 | 0.114656  | 0.123252 |
| 0.111597 | 0.104604  | 0.106352  | 0.112179  | 0.0879953 | 0.116259  | 0.123397 |
| 0.109266 | 0.103438  | 0.0979021 | 0.104895  | 0.0909091 | 0.110723  | 0.120775 |
| 0.128059 | 0.12602   | 0.126603  | 0.13039   | 0.0907634 | 0.137966  | 0.136072 |
| 0.117716 | 0.106643  | 0.106352  | 0.108683  | 0.110723  | 0.11655   | 0.123106 |
| 0.128788 | 0.123252  | 0.124417  | 0.126166  | 0.0938228 | 0.134033  | 0.135635 |
| 0.114802 | 0.102564  | 0.101399  | 0.1081    | 0.0973193 | 0.11859   | 0.120484 |
| 0.123689 | 0.115239  | 0.112325  | 0.116987  | 0.0898893 | 0.130682  | 0.129371 |
| 0.115676 | 0.0850816 | 0.10373   | 0.0871212 | 0.117424  | 0.108974  | 0.124854 |
| 0.120921 | 0.104604  | 0.0981935 | 0.111305  | 0.12296   | 0.112471  | 0.12602  |
| 0.11757  | 0.101253  | 0.0968823 | 0.104458  | 0.117279  | 0.114948  | 0.113345 |
| 0.125    | 0.103147  | 0.107809  | 0.110431  | 0.119172  | 0.11655   | 0.130973 |
| 0.122523 | 0.103001  | 0.105915  | 0.10912   | 0.121941  | 0.11757   | 0.127622 |
| 0.11553  | 0.100379  | 0.10708   | 0.106206  | 0.116987  | 0.11757   | 0.110431 |
| 0.141754 | 0.112325  | 0.0939685 | 0.111451  | 0.142045  | 0.114073  | 0.138112 |
| 0.135198 | 0.127331  | 0.126457  | 0.131119  | 0.130828  | 0.138695  | 0.136801 |
| 0.11859  | 0.0818765 | 0.0708042 | 0.085373  | 0.11859   | 0.0973193 | 0.115239 |
| 0.120192 | 0.113491  | 0.111451  | 0.114656  | 0.121649  | 0.125437  | 0.140443 |
| 0.131993 | 0.0999417 | 0.092366  | 0.101399  | 0.127914  | 0.111597  | 0.13039  |
| 0.124417 | 0.111305  | 0.110431  | 0.11451   | 0.122378  | 0.125874  | 0.137966 |

|          |           |           |           |          |           |          |
|----------|-----------|-----------|-----------|----------|-----------|----------|
| 0.108974 | 0.104021  | 0.105478  | 0.109557  | 0.116841 | 0.113928  | 0.132139 |
| 0.130536 | 0.101107  | 0.080711  | 0.0990676 | 0.131119 | 0.105769  | 0.122815 |
| 0.129225 | 0.0965909 | 0.0782343 | 0.0980478 | 0.135052 | 0.097465  | 0.130245 |
| 0.120338 | 0.113054  | 0.105186  | 0.11451   | 0.127914 | 0.119464  | 0.140297 |
| 0.122669 | 0.122086  | 0.121795  | 0.125874  | 0.134324 | 0.129662  | 0.141463 |
| 0.133741 | 0.0926573 | 0.0795455 | 0.0973193 | 0.134324 | 0.0944056 | 0.126311 |
| 0.105478 | 0.099359  | 0.0984848 | 0.10373   | 0.118298 | 0.111888  | 0.127477 |
| 0.129225 | 0.129516  | 0.130099  | 0.133304  | 0.129516 | 0.136509  | 0.127914 |
| 0.136946 | 0.104604  | 0.0871212 | 0.104604  | 0.141026 | 0.107226  | 0.136509 |
| 0.11014  | 0.099359  | 0.0891608 | 0.104021  | 0.115093 | 0.104604  | 0.120484 |
| 0.214889 | 0.214307  | 0.216346  | 0.214889  | 0.221008 | 0.209645  | 0.224942 |
| 0.110577 | 0.10708   | 0.103001  | 0.109994  | 0.122815 | 0.114365  | 0.134324 |
| 0.122232 | 0.0849359 | 0.0712413 | 0.0942599 | 0.121649 | 0.102418  | 0.124126 |
| 0.122378 | 0.118298  | 0.11451   | 0.11655   | 0.128497 | 0.123252  | 0.142045 |
| 0.12704  | 0.0894522 | 0.0754662 | 0.0917832 | 0.123543 | 0.0999417 | 0.121358 |
| 0.138403 | 0.102564  | 0.0903263 | 0.106643  | 0.143357 | 0.106352  | 0.134761 |
| 0.110431 | 0.103147  | 0.105186  | 0.106352  | 0.116841 | 0.117133  | 0.133887 |
| 0.116113 | 0.100087  | 0.0995047 | 0.100087  | 0.124563 | 0.107663  | 0.126748 |
| 0.132139 | 0.101253  | 0.083479  | 0.104458  | 0.127477 | 0.10271   | 0.127622 |
| 0.119172 | 0.111305  | 0.111597  | 0.113345  | 0.12704  | 0.122086  | 0.136801 |
| 0.122523 | 0.11553   | 0.113782  | 0.119318  | 0.124854 | 0.124854  | 0.138403 |
| 0.121503 | 0.113928  | 0.113345  | 0.11655   | 0.119755 | 0.12296   | 0.132139 |
| 0.117716 | 0.108392  | 0.106935  | 0.113636  | 0.126166 | 0.120047  | 0.138549 |
| 0.12296  | 0.101107  | 0.097028  | 0.106061  | 0.118007 | 0.113345  | 0.116404 |
| 0.115676 | 0.0955711 | 0.104312  | 0.100524  | 0.119755 | 0.115967  | 0.129225 |
| 0.11961  | 0.115822  | 0.11553   | 0.118153  | 0.126894 | 0.124854  | 0.138403 |
| 0.105186 | 0.104604  | 0.100524  | 0.106643  | 0.115385 | 0.11014   | 0.128351 |
| 0.122378 | 0.127914  | 0.123543  | 0.130828  | 0.127622 | 0.138112  | 0.139714 |
| 0.137092 | 0.122815  | 0.121066  | 0.128059  | 0.14292  | 0.133596  | 0.140734 |
| 0.11757  | 0.108246  | 0.107372  | 0.113491  | 0.123689 | 0.114948  | 0.125291 |
| 0.131847 | 0.0995047 | 0.0901807 | 0.101836  | 0.130973 | 0.10912   | 0.134615 |
| 0.109848 | 0.114802  | 0.115676  | 0.120047  | 0.128788 | 0.117716  | 0.139132 |
| 0.133304 | 0.110286  | 0.110286  | 0.116113  | 0.128934 | 0.118444  | 0.124709 |
| 0.126603 | 0.11757   | 0.11961   | 0.119901  | 0.133304 | 0.118735  | 0.138112 |
| 0.13884  | 0.124854  | 0.125146  | 0.126894  | 0.143502 | 0.129808  | 0.147436 |
| 0.117716 | 0.0932401 | 0.0935315 | 0.0973193 | 0.115676 | 0.104895  | 0.118735 |
| 0.128351 | 0.119901  | 0.116696  | 0.122815  | 0.132139 | 0.13039   | 0.126748 |
| 0.142191 | 0.131993  | 0.129371  | 0.134907  | 0.143357 | 0.130245  | 0.145833 |
| 0.117716 | 0.109848  | 0.0955711 | 0.109557  | 0.117716 | 0.115093  | 0.114073 |
| 0.118298 | 0.115676  | 0.111597  | 0.120338  | 0.115967 | 0.122086  | 0.122523 |
| 0.142045 | 0.140006  | 0.139714  | 0.142045  | 0.137092 | 0.145833  | 0.13141  |
| 0.120484 | 0.114948  | 0.11553   | 0.119318  | 0.113491 | 0.127185  | 0.125291 |
| 0.140734 | 0.12296   | 0.125291  | 0.129371  | 0.13141  | 0.131993  | 0.142628 |
| 0.130099 | 0.112908  | 0.113491  | 0.117279  | 0.133887 | 0.124563  | 0.13345  |



|          |           |           |          |           |           |          |
|----------|-----------|-----------|----------|-----------|-----------|----------|
| 0.118007 | 0.112762  | 0.10373   | 0.114802 | 0.125583  | 0.123252  | 0.122815 |
| 0.119318 | 0.116987  | 0.121941  | 0.119027 | 0.117279  | 0.119027  | 0.131119 |
| 0.11655  | 0.107226  | 0.10169   | 0.112179 | 0.120629  | 0.116841  | 0.124854 |
| 0.112034 | 0.11961   | 0.118153  | 0.119901 | 0.121358  | 0.13039   | 0.128788 |
| 0.118153 | 0.109411  | 0.112908  | 0.108829 | 0.130973  | 0.127185  | 0.134907 |
| 0.121358 | 0.123106  | 0.122232  | 0.123106 | 0.122815  | 0.135052  | 0.129953 |
| 0.117279 | 0.12398   | 0.117279  | 0.128351 | 0.122815  | 0.129516  | 0.134615 |
| 0.106206 | 0.120484  | 0.115239  | 0.122232 | 0.116113  | 0.127185  | 0.133159 |
| 0.116696 | 0.131556  | 0.132139  | 0.135635 | 0.131265  | 0.135635  | 0.146562 |
| 0.133596 | 0.103001  | 0.102127  | 0.105624 | 0.123106  | 0.119318  | 0.129079 |
| 0.116696 | 0.103293  | 0.102418  | 0.106498 | 0.106789  | 0.119318  | 0.123834 |
| 0.120192 | 0.122523  | 0.120484  | 0.122815 | 0.126311  | 0.128934  | 0.13141  |
| 0.114948 | 0.10067   | 0.105332  | 0.10067  | 0.112908  | 0.11553   | 0.125    |
| 0.134033 | 0.129371  | 0.12704   | 0.130828 | 0.143939  | 0.134907  | 0.150495 |
| 0.147727 | 0.145396  | 0.142483  | 0.150058 | 0.148601  | 0.148601  | 0.160693 |
| 0.125291 | 0.118881  | 0.11655   | 0.123252 | 0.0961538 | 0.128205  | 0.13039  |
| 0.121358 | 0.111742  | 0.11116   | 0.113782 | 0.0936772 | 0.121941  | 0.125291 |
| 0.122669 | 0.114802  | 0.122086  | 0.118881 | 0.125583  | 0.134033  | 0.137966 |
| 0.128351 | 0.110286  | 0.109994  | 0.11116  | 0.133887  | 0.125437  | 0.1419   |
| 0.126894 | 0.120775  | 0.119027  | 0.123106 | 0.105332  | 0.13039   | 0.130536 |
| 0.124272 | 0.120192  | 0.119027  | 0.121649 | 0.12602   | 0.133887  | 0.146562 |
| 0.129808 | 0.120775  | 0.124854  | 0.121941 | 0.123106  | 0.12398   | 0.143357 |
| 0.122086 | 0.0999417 | 0.102855  | 0.105478 | 0.109266  | 0.11655   | 0.126894 |
| 0.151224 | 0.150932  | 0.15472   | 0.15472  | 0.143648  | 0.15472   | 0.160985 |
| 0.125874 | 0.110431  | 0.111597  | 0.113345 | 0.111597  | 0.126457  | 0.133013 |
| 0.138403 | 0.124417  | 0.118881  | 0.129079 | 0.136655  | 0.129079  | 0.142628 |
| 0.114656 | 0.101836  | 0.105041  | 0.108537 | 0.102127  | 0.122815  | 0.124126 |
| 0.124854 | 0.118153  | 0.122232  | 0.120192 | 0.128642  | 0.137383  | 0.127622 |
| 0.114948 | 0.106206  | 0.102418  | 0.108246 | 0.119901  | 0.113491  | 0.130828 |
| 0.12704  | 0.124709  | 0.128205  | 0.128497 | 0.13986   | 0.106935  | 0.146707 |
| 0.140297 | 0.132139  | 0.129808  | 0.133887 | 0.14292   | 0.136801  | 0.152389 |
| 0.113054 | 0.1081    | 0.113636  | 0.113054 | 0.127331  | 0.0874126 | 0.129808 |
| 0.122815 | 0.122523  | 0.125146  | 0.127768 | 0.141171  | 0.100087  | 0.144522 |
| 0.136655 | 0.136946  | 0.139277  | 0.145105 | 0.138112  | 0.134907  | 0.155449 |
| 0.136655 | 0.134033  | 0.136364  | 0.140734 | 0.148893  | 0.125     | 0.152826 |
| 0.113199 | 0.114365  | 0.112034  | 0.114073 | 0.11116   | 0.128351  | 0.117716 |
| 0.138112 | 0.126457  | 0.129371  | 0.130245 | 0.140734  | 0.127914  | 0.14088  |
| 0.118298 | 0.104604  | 0.100524  | 0.111014 | 0.122086  | 0.106643  | 0.123106 |
| 0.106789 | 0.105624  | 0.107955  | 0.109703 | 0.118153  | 0.105915  | 0.120921 |
| 0.125    | 0.106061  | 0.104021  | 0.106352 | 0.127914  | 0.116259  | 0.126894 |
| 0.112179 | 0.106352  | 0.108683  | 0.111597 | 0.124709  | 0.0842075 | 0.130099 |
| 0.118444 | 0.110868  | 0.105332  | 0.113491 | 0.120192  | 0.11553   | 0.122378 |
| 0.101253 | 0.101253  | 0.0971737 | 0.107372 | 0.120484  | 0.08581   | 0.121795 |
| 0.127185 | 0.092803  | 0.103001  | 0.097465 | 0.128934  | 0.108537  | 0.131993 |

|          |           |           |           |          |           |          |
|----------|-----------|-----------|-----------|----------|-----------|----------|
| 0.121212 | 0.11014   | 0.110431  | 0.115093  | 0.127914 | 0.110723  | 0.12602  |
| 0.116259 | 0.094697  | 0.0859557 | 0.0987762 | 0.108974 | 0.107226  | 0.11116  |
| 0.11859  | 0.105478  | 0.110431  | 0.114219  | 0.128497 | 0.0903263 | 0.130973 |
| 0.111451 | 0.104167  | 0.111451  | 0.111742  | 0.121941 | 0.0855186 | 0.127914 |
| 0.116696 | 0.115822  | 0.116696  | 0.118444  | 0.105624 | 0.124563  | 0.12296  |
| 0.21081  | 0.211101  | 0.210227  | 0.21285   | 0.220134 | 0.202943  | 0.223776 |
| 0.127185 | 0.131265  | 0.131847  | 0.136218  | 0.142045 | 0.107663  | 0.150058 |
| 0.132867 | 0.120921  | 0.122086  | 0.122378  | 0.129662 | 0.125291  | 0.137092 |
| 0.127768 | 0.108829  | 0.113782  | 0.113782  | 0.129516 | 0.121358  | 0.133741 |
| 0.209062 | 0.207022  | 0.201777  | 0.211101  | 0.213141 | 0.19799   | 0.219114 |
| 0.110577 | 0.116696  | 0.116113  | 0.121358  | 0.114656 | 0.118735  | 0.130245 |
| 0.132284 | 0.111597  | 0.115967  | 0.115093  | 0.124126 | 0.120921  | 0.127477 |
| 0.131993 | 0.110723  | 0.117133  | 0.112471  | 0.129079 | 0.121212  | 0.130682 |
| 0.12398  | 0.110286  | 0.109994  | 0.113782  | 0.125146 | 0.115822  | 0.125291 |
| 0.244901 | 0.248689  | 0.245192  | 0.251311  | 0.251603 | 0.237034  | 0.254953 |
| 0.128788 | 0.113928  | 0.117716  | 0.119755  | 0.127914 | 0.12296   | 0.125146 |
| 0.112179 | 0.109266  | 0.104604  | 0.113054  | 0.10169  | 0.119172  | 0.119901 |
| 0.124709 | 0.116259  | 0.119172  | 0.121212  | 0.118881 | 0.125     | 0.13243  |
| 0.122378 | 0.114219  | 0.119464  | 0.114219  | 0.118881 | 0.123834  | 0.131556 |
| 0.121212 | 0.11859   | 0.120047  | 0.122086  | 0.129662 | 0.116841  | 0.129225 |
| 0.111888 | 0.112471  | 0.11451   | 0.11655   | 0.128788 | 0.100524  | 0.135344 |
| 0.115093 | 0.112762  | 0.108392  | 0.117133  | 0.107226 | 0.116841  | 0.124272 |
| 0.114073 | 0.104749  | 0.109411  | 0.108246  | 0.127768 | 0.0863928 | 0.127622 |
| 0.126166 | 0.11451   | 0.11655   | 0.117716  | 0.130828 | 0.117133  | 0.136218 |
| 0.120047 | 0.104312  | 0.103438  | 0.110431  | 0.125291 | 0.11014   | 0.125437 |
| 0.110286 | 0.103001  | 0.107372  | 0.10912   | 0.122232 | 0.0849359 | 0.127622 |
| 0.122378 | 0.0882867 | 0.0894522 | 0.0926573 | 0.120338 | 0.103147  | 0.119027 |
| 0.139714 | 0.13039   | 0.130682  | 0.135635  | 0.141171 | 0.137092  | 0.152681 |
| 0.130973 | 0.11961   | 0.123689  | 0.124272  | 0.128934 | 0.124854  | 0.125    |
| 0.133887 | 0.118735  | 0.122232  | 0.120484  | 0.131847 | 0.126894  | 0.128497 |
| 0.184295 | 0.183129  | 0.186334  | 0.188666  | 0.195076 | 0.176136  | 0.199301 |
| 0.198864 | 0.200029  | 0.198281  | 0.2044    | 0.208188 | 0.190414  | 0.21183  |
| 0.126603 | 0.110286  | 0.109994  | 0.114656  | 0.129516 | 0.11553   | 0.126748 |
| 0.11961  | 0.103001  | 0.101544  | 0.10912   | 0.118735 | 0.110286  | 0.119464 |
| 0.134761 | 0.12398   | 0.120775  | 0.125146  | 0.144668 | 0.124854  | 0.143065 |
| 0.114073 | 0.109411  | 0.107955  | 0.114073  | 0.105332 | 0.11757   | 0.121795 |
| 0.131119 | 0.120338  | 0.11859   | 0.125291  | 0.13345  | 0.123252  | 0.126311 |
| 0.12398  | 0.119027  | 0.119318  | 0.12398   | 0.118735 | 0.129516  | 0.13549  |
| 0.221882 | 0.222465  | 0.21926   | 0.228001  | 0.227418 | 0.211393  | 0.233974 |
| 0.123397 | 0.106206  | 0.107372  | 0.109703  | 0.124272 | 0.116113  | 0.125291 |
| 0.191142 | 0.204837  | 0.202797  | 0.208625  | 0.196678 | 0.19289   | 0.217803 |
| 0.103875 | 0.0992133 | 0.0968823 | 0.106789  | 0.10708  | 0.116404  | 0.1081   |
| 0.116841 | 0.112179  | 0.102273  | 0.113636  | 0.118298 | 0.113054  | 0.119318 |
| 0.104749 | 0.109994  | 0.11116   | 0.113199  | 0.122523 | 0.099796  | 0.123252 |

|          |           |          |          |          |           |          |
|----------|-----------|----------|----------|----------|-----------|----------|
| 0.116404 | 0.103001  | 0.10271  | 0.105915 | 0.118735 | 0.105915  | 0.120047 |
| 0.202214 | 0.200175  | 0.201923 | 0.207459 | 0.210664 | 0.193765  | 0.216055 |
| 0.122086 | 0.116841  | 0.122669 | 0.122669 | 0.139277 | 0.0958625 | 0.141463 |
| 0.115093 | 0.105769  | 0.105186 | 0.11014  | 0.111888 | 0.116841  | 0.124272 |
| 0.115676 | 0.112471  | 0.113636 | 0.117716 | 0.130828 | 0.0891608 | 0.135052 |
| 0.124126 | 0.110723  | 0.115093 | 0.109266 | 0.120629 | 0.120338  | 0.127185 |
| 0.120338 | 0.10373   | 0.102855 | 0.110431 | 0.125874 | 0.110723  | 0.122815 |
| 0.106206 | 0.103584  | 0.103584 | 0.108829 | 0.108246 | 0.119318  | 0.115093 |
| 0.112908 | 0.11553   | 0.109411 | 0.118444 | 0.11116  | 0.116987  | 0.125583 |
| 0.132721 | 0.114656  | 0.11961  | 0.118153 | 0.128642 | 0.125728  | 0.125874 |
| 0.107955 | 0.0989219 | 0.105041 | 0.105915 | 0.119318 | 0.08581   | 0.125291 |
| 0.116259 | 0.111014  | 0.1081   | 0.113928 | 0.112471 | 0.120047  | 0.126311 |
| 0.184586 | 0.183421  | 0.183129 | 0.188666 | 0.194493 | 0.177885  | 0.203089 |
| 0.126457 | 0.119464  | 0.121212 | 0.121795 | 0.120338 | 0.129662  | 0.133596 |
| 0.12602  | 0.113491  | 0.114948 | 0.122815 | 0.129808 | 0.120192  | 0.136072 |
| 0.122378 | 0.112179  | 0.115967 | 0.116259 | 0.117424 | 0.115676  | 0.127768 |
| 0.124854 | 0.113199  | 0.11757  | 0.117279 | 0.128934 | 0.120775  | 0.127331 |
| 0.114365 | 0.106498  | 0.112325 | 0.113199 | 0.127185 | 0.0849359 | 0.131119 |
| 0.110868 | 0.108829  | 0.107955 | 0.114365 | 0.108246 | 0.121358  | 0.115676 |
| 0.11451  | 0.100524  | 0.108392 | 0.104312 | 0.116841 | 0.110431  | 0.121358 |
| 0.11859  | 0.118298  | 0.113928 | 0.121212 | 0.104312 | 0.124126  | 0.125437 |
| 0.122815 | 0.107955  | 0.107663 | 0.114656 | 0.12602  | 0.113491  | 0.136364 |
| 0.120192 | 0.11116   | 0.112034 | 0.11553  | 0.116696 | 0.120775  | 0.125874 |
| 0.120629 | 0.1081    | 0.103147 | 0.113636 | 0.124126 | 0.11451   | 0.127185 |
| 0.129808 | 0.112325  | 0.113782 | 0.115239 | 0.128934 | 0.121066  | 0.133741 |
| 0.138403 | 0.126457  | 0.130245 | 0.126457 | 0.138986 | 0.132576  | 0.140006 |
| 0.125291 | 0.109557  | 0.111305 | 0.114802 | 0.122378 | 0.117716  | 0.11961  |
| 0.122815 | 0.125146  | 0.127477 | 0.130099 | 0.137383 | 0.104749  | 0.146853 |
| 0.119901 | 0.105332  | 0.102127 | 0.112325 | 0.125146 | 0.109411  | 0.12296  |
| 0.112908 | 0.105041  | 0.108537 | 0.109994 | 0.112617 | 0.113199  | 0.130828 |
| 0.1081   | 0.1081    | 0.11014  | 0.113636 | 0.125291 | 0.0879953 | 0.129808 |
| 0.121503 | 0.119172  | 0.117133 | 0.120047 | 0.107517 | 0.125583  | 0.129516 |
| 0.182401 | 0.186189  | 0.185606 | 0.188811 | 0.192016 | 0.172786  | 0.197698 |
| 0.112325 | 0.105624  | 0.103001 | 0.109994 | 0.109411 | 0.113782  | 0.120047 |
| 0.109703 | 0.0960082 | 0.092803 | 0.101544 | 0.108246 | 0.101836  | 0.113928 |
| 0.131265 | 0.115239  | 0.115822 | 0.119027 | 0.130682 | 0.126894  | 0.126166 |
| 0.175554 | 0.158945  | 0.166812 | 0.162442 | 0.18109  | 0.160693  | 0.193765 |
| 0.134615 | 0.130828  | 0.131119 | 0.132867 | 0.138112 | 0.135781  | 0.135052 |
| 0.147436 | 0.137821  | 0.136072 | 0.140152 | 0.14627  | 0.143065  | 0.139423 |
| 0.141754 | 0.133013  | 0.129808 | 0.137092 | 0.144668 | 0.139714  | 0.152681 |
| 0.124563 | 0.108246  | 0.109703 | 0.112325 | 0.120484 | 0.119901  | 0.121503 |
| 0.116259 | 0.107809  | 0.113345 | 0.110723 | 0.130245 | 0.0885781 | 0.131847 |
| 0.207896 | 0.207314  | 0.203817 | 0.210227 | 0.217512 | 0.197698  | 0.219697 |
| 0.128351 | 0.115822  | 0.119027 | 0.116113 | 0.131847 | 0.118735  | 0.140734 |

|          |           |           |           |          |           |          |
|----------|-----------|-----------|-----------|----------|-----------|----------|
| 0.11859  | 0.115093  | 0.118298  | 0.120629  | 0.132576 | 0.0912005 | 0.135344 |
| 0.11655  | 0.1081    | 0.105186  | 0.112471  | 0.115385 | 0.119172  | 0.122232 |
| 0.156177 | 0.160839  | 0.162587  | 0.164918  | 0.174534 | 0.140443  | 0.183129 |
| 0.119464 | 0.0973193 | 0.101981  | 0.101981  | 0.11859  | 0.109557  | 0.122815 |
| 0.146416 | 0.139423  | 0.139714  | 0.140297  | 0.146125 | 0.140297  | 0.151515 |
| 0.125146 | 0.110286  | 0.104458  | 0.112908  | 0.120775 | 0.116404  | 0.121503 |
| 0.186626 | 0.184295  | 0.184586  | 0.190122  | 0.19391  | 0.177885  | 0.199301 |
| 0.127477 | 0.111742  | 0.113199  | 0.119901  | 0.128351 | 0.125146  | 0.121503 |
| 0.119901 | 0.043852  | 0.0785256 | 0.0514277 | 0.119318 | 0.0919289 | 0.122378 |
| 0.117133 | 0.107809  | 0.101399  | 0.114219  | 0.117424 | 0.111014  | 0.128642 |
| 0.126603 | 0.110868  | 0.109411  | 0.116696  | 0.126311 | 0.11757   | 0.122086 |
| 0.126603 | 0.111742  | 0.113491  | 0.114948  | 0.125728 | 0.122232  | 0.125583 |
| 0.124854 | 0.116113  | 0.111451  | 0.120192  | 0.12602  | 0.116987  | 0.136364 |
| 0.121503 | 0.103438  | 0.100524  | 0.106935  | 0.122669 | 0.109848  | 0.121358 |
| 0.188083 | 0.184295  | 0.182255  | 0.187791  | 0.192453 | 0.178759  | 0.200758 |
| 0.12704  | 0.110431  | 0.110723  | 0.113345  | 0.125874 | 0.118298  | 0.130973 |
| 0.117279 | 0.092803  | 0.0910548 | 0.0971737 | 0.120775 | 0.101253  | 0.126457 |
| 0.207168 | 0.206002  | 0.20338   | 0.211247  | 0.215326 | 0.195804  | 0.223922 |
| 0.125874 | 0.119172  | 0.120921  | 0.119172  | 0.119755 | 0.128205  | 0.130682 |
| 0.124563 | 0.103875  | 0.102418  | 0.110286  | 0.12398  | 0.109411  | 0.122378 |
| 0.116696 | 0.0995047 | 0.0986305 | 0.106789  | 0.119027 | 0.10912   | 0.11859  |
| 0.124126 | 0.123252  | 0.123543  | 0.127914  | 0.13345  | 0.100233  | 0.141463 |
| 0.186772 | 0.182984  | 0.180944  | 0.189103  | 0.193765 | 0.176282  | 0.199155 |
| 0.116113 | 0.11116   | 0.10912   | 0.116113  | 0.101836 | 0.122523  | 0.119755 |
| 0.136218 | 0.120775  | 0.121358  | 0.123106  | 0.133013 | 0.129225  | 0.136655 |
| 0.118444 | 0.100087  | 0.100962  | 0.107955  | 0.123106 | 0.106789  | 0.120338 |
| 0.11757  | 0.0995047 | 0.0962995 | 0.104167  | 0.119901 | 0.109994  | 0.117716 |
| 0.115093 | 0.0990676 | 0.0999417 | 0.106935  | 0.120629 | 0.106643  | 0.119027 |
| 0.111742 | 0.103001  | 0.105041  | 0.107372  | 0.127477 | 0.0866841 | 0.128205 |
| 0.113054 | 0.0935315 | 0.0891608 | 0.0987762 | 0.110431 | 0.107226  | 0.109994 |
| 0.129371 | 0.115093  | 0.116259  | 0.121503  | 0.130245 | 0.124417  | 0.123397 |
| 0.128205 | 0.117424  | 0.118881  | 0.121795  | 0.125    | 0.122378  | 0.144376 |
| 0.12704  | 0.111888  | 0.112471  | 0.121212  | 0.126748 | 0.122669  | 0.128059 |
| 0.127768 | 0.113491  | 0.119901  | 0.11553   | 0.123397 | 0.128934  | 0.128788 |
| 0.192016 | 0.190268  | 0.187937  | 0.194056  | 0.198427 | 0.179487  | 0.203234 |
| 0.12602  | 0.109703  | 0.111742  | 0.113491  | 0.127768 | 0.120775  | 0.129079 |
| 0.11859  | 0.118007  | 0.117424  | 0.122669  | 0.132284 | 0.0958625 | 0.137092 |
| 0.119901 | 0.0986305 | 0.0971737 | 0.107955  | 0.120192 | 0.104749  | 0.117133 |
| 0.113636 | 0.0914918 | 0.0894522 | 0.0961538 | 0.109557 | 0.108392  | 0.110577 |
| 0.107517 | 0.11014   | 0.108683  | 0.116259  | 0.116259 | 0.105478  | 0.125728 |
| 0.113491 | 0.112908  | 0.108829  | 0.116404  | 0.106206 | 0.120192  | 0.122669 |
| 0.129516 | 0.125437  | 0.119027  | 0.122815  | 0.137966 | 0.127185  | 0.136364 |
| 0.123252 | 0.106643  | 0.104895  | 0.111597  | 0.12704  | 0.112179  | 0.135927 |
| 0.107809 | 0.0999417 | 0.101981  | 0.105186  | 0.108392 | 0.107517  | 0.114365 |

|          |           |           |           |          |           |          |
|----------|-----------|-----------|-----------|----------|-----------|----------|
| 0.100962 | 0.0960082 | 0.0957168 | 0.101544  | 0.104167 | 0.104749  | 0.11014  |
| 0.110723 | 0.0603147 | 0.0815851 | 0.0635198 | 0.11859  | 0.0920746 | 0.119027 |
| 0.103875 | 0.103875  | 0.103584  | 0.10708   | 0.108829 | 0.11553   | 0.111014 |
| 0.133159 | 0.121503  | 0.123252  | 0.126748  | 0.133159 | 0.129079  | 0.133887 |
| 0.116113 | 0.11116   | 0.105332  | 0.115822  | 0.105624 | 0.118153  | 0.119755 |
| 0.11014  | 0.102855  | 0.10373   | 0.109848  | 0.121503 | 0.0827506 | 0.126603 |
| 0.111597 | 0.106643  | 0.104312  | 0.110723  | 0.104021 | 0.116259  | 0.114948 |
| 0.117861 | 0.104458  | 0.100379  | 0.107663  | 0.119318 | 0.107955  | 0.124126 |
| 0.114802 | 0.0996503 | 0.101107  | 0.105186  | 0.111888 | 0.114219  | 0.121358 |
| 0.120921 | 0.102564  | 0.102855  | 0.11014   | 0.124417 | 0.108974  | 0.123689 |
| 0.12296  | 0.105186  | 0.104604  | 0.106643  | 0.120338 | 0.110431  | 0.123397 |
| 0.120921 | 0.104895  | 0.104604  | 0.106935  | 0.125291 | 0.112471  | 0.132139 |
| 0.127622 | 0.109557  | 0.111888  | 0.113345  | 0.122378 | 0.122669  | 0.12398  |
| 0.11553  | 0.095134  | 0.0913462 | 0.099796  | 0.114948 | 0.108829  | 0.111014 |
| 0.119172 | 0.104021  | 0.102273  | 0.109266  | 0.120338 | 0.110723  | 0.122815 |
| 0.120047 | 0.112471  | 0.109266  | 0.118007  | 0.121503 | 0.116259  | 0.133013 |
| 0.125437 | 0.0971737 | 0.0945513 | 0.100087  | 0.126894 | 0.103293  | 0.132867 |
| 0.118007 | 0.0847902 | 0.0457459 | 0.0850816 | 0.117716 | 0.0789627 | 0.119318 |
| 0.119172 | 0.103147  | 0.097028  | 0.109266  | 0.120629 | 0.108974  | 0.121358 |
| 0.112617 | 0.107663  | 0.112325  | 0.112325  | 0.12398  | 0.0852273 | 0.128497 |
| 0.109703 | 0.104749  | 0.105915  | 0.109411  | 0.108246 | 0.116113  | 0.11451  |
| 0.115239 | 0.107663  | 0.109994  | 0.113199  | 0.124563 | 0.0893065 | 0.129953 |
| 0.127477 | 0.106789  | 0.110868  | 0.112908  | 0.125437 | 0.119318  | 0.123252 |
| 0.117861 | 0.0977564 | 0.0936772 | 0.102418  | 0.115822 | 0.11116   | 0.115093 |
| 0.119318 | 0.105915  | 0.0992133 | 0.109411  | 0.119901 | 0.108246  | 0.121795 |
| 0.114802 | 0.0990676 | 0.0967366 | 0.105769  | 0.109266 | 0.111888  | 0.121066 |
| 0.116987 | 0.106789  | 0.110868  | 0.112325  | 0.130099 | 0.0863928 | 0.132576 |
| 0.128351 | 0.0875583 | 0.10708   | 0.0843531 | 0.13039  | 0.10912   | 0.132867 |
| 0.119464 | 0.0958625 | 0.0903263 | 0.101399  | 0.124709 | 0.100524  | 0.127768 |
| 0.188811 | 0.187937  | 0.18852   | 0.191725  | 0.196387 | 0.179779  | 0.202943 |
| 0.159382 | 0.15035   | 0.153555  | 0.154138  | 0.168998 | 0.143065  | 0.177302 |
| 0.127622 | 0.112762  | 0.115093  | 0.118298  | 0.12704  | 0.120921  | 0.124854 |
| 0.108537 | 0.0995047 | 0.107663  | 0.105624  | 0.114656 | 0.106206  | 0.129371 |
| 0.147582 | 0.138258  | 0.141171  | 0.143794  | 0.149038 | 0.146707  | 0.145688 |
| 0.131119 | 0.117133  | 0.116841  | 0.120921  | 0.133159 | 0.119755  | 0.135052 |
| 0.11553  | 0.112908  | 0.111742  | 0.118444  | 0.122232 | 0.108829  | 0.12704  |
| 0.113345 | 0.0941142 | 0.0961538 | 0.101399  | 0.119755 | 0.0999417 | 0.130973 |
| 0.122669 | 0.0891608 | 0.0847902 | 0.0897436 | 0.11859  | 0.102564  | 0.122523 |
| 0.123252 | 0.0967366 | 0.0952797 | 0.0984848 | 0.125291 | 0.106352  | 0.133304 |
| 0.198572 | 0.194784  | 0.19595   | 0.201486  | 0.208188 | 0.1875    | 0.212413 |
| 0.120338 | 0.113636  | 0.113345  | 0.119755  | 0.106061 | 0.122669  | 0.121941 |
| 0.101544 | 0.106789  | 0.109411  | 0.115239  | 0.117861 | 0.0887238 | 0.126166 |
| 0.114656 | 0.0936772 | 0.0849359 | 0.0989219 | 0.119901 | 0.092803  | 0.120047 |
| 0.121503 | 0.101399  | 0.109848  | 0.105769  | 0.119172 | 0.117716  | 0.126311 |

|          |           |           |           |          |           |          |
|----------|-----------|-----------|-----------|----------|-----------|----------|
| 0.177302 | 0.173223  | 0.171766  | 0.176719  | 0.187791 | 0.164773  | 0.195513 |
| 0.239365 | 0.24257   | 0.243444  | 0.250146  | 0.247523 | 0.234994  | 0.251748 |
| 0.123106 | 0.110868  | 0.105624  | 0.112617  | 0.127768 | 0.117861  | 0.137238 |
| 0.122232 | 0.0965909 | 0.0942599 | 0.0977564 | 0.128351 | 0.102418  | 0.131993 |
| 0.125146 | 0.112034  | 0.114365  | 0.118153  | 0.128059 | 0.120484  | 0.122669 |
| 0.12296  | 0.106352  | 0.108392  | 0.112471  | 0.121795 | 0.120338  | 0.123106 |
| 0.112617 | 0.105915  | 0.103584  | 0.111742  | 0.10271  | 0.113491  | 0.117133 |
| 0.124709 | 0.104895  | 0.101981  | 0.111597  | 0.11859  | 0.107517  | 0.124563 |
| 0.104167 | 0.10271   | 0.102418  | 0.107663  | 0.119901 | 0.0840618 | 0.125    |
| 0.112034 | 0.108537  | 0.104749  | 0.113199  | 0.101836 | 0.114948  | 0.118881 |
| 0.103147 | 0.101107  | 0.104895  | 0.109266  | 0.119172 | 0.0821678 | 0.124563 |
| 0.123397 | 0.0872669 | 0.0488054 | 0.0910548 | 0.124854 | 0.0805653 | 0.120629 |
| 0.117133 | 0.0979021 | 0.094697  | 0.0999417 | 0.11451  | 0.109848  | 0.113491 |
| 0.120192 | 0.108246  | 0.108537  | 0.116696  | 0.125728 | 0.114073  | 0.130536 |
| 0.114802 | 0.107226  | 0.109266  | 0.112179  | 0.128788 | 0.0856643 | 0.130973 |
| 0.109266 | 0.097028  | 0.0961538 | 0.103438  | 0.107517 | 0.103438  | 0.11961  |
| 0.114219 | 0.111597  | 0.108683  | 0.115385  | 0.115385 | 0.127622  | 0.129225 |
| 0.138403 | 0.123543  | 0.131119  | 0.126166  | 0.132576 | 0.134615  | 0.133596 |
| 0.117861 | 0.0995047 | 0.0989219 | 0.107663  | 0.116987 | 0.106498  | 0.118881 |
| 0.102855 | 0.108683  | 0.111305  | 0.108974  | 0.108683 | 0.104895  | 0.121941 |
| 0.129953 | 0.116841  | 0.116259  | 0.122669  | 0.129953 | 0.121795  | 0.132721 |
| 0.202943 | 0.20236   | 0.202069  | 0.207605  | 0.214015 | 0.193328  | 0.216492 |
| 0.116841 | 0.0979021 | 0.0976107 | 0.104021  | 0.118298 | 0.108392  | 0.125146 |
| 0.114656 | 0.0957168 | 0.0907634 | 0.0992133 | 0.112617 | 0.111451  | 0.111305 |
| 0.125437 | 0.10912   | 0.109994  | 0.111116  | 0.127768 | 0.119027  | 0.130828 |
| 0.125291 | 0.117716  | 0.119755  | 0.116841  | 0.121795 | 0.124709  | 0.133013 |
| 0.121795 | 0.100524  | 0.105186  | 0.105478  | 0.117716 | 0.115967  | 0.124272 |
| 0.197844 | 0.195513  | 0.193765  | 0.200466  | 0.205711 | 0.187937  | 0.206731 |
| 0.117861 | 0.109703  | 0.112034  | 0.116404  | 0.13243  | 0.0863928 | 0.132284 |
| 0.117716 | 0.101399  | 0.0979021 | 0.106643  | 0.11859  | 0.105478  | 0.118153 |
| 0.124563 | 0.103584  | 0.10708   | 0.105624  | 0.123106 | 0.120775  | 0.123834 |
| 0.123397 | 0.107955  | 0.105041  | 0.10912   | 0.119318 | 0.116113  | 0.118007 |
| 0.112325 | 0.106206  | 0.111451  | 0.112908  | 0.126603 | 0.0852273 | 0.130536 |
| 0.112325 | 0.0971737 | 0.0977564 | 0.103584  | 0.111742 | 0.090472  | 0.122669 |
| 0.123106 | 0.0861014 | 0.0499709 | 0.0913462 | 0.121941 | 0.0808566 | 0.123834 |
| 0.12398  | 0.113782  | 0.116404  | 0.11757   | 0.117861 | 0.120484  | 0.123543 |
| 0.200175 | 0.192599  | 0.193182  | 0.200175  | 0.201923 | 0.187354  | 0.207314 |
| 0.10708  | 0.0957168 | 0.102418  | 0.10271   | 0.118153 | 0.0831876 | 0.125583 |
| 0.192308 | 0.187354  | 0.18852   | 0.193765  | 0.201632 | 0.18211   | 0.205274 |
| 0.188374 | 0.186334  | 0.187791  | 0.192745  | 0.194784 | 0.182547  | 0.204545 |
| 0.132721 | 0.120775  | 0.123106  | 0.123689  | 0.131265 | 0.130099  | 0.131119 |
| 0.127185 | 0.123689  | 0.127768  | 0.124854  | 0.121941 | 0.134178  | 0.136655 |
| 0.115239 | 0.0814394 | 0.0456002 | 0.0849359 | 0.116696 | 0.0820221 | 0.115967 |
| 0.112179 | 0.100524  | 0.100524  | 0.106061  | 0.118881 | 0.0882867 | 0.122815 |

|          |           |           |           |          |           |          |
|----------|-----------|-----------|-----------|----------|-----------|----------|
| 0.115239 | 0.101253  | 0.108246  | 0.107663  | 0.122815 | 0.0852273 | 0.124709 |
| 0.121358 | 0.104458  | 0.101836  | 0.110286  | 0.122815 | 0.113782  | 0.122086 |
| 0.109703 | 0.101836  | 0.101544  | 0.108246  | 0.10271  | 0.112034  | 0.11451  |
| 0.114948 | 0.108537  | 0.104749  | 0.114365  | 0.10271  | 0.11553   | 0.115967 |
| 0.126748 | 0.113636  | 0.109848  | 0.117133  | 0.130828 | 0.117424  | 0.138258 |
| 0.130973 | 0.111451  | 0.112034  | 0.115239  | 0.128059 | 0.123106  | 0.123252 |
| 0.115093 | 0.102855  | 0.0938228 | 0.106935  | 0.117716 | 0.105186  | 0.117861 |
| 0.115239 | 0.105915  | 0.110868  | 0.10912   | 0.127185 | 0.0863928 | 0.131702 |
| 0.113928 | 0.0405012 | 0.0728438 | 0.0472028 | 0.115093 | 0.0906177 | 0.120192 |
| 0.11553  | 0.112617  | 0.118153  | 0.115822  | 0.126894 | 0.0930944 | 0.137238 |
| 0.125146 | 0.108246  | 0.111742  | 0.116404  | 0.123689 | 0.119901  | 0.122378 |
| 0.121795 | 0.119172  | 0.124709  | 0.125583  | 0.132867 | 0.0987762 | 0.142045 |
| 0.253788 | 0.255828  | 0.252331  | 0.260198  | 0.261364 | 0.245047  | 0.266754 |
| 0.122669 | 0.119755  | 0.118298  | 0.121795  | 0.114219 | 0.128205  | 0.13243  |
| 0.127477 | 0.121941  | 0.114073  | 0.123689  | 0.122815 | 0.125146  | 0.127914 |
| 0.217075 | 0.215909  | 0.209207  | 0.218531  | 0.222028 | 0.202797  | 0.225962 |
| 0.130973 | 0.113199  | 0.11961   | 0.118735  | 0.125437 | 0.130682  | 0.132576 |
| 0.226836 | 0.22567   | 0.224213  | 0.229167  | 0.234994 | 0.218094  | 0.238345 |
| 0.11655  | 0.111014  | 0.106643  | 0.116259  | 0.110723 | 0.121212  | 0.125437 |
| 0.129225 | 0.114656  | 0.112325  | 0.121358  | 0.127185 | 0.121358  | 0.129953 |
| 0.121941 | 0.109411  | 0.109994  | 0.111742  | 0.114656 | 0.118735  | 0.126166 |
| 0.131556 | 0.113782  | 0.116987  | 0.118444  | 0.129516 | 0.125728  | 0.128497 |
| 0.198281 | 0.197698  | 0.197115  | 0.202069  | 0.206148 | 0.190122  | 0.211538 |
| 0.117861 | 0.117861  | 0.11961   | 0.12398   | 0.132721 | 0.0945513 | 0.137238 |
| 0.114365 | 0.104458  | 0.107663  | 0.112908  | 0.125728 | 0.0846445 | 0.129953 |
| 0.222611 | 0.223193  | 0.221737  | 0.227564  | 0.227564 | 0.215326  | 0.232372 |
| 0.11553  | 0.109411  | 0.110577  | 0.114656  | 0.106498 | 0.120775  | 0.121503 |
| 0.194639 | 0.193473  | 0.193182  | 0.197552  | 0.203963 | 0.186189  | 0.208188 |
| 0.113054 | 0.111597  | 0.109557  | 0.117424  | 0.107809 | 0.121503  | 0.120775 |
| 0.120629 | 0.103438  | 0.103147  | 0.108974  | 0.12296  | 0.1081    | 0.118735 |
| 0.123397 | 0.10912   | 0.10271   | 0.110577  | 0.121941 | 0.117279  | 0.120921 |
| 0.131847 | 0.119901  | 0.122815  | 0.124272  | 0.130682 | 0.132721  | 0.128497 |
| 0.122086 | 0.0964452 | 0.104604  | 0.100524  | 0.12296  | 0.111597  | 0.124854 |
| 0.153263 | 0.148601  | 0.146853  | 0.152681  | 0.158508 | 0.145396  | 0.169143 |
| 0.1081   | 0.100233  | 0.106935  | 0.106643  | 0.121503 | 0.0824592 | 0.122815 |
| 0.122669 | 0.115385  | 0.117424  | 0.120047  | 0.119464 | 0.123834  | 0.131556 |
| 0.125583 | 0.114219  | 0.109266  | 0.116841  | 0.123834 | 0.116841  | 0.127768 |
| 0.124126 | 0.118298  | 0.120629  | 0.121503  | 0.115385 | 0.125     | 0.136801 |
| 0.192745 | 0.18954   | 0.190705  | 0.195367  | 0.199155 | 0.18546   | 0.20338  |
| 0.119172 | 0.104895  | 0.0999417 | 0.107517  | 0.120047 | 0.110431  | 0.121066 |
| 0.128934 | 0.111451  | 0.11553   | 0.117279  | 0.128934 | 0.122815  | 0.129371 |
| 0.106352 | 0.101107  | 0.102564  | 0.107809  | 0.108392 | 0.118007  | 0.114948 |
| 0.110286 | 0.111451  | 0.109994  | 0.115239  | 0.103001 | 0.121066  | 0.119172 |
| 0.120921 | 0.109266  | 0.108392  | 0.113928  | 0.122086 | 0.113054  | 0.125728 |

|          |           |           |          |          |           |          |
|----------|-----------|-----------|----------|----------|-----------|----------|
| 0.250728 | 0.254516  | 0.25102   | 0.257139 | 0.259178 | 0.245192  | 0.26049  |
| 0.119464 | 0.101399  | 0.0976107 | 0.104021 | 0.113636 | 0.112471  | 0.114365 |
| 0.119755 | 0.109266  | 0.106352  | 0.113054 | 0.125291 | 0.108974  | 0.128642 |
| 0.170163 | 0.170163  | 0.17366   | 0.175117 | 0.179196 | 0.164044  | 0.188957 |
| 0.182692 | 0.179196  | 0.178322  | 0.185315 | 0.189977 | 0.175408  | 0.194784 |
| 0.123543 | 0.109557  | 0.107517  | 0.11655  | 0.130536 | 0.113636  | 0.138258 |
| 0.114073 | 0.106789  | 0.109703  | 0.111742 | 0.128351 | 0.0852273 | 0.129953 |
| 0.123106 | 0.111742  | 0.109994  | 0.114365 | 0.123397 | 0.11961   | 0.123834 |
| 0.132576 | 0.134324  | 0.134033  | 0.135781 | 0.144231 | 0.109266  | 0.150787 |
| 0.119464 | 0.10373   | 0.101981  | 0.108974 | 0.125583 | 0.109266  | 0.130973 |
| 0.12602  | 0.10912   | 0.106206  | 0.113491 | 0.130682 | 0.113782  | 0.136072 |
| 0.117716 | 0.117133  | 0.11655   | 0.117716 | 0.105478 | 0.125     | 0.125437 |
| 0.106935 | 0.108683  | 0.109266  | 0.111014 | 0.125    | 0.0850816 | 0.128059 |
| 0.119901 | 0.115239  | 0.120484  | 0.121066 | 0.129808 | 0.0977564 | 0.139569 |
| 0.109848 | 0.112471  | 0.107226  | 0.11655  | 0.111597 | 0.112471  | 0.124563 |
| 0.130099 | 0.116404  | 0.121941  | 0.11757  | 0.127768 | 0.126603  | 0.125583 |
| 0.142774 | 0.132576  | 0.133159  | 0.133741 | 0.139277 | 0.138986  | 0.133596 |
| 0.125728 | 0.107372  | 0.103584  | 0.10912  | 0.119027 | 0.118444  | 0.119172 |
| 0.134907 | 0.123252  | 0.128497  | 0.124417 | 0.133159 | 0.131119  | 0.131265 |
| 0.120921 | 0.117424  | 0.118881  | 0.120338 | 0.104895 | 0.128788  | 0.128351 |
| 0.201195 | 0.201486  | 0.20236   | 0.206439 | 0.211393 | 0.195076  | 0.216492 |
| 0.119172 | 0.103438  | 0.0979021 | 0.106643 | 0.123834 | 0.113928  | 0.11961  |
| 0.188811 | 0.188228  | 0.18852   | 0.192599 | 0.196096 | 0.181235  | 0.199738 |
| 0.118298 | 0.111305  | 0.104021  | 0.111014 | 0.116841 | 0.114219  | 0.125437 |
| 0.125874 | 0.112179  | 0.110431  | 0.117133 | 0.127622 | 0.115676  | 0.126894 |
| 0.125583 | 0.112471  | 0.116259  | 0.118007 | 0.129371 | 0.11655   | 0.127477 |
| 0.124272 | 0.105041  | 0.108246  | 0.113199 | 0.123106 | 0.121358  | 0.120047 |
| 0.115967 | 0.109557  | 0.115676  | 0.11451  | 0.130536 | 0.0885781 | 0.134178 |
| 0.113928 | 0.11014   | 0.11451   | 0.116259 | 0.124417 | 0.0879953 | 0.133596 |
| 0.12296  | 0.105769  | 0.106352  | 0.110723 | 0.125291 | 0.111014  | 0.122815 |
| 0.120775 | 0.114073  | 0.115822  | 0.117279 | 0.116987 | 0.124563  | 0.129371 |
| 0.126894 | 0.114365  | 0.11961   | 0.122523 | 0.130099 | 0.121066  | 0.128497 |
| 0.120629 | 0.125     | 0.121503  | 0.12704  | 0.109848 | 0.133741  | 0.132139 |
| 0.248543 | 0.246795  | 0.246212  | 0.251748 | 0.252914 | 0.238928  | 0.259178 |
| 0.12296  | 0.106061  | 0.103438  | 0.111597 | 0.126748 | 0.111305  | 0.124272 |
| 0.182838 | 0.17905   | 0.17905   | 0.184003 | 0.188083 | 0.173223  | 0.19289  |
| 0.187354 | 0.183858  | 0.184149  | 0.190268 | 0.196096 | 0.177448  | 0.199738 |
| 0.124854 | 0.108829  | 0.101253  | 0.115239 | 0.125728 | 0.110868  | 0.129079 |
| 0.119027 | 0.100962  | 0.0962995 | 0.103584 | 0.114948 | 0.112617  | 0.112179 |
| 0.12602  | 0.111742  | 0.110868  | 0.11961  | 0.126311 | 0.115822  | 0.127622 |
| 0.106789 | 0.101253  | 0.106498  | 0.103875 | 0.119901 | 0.0852273 | 0.125291 |
| 0.119172 | 0.0882867 | 0.0859557 | 0.092366 | 0.118007 | 0.0984848 | 0.122523 |
| 0.115967 | 0.112762  | 0.104895  | 0.117133 | 0.1081   | 0.121212  | 0.122815 |
| 0.107955 | 0.106498  | 0.10708   | 0.110868 | 0.125146 | 0.0913462 | 0.13141  |



|          |           |           |           |          |           |          |
|----------|-----------|-----------|-----------|----------|-----------|----------|
| 0.120484 | 0.118153  | 0.120775  | 0.125728  | 0.13447  | 0.0980478 | 0.137821 |
| 0.122669 | 0.102855  | 0.104895  | 0.110723  | 0.120338 | 0.1081    | 0.122815 |
| 0.121503 | 0.116841  | 0.119755  | 0.121795  | 0.13345  | 0.0961538 | 0.137092 |
| 0.120192 | 0.109411  | 0.104749  | 0.112325  | 0.12398  | 0.114656  | 0.123543 |
| 0.128934 | 0.117861  | 0.121358  | 0.12398   | 0.134178 | 0.127768  | 0.128788 |
| 0.127914 | 0.111597  | 0.113636  | 0.112471  | 0.126457 | 0.122086  | 0.123689 |
| 0.121358 | 0.121649  | 0.118735  | 0.123689  | 0.10912  | 0.13039   | 0.128788 |
| 0.125583 | 0.0938228 | 0.0576923 | 0.0967366 | 0.127622 | 0.0836247 | 0.126311 |
| 0.115385 | 0.10169   | 0.101107  | 0.107226  | 0.120921 | 0.106935  | 0.119318 |
| 0.136655 | 0.12296   | 0.125583  | 0.124417  | 0.136655 | 0.130245  | 0.139423 |
| 0.180798 | 0.177593  | 0.180216  | 0.186626  | 0.188374 | 0.171766  | 0.19493  |
| 0.123543 | 0.123834  | 0.123252  | 0.127331  | 0.135781 | 0.100816  | 0.140297 |
| 0.114219 | 0.108683  | 0.115093  | 0.109848  | 0.126457 | 0.0874126 | 0.129516 |
| 0.126603 | 0.10912   | 0.113199  | 0.117279  | 0.126603 | 0.120775  | 0.121795 |
| 0.119172 | 0.0996503 | 0.104895  | 0.109557  | 0.115676 | 0.113928  | 0.116113 |
| 0.127768 | 0.110286  | 0.112908  | 0.112034  | 0.124563 | 0.124563  | 0.12296  |
| 0.131993 | 0.113928  | 0.117424  | 0.118881  | 0.127331 | 0.12704   | 0.130973 |
| 0.188374 | 0.183712  | 0.1875    | 0.188666  | 0.197698 | 0.181381  | 0.199009 |
| 0.105041 | 0.0861014 | 0.101544  | 0.090472  | 0.122815 | 0.0791084 | 0.130828 |
| 0.106061 | 0.0842075 | 0.0949883 | 0.0914918 | 0.112471 | 0.0932401 | 0.12602  |
| 0.11451  | 0.111597  | 0.116259  | 0.117424  | 0.130828 | 0.0920746 | 0.132721 |
| 0.189248 | 0.1875    | 0.186334  | 0.191871  | 0.199446 | 0.182255  | 0.20338  |
| 0.11655  | 0.0932401 | 0.090035  | 0.0999417 | 0.115967 | 0.110431  | 0.112617 |
| 0.11757  | 0.11757   | 0.116404  | 0.119901  | 0.105332 | 0.126603  | 0.123543 |
| 0.118153 | 0.111742  | 0.116113  | 0.117279  | 0.13039  | 0.0901807 | 0.133741 |
| 0.119464 | 0.100524  | 0.10373   | 0.107809  | 0.122378 | 0.112762  | 0.129808 |
| 0.184149 | 0.180944  | 0.180361  | 0.186189  | 0.193473 | 0.174242  | 0.198864 |
| 0.113054 | 0.111597  | 0.111888  | 0.113636  | 0.104021 | 0.117424  | 0.121941 |
| 0.11859  | 0.10373   | 0.107226  | 0.106643  | 0.12296  | 0.110723  | 0.124272 |
| 0.116841 | 0.0967366 | 0.0952797 | 0.100816  | 0.113928 | 0.109848  | 0.116696 |
| 0.119172 | 0.106061  | 0.116259  | 0.112471  | 0.127622 | 0.111305  | 0.127477 |
| 0.123106 | 0.114948  | 0.117279  | 0.11553   | 0.118444 | 0.121941  | 0.129662 |
| 0.121066 | 0.119318  | 0.120484  | 0.122523  | 0.104749 | 0.130099  | 0.127622 |
| 0.119027 | 0.103293  | 0.101253  | 0.108246  | 0.121941 | 0.107663  | 0.120629 |
| 0.124272 | 0.10912   | 0.102418  | 0.113782  | 0.119901 | 0.108246  | 0.128788 |
| 0.142191 | 0.134033  | 0.132867  | 0.137238  | 0.144522 | 0.140152  | 0.154283 |
| 0.234848 | 0.232226  | 0.231643  | 0.237179  | 0.238054 | 0.222028  | 0.244027 |
| 0.127914 | 0.0979021 | 0.0632284 | 0.101107  | 0.129662 | 0.0894522 | 0.128351 |
| 0.124709 | 0.117133  | 0.119755  | 0.11859   | 0.118298 | 0.122378  | 0.129225 |
| 0.111742 | 0.105332  | 0.107663  | 0.110577  | 0.12398  | 0.0849359 | 0.129662 |
| 0.123543 | 0.120047  | 0.112762  | 0.123543  | 0.126457 | 0.119172  | 0.13884  |
| 0.104458 | 0.105624  | 0.111742  | 0.110868  | 0.106498 | 0.109703  | 0.126748 |
| 0.121649 | 0.101544  | 0.10708   | 0.107663  | 0.118735 | 0.120192  | 0.124417 |
| 0.113054 | 0.110723  | 0.113636  | 0.115967  | 0.127331 | 0.0906177 | 0.131847 |

|          |           |           |           |          |           |          |
|----------|-----------|-----------|-----------|----------|-----------|----------|
| 0.119318 | 0.118444  | 0.117279  | 0.121941  | 0.10708  | 0.128351  | 0.127331 |
| 0.115239 | 0.104167  | 0.108829  | 0.111116  | 0.120484 | 0.108829  | 0.131993 |
| 0.232517 | 0.234848  | 0.2331    | 0.238345  | 0.240093 | 0.227273  | 0.24257  |
| 0.114656 | 0.095134  | 0.0945513 | 0.0995047 | 0.113782 | 0.106789  | 0.110723 |
| 0.111451 | 0.0980478 | 0.0936772 | 0.102127  | 0.10708  | 0.108537  | 0.11655  |
| 0.117424 | 0.102273  | 0.100233  | 0.107517  | 0.120047 | 0.108683  | 0.121649 |
| 0.128642 | 0.116404  | 0.116404  | 0.11961   | 0.131556 | 0.125437  | 0.143939 |
| 0.135344 | 0.105915  | 0.0677448 | 0.103875  | 0.134178 | 0.0922203 | 0.132867 |
| 0.120484 | 0.103875  | 0.105041  | 0.10708   | 0.131265 | 0.108829  | 0.127914 |
| 0.11553  | 0.110577  | 0.110577  | 0.116404  | 0.126311 | 0.08581   | 0.128205 |
| 0.118007 | 0.101399  | 0.097028  | 0.106352  | 0.117716 | 0.11014   | 0.126894 |
| 0.230769 | 0.229021  | 0.228147  | 0.233974  | 0.235723 | 0.219406  | 0.241113 |
| 0.117133 | 0.114802  | 0.117424  | 0.119464  | 0.13141  | 0.0914918 | 0.134178 |
| 0.116113 | 0.115239  | 0.114656  | 0.119318  | 0.101836 | 0.122815  | 0.124126 |
| 0.11757  | 0.0983392 | 0.100087  | 0.104749  | 0.116113 | 0.112325  | 0.125    |
| 0.120921 | 0.116259  | 0.114219  | 0.120047  | 0.11451  | 0.125874  | 0.13039  |
| 0.118881 | 0.114802  | 0.113054  | 0.117424  | 0.111597 | 0.122669  | 0.127768 |
| 0.120921 | 0.104021  | 0.103438  | 0.109848  | 0.120047 | 0.111305  | 0.121066 |
| 0.118298 | 0.117133  | 0.113636  | 0.11859   | 0.104895 | 0.123252  | 0.121358 |
| 0.121649 | 0.121649  | 0.118153  | 0.12602   | 0.107663 | 0.128642  | 0.128205 |
| 0.114073 | 0.111451  | 0.108537  | 0.116987  | 0.103584 | 0.122232  | 0.120338 |
| 0.121503 | 0.103438  | 0.102273  | 0.109557  | 0.122086 | 0.110431  | 0.121941 |
| 0.125874 | 0.12296   | 0.122378  | 0.124126  | 0.120921 | 0.128788  | 0.135927 |
| 0.131265 | 0.126311  | 0.128642  | 0.128351  | 0.124563 | 0.13447   | 0.141608 |
| 0.134761 | 0.122523  | 0.121649  | 0.12602   | 0.131847 | 0.129225  | 0.128497 |
| 0.133887 | 0.125437  | 0.128642  | 0.128642  | 0.135635 | 0.130973  | 0.131993 |
| 0.128788 | 0.126166  | 0.126166  | 0.12704   | 0.125291 | 0.136946  | 0.137675 |
| 0.117424 | 0.0824592 | 0.0804196 | 0.0879953 | 0.114802 | 0.100524  | 0.115822 |
| 0.119318 | 0.119901  | 0.121358  | 0.125437  | 0.11553  | 0.135344  | 0.123252 |
| 0.121212 | 0.118298  | 0.118881  | 0.121795  | 0.116259 | 0.125291  | 0.133887 |
| 0.202797 | 0.199592  | 0.200466  | 0.208333  | 0.210373 | 0.193473  | 0.215181 |
| 0.121795 | 0.104021  | 0.0996503 | 0.104021  | 0.128205 | 0.108974  | 0.133596 |
| 0.112762 | 0.104604  | 0.106061  | 0.11014   | 0.111888 | 0.113345  | 0.122523 |
| 0.123397 | 0.108246  | 0.107955  | 0.112908  | 0.12602  | 0.11553   | 0.130245 |
| 0.219114 | 0.221445  | 0.219988  | 0.224068  | 0.223776 | 0.213869  | 0.231206 |
| 0.208042 | 0.20542   | 0.206294  | 0.211538  | 0.217949 | 0.203671  | 0.222174 |
| 0.11757  | 0.118735  | 0.11961   | 0.124563  | 0.107372 | 0.128642  | 0.128205 |
| 0.245047 | 0.248543  | 0.246795  | 0.252622  | 0.252331 | 0.239219  | 0.257721 |
| 0.11655  | 0.0815851 | 0.080711  | 0.0847902 | 0.117133 | 0.0967366 | 0.119027 |
| 0.140152 | 0.120921  | 0.11655   | 0.124709  | 0.13549  | 0.127622  | 0.139423 |
| 0.117133 | 0.099359  | 0.0955711 | 0.104021  | 0.112762 | 0.111014  | 0.112034 |
| 0.126311 | 0.120775  | 0.123397  | 0.121941  | 0.122815 | 0.132139  | 0.134907 |
| 0.186772 | 0.183566  | 0.182401  | 0.187937  | 0.193182 | 0.178322  | 0.199155 |
| 0.126894 | 0.107663  | 0.111451  | 0.110868  | 0.115239 | 0.124563  | 0.134615 |

|           |           |           |           |          |           |          |
|-----------|-----------|-----------|-----------|----------|-----------|----------|
| 0.193036  | 0.190705  | 0.188666  | 0.197115  | 0.202652 | 0.182547  | 0.204254 |
| 0.123397  | 0.103875  | 0.0962995 | 0.10912   | 0.121941 | 0.108246  | 0.12704  |
| 0.0995047 | 0.106498  | 0.11116   | 0.10912   | 0.10708  | 0.097465  | 0.125874 |
| 0.125437  | 0.102418  | 0.104458  | 0.105041  | 0.125728 | 0.114365  | 0.123834 |
| 0.11553   | 0.100962  | 0.106498  | 0.107372  | 0.118735 | 0.103001  | 0.122086 |
| 0.113345  | 0.0964452 | 0.0961538 | 0.104021  | 0.115385 | 0.106352  | 0.116404 |
| 0.11859   | 0.092366  | 0.0897436 | 0.0973193 | 0.119755 | 0.101107  | 0.128642 |
| 0.112762  | 0.0941142 | 0.0926573 | 0.094697  | 0.113054 | 0.106643  | 0.110868 |
| 0.110868  | 0.0992133 | 0.103875  | 0.10912   | 0.123106 | 0.0823135 | 0.128205 |
| 0.107226  | 0.109266  | 0.1081    | 0.112179  | 0.111014 | 0.121212  | 0.114365 |
| 0.120921  | 0.0836247 | 0.0501166 | 0.0903263 | 0.119755 | 0.0792541 | 0.120775 |
| 0.116404  | 0.097465  | 0.0933858 | 0.0992133 | 0.111451 | 0.110286  | 0.115676 |
| 0.119172  | 0.106643  | 0.115967  | 0.113054  | 0.121795 | 0.114219  | 0.123689 |
| 0.120629  | 0.116841  | 0.117716  | 0.122086  | 0.13549  | 0.0973193 | 0.13447  |
| 0.122232  | 0.107372  | 0.10708   | 0.115239  | 0.123106 | 0.117279  | 0.120629 |
| 0.120921  | 0.104021  | 0.105769  | 0.107809  | 0.120338 | 0.113636  | 0.12602  |
| 0.114656  | 0.0965909 | 0.0960082 | 0.103293  | 0.116113 | 0.106789  | 0.115676 |
| 0.111451  | 0.110868  | 0.11116   | 0.116987  | 0.105915 | 0.11757   | 0.124417 |
| 0.121358  | 0.115822  | 0.115239  | 0.120484  | 0.118153 | 0.12398   | 0.128788 |
| 0.131993  | 0.113054  | 0.116259  | 0.116259  | 0.122086 | 0.124417  | 0.125437 |
| 0.123543  | 0.108683  | 0.109557  | 0.11451   | 0.125874 | 0.122378  | 0.118444 |
| 0.11116   | 0.107372  | 0.111451  | 0.109994  | 0.128059 | 0.0849359 | 0.129079 |
| 0.118007  | 0.115967  | 0.120047  | 0.122669  | 0.132284 | 0.0967366 | 0.138258 |
| 0.125     | 0.125874  | 0.128205  | 0.130245  | 0.140152 | 0.102273  | 0.146125 |
| 0.109703  | 0.10067   | 0.0925117 | 0.105915  | 0.100087 | 0.109994  | 0.114802 |
| 0.121941  | 0.104167  | 0.103001  | 0.109703  | 0.123689 | 0.11116   | 0.122669 |
| 0.117716  | 0.0935315 | 0.097028  | 0.100233  | 0.111597 | 0.109557  | 0.117279 |
| 0.129371  | 0.125     | 0.129079  | 0.128497  | 0.12296  | 0.136364  | 0.137383 |
| 0.120484  | 0.101544  | 0.0992133 | 0.105041  | 0.114656 | 0.113491  | 0.112471 |
| 0.141754  | 0.133596  | 0.135052  | 0.134178  | 0.137383 | 0.140297  | 0.136072 |
| 0.134761  | 0.121941  | 0.121066  | 0.128642  | 0.132721 | 0.124563  | 0.136364 |
| 0.129371  | 0.11014   | 0.108683  | 0.118298  | 0.125583 | 0.117424  | 0.137092 |
| 0.121358  | 0.0962995 | 0.0831876 | 0.10271   | 0.118735 | 0.0989219 | 0.119172 |
| 0.114219  | 0.104021  | 0.103147  | 0.109848  | 0.113054 | 0.109266  | 0.125437 |
| 0.131993  | 0.118298  | 0.118298  | 0.124126  | 0.130536 | 0.125583  | 0.128934 |
| 0.201486  | 0.203234  | 0.200903  | 0.206731  | 0.209353 | 0.195659  | 0.216783 |
| 0.118735  | 0.105915  | 0.105624  | 0.106789  | 0.121066 | 0.11553   | 0.12296  |
| 0.123252  | 0.097028  | 0.100233  | 0.101107  | 0.124709 | 0.108683  | 0.126894 |
| 0.119901  | 0.11757   | 0.115239  | 0.11961   | 0.119318 | 0.124272  | 0.130536 |
| 0.121795  | 0.109557  | 0.110431  | 0.113636  | 0.123834 | 0.118881  | 0.120775 |
| 0.127477  | 0.108829  | 0.103001  | 0.114656  | 0.12602  | 0.112034  | 0.128788 |
| 0.125728  | 0.0878497 | 0.105915  | 0.0872669 | 0.126603 | 0.111451  | 0.129662 |
| 0.125291  | 0.0894522 | 0.109848  | 0.0888695 | 0.128497 | 0.112179  | 0.136218 |
| 0.121066  | 0.107663  | 0.106789  | 0.114073  | 0.124854 | 0.114073  | 0.132284 |

|          |           |           |           |           |           |          |
|----------|-----------|-----------|-----------|-----------|-----------|----------|
| 0.107955 | 0.10067   | 0.0986305 | 0.105332  | 0.107372  | 0.11553   | 0.109557 |
| 0.123106 | 0.122232  | 0.121066  | 0.125437  | 0.119318  | 0.127768  | 0.135198 |
| 0.120775 | 0.0962995 | 0.099796  | 0.100962  | 0.116113  | 0.10912   | 0.11859  |
| 0.127914 | 0.0920746 | 0.0536131 | 0.0935315 | 0.126748  | 0.0844988 | 0.125146 |
| 0.172931 | 0.168561  | 0.171183  | 0.172348  | 0.180507  | 0.167686  | 0.187646 |
| 0.115239 | 0.103293  | 0.107663  | 0.112034  | 0.126603  | 0.0855186 | 0.128205 |
| 0.12704  | 0.122086  | 0.123543  | 0.124417  | 0.118007  | 0.130536  | 0.135344 |
| 0.118153 | 0.100379  | 0.0986305 | 0.101544  | 0.115822  | 0.118444  | 0.114802 |
| 0        | 0.115385  | 0.111888  | 0.118881  | 0.112179  | 0.107226  | 0.130099 |
| 0.115385 | 0         | 0.0795455 | 0.041958  | 0.115093  | 0.0938228 | 0.121066 |
| 0.111888 | 0.0795455 | 0         | 0.0868298 | 0.118298  | 0.0804196 | 0.116696 |
| 0.118881 | 0.041958  | 0.0868298 | 0         | 0.120629  | 0.0990676 | 0.121941 |
| 0.112179 | 0.115093  | 0.118298  | 0.120629  | 0         | 0.123834  | 0.129808 |
| 0.107226 | 0.0938228 | 0.0804196 | 0.0990676 | 0.123834  | 0         | 0.128642 |
| 0.130099 | 0.121066  | 0.116696  | 0.121941  | 0.129808  | 0.128642  | 0        |
| 0.103147 | 0.097028  | 0.0967366 | 0.105478  | 0.115967  | 0.105186  | 0.119027 |
| 0.121358 | 0.101836  | 0.0945513 | 0.104749  | 0.119318  | 0.112908  | 0.120629 |
| 0.124417 | 0.11451   | 0.118298  | 0.119464  | 0.099359  | 0.13549   | 0.138549 |
| 0.115385 | 0.0961538 | 0.0888695 | 0.0976107 | 0.120047  | 0.111014  | 0.11553  |
| 0.128497 | 0.104021  | 0.109557  | 0.106061  | 0.123252  | 0.119755  | 0.119901 |
| 0.113928 | 0.0879953 | 0.0856643 | 0.0929487 | 0.115385  | 0.1081    | 0.113491 |
| 0.115676 | 0.092366  | 0.0879953 | 0.094697  | 0.115385  | 0.108683  | 0.116404 |
| 0.107809 | 0.0909091 | 0.0897436 | 0.0929487 | 0.116259  | 0.105478  | 0.116113 |
| 0.127477 | 0.102418  | 0.103584  | 0.107372  | 0.119027  | 0.116696  | 0.122378 |
| 0.109994 | 0.090472  | 0.0866841 | 0.0954254 | 0.111451  | 0.101253  | 0.113345 |
| 0.134178 | 0.133013  | 0.133887  | 0.137383  | 0.131847  | 0.137966  | 0.142483 |
| 0.128351 | 0.121066  | 0.123689  | 0.126603  | 0.13039   | 0.124563  | 0.13345  |
| 0.120484 | 0.0957168 | 0.090472  | 0.0980478 | 0.122815  | 0.105332  | 0.108392 |
| 0.133741 | 0.129662  | 0.131702  | 0.132867  | 0.124709  | 0.140152  | 0.142628 |
| 0.122378 | 0.113636  | 0.112471  | 0.117716  | 0.125874  | 0.121212  | 0.131556 |
| 0.121212 | 0.11859   | 0.113636  | 0.119172  | 0.120047  | 0.120338  | 0.134761 |
| 0.121503 | 0.0917832 | 0.0961538 | 0.094697  | 0.114219  | 0.106935  | 0.113199 |
| 0.136509 | 0.135635  | 0.136801  | 0.135927  | 0.137383  | 0.137092  | 0.147436 |
| 0.128351 | 0.116987  | 0.114073  | 0.118444  | 0.128642  | 0.134178  | 0.130245 |
| 0.126311 | 0.125437  | 0.130973  | 0.127477  | 0.107372  | 0.136218  | 0.143357 |
| 0.115822 | 0.105624  | 0.103001  | 0.110286  | 0.122232  | 0.115822  | 0.12296  |
| 0.117424 | 0.097028  | 0.0871212 | 0.100816  | 0.109266  | 0.106935  | 0.114948 |
| 0.11553  | 0.0898893 | 0.0919289 | 0.0980478 | 0.116404  | 0.105915  | 0.11859  |
| 0.114802 | 0.105478  | 0.106061  | 0.111597  | 0.0888695 | 0.11859   | 0.12602  |
| 0.11655  | 0.104312  | 0.0996503 | 0.107226  | 0.117424  | 0.113928  | 0.122523 |
| 0.127185 | 0.109703  | 0.11116   | 0.108829  | 0.128934  | 0.124563  | 0.130536 |
| 0.110868 | 0.113782  | 0.109703  | 0.120192  | 0.121941  | 0.109703  | 0.128205 |
| 0.10912  | 0.0989219 | 0.0933858 | 0.103875  | 0.10912   | 0.109994  | 0.107809 |
| 0.116841 | 0.0897436 | 0.0912005 | 0.0952797 | 0.117716  | 0.104895  | 0.117861 |

|          |           |           |           |          |           |          |
|----------|-----------|-----------|-----------|----------|-----------|----------|
| 0.121649 | 0.105332  | 0.0977564 | 0.106789  | 0.119901 | 0.113782  | 0.123543 |
| 0.11757  | 0.0954254 | 0.0965909 | 0.101836  | 0.114656 | 0.107955  | 0.121795 |
| 0.123252 | 0.099359  | 0.101107  | 0.106352  | 0.123834 | 0.113636  | 0.123689 |
| 0.11859  | 0.0984848 | 0.0981935 | 0.102564  | 0.115676 | 0.107226  | 0.119901 |
| 0.121066 | 0.104167  | 0.102418  | 0.10708   | 0.130099 | 0.105332  | 0.130245 |
| 0.122815 | 0.0887238 | 0.0866841 | 0.095134  | 0.121066 | 0.103584  | 0.124417 |
| 0.115822 | 0.0805653 | 0.0779429 | 0.0869755 | 0.114365 | 0.0962995 | 0.11014  |
| 0.114365 | 0.100087  | 0.0884324 | 0.102127  | 0.112617 | 0.108246  | 0.121795 |
| 0.121212 | 0.0990676 | 0.100816  | 0.103438  | 0.128788 | 0.106935  | 0.124272 |
| 0.11961  | 0.0744464 | 0.0861014 | 0.0805653 | 0.119318 | 0.097465  | 0.119172 |
| 0.120192 | 0.0983392 | 0.106498  | 0.0971737 | 0.13039  | 0.102418  | 0.127622 |
| 0.112034 | 0.0957168 | 0.0939685 | 0.102418  | 0.117861 | 0.103584  | 0.118298 |
| 0.128788 | 0.099359  | 0.104895  | 0.103147  | 0.131119 | 0.112762  | 0.129225 |

| <b>TDr_94_01108</b> | <b>TDr_95_00965</b> | <b>TDr_95_01932</b> | <b>TDr_95_01958</b> | <b>TDr_95_18544</b> | <b>TDr_95_19158</b> | <b>TDr_95_19158</b> |
|---------------------|---------------------|---------------------|---------------------|---------------------|---------------------|---------------------|
| 0.104458            | 0.111014            | 0.134761            | 0.112034            | 0.118153            | 0.107372            | 0.109703            |
| 0.1081              | 0.115822            | 0.129662            | 0.115385            | 0.116841            | 0.107809            | 0.110723            |
| 0.104895            | 0.10912             | 0.125583            | 0.109557            | 0.111014            | 0.104604            | 0.106935            |
| 0.101107            | 0.119318            | 0.132867            | 0.117133            | 0.116841            | 0.109557            | 0.112762            |
| 0.132284            | 0.133887            | 0.141608            | 0.126457            | 0.133741            | 0.129079            | 0.126166            |
| 0.121503            | 0.133304            | 0.139277            | 0.132284            | 0.130536            | 0.129662            | 0.130245            |
| 0.112034            | 0.115093            | 0.123689            | 0.106498            | 0.11961             | 0.106206            | 0.107372            |
| 0.106206            | 0.113636            | 0.126894            | 0.115822            | 0.116696            | 0.112034            | 0.114073            |
| 0.0952797           | 0.0992133           | 0.117716            | 0.0955711           | 0.1081              | 0.0917832           | 0.0938228           |
| 0.106498            | 0.100524            | 0.123689            | 0.0840618           | 0.109703            | 0.0840618           | 0.0846445           |
| 0.105186            | 0.0884324           | 0.131993            | 0.10169             | 0.116259            | 0.0955711           | 0.100524            |
| 0.103875            | 0.1081              | 0.117861            | 0.111451            | 0.116113            | 0.105915            | 0.111451            |
| 0.104749            | 0.106935            | 0.125728            | 0.101836            | 0.109703            | 0.0936772           | 0.100379            |
| 0.126748            | 0.130682            | 0.152972            | 0.132576            | 0.140152            | 0.129371            | 0.131119            |
| 0.121066            | 0.128497            | 0.135635            | 0.118735            | 0.124854            | 0.116696            | 0.120192            |
| 0.108974            | 0.0968823           | 0.105769            | 0.0871212           | 0.109266            | 0.0903263           | 0.0874126           |
| 0.104167            | 0.113636            | 0.119318            | 0.104458            | 0.114948            | 0.0971737           | 0.104749            |
| 0.141608            | 0.146707            | 0.15472             | 0.134324            | 0.152972            | 0.136072            | 0.13549             |
| 0.105478            | 0.109411            | 0.120921            | 0.106643            | 0.113928            | 0.102273            | 0.103147            |
| 0.194347            | 0.201486            | 0.215035            | 0.204545            | 0.201923            | 0.203089            | 0.206294            |
| 0.114656            | 0.118881            | 0.136801            | 0.122523            | 0.129225            | 0.114073            | 0.119027            |
| 0.111305            | 0.120484            | 0.135198            | 0.117424            | 0.125874            | 0.113054            | 0.117133            |
| 0.083479            | 0.105478            | 0.118153            | 0.106498            | 0.118444            | 0.100379            | 0.106789            |
| 0.115093            | 0.108246            | 0.0967366           | 0.103147            | 0.094697            | 0.10373             | 0.102855            |
| 0.0965909           | 0.0981935           | 0.11961             | 0.0977564           | 0.106206            | 0.0913462           | 0.0960082           |
| 0.121066            | 0.129662            | 0.135635            | 0.126603            | 0.125728            | 0.122523            | 0.124272            |
| 0.111742            | 0.107226            | 0.133887            | 0.108829            | 0.112617            | 0.108537            | 0.109411            |
| 0.114365            | 0.11451             | 0.0922203           | 0.109411            | 0.095134            | 0.10708             | 0.108829            |
| 0.128642            | 0.115093            | 0.12398             | 0.114073            | 0.0895979           | 0.114365            | 0.112908            |
| 0.114365            | 0.111888            | 0.124272            | 0.106498            | 0.0916375           | 0.108246            | 0.108246            |
| 0.115967            | 0.114948            | 0.132867            | 0.111014            | 0.117424            | 0.107517            | 0.111014            |
| 0.116987            | 0.108974            | 0.115239            | 0.104749            | 0.0814394           | 0.106206            | 0.104458            |
| 0.0983392           | 0.0996503           | 0.119901            | 0.101836            | 0.097465            | 0.0948427           | 0.100962            |
| 0.109703            | 0.102273            | 0.126311            | 0.105915            | 0.0930944           | 0.103875            | 0.105332            |
| 0.110723            | 0.0849359           | 0.125291            | 0.0871212           | 0.108974            | 0.0865385           | 0.0871212           |
| 0.113782            | 0.0521562           | 0.122815            | 0.0916375           | 0.105915            | 0.0939685           | 0.092803            |
| 0.119464            | 0.123397            | 0.135781            | 0.11451             | 0.134907            | 0.112179            | 0.113928            |
| 0.111742            | 0.113928            | 0.130973            | 0.112325            | 0.122815            | 0.106206            | 0.111742            |
| 0.100087            | 0.0996503           | 0.100962            | 0.107663            | 0.0878497           | 0.102418            | 0.105915            |
| 0.116987            | 0.122086            | 0.100379            | 0.112325            | 0.128934            | 0.10912             | 0.115239            |
| 0.104167            | 0.105769            | 0.10067             | 0.103584            | 0.114948            | 0.099796            | 0.103584            |
| 0.132721            | 0.140734            | 0.108537            | 0.124563            | 0.143502            | 0.127768            | 0.132139            |

|           |           |           |           |          |           |           |
|-----------|-----------|-----------|-----------|----------|-----------|-----------|
| 0.134178  | 0.138695  | 0.106498  | 0.131265  | 0.144959 | 0.133596  | 0.13447   |
| 0.1081    | 0.109703  | 0.104895  | 0.107517  | 0.11859  | 0.102855  | 0.106352  |
| 0.0912005 | 0.0989219 | 0.11859   | 0.0961538 | 0.11014  | 0.0906177 | 0.097028  |
| 0.106206  | 0.112179  | 0.120192  | 0.0936772 | 0.114656 | 0.0872669 | 0.0971737 |
| 0.110286  | 0.115676  | 0.0898893 | 0.108246  | 0.120192 | 0.104167  | 0.109994  |
| 0.131702  | 0.128642  | 0.111014  | 0.122378  | 0.136655 | 0.123543  | 0.123252  |
| 0.107226  | 0.104458  | 0.101399  | 0.104895  | 0.115967 | 0.102564  | 0.105769  |
| 0.105915  | 0.111888  | 0.104749  | 0.10708   | 0.121066 | 0.104749  | 0.107955  |
| 0.141026  | 0.142045  | 0.153263  | 0.134324  | 0.13141  | 0.135781  | 0.132867  |
| 0.117424  | 0.126603  | 0.0961538 | 0.120338  | 0.130245 | 0.118881  | 0.122086  |
| 0.102418  | 0.109848  | 0.103001  | 0.106789  | 0.122815 | 0.104458  | 0.109994  |
| 0.119027  | 0.117716  | 0.133013  | 0.107663  | 0.124272 | 0.110286  | 0.107372  |
| 0.102418  | 0.118881  | 0.117861  | 0.120484  | 0.122523 | 0.114365  | 0.121066  |
| 0.13447   | 0.132867  | 0.10067   | 0.124854  | 0.138549 | 0.126311  | 0.126603  |
| 0.120629  | 0.113199  | 0.103438  | 0.111014  | 0.130828 | 0.107809  | 0.111305  |
| 0.107809  | 0.107663  | 0.108974  | 0.106935  | 0.118881 | 0.102855  | 0.106935  |
| 0.106935  | 0.10708   | 0.10169   | 0.107809  | 0.122378 | 0.102564  | 0.108683  |
| 0.111742  | 0.110723  | 0.117861  | 0.0954254 | 0.116987 | 0.0986305 | 0.0992133 |
| 0.12602   | 0.130245  | 0.103584  | 0.120192  | 0.139423 | 0.124272  | 0.125728  |
| 0.131847  | 0.134907  | 0.108537  | 0.122815  | 0.14292  | 0.124563  | 0.125146  |
| 0.153555  | 0.16215   | 0.146562  | 0.155594  | 0.16521  | 0.157634  | 0.157925  |
| 0.111014  | 0.109703  | 0.106352  | 0.109557  | 0.119755 | 0.104604  | 0.108974  |
| 0.108683  | 0.108246  | 0.103147  | 0.109266  | 0.119464 | 0.102273  | 0.107517  |
| 0.104604  | 0.100962  | 0.101399  | 0.107517  | 0.118881 | 0.101107  | 0.107809  |
| 0.13243   | 0.138695  | 0.139423  | 0.130682  | 0.142337 | 0.129225  | 0.129225  |
| 0.105624  | 0.106061  | 0.0992133 | 0.106206  | 0.120192 | 0.10067   | 0.106206  |
| 0.123834  | 0.129808  | 0.101981  | 0.124417  | 0.136364 | 0.125583  | 0.124417  |
| 0.107226  | 0.113199  | 0.11859   | 0.0987762 | 0.116841 | 0.0967366 | 0.0981935 |
| 0.109411  | 0.109266  | 0.103293  | 0.11116   | 0.121941 | 0.105915  | 0.112034  |
| 0.133887  | 0.143065  | 0.149621  | 0.135635  | 0.14729  | 0.13447   | 0.135344  |
| 0.114948  | 0.113054  | 0.105624  | 0.114656  | 0.12602  | 0.107663  | 0.112617  |
| 0.131702  | 0.131556  | 0.105769  | 0.122086  | 0.132867 | 0.124126  | 0.125583  |
| 0.11961   | 0.125874  | 0.0971737 | 0.122523  | 0.133304 | 0.122815  | 0.123106  |
| 0.0984848 | 0.112325  | 0.125583  | 0.11451   | 0.119755 | 0.106643  | 0.115093  |
| 0.104895  | 0.104749  | 0.102273  | 0.102855  | 0.120338 | 0.0961538 | 0.102564  |
| 0.105186  | 0.105332  | 0.0996503 | 0.104312  | 0.124126 | 0.100816  | 0.103438  |
| 0.122669  | 0.12602   | 0.111014  | 0.119172  | 0.131993 | 0.119172  | 0.120338  |
| 0.104749  | 0.102273  | 0.105041  | 0.101836  | 0.116113 | 0.0962995 | 0.102418  |
| 0.13141   | 0.136218  | 0.109557  | 0.129953  | 0.133159 | 0.131702  | 0.131993  |
| 0.113636  | 0.112325  | 0.107809  | 0.109266  | 0.125    | 0.108974  | 0.111305  |
| 0.110431  | 0.113491  | 0.0920746 | 0.111597  | 0.117716 | 0.108974  | 0.110431  |
| 0.108974  | 0.111451  | 0.102564  | 0.112762  | 0.123543 | 0.104312  | 0.112471  |
| 0.11451   | 0.111742  | 0.105769  | 0.112762  | 0.126166 | 0.107517  | 0.113054  |
| 0.1081    | 0.10912   | 0.100233  | 0.107517  | 0.118007 | 0.104895  | 0.108683  |

|           |           |           |           |          |           |           |
|-----------|-----------|-----------|-----------|----------|-----------|-----------|
| 0.105478  | 0.109703  | 0.0955711 | 0.108974  | 0.122086 | 0.103147  | 0.109557  |
| 0.128351  | 0.129371  | 0.105624  | 0.116696  | 0.137383 | 0.121358  | 0.121649  |
| 0.0968823 | 0.0912005 | 0.117279  | 0.0957168 | 0.110286 | 0.0893065 | 0.095134  |
| 0.103438  | 0.0840618 | 0.117716  | 0.0827506 | 0.106643 | 0.0795455 | 0.0839161 |
| 0.119172  | 0.126311  | 0.132867  | 0.113636  | 0.12704  | 0.111597  | 0.115385  |
| 0.115967  | 0.119901  | 0.13549   | 0.109266  | 0.122669 | 0.1081    | 0.109848  |
| 0.11655   | 0.123106  | 0.131702  | 0.11014   | 0.126457 | 0.11014   | 0.108974  |
| 0.11961   | 0.129371  | 0.140006  | 0.113199  | 0.135927 | 0.115239  | 0.116696  |
| 0.108683  | 0.108537  | 0.12704   | 0.107809  | 0.126166 | 0.101399  | 0.106935  |
| 0.173951  | 0.179633  | 0.189394  | 0.179196  | 0.184149 | 0.179196  | 0.178322  |
| 0.101836  | 0.109557  | 0.125728  | 0.103584  | 0.118444 | 0.0980478 | 0.103001  |
| 0.120047  | 0.130099  | 0.137238  | 0.113928  | 0.135198 | 0.114219  | 0.114219  |
| 0.111305  | 0.12398   | 0.131993  | 0.107517  | 0.127331 | 0.1081    | 0.109266  |
| 0.126894  | 0.126748  | 0.138549  | 0.120484  | 0.133596 | 0.121066  | 0.123397  |
| 0.0929487 | 0.105041  | 0.12296   | 0.0967366 | 0.115385 | 0.0897436 | 0.097028  |
| 0.115385  | 0.12398   | 0.131702  | 0.107517  | 0.130536 | 0.108974  | 0.106935  |
| 0.103438  | 0.108537  | 0.125874  | 0.105186  | 0.120921 | 0.0987762 | 0.100524  |
| 0.112034  | 0.121503  | 0.124854  | 0.103875  | 0.126894 | 0.103584  | 0.103875  |
| 0.103875  | 0.112179  | 0.120484  | 0.103001  | 0.112908 | 0.099796  | 0.104167  |
| 0.120192  | 0.126748  | 0.13039   | 0.113199  | 0.129808 | 0.116113  | 0.114948  |
| 0.0954254 | 0.106352  | 0.111451  | 0.100379  | 0.113491 | 0.0936772 | 0.100379  |
| 0.121503  | 0.127477  | 0.136655  | 0.118007  | 0.134324 | 0.115967  | 0.116841  |
| 0.105915  | 0.115967  | 0.126311  | 0.10708   | 0.121358 | 0.102127  | 0.107663  |
| 0.122378  | 0.125146  | 0.104312  | 0.115093  | 0.129953 | 0.117133  | 0.118881  |
| 0.121649  | 0.123543  | 0.13039   | 0.108537  | 0.129516 | 0.110577  | 0.11116   |
| 0.100087  | 0.101981  | 0.126311  | 0.101544  | 0.112908 | 0.0968823 | 0.101253  |
| 0.129808  | 0.143648  | 0.145542  | 0.132721  | 0.149038 | 0.137092  | 0.133887  |
| 0.108392  | 0.101836  | 0.129371  | 0.104312  | 0.112762 | 0.0984848 | 0.107517  |
| 0.0984848 | 0.108829  | 0.125     | 0.102564  | 0.117716 | 0.0952797 | 0.0990676 |
| 0.105624  | 0.114802  | 0.11757   | 0.100962  | 0.11961  | 0.100962  | 0.10271   |
| 0.128642  | 0.129371  | 0.14729   | 0.118444  | 0.138258 | 0.124272  | 0.121066  |
| 0.109411  | 0.119464  | 0.113782  | 0.110868  | 0.124272 | 0.110286  | 0.11116   |
| 0.0925117 | 0.105478  | 0.121358  | 0.100962  | 0.114365 | 0.0957168 | 0.0989219 |
| 0.0939685 | 0.104021  | 0.125728  | 0.0983392 | 0.113199 | 0.0930944 | 0.099796  |
| 0.103147  | 0.110868  | 0.130828  | 0.105769  | 0.116259 | 0.102273  | 0.107517  |
| 0.114365  | 0.11655   | 0.124272  | 0.102127  | 0.126603 | 0.103584  | 0.104167  |
| 0.107809  | 0.104458  | 0.129953  | 0.106061  | 0.117424 | 0.103147  | 0.10373   |
| 0.0910548 | 0.106935  | 0.110286  | 0.0910548 | 0.111451 | 0.0866841 | 0.0907634 |
| 0.090472  | 0.0981935 | 0.112617  | 0.0919289 | 0.110868 | 0.08581   | 0.0936772 |
| 0.0958625 | 0.102418  | 0.114219  | 0.0856643 | 0.114802 | 0.0839161 | 0.0897436 |
| 0.109557  | 0.114656  | 0.132284  | 0.118007  | 0.126457 | 0.112762  | 0.116259  |
| 0.113199  | 0.122378  | 0.123689  | 0.0992133 | 0.121941 | 0.10271   | 0.100962  |
| 0.10373   | 0.106206  | 0.114802  | 0.090035  | 0.114219 | 0.085373  | 0.0914918 |
| 0.0939685 | 0.100816  | 0.10912   | 0.0933858 | 0.112325 | 0.0884324 | 0.0939685 |



|           |           |           |           |           |           |           |
|-----------|-----------|-----------|-----------|-----------|-----------|-----------|
| 0.109411  | 0.116841  | 0.112617  | 0.0986305 | 0.120484  | 0.0989219 | 0.0995047 |
| 0.0952797 | 0.105041  | 0.111014  | 0.0938228 | 0.111014  | 0.0882867 | 0.0944056 |
| 0.113928  | 0.123689  | 0.131702  | 0.118007  | 0.128497  | 0.114802  | 0.117716  |
| 0.127914  | 0.124563  | 0.145396  | 0.119755  | 0.120047  | 0.11859   | 0.120047  |
| 0.101399  | 0.109703  | 0.115093  | 0.0990676 | 0.113054  | 0.0964452 | 0.097028  |
| 0.102418  | 0.1081    | 0.11757   | 0.0936772 | 0.118735  | 0.088141  | 0.0936772 |
| 0.101253  | 0.105769  | 0.110286  | 0.0960082 | 0.112034  | 0.0901807 | 0.0968823 |
| 0.0925117 | 0.0979021 | 0.111116  | 0.0933858 | 0.110286  | 0.0861014 | 0.0930944 |
| 0.11553   | 0.114802  | 0.121649  | 0.103875  | 0.123689  | 0.106498  | 0.105332  |
| 0.0939685 | 0.0961538 | 0.112908  | 0.0863928 | 0.106789  | 0.0840618 | 0.0895979 |
| 0.129079  | 0.127477  | 0.136946  | 0.122086  | 0.126166  | 0.120921  | 0.122669  |
| 0.122523  | 0.127914  | 0.133596  | 0.116987  | 0.131847  | 0.115239  | 0.121066  |
| 0.119027  | 0.123834  | 0.123397  | 0.109703  | 0.125437  | 0.110286  | 0.111742  |
| 0.105769  | 0.108246  | 0.122378  | 0.0996503 | 0.119172  | 0.0952797 | 0.101107  |
| 0.107809  | 0.113491  | 0.125583  | 0.110431  | 0.111014  | 0.104312  | 0.108392  |
| 0.092803  | 0.0984848 | 0.114073  | 0.095134  | 0.112034  | 0.0898893 | 0.0980478 |
| 0.0958625 | 0.101544  | 0.0967366 | 0.0967366 | 0.114219  | 0.0891608 | 0.0955711 |
| 0.101981  | 0.0936772 | 0.0976107 | 0.0976107 | 0.0932401 | 0.0906177 | 0.0958625 |
| 0.0987762 | 0.108829  | 0.108974  | 0.113636  | 0.124126  | 0.110431  | 0.111888  |
| 0.123252  | 0.119027  | 0.0454545 | 0.110723  | 0.125874  | 0.111305  | 0.11451   |
| 0.099796  | 0.107226  | 0.128059  | 0.0992133 | 0.123106  | 0.0893065 | 0.100087  |
| 0.119464  | 0.120484  | 0.132867  | 0.115967  | 0.129662  | 0.11655   | 0.115385  |
| 0.125437  | 0.133741  | 0.140006  | 0.119027  | 0.133304  | 0.120192  | 0.123106  |
| 0.186043  | 0.189103  | 0.203817  | 0.200612  | 0.197407  | 0.195367  | 0.196533  |
| 0.231352  | 0.235577  | 0.245629  | 0.240385  | 0.236305  | 0.237471  | 0.238636  |
| 0.0977564 | 0.111888  | 0.118735  | 0.116987  | 0.119901  | 0.109994  | 0.112034  |
| 0.10169   | 0.112325  | 0.0874126 | 0.101981  | 0.112762  | 0.100816  | 0.10169   |
| 0.097028  | 0.0939685 | 0.103438  | 0.0973193 | 0.110723  | 0.0932401 | 0.0964452 |
| 0.100233  | 0.110868  | 0.0952797 | 0.105769  | 0.119464  | 0.105186  | 0.106935  |
| 0.118298  | 0.130973  | 0.135781  | 0.119464  | 0.128205  | 0.121795  | 0.120921  |
| 0.104895  | 0.111116  | 0.0955711 | 0.104895  | 0.121212  | 0.103147  | 0.105186  |
| 0.133887  | 0.136364  | 0.102418  | 0.126603  | 0.143211  | 0.128351  | 0.127185  |
| 0.106352  | 0.108537  | 0.0973193 | 0.107517  | 0.119464  | 0.103147  | 0.107226  |
| 0.120047  | 0.127185  | 0.0944056 | 0.11655   | 0.125     | 0.117424  | 0.118881  |
| 0.125728  | 0.125583  | 0.101544  | 0.116987  | 0.132721  | 0.119318  | 0.120192  |
| 0.121649  | 0.127331  | 0.0965909 | 0.117279  | 0.135344  | 0.115822  | 0.117279  |
| 0.132721  | 0.129371  | 0.112034  | 0.121358  | 0.136801  | 0.120484  | 0.122815  |
| 0.109703  | 0.110431  | 0.0968823 | 0.106498  | 0.122232  | 0.103001  | 0.104458  |
| 0.103293  | 0.109266  | 0.0936772 | 0.102127  | 0.120484  | 0.100087  | 0.101253  |
| 0.102564  | 0.114365  | 0.0976107 | 0.106352  | 0.122086  | 0.103147  | 0.106643  |
| 0.103147  | 0.108246  | 0.0903263 | 0.107226  | 0.113636  | 0.102273  | 0.10373   |
| 0.103438  | 0.109703  | 0.0920746 | 0.105478  | 0.116841  | 0.0990676 | 0.103147  |
| 0.106789  | 0.113636  | 0.0980478 | 0.112617  | 0.119901  | 0.106206  | 0.112325  |
| 0.120047  | 0.124854  | 0.0906177 | 0.117716  | 0.129079  | 0.11655   | 0.112762  |

|           |           |           |           |          |           |           |
|-----------|-----------|-----------|-----------|----------|-----------|-----------|
| 0.125874  | 0.133304  | 0.0949883 | 0.125583  | 0.13141  | 0.127622  | 0.127331  |
| 0.109703  | 0.108683  | 0.0971737 | 0.110577  | 0.118153 | 0.105041  | 0.106206  |
| 0.104021  | 0.107372  | 0.0958625 | 0.107226  | 0.123252 | 0.100233  | 0.106061  |
| 0.122669  | 0.127477  | 0.0926573 | 0.123834  | 0.128497 | 0.121795  | 0.125291  |
| 0.0996503 | 0.106789  | 0.0932401 | 0.104895  | 0.111597 | 0.100233  | 0.10373   |
| 0.135344  | 0.138695  | 0.0962995 | 0.133887  | 0.14292  | 0.133887  | 0.135052  |
| 0.121358  | 0.13141   | 0.138549  | 0.121649  | 0.131556 | 0.121941  | 0.123106  |
| 0.118298  | 0.133013  | 0.113636  | 0.12704   | 0.125583 | 0.12704   | 0.129371  |
| 0.0979021 | 0.107663  | 0.0964452 | 0.104604  | 0.116259 | 0.0999417 | 0.103438  |
| 0.0989219 | 0.106061  | 0.0945513 | 0.100962  | 0.111742 | 0.0965909 | 0.0992133 |
| 0.11655   | 0.119318  | 0.0981935 | 0.112762  | 0.120921 | 0.11451   | 0.114802  |
| 0.112325  | 0.123252  | 0.0936772 | 0.110868  | 0.119318 | 0.11116   | 0.110286  |
| 0.120775  | 0.120921  | 0.099796  | 0.11757   | 0.125728 | 0.117861  | 0.119901  |
| 0.109557  | 0.111742  | 0.0967366 | 0.117424  | 0.124126 | 0.111888  | 0.116841  |
| 0.108829  | 0.108974  | 0.095134  | 0.114656  | 0.123397 | 0.109411  | 0.114073  |
| 0.114948  | 0.118881  | 0.0933858 | 0.107955  | 0.123689 | 0.107955  | 0.109703  |
| 0.123689  | 0.125583  | 0.0910548 | 0.114073  | 0.131847 | 0.11961   | 0.119318  |
| 0.119901  | 0.124709  | 0.0948427 | 0.116987  | 0.13243  | 0.118444  | 0.116113  |
| 0.125291  | 0.127477  | 0.0961538 | 0.121795  | 0.131702 | 0.121795  | 0.123252  |
| 0.122523  | 0.127331  | 0.107663  | 0.123397  | 0.122523 | 0.126311  | 0.125437  |
| 0.107663  | 0.108392  | 0.101836  | 0.106789  | 0.116113 | 0.101836  | 0.106789  |
| 0.122523  | 0.129371  | 0.0977564 | 0.127768  | 0.133304 | 0.125146  | 0.125728  |
| 0.0967366 | 0.106498  | 0.099359  | 0.102564  | 0.111888 | 0.10169   | 0.105186  |
| 0.105915  | 0.107809  | 0.106789  | 0.110577  | 0.118444 | 0.104749  | 0.10912   |
| 0.105332  | 0.109266  | 0.095134  | 0.103875  | 0.122815 | 0.103875  | 0.104749  |
| 0.104604  | 0.110868  | 0.0961538 | 0.110431  | 0.112471 | 0.104021  | 0.109848  |
| 0.103147  | 0.107372  | 0.0891608 | 0.103147  | 0.121212 | 0.099359  | 0.102564  |
| 0.124854  | 0.124709  | 0.0980478 | 0.119901  | 0.135344 | 0.121941  | 0.121066  |
| 0.11014   | 0.107372  | 0.101981  | 0.111014  | 0.108683 | 0.107809  | 0.109266  |
| 0.122669  | 0.128642  | 0.097028  | 0.124126  | 0.131702 | 0.124709  | 0.124417  |
| 0.102855  | 0.111451  | 0.0888695 | 0.108683  | 0.116841 | 0.102855  | 0.106061  |
| 0.11553   | 0.115967  | 0.0907634 | 0.110868  | 0.125728 | 0.109703  | 0.110868  |
| 0.109266  | 0.116696  | 0.113636  | 0.105769  | 0.11451  | 0.105478  | 0.108683  |
| 0.104604  | 0.113782  | 0.129953  | 0.109266  | 0.121795 | 0.10373   | 0.110723  |
| 0.103001  | 0.105769  | 0.125728  | 0.0872669 | 0.112908 | 0.0837704 | 0.0875583 |
| 0.111888  | 0.114656  | 0.121795  | 0.107226  | 0.124126 | 0.105769  | 0.111014  |
| 0.103875  | 0.118298  | 0.125437  | 0.109994  | 0.122815 | 0.104167  | 0.111451  |
| 0.101544  | 0.0964452 | 0.130099  | 0.105332  | 0.10708  | 0.100962  | 0.103584  |
| 0.123689  | 0.117716  | 0.137966  | 0.105624  | 0.124563 | 0.112908  | 0.109411  |
| 0.125583  | 0.128934  | 0.135781  | 0.109557  | 0.131702 | 0.113636  | 0.112471  |
| 0.100233  | 0.0971737 | 0.120047  | 0.0909091 | 0.110723 | 0.090035  | 0.092366  |
| 0.11961   | 0.13141   | 0.135635  | 0.120484  | 0.128059 | 0.119901  | 0.12398   |
| 0.118881  | 0.112617  | 0.131119  | 0.0955711 | 0.120047 | 0.101107  | 0.0990676 |
| 0.115676  | 0.124854  | 0.136364  | 0.109557  | 0.127914 | 0.109557  | 0.108683  |

|          |          |          |           |           |           |           |
|----------|----------|----------|-----------|-----------|-----------|-----------|
| 0.1081   | 0.112034 | 0.124709 | 0.101981  | 0.121795  | 0.106061  | 0.105769  |
| 0.117716 | 0.107663 | 0.126748 | 0.0990676 | 0.11859   | 0.10169   | 0.099359  |
| 0.114656 | 0.109848 | 0.13243  | 0.0957168 | 0.117279  | 0.099796  | 0.097465  |
| 0.117424 | 0.121649 | 0.131702 | 0.111597  | 0.12704   | 0.110723  | 0.113928  |
| 0.124709 | 0.13039  | 0.142774 | 0.120047  | 0.135198  | 0.120921  | 0.120047  |
| 0.116841 | 0.111451 | 0.134033 | 0.101981  | 0.123543  | 0.100524  | 0.0981935 |
| 0.107226 | 0.109703 | 0.123252 | 0.102273  | 0.122086  | 0.101107  | 0.103438  |
| 0.127185 | 0.126748 | 0.13039  | 0.122523  | 0.131556  | 0.120484  | 0.125146  |
| 0.120629 | 0.115822 | 0.136946 | 0.103438  | 0.126457  | 0.107517  | 0.102564  |
| 0.104312 | 0.105332 | 0.127331 | 0.0987762 | 0.11655   | 0.0949883 | 0.0961538 |
| 0.21285  | 0.21824  | 0.23208  | 0.222174  | 0.21926   | 0.220134  | 0.223922  |
| 0.110577 | 0.117716 | 0.128934 | 0.108537  | 0.126894  | 0.104458  | 0.108829  |
| 0.114365 | 0.104312 | 0.126894 | 0.0933858 | 0.117861  | 0.0930944 | 0.0913462 |
| 0.118298 | 0.129225 | 0.137821 | 0.115676  | 0.133159  | 0.12296   | 0.118298  |
| 0.107809 | 0.104167 | 0.130245 | 0.0976107 | 0.119172  | 0.0917832 | 0.0941142 |
| 0.121503 | 0.124563 | 0.143065 | 0.108974  | 0.125583  | 0.111597  | 0.109848  |
| 0.108683 | 0.116113 | 0.124417 | 0.108683  | 0.124126  | 0.104895  | 0.108683  |
| 0.108246 | 0.115676 | 0.130099 | 0.105041  | 0.123689  | 0.101253  | 0.102127  |
| 0.118735 | 0.113054 | 0.131847 | 0.101253  | 0.119027  | 0.101253  | 0.10067   |
| 0.110431 | 0.114948 | 0.138986 | 0.112179  | 0.126748  | 0.109848  | 0.112179  |
| 0.117861 | 0.122669 | 0.137675 | 0.116987  | 0.13039   | 0.117279  | 0.114948  |
| 0.121212 | 0.124563 | 0.132576 | 0.116841  | 0.131702  | 0.118881  | 0.120921  |
| 0.120047 | 0.129516 | 0.137821 | 0.118881  | 0.128205  | 0.115676  | 0.114802  |
| 0.108683 | 0.109994 | 0.124709 | 0.0984848 | 0.110431  | 0.0929487 | 0.0961538 |
| 0.111305 | 0.117279 | 0.129079 | 0.105186  | 0.120921  | 0.101399  | 0.10373   |
| 0.123689 | 0.128497 | 0.142045 | 0.113491  | 0.131556  | 0.114365  | 0.112034  |
| 0.104895 | 0.114948 | 0.128497 | 0.10373   | 0.120047  | 0.102564  | 0.100816  |
| 0.129953 | 0.128059 | 0.109848 | 0.125874  | 0.13986   | 0.125291  | 0.129662  |
| 0.133596 | 0.137529 | 0.146707 | 0.136218  | 0.139714  | 0.131265  | 0.135052  |
| 0.111451 | 0.112179 | 0.127768 | 0.100962  | 0.11961   | 0.100962  | 0.103001  |
| 0.124563 | 0.126457 | 0.132721 | 0.109411  | 0.125437  | 0.114073  | 0.112617  |
| 0.114219 | 0.128351 | 0.136946 | 0.120338  | 0.131702  | 0.118881  | 0.121212  |
| 0.118153 | 0.108392 | 0.13243  | 0.110868  | 0.0925117 | 0.112325  | 0.113199  |
| 0.124563 | 0.127331 | 0.137383 | 0.12398   | 0.133596  | 0.119027  | 0.12398   |
| 0.132139 | 0.134907 | 0.142045 | 0.128642  | 0.140006  | 0.13039   | 0.130973  |
| 0.099359 | 0.10271  | 0.113928 | 0.0909091 | 0.107809  | 0.0891608 | 0.0912005 |
| 0.127768 | 0.123834 | 0.13039  | 0.112617  | 0.128934  | 0.113782  | 0.114365  |
| 0.13549  | 0.137383 | 0.15035  | 0.13345   | 0.141317  | 0.132867  | 0.134907  |
| 0.110431 | 0.107955 | 0.121795 | 0.092366  | 0.11451   | 0.0955711 | 0.0941142 |
| 0.121212 | 0.114948 | 0.108974 | 0.113928  | 0.127914  | 0.108683  | 0.114802  |
| 0.135927 | 0.132867 | 0.136801 | 0.123689  | 0.137675  | 0.125728  | 0.123397  |
| 0.115822 | 0.11859  | 0.105332 | 0.114365  | 0.126894  | 0.113199  | 0.115239  |
| 0.126457 | 0.133013 | 0.132576 | 0.125583  | 0.134615  | 0.130828  | 0.128205  |
| 0.118735 | 0.119464 | 0.12602  | 0.103875  | 0.133304  | 0.103875  | 0.105915  |

|           |          |           |           |           |           |           |
|-----------|----------|-----------|-----------|-----------|-----------|-----------|
| 0.108974  | 0.117279 | 0.134907  | 0.110723  | 0.12296   | 0.11014   | 0.111014  |
| 0.126311  | 0.126748 | 0.121941  | 0.116404  | 0.129516  | 0.118444  | 0.11757   |
| 0.106643  | 0.112325 | 0.123834  | 0.0973193 | 0.12704   | 0.097028  | 0.0987762 |
| 0.118444  | 0.122086 | 0.131847  | 0.107955  | 0.128934  | 0.112617  | 0.110868  |
| 0.115239  | 0.117424 | 0.136509  | 0.110286  | 0.125728  | 0.108829  | 0.108537  |
| 0.115822  | 0.125    | 0.135344  | 0.11553   | 0.122523  | 0.121941  | 0.121649  |
| 0.121066  | 0.127331 | 0.135635  | 0.114948  | 0.134761  | 0.114656  | 0.11553   |
| 0.110868  | 0.12296  | 0.132721  | 0.116987  | 0.129225  | 0.114073  | 0.11553   |
| 0.12602   | 0.141026 | 0.148456  | 0.127477  | 0.141463  | 0.129225  | 0.12398   |
| 0.11553   | 0.114219 | 0.119901  | 0.103293  | 0.117279  | 0.104167  | 0.106789  |
| 0.114073  | 0.109266 | 0.0983392 | 0.105915  | 0.119027  | 0.103001  | 0.103001  |
| 0.126894  | 0.131702 | 0.13243   | 0.111742  | 0.137092  | 0.109994  | 0.113199  |
| 0.106206  | 0.109557 | 0.121941  | 0.097465  | 0.119318  | 0.0965909 | 0.097465  |
| 0.137238  | 0.14088  | 0.144522  | 0.134324  | 0.144814  | 0.129079  | 0.132576  |
| 0.149184  | 0.150204 | 0.150641  | 0.139569  | 0.155303  | 0.138986  | 0.140734  |
| 0.118298  | 0.123397 | 0.0973193 | 0.115676  | 0.125291  | 0.118298  | 0.116841  |
| 0.112908  | 0.119172 | 0.0965909 | 0.111451  | 0.123397  | 0.112034  | 0.109703  |
| 0.119755  | 0.123689 | 0.136946  | 0.125583  | 0.0996503 | 0.12296   | 0.122378  |
| 0.121649  | 0.128497 | 0.135927  | 0.116404  | 0.130682  | 0.116696  | 0.117861  |
| 0.119901  | 0.125874 | 0.0919289 | 0.116404  | 0.129225  | 0.116696  | 0.11961   |
| 0.122523  | 0.126748 | 0.139423  | 0.122232  | 0.13447   | 0.122232  | 0.119318  |
| 0.128934  | 0.13549  | 0.118444  | 0.118153  | 0.135635  | 0.122815  | 0.121941  |
| 0.117716  | 0.118153 | 0.100816  | 0.100524  | 0.118881  | 0.103147  | 0.106061  |
| 0.152972  | 0.161568 | 0.162005  | 0.1588    | 0.16317   | 0.158217  | 0.155886  |
| 0.120921  | 0.116987 | 0.0979021 | 0.106643  | 0.122086  | 0.106352  | 0.107517  |
| 0.128205  | 0.131556 | 0.134033  | 0.118298  | 0.138986  | 0.116841  | 0.121212  |
| 0.11553   | 0.111597 | 0.099796  | 0.104749  | 0.124272  | 0.105624  | 0.101253  |
| 0.121649  | 0.125583 | 0.13884   | 0.118735  | 0.0965909 | 0.121066  | 0.118735  |
| 0.112325  | 0.119464 | 0.136218  | 0.106498  | 0.123397  | 0.107372  | 0.105915  |
| 0.125291  | 0.126311 | 0.155886  | 0.131119  | 0.131993  | 0.128205  | 0.130536  |
| 0.139423  | 0.148019 | 0.151078  | 0.143502  | 0.143794  | 0.143211  | 0.144376  |
| 0.109848  | 0.126311 | 0.13549   | 0.126166  | 0.120047  | 0.123834  | 0.122669  |
| 0.123106  | 0.133741 | 0.150495  | 0.13884   | 0.134761  | 0.137383  | 0.137675  |
| 0.128205  | 0.140589 | 0.143357  | 0.143065  | 0.14831   | 0.136364  | 0.144231  |
| 0.128497  | 0.137092 | 0.157051  | 0.14831   | 0.144814  | 0.141608  | 0.145105  |
| 0.106789  | 0.104021 | 0.114365  | 0.0916375 | 0.115822  | 0.0910548 | 0.0930944 |
| 0.136364  | 0.133304 | 0.150641  | 0.132867  | 0.139277  | 0.134907  | 0.132576  |
| 0.11014   | 0.116987 | 0.13141   | 0.112471  | 0.113636  | 0.108392  | 0.111014  |
| 0.0817308 | 0.115093 | 0.126603  | 0.110286  | 0.117861  | 0.101836  | 0.108829  |
| 0.11859   | 0.11553  | 0.128788  | 0.112179  | 0.123252  | 0.11014   | 0.109848  |
| 0.106352  | 0.120775 | 0.13345   | 0.121212  | 0.120338  | 0.118881  | 0.120629  |
| 0.108246  | 0.11451  | 0.126894  | 0.117861  | 0.122815  | 0.112617  | 0.114365  |
| 0.10067   | 0.114802 | 0.123106  | 0.114656  | 0.118444  | 0.108829  | 0.11116   |
| 0.112617  | 0.11859  | 0.135344  | 0.120775  | 0.125437  | 0.11553   | 0.118444  |

|           |           |           |           |          |           |           |
|-----------|-----------|-----------|-----------|----------|-----------|-----------|
| 0.115676  | 0.122815  | 0.136655  | 0.117133  | 0.126166 | 0.11451   | 0.117424  |
| 0.101399  | 0.100087  | 0.114802  | 0.100816  | 0.110431 | 0.0958625 | 0.0987762 |
| 0.110431  | 0.121066  | 0.133741  | 0.125874  | 0.125583 | 0.120629  | 0.123834  |
| 0.107663  | 0.122378  | 0.13039   | 0.125146  | 0.121649 | 0.121358  | 0.121649  |
| 0.10912   | 0.113345  | 0.0995047 | 0.108537  | 0.119318 | 0.107955  | 0.108829  |
| 0.205857  | 0.212413  | 0.228875  | 0.220425  | 0.217803 | 0.218094  | 0.216638  |
| 0.13039   | 0.144522  | 0.146416  | 0.140589  | 0.135927 | 0.145542  | 0.142045  |
| 0.124417  | 0.128059  | 0.132576  | 0.13345   | 0.129953 | 0.126166  | 0.126748  |
| 0.116696  | 0.123252  | 0.137092  | 0.124854  | 0.121649 | 0.124563  | 0.125437  |
| 0.206439  | 0.20979   | 0.223922  | 0.214889  | 0.211101 | 0.213141  | 0.213141  |
| 0.108537  | 0.11655   | 0.11757   | 0.115822  | 0.119901 | 0.113491  | 0.11757   |
| 0.113928  | 0.115822  | 0.131119  | 0.114802  | 0.119755 | 0.109557  | 0.114802  |
| 0.121503  | 0.124563  | 0.126748  | 0.11859   | 0.126748 | 0.119464  | 0.119464  |
| 0.116404  | 0.123252  | 0.129808  | 0.113491  | 0.121941 | 0.111742  | 0.114948  |
| 0.243153  | 0.247669  | 0.260344  | 0.250146  | 0.248397 | 0.251311  | 0.250437  |
| 0.119172  | 0.123106  | 0.143357  | 0.120629  | 0.114802 | 0.11655   | 0.117424  |
| 0.102855  | 0.104167  | 0.102273  | 0.101981  | 0.11451  | 0.101107  | 0.105769  |
| 0.115093  | 0.126603  | 0.130245  | 0.124709  | 0.129079 | 0.123252  | 0.126748  |
| 0.114802  | 0.125728  | 0.127914  | 0.125     | 0.125874 | 0.119172  | 0.126166  |
| 0.117716  | 0.125437  | 0.13986   | 0.121503  | 0.121503 | 0.120338  | 0.120338  |
| 0.11451   | 0.121941  | 0.138403  | 0.126748  | 0.132284 | 0.123543  | 0.125874  |
| 0.106061  | 0.107955  | 0.104021  | 0.106643  | 0.116841 | 0.102855  | 0.106061  |
| 0.10708   | 0.119172  | 0.132139  | 0.122232  | 0.121649 | 0.116987  | 0.119027  |
| 0.124126  | 0.119318  | 0.142191  | 0.123834  | 0.130536 | 0.120047  | 0.121795  |
| 0.110431  | 0.119318  | 0.126166  | 0.114219  | 0.117133 | 0.104895  | 0.111888  |
| 0.103875  | 0.120629  | 0.135052  | 0.123689  | 0.116696 | 0.11757   | 0.120192  |
| 0.106061  | 0.101544  | 0.124126  | 0.0868298 | 0.113928 | 0.0897436 | 0.0888695 |
| 0.141463  | 0.148601  | 0.146707  | 0.143794  | 0.144668 | 0.144959  | 0.145542  |
| 0.121649  | 0.12296   | 0.14292   | 0.119027  | 0.115822 | 0.117861  | 0.11961   |
| 0.118444  | 0.119755  | 0.133304  | 0.120775  | 0.125437 | 0.116404  | 0.11757   |
| 0.181964  | 0.185897  | 0.203234  | 0.19391   | 0.193036 | 0.189248  | 0.193036  |
| 0.19391   | 0.201923  | 0.21722   | 0.209645  | 0.207022 | 0.206439  | 0.207896  |
| 0.116404  | 0.125     | 0.132721  | 0.116696  | 0.124272 | 0.115239  | 0.116113  |
| 0.109994  | 0.121795  | 0.123106  | 0.110577  | 0.118444 | 0.107955  | 0.110286  |
| 0.130682  | 0.137821  | 0.144959  | 0.130682  | 0.136218 | 0.129808  | 0.129808  |
| 0.105332  | 0.104312  | 0.101253  | 0.104458  | 0.115822 | 0.104167  | 0.107955  |
| 0.120921  | 0.123689  | 0.143065  | 0.122086  | 0.115967 | 0.118007  | 0.120629  |
| 0.122232  | 0.129079  | 0.129808  | 0.125728  | 0.130099 | 0.128934  | 0.126894  |
| 0.216055  | 0.223776  | 0.237908  | 0.228001  | 0.22567  | 0.226253  | 0.225087  |
| 0.108829  | 0.11451   | 0.127185  | 0.119901  | 0.120775 | 0.111451  | 0.116987  |
| 0.19697   | 0.204691  | 0.206002  | 0.206585  | 0.210664 | 0.205711  | 0.206585  |
| 0.0919289 | 0.0958625 | 0.112617  | 0.0872669 | 0.112034 | 0.0802739 | 0.088141  |
| 0.106935  | 0.109411  | 0.124709  | 0.113636  | 0.118007 | 0.10373   | 0.111305  |
| 0.100379  | 0.117424  | 0.13039   | 0.118735  | 0.123397 | 0.111742  | 0.116987  |

|           |           |          |           |          |           |           |
|-----------|-----------|----------|-----------|----------|-----------|-----------|
| 0.108537  | 0.113345  | 0.122523 | 0.10912   | 0.117861 | 0.103001  | 0.10708   |
| 0.199592  | 0.203526  | 0.222028 | 0.211538  | 0.209499 | 0.208042  | 0.206876  |
| 0.122086  | 0.132721  | 0.143939 | 0.135781  | 0.130828 | 0.133159  | 0.132867  |
| 0.102855  | 0.110868  | 0.122086 | 0.107809  | 0.11655  | 0.100524  | 0.10373   |
| 0.115385  | 0.129225  | 0.137238 | 0.130536  | 0.125583 | 0.128497  | 0.127622  |
| 0.116259  | 0.113199  | 0.125874 | 0.120047  | 0.120921 | 0.118881  | 0.118298  |
| 0.111597  | 0.118444  | 0.125291 | 0.113345  | 0.120921 | 0.106061  | 0.111014  |
| 0.0957168 | 0.0976107 | 0.116113 | 0.0875583 | 0.110868 | 0.0831876 | 0.0869755 |
| 0.103875  | 0.110723  | 0.111451 | 0.110868  | 0.119027 | 0.106789  | 0.108829  |
| 0.115239  | 0.117424  | 0.130973 | 0.11961   | 0.119027 | 0.113491  | 0.116404  |
| 0.103584  | 0.115093  | 0.13039  | 0.118444  | 0.117861 | 0.112908  | 0.115239  |
| 0.107809  | 0.112617  | 0.119464 | 0.107809  | 0.114219 | 0.101981  | 0.107226  |
| 0.18109   | 0.187646  | 0.199738 | 0.195367  | 0.191579 | 0.189831  | 0.192453  |
| 0.116841  | 0.129225  | 0.130245 | 0.123252  | 0.126166 | 0.124417  | 0.128497  |
| 0.126603  | 0.132576  | 0.138549 | 0.128642  | 0.128351 | 0.127185  | 0.129225  |
| 0.118298  | 0.124854  | 0.127914 | 0.125874  | 0.122086 | 0.120921  | 0.122669  |
| 0.121649  | 0.115676  | 0.143211 | 0.119027  | 0.121358 | 0.113491  | 0.118444  |
| 0.10912   | 0.125291  | 0.135344 | 0.124854  | 0.119027 | 0.121941  | 0.121941  |
| 0.10067   | 0.100524  | 0.114656 | 0.0866841 | 0.112034 | 0.08581   | 0.0887238 |
| 0.100524  | 0.105332  | 0.124709 | 0.112762  | 0.113636 | 0.106935  | 0.11014   |
| 0.113636  | 0.114365  | 0.102273 | 0.1081    | 0.11859  | 0.107226  | 0.109848  |
| 0.119318  | 0.126457  | 0.132721 | 0.126894  | 0.122815 | 0.123397  | 0.126894  |
| 0.107955  | 0.122086  | 0.128059 | 0.11961   | 0.12602  | 0.116987  | 0.11961   |
| 0.112471  | 0.121649  | 0.129662 | 0.116259  | 0.122086 | 0.112179  | 0.113636  |
| 0.116987  | 0.12296   | 0.13039  | 0.124272  | 0.126894 | 0.117279  | 0.118735  |
| 0.132867  | 0.136509  | 0.138986 | 0.130828  | 0.138986 | 0.132576  | 0.130245  |
| 0.111014  | 0.112617  | 0.136364 | 0.112762  | 0.113928 | 0.11014   | 0.110723  |
| 0.127477  | 0.140734  | 0.143794 | 0.136509  | 0.134178 | 0.140297  | 0.137092  |
| 0.110286  | 0.118298  | 0.128059 | 0.113199  | 0.119027 | 0.105041  | 0.111451  |
| 0.10708   | 0.115676  | 0.125437 | 0.118153  | 0.121358 | 0.114948  | 0.117861  |
| 0.108974  | 0.119027  | 0.132576 | 0.12296   | 0.125    | 0.120338  | 0.120338  |
| 0.113636  | 0.115822  | 0.101981 | 0.111305  | 0.119755 | 0.109557  | 0.113636  |
| 0.178322  | 0.18954   | 0.199592 | 0.195513  | 0.192599 | 0.188228  | 0.193182  |
| 0.101253  | 0.105769  | 0.11961  | 0.102418  | 0.112325 | 0.0957168 | 0.101253  |
| 0.101253  | 0.109266  | 0.117279 | 0.107663  | 0.112034 | 0.101836  | 0.103875  |
| 0.114365  | 0.113928  | 0.129225 | 0.117861  | 0.123689 | 0.111451  | 0.115822  |
| 0.166521  | 0.173368  | 0.191871 | 0.184003  | 0.179341 | 0.17701   | 0.180798  |
| 0.134033  | 0.129516  | 0.149476 | 0.129662  | 0.12704  | 0.124126  | 0.126457  |
| 0.140152  | 0.140297  | 0.15676  | 0.131119  | 0.130245 | 0.134615  | 0.130828  |
| 0.14088   | 0.151515  | 0.14933  | 0.145542  | 0.144376 | 0.146999  | 0.148456  |
| 0.111742  | 0.109266  | 0.13447  | 0.11116   | 0.112908 | 0.106206  | 0.109994  |
| 0.112179  | 0.127477  | 0.13345  | 0.128788  | 0.120338 | 0.124126  | 0.124417  |
| 0.204108  | 0.210082  | 0.225379 | 0.215763  | 0.212558 | 0.21285   | 0.214015  |
| 0.11961   | 0.120338  | 0.131265 | 0.124272  | 0.121358 | 0.122232  | 0.124563  |

|           |          |          |           |          |           |           |
|-----------|----------|----------|-----------|----------|-----------|-----------|
| 0.115385  | 0.129808 | 0.138403 | 0.131119  | 0.123543 | 0.129662  | 0.129079  |
| 0.104021  | 0.10912  | 0.121795 | 0.104895  | 0.116841 | 0.101981  | 0.105478  |
| 0.153846  | 0.163607 | 0.180944 | 0.170455  | 0.172203 | 0.168124  | 0.168998  |
| 0.10169   | 0.109994 | 0.130536 | 0.114802  | 0.114802 | 0.111305  | 0.116259  |
| 0.146707  | 0.145105 | 0.157197 | 0.14088   | 0.150787 | 0.143502  | 0.138258  |
| 0.114948  | 0.11014  | 0.122232 | 0.107955  | 0.12398  | 0.107955  | 0.108829  |
| 0.181381  | 0.186772 | 0.202943 | 0.196533  | 0.191579 | 0.191871  | 0.19391   |
| 0.115822  | 0.117133 | 0.139714 | 0.116696  | 0.118444 | 0.110286  | 0.114656  |
| 0.0992133 | 0.101981 | 0.118735 | 0.0980478 | 0.104458 | 0.0910548 | 0.092803  |
| 0.106935  | 0.112617 | 0.127331 | 0.120047  | 0.122086 | 0.113928  | 0.117424  |
| 0.110286  | 0.11014  | 0.127185 | 0.121066  | 0.113782 | 0.116696  | 0.120775  |
| 0.111451  | 0.112179 | 0.130973 | 0.115239  | 0.120484 | 0.107955  | 0.114365  |
| 0.112325  | 0.122086 | 0.132721 | 0.122232  | 0.13039  | 0.114365  | 0.121358  |
| 0.108683  | 0.115239 | 0.127331 | 0.111888  | 0.120338 | 0.103147  | 0.108974  |
| 0.178759  | 0.183275 | 0.201486 | 0.194784  | 0.193036 | 0.189248  | 0.193328  |
| 0.121503  | 0.124272 | 0.133741 | 0.122086  | 0.129662 | 0.115967  | 0.117424  |
| 0.105624  | 0.112471 | 0.126894 | 0.110868  | 0.119318 | 0.107663  | 0.108537  |
| 0.205128  | 0.207605 | 0.225524 | 0.214744  | 0.211538 | 0.211538  | 0.21183   |
| 0.118007  | 0.126603 | 0.132576 | 0.126457  | 0.12704  | 0.122378  | 0.127622  |
| 0.110286  | 0.117716 | 0.126894 | 0.111742  | 0.121066 | 0.105915  | 0.109703  |
| 0.106206  | 0.115093 | 0.122815 | 0.107372  | 0.116696 | 0.10271   | 0.107955  |
| 0.128788  | 0.140297 | 0.142191 | 0.135781  | 0.133741 | 0.138112  | 0.136072  |
| 0.17803   | 0.186043 | 0.204545 | 0.196678  | 0.190851 | 0.192308  | 0.191434  |
| 0.108829  | 0.111305 | 0.103293 | 0.10912   | 0.120484 | 0.104167  | 0.107663  |
| 0.127768  | 0.132867 | 0.132721 | 0.125437  | 0.13243  | 0.127185  | 0.126311  |
| 0.109703  | 0.115093 | 0.126311 | 0.109703  | 0.114365 | 0.103875  | 0.110577  |
| 0.105915  | 0.115967 | 0.124272 | 0.111451  | 0.118735 | 0.104458  | 0.109994  |
| 0.107517  | 0.114073 | 0.126748 | 0.105478  | 0.117716 | 0.101107  | 0.105478  |
| 0.105915  | 0.11859  | 0.13243  | 0.120775  | 0.122523 | 0.116113  | 0.11553   |
| 0.100816  | 0.100379 | 0.113345 | 0.101107  | 0.114219 | 0.0964452 | 0.0999417 |
| 0.122086  | 0.121358 | 0.142774 | 0.119464  | 0.11859  | 0.114802  | 0.117424  |
| 0.124709  | 0.134761 | 0.136364 | 0.132284  | 0.136655 | 0.129662  | 0.128788  |
| 0.115676  | 0.116113 | 0.140443 | 0.118298  | 0.117424 | 0.111305  | 0.115967  |
| 0.120775  | 0.116841 | 0.126603 | 0.122815  | 0.121941 | 0.122232  | 0.120484  |
| 0.183566  | 0.188083 | 0.208916 | 0.200175  | 0.196387 | 0.19493   | 0.198718  |
| 0.114073  | 0.124126 | 0.130099 | 0.122232  | 0.124854 | 0.116404  | 0.118444  |
| 0.118881  | 0.13243  | 0.141317 | 0.134615  | 0.130245 | 0.131993  | 0.131993  |
| 0.107955  | 0.114802 | 0.12602  | 0.107955  | 0.114656 | 0.103875  | 0.106498  |
| 0.101107  | 0.099796 | 0.115385 | 0.0949883 | 0.111888 | 0.0929487 | 0.0952797 |
| 0.1081    | 0.114656 | 0.128497 | 0.113636  | 0.125    | 0.108392  | 0.111597  |
| 0.105332  | 0.109848 | 0.101544 | 0.105915  | 0.115822 | 0.102418  | 0.107955  |
| 0.127185  | 0.126166 | 0.141754 | 0.128642  | 0.134761 | 0.125146  | 0.128351  |
| 0.112179  | 0.123106 | 0.130828 | 0.126166  | 0.124709 | 0.117133  | 0.124417  |
| 0.094697  | 0.106789 | 0.107517 | 0.10373   | 0.116259 | 0.0964452 | 0.10373   |

|           |           |          |           |          |           |           |
|-----------|-----------|----------|-----------|----------|-----------|-----------|
| 0.0919289 | 0.101107  | 0.104458 | 0.0992133 | 0.112617 | 0.0942599 | 0.10067   |
| 0.0955711 | 0.105332  | 0.116259 | 0.0987762 | 0.104312 | 0.0929487 | 0.0979021 |
| 0.0942599 | 0.0935315 | 0.113491 | 0.0887238 | 0.110577 | 0.0861014 | 0.0913462 |
| 0.129662  | 0.129516  | 0.144522 | 0.121503  | 0.122378 | 0.120921  | 0.11859   |
| 0.104749  | 0.108683  | 0.106206 | 0.108537  | 0.117861 | 0.101544  | 0.107663  |
| 0.106061  | 0.117279  | 0.129371 | 0.115676  | 0.118881 | 0.113928  | 0.114802  |
| 0.097028  | 0.103001  | 0.10373  | 0.10373   | 0.114802 | 0.0987762 | 0.104604  |
| 0.107955  | 0.113345  | 0.125728 | 0.109411  | 0.11553  | 0.103001  | 0.107663  |
| 0.0964452 | 0.106498  | 0.117716 | 0.102855  | 0.111597 | 0.0981935 | 0.100524  |
| 0.108974  | 0.119901  | 0.12704  | 0.111305  | 0.118298 | 0.107226  | 0.110431  |
| 0.108683  | 0.114365  | 0.125    | 0.115676  | 0.120629 | 0.109848  | 0.113636  |
| 0.114802  | 0.122815  | 0.130828 | 0.12296   | 0.12296  | 0.118007  | 0.122669  |
| 0.1081    | 0.111742  | 0.125874 | 0.112471  | 0.119464 | 0.109266  | 0.11014   |
| 0.103293  | 0.10373   | 0.11553  | 0.102418  | 0.113782 | 0.0968823 | 0.105332  |
| 0.1081    | 0.118153  | 0.124709 | 0.111305  | 0.118881 | 0.105769  | 0.111597  |
| 0.109848  | 0.115822  | 0.131119 | 0.124417  | 0.127331 | 0.120047  | 0.121212  |
| 0.107663  | 0.116841  | 0.131556 | 0.116113  | 0.122232 | 0.112908  | 0.115239  |
| 0.10169   | 0.0962995 | 0.122086 | 0.090035  | 0.111597 | 0.0874126 | 0.0906177 |
| 0.106061  | 0.114948  | 0.125    | 0.110431  | 0.115093 | 0.104312  | 0.109557  |
| 0.108246  | 0.123543  | 0.133887 | 0.126311  | 0.119901 | 0.121066  | 0.122523  |
| 0.095134  | 0.0944056 | 0.114948 | 0.090472  | 0.112034 | 0.0831876 | 0.0901807 |
| 0.10912   | 0.122378  | 0.134761 | 0.123106  | 0.123397 | 0.121358  | 0.122523  |
| 0.106498  | 0.111888  | 0.130973 | 0.113199  | 0.120484 | 0.108246  | 0.112034  |
| 0.106498  | 0.103438  | 0.117279 | 0.103875  | 0.114948 | 0.099796  | 0.103001  |
| 0.104458  | 0.113636  | 0.12602  | 0.112908  | 0.119901 | 0.108246  | 0.110286  |
| 0.0990676 | 0.107372  | 0.119755 | 0.100233  | 0.110723 | 0.0964452 | 0.0981935 |
| 0.113491  | 0.123834  | 0.136218 | 0.125146  | 0.123106 | 0.121941  | 0.120775  |
| 0.115822  | 0.115967  | 0.126603 | 0.118444  | 0.110577 | 0.113491  | 0.116404  |
| 0.105186  | 0.11961   | 0.130245 | 0.112762  | 0.121212 | 0.11014   | 0.113054  |
| 0.186772  | 0.190122  | 0.205711 | 0.196096  | 0.194639 | 0.191434  | 0.195221  |
| 0.15035   | 0.158071  | 0.17803  | 0.166667  | 0.172203 | 0.163462  | 0.166667  |
| 0.116259  | 0.116113  | 0.1419   | 0.117424  | 0.115967 | 0.112179  | 0.116259  |
| 0.10271   | 0.114219  | 0.119318 | 0.117861  | 0.120775 | 0.111451  | 0.116987  |
| 0.143502  | 0.143939  | 0.153992 | 0.136801  | 0.137966 | 0.137675  | 0.137092  |
| 0.12296   | 0.120775  | 0.142483 | 0.12704   | 0.136364 | 0.12296   | 0.122378  |
| 0.112325  | 0.12296   | 0.133596 | 0.11961   | 0.130682 | 0.112617  | 0.114948  |
| 0.104604  | 0.118735  | 0.129953 | 0.11655   | 0.125    | 0.109266  | 0.113928  |
| 0.107517  | 0.099796  | 0.123252 | 0.0903263 | 0.112179 | 0.0865385 | 0.087704  |
| 0.112179  | 0.117279  | 0.129662 | 0.114219  | 0.125291 | 0.109557  | 0.113054  |
| 0.192745  | 0.196387  | 0.214598 | 0.207314  | 0.204108 | 0.200612  | 0.2044    |
| 0.106352  | 0.113491  | 0.106352 | 0.113054  | 0.121503 | 0.106935  | 0.113636  |
| 0.101544  | 0.117424  | 0.119318 | 0.117279  | 0.11961  | 0.114073  | 0.116404  |
| 0.101544  | 0.1081    | 0.123689 | 0.107372  | 0.11553  | 0.100962  | 0.104749  |
| 0.106935  | 0.10708   | 0.126457 | 0.116841  | 0.123543 | 0.110723  | 0.11451   |



|           |           |           |           |           |           |           |
|-----------|-----------|-----------|-----------|-----------|-----------|-----------|
| 0.169726  | 0.179487  | 0.197407  | 0.188083  | 0.189248  | 0.186043  | 0.186334  |
| 0.239365  | 0.245047  | 0.256847  | 0.247815  | 0.244901  | 0.246066  | 0.246941  |
| 0.116987  | 0.128205  | 0.136801  | 0.129225  | 0.123689  | 0.122523  | 0.127185  |
| 0.109994  | 0.118298  | 0.130682  | 0.11757   | 0.125728  | 0.109994  | 0.118444  |
| 0.116696  | 0.113636  | 0.141171  | 0.118735  | 0.118444  | 0.113491  | 0.117279  |
| 0.106643  | 0.112325  | 0.125     | 0.109266  | 0.117716  | 0.104604  | 0.11014   |
| 0.103293  | 0.104312  | 0.103584  | 0.105041  | 0.112034  | 0.0992133 | 0.103875  |
| 0.111597  | 0.112617  | 0.128497  | 0.116259  | 0.120047  | 0.111305  | 0.113928  |
| 0.104749  | 0.113636  | 0.127477  | 0.113199  | 0.11961   | 0.106206  | 0.107955  |
| 0.102418  | 0.107517  | 0.0986305 | 0.103875  | 0.119027  | 0.100087  | 0.103001  |
| 0.104604  | 0.116696  | 0.127622  | 0.115093  | 0.117424  | 0.109557  | 0.113345  |
| 0.106789  | 0.0999417 | 0.127477  | 0.0965909 | 0.116113  | 0.0936772 | 0.0942599 |
| 0.104021  | 0.10271   | 0.117716  | 0.105186  | 0.113345  | 0.0996503 | 0.100524  |
| 0.117861  | 0.123543  | 0.135344  | 0.123397  | 0.123106  | 0.117861  | 0.124854  |
| 0.106935  | 0.121358  | 0.136655  | 0.125583  | 0.124126  | 0.121503  | 0.121212  |
| 0.0958625 | 0.106206  | 0.120047  | 0.105478  | 0.113054  | 0.100233  | 0.105478  |
| 0.112471  | 0.119318  | 0.129662  | 0.106643  | 0.122378  | 0.11014   | 0.1081    |
| 0.125     | 0.12602   | 0.135198  | 0.121503  | 0.126166  | 0.120338  | 0.123543  |
| 0.105915  | 0.115676  | 0.12602   | 0.110577  | 0.118444  | 0.104749  | 0.109411  |
| 0.107226  | 0.118444  | 0.117716  | 0.112179  | 0.122086  | 0.108974  | 0.113636  |
| 0.120629  | 0.13243   | 0.134324  | 0.118298  | 0.125874  | 0.119755  | 0.121503  |
| 0.201195  | 0.206876  | 0.222756  | 0.212558  | 0.208479  | 0.210227  | 0.209936  |
| 0.108683  | 0.117861  | 0.122086  | 0.118007  | 0.115385  | 0.111014  | 0.113928  |
| 0.105041  | 0.100816  | 0.114656  | 0.10067   | 0.114073  | 0.0939685 | 0.101544  |
| 0.115239  | 0.121212  | 0.127185  | 0.119901  | 0.128059  | 0.113491  | 0.117279  |
| 0.117133  | 0.124272  | 0.134615  | 0.127622  | 0.128788  | 0.123834  | 0.128205  |
| 0.10373   | 0.105041  | 0.122086  | 0.113345  | 0.120338  | 0.108392  | 0.109266  |
| 0.19289   | 0.195076  | 0.217075  | 0.202797  | 0.199883  | 0.198135  | 0.199883  |
| 0.110868  | 0.126457  | 0.138258  | 0.130099  | 0.124563  | 0.126311  | 0.127185  |
| 0.106061  | 0.113782  | 0.124709  | 0.1081    | 0.116841  | 0.10373   | 0.107226  |
| 0.11757   | 0.104021  | 0.12602   | 0.106789  | 0.0476399 | 0.108537  | 0.105915  |
| 0.101544  | 0.109848  | 0.123106  | 0.112325  | 0.116696  | 0.106498  | 0.110286  |
| 0.112617  | 0.121795  | 0.135635  | 0.127185  | 0.124272  | 0.123397  | 0.124272  |
| 0.100379  | 0.111305  | 0.126311  | 0.112034  | 0.118444  | 0.109703  | 0.111451  |
| 0.105624  | 0.0999417 | 0.127185  | 0.097465  | 0.116404  | 0.0936772 | 0.0939685 |
| 0.112034  | 0.122378  | 0.130973  | 0.119901  | 0.123106  | 0.114656  | 0.121066  |
| 0.190851  | 0.195076  | 0.213287  | 0.203089  | 0.199301  | 0.198135  | 0.202506  |
| 0.102127  | 0.116259  | 0.125146  | 0.115239  | 0.116404  | 0.112034  | 0.112325  |
| 0.187063  | 0.191579  | 0.205711  | 0.199883  | 0.199301  | 0.196096  | 0.198427  |
| 0.185752  | 0.189394  | 0.207896  | 0.199446  | 0.197115  | 0.19391   | 0.195659  |
| 0.120192  | 0.125     | 0.131847  | 0.120484  | 0.125146  | 0.117861  | 0.117861  |
| 0.123689  | 0.132576  | 0.13039   | 0.129516  | 0.13039   | 0.131265  | 0.129808  |
| 0.0992133 | 0.0967366 | 0.117279  | 0.0913462 | 0.11116   | 0.0855186 | 0.0910548 |
| 0.102273  | 0.113782  | 0.124126  | 0.112179  | 0.114802  | 0.109557  | 0.1081    |

|           |           |           |           |           |           |           |
|-----------|-----------|-----------|-----------|-----------|-----------|-----------|
| 0.105624  | 0.119464  | 0.132721  | 0.121358  | 0.11961   | 0.116404  | 0.118735  |
| 0.108829  | 0.117716  | 0.127185  | 0.109994  | 0.118153  | 0.103584  | 0.108537  |
| 0.101544  | 0.105478  | 0.100087  | 0.101253  | 0.110868  | 0.0983392 | 0.10067   |
| 0.100087  | 0.104312  | 0.10067   | 0.104458  | 0.112617  | 0.100962  | 0.104458  |
| 0.120047  | 0.128059  | 0.137238  | 0.128788  | 0.125291  | 0.125291  | 0.127622  |
| 0.111742  | 0.113054  | 0.130099  | 0.116113  | 0.119901  | 0.109411  | 0.11553   |
| 0.104604  | 0.115239  | 0.124709  | 0.105478  | 0.113636  | 0.0990676 | 0.105186  |
| 0.10708   | 0.123834  | 0.133304  | 0.125437  | 0.120775  | 0.120192  | 0.121941  |
| 0.097028  | 0.0968823 | 0.116841  | 0.0932401 | 0.0990676 | 0.0888695 | 0.090035  |
| 0.118153  | 0.129662  | 0.135052  | 0.128059  | 0.128642  | 0.129516  | 0.125146  |
| 0.111742  | 0.113636  | 0.136509  | 0.116113  | 0.116696  | 0.112034  | 0.114365  |
| 0.123252  | 0.137966  | 0.141026  | 0.134324  | 0.131702  | 0.133741  | 0.13345   |
| 0.251166  | 0.255973  | 0.270105  | 0.261364  | 0.256702  | 0.262238  | 0.261072  |
| 0.115385  | 0.124563  | 0.122378  | 0.110431  | 0.119755  | 0.111597  | 0.111014  |
| 0.122815  | 0.124417  | 0.128934  | 0.122815  | 0.124563  | 0.120484  | 0.121066  |
| 0.211538  | 0.217512  | 0.231352  | 0.223485  | 0.219697  | 0.219988  | 0.220862  |
| 0.122523  | 0.127914  | 0.130099  | 0.12398   | 0.13039   | 0.11961   | 0.123397  |
| 0.224505  | 0.230478  | 0.241404  | 0.234994  | 0.230915  | 0.229749  | 0.230041  |
| 0.107809  | 0.11553   | 0.118881  | 0.105478  | 0.117133  | 0.103147  | 0.104895  |
| 0.121649  | 0.128788  | 0.132139  | 0.11961   | 0.126311  | 0.117279  | 0.119318  |
| 0.107663  | 0.119755  | 0.124854  | 0.119318  | 0.121066  | 0.113491  | 0.120775  |
| 0.116696  | 0.118298  | 0.131847  | 0.117279  | 0.120775  | 0.116113  | 0.117279  |
| 0.195076  | 0.201049  | 0.214307  | 0.208188  | 0.205857  | 0.205274  | 0.206439  |
| 0.117861  | 0.132867  | 0.140006  | 0.13039   | 0.129516  | 0.130682  | 0.128351  |
| 0.109411  | 0.124126  | 0.13447   | 0.125728  | 0.121066  | 0.120192  | 0.123689  |
| 0.217366  | 0.221882  | 0.23951   | 0.229312  | 0.22669   | 0.224068  | 0.226981  |
| 0.100087  | 0.106935  | 0.10271   | 0.108829  | 0.120775  | 0.103584  | 0.110868  |
| 0.189103  | 0.195367  | 0.211538  | 0.203671  | 0.202214  | 0.198135  | 0.201049  |
| 0.106352  | 0.109994  | 0.109557  | 0.107809  | 0.120338  | 0.104312  | 0.109266  |
| 0.108974  | 0.117279  | 0.125874  | 0.111597  | 0.122378  | 0.107226  | 0.111305  |
| 0.115822  | 0.113054  | 0.121649  | 0.106789  | 0.120775  | 0.10708   | 0.107955  |
| 0.120192  | 0.122086  | 0.133013  | 0.121649  | 0.125437  | 0.116404  | 0.11961   |
| 0.106935  | 0.113782  | 0.129662  | 0.117133  | 0.120338  | 0.113054  | 0.114802  |
| 0.148019  | 0.1537    | 0.171329  | 0.164336  | 0.164044  | 0.156469  | 0.158508  |
| 0.105478  | 0.117861  | 0.127622  | 0.118881  | 0.120047  | 0.114802  | 0.115967  |
| 0.112471  | 0.121066  | 0.131993  | 0.125583  | 0.129079  | 0.120338  | 0.123543  |
| 0.113054  | 0.11961   | 0.132576  | 0.123252  | 0.129079  | 0.11859   | 0.120338  |
| 0.120921  | 0.125437  | 0.129371  | 0.125291  | 0.126748  | 0.125291  | 0.123543  |
| 0.187209  | 0.191142  | 0.209353  | 0.198281  | 0.19595   | 0.196241  | 0.198572  |
| 0.1081    | 0.117861  | 0.123834  | 0.111888  | 0.120047  | 0.102273  | 0.109266  |
| 0.110868  | 0.109557  | 0.13447   | 0.119318  | 0.124854  | 0.112325  | 0.116113  |
| 0.0929487 | 0.097465  | 0.114802  | 0.0906177 | 0.113345  | 0.0868298 | 0.0932401 |
| 0.105624  | 0.111597  | 0.0983392 | 0.105041  | 0.115239  | 0.106206  | 0.103584  |
| 0.117133  | 0.122523  | 0.127914  | 0.115385  | 0.121795  | 0.111014  | 0.114219  |

|          |          |          |           |          |           |           |
|----------|----------|----------|-----------|----------|-----------|-----------|
| 0.247523 | 0.254079 | 0.262966 | 0.259761  | 0.25539  | 0.257721  | 0.257139  |
| 0.109848 | 0.108246 | 0.116259 | 0.102855  | 0.115093 | 0.101981  | 0.103147  |
| 0.104895 | 0.121358 | 0.129662 | 0.123252  | 0.128788 | 0.112762  | 0.119172  |
| 0.167541 | 0.169726 | 0.191142 | 0.178904  | 0.179779 | 0.179196  | 0.178904  |
| 0.174825 | 0.184295 | 0.200758 | 0.189394  | 0.188811 | 0.185606  | 0.189685  |
| 0.116259 | 0.122523 | 0.135781 | 0.129371  | 0.125    | 0.120921  | 0.125874  |
| 0.111742 | 0.12296  | 0.13447  | 0.123689  | 0.120484 | 0.118735  | 0.119901  |
| 0.103584 | 0.111597 | 0.127768 | 0.113491  | 0.11961  | 0.108829  | 0.114073  |
| 0.13345  | 0.14729  | 0.151515 | 0.143065  | 0.138986 | 0.147436  | 0.142483  |
| 0.114219 | 0.120775 | 0.135198 | 0.12296   | 0.123834 | 0.115093  | 0.119755  |
| 0.120484 | 0.125874 | 0.136509 | 0.127185  | 0.129808 | 0.119901  | 0.125437  |
| 0.113345 | 0.117279 | 0.101399 | 0.112762  | 0.120338 | 0.108683  | 0.111888  |
| 0.107226 | 0.124563 | 0.134615 | 0.120921  | 0.117424 | 0.118298  | 0.118007  |
| 0.120192 | 0.132576 | 0.137675 | 0.131847  | 0.12398  | 0.13039   | 0.129225  |
| 0.105186 | 0.110577 | 0.111888 | 0.111597  | 0.118881 | 0.106935  | 0.111305  |
| 0.115239 | 0.121503 | 0.131556 | 0.116696  | 0.121649 | 0.111742  | 0.116987  |
| 0.130245 | 0.132139 | 0.142483 | 0.13141   | 0.13141  | 0.126166  | 0.128788  |
| 0.115822 | 0.111888 | 0.118444 | 0.106206  | 0.120775 | 0.105332  | 0.108829  |
| 0.123543 | 0.125728 | 0.134907 | 0.122669  | 0.126457 | 0.120338  | 0.122378  |
| 0.115676 | 0.119027 | 0.100816 | 0.113636  | 0.121503 | 0.114219  | 0.113928  |
| 0.197698 | 0.204837 | 0.223922 | 0.212267  | 0.207605 | 0.209353  | 0.211393  |
| 0.109266 | 0.110577 | 0.126166 | 0.0967366 | 0.123252 | 0.0932401 | 0.0979021 |
| 0.181527 | 0.189248 | 0.204837 | 0.200466  | 0.196387 | 0.193473  | 0.19493   |
| 0.106352 | 0.115239 | 0.122086 | 0.117424  | 0.120338 | 0.11014   | 0.117133  |
| 0.118007 | 0.125728 | 0.129079 | 0.118007  | 0.125291 | 0.113636  | 0.117424  |
| 0.119172 | 0.121649 | 0.142191 | 0.119464  | 0.113345 | 0.114802  | 0.113928  |
| 0.111742 | 0.112762 | 0.135344 | 0.113782  | 0.116696 | 0.10708   | 0.112325  |
| 0.111597 | 0.129808 | 0.137238 | 0.127914  | 0.123252 | 0.125874  | 0.128497  |
| 0.112179 | 0.127768 | 0.131119 | 0.125291  | 0.122378 | 0.122669  | 0.123834  |
| 0.113636 | 0.116987 | 0.13141  | 0.111305  | 0.120338 | 0.102855  | 0.113054  |
| 0.113199 | 0.124126 | 0.127768 | 0.124272  | 0.12398  | 0.119901  | 0.123397  |
| 0.121358 | 0.123543 | 0.143211 | 0.120192  | 0.120192 | 0.116404  | 0.119027  |
| 0.118298 | 0.120775 | 0.104604 | 0.11451   | 0.126457 | 0.119755  | 0.113636  |
| 0.245629 | 0.250437 | 0.26049  | 0.253788  | 0.24796  | 0.253205  | 0.251748  |
| 0.111888 | 0.115822 | 0.131119 | 0.114802  | 0.122086 | 0.107226  | 0.11451   |
| 0.174971 | 0.178322 | 0.200321 | 0.190122  | 0.188666 | 0.185169  | 0.186917  |
| 0.178322 | 0.186917 | 0.202797 | 0.196387  | 0.192308 | 0.190268  | 0.193182  |
| 0.11757  | 0.117424 | 0.13447  | 0.116987  | 0.132139 | 0.113491  | 0.116696  |
| 0.10708  | 0.104895 | 0.11961  | 0.103001  | 0.115239 | 0.0992133 | 0.10271   |
| 0.117279 | 0.125874 | 0.13243  | 0.116404  | 0.125728 | 0.112034  | 0.116987  |
| 0.100962 | 0.119172 | 0.13039  | 0.121066  | 0.11961  | 0.11757   | 0.117861  |
| 0.106061 | 0.092803 | 0.124417 | 0.0932401 | 0.111888 | 0.087704  | 0.0909091 |
| 0.104895 | 0.110868 | 0.104604 | 0.108392  | 0.121212 | 0.103438  | 0.11014   |
| 0.108537 | 0.121795 | 0.129808 | 0.11961   | 0.123106 | 0.116404  | 0.118444  |

|          |           |           |           |          |           |           |
|----------|-----------|-----------|-----------|----------|-----------|-----------|
| 0.120192 | 0.132867  | 0.141754  | 0.131556  | 0.127768 | 0.130682  | 0.13039   |
| 0.112762 | 0.117861  | 0.126748  | 0.110723  | 0.115967 | 0.104895  | 0.108974  |
| 0.123252 | 0.132139  | 0.141026  | 0.13141   | 0.127622 | 0.127914  | 0.129371  |
| 0.111451 | 0.112762  | 0.128351  | 0.114948  | 0.120192 | 0.110577  | 0.113782  |
| 0.122815 | 0.121503  | 0.136801  | 0.118444  | 0.118735 | 0.116404  | 0.118735  |
| 0.112179 | 0.116113  | 0.129371  | 0.117424  | 0.122086 | 0.109848  | 0.115385  |
| 0.116987 | 0.122086  | 0.0992133 | 0.112908  | 0.123106 | 0.114656  | 0.113491  |
| 0.114219 | 0.106498  | 0.128497  | 0.0973193 | 0.119172 | 0.0964452 | 0.0964452 |
| 0.111014 | 0.11757   | 0.122378  | 0.109557  | 0.115385 | 0.106352  | 0.1081    |
| 0.130245 | 0.138549  | 0.135198  | 0.130828  | 0.134907 | 0.129953  | 0.128788  |
| 0.174971 | 0.18211   | 0.200029  | 0.191288  | 0.1875   | 0.184878  | 0.188083  |
| 0.126457 | 0.138549  | 0.142483  | 0.135781  | 0.126457 | 0.13549   | 0.131702  |
| 0.111888 | 0.126311  | 0.134907  | 0.125874  | 0.125    | 0.124126  | 0.121503  |
| 0.116987 | 0.117716  | 0.139423  | 0.114948  | 0.112617 | 0.110286  | 0.114365  |
| 0.106935 | 0.109703  | 0.128205  | 0.111305  | 0.111014 | 0.107809  | 0.109848  |
| 0.110286 | 0.115093  | 0.131556  | 0.117279  | 0.121941 | 0.109411  | 0.113199  |
| 0.116841 | 0.119901  | 0.13345   | 0.116259  | 0.122378 | 0.112471  | 0.115385  |
| 0.182838 | 0.188228  | 0.205565  | 0.194202  | 0.194784 | 0.190705  | 0.193328  |
| 0.105332 | 0.119755  | 0.13243   | 0.116404  | 0.119318 | 0.111742  | 0.113491  |
| 0.103147 | 0.111451  | 0.120921  | 0.109266  | 0.115385 | 0.105186  | 0.106061  |
| 0.112762 | 0.129225  | 0.134615  | 0.128497  | 0.12296  | 0.126748  | 0.127914  |
| 0.184586 | 0.187646  | 0.207022  | 0.197407  | 0.19391  | 0.19391   | 0.195076  |
| 0.101107 | 0.0989219 | 0.119755  | 0.104312  | 0.113636 | 0.0964452 | 0.102564  |
| 0.108537 | 0.111305  | 0.0995047 | 0.108537  | 0.11961  | 0.106789  | 0.108537  |
| 0.113491 | 0.127331  | 0.135052  | 0.126311  | 0.124563 | 0.124563  | 0.125146  |
| 0.113928 | 0.121941  | 0.126166  | 0.121503  | 0.121503 | 0.114219  | 0.119172  |
| 0.17803  | 0.186626  | 0.204254  | 0.198427  | 0.189394 | 0.191725  | 0.194639  |
| 0.106061 | 0.111742  | 0.0999417 | 0.109848  | 0.116841 | 0.105769  | 0.109557  |
| 0.108392 | 0.118153  | 0.121795  | 0.119172  | 0.123834 | 0.113345  | 0.115385  |
| 0.107226 | 0.102127  | 0.119172  | 0.108974  | 0.117424 | 0.102855  | 0.1081    |
| 0.108683 | 0.115239  | 0.13986   | 0.124126  | 0.126457 | 0.120921  | 0.123543  |
| 0.112325 | 0.120338  | 0.13039   | 0.121941  | 0.125437 | 0.118735  | 0.12398   |
| 0.114948 | 0.118881  | 0.099796  | 0.111742  | 0.119027 | 0.110868  | 0.111451  |
| 0.10912  | 0.115093  | 0.128642  | 0.113782  | 0.119318 | 0.107663  | 0.110577  |
| 0.116113 | 0.120338  | 0.124854  | 0.119027  | 0.122232 | 0.116696  | 0.120192  |
| 0.140734 | 0.151078  | 0.14831   | 0.145979  | 0.144231 | 0.147436  | 0.146853  |
| 0.230186 | 0.234994  | 0.247086  | 0.236888  | 0.234266 | 0.235723  | 0.237179  |
| 0.120047 | 0.110868  | 0.130828  | 0.100233  | 0.122378 | 0.101107  | 0.0981935 |
| 0.113345 | 0.123689  | 0.131119  | 0.123834  | 0.128205 | 0.122086  | 0.125291  |
| 0.10912  | 0.121503  | 0.131556  | 0.11961   | 0.119901 | 0.11961   | 0.119027  |
| 0.118007 | 0.126311  | 0.136655  | 0.12704   | 0.131119 | 0.120338  | 0.123834  |
| 0.104167 | 0.118298  | 0.115822  | 0.112034  | 0.116113 | 0.110868  | 0.113782  |
| 0.107663 | 0.107517  | 0.121358  | 0.116696  | 0.119027 | 0.113199  | 0.114656  |
| 0.113345 | 0.127477  | 0.134615  | 0.122669  | 0.124126 | 0.120629  | 0.119755  |

|           |           |           |           |          |           |           |
|-----------|-----------|-----------|-----------|----------|-----------|-----------|
| 0.111742  | 0.116259  | 0.0995047 | 0.111451  | 0.119901 | 0.109994  | 0.113199  |
| 0.106206  | 0.119755  | 0.122815  | 0.12398   | 0.128351 | 0.118153  | 0.120192  |
| 0.232809  | 0.234411  | 0.246795  | 0.238928  | 0.236597 | 0.236888  | 0.238636  |
| 0.104749  | 0.105769  | 0.113199  | 0.0992133 | 0.114365 | 0.0948427 | 0.099796  |
| 0.0936772 | 0.101981  | 0.116987  | 0.10067   | 0.111742 | 0.095134  | 0.0989219 |
| 0.1081    | 0.118153  | 0.123834  | 0.107226  | 0.114802 | 0.104312  | 0.1081    |
| 0.127768  | 0.136946  | 0.13884   | 0.132139  | 0.128059 | 0.130682  | 0.132721  |
| 0.124563  | 0.118298  | 0.135927  | 0.103584  | 0.125728 | 0.107955  | 0.104458  |
| 0.114656  | 0.118007  | 0.131556  | 0.118153  | 0.121358 | 0.110577  | 0.113199  |
| 0.109411  | 0.123834  | 0.135052  | 0.12602   | 0.122232 | 0.11961   | 0.122523  |
| 0.106352  | 0.112034  | 0.123543  | 0.113928  | 0.120047 | 0.111597  | 0.113345  |
| 0.22669   | 0.227418  | 0.243007  | 0.232809  | 0.230478 | 0.232809  | 0.233974  |
| 0.115385  | 0.131265  | 0.138112  | 0.130245  | 0.124126 | 0.126166  | 0.126748  |
| 0.108829  | 0.109557  | 0.0989219 | 0.110577  | 0.116696 | 0.106206  | 0.10912   |
| 0.104458  | 0.115093  | 0.118153  | 0.114656  | 0.121649 | 0.106498  | 0.11116   |
| 0.117424  | 0.126603  | 0.126457  | 0.120629  | 0.124417 | 0.116259  | 0.120338  |
| 0.115676  | 0.117861  | 0.121795  | 0.107226  | 0.120921 | 0.108974  | 0.106061  |
| 0.109848  | 0.119901  | 0.124709  | 0.111888  | 0.116841 | 0.106935  | 0.111597  |
| 0.11014   | 0.112617  | 0.104021  | 0.107809  | 0.120338 | 0.107226  | 0.110723  |
| 0.115822  | 0.119755  | 0.101836  | 0.112617  | 0.118735 | 0.113491  | 0.111451  |
| 0.103584  | 0.111305  | 0.10067   | 0.10708   | 0.114948 | 0.103584  | 0.109703  |
| 0.111014  | 0.118735  | 0.127331  | 0.112471  | 0.11859  | 0.103147  | 0.110431  |
| 0.121503  | 0.131265  | 0.132284  | 0.127331  | 0.128205 | 0.127622  | 0.129371  |
| 0.124563  | 0.135781  | 0.137092  | 0.130682  | 0.133887 | 0.130973  | 0.133304  |
| 0.12602   | 0.126457  | 0.143794  | 0.122232  | 0.119027 | 0.117861  | 0.121066  |
| 0.130099  | 0.126166  | 0.144085  | 0.12602   | 0.118444 | 0.121066  | 0.124272  |
| 0.125291  | 0.134761  | 0.134907  | 0.129662  | 0.129662 | 0.129371  | 0.131702  |
| 0.0996503 | 0.0977564 | 0.121503  | 0.0903263 | 0.109848 | 0.0836247 | 0.0891608 |
| 0.112325  | 0.113636  | 0.117861  | 0.0948427 | 0.121066 | 0.099796  | 0.0977564 |
| 0.129371  | 0.128059  | 0.107226  | 0.119172  | 0.131119 | 0.120921  | 0.122086  |
| 0.200466  | 0.206731  | 0.22028   | 0.210082  | 0.207168 | 0.208333  | 0.210373  |
| 0.119755  | 0.122815  | 0.134907  | 0.118298  | 0.126748 | 0.115385  | 0.11859   |
| 0.101107  | 0.109411  | 0.120047  | 0.105186  | 0.115093 | 0.0990676 | 0.103147  |
| 0.116404  | 0.122086  | 0.13039   | 0.114656  | 0.122232 | 0.112908  | 0.114656  |
| 0.216783  | 0.218969  | 0.236305  | 0.227273  | 0.224942 | 0.223193  | 0.224068  |
| 0.202506  | 0.20877   | 0.226107  | 0.216783  | 0.211538 | 0.211538  | 0.212121  |
| 0.115239  | 0.116841  | 0.101544  | 0.11116   | 0.121066 | 0.111451  | 0.110868  |
| 0.244172  | 0.250437  | 0.259033  | 0.253788  | 0.251166 | 0.252331  | 0.251166  |
| 0.100816  | 0.0954254 | 0.124417  | 0.0909091 | 0.110431 | 0.0821678 | 0.0903263 |
| 0.127622  | 0.128934  | 0.136946  | 0.119755  | 0.130245 | 0.120921  | 0.120047  |
| 0.108683  | 0.105915  | 0.117716  | 0.102273  | 0.11655  | 0.0964452 | 0.100524  |
| 0.120192  | 0.128788  | 0.133304  | 0.128934  | 0.13039  | 0.126603  | 0.131265  |
| 0.184441  | 0.186334  | 0.200466  | 0.19289   | 0.191434 | 0.187937  | 0.189394  |
| 0.120192  | 0.116841  | 0.114656  | 0.114073  | 0.130682 | 0.109411  | 0.112617  |

|           |           |          |           |          |           |           |
|-----------|-----------|----------|-----------|----------|-----------|-----------|
| 0.18546   | 0.191725  | 0.214307 | 0.201777  | 0.197407 | 0.198281  | 0.199446  |
| 0.118153  | 0.120047  | 0.13243  | 0.116404  | 0.128934 | 0.107955  | 0.113782  |
| 0.0971737 | 0.112471  | 0.112617 | 0.109994  | 0.11553  | 0.108537  | 0.107955  |
| 0.118444  | 0.116259  | 0.128351 | 0.109703  | 0.121649 | 0.107955  | 0.109411  |
| 0.103875  | 0.111597  | 0.128934 | 0.116696  | 0.117279 | 0.111451  | 0.112617  |
| 0.104312  | 0.109994  | 0.122669 | 0.106643  | 0.112471 | 0.0979021 | 0.10373   |
| 0.104312  | 0.113199  | 0.127914 | 0.11014   | 0.119464 | 0.106352  | 0.106643  |
| 0.10169   | 0.0995047 | 0.113345 | 0.100233  | 0.111597 | 0.0955711 | 0.0981935 |
| 0.105915  | 0.119464  | 0.129516 | 0.11961   | 0.120192 | 0.11757   | 0.118153  |
| 0.0979021 | 0.0989219 | 0.115093 | 0.0871212 | 0.113636 | 0.083042  | 0.090035  |
| 0.106352  | 0.10271   | 0.122086 | 0.0917832 | 0.115093 | 0.0891608 | 0.0926573 |
| 0.105624  | 0.104895  | 0.114948 | 0.101836  | 0.113782 | 0.0986305 | 0.10067   |
| 0.113636  | 0.116404  | 0.136946 | 0.11655   | 0.118881 | 0.11014   | 0.11451   |
| 0.119172  | 0.133304  | 0.139569 | 0.130828  | 0.128205 | 0.128788  | 0.127622  |
| 0.110577  | 0.111597  | 0.135344 | 0.112617  | 0.111451 | 0.112034  | 0.112908  |
| 0.110723  | 0.119901  | 0.123543 | 0.11859   | 0.120047 | 0.110431  | 0.115967  |
| 0.102418  | 0.11451   | 0.122232 | 0.106498  | 0.115239 | 0.10271   | 0.10271   |
| 0.106789  | 0.114219  | 0.105332 | 0.110286  | 0.116696 | 0.104749  | 0.108537  |
| 0.110286  | 0.122669  | 0.130682 | 0.122232  | 0.126311 | 0.116696  | 0.123397  |
| 0.114219  | 0.11757   | 0.130536 | 0.118881  | 0.120921 | 0.112762  | 0.116259  |
| 0.114219  | 0.114365  | 0.137238 | 0.115967  | 0.117716 | 0.11014   | 0.115385  |
| 0.108246  | 0.123252  | 0.133013 | 0.122815  | 0.121649 | 0.121066  | 0.121649  |
| 0.121212  | 0.135635  | 0.138986 | 0.133159  | 0.125874 | 0.132867  | 0.132576  |
| 0.128788  | 0.141463  | 0.145105 | 0.138695  | 0.134324 | 0.1419    | 0.134324  |
| 0.0919289 | 0.104021  | 0.100962 | 0.102127  | 0.108246 | 0.0992133 | 0.102418  |
| 0.110286  | 0.116841  | 0.127477 | 0.114365  | 0.11961  | 0.107955  | 0.112325  |
| 0.0973193 | 0.099796  | 0.11859  | 0.111014  | 0.114802 | 0.103438  | 0.108392  |
| 0.125291  | 0.135927  | 0.131993 | 0.134033  | 0.130828 | 0.132576  | 0.132867  |
| 0.108829  | 0.106935  | 0.11553  | 0.104167  | 0.114656 | 0.10271   | 0.103584  |
| 0.131265  | 0.131993  | 0.141463 | 0.130099  | 0.132721 | 0.129808  | 0.13039   |
| 0.126603  | 0.137529  | 0.138549 | 0.124563  | 0.133596 | 0.125146  | 0.125437  |
| 0.12296   | 0.130099  | 0.13345  | 0.128205  | 0.128788 | 0.120629  | 0.126166  |
| 0.103875  | 0.11014   | 0.127477 | 0.104458  | 0.117861 | 0.0965909 | 0.10271   |
| 0.104312  | 0.115239  | 0.125291 | 0.11859   | 0.119464 | 0.111305  | 0.116841  |
| 0.122669  | 0.124854  | 0.141026 | 0.119464  | 0.11859  | 0.116259  | 0.118007  |
| 0.196533  | 0.203963  | 0.216346 | 0.211101  | 0.206731 | 0.206148  | 0.210227  |
| 0.107955  | 0.117424  | 0.123397 | 0.113782  | 0.120775 | 0.110286  | 0.113782  |
| 0.113636  | 0.112325  | 0.12704  | 0.113928  | 0.124417 | 0.107809  | 0.110431  |
| 0.112325  | 0.125874  | 0.128059 | 0.122523  | 0.123397 | 0.11961   | 0.124854  |
| 0.113345  | 0.114948  | 0.13549  | 0.113636  | 0.117424 | 0.109557  | 0.113636  |
| 0.116404  | 0.12296   | 0.13039  | 0.121649  | 0.131847 | 0.11553   | 0.11961   |
| 0.11553   | 0.115967  | 0.125146 | 0.119318  | 0.109411 | 0.115822  | 0.117279  |
| 0.119755  | 0.11757   | 0.127914 | 0.118881  | 0.113636 | 0.116841  | 0.117133  |
| 0.120192  | 0.126166  | 0.13447  | 0.123397  | 0.122815 | 0.11961   | 0.12398   |

|           |           |           |           |          |           |           |
|-----------|-----------|-----------|-----------|----------|-----------|-----------|
| 0.0913462 | 0.0944056 | 0.114656  | 0.0878497 | 0.108537 | 0.0828963 | 0.0890152 |
| 0.121066  | 0.129953  | 0.132139  | 0.12602   | 0.128059 | 0.127185  | 0.127477  |
| 0.11116   | 0.111888  | 0.12398   | 0.107372  | 0.11757  | 0.102418  | 0.106498  |
| 0.111597  | 0.101836  | 0.128788  | 0.0973193 | 0.121212 | 0.094697  | 0.0961538 |
| 0.172057  | 0.175699  | 0.187209  | 0.18109   | 0.17905  | 0.178176  | 0.18109   |
| 0.10912   | 0.115093  | 0.133887  | 0.119901  | 0.118735 | 0.116404  | 0.119027  |
| 0.119464  | 0.125437  | 0.134907  | 0.127331  | 0.129953 | 0.127622  | 0.128497  |
| 0.110286  | 0.109266  | 0.115822  | 0.0901807 | 0.11961  | 0.0930944 | 0.0962995 |
| 0.103147  | 0.121358  | 0.124417  | 0.115385  | 0.128497 | 0.113928  | 0.115676  |
| 0.097028  | 0.101836  | 0.11451   | 0.0961538 | 0.104021 | 0.0879953 | 0.092366  |
| 0.0967366 | 0.0945513 | 0.118298  | 0.0888695 | 0.109557 | 0.0856643 | 0.0879953 |
| 0.105478  | 0.104749  | 0.119464  | 0.0976107 | 0.106061 | 0.0929487 | 0.094697  |
| 0.115967  | 0.119318  | 0.099359  | 0.120047  | 0.123252 | 0.115385  | 0.115385  |
| 0.105186  | 0.112908  | 0.13549   | 0.111014  | 0.119755 | 0.1081    | 0.108683  |
| 0.119027  | 0.120629  | 0.138549  | 0.11553   | 0.119901 | 0.113491  | 0.116404  |
| 0         | 0.103584  | 0.121212  | 0.105186  | 0.115676 | 0.101107  | 0.106352  |
| 0.103584  | 0         | 0.120775  | 0.0866841 | 0.106498 | 0.0826049 | 0.0863928 |
| 0.121212  | 0.120775  | 0         | 0.11451   | 0.127914 | 0.11451   | 0.118007  |
| 0.105186  | 0.0866841 | 0.11451   | 0         | 0.107809 | 0.0416667 | 0.039627  |
| 0.115676  | 0.106498  | 0.127914  | 0.107809  | 0        | 0.107517  | 0.108392  |
| 0.101107  | 0.0826049 | 0.11451   | 0.0416667 | 0.107517 | 0         | 0.0437063 |
| 0.106352  | 0.0863928 | 0.118007  | 0.039627  | 0.108392 | 0.0437063 | 0         |
| 0.0958625 | 0.101253  | 0.123543  | 0.0941142 | 0.109557 | 0.0894522 | 0.0926573 |
| 0.114656  | 0.112471  | 0.12398   | 0.0980478 | 0.11757  | 0.0980478 | 0.099796  |
| 0.0989219 | 0.100816  | 0.117861  | 0.090472  | 0.114365 | 0.08581   | 0.0893065 |
| 0.131847  | 0.135781  | 0.128642  | 0.132139  | 0.138258 | 0.131556  | 0.132139  |
| 0.117279  | 0.121212  | 0.130973  | 0.128059  | 0.134761 | 0.121066  | 0.127477  |
| 0.100962  | 0.100524  | 0.122815  | 0.0843531 | 0.110868 | 0.0814394 | 0.0869755 |
| 0.131702  | 0.131556  | 0.120921  | 0.132867  | 0.13141  | 0.131119  | 0.132284  |
| 0.115967  | 0.121941  | 0.13986   | 0.120921  | 0.122378 | 0.11451   | 0.120921  |
| 0.123834  | 0.125146  | 0.112471  | 0.11859   | 0.132284 | 0.122669  | 0.121212  |
| 0.11014   | 0.111451  | 0.12704   | 0.100816  | 0.117716 | 0.0955711 | 0.0981935 |
| 0.136801  | 0.139277  | 0.144668  | 0.137092  | 0.14292  | 0.139132  | 0.137383  |
| 0.121358  | 0.123543  | 0.132139  | 0.123106  | 0.128059 | 0.118153  | 0.123689  |
| 0.12602   | 0.131119  | 0.0968823 | 0.128642  | 0.127768 | 0.129516  | 0.130973  |
| 0.109994  | 0.113345  | 0.125146  | 0.105624  | 0.121066 | 0.101253  | 0.101836  |
| 0.100233  | 0.0933858 | 0.111597  | 0.0775058 | 0.114219 | 0.0743007 | 0.0786713 |
| 0.101253  | 0.104895  | 0.113199  | 0.092803  | 0.112034 | 0.088141  | 0.092803  |
| 0.112179  | 0.112325  | 0.0917832 | 0.108974  | 0.11859  | 0.108683  | 0.106935  |
| 0.105769  | 0.108829  | 0.121795  | 0.092366  | 0.124417 | 0.0897436 | 0.0929487 |
| 0.117279  | 0.113928  | 0.131556  | 0.109411  | 0.125146 | 0.10708   | 0.108537  |
| 0.105041  | 0.115676  | 0.128934  | 0.115239  | 0.124563 | 0.111742  | 0.116696  |
| 0.0989219 | 0.104312  | 0.122815  | 0.100379  | 0.109411 | 0.0948427 | 0.0992133 |
| 0.0967366 | 0.101836  | 0.114219  | 0.0929487 | 0.112471 | 0.0865385 | 0.092366  |

|           |           |          |           |          |           |           |
|-----------|-----------|----------|-----------|----------|-----------|-----------|
| 0.106498  | 0.114219  | 0.118153 | 0.101253  | 0.116987 | 0.102127  | 0.105624  |
| 0.0968823 | 0.107226  | 0.108537 | 0.0983392 | 0.116987 | 0.0913462 | 0.10067   |
| 0.105478  | 0.108537  | 0.117424 | 0.0932401 | 0.116841 | 0.0938228 | 0.094697  |
| 0.105769  | 0.108537  | 0.128497 | 0.100524  | 0.120338 | 0.094697  | 0.0987762 |
| 0.113491  | 0.118007  | 0.133304 | 0.118444  | 0.118153 | 0.113491  | 0.112908  |
| 0.10708   | 0.106061  | 0.124272 | 0.102127  | 0.118735 | 0.097465  | 0.100087  |
| 0.0995047 | 0.0967366 | 0.119318 | 0.0855186 | 0.107372 | 0.0849359 | 0.0861014 |
| 0.101253  | 0.106643  | 0.116113 | 0.10067   | 0.112325 | 0.0960082 | 0.101253  |
| 0.111014  | 0.112617  | 0.129079 | 0.113636  | 0.118881 | 0.107809  | 0.111888  |
| 0.103875  | 0.100233  | 0.129225 | 0.10067   | 0.107663 | 0.0977564 | 0.0971737 |
| 0.11961   | 0.120921  | 0.132721 | 0.118444  | 0.120775 | 0.114073  | 0.116987  |
| 0.103001  | 0.111014  | 0.122232 | 0.105332  | 0.114073 | 0.103293  | 0.104749  |
| 0.120338  | 0.118153  | 0.130245 | 0.104895  | 0.118007 | 0.1081    | 0.108392  |



| <b>TDr_95_19177</b> | <b>TDr_96_00582</b> | <b>TDr_96_00604</b> | <b>TDr_96_00625</b> | <b>TDr_96_00629</b> | <b>TDr_96_01395</b> | <b>TDr_96_01724</b> |
|---------------------|---------------------|---------------------|---------------------|---------------------|---------------------|---------------------|
| 0.106498            | 0.119172            | 0.106935            | 0.142191            | 0.129371            | 0.106643            | 0.140589            |
| 0.100524            | 0.115822            | 0.110868            | 0.137383            | 0.124272            | 0.109994            | 0.142191            |
| 0.100233            | 0.113491            | 0.10271             | 0.13243             | 0.124272            | 0.107663            | 0.138403            |
| 0.105478            | 0.114365            | 0.10912             | 0.138258            | 0.122232            | 0.112908            | 0.135781            |
| 0.124709            | 0.136509            | 0.130973            | 0.14729             | 0.144085            | 0.129516            | 0.1419              |
| 0.121795            | 0.136509            | 0.123397            | 0.141754            | 0.137966            | 0.125146            | 0.141026            |
| 0.113199            | 0.11859             | 0.105478            | 0.136655            | 0.131993            | 0.105769            | 0.133596            |
| 0.099796            | 0.121795            | 0.107226            | 0.134033            | 0.123543            | 0.109557            | 0.136801            |
| 0.0941142           | 0.101253            | 0.0925117           | 0.132721            | 0.122815            | 0.092803            | 0.128788            |
| 0.0793998           | 0.0879953           | 0.0836247           | 0.141608            | 0.134033            | 0.0903263           | 0.136509            |
| 0.105186            | 0.119027            | 0.0962995           | 0.141171            | 0.125728            | 0.102127            | 0.140443            |
| 0.0965909           | 0.113928            | 0.106643            | 0.129953            | 0.121212            | 0.104021            | 0.126603            |
| 0.101544            | 0.105478            | 0.097028            | 0.138112            | 0.128497            | 0.0984848           | 0.135344            |
| 0.123252            | 0.137092            | 0.118153            | 0.160402            | 0.144959            | 0.126603            | 0.162879            |
| 0.108537            | 0.118007            | 0.115967            | 0.14831             | 0.138403            | 0.118881            | 0.144959            |
| 0.106061            | 0.112325            | 0.108829            | 0.125146            | 0.125146            | 0.0992133           | 0.132284            |
| 0.0989219           | 0.111305            | 0.104312            | 0.137529            | 0.12296             | 0.0996503           | 0.123689            |
| 0.132867            | 0.14088             | 0.140297            | 0.154866            | 0.154283            | 0.141171            | 0.162005            |
| 0.0926573           | 0.114656            | 0.0995047           | 0.137092            | 0.122232            | 0.106206            | 0.135781            |
| 0.198135            | 0.203817            | 0.202943            | 0.219551            | 0.206731            | 0.203234            | 0.219988            |
| 0.113782            | 0.128497            | 0.11655             | 0.149184            | 0.136946            | 0.113345            | 0.142628            |
| 0.11014             | 0.122815            | 0.111742            | 0.14088             | 0.128059            | 0.109994            | 0.13986             |
| 0.0989219           | 0.111597            | 0.0949883           | 0.125291            | 0.113345            | 0.100816            | 0.123397            |
| 0.112471            | 0.119318            | 0.114365            | 0.125728            | 0.125146            | 0.111742            | 0.118298            |
| 0.0869755           | 0.102273            | 0.0897436           | 0.130828            | 0.117716            | 0.0885781           | 0.125146            |
| 0.117861            | 0.134033            | 0.123252            | 0.147436            | 0.139277            | 0.115676            | 0.142045            |
| 0.103001            | 0.11655             | 0.104312            | 0.135781            | 0.133159            | 0.109557            | 0.13447             |
| 0.107955            | 0.115676            | 0.111014            | 0.127914            | 0.128205            | 0.116841            | 0.121358            |
| 0.117279            | 0.124417            | 0.118007            | 0.140152            | 0.136655            | 0.119464            | 0.130682            |
| 0.103875            | 0.104604            | 0.101981            | 0.140734            | 0.135198            | 0.107517            | 0.135052            |
| 0.11451             | 0.117279            | 0.110286            | 0.140589            | 0.131556            | 0.108537            | 0.139277            |
| 0.109994            | 0.114219            | 0.111305            | 0.132867            | 0.13141             | 0.109848            | 0.134178            |
| 0.0995047           | 0.108683            | 0.0964452           | 0.132576            | 0.121212            | 0.0949883           | 0.123106            |
| 0.105915            | 0.114219            | 0.0967366           | 0.134615            | 0.126748            | 0.106935            | 0.131847            |
| 0.103438            | 0.11553             | 0.101253            | 0.129516            | 0.126311            | 0.0983392           | 0.132867            |
| 0.106206            | 0.117424            | 0.110723            | 0.138403            | 0.129079            | 0.110431            | 0.133304            |
| 0.11859             | 0.119901            | 0.120192            | 0.144085            | 0.142628            | 0.115822            | 0.148019            |
| 0.105915            | 0.118881            | 0.108392            | 0.137529            | 0.128497            | 0.104021            | 0.13447             |
| 0.10067             | 0.113928            | 0.101399            | 0.117716            | 0.109557            | 0.104021            | 0.115239            |
| 0.11116             | 0.124126            | 0.112179            | 0.130245            | 0.128788            | 0.113345            | 0.127477            |
| 0.10067             | 0.11014             | 0.0976107           | 0.128788            | 0.117716            | 0.101399            | 0.121358            |
| 0.128642            | 0.127914            | 0.13141             | 0.140734            | 0.141026            | 0.135781            | 0.14088             |

|           |           |           |          |          |           |          |
|-----------|-----------|-----------|----------|----------|-----------|----------|
| 0.13447   | 0.129079  | 0.136946  | 0.14627  | 0.145688 | 0.134907  | 0.145251 |
| 0.106061  | 0.109411  | 0.103001  | 0.127768 | 0.120484 | 0.106498  | 0.133741 |
| 0.0812937 | 0.103001  | 0.0901807 | 0.131556 | 0.120484 | 0.0919289 | 0.125874 |
| 0.092803  | 0.0955711 | 0.097028  | 0.140443 | 0.130245 | 0.097028  | 0.131556 |
| 0.110286  | 0.125874  | 0.103438  | 0.133741 | 0.128497 | 0.112179  | 0.126311 |
| 0.124417  | 0.121358  | 0.126603  | 0.138549 | 0.139132 | 0.125437  | 0.137821 |
| 0.103147  | 0.118444  | 0.100379  | 0.128059 | 0.120484 | 0.103001  | 0.127622 |
| 0.105041  | 0.109848  | 0.105186  | 0.126457 | 0.120921 | 0.103438  | 0.124854 |
| 0.13141   | 0.140589  | 0.137675  | 0.159819 | 0.157197 | 0.125437  | 0.14831  |
| 0.120629  | 0.127477  | 0.120192  | 0.138549 | 0.137966 | 0.121066  | 0.13549  |
| 0.103293  | 0.109266  | 0.101107  | 0.122378 | 0.113054 | 0.1081    | 0.121941 |
| 0.112034  | 0.115676  | 0.107226  | 0.144814 | 0.143357 | 0.11451   | 0.152535 |
| 0.114656  | 0.121795  | 0.112179  | 0.129079 | 0.116841 | 0.11655   | 0.131265 |
| 0.133304  | 0.134033  | 0.126166  | 0.136364 | 0.140734 | 0.129371  | 0.128059 |
| 0.115967  | 0.121649  | 0.115822  | 0.135927 | 0.135635 | 0.113199  | 0.13141  |
| 0.102855  | 0.113199  | 0.10271   | 0.130682 | 0.121358 | 0.105041  | 0.127622 |
| 0.0999417 | 0.113782  | 0.105332  | 0.134178 | 0.12602  | 0.10912   | 0.13345  |
| 0.104749  | 0.103147  | 0.0999417 | 0.137821 | 0.132284 | 0.0976107 | 0.134178 |
| 0.127768  | 0.129371  | 0.131702  | 0.138403 | 0.134033 | 0.129079  | 0.131847 |
| 0.131265  | 0.130828  | 0.130536  | 0.138986 | 0.143939 | 0.132867  | 0.140589 |
| 0.159091  | 0.165355  | 0.154283  | 0.163899 | 0.158945 | 0.155449  | 0.165501 |
| 0.100233  | 0.112617  | 0.101544  | 0.12602  | 0.118153 | 0.108829  | 0.125583 |
| 0.100233  | 0.111451  | 0.0992133 | 0.122523 | 0.114656 | 0.106498  | 0.121795 |
| 0.101107  | 0.108829  | 0.097465  | 0.128351 | 0.119318 | 0.105332  | 0.125583 |
| 0.129516  | 0.137238  | 0.129079  | 0.144522 | 0.143065 | 0.129953  | 0.153118 |
| 0.102418  | 0.114802  | 0.10169   | 0.126748 | 0.119464 | 0.104604  | 0.128059 |
| 0.125874  | 0.128642  | 0.123689  | 0.135052 | 0.136218 | 0.129225  | 0.137821 |
| 0.0964452 | 0.0980478 | 0.103293  | 0.136218 | 0.130682 | 0.0971737 | 0.132867 |
| 0.105624  | 0.112471  | 0.104895  | 0.131702 | 0.120921 | 0.111014  | 0.121941 |
| 0.138549  | 0.1419    | 0.137529  | 0.154429 | 0.152681 | 0.135198  | 0.162442 |
| 0.112908  | 0.124126  | 0.111888  | 0.12704  | 0.119755 | 0.110723  | 0.12398  |
| 0.128788  | 0.131556  | 0.130099  | 0.135927 | 0.144668 | 0.127477  | 0.142191 |
| 0.122232  | 0.128205  | 0.123543  | 0.142191 | 0.136072 | 0.123834  | 0.133887 |
| 0.0949883 | 0.120192  | 0.10708   | 0.135344 | 0.119901 | 0.108246  | 0.131702 |
| 0.100233  | 0.109411  | 0.0962995 | 0.124854 | 0.11553  | 0.104458  | 0.122669 |
| 0.104895  | 0.11553   | 0.105624  | 0.13039  | 0.120484 | 0.109994  | 0.126748 |
| 0.123543  | 0.126894  | 0.125437  | 0.132721 | 0.131847 | 0.122815  | 0.132867 |
| 0.0989219 | 0.112762  | 0.0984848 | 0.130828 | 0.12296  | 0.102273  | 0.124272 |
| 0.132867  | 0.13447   | 0.130973  | 0.139423 | 0.139714 | 0.13243   | 0.141026 |
| 0.113054  | 0.118444  | 0.109994  | 0.132139 | 0.123689 | 0.112617  | 0.125874 |
| 0.110431  | 0.118444  | 0.105041  | 0.12398  | 0.121941 | 0.110868  | 0.115385 |
| 0.106352  | 0.116987  | 0.108829  | 0.131556 | 0.123397 | 0.108537  | 0.133741 |
| 0.112471  | 0.121358  | 0.11116   | 0.126603 | 0.119901 | 0.114948  | 0.13141  |
| 0.10373   | 0.113782  | 0.103293  | 0.130099 | 0.122523 | 0.108246  | 0.124709 |

|           |           |           |          |          |           |          |
|-----------|-----------|-----------|----------|----------|-----------|----------|
| 0.106352  | 0.114948  | 0.102418  | 0.128642 | 0.121358 | 0.106498  | 0.123543 |
| 0.122815  | 0.124126  | 0.125291  | 0.138403 | 0.138695 | 0.123834  | 0.131847 |
| 0.0980478 | 0.0941142 | 0.094697  | 0.129079 | 0.114802 | 0.0944056 | 0.123689 |
| 0.0949883 | 0.107372  | 0.0986305 | 0.129808 | 0.122232 | 0.0910548 | 0.128497 |
| 0.117716  | 0.121941  | 0.111742  | 0.143794 | 0.139423 | 0.109411  | 0.143065 |
| 0.11451   | 0.123106  | 0.109411  | 0.139423 | 0.133304 | 0.11116   | 0.140152 |
| 0.106061  | 0.117861  | 0.119901  | 0.143211 | 0.14292  | 0.121649  | 0.134033 |
| 0.110868  | 0.130245  | 0.122669  | 0.146853 | 0.144231 | 0.122378  | 0.142337 |
| 0.101981  | 0.116696  | 0.104167  | 0.14088  | 0.127768 | 0.107372  | 0.134033 |
| 0.176573  | 0.180507  | 0.177885  | 0.196241 | 0.188957 | 0.178176  | 0.194056 |
| 0.100962  | 0.112179  | 0.0987762 | 0.134324 | 0.12296  | 0.101107  | 0.132139 |
| 0.116841  | 0.12398   | 0.126603  | 0.151369 | 0.149038 | 0.125728  | 0.145396 |
| 0.105478  | 0.11961   | 0.114073  | 0.142045 | 0.14088  | 0.118735  | 0.136946 |
| 0.123106  | 0.123834  | 0.124417  | 0.144522 | 0.143648 | 0.122378  | 0.143211 |
| 0.0874126 | 0.110577  | 0.0983392 | 0.131556 | 0.120192 | 0.10067   | 0.128497 |
| 0.106643  | 0.124563  | 0.117861  | 0.141754 | 0.138549 | 0.120192  | 0.138695 |
| 0.0926573 | 0.114656  | 0.102418  | 0.13243  | 0.127185 | 0.105624  | 0.130536 |
| 0.100087  | 0.113636  | 0.108683  | 0.137238 | 0.133159 | 0.110723  | 0.130099 |
| 0.104458  | 0.108974  | 0.103438  | 0.131702 | 0.125    | 0.100233  | 0.134761 |
| 0.112325  | 0.125583  | 0.11859   | 0.145105 | 0.143357 | 0.12296   | 0.137092 |
| 0.0916375 | 0.102564  | 0.0882867 | 0.130828 | 0.119172 | 0.0938228 | 0.126311 |
| 0.115093  | 0.127477  | 0.120484  | 0.144959 | 0.141463 | 0.124854  | 0.146562 |
| 0.10067   | 0.114802  | 0.0990676 | 0.137238 | 0.130245 | 0.104021  | 0.132139 |
| 0.11655   | 0.125728  | 0.118735  | 0.133887 | 0.13447  | 0.121066  | 0.138112 |
| 0.114656  | 0.117716  | 0.113636  | 0.139277 | 0.136655 | 0.110431  | 0.133887 |
| 0.0954254 | 0.1081    | 0.0906177 | 0.138986 | 0.128497 | 0.0967366 | 0.133596 |
| 0.132139  | 0.142774  | 0.136072  | 0.153846 | 0.152098 | 0.136072  | 0.158071 |
| 0.100524  | 0.112617  | 0.0983392 | 0.140006 | 0.128351 | 0.10271   | 0.136364 |
| 0.087704  | 0.114073  | 0.104167  | 0.140006 | 0.127768 | 0.0992133 | 0.130536 |
| 0.099796  | 0.101107  | 0.0955711 | 0.13549  | 0.127331 | 0.102564  | 0.127185 |
| 0.121066  | 0.11655   | 0.123252  | 0.154429 | 0.150641 | 0.126457  | 0.155449 |
| 0.114073  | 0.118007  | 0.108392  | 0.133159 | 0.125583 | 0.112762  | 0.133596 |
| 0.0837704 | 0.113345  | 0.0932401 | 0.13141  | 0.123543 | 0.101981  | 0.126603 |
| 0.0890152 | 0.108392  | 0.0984848 | 0.136072 | 0.124709 | 0.0944056 | 0.13243  |
| 0.104895  | 0.112908  | 0.0983392 | 0.138549 | 0.129808 | 0.100379  | 0.140152 |
| 0.104167  | 0.107226  | 0.103147  | 0.143357 | 0.139277 | 0.0999417 | 0.136218 |
| 0.103147  | 0.113491  | 0.0989219 | 0.139714 | 0.124272 | 0.097465  | 0.131702 |
| 0.083479  | 0.0952797 | 0.0856643 | 0.127914 | 0.117716 | 0.0836247 | 0.121066 |
| 0.08581   | 0.10169   | 0.0810023 | 0.132576 | 0.120338 | 0.0850816 | 0.126603 |
| 0.0879953 | 0.0962995 | 0.08581   | 0.135927 | 0.125728 | 0.0878497 | 0.125874 |
| 0.109557  | 0.121066  | 0.10708   | 0.119901 | 0.110577 | 0.121358  | 0.139569 |
| 0.111742  | 0.106352  | 0.109848  | 0.141317 | 0.138986 | 0.108683  | 0.137675 |
| 0.0909091 | 0.101836  | 0.0895979 | 0.13243  | 0.121358 | 0.0878497 | 0.12296  |
| 0.0884324 | 0.097028  | 0.0839161 | 0.126457 | 0.116259 | 0.0865385 | 0.12398  |

|           |           |           |          |          |           |          |
|-----------|-----------|-----------|----------|----------|-----------|----------|
| 0.105624  | 0.111014  | 0.111014  | 0.132284 | 0.126748 | 0.103147  | 0.126894 |
| 0.0917832 | 0.10067   | 0.0884324 | 0.13039  | 0.116987 | 0.0925117 | 0.125    |
| 0.112762  | 0.120484  | 0.109994  | 0.14088  | 0.129225 | 0.112908  | 0.142191 |
| 0.119172  | 0.131556  | 0.121066  | 0.147873 | 0.144085 | 0.112325  | 0.138986 |
| 0.092366  | 0.102418  | 0.0957168 | 0.13243  | 0.129808 | 0.0971737 | 0.12704  |
| 0.092803  | 0.10169   | 0.090035  | 0.136364 | 0.123543 | 0.0894522 | 0.123106 |
| 0.0922203 | 0.0944056 | 0.087704  | 0.133159 | 0.125874 | 0.0941142 | 0.12602  |
| 0.0843531 | 0.104021  | 0.0810023 | 0.131993 | 0.120338 | 0.0929487 | 0.121649 |
| 0.0983392 | 0.105478  | 0.105186  | 0.143357 | 0.138986 | 0.105769  | 0.134761 |
| 0.0872669 | 0.0979021 | 0.0856643 | 0.128205 | 0.115967 | 0.0818765 | 0.122523 |
| 0.13141   | 0.126603  | 0.127185  | 0.142337 | 0.139132 | 0.11961   | 0.143357 |
| 0.118444  | 0.113054  | 0.119464  | 0.142774 | 0.137821 | 0.119755  | 0.135052 |
| 0.105915  | 0.111014  | 0.115385  | 0.136655 | 0.133741 | 0.113636  | 0.134761 |
| 0.0949883 | 0.103293  | 0.0995047 | 0.135635 | 0.121941 | 0.102127  | 0.128788 |
| 0.097028  | 0.110577  | 0.100087  | 0.139132 | 0.129516 | 0.105624  | 0.129662 |
| 0.0893065 | 0.0976107 | 0.0885781 | 0.127914 | 0.117133 | 0.0903263 | 0.123689 |
| 0.0984848 | 0.110577  | 0.0948427 | 0.125146 | 0.112908 | 0.0925117 | 0.121503 |
| 0.0920746 | 0.110286  | 0.0983392 | 0.127477 | 0.11961  | 0.0995047 | 0.128205 |
| 0.109848  | 0.116404  | 0.0992133 | 0.129516 | 0.117861 | 0.111451  | 0.129079 |
| 0.121795  | 0.123397  | 0.114948  | 0.128934 | 0.128059 | 0.119318  | 0.120921 |
| 0.090472  | 0.115385  | 0.0990676 | 0.134907 | 0.123252 | 0.103438  | 0.135927 |
| 0.115385  | 0.120775  | 0.116113  | 0.145251 | 0.141463 | 0.121066  | 0.146562 |
| 0.124272  | 0.123834  | 0.120921  | 0.147436 | 0.145979 | 0.122086  | 0.147582 |
| 0.187209  | 0.203963  | 0.190851  | 0.206294 | 0.193182 | 0.194347  | 0.215181 |
| 0.234557  | 0.243444  | 0.237325  | 0.243735 | 0.238491 | 0.234411  | 0.250874 |
| 0.108829  | 0.116841  | 0.105769  | 0.129371 | 0.116841 | 0.111597  | 0.129225 |
| 0.108683  | 0.109994  | 0.0986305 | 0.121066 | 0.115822 | 0.106789  | 0.121795 |
| 0.102855  | 0.114948  | 0.0957168 | 0.121649 | 0.112908 | 0.099796  | 0.120921 |
| 0.104021  | 0.120484  | 0.0919289 | 0.133013 | 0.124854 | 0.107663  | 0.128205 |
| 0.109557  | 0.117279  | 0.118444  | 0.150495 | 0.141171 | 0.119901  | 0.14831  |
| 0.11014   | 0.114948  | 0.101836  | 0.134178 | 0.13039  | 0.10912   | 0.122378 |
| 0.134178  | 0.144231  | 0.130245  | 0.143065 | 0.148019 | 0.132576  | 0.142045 |
| 0.106352  | 0.120484  | 0.0945513 | 0.125437 | 0.116696 | 0.107955  | 0.129662 |
| 0.123543  | 0.129225  | 0.11553   | 0.130973 | 0.128351 | 0.122815  | 0.129079 |
| 0.128059  | 0.125291  | 0.119172  | 0.128788 | 0.127914 | 0.125     | 0.132721 |
| 0.125437  | 0.128497  | 0.117716  | 0.140443 | 0.139569 | 0.125583  | 0.131847 |
| 0.127185  | 0.127914  | 0.128788  | 0.141026 | 0.143939 | 0.126166  | 0.146416 |
| 0.107663  | 0.116259  | 0.0990676 | 0.130536 | 0.125291 | 0.109266  | 0.128059 |
| 0.106498  | 0.110431  | 0.101107  | 0.12704  | 0.117133 | 0.105769  | 0.119901 |
| 0.111597  | 0.123106  | 0.102127  | 0.128351 | 0.119901 | 0.108829  | 0.121795 |
| 0.103147  | 0.116696  | 0.0942599 | 0.119318 | 0.112908 | 0.102418  | 0.122378 |
| 0.104021  | 0.108829  | 0.0965909 | 0.125437 | 0.117861 | 0.105624  | 0.118007 |
| 0.111451  | 0.125291  | 0.101981  | 0.120047 | 0.116259 | 0.110723  | 0.122523 |
| 0.12296   | 0.128642  | 0.117861  | 0.133887 | 0.133013 | 0.123689  | 0.13345  |

|           |           |           |          |          |           |          |
|-----------|-----------|-----------|----------|----------|-----------|----------|
| 0.129371  | 0.133304  | 0.121066  | 0.135052 | 0.137675 | 0.129516  | 0.133741 |
| 0.10912   | 0.117716  | 0.102855  | 0.128497 | 0.123252 | 0.108392  | 0.122232 |
| 0.1081    | 0.114656  | 0.0960082 | 0.128059 | 0.116113 | 0.104458  | 0.12296  |
| 0.123252  | 0.129808  | 0.114073  | 0.132139 | 0.13243  | 0.128934  | 0.122086 |
| 0.105186  | 0.112325  | 0.0983392 | 0.125728 | 0.116113 | 0.103875  | 0.118881 |
| 0.133887  | 0.135781  | 0.132867  | 0.146853 | 0.145688 | 0.138695  | 0.137092 |
| 0.115239  | 0.119464  | 0.123834  | 0.128497 | 0.125291 | 0.128497  | 0.148456 |
| 0.116841  | 0.135635  | 0.126603  | 0.138549 | 0.138258 | 0.130973  | 0.136072 |
| 0.101981  | 0.109994  | 0.0939685 | 0.123689 | 0.118735 | 0.104458  | 0.115093 |
| 0.103875  | 0.110723  | 0.0920746 | 0.124417 | 0.117133 | 0.101981  | 0.118735 |
| 0.115967  | 0.125437  | 0.112034  | 0.130973 | 0.128642 | 0.112034  | 0.121795 |
| 0.118153  | 0.124709  | 0.107226  | 0.127331 | 0.126166 | 0.114802  | 0.128059 |
| 0.120192  | 0.125583  | 0.117424  | 0.135198 | 0.132867 | 0.123834  | 0.130099 |
| 0.112471  | 0.122523  | 0.103875  | 0.128059 | 0.119027 | 0.113782  | 0.120921 |
| 0.111451  | 0.118881  | 0.102273  | 0.126748 | 0.120338 | 0.115967  | 0.118735 |
| 0.118153  | 0.122378  | 0.111014  | 0.129371 | 0.123252 | 0.116841  | 0.126311 |
| 0.12602   | 0.126748  | 0.119464  | 0.141026 | 0.142191 | 0.121503  | 0.13039  |
| 0.121066  | 0.126748  | 0.113636  | 0.135198 | 0.134615 | 0.124126  | 0.134178 |
| 0.130245  | 0.135344  | 0.123397  | 0.133013 | 0.133013 | 0.130682  | 0.128788 |
| 0.129808  | 0.136364  | 0.120629  | 0.132284 | 0.130828 | 0.12704   | 0.131556 |
| 0.10708   | 0.116841  | 0.0979021 | 0.124709 | 0.117424 | 0.104021  | 0.120775 |
| 0.120484  | 0.13141   | 0.11859   | 0.138403 | 0.13549  | 0.126748  | 0.133304 |
| 0.104604  | 0.11553   | 0.0977564 | 0.123397 | 0.114948 | 0.104167  | 0.11859  |
| 0.102127  | 0.115967  | 0.103438  | 0.132284 | 0.122669 | 0.107517  | 0.135344 |
| 0.106789  | 0.11859   | 0.0964452 | 0.13141  | 0.123834 | 0.111014  | 0.129808 |
| 0.104604  | 0.119027  | 0.0954254 | 0.127768 | 0.123106 | 0.109703  | 0.121503 |
| 0.103438  | 0.11757   | 0.0965909 | 0.123689 | 0.116404 | 0.105332  | 0.124126 |
| 0.128642  | 0.127914  | 0.120047  | 0.138112 | 0.137529 | 0.126748  | 0.135052 |
| 0.104021  | 0.122232  | 0.10271   | 0.128642 | 0.119901 | 0.111742  | 0.131119 |
| 0.130245  | 0.13039   | 0.122815  | 0.138549 | 0.137092 | 0.125437  | 0.133159 |
| 0.105186  | 0.116987  | 0.0960082 | 0.121941 | 0.117279 | 0.104458  | 0.121795 |
| 0.115822  | 0.117424  | 0.112179  | 0.127622 | 0.12704  | 0.113054  | 0.121066 |
| 0.109266  | 0.116696  | 0.107663  | 0.129808 | 0.129516 | 0.110286  | 0.128497 |
| 0.0990676 | 0.109994  | 0.105041  | 0.126311 | 0.111451 | 0.113199  | 0.139277 |
| 0.103001  | 0.112179  | 0.0824592 | 0.129079 | 0.121795 | 0.0836247 | 0.129225 |
| 0.104021  | 0.111742  | 0.105915  | 0.142628 | 0.133887 | 0.112617  | 0.134615 |
| 0.107372  | 0.106061  | 0.106352  | 0.136072 | 0.125583 | 0.109266  | 0.132721 |
| 0.0916375 | 0.108974  | 0.0944056 | 0.134907 | 0.127622 | 0.101981  | 0.129516 |
| 0.10708   | 0.112762  | 0.112179  | 0.153846 | 0.149767 | 0.109266  | 0.154866 |
| 0.129953  | 0.131556  | 0.126894  | 0.144668 | 0.144376 | 0.107955  | 0.144522 |
| 0.0798368 | 0.0910548 | 0.0919289 | 0.140589 | 0.128642 | 0.0925117 | 0.131702 |
| 0.0995047 | 0.115676  | 0.123543  | 0.151807 | 0.149476 | 0.126166  | 0.144085 |
| 0.100524  | 0.101253  | 0.103584  | 0.151661 | 0.146707 | 0.0995047 | 0.144814 |
| 0.0990676 | 0.117861  | 0.117279  | 0.152535 | 0.149913 | 0.115239  | 0.140734 |

|           |           |           |          |          |           |          |
|-----------|-----------|-----------|----------|----------|-----------|----------|
| 0.087704  | 0.108246  | 0.104458  | 0.142337 | 0.137966 | 0.108537  | 0.135198 |
| 0.100816  | 0.101836  | 0.104749  | 0.148164 | 0.137966 | 0.0986305 | 0.1419   |
| 0.0992133 | 0.108392  | 0.0990676 | 0.147145 | 0.143357 | 0.0976107 | 0.146416 |
| 0.0976107 | 0.116696  | 0.112034  | 0.145251 | 0.140297 | 0.11553   | 0.138112 |
| 0.104604  | 0.11961   | 0.123106  | 0.152826 | 0.151078 | 0.120192  | 0.144522 |
| 0.104021  | 0.103875  | 0.0989219 | 0.147582 | 0.144085 | 0.0962995 | 0.148893 |
| 0.0844988 | 0.108246  | 0.100379  | 0.142628 | 0.135635 | 0.105041  | 0.135781 |
| 0.128642  | 0.136946  | 0.129662  | 0.100816 | 0.101981 | 0.118881  | 0.124563 |
| 0.104312  | 0.111742  | 0.108246  | 0.154283 | 0.149038 | 0.106789  | 0.150932 |
| 0.0833333 | 0.101836  | 0.0962995 | 0.139423 | 0.130682 | 0.10067   | 0.134615 |
| 0.213432  | 0.230478  | 0.219114  | 0.227855 | 0.217366 | 0.218823  | 0.230915 |
| 0.08581   | 0.109266  | 0.104604  | 0.143939 | 0.137821 | 0.113928  | 0.13884  |
| 0.0887238 | 0.10373   | 0.0868298 | 0.141317 | 0.131119 | 0.10373   | 0.141463 |
| 0.104604  | 0.115239  | 0.120192  | 0.151661 | 0.146999 | 0.117279  | 0.142774 |
| 0.0999417 | 0.110286  | 0.103293  | 0.143211 | 0.131847 | 0.0933858 | 0.144231 |
| 0.104021  | 0.113199  | 0.104749  | 0.154283 | 0.148164 | 0.106789  | 0.147145 |
| 0.0888695 | 0.118735  | 0.105624  | 0.141171 | 0.134761 | 0.114073  | 0.134033 |
| 0.0922203 | 0.108392  | 0.100233  | 0.137529 | 0.133741 | 0.111888  | 0.141171 |
| 0.106498  | 0.107517  | 0.105478  | 0.150932 | 0.145688 | 0.108392  | 0.148747 |
| 0.0996503 | 0.121649  | 0.105915  | 0.148456 | 0.14088  | 0.118735  | 0.143648 |
| 0.100962  | 0.121795  | 0.118881  | 0.152972 | 0.14627  | 0.11655   | 0.142045 |
| 0.101981  | 0.114365  | 0.113782  | 0.147582 | 0.144376 | 0.11961   | 0.145688 |
| 0.0999417 | 0.115239  | 0.108537  | 0.145833 | 0.14292  | 0.119318  | 0.141317 |
| 0.0958625 | 0.0523019 | 0.100087  | 0.138549 | 0.128642 | 0.097465  | 0.128205 |
| 0.0882867 | 0.109994  | 0.103001  | 0.143211 | 0.135635 | 0.112908  | 0.134033 |
| 0.0957168 | 0.11859   | 0.119755  | 0.154138 | 0.148601 | 0.122378  | 0.144085 |
| 0.087704  | 0.108537  | 0.10708   | 0.140006 | 0.135344 | 0.106498  | 0.134324 |
| 0.125291  | 0.130973  | 0.130973  | 0.144376 | 0.140006 | 0.129808  | 0.129953 |
| 0.118735  | 0.127914  | 0.124126  | 0.154429 | 0.142774 | 0.130536  | 0.1537   |
| 0.108246  | 0.0673077 | 0.109557  | 0.130536 | 0.121503 | 0.104604  | 0.133596 |
| 0.105915  | 0.104312  | 0.115385  | 0.150058 | 0.145105 | 0.102855  | 0.148164 |
| 0.114219  | 0.129225  | 0.116113  | 0.147873 | 0.136801 | 0.116987  | 0.140734 |
| 0.114948  | 0.116841  | 0.107809  | 0.142774 | 0.137238 | 0.116259  | 0.140589 |
| 0.117279  | 0.128788  | 0.107226  | 0.143648 | 0.135198 | 0.124126  | 0.14292  |
| 0.122815  | 0.136364  | 0.124417  | 0.157925 | 0.152389 | 0.128788  | 0.158654 |
| 0.0929487 | 0.0898893 | 0.0907634 | 0.13039  | 0.120775 | 0.0939685 | 0.123834 |
| 0.112908  | 0.120047  | 0.123834  | 0.140443 | 0.138695 | 0.124126  | 0.138258 |
| 0.131119  | 0.137675  | 0.137383  | 0.152535 | 0.142045 | 0.136218  | 0.15676  |
| 0.101981  | 0.105332  | 0.101836  | 0.13884  | 0.133887 | 0.0957168 | 0.133159 |
| 0.112179  | 0.124563  | 0.114073  | 0.141463 | 0.133887 | 0.114948  | 0.134324 |
| 0.139423  | 0.138112  | 0.141608  | 0.108974 | 0.112471 | 0.128205  | 0.135927 |
| 0.115822  | 0.129662  | 0.114219  | 0.123543 | 0.120921 | 0.119755  | 0.13039  |
| 0.126748  | 0.121941  | 0.124563  | 0.109411 | 0.118444 | 0.122232  | 0.138403 |
| 0.109411  | 0.119464  | 0.113054  | 0.106352 | 0.108974 | 0.111888  | 0.136218 |

|           |           |           |          |          |           |          |
|-----------|-----------|-----------|----------|----------|-----------|----------|
| 0.104604  | 0.123397  | 0.108829  | 0.14088  | 0.133887 | 0.109994  | 0.136072 |
| 0.119901  | 0.122086  | 0.120338  | 0.106643 | 0.107809 | 0.118298  | 0.135344 |
| 0.10169   | 0.100087  | 0.0986305 | 0.125437 | 0.119027 | 0.106206  | 0.132867 |
| 0.106498  | 0.126748  | 0.117716  | 0.143065 | 0.139569 | 0.118298  | 0.135344 |
| 0.0898893 | 0.117424  | 0.113054  | 0.146853 | 0.146853 | 0.119172  | 0.136801 |
| 0.116404  | 0.13141   | 0.124417  | 0.14831  | 0.14627  | 0.119464  | 0.140006 |
| 0.105624  | 0.124417  | 0.119464  | 0.147436 | 0.147145 | 0.12704   | 0.144085 |
| 0.10708   | 0.125583  | 0.115967  | 0.142774 | 0.141317 | 0.118007  | 0.140589 |
| 0.124854  | 0.132576  | 0.13345   | 0.150641 | 0.148019 | 0.13345   | 0.153409 |
| 0.0962995 | 0.106352  | 0.100524  | 0.147727 | 0.139569 | 0.104021  | 0.128351 |
| 0.108246  | 0.120338  | 0.099359  | 0.134324 | 0.130536 | 0.1081    | 0.135635 |
| 0.120775  | 0.126166  | 0.119755  | 0.148601 | 0.143648 | 0.120338  | 0.142337 |
| 0.0945513 | 0.100524  | 0.0973193 | 0.138112 | 0.133741 | 0.0912005 | 0.131847 |
| 0.126748  | 0.140589  | 0.127477  | 0.1537   | 0.150787 | 0.135635  | 0.159965 |
| 0.143065  | 0.146416  | 0.141463  | 0.16215  | 0.161859 | 0.147582  | 0.162296 |
| 0.12704   | 0.13243   | 0.115822  | 0.136218 | 0.133304 | 0.118153  | 0.126457 |
| 0.117861  | 0.122086  | 0.111014  | 0.125    | 0.120629 | 0.114802  | 0.118735 |
| 0.111597  | 0.130973  | 0.127768  | 0.149913 | 0.145833 | 0.125437  | 0.137821 |
| 0.102127  | 0.11451   | 0.115967  | 0.148893 | 0.149184 | 0.120921  | 0.142045 |
| 0.119027  | 0.124417  | 0.115967  | 0.129662 | 0.127914 | 0.11859   | 0.128351 |
| 0.103875  | 0.127622  | 0.122378  | 0.152681 | 0.15035  | 0.127622  | 0.143211 |
| 0.121066  | 0.124126  | 0.124709  | 0.140734 | 0.145396 | 0.127331  | 0.148747 |
| 0.107809  | 0.0980478 | 0.109994  | 0.134761 | 0.134178 | 0.104167  | 0.131702 |
| 0.151515  | 0.158945  | 0.154283  | 0.16215  | 0.159237 | 0.155449  | 0.166667 |
| 0.110431  | 0.112617  | 0.108246  | 0.13447  | 0.128934 | 0.111742  | 0.129079 |
| 0.122378  | 0.120484  | 0.122523  | 0.106789 | 0.114948 | 0.117861  | 0.141026 |
| 0.108829  | 0.118881  | 0.103438  | 0.133159 | 0.133741 | 0.109266  | 0.133013 |
| 0.106789  | 0.127331  | 0.126166  | 0.144231 | 0.144231 | 0.125583  | 0.132721 |
| 0.0933858 | 0.112762  | 0.109266  | 0.144522 | 0.138986 | 0.107517  | 0.143211 |
| 0.128788  | 0.140589  | 0.132139  | 0.160111 | 0.143502 | 0.129808  | 0.155303 |
| 0.133596  | 0.149476  | 0.138403  | 0.159674 | 0.152681 | 0.140443  | 0.154575 |
| 0.120629  | 0.129225  | 0.121358  | 0.138549 | 0.129808 | 0.117861  | 0.136072 |
| 0.129225  | 0.137529  | 0.134615  | 0.147727 | 0.138112 | 0.133159  | 0.14729  |
| 0.1419    | 0.146707  | 0.137966  | 0.150204 | 0.136801 | 0.136218  | 0.149767 |
| 0.136946  | 0.141754  | 0.137092  | 0.162442 | 0.148456 | 0.141463  | 0.164918 |
| 0.115239  | 0.11859   | 0.106643  | 0.124709 | 0.122669 | 0.0903263 | 0.124563 |
| 0.126748  | 0.142045  | 0.13243   | 0.154866 | 0.14933  | 0.132721  | 0.149476 |
| 0.104312  | 0.117861  | 0.10067   | 0.141463 | 0.12398  | 0.0995047 | 0.134033 |
| 0.0977564 | 0.117133  | 0.105478  | 0.133741 | 0.122669 | 0.107226  | 0.135344 |
| 0.0952797 | 0.107955  | 0.105041  | 0.149038 | 0.138258 | 0.10271   | 0.129079 |
| 0.11451   | 0.12602   | 0.117861  | 0.135927 | 0.122815 | 0.113782  | 0.131702 |
| 0.0992133 | 0.108974  | 0.103438  | 0.136072 | 0.124417 | 0.11451   | 0.127477 |
| 0.101544  | 0.112762  | 0.100524  | 0.137238 | 0.125    | 0.105478  | 0.134761 |
| 0.114365  | 0.130536  | 0.113636  | 0.144522 | 0.129079 | 0.1081    | 0.141463 |

|           |           |           |          |           |           |          |
|-----------|-----------|-----------|----------|-----------|-----------|----------|
| 0.107226  | 0.116987  | 0.112034  | 0.148456 | 0.133304  | 0.112034  | 0.145979 |
| 0.0894522 | 0.100962  | 0.0875583 | 0.134761 | 0.125728  | 0.0989219 | 0.126748 |
| 0.116841  | 0.128351  | 0.120484  | 0.142337 | 0.127185  | 0.11961   | 0.138986 |
| 0.112325  | 0.123543  | 0.113054  | 0.139569 | 0.126457  | 0.114802  | 0.135927 |
| 0.115239  | 0.120047  | 0.113345  | 0.108683 | 0.106352  | 0.107809  | 0.107663 |
| 0.21285   | 0.225524  | 0.213869  | 0.224068 | 0.214452  | 0.215618  | 0.230624 |
| 0.137675  | 0.141317  | 0.144814  | 0.153555 | 0.145105  | 0.138695  | 0.149038 |
| 0.123252  | 0.128351  | 0.127477  | 0.146125 | 0.140589  | 0.125728  | 0.134324 |
| 0.117279  | 0.129371  | 0.117424  | 0.145396 | 0.127331  | 0.114219  | 0.142045 |
| 0.206148  | 0.219406  | 0.210956  | 0.22028  | 0.211538  | 0.212121  | 0.226544 |
| 0.115239  | 0.121212  | 0.113345  | 0.119464 | 0.11014   | 0.110723  | 0.122232 |
| 0.11014   | 0.116404  | 0.104167  | 0.136801 | 0.128934  | 0.105624  | 0.129662 |
| 0.111888  | 0.128934  | 0.117861  | 0.141463 | 0.131847  | 0.116696  | 0.136655 |
| 0.103875  | 0.113345  | 0.109848  | 0.142191 | 0.13345   | 0.113928  | 0.144668 |
| 0.246066  | 0.254662  | 0.25      | 0.255536 | 0.250874  | 0.251166  | 0.260344 |
| 0.113345  | 0.125437  | 0.117279  | 0.142337 | 0.133596  | 0.111451  | 0.138986 |
| 0.108392  | 0.109703  | 0.106206  | 0.11553  | 0.104458  | 0.101544  | 0.106643 |
| 0.119172  | 0.129225  | 0.120775  | 0.140006 | 0.133304  | 0.121358  | 0.134324 |
| 0.115967  | 0.129808  | 0.113491  | 0.142045 | 0.13039   | 0.117861  | 0.129662 |
| 0.115093  | 0.125437  | 0.119027  | 0.147582 | 0.13884   | 0.116987  | 0.140443 |
| 0.11859   | 0.127768  | 0.120192  | 0.148164 | 0.134761  | 0.124272  | 0.143357 |
| 0.112179  | 0.116113  | 0.105332  | 0.110286 | 0.104458  | 0.104167  | 0.108392 |
| 0.115239  | 0.125291  | 0.11655   | 0.136364 | 0.126457  | 0.115967  | 0.135927 |
| 0.113345  | 0.133013  | 0.121358  | 0.152244 | 0.13884   | 0.123106  | 0.143648 |
| 0.099359  | 0.112325  | 0.10708   | 0.140589 | 0.126894  | 0.107372  | 0.138112 |
| 0.112325  | 0.122378  | 0.109557  | 0.138112 | 0.124126  | 0.111305  | 0.133304 |
| 0.0847902 | 0.0875583 | 0.0875583 | 0.144376 | 0.133887  | 0.0948427 | 0.137821 |
| 0.13447   | 0.145105  | 0.136364  | 0.162005 | 0.153846  | 0.142774  | 0.15574  |
| 0.116113  | 0.129953  | 0.119172  | 0.146853 | 0.13986   | 0.11014   | 0.136509 |
| 0.112034  | 0.117716  | 0.111014  | 0.13986  | 0.132576  | 0.108392  | 0.132139 |
| 0.184878  | 0.201632  | 0.187937  | 0.203089 | 0.190559  | 0.190559  | 0.205565 |
| 0.196824  | 0.212413  | 0.206002  | 0.214161 | 0.201632  | 0.203671  | 0.219551 |
| 0.103584  | 0.113928  | 0.110431  | 0.143939 | 0.130245  | 0.113054  | 0.144376 |
| 0.0992133 | 0.111014  | 0.101981  | 0.140734 | 0.125291  | 0.105478  | 0.13447  |
| 0.122232  | 0.131993  | 0.134033  | 0.151224 | 0.144522  | 0.130245  | 0.154575 |
| 0.108829  | 0.115385  | 0.106352  | 0.108974 | 0.0996503 | 0.101107  | 0.106498 |
| 0.115385  | 0.126603  | 0.11961   | 0.143211 | 0.137092  | 0.110868  | 0.140443 |
| 0.12398   | 0.132284  | 0.128788  | 0.145979 | 0.142191  | 0.123834  | 0.132721 |
| 0.218677  | 0.233392  | 0.22465   | 0.23514  | 0.222028  | 0.223776  | 0.238491 |
| 0.108829  | 0.123252  | 0.111014  | 0.139569 | 0.126166  | 0.111888  | 0.130973 |
| 0.207751  | 0.212267  | 0.204983  | 0.210227 | 0.201195  | 0.206731  | 0.2162   |
| 0.105041  | 0.110431  | 0.0952797 | 0.118298 | 0.110723  | 0.0824592 | 0.116696 |
| 0.104895  | 0.11757   | 0.104749  | 0.141171 | 0.129516  | 0.109411  | 0.13549  |
| 0.112617  | 0.122086  | 0.113054  | 0.099359 | 0.0882867 | 0.111014  | 0.131265 |



|           |          |           |          |          |           |          |
|-----------|----------|-----------|----------|----------|-----------|----------|
| 0.0983392 | 0.110723 | 0.101981  | 0.13986  | 0.126457 | 0.104312  | 0.134178 |
| 0.200758  | 0.213432 | 0.206148  | 0.218094 | 0.207314 | 0.204108  | 0.221737 |
| 0.126748  | 0.133013 | 0.132139  | 0.148747 | 0.131847 | 0.126311  | 0.144814 |
| 0.106643  | 0.119318 | 0.0977564 | 0.135344 | 0.125437 | 0.103293  | 0.127914 |
| 0.120047  | 0.13039  | 0.123397  | 0.139423 | 0.129516 | 0.120192  | 0.13549  |
| 0.112471  | 0.127768 | 0.117279  | 0.136509 | 0.133596 | 0.11961   | 0.134324 |
| 0.0999417 | 0.113782 | 0.101836  | 0.141463 | 0.128351 | 0.105332  | 0.142191 |
| 0.107663  | 0.115967 | 0.0990676 | 0.117133 | 0.111888 | 0.0856643 | 0.117861 |
| 0.113782  | 0.120921 | 0.108683  | 0.115967 | 0.102855 | 0.105769  | 0.112908 |
| 0.111742  | 0.118007 | 0.107226  | 0.137238 | 0.129079 | 0.108683  | 0.127768 |
| 0.107372  | 0.11859  | 0.110723  | 0.134324 | 0.123252 | 0.111597  | 0.133887 |
| 0.107809  | 0.11961  | 0.103293  | 0.131556 | 0.128351 | 0.108246  | 0.128497 |
| 0.182255  | 0.197552 | 0.188228  | 0.203089 | 0.189977 | 0.191434  | 0.206148 |
| 0.119464  | 0.131265 | 0.120484  | 0.142337 | 0.134178 | 0.120775  | 0.13345  |
| 0.118735  | 0.134033 | 0.117716  | 0.146562 | 0.134033 | 0.124126  | 0.143211 |
| 0.114802  | 0.129516 | 0.114073  | 0.139714 | 0.130099 | 0.114365  | 0.132284 |
| 0.113491  | 0.127914 | 0.116841  | 0.146853 | 0.13549  | 0.111014  | 0.142045 |
| 0.116113  | 0.128205 | 0.120047  | 0.139277 | 0.130245 | 0.118007  | 0.133596 |
| 0.109994  | 0.120921 | 0.102564  | 0.119464 | 0.115093 | 0.0862471 | 0.119901 |
| 0.0976107 | 0.119027 | 0.106498  | 0.130973 | 0.124563 | 0.105915  | 0.130536 |
| 0.114802  | 0.116696 | 0.114656  | 0.110286 | 0.107663 | 0.105915  | 0.104021 |
| 0.111742  | 0.129953 | 0.114802  | 0.1419   | 0.128788 | 0.119464  | 0.14292  |
| 0.110286  | 0.125291 | 0.110431  | 0.138986 | 0.12704  | 0.114219  | 0.134178 |
| 0.105769  | 0.115239 | 0.107663  | 0.144668 | 0.129808 | 0.113199  | 0.142483 |
| 0.112325  | 0.130828 | 0.115676  | 0.140443 | 0.129371 | 0.118298  | 0.133596 |
| 0.125     | 0.138258 | 0.131265  | 0.147582 | 0.144085 | 0.126603  | 0.1419   |
| 0.105186  | 0.120484 | 0.107663  | 0.13884  | 0.128351 | 0.103293  | 0.134615 |
| 0.131847  | 0.141608 | 0.137821  | 0.149767 | 0.144231 | 0.134033  | 0.146125 |
| 0.0965909 | 0.1081   | 0.102564  | 0.141026 | 0.128497 | 0.106935  | 0.140297 |
| 0.110868  | 0.122669 | 0.115676  | 0.134907 | 0.12704  | 0.112471  | 0.124563 |
| 0.116259  | 0.124563 | 0.11757   | 0.135635 | 0.123689 | 0.116404  | 0.136364 |
| 0.11859   | 0.121066 | 0.115239  | 0.113491 | 0.106789 | 0.112325  | 0.112762 |
| 0.186189  | 0.198281 | 0.1875    | 0.192745 | 0.183129 | 0.18954   | 0.198427 |
| 0.104458  | 0.11655  | 0.0984848 | 0.130245 | 0.121212 | 0.103438  | 0.122815 |
| 0.097465  | 0.111888 | 0.104312  | 0.131119 | 0.120338 | 0.102564  | 0.129225 |
| 0.111451  | 0.11655  | 0.110431  | 0.136655 | 0.131993 | 0.109557  | 0.130099 |
| 0.170309  | 0.185897 | 0.173368  | 0.195804 | 0.183275 | 0.179196  | 0.200903 |
| 0.128205  | 0.13884  | 0.128642  | 0.154283 | 0.144085 | 0.119901  | 0.149184 |
| 0.132867  | 0.142045 | 0.136801  | 0.158071 | 0.157197 | 0.126603  | 0.150058 |
| 0.137383  | 0.152681 | 0.140443  | 0.159382 | 0.152972 | 0.143357  | 0.155157 |
| 0.10067   | 0.117424 | 0.107226  | 0.138695 | 0.125583 | 0.102855  | 0.134761 |
| 0.115967  | 0.129516 | 0.121649  | 0.139132 | 0.128642 | 0.120775  | 0.137238 |
| 0.205857  | 0.219114 | 0.210956  | 0.220862 | 0.208625 | 0.210373  | 0.226253 |
| 0.113782  | 0.128497 | 0.117716  | 0.142483 | 0.134615 | 0.123252  | 0.136801 |

|           |           |           |          |          |           |          |
|-----------|-----------|-----------|----------|----------|-----------|----------|
| 0.120629  | 0.133013  | 0.128059  | 0.143502 | 0.132721 | 0.124272  | 0.142483 |
| 0.106643  | 0.118735  | 0.10067   | 0.131556 | 0.125728 | 0.104749  | 0.12704  |
| 0.165501  | 0.173223  | 0.162442  | 0.182838 | 0.171766 | 0.171766  | 0.188811 |
| 0.104895  | 0.119901  | 0.105624  | 0.138258 | 0.122523 | 0.107955  | 0.13549  |
| 0.139423  | 0.152098  | 0.143939  | 0.168706 | 0.162296 | 0.143648  | 0.159819 |
| 0.100379  | 0.111888  | 0.0990676 | 0.145396 | 0.136364 | 0.108683  | 0.13884  |
| 0.181381  | 0.197844  | 0.184441  | 0.200466 | 0.190851 | 0.18852   | 0.203234 |
| 0.108246  | 0.121212  | 0.110431  | 0.142774 | 0.133159 | 0.109557  | 0.139423 |
| 0.0893065 | 0.106061  | 0.0882867 | 0.131993 | 0.122086 | 0.0949883 | 0.130682 |
| 0.109557  | 0.123106  | 0.107663  | 0.142337 | 0.128351 | 0.113782  | 0.128205 |
| 0.11116   | 0.125     | 0.111597  | 0.129953 | 0.122669 | 0.106061  | 0.116113 |
| 0.11116   | 0.115093  | 0.104312  | 0.134033 | 0.129371 | 0.106643  | 0.126603 |
| 0.112034  | 0.127914  | 0.11655   | 0.146853 | 0.128788 | 0.120629  | 0.139132 |
| 0.0987762 | 0.111451  | 0.102418  | 0.141463 | 0.12602  | 0.104167  | 0.139569 |
| 0.182255  | 0.195804  | 0.187354  | 0.200758 | 0.188811 | 0.187354  | 0.205565 |
| 0.115967  | 0.128059  | 0.11757   | 0.143794 | 0.131847 | 0.120484  | 0.136364 |
| 0.103001  | 0.113054  | 0.1081    | 0.139277 | 0.127622 | 0.105186  | 0.128934 |
| 0.204837  | 0.218677  | 0.21285   | 0.223339 | 0.211393 | 0.210227  | 0.227273 |
| 0.117424  | 0.127768  | 0.119027  | 0.142337 | 0.131556 | 0.119027  | 0.132576 |
| 0.0986305 | 0.108683  | 0.106061  | 0.141608 | 0.131119 | 0.104021  | 0.14088  |
| 0.0945513 | 0.106061  | 0.103147  | 0.138986 | 0.123834 | 0.104604  | 0.136801 |
| 0.133159  | 0.135927  | 0.137966  | 0.146416 | 0.141754 | 0.128642  | 0.143357 |
| 0.182401  | 0.195367  | 0.185169  | 0.203526 | 0.190997 | 0.188957  | 0.208333 |
| 0.112325  | 0.115093  | 0.109557  | 0.110723 | 0.102564 | 0.104312  | 0.106789 |
| 0.119901  | 0.134324  | 0.124709  | 0.144231 | 0.138986 | 0.122669  | 0.140006 |
| 0.0965909 | 0.109557  | 0.100524  | 0.138403 | 0.129079 | 0.104312  | 0.141463 |
| 0.0945513 | 0.107226  | 0.0996503 | 0.138403 | 0.125583 | 0.104604  | 0.136218 |
| 0.0929487 | 0.10708   | 0.101253  | 0.141171 | 0.126311 | 0.104458  | 0.138986 |
| 0.111742  | 0.123543  | 0.111597  | 0.136946 | 0.125583 | 0.112762  | 0.136509 |
| 0.0859557 | 0.100087  | 0.0884324 | 0.133887 | 0.121941 | 0.0971737 | 0.12704  |
| 0.115676  | 0.126894  | 0.11553   | 0.14292  | 0.13447  | 0.10708   | 0.1419   |
| 0.121212  | 0.135927  | 0.128351  | 0.150787 | 0.143502 | 0.128934  | 0.139569 |
| 0.110431  | 0.125146  | 0.113782  | 0.146707 | 0.135052 | 0.10912   | 0.138986 |
| 0.113782  | 0.126166  | 0.121795  | 0.140734 | 0.138112 | 0.123543  | 0.135927 |
| 0.18852   | 0.2044    | 0.188957  | 0.204983 | 0.190122 | 0.191871  | 0.208333 |
| 0.108829  | 0.122669  | 0.112179  | 0.1419   | 0.130828 | 0.113345  | 0.135052 |
| 0.127331  | 0.13243   | 0.131847  | 0.143794 | 0.137092 | 0.122523  | 0.139277 |
| 0.0942599 | 0.105478  | 0.0979021 | 0.139277 | 0.127622 | 0.10373   | 0.138549 |
| 0.0856643 | 0.0965909 | 0.0872669 | 0.135635 | 0.12602  | 0.0957168 | 0.126457 |
| 0.107517  | 0.121066  | 0.10708   | 0.142045 | 0.126311 | 0.110577  | 0.137238 |
| 0.112908  | 0.117424  | 0.111597  | 0.107517 | 0.103438 | 0.104021  | 0.107372 |
| 0.117861  | 0.13549   | 0.131119  | 0.143065 | 0.138695 | 0.127622  | 0.142628 |
| 0.107517  | 0.130099  | 0.111742  | 0.142337 | 0.128351 | 0.118735  | 0.142774 |
| 0.104021  | 0.105915  | 0.0980478 | 0.123397 | 0.10912  | 0.0945513 | 0.114802 |

|           |           |           |          |          |           |          |
|-----------|-----------|-----------|----------|----------|-----------|----------|
| 0.0954254 | 0.104604  | 0.0885781 | 0.120047 | 0.108974 | 0.0973193 | 0.118444 |
| 0.0894522 | 0.10271   | 0.0893065 | 0.137675 | 0.122523 | 0.0954254 | 0.130828 |
| 0.103875  | 0.113928  | 0.097028  | 0.120338 | 0.111305 | 0.0844988 | 0.118735 |
| 0.120338  | 0.129225  | 0.122523  | 0.148164 | 0.144085 | 0.113491  | 0.141608 |
| 0.10708   | 0.114219  | 0.107517  | 0.115093 | 0.105186 | 0.104895  | 0.109411 |
| 0.108392  | 0.121649  | 0.109994  | 0.135052 | 0.123397 | 0.109994  | 0.131702 |
| 0.106061  | 0.111451  | 0.101836  | 0.110868 | 0.101253 | 0.0995047 | 0.106352 |
| 0.0954254 | 0.11014   | 0.102855  | 0.141317 | 0.125583 | 0.107226  | 0.14088  |
| 0.101107  | 0.112617  | 0.0942599 | 0.132139 | 0.120775 | 0.0995047 | 0.127331 |
| 0.0964452 | 0.112617  | 0.104458  | 0.144085 | 0.131847 | 0.108829  | 0.141317 |
| 0.101107  | 0.122523  | 0.106498  | 0.136509 | 0.125437 | 0.10912   | 0.129953 |
| 0.106643  | 0.126894  | 0.107663  | 0.140589 | 0.127477 | 0.115822  | 0.141317 |
| 0.104312  | 0.112325  | 0.102418  | 0.133304 | 0.127768 | 0.105624  | 0.124709 |
| 0.0878497 | 0.104021  | 0.0894522 | 0.136364 | 0.125291 | 0.100816  | 0.131556 |
| 0.0990676 | 0.112908  | 0.101836  | 0.139714 | 0.12602  | 0.103293  | 0.139569 |
| 0.115385  | 0.129808  | 0.114948  | 0.144668 | 0.128351 | 0.116696  | 0.134615 |
| 0.107663  | 0.124417  | 0.112179  | 0.144522 | 0.132576 | 0.107517  | 0.137092 |
| 0.0961538 | 0.10271   | 0.0907634 | 0.140006 | 0.127185 | 0.0893065 | 0.138986 |
| 0.0967366 | 0.110868  | 0.100379  | 0.138258 | 0.128059 | 0.104167  | 0.138695 |
| 0.117279  | 0.126457  | 0.120338  | 0.139569 | 0.125583 | 0.11655   | 0.134761 |
| 0.104749  | 0.113345  | 0.0984848 | 0.122086 | 0.116259 | 0.0856643 | 0.121941 |
| 0.114073  | 0.124709  | 0.117424  | 0.137821 | 0.126457 | 0.113345  | 0.136801 |
| 0.105915  | 0.111888  | 0.100816  | 0.138112 | 0.128205 | 0.104312  | 0.126603 |
| 0.0919289 | 0.103438  | 0.0944056 | 0.140443 | 0.129953 | 0.100816  | 0.13447  |
| 0.0986305 | 0.111597  | 0.100233  | 0.139569 | 0.125291 | 0.105769  | 0.134178 |
| 0.101981  | 0.115239  | 0.0936772 | 0.127768 | 0.122815 | 0.100962  | 0.127331 |
| 0.11757   | 0.128205  | 0.123252  | 0.142483 | 0.132576 | 0.120338  | 0.14088  |
| 0.116987  | 0.128497  | 0.11859   | 0.139277 | 0.130828 | 0.115676  | 0.137675 |
| 0.106643  | 0.120484  | 0.110577  | 0.139714 | 0.132721 | 0.106789  | 0.134033 |
| 0.187063  | 0.20236   | 0.18954   | 0.206148 | 0.194202 | 0.190705  | 0.209499 |
| 0.163462  | 0.175554  | 0.160111  | 0.176428 | 0.162442 | 0.161568  | 0.181235 |
| 0.111014  | 0.121066  | 0.113491  | 0.143794 | 0.134178 | 0.105915  | 0.140152 |
| 0.116696  | 0.12296   | 0.112179  | 0.125583 | 0.113345 | 0.110723  | 0.125437 |
| 0.138549  | 0.144522  | 0.140152  | 0.161713 | 0.159965 | 0.130536  | 0.153409 |
| 0.114219  | 0.135344  | 0.116987  | 0.152535 | 0.14292  | 0.123689  | 0.144231 |
| 0.109703  | 0.125291  | 0.115385  | 0.147436 | 0.136946 | 0.119755  | 0.141463 |
| 0.105186  | 0.119901  | 0.105624  | 0.144668 | 0.128059 | 0.110577  | 0.140152 |
| 0.0812937 | 0.0939685 | 0.0861014 | 0.145833 | 0.131556 | 0.0948427 | 0.139569 |
| 0.107517  | 0.122815  | 0.115822  | 0.144668 | 0.135344 | 0.109994  | 0.135781 |
| 0.19595   | 0.211247  | 0.200175  | 0.215035 | 0.20134  | 0.200175  | 0.218094 |
| 0.113928  | 0.117279  | 0.112325  | 0.114948 | 0.105332 | 0.106789  | 0.108974 |
| 0.114365  | 0.122378  | 0.111305  | 0.122086 | 0.1081   | 0.109557  | 0.123689 |
| 0.0962995 | 0.110723  | 0.0984848 | 0.13549  | 0.122378 | 0.0999417 | 0.135927 |
| 0.104021  | 0.121649  | 0.106206  | 0.134761 | 0.126603 | 0.111451  | 0.13549  |

|           |           |           |          |           |           |          |
|-----------|-----------|-----------|----------|-----------|-----------|----------|
| 0.177885  | 0.191434  | 0.179196  | 0.197844 | 0.184149  | 0.179779  | 0.200903 |
| 0.244901  | 0.25204   | 0.248252  | 0.250583 | 0.246212  | 0.244755  | 0.257139 |
| 0.110577  | 0.13141   | 0.114802  | 0.143065 | 0.130245  | 0.12296   | 0.14088  |
| 0.106206  | 0.121795  | 0.110723  | 0.143065 | 0.132867  | 0.109266  | 0.136218 |
| 0.109994  | 0.124709  | 0.110723  | 0.146562 | 0.131702  | 0.105769  | 0.139132 |
| 0.104604  | 0.113199  | 0.0980478 | 0.134761 | 0.126603  | 0.0980478 | 0.124417 |
| 0.105915  | 0.111014  | 0.101399  | 0.111597 | 0.102855  | 0.0999417 | 0.104167 |
| 0.103438  | 0.123689  | 0.11116   | 0.137675 | 0.127477  | 0.112034  | 0.133159 |
| 0.105041  | 0.113928  | 0.1081    | 0.136072 | 0.122378  | 0.109266  | 0.135344 |
| 0.109703  | 0.11451   | 0.102564  | 0.107517 | 0.0999417 | 0.102273  | 0.105041 |
| 0.106352  | 0.116987  | 0.109703  | 0.137675 | 0.123397  | 0.110286  | 0.135781 |
| 0.0995047 | 0.107517  | 0.0967366 | 0.141026 | 0.128497  | 0.0926573 | 0.143211 |
| 0.0903263 | 0.103001  | 0.0948427 | 0.139714 | 0.128642  | 0.100962  | 0.132576 |
| 0.114365  | 0.129079  | 0.112762  | 0.140152 | 0.129079  | 0.120629  | 0.141171 |
| 0.115093  | 0.127477  | 0.118735  | 0.140297 | 0.127477  | 0.118735  | 0.137238 |
| 0.0984848 | 0.112908  | 0.097465  | 0.130099 | 0.119318  | 0.0986305 | 0.121795 |
| 0.10169   | 0.11553   | 0.113491  | 0.14292  | 0.139714  | 0.110577  | 0.138695 |
| 0.121212  | 0.121941  | 0.117861  | 0.140589 | 0.140297  | 0.116404  | 0.13141  |
| 0.0936772 | 0.110723  | 0.100524  | 0.138403 | 0.123834  | 0.106061  | 0.135052 |
| 0.108392  | 0.118153  | 0.105332  | 0.137383 | 0.127768  | 0.110286  | 0.13549  |
| 0.112762  | 0.11757   | 0.119318  | 0.14729  | 0.144376  | 0.120775  | 0.146562 |
| 0.20236   | 0.21183   | 0.204254  | 0.217366 | 0.211538  | 0.206294  | 0.222174 |
| 0.101399  | 0.120484  | 0.103584  | 0.135635 | 0.122232  | 0.11116   | 0.134907 |
| 0.0898893 | 0.101399  | 0.0885781 | 0.138695 | 0.125291  | 0.0979021 | 0.13039  |
| 0.10708   | 0.125583  | 0.11014   | 0.13986  | 0.129079  | 0.11655   | 0.133887 |
| 0.117133  | 0.132139  | 0.11757   | 0.145542 | 0.131265  | 0.119027  | 0.134907 |
| 0.105478  | 0.119318  | 0.108537  | 0.133013 | 0.122523  | 0.112617  | 0.132867 |
| 0.194056  | 0.206439  | 0.194784  | 0.211101 | 0.19799   | 0.200321  | 0.2162   |
| 0.118153  | 0.12704   | 0.120338  | 0.141608 | 0.126748  | 0.120338  | 0.136801 |
| 0.0941142 | 0.10708   | 0.097465  | 0.135635 | 0.124272  | 0.100962  | 0.137238 |
| 0.107663  | 0.115385  | 0.114219  | 0.141026 | 0.13549   | 0.111888  | 0.128934 |
| 0.10067   | 0.110431  | 0.0976107 | 0.131993 | 0.123252  | 0.0984848 | 0.120775 |
| 0.114365  | 0.127331  | 0.117133  | 0.1419   | 0.129371  | 0.117133  | 0.135927 |
| 0.10067   | 0.115385  | 0.104312  | 0.137529 | 0.122669  | 0.104604  | 0.130099 |
| 0.0962995 | 0.109266  | 0.0926573 | 0.142191 | 0.128205  | 0.0926573 | 0.140589 |
| 0.110286  | 0.126166  | 0.113928  | 0.139277 | 0.128205  | 0.11451   | 0.133887 |
| 0.19289   | 0.204108  | 0.197115  | 0.212558 | 0.199446  | 0.199446  | 0.212121 |
| 0.106789  | 0.115093  | 0.108392  | 0.132576 | 0.119464  | 0.109266  | 0.131265 |
| 0.189394  | 0.20236   | 0.194784  | 0.203817 | 0.190997  | 0.194493  | 0.209499 |
| 0.186043  | 0.202214  | 0.191142  | 0.206876 | 0.192016  | 0.195804  | 0.209062 |
| 0.115822  | 0.117424  | 0.113928  | 0.135781 | 0.135781  | 0.112762  | 0.13039  |
| 0.122815  | 0.134324  | 0.125     | 0.147145 | 0.141317  | 0.126457  | 0.130973 |
| 0.092803  | 0.0987762 | 0.0879953 | 0.136072 | 0.12296   | 0.090035  | 0.13039  |
| 0.103147  | 0.116987  | 0.105915  | 0.13447  | 0.122523  | 0.10708   | 0.131119 |

|           |          |           |          |          |           |          |
|-----------|----------|-----------|----------|----------|-----------|----------|
| 0.109703  | 0.121212 | 0.112179  | 0.136364 | 0.124709 | 0.113054  | 0.13447  |
| 0.099796  | 0.11014  | 0.10373   | 0.140443 | 0.129953 | 0.108392  | 0.141463 |
| 0.105041  | 0.109557 | 0.101981  | 0.108974 | 0.103147 | 0.0984848 | 0.105041 |
| 0.106206  | 0.112762 | 0.104895  | 0.106352 | 0.102273 | 0.102273  | 0.101253 |
| 0.114802  | 0.133596 | 0.118153  | 0.148747 | 0.135927 | 0.124272  | 0.146562 |
| 0.107372  | 0.117133 | 0.100524  | 0.138403 | 0.129662 | 0.103438  | 0.129225 |
| 0.0932401 | 0.103293 | 0.100962  | 0.136801 | 0.124272 | 0.101544  | 0.134615 |
| 0.113199  | 0.124417 | 0.119464  | 0.139569 | 0.126457 | 0.116841  | 0.137383 |
| 0.0856643 | 0.100087 | 0.0875583 | 0.134178 | 0.121358 | 0.0898893 | 0.129371 |
| 0.123689  | 0.130828 | 0.127622  | 0.143357 | 0.134324 | 0.12296   | 0.137383 |
| 0.108829  | 0.123252 | 0.109848  | 0.13986  | 0.129953 | 0.107226  | 0.135927 |
| 0.129371  | 0.136509 | 0.13243   | 0.143794 | 0.136509 | 0.130099  | 0.141608 |
| 0.254953  | 0.26384  | 0.259178  | 0.264714 | 0.258013 | 0.261509  | 0.269522 |
| 0.118007  | 0.126603 | 0.113199  | 0.137675 | 0.135052 | 0.115239  | 0.132576 |
| 0.115239  | 0.129079 | 0.120921  | 0.144522 | 0.142191 | 0.120047  | 0.135344 |
| 0.213287  | 0.225087 | 0.214598  | 0.228001 | 0.219551 | 0.217512  | 0.231061 |
| 0.113199  | 0.124417 | 0.127622  | 0.138403 | 0.137821 | 0.124417  | 0.137675 |
| 0.225379  | 0.234848 | 0.230478  | 0.236597 | 0.229895 | 0.231643  | 0.242861 |
| 0.108974  | 0.118153 | 0.104749  | 0.133887 | 0.128642 | 0.105041  | 0.123543 |
| 0.109994  | 0.11655  | 0.118298  | 0.14627  | 0.139569 | 0.118881  | 0.144668 |
| 0.11116   | 0.124126 | 0.108392  | 0.140152 | 0.126166 | 0.112179  | 0.130682 |
| 0.109411  | 0.11655  | 0.106643  | 0.138695 | 0.134033 | 0.104895  | 0.129808 |
| 0.196824  | 0.212413 | 0.198135  | 0.214452 | 0.199301 | 0.201632  | 0.218677 |
| 0.127185  | 0.133741 | 0.129662  | 0.143065 | 0.134907 | 0.125291  | 0.139423 |
| 0.115239  | 0.128205 | 0.115385  | 0.140443 | 0.129662 | 0.119464  | 0.137966 |
| 0.222902  | 0.234994 | 0.22567   | 0.23208  | 0.222756 | 0.226253  | 0.237471 |
| 0.113491  | 0.115093 | 0.105769  | 0.112762 | 0.103438 | 0.106352  | 0.109994 |
| 0.192308  | 0.205565 | 0.196533  | 0.211684 | 0.19799  | 0.197407  | 0.216492 |
| 0.111305  | 0.116696 | 0.106206  | 0.113199 | 0.104749 | 0.106789  | 0.112762 |
| 0.0976107 | 0.108829 | 0.103875  | 0.145542 | 0.130973 | 0.105332  | 0.141317 |
| 0.100087  | 0.107517 | 0.102273  | 0.141026 | 0.135781 | 0.106061  | 0.136218 |
| 0.114656  | 0.120338 | 0.113636  | 0.137238 | 0.138403 | 0.111888  | 0.130682 |
| 0.108974  | 0.11961  | 0.104167  | 0.138549 | 0.124563 | 0.106789  | 0.138112 |
| 0.147436  | 0.163024 | 0.143502  | 0.17905  | 0.164773 | 0.160402  | 0.178613 |
| 0.112471  | 0.118735 | 0.113782  | 0.133596 | 0.123689 | 0.110868  | 0.129371 |
| 0.116841  | 0.130973 | 0.115239  | 0.143211 | 0.129808 | 0.119027  | 0.136655 |
| 0.103438  | 0.116113 | 0.110286  | 0.142337 | 0.128059 | 0.118444  | 0.13345  |
| 0.121212  | 0.133013 | 0.125728  | 0.143502 | 0.137383 | 0.122815  | 0.126457 |
| 0.191871  | 0.205128 | 0.190268  | 0.209499 | 0.19289  | 0.196387  | 0.211684 |
| 0.0964452 | 0.107663 | 0.103293  | 0.139132 | 0.125146 | 0.105041  | 0.136364 |
| 0.108537  | 0.118298 | 0.107809  | 0.144231 | 0.130828 | 0.108392  | 0.138549 |
| 0.104604  | 0.114656 | 0.100379  | 0.123106 | 0.114365 | 0.0866841 | 0.121795 |
| 0.109703  | 0.113928 | 0.108392  | 0.108974 | 0.105186 | 0.100233  | 0.105915 |
| 0.101399  | 0.112908 | 0.110868  | 0.14292  | 0.136801 | 0.112325  | 0.1419   |

|           |           |           |          |          |           |          |
|-----------|-----------|-----------|----------|----------|-----------|----------|
| 0.253642  | 0.261364  | 0.258159  | 0.259615 | 0.254371 | 0.25845   | 0.264714 |
| 0.0932401 | 0.104167  | 0.0957168 | 0.136801 | 0.134761 | 0.104749  | 0.130245 |
| 0.109848  | 0.124563  | 0.110577  | 0.145833 | 0.126894 | 0.114656  | 0.141026 |
| 0.174825  | 0.18546   | 0.174679  | 0.188083 | 0.181672 | 0.181381  | 0.190268 |
| 0.179487  | 0.196824  | 0.179341  | 0.200612 | 0.1875   | 0.186626  | 0.20134  |
| 0.112179  | 0.127185  | 0.114948  | 0.144085 | 0.127477 | 0.12398   | 0.145688 |
| 0.114948  | 0.125291  | 0.118007  | 0.138112 | 0.12704  | 0.116259  | 0.138549 |
| 0.105624  | 0.113928  | 0.0990676 | 0.133741 | 0.125291 | 0.10373   | 0.126894 |
| 0.141026  | 0.143794  | 0.144085  | 0.154866 | 0.147582 | 0.141463  | 0.152681 |
| 0.106061  | 0.126603  | 0.110286  | 0.143502 | 0.129225 | 0.119027  | 0.136946 |
| 0.113491  | 0.132576  | 0.115385  | 0.145688 | 0.128497 | 0.119464  | 0.144085 |
| 0.11451   | 0.120484  | 0.114365  | 0.110868 | 0.103875 | 0.111451  | 0.106352 |
| 0.113928  | 0.120484  | 0.118153  | 0.134178 | 0.122815 | 0.111451  | 0.130245 |
| 0.125728  | 0.133741  | 0.130536  | 0.143357 | 0.137238 | 0.124709  | 0.139132 |
| 0.111014  | 0.11757   | 0.107955  | 0.121649 | 0.106789 | 0.10912   | 0.115967 |
| 0.112908  | 0.117424  | 0.110723  | 0.137821 | 0.133741 | 0.107809  | 0.128642 |
| 0.12704   | 0.129516  | 0.124854  | 0.145833 | 0.144376 | 0.120484  | 0.138112 |
| 0.0980478 | 0.106352  | 0.099359  | 0.138112 | 0.136072 | 0.107226  | 0.133887 |
| 0.11859   | 0.121649  | 0.116987  | 0.137966 | 0.13884  | 0.116404  | 0.129371 |
| 0.118298  | 0.119027  | 0.119318  | 0.107372 | 0.109703 | 0.112908  | 0.103147 |
| 0.203817  | 0.218531  | 0.203963  | 0.218823 | 0.206876 | 0.206294  | 0.224796 |
| 0.0981935 | 0.103293  | 0.0983392 | 0.143502 | 0.135052 | 0.0977564 | 0.131993 |
| 0.187354  | 0.199738  | 0.190414  | 0.203234 | 0.190705 | 0.191871  | 0.208625 |
| 0.108683  | 0.123397  | 0.107955  | 0.137383 | 0.124563 | 0.112617  | 0.13141  |
| 0.108683  | 0.11757   | 0.114365  | 0.146125 | 0.137092 | 0.114656  | 0.145979 |
| 0.113345  | 0.125728  | 0.11553   | 0.14292  | 0.135927 | 0.112034  | 0.137821 |
| 0.104167  | 0.119172  | 0.106352  | 0.137821 | 0.126457 | 0.102855  | 0.135344 |
| 0.117424  | 0.129516  | 0.121358  | 0.139714 | 0.130099 | 0.122523  | 0.136946 |
| 0.11859   | 0.127768  | 0.121941  | 0.138549 | 0.128351 | 0.119027  | 0.134907 |
| 0.0964452 | 0.11116   | 0.105041  | 0.142337 | 0.128351 | 0.10912   | 0.144522 |
| 0.114365  | 0.128788  | 0.113054  | 0.142774 | 0.127622 | 0.118007  | 0.135052 |
| 0.116113  | 0.128788  | 0.118007  | 0.144522 | 0.136364 | 0.106643  | 0.137675 |
| 0.122669  | 0.121941  | 0.122232  | 0.113491 | 0.112034 | 0.114656  | 0.111014 |
| 0.24796   | 0.256556  | 0.253059  | 0.253934 | 0.252477 | 0.252185  | 0.259615 |
| 0.10169   | 0.112325  | 0.105332  | 0.145542 | 0.130973 | 0.110577  | 0.141608 |
| 0.175262  | 0.193765  | 0.18007   | 0.199301 | 0.184441 | 0.185897  | 0.198281 |
| 0.183275  | 0.198864  | 0.188374  | 0.202943 | 0.189248 | 0.190414  | 0.204545 |
| 0.110286  | 0.121795  | 0.111597  | 0.148019 | 0.134907 | 0.119172  | 0.147582 |
| 0.0910548 | 0.104021  | 0.0935315 | 0.13549  | 0.128205 | 0.101399  | 0.133887 |
| 0.106498  | 0.11859   | 0.112471  | 0.14627  | 0.135198 | 0.11451   | 0.143794 |
| 0.109411  | 0.121795  | 0.107517  | 0.137238 | 0.125    | 0.11451   | 0.133304 |
| 0.083042  | 0.0960082 | 0.0861014 | 0.144085 | 0.130099 | 0.0913462 | 0.135198 |
| 0.108683  | 0.113491  | 0.106498  | 0.111451 | 0.104749 | 0.103875  | 0.112762 |
| 0.112617  | 0.121795  | 0.115093  | 0.140152 | 0.132284 | 0.115385  | 0.133887 |

|           |          |           |          |          |           |          |
|-----------|----------|-----------|----------|----------|-----------|----------|
| 0.128059  | 0.138112 | 0.131993  | 0.147727 | 0.141026 | 0.126748  | 0.142628 |
| 0.0976107 | 0.109411 | 0.106789  | 0.142045 | 0.130682 | 0.107955  | 0.140734 |
| 0.12704   | 0.134178 | 0.127768  | 0.144668 | 0.135344 | 0.125437  | 0.137821 |
| 0.104458  | 0.121795 | 0.109848  | 0.140152 | 0.130828 | 0.112762  | 0.135927 |
| 0.11553   | 0.128788 | 0.11859   | 0.144231 | 0.140443 | 0.107517  | 0.138258 |
| 0.107226  | 0.116987 | 0.104458  | 0.136801 | 0.12602  | 0.103875  | 0.129371 |
| 0.121358  | 0.119172 | 0.119172  | 0.108974 | 0.112179 | 0.113054  | 0.104749 |
| 0.104021  | 0.10912  | 0.0986305 | 0.142045 | 0.137383 | 0.0962995 | 0.146562 |
| 0.0999417 | 0.111742 | 0.106206  | 0.137383 | 0.125146 | 0.105624  | 0.136946 |
| 0.121795  | 0.134761 | 0.130099  | 0.145542 | 0.140297 | 0.126894  | 0.138986 |
| 0.17905   | 0.194639 | 0.181818  | 0.199883 | 0.186189 | 0.185023  | 0.199446 |
| 0.131119  | 0.137966 | 0.133596  | 0.144959 | 0.142337 | 0.131847  | 0.145979 |
| 0.11655   | 0.127477 | 0.120192  | 0.13884  | 0.127185 | 0.114656  | 0.135198 |
| 0.109411  | 0.124126 | 0.112179  | 0.142191 | 0.134324 | 0.104021  | 0.137675 |
| 0.0976107 | 0.113199 | 0.103293  | 0.133013 | 0.12602  | 0.102127  | 0.129079 |
| 0.106498  | 0.114802 | 0.104021  | 0.135198 | 0.127331 | 0.103147  | 0.127768 |
| 0.110723  | 0.118735 | 0.106206  | 0.13884  | 0.132139 | 0.108829  | 0.129079 |
| 0.186917  | 0.198427 | 0.18648   | 0.202797 | 0.188811 | 0.192016  | 0.206439 |
| 0.11116   | 0.121212 | 0.11451   | 0.133741 | 0.122378 | 0.113636  | 0.138258 |
| 0.0961538 | 0.110868 | 0.0989219 | 0.131265 | 0.121649 | 0.103875  | 0.129953 |
| 0.123543  | 0.129225 | 0.127477  | 0.141754 | 0.13039  | 0.122815  | 0.137821 |
| 0.1875    | 0.201923 | 0.192308  | 0.208042 | 0.193765 | 0.192016  | 0.207896 |
| 0.090035  | 0.105041 | 0.0907634 | 0.139132 | 0.124272 | 0.100087  | 0.132576 |
| 0.112617  | 0.118298 | 0.11451   | 0.108683 | 0.105769 | 0.106935  | 0.105041 |
| 0.117279  | 0.129662 | 0.123543  | 0.139569 | 0.129953 | 0.120047  | 0.140006 |
| 0.107226  | 0.12398  | 0.107372  | 0.140006 | 0.124854 | 0.111742  | 0.137821 |
| 0.18211   | 0.196824 | 0.184878  | 0.203526 | 0.1875   | 0.188957  | 0.203963 |
| 0.111305  | 0.119318 | 0.109703  | 0.107955 | 0.104458 | 0.103584  | 0.105186 |
| 0.108392  | 0.119318 | 0.110577  | 0.135635 | 0.121649 | 0.110868  | 0.127622 |
| 0.0926573 | 0.104458 | 0.0942599 | 0.142045 | 0.126311 | 0.101253  | 0.137821 |
| 0.115967  | 0.129808 | 0.110286  | 0.139714 | 0.124563 | 0.112325  | 0.143065 |
| 0.114365  | 0.128497 | 0.113054  | 0.143648 | 0.129371 | 0.117133  | 0.132721 |
| 0.116987  | 0.118007 | 0.119172  | 0.107809 | 0.110431 | 0.112179  | 0.100379 |
| 0.0939685 | 0.111305 | 0.105186  | 0.140443 | 0.129662 | 0.106935  | 0.138549 |
| 0.116696  | 0.115385 | 0.115385  | 0.142191 | 0.137821 | 0.114802  | 0.135635 |
| 0.13549   | 0.149913 | 0.138258  | 0.161568 | 0.153118 | 0.144085  | 0.156177 |
| 0.232809  | 0.243444 | 0.234994  | 0.247232 | 0.236742 | 0.233829  | 0.250874 |
| 0.111888  | 0.109994 | 0.106789  | 0.146416 | 0.140006 | 0.103293  | 0.147145 |
| 0.114219  | 0.132139 | 0.114073  | 0.143502 | 0.130682 | 0.117861  | 0.13549  |
| 0.112908  | 0.125    | 0.118007  | 0.131119 | 0.122378 | 0.113054  | 0.130099 |
| 0.115676  | 0.13039  | 0.119318  | 0.144959 | 0.135927 | 0.123106  | 0.143065 |
| 0.108829  | 0.120921 | 0.109266  | 0.125874 | 0.117716 | 0.108683  | 0.118153 |
| 0.104749  | 0.118881 | 0.113345  | 0.135198 | 0.13141  | 0.117424  | 0.128934 |
| 0.118881  | 0.128642 | 0.119318  | 0.135052 | 0.126311 | 0.118153  | 0.135198 |

|           |           |           |          |          |           |          |
|-----------|-----------|-----------|----------|----------|-----------|----------|
| 0.118444  | 0.119464  | 0.116841  | 0.109848 | 0.108392 | 0.109557  | 0.10708  |
| 0.115239  | 0.127331  | 0.113345  | 0.144231 | 0.127622 | 0.117716  | 0.137966 |
| 0.233392  | 0.243735  | 0.237034  | 0.244901 | 0.237908 | 0.237325  | 0.25     |
| 0.0887238 | 0.105186  | 0.0909091 | 0.134615 | 0.125291 | 0.0996503 | 0.128642 |
| 0.097465  | 0.11014   | 0.0932401 | 0.125291 | 0.119172 | 0.0961538 | 0.124563 |
| 0.0964452 | 0.106206  | 0.104458  | 0.139132 | 0.127185 | 0.105041  | 0.135198 |
| 0.119901  | 0.139277  | 0.125     | 0.149184 | 0.138986 | 0.129662  | 0.145833 |
| 0.113199  | 0.118881  | 0.111597  | 0.149476 | 0.145396 | 0.111014  | 0.153409 |
| 0.106206  | 0.121212  | 0.111014  | 0.1419   | 0.13141  | 0.111888  | 0.146416 |
| 0.117279  | 0.127622  | 0.11859   | 0.141608 | 0.129953 | 0.116841  | 0.140006 |
| 0.101107  | 0.119027  | 0.106789  | 0.140006 | 0.127185 | 0.106789  | 0.136072 |
| 0.229604  | 0.241696  | 0.234994  | 0.237908 | 0.230041 | 0.231206  | 0.243881 |
| 0.122669  | 0.128642  | 0.125728  | 0.14088  | 0.129225 | 0.122523  | 0.136946 |
| 0.113491  | 0.117424  | 0.113345  | 0.106643 | 0.104312 | 0.107226  | 0.108246 |
| 0.105041  | 0.117716  | 0.105769  | 0.138112 | 0.122669 | 0.111305  | 0.13039  |
| 0.118881  | 0.127768  | 0.120775  | 0.146416 | 0.136218 | 0.115239  | 0.124126 |
| 0.116841  | 0.11961   | 0.108246  | 0.137966 | 0.134178 | 0.109994  | 0.127331 |
| 0.0973193 | 0.109994  | 0.107372  | 0.140006 | 0.128934 | 0.105915  | 0.137529 |
| 0.113636  | 0.114656  | 0.114948  | 0.109703 | 0.107955 | 0.105915  | 0.107226 |
| 0.121066  | 0.121503  | 0.11859   | 0.111597 | 0.113345 | 0.112471  | 0.106498 |
| 0.108246  | 0.115676  | 0.107809  | 0.110723 | 0.102855 | 0.10373   | 0.103875 |
| 0.0987762 | 0.110577  | 0.104167  | 0.141171 | 0.12602  | 0.107663  | 0.141026 |
| 0.119464  | 0.133596  | 0.124272  | 0.145833 | 0.139714 | 0.121649  | 0.13549  |
| 0.124854  | 0.136655  | 0.127914  | 0.148893 | 0.144814 | 0.127914  | 0.139714 |
| 0.120192  | 0.12704   | 0.120629  | 0.14831  | 0.140443 | 0.112762  | 0.138549 |
| 0.119901  | 0.13141   | 0.125     | 0.15035  | 0.143357 | 0.113345  | 0.143211 |
| 0.123252  | 0.135344  | 0.123689  | 0.147582 | 0.142337 | 0.12602   | 0.136946 |
| 0.0751748 | 0.0913462 | 0.0796911 | 0.141754 | 0.13039  | 0.08581   | 0.133741 |
| 0.123106  | 0.125     | 0.117424  | 0.127914 | 0.128788 | 0.0981935 | 0.125728 |
| 0.122378  | 0.121941  | 0.123397  | 0.134761 | 0.136218 | 0.12398   | 0.143065 |
| 0.201923  | 0.21722   | 0.2044    | 0.219551 | 0.207314 | 0.205857  | 0.221154 |
| 0.113636  | 0.123689  | 0.121941  | 0.147873 | 0.140589 | 0.11553   | 0.138403 |
| 0.105769  | 0.114948  | 0.0957168 | 0.131847 | 0.122232 | 0.10271   | 0.127331 |
| 0.10067   | 0.113928  | 0.111597  | 0.145688 | 0.134033 | 0.112471  | 0.143794 |
| 0.217366  | 0.229458  | 0.222465  | 0.235286 | 0.226544 | 0.222756  | 0.235723 |
| 0.208042  | 0.216929  | 0.212267  | 0.220134 | 0.211684 | 0.209353  | 0.224942 |
| 0.120484  | 0.120629  | 0.116841  | 0.112179 | 0.111305 | 0.113054  | 0.106789 |
| 0.247669  | 0.258013  | 0.249563  | 0.257139 | 0.249272 | 0.252185  | 0.261655 |
| 0.076049  | 0.0925117 | 0.0823135 | 0.14292  | 0.12602  | 0.0861014 | 0.136655 |
| 0.117716  | 0.123397  | 0.121358  | 0.146999 | 0.146707 | 0.128059  | 0.155012 |
| 0.0906177 | 0.104749  | 0.0916375 | 0.139132 | 0.13039  | 0.100087  | 0.133159 |
| 0.121066  | 0.132867  | 0.120629  | 0.145105 | 0.136946 | 0.122378  | 0.13447  |
| 0.182401  | 0.197407  | 0.186917  | 0.200612 | 0.190414 | 0.186917  | 0.203089 |
| 0.112617  | 0.122669  | 0.117424  | 0.139569 | 0.136655 | 0.117716  | 0.135635 |



|           |           |           |          |          |           |          |
|-----------|-----------|-----------|----------|----------|-----------|----------|
| 0.18954   | 0.20338   | 0.191434  | 0.205711 | 0.19493  | 0.194639  | 0.209353 |
| 0.105332  | 0.115385  | 0.110431  | 0.142483 | 0.131993 | 0.117133  | 0.141171 |
| 0.112908  | 0.116841  | 0.111014  | 0.116841 | 0.105186 | 0.105769  | 0.119318 |
| 0.095134  | 0.109557  | 0.103147  | 0.145396 | 0.135198 | 0.101981  | 0.13243  |
| 0.106498  | 0.119755  | 0.106061  | 0.13141  | 0.119464 | 0.106352  | 0.130682 |
| 0.0935315 | 0.101544  | 0.0983392 | 0.137675 | 0.123106 | 0.0983392 | 0.132576 |
| 0.100524  | 0.117861  | 0.108537  | 0.140006 | 0.130099 | 0.10912   | 0.129953 |
| 0.087704  | 0.0986305 | 0.0898893 | 0.135927 | 0.125728 | 0.0968823 | 0.127914 |
| 0.110868  | 0.119755  | 0.115676  | 0.135198 | 0.125874 | 0.112762  | 0.133596 |
| 0.107226  | 0.115822  | 0.0995047 | 0.122815 | 0.114656 | 0.0855186 | 0.124126 |
| 0.097028  | 0.102418  | 0.0936772 | 0.136509 | 0.126311 | 0.0922203 | 0.142483 |
| 0.0887238 | 0.104021  | 0.0920746 | 0.137821 | 0.130536 | 0.101399  | 0.132721 |
| 0.11451   | 0.122815  | 0.112325  | 0.142628 | 0.130099 | 0.107663  | 0.138403 |
| 0.124417  | 0.134178  | 0.128934  | 0.148164 | 0.136509 | 0.124563  | 0.139569 |
| 0.105915  | 0.117424  | 0.107517  | 0.138403 | 0.129371 | 0.10373   | 0.133887 |
| 0.102564  | 0.121649  | 0.110577  | 0.132721 | 0.12398  | 0.107372  | 0.128788 |
| 0.0936772 | 0.104021  | 0.0990676 | 0.135781 | 0.123252 | 0.101981  | 0.133887 |
| 0.113782  | 0.116259  | 0.111014  | 0.109848 | 0.106643 | 0.104021  | 0.109703 |
| 0.113782  | 0.129662  | 0.110431  | 0.140734 | 0.131993 | 0.11859   | 0.133887 |
| 0.110431  | 0.116113  | 0.107955  | 0.135344 | 0.129808 | 0.105915  | 0.128788 |
| 0.107517  | 0.121649  | 0.108537  | 0.138549 | 0.128642 | 0.104167  | 0.136364 |
| 0.113491  | 0.123834  | 0.116259  | 0.138695 | 0.125874 | 0.118007  | 0.133596 |
| 0.125291  | 0.134178  | 0.127477  | 0.142337 | 0.137675 | 0.124272  | 0.143065 |
| 0.134033  | 0.137383  | 0.137675  | 0.148747 | 0.142045 | 0.13447   | 0.146562 |
| 0.0986305 | 0.106935  | 0.094697  | 0.113054 | 0.10373  | 0.0979021 | 0.105915 |
| 0.0995047 | 0.108683  | 0.104604  | 0.142483 | 0.126748 | 0.1081    | 0.137383 |
| 0.0987762 | 0.116113  | 0.102418  | 0.13243  | 0.121358 | 0.103875  | 0.126748 |
| 0.125583  | 0.136509  | 0.125728  | 0.149038 | 0.143794 | 0.129225  | 0.136655 |
| 0.0960082 | 0.103438  | 0.092366  | 0.139277 | 0.133741 | 0.103147  | 0.131556 |
| 0.126603  | 0.130245  | 0.125583  | 0.144522 | 0.146562 | 0.120338  | 0.135052 |
| 0.113782  | 0.120921  | 0.123834  | 0.150058 | 0.145688 | 0.126166  | 0.152826 |
| 0.115676  | 0.131847  | 0.118444  | 0.145542 | 0.135344 | 0.124854  | 0.145396 |
| 0.0989219 | 0.11014   | 0.0973193 | 0.140152 | 0.129079 | 0.0967366 | 0.135344 |
| 0.106061  | 0.121066  | 0.107955  | 0.139132 | 0.127185 | 0.109994  | 0.125291 |
| 0.116841  | 0.129516  | 0.119318  | 0.147582 | 0.14088  | 0.108246  | 0.13986  |
| 0.203234  | 0.215035  | 0.207168  | 0.217366 | 0.206585 | 0.203089  | 0.2213   |
| 0.10271   | 0.123252  | 0.105769  | 0.134907 | 0.124417 | 0.108974  | 0.128934 |
| 0.090035  | 0.106789  | 0.0986305 | 0.14729  | 0.133596 | 0.0989219 | 0.132576 |
| 0.112034  | 0.127622  | 0.115385  | 0.1419   | 0.128788 | 0.115967  | 0.133304 |
| 0.105478  | 0.120192  | 0.108537  | 0.140006 | 0.128059 | 0.105041  | 0.134033 |
| 0.10912   | 0.122378  | 0.113636  | 0.15035  | 0.136946 | 0.120629  | 0.144085 |
| 0.117279  | 0.126457  | 0.117133  | 0.140734 | 0.13345  | 0.114219  | 0.13243  |
| 0.120629  | 0.13243   | 0.121649  | 0.137092 | 0.13243  | 0.120484  | 0.134615 |
| 0.108829  | 0.129953  | 0.111597  | 0.13986  | 0.129662 | 0.119172  | 0.139132 |

|           |           |           |           |           |           |          |
|-----------|-----------|-----------|-----------|-----------|-----------|----------|
| 0.103001  | 0.112179  | 0.0894522 | 0.119755  | 0.112762  | 0.0812937 | 0.120775 |
| 0.120192  | 0.134615  | 0.122378  | 0.145105  | 0.13986   | 0.121795  | 0.131265 |
| 0.092803  | 0.107517  | 0.0984848 | 0.143939  | 0.134324  | 0.099359  | 0.128934 |
| 0.101399  | 0.10708   | 0.0965909 | 0.146416  | 0.133887  | 0.0980478 | 0.14627  |
| 0.17264   | 0.189685  | 0.171911  | 0.192016  | 0.178322  | 0.17162   | 0.189831 |
| 0.115239  | 0.126166  | 0.113928  | 0.136655  | 0.12704   | 0.115093  | 0.13447  |
| 0.121795  | 0.135635  | 0.122523  | 0.146999  | 0.139714  | 0.124272  | 0.137238 |
| 0.0971737 | 0.101399  | 0.0917832 | 0.140734  | 0.135198  | 0.0964452 | 0.129516 |
| 0.107809  | 0.127477  | 0.109994  | 0.134178  | 0.128351  | 0.120484  | 0.133741 |
| 0.0909091 | 0.102418  | 0.090472  | 0.133013  | 0.121066  | 0.0957168 | 0.129662 |
| 0.0897436 | 0.103584  | 0.0866841 | 0.133887  | 0.123689  | 0.090472  | 0.131702 |
| 0.0929487 | 0.107372  | 0.0954254 | 0.137383  | 0.126603  | 0.0980478 | 0.132867 |
| 0.116259  | 0.119027  | 0.111451  | 0.131847  | 0.13039   | 0.122815  | 0.124709 |
| 0.105478  | 0.116696  | 0.101253  | 0.137966  | 0.124563  | 0.105332  | 0.140152 |
| 0.116113  | 0.122378  | 0.113345  | 0.142483  | 0.13345   | 0.108392  | 0.142628 |
| 0.0958625 | 0.114656  | 0.0989219 | 0.131847  | 0.117279  | 0.100962  | 0.131702 |
| 0.101253  | 0.112471  | 0.100816  | 0.135781  | 0.121212  | 0.100524  | 0.131556 |
| 0.123543  | 0.12398   | 0.117861  | 0.128642  | 0.130973  | 0.122815  | 0.120921 |
| 0.0941142 | 0.0980478 | 0.090472  | 0.132139  | 0.128059  | 0.0843531 | 0.132867 |
| 0.109557  | 0.11757   | 0.114365  | 0.138258  | 0.134761  | 0.110868  | 0.13141  |
| 0.0894522 | 0.0980478 | 0.08581   | 0.131556  | 0.121066  | 0.0814394 | 0.131119 |
| 0.0926573 | 0.099796  | 0.0893065 | 0.132139  | 0.127477  | 0.0869755 | 0.132284 |
| 0         | 0.0983392 | 0.0863928 | 0.137092  | 0.126311  | 0.0942599 | 0.12704  |
| 0.0983392 | 0         | 0.104021  | 0.142774  | 0.13549   | 0.0990676 | 0.129808 |
| 0.0863928 | 0.104021  | 0         | 0.135781  | 0.124417  | 0.0929487 | 0.130973 |
| 0.137092  | 0.142774  | 0.135781  | 0         | 0.0611888 | 0.130828  | 0.130973 |
| 0.126311  | 0.13549   | 0.124417  | 0.0611888 | 0         | 0.120921  | 0.126311 |
| 0.0942599 | 0.0990676 | 0.0929487 | 0.130828  | 0.120921  | 0         | 0.124272 |
| 0.12704   | 0.129808  | 0.130973  | 0.130973  | 0.126311  | 0.124272  | 0        |
| 0.111888  | 0.126311  | 0.110868  | 0.143211  | 0.13243   | 0.111451  | 0.148019 |
| 0.123543  | 0.123689  | 0.123397  | 0.140297  | 0.142045  | 0.124272  | 0.143939 |
| 0.0958625 | 0.101253  | 0.0866841 | 0.133887  | 0.129516  | 0.092803  | 0.127622 |
| 0.128934  | 0.141317  | 0.142483  | 0.125874  | 0.12704   | 0.143065  | 0.151078 |
| 0.116987  | 0.125583  | 0.123834  | 0.142191  | 0.137529  | 0.125874  | 0.129808 |
| 0.127185  | 0.136072  | 0.12704   | 0.140734  | 0.138403  | 0.13345   | 0.134761 |
| 0.107372  | 0.11014   | 0.107226  | 0.136364  | 0.130536  | 0.104021  | 0.142045 |
| 0.0944056 | 0.101544  | 0.0852273 | 0.127185  | 0.119318  | 0.0793998 | 0.130536 |
| 0.0895979 | 0.0897436 | 0.0909091 | 0.131993  | 0.118298  | 0.0979021 | 0.124563 |
| 0.112762  | 0.115239  | 0.108246  | 0.127185  | 0.125437  | 0.111742  | 0.119755 |
| 0.104312  | 0.103875  | 0.097465  | 0.133013  | 0.13039   | 0.0933858 | 0.127622 |
| 0.0922203 | 0.113345  | 0.112471  | 0.145396  | 0.144814  | 0.112179  | 0.129516 |
| 0.0939685 | 0.121503  | 0.108974  | 0.0912005 | 0.0792541 | 0.111597  | 0.13039  |
| 0.095134  | 0.1081    | 0.0912005 | 0.130536  | 0.120921  | 0.0958625 | 0.128351 |
| 0.0909091 | 0.0852273 | 0.0916375 | 0.133596  | 0.120192  | 0.0945513 | 0.122086 |

|           |           |           |          |          |           |          |
|-----------|-----------|-----------|----------|----------|-----------|----------|
| 0.0968823 | 0.0912005 | 0.100816  | 0.134907 | 0.129662 | 0.0961538 | 0.129808 |
| 0.0939685 | 0.10373   | 0.0888695 | 0.128205 | 0.11655  | 0.0964452 | 0.125437 |
| 0.0999417 | 0.0855186 | 0.101544  | 0.137383 | 0.130682 | 0.102127  | 0.12704  |
| 0.0941142 | 0.102418  | 0.0945513 | 0.14088  | 0.129516 | 0.0989219 | 0.134615 |
| 0.103001  | 0.117716  | 0.113636  | 0.139277 | 0.126748 | 0.112179  | 0.141463 |
| 0.101253  | 0.108974  | 0.0932401 | 0.135198 | 0.12704  | 0.102273  | 0.144668 |
| 0.0802739 | 0.0897436 | 0.083042  | 0.139277 | 0.129371 | 0.0862471 | 0.133304 |
| 0.0939685 | 0.0912005 | 0.0929487 | 0.132576 | 0.124709 | 0.0891608 | 0.126311 |
| 0.102855  | 0.118444  | 0.108537  | 0.135635 | 0.121649 | 0.110577  | 0.140443 |
| 0.10067   | 0.105478  | 0.099359  | 0.136364 | 0.129953 | 0.0938228 | 0.136801 |
| 0.110577  | 0.121503  | 0.113054  | 0.140152 | 0.130828 | 0.117133  | 0.139714 |
| 0.0962995 | 0.114802  | 0.103147  | 0.129371 | 0.114802 | 0.104021  | 0.134178 |
| 0.111597  | 0.112908  | 0.112034  | 0.136218 | 0.136218 | 0.107663  | 0.138112 |

| <b>TDr_96_01817</b> | <b>TDr_96_01818</b> | <b>TDr_96_02433</b> | <b>TDr_97_00205</b> | <b>TDr_97_00583</b> | <b>TDr_97_00777</b> | <b>TDr_97_00793</b> |
|---------------------|---------------------|---------------------|---------------------|---------------------|---------------------|---------------------|
| 0.106498            | 0.125728            | 0.10912             | 0.14831             | 0.13141             | 0.131702            | 0.109557            |
| 0.11655             | 0.127914            | 0.113345            | 0.138258            | 0.131556            | 0.133013            | 0.112617            |
| 0.113054            | 0.124417            | 0.107809            | 0.135635            | 0.128642            | 0.128934            | 0.113491            |
| 0.120047            | 0.130828            | 0.110723            | 0.138549            | 0.128934            | 0.133304            | 0.115239            |
| 0.134033            | 0.136655            | 0.125874            | 0.150204            | 0.130682            | 0.14292             | 0.133304            |
| 0.123834            | 0.134324            | 0.125291            | 0.153992            | 0.141463            | 0.135052            | 0.131556            |
| 0.118153            | 0.131847            | 0.109411            | 0.139277            | 0.125583            | 0.129662            | 0.0999417           |
| 0.111742            | 0.126894            | 0.108246            | 0.137821            | 0.126457            | 0.134033            | 0.113928            |
| 0.113928            | 0.116259            | 0.0912005           | 0.139423            | 0.122523            | 0.129225            | 0.107663            |
| 0.116404            | 0.112325            | 0.0817308           | 0.133159            | 0.121795            | 0.131993            | 0.10169             |
| 0.117424            | 0.126748            | 0.111597            | 0.146125            | 0.131265            | 0.131847            | 0.109703            |
| 0.116987            | 0.125728            | 0.109994            | 0.134033            | 0.120629            | 0.123543            | 0.113928            |
| 0.116696            | 0.124854            | 0.100379            | 0.142483            | 0.125874            | 0.134615            | 0.112471            |
| 0.136946            | 0.130828            | 0.127622            | 0.154283            | 0.148164            | 0.151369            | 0.137966            |
| 0.128351            | 0.135927            | 0.115239            | 0.14627             | 0.132576            | 0.143648            | 0.129079            |
| 0.12704             | 0.115385            | 0.111597            | 0.146707            | 0.127768            | 0.11961             | 0.109703            |
| 0.119027            | 0.125146            | 0.106206            | 0.118007            | 0.0973193           | 0.13345             | 0.115967            |
| 0.136364            | 0.148893            | 0.138403            | 0.158362            | 0.142045            | 0.156906            | 0.137092            |
| 0.112179            | 0.126166            | 0.106352            | 0.133304            | 0.124563            | 0.12602             | 0.109411            |
| 0.206002            | 0.204545            | 0.200758            | 0.214015            | 0.204108            | 0.205274            | 0.21081             |
| 0.107955            | 0.144959            | 0.116113            | 0.149184            | 0.141317            | 0.136072            | 0.118007            |
| 0.0935315           | 0.137238            | 0.117133            | 0.146125            | 0.132139            | 0.134761            | 0.106498            |
| 0.116696            | 0.114073            | 0.107372            | 0.136364            | 0.120921            | 0.121212            | 0.109557            |
| 0.13141             | 0.125291            | 0.119755            | 0.14292             | 0.125728            | 0.117861            | 0.118444            |
| 0.105041            | 0.114365            | 0.0960082           | 0.134907            | 0.118298            | 0.12296             | 0.101107            |
| 0.114073            | 0.141463            | 0.118735            | 0.149767            | 0.142774            | 0.138403            | 0.121212            |
| 0.126603            | 0.133013            | 0.101253            | 0.13345             | 0.118007            | 0.132867            | 0.11655             |
| 0.125437            | 0.122815            | 0.114656            | 0.142191            | 0.124709            | 0.109557            | 0.120629            |
| 0.133304            | 0.132139            | 0.12398             | 0.144814            | 0.130245            | 0.131993            | 0.120921            |
| 0.128642            | 0.136218            | 0.104167            | 0.13986             | 0.116259            | 0.132576            | 0.120047            |
| 0.115676            | 0.12704             | 0.109848            | 0.14292             | 0.129808            | 0.128351            | 0.116404            |
| 0.122232            | 0.124563            | 0.113199            | 0.136655            | 0.123252            | 0.121503            | 0.116259            |
| 0.110286            | 0.116696            | 0.0962995           | 0.13549             | 0.121212            | 0.124417            | 0.106061            |
| 0.11961             | 0.126603            | 0.100379            | 0.147145            | 0.126166            | 0.134907            | 0.117716            |
| 0.127622            | 0.12296             | 0.109848            | 0.136509            | 0.124563            | 0.13243             | 0.111742            |
| 0.130682            | 0.128934            | 0.11553             | 0.141608            | 0.129662            | 0.135781            | 0.122086            |
| 0.120338            | 0.13986             | 0.119464            | 0.151078            | 0.135635            | 0.144376            | 0.0569639           |
| 0.123689            | 0.13243             | 0.113782            | 0.141026            | 0.131993            | 0.134033            | 0.118007            |
| 0.116696            | 0.122815            | 0.103293            | 0.13549             | 0.117133            | 0.111014            | 0.113636            |
| 0.131556            | 0.112908            | 0.113491            | 0.138403            | 0.129371            | 0.125583            | 0.125874            |
| 0.113782            | 0.109994            | 0.104458            | 0.132576            | 0.120629            | 0.11859             | 0.112762            |
| 0.141754            | 0.118153            | 0.133596            | 0.155886            | 0.143065            | 0.131119            | 0.133159            |

|          |           |           |          |          |          |           |
|----------|-----------|-----------|----------|----------|----------|-----------|
| 0.147582 | 0.108537  | 0.136218  | 0.152681 | 0.141026 | 0.136364 | 0.138112  |
| 0.115093 | 0.11014   | 0.108974  | 0.136509 | 0.123106 | 0.124854 | 0.113782  |
| 0.111014 | 0.124126  | 0.0932401 | 0.129516 | 0.110868 | 0.125146 | 0.0977564 |
| 0.124854 | 0.131265  | 0.095134  | 0.136072 | 0.123834 | 0.137529 | 0.0990676 |
| 0.119901 | 0.126894  | 0.114656  | 0.139277 | 0.121503 | 0.103438 | 0.12296   |
| 0.140443 | 0.108974  | 0.129371  | 0.149913 | 0.137966 | 0.136509 | 0.128934  |
| 0.117424 | 0.10373   | 0.106061  | 0.138258 | 0.125437 | 0.123397 | 0.114948  |
| 0.115822 | 0.108537  | 0.112034  | 0.136072 | 0.121212 | 0.124417 | 0.109848  |
| 0.119172 | 0.149476  | 0.130245  | 0.160985 | 0.150495 | 0.146416 | 0.121941  |
| 0.134907 | 0.120047  | 0.126457  | 0.144959 | 0.126894 | 0.112325 | 0.128934  |
| 0.11553  | 0.10912   | 0.108537  | 0.131993 | 0.120629 | 0.120047 | 0.108392  |
| 0.126894 | 0.0945513 | 0.112617  | 0.143939 | 0.136364 | 0.142483 | 0.117133  |
| 0.112034 | 0.116987  | 0.115822  | 0.141026 | 0.124417 | 0.119172 | 0.114802  |
| 0.142337 | 0.128642  | 0.129225  | 0.157051 | 0.143939 | 0.115385 | 0.137821  |
| 0.131993 | 0.106935  | 0.120338  | 0.145251 | 0.133596 | 0.130973 | 0.118444  |
| 0.11655  | 0.111597  | 0.103147  | 0.137383 | 0.122815 | 0.123106 | 0.116404  |
| 0.119755 | 0.108683  | 0.110723  | 0.14088  | 0.120192 | 0.118735 | 0.110577  |
| 0.124563 | 0.123106  | 0.104458  | 0.141317 | 0.126748 | 0.128205 | 0.100816  |
| 0.138549 | 0.116696  | 0.133013  | 0.146853 | 0.146853 | 0.130536 | 0.13141   |
| 0.143211 | 0.119901  | 0.131265  | 0.151515 | 0.140734 | 0.138403 | 0.134033  |
| 0.166084 | 0.152681  | 0.151807  | 0.174097 | 0.170309 | 0.156906 | 0.163607  |
| 0.11655  | 0.111597  | 0.107809  | 0.137675 | 0.122815 | 0.121358 | 0.112325  |
| 0.120047 | 0.11451   | 0.104895  | 0.129808 | 0.121941 | 0.122232 | 0.112034  |
| 0.120047 | 0.0935315 | 0.104312  | 0.131265 | 0.115239 | 0.114656 | 0.113782  |
| 0.13039  | 0.151952  | 0.125728  | 0.148601 | 0.144814 | 0.136072 | 0.122378  |
| 0.118444 | 0.114365  | 0.108537  | 0.131702 | 0.124417 | 0.124709 | 0.11451   |
| 0.129662 | 0.110431  | 0.127914  | 0.141754 | 0.13447  | 0.115822 | 0.131265  |
| 0.122669 | 0.12704   | 0.0987762 | 0.141171 | 0.122815 | 0.13039  | 0.102127  |
| 0.123397 | 0.11116   | 0.110577  | 0.137238 | 0.120629 | 0.122669 | 0.113928  |
| 0.13243  | 0.14729   | 0.139423  | 0.153846 | 0.148601 | 0.1419   | 0.126457  |
| 0.129225 | 0.111742  | 0.110868  | 0.144814 | 0.125874 | 0.120338 | 0.122378  |
| 0.140734 | 0.107226  | 0.132284  | 0.151369 | 0.139132 | 0.134761 | 0.138549  |
| 0.137966 | 0.12602   | 0.126894  | 0.145396 | 0.129079 | 0.121795 | 0.13141   |
| 0.111014 | 0.126166  | 0.111305  | 0.139423 | 0.126311 | 0.124854 | 0.11553   |
| 0.11859  | 0.109848  | 0.105769  | 0.137092 | 0.119901 | 0.121941 | 0.113782  |
| 0.124417 | 0.107226  | 0.109557  | 0.139132 | 0.118735 | 0.120192 | 0.110577  |
| 0.13549  | 0.115676  | 0.121503  | 0.144085 | 0.132721 | 0.125437 | 0.133304  |
| 0.113491 | 0.105624  | 0.105624  | 0.139277 | 0.123252 | 0.124709 | 0.110431  |
| 0.145979 | 0.115676  | 0.132284  | 0.14729  | 0.141463 | 0.131847 | 0.137092  |
| 0.126748 | 0.115385  | 0.117133  | 0.148456 | 0.128059 | 0.127768 | 0.11961   |
| 0.12296  | 0.121503  | 0.114219  | 0.138549 | 0.122232 | 0.113782 | 0.114073  |
| 0.118007 | 0.111597  | 0.114802  | 0.142337 | 0.128934 | 0.121358 | 0.113491  |
| 0.125874 | 0.115967  | 0.113636  | 0.140589 | 0.127477 | 0.124563 | 0.123397  |
| 0.123834 | 0.108392  | 0.104604  | 0.139132 | 0.118735 | 0.116696 | 0.115822  |

|          |          |           |          |          |          |           |
|----------|----------|-----------|----------|----------|----------|-----------|
| 0.120338 | 0.107809 | 0.106643  | 0.137092 | 0.125728 | 0.115822 | 0.116404  |
| 0.141463 | 0.110577 | 0.132721  | 0.14627  | 0.1419   | 0.131702 | 0.13345   |
| 0.117279 | 0.127477 | 0.0989219 | 0.13549  | 0.119464 | 0.125874 | 0.105478  |
| 0.116841 | 0.124417 | 0.102564  | 0.137675 | 0.125146 | 0.130973 | 0.111742  |
| 0.115676 | 0.140443 | 0.113928  | 0.148164 | 0.127768 | 0.13884  | 0.099796  |
| 0.118298 | 0.138112 | 0.113054  | 0.140006 | 0.126603 | 0.136509 | 0.0986305 |
| 0.129953 | 0.133741 | 0.121795  | 0.139423 | 0.122815 | 0.133596 | 0.110286  |
| 0.135927 | 0.144959 | 0.126311  | 0.143939 | 0.137529 | 0.146562 | 0.118298  |
| 0.111014 | 0.129662 | 0.109557  | 0.14292  | 0.122232 | 0.128351 | 0.0971737 |
| 0.177739 | 0.180944 | 0.177156  | 0.19391  | 0.186917 | 0.183712 | 0.174388  |
| 0.099796 | 0.128642 | 0.103875  | 0.137529 | 0.117716 | 0.131702 | 0.0944056 |
| 0.13345  | 0.142774 | 0.118007  | 0.146125 | 0.138258 | 0.141171 | 0.12602   |
| 0.128788 | 0.137821 | 0.112179  | 0.138258 | 0.126311 | 0.137966 | 0.115239  |
| 0.122232 | 0.142628 | 0.128934  | 0.149767 | 0.134033 | 0.143648 | 0.105478  |
| 0.111014 | 0.129662 | 0.106061  | 0.133596 | 0.116987 | 0.132139 | 0.0954254 |
| 0.129953 | 0.141317 | 0.122086  | 0.143211 | 0.133013 | 0.137966 | 0.113199  |
| 0.116259 | 0.137821 | 0.10169   | 0.133596 | 0.118444 | 0.133887 | 0.104458  |
| 0.127185 | 0.131847 | 0.110868  | 0.140734 | 0.123252 | 0.131993 | 0.115676  |
| 0.108246 | 0.12398  | 0.105915  | 0.142191 | 0.127622 | 0.126748 | 0.0725524 |
| 0.135344 | 0.142045 | 0.123397  | 0.14627  | 0.129662 | 0.139277 | 0.123252  |
| 0.116987 | 0.12398  | 0.097465  | 0.135198 | 0.121503 | 0.126748 | 0.105769  |
| 0.127914 | 0.133741 | 0.129953  | 0.141171 | 0.135344 | 0.138258 | 0.103584  |
| 0.115239 | 0.13447  | 0.101253  | 0.140152 | 0.123252 | 0.128788 | 0.0932401 |
| 0.135781 | 0.108392 | 0.123543  | 0.144668 | 0.133013 | 0.126603 | 0.129225  |
| 0.116987 | 0.136801 | 0.112034  | 0.142191 | 0.132576 | 0.137821 | 0.0981935 |
| 0.10708  | 0.128642 | 0.101544  | 0.132576 | 0.117424 | 0.127622 | 0.0862471 |
| 0.140006 | 0.145542 | 0.139714  | 0.149767 | 0.148601 | 0.140734 | 0.133159  |
| 0.11451  | 0.133741 | 0.103147  | 0.132139 | 0.120775 | 0.128059 | 0.0916375 |
| 0.114802 | 0.133159 | 0.104604  | 0.136801 | 0.121941 | 0.127477 | 0.104458  |
| 0.120192 | 0.130099 | 0.0968823 | 0.138986 | 0.121795 | 0.121503 | 0.113928  |
| 0.130682 | 0.143502 | 0.120775  | 0.152681 | 0.141317 | 0.151807 | 0.10373   |
| 0.120484 | 0.120775 | 0.114948  | 0.144814 | 0.131702 | 0.11014  | 0.111305  |
| 0.109703 | 0.131847 | 0.101544  | 0.133741 | 0.121795 | 0.125291 | 0.104895  |
| 0.110868 | 0.129516 | 0.105624  | 0.133159 | 0.121212 | 0.128497 | 0.105769  |
| 0.106935 | 0.131702 | 0.101399  | 0.141171 | 0.126603 | 0.134761 | 0.0855186 |
| 0.128934 | 0.126894 | 0.101253  | 0.1419   | 0.130828 | 0.140152 | 0.104312  |
| 0.111014 | 0.132284 | 0.107517  | 0.136218 | 0.118735 | 0.130099 | 0.0942599 |
| 0.110286 | 0.121358 | 0.0916375 | 0.129662 | 0.11655  | 0.123543 | 0.103438  |
| 0.112325 | 0.122232 | 0.092803  | 0.132284 | 0.115676 | 0.126457 | 0.101981  |
| 0.117716 | 0.125583 | 0.0879953 | 0.137675 | 0.11961  | 0.127185 | 0.104458  |
| 0.116841 | 0.136072 | 0.102564  | 0.130099 | 0.123689 | 0.129225 | 0.116404  |
| 0.135635 | 0.130682 | 0.10912   | 0.146853 | 0.132284 | 0.13549  | 0.118881  |
| 0.116841 | 0.126748 | 0.0984848 | 0.136509 | 0.119318 | 0.129808 | 0.0995047 |
| 0.110868 | 0.124272 | 0.0933858 | 0.133159 | 0.117424 | 0.123543 | 0.0984848 |

|          |          |           |          |          |          |           |
|----------|----------|-----------|----------|----------|----------|-----------|
| 0.130682 | 0.126894 | 0.112325  | 0.137821 | 0.123543 | 0.125874 | 0.110723  |
| 0.113345 | 0.122378 | 0.0990676 | 0.134761 | 0.116987 | 0.123106 | 0.101836  |
| 0.113054 | 0.140734 | 0.112762  | 0.140297 | 0.131265 | 0.130682 | 0.108537  |
| 0.107226 | 0.145105 | 0.118298  | 0.151952 | 0.139714 | 0.138258 | 0.106498  |
| 0.125874 | 0.12704  | 0.0996503 | 0.133887 | 0.119318 | 0.125437 | 0.103875  |
| 0.119027 | 0.126311 | 0.0995047 | 0.141317 | 0.121795 | 0.13141  | 0.102273  |
| 0.116696 | 0.123689 | 0.0916375 | 0.136655 | 0.120921 | 0.126457 | 0.106061  |
| 0.110577 | 0.114365 | 0.0957168 | 0.132284 | 0.118298 | 0.120629 | 0.101399  |
| 0.129225 | 0.13039  | 0.103584  | 0.141608 | 0.132284 | 0.131119 | 0.114802  |
| 0.109703 | 0.11961  | 0.0980478 | 0.135198 | 0.122669 | 0.126457 | 0.0952797 |
| 0.139277 | 0.141317 | 0.122086  | 0.148164 | 0.135344 | 0.146125 | 0.132721  |
| 0.135344 | 0.119027 | 0.120484  | 0.149184 | 0.135198 | 0.146562 | 0.123543  |
| 0.130099 | 0.120484 | 0.108829  | 0.141608 | 0.134324 | 0.138112 | 0.118007  |
| 0.118007 | 0.115967 | 0.104895  | 0.131556 | 0.124272 | 0.132139 | 0.110868  |
| 0.100233 | 0.128788 | 0.104604  | 0.136801 | 0.124272 | 0.131556 | 0.0933858 |
| 0.117279 | 0.12602  | 0.100962  | 0.136364 | 0.11859  | 0.129662 | 0.0996503 |
| 0.117716 | 0.123834 | 0.103147  | 0.137383 | 0.118735 | 0.119027 | 0.101836  |
| 0.11655  | 0.117716 | 0.109266  | 0.142337 | 0.121066 | 0.115239 | 0.108537  |
| 0.114802 | 0.118298 | 0.11014   | 0.135927 | 0.124854 | 0.112908 | 0.116696  |
| 0.139277 | 0.114802 | 0.124417  | 0.148456 | 0.130973 | 0.103001 | 0.124854  |
| 0.115239 | 0.133596 | 0.11116   | 0.136655 | 0.124709 | 0.136946 | 0.101981  |
| 0.136655 | 0.134324 | 0.117424  | 0.141171 | 0.137966 | 0.141171 | 0.124272  |
| 0.125437 | 0.143211 | 0.122523  | 0.15035  | 0.134615 | 0.144522 | 0.109266  |
| 0.191288 | 0.205274 | 0.194784  | 0.204837 | 0.195221 | 0.199009 | 0.203089  |
| 0.23514  | 0.240093 | 0.238928  | 0.241696 | 0.235868 | 0.241404 | 0.245775  |
| 0.110286 | 0.124563 | 0.10912   | 0.131119 | 0.120921 | 0.118881 | 0.114219  |
| 0.11655  | 0.122086 | 0.109848  | 0.136509 | 0.12398  | 0.101836 | 0.112325  |
| 0.107809 | 0.113928 | 0.102855  | 0.13243  | 0.12602  | 0.105915 | 0.104749  |
| 0.114802 | 0.120047 | 0.108974  | 0.135635 | 0.121649 | 0.111451 | 0.107955  |
| 0.130536 | 0.137238 | 0.116259  | 0.144959 | 0.135344 | 0.142337 | 0.131265  |
| 0.117424 | 0.120047 | 0.112471  | 0.141754 | 0.11961  | 0.109411 | 0.114073  |
| 0.151661 | 0.136801 | 0.134761  | 0.157343 | 0.137821 | 0.123543 | 0.1419    |
| 0.113636 | 0.126748 | 0.111014  | 0.135344 | 0.12602  | 0.107372 | 0.118444  |
| 0.136072 | 0.127914 | 0.120921  | 0.146125 | 0.132139 | 0.110286 | 0.130682  |
| 0.128642 | 0.107372 | 0.12602   | 0.141317 | 0.133741 | 0.117424 | 0.130828  |
| 0.132139 | 0.131265 | 0.120775  | 0.143648 | 0.142191 | 0.109266 | 0.132284  |
| 0.136801 | 0.104167 | 0.133013  | 0.150058 | 0.140734 | 0.13549  | 0.132867  |
| 0.112617 | 0.122815 | 0.10912   | 0.134324 | 0.128205 | 0.106643 | 0.113928  |
| 0.116404 | 0.121941 | 0.105041  | 0.135198 | 0.125583 | 0.110723 | 0.112179  |
| 0.120047 | 0.125291 | 0.111014  | 0.138549 | 0.126603 | 0.105624 | 0.115822  |
| 0.108392 | 0.122086 | 0.103147  | 0.135635 | 0.116987 | 0.100962 | 0.109703  |
| 0.115385 | 0.121795 | 0.104895  | 0.13447  | 0.123106 | 0.105041 | 0.112908  |
| 0.120484 | 0.12398  | 0.103293  | 0.137238 | 0.124709 | 0.107226 | 0.118007  |
| 0.128497 | 0.126166 | 0.115967  | 0.134178 | 0.135635 | 0.102127 | 0.127768  |

|          |          |           |          |          |           |          |
|----------|----------|-----------|----------|----------|-----------|----------|
| 0.138112 | 0.127622 | 0.121212  | 0.149913 | 0.137383 | 0.103293  | 0.137383 |
| 0.120484 | 0.126311 | 0.108537  | 0.13986  | 0.130536 | 0.112471  | 0.115385 |
| 0.115967 | 0.120921 | 0.107517  | 0.137966 | 0.122232 | 0.107372  | 0.116696 |
| 0.133159 | 0.129662 | 0.124417  | 0.147582 | 0.13039  | 0.106789  | 0.128642 |
| 0.113636 | 0.121795 | 0.109266  | 0.134178 | 0.119318 | 0.101544  | 0.109703 |
| 0.141754 | 0.128351 | 0.135052  | 0.145396 | 0.142483 | 0.107809  | 0.138695 |
| 0.136509 | 0.139423 | 0.12398   | 0.106935 | 0.1419   | 0.145396  | 0.127622 |
| 0.134324 | 0.128497 | 0.127622  | 0.142628 | 0.130099 | 0.102127  | 0.136801 |
| 0.113345 | 0.120047 | 0.104312  | 0.134178 | 0.121358 | 0.104167  | 0.107372 |
| 0.107955 | 0.11961  | 0.103293  | 0.133741 | 0.120047 | 0.106061  | 0.105769 |
| 0.129079 | 0.130245 | 0.121212  | 0.144668 | 0.123689 | 0.106206  | 0.122232 |
| 0.123689 | 0.128934 | 0.112908  | 0.140734 | 0.129662 | 0.10373   | 0.121212 |
| 0.132139 | 0.130973 | 0.122523  | 0.143357 | 0.123252 | 0.1081    | 0.127622 |
| 0.119464 | 0.125874 | 0.112179  | 0.137966 | 0.118444 | 0.107663  | 0.122523 |
| 0.123106 | 0.121358 | 0.109411  | 0.138695 | 0.113636 | 0.105769  | 0.122378 |
| 0.123397 | 0.126311 | 0.11553   | 0.136946 | 0.131119 | 0.11014   | 0.121212 |
| 0.136218 | 0.127185 | 0.124854  | 0.144231 | 0.134615 | 0.105478  | 0.131702 |
| 0.13447  | 0.133596 | 0.11961   | 0.149184 | 0.140152 | 0.110431  | 0.12704  |
| 0.137238 | 0.131119 | 0.122378  | 0.143211 | 0.137966 | 0.108246  | 0.132139 |
| 0.132721 | 0.121066 | 0.129225  | 0.146562 | 0.137821 | 0.0961538 | 0.131993 |
| 0.116404 | 0.125728 | 0.11116   | 0.139569 | 0.11859  | 0.113636  | 0.115385 |
| 0.128351 | 0.128059 | 0.121941  | 0.140152 | 0.131702 | 0.105478  | 0.127331 |
| 0.110723 | 0.124417 | 0.107809  | 0.13243  | 0.118735 | 0.106498  | 0.110868 |
| 0.11553  | 0.108829 | 0.110577  | 0.136946 | 0.120047 | 0.121503  | 0.113928 |
| 0.112325 | 0.121941 | 0.108537  | 0.134324 | 0.12704  | 0.101981  | 0.114802 |
| 0.117133 | 0.118298 | 0.109848  | 0.132139 | 0.122232 | 0.106789  | 0.112908 |
| 0.118881 | 0.116259 | 0.104604  | 0.131556 | 0.117279 | 0.105332  | 0.111742 |
| 0.137092 | 0.130682 | 0.126603  | 0.1419   | 0.134907 | 0.111305  | 0.129953 |
| 0.116259 | 0.122669 | 0.115093  | 0.139132 | 0.130099 | 0.112034  | 0.116404 |
| 0.134615 | 0.124417 | 0.123834  | 0.141463 | 0.13447  | 0.113199  | 0.135927 |
| 0.115385 | 0.120921 | 0.106352  | 0.134761 | 0.119027 | 0.102418  | 0.11553  |
| 0.13243  | 0.12602  | 0.113782  | 0.137821 | 0.121212 | 0.106352  | 0.119172 |
| 0.133159 | 0.113345 | 0.113054  | 0.140297 | 0.128351 | 0.128351  | 0.122523 |
| 0.121503 | 0.131702 | 0.110723  | 0.114073 | 0.133013 | 0.137092  | 0.114656 |
| 0.118153 | 0.132139 | 0.0968823 | 0.142191 | 0.127622 | 0.132284  | 0.110431 |
| 0.124709 | 0.131119 | 0.113928  | 0.139423 | 0.137966 | 0.135344  | 0.119027 |
| 0.123106 | 0.132721 | 0.113491  | 0.127622 | 0.123252 | 0.137821  | 0.116259 |
| 0.117861 | 0.129808 | 0.097465  | 0.133741 | 0.116841 | 0.133159  | 0.106935 |
| 0.132139 | 0.133013 | 0.117279  | 0.158508 | 0.140443 | 0.15035   | 0.119464 |
| 0.143357 | 0.138403 | 0.121212  | 0.147582 | 0.145833 | 0.146416  | 0.130099 |
| 0.108683 | 0.122086 | 0.0914918 | 0.129516 | 0.114656 | 0.131265  | 0.103584 |
| 0.129808 | 0.133304 | 0.115239  | 0.141608 | 0.136946 | 0.142191  | 0.12296  |
| 0.126748 | 0.125291 | 0.102273  | 0.149621 | 0.136509 | 0.142337  | 0.114656 |
| 0.124709 | 0.135198 | 0.113636  | 0.144085 | 0.135635 | 0.13884   | 0.123106 |



|          |          |           |          |          |          |          |
|----------|----------|-----------|----------|----------|----------|----------|
| 0.125583 | 0.120921 | 0.107809  | 0.137383 | 0.124563 | 0.132721 | 0.113491 |
| 0.128205 | 0.129953 | 0.101399  | 0.144085 | 0.13039  | 0.142045 | 0.114656 |
| 0.129225 | 0.12602  | 0.103001  | 0.145105 | 0.128497 | 0.143648 | 0.117716 |
| 0.135781 | 0.136655 | 0.110431  | 0.14088  | 0.129808 | 0.139714 | 0.124854 |
| 0.137238 | 0.133741 | 0.122669  | 0.146416 | 0.138258 | 0.147873 | 0.126603 |
| 0.125583 | 0.126166 | 0.0979021 | 0.143502 | 0.137383 | 0.148164 | 0.110868 |
| 0.119172 | 0.123543 | 0.103147  | 0.139714 | 0.12398  | 0.130973 | 0.113782 |
| 0.136509 | 0.142628 | 0.126894  | 0.137821 | 0.136072 | 0.138403 | 0.128497 |
| 0.138695 | 0.130536 | 0.108683  | 0.150495 | 0.136801 | 0.14933  | 0.125146 |
| 0.111305 | 0.123252 | 0.10169   | 0.136509 | 0.120192 | 0.124272 | 0.107372 |
| 0.216346 | 0.228293 | 0.219551  | 0.225524 | 0.217075 | 0.222611 | 0.225524 |
| 0.127768 | 0.13039  | 0.101836  | 0.138112 | 0.124709 | 0.135198 | 0.119172 |
| 0.122815 | 0.126311 | 0.0968823 | 0.142774 | 0.124709 | 0.137238 | 0.112471 |
| 0.135198 | 0.129953 | 0.120047  | 0.14088  | 0.135927 | 0.144959 | 0.130099 |
| 0.11655  | 0.129953 | 0.103147  | 0.143502 | 0.13039  | 0.140589 | 0.110577 |
| 0.130828 | 0.13345  | 0.103438  | 0.150787 | 0.138258 | 0.150495 | 0.121941 |
| 0.123543 | 0.130536 | 0.106352  | 0.134178 | 0.129225 | 0.131265 | 0.11553  |
| 0.126894 | 0.129225 | 0.10271   | 0.136655 | 0.122086 | 0.134324 | 0.114802 |
| 0.126894 | 0.123106 | 0.103584  | 0.145979 | 0.13141  | 0.145396 | 0.118007 |
| 0.127914 | 0.134033 | 0.119172  | 0.145833 | 0.136801 | 0.144085 | 0.121941 |
| 0.130682 | 0.140297 | 0.113491  | 0.144231 | 0.134615 | 0.139569 | 0.122669 |
| 0.135198 | 0.13141  | 0.1081    | 0.140589 | 0.130973 | 0.141463 | 0.123397 |
| 0.128788 | 0.136072 | 0.112179  | 0.140297 | 0.128642 | 0.141463 | 0.116113 |
| 0.122378 | 0.129371 | 0.0964452 | 0.140589 | 0.12602  | 0.134178 | 0.105915 |
| 0.125    | 0.137238 | 0.10169   | 0.137966 | 0.128351 | 0.136801 | 0.113491 |
| 0.134178 | 0.139423 | 0.11116   | 0.1419   | 0.138112 | 0.149184 | 0.128205 |
| 0.117133 | 0.124126 | 0.108683  | 0.133887 | 0.13039  | 0.129808 | 0.11116  |
| 0.144814 | 0.115385 | 0.127622  | 0.146125 | 0.132139 | 0.132721 | 0.133887 |
| 0.135344 | 0.146416 | 0.13039   | 0.146562 | 0.145979 | 0.144814 | 0.13345  |
| 0.125728 | 0.124272 | 0.107372  | 0.139569 | 0.127331 | 0.132284 | 0.113928 |
| 0.13039  | 0.12602  | 0.101544  | 0.148893 | 0.140443 | 0.146562 | 0.116841 |
| 0.121503 | 0.136946 | 0.117716  | 0.146707 | 0.138258 | 0.126311 | 0.120775 |
| 0.127477 | 0.137966 | 0.106789  | 0.150641 | 0.13141  | 0.136655 | 0.126457 |
| 0.120192 | 0.140297 | 0.117861  | 0.140152 | 0.138112 | 0.133741 | 0.121795 |
| 0.133304 | 0.146999 | 0.127477  | 0.153555 | 0.144231 | 0.142483 | 0.131119 |
| 0.120338 | 0.125583 | 0.0981935 | 0.137675 | 0.127477 | 0.129225 | 0.10708  |
| 0.135927 | 0.121358 | 0.120192  | 0.14831  | 0.13986  | 0.146853 | 0.123834 |
| 0.137238 | 0.145105 | 0.133741  | 0.153992 | 0.147873 | 0.14729  | 0.140589 |
| 0.126166 | 0.125583 | 0.103438  | 0.139714 | 0.12398  | 0.131265 | 0.106206 |
| 0.131702 | 0.107226 | 0.121212  | 0.146416 | 0.130973 | 0.128642 | 0.125728 |
| 0.144959 | 0.148164 | 0.139132  | 0.142191 | 0.144522 | 0.149184 | 0.133741 |
| 0.131265 | 0.116404 | 0.118735  | 0.143939 | 0.13141  | 0.124709 | 0.127331 |
| 0.143357 | 0.140152 | 0.116259  | 0.139423 | 0.144959 | 0.141754 | 0.134178 |
| 0.139714 | 0.133013 | 0.112908  | 0.134033 | 0.137821 | 0.138112 | 0.125874 |

|          |          |          |          |          |          |          |
|----------|----------|----------|----------|----------|----------|----------|
| 0.127914 | 0.140734 | 0.109266 | 0.135635 | 0.121941 | 0.140297 | 0.116404 |
| 0.134178 | 0.130682 | 0.113782 | 0.13141  | 0.138986 | 0.129079 | 0.122378 |
| 0.129953 | 0.120047 | 0.107226 | 0.134761 | 0.133013 | 0.140297 | 0.110286 |
| 0.126894 | 0.135635 | 0.120484 | 0.136655 | 0.136072 | 0.140443 | 0.121503 |
| 0.13447  | 0.135344 | 0.11553  | 0.144522 | 0.125874 | 0.140152 | 0.120921 |
| 0.131265 | 0.144376 | 0.122232 | 0.14627  | 0.132576 | 0.139277 | 0.126748 |
| 0.137383 | 0.146125 | 0.118444 | 0.142774 | 0.128788 | 0.140734 | 0.11655  |
| 0.12398  | 0.137092 | 0.122232 | 0.141317 | 0.132867 | 0.132284 | 0.116841 |
| 0.140297 | 0.142337 | 0.134761 | 0.145688 | 0.142483 | 0.144231 | 0.131119 |
| 0.128642 | 0.119027 | 0.105041 | 0.143065 | 0.134907 | 0.136946 | 0.115093 |
| 0.125437 | 0.123689 | 0.114073 | 0.145396 | 0.125    | 0.120629 | 0.115676 |
| 0.127185 | 0.137675 | 0.114073 | 0.147727 | 0.125874 | 0.141026 | 0.112762 |
| 0.125728 | 0.121649 | 0.100379 | 0.133741 | 0.125    | 0.134033 | 0.104021 |
| 0.131993 | 0.150641 | 0.130245 | 0.152244 | 0.150204 | 0.138549 | 0.125146 |
| 0.15035  | 0.150932 | 0.14627  | 0.156906 | 0.153992 | 0.14933  | 0.134178 |
| 0.13345  | 0.128788 | 0.115093 | 0.143502 | 0.129808 | 0.106498 | 0.130099 |
| 0.130099 | 0.12602  | 0.110868 | 0.142191 | 0.125291 | 0.105186 | 0.120629 |
| 0.131702 | 0.146853 | 0.123543 | 0.140297 | 0.135635 | 0.13243  | 0.128642 |
| 0.135052 | 0.14088  | 0.112908 | 0.143939 | 0.13345  | 0.143065 | 0.126457 |
| 0.13243  | 0.127477 | 0.119027 | 0.144522 | 0.137529 | 0.108683 | 0.129662 |
| 0.135635 | 0.136801 | 0.11961  | 0.142774 | 0.136655 | 0.145688 | 0.13345  |
| 0.135052 | 0.115822 | 0.124563 | 0.145396 | 0.145396 | 0.124709 | 0.124126 |
| 0.132576 | 0.111305 | 0.104312 | 0.14292  | 0.132721 | 0.121941 | 0.116113 |
| 0.154138 | 0.166667 | 0.149767 | 0.159819 | 0.160402 | 0.145542 | 0.14933  |
| 0.133159 | 0.120629 | 0.112762 | 0.145542 | 0.134761 | 0.122815 | 0.119027 |
| 0.143939 | 0.131119 | 0.120921 | 0.134761 | 0.147582 | 0.14729  | 0.126894 |
| 0.131847 | 0.120775 | 0.114948 | 0.146562 | 0.123252 | 0.119755 | 0.117716 |
| 0.138258 | 0.144959 | 0.128351 | 0.1419   | 0.131702 | 0.131993 | 0.128497 |
| 0.123689 | 0.127768 | 0.103875 | 0.141608 | 0.126748 | 0.136364 | 0.119172 |
| 0.119755 | 0.141608 | 0.128497 | 0.160693 | 0.14933  | 0.147582 | 0.125146 |
| 0.135927 | 0.150787 | 0.142337 | 0.15676  | 0.146853 | 0.151224 | 0.145979 |
| 0.125    | 0.141317 | 0.119755 | 0.140006 | 0.133887 | 0.141463 | 0.126603 |
| 0.134761 | 0.146125 | 0.133887 | 0.150932 | 0.143065 | 0.153263 | 0.136946 |
| 0.148019 | 0.155594 | 0.146853 | 0.163024 | 0.151661 | 0.151078 | 0.145833 |
| 0.138986 | 0.152972 | 0.138695 | 0.163899 | 0.153992 | 0.154283 | 0.144959 |
| 0.125728 | 0.13447  | 0.112908 | 0.141317 | 0.122378 | 0.130245 | 0.111597 |
| 0.132284 | 0.142774 | 0.133159 | 0.154866 | 0.136509 | 0.147582 | 0.13447  |
| 0.111597 | 0.129371 | 0.106352 | 0.144376 | 0.125146 | 0.134761 | 0.117861 |
| 0.120775 | 0.128351 | 0.11116  | 0.137821 | 0.125583 | 0.126166 | 0.120921 |
| 0.123543 | 0.129079 | 0.106352 | 0.139132 | 0.123106 | 0.140006 | 0.114656 |
| 0.11859  | 0.136946 | 0.11655  | 0.137966 | 0.130099 | 0.136509 | 0.123106 |
| 0.124854 | 0.131847 | 0.108829 | 0.132867 | 0.11859  | 0.131119 | 0.115385 |
| 0.11553  | 0.12602  | 0.105332 | 0.139277 | 0.129662 | 0.130828 | 0.117424 |
| 0.11961  | 0.139132 | 0.115822 | 0.148019 | 0.13141  | 0.143065 | 0.122378 |

|           |          |           |          |          |          |          |
|-----------|----------|-----------|----------|----------|----------|----------|
| 0.125583  | 0.134324 | 0.114219  | 0.146707 | 0.134761 | 0.144085 | 0.124854 |
| 0.115093  | 0.111888 | 0.0958625 | 0.135052 | 0.117279 | 0.127477 | 0.109994 |
| 0.120629  | 0.1419   | 0.121212  | 0.14292  | 0.136218 | 0.14088  | 0.122523 |
| 0.117279  | 0.136509 | 0.112325  | 0.137821 | 0.13549  | 0.13986  | 0.119464 |
| 0.130682  | 0.126603 | 0.117279  | 0.140443 | 0.123252 | 0.118881 | 0.120921 |
| 0.210227  | 0.2213   | 0.216055  | 0.223193 | 0.216783 | 0.224942 | 0.220571 |
| 0.144959  | 0.152244 | 0.139132  | 0.151224 | 0.147436 | 0.158508 | 0.14627  |
| 0.136655  | 0.134324 | 0.123252  | 0.142628 | 0.130682 | 0.138549 | 0.137092 |
| 0.120775  | 0.139132 | 0.120484  | 0.144522 | 0.13141  | 0.139277 | 0.122378 |
| 0.206731  | 0.218677 | 0.212267  | 0.222611 | 0.207751 | 0.218823 | 0.219697 |
| 0.117279  | 0.125437 | 0.11961   | 0.144231 | 0.130536 | 0.117716 | 0.114802 |
| 0.128205  | 0.141026 | 0.102855  | 0.145833 | 0.128059 | 0.132721 | 0.12398  |
| 0.129371  | 0.135198 | 0.124126  | 0.146125 | 0.12602  | 0.133887 | 0.128059 |
| 0.120775  | 0.13243  | 0.110286  | 0.139569 | 0.13141  | 0.13986  | 0.122669 |
| 0.246358  | 0.25102  | 0.247232  | 0.255245 | 0.25     | 0.253788 | 0.257576 |
| 0.0990676 | 0.137821 | 0.113054  | 0.146125 | 0.136801 | 0.138258 | 0.105624 |
| 0.125583  | 0.124417 | 0.112471  | 0.135052 | 0.119027 | 0.122523 | 0.115239 |
| 0.124126  | 0.142774 | 0.125874  | 0.123689 | 0.118444 | 0.133596 | 0.13039  |
| 0.121212  | 0.141317 | 0.117716  | 0.129808 | 0.119318 | 0.128642 | 0.128642 |
| 0.109266  | 0.131119 | 0.113928  | 0.14729  | 0.137966 | 0.132721 | 0.11116  |
| 0.128205  | 0.132576 | 0.122378  | 0.146416 | 0.136509 | 0.134761 | 0.128642 |
| 0.124709  | 0.126457 | 0.11655   | 0.139132 | 0.121649 | 0.118735 | 0.118735 |
| 0.120192  | 0.135635 | 0.114365  | 0.13986  | 0.130536 | 0.140734 | 0.11859  |
| 0.125291  | 0.134907 | 0.122378  | 0.145251 | 0.128934 | 0.140589 | 0.125728 |
| 0.115967  | 0.134907 | 0.107809  | 0.137092 | 0.128934 | 0.133013 | 0.122232 |
| 0.113199  | 0.134761 | 0.112325  | 0.140734 | 0.129371 | 0.139569 | 0.118881 |
| 0.117424  | 0.11451  | 0.0871212 | 0.139423 | 0.128934 | 0.135927 | 0.106206 |
| 0.136509  | 0.14933  | 0.141754  | 0.159965 | 0.145688 | 0.14831  | 0.143648 |
| 0.101253  | 0.140006 | 0.113199  | 0.148893 | 0.136946 | 0.133741 | 0.105478 |
| 0.131847  | 0.140006 | 0.104749  | 0.147145 | 0.125291 | 0.135781 | 0.128205 |
| 0.18546   | 0.203817 | 0.188666  | 0.204254 | 0.193473 | 0.197844 | 0.201632 |
| 0.20236   | 0.211393 | 0.204983  | 0.216783 | 0.204837 | 0.210373 | 0.214161 |
| 0.123397  | 0.133013 | 0.109994  | 0.142483 | 0.131993 | 0.139277 | 0.125    |
| 0.116404  | 0.130099 | 0.104167  | 0.13549  | 0.123834 | 0.132867 | 0.118881 |
| 0.133887  | 0.13884  | 0.131265  | 0.150641 | 0.143939 | 0.147436 | 0.13345  |
| 0.12602   | 0.122815 | 0.113199  | 0.137238 | 0.122669 | 0.120921 | 0.117424 |
| 0.102564  | 0.142774 | 0.113928  | 0.150495 | 0.139132 | 0.139132 | 0.10708  |
| 0.131847  | 0.142045 | 0.11961   | 0.137529 | 0.128497 | 0.135198 | 0.133159 |
| 0.219843  | 0.233246 | 0.223339  | 0.233683 | 0.223485 | 0.234557 | 0.231061 |
| 0.120192  | 0.132139 | 0.11116   | 0.141317 | 0.126748 | 0.136946 | 0.123543 |
| 0.206585  | 0.202214 | 0.207168  | 0.219551 | 0.21081  | 0.201195 | 0.211976 |
| 0.115239  | 0.132721 | 0.104167  | 0.138403 | 0.114219 | 0.124126 | 0.102855 |
| 0.117133  | 0.130245 | 0.109848  | 0.14088  | 0.12398  | 0.127768 | 0.115822 |
| 0.123106  | 0.123106 | 0.116987  | 0.126457 | 0.127331 | 0.124709 | 0.117133 |

|           |          |           |          |          |          |          |
|-----------|----------|-----------|----------|----------|----------|----------|
| 0.116696  | 0.127185 | 0.105624  | 0.139277 | 0.126457 | 0.130828 | 0.11655  |
| 0.202214  | 0.215909 | 0.208333  | 0.215472 | 0.209353 | 0.214015 | 0.216638 |
| 0.13141   | 0.145105 | 0.128205  | 0.150204 | 0.143211 | 0.152535 | 0.137966 |
| 0.120338  | 0.130828 | 0.111305  | 0.133013 | 0.119318 | 0.128351 | 0.116113 |
| 0.126457  | 0.141026 | 0.120921  | 0.140589 | 0.137675 | 0.147582 | 0.131265 |
| 0.130828  | 0.130828 | 0.120338  | 0.141754 | 0.129225 | 0.133596 | 0.12398  |
| 0.118881  | 0.132867 | 0.105478  | 0.143794 | 0.13039  | 0.135635 | 0.119901 |
| 0.116696  | 0.133013 | 0.106789  | 0.138403 | 0.119172 | 0.125583 | 0.103438 |
| 0.127185  | 0.125728 | 0.120484  | 0.143648 | 0.125291 | 0.123252 | 0.121503 |
| 0.130973  | 0.142337 | 0.104167  | 0.143939 | 0.126457 | 0.133159 | 0.125874 |
| 0.110868  | 0.133887 | 0.112325  | 0.13345  | 0.128205 | 0.13549  | 0.114802 |
| 0.123252  | 0.132867 | 0.113928  | 0.135344 | 0.116987 | 0.126894 | 0.115822 |
| 0.190705  | 0.201486 | 0.18954   | 0.201923 | 0.189685 | 0.197261 | 0.20134  |
| 0.122669  | 0.145688 | 0.121212  | 0.127477 | 0.121066 | 0.130099 | 0.129808 |
| 0.120192  | 0.139132 | 0.12602   | 0.146853 | 0.131702 | 0.137529 | 0.128205 |
| 0.122086  | 0.133159 | 0.11655   | 0.135344 | 0.130973 | 0.131847 | 0.130973 |
| 0.10067   | 0.139714 | 0.110868  | 0.150641 | 0.13549  | 0.137238 | 0.107226 |
| 0.122815  | 0.138549 | 0.117861  | 0.140152 | 0.134033 | 0.142191 | 0.125    |
| 0.121358  | 0.135052 | 0.10912   | 0.138986 | 0.118881 | 0.123252 | 0.107517 |
| 0.113928  | 0.126457 | 0.1081    | 0.138549 | 0.125728 | 0.125728 | 0.108537 |
| 0.129662  | 0.127914 | 0.119755  | 0.140006 | 0.122232 | 0.120775 | 0.12398  |
| 0.119027  | 0.138258 | 0.122232  | 0.147145 | 0.130245 | 0.135781 | 0.127622 |
| 0.11757   | 0.136801 | 0.116113  | 0.129371 | 0.120921 | 0.129662 | 0.124417 |
| 0.122086  | 0.135198 | 0.110431  | 0.141171 | 0.13447  | 0.137092 | 0.122523 |
| 0.127185  | 0.134761 | 0.121941  | 0.145688 | 0.126748 | 0.134324 | 0.126457 |
| 0.137529  | 0.1419   | 0.134615  | 0.156031 | 0.135635 | 0.144376 | 0.136801 |
| 0.0952797 | 0.134324 | 0.108392  | 0.141754 | 0.13243  | 0.133304 | 0.103293 |
| 0.141754  | 0.148164 | 0.134178  | 0.148019 | 0.145688 | 0.151515 | 0.139569 |
| 0.116696  | 0.130099 | 0.10708   | 0.1419   | 0.127331 | 0.135198 | 0.119464 |
| 0.119027  | 0.134178 | 0.109994  | 0.130245 | 0.119755 | 0.128497 | 0.124709 |
| 0.11859   | 0.129079 | 0.116841  | 0.139714 | 0.132721 | 0.13884  | 0.125728 |
| 0.133741  | 0.127914 | 0.121212  | 0.143502 | 0.127185 | 0.123397 | 0.124854 |
| 0.188228  | 0.195513 | 0.189103  | 0.202943 | 0.190705 | 0.193036 | 0.19799  |
| 0.119901  | 0.128642 | 0.109411  | 0.133741 | 0.114219 | 0.124417 | 0.11014  |
| 0.111451  | 0.120775 | 0.0995047 | 0.132576 | 0.118298 | 0.123834 | 0.111305 |
| 0.132139  | 0.139714 | 0.105041  | 0.143357 | 0.125    | 0.136364 | 0.125291 |
| 0.178467  | 0.185752 | 0.17701   | 0.196096 | 0.183275 | 0.18648  | 0.186772 |
| 0.111014  | 0.152972 | 0.122669  | 0.154575 | 0.145833 | 0.142628 | 0.11553  |
| 0.121212  | 0.146562 | 0.129953  | 0.164481 | 0.152826 | 0.149913 | 0.11961  |
| 0.14088   | 0.151078 | 0.145542  | 0.159382 | 0.147436 | 0.151515 | 0.145396 |
| 0.0942599 | 0.13243  | 0.107372  | 0.1419   | 0.130536 | 0.129079 | 0.100233 |
| 0.122669  | 0.137821 | 0.119755  | 0.13884  | 0.133887 | 0.143794 | 0.125728 |
| 0.207022  | 0.220134 | 0.210227  | 0.219406 | 0.212121 | 0.221154 | 0.217075 |
| 0.123106  | 0.137966 | 0.124854  | 0.141317 | 0.129079 | 0.130245 | 0.128205 |

|           |          |           |          |          |          |          |
|-----------|----------|-----------|----------|----------|----------|----------|
| 0.128205  | 0.142191 | 0.125291  | 0.142337 | 0.137383 | 0.146707 | 0.131556 |
| 0.123543  | 0.131702 | 0.112471  | 0.13243  | 0.117279 | 0.124563 | 0.113491 |
| 0.167832  | 0.171911 | 0.16958   | 0.185752 | 0.178176 | 0.174388 | 0.174388 |
| 0.112471  | 0.132576 | 0.110431  | 0.139423 | 0.12602  | 0.132139 | 0.116404 |
| 0.144085  | 0.147873 | 0.141754  | 0.163462 | 0.145396 | 0.156177 | 0.144231 |
| 0.126603  | 0.116113 | 0.106206  | 0.146853 | 0.129953 | 0.132867 | 0.116841 |
| 0.190122  | 0.200903 | 0.188374  | 0.198135 | 0.187646 | 0.196678 | 0.197844 |
| 0.0971737 | 0.140297 | 0.109994  | 0.147727 | 0.133159 | 0.13345  | 0.104604 |
| 0.111451  | 0.120484 | 0.0954254 | 0.138695 | 0.11859  | 0.128788 | 0.106643 |
| 0.118298  | 0.138112 | 0.111014  | 0.137383 | 0.120484 | 0.132139 | 0.120192 |
| 0.120775  | 0.137966 | 0.116696  | 0.145396 | 0.12296  | 0.130828 | 0.124709 |
| 0.125728  | 0.13884  | 0.103293  | 0.142774 | 0.127622 | 0.135781 | 0.121795 |
| 0.110868  | 0.134178 | 0.120775  | 0.143357 | 0.122378 | 0.138695 | 0.115676 |
| 0.117133  | 0.133159 | 0.104604  | 0.14088  | 0.128351 | 0.135052 | 0.119027 |
| 0.1875    | 0.200029 | 0.189248  | 0.199883 | 0.187063 | 0.195804 | 0.199009 |
| 0.12296   | 0.133741 | 0.117133  | 0.150204 | 0.127768 | 0.137092 | 0.125728 |
| 0.11961   | 0.130973 | 0.112325  | 0.142191 | 0.127914 | 0.137821 | 0.119755 |
| 0.210956  | 0.216492 | 0.20979   | 0.220717 | 0.210519 | 0.217512 | 0.220425 |
| 0.12296   | 0.143648 | 0.120921  | 0.127185 | 0.120775 | 0.131556 | 0.131556 |
| 0.115822  | 0.131265 | 0.106206  | 0.141026 | 0.129662 | 0.132867 | 0.118881 |
| 0.112908  | 0.128351 | 0.101253  | 0.137821 | 0.125291 | 0.129662 | 0.115385 |
| 0.138986  | 0.141317 | 0.132576  | 0.144668 | 0.144376 | 0.150495 | 0.13884  |
| 0.184441  | 0.198718 | 0.191725  | 0.200903 | 0.189831 | 0.19799  | 0.198864 |
| 0.128934  | 0.124563 | 0.114365  | 0.141026 | 0.122378 | 0.121212 | 0.120047 |
| 0.131556  | 0.14292  | 0.131265  | 0.148019 | 0.130536 | 0.137529 | 0.131119 |
| 0.11553   | 0.130099 | 0.104458  | 0.137238 | 0.125291 | 0.132284 | 0.11859  |
| 0.115822  | 0.13039  | 0.101253  | 0.143065 | 0.127914 | 0.135781 | 0.116259 |
| 0.113345  | 0.130828 | 0.10373   | 0.141171 | 0.127768 | 0.133304 | 0.117861 |
| 0.118735  | 0.13447  | 0.114365  | 0.138112 | 0.132867 | 0.138403 | 0.120047 |
| 0.111305  | 0.116841 | 0.0952797 | 0.136509 | 0.116113 | 0.122815 | 0.106789 |
| 0.0990676 | 0.136655 | 0.112762  | 0.148747 | 0.135635 | 0.134178 | 0.103001 |
| 0.129371  | 0.143065 | 0.122669  | 0.143794 | 0.136801 | 0.141171 | 0.129516 |
| 0.0979021 | 0.141608 | 0.113636  | 0.146999 | 0.134178 | 0.133304 | 0.106206 |
| 0.13447   | 0.133304 | 0.122523  | 0.147436 | 0.131993 | 0.136072 | 0.129953 |
| 0.190268  | 0.208042 | 0.19493   | 0.203234 | 0.194784 | 0.20236  | 0.2044   |
| 0.121941  | 0.136801 | 0.120192  | 0.145396 | 0.124709 | 0.134615 | 0.124126 |
| 0.13345   | 0.143065 | 0.12704   | 0.146999 | 0.140006 | 0.146999 | 0.132721 |
| 0.113782  | 0.13039  | 0.103584  | 0.137238 | 0.127622 | 0.130828 | 0.115967 |
| 0.111597  | 0.113636 | 0.0894522 | 0.136801 | 0.114073 | 0.122523 | 0.106206 |
| 0.109266  | 0.121503 | 0.113928  | 0.14088  | 0.128059 | 0.124563 | 0.106206 |
| 0.127185  | 0.126603 | 0.119901  | 0.138403 | 0.12296  | 0.118881 | 0.118298 |
| 0.132139  | 0.145251 | 0.128642  | 0.140443 | 0.133741 | 0.147436 | 0.127914 |
| 0.118298  | 0.137821 | 0.121795  | 0.144668 | 0.13039  | 0.136801 | 0.125728 |
| 0.11655   | 0.113636 | 0.106352  | 0.139714 | 0.117279 | 0.118735 | 0.110868 |

|           |          |           |          |          |          |          |
|-----------|----------|-----------|----------|----------|----------|----------|
| 0.116696  | 0.107955 | 0.100962  | 0.132867 | 0.115676 | 0.111014 | 0.106352 |
| 0.115093  | 0.114219 | 0.0944056 | 0.140589 | 0.119027 | 0.125437 | 0.111116 |
| 0.115239  | 0.133596 | 0.106498  | 0.138986 | 0.118298 | 0.126166 | 0.104021 |
| 0.107809  | 0.143939 | 0.118881  | 0.152826 | 0.137966 | 0.13447  | 0.10708  |
| 0.12602   | 0.131556 | 0.11553   | 0.138695 | 0.124126 | 0.121212 | 0.115967 |
| 0.115093  | 0.133159 | 0.113636  | 0.136801 | 0.130682 | 0.136218 | 0.119027 |
| 0.123834  | 0.126166 | 0.111888  | 0.137675 | 0.119318 | 0.118735 | 0.111742 |
| 0.113782  | 0.13039  | 0.10708   | 0.140734 | 0.127914 | 0.13345  | 0.117133 |
| 0.117133  | 0.127914 | 0.104895  | 0.133596 | 0.114948 | 0.122815 | 0.111742 |
| 0.115967  | 0.133741 | 0.106352  | 0.140589 | 0.128642 | 0.134761 | 0.120484 |
| 0.119464  | 0.132867 | 0.113636  | 0.139714 | 0.120192 | 0.129516 | 0.119901 |
| 0.11451   | 0.135198 | 0.119464  | 0.143502 | 0.128642 | 0.133304 | 0.124563 |
| 0.120921  | 0.136655 | 0.0999417 | 0.142045 | 0.12398  | 0.130973 | 0.11757  |
| 0.117861  | 0.114656 | 0.0948427 | 0.140443 | 0.119755 | 0.125874 | 0.108392 |
| 0.11655   | 0.13549  | 0.106352  | 0.141754 | 0.128059 | 0.131847 | 0.118444 |
| 0.122669  | 0.138695 | 0.116259  | 0.14292  | 0.124563 | 0.138549 | 0.127768 |
| 0.120192  | 0.139423 | 0.118735  | 0.148893 | 0.13141  | 0.140152 | 0.125874 |
| 0.113054  | 0.11859  | 0.100233  | 0.13884  | 0.115822 | 0.130682 | 0.107955 |
| 0.114802  | 0.128788 | 0.106352  | 0.137966 | 0.128059 | 0.135052 | 0.11553  |
| 0.119318  | 0.135344 | 0.118444  | 0.139569 | 0.13345  | 0.141026 | 0.124417 |
| 0.112908  | 0.131556 | 0.103875  | 0.141026 | 0.11655  | 0.124709 | 0.104895 |
| 0.118735  | 0.140297 | 0.119027  | 0.138986 | 0.135198 | 0.1419   | 0.121503 |
| 0.123106  | 0.139132 | 0.104458  | 0.145979 | 0.124126 | 0.130245 | 0.124417 |
| 0.116404  | 0.112908 | 0.097465  | 0.140152 | 0.122378 | 0.128497 | 0.111888 |
| 0.11757   | 0.130099 | 0.110868  | 0.138986 | 0.123543 | 0.134324 | 0.117716 |
| 0.115093  | 0.128497 | 0.105478  | 0.133596 | 0.117861 | 0.122232 | 0.110286 |
| 0.121649  | 0.139714 | 0.119901  | 0.142483 | 0.136655 | 0.143939 | 0.12704  |
| 0.126894  | 0.135052 | 0.121649  | 0.150058 | 0.133159 | 0.134615 | 0.12704  |
| 0.118298  | 0.134615 | 0.112762  | 0.144376 | 0.123106 | 0.13243  | 0.118153 |
| 0.19289   | 0.204837 | 0.190851  | 0.207605 | 0.195659 | 0.200321 | 0.201777 |
| 0.159965  | 0.172494 | 0.160839  | 0.18109  | 0.170017 | 0.175262 | 0.168561 |
| 0.0979021 | 0.140152 | 0.110431  | 0.146125 | 0.132139 | 0.13243  | 0.105624 |
| 0.124272  | 0.120484 | 0.11757   | 0.141317 | 0.129662 | 0.124126 | 0.122086 |
| 0.121941  | 0.154866 | 0.133304  | 0.163753 | 0.154138 | 0.150058 | 0.125583 |
| 0.125291  | 0.136072 | 0.123252  | 0.150204 | 0.126894 | 0.140297 | 0.122232 |
| 0.121649  | 0.122232 | 0.11553   | 0.143939 | 0.12704  | 0.13345  | 0.121503 |
| 0.111305  | 0.124709 | 0.113636  | 0.145251 | 0.131556 | 0.133013 | 0.122523 |
| 0.118007  | 0.11655  | 0.0862471 | 0.137966 | 0.128642 | 0.135344 | 0.101253 |
| 0.124126  | 0.131993 | 0.117133  | 0.149038 | 0.133013 | 0.138258 | 0.126603 |
| 0.200321  | 0.20877  | 0.201195  | 0.215035 | 0.200758 | 0.210664 | 0.210664 |
| 0.128497  | 0.129079 | 0.120047  | 0.143794 | 0.126311 | 0.125146 | 0.120484 |
| 0.124854  | 0.130099 | 0.118444  | 0.136655 | 0.132867 | 0.128788 | 0.121212 |
| 0.115822  | 0.123689 | 0.104167  | 0.137821 | 0.123252 | 0.127914 | 0.115676 |
| 0.125291  | 0.13549  | 0.115093  | 0.144085 | 0.124563 | 0.135052 | 0.121649 |

|           |          |           |          |          |          |          |
|-----------|----------|-----------|----------|----------|----------|----------|
| 0.184586  | 0.190997 | 0.186043  | 0.202214 | 0.192308 | 0.189394 | 0.193473 |
| 0.244027  | 0.250146 | 0.246066  | 0.250874 | 0.244755 | 0.253205 | 0.252622 |
| 0.118153  | 0.13884  | 0.122523  | 0.14831  | 0.13345  | 0.136655 | 0.125    |
| 0.122815  | 0.134761 | 0.116987  | 0.145688 | 0.132867 | 0.139277 | 0.127622 |
| 0.0989219 | 0.140297 | 0.111116  | 0.147727 | 0.133741 | 0.134907 | 0.10373  |
| 0.121795  | 0.136655 | 0.0996503 | 0.141463 | 0.124854 | 0.129808 | 0.11553  |
| 0.122232  | 0.126894 | 0.110868  | 0.136655 | 0.117716 | 0.117716 | 0.113928 |
| 0.11859   | 0.127914 | 0.109848  | 0.13884  | 0.124854 | 0.129808 | 0.118735 |
| 0.119027  | 0.125728 | 0.108246  | 0.137821 | 0.130245 | 0.134324 | 0.120629 |
| 0.122232  | 0.12398  | 0.112325  | 0.137529 | 0.120921 | 0.118298 | 0.113636 |
| 0.116259  | 0.126166 | 0.108683  | 0.136801 | 0.129225 | 0.13447  | 0.115822 |
| 0.118735  | 0.120192 | 0.101253  | 0.141608 | 0.123252 | 0.138403 | 0.113345 |
| 0.118298  | 0.114802 | 0.094697  | 0.139423 | 0.121066 | 0.127768 | 0.108829 |
| 0.112617  | 0.136218 | 0.122523  | 0.147436 | 0.126457 | 0.13345  | 0.124709 |
| 0.120921  | 0.136946 | 0.116259  | 0.142337 | 0.133304 | 0.141754 | 0.122523 |
| 0.109266  | 0.127331 | 0.104604  | 0.125728 | 0.114365 | 0.123689 | 0.112325 |
| 0.125     | 0.137529 | 0.109848  | 0.136218 | 0.124563 | 0.133887 | 0.117861 |
| 0.13986   | 0.142191 | 0.111888  | 0.149913 | 0.132139 | 0.139714 | 0.130973 |
| 0.113199  | 0.13243  | 0.105915  | 0.137529 | 0.125874 | 0.129953 | 0.117133 |
| 0.112762  | 0.117716 | 0.11014   | 0.143211 | 0.127185 | 0.11757  | 0.112325 |
| 0.132284  | 0.135198 | 0.11655   | 0.146125 | 0.135927 | 0.141463 | 0.13039  |
| 0.206439  | 0.215181 | 0.207022  | 0.220571 | 0.210373 | 0.217657 | 0.215035 |
| 0.109266  | 0.128497 | 0.111305  | 0.134761 | 0.121358 | 0.129225 | 0.115239 |
| 0.116987  | 0.115822 | 0.0925117 | 0.135198 | 0.11655  | 0.126166 | 0.111305 |
| 0.125146  | 0.137675 | 0.116987  | 0.145688 | 0.125    | 0.134033 | 0.124709 |
| 0.122378  | 0.145396 | 0.118298  | 0.129225 | 0.121358 | 0.133887 | 0.132139 |
| 0.125874  | 0.129953 | 0.113928  | 0.13884  | 0.122232 | 0.131847 | 0.120484 |
| 0.196387  | 0.210664 | 0.197552  | 0.213141 | 0.200321 | 0.210519 | 0.208188 |
| 0.121941  | 0.141754 | 0.121941  | 0.144522 | 0.137238 | 0.14627  | 0.125874 |
| 0.114802  | 0.127622 | 0.102564  | 0.136509 | 0.126311 | 0.131847 | 0.115822 |
| 0.124854  | 0.133596 | 0.117861  | 0.138986 | 0.125583 | 0.125    | 0.118007 |
| 0.118153  | 0.134761 | 0.0983392 | 0.140152 | 0.119464 | 0.129662 | 0.118881 |
| 0.121649  | 0.13884  | 0.116987  | 0.142483 | 0.134615 | 0.143648 | 0.124417 |
| 0.110577  | 0.13039  | 0.106206  | 0.139569 | 0.127622 | 0.131702 | 0.113054 |
| 0.115822  | 0.121649 | 0.100962  | 0.141026 | 0.126166 | 0.138403 | 0.111597 |
| 0.119027  | 0.139714 | 0.118444  | 0.127331 | 0.117716 | 0.129079 | 0.125874 |
| 0.198135  | 0.210373 | 0.199009  | 0.211101 | 0.197407 | 0.207022 | 0.204983 |
| 0.113199  | 0.130099 | 0.106206  | 0.134907 | 0.125291 | 0.133741 | 0.113928 |
| 0.191142  | 0.206876 | 0.196387  | 0.205857 | 0.195659 | 0.203234 | 0.202652 |
| 0.189248  | 0.205274 | 0.193328  | 0.206002 | 0.194639 | 0.200758 | 0.205128 |
| 0.13447   | 0.142337 | 0.10708   | 0.145979 | 0.128788 | 0.139569 | 0.128205 |
| 0.129808  | 0.14933  | 0.127477  | 0.129371 | 0.12296  | 0.132576 | 0.134033 |
| 0.114365  | 0.114073 | 0.097465  | 0.136364 | 0.115676 | 0.12704  | 0.105478 |
| 0.112179  | 0.132576 | 0.107226  | 0.133887 | 0.129225 | 0.133304 | 0.116113 |

|           |          |           |          |          |          |          |
|-----------|----------|-----------|----------|----------|----------|----------|
| 0.116113  | 0.135635 | 0.114073  | 0.137821 | 0.129662 | 0.138112 | 0.116841 |
| 0.11961   | 0.134178 | 0.109411  | 0.1419   | 0.132284 | 0.136072 | 0.119464 |
| 0.119901  | 0.124272 | 0.109703  | 0.130828 | 0.119464 | 0.11655  | 0.1081   |
| 0.124272  | 0.122815 | 0.113491  | 0.135198 | 0.118298 | 0.118007 | 0.11451  |
| 0.119172  | 0.140152 | 0.124417  | 0.150204 | 0.131265 | 0.137383 | 0.130682 |
| 0.125146  | 0.141463 | 0.100379  | 0.147436 | 0.126457 | 0.134324 | 0.118881 |
| 0.111305  | 0.128497 | 0.104312  | 0.133596 | 0.124563 | 0.131265 | 0.113491 |
| 0.11757   | 0.13884  | 0.119318  | 0.138112 | 0.134324 | 0.143065 | 0.120338 |
| 0.111014  | 0.11859  | 0.0891608 | 0.137383 | 0.116404 | 0.12398  | 0.104167 |
| 0.13243   | 0.141463 | 0.123397  | 0.142774 | 0.138112 | 0.143939 | 0.128788 |
| 0.0933858 | 0.139132 | 0.10912   | 0.143939 | 0.134324 | 0.130828 | 0.10169  |
| 0.134615  | 0.147145 | 0.130245  | 0.146416 | 0.143502 | 0.151078 | 0.135344 |
| 0.257284  | 0.258159 | 0.259033  | 0.262092 | 0.25539  | 0.261218 | 0.266171 |
| 0.134033  | 0.137238 | 0.120047  | 0.136801 | 0.120484 | 0.13039  | 0.123397 |
| 0.133596  | 0.13243  | 0.119901  | 0.140734 | 0.124709 | 0.133159 | 0.12704  |
| 0.213869  | 0.221445 | 0.217657  | 0.22567  | 0.21722  | 0.226253 | 0.224213 |
| 0.13243   | 0.138258 | 0.115822  | 0.13141  | 0.116259 | 0.132576 | 0.12296  |
| 0.227418  | 0.234703 | 0.232372  | 0.236597 | 0.227855 | 0.235723 | 0.238054 |
| 0.126457  | 0.13549  | 0.112762  | 0.132139 | 0.116113 | 0.127477 | 0.116113 |
| 0.130099  | 0.133013 | 0.113491  | 0.143357 | 0.133741 | 0.141317 | 0.127331 |
| 0.11553   | 0.13884  | 0.114656  | 0.128205 | 0.119172 | 0.124126 | 0.123252 |
| 0.129516  | 0.142045 | 0.107663  | 0.143939 | 0.12704  | 0.137821 | 0.125583 |
| 0.204983  | 0.211684 | 0.20236   | 0.213869 | 0.204254 | 0.208333 | 0.213869 |
| 0.133013  | 0.146999 | 0.126311  | 0.147727 | 0.140152 | 0.147727 | 0.131993 |
| 0.11961   | 0.137675 | 0.117279  | 0.141026 | 0.134324 | 0.141026 | 0.123543 |
| 0.224359  | 0.235723 | 0.226981  | 0.235868 | 0.22567  | 0.232955 | 0.234411 |
| 0.123397  | 0.129516 | 0.11757   | 0.13986  | 0.123252 | 0.119464 | 0.11859  |
| 0.19697   | 0.207751 | 0.197844  | 0.209645 | 0.196824 | 0.206148 | 0.208188 |
| 0.124126  | 0.128497 | 0.115967  | 0.139132 | 0.124272 | 0.122523 | 0.11961  |
| 0.118298  | 0.133159 | 0.103438  | 0.139423 | 0.124563 | 0.135635 | 0.121066 |
| 0.12602   | 0.113782 | 0.100379  | 0.142483 | 0.124126 | 0.131702 | 0.115385 |
| 0.136218  | 0.14729  | 0.108537  | 0.147727 | 0.130536 | 0.136946 | 0.125874 |
| 0.114219  | 0.130828 | 0.111888  | 0.143502 | 0.129808 | 0.132139 | 0.111451 |
| 0.159965  | 0.161422 | 0.157634  | 0.17701  | 0.165355 | 0.166812 | 0.165938 |
| 0.117133  | 0.130536 | 0.111888  | 0.135052 | 0.128934 | 0.134761 | 0.115822 |
| 0.119755  | 0.143357 | 0.122669  | 0.127768 | 0.122232 | 0.130973 | 0.130099 |
| 0.123252  | 0.134033 | 0.113345  | 0.136801 | 0.124854 | 0.138258 | 0.121649 |
| 0.129079  | 0.142774 | 0.120047  | 0.135927 | 0.12602  | 0.137675 | 0.130099 |
| 0.191579  | 0.204983 | 0.196533  | 0.210664 | 0.197552 | 0.203089 | 0.20542  |
| 0.115967  | 0.129953 | 0.104604  | 0.138258 | 0.12602  | 0.133304 | 0.11757  |
| 0.129225  | 0.146416 | 0.106206  | 0.149476 | 0.130828 | 0.13986  | 0.124417 |
| 0.111597  | 0.132284 | 0.105478  | 0.137675 | 0.119027 | 0.126894 | 0.10067  |
| 0.128351  | 0.124563 | 0.116696  | 0.134324 | 0.119464 | 0.117133 | 0.116841 |
| 0.122086  | 0.131993 | 0.108392  | 0.138549 | 0.128642 | 0.135927 | 0.123397 |



|           |          |           |          |          |          |          |
|-----------|----------|-----------|----------|----------|----------|----------|
| 0.253059  | 0.258013 | 0.255682  | 0.256702 | 0.252914 | 0.259324 | 0.266317 |
| 0.12296   | 0.113345 | 0.0961538 | 0.137092 | 0.120192 | 0.127185 | 0.110577 |
| 0.120338  | 0.13141  | 0.11655   | 0.143502 | 0.129516 | 0.132721 | 0.121649 |
| 0.183566  | 0.178613 | 0.180653  | 0.192162 | 0.179633 | 0.181381 | 0.188083 |
| 0.185897  | 0.195804 | 0.185315  | 0.201486 | 0.184878 | 0.19391  | 0.198281 |
| 0.121795  | 0.13345  | 0.123252  | 0.148456 | 0.130973 | 0.137383 | 0.128351 |
| 0.120775  | 0.136801 | 0.114948  | 0.138403 | 0.134033 | 0.1419   | 0.121503 |
| 0.120484  | 0.139132 | 0.101836  | 0.143065 | 0.126457 | 0.134033 | 0.122378 |
| 0.146562  | 0.156177 | 0.141317  | 0.1537   | 0.152244 | 0.157197 | 0.146999 |
| 0.111597  | 0.133159 | 0.118298  | 0.146416 | 0.130099 | 0.134178 | 0.123689 |
| 0.117861  | 0.140297 | 0.122232  | 0.148019 | 0.129662 | 0.138695 | 0.127331 |
| 0.130828  | 0.12704  | 0.123834  | 0.141171 | 0.124854 | 0.120484 | 0.124563 |
| 0.119172  | 0.131993 | 0.114219  | 0.137092 | 0.129516 | 0.139132 | 0.11961  |
| 0.131556  | 0.142628 | 0.12602   | 0.141026 | 0.137529 | 0.147145 | 0.132576 |
| 0.126166  | 0.126166 | 0.118298  | 0.144668 | 0.124272 | 0.120484 | 0.117861 |
| 0.131847  | 0.142045 | 0.104458  | 0.143357 | 0.123834 | 0.136655 | 0.12704  |
| 0.144522  | 0.15035  | 0.121212  | 0.153409 | 0.135344 | 0.148747 | 0.136509 |
| 0.123689  | 0.115239 | 0.0992133 | 0.141026 | 0.122669 | 0.133159 | 0.116841 |
| 0.137529  | 0.147436 | 0.111888  | 0.146125 | 0.127185 | 0.140297 | 0.129225 |
| 0.132576  | 0.125583 | 0.120338  | 0.141754 | 0.127477 | 0.121941 | 0.126311 |
| 0.202943  | 0.219843 | 0.207605  | 0.219697 | 0.208625 | 0.215035 | 0.219406 |
| 0.126457  | 0.125    | 0.105478  | 0.142337 | 0.124563 | 0.135635 | 0.111742 |
| 0.190268  | 0.20134  | 0.191434  | 0.205274 | 0.19391  | 0.200903 | 0.202069 |
| 0.119464  | 0.13141  | 0.113928  | 0.129808 | 0.123106 | 0.133013 | 0.120484 |
| 0.126457  | 0.135781 | 0.113928  | 0.144668 | 0.131847 | 0.139423 | 0.126311 |
| 0.0999417 | 0.140443 | 0.113928  | 0.146707 | 0.135635 | 0.132139 | 0.103293 |
| 0.0957168 | 0.135052 | 0.106498  | 0.142774 | 0.13141  | 0.131993 | 0.10169  |
| 0.122378  | 0.138695 | 0.121795  | 0.139714 | 0.135052 | 0.146707 | 0.128059 |
| 0.125     | 0.139277 | 0.121795  | 0.136509 | 0.13447  | 0.139423 | 0.127477 |
| 0.119464  | 0.133741 | 0.109557  | 0.141171 | 0.128934 | 0.136801 | 0.12398  |
| 0.11961   | 0.139132 | 0.118444  | 0.128497 | 0.120338 | 0.131119 | 0.129079 |
| 0.10067   | 0.139714 | 0.116113  | 0.151807 | 0.138695 | 0.136364 | 0.106352 |
| 0.141026  | 0.129079 | 0.124709  | 0.144668 | 0.130682 | 0.126311 | 0.130099 |
| 0.248543  | 0.253788 | 0.251166  | 0.25539  | 0.248397 | 0.252768 | 0.260052 |
| 0.120629  | 0.136072 | 0.107517  | 0.144668 | 0.130973 | 0.136509 | 0.122523 |
| 0.182547  | 0.195659 | 0.183712  | 0.196096 | 0.185315 | 0.192599 | 0.196387 |
| 0.191142  | 0.202797 | 0.190851  | 0.201777 | 0.188957 | 0.196533 | 0.200903 |
| 0.127768  | 0.130973 | 0.120775  | 0.138112 | 0.12296  | 0.135781 | 0.123252 |
| 0.118153  | 0.116987 | 0.0965909 | 0.13549  | 0.117716 | 0.128497 | 0.110723 |
| 0.125728  | 0.137092 | 0.111451  | 0.138695 | 0.128497 | 0.139569 | 0.125291 |
| 0.113491  | 0.132139 | 0.112325  | 0.134324 | 0.12704  | 0.136072 | 0.117424 |
| 0.116841  | 0.119755 | 0.0882867 | 0.137383 | 0.126603 | 0.134761 | 0.104749 |
| 0.127622  | 0.126457 | 0.114802  | 0.137383 | 0.121066 | 0.124854 | 0.118153 |
| 0.127185  | 0.126603 | 0.11757   | 0.136364 | 0.131702 | 0.137238 | 0.125    |

|           |          |           |          |          |          |           |
|-----------|----------|-----------|----------|----------|----------|-----------|
| 0.13243   | 0.144376 | 0.127768  | 0.149476 | 0.143357 | 0.145979 | 0.133741  |
| 0.117133  | 0.13345  | 0.104895  | 0.140589 | 0.126603 | 0.135344 | 0.11961   |
| 0.129371  | 0.143939 | 0.127622  | 0.144376 | 0.139714 | 0.150787 | 0.129225  |
| 0.122232  | 0.133013 | 0.112034  | 0.142191 | 0.122086 | 0.129662 | 0.117716  |
| 0.104749  | 0.141171 | 0.11757   | 0.150058 | 0.135198 | 0.132284 | 0.106643  |
| 0.126457  | 0.141317 | 0.102564  | 0.146999 | 0.127768 | 0.136218 | 0.124272  |
| 0.140297  | 0.124563 | 0.124272  | 0.145688 | 0.130536 | 0.119755 | 0.128788  |
| 0.124417  | 0.118007 | 0.104312  | 0.143794 | 0.124854 | 0.139132 | 0.117861  |
| 0.11451   | 0.12704  | 0.107226  | 0.135927 | 0.123689 | 0.130973 | 0.114656  |
| 0.136655  | 0.142774 | 0.13345   | 0.151369 | 0.130973 | 0.143211 | 0.133596  |
| 0.183712  | 0.196241 | 0.1875    | 0.20134  | 0.185606 | 0.193182 | 0.198135  |
| 0.136072  | 0.147145 | 0.129371  | 0.147582 | 0.141171 | 0.151952 | 0.136801  |
| 0.120047  | 0.137529 | 0.119172  | 0.139132 | 0.134178 | 0.142045 | 0.124563  |
| 0.0962995 | 0.140589 | 0.107955  | 0.147145 | 0.130828 | 0.131702 | 0.102273  |
| 0.0941142 | 0.131702 | 0.104312  | 0.138549 | 0.12602  | 0.128059 | 0.0977564 |
| 0.127185  | 0.139423 | 0.102127  | 0.145396 | 0.125874 | 0.134033 | 0.124126  |
| 0.130245  | 0.140443 | 0.104895  | 0.147873 | 0.129225 | 0.137092 | 0.124272  |
| 0.190705  | 0.201777 | 0.191579  | 0.203671 | 0.191434 | 0.200758 | 0.200175  |
| 0.125146  | 0.124854 | 0.114365  | 0.139277 | 0.12704  | 0.133741 | 0.120921  |
| 0.11655   | 0.11655  | 0.105186  | 0.13243  | 0.120484 | 0.126311 | 0.115822  |
| 0.125     | 0.140443 | 0.123543  | 0.142045 | 0.135635 | 0.145833 | 0.130099  |
| 0.193328  | 0.202943 | 0.19391   | 0.206294 | 0.192599 | 0.201049 | 0.203963  |
| 0.118881  | 0.117133 | 0.0961538 | 0.139714 | 0.120484 | 0.129225 | 0.111451  |
| 0.132721  | 0.125437 | 0.121358  | 0.13986  | 0.124126 | 0.118881 | 0.122086  |
| 0.126311  | 0.140006 | 0.121941  | 0.141608 | 0.136072 | 0.142483 | 0.127914  |
| 0.113928  | 0.134324 | 0.115967  | 0.140589 | 0.123689 | 0.13243  | 0.121066  |
| 0.183858  | 0.199592 | 0.187354  | 0.198864 | 0.190414 | 0.198281 | 0.198864  |
| 0.125874  | 0.125291 | 0.115385  | 0.137966 | 0.121941 | 0.118153 | 0.119901  |
| 0.117716  | 0.129662 | 0.112762  | 0.138258 | 0.11961  | 0.128934 | 0.120775  |
| 0.11655   | 0.118298 | 0.0990676 | 0.141463 | 0.12398  | 0.123106 | 0.109703  |
| 0.113928  | 0.138695 | 0.120921  | 0.146707 | 0.135635 | 0.137675 | 0.121066  |
| 0.11961   | 0.140589 | 0.119901  | 0.126457 | 0.120338 | 0.130245 | 0.128205  |
| 0.135635  | 0.127768 | 0.123106  | 0.143357 | 0.123543 | 0.120338 | 0.125583  |
| 0.116696  | 0.133013 | 0.106206  | 0.138986 | 0.12704  | 0.134324 | 0.11859   |
| 0.134761  | 0.12602  | 0.114656  | 0.14831  | 0.126457 | 0.130536 | 0.128497  |
| 0.139277  | 0.150058 | 0.142191  | 0.160402 | 0.14729  | 0.148747 | 0.144376  |
| 0.237762  | 0.242716 | 0.238345  | 0.245192 | 0.232372 | 0.241696 | 0.244901  |
| 0.129662  | 0.125583 | 0.107517  | 0.14729  | 0.129516 | 0.145542 | 0.121358  |
| 0.118881  | 0.141317 | 0.119755  | 0.128059 | 0.122232 | 0.130682 | 0.129516  |
| 0.120775  | 0.130973 | 0.117861  | 0.138403 | 0.130828 | 0.138403 | 0.122378  |
| 0.117424  | 0.135781 | 0.122378  | 0.144376 | 0.126894 | 0.140589 | 0.122523  |
| 0.114656  | 0.12602  | 0.113199  | 0.125583 | 0.113928 | 0.113928 | 0.118298  |
| 0.128351  | 0.131847 | 0.116696  | 0.135781 | 0.120921 | 0.128205 | 0.120338  |
| 0.124709  | 0.136946 | 0.120921  | 0.136801 | 0.13243  | 0.141463 | 0.128934  |

|          |          |           |          |          |          |          |
|----------|----------|-----------|----------|----------|----------|----------|
| 0.134178 | 0.12398  | 0.122232  | 0.143357 | 0.124126 | 0.11859  | 0.124126 |
| 0.117279 | 0.130682 | 0.11757   | 0.146853 | 0.127622 | 0.132284 | 0.125    |
| 0.235431 | 0.246795 | 0.236014  | 0.241404 | 0.23616  | 0.241404 | 0.24461  |
| 0.116404 | 0.114073 | 0.0948427 | 0.136655 | 0.117424 | 0.12296  | 0.110723 |
| 0.114656 | 0.121649 | 0.102418  | 0.129953 | 0.114219 | 0.119464 | 0.109557 |
| 0.115676 | 0.127331 | 0.104895  | 0.137383 | 0.125437 | 0.131265 | 0.117861 |
| 0.123397 | 0.143794 | 0.129808  | 0.150641 | 0.135198 | 0.141026 | 0.13141  |
| 0.133304 | 0.123397 | 0.114073  | 0.14831  | 0.132284 | 0.146562 | 0.12704  |
| 0.117861 | 0.130099 | 0.114365  | 0.141317 | 0.133159 | 0.134907 | 0.117133 |
| 0.122523 | 0.139423 | 0.121358  | 0.140734 | 0.134615 | 0.143939 | 0.124126 |
| 0.112179 | 0.128788 | 0.112179  | 0.138258 | 0.125437 | 0.131265 | 0.122232 |
| 0.229021 | 0.23514  | 0.232517  | 0.241113 | 0.230624 | 0.237617 | 0.239365 |
| 0.126457 | 0.140443 | 0.122669  | 0.142045 | 0.139714 | 0.147873 | 0.130099 |
| 0.128059 | 0.125437 | 0.120484  | 0.140443 | 0.125    | 0.119172 | 0.120921 |
| 0.119318 | 0.127185 | 0.112034  | 0.142191 | 0.119464 | 0.129079 | 0.121795 |
| 0.126748 | 0.138403 | 0.115093  | 0.138258 | 0.12602  | 0.137966 | 0.127185 |
| 0.127914 | 0.13141  | 0.115676  | 0.135635 | 0.116404 | 0.128642 | 0.120775 |
| 0.118007 | 0.13141  | 0.106935  | 0.13447  | 0.125146 | 0.133304 | 0.11757  |
| 0.131993 | 0.125874 | 0.117716  | 0.138549 | 0.12398  | 0.11961  | 0.120484 |
| 0.134178 | 0.128934 | 0.126311  | 0.142483 | 0.125    | 0.119755 | 0.125291 |
| 0.125146 | 0.124854 | 0.115239  | 0.137821 | 0.120921 | 0.118298 | 0.11655  |
| 0.114802 | 0.132867 | 0.105769  | 0.140297 | 0.127477 | 0.135635 | 0.118735 |
| 0.130245 | 0.144814 | 0.124126  | 0.126894 | 0.121941 | 0.128642 | 0.133013 |
| 0.129808 | 0.149038 | 0.129808  | 0.126457 | 0.126166 | 0.137238 | 0.138112 |
| 0.105915 | 0.141171 | 0.117279  | 0.152681 | 0.138112 | 0.136946 | 0.108683 |
| 0.107372 | 0.145251 | 0.120192  | 0.155594 | 0.141317 | 0.137821 | 0.117424 |
| 0.128788 | 0.149184 | 0.126748  | 0.129516 | 0.122523 | 0.133887 | 0.133887 |
| 0.108392 | 0.115967 | 0.0844988 | 0.134178 | 0.122232 | 0.131556 | 0.101544 |
| 0.133596 | 0.139714 | 0.119901  | 0.145396 | 0.127331 | 0.134615 | 0.115967 |
| 0.13549  | 0.110431 | 0.12704   | 0.14729  | 0.137092 | 0.127768 | 0.128351 |
| 0.203963 | 0.217657 | 0.206876  | 0.217803 | 0.204983 | 0.211393 | 0.218386 |
| 0.128205 | 0.13345  | 0.120921  | 0.149038 | 0.133013 | 0.143502 | 0.130099 |
| 0.122086 | 0.134033 | 0.106061  | 0.131847 | 0.119027 | 0.127477 | 0.112617 |
| 0.123397 | 0.133013 | 0.112908  | 0.143357 | 0.129079 | 0.138112 | 0.125583 |
| 0.222319 | 0.230186 | 0.222319  | 0.230332 | 0.221882 | 0.231789 | 0.23208  |
| 0.212121 | 0.222902 | 0.213869  | 0.220425 | 0.209645 | 0.217512 | 0.220717 |
| 0.135635 | 0.128934 | 0.125437  | 0.143065 | 0.123252 | 0.121503 | 0.125583 |
| 0.247378 | 0.254371 | 0.252622  | 0.255973 | 0.25102  | 0.253934 | 0.256556 |
| 0.107809 | 0.116259 | 0.087704  | 0.131556 | 0.125146 | 0.130682 | 0.099796 |
| 0.142774 | 0.137238 | 0.124126  | 0.144668 | 0.143794 | 0.146125 | 0.131847 |
| 0.120629 | 0.113345 | 0.0938228 | 0.138549 | 0.11757  | 0.124563 | 0.11116  |
| 0.125437 | 0.143502 | 0.125728  | 0.127914 | 0.124417 | 0.132867 | 0.133159 |
| 0.189103 | 0.198718 | 0.18852   | 0.202652 | 0.191871 | 0.197115 | 0.200029 |
| 0.135052 | 0.132139 | 0.114656  | 0.144231 | 0.120629 | 0.132867 | 0.129953 |

|           |          |           |          |          |          |           |
|-----------|----------|-----------|----------|----------|----------|-----------|
| 0.192453  | 0.207022 | 0.196533  | 0.210373 | 0.194639 | 0.204837 | 0.204254  |
| 0.121358  | 0.128351 | 0.113491  | 0.134615 | 0.120338 | 0.134907 | 0.120629  |
| 0.123106  | 0.121941 | 0.118444  | 0.136946 | 0.129953 | 0.120047 | 0.118298  |
| 0.122815  | 0.131556 | 0.109411  | 0.134907 | 0.123834 | 0.137529 | 0.118881  |
| 0.116113  | 0.126603 | 0.110577  | 0.139569 | 0.124417 | 0.129371 | 0.112471  |
| 0.109848  | 0.126457 | 0.100524  | 0.136218 | 0.122815 | 0.12602  | 0.112034  |
| 0.117424  | 0.132284 | 0.111888  | 0.141171 | 0.128642 | 0.137675 | 0.121649  |
| 0.113345  | 0.113636 | 0.0938228 | 0.133596 | 0.112617 | 0.122815 | 0.10912   |
| 0.117279  | 0.132721 | 0.115239  | 0.136946 | 0.130828 | 0.135198 | 0.122086  |
| 0.117716  | 0.134615 | 0.1081    | 0.136801 | 0.116696 | 0.128059 | 0.105041  |
| 0.115967  | 0.117424 | 0.101981  | 0.137383 | 0.119901 | 0.134761 | 0.108246  |
| 0.118444  | 0.112325 | 0.0942599 | 0.13549  | 0.11859  | 0.125    | 0.110723  |
| 0.104021  | 0.131702 | 0.107226  | 0.147582 | 0.135927 | 0.129225 | 0.108537  |
| 0.13141   | 0.145396 | 0.124417  | 0.146125 | 0.140006 | 0.147582 | 0.133304  |
| 0.0945513 | 0.13447  | 0.106206  | 0.142191 | 0.130536 | 0.128497 | 0.0990676 |
| 0.11859   | 0.13141  | 0.112762  | 0.140006 | 0.123106 | 0.130682 | 0.11961   |
| 0.109703  | 0.125146 | 0.101253  | 0.134907 | 0.122669 | 0.128497 | 0.113928  |
| 0.124272  | 0.12398  | 0.113782  | 0.137529 | 0.123252 | 0.119755 | 0.115676  |
| 0.118444  | 0.13884  | 0.118444  | 0.130828 | 0.124126 | 0.130245 | 0.125583  |
| 0.128788  | 0.13986  | 0.103438  | 0.144085 | 0.126603 | 0.135344 | 0.124563  |
| 0.0958625 | 0.136946 | 0.109266  | 0.14292  | 0.13039  | 0.133596 | 0.100962  |
| 0.120775  | 0.135052 | 0.117861  | 0.137529 | 0.133741 | 0.13986  | 0.122669  |
| 0.129953  | 0.144231 | 0.128788  | 0.144668 | 0.139714 | 0.147582 | 0.134178  |
| 0.140152  | 0.150058 | 0.133741  | 0.150787 | 0.145542 | 0.156031 | 0.141463  |
| 0.11553   | 0.117279 | 0.105915  | 0.131702 | 0.120921 | 0.11451  | 0.107226  |
| 0.116113  | 0.131556 | 0.106206  | 0.140734 | 0.127914 | 0.135781 | 0.121795  |
| 0.118007  | 0.125291 | 0.105186  | 0.137383 | 0.120192 | 0.130099 | 0.11553   |
| 0.130245  | 0.147727 | 0.129371  | 0.126894 | 0.125728 | 0.134761 | 0.13447   |
| 0.119318  | 0.11553  | 0.0942599 | 0.138112 | 0.121503 | 0.129662 | 0.11014   |
| 0.144959  | 0.149621 | 0.119027  | 0.155012 | 0.137529 | 0.147145 | 0.139569  |
| 0.136801  | 0.13884  | 0.122815  | 0.146853 | 0.140734 | 0.14627  | 0.136655  |
| 0.119755  | 0.13986  | 0.123834  | 0.147582 | 0.129808 | 0.136218 | 0.128934  |
| 0.117861  | 0.128642 | 0.101544  | 0.144522 | 0.127622 | 0.136655 | 0.109266  |
| 0.115385  | 0.132576 | 0.104021  | 0.13243  | 0.121358 | 0.130099 | 0.119318  |
| 0.106061  | 0.140734 | 0.114219  | 0.153409 | 0.139132 | 0.137383 | 0.105915  |
| 0.204983  | 0.218094 | 0.208479  | 0.215326 | 0.206876 | 0.212704 | 0.215909  |
| 0.119027  | 0.129516 | 0.118735  | 0.138695 | 0.12296  | 0.129371 | 0.119464  |
| 0.121503  | 0.132576 | 0.105769  | 0.13884  | 0.125437 | 0.140297 | 0.115239  |
| 0.120192  | 0.139714 | 0.118444  | 0.126166 | 0.118007 | 0.12704  | 0.127914  |
| 0.0973193 | 0.13549  | 0.106643  | 0.144668 | 0.135635 | 0.131265 | 0.10067   |
| 0.125437  | 0.135927 | 0.119027  | 0.138112 | 0.120338 | 0.136946 | 0.125583  |
| 0.128642  | 0.133887 | 0.118444  | 0.145979 | 0.128788 | 0.135198 | 0.122378  |
| 0.131119  | 0.132284 | 0.119755  | 0.146125 | 0.131265 | 0.135635 | 0.128059  |
| 0.116113  | 0.136509 | 0.117861  | 0.141317 | 0.126166 | 0.132576 | 0.124126  |

|          |          |           |          |          |           |           |
|----------|----------|-----------|----------|----------|-----------|-----------|
| 0.111451 | 0.132721 | 0.103875  | 0.137238 | 0.116259 | 0.123543  | 0.101107  |
| 0.125728 | 0.144959 | 0.124854  | 0.125583 | 0.123252 | 0.131702  | 0.132284  |
| 0.121358 | 0.126603 | 0.099796  | 0.137238 | 0.119755 | 0.132284  | 0.113636  |
| 0.120921 | 0.123252 | 0.104604  | 0.143794 | 0.125437 | 0.13884   | 0.114948  |
| 0.174097 | 0.180798 | 0.171474  | 0.192308 | 0.18007  | 0.187063  | 0.18007   |
| 0.118153 | 0.137675 | 0.118153  | 0.142483 | 0.134033 | 0.143939  | 0.123834  |
| 0.130536 | 0.143939 | 0.126457  | 0.129516 | 0.123106 | 0.133887  | 0.133596  |
| 0.126603 | 0.121358 | 0.0980478 | 0.145396 | 0.129079 | 0.132867  | 0.111597  |
| 0.122378 | 0.121212 | 0.121503  | 0.136509 | 0.128351 | 0.126311  | 0.115822  |
| 0.113636 | 0.11859  | 0.0917832 | 0.135635 | 0.116987 | 0.125437  | 0.105624  |
| 0.112471 | 0.113636 | 0.0961538 | 0.136801 | 0.114073 | 0.130973  | 0.103001  |
| 0.117716 | 0.119172 | 0.094697  | 0.135927 | 0.118444 | 0.127477  | 0.110286  |
| 0.125874 | 0.120047 | 0.114219  | 0.137383 | 0.128642 | 0.107372  | 0.122232  |
| 0.121212 | 0.120338 | 0.106935  | 0.137092 | 0.134178 | 0.136218  | 0.115822  |
| 0.131556 | 0.134761 | 0.113199  | 0.147436 | 0.130245 | 0.143357  | 0.12296   |
| 0.115967 | 0.123834 | 0.11014   | 0.136801 | 0.121358 | 0.12602   | 0.109994  |
| 0.121941 | 0.125146 | 0.111451  | 0.139277 | 0.123543 | 0.131119  | 0.113345  |
| 0.13986  | 0.112471 | 0.12704   | 0.144668 | 0.132139 | 0.0968823 | 0.125146  |
| 0.120921 | 0.11859  | 0.100816  | 0.137092 | 0.123106 | 0.128642  | 0.105624  |
| 0.122378 | 0.132284 | 0.117716  | 0.14292  | 0.128059 | 0.127768  | 0.121066  |
| 0.11451  | 0.122669 | 0.0955711 | 0.139132 | 0.118153 | 0.129516  | 0.101253  |
| 0.120921 | 0.121212 | 0.0981935 | 0.137383 | 0.123689 | 0.130973  | 0.101836  |
| 0.111888 | 0.123543 | 0.0958625 | 0.128934 | 0.116987 | 0.127185  | 0.107372  |
| 0.126311 | 0.123689 | 0.101253  | 0.141317 | 0.125583 | 0.136072  | 0.11014   |
| 0.110868 | 0.123397 | 0.0866841 | 0.142483 | 0.123834 | 0.12704   | 0.107226  |
| 0.143211 | 0.140297 | 0.133887  | 0.125874 | 0.142191 | 0.140734  | 0.136364  |
| 0.13243  | 0.142045 | 0.129516  | 0.12704  | 0.137529 | 0.138403  | 0.130536  |
| 0.111451 | 0.124272 | 0.092803  | 0.143065 | 0.125874 | 0.13345   | 0.104021  |
| 0.148019 | 0.143939 | 0.127622  | 0.151078 | 0.129808 | 0.134761  | 0.142045  |
| 0        | 0.138403 | 0.120921  | 0.144959 | 0.137966 | 0.135635  | 0.107663  |
| 0.138403 | 0        | 0.12704   | 0.145542 | 0.137092 | 0.124272  | 0.133596  |
| 0.120921 | 0.12704  | 0         | 0.139714 | 0.119027 | 0.13243   | 0.10912   |
| 0.144959 | 0.145542 | 0.139714  | 0        | 0.13345  | 0.14831   | 0.142483  |
| 0.137966 | 0.137092 | 0.119027  | 0.13345  | 0        | 0.137238  | 0.129079  |
| 0.135635 | 0.124272 | 0.13243   | 0.14831  | 0.137238 | 0         | 0.136946  |
| 0.107663 | 0.133596 | 0.10912   | 0.142483 | 0.129079 | 0.136946  | 0         |
| 0.114802 | 0.117716 | 0.0967366 | 0.136509 | 0.124272 | 0.127768  | 0.0995047 |
| 0.117861 | 0.121649 | 0.0986305 | 0.136364 | 0.127622 | 0.130536  | 0.10373   |
| 0.120629 | 0.121795 | 0.112471  | 0.137383 | 0.126311 | 0.105041  | 0.119318  |
| 0.125874 | 0.124709 | 0.100816  | 0.137383 | 0.125437 | 0.131265  | 0.108537  |
| 0.131847 | 0.133887 | 0.11116   | 0.138695 | 0.127331 | 0.139569  | 0.11451   |
| 0.124563 | 0.126603 | 0.118153  | 0.125874 | 0.136072 | 0.131702  | 0.121795  |
| 0.106789 | 0.125437 | 0.10067   | 0.130536 | 0.11655  | 0.122669  | 0.0871212 |
| 0.120047 | 0.122378 | 0.0938228 | 0.13447  | 0.126311 | 0.129225  | 0.103875  |

|          |           |           |          |          |          |           |
|----------|-----------|-----------|----------|----------|----------|-----------|
| 0.12602  | 0.117279  | 0.104167  | 0.142774 | 0.131119 | 0.131119 | 0.110431  |
| 0.122232 | 0.125728  | 0.103001  | 0.136946 | 0.127331 | 0.125874 | 0.104895  |
| 0.12704  | 0.121212  | 0.101399  | 0.14292  | 0.133596 | 0.13447  | 0.111742  |
| 0.11451  | 0.12704   | 0.0917832 | 0.13884  | 0.12602  | 0.133596 | 0.108246  |
| 0.11757  | 0.128351  | 0.112034  | 0.138403 | 0.13141  | 0.138403 | 0.115093  |
| 0.11553  | 0.0980478 | 0.106498  | 0.138695 | 0.128205 | 0.131993 | 0.111014  |
| 0.107955 | 0.110868  | 0.0852273 | 0.132867 | 0.124126 | 0.128205 | 0.0979021 |
| 0.11961  | 0.119027  | 0.100087  | 0.141026 | 0.123252 | 0.129662 | 0.106061  |
| 0.11451  | 0.128205  | 0.11451   | 0.140006 | 0.127185 | 0.13243  | 0.115239  |
| 0.119027 | 0.119901  | 0.100962  | 0.140152 | 0.124417 | 0.134907 | 0.111888  |
| 0.130682 | 0.131265  | 0.115239  | 0.138695 | 0.125291 | 0.138695 | 0.121795  |
| 0.110577 | 0.124272  | 0.106789  | 0.131702 | 0.128205 | 0.12704  | 0.111305  |
| 0.126748 | 0.125874  | 0.115385  | 0.143794 | 0.129516 | 0.141171 | 0.116696  |

| <b>TDr_97_00903</b> | <b>TDr_97_00907</b> | <b>TDr_97_00917</b> | <b>TDr_97_00940</b> | <b>TDr_97_00960</b> | <b>TDr_97_01715</b> | <b>TDr_99_02354</b> |
|---------------------|---------------------|---------------------|---------------------|---------------------|---------------------|---------------------|
| 0.110577            | 0.111597            | 0.122523            | 0.117861            | 0.127622            | 0.113636            | 0.105186            |
| 0.106935            | 0.109703            | 0.120047            | 0.120047            | 0.125728            | 0.117279            | 0.105915            |
| 0.103147            | 0.106789            | 0.116259            | 0.119755            | 0.122523            | 0.113491            | 0.100962            |
| 0.112179            | 0.107372            | 0.117133            | 0.115676            | 0.126894            | 0.11757             | 0.107955            |
| 0.127331            | 0.127768            | 0.125583            | 0.132867            | 0.135635            | 0.138258            | 0.122523            |
| 0.12704             | 0.120775            | 0.129371            | 0.130245            | 0.137092            | 0.126311            | 0.113782            |
| 0.105041            | 0.109266            | 0.116987            | 0.10708             | 0.122378            | 0.127914            | 0.0635198           |
| 0.112034            | 0.106935            | 0.117279            | 0.11961             | 0.124709            | 0.118298            | 0.109557            |
| 0.0938228           | 0.0884324           | 0.108392            | 0.0979021           | 0.106789            | 0.112034            | 0.100962            |
| 0.0861014           | 0.0868298           | 0.114656            | 0.0872669           | 0.092366            | 0.11014             | 0.0967366           |
| 0.101981            | 0.101544            | 0.11859             | 0.113345            | 0.126311            | 0.114073            | 0.0957168           |
| 0.111742            | 0.102273            | 0.103875            | 0.113782            | 0.116841            | 0.113928            | 0.0996503           |
| 0.0954254           | 0.100524            | 0.119027            | 0.108829            | 0.111888            | 0.113636            | 0.106061            |
| 0.12704             | 0.124272            | 0.140734            | 0.135781            | 0.146125            | 0.131556            | 0.128059            |
| 0.118153            | 0.117716            | 0.129225            | 0.118735            | 0.125583            | 0.127914            | 0.120338            |
| 0.102855            | 0.108537            | 0.107809            | 0.110431            | 0.119318            | 0.113199            | 0.109411            |
| 0.104749            | 0.0996503           | 0.107955            | 0.114073            | 0.117424            | 0.115676            | 0.0976107           |
| 0.139569            | 0.139132            | 0.142191            | 0.141026            | 0.14933             | 0.14729             | 0.136218            |
| 0.103147            | 0.102127            | 0.109848            | 0.117133            | 0.120775            | 0.114656            | 0.0989219           |
| 0.201923            | 0.200321            | 0.206294            | 0.205711            | 0.216346            | 0.198572            | 0.200029            |
| 0.119027            | 0.115967            | 0.119027            | 0.127768            | 0.136655            | 0.127914            | 0.0976107           |
| 0.111014            | 0.113199            | 0.117716            | 0.125               | 0.128642            | 0.125437            | 0.0930944           |
| 0.0933858           | 0.0967366           | 0.107955            | 0.110577            | 0.110431            | 0.0996503           | 0.102564            |
| 0.104895            | 0.111451            | 0.100233            | 0.118007            | 0.124563            | 0.122523            | 0.116696            |
| 0.0925117           | 0.0859557           | 0.105332            | 0.104749            | 0.107226            | 0.105478            | 0.0914918           |
| 0.12602             | 0.119464            | 0.123106            | 0.129808            | 0.140152            | 0.136072            | 0.103147            |
| 0.10912             | 0.110431            | 0.118153            | 0.114948            | 0.122086            | 0.125874            | 0.105186            |
| 0.108537            | 0.106643            | 0.103293            | 0.116404            | 0.119172            | 0.117716            | 0.113345            |
| 0.114365            | 0.115967            | 0.117279            | 0.124563            | 0.123543            | 0.129662            | 0.115385            |
| 0.113491            | 0.104021            | 0.11553             | 0.107955            | 0.11655             | 0.12704             | 0.112471            |
| 0.108974            | 0.114656            | 0.122378            | 0.118007            | 0.128642            | 0.119318            | 0.099796            |
| 0.108537            | 0.113636            | 0.114073            | 0.112325            | 0.118881            | 0.125874            | 0.111014            |
| 0.0968823           | 0.100524            | 0.111451            | 0.103584            | 0.119755            | 0.108392            | 0.0964452           |
| 0.103875            | 0.10373             | 0.116404            | 0.116987            | 0.122378            | 0.122669            | 0.108974            |
| 0.0984848           | 0.101836            | 0.116259            | 0.107809            | 0.11757             | 0.118444            | 0.103293            |
| 0.105041            | 0.114802            | 0.119901            | 0.108246            | 0.11451             | 0.123252            | 0.112762            |
| 0.112471            | 0.114948            | 0.127622            | 0.113054            | 0.125437            | 0.136509            | 0.101253            |
| 0.108246            | 0.1081              | 0.118444            | 0.111742            | 0.113928            | 0.115093            | 0.112762            |
| 0.0971737           | 0.102273            | 0.100087            | 0.10912             | 0.117424            | 0.105478            | 0.0990676           |
| 0.105624            | 0.111888            | 0.103584            | 0.117861            | 0.120921            | 0.125               | 0.109848            |
| 0.0960082           | 0.0955711           | 0.0942599           | 0.112325            | 0.120629            | 0.111305            | 0.0981935           |
| 0.121649            | 0.122378            | 0.124854            | 0.135635            | 0.138112            | 0.134324            | 0.131119            |

|           |           |           |           |          |          |           |
|-----------|-----------|-----------|-----------|----------|----------|-----------|
| 0.128059  | 0.132284  | 0.121358  | 0.133013  | 0.145396 | 0.138403 | 0.133741  |
| 0.0976107 | 0.0965909 | 0.102273  | 0.115385  | 0.125437 | 0.109994 | 0.103584  |
| 0.0914918 | 0.0901807 | 0.105186  | 0.099359  | 0.101253 | 0.104167 | 0.0820221 |
| 0.0980478 | 0.0795455 | 0.112617  | 0.101836  | 0.106935 | 0.116259 | 0.102855  |
| 0.106498  | 0.111305  | 0.0855186 | 0.116696  | 0.125    | 0.122378 | 0.107809  |
| 0.113054  | 0.118153  | 0.112471  | 0.129079  | 0.133596 | 0.131847 | 0.131556  |
| 0.0976107 | 0.103293  | 0.101981  | 0.113928  | 0.117279 | 0.113491 | 0.104458  |
| 0.0989219 | 0.099359  | 0.101836  | 0.113782  | 0.119172 | 0.115093 | 0.103438  |
| 0.134033  | 0.139132  | 0.143357  | 0.133741  | 0.142045 | 0.14933  | 0.116987  |
| 0.117133  | 0.123397  | 0.101981  | 0.125     | 0.131556 | 0.124854 | 0.121941  |
| 0.0995047 | 0.0961538 | 0.0989219 | 0.111116  | 0.122669 | 0.1081   | 0.100233  |
| 0.109703  | 0.108392  | 0.127768  | 0.114656  | 0.120338 | 0.130828 | 0.112762  |
| 0.114365  | 0.110723  | 0.104458  | 0.120775  | 0.13141  | 0.109848 | 0.105186  |
| 0.124854  | 0.131119  | 0.0989219 | 0.130973  | 0.134907 | 0.134907 | 0.128497  |
| 0.113345  | 0.114365  | 0.104604  | 0.117716  | 0.12602  | 0.125728 | 0.116404  |
| 0.104312  | 0.101836  | 0.101981  | 0.115093  | 0.125728 | 0.115822 | 0.103875  |
| 0.104895  | 0.103584  | 0.101107  | 0.115385  | 0.118735 | 0.116987 | 0.106498  |
| 0.0922203 | 0.105186  | 0.110286  | 0.0989219 | 0.116841 | 0.125291 | 0.097028  |
| 0.118153  | 0.122669  | 0.118735  | 0.130099  | 0.137821 | 0.134324 | 0.125583  |
| 0.120192  | 0.126748  | 0.126603  | 0.131847  | 0.136655 | 0.136364 | 0.132867  |
| 0.151515  | 0.151952  | 0.153555  | 0.154138  | 0.165064 | 0.154866 | 0.158654  |
| 0.0979021 | 0.10271   | 0.105186  | 0.114219  | 0.121066 | 0.109994 | 0.103584  |
| 0.0967366 | 0.100087  | 0.0987762 | 0.112471  | 0.117279 | 0.109703 | 0.097465  |
| 0.101399  | 0.0980478 | 0.097028  | 0.113345  | 0.11757  | 0.109994 | 0.0977564 |
| 0.128351  | 0.136072  | 0.13243   | 0.131265  | 0.13549  | 0.137238 | 0.117133  |
| 0.101836  | 0.101107  | 0.099796  | 0.117279  | 0.120921 | 0.114802 | 0.105186  |
| 0.120921  | 0.124563  | 0.10169   | 0.128205  | 0.136801 | 0.125728 | 0.117861  |
| 0.0912005 | 0.0989219 | 0.111597  | 0.0990676 | 0.11553  | 0.120775 | 0.0957168 |
| 0.103875  | 0.100816  | 0.10067   | 0.115239  | 0.122669 | 0.117424 | 0.106061  |
| 0.135927  | 0.138986  | 0.144959  | 0.137092  | 0.144231 | 0.142191 | 0.124126  |
| 0.103875  | 0.105769  | 0.10912   | 0.120775  | 0.129079 | 0.116259 | 0.112762  |
| 0.121503  | 0.126311  | 0.114219  | 0.130828  | 0.139423 | 0.133596 | 0.125146  |
| 0.121358  | 0.123543  | 0.106789  | 0.13039   | 0.134033 | 0.131702 | 0.122086  |
| 0.109266  | 0.104458  | 0.109266  | 0.11859   | 0.116404 | 0.104458 | 0.101836  |
| 0.0917832 | 0.0968823 | 0.0964452 | 0.11014   | 0.11961  | 0.10912  | 0.10067   |
| 0.099359  | 0.0986305 | 0.100816  | 0.113928  | 0.121941 | 0.114365 | 0.103293  |
| 0.11859   | 0.121649  | 0.115093  | 0.126748  | 0.13447  | 0.131265 | 0.121358  |
| 0.0977564 | 0.0979021 | 0.102418  | 0.107663  | 0.114219 | 0.111597 | 0.0987762 |
| 0.129371  | 0.123689  | 0.121795  | 0.130245  | 0.142045 | 0.135635 | 0.126603  |
| 0.101107  | 0.107372  | 0.106061  | 0.121212  | 0.125437 | 0.121649 | 0.112325  |
| 0.104021  | 0.108537  | 0.0987762 | 0.119172  | 0.118153 | 0.118735 | 0.105332  |
| 0.103438  | 0.104167  | 0.099359  | 0.117424  | 0.125146 | 0.110286 | 0.107663  |
| 0.10373   | 0.109703  | 0.110431  | 0.123834  | 0.129516 | 0.115239 | 0.112908  |
| 0.102273  | 0.103875  | 0.104021  | 0.117133  | 0.118444 | 0.112325 | 0.104458  |



|           |           |           |           |          |          |           |
|-----------|-----------|-----------|-----------|----------|----------|-----------|
| 0.100524  | 0.101253  | 0.0917832 | 0.111888  | 0.122523 | 0.114073 | 0.101836  |
| 0.116696  | 0.117716  | 0.109411  | 0.128934  | 0.130536 | 0.131119 | 0.124709  |
| 0.092803  | 0.0804196 | 0.10912   | 0.110577  | 0.115676 | 0.107226 | 0.0987762 |
| 0.0941142 | 0.095134  | 0.112762  | 0.104895  | 0.112908 | 0.114948 | 0.102418  |
| 0.111014  | 0.111451  | 0.123834  | 0.11655   | 0.122815 | 0.131847 | 0.0884324 |
| 0.109266  | 0.11116   | 0.125     | 0.112471  | 0.12602  | 0.128642 | 0.0598776 |
| 0.115967  | 0.11961   | 0.124126  | 0.119755  | 0.116987 | 0.129225 | 0.113199  |
| 0.123689  | 0.125583  | 0.130099  | 0.120484  | 0.121503 | 0.132284 | 0.119755  |
| 0.104021  | 0.103001  | 0.114802  | 0.115093  | 0.124272 | 0.112617 | 0.0933858 |
| 0.177156  | 0.17264   | 0.184149  | 0.182984  | 0.1875   | 0.175262 | 0.16623   |
| 0.101253  | 0.094697  | 0.111742  | 0.10912   | 0.117716 | 0.117716 | 0.0751748 |
| 0.120921  | 0.120775  | 0.125583  | 0.125     | 0.127768 | 0.135052 | 0.121649  |
| 0.11451   | 0.110286  | 0.121212  | 0.11655   | 0.11757  | 0.127185 | 0.112034  |
| 0.121941  | 0.121503  | 0.128351  | 0.123106  | 0.134033 | 0.136946 | 0.0990676 |
| 0.101399  | 0.099796  | 0.107517  | 0.104604  | 0.104749 | 0.110286 | 0.0925117 |
| 0.117133  | 0.118444  | 0.121212  | 0.11655   | 0.11757  | 0.126603 | 0.111742  |
| 0.106061  | 0.103293  | 0.108683  | 0.106935  | 0.108537 | 0.114656 | 0.0919289 |
| 0.109411  | 0.110723  | 0.115822  | 0.106498  | 0.113054 | 0.121212 | 0.101981  |
| 0.0986305 | 0.0955711 | 0.112325  | 0.11116   | 0.115093 | 0.11451  | 0.0912005 |
| 0.116404  | 0.118881  | 0.120484  | 0.125146  | 0.117133 | 0.135781 | 0.109848  |
| 0.0898893 | 0.0719697 | 0.100379  | 0.0986305 | 0.110723 | 0.107809 | 0.092366  |
| 0.117424  | 0.123689  | 0.130828  | 0.123543  | 0.127185 | 0.128351 | 0.104749  |
| 0.101544  | 0.0941142 | 0.112325  | 0.107955  | 0.117716 | 0.121212 | 0.0719697 |
| 0.113345  | 0.11961   | 0.113636  | 0.122378  | 0.128059 | 0.126311 | 0.121941  |
| 0.105624  | 0.106935  | 0.121358  | 0.106789  | 0.123252 | 0.131119 | 0.0920746 |
| 0.0948427 | 0.101107  | 0.105624  | 0.108829  | 0.117424 | 0.116841 | 0.0635198 |
| 0.133013  | 0.134033  | 0.140297  | 0.134178  | 0.143939 | 0.136364 | 0.125874  |
| 0.101399  | 0.106206  | 0.1081    | 0.112471  | 0.116696 | 0.119318 | 0.0677448 |
| 0.103147  | 0.10067   | 0.111888  | 0.114219  | 0.108246 | 0.112034 | 0.095134  |
| 0.0992133 | 0.0847902 | 0.0960082 | 0.108829  | 0.116841 | 0.120921 | 0.102855  |
| 0.122232  | 0.118298  | 0.136801  | 0.126311  | 0.13141  | 0.138403 | 0.106935  |
| 0.108829  | 0.115967  | 0.10912   | 0.11553   | 0.126748 | 0.113636 | 0.104021  |
| 0.102127  | 0.0973193 | 0.108537  | 0.110577  | 0.108974 | 0.111305 | 0.0897436 |
| 0.0965909 | 0.0990676 | 0.105624  | 0.113782  | 0.111305 | 0.1081   | 0.0952797 |
| 0.101399  | 0.102418  | 0.118298  | 0.111014  | 0.123106 | 0.121649 | 0.0808566 |
| 0.097465  | 0.108683  | 0.121941  | 0.103001  | 0.118298 | 0.125874 | 0.106935  |
| 0.0999417 | 0.102127  | 0.113636  | 0.109557  | 0.121649 | 0.121358 | 0.0470571 |
| 0.0849359 | 0.0844988 | 0.101836  | 0.0971737 | 0.108683 | 0.109848 | 0.0859557 |
| 0.0863928 | 0.0885781 | 0.105915  | 0.0971737 | 0.106935 | 0.106643 | 0.0815851 |
| 0.0839161 | 0.0887238 | 0.103147  | 0.0987762 | 0.108829 | 0.114656 | 0.0887238 |
| 0.112179  | 0.103584  | 0.113928  | 0.119755  | 0.124854 | 0.109703 | 0.105332  |
| 0.112617  | 0.110431  | 0.118735  | 0.107955  | 0.125    | 0.133159 | 0.103438  |
| 0.0903263 | 0.092803  | 0.107517  | 0.0990676 | 0.114948 | 0.115239 | 0.0887238 |
| 0.0828963 | 0.087704  | 0.10271   | 0.0977564 | 0.111014 | 0.11014  | 0.0871212 |

|           |           |           |           |          |          |           |
|-----------|-----------|-----------|-----------|----------|----------|-----------|
| 0.0983392 | 0.0984848 | 0.108829  | 0.101253  | 0.11859  | 0.120338 | 0.100233  |
| 0.0868298 | 0.0872669 | 0.100233  | 0.100524  | 0.11553  | 0.108246 | 0.0852273 |
| 0.113345  | 0.116404  | 0.120047  | 0.125291  | 0.130099 | 0.11961  | 0.102418  |
| 0.118298  | 0.121941  | 0.130245  | 0.126457  | 0.13039  | 0.13447  | 0.105041  |
| 0.0979021 | 0.0960082 | 0.106643  | 0.100816  | 0.113782 | 0.115239 | 0.0939685 |
| 0.0890152 | 0.0917832 | 0.107955  | 0.0992133 | 0.113636 | 0.115385 | 0.0903263 |
| 0.0837704 | 0.0914918 | 0.103584  | 0.0986305 | 0.110723 | 0.116259 | 0.094697  |
| 0.088141  | 0.090035  | 0.104167  | 0.104167  | 0.104312 | 0.104604 | 0.0917832 |
| 0.100379  | 0.106643  | 0.11553   | 0.10067   | 0.118881 | 0.126748 | 0.107809  |
| 0.0826049 | 0.0850816 | 0.102127  | 0.099796  | 0.106643 | 0.107517 | 0.0824592 |
| 0.125291  | 0.128642  | 0.130828  | 0.128497  | 0.136509 | 0.137092 | 0.117861  |
| 0.117279  | 0.0952797 | 0.12602   | 0.124272  | 0.133159 | 0.133159 | 0.123252  |
| 0.113491  | 0.0932401 | 0.119318  | 0.123397  | 0.125874 | 0.125583 | 0.114219  |
| 0.0973193 | 0.0828963 | 0.114802  | 0.111888  | 0.111451 | 0.11116  | 0.100087  |
| 0.0987762 | 0.0971737 | 0.111597  | 0.113054  | 0.123397 | 0.116113 | 0.0925117 |
| 0.0895979 | 0.0882867 | 0.103584  | 0.104167  | 0.113345 | 0.113054 | 0.0839161 |
| 0.0874126 | 0.0916375 | 0.101107  | 0.105186  | 0.115239 | 0.107372 | 0.0948427 |
| 0.0990676 | 0.0971737 | 0.0944056 | 0.110723  | 0.112908 | 0.112908 | 0.102127  |
| 0.103147  | 0.105041  | 0.100816  | 0.115093  | 0.128642 | 0.110577 | 0.105041  |
| 0.107809  | 0.112034  | 0.092366  | 0.120338  | 0.13039  | 0.127477 | 0.117861  |
| 0.101544  | 0.0987762 | 0.111451  | 0.108246  | 0.109266 | 0.107809 | 0.0981935 |
| 0.119755  | 0.110868  | 0.128205  | 0.127331  | 0.125728 | 0.13243  | 0.11757   |
| 0.121066  | 0.120338  | 0.132139  | 0.120484  | 0.128497 | 0.138986 | 0.0979021 |
| 0.19391   | 0.189685  | 0.196824  | 0.206439  | 0.210664 | 0.190559 | 0.194056  |
| 0.236305  | 0.235286  | 0.238636  | 0.243881  | 0.24898  | 0.236451 | 0.237325  |
| 0.10912   | 0.109266  | 0.103001  | 0.11757   | 0.122086 | 0.108974 | 0.102273  |
| 0.097028  | 0.0995047 | 0.0792541 | 0.11014   | 0.119027 | 0.114365 | 0.0995047 |
| 0.0952797 | 0.0962995 | 0.0926573 | 0.112471  | 0.120192 | 0.100962 | 0.0945513 |
| 0.100233  | 0.102127  | 0.0944056 | 0.113928  | 0.119901 | 0.116696 | 0.101544  |
| 0.117716  | 0.11961   | 0.130536  | 0.124417  | 0.128934 | 0.128059 | 0.120484  |
| 0.100233  | 0.106498  | 0.0795455 | 0.108683  | 0.120484 | 0.123689 | 0.10708   |
| 0.128642  | 0.135781  | 0.101253  | 0.133013  | 0.142191 | 0.14627  | 0.132576  |
| 0.099359  | 0.106498  | 0.0810023 | 0.117133  | 0.127477 | 0.116696 | 0.0986305 |
| 0.109557  | 0.120775  | 0.0859557 | 0.121212  | 0.134178 | 0.132721 | 0.11553   |
| 0.116113  | 0.120629  | 0.101253  | 0.12602   | 0.134324 | 0.124126 | 0.118298  |
| 0.11553   | 0.11859   | 0.0922203 | 0.127768  | 0.130536 | 0.135198 | 0.118007  |
| 0.121358  | 0.126166  | 0.115822  | 0.124563  | 0.134033 | 0.131993 | 0.126166  |
| 0.101253  | 0.101399  | 0.088141  | 0.114948  | 0.120921 | 0.116259 | 0.103438  |
| 0.0968823 | 0.0996503 | 0.0470571 | 0.112325  | 0.119755 | 0.11655  | 0.100233  |
| 0.101107  | 0.103293  | 0.0777972 | 0.113054  | 0.120192 | 0.116696 | 0.101836  |
| 0.0958625 | 0.10067   | 0.0824592 | 0.111014  | 0.118444 | 0.113491 | 0.0971737 |
| 0.0984848 | 0.10067   | 0.0463287 | 0.110431  | 0.120775 | 0.115239 | 0.101544  |
| 0.101253  | 0.103438  | 0.0890152 | 0.114656  | 0.122669 | 0.115967 | 0.0996503 |
| 0.111888  | 0.115822  | 0.0912005 | 0.121503  | 0.131265 | 0.128059 | 0.11757   |

|           |           |           |           |          |          |           |
|-----------|-----------|-----------|-----------|----------|----------|-----------|
| 0.125     | 0.13039   | 0.0981935 | 0.130828  | 0.133596 | 0.137675 | 0.122523  |
| 0.103875  | 0.1081    | 0.0770688 | 0.112325  | 0.122086 | 0.118881 | 0.105186  |
| 0.0964452 | 0.104458  | 0.0888695 | 0.113928  | 0.122523 | 0.114073 | 0.101836  |
| 0.120047  | 0.122815  | 0.0906177 | 0.125291  | 0.131847 | 0.130099 | 0.119027  |
| 0.100816  | 0.0995047 | 0.0839161 | 0.112762  | 0.120192 | 0.112325 | 0.0992133 |
| 0.133013  | 0.127914  | 0.0913462 | 0.135344  | 0.148893 | 0.142774 | 0.129953  |
| 0.121649  | 0.102273  | 0.129808  | 0.126603  | 0.129371 | 0.118881 | 0.121212  |
| 0.131993  | 0.126894  | 0.113054  | 0.136072  | 0.127768 | 0.122523 | 0.120192  |
| 0.0949883 | 0.0962995 | 0.0786713 | 0.107809  | 0.118735 | 0.111451 | 0.0916375 |
| 0.0933858 | 0.10169   | 0.0802739 | 0.105624  | 0.117133 | 0.11014  | 0.0979021 |
| 0.111014  | 0.115239  | 0.0850816 | 0.115385  | 0.128642 | 0.12398  | 0.109994  |
| 0.108246  | 0.118007  | 0.0893065 | 0.114365  | 0.124417 | 0.125    | 0.110723  |
| 0.116987  | 0.126166  | 0.0855186 | 0.124272  | 0.12704  | 0.128205 | 0.113054  |
| 0.105769  | 0.110577  | 0.0879953 | 0.116841  | 0.123397 | 0.114656 | 0.10271   |
| 0.10708   | 0.103147  | 0.0793998 | 0.11553   | 0.120921 | 0.120629 | 0.103438  |
| 0.105624  | 0.112762  | 0.0910548 | 0.117861  | 0.126166 | 0.119464 | 0.113345  |
| 0.116404  | 0.119172  | 0.0948427 | 0.11961   | 0.128497 | 0.136655 | 0.118881  |
| 0.116404  | 0.120629  | 0.0878497 | 0.125437  | 0.132576 | 0.129371 | 0.112179  |
| 0.112471  | 0.121066  | 0.097028  | 0.126166  | 0.133596 | 0.13447  | 0.120775  |
| 0.119901  | 0.125291  | 0.114073  | 0.125146  | 0.132867 | 0.128497 | 0.119172  |
| 0.0980478 | 0.104895  | 0.0855186 | 0.112325  | 0.120338 | 0.11451  | 0.0996503 |
| 0.116987  | 0.125583  | 0.0986305 | 0.122523  | 0.130536 | 0.132284 | 0.115967  |
| 0.0979021 | 0.0983392 | 0.0844988 | 0.112471  | 0.120192 | 0.112034 | 0.0968823 |
| 0.10067   | 0.101399  | 0.0983392 | 0.11757   | 0.123252 | 0.11859  | 0.0981935 |
| 0.10067   | 0.103438  | 0.0826049 | 0.11553   | 0.123252 | 0.11655  | 0.099359  |
| 0.105186  | 0.101544  | 0.083042  | 0.112471  | 0.120484 | 0.114948 | 0.101544  |
| 0.0981935 | 0.101544  | 0.0804196 | 0.108974  | 0.116987 | 0.112617 | 0.0968823 |
| 0.115239  | 0.123543  | 0.0977564 | 0.127185  | 0.129953 | 0.134033 | 0.117133  |
| 0.104604  | 0.10912   | 0.106352  | 0.122086  | 0.128059 | 0.112325 | 0.099796  |
| 0.120629  | 0.124563  | 0.0990676 | 0.127914  | 0.134761 | 0.138258 | 0.121649  |
| 0.0979021 | 0.108829  | 0.0839161 | 0.108683  | 0.11961  | 0.114365 | 0.101253  |
| 0.101836  | 0.117716  | 0.0895979 | 0.113199  | 0.119464 | 0.123252 | 0.111014  |
| 0.11014   | 0.108246  | 0.119755  | 0.11014   | 0.120484 | 0.114365 | 0.114948  |
| 0.107809  | 0.083479  | 0.11859   | 0.115967  | 0.122523 | 0.103001 | 0.106498  |
| 0.083479  | 0.102273  | 0.108829  | 0.0989219 | 0.121503 | 0.116841 | 0.0999417 |
| 0.109557  | 0.0861014 | 0.111305  | 0.122086  | 0.124272 | 0.120775 | 0.110577  |
| 0.108829  | 0.0862471 | 0.114656  | 0.11961   | 0.118007 | 0.115967 | 0.107226  |
| 0.100087  | 0.0984848 | 0.110868  | 0.113199  | 0.115093 | 0.11859  | 0.0964452 |
| 0.109703  | 0.113636  | 0.136801  | 0.113199  | 0.119464 | 0.134615 | 0.118298  |
| 0.110431  | 0.124272  | 0.134324  | 0.122086  | 0.130973 | 0.141171 | 0.128351  |
| 0.0967366 | 0.090472  | 0.108974  | 0.100816  | 0.10067  | 0.116987 | 0.0925117 |
| 0.119318  | 0.119172  | 0.127768  | 0.119027  | 0.1081   | 0.129079 | 0.121795  |
| 0.100816  | 0.102127  | 0.127331  | 0.0981935 | 0.105915 | 0.131265 | 0.110868  |
| 0.111014  | 0.112617  | 0.128497  | 0.119172  | 0.116113 | 0.129225 | 0.11961   |

|           |           |          |           |          |          |           |
|-----------|-----------|----------|-----------|----------|----------|-----------|
| 0.109848  | 0.100087  | 0.120921 | 0.113636  | 0.100379 | 0.115239 | 0.107372  |
| 0.104021  | 0.100379  | 0.118881 | 0.109557  | 0.111451 | 0.128059 | 0.110868  |
| 0.104749  | 0.110723  | 0.127185 | 0.0968823 | 0.112179 | 0.128788 | 0.109557  |
| 0.118881  | 0.10912   | 0.121212 | 0.115967  | 0.10708  | 0.123106 | 0.116113  |
| 0.126748  | 0.121066  | 0.134033 | 0.119755  | 0.105332 | 0.126894 | 0.123689  |
| 0.101981  | 0.100087  | 0.124709 | 0.104604  | 0.117861 | 0.128642 | 0.112617  |
| 0.103438  | 0.099796  | 0.115967 | 0.110431  | 0.103875 | 0.114365 | 0.106498  |
| 0.118153  | 0.12704   | 0.123106 | 0.128351  | 0.140734 | 0.113636 | 0.122378  |
| 0.110723  | 0.117279  | 0.132576 | 0.102273  | 0.119318 | 0.137966 | 0.115822  |
| 0.0976107 | 0.100087  | 0.111014 | 0.106935  | 0.109411 | 0.112034 | 0.0971737 |
| 0.219843  | 0.216783  | 0.221008 | 0.225962  | 0.2331   | 0.217075 | 0.217075  |
| 0.11116   | 0.106352  | 0.11757  | 0.114365  | 0.108974 | 0.113345 | 0.115093  |
| 0.0962995 | 0.0938228 | 0.113782 | 0.103584  | 0.11014  | 0.120921 | 0.0996503 |
| 0.116841  | 0.119318  | 0.132576 | 0.118881  | 0.109994 | 0.130099 | 0.124854  |
| 0.0996503 | 0.100962  | 0.118007 | 0.108974  | 0.119027 | 0.124563 | 0.104167  |
| 0.109266  | 0.109411  | 0.136364 | 0.107517  | 0.11757  | 0.132139 | 0.116987  |
| 0.108974  | 0.103293  | 0.118298 | 0.113636  | 0.102127 | 0.118444 | 0.11116   |
| 0.106498  | 0.101981  | 0.119901 | 0.107663  | 0.106061 | 0.115967 | 0.104312  |
| 0.105041  | 0.106061  | 0.121358 | 0.10708   | 0.111888 | 0.128788 | 0.111888  |
| 0.110723  | 0.111451  | 0.129662 | 0.115967  | 0.118735 | 0.12602  | 0.116696  |
| 0.11553   | 0.118007  | 0.129225 | 0.122523  | 0.107226 | 0.13141  | 0.119755  |
| 0.11859   | 0.114948  | 0.126748 | 0.115385  | 0.113199 | 0.129516 | 0.113199  |
| 0.118881  | 0.110577  | 0.120921 | 0.113928  | 0.108246 | 0.128351 | 0.114073  |
| 0.0996503 | 0.0826049 | 0.112179 | 0.100233  | 0.112617 | 0.116404 | 0.101836  |
| 0.111597  | 0.100962  | 0.115093 | 0.115967  | 0.112617 | 0.11961  | 0.110868  |
| 0.125728  | 0.114219  | 0.133887 | 0.118735  | 0.111305 | 0.127331 | 0.122378  |
| 0.106352  | 0.103293  | 0.117424 | 0.108392  | 0.105624 | 0.112617 | 0.111742  |
| 0.124709  | 0.12398   | 0.119464 | 0.125874  | 0.133013 | 0.134178 | 0.128351  |
| 0.128059  | 0.120338  | 0.137092 | 0.13884   | 0.137821 | 0.134907 | 0.123543  |
| 0.108246  | 0.104312  | 0.117861 | 0.109994  | 0.123252 | 0.110431 | 0.112762  |
| 0.114073  | 0.106935  | 0.124854 | 0.109994  | 0.112762 | 0.133159 | 0.115385  |
| 0.117133  | 0.118735  | 0.125    | 0.126457  | 0.124854 | 0.122523 | 0.111451  |
| 0.116113  | 0.113928  | 0.123397 | 0.122232  | 0.12704  | 0.131993 | 0.117133  |
| 0.116404  | 0.118007  | 0.12602  | 0.128059  | 0.136655 | 0.127331 | 0.112179  |
| 0.125437  | 0.123834  | 0.137383 | 0.139132  | 0.138695 | 0.132284 | 0.127331  |
| 0.0929487 | 0.0458916 | 0.104895 | 0.108974  | 0.114073 | 0.110577 | 0.0968823 |
| 0.117861  | 0.0999417 | 0.124563 | 0.13039   | 0.127331 | 0.127331 | 0.127331  |
| 0.133741  | 0.130973  | 0.139569 | 0.144814  | 0.145833 | 0.134761 | 0.130973  |
| 0.0949883 | 0.105332  | 0.111305 | 0.0979021 | 0.118735 | 0.127477 | 0.097465  |
| 0.109557  | 0.114073  | 0.108974 | 0.121795  | 0.128934 | 0.121649 | 0.109703  |
| 0.128059  | 0.140734  | 0.13243  | 0.13884   | 0.145105 | 0.126166 | 0.13141   |
| 0.10912   | 0.117424  | 0.108246 | 0.125146  | 0.131119 | 0.119755 | 0.117424  |
| 0.125583  | 0.128351  | 0.137529 | 0.116841  | 0.128059 | 0.118444 | 0.127477  |
| 0.109703  | 0.115967  | 0.127768 | 0.114365  | 0.127622 | 0.106352 | 0.115967  |

|           |           |           |           |          |          |          |
|-----------|-----------|-----------|-----------|----------|----------|----------|
| 0.112762  | 0.112908  | 0.120921  | 0.123252  | 0.116404 | 0.125437 | 0.103293 |
| 0.110577  | 0.117133  | 0.118735  | 0.120484  | 0.12704  | 0.10169  | 0.124126 |
| 0.0955711 | 0.0887238 | 0.118881  | 0.102855  | 0.112908 | 0.106789 | 0.10912  |
| 0.112908  | 0.112179  | 0.11757   | 0.126311  | 0.112471 | 0.127622 | 0.109266 |
| 0.119027  | 0.108974  | 0.131265  | 0.115239  | 0.109266 | 0.124126 | 0.119172 |
| 0.123689  | 0.123543  | 0.124854  | 0.126603  | 0.124709 | 0.137529 | 0.11014  |
| 0.121358  | 0.119172  | 0.123689  | 0.121358  | 0.111597 | 0.13141  | 0.110723 |
| 0.112034  | 0.120047  | 0.12398   | 0.124563  | 0.12296  | 0.12296  | 0.106643 |
| 0.128059  | 0.135781  | 0.139714  | 0.136801  | 0.136655 | 0.131702 | 0.12704  |
| 0.0948427 | 0.0827506 | 0.121066  | 0.103293  | 0.107517 | 0.125    | 0.108974 |
| 0.100962  | 0.104021  | 0.10067   | 0.11553   | 0.129371 | 0.126166 | 0.101981 |
| 0.118735  | 0.118881  | 0.123106  | 0.115822  | 0.130828 | 0.138986 | 0.109266 |
| 0.0939685 | 0.0958625 | 0.115239  | 0.0901807 | 0.106352 | 0.115093 | 0.100524 |
| 0.126748  | 0.131556  | 0.137238  | 0.135781  | 0.142337 | 0.140589 | 0.12398  |
| 0.138986  | 0.148747  | 0.145979  | 0.140443  | 0.145833 | 0.153409 | 0.131556 |
| 0.11451   | 0.11961   | 0.0850816 | 0.122086  | 0.132139 | 0.138549 | 0.112908 |
| 0.109703  | 0.105478  | 0.088141  | 0.11757   | 0.125291 | 0.122086 | 0.109848 |
| 0.12704   | 0.125437  | 0.121795  | 0.132284  | 0.121941 | 0.131556 | 0.122523 |
| 0.121358  | 0.111014  | 0.129808  | 0.12398   | 0.108683 | 0.129079 | 0.124126 |
| 0.110868  | 0.120047  | 0.0872669 | 0.123106  | 0.129079 | 0.124417 | 0.113928 |
| 0.116987  | 0.124417  | 0.132139  | 0.125437  | 0.115676 | 0.13141  | 0.123543 |
| 0.119027  | 0.126457  | 0.12602   | 0.12602   | 0.127331 | 0.126748 | 0.122086 |
| 0.102855  | 0.105624  | 0.113636  | 0.108392  | 0.118153 | 0.117861 | 0.116696 |
| 0.152098  | 0.161568  | 0.136364  | 0.15472   | 0.16215  | 0.15778  | 0.140297 |
| 0.0996503 | 0.10912   | 0.111014  | 0.11014   | 0.117861 | 0.118735 | 0.113491 |
| 0.114219  | 0.119901  | 0.137821  | 0.119464  | 0.135052 | 0.109703 | 0.126311 |
| 0.0989219 | 0.109266  | 0.102127  | 0.116696  | 0.129371 | 0.128205 | 0.104021 |
| 0.125146  | 0.126457  | 0.124854  | 0.125437  | 0.119172 | 0.130828 | 0.115967 |
| 0.10912   | 0.107226  | 0.125437  | 0.120775  | 0.115093 | 0.119172 | 0.112471 |
| 0.129953  | 0.132139  | 0.141317  | 0.137821  | 0.144668 | 0.131556 | 0.120192 |
| 0.141463  | 0.143065  | 0.136509  | 0.148456  | 0.149767 | 0.148893 | 0.13986  |
| 0.123834  | 0.122232  | 0.123834  | 0.128788  | 0.136801 | 0.126603 | 0.117861 |
| 0.13447   | 0.133741  | 0.137966  | 0.136509  | 0.140152 | 0.138112 | 0.132867 |
| 0.131702  | 0.134761  | 0.13549   | 0.147727  | 0.157488 | 0.13243  | 0.139423 |
| 0.138695  | 0.135927  | 0.142774  | 0.14831   | 0.15574  | 0.139132 | 0.135344 |
| 0.0942599 | 0.117716  | 0.107955  | 0.095134  | 0.12296  | 0.121795 | 0.106352 |
| 0.132284  | 0.133013  | 0.13141   | 0.136655  | 0.13884  | 0.14088  | 0.131556 |
| 0.104604  | 0.111451  | 0.121503  | 0.113345  | 0.121066 | 0.118153 | 0.100379 |
| 0.100087  | 0.109557  | 0.116987  | 0.114073  | 0.120921 | 0.108392 | 0.108392 |
| 0.11014   | 0.105332  | 0.119172  | 0.113345  | 0.112908 | 0.120192 | 0.113491 |
| 0.117716  | 0.117279  | 0.120338  | 0.121795  | 0.128351 | 0.122815 | 0.113782 |
| 0.10912   | 0.104604  | 0.112908  | 0.120484  | 0.122669 | 0.117133 | 0.107517 |
| 0.106206  | 0.109266  | 0.114948  | 0.113199  | 0.119172 | 0.111888 | 0.107226 |
| 0.114073  | 0.11451   | 0.125728  | 0.125728  | 0.134324 | 0.128205 | 0.115385 |

|           |           |           |           |           |           |           |
|-----------|-----------|-----------|-----------|-----------|-----------|-----------|
| 0.113928  | 0.11116   | 0.127914  | 0.118881  | 0.128642  | 0.123689  | 0.117279  |
| 0.0885781 | 0.0936772 | 0.110431  | 0.0981935 | 0.107955  | 0.109703  | 0.0916375 |
| 0.120921  | 0.121066  | 0.122086  | 0.127331  | 0.134761  | 0.124854  | 0.118444  |
| 0.114948  | 0.116841  | 0.117861  | 0.123106  | 0.129953  | 0.120629  | 0.113928  |
| 0.103293  | 0.107517  | 0.102418  | 0.114365  | 0.127331  | 0.11014   | 0.109848  |
| 0.214889  | 0.214452  | 0.218969  | 0.2213    | 0.227273  | 0.212413  | 0.212413  |
| 0.140006  | 0.142191  | 0.138549  | 0.141171  | 0.146562  | 0.145979  | 0.141608  |
| 0.128788  | 0.125146  | 0.124126  | 0.130245  | 0.132721  | 0.138549  | 0.119027  |
| 0.121066  | 0.123252  | 0.123689  | 0.126894  | 0.13345   | 0.126166  | 0.114802  |
| 0.21285   | 0.211538  | 0.209353  | 0.218969  | 0.221737  | 0.210373  | 0.210664  |
| 0.107372  | 0.111014  | 0.114073  | 0.122815  | 0.131119  | 0.106352  | 0.104312  |
| 0.111305  | 0.111742  | 0.119172  | 0.113636  | 0.125437  | 0.121649  | 0.110286  |
| 0.120047  | 0.117861  | 0.119464  | 0.124417  | 0.130682  | 0.130099  | 0.113199  |
| 0.110577  | 0.112762  | 0.125146  | 0.11553   | 0.121212  | 0.120921  | 0.116841  |
| 0.250146  | 0.249417  | 0.252477  | 0.254808  | 0.259615  | 0.248834  | 0.247669  |
| 0.113054  | 0.116404  | 0.125291  | 0.122669  | 0.128642  | 0.128059  | 0.0986305 |
| 0.0955711 | 0.100962  | 0.101107  | 0.112762  | 0.12398   | 0.105624  | 0.105041  |
| 0.126457  | 0.120775  | 0.11014   | 0.125583  | 0.132139  | 0.128642  | 0.114365  |
| 0.124417  | 0.118153  | 0.109266  | 0.121795  | 0.128934  | 0.129225  | 0.117279  |
| 0.119172  | 0.120484  | 0.129662  | 0.122669  | 0.125728  | 0.125146  | 0.105624  |
| 0.122669  | 0.124272  | 0.128788  | 0.126166  | 0.135927  | 0.121066  | 0.121358  |
| 0.100524  | 0.103584  | 0.10169   | 0.113636  | 0.126603  | 0.107663  | 0.105915  |
| 0.117861  | 0.117133  | 0.118735  | 0.125437  | 0.130536  | 0.124126  | 0.112179  |
| 0.121212  | 0.121358  | 0.122086  | 0.12704   | 0.128934  | 0.12602   | 0.120484  |
| 0.104604  | 0.10271   | 0.120921  | 0.115676  | 0.118444  | 0.118444  | 0.111451  |
| 0.11553   | 0.113928  | 0.117279  | 0.119901  | 0.129662  | 0.119464  | 0.111597  |
| 0.092366  | 0.0919289 | 0.120338  | 0.0935315 | 0.0954254 | 0.113782  | 0.0992133 |
| 0.141754  | 0.1419    | 0.133596  | 0.146125  | 0.149767  | 0.15035   | 0.139277  |
| 0.118735  | 0.122378  | 0.127477  | 0.121941  | 0.127914  | 0.134324  | 0.0999417 |
| 0.119027  | 0.120921  | 0.120192  | 0.118444  | 0.122378  | 0.130245  | 0.116259  |
| 0.192162  | 0.18648   | 0.189831  | 0.199155  | 0.204837  | 0.183858  | 0.18648   |
| 0.207022  | 0.198427  | 0.206148  | 0.214598  | 0.217075  | 0.200758  | 0.20542   |
| 0.10912   | 0.110723  | 0.126603  | 0.11961   | 0.124126  | 0.122378  | 0.112179  |
| 0.101836  | 0.104021  | 0.116404  | 0.111451  | 0.118298  | 0.115385  | 0.109266  |
| 0.127477  | 0.133159  | 0.14088   | 0.133596  | 0.136655  | 0.136655  | 0.128497  |
| 0.0948427 | 0.102273  | 0.0968823 | 0.114948  | 0.124709  | 0.102564  | 0.106643  |
| 0.11655   | 0.120775  | 0.129662  | 0.122086  | 0.128934  | 0.128059  | 0.099796  |
| 0.128351  | 0.127622  | 0.119027  | 0.128642  | 0.130828  | 0.135781  | 0.121795  |
| 0.225379  | 0.22028   | 0.226544  | 0.23412   | 0.235723  | 0.219988  | 0.224068  |
| 0.112908  | 0.1081    | 0.11553   | 0.118153  | 0.125583  | 0.125     | 0.104895  |
| 0.200466  | 0.206439  | 0.19697   | 0.212413  | 0.218677  | 0.196241  | 0.204108  |
| 0.0831876 | 0.0987762 | 0.099796  | 0.0922203 | 0.117424  | 0.111597  | 0.0917832 |
| 0.109557  | 0.107955  | 0.112179  | 0.112762  | 0.120775  | 0.120484  | 0.106789  |
| 0.11116   | 0.110723  | 0.118153  | 0.116696  | 0.129662  | 0.0847902 | 0.108683  |

|          |          |          |           |          |          |           |
|----------|----------|----------|-----------|----------|----------|-----------|
| 0.10271  | 0.100816 | 0.11553  | 0.112325  | 0.118007 | 0.115093 | 0.107517  |
| 0.208042 | 0.204691 | 0.209207 | 0.2162    | 0.222756 | 0.200903 | 0.205857  |
| 0.128497 | 0.130973 | 0.13141  | 0.135198  | 0.140589 | 0.13447  | 0.129225  |
| 0.102855 | 0.106789 | 0.106352 | 0.0990676 | 0.123397 | 0.122523 | 0.100087  |
| 0.126457 | 0.124272 | 0.123834 | 0.126166  | 0.134761 | 0.130973 | 0.122815  |
| 0.122378 | 0.121066 | 0.120338 | 0.117716  | 0.127185 | 0.12602  | 0.118153  |
| 0.10373  | 0.104167 | 0.119172 | 0.116841  | 0.123106 | 0.116696 | 0.108246  |
| 0.088141 | 0.104312 | 0.097465 | 0.0945513 | 0.120629 | 0.111888 | 0.0961538 |
| 0.10271  | 0.105186 | 0.109411 | 0.115822  | 0.130245 | 0.106352 | 0.108683  |
| 0.118444 | 0.117424 | 0.120484 | 0.115822  | 0.122669 | 0.124709 | 0.117424  |
| 0.11116  | 0.112179 | 0.113782 | 0.120775  | 0.127622 | 0.116259 | 0.1081    |
| 0.102855 | 0.109703 | 0.104312 | 0.102855  | 0.122815 | 0.122523 | 0.104458  |
| 0.188083 | 0.183858 | 0.191579 | 0.198281  | 0.205711 | 0.187646 | 0.186772  |
| 0.125874 | 0.12398  | 0.109848 | 0.126748  | 0.130973 | 0.131847 | 0.118444  |
| 0.124272 | 0.123834 | 0.11553  | 0.135052  | 0.137238 | 0.134615 | 0.120629  |
| 0.117716 | 0.118153 | 0.107809 | 0.125874  | 0.131265 | 0.12602  | 0.115239  |
| 0.112034 | 0.11655  | 0.126894 | 0.123106  | 0.130828 | 0.125874 | 0.0990676 |
| 0.121649 | 0.120047 | 0.121358 | 0.124563  | 0.128205 | 0.129079 | 0.118881  |
| 0.092803 | 0.11014  | 0.102127 | 0.0942599 | 0.121503 | 0.115385 | 0.102273  |
| 0.113054 | 0.107663 | 0.111888 | 0.115385  | 0.120192 | 0.113199 | 0.0995047 |
| 0.104312 | 0.108829 | 0.102273 | 0.117133  | 0.128059 | 0.110577 | 0.108537  |
| 0.117861 | 0.120338 | 0.115239 | 0.131847  | 0.134615 | 0.12704  | 0.119464  |
| 0.119318 | 0.118298 | 0.104749 | 0.123397  | 0.130828 | 0.126748 | 0.111014  |
| 0.107226 | 0.108829 | 0.120338 | 0.121795  | 0.127477 | 0.121358 | 0.112908  |
| 0.119318 | 0.112471 | 0.118735 | 0.125437  | 0.129662 | 0.124417 | 0.113345  |
| 0.132284 | 0.130099 | 0.13141  | 0.132867  | 0.134761 | 0.144376 | 0.126311  |
| 0.106061 | 0.109703 | 0.119755 | 0.118007  | 0.122815 | 0.119318 | 0.0872669 |
| 0.135927 | 0.138403 | 0.137383 | 0.138258  | 0.142191 | 0.141026 | 0.13549   |
| 0.103001 | 0.102855 | 0.121066 | 0.115822  | 0.120921 | 0.112471 | 0.107226  |
| 0.120484 | 0.115967 | 0.110868 | 0.121649  | 0.121503 | 0.122669 | 0.110723  |
| 0.117716 | 0.119318 | 0.120047 | 0.125583  | 0.130973 | 0.121066 | 0.116113  |
| 0.106061 | 0.109411 | 0.10373  | 0.116841  | 0.129516 | 0.111451 | 0.114073  |
| 0.187063 | 0.183129 | 0.187354 | 0.195513  | 0.204108 | 0.178759 | 0.189248  |
| 0.10271  | 0.102273 | 0.101253 | 0.0965909 | 0.122086 | 0.117133 | 0.0961538 |
| 0.101544 | 0.103438 | 0.105624 | 0.112325  | 0.11451  | 0.112762 | 0.0999417 |
| 0.116696 | 0.118007 | 0.119318 | 0.114365  | 0.120629 | 0.125583 | 0.115967  |
| 0.177885 | 0.174242 | 0.180216 | 0.189248  | 0.193182 | 0.173368 | 0.178613  |
| 0.127622 | 0.132139 | 0.137529 | 0.129953  | 0.137383 | 0.139423 | 0.110286  |
| 0.13345  | 0.138549 | 0.143939 | 0.13345   | 0.142337 | 0.149913 | 0.117279  |
| 0.144085 | 0.143065 | 0.135344 | 0.146999  | 0.150932 | 0.152389 | 0.141608  |
| 0.106789 | 0.1081   | 0.116696 | 0.117861  | 0.121212 | 0.120629 | 0.0894522 |
| 0.122086 | 0.121649 | 0.123252 | 0.125     | 0.131265 | 0.127185 | 0.119027  |
| 0.211976 | 0.209499 | 0.216055 | 0.219843  | 0.226981 | 0.206876 | 0.210373  |
| 0.122523 | 0.122378 | 0.125146 | 0.126311  | 0.13141  | 0.12704  | 0.120338  |

|           |           |          |           |          |           |           |
|-----------|-----------|----------|-----------|----------|-----------|-----------|
| 0.126166  | 0.124563  | 0.127622 | 0.127622  | 0.13447  | 0.130682  | 0.123397  |
| 0.102564  | 0.107955  | 0.103147 | 0.101399  | 0.122232 | 0.122232  | 0.0995047 |
| 0.168998  | 0.163316  | 0.170455 | 0.174825  | 0.181672 | 0.160693  | 0.167978  |
| 0.110723  | 0.109703  | 0.113345 | 0.116841  | 0.120192 | 0.117279  | 0.101253  |
| 0.144376  | 0.146562  | 0.14088  | 0.143502  | 0.146853 | 0.152389  | 0.1419    |
| 0.106498  | 0.108392  | 0.118735 | 0.10271   | 0.113928 | 0.124417  | 0.104312  |
| 0.190122  | 0.185897  | 0.190705 | 0.197698  | 0.202214 | 0.187937  | 0.187646  |
| 0.113782  | 0.114802  | 0.123397 | 0.122232  | 0.128497 | 0.122378  | 0.0906177 |
| 0.0965909 | 0.0920746 | 0.10912  | 0.107955  | 0.108683 | 0.111305  | 0.100524  |
| 0.11451   | 0.112325  | 0.115093 | 0.123543  | 0.122523 | 0.12398   | 0.105915  |
| 0.114656  | 0.113636  | 0.118153 | 0.120192  | 0.121503 | 0.117133  | 0.113928  |
| 0.113199  | 0.114802  | 0.119027 | 0.115239  | 0.120629 | 0.122669  | 0.112762  |
| 0.116696  | 0.120047  | 0.122232 | 0.127185  | 0.129662 | 0.124709  | 0.11451   |
| 0.101981  | 0.103584  | 0.119172 | 0.117133  | 0.119027 | 0.116404  | 0.10708   |
| 0.18954   | 0.183858  | 0.192745 | 0.198572  | 0.204254 | 0.18648   | 0.185897  |
| 0.117133  | 0.116987  | 0.116259 | 0.124126  | 0.132139 | 0.125437  | 0.11116   |
| 0.10912   | 0.109557  | 0.11757  | 0.119318  | 0.122086 | 0.120921  | 0.108392  |
| 0.211247  | 0.207314  | 0.214744 | 0.219114  | 0.223922 | 0.207896  | 0.207605  |
| 0.125     | 0.121358  | 0.1081   | 0.127331  | 0.131847 | 0.130099  | 0.116404  |
| 0.101544  | 0.108392  | 0.118153 | 0.114948  | 0.120047 | 0.119172  | 0.107809  |
| 0.100379  | 0.101399  | 0.115239 | 0.11116   | 0.116841 | 0.117133  | 0.104604  |
| 0.134033  | 0.135052  | 0.133741 | 0.134907  | 0.140589 | 0.137675  | 0.133887  |
| 0.189685  | 0.182255  | 0.190559 | 0.199592  | 0.202069 | 0.185752  | 0.185169  |
| 0.0992133 | 0.102564  | 0.100379 | 0.118153  | 0.128205 | 0.104312  | 0.1081    |
| 0.125437  | 0.123834  | 0.125728 | 0.129225  | 0.133159 | 0.134907  | 0.121503  |
| 0.100962  | 0.104312  | 0.119027 | 0.11553   | 0.119172 | 0.113054  | 0.105769  |
| 0.102127  | 0.100524  | 0.11757  | 0.111742  | 0.118881 | 0.112762  | 0.104895  |
| 0.101981  | 0.101544  | 0.118298 | 0.113054  | 0.121941 | 0.113199  | 0.106206  |
| 0.113782  | 0.11451   | 0.118735 | 0.118735  | 0.131993 | 0.120629  | 0.112179  |
| 0.0935315 | 0.0930944 | 0.109557 | 0.0958625 | 0.105332 | 0.10708   | 0.0910548 |
| 0.113345  | 0.115822  | 0.127622 | 0.118007  | 0.127477 | 0.128059  | 0.0968823 |
| 0.130245  | 0.127185  | 0.120629 | 0.134033  | 0.137092 | 0.13884   | 0.119901  |
| 0.113054  | 0.114656  | 0.125874 | 0.121795  | 0.128934 | 0.12602   | 0.0916375 |
| 0.12602   | 0.124417  | 0.120775 | 0.12398   | 0.127331 | 0.131993  | 0.122086  |
| 0.193473  | 0.189831  | 0.195513 | 0.203963  | 0.207896 | 0.189248  | 0.190122  |
| 0.113491  | 0.108683  | 0.118153 | 0.122815  | 0.126748 | 0.126748  | 0.107809  |
| 0.126748  | 0.133887  | 0.126457 | 0.131993  | 0.135344 | 0.134761  | 0.128059  |
| 0.0995047 | 0.0996503 | 0.115239 | 0.112908  | 0.115385 | 0.116841  | 0.102855  |
| 0.0914918 | 0.0942599 | 0.109557 | 0.0949883 | 0.103584 | 0.10912   | 0.0890152 |
| 0.109266  | 0.108829  | 0.112762 | 0.119172  | 0.128934 | 0.110868  | 0.101836  |
| 0.100379  | 0.105186  | 0.104167 | 0.112908  | 0.129079 | 0.106643  | 0.108683  |
| 0.12602   | 0.125583  | 0.131265 | 0.132139  | 0.129079 | 0.134615  | 0.125874  |
| 0.11655   | 0.116113  | 0.115093 | 0.127914  | 0.135052 | 0.123106  | 0.113199  |
| 0.0912005 | 0.0954254 | 0.106935 | 0.107517  | 0.118153 | 0.0960082 | 0.099796  |



|           |           |           |           |           |           |           |
|-----------|-----------|-----------|-----------|-----------|-----------|-----------|
| 0.0895979 | 0.0935315 | 0.103584  | 0.101544  | 0.113636  | 0.0964452 | 0.0949883 |
| 0.097028  | 0.0913462 | 0.108392  | 0.104895  | 0.114365  | 0.110286  | 0.101253  |
| 0.0866841 | 0.104895  | 0.102127  | 0.095134  | 0.118881  | 0.11451   | 0.0944056 |
| 0.120047  | 0.124272  | 0.129953  | 0.123543  | 0.13039   | 0.137966  | 0.10271   |
| 0.101544  | 0.102855  | 0.103584  | 0.11757   | 0.129079  | 0.106643  | 0.1081    |
| 0.113928  | 0.112908  | 0.113636  | 0.118298  | 0.125146  | 0.11757   | 0.110577  |
| 0.0967366 | 0.0971737 | 0.0979021 | 0.111014  | 0.120192  | 0.103875  | 0.100962  |
| 0.102127  | 0.101107  | 0.113782  | 0.113199  | 0.121795  | 0.115967  | 0.106352  |
| 0.0973193 | 0.103293  | 0.101981  | 0.0981935 | 0.11553   | 0.117279  | 0.0960082 |
| 0.103438  | 0.103293  | 0.119464  | 0.118298  | 0.121358  | 0.117279  | 0.10708   |
| 0.106935  | 0.108246  | 0.110431  | 0.120921  | 0.12602   | 0.121649  | 0.103584  |
| 0.115967  | 0.114948  | 0.115093  | 0.128497  | 0.131556  | 0.123397  | 0.113199  |
| 0.106352  | 0.10912   | 0.112471  | 0.113636  | 0.116404  | 0.121941  | 0.105915  |
| 0.0957168 | 0.0961538 | 0.113199  | 0.0980478 | 0.109557  | 0.109848  | 0.0958625 |
| 0.10169   | 0.100379  | 0.116841  | 0.115967  | 0.11961   | 0.116696  | 0.108537  |
| 0.11859   | 0.116696  | 0.115967  | 0.130828  | 0.129225  | 0.125146  | 0.110868  |
| 0.113491  | 0.115385  | 0.120484  | 0.120775  | 0.128788  | 0.125583  | 0.113636  |
| 0.0929487 | 0.095134  | 0.1081    | 0.104021  | 0.113782  | 0.115822  | 0.100379  |
| 0.100524  | 0.103001  | 0.113928  | 0.11451   | 0.117861  | 0.115822  | 0.105041  |
| 0.11961   | 0.11859   | 0.122232  | 0.123689  | 0.129371  | 0.124126  | 0.116259  |
| 0.0852273 | 0.101981  | 0.10271   | 0.0989219 | 0.120921  | 0.112762  | 0.0955711 |
| 0.116696  | 0.119172  | 0.118153  | 0.125437  | 0.132576  | 0.122378  | 0.112471  |
| 0.109411  | 0.111014  | 0.114948  | 0.115239  | 0.117716  | 0.122669  | 0.107517  |
| 0.0919289 | 0.0987762 | 0.110868  | 0.099796  | 0.107517  | 0.113054  | 0.0955711 |
| 0.108537  | 0.102855  | 0.114365  | 0.120192  | 0.121795  | 0.117133  | 0.0981935 |
| 0.0976107 | 0.101836  | 0.099359  | 0.0996503 | 0.11757   | 0.11553   | 0.0936772 |
| 0.121066  | 0.118881  | 0.122523  | 0.128642  | 0.133741  | 0.126748  | 0.118298  |
| 0.116987  | 0.115676  | 0.118735  | 0.12398   | 0.129371  | 0.129953  | 0.119755  |
| 0.108392  | 0.111742  | 0.115385  | 0.12296   | 0.127477  | 0.121358  | 0.106498  |
| 0.193182  | 0.1875    | 0.196678  | 0.203089  | 0.207605  | 0.190705  | 0.191288  |
| 0.161131  | 0.159819  | 0.167541  | 0.167541  | 0.179633  | 0.15778   | 0.166521  |
| 0.111305  | 0.11757   | 0.126457  | 0.120047  | 0.128934  | 0.125728  | 0.0890152 |
| 0.107955  | 0.105478  | 0.113782  | 0.120775  | 0.132867  | 0.108683  | 0.116259  |
| 0.137383  | 0.143939  | 0.146999  | 0.137675  | 0.145688  | 0.154138  | 0.119464  |
| 0.122669  | 0.124272  | 0.120629  | 0.128497  | 0.13447   | 0.130099  | 0.117861  |
| 0.113782  | 0.113054  | 0.12398   | 0.123397  | 0.12704   | 0.117716  | 0.117424  |
| 0.107517  | 0.107372  | 0.122378  | 0.120921  | 0.128351  | 0.116404  | 0.110868  |
| 0.0865385 | 0.0869755 | 0.118007  | 0.0914918 | 0.0983392 | 0.112034  | 0.0971737 |
| 0.108683  | 0.118153  | 0.121503  | 0.120047  | 0.127185  | 0.122815  | 0.116696  |
| 0.201486  | 0.197552  | 0.207605  | 0.211101  | 0.217075  | 0.197261  | 0.19697   |
| 0.10373   | 0.106206  | 0.10169   | 0.120047  | 0.128059  | 0.109411  | 0.107663  |
| 0.112908  | 0.109266  | 0.113491  | 0.122815  | 0.131993  | 0.106061  | 0.114219  |
| 0.0986305 | 0.101981  | 0.112325  | 0.111742  | 0.118881  | 0.107809  | 0.104312  |
| 0.118298  | 0.113491  | 0.116841  | 0.120629  | 0.125146  | 0.119901  | 0.114073  |

|           |           |           |           |          |          |           |
|-----------|-----------|-----------|-----------|----------|----------|-----------|
| 0.179633  | 0.178613  | 0.183421  | 0.192162  | 0.197261 | 0.17366  | 0.181527  |
| 0.246358  | 0.24155   | 0.248397  | 0.251311  | 0.257284 | 0.242716 | 0.245047  |
| 0.116696  | 0.120338  | 0.114948  | 0.13039   | 0.136655 | 0.126166 | 0.115093  |
| 0.111451  | 0.114802  | 0.124272  | 0.119027  | 0.124417 | 0.122669 | 0.117133  |
| 0.108537  | 0.116259  | 0.125437  | 0.120775  | 0.127914 | 0.122086 | 0.0952797 |
| 0.107809  | 0.106498  | 0.112762  | 0.112762  | 0.11757  | 0.117279 | 0.106206  |
| 0.0971737 | 0.0958625 | 0.0971737 | 0.112325  | 0.124126 | 0.104895 | 0.103438  |
| 0.111597  | 0.103875  | 0.111597  | 0.122378  | 0.121358 | 0.116987 | 0.102127  |
| 0.109703  | 0.109848  | 0.116696  | 0.114948  | 0.123834 | 0.112471 | 0.108392  |
| 0.0948427 | 0.101981  | 0.0986305 | 0.112908  | 0.125    | 0.104312 | 0.104604  |
| 0.108683  | 0.110286  | 0.118007  | 0.115385  | 0.125146 | 0.110286 | 0.110577  |
| 0.0948427 | 0.0979021 | 0.112908  | 0.105624  | 0.113636 | 0.118007 | 0.10373   |
| 0.0961538 | 0.0960082 | 0.113345  | 0.100816  | 0.108537 | 0.113782 | 0.0957168 |
| 0.119027  | 0.11859   | 0.113199  | 0.129808  | 0.138112 | 0.127331 | 0.115385  |
| 0.118298  | 0.116987  | 0.120338  | 0.123543  | 0.130973 | 0.125146 | 0.114365  |
| 0.106643  | 0.100962  | 0.105769  | 0.111888  | 0.112908 | 0.114948 | 0.0983392 |
| 0.11014   | 0.113491  | 0.116259  | 0.119172  | 0.113491 | 0.124272 | 0.10912   |
| 0.125     | 0.128059  | 0.125291  | 0.120047  | 0.12602  | 0.132139 | 0.12602   |
| 0.099796  | 0.10373   | 0.113782  | 0.111451  | 0.119464 | 0.114219 | 0.105769  |
| 0.104312  | 0.112617  | 0.107226  | 0.116841  | 0.123106 | 0.110286 | 0.106789  |
| 0.117716  | 0.120775  | 0.130536  | 0.12296   | 0.125437 | 0.129808 | 0.121358  |
| 0.207896  | 0.20542   | 0.212267  | 0.214307  | 0.217366 | 0.205128 | 0.204837  |
| 0.110431  | 0.103875  | 0.107517  | 0.12296   | 0.12602  | 0.11757  | 0.105624  |
| 0.0945513 | 0.0955711 | 0.109994  | 0.0957168 | 0.107517 | 0.110431 | 0.0944056 |
| 0.116113  | 0.11014   | 0.11961   | 0.123689  | 0.125874 | 0.125874 | 0.106061  |
| 0.122086  | 0.11757   | 0.111305  | 0.130536  | 0.131847 | 0.128934 | 0.114073  |
| 0.113636  | 0.10912   | 0.113345  | 0.115385  | 0.121649 | 0.116113 | 0.109994  |
| 0.198718  | 0.19595   | 0.203963  | 0.206002  | 0.214307 | 0.194493 | 0.193619  |
| 0.124563  | 0.120338  | 0.124563  | 0.128642  | 0.136072 | 0.125291 | 0.118298  |
| 0.099359  | 0.099796  | 0.114802  | 0.113054  | 0.116696 | 0.113199 | 0.105624  |
| 0.112908  | 0.113345  | 0.116404  | 0.121941  | 0.122669 | 0.12296  | 0.110431  |
| 0.105915  | 0.104604  | 0.112325  | 0.10912   | 0.11451  | 0.117133 | 0.10373   |
| 0.118444  | 0.122086  | 0.120192  | 0.129516  | 0.132867 | 0.122378 | 0.117133  |
| 0.105915  | 0.105478  | 0.111742  | 0.116987  | 0.119755 | 0.116841 | 0.106935  |
| 0.0960082 | 0.0987762 | 0.115239  | 0.104749  | 0.11451  | 0.115385 | 0.102855  |
| 0.119901  | 0.11451   | 0.108246  | 0.125146  | 0.129953 | 0.124417 | 0.11014   |
| 0.200758  | 0.194493  | 0.199592  | 0.208333  | 0.210519 | 0.194202 | 0.194784  |
| 0.111742  | 0.109557  | 0.112034  | 0.114948  | 0.123543 | 0.119172 | 0.1081    |
| 0.193765  | 0.188666  | 0.196387  | 0.202797  | 0.207314 | 0.187791 | 0.193619  |
| 0.194784  | 0.189394  | 0.194493  | 0.200321  | 0.20542  | 0.192599 | 0.191725  |
| 0.121649  | 0.122669  | 0.121066  | 0.11553   | 0.122378 | 0.127914 | 0.120338  |
| 0.131847  | 0.130245  | 0.115822  | 0.128934  | 0.133159 | 0.135781 | 0.122669  |
| 0.0916375 | 0.090035  | 0.106498  | 0.100962  | 0.112762 | 0.112762 | 0.0941142 |
| 0.111014  | 0.106206  | 0.110431  | 0.117424  | 0.122232 | 0.116113 | 0.106789  |

|           |           |           |           |          |          |           |
|-----------|-----------|-----------|-----------|----------|----------|-----------|
| 0.11553   | 0.114802  | 0.118735  | 0.12398   | 0.129371 | 0.121795 | 0.111888  |
| 0.103293  | 0.101981  | 0.119901  | 0.118735  | 0.120047 | 0.118007 | 0.108392  |
| 0.0957168 | 0.0964452 | 0.0962995 | 0.107955  | 0.120338 | 0.105478 | 0.0999417 |
| 0.0968823 | 0.0981935 | 0.0980478 | 0.110577  | 0.122086 | 0.101981 | 0.102564  |
| 0.120047  | 0.122232  | 0.120047  | 0.134324  | 0.135635 | 0.128934 | 0.120192  |
| 0.112325  | 0.112762  | 0.116404  | 0.120192  | 0.122378 | 0.121795 | 0.111014  |
| 0.0996503 | 0.100379  | 0.113636  | 0.110723  | 0.116113 | 0.112617 | 0.103293  |
| 0.119901  | 0.116259  | 0.11961   | 0.124563  | 0.128788 | 0.122086 | 0.115093  |
| 0.092366  | 0.0898893 | 0.104604  | 0.10169   | 0.107955 | 0.110577 | 0.0989219 |
| 0.127477  | 0.128205  | 0.123106  | 0.131556  | 0.131702 | 0.134907 | 0.12704   |
| 0.109411  | 0.111014  | 0.122232  | 0.119901  | 0.125583 | 0.121503 | 0.0897436 |
| 0.133159  | 0.129516  | 0.132576  | 0.13549   | 0.137966 | 0.137092 | 0.132139  |
| 0.259907  | 0.25743   | 0.258741  | 0.262238  | 0.268794 | 0.257721 | 0.257721  |
| 0.113928  | 0.118735  | 0.11014   | 0.103147  | 0.124563 | 0.133887 | 0.112325  |
| 0.122232  | 0.125     | 0.120192  | 0.116987  | 0.121795 | 0.136364 | 0.118881  |
| 0.216492  | 0.21285   | 0.22028   | 0.228147  | 0.230332 | 0.213724 | 0.217803  |
| 0.125146  | 0.120047  | 0.120775  | 0.119901  | 0.119755 | 0.128788 | 0.120047  |
| 0.232372  | 0.226981  | 0.229458  | 0.234994  | 0.241841 | 0.229895 | 0.230769  |
| 0.10373   | 0.110868  | 0.102564  | 0.101981  | 0.121066 | 0.122815 | 0.103875  |
| 0.11553   | 0.119172  | 0.127477  | 0.122815  | 0.123834 | 0.126166 | 0.121212  |
| 0.114073  | 0.112179  | 0.104167  | 0.121649  | 0.125583 | 0.123543 | 0.108974  |
| 0.116987  | 0.113636  | 0.119318  | 0.114948  | 0.123834 | 0.126166 | 0.11655   |
| 0.204691  | 0.198135  | 0.206731  | 0.211101  | 0.217657 | 0.198427 | 0.20134   |
| 0.126603  | 0.132284  | 0.129516  | 0.130973  | 0.138403 | 0.134907 | 0.126748  |
| 0.117861  | 0.120338  | 0.119901  | 0.122815  | 0.131993 | 0.125583 | 0.115093  |
| 0.226399  | 0.223048  | 0.228438  | 0.233392  | 0.239073 | 0.221882 | 0.223631  |
| 0.0971737 | 0.103438  | 0.104458  | 0.11757   | 0.127622 | 0.106061 | 0.108683  |
| 0.196096  | 0.194202  | 0.20134   | 0.207168  | 0.212267 | 0.194784 | 0.195367  |
| 0.0987762 | 0.104458  | 0.10169   | 0.117424  | 0.128642 | 0.104458 | 0.107372  |
| 0.100233  | 0.105624  | 0.117716  | 0.115967  | 0.121066 | 0.116113 | 0.107372  |
| 0.103293  | 0.108392  | 0.120775  | 0.0980478 | 0.108683 | 0.123543 | 0.106061  |
| 0.123689  | 0.120921  | 0.122815  | 0.118444  | 0.125    | 0.127622 | 0.120047  |
| 0.11014   | 0.114365  | 0.115967  | 0.120338  | 0.121358 | 0.122232 | 0.107372  |
| 0.154429  | 0.152826  | 0.164336  | 0.159965  | 0.171766 | 0.152244 | 0.150495  |
| 0.112179  | 0.112908  | 0.113054  | 0.11859   | 0.126603 | 0.121066 | 0.111451  |
| 0.125291  | 0.119027  | 0.1081    | 0.124126  | 0.13447  | 0.125728 | 0.115822  |
| 0.113636  | 0.110286  | 0.118881  | 0.126166  | 0.121358 | 0.122523 | 0.111742  |
| 0.127622  | 0.122523  | 0.11451   | 0.12704   | 0.127185 | 0.133596 | 0.118735  |
| 0.195367  | 0.193182  | 0.19799   | 0.206148  | 0.211538 | 0.192599 | 0.194639  |
| 0.101107  | 0.100962  | 0.115093  | 0.111305  | 0.117861 | 0.113782 | 0.104749  |
| 0.114365  | 0.111888  | 0.119901  | 0.120484  | 0.126457 | 0.123252 | 0.112179  |
| 0.0865385 | 0.106206  | 0.100816  | 0.0932401 | 0.116696 | 0.114365 | 0.0968823 |
| 0.0995047 | 0.103147  | 0.100087  | 0.113782  | 0.125291 | 0.106352 | 0.108974  |
| 0.108974  | 0.110868  | 0.120921  | 0.118007  | 0.118444 | 0.120484 | 0.114365  |

|           |           |          |           |          |          |           |
|-----------|-----------|----------|-----------|----------|----------|-----------|
| 0.258304  | 0.255245  | 0.256556 | 0.262383  | 0.263695 | 0.253497 | 0.255828  |
| 0.0999417 | 0.102127  | 0.113345 | 0.0967366 | 0.106206 | 0.11757  | 0.0983392 |
| 0.111597  | 0.112617  | 0.119464 | 0.123543  | 0.130682 | 0.119318 | 0.109411  |
| 0.178613  | 0.180798  | 0.179487 | 0.184732  | 0.190705 | 0.173805 | 0.17905   |
| 0.188811  | 0.181381  | 0.189685 | 0.194347  | 0.201777 | 0.181964 | 0.181964  |
| 0.119172  | 0.116696  | 0.11451  | 0.132576  | 0.137383 | 0.127185 | 0.116696  |
| 0.119027  | 0.117716  | 0.121358 | 0.123689  | 0.135198 | 0.122086 | 0.115676  |
| 0.106789  | 0.108974  | 0.114073 | 0.112908  | 0.123834 | 0.118881 | 0.108683  |
| 0.143939  | 0.143502  | 0.141317 | 0.144814  | 0.147873 | 0.151369 | 0.143211  |
| 0.113928  | 0.114365  | 0.110723 | 0.125874  | 0.129516 | 0.122815 | 0.111742  |
| 0.11757   | 0.11859   | 0.116696 | 0.131265  | 0.136364 | 0.126457 | 0.117133  |
| 0.10373   | 0.110577  | 0.104021 | 0.11859   | 0.130973 | 0.112325 | 0.112325  |
| 0.116841  | 0.117861  | 0.120338 | 0.119172  | 0.12398  | 0.122232 | 0.114948  |
| 0.13039   | 0.130245  | 0.12602  | 0.132139  | 0.138695 | 0.134033 | 0.126748  |
| 0.102273  | 0.103584  | 0.107809 | 0.115093  | 0.126894 | 0.104458 | 0.109994  |
| 0.118735  | 0.119172  | 0.121649 | 0.114656  | 0.119755 | 0.124709 | 0.118007  |
| 0.131993  | 0.131556  | 0.132284 | 0.123834  | 0.133887 | 0.139423 | 0.131556  |
| 0.0992133 | 0.106061  | 0.119318 | 0.10271   | 0.105769 | 0.121795 | 0.102273  |
| 0.12296   | 0.125146  | 0.127331 | 0.120338  | 0.125146 | 0.131556 | 0.121649  |
| 0.106935  | 0.114948  | 0.104895 | 0.117424  | 0.13039  | 0.114656 | 0.114365  |
| 0.207314  | 0.203089  | 0.20877  | 0.218677  | 0.222028 | 0.203671 | 0.206585  |
| 0.100816  | 0.103584  | 0.115385 | 0.0976107 | 0.110286 | 0.123689 | 0.101253  |
| 0.193182  | 0.191871  | 0.193473 | 0.198135  | 0.204983 | 0.188083 | 0.190122  |
| 0.115967  | 0.108246  | 0.1081   | 0.119464  | 0.121066 | 0.120192 | 0.103875  |
| 0.113636  | 0.114948  | 0.123834 | 0.118298  | 0.125146 | 0.124854 | 0.11757   |
| 0.114802  | 0.116987  | 0.125583 | 0.121795  | 0.125437 | 0.125146 | 0.095134  |
| 0.104458  | 0.110723  | 0.119027 | 0.116987  | 0.119755 | 0.120629 | 0.0865385 |
| 0.122669  | 0.122815  | 0.121795 | 0.128788  | 0.133596 | 0.127477 | 0.121649  |
| 0.121212  | 0.121358  | 0.121212 | 0.125583  | 0.132721 | 0.127768 | 0.11961   |
| 0.103438  | 0.105041  | 0.121503 | 0.119172  | 0.122815 | 0.116113 | 0.110577  |
| 0.123106  | 0.118007  | 0.106789 | 0.125437  | 0.129953 | 0.126166 | 0.114802  |
| 0.116404  | 0.116259  | 0.126311 | 0.120192  | 0.127331 | 0.127622 | 0.101981  |
| 0.112762  | 0.11757   | 0.11014  | 0.120629  | 0.137383 | 0.11553  | 0.120192  |
| 0.251166  | 0.251894  | 0.250874 | 0.254662  | 0.258887 | 0.249272 | 0.25102   |
| 0.107226  | 0.107372  | 0.120629 | 0.119172  | 0.121941 | 0.116404 | 0.111742  |
| 0.186043  | 0.180361  | 0.187791 | 0.195076  | 0.200466 | 0.180361 | 0.180944  |
| 0.189977  | 0.186917  | 0.192599 | 0.200175  | 0.2044   | 0.182255 | 0.186626  |
| 0.107955  | 0.109848  | 0.121941 | 0.123689  | 0.126457 | 0.123543 | 0.113636  |
| 0.0977564 | 0.101399  | 0.114365 | 0.0954254 | 0.106061 | 0.113345 | 0.0961538 |
| 0.112617  | 0.113636  | 0.126311 | 0.116696  | 0.122086 | 0.126166 | 0.118007  |
| 0.114948  | 0.111888  | 0.116113 | 0.121941  | 0.12704  | 0.120047 | 0.110431  |
| 0.0897436 | 0.0893065 | 0.113636 | 0.0973193 | 0.100962 | 0.110286 | 0.0948427 |
| 0.0958625 | 0.099796  | 0.104312 | 0.115967  | 0.128642 | 0.103875 | 0.106789  |
| 0.116113  | 0.115385  | 0.121649 | 0.120484  | 0.120338 | 0.121795 | 0.120338  |

|           |           |          |          |          |          |           |
|-----------|-----------|----------|----------|----------|----------|-----------|
| 0.129225  | 0.133159  | 0.129516 | 0.133013 | 0.137821 | 0.135198 | 0.129662  |
| 0.10373   | 0.105624  | 0.117424 | 0.119172 | 0.119318 | 0.11757  | 0.110286  |
| 0.129079  | 0.128642  | 0.125583 | 0.127914 | 0.133887 | 0.135052 | 0.126894  |
| 0.112034  | 0.11014   | 0.112908 | 0.118735 | 0.120921 | 0.121503 | 0.106061  |
| 0.115822  | 0.120921  | 0.127768 | 0.122815 | 0.127331 | 0.132284 | 0.101107  |
| 0.113054  | 0.113491  | 0.117716 | 0.117424 | 0.122523 | 0.121941 | 0.111451  |
| 0.109703  | 0.115676  | 0.106789 | 0.121649 | 0.13141  | 0.115676 | 0.115676  |
| 0.104021  | 0.106498  | 0.117716 | 0.105478 | 0.114948 | 0.124272 | 0.109994  |
| 0.104604  | 0.103875  | 0.116259 | 0.114802 | 0.119901 | 0.112908 | 0.107955  |
| 0.128205  | 0.127185  | 0.128497 | 0.127331 | 0.133887 | 0.13884  | 0.124272  |
| 0.183712  | 0.180653  | 0.187209 | 0.194202 | 0.199301 | 0.181235 | 0.183566  |
| 0.135781  | 0.135344  | 0.13141  | 0.137238 | 0.140589 | 0.14088  | 0.131265  |
| 0.122378  | 0.121941  | 0.121212 | 0.128497 | 0.133013 | 0.125728 | 0.118153  |
| 0.110286  | 0.113928  | 0.124563 | 0.11961  | 0.124126 | 0.124126 | 0.0929487 |
| 0.103438  | 0.106789  | 0.115676 | 0.115676 | 0.115822 | 0.114365 | 0.0828963 |
| 0.112034  | 0.113928  | 0.117279 | 0.11553  | 0.12296  | 0.121503 | 0.110723  |
| 0.115676  | 0.11757   | 0.118007 | 0.117133 | 0.122815 | 0.124854 | 0.113782  |
| 0.191871  | 0.18852   | 0.193036 | 0.199738 | 0.203671 | 0.190268 | 0.187063  |
| 0.113199  | 0.114219  | 0.120192 | 0.120192 | 0.128205 | 0.116259 | 0.115385  |
| 0.10373   | 0.10271   | 0.108683 | 0.114219 | 0.121358 | 0.107955 | 0.103584  |
| 0.125     | 0.125146  | 0.125    | 0.126748 | 0.132139 | 0.129808 | 0.123106  |
| 0.192453  | 0.189977  | 0.194493 | 0.202069 | 0.208042 | 0.190268 | 0.192016  |
| 0.0952797 | 0.0971737 | 0.112471 | 0.099359 | 0.109411 | 0.11116  | 0.0945513 |
| 0.103293  | 0.108392  | 0.103293 | 0.115822 | 0.126457 | 0.110723 | 0.110723  |
| 0.122232  | 0.121503  | 0.124854 | 0.129808 | 0.131993 | 0.127914 | 0.120921  |
| 0.112471  | 0.114656  | 0.111888 | 0.121212 | 0.130099 | 0.120775 | 0.110577  |
| 0.188811  | 0.186917  | 0.191434 | 0.195221 | 0.201777 | 0.183421 | 0.186334  |
| 0.102273  | 0.107372  | 0.103147 | 0.11451  | 0.127185 | 0.106206 | 0.10912   |
| 0.110431  | 0.107372  | 0.112179 | 0.120047 | 0.12602  | 0.115822 | 0.10708   |
| 0.100233  | 0.100379  | 0.112471 | 0.106352 | 0.116113 | 0.113491 | 0.0962995 |
| 0.116259  | 0.118444  | 0.120047 | 0.127331 | 0.134761 | 0.121941 | 0.114073  |
| 0.119318  | 0.117424  | 0.106789 | 0.125728 | 0.13141  | 0.12704  | 0.114219  |
| 0.108537  | 0.113054  | 0.106498 | 0.120192 | 0.131119 | 0.11451  | 0.115676  |
| 0.101836  | 0.105478  | 0.119901 | 0.11553  | 0.118881 | 0.115676 | 0.107809  |
| 0.115239  | 0.112762  | 0.113491 | 0.119901 | 0.124126 | 0.129371 | 0.111597  |
| 0.143648  | 0.143211  | 0.135781 | 0.147145 | 0.151952 | 0.151661 | 0.138258  |
| 0.238345  | 0.236451  | 0.23514  | 0.243298 | 0.247523 | 0.239365 | 0.235577  |
| 0.103438  | 0.110577  | 0.121212 | 0.110431 | 0.11757  | 0.128351 | 0.113782  |
| 0.123543  | 0.121358  | 0.108683 | 0.128788 | 0.130682 | 0.125728 | 0.117279  |
| 0.114073  | 0.118881  | 0.121358 | 0.124563 | 0.126166 | 0.118881 | 0.113636  |
| 0.119464  | 0.122232  | 0.121795 | 0.13141  | 0.13243  | 0.128059 | 0.116113  |
| 0.116113  | 0.11014   | 0.104167 | 0.11757  | 0.119755 | 0.108683 | 0.106643  |
| 0.119901  | 0.112471  | 0.113491 | 0.117279 | 0.123543 | 0.124709 | 0.111305  |
| 0.118881  | 0.122523  | 0.123543 | 0.125874 | 0.127185 | 0.125437 | 0.122523  |

|           |           |           |           |           |          |           |
|-----------|-----------|-----------|-----------|-----------|----------|-----------|
| 0.106498  | 0.11014   | 0.103875  | 0.119901  | 0.128497  | 0.111597 | 0.113345  |
| 0.116113  | 0.115093  | 0.111451  | 0.128642  | 0.134907  | 0.116841 | 0.115385  |
| 0.239219  | 0.236742  | 0.238054  | 0.242133  | 0.249272  | 0.235868 | 0.234703  |
| 0.0948427 | 0.0961538 | 0.110577  | 0.0983392 | 0.107809  | 0.111597 | 0.0958625 |
| 0.0962995 | 0.10169   | 0.0954254 | 0.0971737 | 0.115093  | 0.115676 | 0.092366  |
| 0.102273  | 0.100379  | 0.114219  | 0.111888  | 0.118153  | 0.114365 | 0.106789  |
| 0.128351  | 0.129662  | 0.122232  | 0.134761  | 0.138695  | 0.138403 | 0.126166  |
| 0.111451  | 0.115676  | 0.126311  | 0.109994  | 0.118007  | 0.13549  | 0.118881  |
| 0.110577  | 0.113636  | 0.124854  | 0.125728  | 0.127622  | 0.118298 | 0.111014  |
| 0.120484  | 0.124126  | 0.123106  | 0.126603  | 0.135198  | 0.126457 | 0.118007  |
| 0.107517  | 0.108537  | 0.111597  | 0.119172  | 0.12602   | 0.120775 | 0.108537  |
| 0.233392  | 0.23208   | 0.231352  | 0.237762  | 0.242279  | 0.230332 | 0.229458  |
| 0.125     | 0.128059  | 0.125     | 0.128497  | 0.132721  | 0.13039  | 0.123397  |
| 0.100962  | 0.108392  | 0.100962  | 0.114948  | 0.128205  | 0.109848 | 0.111888  |
| 0.106206  | 0.106352  | 0.102418  | 0.125146  | 0.126748  | 0.115967 | 0.110723  |
| 0.119755  | 0.11757   | 0.110431  | 0.127622  | 0.128934  | 0.132139 | 0.118444  |
| 0.108683  | 0.11553   | 0.109848  | 0.101107  | 0.125437  | 0.129516 | 0.106498  |
| 0.102855  | 0.105915  | 0.118007  | 0.113636  | 0.116113  | 0.115822 | 0.107955  |
| 0.106061  | 0.107663  | 0.10169   | 0.112471  | 0.126311  | 0.108829 | 0.108829  |
| 0.107663  | 0.113928  | 0.107663  | 0.118444  | 0.13141   | 0.11655  | 0.115093  |
| 0.0995047 | 0.101399  | 0.103293  | 0.11553   | 0.126748  | 0.104604 | 0.106643  |
| 0.102564  | 0.105332  | 0.118298  | 0.114802  | 0.118444  | 0.116987 | 0.10708   |
| 0.129662  | 0.127768  | 0.11014   | 0.129953  | 0.133596  | 0.133887 | 0.119901  |
| 0.133304  | 0.131702  | 0.11553   | 0.130099  | 0.13549   | 0.137238 | 0.127331  |
| 0.118444  | 0.122378  | 0.128351  | 0.123106  | 0.131993  | 0.132867 | 0.102564  |
| 0.122232  | 0.125     | 0.131556  | 0.126894  | 0.135781  | 0.13345  | 0.107809  |
| 0.132867  | 0.127477  | 0.113636  | 0.127622  | 0.135927  | 0.136509 | 0.122523  |
| 0.0847902 | 0.0823135 | 0.111597  | 0.0935315 | 0.0983392 | 0.106789 | 0.0898893 |
| 0.104167  | 0.122669  | 0.114073  | 0.0989219 | 0.129662  | 0.130245 | 0.113345  |
| 0.119464  | 0.116987  | 0.113636  | 0.127914  | 0.138549  | 0.126603 | 0.122232  |
| 0.208625  | 0.206439  | 0.207459  | 0.216783  | 0.2213    | 0.204691 | 0.204108  |
| 0.11655   | 0.122232  | 0.126457  | 0.121503  | 0.126894  | 0.13039  | 0.123106  |
| 0.0999417 | 0.102418  | 0.104895  | 0.0987762 | 0.120484  | 0.118153 | 0.0980478 |
| 0.109703  | 0.109848  | 0.122523  | 0.121066  | 0.121503  | 0.122669 | 0.115385  |
| 0.224359  | 0.222465  | 0.226981  | 0.228147  | 0.233246  | 0.2213   | 0.219843  |
| 0.212995  | 0.206731  | 0.212413  | 0.219697  | 0.223631  | 0.208479 | 0.21081   |
| 0.110868  | 0.113928  | 0.104167  | 0.120775  | 0.130536  | 0.113345 | 0.11451   |
| 0.252331  | 0.249563  | 0.252331  | 0.256993  | 0.261801  | 0.250437 | 0.24898   |
| 0.085373  | 0.0840618 | 0.115385  | 0.0938228 | 0.10067   | 0.108246 | 0.0922203 |
| 0.124417  | 0.112617  | 0.131702  | 0.13141   | 0.129225  | 0.136801 | 0.125728  |
| 0.0944056 | 0.099796  | 0.113636  | 0.0984848 | 0.107955  | 0.114365 | 0.0962995 |
| 0.127185  | 0.126166  | 0.112617  | 0.129808  | 0.130828  | 0.131119 | 0.119172  |
| 0.189685  | 0.187791  | 0.188811  | 0.199301  | 0.203817  | 0.186334 | 0.186917  |
| 0.118444  | 0.115385  | 0.106206  | 0.126894  | 0.126457  | 0.129953 | 0.117716  |

|           |           |           |           |          |           |           |
|-----------|-----------|-----------|-----------|----------|-----------|-----------|
| 0.196533  | 0.188228  | 0.200321  | 0.204983  | 0.209499 | 0.189685  | 0.189685  |
| 0.107372  | 0.109266  | 0.118444  | 0.119901  | 0.125    | 0.12296   | 0.108392  |
| 0.105915  | 0.105478  | 0.108829  | 0.113782  | 0.12704  | 0.100816  | 0.108683  |
| 0.109411  | 0.103147  | 0.119901  | 0.111451  | 0.107809 | 0.119464  | 0.112471  |
| 0.107372  | 0.108974  | 0.115822  | 0.115239  | 0.125583 | 0.113636  | 0.104895  |
| 0.0958625 | 0.0992133 | 0.112471  | 0.108392  | 0.11553  | 0.111742  | 0.101253  |
| 0.108683  | 0.109703  | 0.118298  | 0.114219  | 0.122232 | 0.118153  | 0.111742  |
| 0.094697  | 0.0936772 | 0.108974  | 0.0935315 | 0.101836 | 0.109994  | 0.092803  |
| 0.114365  | 0.113928  | 0.114073  | 0.122523  | 0.130828 | 0.119172  | 0.112471  |
| 0.0912005 | 0.107663  | 0.104021  | 0.0967366 | 0.121358 | 0.116113  | 0.0977564 |
| 0.092366  | 0.0919289 | 0.11014   | 0.102564  | 0.112908 | 0.116404  | 0.10067   |
| 0.0965909 | 0.0996503 | 0.110868  | 0.0954254 | 0.1081   | 0.112179  | 0.0952797 |
| 0.112762  | 0.113199  | 0.123543  | 0.120047  | 0.121941 | 0.119318  | 0.099796  |
| 0.129662  | 0.124563  | 0.124126  | 0.132576  | 0.137675 | 0.135635  | 0.126603  |
| 0.106206  | 0.113345  | 0.120192  | 0.11757   | 0.123252 | 0.11859   | 0.0894522 |
| 0.106643  | 0.106789  | 0.112179  | 0.117133  | 0.123106 | 0.120192  | 0.103293  |
| 0.0992133 | 0.0999417 | 0.112617  | 0.10912   | 0.115967 | 0.113928  | 0.102273  |
| 0.10271   | 0.105769  | 0.105332  | 0.114948  | 0.12704  | 0.106643  | 0.111888  |
| 0.119318  | 0.118881  | 0.106206  | 0.123397  | 0.126748 | 0.125291  | 0.114802  |
| 0.114219  | 0.116404  | 0.117133  | 0.115093  | 0.121649 | 0.122815  | 0.112325  |
| 0.108683  | 0.112034  | 0.121795  | 0.115093  | 0.126894 | 0.123397  | 0.0936772 |
| 0.119318  | 0.118007  | 0.120484  | 0.124563  | 0.127914 | 0.126166  | 0.118007  |
| 0.129371  | 0.128934  | 0.128788  | 0.132867  | 0.136801 | 0.136218  | 0.128351  |
| 0.138986  | 0.139132  | 0.134324  | 0.137821  | 0.142628 | 0.143502  | 0.137675  |
| 0.092803  | 0.0885781 | 0.0960082 | 0.108829  | 0.115967 | 0.0979021 | 0.0952797 |
| 0.103293  | 0.104021  | 0.119318  | 0.117861  | 0.118881 | 0.11655   | 0.108392  |
| 0.108974  | 0.106789  | 0.107226  | 0.113345  | 0.116404 | 0.116696  | 0.103584  |
| 0.13549   | 0.128059  | 0.11655   | 0.13141   | 0.136509 | 0.137966  | 0.121941  |
| 0.10067   | 0.102273  | 0.114073  | 0.0980478 | 0.106352 | 0.118881  | 0.0973193 |
| 0.132721  | 0.134907  | 0.135344  | 0.12602   | 0.13345  | 0.13986   | 0.13141   |
| 0.122523  | 0.124709  | 0.135635  | 0.126894  | 0.129662 | 0.132284  | 0.125874  |
| 0.120338  | 0.121358  | 0.117133  | 0.131702  | 0.136509 | 0.134761  | 0.121358  |
| 0.0995047 | 0.100816  | 0.114948  | 0.110868  | 0.117716 | 0.116841  | 0.102564  |
| 0.11451   | 0.109411  | 0.110723  | 0.118881  | 0.119901 | 0.123397  | 0.103875  |
| 0.11451   | 0.118735  | 0.127914  | 0.124709  | 0.127185 | 0.13039   | 0.101544  |
| 0.206731  | 0.202797  | 0.205274  | 0.214598  | 0.22028  | 0.204837  | 0.205128  |
| 0.109411  | 0.109266  | 0.114948  | 0.119027  | 0.123252 | 0.119755  | 0.105186  |
| 0.10169   | 0.0983392 | 0.118881  | 0.112179  | 0.109994 | 0.116404  | 0.107372  |
| 0.120484  | 0.117133  | 0.103293  | 0.124563  | 0.128788 | 0.127331  | 0.111597  |
| 0.105478  | 0.11116   | 0.119755  | 0.117716  | 0.122232 | 0.120192  | 0.0890152 |
| 0.113491  | 0.115093  | 0.121941  | 0.126603  | 0.12704  | 0.125874  | 0.115967  |
| 0.114656  | 0.11859   | 0.118153  | 0.12398   | 0.129662 | 0.131119  | 0.120338  |
| 0.120629  | 0.121358  | 0.122086  | 0.121795  | 0.130682 | 0.13039   | 0.122815  |
| 0.119027  | 0.120338  | 0.112325  | 0.13039   | 0.134033 | 0.126166  | 0.115093  |

|           |           |           |           |           |           |           |
|-----------|-----------|-----------|-----------|-----------|-----------|-----------|
| 0.0855186 | 0.10169   | 0.10271   | 0.0960082 | 0.11655   | 0.110431  | 0.0932401 |
| 0.127768  | 0.125291  | 0.108537  | 0.124854  | 0.132576  | 0.134615  | 0.119464  |
| 0.104167  | 0.0987762 | 0.118153  | 0.104167  | 0.109557  | 0.117133  | 0.106352  |
| 0.0979021 | 0.0983392 | 0.11859   | 0.107517  | 0.118735  | 0.11961   | 0.105915  |
| 0.174679  | 0.172494  | 0.17905   | 0.178759  | 0.185315  | 0.175117  | 0.166667  |
| 0.114656  | 0.115676  | 0.118153  | 0.125728  | 0.13345   | 0.121795  | 0.112179  |
| 0.131119  | 0.126603  | 0.11451   | 0.127331  | 0.13447   | 0.132721  | 0.121649  |
| 0.0910548 | 0.101107  | 0.111451  | 0.099796  | 0.114802  | 0.122086  | 0.100233  |
| 0.117424  | 0.11553   | 0.114802  | 0.11655   | 0.127185  | 0.110868  | 0.10912   |
| 0.097028  | 0.0898893 | 0.105478  | 0.104312  | 0.109703  | 0.113782  | 0.0989219 |
| 0.0871212 | 0.0919289 | 0.106061  | 0.0996503 | 0.11116   | 0.109703  | 0.0933858 |
| 0.100816  | 0.0980478 | 0.111597  | 0.107226  | 0.108829  | 0.120192  | 0.103875  |
| 0.109266  | 0.116404  | 0.0888695 | 0.117424  | 0.128934  | 0.121941  | 0.10912   |
| 0.106935  | 0.105915  | 0.11859   | 0.113928  | 0.124563  | 0.109703  | 0.109994  |
| 0.114948  | 0.11859   | 0.12602   | 0.122523  | 0.130536  | 0.128205  | 0.107809  |
| 0.100233  | 0.101253  | 0.112179  | 0.105769  | 0.117279  | 0.105041  | 0.0989219 |
| 0.0933858 | 0.104895  | 0.112325  | 0.108829  | 0.113928  | 0.115676  | 0.104312  |
| 0.111597  | 0.113199  | 0.0917832 | 0.121795  | 0.131556  | 0.128934  | 0.122815  |
| 0.0775058 | 0.092803  | 0.108974  | 0.092366  | 0.109411  | 0.115239  | 0.100379  |
| 0.114219  | 0.112034  | 0.11859   | 0.124417  | 0.125146  | 0.124563  | 0.109411  |
| 0.0743007 | 0.088141  | 0.108683  | 0.0897436 | 0.10708   | 0.111742  | 0.0948427 |
| 0.0786713 | 0.092803  | 0.106935  | 0.0929487 | 0.108537  | 0.116696  | 0.0992133 |
| 0.0944056 | 0.0895979 | 0.112762  | 0.104312  | 0.0922203 | 0.0939685 | 0.095134  |
| 0.101544  | 0.0897436 | 0.115239  | 0.103875  | 0.113345  | 0.121503  | 0.1081    |
| 0.0852273 | 0.0909091 | 0.108246  | 0.097465  | 0.112471  | 0.108974  | 0.0912005 |
| 0.127185  | 0.131993  | 0.127185  | 0.133013  | 0.145396  | 0.0912005 | 0.130536  |
| 0.119318  | 0.118298  | 0.125437  | 0.13039   | 0.144814  | 0.0792541 | 0.120921  |
| 0.0793998 | 0.0979021 | 0.111742  | 0.0933858 | 0.112179  | 0.111597  | 0.0958625 |
| 0.130536  | 0.124563  | 0.119755  | 0.127622  | 0.129516  | 0.13039   | 0.128351  |
| 0.114802  | 0.117861  | 0.120629  | 0.125874  | 0.131847  | 0.124563  | 0.106789  |
| 0.117716  | 0.121649  | 0.121795  | 0.124709  | 0.133887  | 0.126603  | 0.125437  |
| 0.0967366 | 0.0986305 | 0.112471  | 0.100816  | 0.11116   | 0.118153  | 0.10067   |
| 0.136509  | 0.136364  | 0.137383  | 0.137383  | 0.138695  | 0.125874  | 0.130536  |
| 0.124272  | 0.127622  | 0.126311  | 0.125437  | 0.127331  | 0.136072  | 0.11655   |
| 0.127768  | 0.130536  | 0.105041  | 0.131265  | 0.139569  | 0.131702  | 0.122669  |
| 0.0995047 | 0.10373   | 0.119318  | 0.108537  | 0.11451   | 0.121795  | 0.0871212 |
| 0         | 0.0913462 | 0.105186  | 0.0865385 | 0.10708   | 0.106498  | 0.0907634 |
| 0.0913462 | 0         | 0.108829  | 0.109703  | 0.114802  | 0.106935  | 0.094697  |
| 0.105186  | 0.108829  | 0         | 0.113636  | 0.124563  | 0.12398   | 0.108246  |
| 0.0865385 | 0.109703  | 0.113636  | 0         | 0.099796  | 0.121941  | 0.107372  |
| 0.10708   | 0.114802  | 0.124563  | 0.099796  | 0         | 0.124126  | 0.11451   |
| 0.106498  | 0.106935  | 0.12398   | 0.121941  | 0.124126  | 0         | 0.115093  |
| 0.0907634 | 0.094697  | 0.108246  | 0.107372  | 0.11451   | 0.115093  | 0         |
| 0.0891608 | 0.0441434 | 0.1081    | 0.106061  | 0.112617  | 0.107372  | 0.0960082 |



|           |           |          |           |           |          |           |
|-----------|-----------|----------|-----------|-----------|----------|-----------|
| 0.0992133 | 0.0987762 | 0.112325 | 0.105915  | 0.117133  | 0.120629 | 0.104312  |
| 0.0849359 | 0.0754662 | 0.112908 | 0.104167  | 0.111305  | 0.105769 | 0.099359  |
| 0.0981935 | 0.0493881 | 0.115385 | 0.110723  | 0.116987  | 0.117279 | 0.106498  |
| 0.0976107 | 0.0933858 | 0.113928 | 0.104604  | 0.112325  | 0.114073 | 0.102418  |
| 0.110577  | 0.11451   | 0.121941 | 0.123689  | 0.125583  | 0.121503 | 0.108392  |
| 0.0968823 | 0.0967366 | 0.114948 | 0.10708   | 0.116841  | 0.116841 | 0.101399  |
| 0.0846445 | 0.0824592 | 0.110868 | 0.0887238 | 0.0967366 | 0.109557 | 0.0932401 |
| 0.0910548 | 0.0938228 | 0.106206 | 0.103584  | 0.112179  | 0.113636 | 0.0955711 |
| 0.106935  | 0.111451  | 0.121795 | 0.122086  | 0.123689  | 0.113782 | 0.105332  |
| 0.10271   | 0.0967366 | 0.115822 | 0.103584  | 0.113928  | 0.119172 | 0.107809  |
| 0.117279  | 0.112762  | 0.128351 | 0.122523  | 0.128788  | 0.123543 | 0.118881  |
| 0.10067   | 0.104312  | 0.110868 | 0.116987  | 0.123543  | 0.110431 | 0.100233  |
| 0.106352  | 0.109703  | 0.123834 | 0.106935  | 0.115822  | 0.126311 | 0.123689  |

| <b>TDr_99_02607</b> | <b>TDr_99_02626</b> | <b>TDr_99_02674</b> | <b>TDr_99_02789</b> | <b>TDr_99_02824</b> | <b>TDr_Adaka</b> | <b>TDr_Ame</b> |
|---------------------|---------------------|---------------------|---------------------|---------------------|------------------|----------------|
| 0.110577            | 0.117716            | 0.113928            | 0.11757             | 0.110286            | 0.106061         | 0.112471       |
| 0.109848            | 0.109703            | 0.108246            | 0.119464            | 0.114802            | 0.0441434        | 0.108246       |
| 0.10373             | 0.108537            | 0.10067             | 0.113636            | 0.111888            | 0.0520105        | 0.099796       |
| 0.108392            | 0.118153            | 0.107955            | 0.115967            | 0.105769            | 0.104458         | 0.104167       |
| 0.12704             | 0.131556            | 0.13039             | 0.129371            | 0.129953            | 0.133013         | 0.124272       |
| 0.122378            | 0.133304            | 0.124854            | 0.132284            | 0.124709            | 0.122523         | 0.124563       |
| 0.111742            | 0.11655             | 0.111305            | 0.114656            | 0.116404            | 0.117424         | 0.119464       |
| 0.109994            | 0.113636            | 0.111305            | 0.116404            | 0.107663            | 0.107809         | 0.106061       |
| 0.0888695           | 0.106206            | 0.0965909           | 0.0987762           | 0.0894522           | 0.107372         | 0.0907634      |
| 0.0808566           | 0.0862471           | 0.0882867           | 0.088141            | 0.0852273           | 0.102855         | 0.0871212      |
| 0.10373             | 0.114365            | 0.105624            | 0.11451             | 0.107809            | 0.11757          | 0.108246       |
| 0.100962            | 0.112179            | 0.106352            | 0.109994            | 0.103875            | 0.105478         | 0.106643       |
| 0.0977564           | 0.115093            | 0.101399            | 0.106498            | 0.0986305           | 0.1081           | 0.0964452      |
| 0.125874            | 0.131265            | 0.127768            | 0.132284            | 0.120921            | 0.129225         | 0.0942599      |
| 0.116987            | 0.115093            | 0.118007            | 0.120484            | 0.119027            | 0.116841         | 0.114219       |
| 0.106352            | 0.114365            | 0.105332            | 0.111305            | 0.113928            | 0.11553          | 0.110868       |
| 0.0986305           | 0.111014            | 0.10169             | 0.108537            | 0.106789            | 0.113345         | 0.109266       |
| 0.140152            | 0.135635            | 0.139132            | 0.141317            | 0.142483            | 0.135635         | 0.135927       |
| 0.101399            | 0.109411            | 0.100087            | 0.111597            | 0.104604            | 0.0645396        | 0.10067        |
| 0.203089            | 0.195076            | 0.198572            | 0.206585            | 0.200175            | 0.189248         | 0.200903       |
| 0.114656            | 0.121503            | 0.115676            | 0.12602             | 0.11553             | 0.119172         | 0.11859        |
| 0.117424            | 0.118444            | 0.116404            | 0.121795            | 0.110431            | 0.117861         | 0.110577       |
| 0.0960082           | 0.104895            | 0.092366            | 0.103001            | 0.10271             | 0.111014         | 0.101981       |
| 0.109266            | 0.119901            | 0.113199            | 0.115676            | 0.120338            | 0.127185         | 0.11757        |
| 0.0872669           | 0.102855            | 0.0941142           | 0.0962995           | 0.097465            | 0.106061         | 0.101107       |
| 0.123397            | 0.126748            | 0.117716            | 0.129225            | 0.126311            | 0.124126         | 0.124126       |
| 0.107663            | 0.112762            | 0.109557            | 0.114073            | 0.113491            | 0.126166         | 0.119755       |
| 0.108537            | 0.118007            | 0.105478            | 0.11553             | 0.116987            | 0.117716         | 0.11014        |
| 0.120484            | 0.123543            | 0.120338            | 0.121358            | 0.123397            | 0.128205         | 0.121503       |
| 0.101544            | 0.118007            | 0.11014             | 0.105915            | 0.102418            | 0.122086         | 0.111305       |
| 0.115967            | 0.121066            | 0.114073            | 0.121212            | 0.113636            | 0.116987         | 0.116696       |
| 0.113199            | 0.115676            | 0.111014            | 0.117279            | 0.118444            | 0.123252         | 0.1081         |
| 0.095134            | 0.102273            | 0.102273            | 0.106789            | 0.100087            | 0.106352         | 0.101981       |
| 0.104167            | 0.113928            | 0.108392            | 0.109994            | 0.109411            | 0.116841         | 0.103438       |
| 0.105478            | 0.112034            | 0.104458            | 0.110431            | 0.111888            | 0.122232         | 0.110286       |
| 0.109994            | 0.118007            | 0.117133            | 0.115239            | 0.116404            | 0.125291         | 0.117424       |
| 0.11655             | 0.120775            | 0.11757             | 0.122669            | 0.120629            | 0.127768         | 0.123689       |
| 0.107663            | 0.109848            | 0.113636            | 0.114656            | 0.104749            | 0.122669         | 0.109266       |
| 0.101253            | 0.1081              | 0.0958625           | 0.109703            | 0.10708             | 0.108683         | 0.107517       |
| 0.112617            | 0.116259            | 0.106352            | 0.121941            | 0.112325            | 0.122669         | 0.11451        |
| 0.0965909           | 0.105769            | 0.0979021           | 0.105915            | 0.104167            | 0.11014          | 0.0964452      |
| 0.123689            | 0.129953            | 0.123252            | 0.128351            | 0.135052            | 0.143648         | 0.130828       |

|           |           |           |           |           |          |           |
|-----------|-----------|-----------|-----------|-----------|----------|-----------|
| 0.127768  | 0.13345   | 0.136072  | 0.133887  | 0.140589  | 0.142191 | 0.135781  |
| 0.0976107 | 0.114656  | 0.104458  | 0.105478  | 0.104312  | 0.119318 | 0.103875  |
| 0.0888695 | 0.099796  | 0.0945513 | 0.0944056 | 0.0961538 | 0.11116  | 0.104749  |
| 0.0773601 | 0.0999417 | 0.0917832 | 0.0782343 | 0.101836  | 0.115093 | 0.112179  |
| 0.113199  | 0.121212  | 0.113636  | 0.12398   | 0.115822  | 0.121795 | 0.115093  |
| 0.119464  | 0.125146  | 0.125437  | 0.12296   | 0.131119  | 0.135927 | 0.125146  |
| 0.103438  | 0.105332  | 0.101836  | 0.113345  | 0.107226  | 0.115239 | 0.0995047 |
| 0.0977564 | 0.106643  | 0.102273  | 0.105915  | 0.108246  | 0.115967 | 0.101107  |
| 0.141026  | 0.136509  | 0.13884   | 0.146853  | 0.134615  | 0.135344 | 0.149038  |
| 0.120921  | 0.121358  | 0.119901  | 0.125874  | 0.126457  | 0.128934 | 0.12398   |
| 0.0971737 | 0.115385  | 0.101107  | 0.104167  | 0.104458  | 0.117716 | 0.106352  |
| 0.109994  | 0.111597  | 0.113054  | 0.113199  | 0.107372  | 0.121795 | 0.0536131 |
| 0.109994  | 0.117133  | 0.113636  | 0.120484  | 0.110577  | 0.111305 | 0.112179  |
| 0.135927  | 0.133741  | 0.127331  | 0.139714  | 0.132721  | 0.143648 | 0.134907  |
| 0.112179  | 0.119318  | 0.115239  | 0.117716  | 0.117424  | 0.123689 | 0.111451  |
| 0.0979021 | 0.112617  | 0.106498  | 0.108974  | 0.104895  | 0.11961  | 0.103584  |
| 0.104312  | 0.10912   | 0.103293  | 0.110431  | 0.110723  | 0.114948 | 0.104458  |
| 0.102418  | 0.0844988 | 0.101981  | 0.10708   | 0.109411  | 0.11451  | 0.113054  |
| 0.119318  | 0.126166  | 0.120629  | 0.120775  | 0.13243   | 0.137529 | 0.127331  |
| 0.12602   | 0.126748  | 0.124417  | 0.128934  | 0.133887  | 0.13549  | 0.126166  |
| 0.15676   | 0.150495  | 0.146416  | 0.1588    | 0.151224  | 0.152826 | 0.157488  |
| 0.10373   | 0.114073  | 0.101544  | 0.111014  | 0.104604  | 0.112617 | 0.103875  |
| 0.0984848 | 0.109703  | 0.0983392 | 0.110723  | 0.104604  | 0.110868 | 0.104167  |
| 0.0955711 | 0.110577  | 0.0995047 | 0.106935  | 0.106935  | 0.112617 | 0.10271   |
| 0.135344  | 0.13986   | 0.131993  | 0.135635  | 0.126894  | 0.134907 | 0.141317  |
| 0.103584  | 0.111597  | 0.0976107 | 0.114073  | 0.106498  | 0.115676 | 0.100233  |
| 0.125     | 0.126603  | 0.127477  | 0.127914  | 0.125583  | 0.134178 | 0.130973  |
| 0.101399  | 0.0840618 | 0.0960082 | 0.10169   | 0.102855  | 0.115822 | 0.107663  |
| 0.101544  | 0.111014  | 0.103438  | 0.109703  | 0.113782  | 0.119172 | 0.109848  |
| 0.140589  | 0.141317  | 0.138695  | 0.140589  | 0.137092  | 0.143065 | 0.146853  |
| 0.106498  | 0.120921  | 0.106352  | 0.115239  | 0.118444  | 0.123543 | 0.115093  |
| 0.130828  | 0.127768  | 0.131265  | 0.131702  | 0.133741  | 0.13243  | 0.124854  |
| 0.122523  | 0.123834  | 0.122669  | 0.129225  | 0.131556  | 0.131702 | 0.119172  |
| 0.106352  | 0.116404  | 0.10912   | 0.115967  | 0.109266  | 0.112617 | 0.11116   |
| 0.0941142 | 0.105332  | 0.0960082 | 0.103147  | 0.105478  | 0.113199 | 0.101253  |
| 0.0990676 | 0.111742  | 0.104749  | 0.1081    | 0.112179  | 0.112617 | 0.100087  |
| 0.120047  | 0.124563  | 0.125146  | 0.126166  | 0.126457  | 0.133596 | 0.125146  |
| 0.0965909 | 0.111597  | 0.0999417 | 0.10708   | 0.102127  | 0.111888 | 0.101107  |
| 0.127622  | 0.127477  | 0.125146  | 0.129079  | 0.132284  | 0.136218 | 0.127185  |
| 0.107517  | 0.119027  | 0.108246  | 0.114219  | 0.113054  | 0.124272 | 0.113782  |
| 0.108683  | 0.11116   | 0.105332  | 0.114219  | 0.118007  | 0.122523 | 0.112908  |
| 0.10373   | 0.116113  | 0.108829  | 0.115093  | 0.116259  | 0.11757  | 0.108537  |
| 0.110431  | 0.120484  | 0.105332  | 0.114802  | 0.113636  | 0.122232 | 0.11116   |
| 0.100524  | 0.111742  | 0.105041  | 0.112179  | 0.11014   | 0.113199 | 0.103293  |

|           |           |           |           |           |          |           |
|-----------|-----------|-----------|-----------|-----------|----------|-----------|
| 0.102564  | 0.111451  | 0.103875  | 0.109557  | 0.107517  | 0.118735 | 0.10912   |
| 0.119901  | 0.123834  | 0.122378  | 0.122815  | 0.128059  | 0.141608 | 0.128205  |
| 0.0785256 | 0.104312  | 0.0929487 | 0.0878497 | 0.10271   | 0.115385 | 0.104895  |
| 0.0935315 | 0.103001  | 0.0957168 | 0.0996503 | 0.0964452 | 0.113199 | 0.0986305 |
| 0.113636  | 0.122232  | 0.117861  | 0.118881  | 0.117716  | 0.122815 | 0.120484  |
| 0.117424  | 0.119901  | 0.115822  | 0.121503  | 0.119755  | 0.124563 | 0.122815  |
| 0.117716  | 0.122523  | 0.123397  | 0.12296   | 0.124417  | 0.124854 | 0.130682  |
| 0.127768  | 0.127331  | 0.126166  | 0.132721  | 0.133304  | 0.133159 | 0.137238  |
| 0.105478  | 0.117861  | 0.107372  | 0.111597  | 0.111597  | 0.113782 | 0.115239  |
| 0.174242  | 0.176428  | 0.179341  | 0.175699  | 0.177448  | 0.175262 | 0.180507  |
| 0.0995047 | 0.111014  | 0.104895  | 0.105915  | 0.100379  | 0.111888 | 0.107517  |
| 0.121503  | 0.130682  | 0.126894  | 0.123252  | 0.131119  | 0.13243  | 0.137092  |
| 0.113636  | 0.128351  | 0.11961   | 0.11655   | 0.120629  | 0.124854 | 0.129225  |
| 0.123106  | 0.130536  | 0.120921  | 0.126603  | 0.130099  | 0.134615 | 0.13549   |
| 0.102564  | 0.107663  | 0.101836  | 0.106935  | 0.108392  | 0.11116  | 0.112034  |
| 0.119755  | 0.123106  | 0.121066  | 0.123834  | 0.125     | 0.13039  | 0.13039   |
| 0.105186  | 0.115239  | 0.108829  | 0.112471  | 0.109848  | 0.113782 | 0.11553   |
| 0.110577  | 0.109266  | 0.113928  | 0.115239  | 0.117861  | 0.121795 | 0.125     |
| 0.0989219 | 0.109266  | 0.100816  | 0.104749  | 0.103293  | 0.118298 | 0.108974  |
| 0.11961   | 0.122669  | 0.124709  | 0.122523  | 0.131556  | 0.133741 | 0.134907  |
| 0.0712413 | 0.0999417 | 0.0842075 | 0.0805653 | 0.0957168 | 0.114802 | 0.104895  |
| 0.123834  | 0.125146  | 0.123106  | 0.128497  | 0.13141   | 0.129808 | 0.13447   |
| 0.0957168 | 0.114219  | 0.103147  | 0.105332  | 0.105915  | 0.111305 | 0.115385  |
| 0.117133  | 0.114656  | 0.11553   | 0.124126  | 0.117716  | 0.133887 | 0.116696  |
| 0.111451  | 0.117716  | 0.111305  | 0.115822  | 0.120192  | 0.126166 | 0.118881  |
| 0.10271   | 0.104895  | 0.106352  | 0.111742  | 0.103001  | 0.113054 | 0.105478  |
| 0.137383  | 0.142483  | 0.137821  | 0.13884   | 0.136218  | 0.138986 | 0.143065  |
| 0.103147  | 0.107372  | 0.10708   | 0.113928  | 0.107809  | 0.117861 | 0.11116   |
| 0.0967366 | 0.108829  | 0.103001  | 0.106643  | 0.104895  | 0.112034 | 0.112325  |
| 0.0840618 | 0.0987762 | 0.100524  | 0.0837704 | 0.0992133 | 0.115676 | 0.11014   |
| 0.118153  | 0.126166  | 0.123543  | 0.118444  | 0.125728  | 0.134907 | 0.131119  |
| 0.115822  | 0.120921  | 0.115385  | 0.121066  | 0.117861  | 0.124126 | 0.118881  |
| 0.0971737 | 0.113345  | 0.101981  | 0.103293  | 0.106498  | 0.110723 | 0.105769  |
| 0.101253  | 0.112179  | 0.103147  | 0.109994  | 0.102418  | 0.108683 | 0.109557  |
| 0.105186  | 0.11116   | 0.100962  | 0.111888  | 0.103438  | 0.116696 | 0.107372  |
| 0.104749  | 0.0824592 | 0.104895  | 0.105624  | 0.114365  | 0.126457 | 0.11859   |
| 0.104021  | 0.114073  | 0.108537  | 0.111597  | 0.109848  | 0.114948 | 0.111742  |
| 0.0828963 | 0.0804196 | 0.0801282 | 0.0930944 | 0.0948427 | 0.108392 | 0.0967366 |
| 0.0901807 | 0.0815851 | 0.0888695 | 0.0971737 | 0.095134  | 0.105769 | 0.0973193 |
| 0.0827506 | 0.0878497 | 0.0910548 | 0.0932401 | 0.0973193 | 0.114656 | 0.106789  |
| 0.104895  | 0.124563  | 0.114948  | 0.113928  | 0.109557  | 0.121066 | 0.109994  |
| 0.110577  | 0.0856643 | 0.112762  | 0.110868  | 0.118153  | 0.125874 | 0.12704   |
| 0.0935315 | 0.0861014 | 0.0872669 | 0.100816  | 0.0961538 | 0.114948 | 0.100379  |
| 0.0849359 | 0.0824592 | 0.0847902 | 0.0930944 | 0.0977564 | 0.108683 | 0.102273  |

|           |           |           |           |           |          |           |
|-----------|-----------|-----------|-----------|-----------|----------|-----------|
| 0.0992133 | 0.085373  | 0.100233  | 0.0995047 | 0.110868  | 0.126166 | 0.117133  |
| 0.087704  | 0.0852273 | 0.08581   | 0.0932401 | 0.099359  | 0.112325 | 0.103001  |
| 0.114219  | 0.125728  | 0.11757   | 0.123252  | 0.110723  | 0.117279 | 0.120484  |
| 0.124709  | 0.127477  | 0.122232  | 0.132284  | 0.120629  | 0.12398  | 0.13243   |
| 0.0938228 | 0.0791084 | 0.0939685 | 0.097028  | 0.104021  | 0.11757  | 0.110577  |
| 0.0925117 | 0.0850816 | 0.0909091 | 0.102127  | 0.101253  | 0.115093 | 0.101107  |
| 0.0907634 | 0.0871212 | 0.0920746 | 0.0968823 | 0.0971737 | 0.109266 | 0.108683  |
| 0.0872669 | 0.0949883 | 0.083042  | 0.0980478 | 0.0948427 | 0.107226 | 0.101981  |
| 0.106498  | 0.0862471 | 0.104604  | 0.103875  | 0.108537  | 0.118881 | 0.116841  |
| 0.0852273 | 0.0810023 | 0.0850816 | 0.0887238 | 0.0960082 | 0.106061 | 0.0964452 |
| 0.125583  | 0.130973  | 0.130099  | 0.13141   | 0.132576  | 0.136509 | 0.135635  |
| 0.0942599 | 0.118298  | 0.111597  | 0.0957168 | 0.121358  | 0.132576 | 0.126457  |
| 0.092803  | 0.114802  | 0.105478  | 0.0922203 | 0.111451  | 0.124709 | 0.11655   |
| 0.0810023 | 0.113491  | 0.0977564 | 0.0885781 | 0.106352  | 0.11961  | 0.104167  |
| 0.0958625 | 0.107955  | 0.0989219 | 0.102564  | 0.106935  | 0.112325 | 0.111451  |
| 0.0887238 | 0.0833333 | 0.0839161 | 0.0971737 | 0.100962  | 0.11451  | 0.105186  |
| 0.0912005 | 0.10708   | 0.0872669 | 0.101981  | 0.103438  | 0.11116  | 0.111742  |
| 0.0976107 | 0.110286  | 0.099796  | 0.104021  | 0.102855  | 0.112617 | 0.0995047 |
| 0.105769  | 0.117861  | 0.104749  | 0.11451   | 0.109266  | 0.105915 | 0.108537  |
| 0.112471  | 0.11757   | 0.107955  | 0.115967  | 0.125291  | 0.129808 | 0.122815  |
| 0.106206  | 0.11451   | 0.106061  | 0.113782  | 0.109703  | 0.11655  | 0.114219  |
| 0.113345  | 0.114073  | 0.118153  | 0.111305  | 0.12296   | 0.118444 | 0.114073  |
| 0.122523  | 0.128497  | 0.125583  | 0.123689  | 0.127185  | 0.134033 | 0.131993  |
| 0.190122  | 0.19493   | 0.187063  | 0.19799   | 0.190705  | 0.18007  | 0.192016  |
| 0.236014  | 0.236451  | 0.235577  | 0.241841  | 0.237471  | 0.222174 | 0.237617  |
| 0.109994  | 0.122669  | 0.107517  | 0.120484  | 0.103293  | 0.105769 | 0.109557  |
| 0.097028  | 0.109994  | 0.0971737 | 0.107517  | 0.106061  | 0.116113 | 0.108537  |
| 0.0955711 | 0.10708   | 0.0992133 | 0.104021  | 0.103147  | 0.110868 | 0.102127  |
| 0.104312  | 0.113782  | 0.101544  | 0.113928  | 0.111014  | 0.116404 | 0.103293  |
| 0.118007  | 0.118444  | 0.119318  | 0.120047  | 0.118007  | 0.116404 | 0.117279  |
| 0.107809  | 0.118444  | 0.10912   | 0.111888  | 0.106935  | 0.120775 | 0.110868  |
| 0.136218  | 0.141026  | 0.139277  | 0.14088   | 0.139132  | 0.153263 | 0.142191  |
| 0.107517  | 0.112617  | 0.105915  | 0.120047  | 0.110723  | 0.122232 | 0.112325  |
| 0.119755  | 0.119901  | 0.114365  | 0.127622  | 0.125291  | 0.129225 | 0.123689  |
| 0.122523  | 0.123834  | 0.122378  | 0.123689  | 0.125728  | 0.131119 | 0.125291  |
| 0.120775  | 0.125     | 0.121503  | 0.12398   | 0.125146  | 0.138986 | 0.130245  |
| 0.126894  | 0.127622  | 0.126748  | 0.130099  | 0.130099  | 0.13345  | 0.125     |
| 0.104167  | 0.115093  | 0.102564  | 0.110577  | 0.109411  | 0.120338 | 0.108974  |
| 0.0992133 | 0.108392  | 0.104604  | 0.10912   | 0.103293  | 0.117716 | 0.112179  |
| 0.100233  | 0.114948  | 0.104458  | 0.109848  | 0.110723  | 0.121941 | 0.115822  |
| 0.103147  | 0.108829  | 0.0986305 | 0.113345  | 0.106643  | 0.112908 | 0.106498  |
| 0.102273  | 0.108829  | 0.105915  | 0.11014   | 0.104895  | 0.118444 | 0.110868  |
| 0.104167  | 0.114219  | 0.100233  | 0.114073  | 0.107955  | 0.120921 | 0.110723  |
| 0.115967  | 0.123106  | 0.116404  | 0.121503  | 0.125291  | 0.128351 | 0.121941  |

|           |           |           |           |           |          |           |
|-----------|-----------|-----------|-----------|-----------|----------|-----------|
| 0.128788  | 0.126603  | 0.119901  | 0.130245  | 0.129953  | 0.139423 | 0.13447   |
| 0.104458  | 0.114802  | 0.106061  | 0.117279  | 0.110577  | 0.124417 | 0.117133  |
| 0.100816  | 0.114948  | 0.101544  | 0.111305  | 0.111014  | 0.120192 | 0.11116   |
| 0.124417  | 0.129225  | 0.120775  | 0.128497  | 0.126748  | 0.13447  | 0.129516  |
| 0.0973193 | 0.107372  | 0.0986305 | 0.110431  | 0.107517  | 0.114948 | 0.110286  |
| 0.128059  | 0.136364  | 0.132576  | 0.134761  | 0.138549  | 0.138112 | 0.137821  |
| 0.0989219 | 0.119464  | 0.11451   | 0.0925117 | 0.119901  | 0.129079 | 0.125583  |
| 0.127622  | 0.130973  | 0.131265  | 0.129953  | 0.131119  | 0.13243  | 0.133887  |
| 0.0961538 | 0.104167  | 0.0948427 | 0.106352  | 0.107226  | 0.115822 | 0.107663  |
| 0.0995047 | 0.107517  | 0.101107  | 0.104458  | 0.0980478 | 0.112179 | 0.106935  |
| 0.118007  | 0.118735  | 0.109411  | 0.123543  | 0.119172  | 0.131265 | 0.119318  |
| 0.117279  | 0.119755  | 0.113928  | 0.120484  | 0.114656  | 0.12704  | 0.120047  |
| 0.125437  | 0.123834  | 0.123834  | 0.135344  | 0.121358  | 0.135198 | 0.132576  |
| 0.111014  | 0.118444  | 0.109411  | 0.117424  | 0.117133  | 0.118153 | 0.116113  |
| 0.106789  | 0.114802  | 0.106643  | 0.112908  | 0.111451  | 0.126748 | 0.11859   |
| 0.114073  | 0.122086  | 0.108683  | 0.120775  | 0.119027  | 0.123543 | 0.119464  |
| 0.118735  | 0.124417  | 0.115385  | 0.120192  | 0.127768  | 0.136655 | 0.128788  |
| 0.121066  | 0.124126  | 0.118881  | 0.126311  | 0.123689  | 0.130828 | 0.126457  |
| 0.122378  | 0.128642  | 0.119027  | 0.123252  | 0.129953  | 0.138549 | 0.129808  |
| 0.128059  | 0.124417  | 0.117424  | 0.127185  | 0.133013  | 0.132576 | 0.125874  |
| 0.106789  | 0.111305  | 0.104021  | 0.115239  | 0.10708   | 0.117424 | 0.112179  |
| 0.125146  | 0.127622  | 0.124417  | 0.131556  | 0.128642  | 0.129662 | 0.124126  |
| 0.099359  | 0.112325  | 0.0971737 | 0.109266  | 0.107809  | 0.114365 | 0.112034  |
| 0.100087  | 0.111305  | 0.109557  | 0.109411  | 0.107955  | 0.11655  | 0.102855  |
| 0.101836  | 0.114802  | 0.10373   | 0.109703  | 0.110577  | 0.115093 | 0.104895  |
| 0.100233  | 0.11116   | 0.103584  | 0.112471  | 0.110723  | 0.121649 | 0.110868  |
| 0.102855  | 0.107955  | 0.10067   | 0.108974  | 0.108392  | 0.115822 | 0.102127  |
| 0.121358  | 0.127622  | 0.121212  | 0.13039   | 0.13039   | 0.138112 | 0.127331  |
| 0.106643  | 0.117861  | 0.109411  | 0.113636  | 0.114802  | 0.112908 | 0.112325  |
| 0.124709  | 0.127768  | 0.12602   | 0.131702  | 0.127914  | 0.129808 | 0.127768  |
| 0.106935  | 0.10708   | 0.101544  | 0.115967  | 0.109266  | 0.114073 | 0.108537  |
| 0.115239  | 0.114219  | 0.109848  | 0.121649  | 0.115822  | 0.132284 | 0.122086  |
| 0.107226  | 0.114656  | 0.109703  | 0.109266  | 0.11655   | 0.120775 | 0.118444  |
| 0.0801282 | 0.11116   | 0.0962995 | 0.0885781 | 0.101399  | 0.116404 | 0.103584  |
| 0.101253  | 0.104021  | 0.102273  | 0.106498  | 0.105624  | 0.118298 | 0.110723  |
| 0.0836247 | 0.106498  | 0.0986305 | 0.0856643 | 0.109848  | 0.117279 | 0.107372  |
| 0.08581   | 0.114219  | 0.100524  | 0.0875583 | 0.11116   | 0.122669 | 0.116259  |
| 0.0983392 | 0.109557  | 0.0979021 | 0.107372  | 0.101544  | 0.118298 | 0.107809  |
| 0.108829  | 0.105478  | 0.115676  | 0.112325  | 0.114656  | 0.128497 | 0.108974  |
| 0.126166  | 0.125437  | 0.120484  | 0.12704   | 0.115385  | 0.13447  | 0.130682  |
| 0.0891608 | 0.0977564 | 0.0968823 | 0.099359  | 0.0917832 | 0.105332 | 0.0919289 |
| 0.118735  | 0.115967  | 0.118007  | 0.124272  | 0.116696  | 0.12296  | 0.120338  |
| 0.0949883 | 0.0968823 | 0.103293  | 0.0976107 | 0.104312  | 0.122815 | 0.103875  |
| 0.108974  | 0.114948  | 0.116113  | 0.113928  | 0.113345  | 0.125728 | 0.120192  |

|           |           |           |           |           |          |           |
|-----------|-----------|-----------|-----------|-----------|----------|-----------|
| 0.0973193 | 0.104749  | 0.105624  | 0.10169   | 0.108392  | 0.115239 | 0.112617  |
| 0.0955711 | 0.105624  | 0.108537  | 0.101981  | 0.105769  | 0.116113 | 0.101836  |
| 0.10708   | 0.104312  | 0.105186  | 0.112617  | 0.107955  | 0.115385 | 0.103438  |
| 0.108392  | 0.108829  | 0.113199  | 0.113345  | 0.116841  | 0.123106 | 0.119318  |
| 0.120921  | 0.116696  | 0.12602   | 0.123252  | 0.126166  | 0.13039  | 0.122815  |
| 0.0987762 | 0.100087  | 0.10708   | 0.103147  | 0.106061  | 0.114365 | 0.0925117 |
| 0.0981935 | 0.101836  | 0.102127  | 0.104021  | 0.10373   | 0.111451 | 0.108537  |
| 0.126894  | 0.131119  | 0.124709  | 0.135344  | 0.13243   | 0.134033 | 0.136072  |
| 0.114219  | 0.10708   | 0.112325  | 0.117424  | 0.115385  | 0.122523 | 0.109411  |
| 0.0958625 | 0.10708   | 0.0989219 | 0.100816  | 0.0967366 | 0.103293 | 0.10067   |
| 0.21722   | 0.218531  | 0.214452  | 0.225379  | 0.214889  | 0.206002 | 0.220571  |
| 0.104749  | 0.110723  | 0.112471  | 0.110868  | 0.107663  | 0.11451  | 0.113636  |
| 0.0939685 | 0.102273  | 0.101107  | 0.10067   | 0.103584  | 0.113054 | 0.097028  |
| 0.118298  | 0.116113  | 0.128059  | 0.121795  | 0.119755  | 0.123106 | 0.114656  |
| 0.0955711 | 0.105915  | 0.102127  | 0.103438  | 0.104604  | 0.114656 | 0.10067   |
| 0.109557  | 0.104167  | 0.109703  | 0.113054  | 0.117133  | 0.125146 | 0.105624  |
| 0.101981  | 0.114948  | 0.102418  | 0.109266  | 0.106935  | 0.120192 | 0.103293  |
| 0.103584  | 0.106061  | 0.1081    | 0.109703  | 0.105332  | 0.112179 | 0.105769  |
| 0.0986305 | 0.10373   | 0.109266  | 0.102127  | 0.108829  | 0.116841 | 0.100233  |
| 0.112471  | 0.11553   | 0.113491  | 0.116259  | 0.120047  | 0.117861 | 0.111742  |
| 0.114948  | 0.114219  | 0.112762  | 0.123106  | 0.121649  | 0.124126 | 0.125583  |
| 0.117424  | 0.109994  | 0.118735  | 0.122086  | 0.114802  | 0.121649 | 0.120775  |
| 0.112471  | 0.109703  | 0.113199  | 0.116259  | 0.11859   | 0.118444 | 0.119901  |
| 0.0795455 | 0.0971737 | 0.0992133 | 0.0842075 | 0.097028  | 0.114365 | 0.10708   |
| 0.100524  | 0.110868  | 0.105624  | 0.106352  | 0.107226  | 0.114948 | 0.116987  |
| 0.113199  | 0.119755  | 0.126457  | 0.115239  | 0.122815  | 0.125    | 0.122378  |
| 0.101981  | 0.103293  | 0.10708   | 0.105478  | 0.103147  | 0.113782 | 0.110577  |
| 0.126166  | 0.12398   | 0.123106  | 0.129953  | 0.135198  | 0.136801 | 0.129225  |
| 0.11757   | 0.131993  | 0.129079  | 0.125437  | 0.128059  | 0.133741 | 0.127914  |
| 0.100087  | 0.104312  | 0.113345  | 0.099796  | 0.110286  | 0.121212 | 0.114802  |
| 0.103584  | 0.103438  | 0.108392  | 0.108537  | 0.10912   | 0.123834 | 0.108392  |
| 0.115093  | 0.124563  | 0.111742  | 0.125291  | 0.119464  | 0.124563 | 0.127768  |
| 0.112034  | 0.118881  | 0.118881  | 0.116113  | 0.114656  | 0.127622 | 0.115385  |
| 0.116113  | 0.123543  | 0.115385  | 0.122815  | 0.112034  | 0.125874 | 0.120338  |
| 0.122815  | 0.138112  | 0.124126  | 0.128642  | 0.125437  | 0.136364 | 0.127914  |
| 0.0474942 | 0.0971737 | 0.0750291 | 0.0498252 | 0.097028  | 0.116696 | 0.099796  |
| 0.100379  | 0.11655   | 0.109266  | 0.0919289 | 0.121649  | 0.132284 | 0.118298  |
| 0.132284  | 0.136801  | 0.13447   | 0.134907  | 0.137238  | 0.136509 | 0.132721  |
| 0.102273  | 0.08581   | 0.104749  | 0.104895  | 0.108974  | 0.11757  | 0.112617  |
| 0.110431  | 0.118444  | 0.116696  | 0.120047  | 0.120047  | 0.121358 | 0.109994  |
| 0.142337  | 0.138403  | 0.138403  | 0.143794  | 0.141463  | 0.142191 | 0.144814  |
| 0.118153  | 0.124126  | 0.109848  | 0.12398   | 0.11961   | 0.127914 | 0.119172  |
| 0.125291  | 0.113782  | 0.114365  | 0.125583  | 0.12296   | 0.137383 | 0.130099  |
| 0.110868  | 0.108974  | 0.115385  | 0.114656  | 0.117861  | 0.128497 | 0.118298  |

|           |           |           |           |          |          |          |
|-----------|-----------|-----------|-----------|----------|----------|----------|
| 0.110431  | 0.11961   | 0.118153  | 0.117716  | 0.119755 | 0.122523 | 0.124272 |
| 0.116987  | 0.123543  | 0.11655   | 0.122232  | 0.124854 | 0.128497 | 0.126166 |
| 0.085373  | 0.100962  | 0.0957168 | 0.0865385 | 0.106352 | 0.119318 | 0.111451 |
| 0.110286  | 0.12296   | 0.119464  | 0.11116   | 0.121649 | 0.129371 | 0.128205 |
| 0.109411  | 0.114219  | 0.118007  | 0.113491  | 0.118153 | 0.127914 | 0.117716 |
| 0.124563  | 0.127331  | 0.126457  | 0.128351  | 0.126311 | 0.133159 | 0.135198 |
| 0.121066  | 0.12704   | 0.122669  | 0.126894  | 0.123106 | 0.13549  | 0.135781 |
| 0.118735  | 0.128205  | 0.118298  | 0.125437  | 0.121358 | 0.125583 | 0.128205 |
| 0.137675  | 0.136946  | 0.139277  | 0.136509  | 0.135635 | 0.138403 | 0.145396 |
| 0.0770688 | 0.0955711 | 0.0926573 | 0.0747378 | 0.100962 | 0.122378 | 0.105478 |
| 0.108246  | 0.116841  | 0.107809  | 0.112325  | 0.11116  | 0.122378 | 0.106935 |
| 0.125728  | 0.128205  | 0.122086  | 0.127185  | 0.128059 | 0.129662 | 0.127622 |
| 0.095134  | 0.0996503 | 0.0973193 | 0.100379  | 0.100379 | 0.120921 | 0.111597 |
| 0.134033  | 0.142045  | 0.127185  | 0.138695  | 0.132576 | 0.132139 | 0.13447  |
| 0.14831   | 0.146416  | 0.14088   | 0.146853  | 0.138986 | 0.148456 | 0.151078 |
| 0.117424  | 0.122523  | 0.11553   | 0.120921  | 0.12296  | 0.135052 | 0.122815 |
| 0.107955  | 0.120047  | 0.102273  | 0.113199  | 0.112325 | 0.127331 | 0.117424 |
| 0.123834  | 0.130682  | 0.12602   | 0.129953  | 0.125874 | 0.128351 | 0.128351 |
| 0.109994  | 0.117716  | 0.113345  | 0.114948  | 0.114073 | 0.125874 | 0.123543 |
| 0.117861  | 0.116259  | 0.112471  | 0.123397  | 0.125146 | 0.136946 | 0.129371 |
| 0.121941  | 0.124417  | 0.125     | 0.127477  | 0.122232 | 0.128205 | 0.125291 |
| 0.123689  | 0.116259  | 0.124709  | 0.127185  | 0.12398  | 0.13141  | 0.123543 |
| 0.102273  | 0.100087  | 0.105915  | 0.107517  | 0.106643 | 0.126894 | 0.109994 |
| 0.160256  | 0.158654  | 0.156031  | 0.162587  | 0.149184 | 0.157197 | 0.158362 |
| 0.103147  | 0.106206  | 0.100087  | 0.109848  | 0.113928 | 0.12602  | 0.112908 |
| 0.114802  | 0.118153  | 0.119027  | 0.12296   | 0.120921 | 0.13447  | 0.119318 |
| 0.111451  | 0.11859   | 0.109848  | 0.114073  | 0.11116  | 0.125583 | 0.111597 |
| 0.125728  | 0.127331  | 0.125     | 0.130099  | 0.127477 | 0.134324 | 0.133159 |
| 0.108829  | 0.111305  | 0.116841  | 0.112034  | 0.10912  | 0.120338 | 0.112179 |
| 0.134324  | 0.139714  | 0.131847  | 0.141608  | 0.126166 | 0.123689 | 0.131847 |
| 0.14292   | 0.141608  | 0.145396  | 0.145542  | 0.146707 | 0.133741 | 0.138695 |
| 0.121212  | 0.127768  | 0.118735  | 0.130536  | 0.118298 | 0.108537 | 0.113782 |
| 0.135052  | 0.13549   | 0.131702  | 0.141171  | 0.131556 | 0.119464 | 0.128205 |
| 0.134324  | 0.142045  | 0.130682  | 0.141317  | 0.144814 | 0.144668 | 0.14729  |
| 0.135781  | 0.147582  | 0.135052  | 0.145688  | 0.132576 | 0.13039  | 0.135927 |
| 0.114073  | 0.117716  | 0.114219  | 0.121358  | 0.121941 | 0.127622 | 0.125291 |
| 0.131702  | 0.137383  | 0.137966  | 0.136364  | 0.134033 | 0.131847 | 0.128642 |
| 0.113636  | 0.114073  | 0.108537  | 0.120047  | 0.108974 | 0.104458 | 0.104167 |
| 0.107955  | 0.112179  | 0.104895  | 0.119027  | 0.103293 | 0.111888 | 0.111014 |
| 0.101399  | 0.108829  | 0.113199  | 0.11014   | 0.106935 | 0.11757  | 0.116113 |
| 0.115967  | 0.125437  | 0.11553   | 0.125583  | 0.110431 | 0.106789 | 0.111451 |
| 0.103293  | 0.111014  | 0.105769  | 0.112617  | 0.106206 | 0.115967 | 0.113054 |
| 0.109411  | 0.111305  | 0.104604  | 0.116113  | 0.101836 | 0.100524 | 0.101399 |
| 0.117279  | 0.130536  | 0.119172  | 0.122815  | 0.114073 | 0.111888 | 0.11014  |



|           |           |           |           |           |           |           |
|-----------|-----------|-----------|-----------|-----------|-----------|-----------|
| 0.113928  | 0.11116   | 0.109411  | 0.118881  | 0.113636  | 0.111451  | 0.110286  |
| 0.0929487 | 0.0942599 | 0.0898893 | 0.101107  | 0.0920746 | 0.105332  | 0.0916375 |
| 0.120921  | 0.128059  | 0.117279  | 0.128205  | 0.115385  | 0.109703  | 0.113199  |
| 0.114073  | 0.121503  | 0.111014  | 0.12398   | 0.108829  | 0.106935  | 0.111014  |
| 0.107955  | 0.113636  | 0.104021  | 0.112325  | 0.123689  | 0.126748  | 0.122378  |
| 0.216929  | 0.214161  | 0.210664  | 0.223339  | 0.212558  | 0.202797  | 0.217949  |
| 0.141171  | 0.1419    | 0.137821  | 0.146416  | 0.13447   | 0.124126  | 0.136072  |
| 0.124417  | 0.125728  | 0.124563  | 0.127914  | 0.129662  | 0.124272  | 0.129225  |
| 0.121358  | 0.120047  | 0.120921  | 0.130682  | 0.121358  | 0.104895  | 0.120047  |
| 0.210519  | 0.210956  | 0.208916  | 0.217512  | 0.209353  | 0.19493   | 0.211538  |
| 0.113782  | 0.118298  | 0.107226  | 0.113782  | 0.120775  | 0.124417  | 0.12296   |
| 0.112179  | 0.12602   | 0.114365  | 0.118881  | 0.106935  | 0.129808  | 0.122523  |
| 0.11655   | 0.123106  | 0.117861  | 0.124709  | 0.127622  | 0.12398   | 0.120484  |
| 0.112908  | 0.11451   | 0.110723  | 0.118735  | 0.108829  | 0.11014   | 0.108683  |
| 0.247815  | 0.247378  | 0.25      | 0.252185  | 0.246941  | 0.232517  | 0.250583  |
| 0.118007  | 0.125437  | 0.116987  | 0.128788  | 0.115967  | 0.118735  | 0.125146  |
| 0.100524  | 0.110286  | 0.097465  | 0.106061  | 0.113928  | 0.120192  | 0.116696  |
| 0.122378  | 0.122815  | 0.116696  | 0.129079  | 0.123834  | 0.124563  | 0.124272  |
| 0.119464  | 0.121066  | 0.117279  | 0.128497  | 0.122086  | 0.120484  | 0.119318  |
| 0.121795  | 0.122523  | 0.117279  | 0.127331  | 0.116259  | 0.119318  | 0.124563  |
| 0.124417  | 0.128642  | 0.123106  | 0.131702  | 0.120047  | 0.116404  | 0.119901  |
| 0.106061  | 0.112325  | 0.0983392 | 0.111014  | 0.122669  | 0.122815  | 0.120192  |
| 0.117861  | 0.124126  | 0.111597  | 0.126311  | 0.114073  | 0.104895  | 0.110723  |
| 0.119755  | 0.131265  | 0.123689  | 0.127914  | 0.118298  | 0.11961   | 0.116113  |
| 0.107226  | 0.112325  | 0.103293  | 0.112762  | 0.105478  | 0.107372  | 0.10708   |
| 0.114073  | 0.121503  | 0.108974  | 0.121358  | 0.11116   | 0.105186  | 0.110723  |
| 0.0868298 | 0.0840618 | 0.0930944 | 0.0888695 | 0.0929487 | 0.107955  | 0.0925117 |
| 0.144085  | 0.139277  | 0.142774  | 0.145542  | 0.146999  | 0.135781  | 0.136364  |
| 0.124272  | 0.126166  | 0.121795  | 0.130099  | 0.11961   | 0.11859   | 0.129953  |
| 0.119027  | 0.127331  | 0.118298  | 0.124272  | 0.111742  | 0.130828  | 0.129079  |
| 0.186626  | 0.191434  | 0.187354  | 0.194784  | 0.184295  | 0.176573  | 0.189103  |
| 0.200029  | 0.205128  | 0.201049  | 0.206731  | 0.199446  | 0.189685  | 0.203089  |
| 0.111451  | 0.114802  | 0.109848  | 0.118444  | 0.111451  | 0.110431  | 0.1081    |
| 0.105915  | 0.108974  | 0.106061  | 0.112034  | 0.104167  | 0.106935  | 0.105186  |
| 0.133887  | 0.126457  | 0.128205  | 0.137675  | 0.133887  | 0.0603147 | 0.129371  |
| 0.102418  | 0.111597  | 0.0984848 | 0.107955  | 0.116987  | 0.119172  | 0.119464  |
| 0.123834  | 0.127768  | 0.121649  | 0.13141   | 0.115676  | 0.117861  | 0.128934  |
| 0.126894  | 0.128497  | 0.133159  | 0.13243   | 0.130099  | 0.125583  | 0.126748  |
| 0.221008  | 0.222611  | 0.223193  | 0.227418  | 0.221008  | 0.205711  | 0.224068  |
| 0.107663  | 0.119755  | 0.111014  | 0.118444  | 0.113491  | 0.112179  | 0.118007  |
| 0.204545  | 0.210227  | 0.205857  | 0.211247  | 0.202797  | 0.200029  | 0.205565  |
| 0.100379  | 0.111888  | 0.0996503 | 0.110286  | 0.106789  | 0.117133  | 0.113054  |
| 0.109557  | 0.116987  | 0.110286  | 0.118007  | 0.102564  | 0.119318  | 0.11553   |
| 0.110577  | 0.11859   | 0.1081    | 0.119027  | 0.113199  | 0.110431  | 0.109557  |

|          |          |          |          |          |          |          |
|----------|----------|----------|----------|----------|----------|----------|
| 0.10271  | 0.109557 | 0.10373  | 0.109703 | 0.103875 | 0.111305 | 0.104021 |
| 0.203963 | 0.207605 | 0.203526 | 0.212121 | 0.203671 | 0.19391  | 0.204983 |
| 0.132284 | 0.135344 | 0.124272 | 0.140443 | 0.12704  | 0.114365 | 0.123106 |
| 0.108392 | 0.120192 | 0.110286 | 0.113928 | 0.108392 | 0.124563 | 0.109703 |
| 0.123252 | 0.130682 | 0.119901 | 0.130536 | 0.117424 | 0.111451 | 0.114948 |
| 0.119464 | 0.117861 | 0.114948 | 0.128788 | 0.118881 | 0.115822 | 0.120192 |
| 0.104312 | 0.112617 | 0.103584 | 0.113345 | 0.106643 | 0.10708  | 0.107372 |
| 0.104458 | 0.114802 | 0.105478 | 0.112908 | 0.110577 | 0.118298 | 0.118007 |
| 0.105624 | 0.115676 | 0.104604 | 0.110286 | 0.116696 | 0.125    | 0.119464 |
| 0.11553  | 0.128205 | 0.115385 | 0.122815 | 0.111742 | 0.129953 | 0.126166 |
| 0.112617 | 0.120338 | 0.1081   | 0.121066 | 0.106206 | 0.10373  | 0.106935 |
| 0.109848 | 0.119318 | 0.113199 | 0.119464 | 0.113636 | 0.12398  | 0.116113 |
| 0.184003 | 0.191142 | 0.186189 | 0.193328 | 0.184295 | 0.175408 | 0.190851 |
| 0.125    | 0.121941 | 0.119027 | 0.132284 | 0.124126 | 0.122523 | 0.125437 |
| 0.127768 | 0.126748 | 0.125    | 0.130682 | 0.128351 | 0.120629 | 0.12296  |
| 0.117716 | 0.121358 | 0.123106 | 0.122086 | 0.117424 | 0.113199 | 0.114656 |
| 0.121358 | 0.127622 | 0.117424 | 0.128934 | 0.114656 | 0.120338 | 0.125    |
| 0.118735 | 0.129662 | 0.118881 | 0.126894 | 0.115822 | 0.105769 | 0.115385 |
| 0.109994 | 0.119755 | 0.11014  | 0.11961  | 0.114365 | 0.124417 | 0.122086 |
| 0.1081   | 0.112617 | 0.107663 | 0.119172 | 0.111597 | 0.112908 | 0.112325 |
| 0.110431 | 0.114948 | 0.104458 | 0.110431 | 0.123834 | 0.127477 | 0.124272 |
| 0.123106 | 0.124126 | 0.12296  | 0.128934 | 0.122232 | 0.114219 | 0.116841 |
| 0.114656 | 0.121503 | 0.113636 | 0.124272 | 0.116404 | 0.117424 | 0.117716 |
| 0.109848 | 0.11961  | 0.109994 | 0.115967 | 0.109848 | 0.107372 | 0.109703 |
| 0.118153 | 0.122378 | 0.118881 | 0.126603 | 0.123106 | 0.125874 | 0.11859  |
| 0.129662 | 0.129808 | 0.130682 | 0.136072 | 0.13549  | 0.135927 | 0.132139 |
| 0.112471 | 0.116987 | 0.110286 | 0.120921 | 0.108392 | 0.117279 | 0.118153 |
| 0.136218 | 0.140734 | 0.134324 | 0.14292  | 0.131556 | 0.121212 | 0.131119 |
| 0.103293 | 0.11014  | 0.10373  | 0.111451 | 0.103584 | 0.1081   | 0.105186 |
| 0.114948 | 0.118007 | 0.119464 | 0.123689 | 0.118444 | 0.113928 | 0.116841 |
| 0.116841 | 0.122523 | 0.116404 | 0.126748 | 0.113636 | 0.106789 | 0.112908 |
| 0.111888 | 0.119901 | 0.105624 | 0.113054 | 0.123543 | 0.127185 | 0.126603 |
| 0.184441 | 0.188083 | 0.181964 | 0.192016 | 0.192016 | 0.174679 | 0.188957 |
| 0.105332 | 0.11451  | 0.107226 | 0.111451 | 0.109703 | 0.120047 | 0.1081   |
| 0.105332 | 0.115093 | 0.107809 | 0.112617 | 0.105332 | 0.106643 | 0.106352 |
| 0.115822 | 0.123543 | 0.115676 | 0.122815 | 0.108829 | 0.130536 | 0.129079 |
| 0.174388 | 0.179196 | 0.175699 | 0.183712 | 0.174679 | 0.166958 | 0.173368 |
| 0.134324 | 0.136509 | 0.12602  | 0.140152 | 0.125874 | 0.126311 | 0.13447  |
| 0.142483 | 0.140006 | 0.137092 | 0.144522 | 0.134615 | 0.13447  | 0.145833 |
| 0.145251 | 0.140152 | 0.142774 | 0.14933  | 0.148164 | 0.136072 | 0.138986 |
| 0.110868 | 0.114802 | 0.106643 | 0.118444 | 0.105041 | 0.111305 | 0.117716 |
| 0.121503 | 0.127185 | 0.118153 | 0.132867 | 0.115967 | 0.106789 | 0.116113 |
| 0.210519 | 0.211538 | 0.208042 | 0.218094 | 0.207314 | 0.193765 | 0.208916 |
| 0.123106 | 0.127622 | 0.124417 | 0.127768 | 0.121941 | 0.111597 | 0.115385 |

|           |           |           |           |           |           |           |
|-----------|-----------|-----------|-----------|-----------|-----------|-----------|
| 0.125583  | 0.132139  | 0.123689  | 0.134324  | 0.120921  | 0.109703  | 0.117279  |
| 0.108683  | 0.118153  | 0.109703  | 0.115385  | 0.111888  | 0.122232  | 0.114073  |
| 0.167249  | 0.170892  | 0.165064  | 0.172494  | 0.165501  | 0.151952  | 0.164773  |
| 0.110723  | 0.113782  | 0.109703  | 0.119172  | 0.109557  | 0.10067   | 0.108537  |
| 0.143794  | 0.138403  | 0.150641  | 0.145542  | 0.142045  | 0.140734  | 0.137238  |
| 0.108246  | 0.100233  | 0.104604  | 0.114948  | 0.102127  | 0.111014  | 0.106352  |
| 0.184003  | 0.189977  | 0.184149  | 0.194493  | 0.186334  | 0.17803   | 0.190268  |
| 0.116113  | 0.119464  | 0.113054  | 0.125437  | 0.107372  | 0.116841  | 0.119464  |
| 0.0913462 | 0.103147  | 0.0944056 | 0.101253  | 0.0980478 | 0.107517  | 0.0932401 |
| 0.109848  | 0.119901  | 0.119027  | 0.121795  | 0.117424  | 0.118153  | 0.114948  |
| 0.115822  | 0.12296   | 0.116841  | 0.122815  | 0.116696  | 0.119755  | 0.124417  |
| 0.111451  | 0.121503  | 0.113345  | 0.120775  | 0.105332  | 0.127331  | 0.122669  |
| 0.117279  | 0.123252  | 0.119172  | 0.125146  | 0.11757   | 0.119755  | 0.117133  |
| 0.102855  | 0.109994  | 0.10067   | 0.111305  | 0.104312  | 0.106206  | 0.103001  |
| 0.18546   | 0.191434  | 0.183566  | 0.192745  | 0.186043  | 0.17803   | 0.187937  |
| 0.117424  | 0.122815  | 0.121358  | 0.121795  | 0.118298  | 0.123689  | 0.114656  |
| 0.108829  | 0.113636  | 0.110723  | 0.114656  | 0.106498  | 0.111305  | 0.101981  |
| 0.209499  | 0.210227  | 0.206439  | 0.2162    | 0.207459  | 0.196241  | 0.210519  |
| 0.122669  | 0.120192  | 0.121941  | 0.131993  | 0.122378  | 0.123397  | 0.122523  |
| 0.104458  | 0.109848  | 0.102855  | 0.112908  | 0.107663  | 0.107226  | 0.103438  |
| 0.105041  | 0.104312  | 0.102564  | 0.110577  | 0.100087  | 0.103147  | 0.100816  |
| 0.13549   | 0.133887  | 0.133013  | 0.140152  | 0.131119  | 0.122815  | 0.128934  |
| 0.185606  | 0.190414  | 0.185169  | 0.193182  | 0.185023  | 0.174971  | 0.188957  |
| 0.101836  | 0.114219  | 0.0990676 | 0.109703  | 0.119027  | 0.126457  | 0.121212  |
| 0.124563  | 0.127331  | 0.126166  | 0.13039   | 0.13243   | 0.129079  | 0.125583  |
| 0.102127  | 0.109557  | 0.104312  | 0.11116   | 0.104749  | 0.106935  | 0.104312  |
| 0.102418  | 0.105769  | 0.103147  | 0.110577  | 0.101544  | 0.107517  | 0.104895  |
| 0.103147  | 0.108537  | 0.103875  | 0.109557  | 0.102855  | 0.107372  | 0.102418  |
| 0.113782  | 0.121503  | 0.111888  | 0.12398   | 0.110577  | 0.107517  | 0.109848  |
| 0.0941142 | 0.0968823 | 0.0875583 | 0.101107  | 0.0891608 | 0.103584  | 0.0939685 |
| 0.120629  | 0.125437  | 0.116696  | 0.129079  | 0.113636  | 0.119318  | 0.123106  |
| 0.127914  | 0.128642  | 0.128351  | 0.13549   | 0.13345   | 0.131556  | 0.124854  |
| 0.116259  | 0.122232  | 0.112908  | 0.12704   | 0.112471  | 0.118153  | 0.123397  |
| 0.123689  | 0.117133  | 0.119464  | 0.130099  | 0.126311  | 0.121212  | 0.124417  |
| 0.191142  | 0.194202  | 0.187209  | 0.19697   | 0.187646  | 0.184295  | 0.195367  |
| 0.114073  | 0.120921  | 0.111888  | 0.123689  | 0.121066  | 0.126748  | 0.116259  |
| 0.129662  | 0.133013  | 0.126311  | 0.136364  | 0.125     | 0.112908  | 0.122523  |
| 0.101836  | 0.104021  | 0.100816  | 0.10912   | 0.100379  | 0.104895  | 0.0996503 |
| 0.0909091 | 0.0916375 | 0.0887238 | 0.0976107 | 0.0882867 | 0.0980478 | 0.0895979 |
| 0.108974  | 0.119027  | 0.109703  | 0.117424  | 0.111305  | 0.115239  | 0.105915  |
| 0.103293  | 0.116259  | 0.0999417 | 0.108246  | 0.119901  | 0.125583  | 0.122669  |
| 0.126311  | 0.133741  | 0.130245  | 0.130682  | 0.128351  | 0.122378  | 0.129079  |
| 0.115385  | 0.121941  | 0.118153  | 0.127914  | 0.119172  | 0.116696  | 0.116113  |
| 0.0912005 | 0.101544  | 0.0939685 | 0.102273  | 0.104021  | 0.116987  | 0.10912   |

|           |           |           |           |           |           |           |
|-----------|-----------|-----------|-----------|-----------|-----------|-----------|
| 0.0913462 | 0.0979021 | 0.0868298 | 0.101253  | 0.100379  | 0.109557  | 0.100233  |
| 0.0917832 | 0.103875  | 0.0962995 | 0.0984848 | 0.0967366 | 0.102127  | 0.0954254 |
| 0.101544  | 0.113636  | 0.103147  | 0.111742  | 0.10912   | 0.119755  | 0.117133  |
| 0.126748  | 0.125437  | 0.123689  | 0.132867  | 0.119464  | 0.121649  | 0.13039   |
| 0.100962  | 0.113636  | 0.0990676 | 0.108537  | 0.116113  | 0.121503  | 0.119755  |
| 0.111888  | 0.119901  | 0.108829  | 0.120921  | 0.11014   | 0.103293  | 0.107955  |
| 0.0964452 | 0.11116   | 0.0936772 | 0.104312  | 0.110431  | 0.11757   | 0.116113  |
| 0.104458  | 0.108974  | 0.100233  | 0.112908  | 0.101544  | 0.11014   | 0.10169   |
| 0.100233  | 0.113491  | 0.105041  | 0.11014   | 0.106352  | 0.119027  | 0.106498  |
| 0.107809  | 0.11116   | 0.103584  | 0.111305  | 0.104895  | 0.108537  | 0.105041  |
| 0.106643  | 0.115239  | 0.108537  | 0.118881  | 0.115676  | 0.116696  | 0.112908  |
| 0.117133  | 0.121358  | 0.118153  | 0.125     | 0.119172  | 0.117279  | 0.114656  |
| 0.107517  | 0.121358  | 0.107372  | 0.115093  | 0.102855  | 0.126603  | 0.11961   |
| 0.0942599 | 0.0979021 | 0.090035  | 0.105915  | 0.0945513 | 0.102855  | 0.0938228 |
| 0.105186  | 0.111742  | 0.103584  | 0.113345  | 0.104312  | 0.110286  | 0.104749  |
| 0.117424  | 0.123689  | 0.124272  | 0.127622  | 0.125583  | 0.118735  | 0.122232  |
| 0.115239  | 0.121795  | 0.113345  | 0.124272  | 0.112617  | 0.115676  | 0.107517  |
| 0.0929487 | 0.103293  | 0.101544  | 0.100233  | 0.0996503 | 0.108246  | 0.0922203 |
| 0.102855  | 0.107372  | 0.100379  | 0.112179  | 0.106061  | 0.106789  | 0.103001  |
| 0.119901  | 0.123543  | 0.115093  | 0.127477  | 0.112034  | 0.106352  | 0.113054  |
| 0.103001  | 0.115093  | 0.104312  | 0.111451  | 0.106789  | 0.122086  | 0.116259  |
| 0.117861  | 0.125     | 0.115385  | 0.127477  | 0.112034  | 0.105769  | 0.112179  |
| 0.108246  | 0.120921  | 0.112179  | 0.116404  | 0.10708   | 0.125874  | 0.118298  |
| 0.099796  | 0.099359  | 0.0955711 | 0.107663  | 0.0968823 | 0.105769  | 0.0967366 |
| 0.10271   | 0.117716  | 0.105769  | 0.111451  | 0.108246  | 0.104021  | 0.106643  |
| 0.102273  | 0.113491  | 0.104167  | 0.108974  | 0.104312  | 0.120192  | 0.103001  |
| 0.119027  | 0.130828  | 0.118881  | 0.128642  | 0.116696  | 0.107226  | 0.114219  |
| 0.115822  | 0.127331  | 0.118881  | 0.123689  | 0.118153  | 0.113054  | 0.111888  |
| 0.115385  | 0.114656  | 0.109411  | 0.119464  | 0.110723  | 0.0960082 | 0.110577  |
| 0.188811  | 0.193328  | 0.190705  | 0.196387  | 0.189394  | 0.181381  | 0.193619  |
| 0.161422  | 0.166812  | 0.163316  | 0.167541  | 0.161422  | 0.150204  | 0.155157  |
| 0.117716  | 0.123106  | 0.116987  | 0.124126  | 0.113636  | 0.115822  | 0.127477  |
| 0.109703  | 0.11655   | 0.107517  | 0.113782  | 0.11757   | 0.115093  | 0.116259  |
| 0.144959  | 0.141608  | 0.141608  | 0.151952  | 0.137966  | 0.13986   | 0.150641  |
| 0.121795  | 0.129516  | 0.125728  | 0.13141   | 0.121795  | 0.124563  | 0.117861  |
| 0.112034  | 0.12296   | 0.116841  | 0.118153  | 0.109411  | 0.115385  | 0.111597  |
| 0.112762  | 0.115239  | 0.107955  | 0.118298  | 0.106061  | 0.112908  | 0.102418  |
| 0.0842075 | 0.0910548 | 0.0893065 | 0.0903263 | 0.0885781 | 0.105624  | 0.0878497 |
| 0.117133  | 0.120484  | 0.114656  | 0.125583  | 0.109848  | 0.11757   | 0.108537  |
| 0.196533  | 0.201632  | 0.19493   | 0.205274  | 0.196241  | 0.187646  | 0.198718  |
| 0.104604  | 0.114365  | 0.102127  | 0.111305  | 0.12296   | 0.126894  | 0.123106  |
| 0.110286  | 0.119755  | 0.108392  | 0.117279  | 0.114073  | 0.108683  | 0.117133  |
| 0.100962  | 0.105769  | 0.104312  | 0.112034  | 0.10067   | 0.107809  | 0.0941142 |
| 0.112471  | 0.118735  | 0.109703  | 0.123834  | 0.111888  | 0.113782  | 0.112617  |

|           |           |           |           |           |          |           |
|-----------|-----------|-----------|-----------|-----------|----------|-----------|
| 0.17905   | 0.183566  | 0.179196  | 0.185169  | 0.176136  | 0.171911 | 0.175991  |
| 0.243444  | 0.246503  | 0.244172  | 0.24898   | 0.243444  | 0.230186 | 0.246503  |
| 0.118444  | 0.125874  | 0.121503  | 0.127768  | 0.121941  | 0.11451  | 0.116841  |
| 0.113782  | 0.118881  | 0.108974  | 0.125728  | 0.109411  | 0.114219 | 0.111597  |
| 0.120484  | 0.120921  | 0.11451   | 0.12602   | 0.109994  | 0.118298 | 0.123543  |
| 0.106061  | 0.118444  | 0.104749  | 0.113636  | 0.102564  | 0.121358 | 0.120192  |
| 0.0957168 | 0.108683  | 0.0981935 | 0.102418  | 0.112617  | 0.121795 | 0.113928  |
| 0.1081    | 0.120775  | 0.110868  | 0.116259  | 0.109848  | 0.11553  | 0.105915  |
| 0.107663  | 0.115676  | 0.106061  | 0.119027  | 0.106789  | 0.105186 | 0.106352  |
| 0.102127  | 0.108974  | 0.0984848 | 0.106206  | 0.116113  | 0.118298 | 0.119172  |
| 0.111597  | 0.119027  | 0.109703  | 0.115967  | 0.105769  | 0.104749 | 0.10912   |
| 0.0965909 | 0.106352  | 0.106061  | 0.106498  | 0.100087  | 0.111014 | 0.0856643 |
| 0.0949883 | 0.101253  | 0.0930944 | 0.105186  | 0.0929487 | 0.102418 | 0.0957168 |
| 0.121941  | 0.122378  | 0.121503  | 0.128351  | 0.11961   | 0.112762 | 0.114219  |
| 0.117424  | 0.12602   | 0.115822  | 0.125291  | 0.113054  | 0.10708  | 0.112617  |
| 0.099359  | 0.10912   | 0.104167  | 0.106643  | 0.104021  | 0.109703 | 0.105915  |
| 0.116259  | 0.119318  | 0.116696  | 0.116259  | 0.11859   | 0.123397 | 0.122815  |
| 0.124417  | 0.132721  | 0.126603  | 0.128788  | 0.121503  | 0.139132 | 0.135635  |
| 0.104167  | 0.107226  | 0.10373   | 0.109703  | 0.100962  | 0.107226 | 0.101981  |
| 0.111014  | 0.11116   | 0.106206  | 0.117133  | 0.108392  | 0.113491 | 0.112034  |
| 0.120047  | 0.114073  | 0.117861  | 0.120629  | 0.11859   | 0.11757  | 0.116696  |
| 0.205274  | 0.206002  | 0.202214  | 0.211684  | 0.204691  | 0.19493  | 0.208042  |
| 0.106935  | 0.118444  | 0.105332  | 0.115093  | 0.108683  | 0.107955 | 0.104458  |
| 0.0930944 | 0.10169   | 0.0917832 | 0.103001  | 0.0901807 | 0.104604 | 0.094697  |
| 0.109411  | 0.120629  | 0.113636  | 0.121649  | 0.119027  | 0.122378 | 0.115093  |
| 0.119464  | 0.12602   | 0.119901  | 0.129662  | 0.120047  | 0.124563 | 0.121941  |
| 0.112179  | 0.11553   | 0.107955  | 0.122378  | 0.113636  | 0.110286 | 0.112034  |
| 0.194056  | 0.200029  | 0.195076  | 0.204254  | 0.193765  | 0.185169 | 0.196241  |
| 0.122523  | 0.127331  | 0.120629  | 0.13039   | 0.117861  | 0.108683 | 0.11859   |
| 0.10169   | 0.104167  | 0.100379  | 0.106935  | 0.102564  | 0.107372 | 0.101253  |
| 0.112908  | 0.117424  | 0.114802  | 0.120484  | 0.11961   | 0.122378 | 0.116841  |
| 0.105915  | 0.117133  | 0.1081    | 0.113491  | 0.100379  | 0.121795 | 0.118007  |
| 0.119027  | 0.12704   | 0.117133  | 0.129516  | 0.112325  | 0.110431 | 0.113345  |
| 0.107955  | 0.108974  | 0.104312  | 0.112908  | 0.101836  | 0.106935 | 0.106061  |
| 0.0948427 | 0.106061  | 0.106061  | 0.106498  | 0.0983392 | 0.113928 | 0.087704  |
| 0.116987  | 0.119172  | 0.113928  | 0.124272  | 0.116696  | 0.122378 | 0.117133  |
| 0.193765  | 0.199155  | 0.195659  | 0.202797  | 0.193473  | 0.184003 | 0.198864  |
| 0.108829  | 0.114802  | 0.104895  | 0.116987  | 0.106789  | 0.102855 | 0.106352  |
| 0.189685  | 0.196824  | 0.191579  | 0.198135  | 0.192308  | 0.18109  | 0.192453  |
| 0.18954   | 0.196096  | 0.189685  | 0.198572  | 0.190122  | 0.181818 | 0.193182  |
| 0.121066  | 0.127914  | 0.120921  | 0.128642  | 0.114948  | 0.13549  | 0.130828  |
| 0.128351  | 0.125583  | 0.128205  | 0.135344  | 0.130099  | 0.132284 | 0.132284  |
| 0.0930944 | 0.0996503 | 0.0987762 | 0.0980478 | 0.0992133 | 0.105478 | 0.0871212 |
| 0.107517  | 0.116696  | 0.105915  | 0.116259  | 0.107517  | 0.104167 | 0.105041  |

|           |           |           |           |           |          |           |
|-----------|-----------|-----------|-----------|-----------|----------|-----------|
| 0.112908  | 0.123834  | 0.114219  | 0.124272  | 0.11116   | 0.102564 | 0.108392  |
| 0.103293  | 0.112762  | 0.103147  | 0.111742  | 0.105332  | 0.110431 | 0.0999417 |
| 0.0962995 | 0.108683  | 0.0917832 | 0.103875  | 0.110868  | 0.119172 | 0.115676  |
| 0.0977564 | 0.109266  | 0.0967366 | 0.103584  | 0.115822  | 0.117424 | 0.11655   |
| 0.125     | 0.122815  | 0.123397  | 0.13141   | 0.124417  | 0.118735 | 0.118735  |
| 0.109703  | 0.121503  | 0.111597  | 0.11961   | 0.105915  | 0.129079 | 0.123252  |
| 0.0996503 | 0.10271   | 0.0971737 | 0.104895  | 0.0996503 | 0.10067  | 0.0977564 |
| 0.116987  | 0.124126  | 0.113345  | 0.12602   | 0.114073  | 0.106643 | 0.111888  |
| 0.0914918 | 0.0992133 | 0.0916375 | 0.0976107 | 0.0938228 | 0.103584 | 0.0898893 |
| 0.128059  | 0.130536  | 0.123252  | 0.133013  | 0.121066  | 0.113928 | 0.119464  |
| 0.112617  | 0.123543  | 0.109557  | 0.123106  | 0.109994  | 0.116259 | 0.118298  |
| 0.132284  | 0.136218  | 0.127768  | 0.137821  | 0.125291  | 0.11757  | 0.122523  |
| 0.25845   | 0.256556  | 0.257139  | 0.263403  | 0.25641   | 0.243735 | 0.258887  |
| 0.120047  | 0.124854  | 0.123397  | 0.125291  | 0.12296   | 0.133596 | 0.125437  |
| 0.125728  | 0.125583  | 0.126457  | 0.130682  | 0.119318  | 0.129371 | 0.126457  |
| 0.212995  | 0.215763  | 0.212558  | 0.220571  | 0.214744  | 0.199738 | 0.214889  |
| 0.121649  | 0.117133  | 0.120629  | 0.125437  | 0.116987  | 0.125874 | 0.122378  |
| 0.229458  | 0.225233  | 0.22669   | 0.234703  | 0.228293  | 0.215618 | 0.230186  |
| 0.110431  | 0.121649  | 0.112325  | 0.117133  | 0.111305  | 0.126894 | 0.114365  |
| 0.116113  | 0.116259  | 0.114802  | 0.11961   | 0.115822  | 0.116259 | 0.115093  |
| 0.110868  | 0.115385  | 0.113928  | 0.122523  | 0.114073  | 0.120629 | 0.115093  |
| 0.114656  | 0.125874  | 0.117716  | 0.121066  | 0.114365  | 0.130828 | 0.126748  |
| 0.200321  | 0.206585  | 0.199301  | 0.209645  | 0.202069  | 0.189977 | 0.202506  |
| 0.13039   | 0.132284  | 0.126166  | 0.135927  | 0.121649  | 0.115676 | 0.125583  |
| 0.120192  | 0.124126  | 0.116259  | 0.127185  | 0.114656  | 0.109848 | 0.111597  |
| 0.221154  | 0.224505  | 0.224796  | 0.228438  | 0.222319  | 0.213724 | 0.225962  |
| 0.101253  | 0.112471  | 0.099359  | 0.107372  | 0.116404  | 0.121212 | 0.118298  |
| 0.196096  | 0.19799   | 0.193619  | 0.202506  | 0.192308  | 0.182838 | 0.198572  |
| 0.103438  | 0.114656  | 0.101836  | 0.111305  | 0.116841  | 0.123689 | 0.120192  |
| 0.106643  | 0.109411  | 0.102418  | 0.113345  | 0.104895  | 0.108246 | 0.105041  |
| 0.106206  | 0.101981  | 0.0999417 | 0.110868  | 0.102418  | 0.110723 | 0.104312  |
| 0.117279  | 0.128788  | 0.120047  | 0.124272  | 0.116113  | 0.134907 | 0.13141   |
| 0.113054  | 0.112034  | 0.109411  | 0.124417  | 0.109848  | 0.101253 | 0.112034  |
| 0.155594  | 0.158071  | 0.154283  | 0.162587  | 0.152098  | 0.148164 | 0.149913  |
| 0.113636  | 0.116696  | 0.110868  | 0.121212  | 0.109848  | 0.10271  | 0.107663  |
| 0.120921  | 0.127477  | 0.119901  | 0.131119  | 0.120921  | 0.123689 | 0.120775  |
| 0.109557  | 0.118444  | 0.113199  | 0.119755  | 0.109266  | 0.119901 | 0.116113  |
| 0.123543  | 0.129516  | 0.131265  | 0.13345   | 0.129079  | 0.126311 | 0.124854  |
| 0.191579  | 0.196678  | 0.191725  | 0.199738  | 0.192745  | 0.183858 | 0.196096  |
| 0.103147  | 0.107663  | 0.099796  | 0.111597  | 0.101981  | 0.105915 | 0.102418  |
| 0.112617  | 0.125291  | 0.11451   | 0.120775  | 0.108246  | 0.127331 | 0.124709  |
| 0.10373   | 0.113491  | 0.105041  | 0.113054  | 0.106061  | 0.11961  | 0.117279  |
| 0.103001  | 0.110723  | 0.0999417 | 0.108246  | 0.116987  | 0.123543 | 0.120338  |
| 0.111305  | 0.113491  | 0.109703  | 0.115385  | 0.111888  | 0.109994 | 0.107372  |

|           |           |           |          |           |          |           |
|-----------|-----------|-----------|----------|-----------|----------|-----------|
| 0.255099  | 0.25204   | 0.253788  | 0.259178 | 0.255682  | 0.239802 | 0.258159  |
| 0.101981  | 0.0983392 | 0.0995047 | 0.106352 | 0.0999417 | 0.110286 | 0.100962  |
| 0.110431  | 0.121358  | 0.112325  | 0.125291 | 0.118007  | 0.116987 | 0.114948  |
| 0.178904  | 0.17701   | 0.178759  | 0.187354 | 0.177156  | 0.168852 | 0.180507  |
| 0.181235  | 0.189248  | 0.18109   | 0.190559 | 0.181818  | 0.176136 | 0.185752  |
| 0.121795  | 0.123689  | 0.119027  | 0.12704  | 0.120047  | 0.115822 | 0.11757   |
| 0.118153  | 0.124417  | 0.115385  | 0.125146 | 0.113491  | 0.106935 | 0.111597  |
| 0.107955  | 0.120338  | 0.11014   | 0.116113 | 0.104167  | 0.121795 | 0.120047  |
| 0.143648  | 0.144085  | 0.140297  | 0.149767 | 0.139277  | 0.126603 | 0.136218  |
| 0.11451   | 0.120484  | 0.118153  | 0.125583 | 0.115385  | 0.113491 | 0.113491  |
| 0.119901  | 0.124417  | 0.120629  | 0.128642 | 0.120775  | 0.11655  | 0.116841  |
| 0.109848  | 0.118444  | 0.106498  | 0.117133 | 0.12704   | 0.128642 | 0.126311  |
| 0.117424  | 0.11961   | 0.112034  | 0.125    | 0.111888  | 0.103293 | 0.110577  |
| 0.129225  | 0.134033  | 0.125874  | 0.135927 | 0.125437  | 0.111888 | 0.120338  |
| 0.103438  | 0.114365  | 0.102418  | 0.110723 | 0.118007  | 0.121941 | 0.121066  |
| 0.116404  | 0.127331  | 0.115676  | 0.121649 | 0.109994  | 0.132284 | 0.127622  |
| 0.13141   | 0.135927  | 0.130682  | 0.13549  | 0.125583  | 0.144959 | 0.143211  |
| 0.105624  | 0.104021  | 0.100524  | 0.107663 | 0.100087  | 0.110431 | 0.104021  |
| 0.12296   | 0.130973  | 0.12398   | 0.129079 | 0.117716  | 0.138549 | 0.134761  |
| 0.111014  | 0.118153  | 0.10912   | 0.113928 | 0.125874  | 0.131265 | 0.127768  |
| 0.203526  | 0.208916  | 0.202506  | 0.210227 | 0.202069  | 0.193765 | 0.206002  |
| 0.100233  | 0.078817  | 0.099796  | 0.101107 | 0.104895  | 0.118735 | 0.112034  |
| 0.187937  | 0.192745  | 0.188666  | 0.197261 | 0.189977  | 0.176136 | 0.192162  |
| 0.110431  | 0.116696  | 0.112908  | 0.121212 | 0.11655   | 0.121066 | 0.11116   |
| 0.115676  | 0.114948  | 0.113782  | 0.118007 | 0.113054  | 0.11116  | 0.114073  |
| 0.120047  | 0.123106  | 0.116696  | 0.127622 | 0.115676  | 0.113199 | 0.125146  |
| 0.111742  | 0.116841  | 0.105769  | 0.121066 | 0.105041  | 0.112471 | 0.113636  |
| 0.123543  | 0.12602   | 0.119901  | 0.130536 | 0.115093  | 0.108829 | 0.116987  |
| 0.124417  | 0.126603  | 0.116987  | 0.130828 | 0.116841  | 0.109411 | 0.115822  |
| 0.106352  | 0.112325  | 0.106789  | 0.113928 | 0.10169   | 0.108246 | 0.107372  |
| 0.119901  | 0.119172  | 0.117424  | 0.129516 | 0.119901  | 0.118007 | 0.120338  |
| 0.122232  | 0.124417  | 0.115676  | 0.127185 | 0.114948  | 0.120047 | 0.12704   |
| 0.115676  | 0.120775  | 0.113782  | 0.115676 | 0.131993  | 0.135344 | 0.133013  |
| 0.249417  | 0.250146  | 0.24898   | 0.255828 | 0.249417  | 0.236742 | 0.252477  |
| 0.107226  | 0.113199  | 0.106498  | 0.11655  | 0.105478  | 0.112034 | 0.106789  |
| 0.176719  | 0.186772  | 0.180653  | 0.187209 | 0.179633  | 0.172494 | 0.181527  |
| 0.183566  | 0.192162  | 0.185752  | 0.194347 | 0.187937  | 0.173223 | 0.18954   |
| 0.112908  | 0.119172  | 0.113054  | 0.11757  | 0.120484  | 0.112179 | 0.115093  |
| 0.100379  | 0.100524  | 0.0955711 | 0.105041 | 0.0957168 | 0.105186 | 0.0987762 |
| 0.113491  | 0.115093  | 0.113636  | 0.118153 | 0.11553   | 0.116841 | 0.113928  |
| 0.111742  | 0.121503  | 0.11014   | 0.121358 | 0.107955  | 0.104895 | 0.105769  |
| 0.0856643 | 0.0933858 | 0.090472  | 0.094697 | 0.0909091 | 0.10708  | 0.0939685 |
| 0.101107  | 0.111742  | 0.0965909 | 0.108974 | 0.116841  | 0.122523 | 0.116404  |
| 0.114656  | 0.120338  | 0.115967  | 0.121649 | 0.114948  | 0.108683 | 0.11655   |

|           |          |           |          |           |          |           |
|-----------|----------|-----------|----------|-----------|----------|-----------|
| 0.131556  | 0.135198 | 0.130828  | 0.135927 | 0.124563  | 0.11859  | 0.123252  |
| 0.104604  | 0.10912  | 0.106206  | 0.112471 | 0.103438  | 0.107372 | 0.105041  |
| 0.129953  | 0.13243  | 0.12602   | 0.135198 | 0.122669  | 0.11553  | 0.120775  |
| 0.114365  | 0.120338 | 0.117133  | 0.121941 | 0.110286  | 0.119755 | 0.117133  |
| 0.123106  | 0.127914 | 0.118881  | 0.131265 | 0.115239  | 0.122086 | 0.126457  |
| 0.111014  | 0.125146 | 0.113199  | 0.119755 | 0.106352  | 0.130973 | 0.123397  |
| 0.114073  | 0.117424 | 0.110723  | 0.115239 | 0.130973  | 0.132576 | 0.130828  |
| 0.104604  | 0.105041 | 0.110286  | 0.112762 | 0.1081    | 0.116696 | 0.0948427 |
| 0.106352  | 0.112034 | 0.104458  | 0.112179 | 0.105186  | 0.105915 | 0.103875  |
| 0.127622  | 0.129225 | 0.126311  | 0.134324 | 0.135198  | 0.133013 | 0.130973  |
| 0.181964  | 0.185315 | 0.17803   | 0.188957 | 0.17905   | 0.172494 | 0.183858  |
| 0.136946  | 0.137675 | 0.130973  | 0.140734 | 0.129079  | 0.120192 | 0.130099  |
| 0.120338  | 0.125437 | 0.11757   | 0.129079 | 0.115676  | 0.103584 | 0.116113  |
| 0.116404  | 0.119755 | 0.113636  | 0.124854 | 0.111451  | 0.117716 | 0.121503  |
| 0.1081    | 0.10912  | 0.104458  | 0.116259 | 0.10373   | 0.108246 | 0.112325  |
| 0.110868  | 0.123543 | 0.113345  | 0.119027 | 0.108246  | 0.125291 | 0.123252  |
| 0.11655   | 0.127477 | 0.116696  | 0.121503 | 0.109266  | 0.130682 | 0.127768  |
| 0.18954   | 0.192016 | 0.185315  | 0.196241 | 0.188083  | 0.18007  | 0.188811  |
| 0.114365  | 0.119464 | 0.115676  | 0.121649 | 0.114073  | 0.105186 | 0.108974  |
| 0.10169   | 0.109411 | 0.101836  | 0.111888 | 0.104312  | 0.106206 | 0.101253  |
| 0.124417  | 0.13039  | 0.122232  | 0.130828 | 0.11859   | 0.109411 | 0.118444  |
| 0.188666  | 0.194347 | 0.188811  | 0.19595  | 0.188374  | 0.180361 | 0.191434  |
| 0.0973193 | 0.097465 | 0.090472  | 0.104895 | 0.094697  | 0.103293 | 0.0962995 |
| 0.106789  | 0.115093 | 0.103147  | 0.110868 | 0.12398   | 0.127622 | 0.125291  |
| 0.122815  | 0.128205 | 0.119755  | 0.130682 | 0.115239  | 0.110723 | 0.115967  |
| 0.115676  | 0.118444 | 0.114073  | 0.123252 | 0.119464  | 0.11116  | 0.113782  |
| 0.185315  | 0.189248 | 0.18546   | 0.19697  | 0.183858  | 0.174388 | 0.18546   |
| 0.105186  | 0.114365 | 0.0983392 | 0.112762 | 0.119172  | 0.124854 | 0.122232  |
| 0.1081    | 0.118444 | 0.10912   | 0.115676 | 0.113928  | 0.116696 | 0.108537  |
| 0.104895  | 0.100962 | 0.095134  | 0.110431 | 0.0981935 | 0.107372 | 0.0962995 |
| 0.11655   | 0.124854 | 0.119027  | 0.128497 | 0.120629  | 0.113491 | 0.11757   |
| 0.119318  | 0.119464 | 0.117133  | 0.126603 | 0.118153  | 0.120047 | 0.120338  |
| 0.112908  | 0.115385 | 0.105769  | 0.110868 | 0.127185  | 0.131702 | 0.130536  |
| 0.101836  | 0.108683 | 0.105478  | 0.110868 | 0.103875  | 0.108392 | 0.103438  |
| 0.112034  | 0.124126 | 0.119464  | 0.116696 | 0.115239  | 0.120921 | 0.113636  |
| 0.14627   | 0.138549 | 0.144668  | 0.148893 | 0.146562  | 0.135635 | 0.137092  |
| 0.235431  | 0.234703 | 0.235577  | 0.243881 | 0.235723  | 0.220425 | 0.236451  |
| 0.109848  | 0.10708  | 0.116987  | 0.113054 | 0.112762  | 0.119901 | 0.101544  |
| 0.120629  | 0.124272 | 0.120192  | 0.130536 | 0.120629  | 0.126894 | 0.120484  |
| 0.119318  | 0.121795 | 0.112762  | 0.124854 | 0.114365  | 0.106061 | 0.109557  |
| 0.120921  | 0.126894 | 0.11961   | 0.130536 | 0.120629  | 0.119901 | 0.120775  |
| 0.111742  | 0.113636 | 0.113054  | 0.119318 | 0.114365  | 0.112179 | 0.115967  |
| 0.114073  | 0.11655  | 0.109557  | 0.120484 | 0.114073  | 0.114219 | 0.115385  |
| 0.121795  | 0.125437 | 0.11757   | 0.130245 | 0.119755  | 0.108246 | 0.116404  |



|           |           |           |           |           |           |           |
|-----------|-----------|-----------|-----------|-----------|-----------|-----------|
| 0.110577  | 0.113928  | 0.103438  | 0.113491  | 0.128059  | 0.129953  | 0.127622  |
| 0.119027  | 0.126748  | 0.121212  | 0.125728  | 0.115822  | 0.115385  | 0.115967  |
| 0.236014  | 0.234703  | 0.235286  | 0.239802  | 0.236014  | 0.221591  | 0.238782  |
| 0.0965909 | 0.0996503 | 0.0909091 | 0.106206  | 0.0907634 | 0.105186  | 0.0949883 |
| 0.0995047 | 0.109848  | 0.106352  | 0.107372  | 0.101836  | 0.11451   | 0.10169   |
| 0.104021  | 0.106498  | 0.099796  | 0.1081    | 0.101981  | 0.105624  | 0.102127  |
| 0.132139  | 0.127622  | 0.129662  | 0.137675  | 0.132139  | 0.122669  | 0.123834  |
| 0.113782  | 0.111597  | 0.120047  | 0.116987  | 0.116987  | 0.126748  | 0.107517  |
| 0.114948  | 0.112179  | 0.108974  | 0.120775  | 0.121358  | 0.0474942 | 0.107226  |
| 0.121358  | 0.127331  | 0.115093  | 0.13039   | 0.116113  | 0.106935  | 0.113928  |
| 0.113054  | 0.119318  | 0.10912   | 0.11655   | 0.111014  | 0.109994  | 0.107372  |
| 0.231935  | 0.228875  | 0.229749  | 0.235431  | 0.22873   | 0.216929  | 0.233246  |
| 0.12704   | 0.127768  | 0.122815  | 0.134907  | 0.121212  | 0.107955  | 0.119901  |
| 0.108246  | 0.11451   | 0.104604  | 0.111742  | 0.122815  | 0.127914  | 0.122669  |
| 0.106498  | 0.117424  | 0.113928  | 0.116404  | 0.110868  | 0.113636  | 0.111597  |
| 0.117716  | 0.123689  | 0.124272  | 0.126166  | 0.123543  | 0.120484  | 0.12602   |
| 0.118007  | 0.122815  | 0.11961   | 0.120047  | 0.116841  | 0.130682  | 0.119027  |
| 0.106935  | 0.110577  | 0.104749  | 0.111597  | 0.104021  | 0.105041  | 0.106206  |
| 0.107517  | 0.11553   | 0.102127  | 0.1081    | 0.120629  | 0.127185  | 0.122815  |
| 0.112908  | 0.120338  | 0.108974  | 0.11553   | 0.129808  | 0.131702  | 0.131119  |
| 0.102127  | 0.111014  | 0.0955711 | 0.107663  | 0.117279  | 0.122378  | 0.119755  |
| 0.104604  | 0.110577  | 0.103293  | 0.114802  | 0.101399  | 0.109703  | 0.105624  |
| 0.126457  | 0.12398   | 0.12398   | 0.132576  | 0.128788  | 0.126603  | 0.127477  |
| 0.132139  | 0.127622  | 0.129079  | 0.137383  | 0.131265  | 0.129662  | 0.127914  |
| 0.124272  | 0.127331  | 0.121212  | 0.130682  | 0.119901  | 0.124126  | 0.128497  |
| 0.128351  | 0.131702  | 0.123252  | 0.133887  | 0.120775  | 0.125583  | 0.133159  |
| 0.129079  | 0.128934  | 0.126603  | 0.134324  | 0.127914  | 0.133304  | 0.128934  |
| 0.0786713 | 0.0901807 | 0.0863928 | 0.0882867 | 0.0847902 | 0.104167  | 0.0849359 |
| 0.121358  | 0.124126  | 0.11859   | 0.128351  | 0.127768  | 0.135198  | 0.134907  |
| 0.116259  | 0.123397  | 0.120484  | 0.121795  | 0.128205  | 0.134761  | 0.11961   |
| 0.207168  | 0.208479  | 0.203234  | 0.215618  | 0.204837  | 0.190997  | 0.206439  |
| 0.121503  | 0.126894  | 0.119901  | 0.127622  | 0.118881  | 0.120484  | 0.115239  |
| 0.103147  | 0.114365  | 0.10708   | 0.111014  | 0.105478  | 0.120484  | 0.109411  |
| 0.109994  | 0.11451   | 0.106935  | 0.115239  | 0.112908  | 0.111014  | 0.109848  |
| 0.219114  | 0.220717  | 0.218969  | 0.228438  | 0.216783  | 0.210227  | 0.224213  |
| 0.209207  | 0.21285   | 0.206439  | 0.2162    | 0.212413  | 0.198572  | 0.212558  |
| 0.113491  | 0.117716  | 0.107517  | 0.113199  | 0.128642  | 0.133159  | 0.128788  |
| 0.25      | 0.248397  | 0.250146  | 0.25641   | 0.250583  | 0.234994  | 0.253059  |
| 0.0818765 | 0.090472  | 0.08581   | 0.0885781 | 0.0891608 | 0.105624  | 0.0852273 |
| 0.116259  | 0.119901  | 0.123689  | 0.115093  | 0.128788  | 0.124563  | 0.123689  |
| 0.0996503 | 0.0965909 | 0.0913462 | 0.104604  | 0.0961538 | 0.107663  | 0.0962995 |
| 0.125437  | 0.124709  | 0.124417  | 0.131847  | 0.129225  | 0.128497  | 0.125     |
| 0.187354  | 0.190705  | 0.18546   | 0.193765  | 0.185315  | 0.174679  | 0.188666  |
| 0.117279  | 0.121503  | 0.118298  | 0.119318  | 0.121941  | 0.124709  | 0.118298  |

|           |           |           |           |           |          |           |
|-----------|-----------|-----------|-----------|-----------|----------|-----------|
| 0.191288  | 0.198718  | 0.191142  | 0.200321  | 0.190122  | 0.18211  | 0.193473  |
| 0.109411  | 0.11451   | 0.112762  | 0.118735  | 0.112034  | 0.108392 | 0.111305  |
| 0.10708   | 0.113928  | 0.104021  | 0.112325  | 0.118444  | 0.116259 | 0.120338  |
| 0.10271   | 0.108974  | 0.111597  | 0.109994  | 0.103875  | 0.119172 | 0.116841  |
| 0.109703  | 0.115385  | 0.109557  | 0.121941  | 0.112908  | 0.102855 | 0.109266  |
| 0.100816  | 0.100962  | 0.097465  | 0.106061  | 0.0967366 | 0.103293 | 0.0992133 |
| 0.108974  | 0.116404  | 0.110868  | 0.121212  | 0.102855  | 0.113199 | 0.106206  |
| 0.0912005 | 0.095134  | 0.0878497 | 0.0996503 | 0.0914918 | 0.100962 | 0.0962995 |
| 0.114365  | 0.120338  | 0.110723  | 0.121941  | 0.109411  | 0.103147 | 0.107809  |
| 0.108683  | 0.115822  | 0.104749  | 0.114802  | 0.113636  | 0.122232 | 0.11961   |
| 0.0952797 | 0.101544  | 0.0989219 | 0.10169   | 0.101107  | 0.109411 | 0.0852273 |
| 0.097465  | 0.0984848 | 0.0914918 | 0.103875  | 0.095134  | 0.105769 | 0.0955711 |
| 0.115676  | 0.123106  | 0.113782  | 0.125874  | 0.114802  | 0.113782 | 0.119318  |
| 0.126457  | 0.13243   | 0.124854  | 0.132576  | 0.123252  | 0.116113 | 0.121649  |
| 0.113782  | 0.115676  | 0.110431  | 0.120192  | 0.10708   | 0.109557 | 0.115093  |
| 0.106935  | 0.11757   | 0.109703  | 0.115967  | 0.113928  | 0.117861 | 0.109994  |
| 0.101836  | 0.103147  | 0.100816  | 0.108537  | 0.10271   | 0.102855 | 0.0987762 |
| 0.106206  | 0.112179  | 0.0999417 | 0.109411  | 0.119901  | 0.121212 | 0.125291  |
| 0.116404  | 0.119172  | 0.115093  | 0.126311  | 0.11961   | 0.122086 | 0.11655   |
| 0.117133  | 0.123106  | 0.112908  | 0.123252  | 0.108974  | 0.13039  | 0.12602   |
| 0.115385  | 0.121066  | 0.112617  | 0.122086  | 0.112762  | 0.112908 | 0.121358  |
| 0.119027  | 0.124709  | 0.115385  | 0.12602   | 0.113491  | 0.106935 | 0.112471  |
| 0.13141   | 0.130973  | 0.125728  | 0.136655  | 0.122378  | 0.116113 | 0.122523  |
| 0.137821  | 0.137675  | 0.13447   | 0.143939  | 0.130828  | 0.119901 | 0.130973  |
| 0.0907634 | 0.105186  | 0.0894522 | 0.100379  | 0.106206  | 0.112179 | 0.105478  |
| 0.108829  | 0.11014   | 0.105769  | 0.112908  | 0.103875  | 0.106643 | 0.104021  |
| 0.106061  | 0.108829  | 0.103875  | 0.115967  | 0.107226  | 0.106206 | 0.107663  |
| 0.131993  | 0.12602   | 0.129516  | 0.134907  | 0.131993  | 0.133596 | 0.131847  |
| 0.0995047 | 0.0979021 | 0.0944056 | 0.103875  | 0.099796  | 0.107226 | 0.0973193 |
| 0.131847  | 0.138695  | 0.132867  | 0.135927  | 0.125437  | 0.145688 | 0.143648  |
| 0.125437  | 0.121795  | 0.12296   | 0.12602   | 0.122815  | 0.124126 | 0.121503  |
| 0.125583  | 0.12602   | 0.121066  | 0.129662  | 0.126457  | 0.116696 | 0.116404  |
| 0.0962995 | 0.0981935 | 0.0990676 | 0.106498  | 0.100087  | 0.10169  | 0.102273  |
| 0.108392  | 0.11757   | 0.116696  | 0.119172  | 0.111305  | 0.111451 | 0.111742  |
| 0.123834  | 0.122815  | 0.11757   | 0.129371  | 0.114219  | 0.124563 | 0.127768  |
| 0.200321  | 0.208333  | 0.199009  | 0.211684  | 0.200612  | 0.196387 | 0.206294  |
| 0.108246  | 0.116841  | 0.108974  | 0.117861  | 0.11553   | 0.117424 | 0.111597  |
| 0.0958625 | 0.107372  | 0.106498  | 0.108974  | 0.100524  | 0.114656 | 0.10912   |
| 0.118735  | 0.119755  | 0.117133  | 0.126603  | 0.121358  | 0.11859  | 0.120338  |
| 0.113054  | 0.115822  | 0.108537  | 0.121795  | 0.107517  | 0.113199 | 0.119901  |
| 0.116696  | 0.121503  | 0.117424  | 0.12398   | 0.11961   | 0.113345 | 0.120338  |
| 0.11757   | 0.12704   | 0.120629  | 0.123397  | 0.121066  | 0.112179 | 0.115676  |
| 0.122086  | 0.130973  | 0.124854  | 0.126748  | 0.124709  | 0.11553  | 0.113782  |
| 0.121066  | 0.120921  | 0.120338  | 0.126894  | 0.121649  | 0.114802 | 0.113054  |

|           |           |           |           |           |          |           |
|-----------|-----------|-----------|-----------|-----------|----------|-----------|
| 0.099796  | 0.109557  | 0.101981  | 0.109994  | 0.106498  | 0.117424 | 0.111597  |
| 0.125728  | 0.123834  | 0.124417  | 0.129808  | 0.128642  | 0.127622 | 0.126748  |
| 0.0960082 | 0.106061  | 0.107809  | 0.105041  | 0.099796  | 0.115385 | 0.112179  |
| 0.0952797 | 0.107955  | 0.104749  | 0.106643  | 0.106352  | 0.114365 | 0.092803  |
| 0.175554  | 0.180361  | 0.169872  | 0.180798  | 0.167978  | 0.168998 | 0.171911  |
| 0.114365  | 0.128205  | 0.113928  | 0.125437  | 0.109703  | 0.108974 | 0.111305  |
| 0.127622  | 0.124563  | 0.128059  | 0.132284  | 0.127622  | 0.127768 | 0.127185  |
| 0.0980478 | 0.0777972 | 0.0984848 | 0.0980478 | 0.107955  | 0.121503 | 0.108392  |
| 0.116841  | 0.121649  | 0.11757   | 0.123252  | 0.11859   | 0.121066 | 0.122815  |
| 0.0897436 | 0.105332  | 0.0954254 | 0.099359  | 0.0984848 | 0.104167 | 0.0887238 |
| 0.0912005 | 0.0977564 | 0.0965909 | 0.101107  | 0.0981935 | 0.102418 | 0.0866841 |
| 0.0952797 | 0.106789  | 0.101836  | 0.106352  | 0.102564  | 0.10708  | 0.095134  |
| 0.117716  | 0.119901  | 0.114656  | 0.123834  | 0.115676  | 0.130099 | 0.121066  |
| 0.104895  | 0.113782  | 0.107955  | 0.113636  | 0.107226  | 0.105332 | 0.103584  |
| 0.117861  | 0.123543  | 0.121795  | 0.123689  | 0.119901  | 0.130245 | 0.124417  |
| 0.0967366 | 0.106498  | 0.0968823 | 0.105478  | 0.105769  | 0.113491 | 0.10708   |
| 0.101836  | 0.114219  | 0.107226  | 0.108537  | 0.108537  | 0.118007 | 0.106061  |
| 0.114219  | 0.118153  | 0.108537  | 0.117424  | 0.128497  | 0.133304 | 0.124272  |
| 0.0929487 | 0.101253  | 0.0983392 | 0.0932401 | 0.100524  | 0.118444 | 0.102127  |
| 0.112471  | 0.116987  | 0.116987  | 0.116841  | 0.120338  | 0.118153 | 0.118735  |
| 0.0865385 | 0.102127  | 0.0913462 | 0.0938228 | 0.094697  | 0.113491 | 0.097465  |
| 0.092366  | 0.105624  | 0.10067   | 0.094697  | 0.0987762 | 0.112908 | 0.100087  |
| 0.0909091 | 0.0968823 | 0.0939685 | 0.0999417 | 0.0941142 | 0.103001 | 0.101253  |
| 0.0852273 | 0.0912005 | 0.10373   | 0.0855186 | 0.102418  | 0.117716 | 0.108974  |
| 0.0916375 | 0.100816  | 0.0888695 | 0.101544  | 0.0945513 | 0.113636 | 0.0932401 |
| 0.133596  | 0.134907  | 0.128205  | 0.137383  | 0.14088   | 0.139277 | 0.135198  |
| 0.120192  | 0.129662  | 0.11655   | 0.130682  | 0.129516  | 0.126748 | 0.12704   |
| 0.0945513 | 0.0961538 | 0.0964452 | 0.102127  | 0.0989219 | 0.112179 | 0.102273  |
| 0.122086  | 0.129808  | 0.125437  | 0.12704   | 0.134615  | 0.141463 | 0.144668  |
| 0.120047  | 0.12602   | 0.122232  | 0.12704   | 0.11451   | 0.11757  | 0.11553   |
| 0.122378  | 0.117279  | 0.125728  | 0.121212  | 0.12704   | 0.128351 | 0.0980478 |
| 0.0938228 | 0.104167  | 0.103001  | 0.101399  | 0.0917832 | 0.112034 | 0.106498  |
| 0.13447   | 0.142774  | 0.136946  | 0.14292   | 0.13884   | 0.138403 | 0.138695  |
| 0.126311  | 0.131119  | 0.127331  | 0.133596  | 0.12602   | 0.13141  | 0.128205  |
| 0.129225  | 0.131119  | 0.125874  | 0.13447   | 0.133596  | 0.138403 | 0.131993  |
| 0.103875  | 0.110431  | 0.104895  | 0.111742  | 0.108246  | 0.115093 | 0.111014  |
| 0.0891608 | 0.0992133 | 0.0849359 | 0.0981935 | 0.0976107 | 0.110577 | 0.0968823 |
| 0.0441434 | 0.0987762 | 0.0754662 | 0.0493881 | 0.0933858 | 0.11451  | 0.0967366 |
| 0.1081    | 0.112325  | 0.112908  | 0.115385  | 0.113928  | 0.121941 | 0.114948  |
| 0.106061  | 0.105915  | 0.104167  | 0.110723  | 0.104604  | 0.123689 | 0.10708   |
| 0.112617  | 0.117133  | 0.111305  | 0.116987  | 0.112325  | 0.125583 | 0.116841  |
| 0.107372  | 0.120629  | 0.105769  | 0.117279  | 0.114073  | 0.121503 | 0.116841  |
| 0.0960082 | 0.104312  | 0.099359  | 0.106498  | 0.102418  | 0.108392 | 0.101399  |
| 0         | 0.0957168 | 0.0779429 | 0.0457459 | 0.0949883 | 0.113782 | 0.0989219 |

|           |           |           |           |           |           |           |
|-----------|-----------|-----------|-----------|-----------|-----------|-----------|
| 0.0957168 | 0         | 0.0891608 | 0.0945513 | 0.106789  | 0.113345  | 0.106061  |
| 0.0779429 | 0.0891608 | 0         | 0.0869755 | 0.097465  | 0.112471  | 0.0984848 |
| 0.0457459 | 0.0945513 | 0.0869755 | 0         | 0.102855  | 0.119318  | 0.105915  |
| 0.0949883 | 0.106789  | 0.097465  | 0.102855  | 0         | 0.119318  | 0.0957168 |
| 0.113782  | 0.113345  | 0.112471  | 0.119318  | 0.119318  | 0         | 0.109557  |
| 0.0989219 | 0.106061  | 0.0984848 | 0.105915  | 0.0957168 | 0.109557  | 0         |
| 0.0782343 | 0.0874126 | 0.0868298 | 0.0884324 | 0.0843531 | 0.101107  | 0.0827506 |
| 0.0919289 | 0.0448718 | 0.0821678 | 0.0954254 | 0.099796  | 0.106061  | 0.0984848 |
| 0.111888  | 0.112617  | 0.106789  | 0.119755  | 0.11655   | 0.0467657 | 0.105041  |
| 0.0960082 | 0.114219  | 0.105769  | 0.101836  | 0.0977564 | 0.109848  | 0.0932401 |
| 0.113782  | 0.121212  | 0.117716  | 0.121066  | 0.11757   | 0.104312  | 0.115385  |
| 0.103001  | 0.108683  | 0.100524  | 0.110577  | 0.10708   | 0.0614802 | 0.0999417 |
| 0.108683  | 0.109994  | 0.113782  | 0.111014  | 0.112762  | 0.119318  | 0.113491  |

| TDr_Amula | TDr_Ehuru | TDr_Idu_Ekpey Makakusa | TDr_Gbangu | TDr_River_Omi Ufenyi |           |           |
|-----------|-----------|------------------------|------------|----------------------|-----------|-----------|
| 0.100524  | 0.111305  | 0.104749               | 0.102855   | 0.108392             | 0.103147  | 0.112325  |
| 0.0992133 | 0.10271   | 0.0425408              | 0.107663   | 0.108246             | 0.0540501 | 0.120921  |
| 0.0939685 | 0.100379  | 0.0445804              | 0.10271    | 0.103875             | 0.0488054 | 0.116841  |
| 0.0992133 | 0.109703  | 0.104021               | 0.105915   | 0.113491             | 0.097465  | 0.11859   |
| 0.125146  | 0.128059  | 0.131993               | 0.128642   | 0.125728             | 0.128059  | 0.135198  |
| 0.11757   | 0.126894  | 0.122086               | 0.126603   | 0.130973             | 0.118735  | 0.141026  |
| 0.106061  | 0.112471  | 0.121358               | 0.117133   | 0.124417             | 0.11451   | 0.129225  |
| 0.102855  | 0.107809  | 0.10708                | 0.107226   | 0.118007             | 0.0964452 | 0.121066  |
| 0.081148  | 0.0962995 | 0.104021               | 0.053176   | 0.103584             | 0.0960082 | 0.100524  |
| 0.0434149 | 0.0833333 | 0.103584               | 0.0885781  | 0.111014             | 0.0981935 | 0.0960082 |
| 0.0986305 | 0.107372  | 0.112471               | 0.106498   | 0.12602              | 0.107663  | 0.12704   |
| 0.105186  | 0.106643  | 0.10271                | 0.10373    | 0.113636             | 0.0967366 | 0.121066  |
| 0.0894522 | 0.107226  | 0.103875               | 0.0847902  | 0.104604             | 0.0958625 | 0.0971737 |
| 0.112617  | 0.128351  | 0.12704                | 0.120192   | 0.125728             | 0.121066  | 0.141317  |
| 0.099359  | 0.113636  | 0.116987               | 0.115967   | 0.133159             | 0.111014  | 0.127477  |
| 0.102127  | 0.108246  | 0.115967               | 0.11116    | 0.121649             | 0.107955  | 0.118881  |
| 0.0984848 | 0.104895  | 0.110286               | 0.108683   | 0.113928             | 0.106643  | 0.118735  |
| 0.135052  | 0.13447   | 0.134907               | 0.139132   | 0.141463             | 0.132721  | 0.143939  |
| 0.0954254 | 0.105624  | 0.0611888              | 0.101836   | 0.106498             | 0.053176  | 0.115093  |
| 0.188666  | 0.19595   | 0.190559               | 0.200029   | 0.19799              | 0.190122  | 0.208333  |
| 0.111888  | 0.117424  | 0.117861               | 0.118881   | 0.134615             | 0.111305  | 0.135927  |
| 0.105041  | 0.110577  | 0.113345               | 0.116404   | 0.129516             | 0.106498  | 0.126748  |
| 0.0935315 | 0.0944056 | 0.107955               | 0.102273   | 0.115676             | 0.104021  | 0.11757   |
| 0.114656  | 0.115822  | 0.126748               | 0.121358   | 0.12602              | 0.116696  | 0.128497  |
| 0.0812937 | 0.0961538 | 0.103293               | 0.104021   | 0.109266             | 0.0932401 | 0.103001  |
| 0.114219  | 0.120921  | 0.124854               | 0.126166   | 0.136946             | 0.116841  | 0.137092  |
| 0.104895  | 0.111597  | 0.125728               | 0.11859    | 0.126748             | 0.118007  | 0.125728  |
| 0.109848  | 0.112179  | 0.11553                | 0.106935   | 0.117716             | 0.108974  | 0.115239  |
| 0.115093  | 0.119755  | 0.128642               | 0.119755   | 0.129953             | 0.12296   | 0.122815  |
| 0.0917832 | 0.11451   | 0.120192               | 0.0973193  | 0.11859              | 0.113636  | 0.110577  |
| 0.106498  | 0.118735  | 0.115385               | 0.119027   | 0.126603             | 0.110577  | 0.12704   |
| 0.105769  | 0.110431  | 0.120484               | 0.106061   | 0.121212             | 0.115093  | 0.111742  |
| 0.0882867 | 0.0955711 | 0.107663               | 0.0984848  | 0.108683             | 0.0999417 | 0.111742  |
| 0.0987762 | 0.108683  | 0.11553                | 0.106643   | 0.121212             | 0.11014   | 0.114073  |
| 0.103001  | 0.109994  | 0.120338               | 0.107663   | 0.124854             | 0.114073  | 0.121212  |
| 0.102855  | 0.114219  | 0.12398                | 0.110723   | 0.124709             | 0.121795  | 0.123689  |
| 0.110868  | 0.117279  | 0.129953               | 0.122523   | 0.13447              | 0.125437  | 0.126457  |
| 0.102273  | 0.106643  | 0.121066               | 0.111014   | 0.12704              | 0.113636  | 0.122232  |
| 0.0999417 | 0.0999417 | 0.106789               | 0.103147   | 0.114802             | 0.101981  | 0.114073  |
| 0.110431  | 0.110431  | 0.122523               | 0.114219   | 0.129371             | 0.113054  | 0.119901  |
| 0.0944056 | 0.0996503 | 0.10708                | 0.102855   | 0.114219             | 0.0967366 | 0.114073  |
| 0.125     | 0.129371  | 0.14292                | 0.136072   | 0.141317             | 0.131702  | 0.138258  |

|           |           |          |           |          |           |          |
|-----------|-----------|----------|-----------|----------|-----------|----------|
| 0.131702  | 0.128497  | 0.141463 | 0.136946  | 0.140443 | 0.136655  | 0.134761 |
| 0.101253  | 0.10708   | 0.11859  | 0.103875  | 0.120484 | 0.103584  | 0.117716 |
| 0.0826049 | 0.0945513 | 0.106061 | 0.0995047 | 0.113491 | 0.0986305 | 0.111597 |
| 0.0879953 | 0.0981935 | 0.116404 | 0.103147  | 0.119464 | 0.107809  | 0.111116 |
| 0.111597  | 0.117716  | 0.121358 | 0.113928  | 0.124709 | 0.111305  | 0.128642 |
| 0.117279  | 0.123397  | 0.135198 | 0.128059  | 0.138549 | 0.129225  | 0.125874 |
| 0.0957168 | 0.102418  | 0.111305 | 0.108537  | 0.123689 | 0.10271   | 0.117133 |
| 0.099359  | 0.100233  | 0.114073 | 0.108392  | 0.120921 | 0.102273  | 0.114073 |
| 0.126603  | 0.135635  | 0.136655 | 0.140589  | 0.144085 | 0.133013  | 0.138403 |
| 0.119318  | 0.119318  | 0.127331 | 0.124854  | 0.134178 | 0.123689  | 0.128788 |
| 0.102564  | 0.108392  | 0.110577 | 0.11014   | 0.123252 | 0.104312  | 0.118153 |
| 0.0917832 | 0.109266  | 0.120484 | 0.104021  | 0.123834 | 0.11451   | 0.111742 |
| 0.1081    | 0.113054  | 0.106789 | 0.114802  | 0.112471 | 0.103438  | 0.125728 |
| 0.135198  | 0.132284  | 0.14088  | 0.134033  | 0.142774 | 0.131119  | 0.140589 |
| 0.109411  | 0.116404  | 0.124417 | 0.120192  | 0.13243  | 0.117279  | 0.124126 |
| 0.105624  | 0.105915  | 0.115385 | 0.107372  | 0.121649 | 0.104458  | 0.116841 |
| 0.0977564 | 0.10708   | 0.112762 | 0.106206  | 0.125146 | 0.106498  | 0.118007 |
| 0.0903263 | 0.083042  | 0.116113 | 0.115385  | 0.12704  | 0.110431  | 0.109994 |
| 0.124709  | 0.122378  | 0.135927 | 0.134033  | 0.139569 | 0.126166  | 0.135052 |
| 0.124709  | 0.123834  | 0.137092 | 0.134033  | 0.138112 | 0.127914  | 0.132139 |
| 0.146707  | 0.150495  | 0.155012 | 0.154575  | 0.159237 | 0.150204  | 0.162587 |
| 0.103293  | 0.107955  | 0.113636 | 0.10912   | 0.118735 | 0.102127  | 0.11655  |
| 0.0957168 | 0.103001  | 0.106643 | 0.10912   | 0.120192 | 0.0977564 | 0.120921 |
| 0.100379  | 0.105041  | 0.108683 | 0.103584  | 0.122232 | 0.0977564 | 0.121795 |
| 0.124417  | 0.136072  | 0.133304 | 0.133741  | 0.142191 | 0.129953  | 0.141171 |
| 0.0996503 | 0.103438  | 0.109994 | 0.107226  | 0.120921 | 0.101107  | 0.121358 |
| 0.123397  | 0.128351  | 0.135198 | 0.127185  | 0.138258 | 0.124563  | 0.140734 |
| 0.0907634 | 0.0817308 | 0.115967 | 0.114365  | 0.129225 | 0.107372  | 0.119464 |
| 0.105186  | 0.107226  | 0.114073 | 0.114219  | 0.124126 | 0.107226  | 0.121941 |
| 0.134324  | 0.143065  | 0.14292  | 0.141317  | 0.142191 | 0.140443  | 0.14729  |
| 0.111014  | 0.115676  | 0.115822 | 0.111305  | 0.125874 | 0.113928  | 0.129516 |
| 0.122523  | 0.124563  | 0.130828 | 0.129516  | 0.138549 | 0.124563  | 0.131119 |
| 0.119172  | 0.123543  | 0.129516 | 0.123252  | 0.136364 | 0.123543  | 0.134178 |
| 0.107372  | 0.112617  | 0.110431 | 0.113782  | 0.118153 | 0.106206  | 0.121503 |
| 0.103584  | 0.0992133 | 0.111888 | 0.107955  | 0.12398  | 0.100962  | 0.118881 |
| 0.0986305 | 0.105624  | 0.111014 | 0.108246  | 0.120775 | 0.104749  | 0.11859  |
| 0.125146  | 0.120192  | 0.13141  | 0.123106  | 0.135635 | 0.121941  | 0.128788 |
| 0.0949883 | 0.106935  | 0.11116  | 0.106352  | 0.121212 | 0.099359  | 0.116404 |
| 0.122523  | 0.122815  | 0.137238 | 0.127768  | 0.138258 | 0.126894  | 0.132867 |
| 0.104458  | 0.114656  | 0.122086 | 0.115239  | 0.130973 | 0.111742  | 0.123834 |
| 0.113199  | 0.107663  | 0.116841 | 0.11553   | 0.127768 | 0.112034  | 0.123834 |
| 0.108246  | 0.109703  | 0.115385 | 0.108537  | 0.122815 | 0.108537  | 0.120921 |
| 0.108829  | 0.114365  | 0.122378 | 0.11757   | 0.128351 | 0.10912   | 0.126748 |
| 0.100087  | 0.105041  | 0.111597 | 0.111742  | 0.120775 | 0.100962  | 0.120047 |

|           |           |          |           |          |           |          |
|-----------|-----------|----------|-----------|----------|-----------|----------|
| 0.106206  | 0.106206  | 0.11859  | 0.10912   | 0.122815 | 0.108537  | 0.122669 |
| 0.124417  | 0.123252  | 0.140006 | 0.131119  | 0.140734 | 0.130245  | 0.132139 |
| 0.0938228 | 0.099359  | 0.10912  | 0.104895  | 0.120921 | 0.103438  | 0.11757  |
| 0.0954254 | 0.0971737 | 0.112762 | 0.0962995 | 0.119027 | 0.105041  | 0.111888 |
| 0.106789  | 0.11553   | 0.123252 | 0.120775  | 0.133887 | 0.114365  | 0.130536 |
| 0.112617  | 0.117861  | 0.125291 | 0.123397  | 0.126894 | 0.121066  | 0.134324 |
| 0.112908  | 0.120192  | 0.125    | 0.124563  | 0.132139 | 0.118444  | 0.125583 |
| 0.120629  | 0.126166  | 0.13884  | 0.133159  | 0.140152 | 0.128788  | 0.139423 |
| 0.10271   | 0.111742  | 0.111597 | 0.112617  | 0.117861 | 0.107372  | 0.124709 |
| 0.172931  | 0.177302  | 0.173368 | 0.18109   | 0.177885 | 0.173514  | 0.187646 |
| 0.0958625 | 0.104604  | 0.108537 | 0.106643  | 0.125    | 0.099359  | 0.123106 |
| 0.116404  | 0.129808  | 0.131702 | 0.125146  | 0.142628 | 0.127768  | 0.136946 |
| 0.107955  | 0.122232  | 0.125874 | 0.119027  | 0.137675 | 0.118153  | 0.129662 |
| 0.121795  | 0.126748  | 0.134178 | 0.13549   | 0.140443 | 0.133159  | 0.134761 |
| 0.0965909 | 0.105624  | 0.108683 | 0.107663  | 0.118444 | 0.100379  | 0.121212 |
| 0.116987  | 0.122523  | 0.130536 | 0.127185  | 0.132139 | 0.121358  | 0.13549  |
| 0.0957168 | 0.10912   | 0.113054 | 0.110868  | 0.12602  | 0.102418  | 0.121503 |
| 0.104312  | 0.108683  | 0.125728 | 0.12296   | 0.128205 | 0.115967  | 0.121358 |
| 0.0932401 | 0.102855  | 0.114073 | 0.107517  | 0.121503 | 0.108974  | 0.116404 |
| 0.115676  | 0.123834  | 0.13447  | 0.129079  | 0.141317 | 0.129953  | 0.137383 |
| 0.0844988 | 0.094697  | 0.110868 | 0.104312  | 0.117424 | 0.10169   | 0.115822 |
| 0.119901  | 0.123106  | 0.131702 | 0.13039   | 0.132721 | 0.127477  | 0.132576 |
| 0.10169   | 0.1081    | 0.110577 | 0.11451   | 0.121795 | 0.108683  | 0.12602  |
| 0.114365  | 0.11553   | 0.130536 | 0.120484  | 0.133304 | 0.121941  | 0.12296  |
| 0.107226  | 0.114802  | 0.125437 | 0.118881  | 0.13141  | 0.122669  | 0.121358 |
| 0.0917832 | 0.0987762 | 0.110868 | 0.105186  | 0.120921 | 0.105769  | 0.123397 |
| 0.133159  | 0.140734  | 0.139714 | 0.138112  | 0.141608 | 0.136072  | 0.144959 |
| 0.0962995 | 0.100962  | 0.114219 | 0.112034  | 0.123106 | 0.112908  | 0.123543 |
| 0.0898893 | 0.105915  | 0.108974 | 0.104749  | 0.119318 | 0.100962  | 0.123834 |
| 0.0961538 | 0.0976107 | 0.116696 | 0.1081    | 0.124126 | 0.106935  | 0.118444 |
| 0.110723  | 0.125583  | 0.137092 | 0.128205  | 0.141317 | 0.135198  | 0.139423 |
| 0.11014   | 0.114802  | 0.121649 | 0.120921  | 0.124417 | 0.112179  | 0.127477 |
| 0.0903263 | 0.109266  | 0.110577 | 0.10373   | 0.120921 | 0.0984848 | 0.118444 |
| 0.0906177 | 0.106643  | 0.106789 | 0.101399  | 0.121795 | 0.0981935 | 0.118444 |
| 0.0968823 | 0.108537  | 0.111597 | 0.105624  | 0.125728 | 0.10708   | 0.12296  |
| 0.0888695 | 0.0888695 | 0.12398  | 0.118881  | 0.129953 | 0.119755  | 0.117279 |
| 0.10067   | 0.108537  | 0.113054 | 0.114365  | 0.120484 | 0.108829  | 0.12704  |
| 0.0786713 | 0.0757576 | 0.105915 | 0.0979021 | 0.11014  | 0.0961538 | 0.107955 |
| 0.07838   | 0.0743007 | 0.103001 | 0.0990676 | 0.116841 | 0.0938228 | 0.114365 |
| 0.0796911 | 0.0840618 | 0.112471 | 0.101836  | 0.116404 | 0.104167  | 0.110723 |
| 0.108829  | 0.118735  | 0.116259 | 0.109411  | 0.126603 | 0.113491  | 0.129079 |
| 0.104895  | 0.0949883 | 0.126894 | 0.121795  | 0.136364 | 0.116259  | 0.123397 |
| 0.083479  | 0.0782343 | 0.110723 | 0.104167  | 0.118444 | 0.101253  | 0.113345 |
| 0.07838   | 0.076049  | 0.10708  | 0.0979021 | 0.115967 | 0.094697  | 0.114656 |

|           |           |          |           |          |           |          |
|-----------|-----------|----------|-----------|----------|-----------|----------|
| 0.100524  | 0.0847902 | 0.125437 | 0.120921  | 0.129662 | 0.114219  | 0.120192 |
| 0.090472  | 0.0791084 | 0.107809 | 0.105624  | 0.115239 | 0.101836  | 0.118298 |
| 0.10708   | 0.121066  | 0.116841 | 0.114656  | 0.124854 | 0.113782  | 0.129953 |
| 0.112908  | 0.123689  | 0.125291 | 0.126311  | 0.13243  | 0.121649  | 0.127914 |
| 0.0890152 | 0.0793998 | 0.115676 | 0.116113  | 0.118735 | 0.110868  | 0.116259 |
| 0.0836247 | 0.07838   | 0.109411 | 0.10169   | 0.118881 | 0.104021  | 0.113199 |
| 0.0833333 | 0.0839161 | 0.10912  | 0.102273  | 0.115967 | 0.104021  | 0.109411 |
| 0.0812937 | 0.0868298 | 0.106498 | 0.0987762 | 0.113054 | 0.0979021 | 0.111116 |
| 0.0929487 | 0.0882867 | 0.118444 | 0.117424  | 0.125583 | 0.11451   | 0.118444 |
| 0.0775058 | 0.0728438 | 0.105332 | 0.0996503 | 0.112179 | 0.097028  | 0.108246 |
| 0.122815  | 0.130099  | 0.136946 | 0.128934  | 0.137966 | 0.129225  | 0.133741 |
| 0.112471  | 0.115385  | 0.133013 | 0.125     | 0.135198 | 0.126457  | 0.130682 |
| 0.102273  | 0.110723  | 0.125437 | 0.113928  | 0.126748 | 0.117716  | 0.121649 |
| 0.0933858 | 0.108537  | 0.113928 | 0.105041  | 0.126311 | 0.107663  | 0.115967 |
| 0.0942599 | 0.103001  | 0.109848 | 0.110286  | 0.122232 | 0.102127  | 0.121503 |
| 0.0871212 | 0.0766317 | 0.10912  | 0.103438  | 0.12296  | 0.102564  | 0.120484 |
| 0.0933858 | 0.10067   | 0.111014 | 0.104749  | 0.114948 | 0.104458  | 0.114219 |
| 0.0913462 | 0.103584  | 0.111888 | 0.095134  | 0.111451 | 0.100379  | 0.106061 |
| 0.103584  | 0.112034  | 0.102564 | 0.105332  | 0.115822 | 0.0968823 | 0.126748 |
| 0.119901  | 0.116404  | 0.129079 | 0.12602   | 0.13243  | 0.119901  | 0.130245 |
| 0.100233  | 0.1081    | 0.113782 | 0.112471  | 0.121503 | 0.1081    | 0.124563 |
| 0.101836  | 0.111742  | 0.123252 | 0.121358  | 0.125437 | 0.11961   | 0.122669 |
| 0.11655   | 0.124126  | 0.135927 | 0.130245  | 0.142191 | 0.126166  | 0.130099 |
| 0.189685  | 0.192599  | 0.177885 | 0.19493   | 0.189685 | 0.175117  | 0.203234 |
| 0.231206  | 0.233829  | 0.224359 | 0.236742  | 0.230915 | 0.221882  | 0.241841 |
| 0.107226  | 0.11451   | 0.104749 | 0.106061  | 0.106935 | 0.0976107 | 0.123397 |
| 0.102127  | 0.103584  | 0.111888 | 0.109411  | 0.118735 | 0.104167  | 0.117133 |
| 0.100962  | 0.103001  | 0.108974 | 0.105624  | 0.116404 | 0.102127  | 0.118881 |
| 0.104458  | 0.108537  | 0.113636 | 0.108537  | 0.125146 | 0.100962  | 0.123834 |
| 0.101253  | 0.114948  | 0.115385 | 0.118735  | 0.135635 | 0.110577  | 0.130536 |
| 0.109411  | 0.114073  | 0.119172 | 0.108537  | 0.122523 | 0.109411  | 0.126166 |
| 0.13986   | 0.139277  | 0.150787 | 0.142191  | 0.14831  | 0.142483  | 0.147582 |
| 0.109703  | 0.106789  | 0.122378 | 0.11757   | 0.125146 | 0.108246  | 0.124709 |
| 0.11961   | 0.112908  | 0.129662 | 0.129225  | 0.137092 | 0.118444  | 0.132867 |
| 0.120047  | 0.123834  | 0.131265 | 0.129953  | 0.137821 | 0.123543  | 0.133013 |
| 0.124709  | 0.124417  | 0.139423 | 0.129953  | 0.137238 | 0.128788  | 0.140589 |
| 0.122669  | 0.125291  | 0.130099 | 0.130536  | 0.142191 | 0.126166  | 0.130099 |
| 0.107517  | 0.111597  | 0.115239 | 0.110723  | 0.125291 | 0.106935  | 0.124854 |
| 0.104604  | 0.10373   | 0.114948 | 0.111888  | 0.123834 | 0.106935  | 0.121066 |
| 0.108246  | 0.112908  | 0.120047 | 0.114948  | 0.126603 | 0.109411  | 0.129079 |
| 0.102127  | 0.103875  | 0.111014 | 0.112325  | 0.115239 | 0.101253  | 0.119464 |
| 0.105332  | 0.103293  | 0.115093 | 0.111116  | 0.123106 | 0.103875  | 0.121212 |
| 0.109266  | 0.110431  | 0.122232 | 0.115676  | 0.119755 | 0.111888  | 0.126603 |
| 0.122232  | 0.119318  | 0.127914 | 0.126894  | 0.131265 | 0.118444  | 0.133159 |



|           |           |          |           |          |           |          |
|-----------|-----------|----------|-----------|----------|-----------|----------|
| 0.130099  | 0.128351  | 0.138986 | 0.132139  | 0.143211 | 0.128351  | 0.1419   |
| 0.111888  | 0.109557  | 0.119027 | 0.118007  | 0.128788 | 0.112179  | 0.125437 |
| 0.108246  | 0.108246  | 0.116259 | 0.112325  | 0.12398  | 0.106789  | 0.125291 |
| 0.123689  | 0.122232  | 0.130245 | 0.130682  | 0.136801 | 0.126894  | 0.13345  |
| 0.103875  | 0.101544  | 0.109266 | 0.10912   | 0.119027 | 0.101544  | 0.120047 |
| 0.134033  | 0.136655  | 0.140589 | 0.141026  | 0.150058 | 0.128205  | 0.148747 |
| 0.111014  | 0.119755  | 0.128934 | 0.120338  | 0.134033 | 0.12296   | 0.128934 |
| 0.128642  | 0.126603  | 0.134324 | 0.135052  | 0.135344 | 0.128351  | 0.13986  |
| 0.101253  | 0.0980478 | 0.114802 | 0.110577  | 0.121066 | 0.101253  | 0.119755 |
| 0.100233  | 0.103438  | 0.109411 | 0.101107  | 0.118881 | 0.101107  | 0.114365 |
| 0.11553   | 0.109703  | 0.128205 | 0.12398   | 0.130099 | 0.119027  | 0.128205 |
| 0.118007  | 0.115093  | 0.126603 | 0.120047  | 0.127331 | 0.113928  | 0.125728 |
| 0.125583  | 0.122086  | 0.135052 | 0.131702  | 0.135781 | 0.126748  | 0.134178 |
| 0.116113  | 0.114073  | 0.116841 | 0.117279  | 0.12602  | 0.110577  | 0.129079 |
| 0.110431  | 0.112762  | 0.123689 | 0.116841  | 0.125583 | 0.113345  | 0.128934 |
| 0.115093  | 0.115676  | 0.124272 | 0.122669  | 0.129371 | 0.111888  | 0.129516 |
| 0.121212  | 0.124417  | 0.133596 | 0.128788  | 0.13986  | 0.125583  | 0.132721 |
| 0.124417  | 0.120047  | 0.133596 | 0.129079  | 0.137821 | 0.120338  | 0.135635 |
| 0.129516  | 0.126603  | 0.136072 | 0.131847  | 0.141754 | 0.127768  | 0.140734 |
| 0.125291  | 0.122669  | 0.127185 | 0.125583  | 0.13345  | 0.124417  | 0.132721 |
| 0.108974  | 0.106352  | 0.116987 | 0.111888  | 0.124709 | 0.1081    | 0.119901 |
| 0.120921  | 0.122669  | 0.129808 | 0.125     | 0.136946 | 0.121503  | 0.134761 |
| 0.106498  | 0.104749  | 0.109848 | 0.108829  | 0.121066 | 0.100087  | 0.121503 |
| 0.0979021 | 0.108683  | 0.114656 | 0.106352  | 0.12296  | 0.10169   | 0.121066 |
| 0.104604  | 0.108974  | 0.112908 | 0.109557  | 0.123543 | 0.100816  | 0.125437 |
| 0.106206  | 0.105041  | 0.117716 | 0.111451  | 0.125146 | 0.107955  | 0.128497 |
| 0.105332  | 0.10271   | 0.112762 | 0.111742  | 0.118735 | 0.104458  | 0.11859  |
| 0.127914  | 0.127914  | 0.137383 | 0.127622  | 0.138403 | 0.126748  | 0.136218 |
| 0.106498  | 0.114073  | 0.110723 | 0.114073  | 0.11757  | 0.106498  | 0.122669 |
| 0.12602   | 0.126603  | 0.132576 | 0.125728  | 0.138258 | 0.120484  | 0.137238 |
| 0.104458  | 0.104458  | 0.110431 | 0.115239  | 0.118153 | 0.103001  | 0.123834 |
| 0.119172  | 0.114219  | 0.13243  | 0.121503  | 0.129953 | 0.123543  | 0.128059 |
| 0.108246  | 0.113199  | 0.118881 | 0.107372  | 0.108537 | 0.114948  | 0.105478 |
| 0.0925117 | 0.105041  | 0.114219 | 0.105041  | 0.122523 | 0.106789  | 0.12296  |
| 0.099359  | 0.101981  | 0.114073 | 0.104312  | 0.119464 | 0.108392  | 0.117861 |
| 0.10067   | 0.103875  | 0.11655  | 0.114656  | 0.125728 | 0.112034  | 0.124417 |
| 0.106352  | 0.108974  | 0.118735 | 0.111597  | 0.123252 | 0.115093  | 0.121941 |
| 0.0935315 | 0.103438  | 0.11553  | 0.109557  | 0.11859  | 0.108392  | 0.122523 |
| 0.0859557 | 0.103147  | 0.128351 | 0.11655   | 0.129662 | 0.122086  | 0.115822 |
| 0.122232  | 0.124272  | 0.138112 | 0.12602   | 0.139714 | 0.128934  | 0.135781 |
| 0.0721154 | 0.0901807 | 0.101107 | 0.0884324 | 0.11116  | 0.0968823 | 0.106643 |
| 0.0990676 | 0.114802  | 0.124272 | 0.121795  | 0.132576 | 0.115967  | 0.12602  |
| 0.0724068 | 0.0948427 | 0.122378 | 0.0962995 | 0.122232 | 0.118444  | 0.105478 |
| 0.095134  | 0.110577  | 0.122086 | 0.117279  | 0.134761 | 0.117861  | 0.123543 |

|           |           |          |           |          |           |          |
|-----------|-----------|----------|-----------|----------|-----------|----------|
| 0.0843531 | 0.103875  | 0.111597 | 0.112325  | 0.12398  | 0.104458  | 0.112762 |
| 0.0791084 | 0.100962  | 0.112471 | 0.0986305 | 0.116696 | 0.110577  | 0.107809 |
| 0.076049  | 0.0979021 | 0.118735 | 0.0990676 | 0.116259 | 0.114219  | 0.107663 |
| 0.0968823 | 0.104458  | 0.123252 | 0.123397  | 0.127768 | 0.114948  | 0.121503 |
| 0.0986305 | 0.115822  | 0.130828 | 0.124854  | 0.135052 | 0.12398   | 0.121503 |
| 0.0747378 | 0.0939685 | 0.112471 | 0.0884324 | 0.114365 | 0.109703  | 0.100524 |
| 0.0817308 | 0.100087  | 0.106061 | 0.110868  | 0.121358 | 0.105915  | 0.115385 |
| 0.13141   | 0.124126  | 0.132139 | 0.131993  | 0.131993 | 0.126748  | 0.135344 |
| 0.0843531 | 0.105332  | 0.124417 | 0.110577  | 0.122523 | 0.119901  | 0.108974 |
| 0.0826049 | 0.101544  | 0.102855 | 0.101253  | 0.121649 | 0.0965909 | 0.113345 |
| 0.214161  | 0.2162    | 0.206439 | 0.217949  | 0.213287 | 0.202797  | 0.224213 |
| 0.0871212 | 0.108392  | 0.11757  | 0.115385  | 0.120047 | 0.111597  | 0.121649 |
| 0.0731352 | 0.0967366 | 0.111451 | 0.094697  | 0.113928 | 0.107517  | 0.109411 |
| 0.100087  | 0.114073  | 0.126748 | 0.122232  | 0.139132 | 0.119318  | 0.125583 |
| 0.0796911 | 0.102418  | 0.115967 | 0.0977564 | 0.121358 | 0.106498  | 0.104604 |
| 0.083479  | 0.102418  | 0.127914 | 0.116696  | 0.118735 | 0.122523  | 0.1081   |
| 0.0898893 | 0.113199  | 0.120921 | 0.104167  | 0.123397 | 0.110286  | 0.119755 |
| 0.0868298 | 0.0987762 | 0.112325 | 0.108392  | 0.116259 | 0.107226  | 0.118153 |
| 0.0766317 | 0.0990676 | 0.118444 | 0.099359  | 0.119464 | 0.111888  | 0.105624 |
| 0.0962995 | 0.114656  | 0.117133 | 0.113199  | 0.130099 | 0.113199  | 0.127914 |
| 0.0976107 | 0.112179  | 0.125437 | 0.121212  | 0.133741 | 0.121212  | 0.123689 |
| 0.100087  | 0.110868  | 0.122086 | 0.118153  | 0.128934 | 0.116987  | 0.123834 |
| 0.0939685 | 0.105332  | 0.120338 | 0.119901  | 0.123689 | 0.114948  | 0.119464 |
| 0.0866841 | 0.0925117 | 0.114802 | 0.102418  | 0.119901 | 0.105332  | 0.109848 |
| 0.0878497 | 0.105041  | 0.112179 | 0.105624  | 0.119027 | 0.106498  | 0.121503 |
| 0.102273  | 0.117424  | 0.127477 | 0.117133  | 0.132284 | 0.121212  | 0.126603 |
| 0.0817308 | 0.103293  | 0.114802 | 0.108829  | 0.123397 | 0.108246  | 0.115385 |
| 0.12398   | 0.122232  | 0.136072 | 0.137383  | 0.137383 | 0.126894  | 0.13141  |
| 0.117133  | 0.129371  | 0.131265 | 0.129371  | 0.132576 | 0.129662  | 0.13884  |
| 0.101399  | 0.10169   | 0.120775 | 0.110723  | 0.119464 | 0.114802  | 0.119901 |
| 0.0818765 | 0.0996503 | 0.124272 | 0.099359  | 0.123834 | 0.114802  | 0.114365 |
| 0.108829  | 0.11961   | 0.125    | 0.121941  | 0.127768 | 0.115822  | 0.134615 |
| 0.106935  | 0.114802  | 0.12398  | 0.111888  | 0.12296  | 0.121212  | 0.121649 |
| 0.111888  | 0.119172  | 0.124272 | 0.124126  | 0.126457 | 0.120338  | 0.131265 |
| 0.11655   | 0.134907  | 0.131265 | 0.130828  | 0.141608 | 0.125291  | 0.145833 |
| 0.0837704 | 0.0901807 | 0.113054 | 0.097465  | 0.114656 | 0.102418  | 0.111014 |
| 0.107517  | 0.115967  | 0.13243  | 0.124709  | 0.136364 | 0.124417  | 0.127768 |
| 0.12602   | 0.13447   | 0.133741 | 0.136218  | 0.139714 | 0.131847  | 0.141608 |
| 0.0939685 | 0.0852273 | 0.117716 | 0.110286  | 0.126311 | 0.110577  | 0.111888 |
| 0.11116   | 0.113199  | 0.117133 | 0.119901  | 0.130099 | 0.114073  | 0.130828 |
| 0.140443  | 0.140734  | 0.14292  | 0.140734  | 0.142774 | 0.135198  | 0.144959 |
| 0.112762  | 0.115967  | 0.126894 | 0.121795  | 0.132867 | 0.115676  | 0.125728 |
| 0.111451  | 0.11553   | 0.136072 | 0.124272  | 0.13884  | 0.132721  | 0.129079 |
| 0.102855  | 0.111014  | 0.127185 | 0.121795  | 0.133741 | 0.118881  | 0.122815 |

|           |           |          |          |           |           |          |
|-----------|-----------|----------|----------|-----------|-----------|----------|
| 0.10271   | 0.118735  | 0.121503 | 0.114656 | 0.129808  | 0.112908  | 0.132284 |
| 0.109557  | 0.119172  | 0.130682 | 0.12704  | 0.127331  | 0.121795  | 0.120775 |
| 0.0869755 | 0.0992133 | 0.11655  | 0.108829 | 0.121358  | 0.114656  | 0.112471 |
| 0.114802  | 0.121503  | 0.129808 | 0.122669 | 0.138986  | 0.122378  | 0.135052 |
| 0.097028  | 0.112179  | 0.123397 | 0.11451  | 0.126457  | 0.124126  | 0.122523 |
| 0.121503  | 0.126457  | 0.13243  | 0.124417 | 0.13986   | 0.124709  | 0.133887 |
| 0.113054  | 0.122086  | 0.133596 | 0.126457 | 0.134324  | 0.125874  | 0.127477 |
| 0.111597  | 0.121212  | 0.125437 | 0.120629 | 0.132576  | 0.120629  | 0.131265 |
| 0.129662  | 0.140152  | 0.141171 | 0.134907 | 0.143065  | 0.135198  | 0.145833 |
| 0.0789627 | 0.0944056 | 0.121358 | 0.106643 | 0.123834  | 0.117424  | 0.116113 |
| 0.10169   | 0.111888  | 0.120775 | 0.108974 | 0.127914  | 0.11451   | 0.126311 |
| 0.118881  | 0.126166  | 0.127185 | 0.126748 | 0.127914  | 0.122669  | 0.127185 |
| 0.0795455 | 0.0961538 | 0.118735 | 0.105478 | 0.118881  | 0.112762  | 0.107955 |
| 0.123106  | 0.133887  | 0.131702 | 0.135052 | 0.136509  | 0.127477  | 0.139569 |
| 0.132721  | 0.14729   | 0.151807 | 0.146125 | 0.152535  | 0.146999  | 0.150932 |
| 0.123689  | 0.121941  | 0.134033 | 0.121941 | 0.137966  | 0.11961   | 0.132867 |
| 0.112471  | 0.113928  | 0.125437 | 0.122086 | 0.126166  | 0.112762  | 0.129225 |
| 0.119901  | 0.123106  | 0.132284 | 0.123397 | 0.13884   | 0.12398   | 0.134033 |
| 0.097028  | 0.112762  | 0.12602  | 0.124709 | 0.129953  | 0.11859   | 0.121358 |
| 0.121795  | 0.113054  | 0.131265 | 0.129953 | 0.13549   | 0.124709  | 0.131265 |
| 0.104021  | 0.120338  | 0.130099 | 0.127914 | 0.145979  | 0.124709  | 0.136801 |
| 0.109266  | 0.122669  | 0.131847 | 0.121795 | 0.130536  | 0.127331  | 0.125437 |
| 0.0895979 | 0.100962  | 0.121795 | 0.103875 | 0.126603  | 0.11757   | 0.110723 |
| 0.152535  | 0.15574   | 0.157343 | 0.158362 | 0.158654  | 0.150787  | 0.163753 |
| 0.100379  | 0.106789  | 0.127331 | 0.12398  | 0.131265  | 0.116987  | 0.113345 |
| 0.108829  | 0.118444  | 0.13141  | 0.126894 | 0.142045  | 0.124854  | 0.136946 |
| 0.105186  | 0.113636  | 0.121941 | 0.106935 | 0.131119  | 0.11451   | 0.126603 |
| 0.120629  | 0.121503  | 0.132721 | 0.128497 | 0.140152  | 0.124709  | 0.135927 |
| 0.0906177 | 0.108392  | 0.120192 | 0.113636 | 0.130828  | 0.108974  | 0.121649 |
| 0.121941  | 0.135344  | 0.124417 | 0.128642 | 0.123689  | 0.119901  | 0.138986 |
| 0.135781  | 0.136364  | 0.137675 | 0.142774 | 0.144814  | 0.131119  | 0.147873 |
| 0.115239  | 0.121649  | 0.108974 | 0.110868 | 0.097465  | 0.103293  | 0.129371 |
| 0.128205  | 0.132867  | 0.122523 | 0.123834 | 0.112762  | 0.117133  | 0.13447  |
| 0.144376  | 0.136509  | 0.141317 | 0.144959 | 0.147873  | 0.137383  | 0.151515 |
| 0.130973  | 0.140297  | 0.129662 | 0.133013 | 0.131265  | 0.126311  | 0.145688 |
| 0.123834  | 0.117424  | 0.127185 | 0.117133 | 0.125874  | 0.120629  | 0.12398  |
| 0.128059  | 0.135344  | 0.126748 | 0.132139 | 0.133304  | 0.126603  | 0.13986  |
| 0.0954254 | 0.102127  | 0.104021 | 0.107663 | 0.119027  | 0.0948427 | 0.122669 |
| 0.10373   | 0.105769  | 0.108829 | 0.110723 | 0.123834  | 0.104895  | 0.126894 |
| 0.0875583 | 0.104167  | 0.115967 | 0.105332 | 0.120484  | 0.110577  | 0.113928 |
| 0.112908  | 0.119027  | 0.106352 | 0.107955 | 0.105041  | 0.0954254 | 0.122669 |
| 0.101107  | 0.108683  | 0.112908 | 0.111014 | 0.125583  | 0.107809  | 0.124563 |
| 0.0917832 | 0.104895  | 0.102127 | 0.104312 | 0.110431  | 0.0920746 | 0.120192 |
| 0.110431  | 0.120921  | 0.109994 | 0.099359 | 0.0999417 | 0.104604  | 0.120484 |

|           |           |           |           |          |           |           |
|-----------|-----------|-----------|-----------|----------|-----------|-----------|
| 0.0962995 | 0.10912   | 0.111014  | 0.115822  | 0.123689 | 0.104167  | 0.130245  |
| 0.0776515 | 0.0893065 | 0.103438  | 0.0980478 | 0.111742 | 0.0936772 | 0.111597  |
| 0.114656  | 0.121358  | 0.109848  | 0.11116   | 0.109411 | 0.099796  | 0.123543  |
| 0.109266  | 0.116841  | 0.107372  | 0.108392  | 0.103438 | 0.097028  | 0.123397  |
| 0.119172  | 0.111597  | 0.122815  | 0.118881  | 0.12704  | 0.115385  | 0.127477  |
| 0.20979   | 0.212121  | 0.202943  | 0.214744  | 0.206002 | 0.201923  | 0.218386  |
| 0.13549   | 0.13986   | 0.129225  | 0.130536  | 0.121212 | 0.124709  | 0.13447   |
| 0.124563  | 0.119901  | 0.124709  | 0.13039   | 0.13447  | 0.116987  | 0.141317  |
| 0.111888  | 0.112471  | 0.108537  | 0.115967  | 0.117133 | 0.104895  | 0.127768  |
| 0.205711  | 0.208625  | 0.194202  | 0.210082  | 0.202214 | 0.19289   | 0.21722   |
| 0.117716  | 0.114219  | 0.119027  | 0.120047  | 0.125291 | 0.113928  | 0.127477  |
| 0.116696  | 0.120775  | 0.128497  | 0.119027  | 0.123689 | 0.119027  | 0.132284  |
| 0.116696  | 0.120775  | 0.120047  | 0.123106  | 0.117861 | 0.115239  | 0.132576  |
| 0.0941142 | 0.109557  | 0.110868  | 0.113345  | 0.130245 | 0.105186  | 0.129225  |
| 0.243298  | 0.244755  | 0.235286  | 0.249417  | 0.245921 | 0.2331    | 0.253059  |
| 0.107955  | 0.118153  | 0.119755  | 0.12398   | 0.12602  | 0.111451  | 0.128788  |
| 0.113199  | 0.105624  | 0.11451   | 0.111451  | 0.126311 | 0.108829  | 0.125583  |
| 0.120775  | 0.114365  | 0.120921  | 0.120192  | 0.127185 | 0.117279  | 0.133741  |
| 0.119318  | 0.114948  | 0.119755  | 0.120192  | 0.122523 | 0.112908  | 0.130828  |
| 0.10912   | 0.120775  | 0.121212  | 0.123397  | 0.127768 | 0.116404  | 0.129371  |
| 0.114073  | 0.123106  | 0.113345  | 0.114656  | 0.113782 | 0.112034  | 0.129662  |
| 0.116696  | 0.107955  | 0.117716  | 0.117861  | 0.127477 | 0.112617  | 0.124709  |
| 0.113636  | 0.118881  | 0.105915  | 0.108392  | 0.10373  | 0.0976107 | 0.124854  |
| 0.118735  | 0.123689  | 0.115385  | 0.122523  | 0.123397 | 0.114073  | 0.136946  |
| 0.0907634 | 0.106498  | 0.106643  | 0.109994  | 0.125437 | 0.101836  | 0.124126  |
| 0.106061  | 0.113636  | 0.107372  | 0.106935  | 0.102855 | 0.0990676 | 0.120775  |
| 0.0476399 | 0.0840618 | 0.105186  | 0.0925117 | 0.11553  | 0.105041  | 0.0981935 |
| 0.135198  | 0.136072  | 0.13884   | 0.142483  | 0.14627  | 0.131702  | 0.14729   |
| 0.111305  | 0.122086  | 0.121649  | 0.125291  | 0.127914 | 0.116259  | 0.128351  |
| 0.118881  | 0.123834  | 0.126603  | 0.120921  | 0.124417 | 0.12296   | 0.131847  |
| 0.184732  | 0.187937  | 0.175554  | 0.187354  | 0.185315 | 0.173077  | 0.198281  |
| 0.198427  | 0.200758  | 0.193328  | 0.201049  | 0.200758 | 0.18648   | 0.211684  |
| 0.0944056 | 0.107809  | 0.111451  | 0.115967  | 0.125583 | 0.103147  | 0.128059  |
| 0.087704  | 0.101399  | 0.105915  | 0.110723  | 0.123252 | 0.097028  | 0.126311  |
| 0.121503  | 0.122086  | 0.0645396 | 0.131702  | 0.123834 | 0.0818765 | 0.133304  |
| 0.113345  | 0.104312  | 0.11553   | 0.118007  | 0.127914 | 0.107809  | 0.121941  |
| 0.109703  | 0.11961   | 0.118007  | 0.125146  | 0.130099 | 0.11757   | 0.129371  |
| 0.124417  | 0.126457  | 0.123397  | 0.12704   | 0.129662 | 0.119172  | 0.135927  |
| 0.217075  | 0.221445  | 0.209936  | 0.222611  | 0.215618 | 0.206585  | 0.231789  |
| 0.1081    | 0.112762  | 0.113782  | 0.118881  | 0.124709 | 0.103147  | 0.130099  |
| 0.207896  | 0.207022  | 0.199009  | 0.205274  | 0.203234 | 0.19595   | 0.215326  |
| 0.110431  | 0.10373   | 0.113199  | 0.106352  | 0.117716 | 0.106352  | 0.118735  |
| 0.109411  | 0.110286  | 0.115385  | 0.113199  | 0.122815 | 0.11116   | 0.127914  |
| 0.108392  | 0.111597  | 0.107372  | 0.11014   | 0.113345 | 0.103147  | 0.120484  |

|           |          |          |          |          |           |          |
|-----------|----------|----------|----------|----------|-----------|----------|
| 0.0903263 | 0.102273 | 0.107663 | 0.105478 | 0.121795 | 0.101981  | 0.123397 |
| 0.199446  | 0.202943 | 0.194056 | 0.204108 | 0.200612 | 0.191871  | 0.216492 |
| 0.124563  | 0.128934 | 0.117716 | 0.11961  | 0.108246 | 0.111451  | 0.132576 |
| 0.110286  | 0.111451 | 0.11859  | 0.112325 | 0.122523 | 0.115822  | 0.123252 |
| 0.116987  | 0.123106 | 0.112762 | 0.114656 | 0.107955 | 0.105041  | 0.124709 |
| 0.114365  | 0.112617 | 0.114802 | 0.115822 | 0.118735 | 0.110868  | 0.123252 |
| 0.0913462 | 0.105041 | 0.107226 | 0.113491 | 0.121066 | 0.0992133 | 0.125874 |
| 0.114219  | 0.108683 | 0.118444 | 0.109557 | 0.123543 | 0.111305  | 0.119901 |
| 0.114802  | 0.112471 | 0.121358 | 0.118007 | 0.123543 | 0.113054  | 0.127477 |
| 0.117716  | 0.123252 | 0.130099 | 0.121503 | 0.12704  | 0.122669  | 0.130973 |
| 0.106643  | 0.115093 | 0.103001 | 0.104021 | 0.104021 | 0.0932401 | 0.119901 |
| 0.113782  | 0.113782 | 0.123252 | 0.114365 | 0.121358 | 0.121358  | 0.123834 |
| 0.183275  | 0.187063 | 0.174388 | 0.186189 | 0.184149 | 0.17162   | 0.19799  |
| 0.123689  | 0.120775 | 0.122378 | 0.122815 | 0.126894 | 0.11553   | 0.134615 |
| 0.119172  | 0.122378 | 0.123397 | 0.126748 | 0.131702 | 0.113928  | 0.140589 |
| 0.112325  | 0.119027 | 0.114802 | 0.112325 | 0.126603 | 0.107955  | 0.134615 |
| 0.108392  | 0.121795 | 0.115239 | 0.12296  | 0.124126 | 0.111597  | 0.130973 |
| 0.116259  | 0.120921 | 0.110577 | 0.108392 | 0.100816 | 0.101981  | 0.127185 |
| 0.117716  | 0.11451  | 0.125728 | 0.116841 | 0.123834 | 0.113636  | 0.120484 |
| 0.106206  | 0.108246 | 0.111597 | 0.107372 | 0.113199 | 0.103584  | 0.117716 |
| 0.121358  | 0.112034 | 0.125291 | 0.120484 | 0.125146 | 0.11757   | 0.125291 |
| 0.114219  | 0.115385 | 0.112617 | 0.116841 | 0.123252 | 0.1081    | 0.134761 |
| 0.115676  | 0.115676 | 0.114656 | 0.112471 | 0.122086 | 0.108683  | 0.131265 |
| 0.0962995 | 0.108537 | 0.106935 | 0.114656 | 0.124272 | 0.0980478 | 0.127914 |
| 0.112762  | 0.11859  | 0.11961  | 0.123252 | 0.121795 | 0.114802  | 0.132721 |
| 0.126894  | 0.129225 | 0.13141  | 0.13447  | 0.129516 | 0.128642  | 0.141026 |
| 0.10271   | 0.110577 | 0.113928 | 0.11757  | 0.122523 | 0.104749  | 0.122669 |
| 0.132576  | 0.134324 | 0.12398  | 0.128788 | 0.118007 | 0.117133  | 0.130682 |
| 0.0903263 | 0.103438 | 0.103293 | 0.111888 | 0.122378 | 0.0984848 | 0.123689 |
| 0.113054  | 0.114802 | 0.114948 | 0.11451  | 0.118298 | 0.111305  | 0.130682 |
| 0.113782  | 0.116404 | 0.106352 | 0.113491 | 0.104167 | 0.103293  | 0.123543 |
| 0.122232  | 0.114948 | 0.126166 | 0.124854 | 0.126894 | 0.117279  | 0.131702 |
| 0.186334  | 0.184878 | 0.17803  | 0.190997 | 0.184003 | 0.177302  | 0.196387 |
| 0.107517  | 0.111014 | 0.11553  | 0.108683 | 0.11859  | 0.11451   | 0.11961  |
| 0.102273  | 0.105769 | 0.103584 | 0.102273 | 0.110723 | 0.0958625 | 0.117279 |
| 0.115385  | 0.120047 | 0.127185 | 0.121795 | 0.125874 | 0.122378  | 0.13243  |
| 0.168124  | 0.174242 | 0.167395 | 0.171329 | 0.168998 | 0.162005  | 0.184586 |
| 0.119901  | 0.129516 | 0.126748 | 0.136218 | 0.135344 | 0.123689  | 0.139277 |
| 0.125728  | 0.135927 | 0.140443 | 0.141171 | 0.143211 | 0.13447   | 0.136655 |
| 0.136364  | 0.138403 | 0.141171 | 0.142774 | 0.145979 | 0.133159  | 0.149621 |
| 0.0990676 | 0.108974 | 0.10708  | 0.113345 | 0.121212 | 0.10169   | 0.121649 |
| 0.115822  | 0.121358 | 0.110431 | 0.112034 | 0.103584 | 0.103293  | 0.12296  |
| 0.204837  | 0.209207 | 0.194493 | 0.208042 | 0.201923 | 0.193473  | 0.219551 |
| 0.112762  | 0.122378 | 0.112617 | 0.119464 | 0.117424 | 0.109848  | 0.126603 |

|           |           |           |           |          |           |          |
|-----------|-----------|-----------|-----------|----------|-----------|----------|
| 0.11961   | 0.127768  | 0.113636  | 0.116404  | 0.105915 | 0.105041  | 0.129371 |
| 0.109994  | 0.111451  | 0.120629  | 0.114073  | 0.11757  | 0.117861  | 0.123543 |
| 0.161859  | 0.167104  | 0.152098  | 0.163316  | 0.147873 | 0.149621  | 0.173077 |
| 0.0989219 | 0.106498  | 0.0967366 | 0.100962  | 0.112908 | 0.0930944 | 0.119464 |
| 0.139569  | 0.142483  | 0.139423  | 0.145979  | 0.144522 | 0.138403  | 0.149913 |
| 0.0894522 | 0.100233  | 0.112617  | 0.108974  | 0.118298 | 0.108392  | 0.11757  |
| 0.183858  | 0.187063  | 0.176428  | 0.186772  | 0.181527 | 0.17162   | 0.196824 |
| 0.104312  | 0.113345  | 0.110868  | 0.120921  | 0.125291 | 0.107517  | 0.127768 |
| 0.0833333 | 0.0944056 | 0.105041  | 0.0824592 | 0.100233 | 0.0976107 | 0.099796 |
| 0.108537  | 0.113199  | 0.111305  | 0.114948  | 0.122232 | 0.10912   | 0.132284 |
| 0.113636  | 0.117424  | 0.120192  | 0.122669  | 0.126748 | 0.111014  | 0.130973 |
| 0.112471  | 0.118007  | 0.124563  | 0.117424  | 0.121503 | 0.117133  | 0.129225 |
| 0.111305  | 0.115385  | 0.116404  | 0.12296   | 0.123252 | 0.109848  | 0.132139 |
| 0.0863928 | 0.102127  | 0.102564  | 0.106789  | 0.122232 | 0.0968823 | 0.124709 |
| 0.182692  | 0.185897  | 0.177302  | 0.185897  | 0.18211  | 0.172203  | 0.200029 |
| 0.117279  | 0.119318  | 0.119172  | 0.119901  | 0.116696 | 0.117861  | 0.13345  |
| 0.102273  | 0.106935  | 0.110286  | 0.0990676 | 0.107517 | 0.099359  | 0.115822 |
| 0.204108  | 0.205857  | 0.198427  | 0.209353  | 0.204108 | 0.194493  | 0.221737 |
| 0.122523  | 0.116696  | 0.119755  | 0.122815  | 0.125728 | 0.116696  | 0.133741 |
| 0.0879953 | 0.102855  | 0.103875  | 0.109557  | 0.120921 | 0.0984848 | 0.124272 |
| 0.085373  | 0.0964452 | 0.0995047 | 0.1081    | 0.122669 | 0.0932401 | 0.122523 |
| 0.13039   | 0.131847  | 0.128205  | 0.12602   | 0.115822 | 0.119318  | 0.131702 |
| 0.182255  | 0.184878  | 0.175991  | 0.186043  | 0.183421 | 0.174097  | 0.200758 |
| 0.117716  | 0.109266  | 0.120192  | 0.117133  | 0.128497 | 0.112471  | 0.123689 |
| 0.122086  | 0.125291  | 0.125728  | 0.130828  | 0.123252 | 0.122086  | 0.136509 |
| 0.0859557 | 0.100524  | 0.103001  | 0.106061  | 0.12296  | 0.0987762 | 0.122815 |
| 0.0856643 | 0.100816  | 0.102127  | 0.105186  | 0.118298 | 0.0949883 | 0.120775 |
| 0.0852273 | 0.100379  | 0.102855  | 0.106789  | 0.119901 | 0.0989219 | 0.122378 |
| 0.11014   | 0.116259  | 0.107372  | 0.107517  | 0.103438 | 0.100816  | 0.122232 |
| 0.0767774 | 0.0884324 | 0.0987762 | 0.0986305 | 0.110286 | 0.0933858 | 0.112471 |
| 0.103584  | 0.115822  | 0.115093  | 0.123106  | 0.127185 | 0.112325  | 0.128205 |
| 0.121941  | 0.125728  | 0.130245  | 0.127768  | 0.131847 | 0.125146  | 0.138986 |
| 0.107663  | 0.117279  | 0.114802  | 0.120775  | 0.126894 | 0.110286  | 0.128205 |
| 0.115676  | 0.116841  | 0.119027  | 0.119464  | 0.12296  | 0.115676  | 0.120775 |
| 0.18954   | 0.188666  | 0.182401  | 0.193036  | 0.1875   | 0.178176  | 0.204254 |
| 0.111305  | 0.11655   | 0.116696  | 0.121212  | 0.119755 | 0.113054  | 0.133596 |
| 0.124272  | 0.125728  | 0.119755  | 0.11961   | 0.11116  | 0.109703  | 0.130536 |
| 0.0847902 | 0.102855  | 0.105332  | 0.105769  | 0.120629 | 0.0955711 | 0.121358 |
| 0.071824  | 0.088141  | 0.0984848 | 0.097465  | 0.110577 | 0.0930944 | 0.109266 |
| 0.103875  | 0.113782  | 0.109848  | 0.116404  | 0.118444 | 0.106498  | 0.126166 |
| 0.119172  | 0.110723  | 0.121066  | 0.11655   | 0.129079 | 0.113345  | 0.124563 |
| 0.122378  | 0.131993  | 0.121649  | 0.121795  | 0.12704  | 0.118298  | 0.135927 |
| 0.112908  | 0.114948  | 0.111014  | 0.116696  | 0.126311 | 0.103293  | 0.131119 |
| 0.0977564 | 0.097465  | 0.109266  | 0.105041  | 0.120775 | 0.103001  | 0.118881 |

|           |           |           |           |           |           |          |
|-----------|-----------|-----------|-----------|-----------|-----------|----------|
| 0.0888695 | 0.0912005 | 0.106206  | 0.101399  | 0.113345  | 0.0990676 | 0.114365 |
| 0.0814394 | 0.0986305 | 0.102855  | 0.083479  | 0.099796  | 0.0942599 | 0.105769 |
| 0.111888  | 0.106935  | 0.11553   | 0.108683  | 0.122086  | 0.112471  | 0.11757  |
| 0.112617  | 0.119027  | 0.124126  | 0.128059  | 0.133596  | 0.117861  | 0.130828 |
| 0.11451   | 0.1081    | 0.118153  | 0.114802  | 0.129662  | 0.107517  | 0.128059 |
| 0.107372  | 0.113491  | 0.101399  | 0.107372  | 0.103001  | 0.0939685 | 0.12296  |
| 0.11116   | 0.104458  | 0.113054  | 0.112034  | 0.123397  | 0.103584  | 0.121795 |
| 0.0879953 | 0.10169   | 0.105332  | 0.107517  | 0.12296   | 0.097028  | 0.12602  |
| 0.105624  | 0.105915  | 0.113345  | 0.10912   | 0.117861  | 0.109994  | 0.118007 |
| 0.0910548 | 0.105041  | 0.105478  | 0.109994  | 0.12602   | 0.0995047 | 0.12704  |
| 0.105915  | 0.110868  | 0.112762  | 0.114948  | 0.116113  | 0.105915  | 0.128788 |
| 0.110868  | 0.116113  | 0.11451   | 0.118735  | 0.123689  | 0.103001  | 0.129079 |
| 0.110286  | 0.113782  | 0.123543  | 0.117279  | 0.124272  | 0.112325  | 0.127622 |
| 0.0775058 | 0.092366  | 0.0995047 | 0.100816  | 0.112762  | 0.0952797 | 0.112617 |
| 0.090472  | 0.103001  | 0.104021  | 0.109994  | 0.123106  | 0.0965909 | 0.123252 |
| 0.11553   | 0.117279  | 0.113345  | 0.121358  | 0.121649  | 0.112908  | 0.133159 |
| 0.110431  | 0.112471  | 0.11553   | 0.100524  | 0.112762  | 0.107809  | 0.120775 |
| 0.0823135 | 0.0936772 | 0.106935  | 0.0861014 | 0.110868  | 0.0983392 | 0.100233 |
| 0.0875583 | 0.101544  | 0.105478  | 0.106498  | 0.124854  | 0.0957168 | 0.123543 |
| 0.113636  | 0.118007  | 0.106789  | 0.109557  | 0.104604  | 0.101399  | 0.121941 |
| 0.11451   | 0.107809  | 0.117861  | 0.108974  | 0.126166  | 0.112762  | 0.120192 |
| 0.111597  | 0.11655   | 0.106206  | 0.111014  | 0.105186  | 0.0973193 | 0.125437 |
| 0.110723  | 0.114219  | 0.117861  | 0.113928  | 0.122378  | 0.113054  | 0.126603 |
| 0.0769231 | 0.0955711 | 0.104749  | 0.102564  | 0.114802  | 0.0990676 | 0.11553  |
| 0.101399  | 0.1081    | 0.102127  | 0.111597  | 0.115676  | 0.0941142 | 0.125146 |
| 0.103001  | 0.104749  | 0.113928  | 0.108246  | 0.119318  | 0.109411  | 0.119172 |
| 0.11451   | 0.123543  | 0.109703  | 0.112471  | 0.107809  | 0.104312  | 0.125437 |
| 0.116259  | 0.122086  | 0.111742  | 0.0926573 | 0.0964452 | 0.108683  | 0.101544 |
| 0.106789  | 0.106498  | 0.0935315 | 0.102418  | 0.105624  | 0.0895979 | 0.115385 |
| 0.186917  | 0.18954   | 0.179487  | 0.190122  | 0.186334  | 0.17701   | 0.204837 |
| 0.15778   | 0.16215   | 0.14831   | 0.150495  | 0.144376  | 0.149038  | 0.16317  |
| 0.107955  | 0.116113  | 0.113928  | 0.118735  | 0.126603  | 0.108829  | 0.127914 |
| 0.113636  | 0.113636  | 0.112617  | 0.108392  | 0.108683  | 0.108974  | 0.122232 |
| 0.129953  | 0.140734  | 0.14088   | 0.14627   | 0.148019  | 0.138986  | 0.138549 |
| 0.118735  | 0.12398   | 0.11859   | 0.123106  | 0.12602   | 0.118444  | 0.13549  |
| 0.103438  | 0.115676  | 0.112325  | 0.114219  | 0.12296   | 0.111014  | 0.128059 |
| 0.10067   | 0.109411  | 0.113636  | 0.105624  | 0.121358  | 0.10271   | 0.124417 |
| 0.0479312 | 0.08581   | 0.106643  | 0.095134  | 0.114365  | 0.101253  | 0.101399 |
| 0.109411  | 0.114656  | 0.117133  | 0.104458  | 0.114656  | 0.106498  | 0.118298 |
| 0.194639  | 0.198718  | 0.18546   | 0.200466  | 0.195221  | 0.183566  | 0.210519 |
| 0.118444  | 0.107663  | 0.122669  | 0.121941  | 0.128059  | 0.115239  | 0.129371 |
| 0.113345  | 0.11451   | 0.108537  | 0.115967  | 0.108392  | 0.0990676 | 0.124272 |
| 0.0844988 | 0.0987762 | 0.103001  | 0.100233  | 0.11859   | 0.099359  | 0.116987 |
| 0.106498  | 0.110577  | 0.109266  | 0.109994  | 0.117861  | 0.104749  | 0.125291 |

|           |           |          |           |          |           |           |
|-----------|-----------|----------|-----------|----------|-----------|-----------|
| 0.178322  | 0.179779  | 0.169726 | 0.175991  | 0.175408 | 0.166667  | 0.190705  |
| 0.240385  | 0.242716  | 0.231498 | 0.245629  | 0.237471 | 0.229895  | 0.250146  |
| 0.113636  | 0.115385  | 0.113782 | 0.121212  | 0.124126 | 0.104312  | 0.13243   |
| 0.107517  | 0.113054  | 0.114656 | 0.104604  | 0.113054 | 0.1081    | 0.119027  |
| 0.106643  | 0.115093  | 0.111116 | 0.120629  | 0.124126 | 0.1081    | 0.127477  |
| 0.109994  | 0.111116  | 0.119172 | 0.116404  | 0.120484 | 0.111742  | 0.126166  |
| 0.11014   | 0.104312  | 0.114948 | 0.109266  | 0.121212 | 0.106352  | 0.11961   |
| 0.109703  | 0.113491  | 0.111597 | 0.109994  | 0.115239 | 0.105915  | 0.128205  |
| 0.0958625 | 0.1081    | 0.104749 | 0.106935  | 0.11014  | 0.0984848 | 0.11961   |
| 0.113636  | 0.104021  | 0.11553  | 0.114802  | 0.122669 | 0.109266  | 0.120192  |
| 0.0986305 | 0.10912   | 0.102855 | 0.106206  | 0.105915 | 0.0954254 | 0.119464  |
| 0.0824592 | 0.0967366 | 0.111742 | 0.0882867 | 0.112471 | 0.102564  | 0.102127  |
| 0.078817  | 0.0954254 | 0.104895 | 0.101836  | 0.114948 | 0.0989219 | 0.11655   |
| 0.115385  | 0.11655   | 0.111742 | 0.119755  | 0.12704  | 0.106643  | 0.134178  |
| 0.114073  | 0.119901  | 0.107809 | 0.111451  | 0.105624 | 0.097465  | 0.126748  |
| 0.097465  | 0.103293  | 0.107226 | 0.102127  | 0.113491 | 0.0989219 | 0.120921  |
| 0.100962  | 0.117279  | 0.120047 | 0.115822  | 0.135344 | 0.113199  | 0.125     |
| 0.125437  | 0.13039   | 0.139569 | 0.130973  | 0.130973 | 0.129516  | 0.134615  |
| 0.0882867 | 0.101981  | 0.101253 | 0.106061  | 0.122086 | 0.0958625 | 0.122232  |
| 0.097465  | 0.106789  | 0.112762 | 0.113782  | 0.121358 | 0.106206  | 0.12296   |
| 0.101544  | 0.114948  | 0.11655  | 0.120775  | 0.135927 | 0.114656  | 0.131119  |
| 0.197261  | 0.202506  | 0.195367 | 0.208042  | 0.200758 | 0.191142  | 0.214015  |
| 0.104749  | 0.108829  | 0.106061 | 0.110577  | 0.114948 | 0.0965909 | 0.124709  |
| 0.0740093 | 0.0929487 | 0.099796 | 0.102273  | 0.113636 | 0.0958625 | 0.114656  |
| 0.111014  | 0.11655   | 0.117861 | 0.119172  | 0.118298 | 0.110431  | 0.13447   |
| 0.11961   | 0.121941  | 0.119464 | 0.119901  | 0.126311 | 0.114656  | 0.137821  |
| 0.109411  | 0.110286  | 0.106935 | 0.105624  | 0.118444 | 0.101253  | 0.121212  |
| 0.191288  | 0.197698  | 0.185023 | 0.198281  | 0.195659 | 0.181964  | 0.208625  |
| 0.117716  | 0.12296   | 0.107955 | 0.112179  | 0.106935 | 0.101399  | 0.126894  |
| 0.0884324 | 0.101253  | 0.105478 | 0.107663  | 0.119318 | 0.0983392 | 0.120921  |
| 0.106352  | 0.113054  | 0.118444 | 0.110723  | 0.123252 | 0.114219  | 0.121358  |
| 0.1081    | 0.109266  | 0.119901 | 0.113636  | 0.120629 | 0.109848  | 0.125437  |
| 0.113928  | 0.120338  | 0.108537 | 0.113345  | 0.105769 | 0.0987762 | 0.130099  |
| 0.0976107 | 0.106352  | 0.105624 | 0.103147  | 0.112762 | 0.0935315 | 0.11961   |
| 0.0815851 | 0.0955711 | 0.111742 | 0.0909091 | 0.112179 | 0.104604  | 0.105624  |
| 0.116259  | 0.113928  | 0.117861 | 0.114219  | 0.123543 | 0.111888  | 0.133013  |
| 0.192453  | 0.19391   | 0.182984 | 0.196241  | 0.192745 | 0.181964  | 0.205711  |
| 0.104604  | 0.109266  | 0.102418 | 0.101399  | 0.105186 | 0.0929487 | 0.117861  |
| 0.188666  | 0.194784  | 0.181818 | 0.191871  | 0.184295 | 0.179633  | 0.201632  |
| 0.187646  | 0.19289   | 0.177885 | 0.190559  | 0.188228 | 0.177156  | 0.202943  |
| 0.122378  | 0.122669  | 0.132139 | 0.127622  | 0.128497 | 0.126166  | 0.133013  |
| 0.123543  | 0.121503  | 0.129516 | 0.129953  | 0.132284 | 0.125291  | 0.135927  |
| 0.0792541 | 0.0917832 | 0.102127 | 0.0842075 | 0.105186 | 0.0964452 | 0.0989219 |
| 0.103293  | 0.111742  | 0.106061 | 0.101836  | 0.106498 | 0.0930944 | 0.120338  |



|           |           |           |           |           |           |          |
|-----------|-----------|-----------|-----------|-----------|-----------|----------|
| 0.106352  | 0.119464  | 0.101544  | 0.108974  | 0.105186  | 0.0935315 | 0.121941 |
| 0.0885781 | 0.105186  | 0.107955  | 0.106643  | 0.125583  | 0.100524  | 0.125146 |
| 0.108392  | 0.101107  | 0.114073  | 0.107809  | 0.120047  | 0.105478  | 0.116404 |
| 0.110431  | 0.104312  | 0.114948  | 0.111888  | 0.123252  | 0.107517  | 0.121941 |
| 0.118444  | 0.118735  | 0.115967  | 0.125146  | 0.128934  | 0.109994  | 0.134615 |
| 0.111888  | 0.118298  | 0.126894  | 0.117133  | 0.124709  | 0.11655   | 0.129516 |
| 0.0852273 | 0.0965909 | 0.0999417 | 0.104458  | 0.11757   | 0.0919289 | 0.120921 |
| 0.113928  | 0.115967  | 0.10708   | 0.107517  | 0.105769  | 0.101107  | 0.12398  |
| 0.076486  | 0.0910548 | 0.101399  | 0.0759033 | 0.0980478 | 0.0945513 | 0.100524 |
| 0.120629  | 0.125583  | 0.114948  | 0.115967  | 0.110723  | 0.109557  | 0.125437 |
| 0.104895  | 0.114219  | 0.111451  | 0.115676  | 0.124709  | 0.104312  | 0.12398  |
| 0.127185  | 0.130682  | 0.120921  | 0.124272  | 0.112034  | 0.111742  | 0.129079 |
| 0.254516  | 0.255682  | 0.245047  | 0.256847  | 0.25102   | 0.24461   | 0.262821 |
| 0.121358  | 0.119318  | 0.134033  | 0.125728  | 0.126603  | 0.132139  | 0.126166 |
| 0.122086  | 0.12296   | 0.130973  | 0.127622  | 0.130536  | 0.12704   | 0.134178 |
| 0.21081   | 0.21285   | 0.20338   | 0.214889  | 0.21081   | 0.199155  | 0.222902 |
| 0.111597  | 0.114802  | 0.124854  | 0.124709  | 0.128788  | 0.120921  | 0.132721 |
| 0.225233  | 0.225233  | 0.217512  | 0.226981  | 0.221737  | 0.215618  | 0.234703 |
| 0.113199  | 0.114073  | 0.126457  | 0.116404  | 0.121941  | 0.121066  | 0.126457 |
| 0.0976107 | 0.113636  | 0.116696  | 0.117424  | 0.131702  | 0.111305  | 0.131265 |
| 0.112762  | 0.113054  | 0.115239  | 0.111597  | 0.119755  | 0.107226  | 0.128934 |
| 0.118007  | 0.120921  | 0.130973  | 0.119172  | 0.126457  | 0.120047  | 0.133887 |
| 0.196387  | 0.20134   | 0.1875    | 0.200466  | 0.198718  | 0.185606  | 0.213724 |
| 0.124417  | 0.128788  | 0.118444  | 0.119464  | 0.112762  | 0.109557  | 0.127768 |
| 0.115093  | 0.119464  | 0.108246  | 0.109848  | 0.108683  | 0.0967366 | 0.12398  |
| 0.219843  | 0.222465  | 0.214452  | 0.2213    | 0.219843  | 0.211101  | 0.232226 |
| 0.116841  | 0.107517  | 0.116696  | 0.117424  | 0.123834  | 0.105769  | 0.126894 |
| 0.192745  | 0.193619  | 0.184441  | 0.195367  | 0.193328  | 0.180798  | 0.20979  |
| 0.115822  | 0.108246  | 0.119464  | 0.118153  | 0.12602   | 0.110286  | 0.129371 |
| 0.0884324 | 0.10271   | 0.105186  | 0.110868  | 0.12602   | 0.0980478 | 0.126748 |
| 0.0836247 | 0.0981935 | 0.110286  | 0.108974  | 0.117133  | 0.104895  | 0.112908 |
| 0.121503  | 0.125874  | 0.13447   | 0.128788  | 0.131119  | 0.12704   | 0.133013 |
| 0.101544  | 0.105624  | 0.100816  | 0.105624  | 0.116987  | 0.0945513 | 0.120047 |
| 0.145251  | 0.154575  | 0.147436  | 0.150495  | 0.1537    | 0.143502  | 0.164336 |
| 0.108246  | 0.111742  | 0.102855  | 0.104167  | 0.101836  | 0.0945513 | 0.120629 |
| 0.117279  | 0.121649  | 0.118298  | 0.117861  | 0.126311  | 0.116113  | 0.133741 |
| 0.109411  | 0.115239  | 0.116259  | 0.115239  | 0.125728  | 0.114073  | 0.128497 |
| 0.12398   | 0.125437  | 0.124417  | 0.127477  | 0.128059  | 0.120192  | 0.136946 |
| 0.18852   | 0.192016  | 0.18109   | 0.191725  | 0.187646  | 0.179196  | 0.203526 |
| 0.0869755 | 0.0995047 | 0.10169   | 0.108537  | 0.121941  | 0.0960082 | 0.122086 |
| 0.115093  | 0.119172  | 0.121941  | 0.121212  | 0.126748  | 0.117424  | 0.134761 |
| 0.111742  | 0.109703  | 0.116259  | 0.106498  | 0.124854  | 0.109411  | 0.118881 |
| 0.118007  | 0.106352  | 0.121649  | 0.118881  | 0.123834  | 0.111597  | 0.12398  |
| 0.092803  | 0.107955  | 0.108392  | 0.111451  | 0.129225  | 0.103875  | 0.12704  |

|           |           |          |           |          |           |          |
|-----------|-----------|----------|-----------|----------|-----------|----------|
| 0.253497  | 0.251166  | 0.244901 | 0.253205  | 0.248834 | 0.242716  | 0.260635 |
| 0.0808566 | 0.0960082 | 0.109557 | 0.106498  | 0.113491 | 0.102127  | 0.113345 |
| 0.104458  | 0.114073  | 0.110431 | 0.116113  | 0.119027 | 0.110286  | 0.134324 |
| 0.173805  | 0.173223  | 0.167541 | 0.17264   | 0.1706   | 0.166521  | 0.18211  |
| 0.176136  | 0.184586  | 0.174825 | 0.184295  | 0.183421 | 0.169726  | 0.197552 |
| 0.114073  | 0.11757   | 0.11451  | 0.121358  | 0.125146 | 0.10708   | 0.13549  |
| 0.113928  | 0.117716  | 0.10708  | 0.106352  | 0.103438 | 0.100524  | 0.120192 |
| 0.109557  | 0.11451   | 0.118444 | 0.11655   | 0.123543 | 0.112179  | 0.126603 |
| 0.139423  | 0.142337  | 0.130245 | 0.133013  | 0.121066 | 0.124272  | 0.136946 |
| 0.109994  | 0.115822  | 0.113054 | 0.114948  | 0.124563 | 0.103001  | 0.131119 |
| 0.11451   | 0.11859   | 0.116404 | 0.12296   | 0.127914 | 0.106935  | 0.132721 |
| 0.125437  | 0.114073  | 0.125583 | 0.121941  | 0.129808 | 0.120775  | 0.132284 |
| 0.110868  | 0.115239  | 0.1081   | 0.109994  | 0.10067  | 0.099796  | 0.117424 |
| 0.122378  | 0.126457  | 0.118153 | 0.118007  | 0.110723 | 0.107517  | 0.126603 |
| 0.11553   | 0.110577  | 0.117133 | 0.116987  | 0.121941 | 0.11116   | 0.128205 |
| 0.116259  | 0.124126  | 0.130099 | 0.121503  | 0.125    | 0.122378  | 0.129808 |
| 0.131847  | 0.135635  | 0.143939 | 0.135344  | 0.137966 | 0.137675  | 0.139277 |
| 0.0827506 | 0.100816  | 0.112908 | 0.106352  | 0.115385 | 0.108392  | 0.114365 |
| 0.124854  | 0.127185  | 0.139277 | 0.131847  | 0.128351 | 0.129808  | 0.134615 |
| 0.125146  | 0.116113  | 0.127331 | 0.121941  | 0.133596 | 0.11961   | 0.130245 |
| 0.20134   | 0.204545  | 0.193036 | 0.202797  | 0.203089 | 0.189685  | 0.216055 |
| 0.0861014 | 0.0799825 | 0.118007 | 0.11116   | 0.125728 | 0.114656  | 0.115676 |
| 0.187209  | 0.189248  | 0.177739 | 0.190997  | 0.186043 | 0.174679  | 0.20338  |
| 0.11116   | 0.110286  | 0.118007 | 0.117279  | 0.12398  | 0.107372  | 0.127914 |
| 0.0939685 | 0.111742  | 0.113054 | 0.117279  | 0.129808 | 0.108829  | 0.129662 |
| 0.106206  | 0.11553   | 0.115676 | 0.121649  | 0.122815 | 0.110868  | 0.126457 |
| 0.0999417 | 0.111014  | 0.109994 | 0.114219  | 0.122669 | 0.097028  | 0.122523 |
| 0.116404  | 0.121941  | 0.109266 | 0.114365  | 0.107372 | 0.103293  | 0.125874 |
| 0.118444  | 0.122232  | 0.113054 | 0.115239  | 0.103875 | 0.104458  | 0.124417 |
| 0.0898893 | 0.106206  | 0.106061 | 0.110286  | 0.125146 | 0.100379  | 0.127914 |
| 0.117133  | 0.113636  | 0.118153 | 0.118007  | 0.124126 | 0.111305  | 0.133887 |
| 0.112471  | 0.118881  | 0.121066 | 0.12296   | 0.125874 | 0.11451   | 0.129225 |
| 0.129808  | 0.118735  | 0.131702 | 0.131847  | 0.136801 | 0.123397  | 0.132867 |
| 0.244027  | 0.248106  | 0.237762 | 0.249854  | 0.245484 | 0.234994  | 0.252622 |
| 0.088141  | 0.105624  | 0.107226 | 0.110577  | 0.126311 | 0.10271   | 0.127914 |
| 0.177448  | 0.183858  | 0.172057 | 0.18211   | 0.182401 | 0.167832  | 0.19391  |
| 0.186334  | 0.185752  | 0.17366  | 0.185169  | 0.184586 | 0.169726  | 0.199301 |
| 0.107226  | 0.112762  | 0.109411 | 0.116259  | 0.118298 | 0.104312  | 0.12398  |
| 0.0795455 | 0.0955711 | 0.104458 | 0.101107  | 0.111014 | 0.0999417 | 0.113491 |
| 0.0958625 | 0.109848  | 0.114656 | 0.11451   | 0.130536 | 0.107809  | 0.130099 |
| 0.108392  | 0.112762  | 0.102418 | 0.104021  | 0.102564 | 0.0944056 | 0.125437 |
| 0.0514277 | 0.0855186 | 0.106352 | 0.0919289 | 0.112617 | 0.0992133 | 0.100816 |
| 0.116696  | 0.105332  | 0.11859  | 0.114948  | 0.124854 | 0.108829  | 0.125874 |
| 0.108974  | 0.117424  | 0.108829 | 0.111888  | 0.105769 | 0.105769  | 0.119318 |

|           |           |           |           |           |           |           |
|-----------|-----------|-----------|-----------|-----------|-----------|-----------|
| 0.124709  | 0.129953  | 0.119318  | 0.122086  | 0.111597  | 0.111597  | 0.128351  |
| 0.0866841 | 0.100379  | 0.105478  | 0.114073  | 0.122232  | 0.10067   | 0.126457  |
| 0.120192  | 0.126311  | 0.119172  | 0.118153  | 0.111451  | 0.110577  | 0.128788  |
| 0.11451   | 0.113928  | 0.116404  | 0.115093  | 0.122378  | 0.112471  | 0.129808  |
| 0.112471  | 0.121503  | 0.122232  | 0.126166  | 0.12704   | 0.11451   | 0.128059  |
| 0.113782  | 0.117279  | 0.127622  | 0.118735  | 0.12398   | 0.11757   | 0.129662  |
| 0.127622  | 0.116841  | 0.129808  | 0.127914  | 0.136655  | 0.121503  | 0.132721  |
| 0.0866841 | 0.0992133 | 0.116841  | 0.0925117 | 0.110868  | 0.110868  | 0.0981935 |
| 0.090472  | 0.104458  | 0.106352  | 0.106789  | 0.116696  | 0.101836  | 0.120921  |
| 0.124854  | 0.127477  | 0.13141   | 0.13447   | 0.125146  | 0.124272  | 0.13986   |
| 0.177448  | 0.182401  | 0.169726  | 0.181818  | 0.181527  | 0.165793  | 0.191288  |
| 0.128642  | 0.133304  | 0.124709  | 0.124563  | 0.113199  | 0.116987  | 0.131119  |
| 0.114948  | 0.11961   | 0.11014   | 0.112325  | 0.104167  | 0.102418  | 0.125583  |
| 0.104312  | 0.114802  | 0.11553   | 0.118298  | 0.125291  | 0.109266  | 0.12602   |
| 0.099796  | 0.104167  | 0.104312  | 0.110286  | 0.117861  | 0.097465  | 0.120047  |
| 0.114802  | 0.120629  | 0.124272  | 0.118298  | 0.121503  | 0.11655   | 0.130682  |
| 0.117861  | 0.122815  | 0.130536  | 0.119901  | 0.12398   | 0.120484  | 0.131702  |
| 0.185897  | 0.190268  | 0.17905   | 0.186189  | 0.185897  | 0.174242  | 0.199155  |
| 0.108683  | 0.11655   | 0.109411  | 0.0979021 | 0.0926573 | 0.104895  | 0.118735  |
| 0.0995047 | 0.104167  | 0.104895  | 0.0992133 | 0.104167  | 0.0945513 | 0.119172  |
| 0.121649  | 0.124563  | 0.114219  | 0.115239  | 0.105041  | 0.103001  | 0.125     |
| 0.187354  | 0.189394  | 0.178176  | 0.188811  | 0.188228  | 0.174242  | 0.20236   |
| 0.0770688 | 0.0919289 | 0.0996503 | 0.10067   | 0.111451  | 0.097465  | 0.115967  |
| 0.120629  | 0.111597  | 0.122815  | 0.120047  | 0.130245  | 0.117133  | 0.128059  |
| 0.116259  | 0.123252  | 0.111451  | 0.113054  | 0.105769  | 0.102855  | 0.12602   |
| 0.10912   | 0.112908  | 0.110723  | 0.116113  | 0.119901  | 0.10271   | 0.127914  |
| 0.18109   | 0.184003  | 0.173368  | 0.186334  | 0.183129  | 0.170017  | 0.197552  |
| 0.118735  | 0.11116   | 0.119755  | 0.11961   | 0.124854  | 0.112325  | 0.124417  |
| 0.105041  | 0.113491  | 0.111597  | 0.114073  | 0.114656  | 0.104749  | 0.125874  |
| 0.0846445 | 0.0922203 | 0.104895  | 0.101544  | 0.112908  | 0.0989219 | 0.119172  |
| 0.111742  | 0.118444  | 0.108974  | 0.113199  | 0.114948  | 0.100962  | 0.123252  |
| 0.115967  | 0.114802  | 0.11961   | 0.118298  | 0.125874  | 0.112471  | 0.134178  |
| 0.125874  | 0.116841  | 0.127185  | 0.125874  | 0.132576  | 0.119755  | 0.129516  |
| 0.0885781 | 0.101107  | 0.105041  | 0.109557  | 0.122669  | 0.0967366 | 0.125728  |
| 0.115093  | 0.118881  | 0.122523  | 0.110723  | 0.116259  | 0.115967  | 0.126311  |
| 0.135344  | 0.136509  | 0.136946  | 0.143502  | 0.147582  | 0.131847  | 0.151807  |
| 0.23208   | 0.232955  | 0.222611  | 0.235868  | 0.230332  | 0.218677  | 0.241841  |
| 0.0933858 | 0.0992133 | 0.120921  | 0.0977564 | 0.116696  | 0.114073  | 0.104021  |
| 0.117861  | 0.11553   | 0.121212  | 0.120484  | 0.125728  | 0.11553   | 0.133741  |
| 0.111888  | 0.115967  | 0.105915  | 0.113345  | 0.0999417 | 0.0996503 | 0.119901  |
| 0.114073  | 0.118444  | 0.118007  | 0.128642  | 0.128351  | 0.113491  | 0.134907  |
| 0.113345  | 0.111888  | 0.110577  | 0.113636  | 0.120338  | 0.109848  | 0.122815  |
| 0.110431  | 0.109557  | 0.109994  | 0.11014   | 0.116259  | 0.104021  | 0.121649  |
| 0.119027  | 0.121358  | 0.110723  | 0.112908  | 0.104167  | 0.107663  | 0.122086  |

|           |           |           |           |          |           |          |
|-----------|-----------|-----------|-----------|----------|-----------|----------|
| 0.126457  | 0.113345  | 0.124563  | 0.125     | 0.129662 | 0.115967  | 0.128934 |
| 0.113636  | 0.11859   | 0.11553   | 0.115676  | 0.122669 | 0.106643  | 0.131265 |
| 0.233537  | 0.233246  | 0.224359  | 0.23616   | 0.231206 | 0.221591  | 0.240676 |
| 0.0777972 | 0.092366  | 0.103293  | 0.0996503 | 0.106643 | 0.0955711 | 0.111116 |
| 0.100233  | 0.103147  | 0.113782  | 0.102564  | 0.113636 | 0.105769  | 0.116987 |
| 0.0863928 | 0.101836  | 0.105186  | 0.10912   | 0.121066 | 0.0992133 | 0.122086 |
| 0.125291  | 0.122378  | 0.126311  | 0.129662  | 0.13345  | 0.117133  | 0.137966 |
| 0.0964452 | 0.106935  | 0.125728  | 0.104895  | 0.121503 | 0.121795  | 0.104458 |
| 0.102855  | 0.106061  | 0.0479312 | 0.108974  | 0.106352 | 0.0591492 | 0.120192 |
| 0.114219  | 0.120629  | 0.109411  | 0.111305  | 0.102855 | 0.100816  | 0.126894 |
| 0.105332  | 0.110868  | 0.109557  | 0.109411  | 0.119027 | 0.0954254 | 0.121795 |
| 0.228875  | 0.225379  | 0.21824   | 0.231789  | 0.227418 | 0.216638  | 0.23951  |
| 0.117279  | 0.123106  | 0.113345  | 0.117279  | 0.108537 | 0.104749  | 0.127331 |
| 0.118881  | 0.111597  | 0.123397  | 0.116259  | 0.125874 | 0.11655   | 0.125146 |
| 0.102855  | 0.111014  | 0.110868  | 0.110723  | 0.120047 | 0.105478  | 0.125728 |
| 0.115239  | 0.121358  | 0.122086  | 0.123397  | 0.12602  | 0.114365  | 0.129371 |
| 0.118444  | 0.116113  | 0.127622  | 0.121066  | 0.123397 | 0.126311  | 0.12704  |
| 0.0869755 | 0.105624  | 0.107226  | 0.109411  | 0.121941 | 0.0957168 | 0.120921 |
| 0.117861  | 0.112034  | 0.123834  | 0.119901  | 0.128642 | 0.117279  | 0.128205 |
| 0.125583  | 0.117133  | 0.128351  | 0.125874  | 0.132576 | 0.121503  | 0.128642 |
| 0.117133  | 0.104604  | 0.116987  | 0.117424  | 0.125    | 0.108974  | 0.12602  |
| 0.0869755 | 0.103001  | 0.104604  | 0.111742  | 0.125728 | 0.0992133 | 0.122669 |
| 0.119318  | 0.121066  | 0.124126  | 0.124854  | 0.127477 | 0.119901  | 0.135198 |
| 0.128497  | 0.127331  | 0.128934  | 0.129662  | 0.133159 | 0.123543  | 0.13884  |
| 0.113636  | 0.119464  | 0.124272  | 0.128205  | 0.129371 | 0.120047  | 0.131556 |
| 0.117424  | 0.125     | 0.126311  | 0.129079  | 0.134324 | 0.120921  | 0.134761 |
| 0.126311  | 0.124272  | 0.13141   | 0.130099  | 0.130099 | 0.122232  | 0.138986 |
| 0.0447261 | 0.0843531 | 0.0987762 | 0.08581   | 0.114073 | 0.0957168 | 0.102273 |
| 0.130828  | 0.124417  | 0.135052  | 0.126457  | 0.134324 | 0.129662  | 0.128351 |
| 0.117861  | 0.123689  | 0.131119  | 0.123397  | 0.139714 | 0.12398   | 0.130245 |
| 0.203817  | 0.203817  | 0.192016  | 0.206731  | 0.19799  | 0.188957  | 0.213578 |
| 0.112325  | 0.119318  | 0.124417  | 0.107955  | 0.112617 | 0.115239  | 0.121795 |
| 0.111742  | 0.108246  | 0.117716  | 0.110286  | 0.120484 | 0.112908  | 0.122378 |
| 0.0935315 | 0.108974  | 0.109703  | 0.112471  | 0.127914 | 0.104312  | 0.129808 |
| 0.214889  | 0.217803  | 0.210082  | 0.222465  | 0.217803 | 0.209062  | 0.22873  |
| 0.205857  | 0.210519  | 0.200758  | 0.208479  | 0.207022 | 0.200612  | 0.221737 |
| 0.126166  | 0.114802  | 0.129808  | 0.126748  | 0.134324 | 0.122086  | 0.13243  |
| 0.247523  | 0.245484  | 0.235723  | 0.249272  | 0.242279 | 0.234703  | 0.254371 |
| 0.0458916 | 0.0831876 | 0.101981  | 0.0884324 | 0.112325 | 0.0971737 | 0.100524 |
| 0.110577  | 0.116404  | 0.129953  | 0.128059  | 0.130973 | 0.127185  | 0.129079 |
| 0.076486  | 0.092803  | 0.106061  | 0.101836  | 0.111742 | 0.103001  | 0.111014 |
| 0.124126  | 0.122669  | 0.124563  | 0.122086  | 0.130245 | 0.118298  | 0.137383 |
| 0.184295  | 0.186334  | 0.172494  | 0.187209  | 0.184295 | 0.171183  | 0.196678 |
| 0.115385  | 0.11859   | 0.124854  | 0.11859   | 0.128205 | 0.120338  | 0.13039  |

|           |           |           |           |           |           |           |
|-----------|-----------|-----------|-----------|-----------|-----------|-----------|
| 0.188228  | 0.192016  | 0.177302  | 0.191725  | 0.191725  | 0.177739  | 0.205274  |
| 0.101981  | 0.111014  | 0.10708   | 0.113928  | 0.116259  | 0.105186  | 0.11961   |
| 0.112471  | 0.109266  | 0.112034  | 0.112762  | 0.112471  | 0.1081    | 0.123106  |
| 0.090035  | 0.104895  | 0.116696  | 0.106643  | 0.116841  | 0.112471  | 0.112617  |
| 0.101399  | 0.106352  | 0.103293  | 0.1081    | 0.107517  | 0.0981935 | 0.119901  |
| 0.0808566 | 0.0957168 | 0.100816  | 0.102418  | 0.116696  | 0.090472  | 0.117133  |
| 0.103001  | 0.110868  | 0.114219  | 0.0977564 | 0.108537  | 0.103001  | 0.115676  |
| 0.0747378 | 0.0895979 | 0.100524  | 0.0986305 | 0.10912   | 0.0960082 | 0.111305  |
| 0.109848  | 0.11451   | 0.103875  | 0.105769  | 0.102855  | 0.0955711 | 0.118444  |
| 0.113491  | 0.113199  | 0.119464  | 0.112908  | 0.123106  | 0.112034  | 0.116259  |
| 0.0817308 | 0.0942599 | 0.106643  | 0.0869755 | 0.107955  | 0.10067   | 0.101107  |
| 0.076049  | 0.0929487 | 0.103001  | 0.101981  | 0.110723  | 0.0961538 | 0.11116   |
| 0.103001  | 0.114948  | 0.111888  | 0.119027  | 0.122232  | 0.109411  | 0.131993  |
| 0.121941  | 0.126894  | 0.119464  | 0.119027  | 0.110286  | 0.11116   | 0.128497  |
| 0.101107  | 0.11014   | 0.106789  | 0.115093  | 0.122378  | 0.100233  | 0.121649  |
| 0.106498  | 0.110286  | 0.113054  | 0.111451  | 0.112325  | 0.105041  | 0.125874  |
| 0.0821678 | 0.0973193 | 0.0983392 | 0.103147  | 0.118007  | 0.0929487 | 0.121066  |
| 0.119172  | 0.110723  | 0.120484  | 0.118007  | 0.118298  | 0.114219  | 0.120484  |
| 0.115676  | 0.115676  | 0.119318  | 0.118298  | 0.123834  | 0.113345  | 0.132721  |
| 0.11553   | 0.116113  | 0.128497  | 0.121066  | 0.123689  | 0.11961   | 0.130828  |
| 0.105041  | 0.114948  | 0.111305  | 0.113782  | 0.122232  | 0.105915  | 0.121212  |
| 0.112471  | 0.120338  | 0.108246  | 0.108683  | 0.106935  | 0.0999417 | 0.123397  |
| 0.12398   | 0.127477  | 0.119464  | 0.121358  | 0.110286  | 0.108537  | 0.129079  |
| 0.131556  | 0.135635  | 0.125583  | 0.128059  | 0.11757   | 0.119318  | 0.130828  |
| 0.104021  | 0.0990676 | 0.107663  | 0.102564  | 0.11859   | 0.0981935 | 0.116696  |
| 0.0894522 | 0.103438  | 0.104167  | 0.1081    | 0.124126  | 0.0996503 | 0.128351  |
| 0.100379  | 0.103293  | 0.10169   | 0.101544  | 0.114365  | 0.095134  | 0.119464  |
| 0.127477  | 0.124272  | 0.133159  | 0.127768  | 0.13243   | 0.125437  | 0.138112  |
| 0.0812937 | 0.0949883 | 0.106206  | 0.100816  | 0.114219  | 0.10373   | 0.112617  |
| 0.134324  | 0.138403  | 0.145251  | 0.136364  | 0.138986  | 0.138986  | 0.137675  |
| 0.106061  | 0.11859   | 0.122815  | 0.124417  | 0.138112  | 0.118298  | 0.134178  |
| 0.118444  | 0.120484  | 0.117716  | 0.123689  | 0.128642  | 0.112034  | 0.136072  |
| 0.0818765 | 0.0879953 | 0.0995047 | 0.0987762 | 0.108392  | 0.0955711 | 0.108537  |
| 0.105041  | 0.114073  | 0.111597  | 0.112034  | 0.118153  | 0.104458  | 0.130536  |
| 0.107372  | 0.116113  | 0.125     | 0.12602   | 0.130099  | 0.116696  | 0.127331  |
| 0.201923  | 0.204545  | 0.193619  | 0.204545  | 0.204254  | 0.190559  | 0.214307  |
| 0.105478  | 0.110431  | 0.112908  | 0.112471  | 0.11451   | 0.104895  | 0.126311  |
| 0.0855186 | 0.103293  | 0.109848  | 0.101544  | 0.115822  | 0.108246  | 0.111305  |
| 0.115093  | 0.114802  | 0.115822  | 0.119464  | 0.124126  | 0.113054  | 0.130099  |
| 0.099796  | 0.111451  | 0.11014   | 0.115239  | 0.124272  | 0.103001  | 0.121795  |
| 0.108683  | 0.119755  | 0.112325  | 0.117133  | 0.122669  | 0.107809  | 0.128059  |
| 0.115093  | 0.120921  | 0.113782  | 0.0920746 | 0.0964452 | 0.106643  | 0.0992133 |
| 0.119318  | 0.125146  | 0.117716  | 0.0960082 | 0.0945513 | 0.111742  | 0.0984848 |
| 0.112471  | 0.116841  | 0.114656  | 0.118007  | 0.124709  | 0.104312  | 0.133013  |

|           |           |           |           |           |           |          |
|-----------|-----------|-----------|-----------|-----------|-----------|----------|
| 0.108392  | 0.107226  | 0.115239  | 0.1081    | 0.118298  | 0.106352  | 0.11757  |
| 0.123252  | 0.119755  | 0.128934  | 0.123834  | 0.129079  | 0.11859   | 0.133887 |
| 0.087704  | 0.10169   | 0.113782  | 0.101107  | 0.112762  | 0.109266  | 0.112908 |
| 0.0861014 | 0.100379  | 0.112471  | 0.0930944 | 0.112908  | 0.105915  | 0.104021 |
| 0.166667  | 0.175408  | 0.168561  | 0.171911  | 0.176573  | 0.163462  | 0.184003 |
| 0.111888  | 0.119172  | 0.106206  | 0.107226  | 0.109266  | 0.097028  | 0.124854 |
| 0.123106  | 0.122523  | 0.123252  | 0.125146  | 0.130099  | 0.119318  | 0.138112 |
| 0.0874126 | 0.0824592 | 0.118735  | 0.110431  | 0.128497  | 0.114802  | 0.115822 |
| 0.115822  | 0.114365  | 0.121212  | 0.11961   | 0.120192  | 0.112034  | 0.128788 |
| 0.0805653 | 0.100087  | 0.0990676 | 0.0744464 | 0.0983392 | 0.0957168 | 0.099359 |
| 0.0779429 | 0.0884324 | 0.100816  | 0.0861014 | 0.106498  | 0.0939685 | 0.104895 |
| 0.0869755 | 0.102127  | 0.103438  | 0.0805653 | 0.0971737 | 0.102418  | 0.103147 |
| 0.114365  | 0.112617  | 0.128788  | 0.119318  | 0.13039   | 0.117861  | 0.131119 |
| 0.0962995 | 0.108246  | 0.106935  | 0.097465  | 0.102418  | 0.103584  | 0.112762 |
| 0.11014   | 0.121795  | 0.124272  | 0.119172  | 0.127622  | 0.118298  | 0.129225 |
| 0.0995047 | 0.101253  | 0.111014  | 0.103875  | 0.11961   | 0.103001  | 0.120338 |
| 0.0967366 | 0.106643  | 0.112617  | 0.100233  | 0.120921  | 0.111014  | 0.118153 |
| 0.119318  | 0.116113  | 0.129079  | 0.129225  | 0.132721  | 0.122232  | 0.130245 |
| 0.0855186 | 0.10067   | 0.113636  | 0.10067   | 0.118444  | 0.105332  | 0.104895 |
| 0.107372  | 0.112325  | 0.118881  | 0.107663  | 0.120775  | 0.114073  | 0.118007 |
| 0.0849359 | 0.0960082 | 0.107809  | 0.0977564 | 0.114073  | 0.103293  | 0.1081   |
| 0.0861014 | 0.101253  | 0.111888  | 0.0971737 | 0.116987  | 0.104749  | 0.108392 |
| 0.0802739 | 0.0939685 | 0.102855  | 0.10067   | 0.110577  | 0.0962995 | 0.111597 |
| 0.0897436 | 0.0912005 | 0.118444  | 0.105478  | 0.121503  | 0.114802  | 0.112908 |
| 0.083042  | 0.0929487 | 0.108537  | 0.099359  | 0.113054  | 0.103147  | 0.112034 |
| 0.139277  | 0.132576  | 0.135635  | 0.136364  | 0.140152  | 0.129371  | 0.136218 |
| 0.129371  | 0.124709  | 0.121649  | 0.129953  | 0.130828  | 0.114802  | 0.136218 |
| 0.0862471 | 0.0891608 | 0.110577  | 0.0938228 | 0.117133  | 0.104021  | 0.107663 |
| 0.133304  | 0.126311  | 0.140443  | 0.136801  | 0.139714  | 0.134178  | 0.138112 |
| 0.107955  | 0.11961   | 0.11451   | 0.119027  | 0.130682  | 0.110577  | 0.126748 |
| 0.110868  | 0.119027  | 0.128205  | 0.119901  | 0.131265  | 0.124272  | 0.125874 |
| 0.0852273 | 0.100087  | 0.11451   | 0.100962  | 0.115239  | 0.106789  | 0.115385 |
| 0.132867  | 0.141026  | 0.140006  | 0.140152  | 0.138695  | 0.131702  | 0.143794 |
| 0.124126  | 0.123252  | 0.127185  | 0.124417  | 0.125291  | 0.128205  | 0.129516 |
| 0.128205  | 0.129662  | 0.13243   | 0.134907  | 0.138695  | 0.12704   | 0.141171 |
| 0.0979021 | 0.106061  | 0.115239  | 0.111888  | 0.121795  | 0.111305  | 0.116696 |
| 0.0846445 | 0.0910548 | 0.106935  | 0.10271   | 0.117279  | 0.10067   | 0.106352 |
| 0.0824592 | 0.0938228 | 0.111451  | 0.0967366 | 0.112762  | 0.104312  | 0.109703 |
| 0.110868  | 0.106206  | 0.121795  | 0.115822  | 0.128351  | 0.110868  | 0.123834 |
| 0.0887238 | 0.103584  | 0.122086  | 0.103584  | 0.122523  | 0.116987  | 0.106935 |
| 0.0967366 | 0.112179  | 0.123689  | 0.113928  | 0.128788  | 0.123543  | 0.115822 |
| 0.109557  | 0.113636  | 0.113782  | 0.119172  | 0.123543  | 0.110431  | 0.126311 |
| 0.0932401 | 0.0955711 | 0.105332  | 0.107809  | 0.118881  | 0.100233  | 0.123689 |
| 0.0782343 | 0.0919289 | 0.111888  | 0.0960082 | 0.113782  | 0.103001  | 0.108683 |

|           |           |           |           |          |           |           |
|-----------|-----------|-----------|-----------|----------|-----------|-----------|
| 0.0874126 | 0.0448718 | 0.112617  | 0.114219  | 0.121212 | 0.108683  | 0.109994  |
| 0.0868298 | 0.0821678 | 0.106789  | 0.105769  | 0.117716 | 0.100524  | 0.113782  |
| 0.0884324 | 0.0954254 | 0.119755  | 0.101836  | 0.121066 | 0.110577  | 0.111014  |
| 0.0843531 | 0.099796  | 0.11655   | 0.0977564 | 0.11757  | 0.10708   | 0.112762  |
| 0.101107  | 0.106061  | 0.0467657 | 0.109848  | 0.104312 | 0.0614802 | 0.119318  |
| 0.0827506 | 0.0984848 | 0.105041  | 0.0932401 | 0.115385 | 0.0999417 | 0.113491  |
| 0         | 0.0836247 | 0.101253  | 0.0868298 | 0.110723 | 0.0929487 | 0.0977564 |
| 0.0836247 | 0         | 0.104167  | 0.109848  | 0.118298 | 0.0990676 | 0.109703  |
| 0.101253  | 0.104167  | 0         | 0.106789  | 0.109703 | 0.0557984 | 0.11859   |
| 0.0868298 | 0.109848  | 0.106789  | 0         | 0.103147 | 0.105769  | 0.101544  |
| 0.110723  | 0.118298  | 0.109703  | 0.103147  | 0        | 0.109848  | 0.101253  |
| 0.0929487 | 0.0990676 | 0.0557984 | 0.105769  | 0.109848 | 0         | 0.114656  |
| 0.0977564 | 0.109703  | 0.11859   | 0.101544  | 0.101253 | 0.114656  | 0         |
